# Supplementary material for: Coordinated regulation of transcription by CcpA and the Staphylococcus aureus two-component system HptRS
Source: PubMed Central journal article supplement (PMC6291074; doi:10.1371/journal.pone.0207161), 2018-12-12
Supplement: pone.0207161.s006.pdf [file pone.0207161.s006.pdf]

| Table of Contents                                                                                                                                                                                             | Page          |
|---------------------------------------------------------------------------------------------------------------------------------------------------------------------------------------------------------------|---------------|
| <b>Figure A:</b> <i>S. aureus</i> strains SA564 and SA564- $\Delta$ <i>hptRS</i> grow equivalently when cultivated anaerobically or in iron-limited TSB.                                                      | <b>S-2</b>    |
| <b>Figure B:</b> <i>S. aureus</i> strains SA564 and SA564- $\Delta$ <i>hptRS</i> grow equivalently when cultivated in the presence of streptonigrin, carbonyl cyanide 3-chlorophenylhydrazon E, or nigericin. | <b>S-3</b>    |
| <b>Figure C:</b> Antibiotic resistance profiles are equivalent for SA564 relative to SA564- $\Delta$ <i>hptRS</i> .                                                                                           | <b>S-4</b>    |
| <b>Figure D:</b> SA564 and SA564- $\Delta$ <i>hptRS</i> grow equivalently when cultivated with varying concentrations of diamide, paraquat, or H <sub>2</sub> O <sub>2</sub> .                                | <b>S-5</b>    |
| <b>Figure E:</b> RT-qPCR analysis of <i>hptR</i> and <i>hptS</i> mRNA abundance in SA564 cultivated aerobically and anaerobically during the exponential and post-exponential growth phases.                  | <b>S-6</b>    |
| <b>Figure F:</b> Mean protein abundance and 95% confidence interval plots for a 3-way interaction (s x m x h)                                                                                                 | <b>S-7</b>    |
| <b>Figure G:</b> Mean protein abundance and 95% confidence interval plots for a 2-way interaction (s x m   h)                                                                                                 | <b>S-509</b>  |
| <b>Figure H:</b> Mean protein abundance and 95% confidence interval plots for a 2-way interaction (s x h   m)                                                                                                 | <b>S-1011</b> |
| <b>Figure I:</b> Mean protein abundance and 95% confidence interval plots for a 2-way interaction (m x h   s)                                                                                                 | <b>S-1513</b> |
| <b>Figure J:</b> Mean protein abundance and 95% confidence interval plots for a main effect of hour                                                                                                           | <b>S-2015</b> |
| <b>Figure K:</b> Mean protein abundance and 95% confidence interval plots for a main effect of media                                                                                                          | <b>S-2517</b> |
| <b>Figure L:</b> Mean protein abundance and 95% confidence interval plots for a main effect of strain                                                                                                         | <b>S-3019</b> |

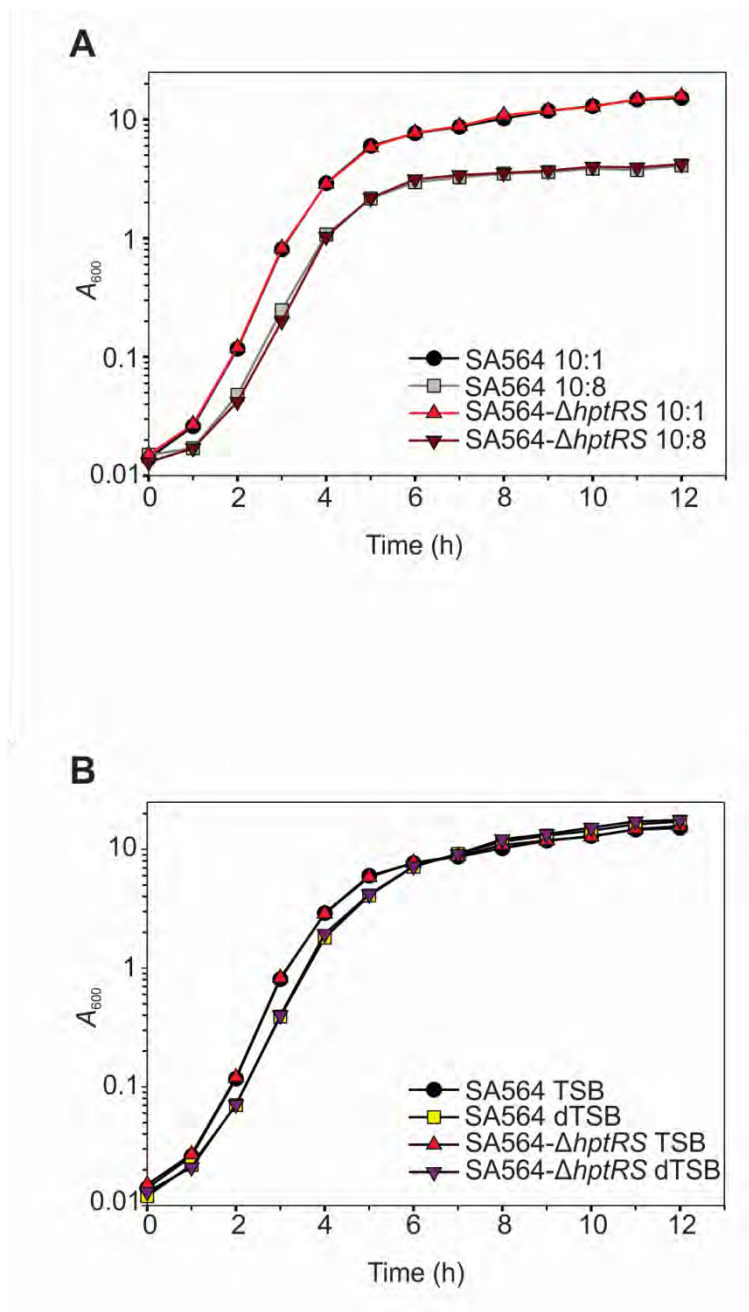

**Figure A** *S. aureus* strains SA564 and SA564- $\Delta hptRS$  grow equivalently when cultivated anaerobically (A) or in iron-limited TSB (B). To assess anaerobic growth *S. aureus* strains were cultivated with a flask to medium ratio of 10:1 (aerobic) or 10:8 (anaerobic), at 37 °C under aeration at 225 rpm. To assess growth in iron limited TSB, deferrated TSB (dTSB) was prepared as described<sup>1</sup>. Data is represented as the average of three biological replicates.

- (1) Sadykov, M. R.; Zhang, B.; Halouska, S.; Nelson, J. L.; Kreimer, L. W.; Zhu, Y.; Powers, R.; Somerville, G. A. Using NMR metabolomics to investigate tricarboxylic acid cycle-dependent signal transduction in *Staphylococcus epidermidis*. *J. Biol. Chem.* **2010**, 285 (47), 36616–36624.

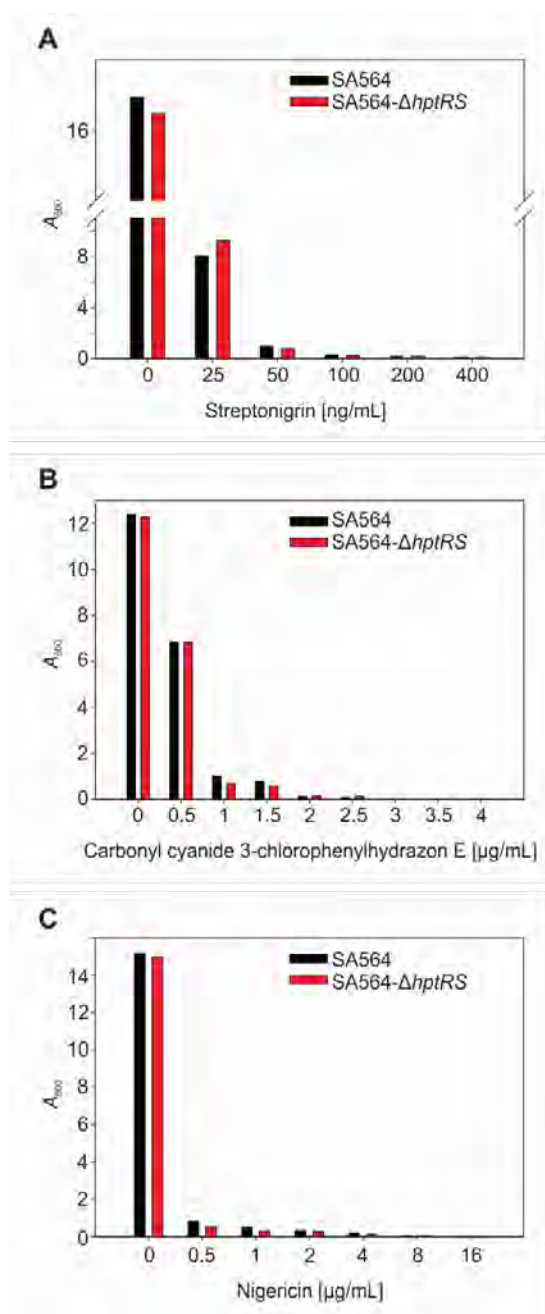

**Figure B.** *S. aureus* strains SA564 and SA564- $\Delta hptRS$  grow equivalently when cultivated in the presence of streptonigrin (A), carbonyl cyanide 3-chlorophenylhydrazon E (B), or Nigericin (C). The absorbance was recorded after 18 h of incubation at 37 °C under aeration at 225 rpm with and without streptonigrin, carbonyl cyanide 3-chlorophenylhydrazon E, or nigericin. Data are representative of at least two biological replicates.

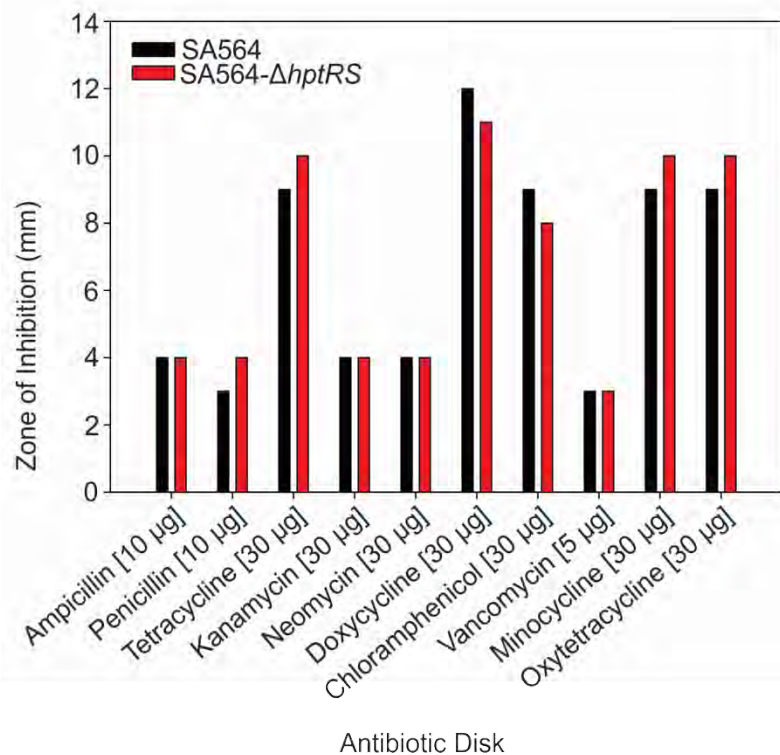

**Figure C.** Antibiotic resistance profiles are equivalent for SA564 relative to SA564- $\Delta$ hptRS. Antibiotic susceptibility was investigated using antibiotic disks on TSA. Data represent the mean zone of inhibition for 3 technical replicates.

**Figure D.** There were no observed growth differences between SA564 and SA564- $\Delta hptRS$  when diamide, paraquat, or H<sub>2</sub>O<sub>2</sub> were added to the culture medium. Bacterial strains were inoculated from a single colony on TSA into TSB and incubated at 37 °C under aeration at 225 rpm. A 2 h pre-culture was prepared as described. After pre-incubation the  $A_6$  was recorded and bacteria were diluted to .5 McFarland units (i.e.,  $A_6 = .8$ ;  $1.5 \times 10^8$  CFU/mL). This bacterial suspension was used for initial inoculation (2  $\mu$ L) into 2mL prewarmed TSB, in 17x1 mm test tubes, with or without the listed compounds. Growth was visually inspected at 2 h, 6 h, and 24 h post inoculation and no differences were observed between SA564 and SA564- $\Delta hptRS$ .

| Compound                      | Concentration |
|-------------------------------|---------------|
| Diamide                       | 10 mM         |
|                               | 1 mM          |
|                               | 0.1 mM        |
|                               | 0.01 mM       |
| Paraquat                      | 50 mM         |
|                               | 25 mM         |
|                               | 10 mM         |
|                               | 5mM           |
|                               | 1 mM          |
|                               | 0.1 mM        |
|                               | 0.01 mM       |
|                               | 0.001 mM      |
| H <sub>2</sub> O <sub>2</sub> | 2.5 mM        |
|                               | 5 mM          |
|                               | 10 mM         |
|                               | 20 mM         |
|                               | 30 mM         |

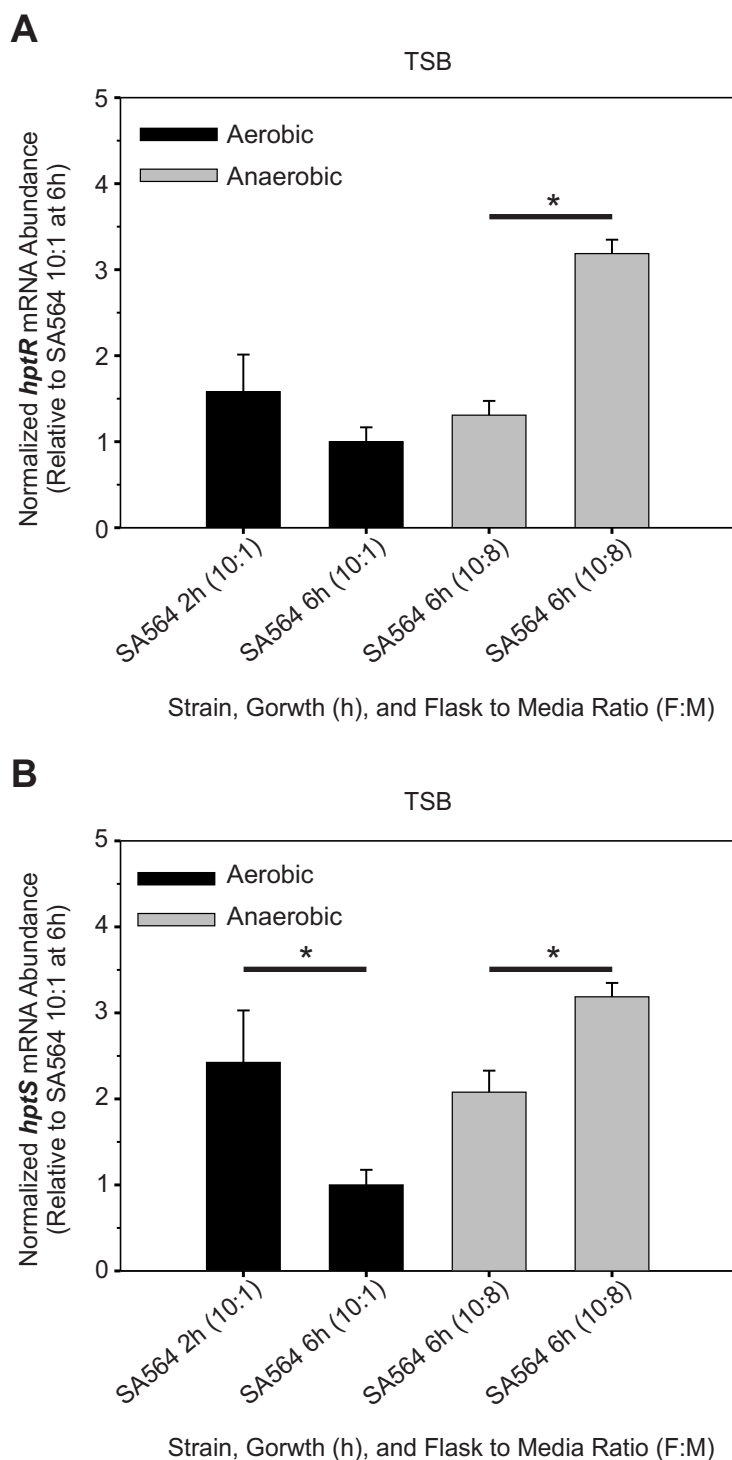

**Figure E. Transcript abundance of *hptR* and *hptS* is temporally regulated.** Relative mRNA levels during the exponential and post-exponential growth phases were determined by RT-qPCR for genes *hptR* (A) and *hptS* (B). The data are represented as the mean and standard error of the mean for 3 biological replicates, each determined in technical duplicate. The data were normalized using 16S rRNA and are plotted relative to SA564 6h (1:1). A statistically significant difference ( $p \leq 5$ ) between exponential (2h) and post-exponential (6h) growth phases is represented with an (\*). Bacteria were cultivated in TSB with a flask-to-medium ratio of 1:1, or 1:8.

**Figure F.**

3-way analysis: s x m x h

Pages: S7-S508

The normalized protein abundance, lower 95% confidence interval, and upper 95% confidence interval were plotted for each protein. These plots were analyzed if a significant three way interaction was identified between strain, media, and hour.

# 6PGD\_STAAM

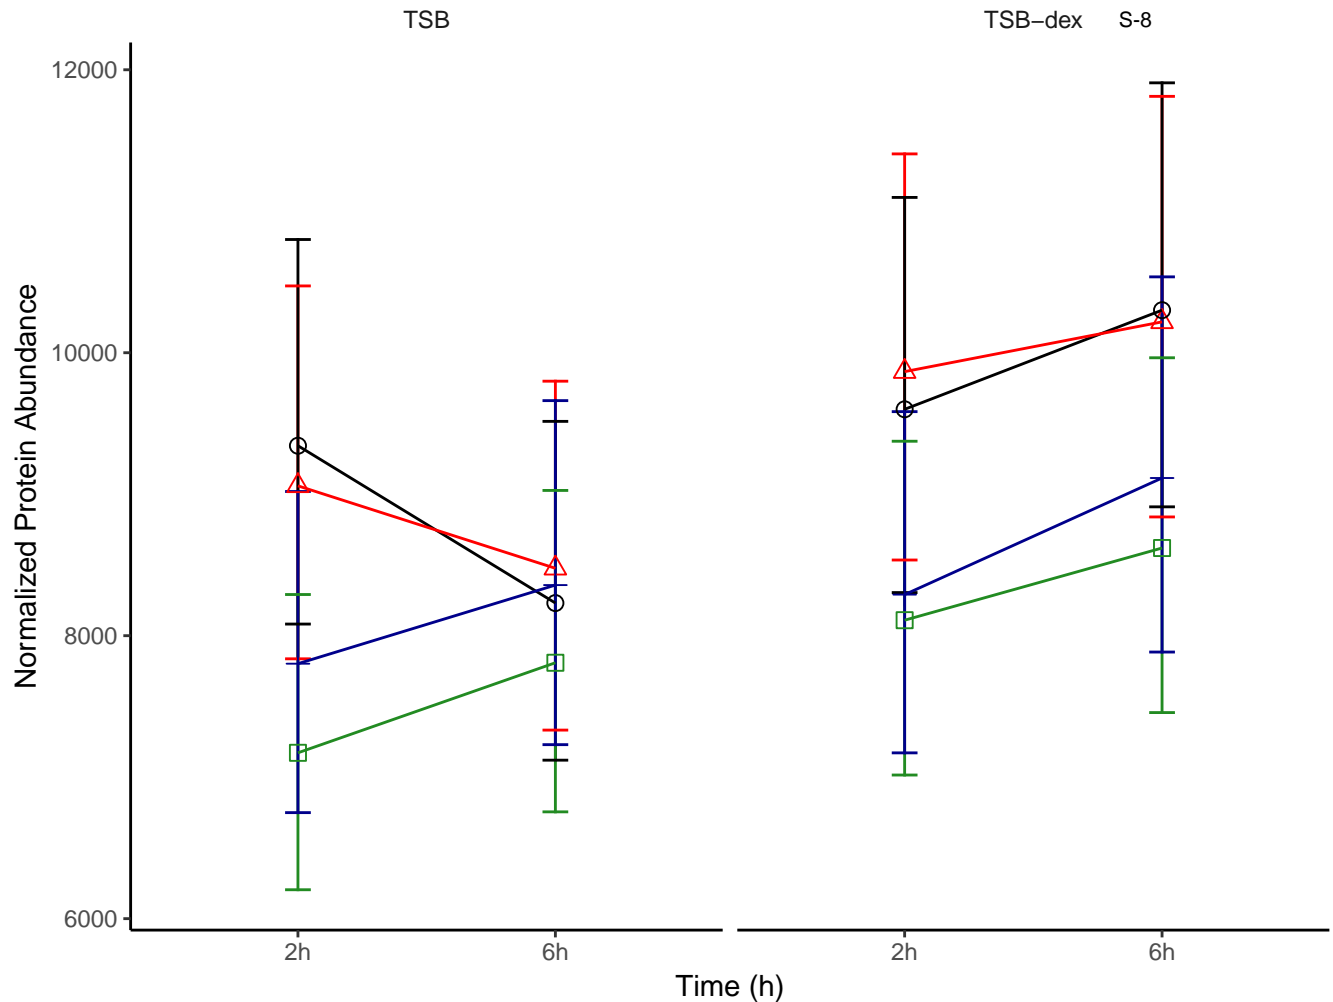

- SA564
- △ SA564- $\Delta$ hptRS
- SA564- $\Delta$ ccpA
- + SA564- $\Delta$ hptRS/ccpA



# ACCA\_STAAM

TSB

TSB-dex S-9

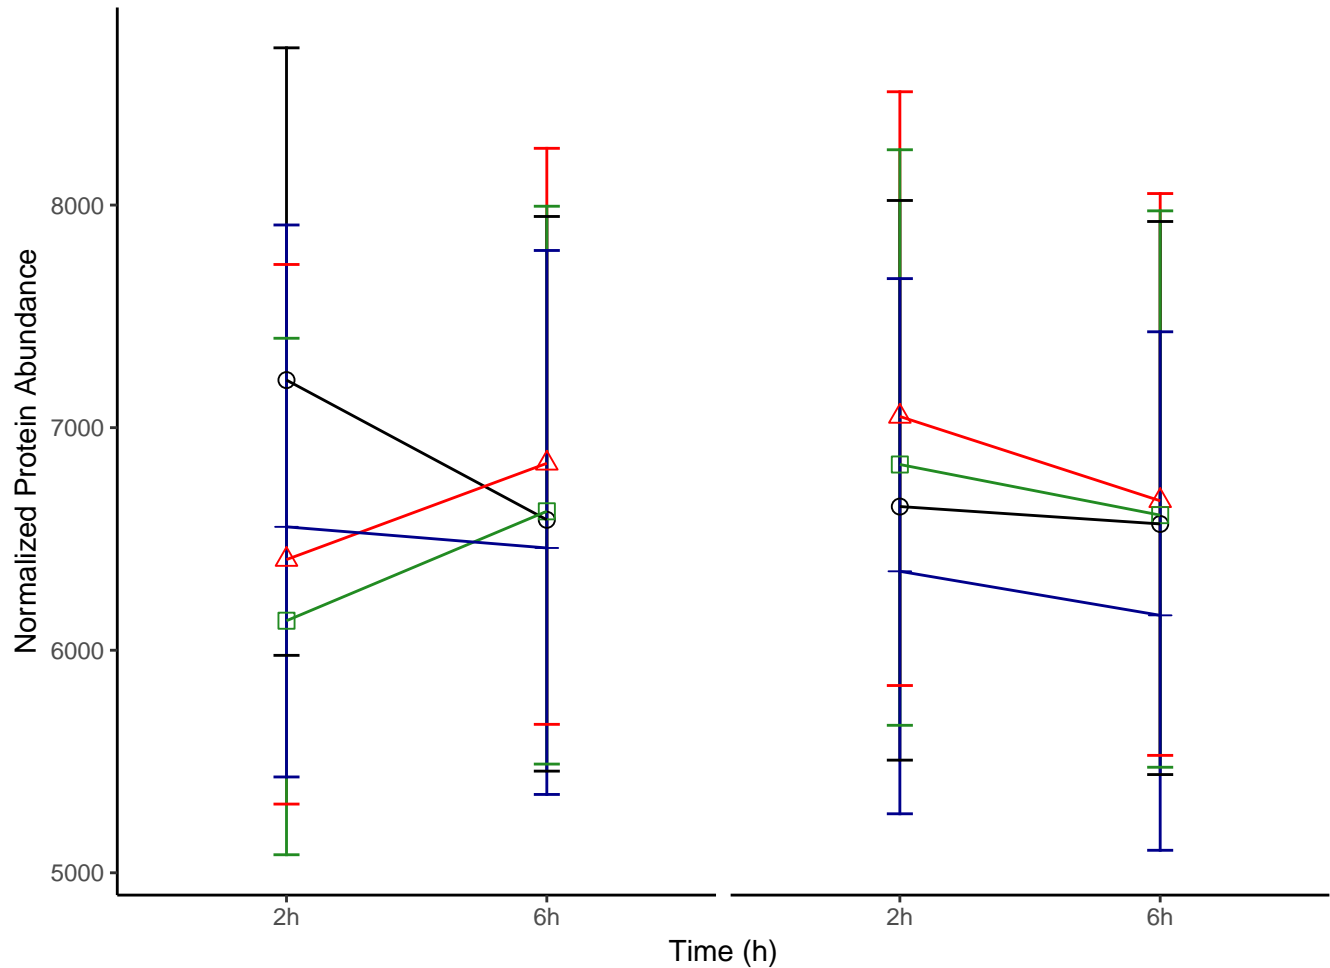

- SA564
- △ SA564- $\Delta$ hptRS
- SA564- $\Delta$ ccpA
- + SA564- $\Delta$ hptRS/ccpA

# ACKA\_STAAM

TSB

TSB-dex S-10

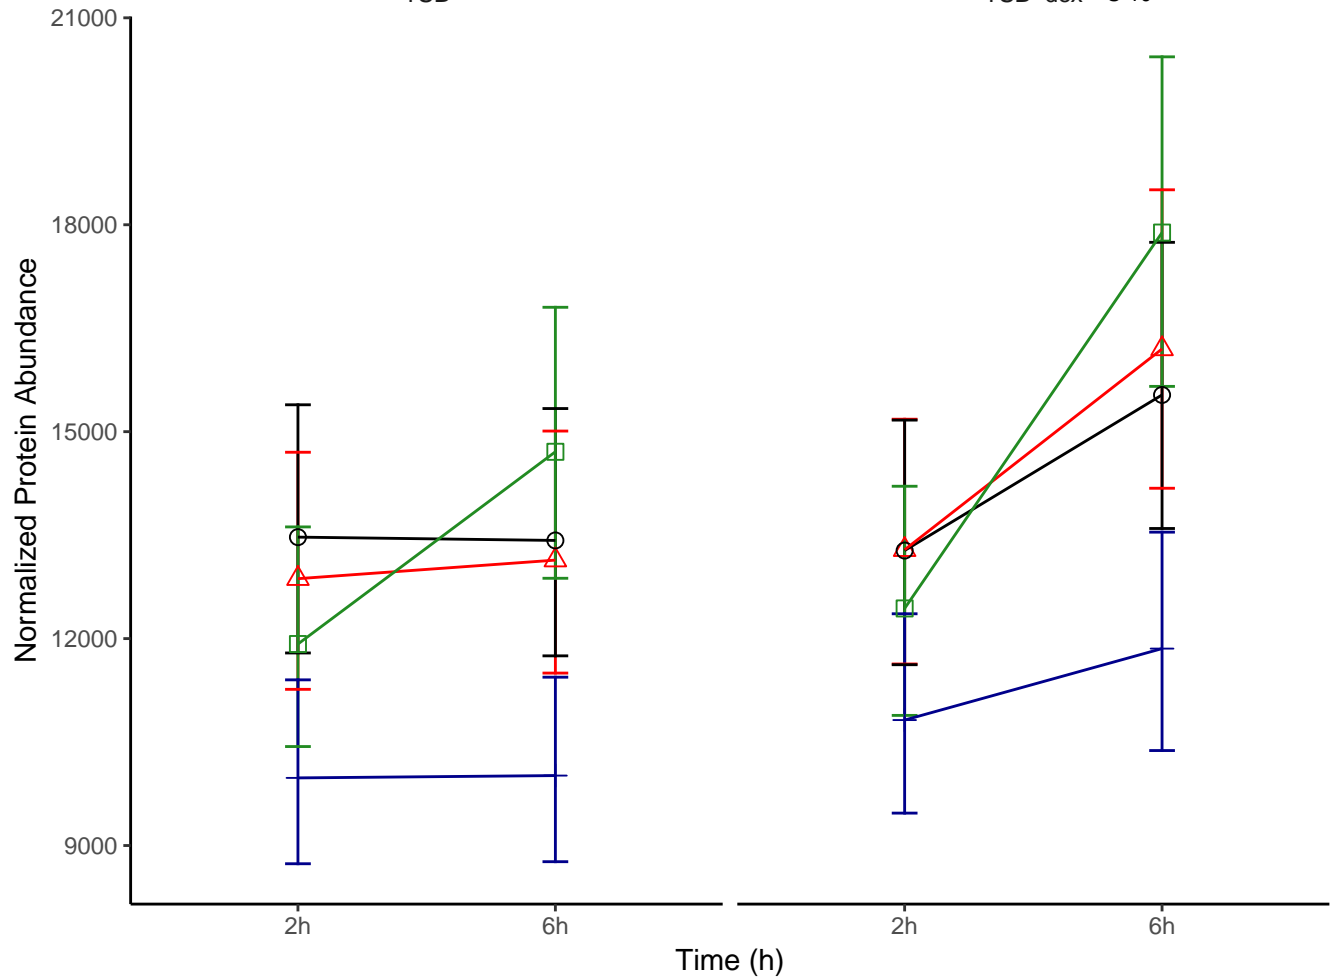

- SA564
- △ SA564- $\Delta$ hptRS
- SA564- $\Delta$ ccpA
- + SA564- $\Delta$ hptRS/ccpA

# ACON\_STAAM

TSB

TSB-dex S-11

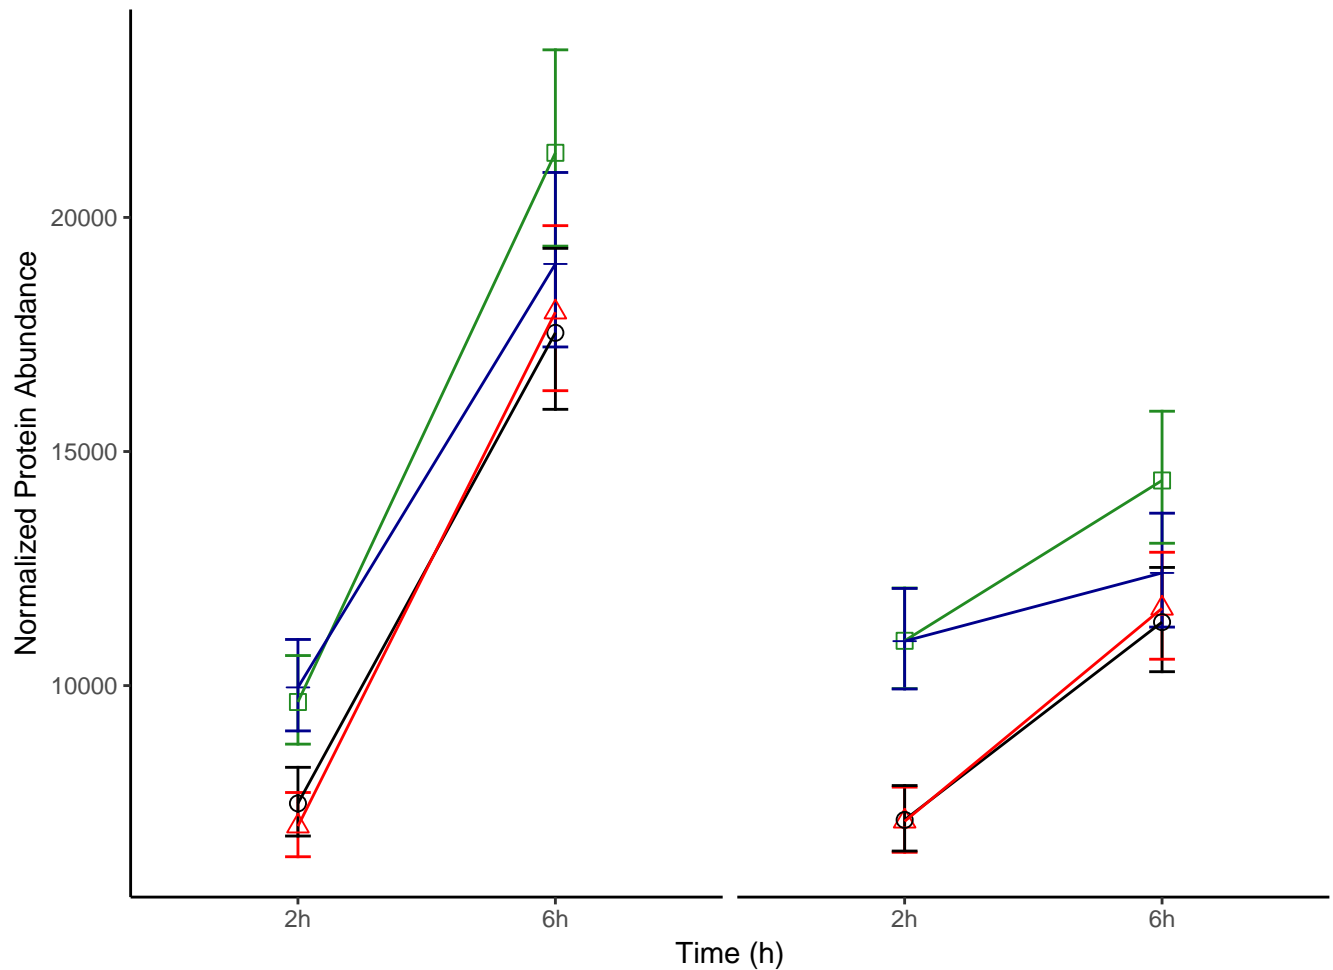

- SA564
- △ SA564- $\Delta$ hptRS
- SA564- $\Delta$ ccpA
- + SA564- $\Delta$ hptRS/ccpA

# ACP\_STAAM

TSB

TSB-dex S-12

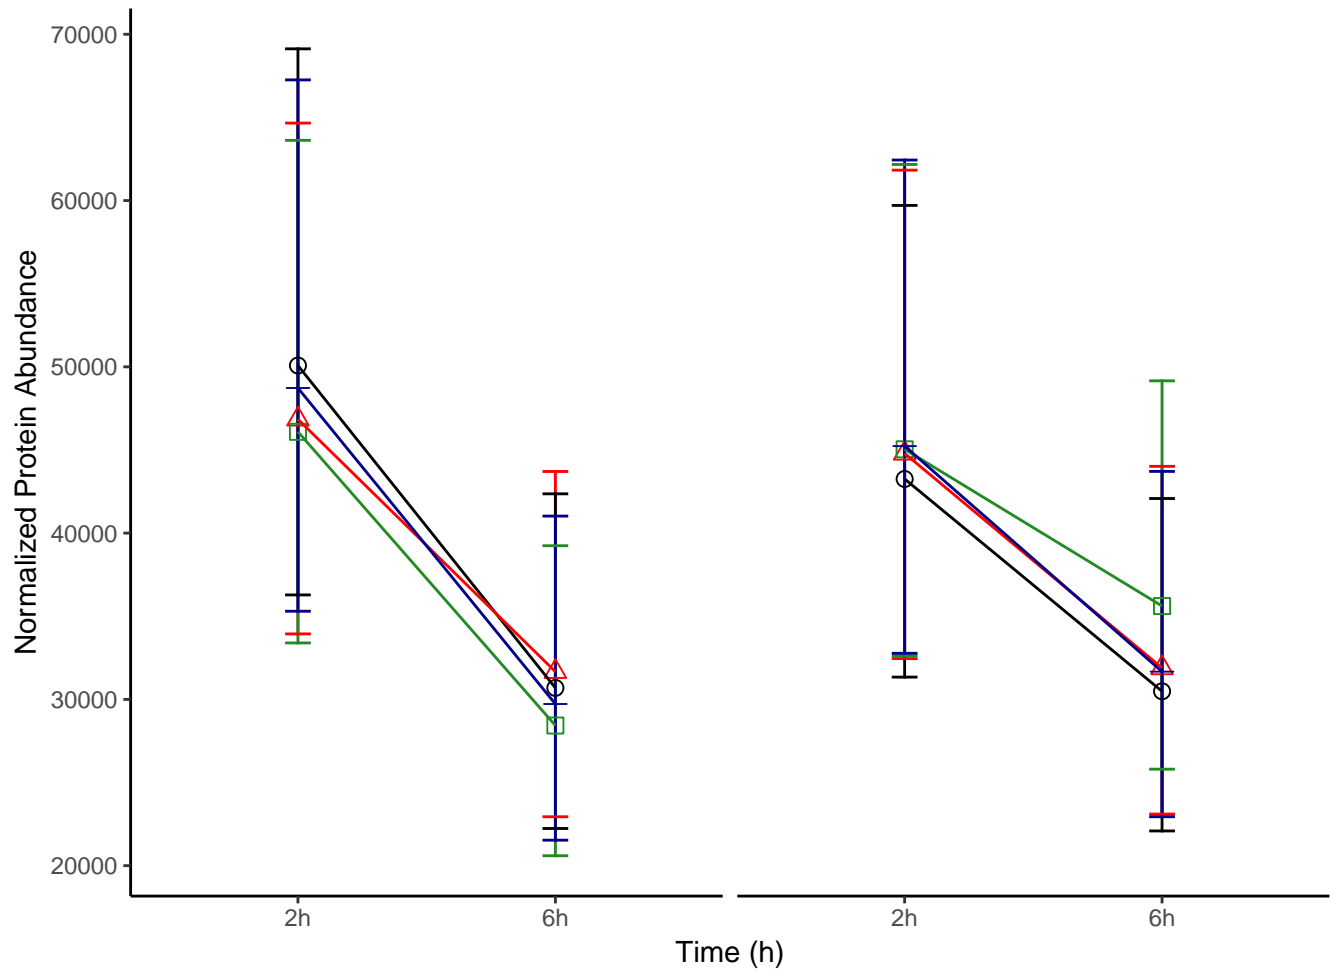

- SA564
- △ SA564- $\Delta hptRS$
- SA564- $\Delta ccpA$
- + SA564- $\Delta hptRS/ccpA$

# ADH\_STAAM

TSB

TSB-dex S-13

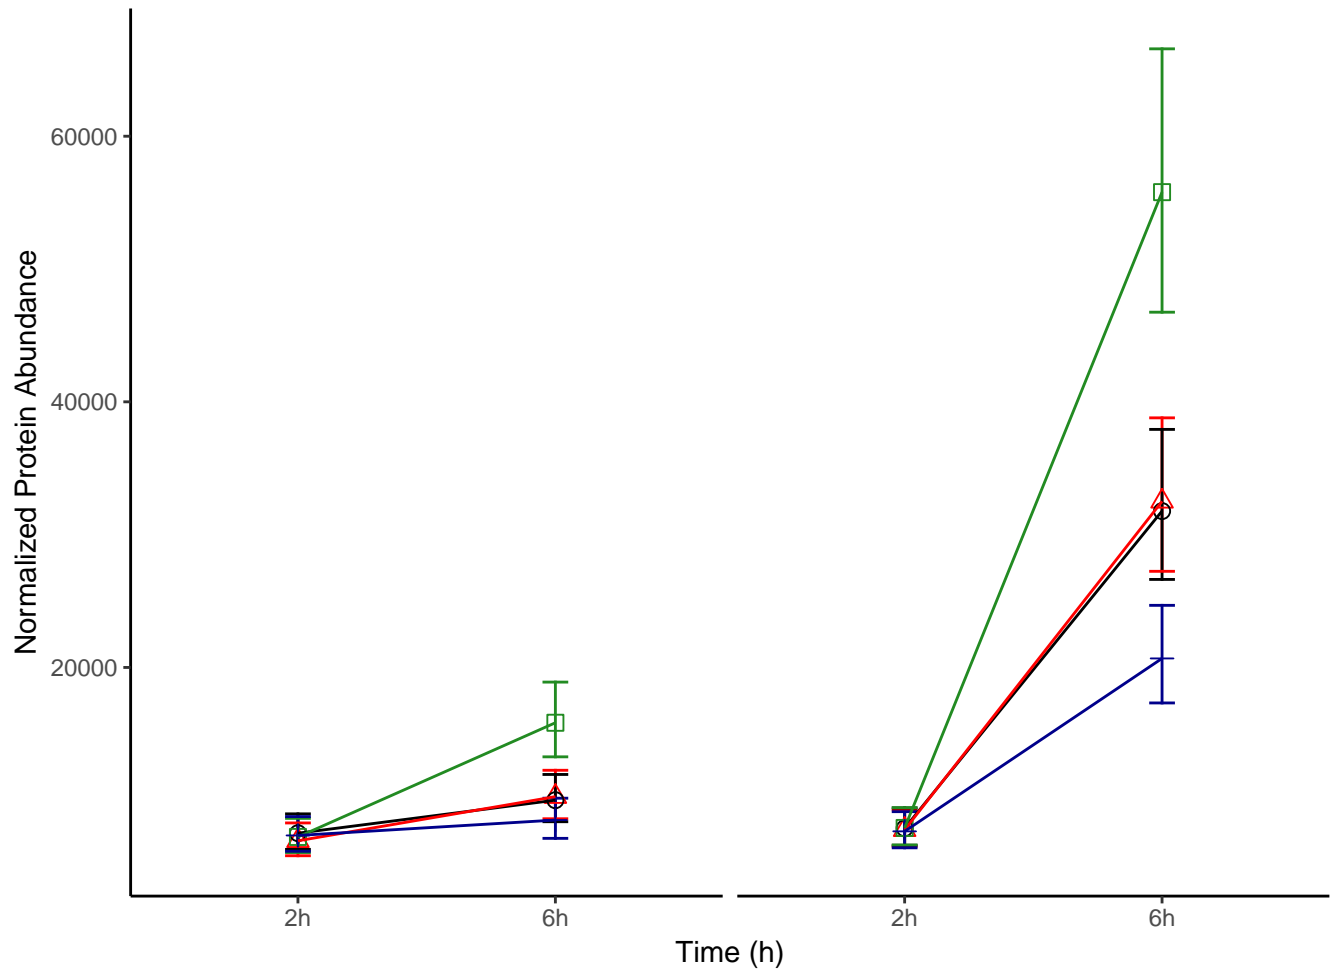

- SA564
- △ SA564- $\Delta$ *hptRS*
- SA564- $\Delta$ *ccpA*
- + SA564- $\Delta$ *hptRS/ccpA*

# AHPC\_STAAM

TSB

TSB-dex S-14

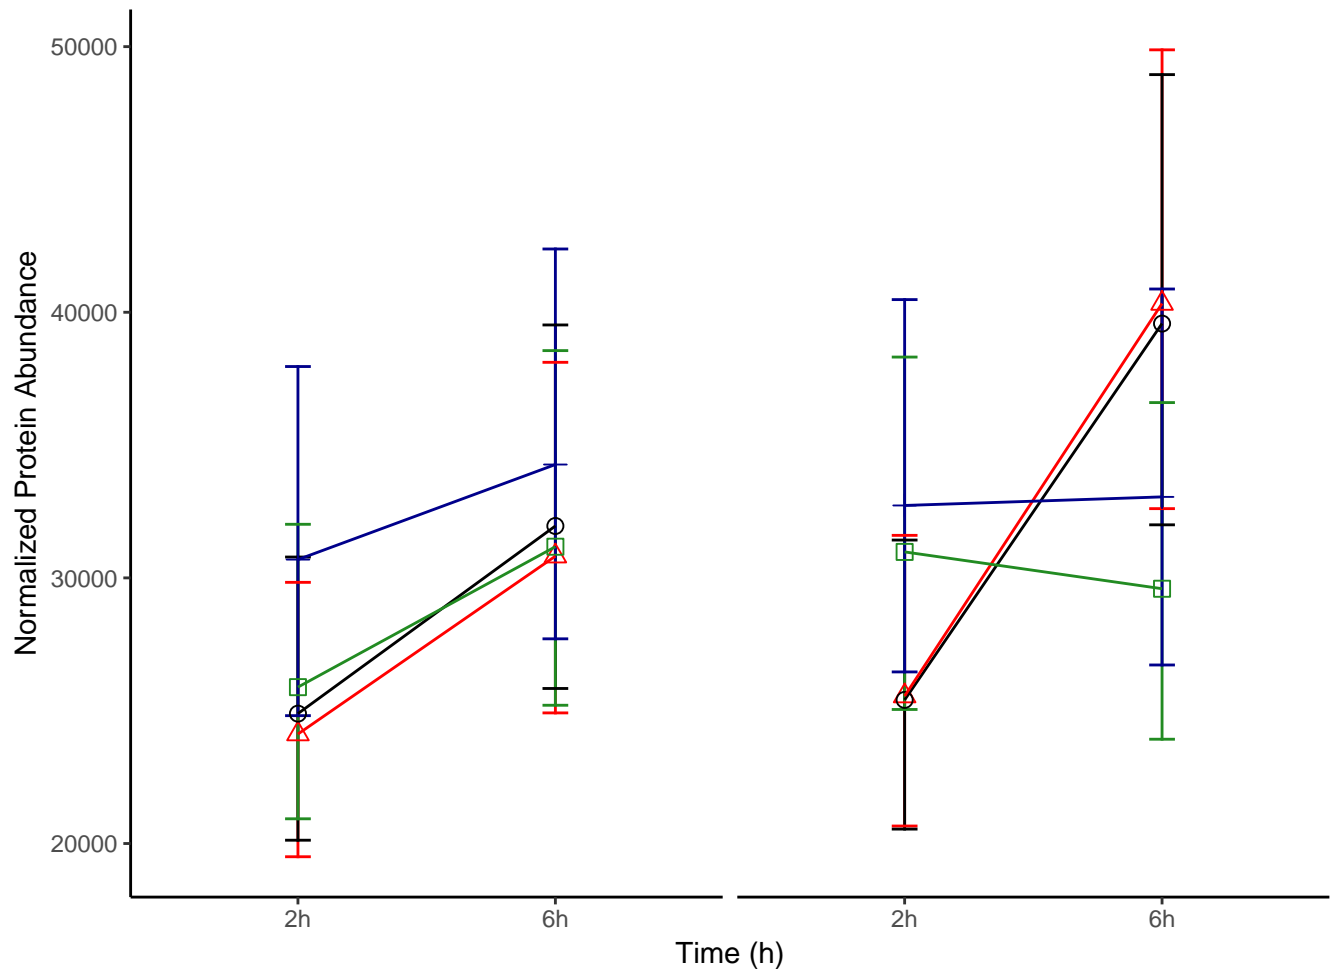

- SA564
- △ SA564- $\Delta hptRS$
- SA564- $\Delta ccpA$
- ⊕ SA564- $\Delta hptRS/ccpA$

# AHPF\_STAAM

TSB

TSB-dex S-15

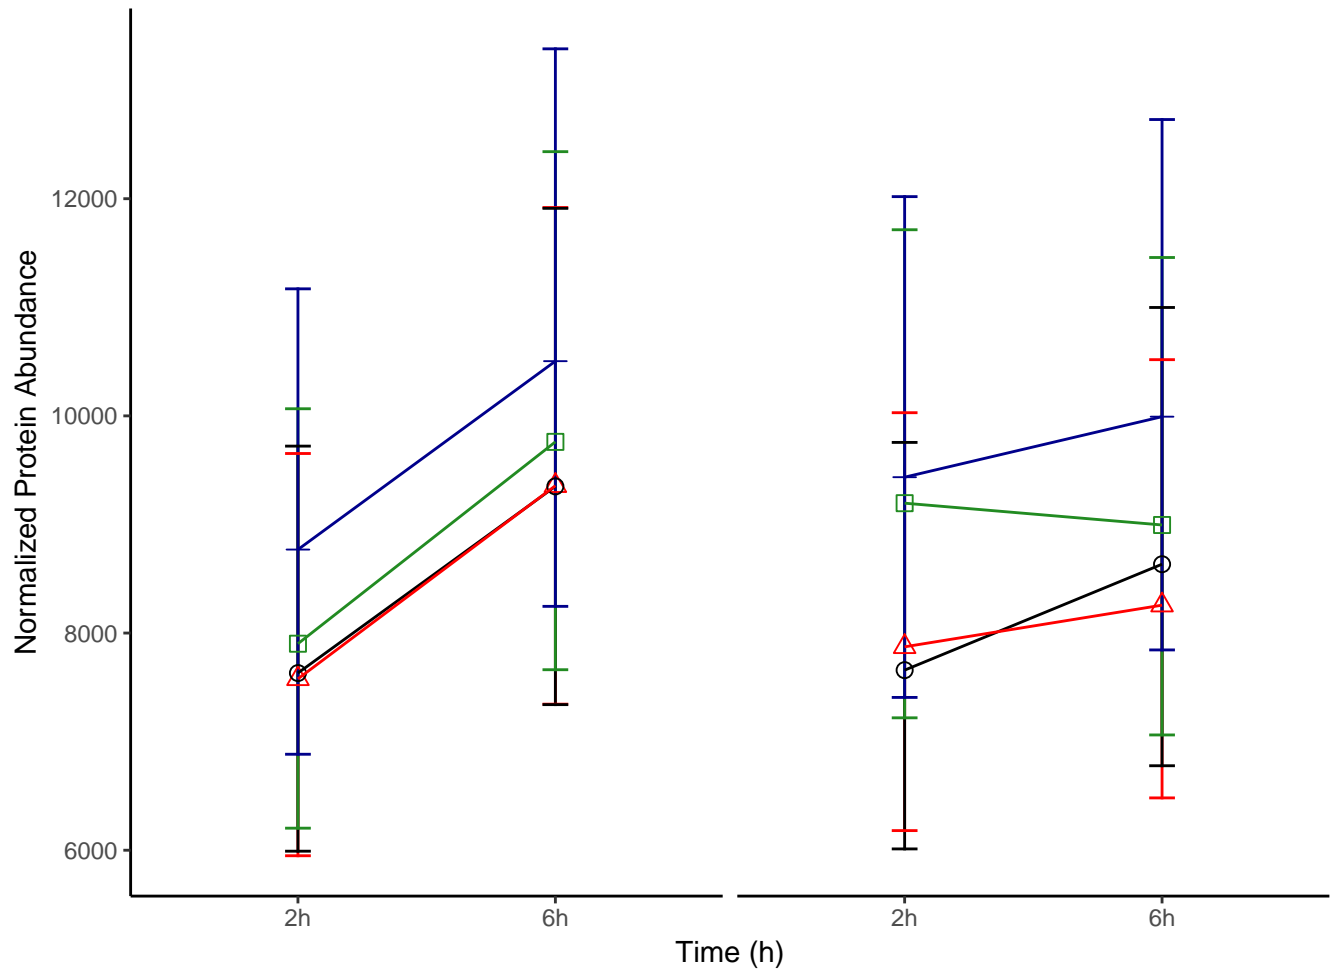

- SA564
- △ SA564- $\Delta$ hptRS
- SA564- $\Delta$ ccpA
- + SA564- $\Delta$ hptRS/ccpA

# ALD1\_STAAM

TSB

TSB-dex S-16

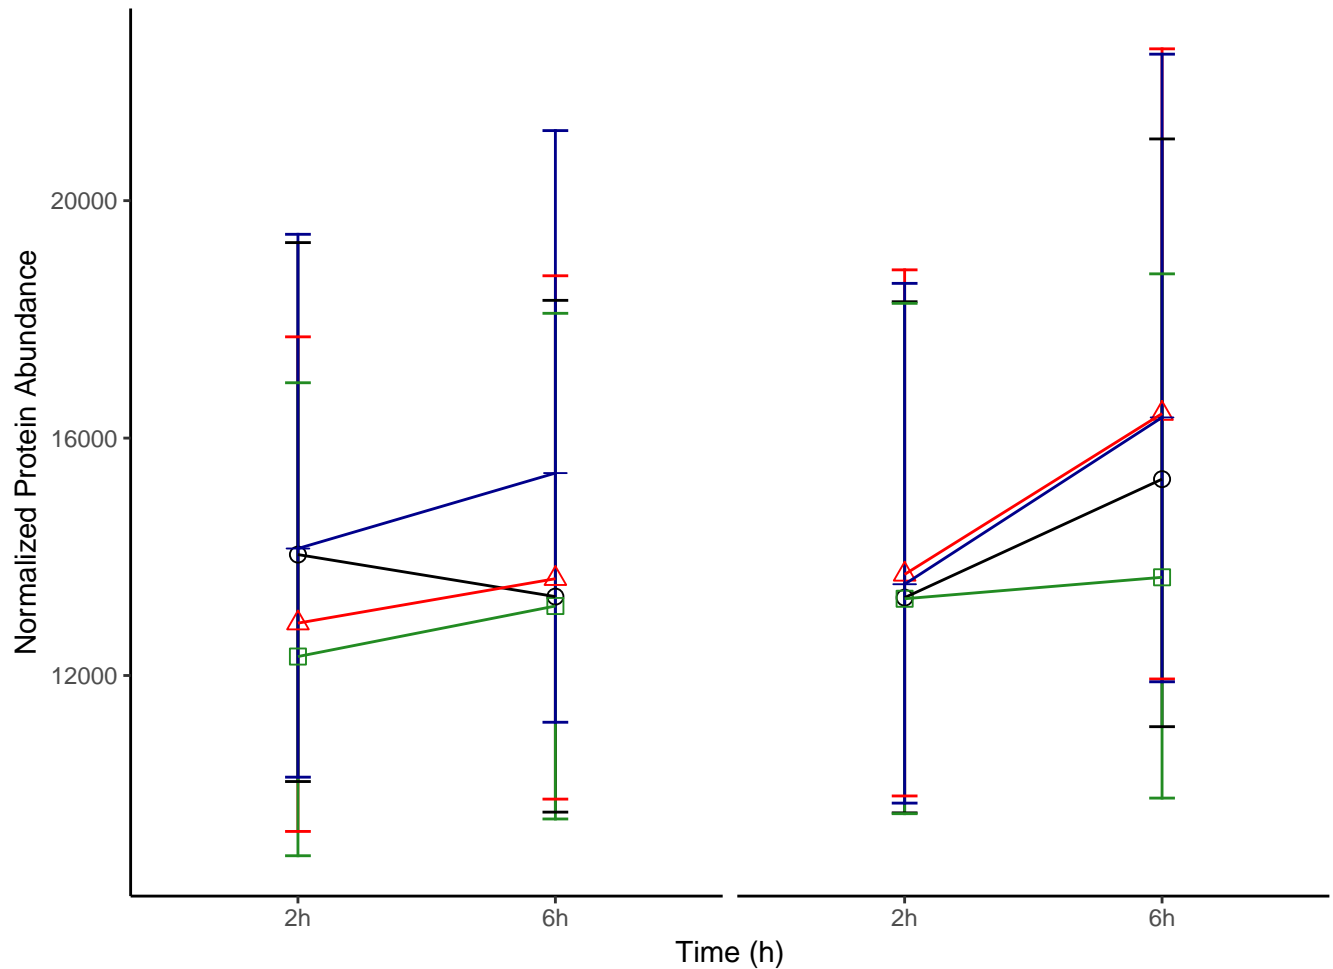

- SA564
- △ SA564- $\Delta$ hptRS
- SA564- $\Delta$ ccpA
- + SA564- $\Delta$ hptRS/ccpA



## ALDA\_STAAM

TSB

TSB-dex S-17

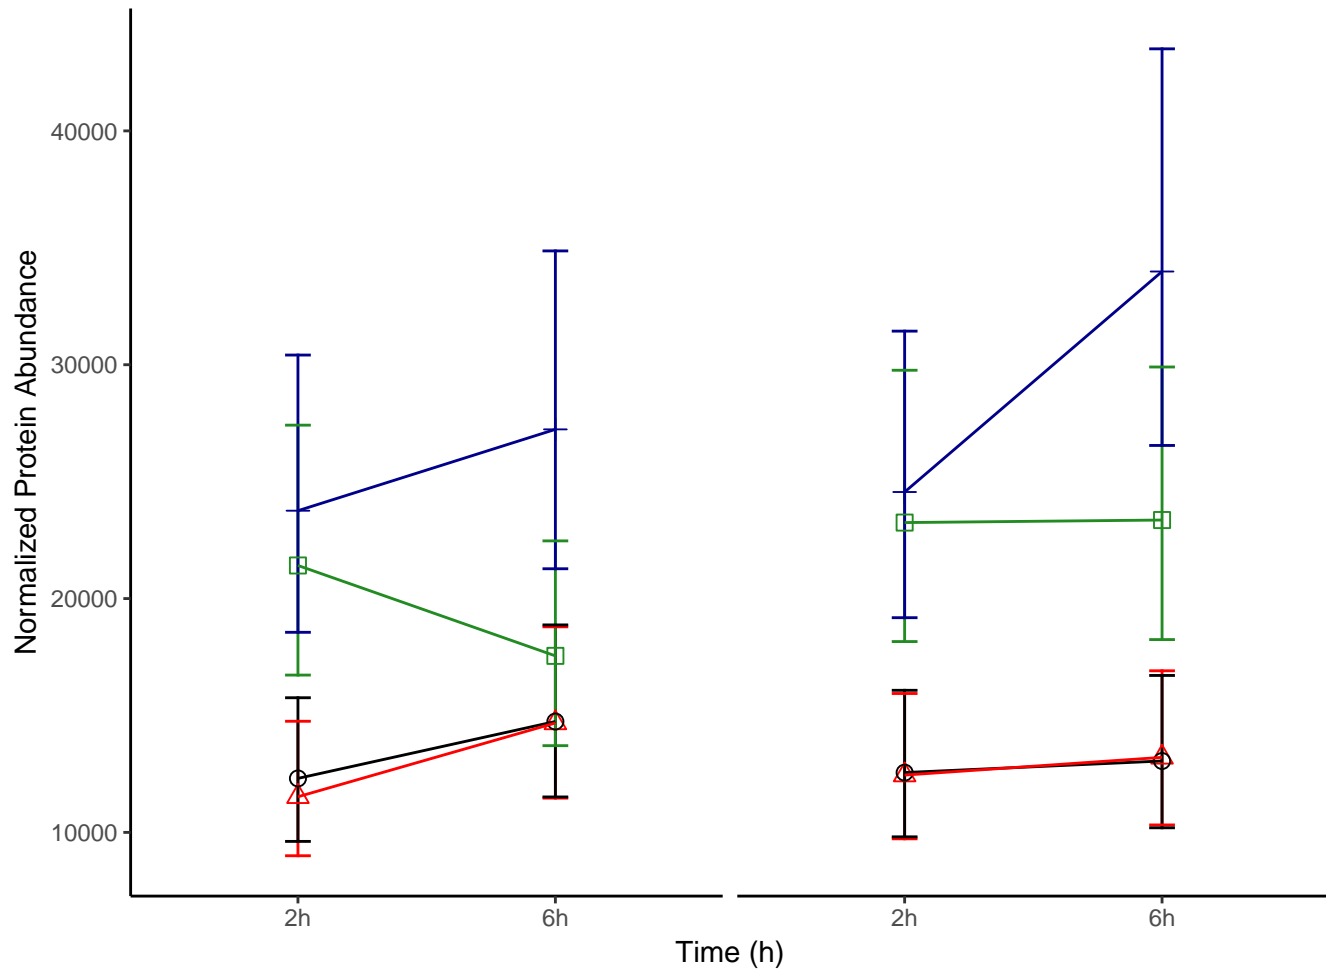

- SA564
- △ SA564- $\Delta hptRS$
- SA564- $\Delta ccpA$
- + SA564- $\Delta hptRS/ccpA$

# ALF1\_STAAM

TSB

TSB-dex S-18

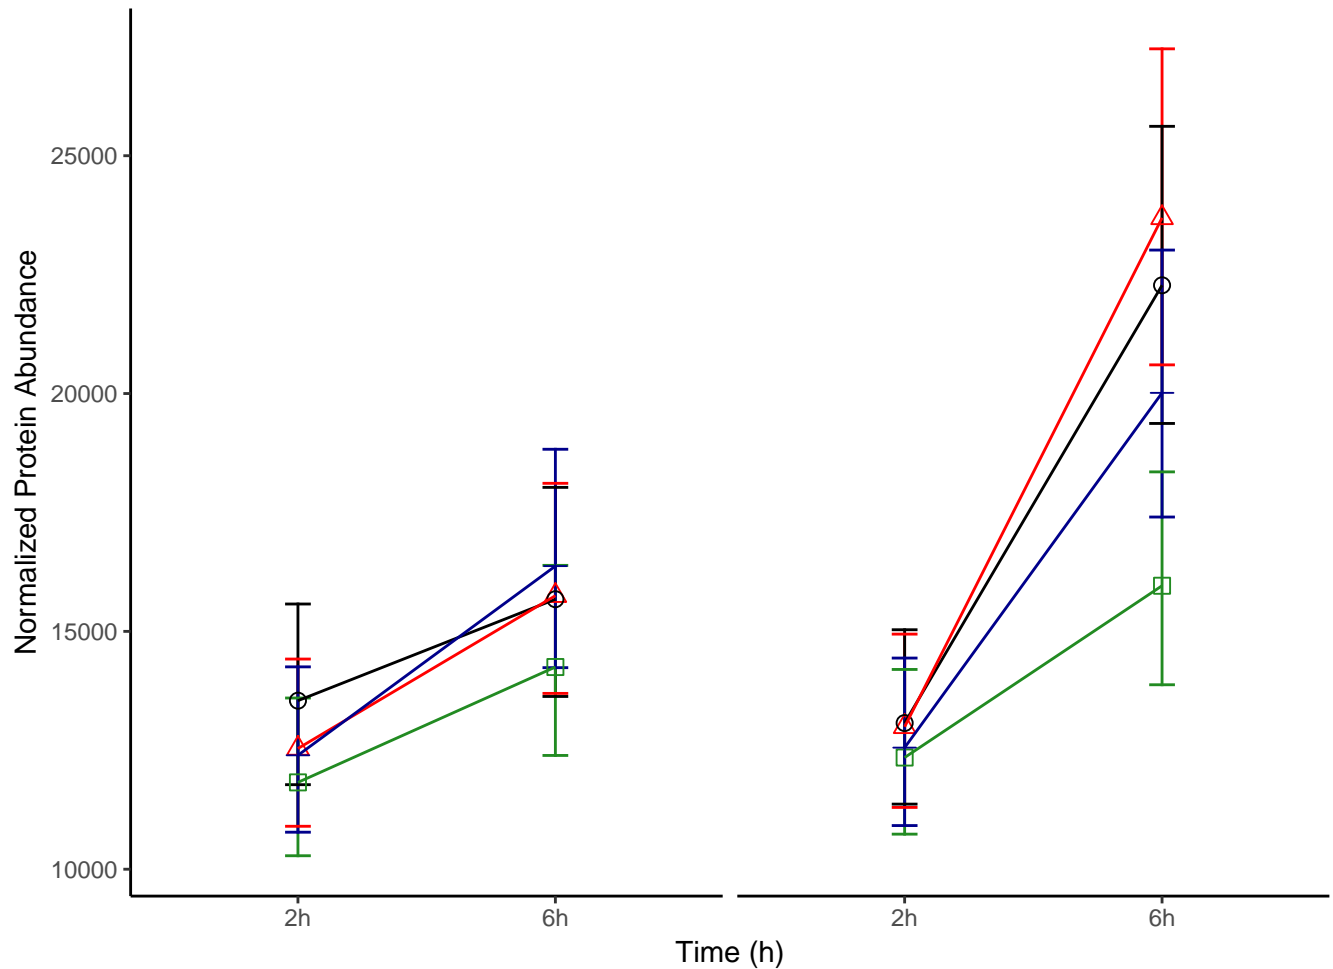

- SA564
- △ SA564-ΔhptRS
- SA564-ΔccpA
- + SA564-ΔhptRS/ccpA

# ALF2\_STAAM

TSB

TSB-dex S-19

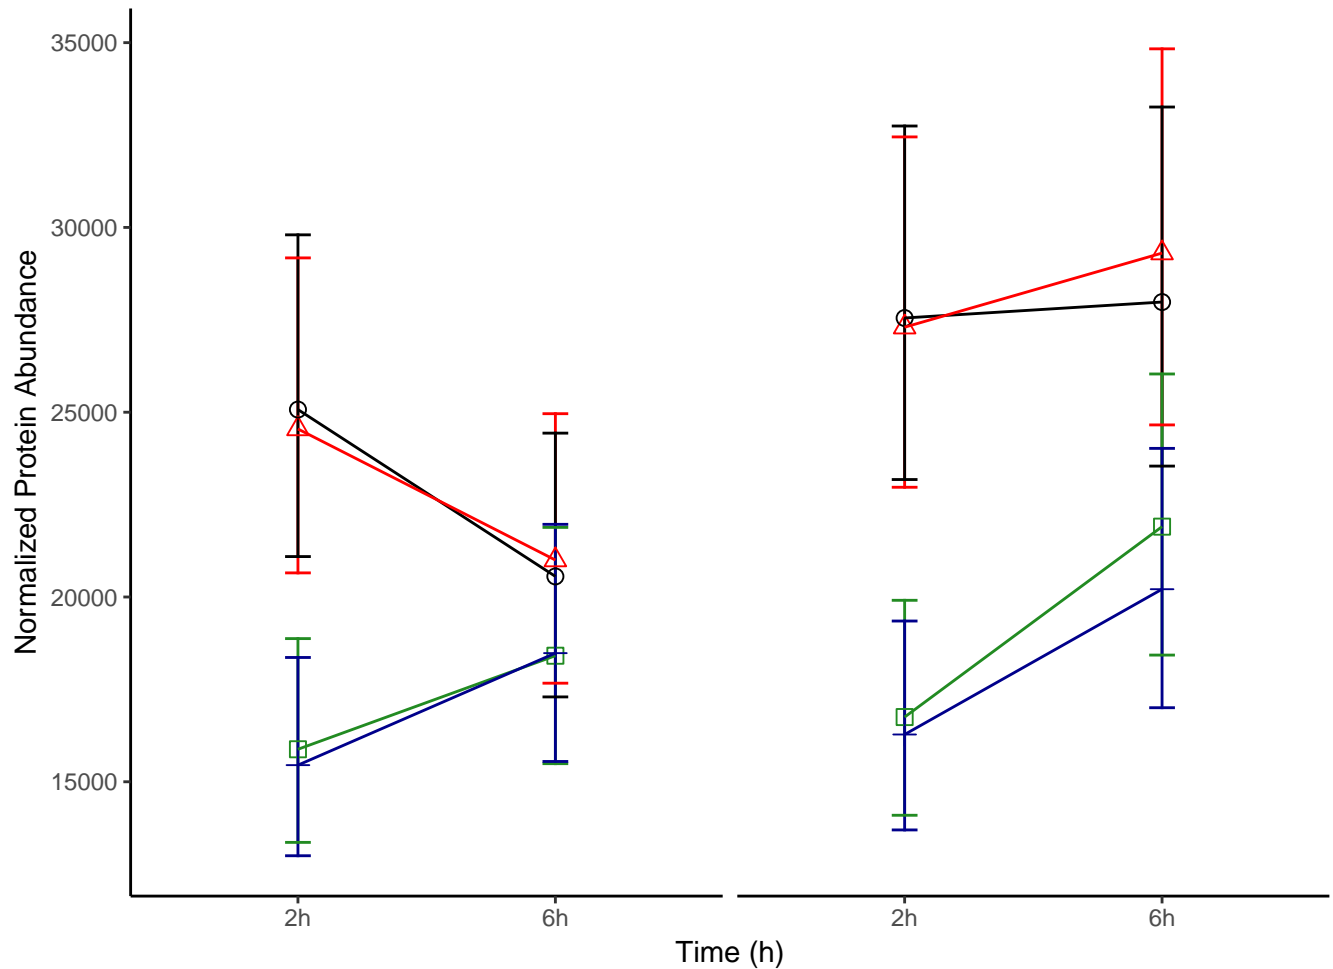

- SA564
- △ SA564- $\Delta$ hptRS
- SA564- $\Delta$ ccpA
- + SA564- $\Delta$ hptRS/ccpA

# APT\_STAAM

TSB

TSB-dex S-20

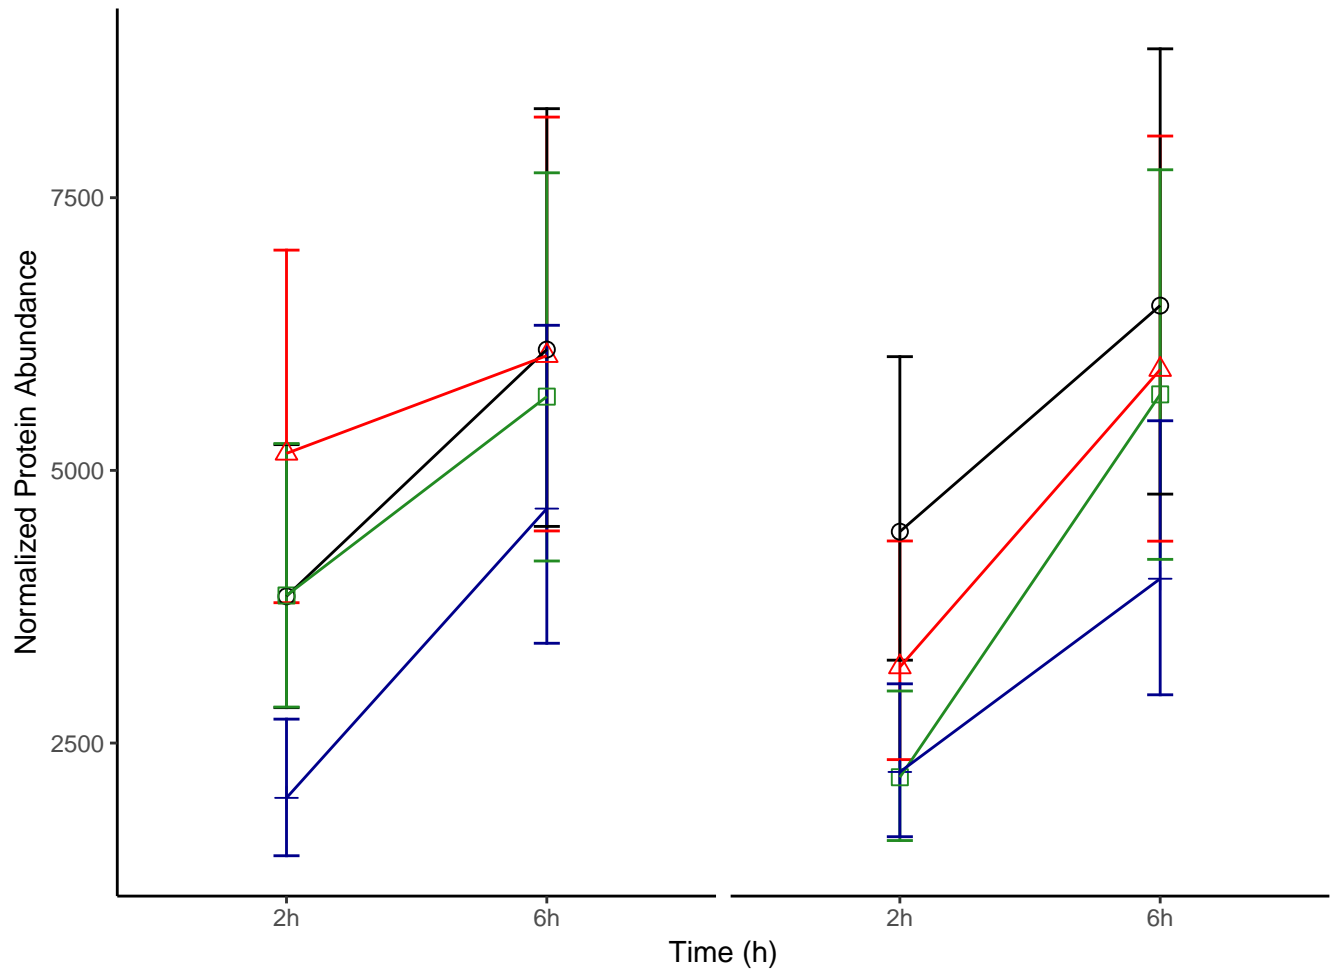

- SA564
  - △ SA564- $\Delta hptRS$
  - SA564- $\Delta ccpA$
  - +
- SA564- $\Delta hptRS/ccpA$

# ARCA\_STAAM

TSB

TSB-dex S-21

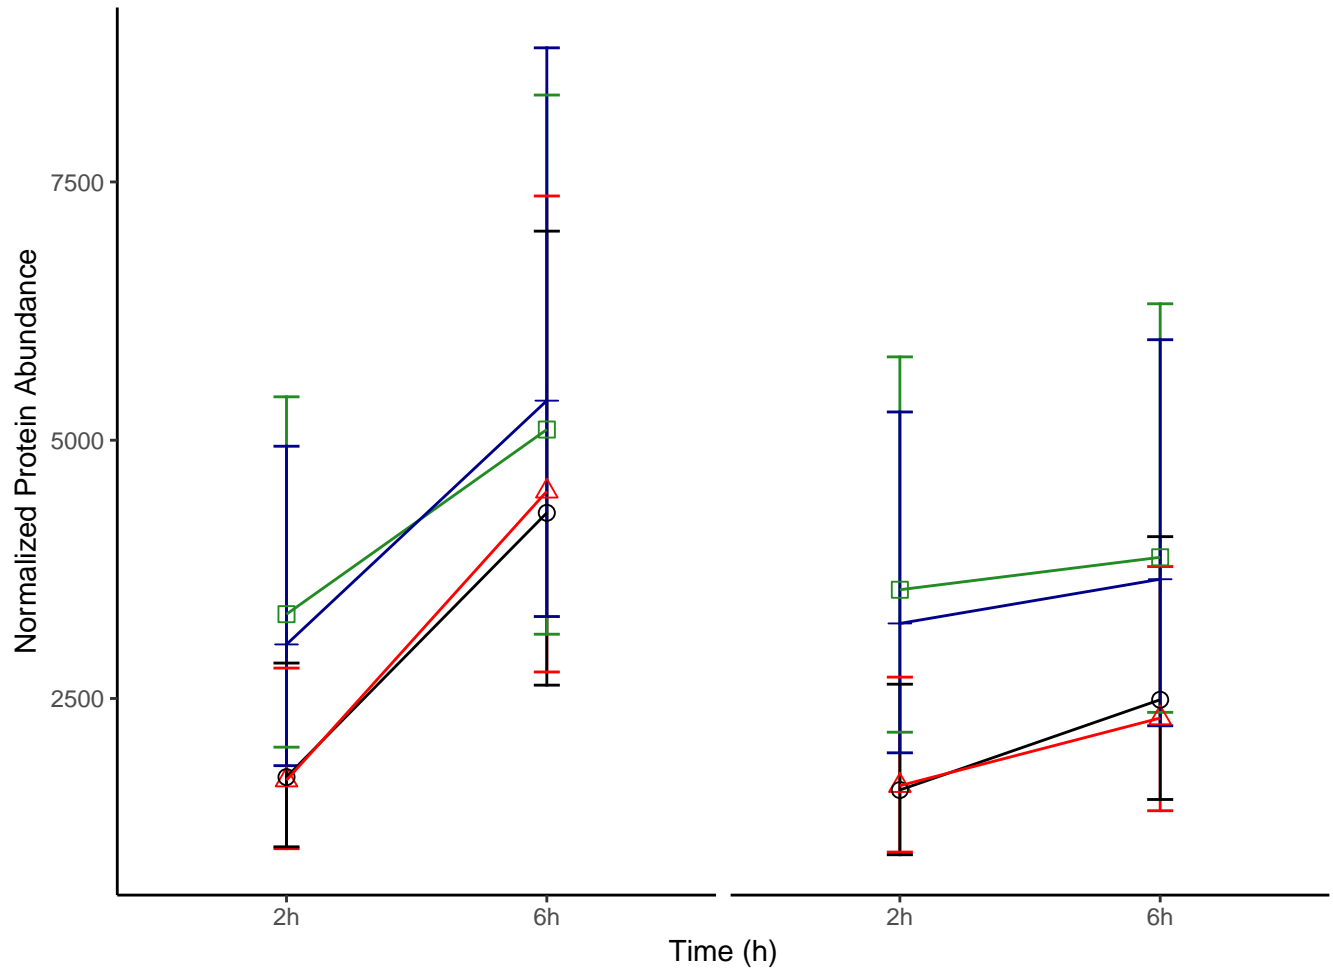

- SA564
- △ SA564- $\Delta$ *hptRS*
- SA564- $\Delta$ *ccpA*
- + SA564- $\Delta$ *hptRS/ccpA*

# ARCC1\_STAAM

TSB

TSB-dex S-22

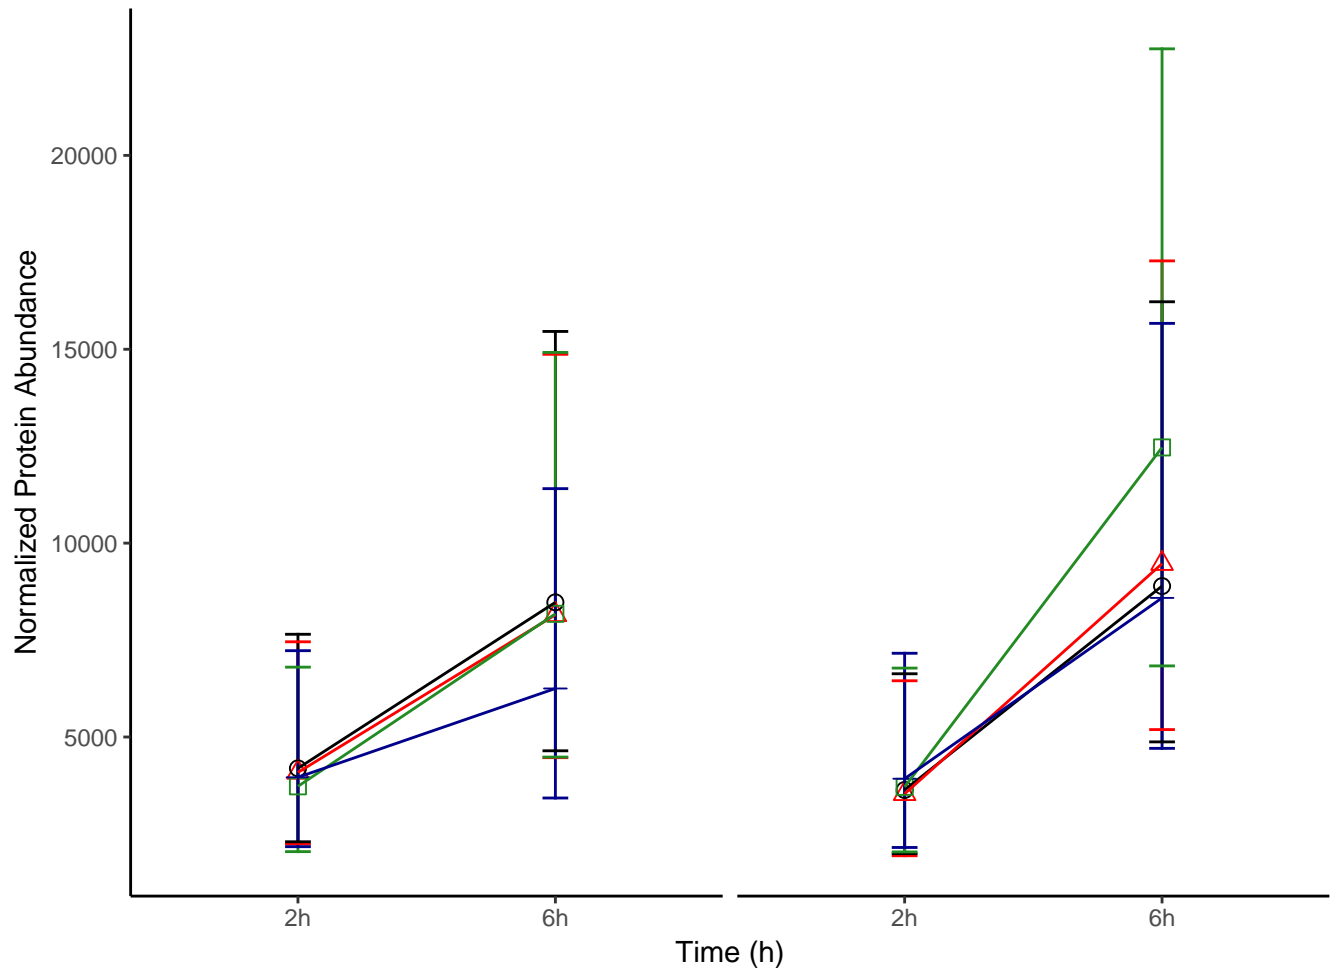

- SA564
- △ SA564- $\Delta$ hptRS
- SA564- $\Delta$ ccpA
- + SA564- $\Delta$ hptRS/ccpA

# ARGI\_STAAM

TSB

TSB-dex S-23

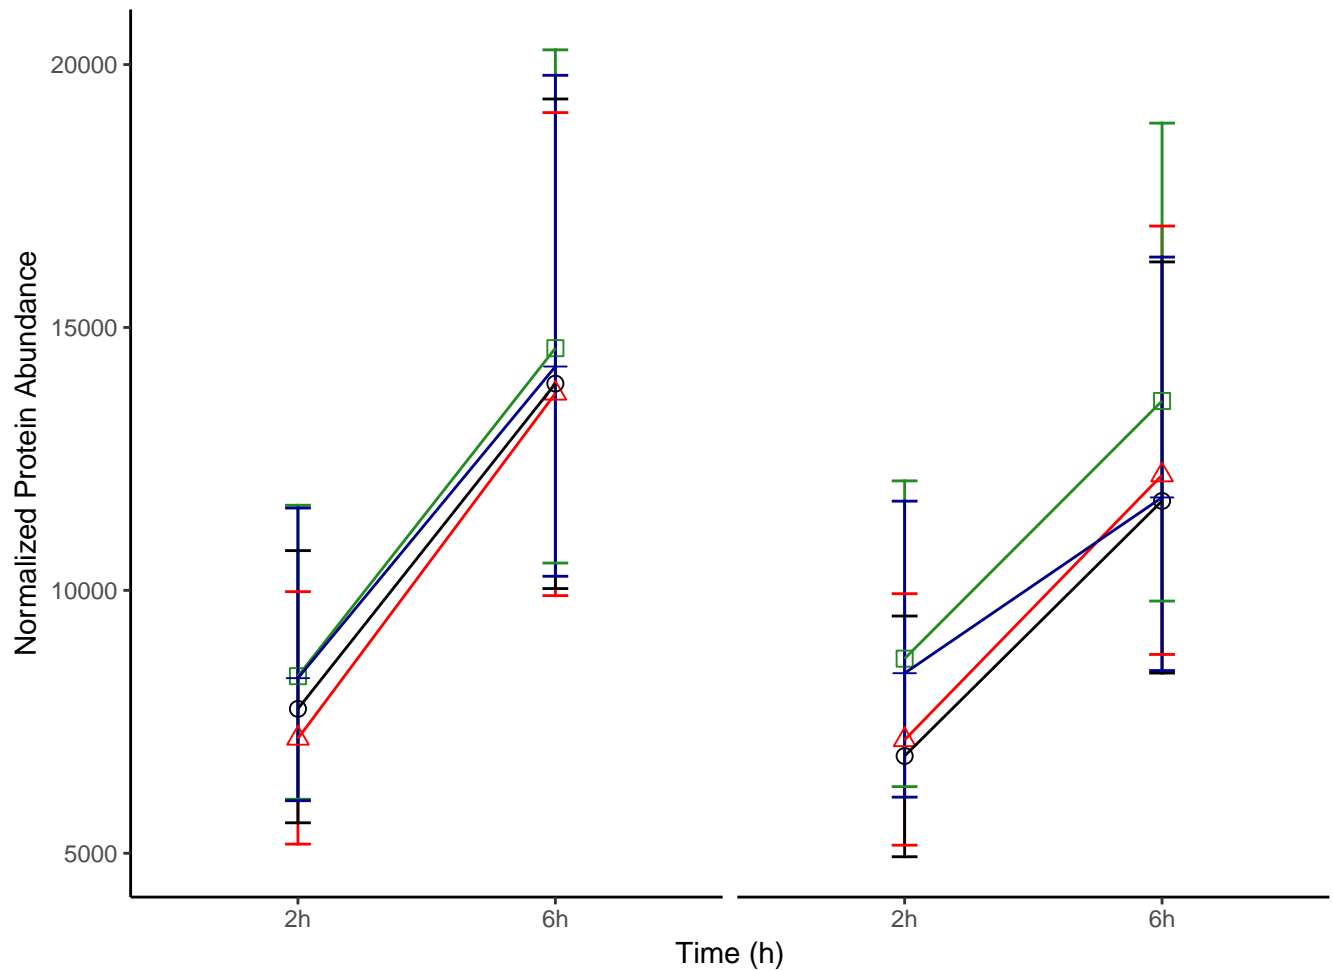

- SA564
- △ SA564- $\Delta hptRS$
- SA564- $\Delta ccpA$
- + SA564- $\Delta hptRS/ccpA$

# ARGR\_STAAM

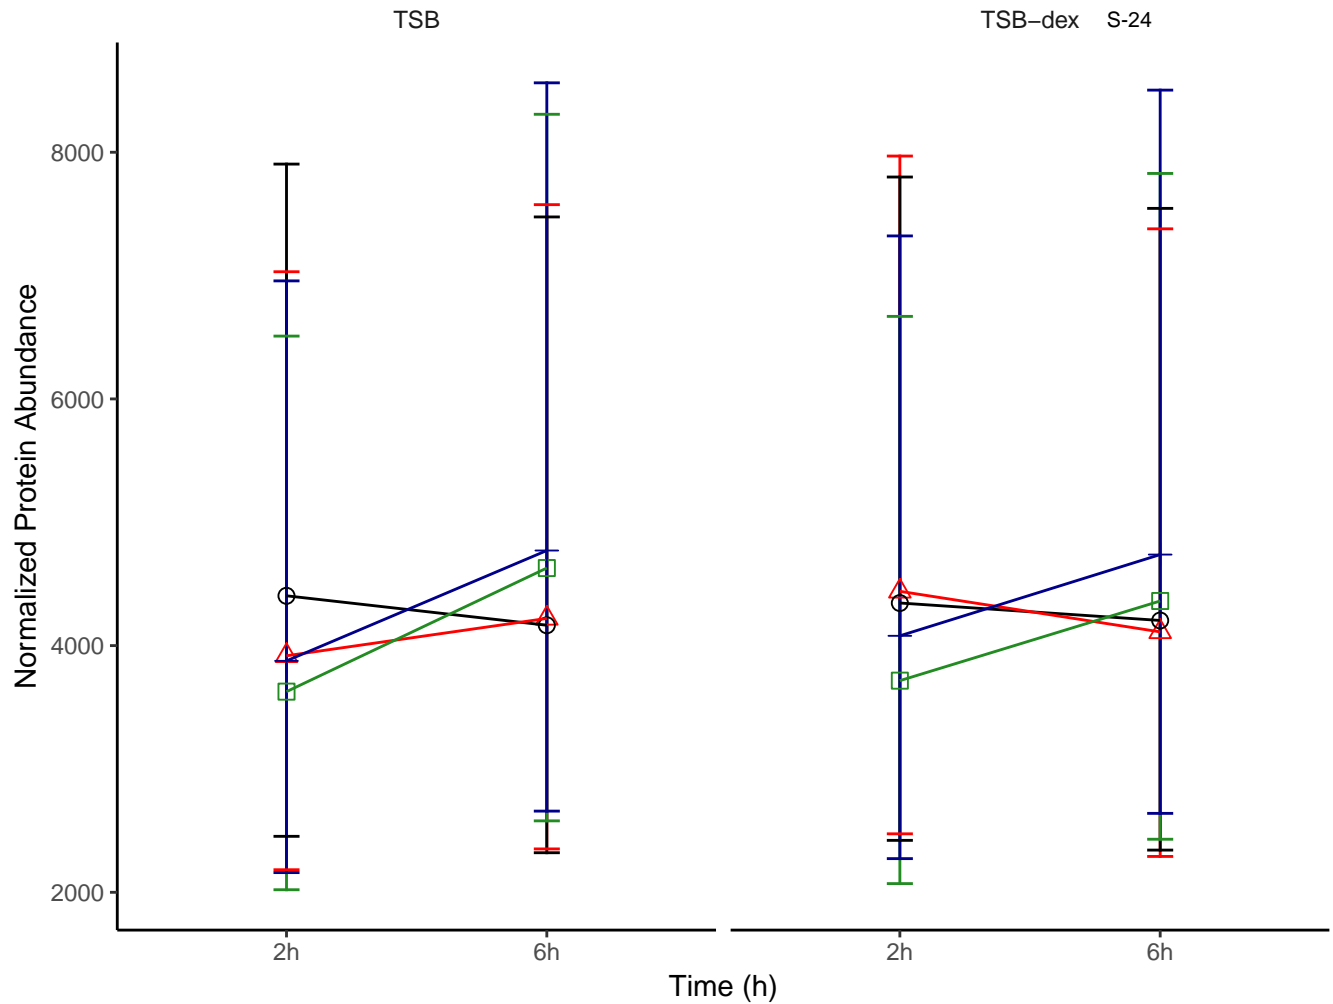

- SA564
- △ SA564-ΔhptRS
- SA564-ΔccpA
- + SA564-ΔhptRS/ccpA



# ARLR\_STAAM

TSB

TSB-dex S-25

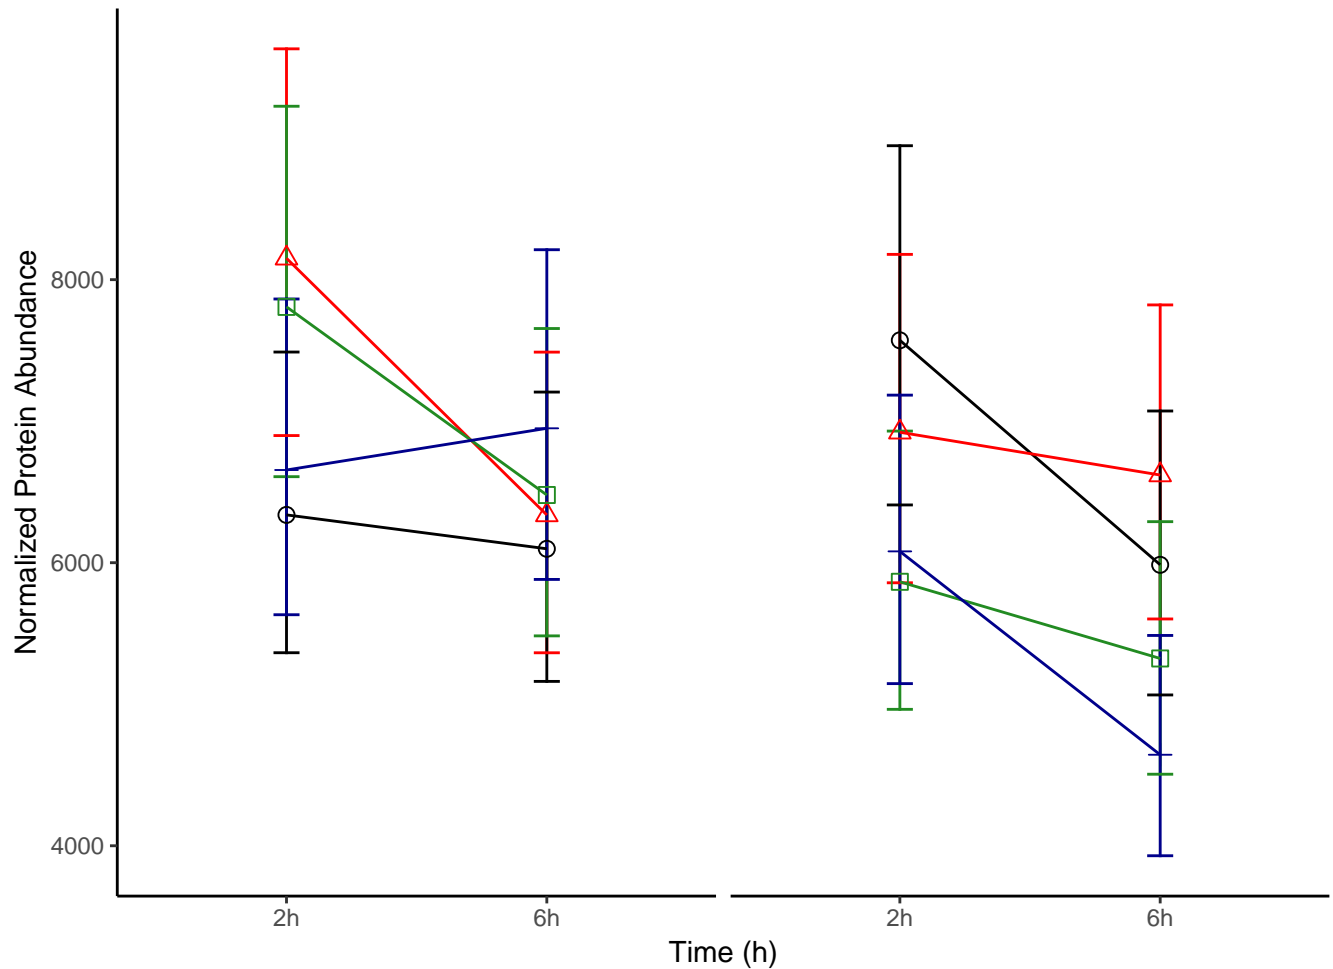

- SA564
- △ SA564-ΔhptRS
- SA564-ΔccpA
- + SA564-ΔhptRS/ccpA

# ARLY\_STAAM

TSB

TSB-dex S-26

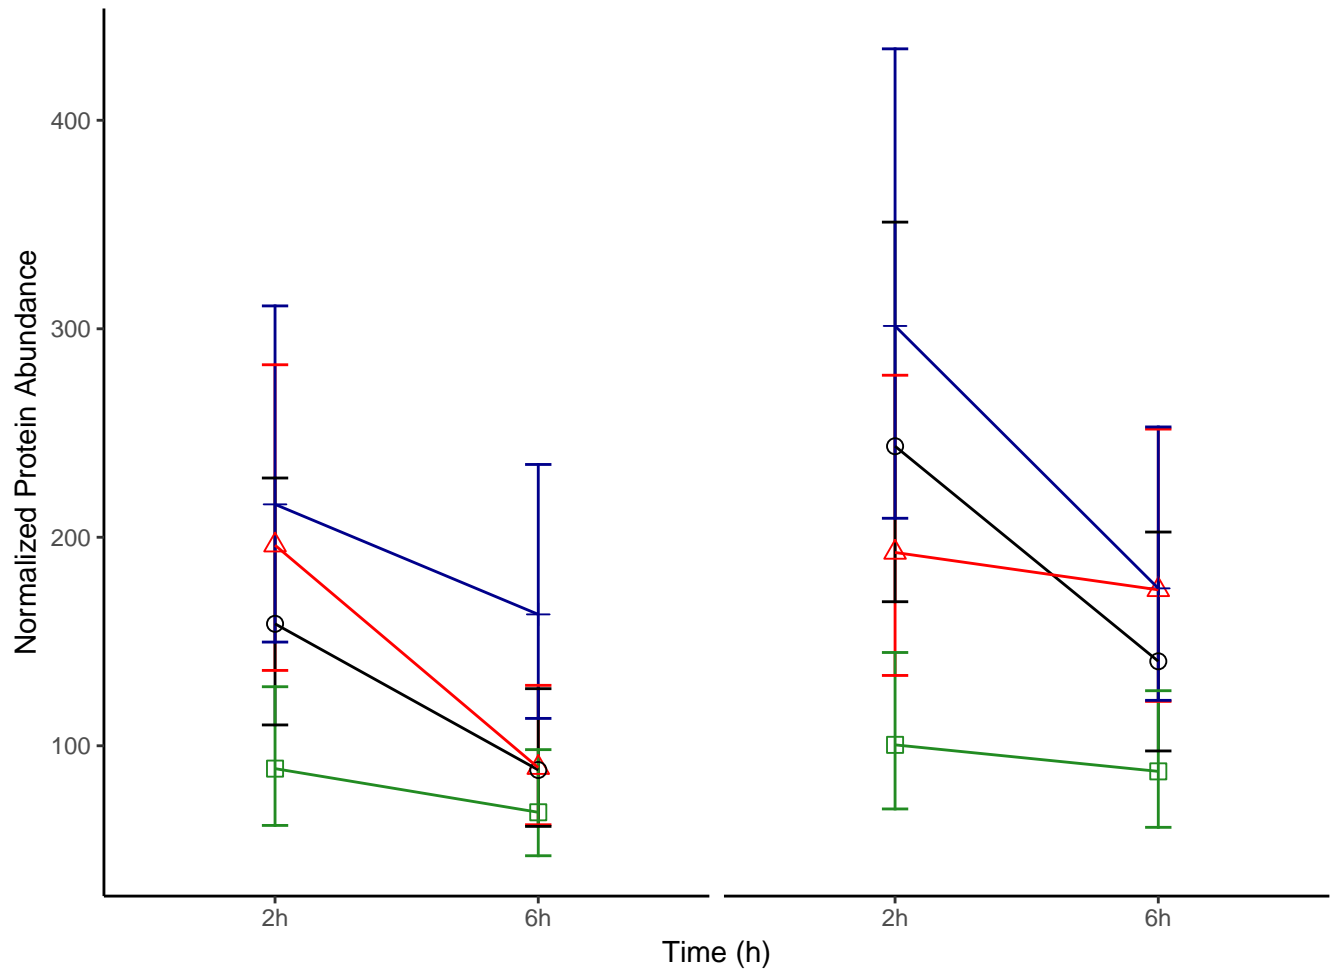

- SA564
- △ SA564- $\Delta$ *hptRS*
- SA564- $\Delta$ *ccpA*
- + SA564- $\Delta$ *hptRS/ccpA*

# ARO<sub>A</sub>\_STAAM

TSB

TSB-dex S-27

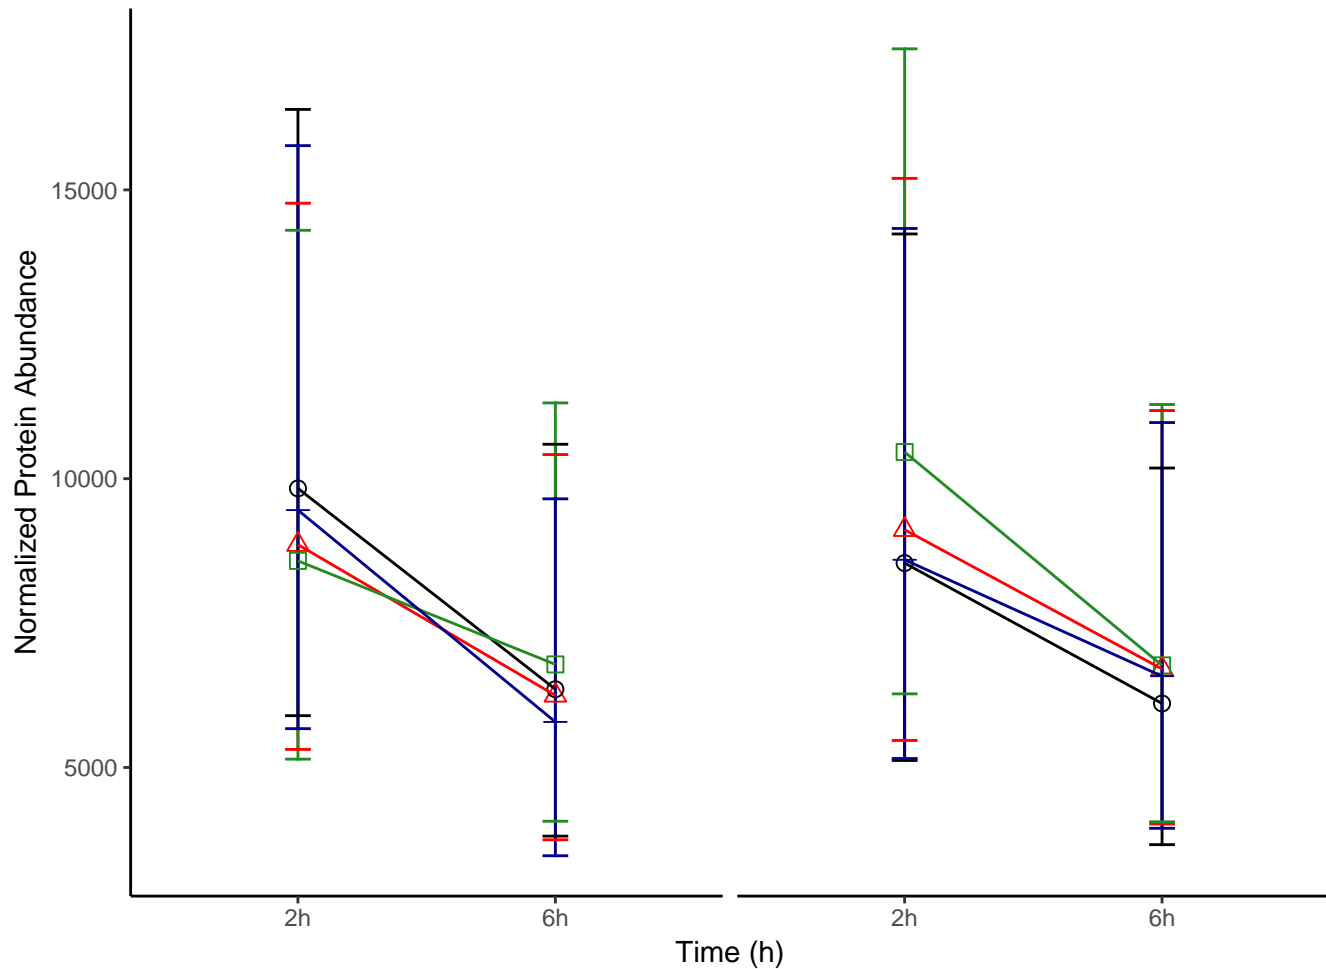

- SA564
- △ SA564- $\Delta$ *hptRS*
- SA564- $\Delta$ *ccpA*
- + SA564- $\Delta$ *hptRS/ccpA*

# AROB\_STAAM

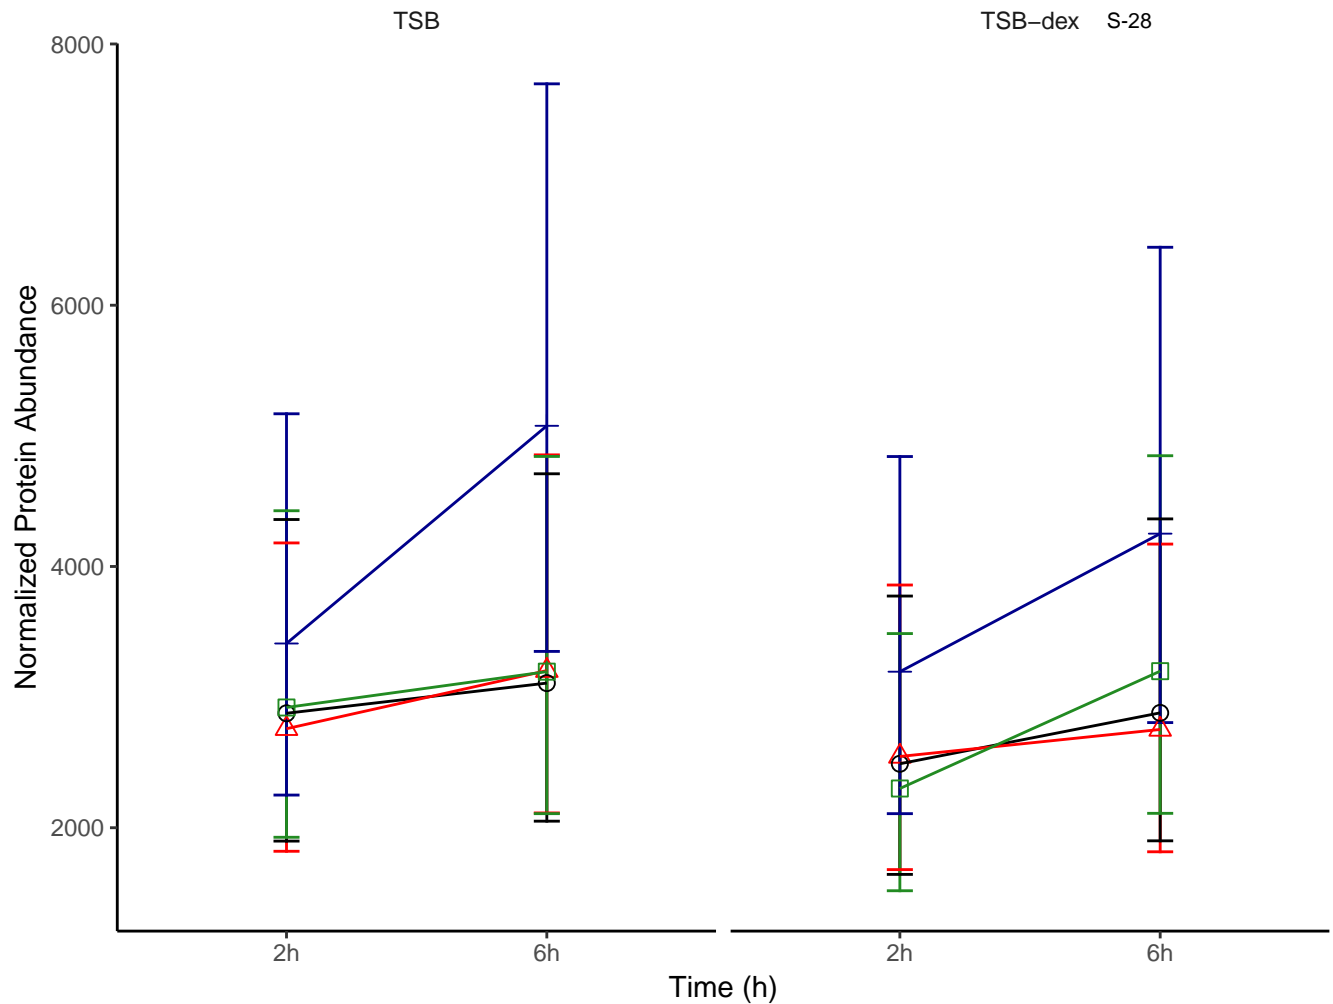

- SA564
- △ SA564- $\Delta hptRS$
- SA564- $\Delta ccpA$
- + SA564- $\Delta hptRS/ccpA$

# AROE\_STAAM

TSB

TSB-dex S-29

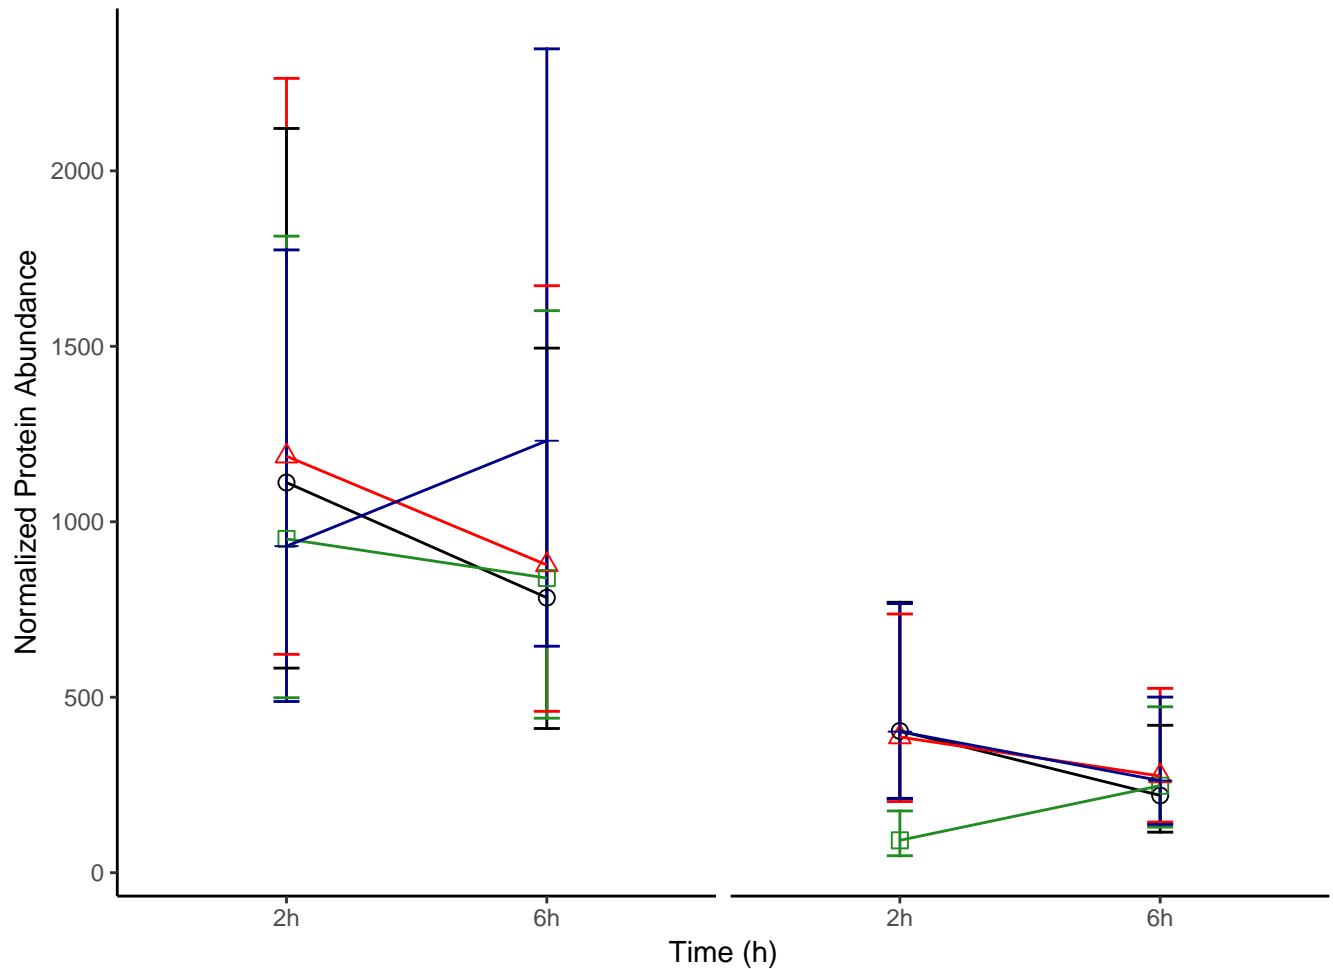

- SA564
- △ SA564- $\Delta$ *hptRS*
- SA564- $\Delta$ *ccpA*
- + SA564- $\Delta$ *hptRS/ccpA*

# ASP23\_STAAM

TSB

TSB-dex S-30

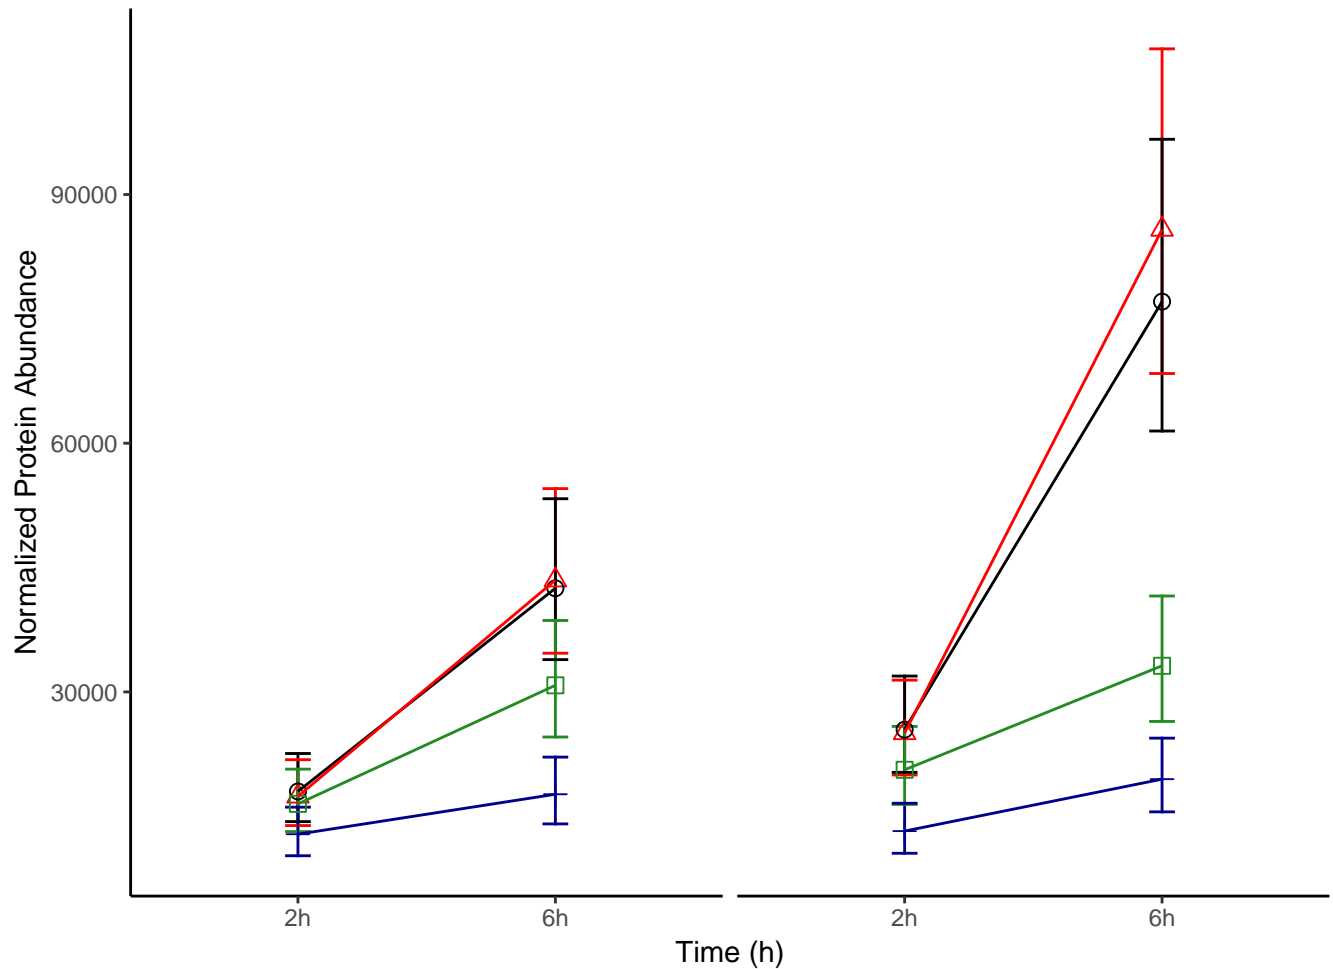

- SA564
- △ SA564- $\Delta$ hptRS
- SA564- $\Delta$ ccpA
- + SA564- $\Delta$ hptRS/ccpA

# ATL\_STAAM

TSB

TSB-dex S-31

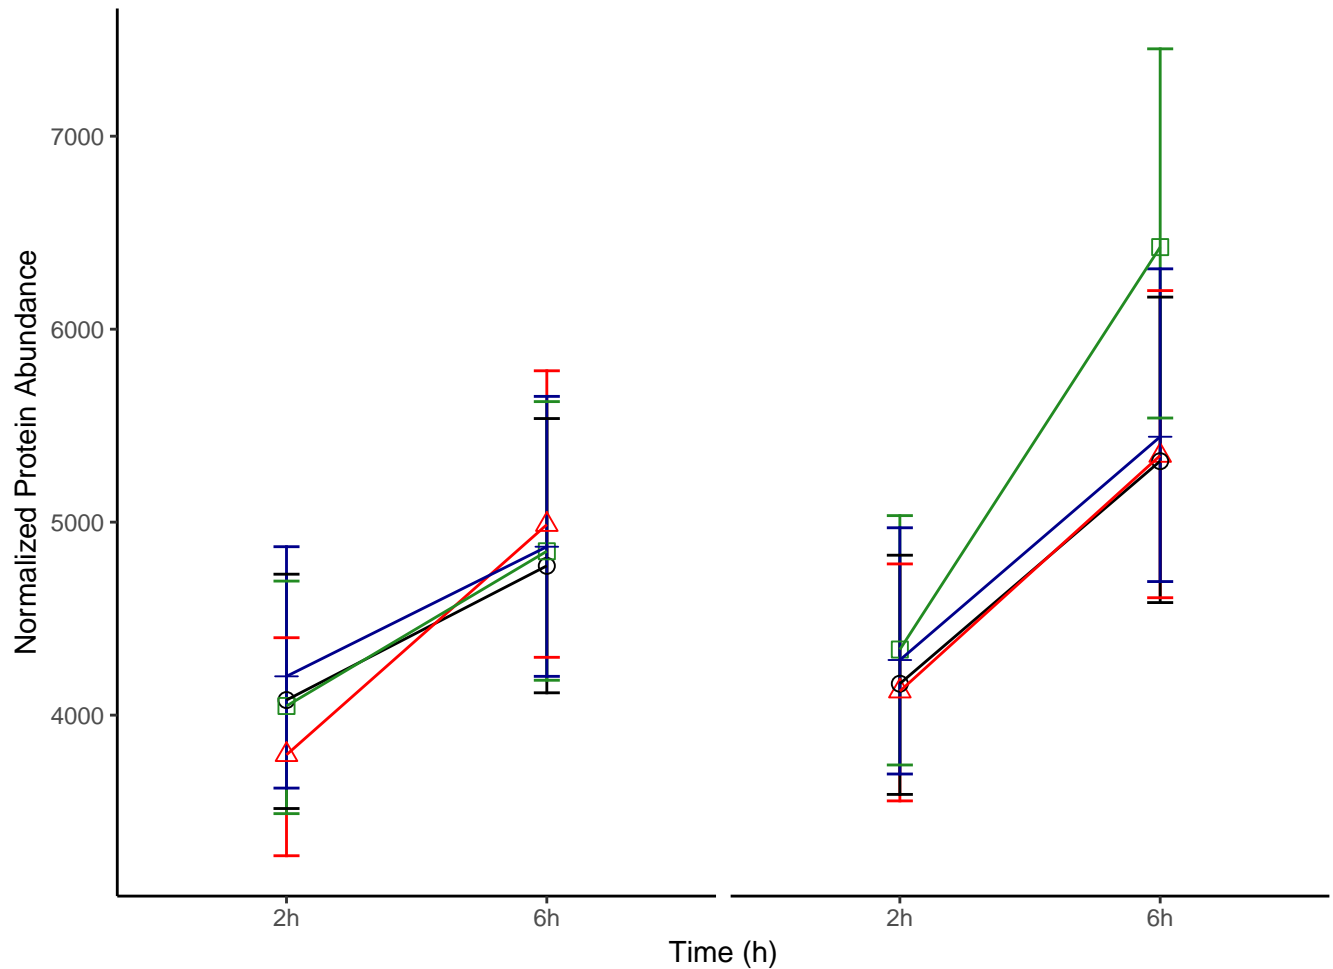

- SA564
- △ SA564- $\Delta$ *hptRS*
- SA564- $\Delta$ *ccpA*
- + SA564- $\Delta$ *hptRS/ccpA*

# ATPA\_STAAM

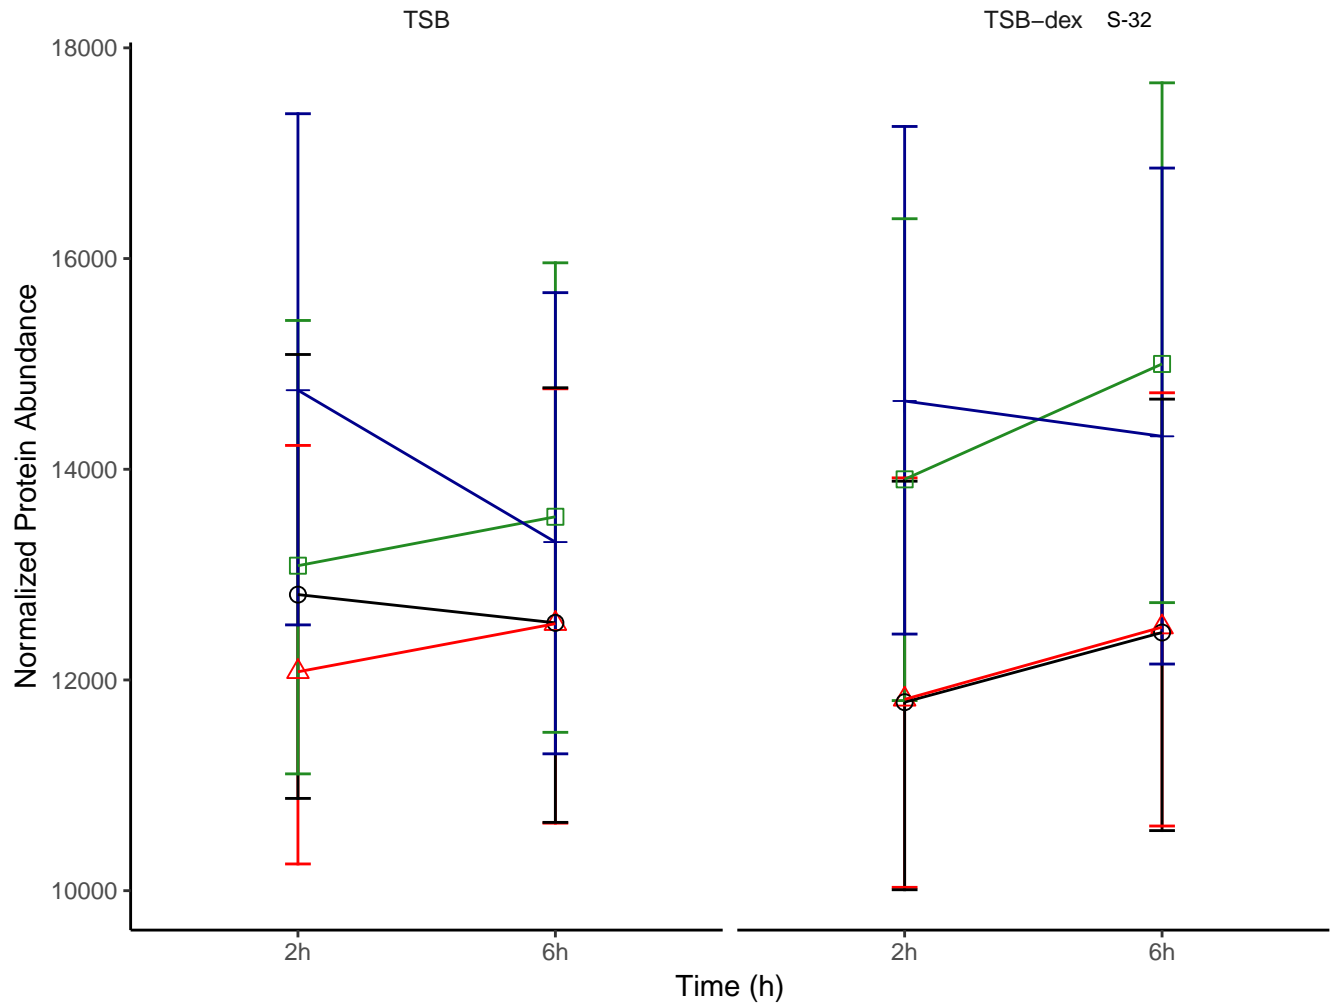

- SA564
- △ SA564- $\Delta$ hptRS
- SA564- $\Delta$ ccpA
- + SA564- $\Delta$ hptRS/ccpA



# ATPB\_STAAM

TSB

TSB-dex S-33

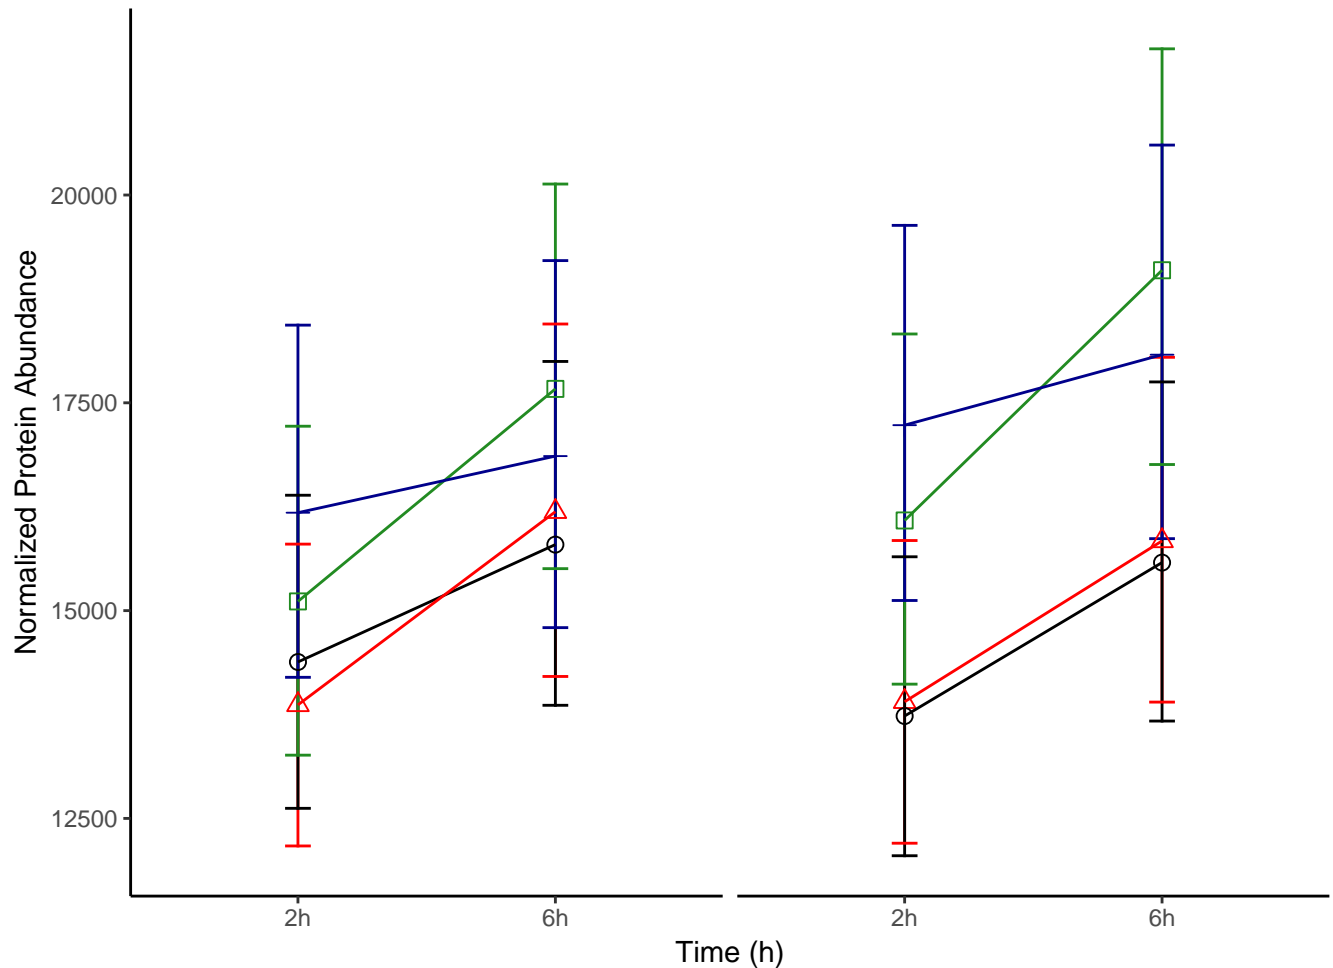

- SA564
- △ SA564- $\Delta$ *hptRS*
- SA564- $\Delta$ *ccpA*
- + SA564- $\Delta$ *hptRS/ccpA*

# ATPD\_STAAM

TSB

TSB-dex S-34

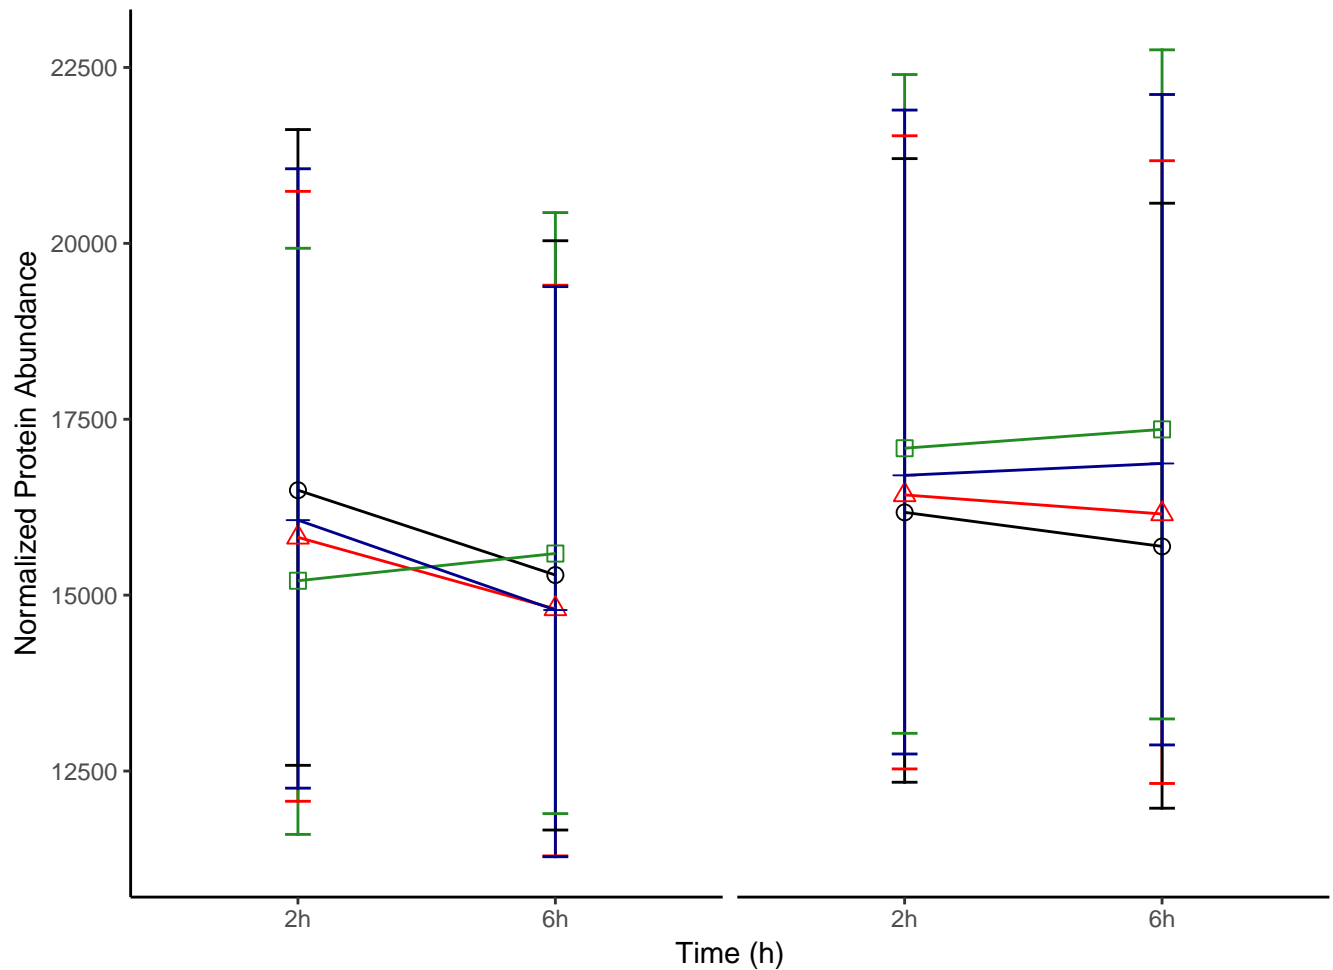

- SA564
- △ SA564- $\Delta$ hptRS
- SA564- $\Delta$ ccpA
- + SA564- $\Delta$ hptRS/ccpA

# ATPE\_STAAM

TSB

TSB-dex S-35

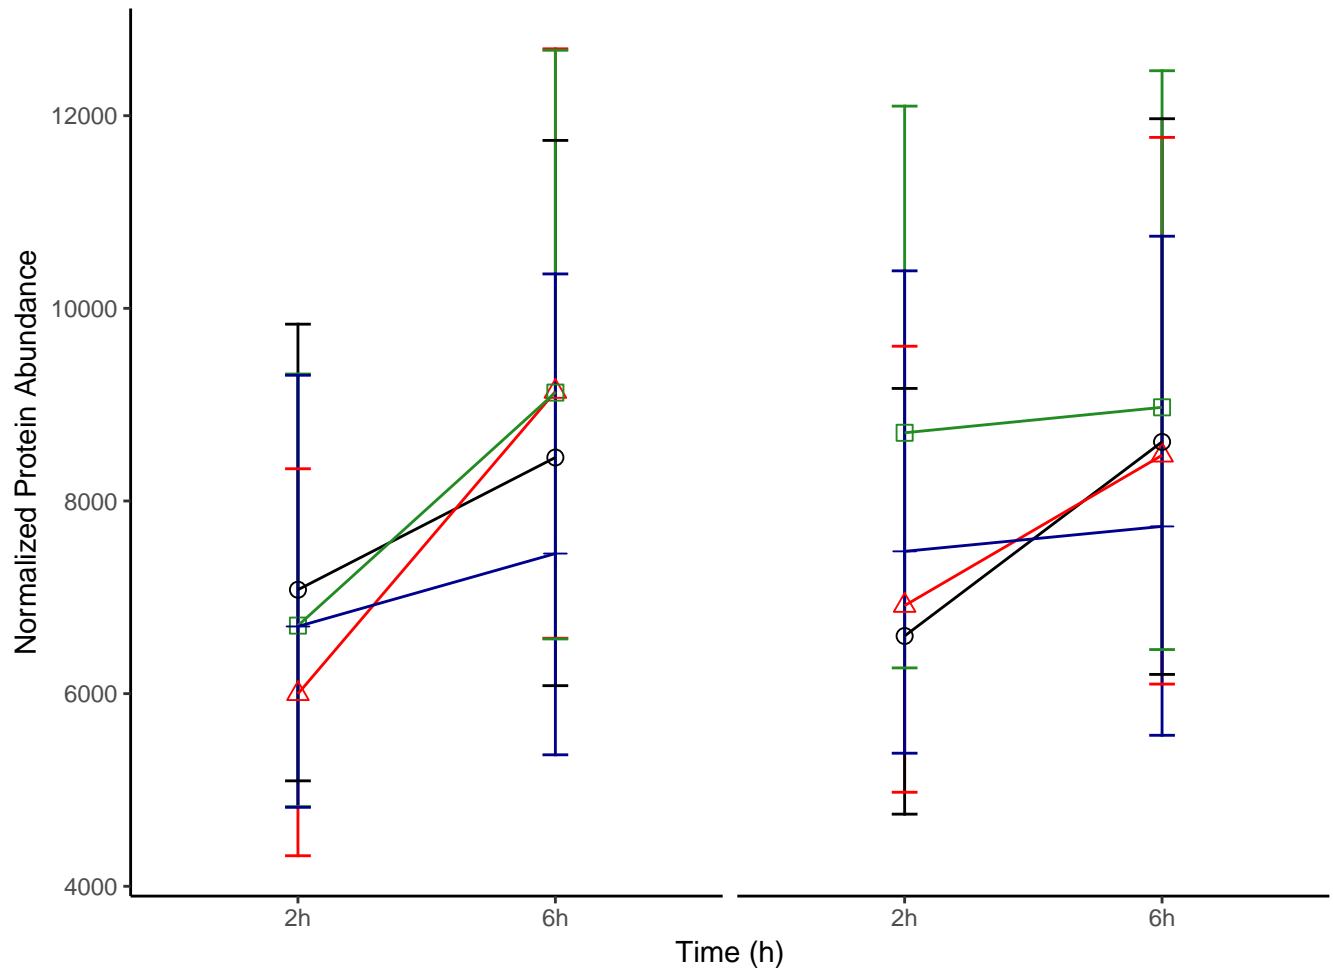

- SA564
- △ SA564- $\Delta$ *hptRS*
- SA564- $\Delta$ *ccpA*
- + SA564- $\Delta$ *hptRS/ccpA*

# ATPF\_STAAM

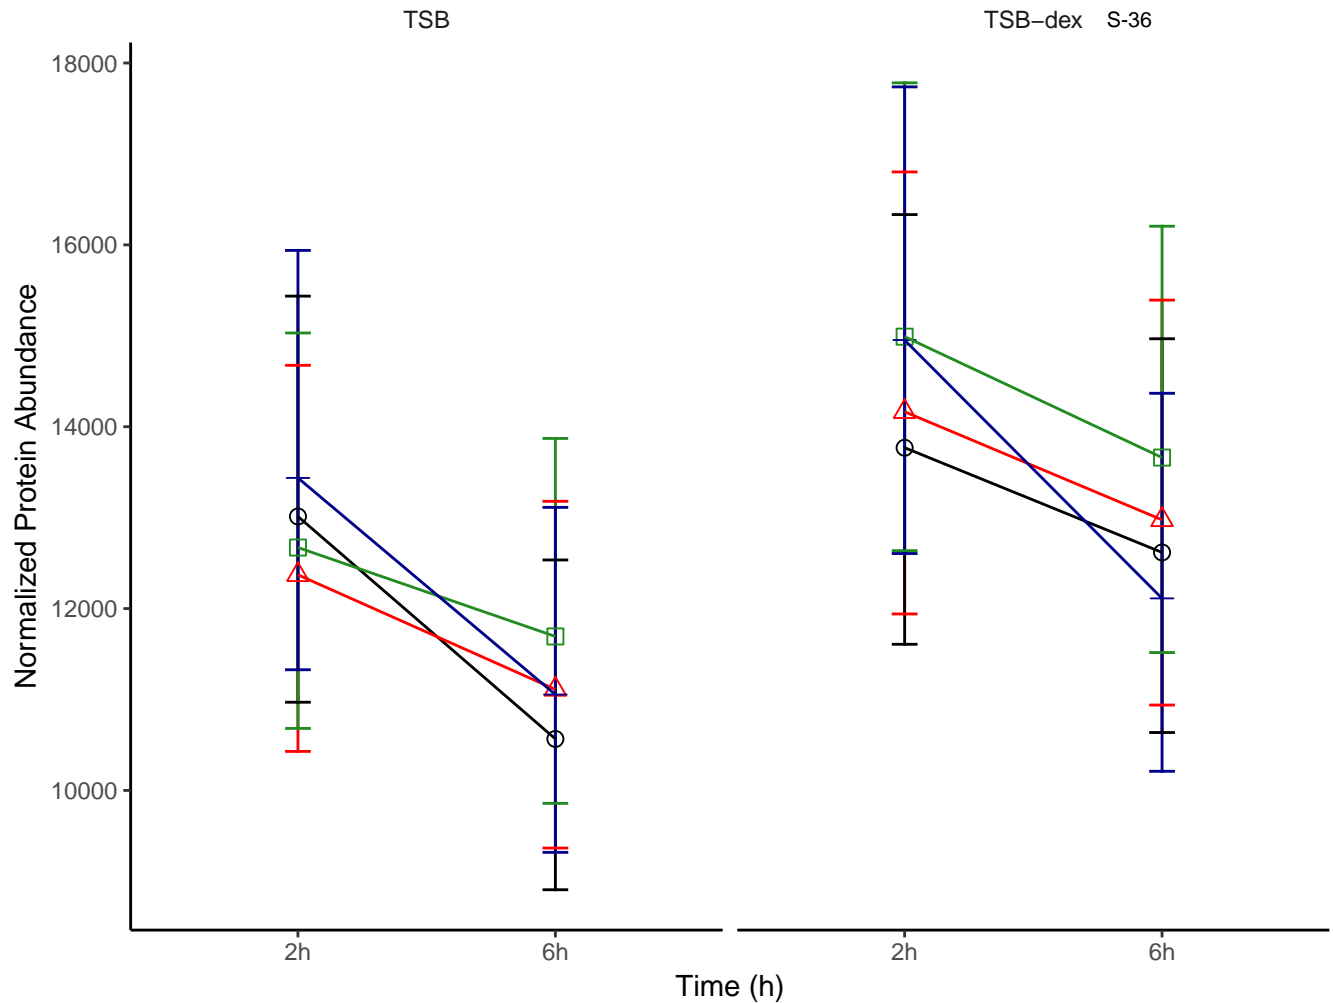

- SA564
- △ SA564- $\Delta$ hptRS
- SA564- $\Delta$ ccpA
- + SA564- $\Delta$ hptRS/ccpA

# ATPG\_STAAM

TSB

TSB-dex S-37

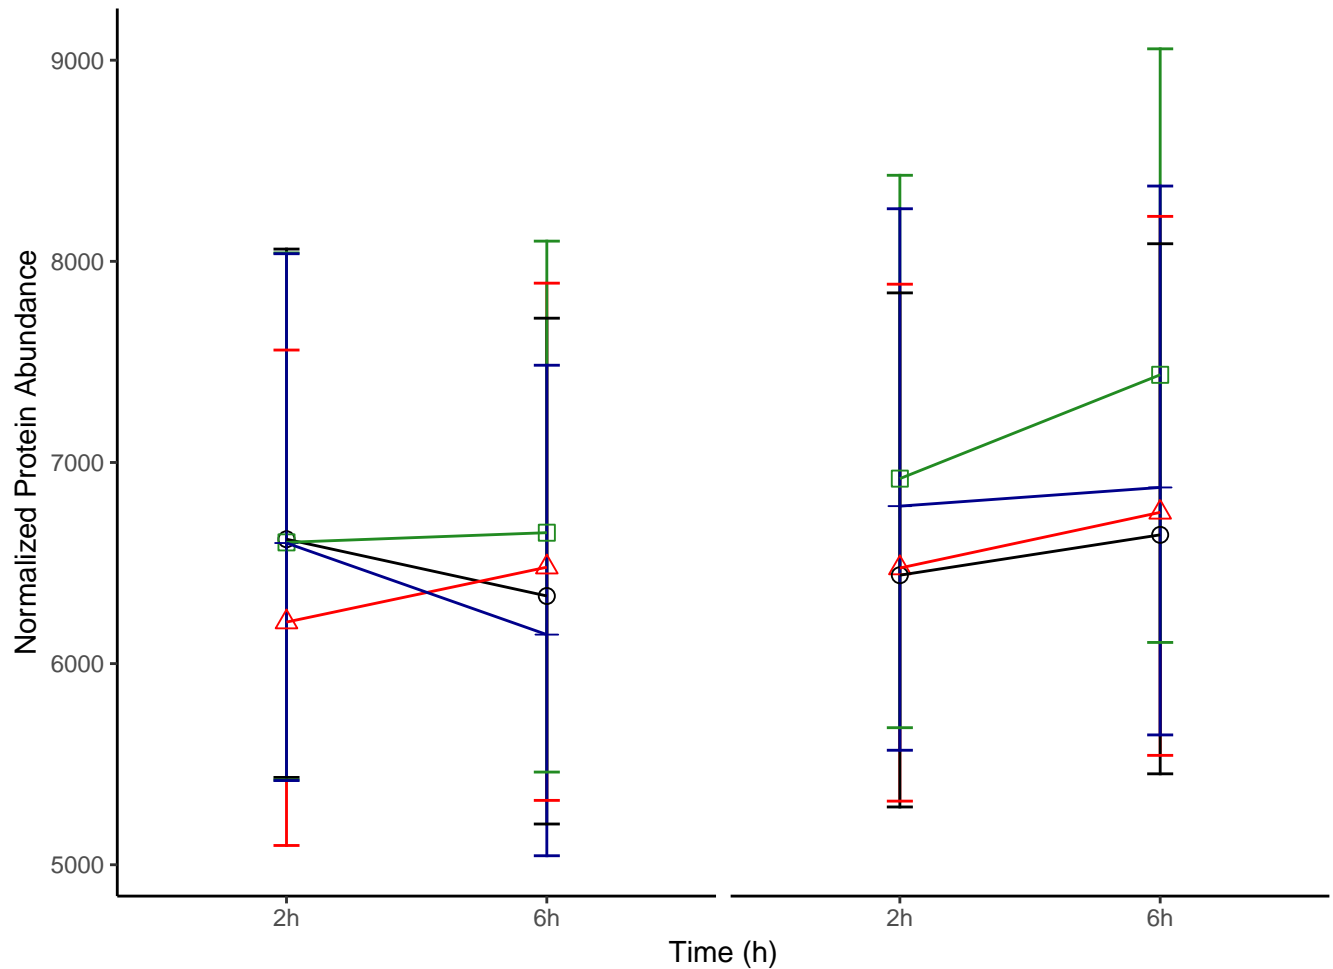

- SA564
- △ SA564- $\Delta$ *hptRS*
- SA564- $\Delta$ *ccpA*
- + SA564- $\Delta$ *hptRS/ccpA*

# AZO1\_STAAM

TSB

TSB-dex S-38

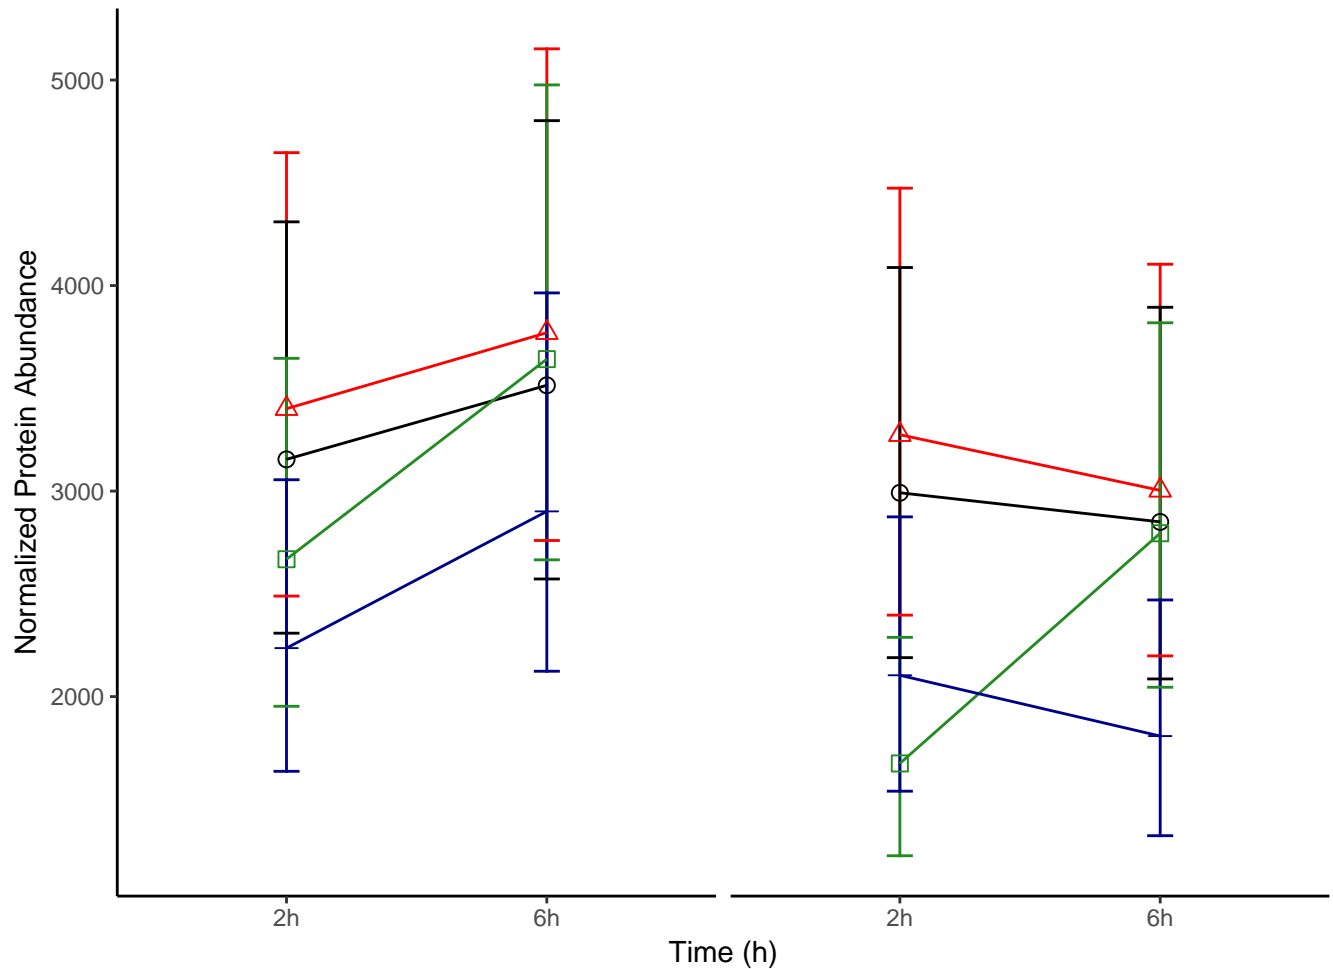

- SA564
- △ SA564-ΔhptRS
- SA564-ΔccpA
- + SA564-ΔhptRS/ccpA

# AZOR\_STAAM

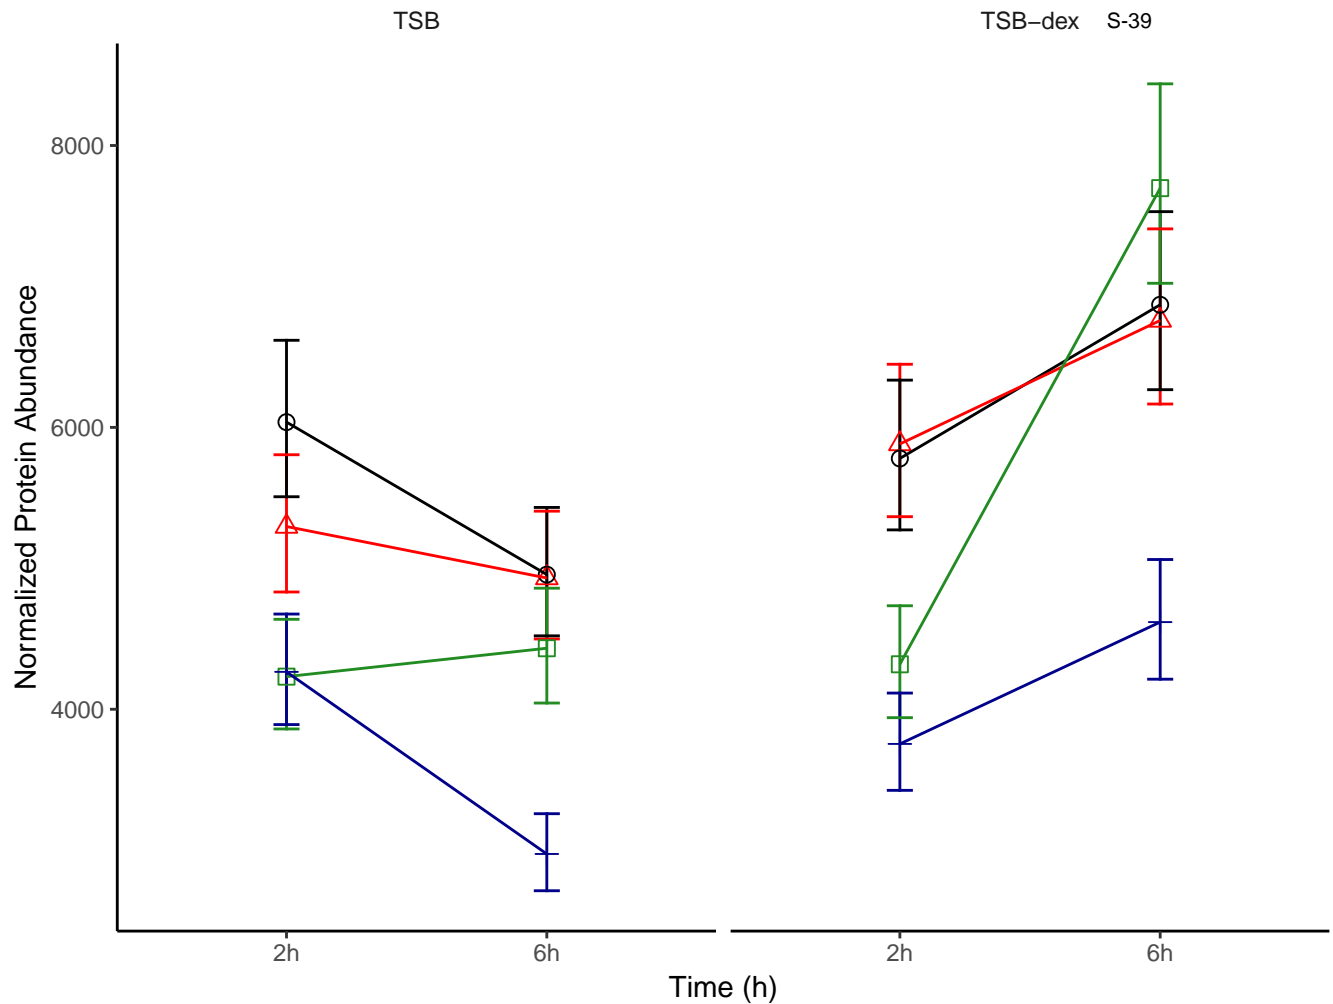

- SA564
- △ SA564- $\Delta$ *hptRS*
- SA564- $\Delta$ *ccpA*
- + SA564- $\Delta$ *hptRS/ccpA*

# BSAA\_STAAM

TSB

TSB-dex S-40

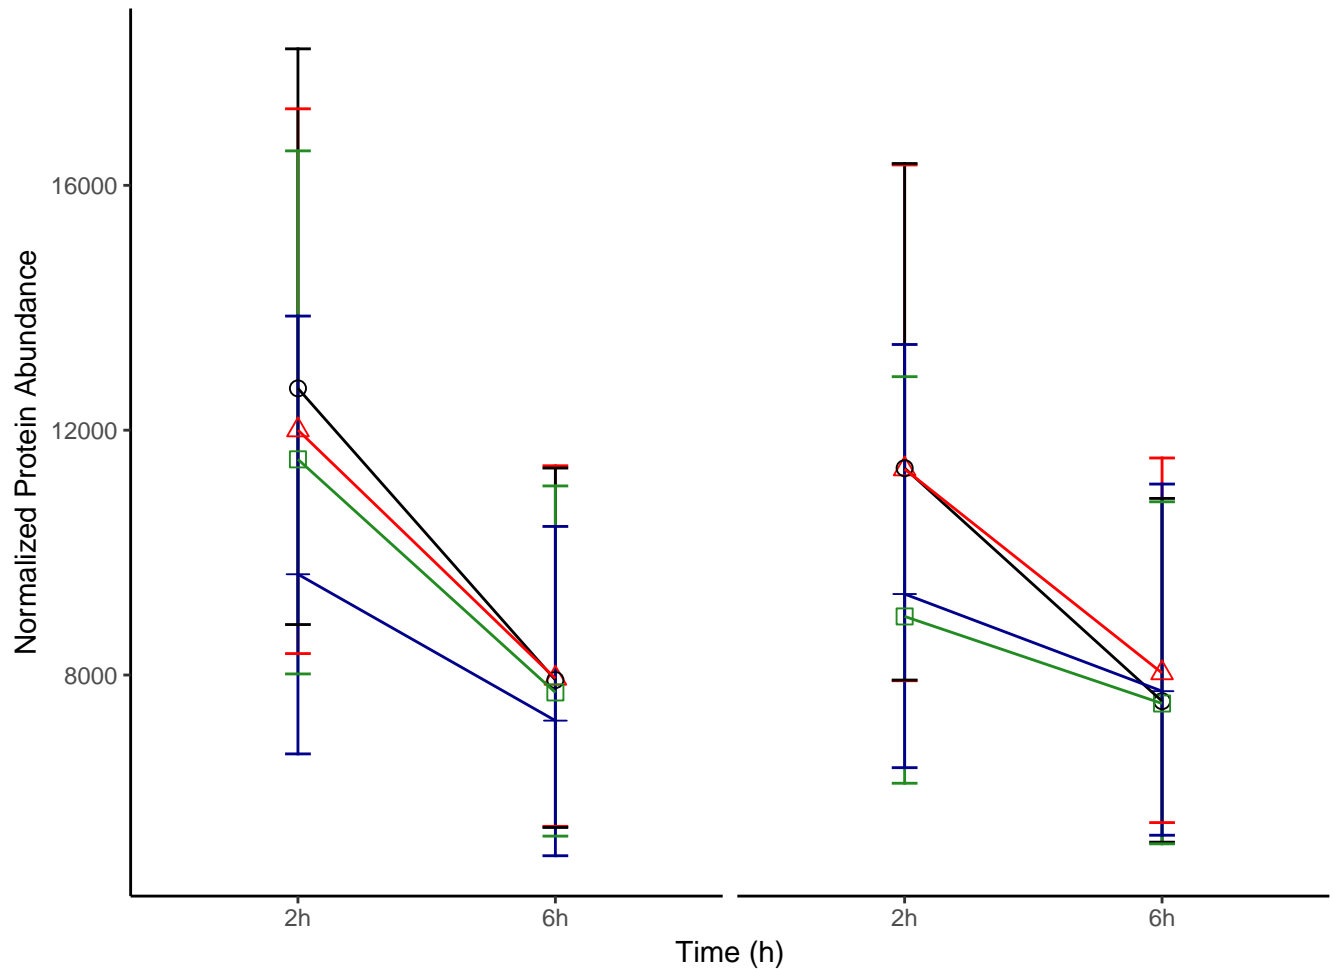

- SA564
- △ SA564- $\Delta$ *hptRS*
- SA564- $\Delta$ *ccpA*
- + SA564- $\Delta$ *hptRS/ccpA*



# BUTA\_STAAM

TSB

TSB-dex S-41

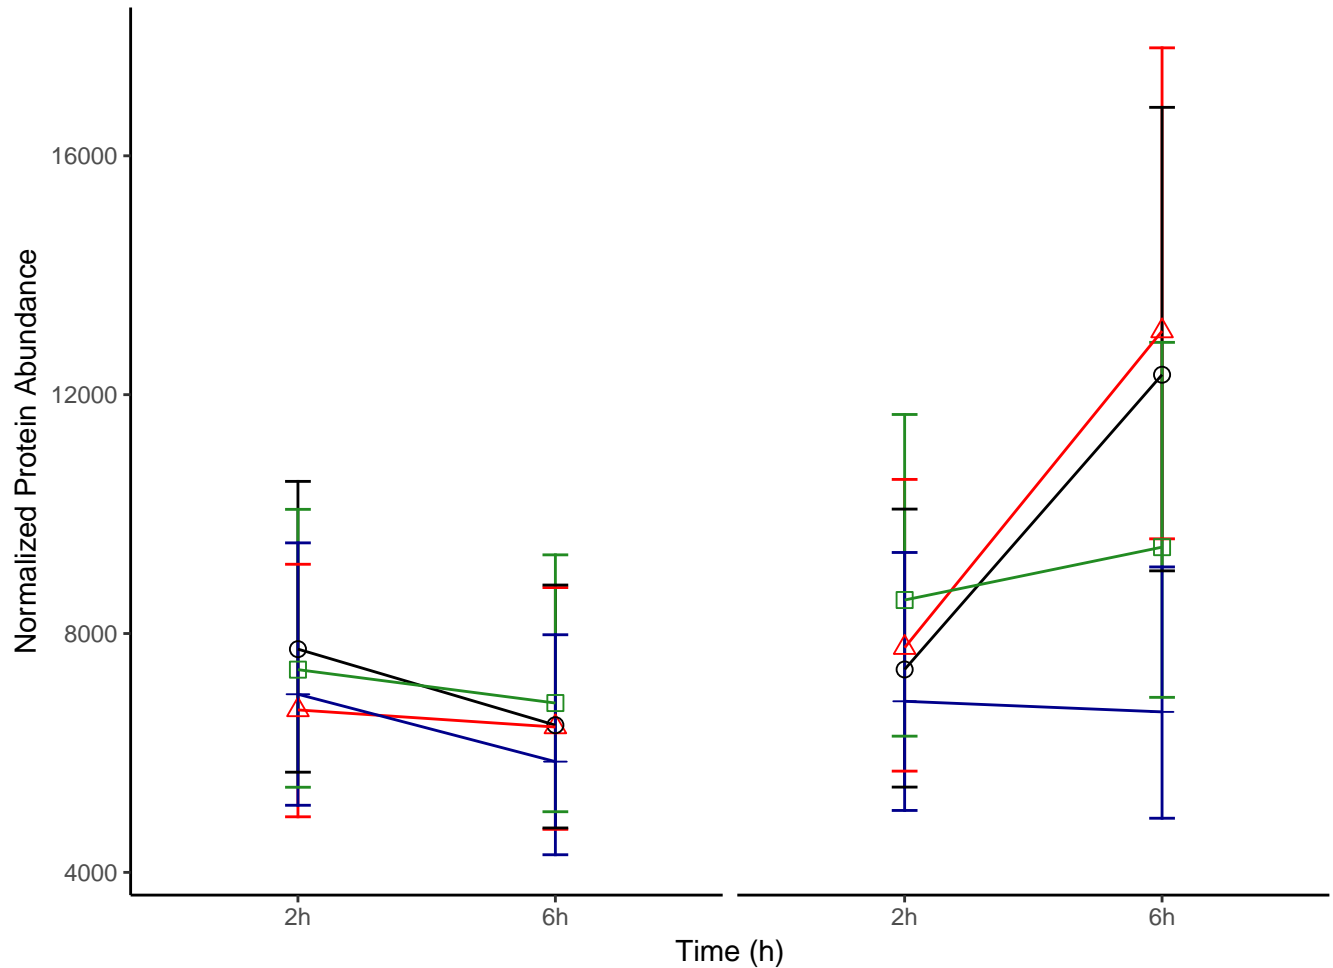

- SA564
- △ SA564- $\Delta$ *hptRS*
- SA564- $\Delta$ *ccpA*
- + SA564- $\Delta$ *hptRS/ccpA*

# CARA\_STAAM

TSB

TSB-dex S-42

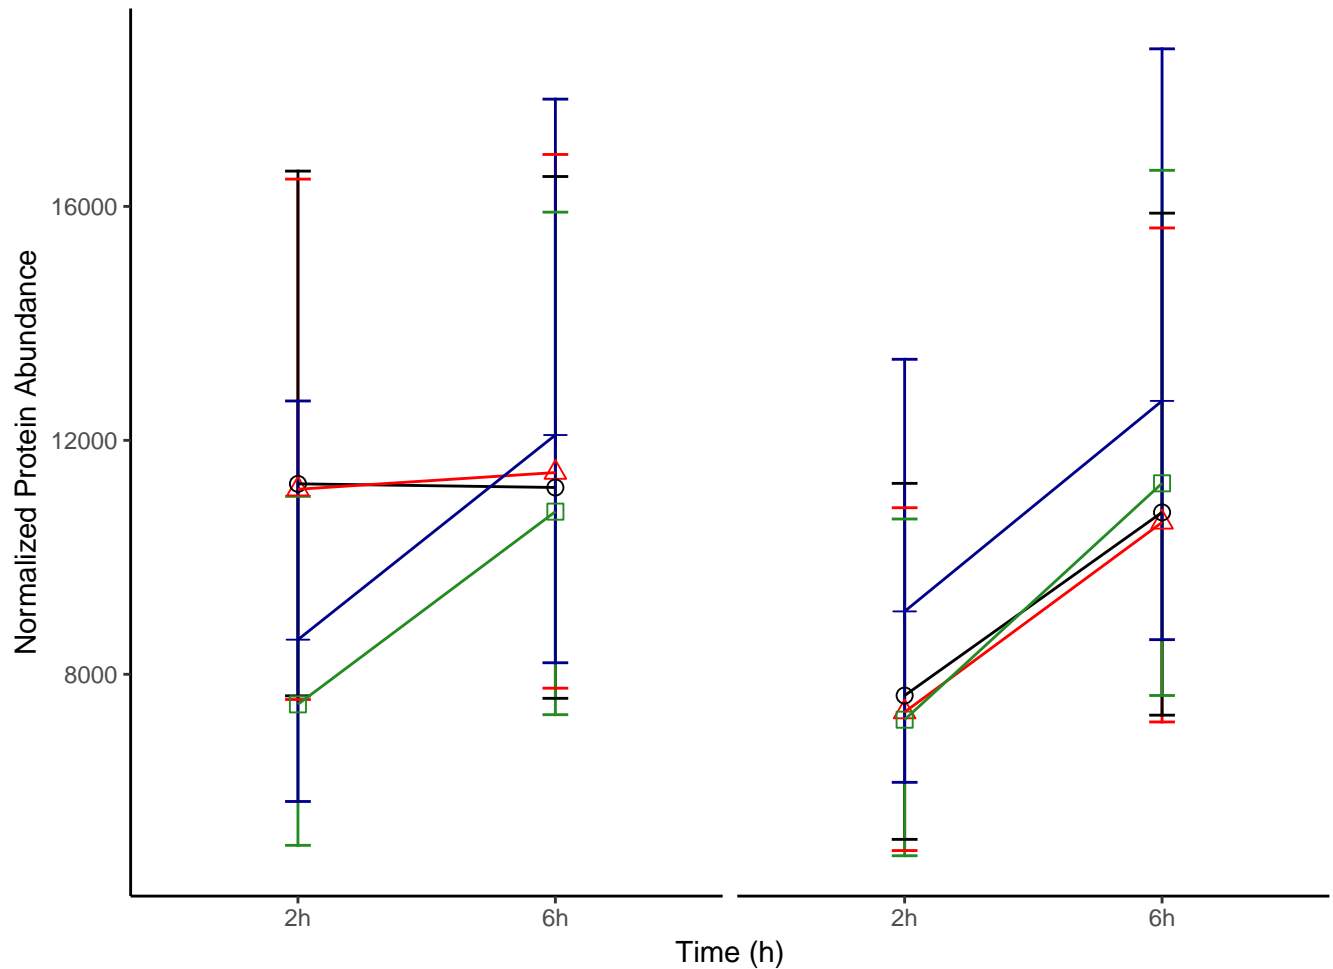

- SA564
- △ SA564-ΔhptRS
- SA564-ΔccpA
- + SA564-ΔhptRS/ccpA

# CARB\_STAAM

TSB

TSB-dex S-43

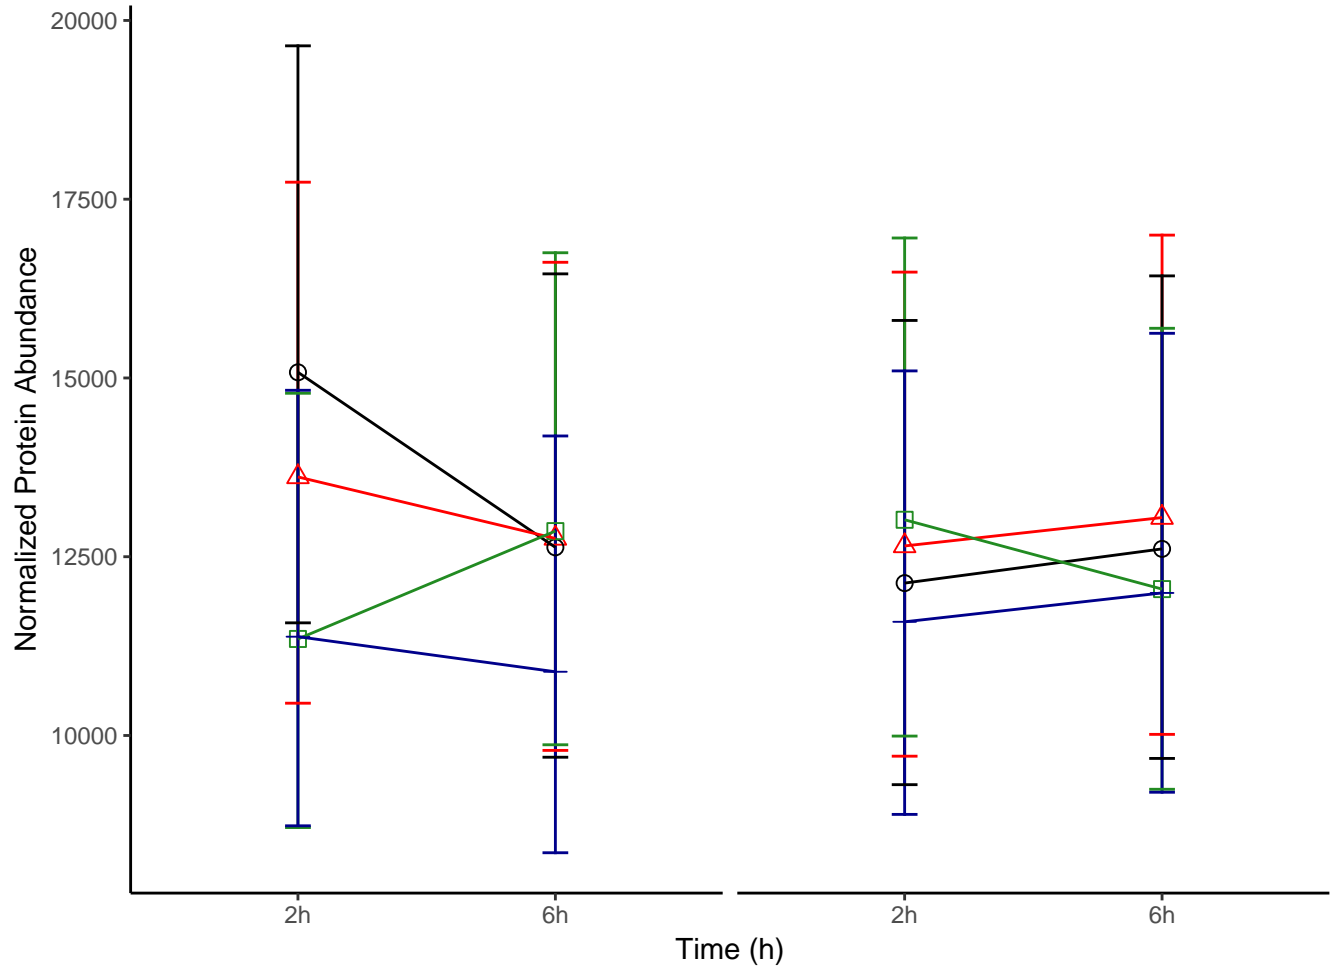

- SA564
- △ SA564-Δ*hptRS*
- SA564-Δ*ccpA*
- + SA564-Δ*hptRS/ccpA*

# CATA\_STAAM

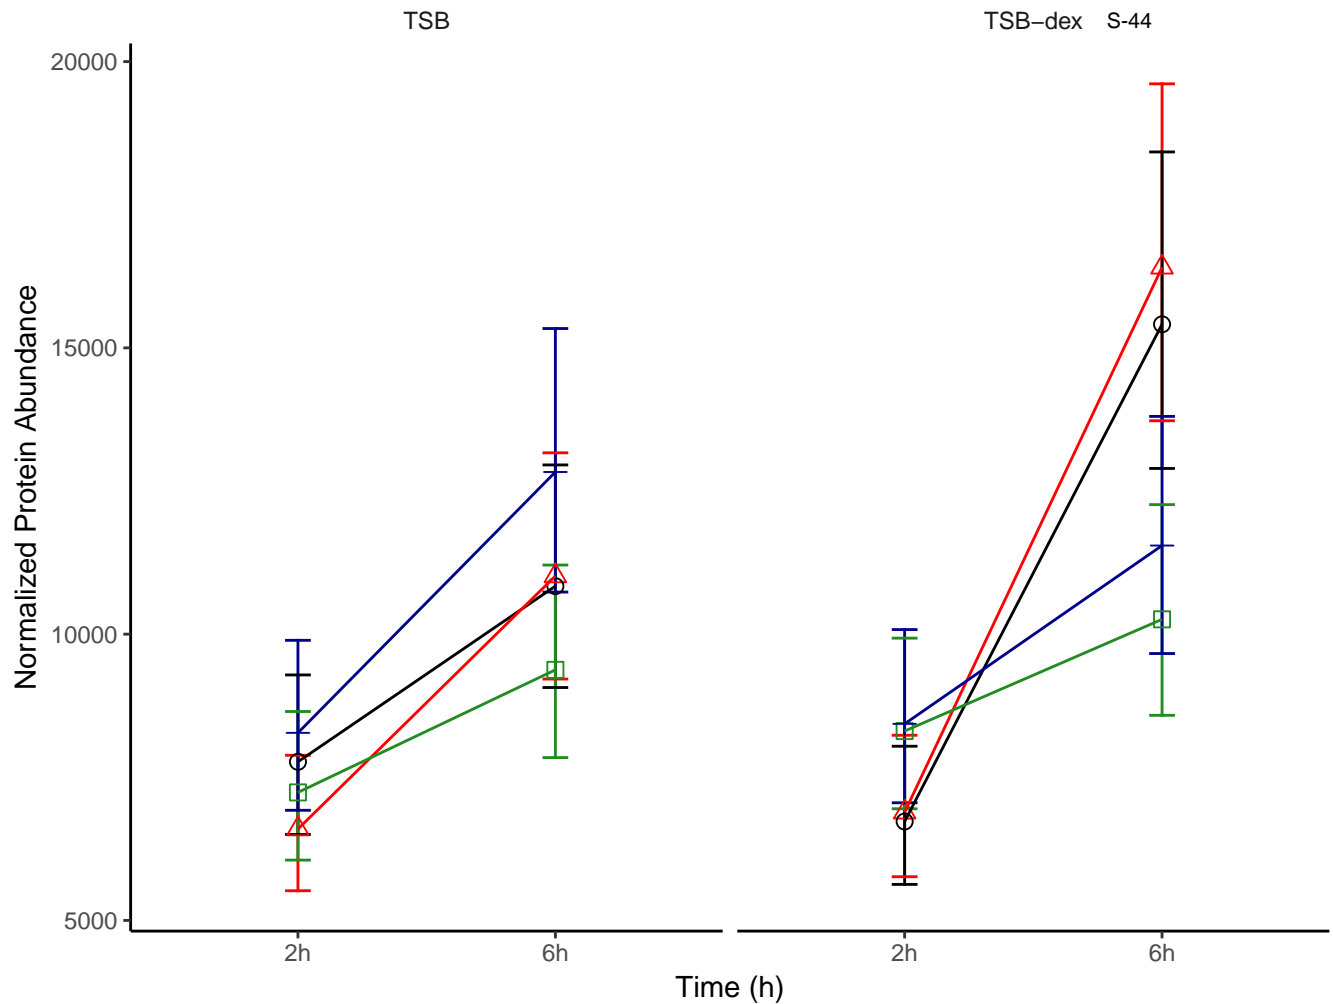

- SA564
- △ SA564-ΔhptRS
- SA564-ΔccpA
- + SA564-ΔhptRS/ccpA

# CCPA\_STAAM

TSB

TSB-dex S-45

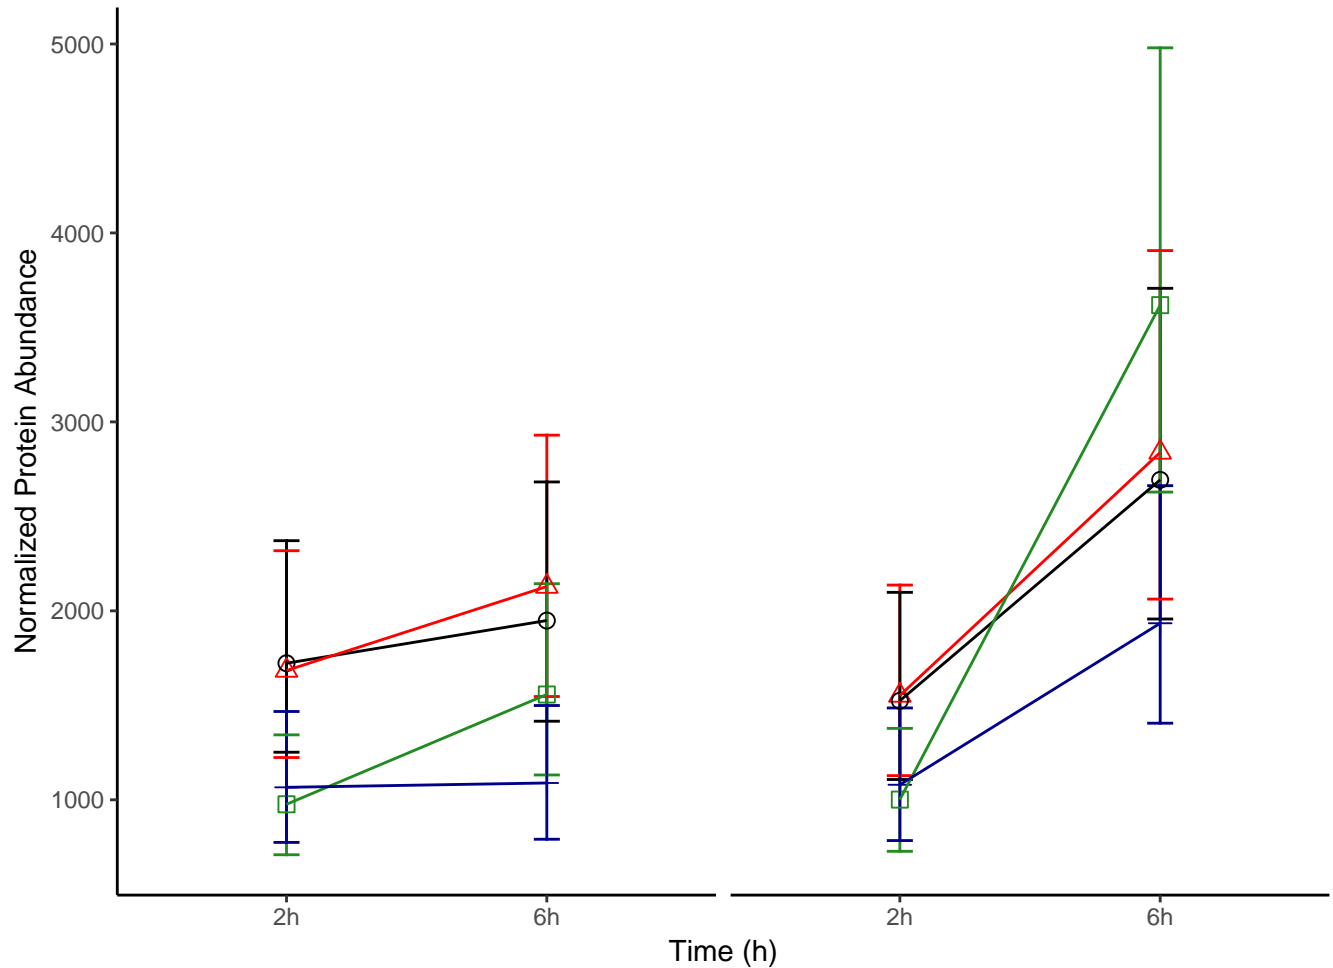

- SA564
- △ SA564-ΔhptRS
- SA564-ΔccpA
- + SA564-ΔhptRS/ccpA

# CDR\_STAAM

TSB

TSB-dex S-46

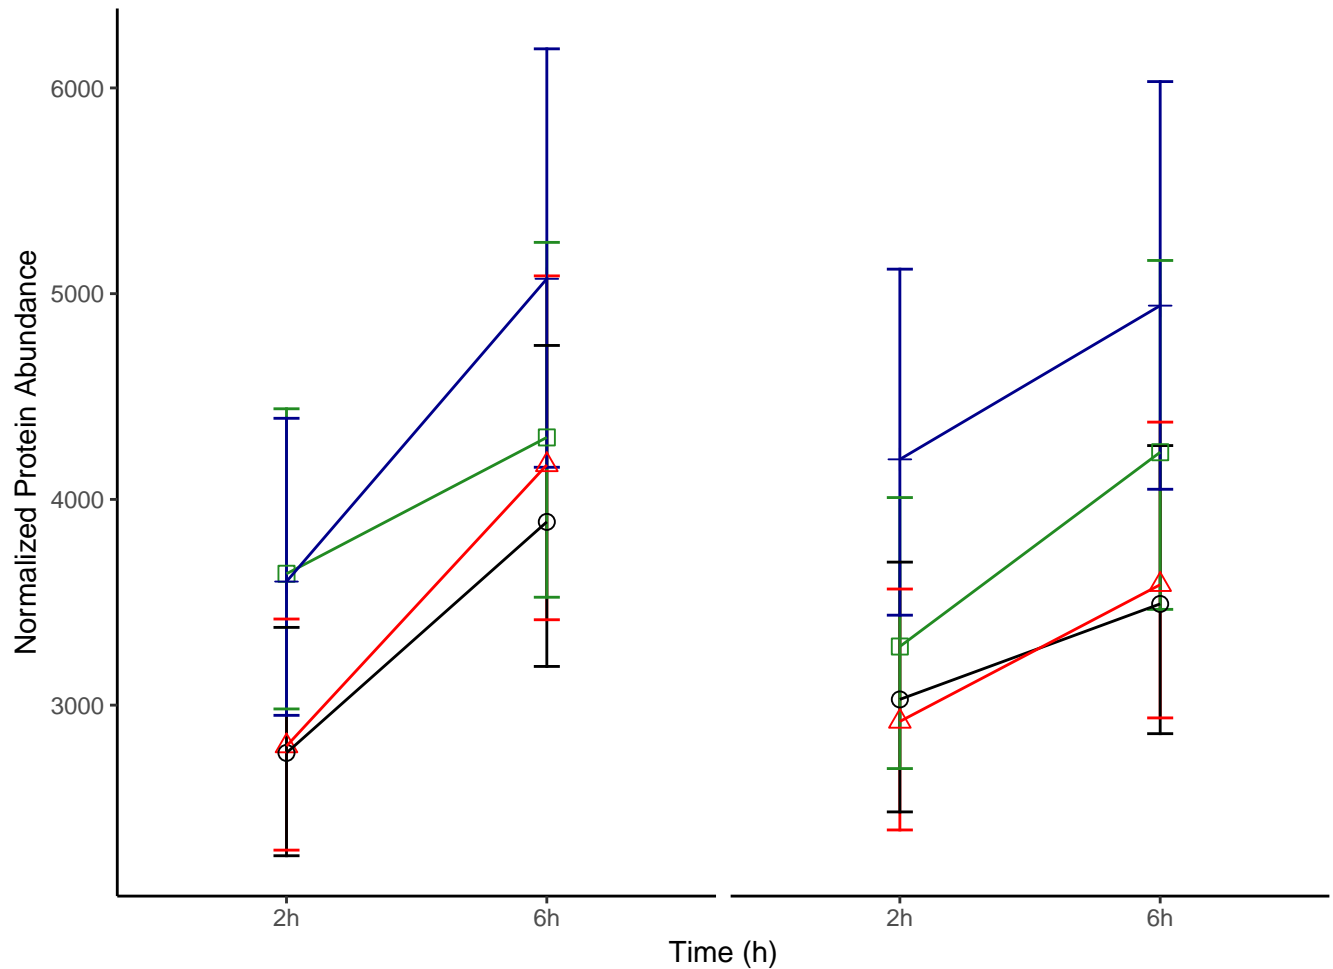

- SA564
- △ SA564-ΔhptRS
- SA564-ΔccpA
- + SA564-ΔhptRS/ccpA

# CH10\_STAAM

TSB

TSB-dex S-47

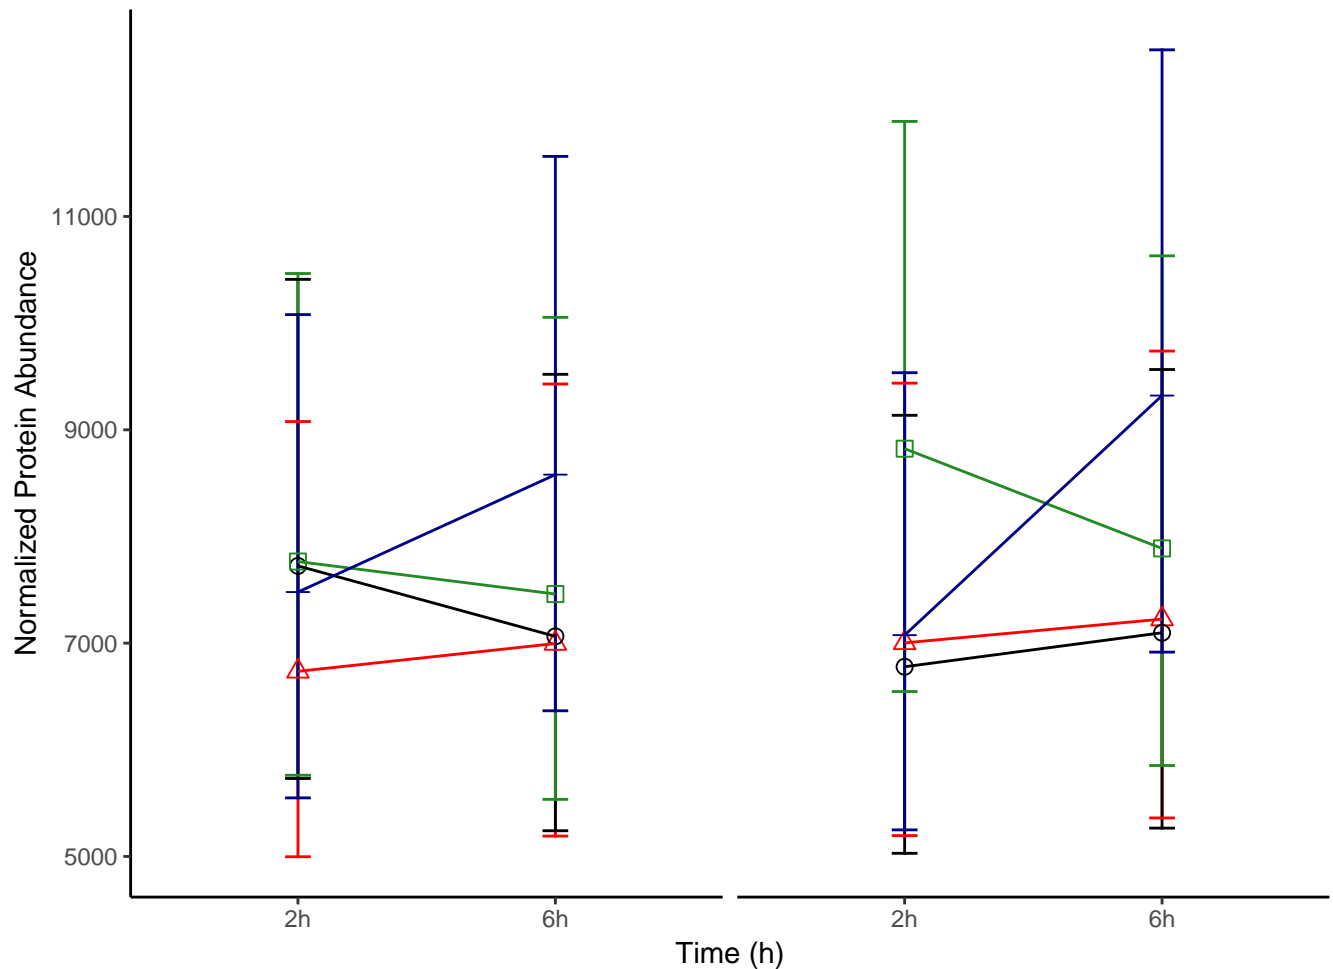

- SA564
- △ SA564- $\Delta$ hptRS
- SA564- $\Delta$ ccpA
- + SA564- $\Delta$ hptRS/ccpA

# CH60\_STAAM

TSB

TSB-dex S-48

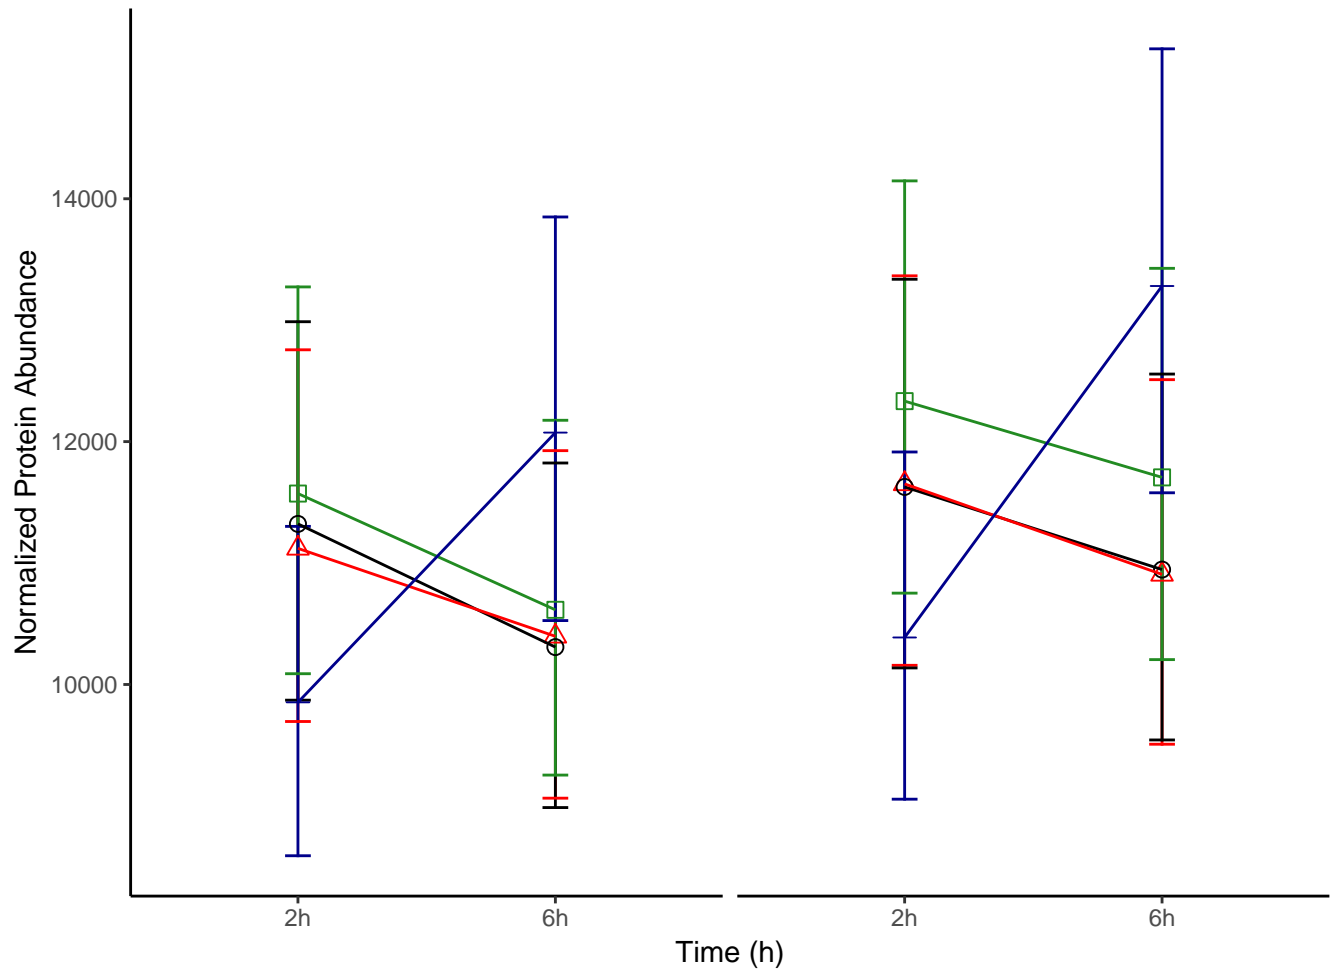

- SA564
- △ SA564-ΔhptRS
- SA564-ΔccpA
- + SA564-ΔhptRS/ccpA



# CLPB\_STAAM

TSB

TSB-dex S-49

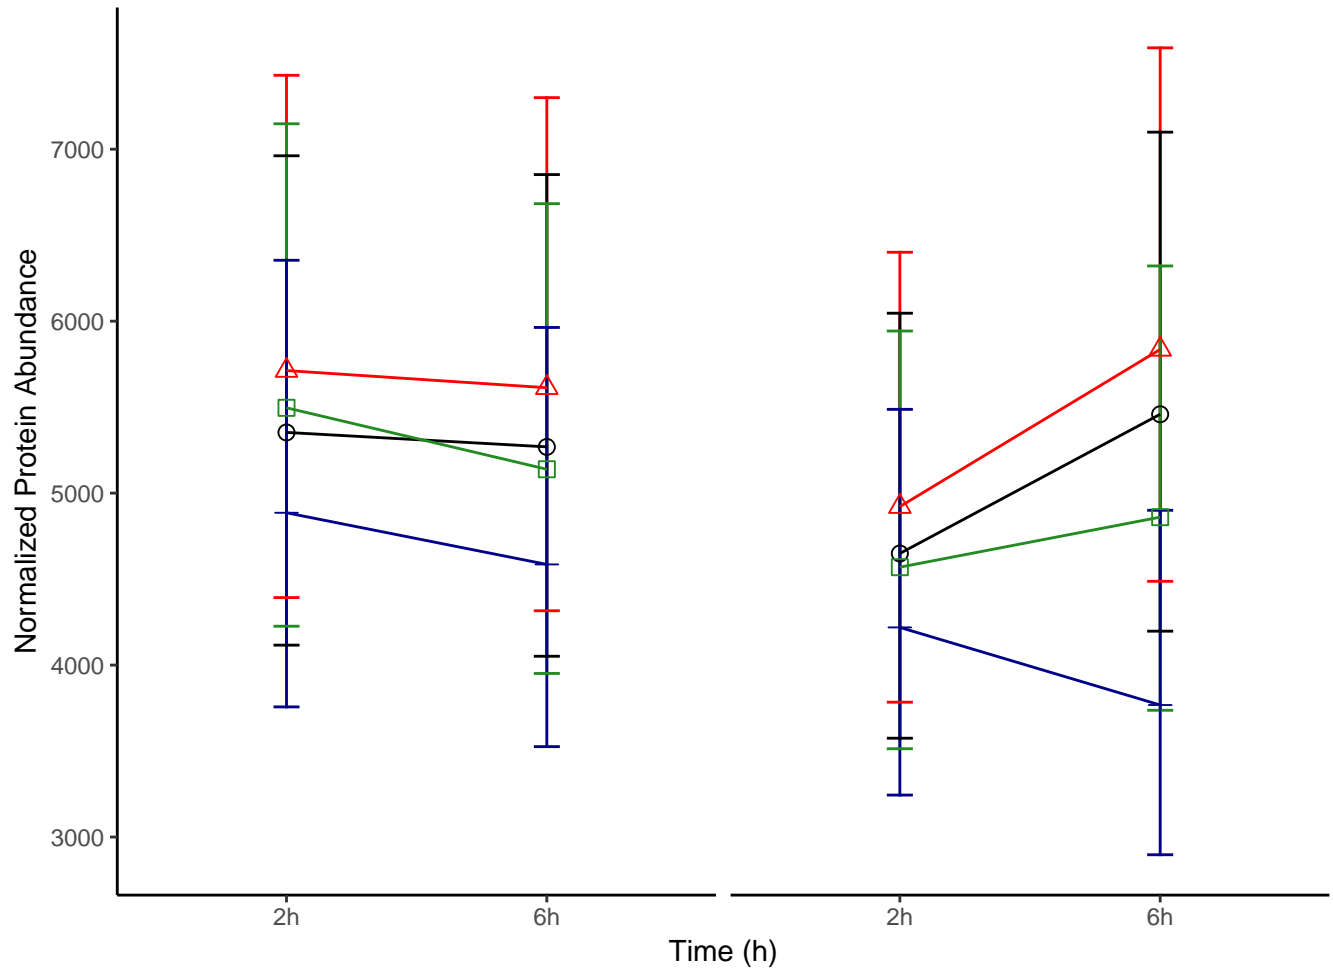

- SA564
- △ SA564-ΔhptRS
- SA564-ΔccpA
- + SA564-ΔhptRS/ccpA

# CLPC\_STAAM

TSB

TSB-dex S-50

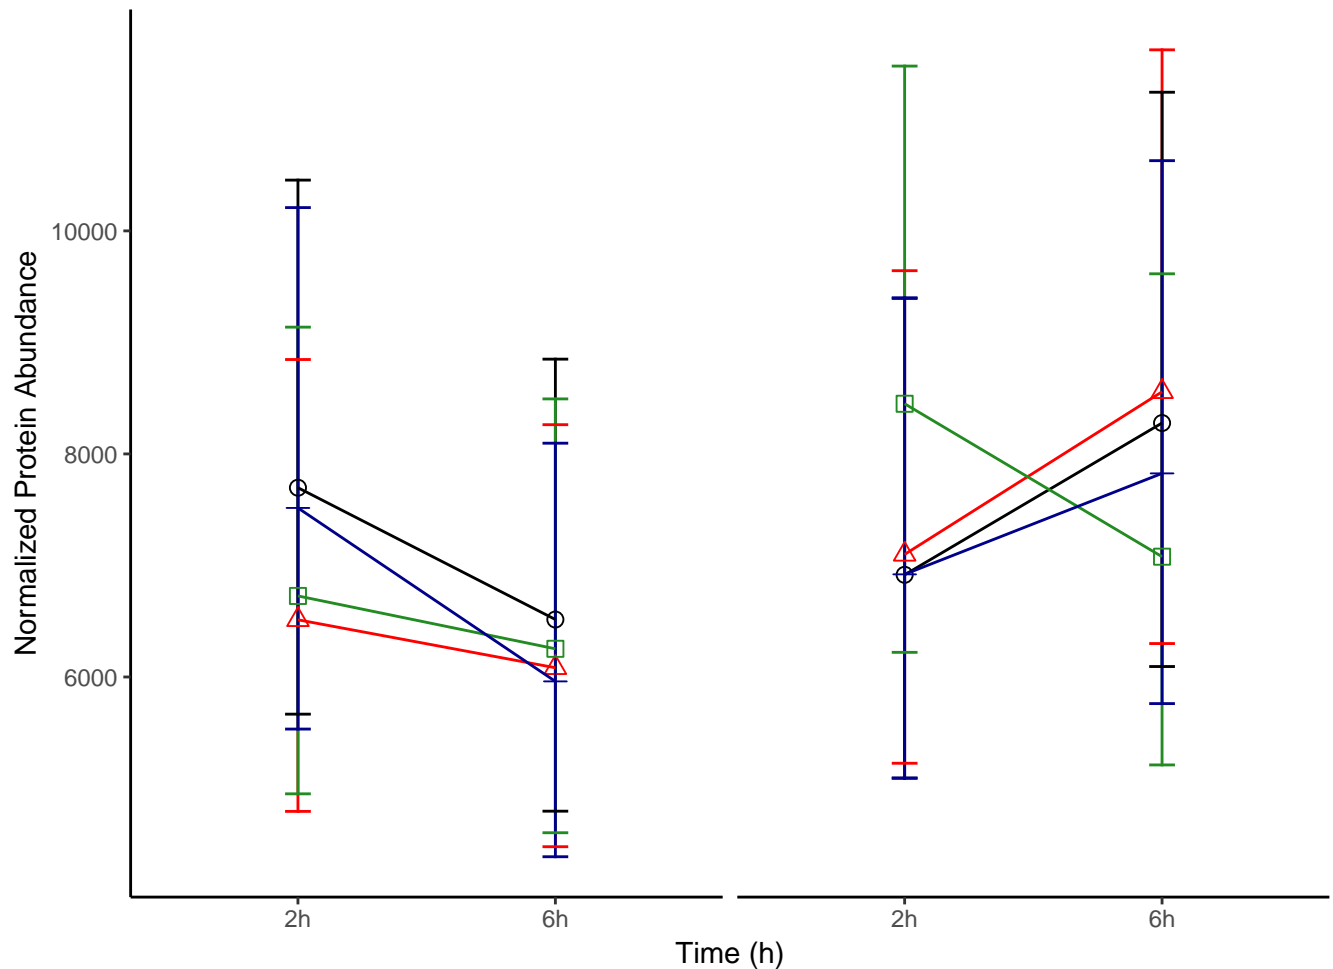

- SA564
- △ SA564-ΔhptRS
- SA564-ΔccpA
- + SA564-ΔhptRS/ccpA

# CLPL\_STAAM

TSB

TSB-dex S-51

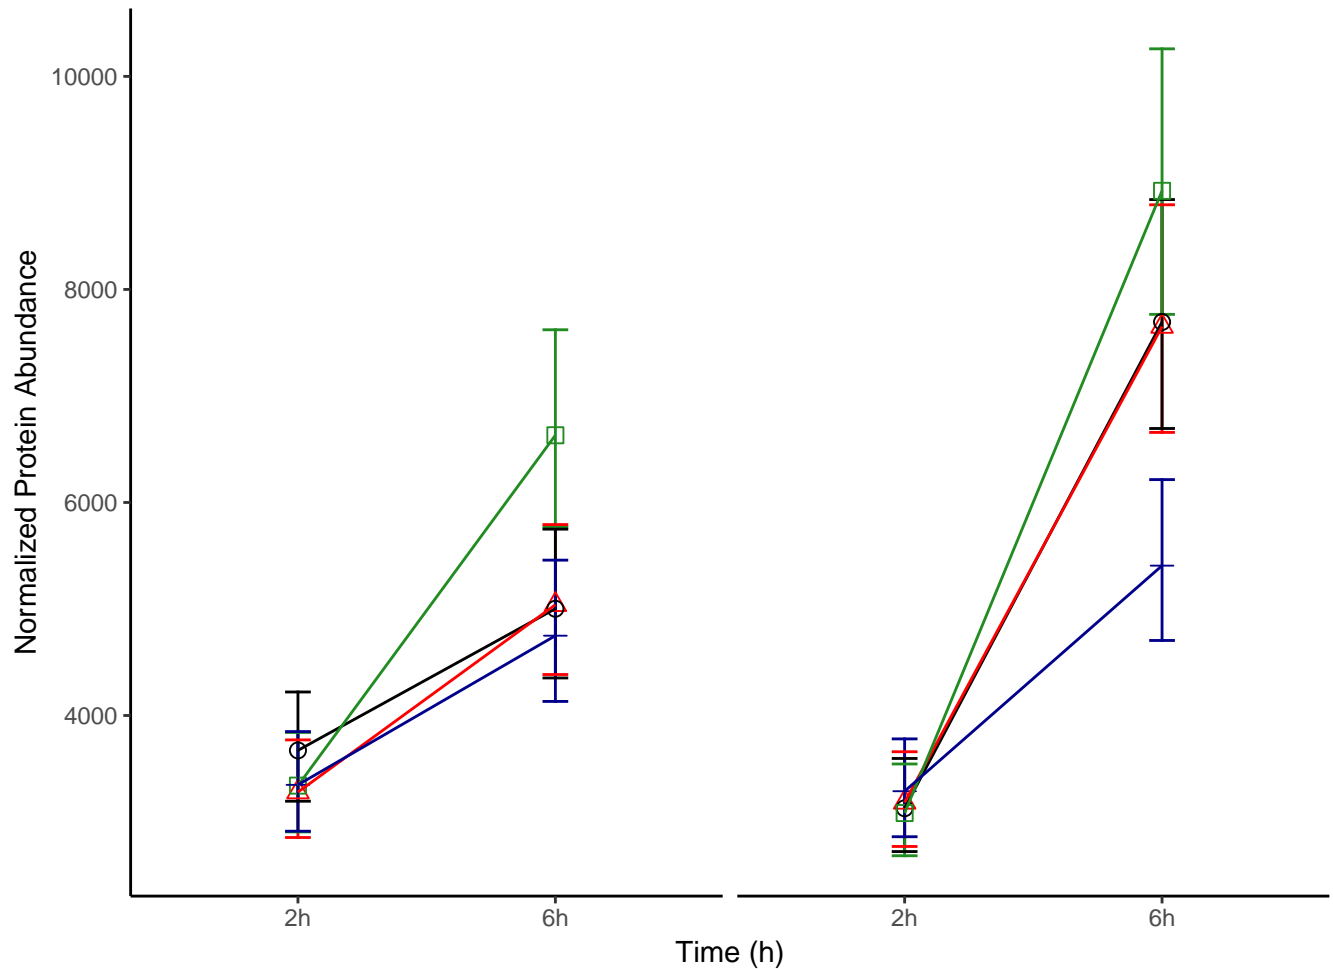

- SA564
- △ SA564-ΔhptRS
- SA564-ΔccpA
- + SA564-ΔhptRS/ccpA

# CLPP\_STAAM

TSB

TSB-dex S-52

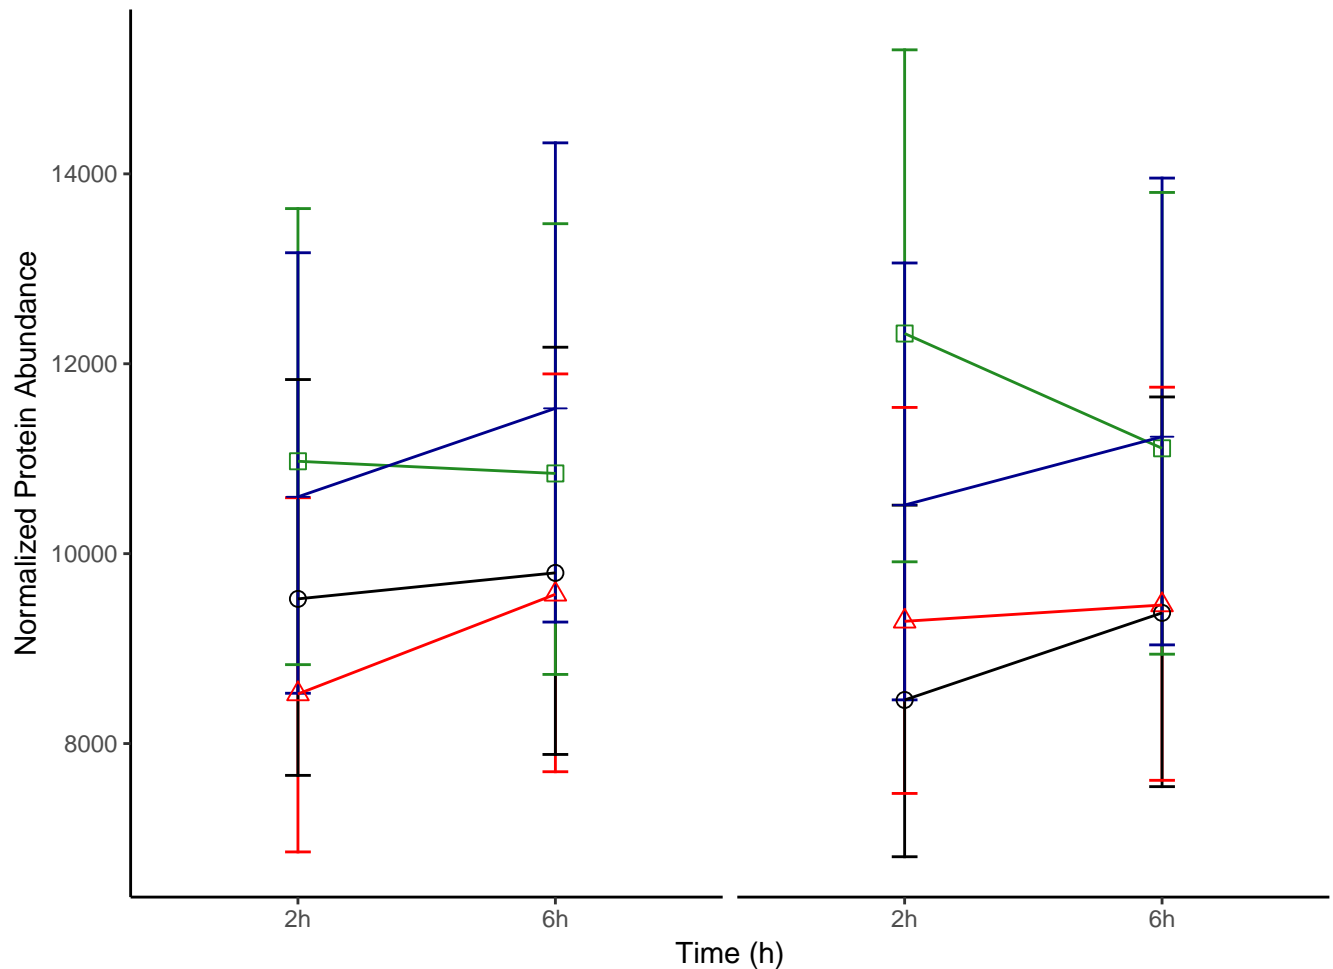

- SA564
- △ SA564- $\Delta$ hptRS
- SA564- $\Delta$ ccpA
- + SA564- $\Delta$ hptRS/ccpA

# CLPX\_STAAM

TSB

TSB-dex S-53

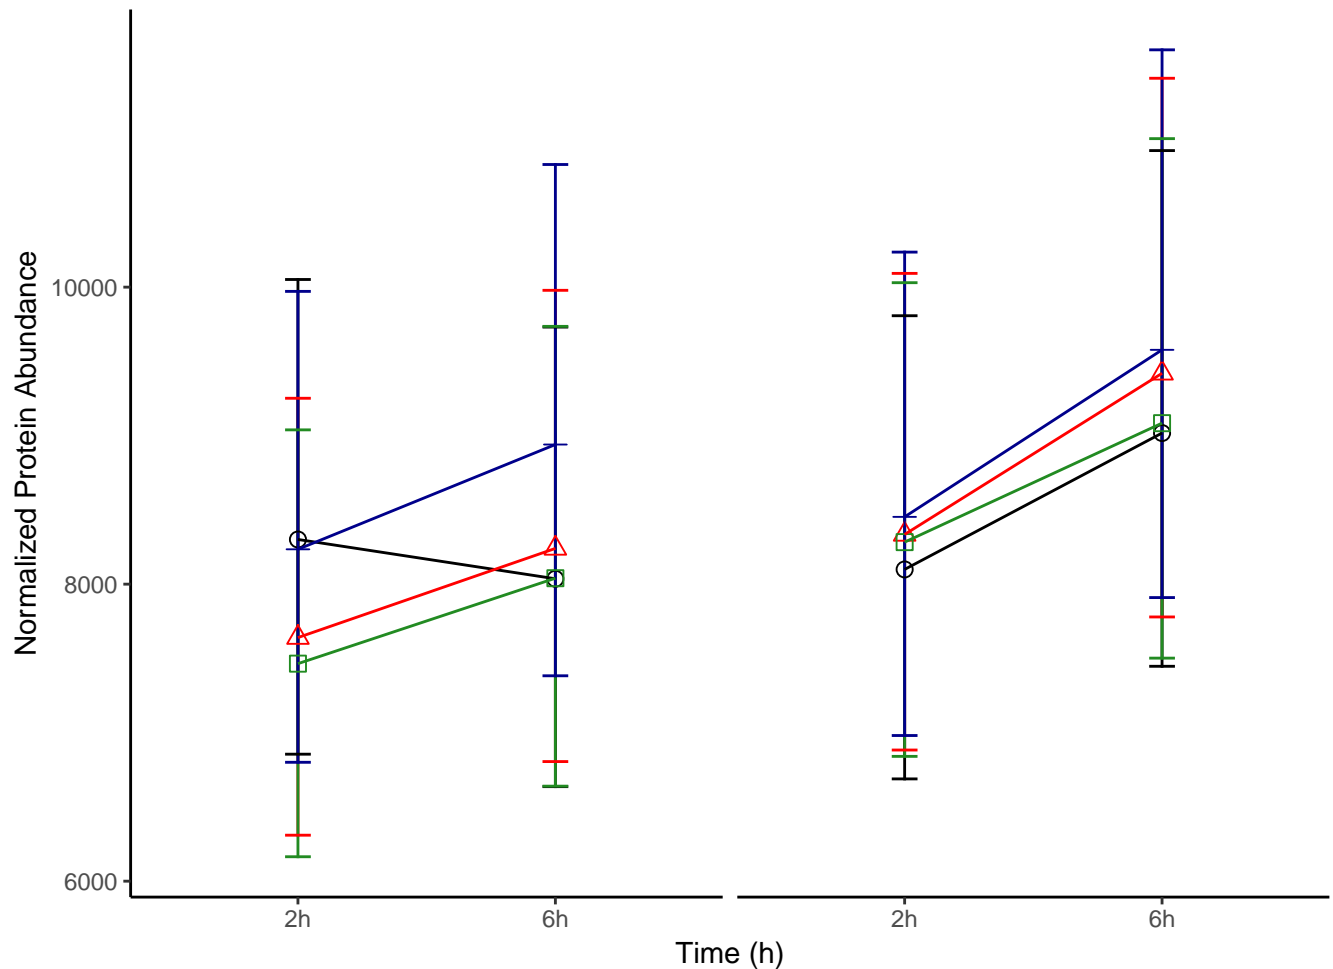

- SA564
- △ SA564- $\Delta hptRS$
- SA564- $\Delta ccpA$
- + SA564- $\Delta hptRS/ccpA$

# CODY\_STAAM

TSB

TSB-dex S-54

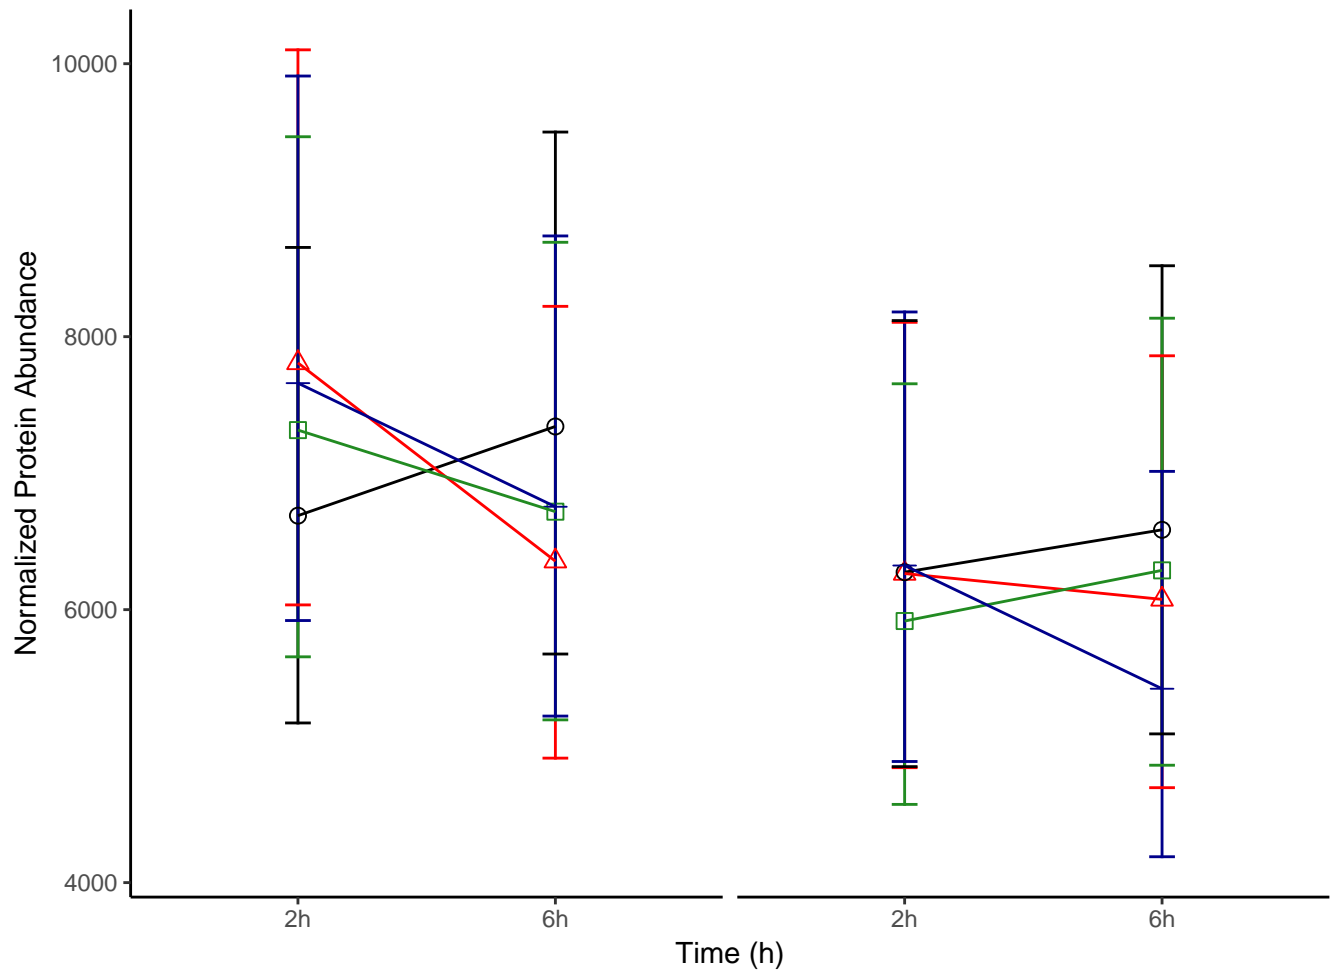

- SA564
- △ SA564-Δ*hptRS*
- SA564-Δ*ccpA*
- + SA564-Δ*hptRS/ccpA*

# COPZ\_STAAM

TSB

TSB-dex S-55

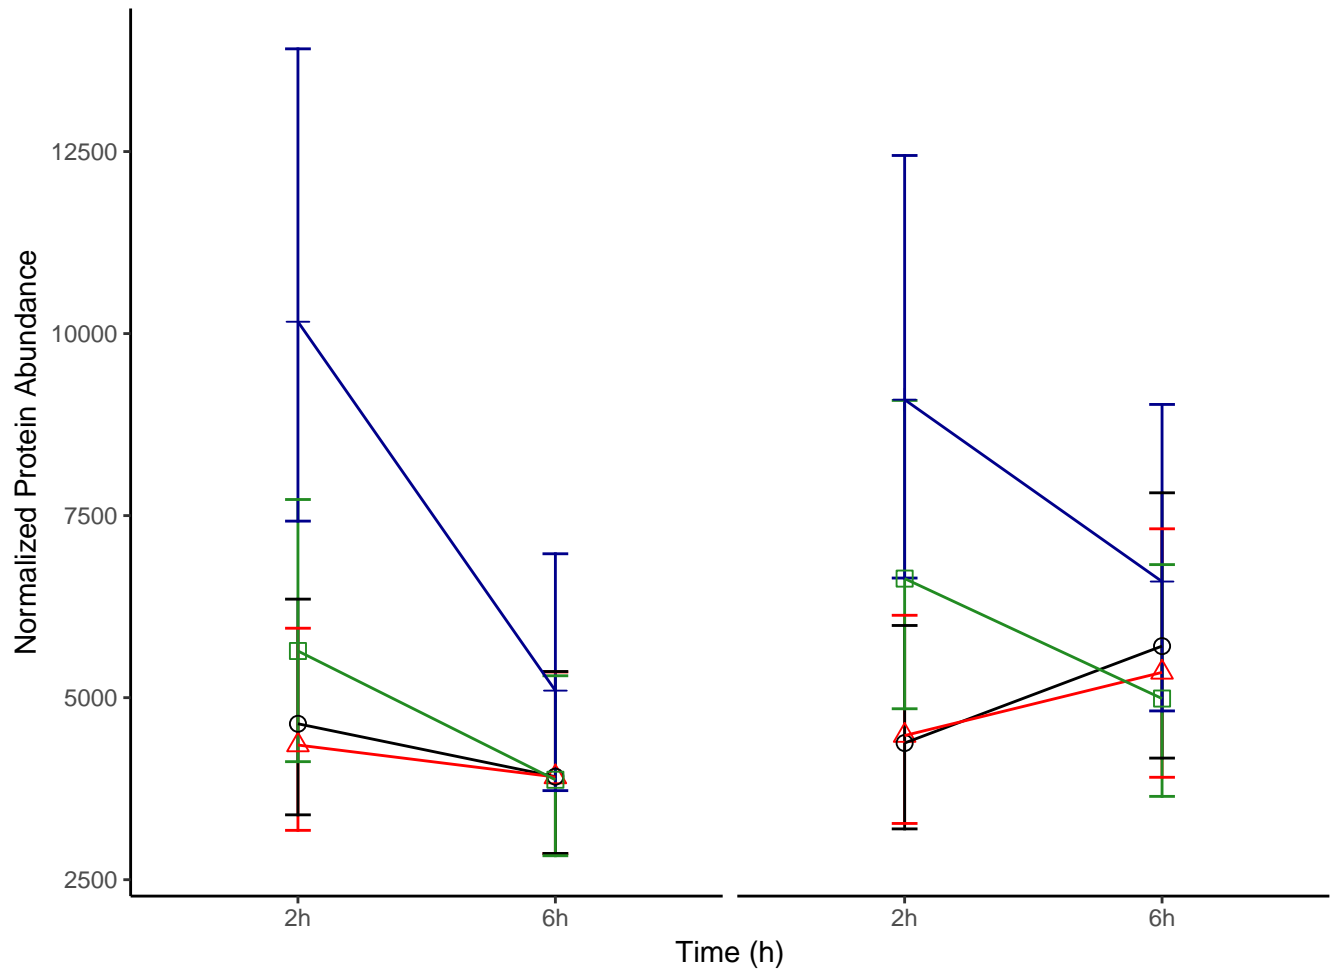

- SA564
- △ SA564- $\Delta hptRS$
- SA564- $\Delta ccpA$
- + SA564- $\Delta hptRS/ccpA$

# CRTN\_STAAM

TSB

TSB-dex S-56

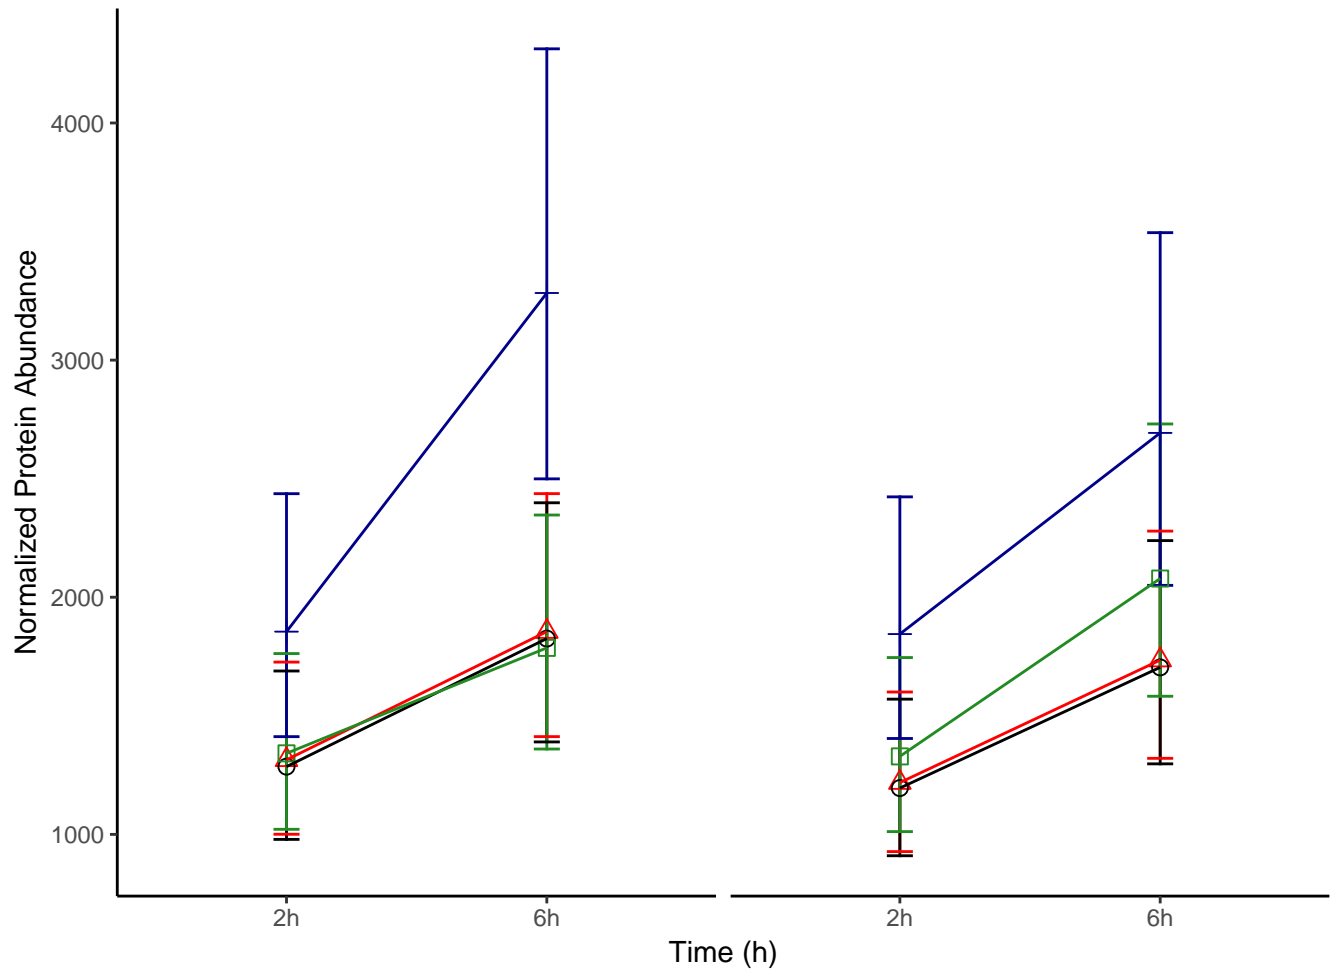

- SA564
- △ SA564-ΔhptRS
- SA564-ΔccpA
- + SA564-ΔhptRS/ccpA



# CSD\_STAAM

TSB

TSB-dex S-57

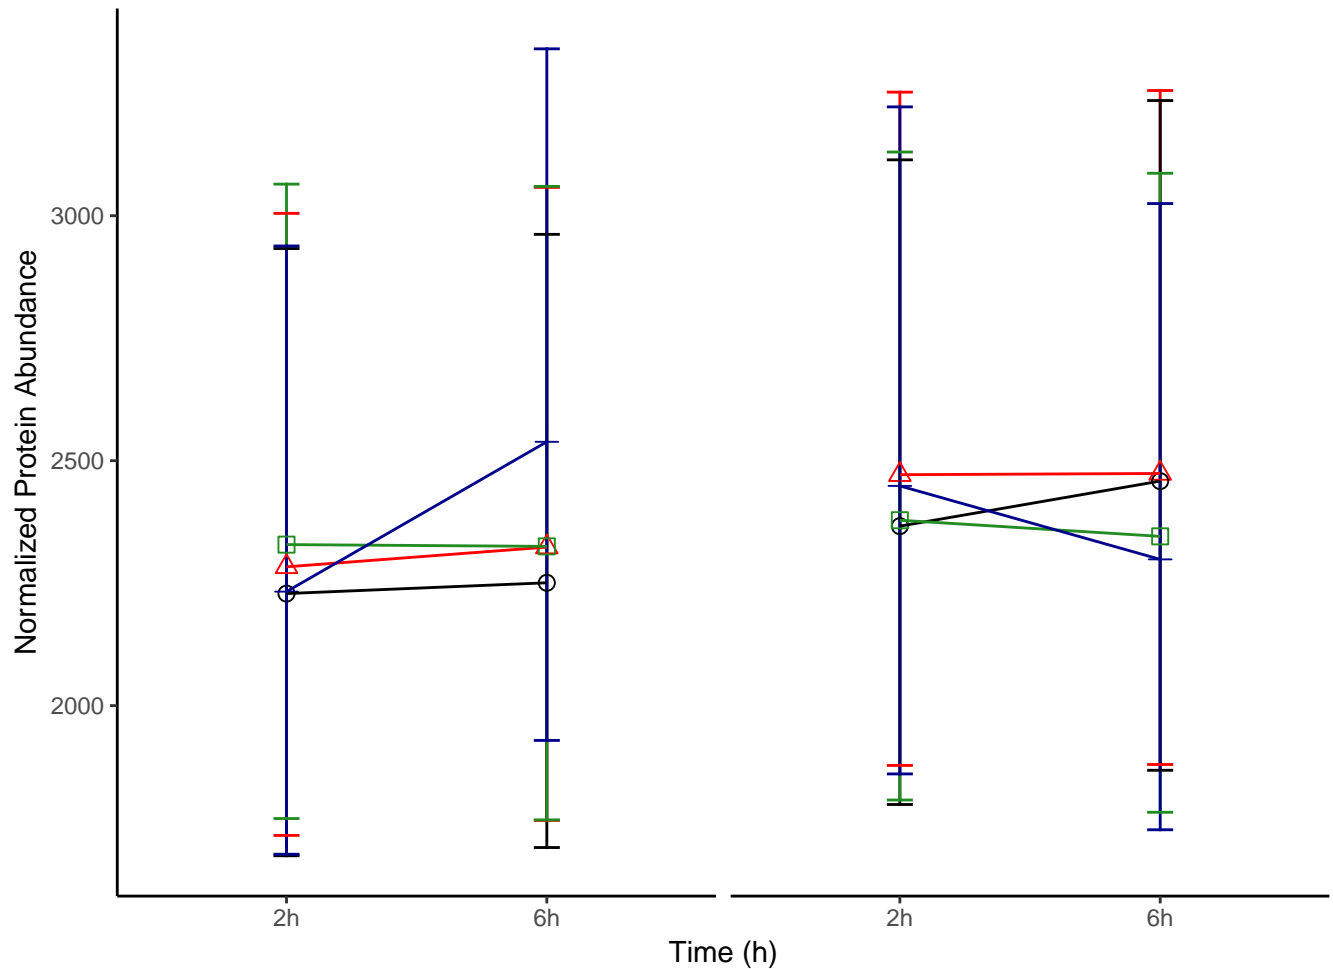

- SA564
- △ SA564- $\Delta hptRS$
- SA564- $\Delta ccpA$
- + SA564- $\Delta hptRS/ccpA$

# CSHA\_STAAM

TSB

TSB-dex S-58

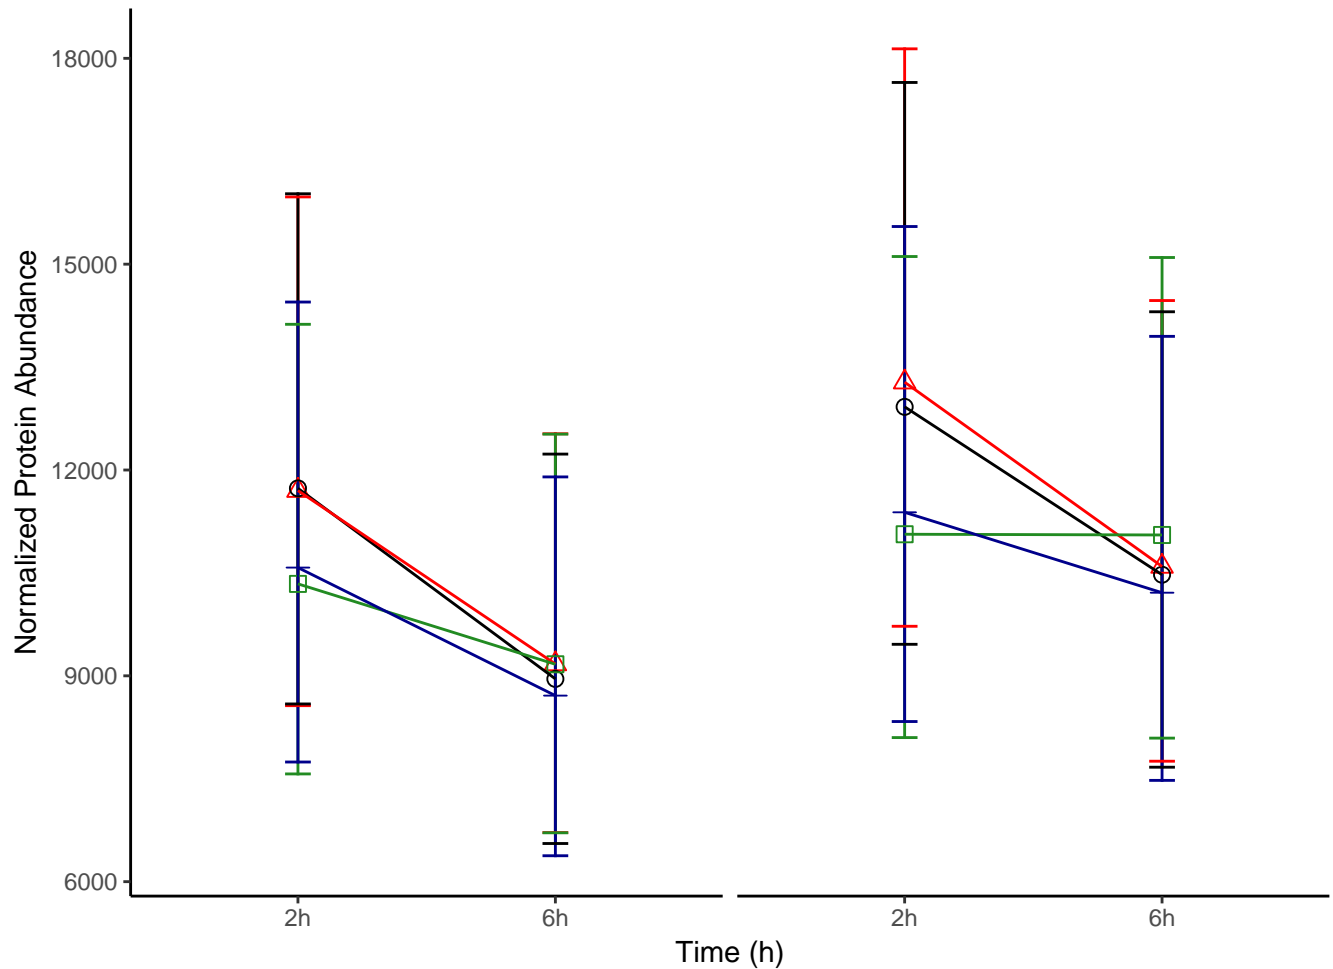

- SA564
- △ SA564-Δ*hptRS*
- SA564-Δ*ccpA*
- + SA564-Δ*hptRS/ccpA*

# CSPA\_STAAM

TSB

TSB-dex S-59

Normalized Protein Abundance

2e+05

1e+05

2h

6h

Time (h)

2h

6h

- SA564
- △ SA564- $\Delta$ *hptRS*
- SA564- $\Delta$ *ccpA*
- + SA564- $\Delta$ *hptRS/ccpA*

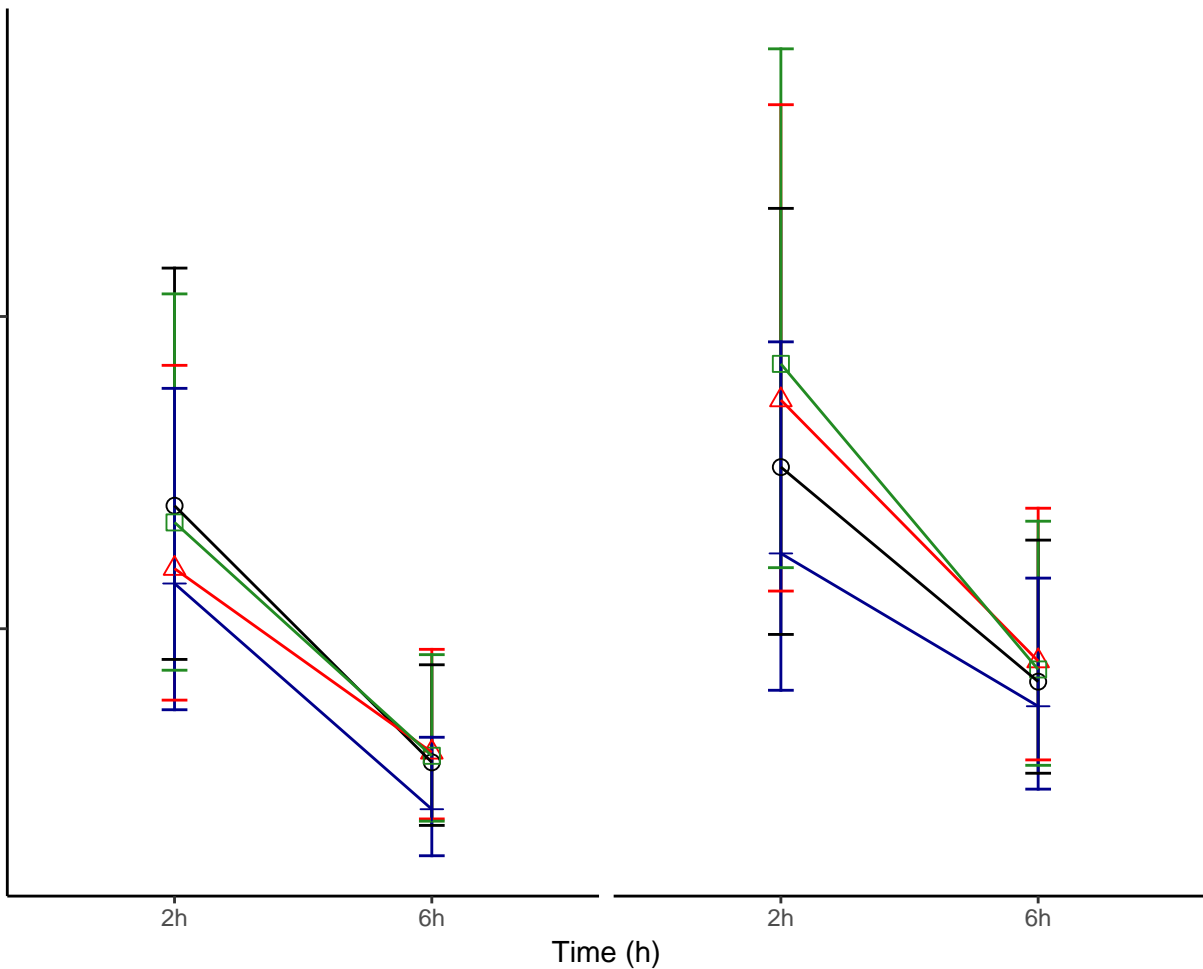

## CTPAL\_STAAM

TSB

TSB-dex S-60

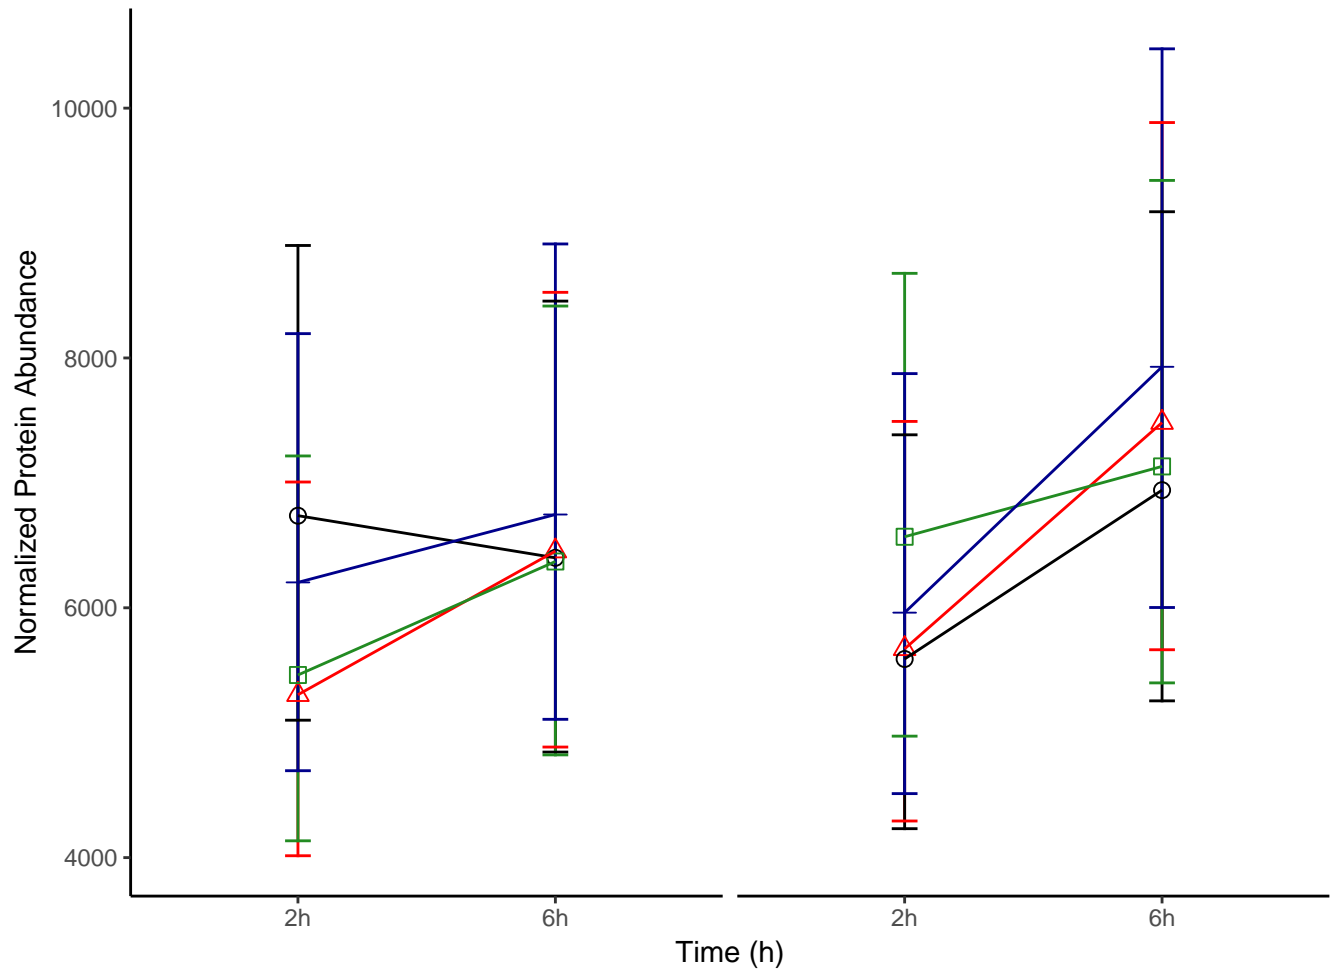

- SA564
- △ SA564-ΔhptRS
- SA564-ΔccpA
- + SA564-ΔhptRS/ccpA

# CVFB\_STAAM

TSB

TSB-dex S-61

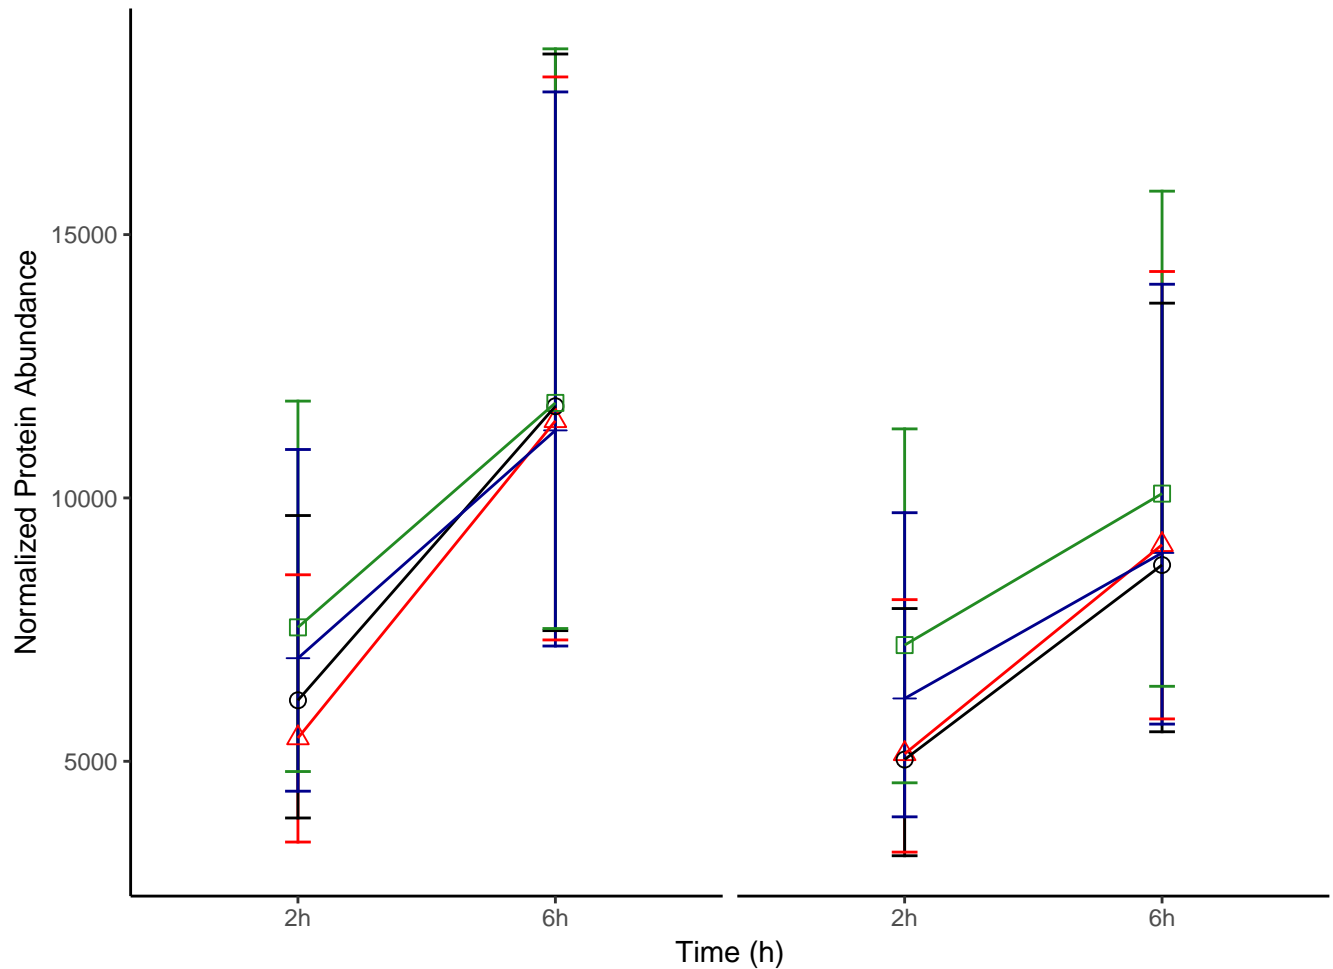

- SA564
- △ SA564-ΔhptRS
- SA564-ΔccpA
- + SA564-ΔhptRS/ccpA

# CYSE\_STAAM

TSB

TSB-dex S-62

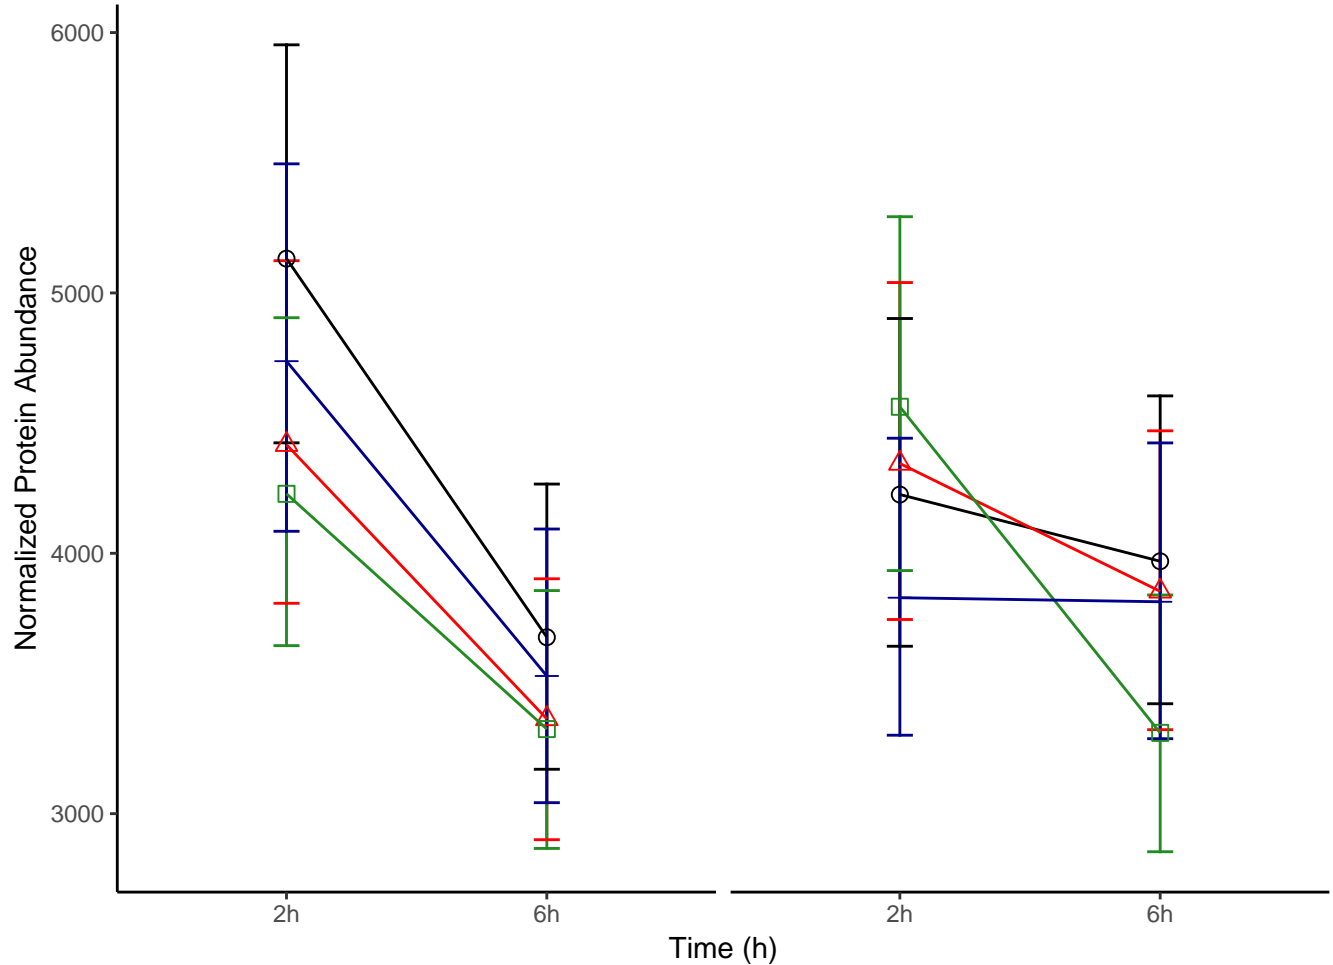

- SA564
- △ SA564- $\Delta$ *hptRS*
- SA564- $\Delta$ *ccpA*
- + SA564- $\Delta$ *hptRS/ccpA*

# CYSK\_STAAM

TSB

TSB-dex S-63

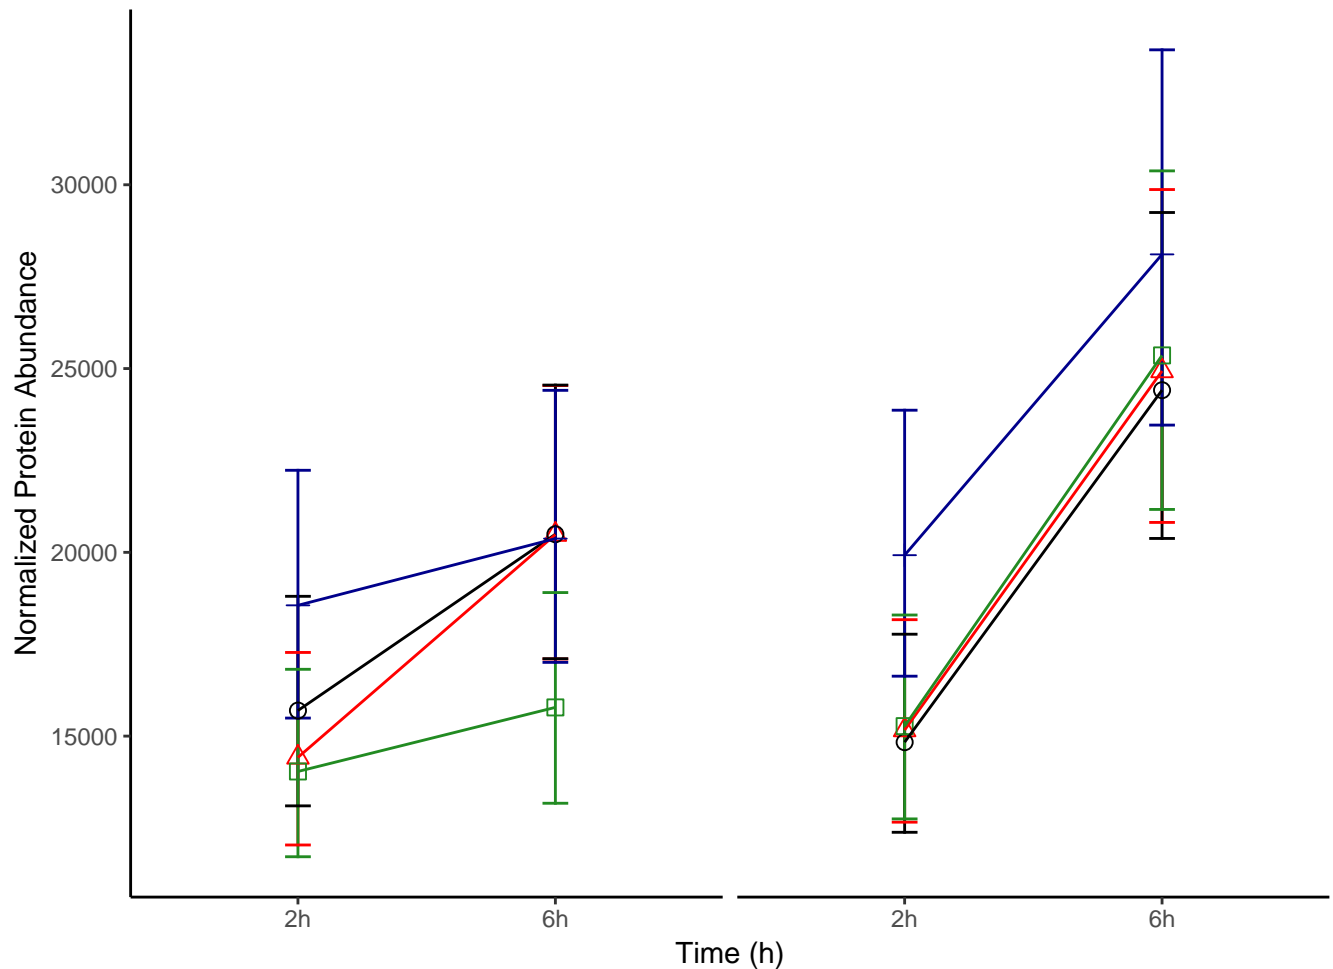

- SA564
- △ SA564-ΔhptRS
- SA564-ΔccpA
- + SA564-ΔhptRS/ccpA

# DAAA\_STAAM

TSB

TSB-dex S-64

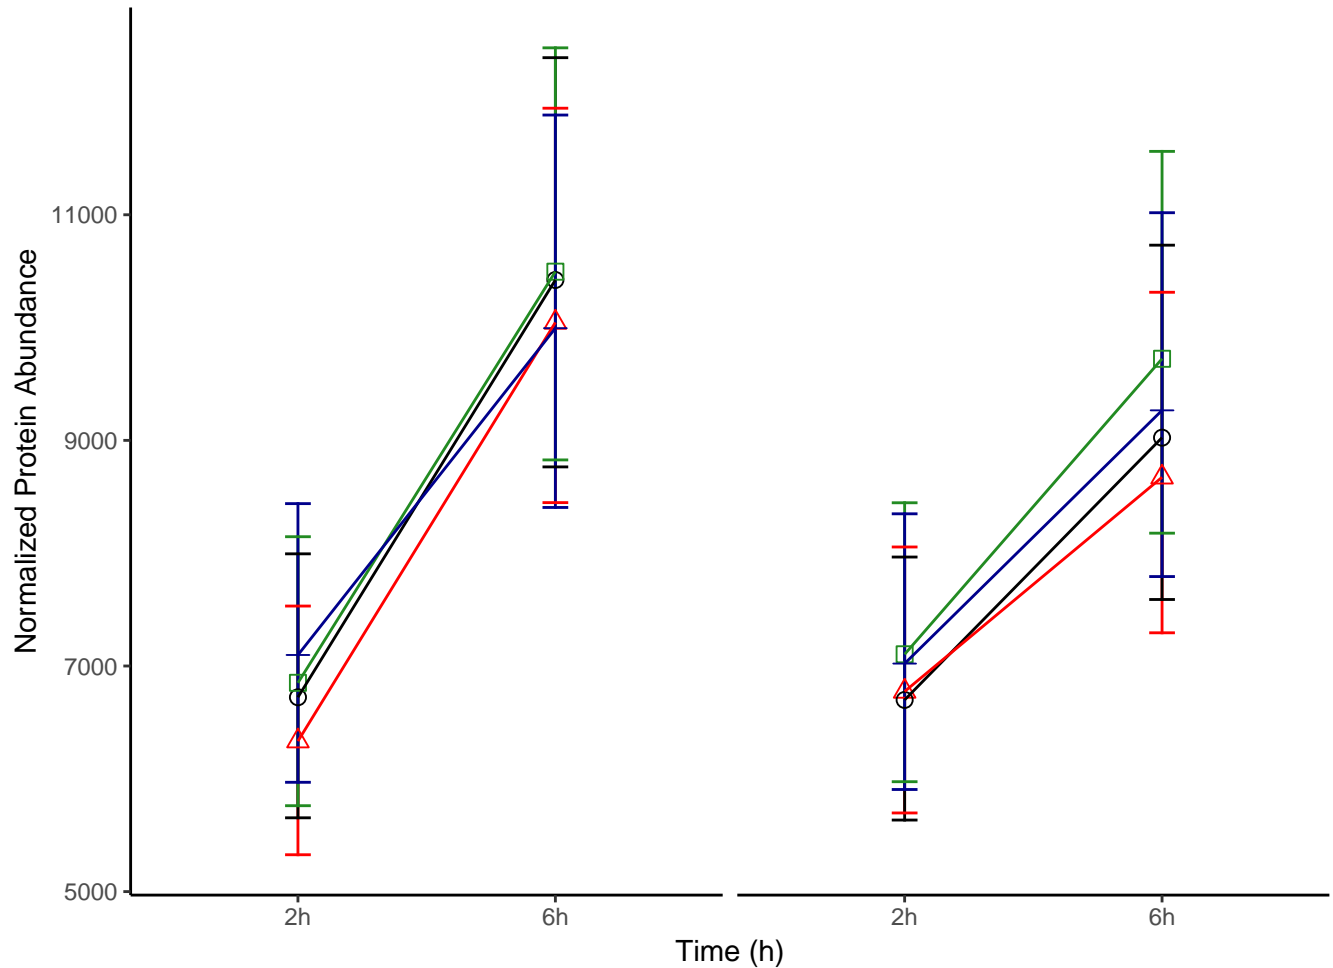

- SA564
- △ SA564-ΔhptRS
- SA564-ΔccpA
- + SA564-ΔhptRS/ccpA



# DAPB\_STAAM

TSB

TSB-dex S-65

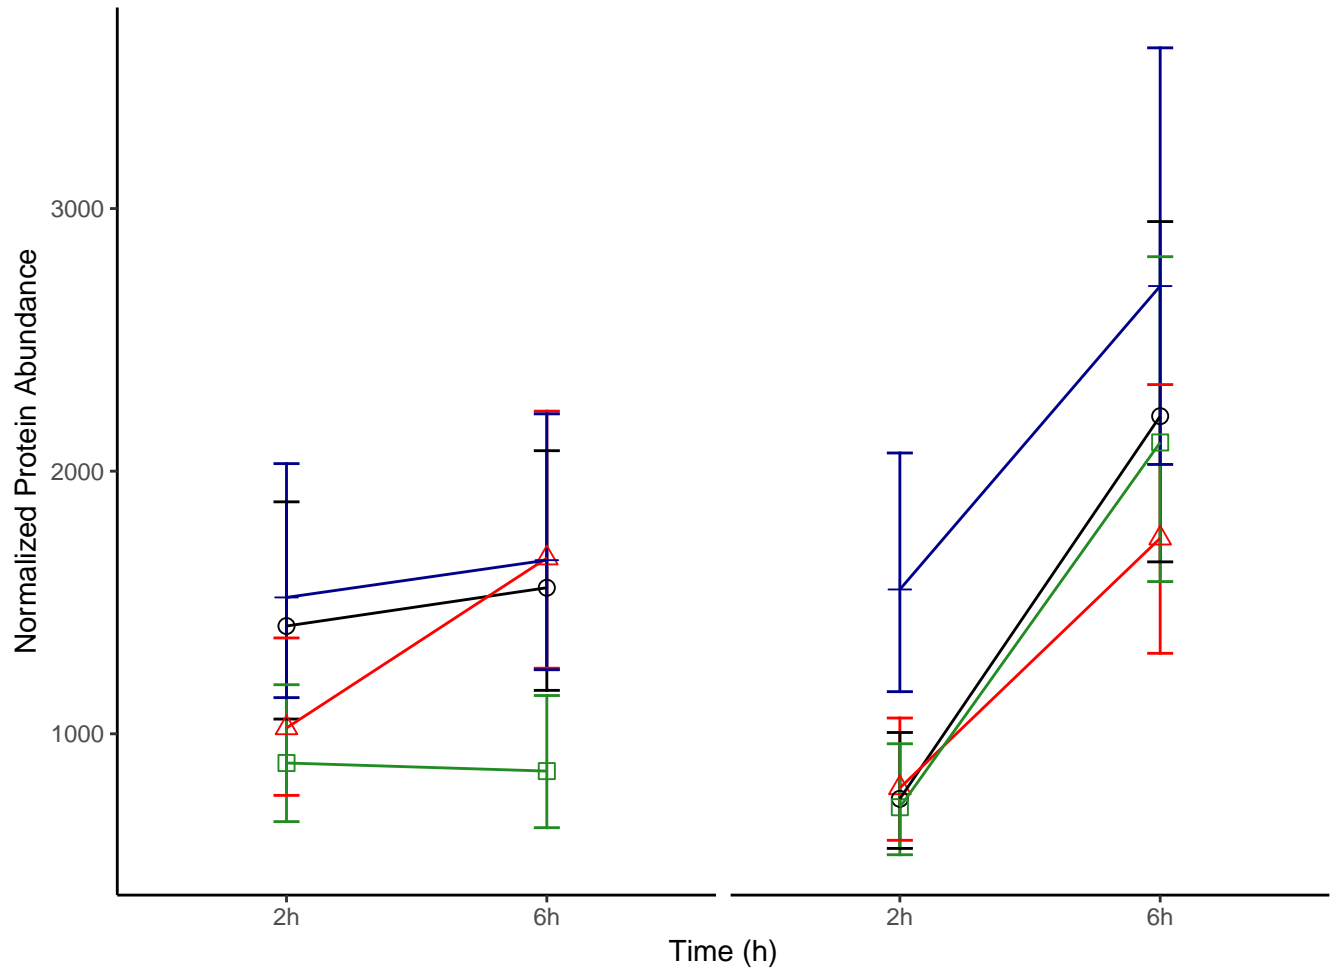

- SA564
- △ SA564-ΔhptRS
- SA564-ΔccpA
- + SA564-ΔhptRS/ccpA

# DAPH\_STAAM

TSB

TSB-dex S-66

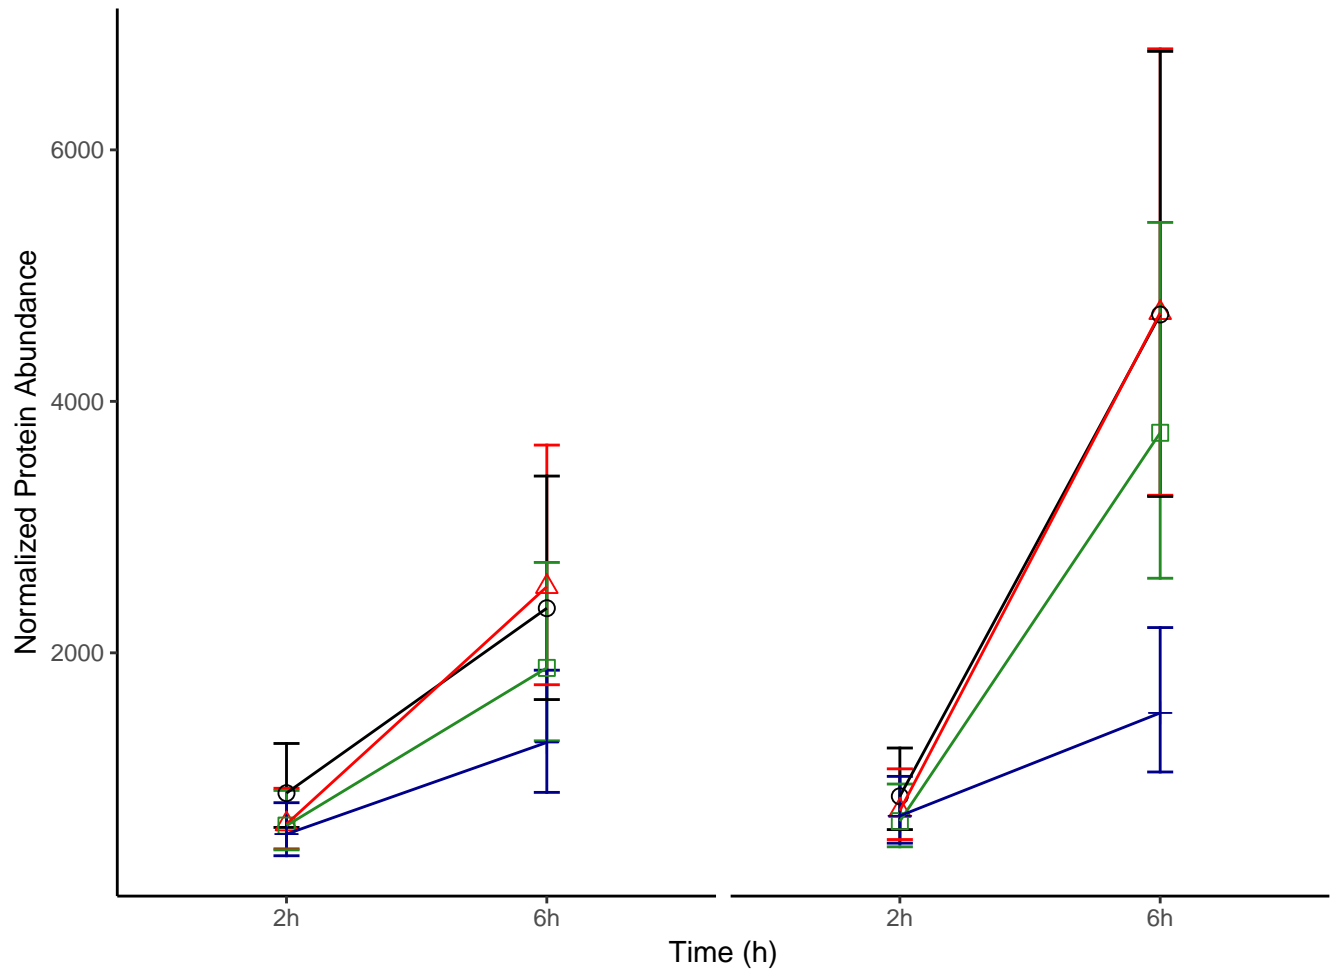

- SA564
- SA564- $\Delta hptRS$
- SA564- $\Delta ccpA$
- SA564- $\Delta hptRS/ccpA$

# DBH\_STAAM

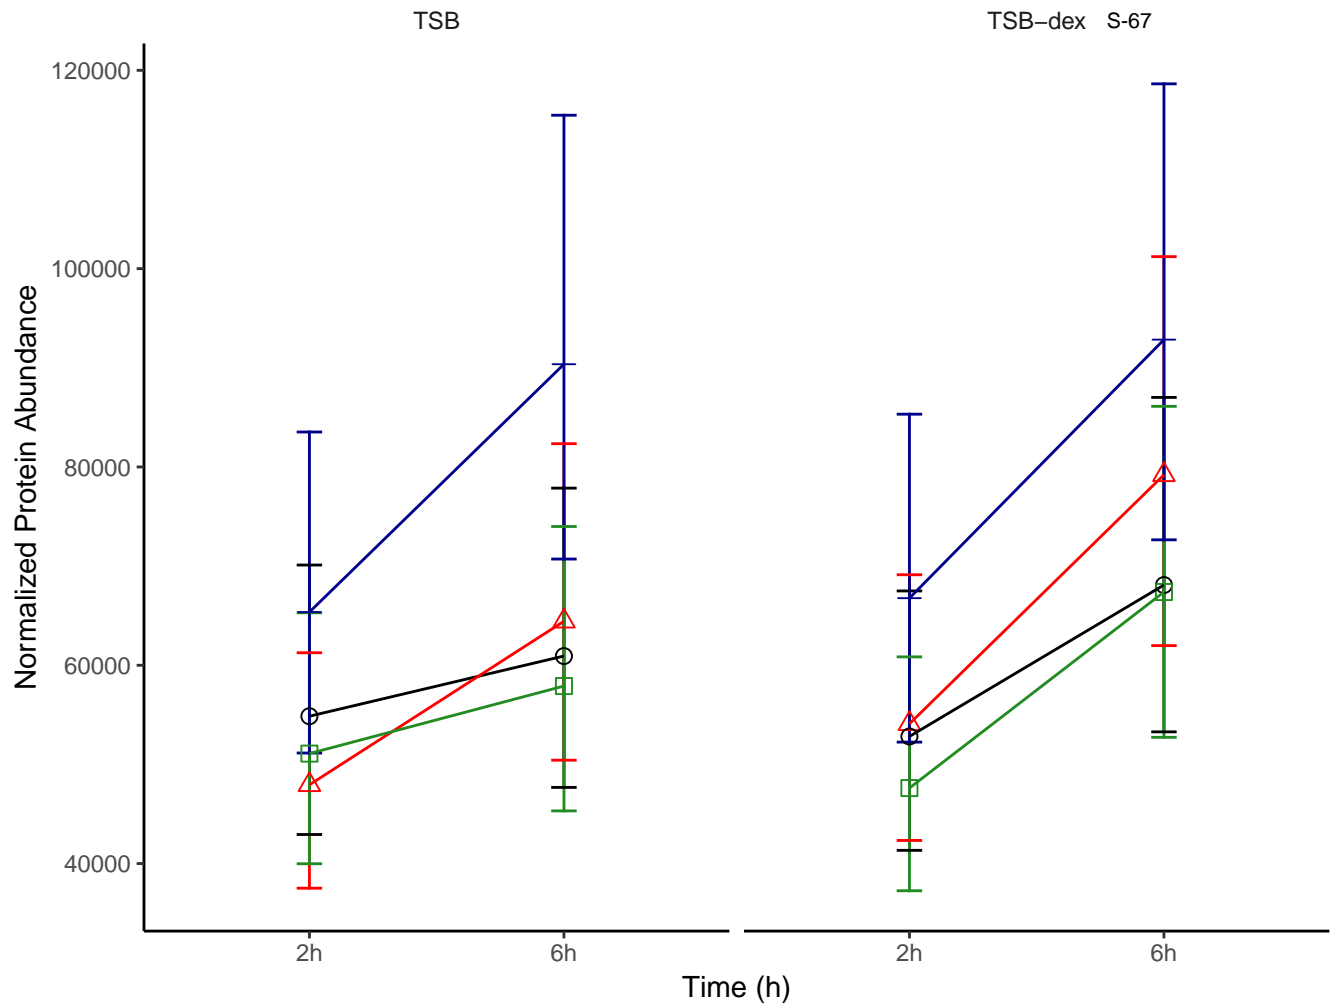

- SA564
- △ SA564-ΔhptRS
- SA564-ΔccpA
- + SA564-ΔhptRS/ccpA

# DCUP\_STAAM

TSB

TSB-dex S-68

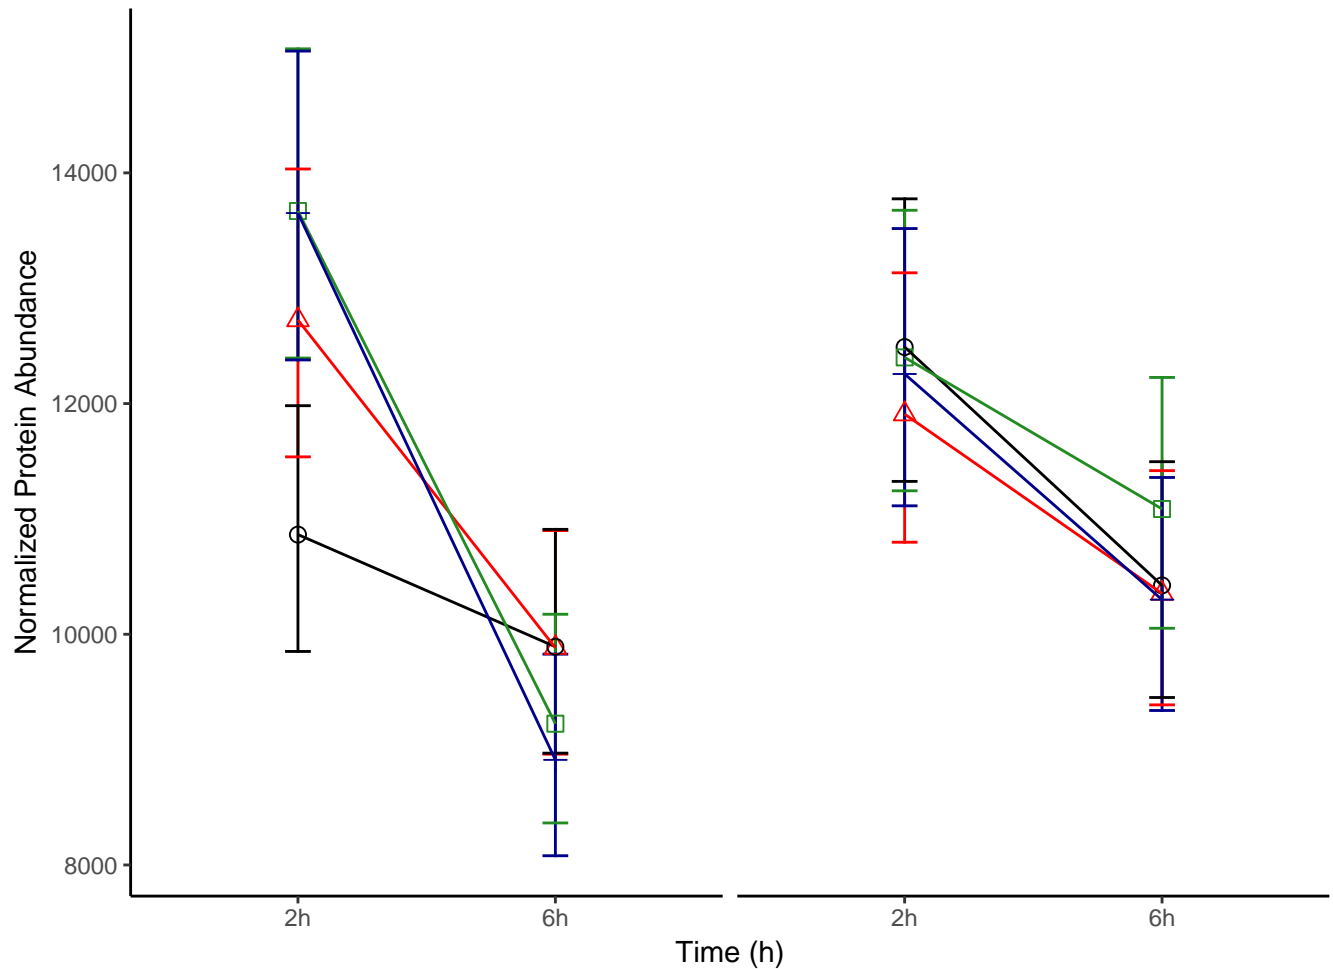

- SA564
- △ SA564- $\Delta hptRS$
- SA564- $\Delta ccpA$
- + SA564- $\Delta hptRS/ccpA$

## DDL\_STAAM

TSB

TSB-dex S-69

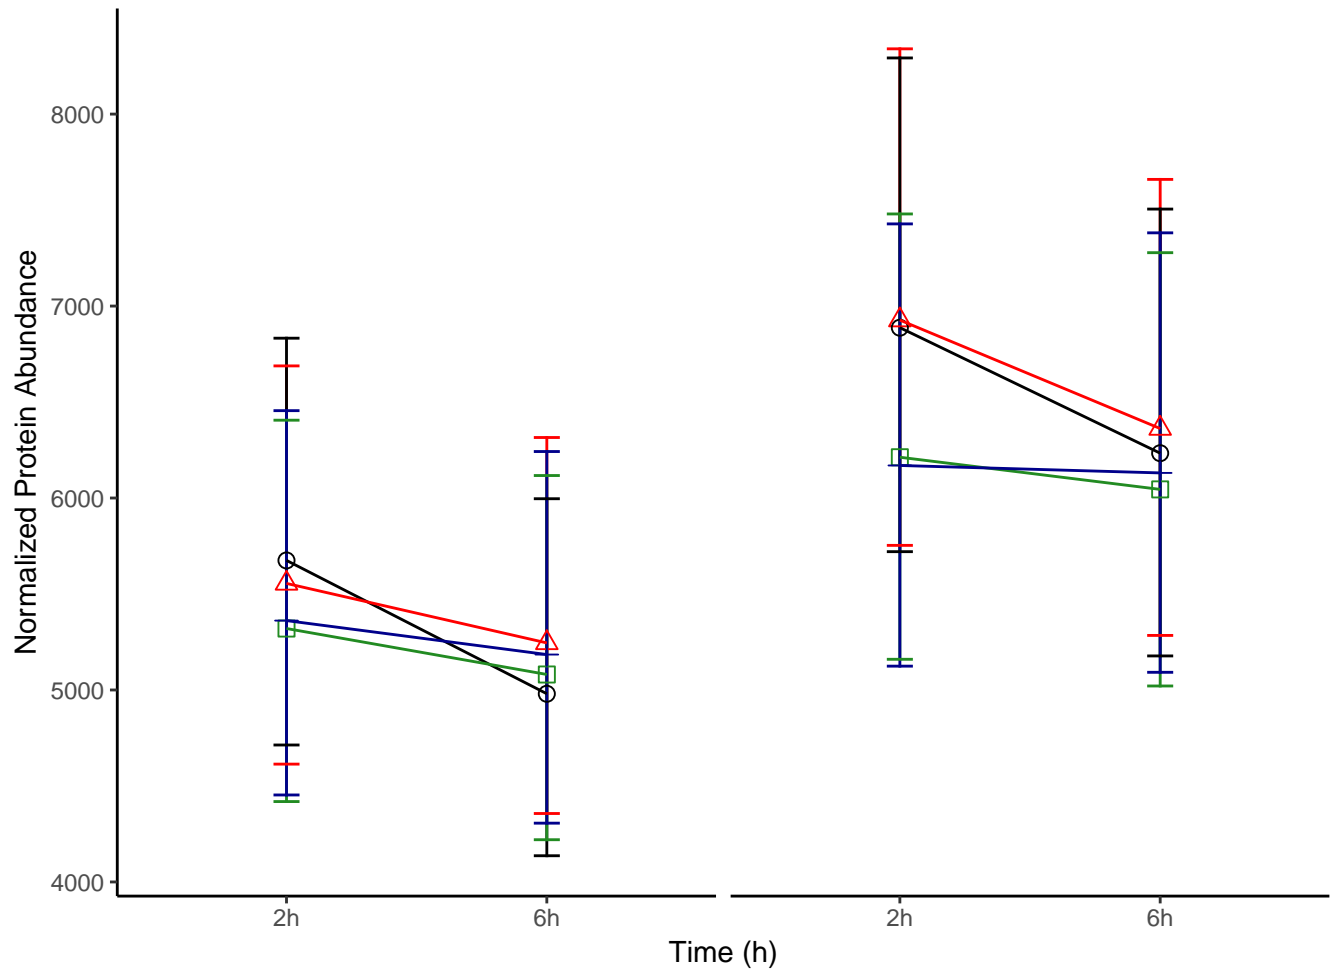

- SA564
- △ SA564- $\Delta$ *hptRS*
- SA564- $\Delta$ *ccpA*
- + SA564- $\Delta$ *hptRS/ccpA*

# DEF\_STAAM

TSB

TSB-dex S-70

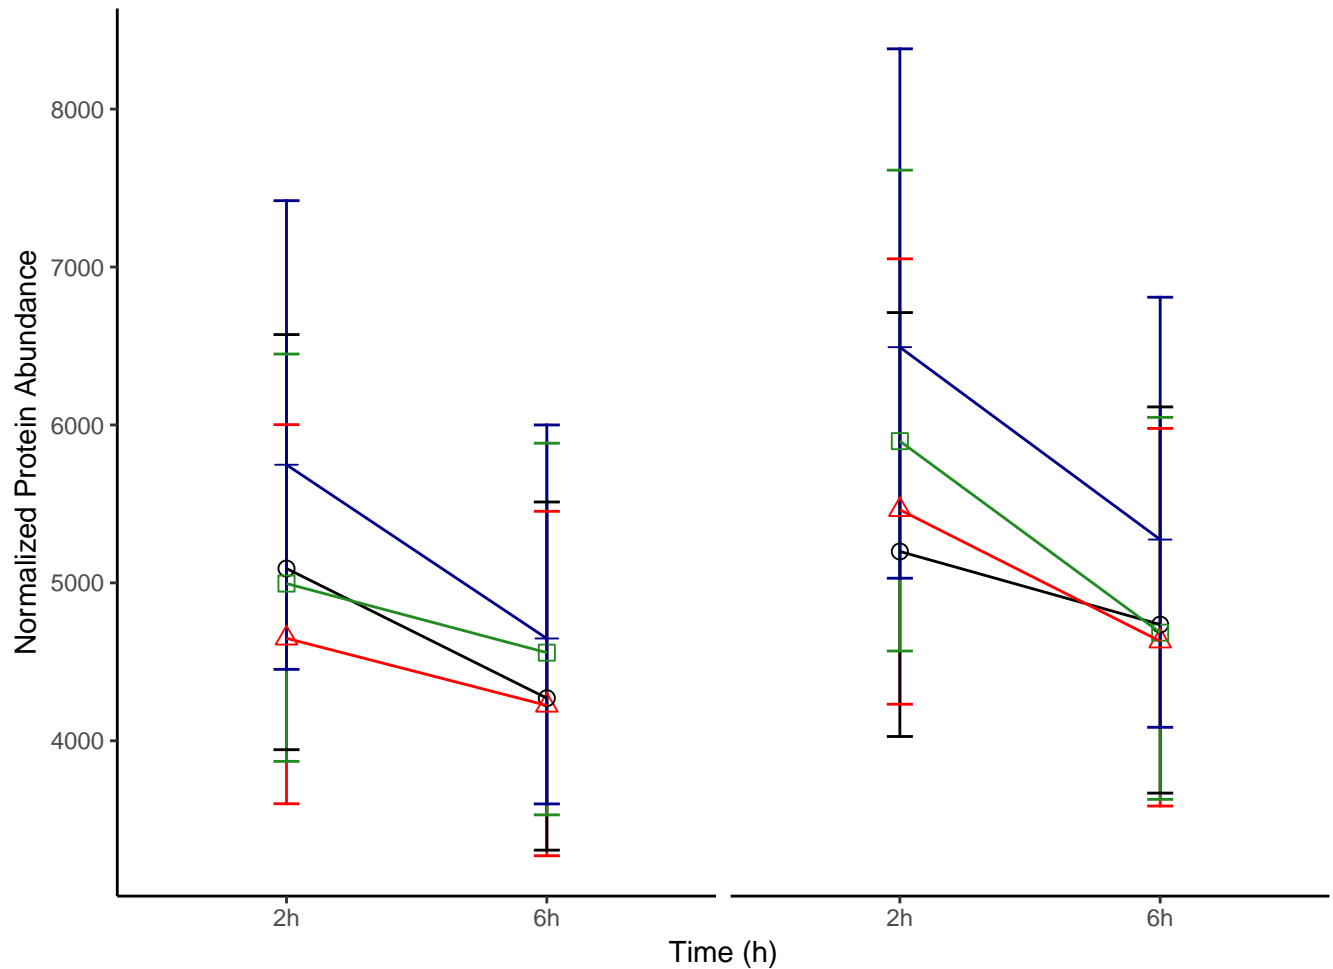

- SA564
- △ SA564- $\Delta$ *hptRS*
- SA564- $\Delta$ *ccpA*
- + SA564- $\Delta$ *hptRS/ccpA*

# DEOB\_STAAM

TSB

TSB-dex S-71

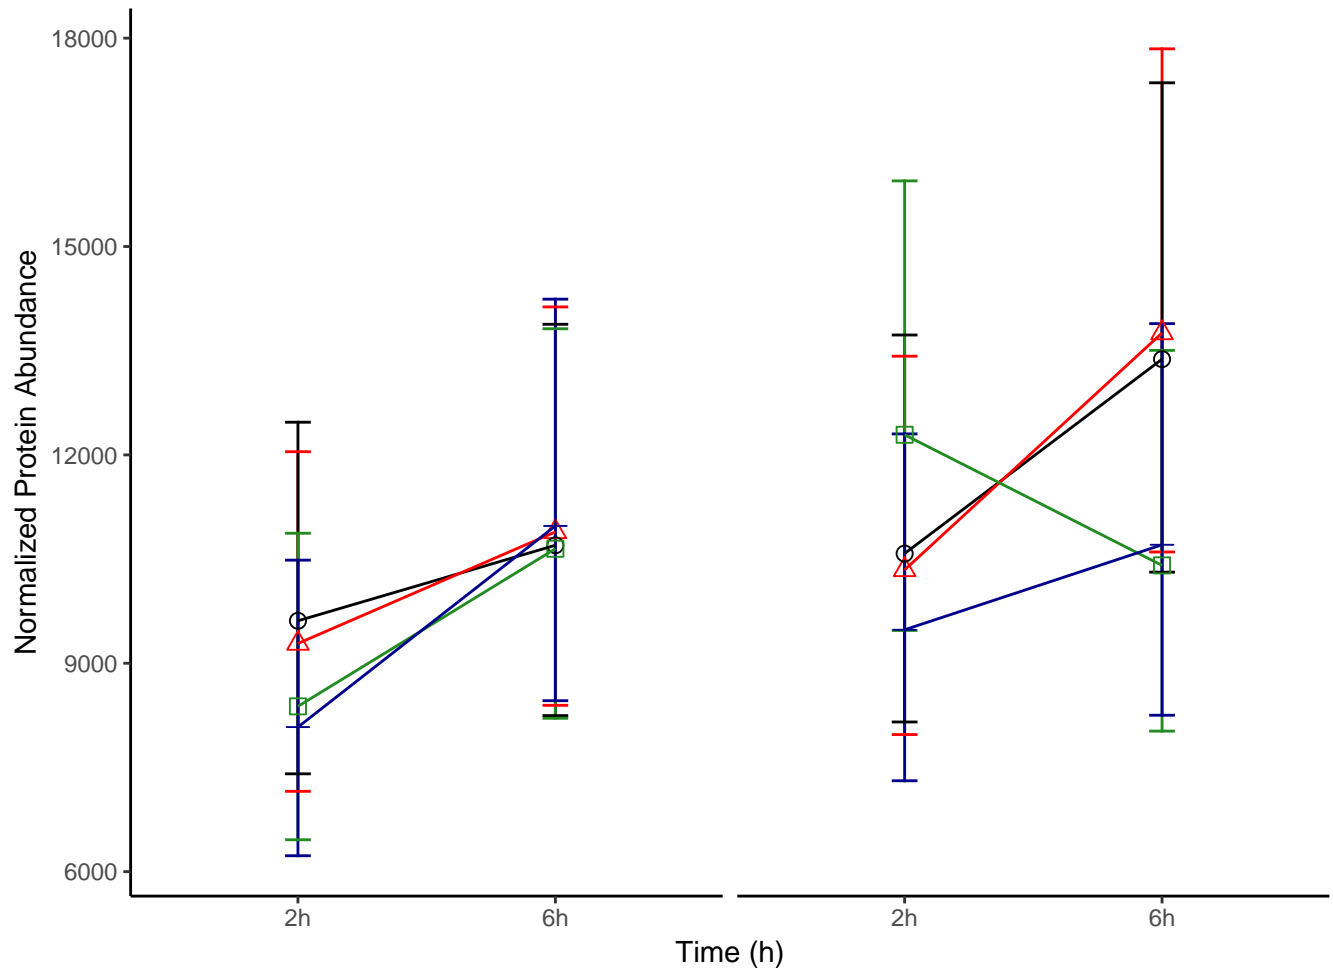

- SA564
- △ SA564- $\Delta$ *hptRS*
- SA564- $\Delta$ *ccpA*
- + SA564- $\Delta$ *hptRS/ccpA*

# DEOC1\_STAAM

TSB

TSB-dex S-72

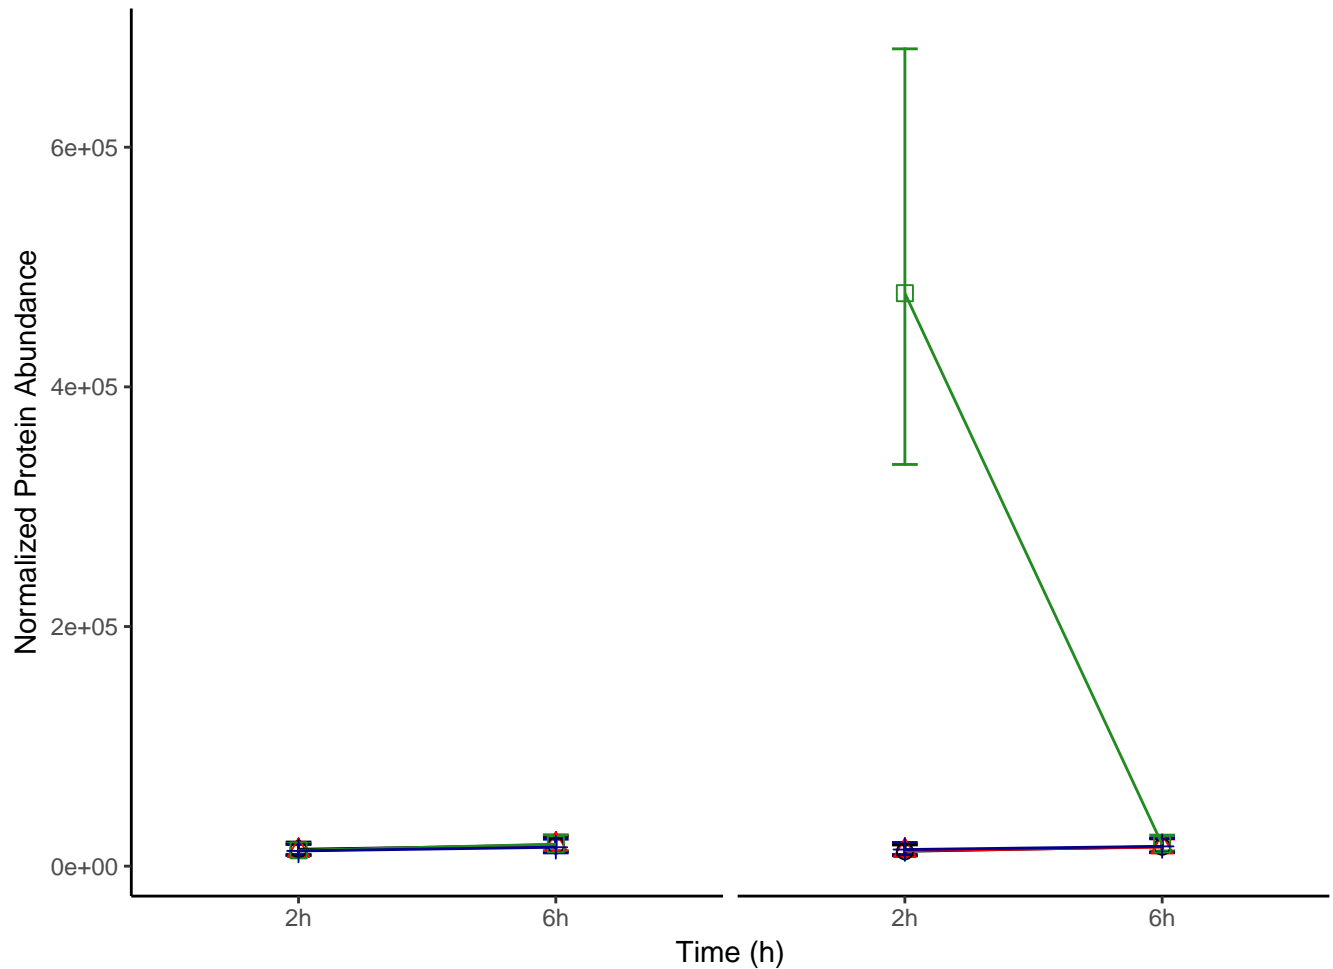

- SA564
- △ SA564-ΔhptRS
- SA564-ΔccpA
- + SA564-ΔhptRS/ccpA



# DEOC2\_STAAM

TSB

TSB-dex S-73

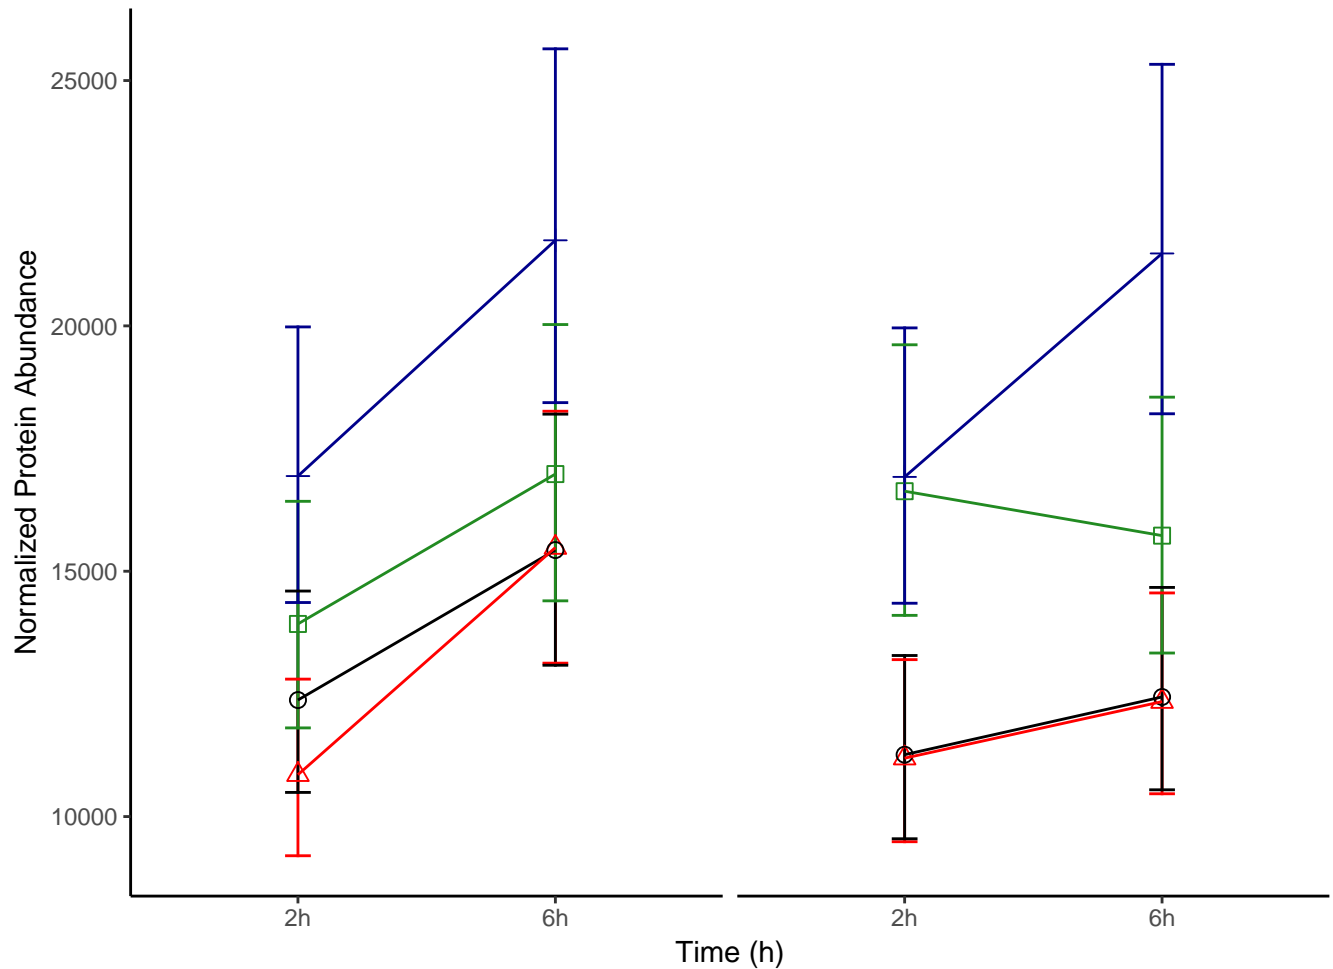

- SA564
- △ SA564-Δ*hptRS*
- SA564-Δ*ccpA*
- + SA564-Δ*hptRS/ccpA*

# DER\_STAAM

TSB

TSB-dex S-74

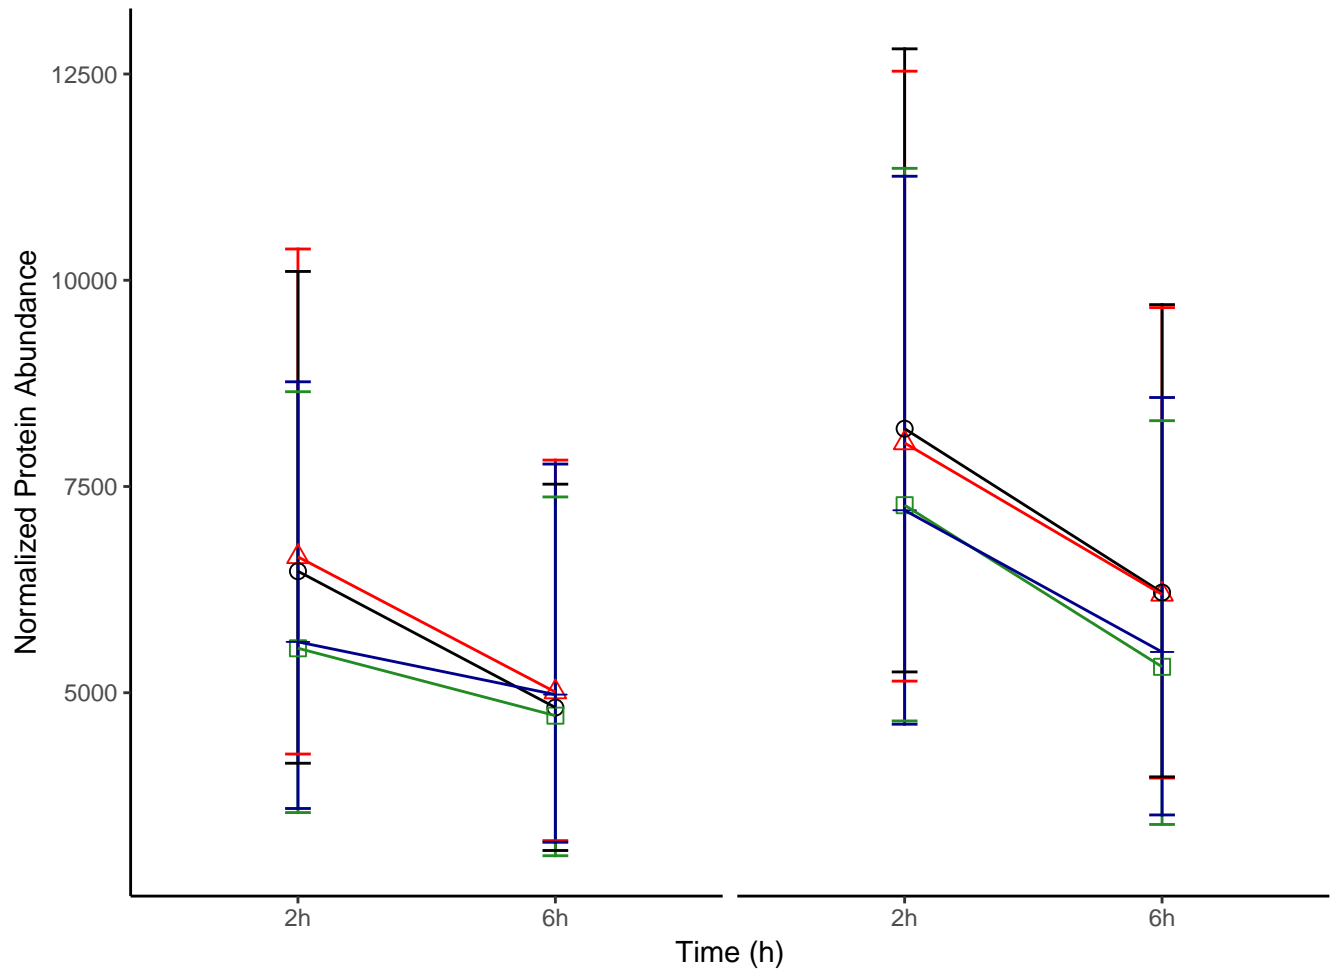

- SA564
- △ SA564- $\Delta$ *hptRS*
- SA564- $\Delta$ *ccpA*
- +

# DHA1\_STAAM

TSB

TSB-dex S-75

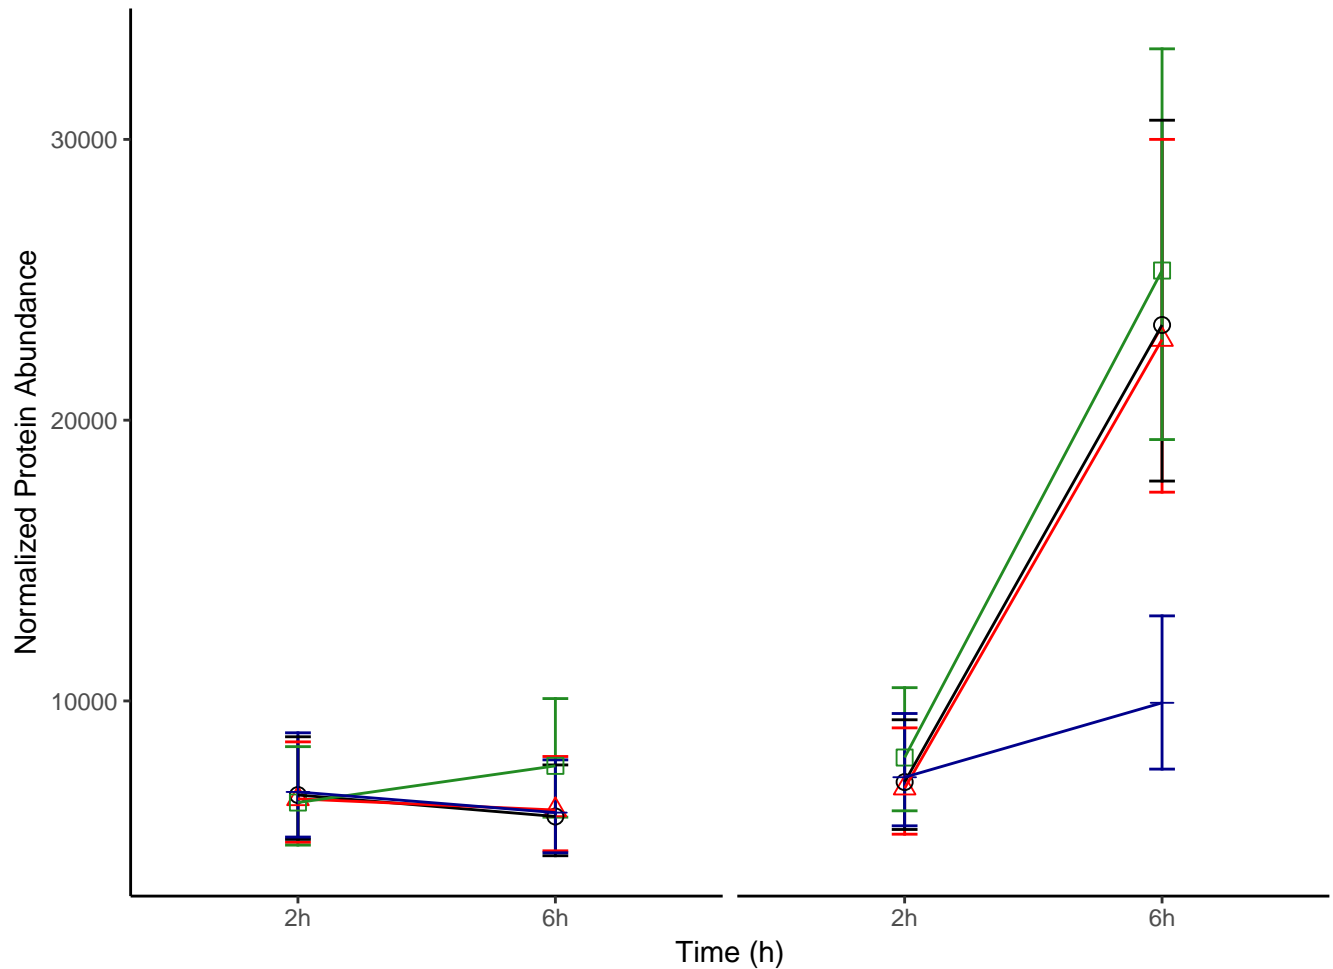

- SA564
- △ SA564- $\Delta$ hptRS
- SA564- $\Delta$ ccpA
- + SA564- $\Delta$ hptRS/ccpA

# DHA2\_STAAM

TSB

TSB-dex S-76

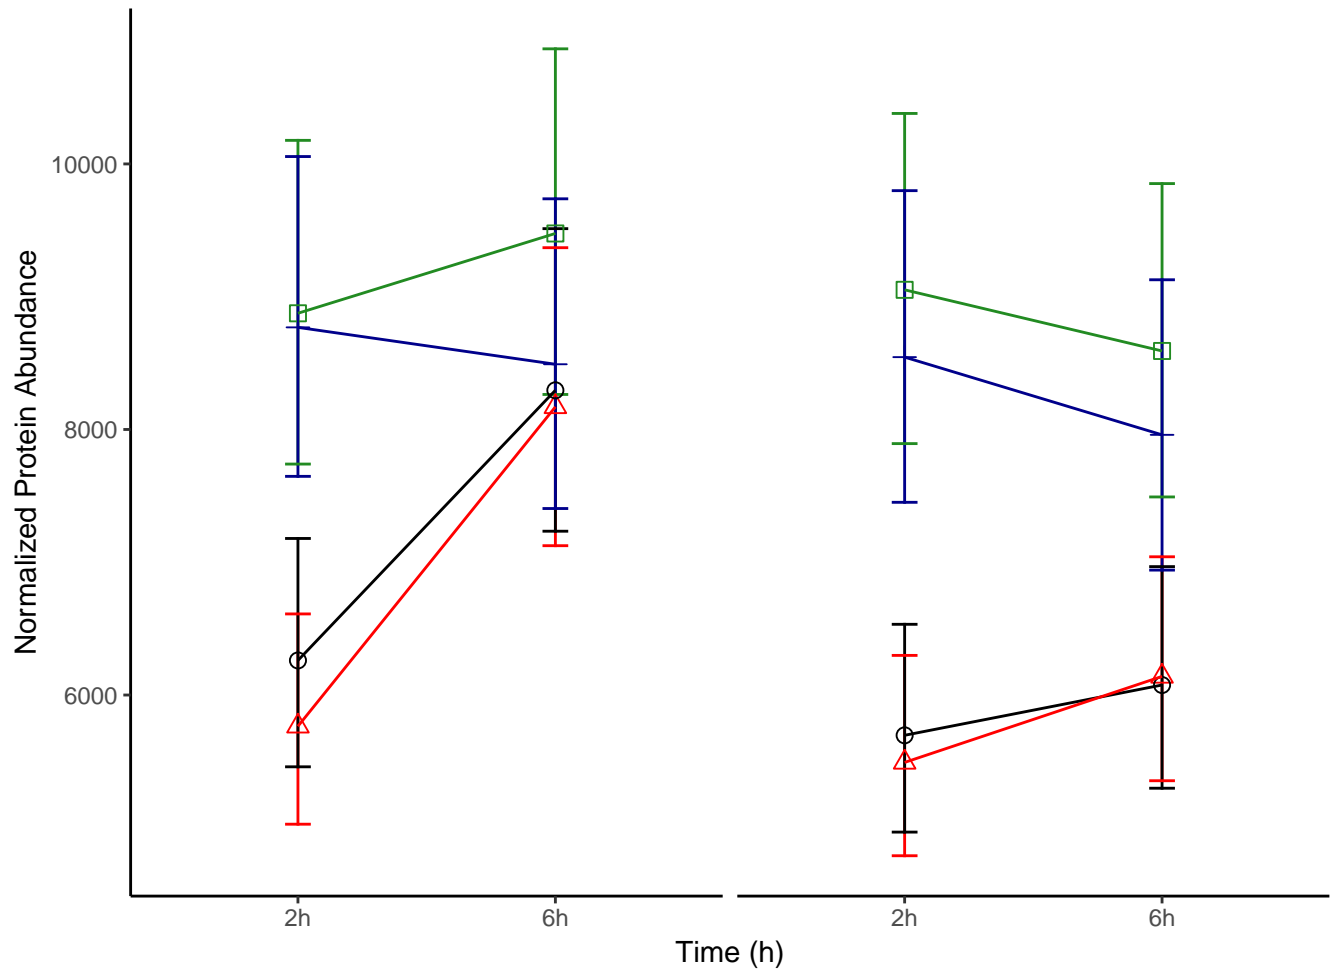

- SA564
- △ SA564-ΔhptRS
- SA564-ΔccpA
- + SA564-ΔhptRS/ccpA

# DHE2\_STAAM

TSB

TSB-dex S-77

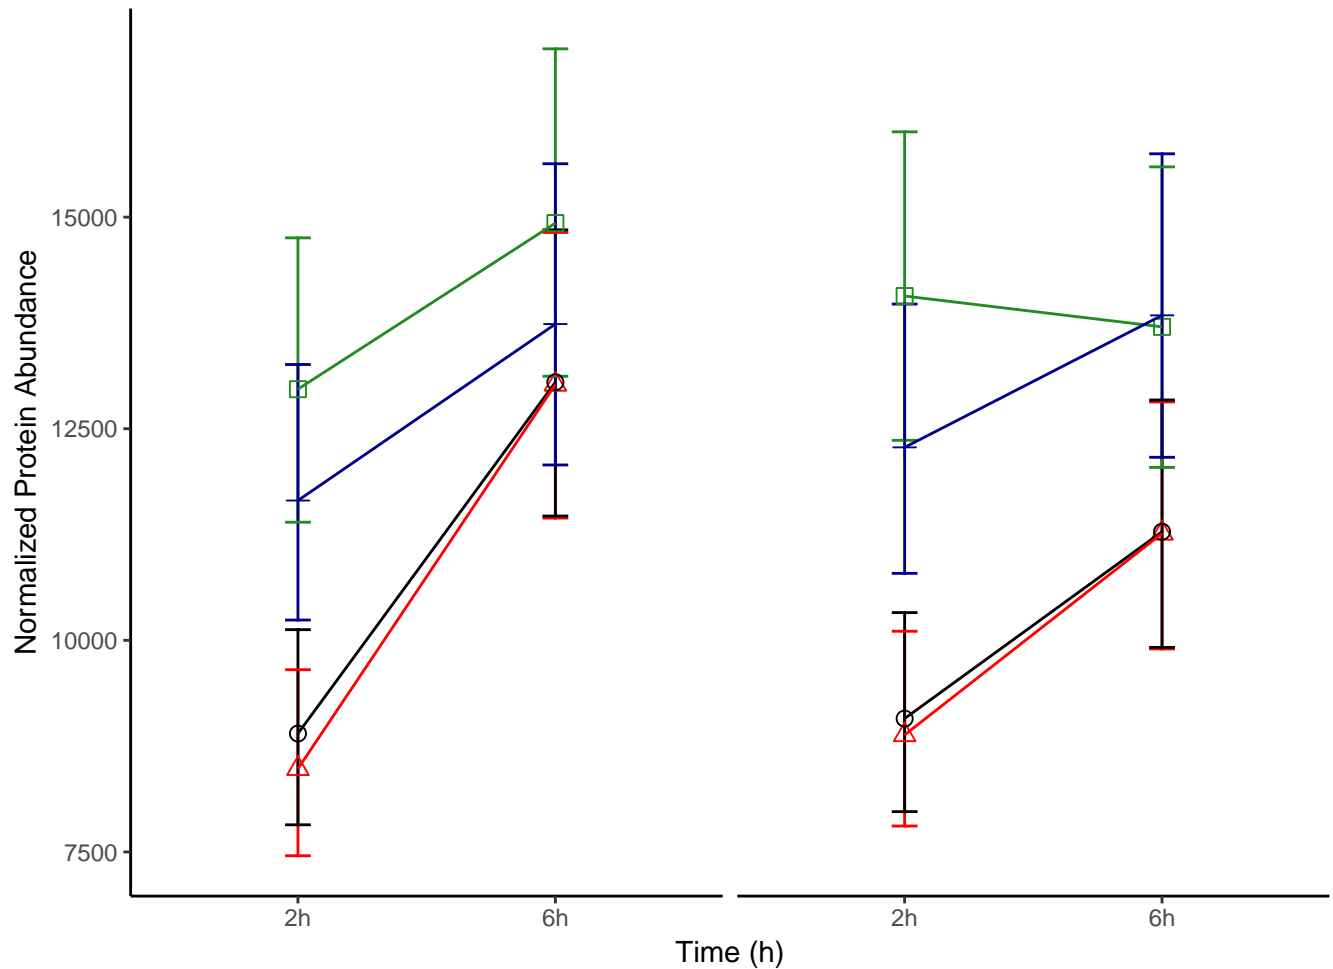

- SA564
- △ SA564-ΔhptRS
- SA564-ΔccpA
- + SA564-ΔhptRS/ccpA

# DHPS\_STAAM

TSB

TSB-dex S-78

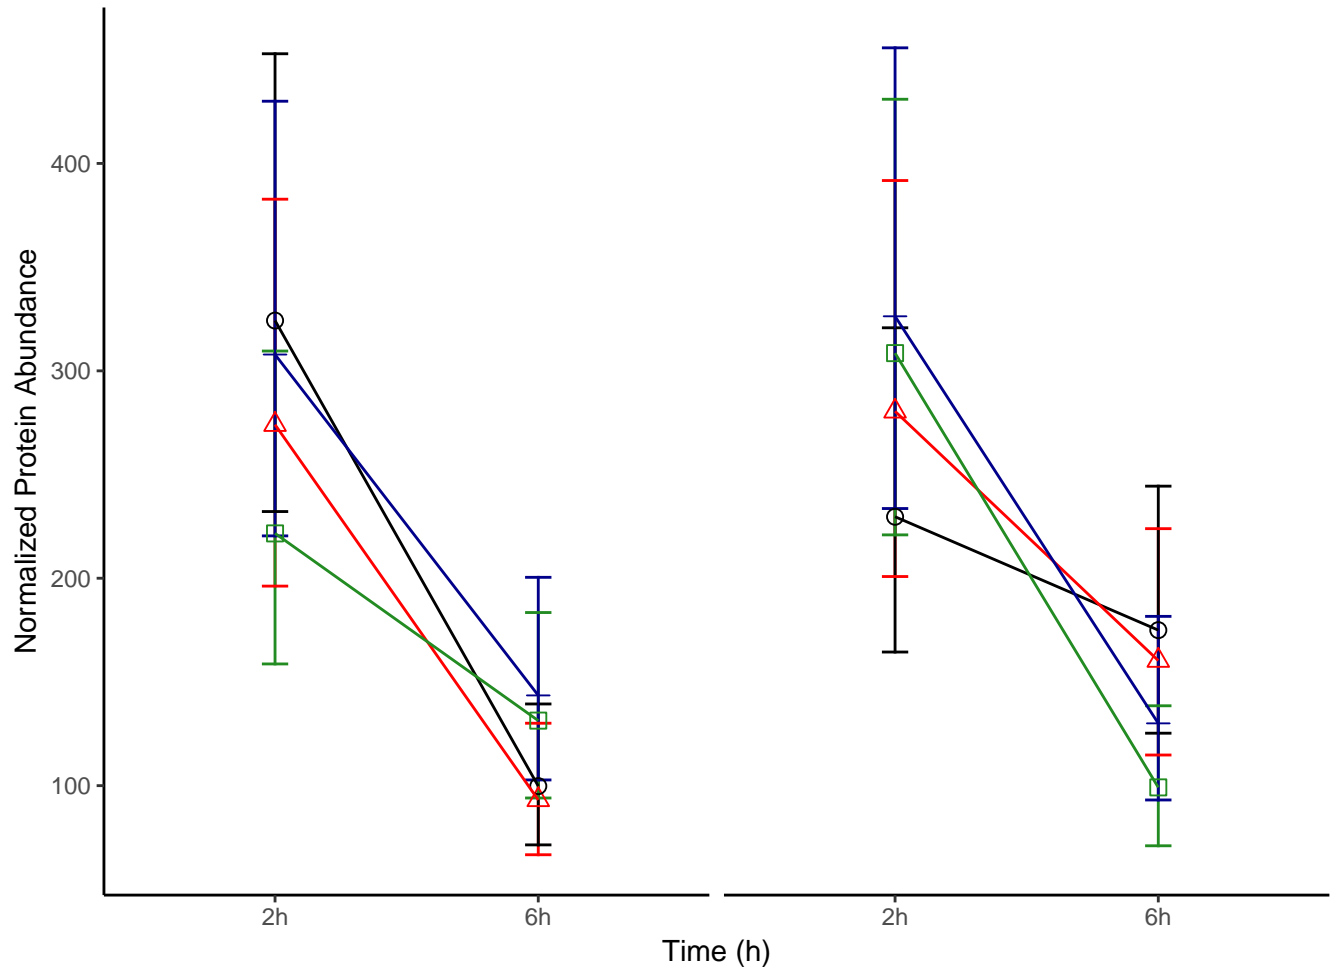

- SA564
- △ SA564-ΔhptRS
- SA564-ΔccpA
- + SA564-ΔhptRS/ccpA

# DLDH\_STAAM

TSB

TSB-dex S-79

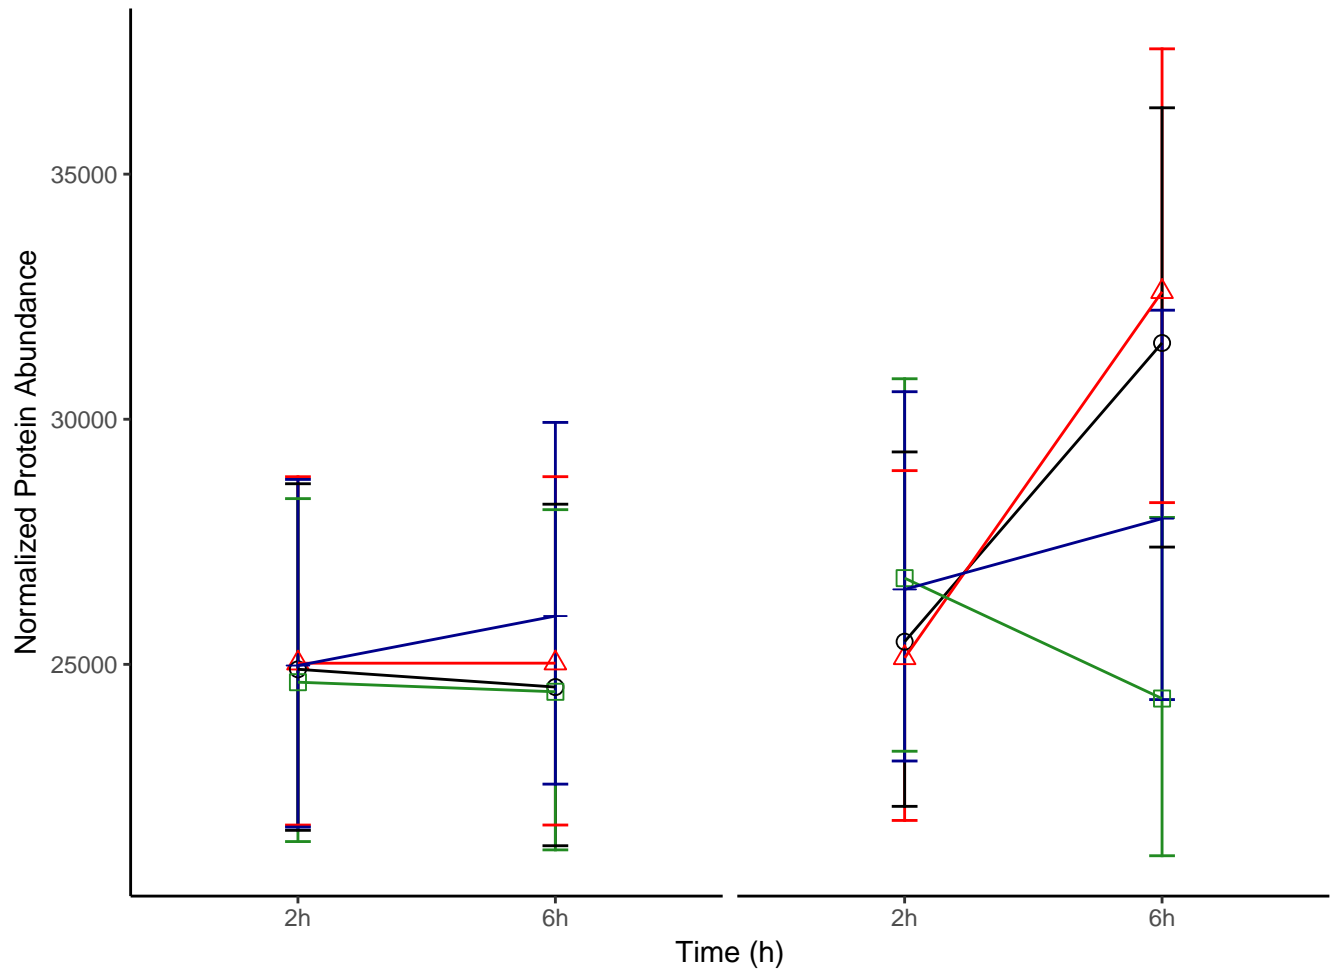

- SA564
- △ SA564-Δ*hptRS*
- SA564-Δ*ccpA*
- + SA564-Δ*hptRS/ccpA*

## DLTA\_STAAM

TSB

TSB-dex S-80

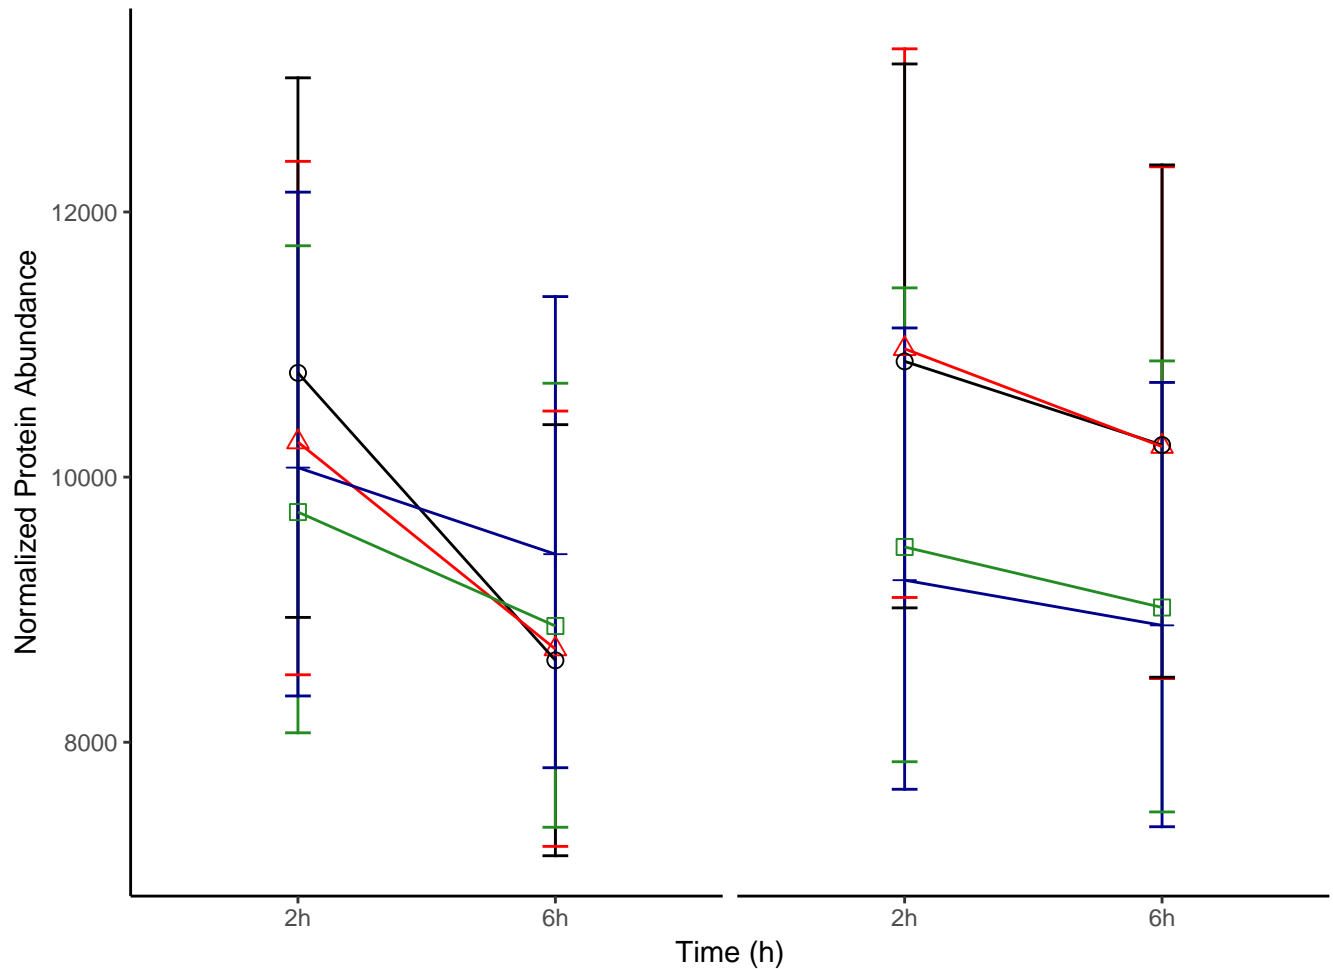

- SA564
- △ SA564-ΔhptRS
- SA564-ΔccpA
- + SA564-ΔhptRS/ccpA



# DLTC\_STAAM

TSB

TSB-dex S-81

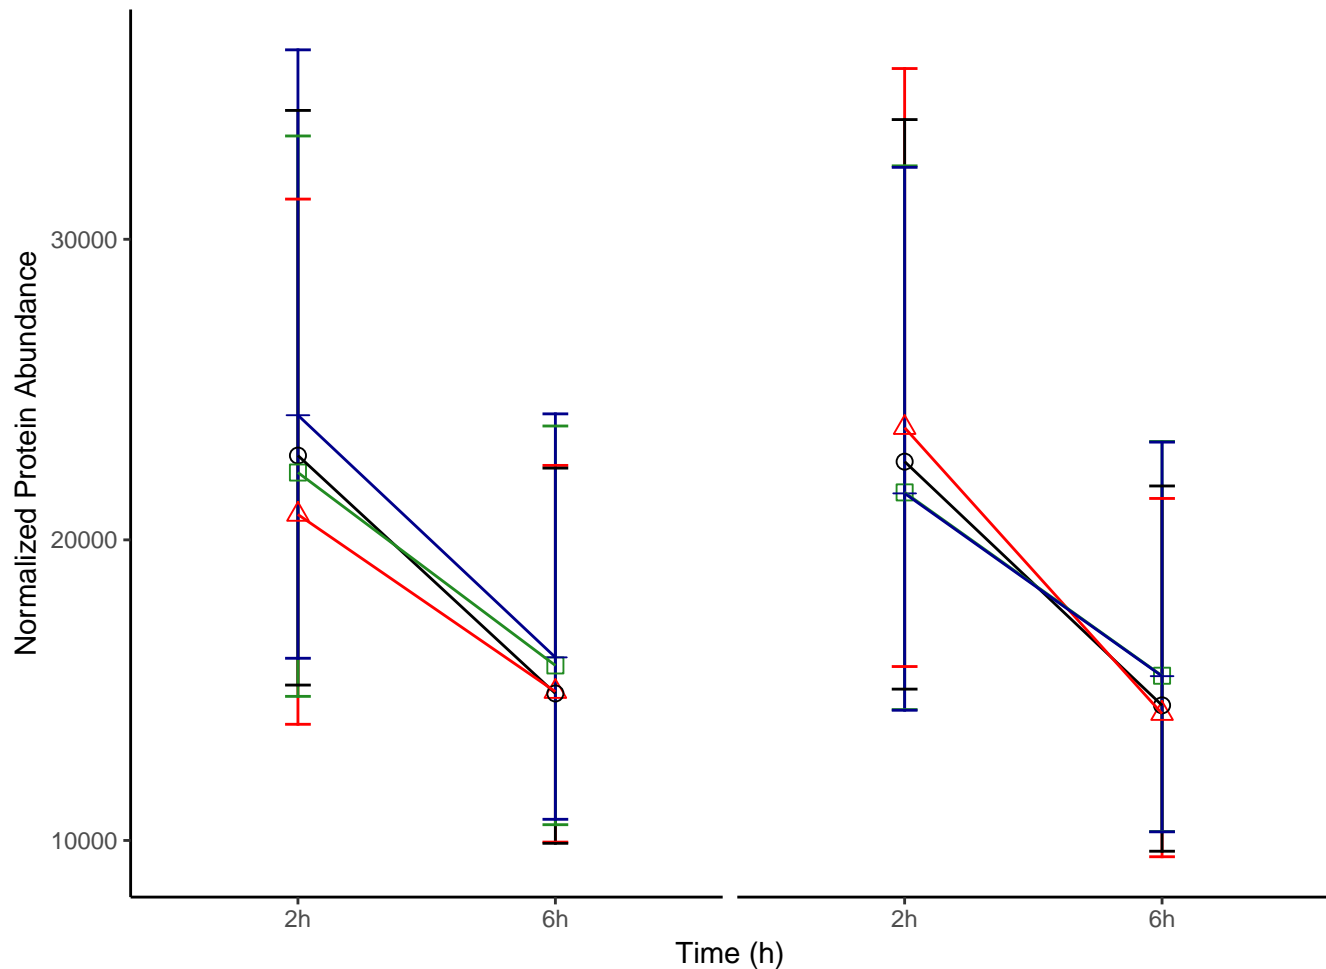

- SA564
- △ SA564- $\Delta hptRS$
- SA564- $\Delta ccpA$
- + SA564- $\Delta hptRS/ccpA$

# DNAA\_STAAM

TSB

TSB-dex S-82

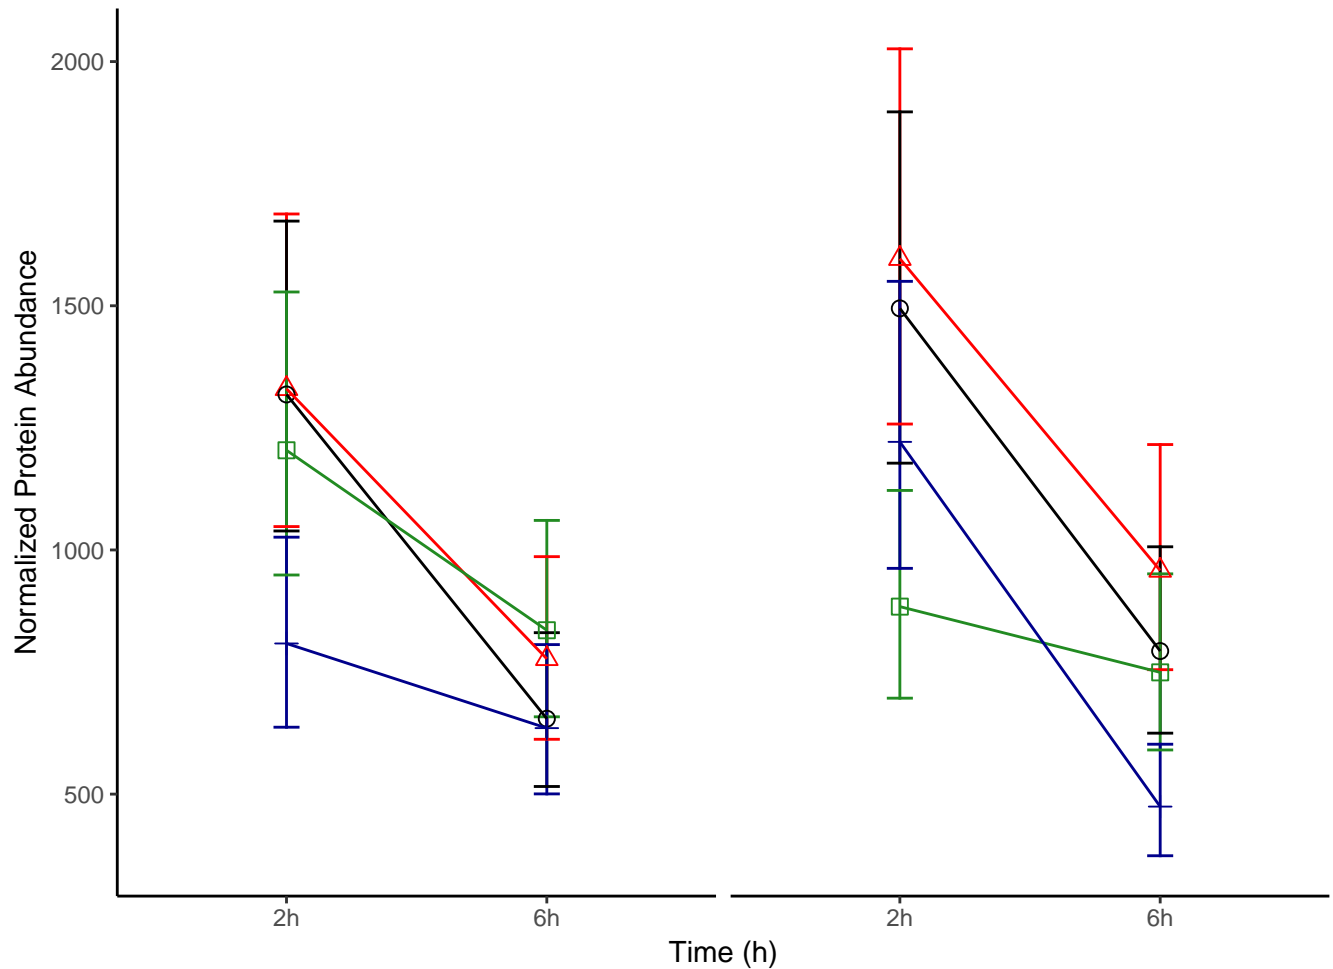

- SA564
- △ SA564-ΔhptRS
- SA564-ΔccpA
- + SA564-ΔhptRS/ccpA

# DNAG\_STAAM

TSB

TSB-dex S-83

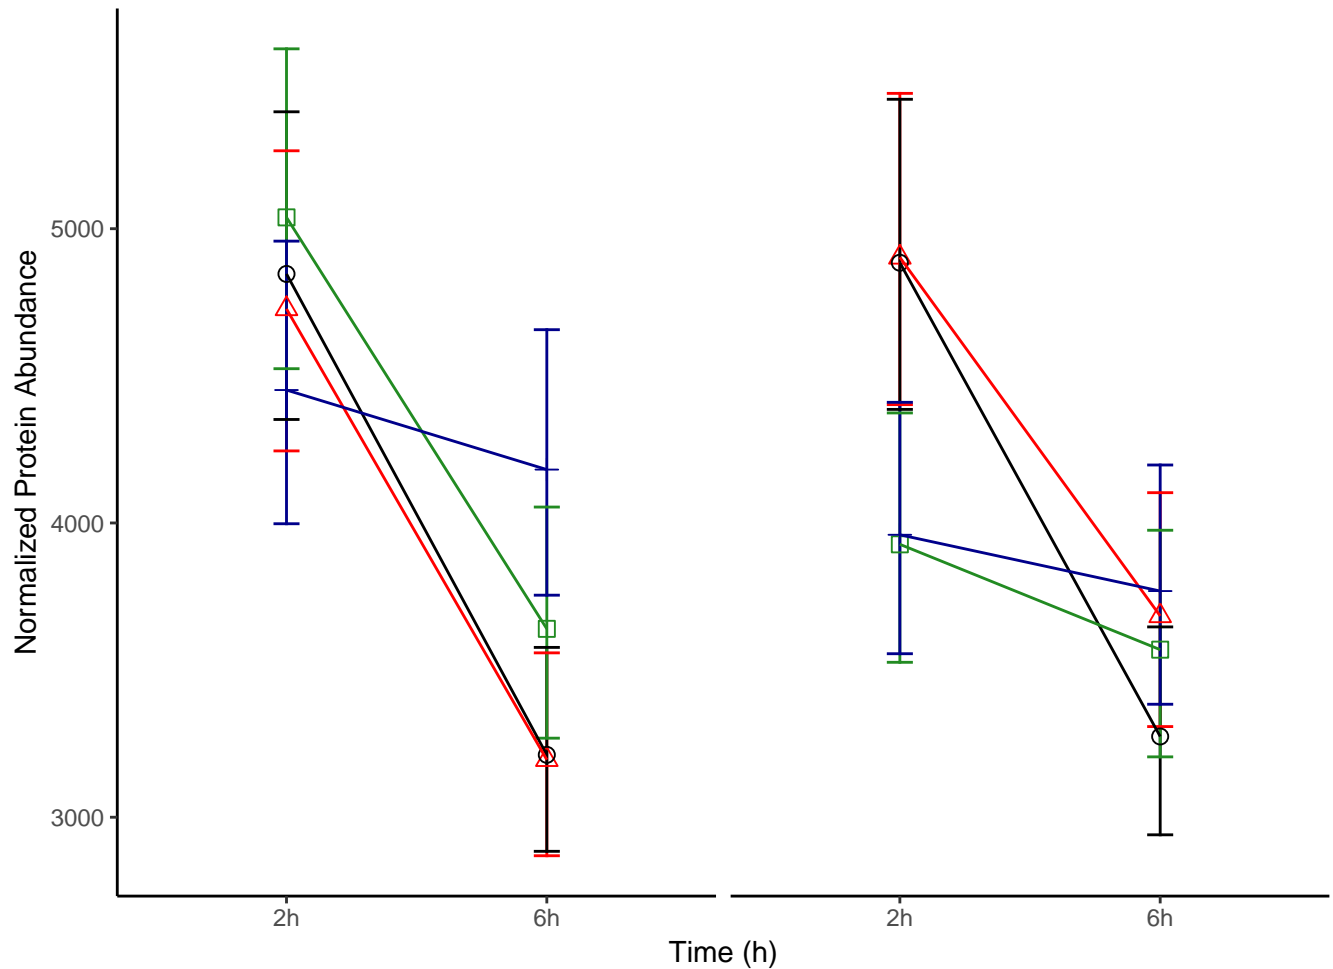

- SA564
- △ SA564- $\Delta$ *hptRS*
- SA564- $\Delta$ *ccpA*
- + SA564- $\Delta$ *hptRS/ccpA*

# DNAJ\_STAAM

TSB

TSB-dex S-84

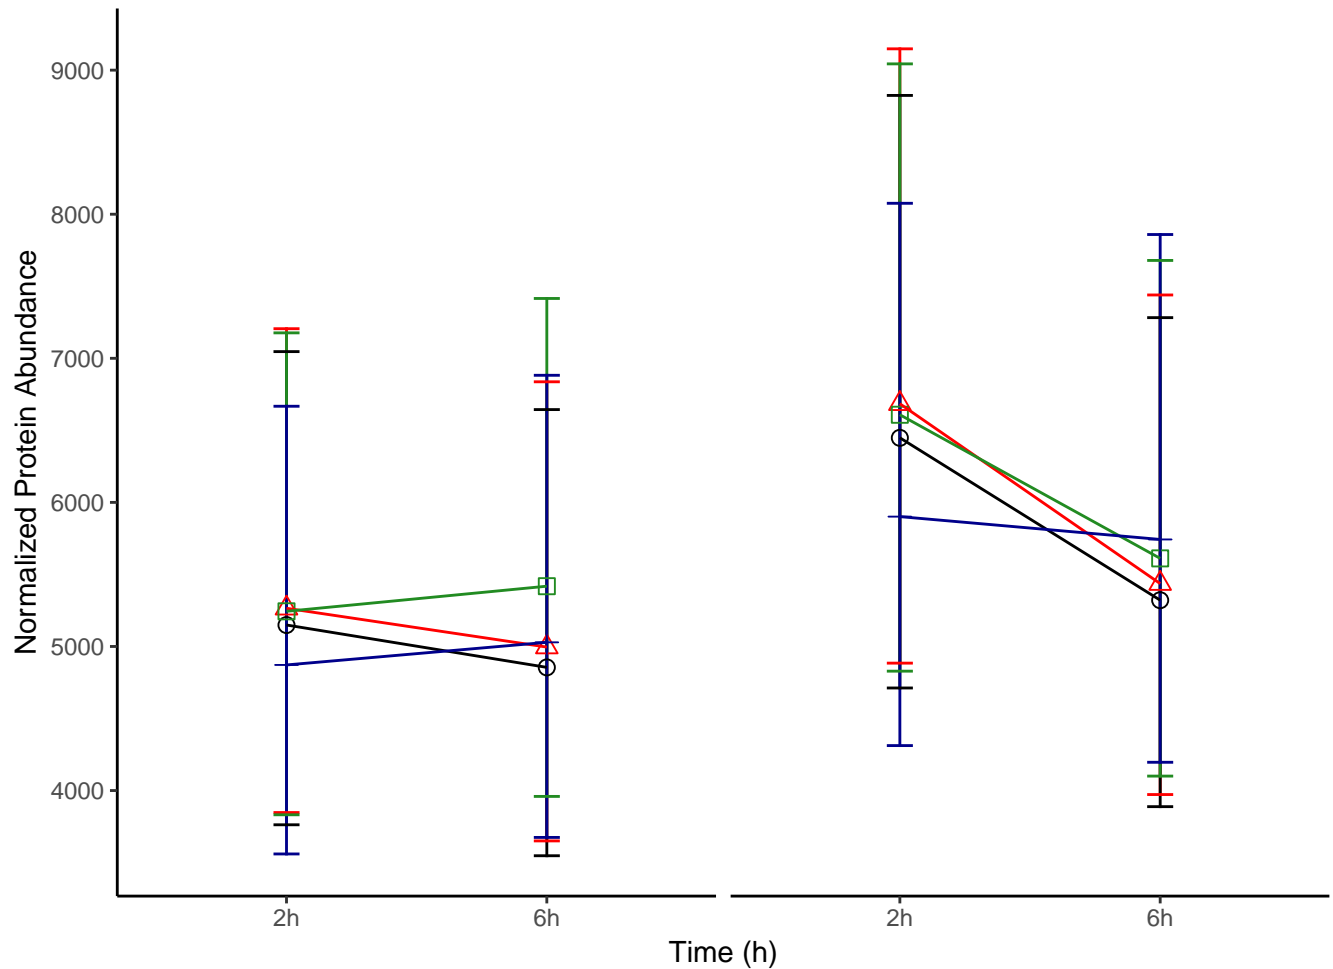

- SA564
- △ SA564- $\Delta$ hptRS
- SA564- $\Delta$ ccpA
- + SA564- $\Delta$ hptRS/ccpA

# DNAK\_STAAM

TSB

TSB-dex S-85

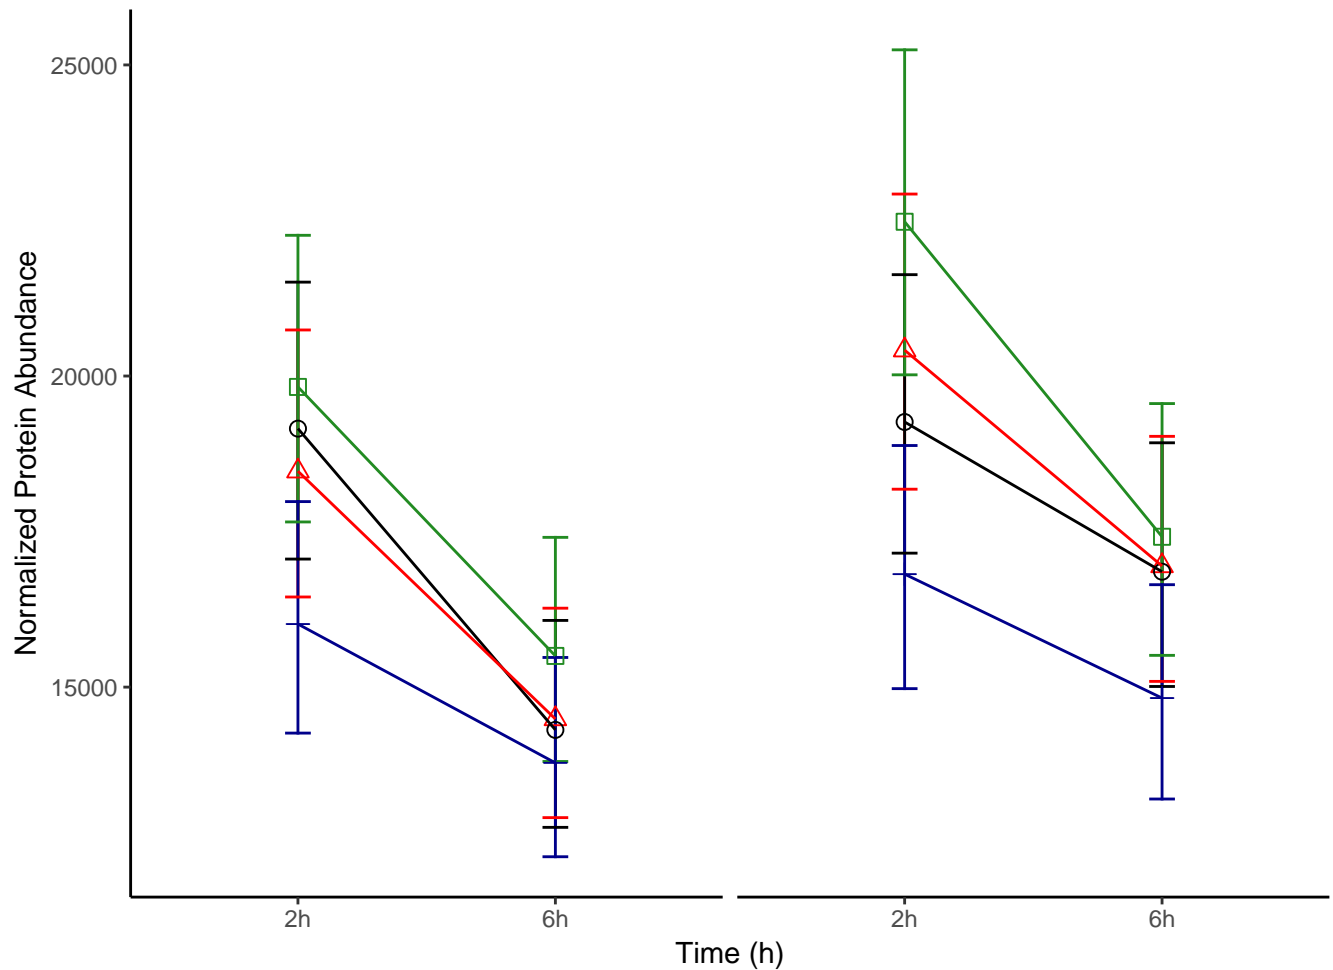

- SA564
- △ SA564-ΔhptRS
- SA564-ΔccpA
- + SA564-ΔhptRS/ccpA

# DNLJ\_STAAM

TSB

TSB-dex S-86

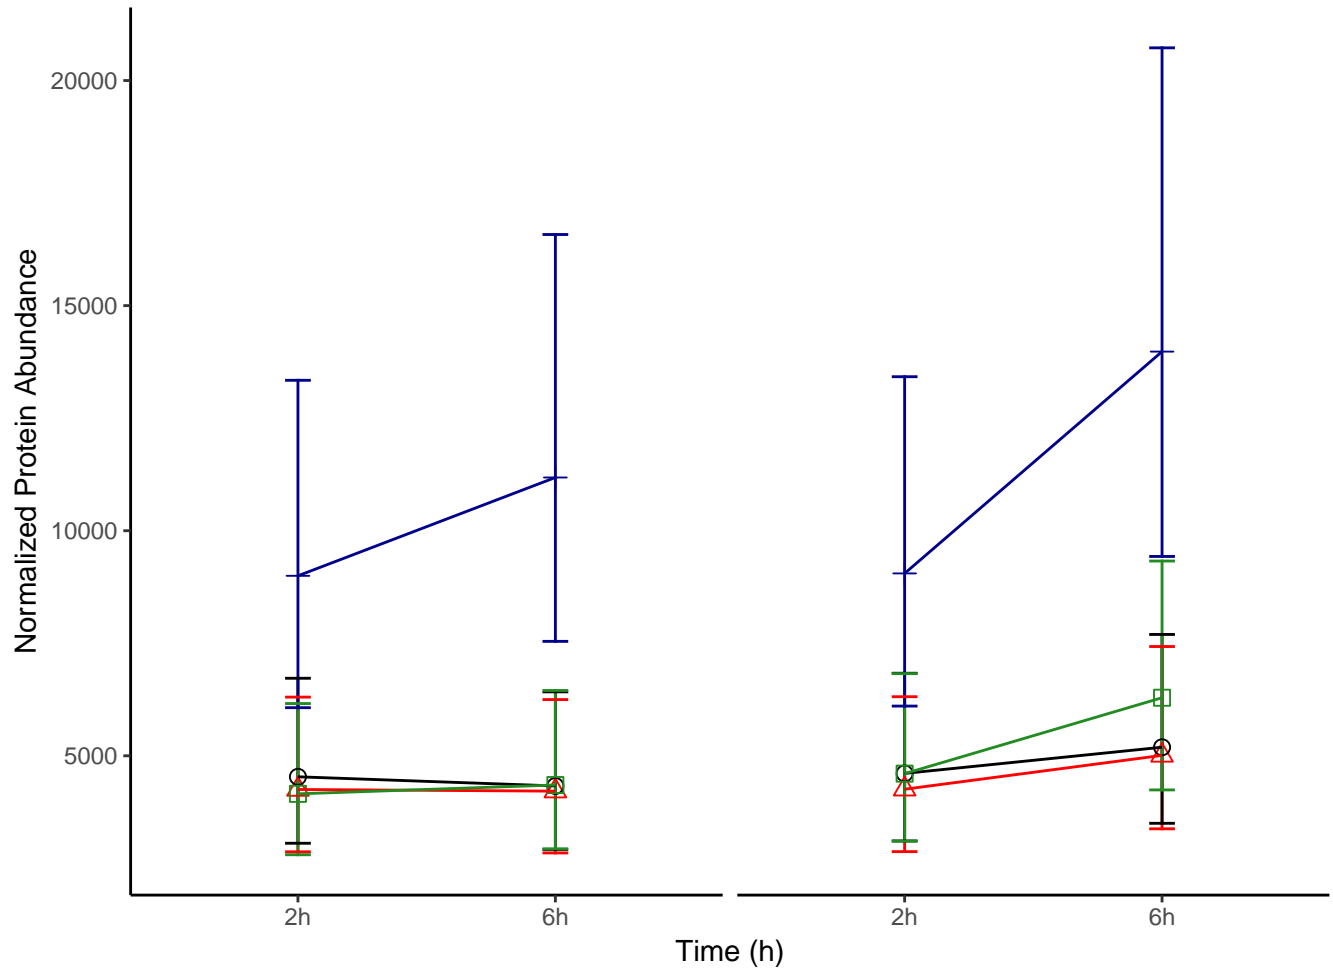

- SA564
- △ SA564- $\Delta$ *hptRS*
- SA564- $\Delta$ *ccpA*
- + SA564- $\Delta$ *hptRS/ccpA*

# DPO3B\_STAAM

TSB

TSB-dex S-87

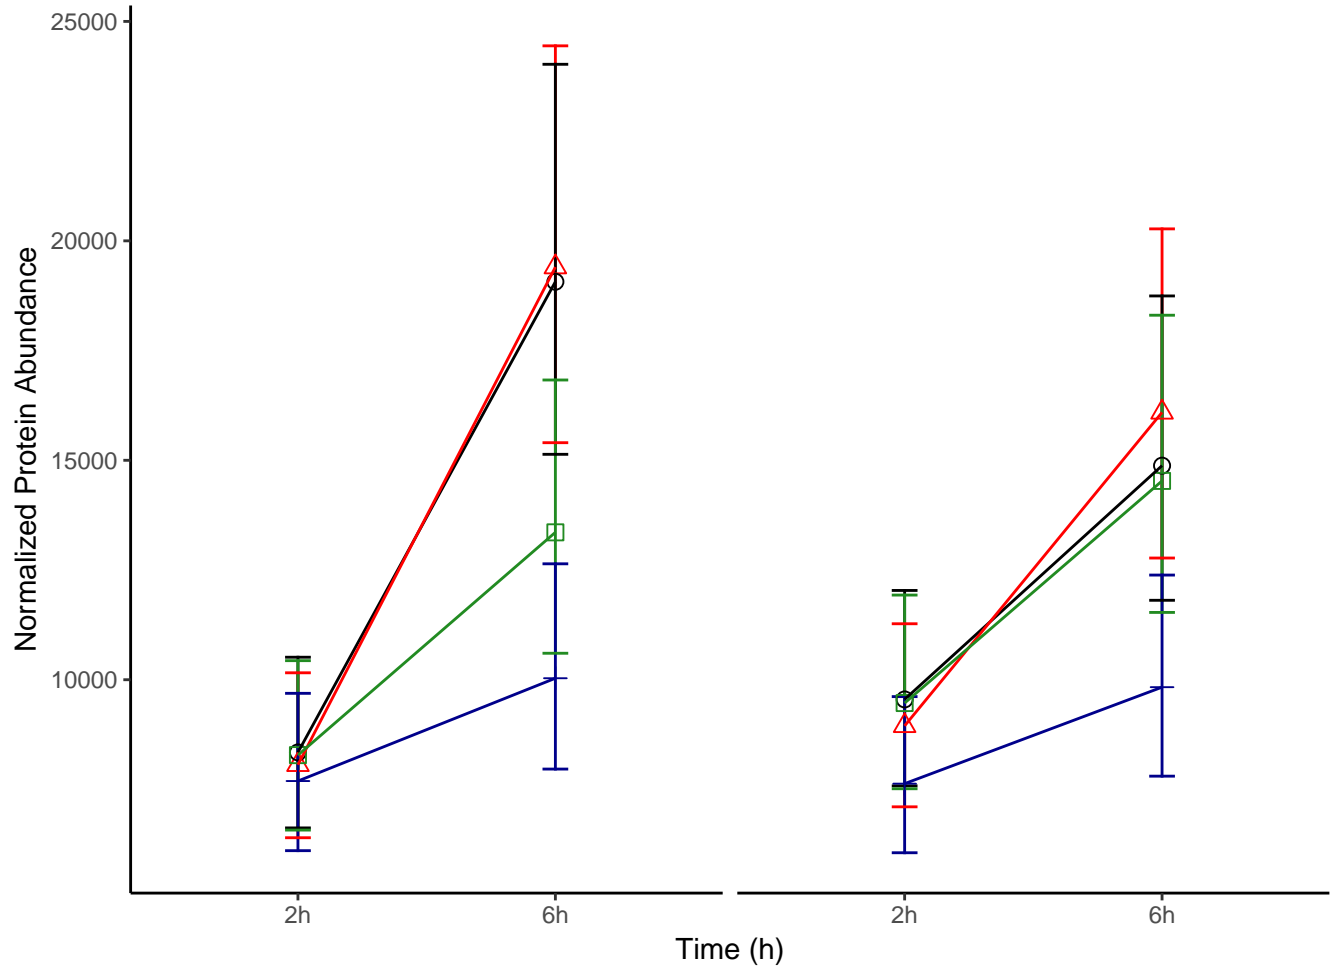

- SA564
- △ SA564- $\Delta$ hptRS
- SA564- $\Delta$ ccpA
- + SA564- $\Delta$ hptRS/ccpA

# DPO4\_STAAM

TSB

TSB-dex S-88

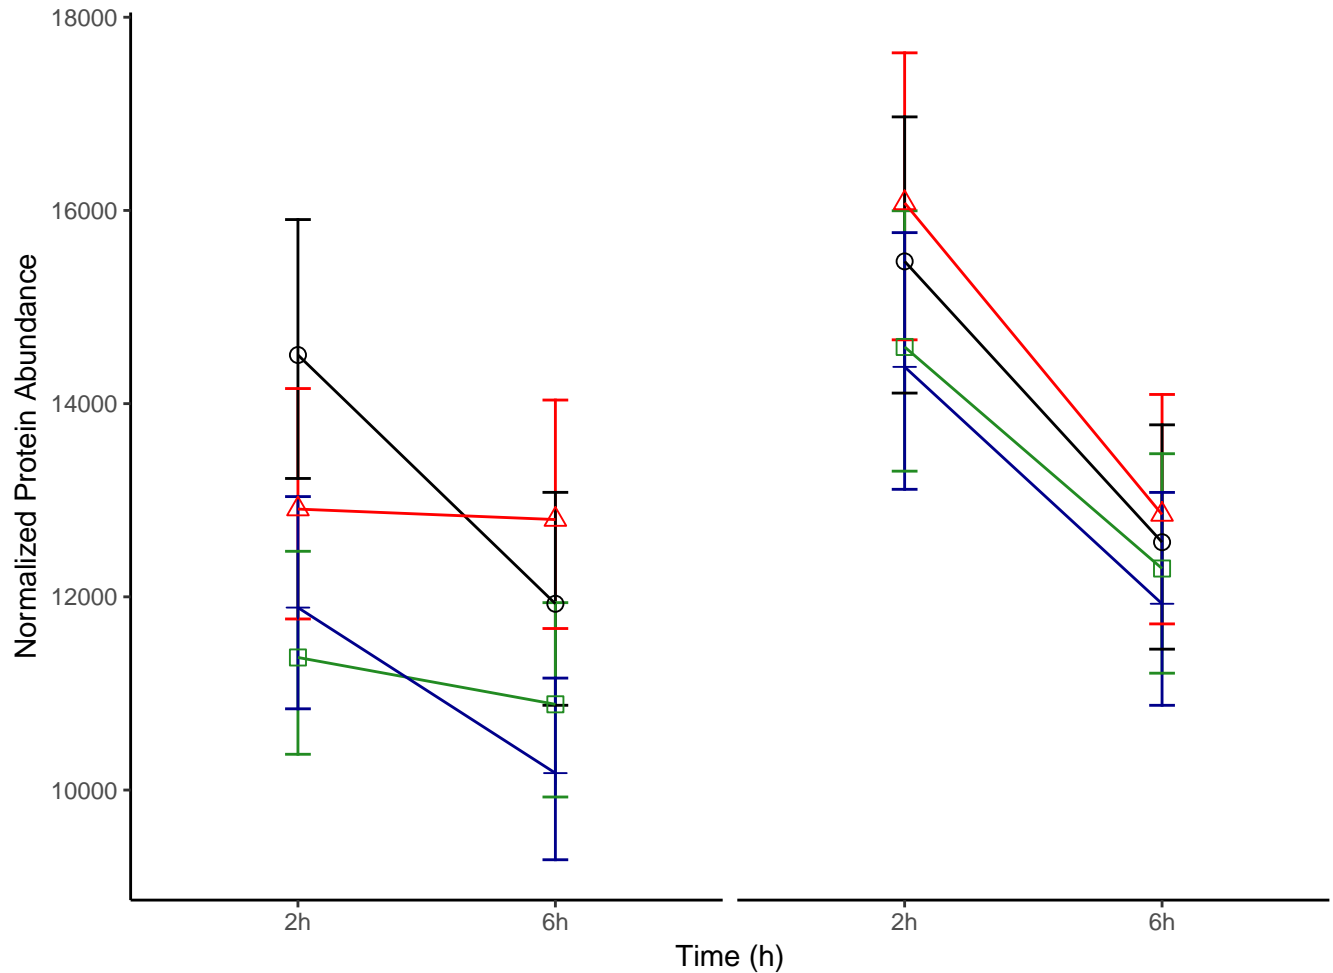

- SA564
- △ SA564- $\Delta$ *hptRS*
- SA564- $\Delta$ *ccpA*
- + SA564- $\Delta$ *hptRS/ccpA*



# DTD\_STAAM

TSB

TSB-dex S-89

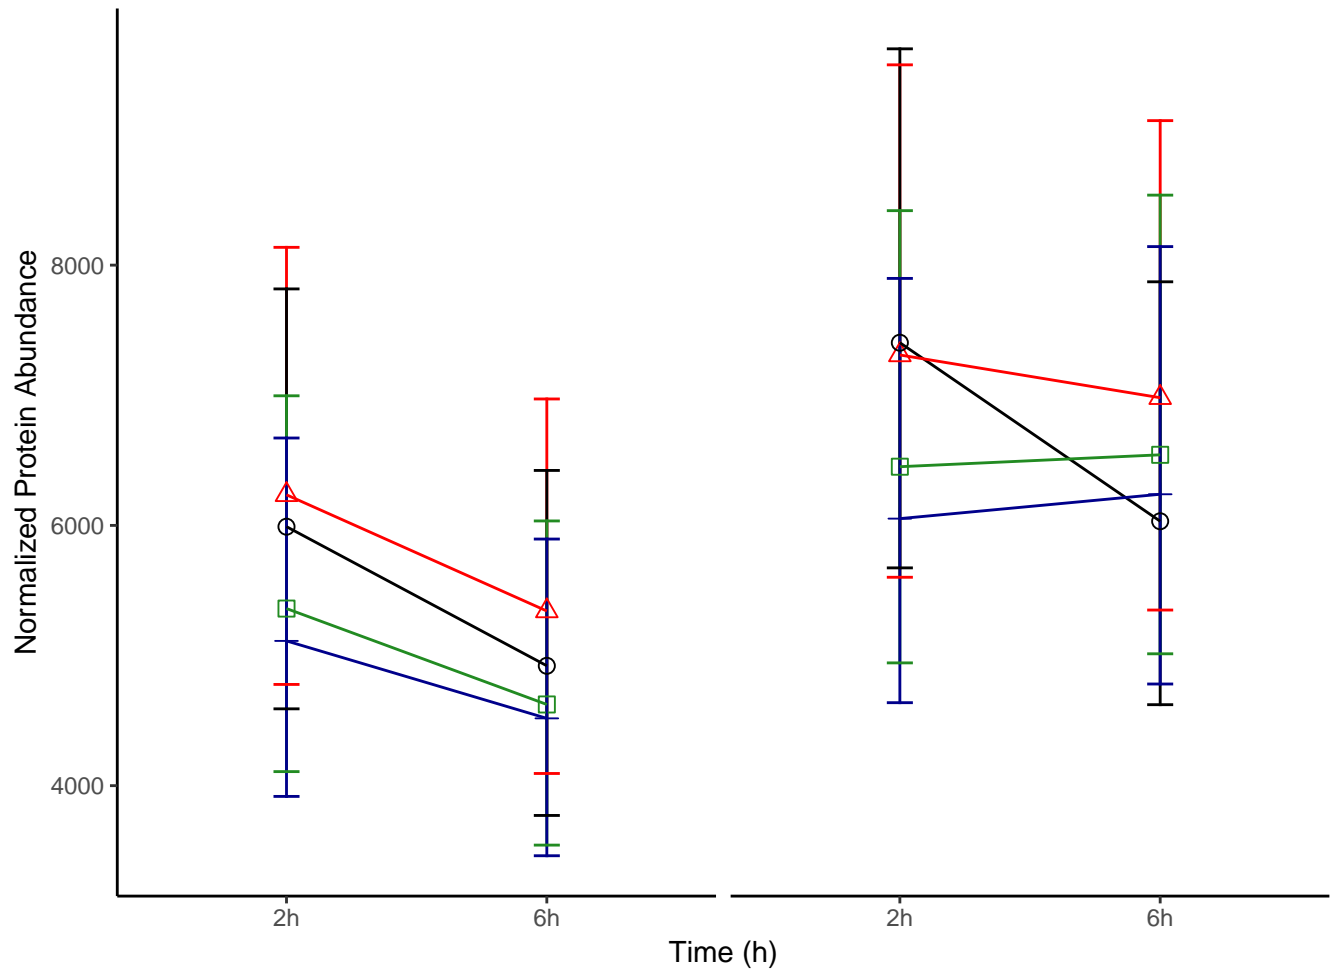

- SA564
- △ SA564- $\Delta hptRS$
- SA564- $\Delta ccpA$
- + SA564- $\Delta hptRS/ccpA$

# DYR\_STAAM

TSB

TSB-dex S-90

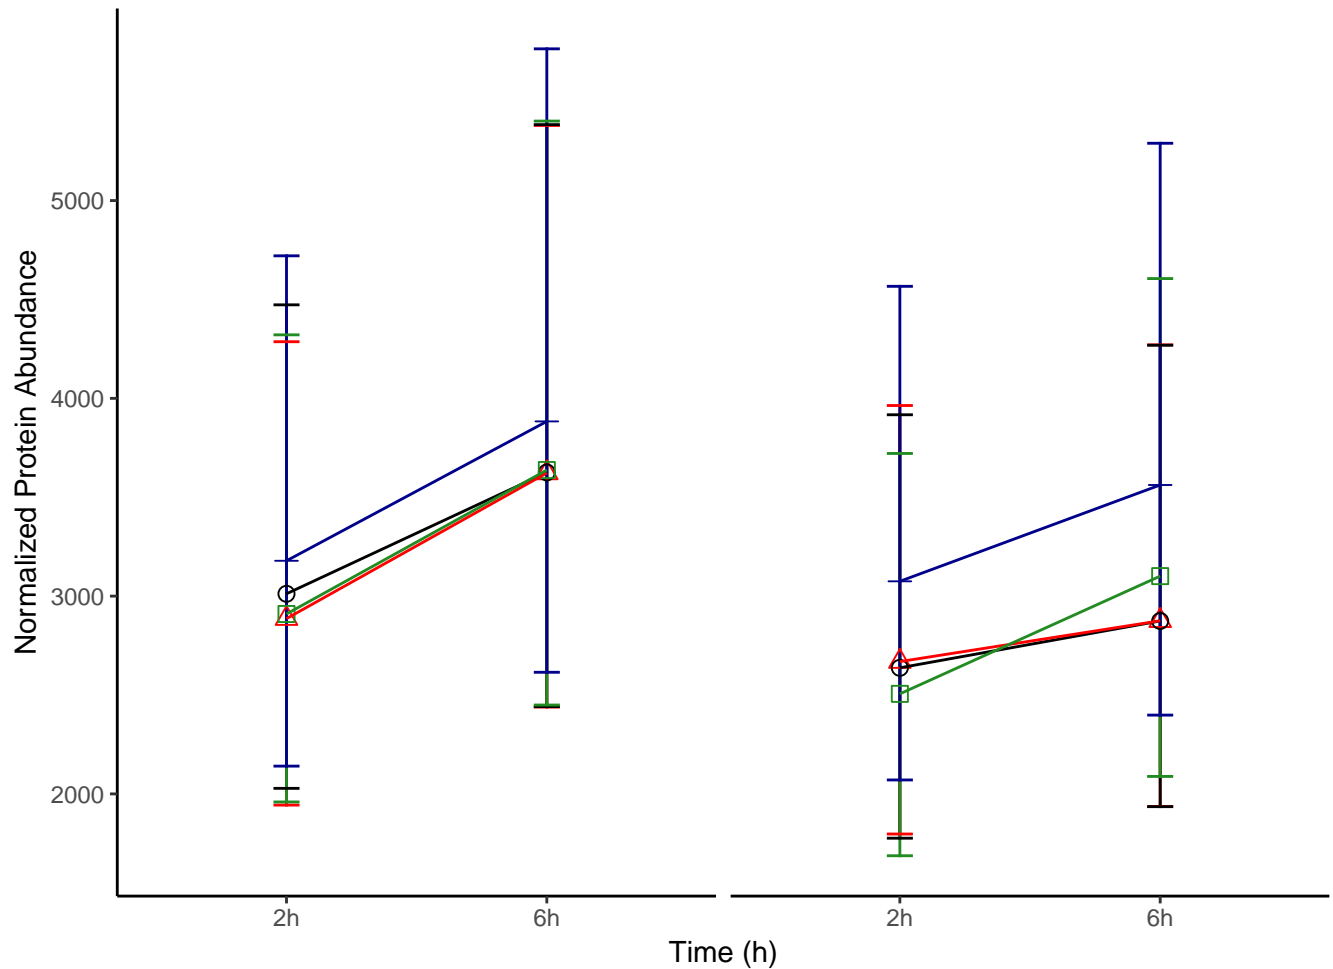

- SA564
- △ SA564- $\Delta$ *hptRS*
- SA564- $\Delta$ *ccpA*
- + SA564- $\Delta$ *hptRS/ccpA*

# EBPS\_STAAM

TSB

TSB-dex S-91

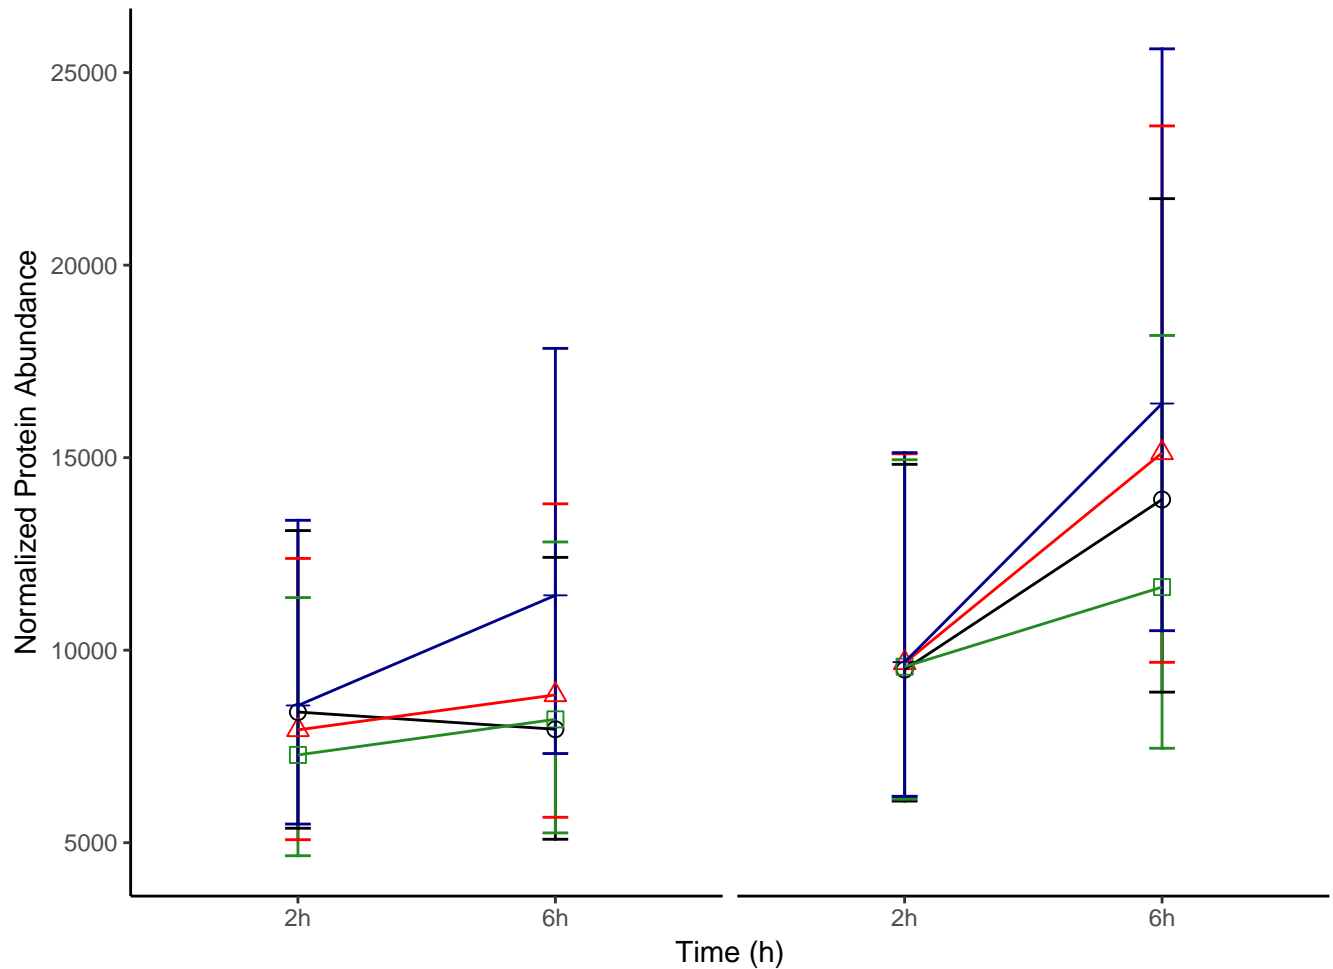

- SA564
- △ SA564- $\Delta$ *hptRS*
- SA564- $\Delta$ *ccpA*
- + SA564- $\Delta$ *hptRS/ccpA*

# ECFA1\_STAAM

TSB

TSB-dex S-92

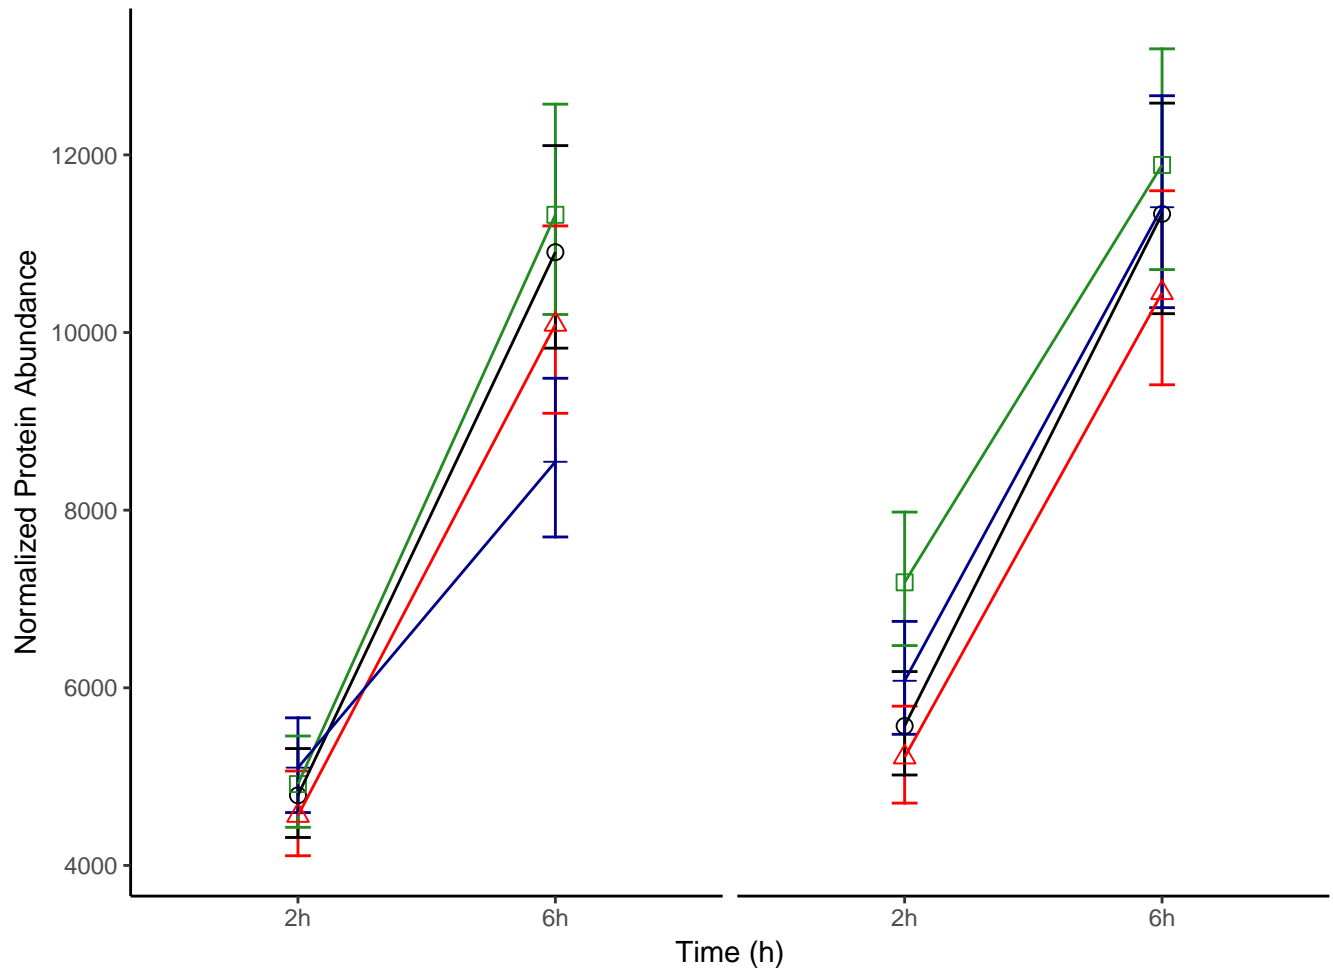

- SA564
- △ SA564- $\Delta$ hptRS
- SA564- $\Delta$ ccpA
- + SA564- $\Delta$ hptRS/ccpA

# EFG\_STAAM

TSB

TSB-dex S-93

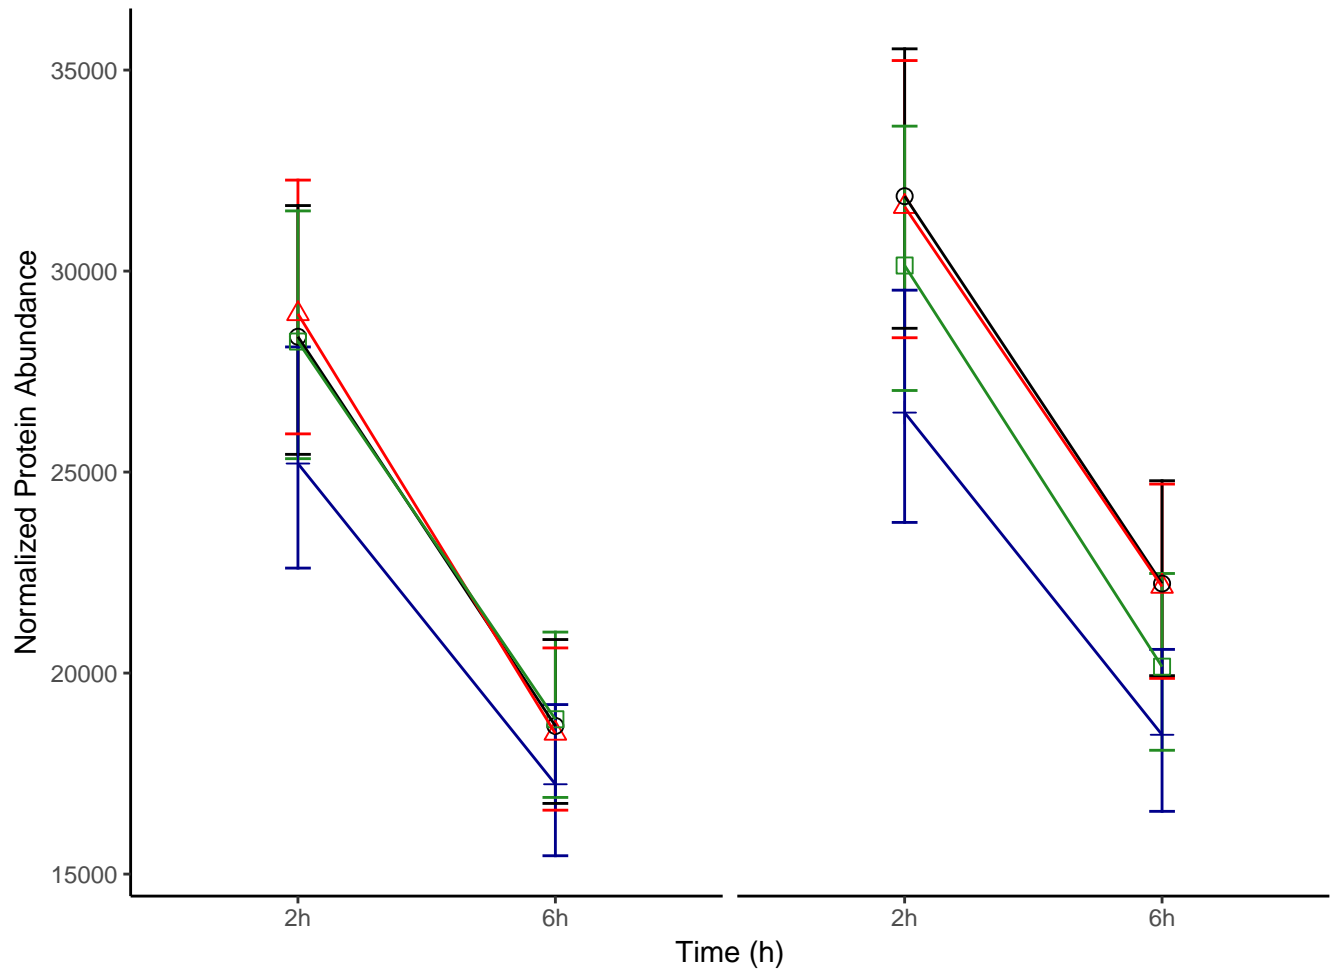

- SA564
- △ SA564- $\Delta$ hptRS
- SA564- $\Delta$ ccpA
- + SA564- $\Delta$ hptRS/ccpA

## EFP\_STAAM

TSB

TSB-dex S-94

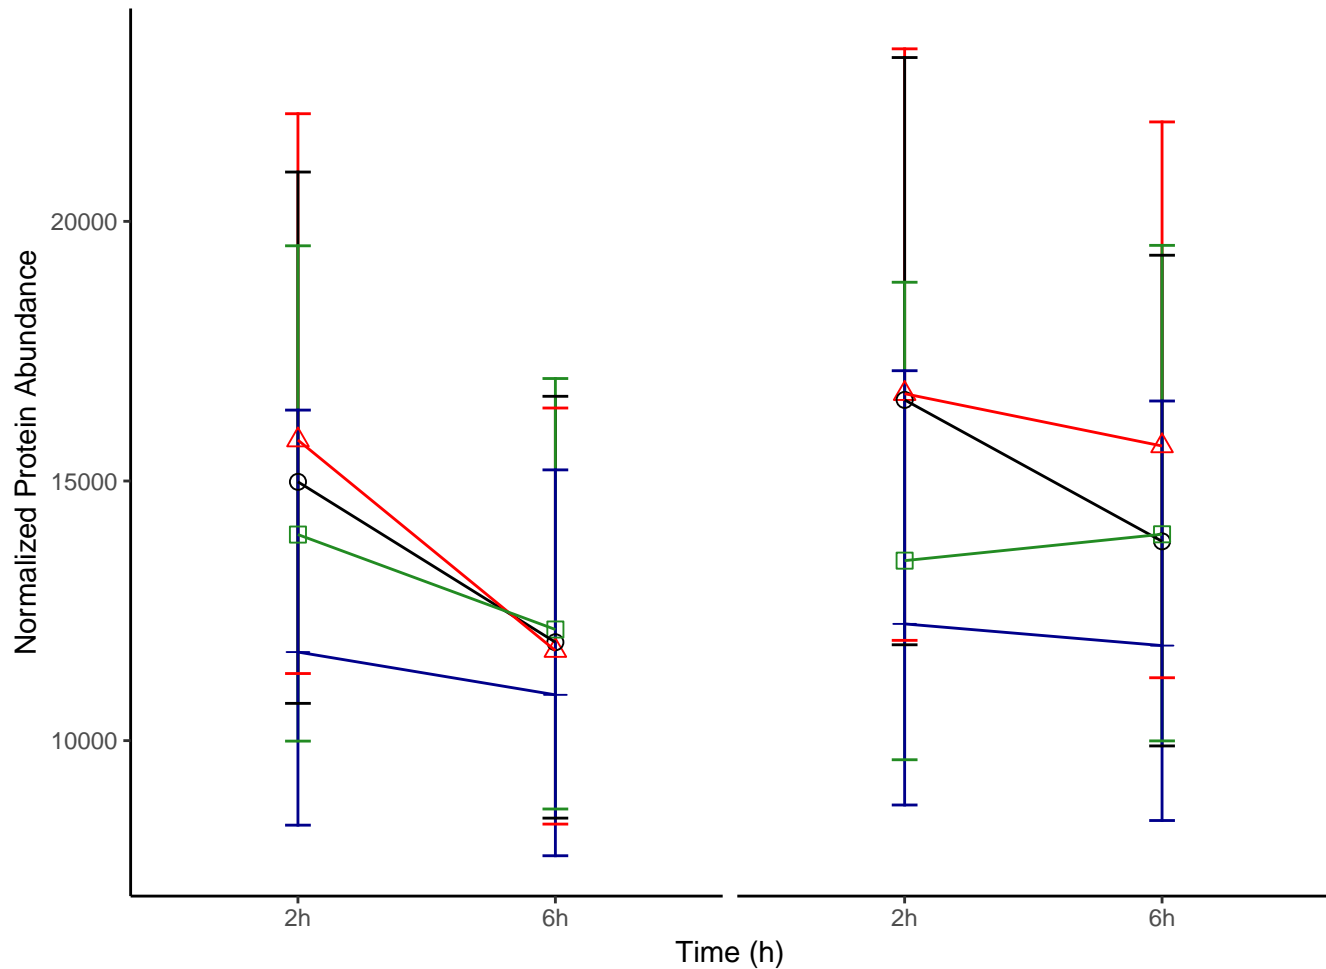

- SA564
- △ SA564-ΔhptRS
- SA564-ΔccpA
- + SA564-ΔhptRS/ccpA

# EFTS\_STAAM

TSB

TSB-dex S-95

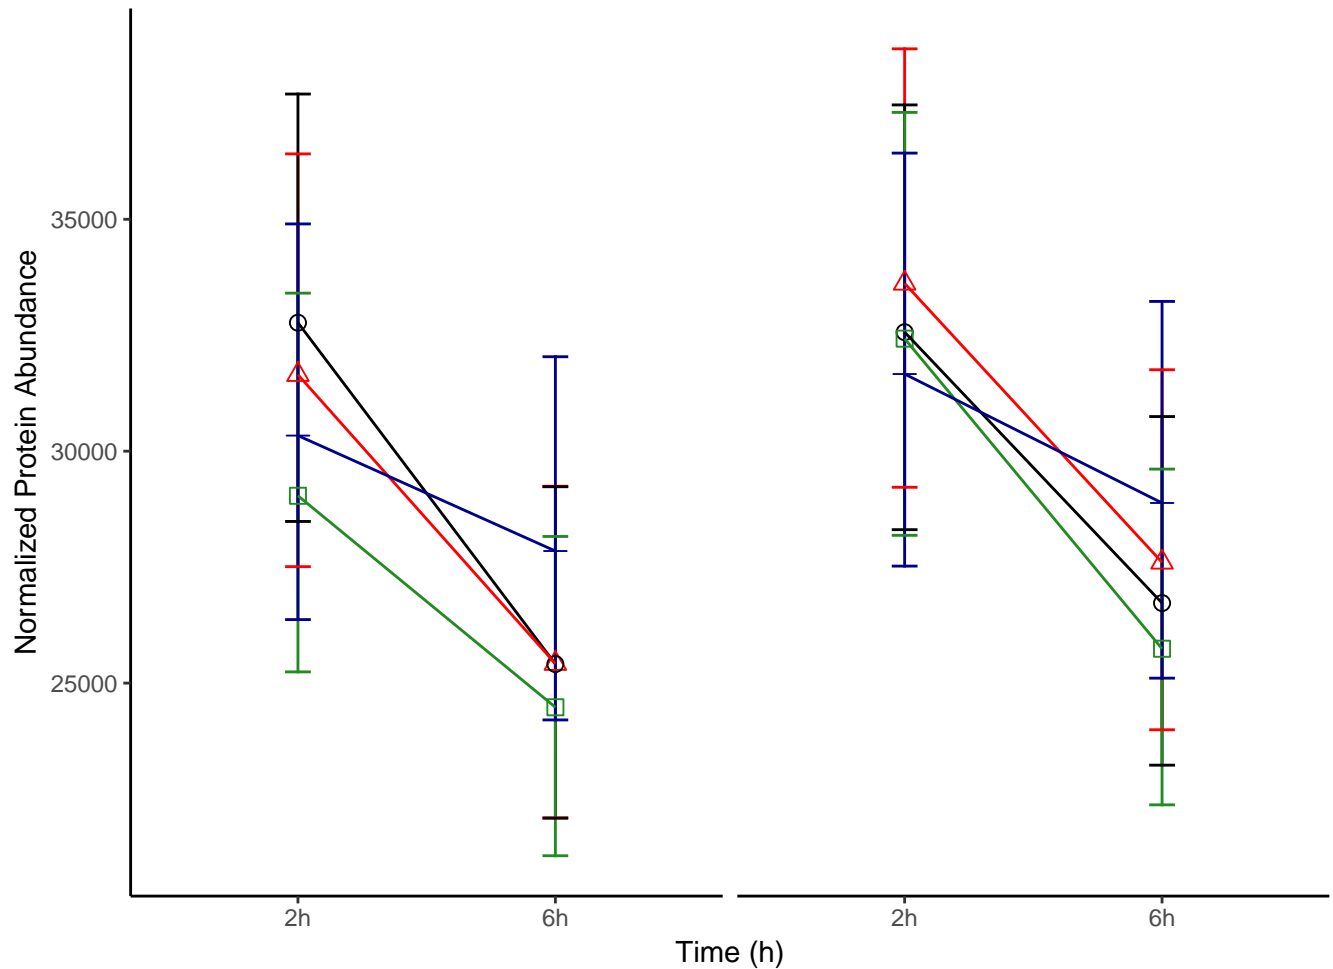

- SA564
- △ SA564- $\Delta$ *hptRS*
- SA564- $\Delta$ *ccpA*
- + SA564- $\Delta$ *hptRS/ccpA*

# EFTU\_STAAM

TSB

TSB-dex S-96

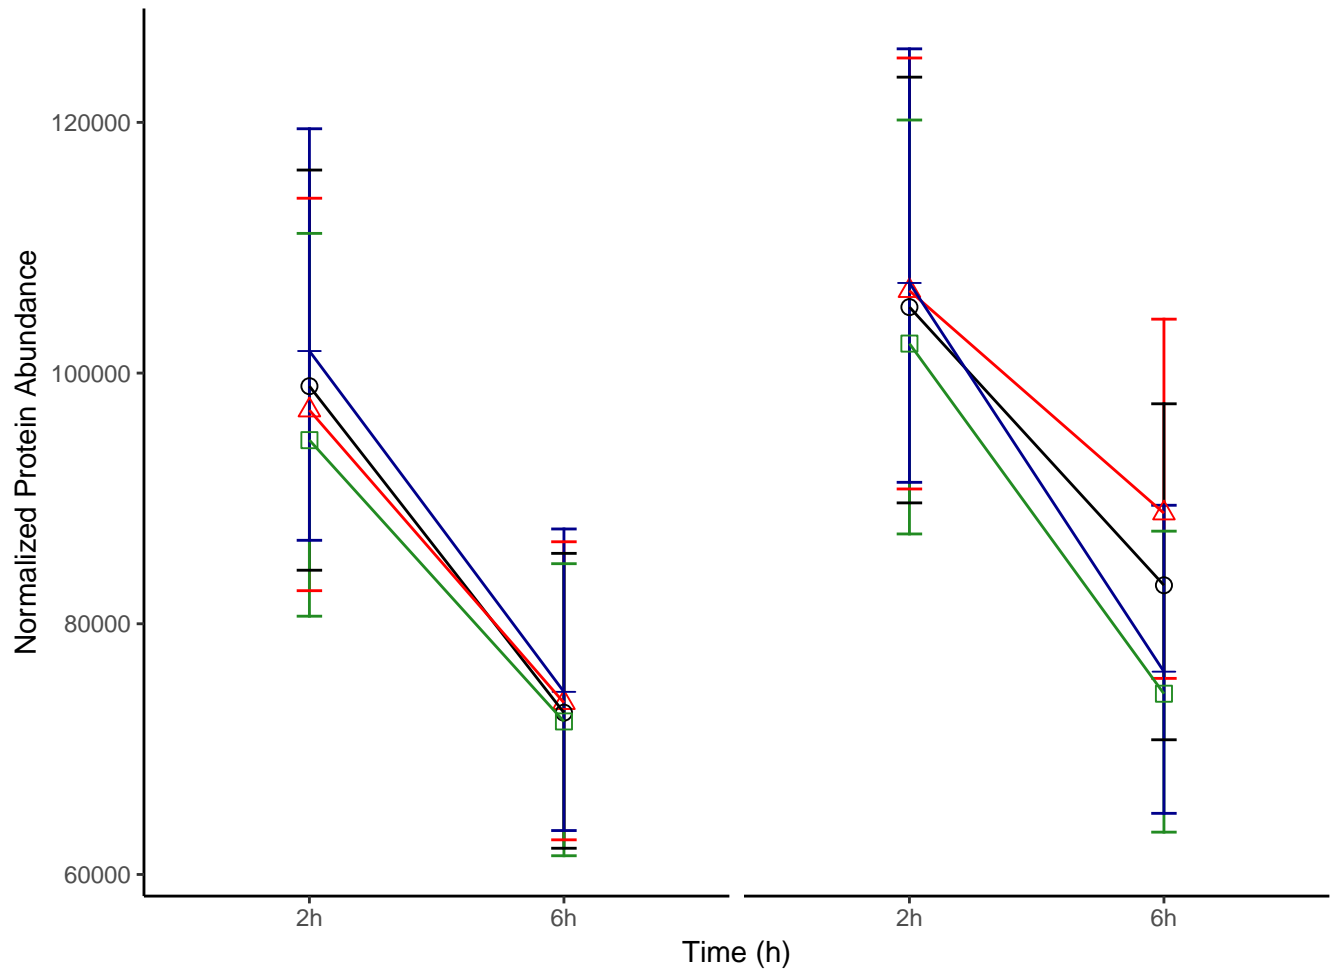

- SA564
- △ SA564- $\Delta$ *hptRS*
- SA564- $\Delta$ *ccpA*
- + SA564- $\Delta$ *hptRS/ccpA*



# ENO\_STAAM

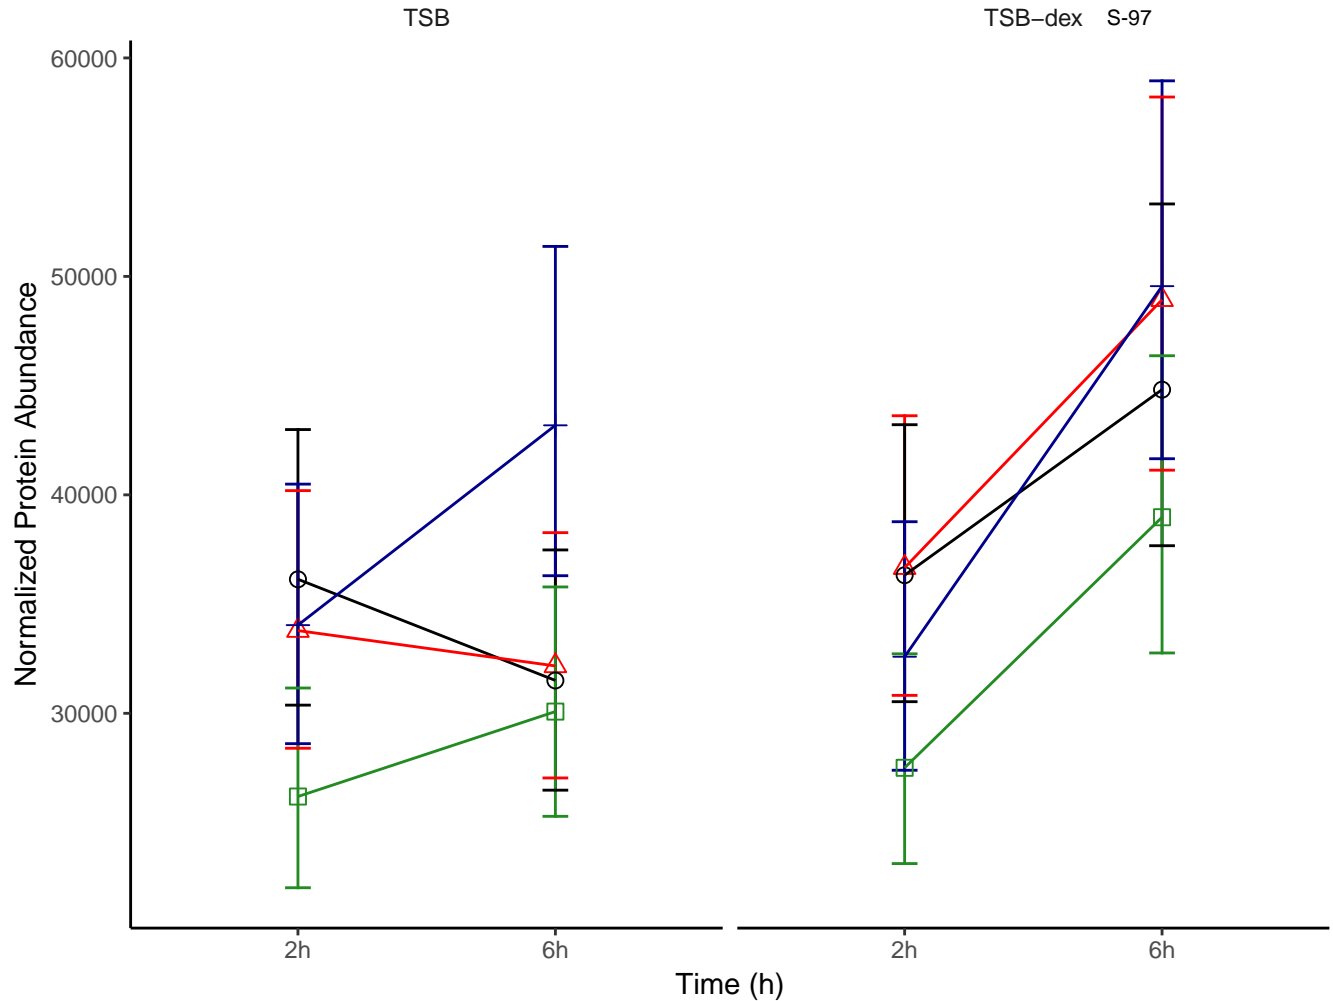

- SA564
- △ SA564-ΔhptRS
- SA564-ΔccpA
- + SA564-ΔhptRS/ccpA

# ERA\_STAAM

TSB

TSB-dex S-98

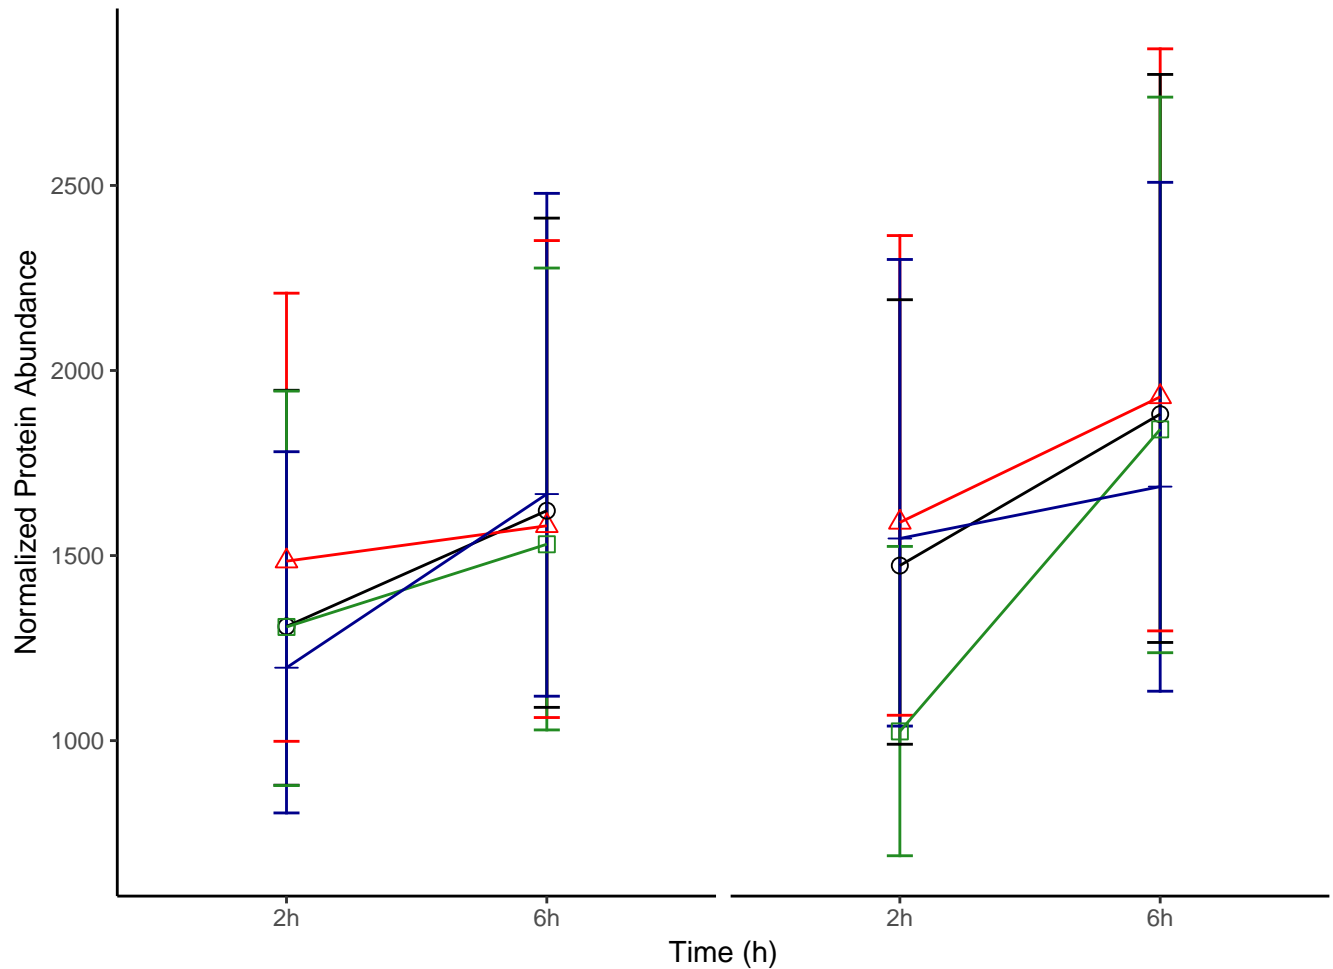

- SA564
- △ SA564- $\Delta$ *hptRS*
- SA564- $\Delta$ *ccpA*
- + SA564- $\Delta$ *hptRS/ccpA*

# ERMA\_STAAM

TSB

TSB-dex S-99

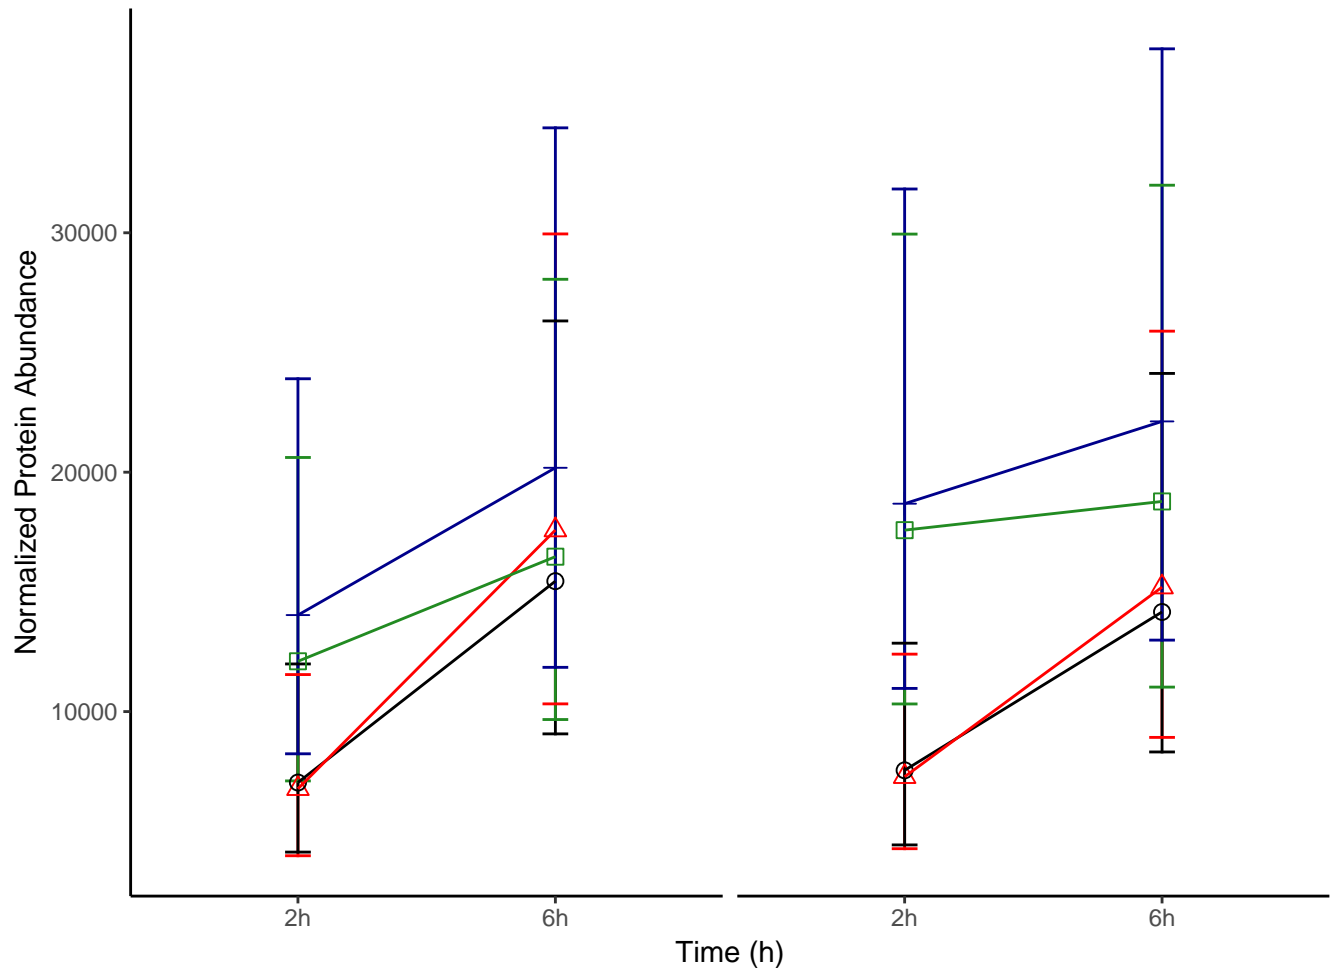

- SA564
- △ SA564- $\Delta hptRS$
- SA564- $\Delta ccpA$
- + SA564- $\Delta hptRS/ccpA$

# ESSA\_STAAM

TSB

TSB-dex S-100

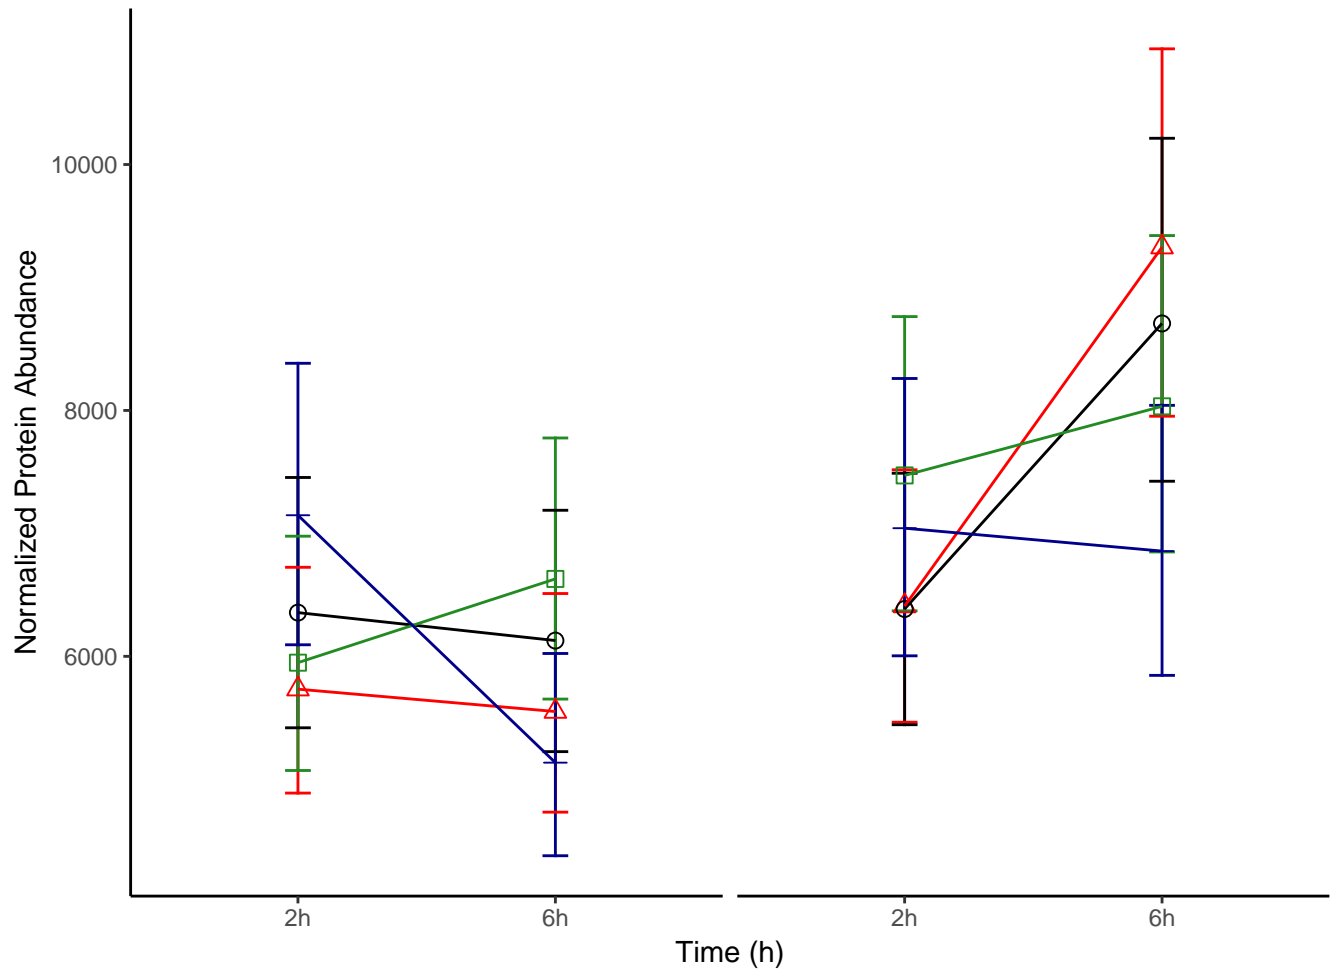

- SA564
- △ SA564- $\Delta$ *hptRS*
- SA564- $\Delta$ *ccpA*
- + SA564- $\Delta$ *hptRS/ccpA*

# ESXA\_STAAM

TSB

TSB-dex S-101

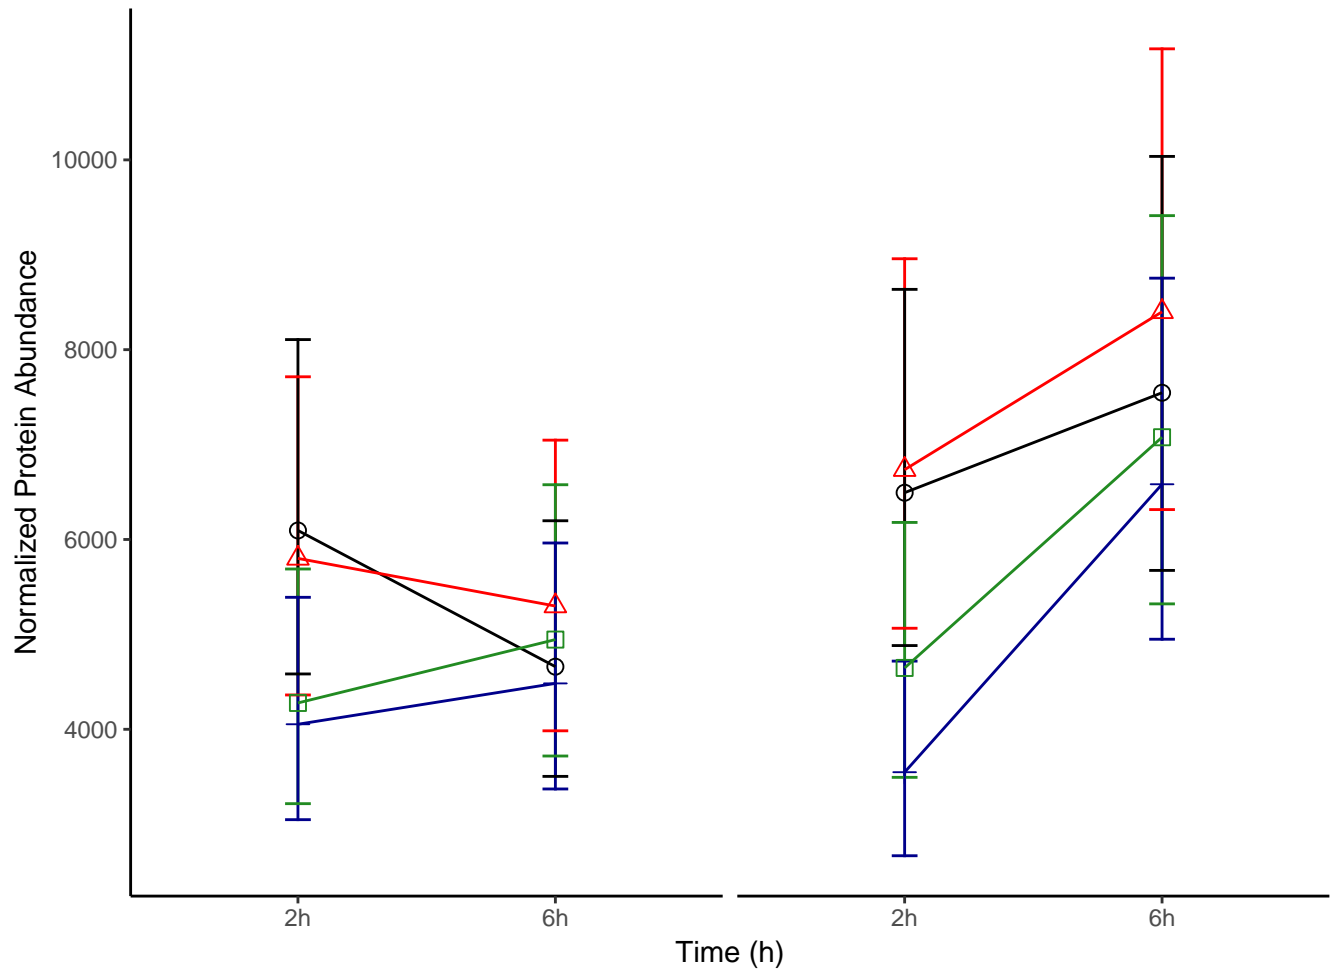

- SA564
- △ SA564- $\Delta$ *hptRS*
- SA564- $\Delta$ *ccpA*
- + SA564- $\Delta$ *hptRS/ccpA*

# EX7L\_STAAM

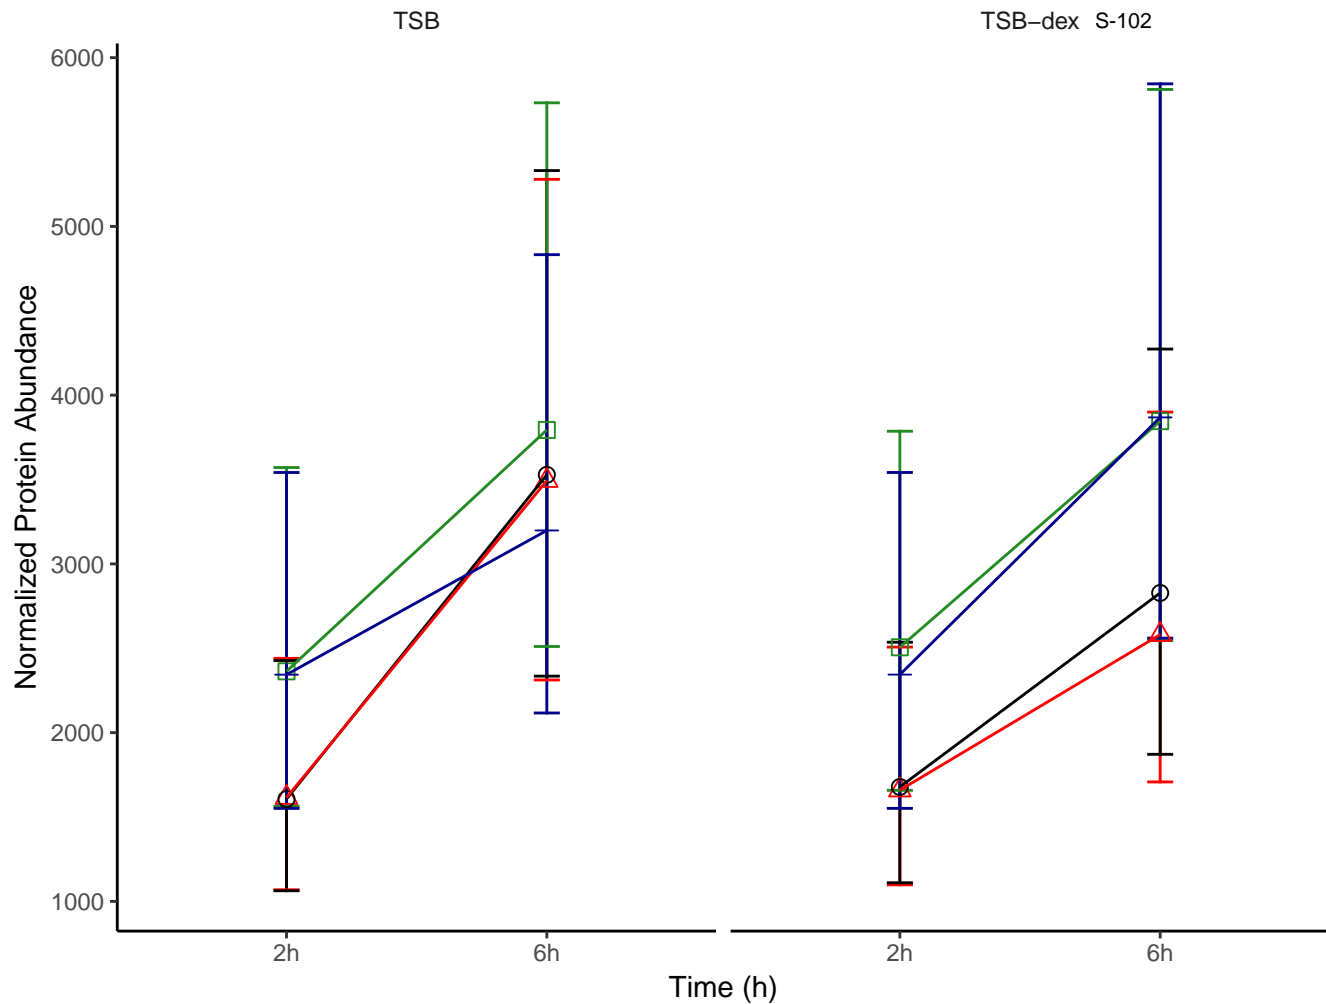

- SA564
- △ SA564- $\Delta$ hptRS
- SA564- $\Delta$ ccpA
- + SA564- $\Delta$ hptRS/ccpA

# EZRA\_STAAM

TSB

TSB-dex S-103

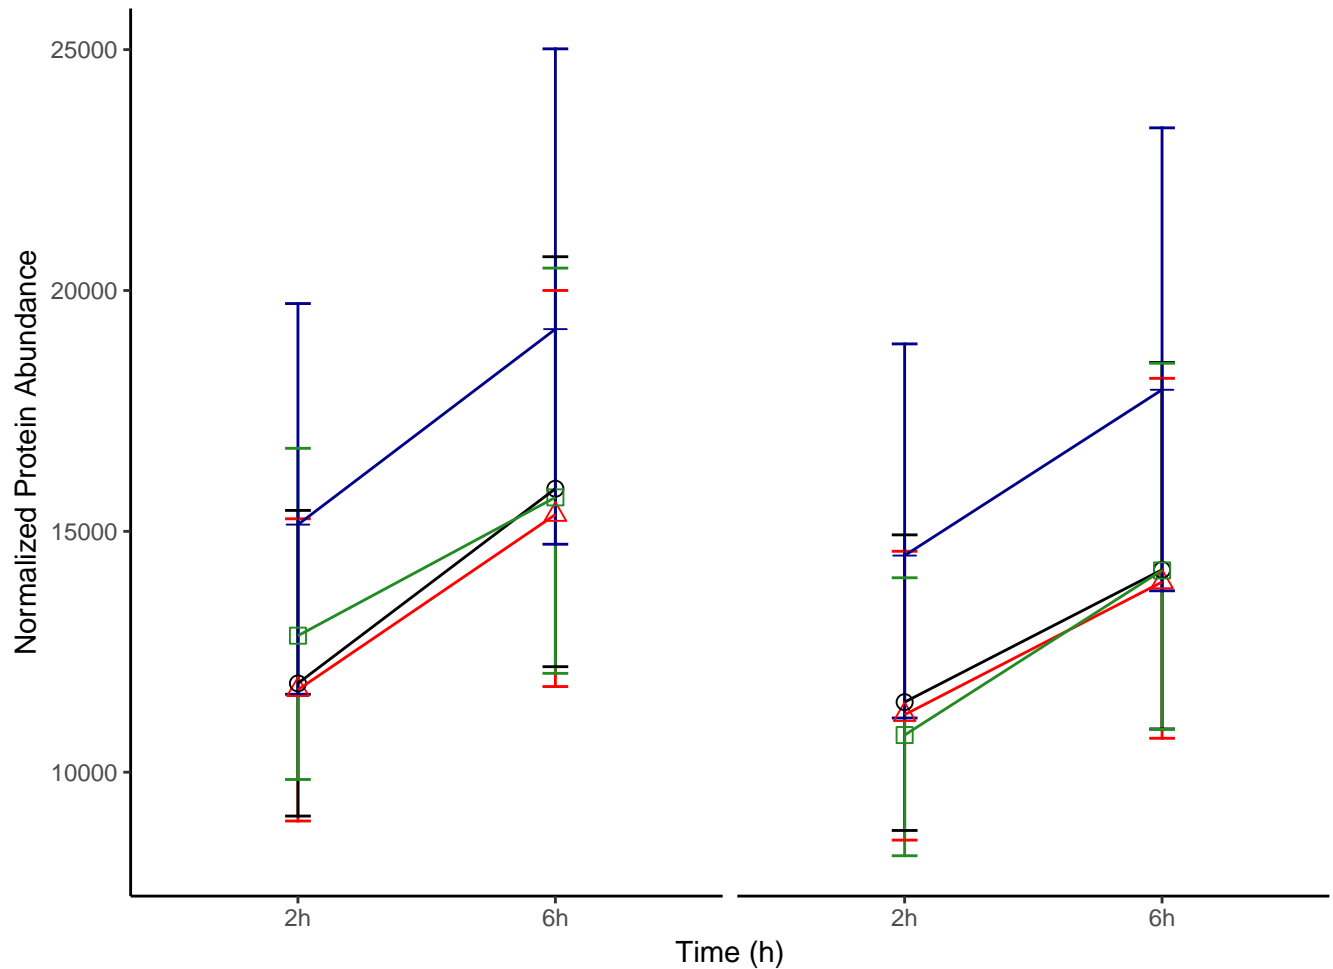

- SA564
- △ SA564- $\Delta$ hptRS
- SA564- $\Delta$ ccpA
- + SA564- $\Delta$ hptRS/ccpA

# FABD\_STAAM

TSB

TSB-dex S-104

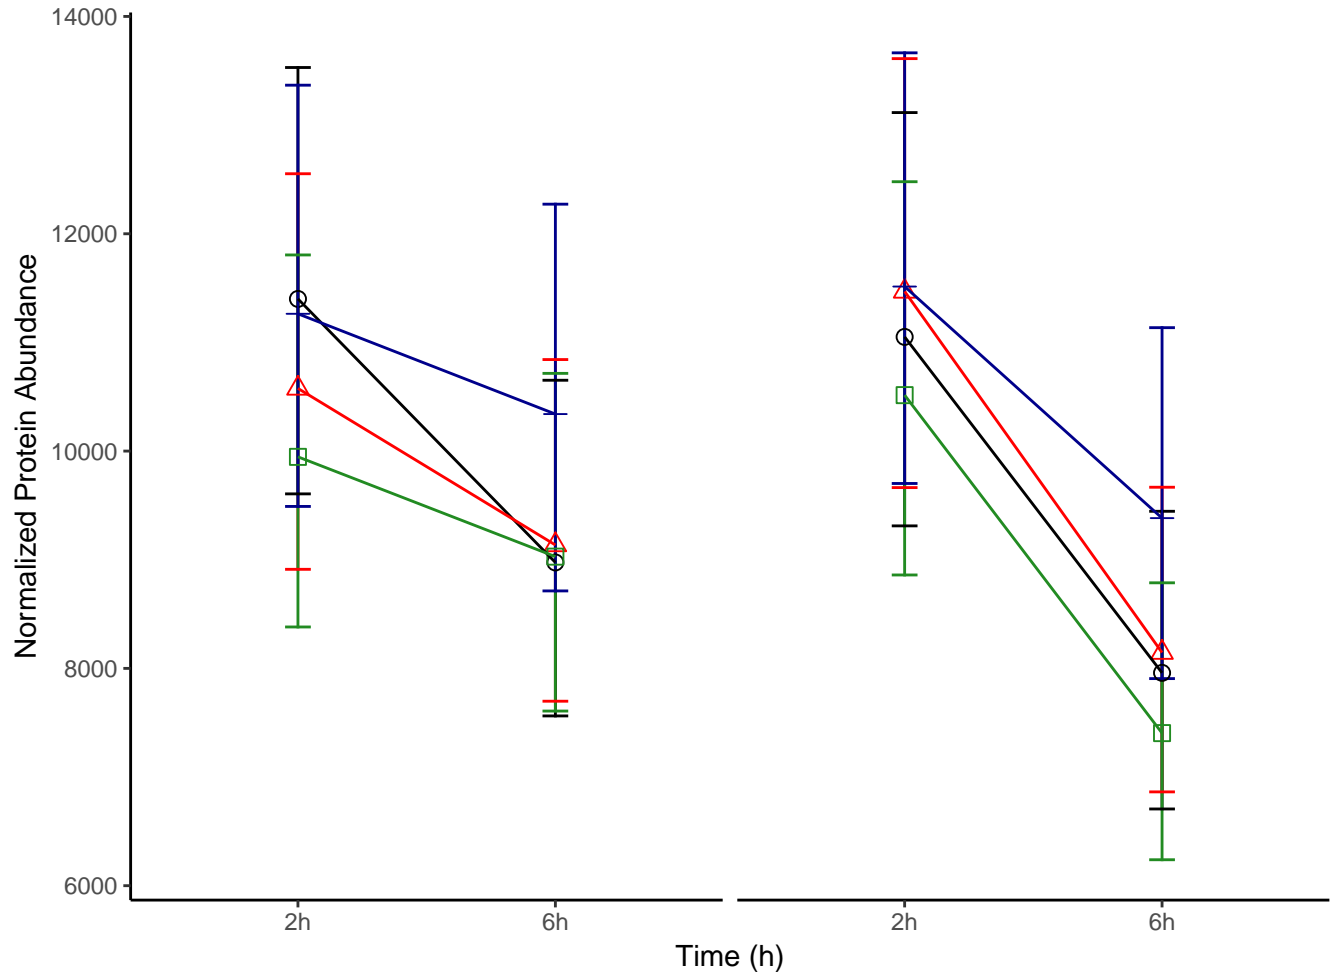

- SA564
- △ SA564- $\Delta$ *hptRS*
- SA564- $\Delta$ *ccpA*
- + SA564- $\Delta$ *hptRS/ccpA*



# FABF\_STAAM

TSB

TSB-dex S-105

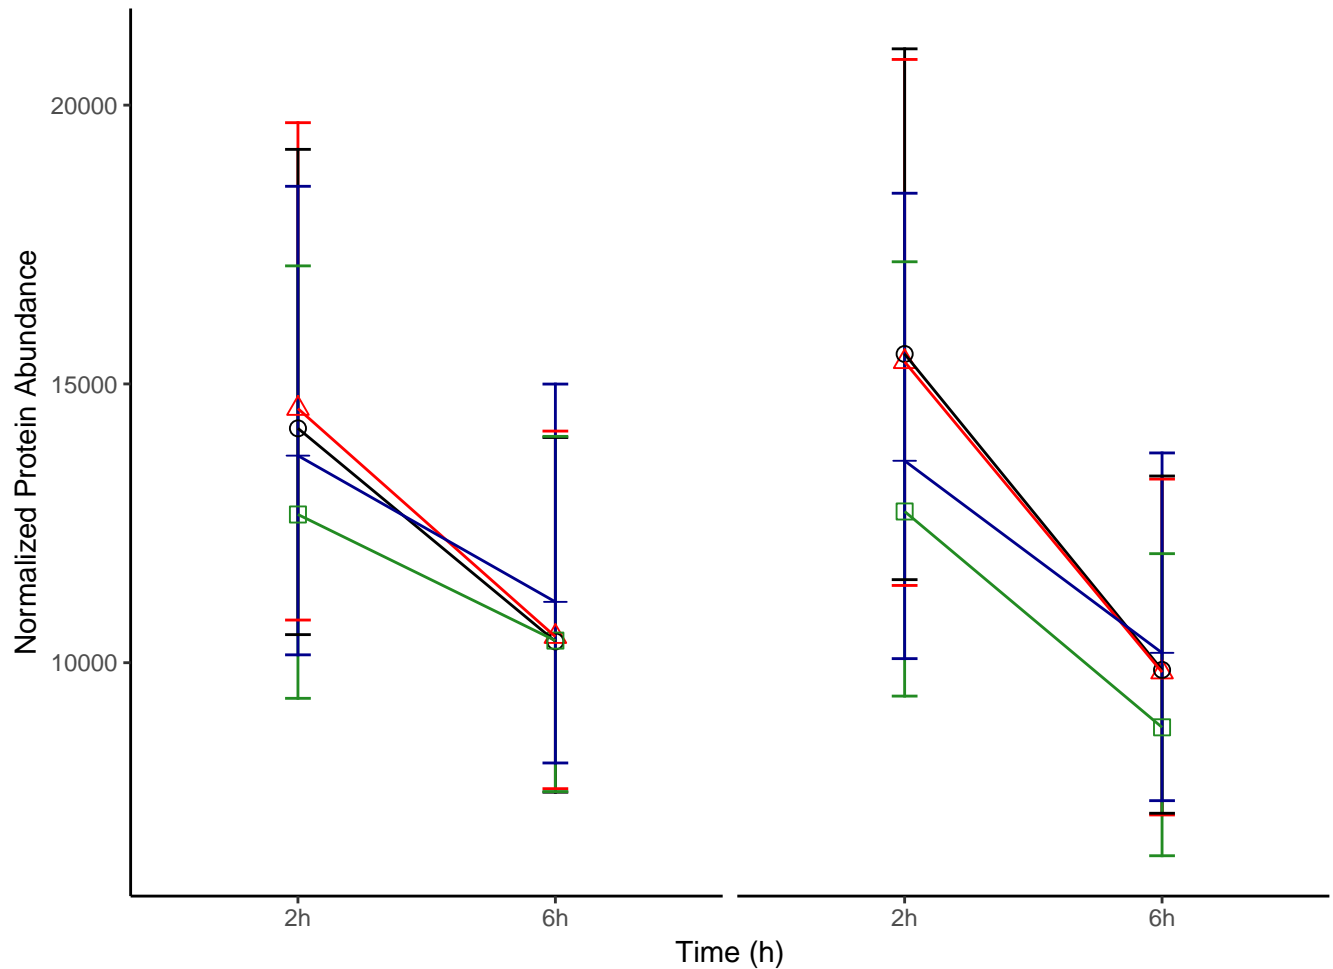

- SA564
- △ SA564-ΔhptRS
- SA564-ΔccpA
- + SA564-ΔhptRS/ccpA

# FABG\_STAAM

TSB

TSB-dex S-106

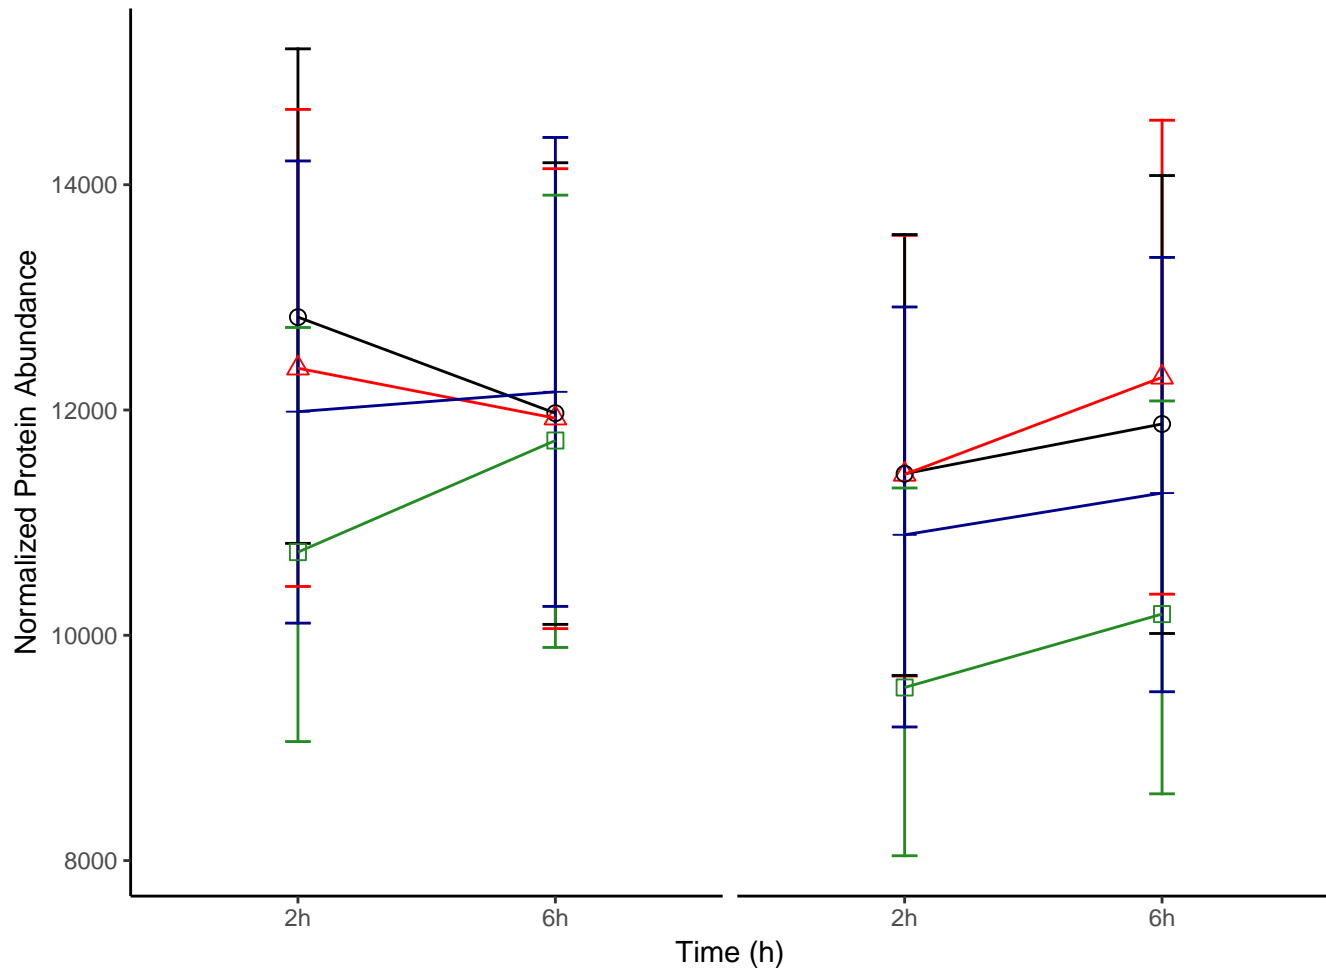

- SA564
- △ SA564- $\Delta$ *hptRS*
- SA564- $\Delta$ *ccpA*
- + SA564- $\Delta$ *hptRS/ccpA*

# FABH\_STAAM

TSB

TSB-dex S-107

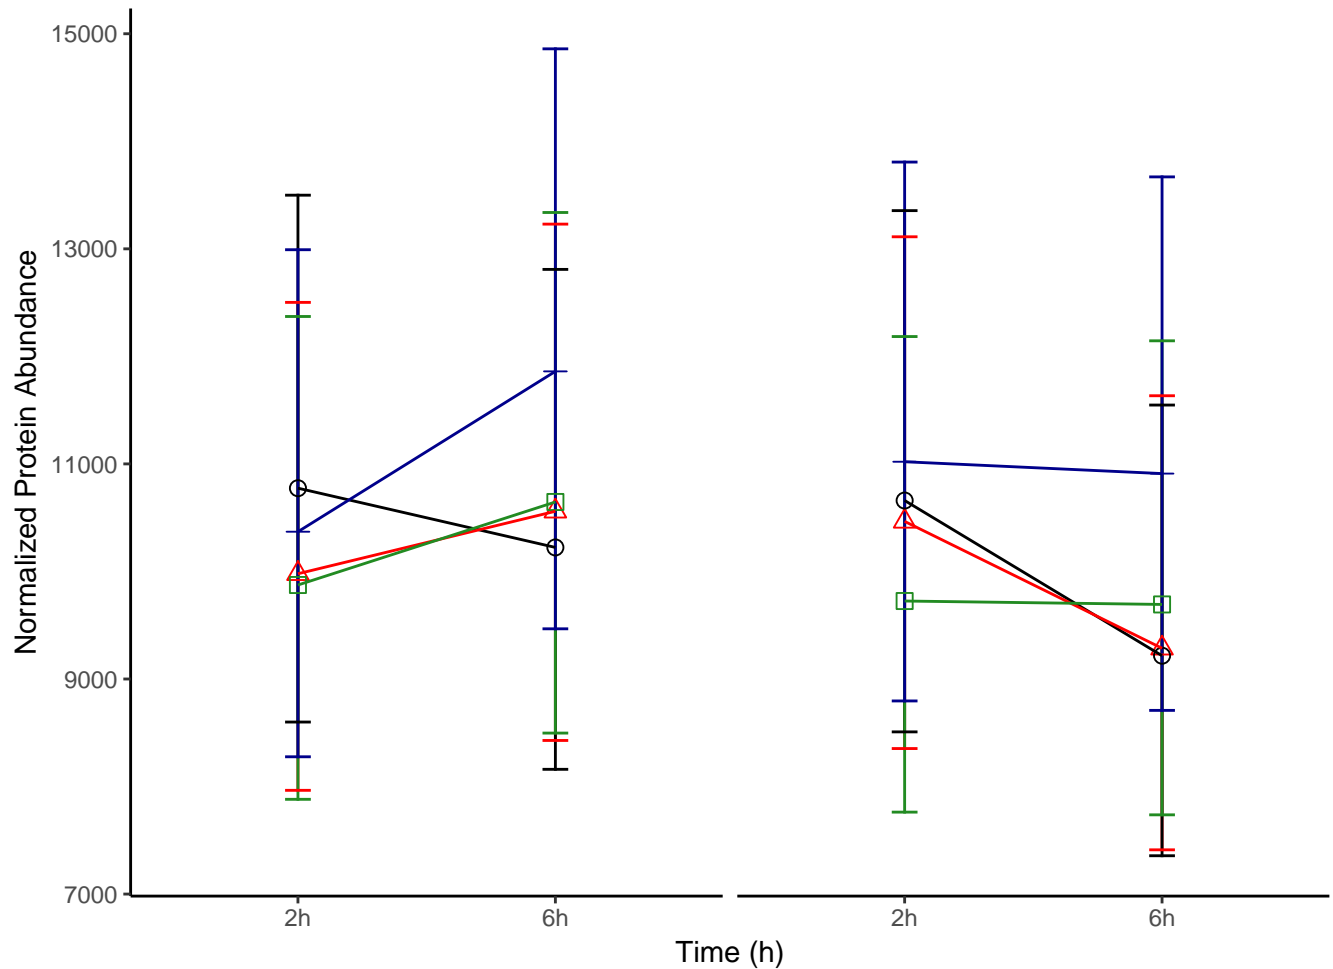

- SA564
- △ SA564- $\Delta$ hptRS
- SA564- $\Delta$ ccpA
- + SA564- $\Delta$ hptRS/ccpA

# FABZ\_STAAM

TSB

TSB-dex S-108

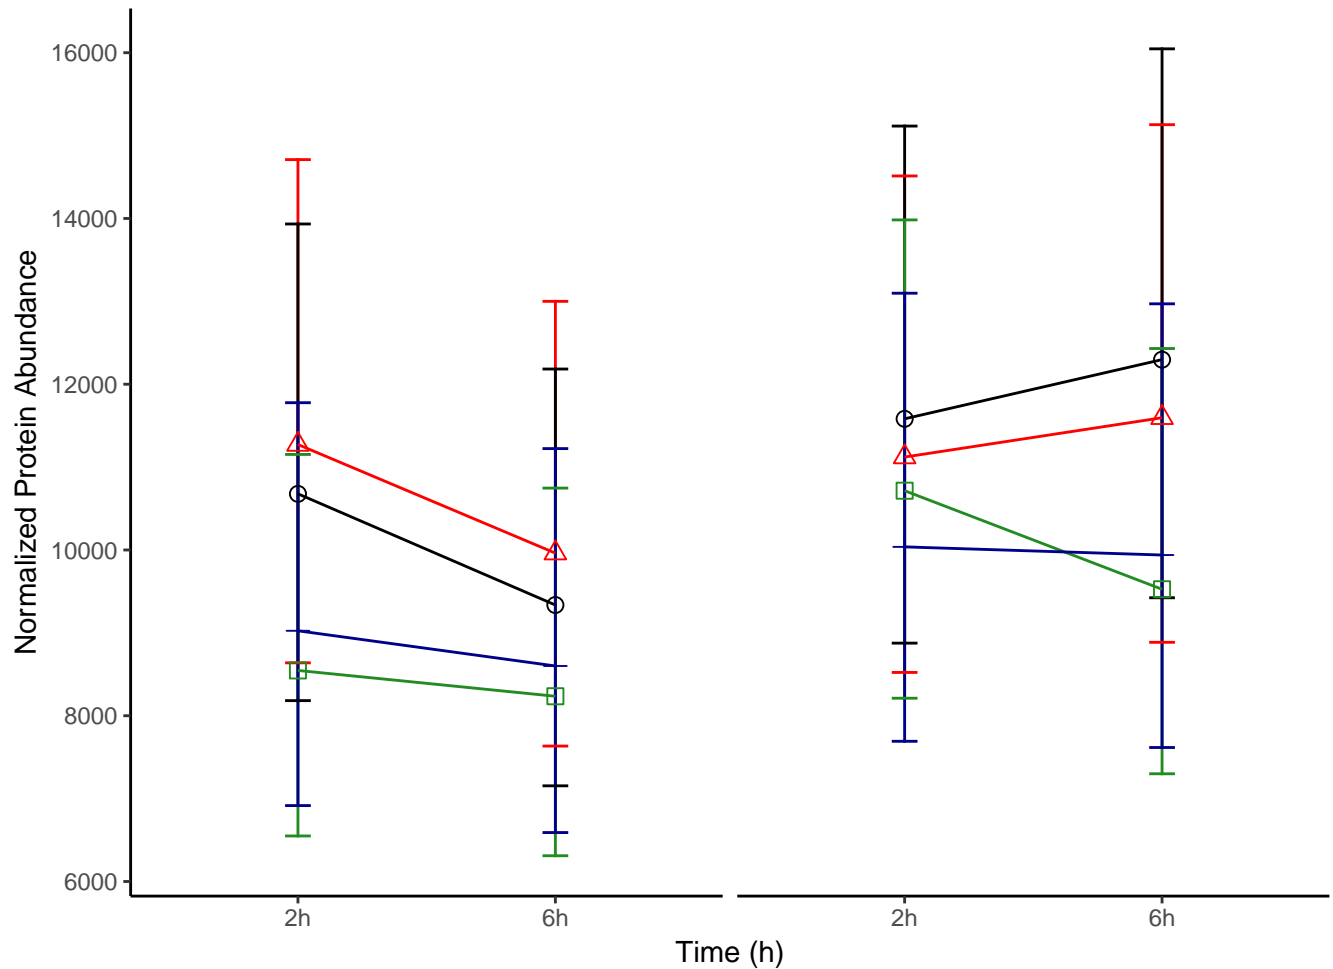

- SA564
- △ SA564- $\Delta$ hptRS
- SA564- $\Delta$ ccpA
- + SA564- $\Delta$ hptRS/ccpA

# FEMA\_STAAM

TSB

TSB-dex S-109

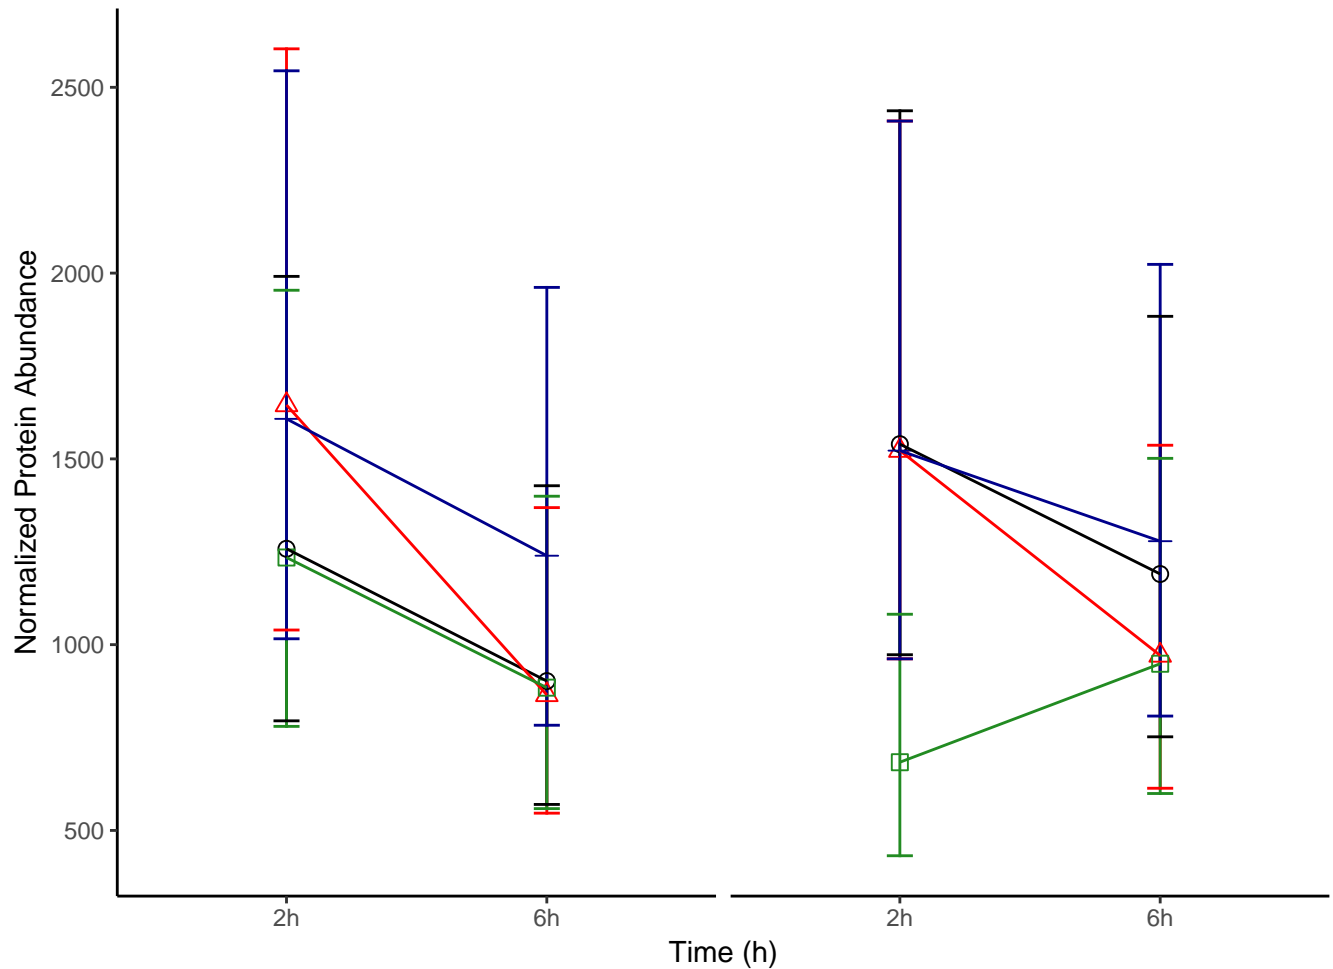

- SA564
- △ SA564- $\Delta hptRS$
- SA564- $\Delta ccpA$
- + SA564- $\Delta hptRS/ccpA$

# FEMB\_STAAM

TSB

TSB-dex S-110

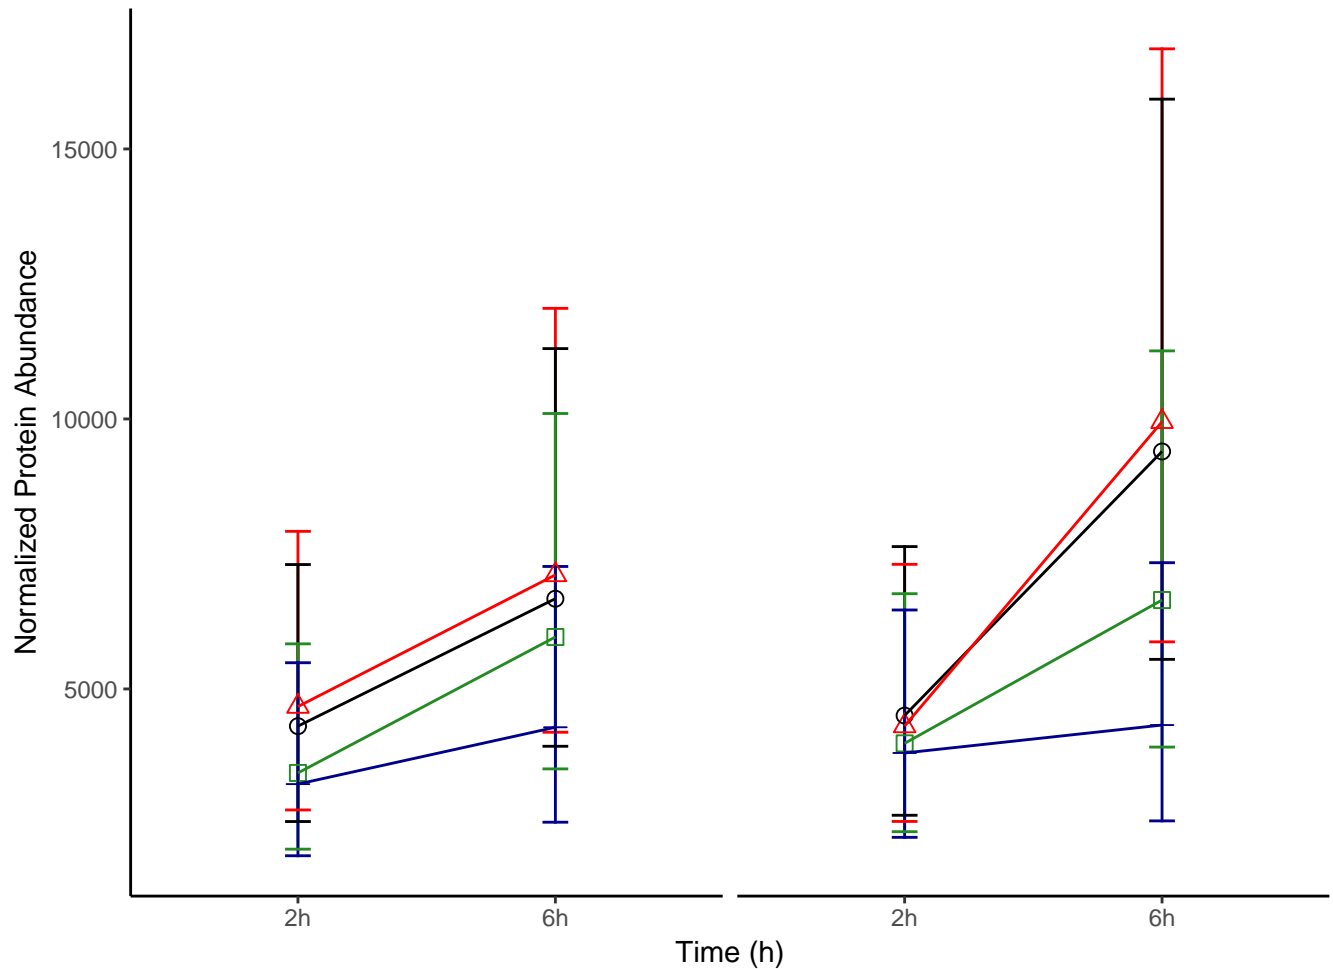

- SA564
- △ SA564-ΔhptRS
- SA564-ΔccpA
- + SA564-ΔhptRS/ccpA

# FEMX\_STAAM

TSB

TSB-dex S-111

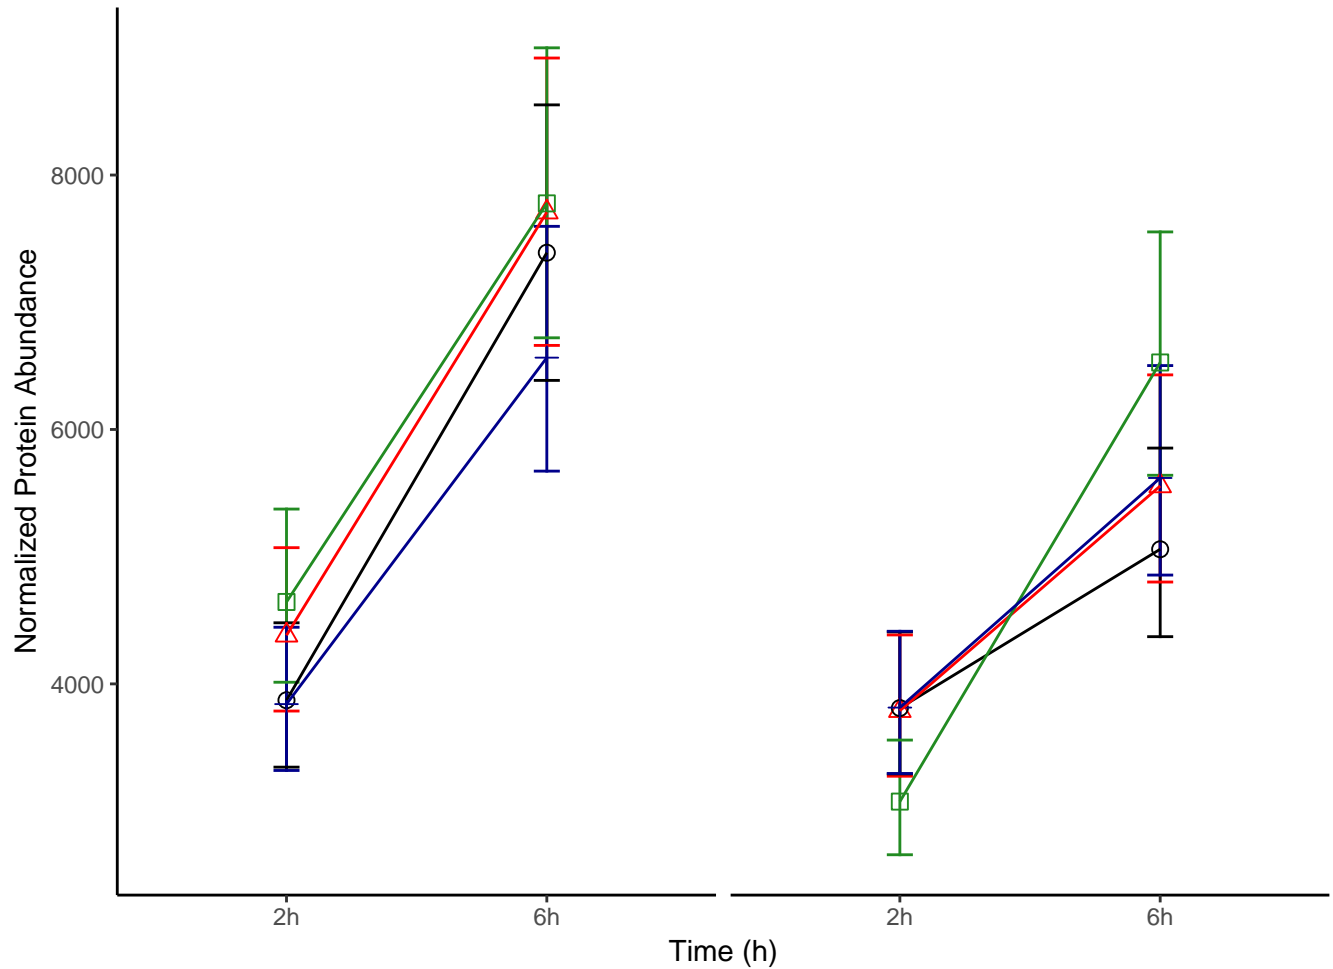

- SA564
- △ SA564- $\Delta$ *hptRS*
- SA564- $\Delta$ *ccpA*
- + SA564- $\Delta$ *hptRS/ccpA*

# FENR\_STAAM

TSB

TSB-dex S-112

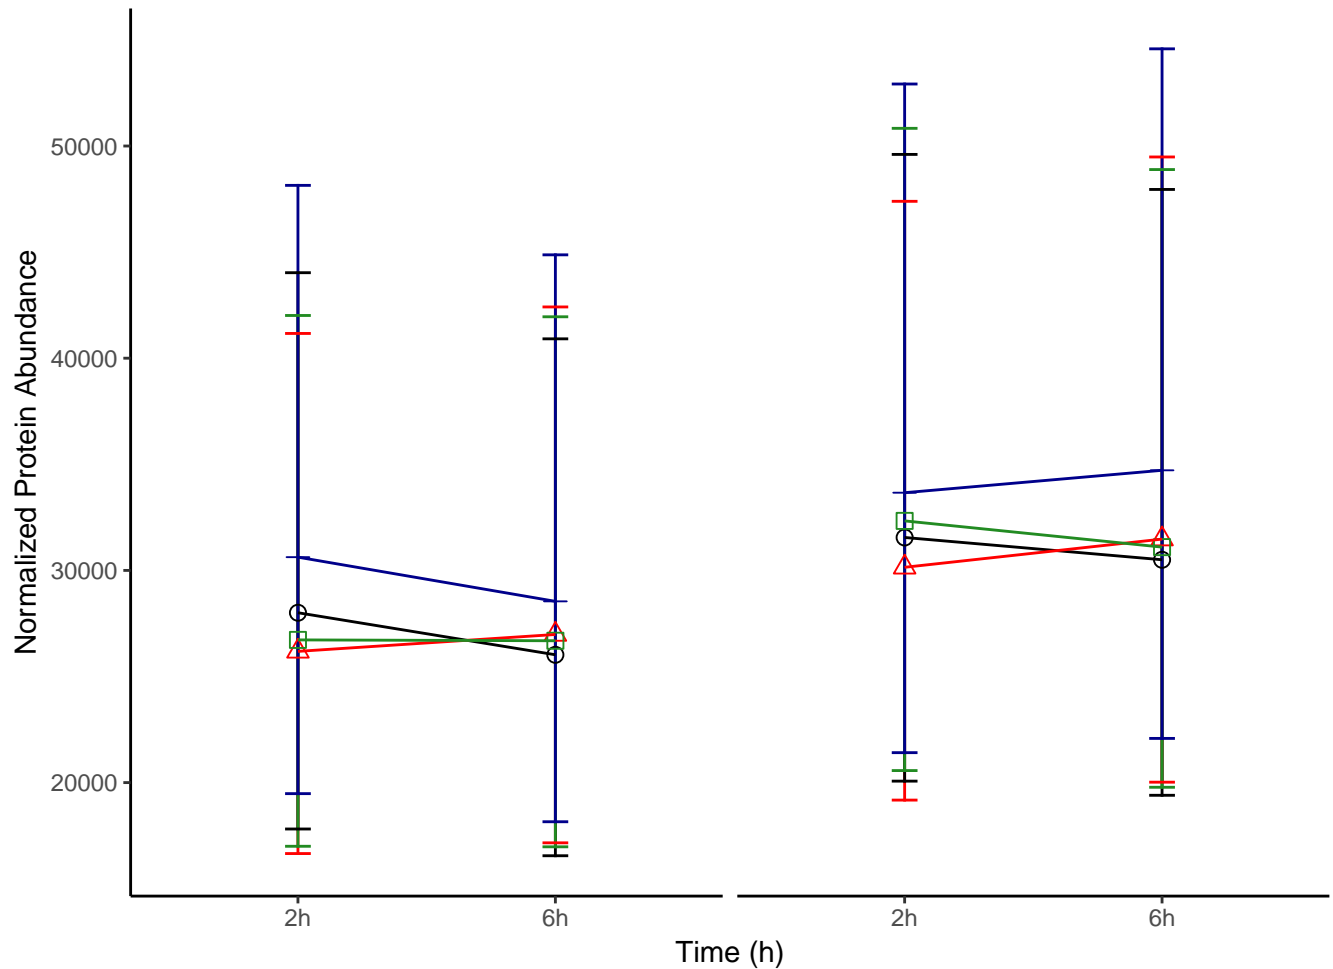

- SA564
- △ SA564- $\Delta$ hptRS
- SA564- $\Delta$ ccpA
- + SA564- $\Delta$ hptRS/ccpA



# FLIPR\_STAAM

TSB

TSB-dex S-113

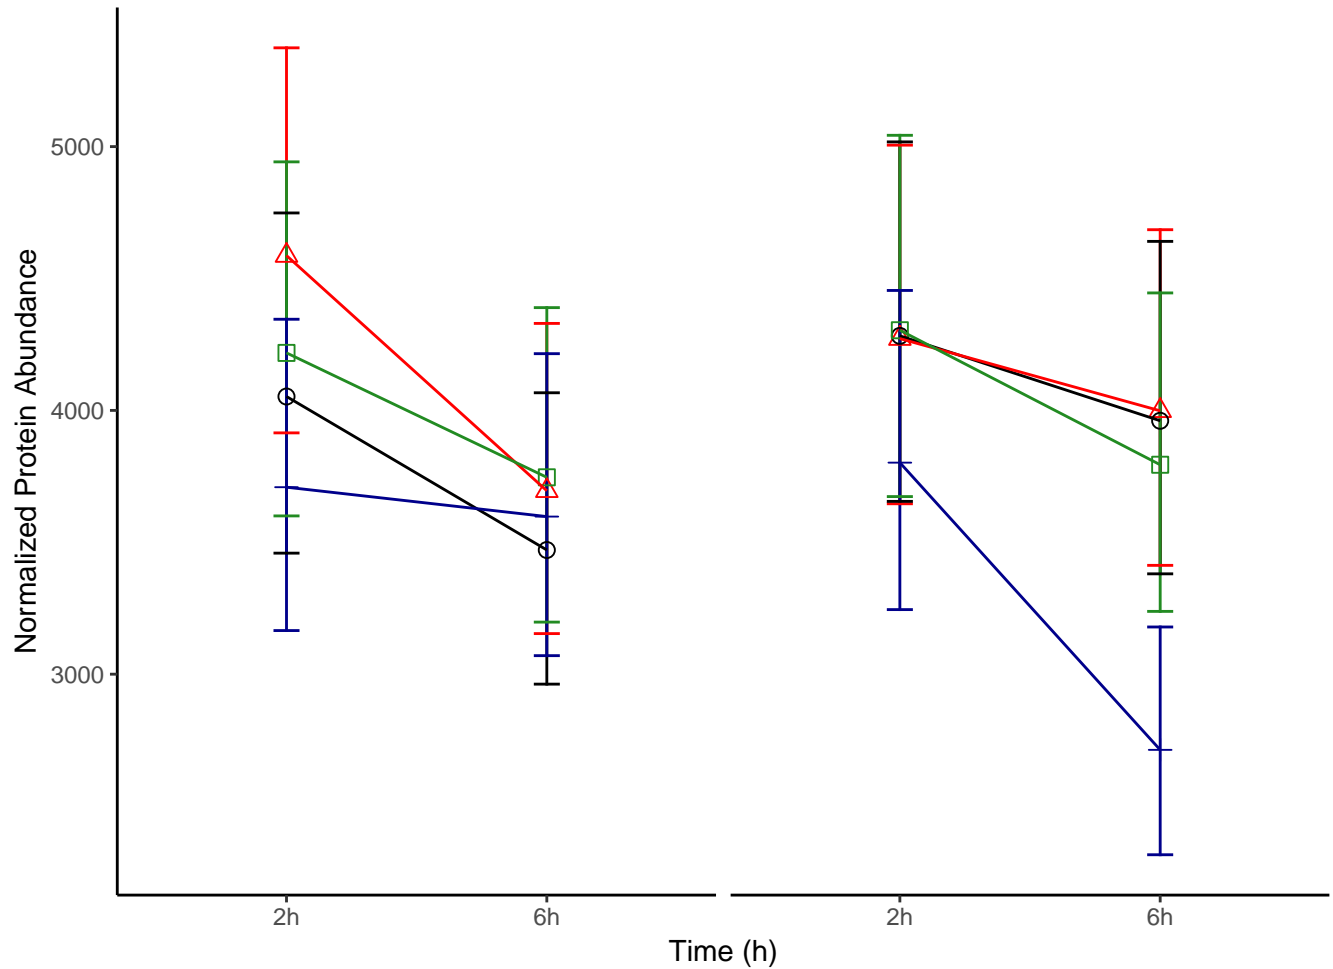

- SA564
- △ SA564- $\Delta$ *hptRS*
- SA564- $\Delta$ *ccpA*
- + SA564- $\Delta$ *hptRS/ccpA*

# FMT\_STAAM

TSB

TSB-dex S-114

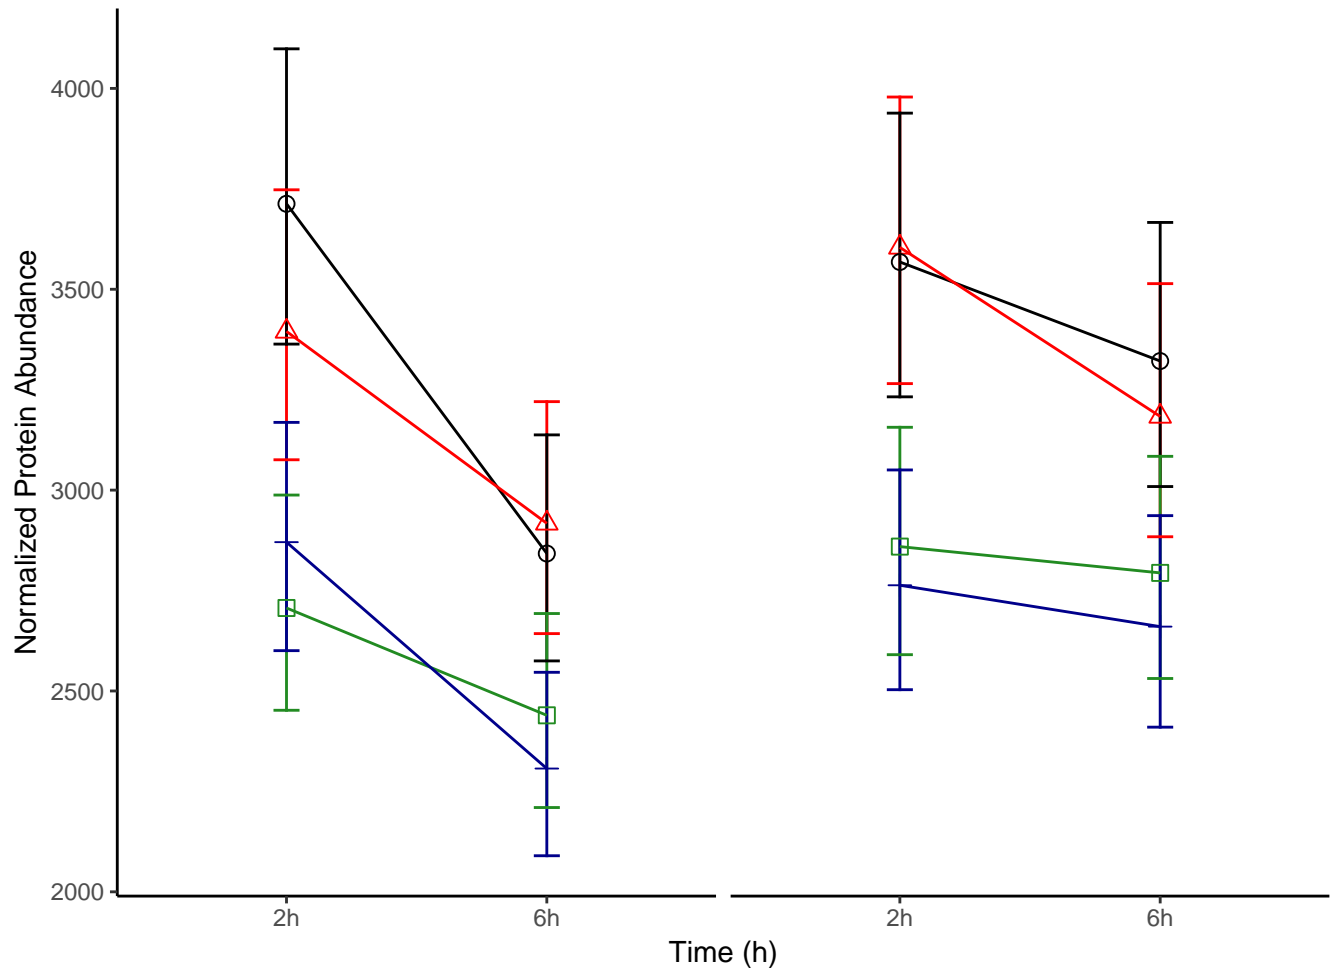

- SA564
- △ SA564- $\Delta$ *hptRS*
- SA564- $\Delta$ *ccpA*
- + SA564- $\Delta$ *hptRS/ccpA*

# FMTA\_STAAM

TSB

TSB-dex S-115

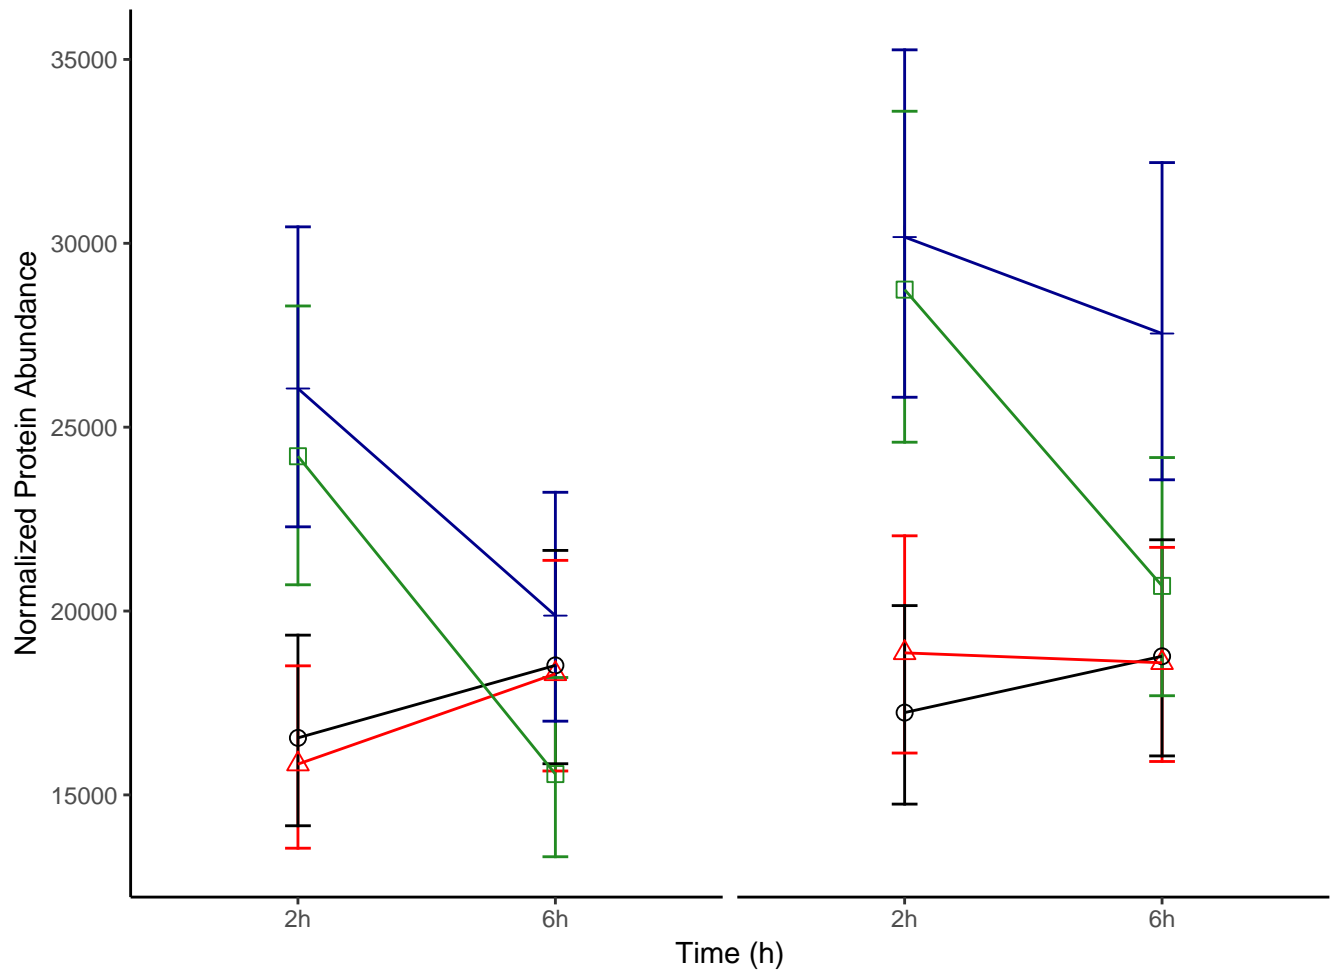

- SA564
- △ SA564- $\Delta$ hptRS
- SA564- $\Delta$ ccpA
- + SA564- $\Delta$ hptRS/ccpA

# FOLB\_STAAM

TSB

TSB-dex S-116

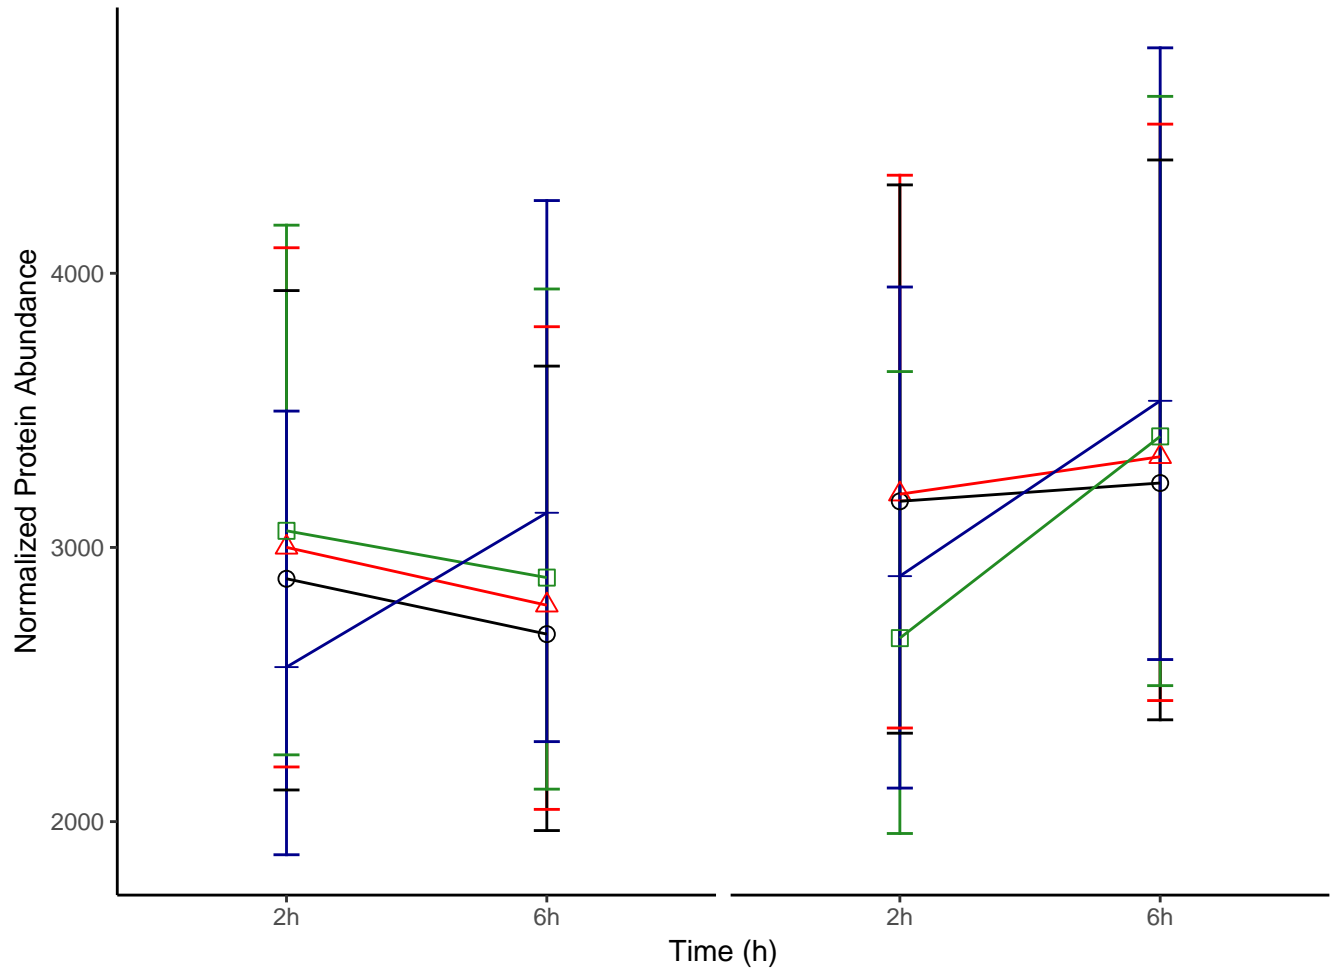

- SA564
- △ SA564-ΔhptRS
- SA564-ΔccpA
- + SA564-ΔhptRS/ccpA

# FOLD\_STAAM

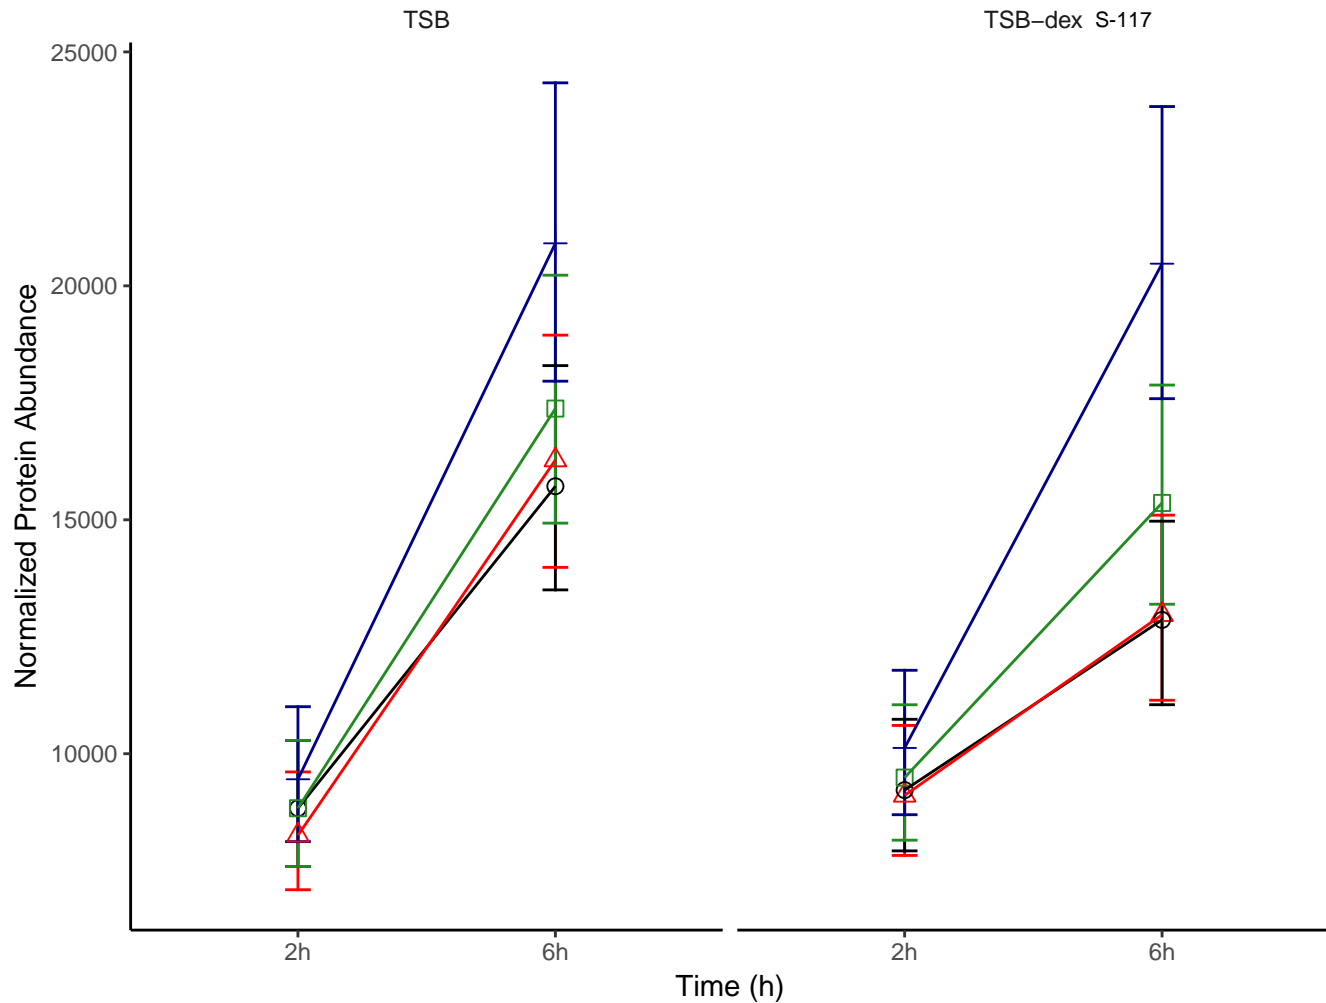

- SA564
- △ SA564-ΔhptRS
- SA564-ΔccpA
- + SA564-ΔhptRS/ccpA

# FTHS\_STAAM

TSB

TSB-dex S-118

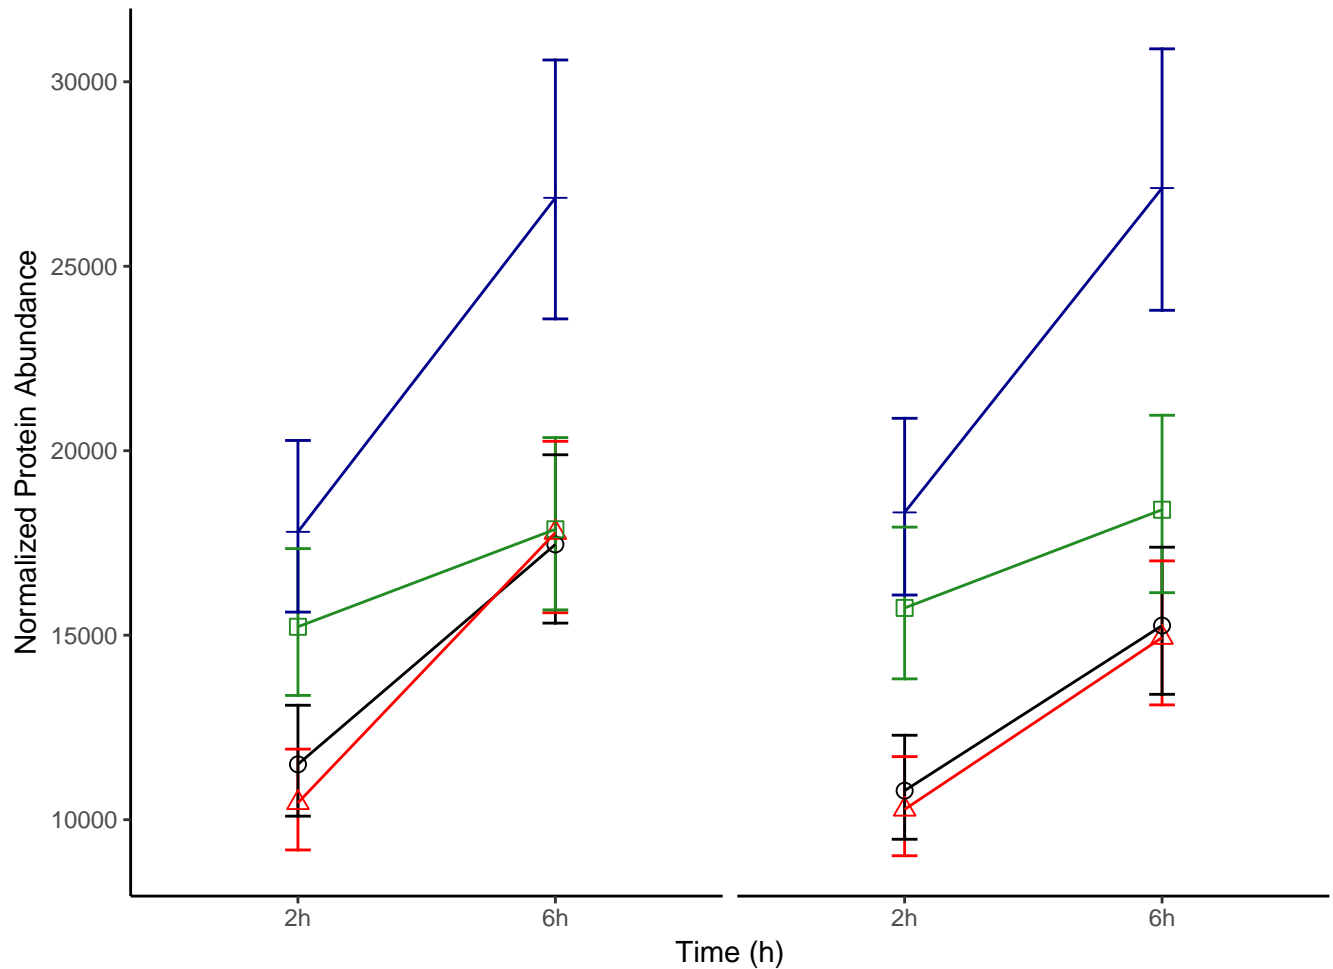

- SA564
- △ SA564- $\Delta$ *hptRS*
- SA564- $\Delta$ *ccpA*
- + SA564- $\Delta$ *hptRS/ccpA*

# FTN\_STAAM

TSB

TSB-dex S-119

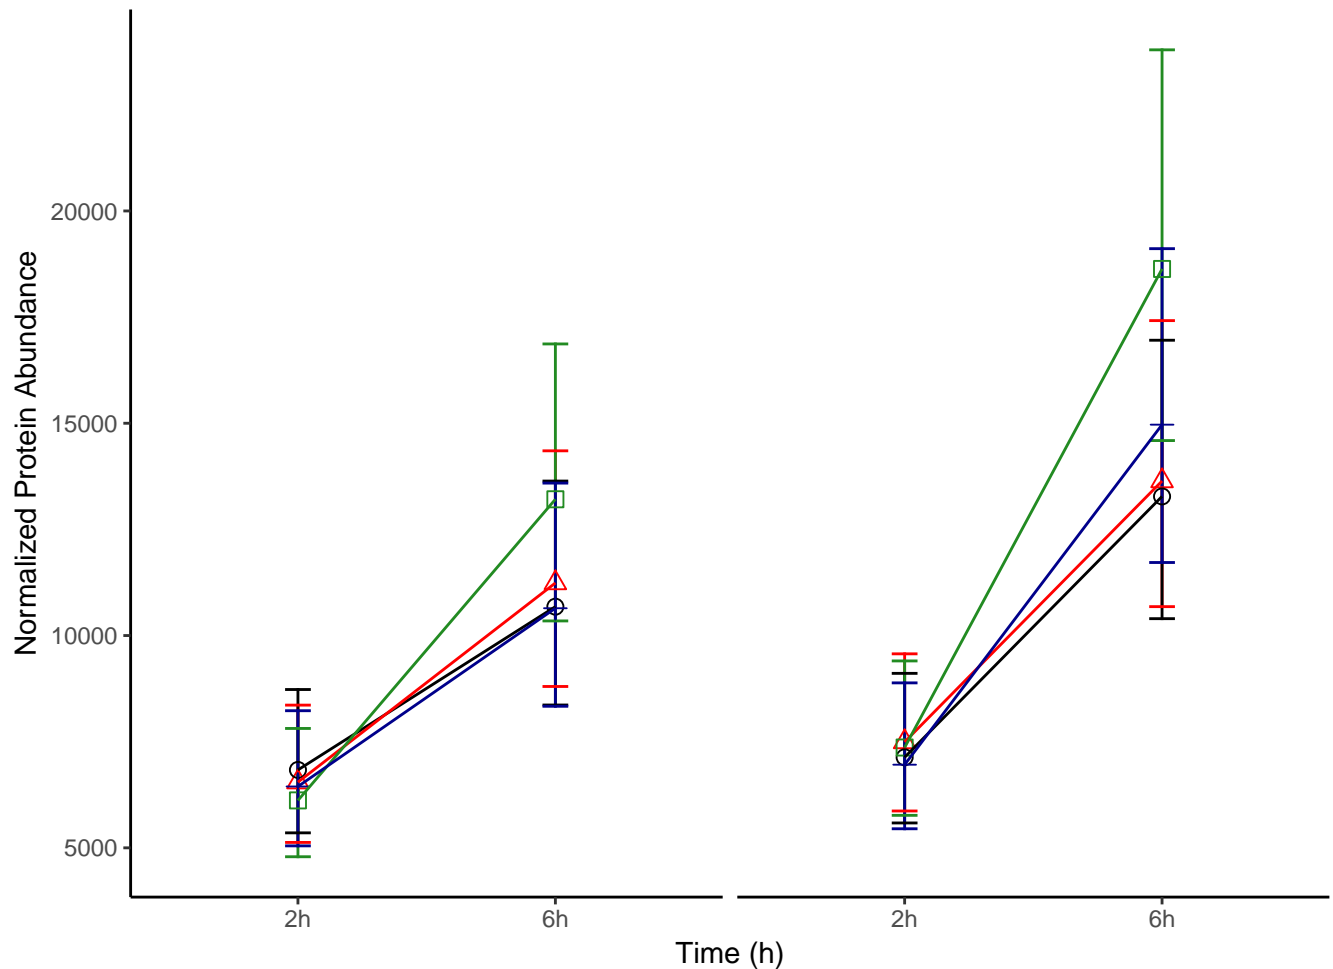

- SA564
- △ SA564- $\Delta$ *hptRS*
- SA564- $\Delta$ *ccpA*
- + SA564- $\Delta$ *hptRS/ccpA*

# FTSA\_STAAM

TSB

TSB-dex S-120

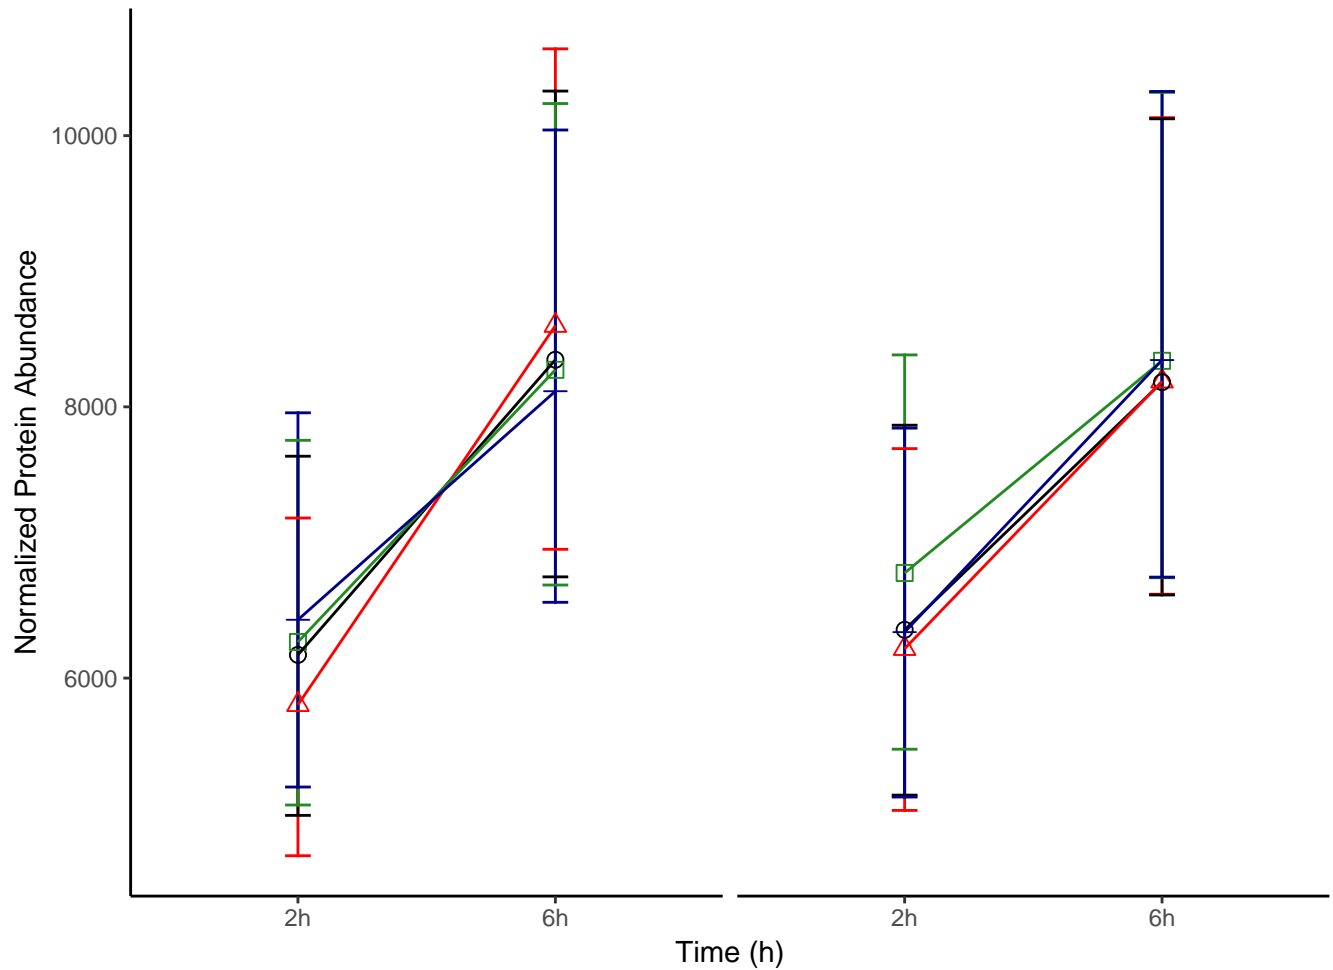

- SA564
- △ SA564- $\Delta hptRS$
- SA564- $\Delta ccpA$
- + SA564- $\Delta hptRS/ccpA$



# FTSZ\_STAAM

TSB

TSB-dex S-121

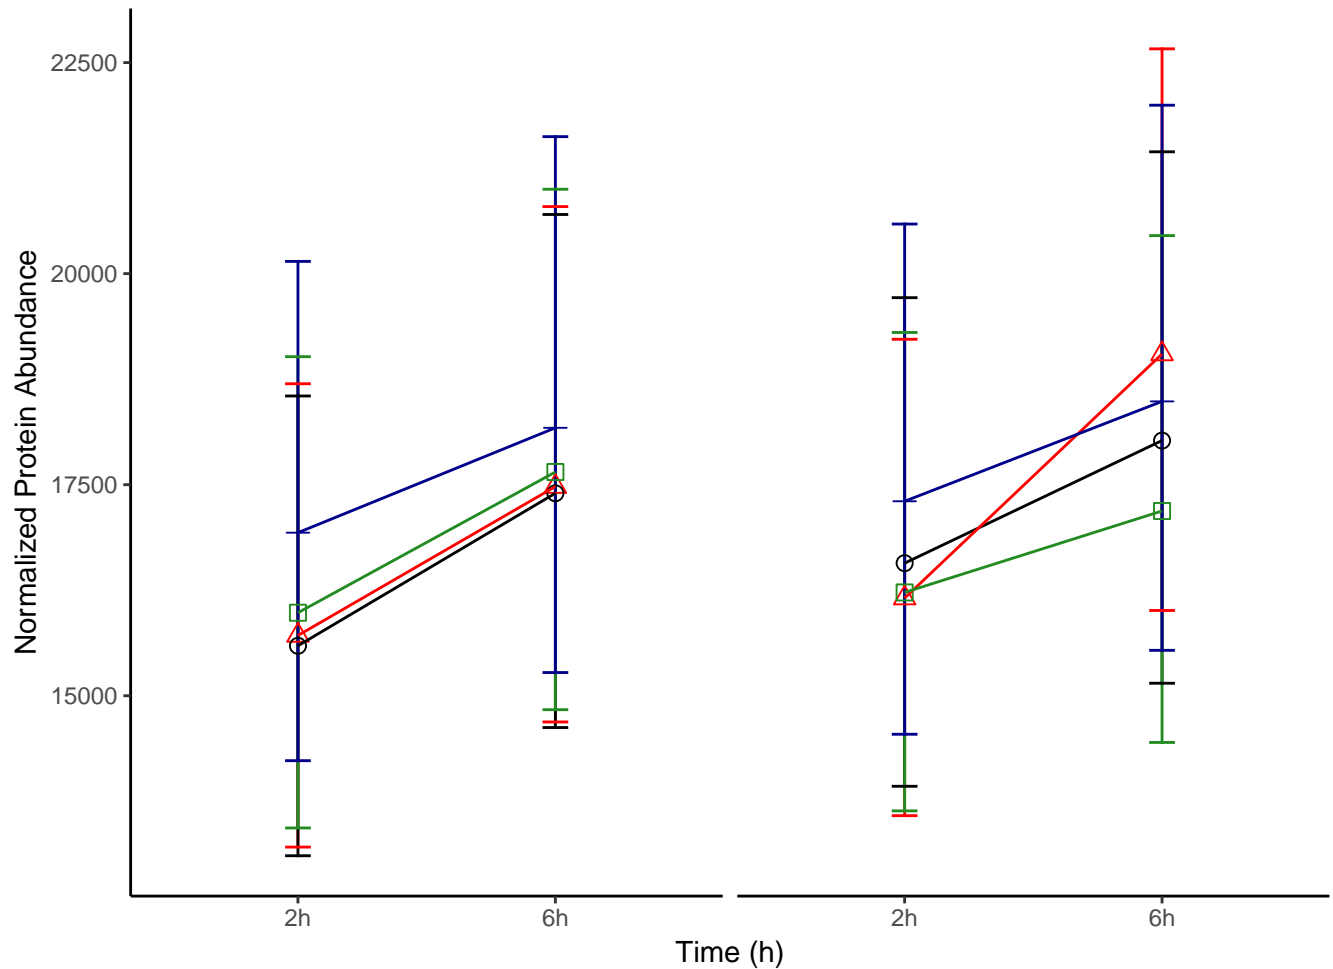

- SA564
- △ SA564- $\Delta$ *hptRS*
- SA564- $\Delta$ *ccpA*
- + SA564- $\Delta$ *hptRS/ccpA*

# FUMC\_STAAM

TSB

TSB-dex S-122

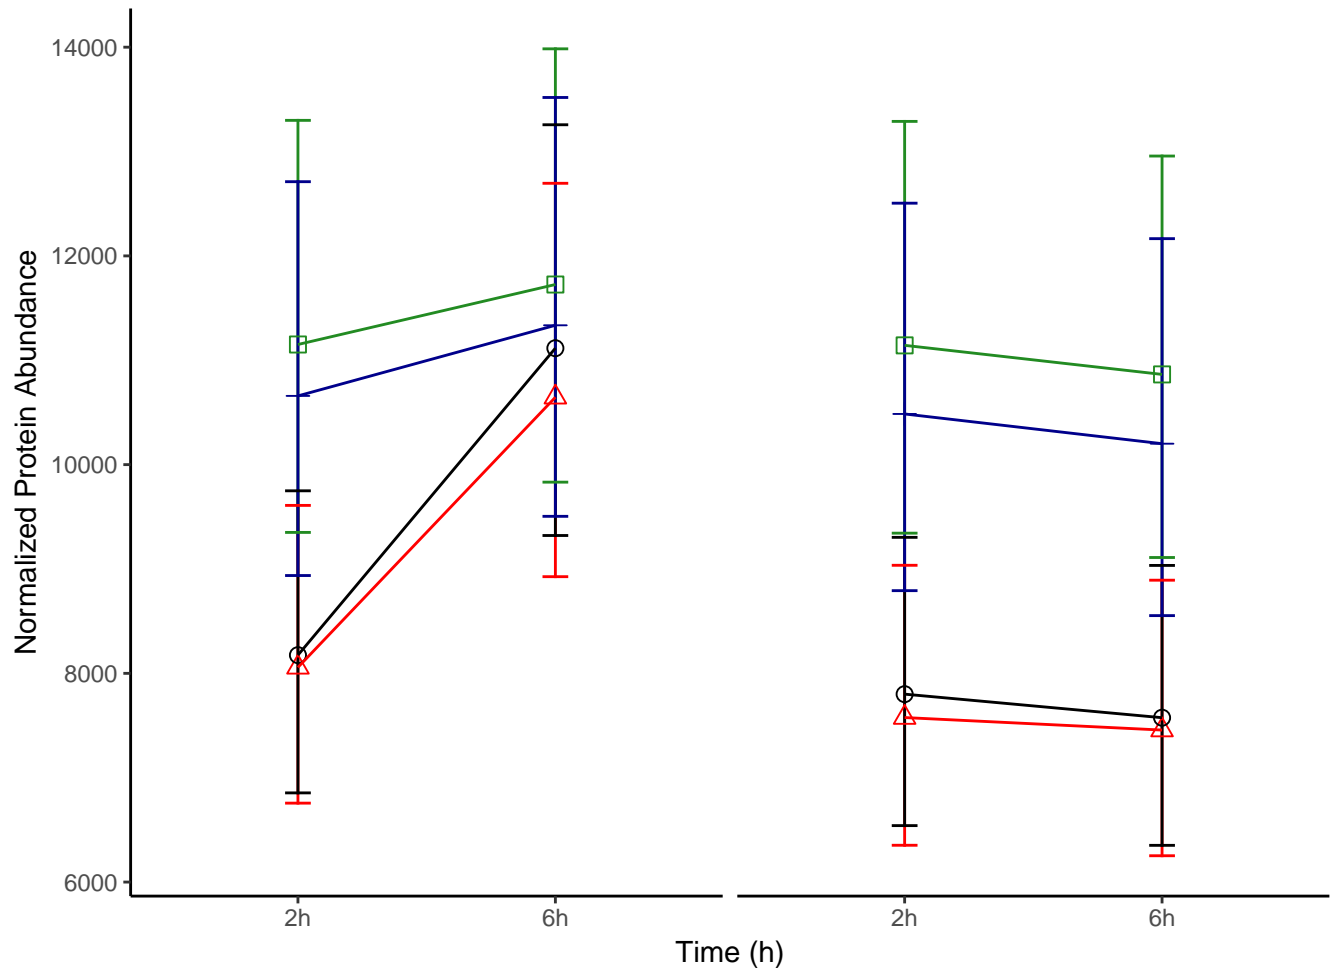

- SA564
- △ SA564-ΔhptRS
- SA564-ΔccpA
- + SA564-ΔhptRS/ccpA

# G3P1\_STAAM

TSB

TSB-dex S-123

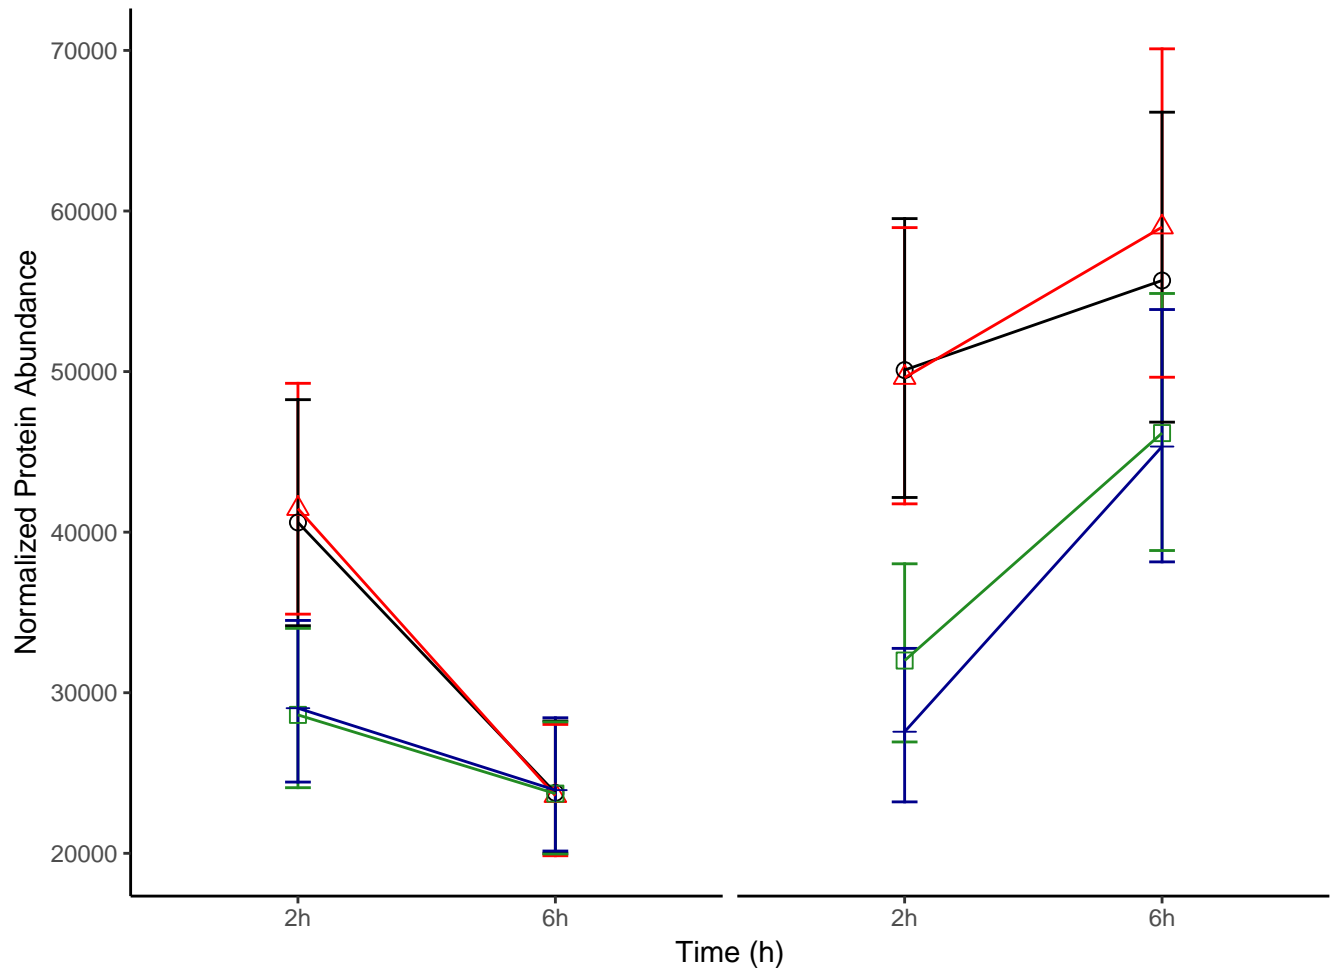

- SA564
- △ SA564- $\Delta$ *hptRS*
- SA564- $\Delta$ *ccpA*
- + SA564- $\Delta$ *hptRS/ccpA*

# G3P2\_STAAM

TSB

TSB-dex S-124

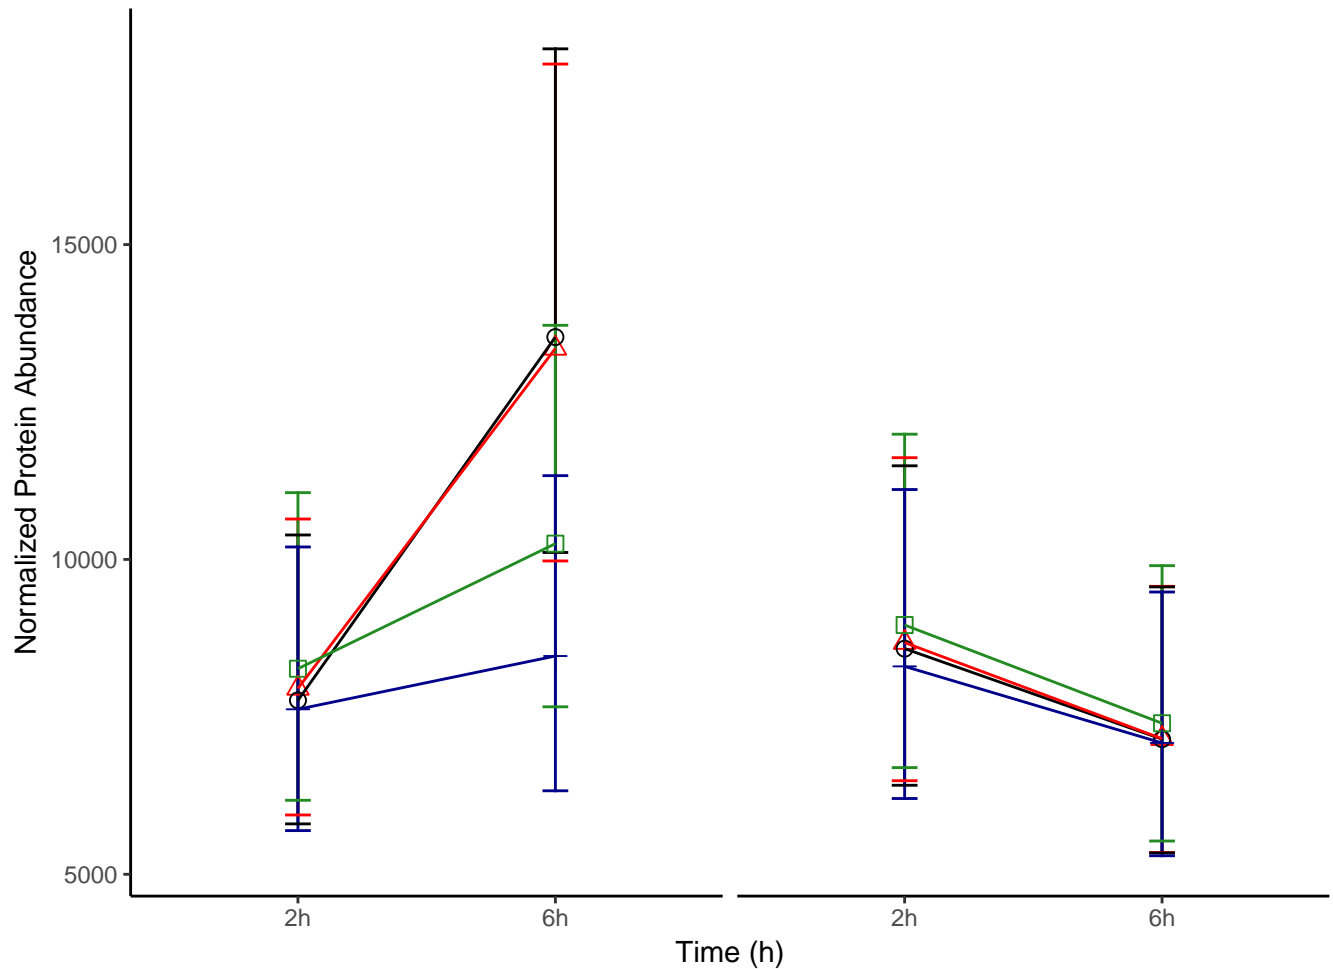

- SA564
- △ SA564- $\Delta hptRS$
- SA564- $\Delta ccpA$
- + SA564- $\Delta hptRS/ccpA$

# G6PI\_STAAM

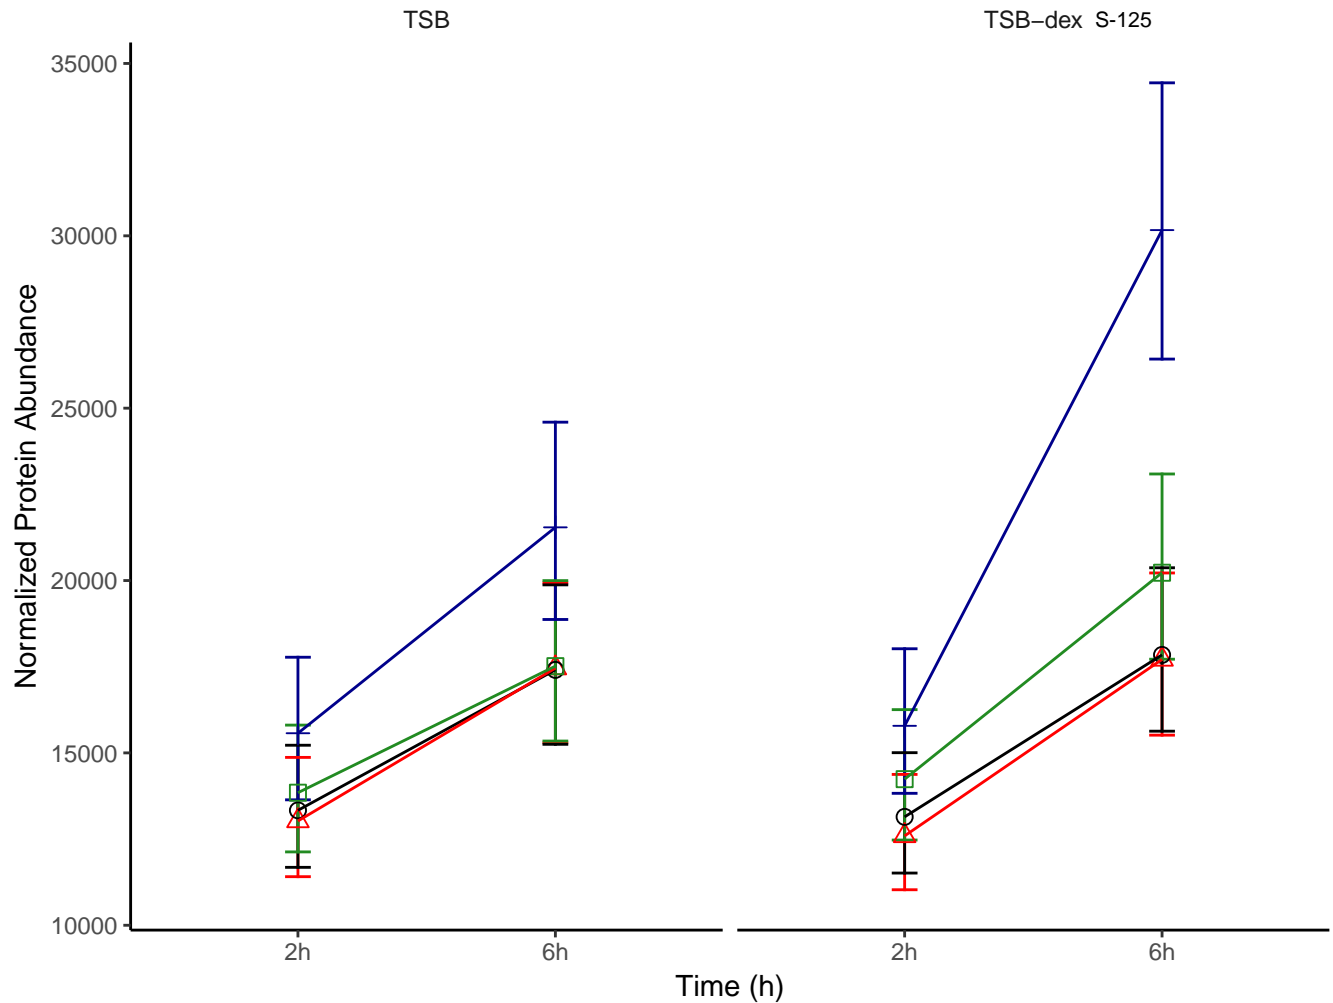

- SA564
- △ SA564- $\Delta$ *hptRS*
- SA564- $\Delta$ *ccpA*
- + SA564- $\Delta$ *hptRS/ccpA*

# GATA\_STAAM

TSB

TSB-dex S-126

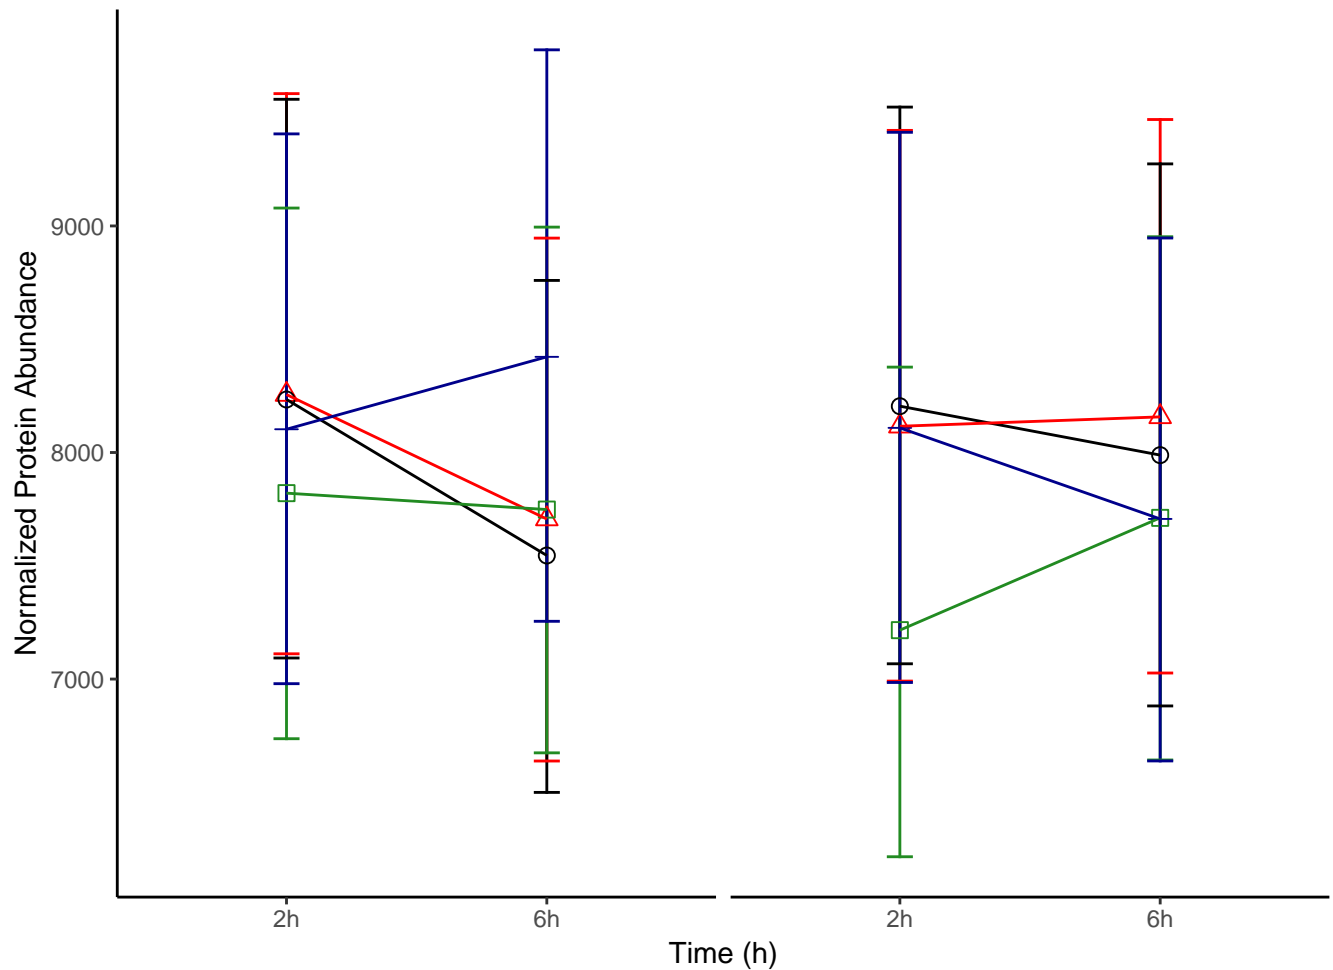

- SA564
- △ SA564- $\Delta hptRS$
- SA564- $\Delta ccpA$
- + SA564- $\Delta hptRS/ccpA$

# GATB\_STAAM

TSB

TSB-dex S-127

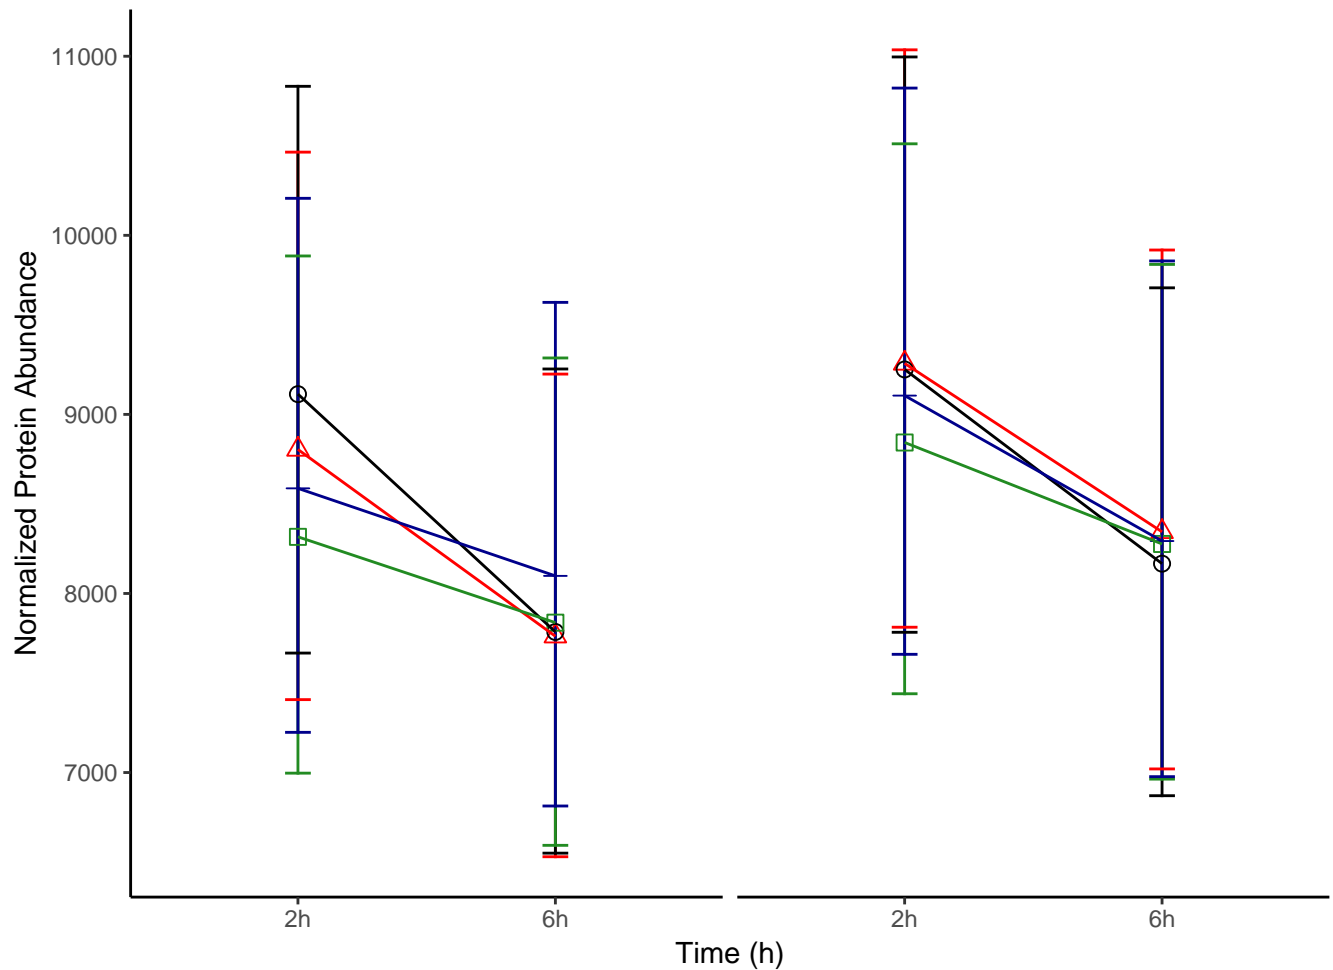

- SA564
- △ SA564- $\Delta$ hptRS
- SA564- $\Delta$ ccpA
- + SA564- $\Delta$ hptRS/ccpA

# GATC\_STAAM

TSB

TSB-dex S-128

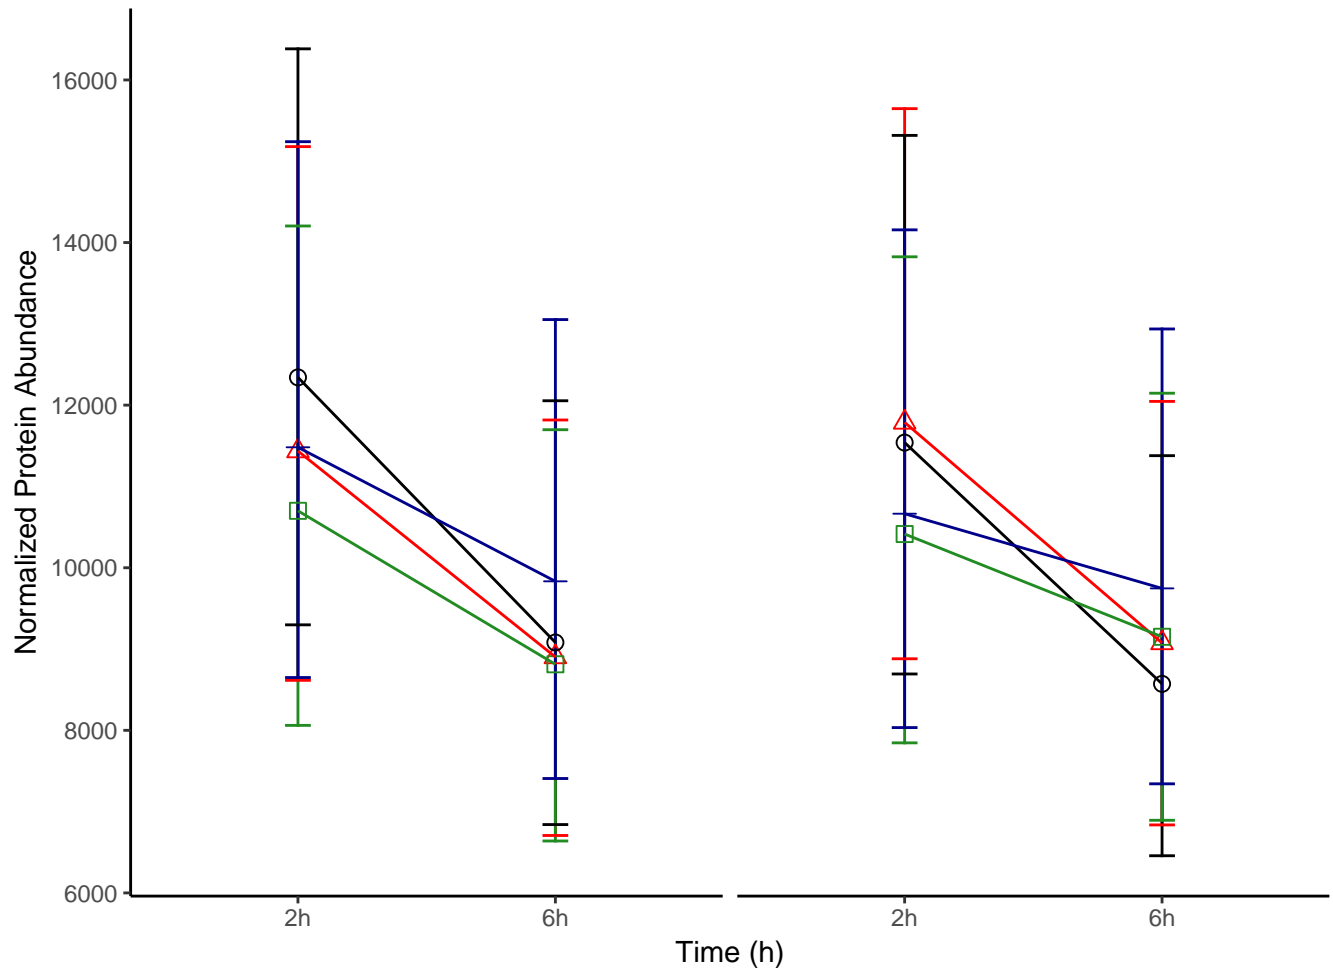

- SA564
- △ SA564- $\Delta$ *hptRS*
- SA564- $\Delta$ *ccpA*
- + SA564- $\Delta$ *hptRS/ccpA*



# GCH4\_STAAM

TSB

TSB-dex S-129

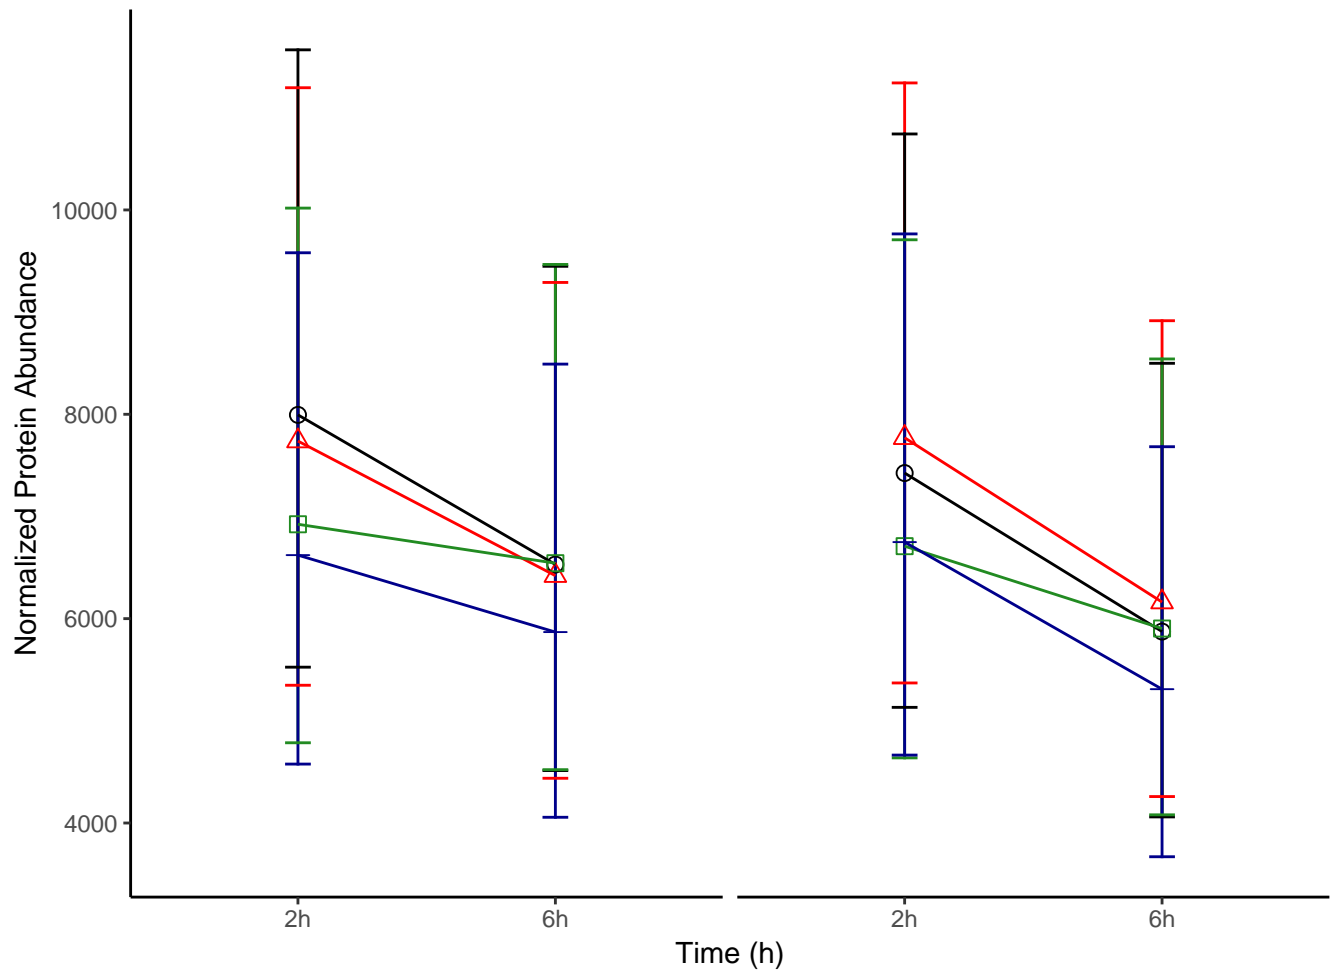

- SA564
- △ SA564- $\Delta$ hptRS
- SA564- $\Delta$ ccpA
- + SA564- $\Delta$ hptRS/ccpA

# GCSH\_STAAM

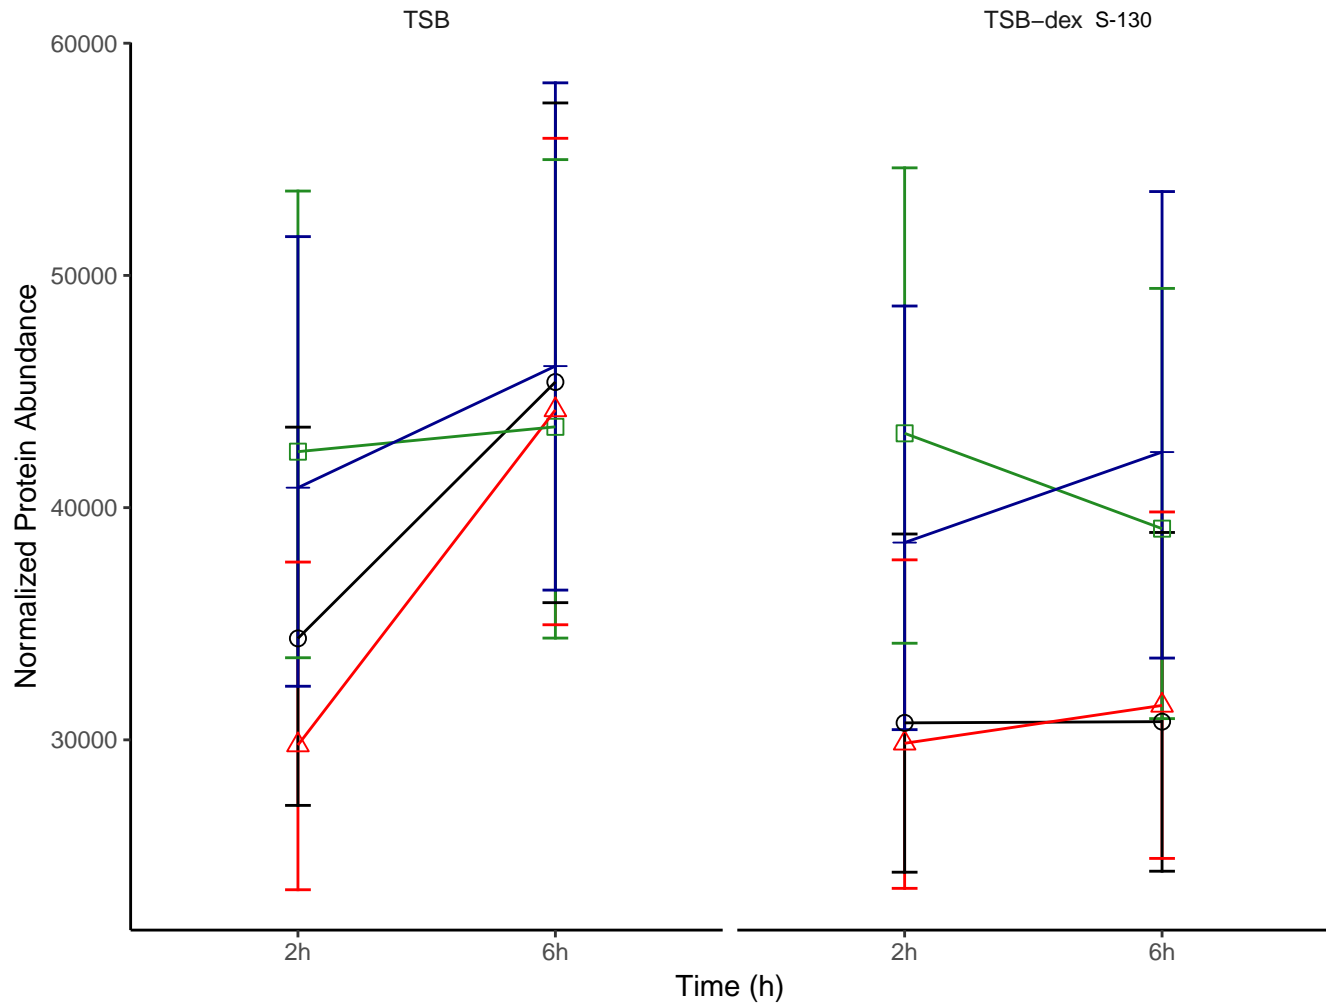

- SA564
- △ SA564-ΔhptRS
- SA564-ΔccpA
- + SA564-ΔhptRS/ccpA

# GCSPA\_STAAM

TSB

TSB-dex S-131

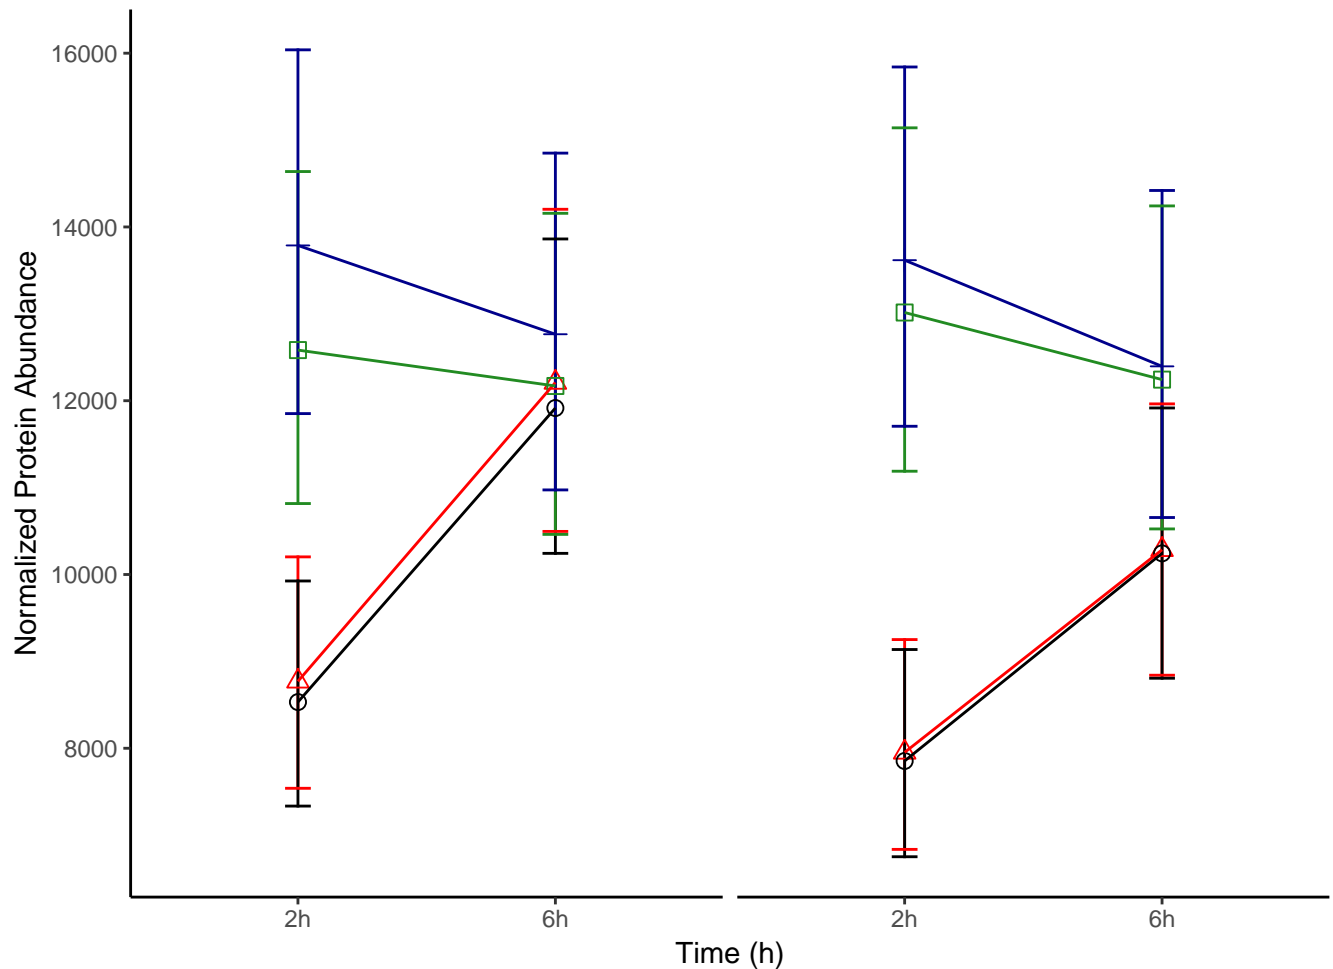

- SA564
- △ SA564- $\Delta$ *hptRS*
- SA564- $\Delta$ *ccpA*
- + SA564- $\Delta$ *hptRS/ccpA*

# GCSPB\_STAAM

TSB

TSB-dex S-132

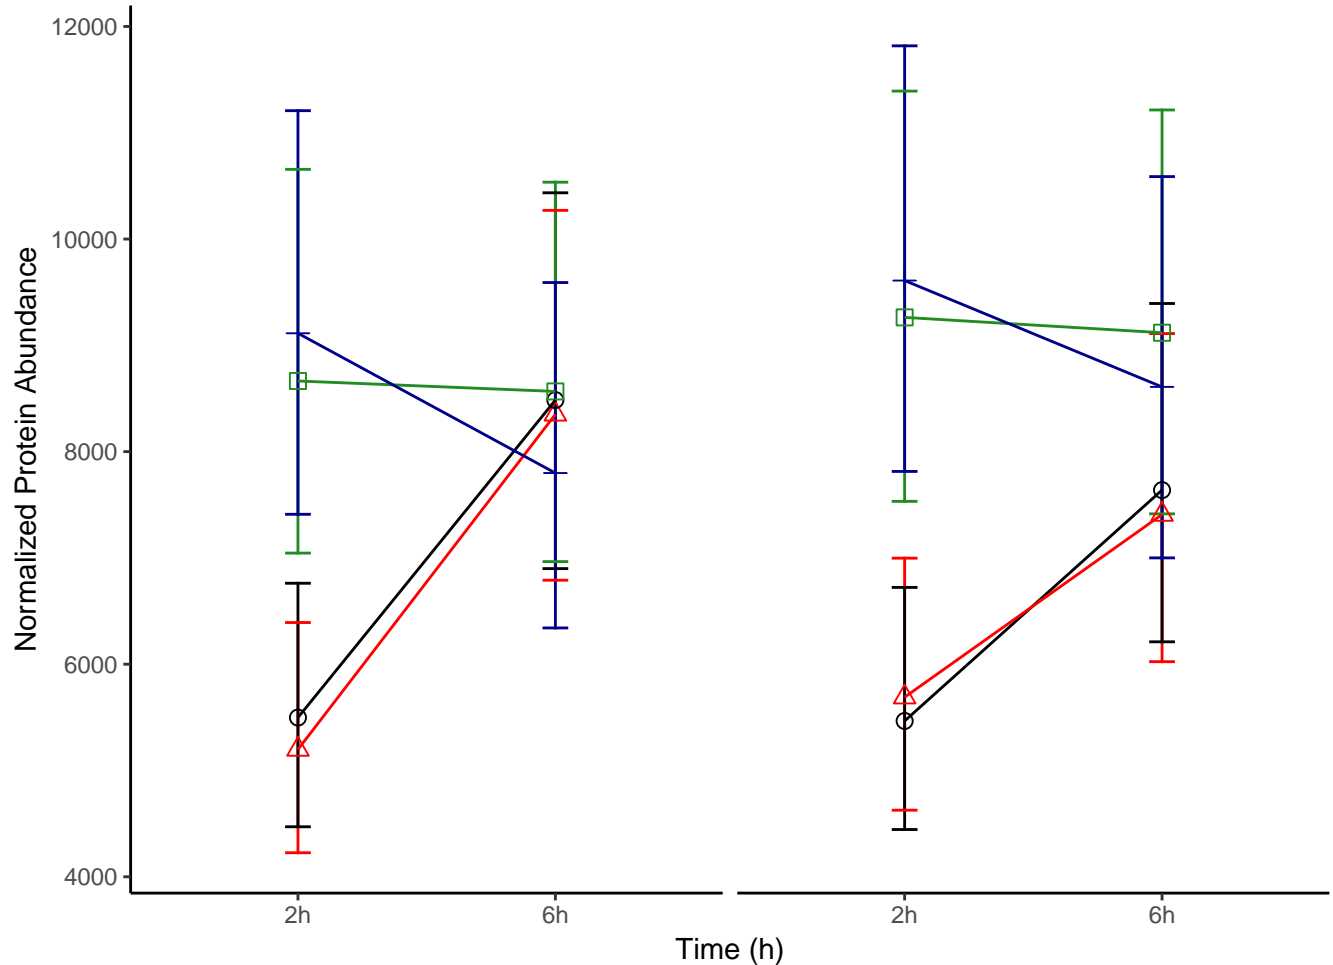

- SA564
- △ SA564- $\Delta$ hptRS
- SA564- $\Delta$ ccpA
- + SA564- $\Delta$ hptRS/ccpA

# GCST\_STAAM

TSB

TSB-dex S-133

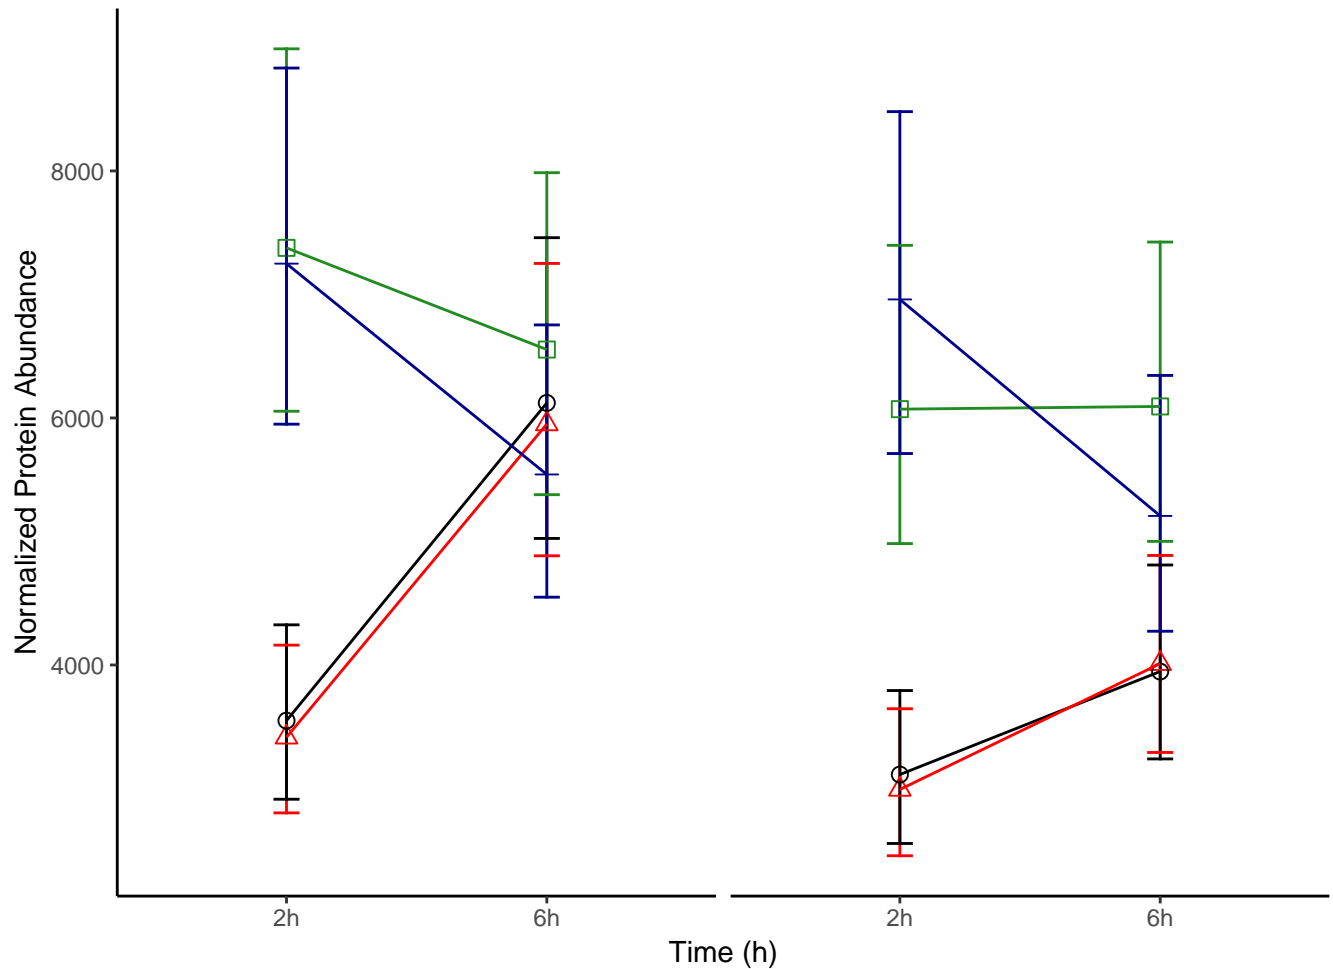

- SA564
- △ SA564-ΔhptRS
- SA564-ΔccpA
- + SA564-ΔhptRS/ccpA

# GLMM\_STAAM

TSB

TSB-dex S-134

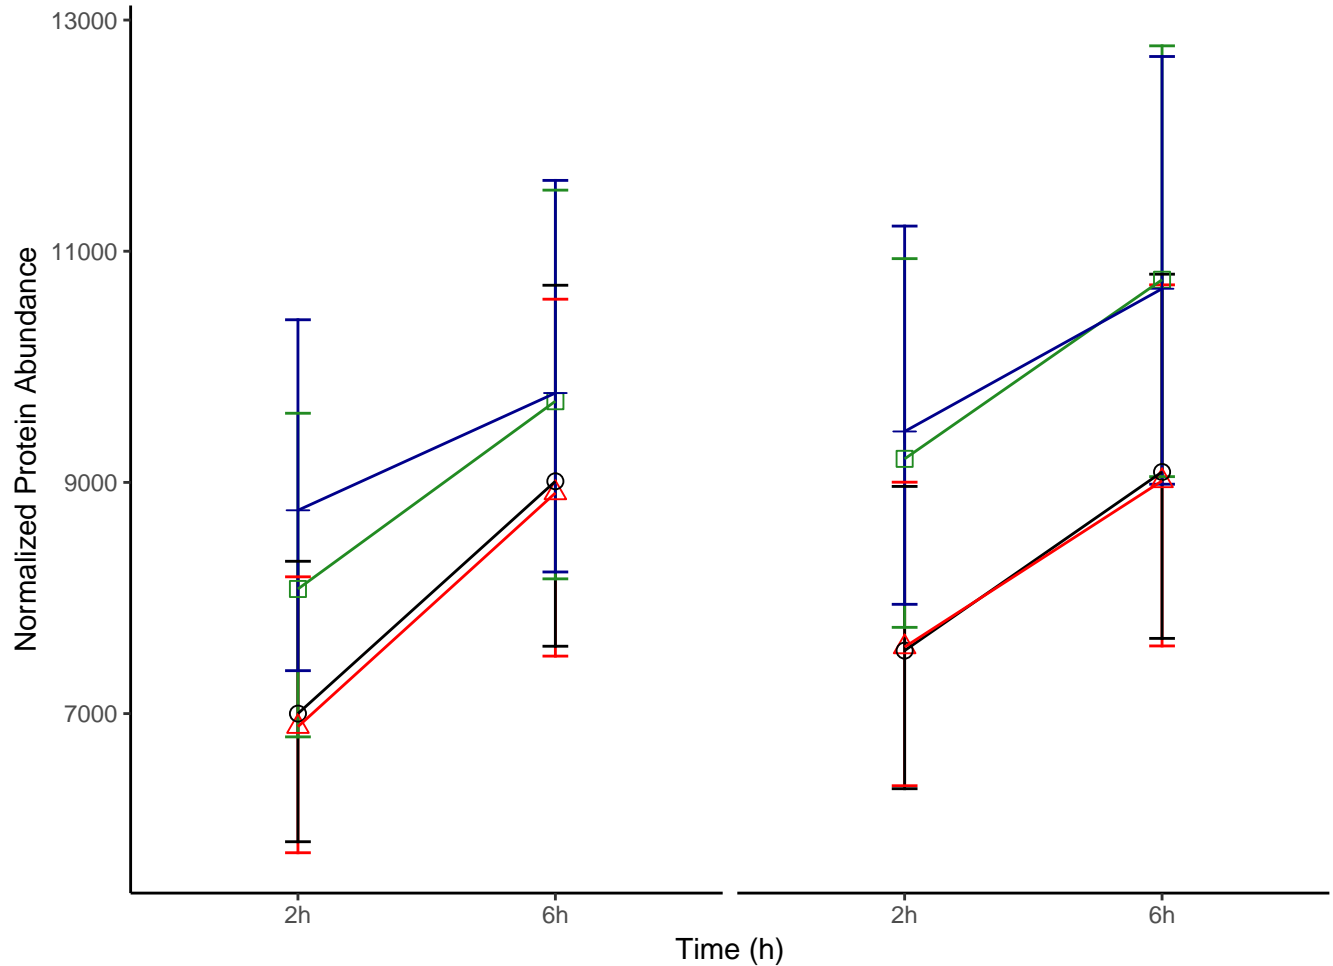

- SA564
- △ SA564- $\Delta$ hptRS
- SA564- $\Delta$ ccpA
- + SA564- $\Delta$ hptRS/ccpA

# GLMS\_STAAM

TSB

TSB-dex S-135

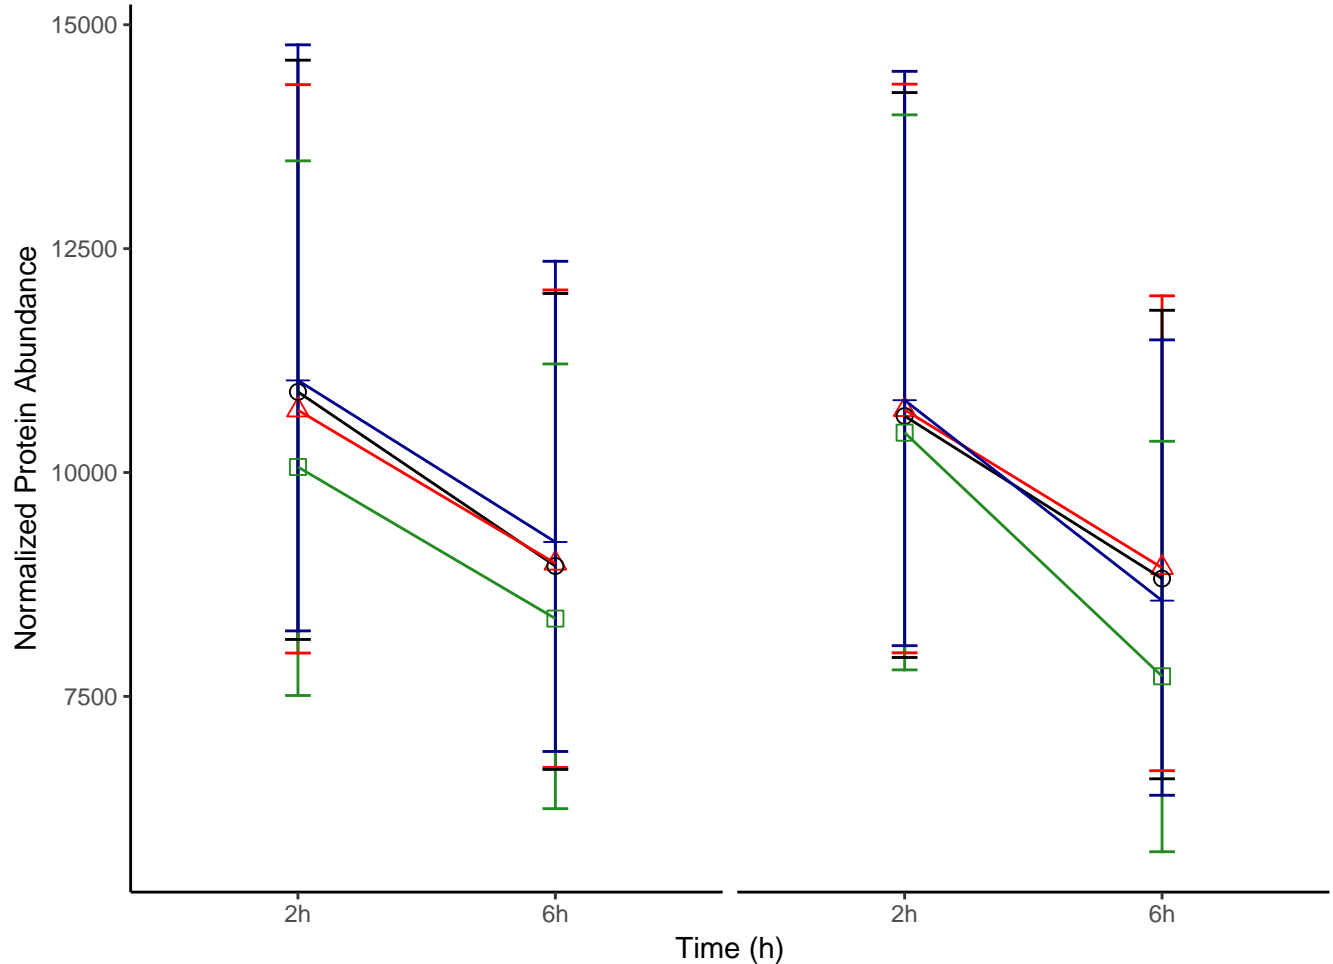

- SA564
- △ SA564-ΔhptRS
- SA564-ΔccpA
- + SA564-ΔhptRS/ccpA

# GLMU\_STAAM

TSB

TSB-dex S-136

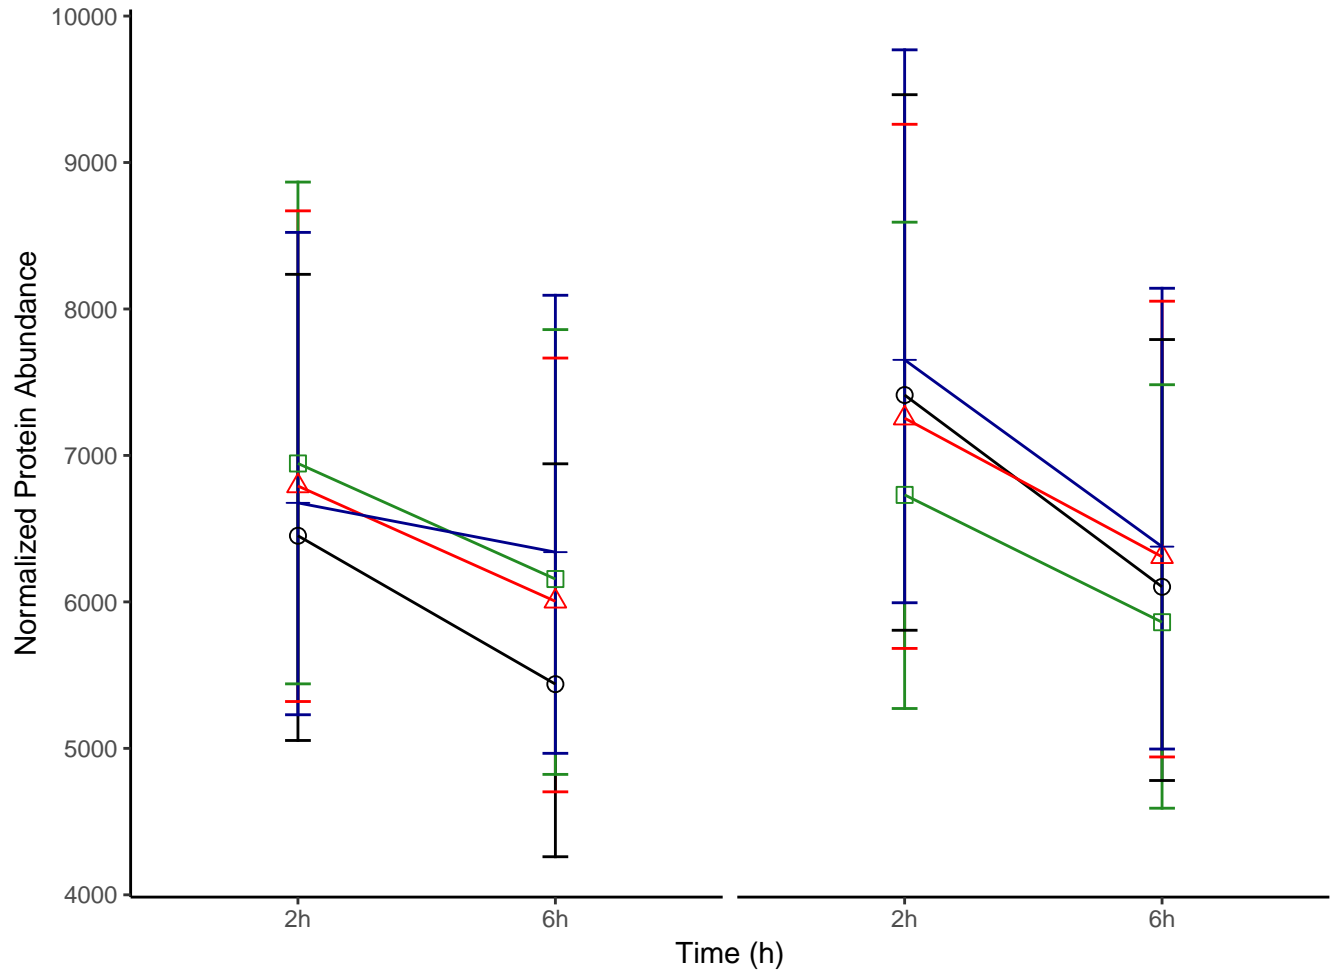

- SA564
- △ SA564-ΔhptRS
- SA564-ΔccpA
- + SA564-ΔhptRS/ccpA



# GLNA\_STAAM

TSB

TSB-dex S-137

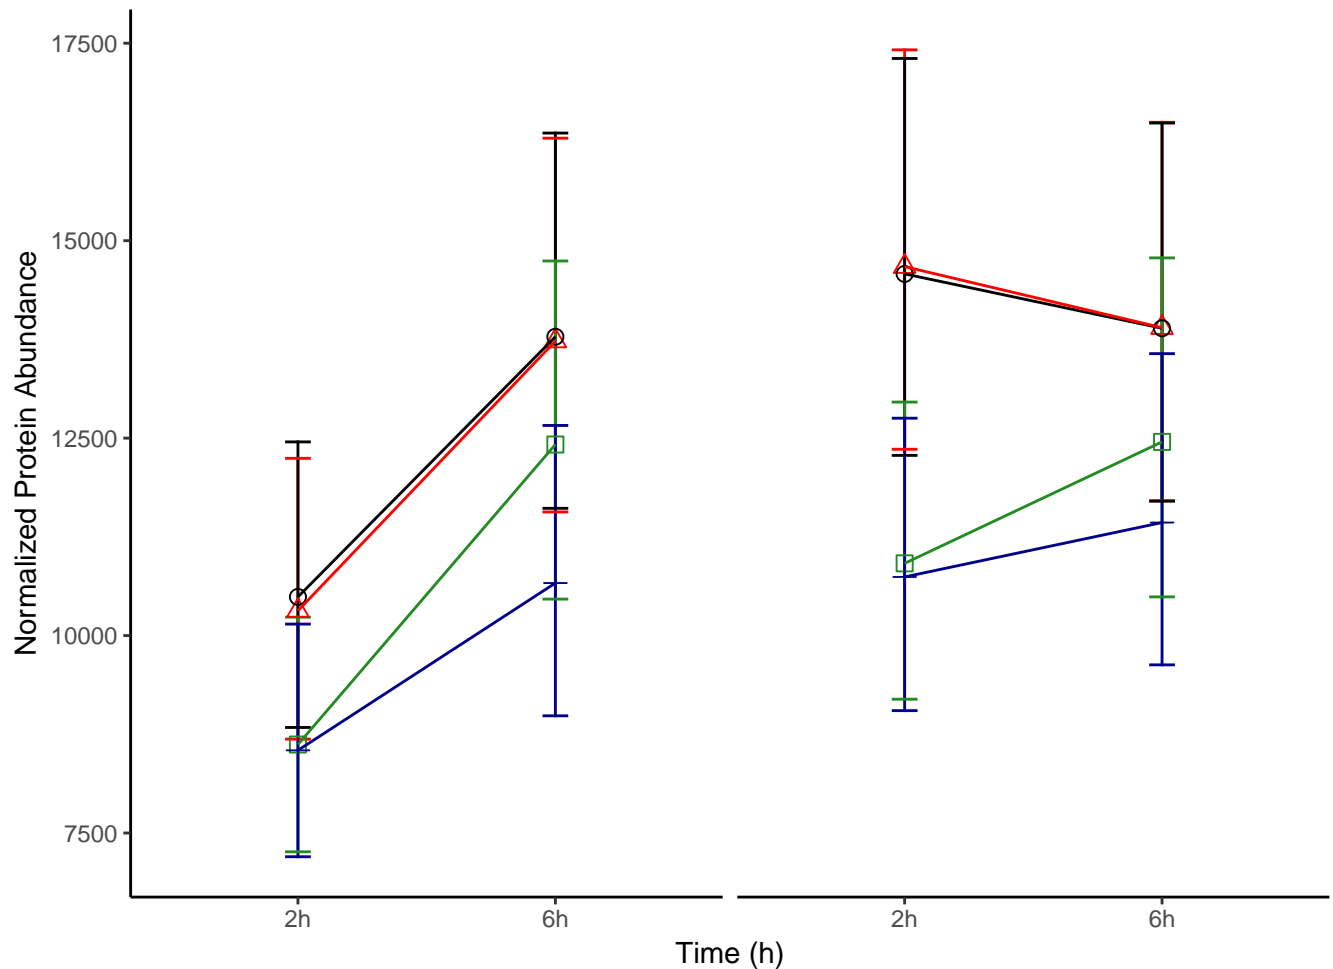

- SA564
- △ SA564- $\Delta$ *hptRS*
- SA564- $\Delta$ *ccpA*
- + SA564- $\Delta$ *hptRS/ccpA*

# GLPD\_STAAM

TSB

TSB-dex S-138

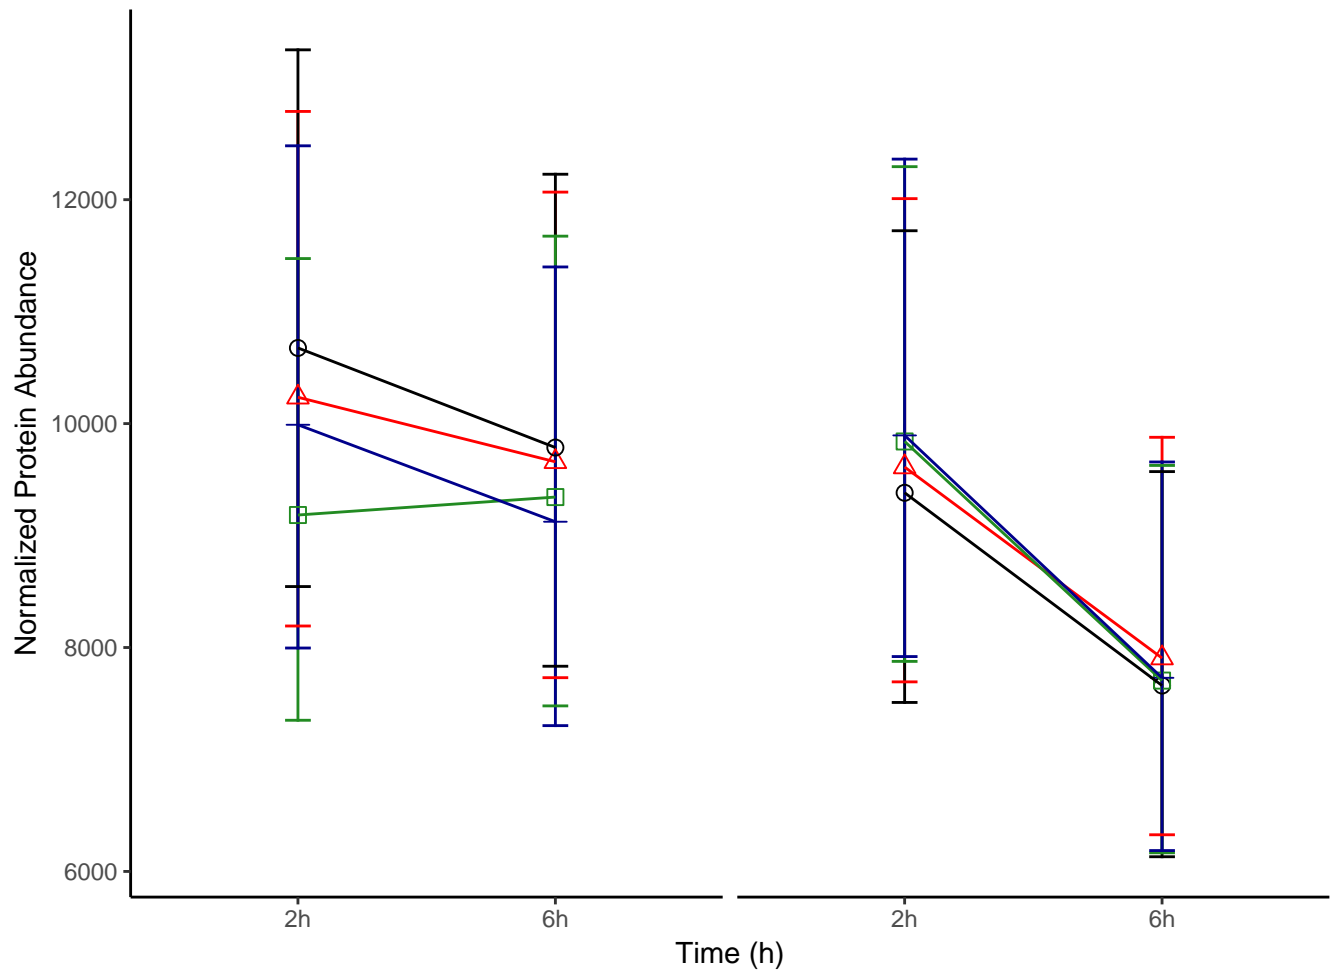

- SA564
- △ SA564- $\Delta$ *hptRS*
- SA564- $\Delta$ *ccpA*
- + SA564- $\Delta$ *hptRS/ccpA*

# GLPK\_STAAM

TSB

TSB-dex S-139

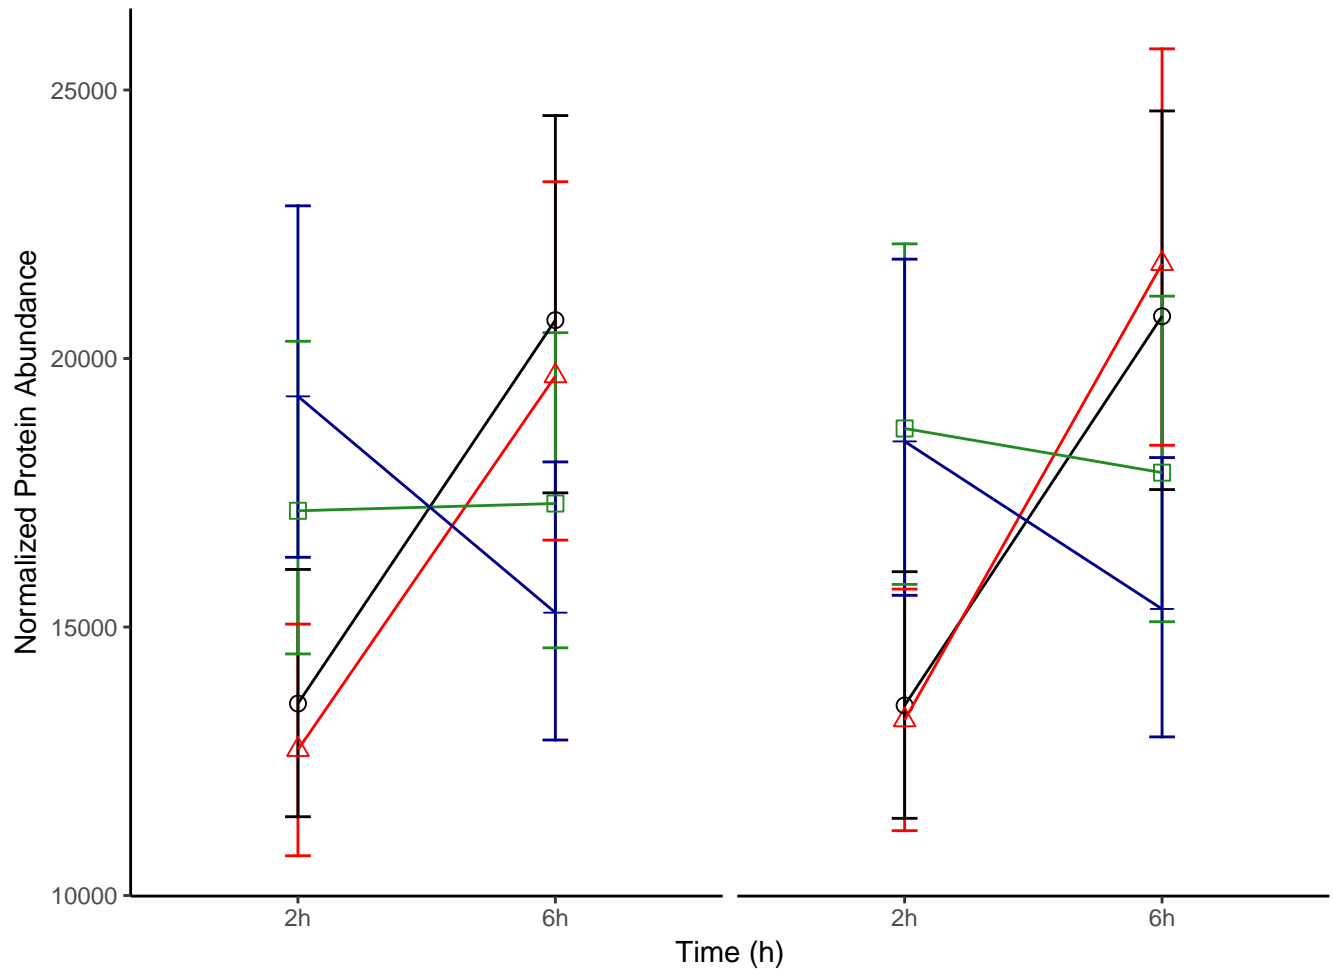

- SA564
- △ SA564-ΔhptRS
- SA564-ΔccpA
- + SA564-ΔhptRS/ccpA

# GLYA\_STAAM

TSB

TSB-dex S-140

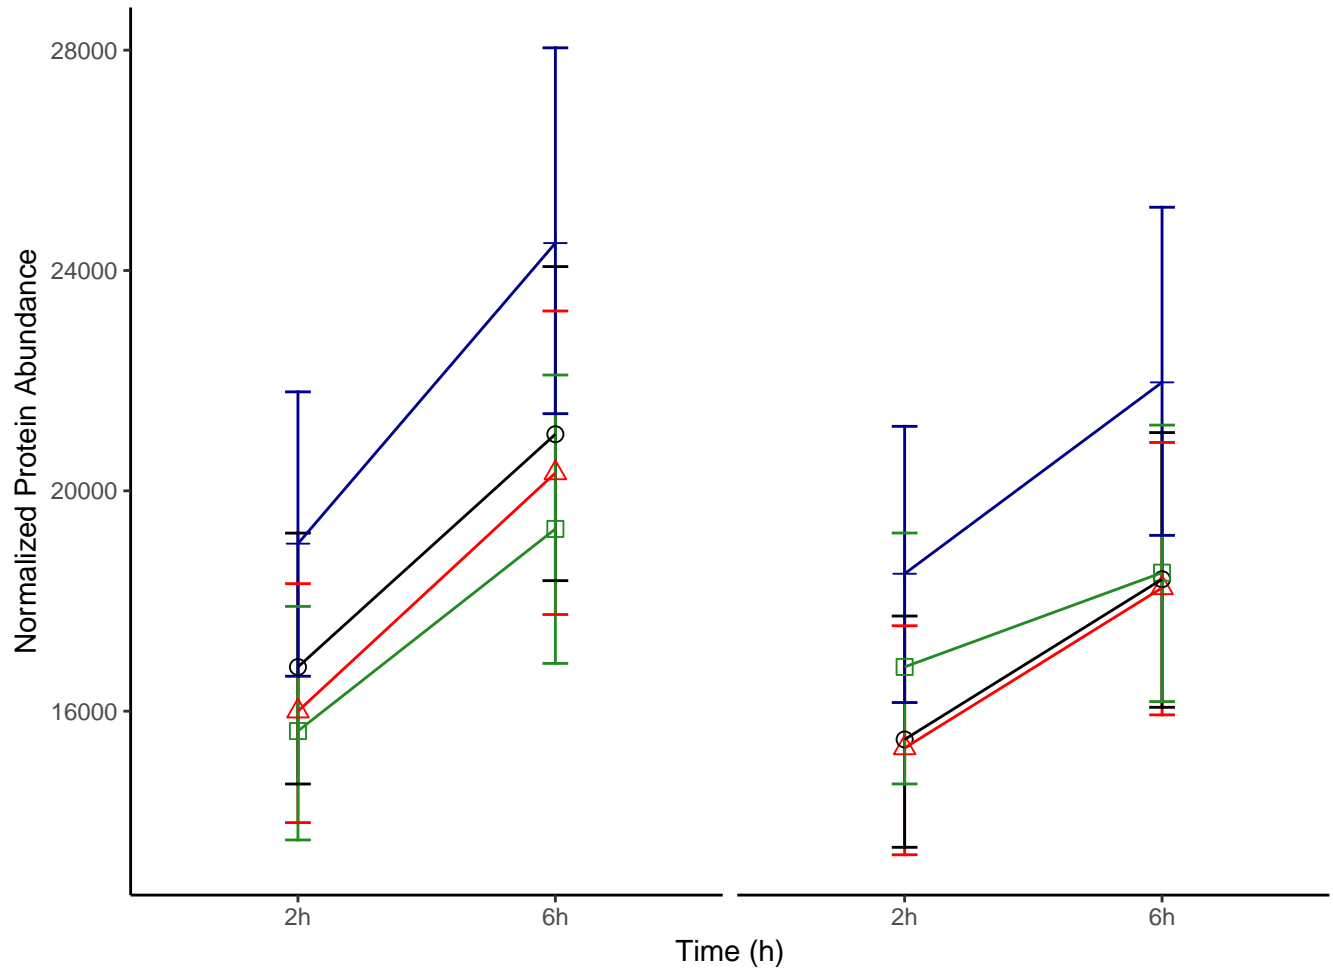

- SA564
- △ SA564- $\Delta$ *hptRS*
- SA564- $\Delta$ *ccpA*
- + SA564- $\Delta$ *hptRS/ccpA*

# GPDA\_STAAM

TSB

TSB-dex S-141

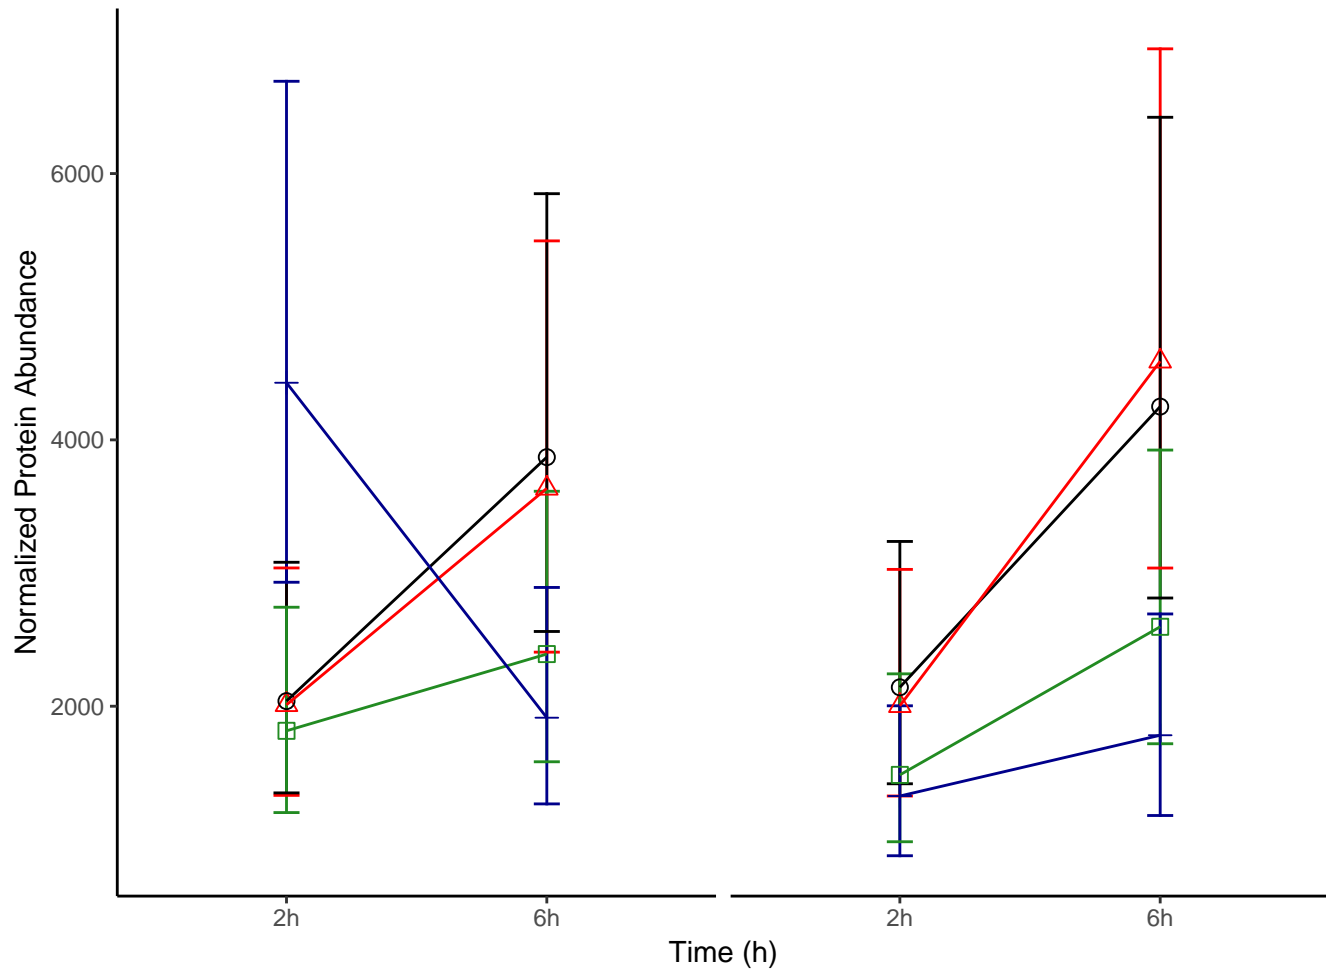

- SA564
- △ SA564- $\Delta$ *hptRS*
- SA564- $\Delta$ *ccpA*
- + SA564- $\Delta$ *hptRS/ccpA*

# GPMA\_STAAM

TSB

TSB-dex S-142

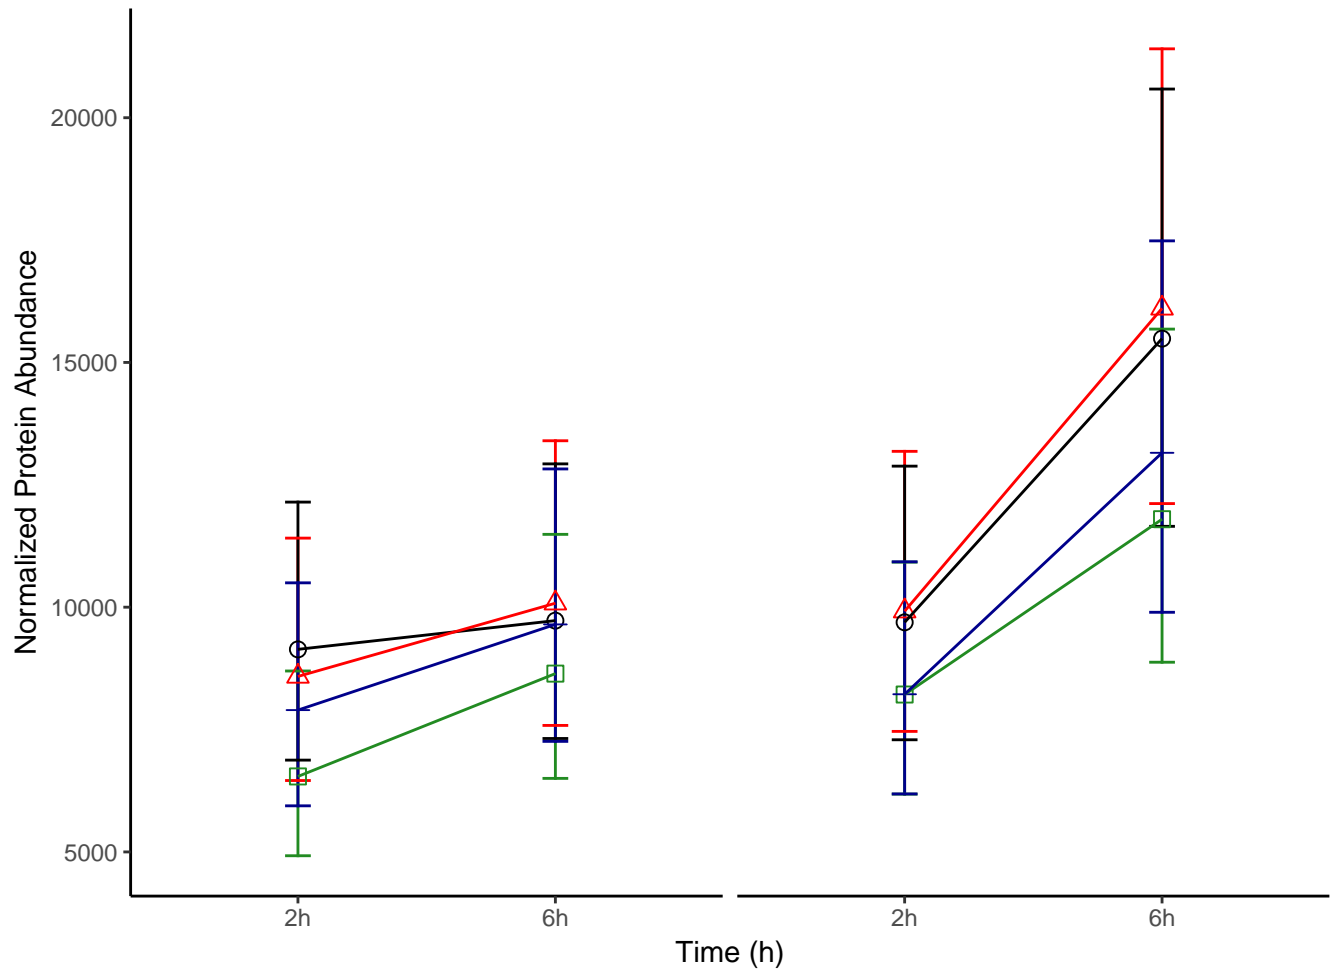

- SA564
- △ SA564- $\Delta hptRS$
- SA564- $\Delta ccpA$
- + SA564- $\Delta hptRS/ccpA$

# GPMI\_STAAM

TSB

TSB-dex S-143

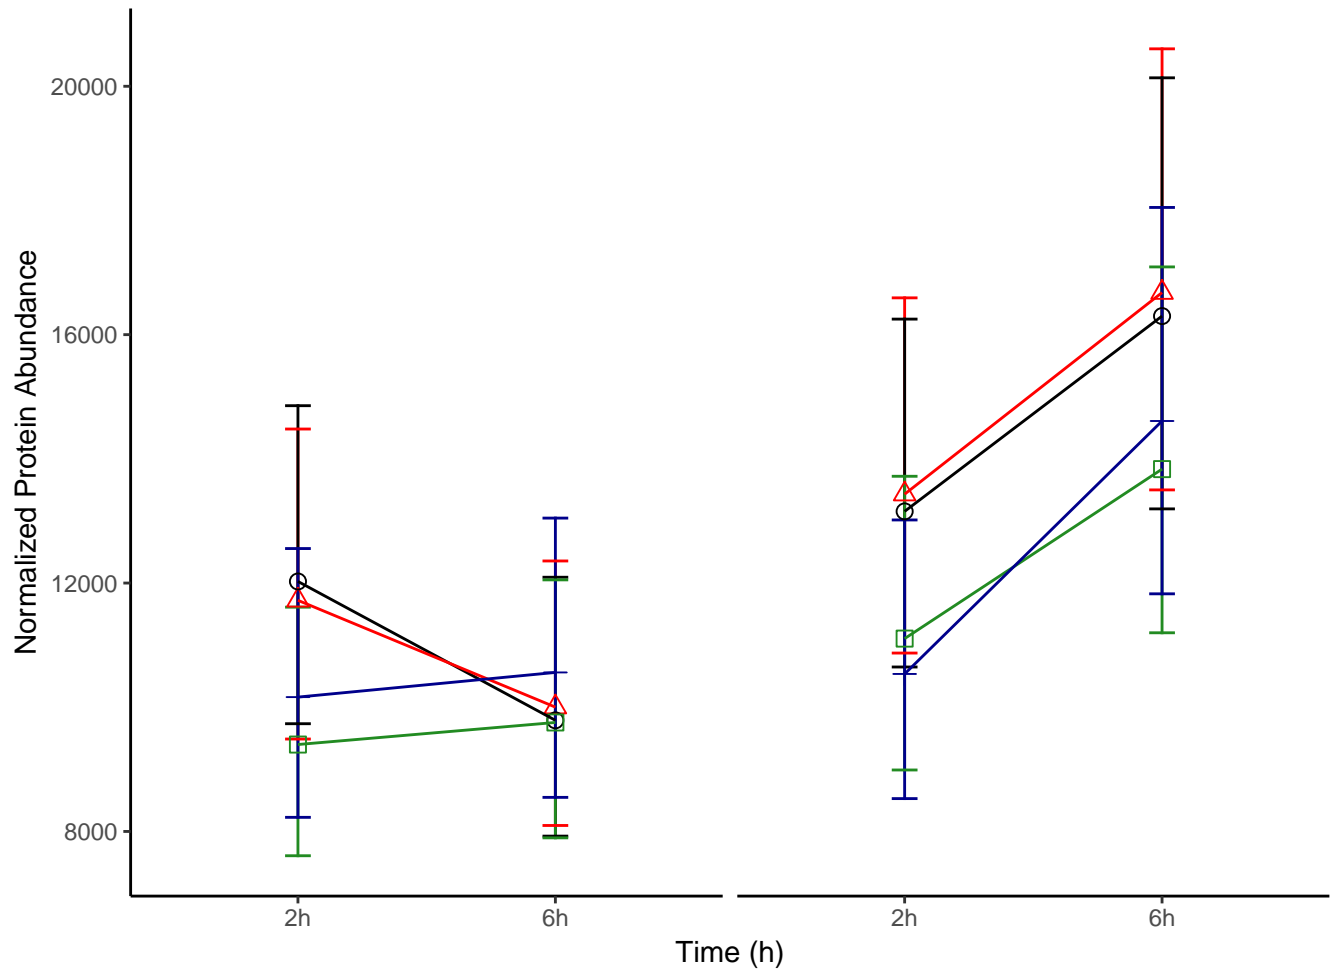

- SA564
- △ SA564- $\Delta$ *hptRS*
- SA564- $\Delta$ *ccpA*
- + SA564- $\Delta$ *hptRS/ccpA*

# GPSB\_STAAM

TSB

TSB-dex S-144

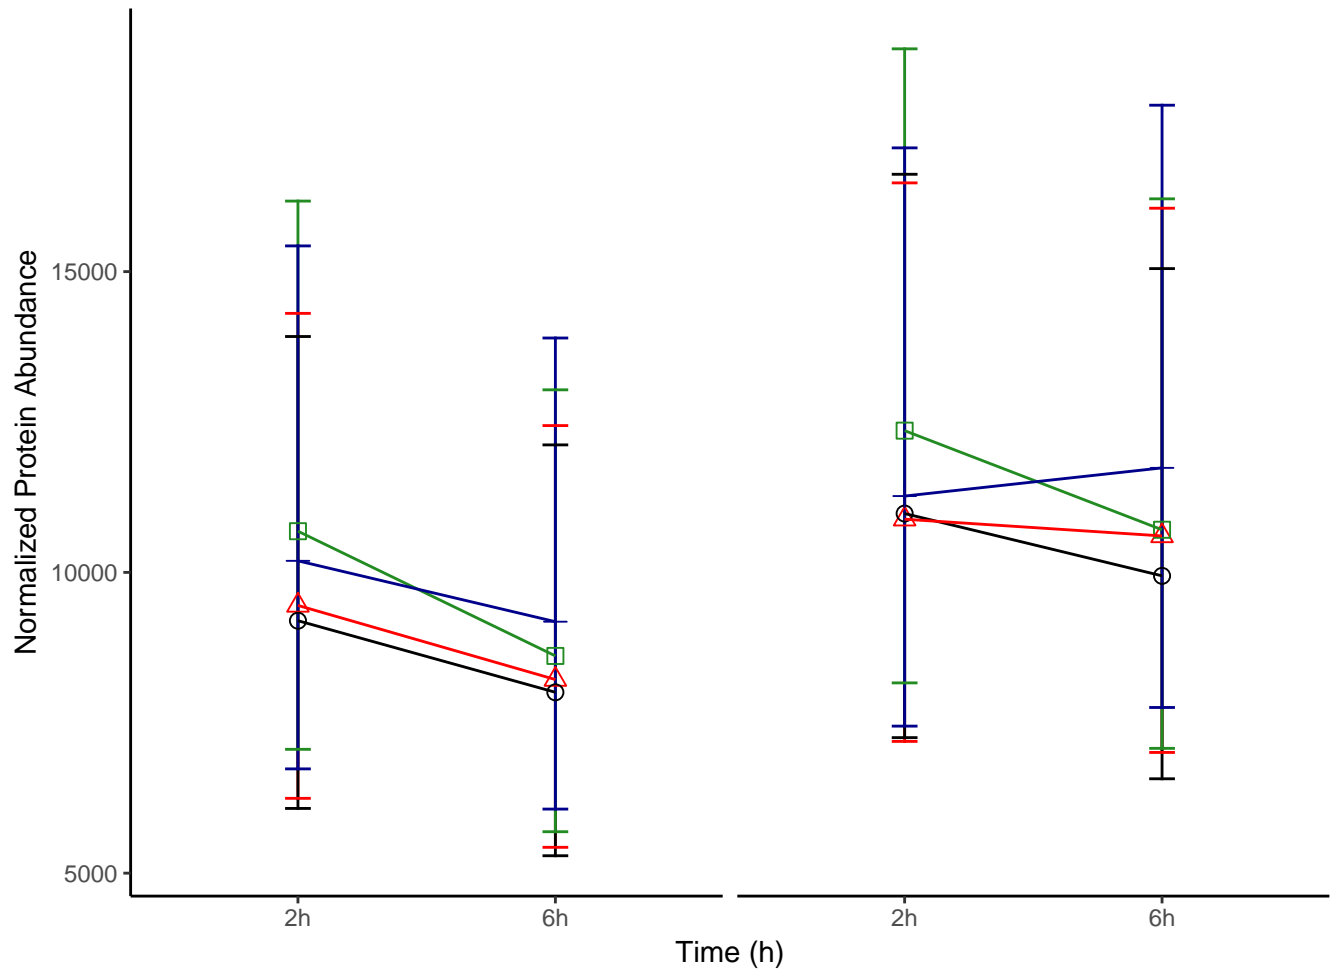

- SA564
- △ SA564-ΔhptRS
- SA564-ΔccpA
- + SA564-ΔhptRS/ccpA



# GRAR\_STAAM

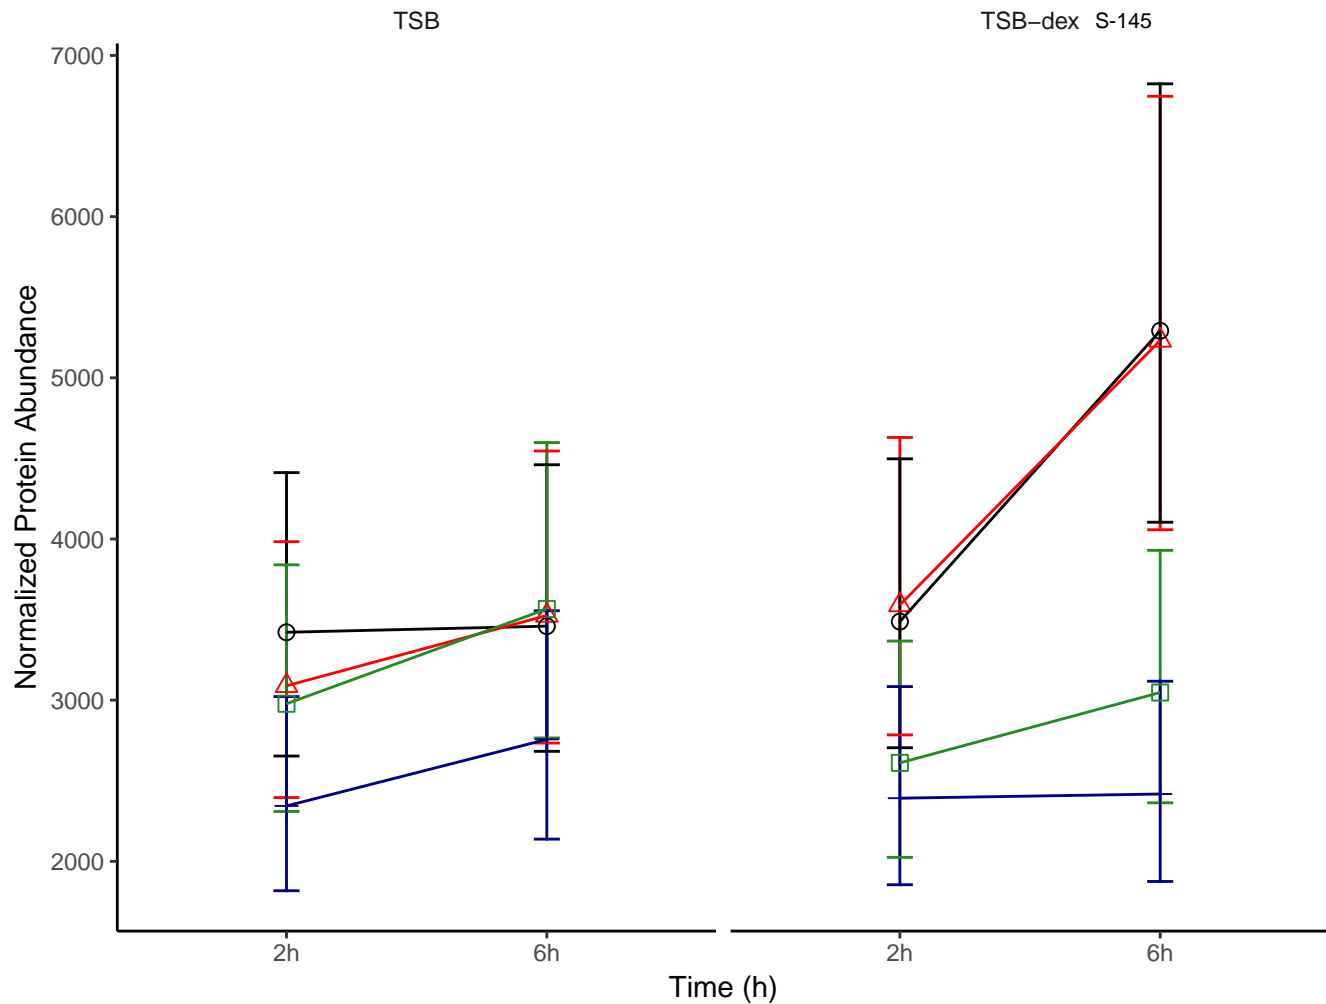

- SA564
- △ SA564- $\Delta$ *hptRS*
- SA564- $\Delta$ *ccpA*
- + SA564- $\Delta$ *hptRS/ccpA*

# GREY\_STAAM

TSB

TSB-dex S-146

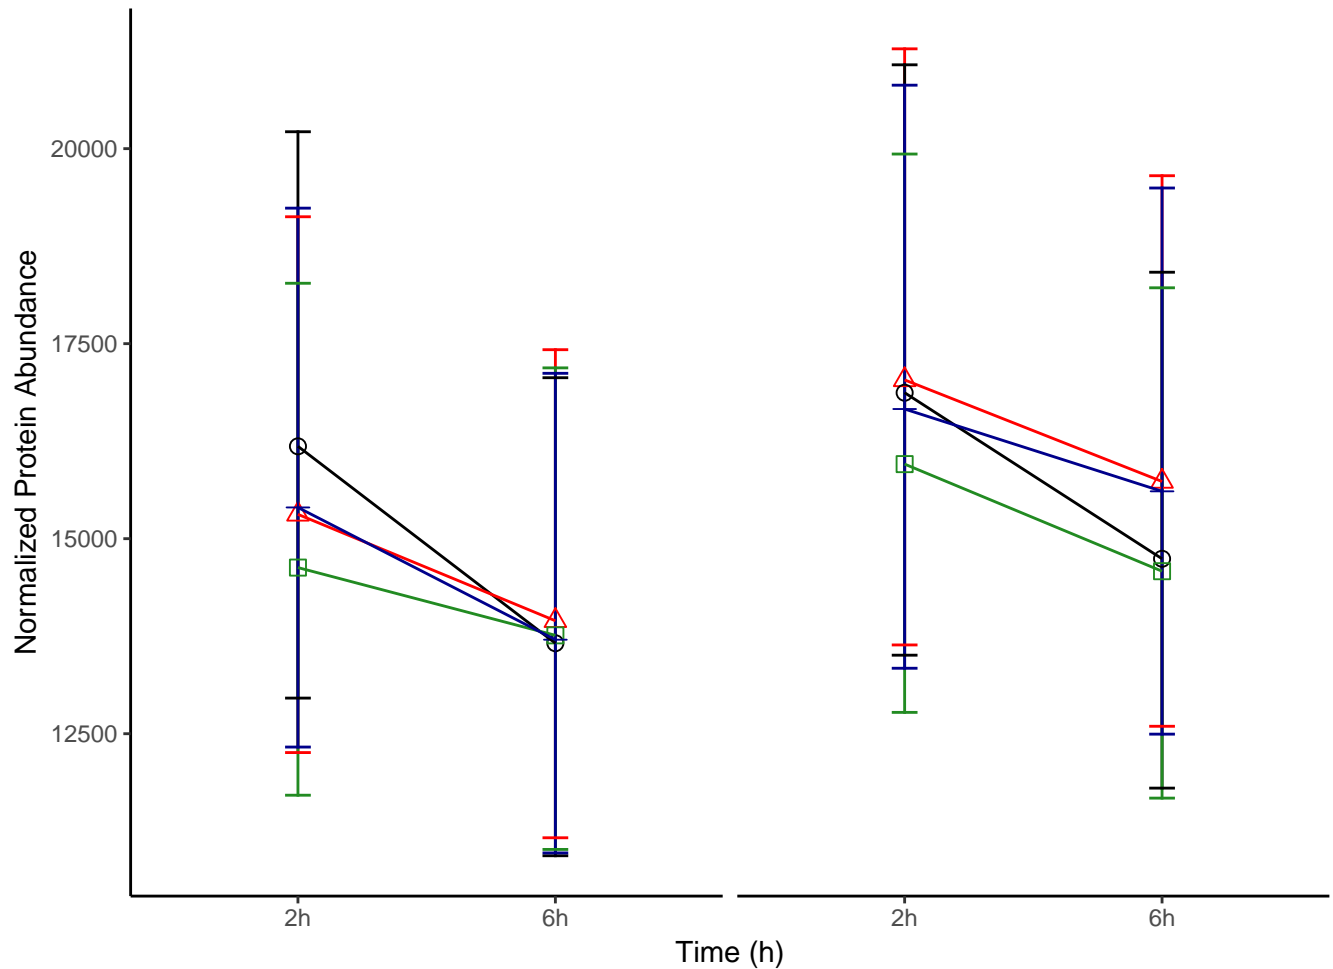

- SA564
- △ SA564-ΔhptRS
- SA564-ΔccpA
- + SA564-ΔhptRS/ccpA

## GRPE\_STAAM

TSB

TSB-dex S-147

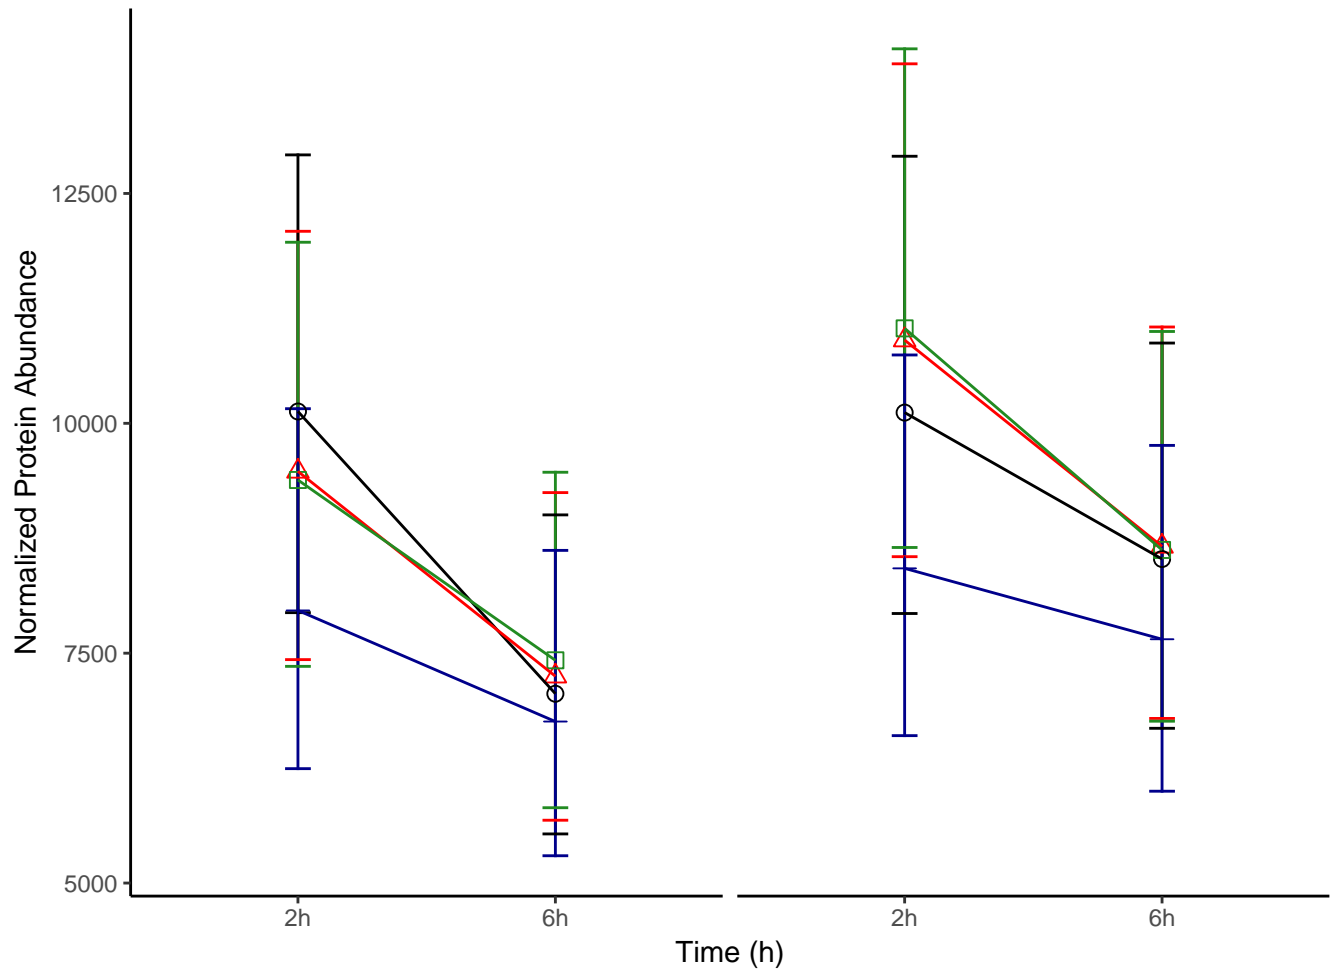

- SA564
- △ SA564-ΔhptRS
- SA564-ΔccpA
- + SA564-ΔhptRS/ccpA

# GSA1\_STAAM

TSB

TSB-dex S-148

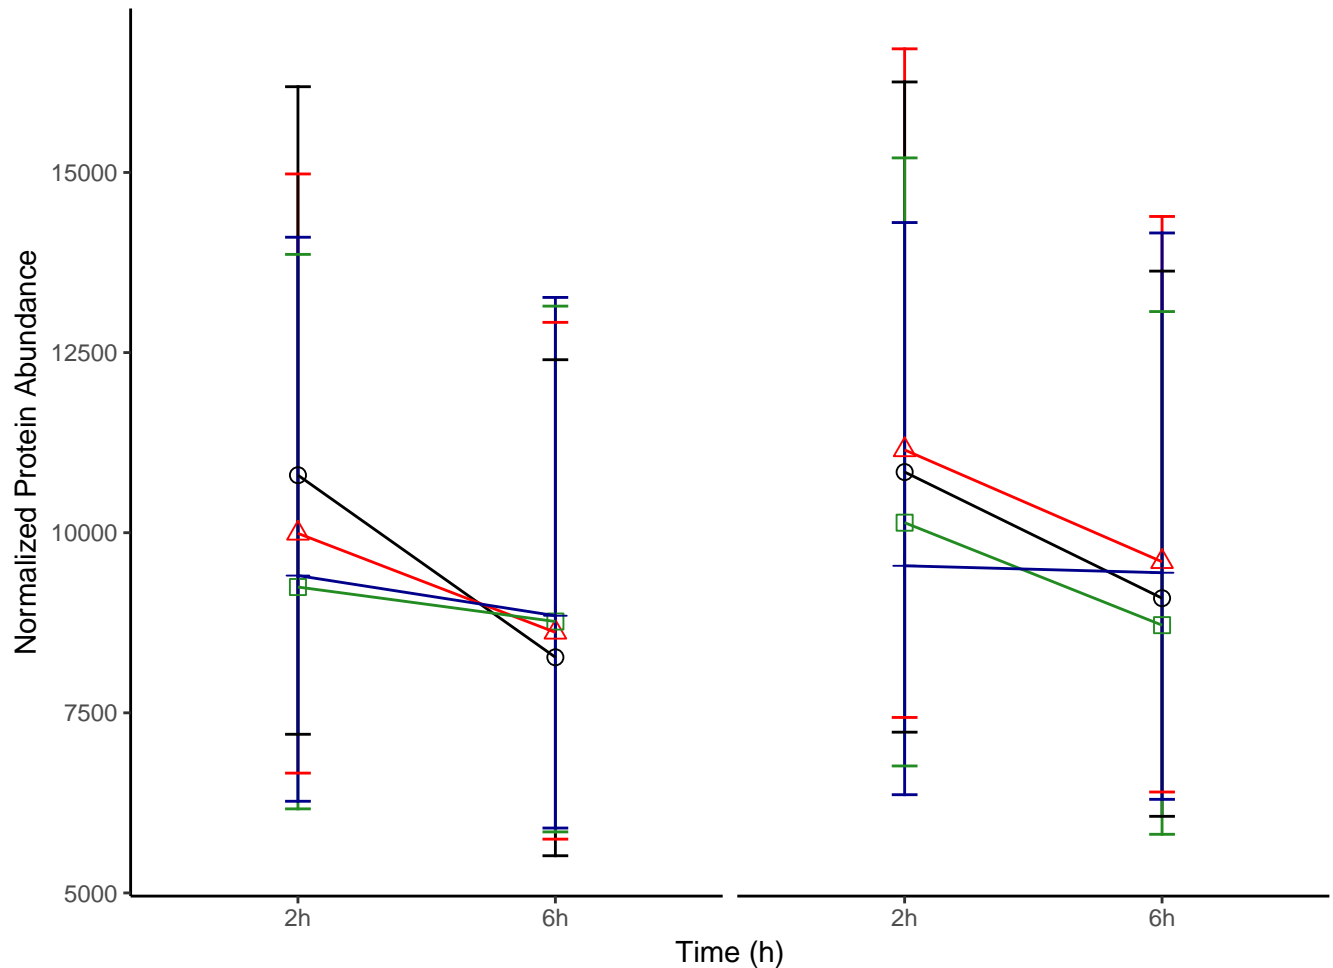

- SA564
- △ SA564-ΔhptRS
- SA564-ΔccpA
- + SA564-ΔhptRS/ccpA

# GSA2\_STAAM

TSB

TSB-dex S-149

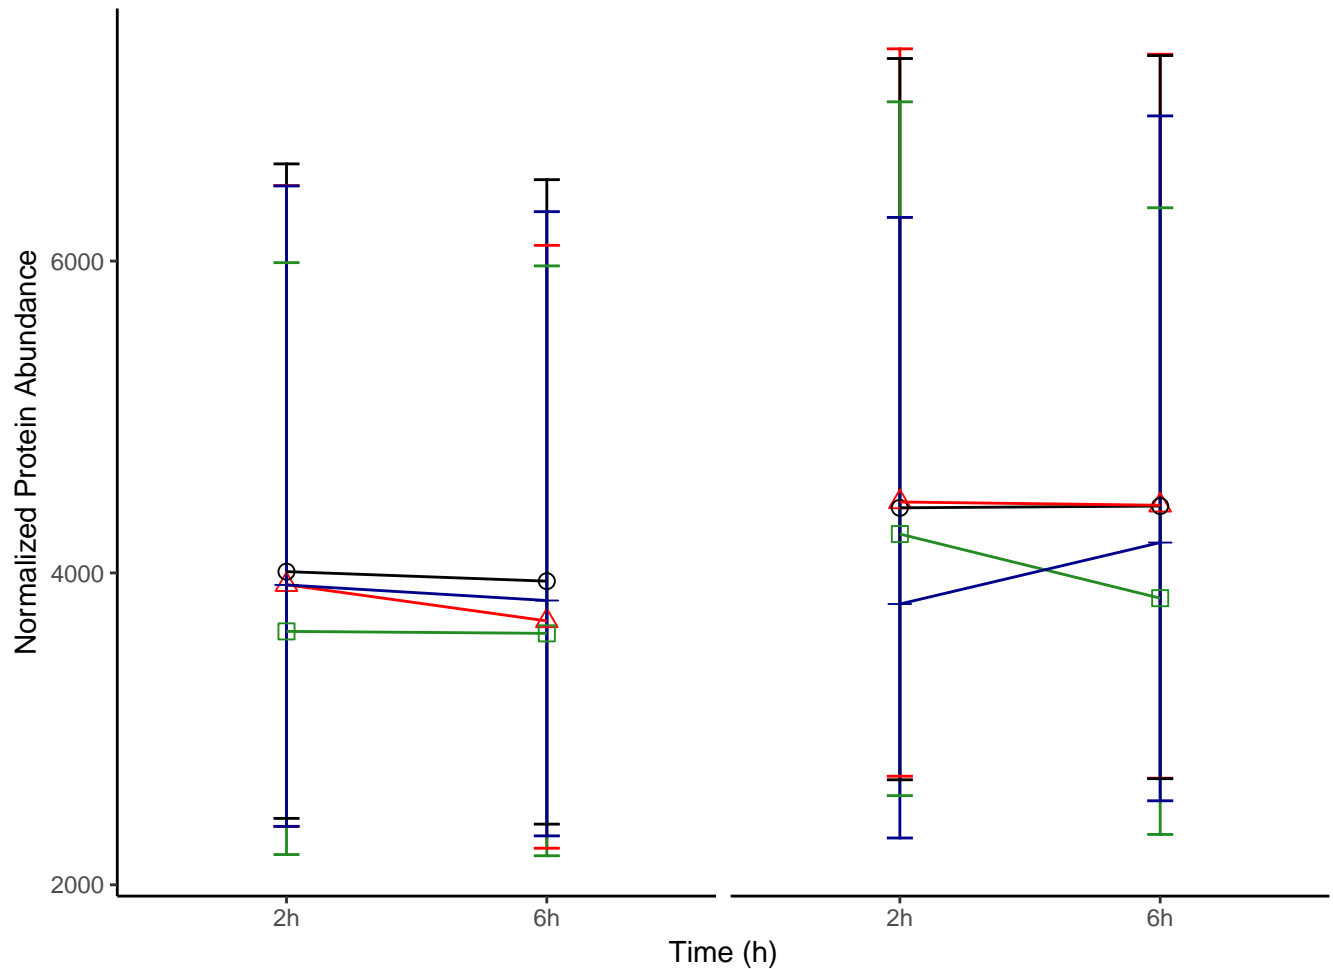

- SA564
- △ SA564-ΔhptRS
- SA564-ΔccpA
- + SA564-ΔhptRS/ccpA

# GTAB\_STAAM

TSB

TSB-dex S-150

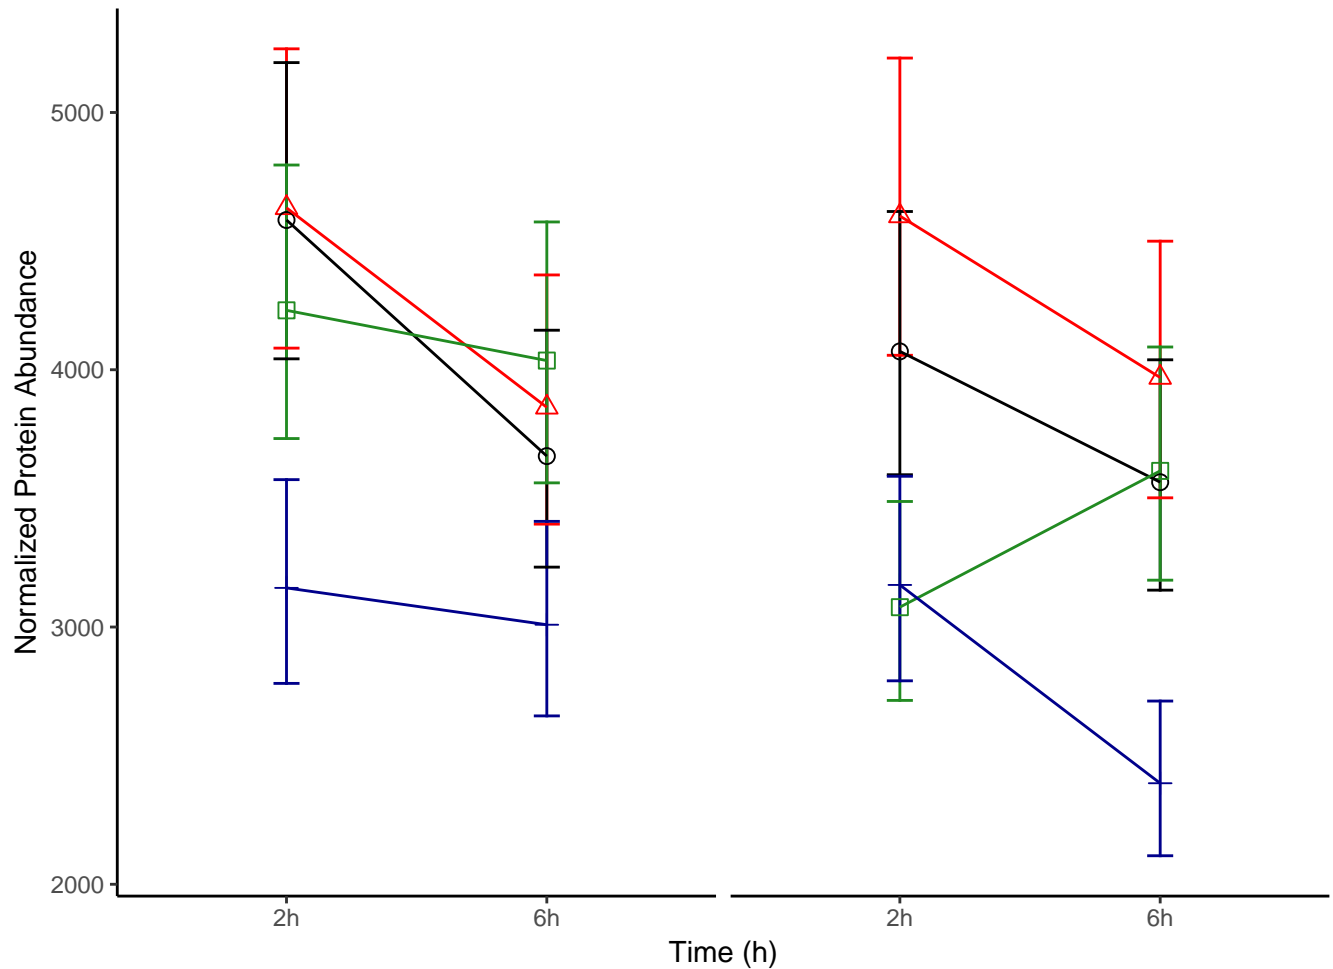

- SA564
- △ SA564- $\Delta$ *hptRS*
- SA564- $\Delta$ *ccpA*
- + SA564- $\Delta$ *hptRS/ccpA*

# GUAA\_STAAM

TSB

TSB-dex S-151

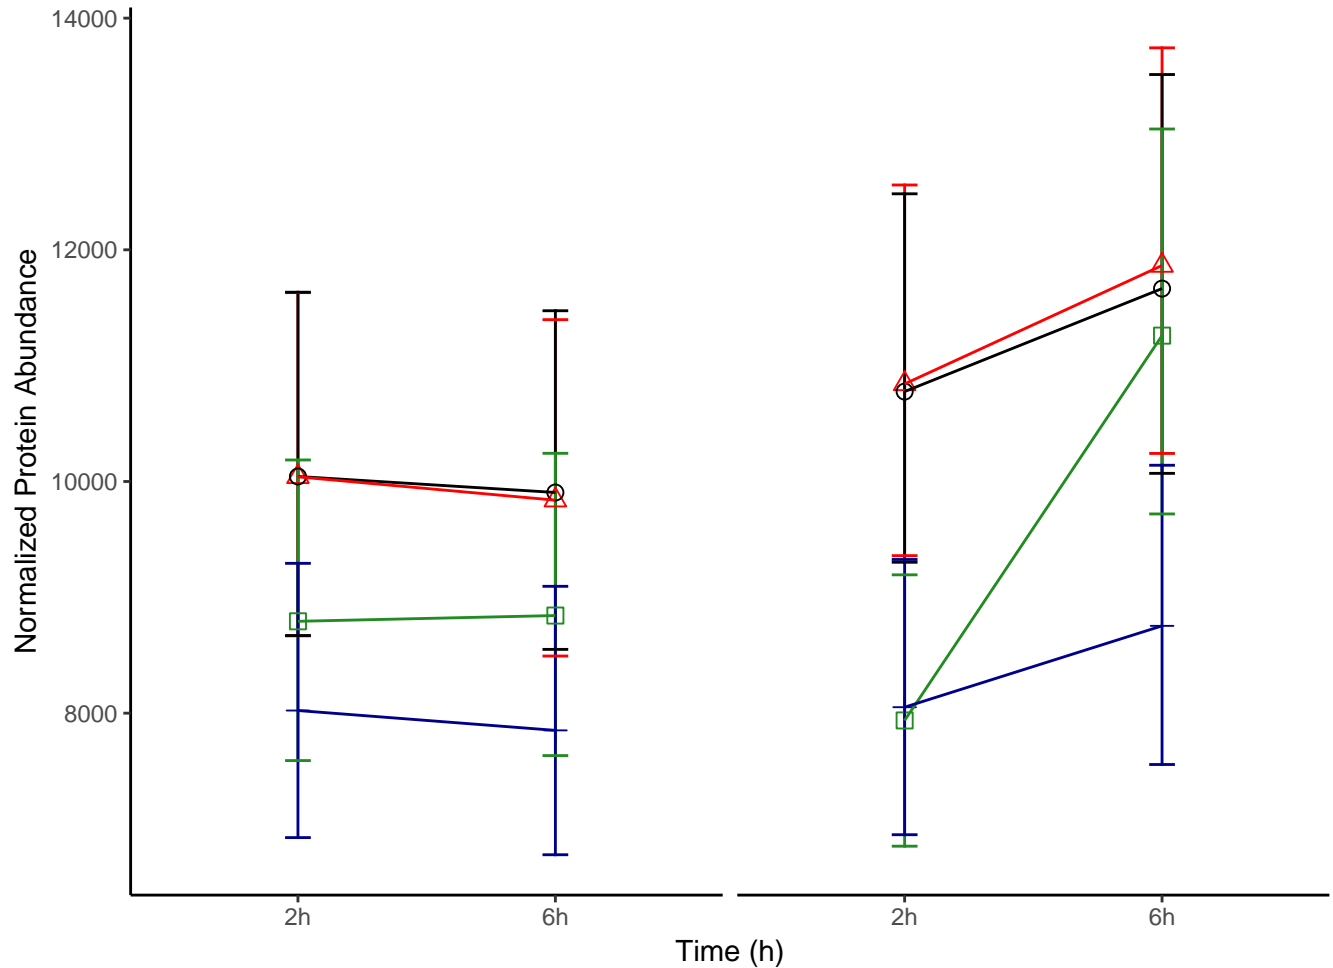

- SA564
- △ SA564-Δ*hptRS*
- SA564-Δ*ccpA*
- + SA564-Δ*hptRS/ccpA*

# GUAC\_STAAM

TSB

TSB-dex S-152

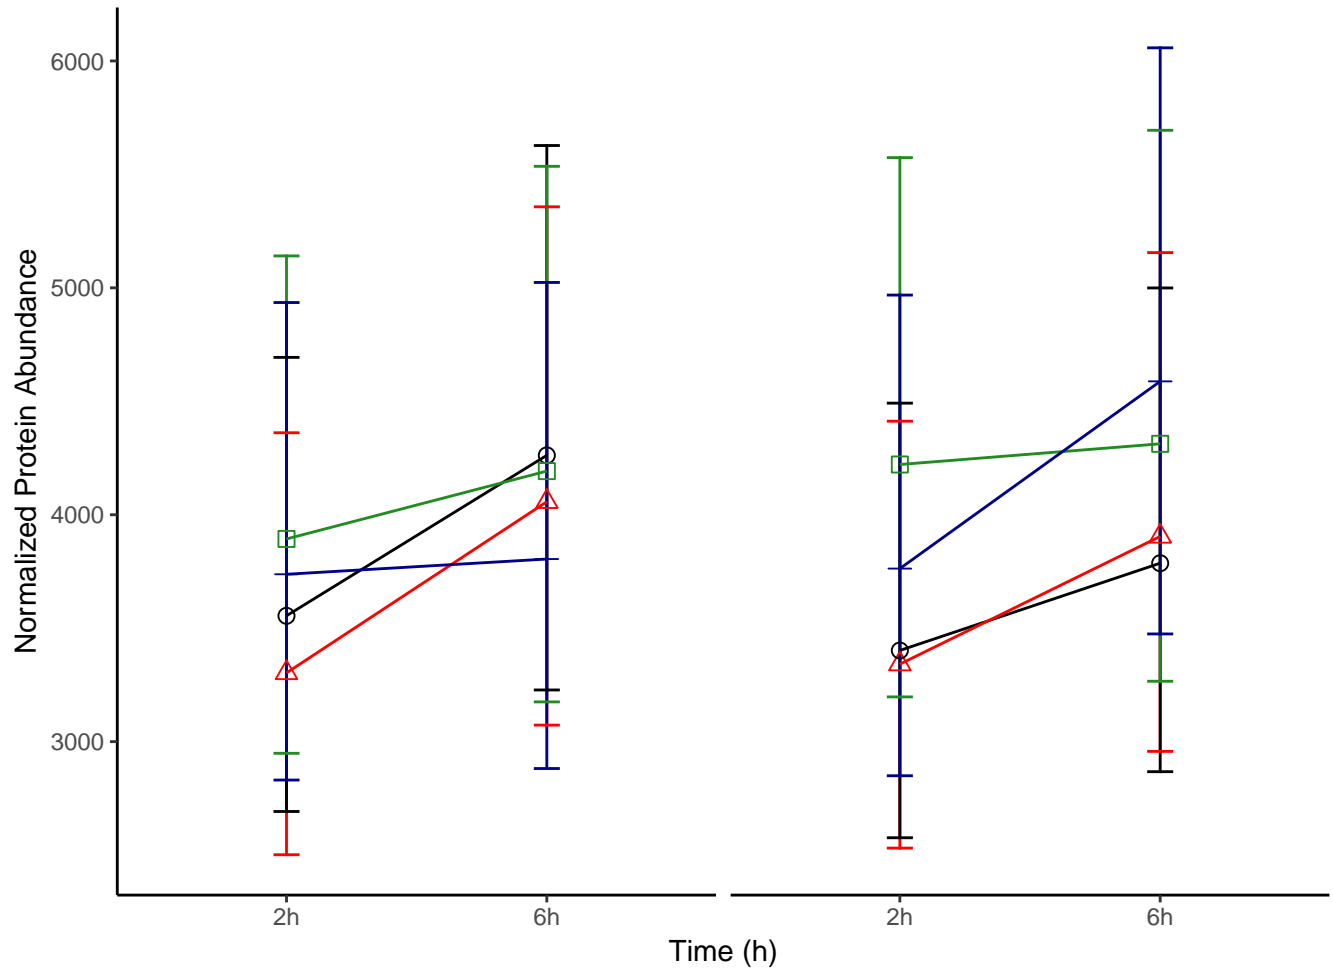

- SA564
- △ SA564- $\Delta$ *hptRS*
- SA564- $\Delta$ *ccpA*
- + SA564- $\Delta$ *hptRS/ccpA*



# GYRB\_STAAM

TSB

TSB-dex S-153

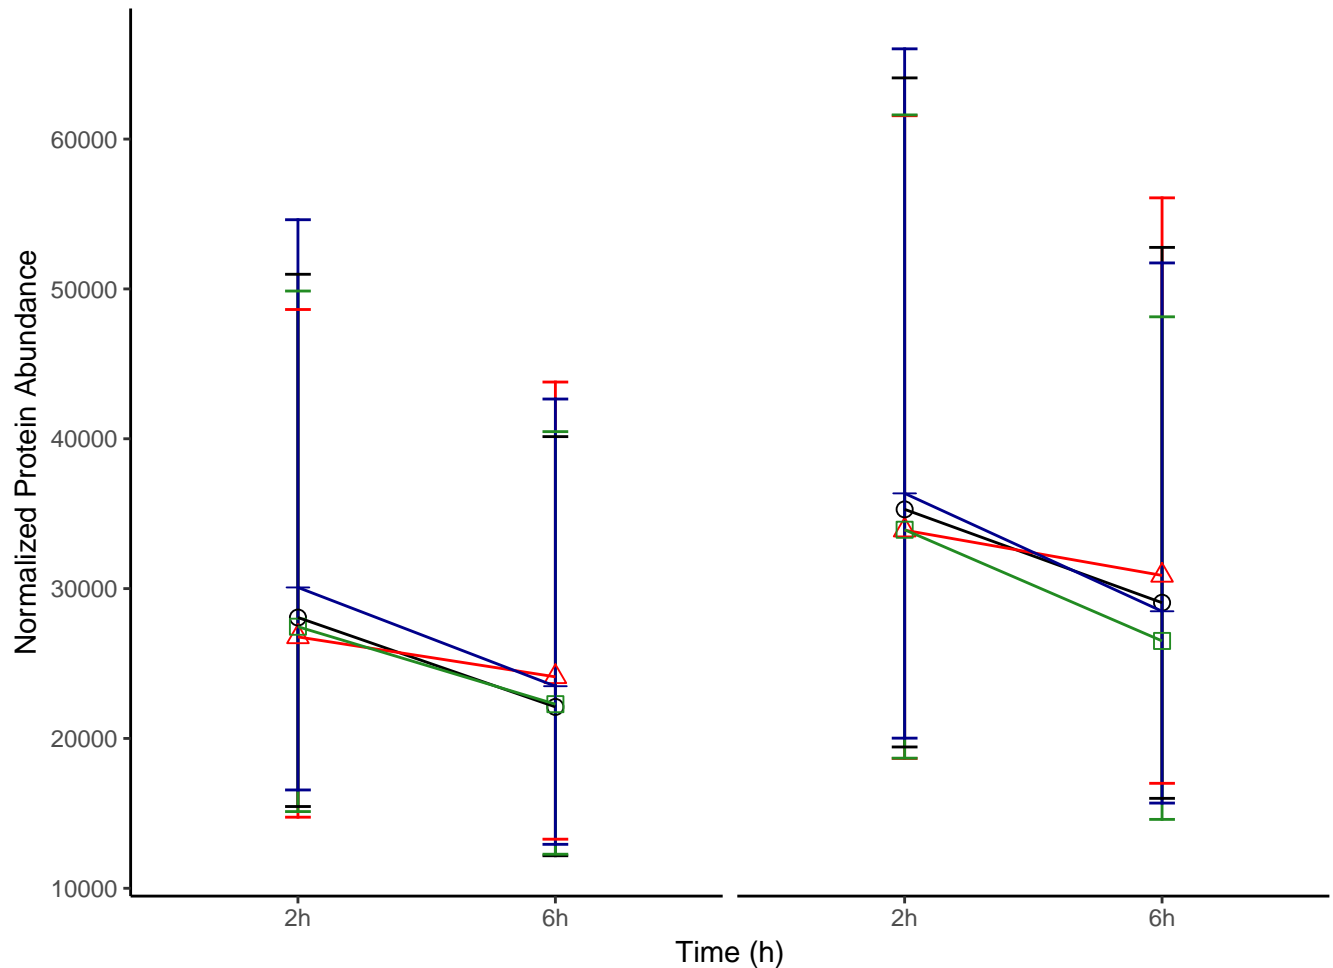

- SA564
- △ SA564- $\Delta hptRS$
- SA564- $\Delta ccpA$
- + SA564- $\Delta hptRS/ccpA$

# HCHA\_STAAM

TSB

TSB-dex S-154

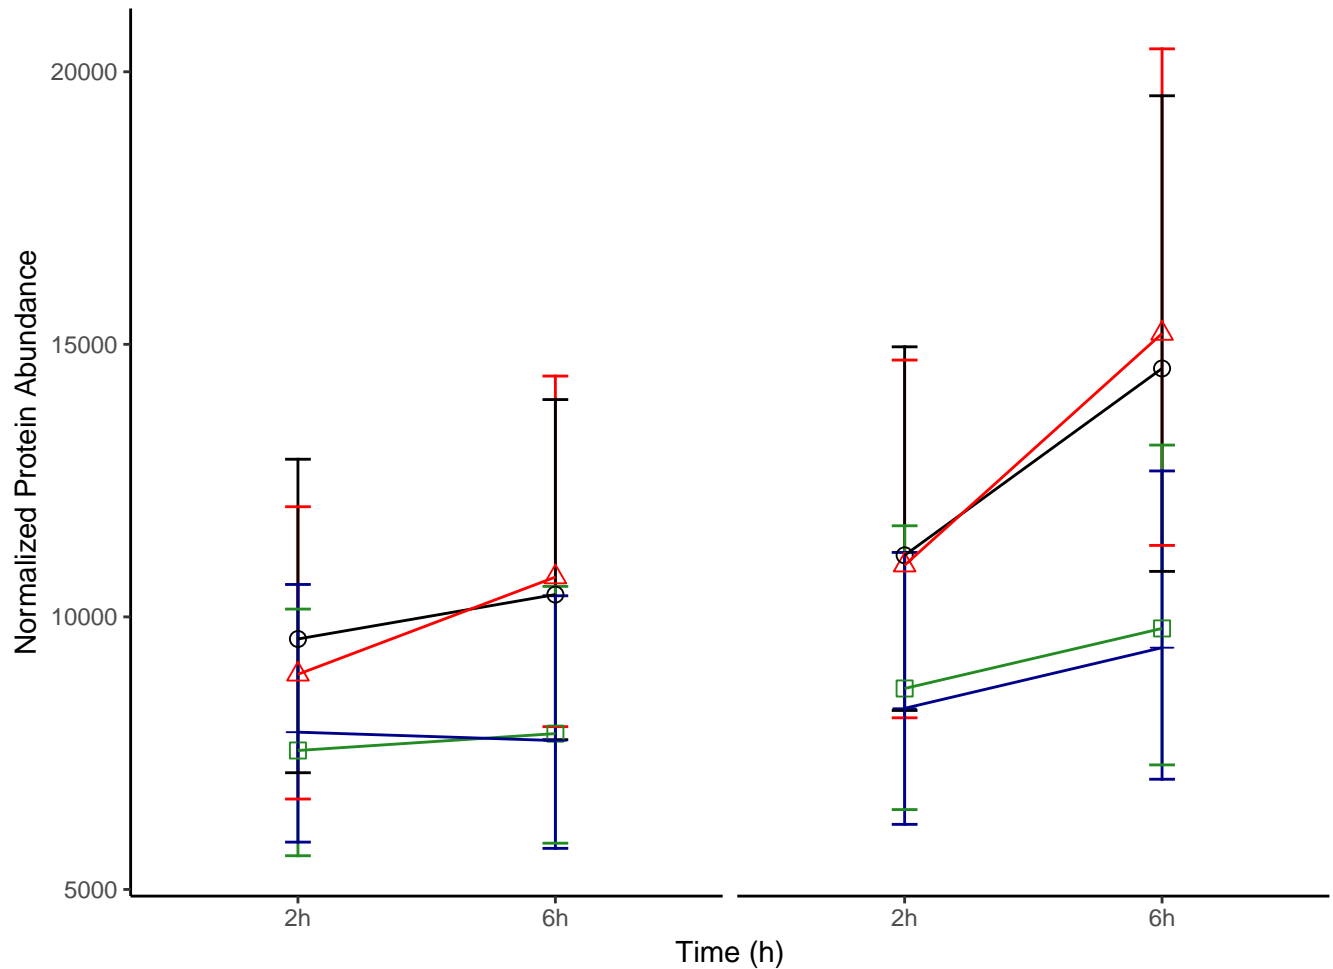

- SA564
- △ SA564-ΔhptRS
- SA564-ΔccpA
- + SA564-ΔhptRS/ccpA

# HEM2\_STAAM

TSB

TSB-dex S-155

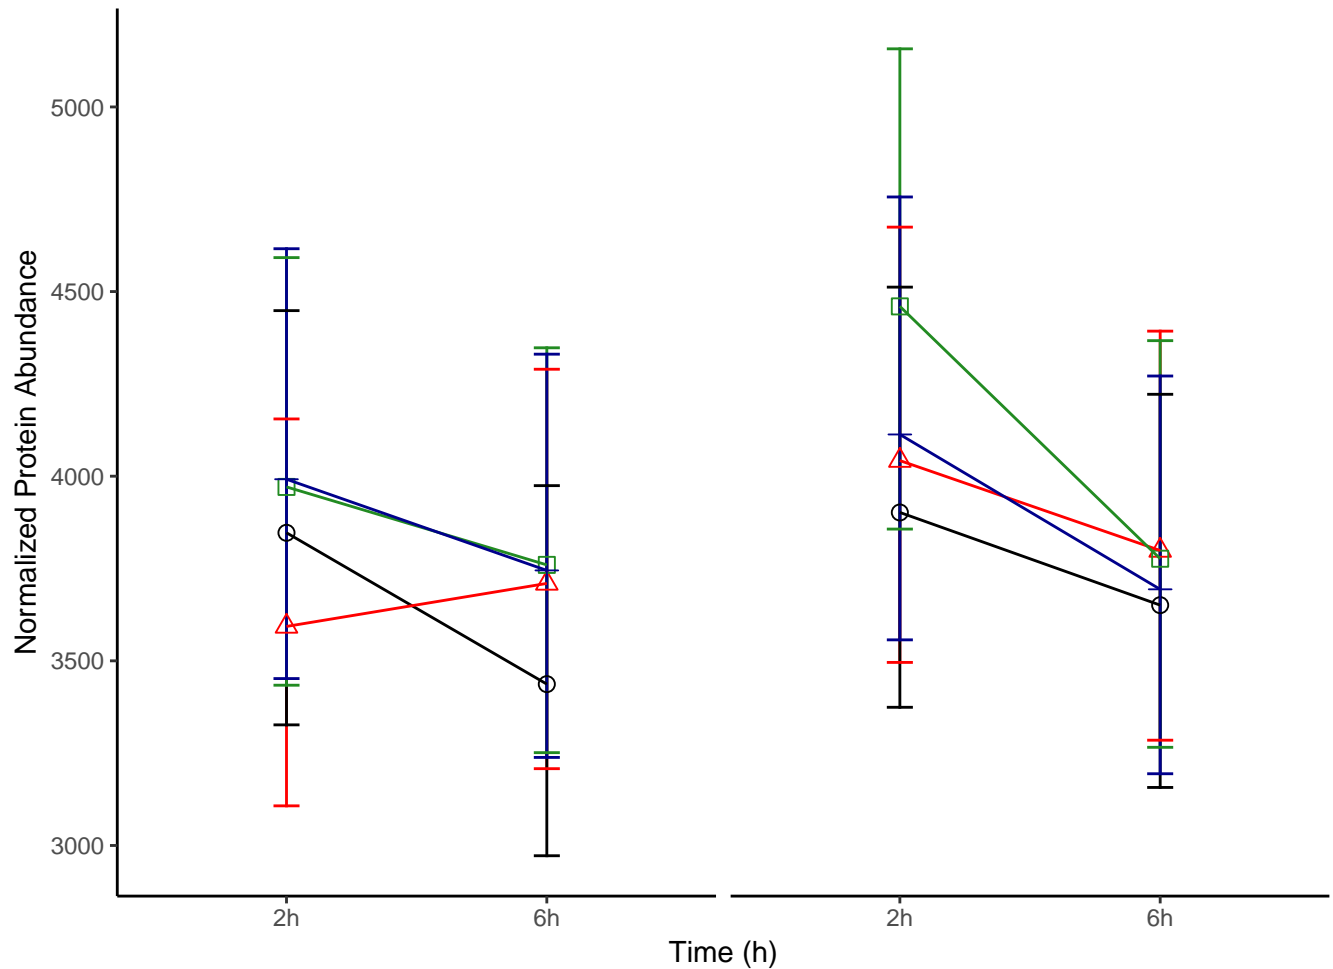

- SA564
- △ SA564- $\Delta hptRS$
- SA564- $\Delta ccpA$
- + SA564- $\Delta hptRS/ccpA$

# HEM3\_STAAM

TSB

TSB-dex S-156

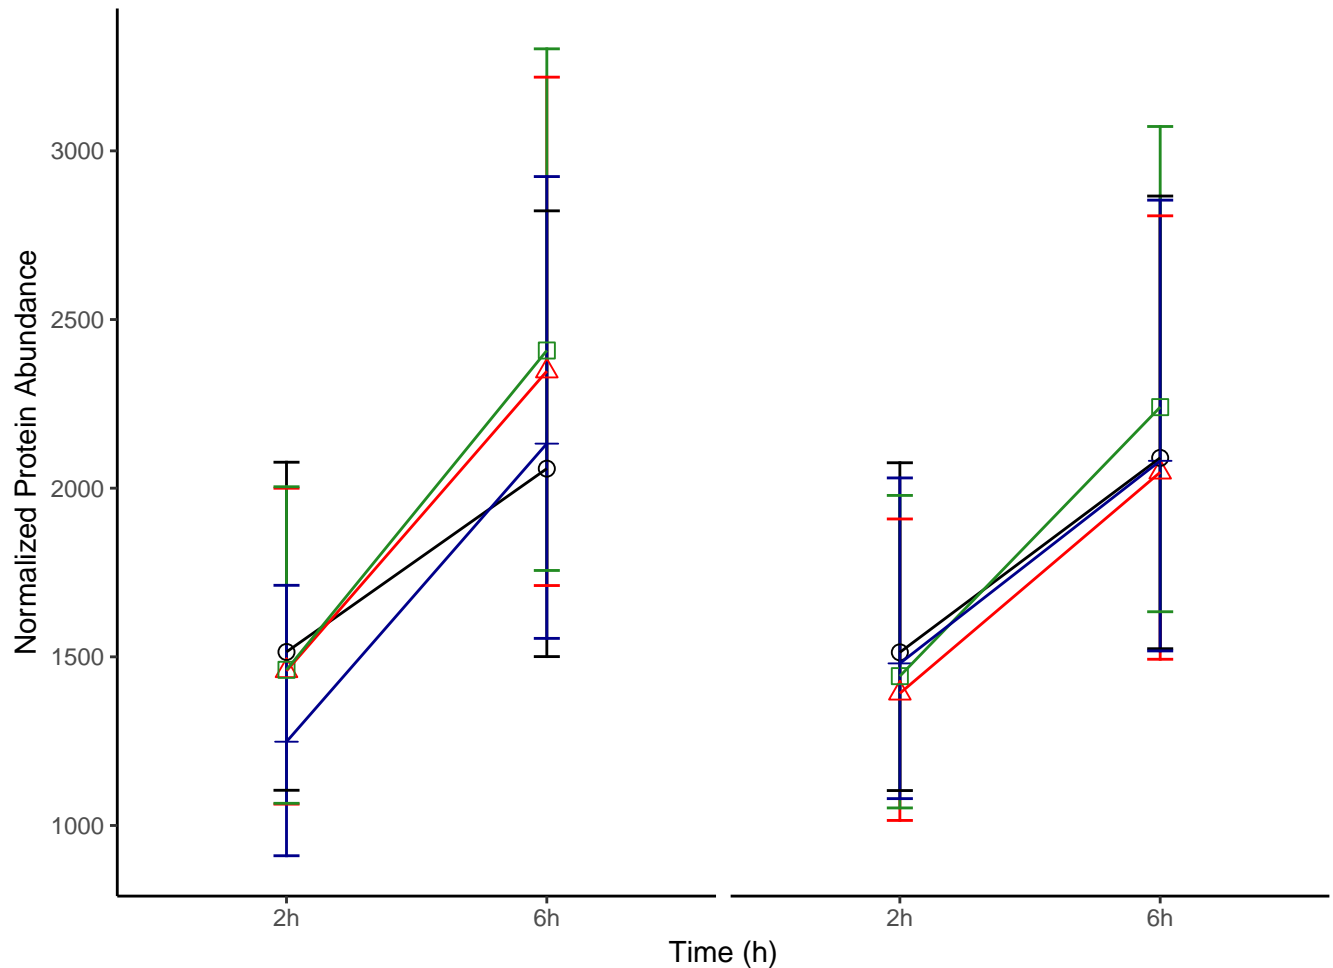

- SA564
- △ SA564- $\Delta$ *hptRS*
- SA564- $\Delta$ *ccpA*
- + SA564- $\Delta$ *hptRS/ccpA*

# HLD\_STAAM

TSB

TSB-dex S-157

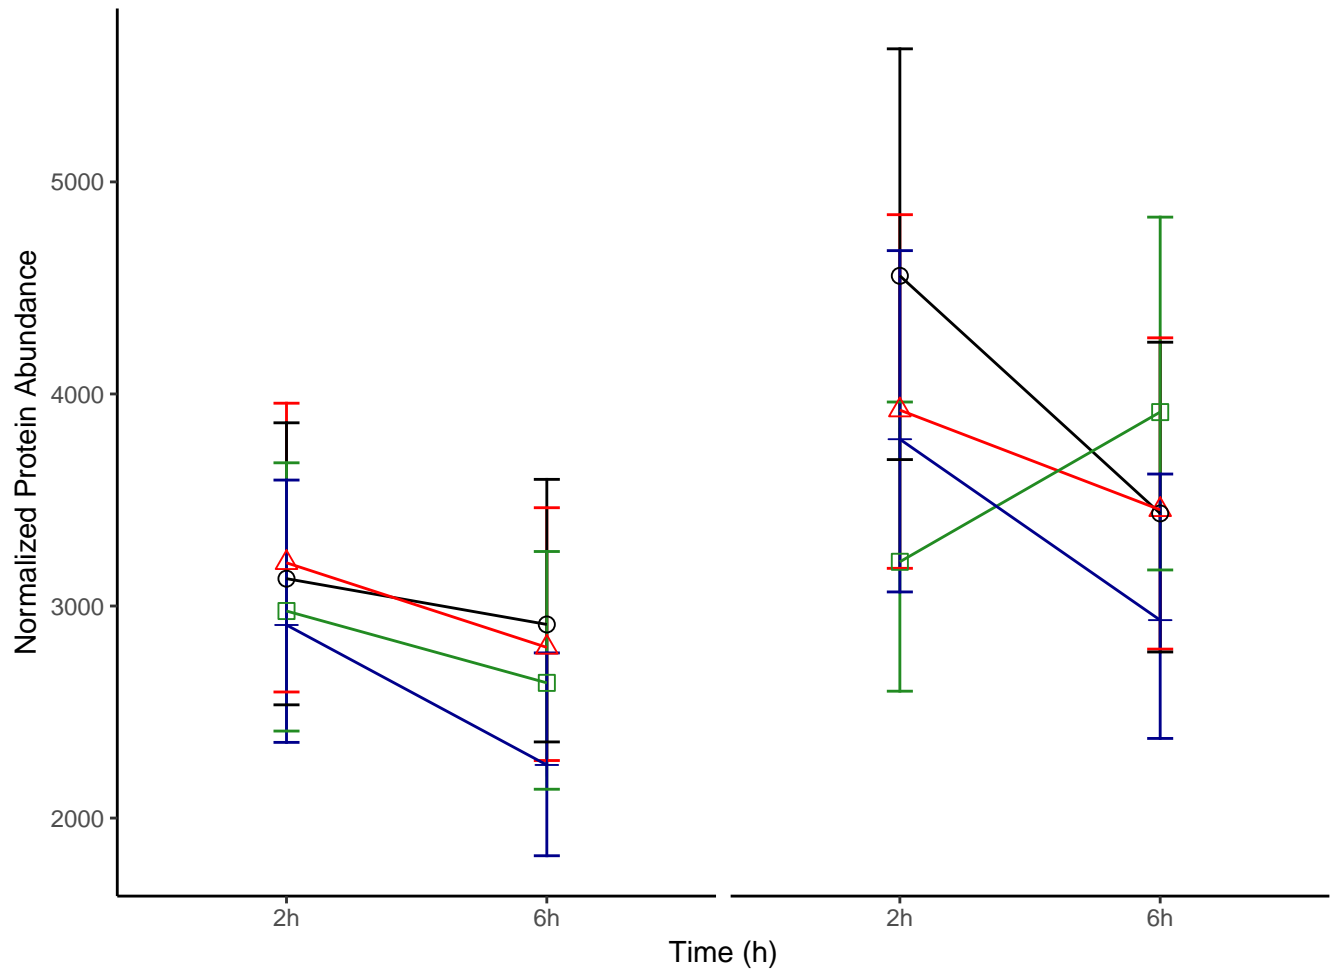

- SA564
- △ SA564- $\Delta$ *hptRS*
- SA564- $\Delta$ *ccpA*
- + SA564- $\Delta$ *hptRS/ccpA*

# HPRK\_STAAM

TSB

TSB-dex S-158

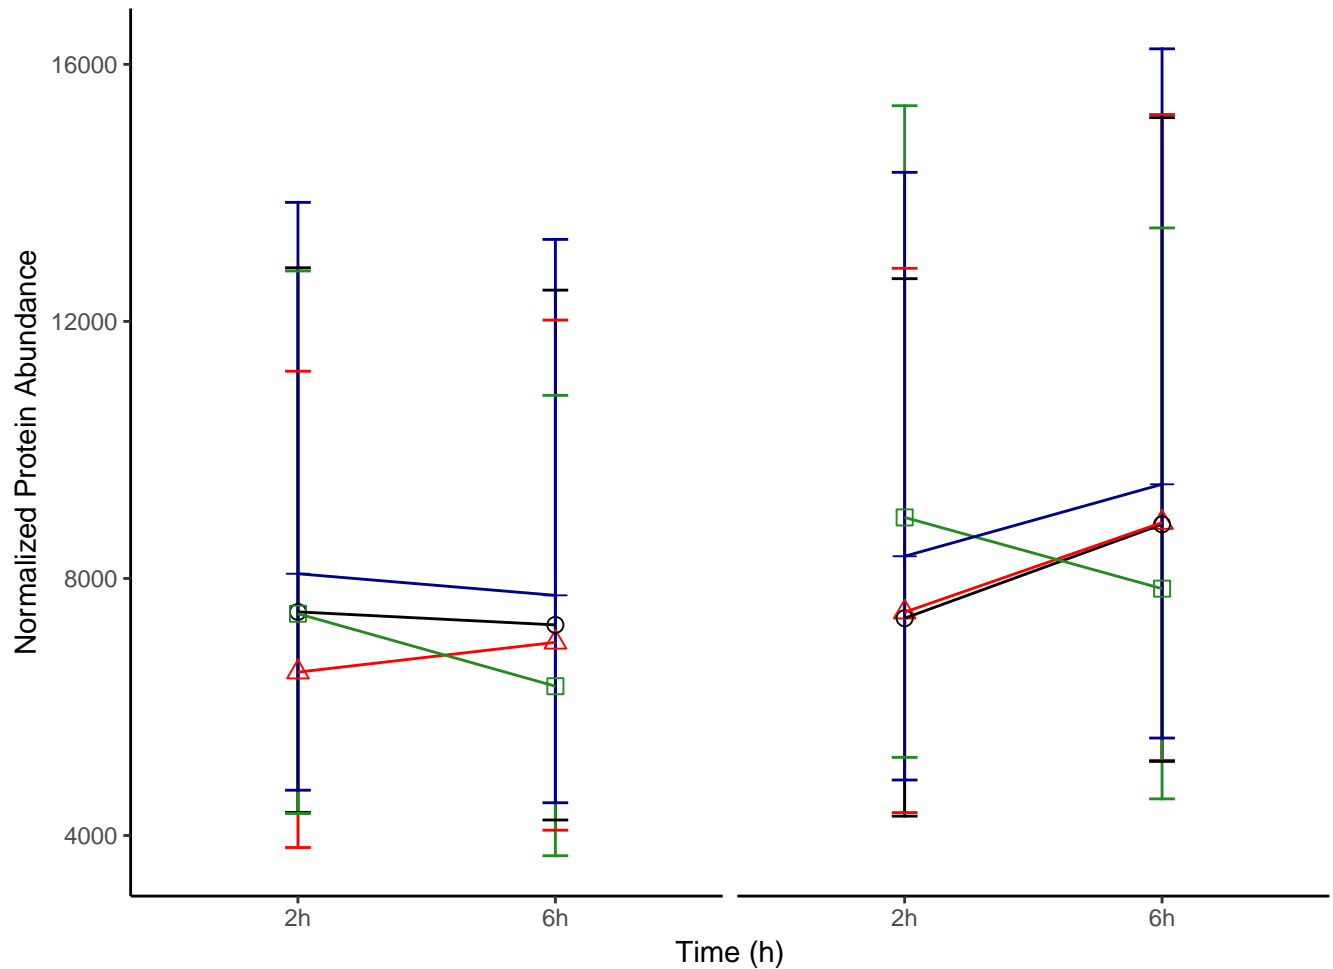

- SA564
- △ SA564- $\Delta$ *hptRS*
- SA564- $\Delta$ *ccpA*
- + SA564- $\Delta$ *hptRS/ccpA*

# HPRT\_STAAM

TSB

TSB-dex S-159

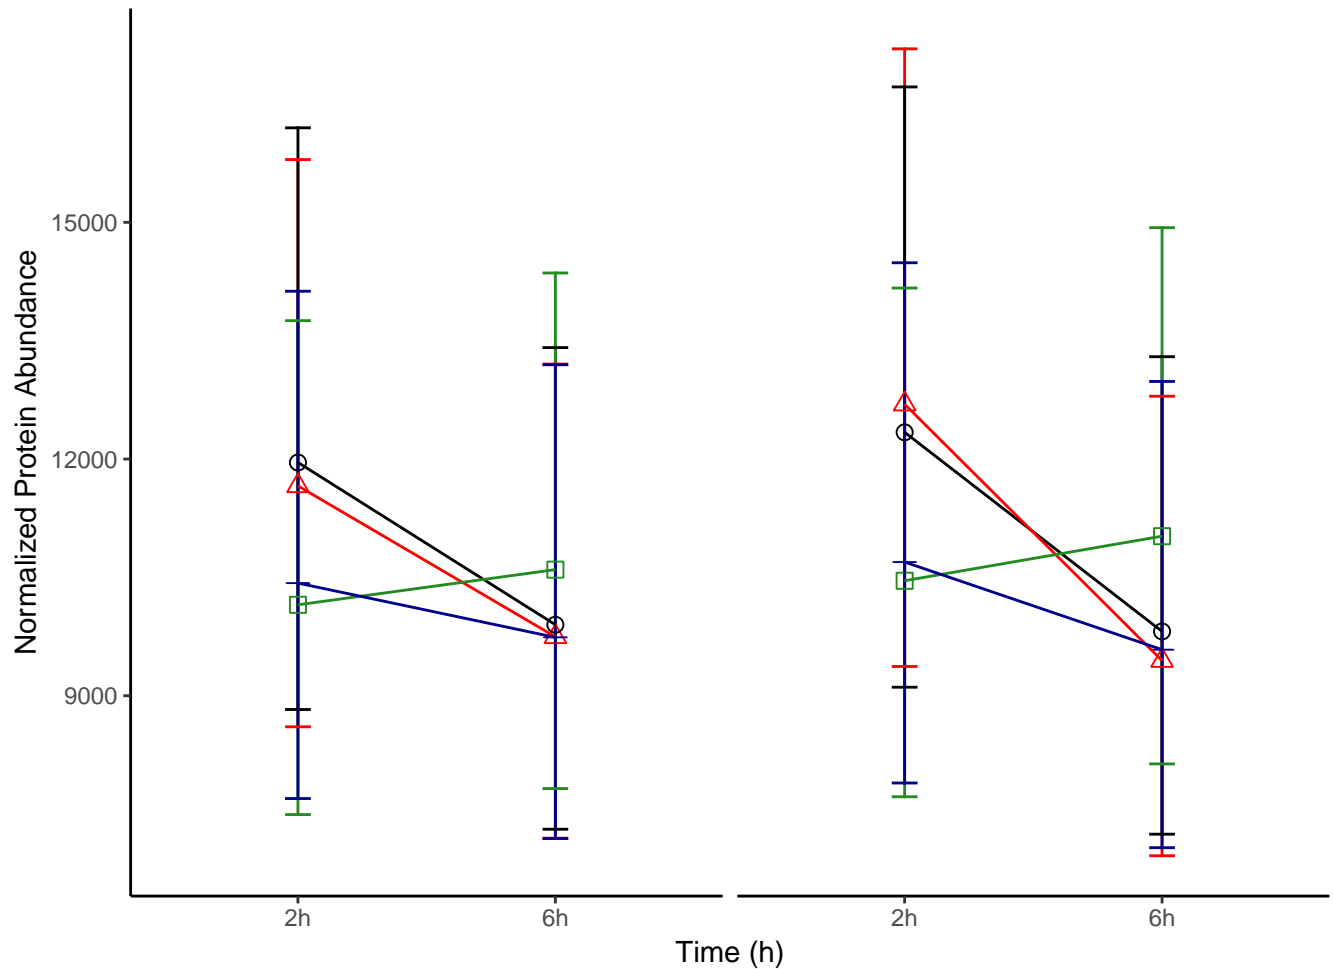

- SA564
- △ SA564- $\Delta$ *hptRS*
- SA564- $\Delta$ *ccpA*
- + SA564- $\Delta$ *hptRS/ccpA*

# HPS\_STAAM

TSB

TSB-dex S-160

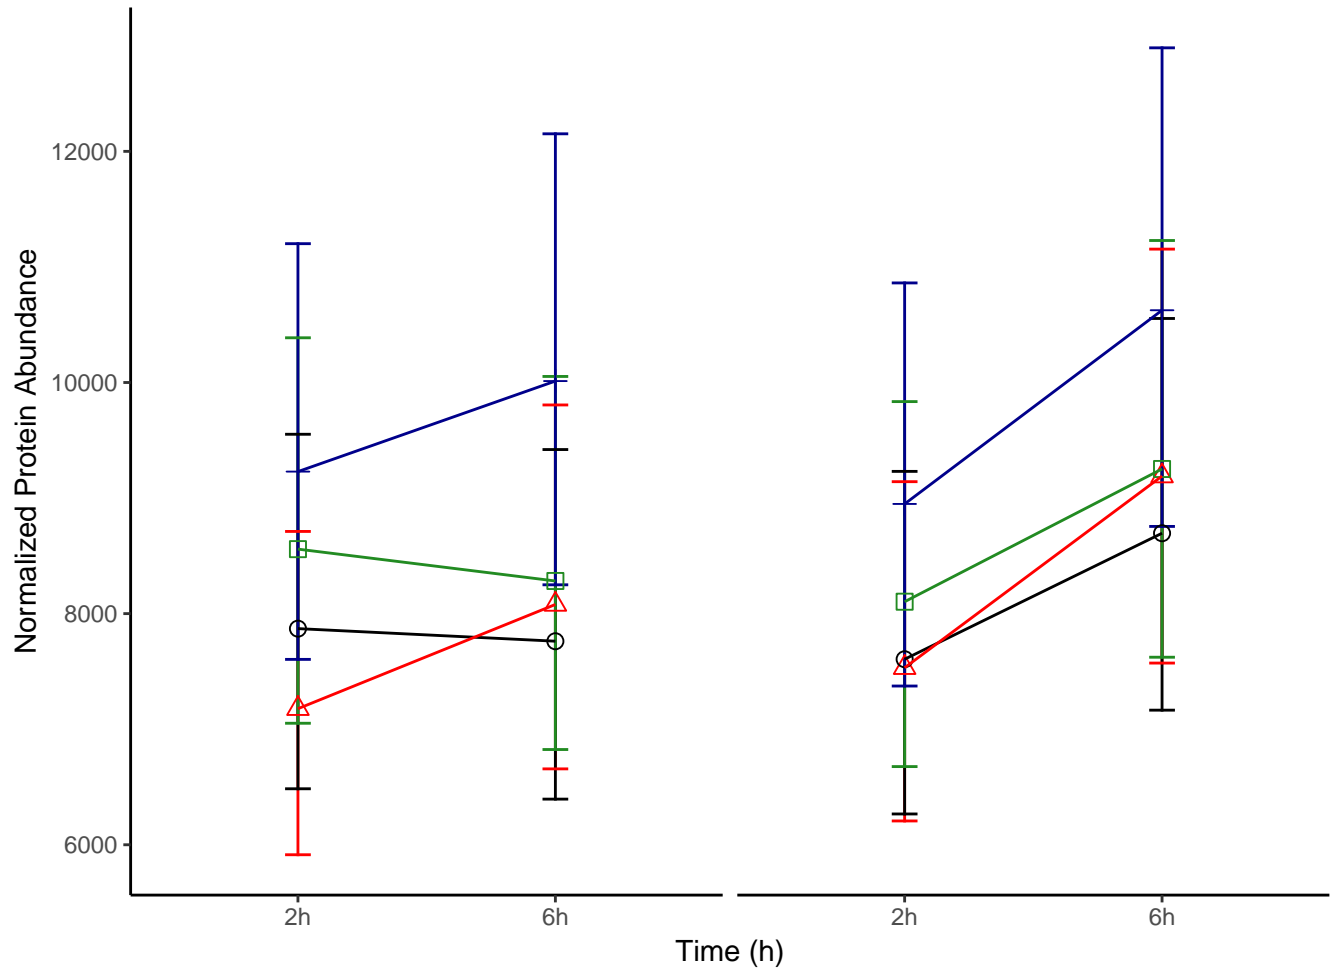

- SA564
- △ SA564-ΔhptRS
- SA564-ΔccpA
- + SA564-ΔhptRS/ccpA



# HRTA\_STAAM

TSB

TSB-dex S-161

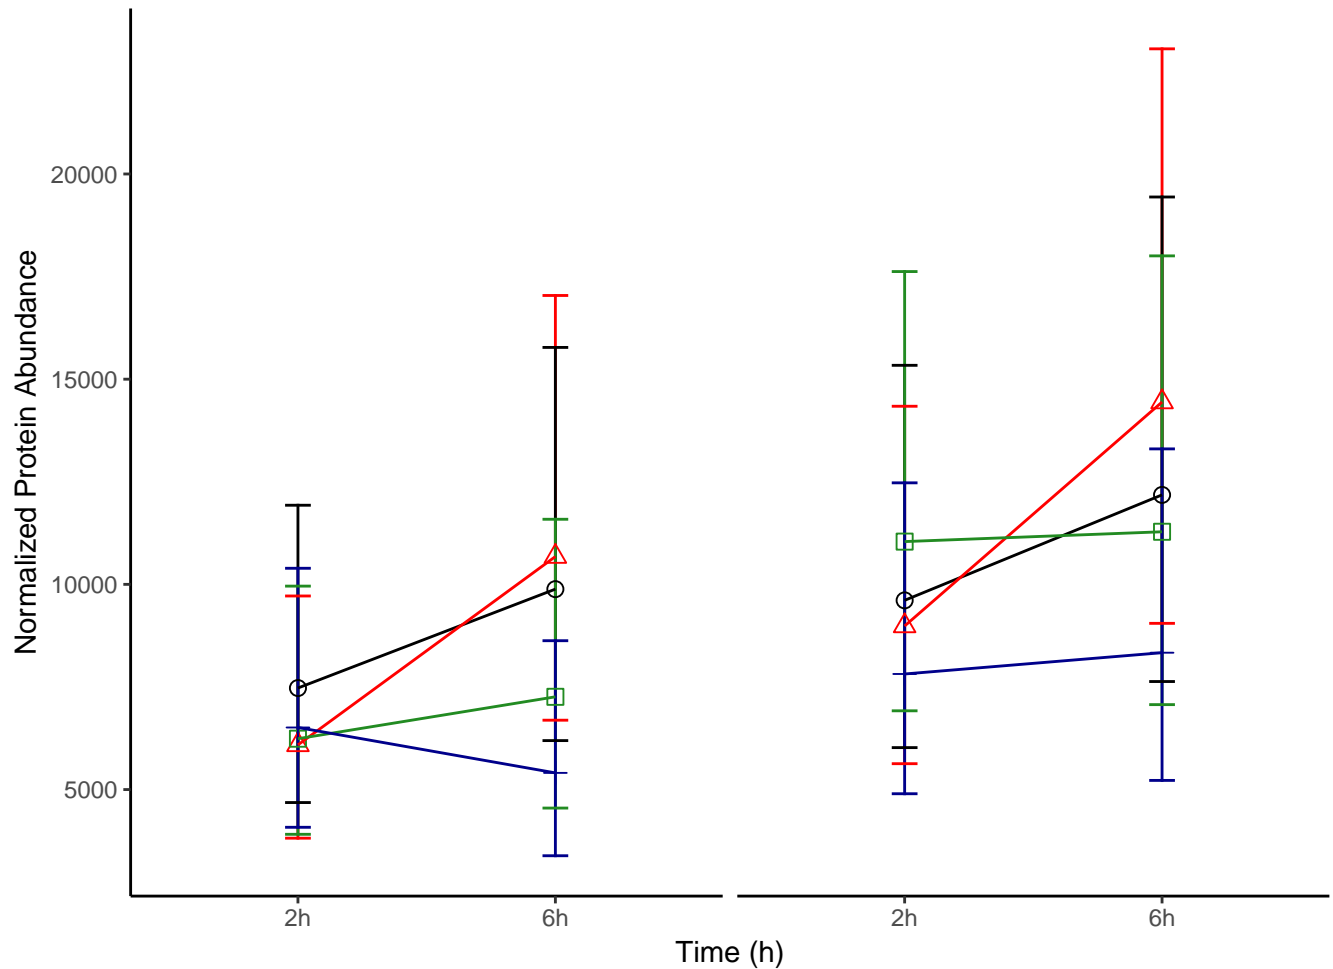

- SA564
- △ SA564- $\Delta$ *hptRS*
- SA564- $\Delta$ *ccpA*
- + SA564- $\Delta$ *hptRS/ccpA*

# HSLO\_STAAM

TSB

TSB-dex S-162

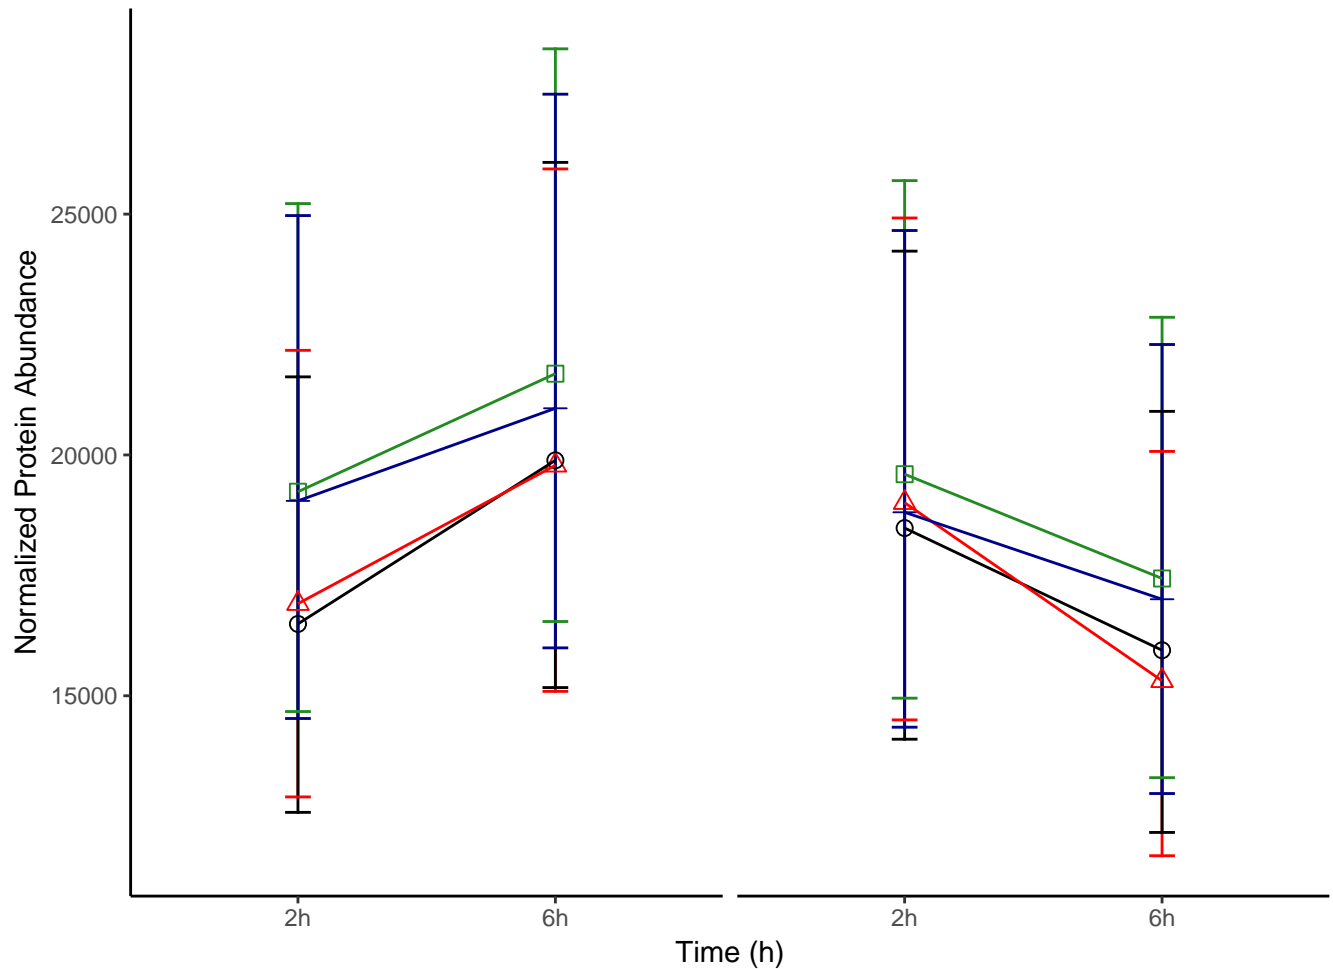

- SA564
- △ SA564- $\Delta$ *hptRS*
- SA564- $\Delta$ *ccpA*
- + SA564- $\Delta$ *hptRS/ccpA*

# HSLU\_STAAM

TSB

TSB-dex S-163

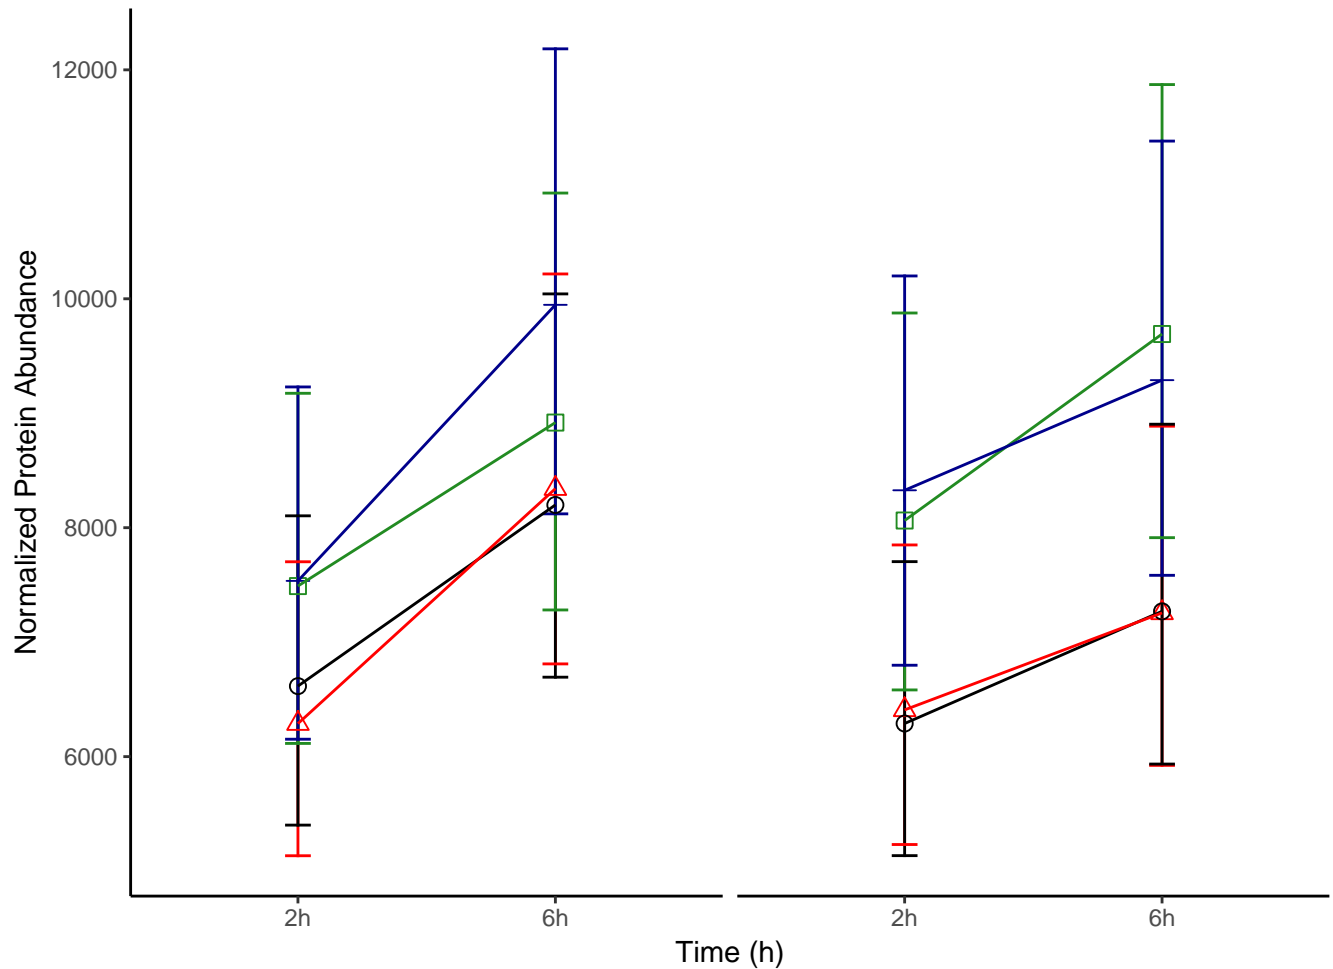

- SA564
- △ SA564- $\Delta$ *hptRS*
- SA564- $\Delta$ *ccpA*
- + SA564- $\Delta$ *hptRS/ccpA*

# HSLV\_STAAM

TSB

TSB-dex S-164

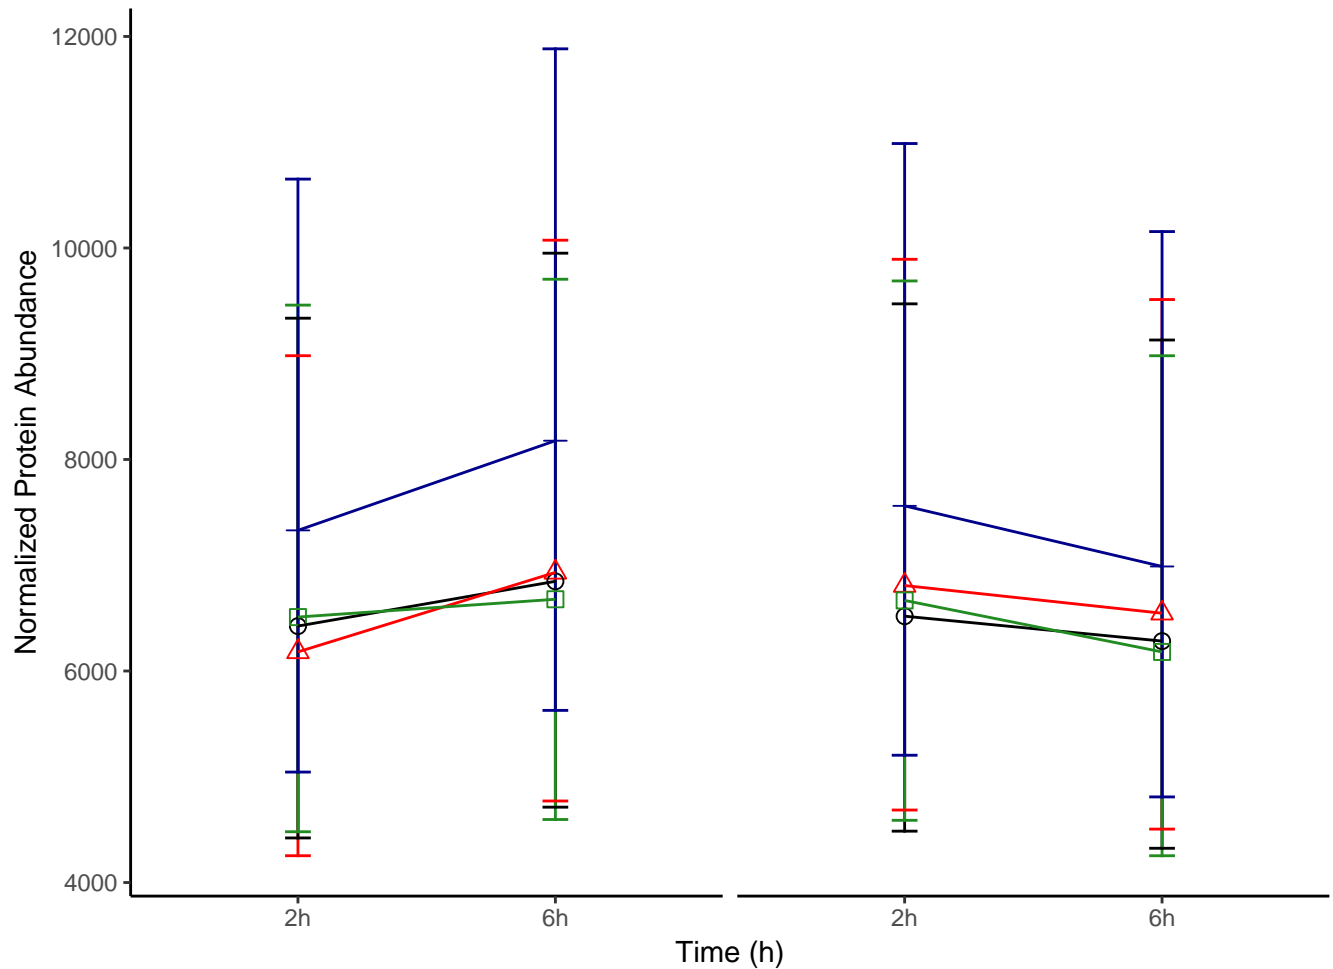

- SA564
- △ SA564- $\Delta$ *hptRS*
- SA564- $\Delta$ *ccpA*
- + SA564- $\Delta$ *hptRS/ccpA*

# HUTH\_STAAM

TSB

TSB-dex S-165

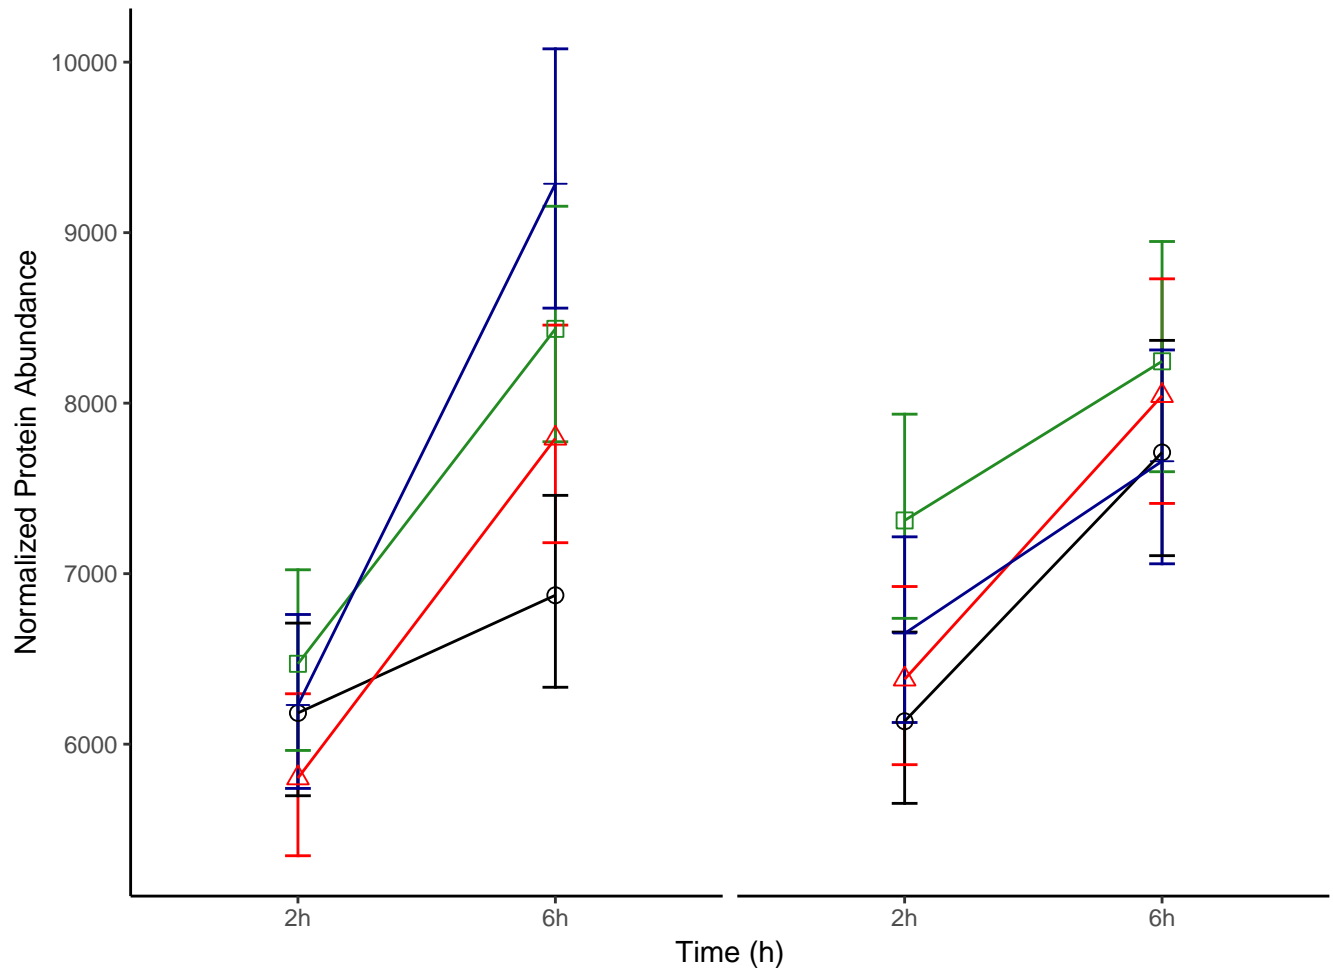

- SA564
- △ SA564- $\Delta$ hptRS
- SA564- $\Delta$ ccpA
- + SA564- $\Delta$ hptRS/ccpA

# HUTI\_STAAM

TSB

TSB-dex S-166

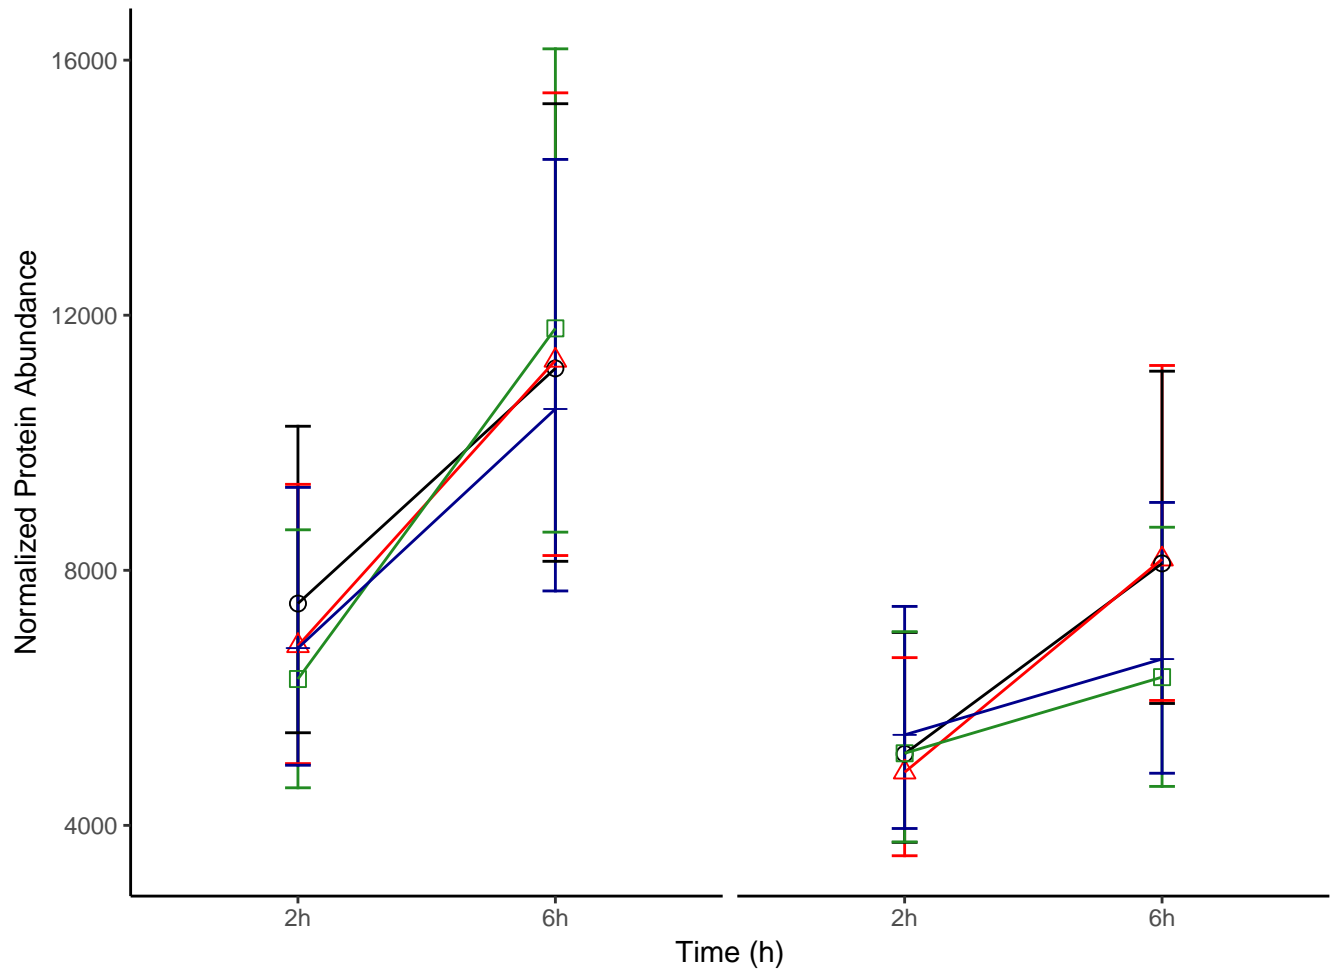

- SA564
- △ SA564- $\Delta$ hptRS
- SA564- $\Delta$ ccpA
- + SA564- $\Delta$ hptRS/ccpA

# HUTU\_STAAM

TSB

TSB-dex S-167

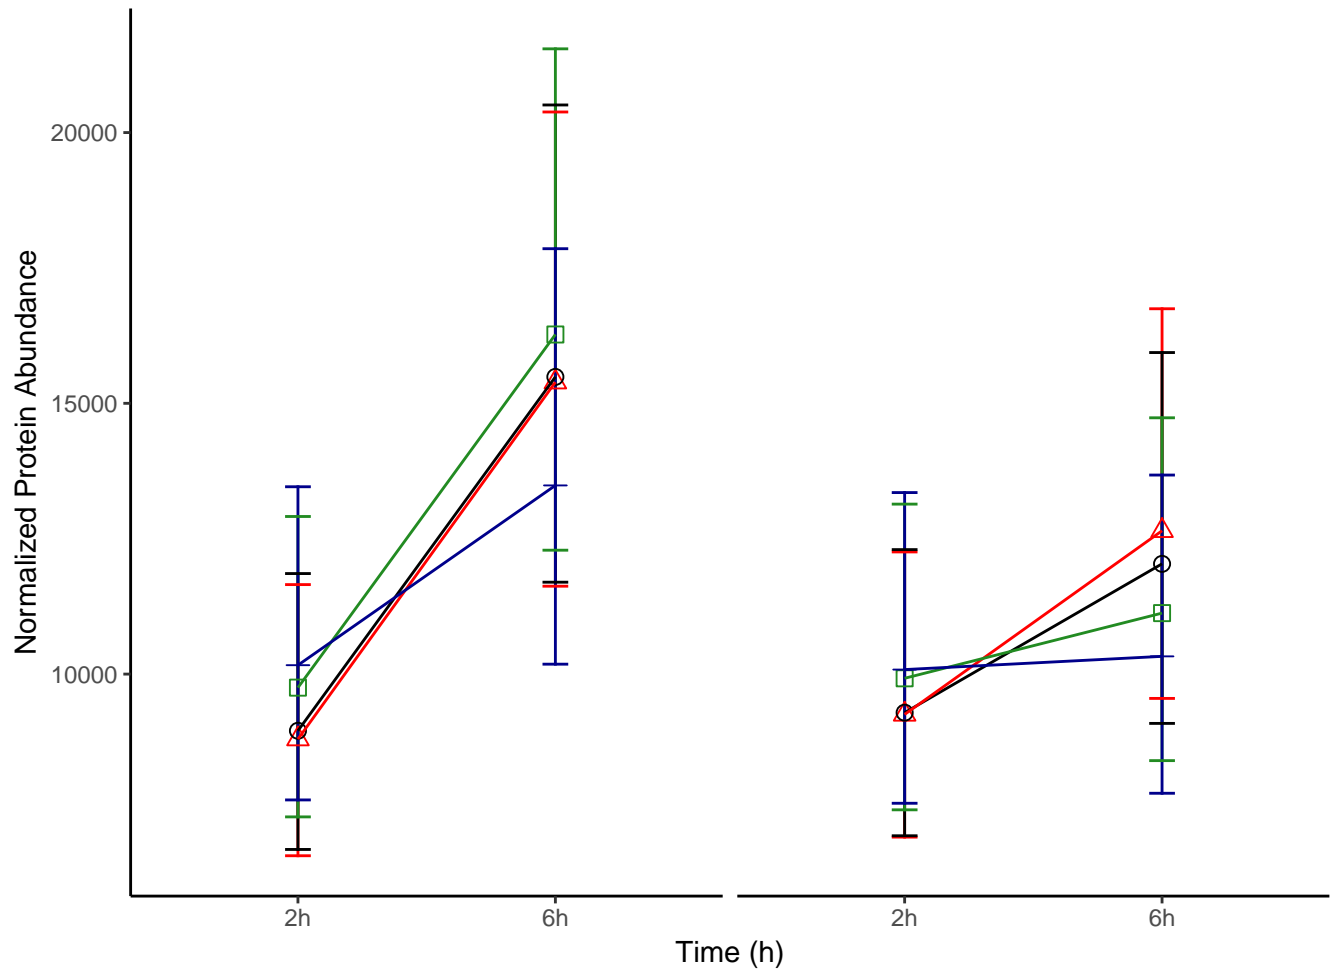

- SA564
- △ SA564- $\Delta$ *hptRS*
- SA564- $\Delta$ *ccpA*
- + SA564- $\Delta$ *hptRS/ccpA*

# ICAB\_STAAM

TSB

TSB-dex S-168

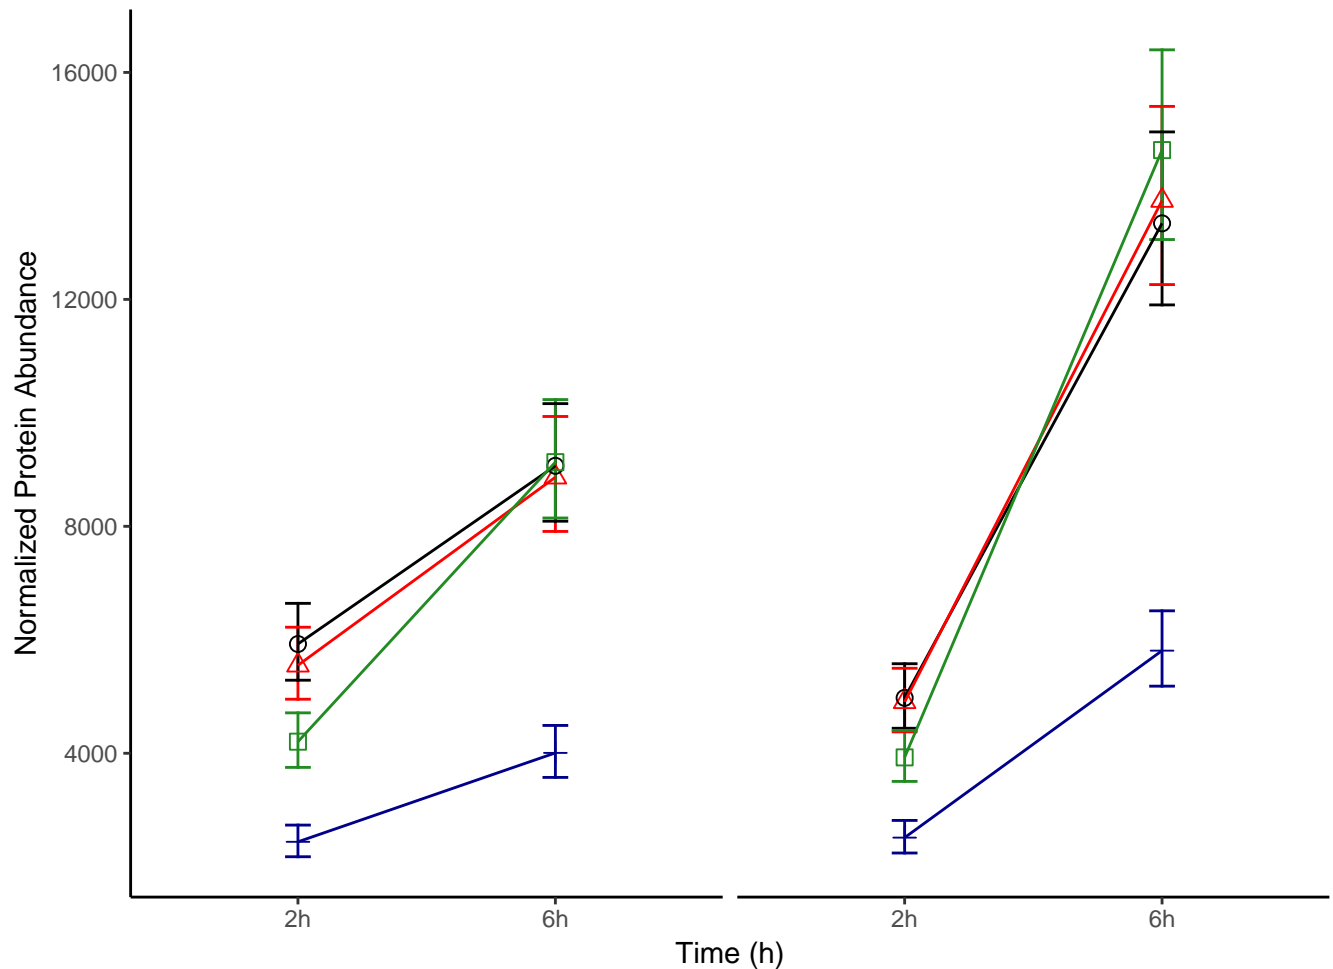

- SA564
- △ SA564- $\Delta$ hptRS
- SA564- $\Delta$ ccpA
- + SA564- $\Delta$ hptRS/ccpA



# IDH\_STAAM

TSB

TSB-dex S-169

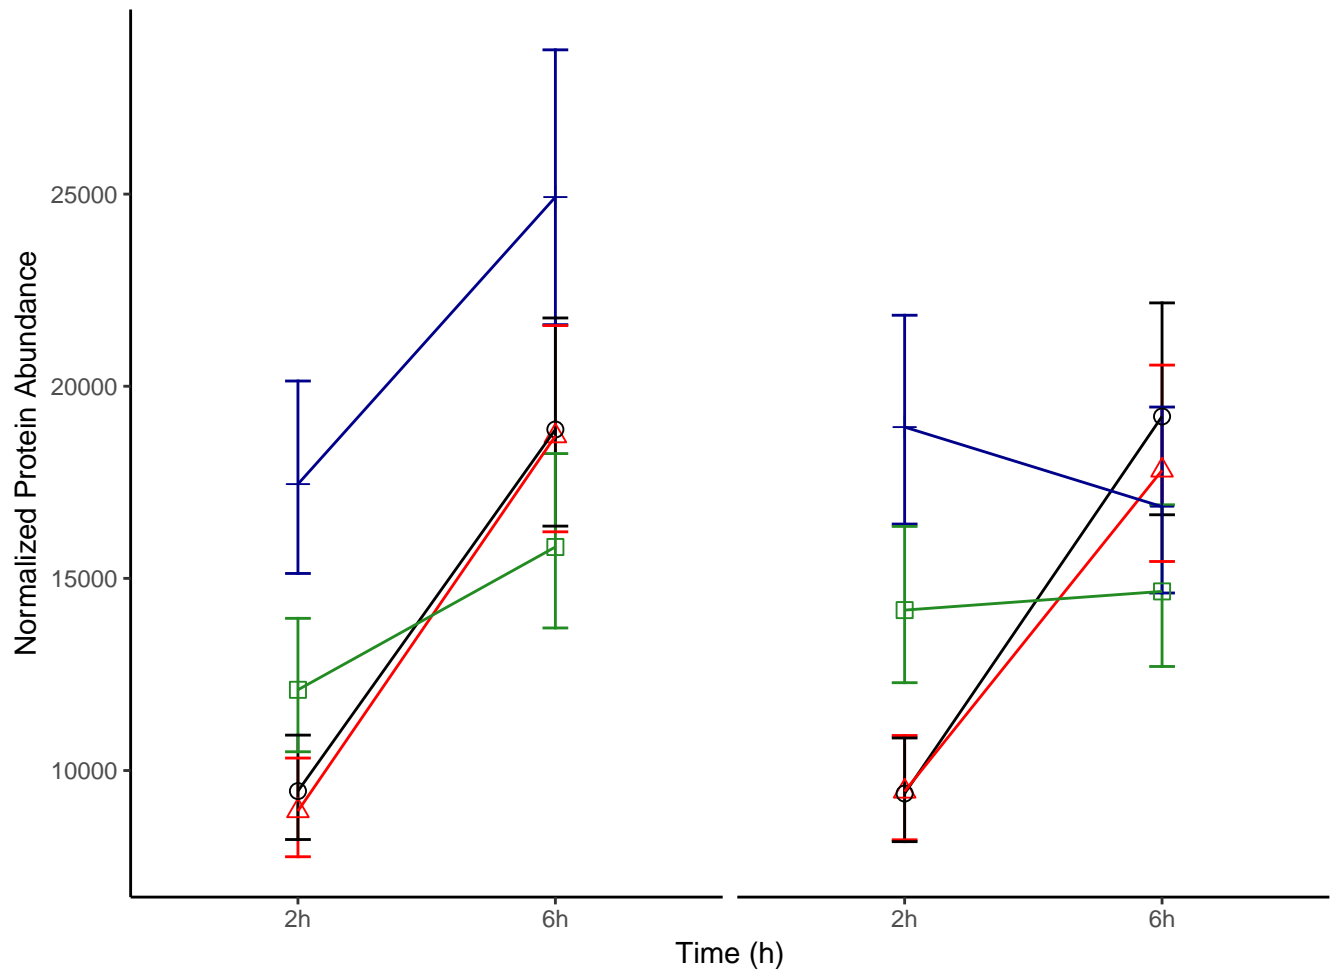

- SA564
- △ SA564- $\Delta$ hptRS
- SA564- $\Delta$ ccpA
- + SA564- $\Delta$ hptRS/ccpA

# IF1\_STAAM

TSB

TSB-dex S-170

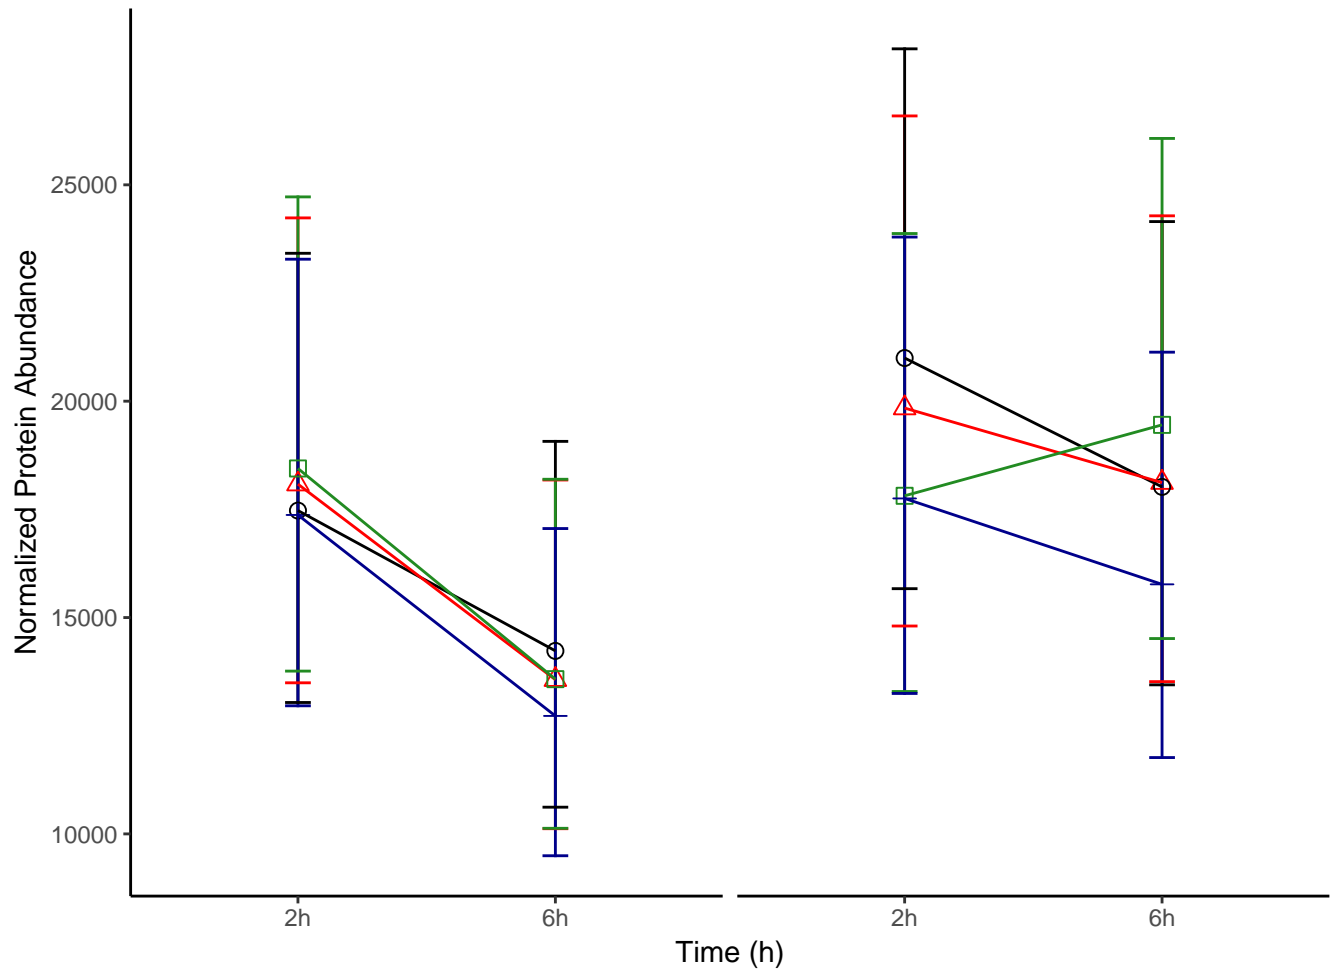

- SA564
- △ SA564- $\Delta$ *hptRS*
- SA564- $\Delta$ *ccpA*
- + SA564- $\Delta$ *hptRS/ccpA*

# IF2\_STAAM

TSB

TSB-dex S-171

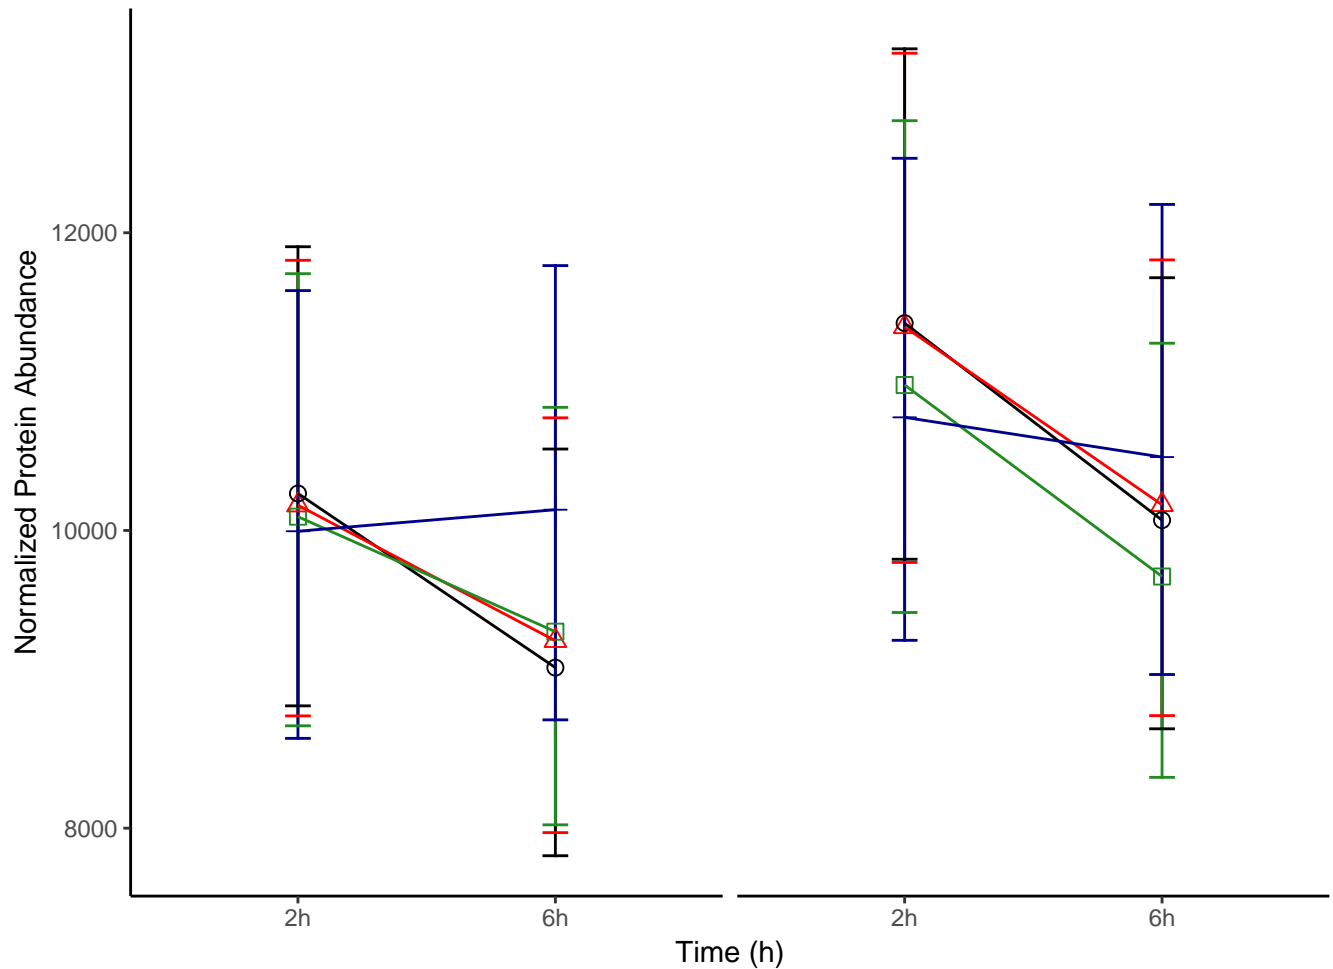

- SA564
- △ SA564- $\Delta$ *hptRS*
- SA564- $\Delta$ *ccpA*
- + SA564- $\Delta$ *hptRS/ccpA*

# IF3\_STAAM

TSB

TSB-dex S-172

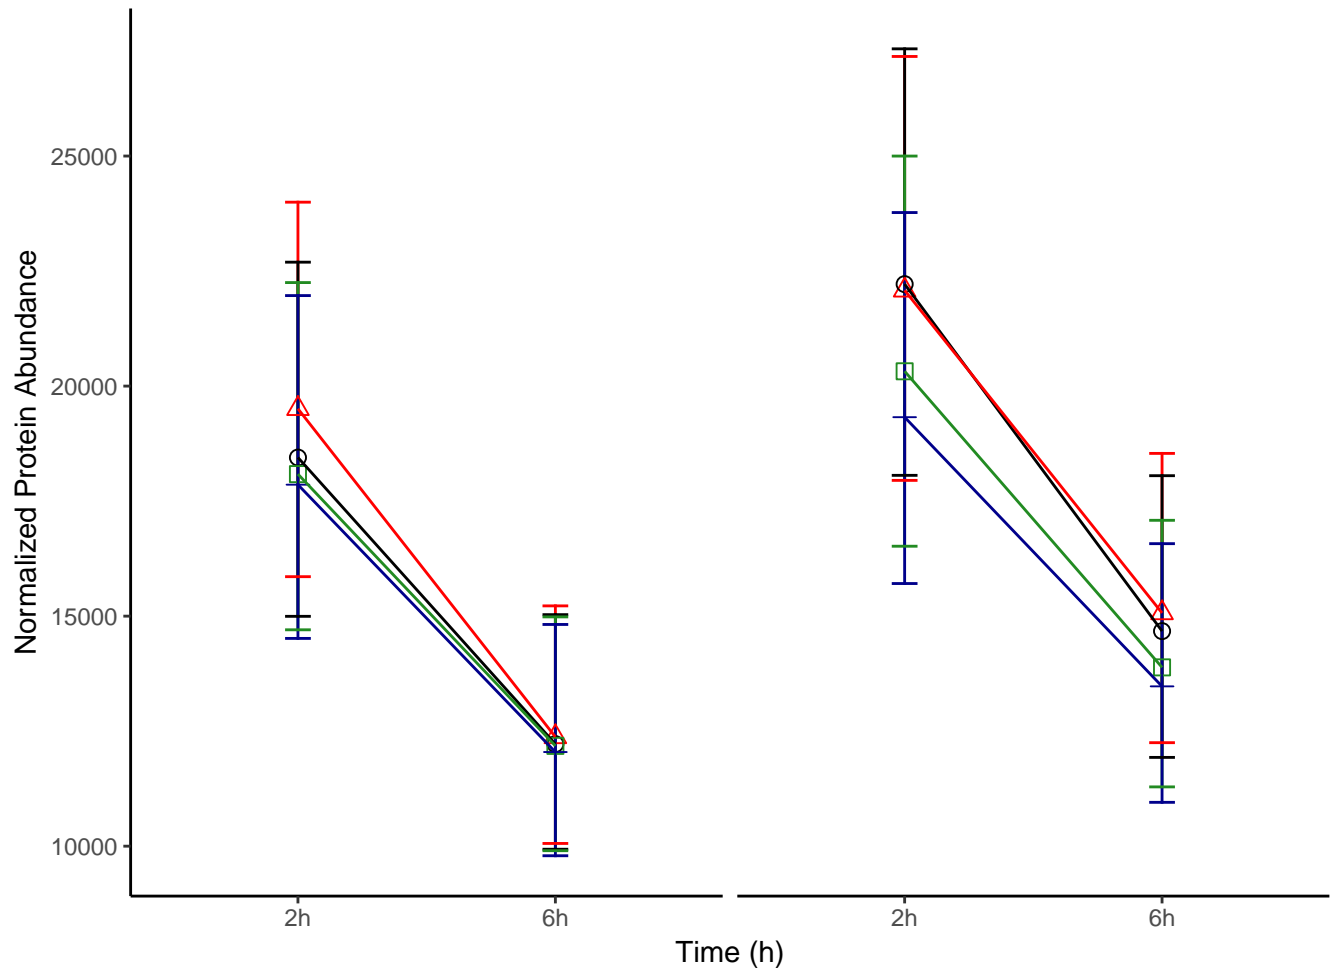

- SA564
- △ SA564- $\Delta$ *hptRS*
- SA564- $\Delta$ *ccpA*
- + SA564- $\Delta$ *hptRS/ccpA*

# ILVC\_STAAM

TSB

TSB-dex S-173

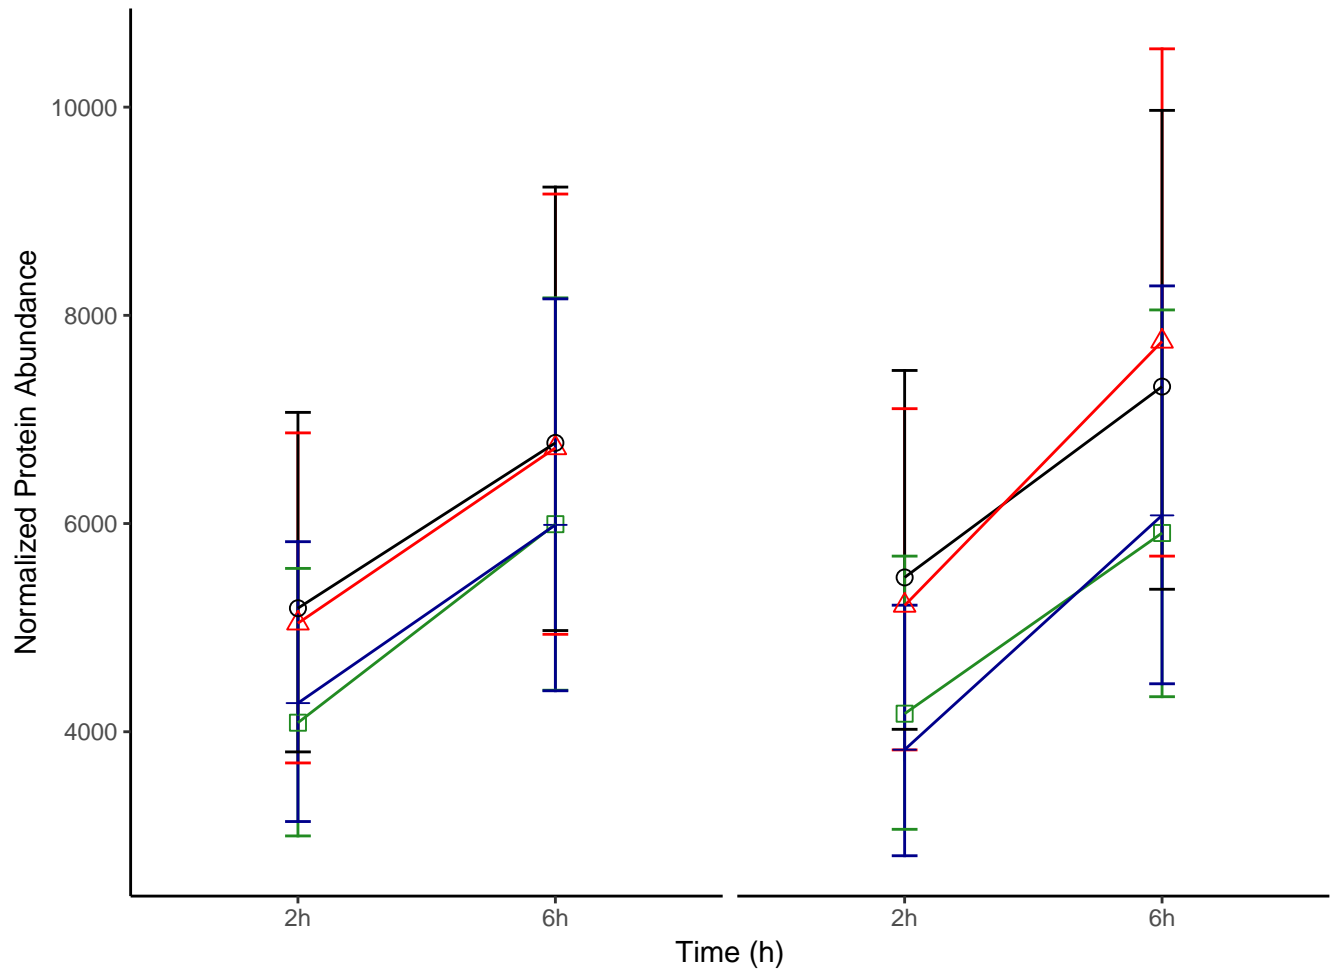

- SA564
- △ SA564- $\Delta$ hptRS
- SA564- $\Delta$ ccpA
- + SA564- $\Delta$ hptRS/ccpA

# ILVE\_STAAM

TSB

TSB-dex S-174

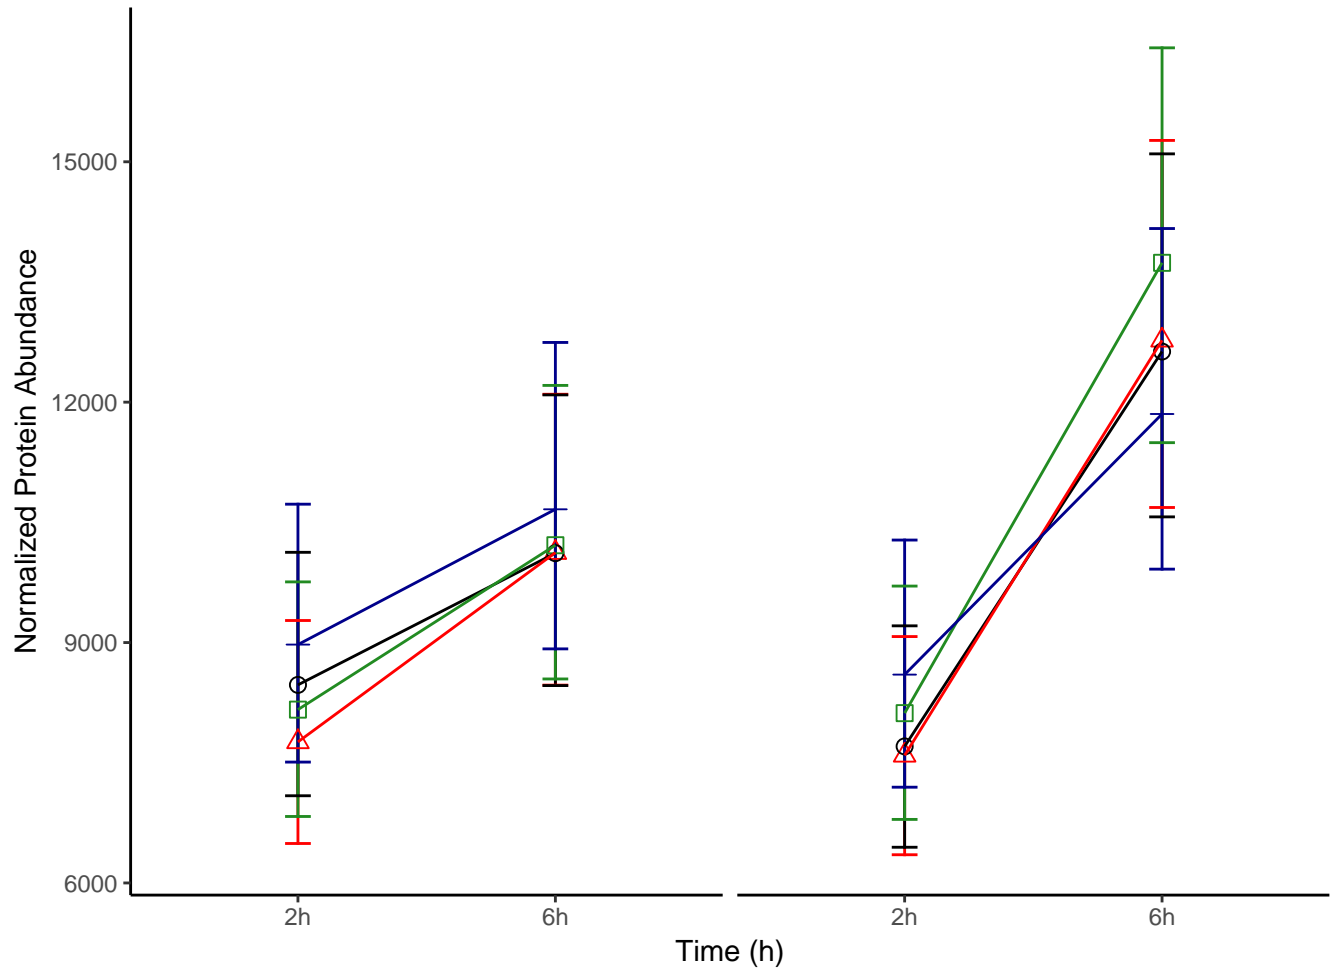

- SA564
- △ SA564- $\Delta$ *hptRS*
- SA564- $\Delta$ *ccpA*
- + SA564- $\Delta$ *hptRS/ccpA*

# IMDH\_STAAM

TSB

TSB-dex S-175

Normalized Protein Abundance

20000

15000

2h

6h

Time (h)

2h

6h

- SA564
- △ SA564- $\Delta$ *hptRS*
- SA564- $\Delta$ *ccpA*
- + SA564- $\Delta$ *hptRS/ccpA*

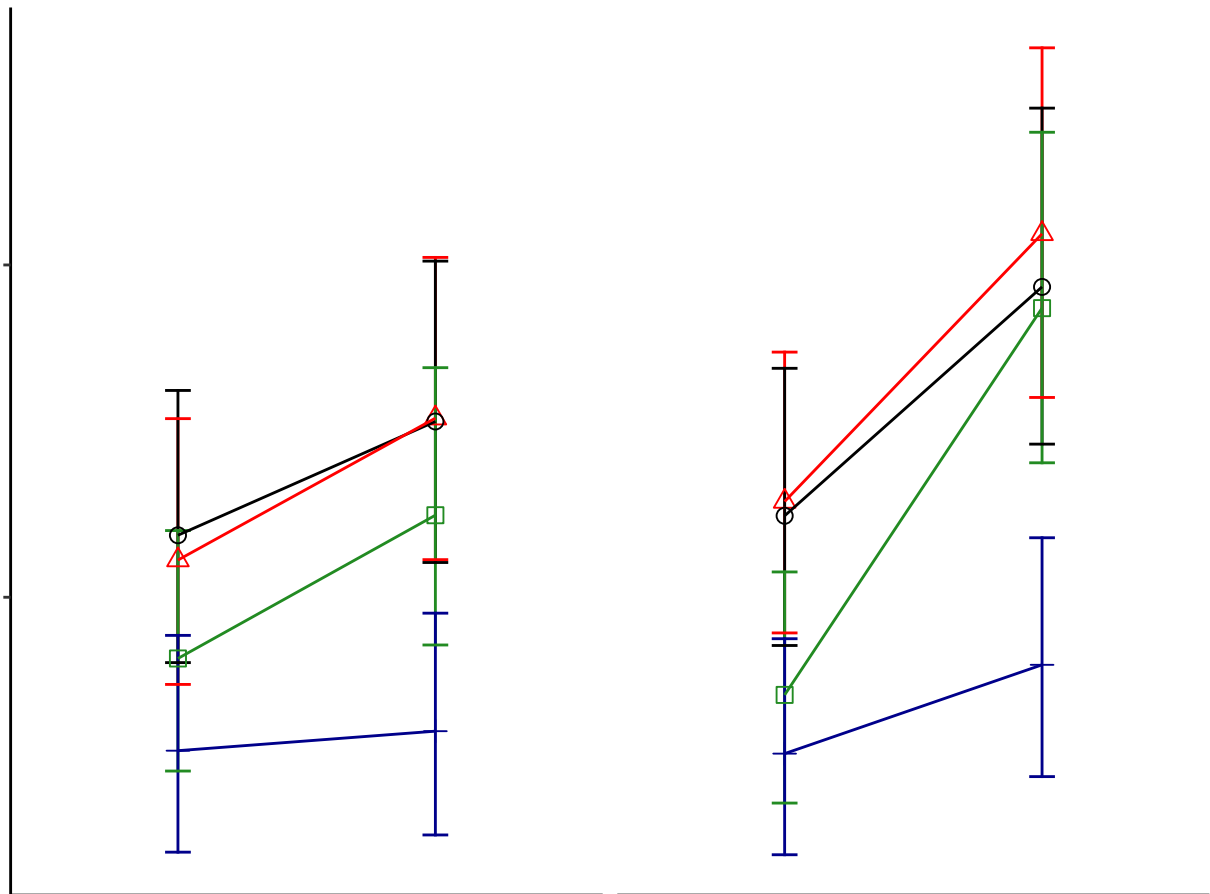

# ISAA\_STAAM

TSB

TSB-dex S-176

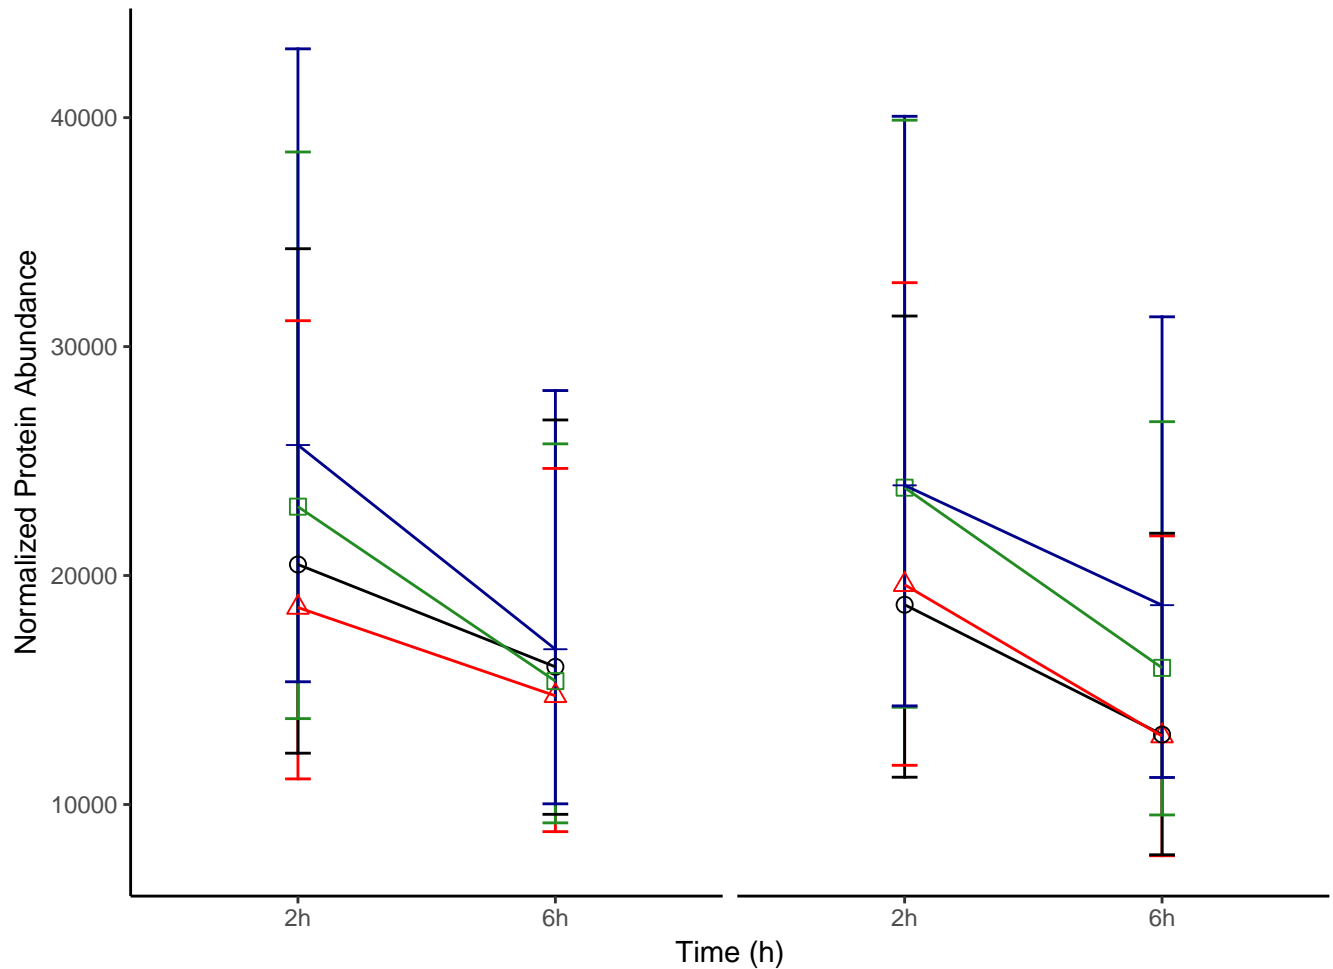

- SA564
- △ SA564-Δ*hptRS*
- SA564-Δ*ccpA*
- + SA564-Δ*hptRS/ccpA*



## ISPD1\_STAAM

TSB

TSB-dex S-177

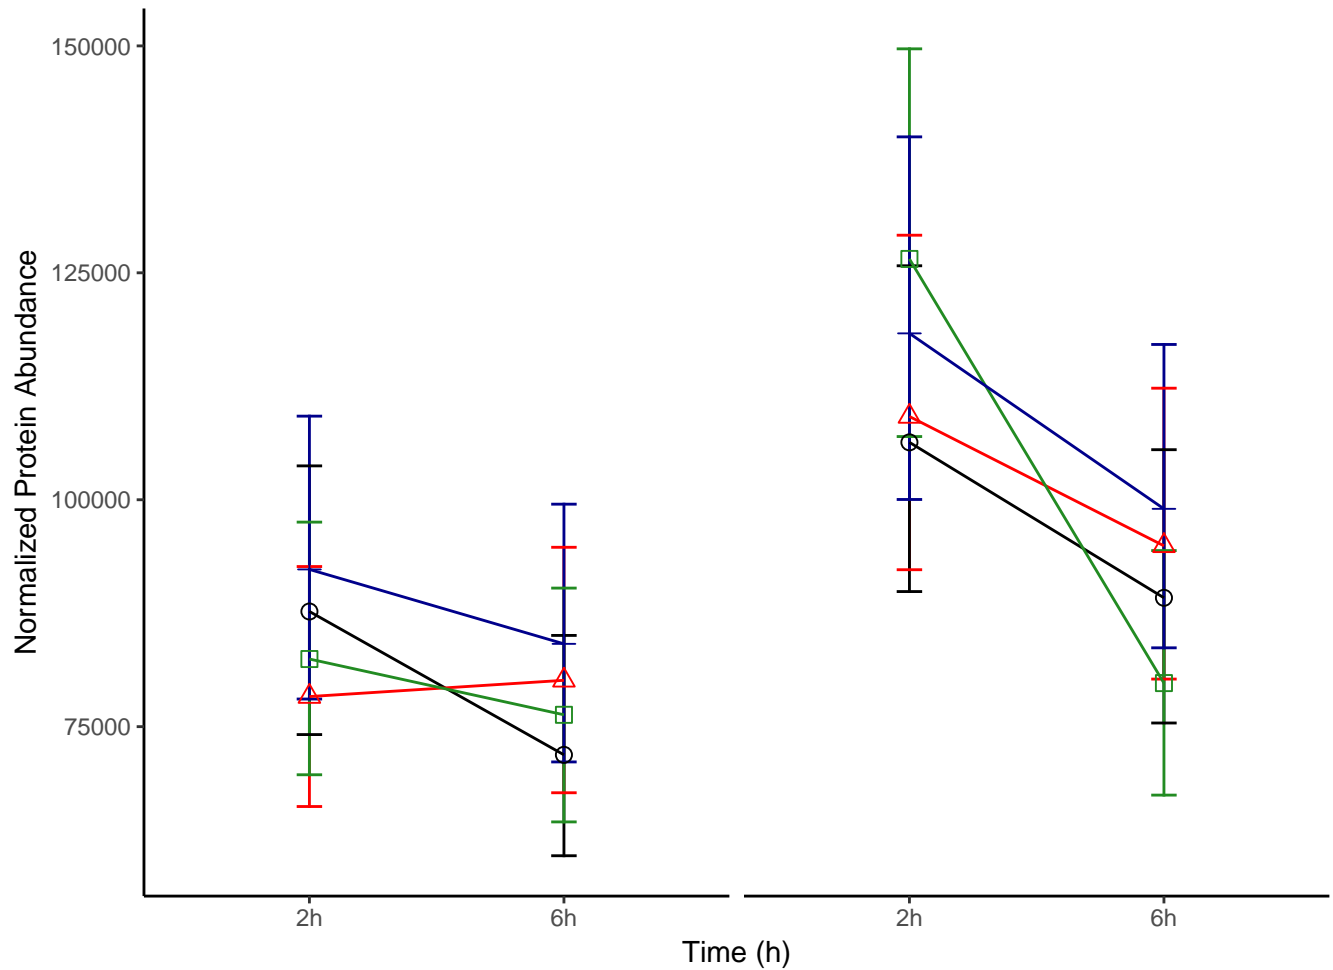

- SA564
- △ SA564- $\Delta$ *hptRS*
- SA564- $\Delta$ *ccpA*
- + SA564- $\Delta$ *hptRS/ccpA*

## ISPD2\_STAAM

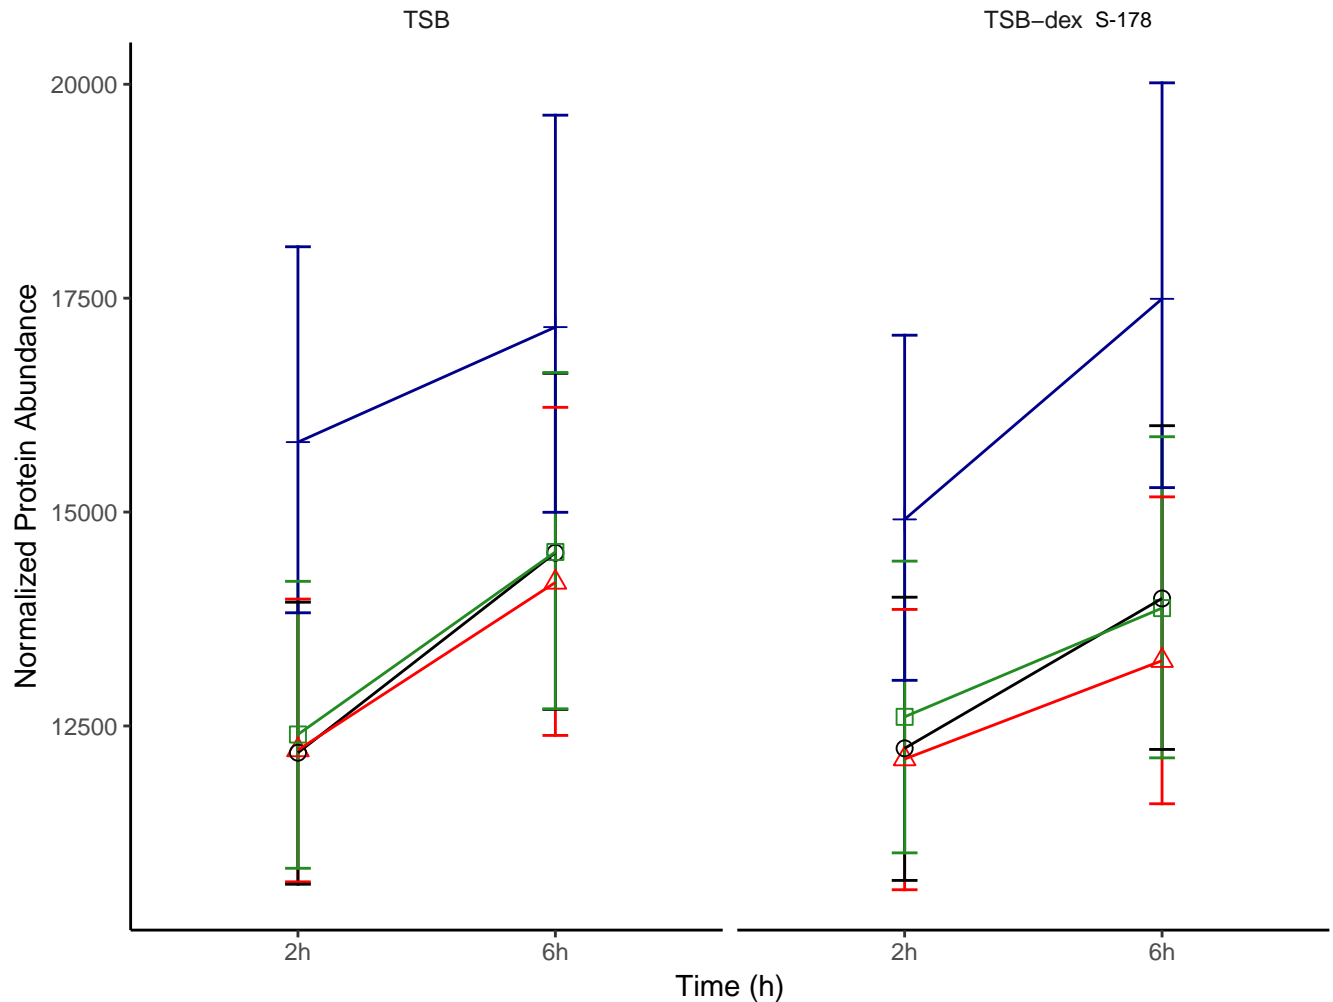

- SA564
- △ SA564-Δ*hptRS*
- SA564-Δ*ccpA*
- + SA564-Δ*hptRS/ccpA*

# ISPE\_STAAM

TSB

TSB-dex S-179

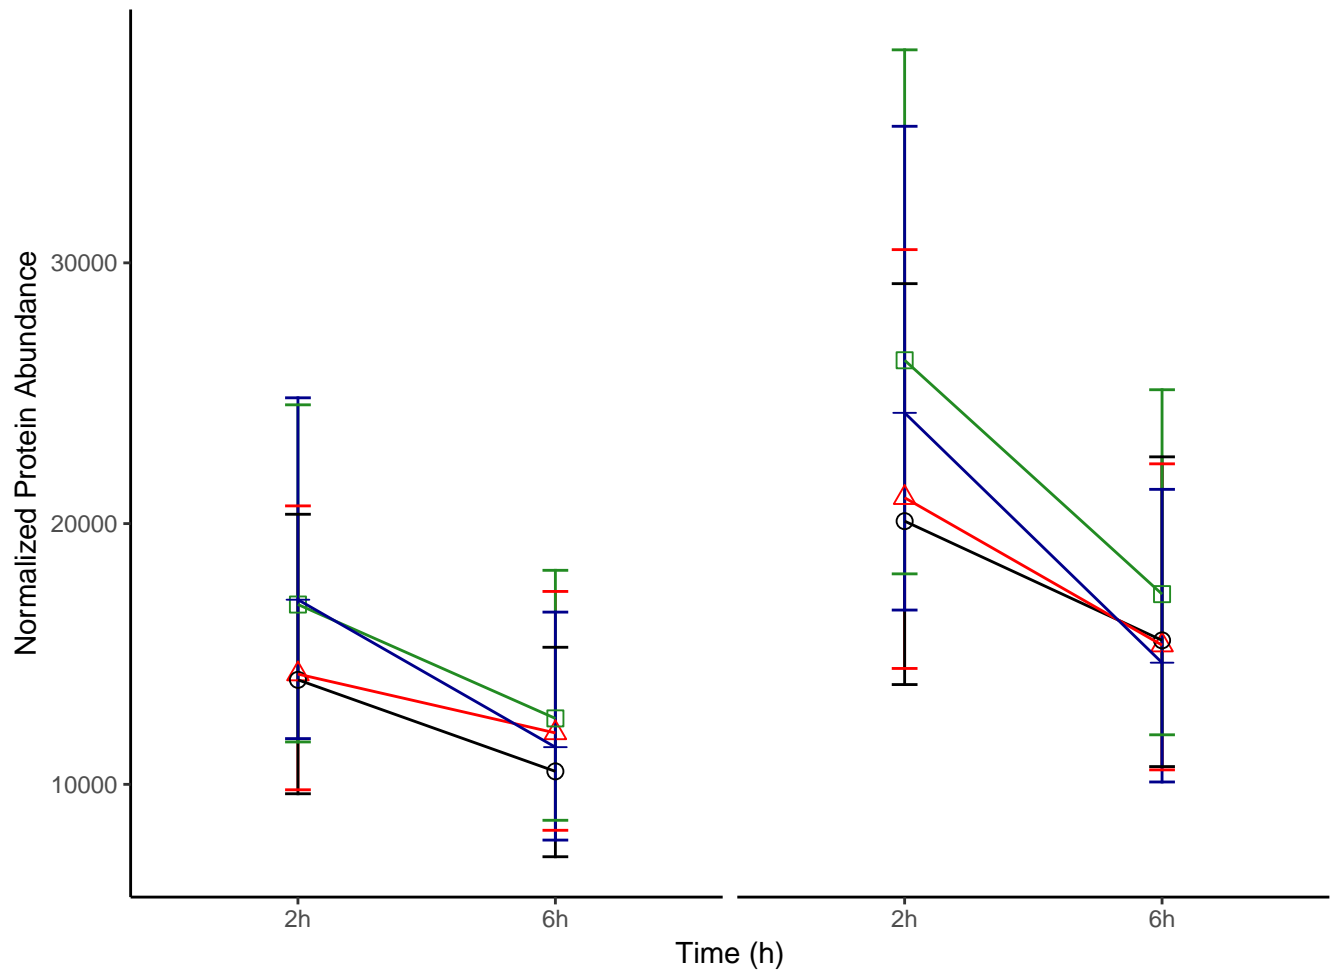

- SA564
- △ SA564- $\Delta hptRS$
- SA564- $\Delta ccpA$
- + SA564- $\Delta hptRS/ccpA$

# KAD\_STAAM

TSB

TSB-dex S-180

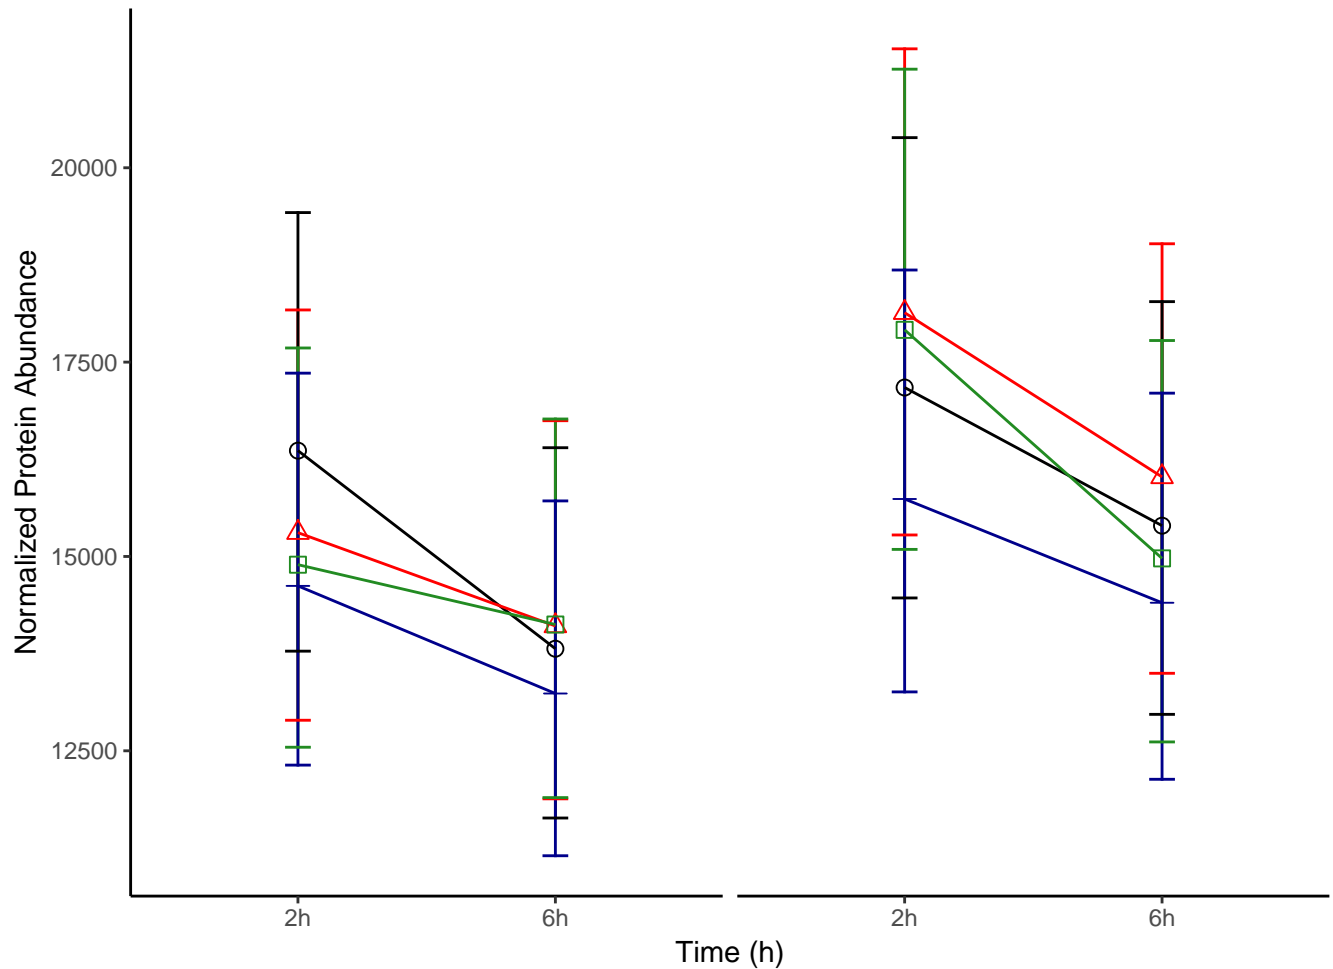

- SA564
- △ SA564-ΔhptRS
- SA564-ΔccpA
- + SA564-ΔhptRS/ccpA

# KCY\_STAAM

TSB

TSB-dex S-181

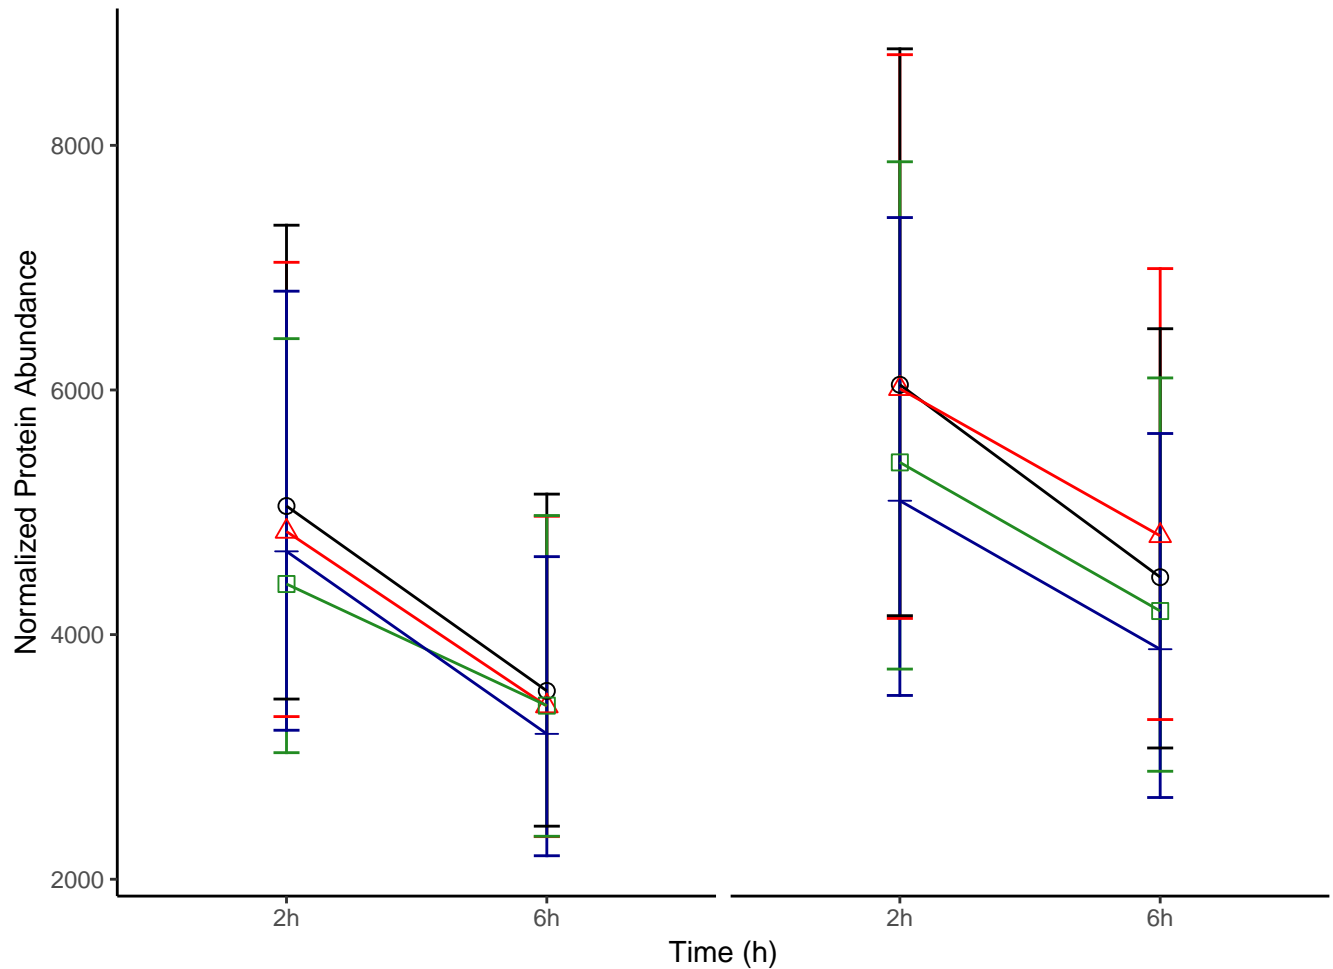

- SA564
- △ SA564- $\Delta hptRS$
- SA564- $\Delta ccpA$
- + SA564- $\Delta hptRS/ccpA$

# KITH\_STAAM

TSB

TSB-dex S-182

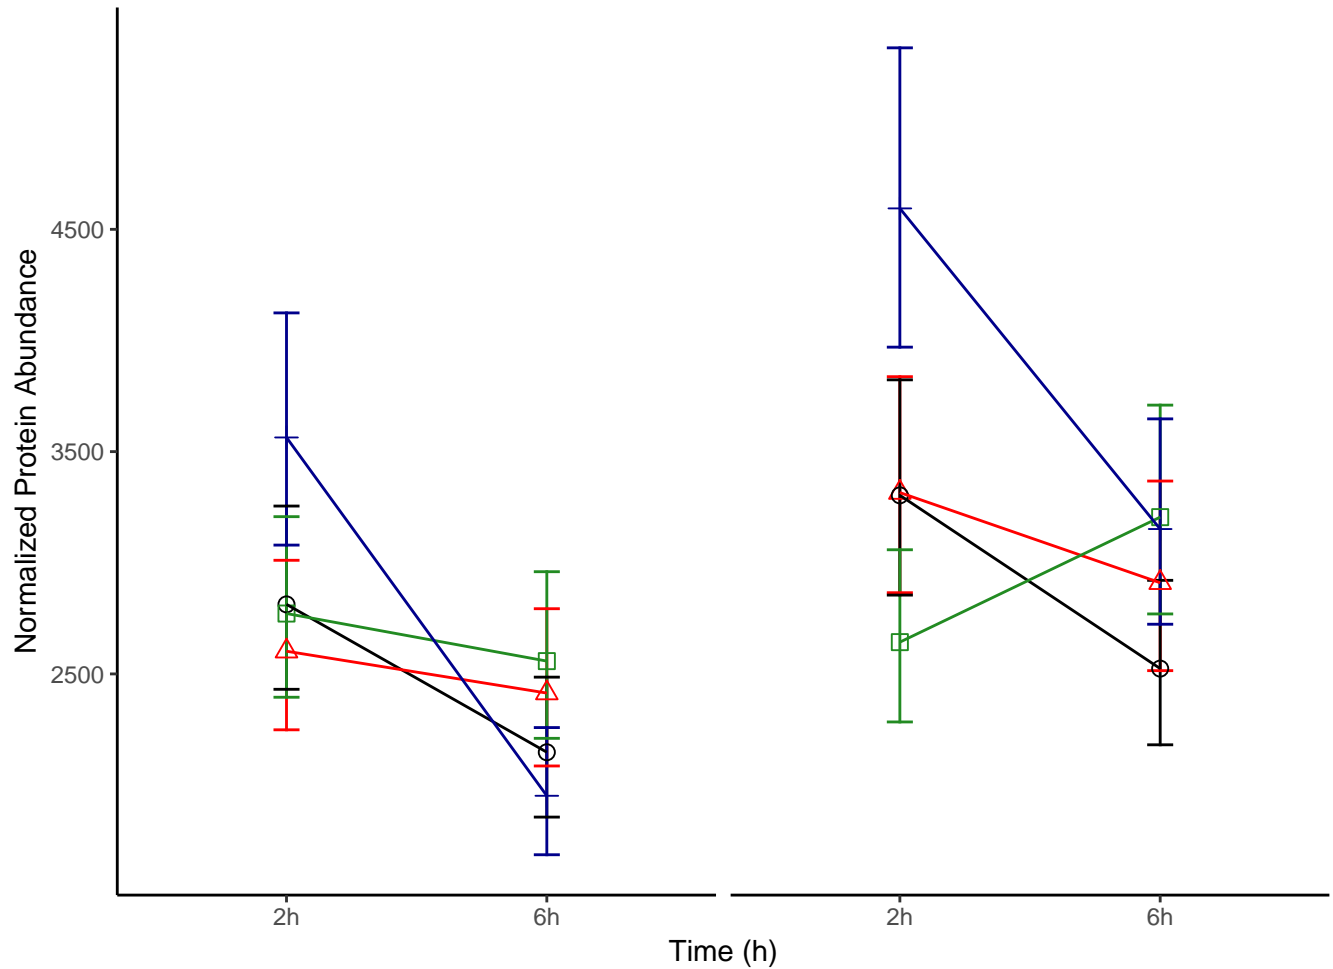

- SA564
- △ SA564-ΔhptRS
- SA564-ΔccpA
- + SA564-ΔhptRS/ccpA

# KPRS\_STAAM

TSB

TSB-dex S-183

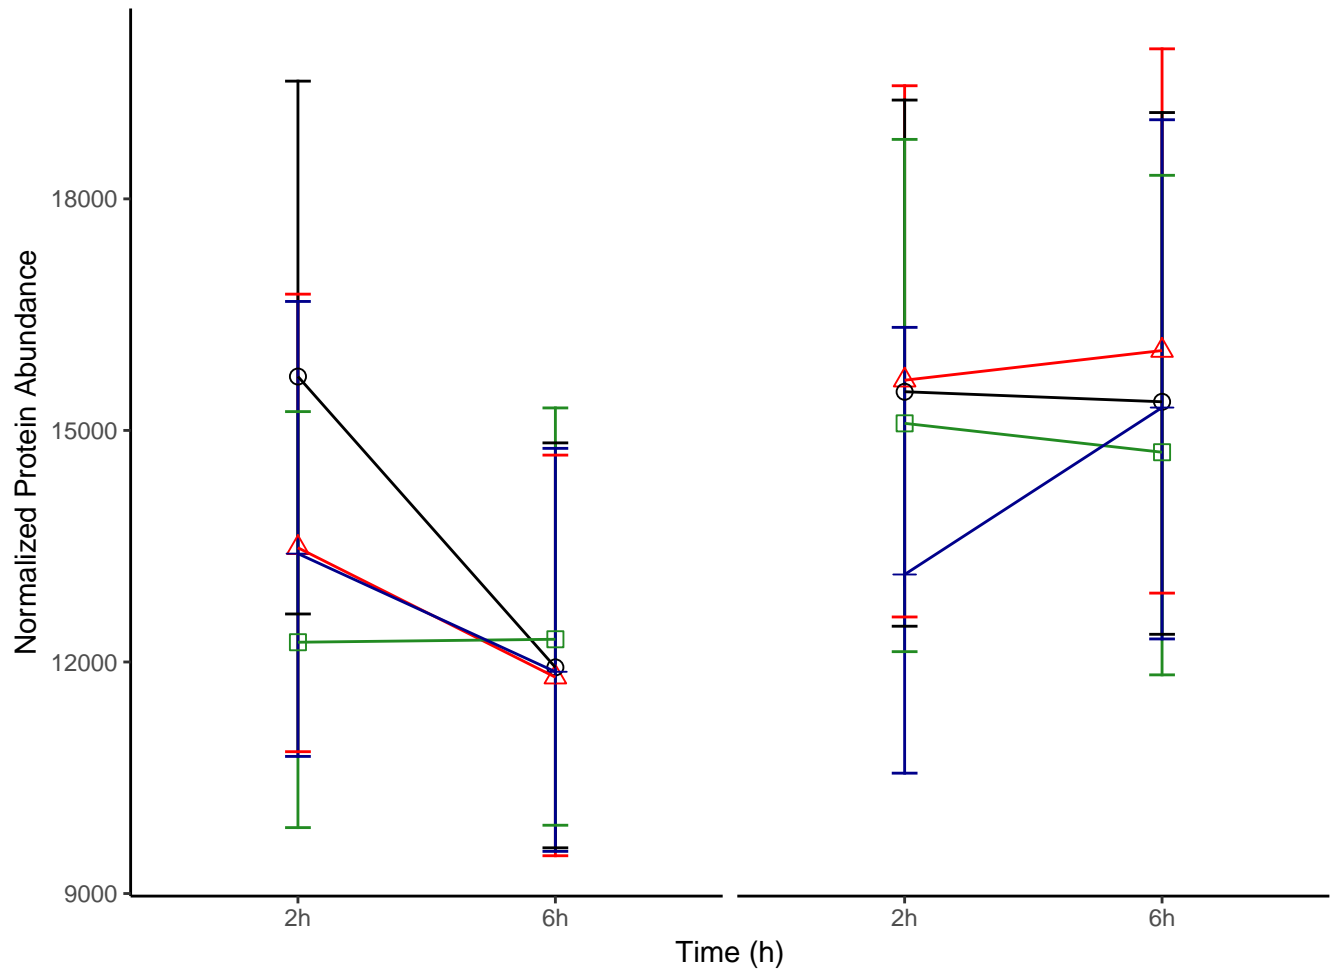

- SA564
- △ SA564-ΔhptRS
- SA564-ΔccpA
- + SA564-ΔhptRS/ccpA

# KPYK\_STAAM

TSB

TSB-dex S-184

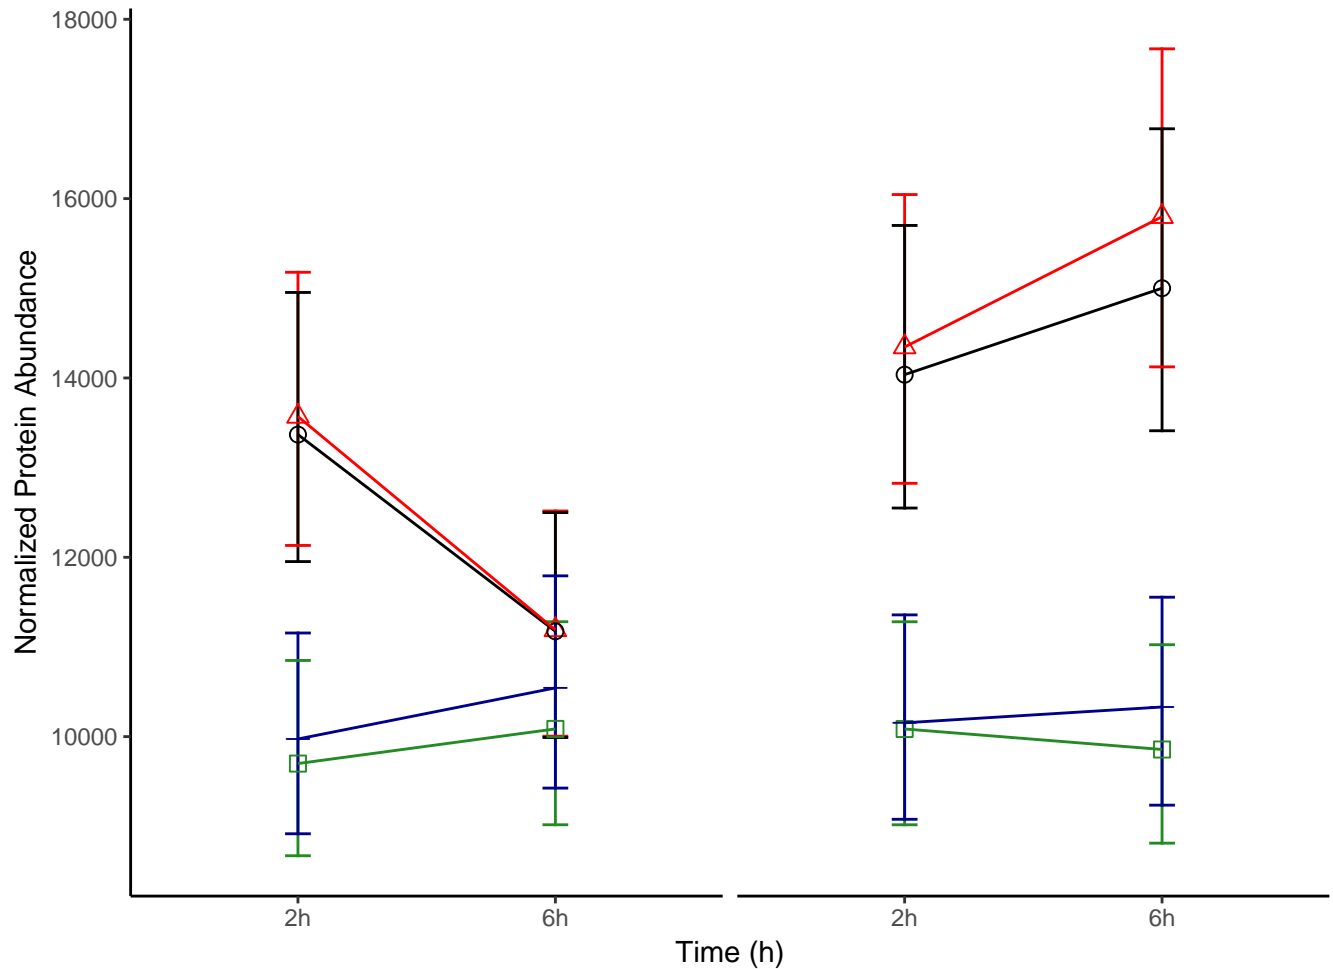

- SA564
- △ SA564- $\Delta$ hptRS
- SA564- $\Delta$ ccpA
- + SA564- $\Delta$ hptRS/ccpA



# KTHY\_STAAM

TSB

TSB-dex S-185

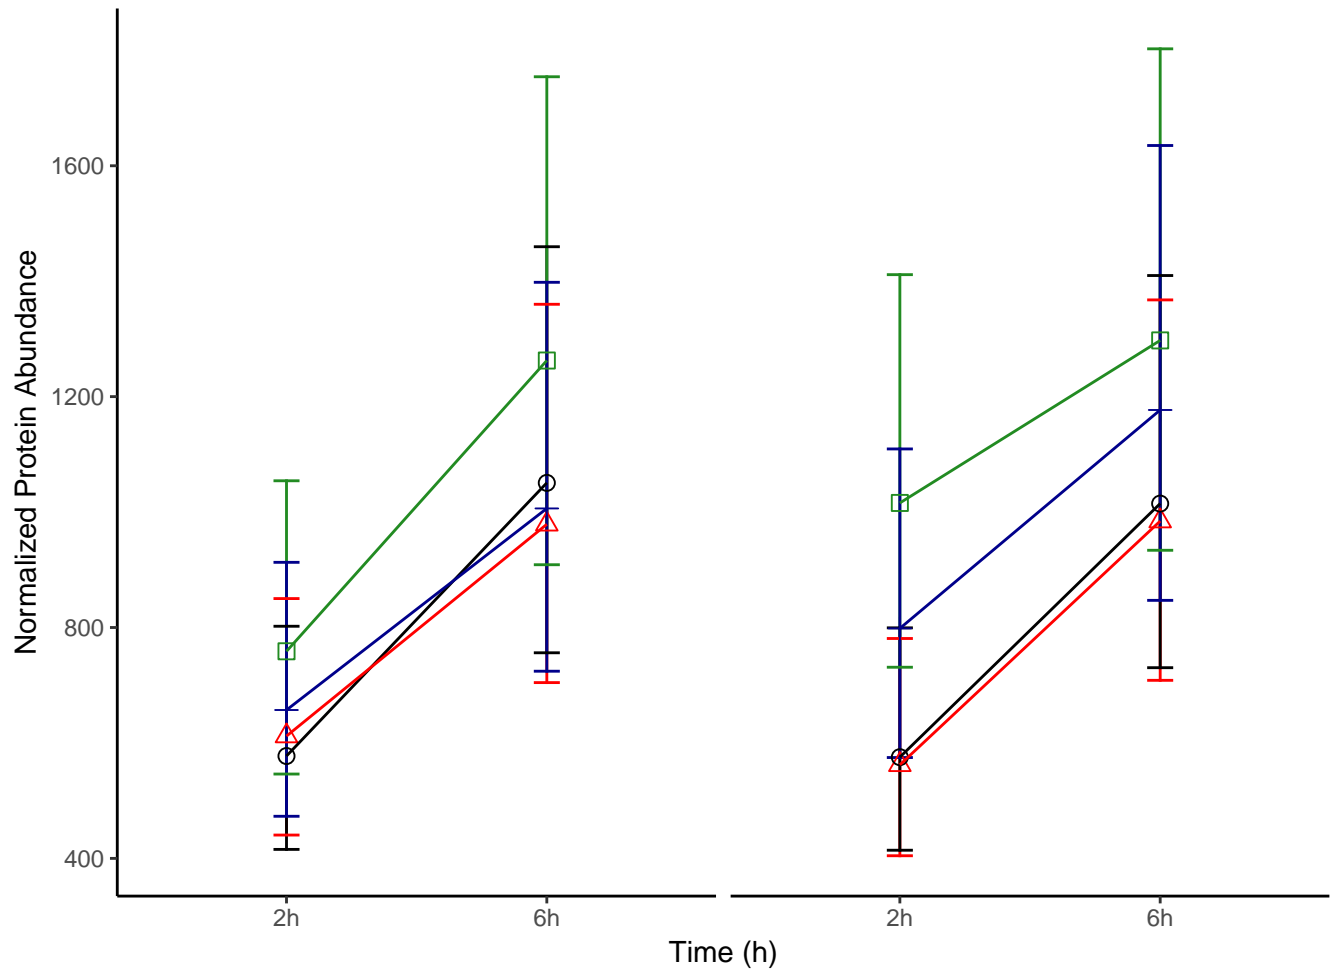

- SA564
- △ SA564- $\Delta$ *hptRS*
- SA564- $\Delta$ *ccpA*
- + SA564- $\Delta$ *hptRS/ccpA*

# LACA\_STAAM

TSB

TSB-dex S-186

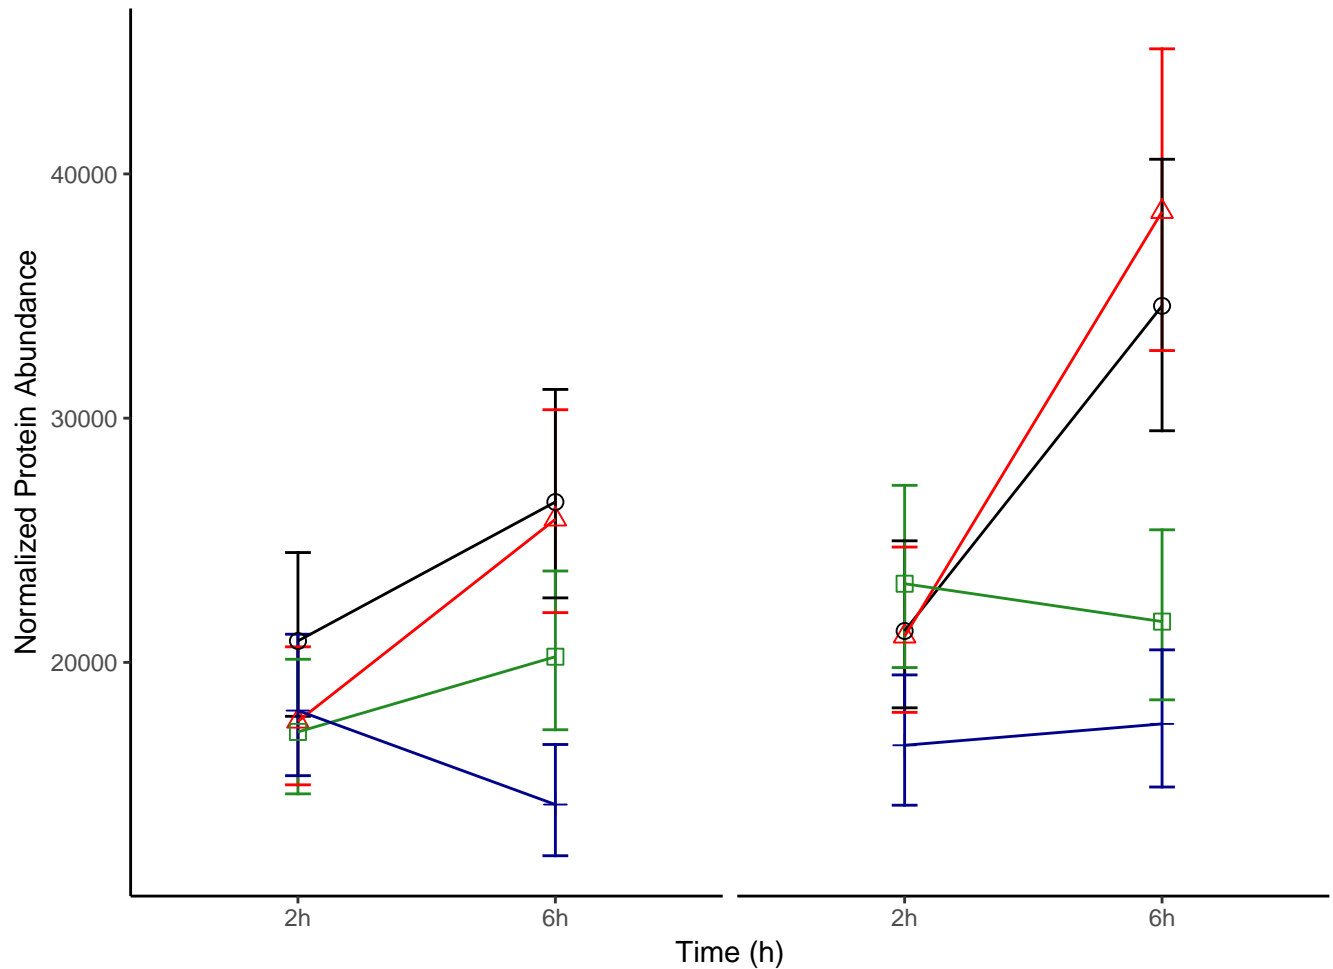

- SA564
- △ SA564-Δ*hptRS*
- SA564-Δ*ccpA*
- + SA564-Δ*hptRS/ccpA*

# LDH1\_STAAM

TSB

TSB-dex S-187

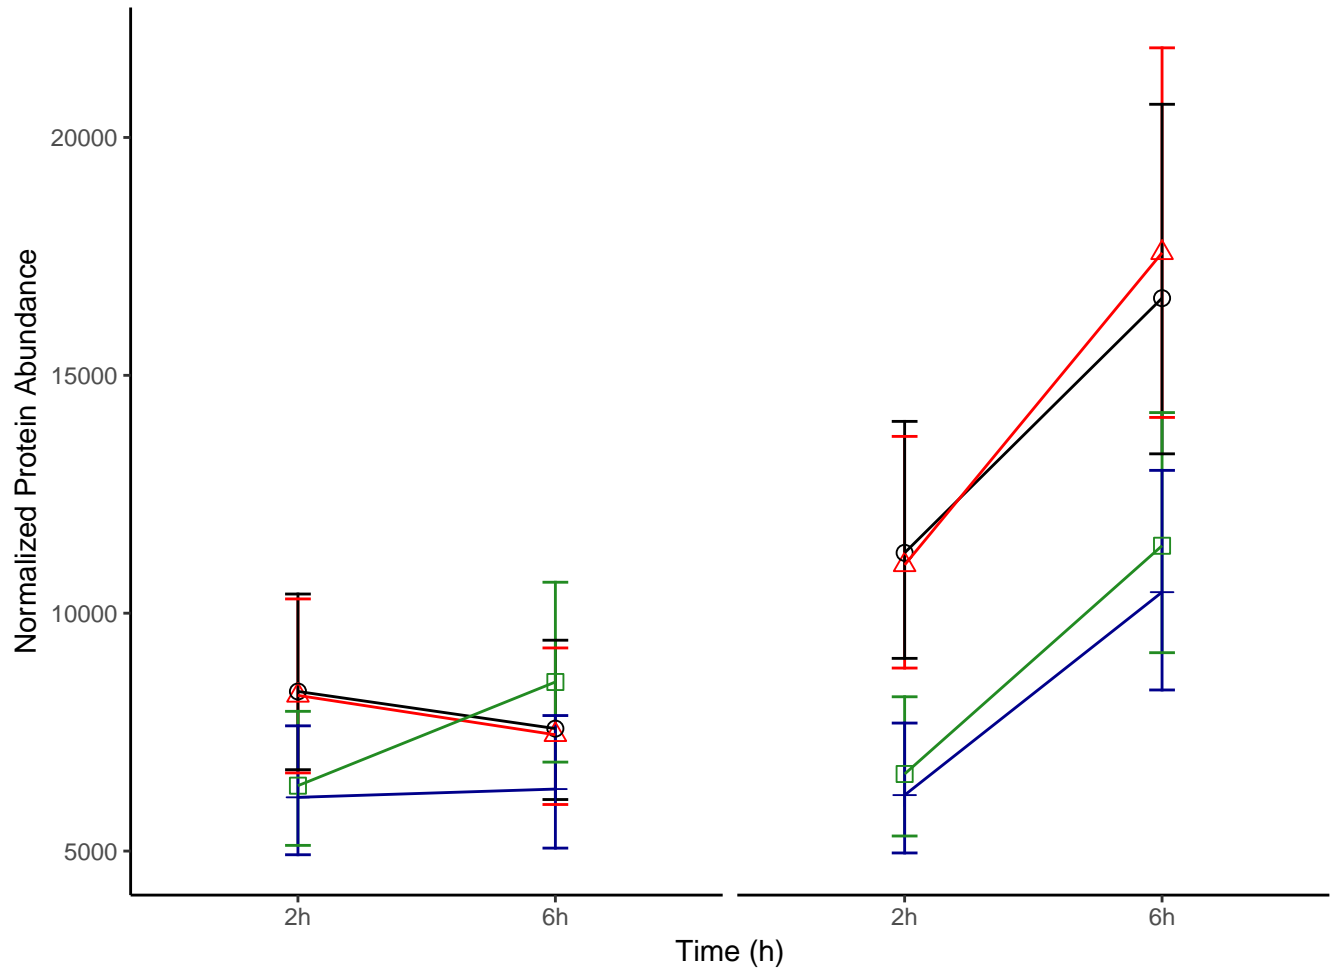

- SA564
- △ SA564- $\Delta$ *hptRS*
- SA564- $\Delta$ *ccpA*
- + SA564- $\Delta$ *hptRS/ccpA*

# LDH2\_STAAM

TSB

TSB-dex S-188

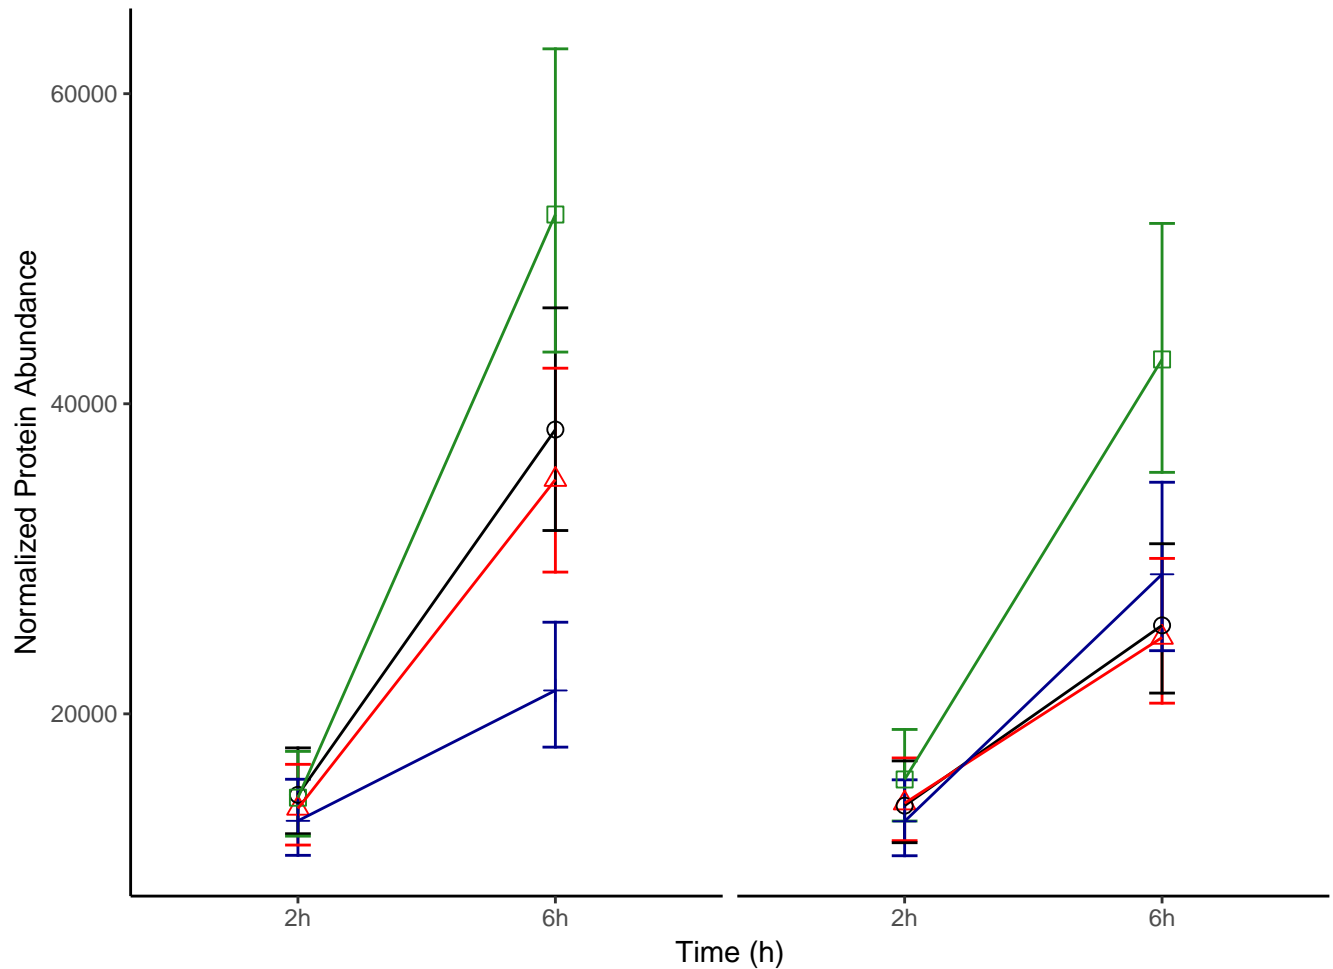

- SA564
- △ SA564- $\Delta$ *hptRS*
- SA564- $\Delta$ *ccpA*
- + SA564- $\Delta$ *hptRS/ccpA*

# LDHD\_STAAM

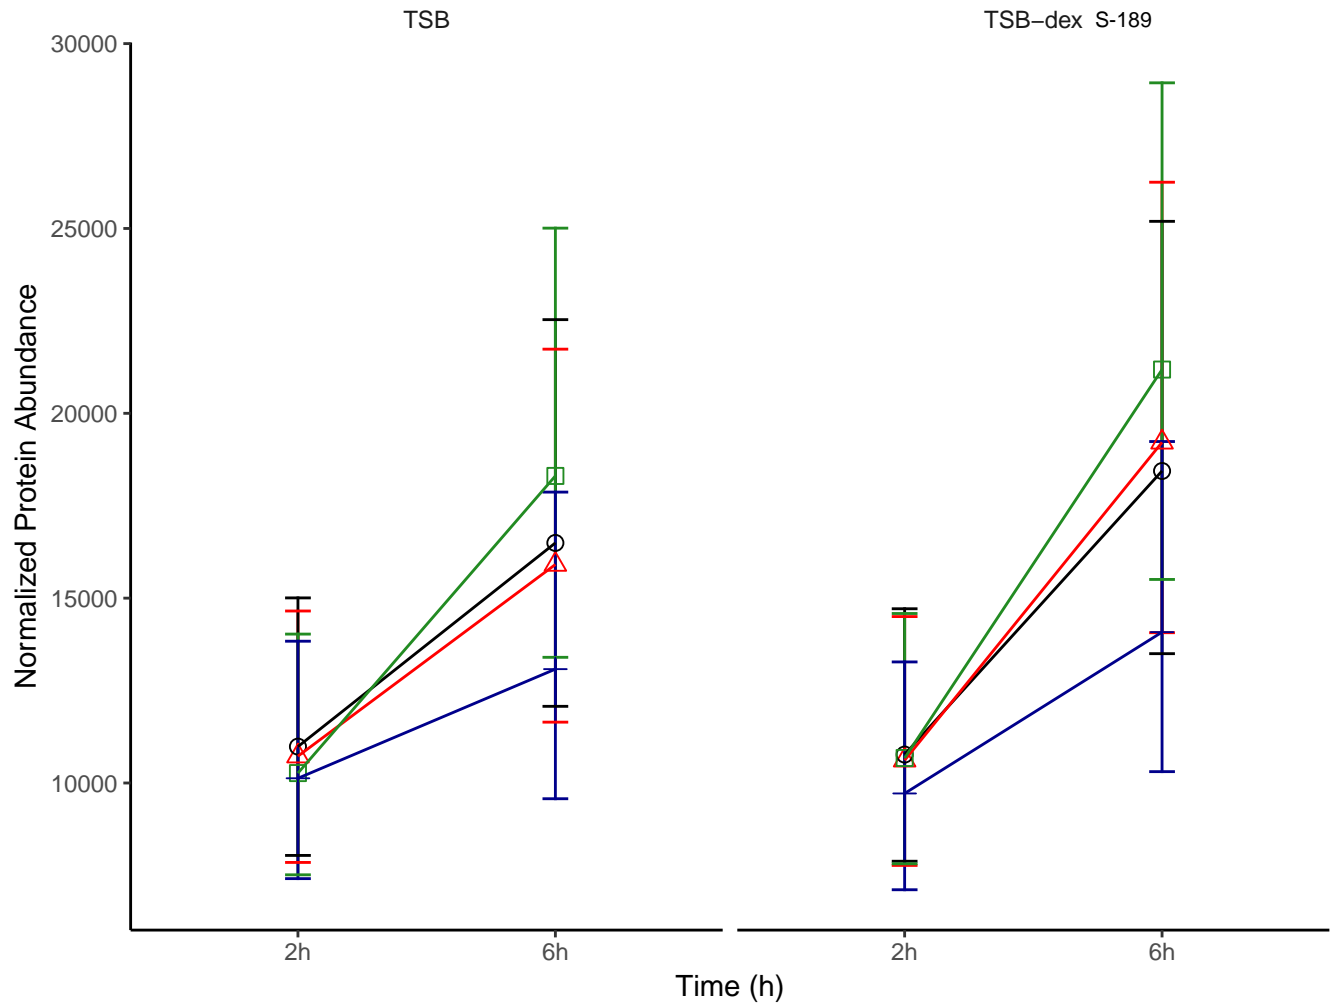

- SA564
- △ SA564- $\Delta$ *hptRS*
- SA564- $\Delta$ *ccpA*
- + SA564- $\Delta$ *hptRS/ccpA*

## LEP\_STAAM

TSB

TSB-dex S-190

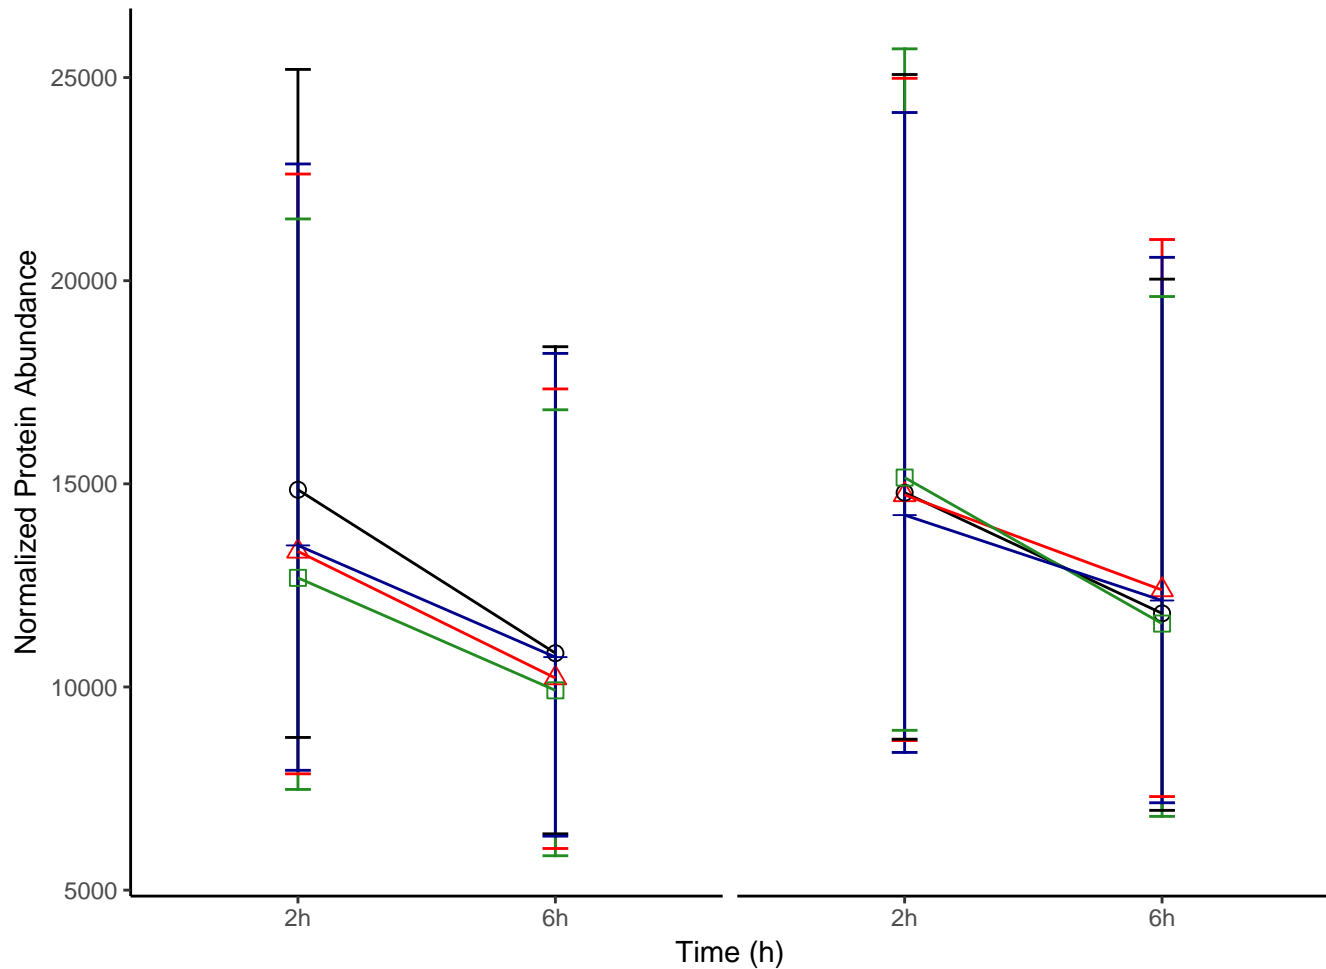

- SA564
- △ SA564- $\Delta$ hptRS
- SA564- $\Delta$ ccpA
- + SA564- $\Delta$ hptRS/ccpA

## LEPA\_STAAM

TSB

TSB-dex S-191

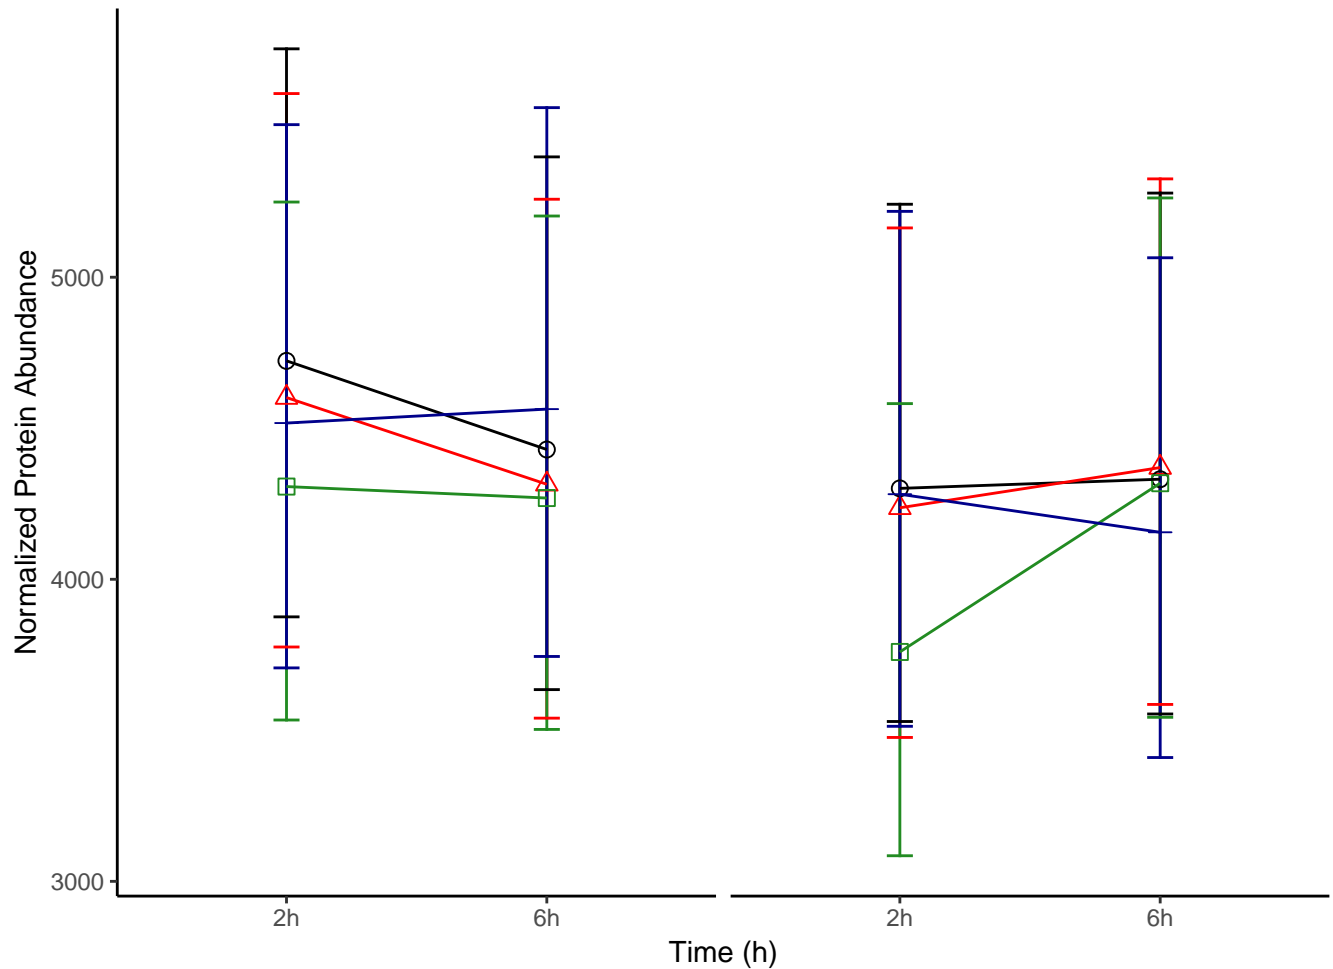

- SA564
- △ SA564- $\Delta hptRS$
- SA564- $\Delta ccpA$
- + SA564- $\Delta hptRS/ccpA$

# LEU1\_STAAM

TSB

TSB-dex S-192

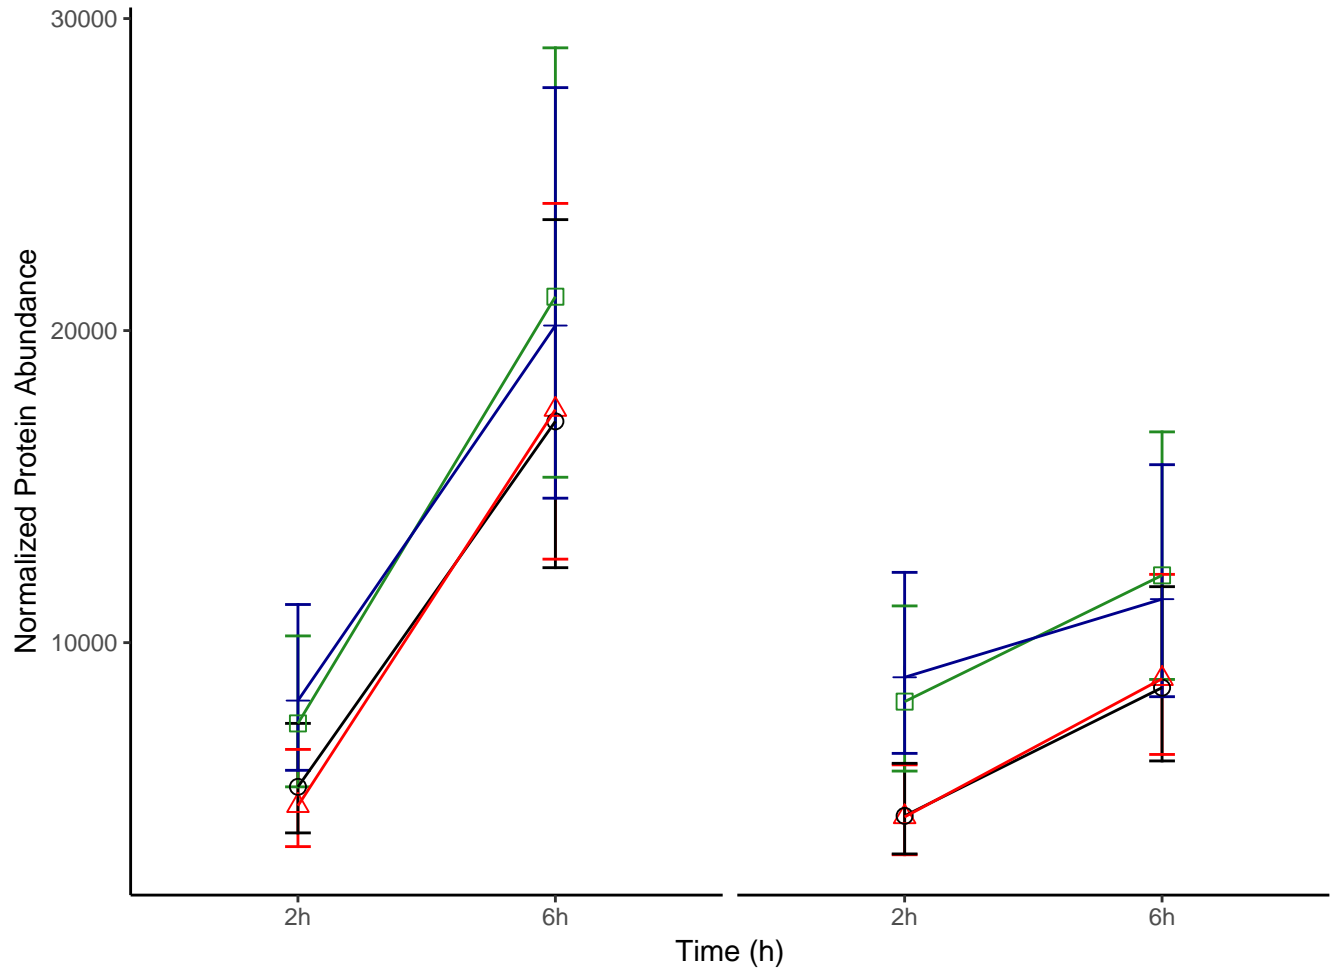

- SA564
- △ SA564- $\Delta hptRS$
- SA564- $\Delta ccpA$
- + SA564- $\Delta hptRS/ccpA$



# LIPA\_STAAM

TSB

TSB-dex S-193

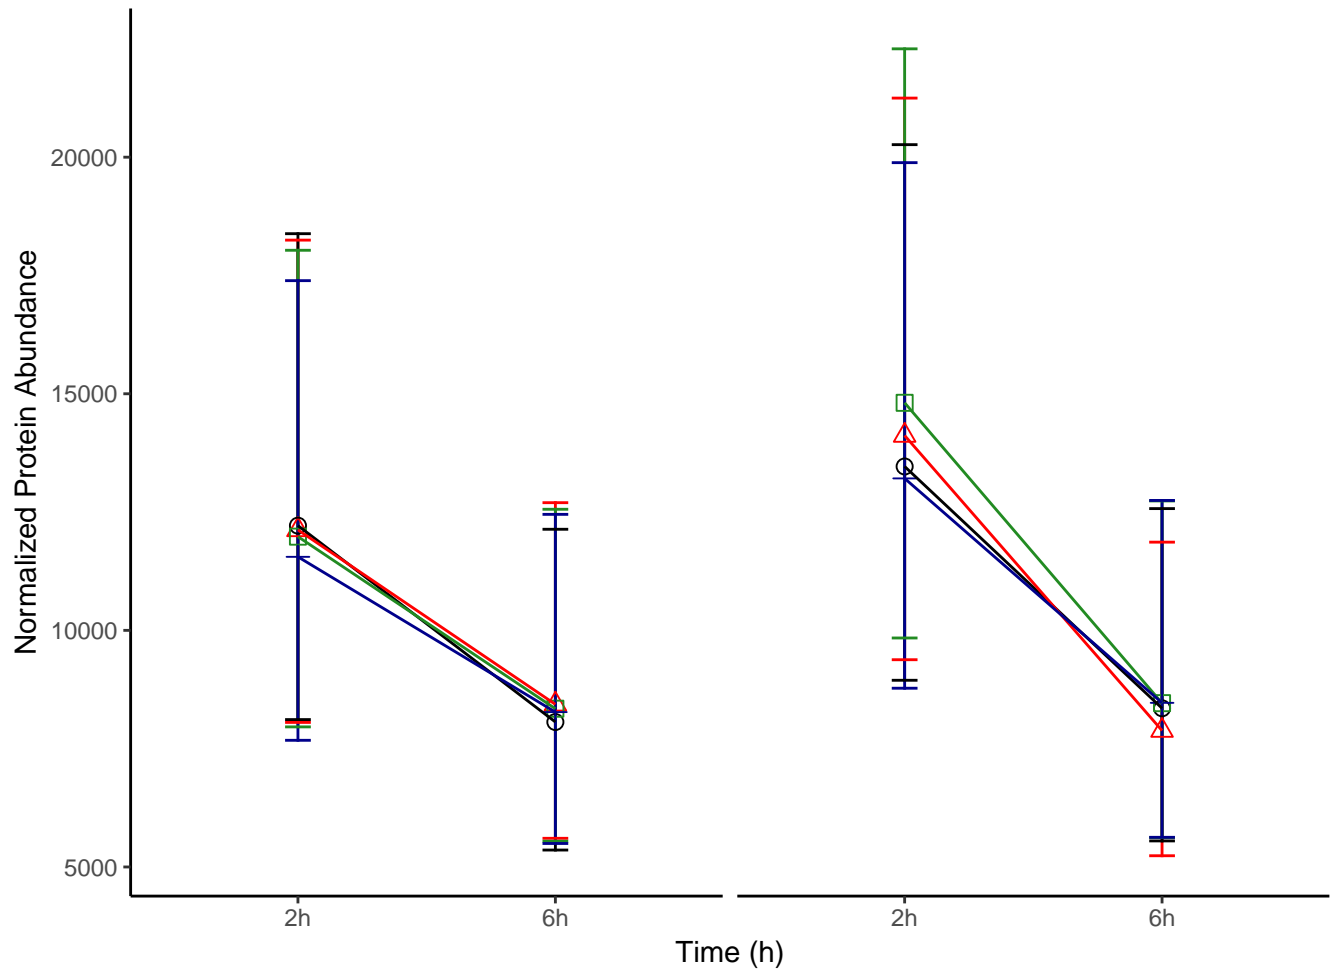

- SA564
- △ SA564-ΔhptRS
- SA564-ΔccpA
- + SA564-ΔhptRS/ccpA

# LUXS\_STAAM

TSB

TSB-dex S-194

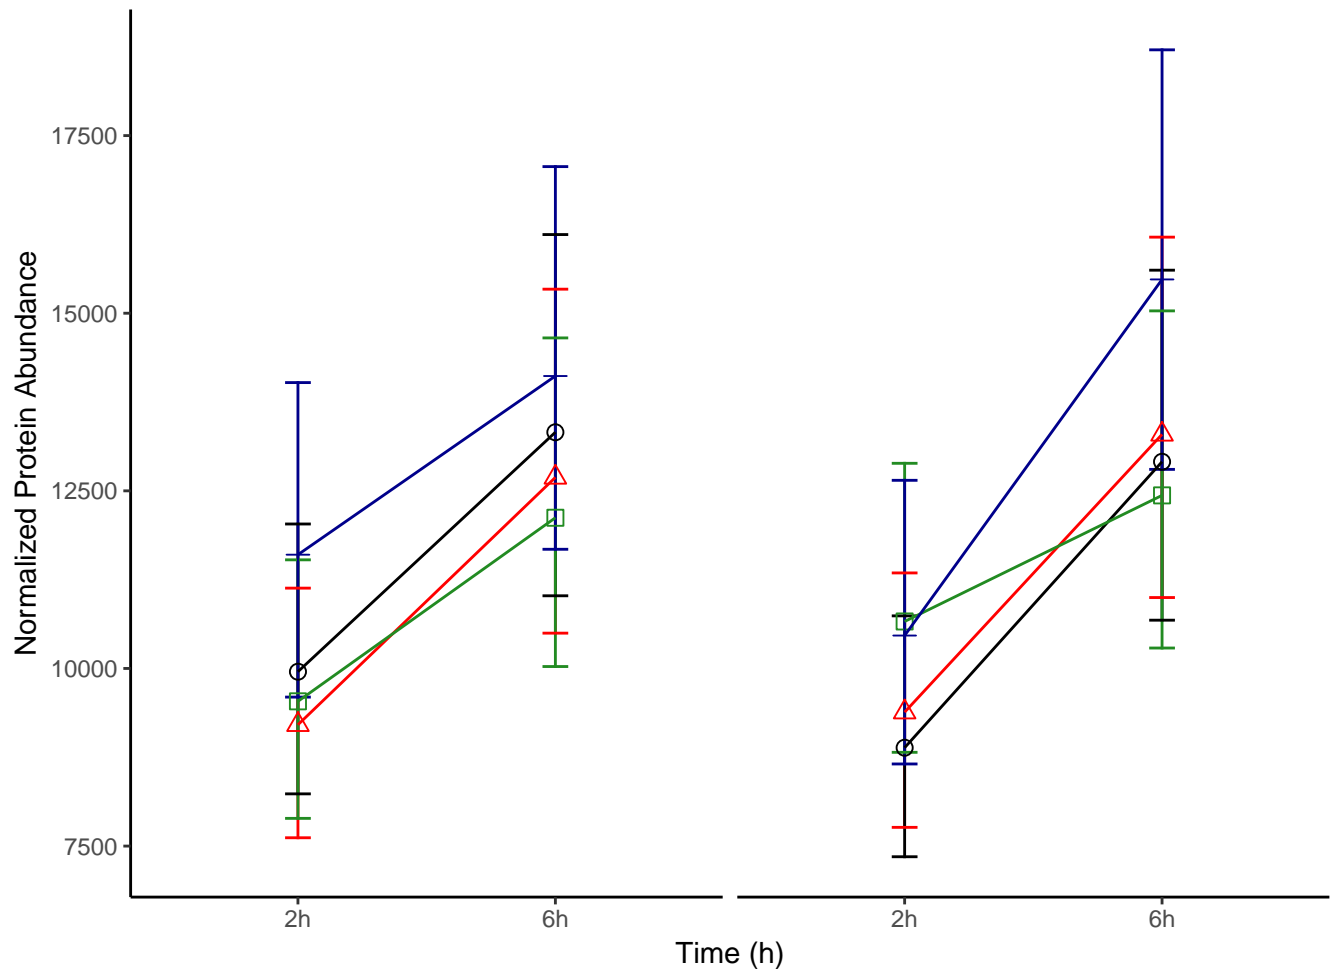

- SA564
- △ SA564-ΔhptRS
- SA564-ΔccpA
- + SA564-ΔhptRS/ccpA

# LYTH\_STAAM

TSB

TSB-dex S-195

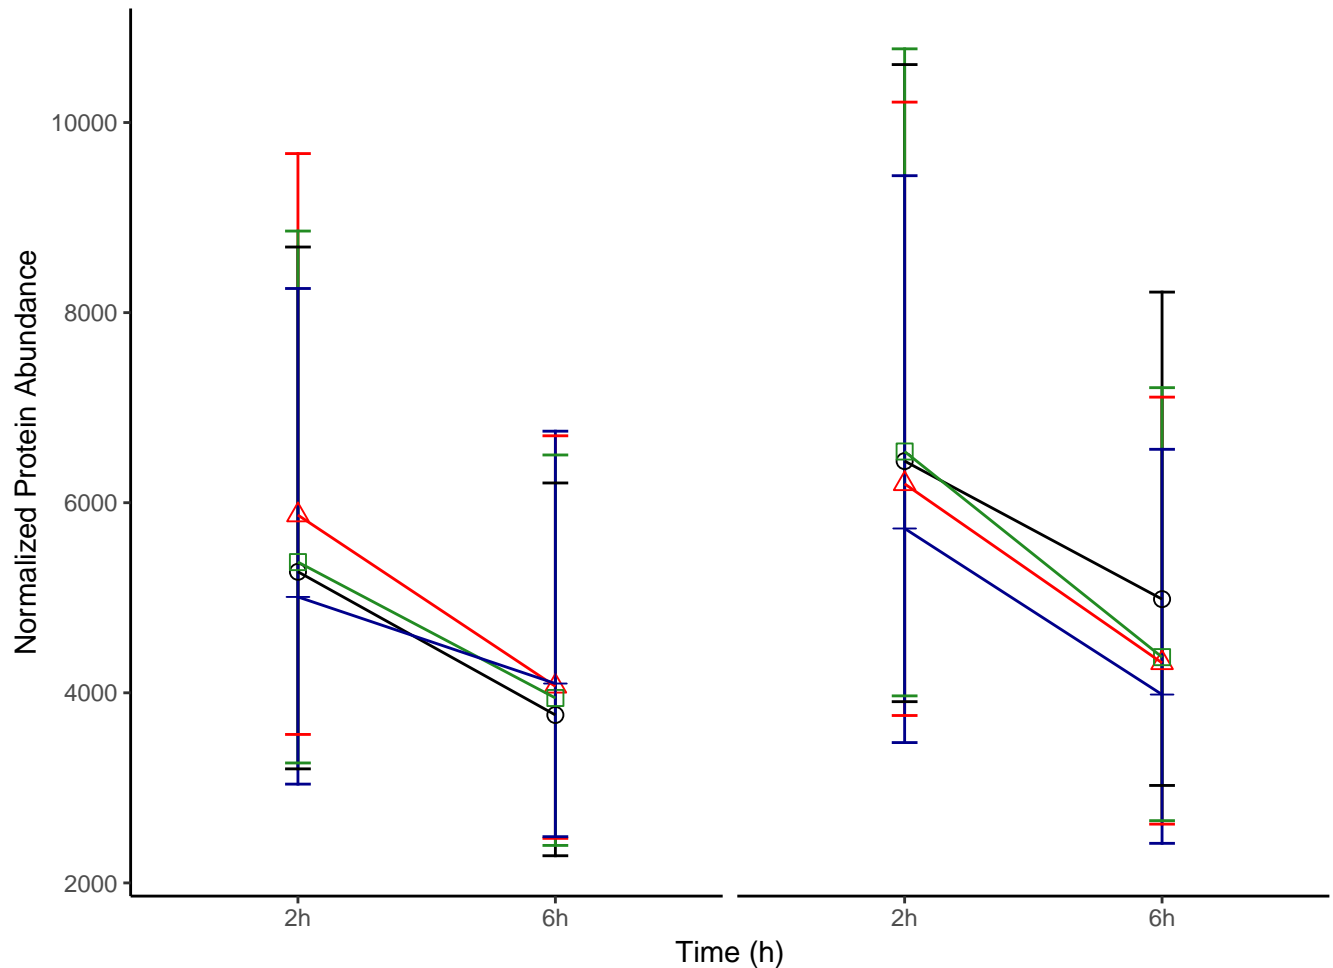

- SA564
- △ SA564- $\Delta$ *hptRS*
- SA564- $\Delta$ *ccpA*
- + SA564- $\Delta$ *hptRS/ccpA*

# LYTN\_STAAM

TSB

TSB-dex S-196

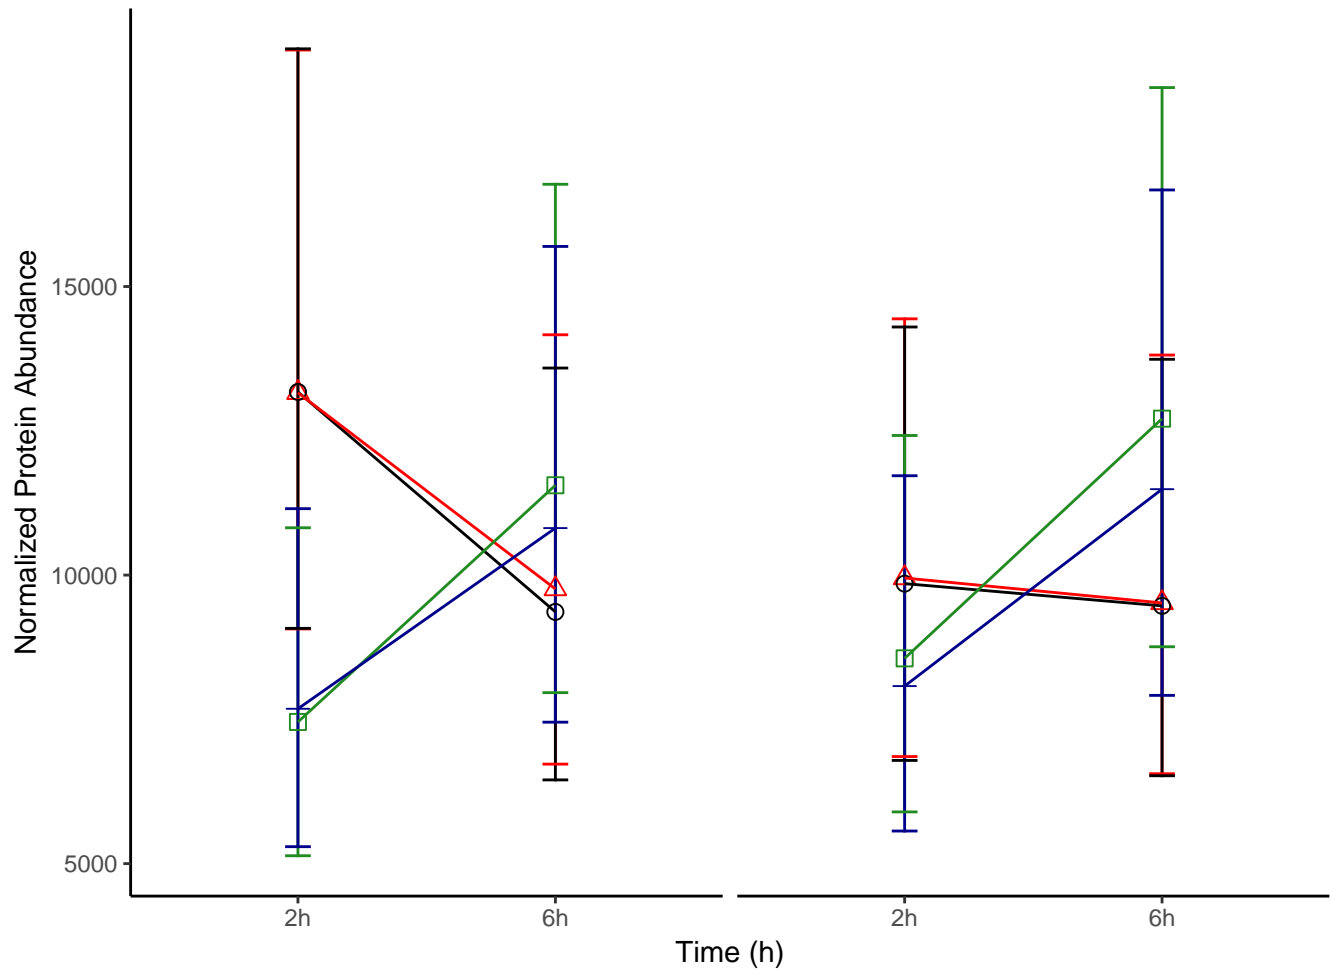

- SA564
- △ SA564- $\Delta$ hptRS
- SA564- $\Delta$ ccpA
- + SA564- $\Delta$ hptRS/ccpA

# MAP\_STAAM

TSB

TSB-dex S-197

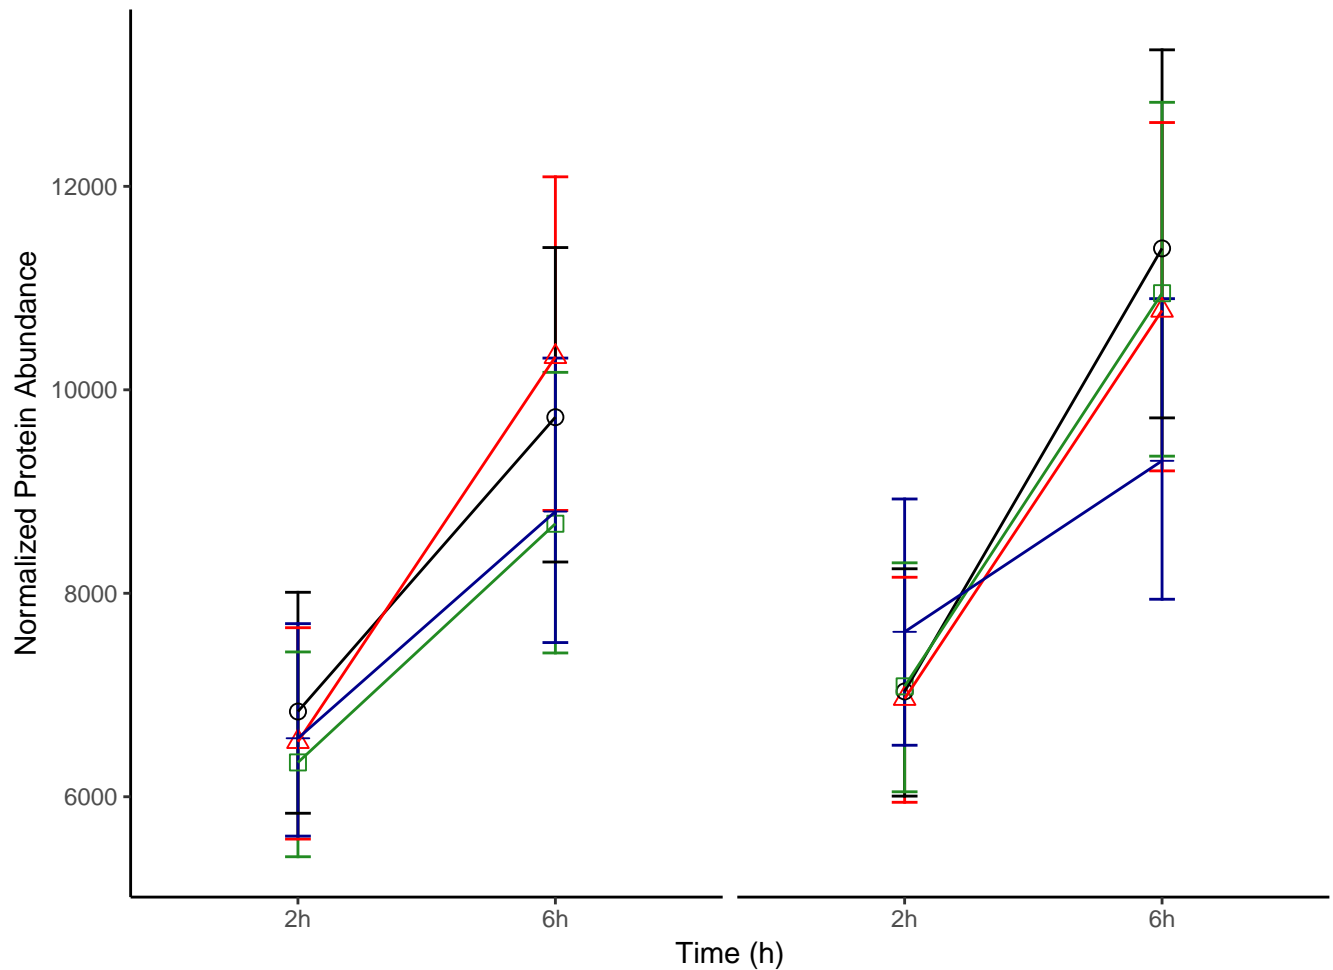

- SA564
- △ SA564- $\Delta$ *hptRS*
- SA564- $\Delta$ *ccpA*
- + SA564- $\Delta$ *hptRS/ccpA*

# MAP1\_STAAM

TSB

TSB-dex S-198

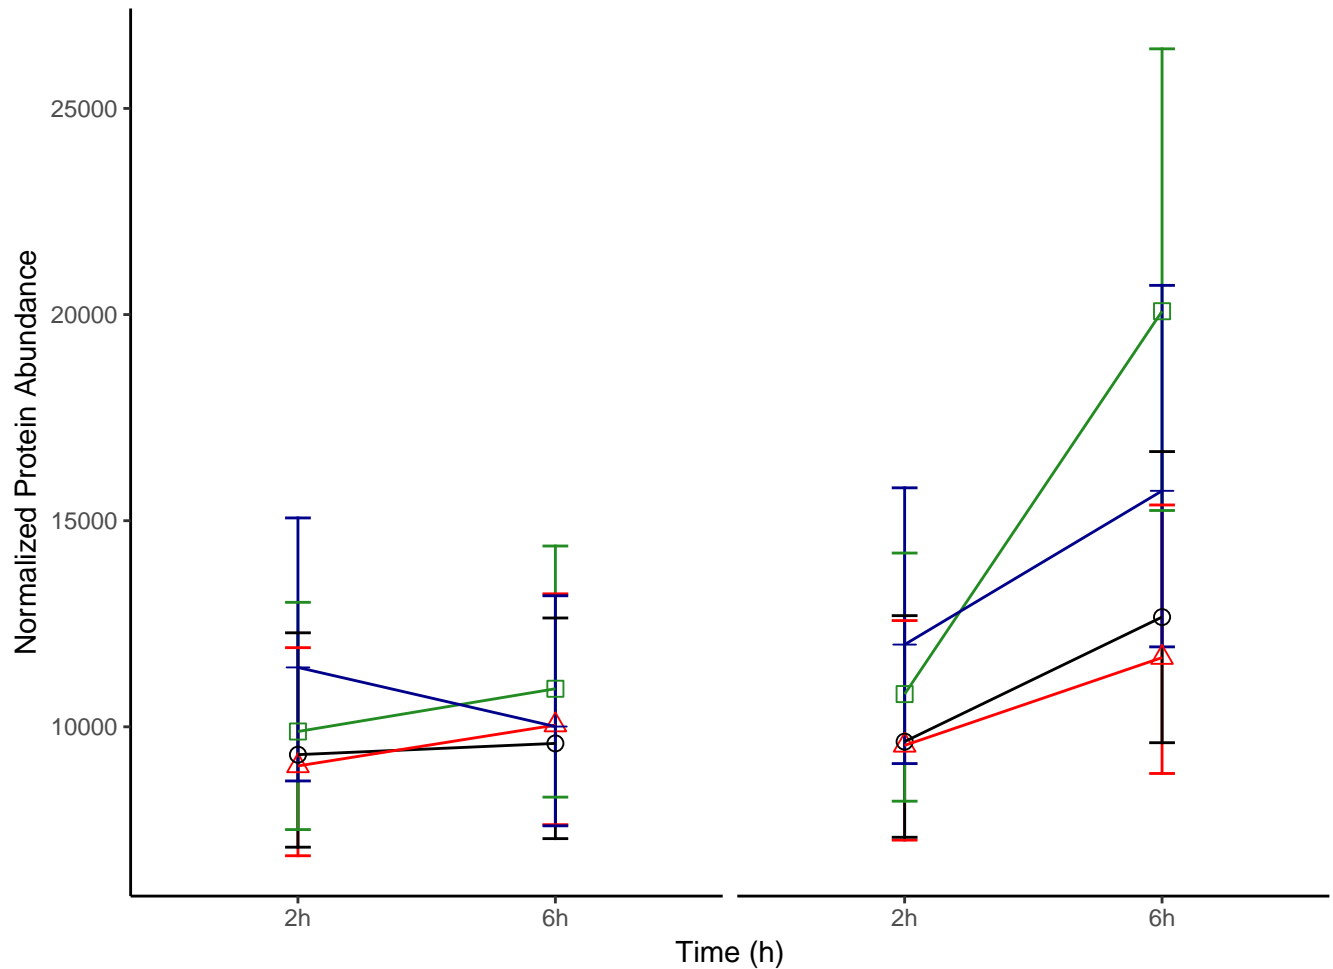

- SA564
- △ SA564-ΔhptRS
- SA564-ΔccpA
- + SA564-ΔhptRS/ccpA

# MAZF\_STAAM

TSB

TSB-dex S-199

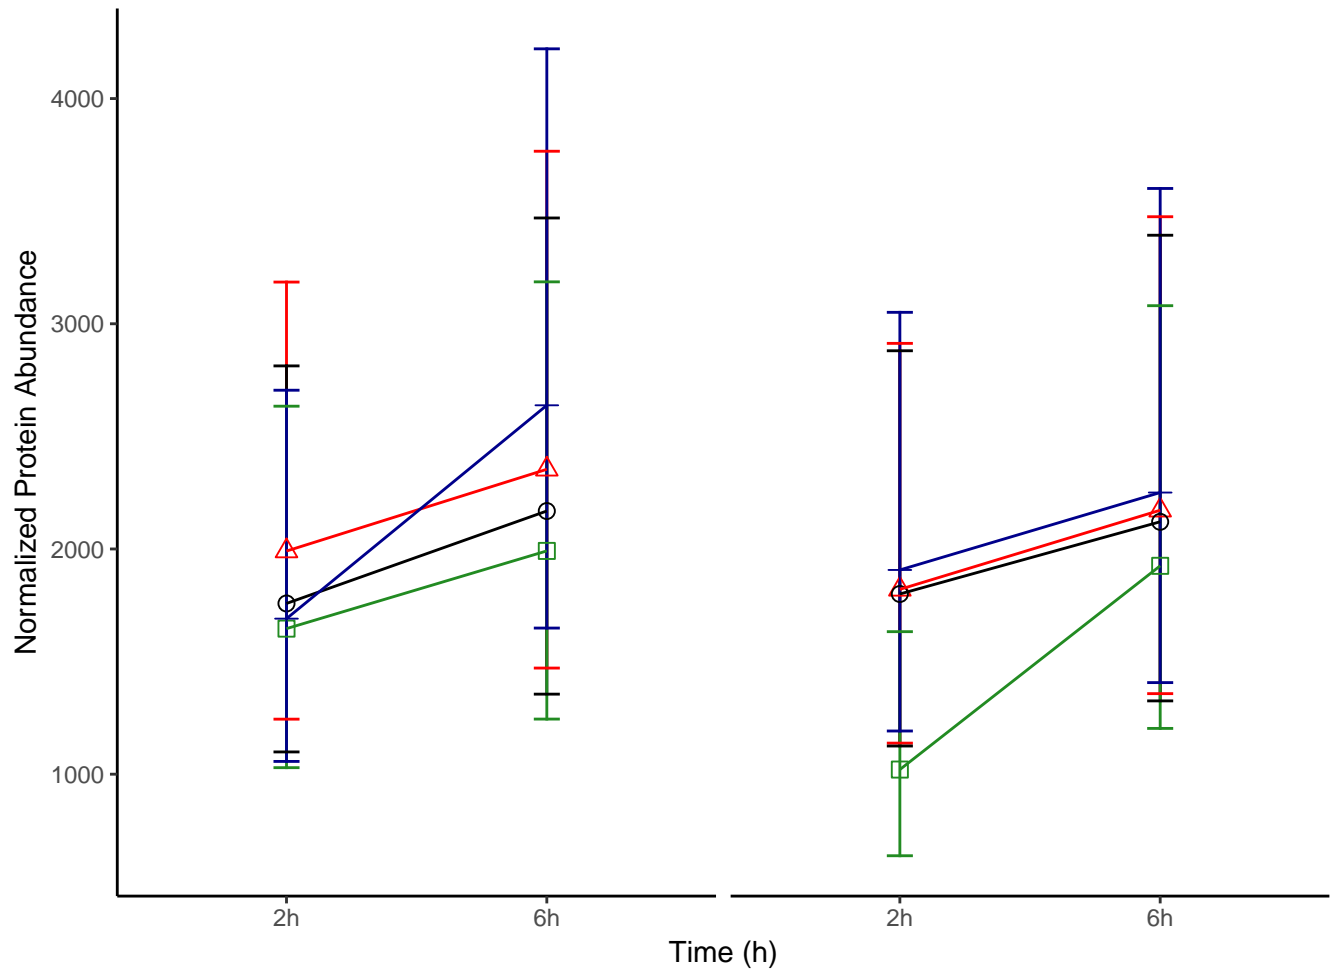

- SA564
- △ SA564-ΔhptRS
- SA564-ΔccpA
- + SA564-ΔhptRS/ccpA

# MENB\_STAAM

TSB

TSB-dex S-200

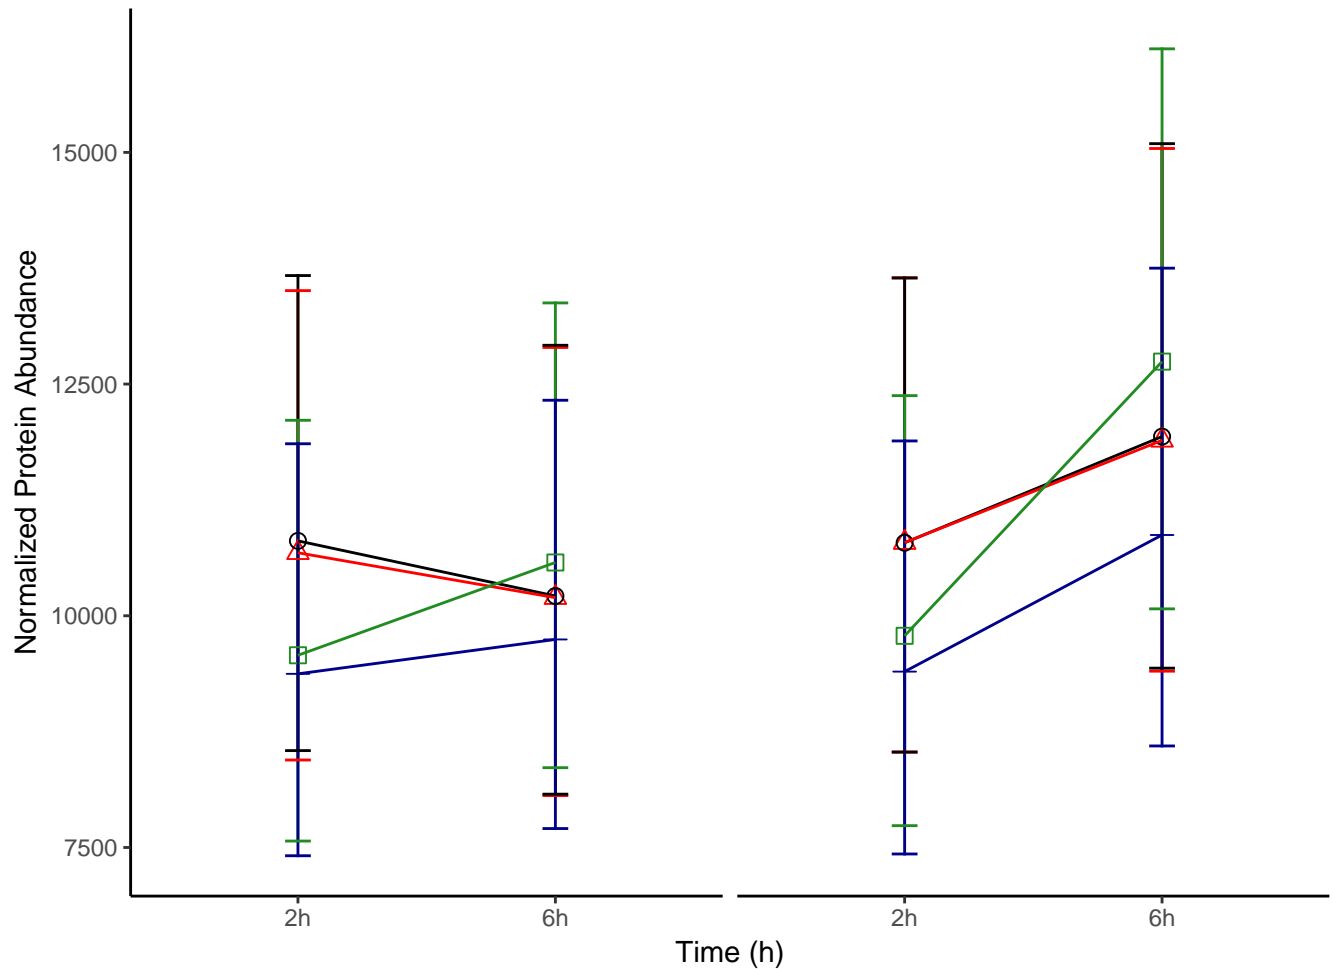

- SA564
- △ SA564-ΔhptRS
- SA564-ΔccpA
- + SA564-ΔhptRS/ccpA



# MENG\_STAAM

TSB

TSB-dex S-201

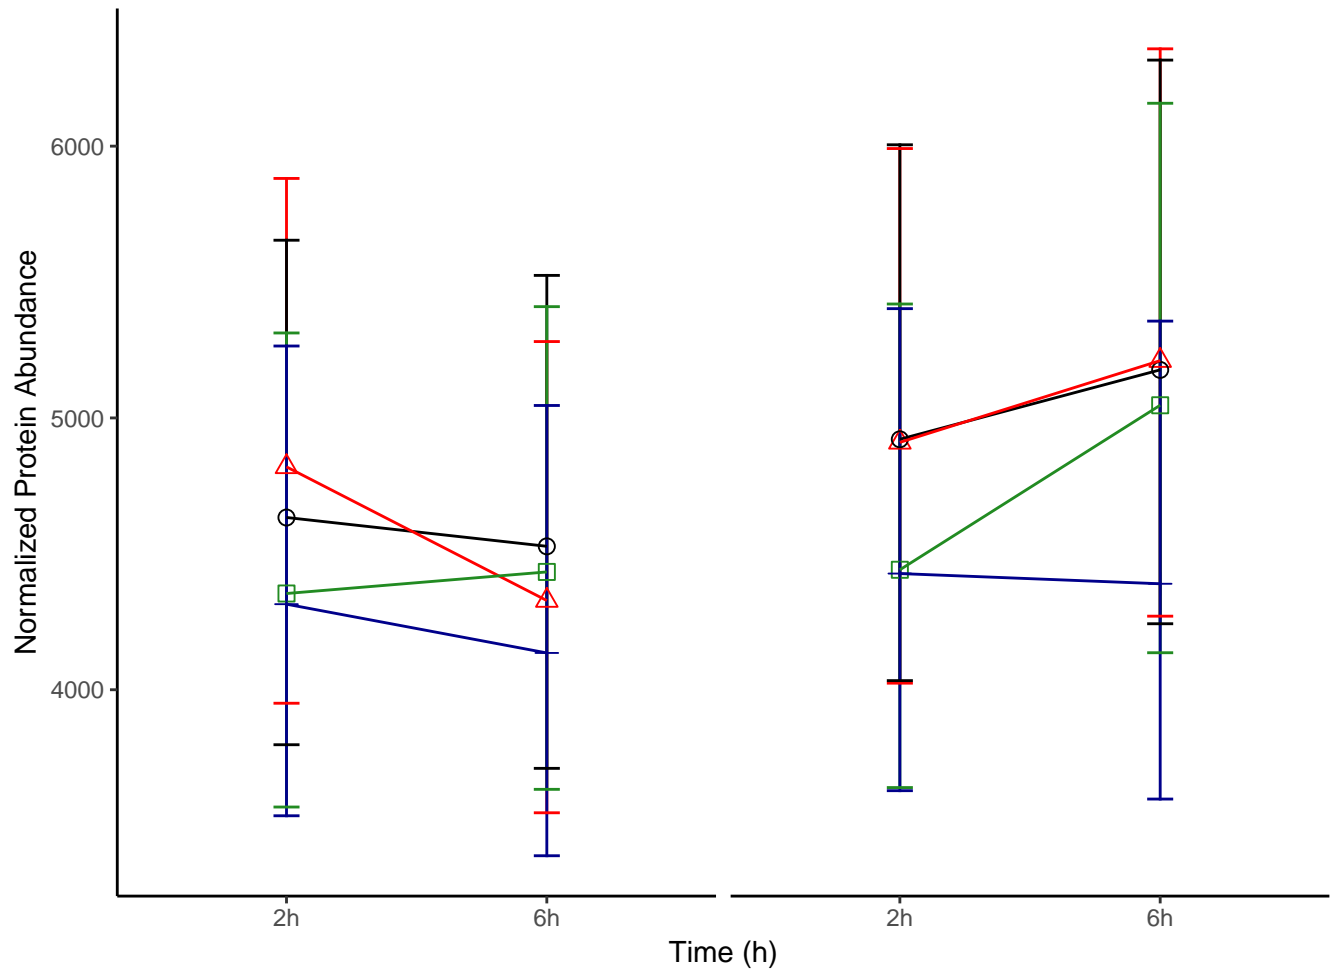

- SA564
- △ SA564-Δ*hptRS*
- SA564-Δ*ccpA*
- + SA564-Δ*hptRS/ccpA*

# METK\_STAAM

TSB

TSB-dex S-202

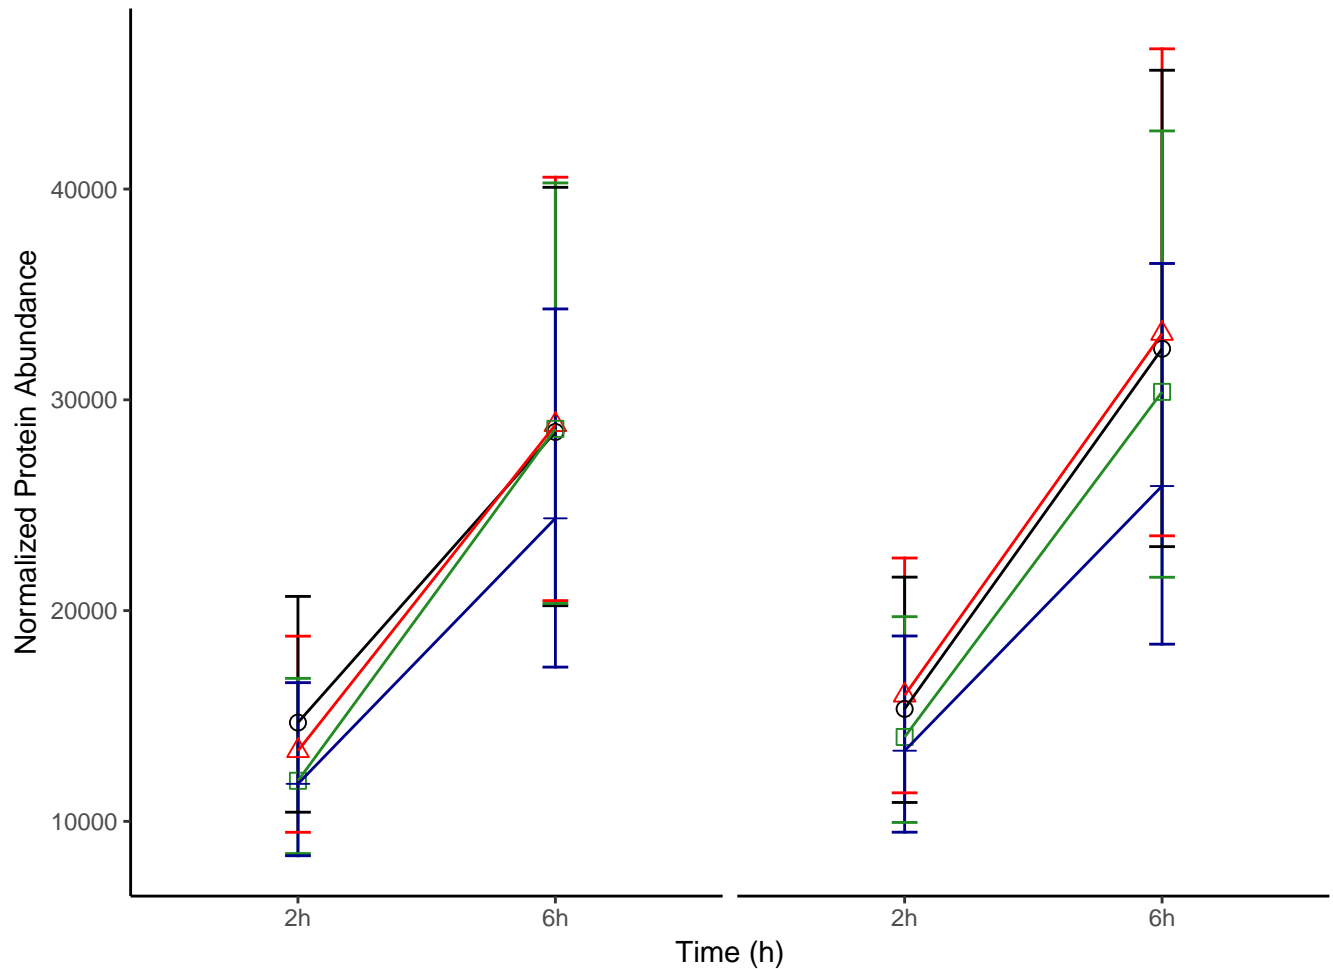

- SA564
- △ SA564- $\Delta$ hptRS
- SA564- $\Delta$ ccpA
- + SA564- $\Delta$ hptRS/ccpA

# METN2\_STAAM

TSB

TSB-dex S-203

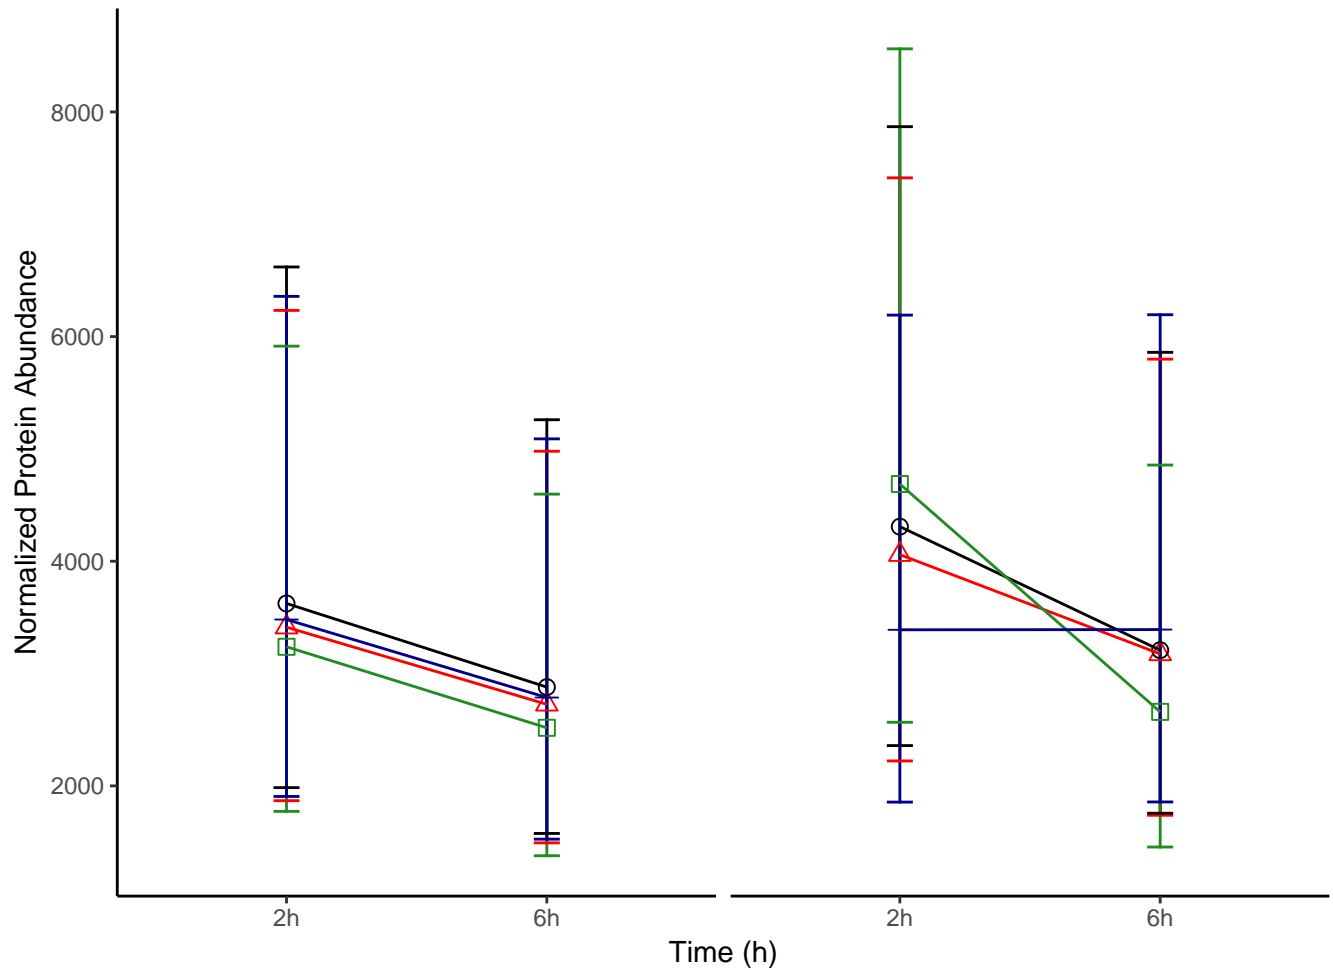

- SA564
- △ SA564- $\Delta$ hptRS
- SA564- $\Delta$ ccpA
- + SA564- $\Delta$ hptRS/ccpA

# MGRA\_STAAM

TSB

TSB-dex S-204

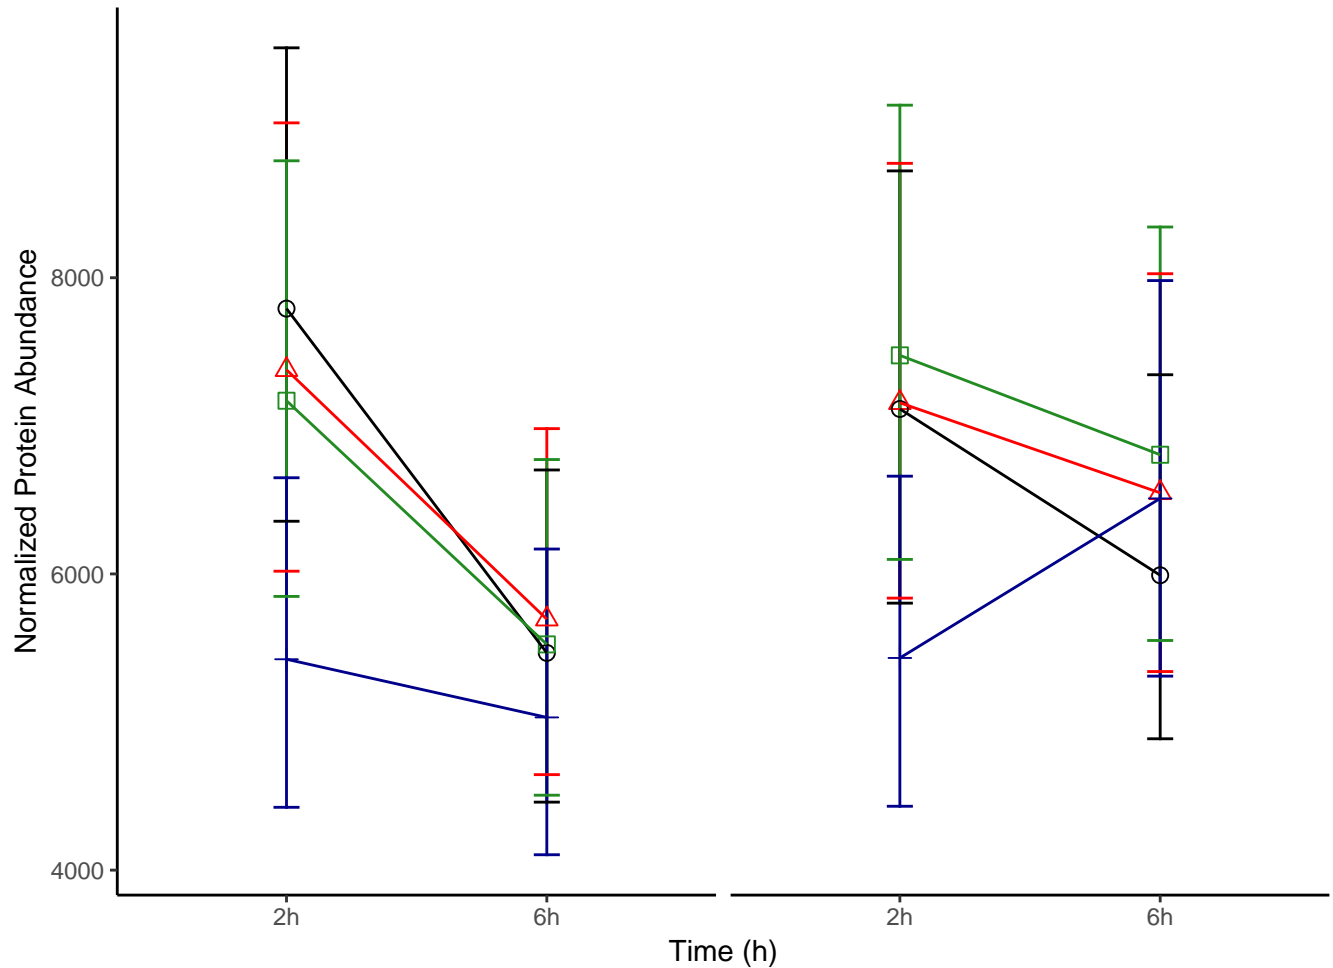

- SA564
- △ SA564- $\Delta$ *hptRS*
- SA564- $\Delta$ *ccpA*
- + SA564- $\Delta$ *hptRS/ccpA*

# MIAB\_STAAM

TSB

TSB-dex S-205

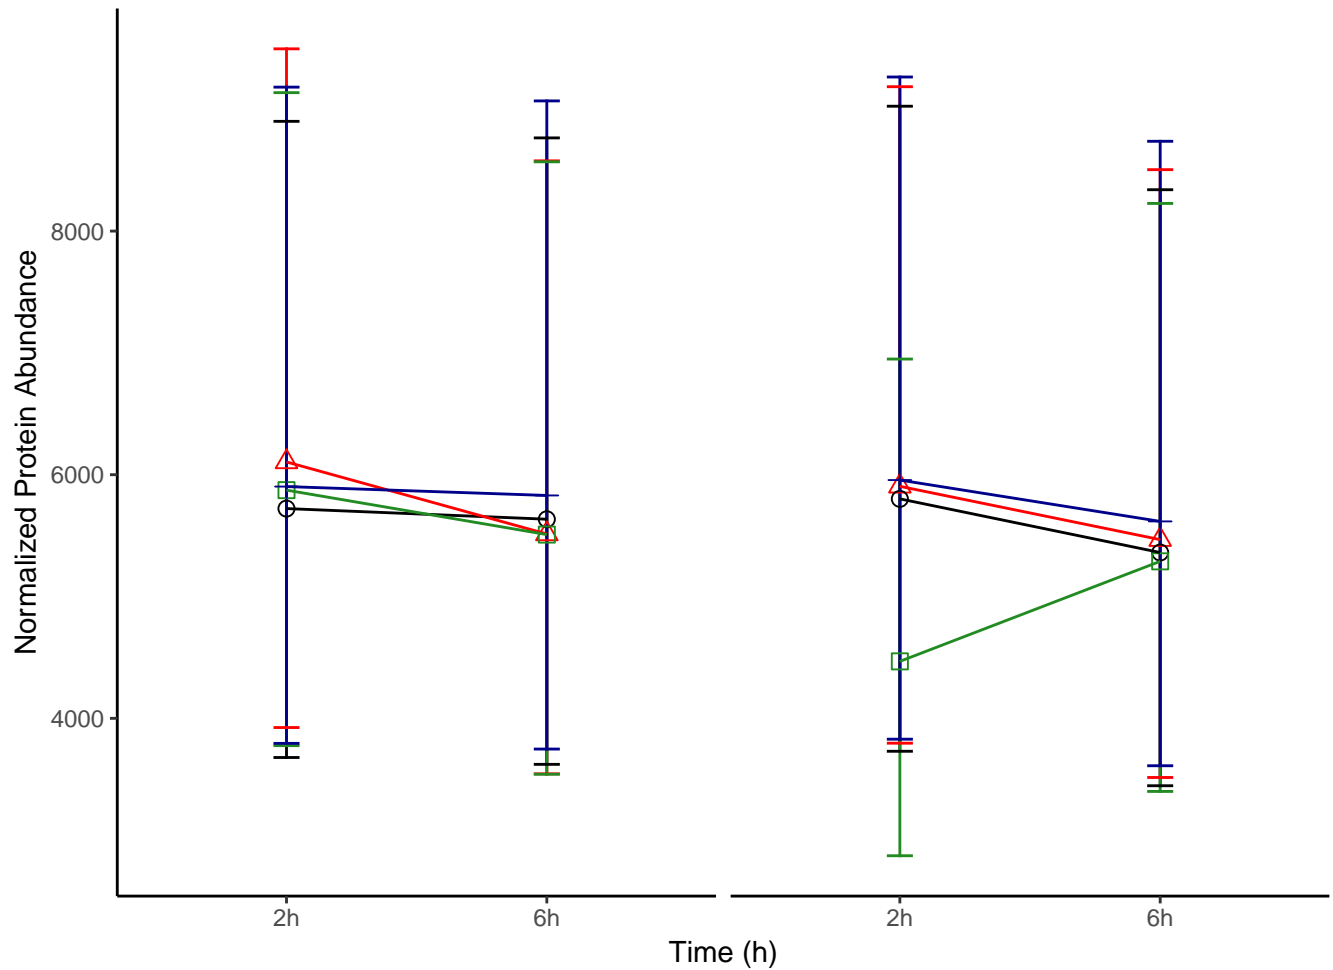

- SA564
- △ SA564- $\Delta hptRS$
- SA564- $\Delta ccpA$
- + SA564- $\Delta hptRS/ccpA$

# MNME\_STAAM

TSB

TSB-dex S-206

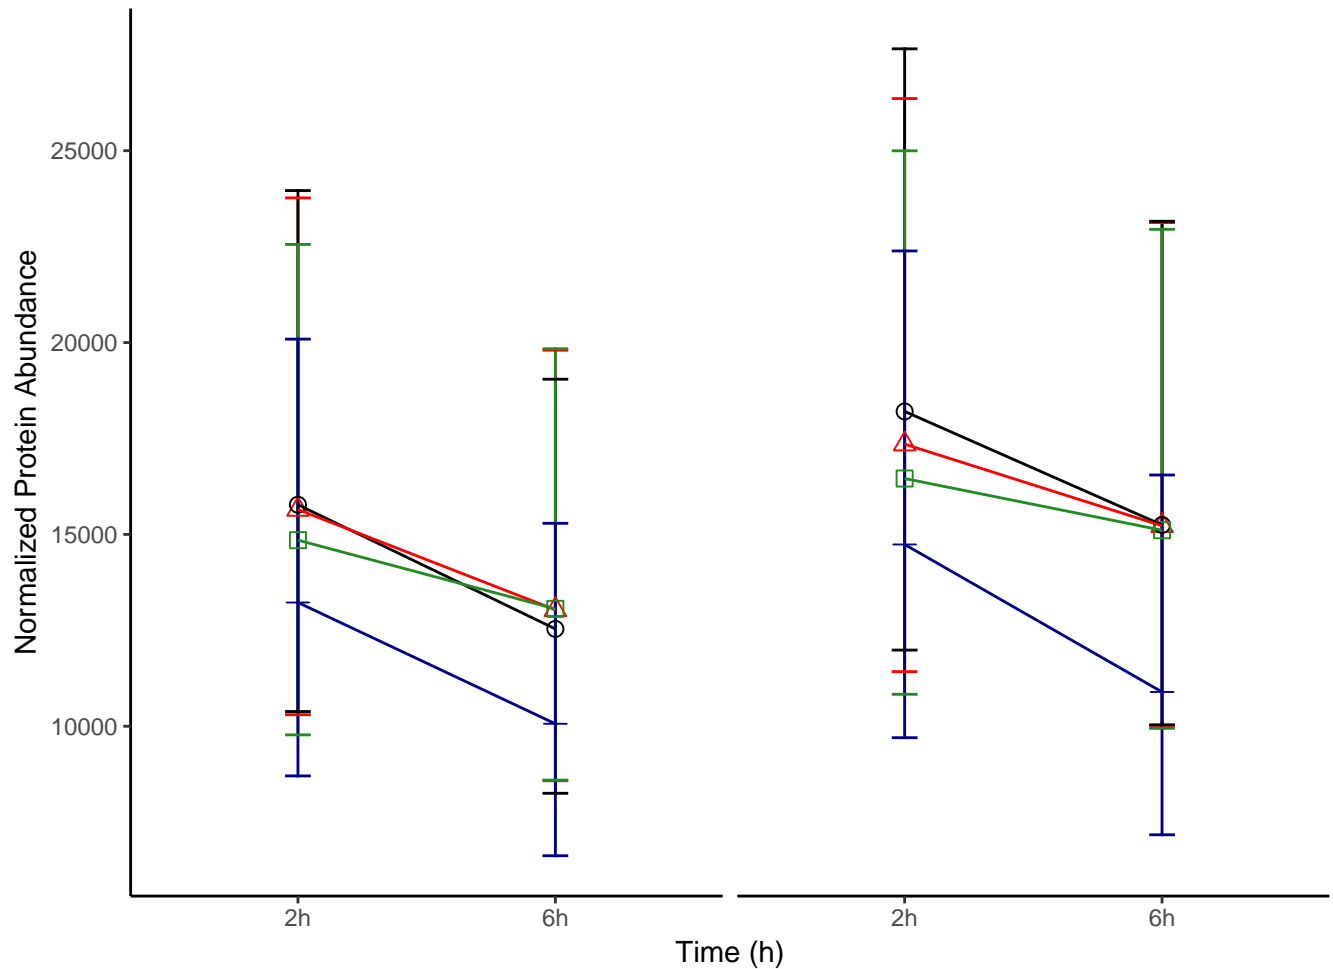

- SA564
- △ SA564- $\Delta hptRS$
- SA564- $\Delta ccpA$
- + SA564- $\Delta hptRS/ccpA$

# MNMG\_STAAM

TSB

TSB-dex S-207

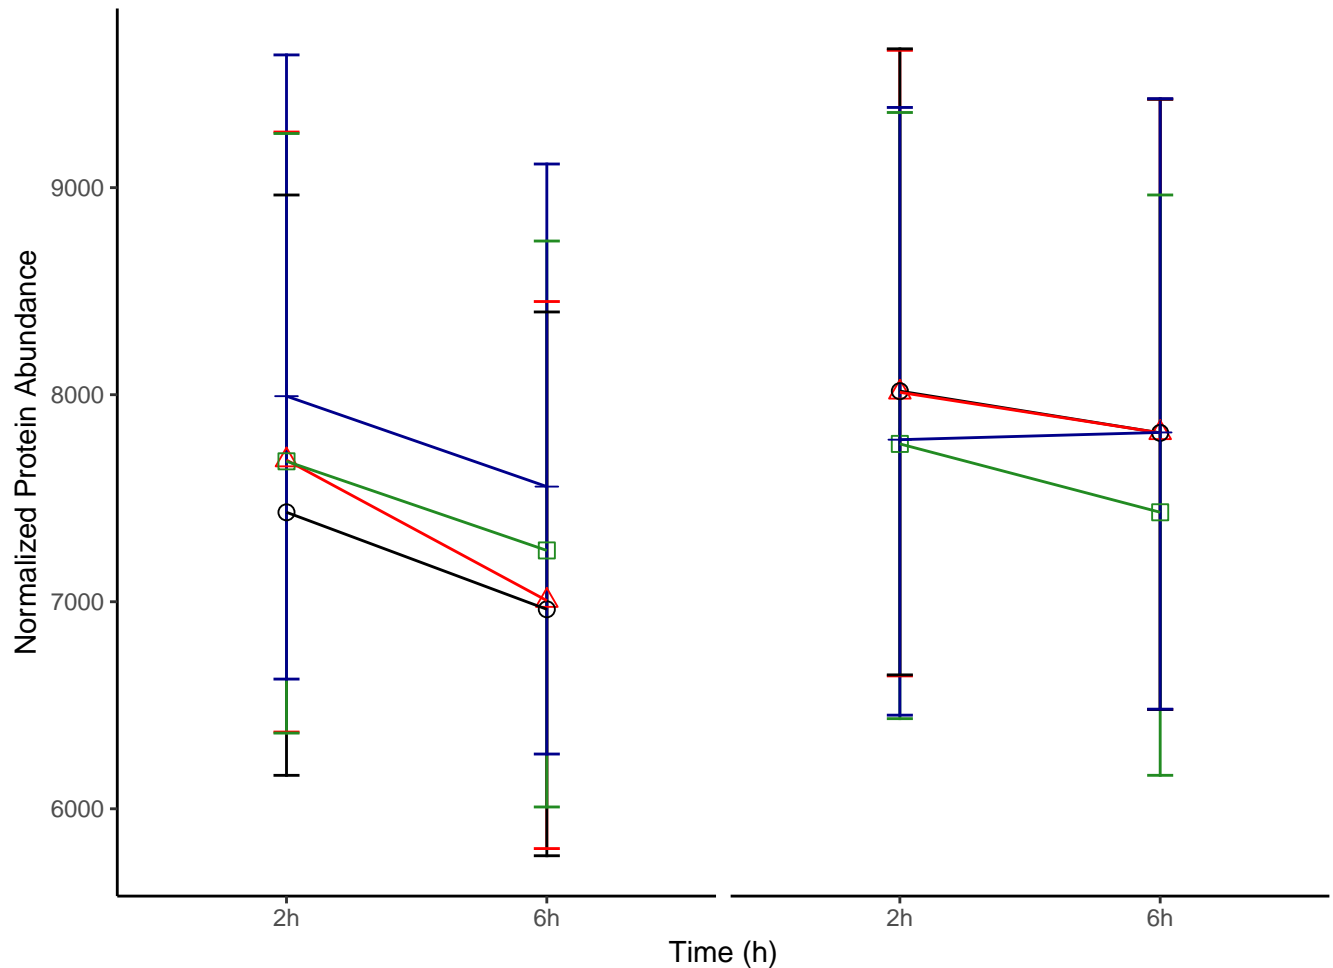

- SA564
- △ SA564- $\Delta hptRS$
- SA564- $\Delta ccpA$
- + SA564- $\Delta hptRS/ccpA$

# MOAC\_STAAM

TSB

TSB-dex S-208

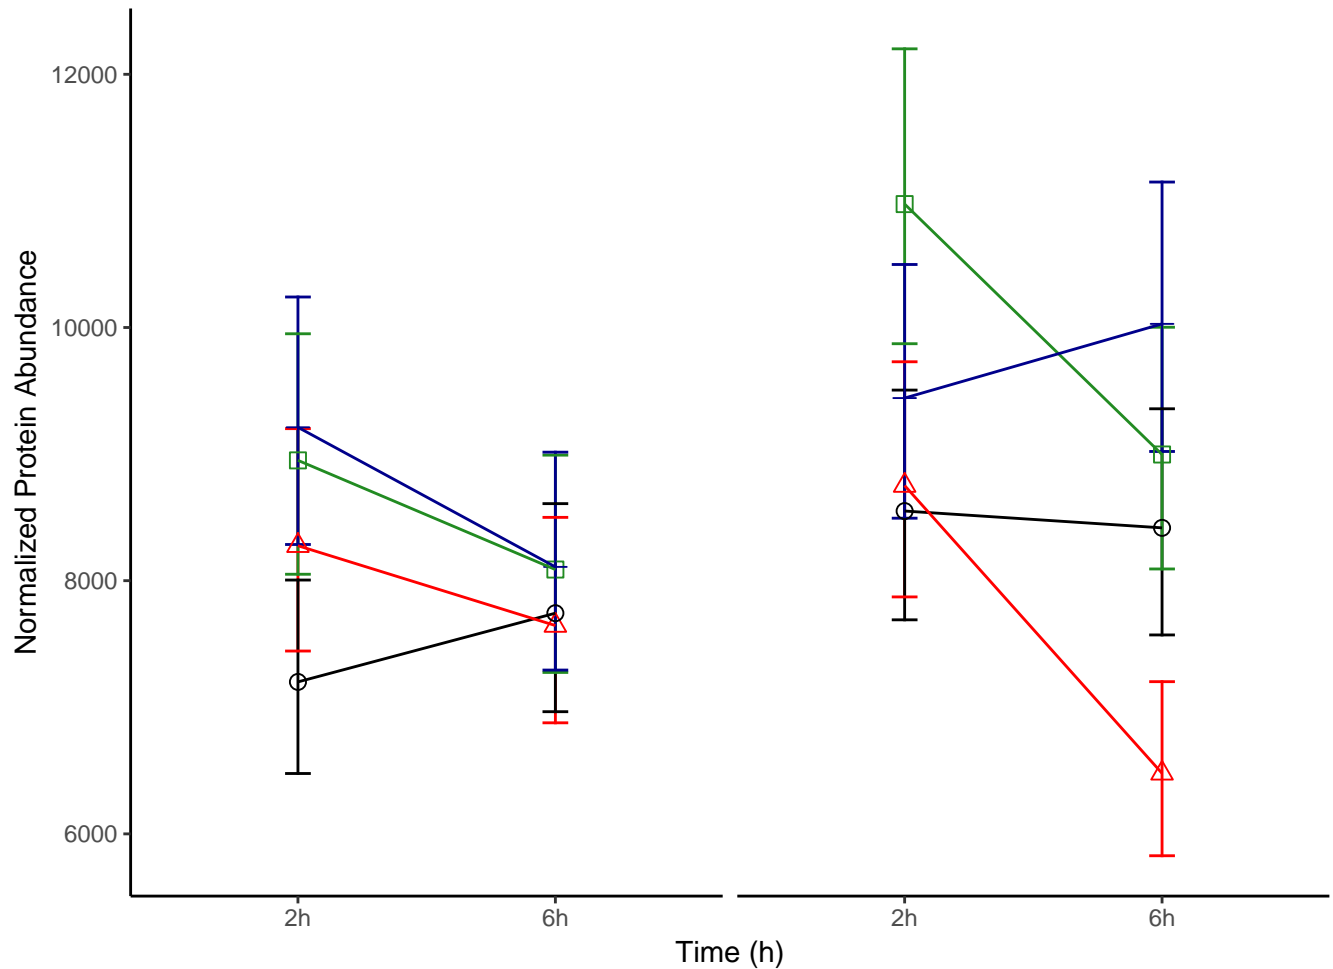

- SA564
- △ SA564- $\Delta$ *hptRS*
- SA564- $\Delta$ *ccpA*
- + SA564- $\Delta$ *hptRS/ccpA*



# MOEA\_STAAM

TSB

TSB-dex S-209

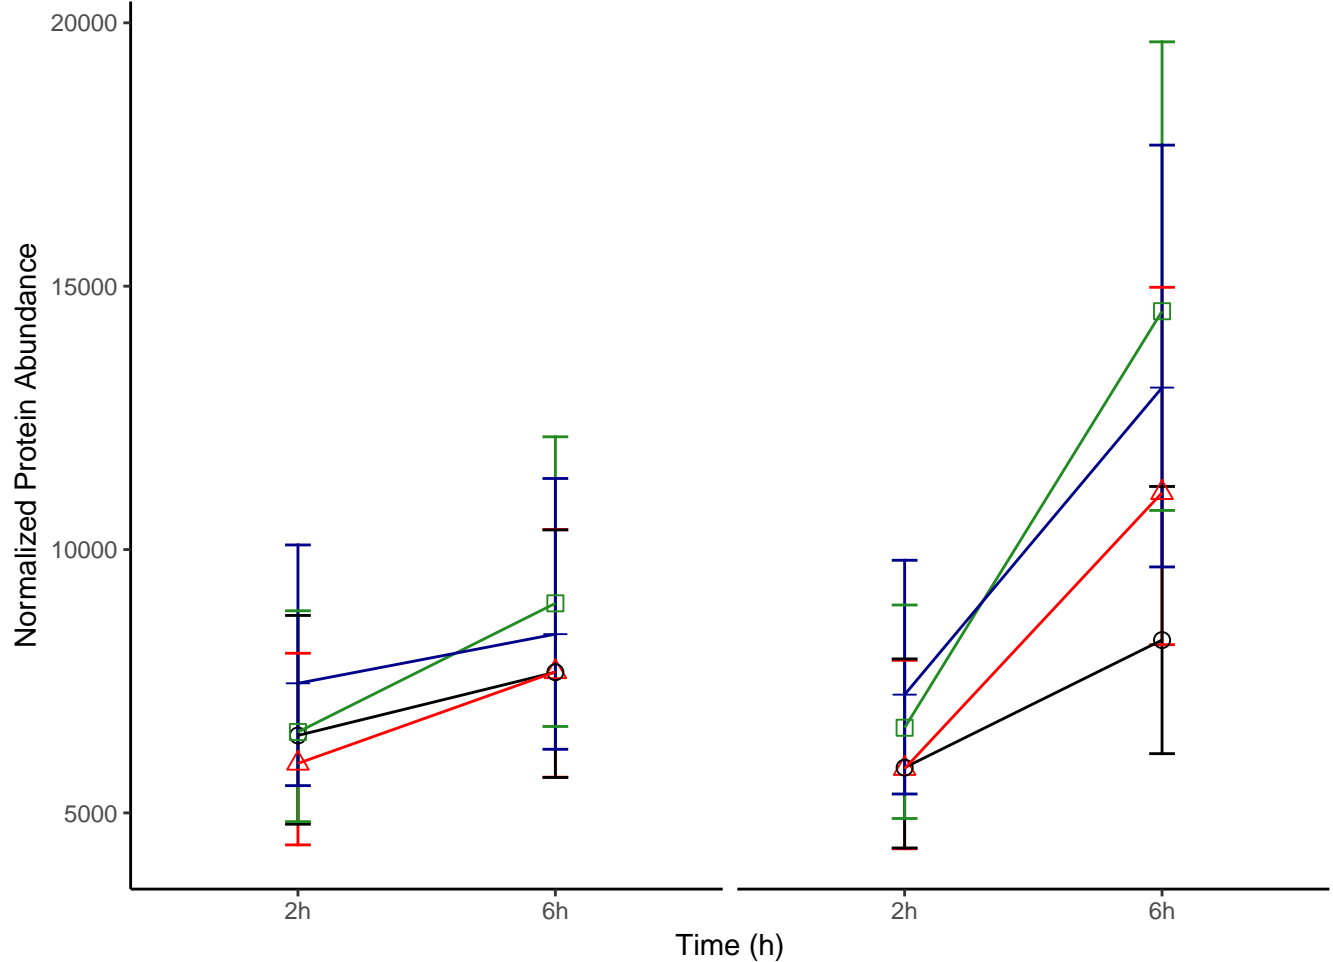

- SA564
- △ SA564-ΔhptRS
- SA564-ΔccpA
- + SA564-ΔhptRS/ccpA

# MQO2\_STAAM

TSB

TSB-dex S-210

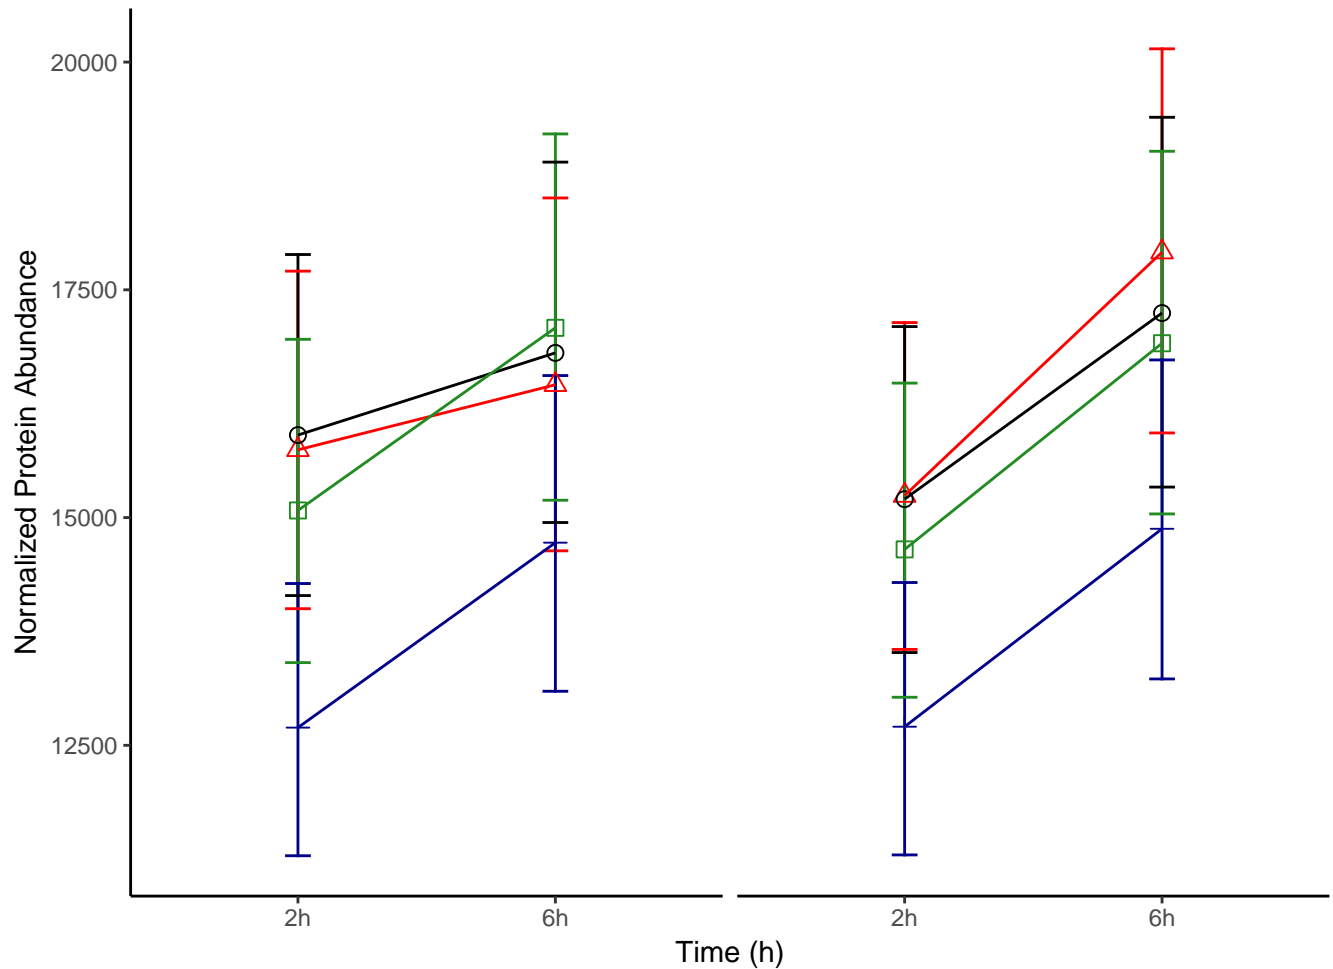

- SA564
- △ SA564- $\Delta$ *hptRS*
- SA564- $\Delta$ *ccpA*
- + SA564- $\Delta$ *hptRS/ccpA*

# MSRA1\_STAAM

TSB

TSB-dex S-211

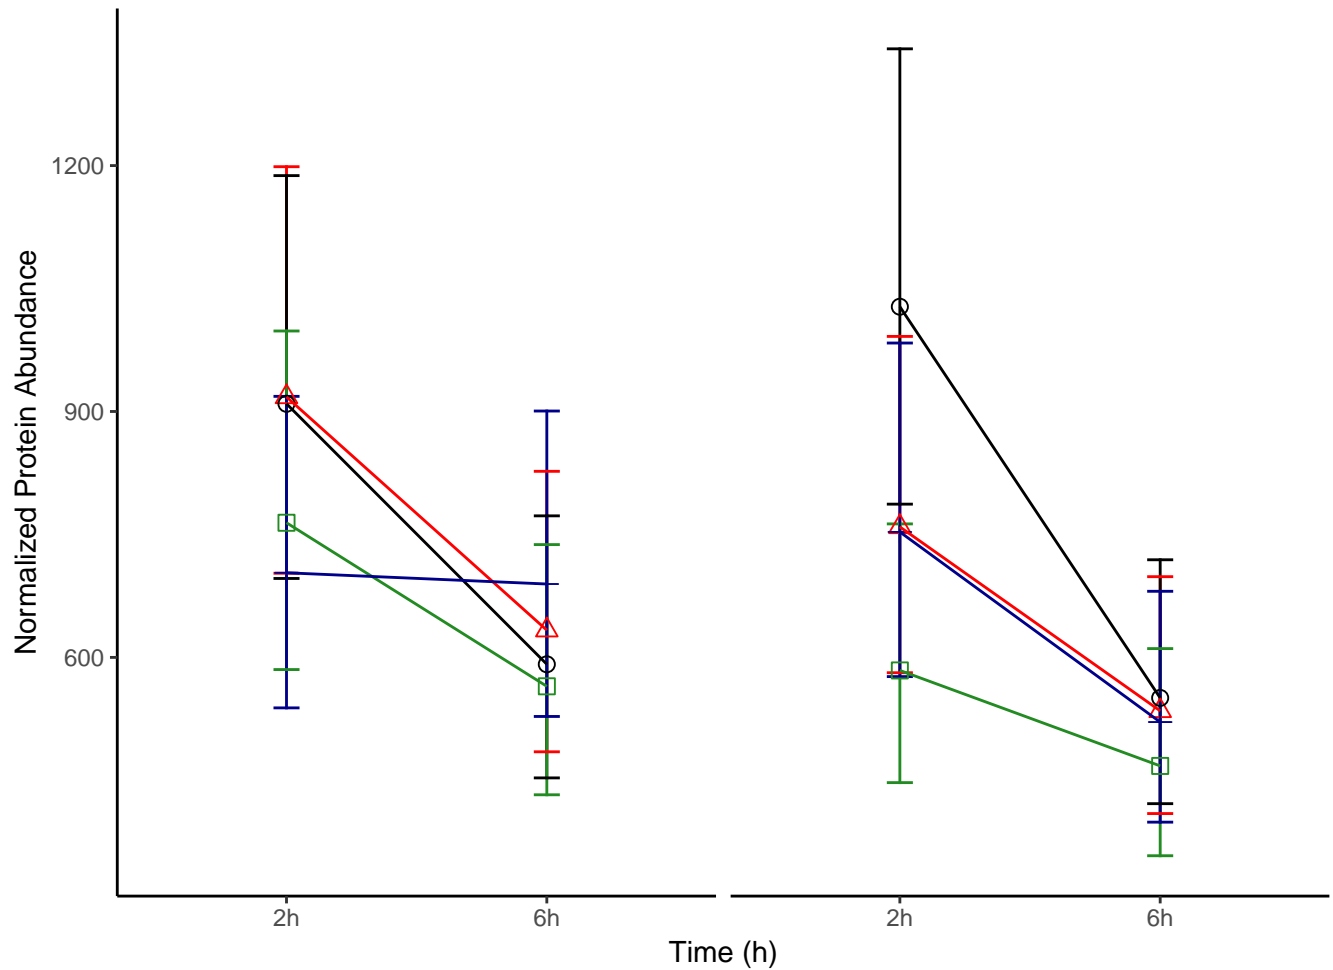

- SA564
- △ SA564- $\Delta$ *hptRS*
- SA564- $\Delta$ *ccpA*
- + SA564- $\Delta$ *hptRS/ccpA*

# MSRA2\_STAAM

TSB

TSB-dex S-212

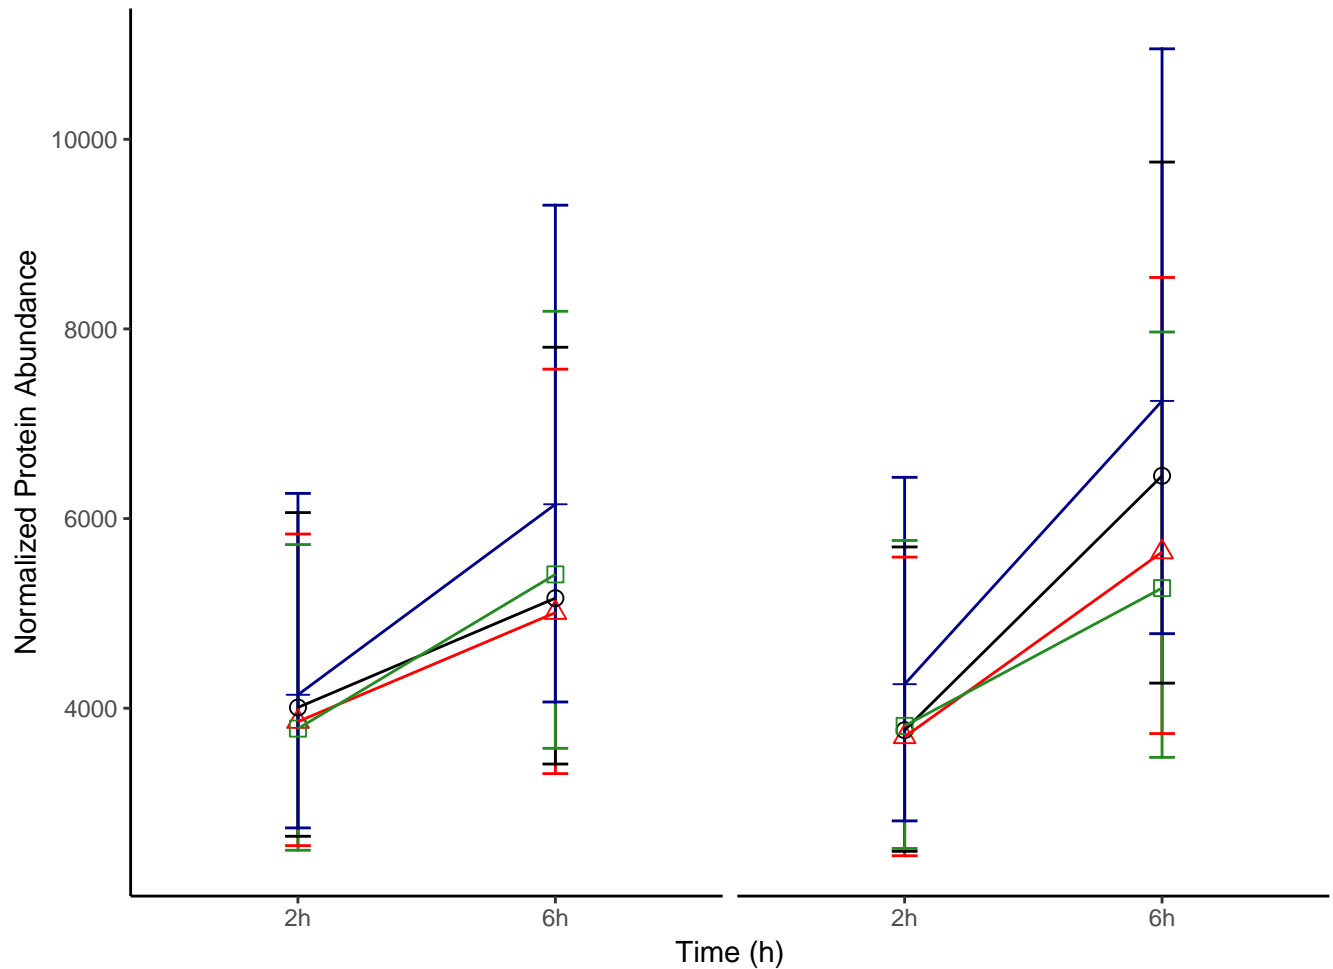

- SA564
- △ SA564-ΔhptRS
- SA564-ΔccpA
- + SA564-ΔhptRS/ccpA

# MSRB\_STAAM

TSB

TSB-dex S-213

Normalized Protein Abundance

20000

10000

2h

6h

Time (h)

2h

6h

- SA564
- △ SA564- $\Delta$ *hptRS*
- SA564- $\Delta$ *ccpA*
- + SA564- $\Delta$ *hptRS/ccpA*

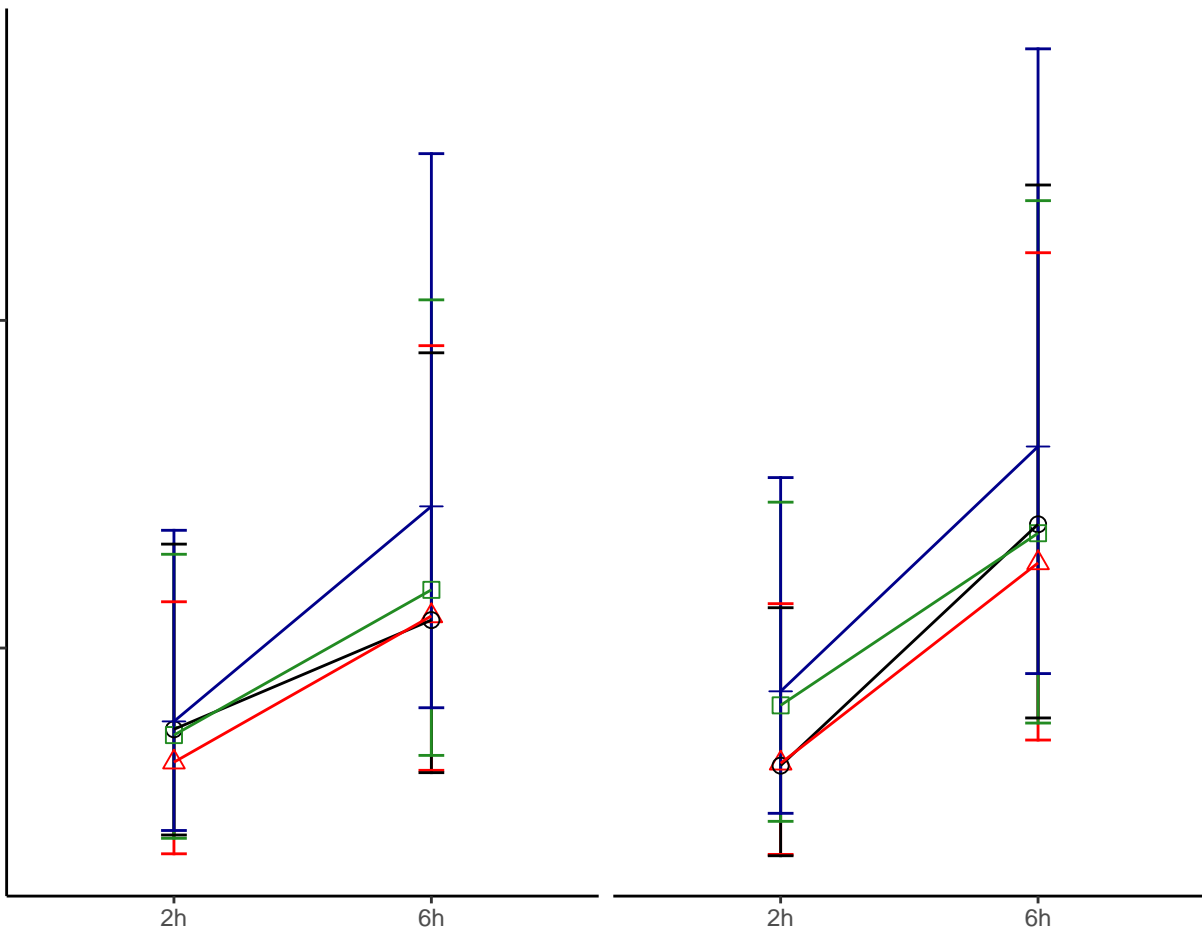

# MTLD\_STAAM

TSB

TSB-dex S-214

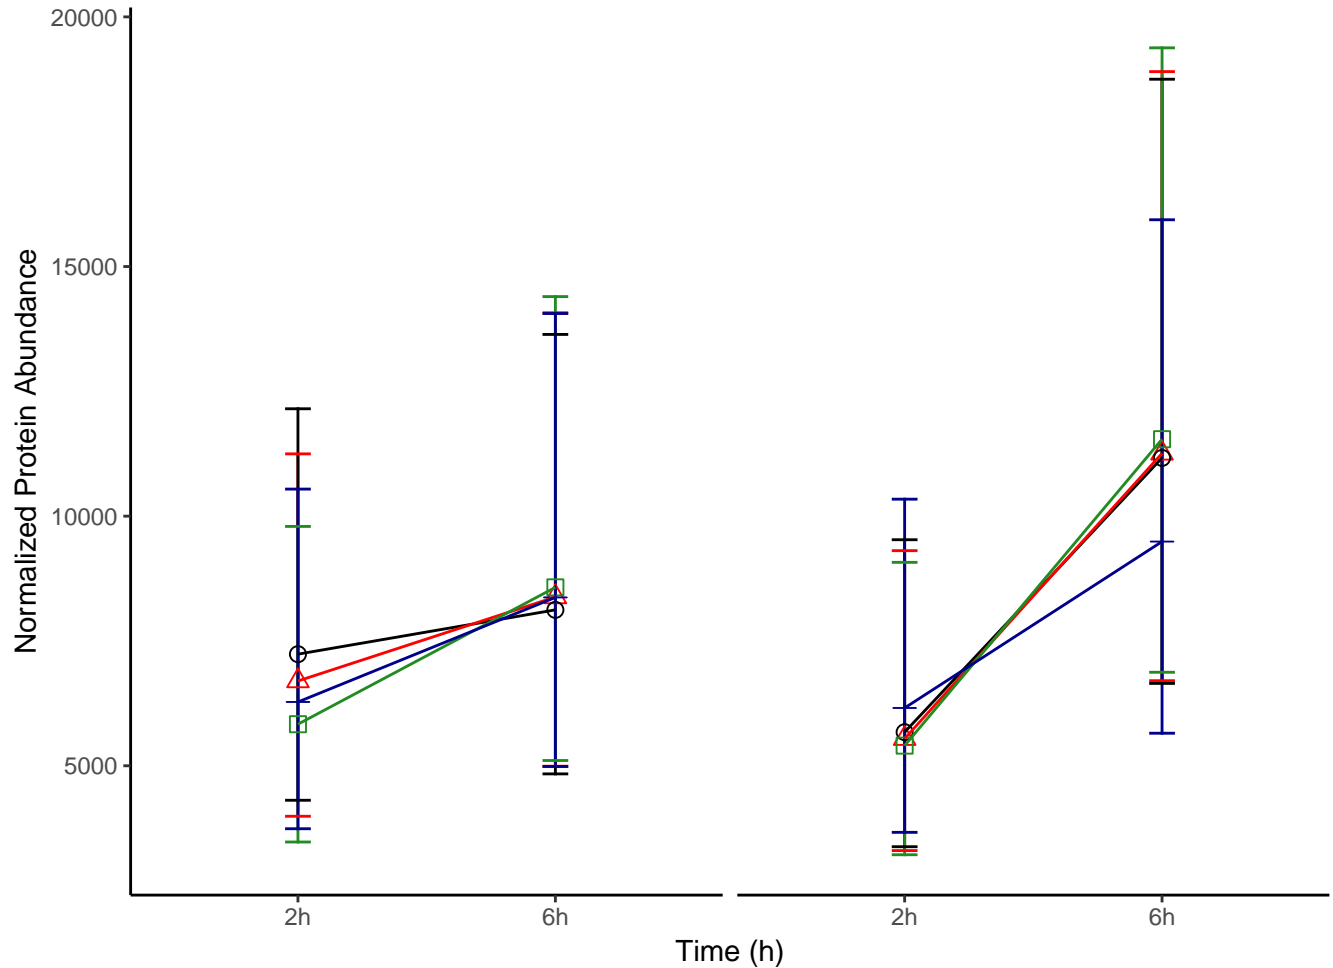

- SA564
- △ SA564- $\Delta hptRS$
- SA564- $\Delta ccpA$
- + SA564- $\Delta hptRS/ccpA$

# MTNN\_STAAM

TSB

TSB-dex S-215

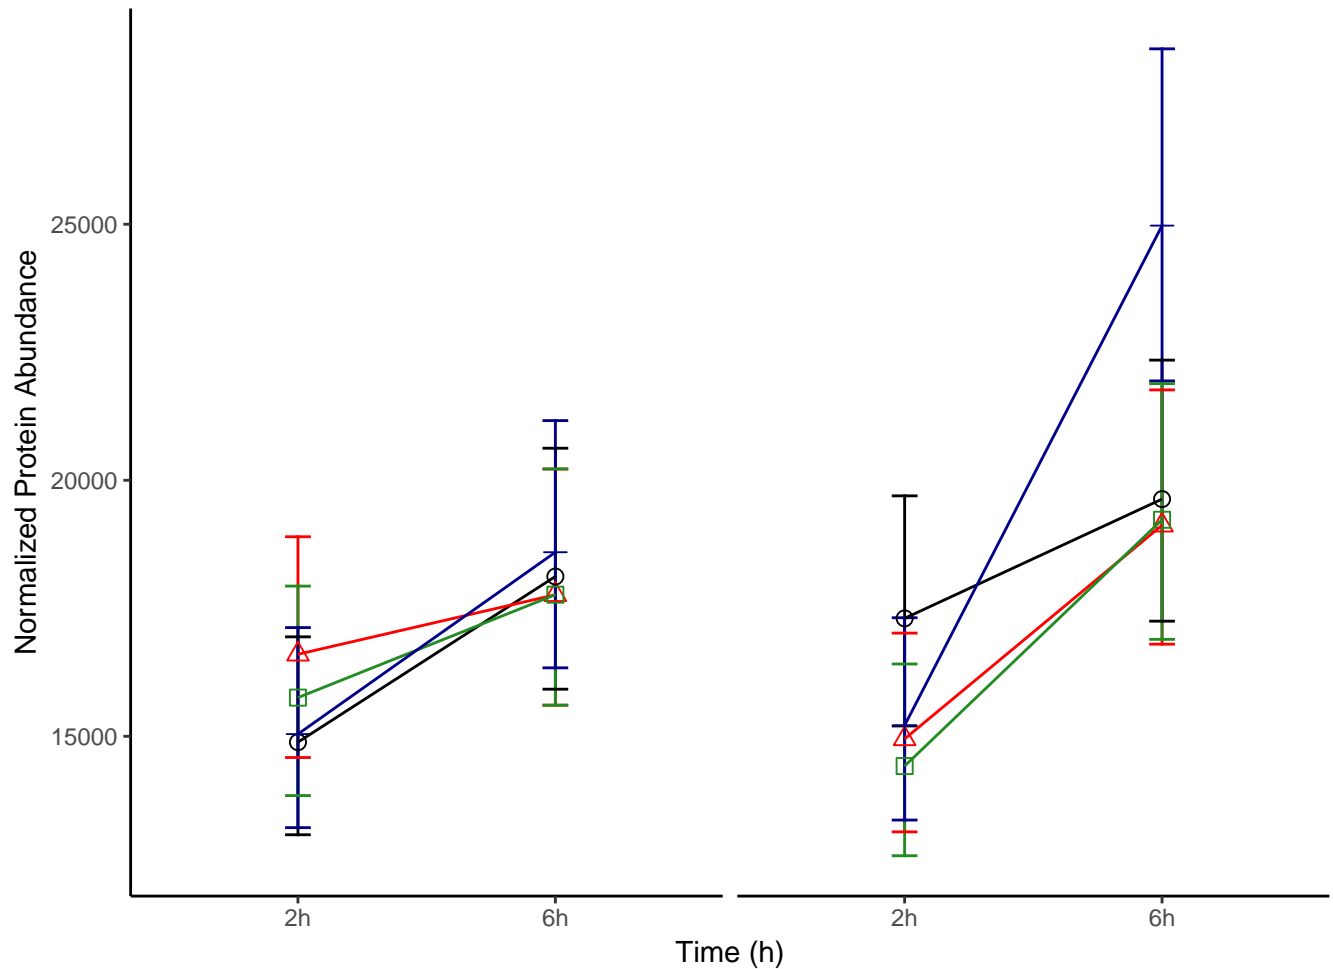

- SA564
- SA564- $\Delta$ *hptRS*
- SA564- $\Delta$ *ccpA*
- SA564- $\Delta$ *hptRS/ccpA*

# MURA1\_STAAM

TSB

TSB-dex S-216

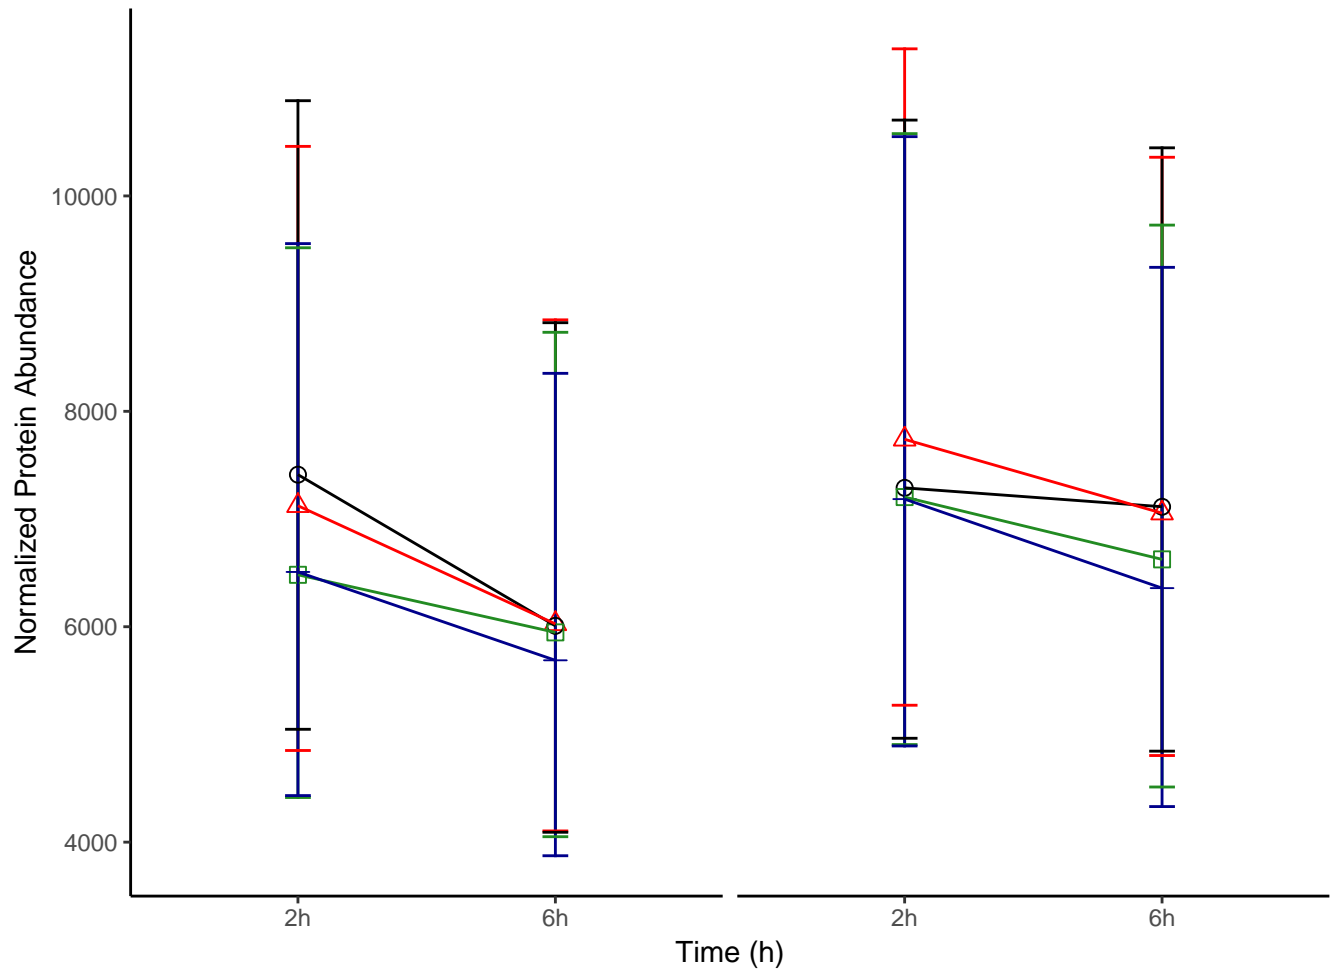

- SA564
- △ SA564- $\Delta$ hptRS
- SA564- $\Delta$ ccpA
- + SA564- $\Delta$ hptRS/ccpA



# MURA2\_STAAM

TSB

TSB-dex S-217

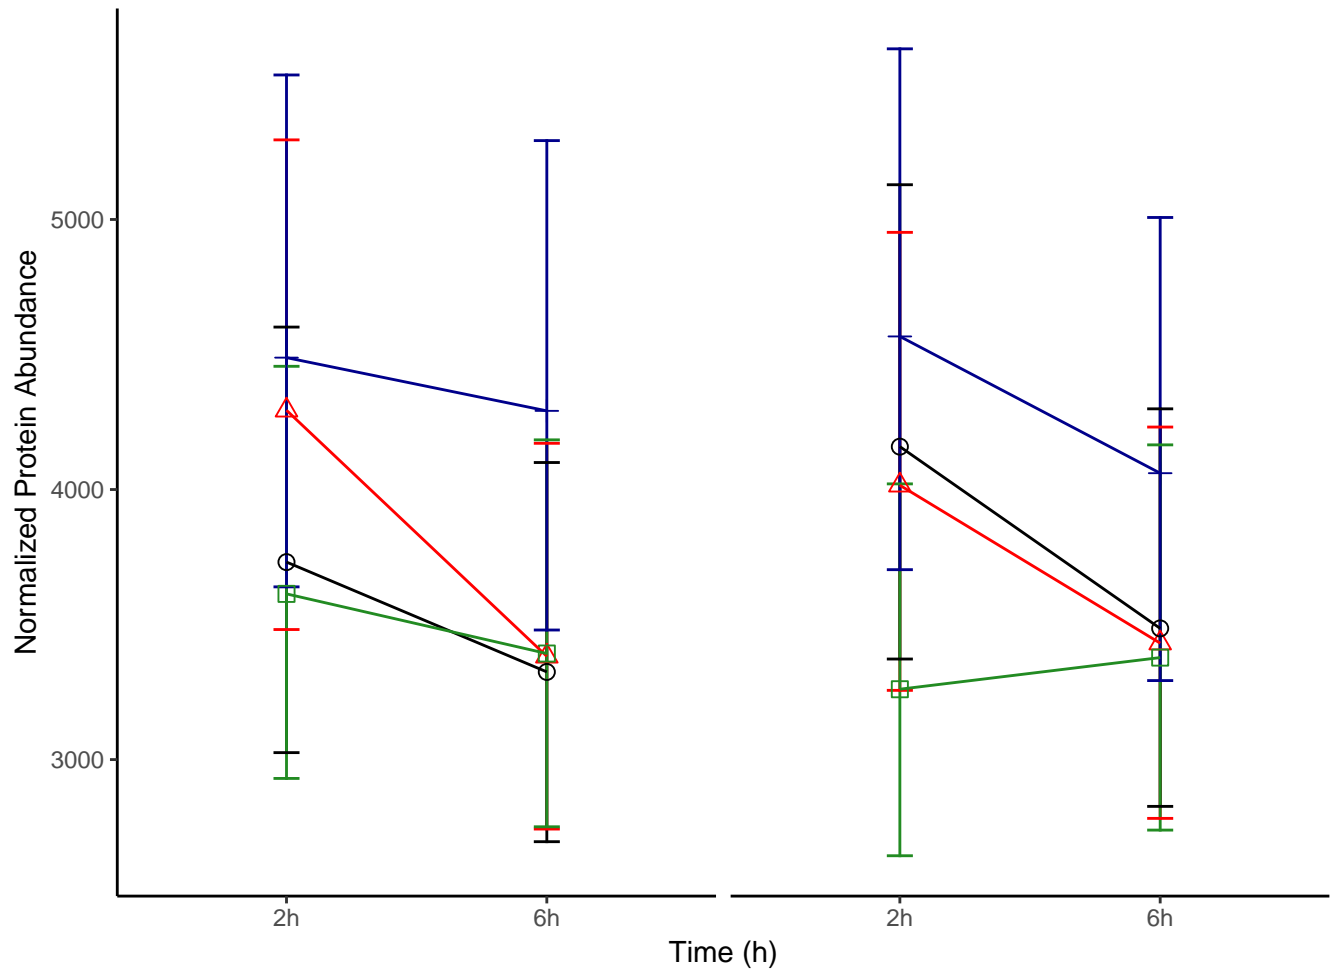

- SA564
- △ SA564-ΔhptRS
- SA564-ΔccpA
- + SA564-ΔhptRS/ccpA

# MURC\_STAAM

TSB

TSB-dex S-218

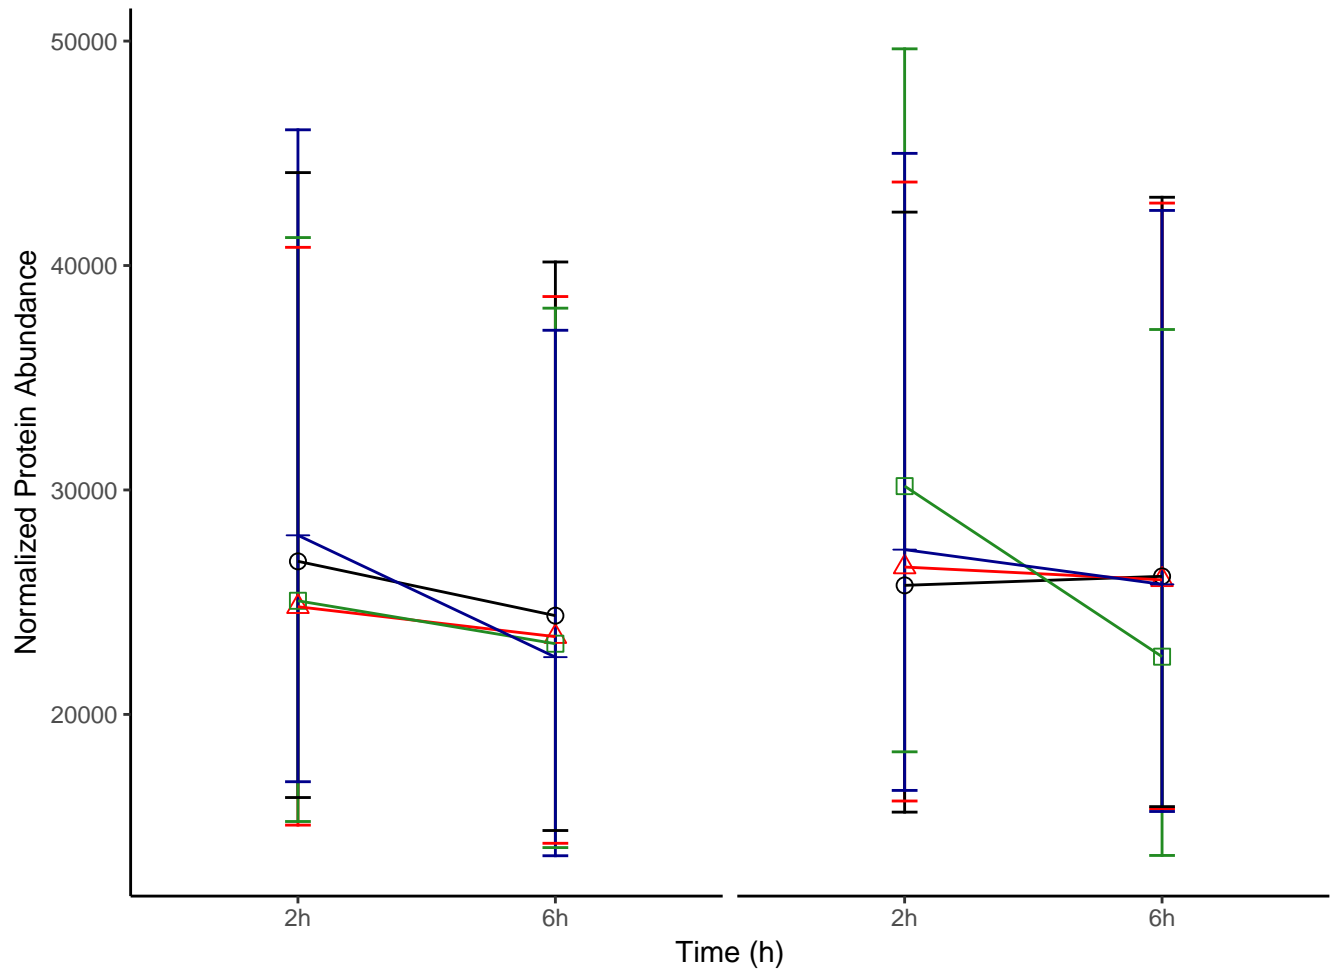

- SA564
- △ SA564-ΔhptRS
- SA564-ΔccpA
- + SA564-ΔhptRS/ccpA

# MURD\_STAAM

TSB

TSB-dex S-219

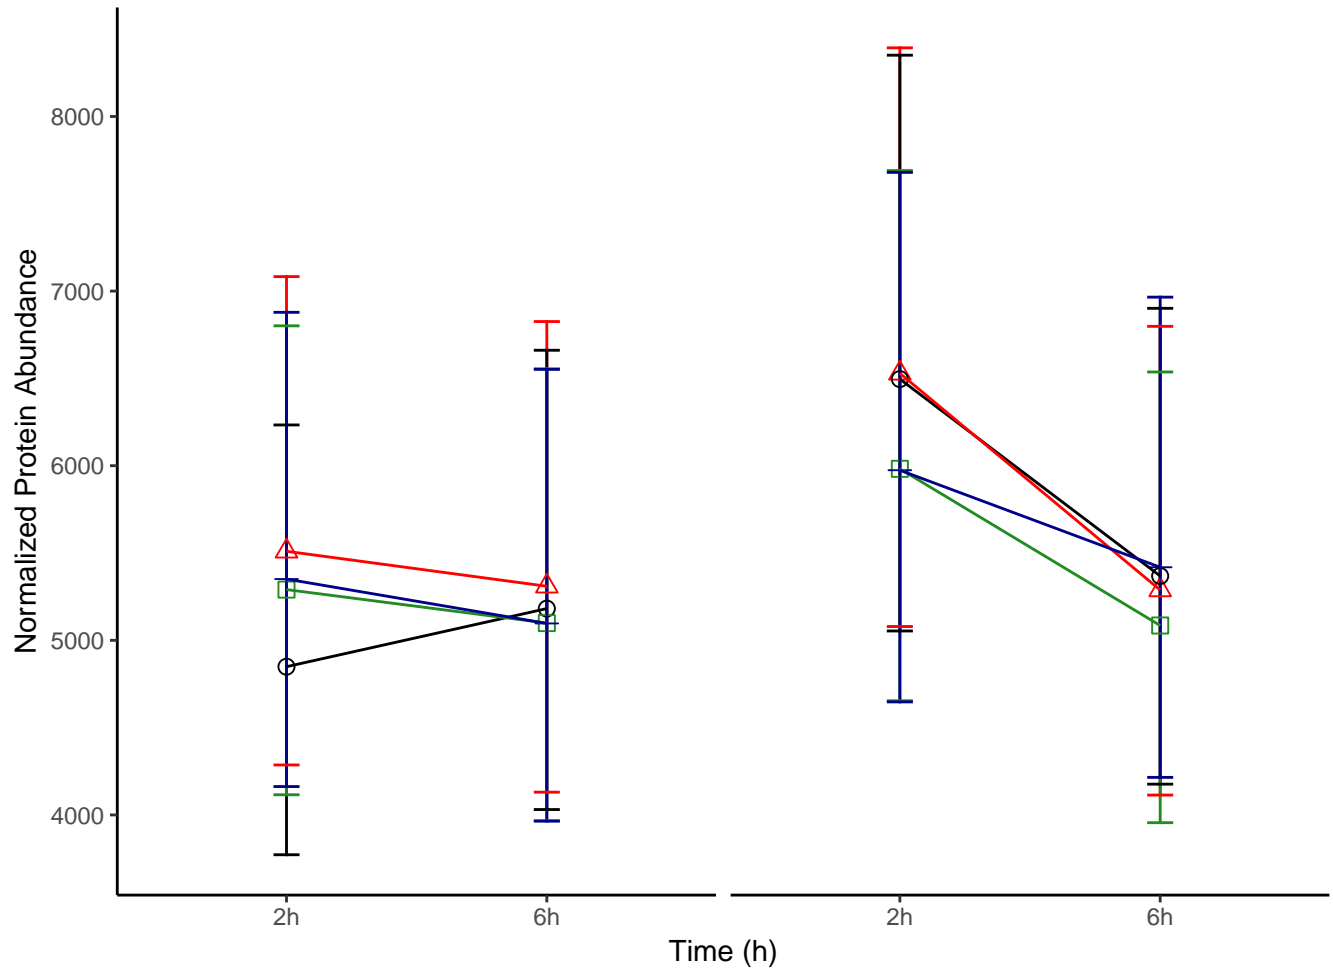

- SA564
- △ SA564- $\Delta$ *hptRS*
- SA564- $\Delta$ *ccpA*
- + SA564- $\Delta$ *hptRS/ccpA*

# MURE\_STAAM

TSB

TSB-dex S-220

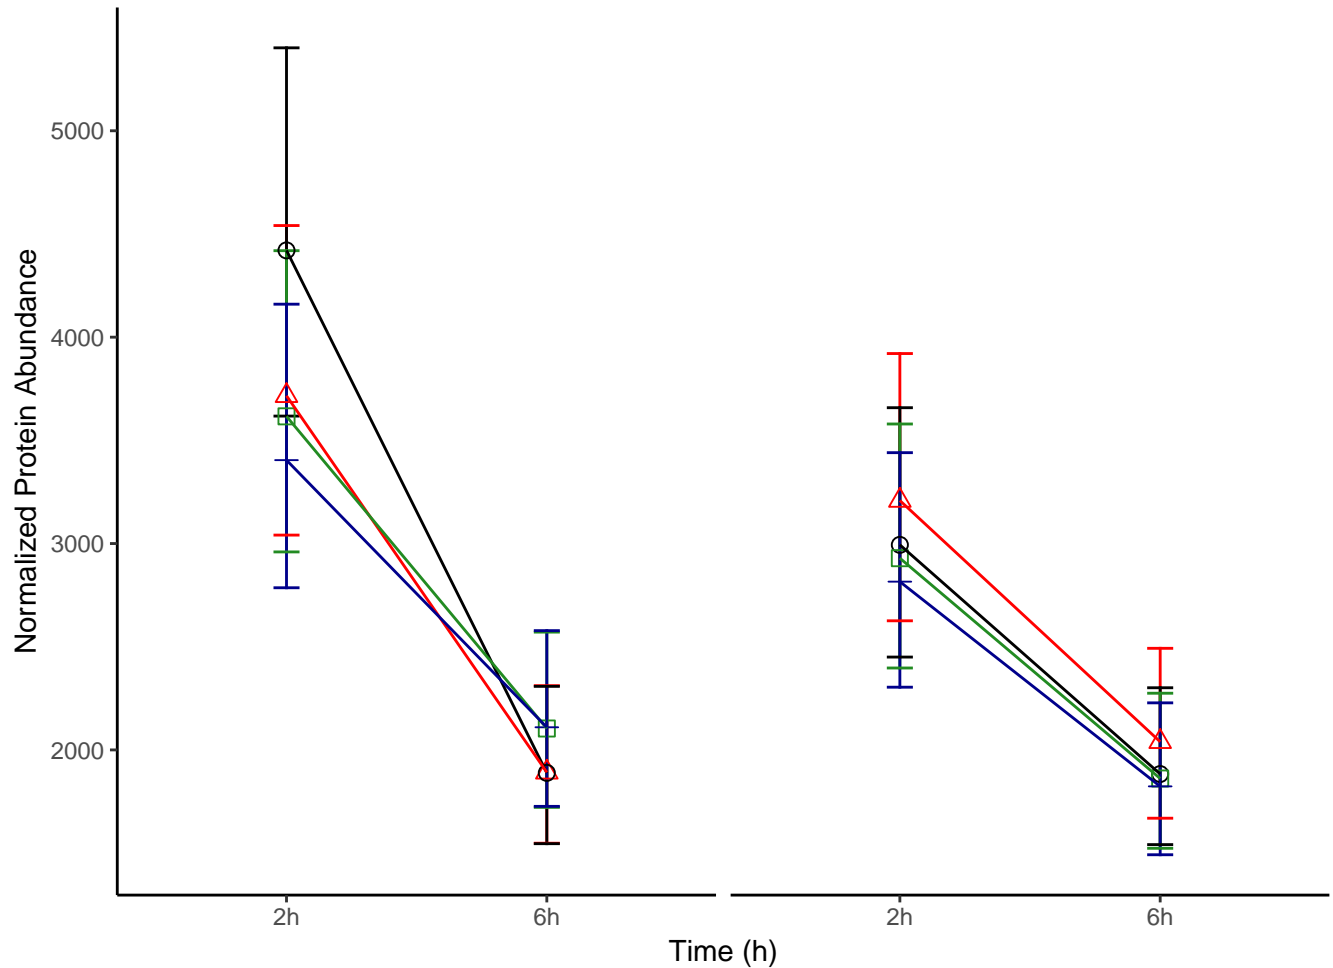

- SA564
- △ SA564- $\Delta hptRS$
- SA564- $\Delta ccpA$
- +

# MURG\_STAAM

TSB

TSB-dex S-221

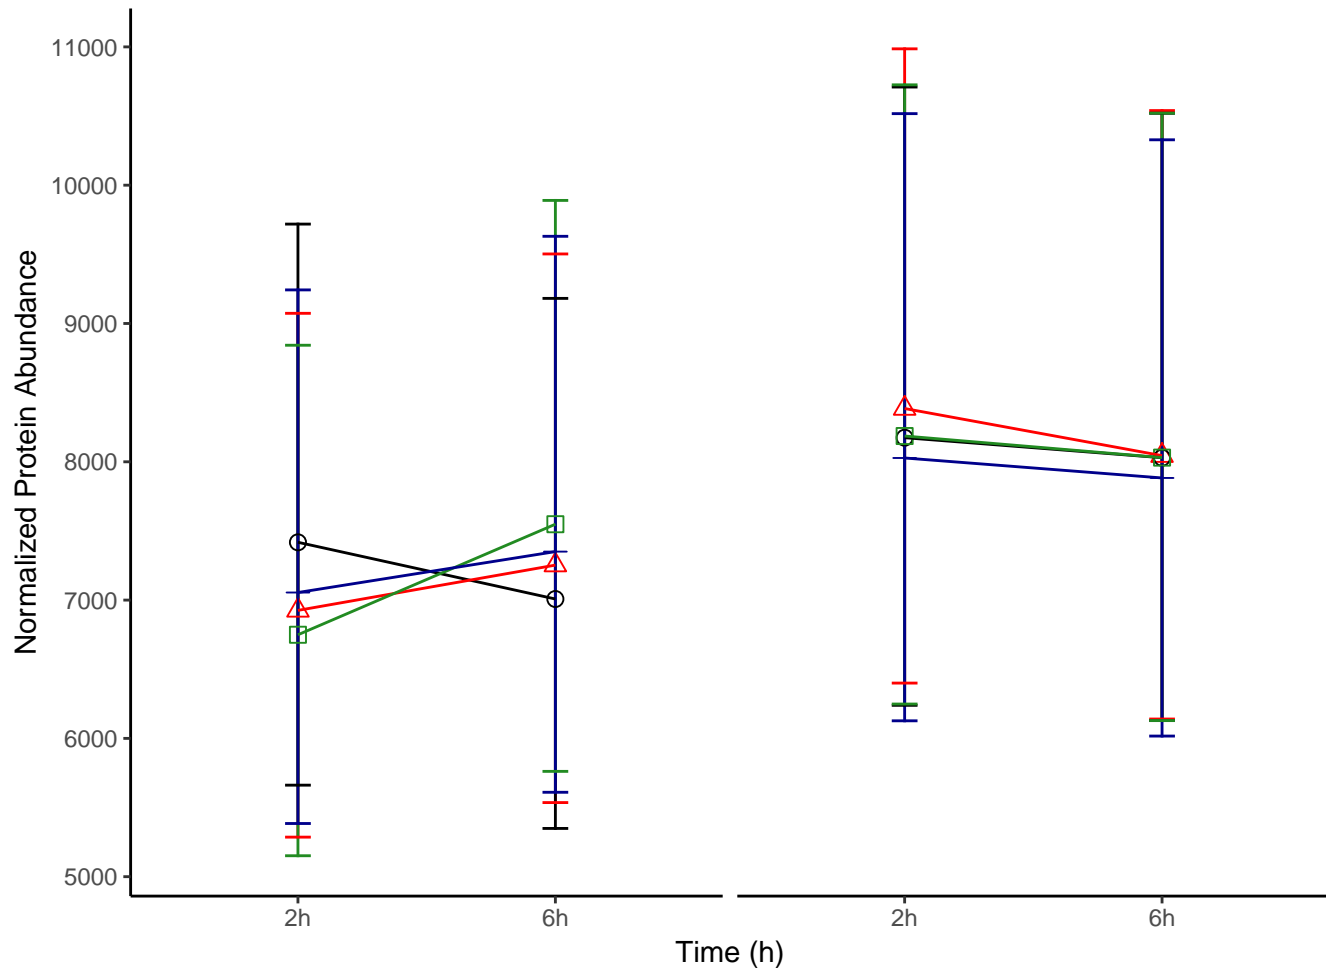

- SA564
- △ SA564- $\Delta$ *hptRS*
- SA564- $\Delta$ *ccpA*
- + SA564- $\Delta$ *hptRS/ccpA*

# MURI\_STAAM

TSB

TSB-dex S-222

Normalized Protein Abundance

20000

10000

2h

6h

Time (h)

2h

6h

- SA564
- △ SA564- $\Delta$ *hptRS*
- SA564- $\Delta$ *ccpA*
- + SA564- $\Delta$ *hptRS/ccpA*

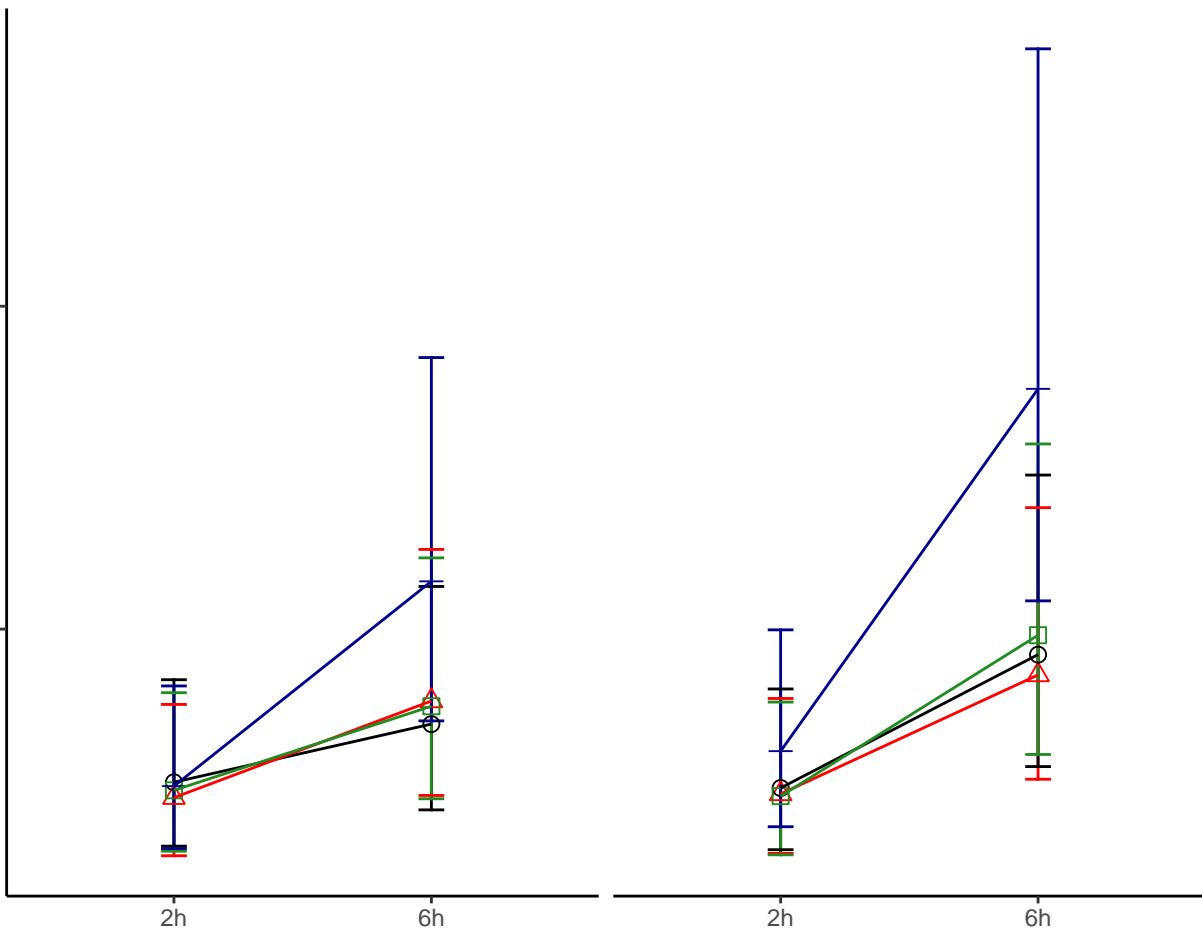

# MUTS\_STAAM

TSB

TSB-dex S-223

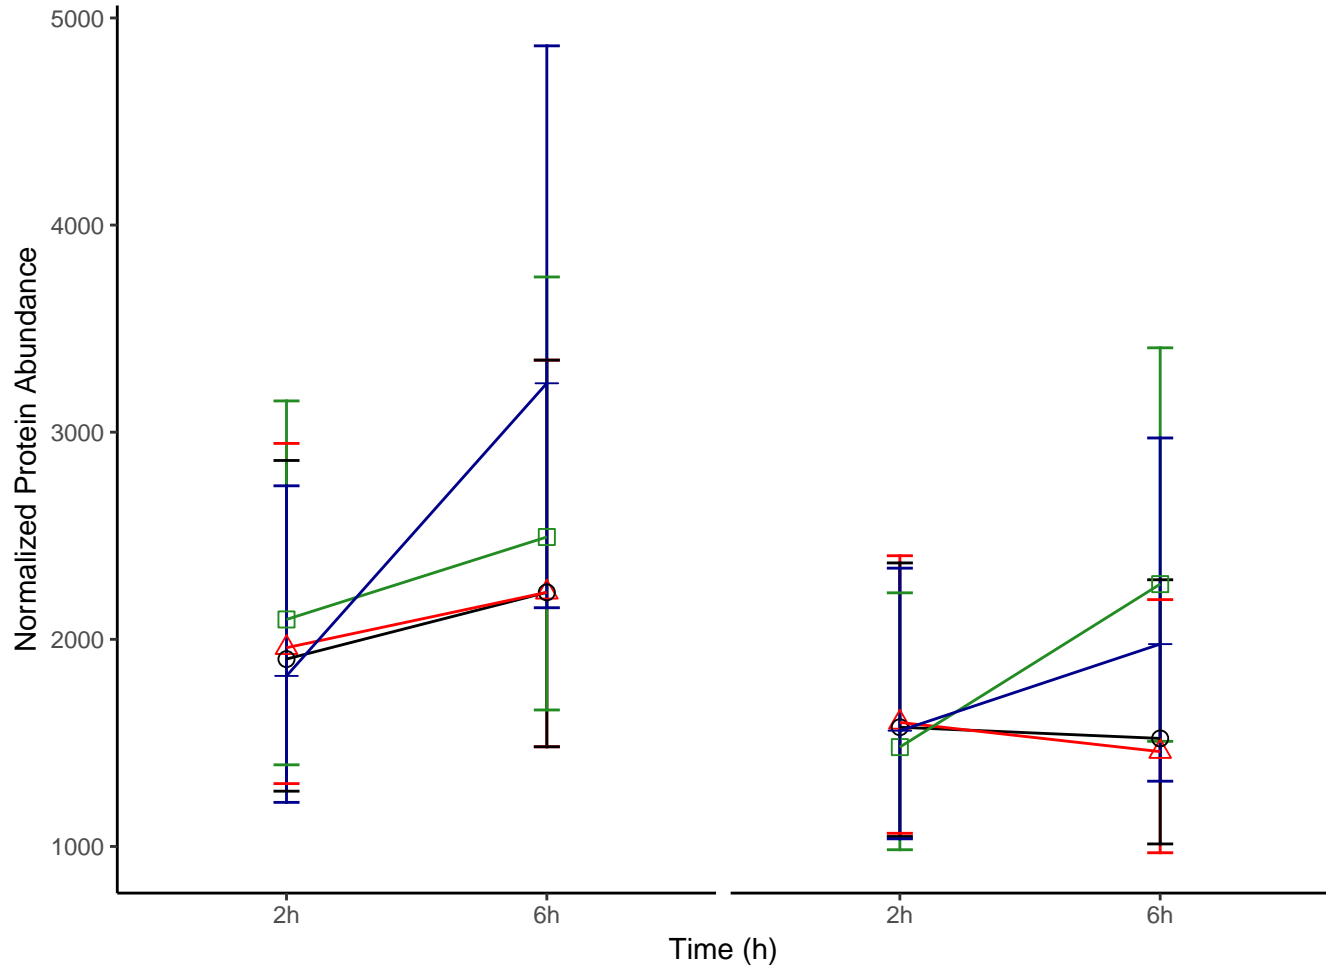

- SA564
- △ SA564- $\Delta$ *hptRS*
- SA564- $\Delta$ *ccpA*
- + SA564- $\Delta$ *hptRS/ccpA*

# NADD\_STAAM

TSB

TSB-dex S-224

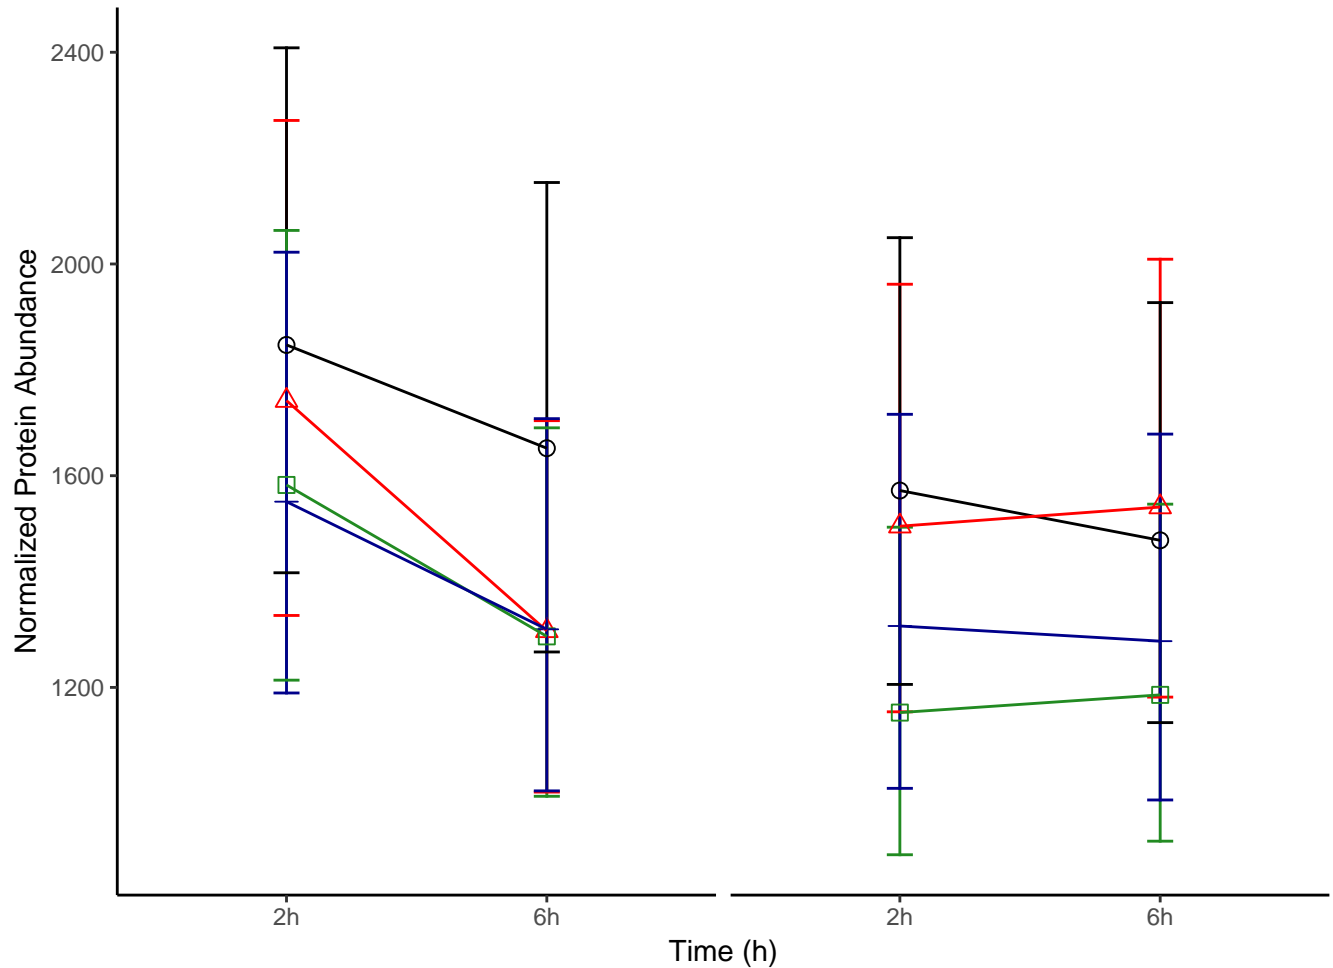

- SA564
- △ SA564-ΔhptRS
- SA564-ΔccpA
- + SA564-ΔhptRS/ccpA



# NADE\_STAAM

TSB

TSB-dex S-225

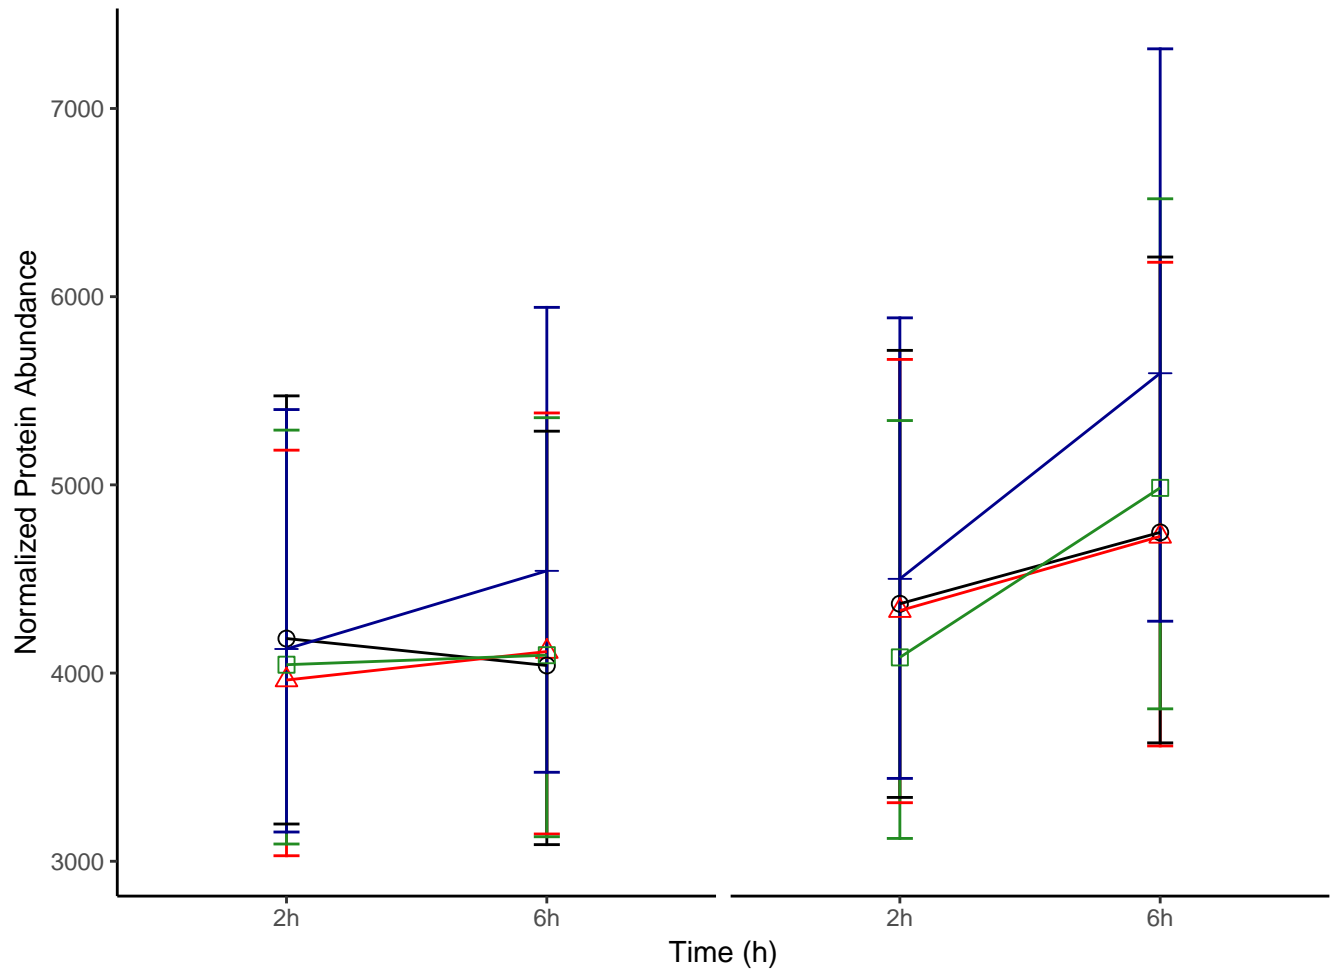

- SA564
- △ SA564- $\Delta hptRS$
- SA564- $\Delta ccpA$
- + SA564- $\Delta hptRS/ccpA$

# NAGD\_STAAM

TSB

TSB-dex S-226

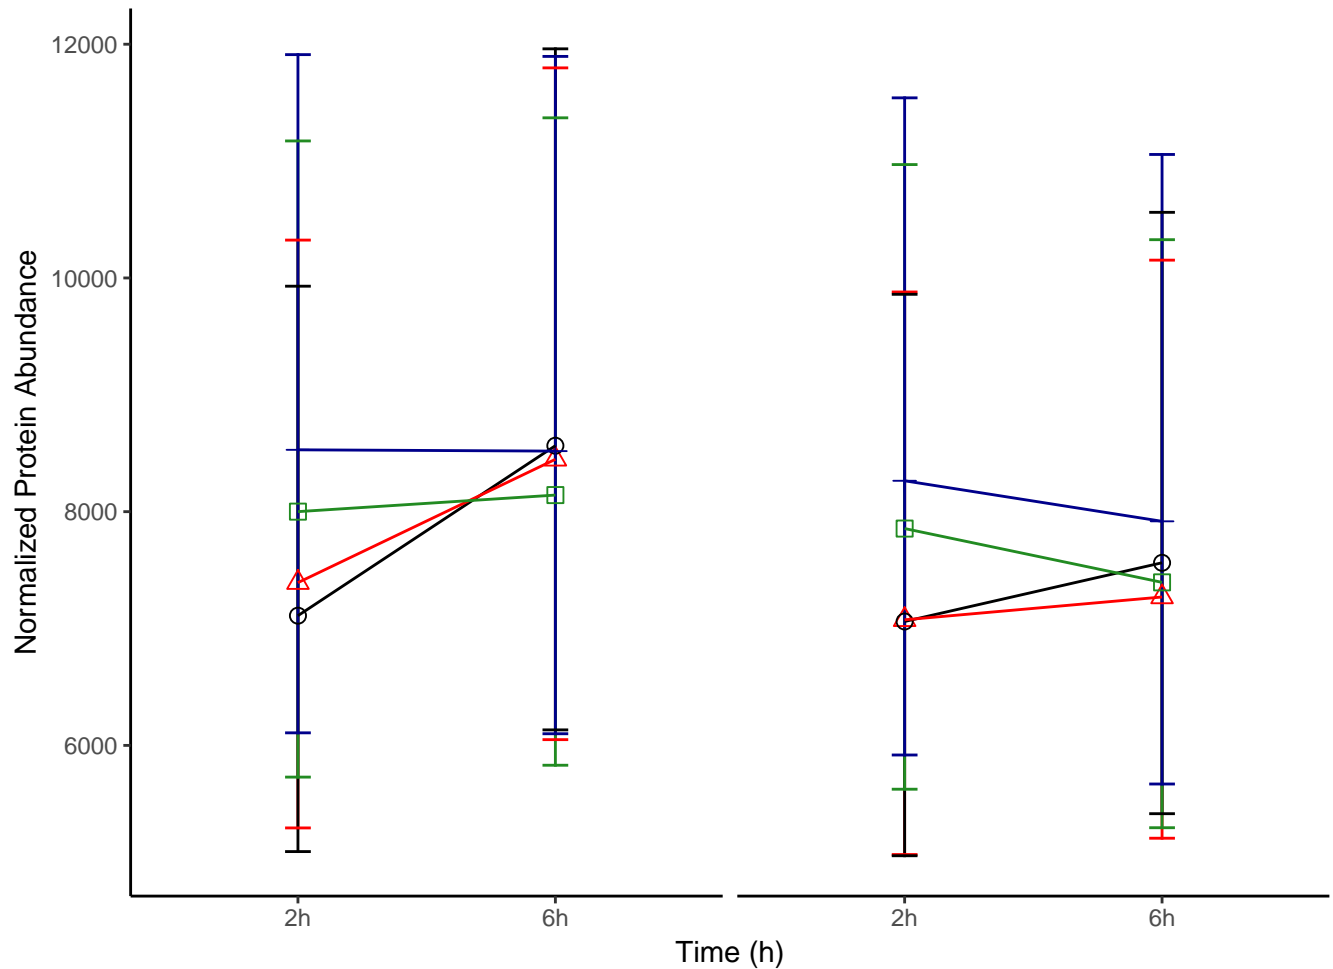

- SA564
- △ SA564- $\Delta$ *hptRS*
- SA564- $\Delta$ *ccpA*
- + SA564- $\Delta$ *hptRS/ccpA*

# NDK\_STAAM

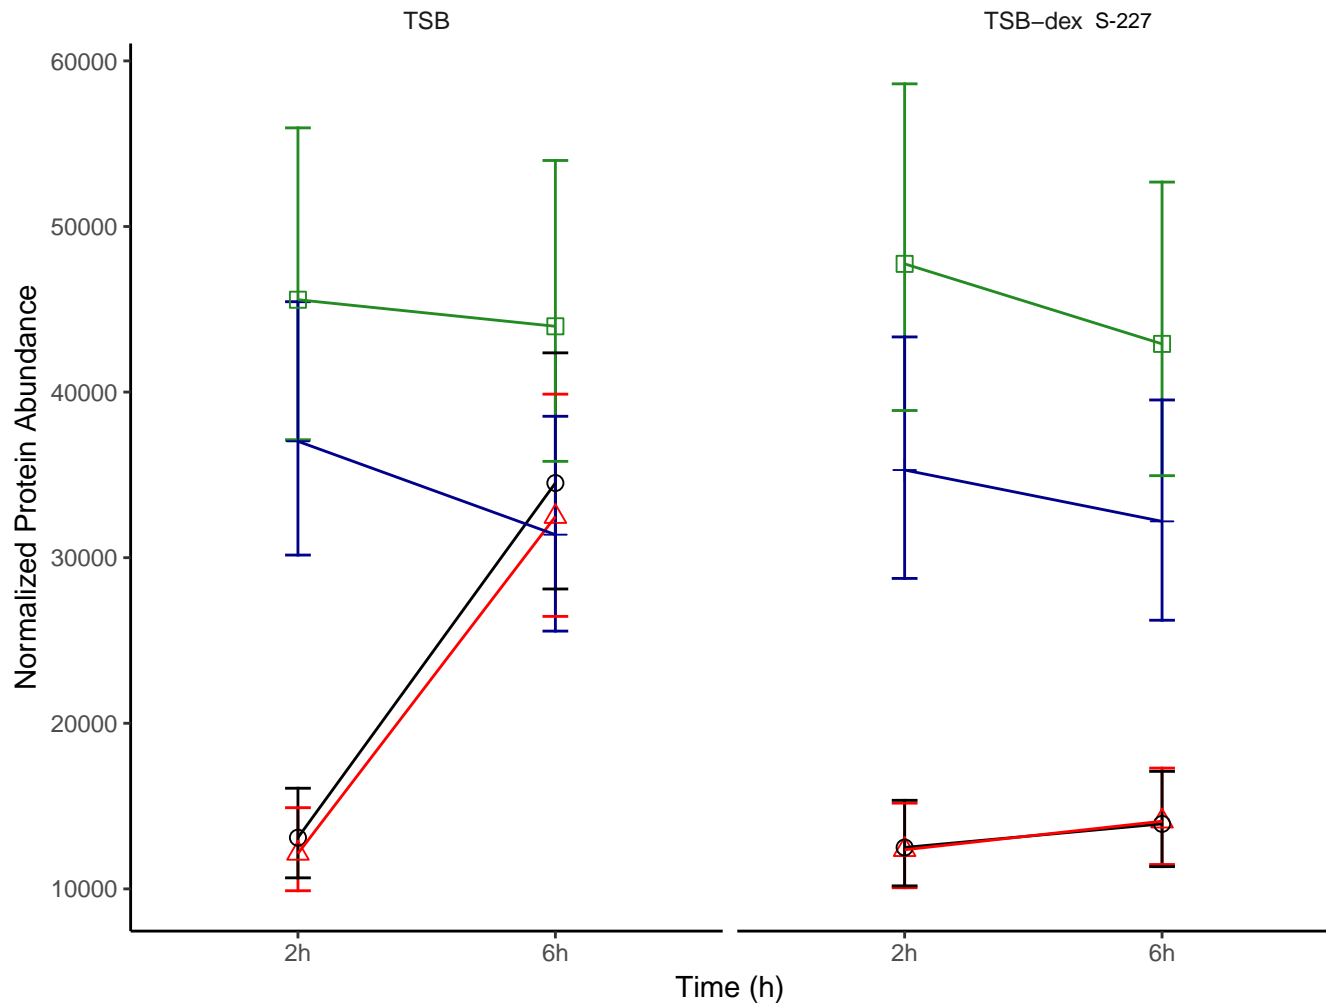

- SA564
- △ SA564- $\Delta$ hptRS
- SA564- $\Delta$ ccpA
- + SA564- $\Delta$ hptRS/ccpA

# NRDR\_STAAM

TSB

TSB-dex S-228

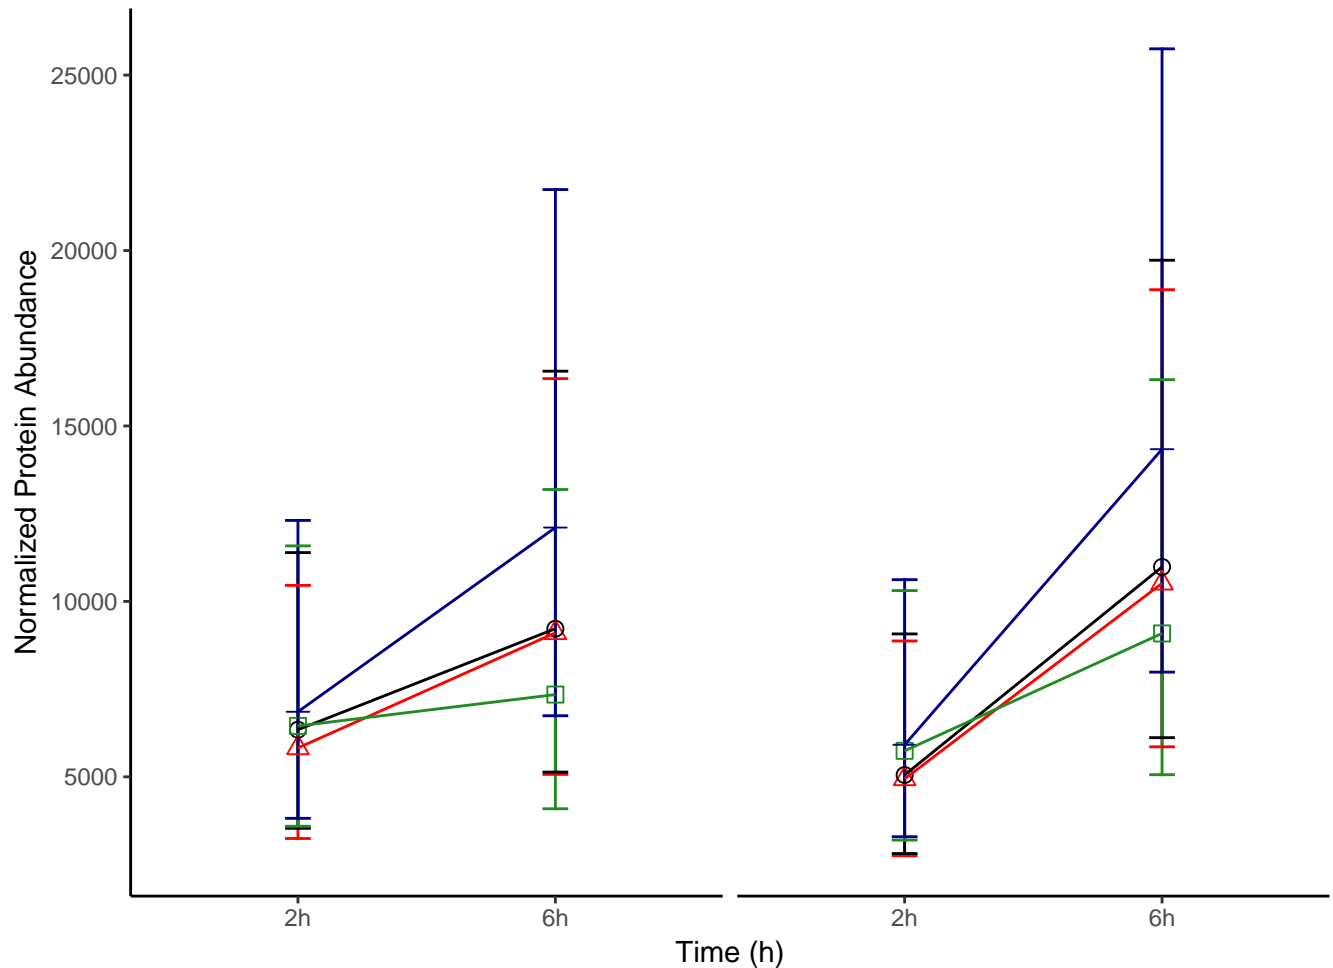

- SA564
- △ SA564- $\Delta$ hptRS
- SA564- $\Delta$ ccpA
- + SA564- $\Delta$ hptRS/ccpA

# NREB\_STAAM

TSB

TSB-dex S-229

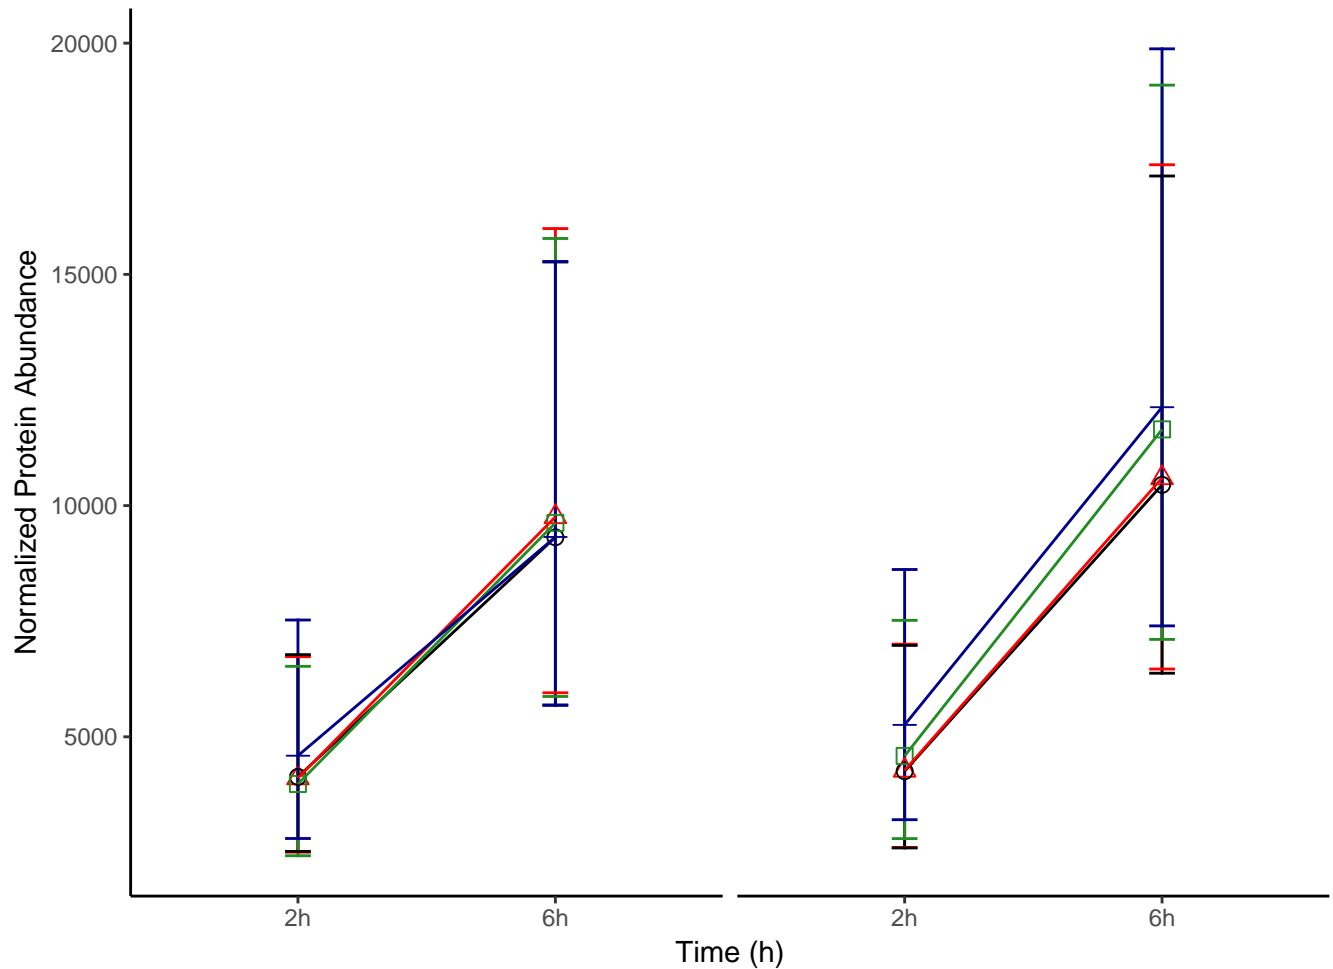

- SA564
- △ SA564- $\Delta$ hptRS
- SA564- $\Delta$ ccpA
- + SA564- $\Delta$ hptRS/ccpA

# NUSG\_STAAM

TSB

TSB-dex S-230

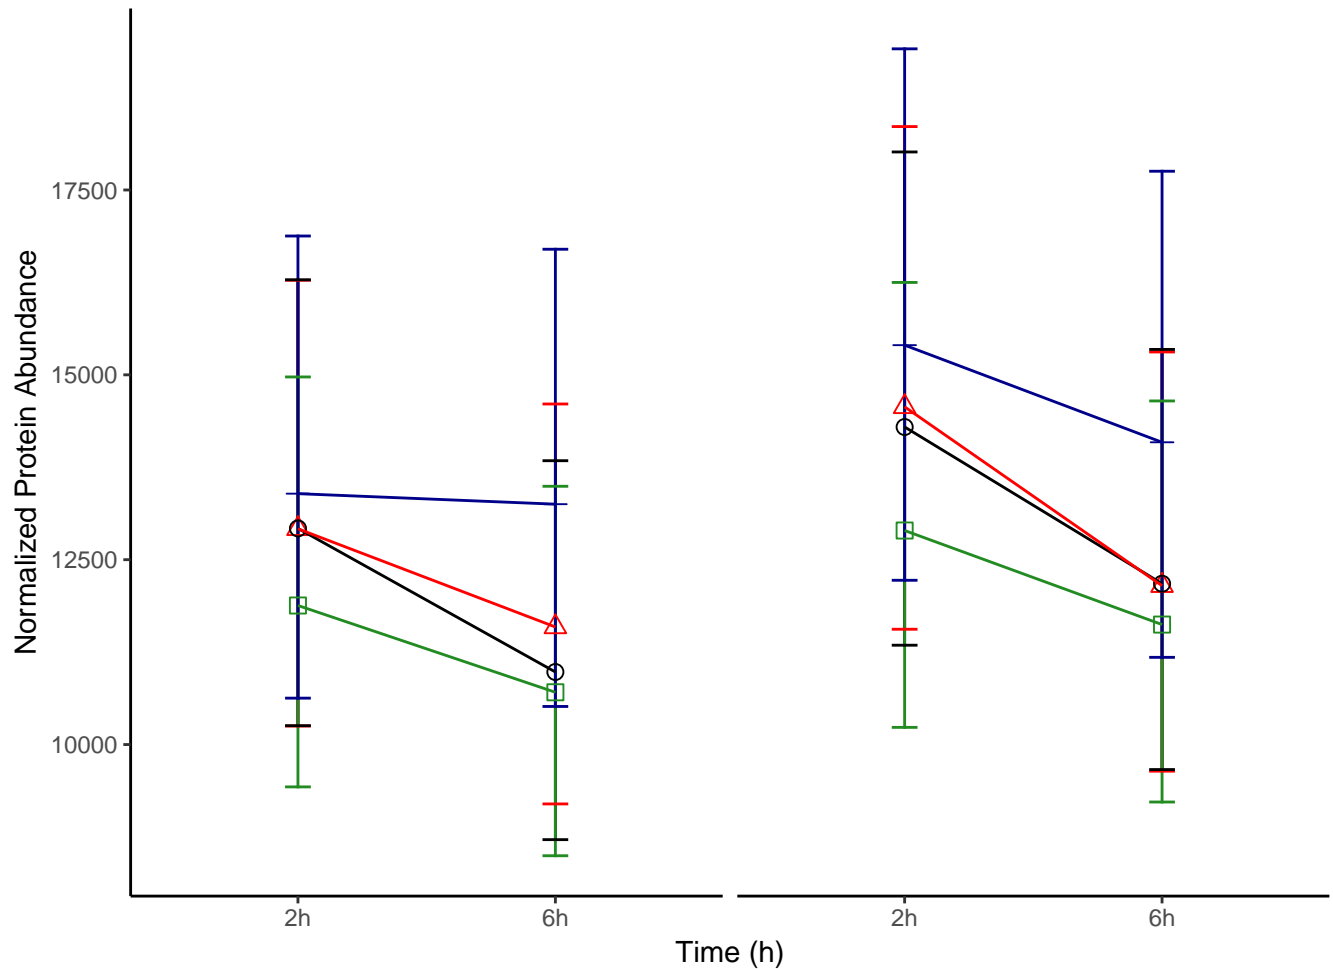

- SA564
- △ SA564-ΔhptRS
- SA564-ΔccpA
- + SA564-ΔhptRS/ccpA

# OAT2\_STAAM

TSB

TSB-dex S-231

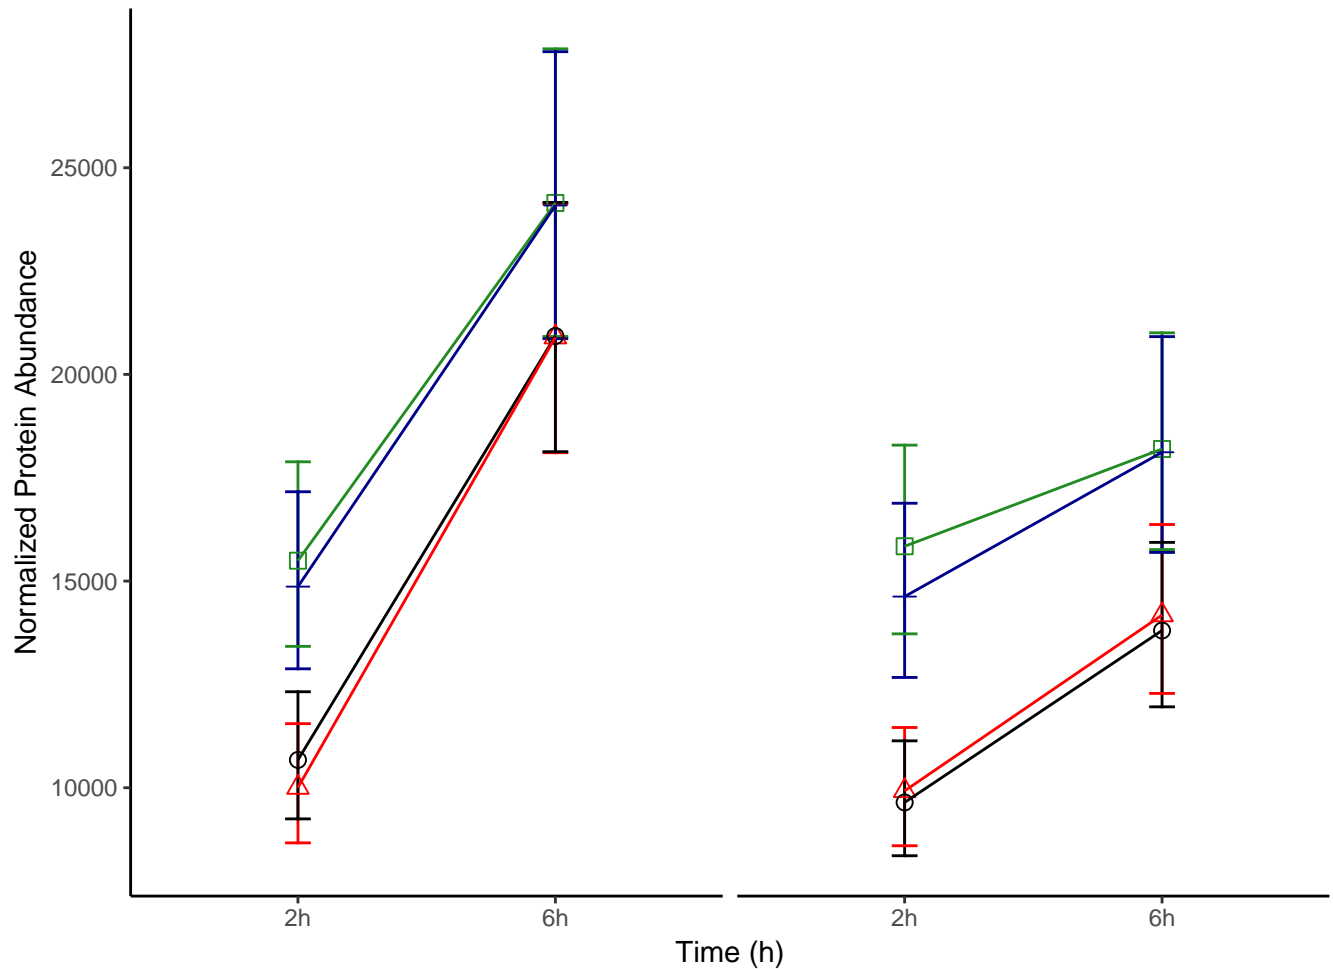

- SA564
- △ SA564- $\Delta$ hptRS
- SA564- $\Delta$ ccpA
- + SA564- $\Delta$ hptRS/ccpA

# OBG\_STAAM

TSB

TSB-dex S-232

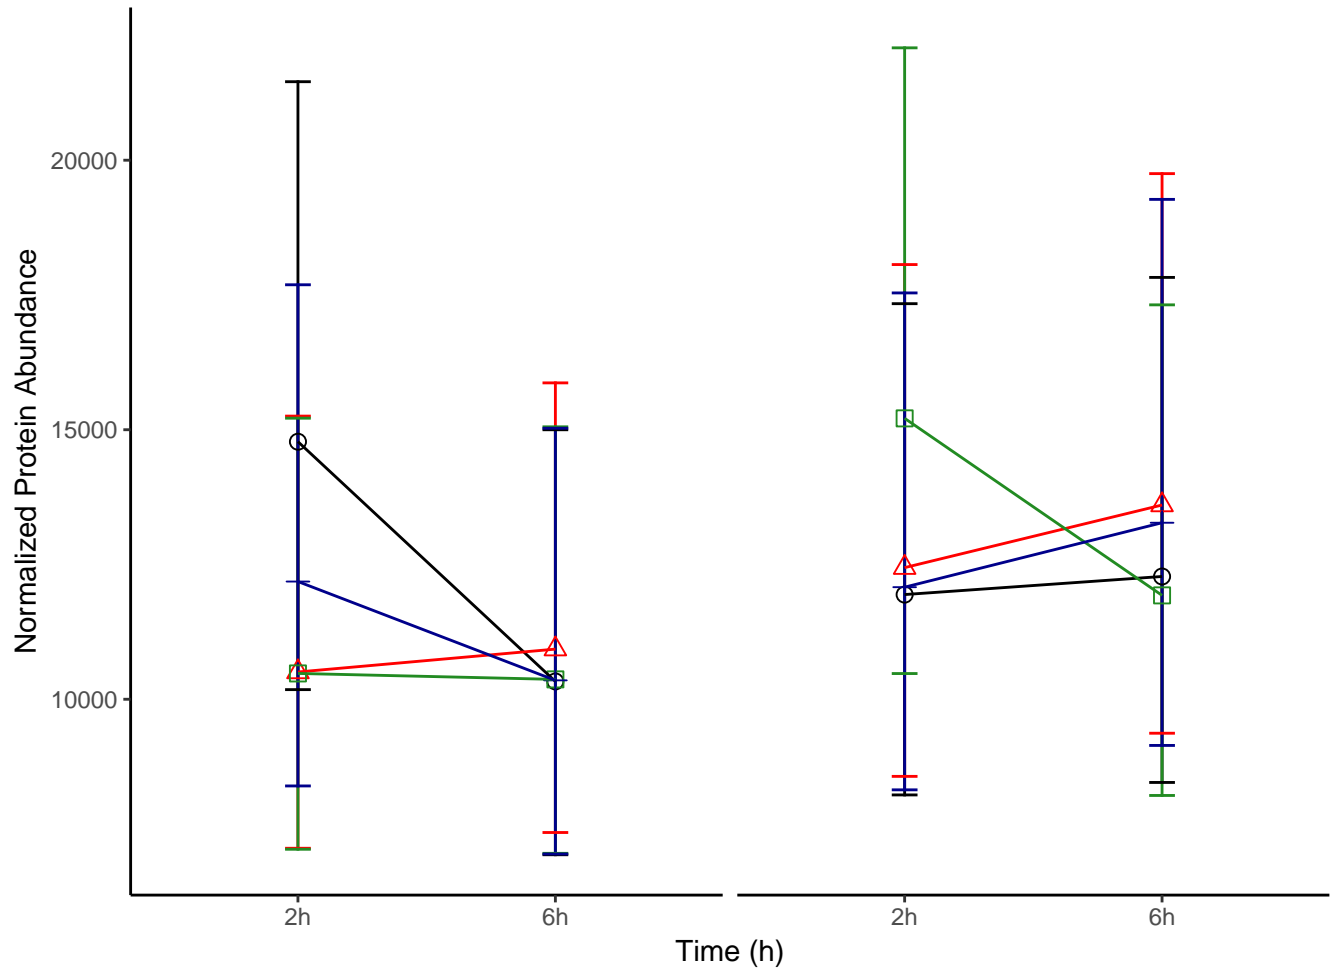

- SA564
- △ SA564- $\Delta$ *hptRS*
- SA564- $\Delta$ *ccpA*
- + SA564- $\Delta$ *hptRS/ccpA*



# ODO1\_STAAM

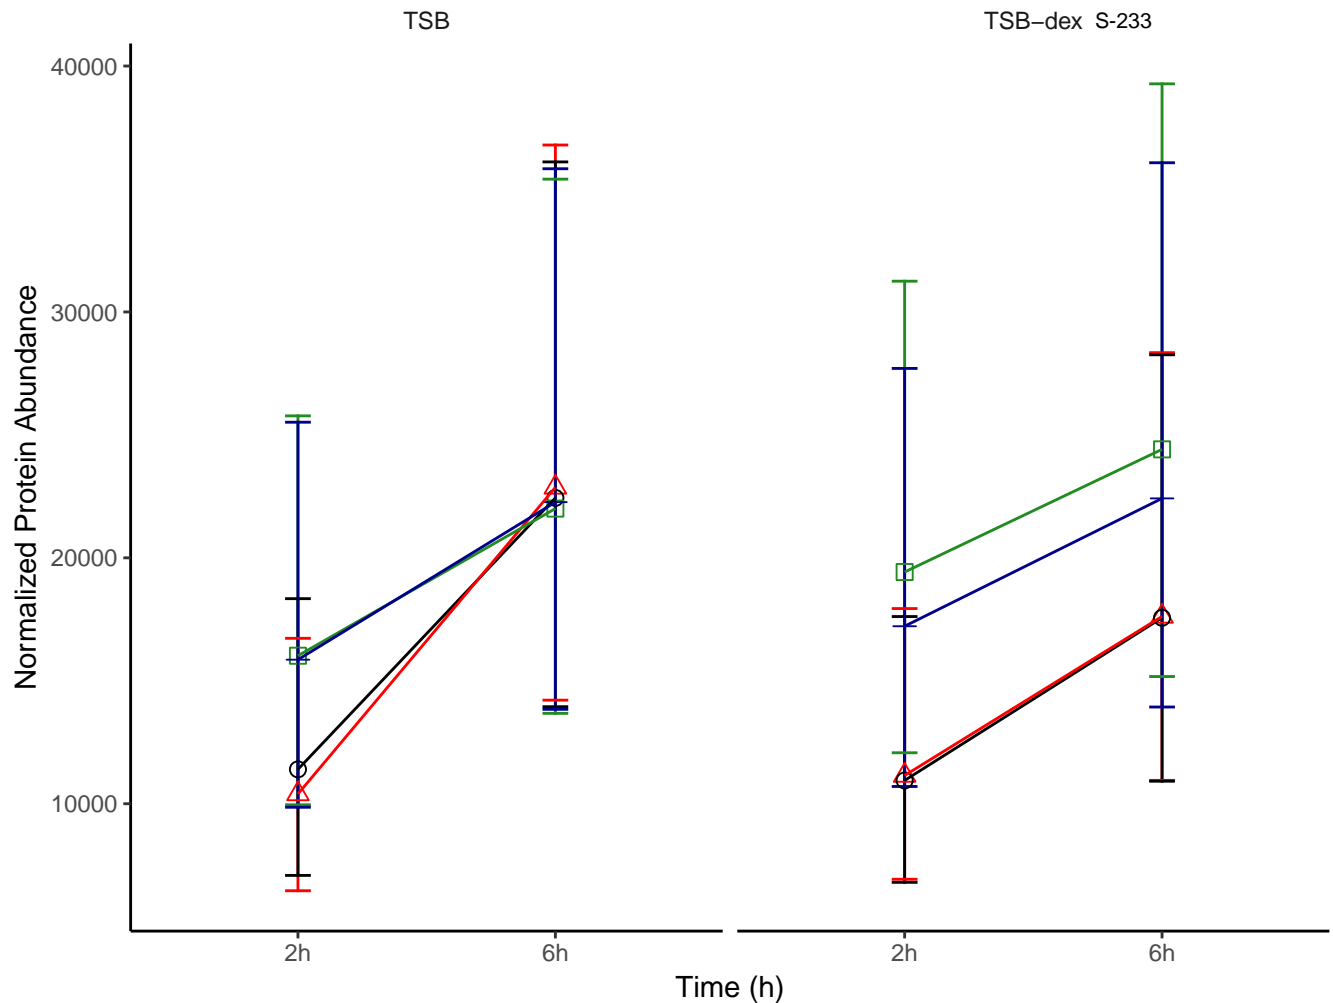

- SA564
- △ SA564- $\Delta$ hptRS
- SA564- $\Delta$ ccpA
- + SA564- $\Delta$ hptRS/ccpA

# ODO2\_STAAM

TSB

TSB-dex S-234

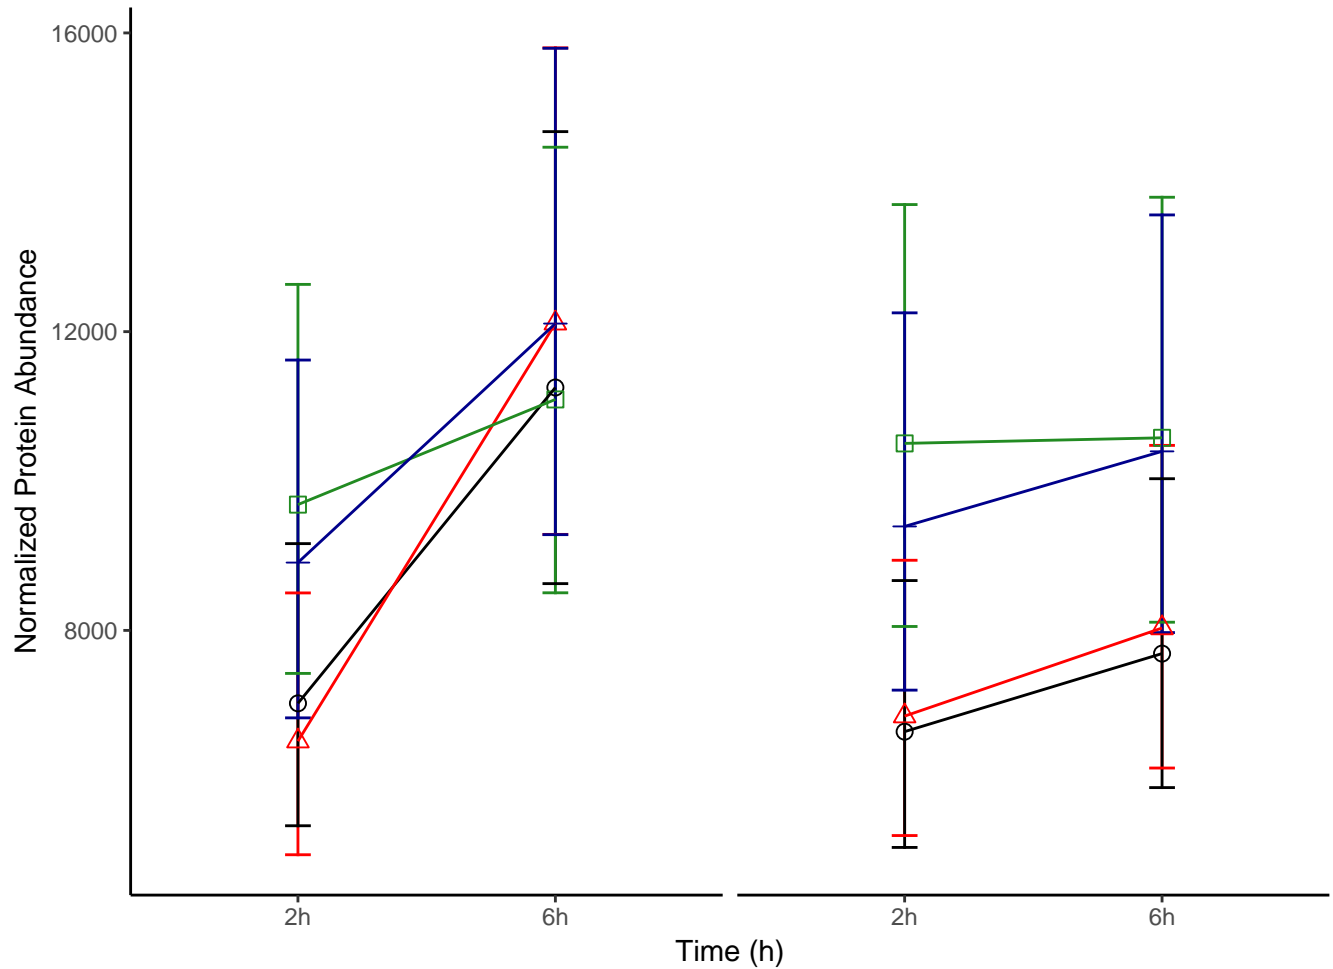

- SA564
- △ SA564-Δ*hptRS*
- SA564-Δ*ccpA*
- + SA564-Δ*hptRS/ccpA*

# ODP2\_STAAM

TSB

TSB-dex S-235

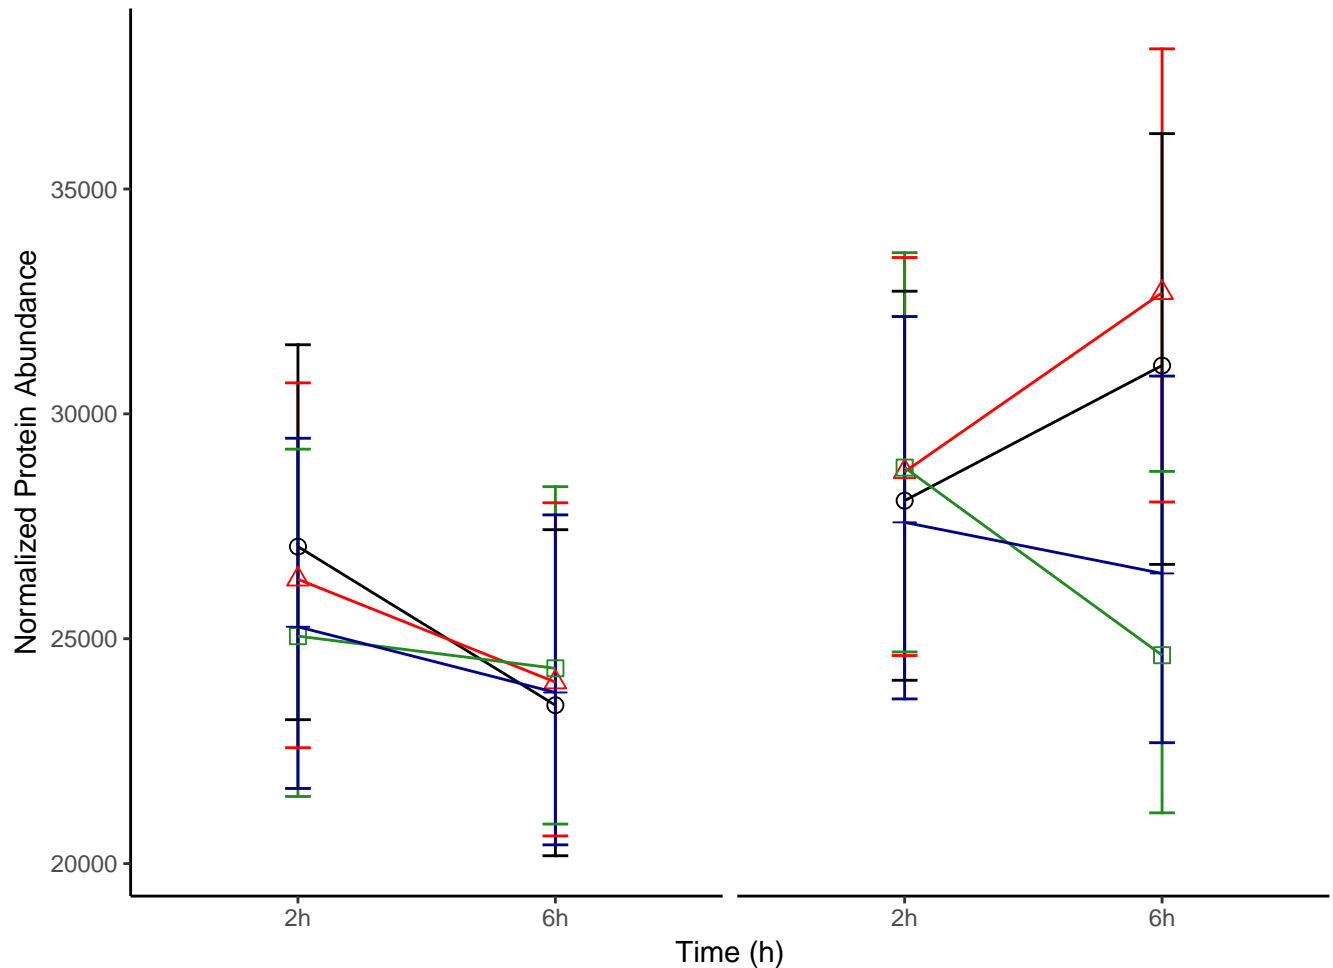

- SA564
- △ SA564- $\Delta$ hptRS
- SA564- $\Delta$ ccpA
- + SA564- $\Delta$ hptRS/ccpA

# ODPA\_STAAM

TSB

TSB-dex S-236

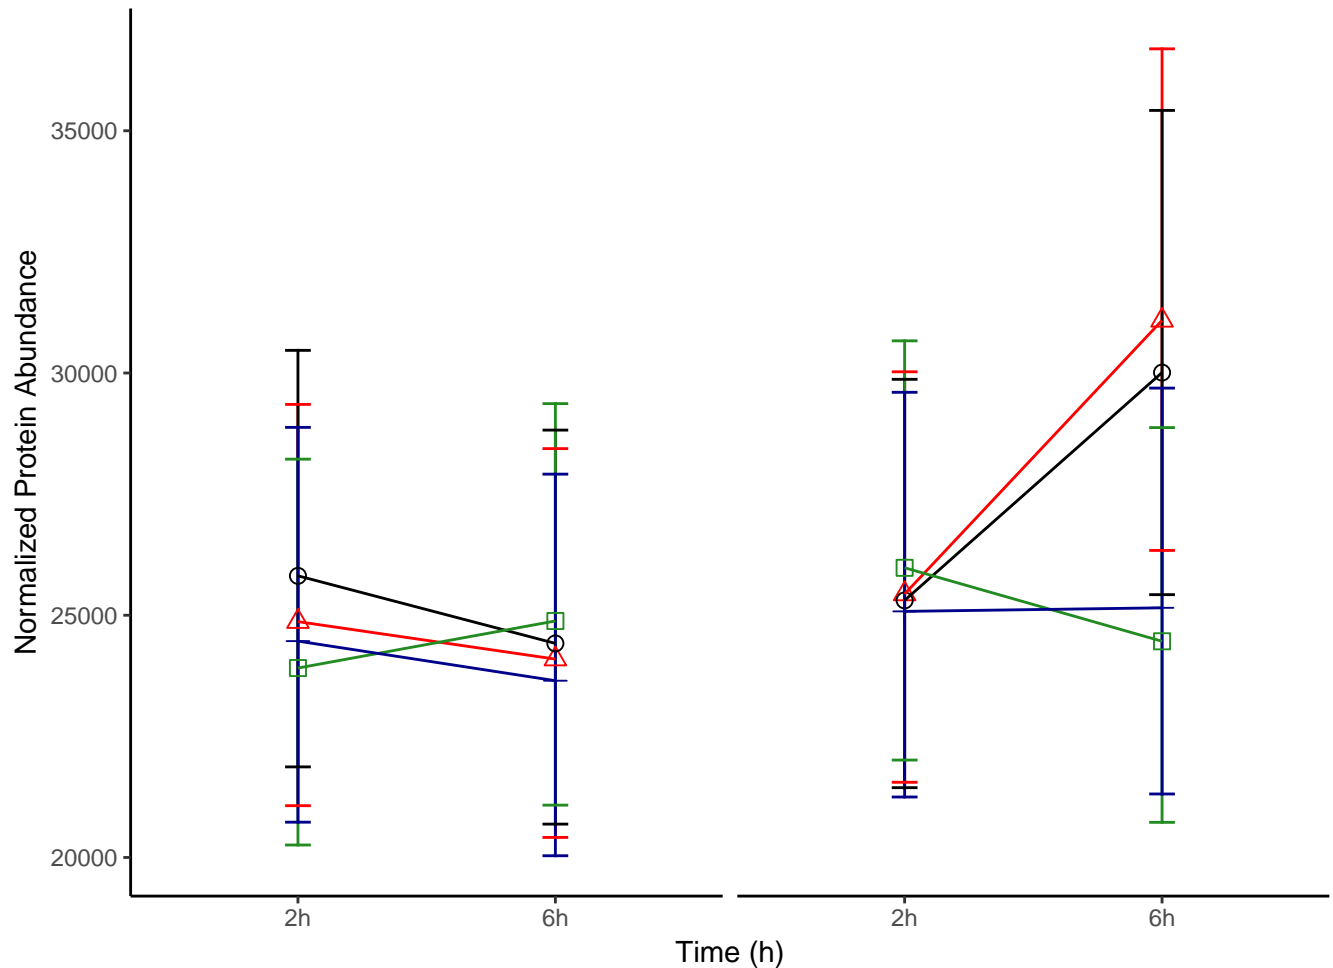

- SA564
- △ SA564- $\Delta$ *hptRS*
- SA564- $\Delta$ *ccpA*
- + SA564- $\Delta$ *hptRS/ccpA*

# ODPB\_STAAM

TSB

TSB-dex S-237

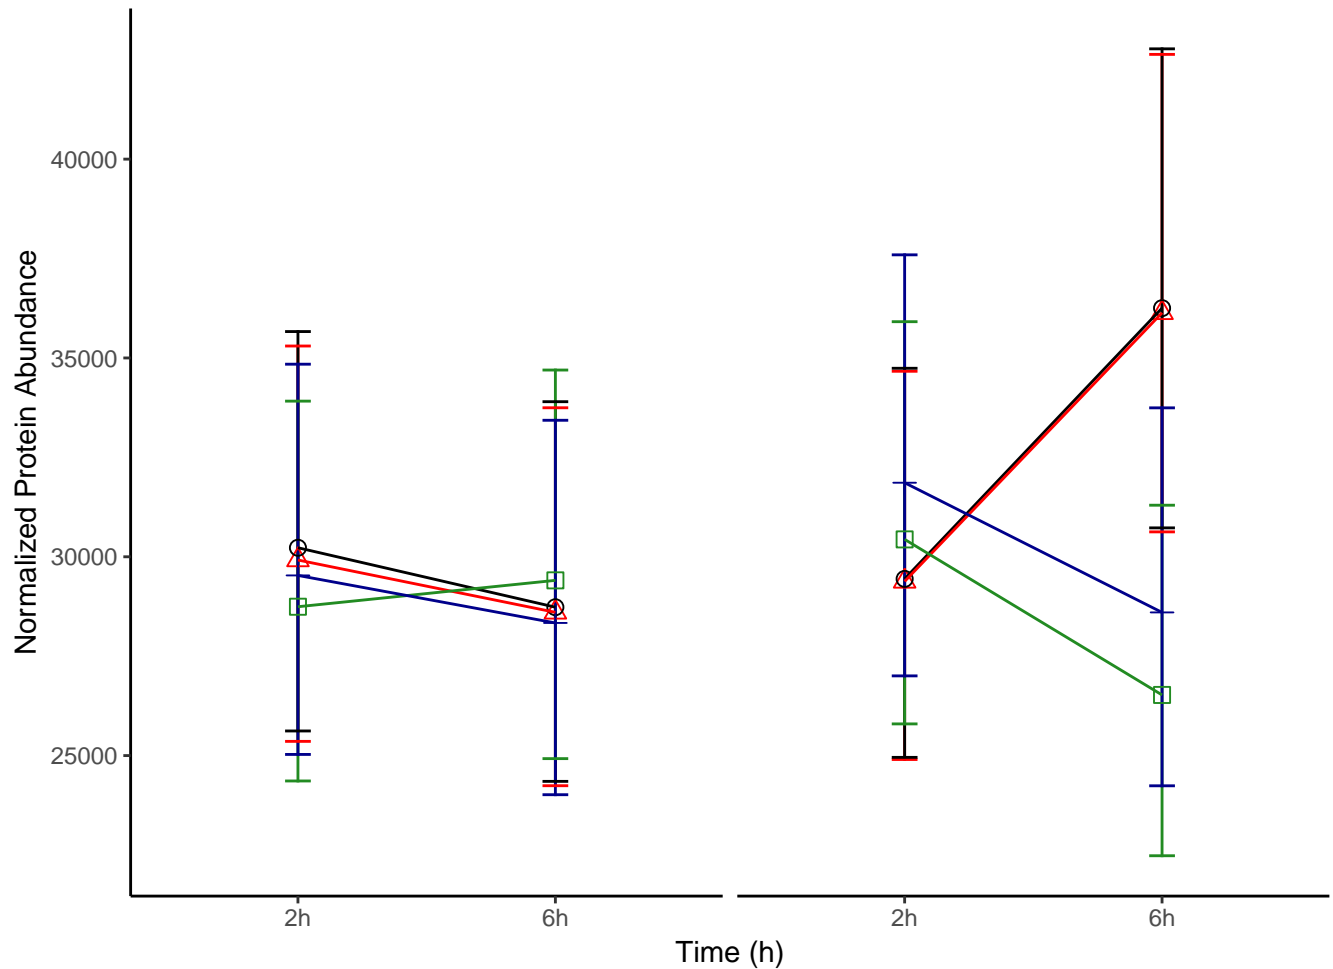

- SA564
- △ SA564-ΔhptRS
- SA564-ΔccpA
- + SA564-ΔhptRS/ccpA

# OHRL\_STAAM

TSB

TSB-dex S-238

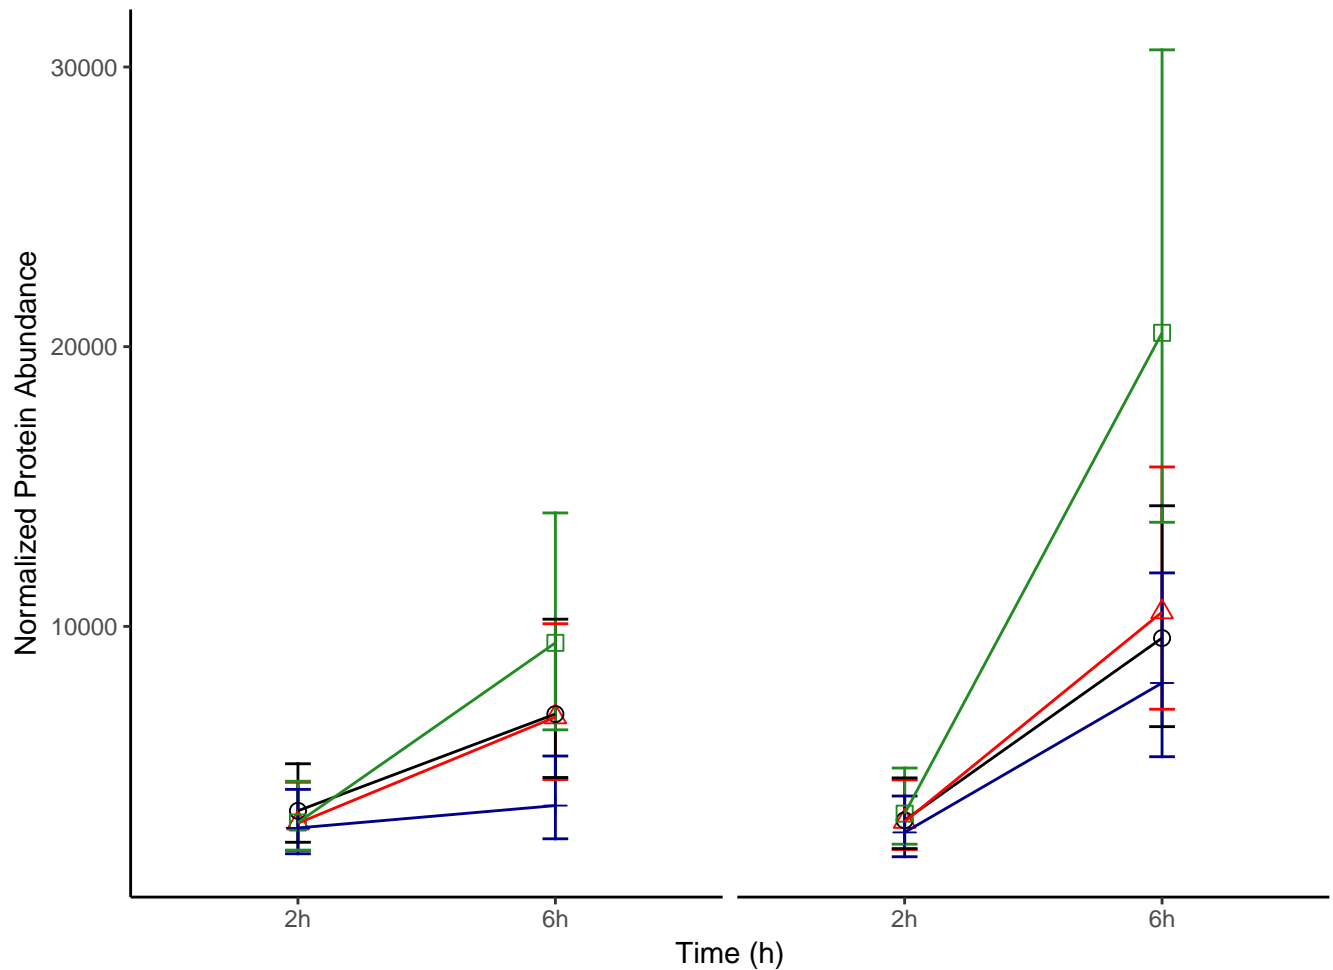

- SA564
- △ SA564-ΔhptRS
- SA564-ΔccpA
- + SA564-ΔhptRS/ccpA

# OTC\_STAAM

TSB

TSB-dex S-239

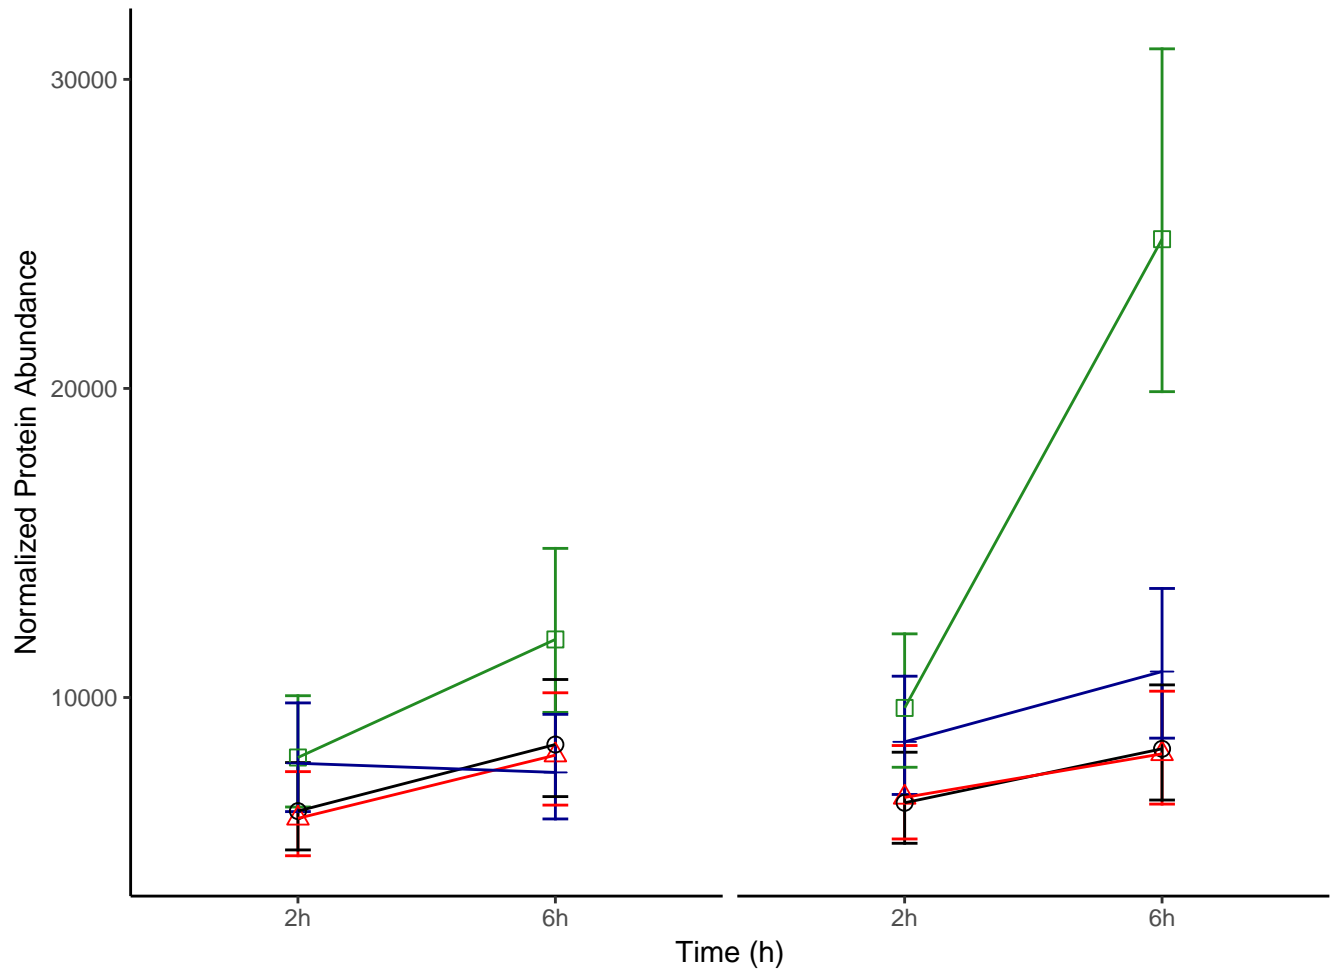

- SA564
- △ SA564- $\Delta$ *hptRS*
- SA564- $\Delta$ *ccpA*
- + SA564- $\Delta$ *hptRS/ccpA*

# OTCC\_STAAM

TSB

TSB-dex S-240

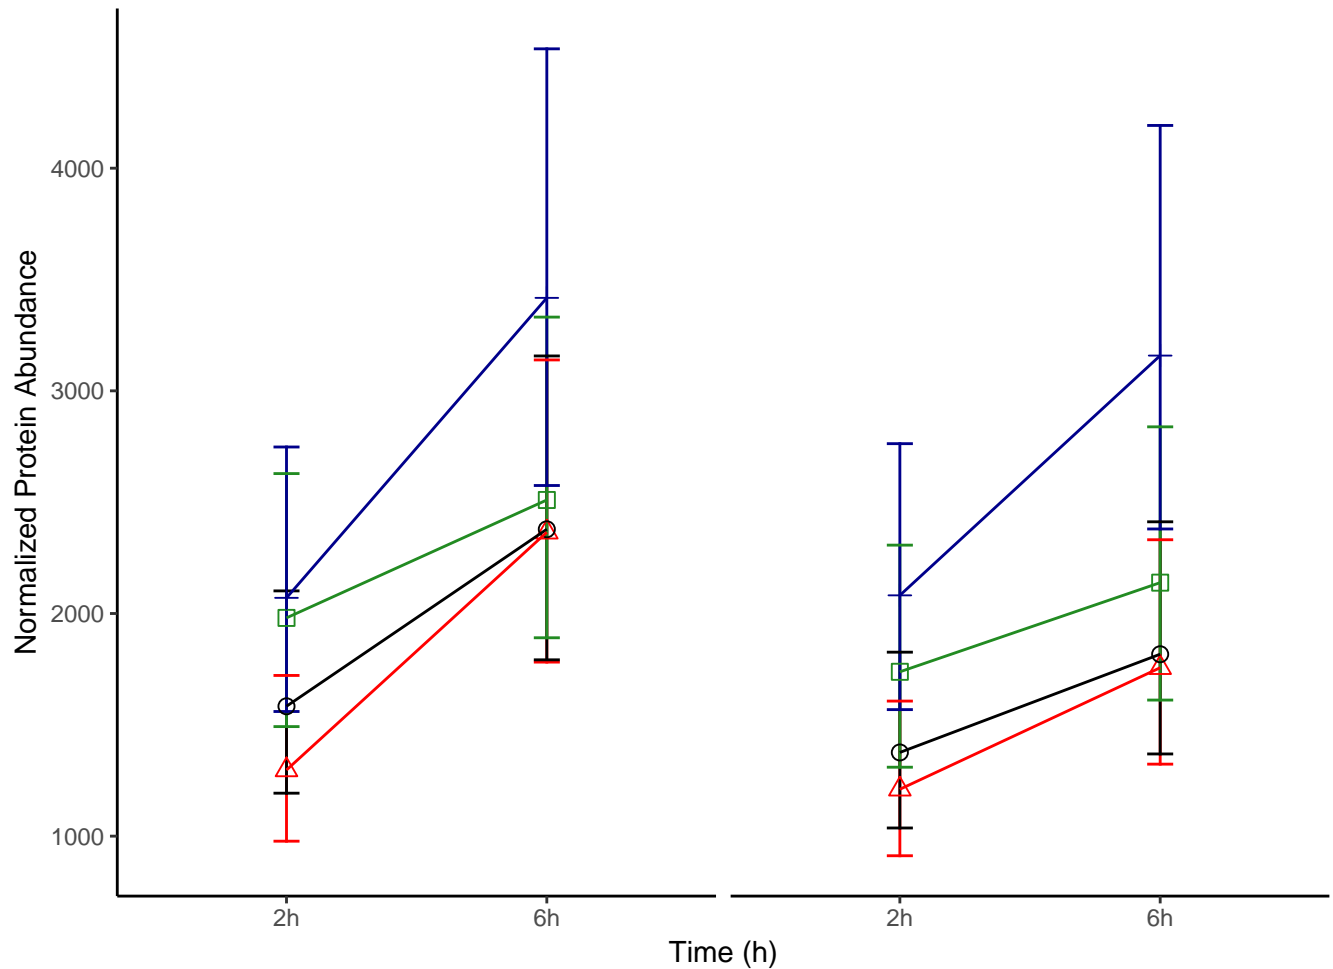

- SA564
- △ SA564- $\Delta$ *hptRS*
- SA564- $\Delta$ *ccpA*
- + SA564- $\Delta$ *hptRS/ccpA*



# P5CR\_STAAM

TSB

TSB-dex S-241

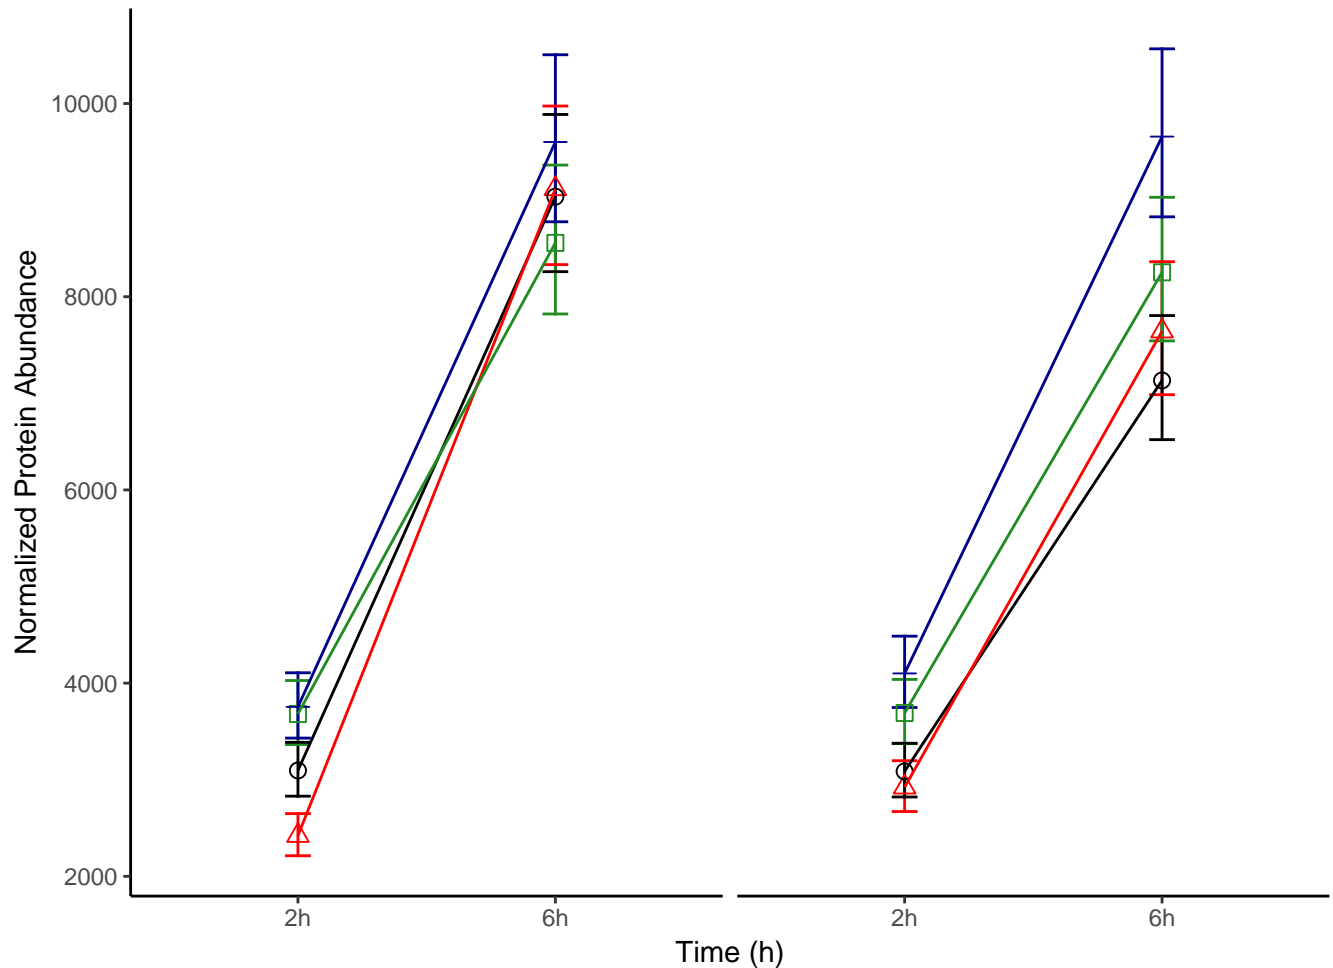

- SA564
- △ SA564-ΔhptRS
- SA564-ΔccpA
- + SA564-ΔhptRS/ccpA

# PANB\_STAAM

TSB

TSB-dex S-242

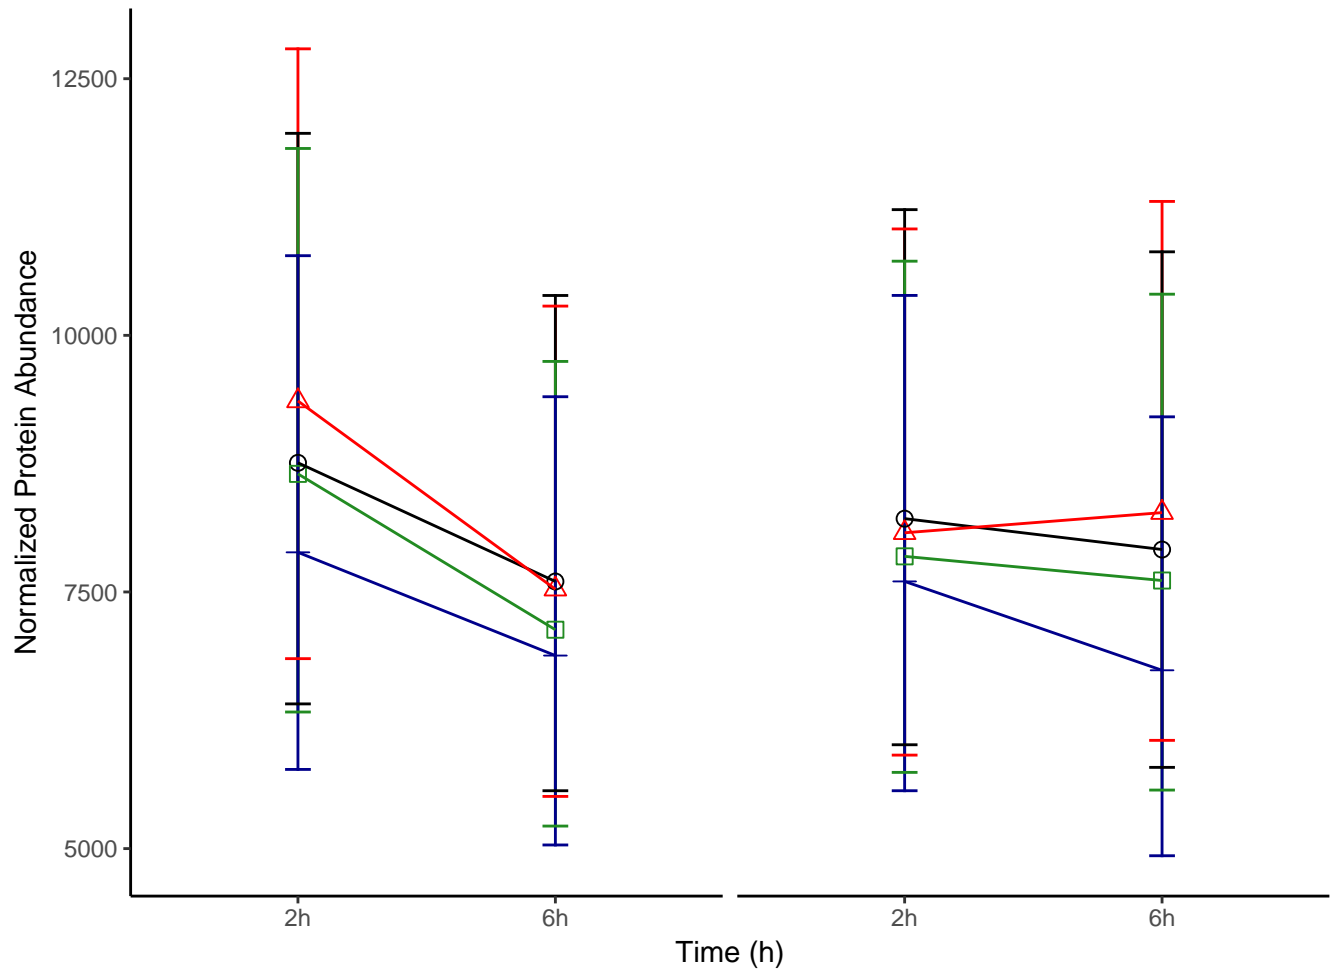

- SA564
- △ SA564-ΔhptRS
- SA564-ΔccpA
- + SA564-ΔhptRS/ccpA

# PAND\_STAAM

TSB

TSB-dex S-243

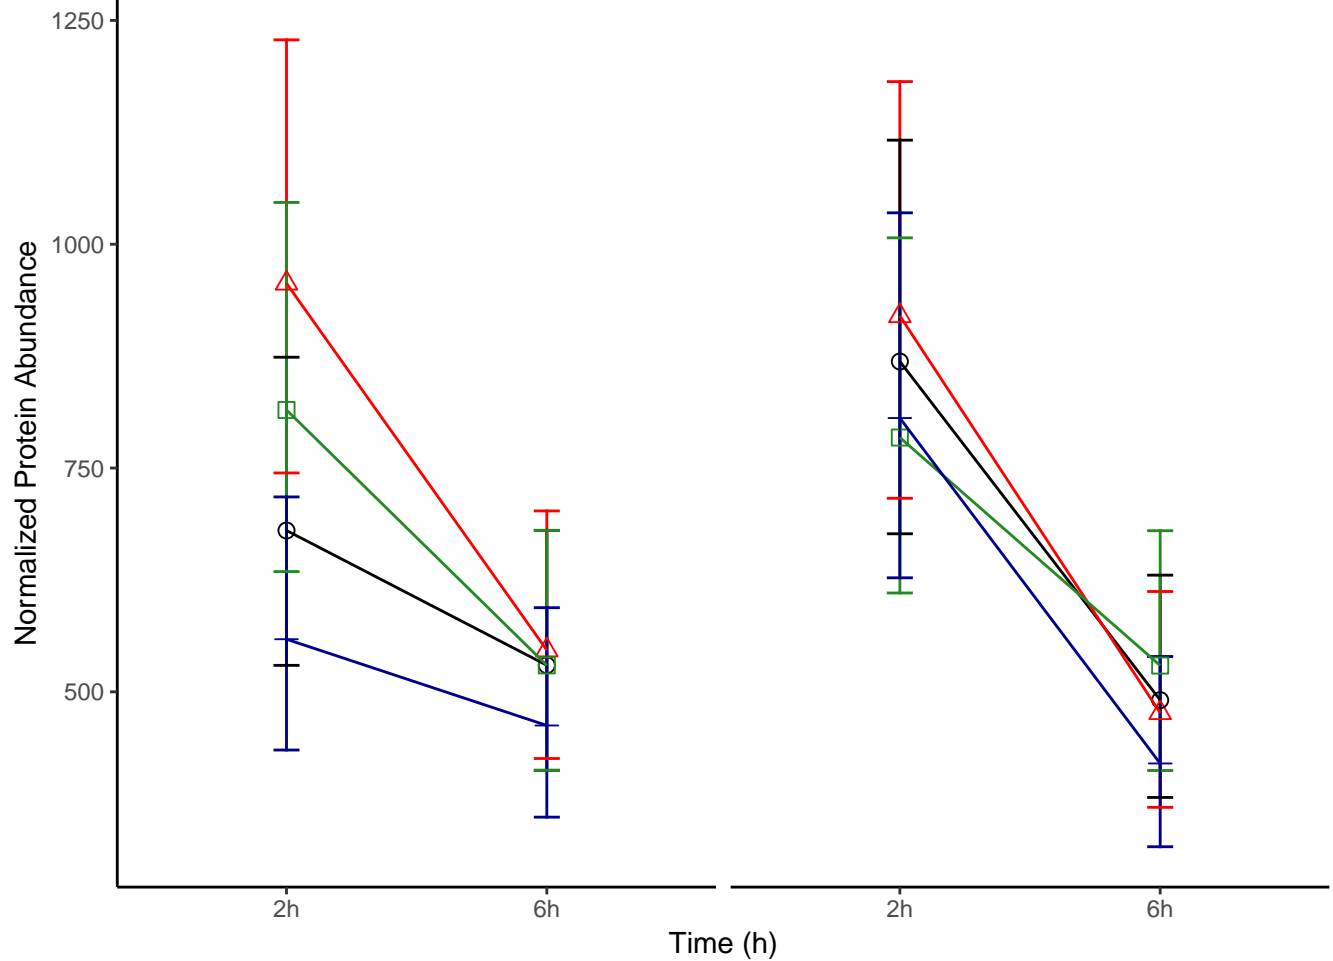

- SA564
- △ SA564- $\Delta$ *hptRS*
- SA564- $\Delta$ *ccpA*
- + SA564- $\Delta$ *hptRS/ccpA*

# PARC\_STAAM

TSB

TSB-dex S-244

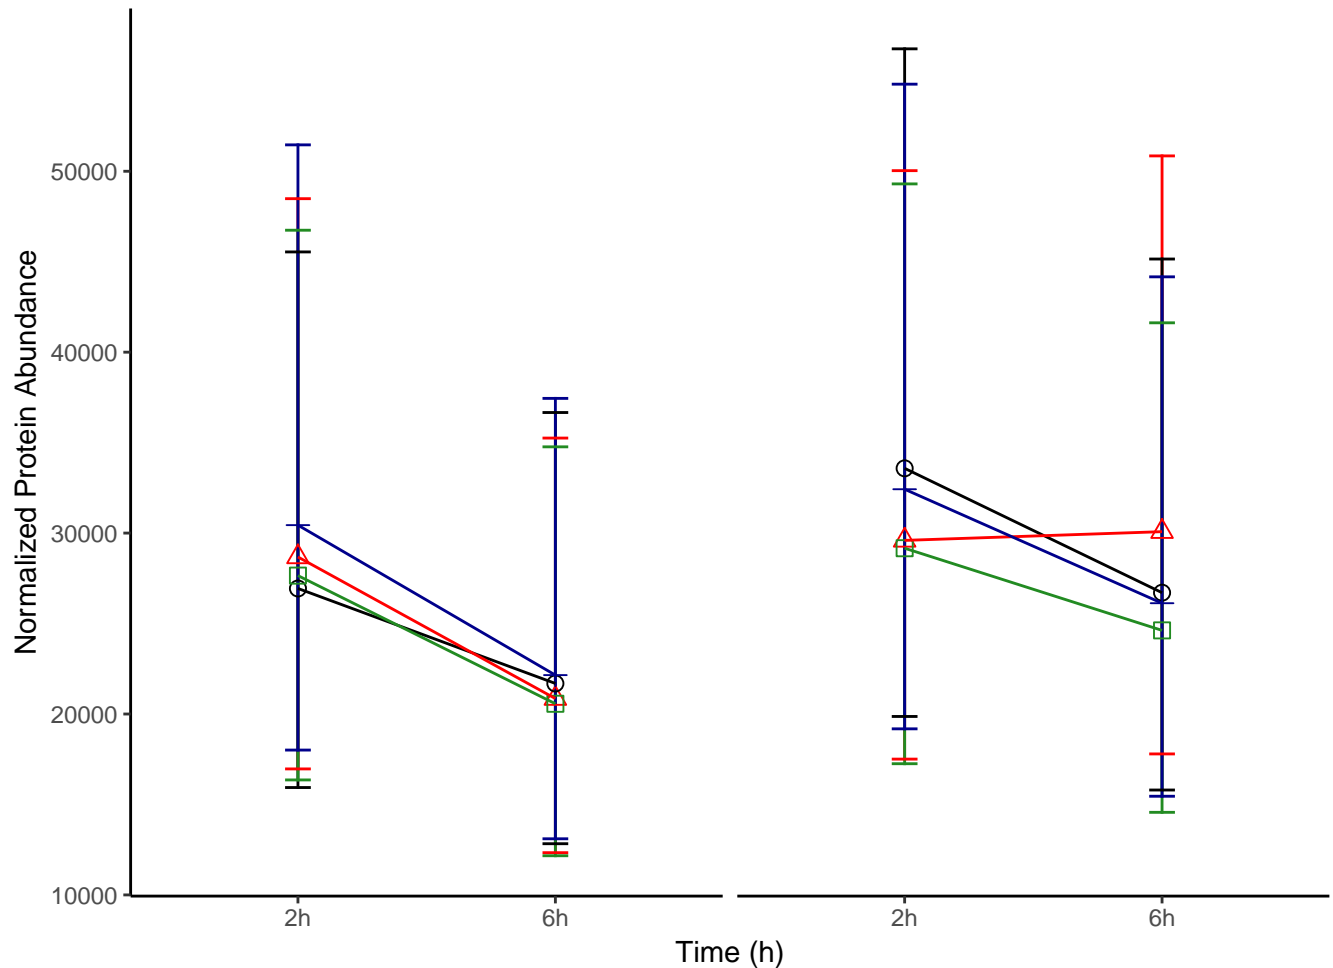

- SA564
- △ SA564- $\Delta$ hptRS
- SA564- $\Delta$ ccpA
- + SA564- $\Delta$ hptRS/ccpA

# PCKA\_STAAM

TSB

TSB-dex S-245

Normalized Protein Abundance

15000

10000

2h

6h

Time (h)

2h

6h

- SA564
- △ SA564- $\Delta$ *hptRS*
- SA564- $\Delta$ *ccpA*
- + SA564- $\Delta$ *hptRS/ccpA*

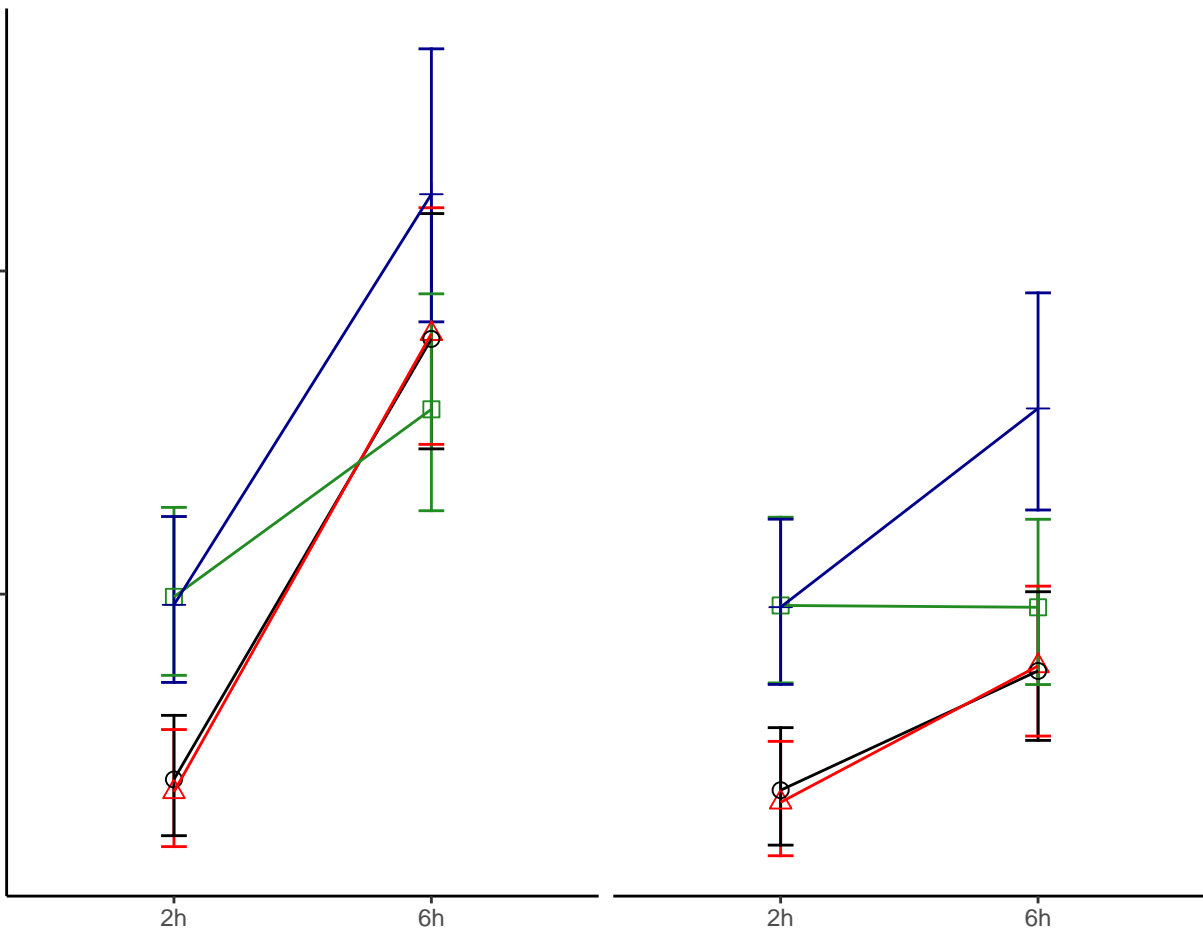

# PCRA\_STAAM

TSB

TSB-dex S-246

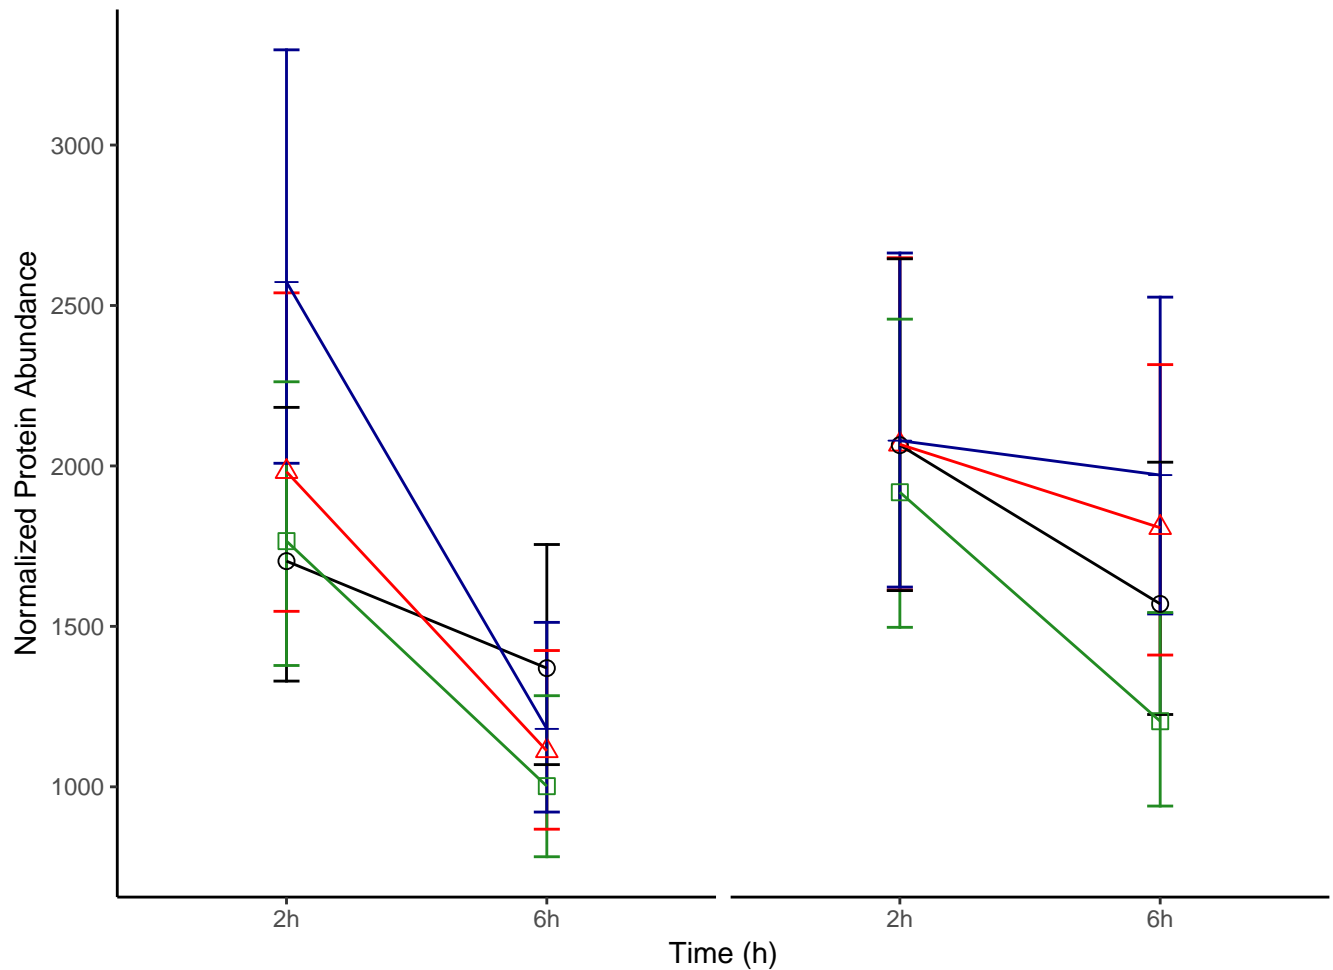

- SA564
- △ SA564- $\Delta$ *hptRS*
- SA564- $\Delta$ *ccpA*
- + SA564- $\Delta$ *hptRS/ccpA*

# PDP\_STAAM

TSB

TSB-dex S-247

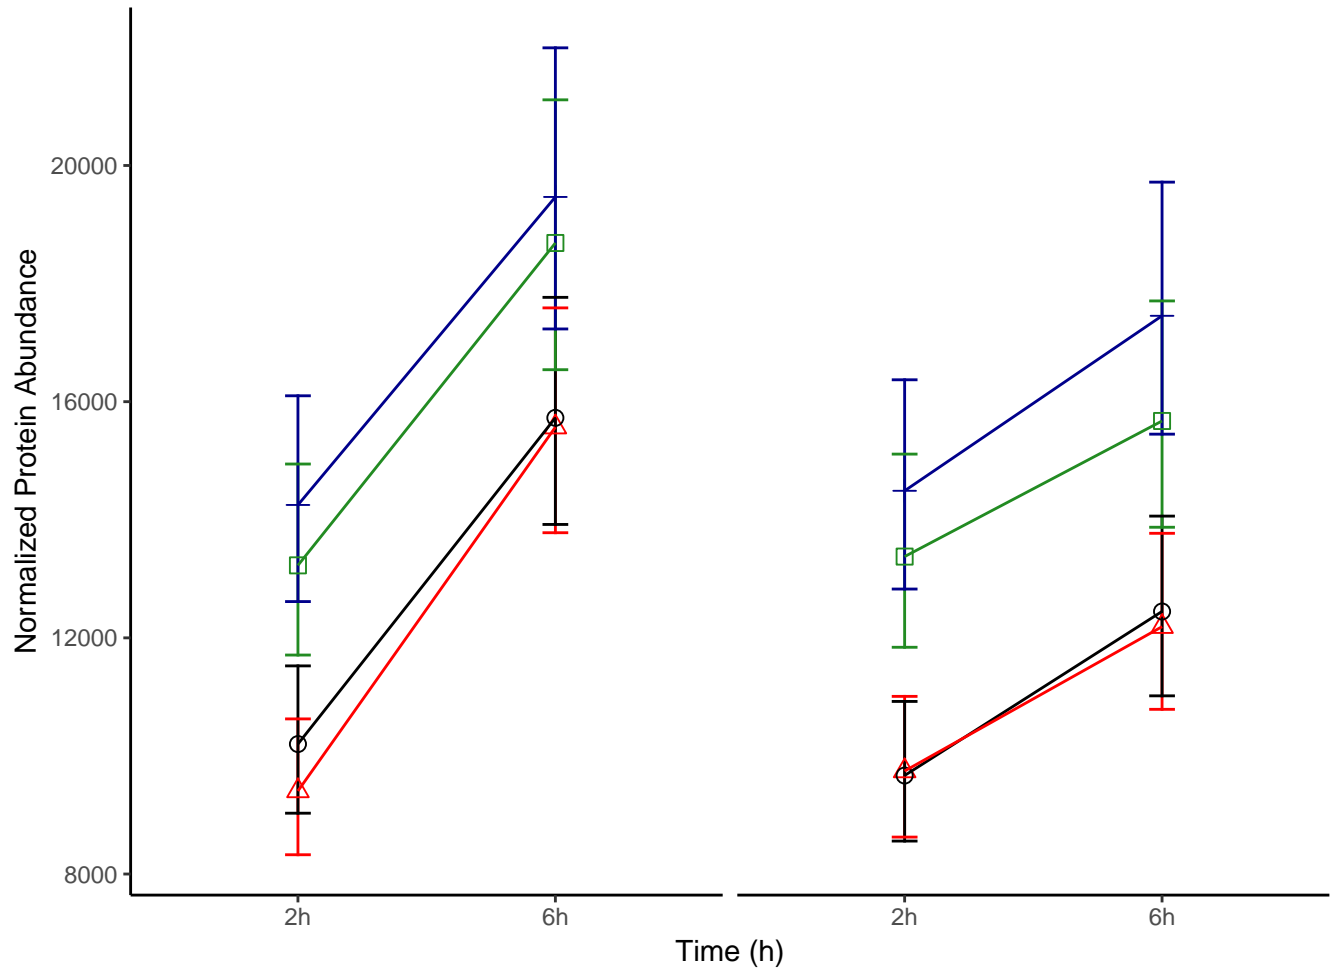

- SA564
- △ SA564-ΔhptRS
- SA564-ΔccpA
- + SA564-ΔhptRS/ccpA

# PDRP\_STAAM

TSB

TSB-dex S-248

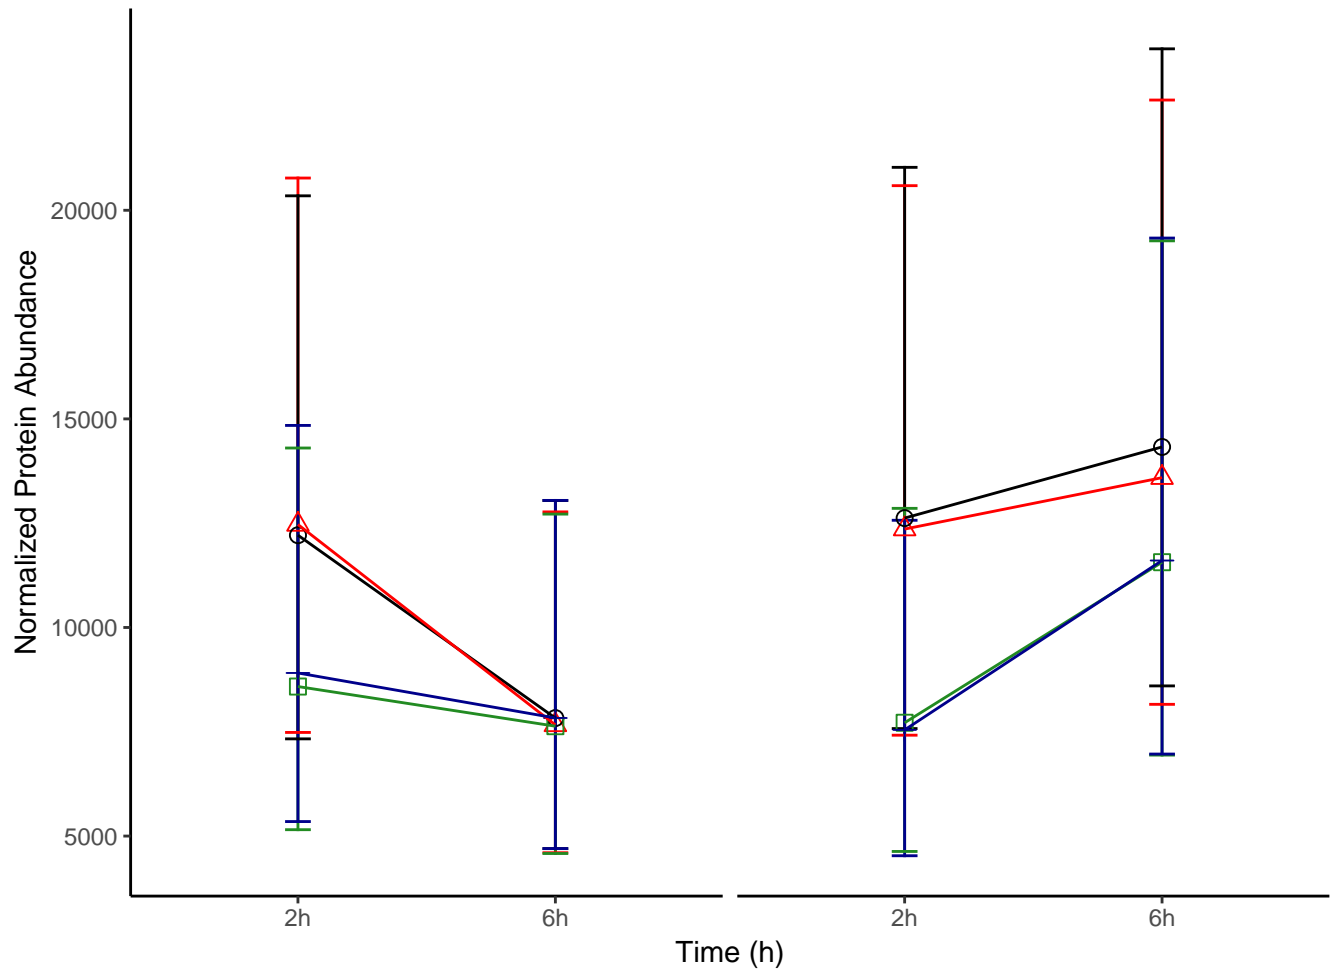

- SA564
- △ SA564- $\Delta$ hptRS
- SA564- $\Delta$ ccpA
- + SA564- $\Delta$ hptRS/ccpA



# PDXS\_STAAM

TSB

TSB-dex S-249

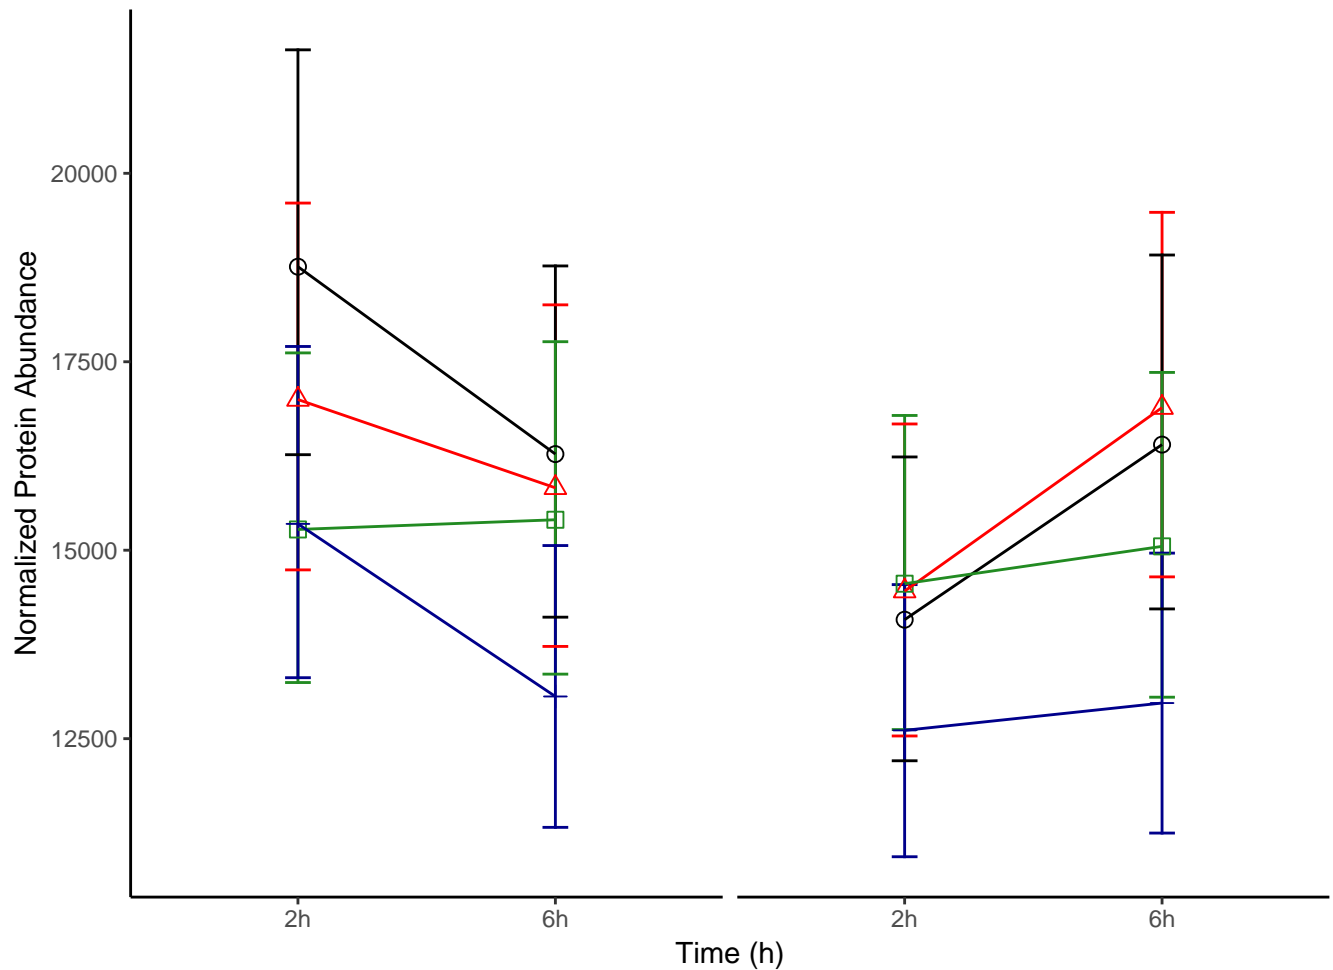

- SA564
- △ SA564- $\Delta$ *hptRS*
- SA564- $\Delta$ *ccpA*
- + SA564- $\Delta$ *hptRS/ccpA*

# PDXT\_STAAM

TSB

TSB-dex S-250

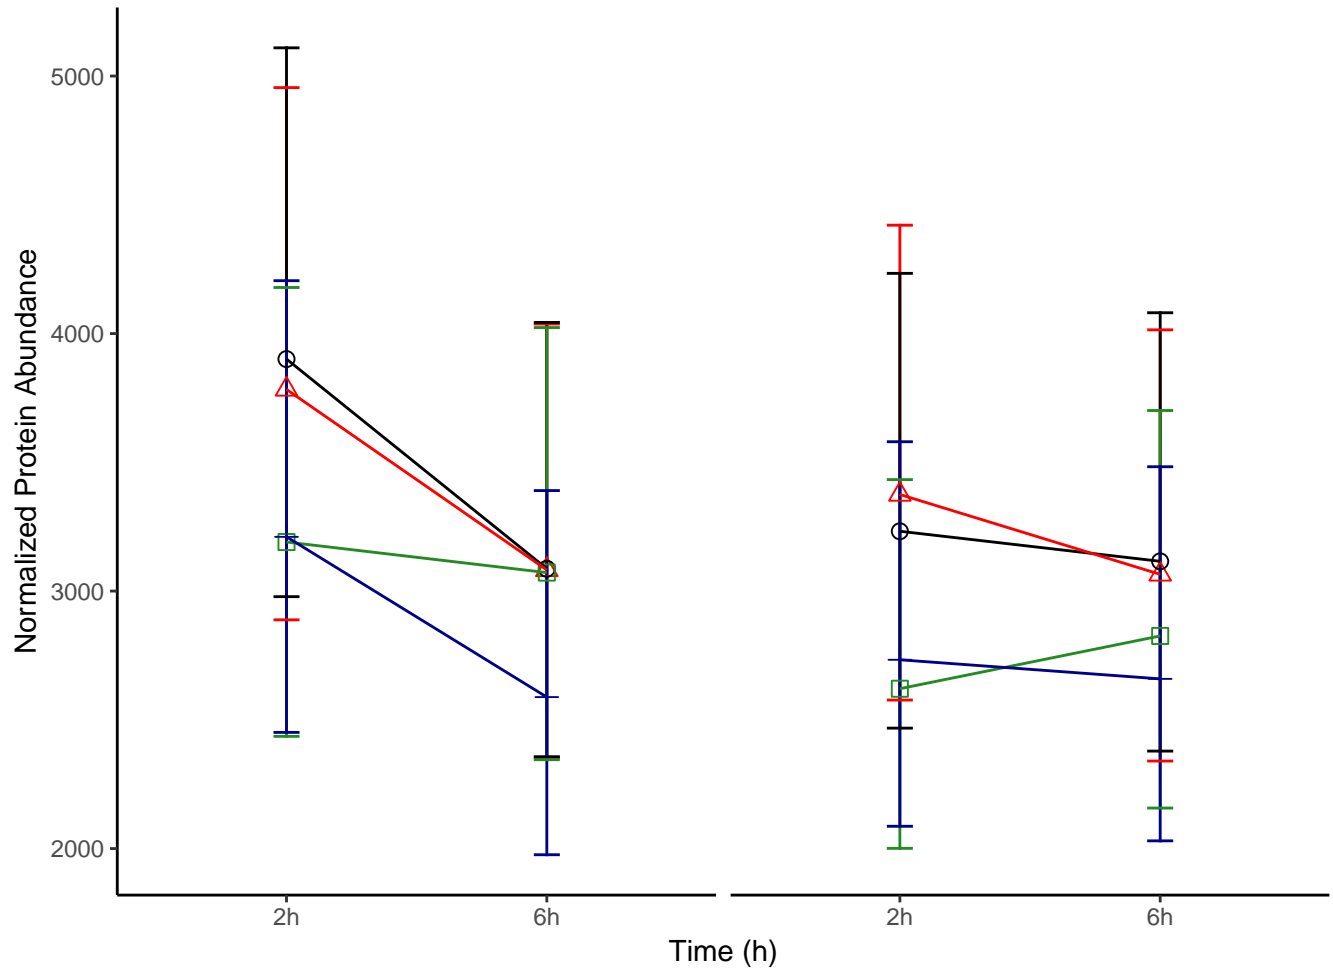

- SA564
- △ SA564- $\Delta hptRS$
- SA564- $\Delta ccpA$
- + SA564- $\Delta hptRS/ccpA$

# PEPVL\_STAAM

TSB

TSB-dex S-251

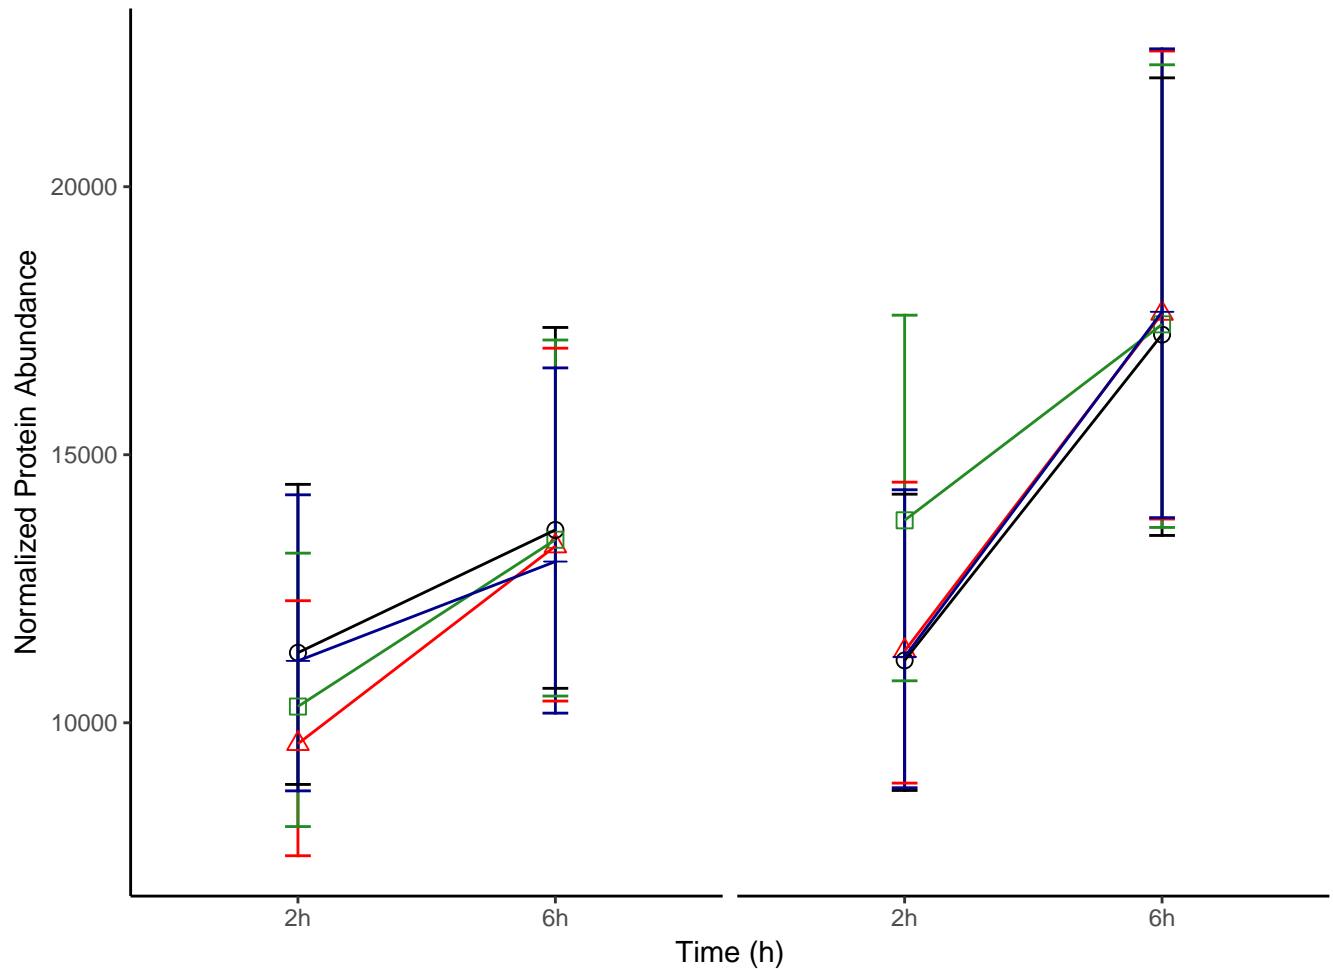

- SA564
- △ SA564- $\Delta$ *hptRS*
- SA564- $\Delta$ *ccpA*
- + SA564- $\Delta$ *hptRS/ccpA*

# PERR\_STAAM

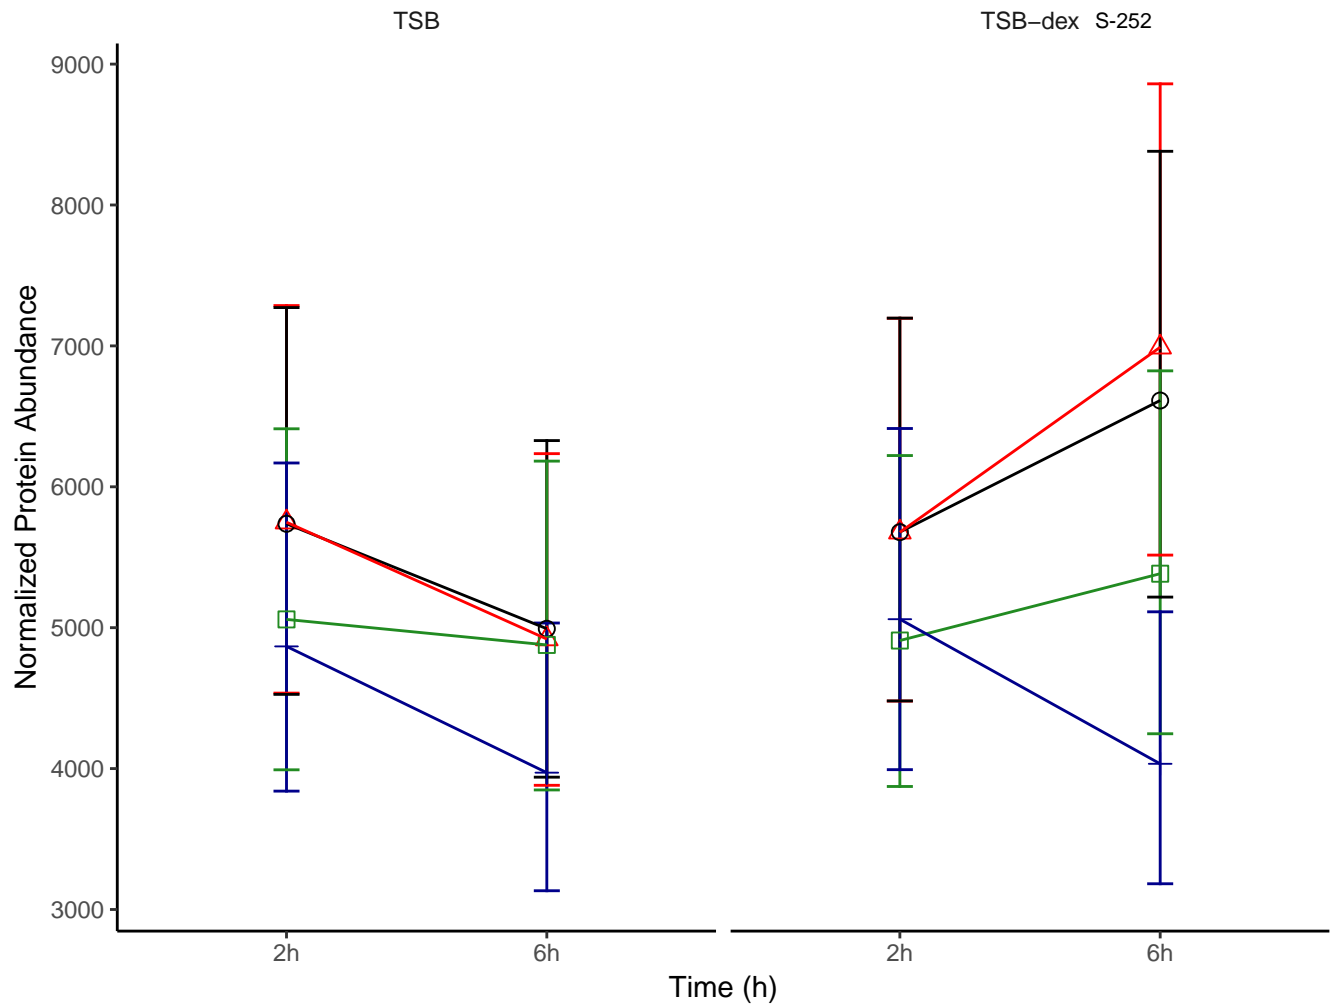

- SA564
- △ SA564-ΔhptRS
- SA564-ΔccpA
- + SA564-ΔhptRS/ccpA

# PFKA\_STAAM

TSB

TSB-dex S-253

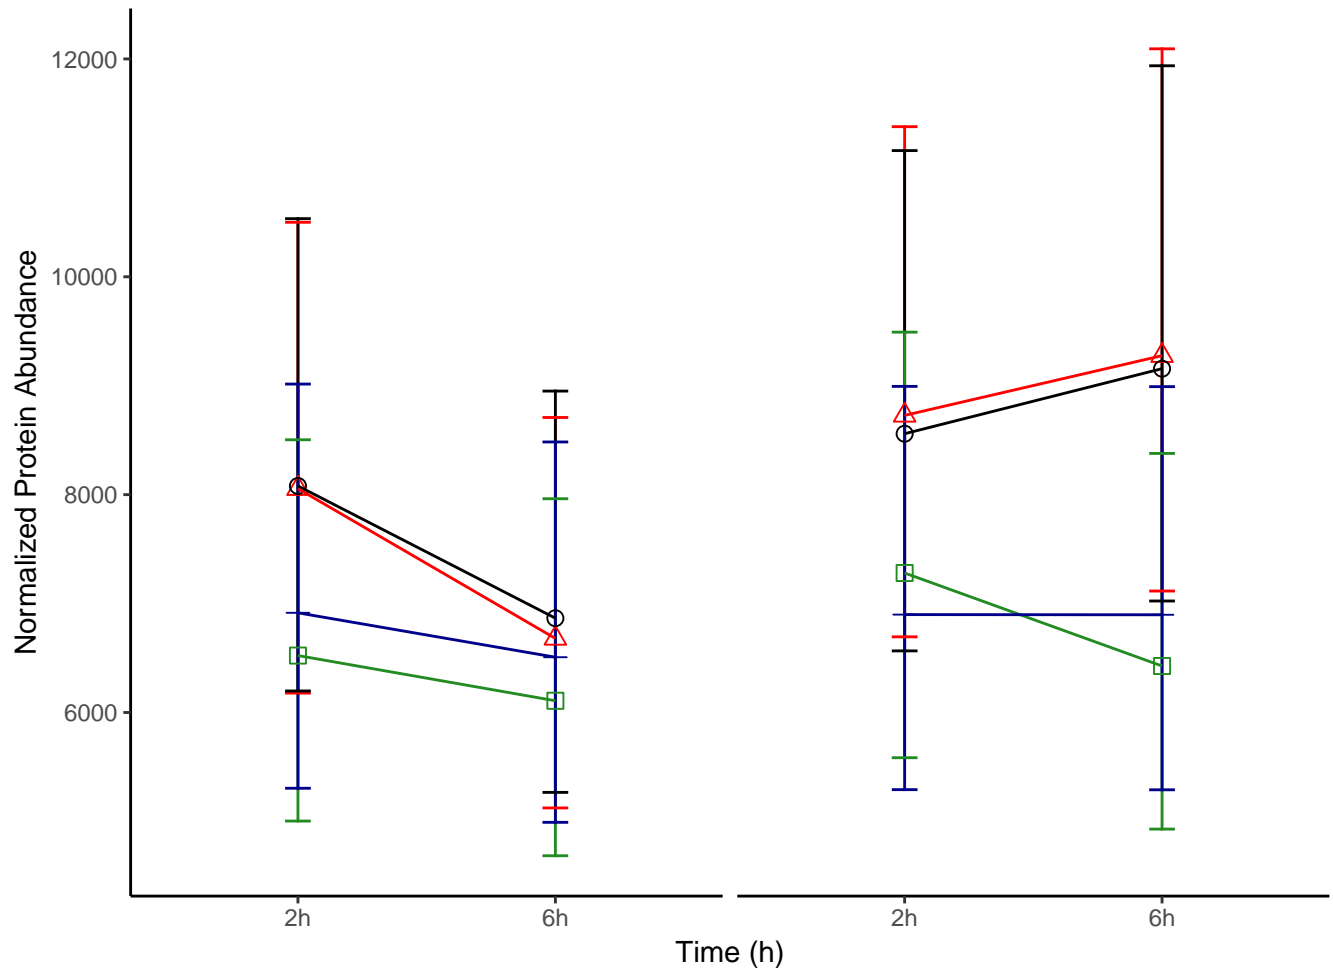

- SA564
- △ SA564- $\Delta$ *hptRS*
- SA564- $\Delta$ *ccpA*
- + SA564- $\Delta$ *hptRS/ccpA*

# PFLA\_STAAM

TSB

TSB-dex S-254

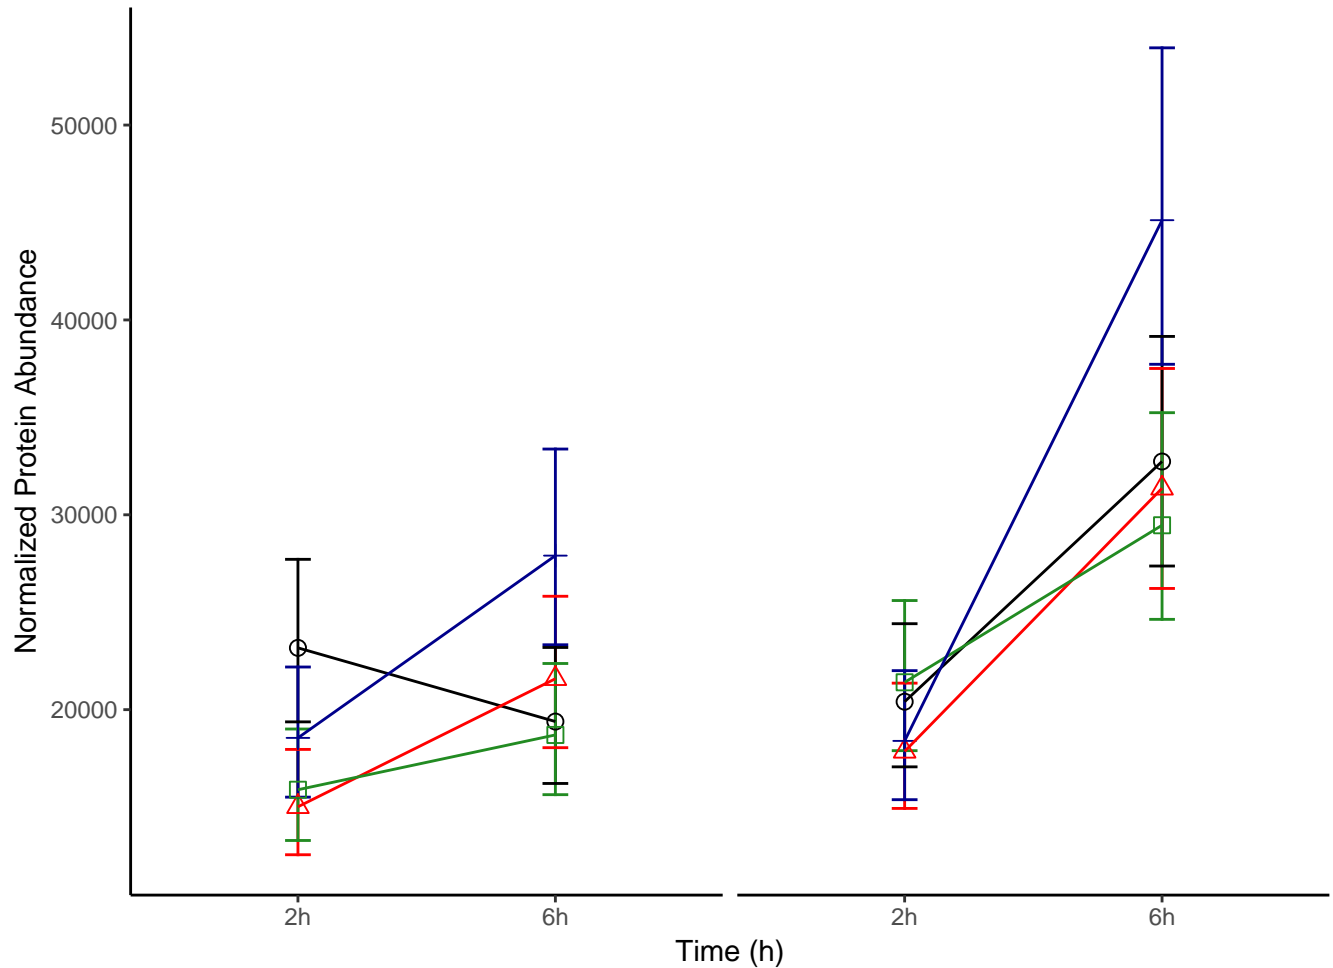

- SA564
- △ SA564-ΔhptRS
- SA564-ΔccpA
- + SA564-ΔhptRS/ccpA

# PFLB\_STAAM

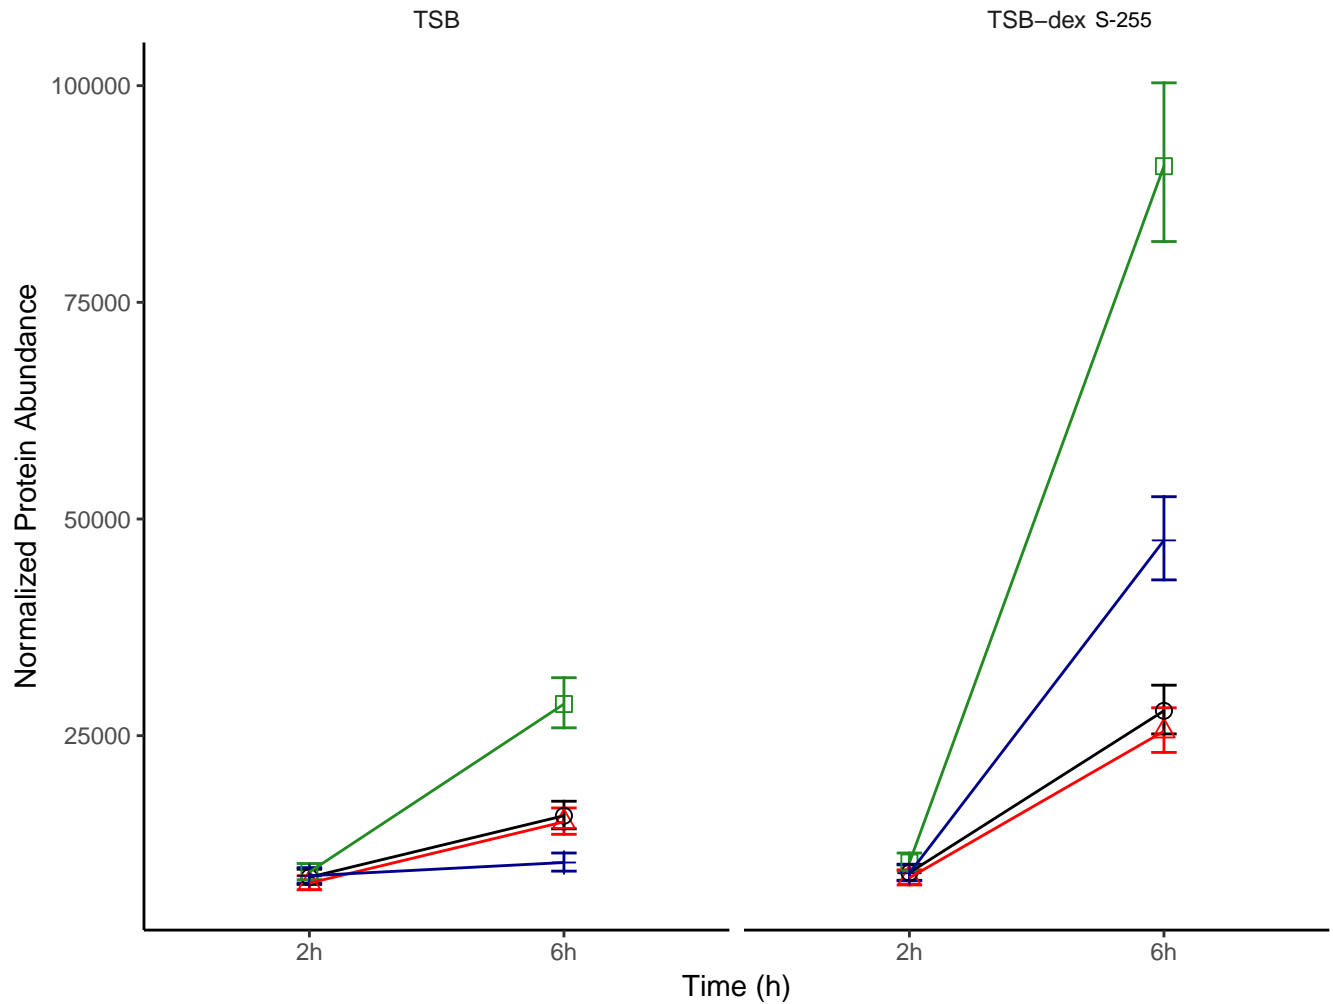

- SA564
- △ SA564- $\Delta hptRS$
- SA564- $\Delta ccpA$
- + SA564- $\Delta hptRS/ccpA$

# PGCA\_STAAM

TSB

TSB-dex S-256

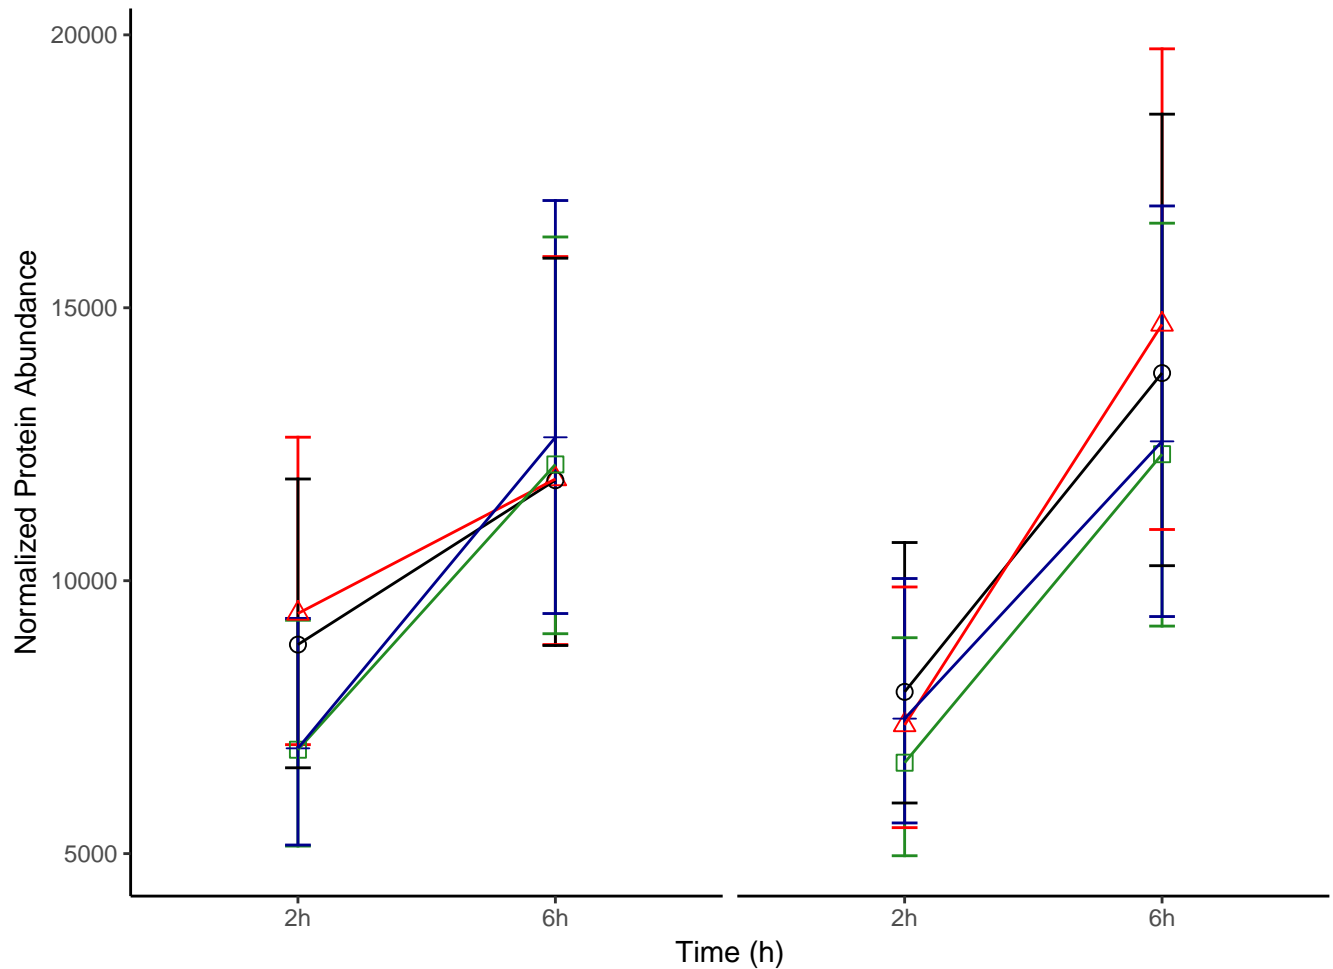

- SA564
- △ SA564-ΔhptRS
- SA564-ΔccpA
- + SA564-ΔhptRS/ccpA



# PGK\_STAAM

TSB

TSB-dex S-257

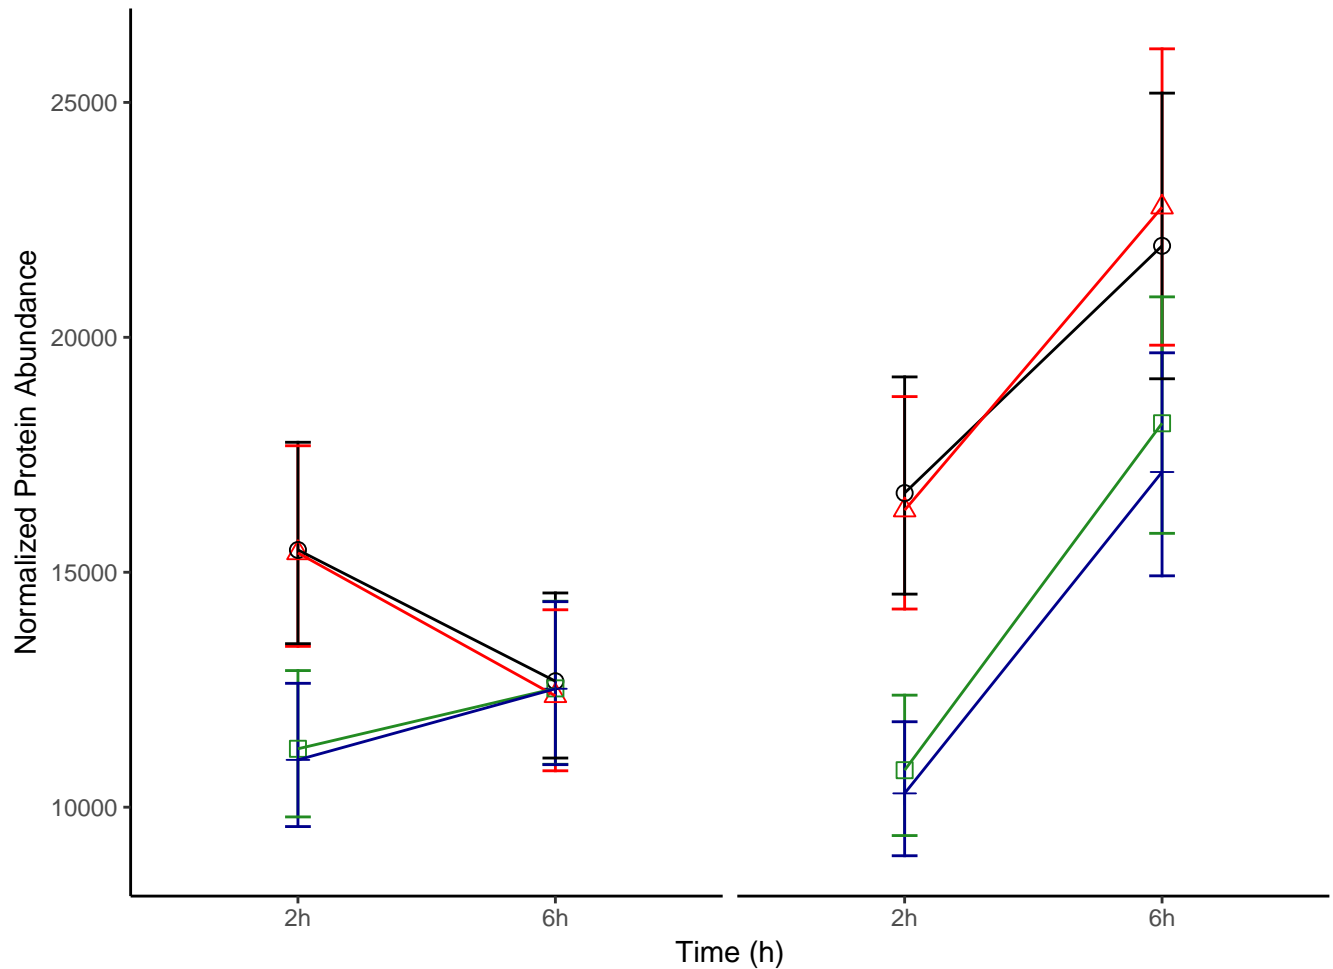

- SA564
- △ SA564- $\Delta$ hptRS
- SA564- $\Delta$ ccpA
- + SA564- $\Delta$ hptRS/ccpA

# PHNC\_STAAM

TSB

TSB-dex S-258

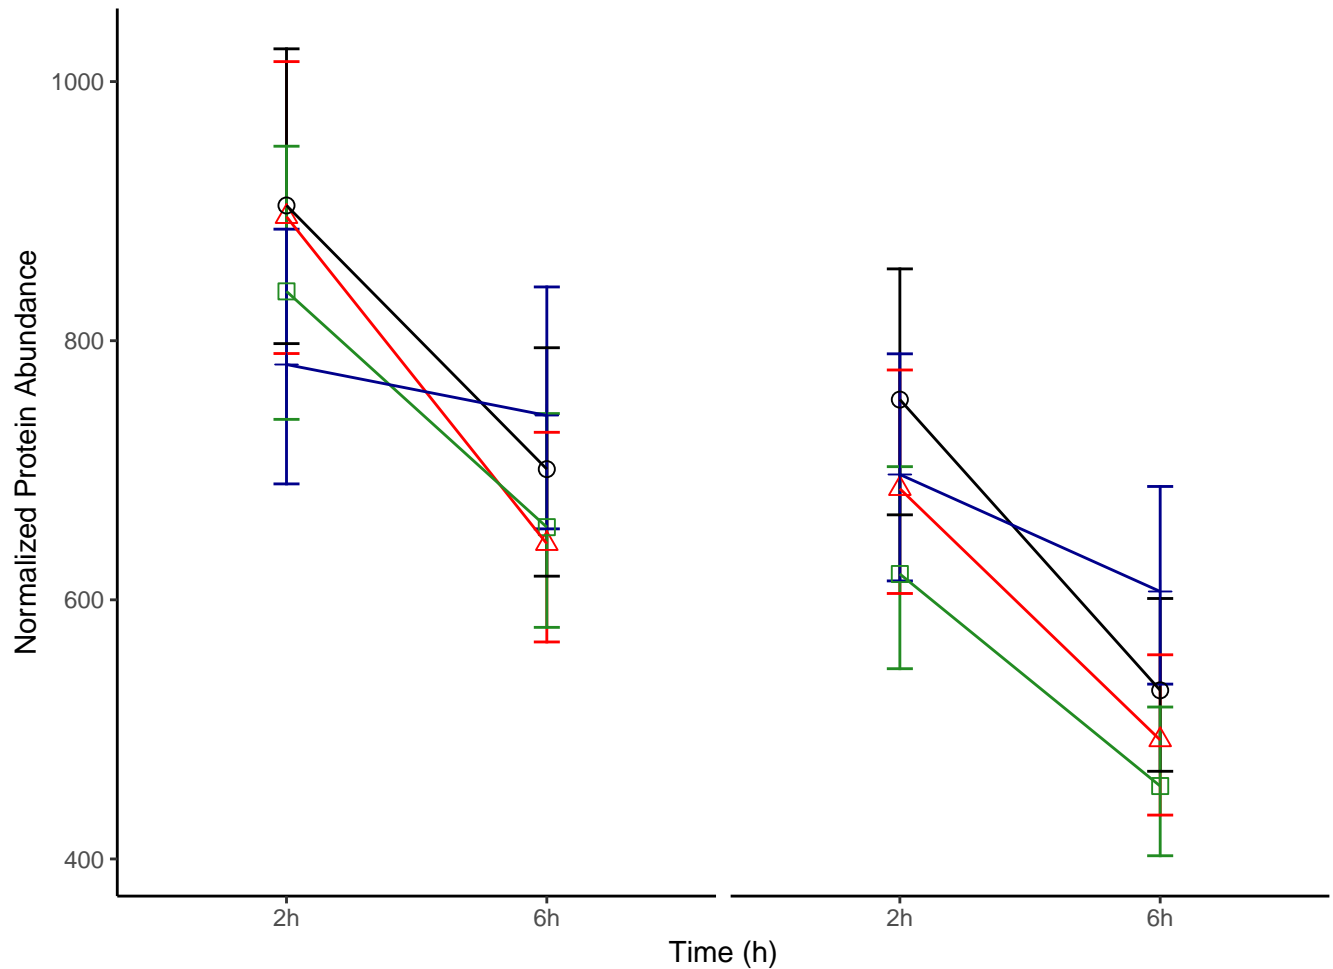

- SA564
- △ SA564- $\Delta$ *hptRS*
- SA564- $\Delta$ *ccpA*
- + SA564- $\Delta$ *hptRS/ccpA*

# PLSX\_STAAM

TSB

TSB-dex S-259

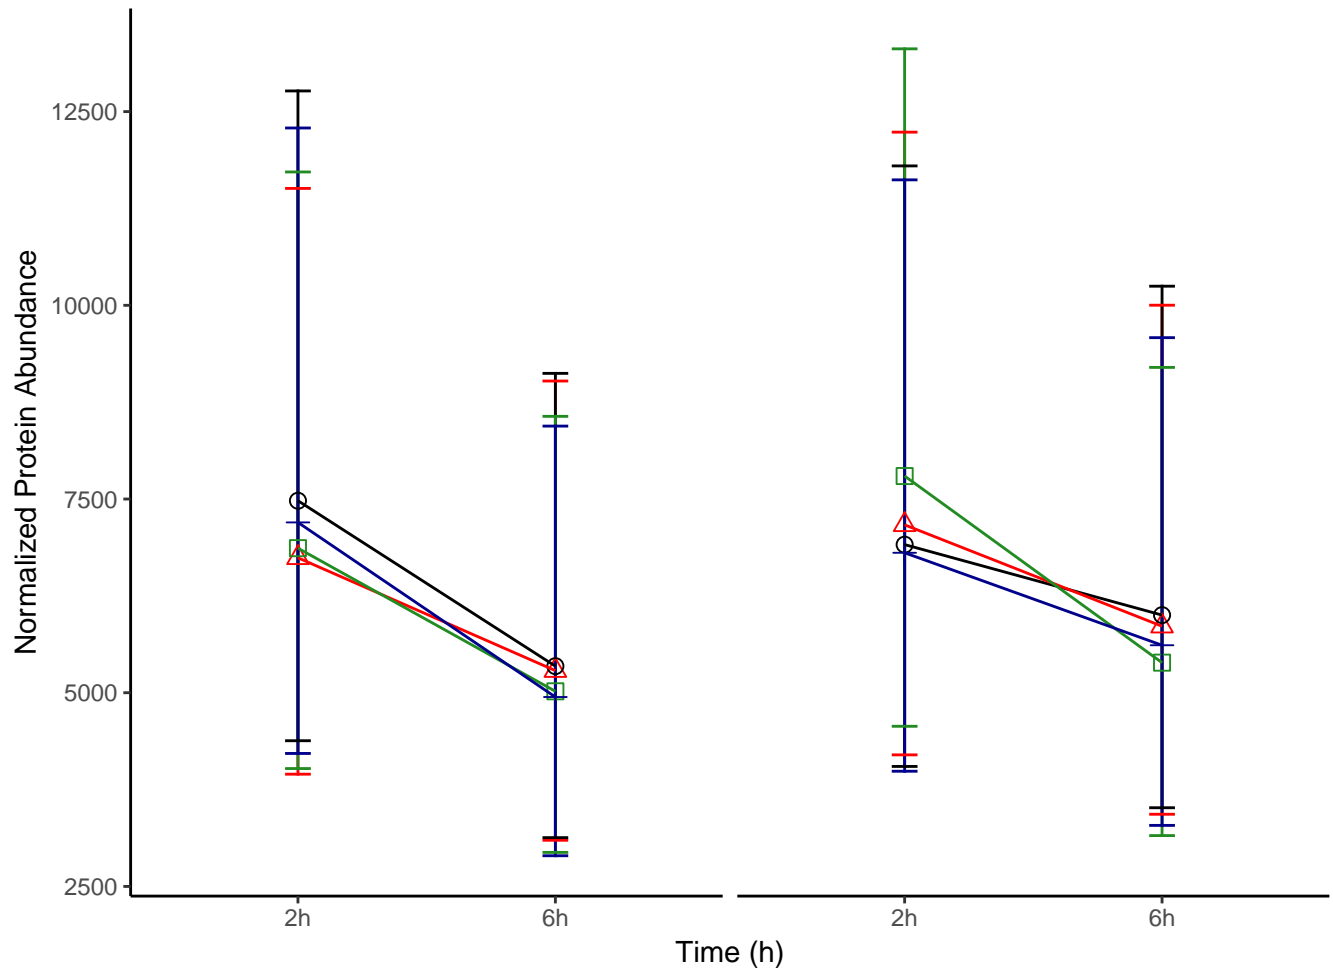

- SA564
- △ SA564-ΔhptRS
- SA564-ΔccpA
- + SA564-ΔhptRS/ccpA

# PNP\_STAAM

TSB

TSB-dex S-260

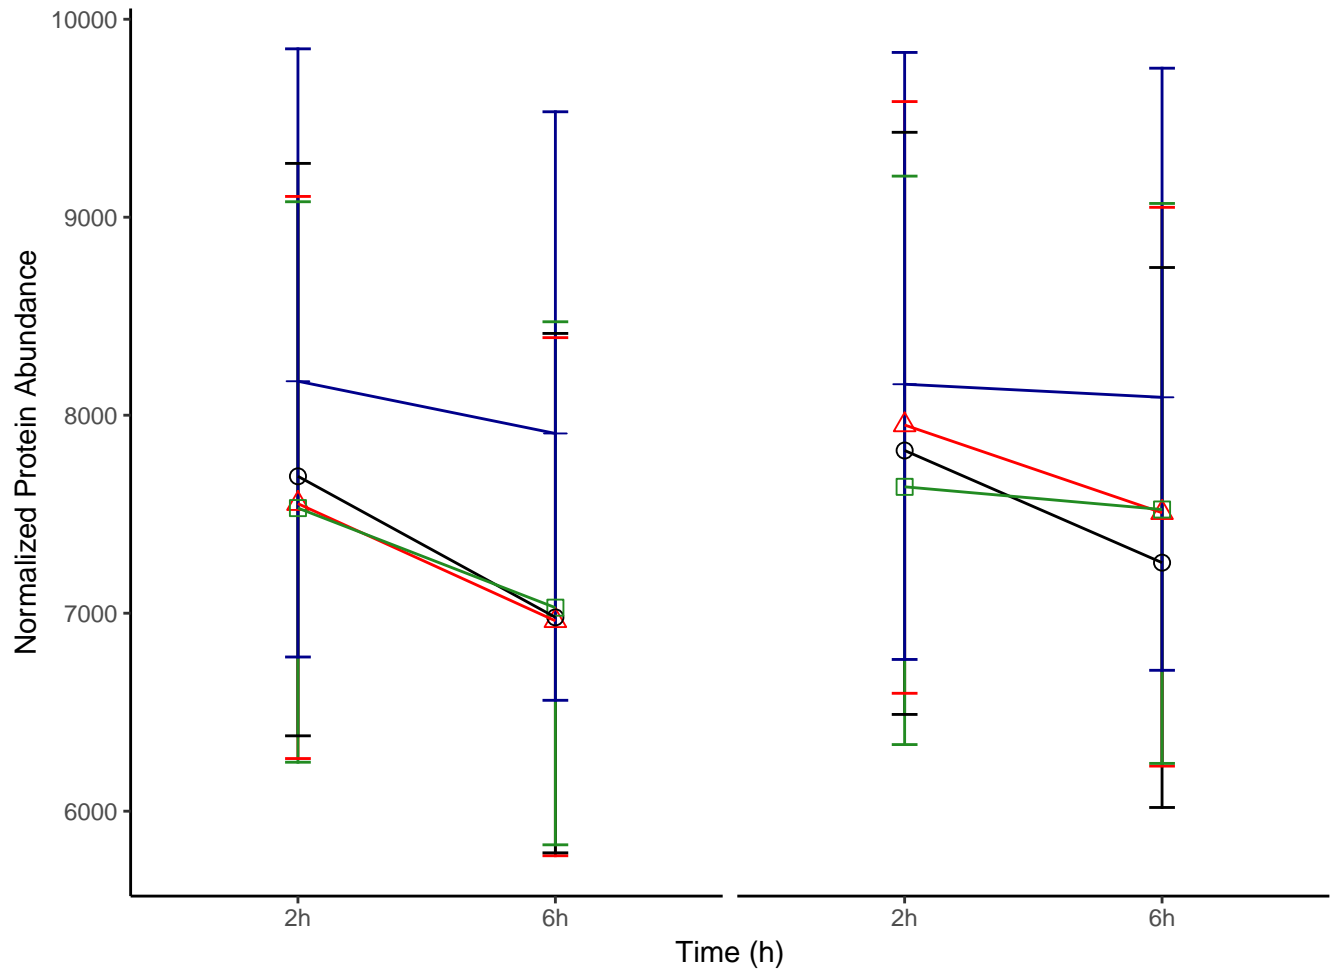

- SA564
- △ SA564- $\Delta$ hptRS
- SA564- $\Delta$ ccpA
- + SA564- $\Delta$ hptRS/ccpA

# PPAC\_STAAM

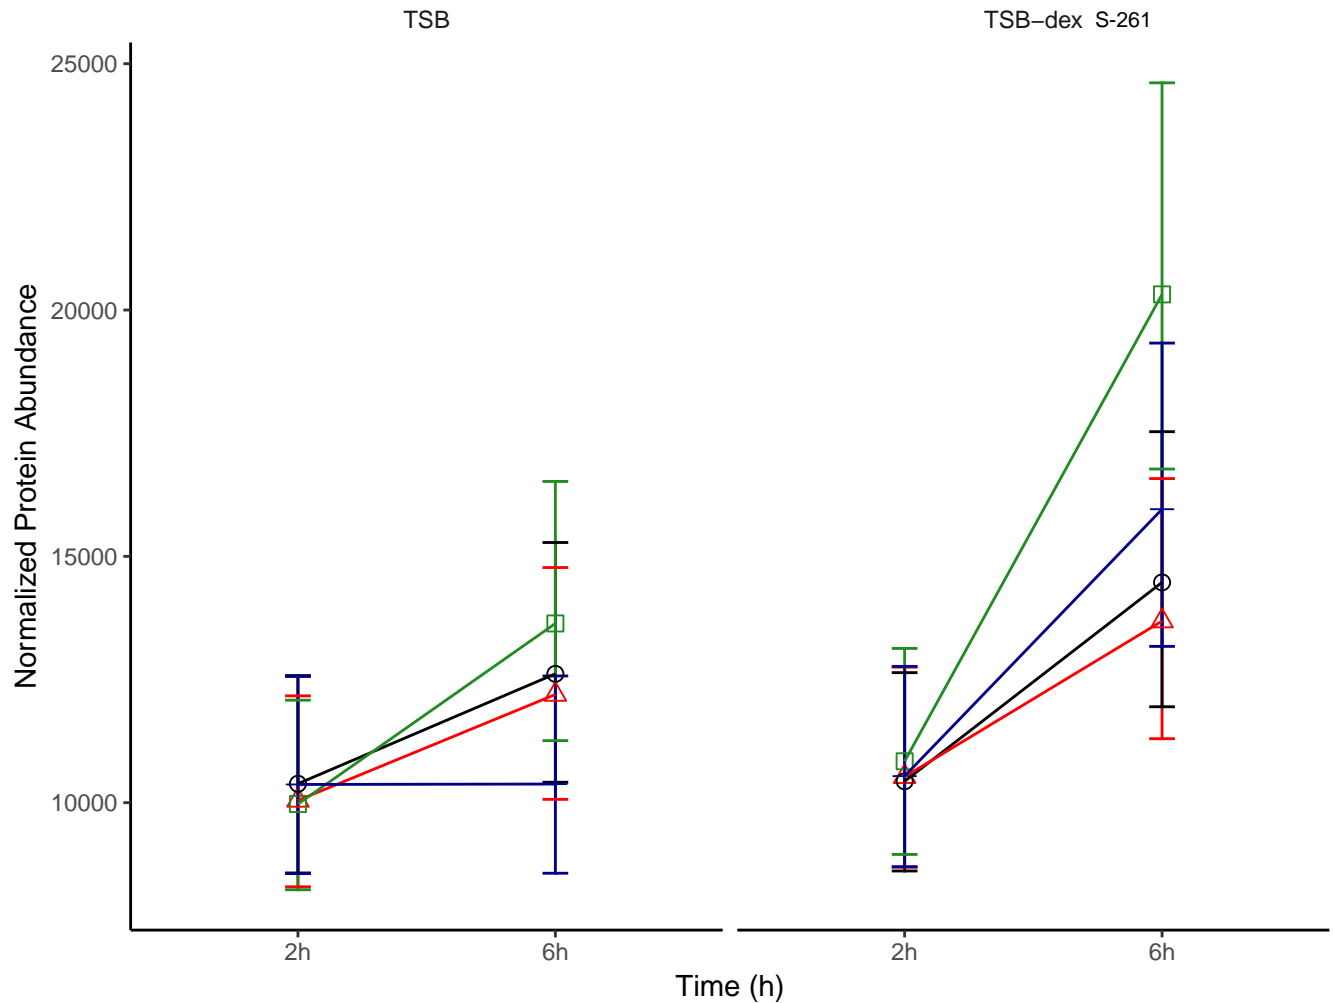

- SA564
- △ SA564- $\Delta$ hptRS
- SA564- $\Delta$ ccpA
- + SA564- $\Delta$ hptRS/ccpA

# PPAT\_STAAM

TSB

TSB-dex S-262

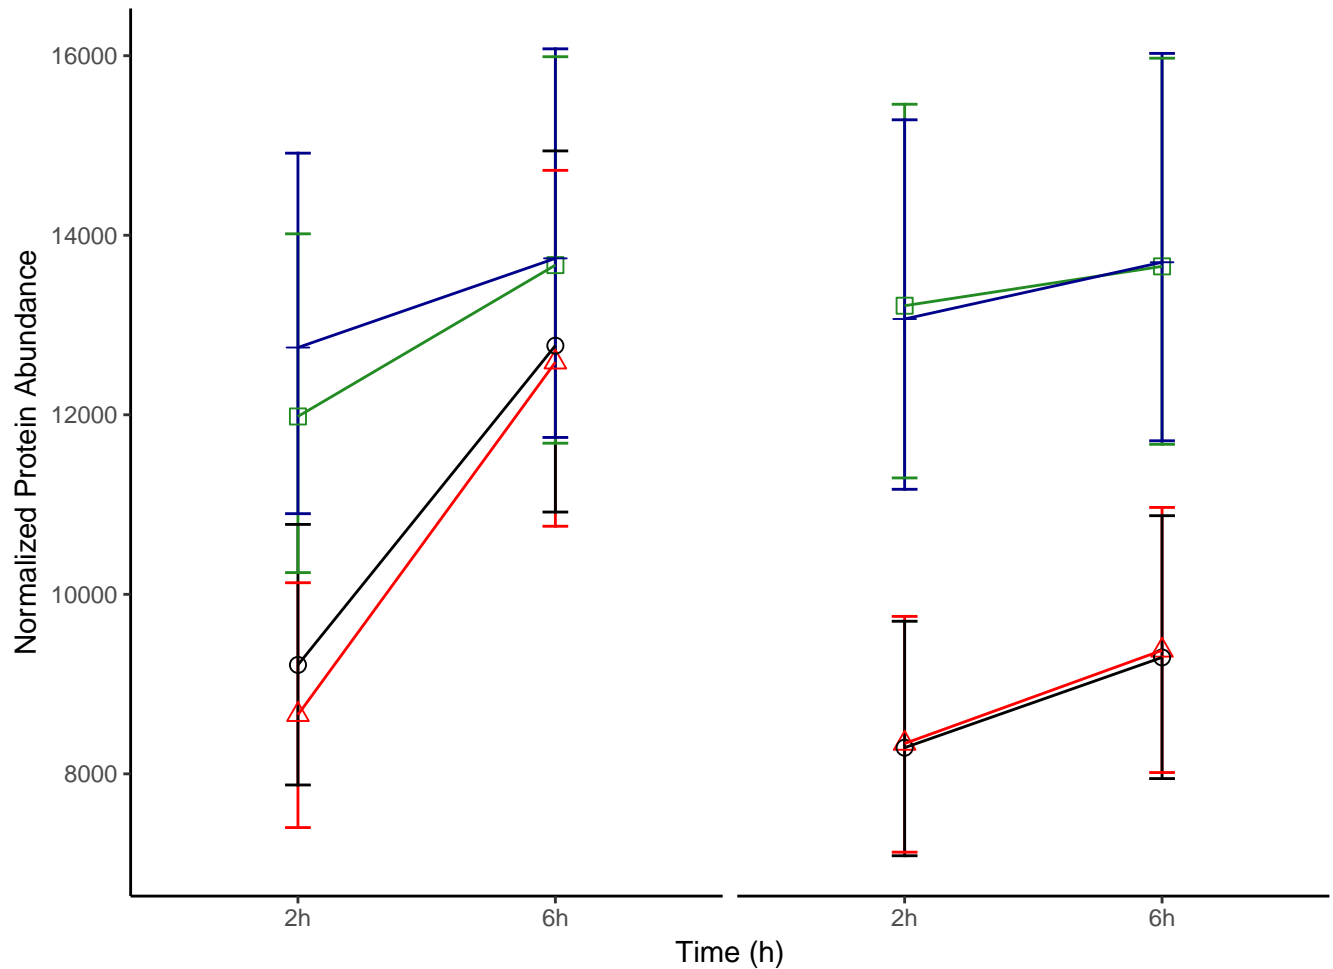

- SA564
- △ SA564- $\Delta$ hptRS
- SA564- $\Delta$ ccpA
- + SA564- $\Delta$ hptRS/ccpA

# PPI1\_STAAM

TSB

TSB-dex S-263

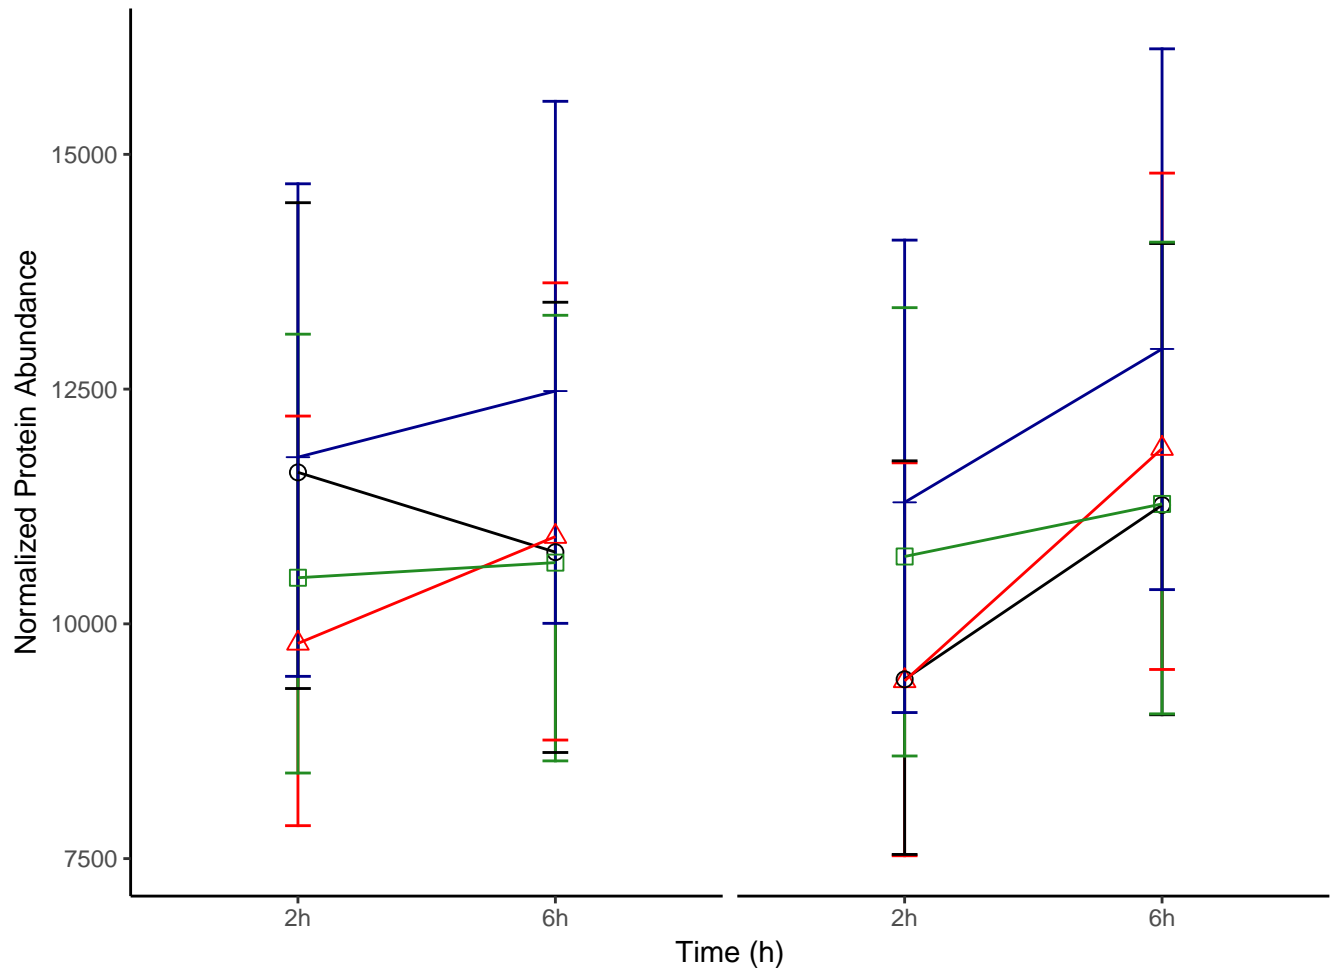

- SA564
- △ SA564-ΔhptRS
- SA564-ΔccpA
- + SA564-ΔhptRS/ccpA

# PRSA\_STAAM

TSB

TSB-dex S-264

Normalized Protein Abundance

20000

15000

10000

2h

6h

2h

6h

Time (h)

- SA564
- △ SA564- $\Delta hptRS$
- SA564- $\Delta ccpA$
- + SA564- $\Delta hptRS/ccpA$

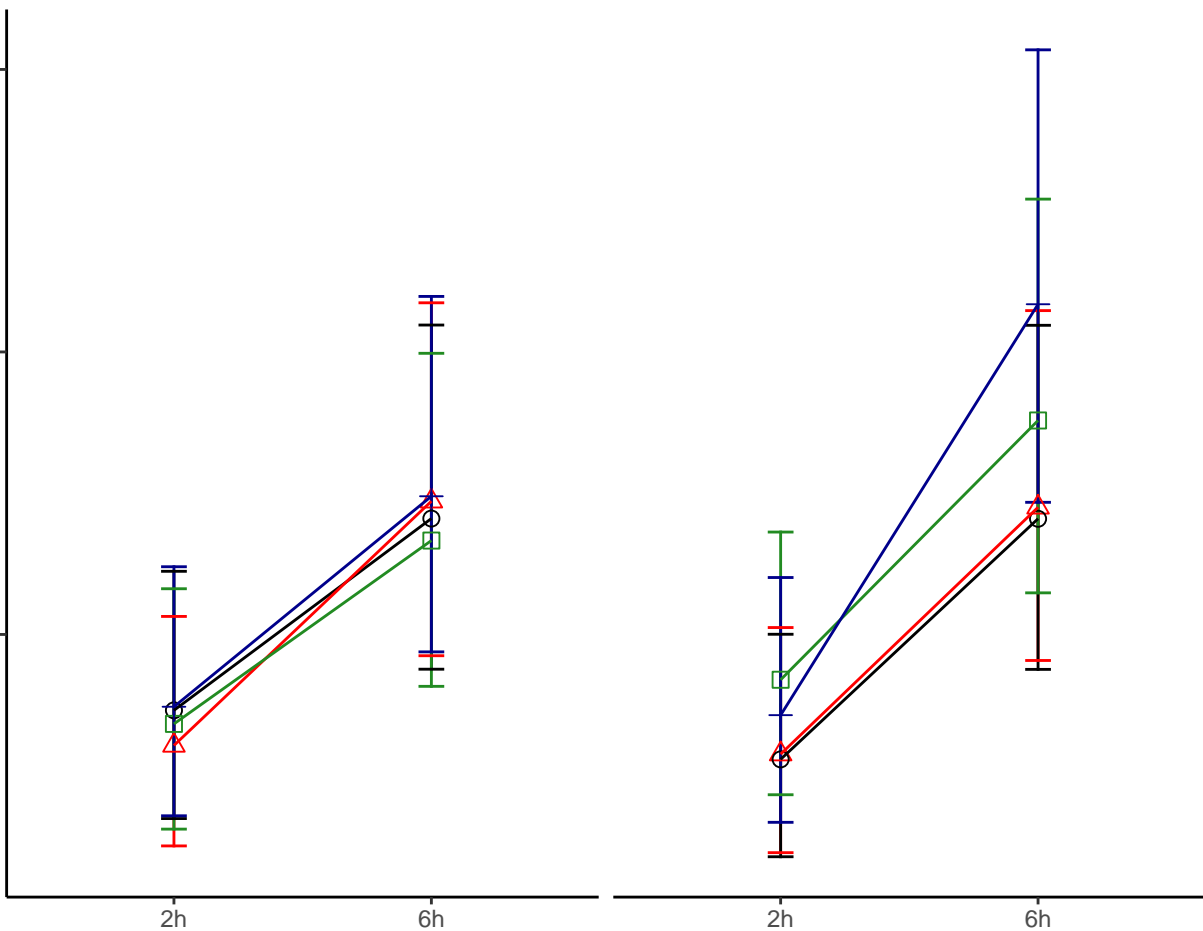



# PSTB\_STAAM

TSB

TSB-dex S-265

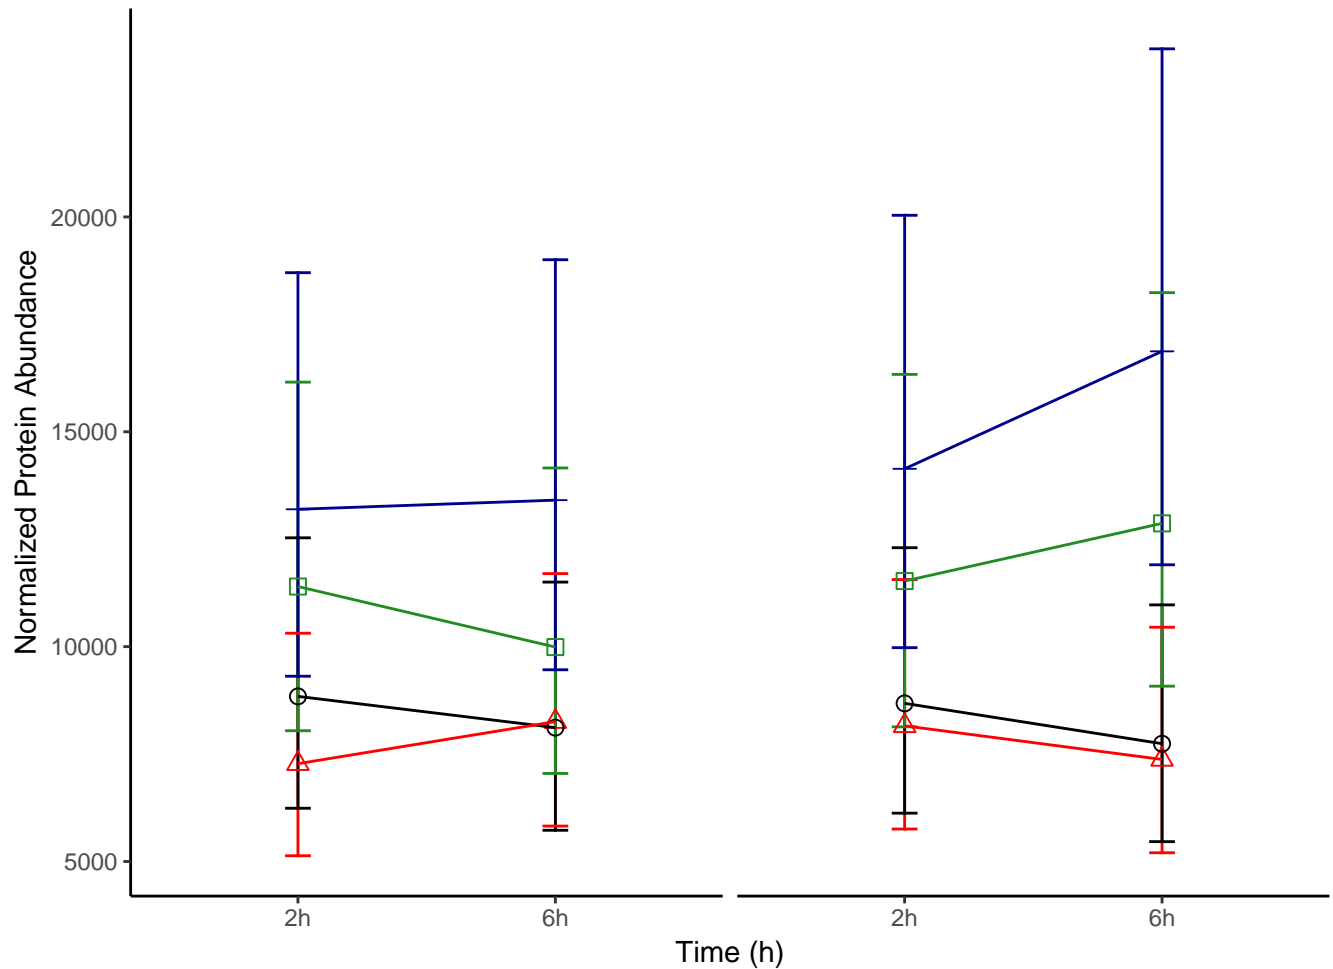

- SA564
- △ SA564- $\Delta hptRS$
- SA564- $\Delta ccpA$
- + SA564- $\Delta hptRS/ccpA$

# PSTS\_STAAM

TSB

TSB-dex S-266

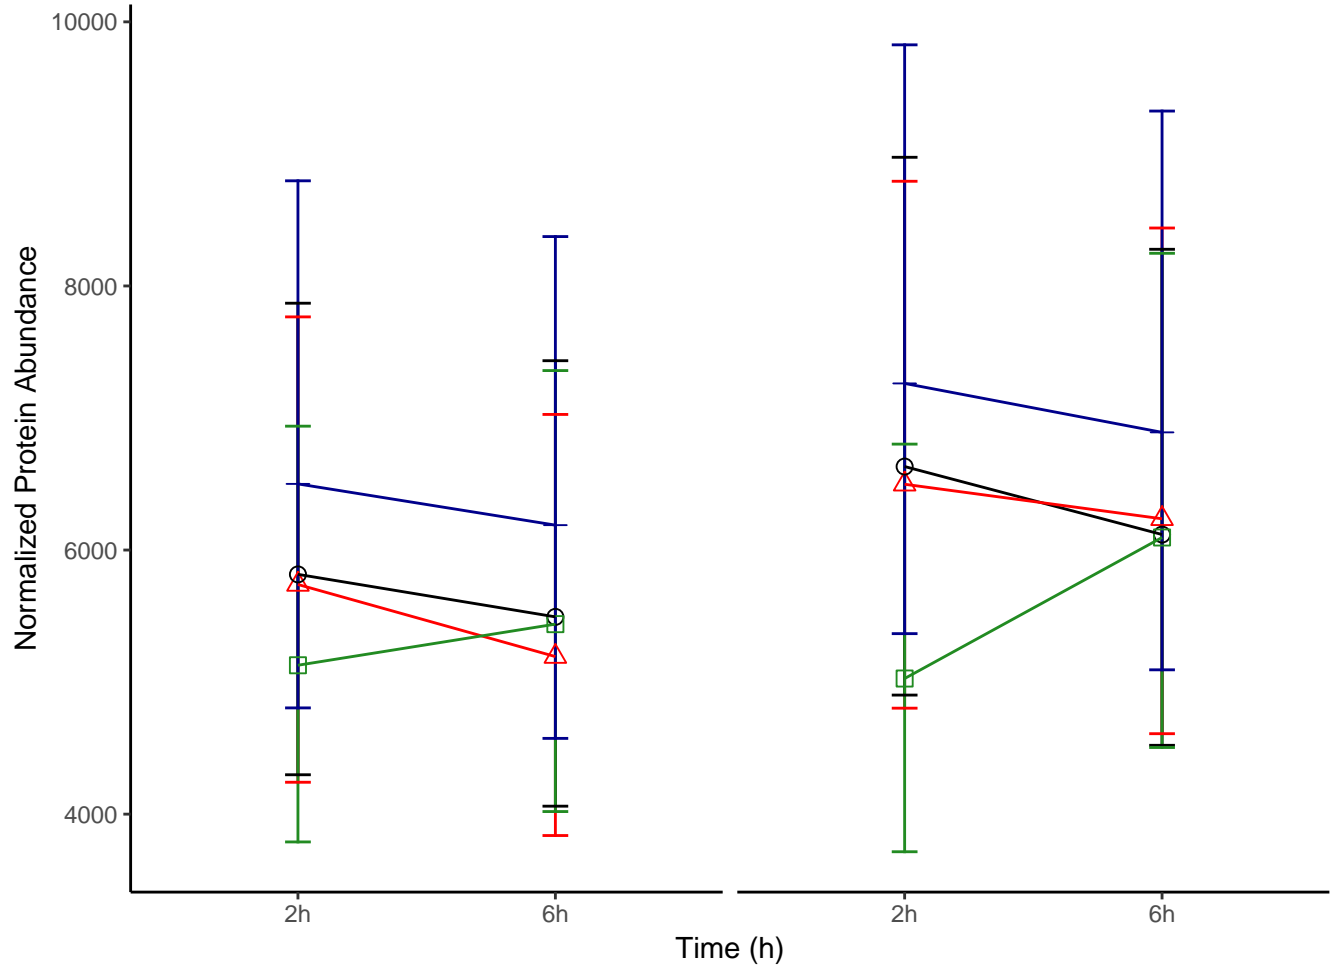

- SA564
- △ SA564-ΔhptRS
- SA564-ΔccpA
- + SA564-ΔhptRS/ccpA

# PT1\_STAAM

TSB

TSB-dex S-267

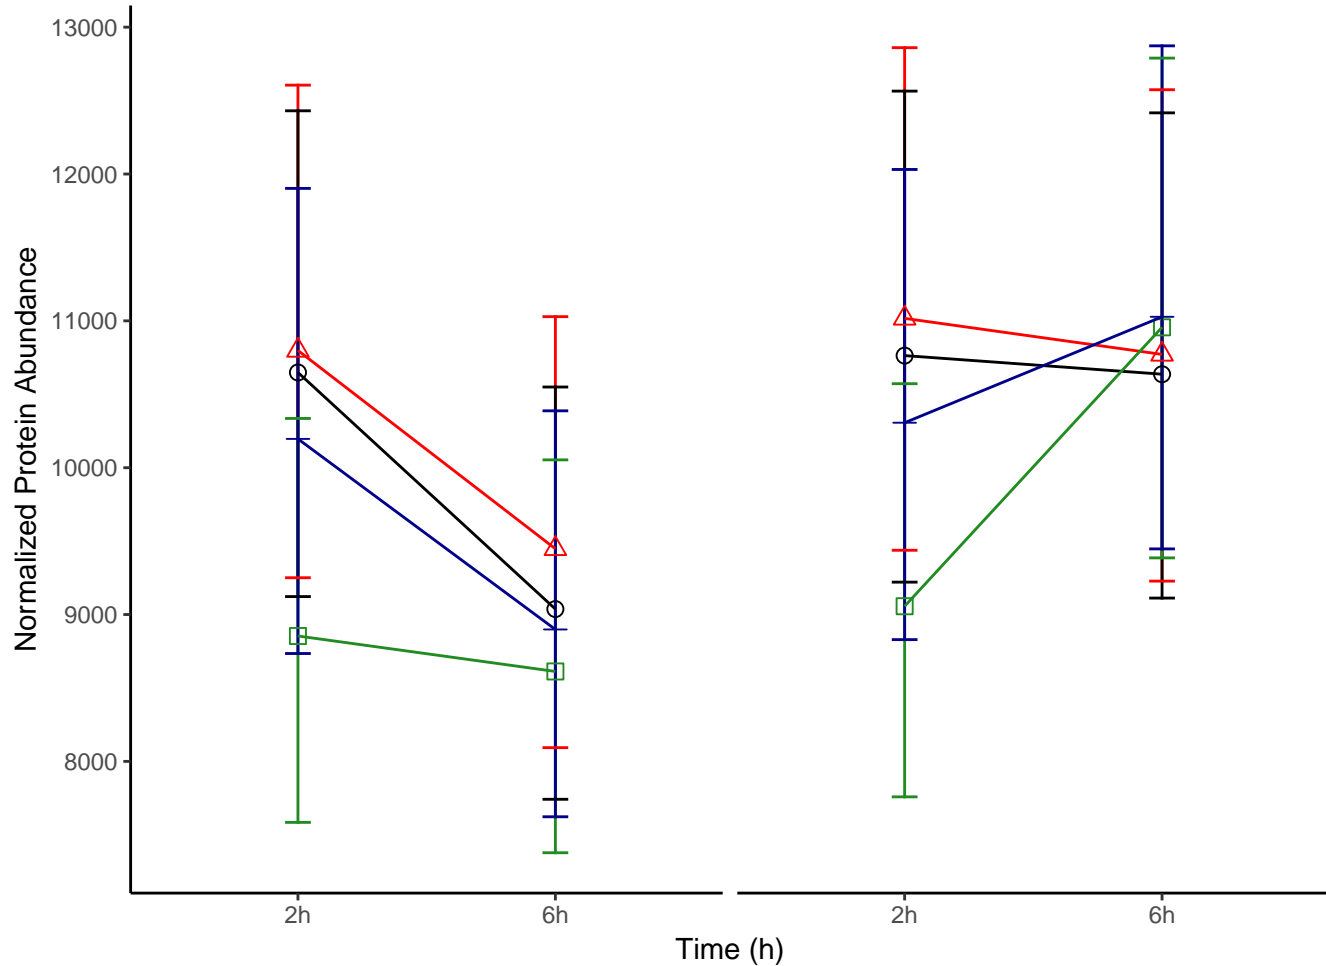

- SA564
- △ SA564- $\Delta$ *hptRS*
- SA564- $\Delta$ *ccpA*
- + SA564- $\Delta$ *hptRS/ccpA*

# PTAS\_STAAM

TSB

TSB-dex S-268

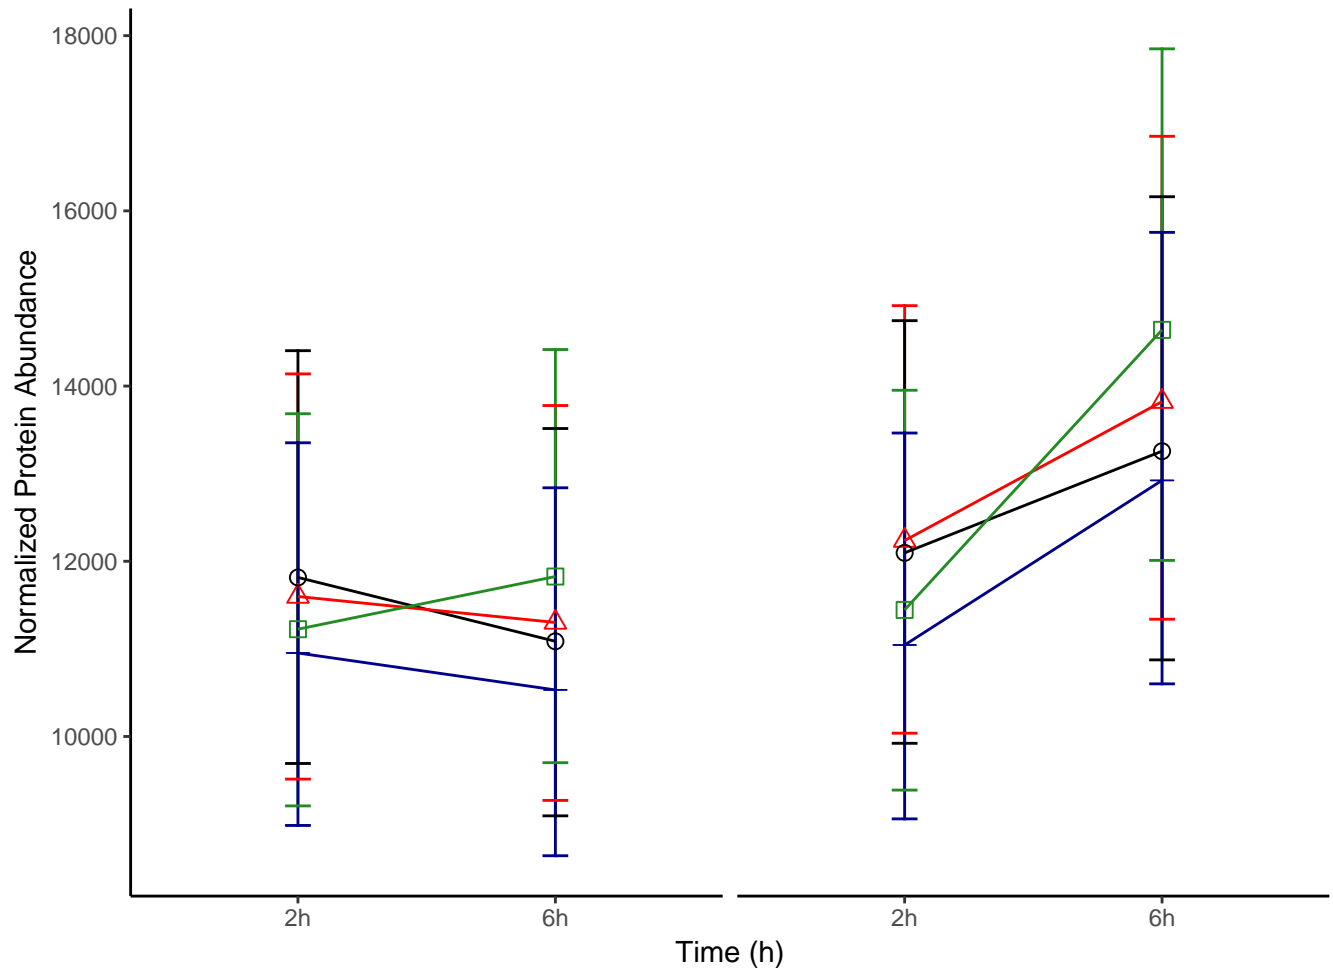

- SA564
- △ SA564-ΔhptRS
- SA564-ΔccpA
- + SA564-ΔhptRS/ccpA

# PTG3C\_STAAM

TSB

TSB-dex S-269

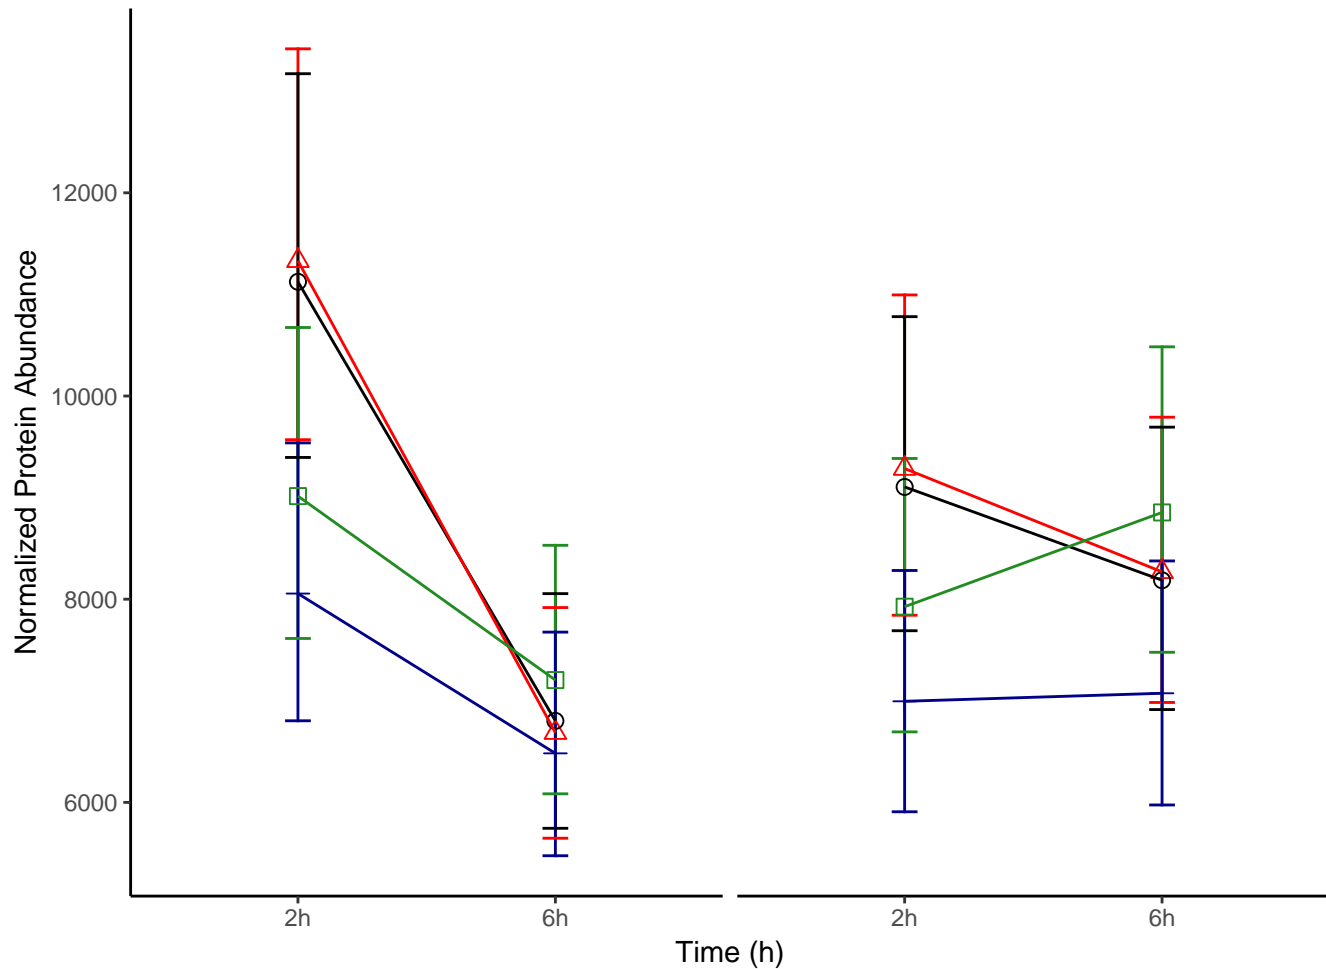

- SA564
- △ SA564- $\Delta$ hptRS
- SA564- $\Delta$ ccpA
- + SA564- $\Delta$ hptRS/ccpA

# PTGA\_STAAM

TSB

TSB-dex S-270

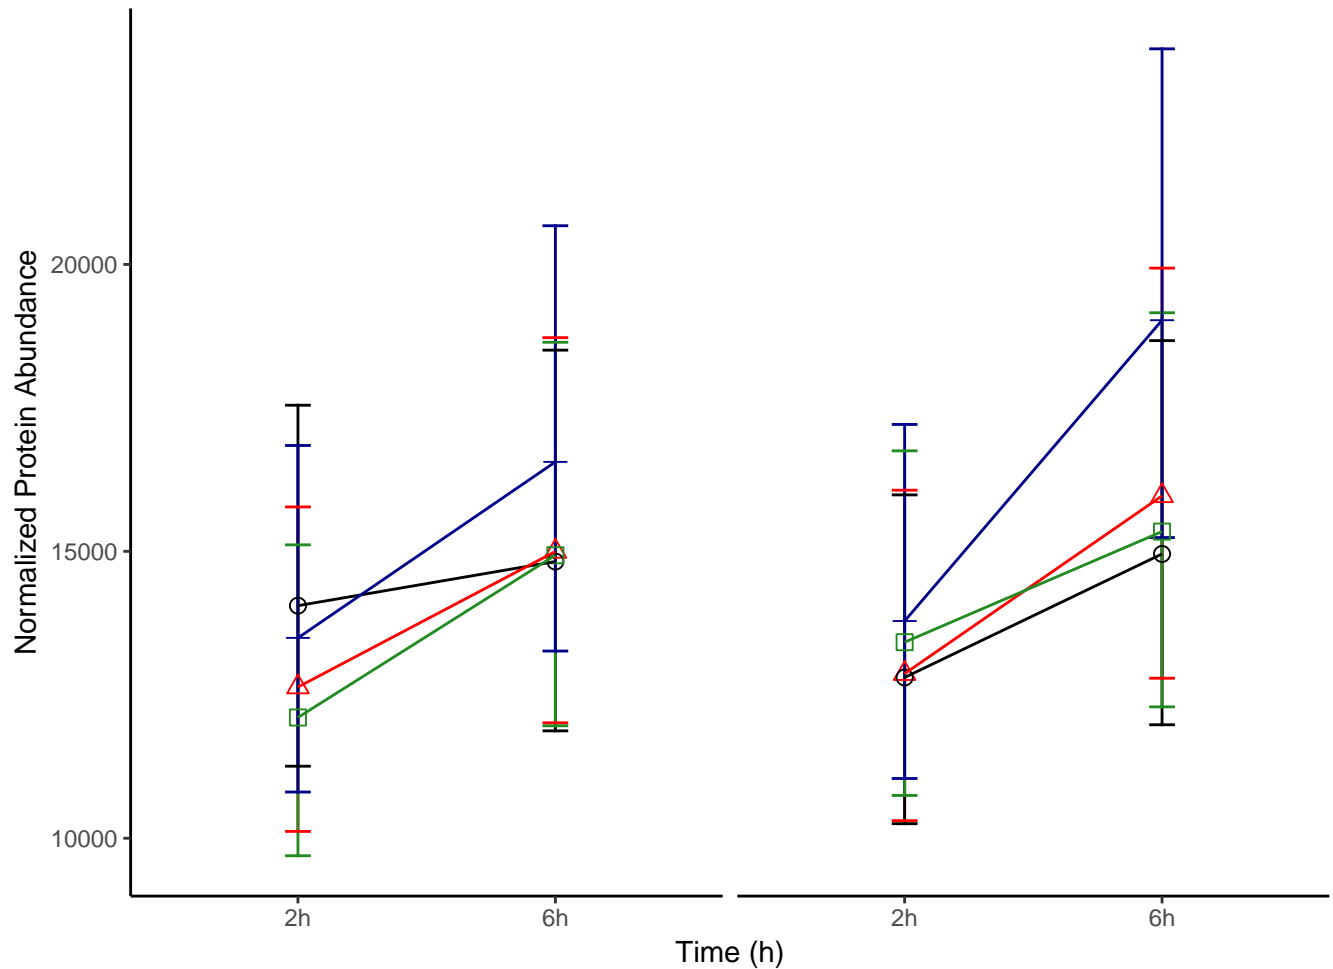

- SA564
- △ SA564- $\Delta$ hptRS
- SA564- $\Delta$ ccpA
- + SA564- $\Delta$ hptRS/ccpA

# PTH\_STAAM

TSB

TSB-dex S-271

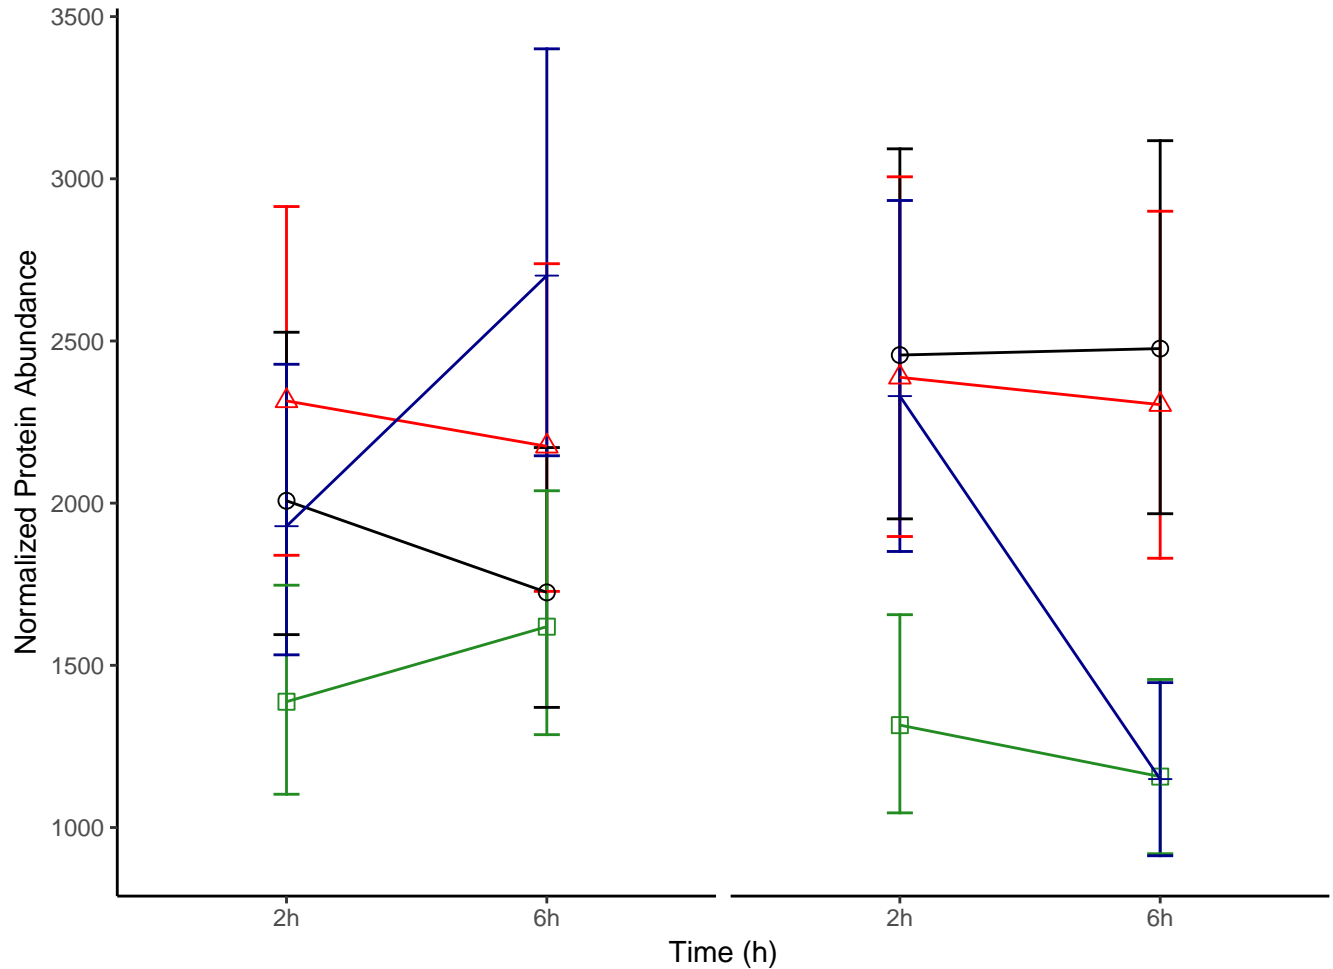

- SA564
- △ SA564-ΔhptRS
- SA564-ΔccpA
- + SA564-ΔhptRS/ccpA

# PTHP\_STAAM

TSB

TSB-dex S-272

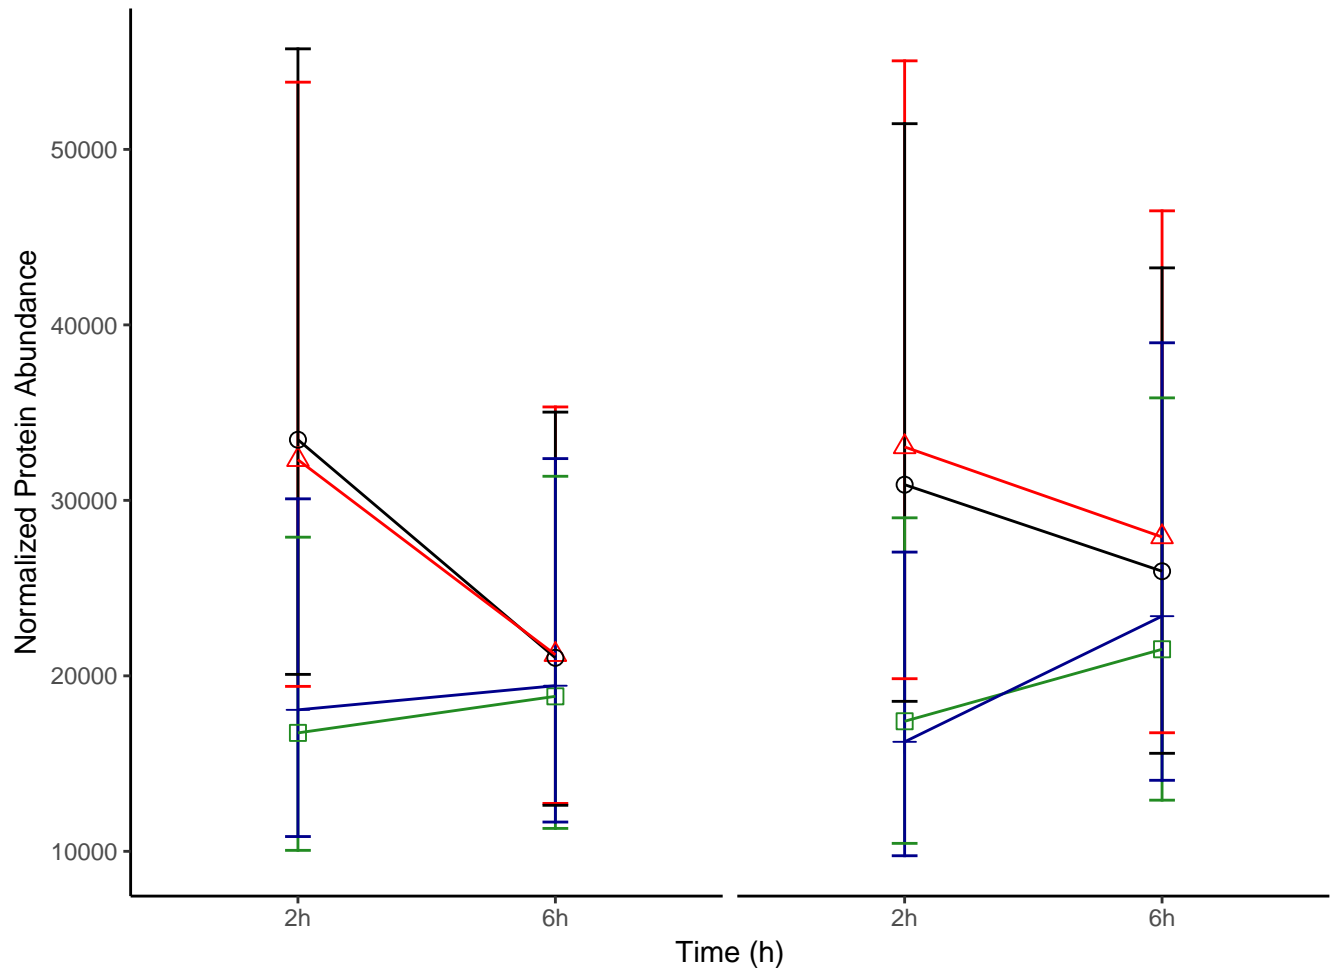

- SA564
- △ SA564-ΔhptRS
- SA564-ΔccpA
- + SA564-ΔhptRS/ccpA



# PTMA\_STAAM

TSB

TSB-dex S-273

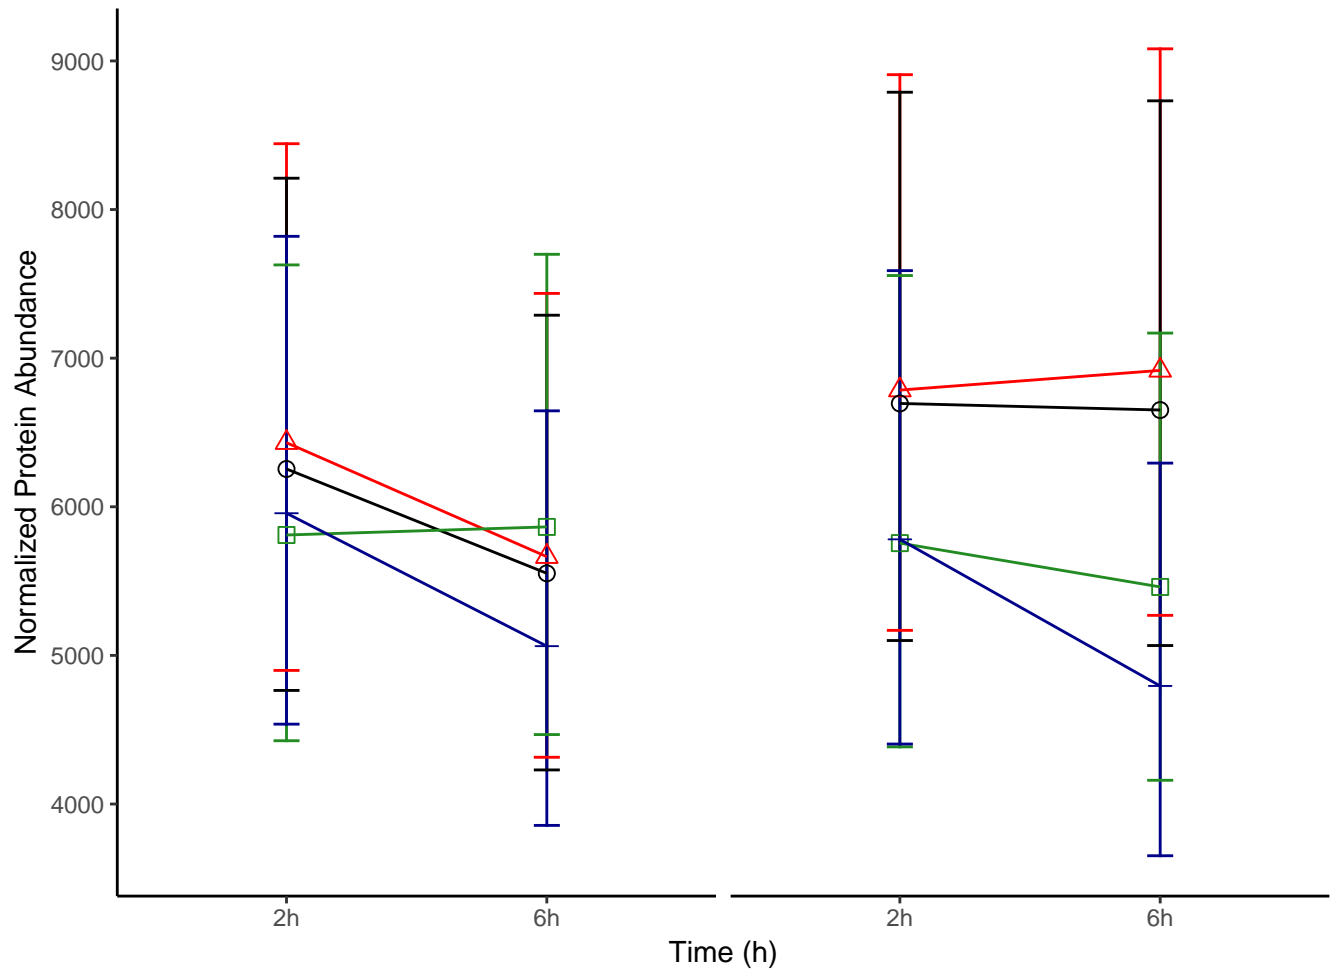

- SA564
- △ SA564- $\Delta$ *hptRS*
- SA564- $\Delta$ *ccpA*
- + SA564- $\Delta$ *hptRS/ccpA*

# PUR1\_STAAM

TSB

TSB-dex S-274

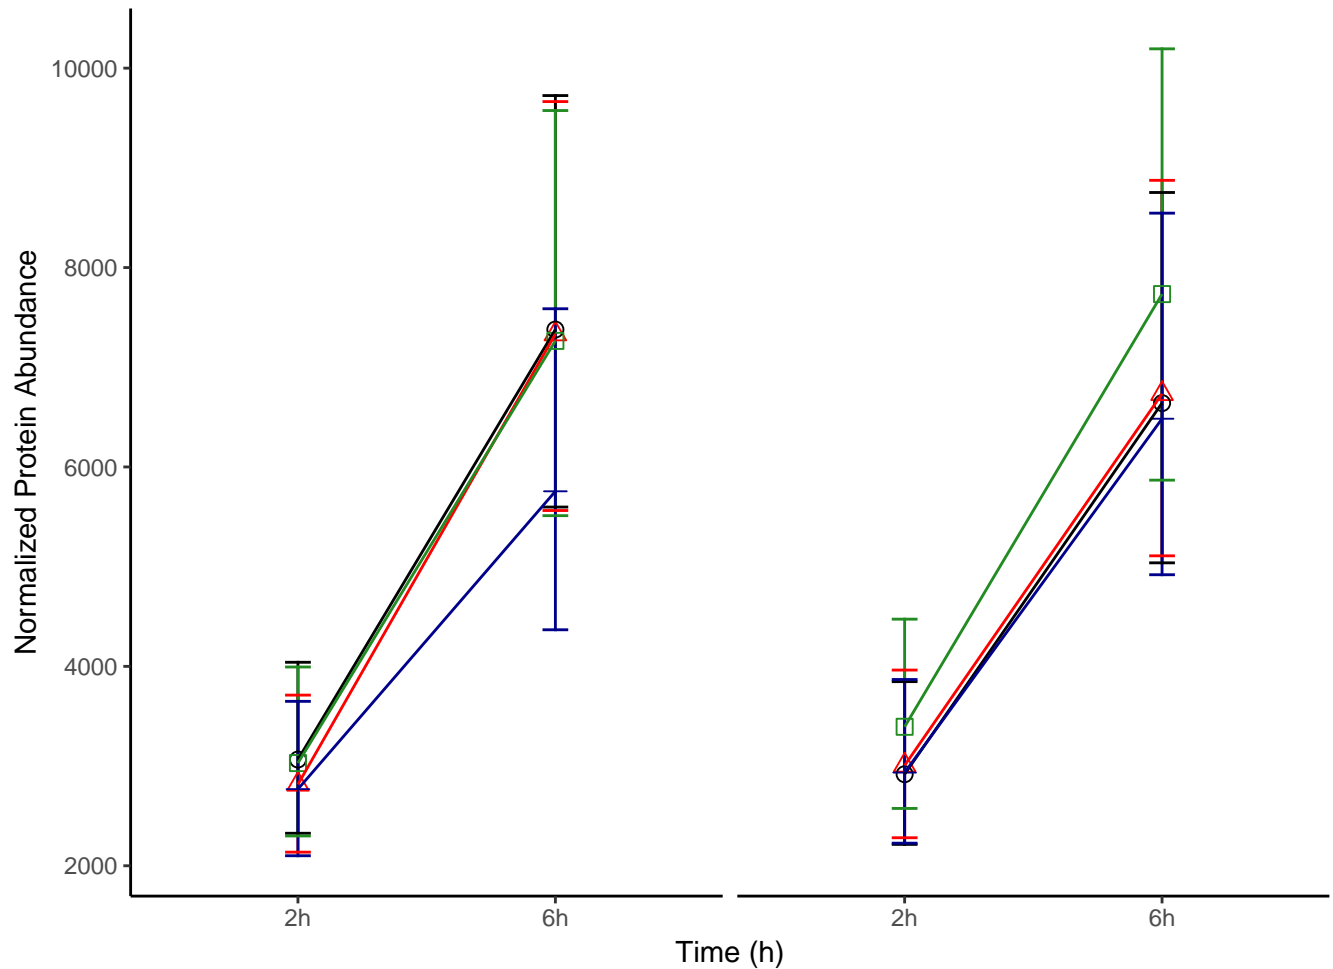

- SA564
- △ SA564- $\Delta$ hptRS
- SA564- $\Delta$ ccpA
- + SA564- $\Delta$ hptRS/ccpA

# PUR2\_STAAM

TSB

TSB-dex S-275

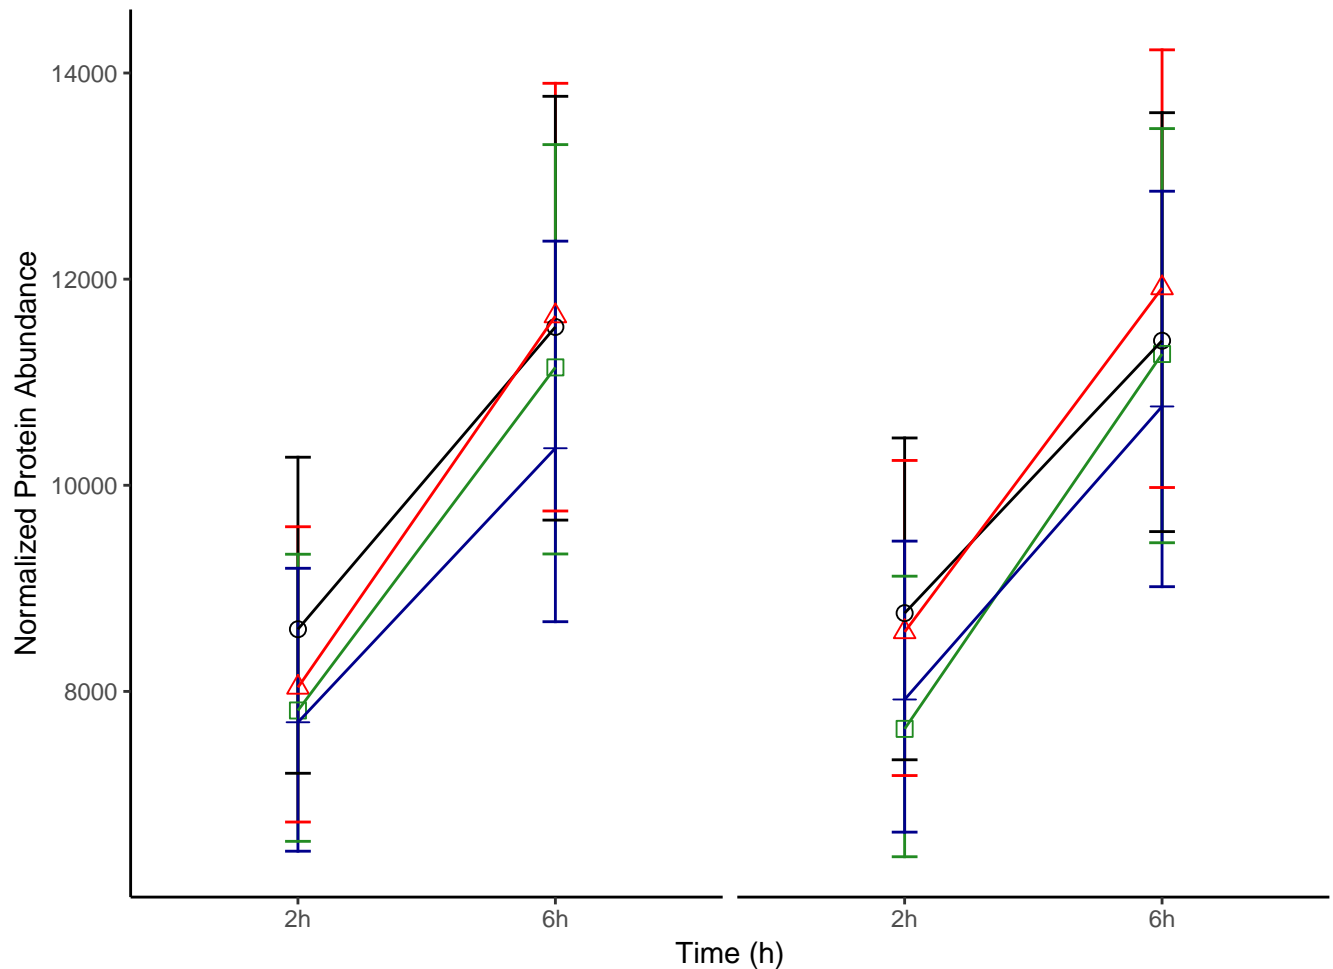

- SA564
- △ SA564-ΔhptRS
- SA564-ΔccpA
- + SA564-ΔhptRS/ccpA

# PUR3\_STAAM

TSB

TSB-dex S-276

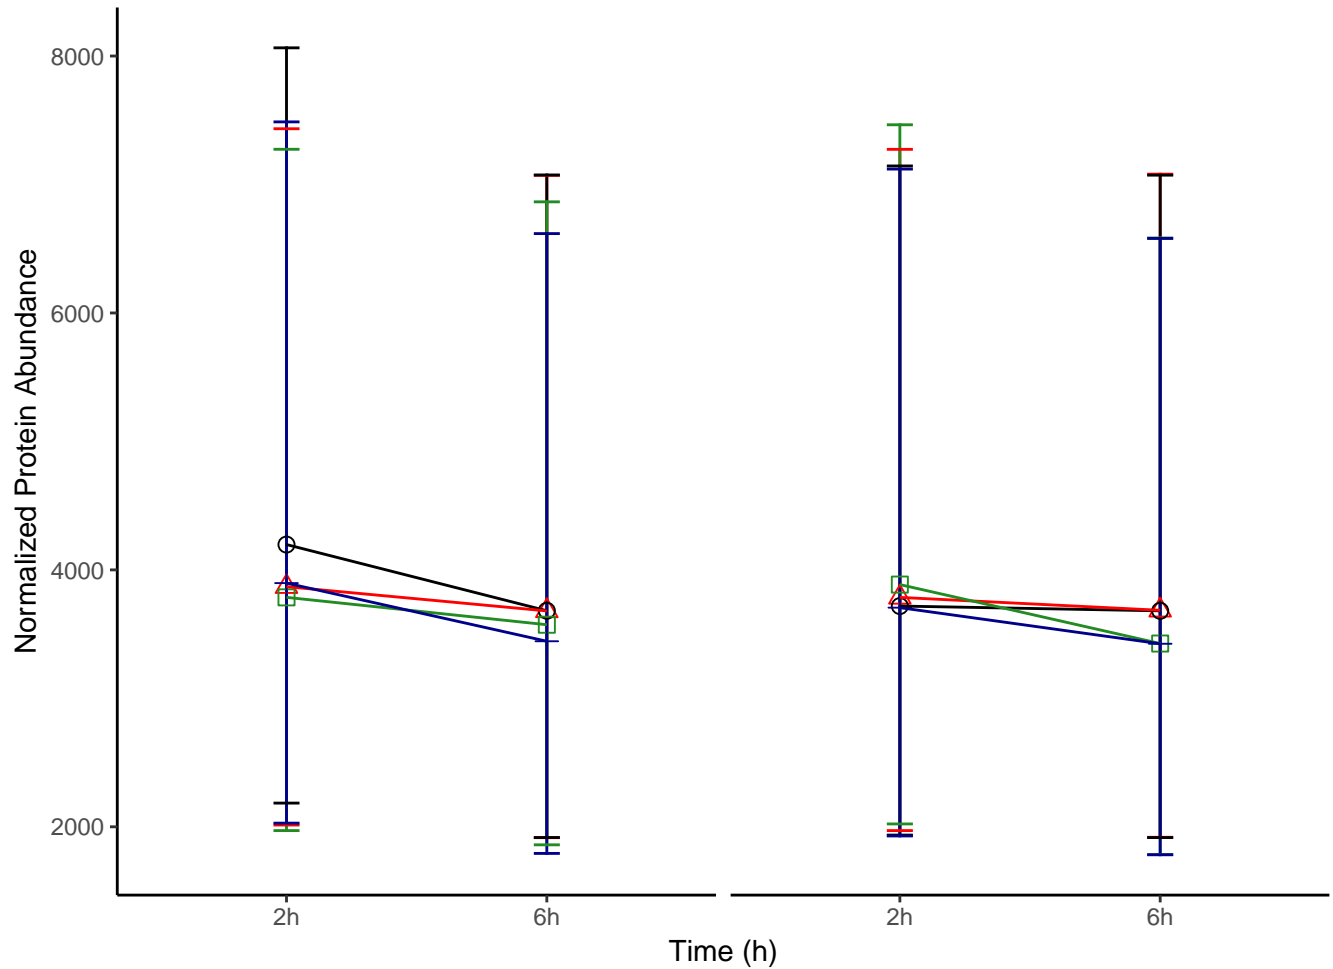

- SA564
- △ SA564- $\Delta$ *hptRS*
- SA564- $\Delta$ *ccpA*
- + SA564- $\Delta$ *hptRS/ccpA*

# PUR5\_STAAM

TSB

TSB-dex S-277

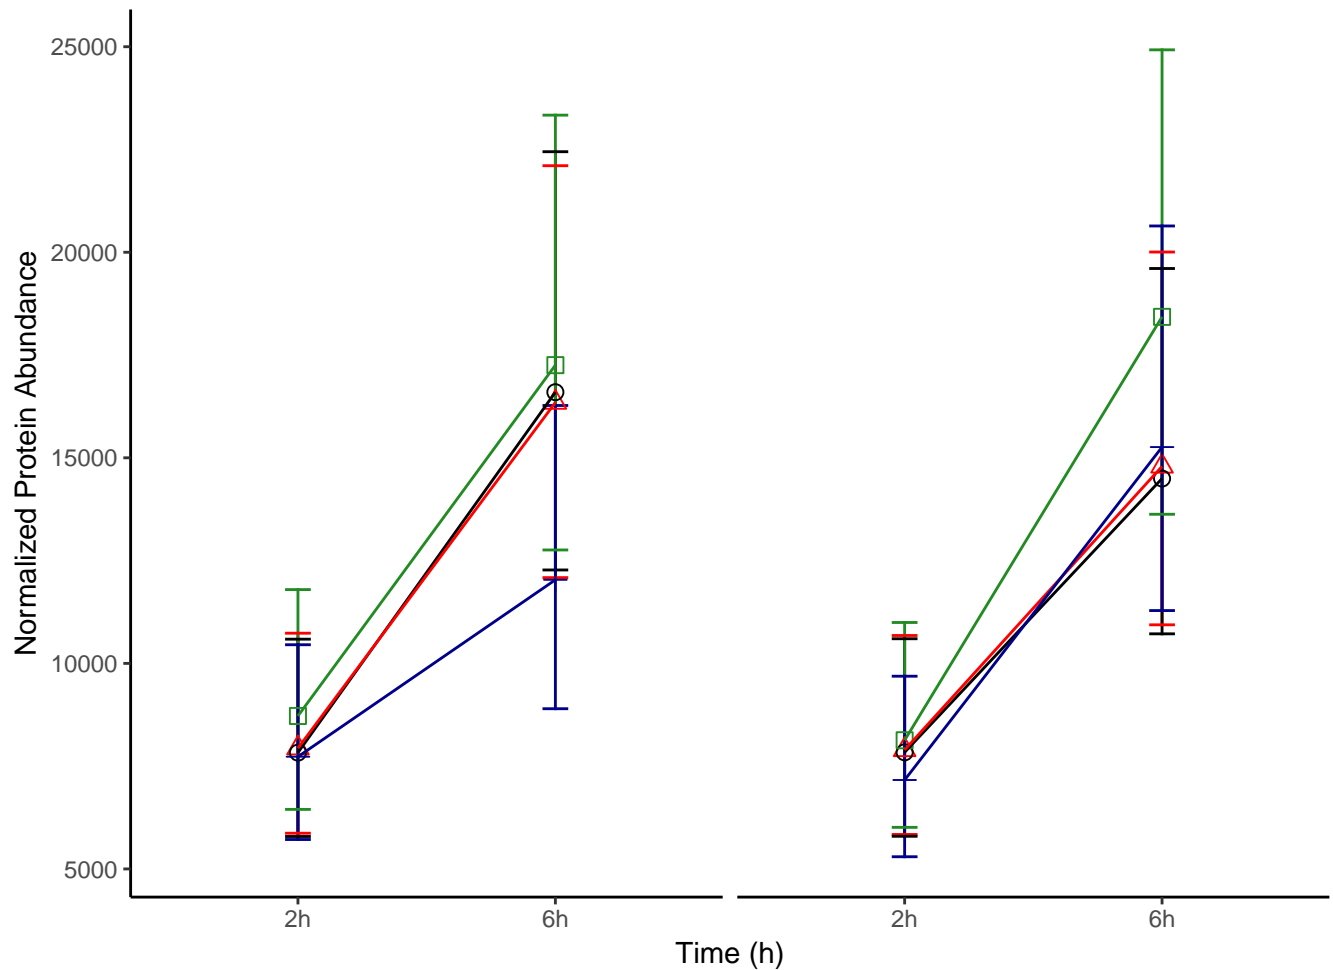

- SA564
- △ SA564-ΔhptRS
- SA564-ΔccpA
- + SA564-ΔhptRS/ccpA

# PUR7\_STAAM

TSB

TSB-dex S-278

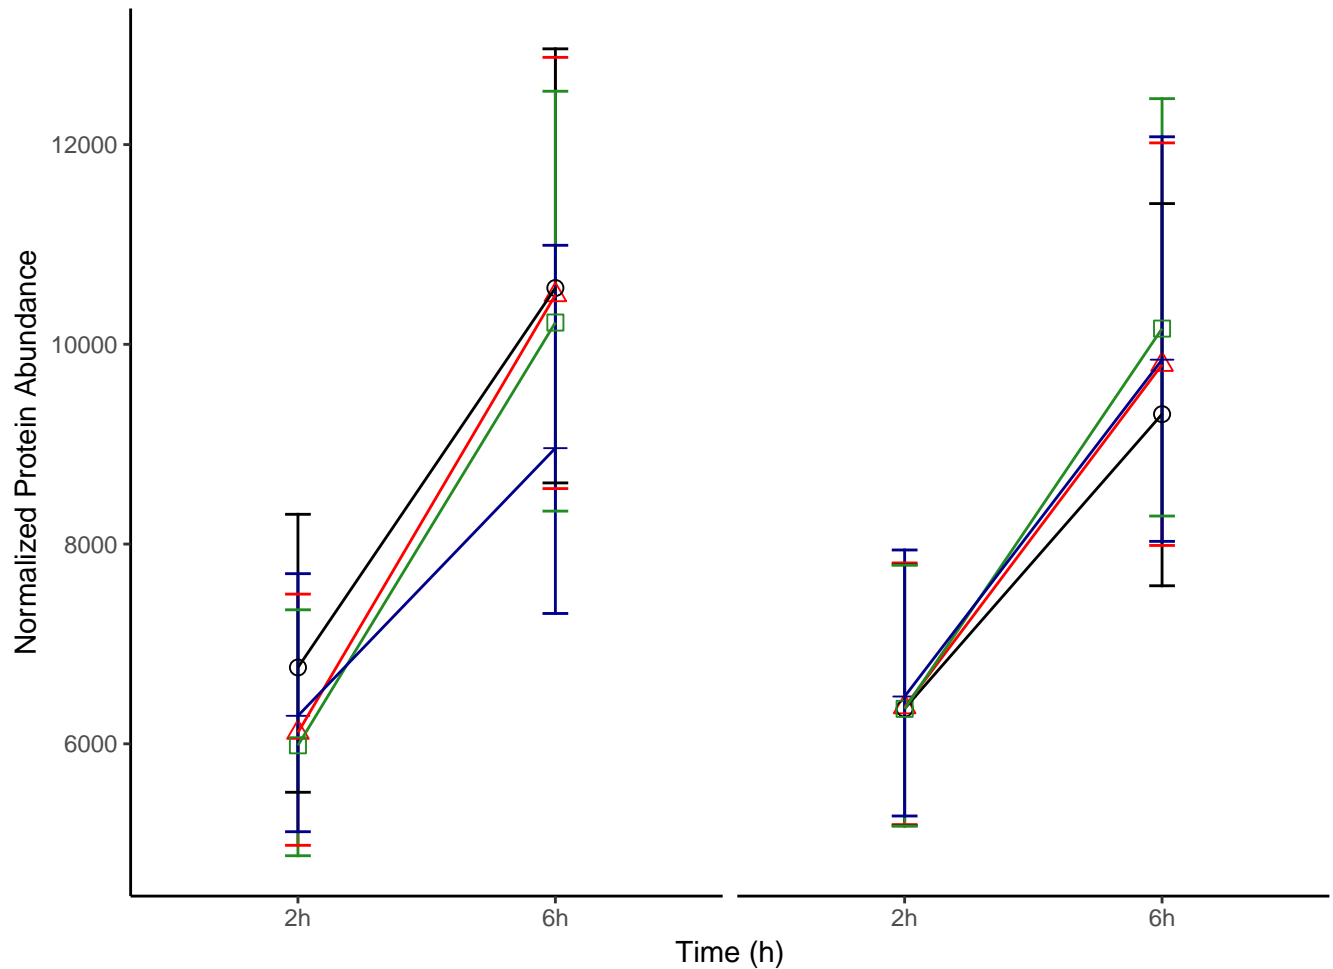

- SA564
- △ SA564- $\Delta$ *hptRS*
- SA564- $\Delta$ *ccpA*
- + SA564- $\Delta$ *hptRS/ccpA*

# PUR8\_STAAM

TSB

TSB-dex S-279

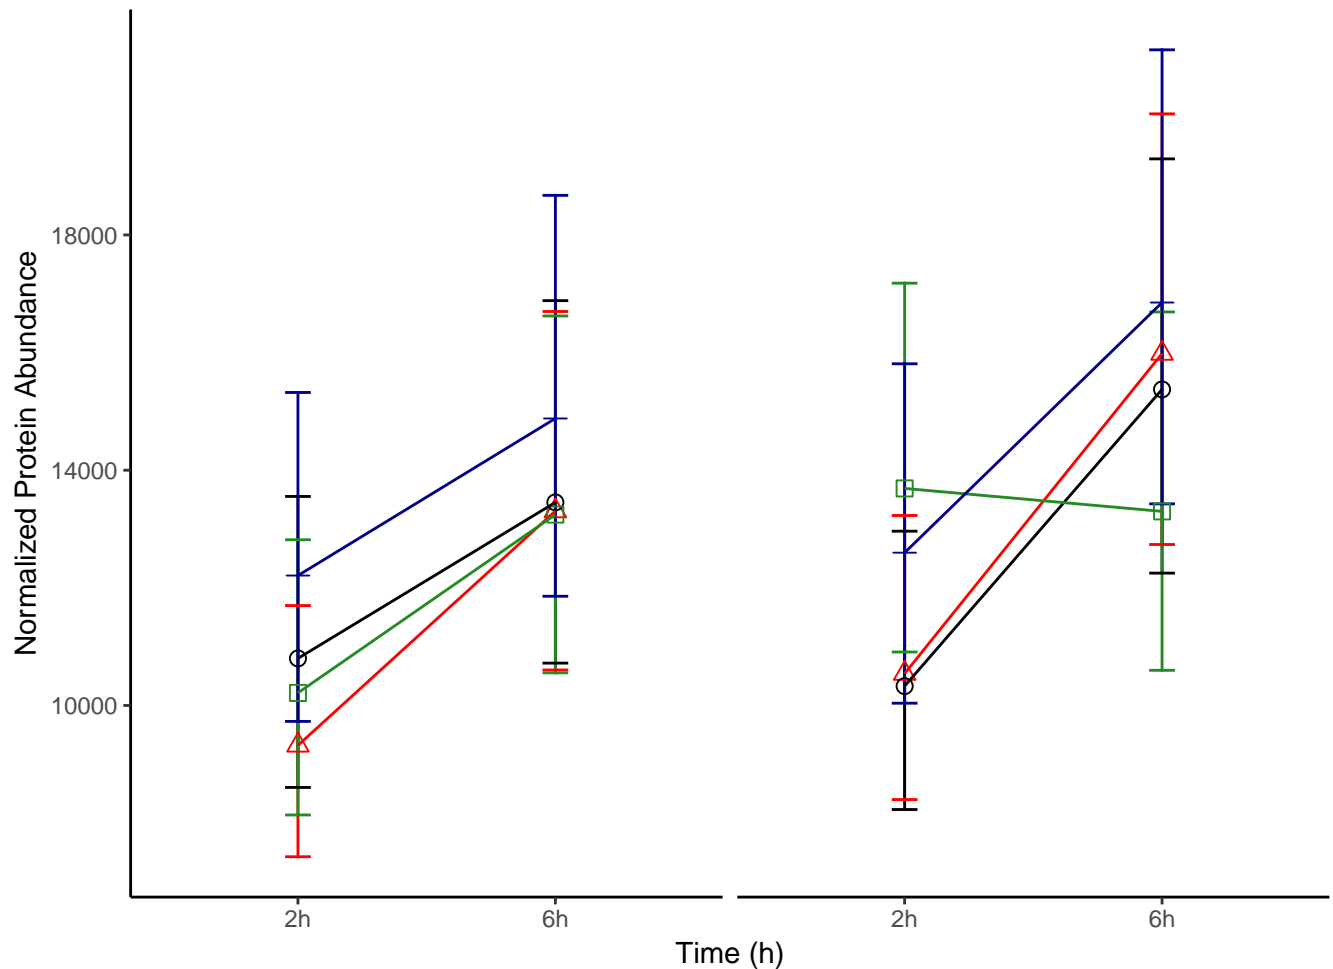

- SA564
- △ SA564-ΔhptRS
- SA564-ΔccpA
- + SA564-ΔhptRS/ccpA

# PUR9\_STAAM

TSB

TSB-dex S-280

Normalized Protein Abundance

15000

10000

2h

6h

Time (h)

2h

6h

- SA564
- △ SA564- $\Delta$ *hptRS*
- SA564- $\Delta$ *ccpA*
- + SA564- $\Delta$ *hptRS/ccpA*

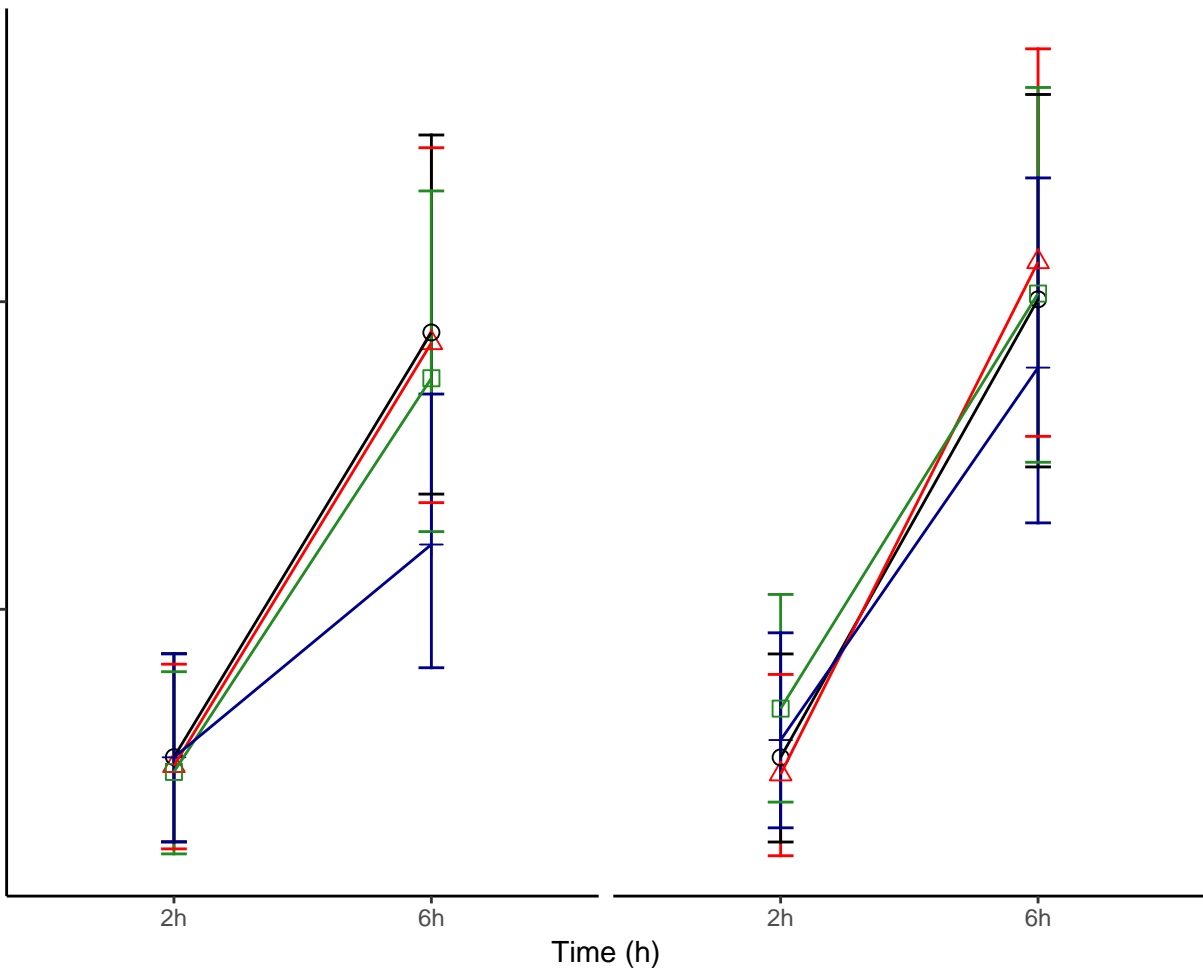



# PURA\_STAAM

TSB

TSB-dex S-281

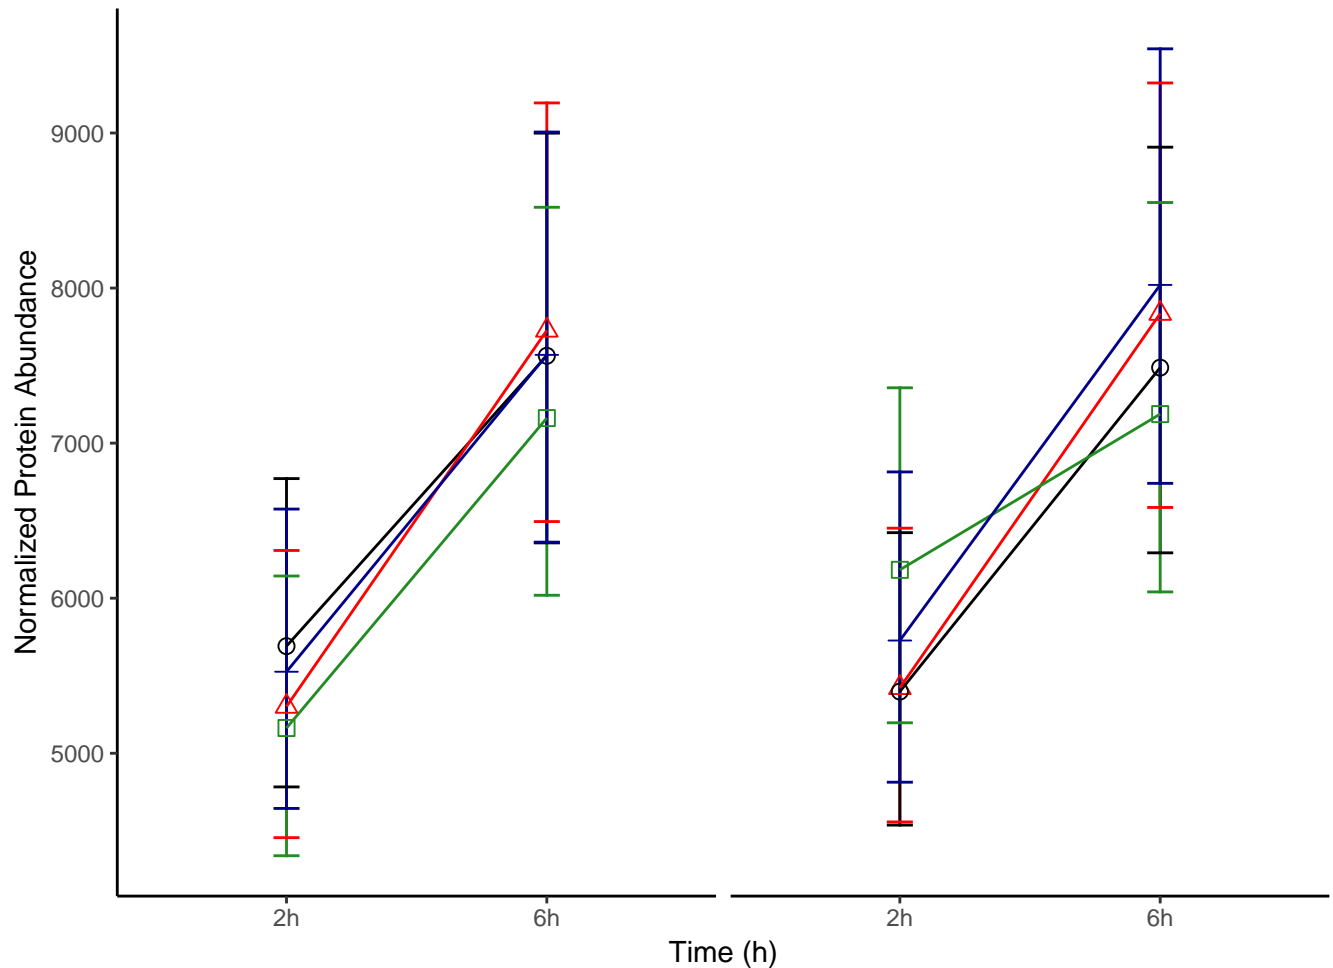

- SA564
- △ SA564- $\Delta$ *hptRS*
- SA564- $\Delta$ *ccpA*
- + SA564- $\Delta$ *hptRS/ccpA*

# PURK\_STAAM

TSB

TSB-dex S-282

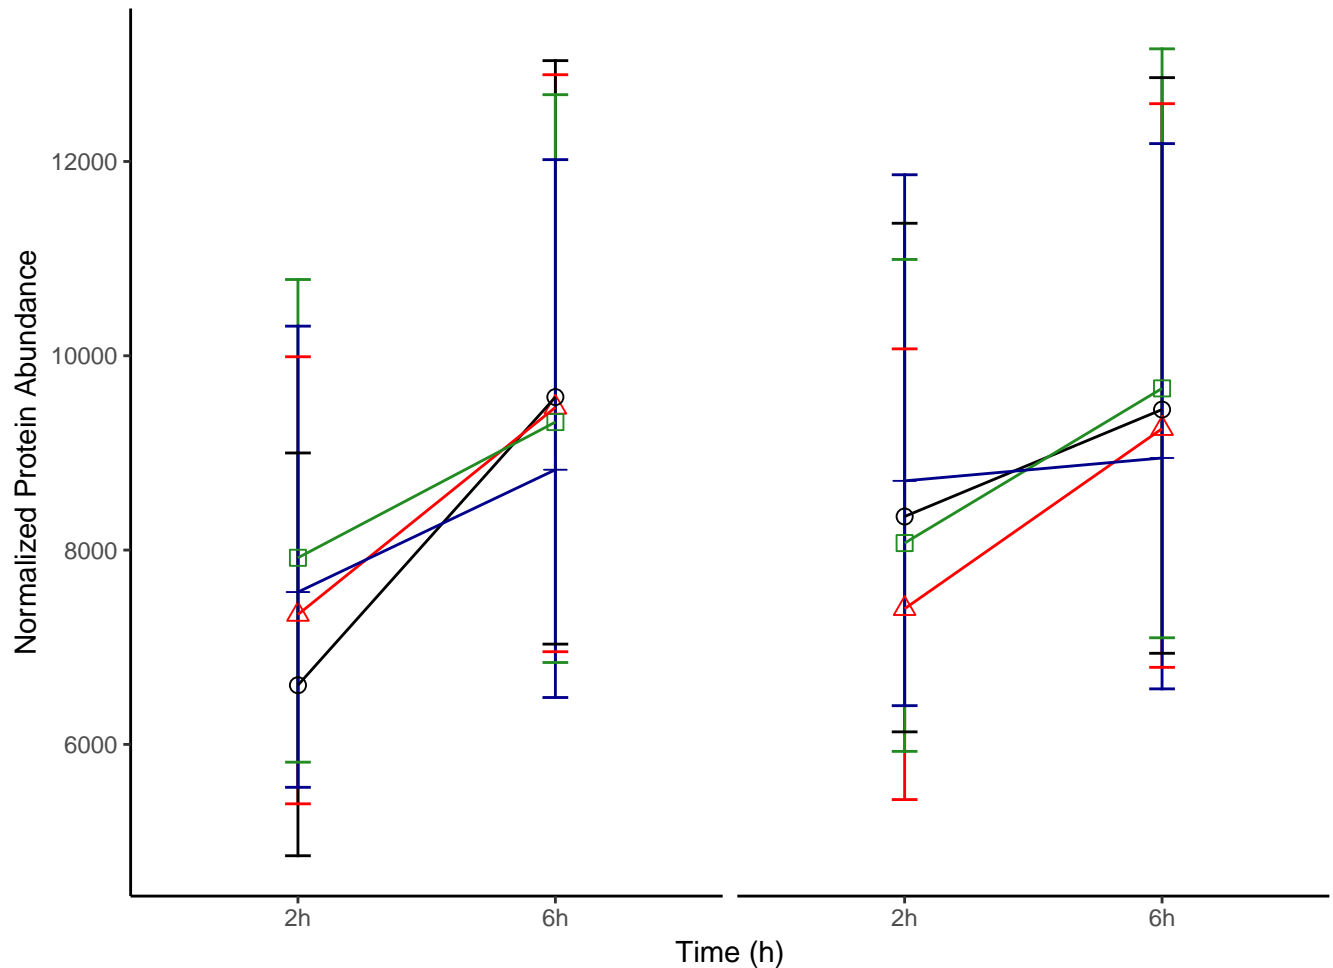

- SA564
- △ SA564- $\Delta$ *hptRS*
- SA564- $\Delta$ *ccpA*
- + SA564- $\Delta$ *hptRS/ccpA*

# PURL\_STAAM

TSB

TSB-dex S-283

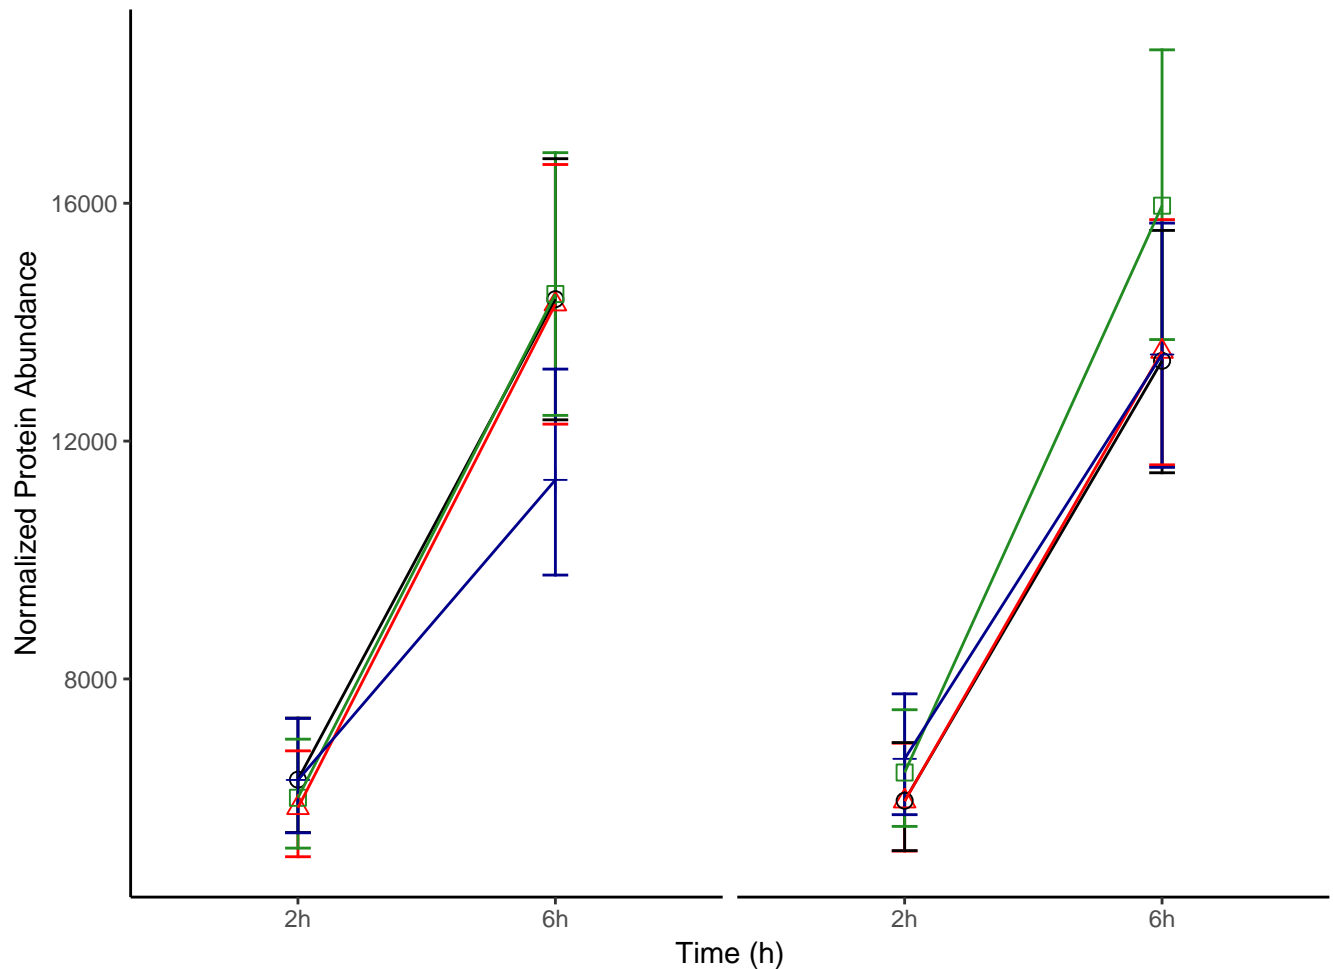

- SA564
- △ SA564- $\Delta hptRS$
- SA564- $\Delta ccpA$
- + SA564- $\Delta hptRS/ccpA$

# PURQ\_STAAM

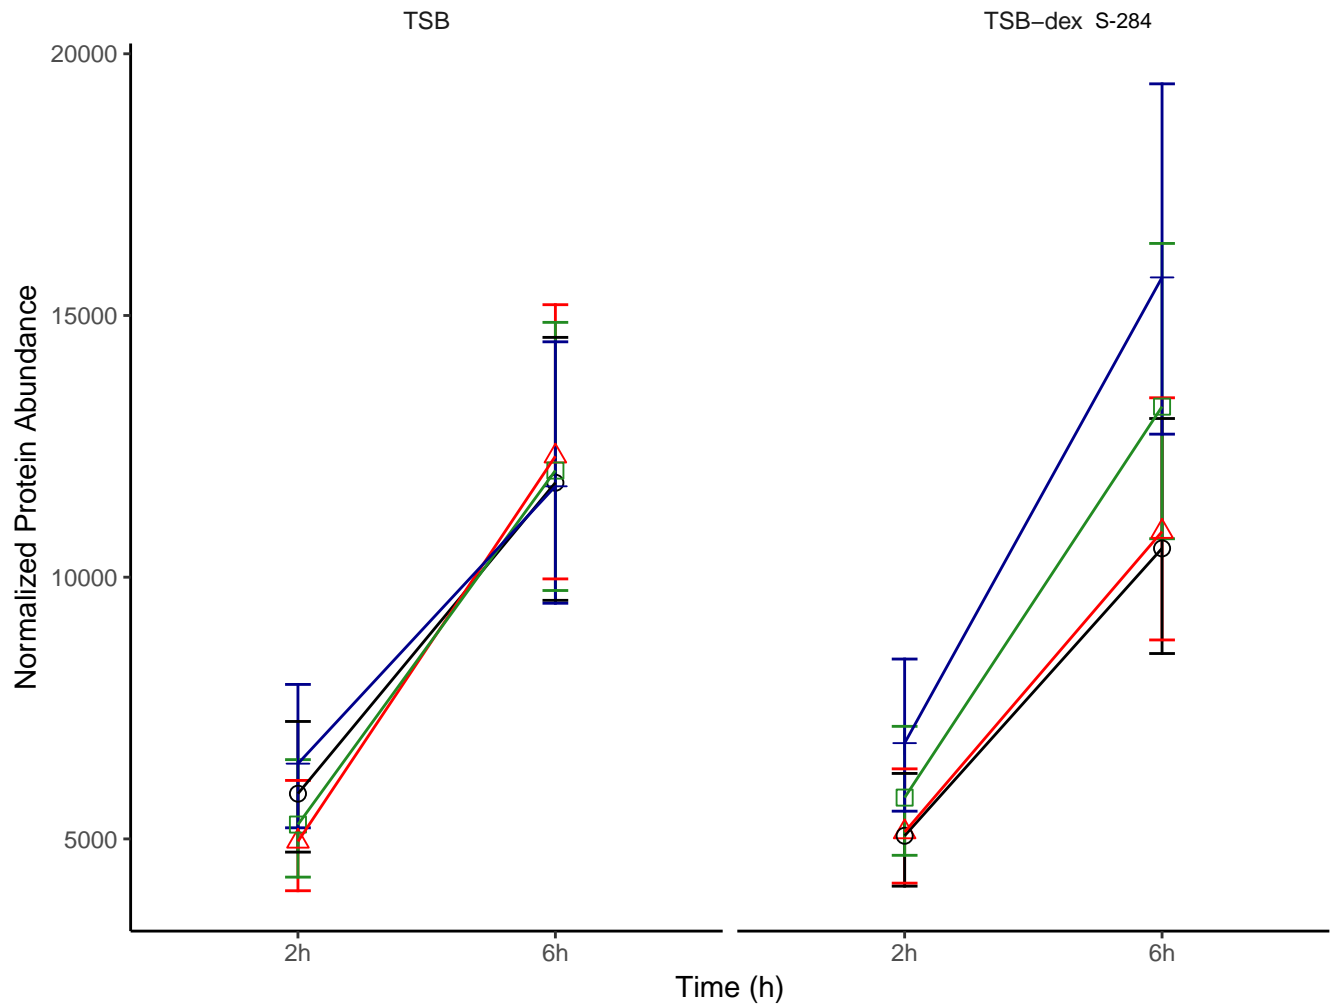

- SA564
- △ SA564-ΔhptRS
- SA564-ΔccpA
- + SA564-ΔhptRS/ccpA

# PYRB\_STAAM

TSB

TSB-dex S-285

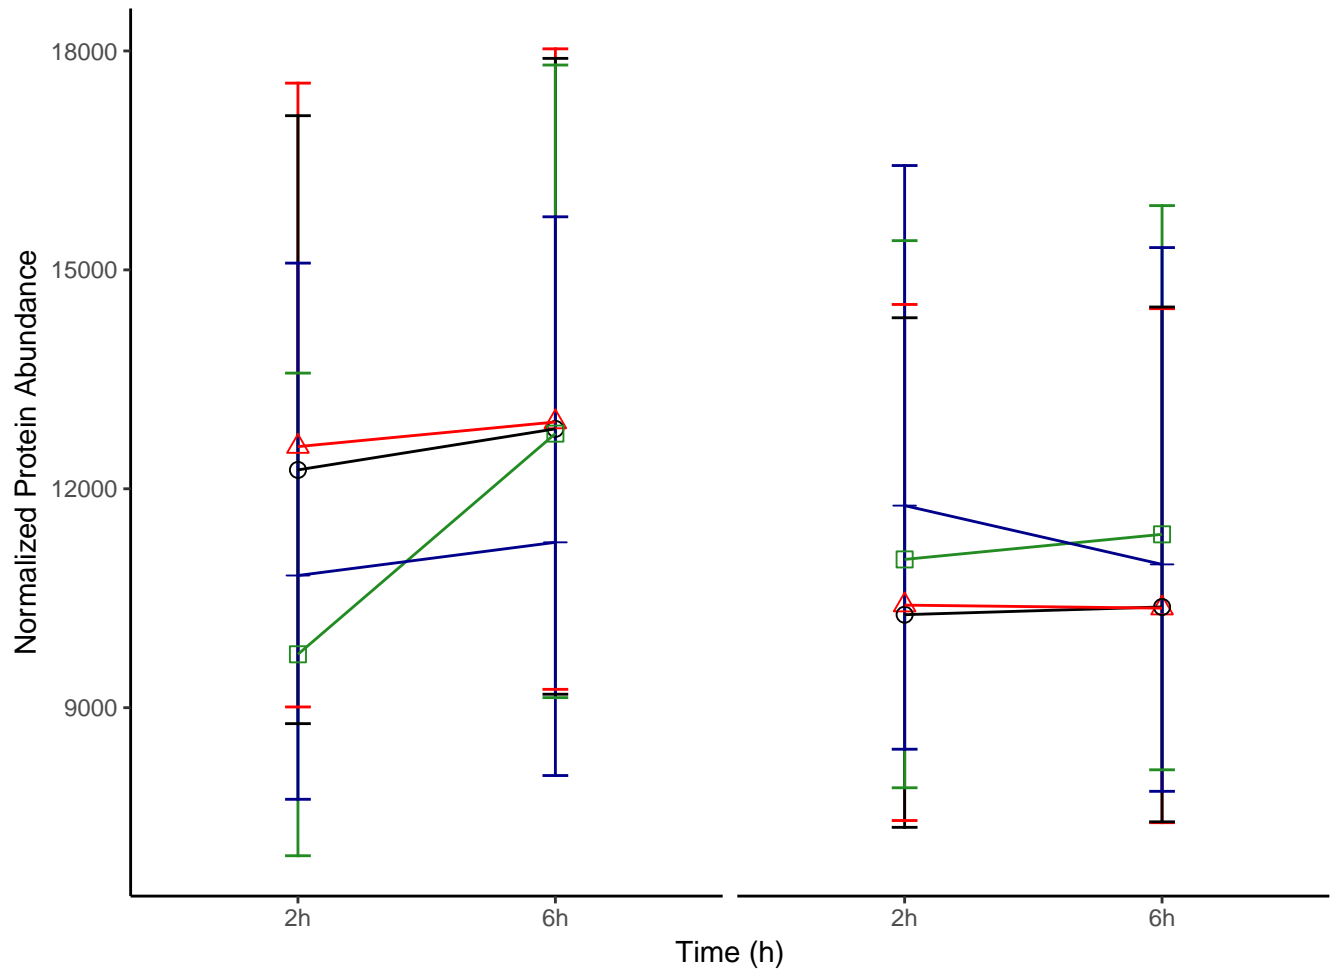

- SA564
- △ SA564- $\Delta$ hptRS
- SA564- $\Delta$ ccpA
- + SA564- $\Delta$ hptRS/ccpA

# PYRC\_STAAM

TSB

TSB-dex S-286

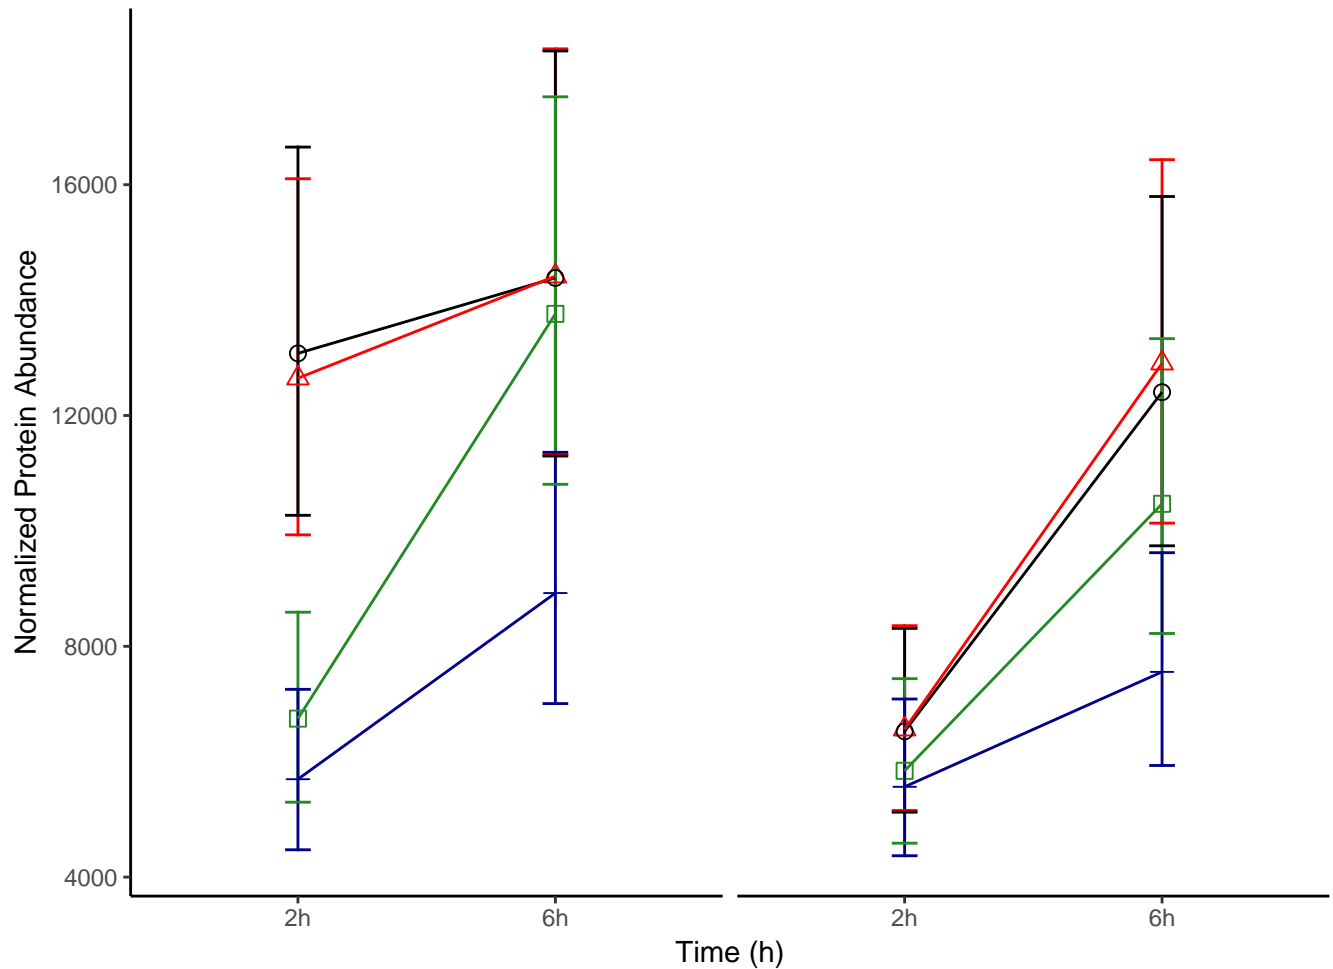

- SA564
- △ SA564- $\Delta$ *hptRS*
- SA564- $\Delta$ *ccpA*
- + SA564- $\Delta$ *hptRS/ccpA*

# PYRE\_STAAM

TSB

TSB-dex S-287

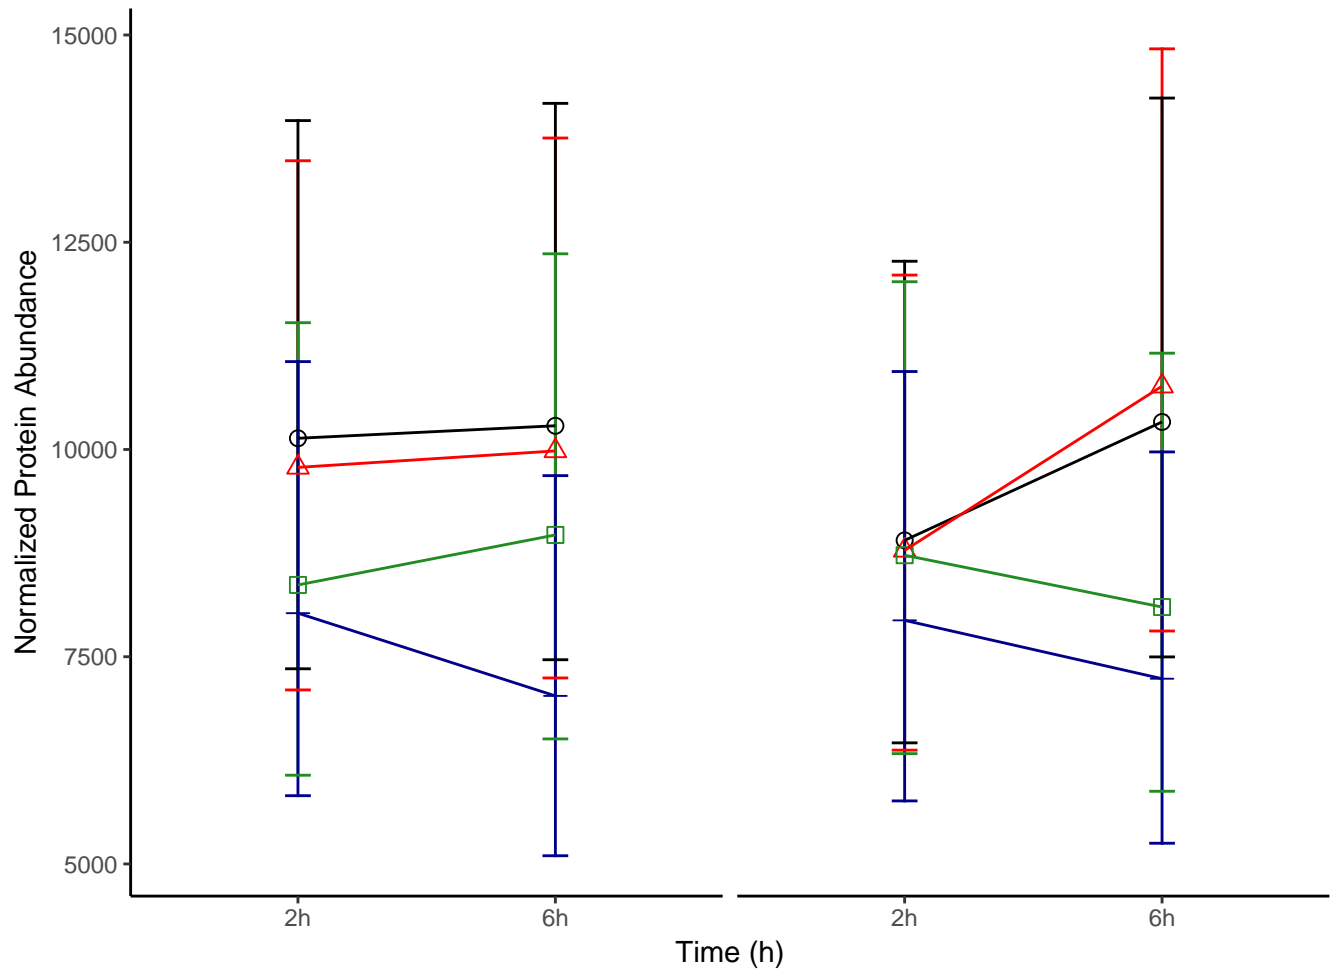

- SA564
- △ SA564- $\Delta$ hptRS
- SA564- $\Delta$ ccpA
- + SA564- $\Delta$ hptRS/ccpA

# PYRF\_STAAM

TSB

TSB-dex S-288

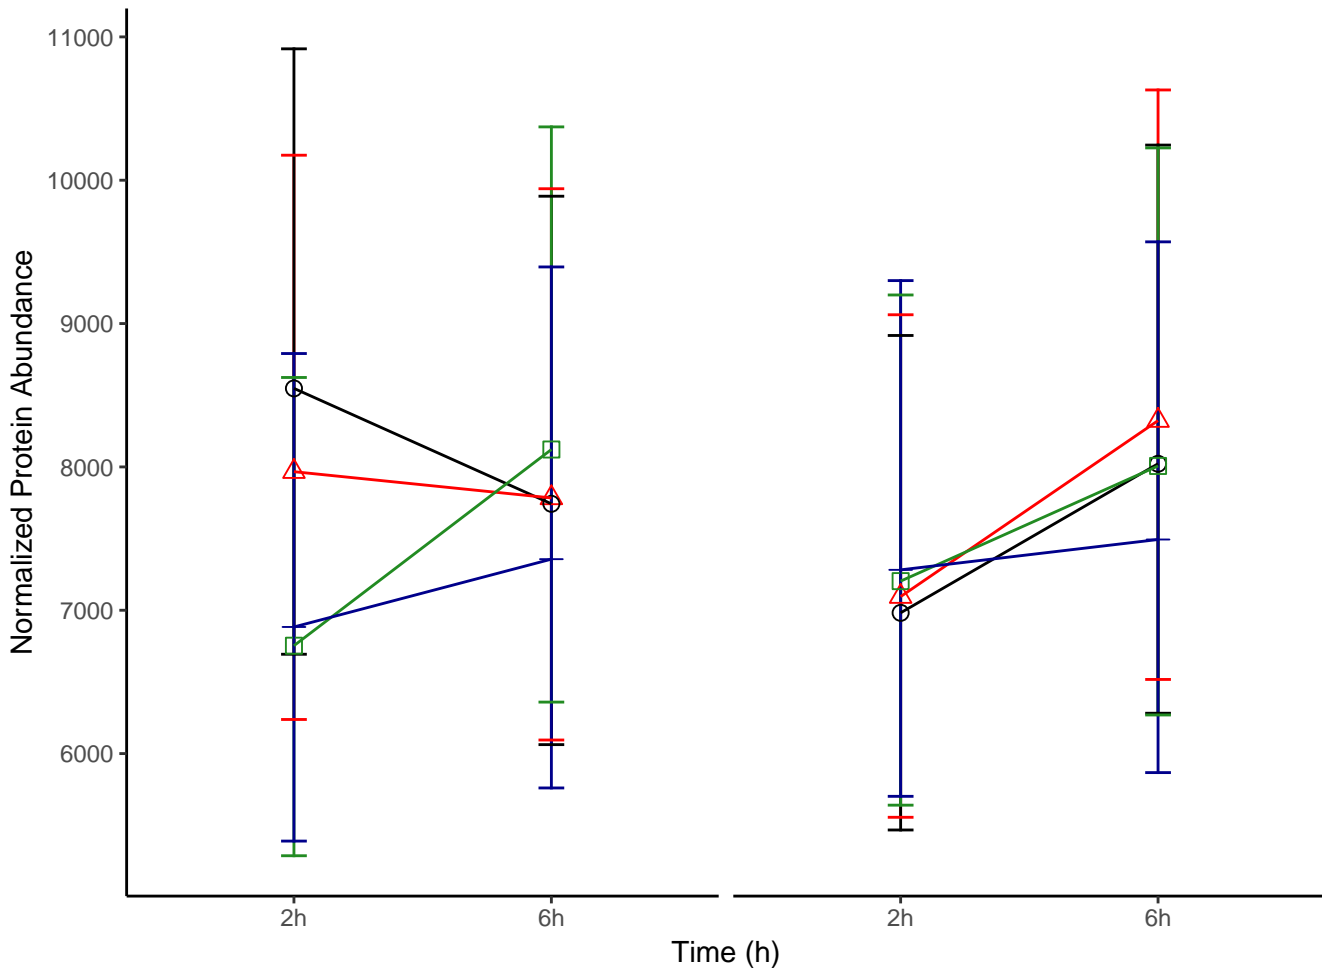

- SA564
- △ SA564- $\Delta$ *hptRS*
- SA564- $\Delta$ *ccpA*
- + SA564- $\Delta$ *hptRS/ccpA*



# PYRG\_STAAM

TSB

TSB-dex S-289

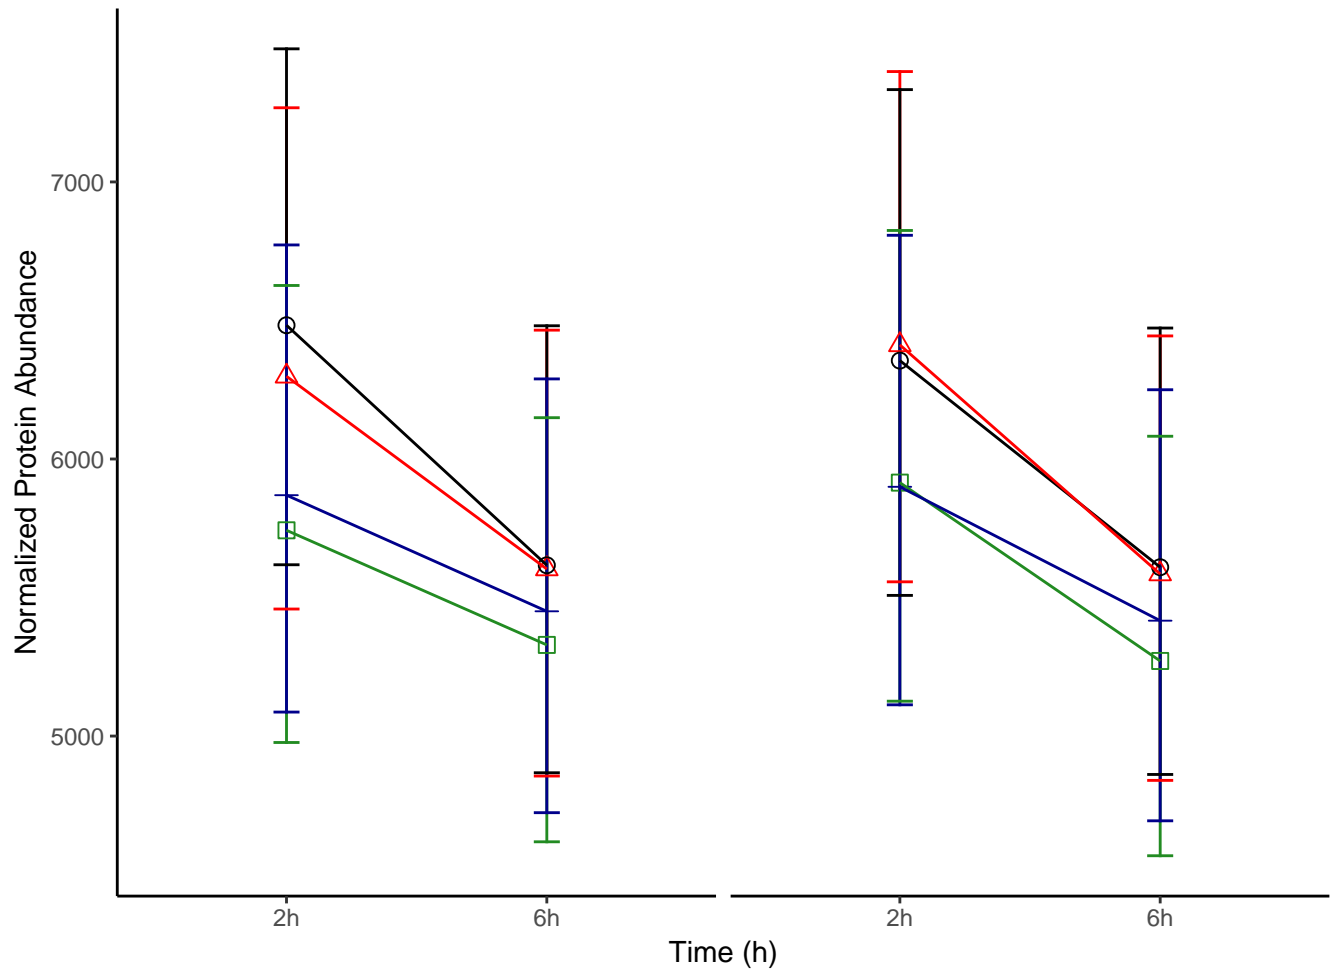

- SA564
- △ SA564- $\Delta hptRS$
- SA564- $\Delta ccpA$
- + SA564- $\Delta hptRS/ccpA$

# PYRH\_STAAM

TSB

TSB-dex S-290

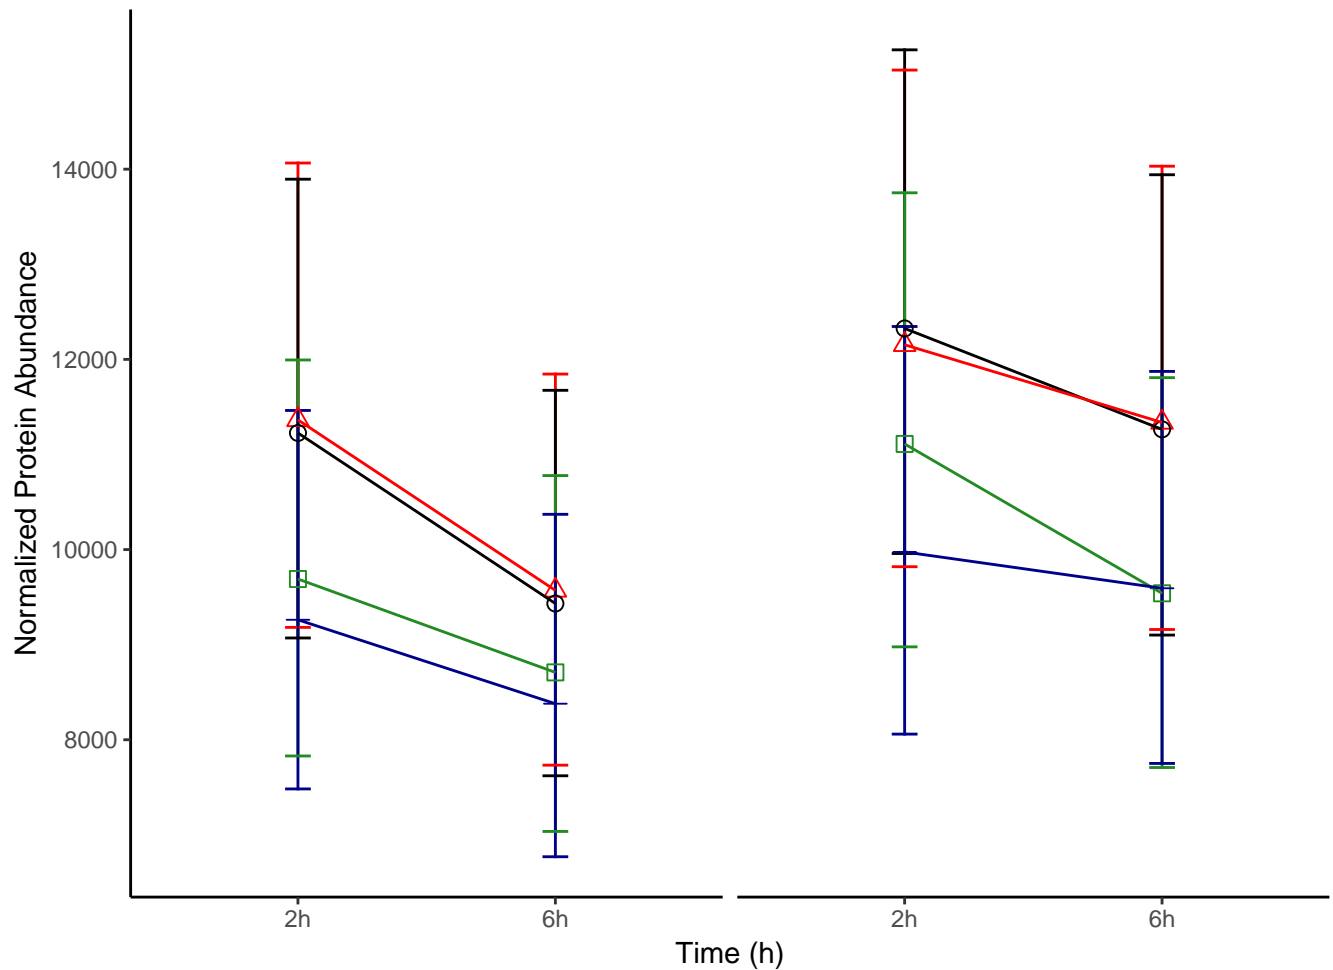

- SA564
- △ SA564-ΔhptRS
- SA564-ΔccpA
- + SA564-ΔhptRS/ccpA

# PYRR\_STAAM

TSB

TSB-dex S-291

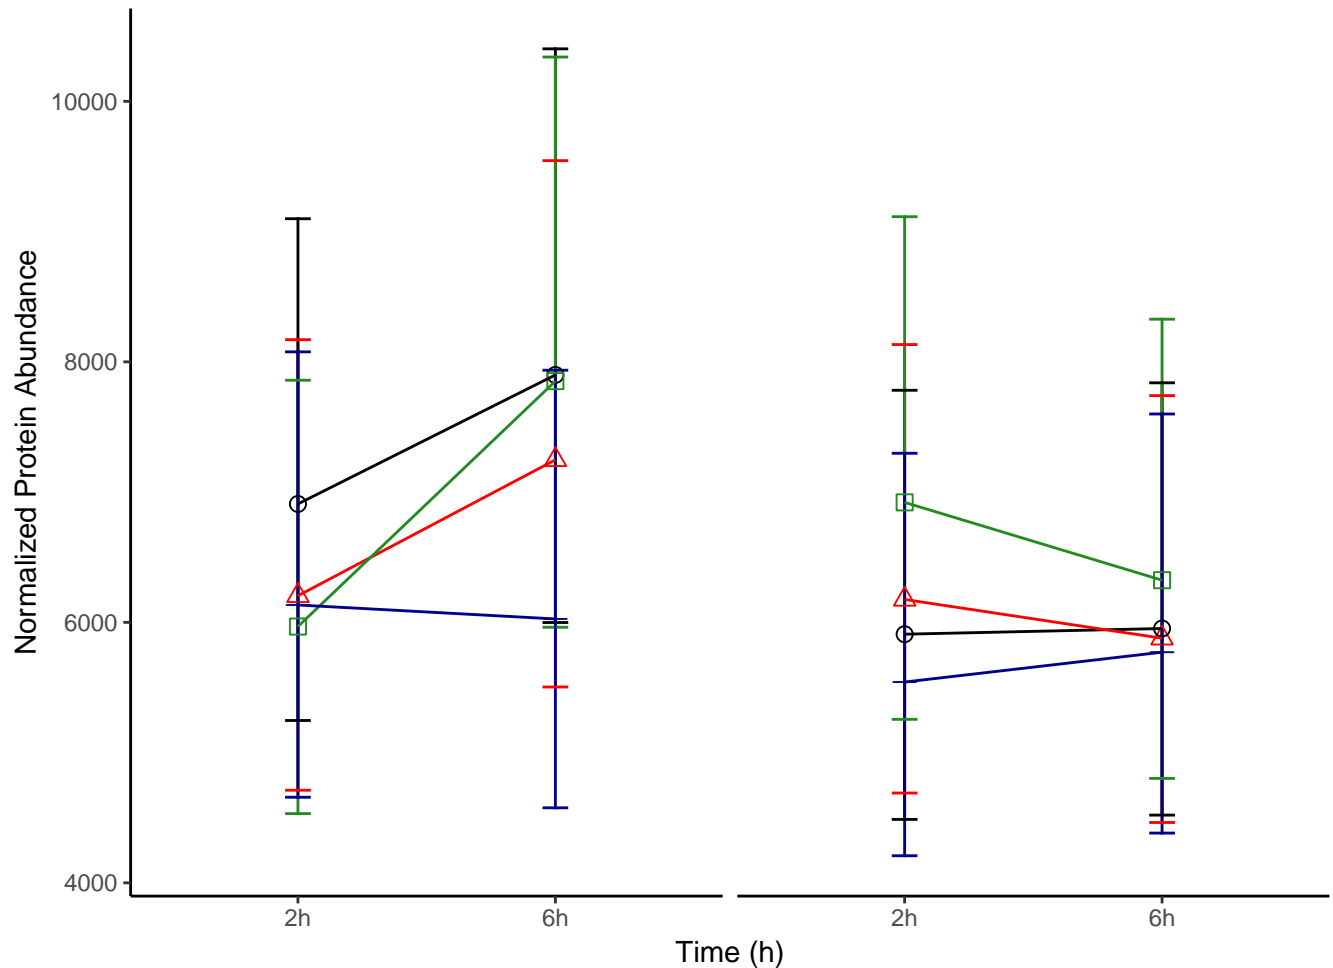

- SA564
- △ SA564- $\Delta$ hptRS
- SA564- $\Delta$ ccpA
- + SA564- $\Delta$ hptRS/ccpA

# QOX2\_STAAM

TSB

TSB-dex S-292

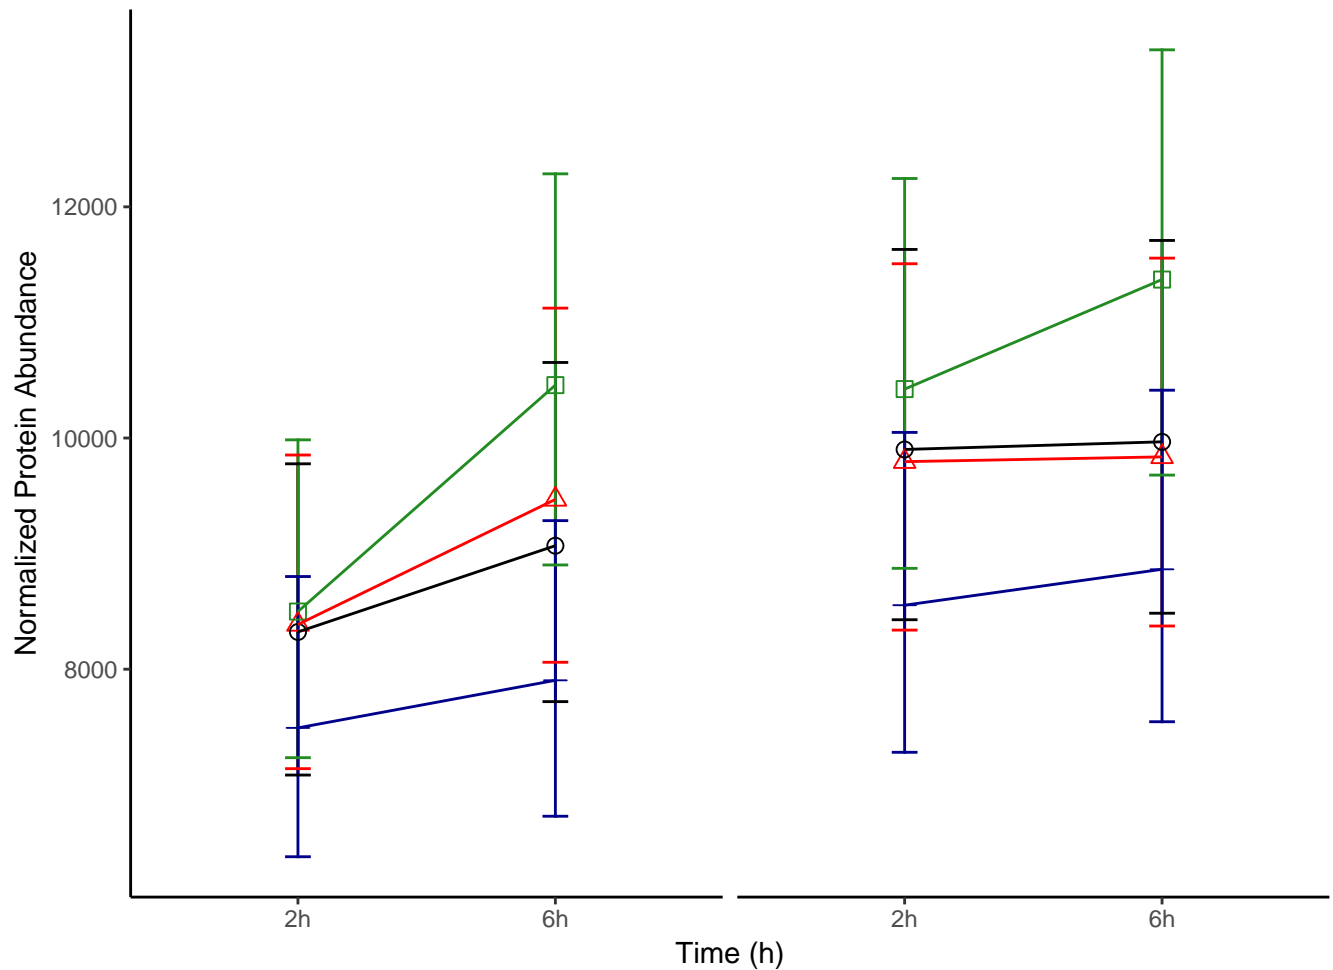

- SA564
- △ SA564-ΔhptRS
- SA564-ΔccpA
- + SA564-ΔhptRS/ccpA

# QUEA\_STAAM

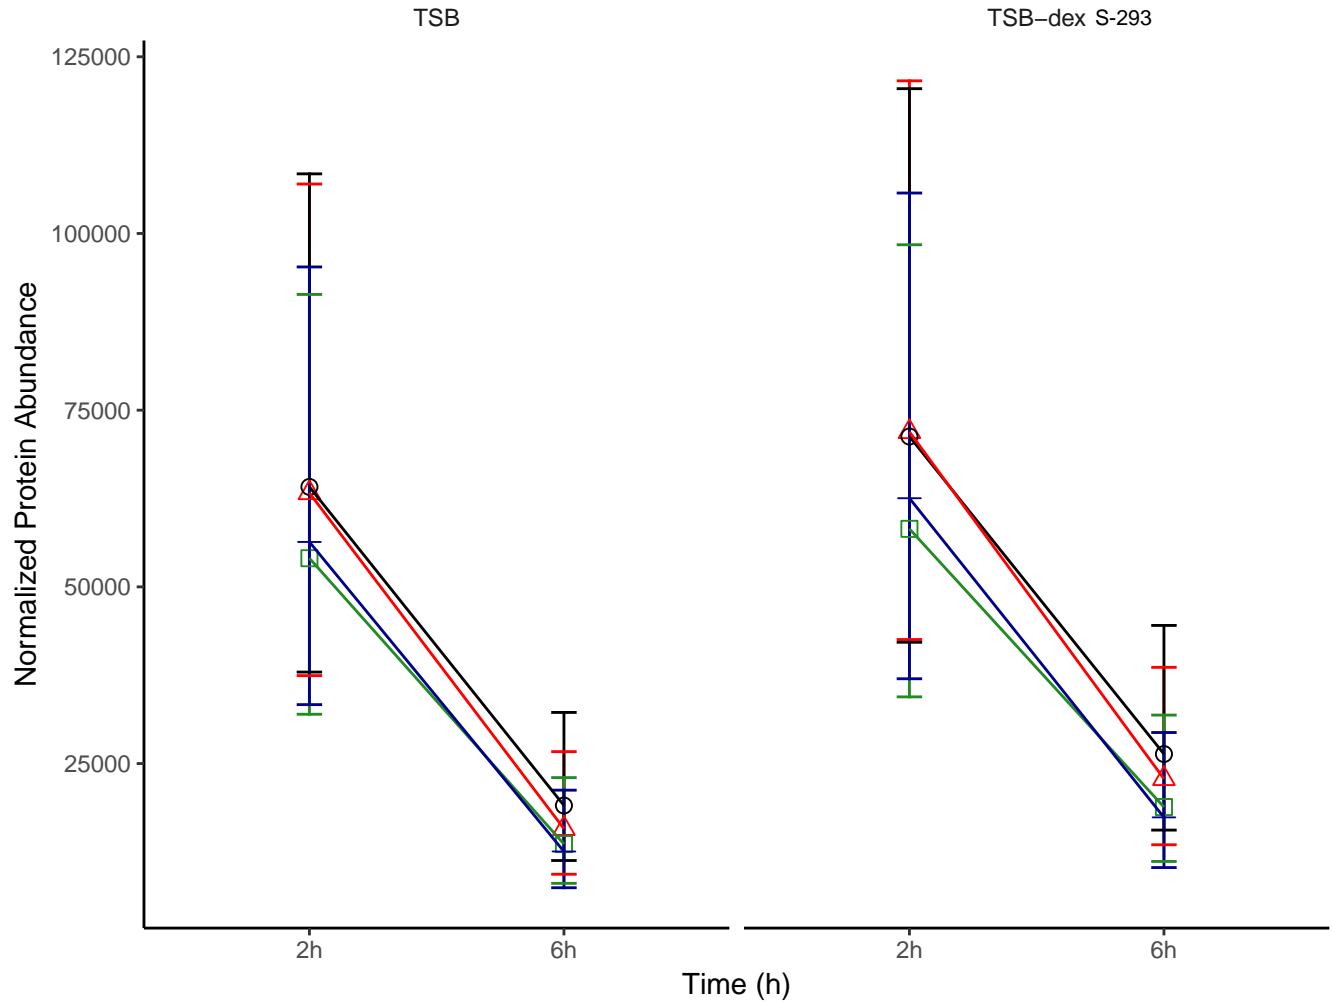

- SA564
  - △ SA564- $\Delta hptRS$
  - SA564- $\Delta ccpA$
  - +
- SA564- $\Delta hptRS/ccpA$

# QUEC\_STAAM

TSB

TSB-dex S-294

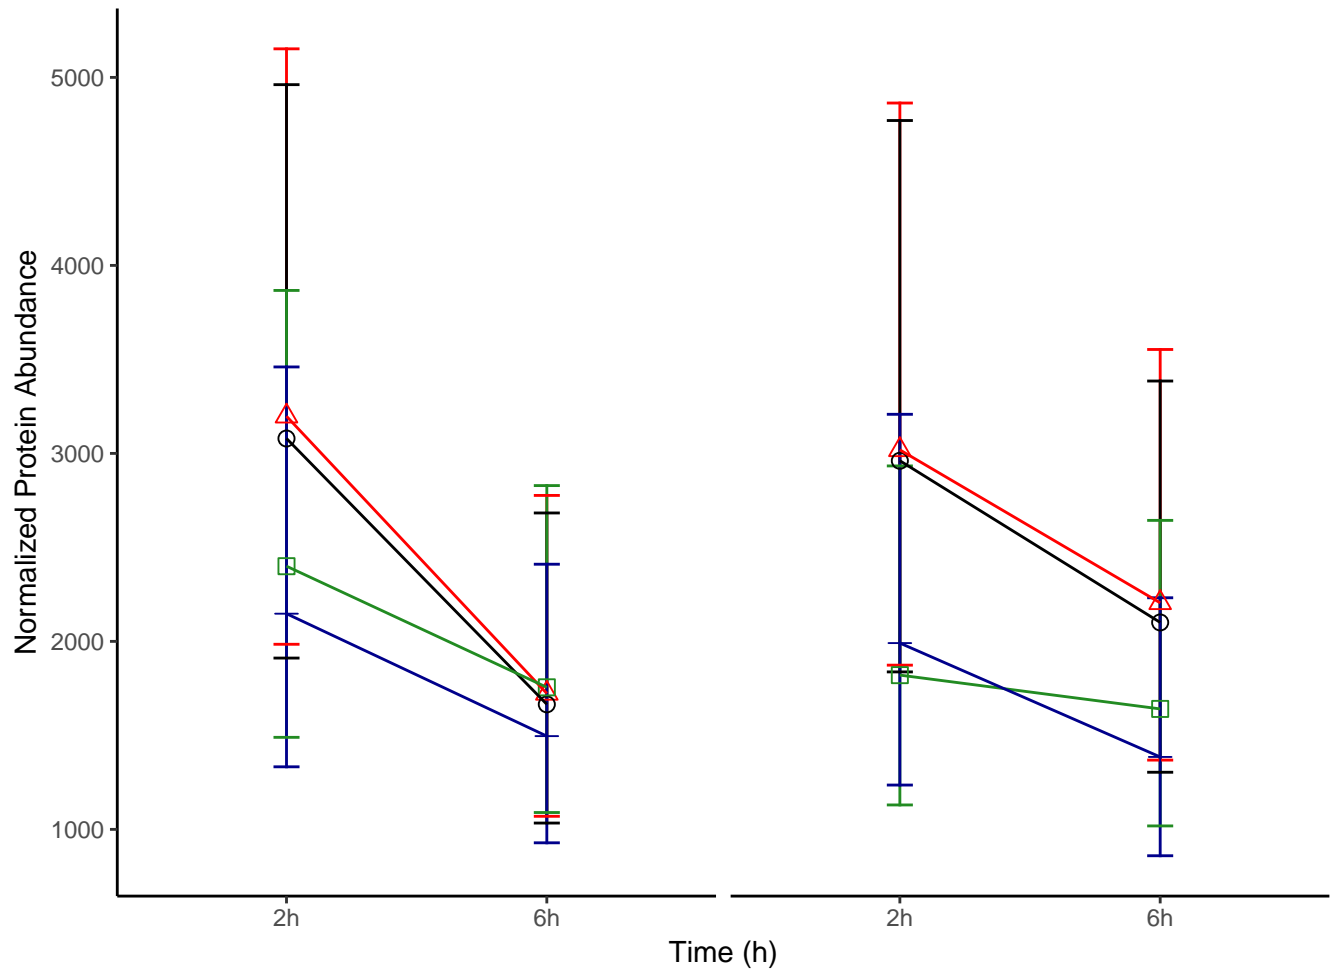

- SA564
- △ SA564- $\Delta hptRS$
- SA564- $\Delta ccpA$
- + SA564- $\Delta hptRS/ccpA$

# RBFA\_STAAM

TSB

TSB-dex S-295

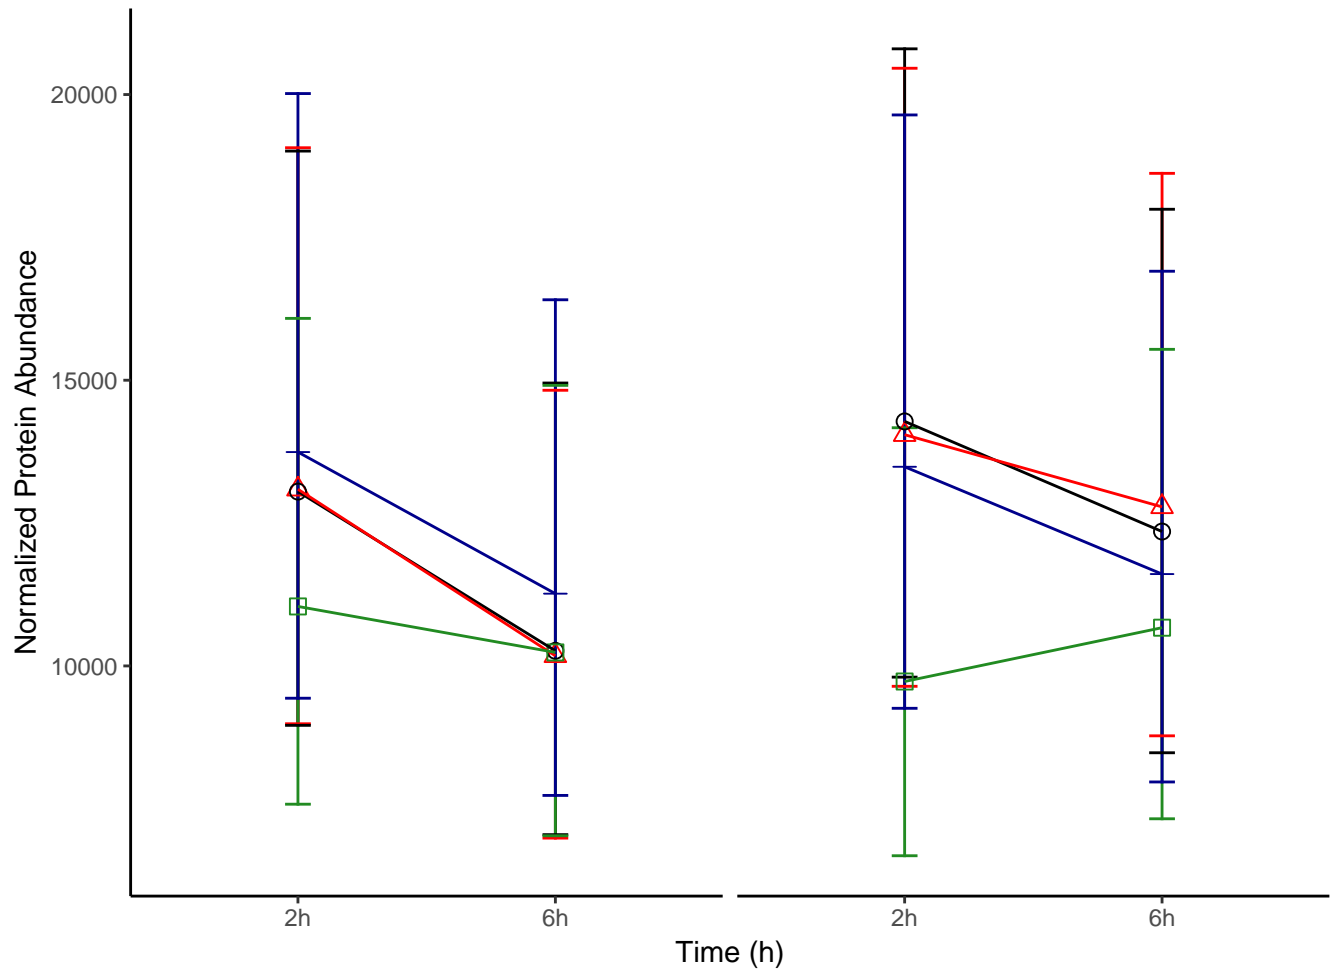

- SA564
- △ SA564- $\Delta$ hptRS
- SA564- $\Delta$ ccpA
- + SA564- $\Delta$ hptRS/ccpA

# RECA\_STAAM

TSB

TSB-dex S-296

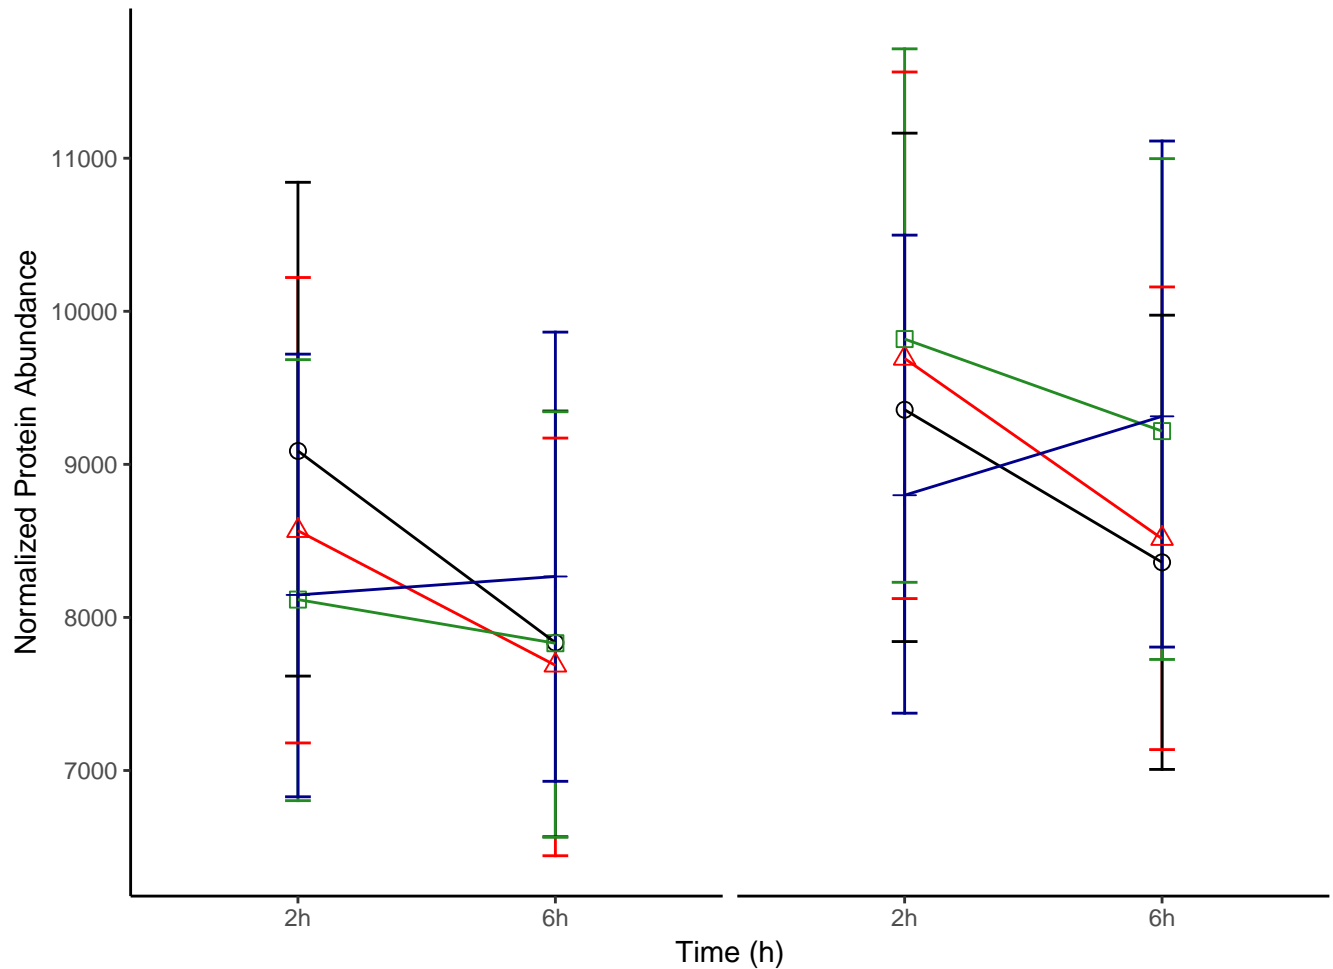

- SA564
- △ SA564- $\Delta$ hptRS
- SA564- $\Delta$ ccpA
- + SA564- $\Delta$ hptRS/ccpA



# RELA\_STAAM

TSB

TSB-dex S-297

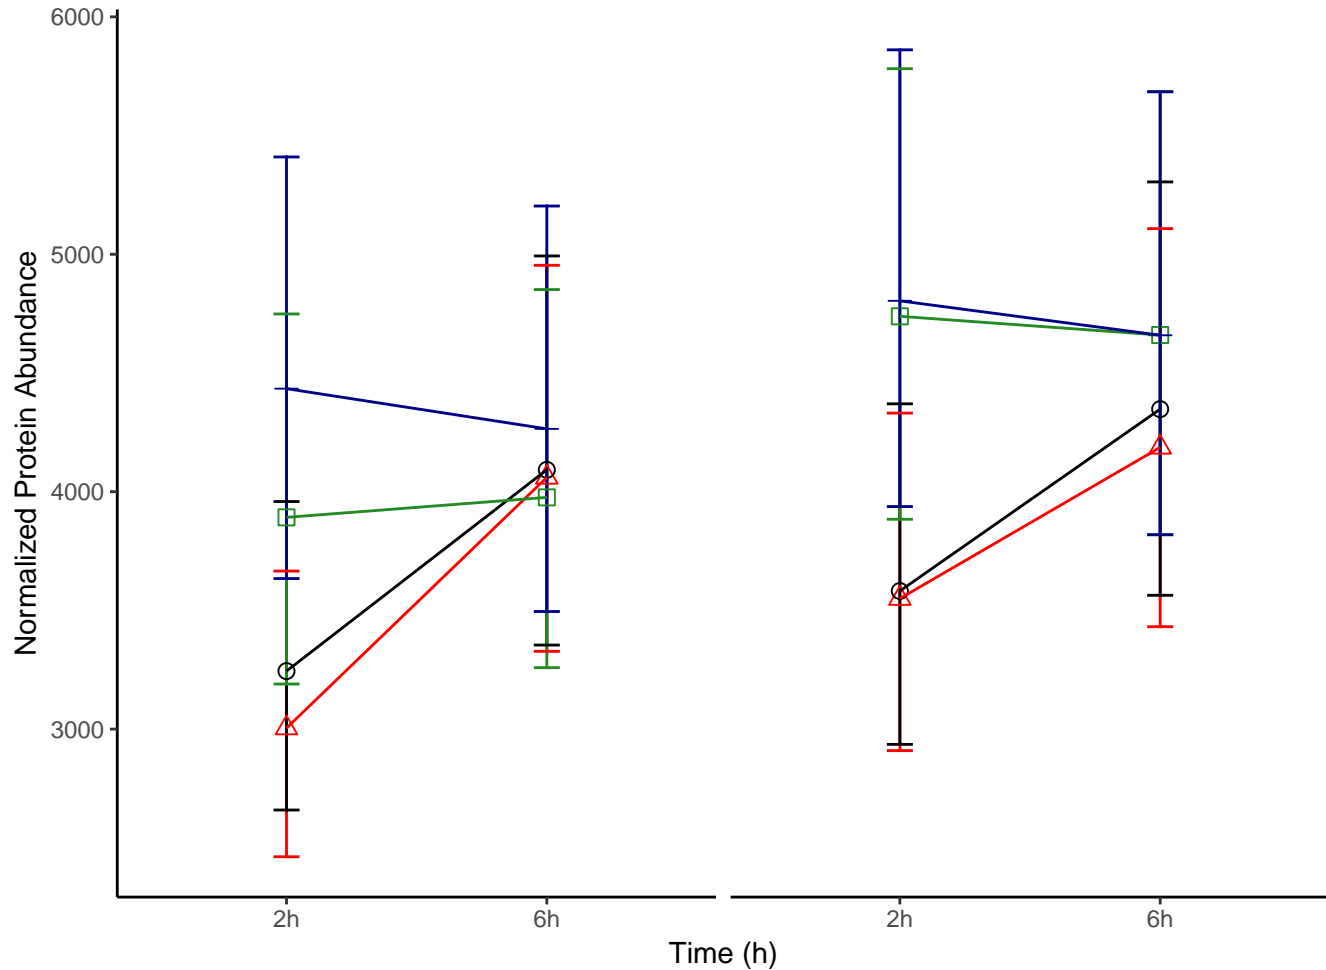

- SA564
- △ SA564-Δ*hptRS*
- SA564-Δ*ccpA*
- + SA564-Δ*hptRS/ccpA*

# REX\_STAAM

TSB

TSB-dex S-298

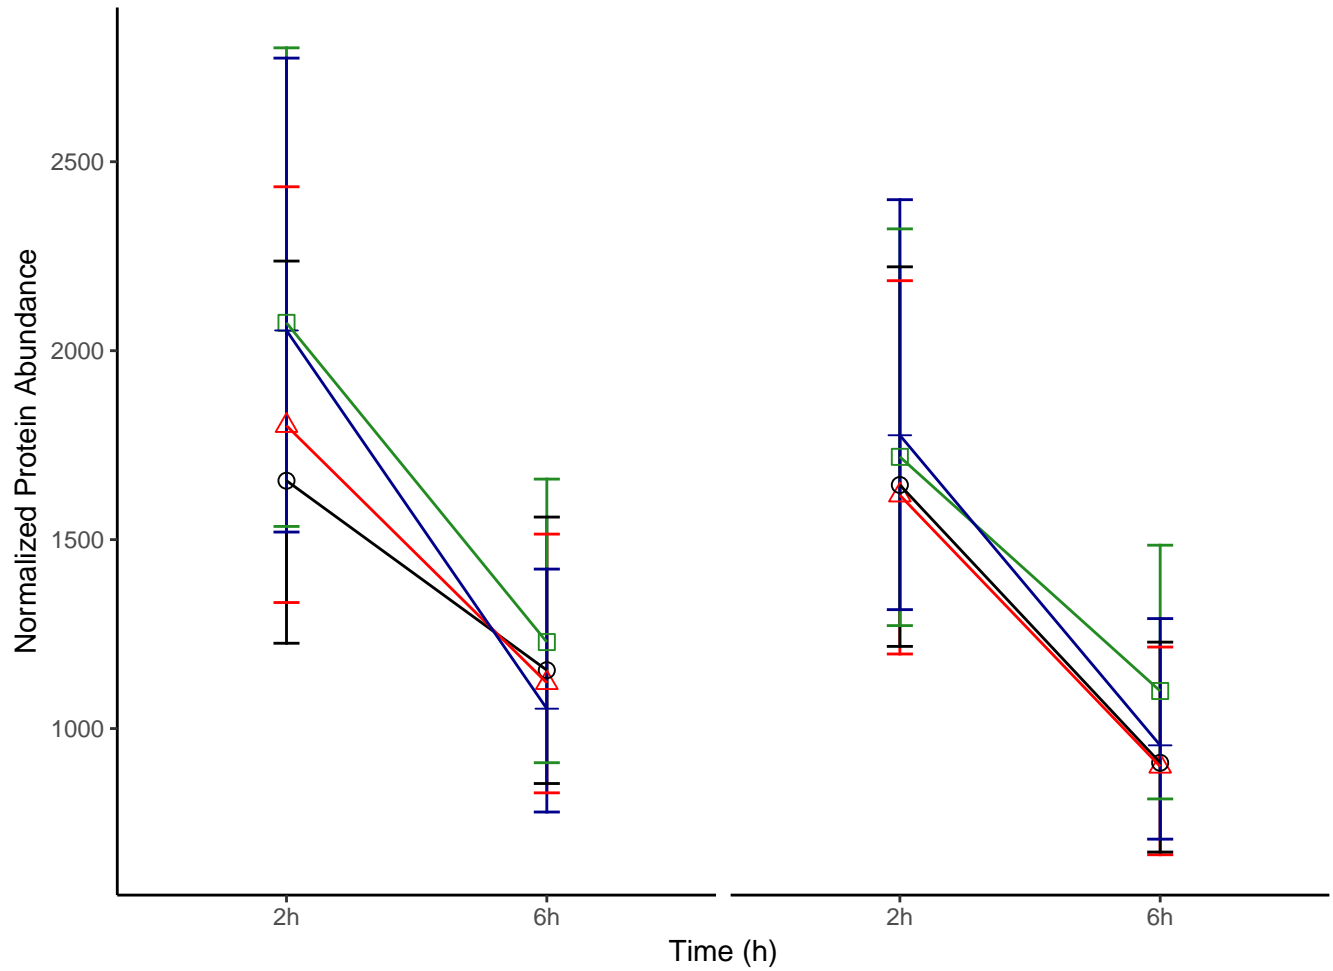

- SA564
- △ SA564-ΔhptRS
- SA564-ΔccpA
- + SA564-ΔhptRS/ccpA

## RF1\_STAAM

TSB

TSB-dex S-299

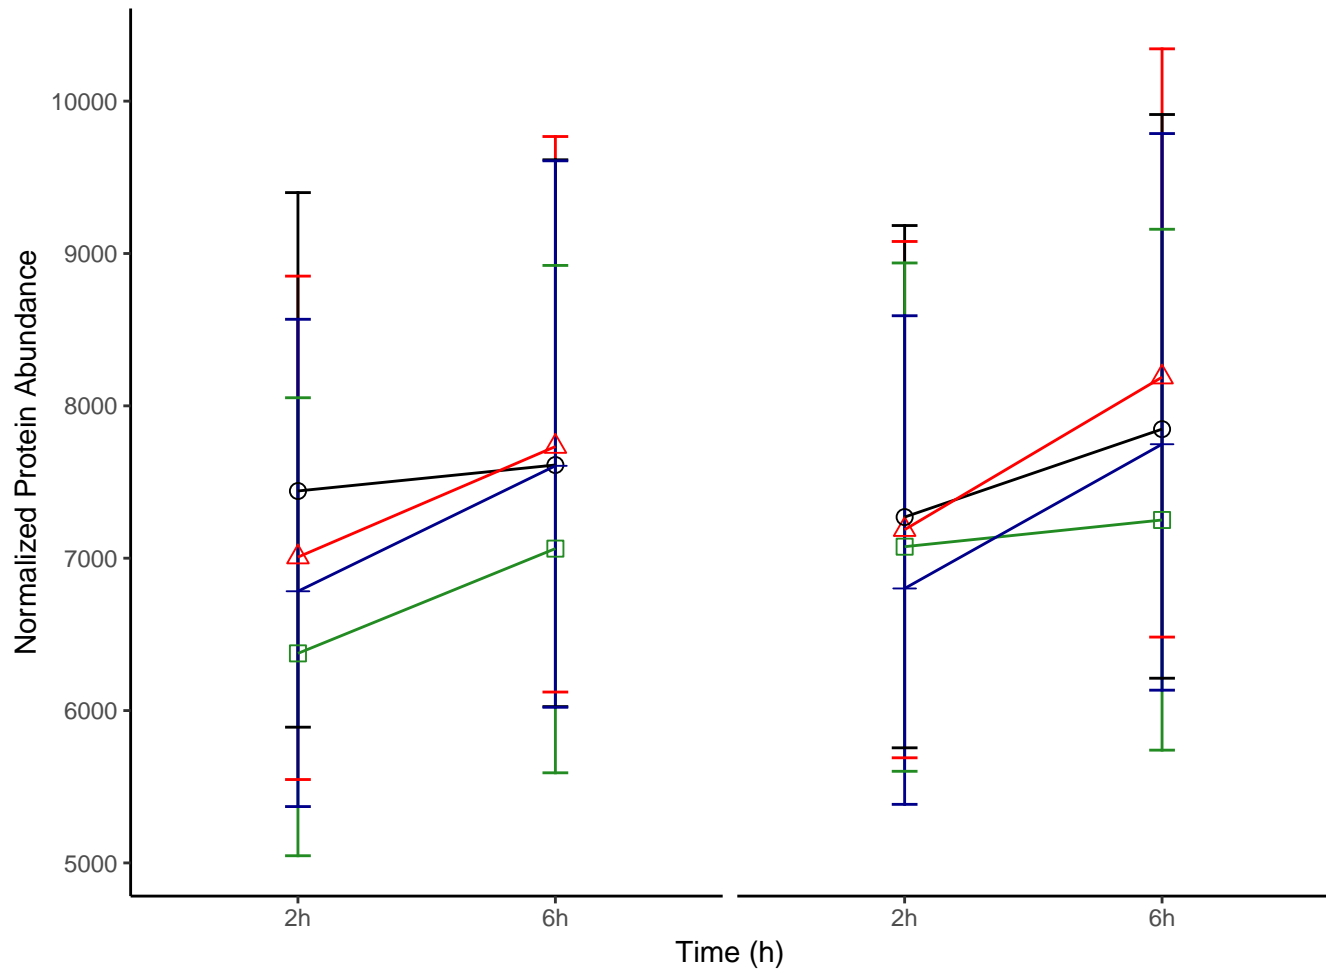

- SA564
- △ SA564- $\Delta$ hptRS
- SA564- $\Delta$ ccpA
- + SA564- $\Delta$ hptRS/ccpA

# RIBBA\_STAAM

TSB

TSB-dex S-300

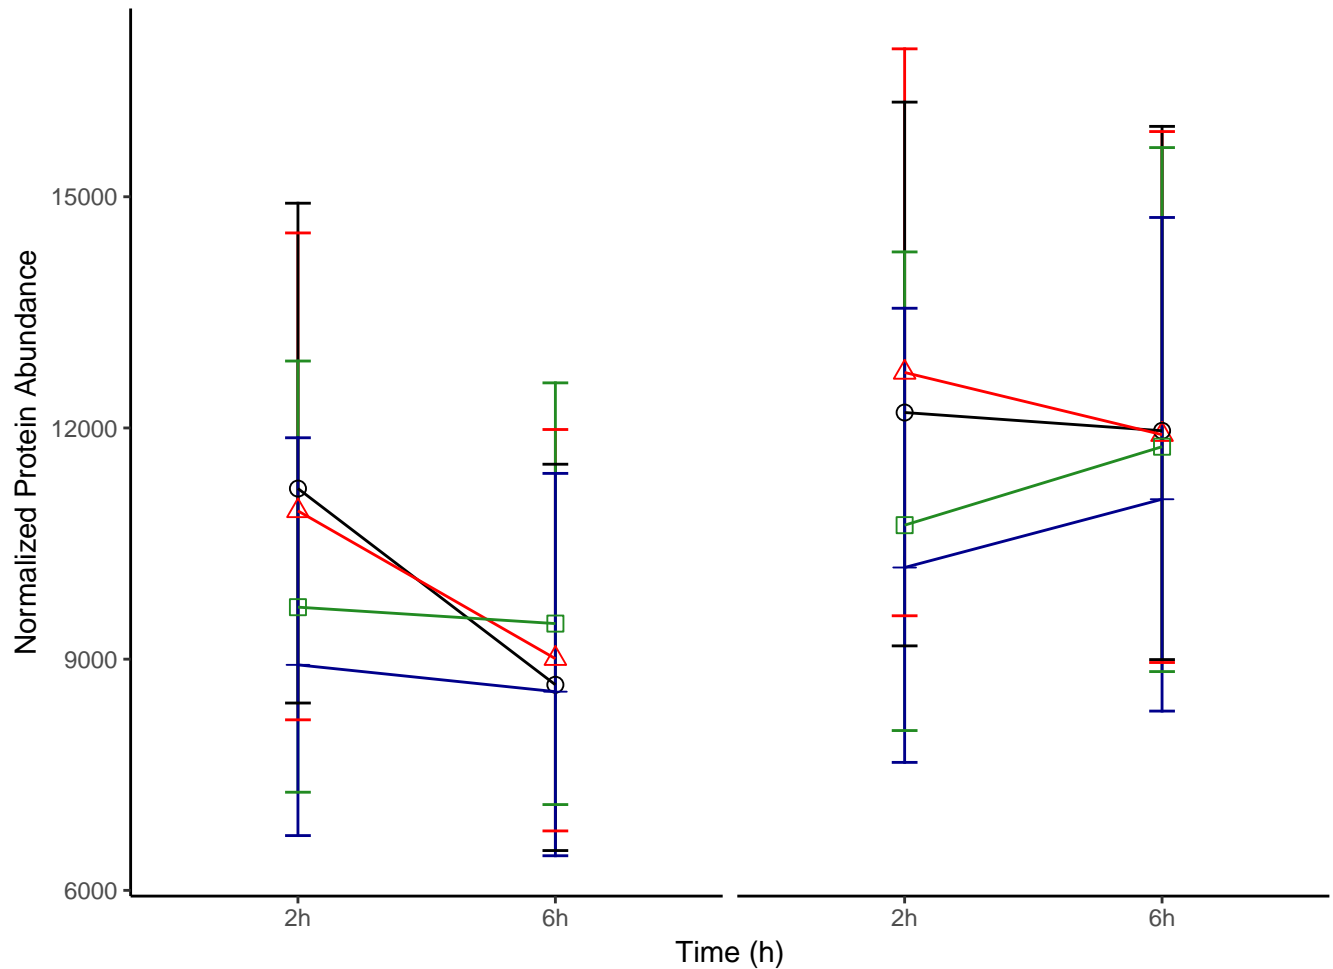

- SA564
- △ SA564- $\Delta$ *hptRS*
- SA564- $\Delta$ *ccpA*
- + SA564- $\Delta$ *hptRS/ccpA*

# RIMM\_STAAM

TSB

TSB-dex S-301

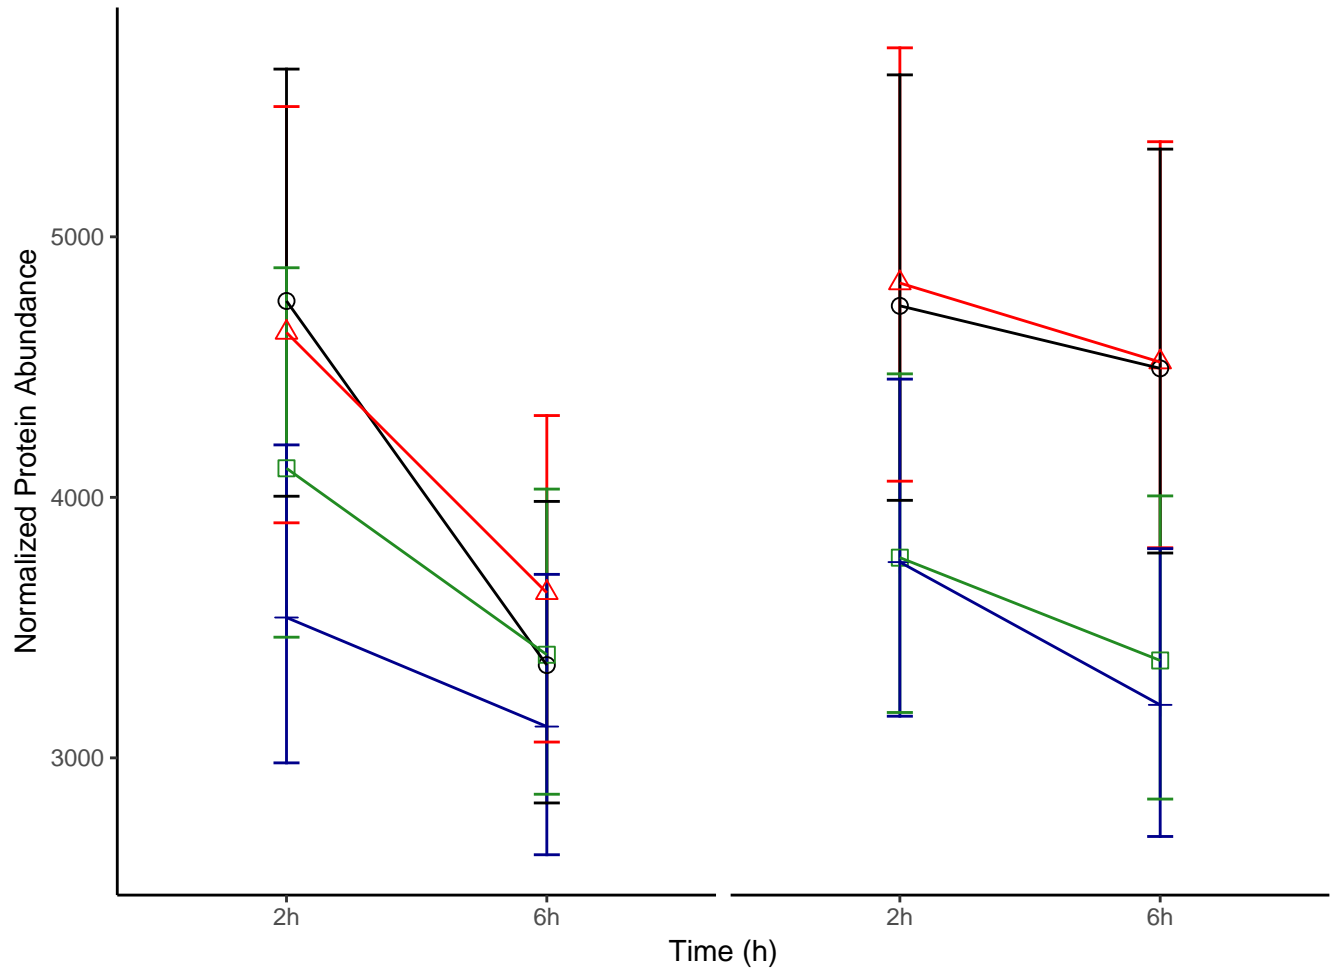

- SA564
- △ SA564- $\Delta$ *hptRS*
- SA564- $\Delta$ *ccpA*
- + SA564- $\Delta$ *hptRS/ccpA*

# RISB\_STAAM

TSB

TSB-dex S-302

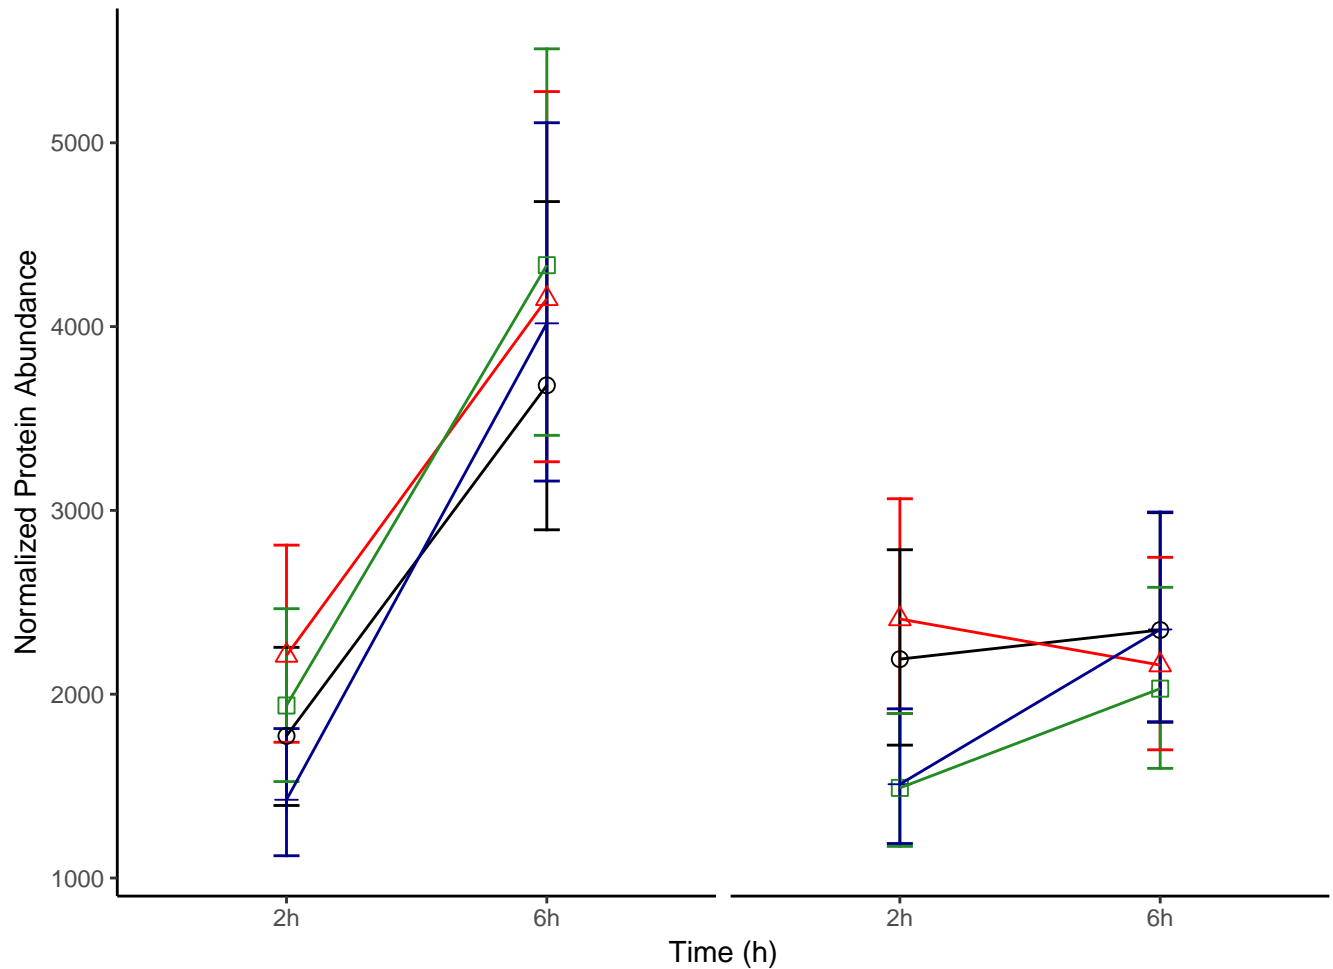

- SA564
- △ SA564-ΔhptRS
- SA564-ΔccpA
- + SA564-ΔhptRS/ccpA

# RL1\_STAAM

TSB

TSB-dex S-303

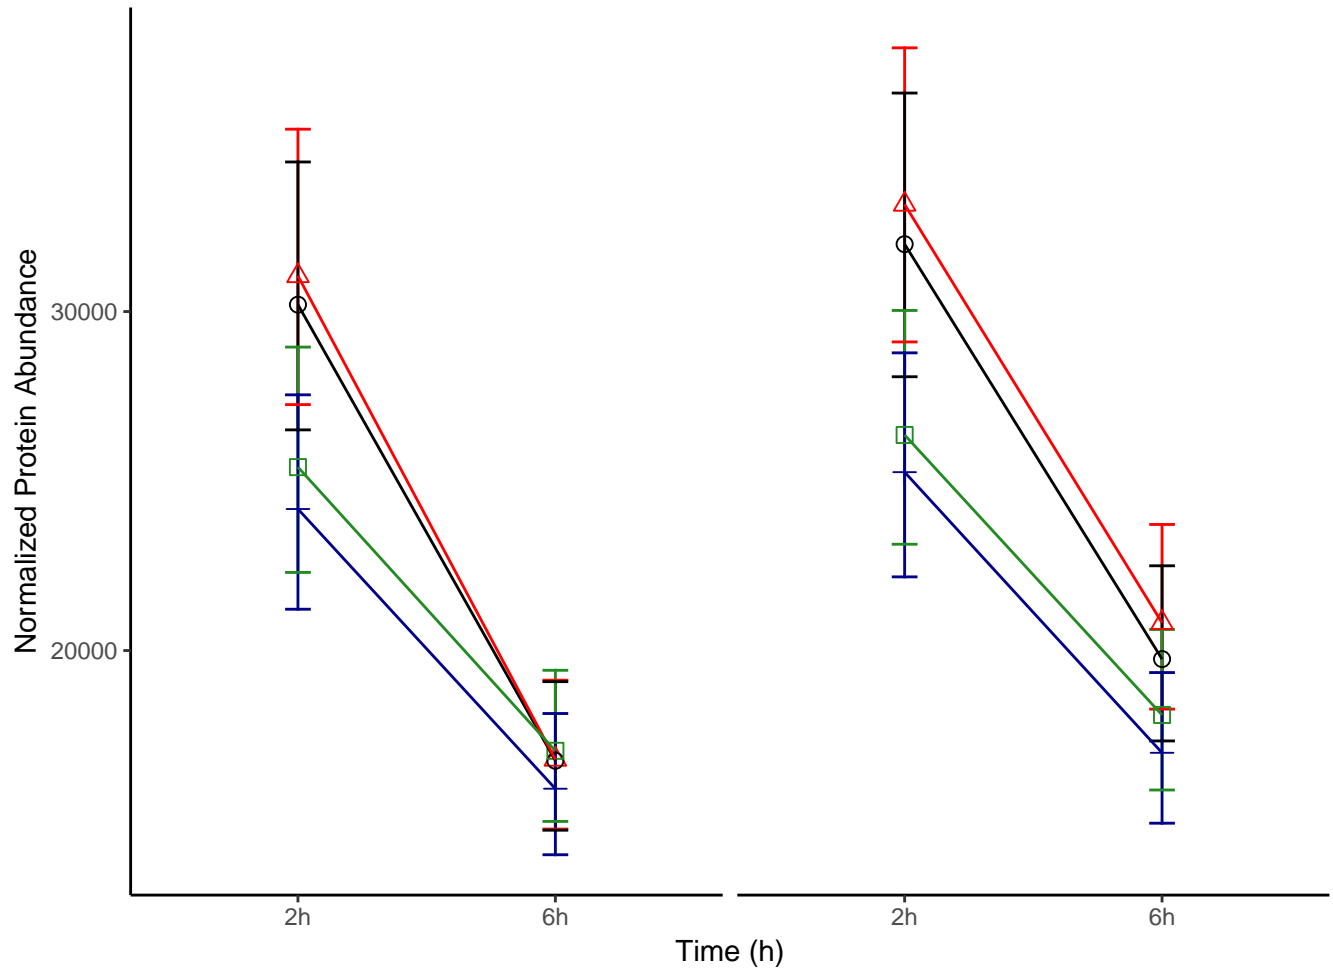

- SA564
- △ SA564-Δ*hptRS*
- SA564-Δ*ccpA*
- ⊕ SA564-Δ*hptRS/ccpA*

# RL10\_STAAM

TSB

TSB-dex S-304

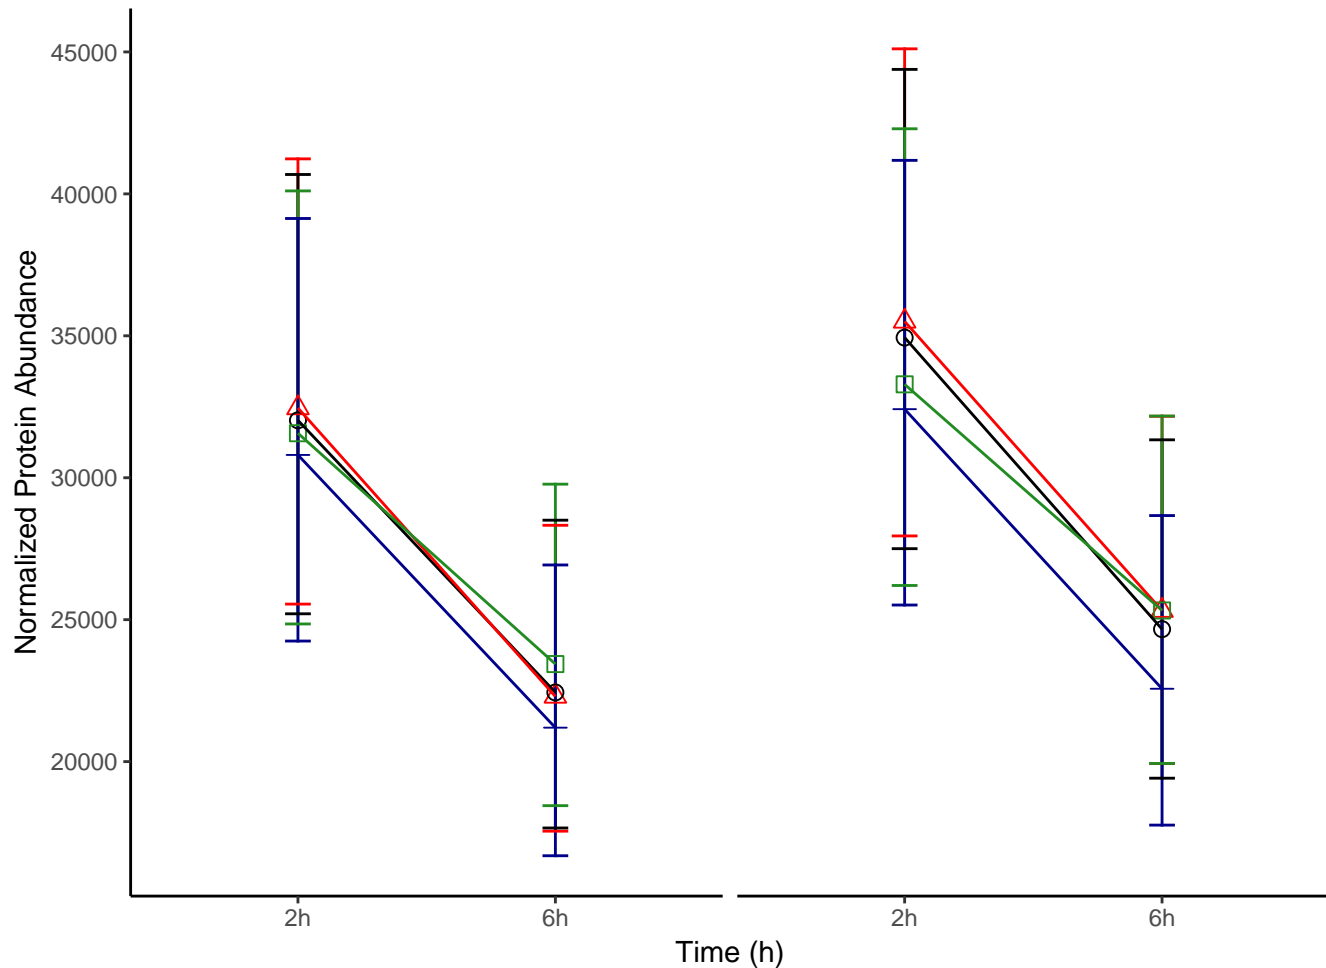

- SA564
- △ SA564- $\Delta$ *hptRS*
- SA564- $\Delta$ *ccpA*
- + SA564- $\Delta$ *hptRS/ccpA*



# RL11\_STAAM

TSB

TSB-dex S-305

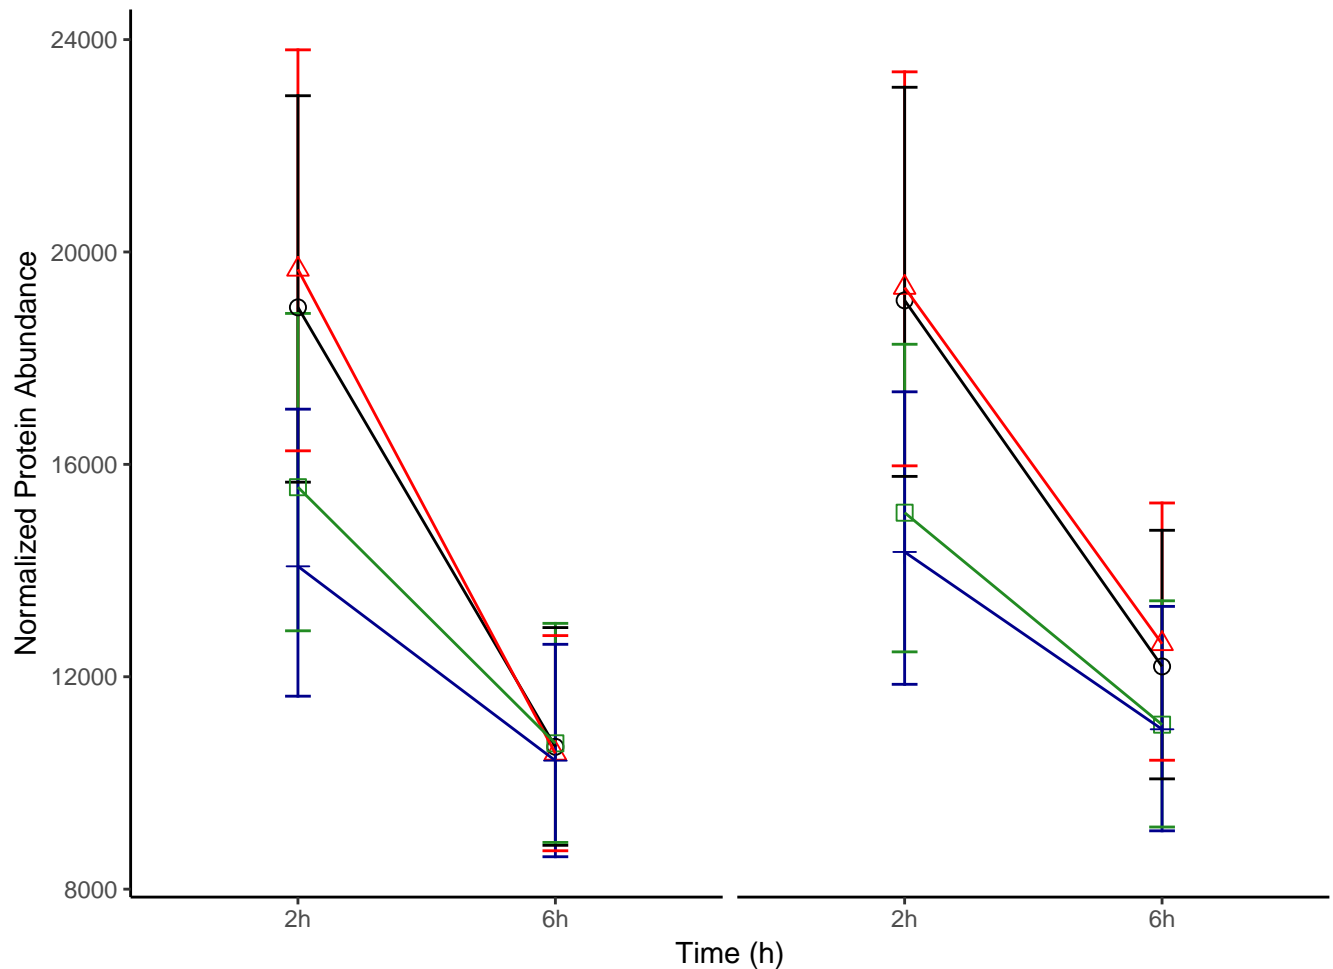

- SA564
- △ SA564- $\Delta$ *hptRS*
- SA564- $\Delta$ *ccpA*
- + SA564- $\Delta$ *hptRS/ccpA*

# RL13\_STAAM

TSB

TSB-dex S-306

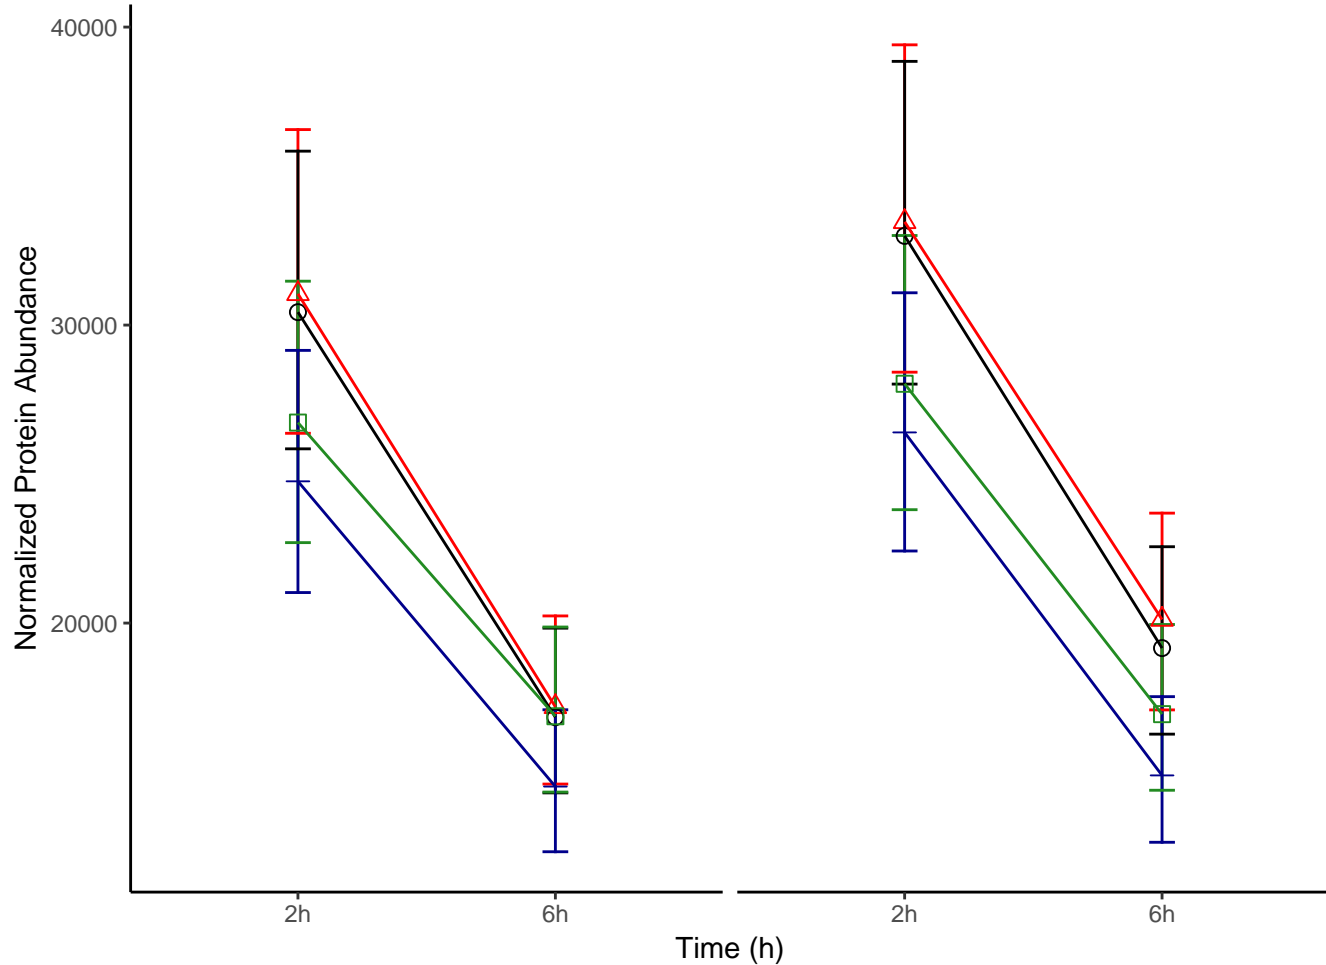

- SA564
- △ SA564- $\Delta$ *hptRS*
- SA564- $\Delta$ *ccpA*
- + SA564- $\Delta$ *hptRS/ccpA*

# RL14\_STAAM

TSB

TSB-dex S-307

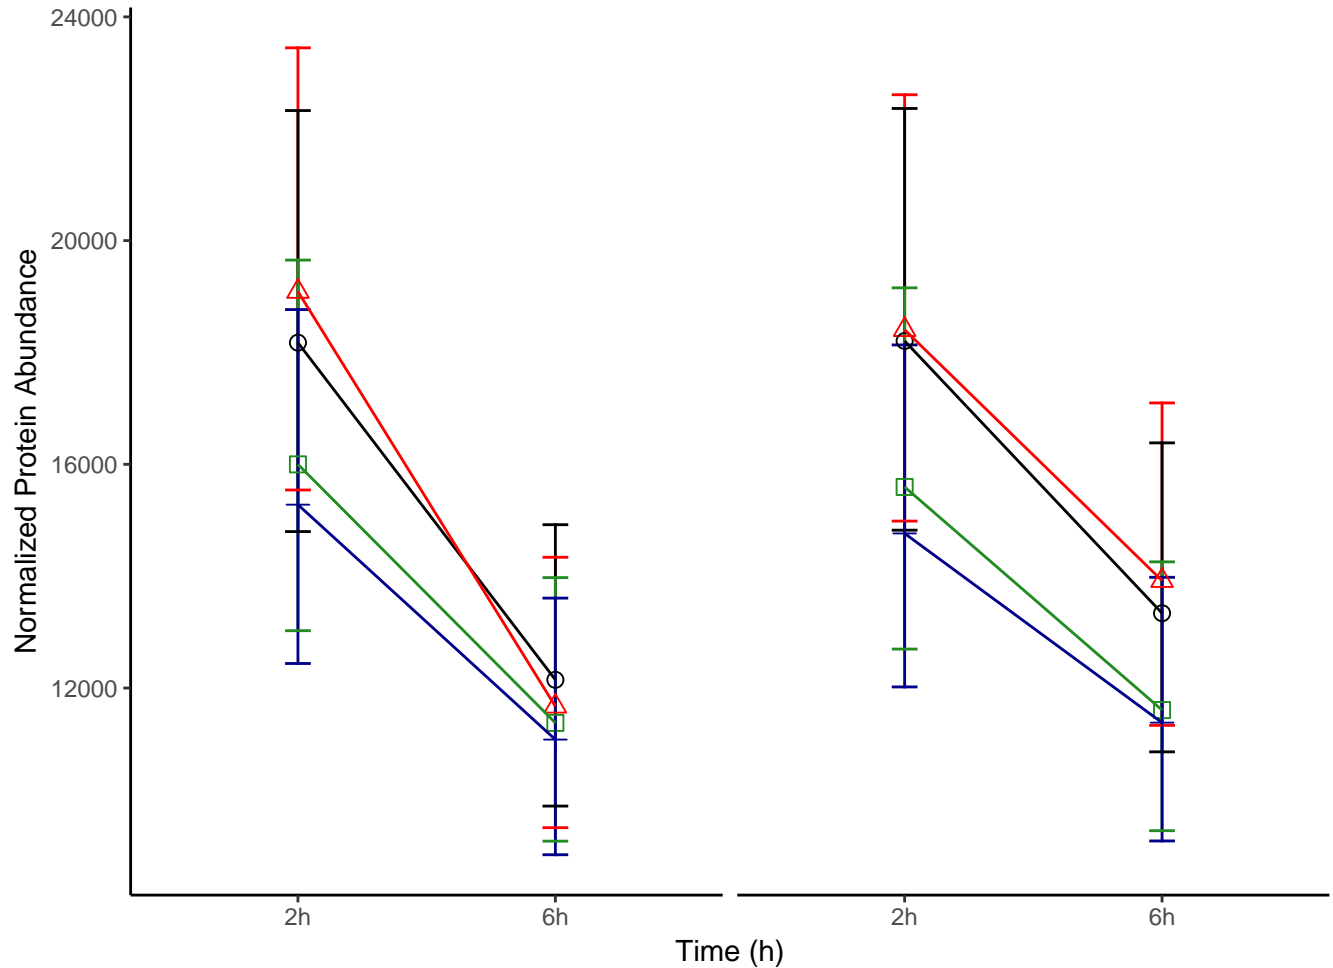

- SA564
- △ SA564-ΔhptRS
- SA564-ΔccpA
- + SA564-ΔhptRS/ccpA

# RL15\_STAAM

TSB

TSB-dex S-308

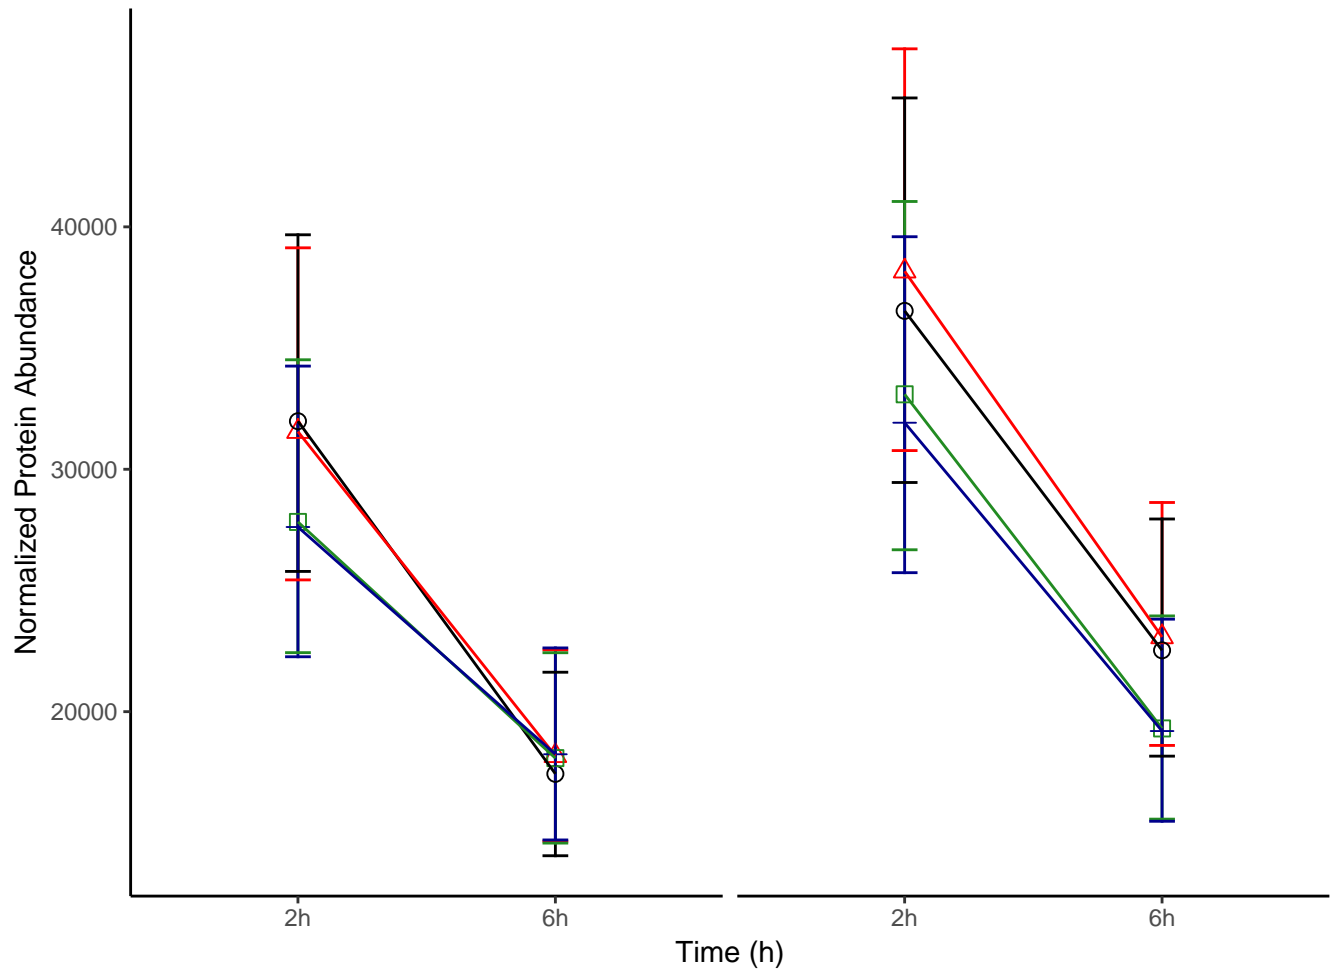

- SA564
- △ SA564-ΔhptRS
- SA564-ΔccpA
- + SA564-ΔhptRS/ccpA

# RL16\_STAAM

TSB

TSB-dex S-309

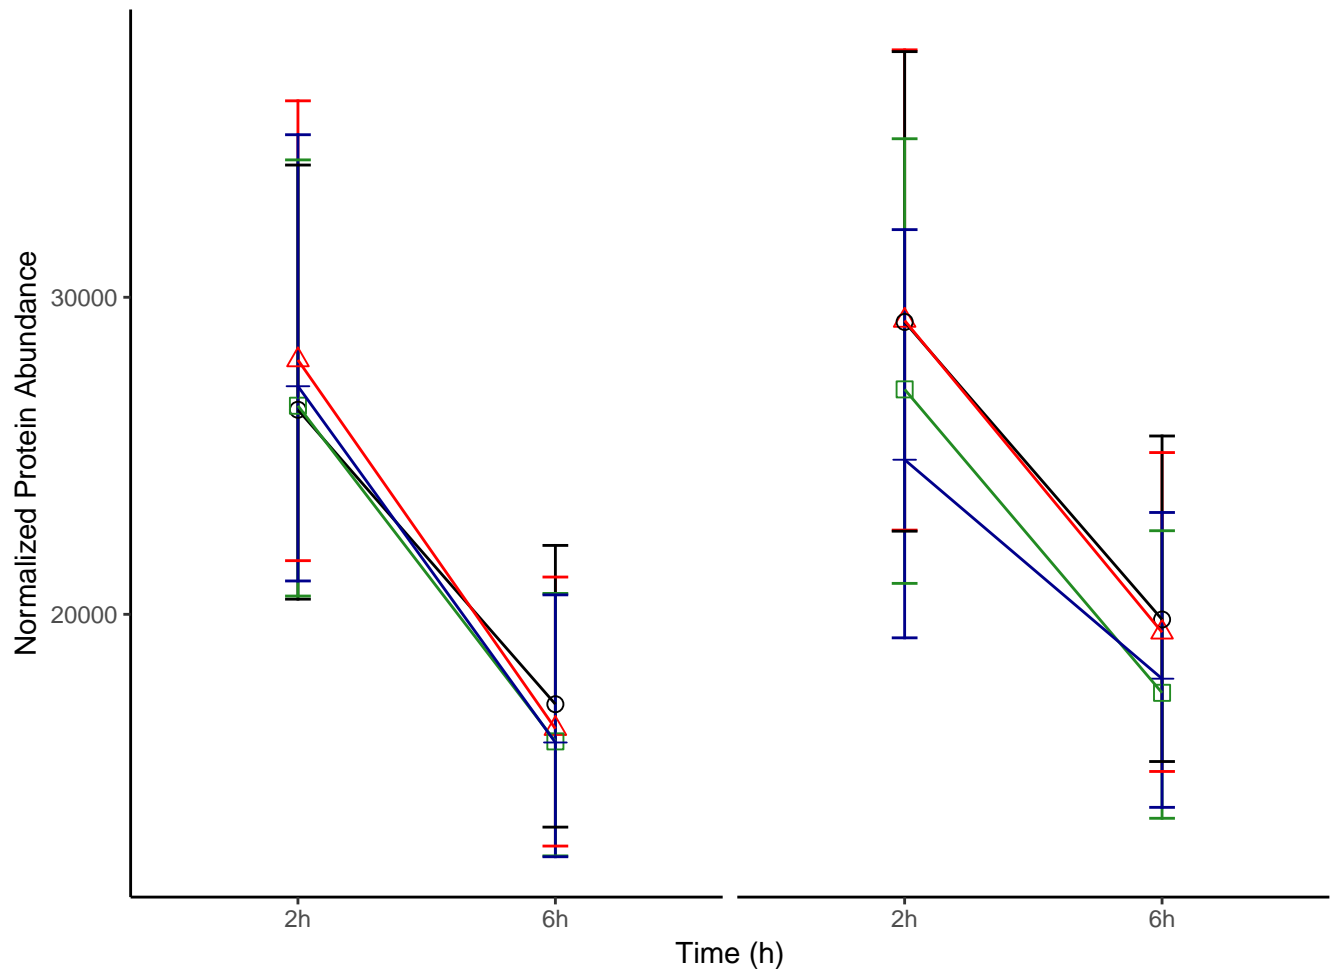

- SA564
- △ SA564- $\Delta$ *hptRS*
- SA564- $\Delta$ *ccpA*
- + SA564- $\Delta$ *hptRS/ccpA*

# RL17\_STAAM

TSB

TSB-dex S-310

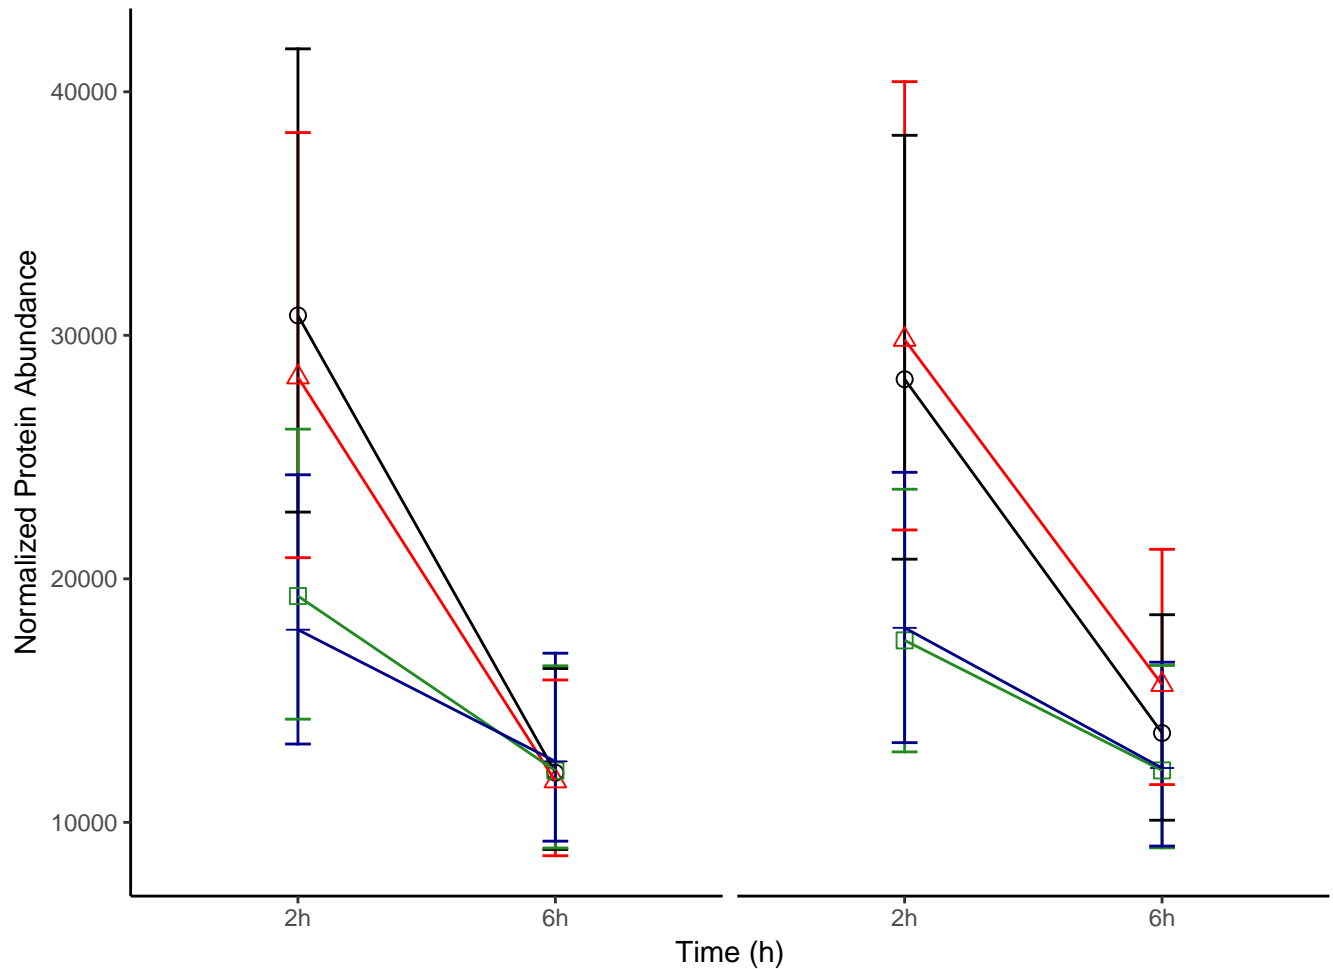

- SA564
- △ SA564- $\Delta$ hptRS
- SA564- $\Delta$ ccpA
- + SA564- $\Delta$ hptRS/ccpA

# RL18\_STAAM

TSB

TSB-dex S-311

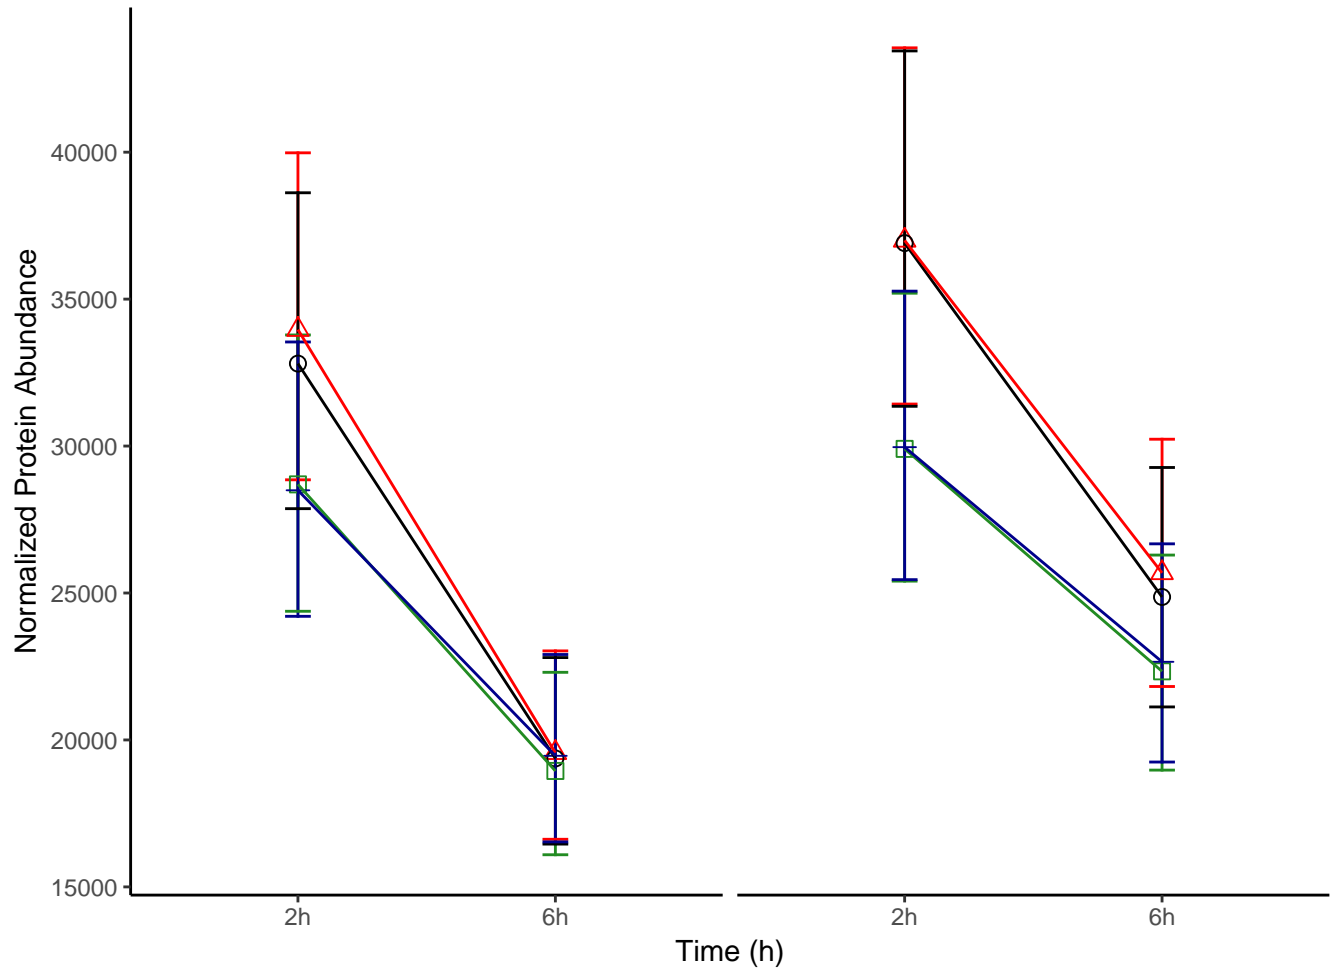

- SA564
- △ SA564- $\Delta$ hptRS
- SA564- $\Delta$ ccpA
- + SA564- $\Delta$ hptRS/ccpA

# RL19\_STAAM

TSB

TSB-dex S-312

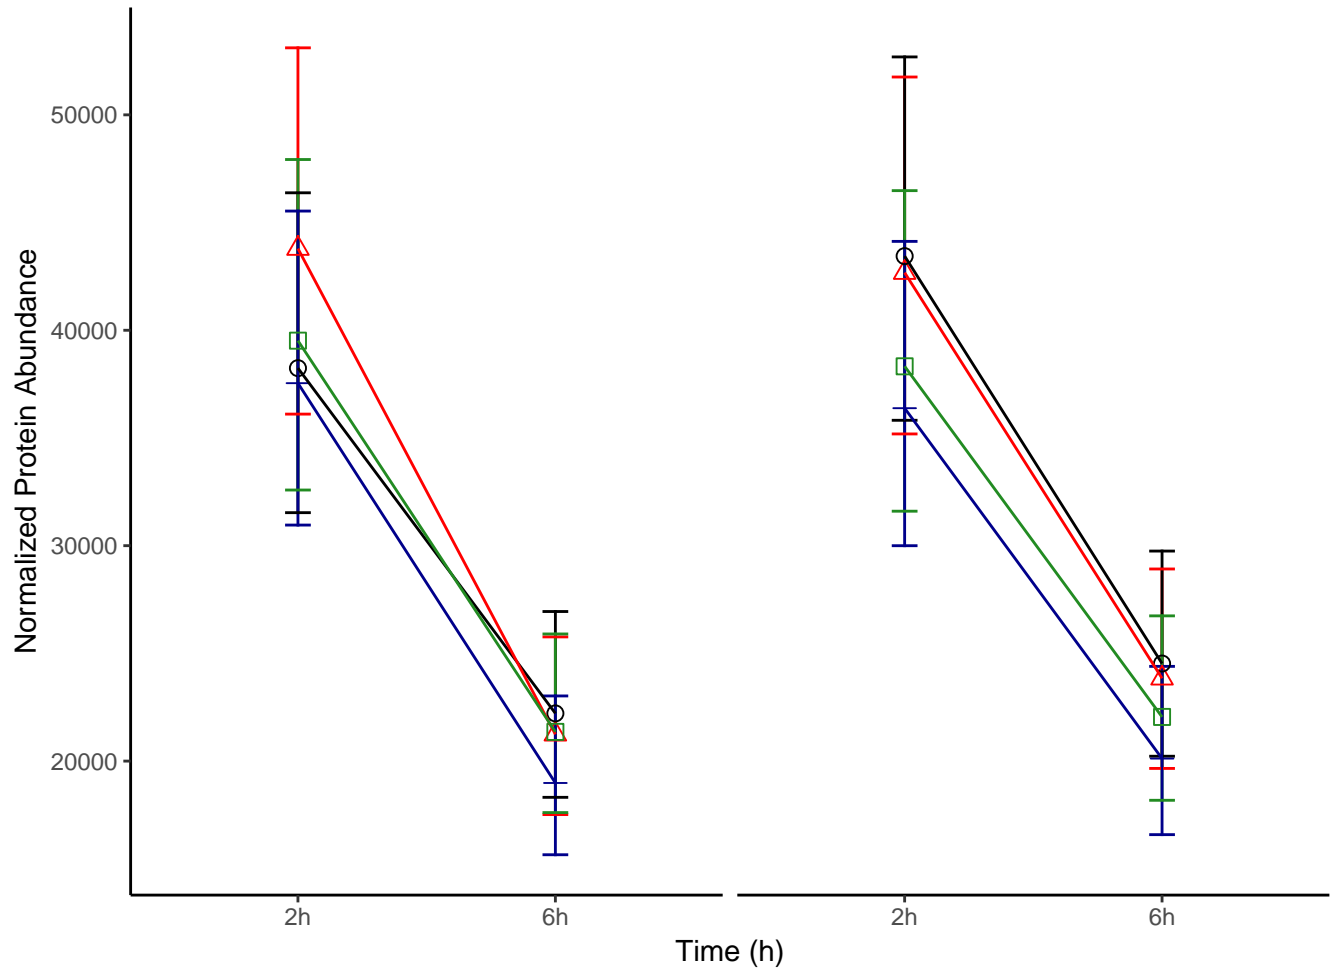

- SA564
- △ SA564- $\Delta$ hptRS
- SA564- $\Delta$ ccpA
- + SA564- $\Delta$ hptRS/ccpA



# RL2\_STAAM

TSB

TSB-dex S-313

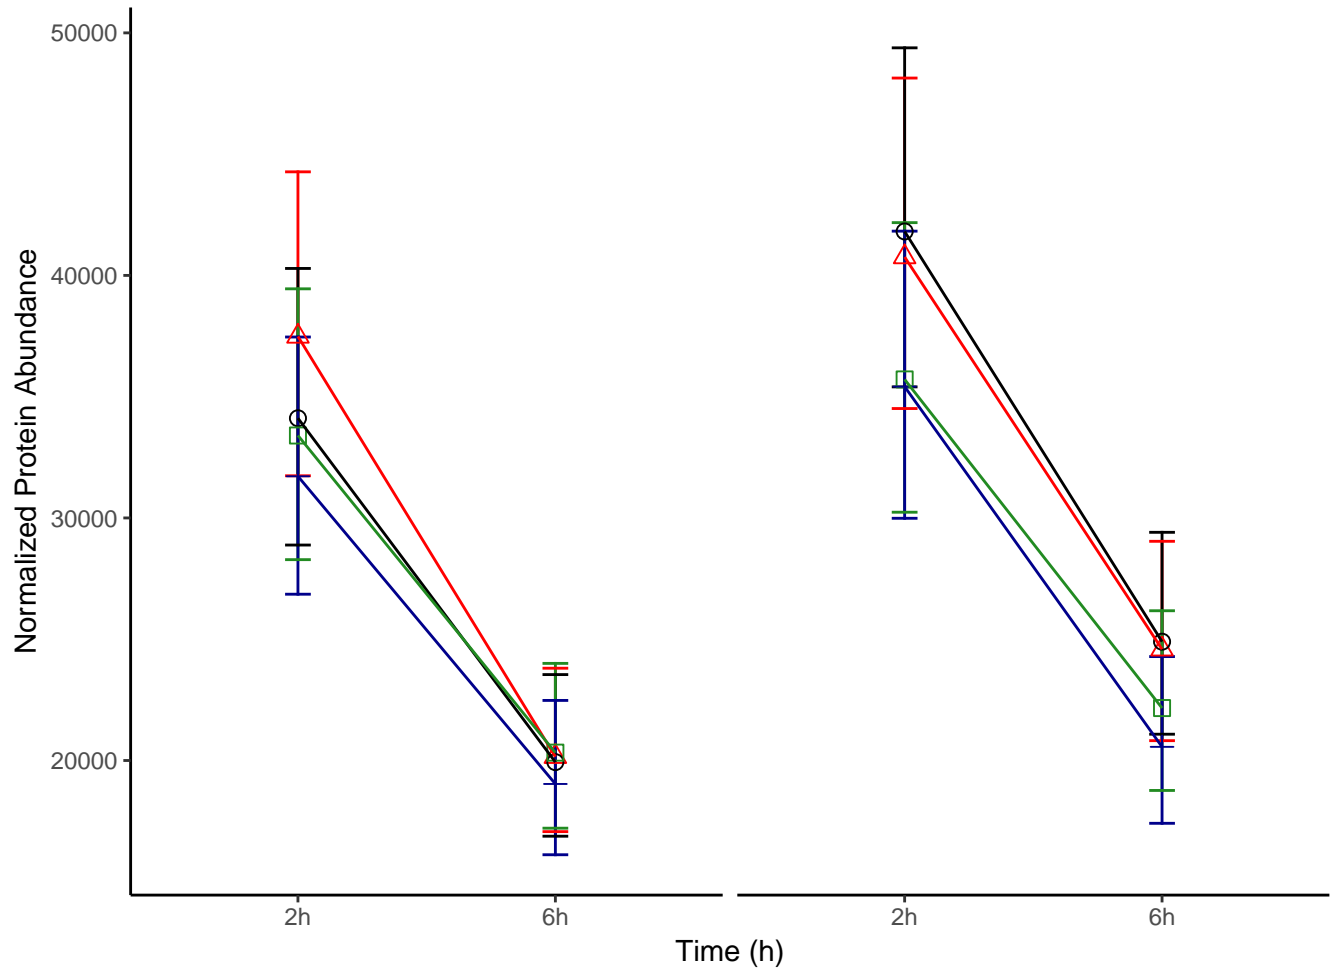

- SA564
- △ SA564-ΔhptRS
- SA564-ΔccpA
- + SA564-ΔhptRS/ccpA

# RL20\_STAAM

TSB

TSB-dex S-314

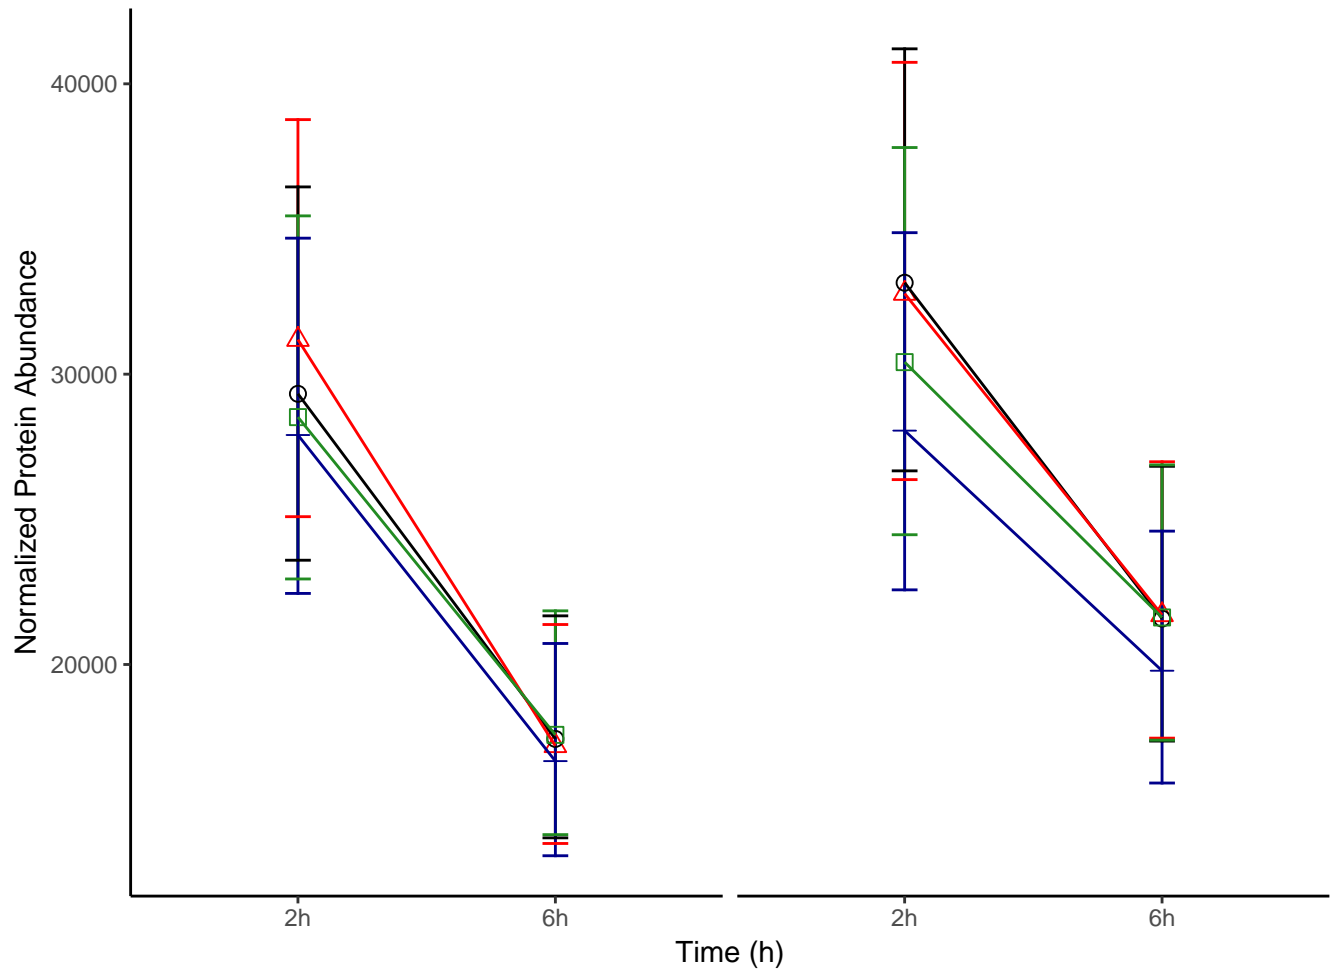

- SA564
- △ SA564-ΔhptRS
- SA564-ΔccpA
- + SA564-ΔhptRS/ccpA

# RL21\_STAAM

TSB

TSB-dex S-315

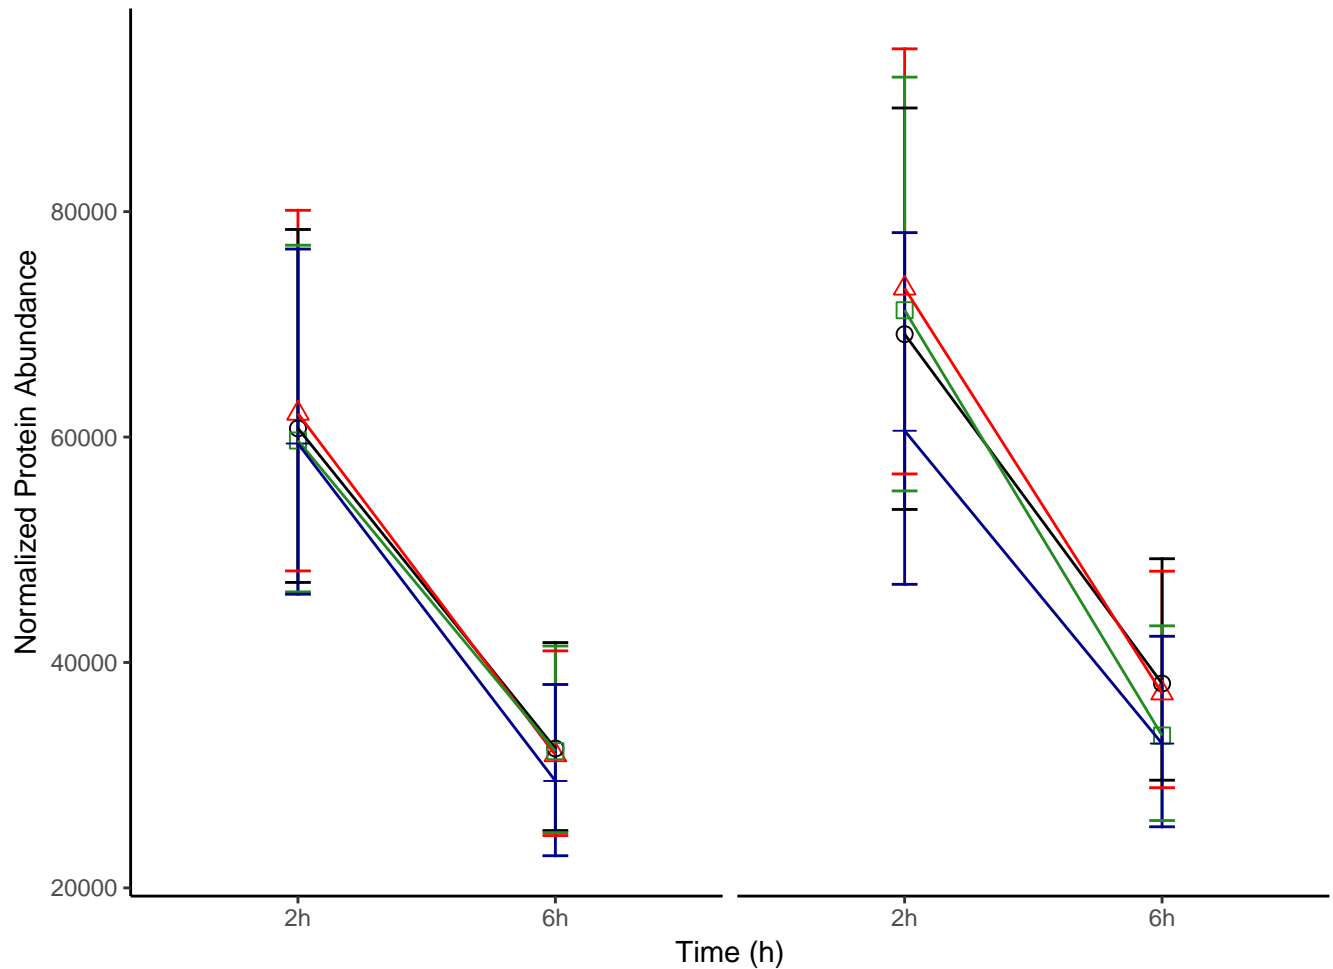

- SA564
- △ SA564- $\Delta$ *hptRS*
- SA564- $\Delta$ *ccpA*
- + SA564- $\Delta$ *hptRS/ccpA*

# RL22\_STAAM

TSB

TSB-dex S-316

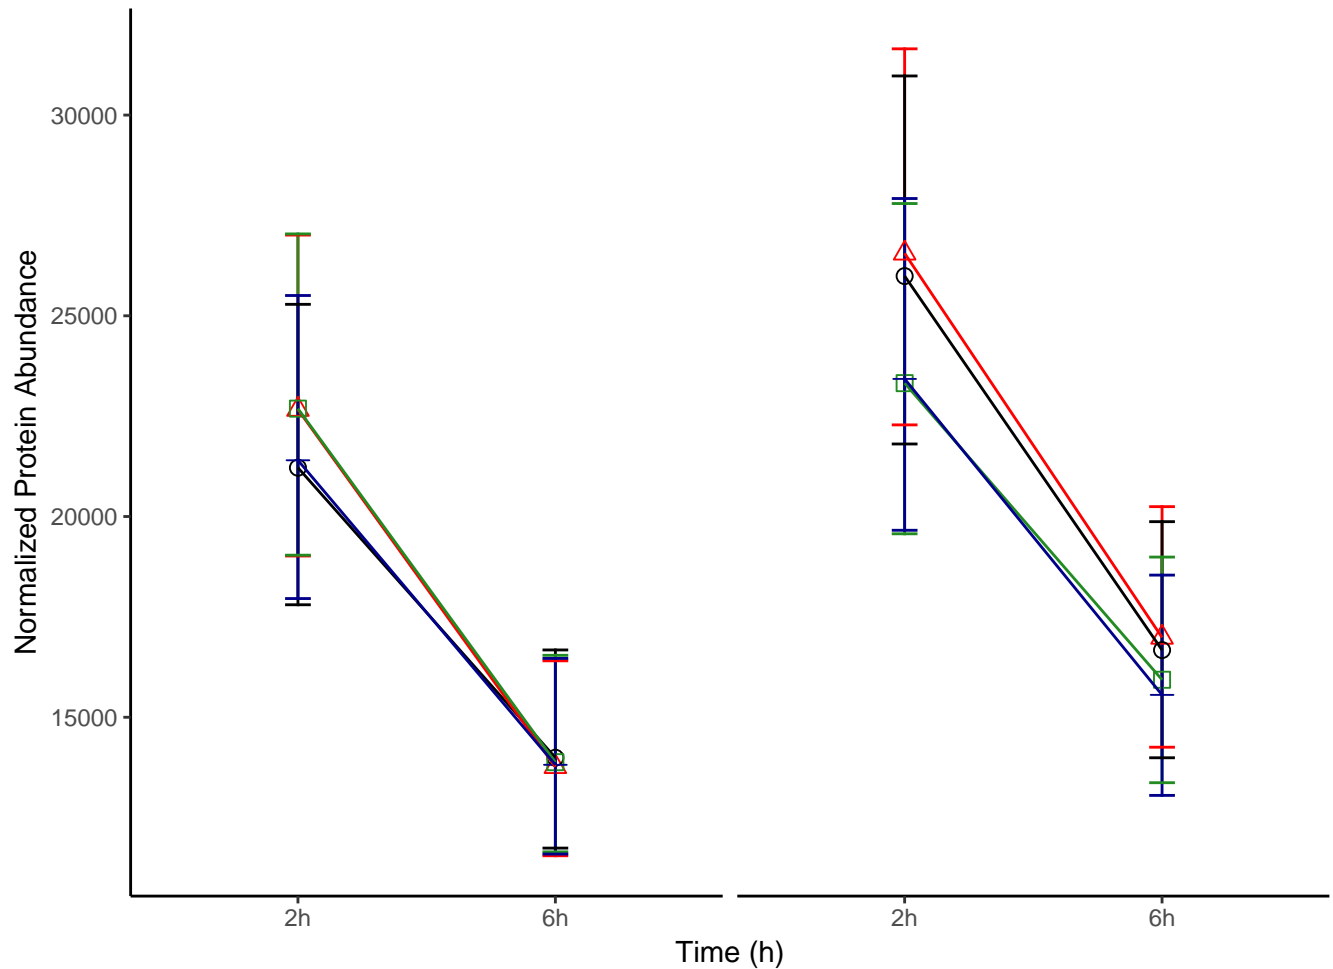

- SA564
- SA564- $\Delta hptRS$
- SA564- $\Delta ccpA$
- SA564- $\Delta hptRS/ccpA$

# RL23\_STAAM

TSB

TSB-dex S-317

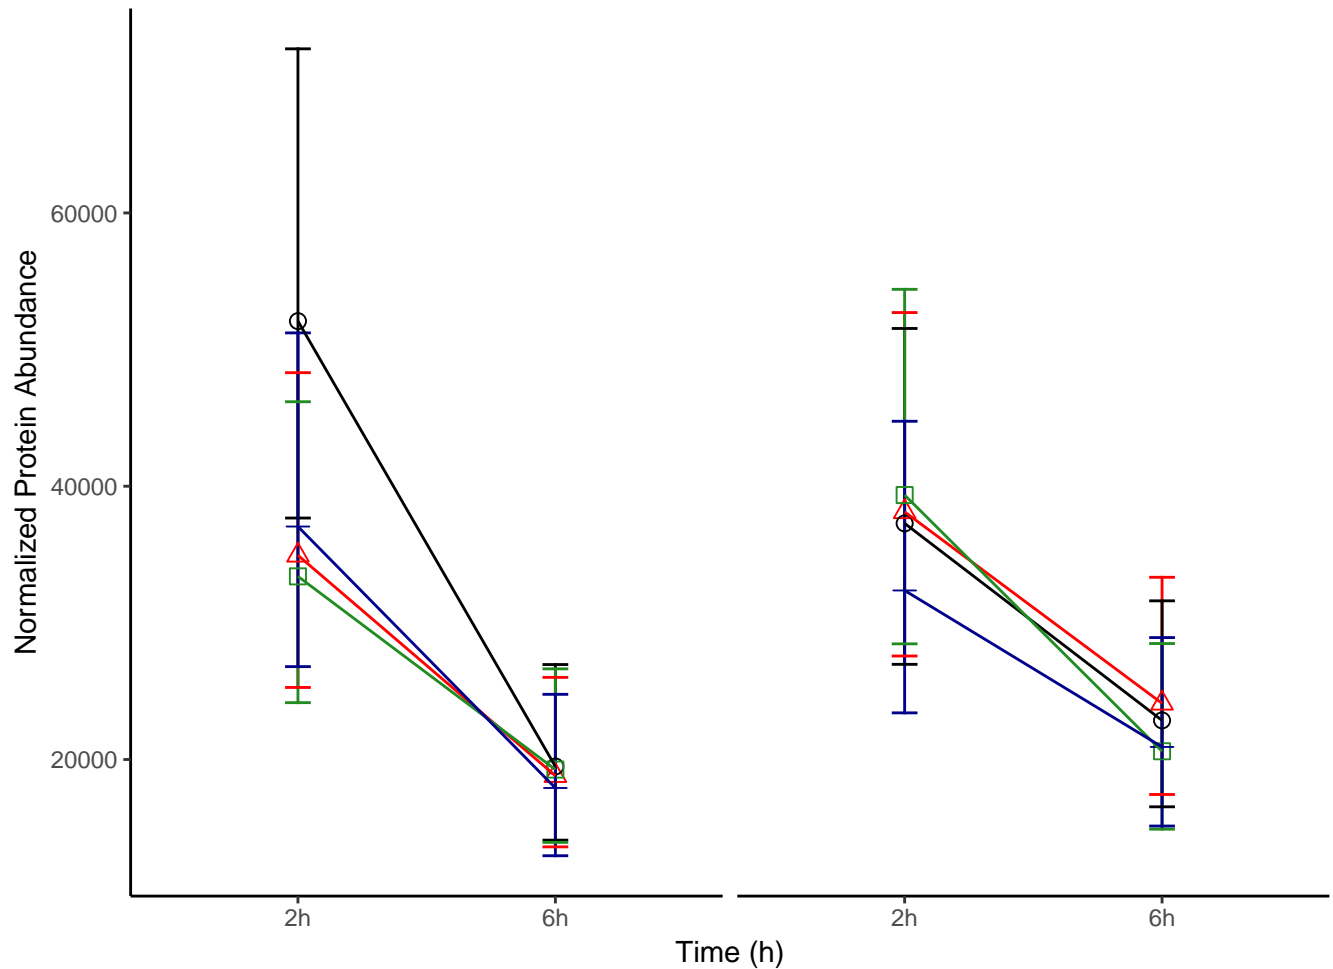

- SA564
- △ SA564-ΔhptRS
- SA564-ΔccpA
- + SA564-ΔhptRS/ccpA

# RL24\_STAAM

TSB

TSB-dex S-318

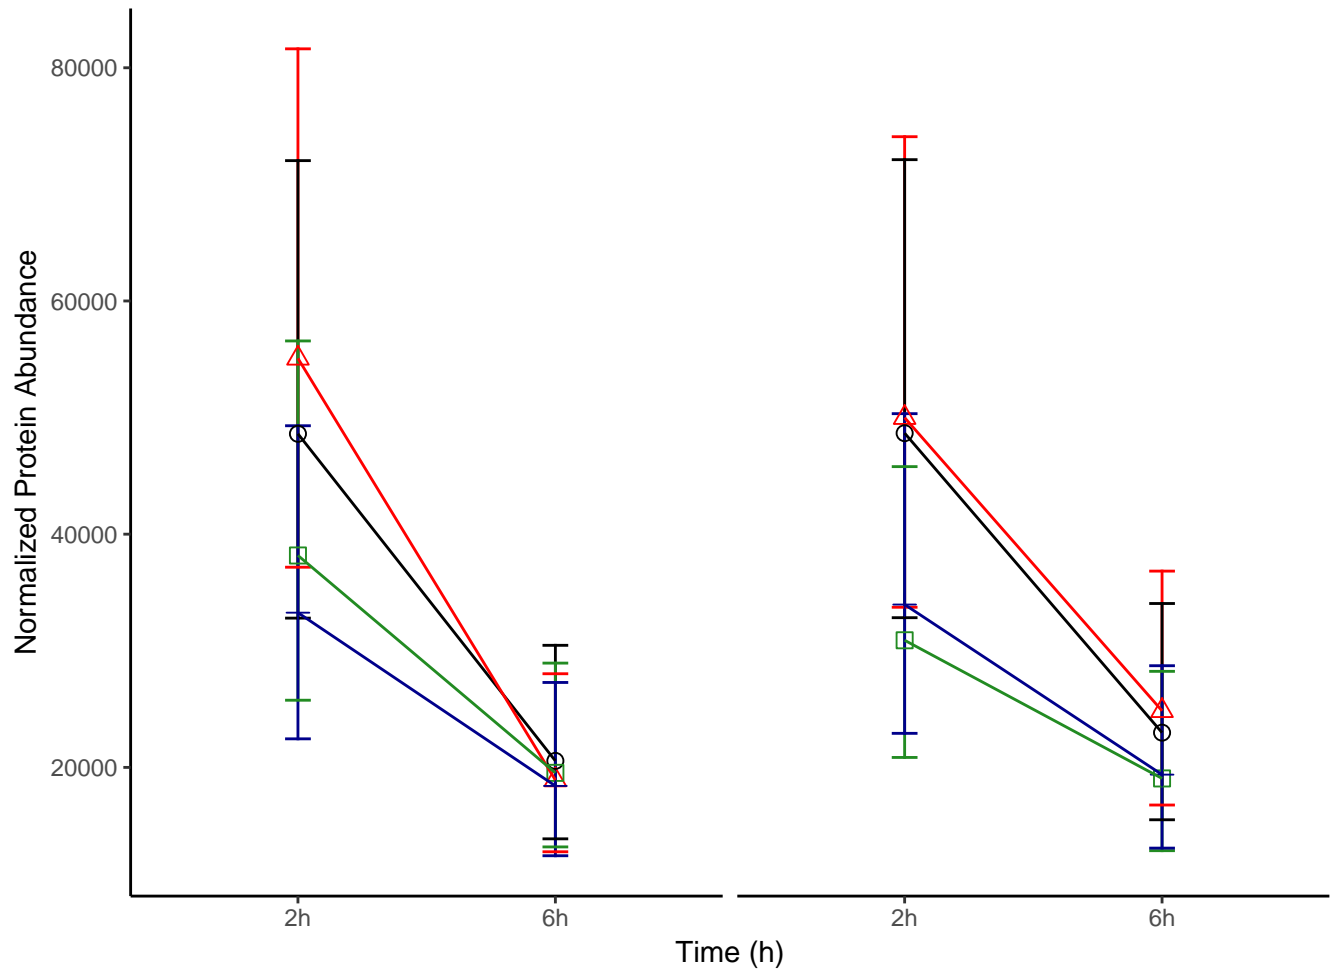

- SA564
- △ SA564-Δ*hptRS*
- SA564-Δ*ccpA*
- + SA564-Δ*hptRS/ccpA*

# RL25\_STAAM

TSB

TSB-dex S-319

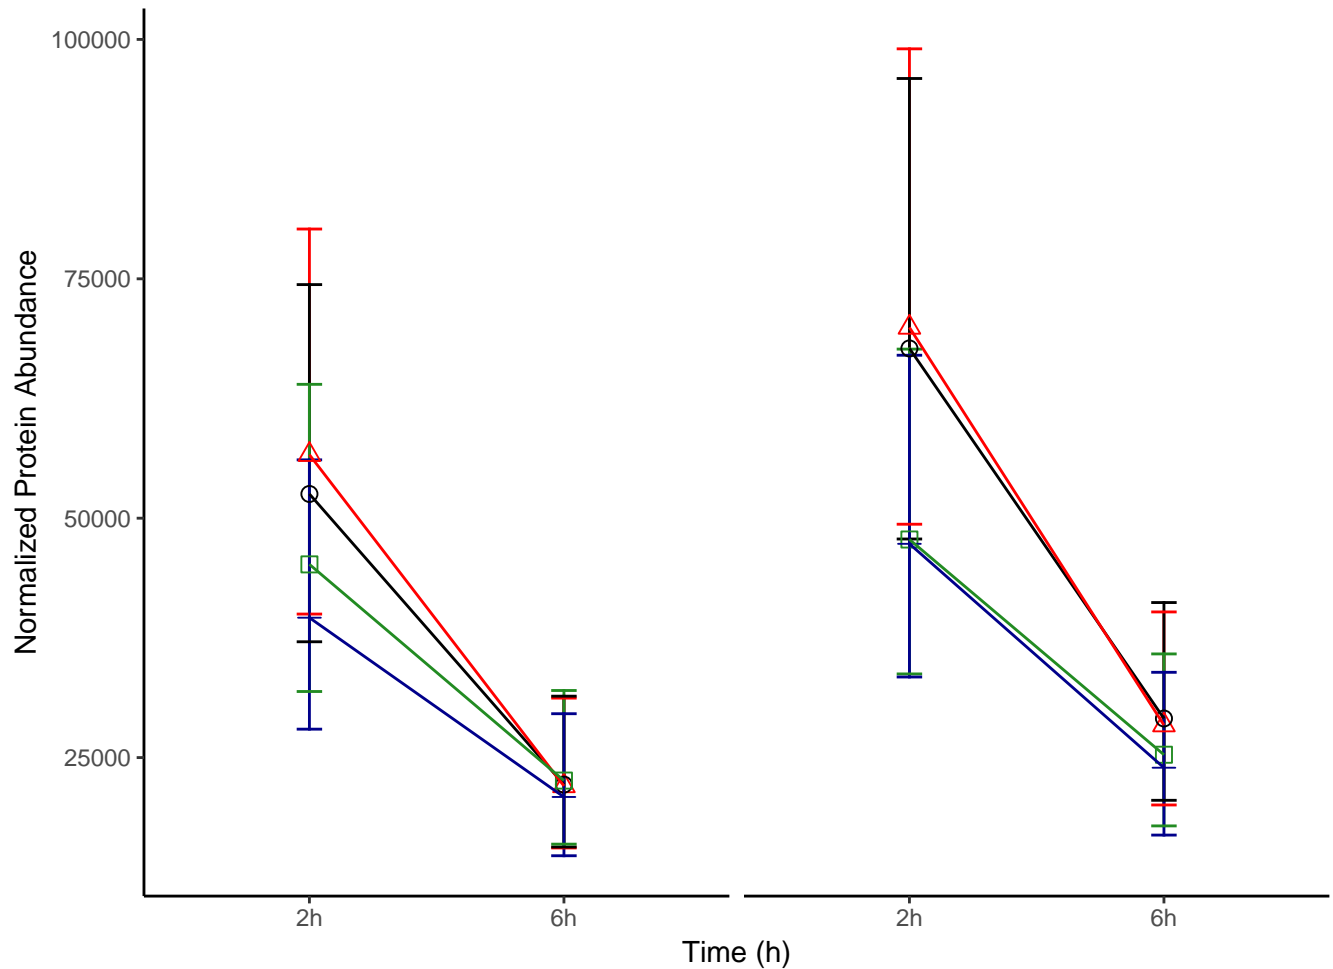

- SA564
- △ SA564- $\Delta hptRS$
- SA564- $\Delta ccpA$
- +

# RL27\_STAAM

TSB

TSB-dex S-320

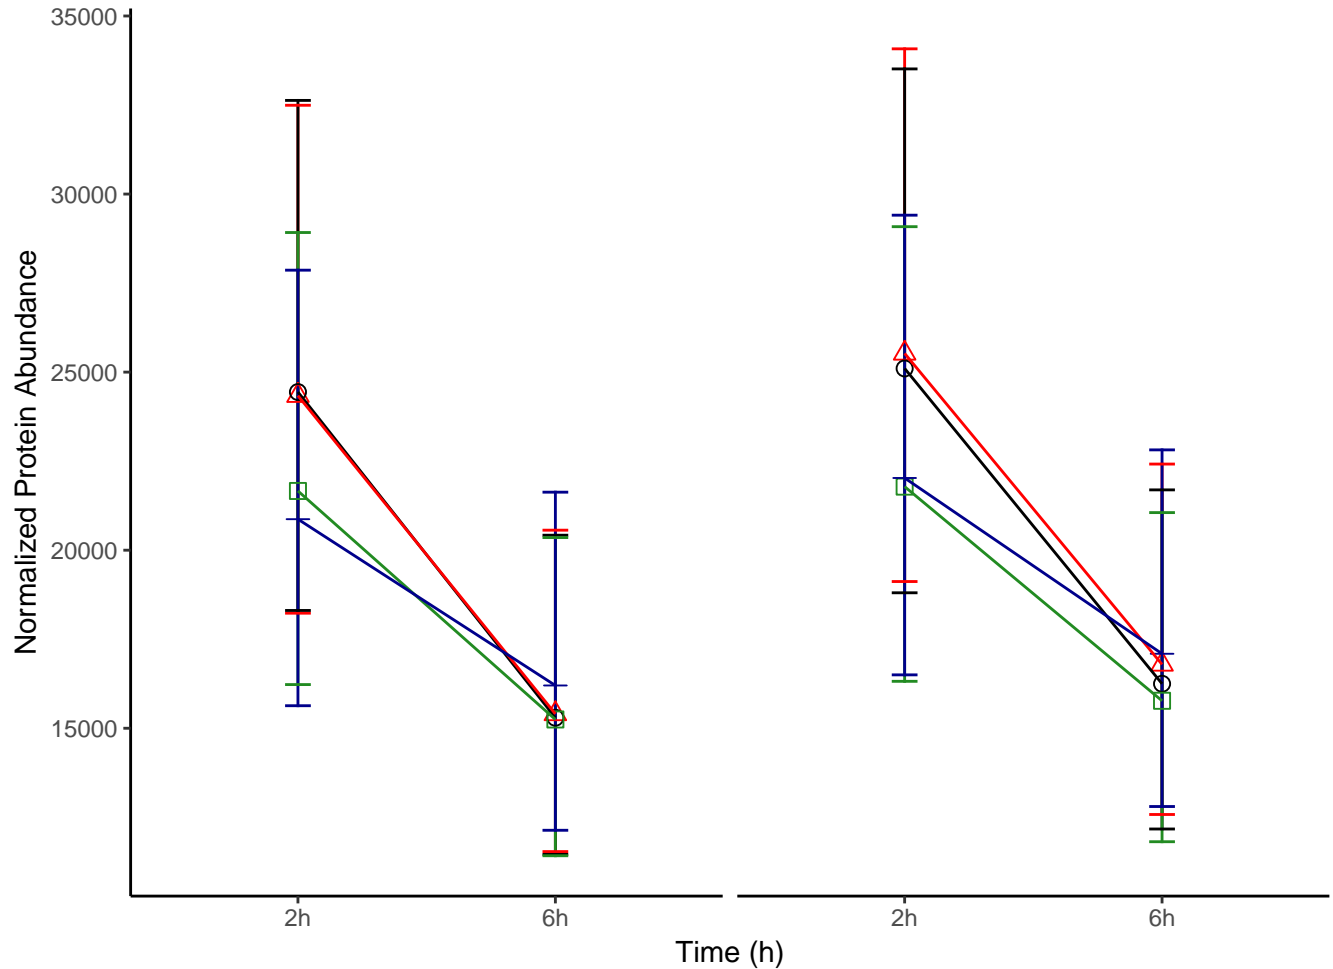

- SA564
- △ SA564-Δ*hptRS*
- SA564-Δ*ccpA*
- + SA564-Δ*hptRS/ccpA*



# RL28\_STAAM

TSB

TSB-dex S-321

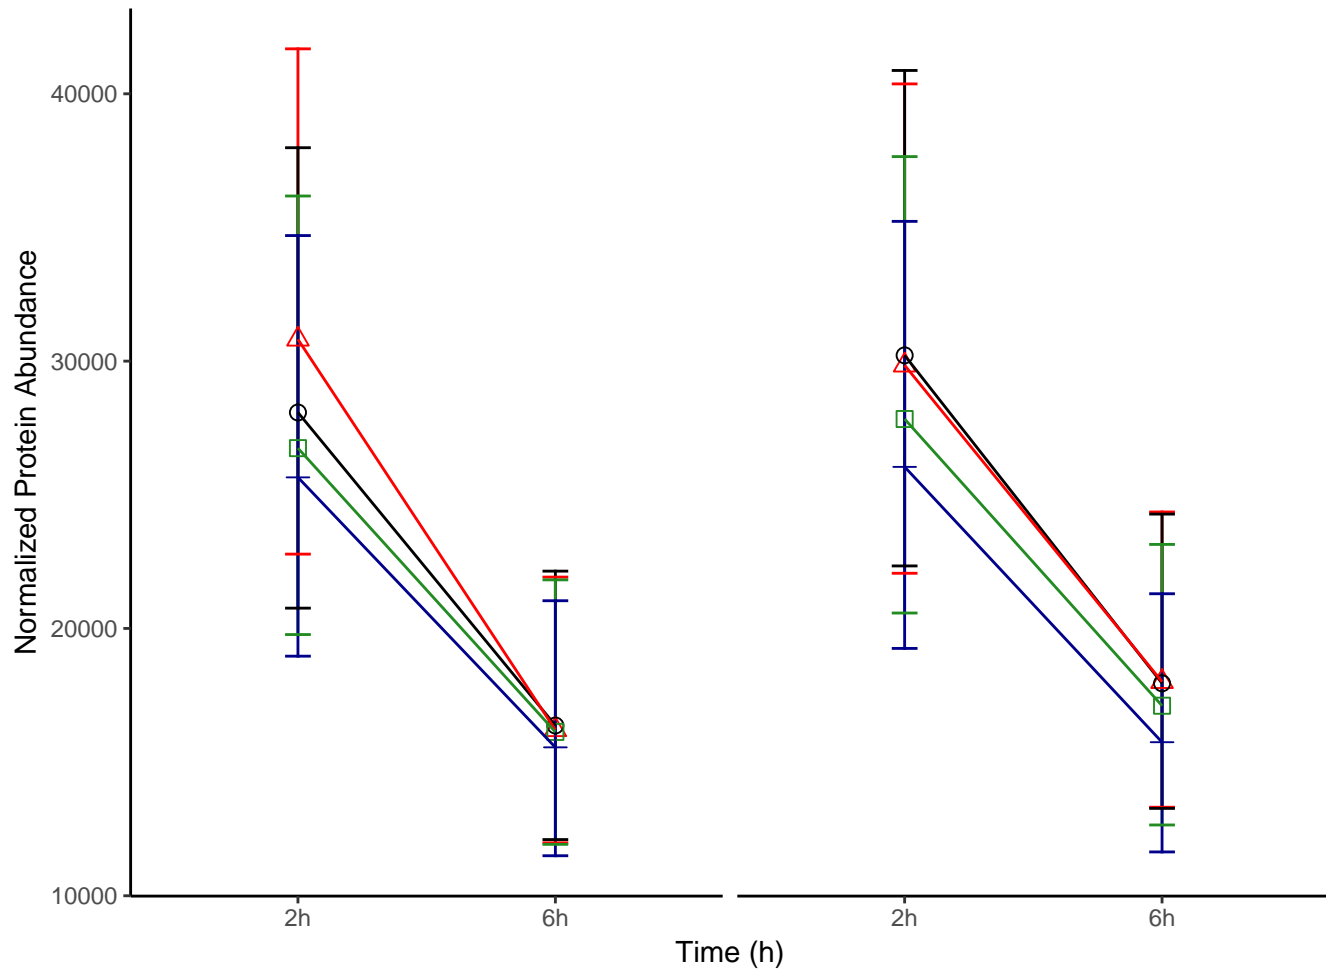

- SA564
- △ SA564-ΔhptRS
- SA564-ΔccpA
- + SA564-ΔhptRS/ccpA

# RL29\_STAAM

TSB

TSB-dex S-322

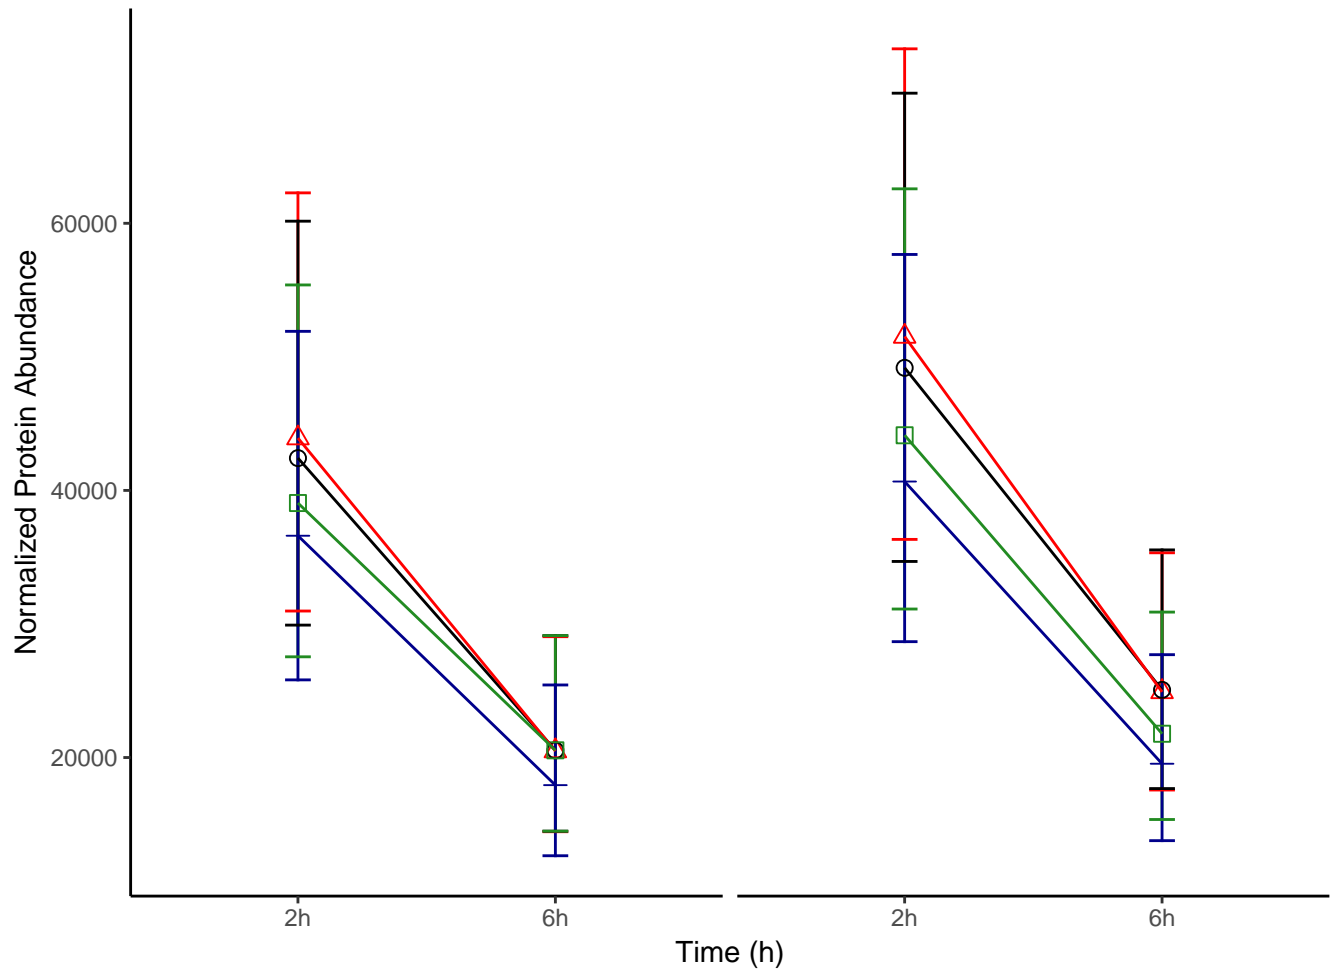

- SA564
- △ SA564-Δ*hptRS*
- SA564-Δ*ccpA*
- + SA564-Δ*hptRS/ccpA*

# RL3\_STAAM

TSB

TSB-dex S-323

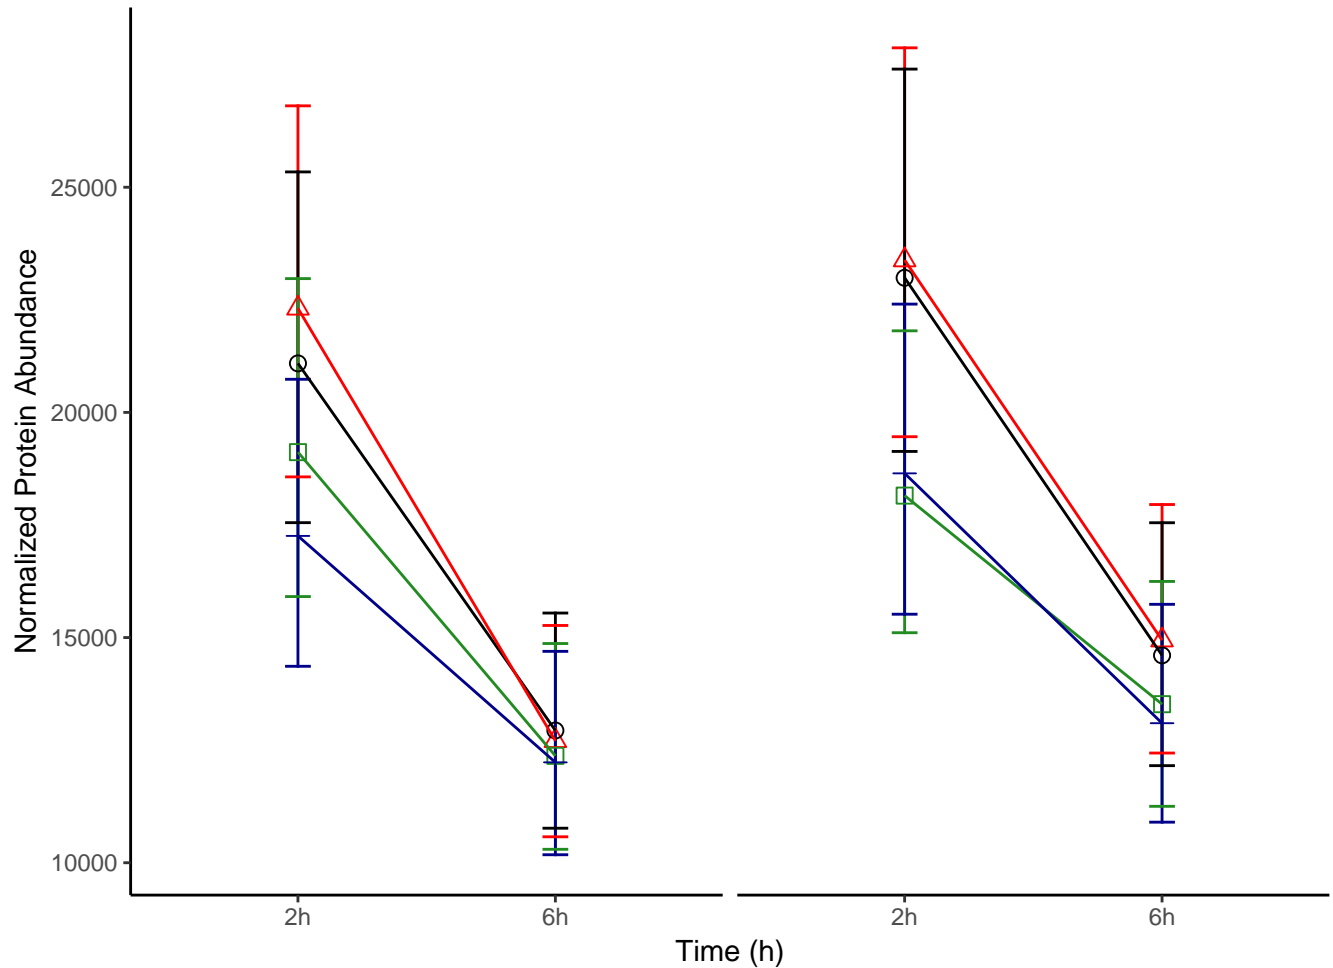

- SA564
- △ SA564- $\Delta hptRS$
- SA564- $\Delta ccpA$
- + SA564- $\Delta hptRS/ccpA$

# RL30\_STAAM

TSB

TSB-dex S-324

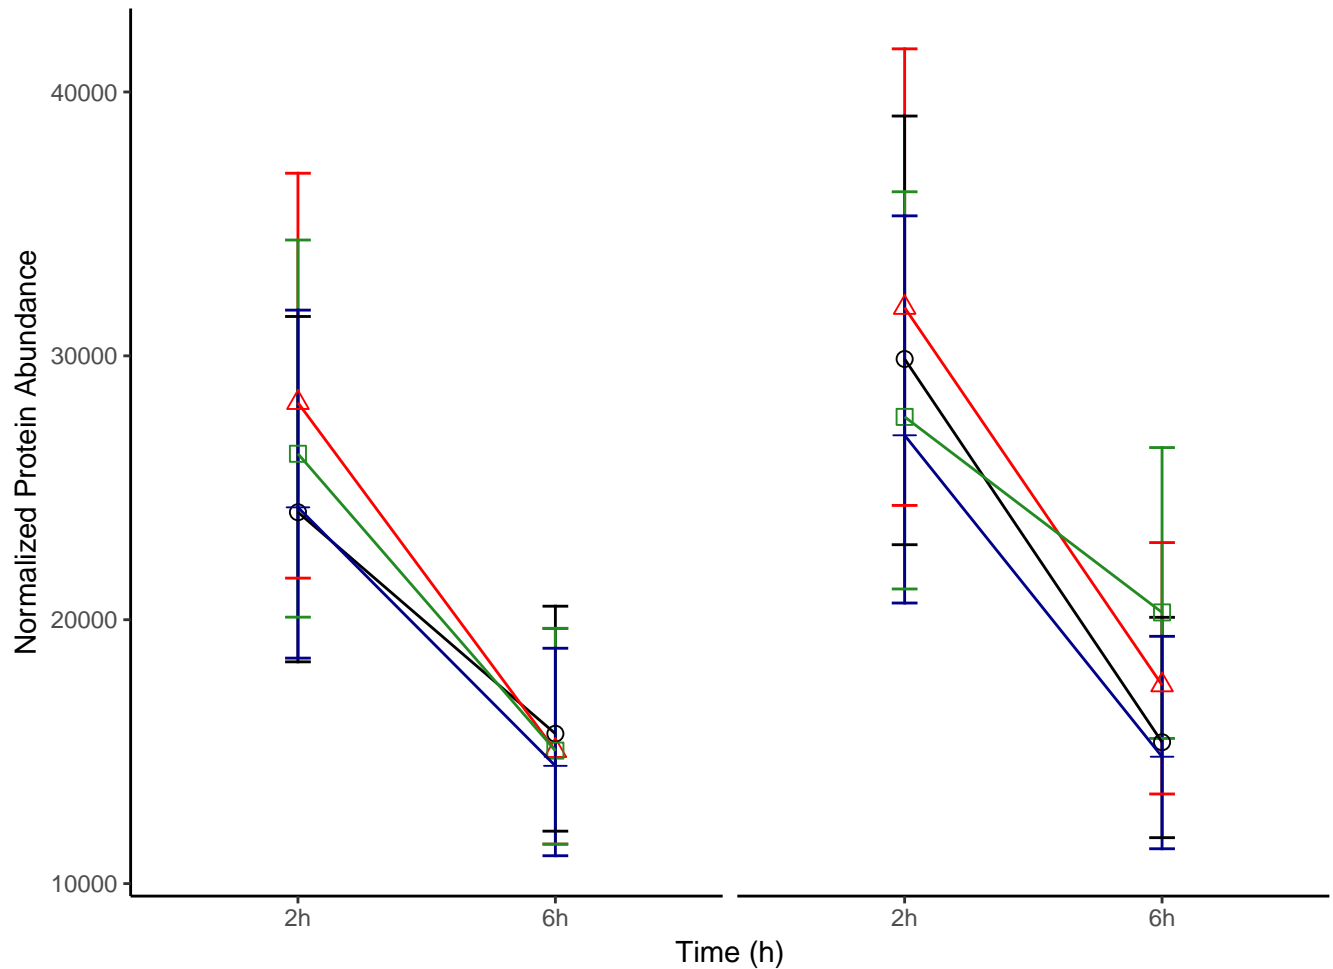

- SA564
- △ SA564- $\Delta$ hptRS
- SA564- $\Delta$ ccpA
- + SA564- $\Delta$ hptRS/ccpA

# RL31B\_STAAM

TSB

TSB-dex S-325

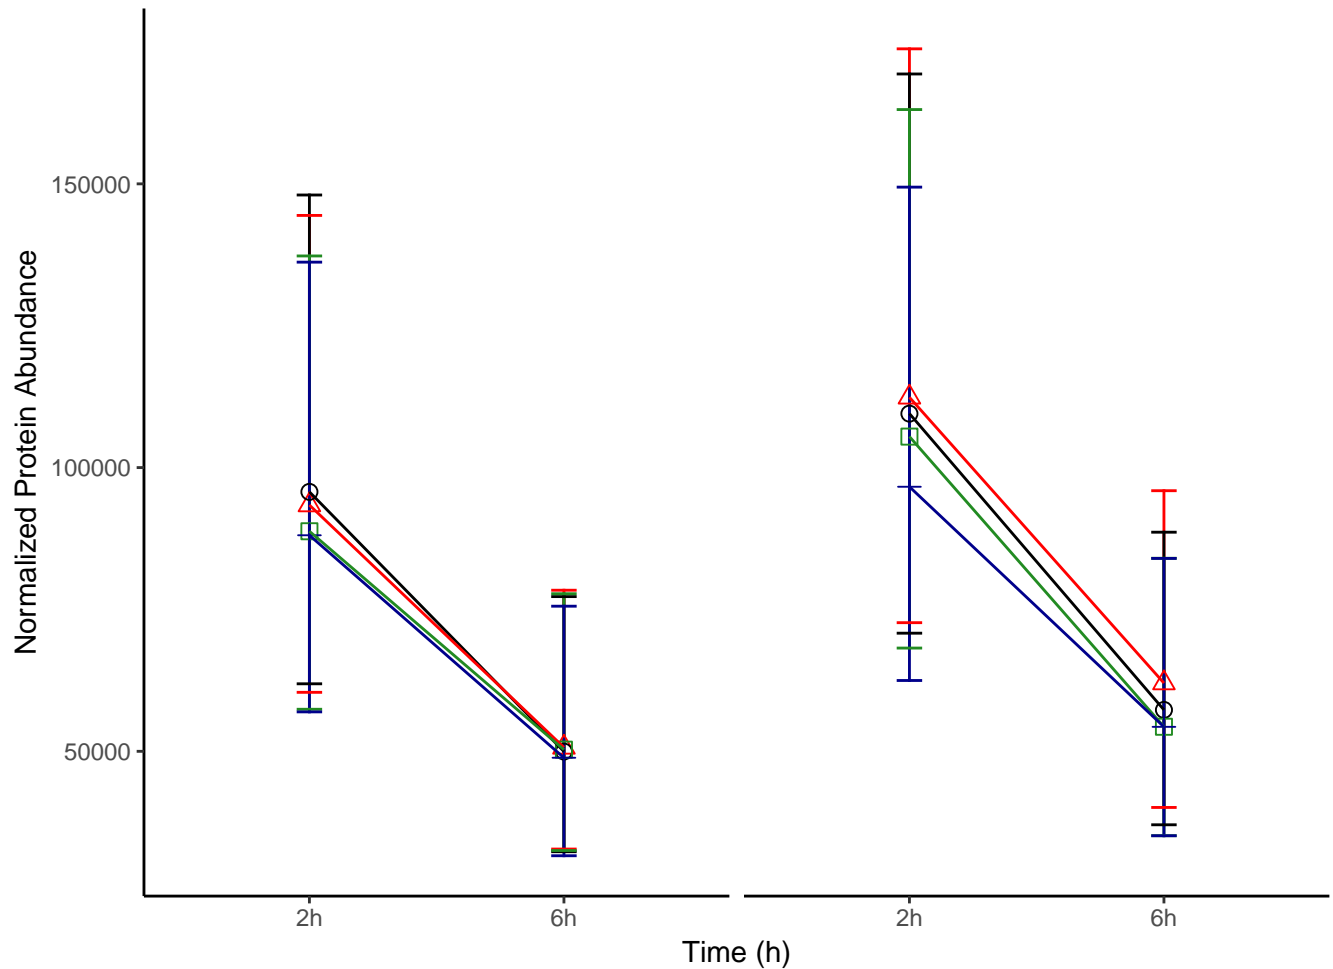

- SA564
- △ SA564- $\Delta hptRS$
- SA564- $\Delta ccpA$
- + SA564- $\Delta hptRS/ccpA$

# RL32\_STAAM

TSB

TSB-dex S-326

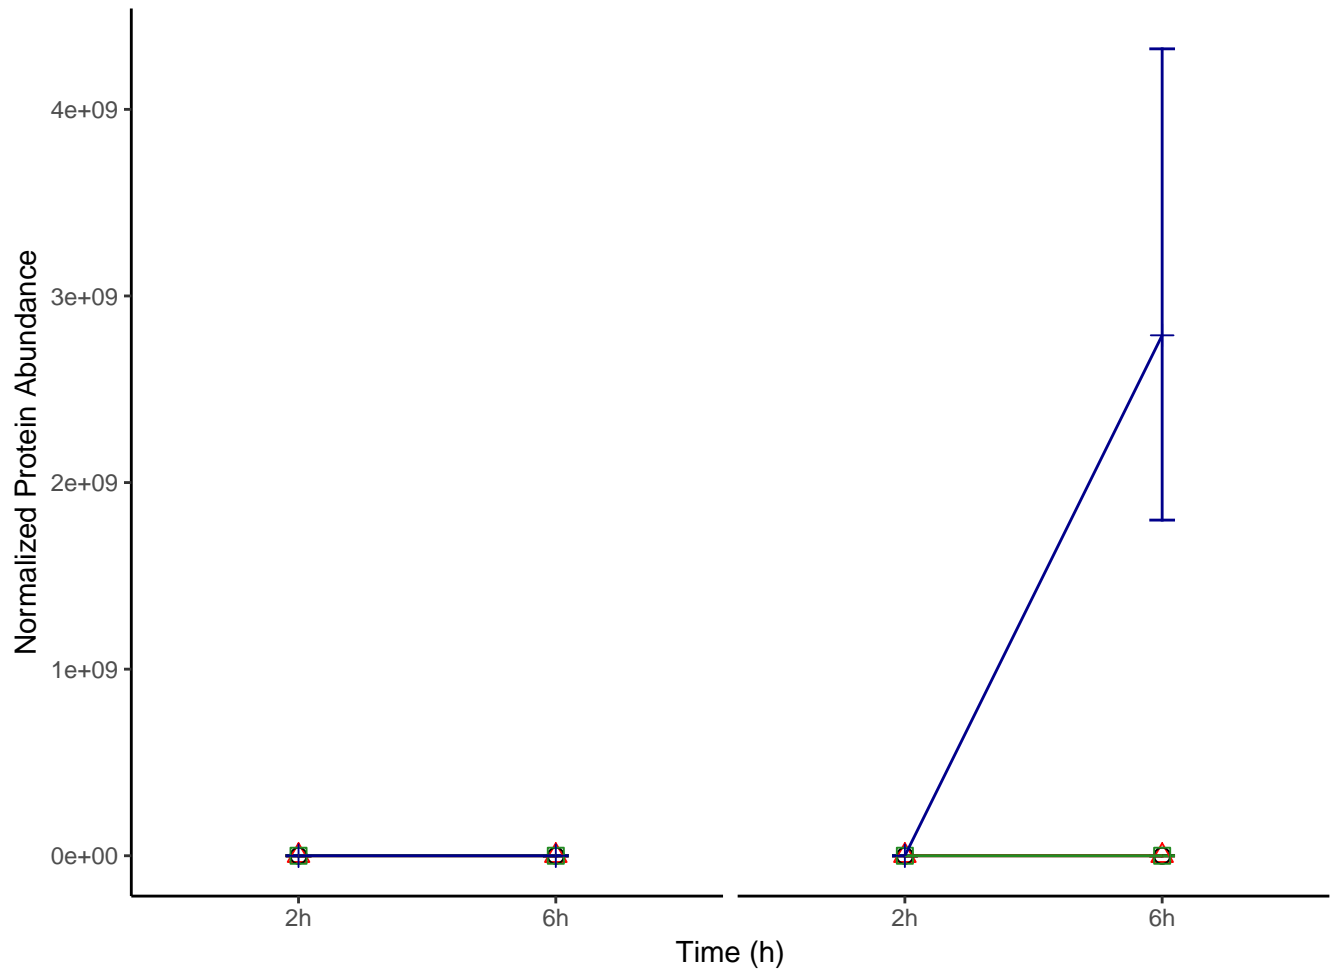

- SA564
- △ SA564-ΔhptRS
- SA564-ΔccpA
- + SA564-ΔhptRS/ccpA

# RL331\_STAAM

TSB

TSB-dex S-327

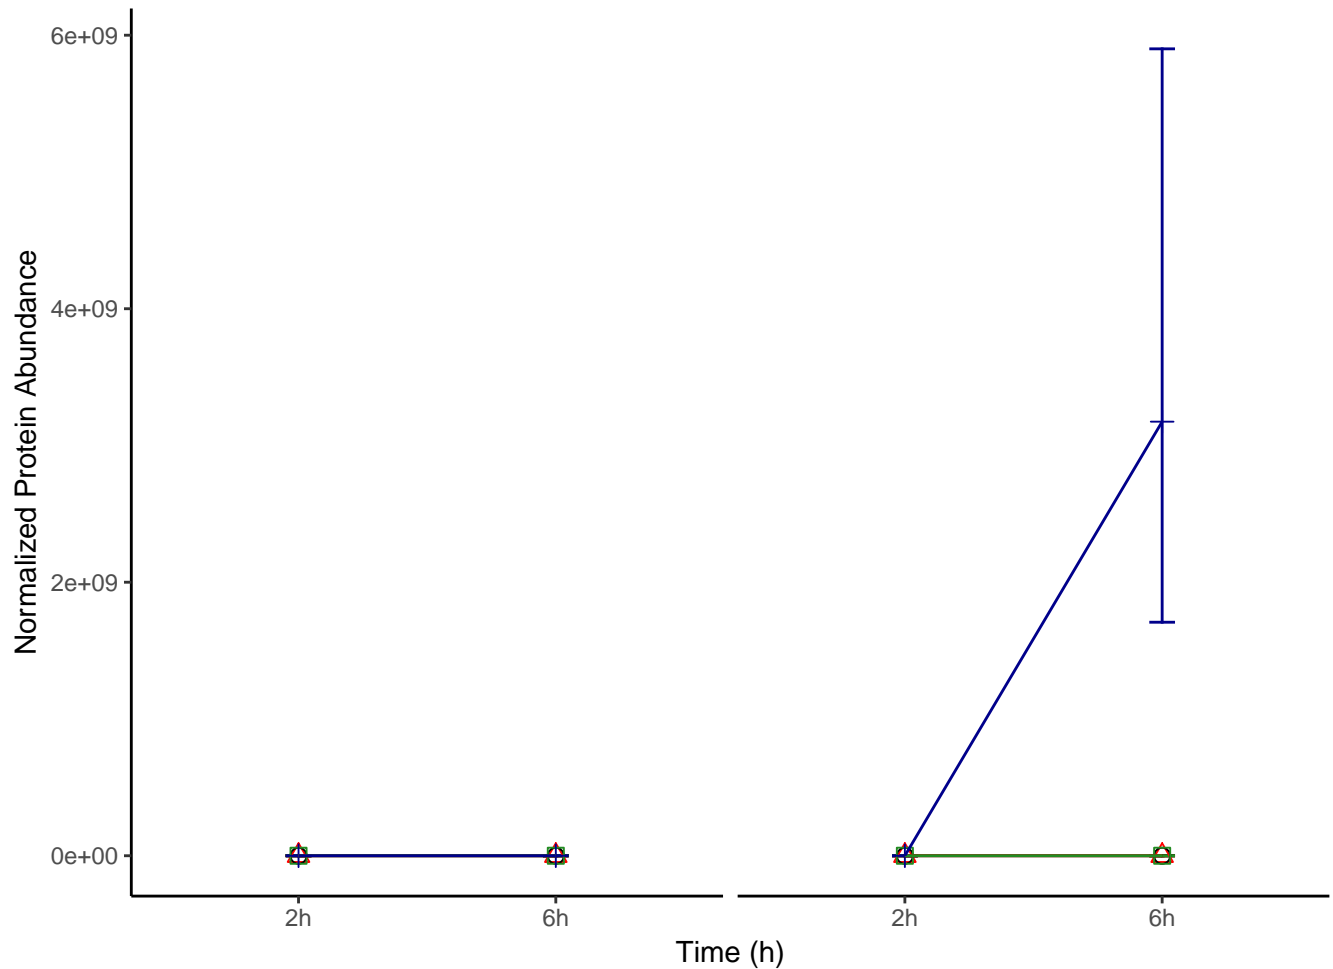

- SA564
- △ SA564-ΔhptRS
- SA564-ΔccpA
- + SA564-ΔhptRS/ccpA

# RL332\_STAAM

TSB

TSB-dex S-328

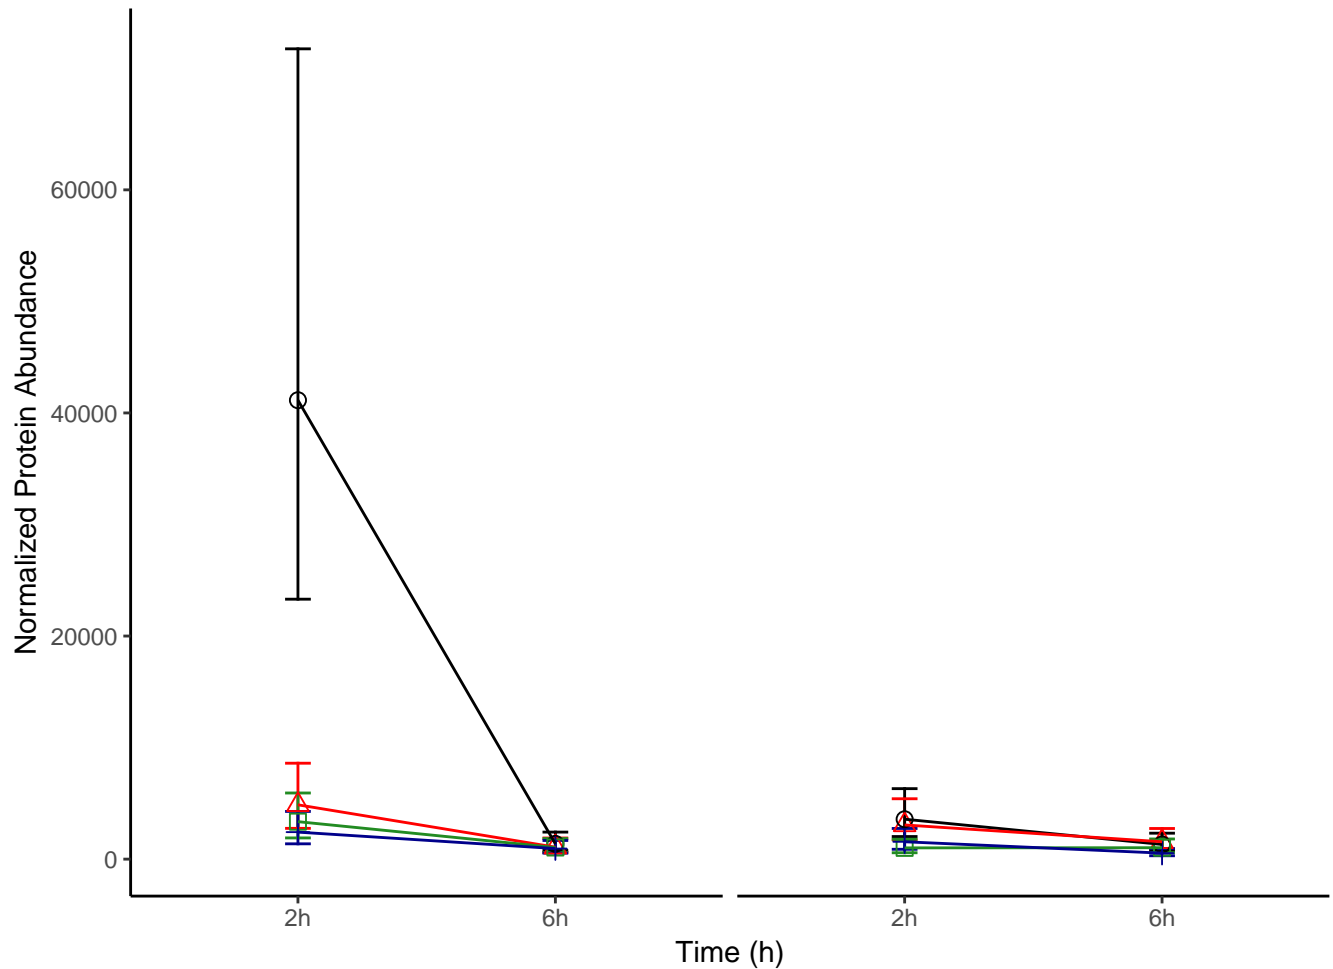

- SA564
- △ SA564- $\Delta hptRS$
- SA564- $\Delta ccpA$
- + SA564- $\Delta hptRS/ccpA$



# RL35\_STAAM

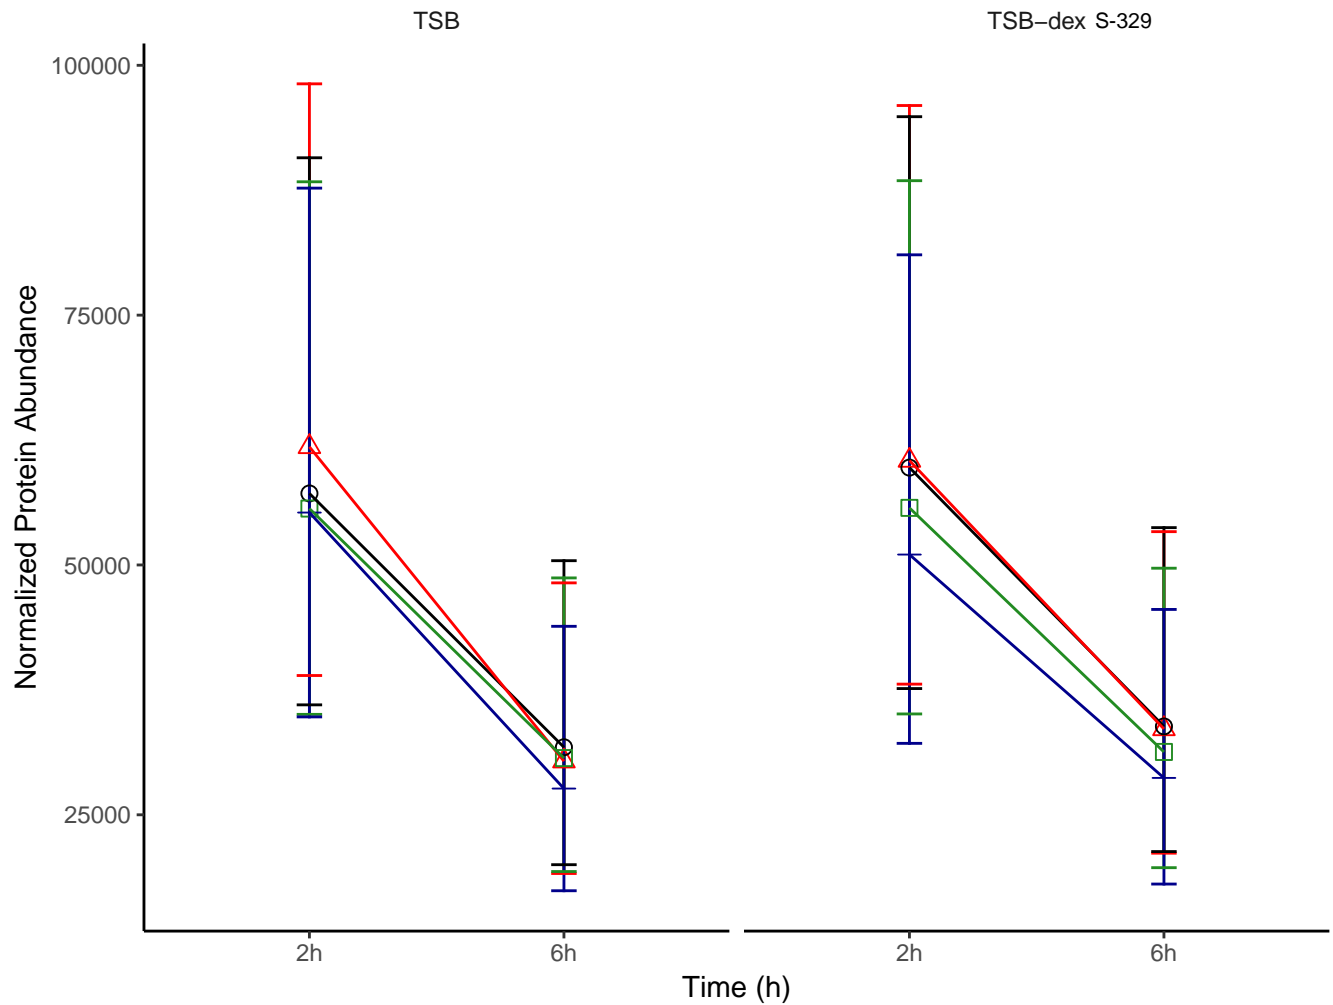

- SA564
- △ SA564- $\Delta hptRS$
- SA564- $\Delta ccpA$
- ⊕ SA564- $\Delta hptRS/ccpA$

# RL36\_STAAM

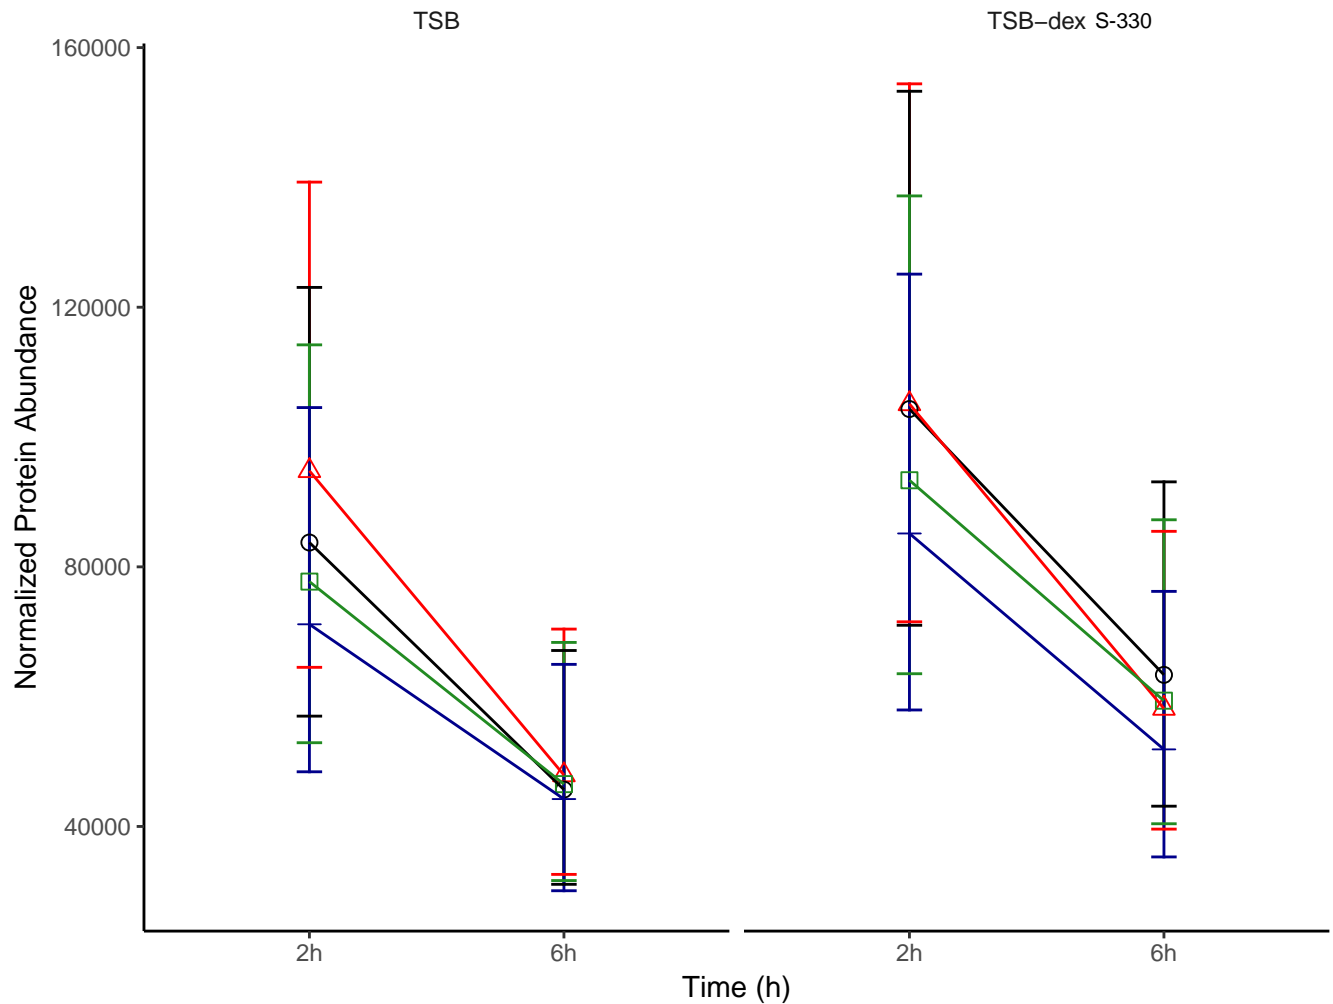

- SA564
- △ SA564- $\Delta$ *hptRS*
- SA564- $\Delta$ *ccpA*
- + SA564- $\Delta$ *hptRS/ccpA*

# RL4\_STAAM

TSB

TSB-dex S-331

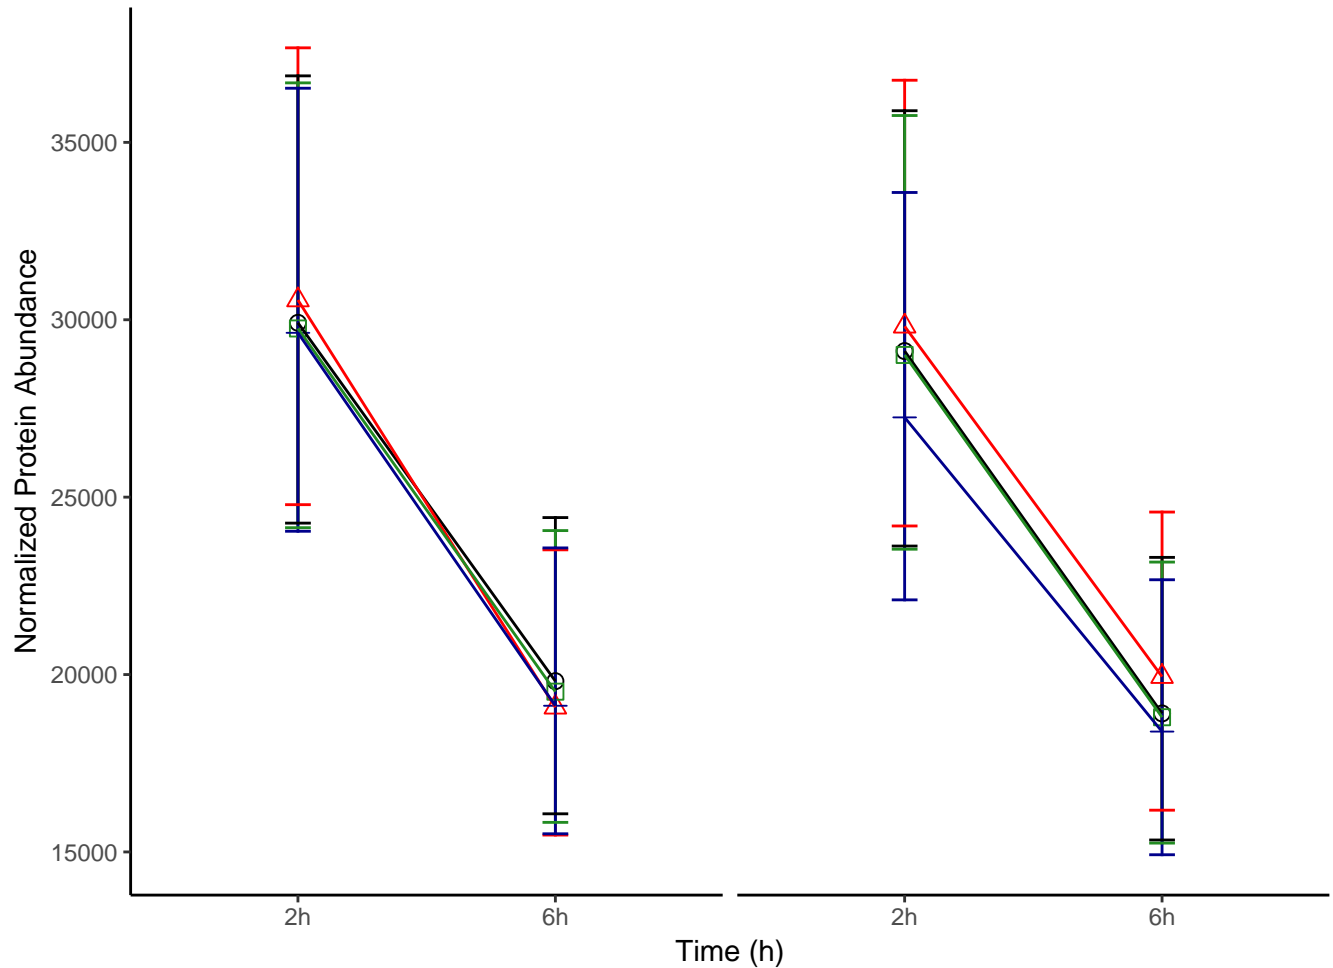

- SA564
- △ SA564- $\Delta hptRS$
- SA564- $\Delta ccpA$
- + SA564- $\Delta hptRS/ccpA$

# RL5\_STAAM

TSB

TSB-dex S-332

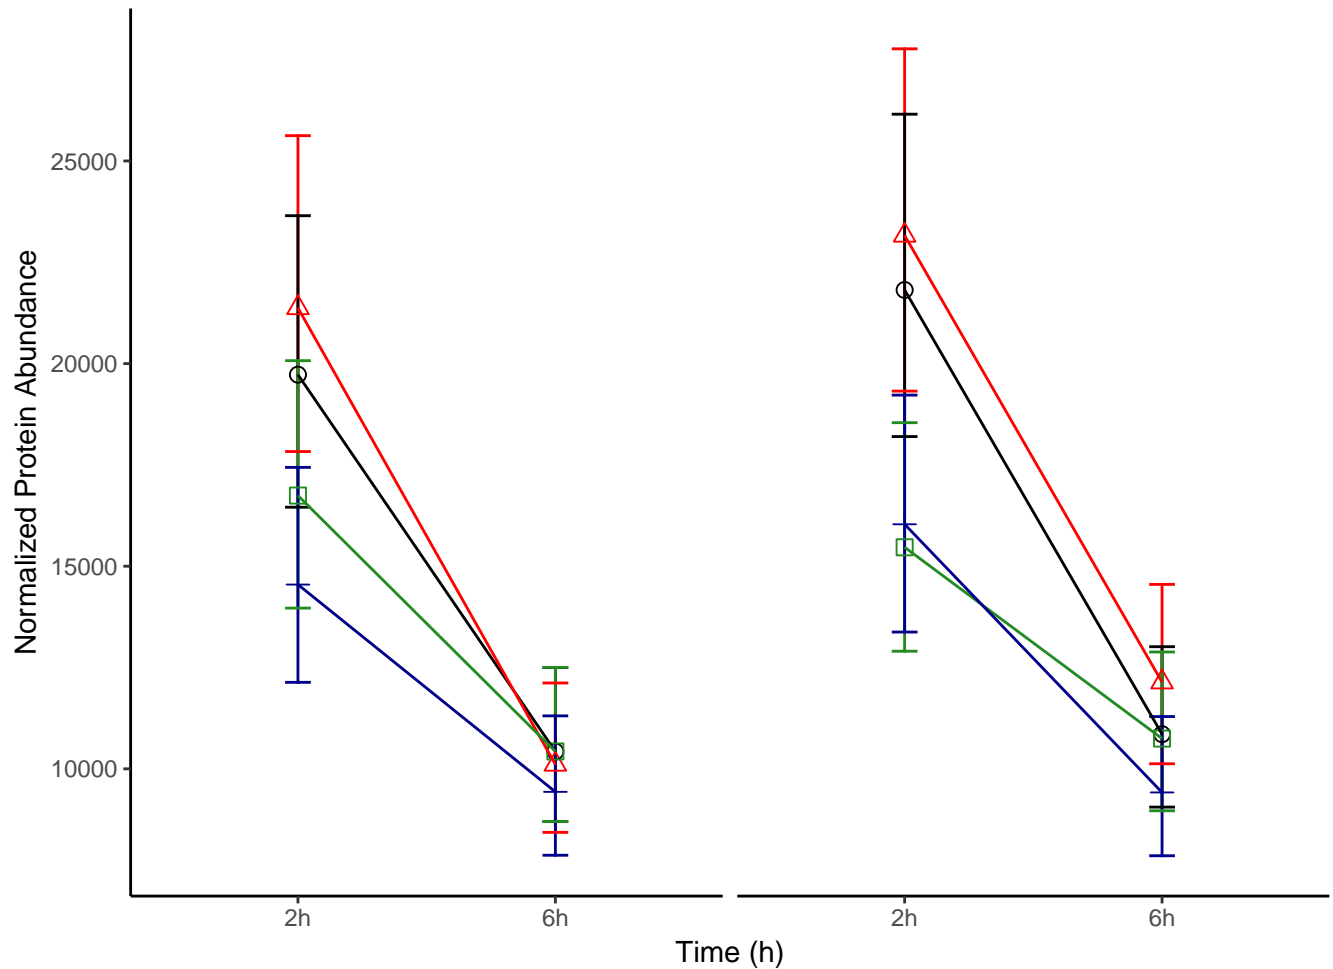

- SA564
- △ SA564- $\Delta$ *hptRS*
- SA564- $\Delta$ *ccpA*
- + SA564- $\Delta$ *hptRS/ccpA*

# RL6\_STAAM

TSB

TSB-dex S-333

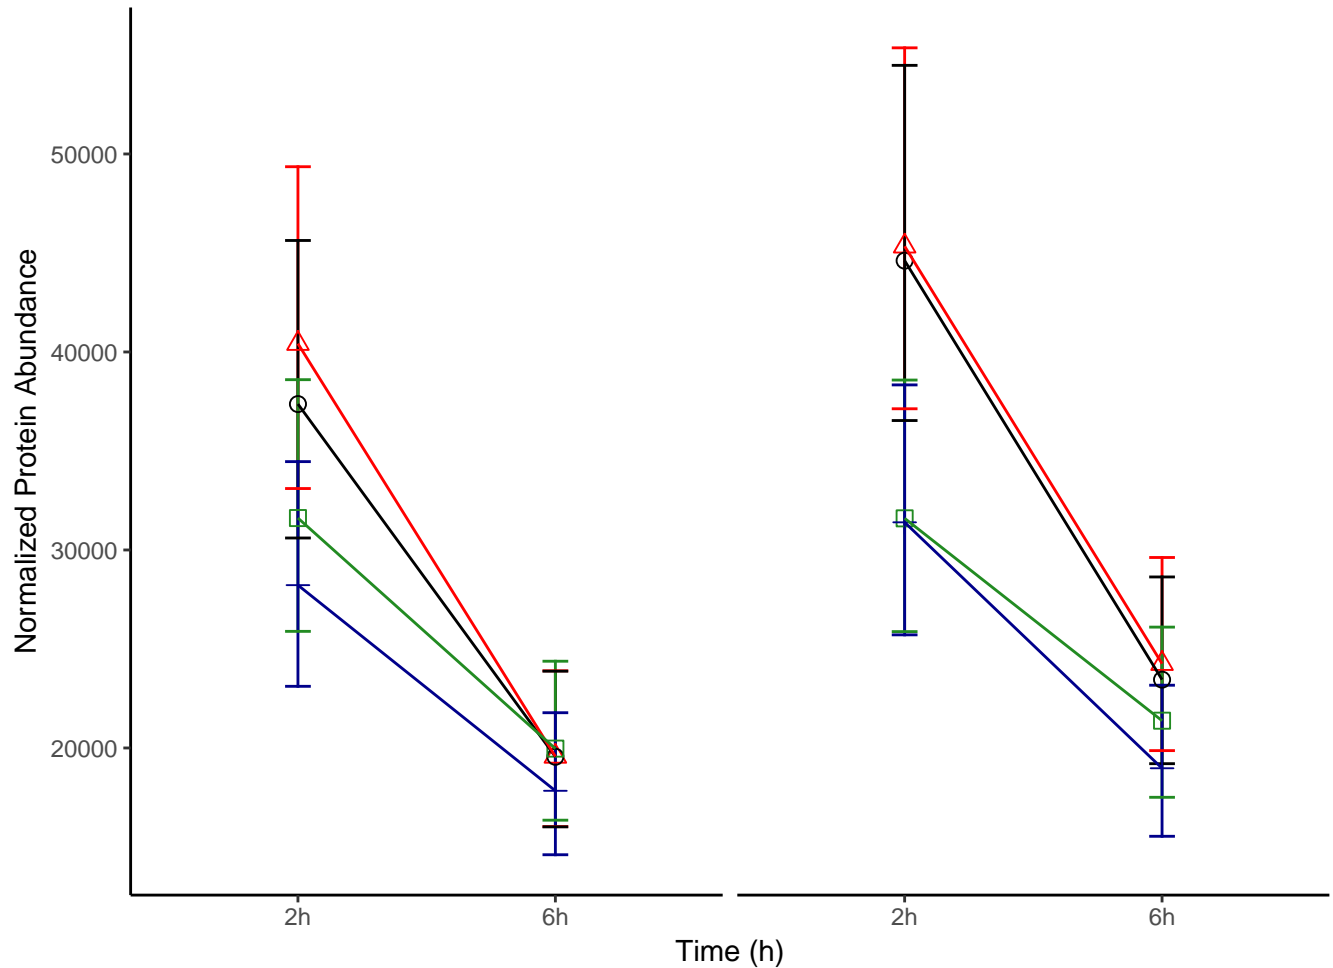

- SA564
- △ SA564-ΔhptRS
- SA564-ΔccpA
- + SA564-ΔhptRS/ccpA

# RL7\_STAAM

TSB

TSB-dex S-334

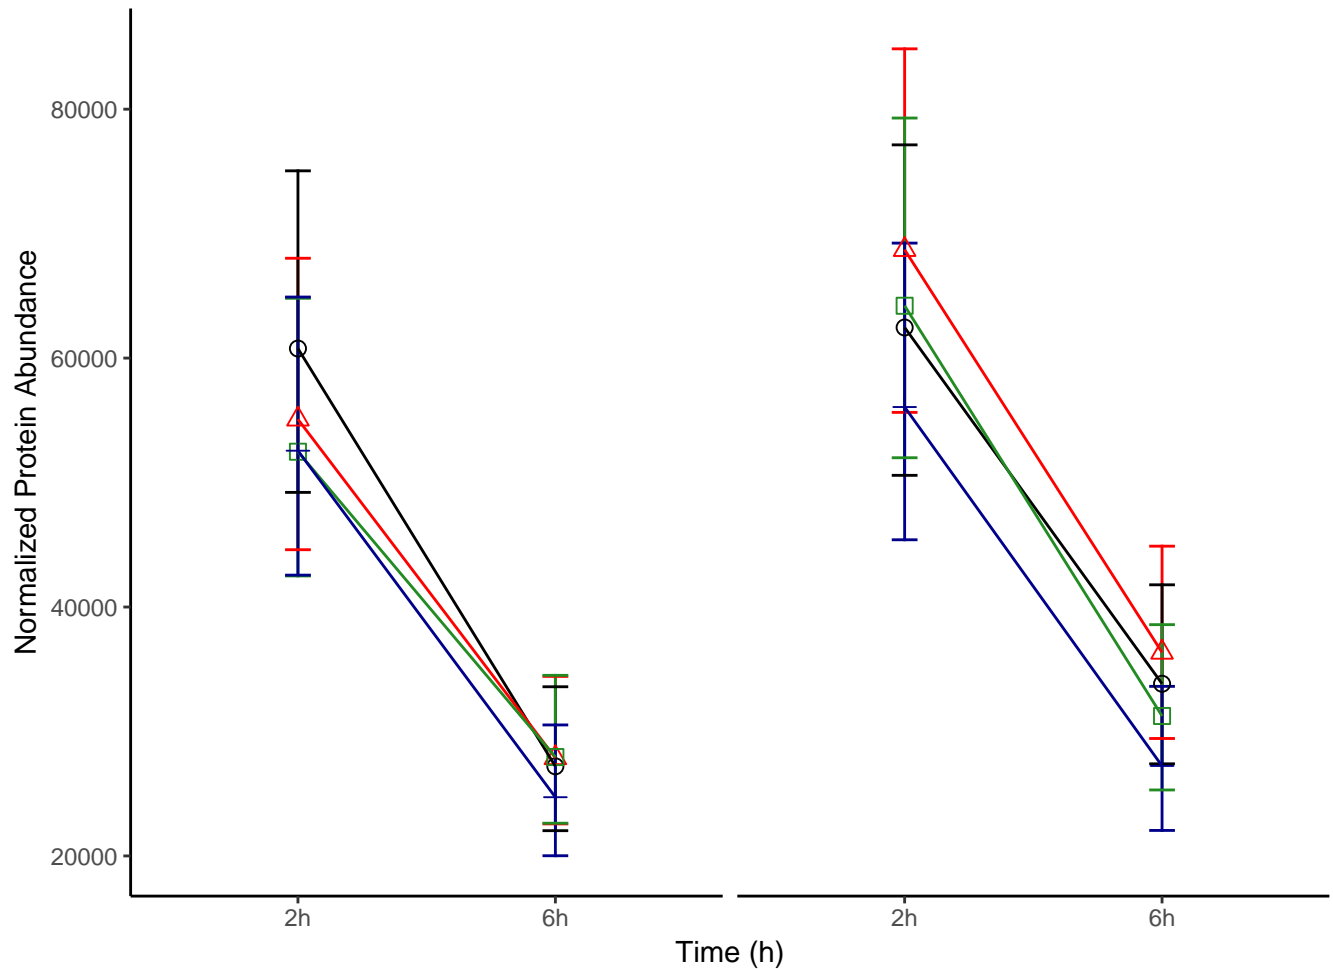

- SA564
- △ SA564- $\Delta$ *hptRS*
- SA564- $\Delta$ *ccpA*
- + SA564- $\Delta$ *hptRS/ccpA*

# RL9\_STAAM

TSB

TSB-dex S-335

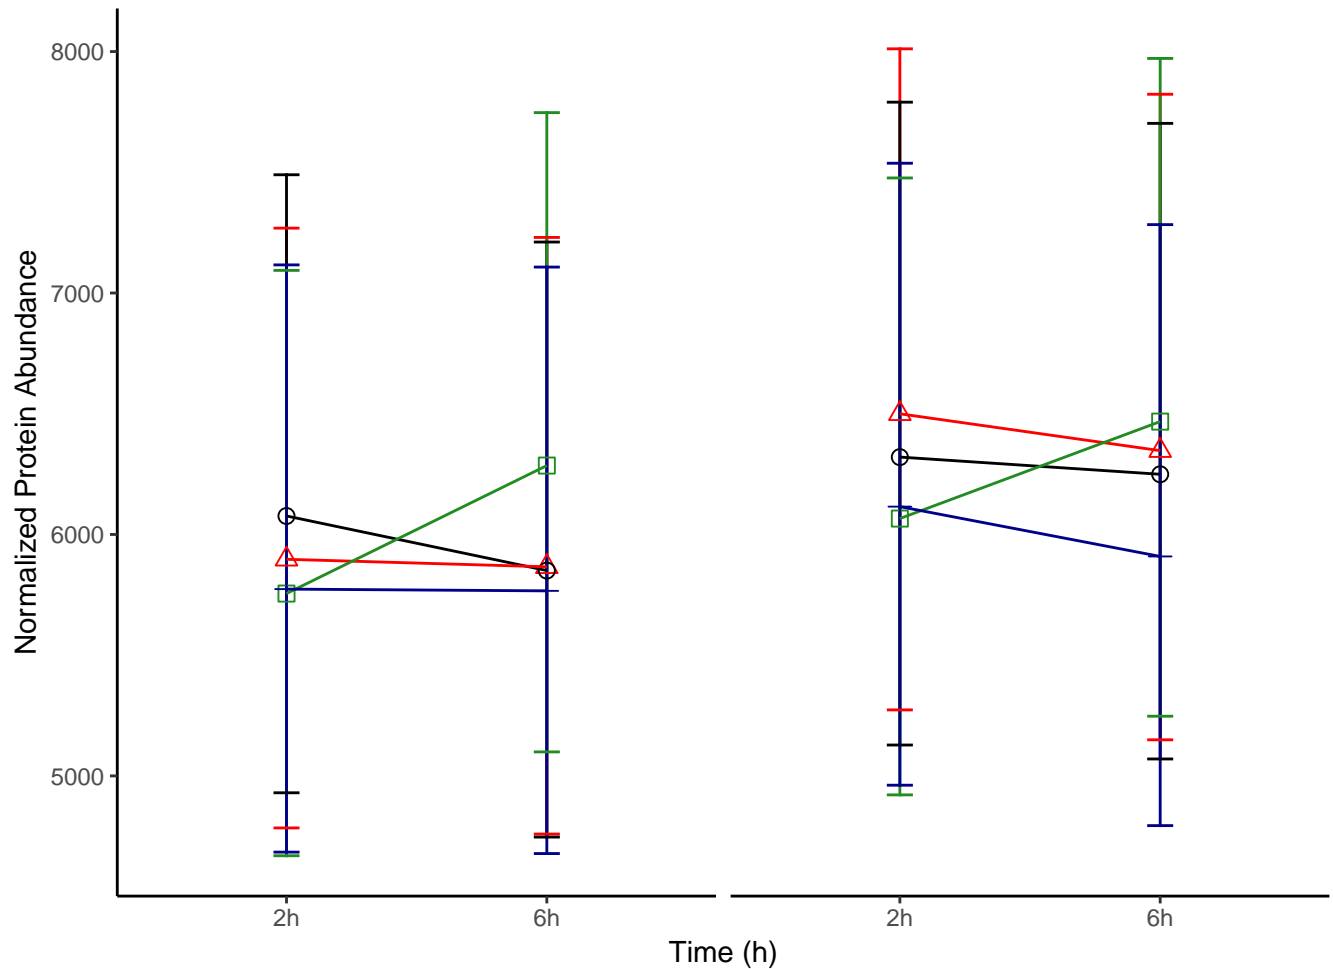

- SA564
- △ SA564- $\Delta hptRS$
- SA564- $\Delta ccpA$
- + SA564- $\Delta hptRS/ccpA$

# RNJ1\_STAAM

TSB

TSB-dex S-336

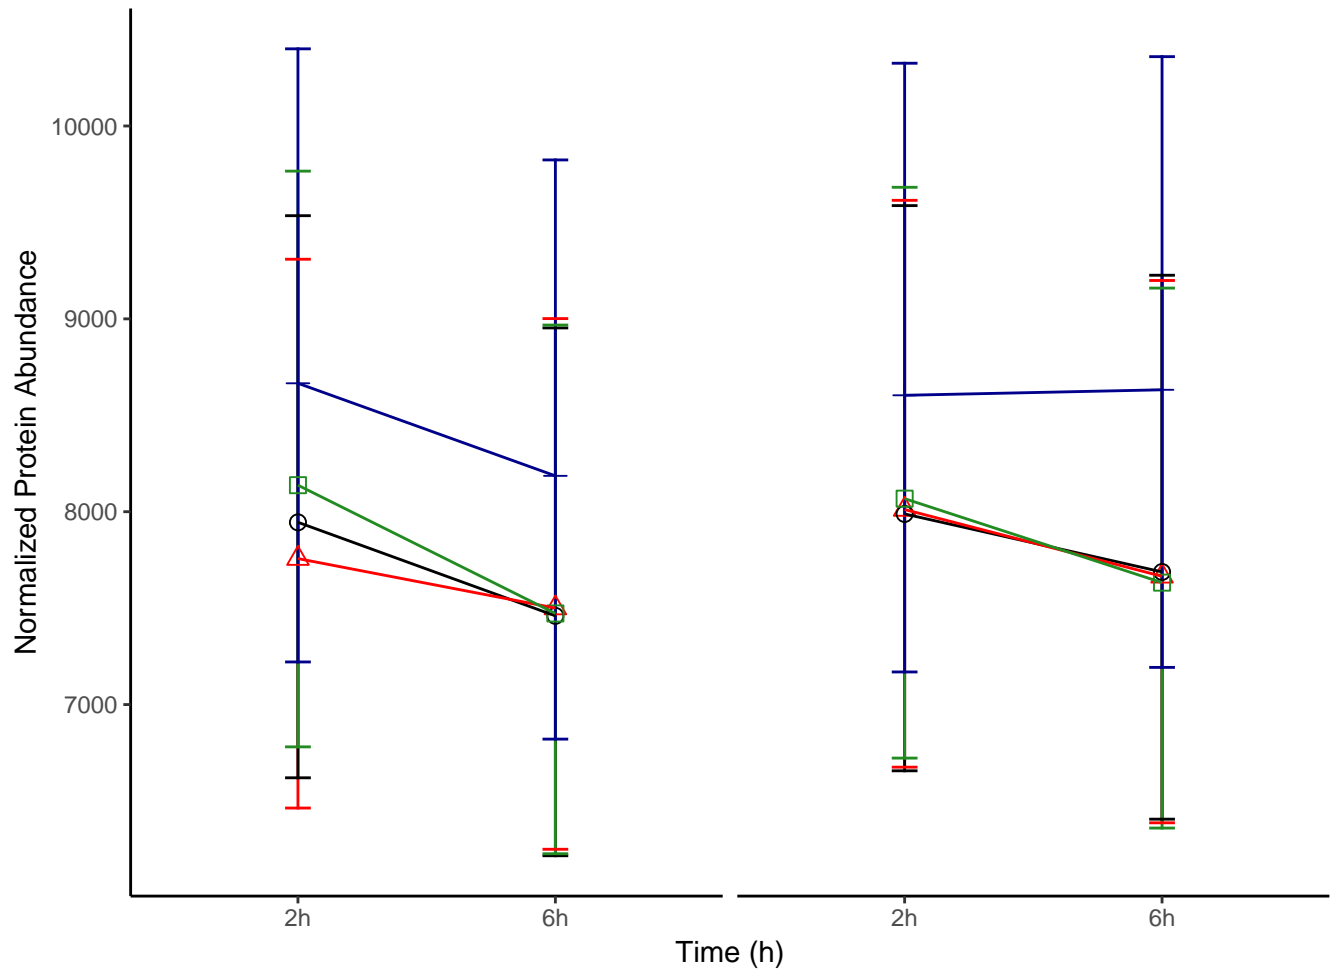

- SA564
- △ SA564- $\Delta$ hptRS
- SA564- $\Delta$ ccpA
- + SA564- $\Delta$ hptRS/ccpA



# RNJ2\_STAAM

TSB

TSB-dex S-337

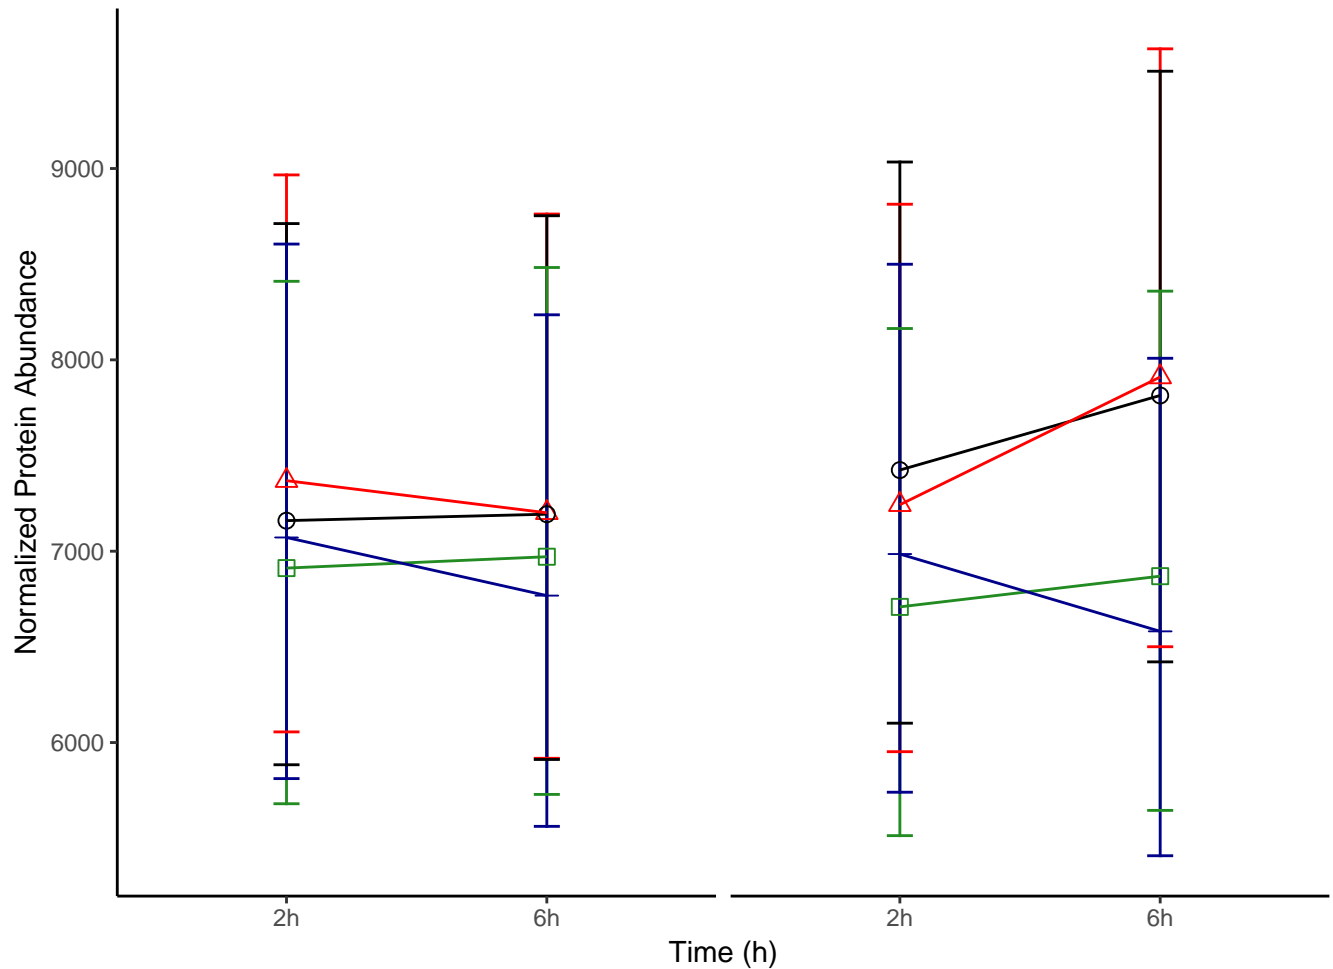

- SA564
- △ SA564- $\Delta$ *hptRS*
- SA564- $\Delta$ *ccpA*
- + SA564- $\Delta$ *hptRS/ccpA*

# RNY\_STAAM

TSB

TSB-dex S-338

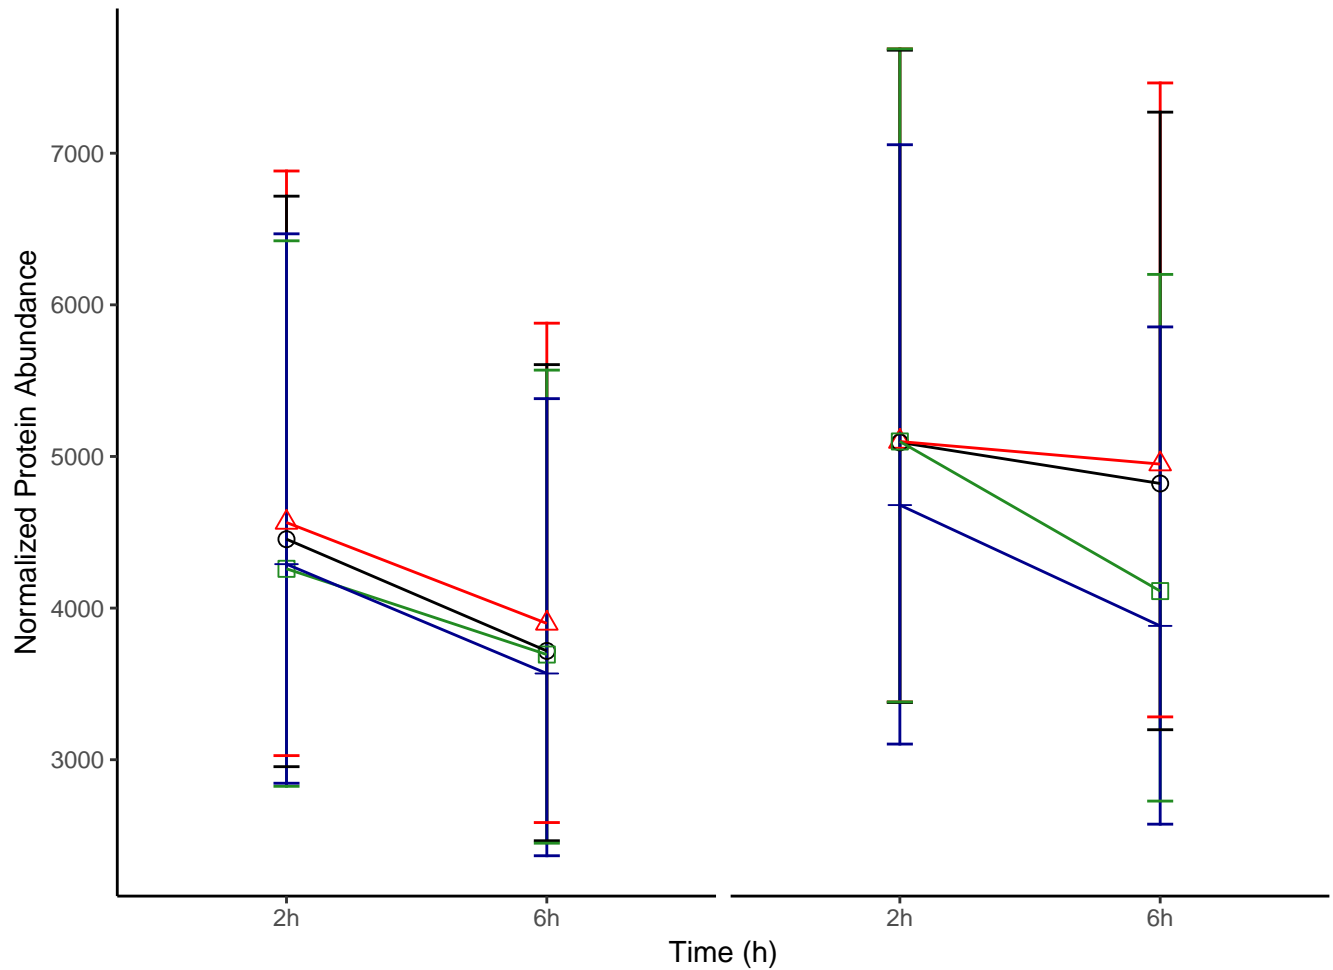

- SA564
- △ SA564- $\Delta hptRS$
- SA564- $\Delta ccpA$
- + SA564- $\Delta hptRS/ccpA$

# ROCA\_STAAM

TSB

TSB-dex S-339

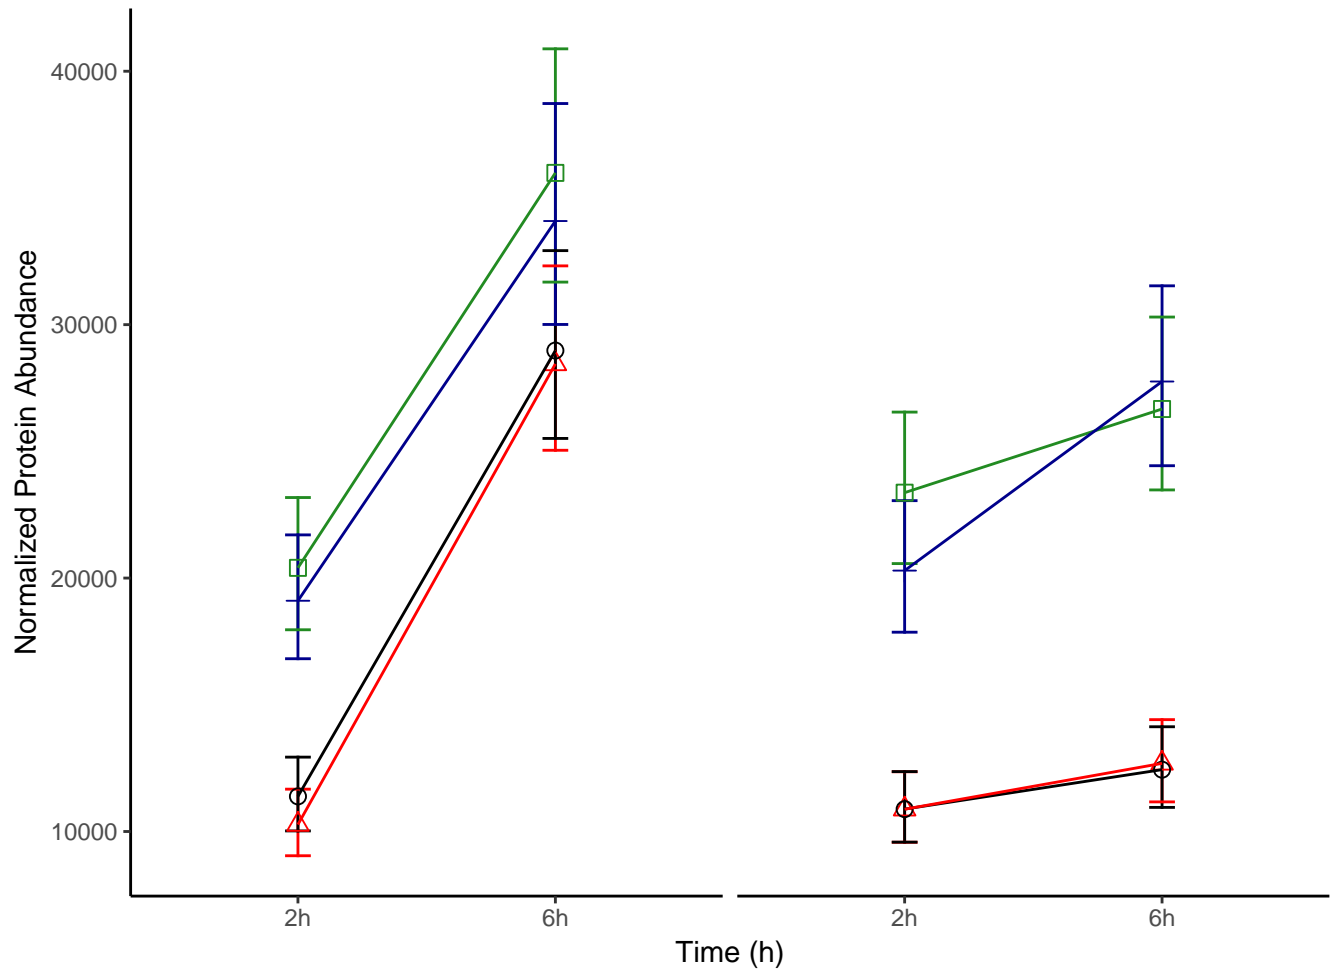

- SA564
- △ SA564- $\Delta$ hptRS
- SA564- $\Delta$ ccpA
- + SA564- $\Delta$ hptRS/ccpA

# ROT\_STAAM

TSB

TSB-dex S-340

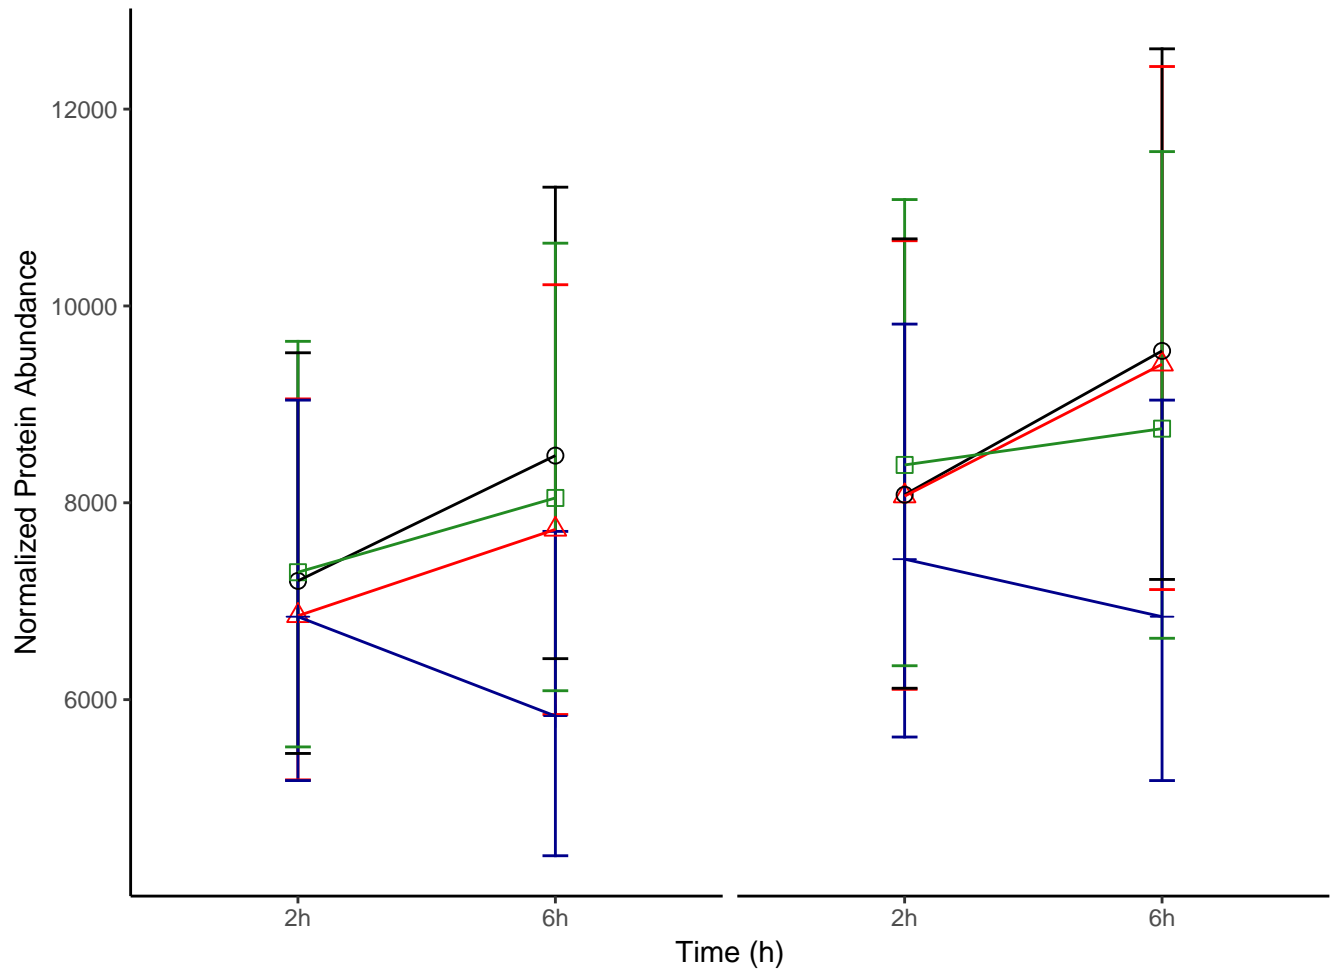

- SA564
- △ SA564- $\Delta$ *hptRS*
- SA564- $\Delta$ *ccpA*
- + SA564- $\Delta$ *hptRS/ccpA*

# RPOA\_STAAM

TSB

TSB-dex S-341

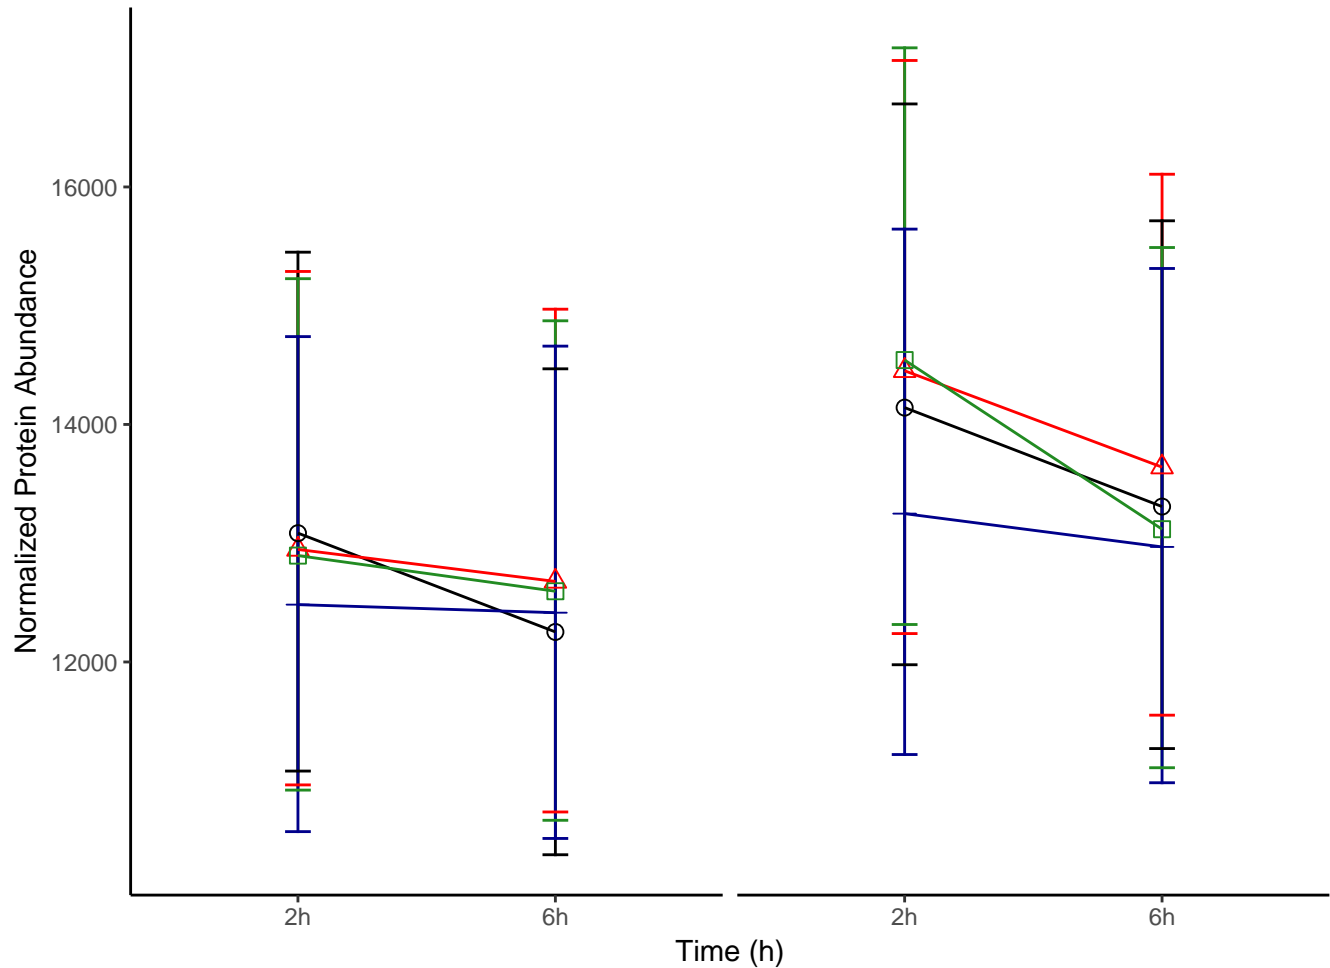

- SA564
- △ SA564- $\Delta$ hptRS
- SA564- $\Delta$ ccpA
- + SA564- $\Delta$ hptRS/ccpA

# RPOB\_STAAM

TSB

TSB-dex S-342

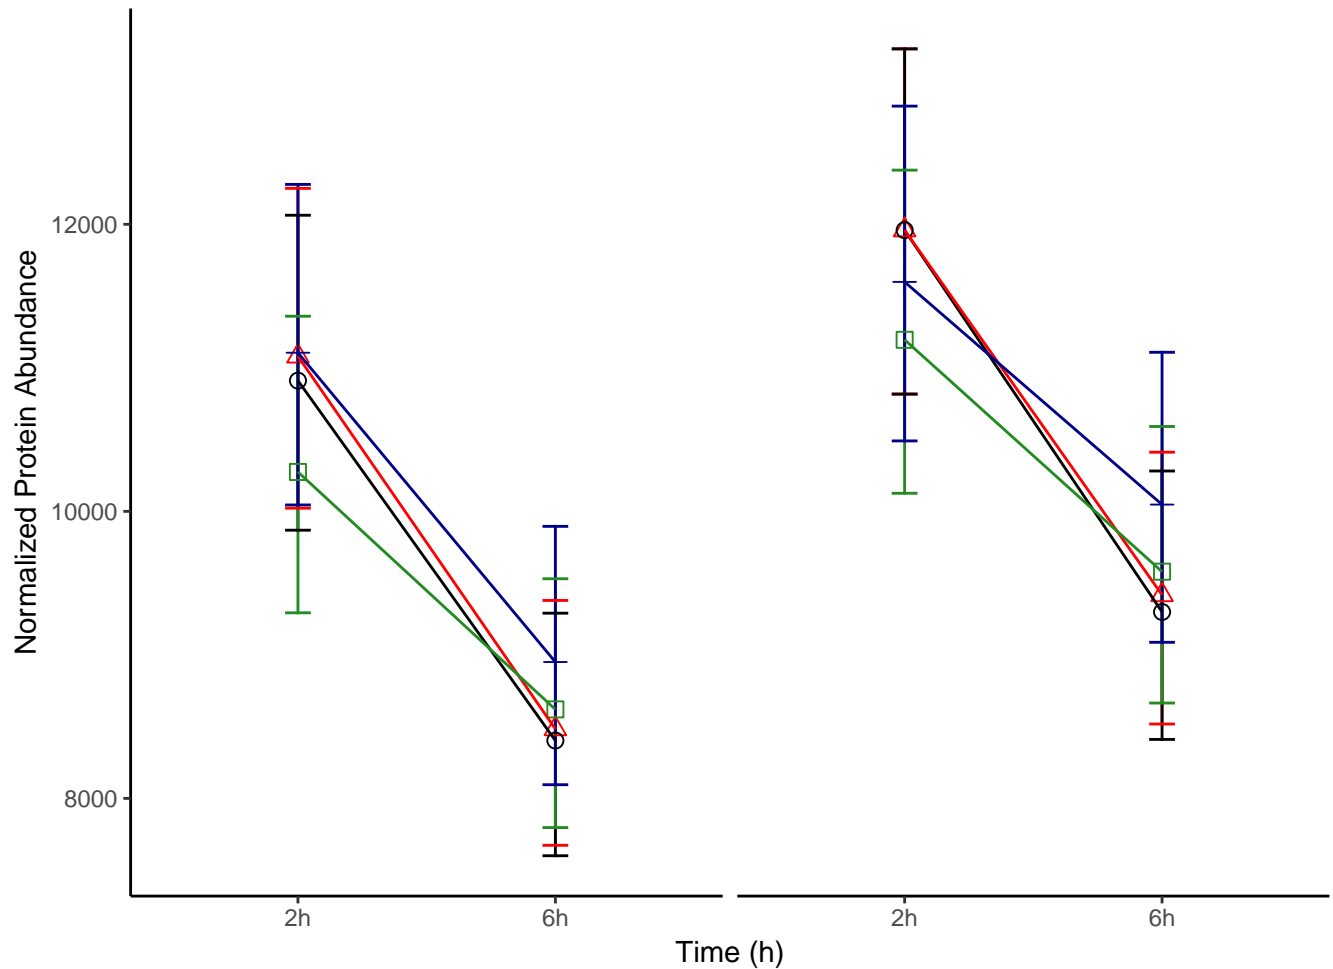

- SA564
- △ SA564- $\Delta$ hptRS
- SA564- $\Delta$ ccpA
- + SA564- $\Delta$ hptRS/ccpA

# RPOC\_STAAM

TSB

TSB-dex S-343

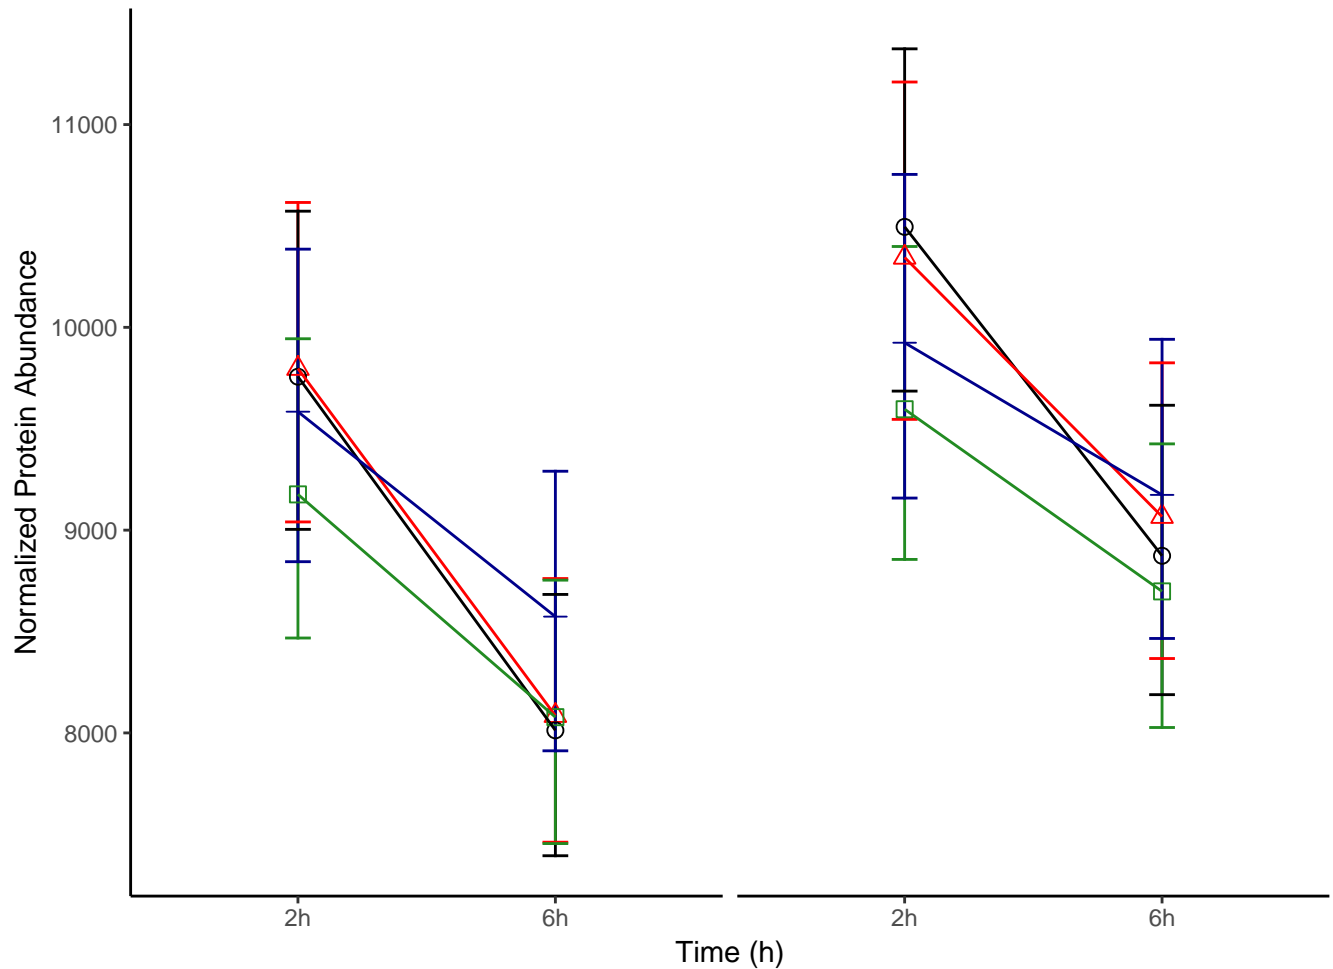

- SA564
- △ SA564- $\Delta$ hptRS
- SA564- $\Delta$ ccpA
- + SA564- $\Delta$ hptRS/ccpA

# RPOE\_STAAM

TSB

TSB-dex S-344

Normalized Protein Abundance

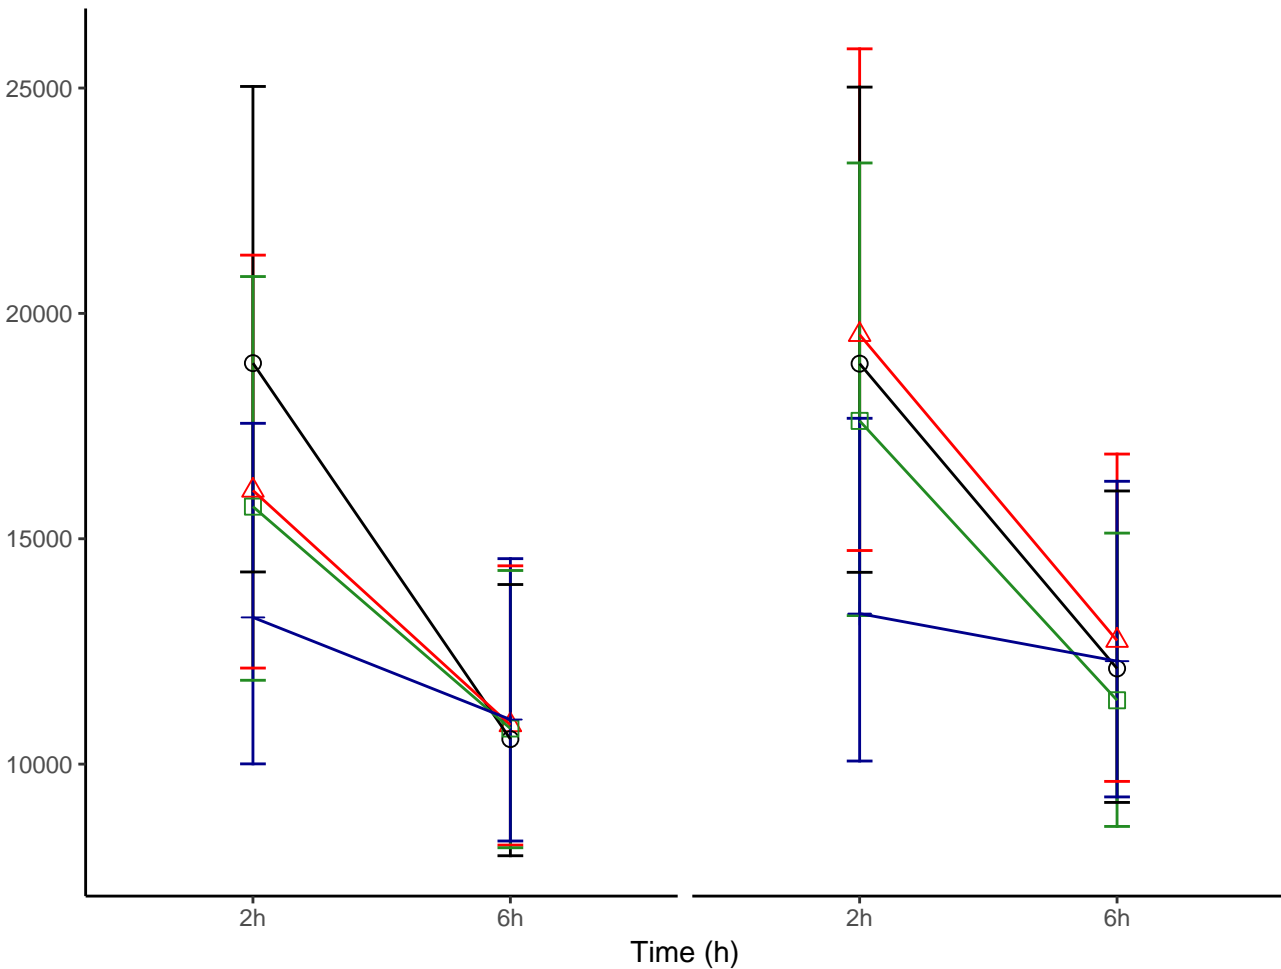

- SA564
- △ SA564- $\Delta$ *hptRS*
- SA564- $\Delta$ *ccpA*
- + SA564- $\Delta$ *hptRS/ccpA*



# RPOZ\_STAAM

TSB

TSB-dex S-345

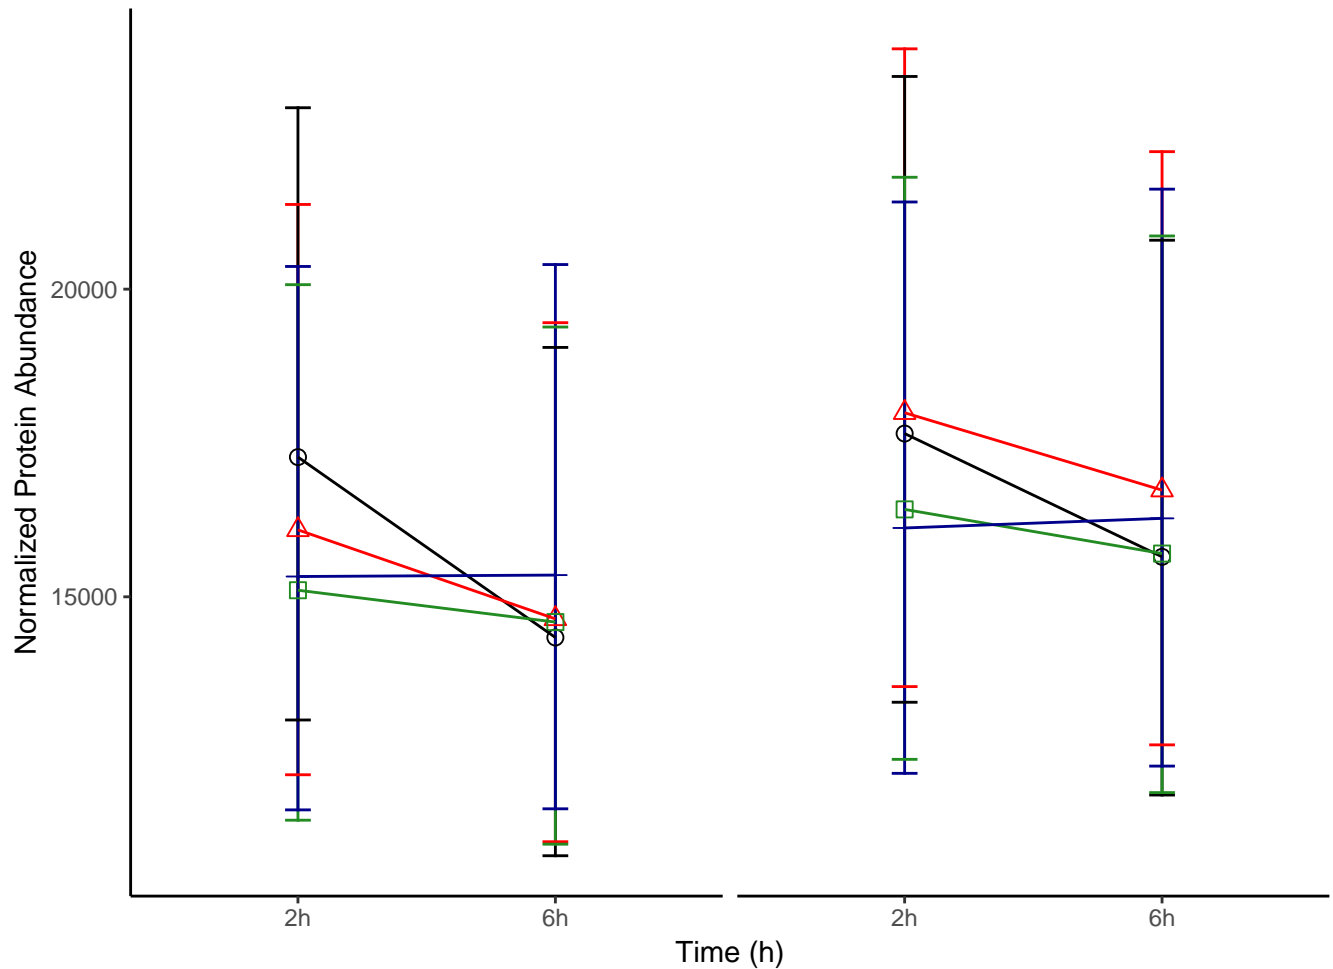

- SA564
- △ SA564- $\Delta$ hptRS
- SA564- $\Delta$ ccpA
- + SA564- $\Delta$ hptRS/ccpA

# RRF\_STAAM

TSB

TSB-dex S-346

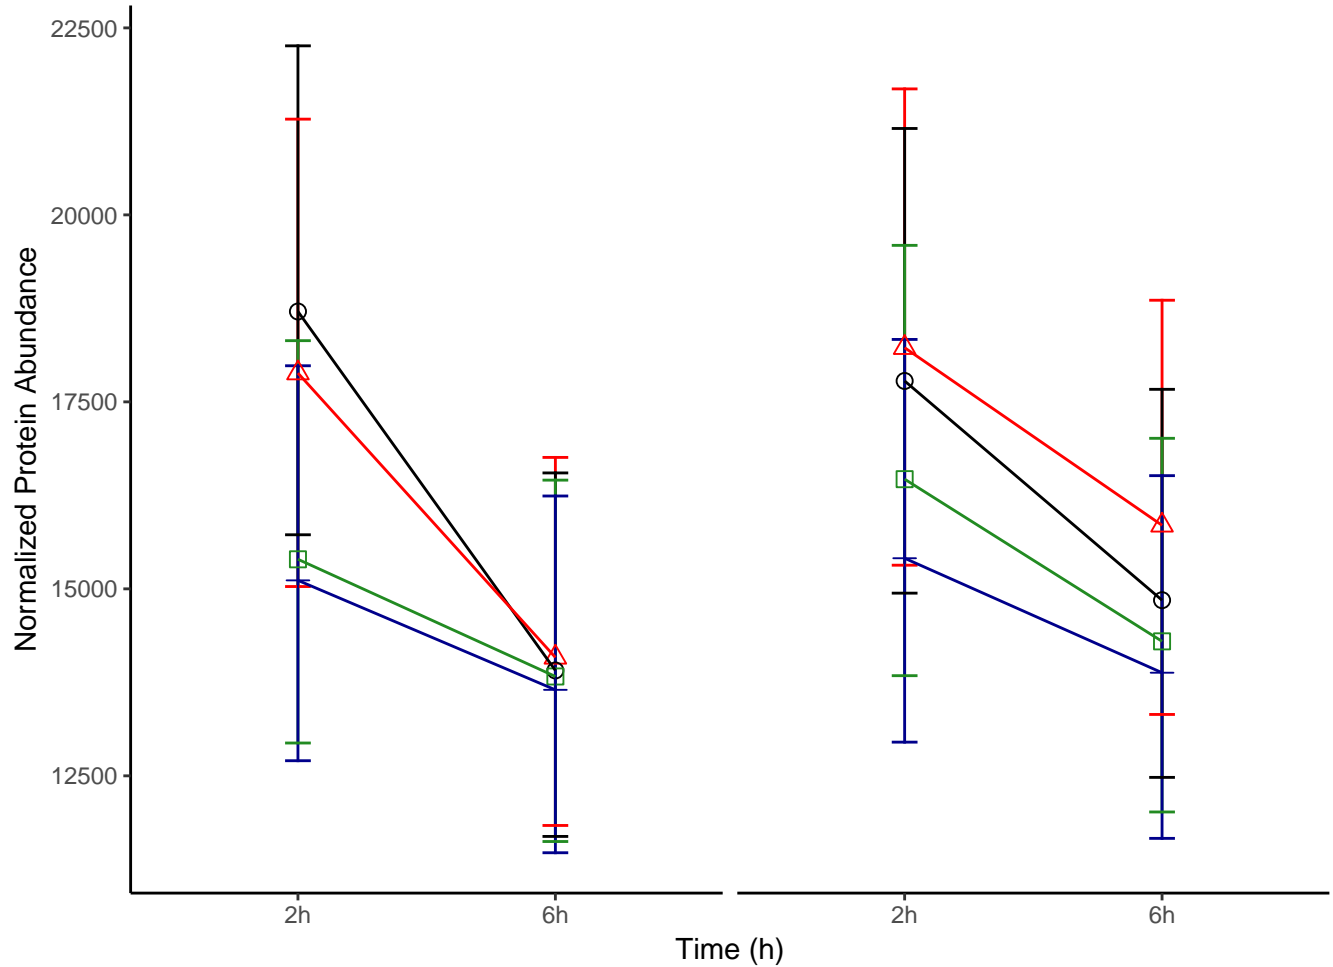

- SA564
- △ SA564- $\Delta$ *hptRS*
- SA564- $\Delta$ *ccpA*
- + SA564- $\Delta$ *hptRS/ccpA*

## RS1\_STAAM

TSB

TSB-dex S-347

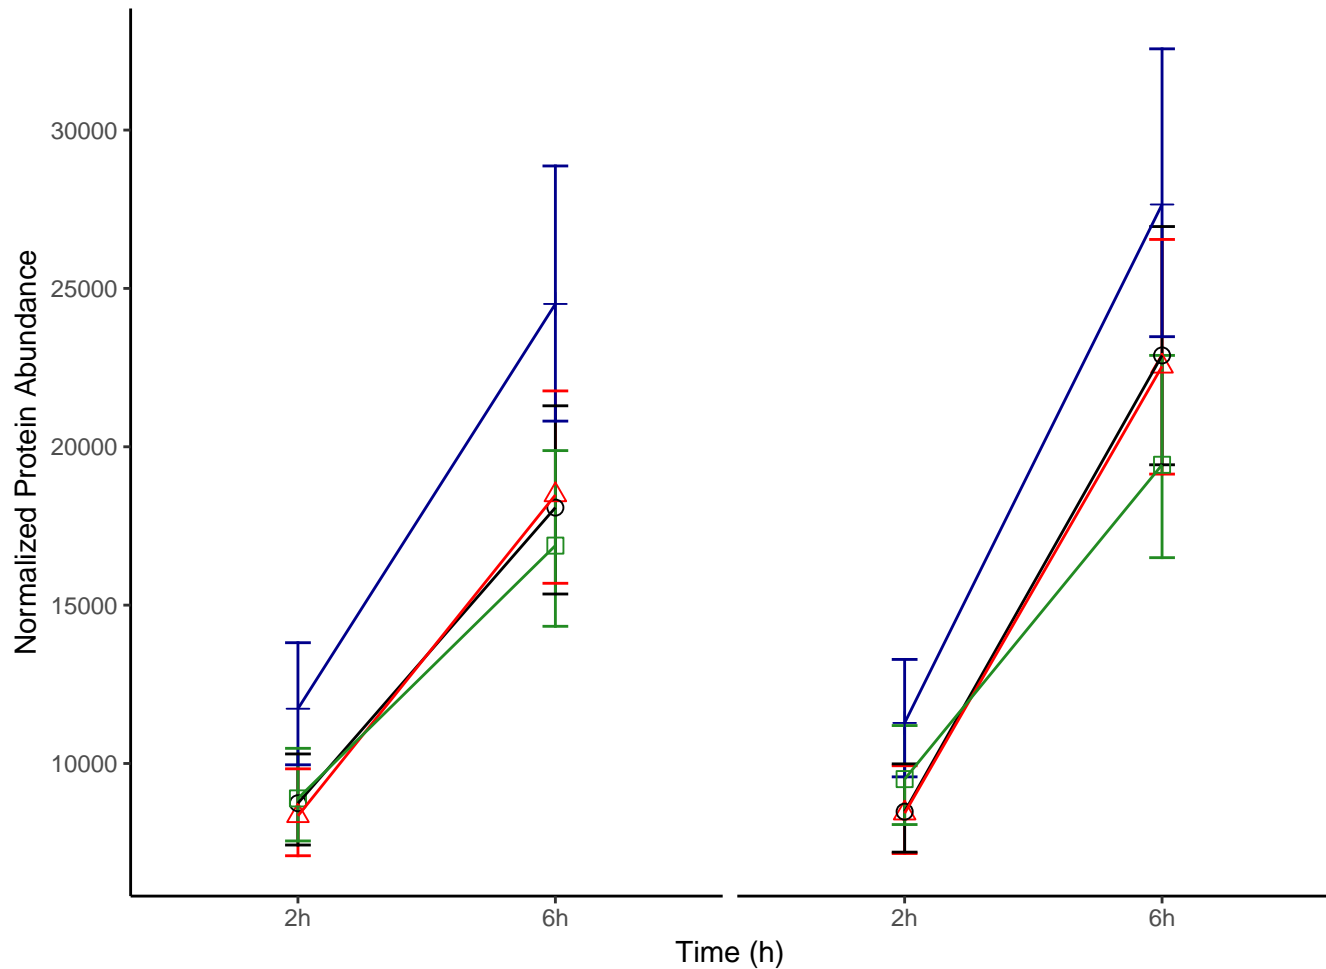

- SA564
- SA564- $\Delta hptRS$
- SA564- $\Delta ccpA$
- SA564- $\Delta hptRS/ccpA$

# RS10\_STAAM

TSB

TSB-dex S-348

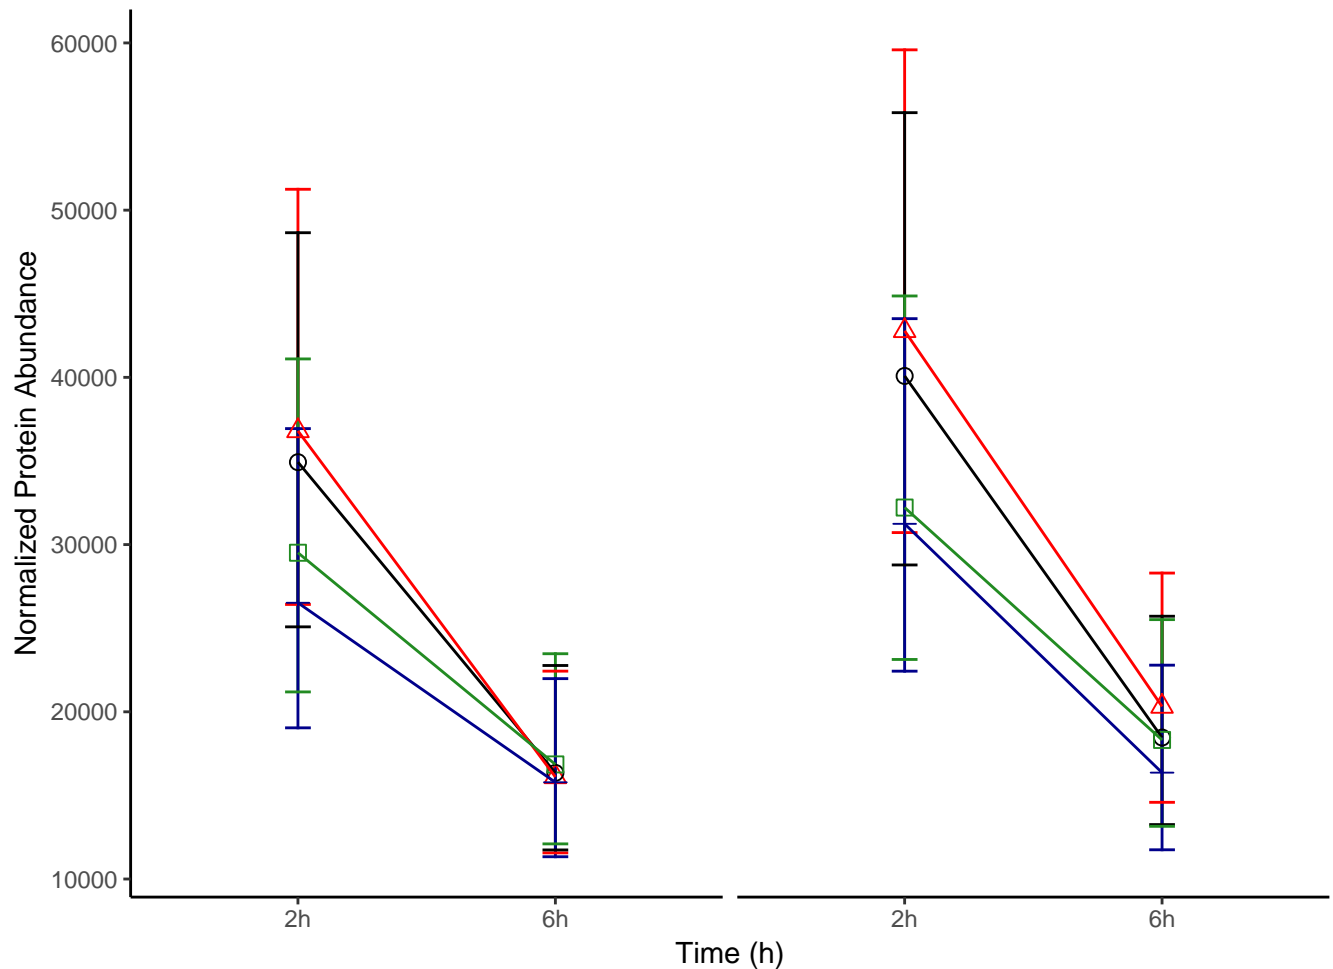

- SA564
- △ SA564-Δ*hptRS*
- SA564-Δ*ccpA*
- + SA564-Δ*hptRS/ccpA*

# RS11\_STAAM

TSB

TSB-dex S-349

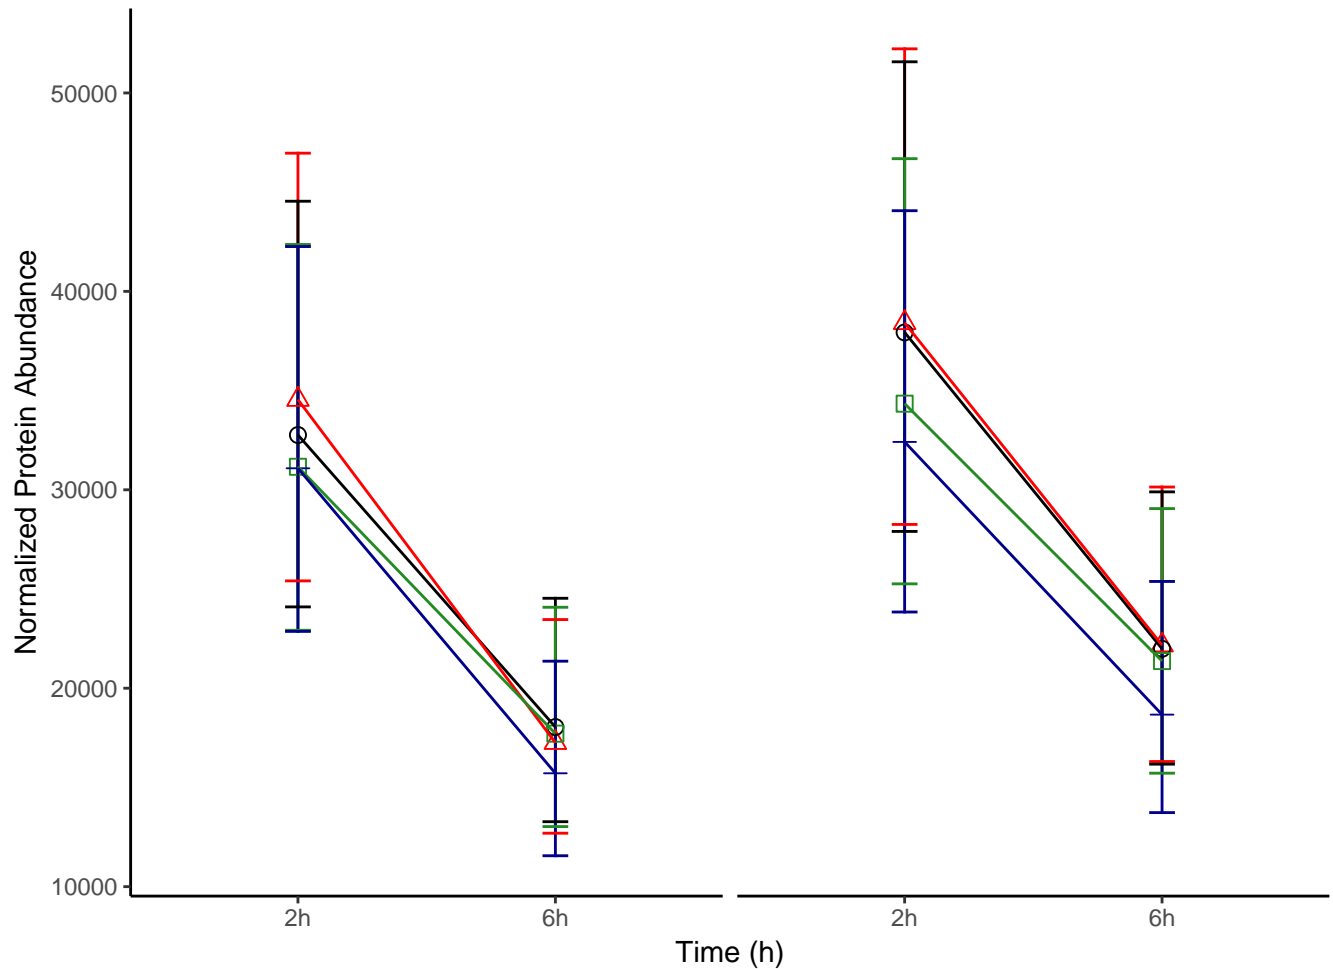

- SA564
- △ SA564- $\Delta$ *hptRS*
- SA564- $\Delta$ *ccpA*
- + SA564- $\Delta$ *hptRS/ccpA*

# RS12\_STAAM

TSB

TSB-dex S-350

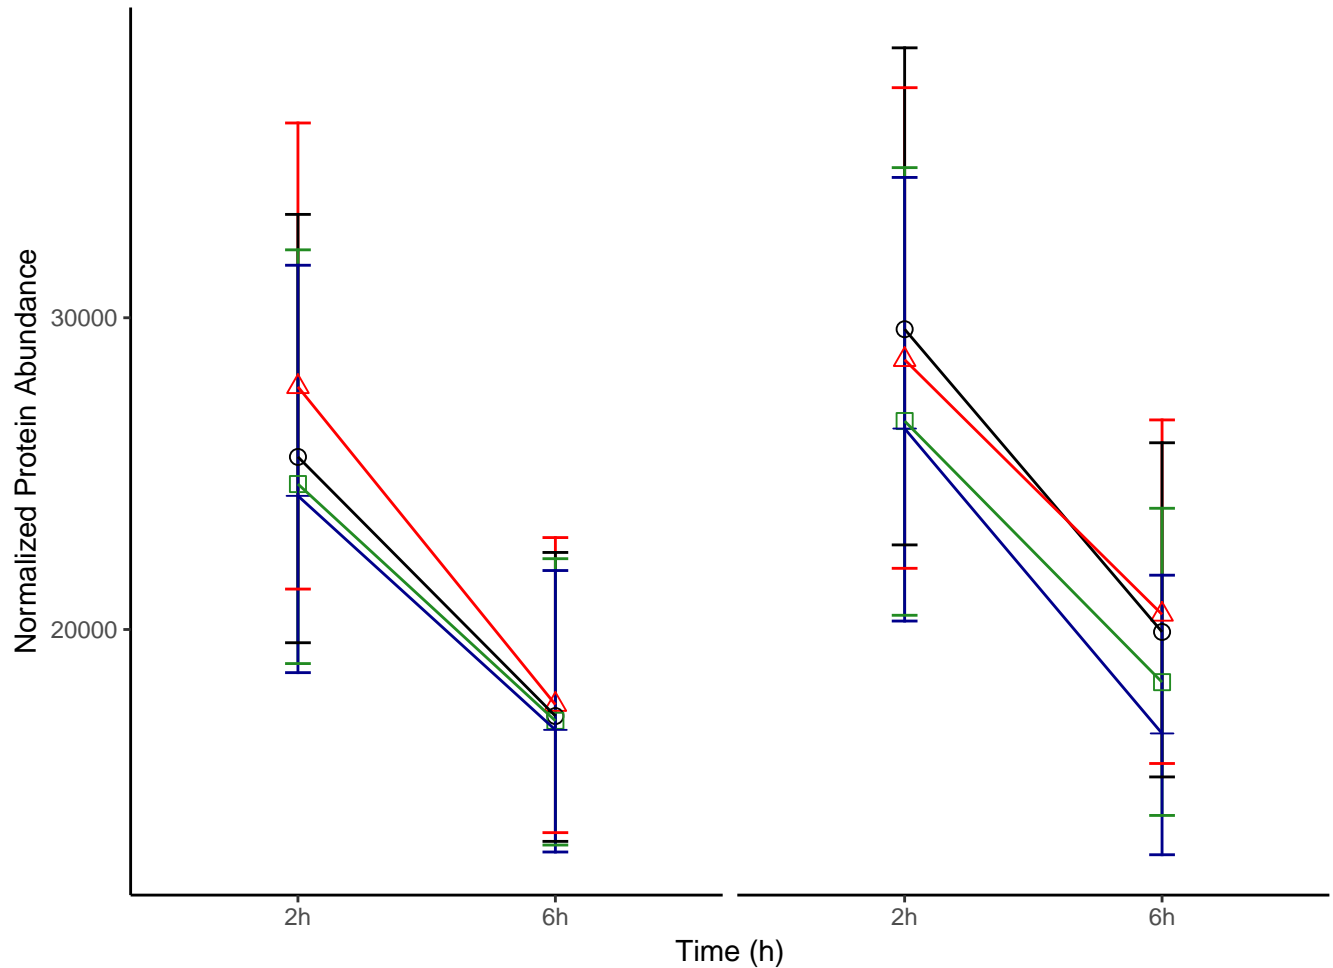

- SA564
- △ SA564- $\Delta$ *hptRS*
- SA564- $\Delta$ *ccpA*
- + SA564- $\Delta$ *hptRS/ccpA*

# RS13\_STAAM

TSB

TSB-dex S-351

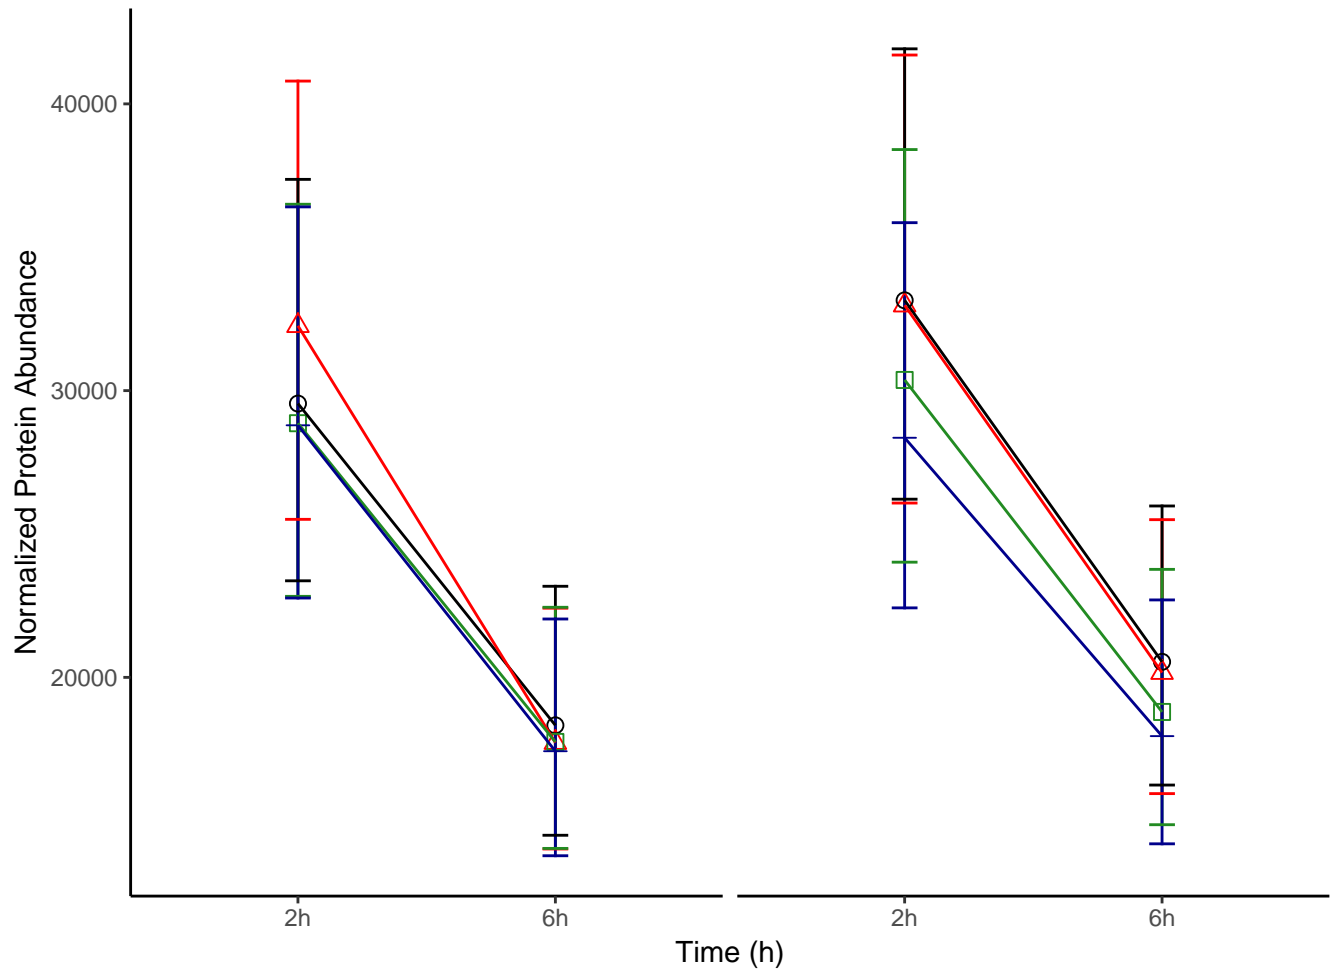

- SA564
- △ SA564- $\Delta hptRS$
- SA564- $\Delta ccpA$
- + SA564- $\Delta hptRS/ccpA$

# RS15\_STAAM

TSB

TSB-dex S-352

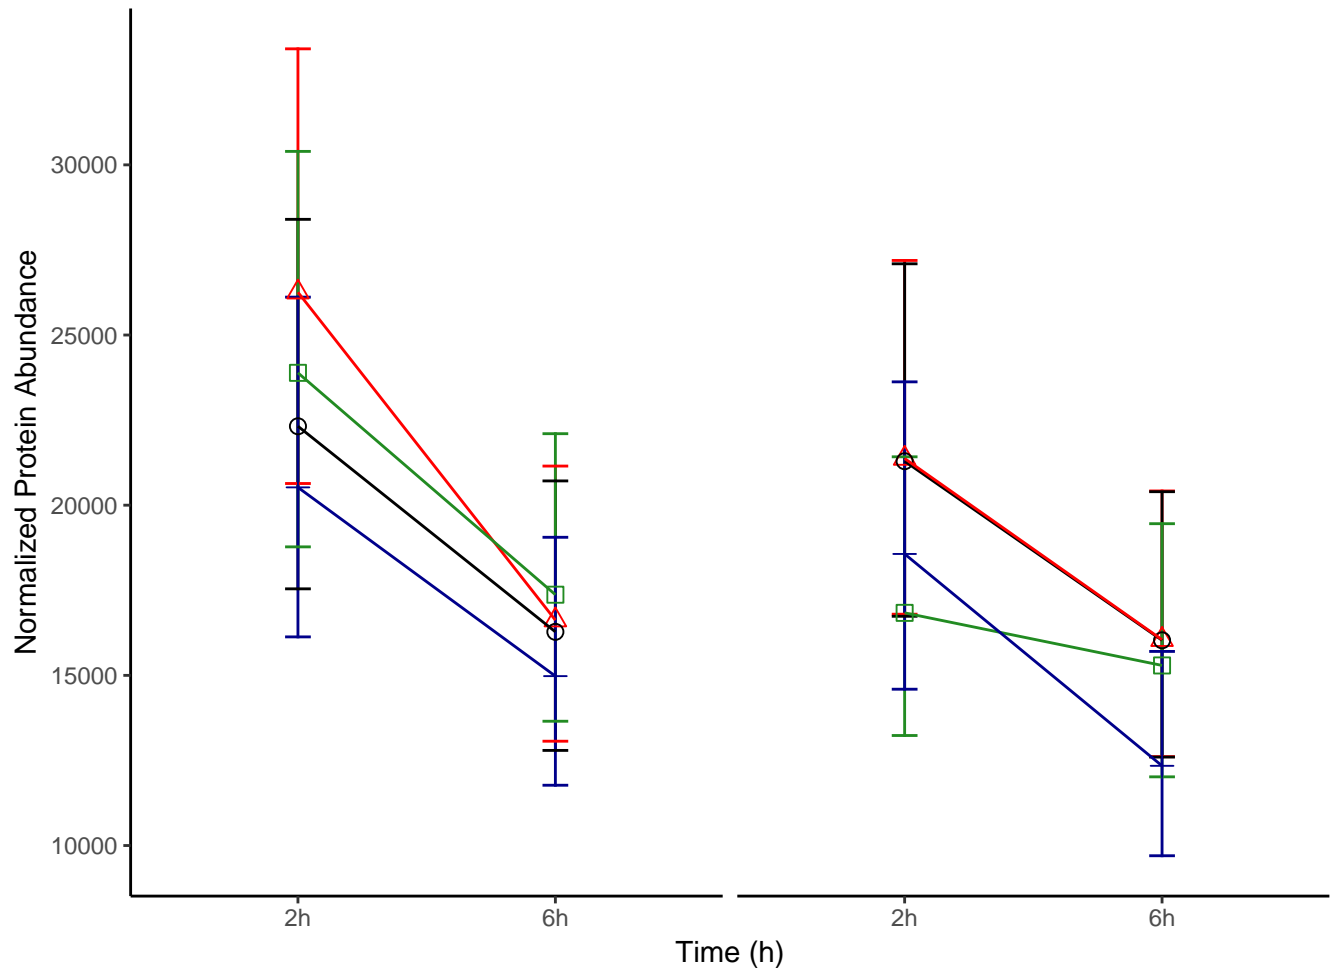

- SA564
- △ SA564- $\Delta hptRS$
- SA564- $\Delta ccpA$
- + SA564- $\Delta hptRS/ccpA$



# RS16\_STAAM

TSB

TSB-dex S-353

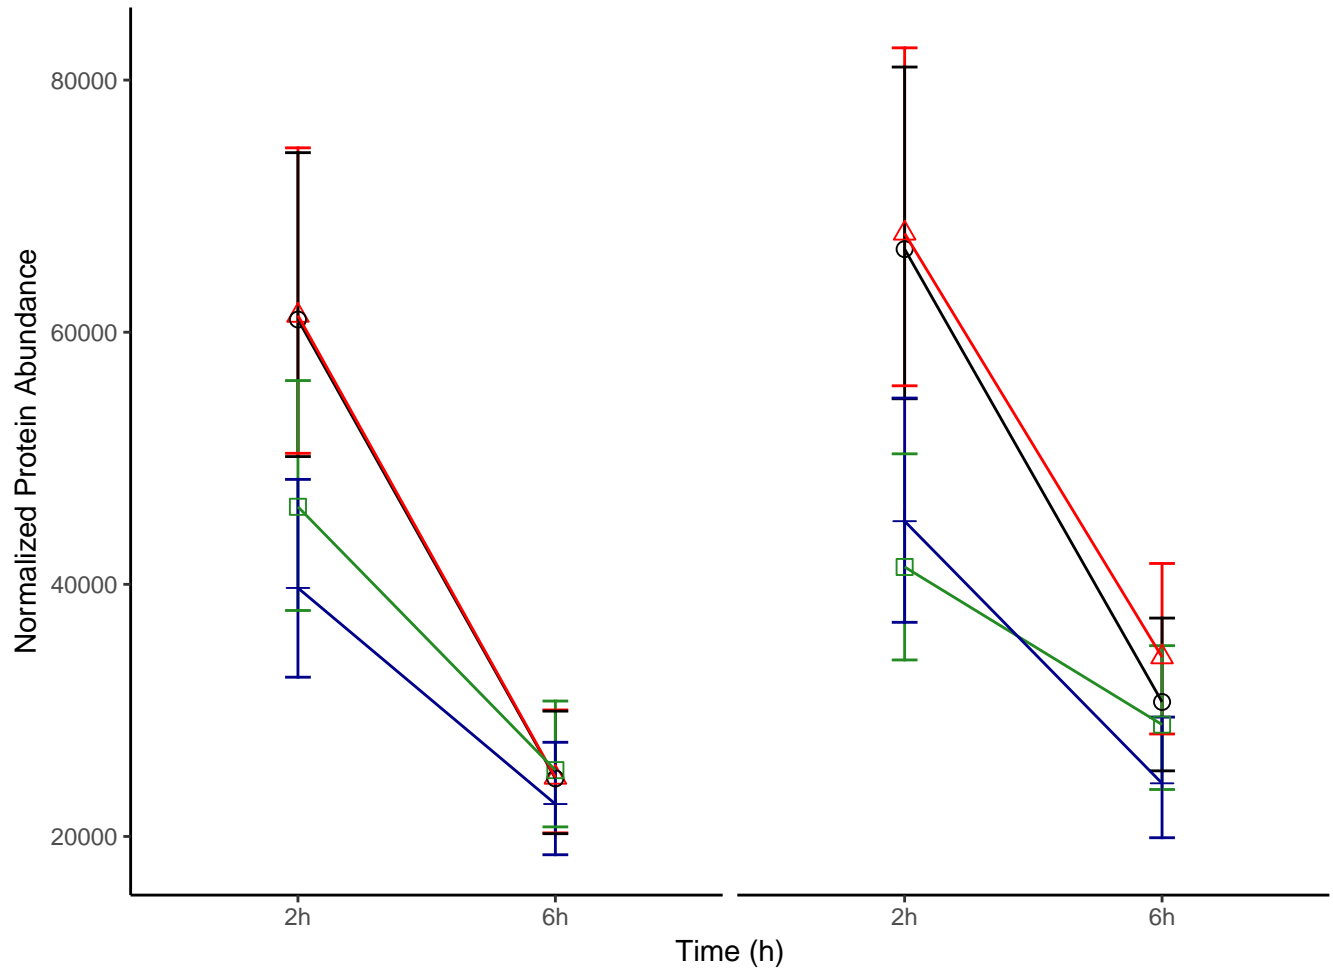

- SA564
- △ SA564- $\Delta$ *hptRS*
- SA564- $\Delta$ *ccpA*
- + SA564- $\Delta$ *hptRS/ccpA*

# RS17\_STAAM

TSB

TSB-dex S-354

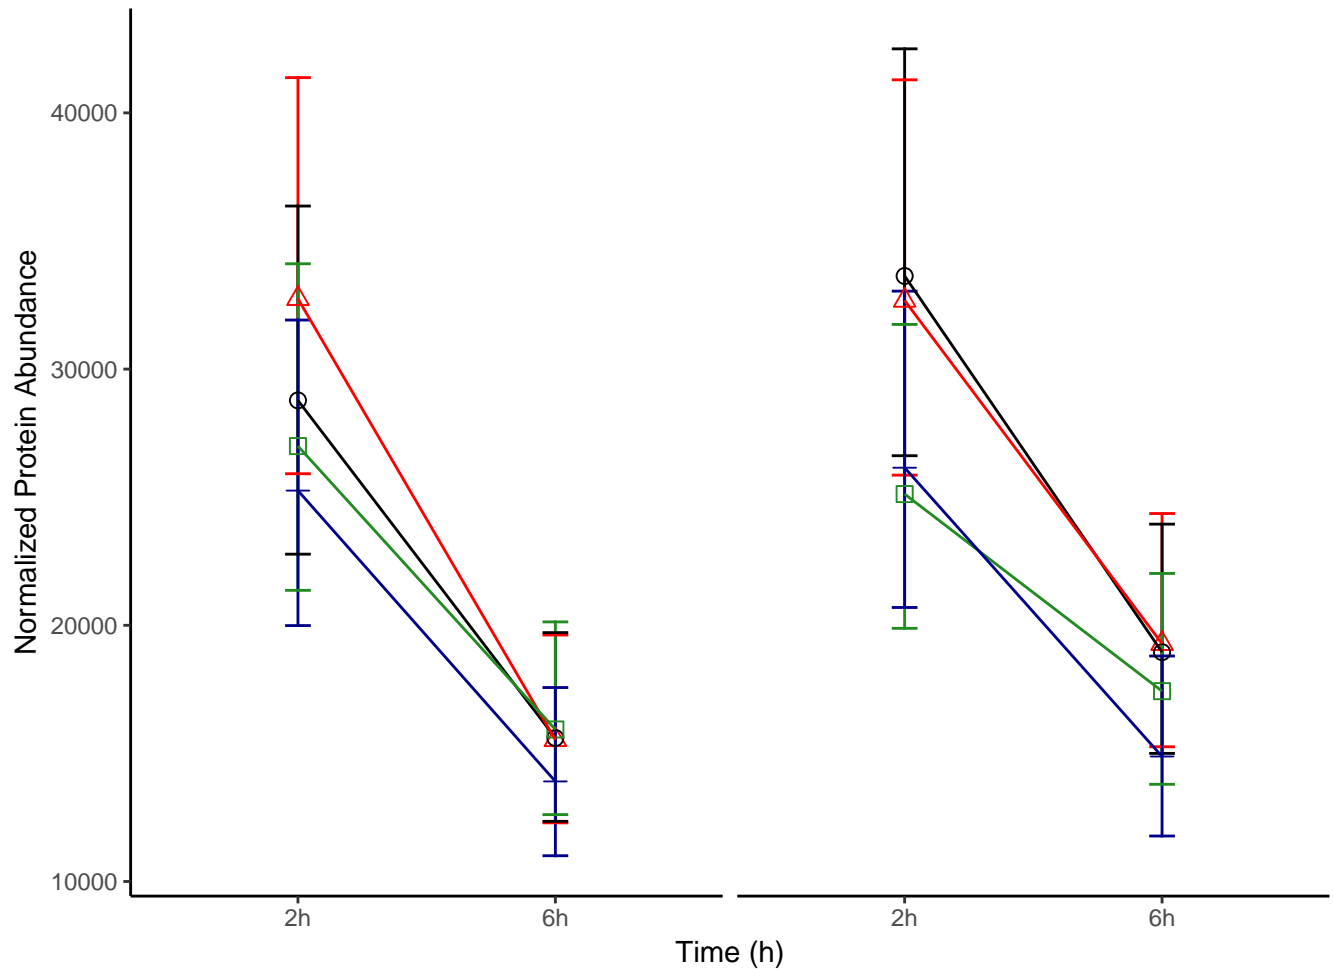

- SA564
- △ SA564-Δ*hptRS*
- SA564-Δ*ccpA*
- + SA564-Δ*hptRS/ccpA*

# RS18\_STAAM

TSB

TSB-dex S-355

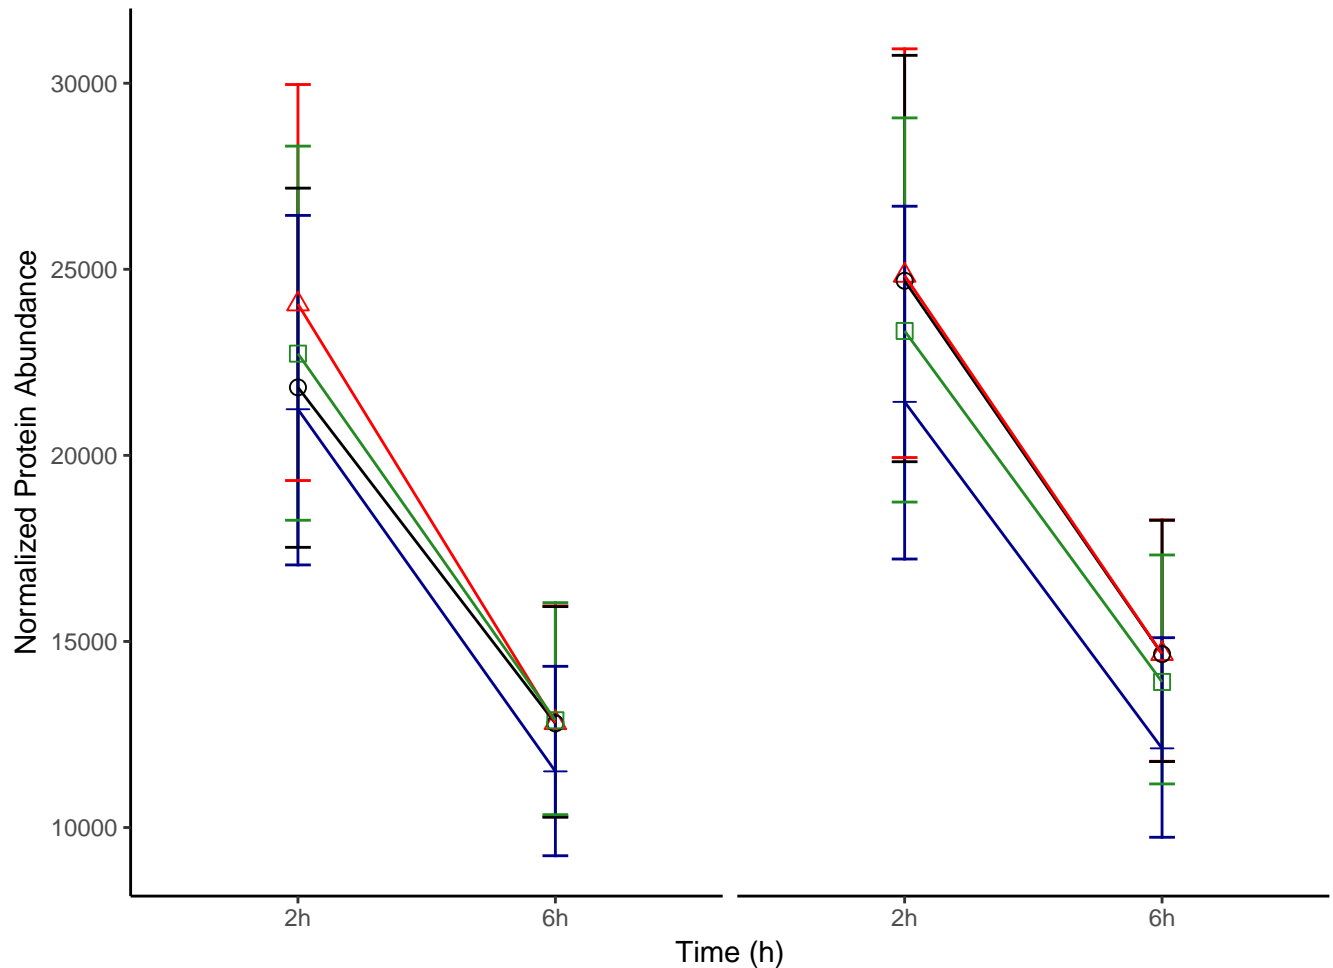

- SA564
- △ SA564- $\Delta hptRS$
- SA564- $\Delta ccpA$
- + SA564- $\Delta hptRS/ccpA$

# RS19\_STAAM

TSB

TSB-dex S-356

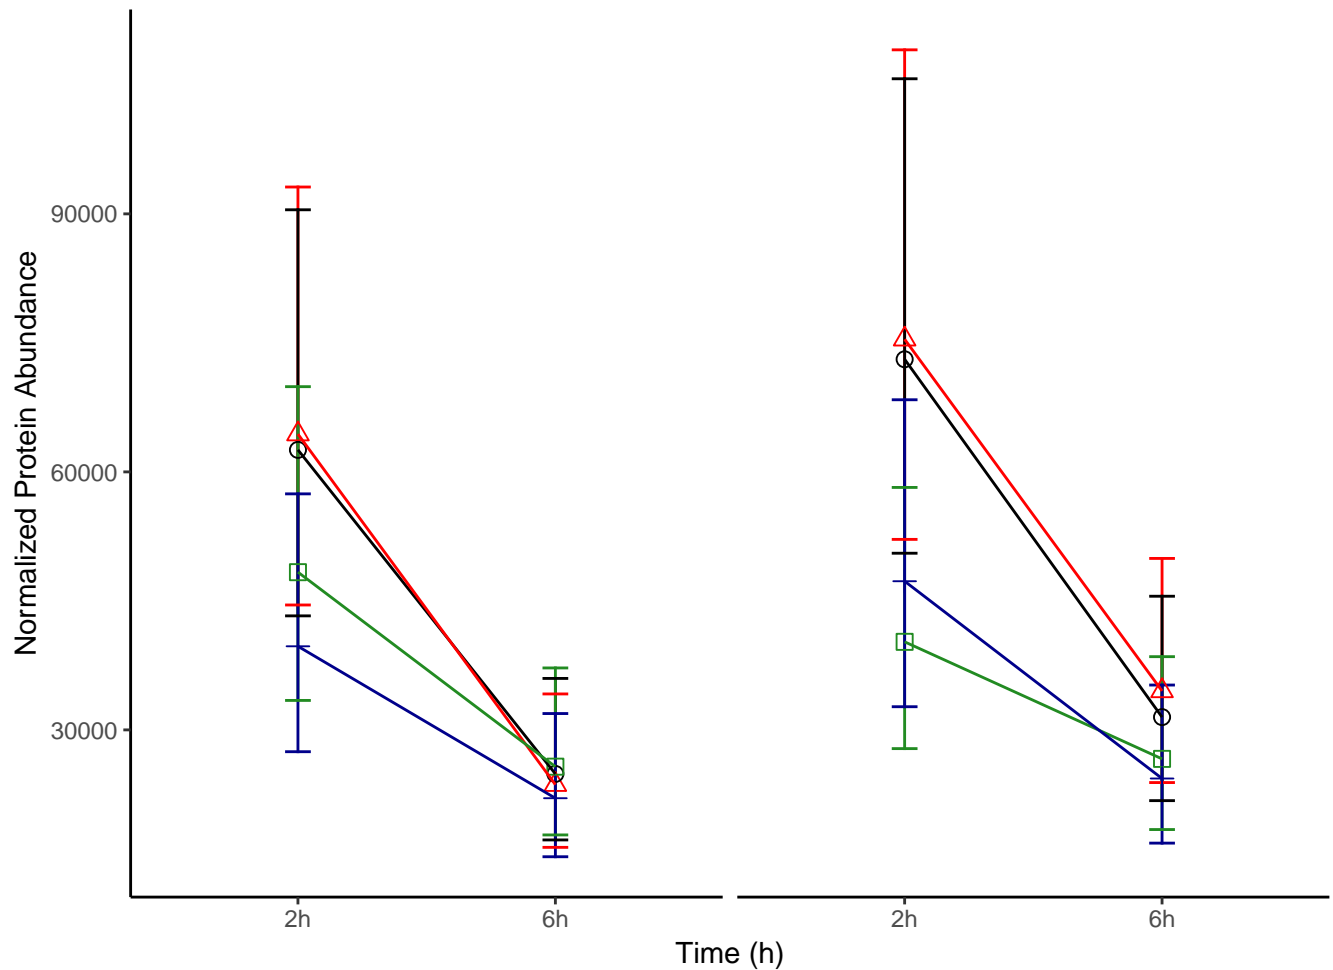

- SA564
- △ SA564-Δ*hptRS*
- SA564-Δ*ccpA*
- + SA564-Δ*hptRS/ccpA*

# RS2\_STAAM

TSB

TSB-dex S-357

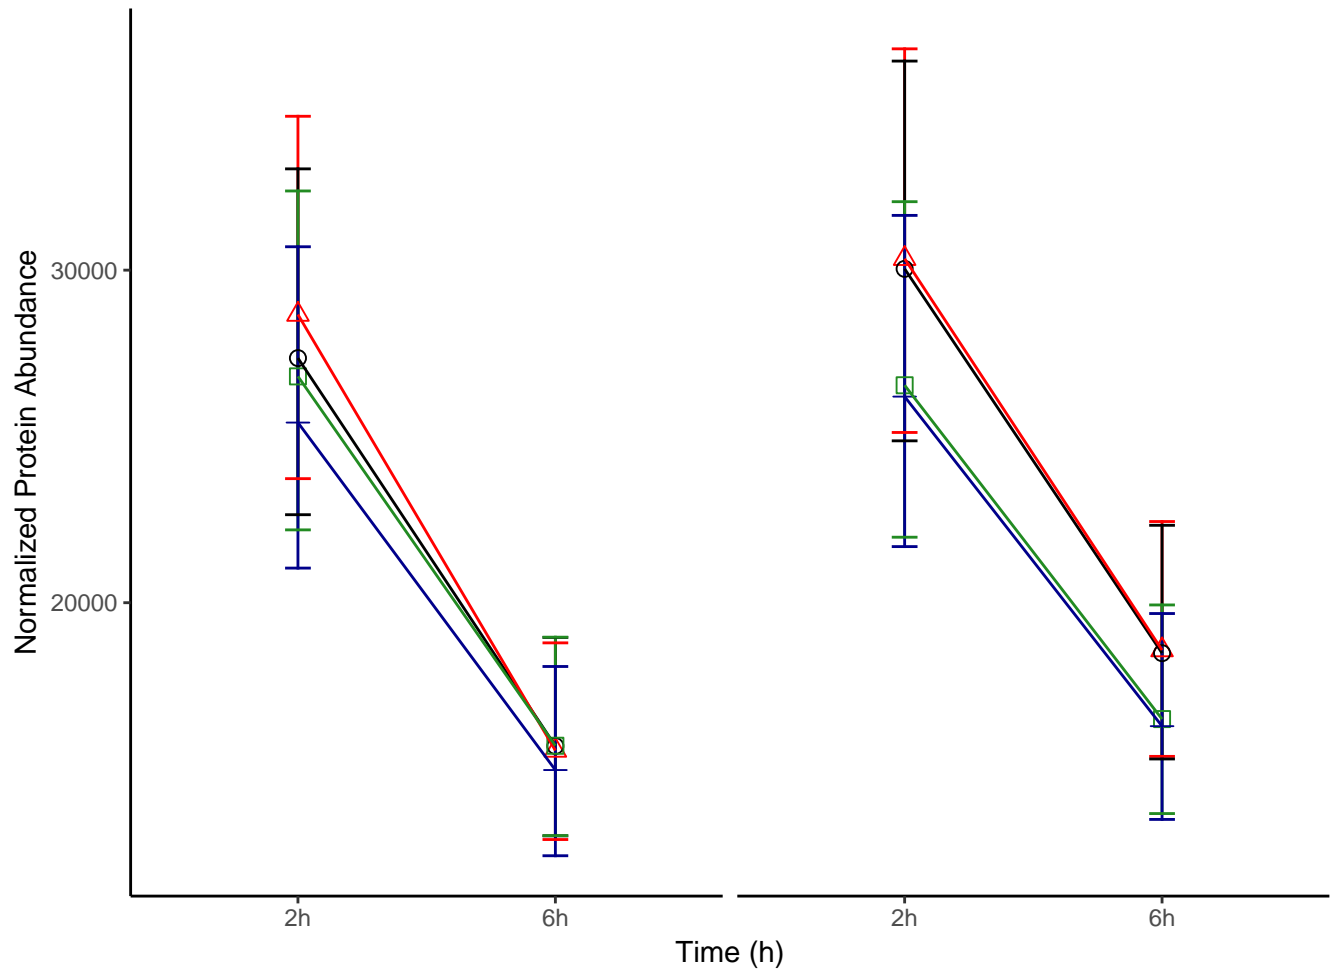

- SA564
- △ SA564- $\Delta$ *hptRS*
- SA564- $\Delta$ *ccpA*
- + SA564- $\Delta$ *hptRS/ccpA*

# RS20\_STAAM

TSB

TSB-dex S-358

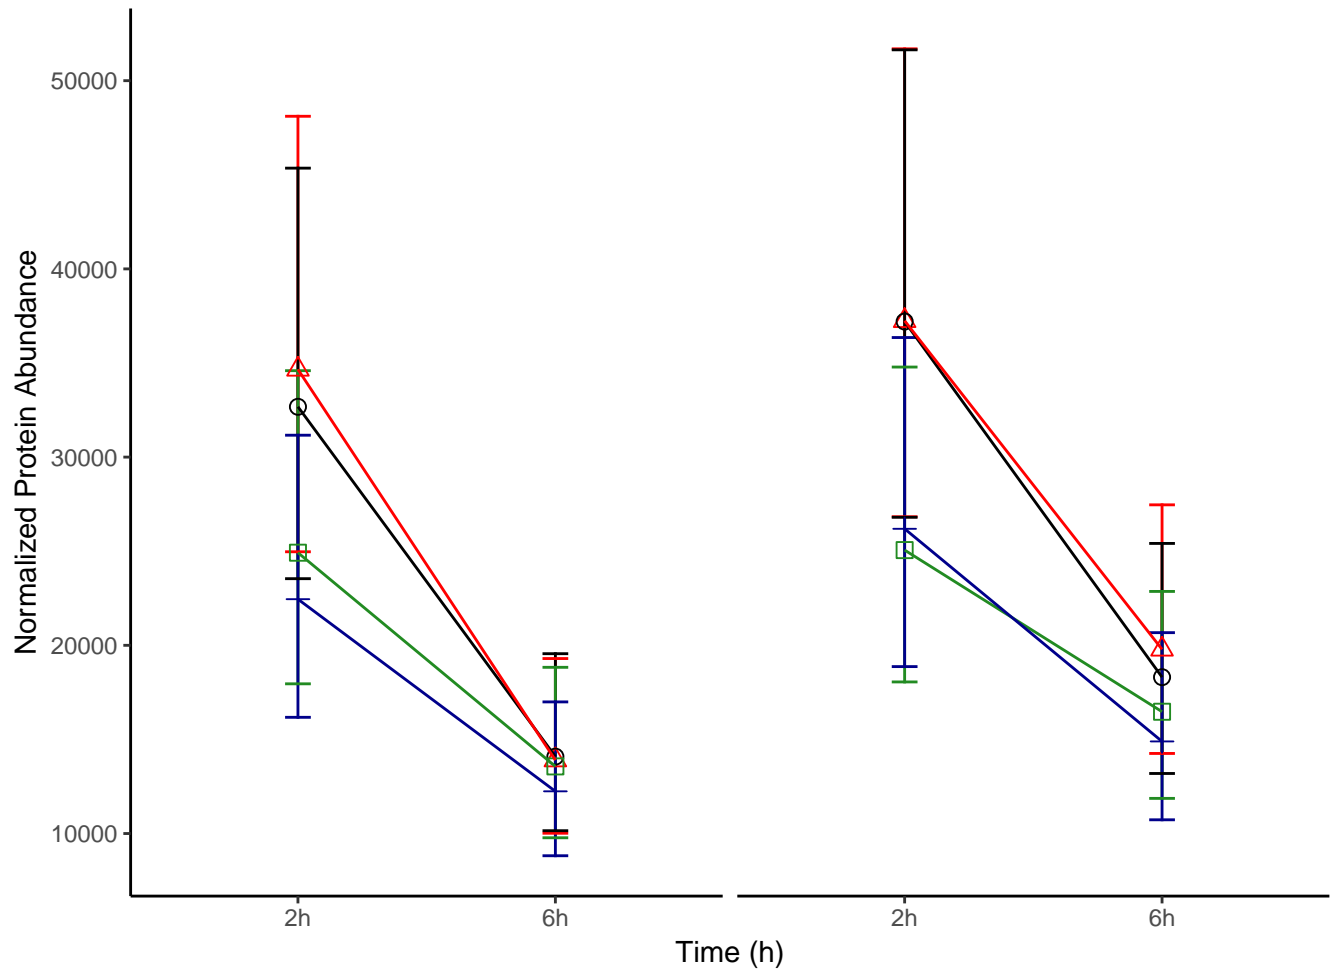

- SA564
- △ SA564-Δ*hptRS*
- SA564-Δ*ccpA*
- + SA564-Δ*hptRS/ccpA*

# RS21\_STAAM

TSB

TSB-dex S-359

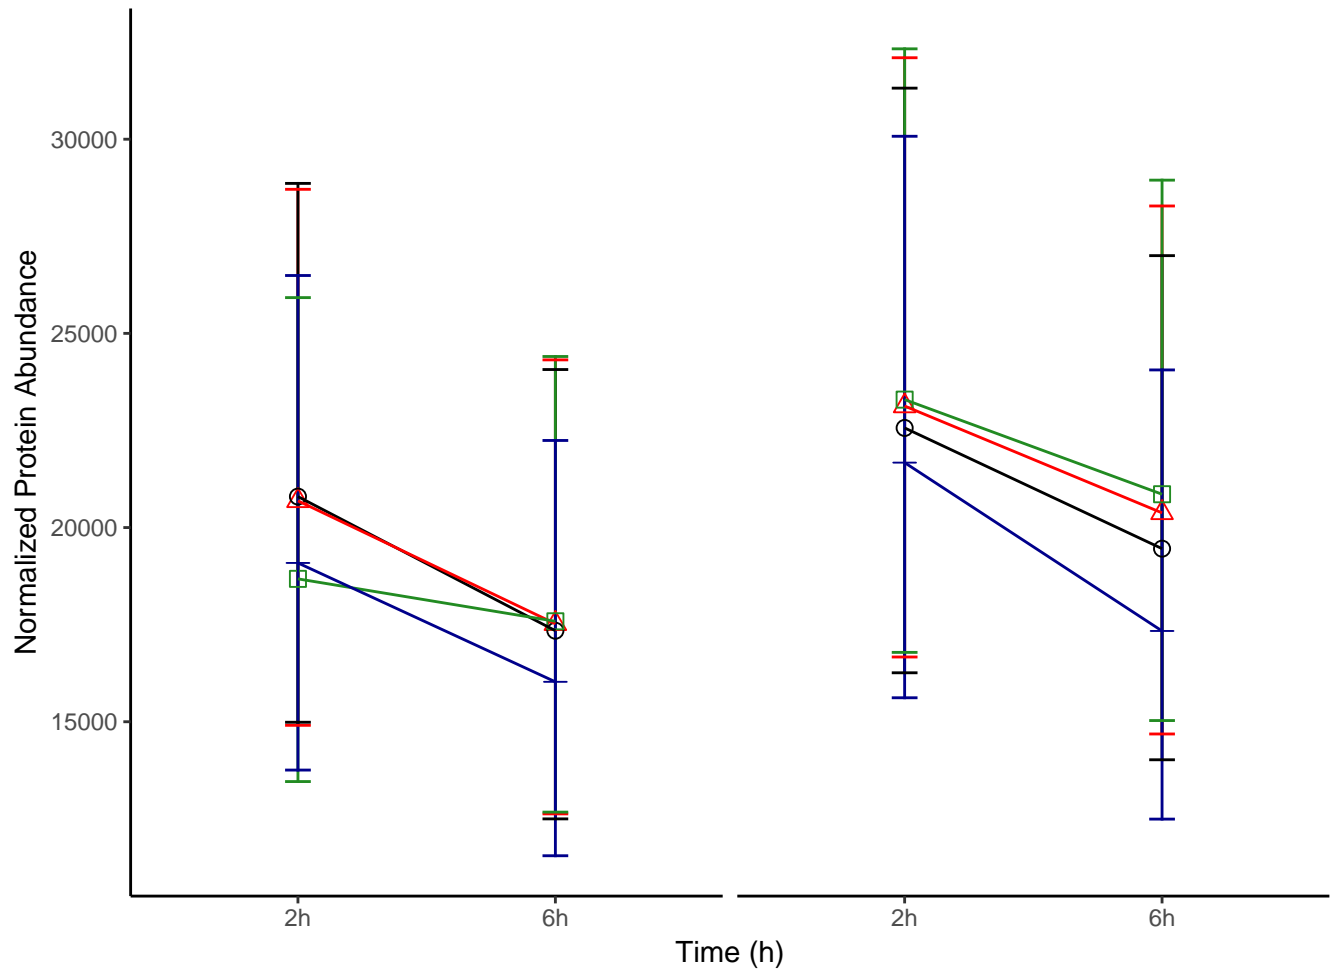

- SA564
- △ SA564- $\Delta$ hptRS
- SA564- $\Delta$ ccpA
- + SA564- $\Delta$ hptRS/ccpA

# RS3\_STAAM

TSB

TSB-dex S-360

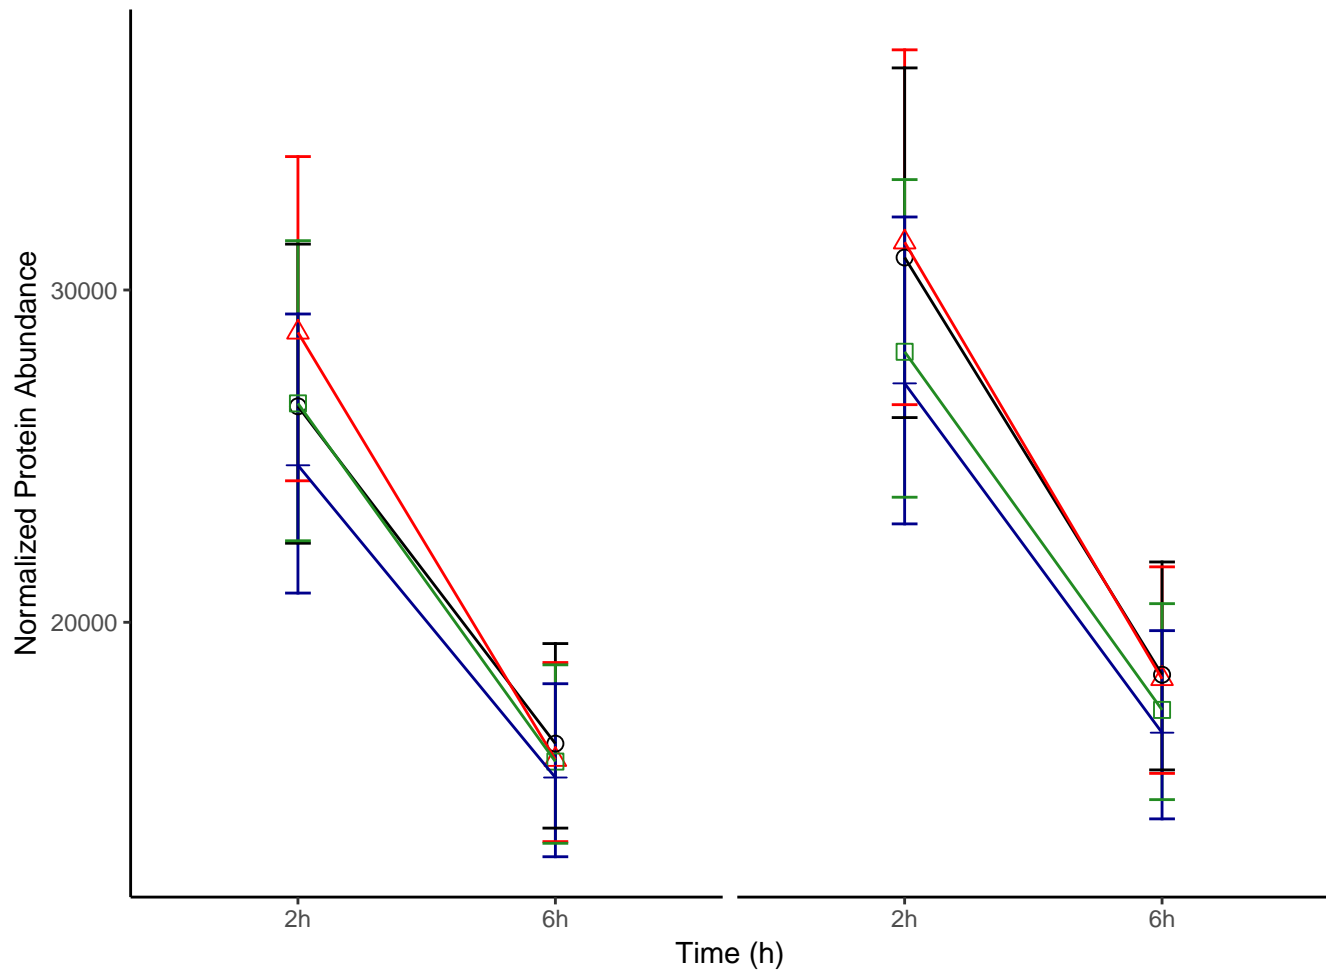

- SA564
- △ SA564-Δ*hptRS*
- SA564-Δ*ccpA*
- + SA564-Δ*hptRS/ccpA*



# RS4\_STAAM

TSB

TSB-dex S-361

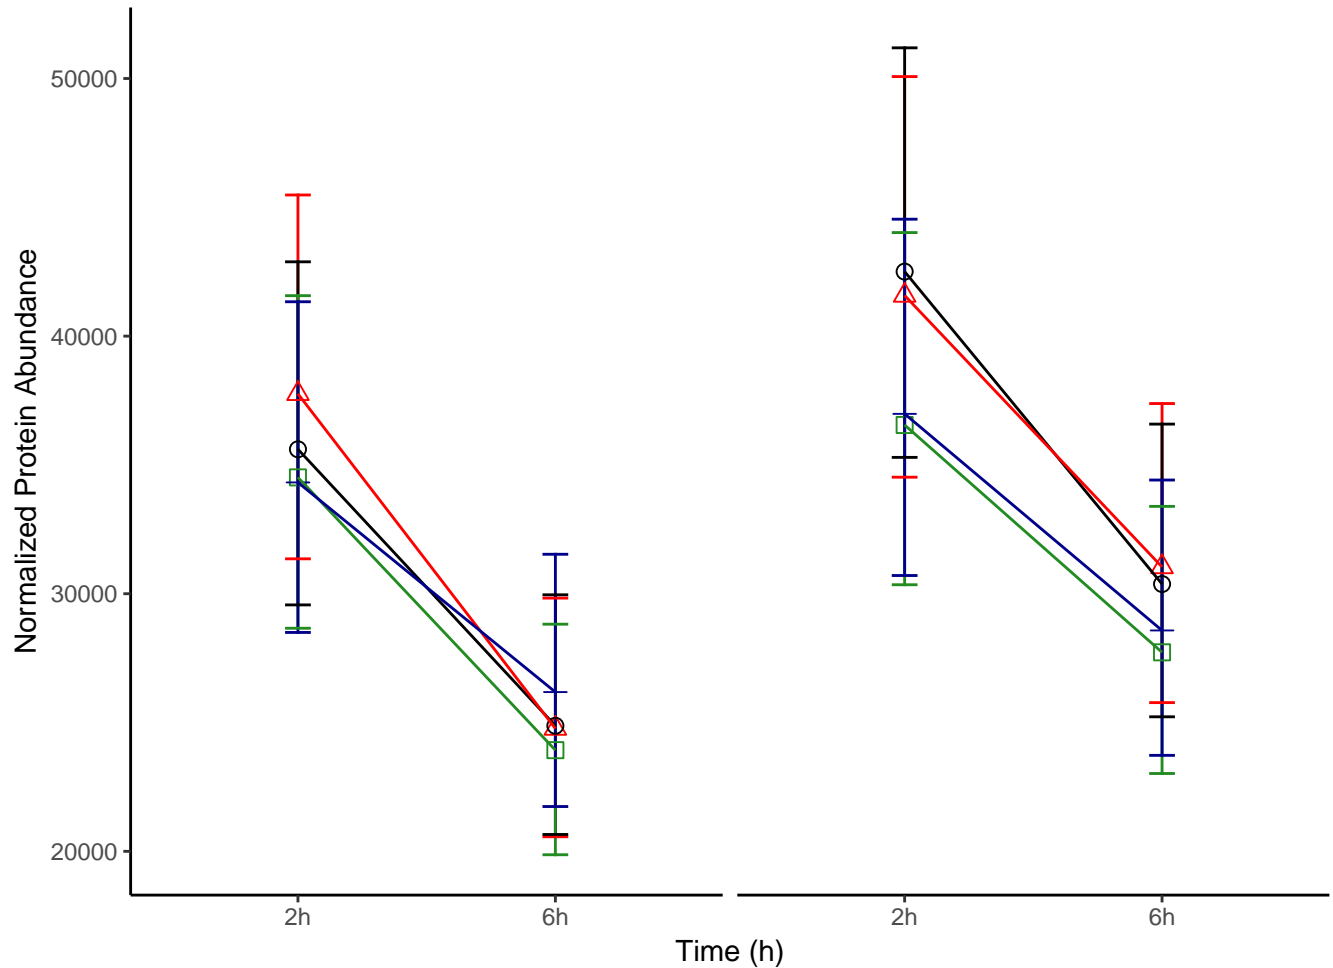

- SA564
- △ SA564-ΔhptRS
- SA564-ΔccpA
- + SA564-ΔhptRS/ccpA

# RS5\_STAAM

TSB

TSB-dex S-362

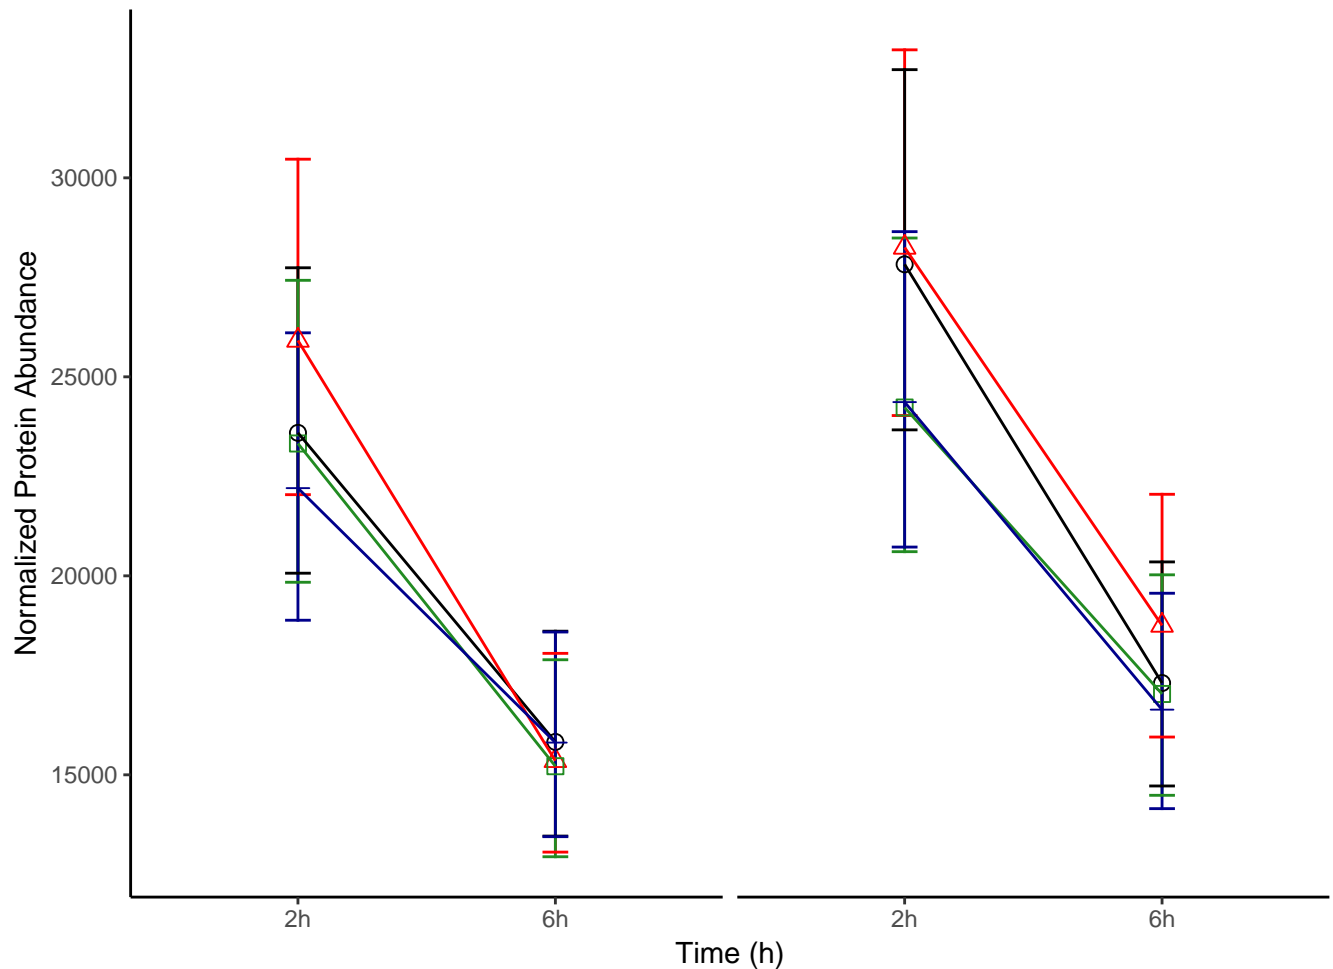

- SA564
- △ SA564- $\Delta$ *hptRS*
- SA564- $\Delta$ *ccpA*
- + SA564- $\Delta$ *hptRS/ccpA*

# RS6\_STAAM

TSB

TSB-dex S-363

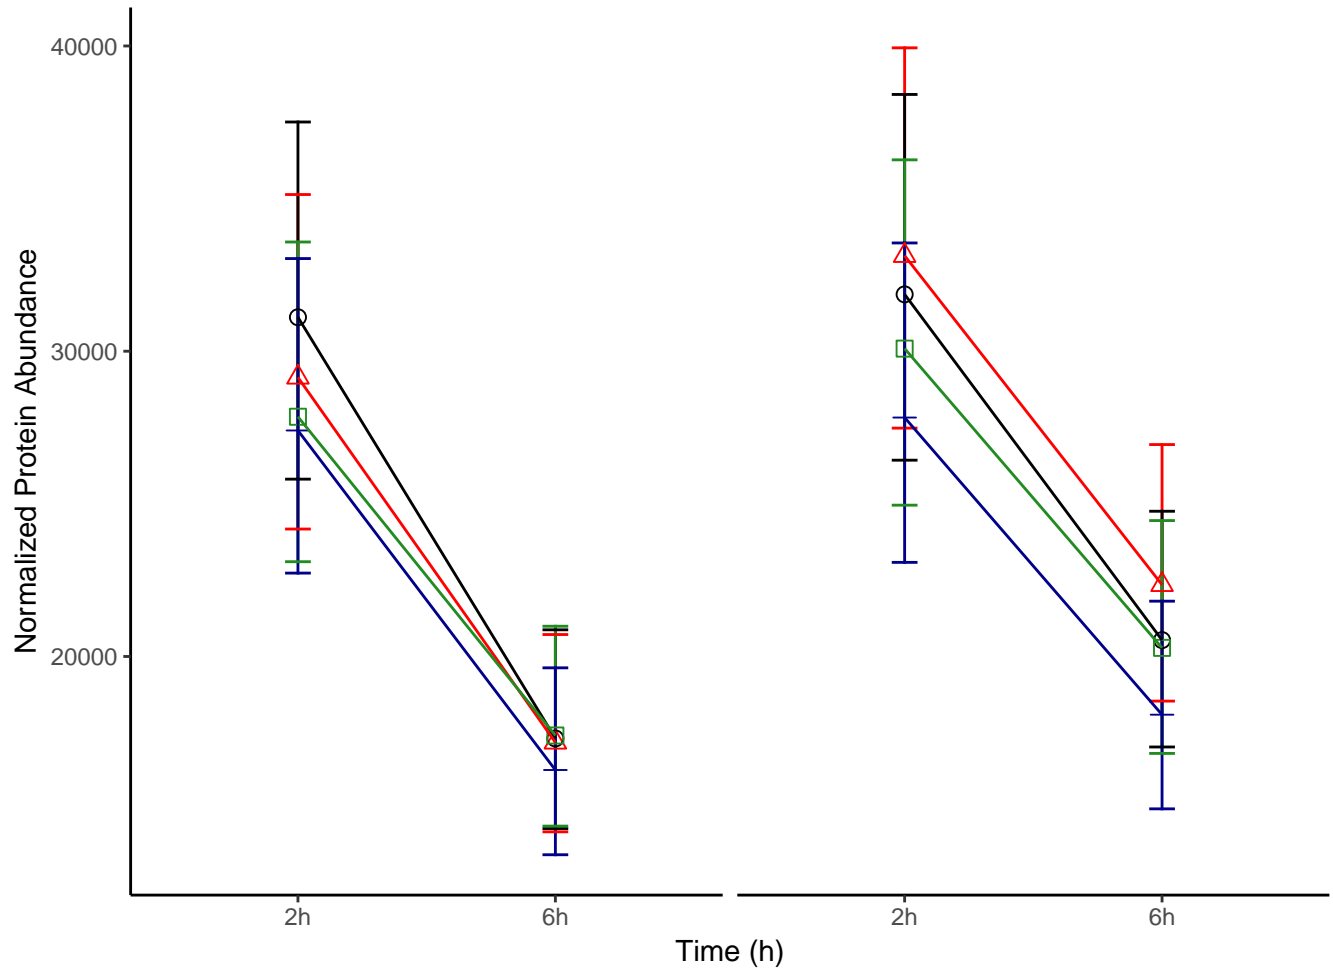

- SA564
- △ SA564- $\Delta$ *hptRS*
- SA564- $\Delta$ *ccpA*
- + SA564- $\Delta$ *hptRS/ccpA*

# RS7\_STAAM

TSB

TSB-dex S-364

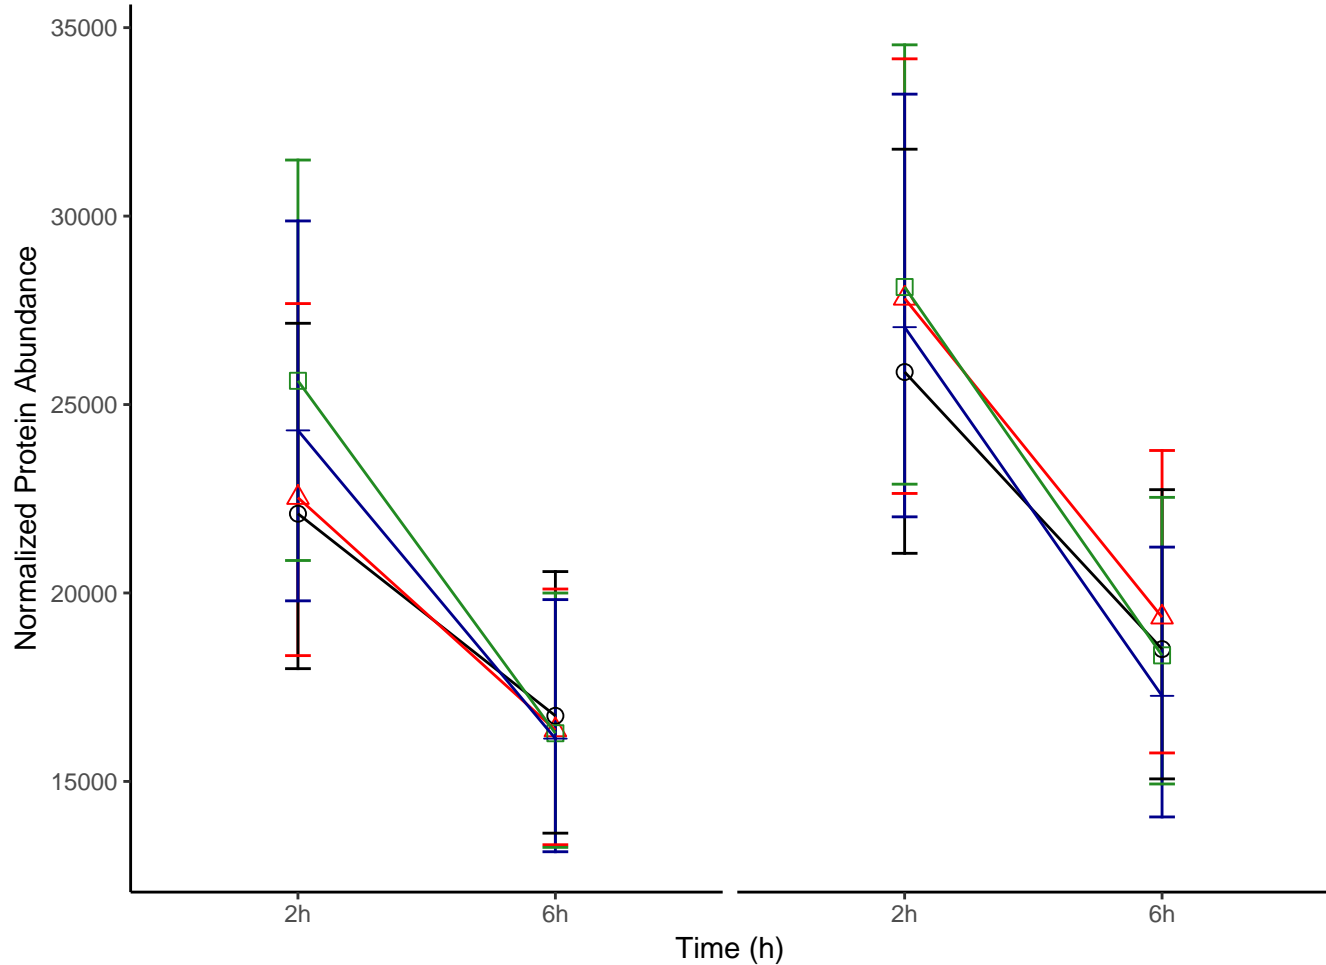

- SA564
- △ SA564- $\Delta hptRS$
- SA564- $\Delta ccpA$
- + SA564- $\Delta hptRS/ccpA$

# RS8\_STAAM

TSB

TSB-dex S-365

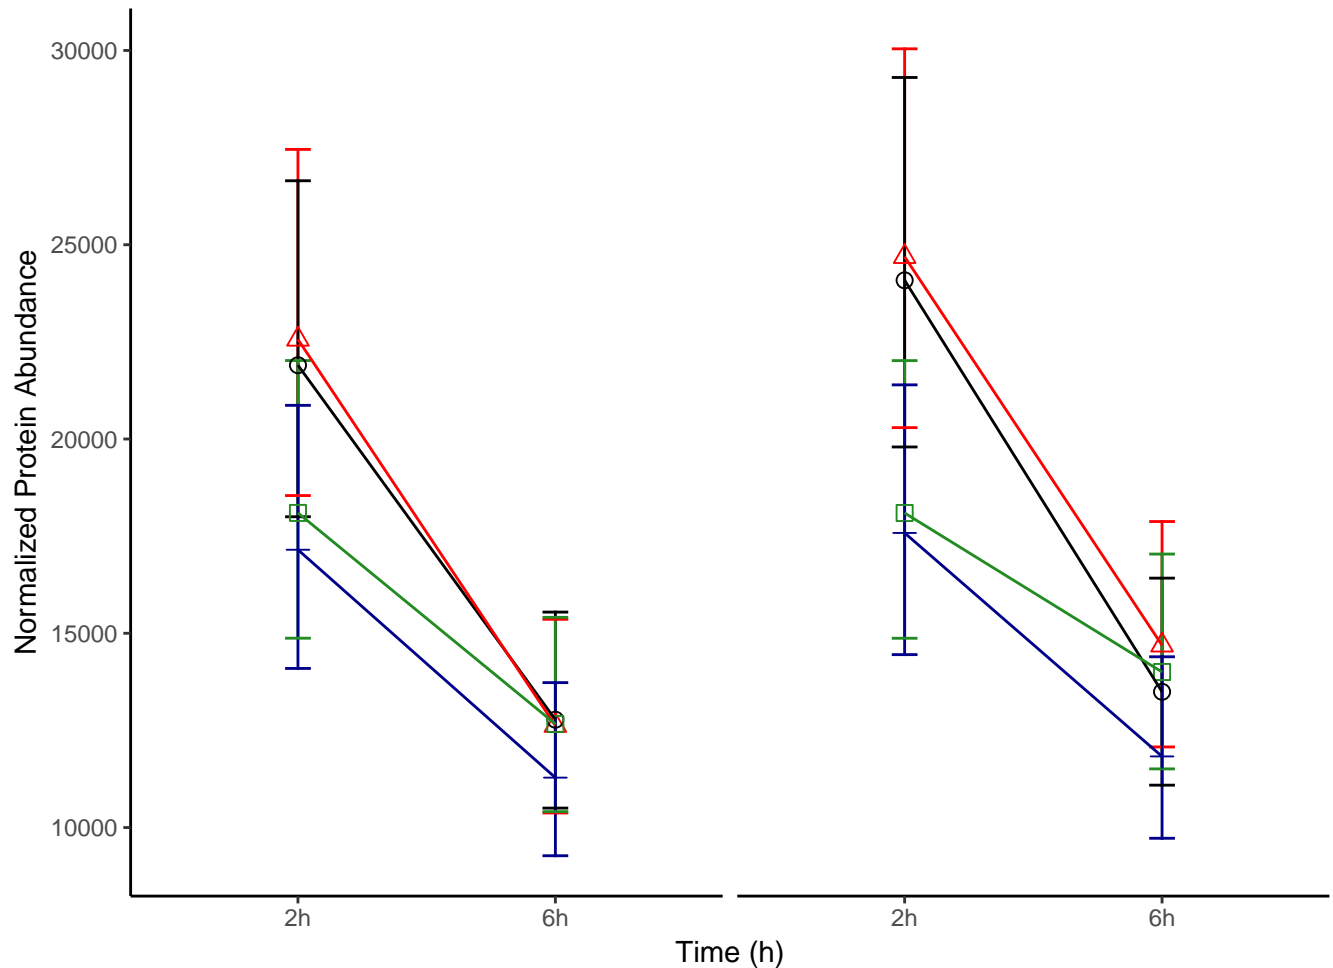

- SA564
- △ SA564-Δ*hptRS*
- SA564-Δ*ccpA*
- + SA564-Δ*hptRS/ccpA*

# RS9\_STAAM

TSB

TSB-dex S-366

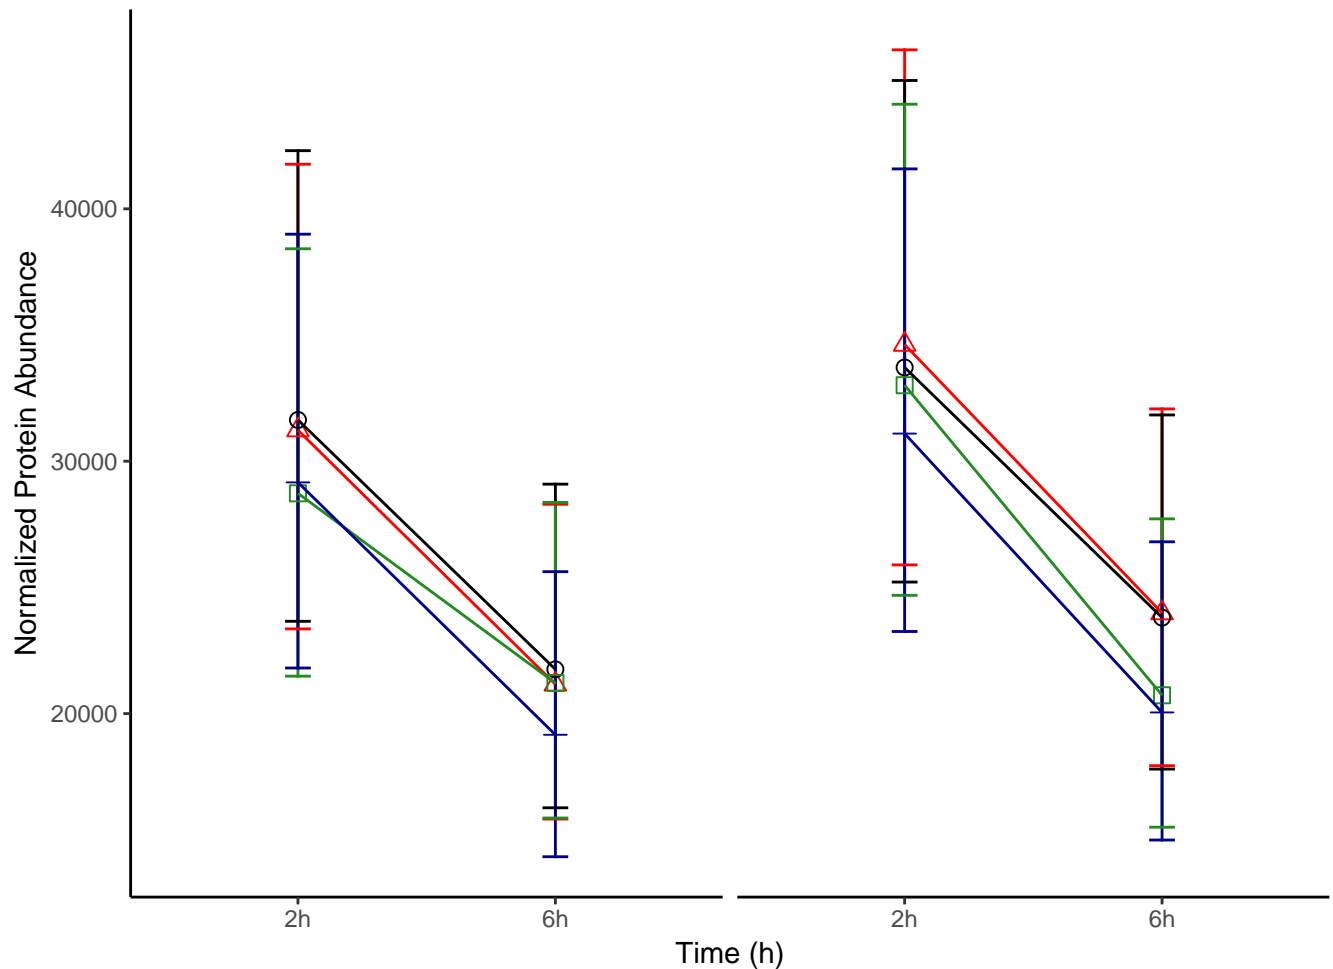

- SA564
- △ SA564- $\Delta hptRS$
- SA564- $\Delta ccpA$
- + SA564- $\Delta hptRS/ccpA$

# RSBV\_STAAM

TSB

TSB-dex S-367

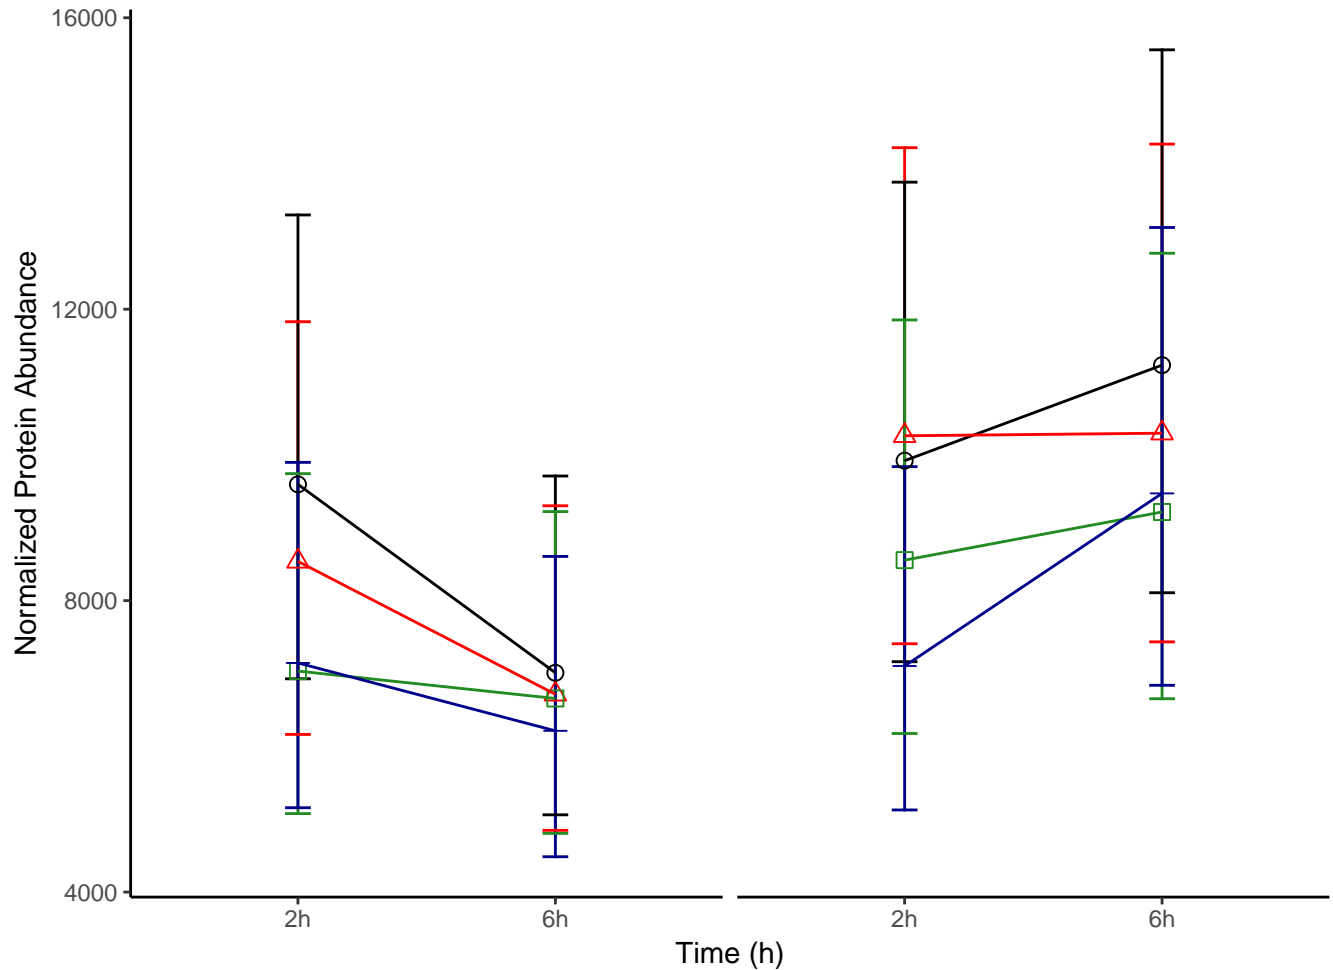

- SA564
- △ SA564- $\Delta$ *hptRS*
- SA564- $\Delta$ *ccpA*
- + SA564- $\Delta$ *hptRS/ccpA*

# RSBW\_STAAM

TSB

TSB-dex S-368

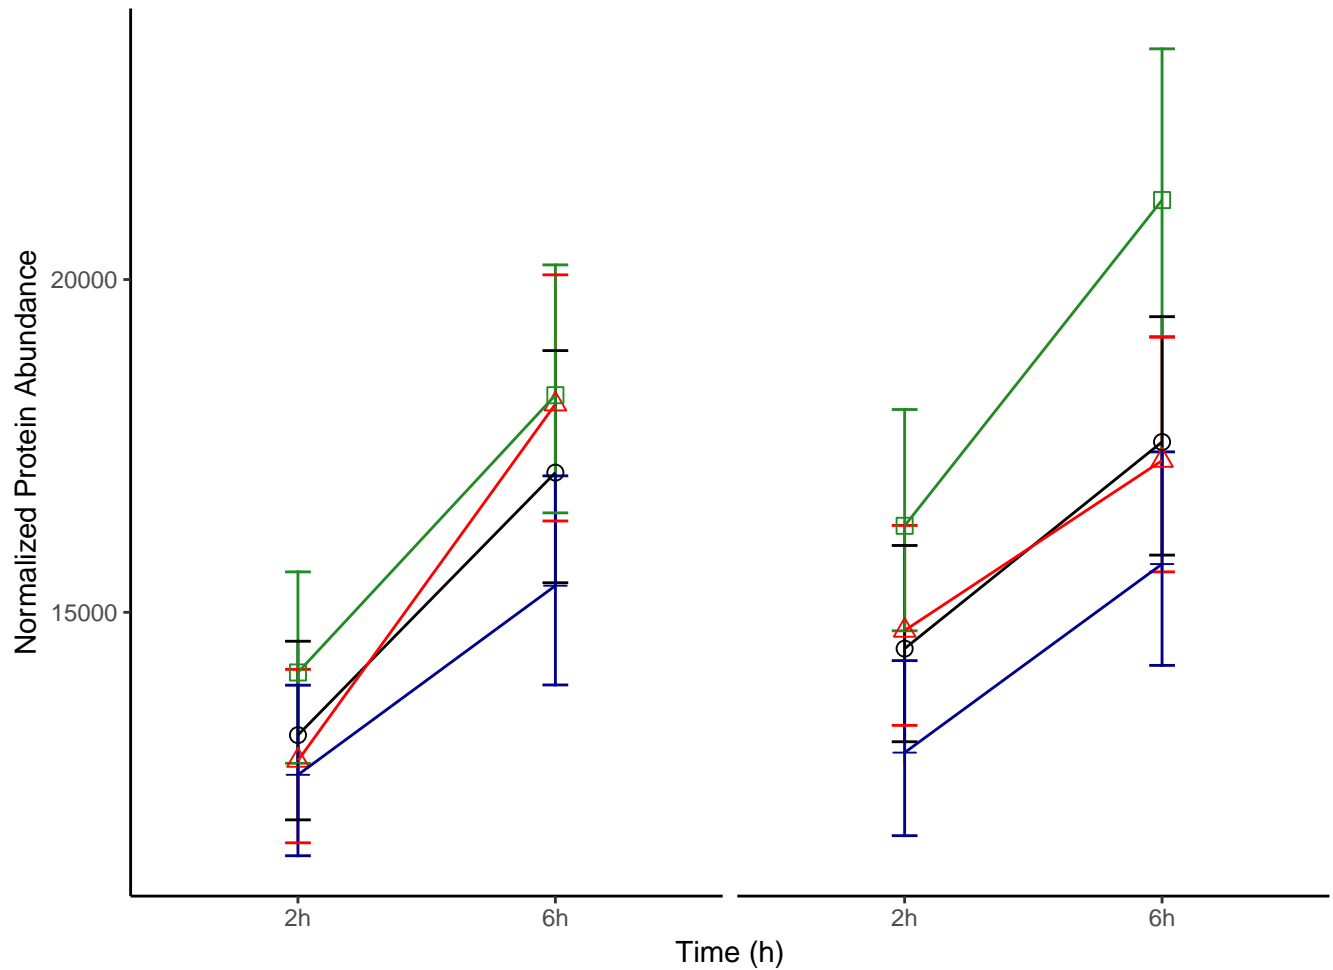

- SA564
- △ SA564-Δ*hptRS*
- SA564-Δ*ccpA*
- + SA564-Δ*hptRS/ccpA*



# RSMA\_STAAM

TSB

TSB-dex S-369

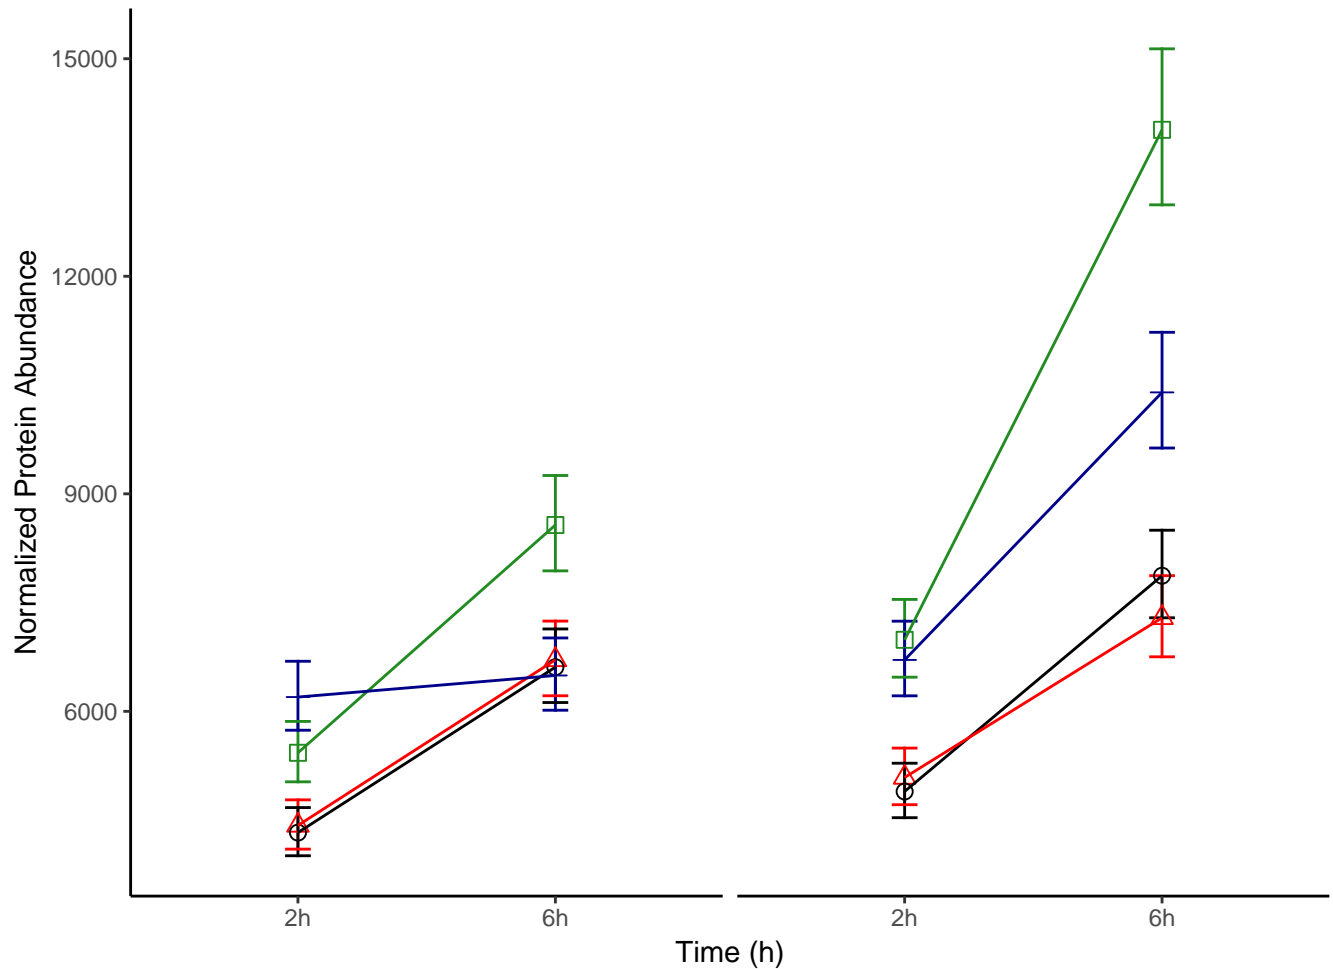

- SA564
- △ SA564- $\Delta$ hptRS
- SA564- $\Delta$ ccpA
- + SA564- $\Delta$ hptRS/ccpA

# RSMG\_STAAM

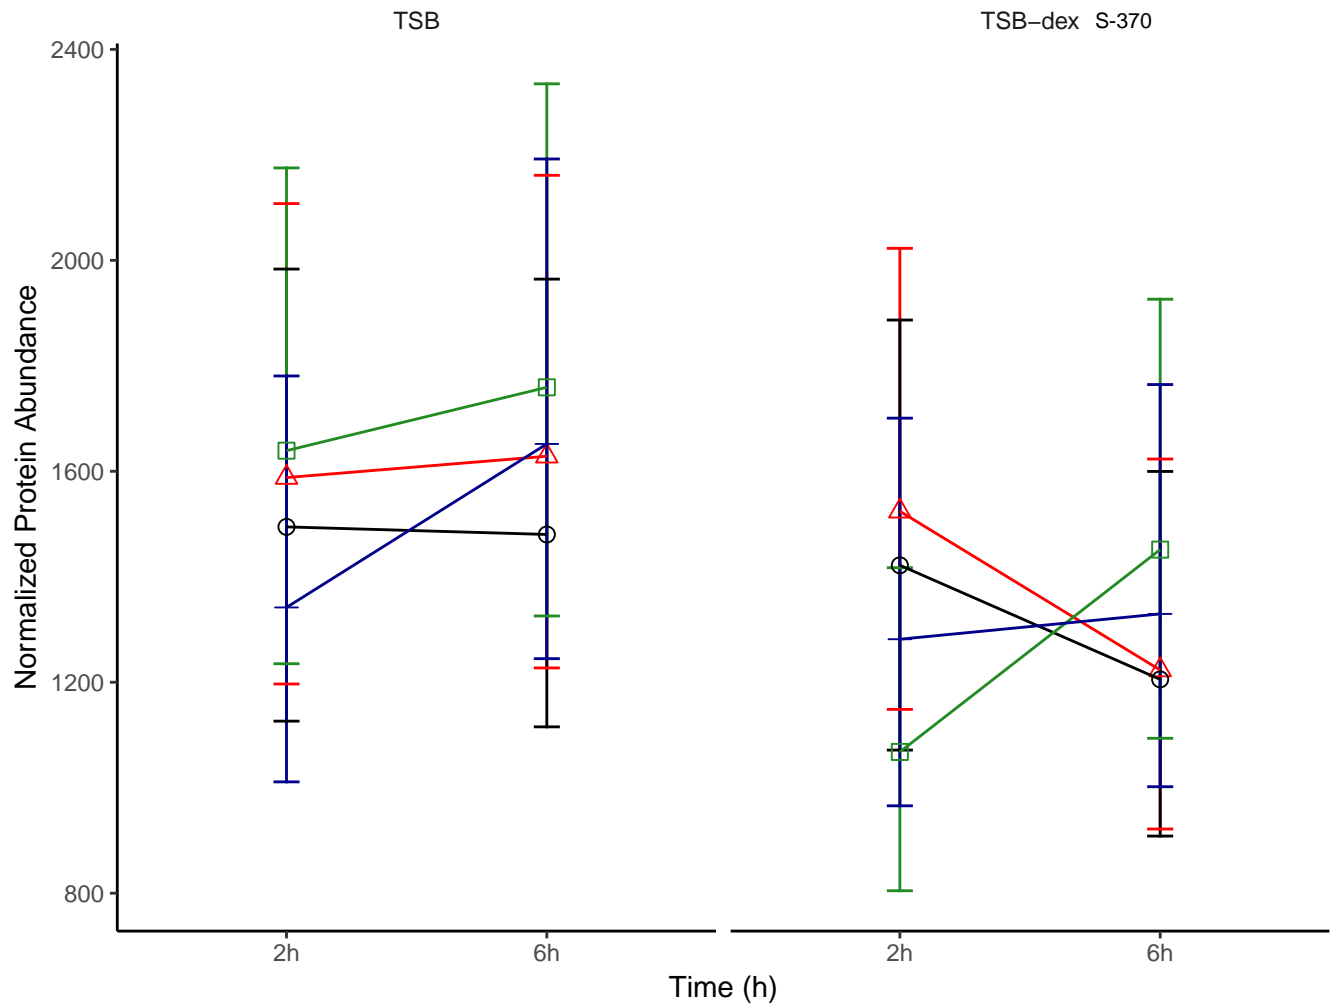

- SA564
- △ SA564-ΔhptRS
- SA564-ΔccpA
- + SA564-ΔhptRS/ccpA

# RUVX\_STAAM

TSB

TSB-dex S-371

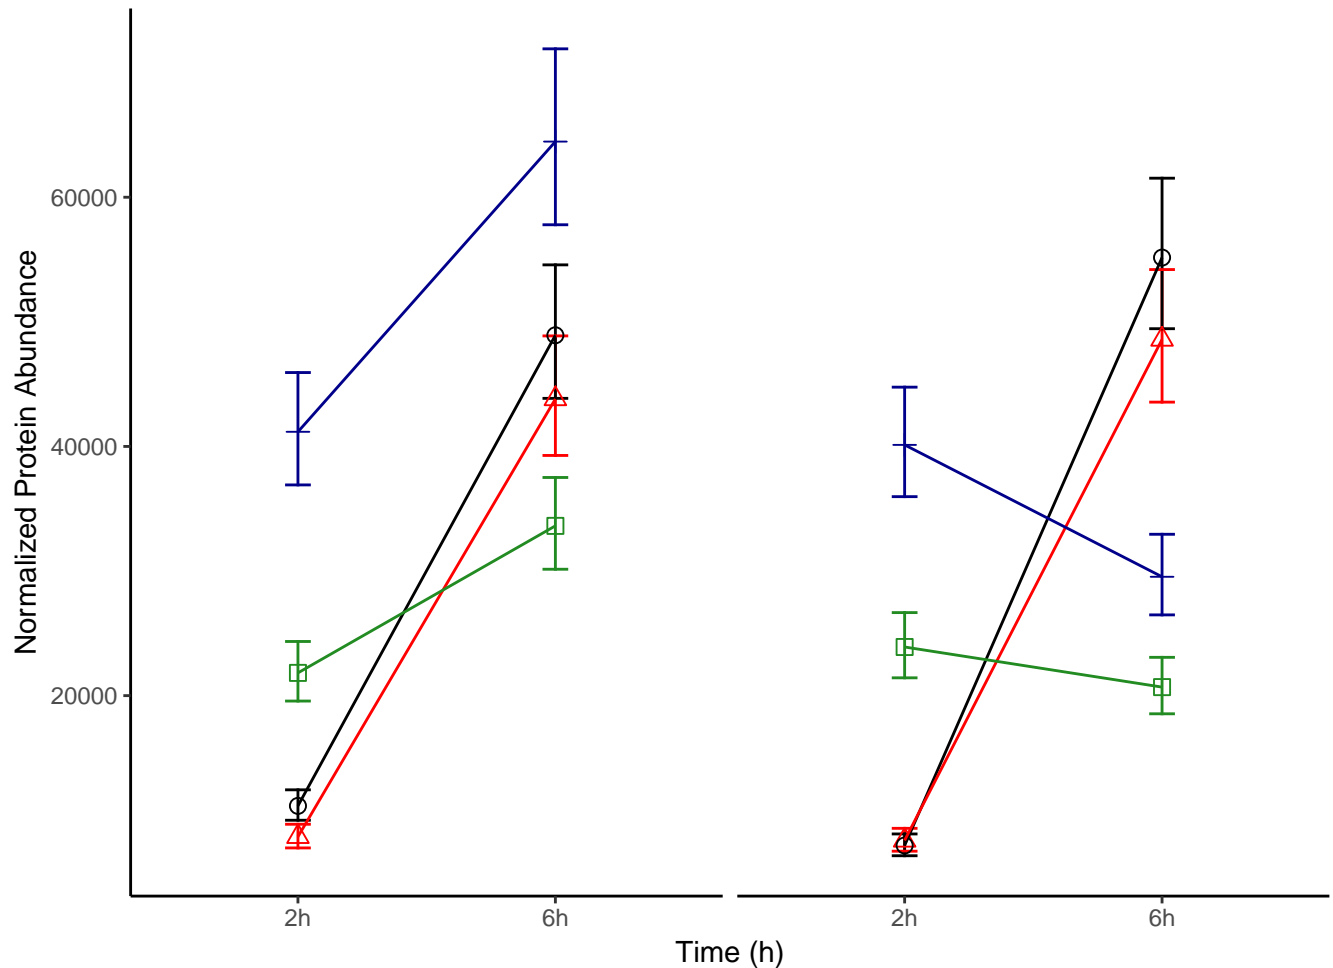

- SA564
- △ SA564- $\Delta$ hptRS
- SA564- $\Delta$ ccpA
- + SA564- $\Delta$ hptRS/ccpA

# S3AD\_STAAM

TSB

TSB-dex S-372

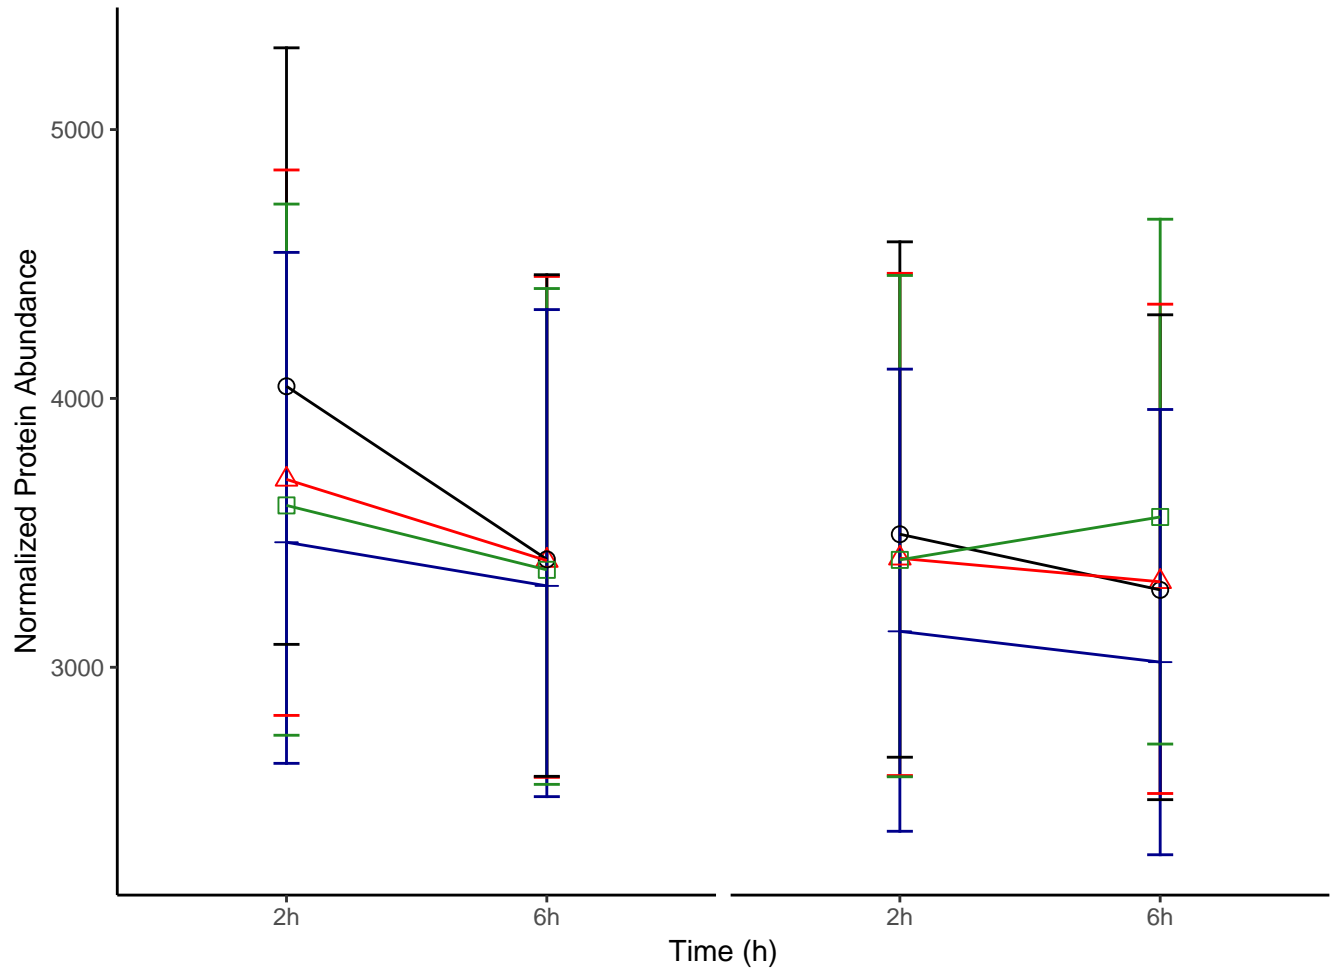

- SA564
- △ SA564- $\Delta hptRS$
- SA564- $\Delta ccpA$
- + SA564- $\Delta hptRS/ccpA$

# SAER\_STAAM

TSB

TSB-dex S-373

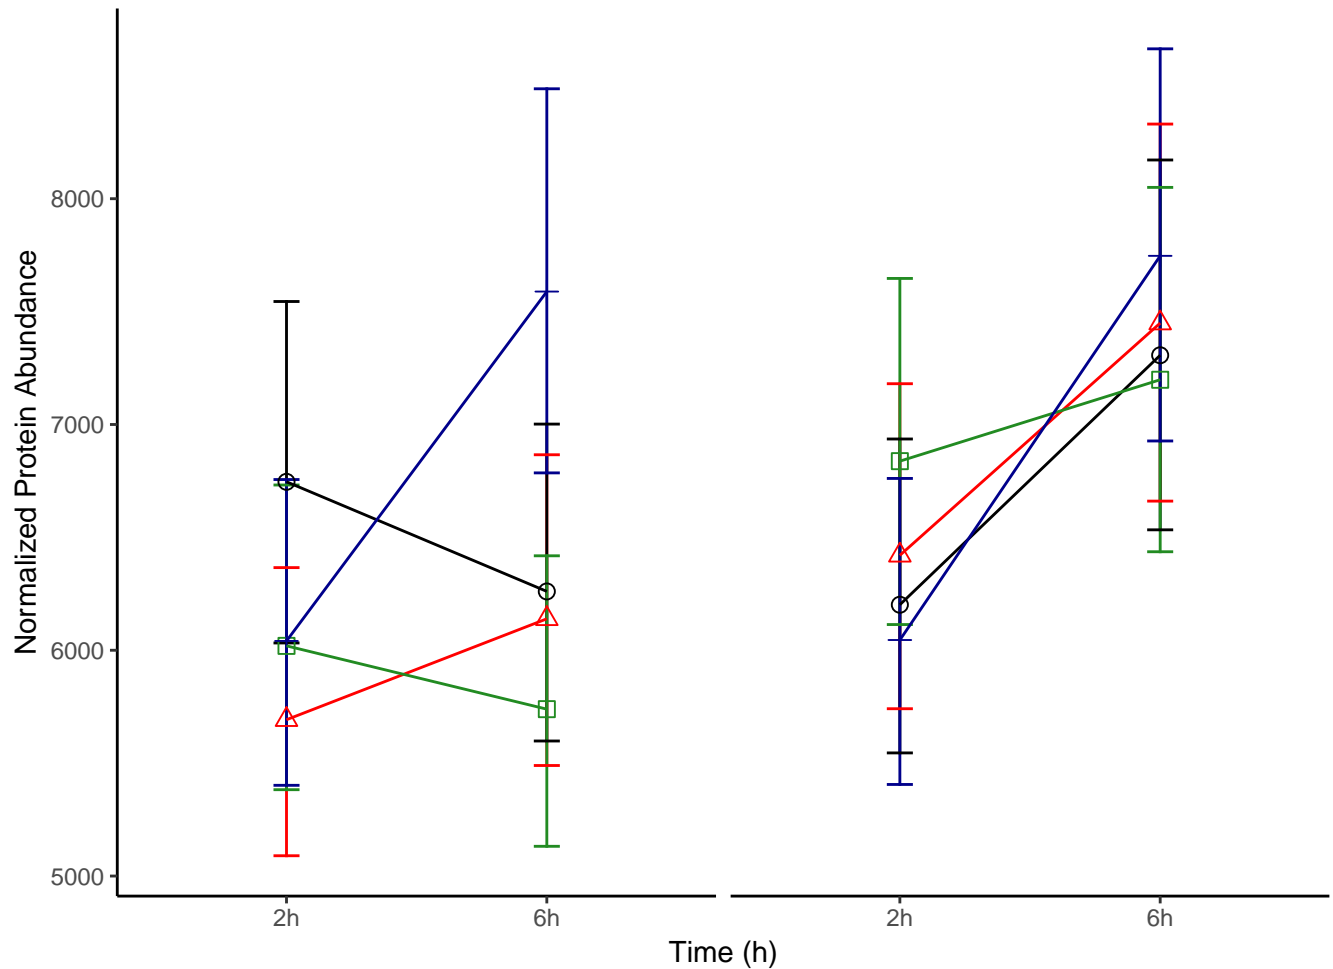

- SA564
- △ SA564-ΔhptRS
- SA564-ΔccpA
- + SA564-ΔhptRS/ccpA

# SARA\_STAAM

TSB

TSB-dex S-374

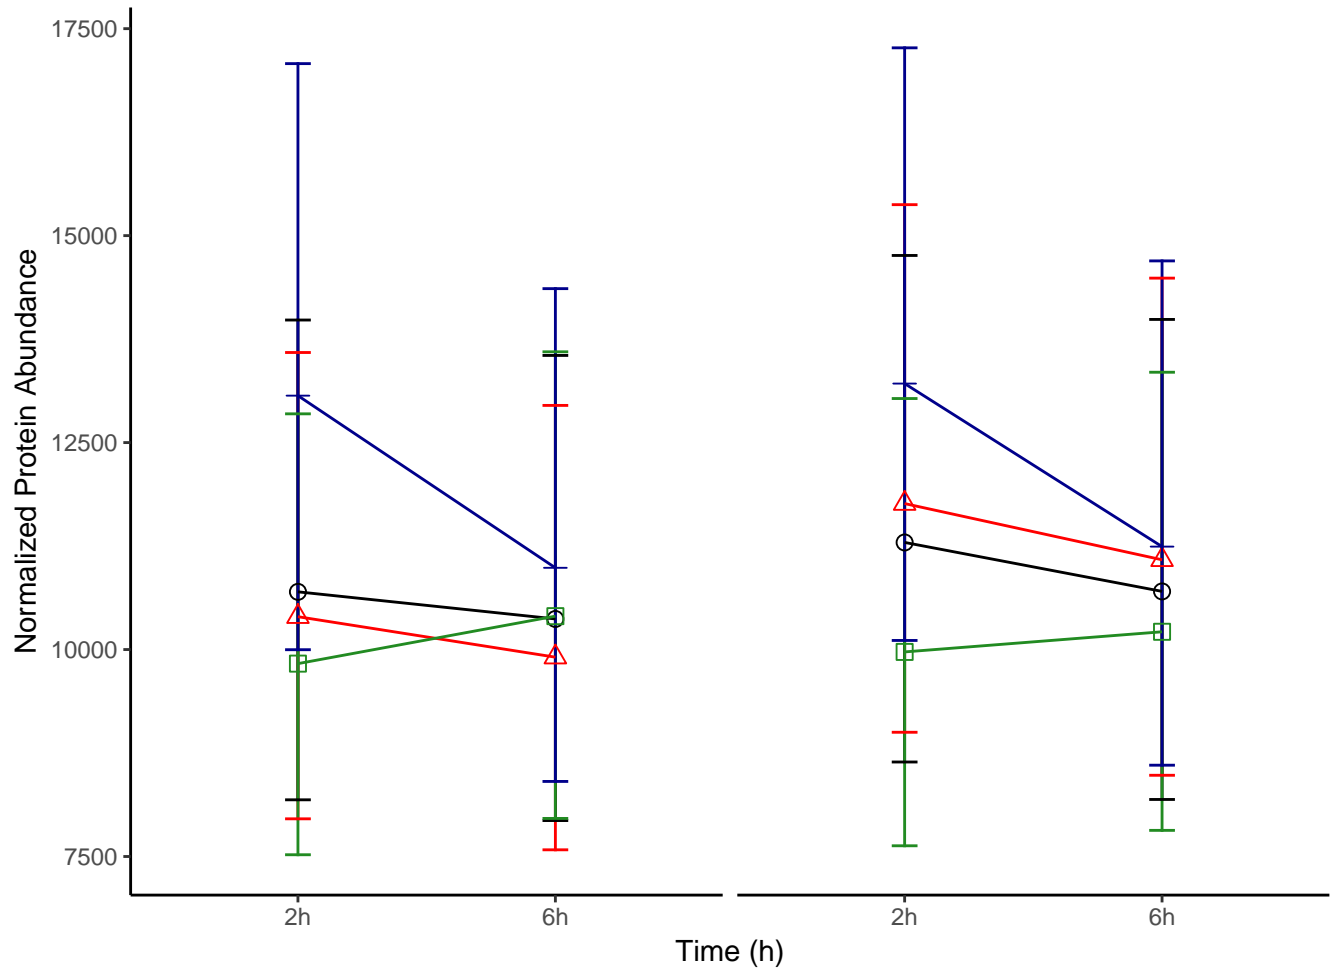

- SA564
- △ SA564- $\Delta hptRS$
- SA564- $\Delta ccpA$
- + SA564- $\Delta hptRS/ccpA$

# SARR\_STAAM

TSB

TSB-dex S-375

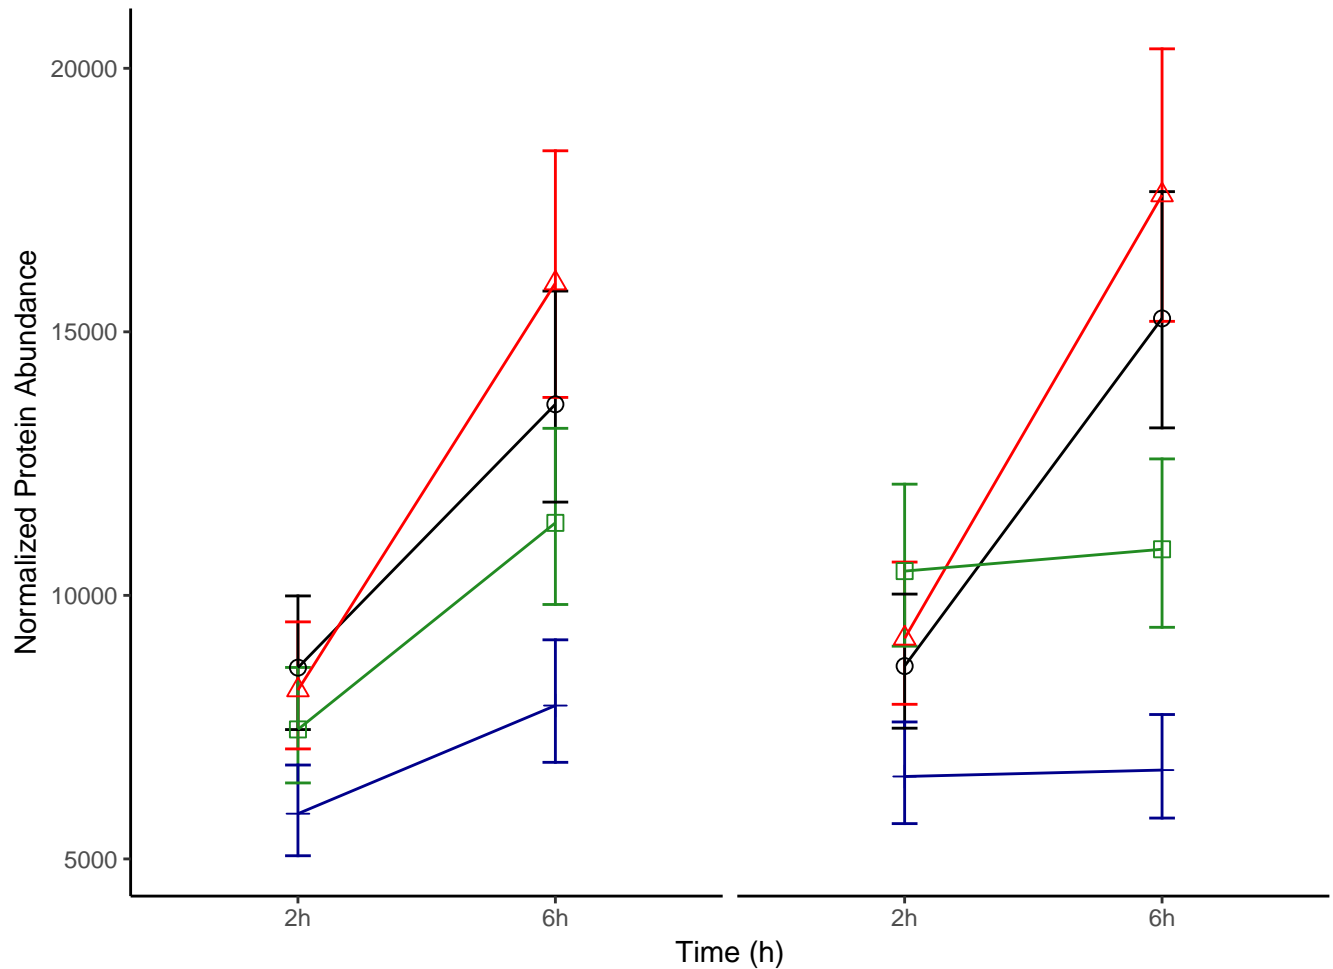

- SA564
- SA564- $\Delta hptRS$
- SA564- $\Delta ccpA$
- SA564- $\Delta hptRS/ccpA$

# SARS\_STAAM

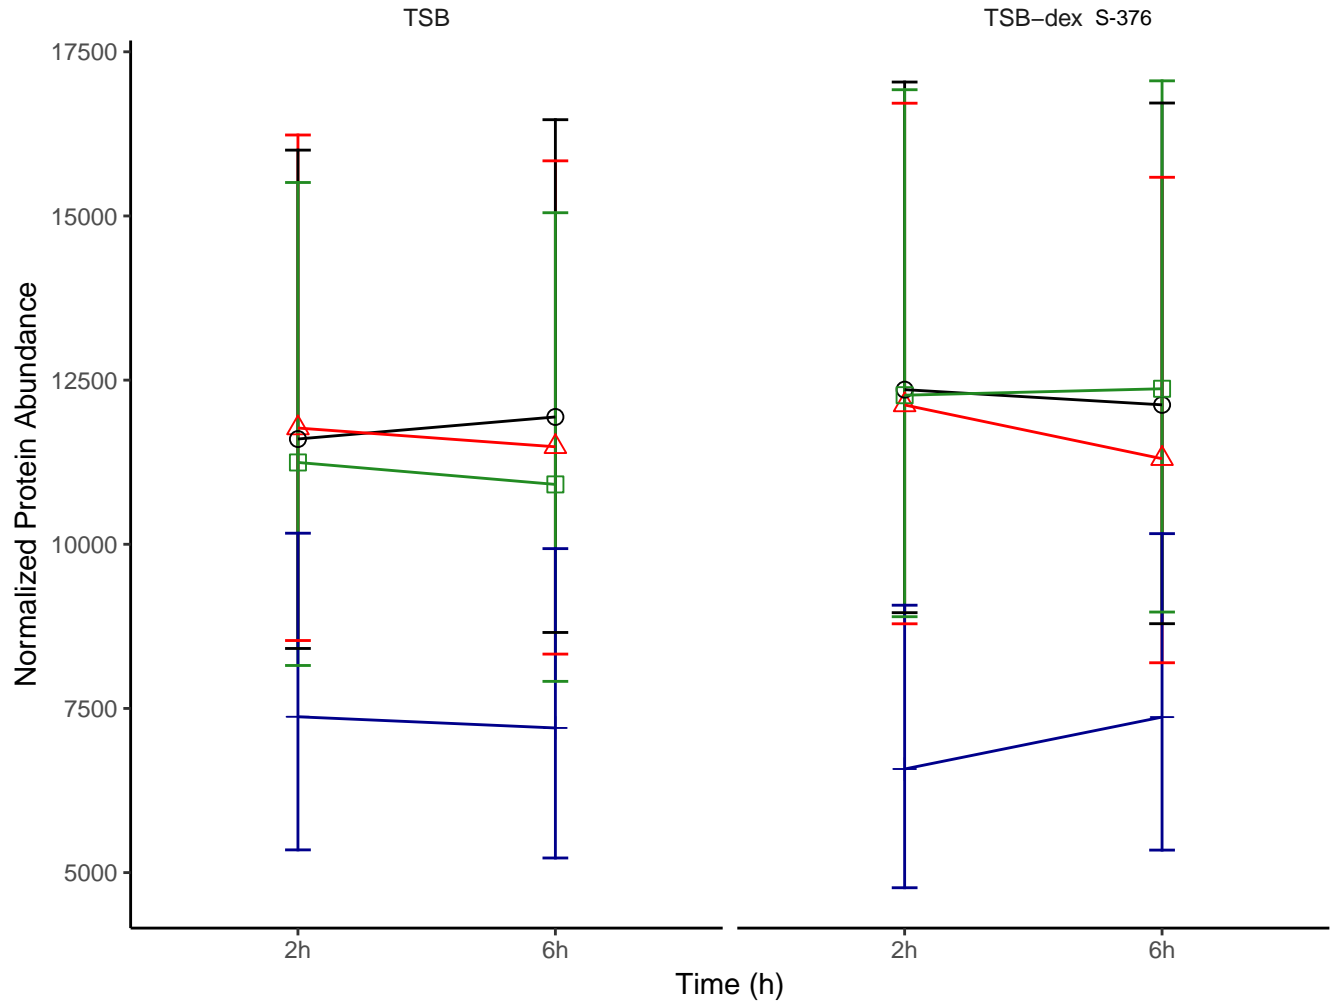

- SA564
- △ SA564- $\Delta$ hptRS
- SA564- $\Delta$ ccpA
- + SA564- $\Delta$ hptRS/ccpA



# SBCC\_STAAM

TSB

TSB-dex S-377

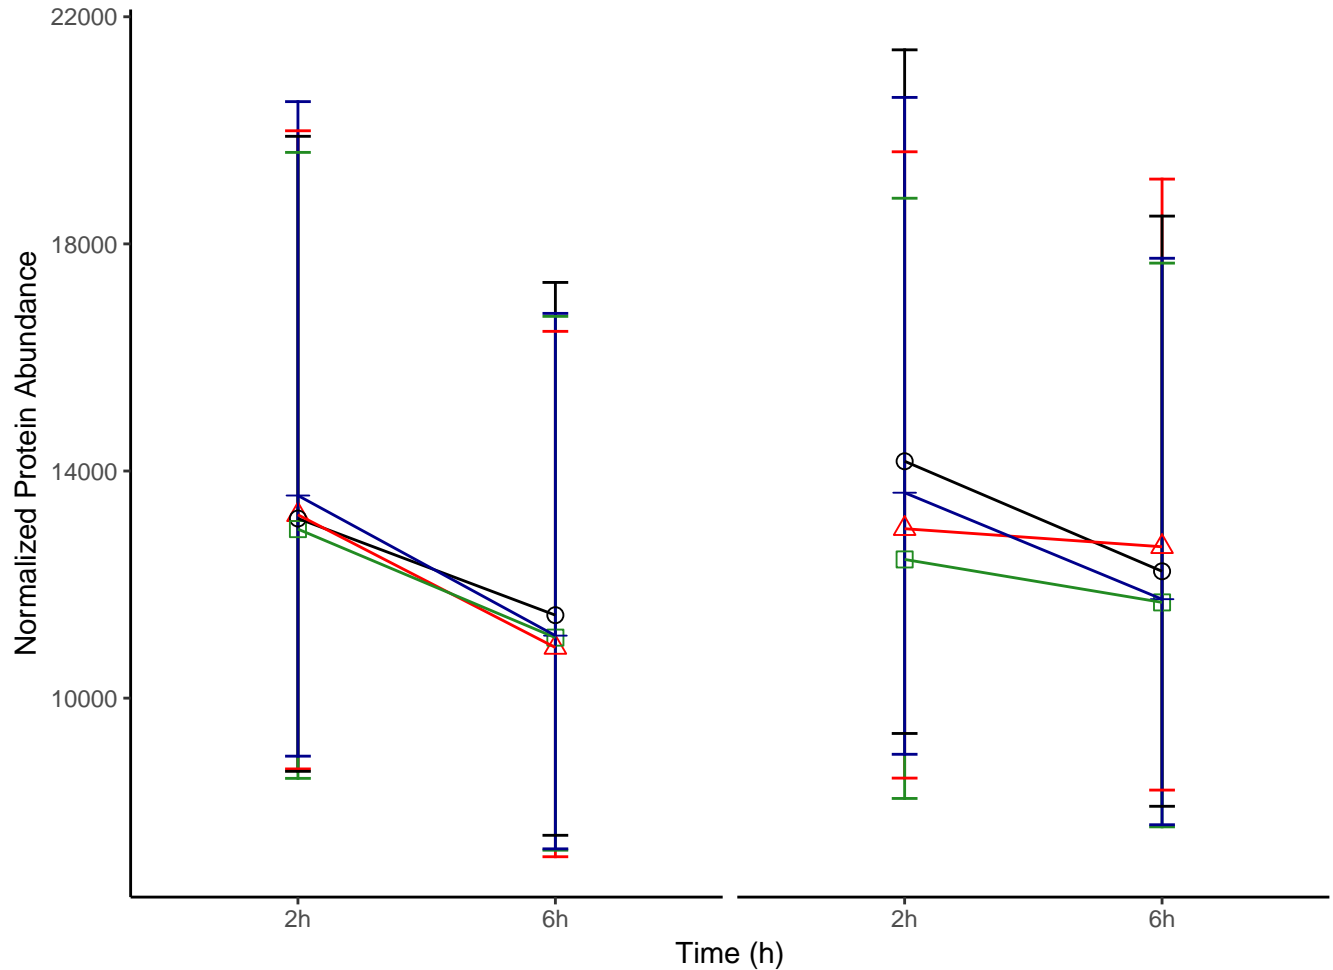

- SA564
- △ SA564- $\Delta hptRS$
- SA564- $\Delta ccpA$
- + SA564- $\Delta hptRS/ccpA$

# SBI\_STAAM

TSB

TSB-dex S-378

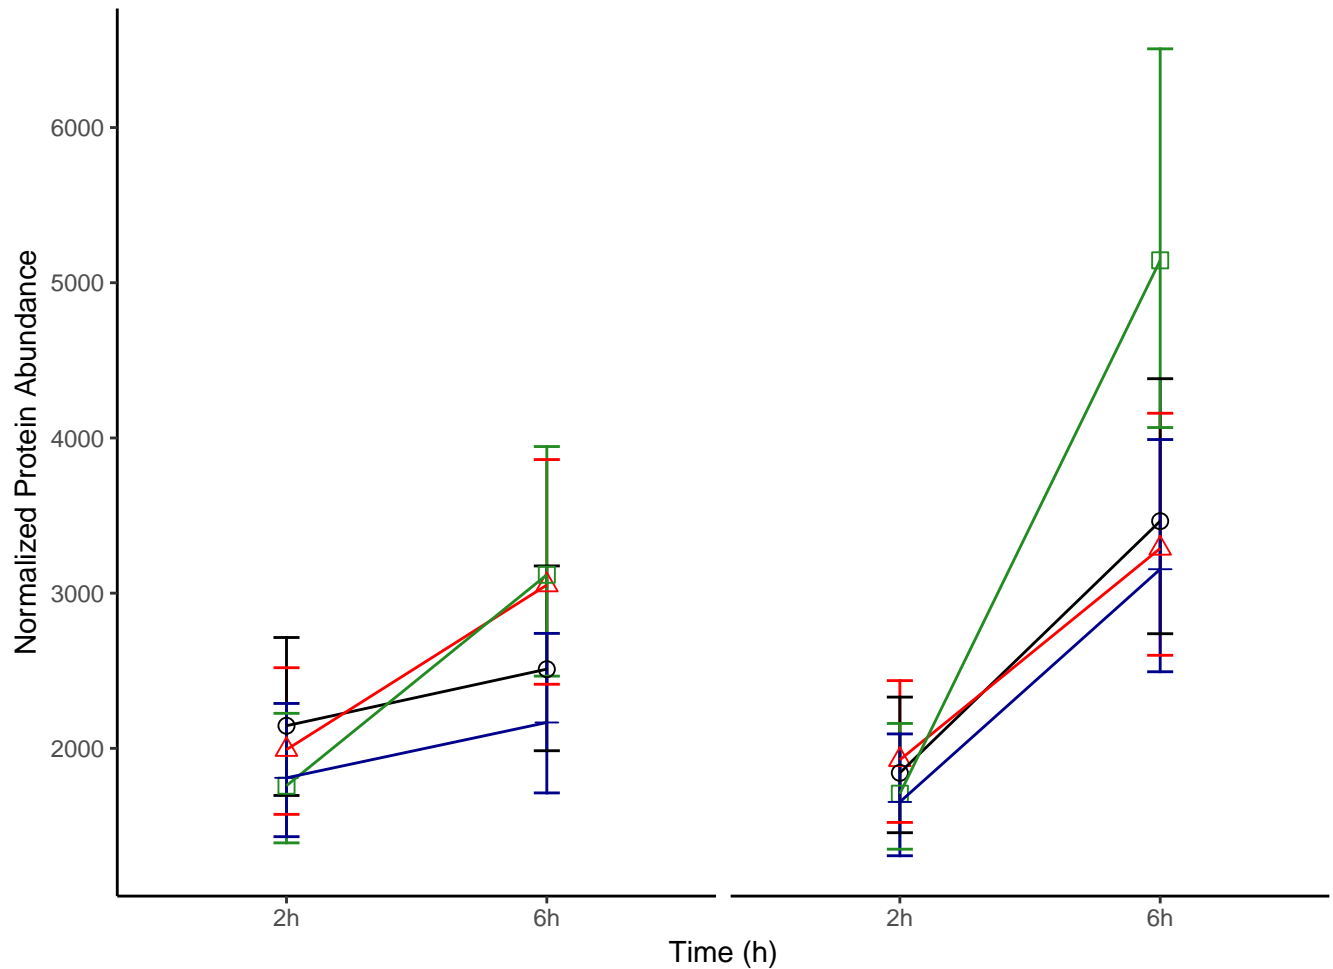

- SA564
- △ SA564-ΔhptRS
- SA564-ΔccpA
- + SA564-ΔhptRS/ccpA

# SCPA\_STAAM

TSB

TSB-dex S-379

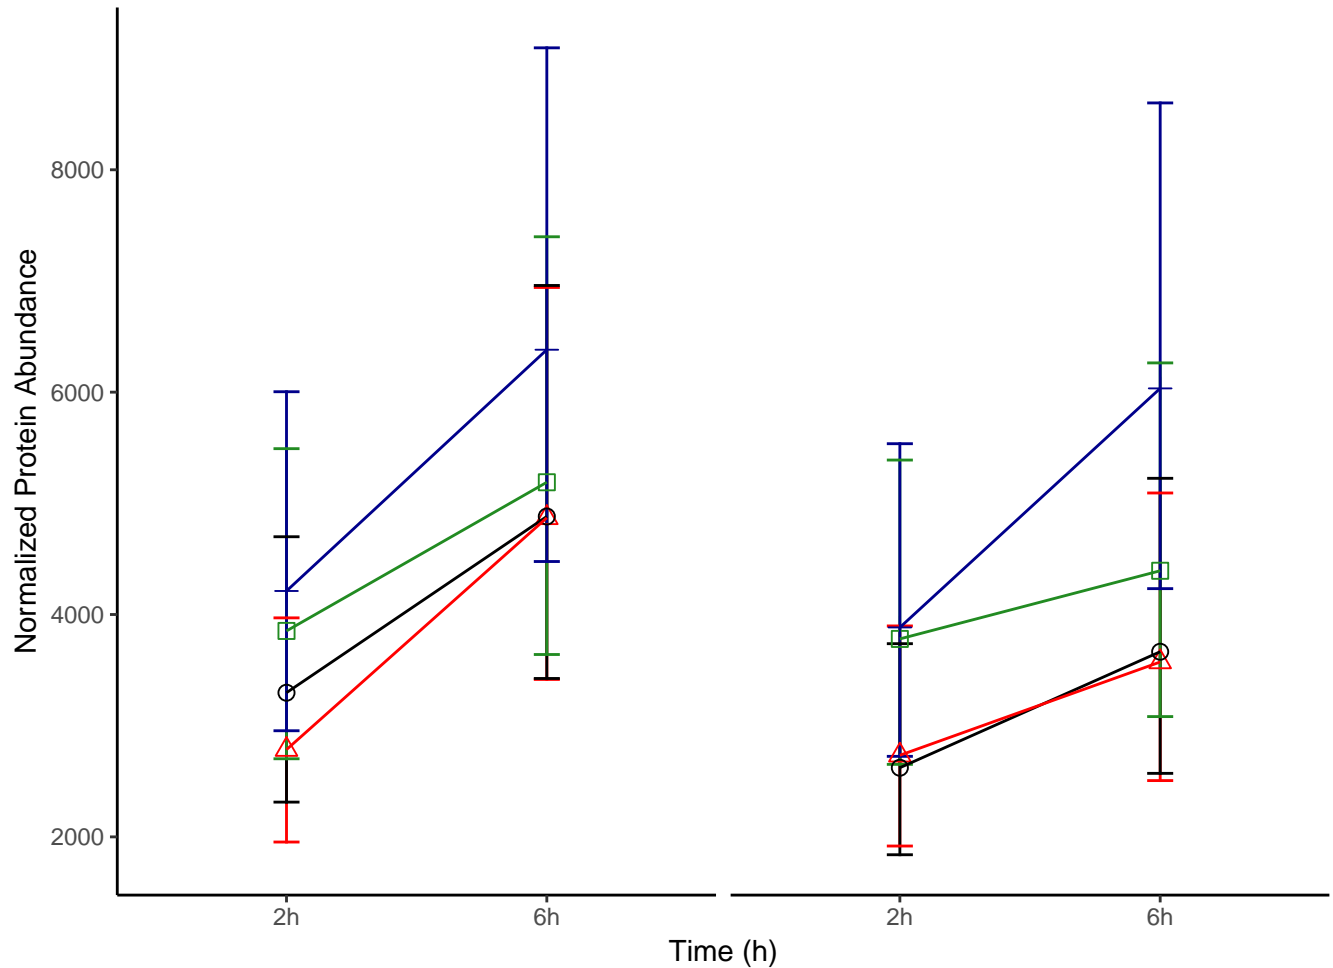

- SA564
- △ SA564-ΔhptRS
- SA564-ΔccpA
- + SA564-ΔhptRS/ccpA

# SCPB\_STAAM

TSB

TSB-dex S-380

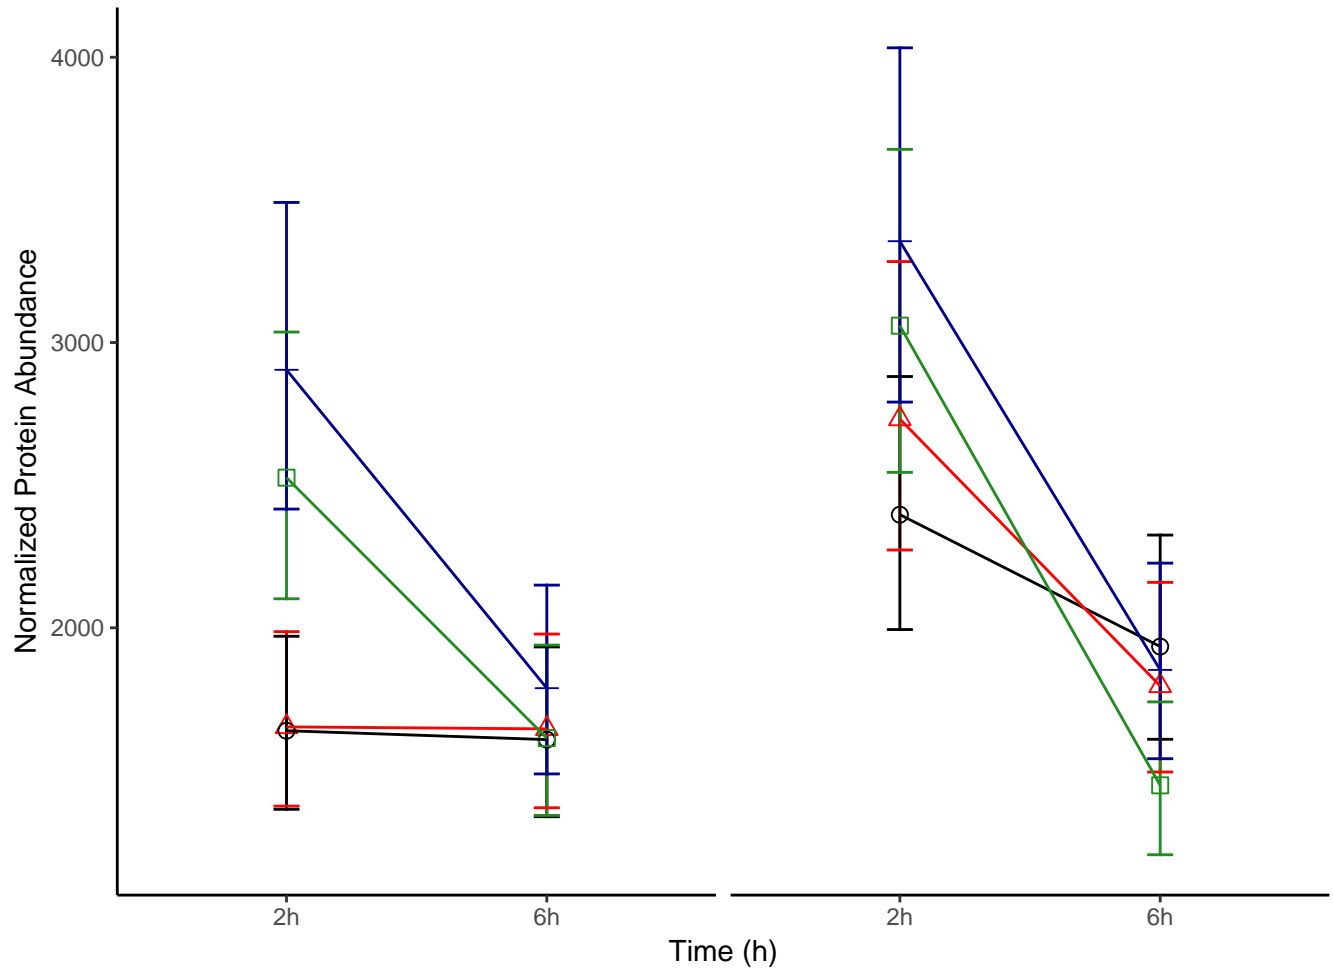

- SA564
- △ SA564-ΔhptRS
- SA564-ΔccpA
- + SA564-ΔhptRS/ccpA

# SECA1\_STAAM

TSB

TSB-dex S-381

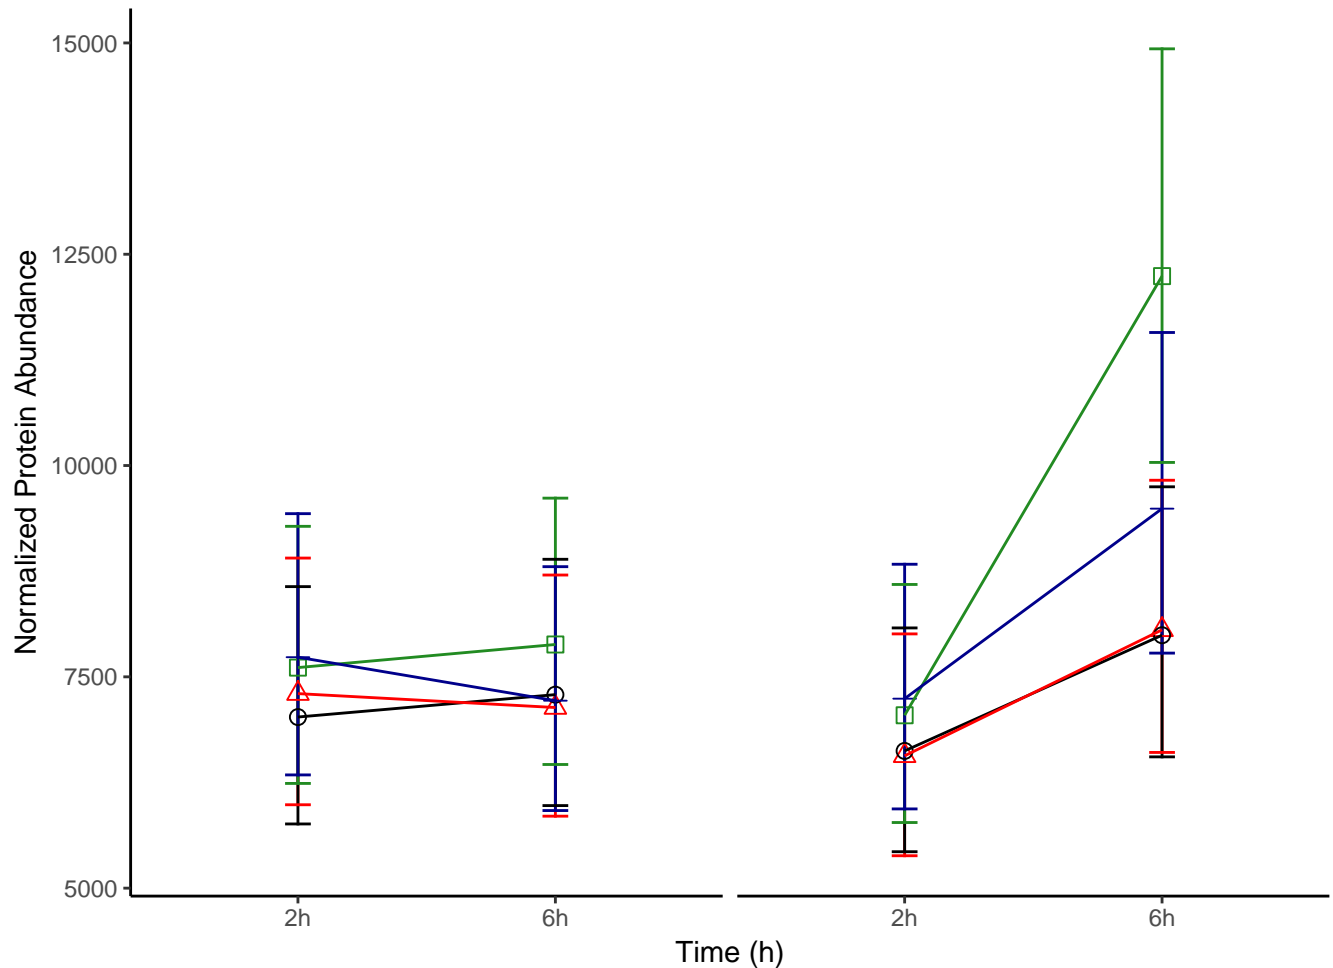

- SA564
- △ SA564-ΔhptRS
- SA564-ΔccpA
- + SA564-ΔhptRS/ccpA

# SIGA\_STAAM

TSB

TSB-dex S-382

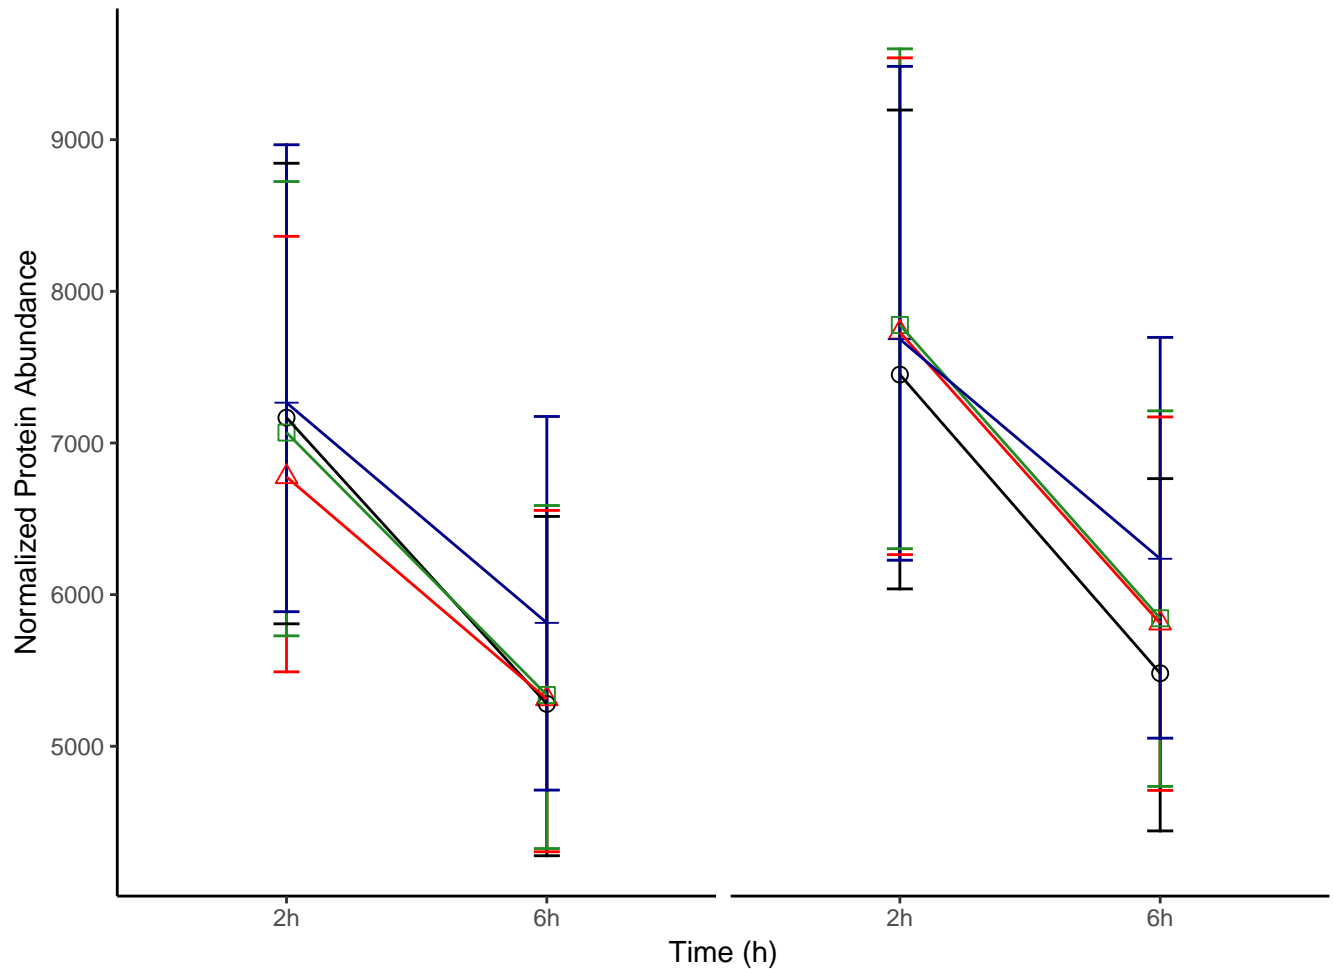

- SA564
- △ SA564- $\Delta hptRS$
- SA564- $\Delta ccpA$
- + SA564- $\Delta hptRS/ccpA$

# SODM1\_STAAM

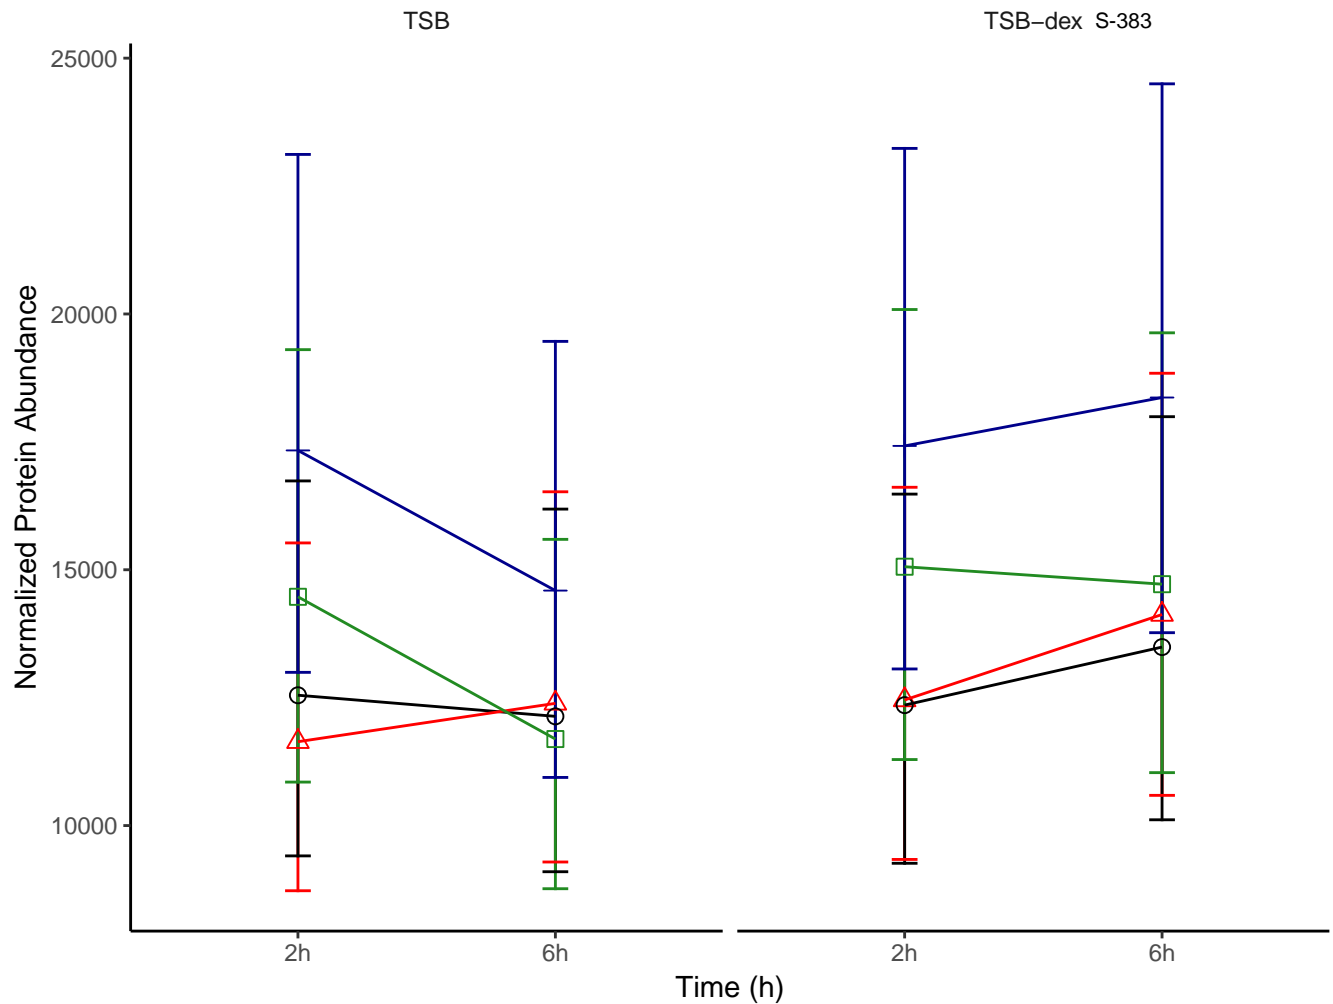

- SA564
- △ SA564-ΔhptRS
- SA564-ΔccpA
- + SA564-ΔhptRS/ccpA

# SODM2\_STAAM

TSB

TSB-dex S-384

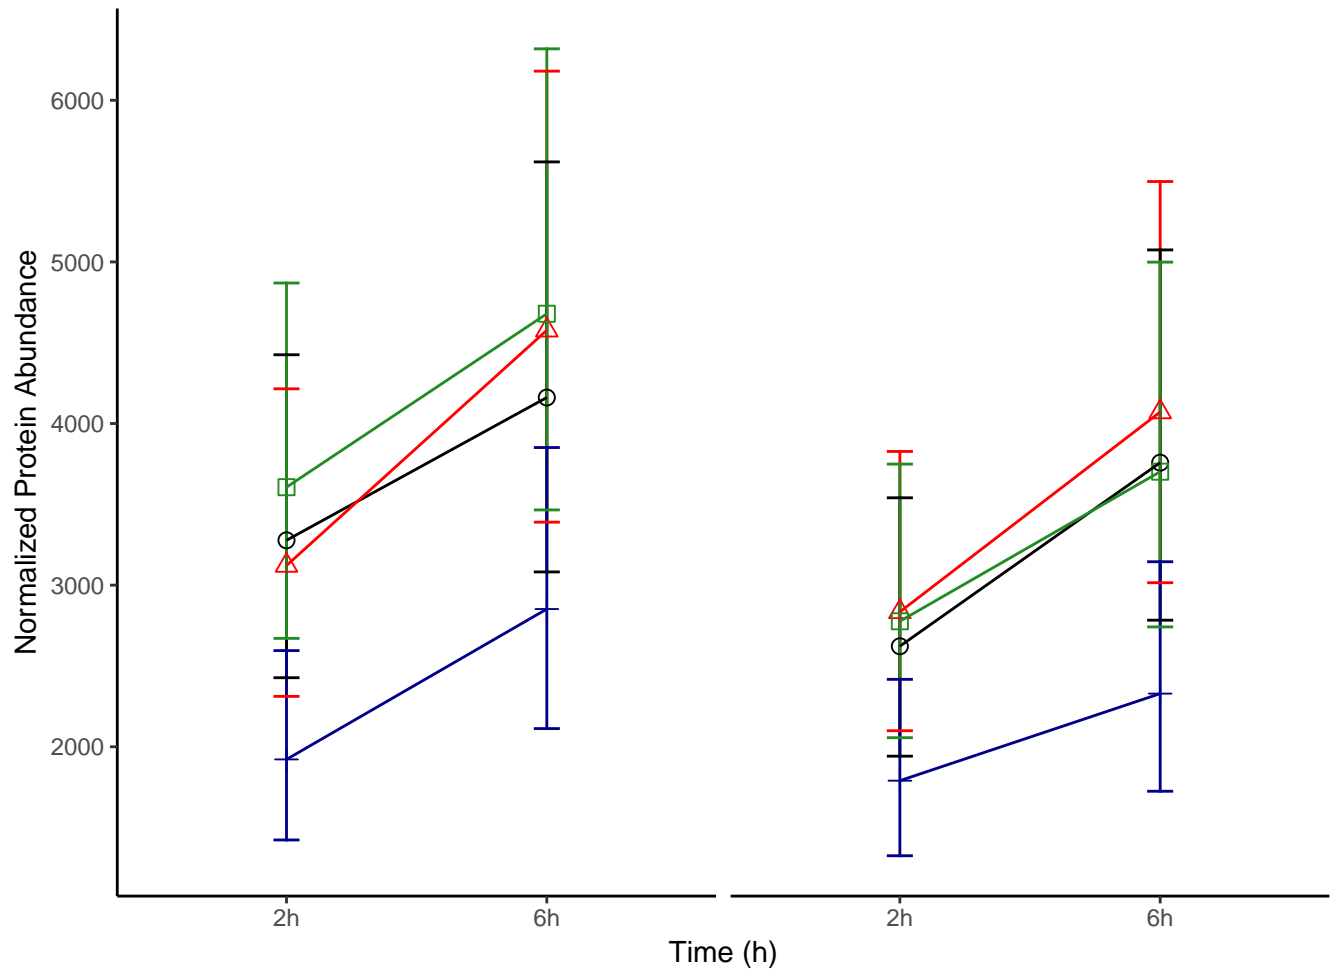

- SA564
- △ SA564- $\Delta hptRS$
- SA564- $\Delta ccpA$
- + SA564- $\Delta hptRS/ccpA$



# SP5G\_STAAM

TSB

TSB-dex S-385

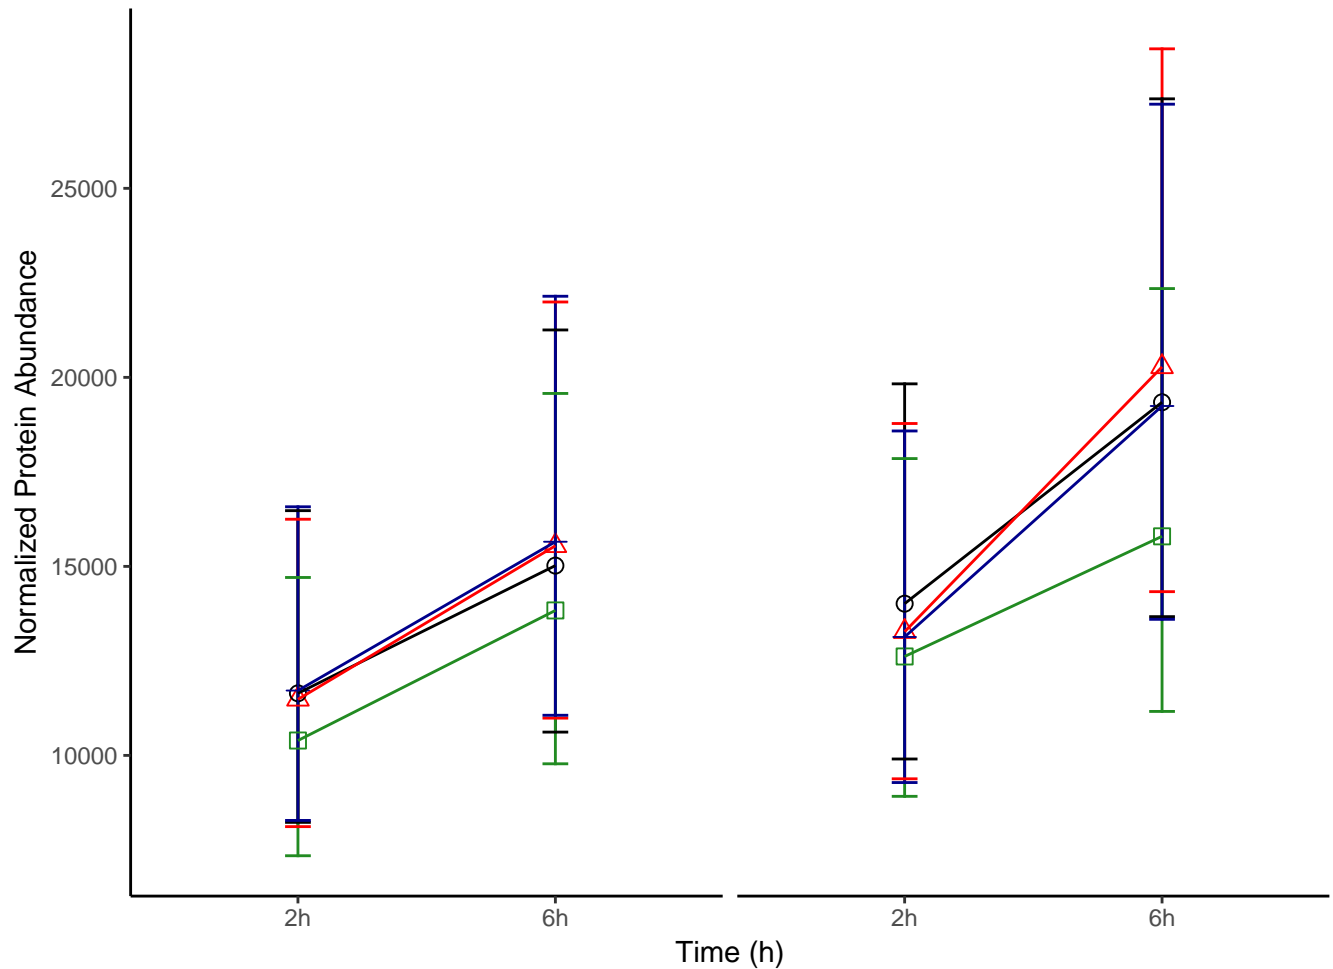

- SA564
- △ SA564- $\Delta$ *hptRS*
- SA564- $\Delta$ *ccpA*
- + SA564- $\Delta$ *hptRS/ccpA*

# SPA\_STAAM

TSB

TSB-dex S-386

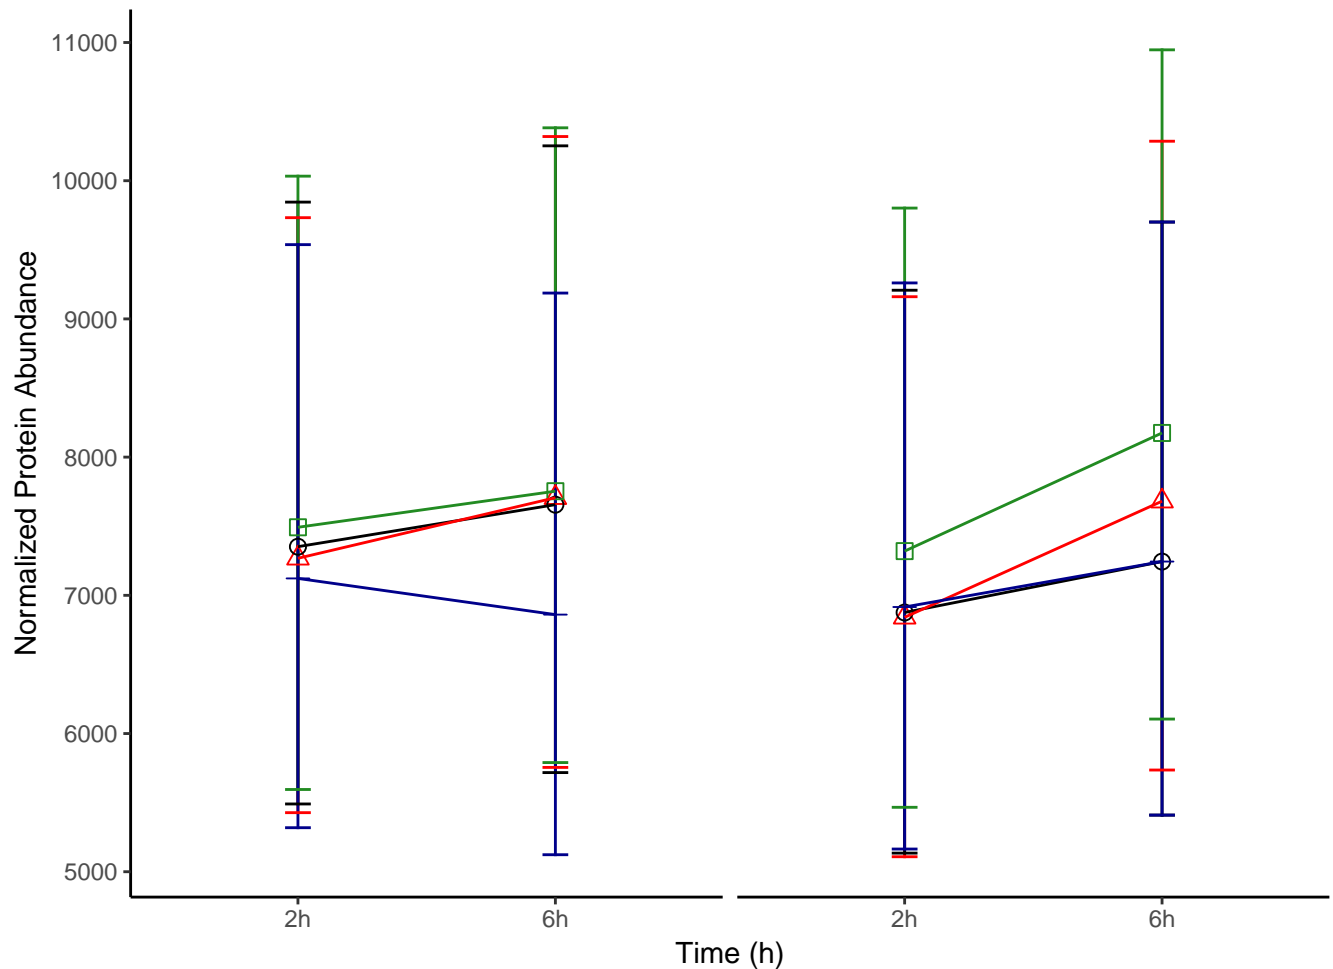

- SA564
- △ SA564- $\Delta$ hptRS
- SA564- $\Delta$ ccpA
- + SA564- $\Delta$ hptRS/ccpA

# SPLD\_STAAM

TSB

TSB-dex S-387

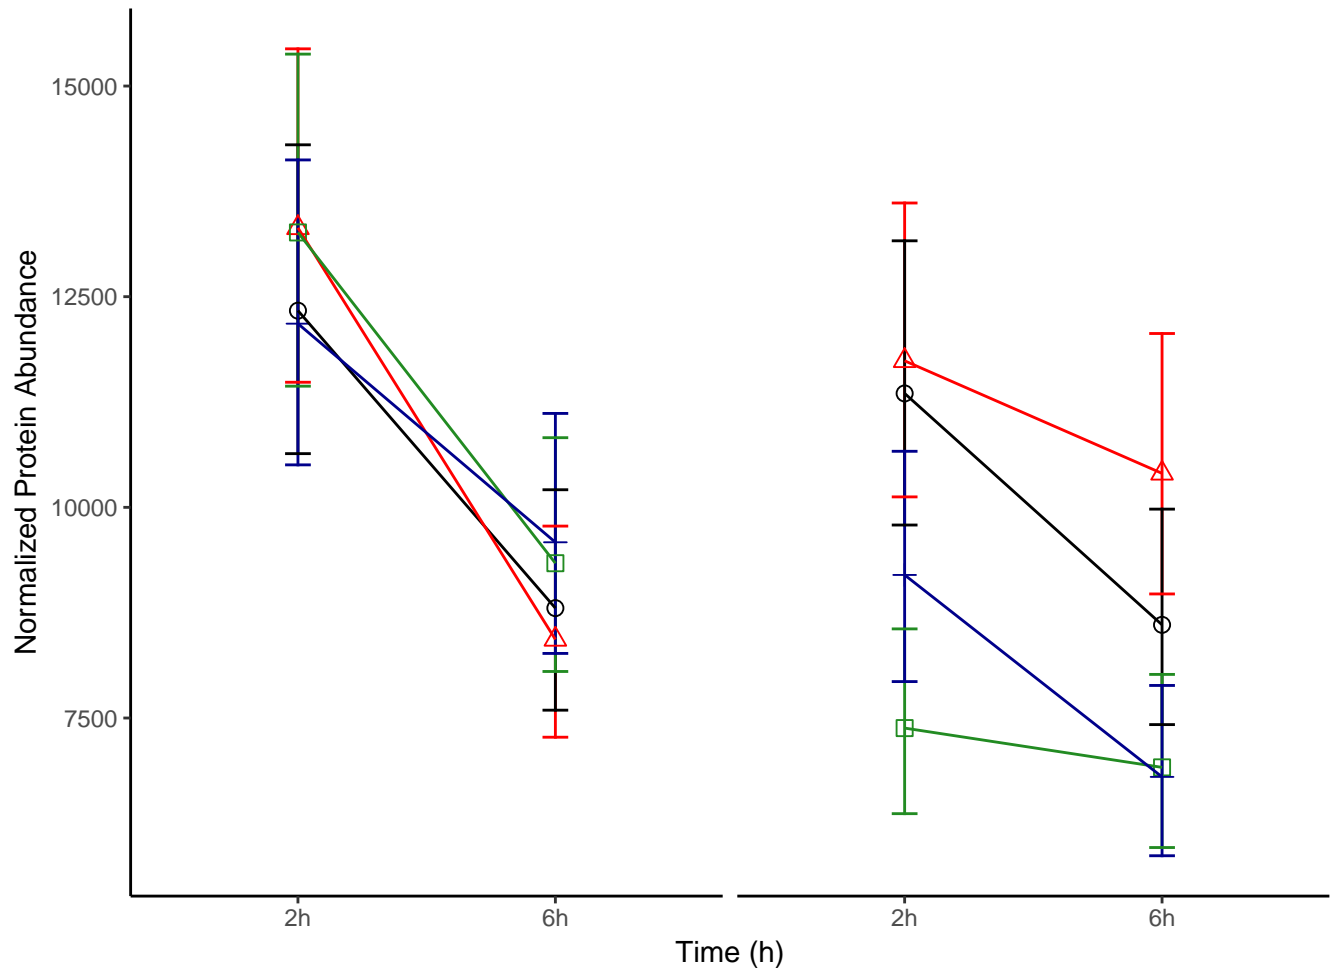

- SA564
- △ SA564-Δ*hptRS*
- SA564-Δ*ccpA*
- + SA564-Δ*hptRS/ccpA*

# SPX\_STAAM

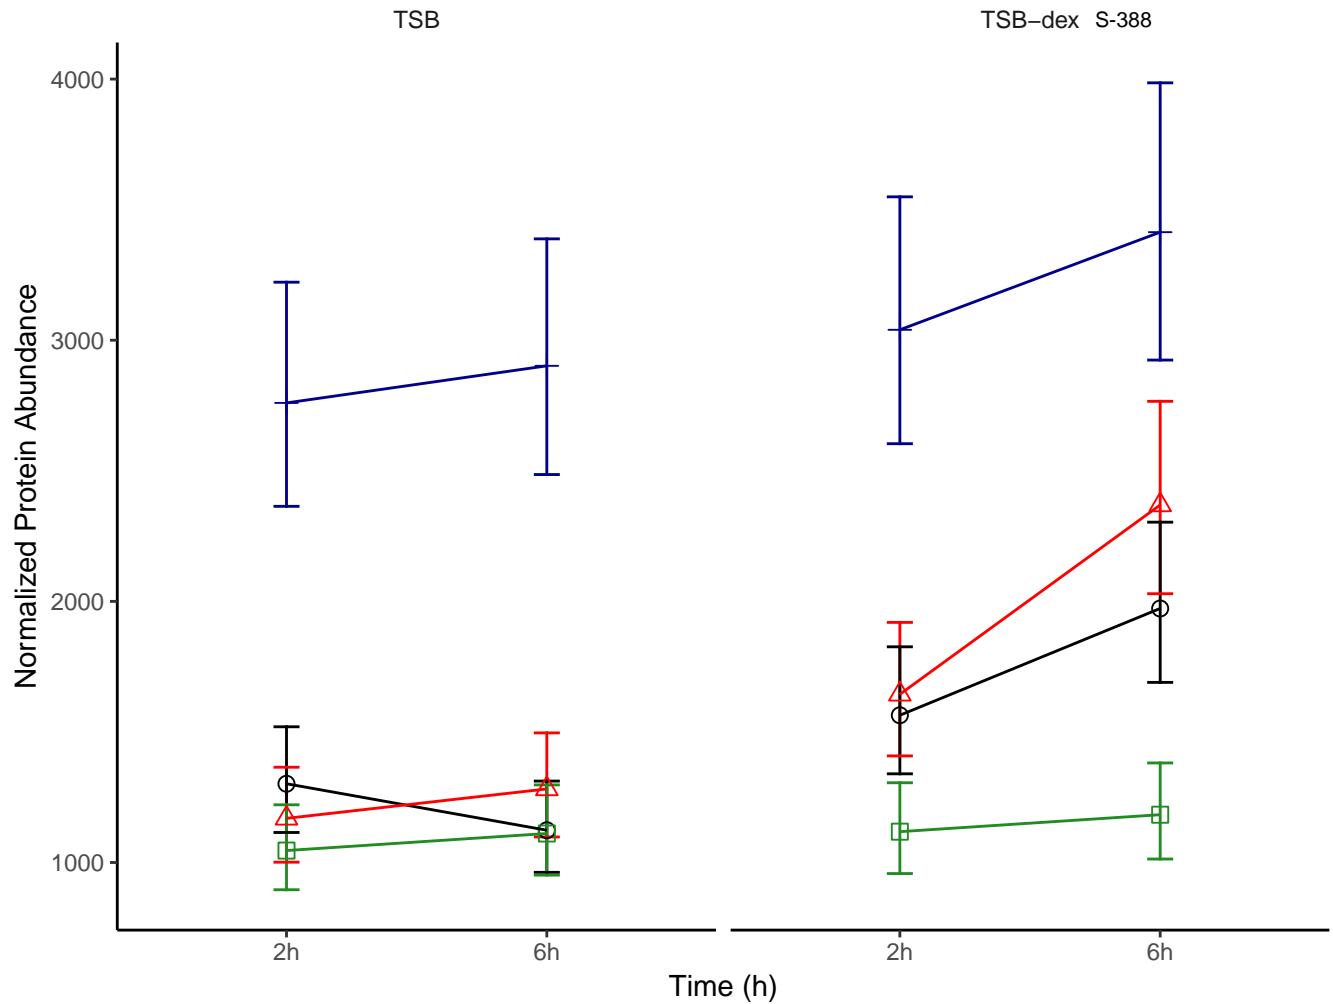

- SA564
- △ SA564-ΔhptRS
- SA564-ΔccpA
- + SA564-ΔhptRS/ccpA

# SRRRA\_STAAM

TSB

TSB-dex S-389

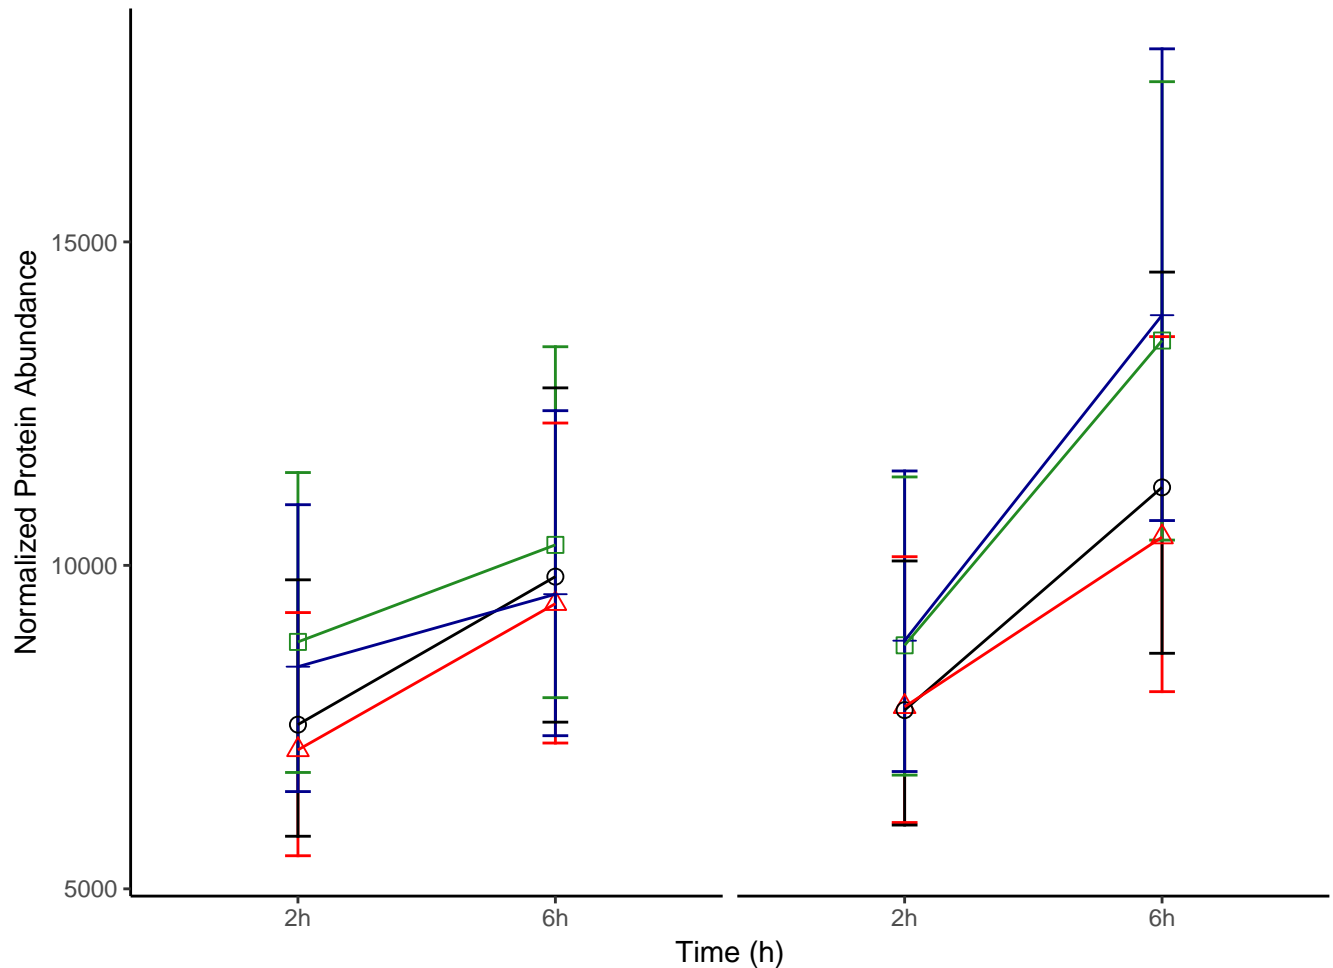

- SA564
- △ SA564- $\Delta$ hptRS
- SA564- $\Delta$ ccpA
- + SA564- $\Delta$ hptRS/ccpA

# SSAA2\_STAAM

TSB

TSB-dex S-390

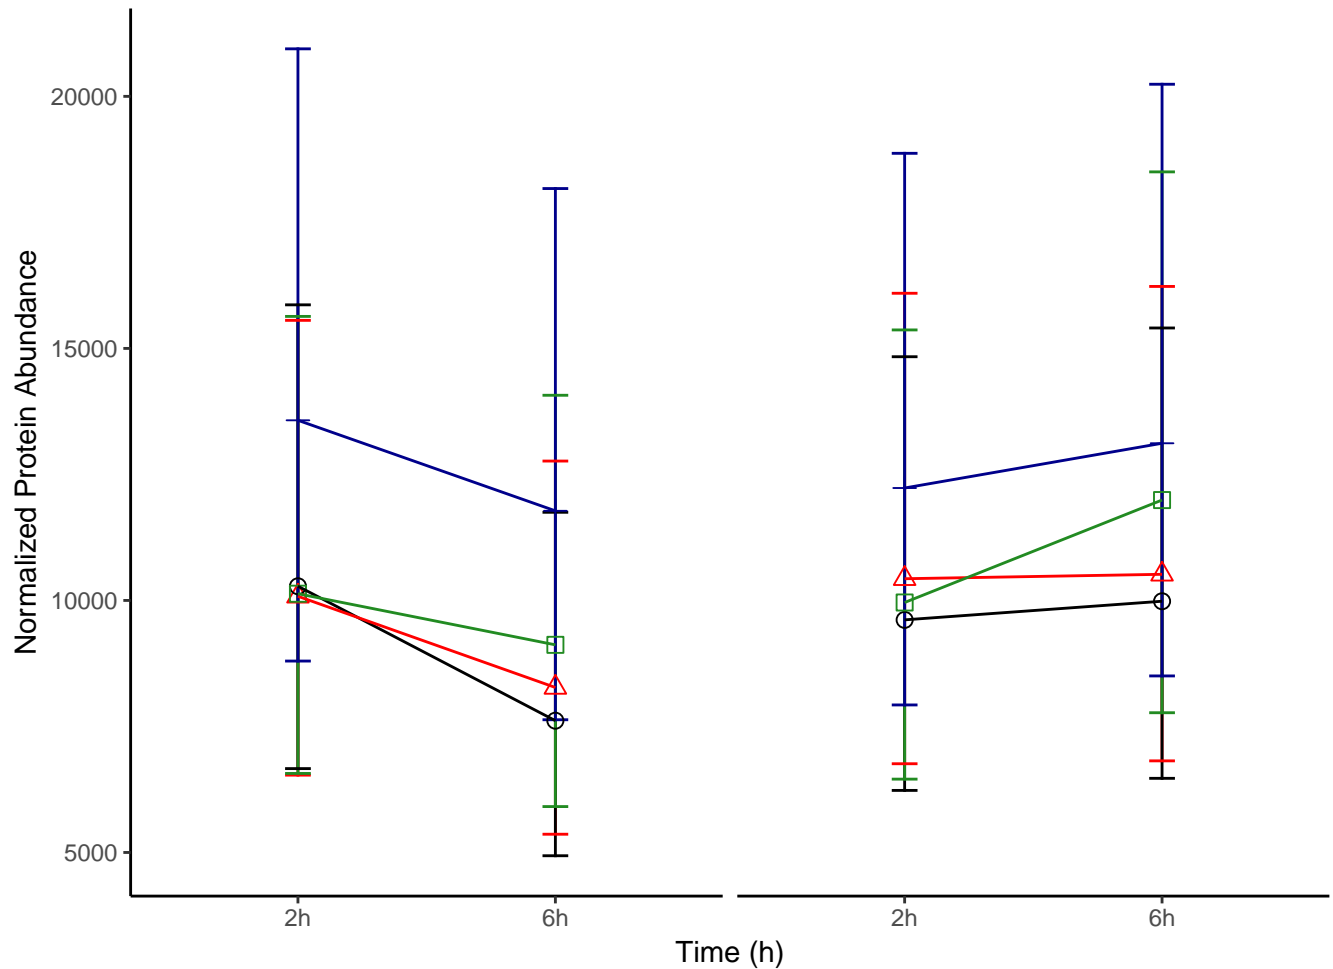

- SA564
- △ SA564- $\Delta$ *hptRS*
- SA564- $\Delta$ *ccpA*
- + SA564- $\Delta$ *hptRS/ccpA*

# SSB1\_STAAM

TSB

TSB-dex S-391

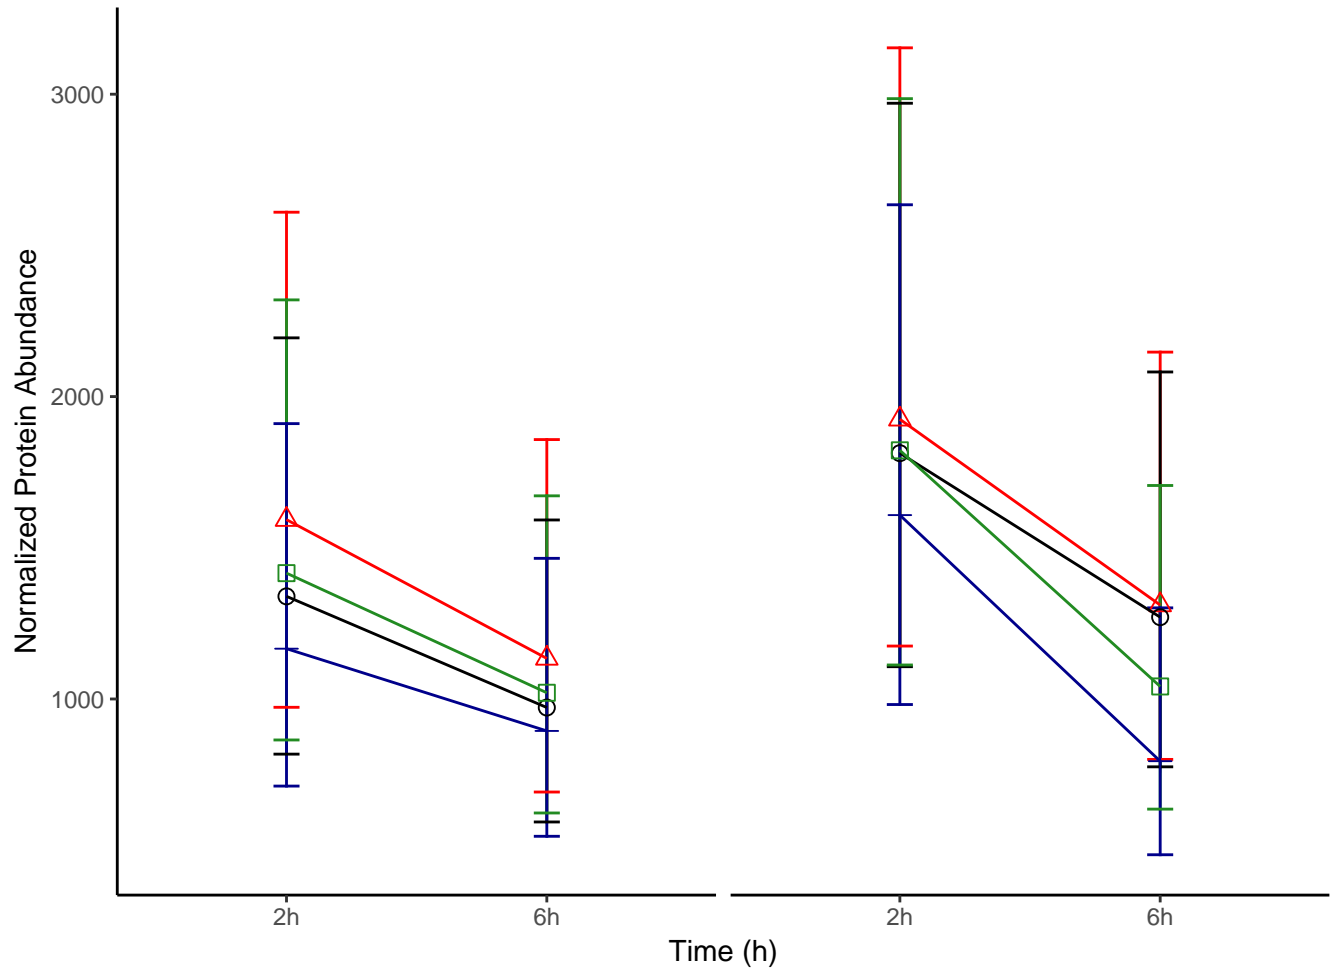

- SA564
- △ SA564- $\Delta$ *hptRS*
- SA564- $\Delta$ *ccpA*
- + SA564- $\Delta$ *hptRS/ccpA*

# SSB2\_STAAM

TSB

TSB-dex S-392

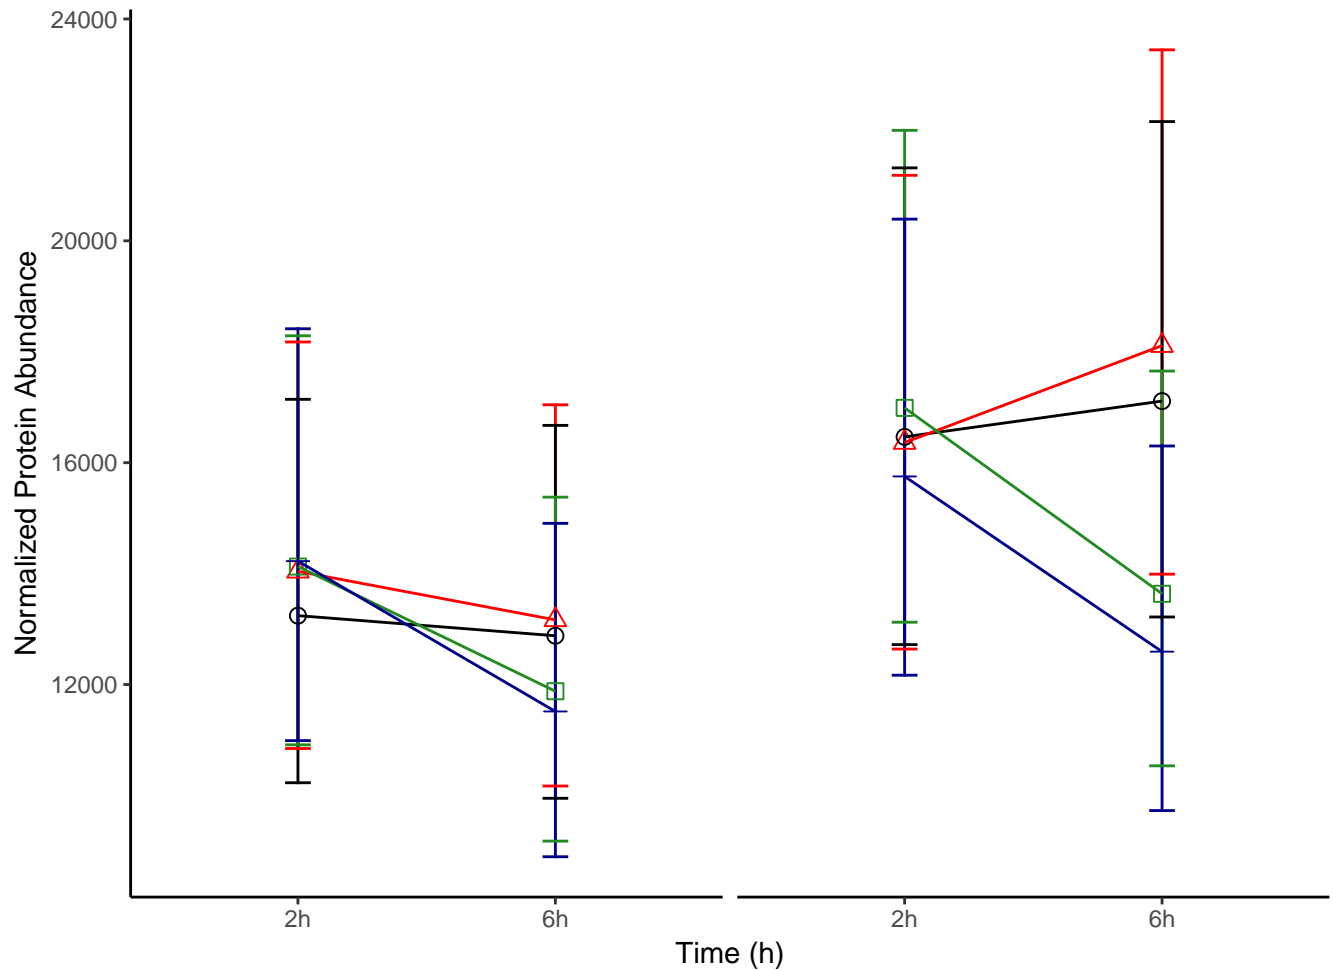

- SA564
- △ SA564- $\Delta$ hptRS
- SA564- $\Delta$ ccpA
- + SA564- $\Delta$ hptRS/ccpA



# SUCC\_STAAM

TSB

TSB-dex S-393

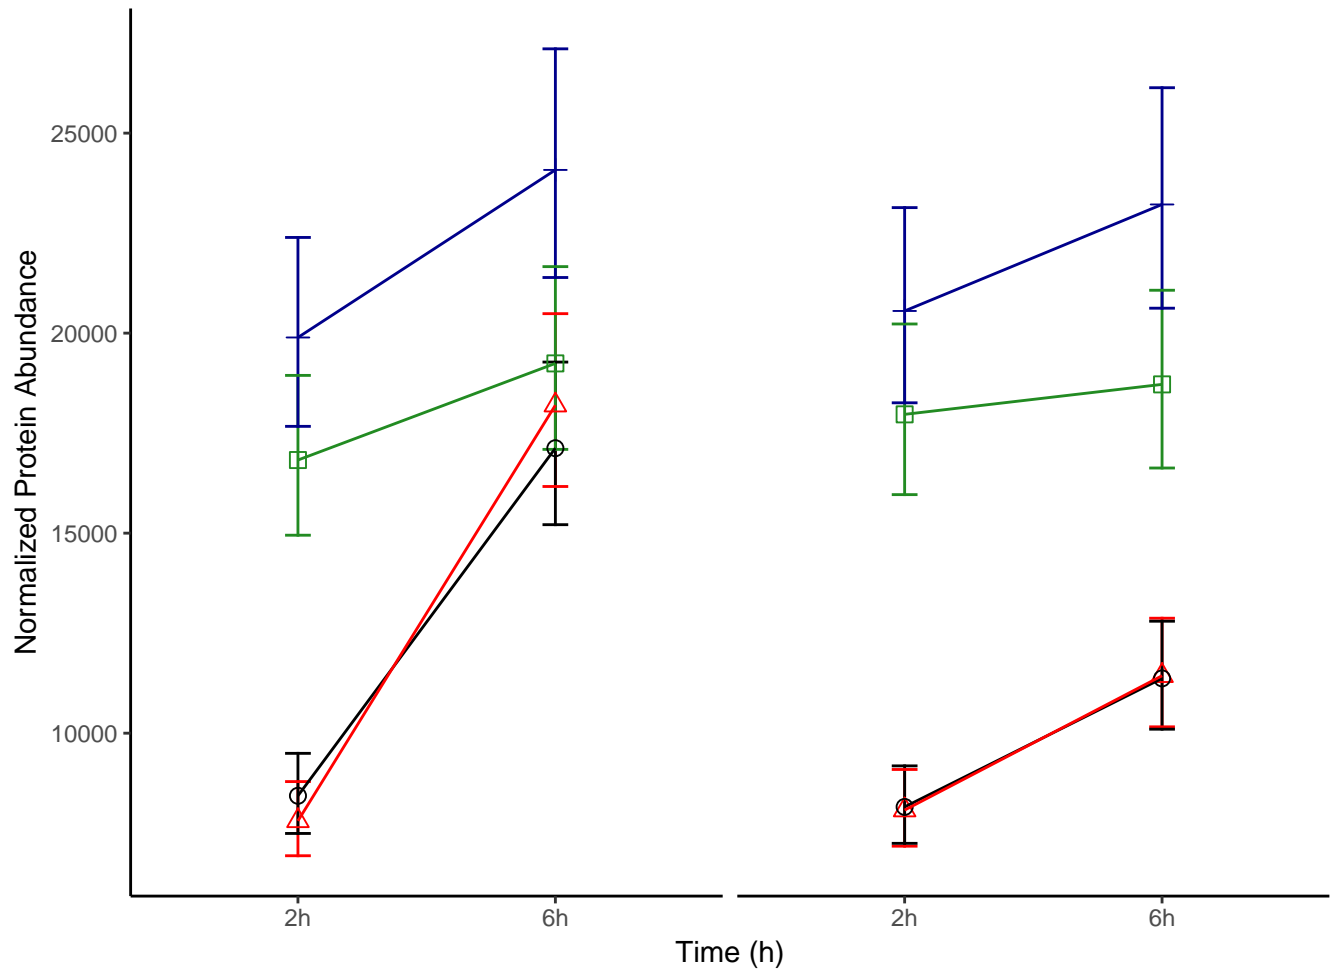

- SA564
- △ SA564-ΔhptRS
- SA564-ΔccpA
- + SA564-ΔhptRS/ccpA

# SUCD\_STAAM

TSB

TSB-dex S-394

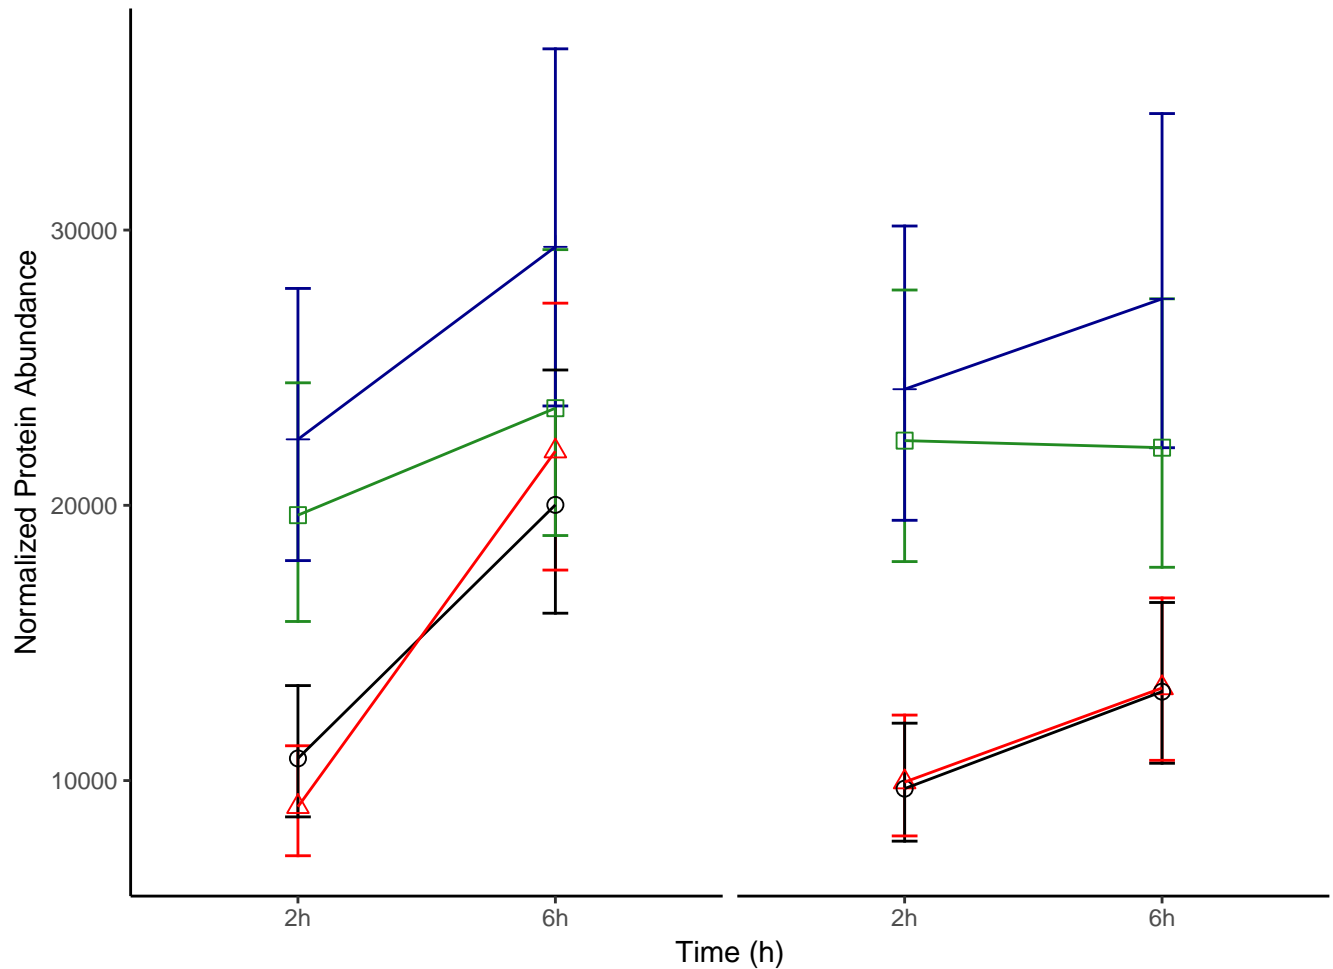

- SA564
- △ SA564-ΔhptRS
- SA564-ΔccpA
- + SA564-ΔhptRS/ccpA

# SYA\_STAAM

TSB

TSB-dex S-395

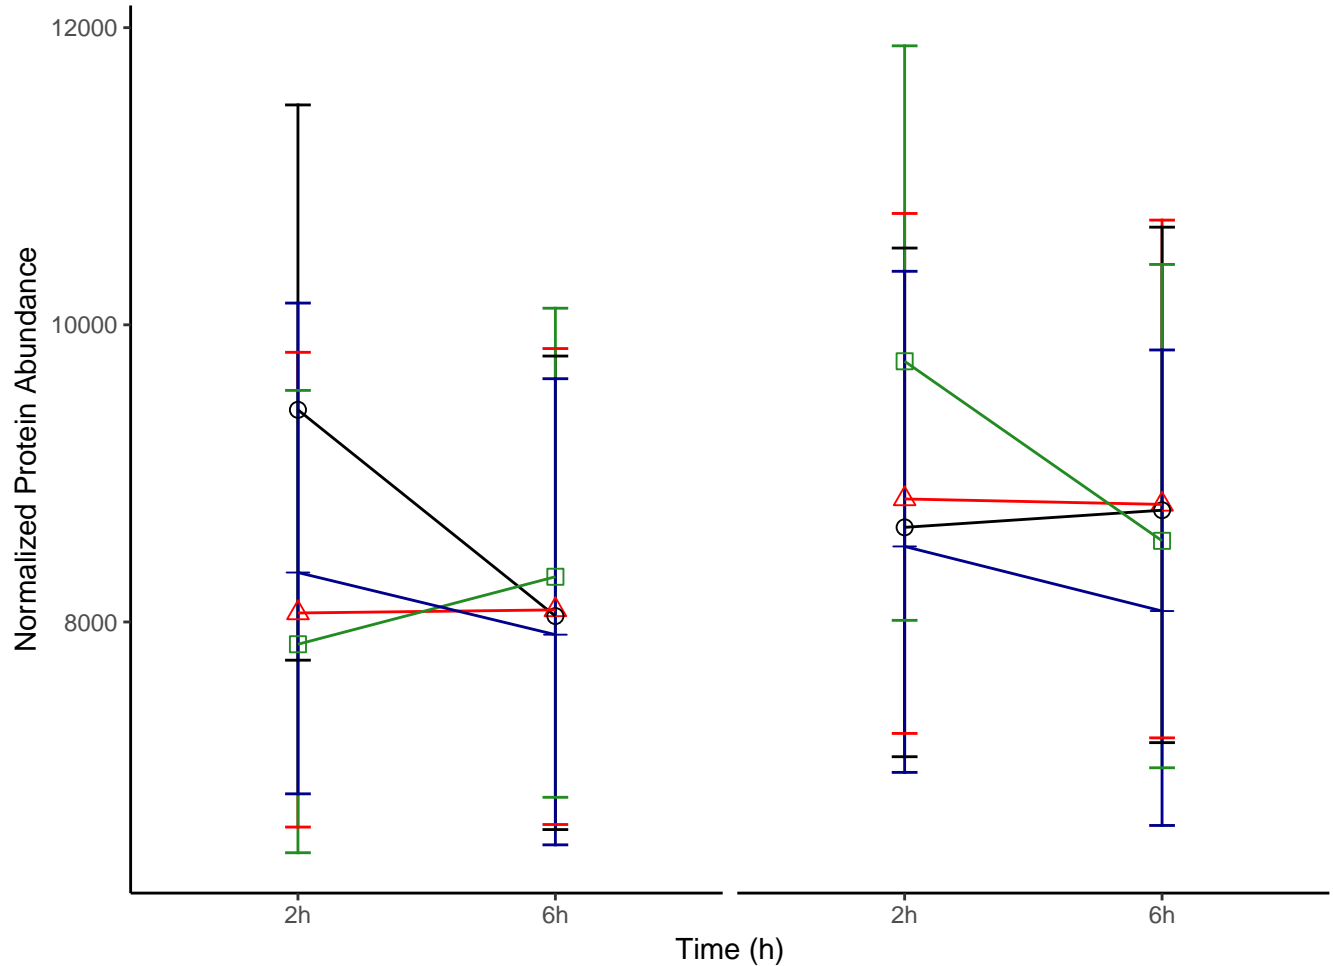

- SA564
- △ SA564- $\Delta$ *hptRS*
- SA564- $\Delta$ *ccpA*
- + SA564- $\Delta$ *hptRS/ccpA*

# SYC\_STAAM

TSB

TSB-dex S-396

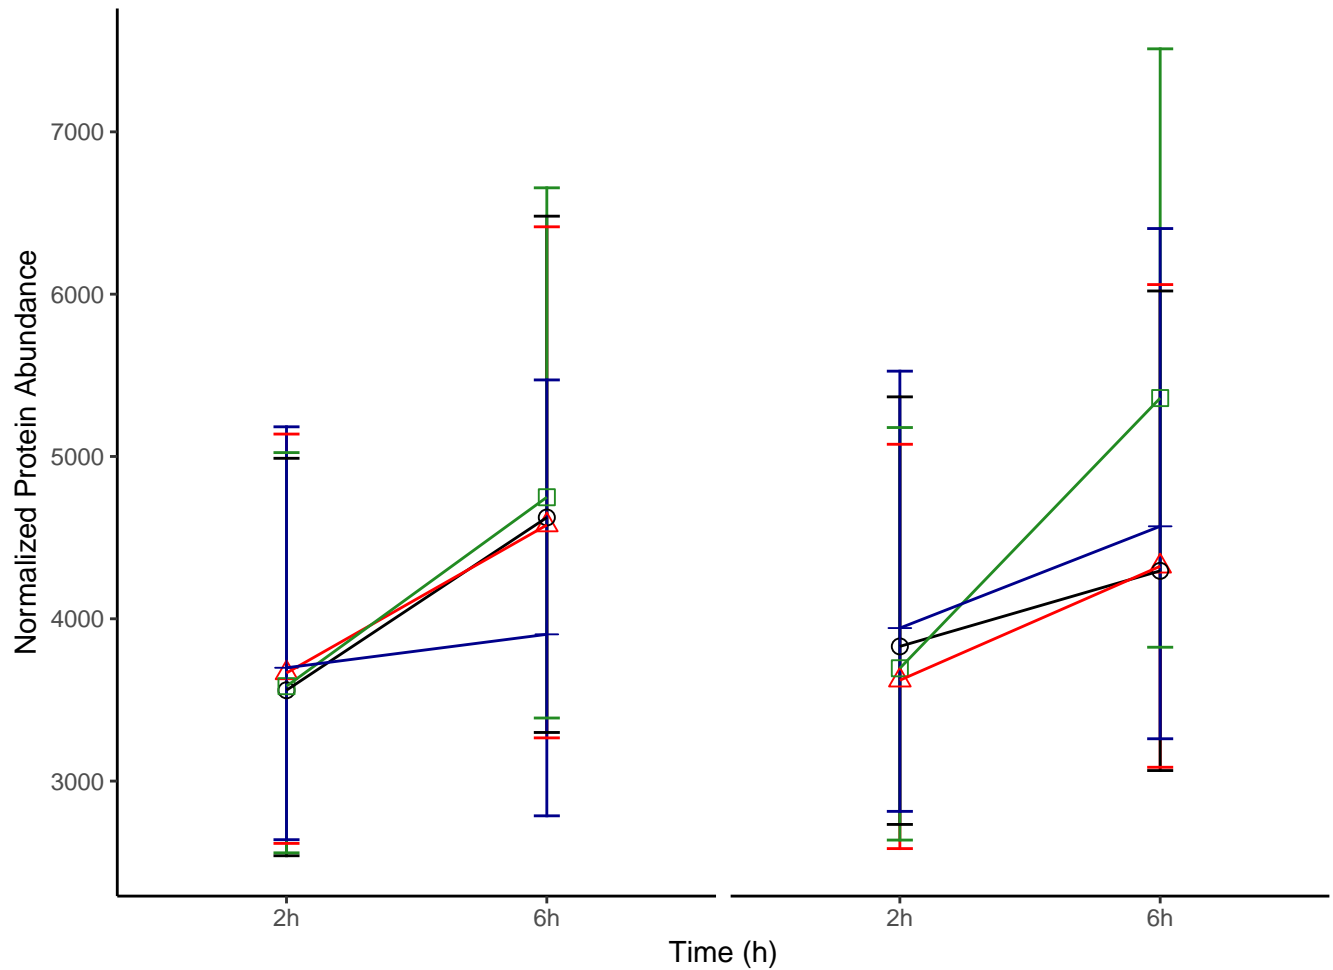

- SA564
- △ SA564- $\Delta$ *hptRS*
- SA564- $\Delta$ *ccpA*
- + SA564- $\Delta$ *hptRS/ccpA*

# SYD\_STAAM

TSB

TSB-dex S-397

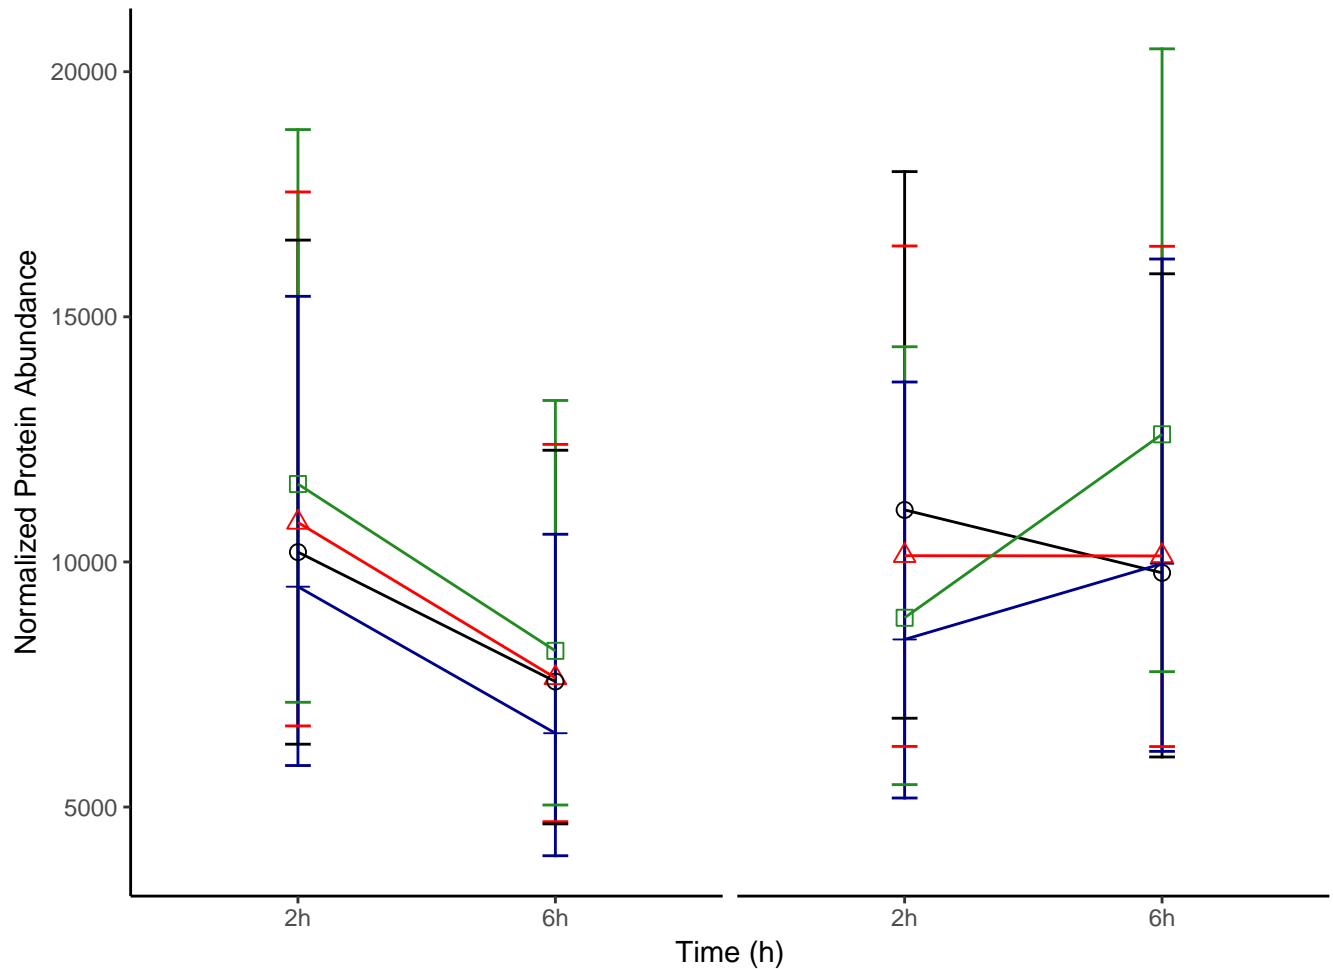

- SA564
- △ SA564- $\Delta$ hptRS
- SA564- $\Delta$ ccpA
- + SA564- $\Delta$ hptRS/ccpA

# SYE\_STAAM

TSB

TSB-dex S-398

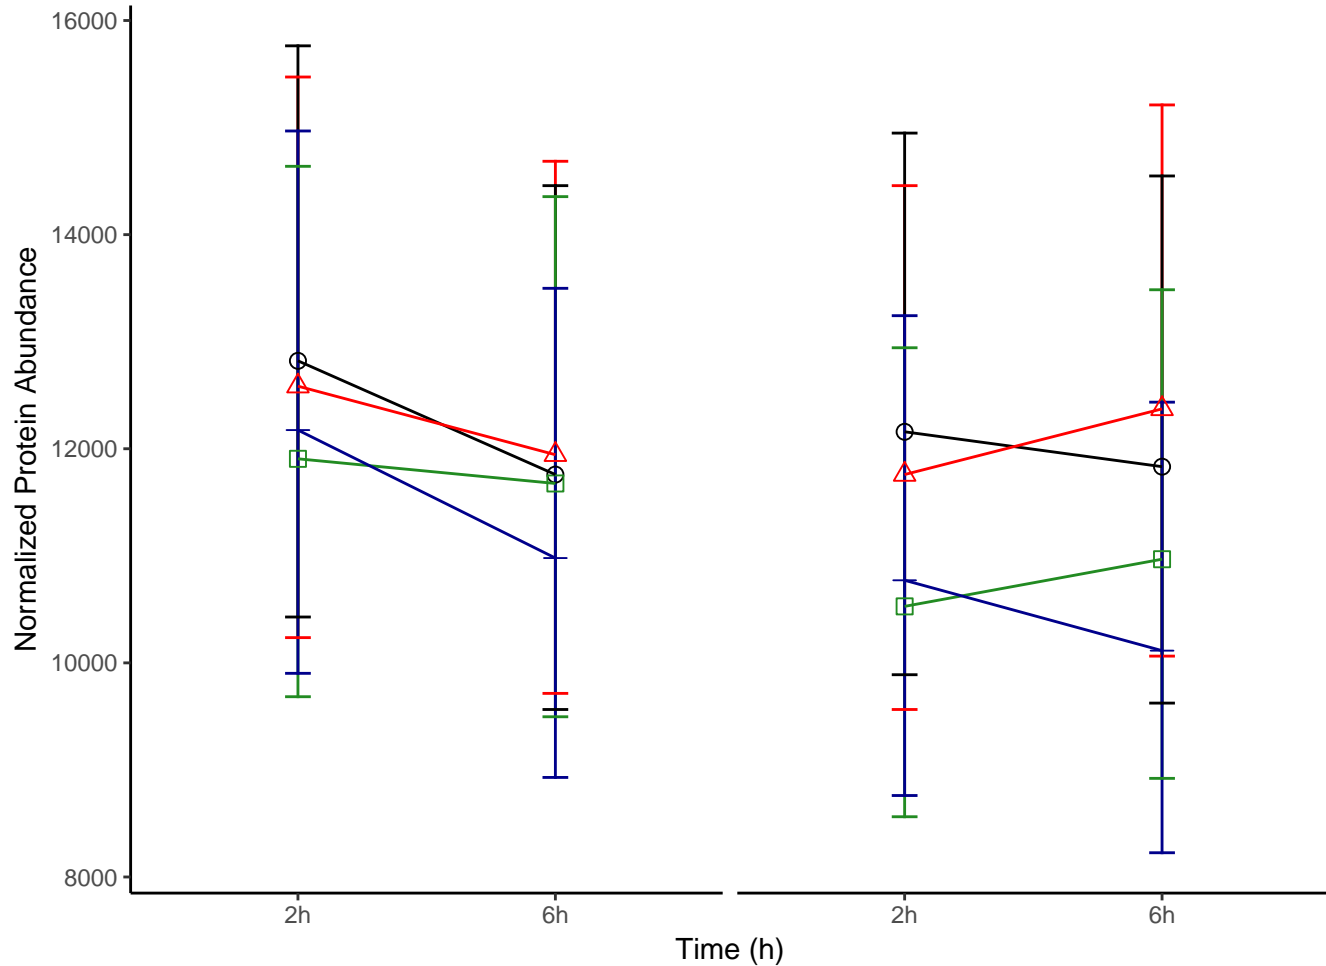

- SA564
- △ SA564- $\Delta$ hptRS
- SA564- $\Delta$ ccpA
- + SA564- $\Delta$ hptRS/ccpA

# SYFB\_STAAM

TSB

TSB-dex S-399

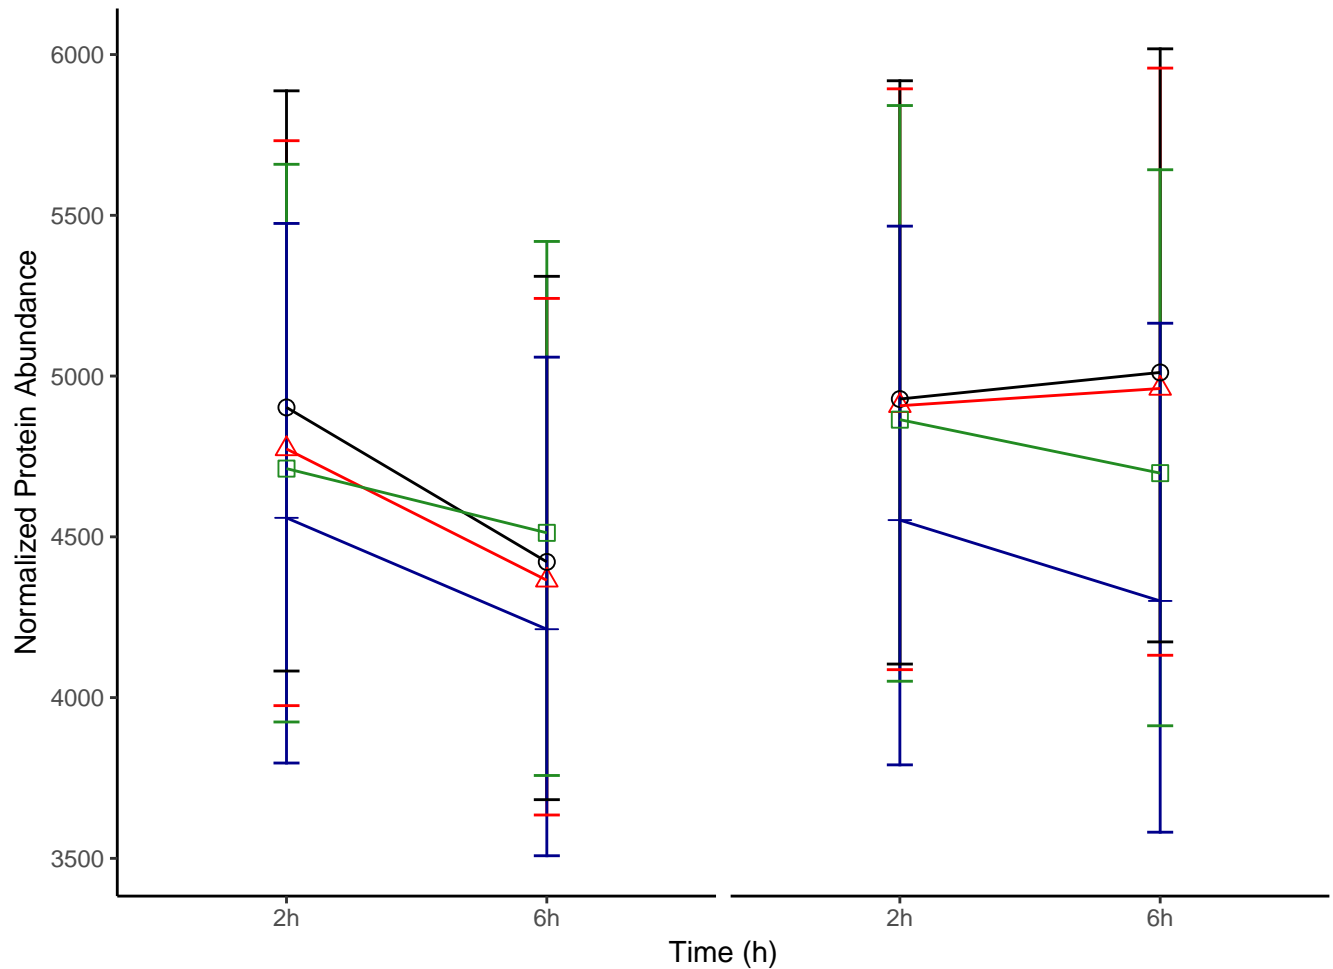

- SA564
- △ SA564- $\Delta$ *hptRS*
- SA564- $\Delta$ *ccpA*
- + SA564- $\Delta$ *hptRS/ccpA*

# SYG\_STAAM

TSB

TSB-dex S-400

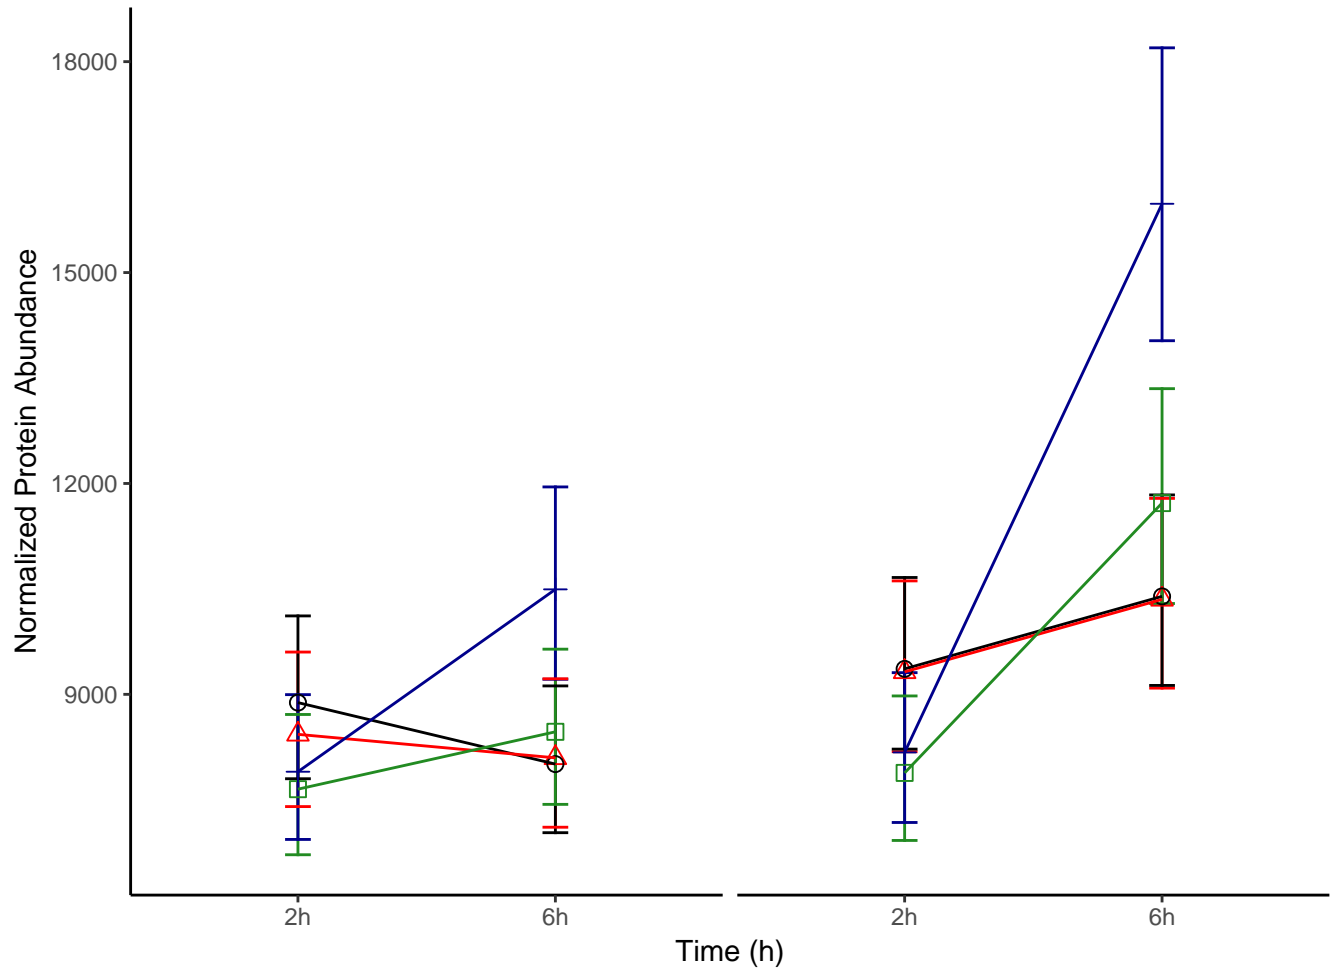

- SA564
- △ SA564-ΔhptRS
- SA564-ΔccpA
- + SA564-ΔhptRS/ccpA



# SYH\_STAAM

TSB

TSB-dex S-401

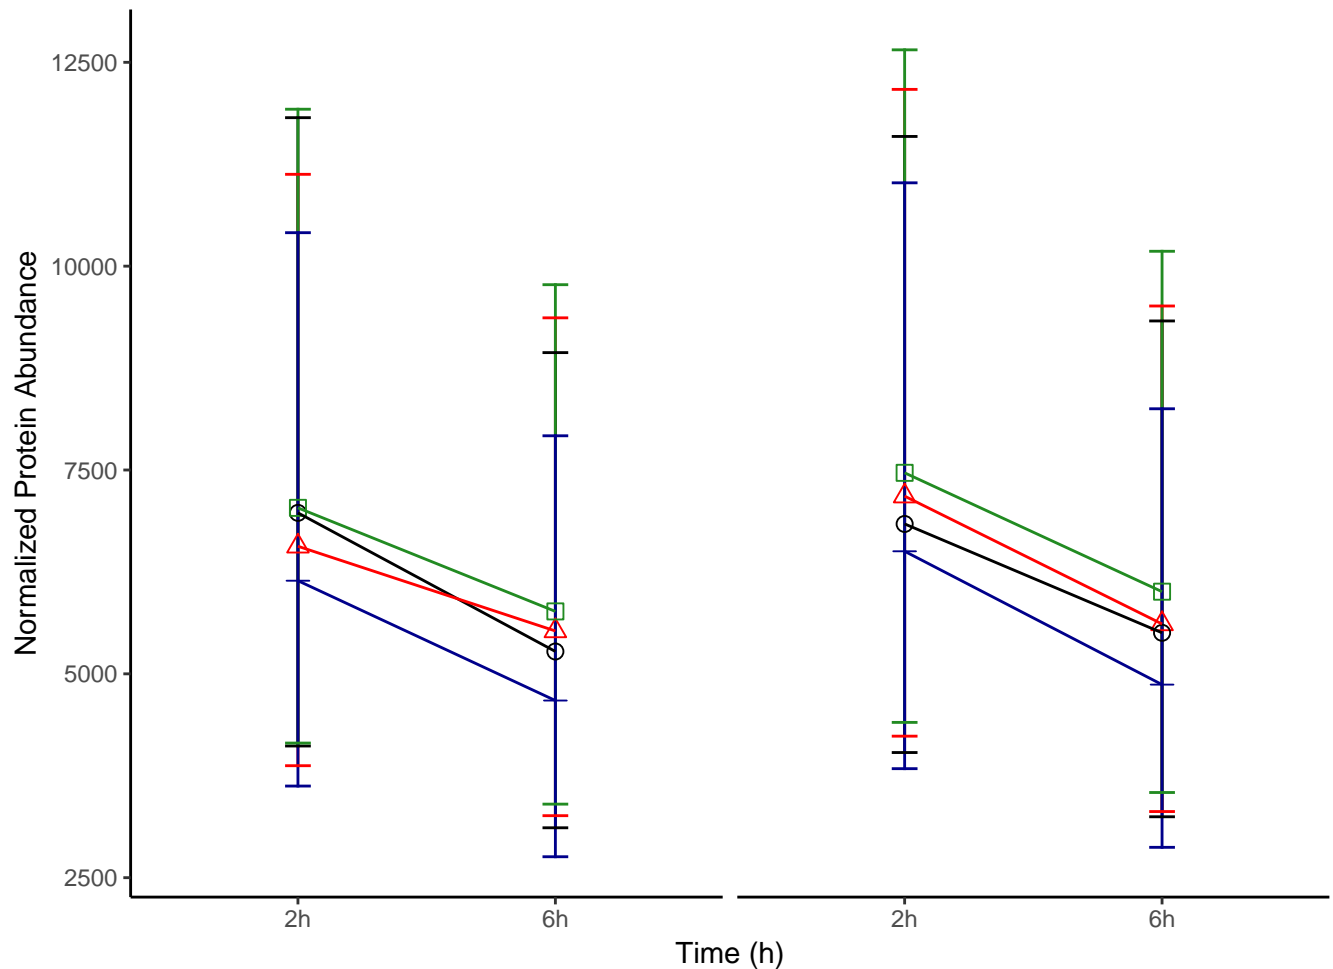

- SA564
- △ SA564- $\Delta hptRS$
- SA564- $\Delta ccpA$
- + SA564- $\Delta hptRS/ccpA$

# SYI\_STAAM

TSB

TSB-dex S-402

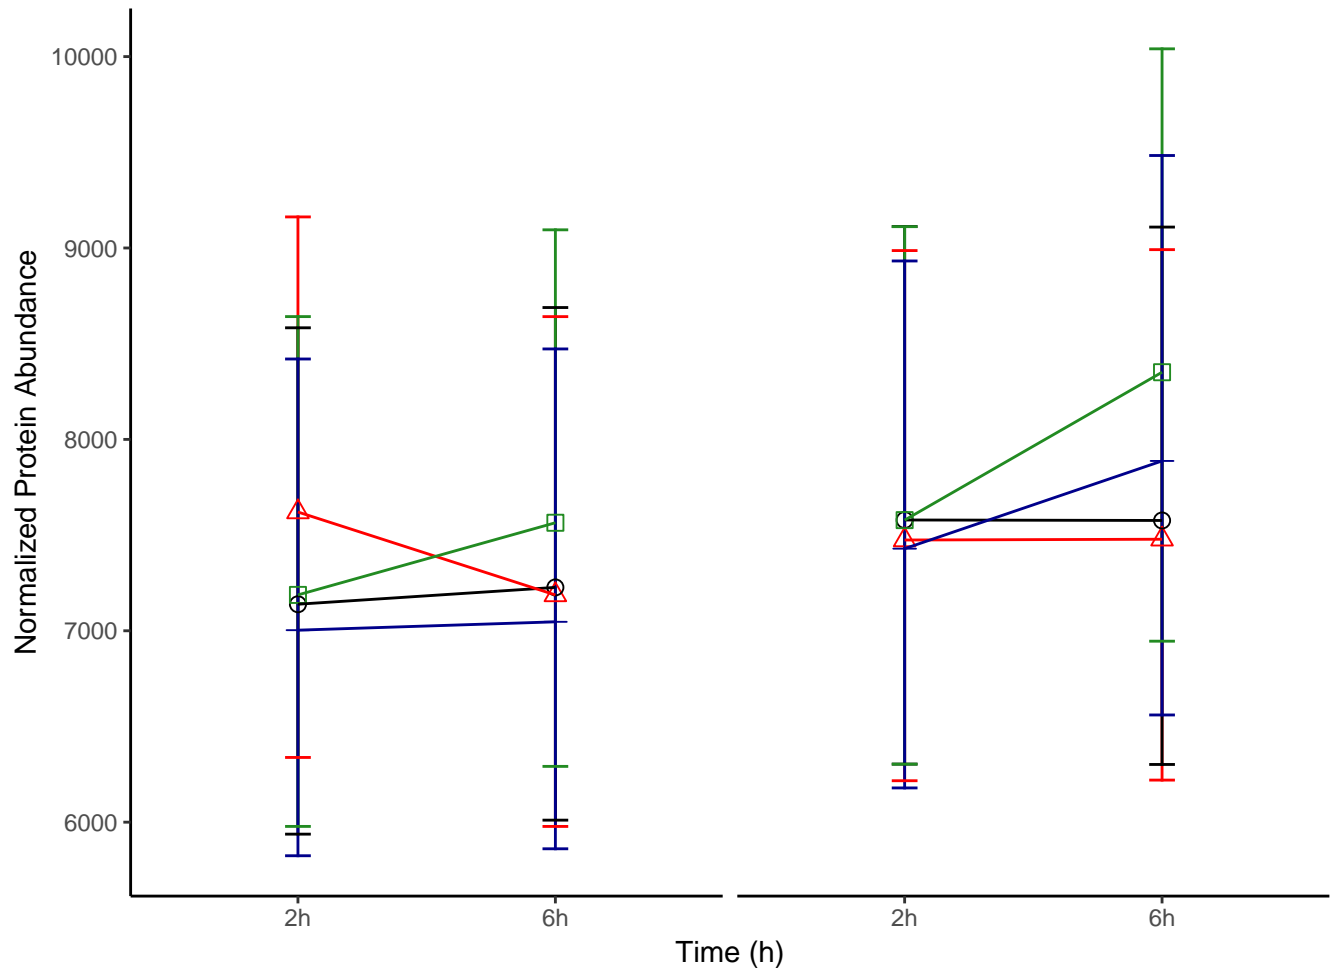

- SA564
- △ SA564- $\Delta$ hptRS
- SA564- $\Delta$ ccpA
- + SA564- $\Delta$ hptRS/ccpA

# SYK\_STAAM

TSB

TSB-dex S-403

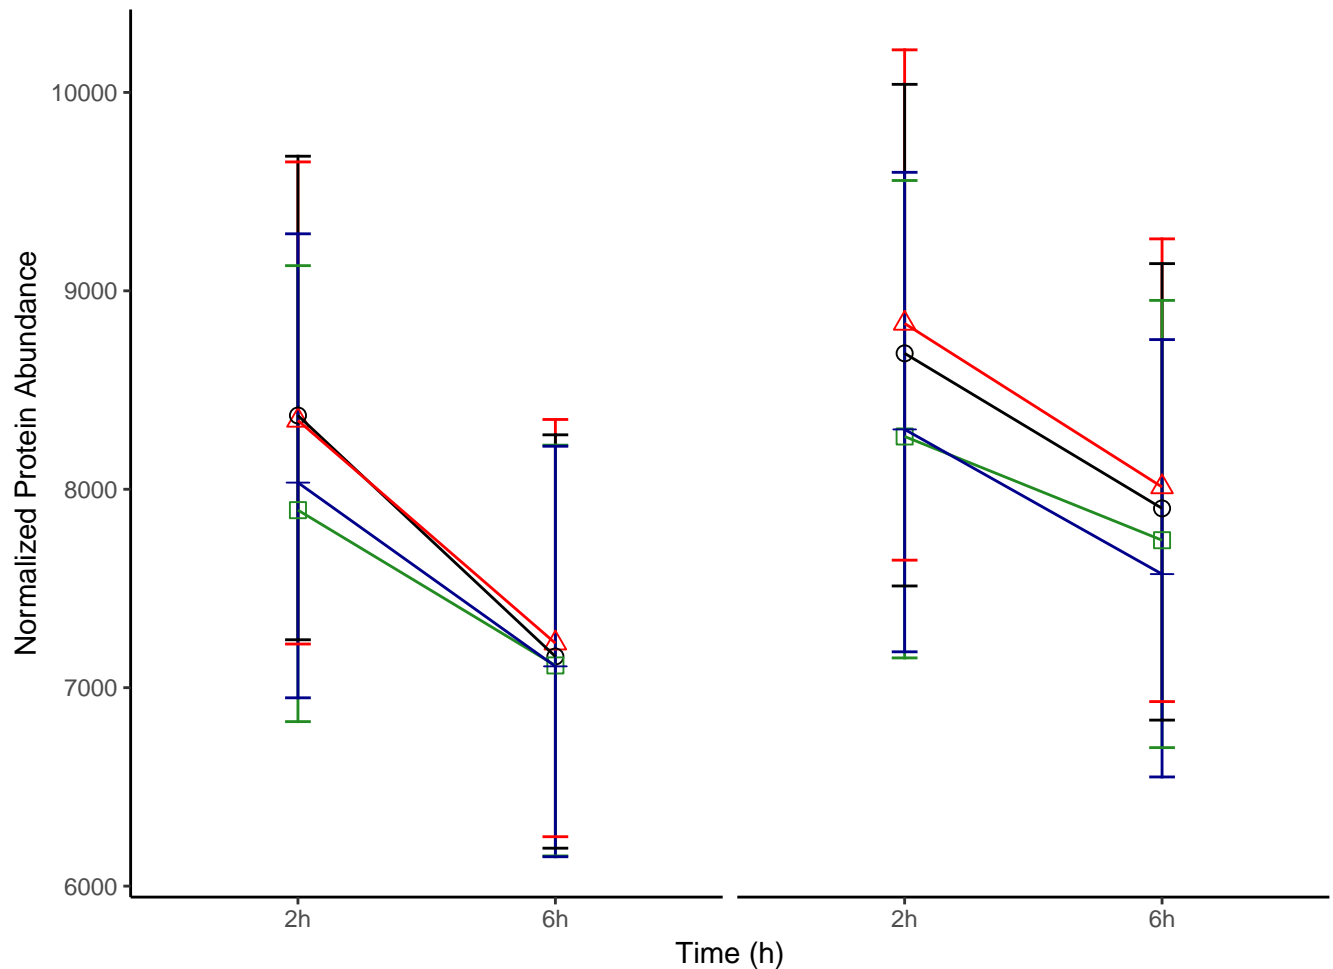

- SA564
- △ SA564- $\Delta$ *hptRS*
- SA564- $\Delta$ *ccpA*
- + SA564- $\Delta$ *hptRS/ccpA*

## SYM\_STAAM

TSB

TSB-dex S-404

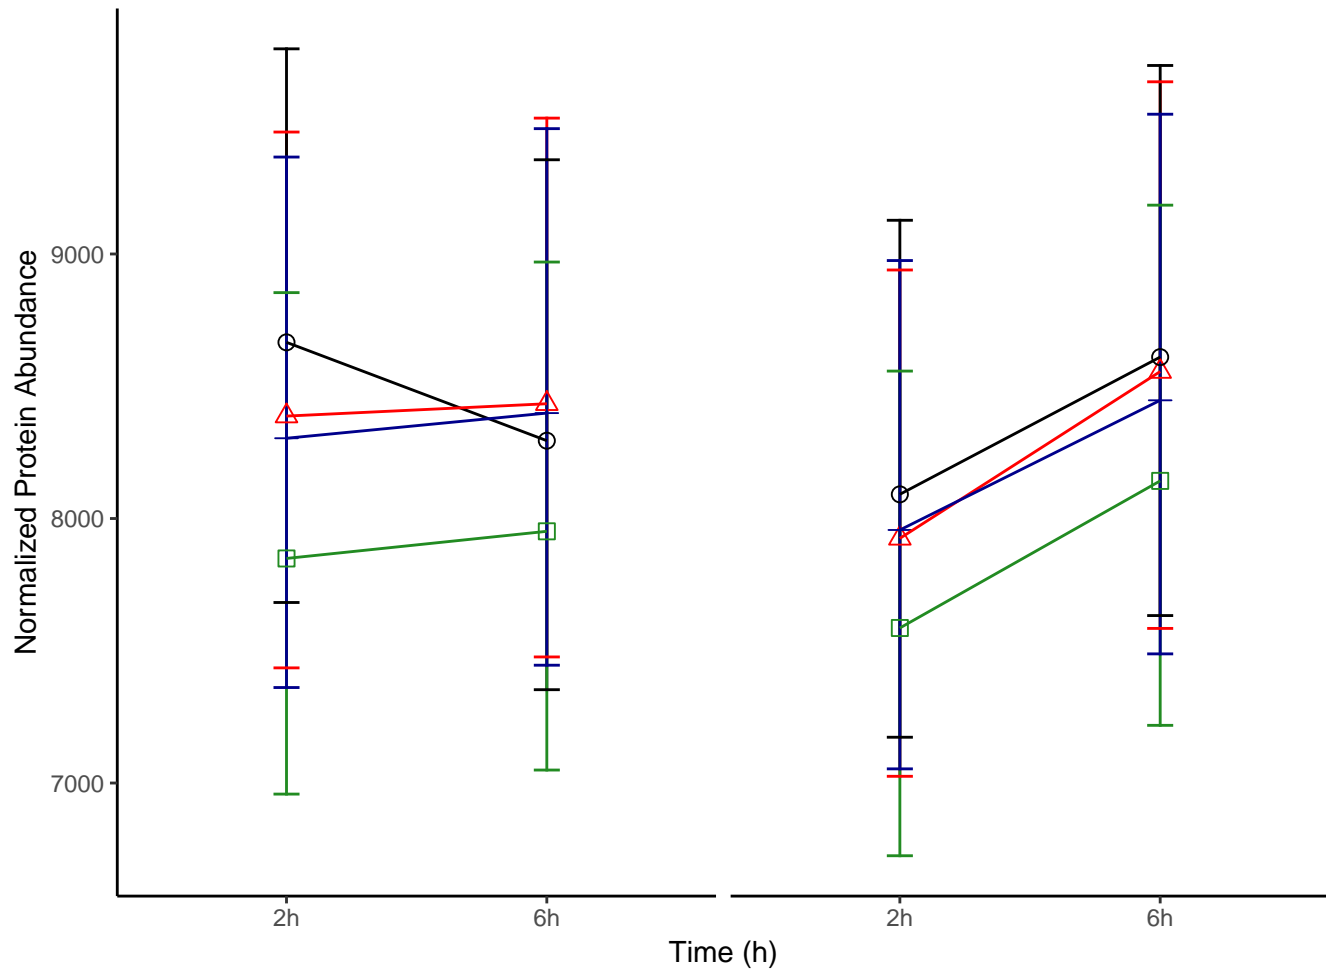

- SA564
- △ SA564- $\Delta$ *hptRS*
- SA564- $\Delta$ *ccpA*
- + SA564- $\Delta$ *hptRS/ccpA*

# SYN\_STAAM

TSB

TSB-dex S-405

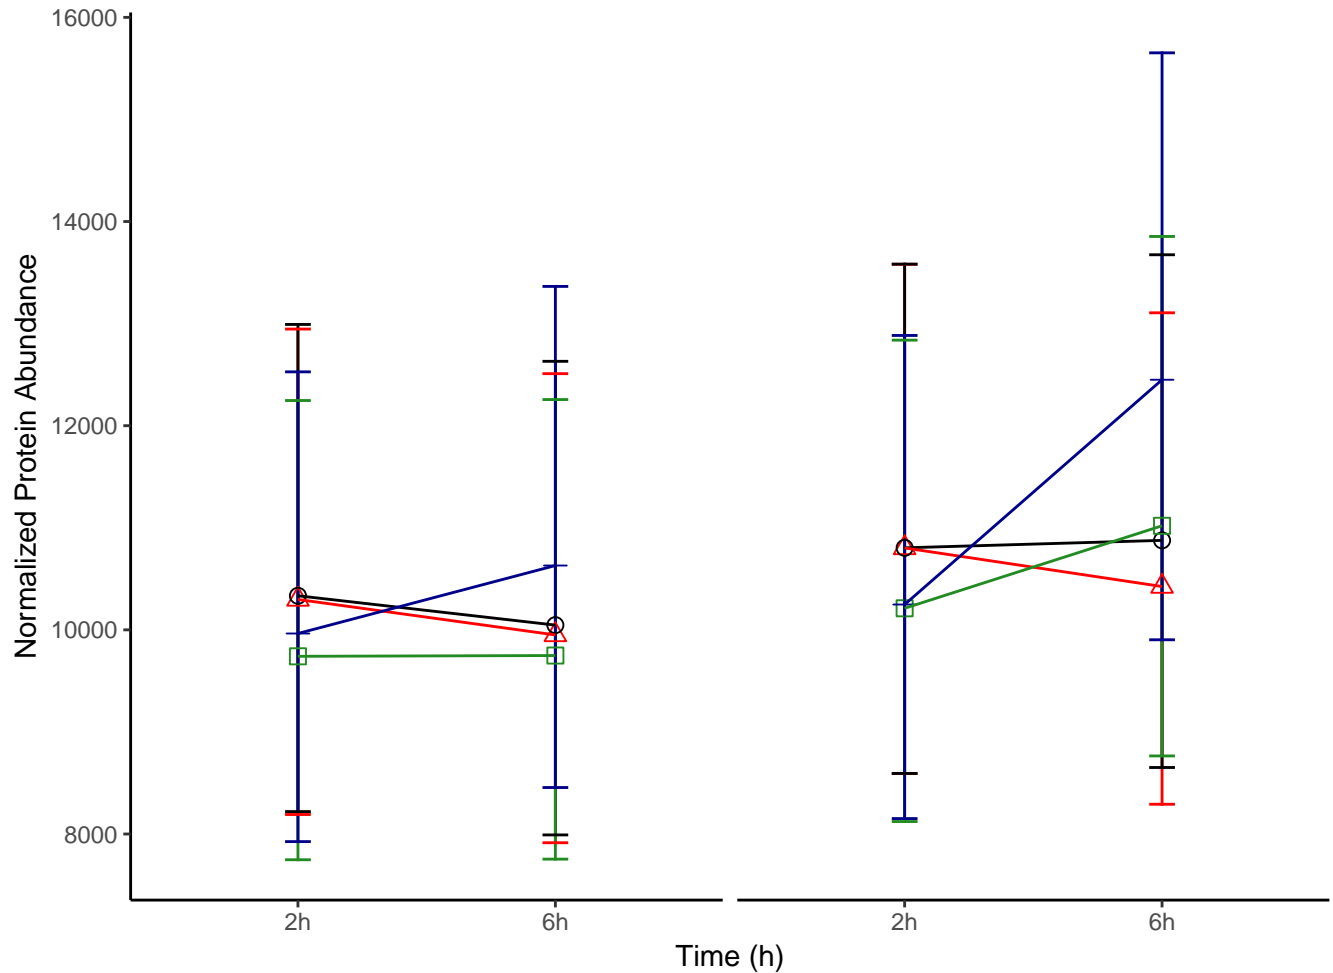

- SA564
- △ SA564- $\Delta$ hptRS
- SA564- $\Delta$ ccpA
- + SA564- $\Delta$ hptRS/ccpA

# SYP\_STAAM

TSB

TSB-dex S-406

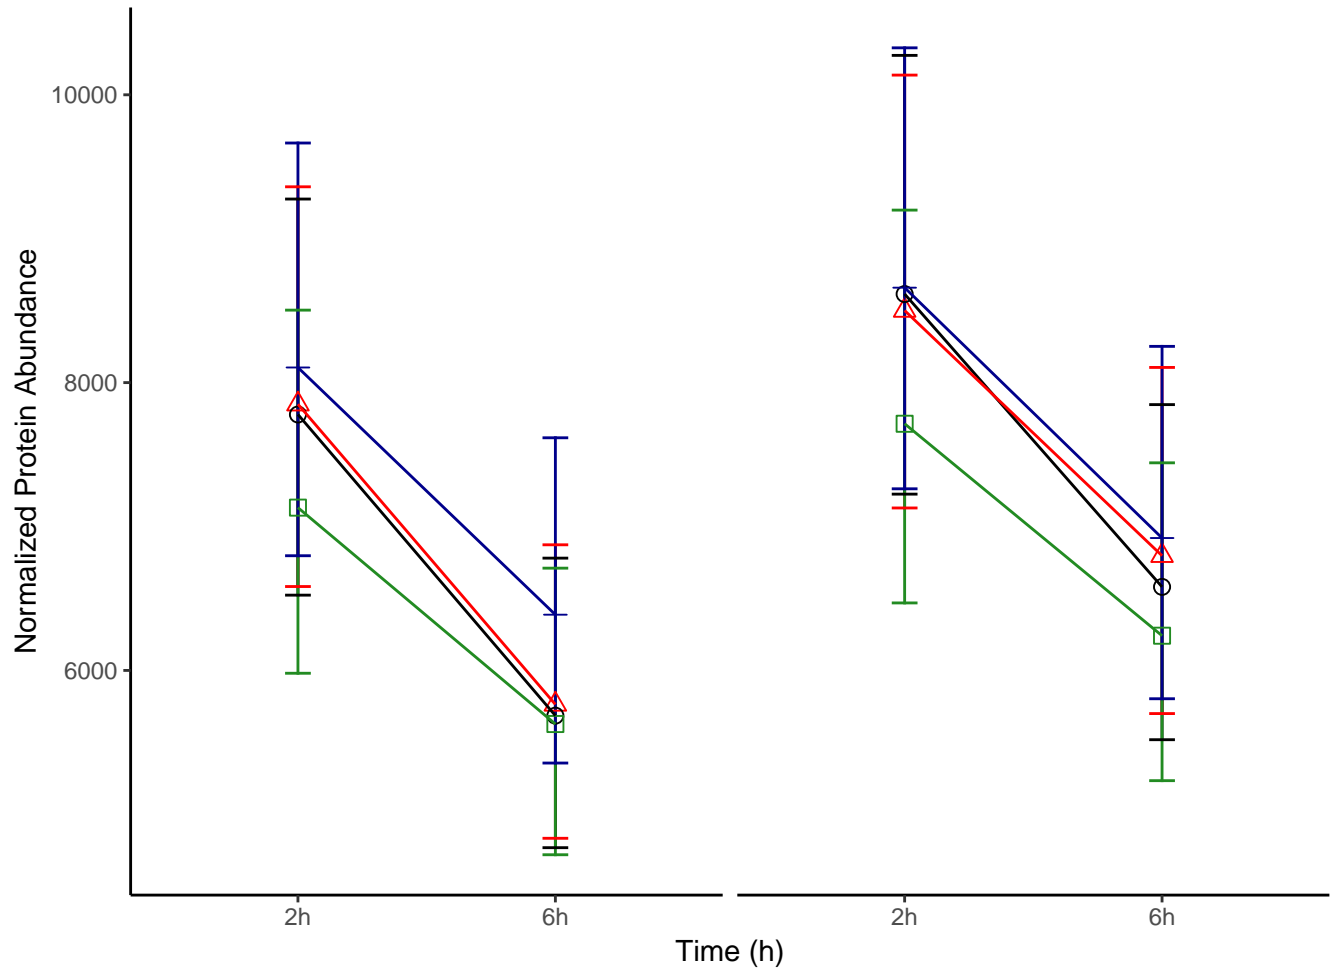

- SA564
- △ SA564- $\Delta$ *hptRS*
- SA564- $\Delta$ *ccpA*
- + SA564- $\Delta$ *hptRS/ccpA*

# SYR\_STAAM

TSB

TSB-dex S-407

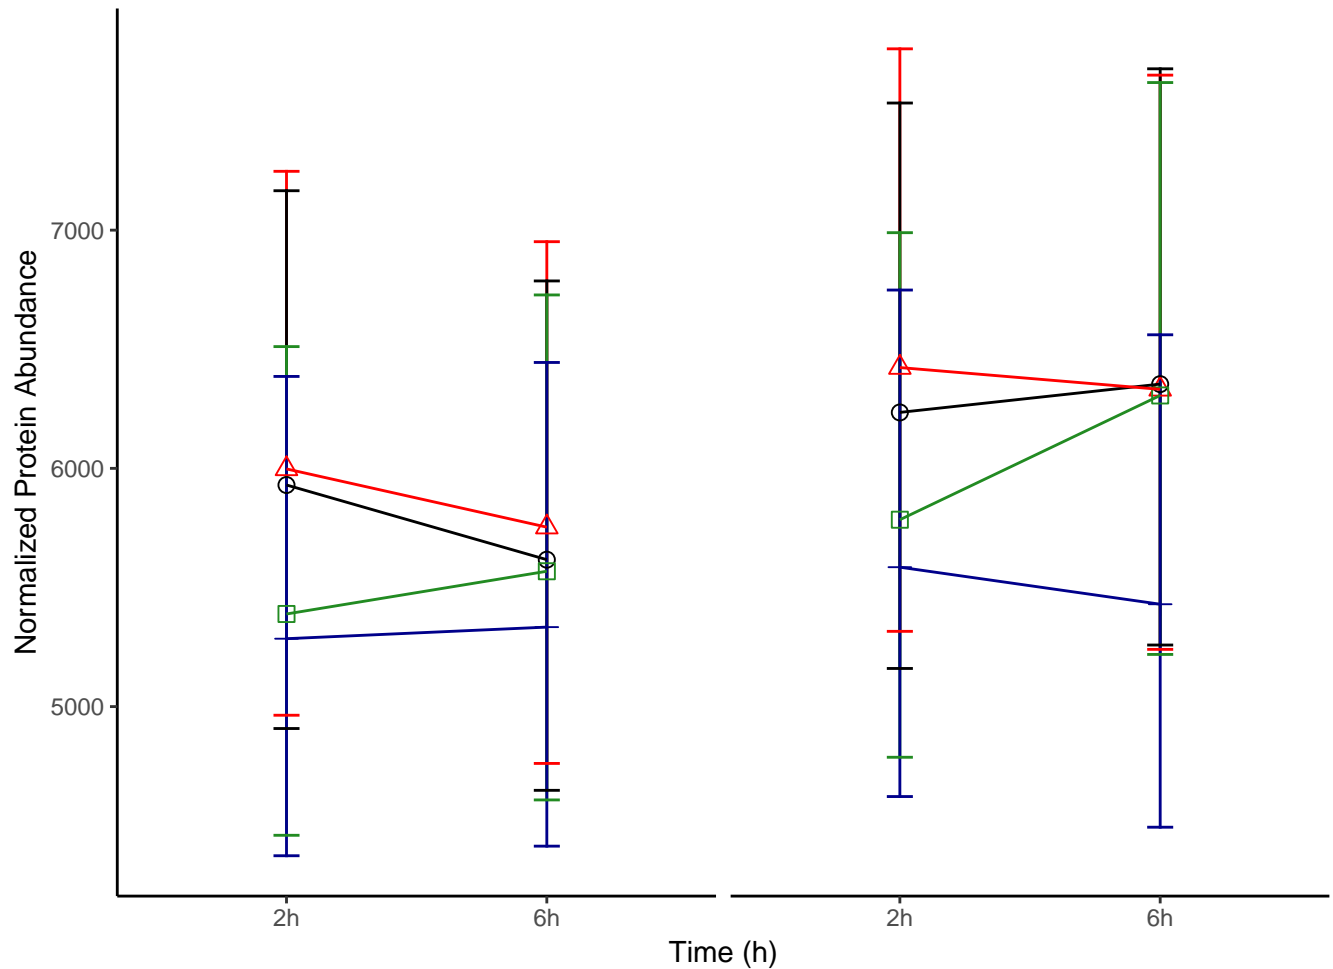

- SA564
- △ SA564- $\Delta hptRS$
- SA564- $\Delta ccpA$
- + SA564- $\Delta hptRS/ccpA$

# SYS\_STAAM

TSB

TSB-dex S-408

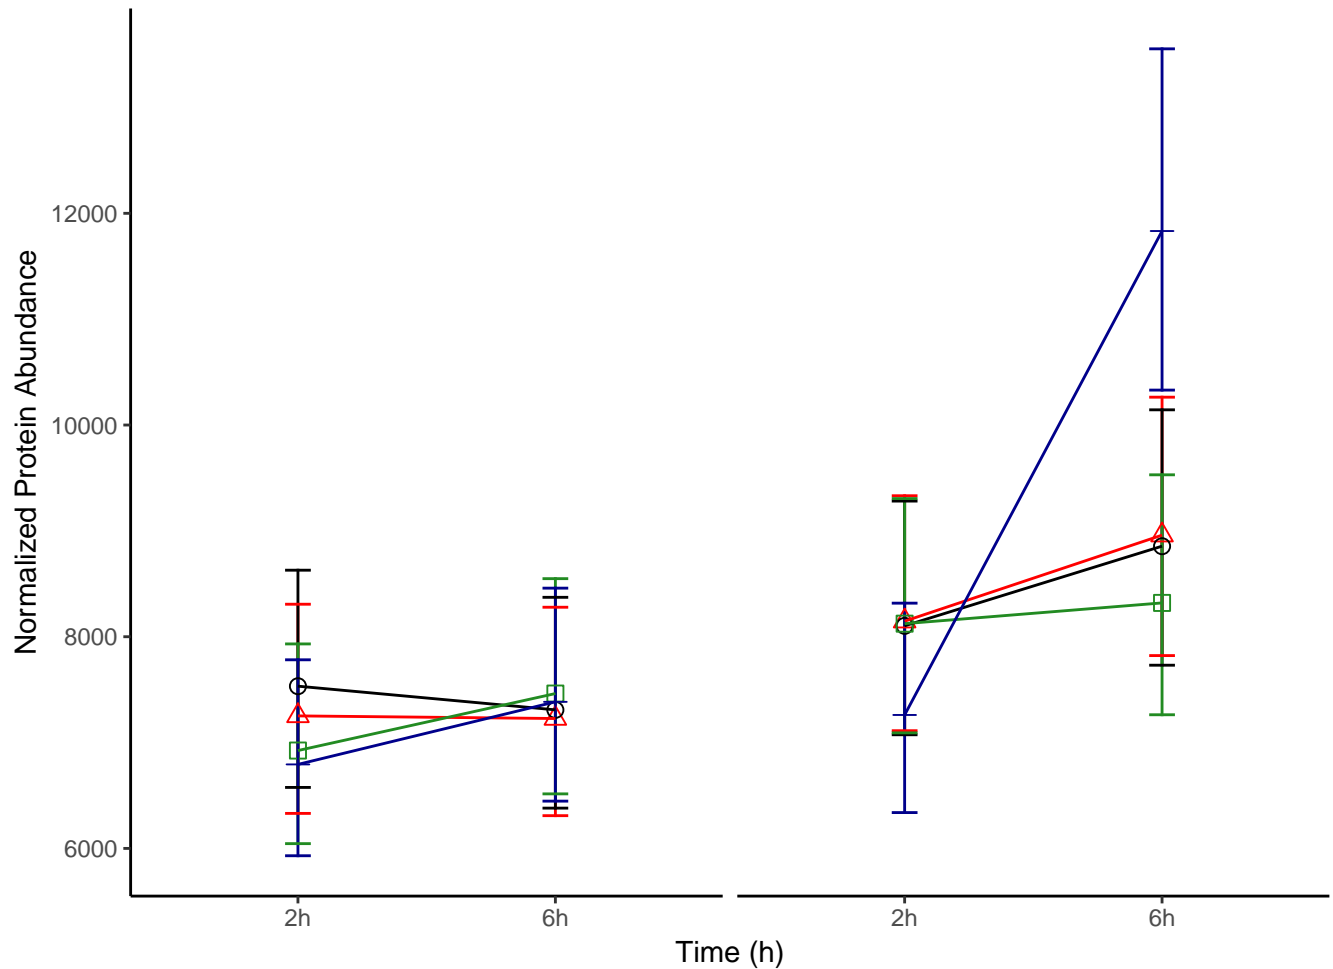

- SA564
- △ SA564-ΔhptRS
- SA564-ΔccpA
- + SA564-ΔhptRS/ccpA



# SYT\_STAAM

TSB

TSB-dex S-409

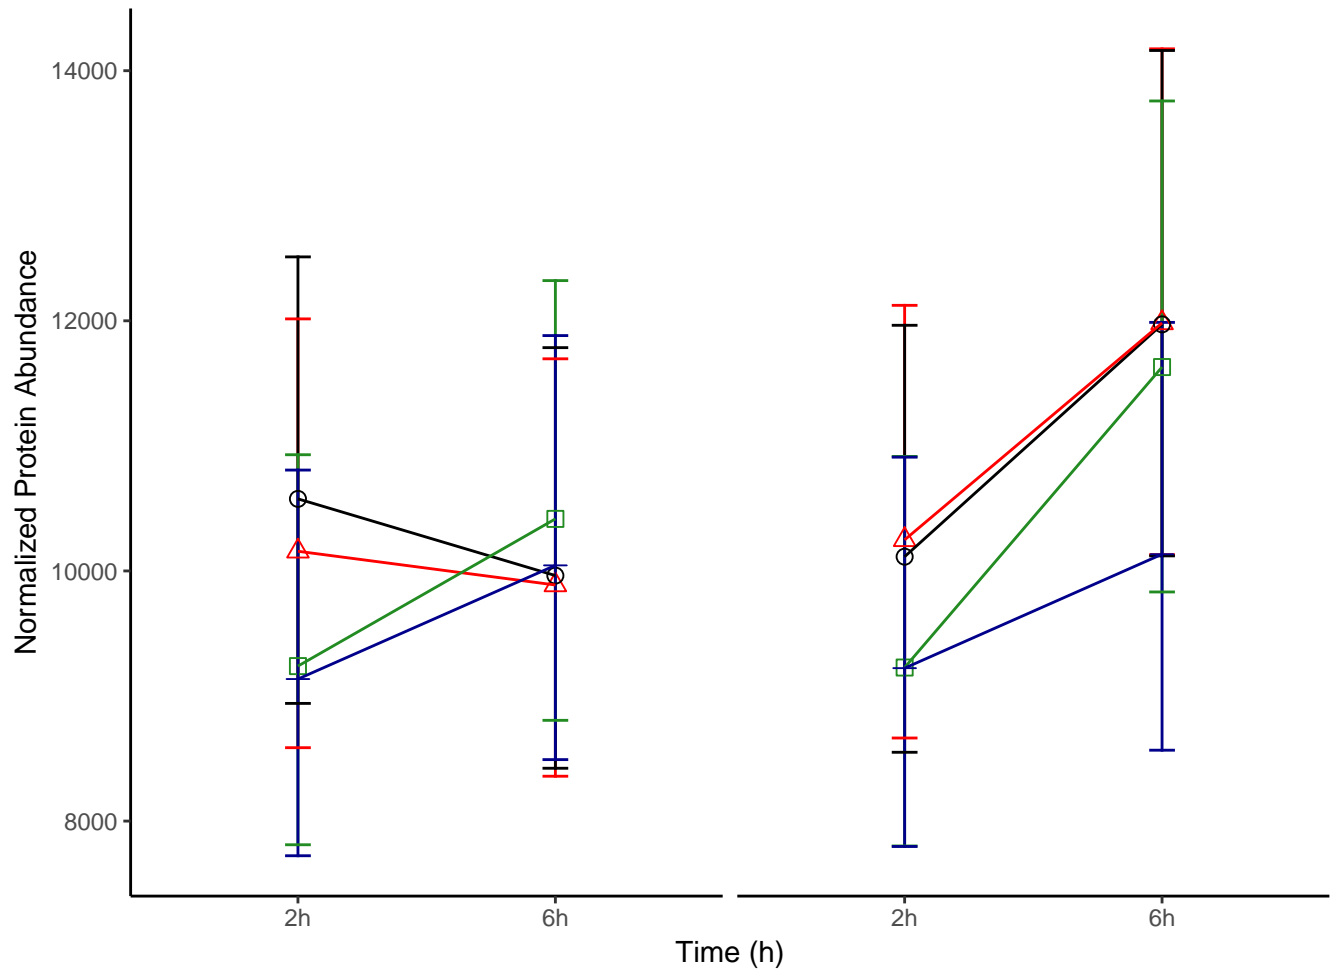

- SA564
- △ SA564- $\Delta$ hptRS
- SA564- $\Delta$ ccpA
- + SA564- $\Delta$ hptRS/ccpA

# SYV\_STAAM

TSB

TSB-dex S-410

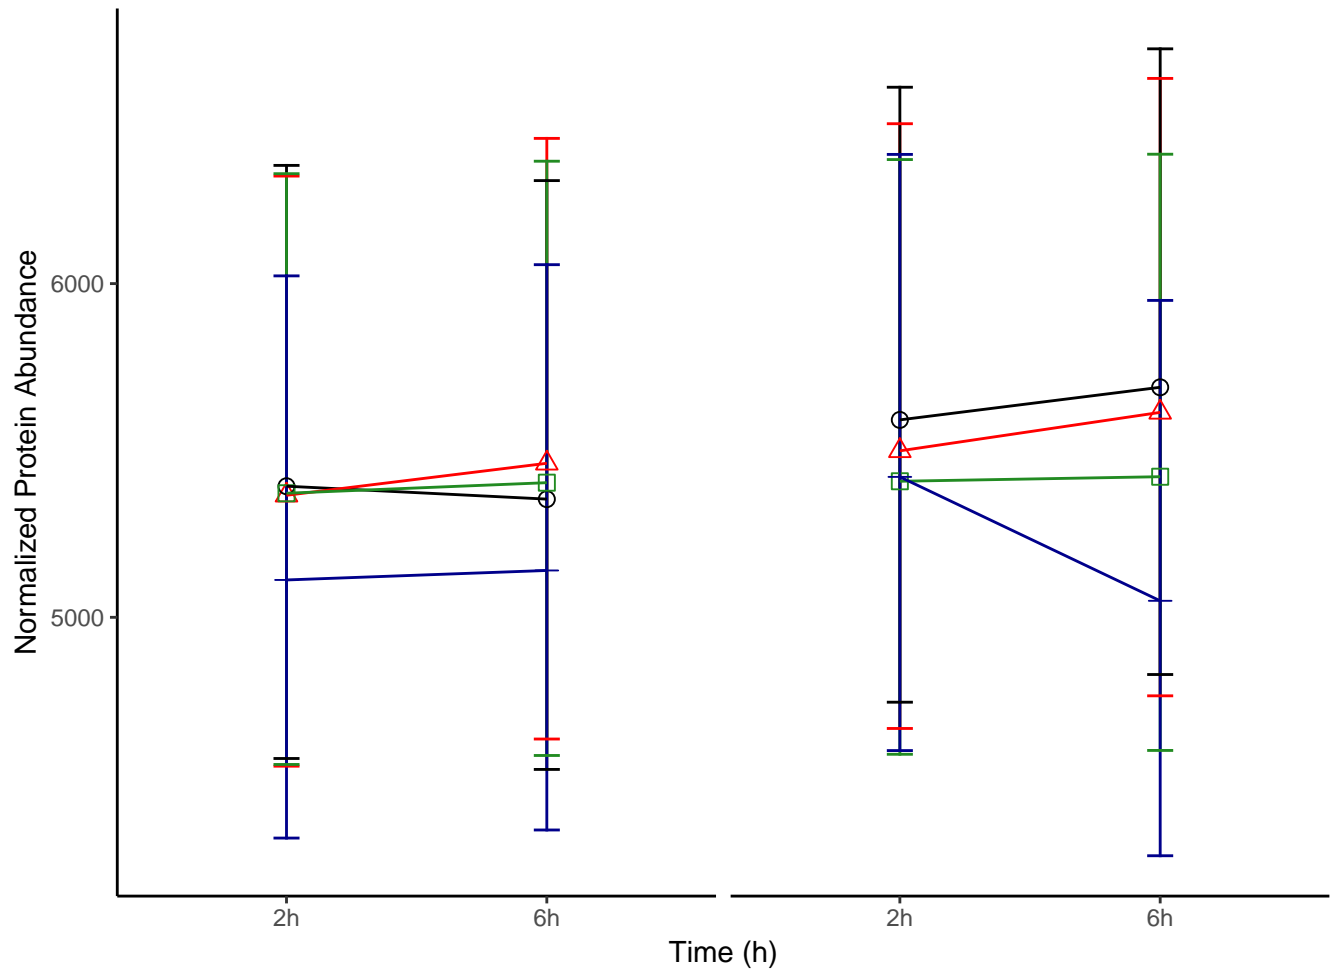

- SA564
- △ SA564- $\Delta$ *hptRS*
- SA564- $\Delta$ *ccpA*
- + SA564- $\Delta$ *hptRS/ccpA*

# SYW\_STAAM

TSB

TSB-dex S-411

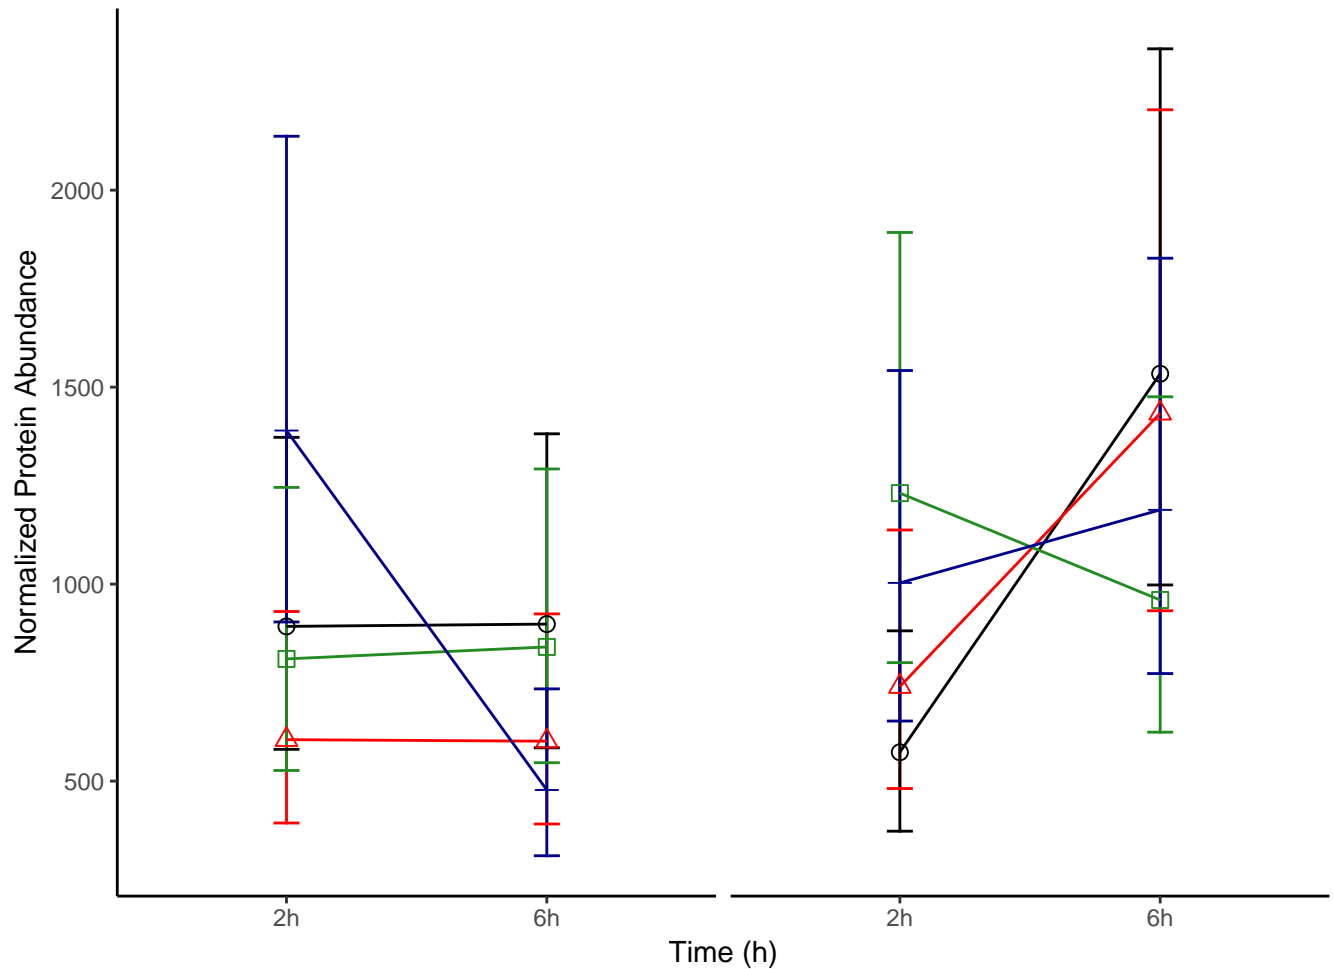

- SA564
- △ SA564- $\Delta$ *hptRS*
- SA564- $\Delta$ *ccpA*
- + SA564- $\Delta$ *hptRS/ccpA*

# SYT\_STAAM

TSB

TSB-dex S-412

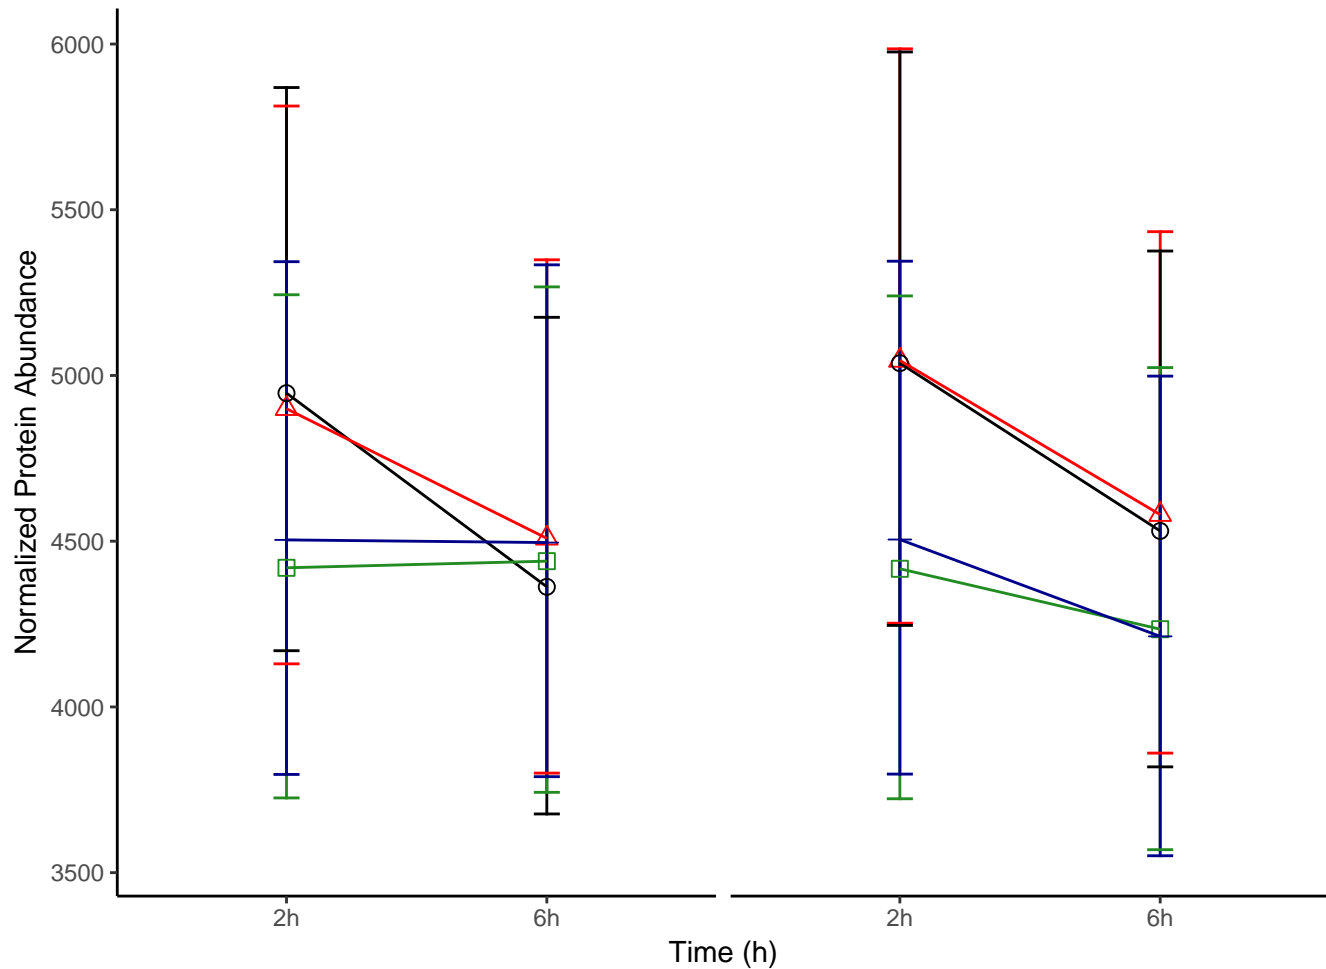

- SA564
- △ SA564- $\Delta hptRS$
- SA564- $\Delta ccpA$
- + SA564- $\Delta hptRS/ccpA$

# T431\_STAAM

TSB

TSB-dex S-413

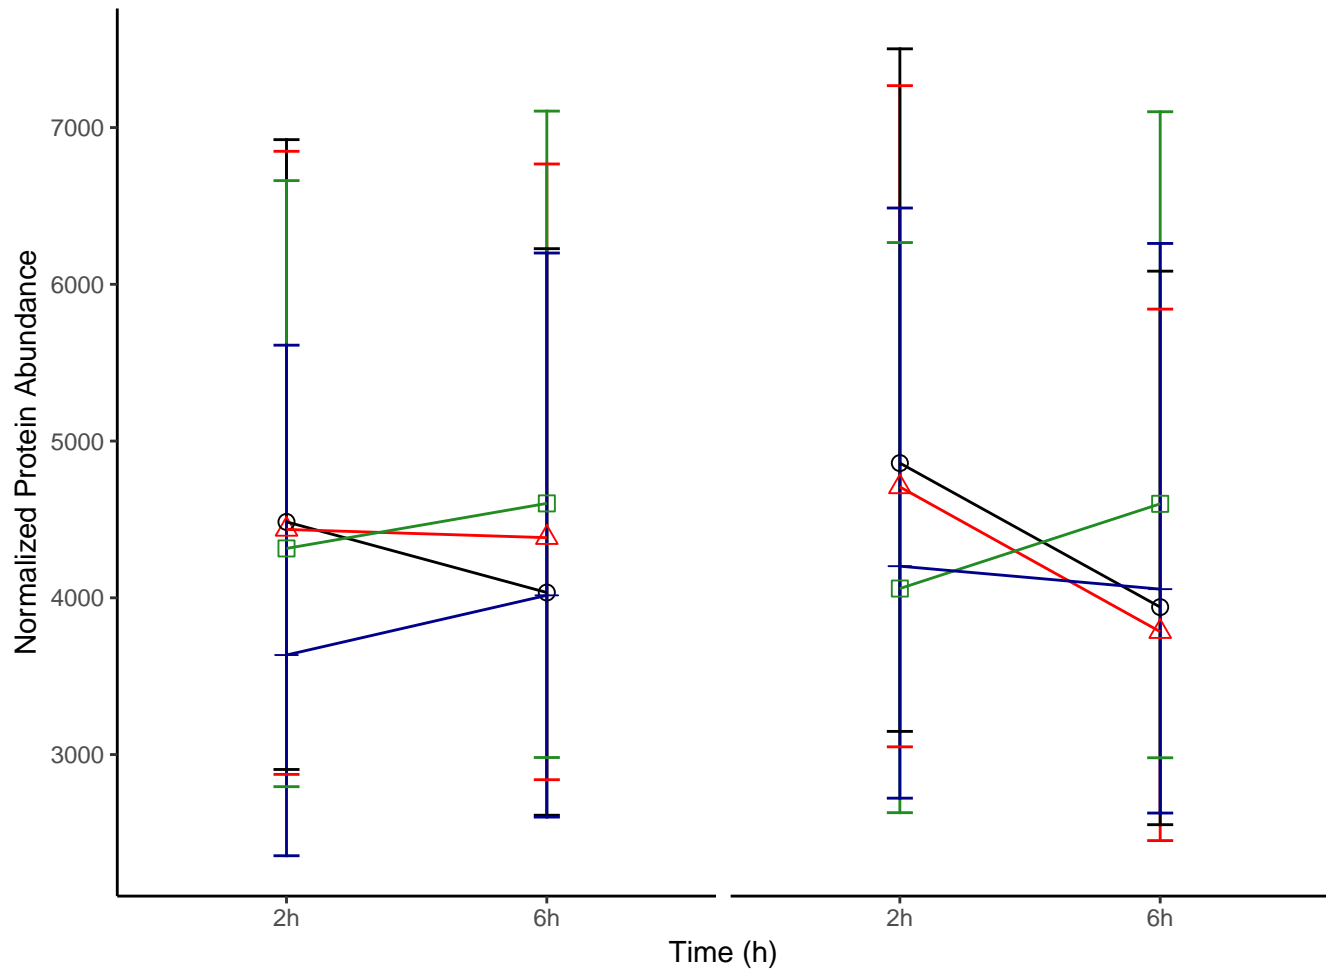

- SA564
- △ SA564-Δ*hptRS*
- SA564-Δ*ccpA*
- + SA564-Δ*hptRS/ccpA*

# TADA\_STAAM

TSB

TSB-dex S-414

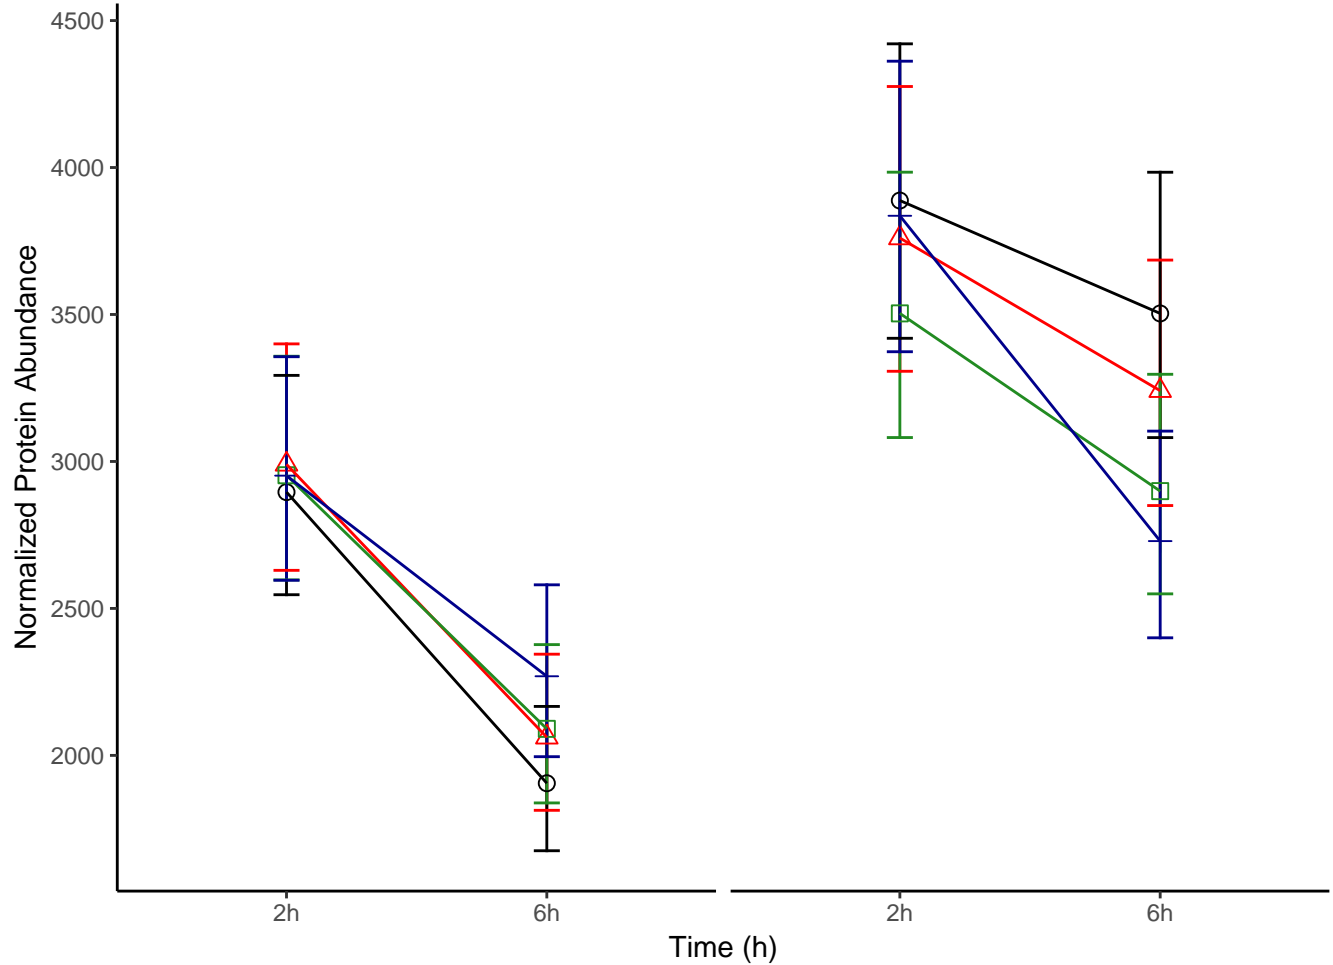

- SA564
- △ SA564- $\Delta$ *hptRS*
- SA564- $\Delta$ *ccpA*
- + SA564- $\Delta$ *hptRS/ccpA*

## TAGA\_STAAM

TSB

TSB-dex S-415

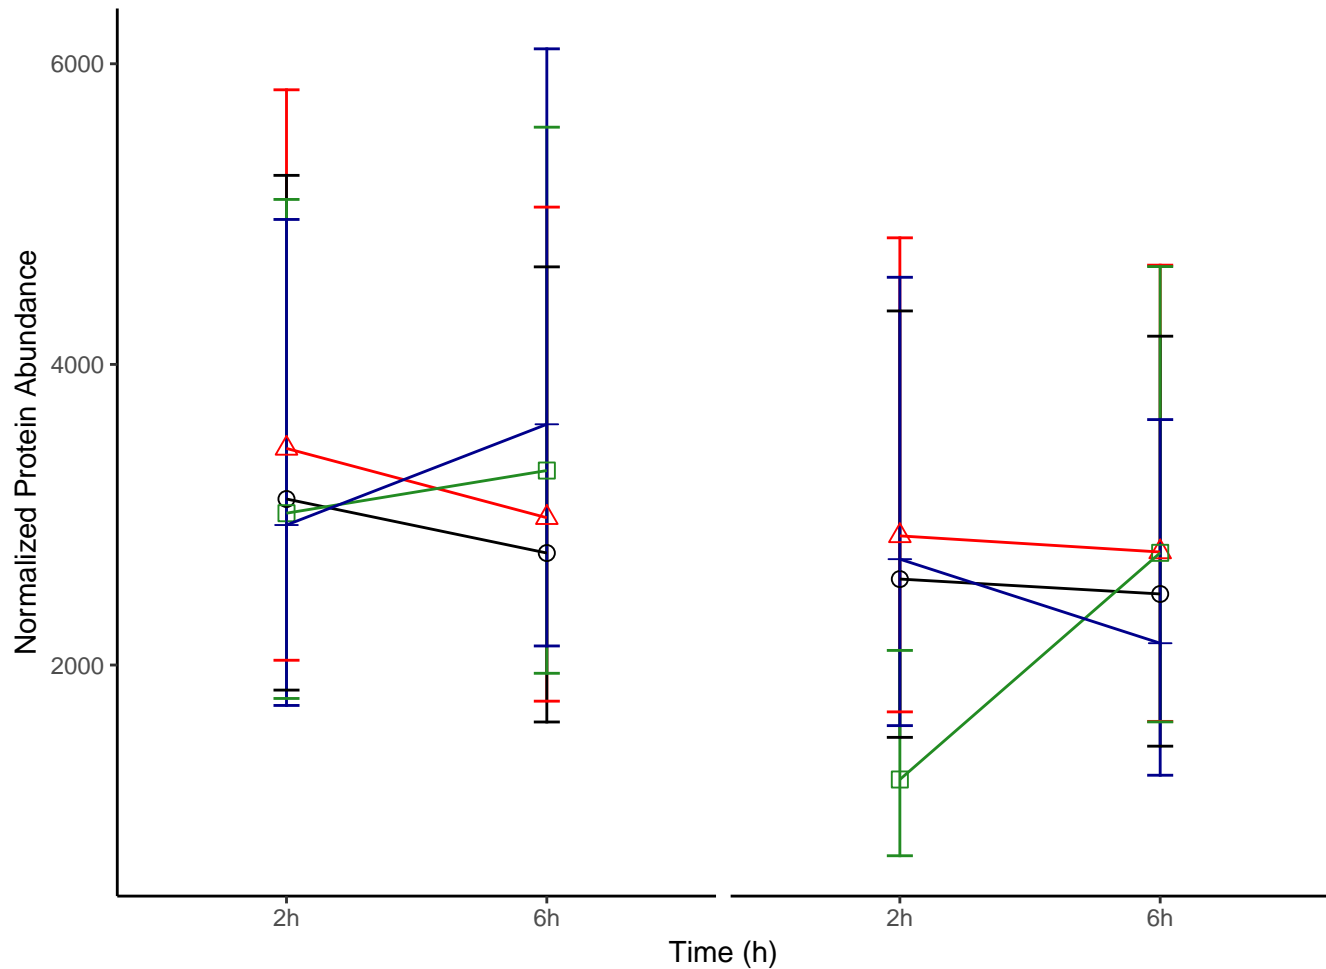

- SA564
- △ SA564-Δ*hptRS*
- SA564-Δ*ccpA*
- + SA564-Δ*hptRS/ccpA*

# TDCB\_STAAM

TSB

TSB-dex S-416

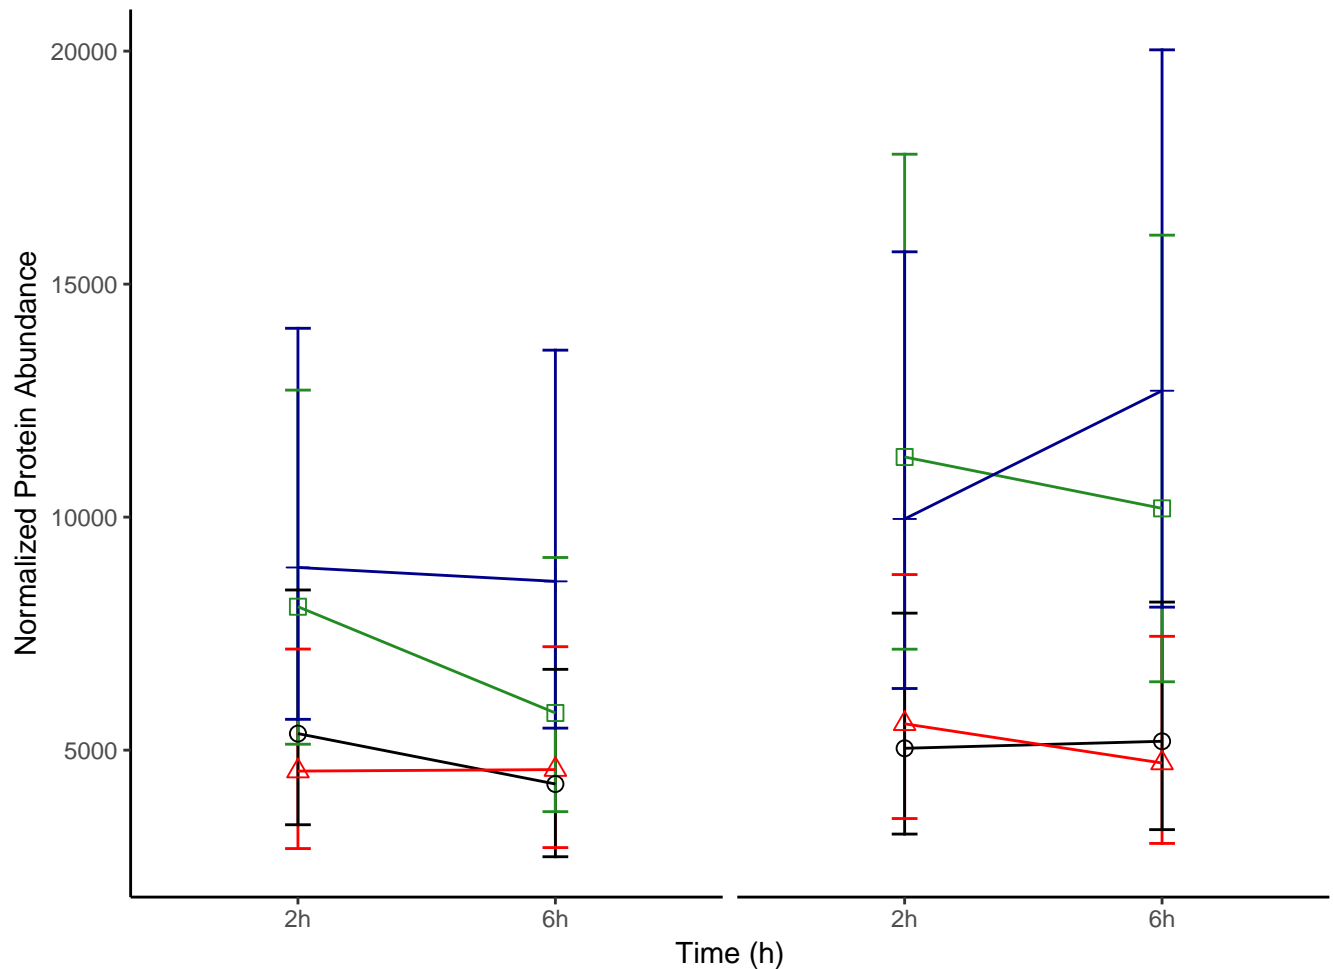

- SA564
- △ SA564- $\Delta$ hptRS
- SA564- $\Delta$ ccpA
- + SA564- $\Delta$ hptRS/ccpA



# TELL\_STAAM

TSB

TSB-dex S-417

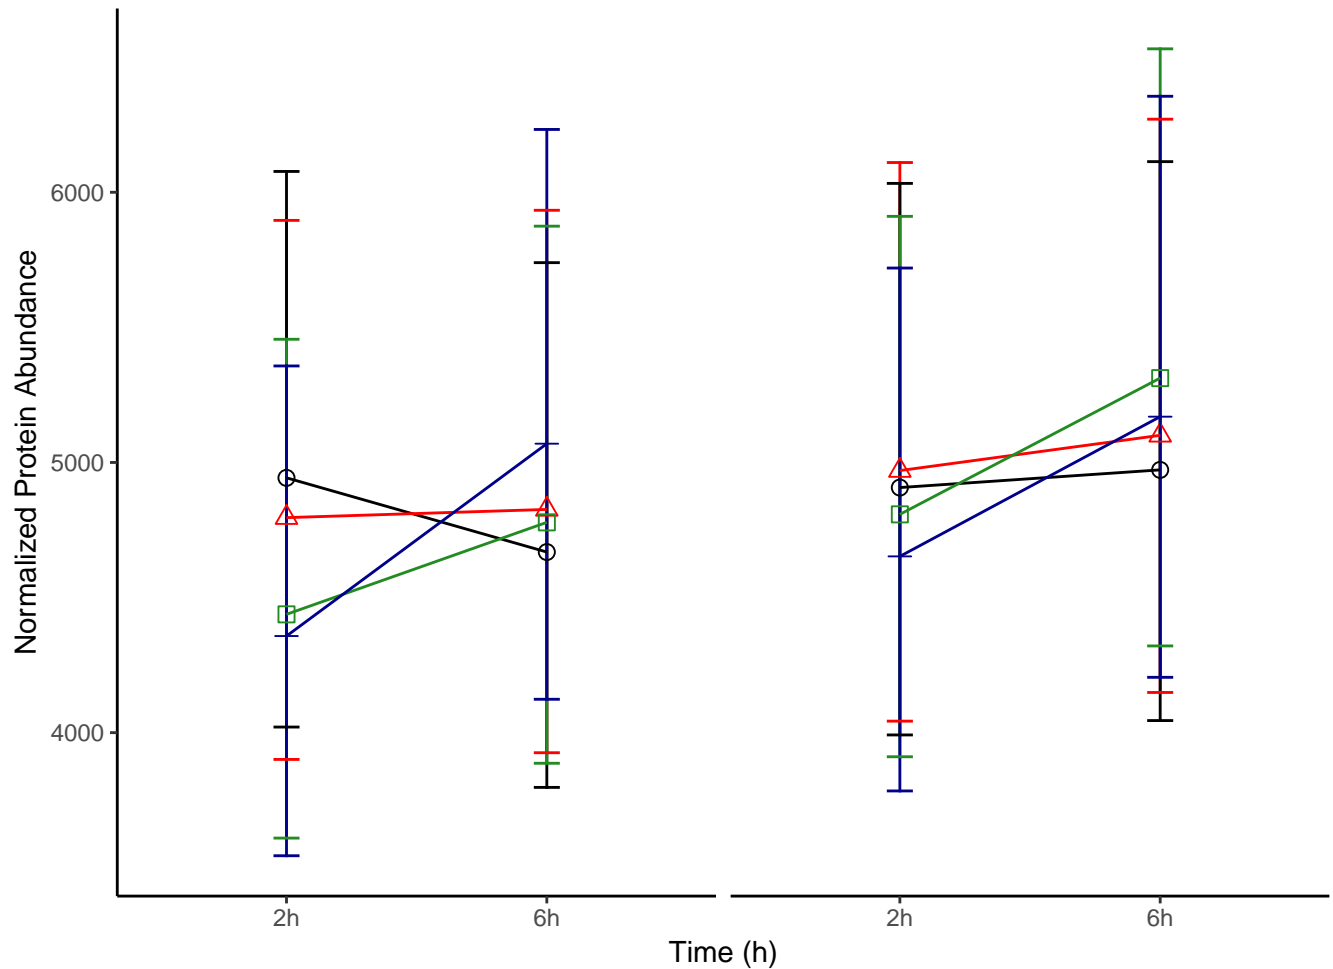

- SA564
- △ SA564- $\Delta$ *hptRS*
- SA564- $\Delta$ *ccpA*
- + SA564- $\Delta$ *hptRS/ccpA*

# THID\_STAAM

TSB

TSB-dex S-418

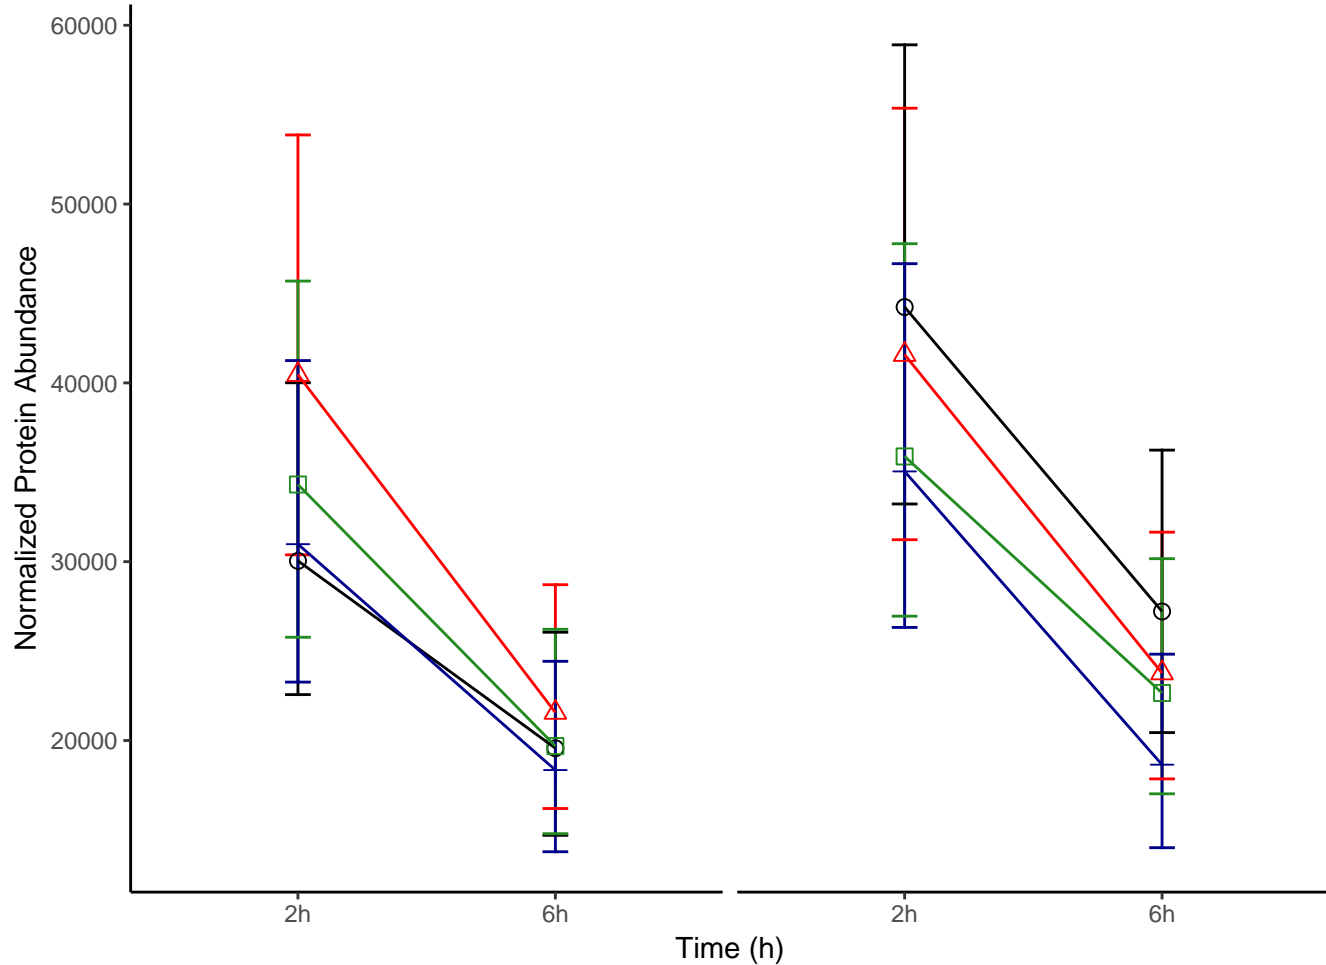

- SA564
- △ SA564- $\Delta$ *hptRS*
- SA564- $\Delta$ *ccpA*
- + SA564- $\Delta$ *hptRS/ccpA*

# THIM\_STAAM

TSB

TSB-dex S-419

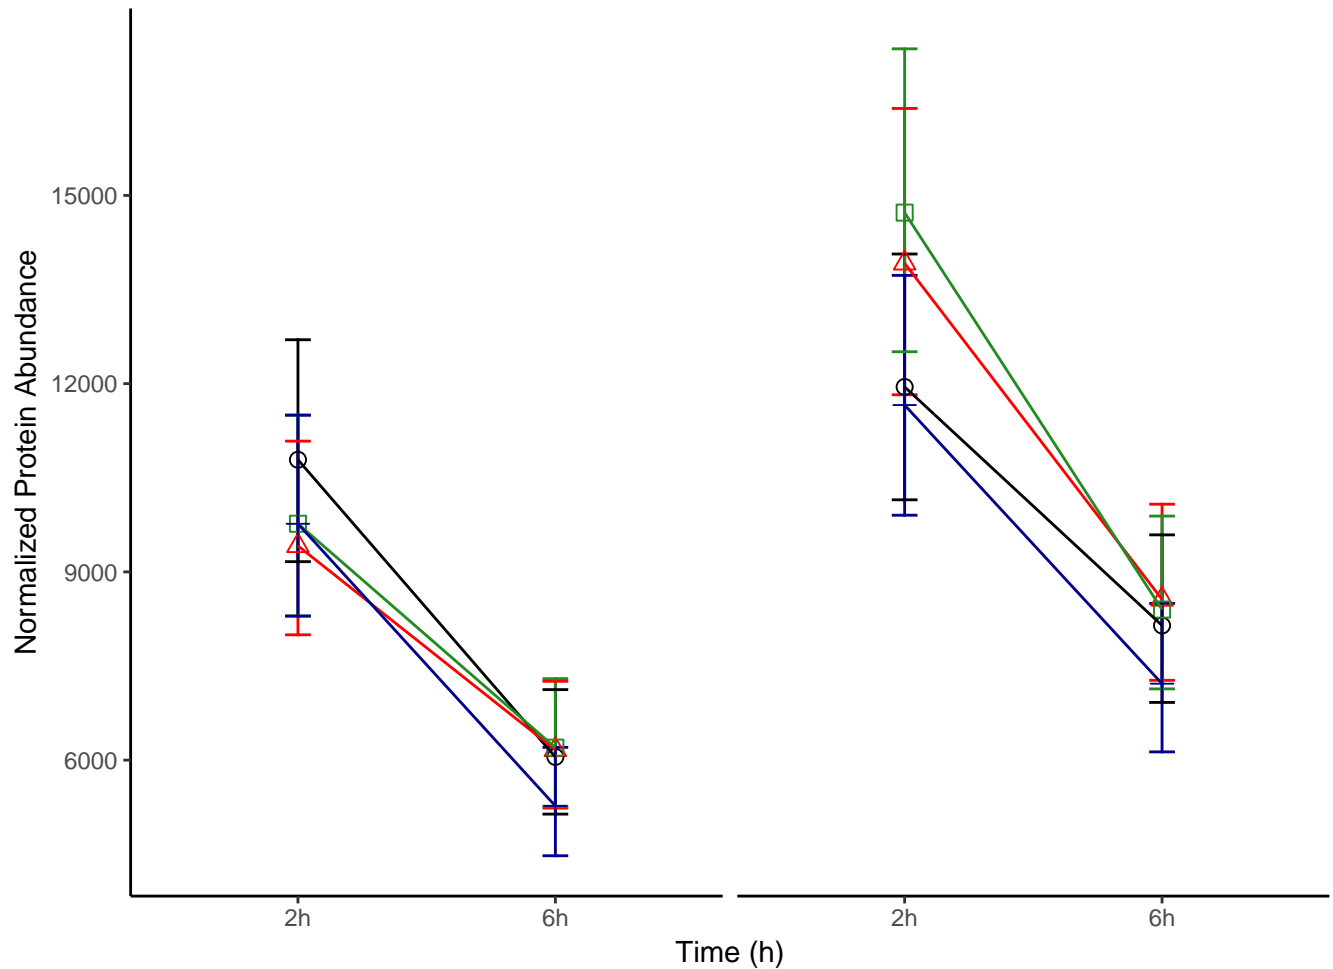

- SA564
- △ SA564- $\Delta$ hptRS
- SA564- $\Delta$ ccpA
- + SA564- $\Delta$ hptRS/ccpA

# THIO\_STAAM

TSB

TSB-dex S-420

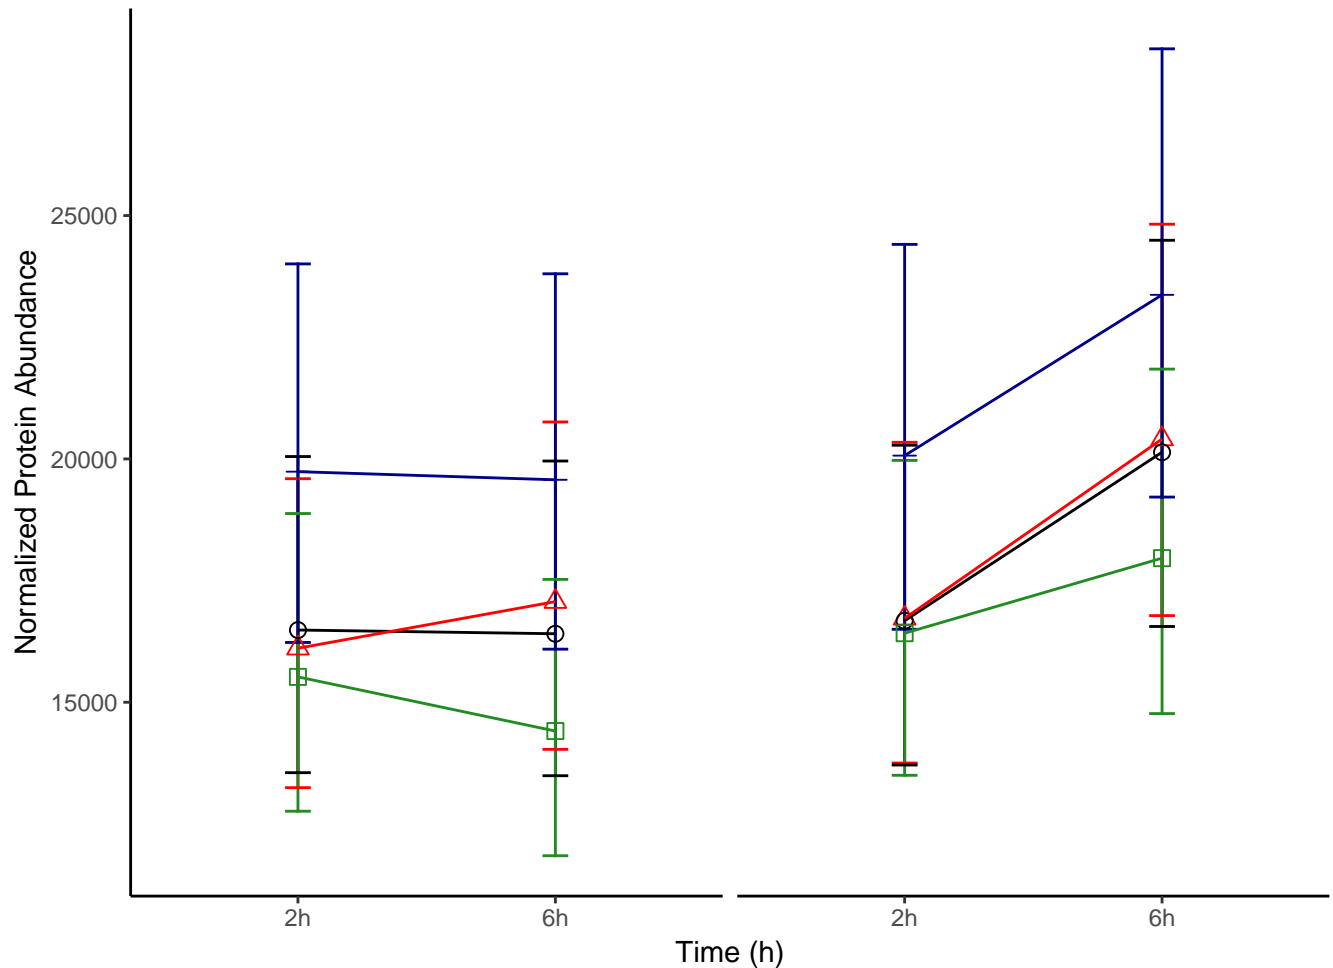

- SA564
- △ SA564- $\Delta$ hptRS
- SA564- $\Delta$ ccpA
- + SA564- $\Delta$ hptRS/ccpA

# THLA\_STAAM

TSB

TSB-dex S-421

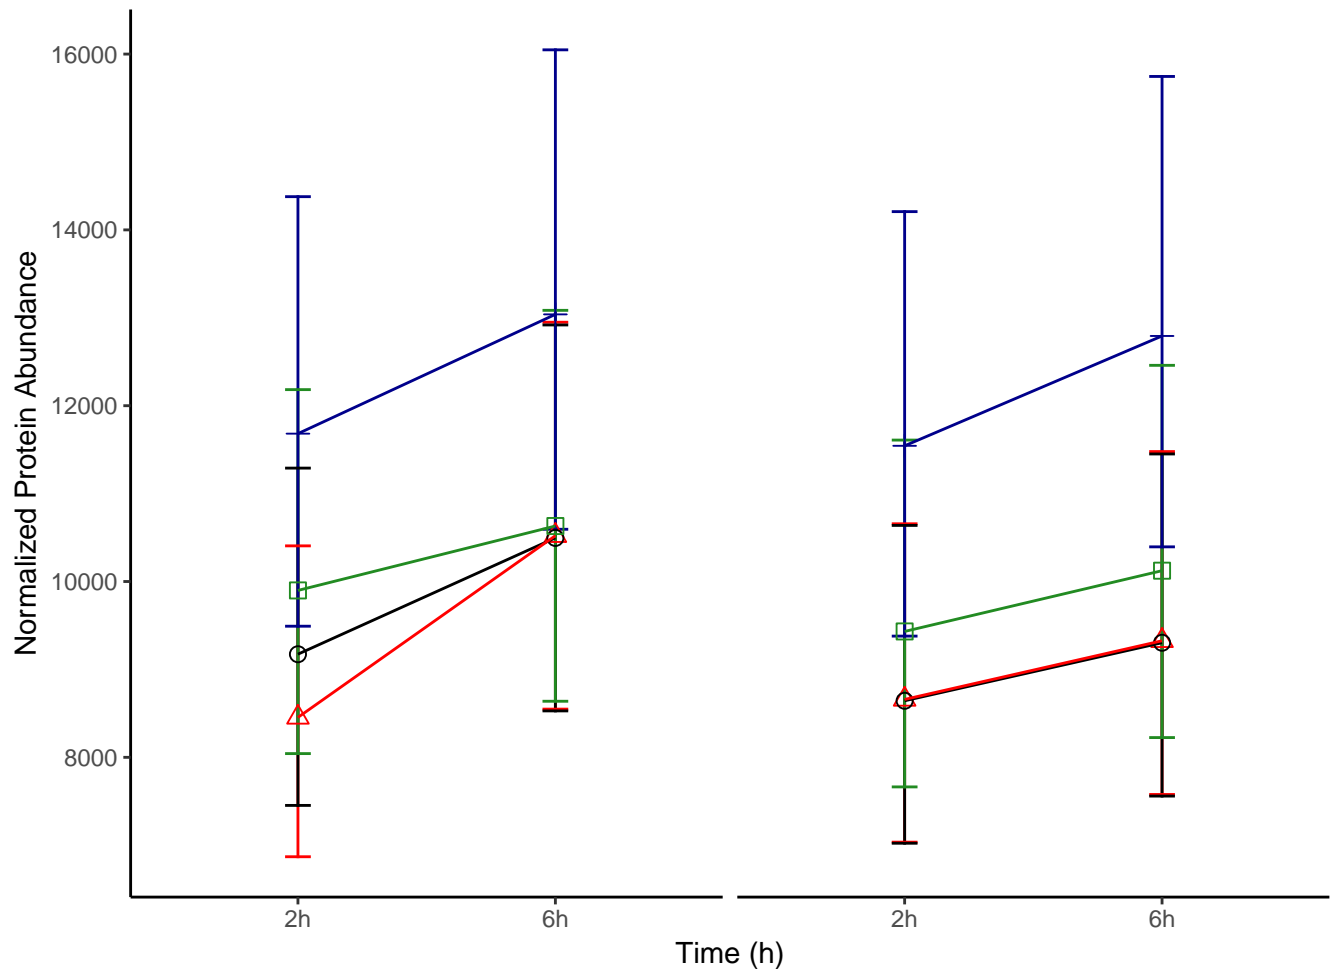

- SA564
- △ SA564- $\Delta$ hptRS
- SA564- $\Delta$ ccpA
- + SA564- $\Delta$ hptRS/ccpA

# TIG\_STAAM

TSB

TSB-dex S-422

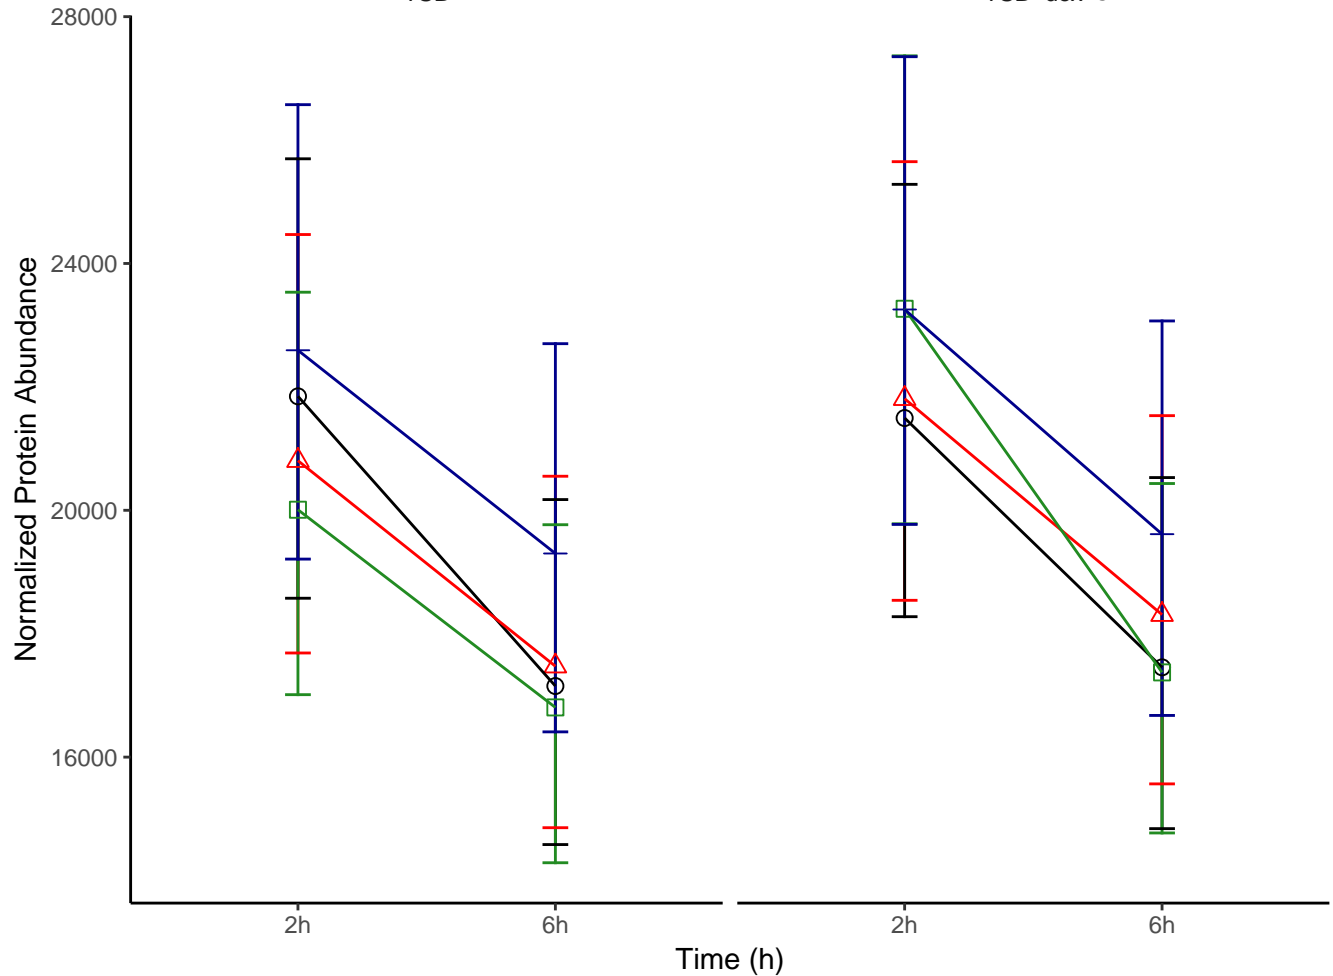

- SA564
- △ SA564- $\Delta$ *hptRS*
- SA564- $\Delta$ *ccpA*
- + SA564- $\Delta$ *hptRS/ccpA*

## TKT\_STAAM

TSB

TSB-dex S-423

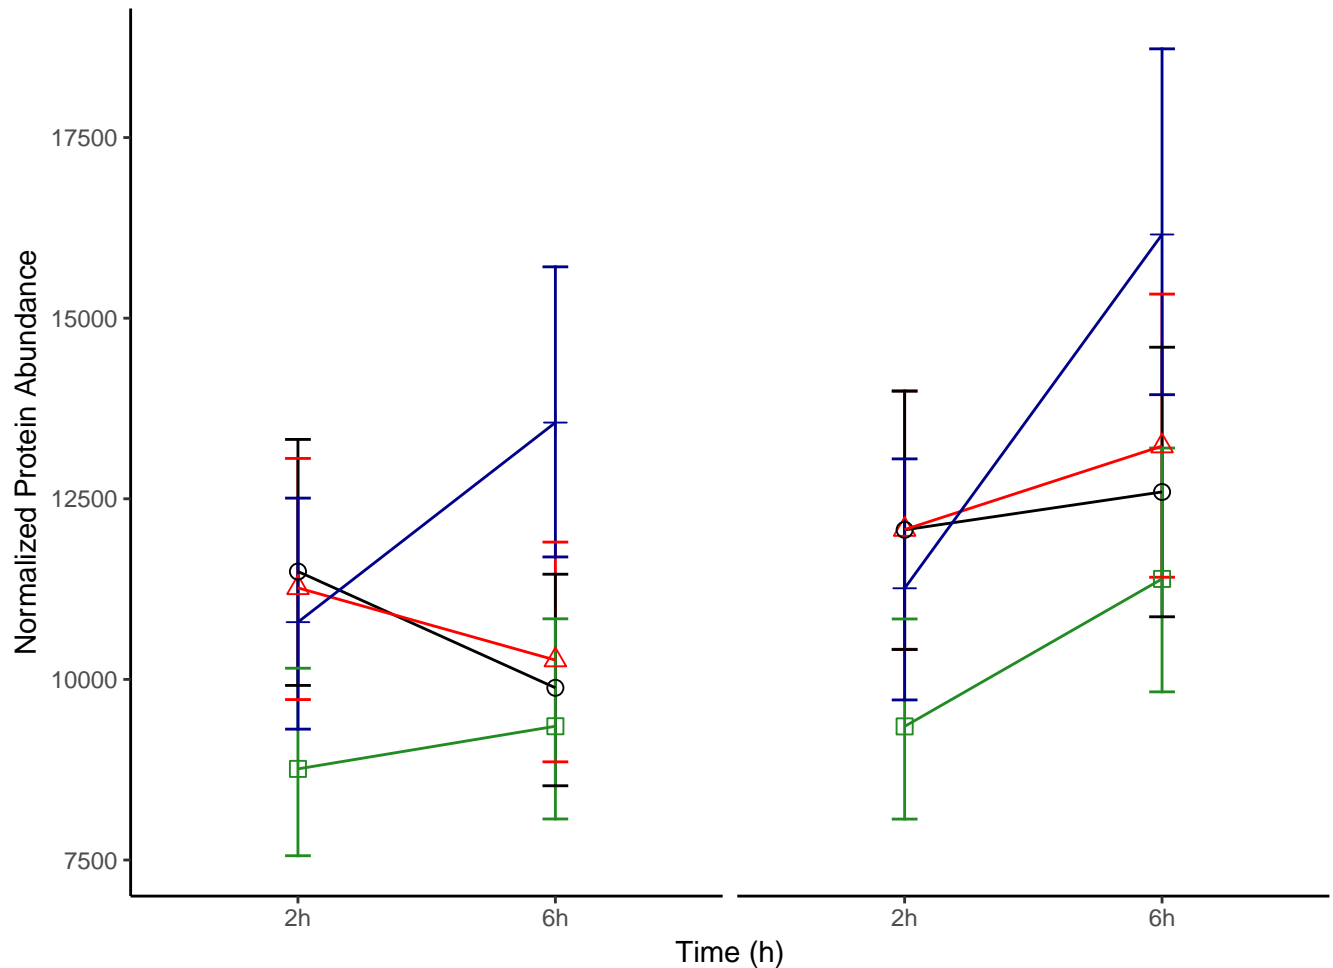

- SA564
- △ SA564-ΔhptRS
- SA564-ΔccpA
- + SA564-ΔhptRS/ccpA

# TOP1\_STAAM

TSB

TSB-dex S-424

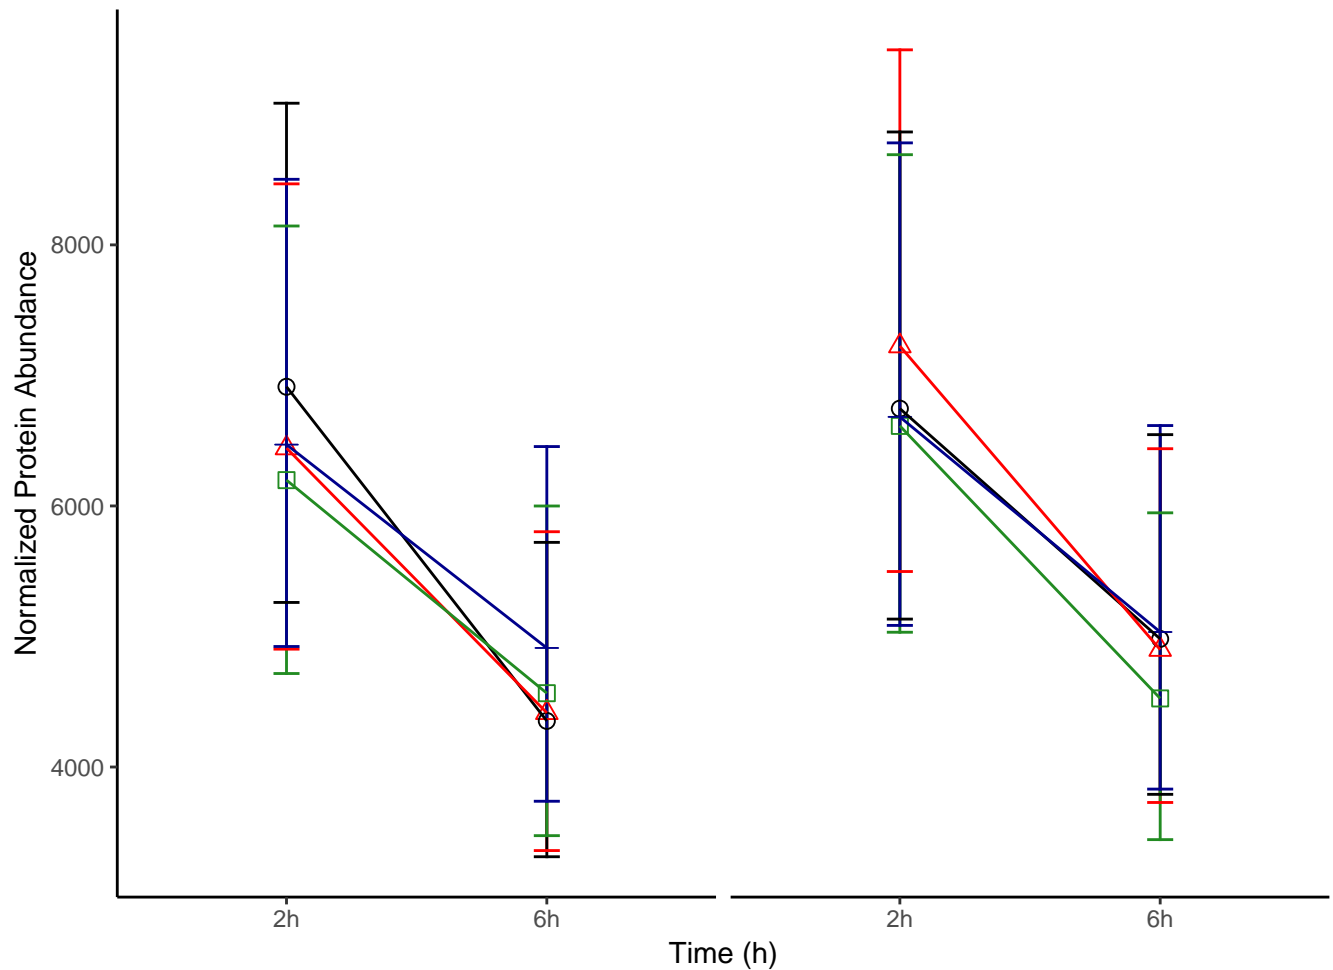

- SA564
- △ SA564- $\Delta hptRS$
- SA564- $\Delta ccpA$
- + SA564- $\Delta hptRS/ccpA$



# TOP3\_STAAM

TSB

TSB-dex S-425

Normalized Protein Abundance

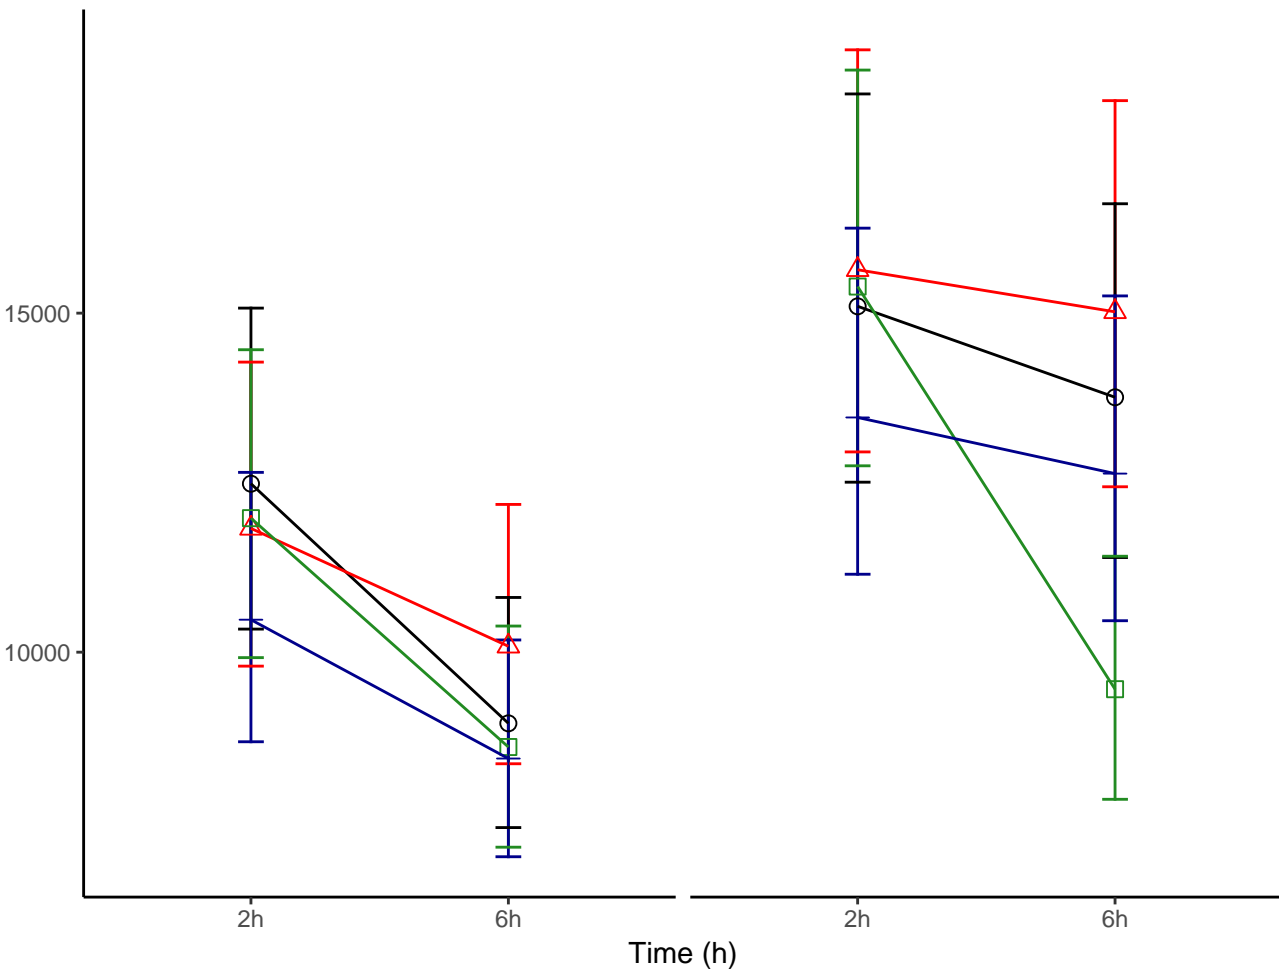

- SA564
- △ SA564-ΔhptRS
- SA564-ΔccpA
- + SA564-ΔhptRS/ccpA

# TPIS\_STAAM

TSB

TSB-dex S-426

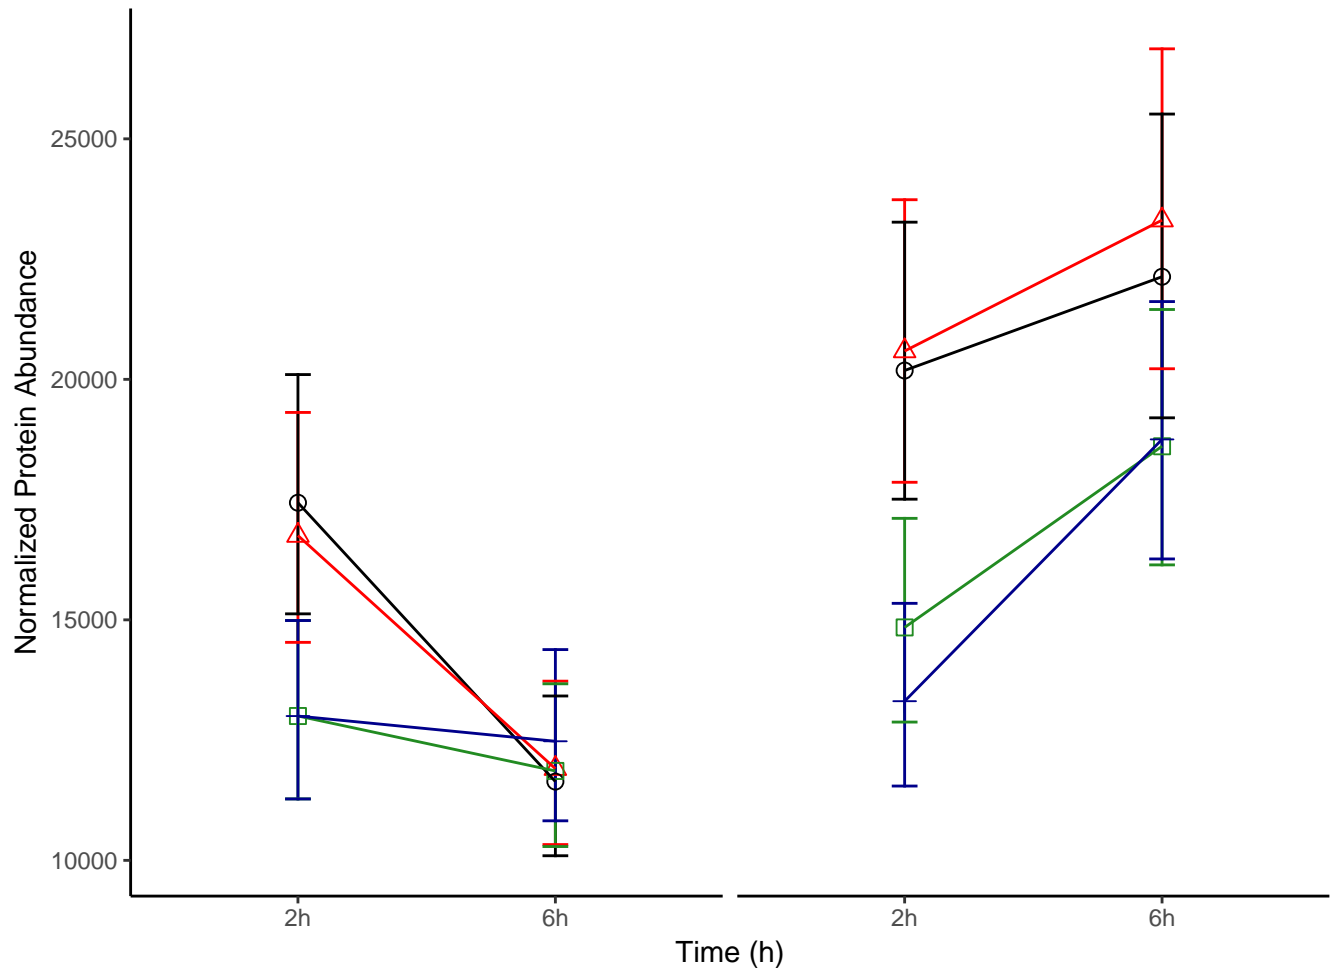

- SA564
- △ SA564- $\Delta$ *hptRS*
- SA564- $\Delta$ *ccpA*
- + SA564- $\Delta$ *hptRS/ccpA*

# TPX\_STAAM

TSB

TSB-dex S-427

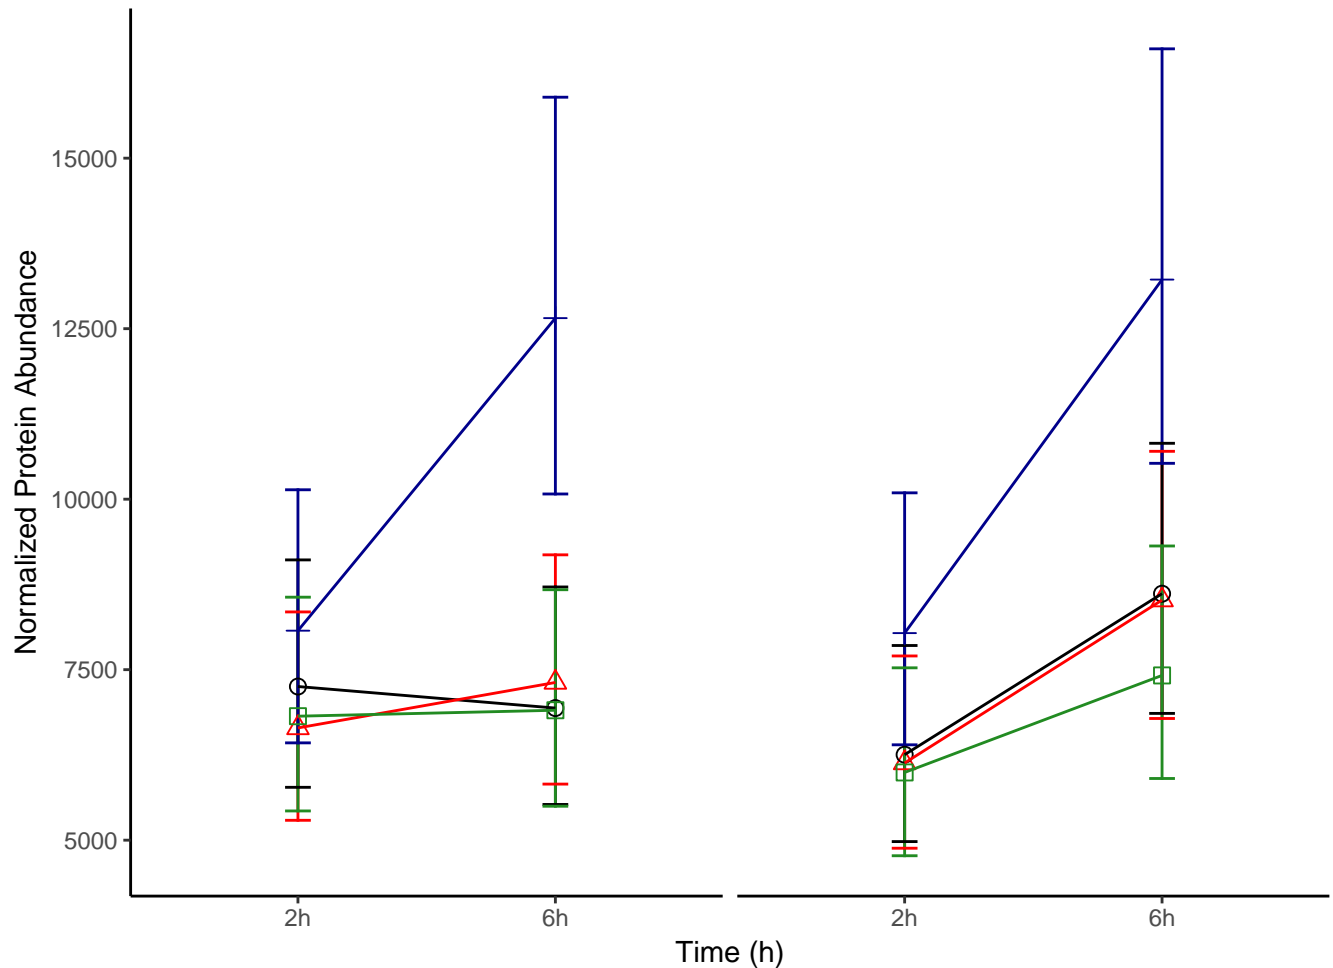

- SA564
- △ SA564- $\Delta$ *hptRS*
- SA564- $\Delta$ *ccpA*
- + SA564- $\Delta$ *hptRS/ccpA*

# TRAC\_STAAM

TSB

TSB-dex S-428

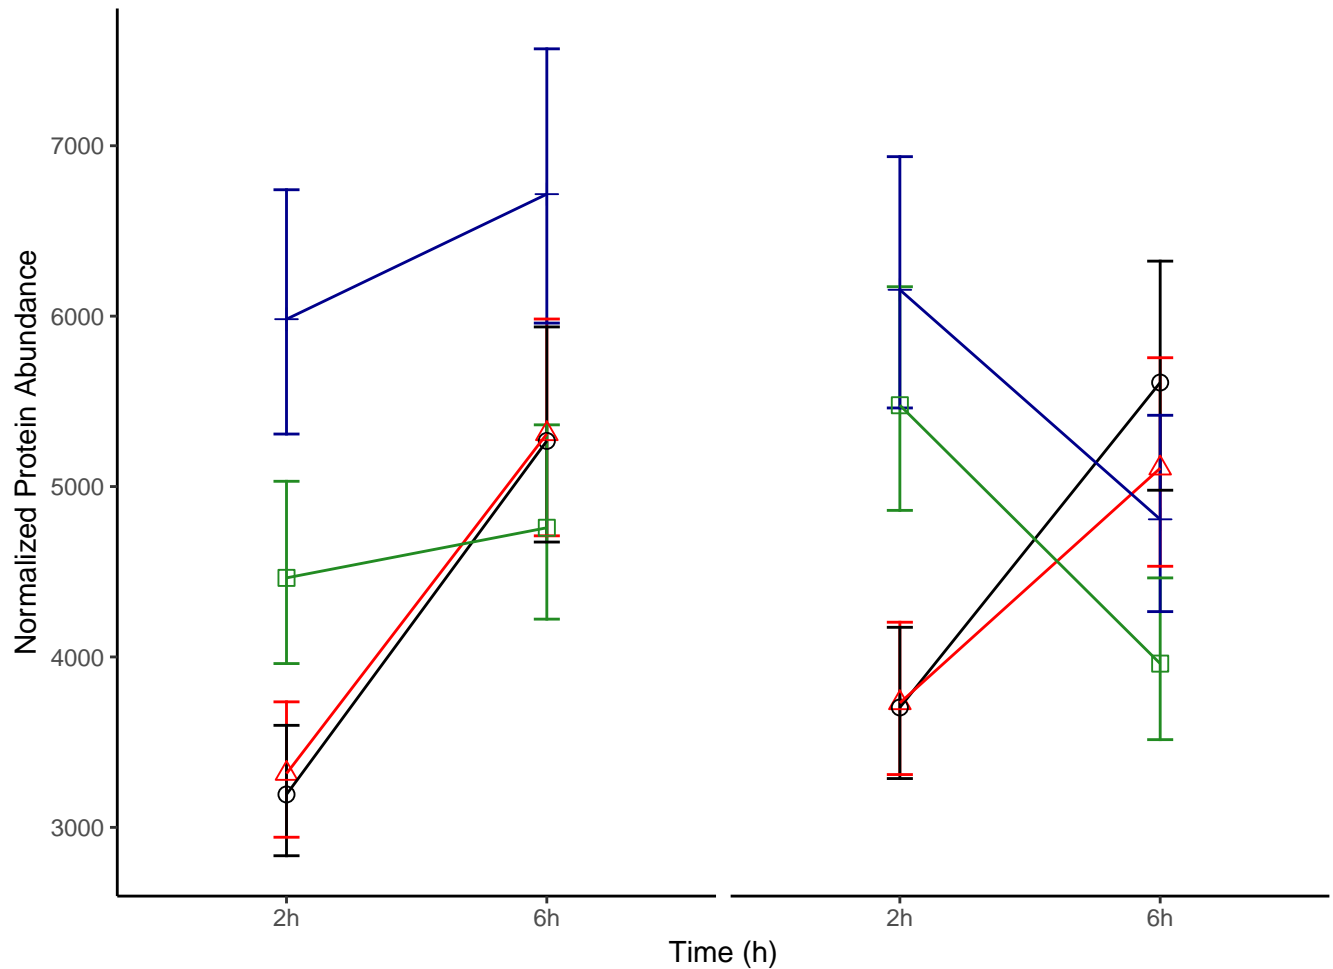

- SA564
- △ SA564- $\Delta$ *hptRS*
- SA564- $\Delta$ *ccpA*
- + SA564- $\Delta$ *hptRS/ccpA*

# TRAP\_STAAM

TSB

TSB-dex S-429

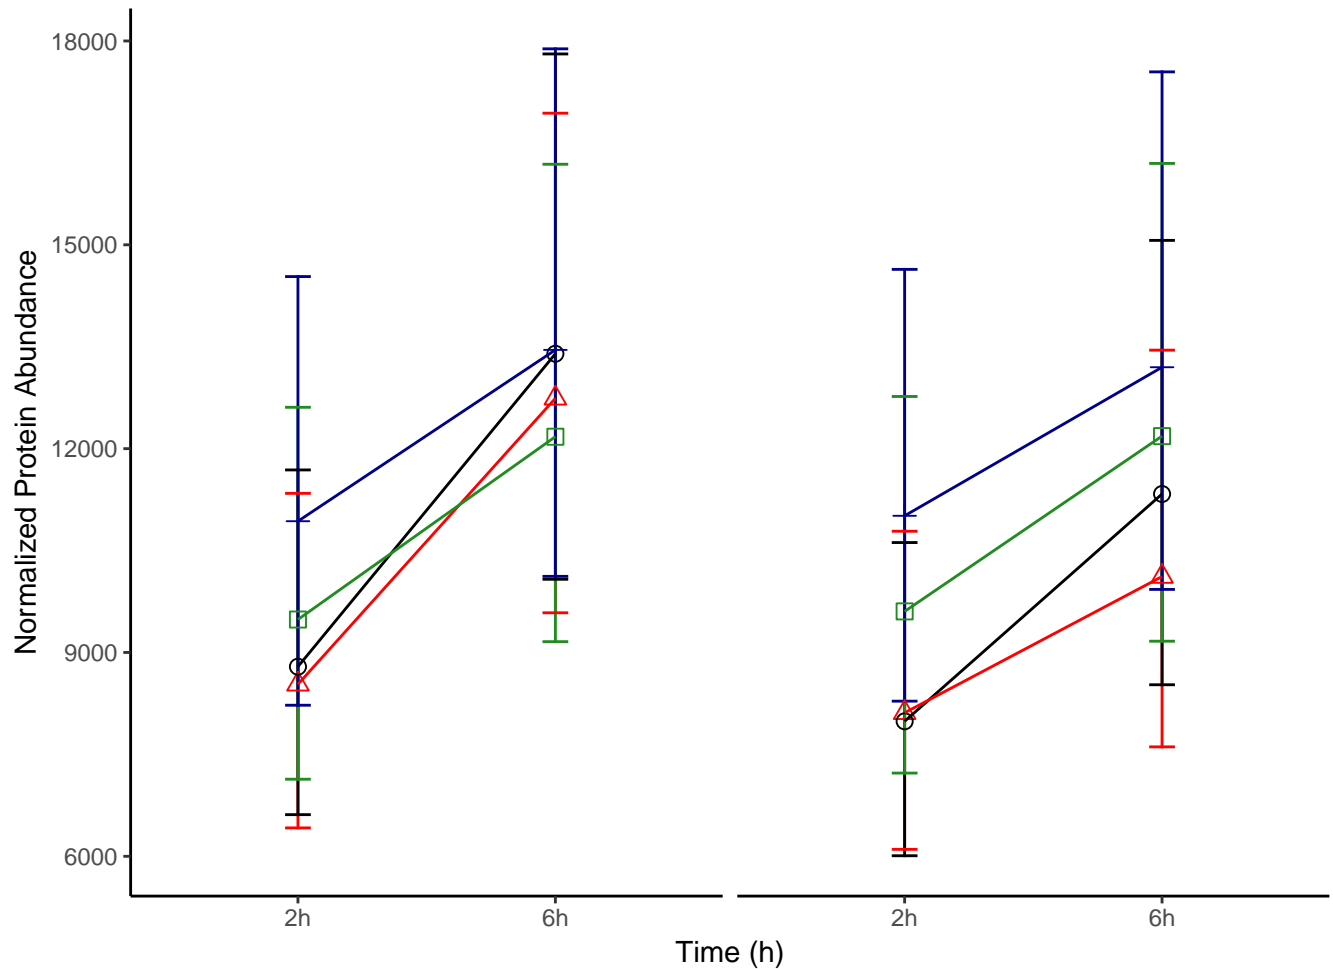

- SA564
- △ SA564-ΔhptRS
- SA564-ΔccpA
- + SA564-ΔhptRS/ccpA

# TRMB\_STAAM

TSB

TSB-dex S-430

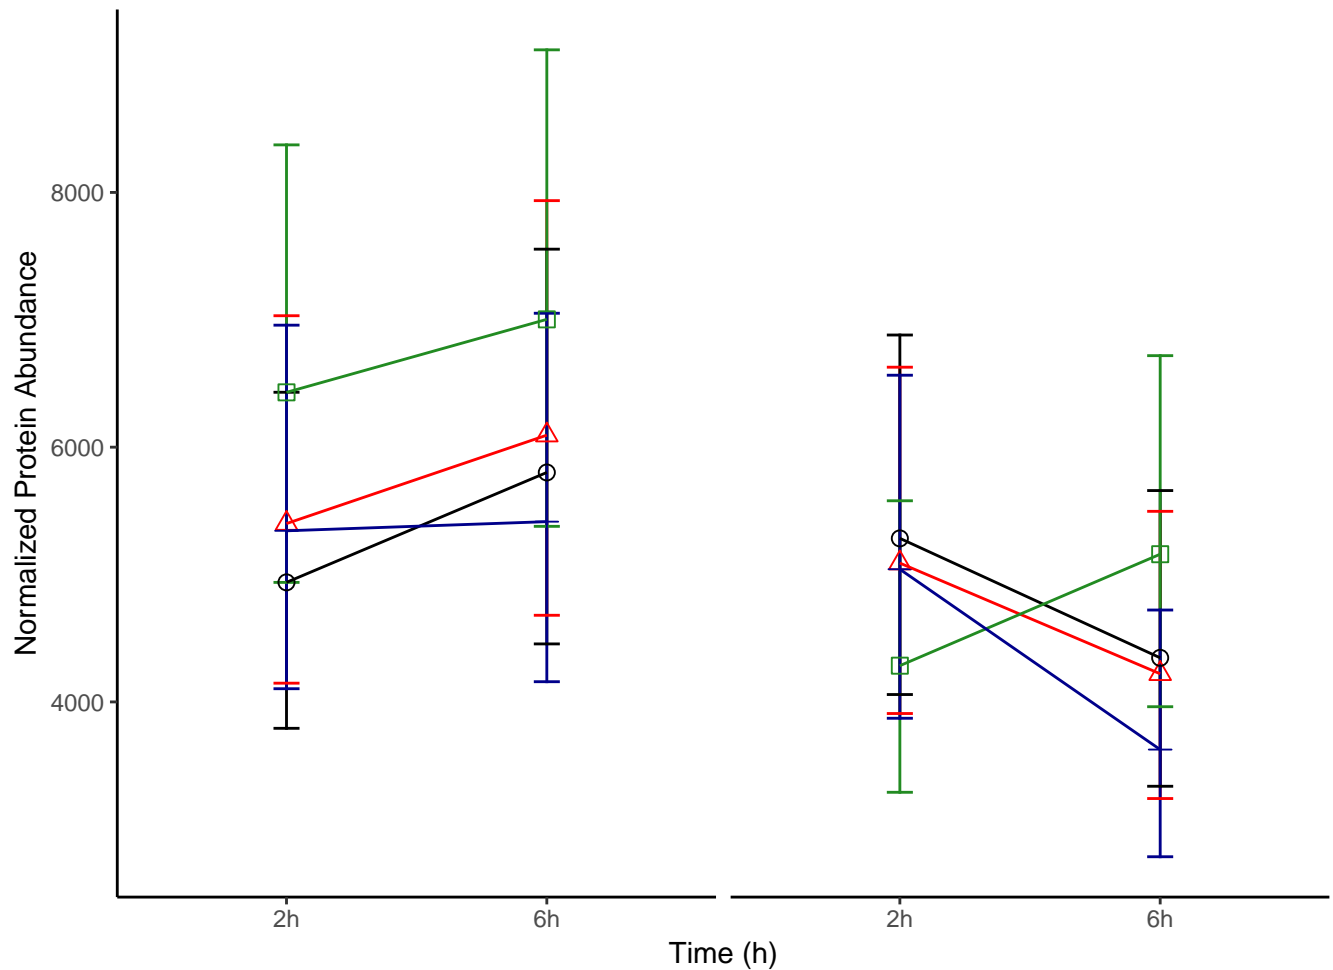

- SA564
- △ SA564- $\Delta$ *hptRS*
- SA564- $\Delta$ *ccpA*
- + SA564- $\Delta$ *hptRS/ccpA*

# TRMFO\_STAAM

TSB

TSB-dex S-431

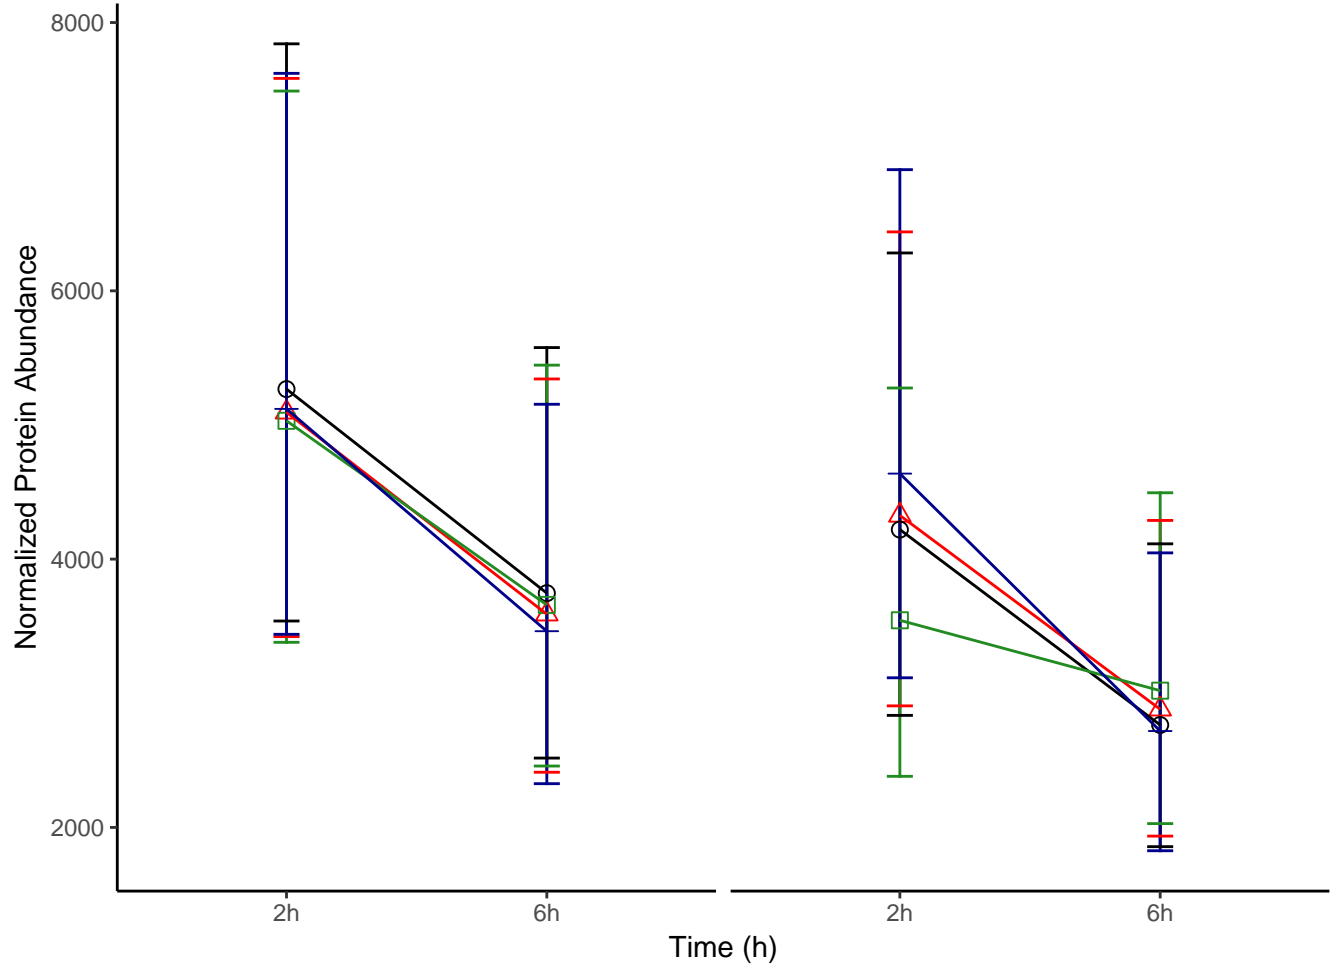

- SA564
- △ SA564- $\Delta hptRS$
- SA564- $\Delta ccpA$
- + SA564- $\Delta hptRS/ccpA$

# TRMHL\_STAAM

TSB

TSB-dex S-432

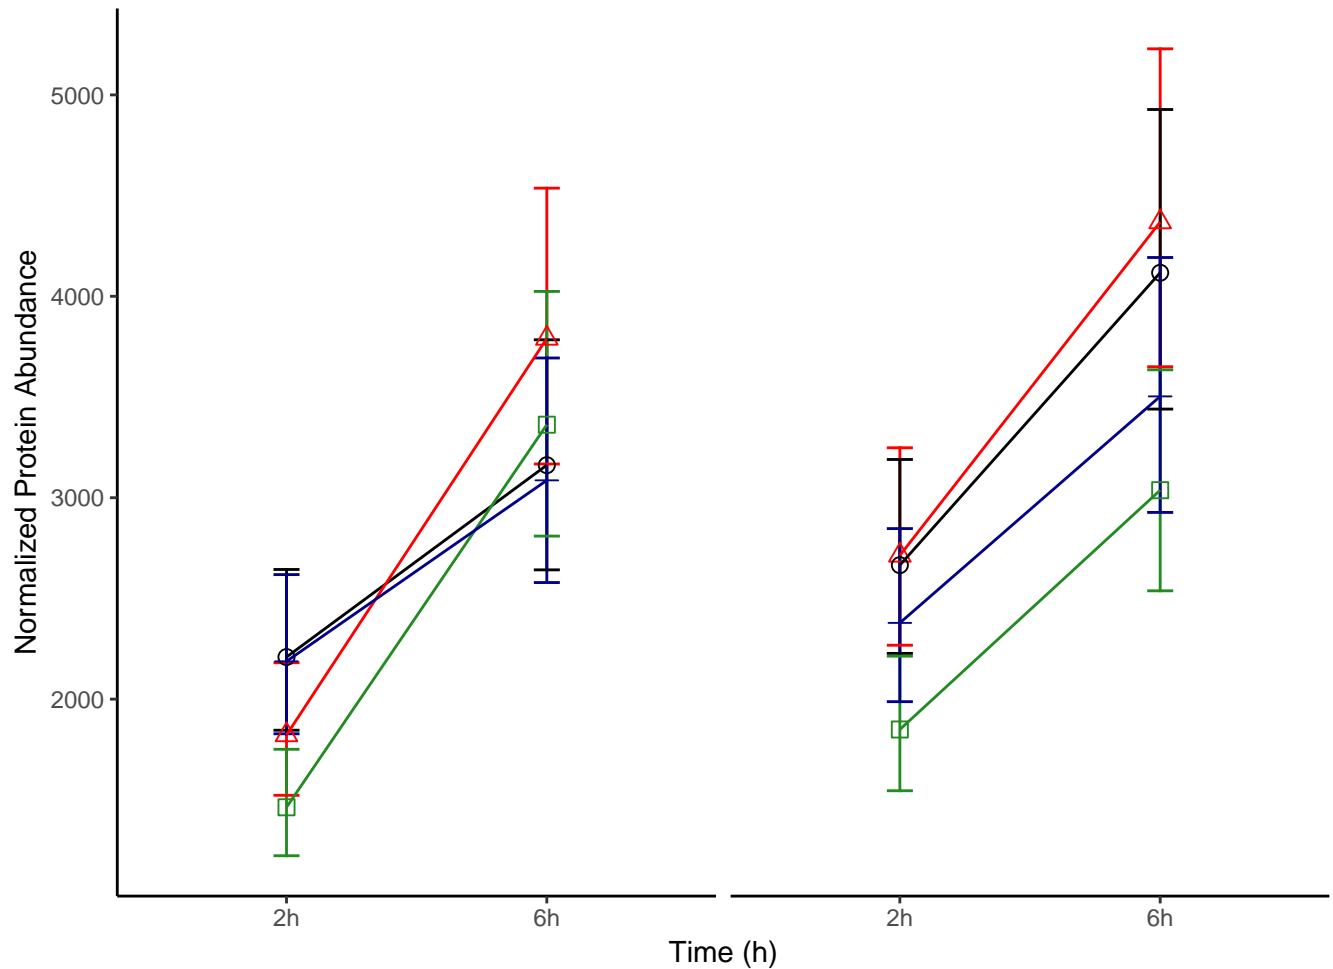

- SA564
- △ SA564- $\Delta$ *hptRS*
- SA564- $\Delta$ *ccpA*
- + SA564- $\Delta$ *hptRS/ccpA*



## TRPA\_STAAM

TSB

TSB-dex S-433

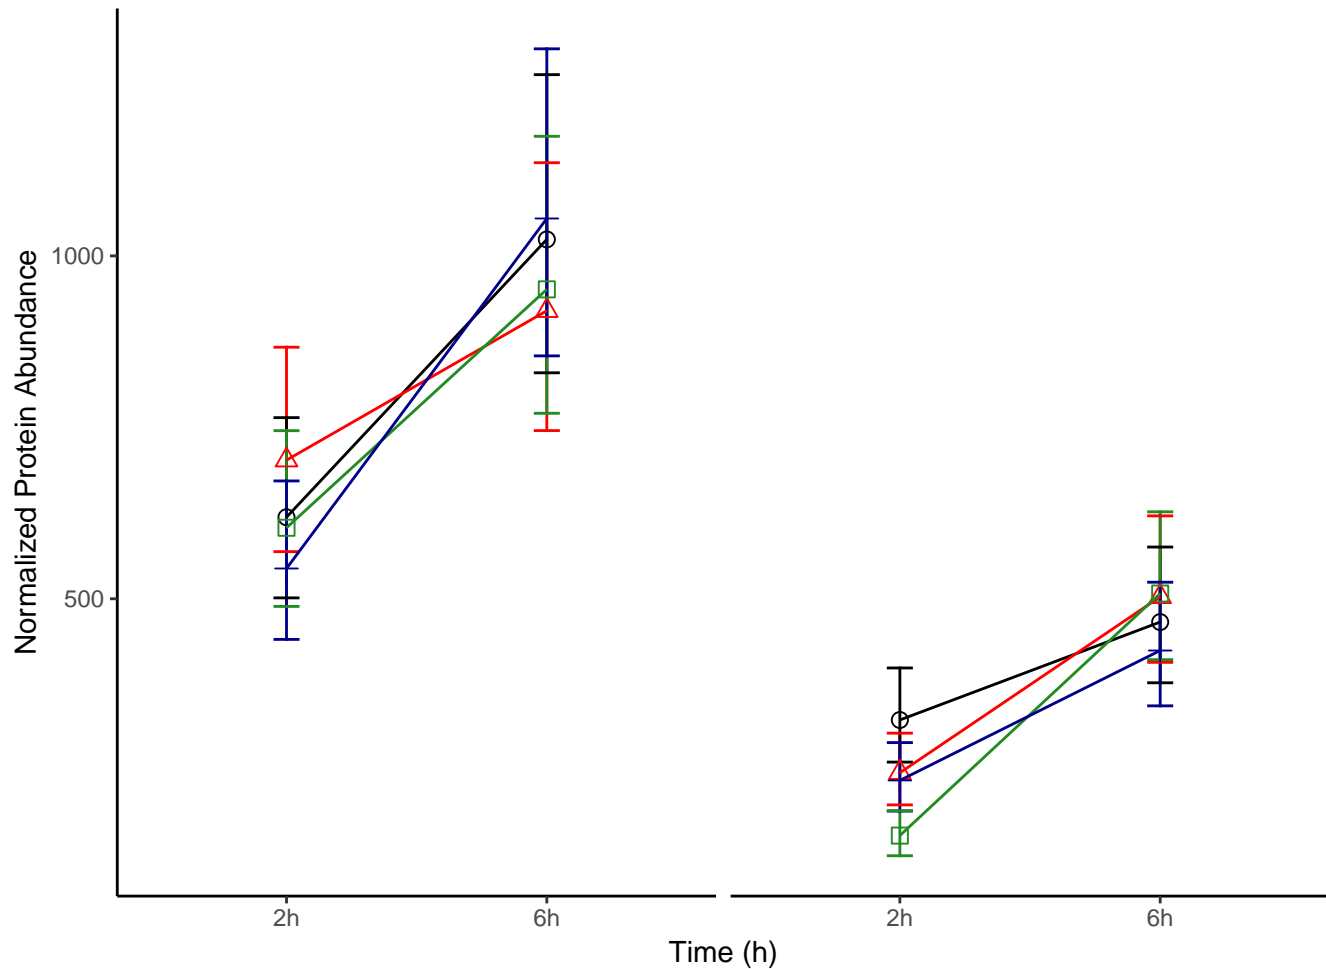

- SA564
- △ SA564- $\Delta$ *hptRS*
- SA564- $\Delta$ *ccpA*
- + SA564- $\Delta$ *hptRS/ccpA*

# TRPF\_STAAM

TSB

TSB-dex S-434

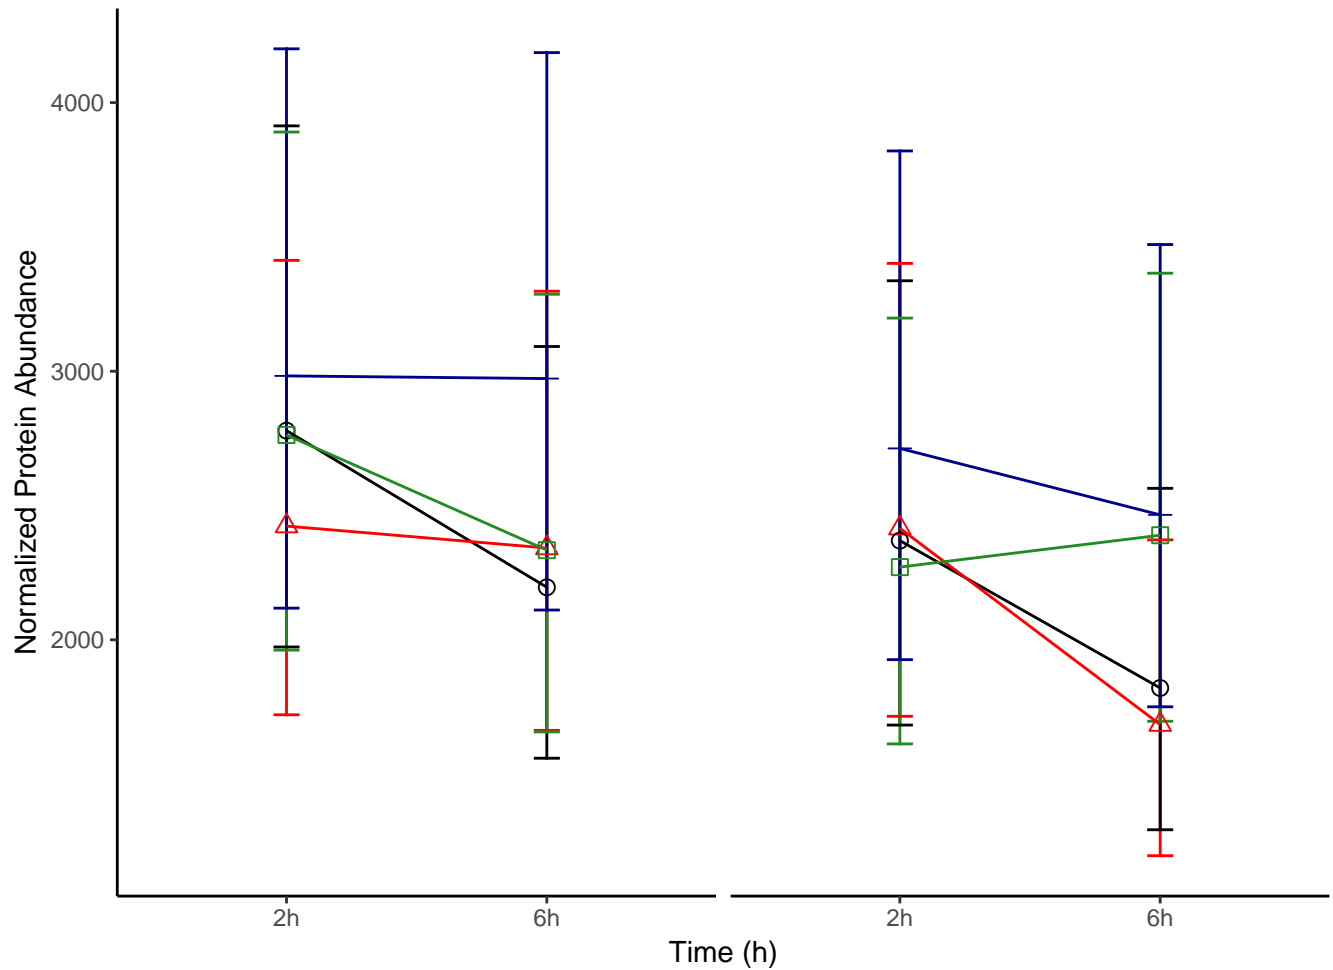

- SA564
- △ SA564- $\Delta$ *hptRS*
- SA564- $\Delta$ *ccpA*
- + SA564- $\Delta$ *hptRS/ccpA*

# TRUB\_STAAM

TSB

TSB-dex S-435

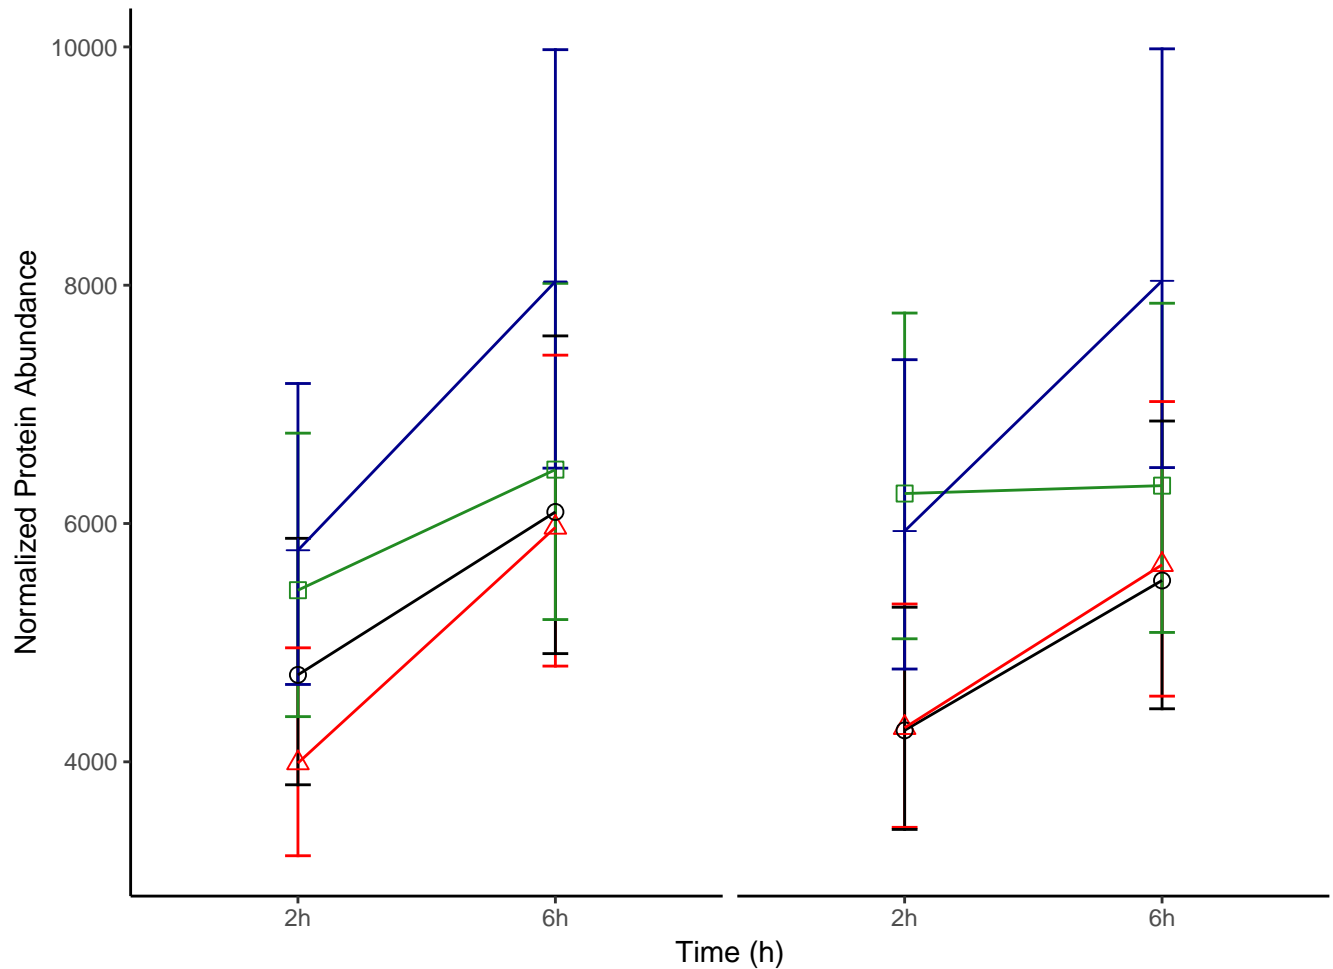

- SA564
- △ SA564- $\Delta$ *hptRS*
- SA564- $\Delta$ *ccpA*
- + SA564- $\Delta$ *hptRS/ccpA*

# TRXB\_STAAM

TSB

TSB-dex S-436

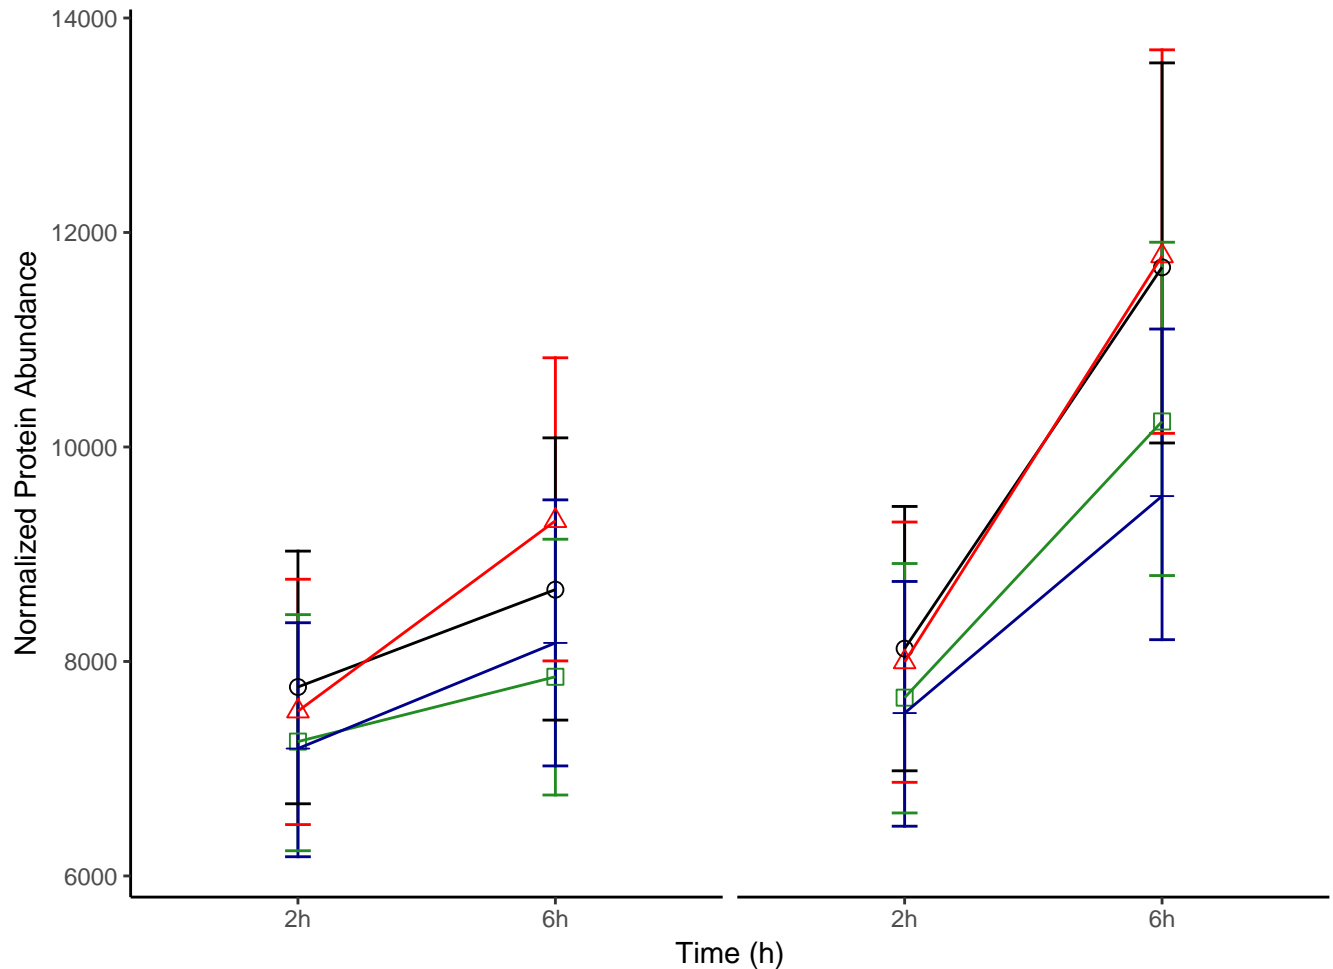

- SA564
- △ SA564- $\Delta$ *hptRS*
- SA564- $\Delta$ *ccpA*
- + SA564- $\Delta$ *hptRS/ccpA*

# TSAD\_STAAM

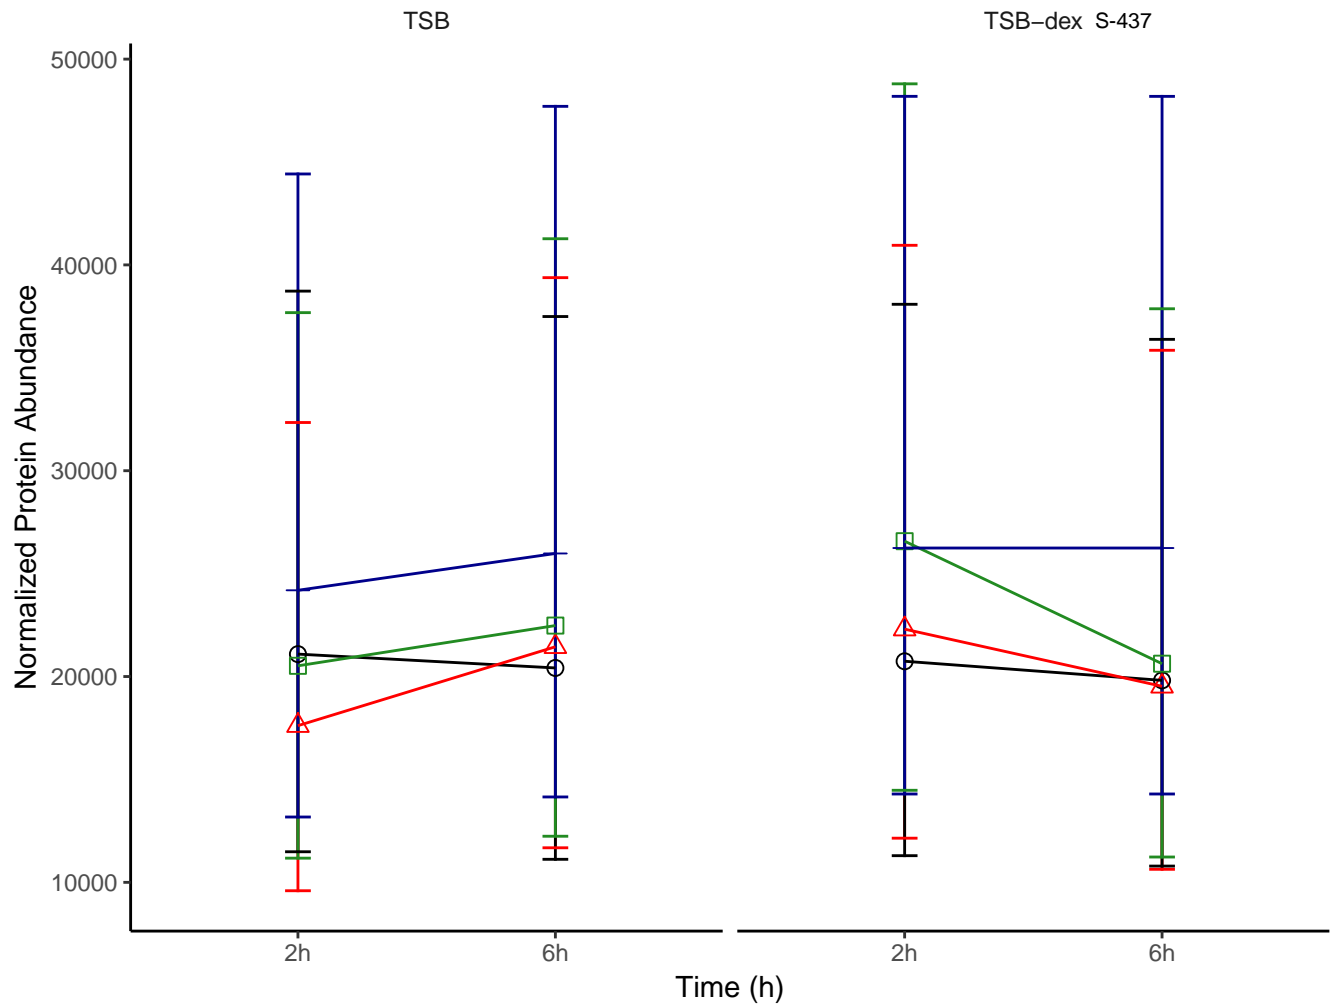

- SA564
- △ SA564- $\Delta$ hptRS
- SA564- $\Delta$ ccpA
- + SA564- $\Delta$ hptRS/ccpA

# TYRA\_STAAM

TSB

TSB-dex S-438

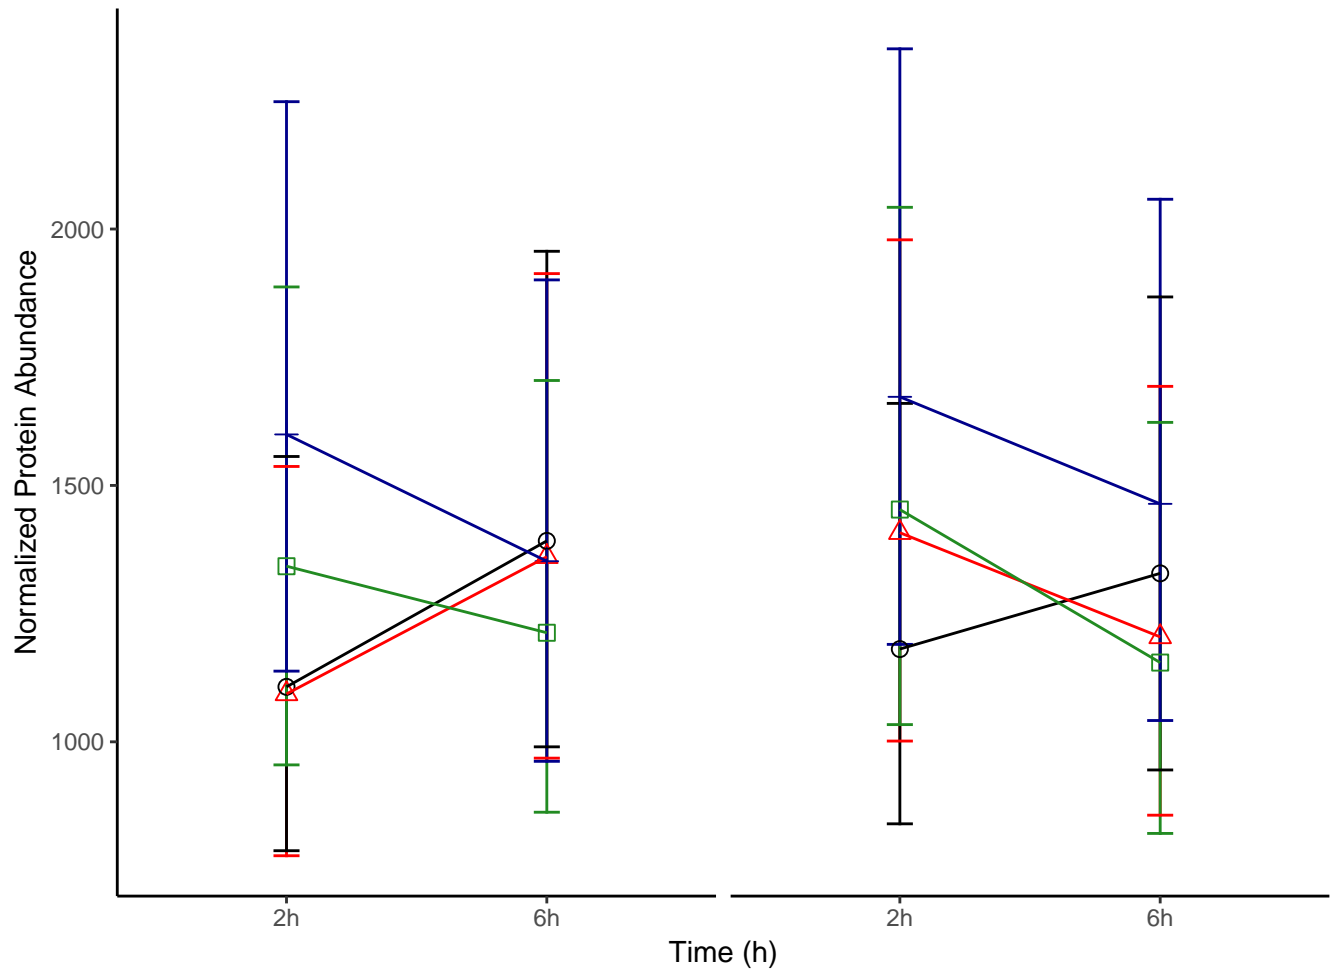

- SA564
- △ SA564- $\Delta$ *hptRS*
- SA564- $\Delta$ *ccpA*
- + SA564- $\Delta$ *hptRS/ccpA*

# TYSY\_STAAM

TSB

TSB-dex S-439

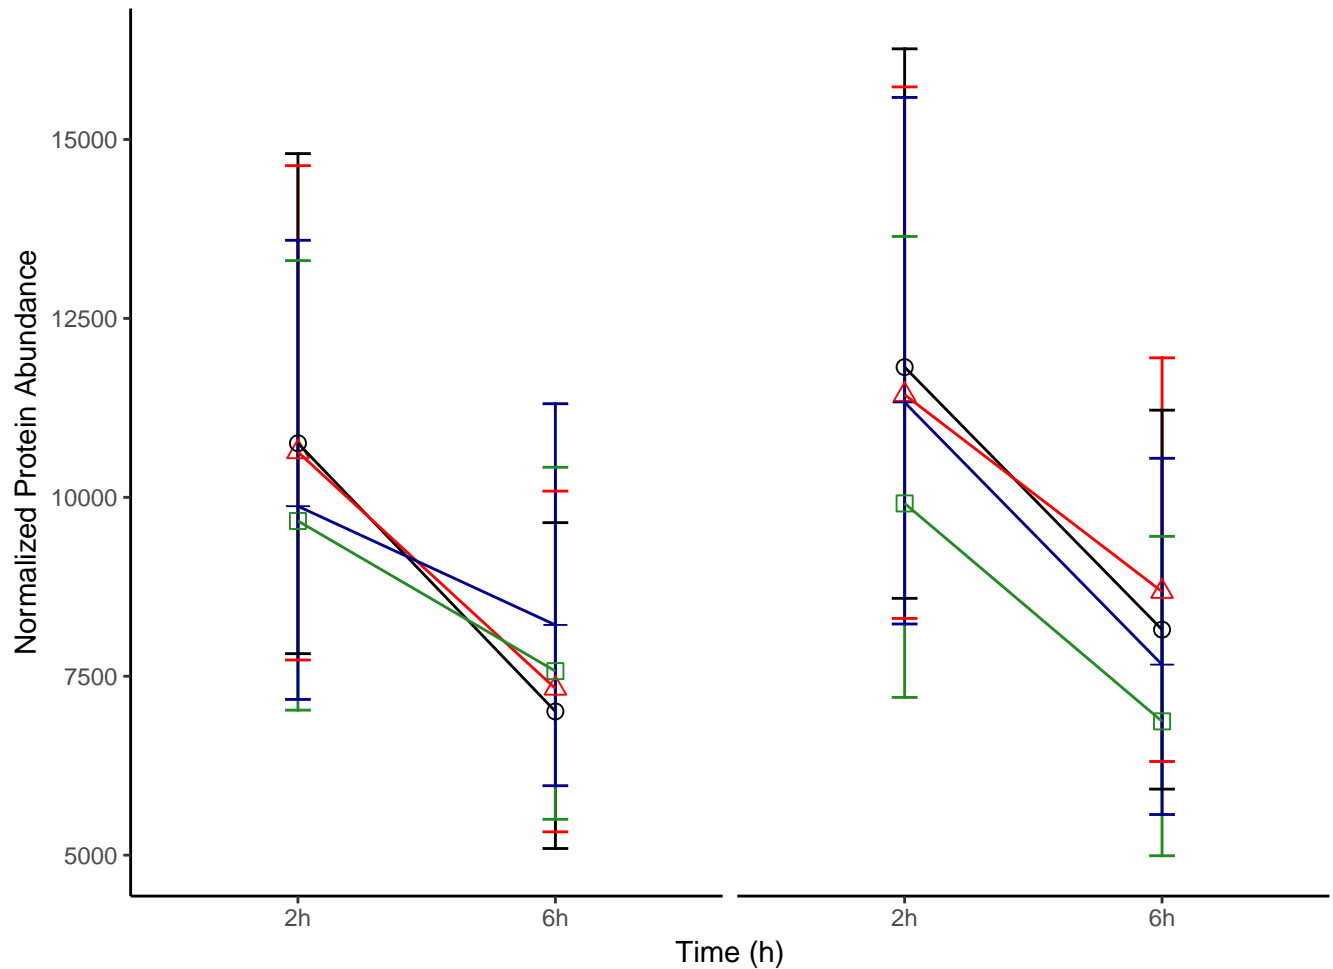

- SA564
- △ SA564-Δ*hptRS*
- SA564-Δ*ccpA*
- + SA564-Δ*hptRS/ccpA*

# UNG\_STAAM

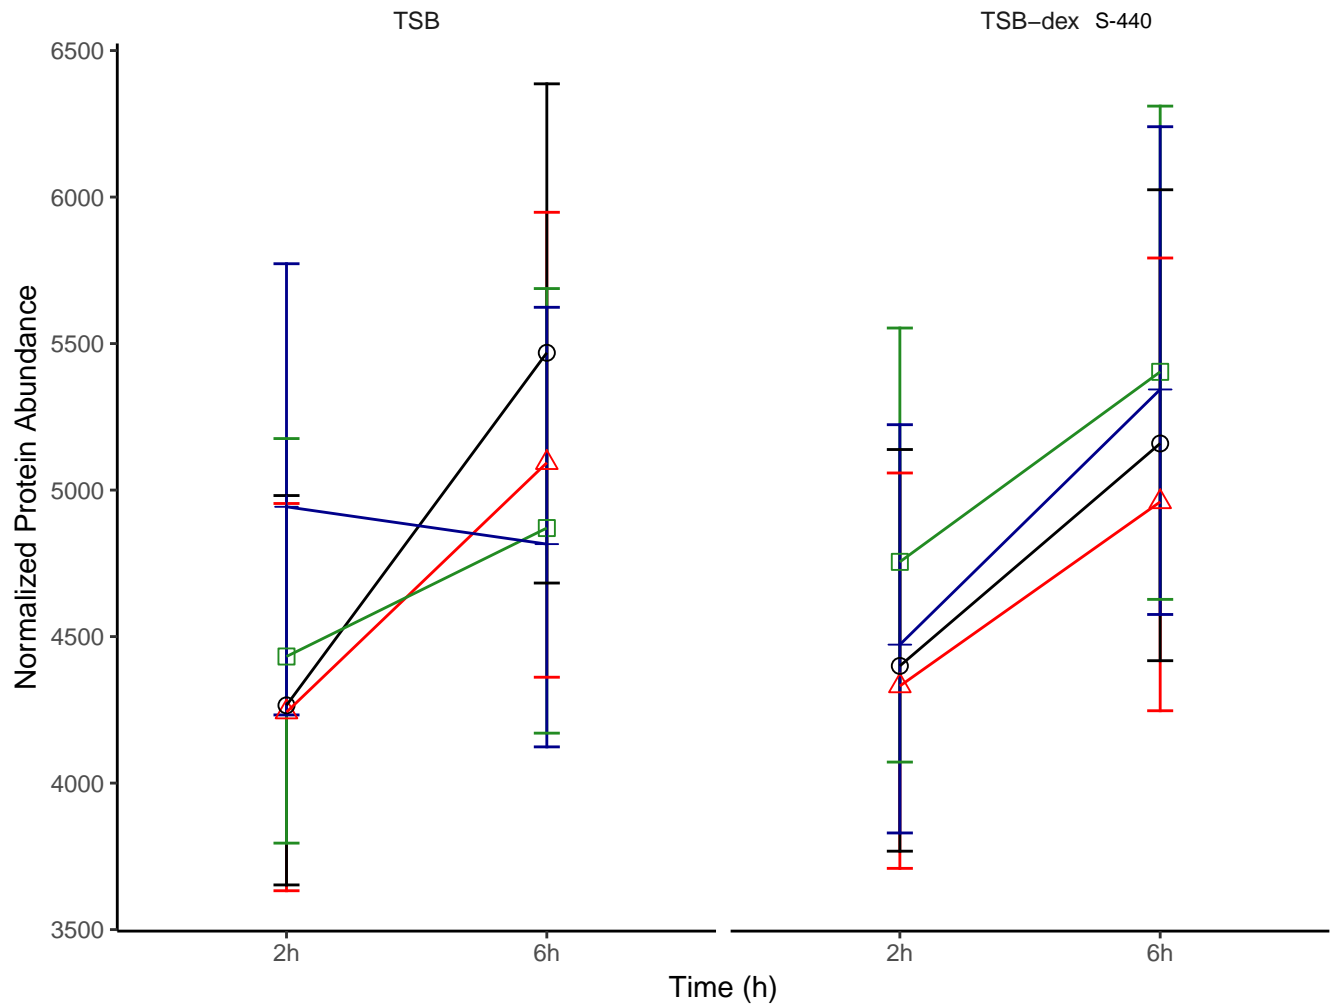

- SA564
- △ SA564- $\Delta$ hptRS
- SA564- $\Delta$ ccpA
- + SA564- $\Delta$ hptRS/ccpA



# UP355\_STAAM

TSB

TSB-dex S-441

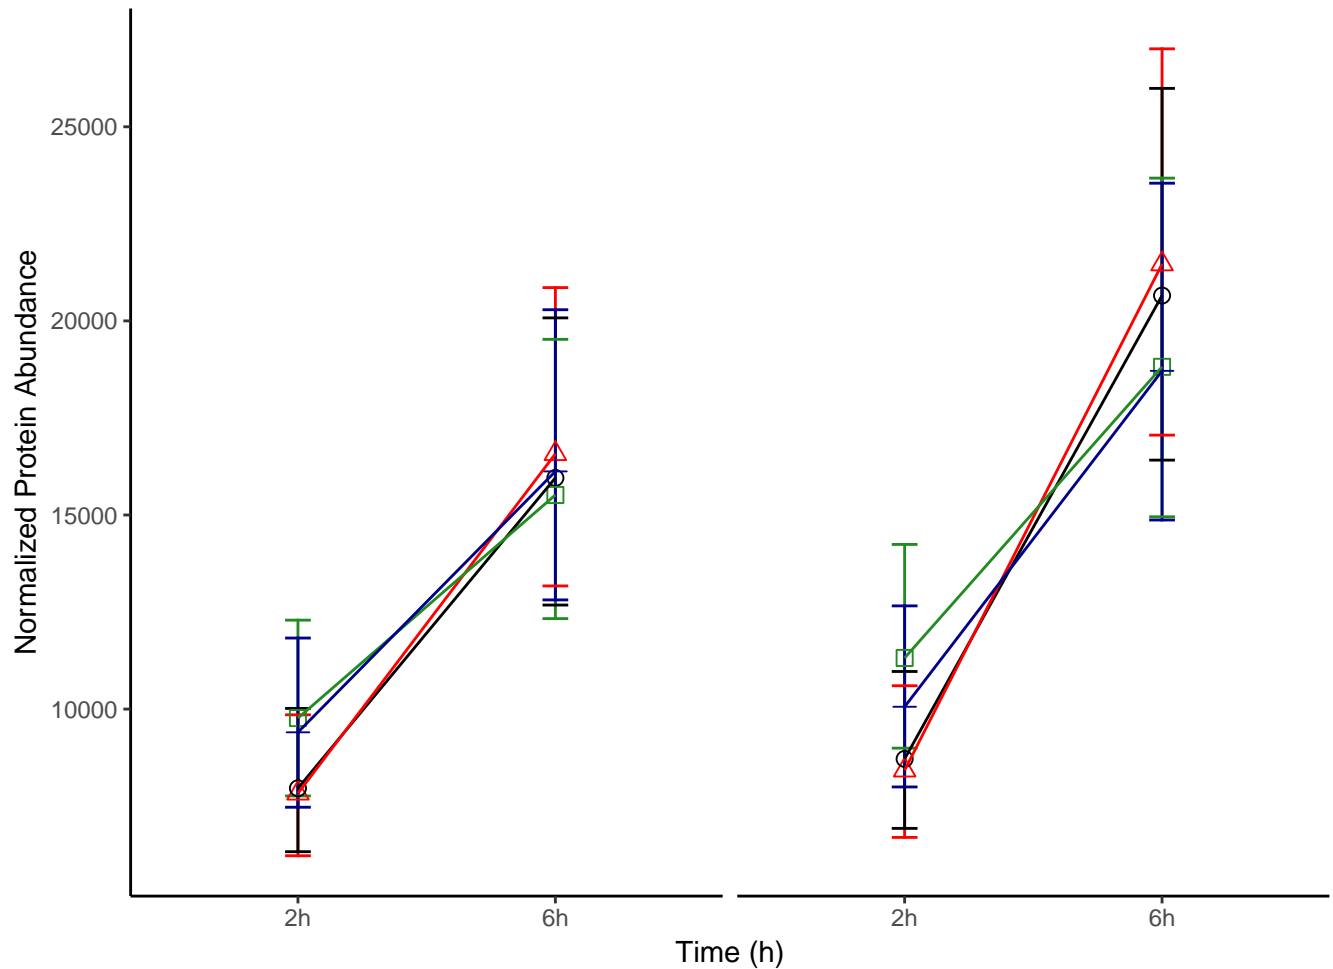

- SA564
- △ SA564-ΔhptRS
- SA564-ΔccpA
- + SA564-ΔhptRS/ccpA

# UPP\_STAAM

TSB

TSB-dex S-442

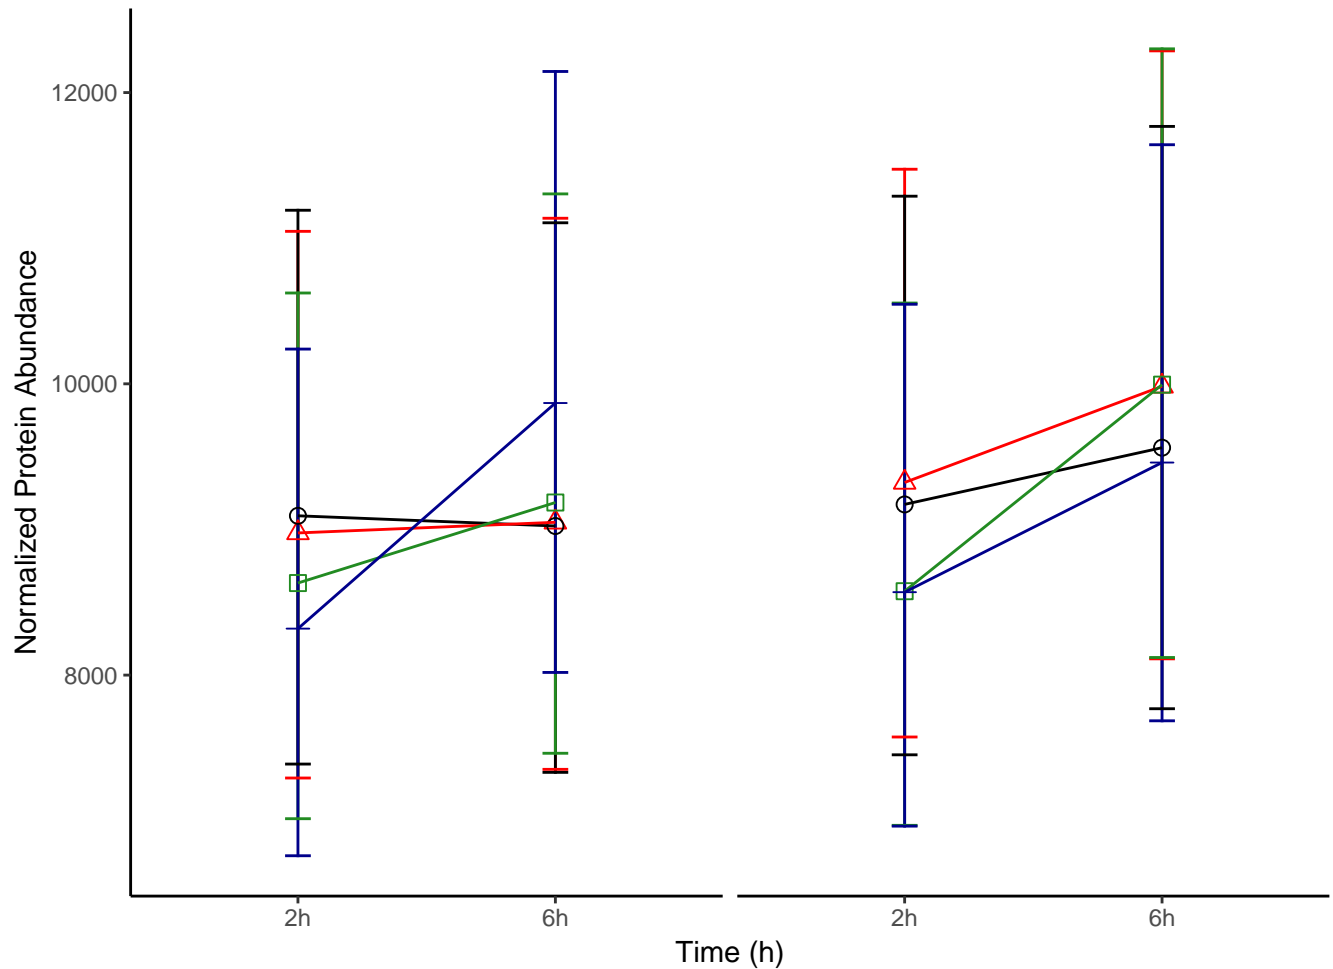

- SA564
- △ SA564- $\Delta$ hptRS
- SA564- $\Delta$ ccpA
- + SA564- $\Delta$ hptRS/ccpA

# UREE\_STAAM

TSB

TSB-dex S-443

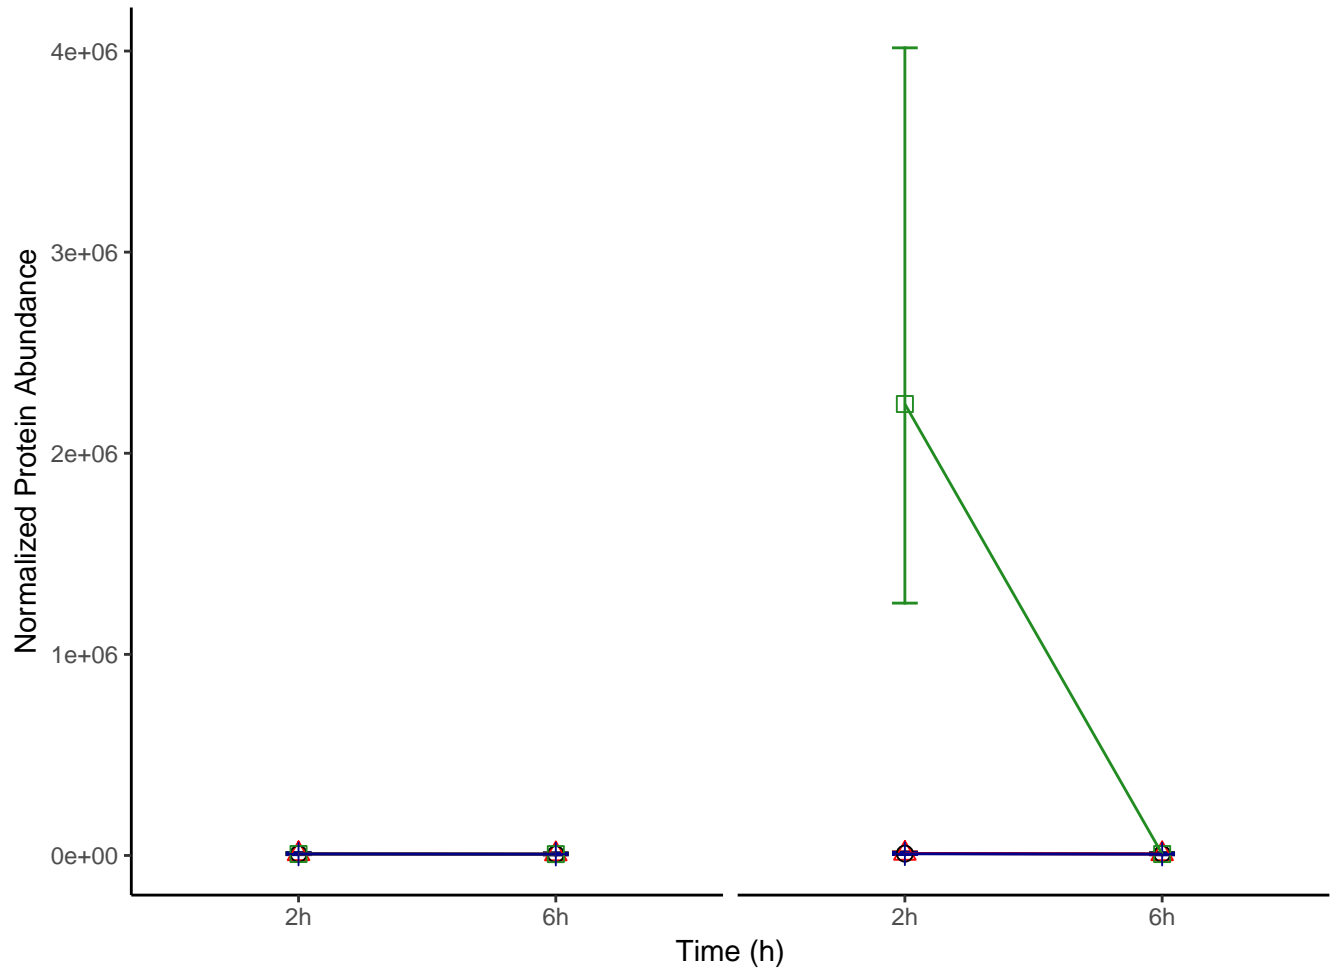

- SA564
- △ SA564- $\Delta$ *hptRS*
- SA564- $\Delta$ *ccpA*
- + SA564- $\Delta$ *hptRS/ccpA*

# UREG\_STAAM

TSB

TSB-dex S-444

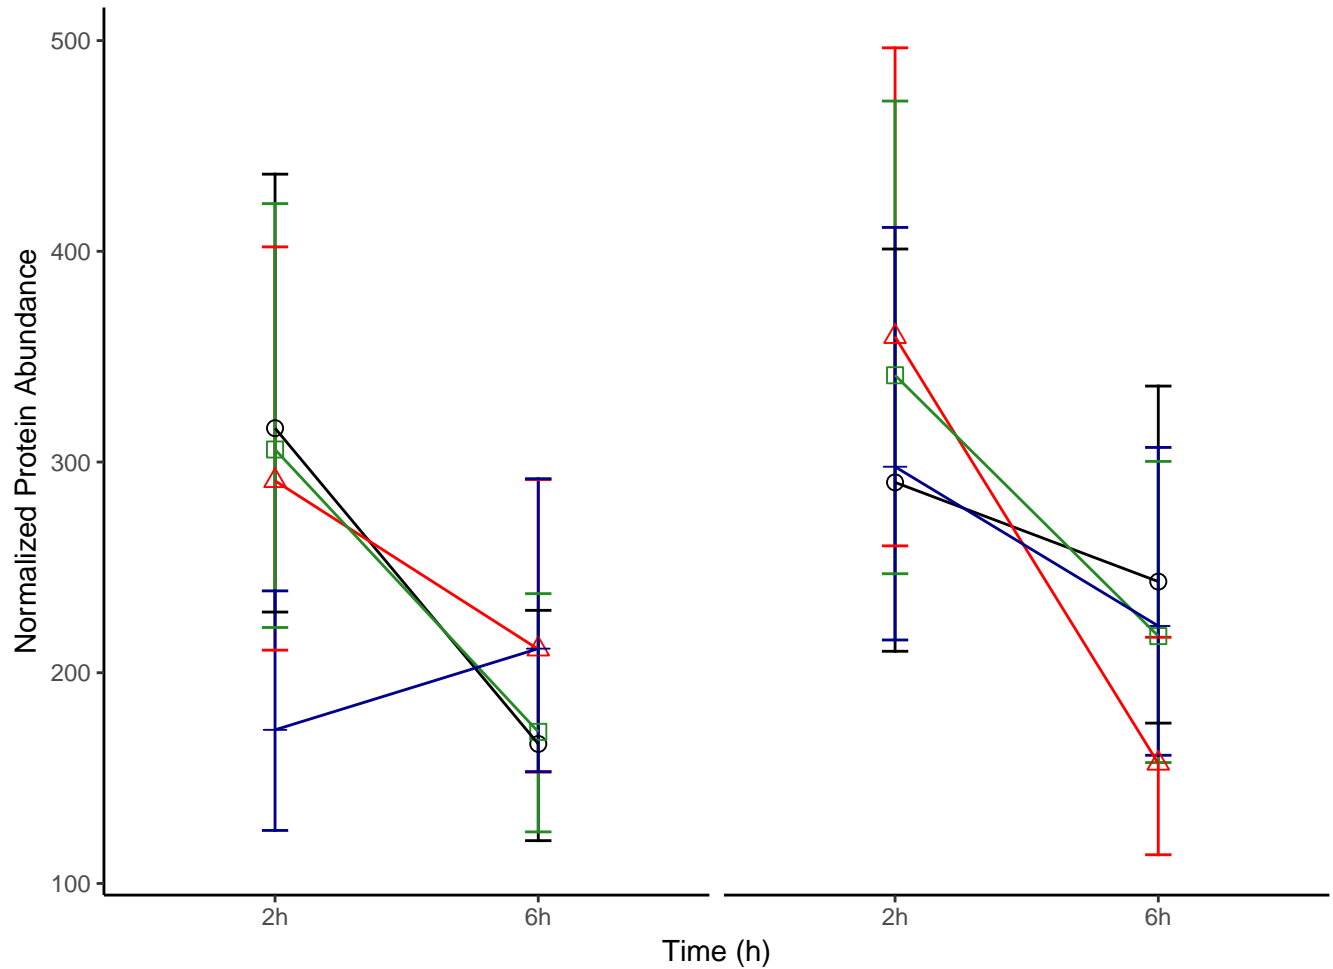

- SA564
- △ SA564- $\Delta$ *hptRS*
- SA564- $\Delta$ *ccpA*
- + SA564- $\Delta$ *hptRS/ccpA*

# URK\_STAAM

TSB

TSB-dex S-445

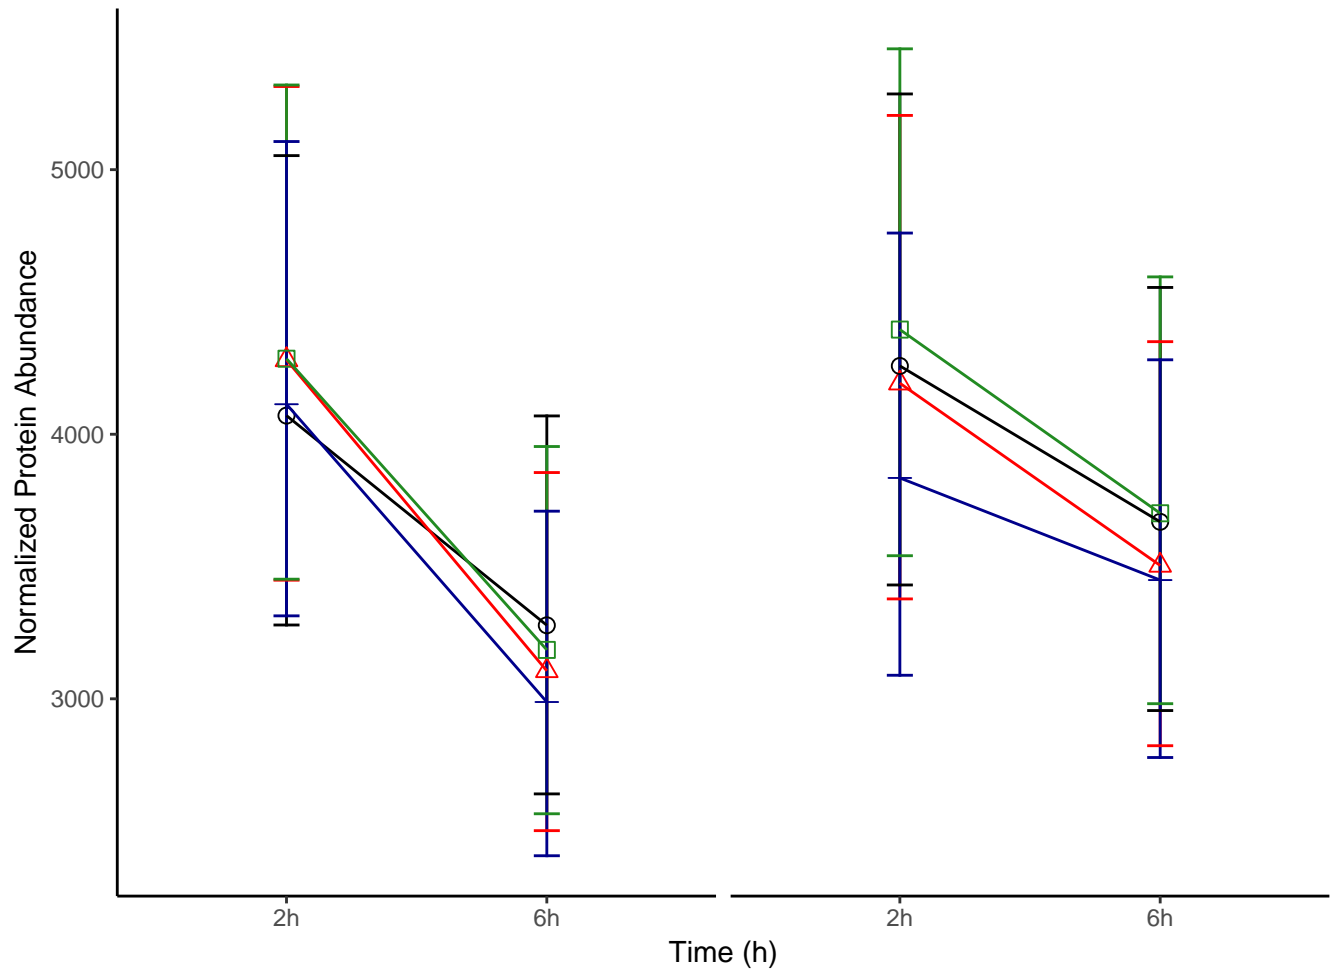

- SA564
- △ SA564- $\Delta hptRS$
- SA564- $\Delta ccpA$
- + SA564- $\Delta hptRS/ccpA$

# URTF\_STAAM

TSB

TSB-dex S-446

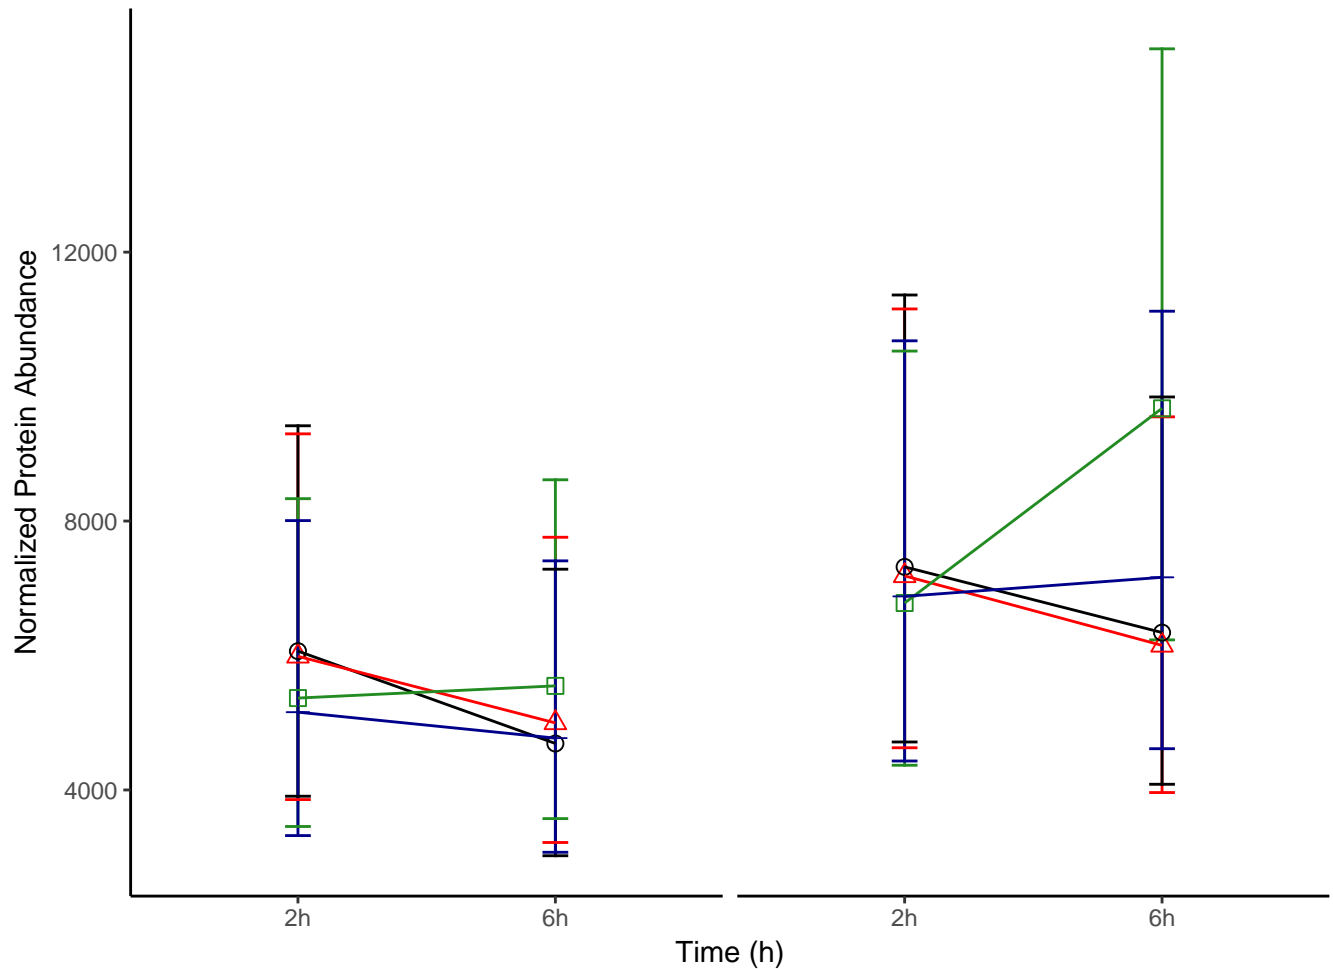

- SA564
- △ SA564- $\Delta$ hptRS
- SA564- $\Delta$ ccpA
- + SA564- $\Delta$ hptRS/ccpA

# UVRA\_STAAM

TSB

TSB-dex S-447

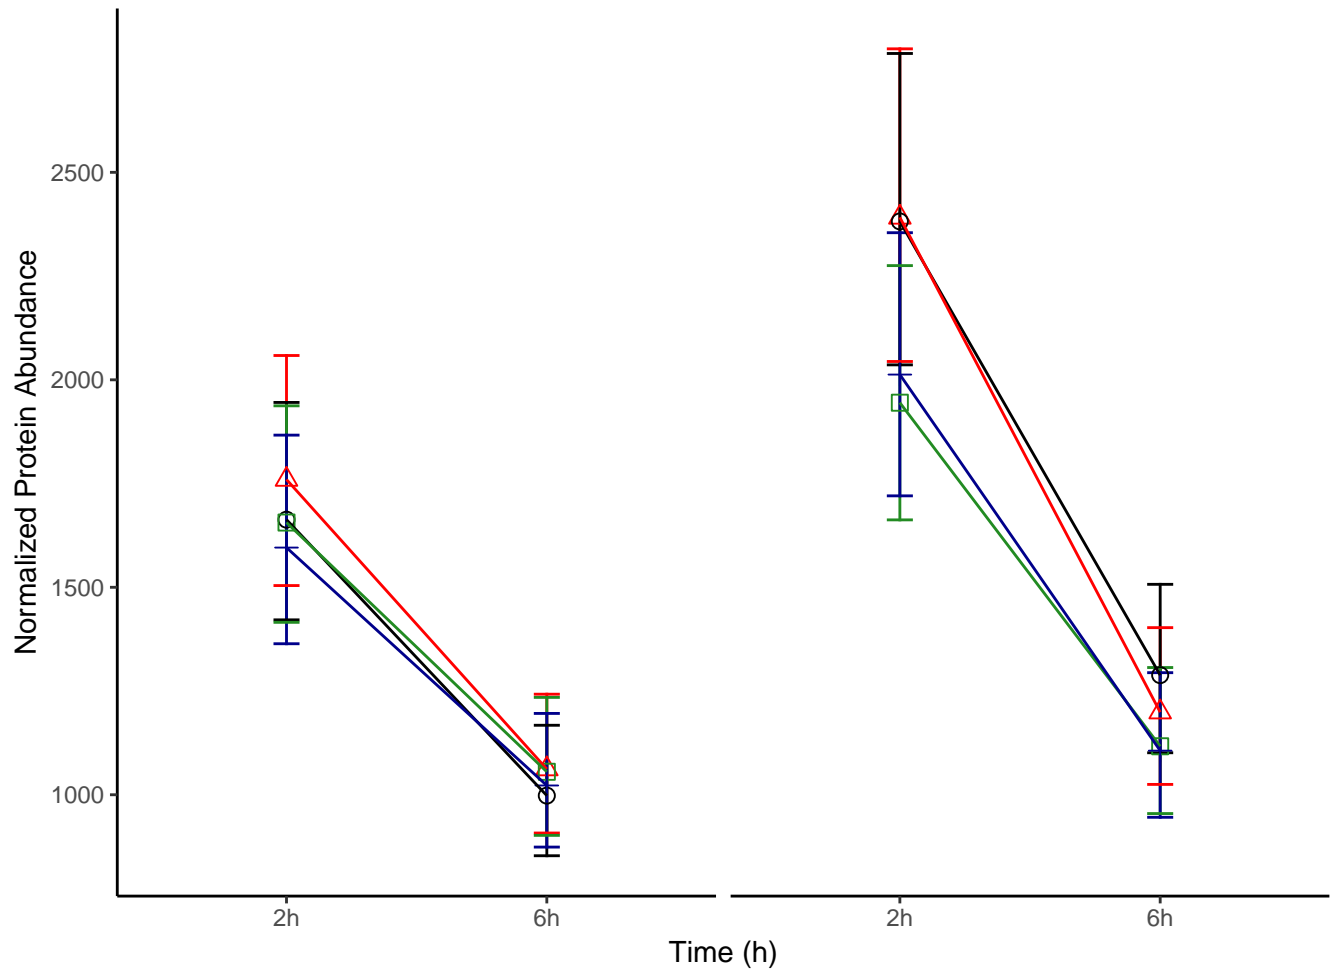

- SA564
- △ SA564- $\Delta$ *hptRS*
- SA564- $\Delta$ *ccpA*
- + SA564- $\Delta$ *hptRS/ccpA*

# VRAC\_STAAM

TSB

TSB-dex S-448

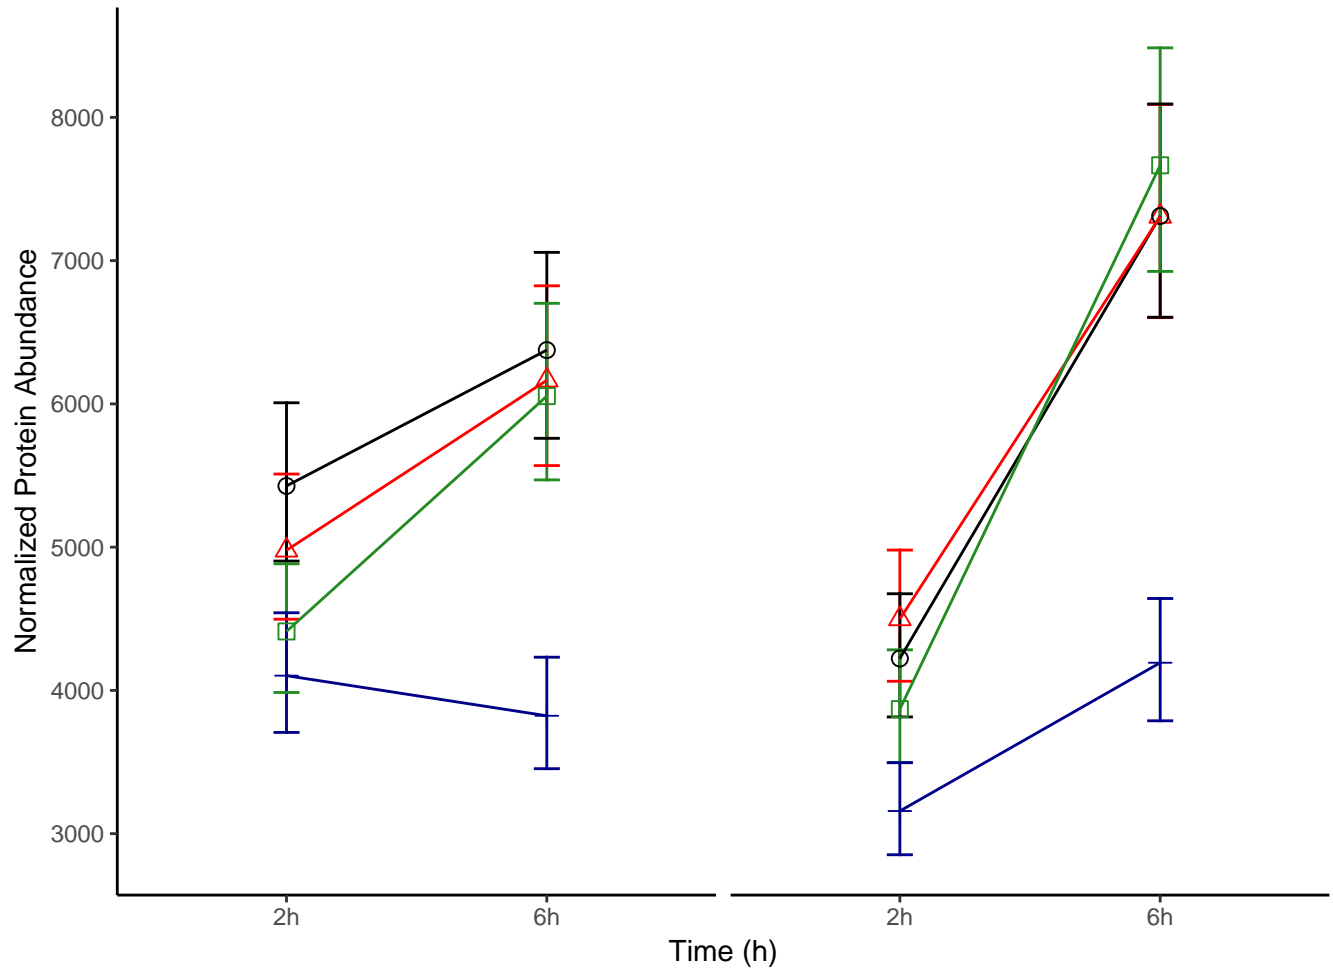

- SA564
- △ SA564-ΔhptRS
- SA564-ΔccpA
- + SA564-ΔhptRS/ccpA



# VRAR\_STAAM

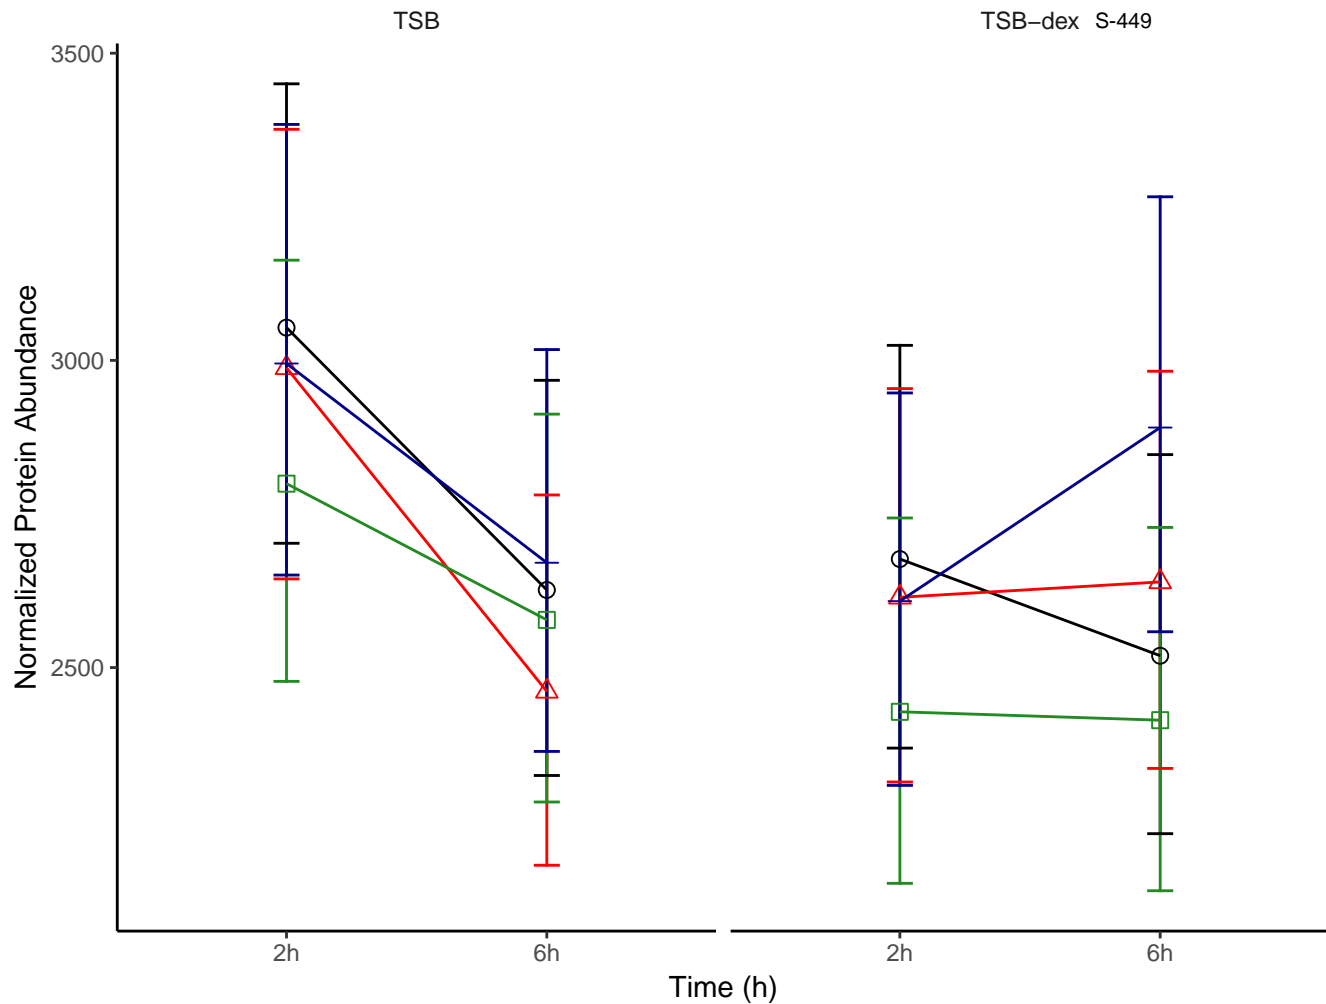

- SA564
- △ SA564-ΔhptRS
- SA564-ΔccpA
- + SA564-ΔhptRS/ccpA

# WALK\_STAAM

TSB

TSB-dex S-450

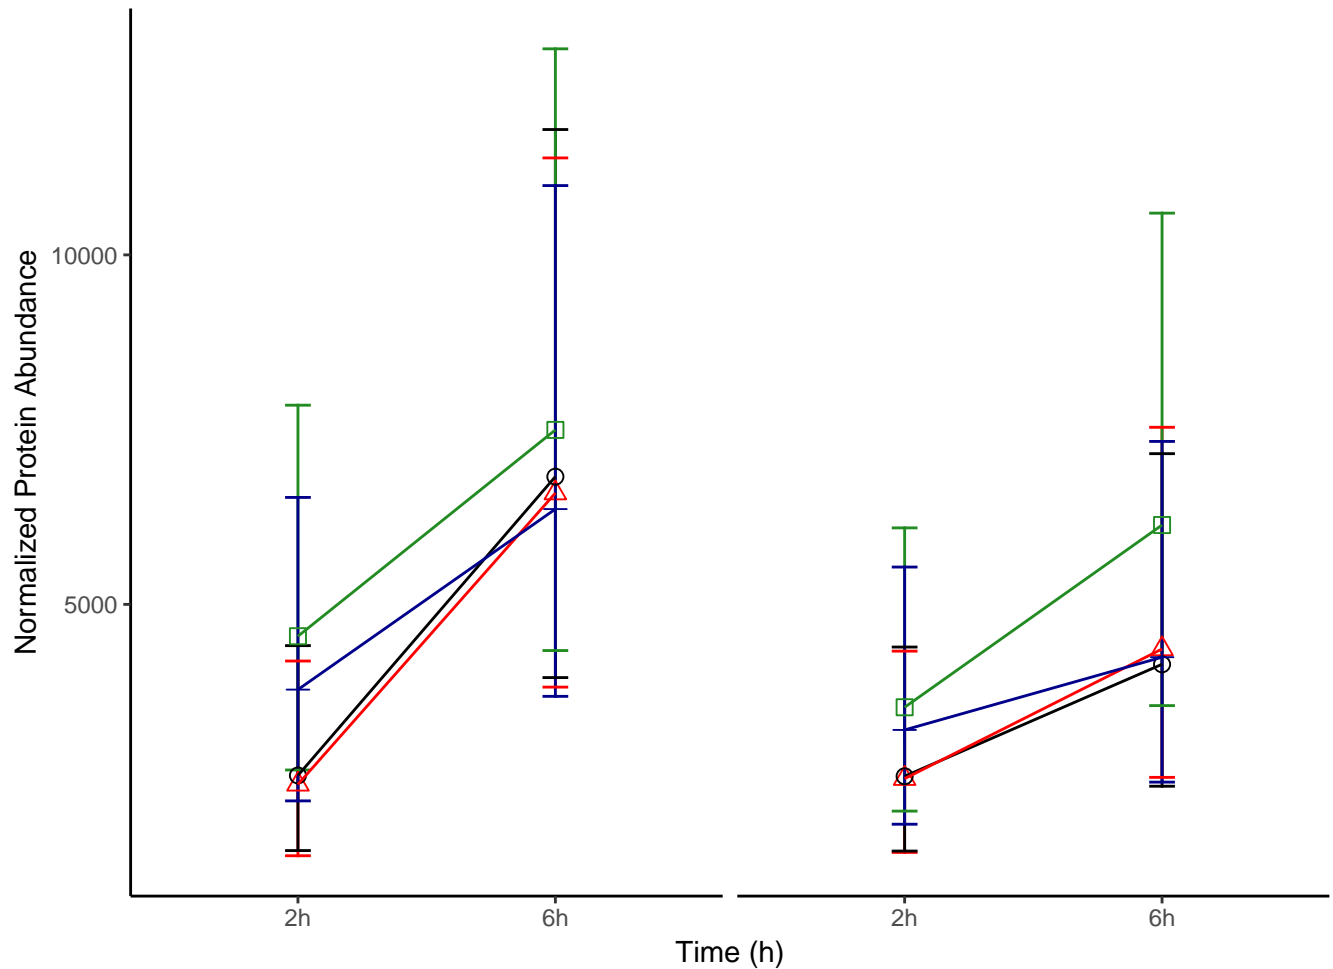

- SA564
- △ SA564-ΔhptRS
- SA564-ΔccpA
- + SA564-ΔhptRS/ccpA

# WALR\_STAAM

TSB

TSB-dex S-451

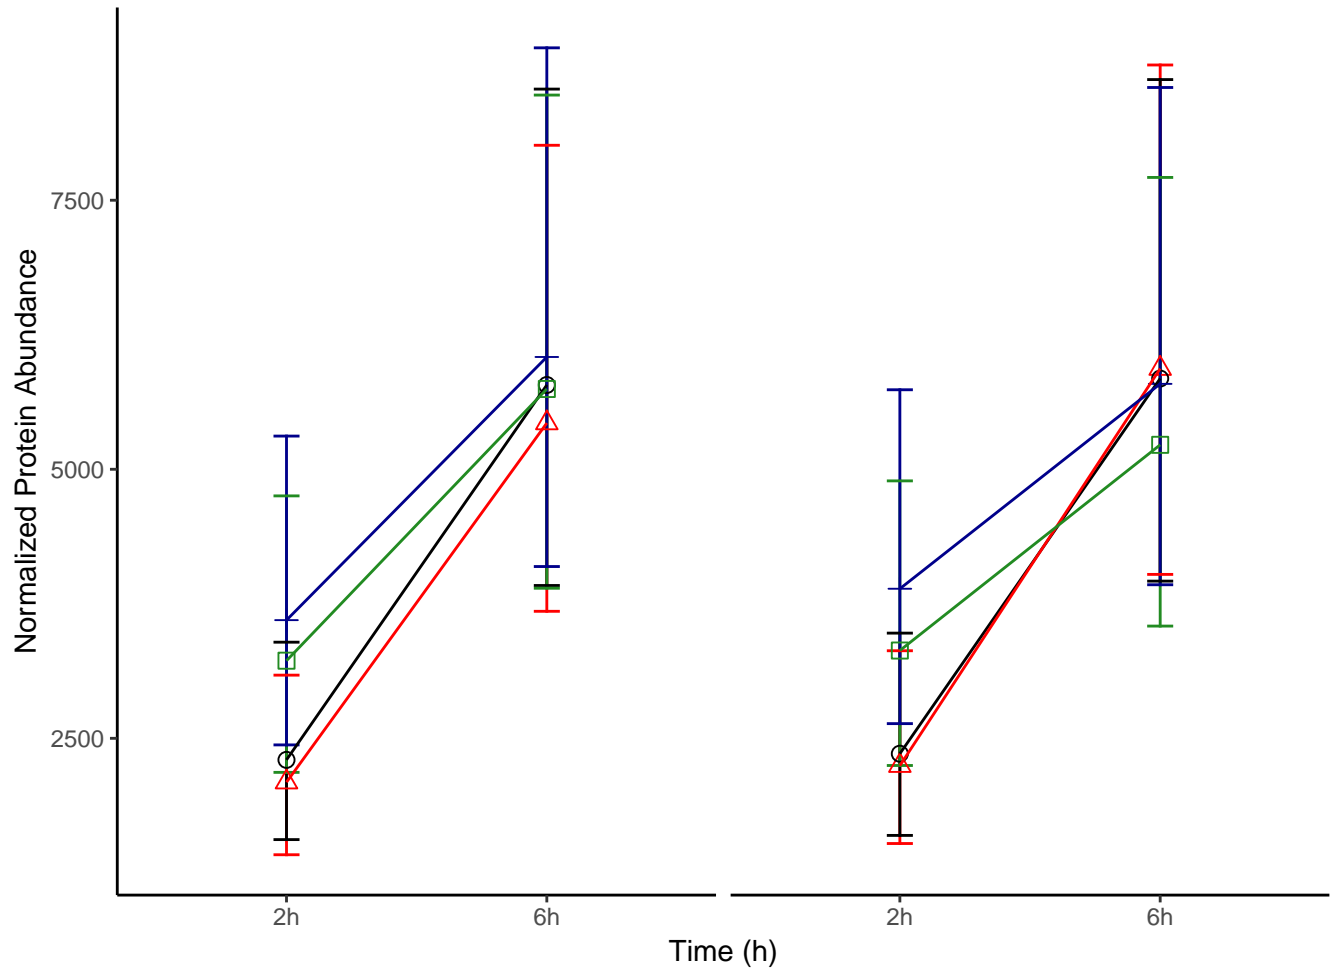

- SA564
- △ SA564-ΔhptRS
- SA564-ΔccpA
- + SA564-ΔhptRS/ccpA

# XERD\_STAAM

TSB

TSB-dex S-452

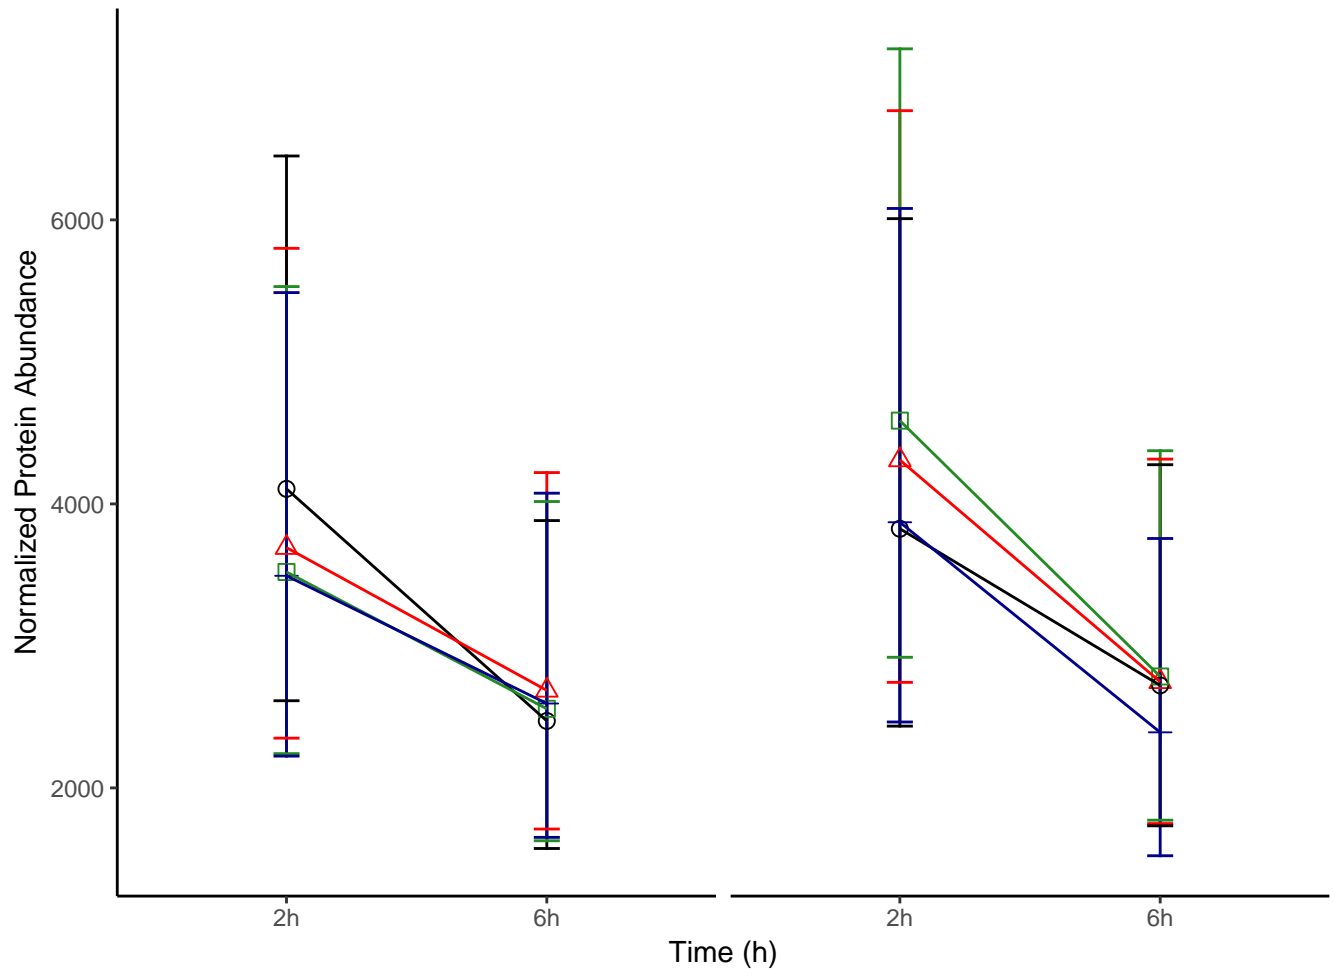

- SA564
- △ SA564- $\Delta$ *hptRS*
- SA564- $\Delta$ *ccpA*
- ⊕ SA564- $\Delta$ *hptRS/ccpA*

# XPT\_STAAM

TSB

TSB-dex S-453

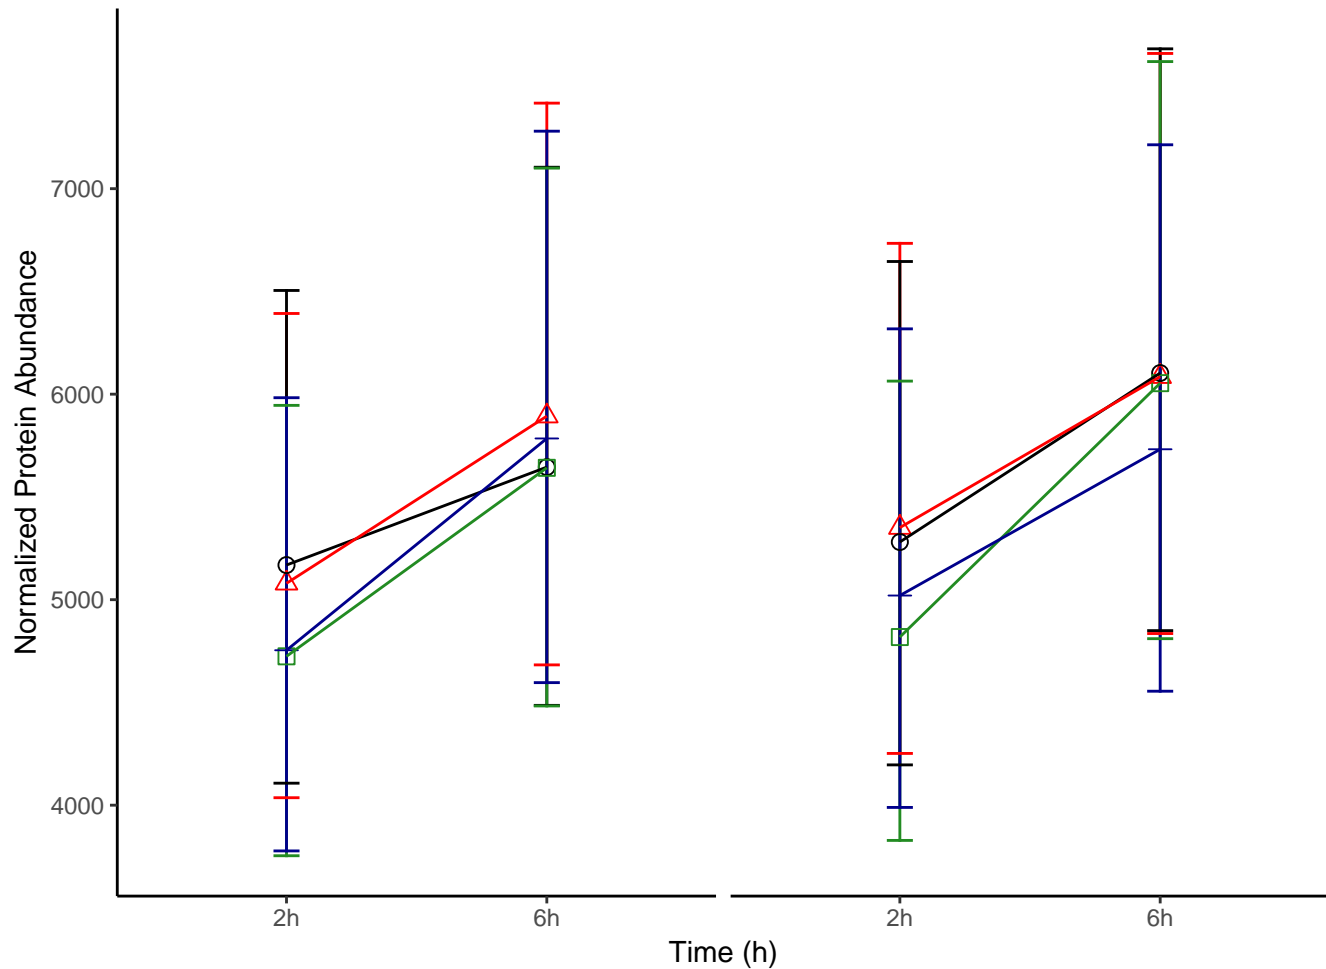

- SA564
- △ SA564-ΔhptRS
- SA564-ΔccpA
- + SA564-ΔhptRS/ccpA

# Y098\_STAAM

TSB

TSB-dex S-454

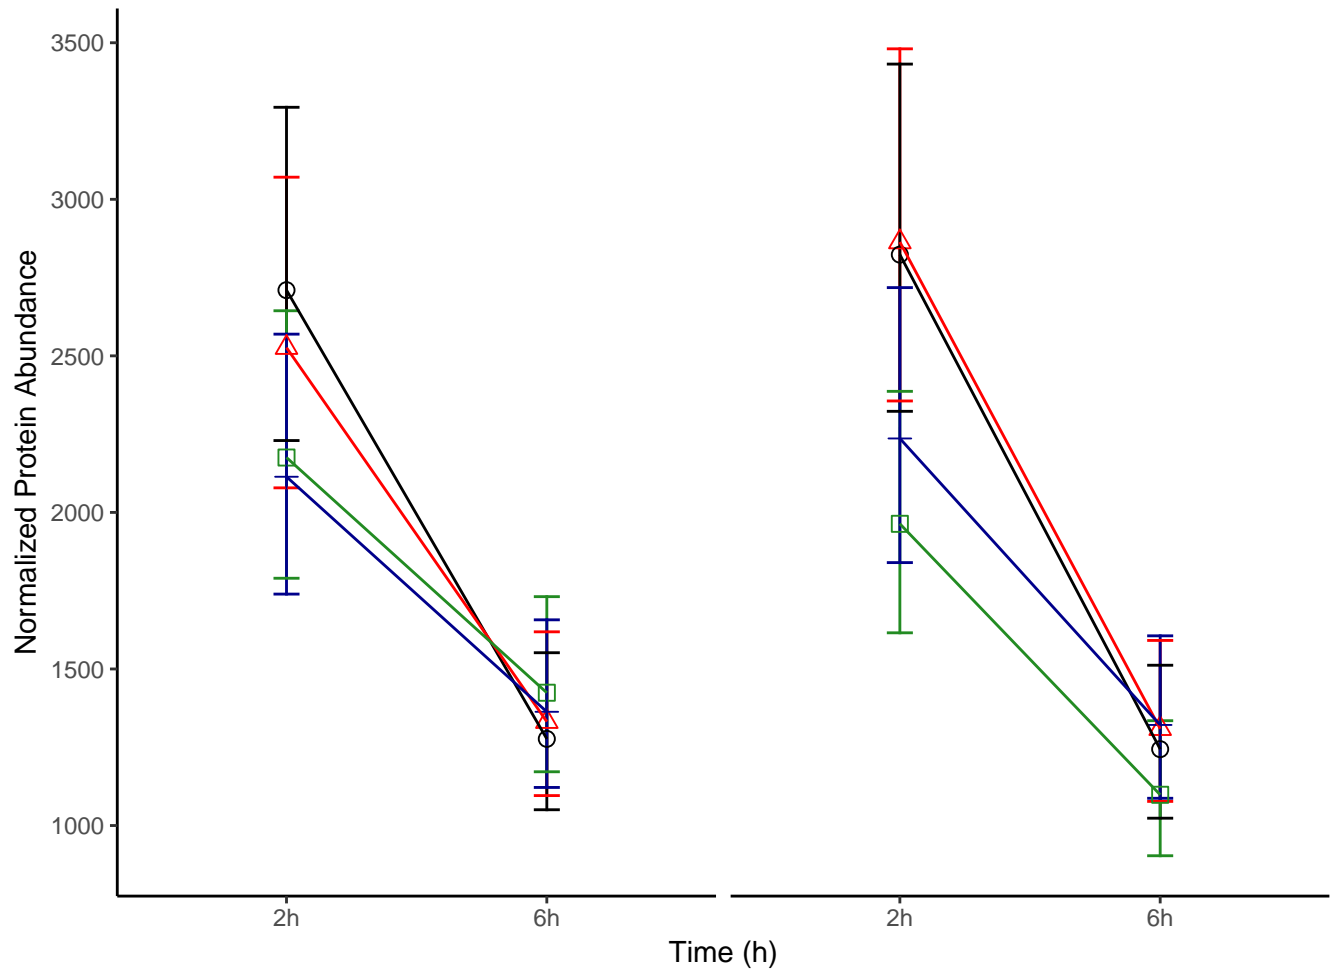

- SA564
- △ SA564- $\Delta$ *hptRS*
- SA564- $\Delta$ *ccpA*
- + SA564- $\Delta$ *hptRS/ccpA*

# Y099\_STAAM

TSB

TSB-dex S-455

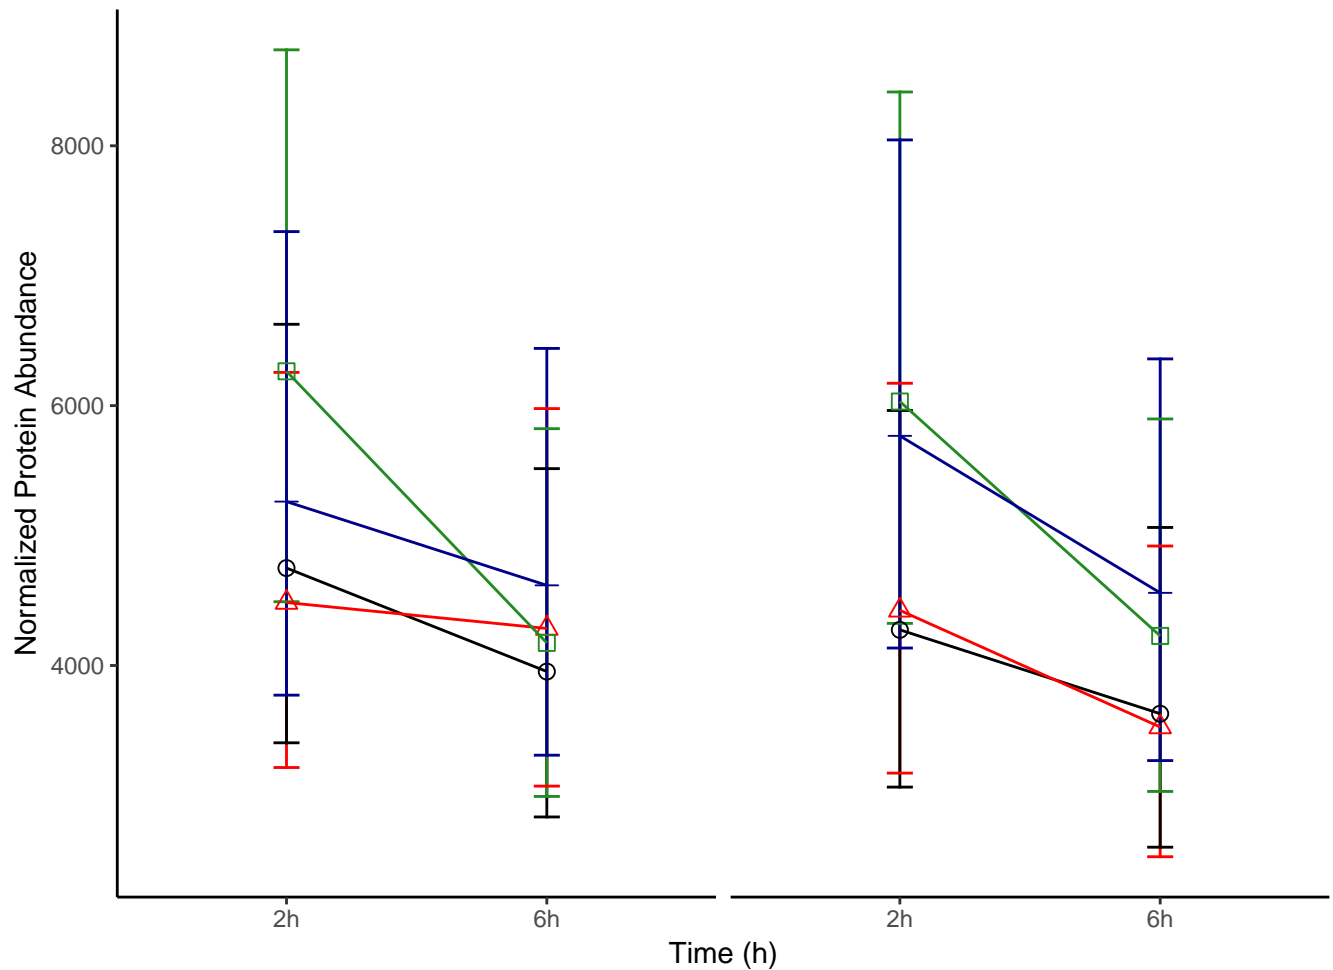

- SA564
- △ SA564- $\Delta$ hptRS
- SA564- $\Delta$ ccpA
- + SA564- $\Delta$ hptRS/ccpA

# Y1015\_STAAM

TSB

TSB-dex S-456

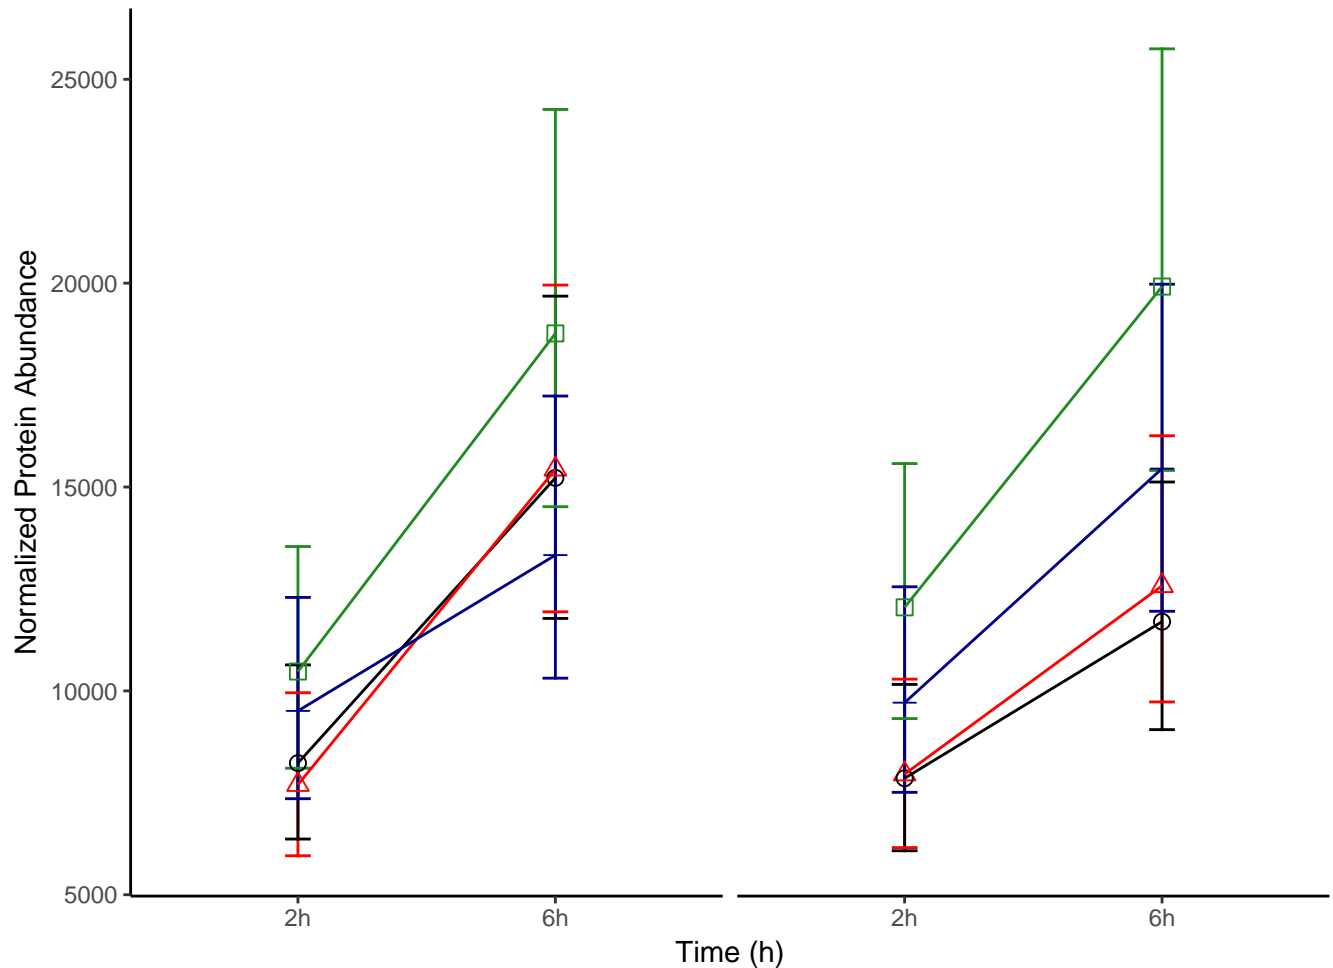

- SA564
- △ SA564- $\Delta$ hptRS
- SA564- $\Delta$ ccpA
- + SA564- $\Delta$ hptRS/ccpA



# Y1090\_STAAM

TSB

TSB-dex S-457

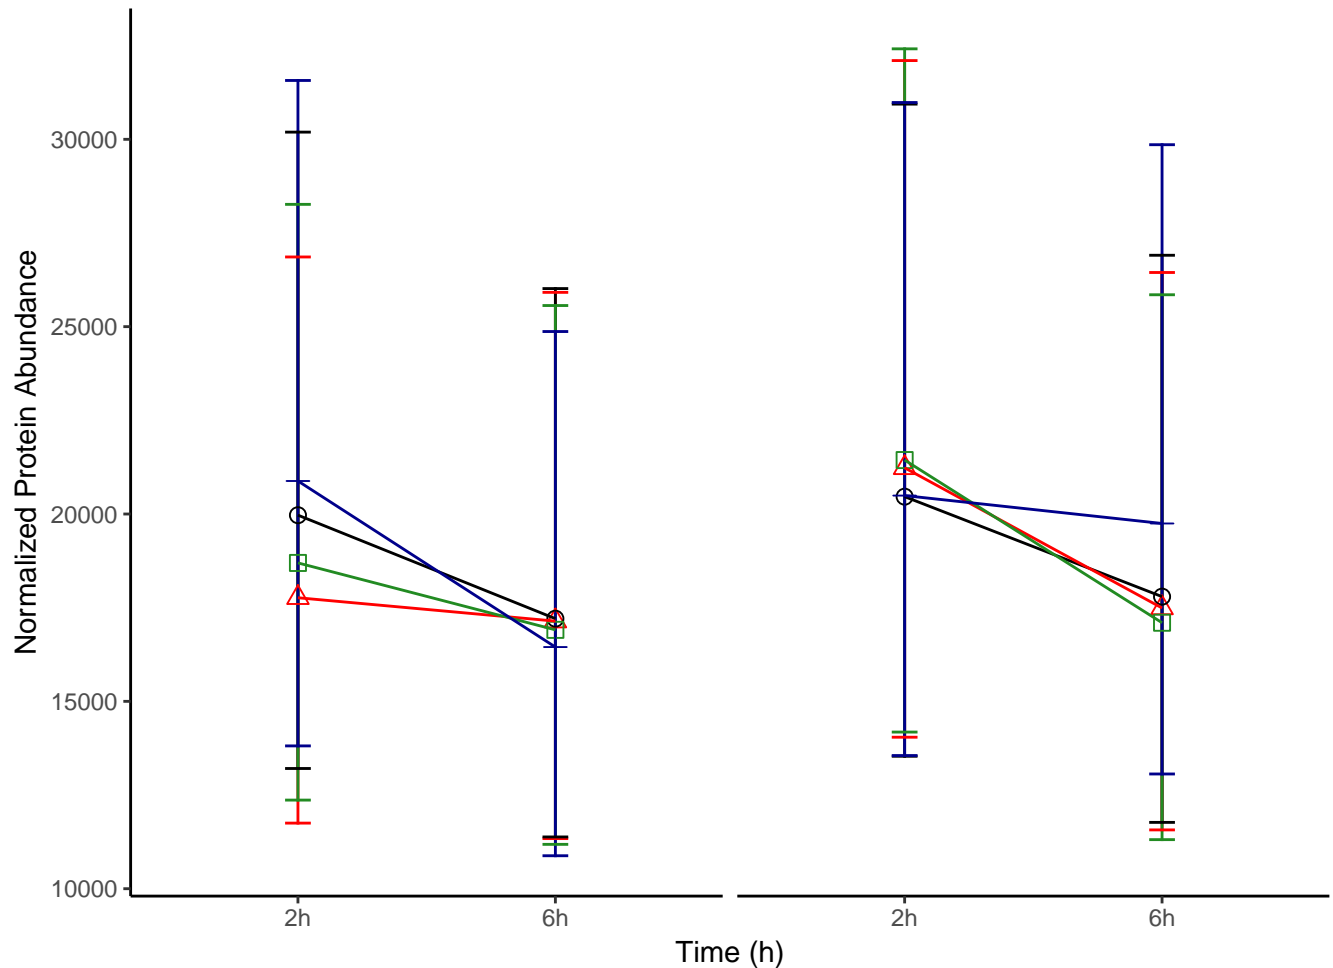

- SA564
- △ SA564- $\Delta$ hptRS
- SA564- $\Delta$ ccpA
- + SA564- $\Delta$ hptRS/ccpA

# Y1176\_STAAM

TSB

TSB-dex S-458

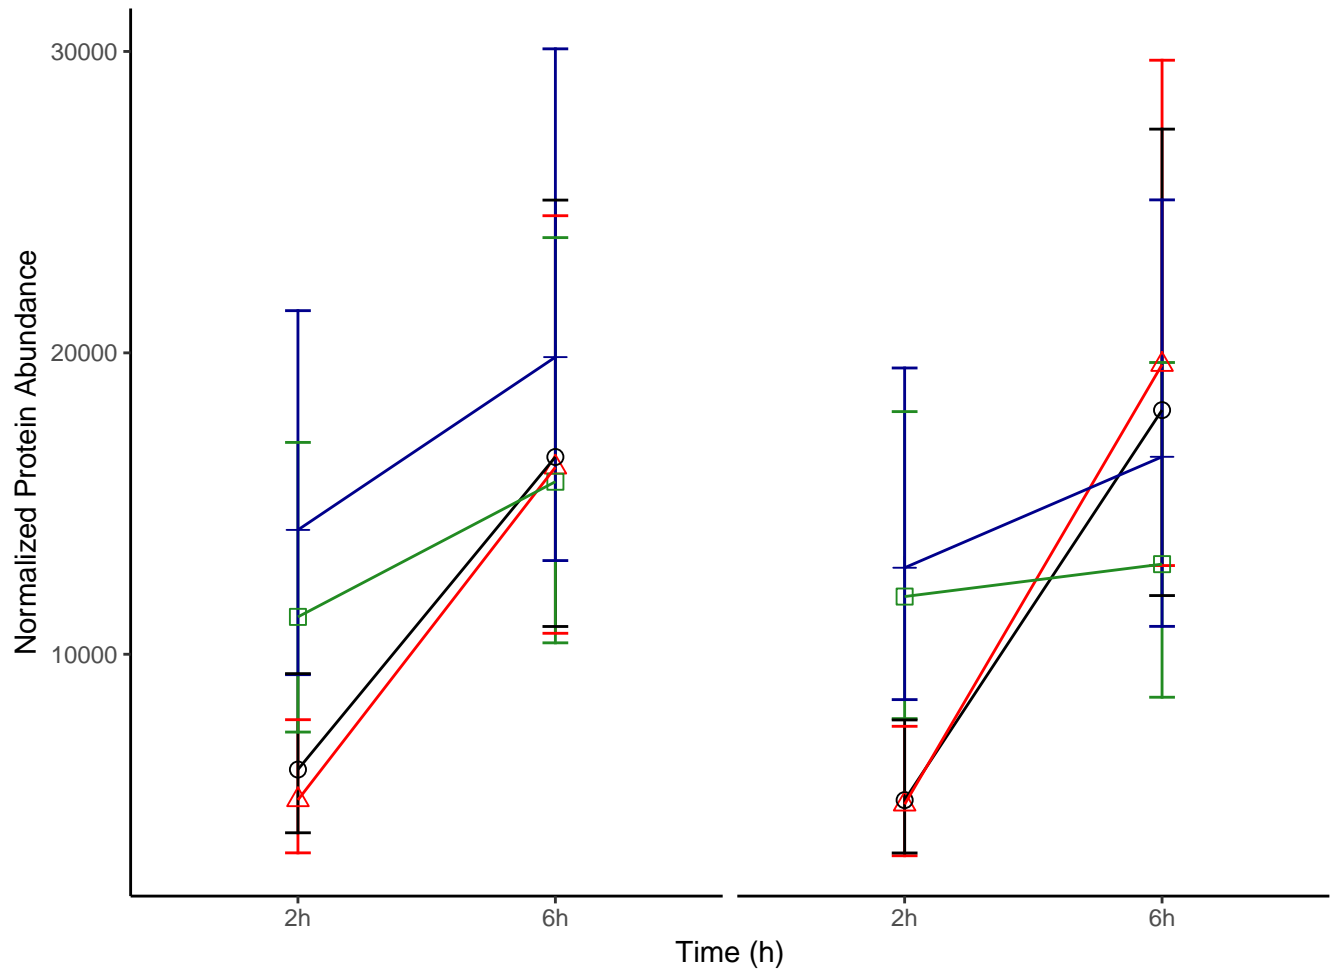

- SA564
- △ SA564- $\Delta$ *hptRS*
- SA564- $\Delta$ *ccpA*
- + SA564- $\Delta$ *hptRS/ccpA*

# Y1177\_STAAM

TSB

TSB-dex S-459

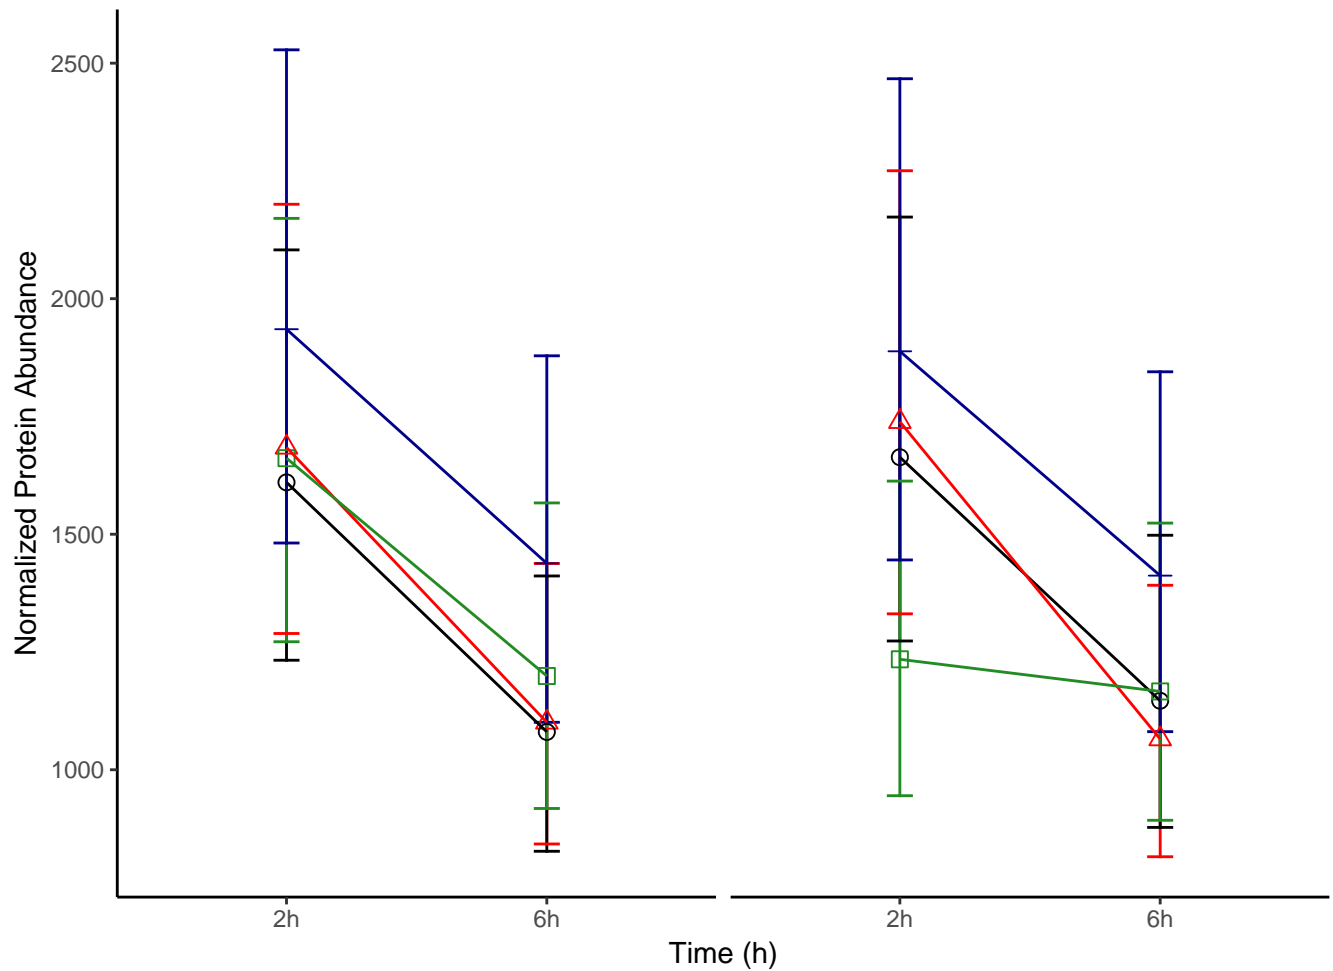

- SA564
- △ SA564- $\Delta$ *hptRS*
- SA564- $\Delta$ *ccpA*
- + SA564- $\Delta$ *hptRS/ccpA*

# Y1187\_STAAM

TSB

TSB-dex S-460

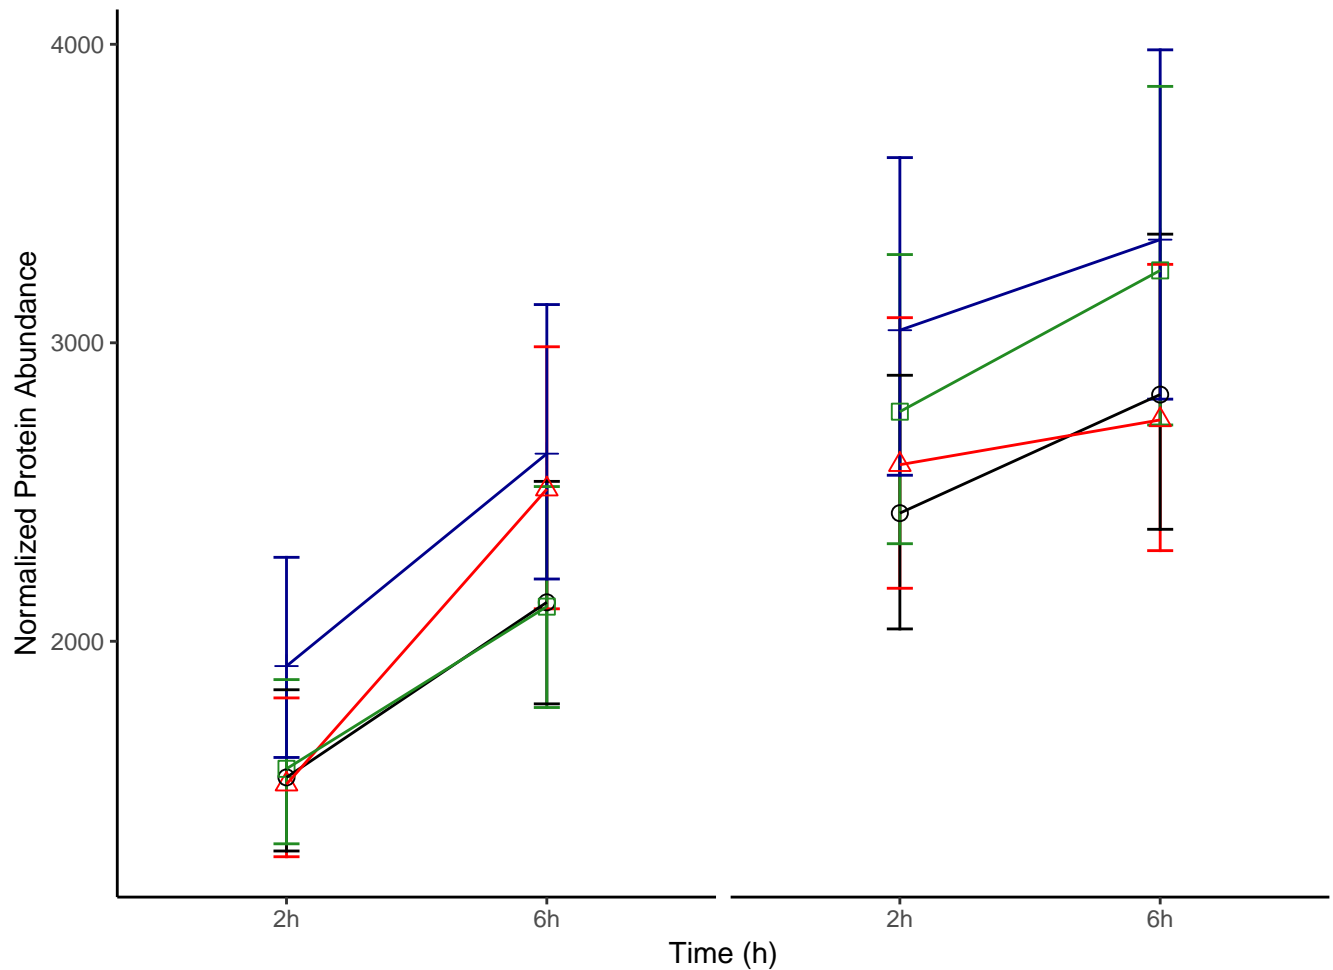

- SA564
- △ SA564- $\Delta$ hptRS
- SA564- $\Delta$ ccpA
- + SA564- $\Delta$ hptRS/ccpA

# Y1226\_STAAM

TSB

TSB-dex S-461

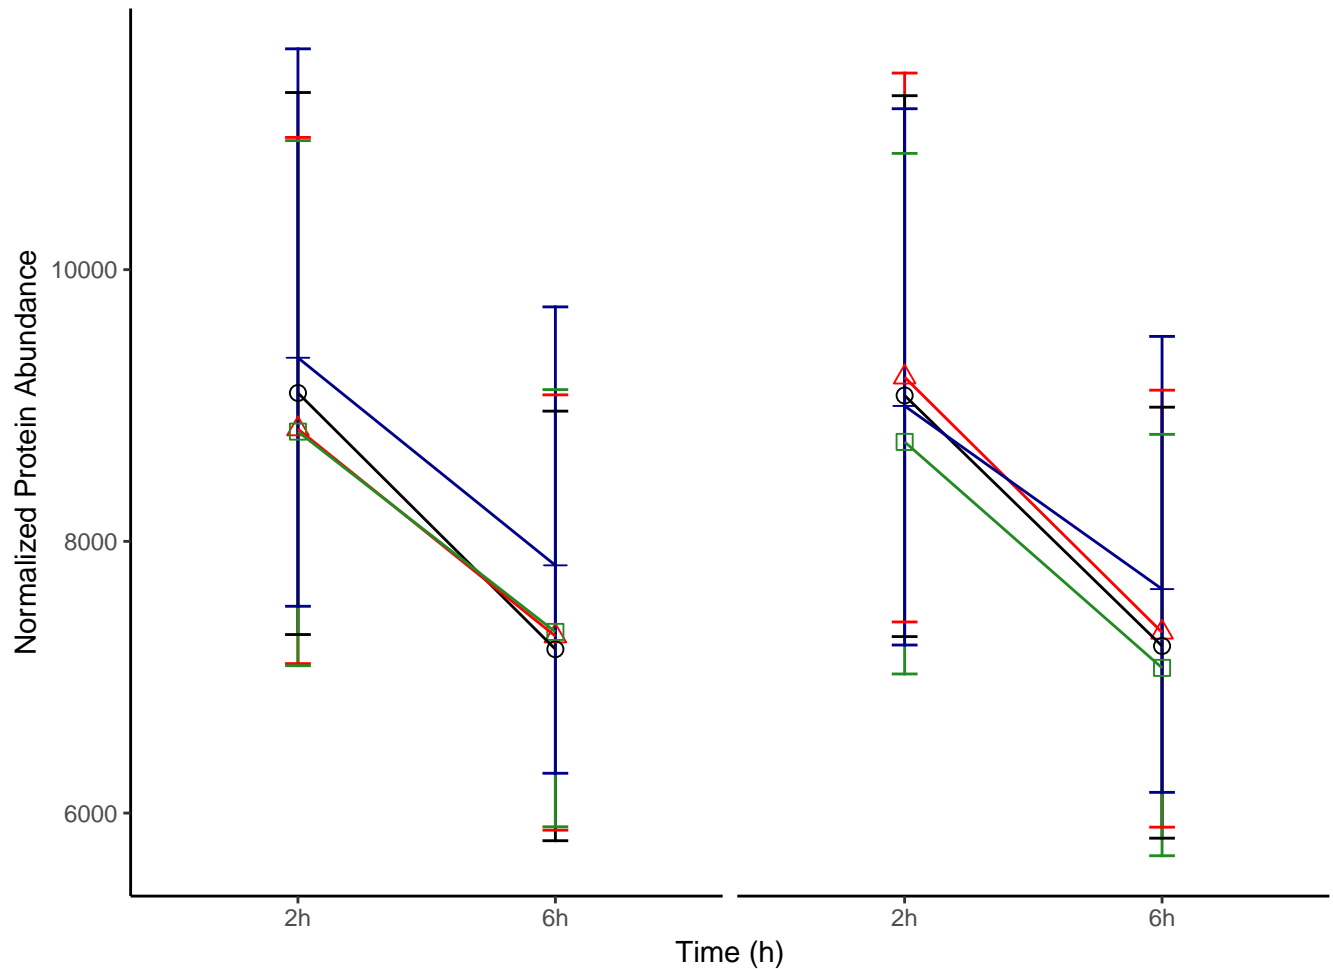

- SA564
- △ SA564- $\Delta$ *hptRS*
- SA564- $\Delta$ *ccpA*
- + SA564- $\Delta$ *hptRS/ccpA*

# Y1341\_STAAM

TSB

TSB-dex S-462

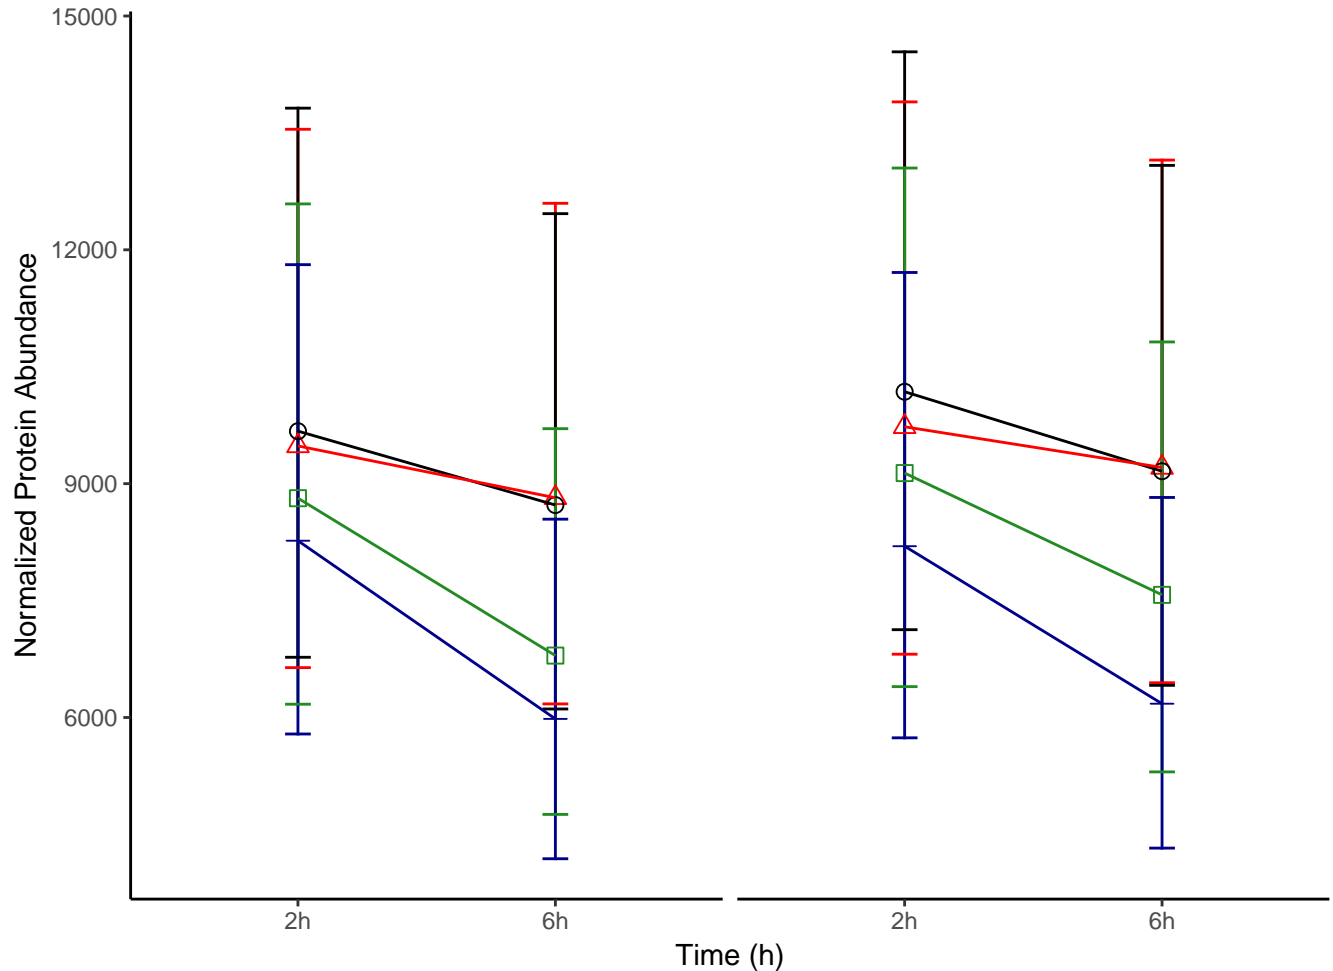

- SA564
- △ SA564- $\Delta$ hptRS
- SA564- $\Delta$ ccpA
- + SA564- $\Delta$ hptRS/ccpA

# Y1343\_STAAM

TSB

TSB-dex S-463

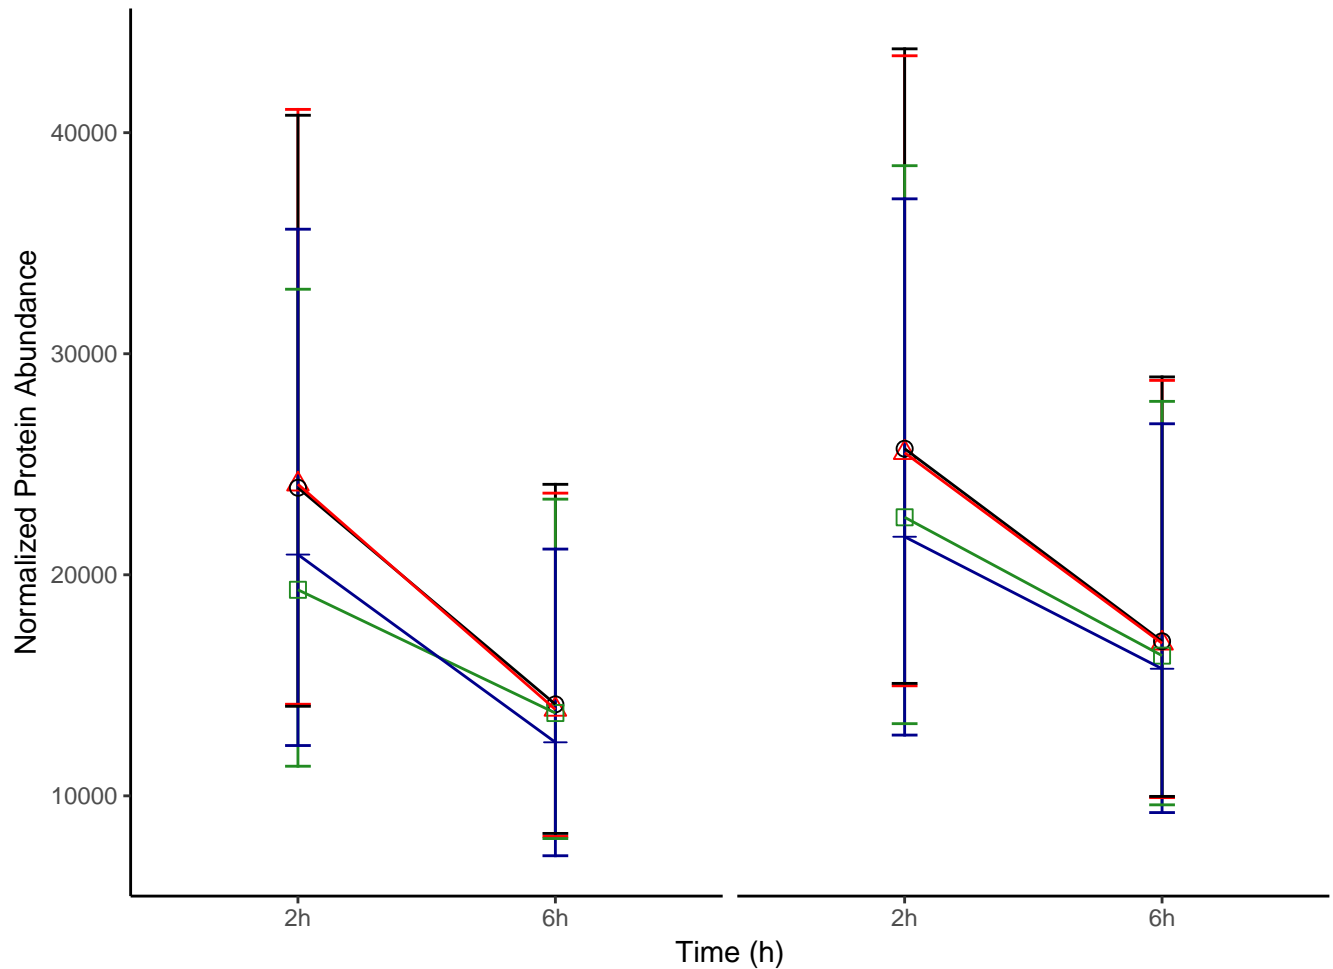

- SA564
- △ SA564- $\Delta$ hptRS
- SA564- $\Delta$ ccpA
- + SA564- $\Delta$ hptRS/ccpA

# Y1352\_STAAM

TSB

TSB-dex S-464

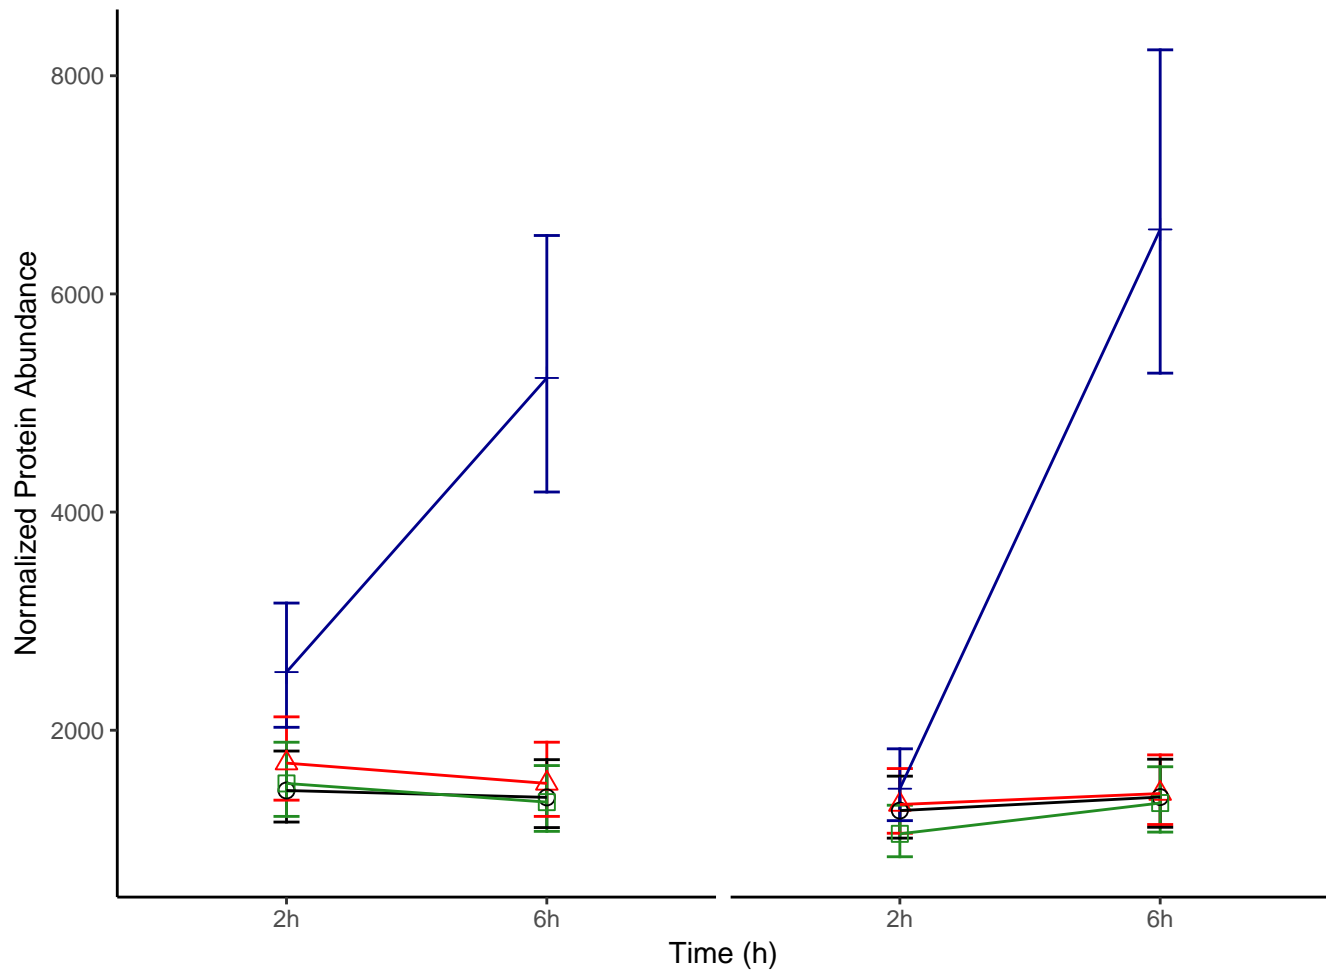

- SA564
- △ SA564- $\Delta$ *hptRS*
- SA564- $\Delta$ *ccpA*
- + SA564- $\Delta$ *hptRS/ccpA*



# Y1363\_STAAM

TSB

TSB-dex S-465

Normalized Protein Abundance

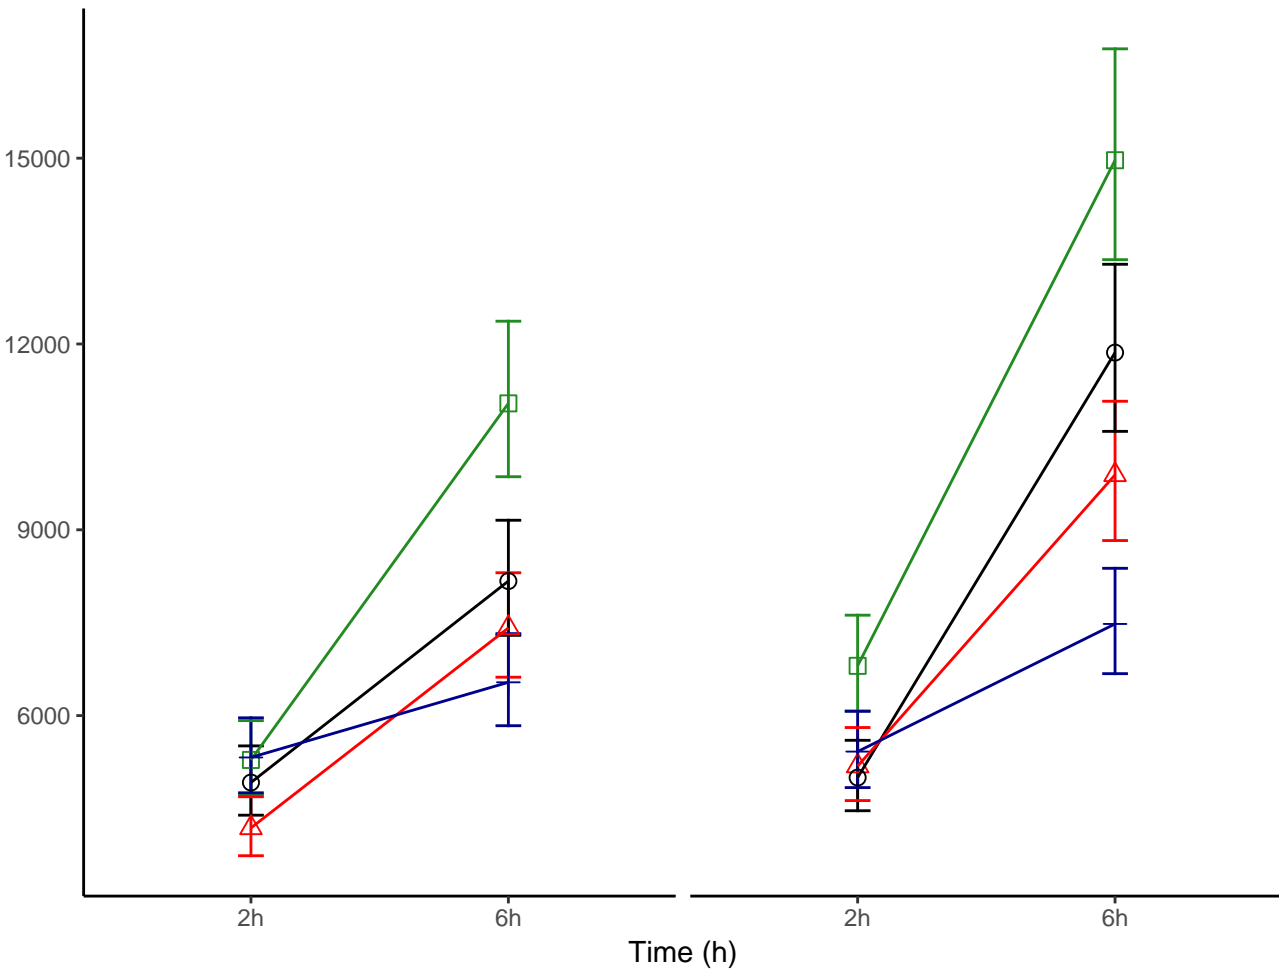

- SA564
- △ SA564-ΔhptRS
- SA564-ΔccpA
- + SA564-ΔhptRS/ccpA

# Y1409\_STAAM

TSB

TSB-dex S-466

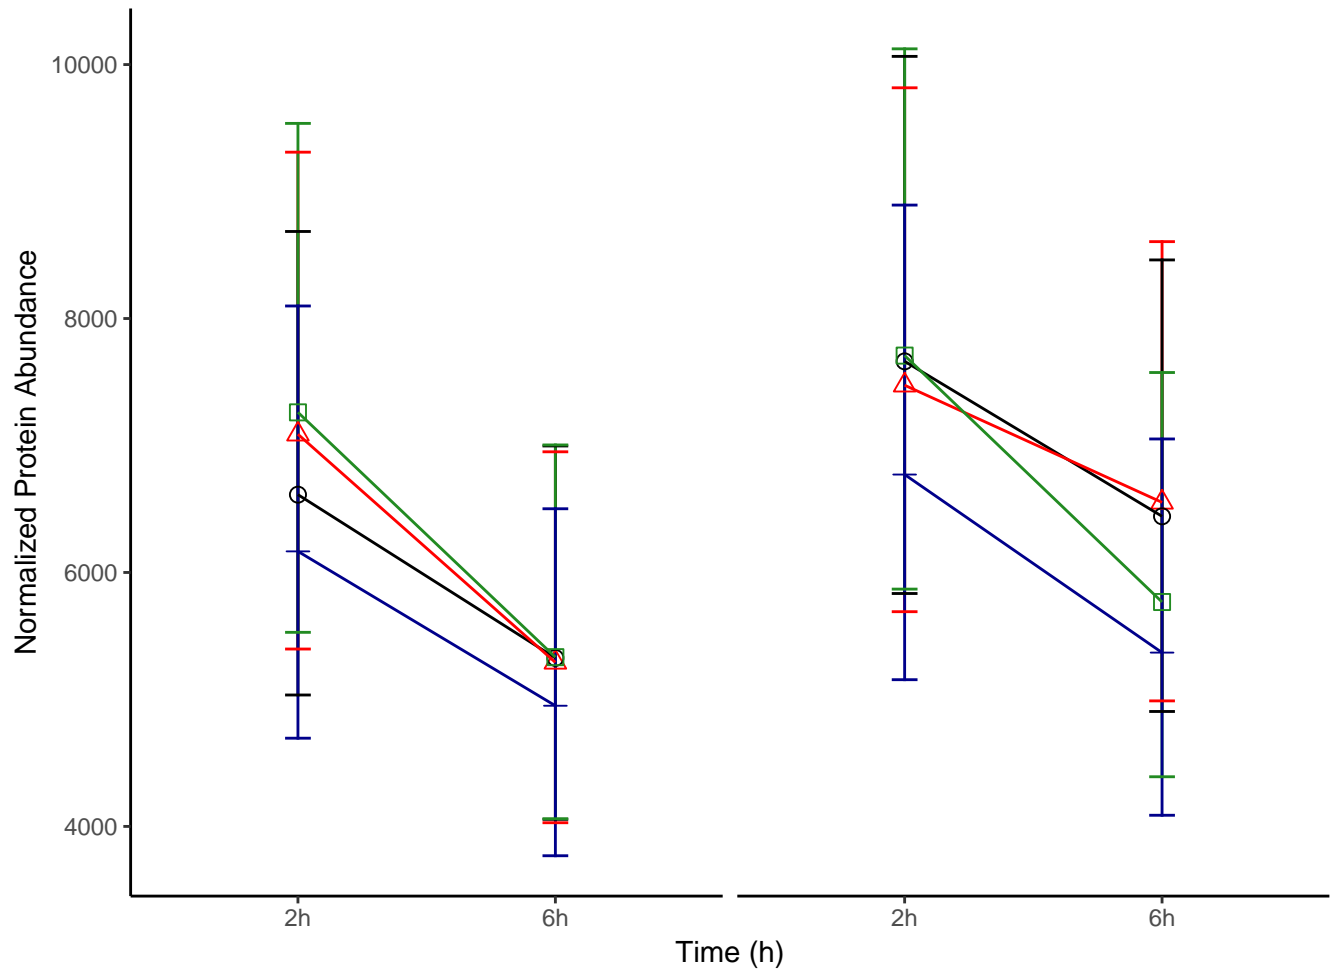

- SA564
- △ SA564- $\Delta$ *hptRS*
- SA564- $\Delta$ *ccpA*
- + SA564- $\Delta$ *hptRS/ccpA*

# Y1425\_STAAM

TSB

TSB-dex S-467

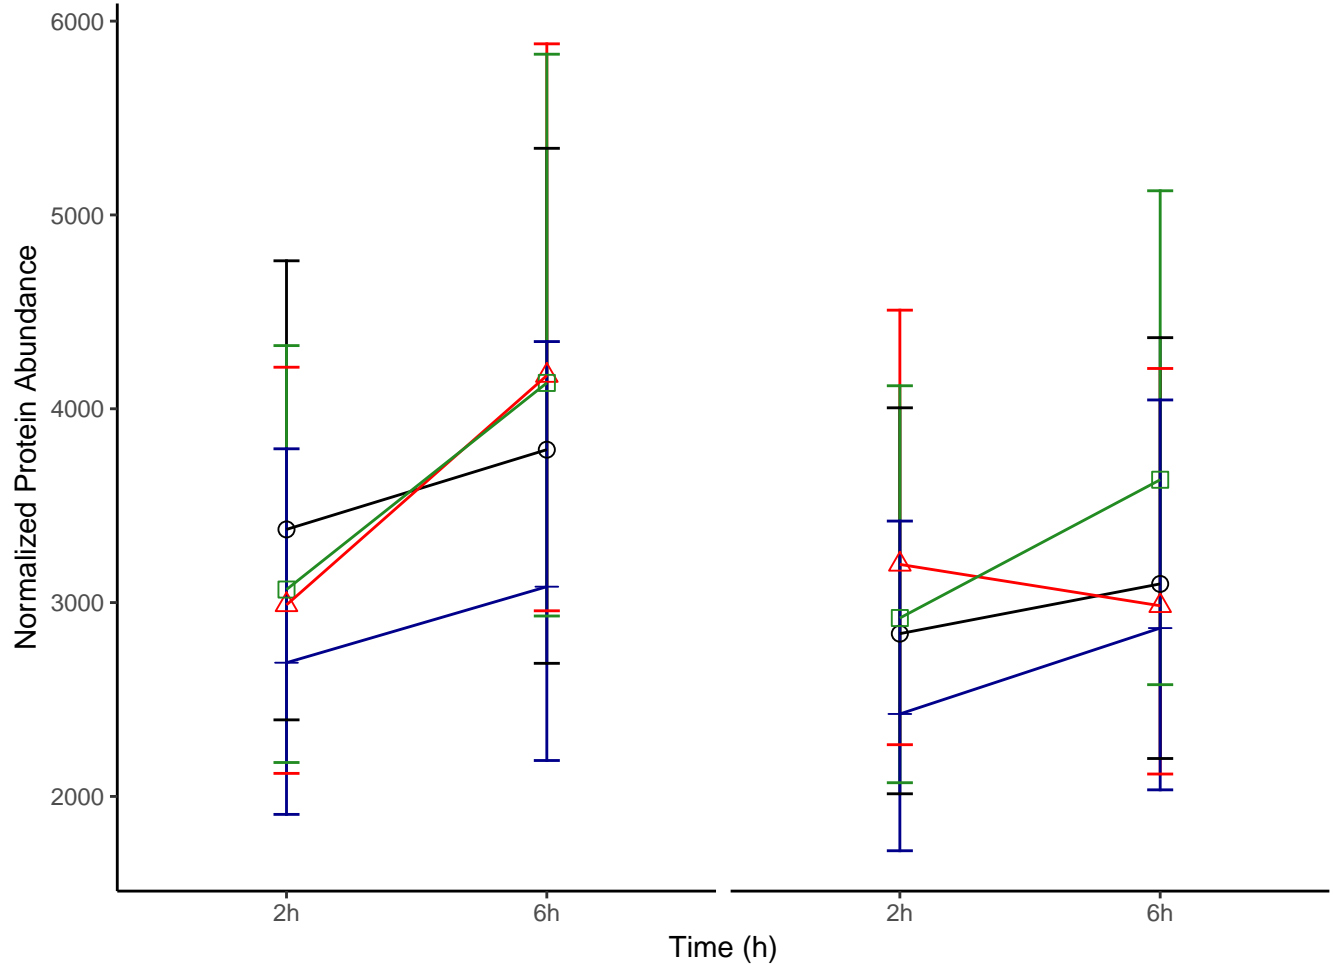

- SA564
- △ SA564- $\Delta$ hptRS
- SA564- $\Delta$ ccpA
- ⊕ SA564- $\Delta$ hptRS/ccpA

# Y1462\_STAAM

TSB

TSB-dex S-468

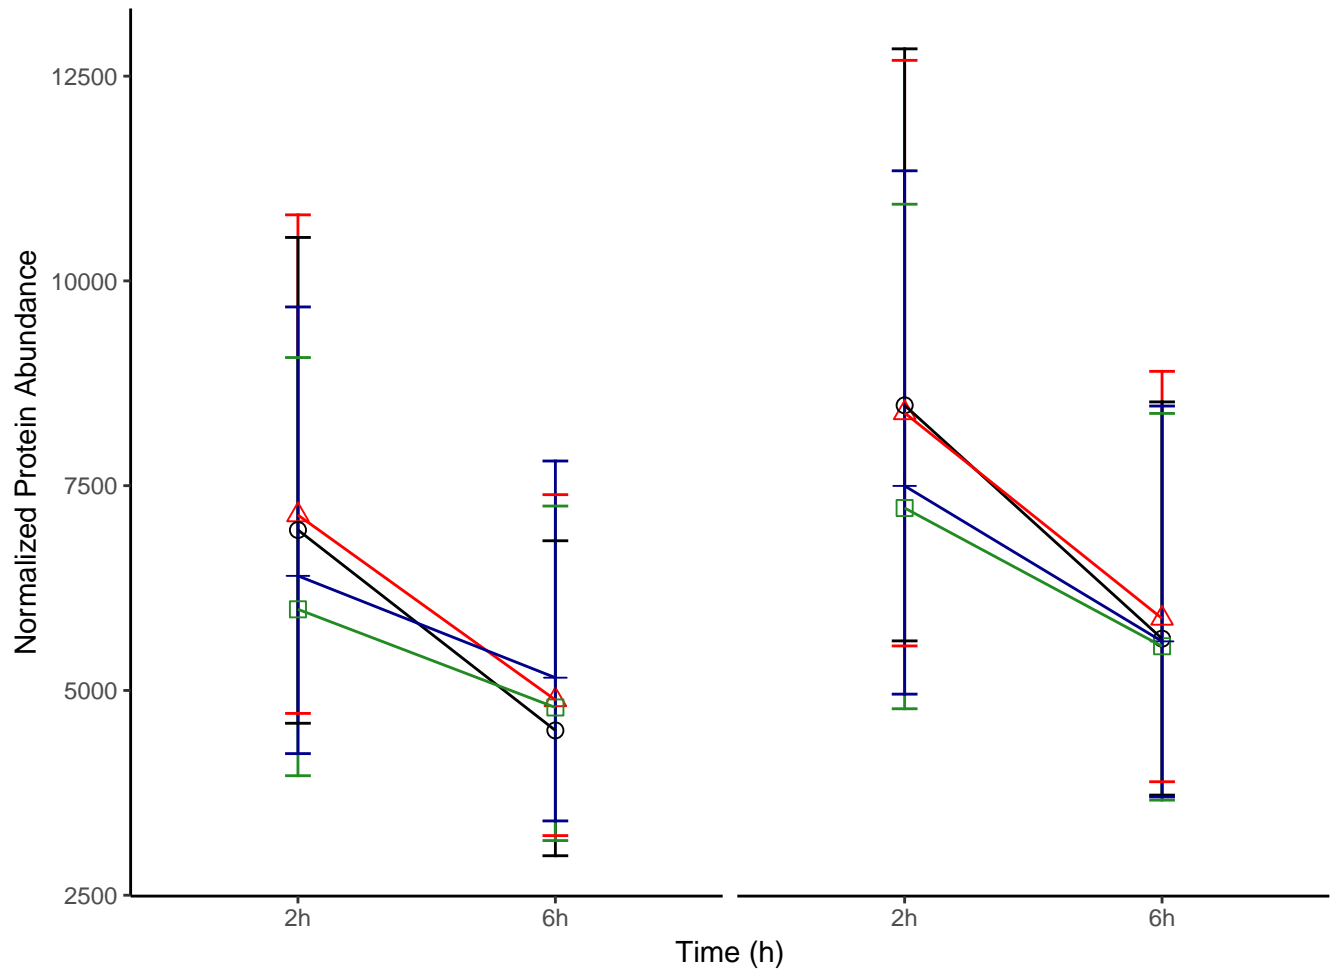

- SA564
- △ SA564- $\Delta$ *hptRS*
- SA564- $\Delta$ *ccpA*
- + SA564- $\Delta$ *hptRS/ccpA*

# Y1514\_STAAM

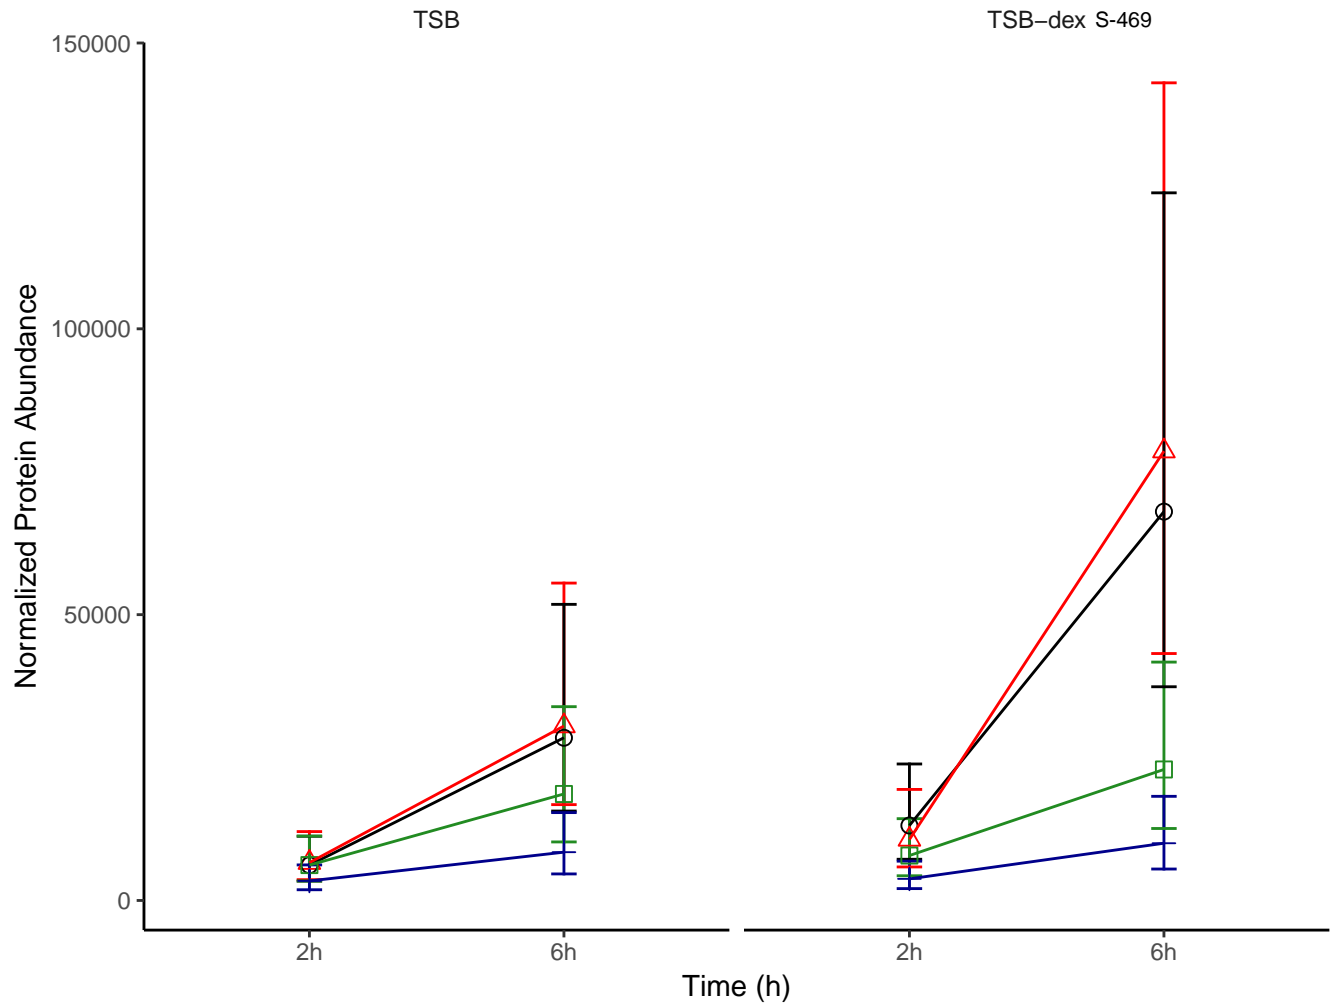

- SA564
- △ SA564- $\Delta$ *hptRS*
- SA564- $\Delta$ *ccpA*
- ⊕ SA564- $\Delta$ *hptRS/ccpA*

# Y1573\_STAAM

TSB

TSB-dex S-470

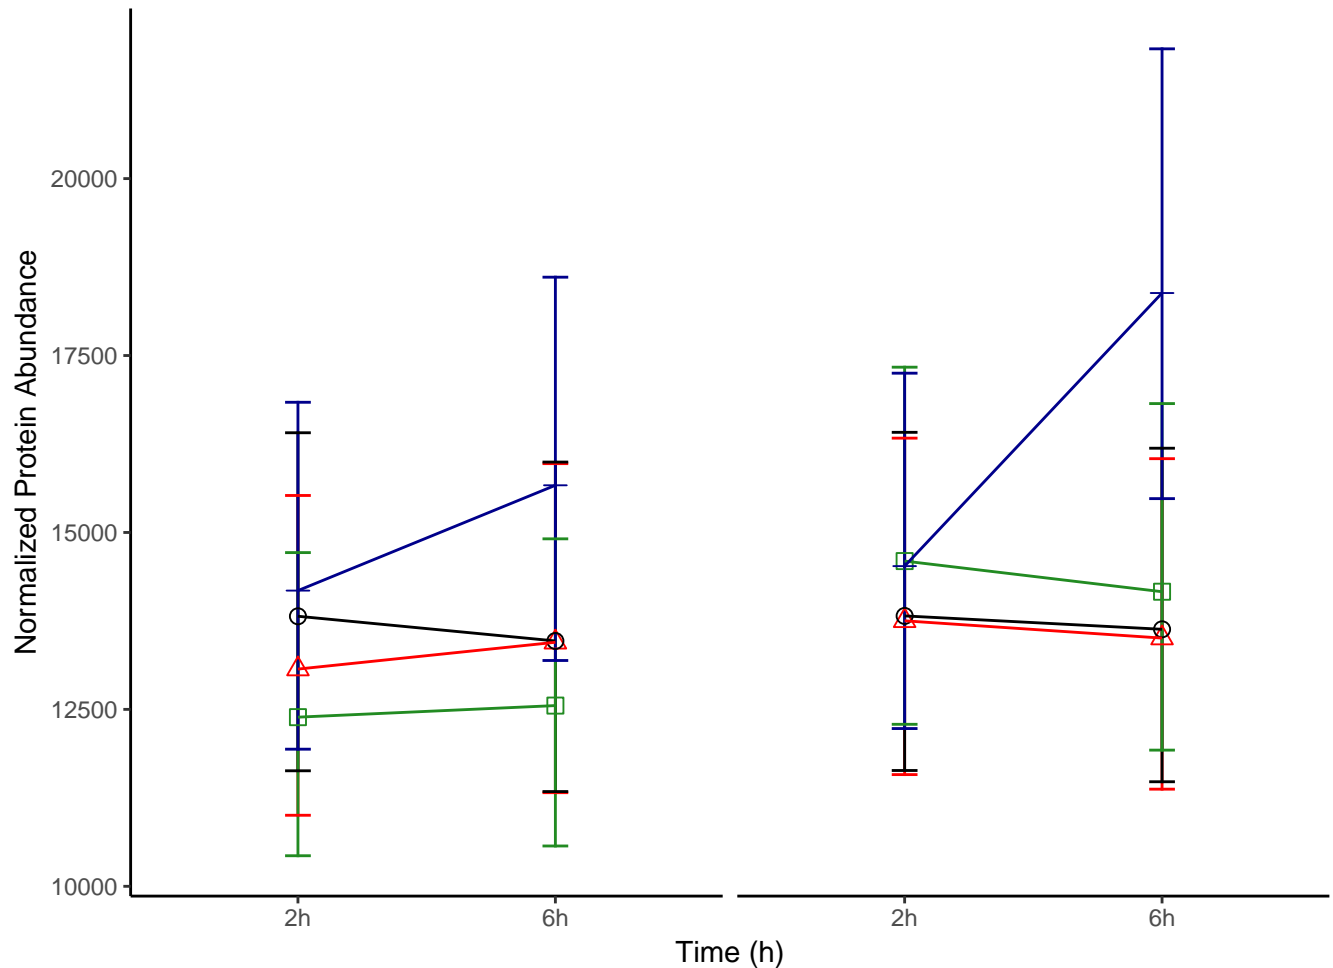

- SA564
- △ SA564- $\Delta$ hptRS
- SA564- $\Delta$ ccpA
- + SA564- $\Delta$ hptRS/ccpA

# Y1605\_STAAM

TSB

TSB-dex S-471

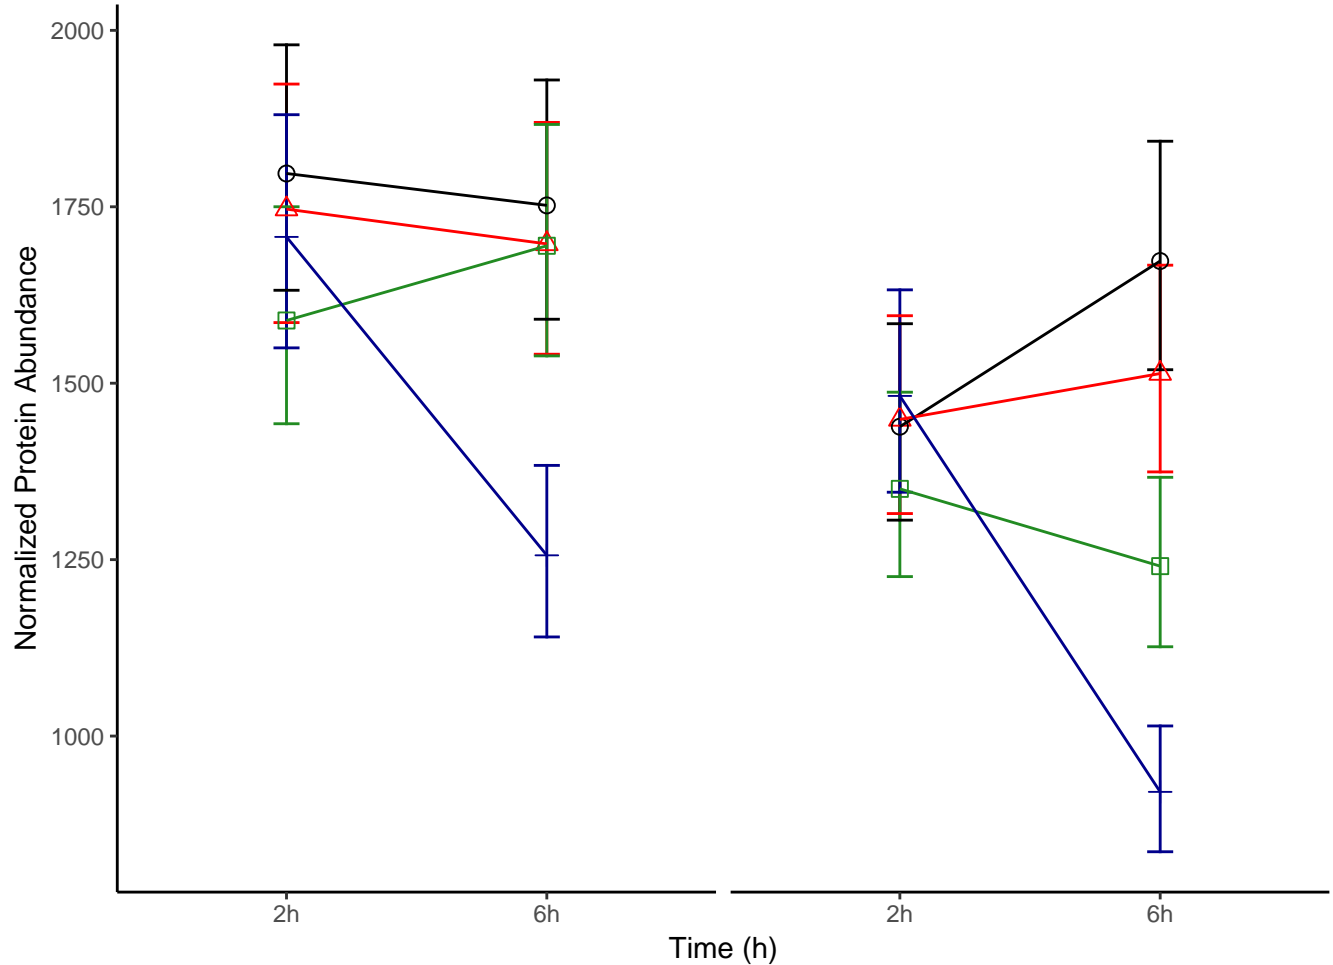

- SA564
- △ SA564- $\Delta$ *hptRS*
- SA564- $\Delta$ *ccpA*
- + SA564- $\Delta$ *hptRS/ccpA*

# Y1617\_STAAM

TSB

TSB-dex S-472

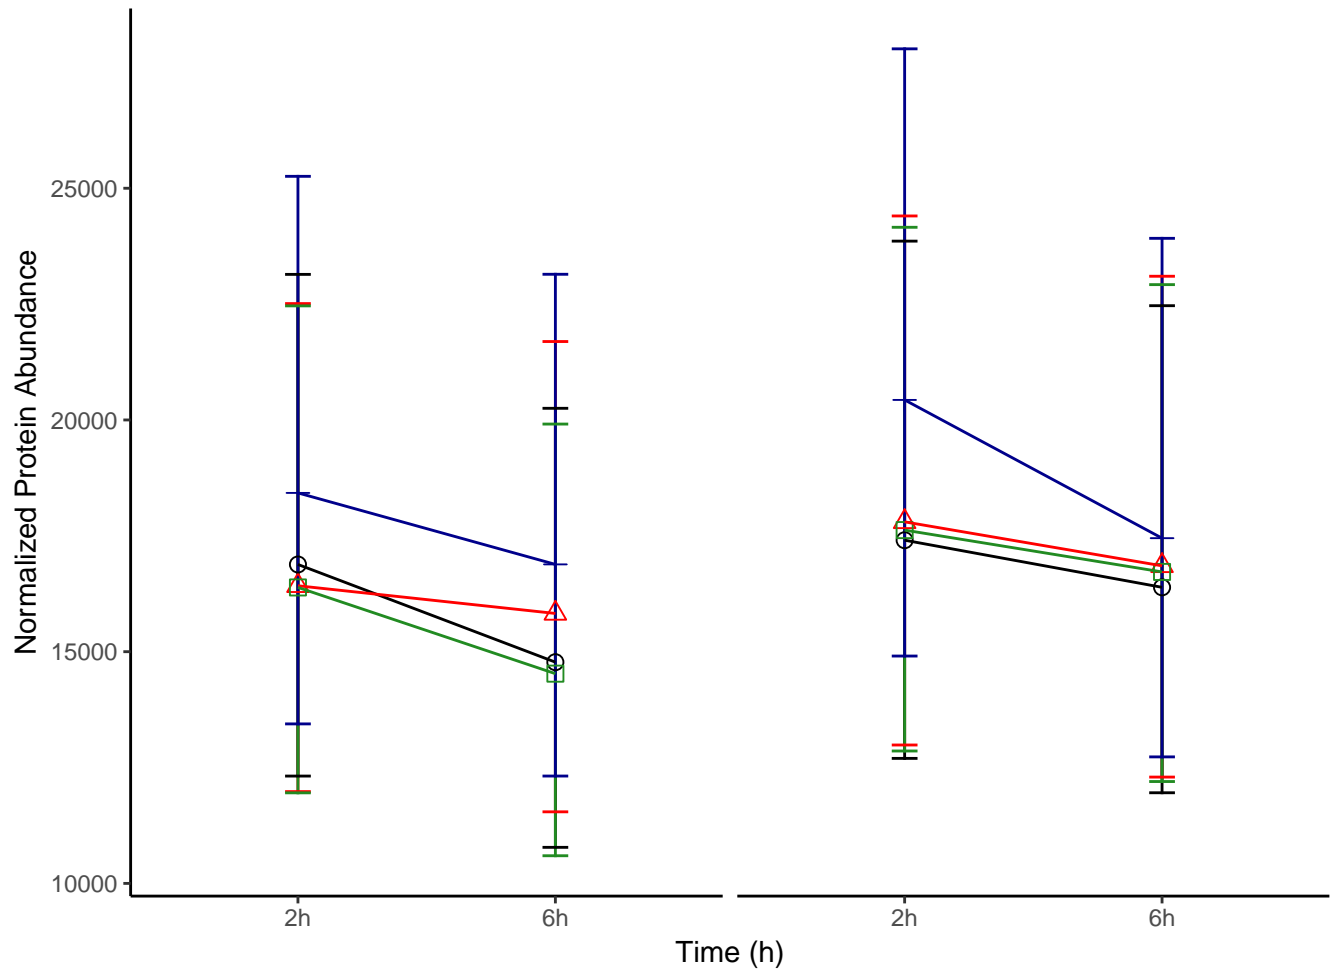

- SA564
- △ SA564- $\Delta$ hptRS
- SA564- $\Delta$ ccpA
- + SA564- $\Delta$ hptRS/ccpA



# Y1625\_STAAM

TSB

TSB-dex S-473

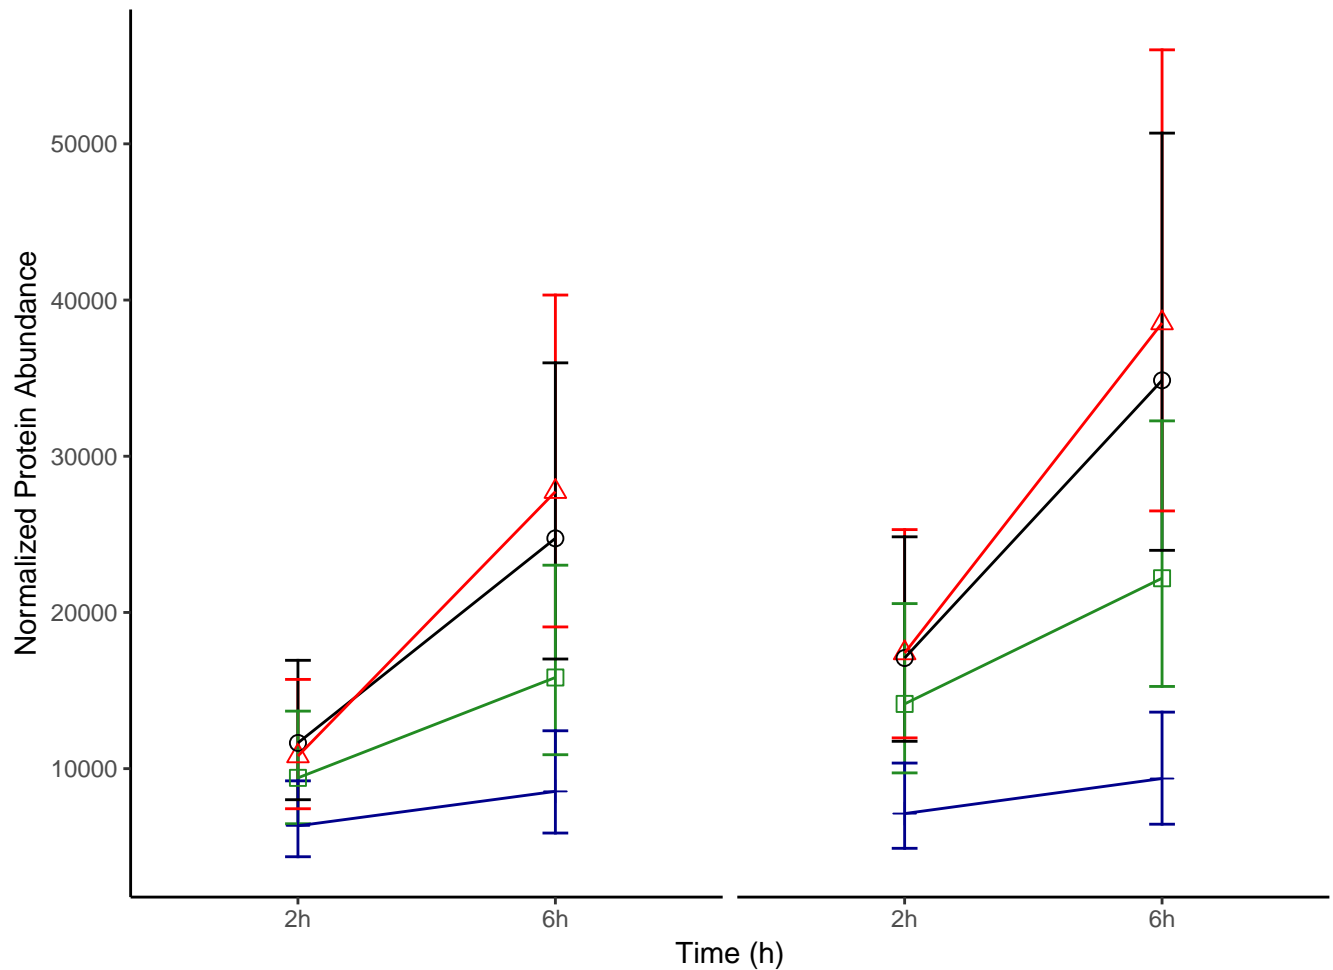

- SA564
- △ SA564- $\Delta$ hptRS
- SA564- $\Delta$ ccpA
- + SA564- $\Delta$ hptRS/ccpA

# Y1710\_STAAM

TSB

TSB-dex S-474

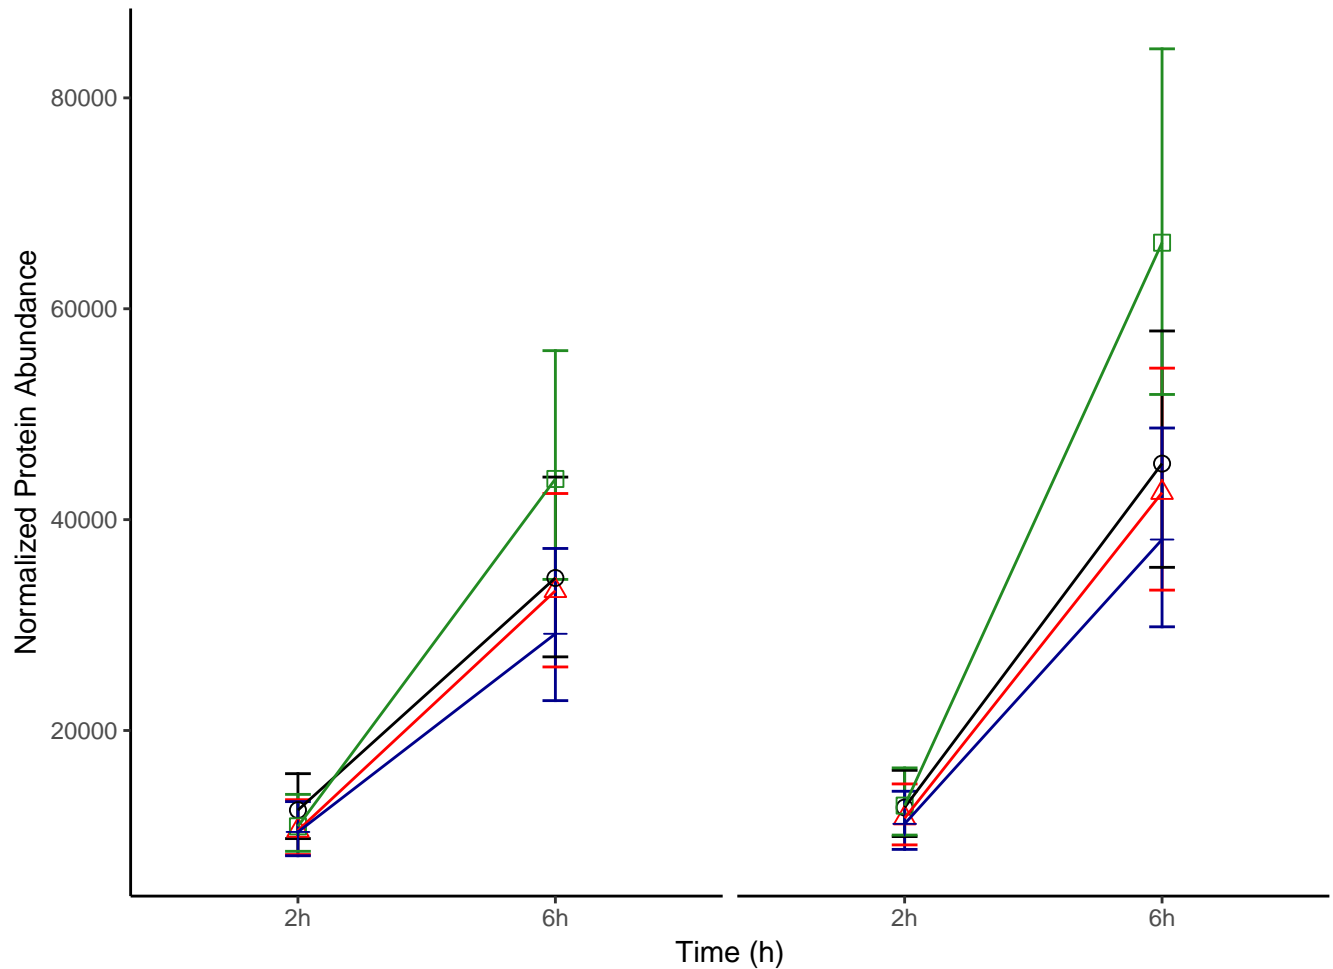

- SA564
- △ SA564- $\Delta$ *hptRS*
- SA564- $\Delta$ *ccpA*
- + SA564- $\Delta$ *hptRS/ccpA*

# Y1739\_STAAM

TSB

TSB-dex S-475

Normalized Protein Abundance

30000

20000

2h

6h

Time (h)

2h

6h

- SA564
- △ SA564- $\Delta$ *hptRS*
- SA564- $\Delta$ *ccpA*
- + SA564- $\Delta$ *hptRS/ccpA*

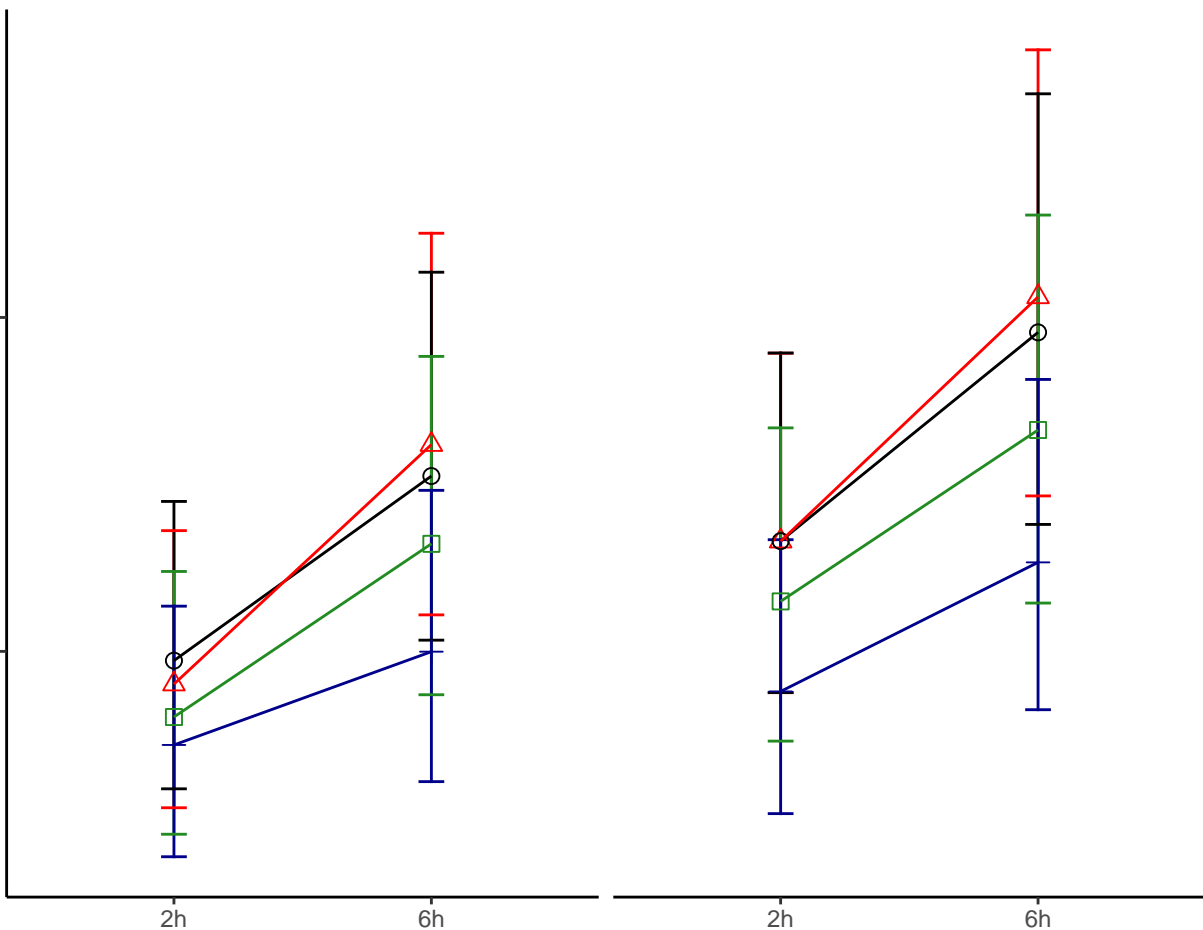

# Y1845\_STAAM

TSB

TSB-dex S-476

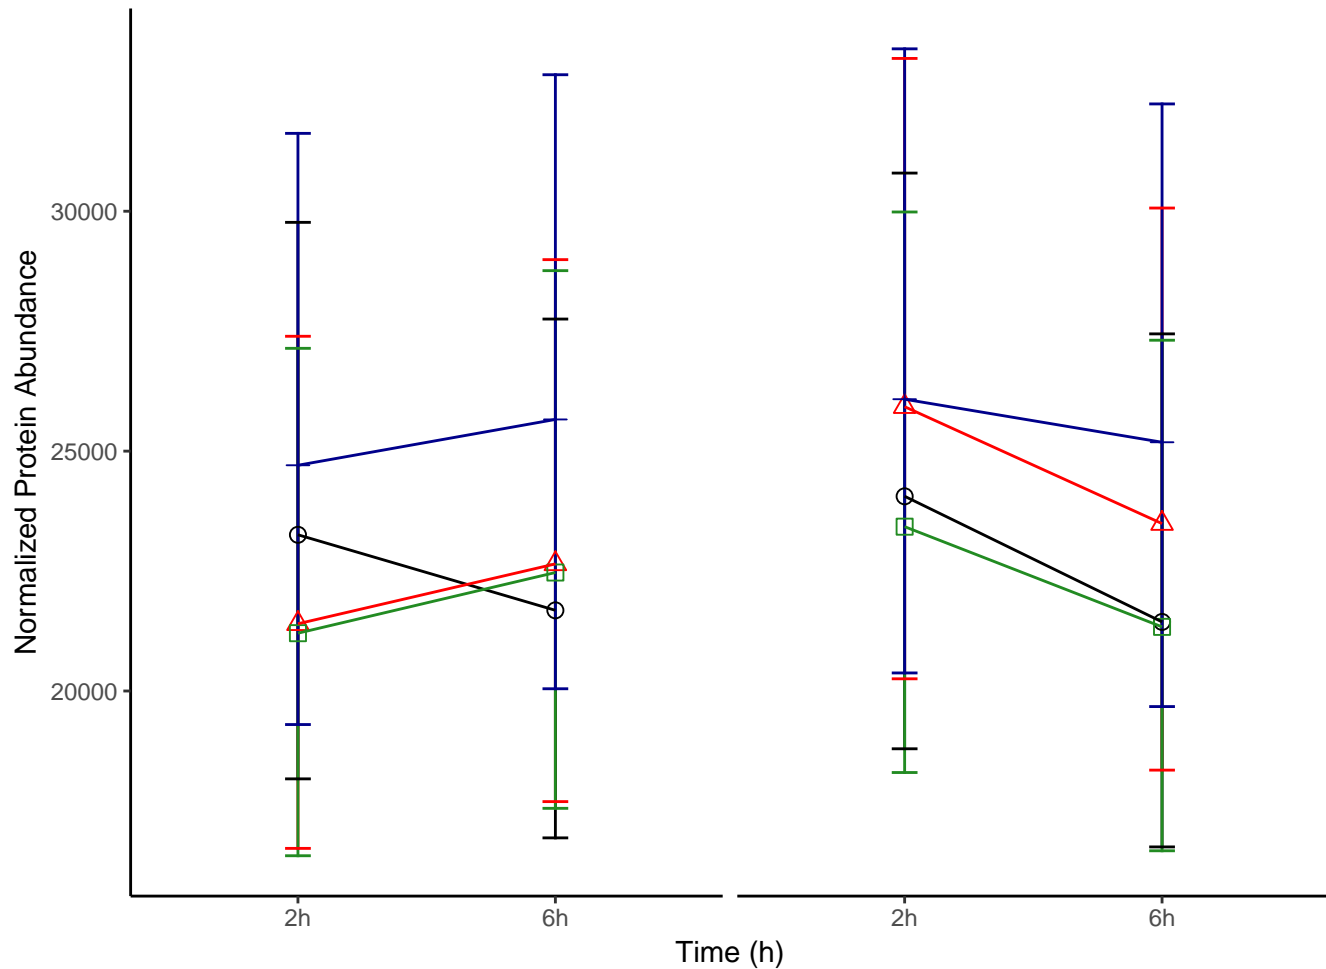

- SA564
- △ SA564- $\Delta$ hptRS
- SA564- $\Delta$ ccpA
- + SA564- $\Delta$ hptRS/ccpA

# Y1866\_STAAM

TSB

TSB-dex S-477

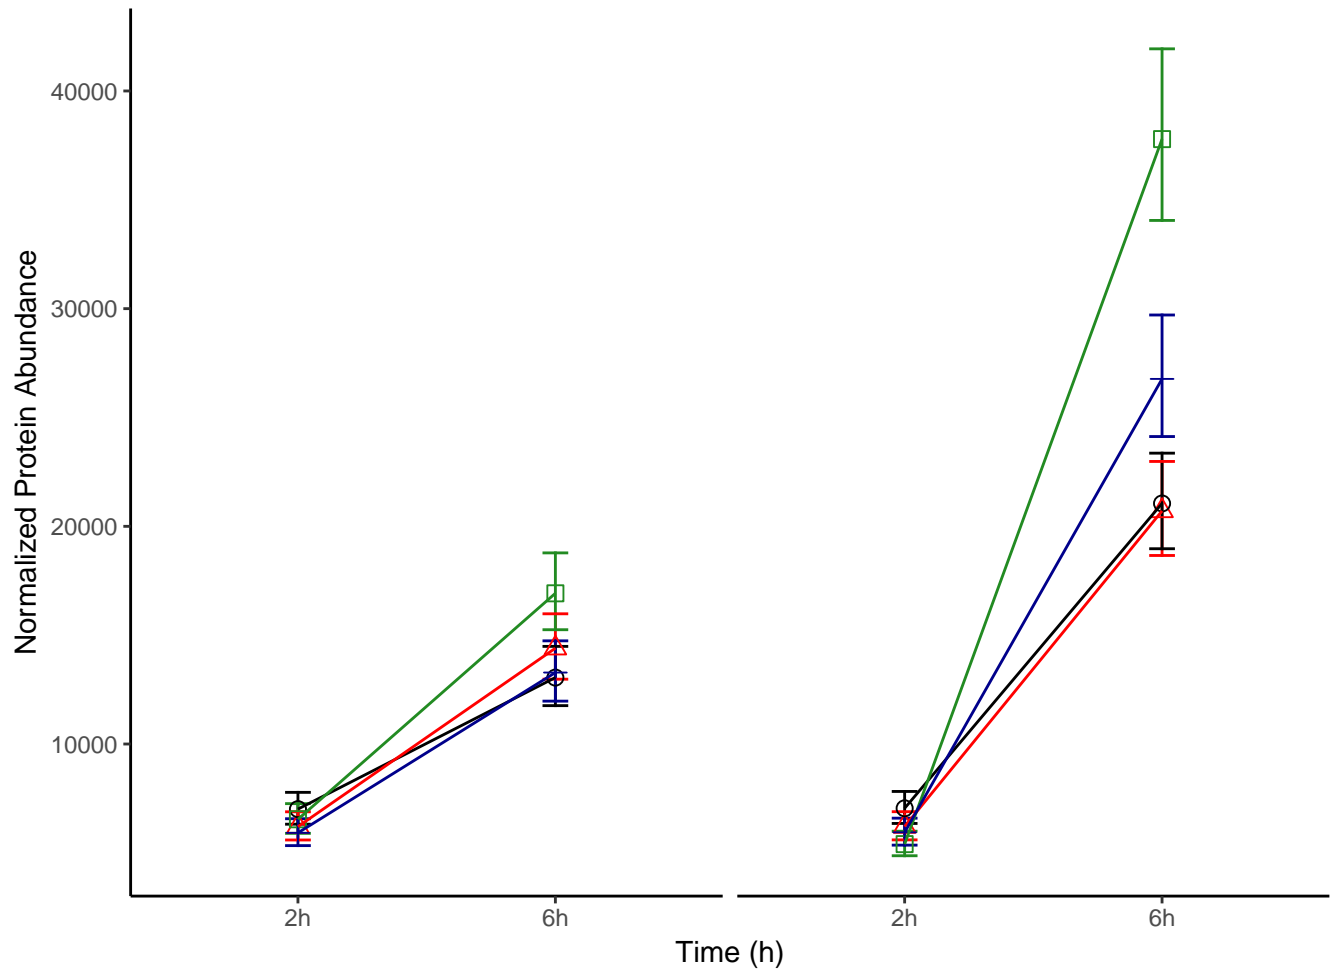

- SA564
- △ SA564- $\Delta$ *hptRS*
- SA564- $\Delta$ *ccpA*
- + SA564- $\Delta$ *hptRS/ccpA*

# Y1880\_STAAM

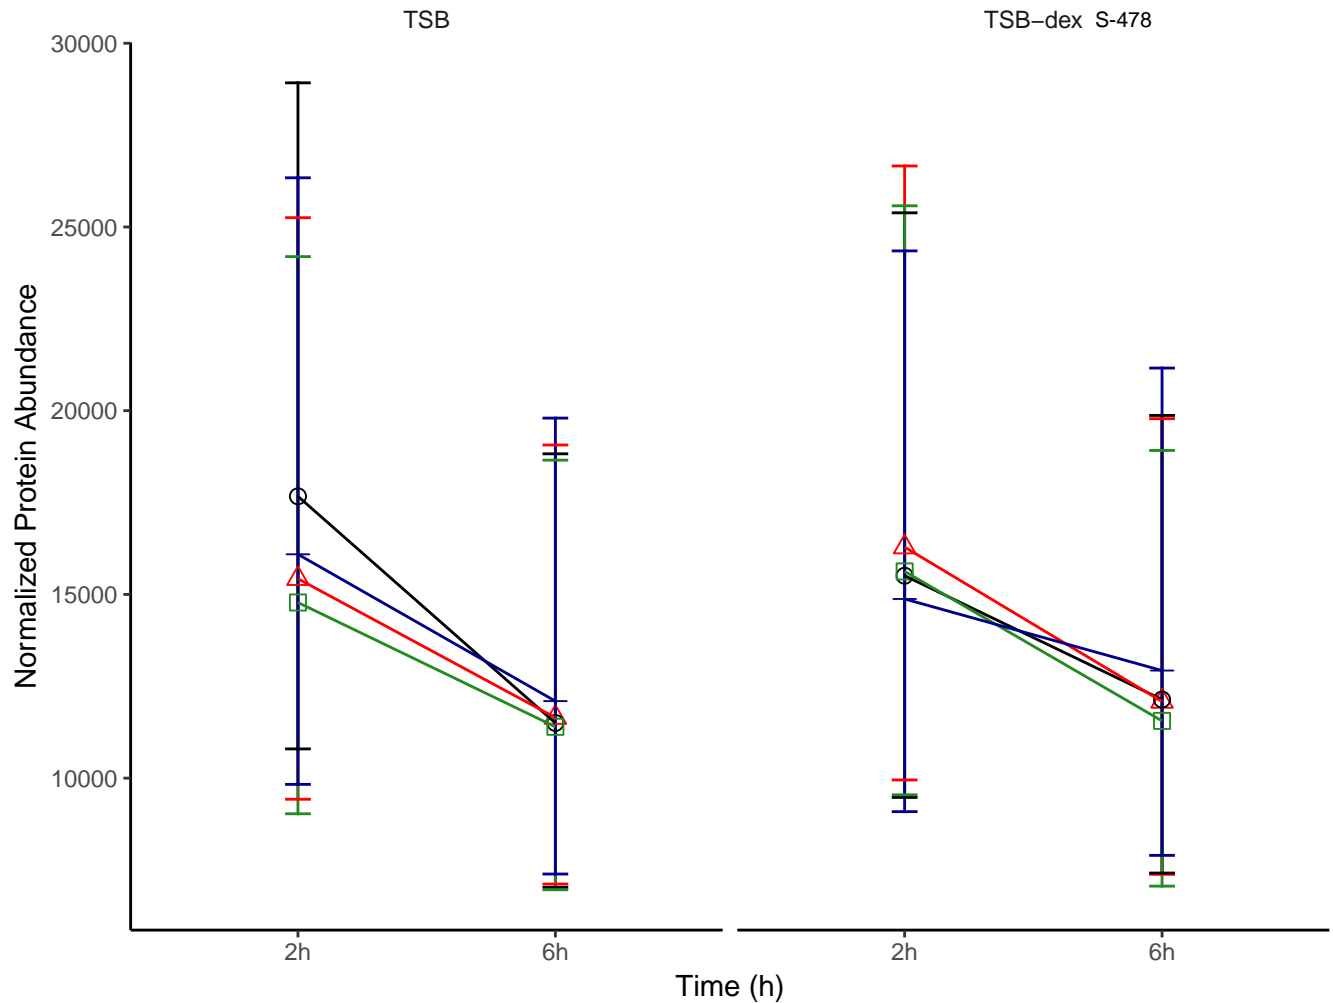

- SA564
- △ SA564- $\Delta$ hptRS
- SA564- $\Delta$ ccpA
- + SA564- $\Delta$ hptRS/ccpA

# Y1921\_STAAM

TSB

TSB-dex S-479

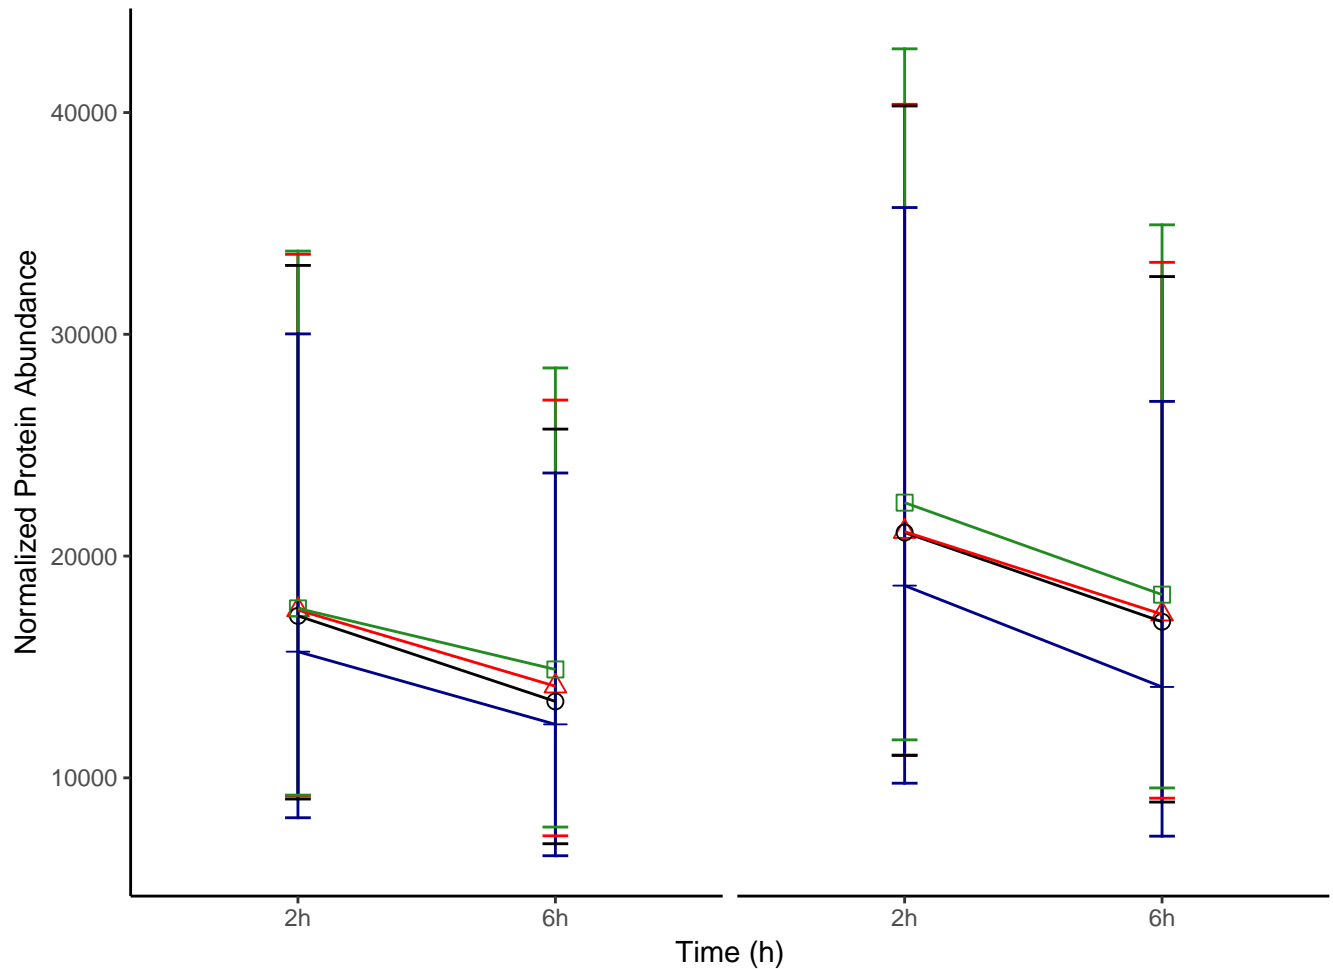

- SA564
- △ SA564- $\Delta$ hptRS
- SA564- $\Delta$ ccpA
- + SA564- $\Delta$ hptRS/ccpA

# Y2173\_STAAM

TSB

TSB-dex S-480

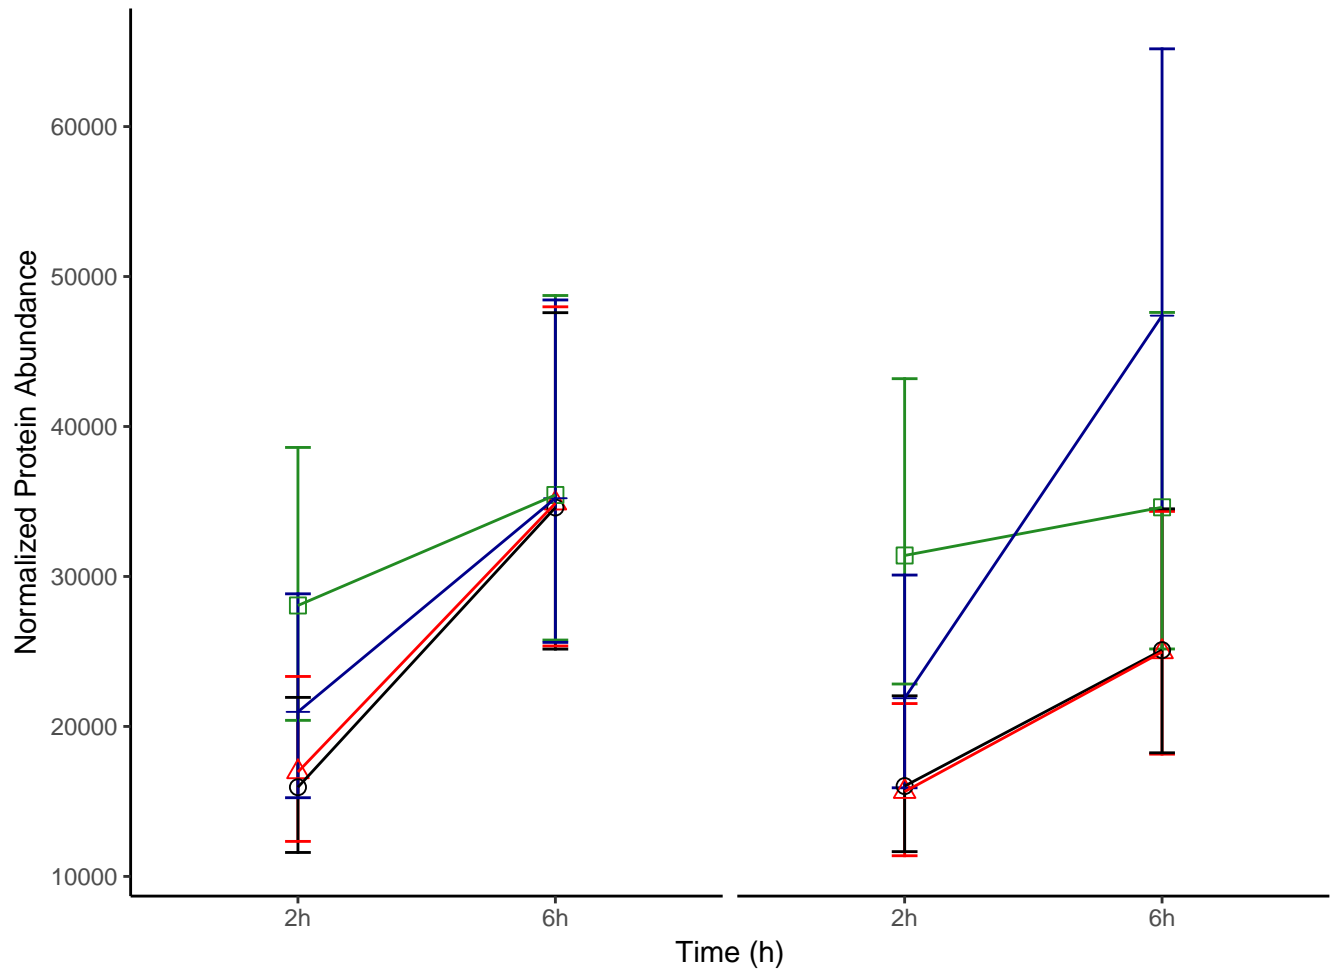

- SA564
- △ SA564- $\Delta$ hptRS
- SA564- $\Delta$ ccpA
- + SA564- $\Delta$ hptRS/ccpA



# Y2204\_STAAM

TSB

TSB-dex S-481

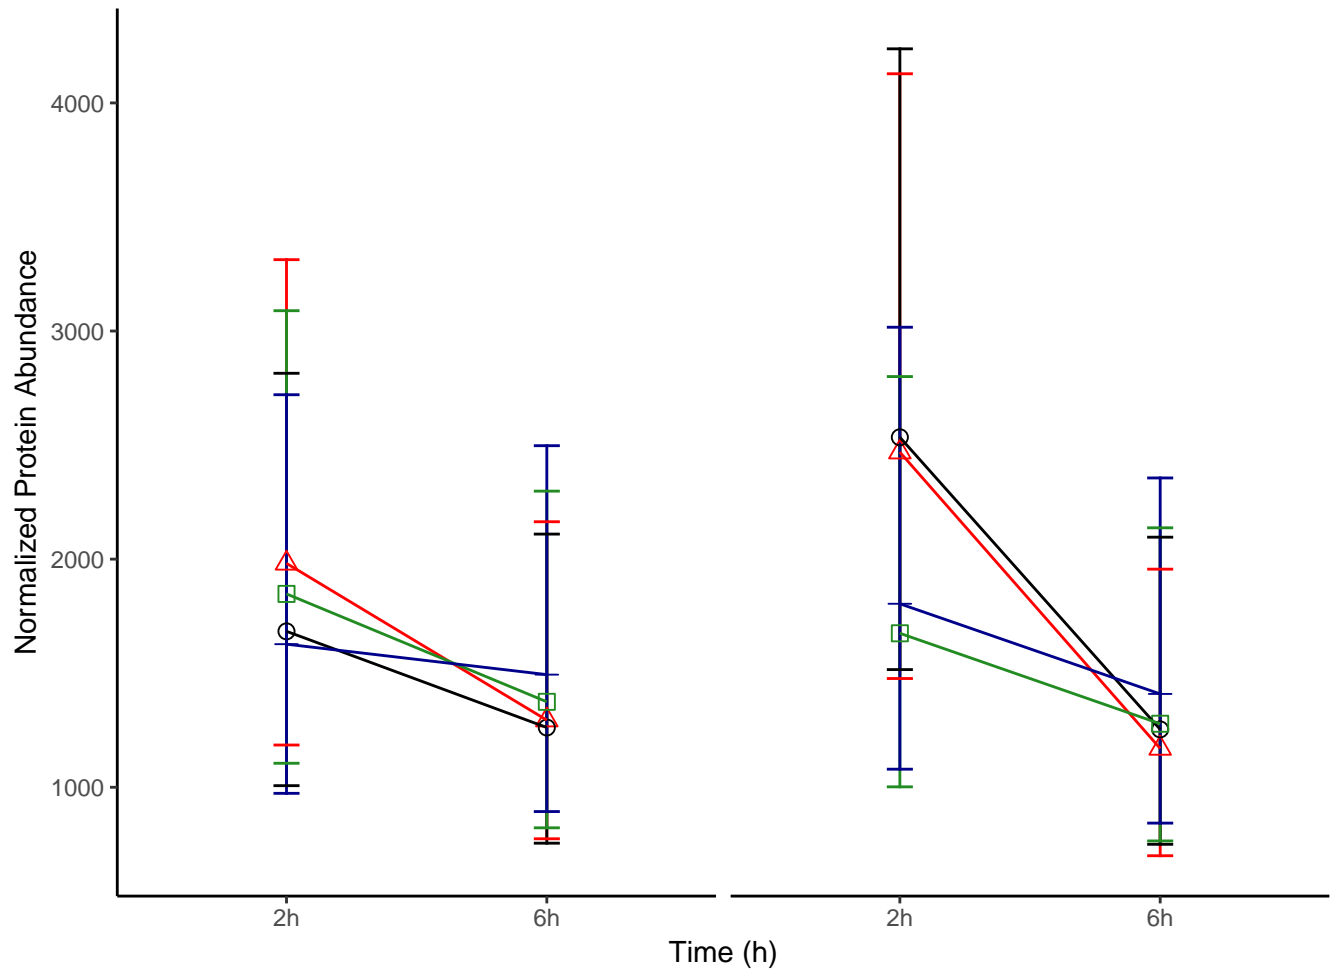

- SA564
- △ SA564- $\Delta$ *hptRS*
- SA564- $\Delta$ *ccpA*
- + SA564- $\Delta$ *hptRS/ccpA*

# Y2265\_STAAM

TSB

TSB-dex S-482

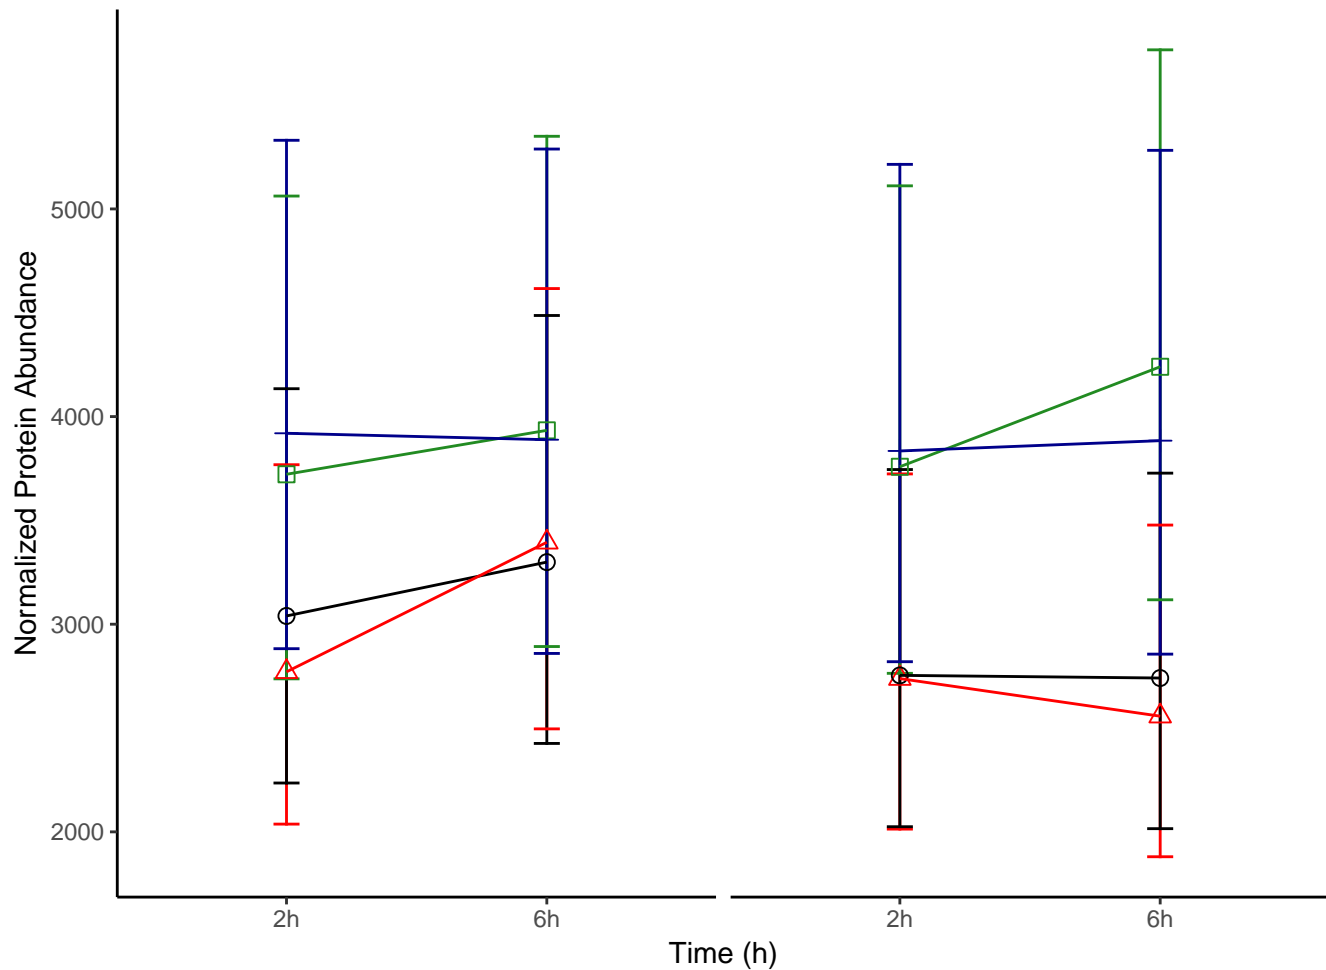

- SA564
- △ SA564- $\Delta hptRS$
- SA564- $\Delta ccpA$
- + SA564- $\Delta hptRS/ccpA$

# Y2305\_STAAM

TSB

TSB-dex S-483

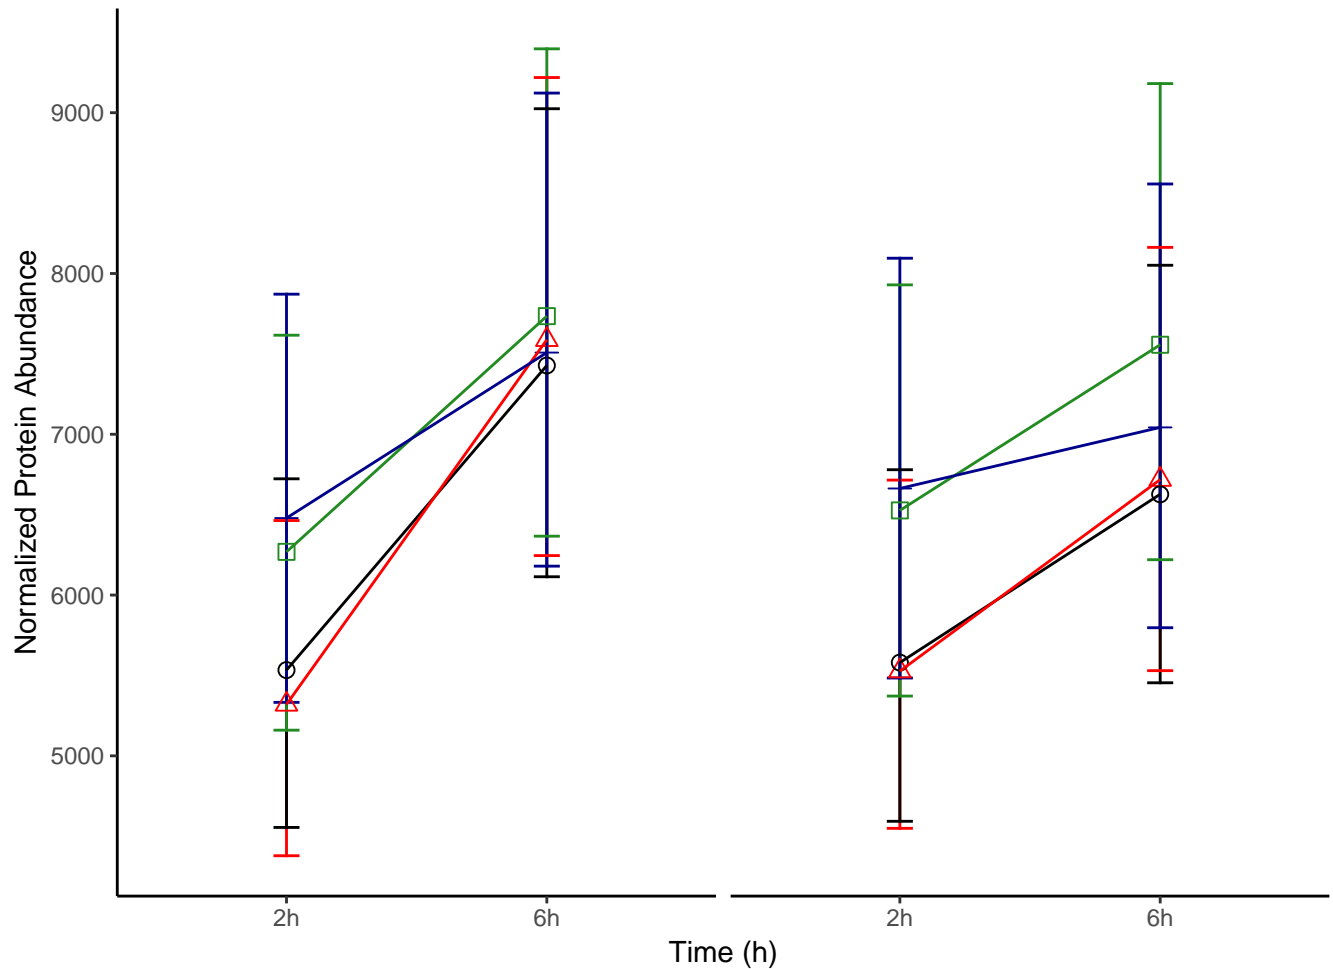

- SA564
- △ SA564- $\Delta$ *hptRS*
- SA564- $\Delta$ *ccpA*
- + SA564- $\Delta$ *hptRS/ccpA*

# Y2363\_STAAM

TSB

TSB-dex S-484

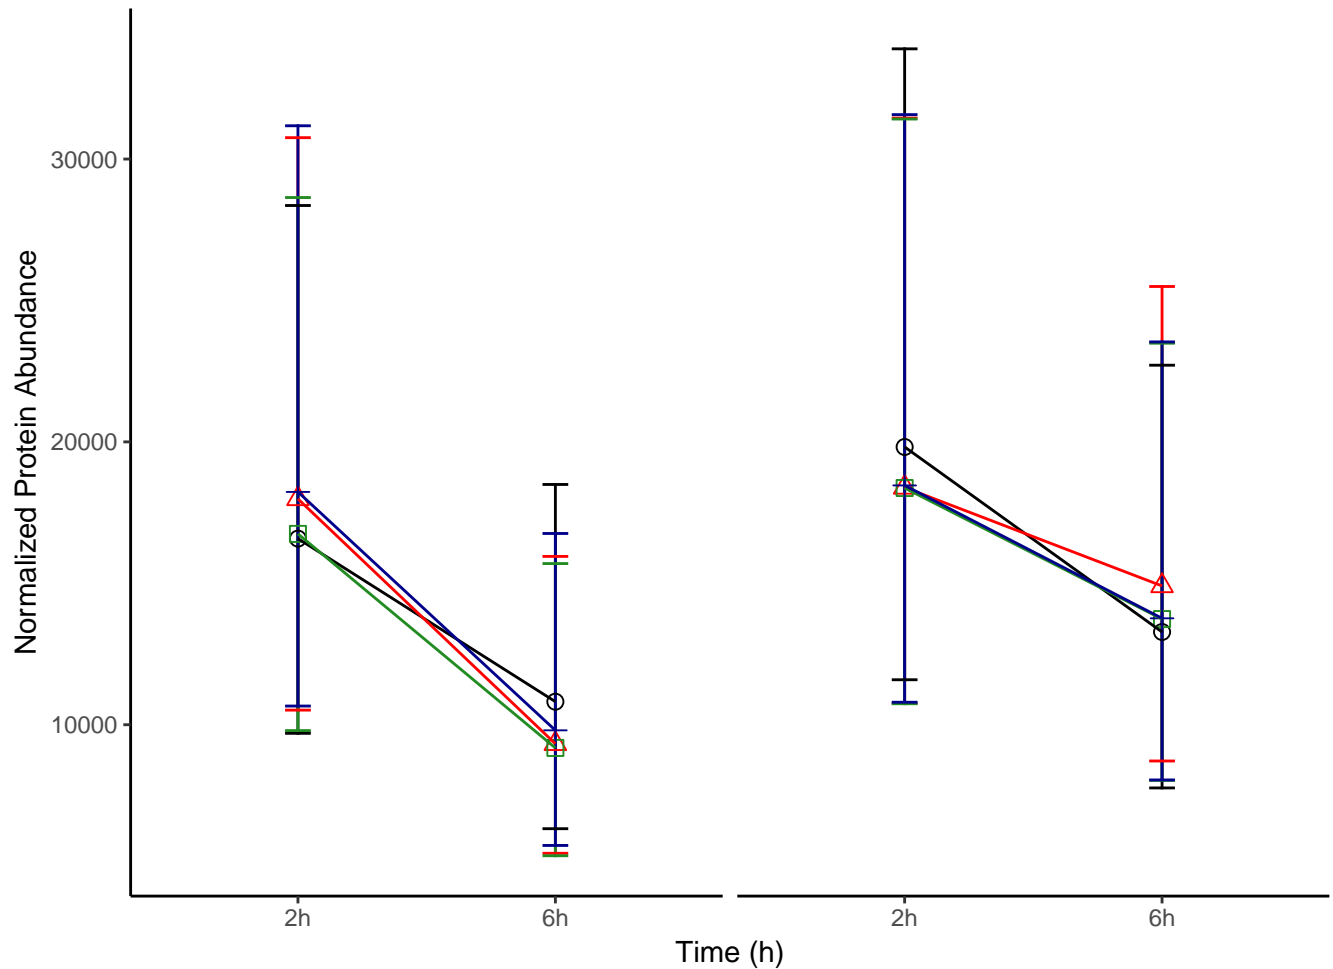

- SA564
- △ SA564- $\Delta hptRS$
- SA564- $\Delta ccpA$
- + SA564- $\Delta hptRS/ccpA$

# Y2368\_STAAM

TSB

TSB-dex S-485

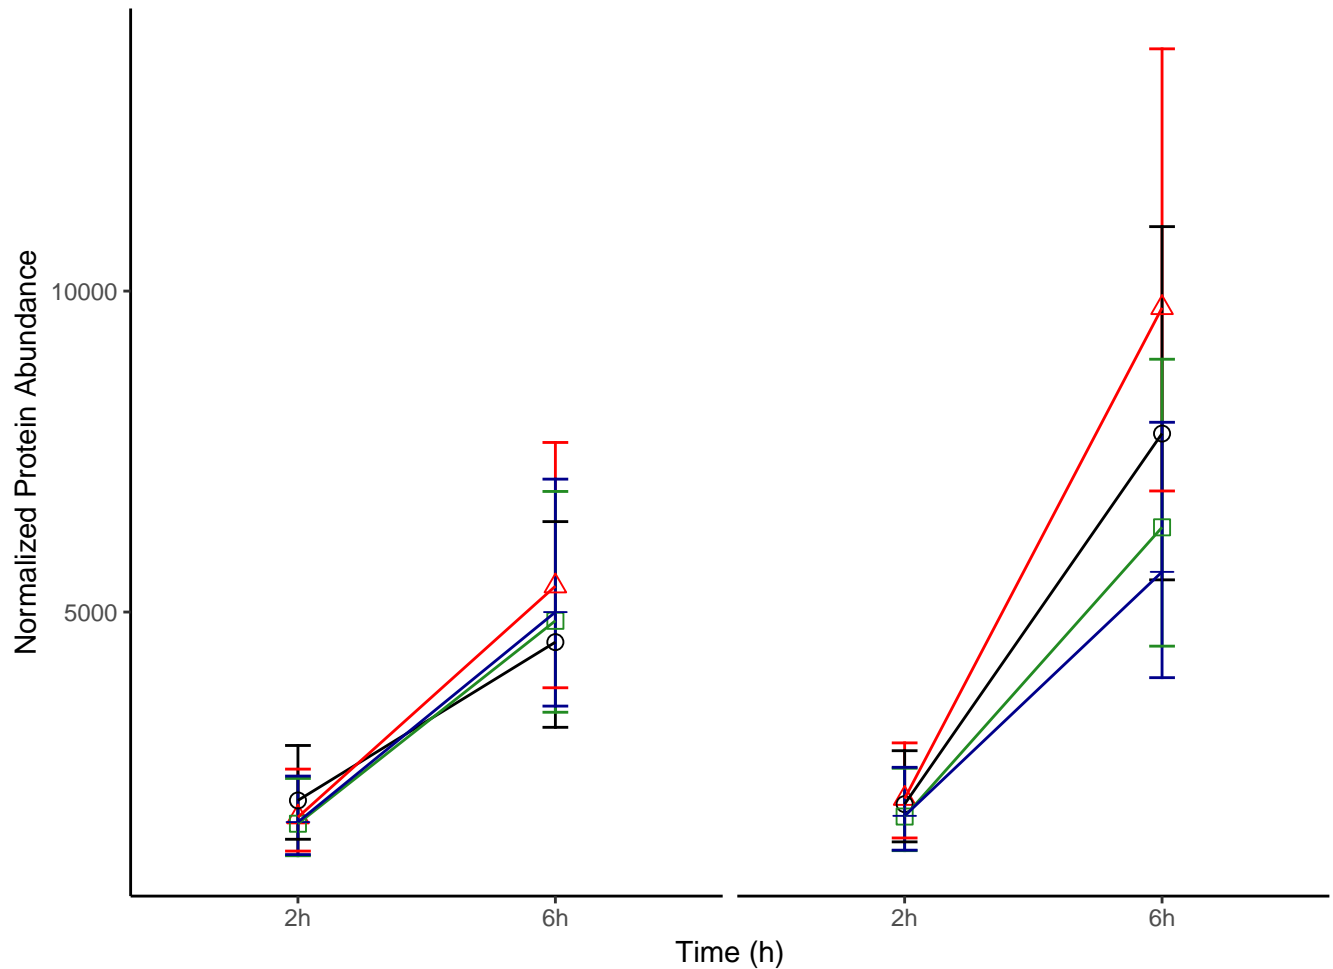

- SA564
- △ SA564- $\Delta$ *hptRS*
- SA564- $\Delta$ *ccpA*
- + SA564- $\Delta$ *hptRS/ccpA*

# Y2478\_STAAM

TSB

TSB-dex S-486

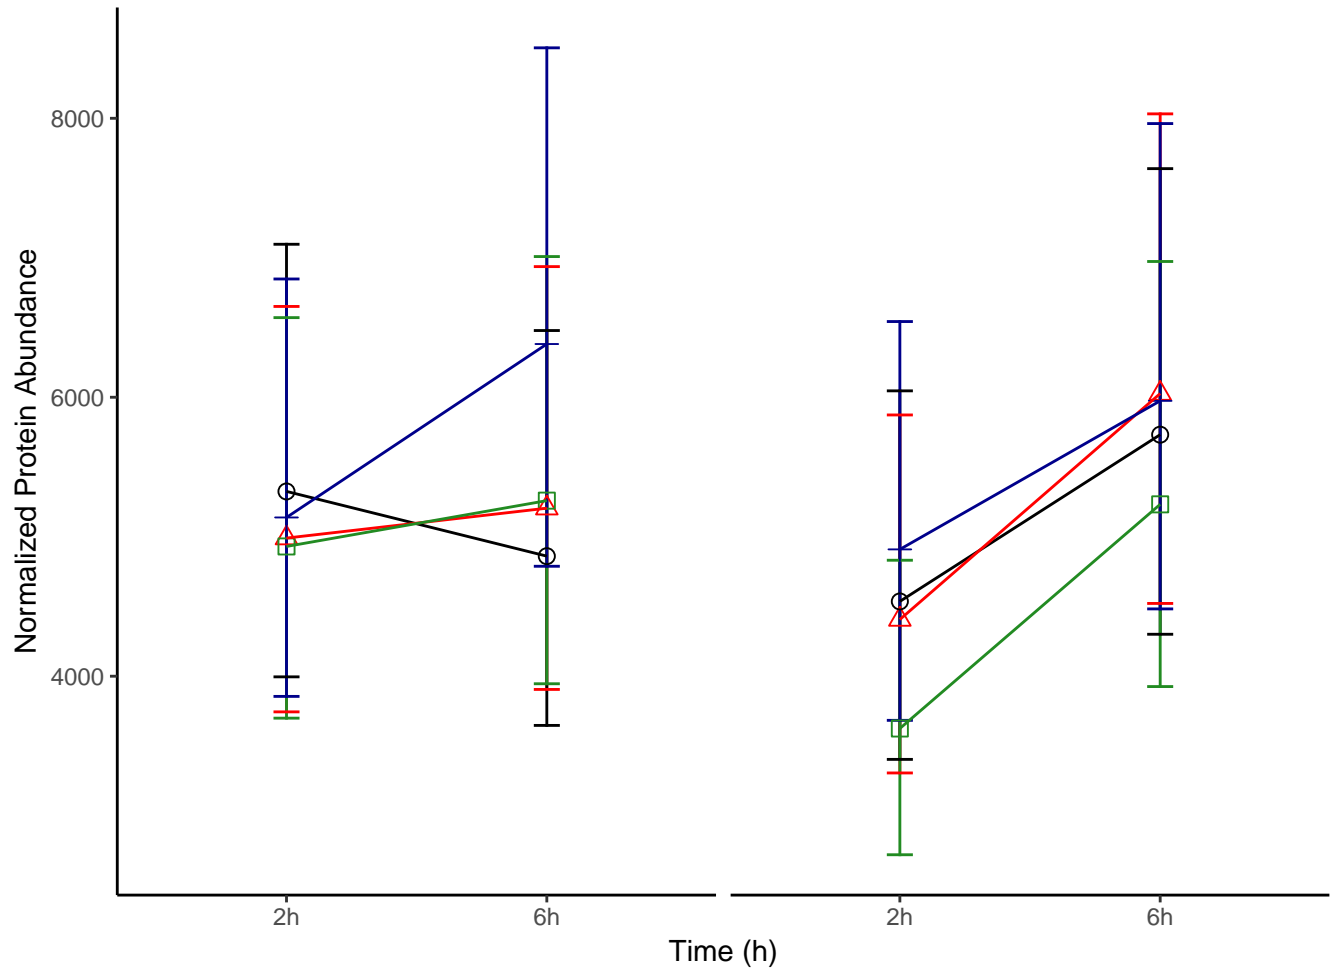

- SA564
- △ SA564- $\Delta$ *hptRS*
- SA564- $\Delta$ *ccpA*
- + SA564- $\Delta$ *hptRS/ccpA*

# Y2523\_STAAM

TSB

TSB-dex S-487

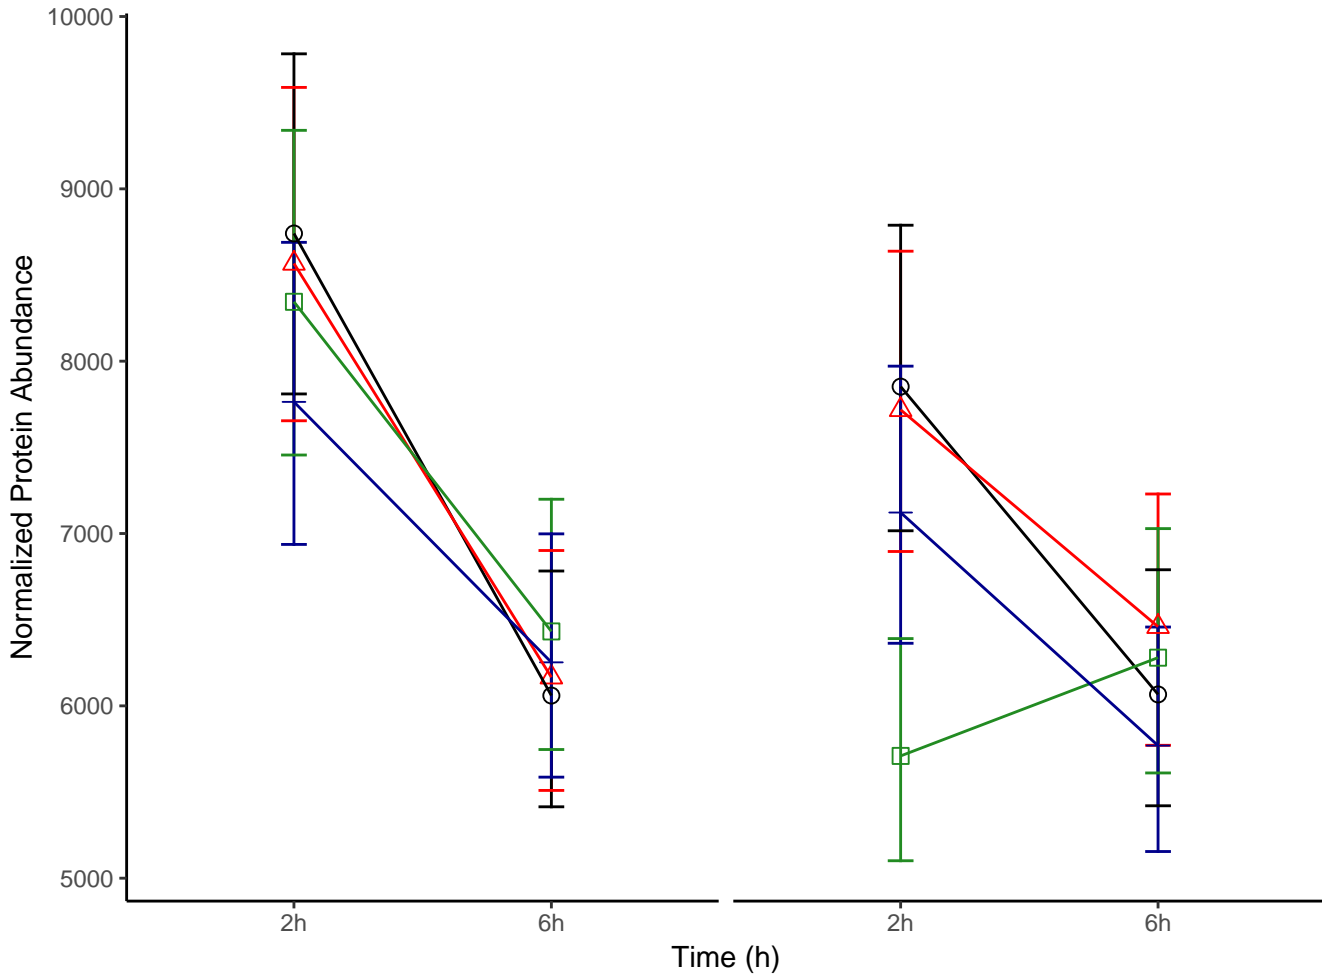

- SA564
- △ SA564- $\Delta hptRS$
- SA564- $\Delta ccpA$
- + SA564- $\Delta hptRS/ccpA$

# Y2573\_STAAM

TSB

TSB-dex S-488

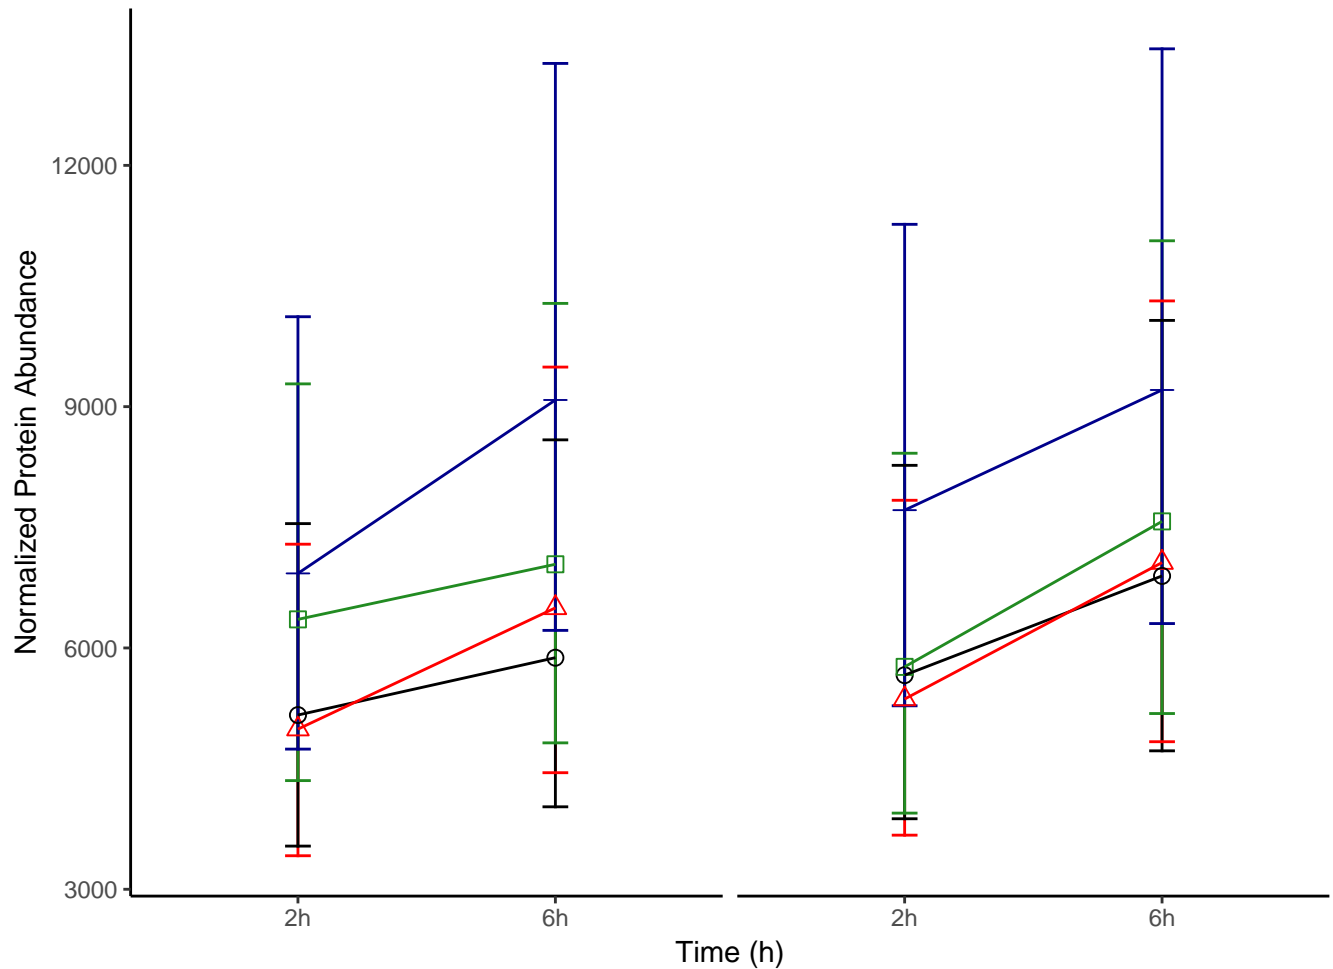

- SA564
- △ SA564-ΔhptRS
- SA564-ΔccpA
- + SA564-ΔhptRS/ccpA



# Y2578\_STAAM

TSB

TSB-dex S-489

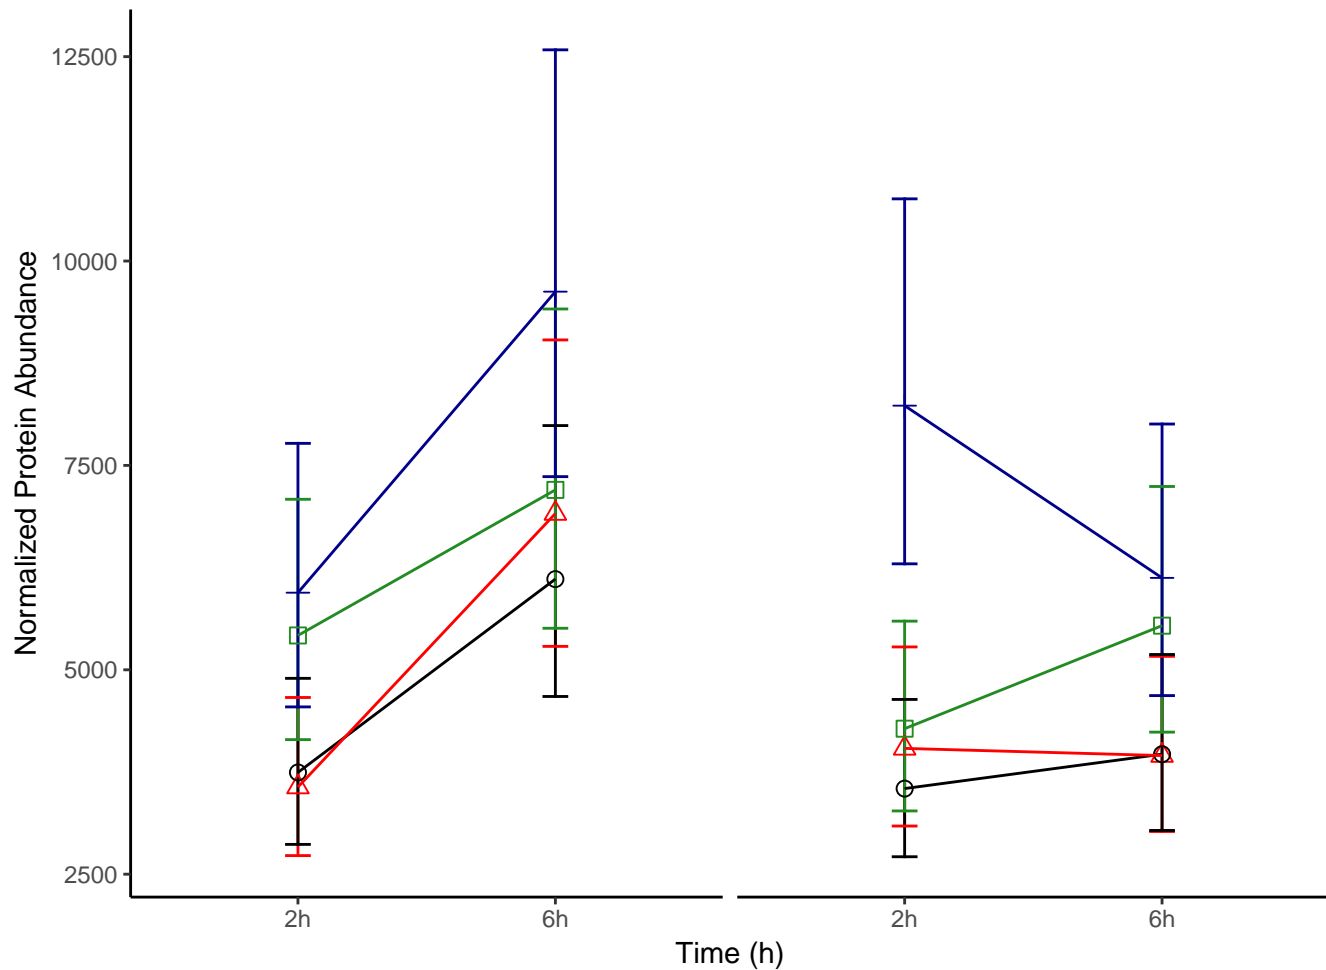

- SA564
- △ SA564- $\Delta$ hptRS
- SA564- $\Delta$ ccpA
- + SA564- $\Delta$ hptRS/ccpA

# Y2581\_STAAM

TSB

TSB-dex S-490

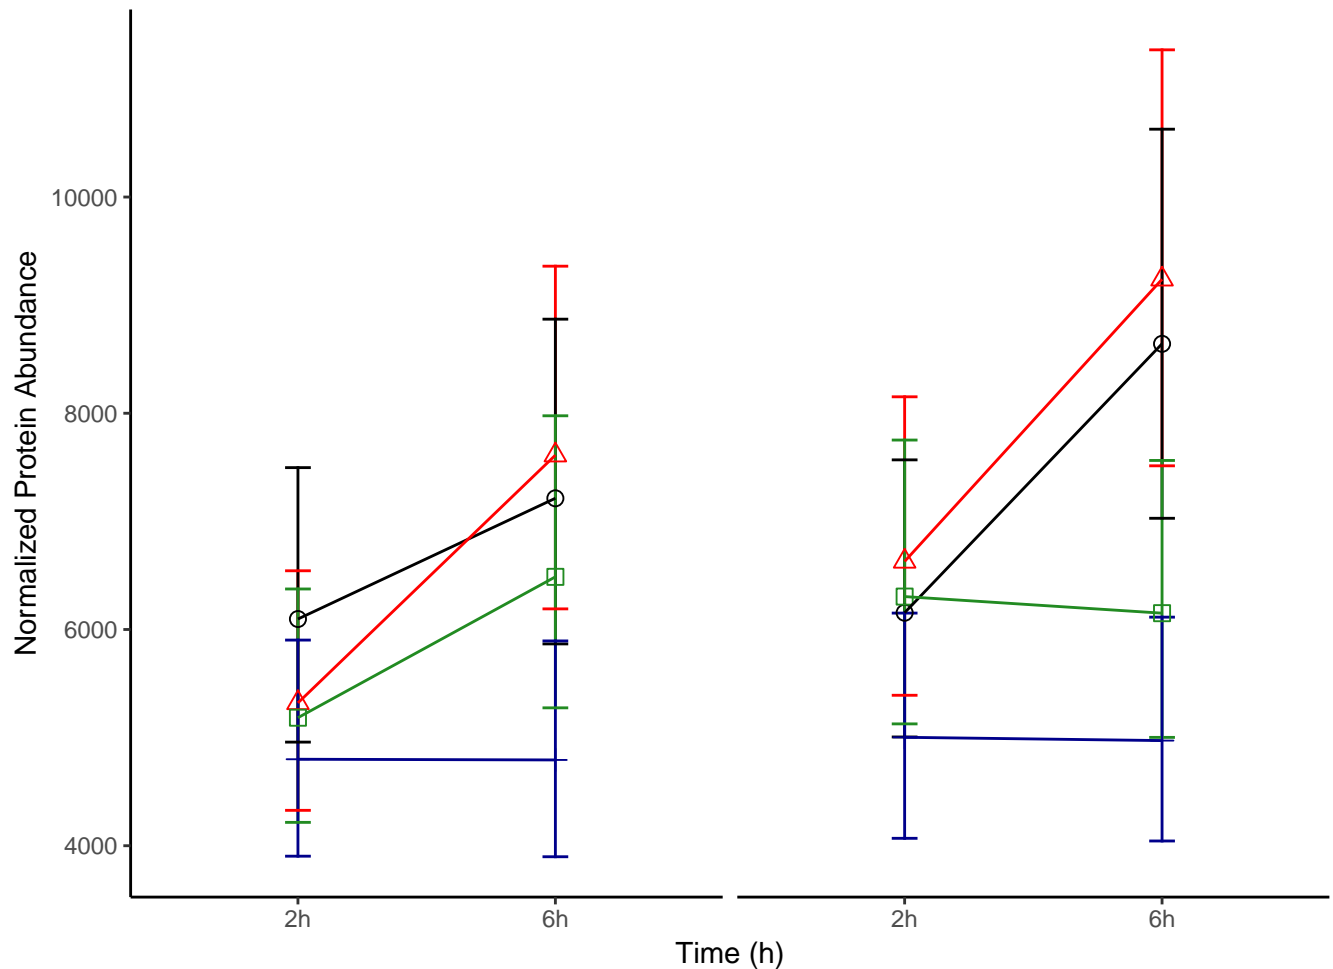

- SA564
- △ SA564- $\Delta$ hptRS
- SA564- $\Delta$ ccpA
- + SA564- $\Delta$ hptRS/ccpA

# Y2627\_STAAM

TSB

TSB-dex S-491

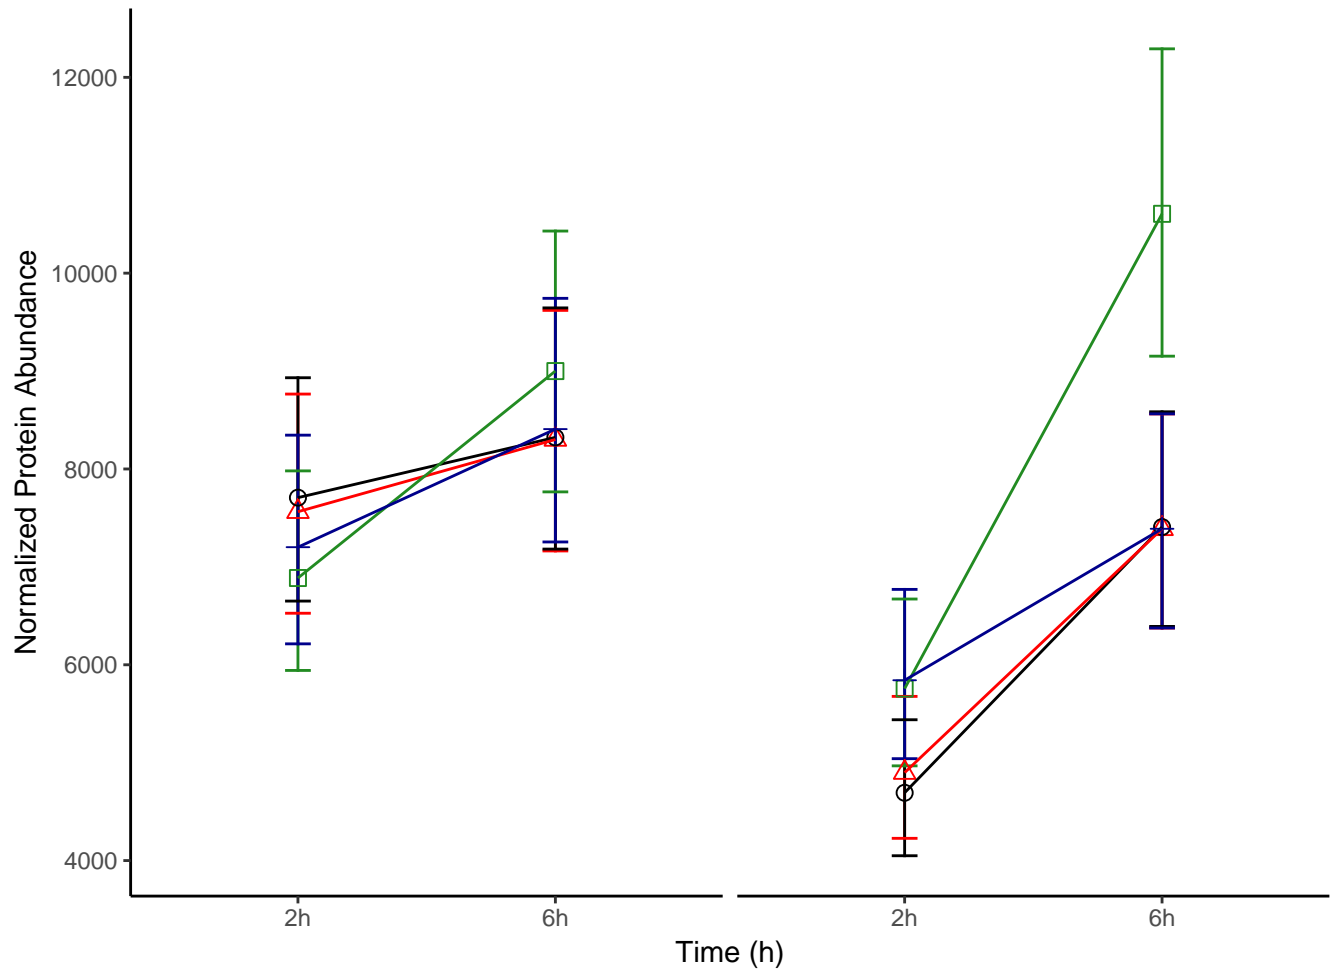

- SA564
- △ SA564- $\Delta$ hptRS
- SA564- $\Delta$ ccpA
- + SA564- $\Delta$ hptRS/ccpA

# Y2687\_STAAM

TSB

TSB-dex S-492

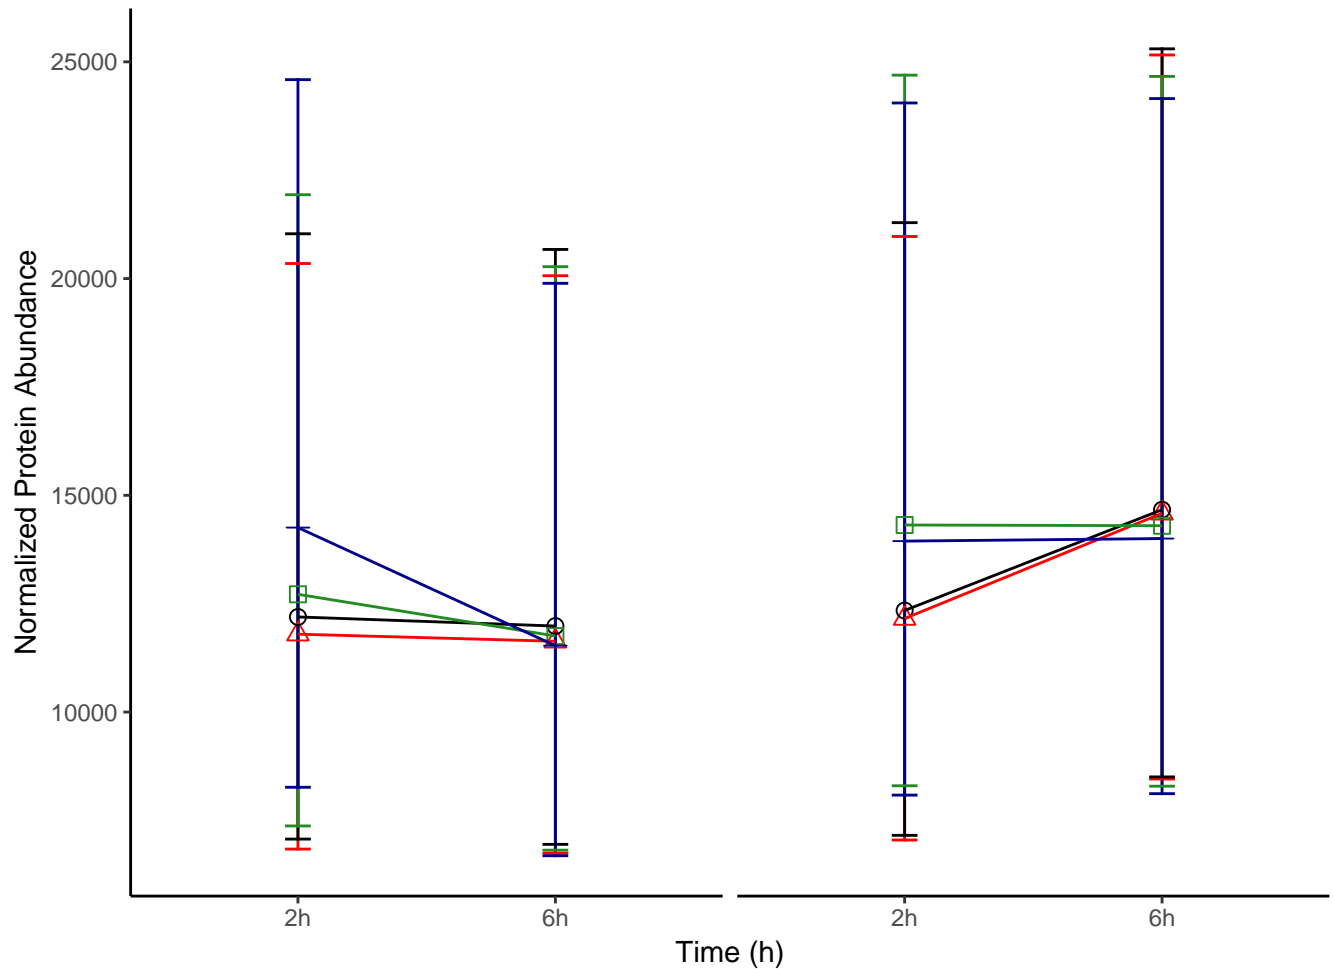

- SA564
- △ SA564- $\Delta$ *hptRS*
- SA564- $\Delta$ *ccpA*
- + SA564- $\Delta$ *hptRS/ccpA*

# Y2689\_STAAM

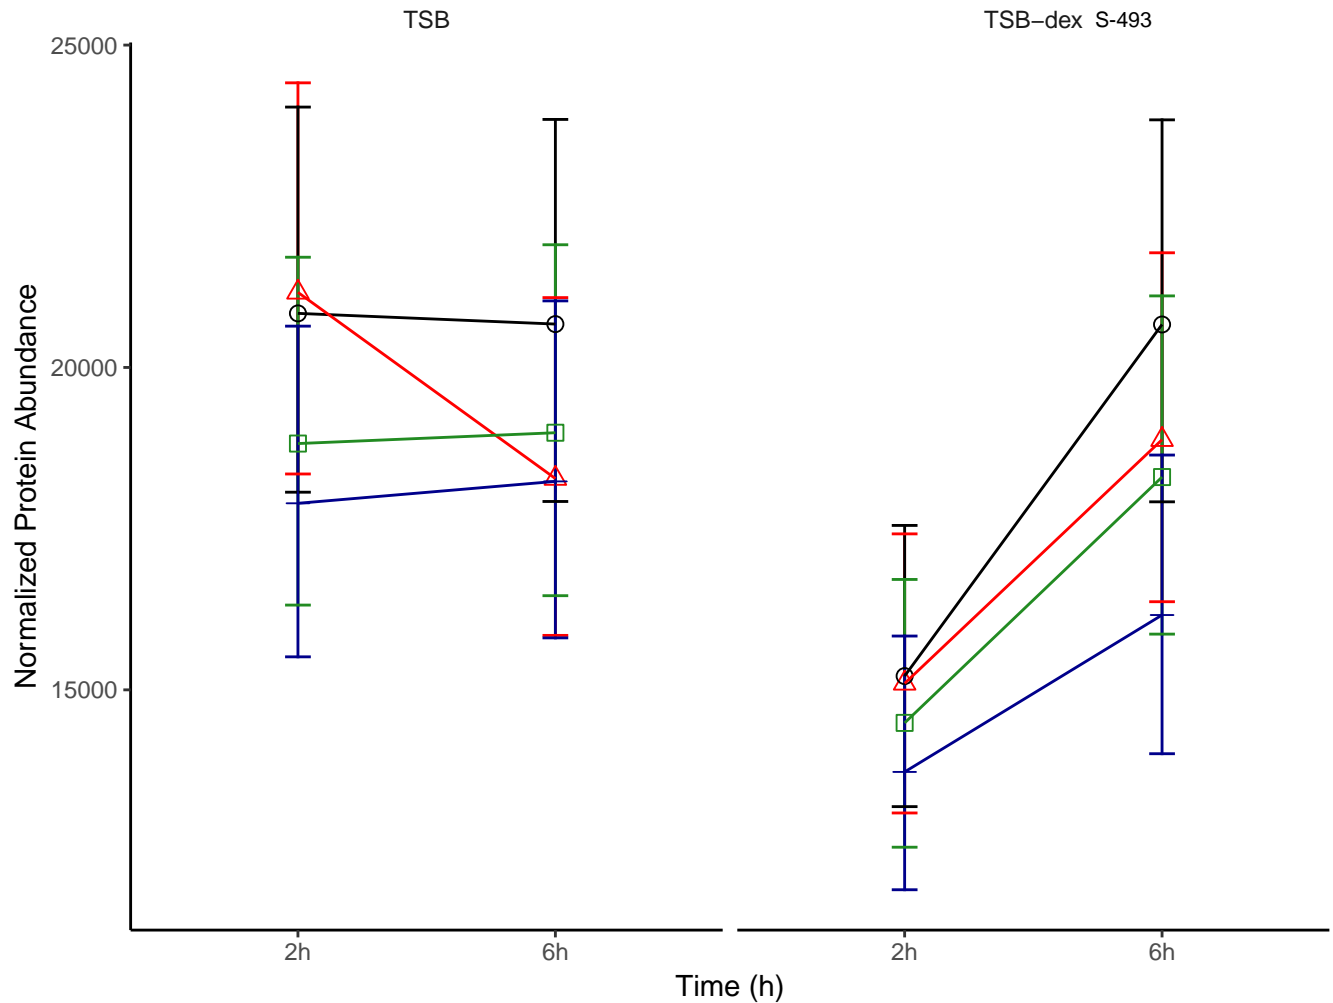

- SA564
- △ SA564-ΔhptRS
- SA564-ΔccpA
- + SA564-ΔhptRS/ccpA

# Y385\_STAAM

TSB

TSB-dex S-494

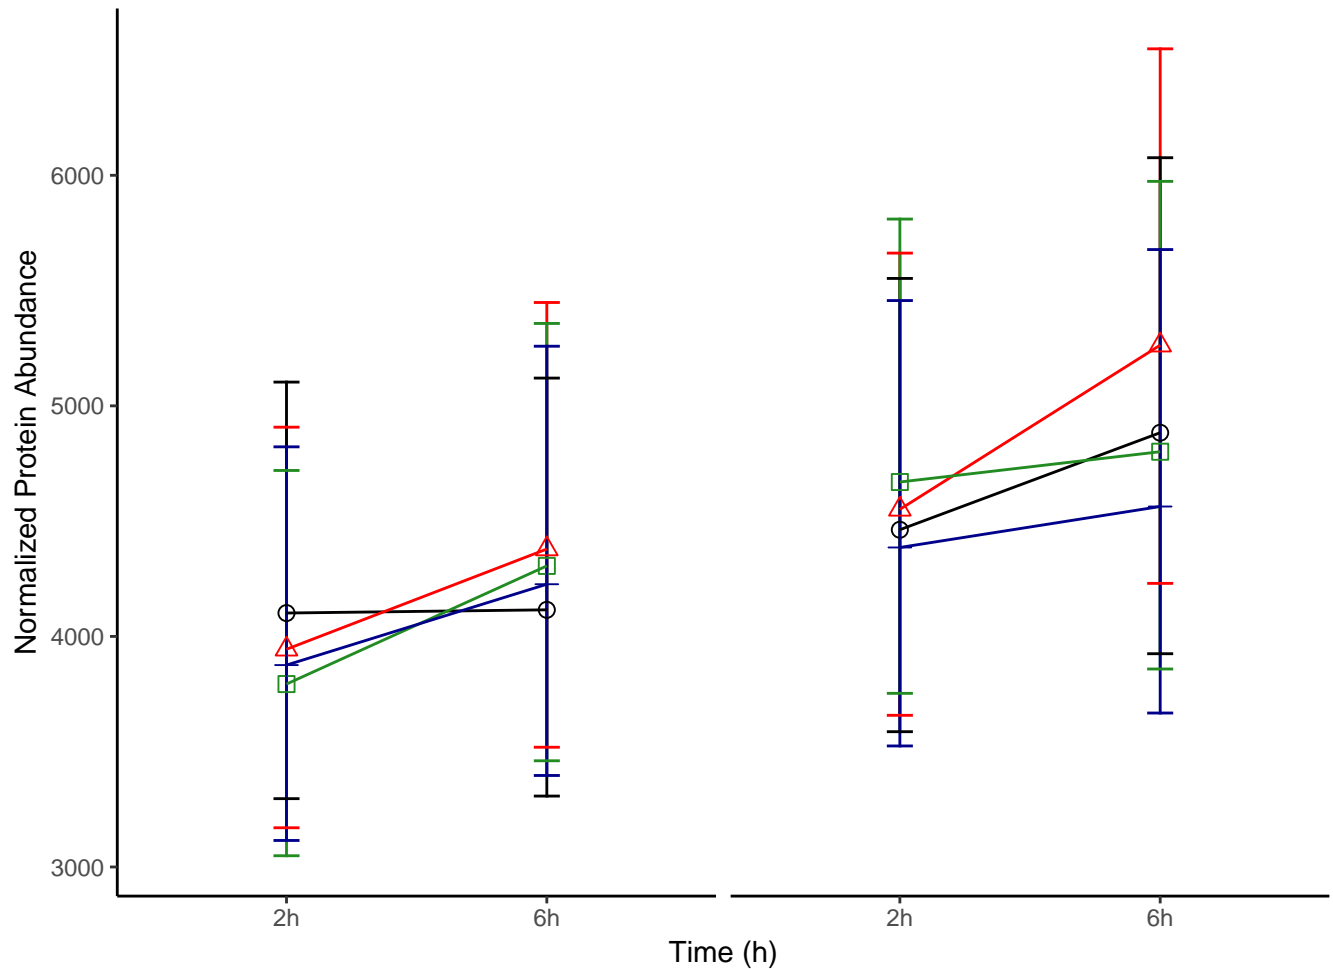

- SA564
- △ SA564- $\Delta hptRS$
- SA564- $\Delta ccpA$
- + SA564- $\Delta hptRS/ccpA$

# Y437\_STAAM

TSB

TSB-dex S-495

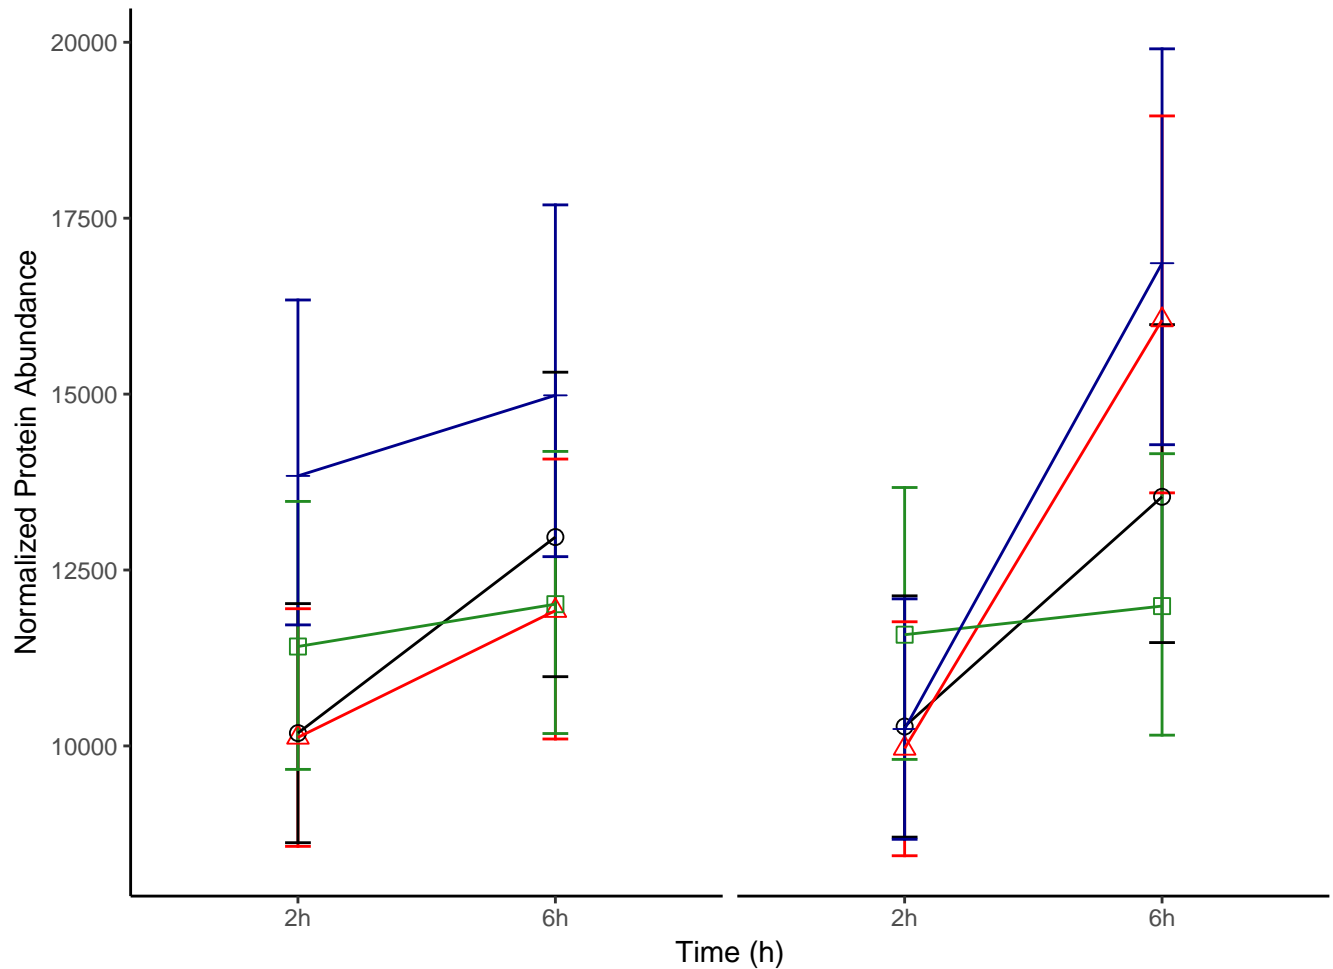

- SA564
- △ SA564- $\Delta$ hptRS
- SA564- $\Delta$ ccpA
- + SA564- $\Delta$ hptRS/ccpA

# Y479\_STAAM

TSB

TSB-dex S-496

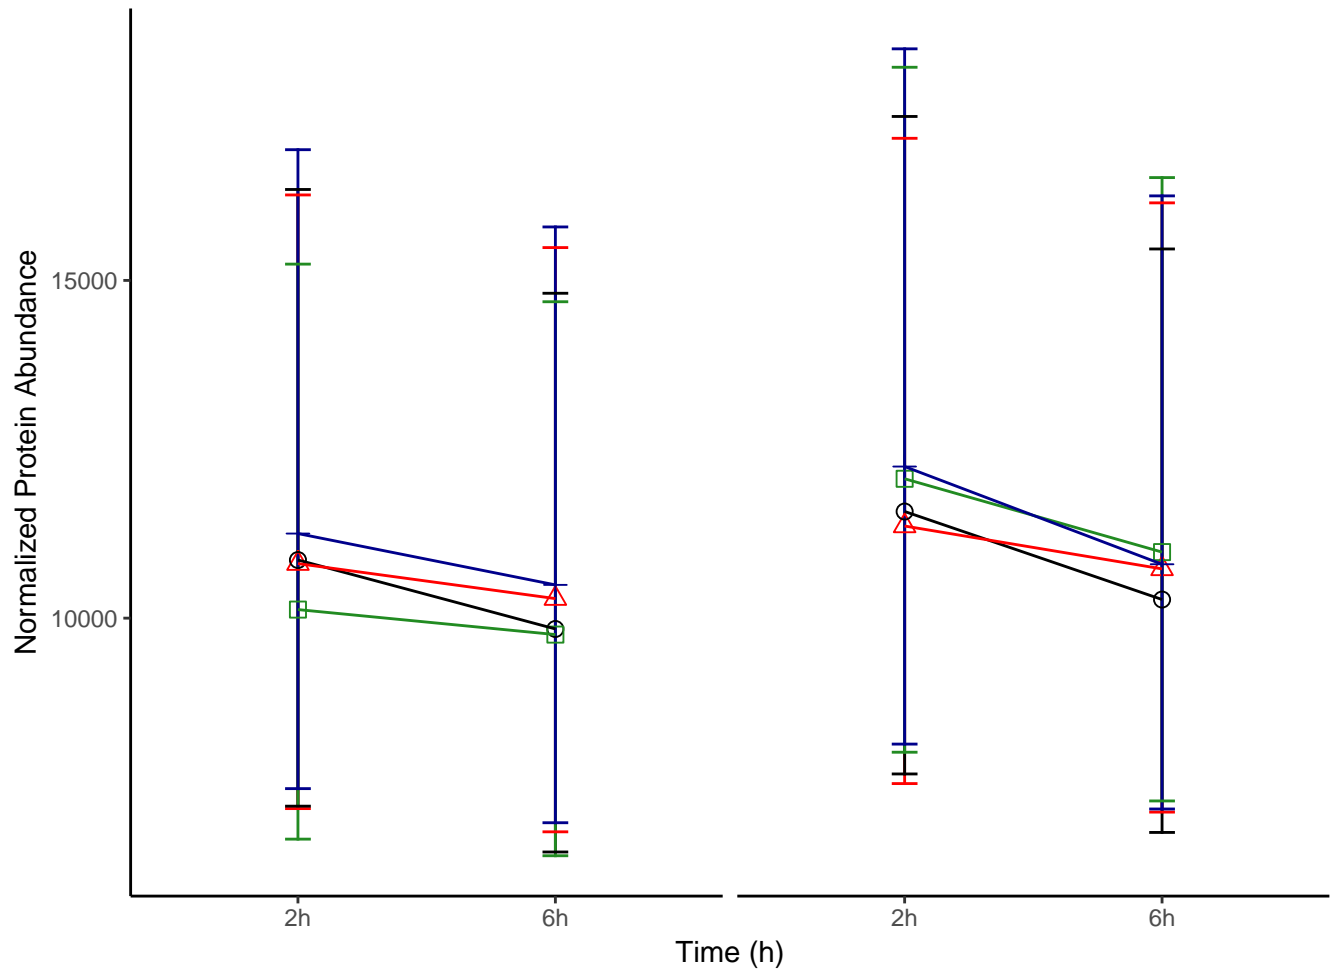

- SA564
- △ SA564- $\Delta$ *hptRS*
- SA564- $\Delta$ *ccpA*
- + SA564- $\Delta$ *hptRS/ccpA*



# Y553\_STAAM

TSB

TSB-dex S-497

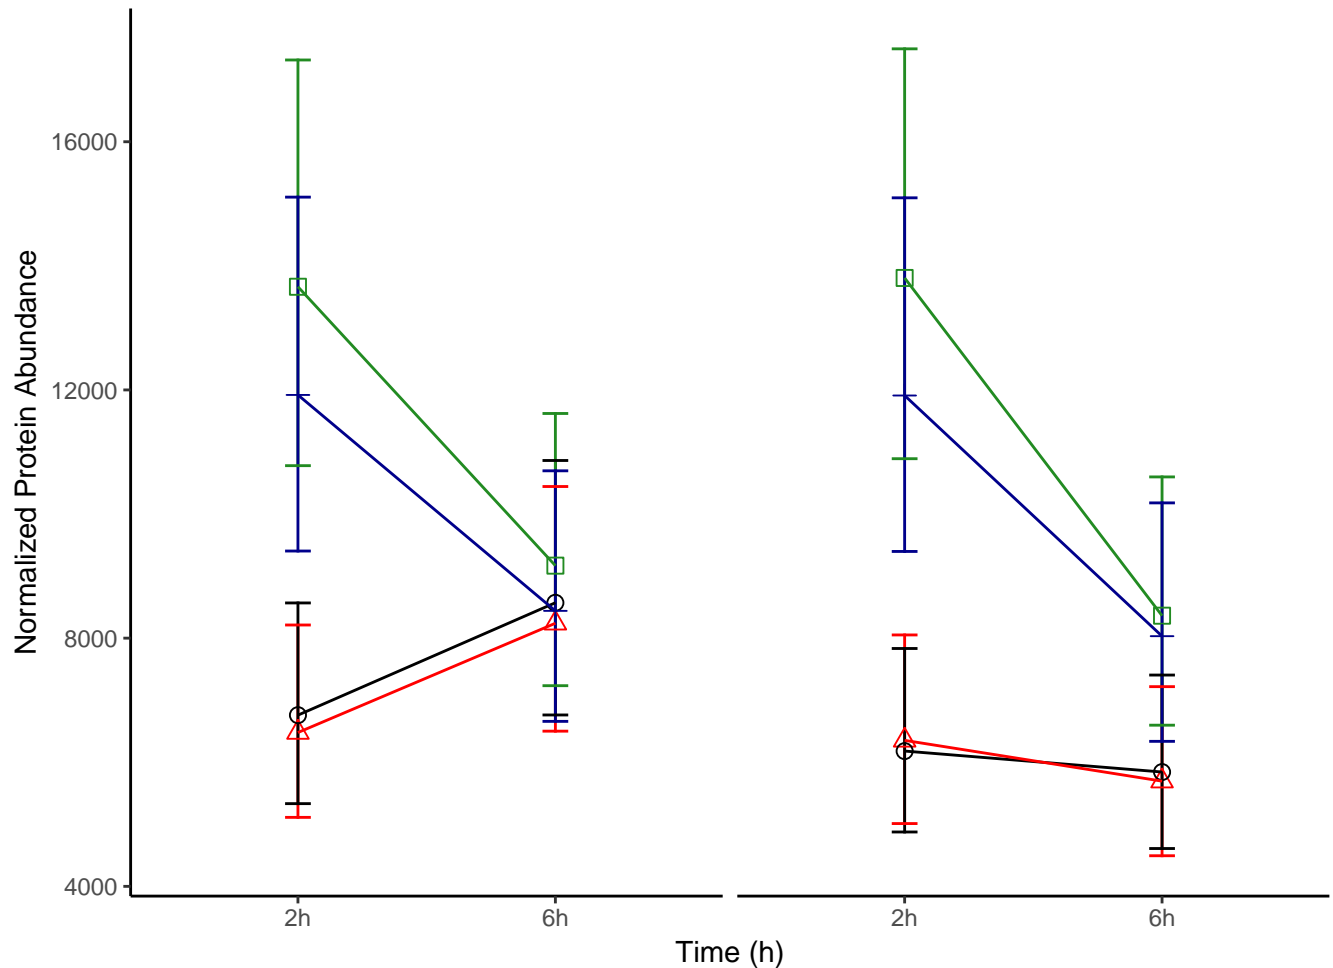

- SA564
- △ SA564-Δ*hptRS*
- SA564-Δ*ccpA*
- + SA564-Δ*hptRS/ccpA*

# Y587\_STAAM

TSB

TSB-dex S-498

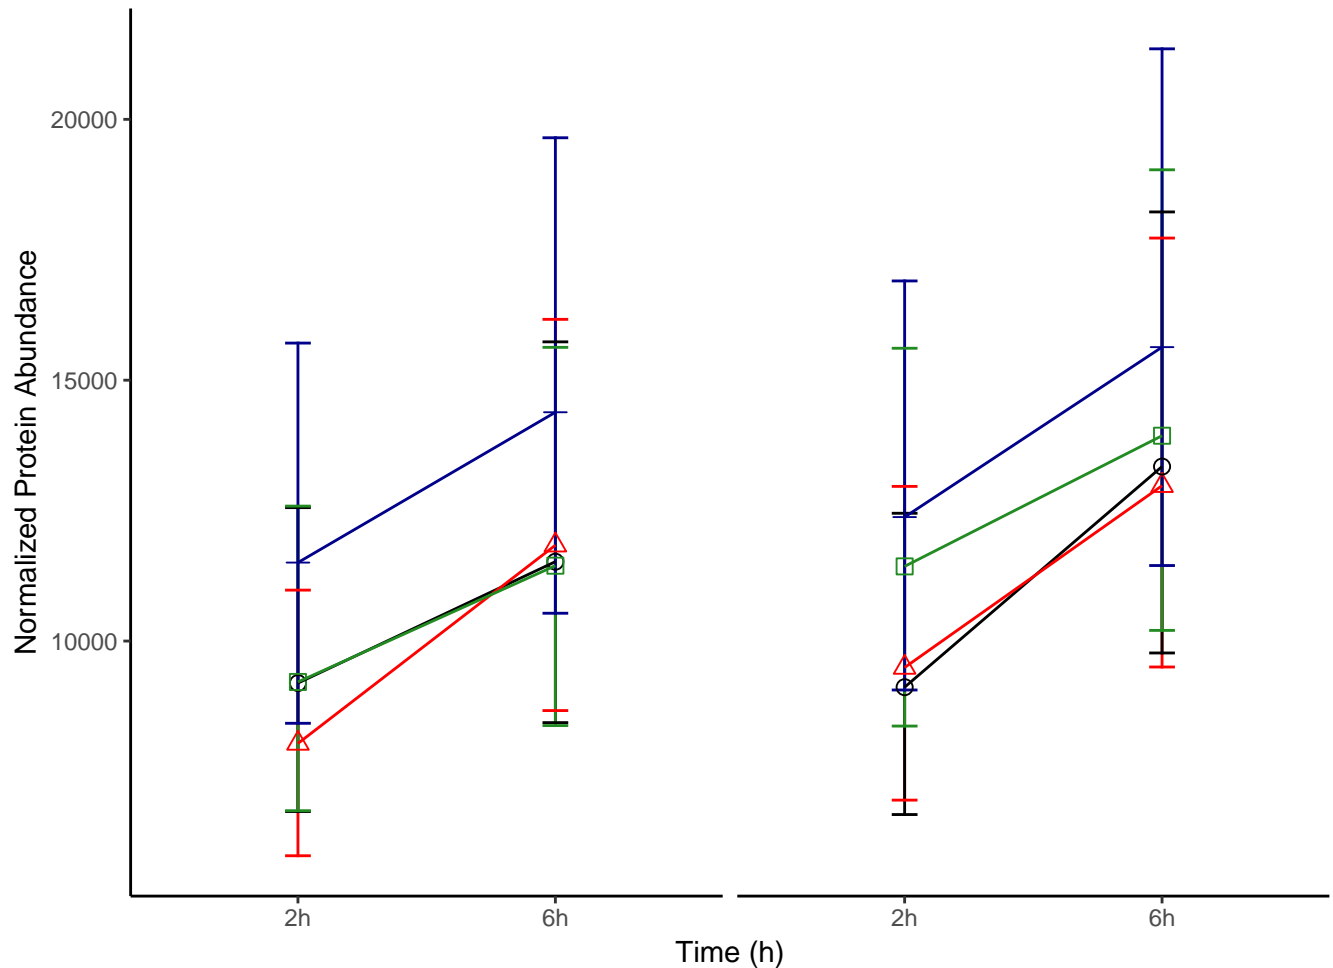

- SA564
- △ SA564- $\Delta$ hptRS
- SA564- $\Delta$ ccpA
- + SA564- $\Delta$ hptRS/ccpA

# Y669\_STAAM

TSB

TSB-dex S-499

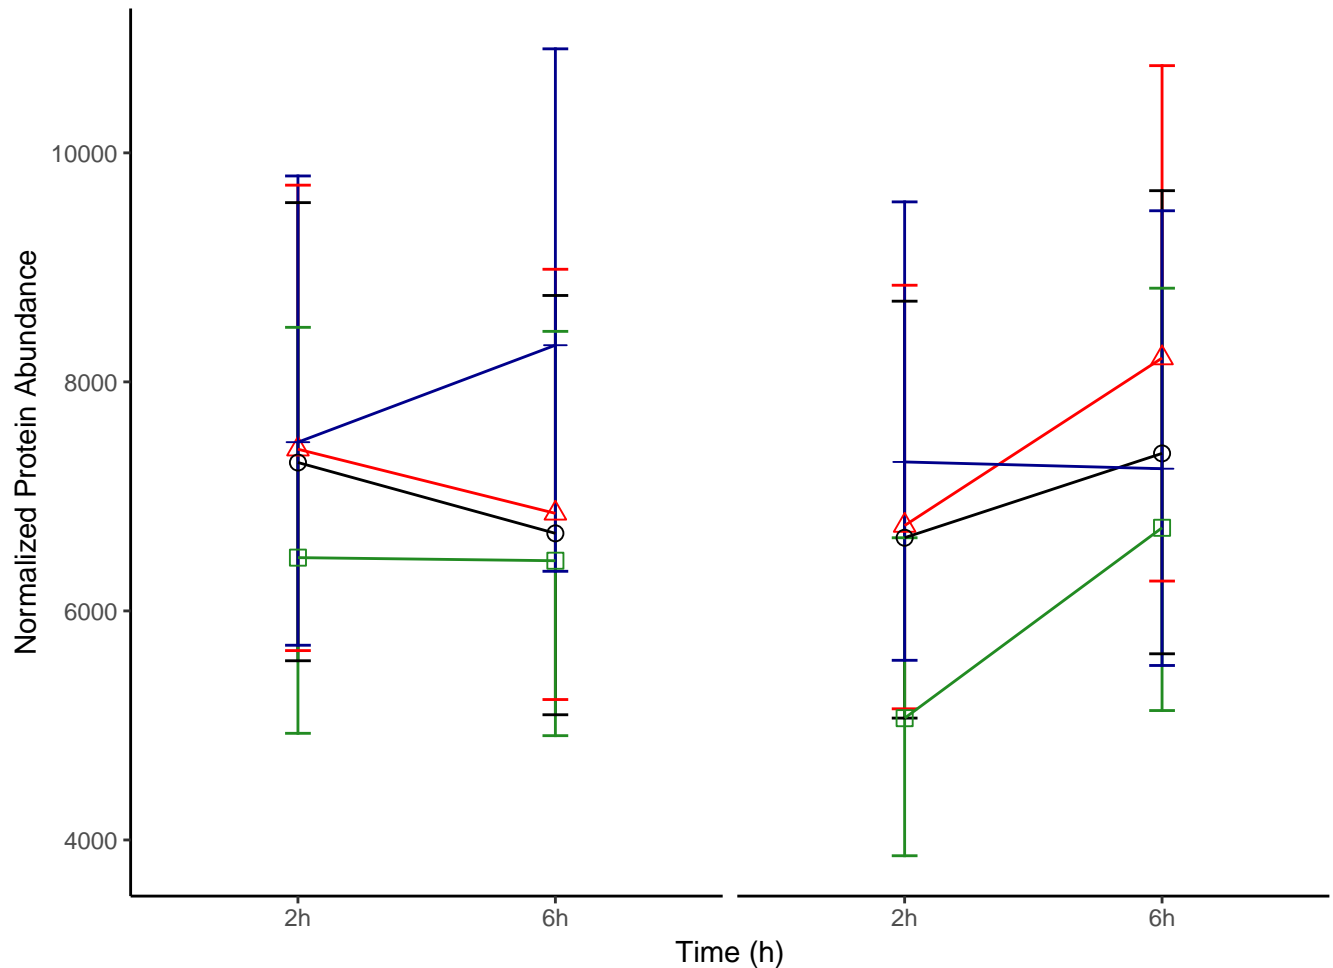

- SA564
- △ SA564- $\Delta$ hptRS
- SA564- $\Delta$ ccpA
- + SA564- $\Delta$ hptRS/ccpA

# Y752\_STAAM

TSB

TSB-dex S-500

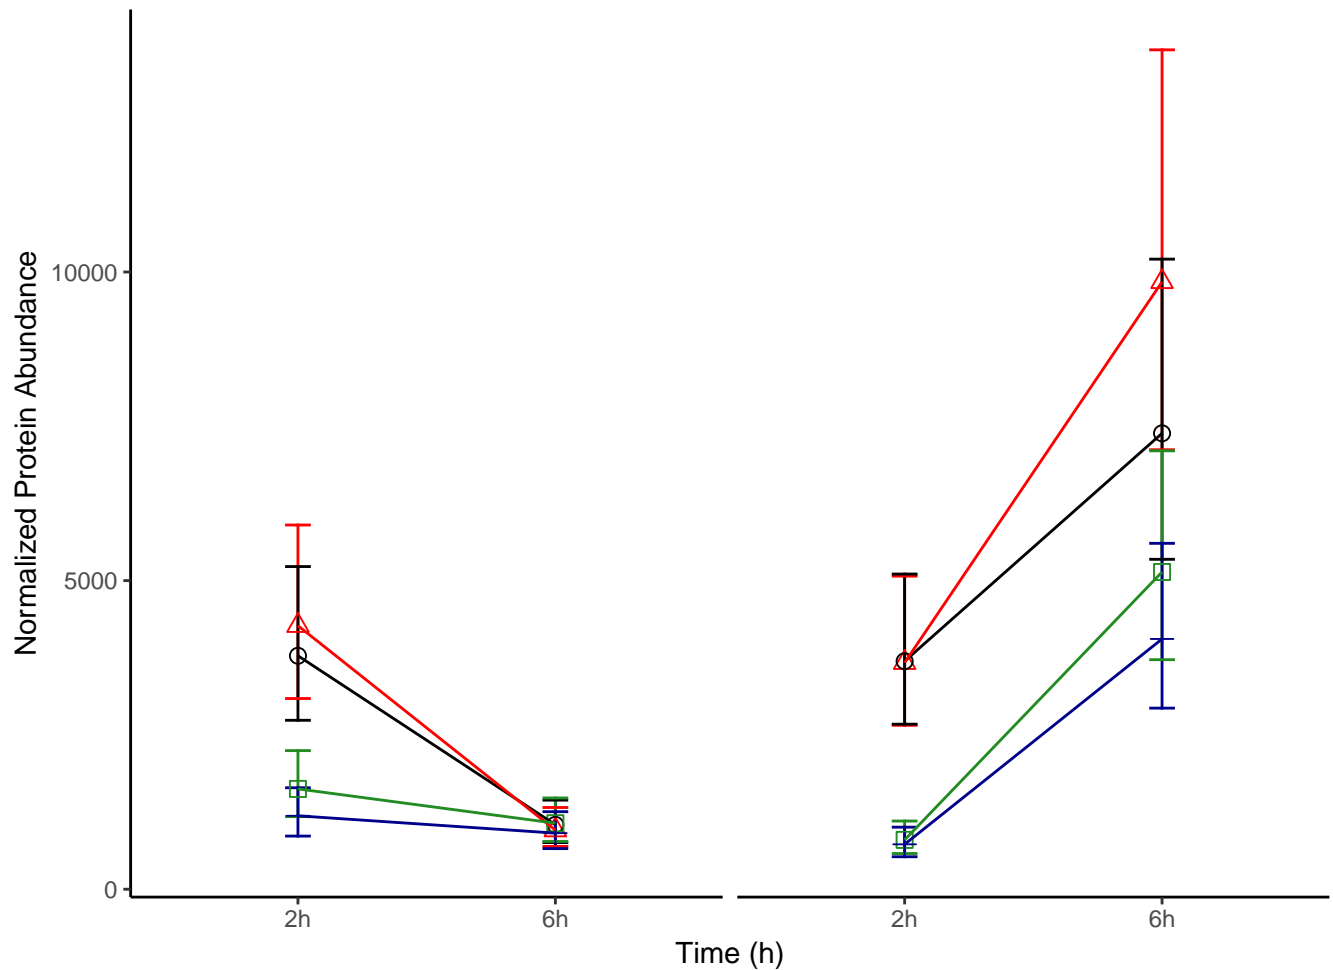

- SA564
- △ SA564- $\Delta$ *hptRS*
- SA564- $\Delta$ *ccpA*
- + SA564- $\Delta$ *hptRS/ccpA*

# Y765\_STAAM

TSB

TSB-dex S-501

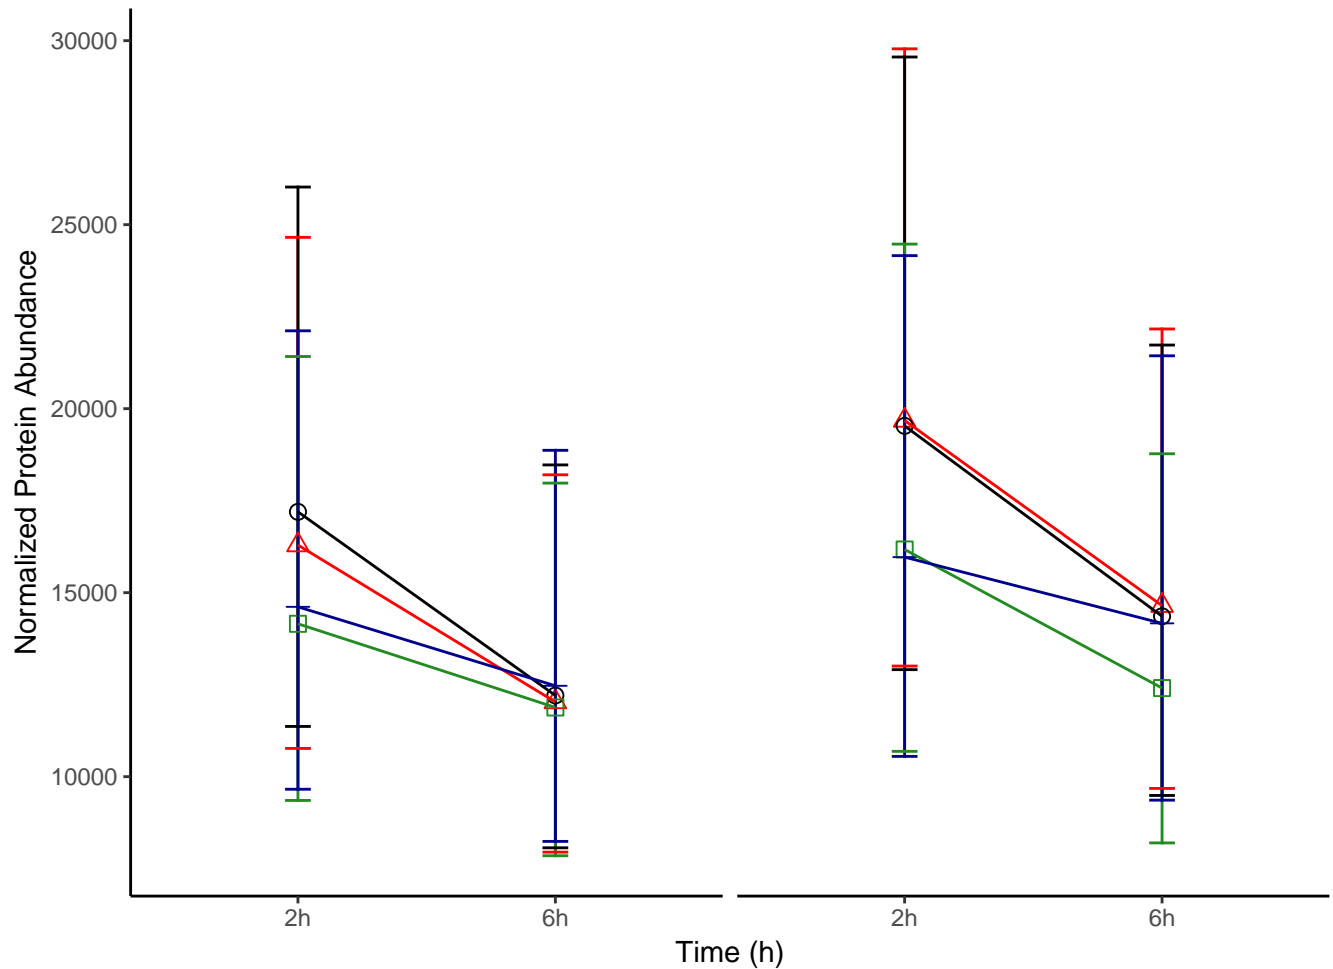

- SA564
- △ SA564- $\Delta$ hptRS
- SA564- $\Delta$ ccpA
- + SA564- $\Delta$ hptRS/ccpA

# Y769\_STAAM

TSB

TSB-dex S-502

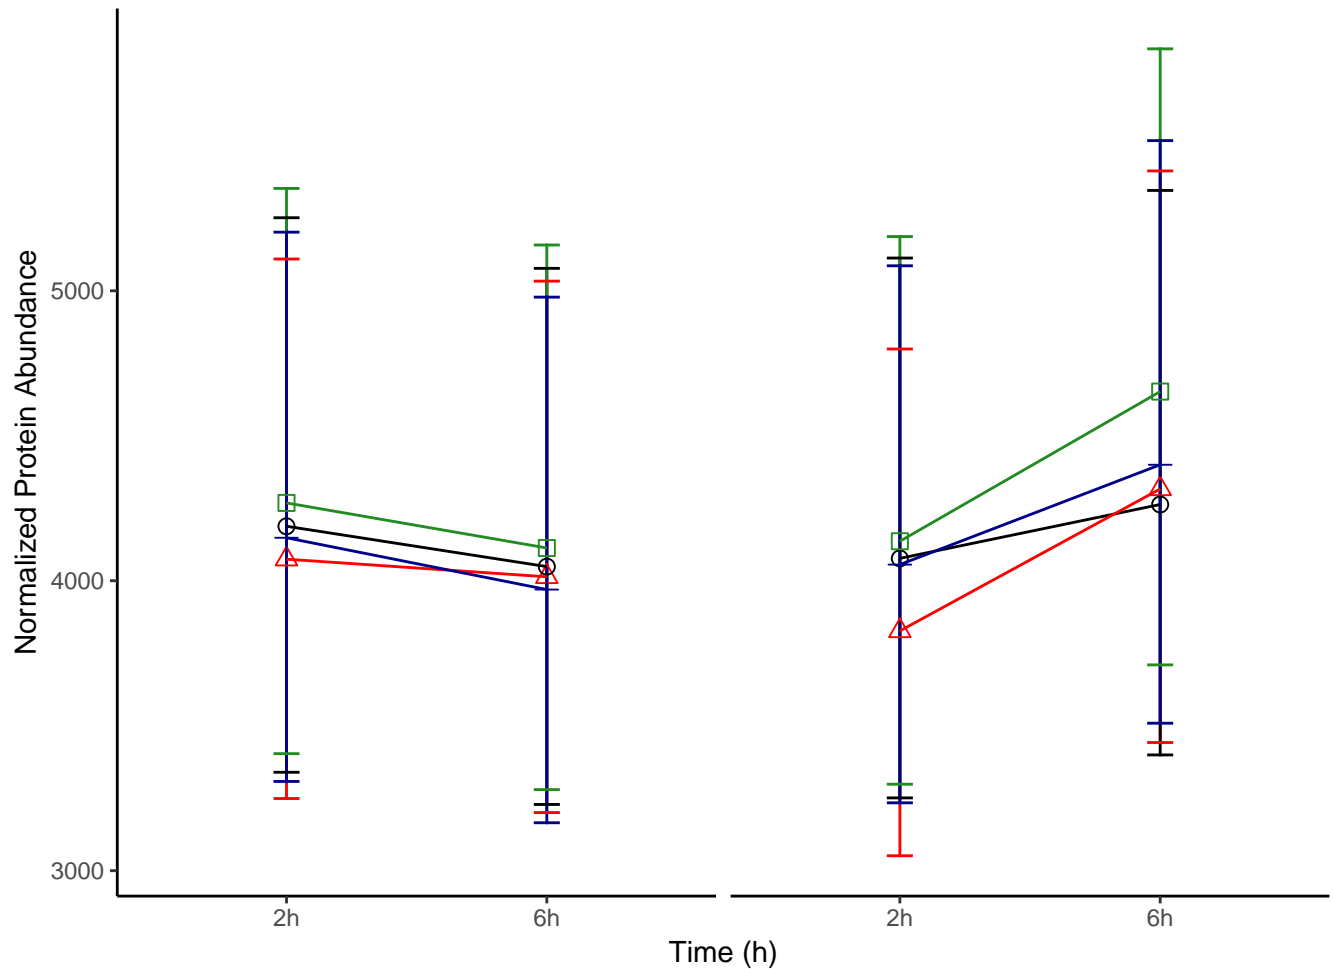

- SA564
- △ SA564- $\Delta$ *hptRS*
- SA564- $\Delta$ *ccpA*
- + SA564- $\Delta$ *hptRS/ccpA*

# Y840\_STAAM

TSB

TSB-dex S-503

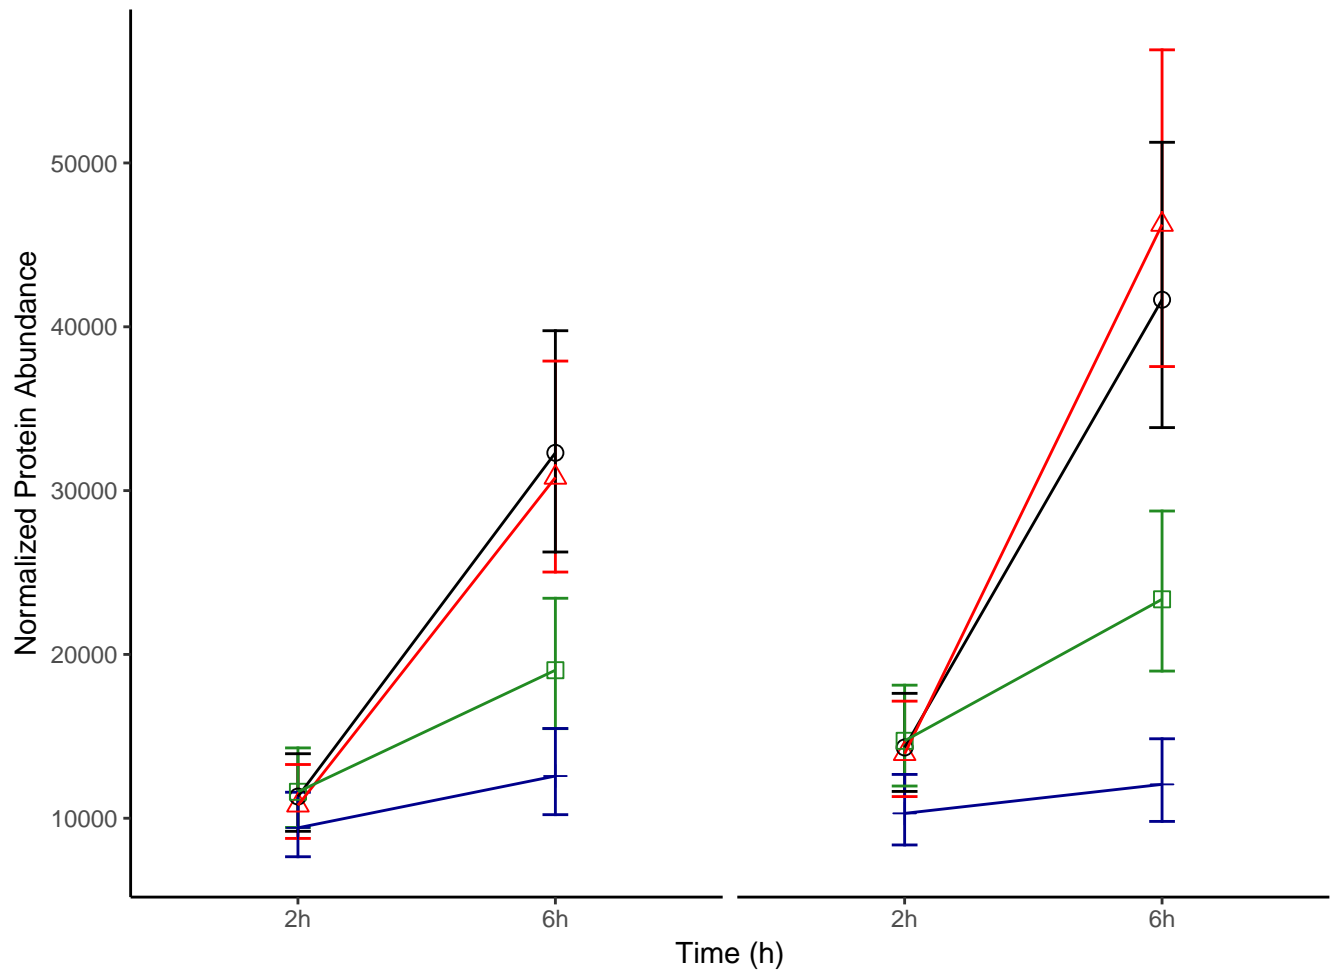

- SA564
- △ SA564- $\Delta hptRS$
- SA564- $\Delta ccpA$
- + SA564- $\Delta hptRS/ccpA$

# Y846\_STAAM

TSB

TSB-dex S-504

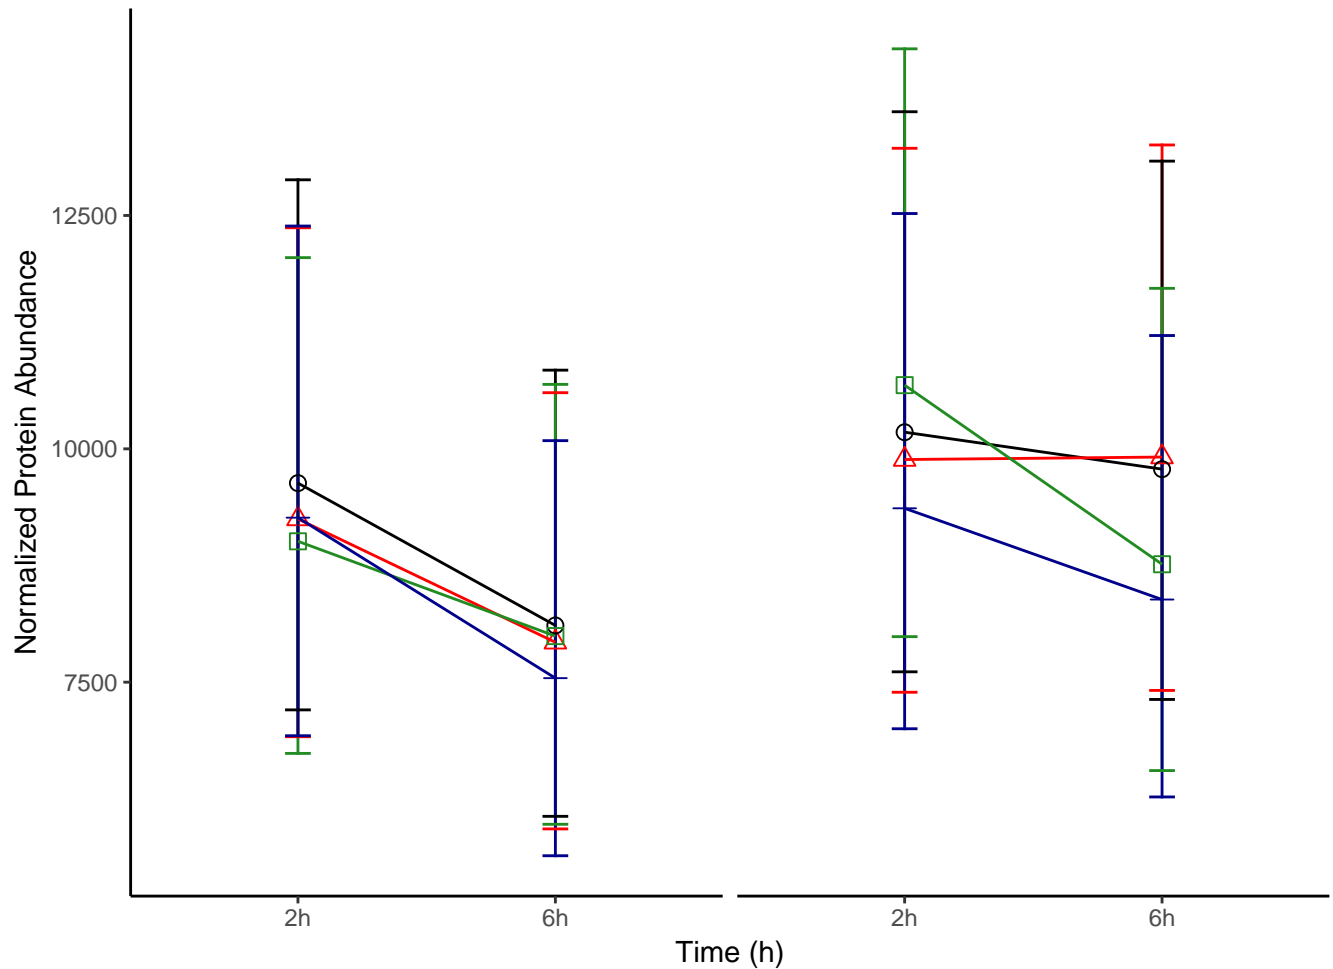

- SA564
- △ SA564- $\Delta$ *hptRS*
- SA564- $\Delta$ *ccpA*
- + SA564- $\Delta$ *hptRS/ccpA*



# Y941\_STAAM

TSB

TSB-dex S-505

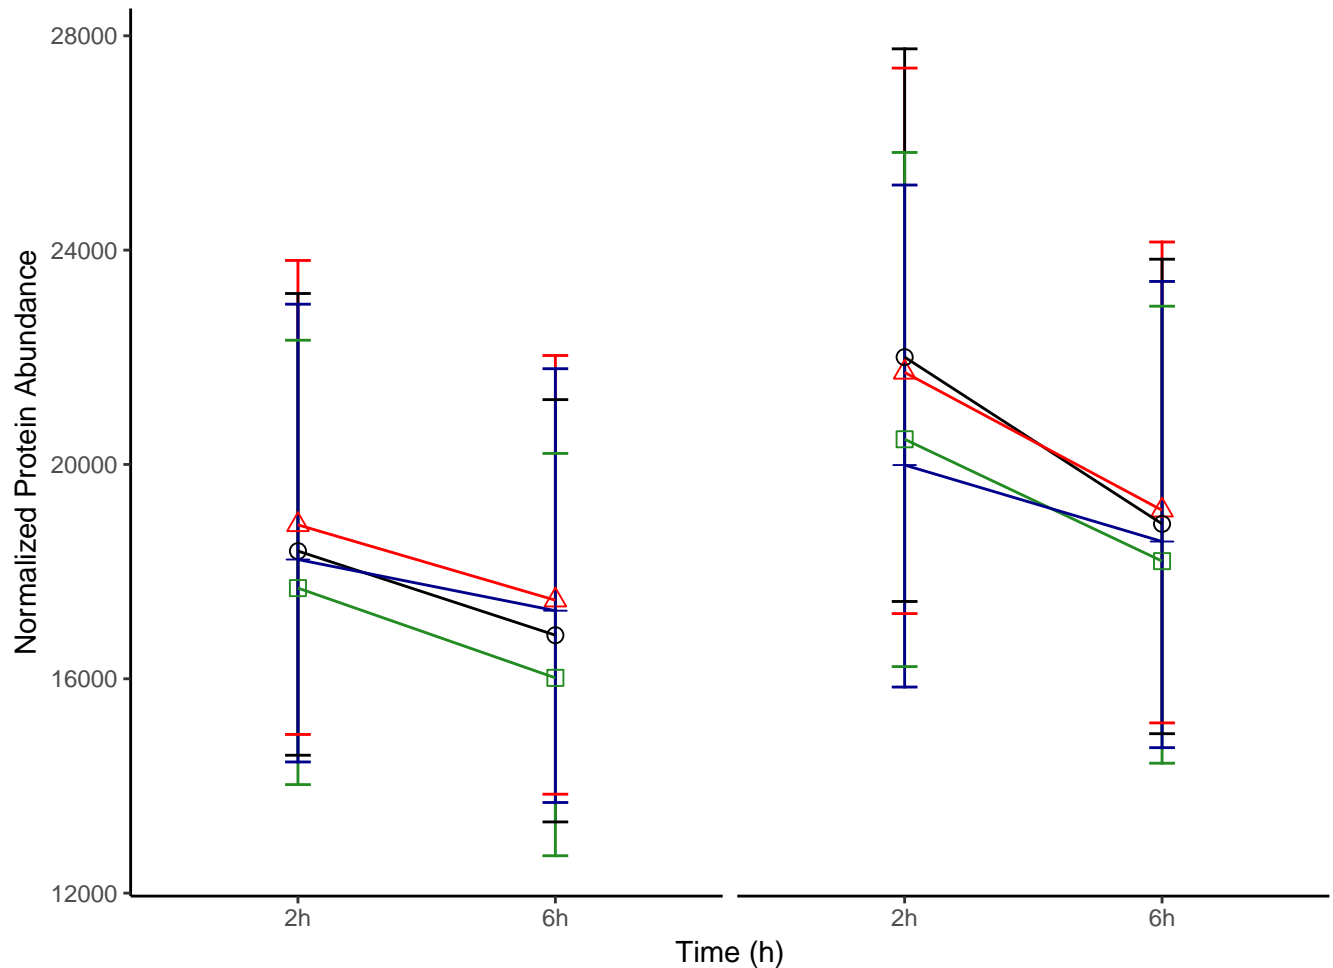

- SA564
- △ SA564- $\Delta$ *hptRS*
- SA564- $\Delta$ *ccpA*
- + SA564- $\Delta$ *hptRS/ccpA*

# Y968\_STAAM

TSB

TSB-dex S-506

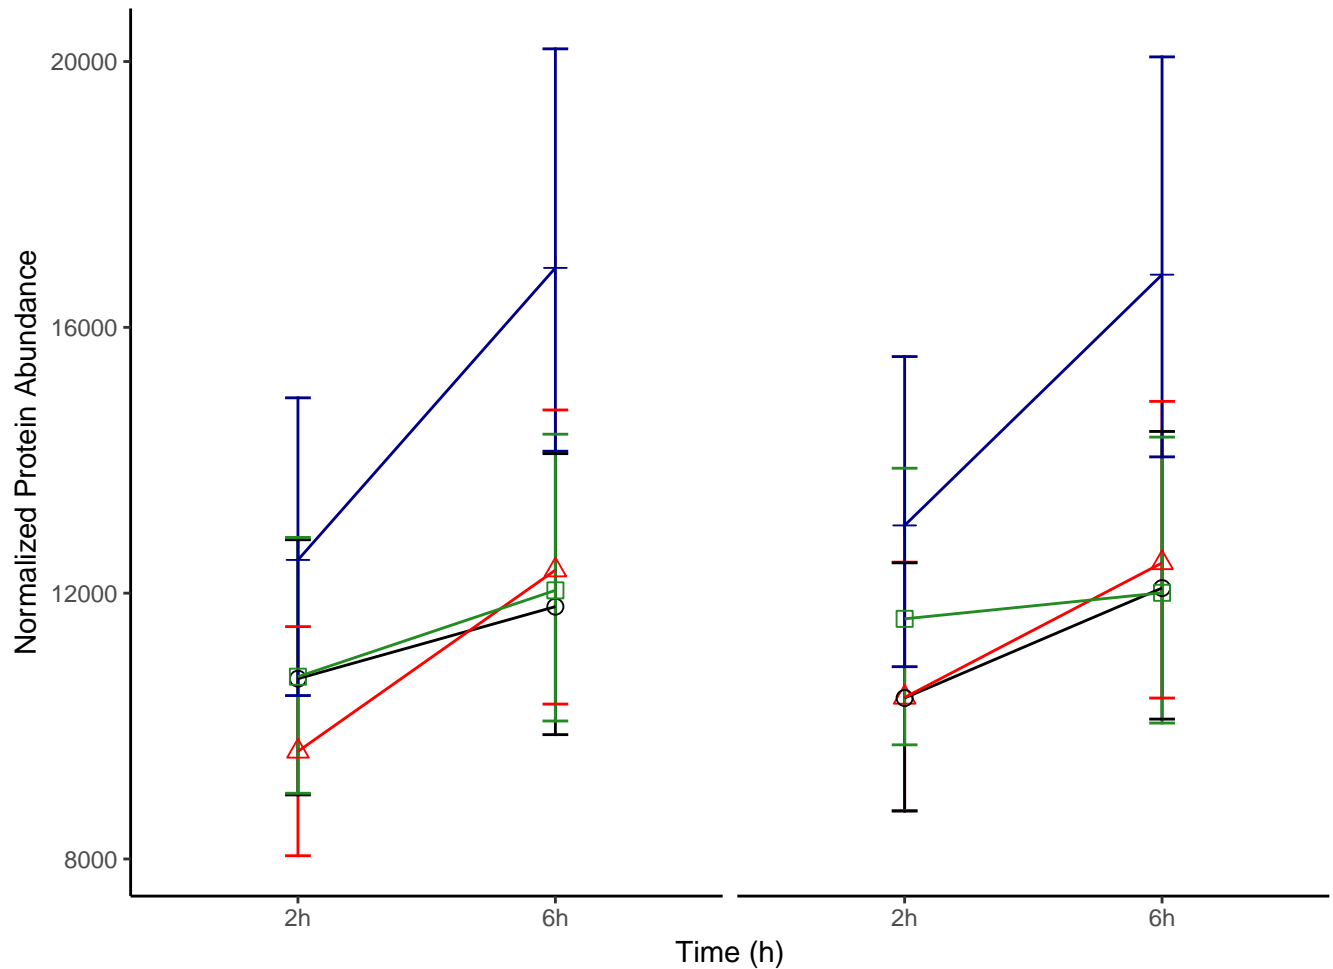

- SA564
- △ SA564- $\Delta$ hptRS
- SA564- $\Delta$ ccpA
- + SA564- $\Delta$ hptRS/ccpA

# YABA\_STAAM

TSB

TSB-dex S-507

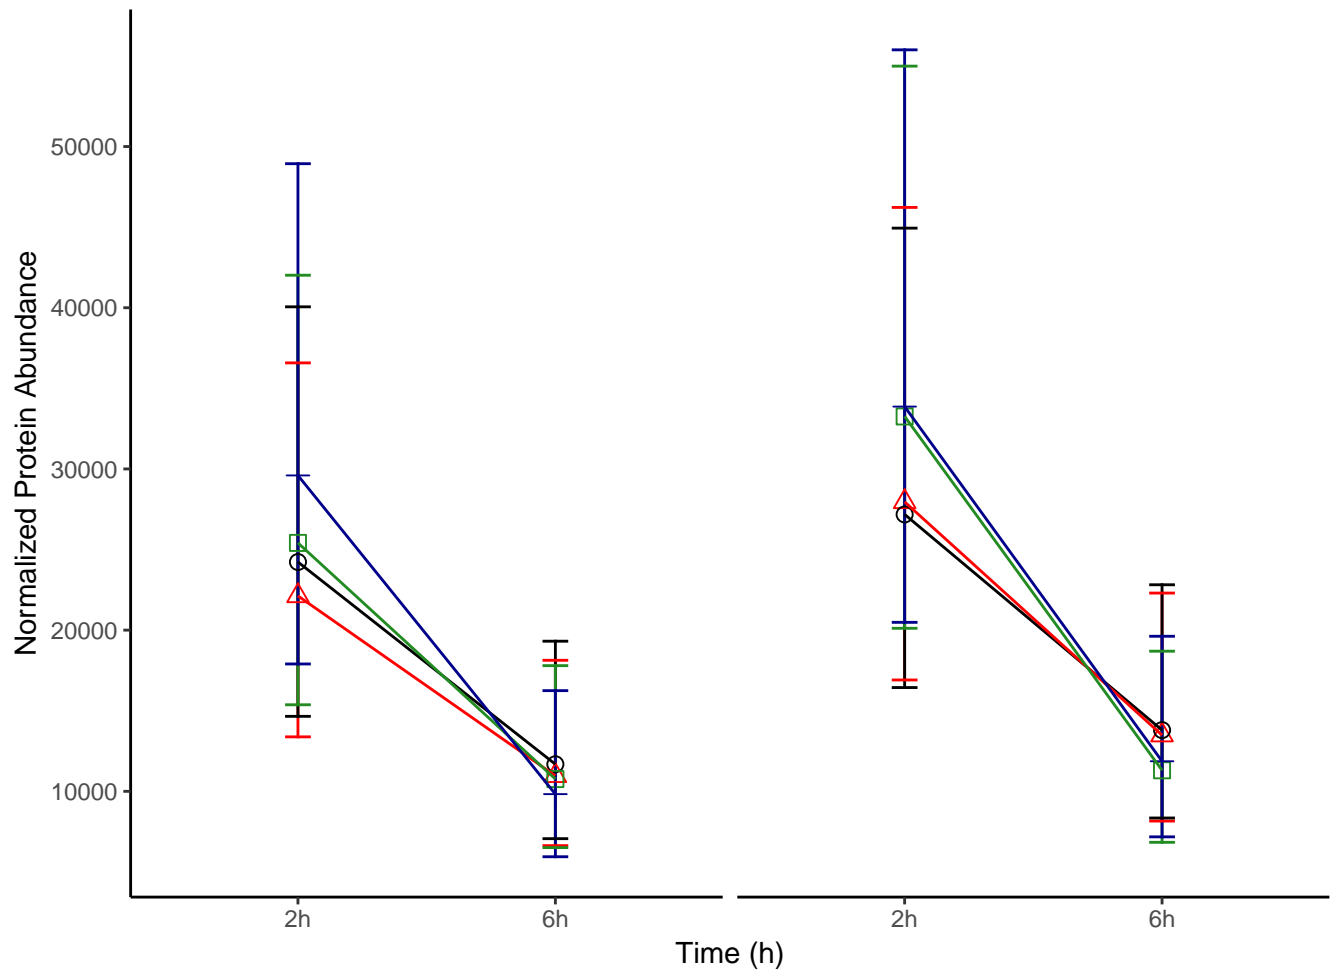

- SA564
- △ SA564-ΔhptRS
- SA564-ΔccpA
- + SA564-ΔhptRS/ccpA

# YBEY\_STAAM

TSB

TSB-dex S-508

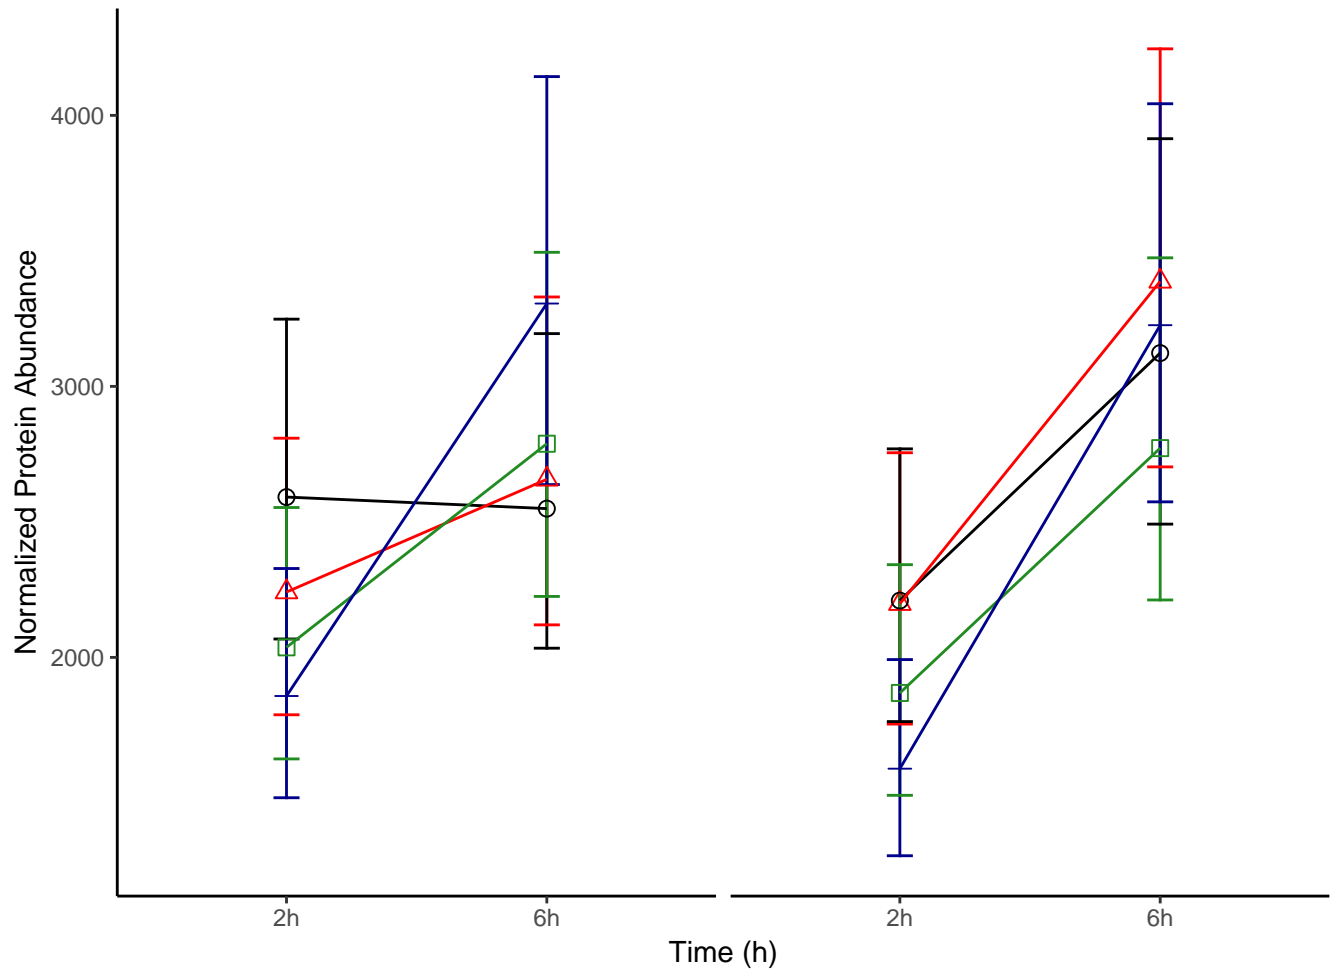

- SA564
- △ SA564- $\Delta$ *hptRS*
- SA564- $\Delta$ *ccpA*
- + SA564- $\Delta$ *hptRS/ccpA*

**Figure G.**

2-way analysis: s x m | h

Pages: S509-S1010

The normalized protein abundance, lower 95% confidence interval, and upper 95% confidence interval were plotted for each protein. These plots were analyzed if a 3-way interaction was rejected and 2-way interaction was identified between strain and media.

# 6PGD\_STAAM

S-510

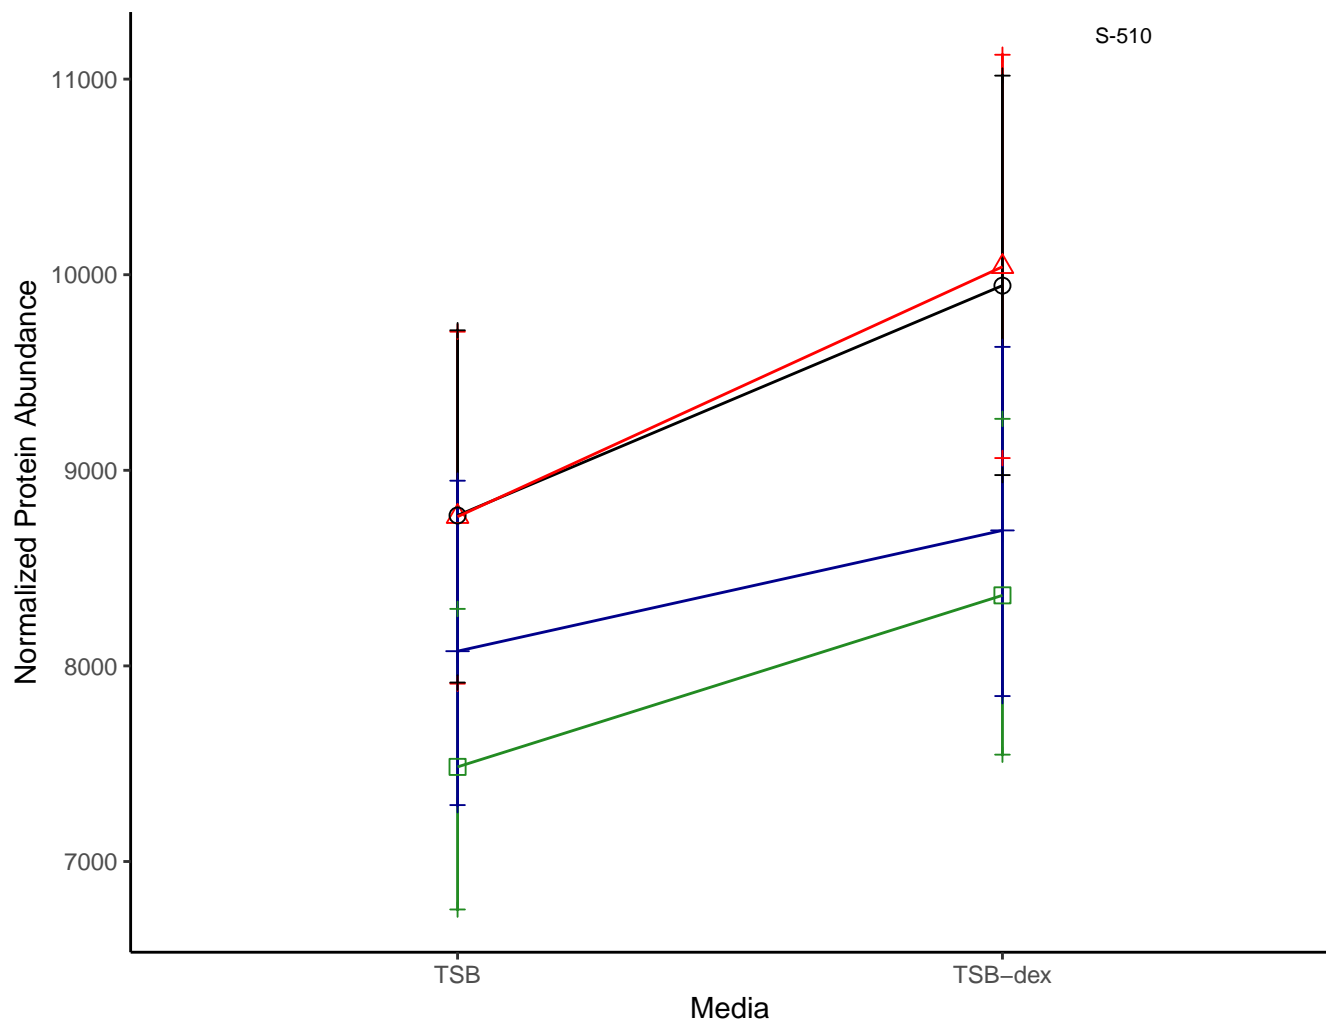

- SA564
- SA564- $\Delta$ *hptRS*
- SA564- $\Delta$ *ccpA*
- SA564- $\Delta$ *hptRS/ccpA*

# ACCA\_STAAM

S-511

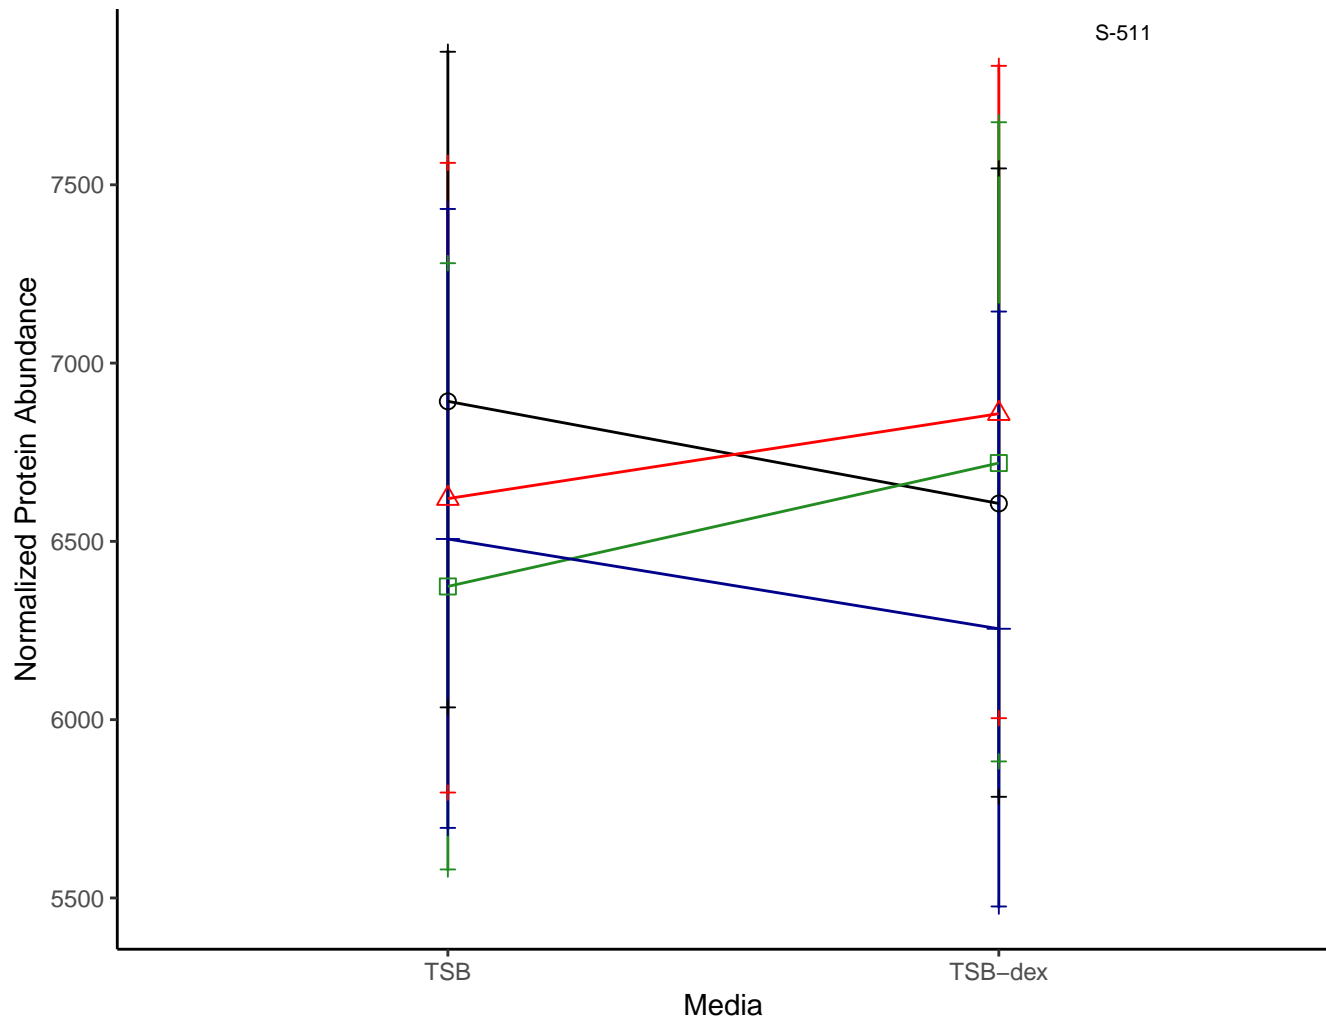

- ⊕ SA564
- △ SA564- $\Delta$ *hptRS*
- ⊞ SA564- $\Delta$ *ccpA*
- + SA564- $\Delta$ *hptRS/ccpA*

# ACKA\_STAAM

S-512

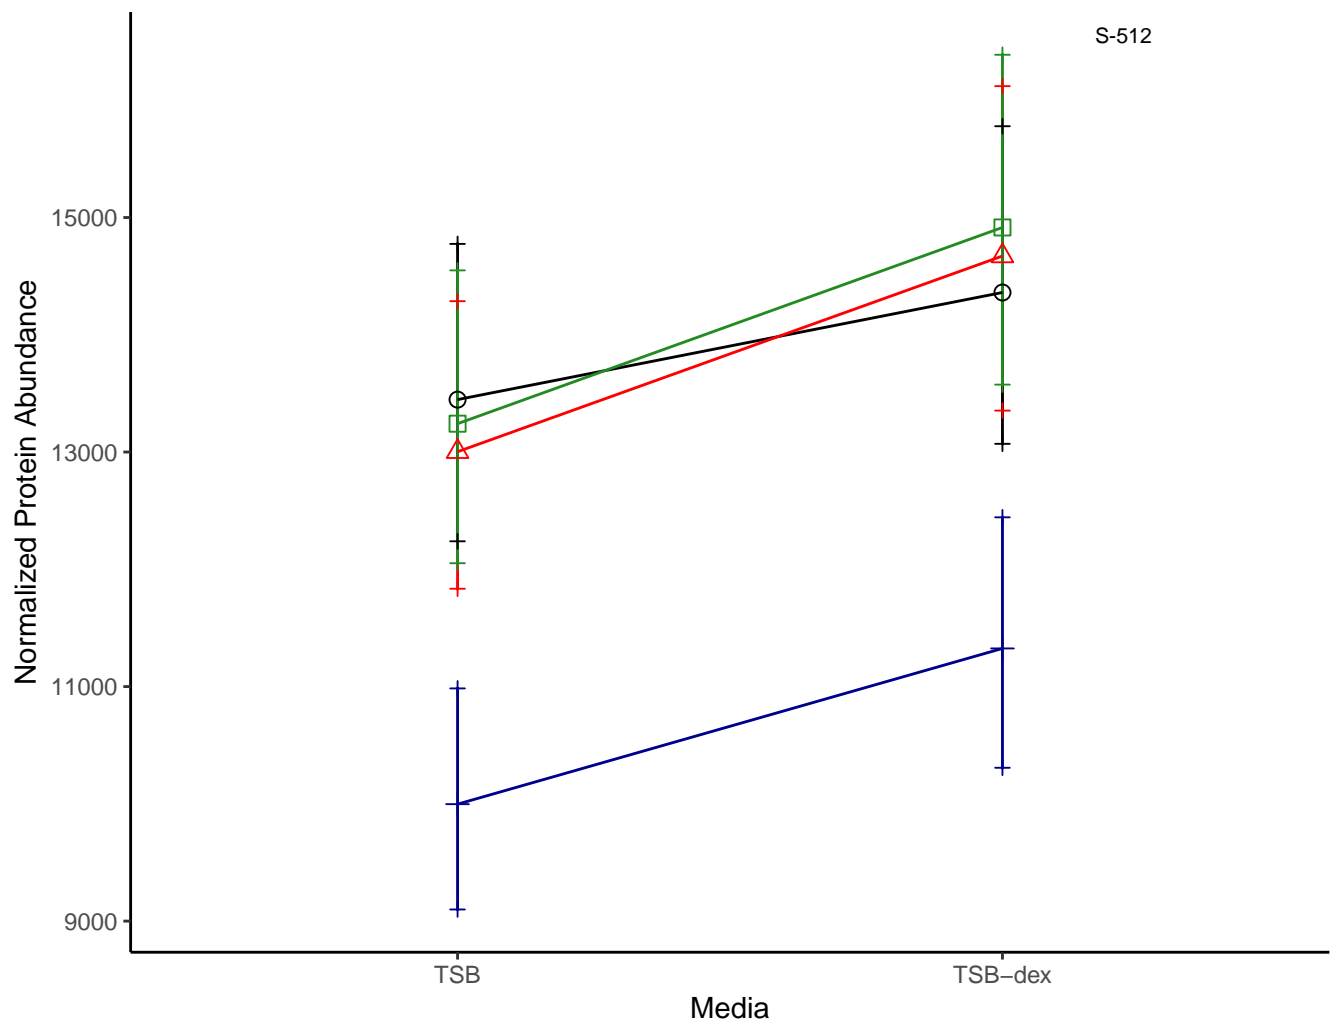

- ⊕ SA564
- △ SA564- $\Delta$ *hptRS*
- ⊞ SA564- $\Delta$ *ccpA*
- + SA564- $\Delta$ *hptRS/ccpA*



# ACON\_STAAM

S-513

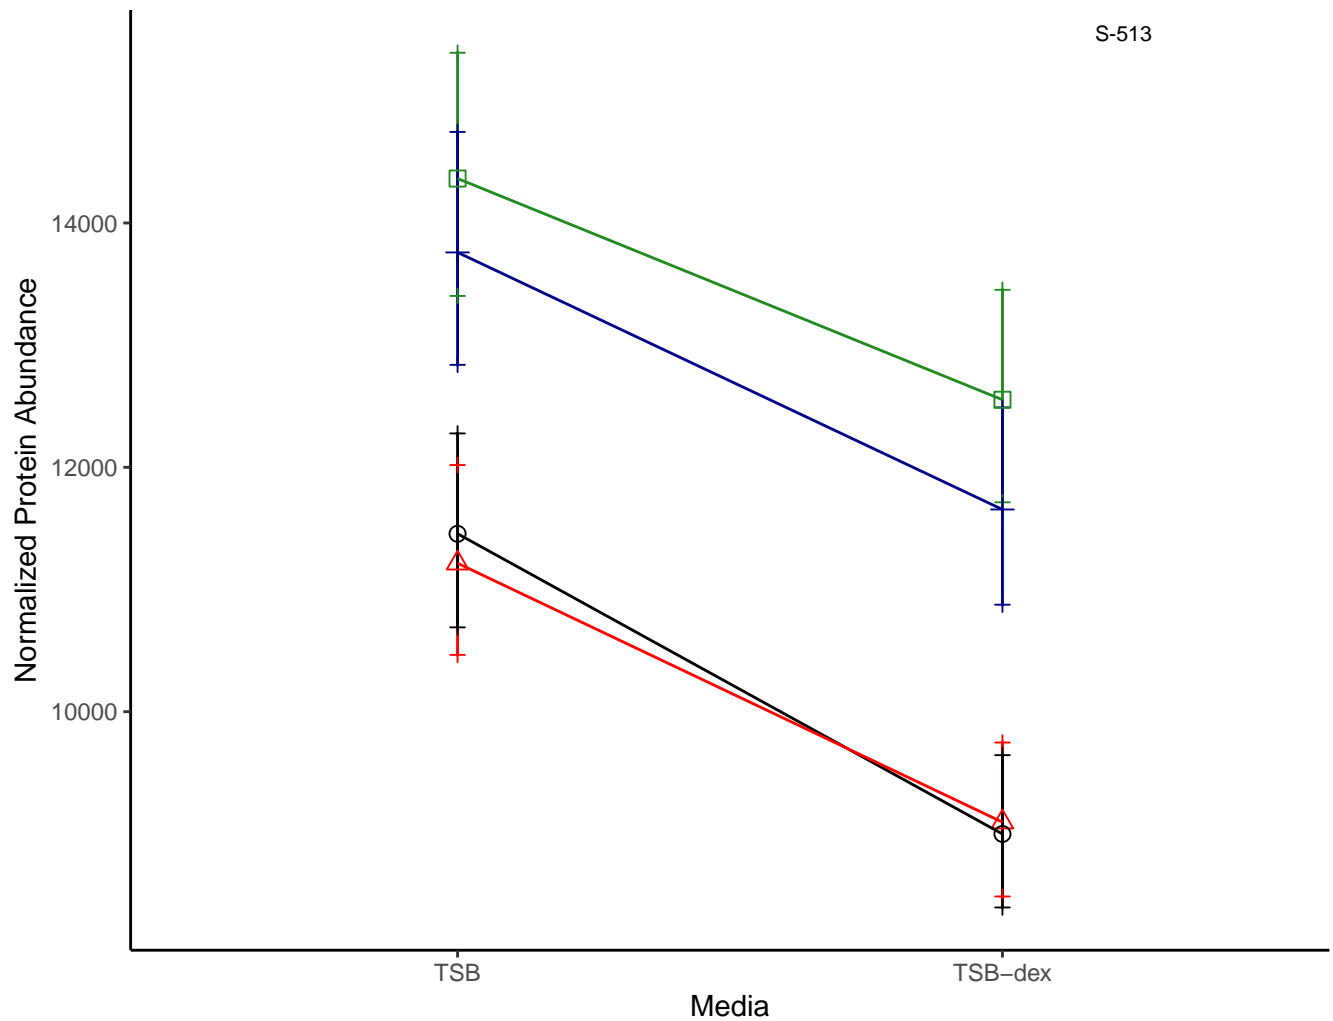

- ⊕ SA564
- △ SA564- $\Delta$ hptRS
- ⊞ SA564- $\Delta$ ccpA
- + SA564- $\Delta$ hptRS/ccpA

# ACP\_STAAM

S-514

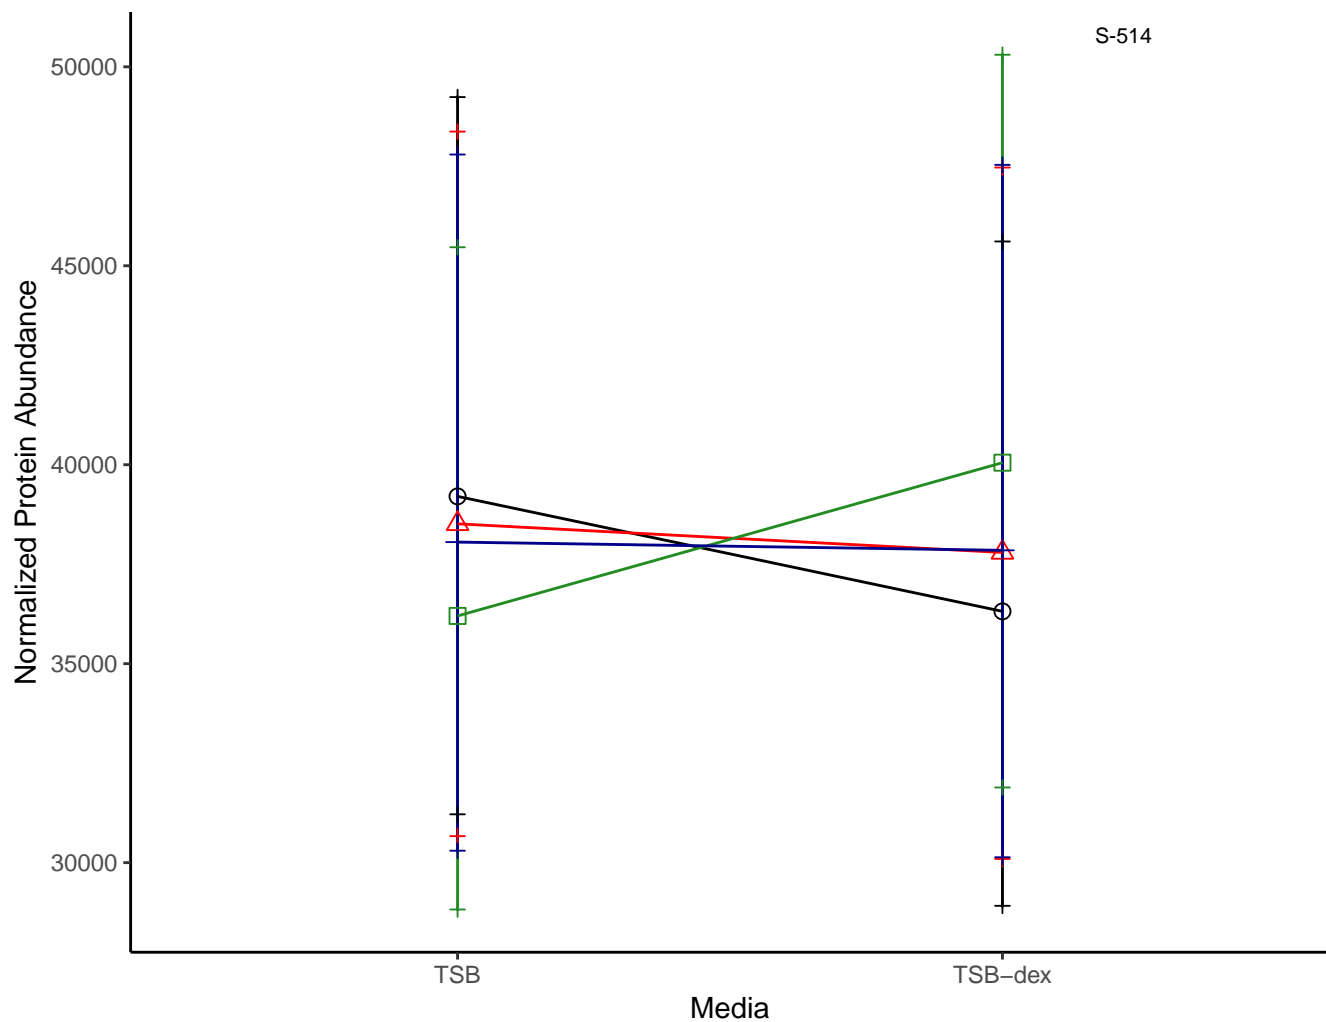

- ⊕ SA564
- △ SA564- $\Delta$ *hptRS*
- ⊞ SA564- $\Delta$ *ccpA*
- + SA564- $\Delta$ *hptRS/ccpA*

# ADH\_STAAM

S-515

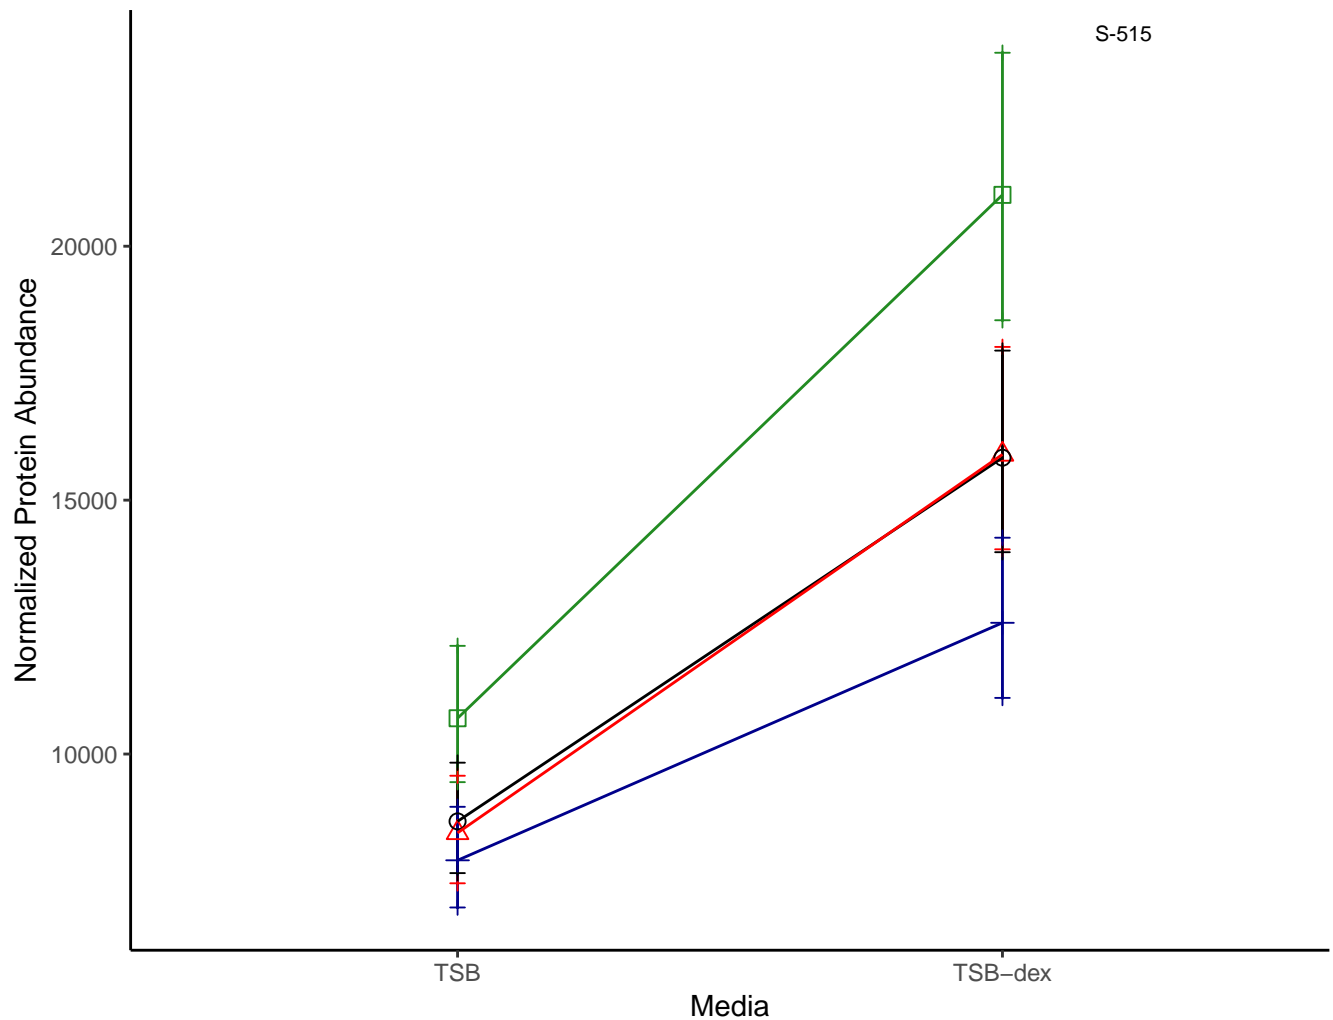

- ⊕ SA564
- △ SA564- $\Delta$ *hptRS*
- ⊞ SA564- $\Delta$ *ccpA*
- + SA564- $\Delta$ *hptRS/ccpA*

# AHPC\_STAAM

S-516

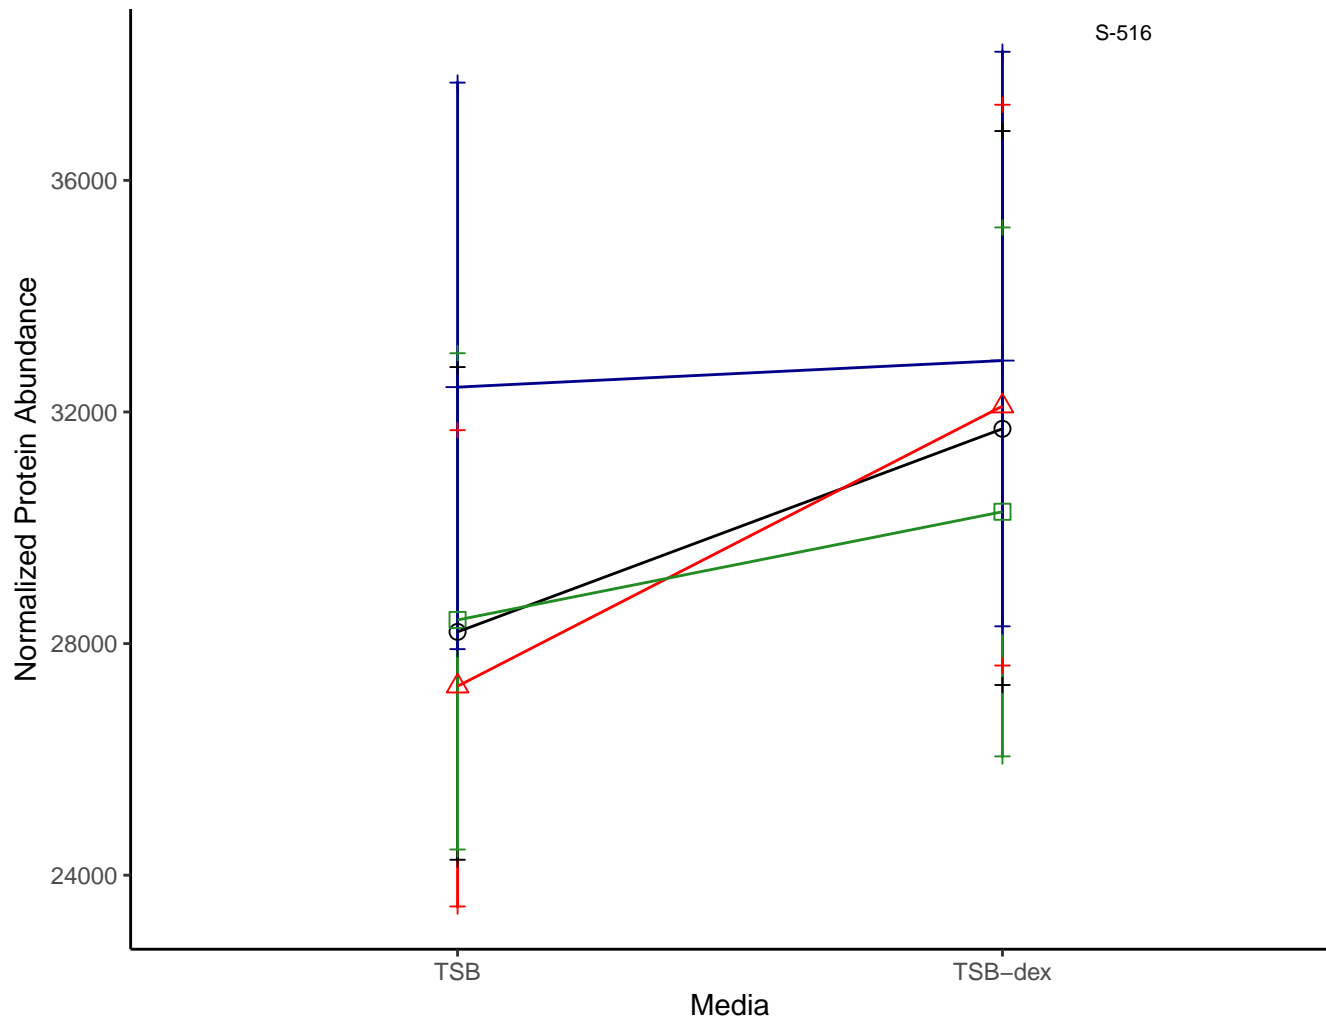

- ⊕ SA564
- △ SA564- $\Delta$ *hptRS*
- ⊞ SA564- $\Delta$ *ccpA*
- + SA564- $\Delta$ *hptRS/ccpA*

# AHPF\_STAAM

S-517

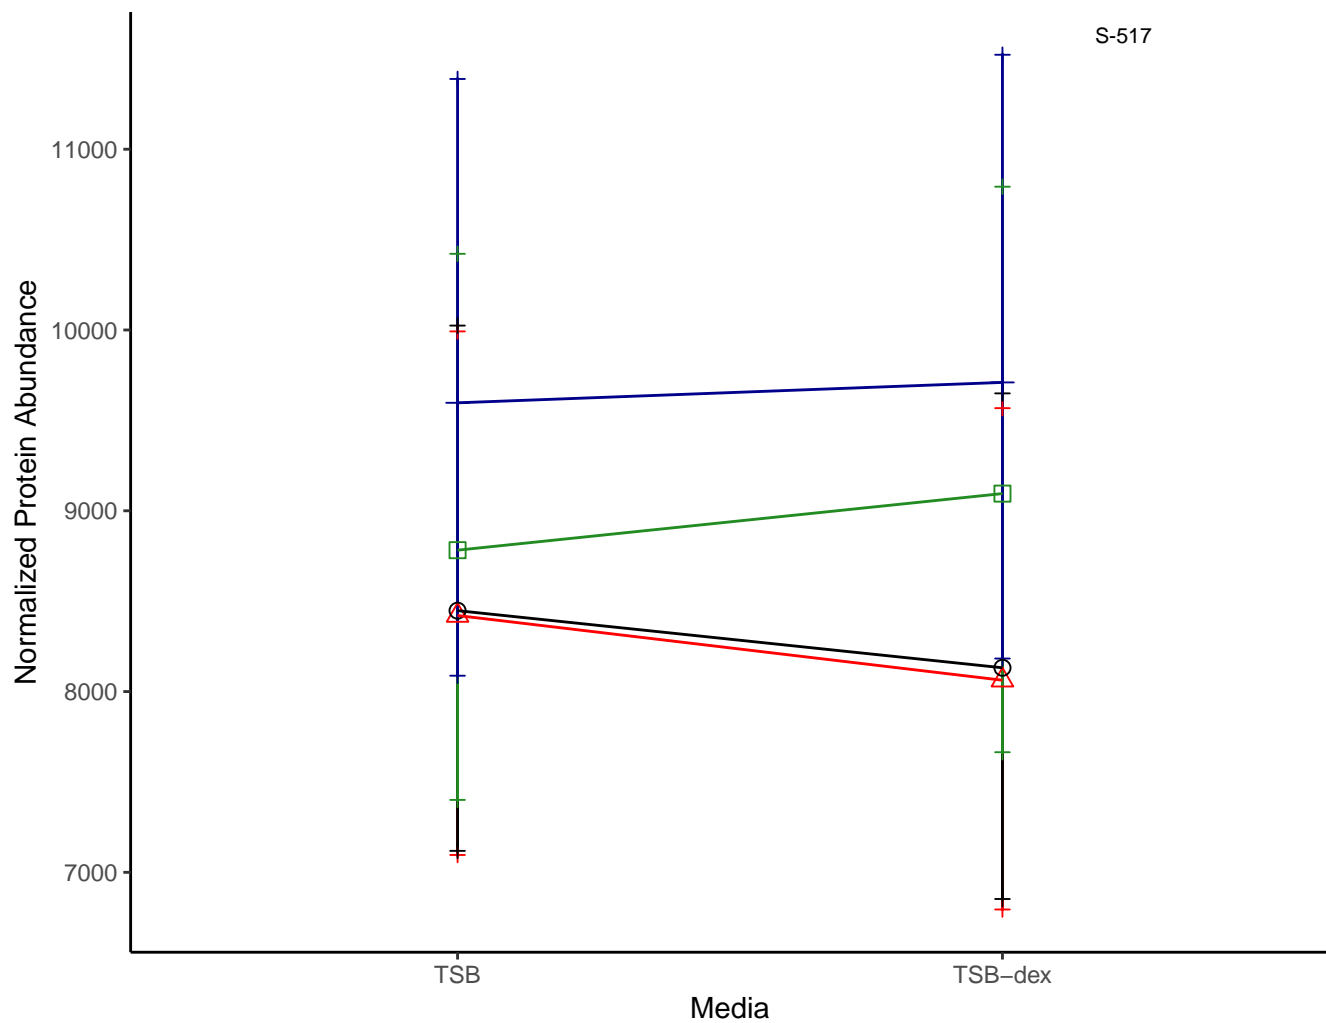

- ⊕ SA564
- △ SA564- $\Delta$ *hptRS*
- ⊞ SA564- $\Delta$ *ccpA*
- + SA564- $\Delta$ *hptRS/ccpA*

# ALD1\_STAAM

S-518

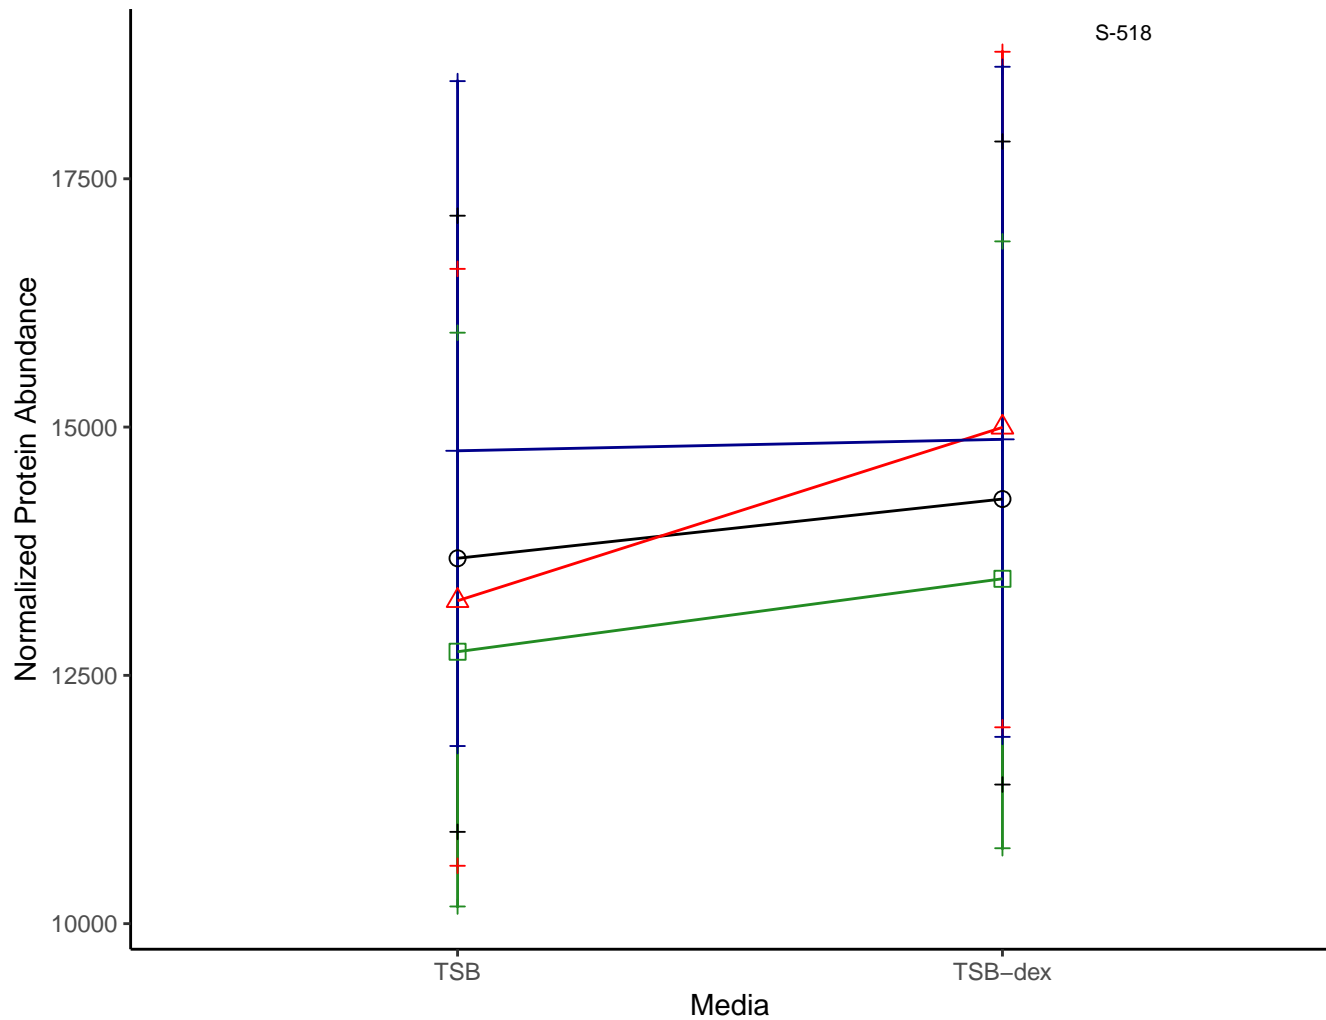

- ⊕ SA564
- △ SA564-ΔhptRS
- ⊞ SA564-ΔccpA
- + SA564-ΔhptRS/ccpA

# ALDA\_STAAM

S-519

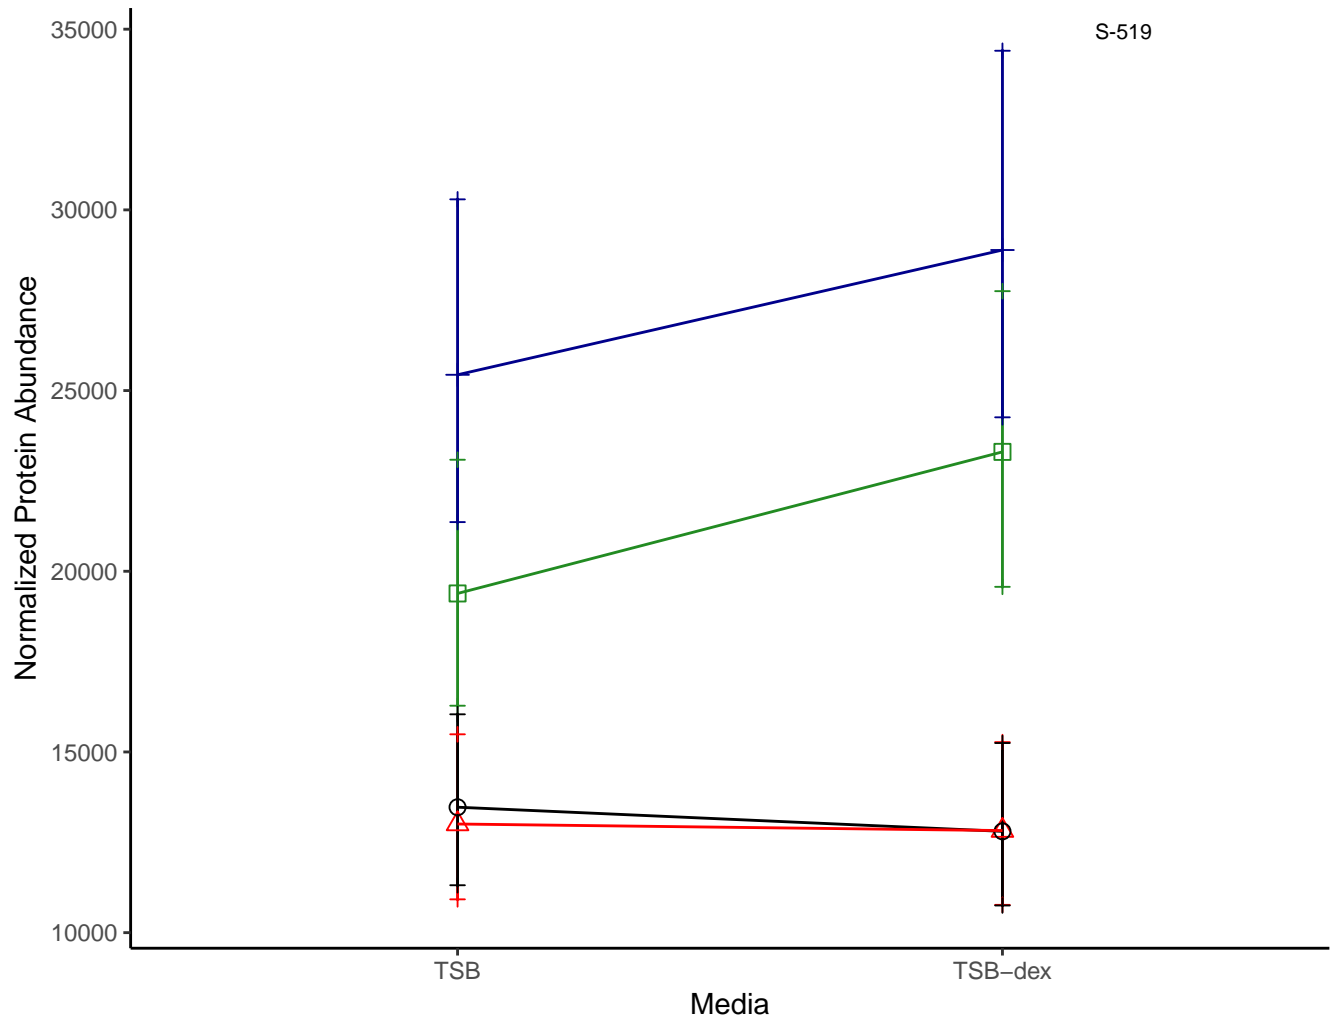

- ⊕ SA564
- △ SA564- $\Delta$ *hptRS*
- ⊞ SA564- $\Delta$ *ccpA*
- + SA564- $\Delta$ *hptRS/ccpA*

# ALF1\_STAAM

S-520

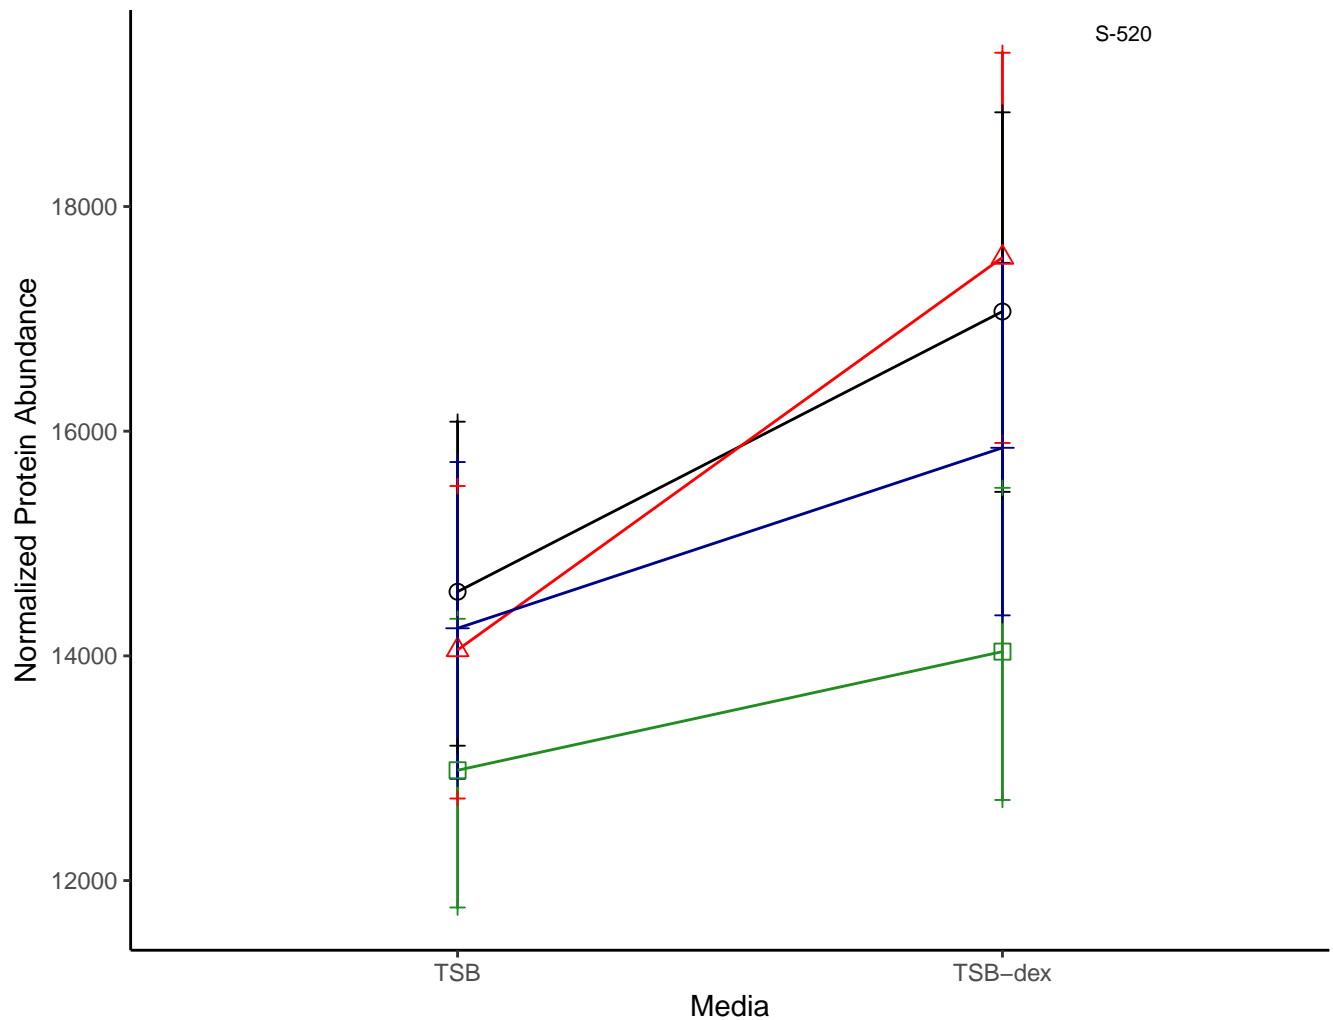

- ⊕ SA564
- △ SA564- $\Delta$ hptRS
- ⊞ SA564- $\Delta$ ccpA
- + SA564- $\Delta$ hptRS/ccpA



# ALF2\_STAAM

S-521

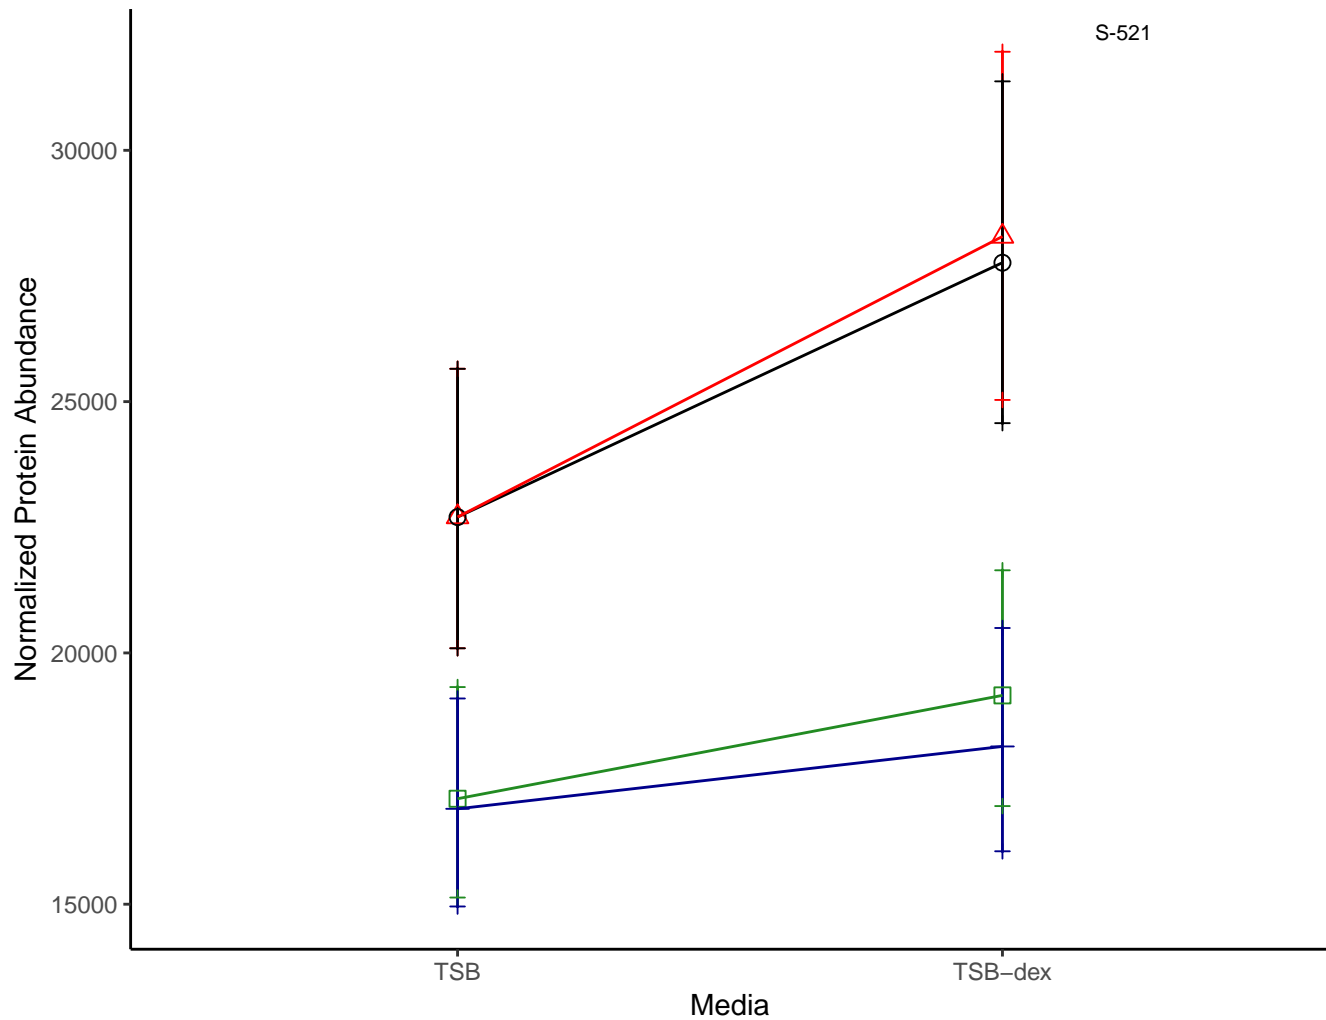

- ⊕ SA564
- △ SA564-ΔhptRS
- ⊞ SA564-ΔccpA
- + SA564-ΔhptRS/ccpA

# APT\_STAAM

S-522

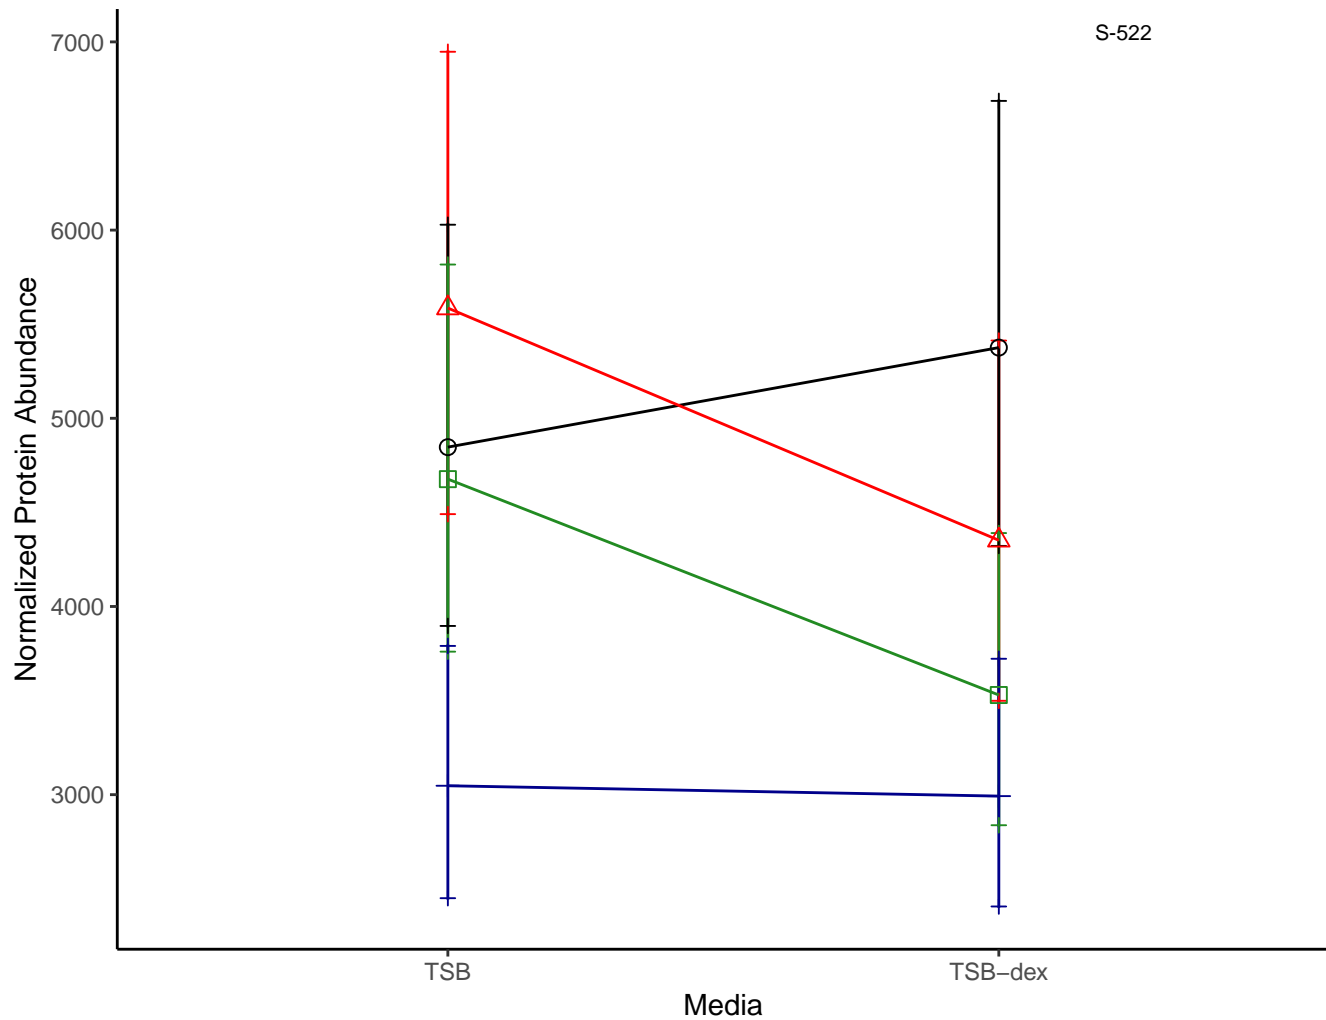

- ⊕ SA564
- △ SA564- $\Delta$ *hptRS*
- ⊞ SA564- $\Delta$ *ccpA*
- + SA564- $\Delta$ *hptRS/ccpA*

# ARCA\_STAAM

S-523

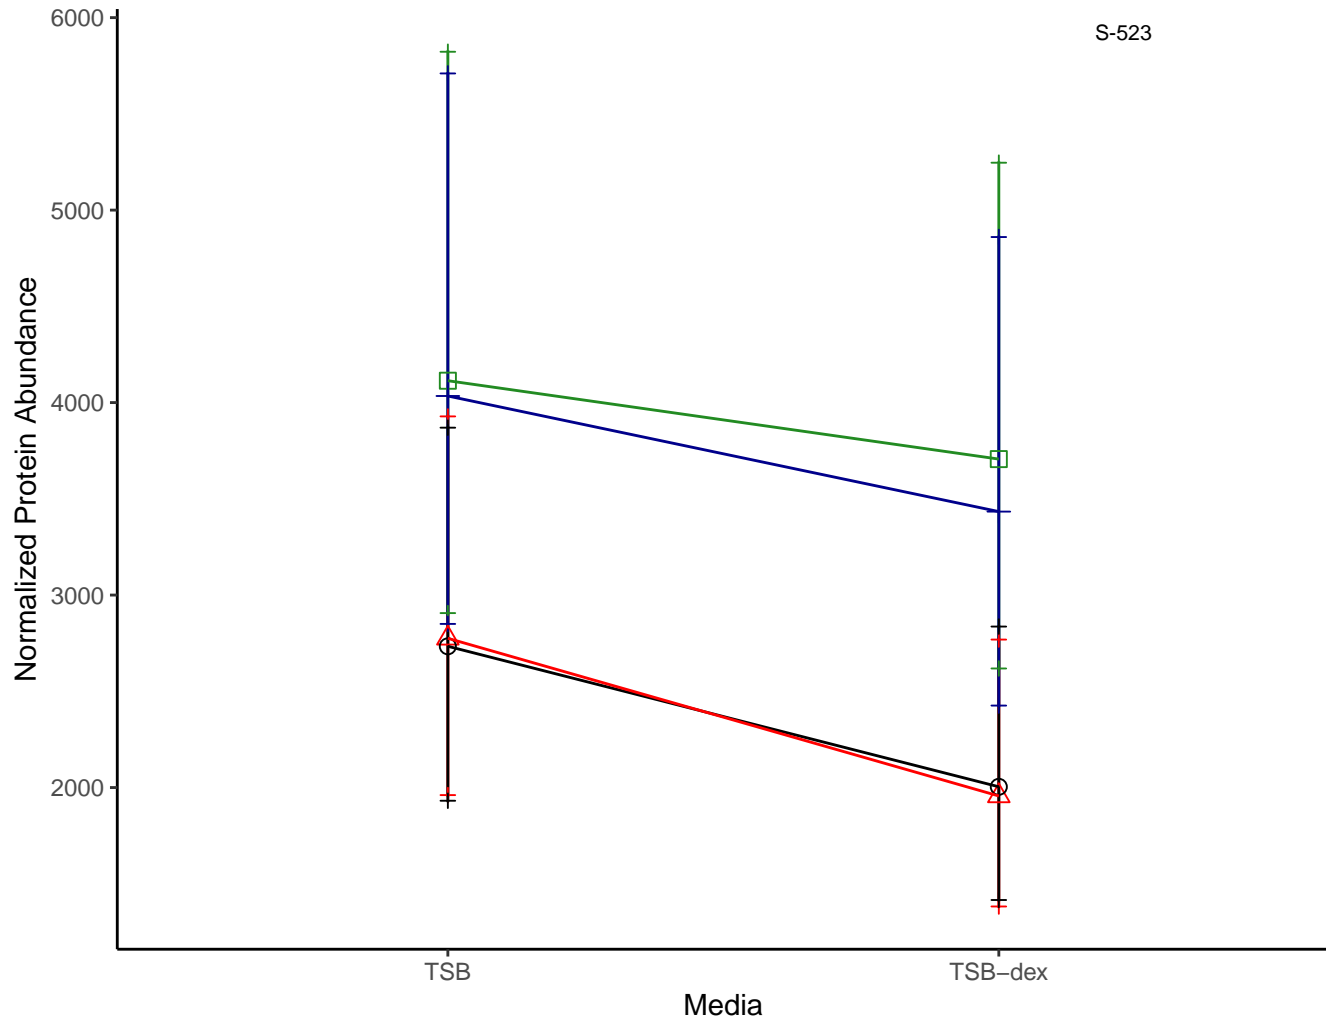

- ⊕ SA564
- △ SA564- $\Delta hptRS$
- ⊞ SA564- $\Delta ccpA$
- + SA564- $\Delta hptRS/ccpA$

# ARCC1\_STAAM

S-524

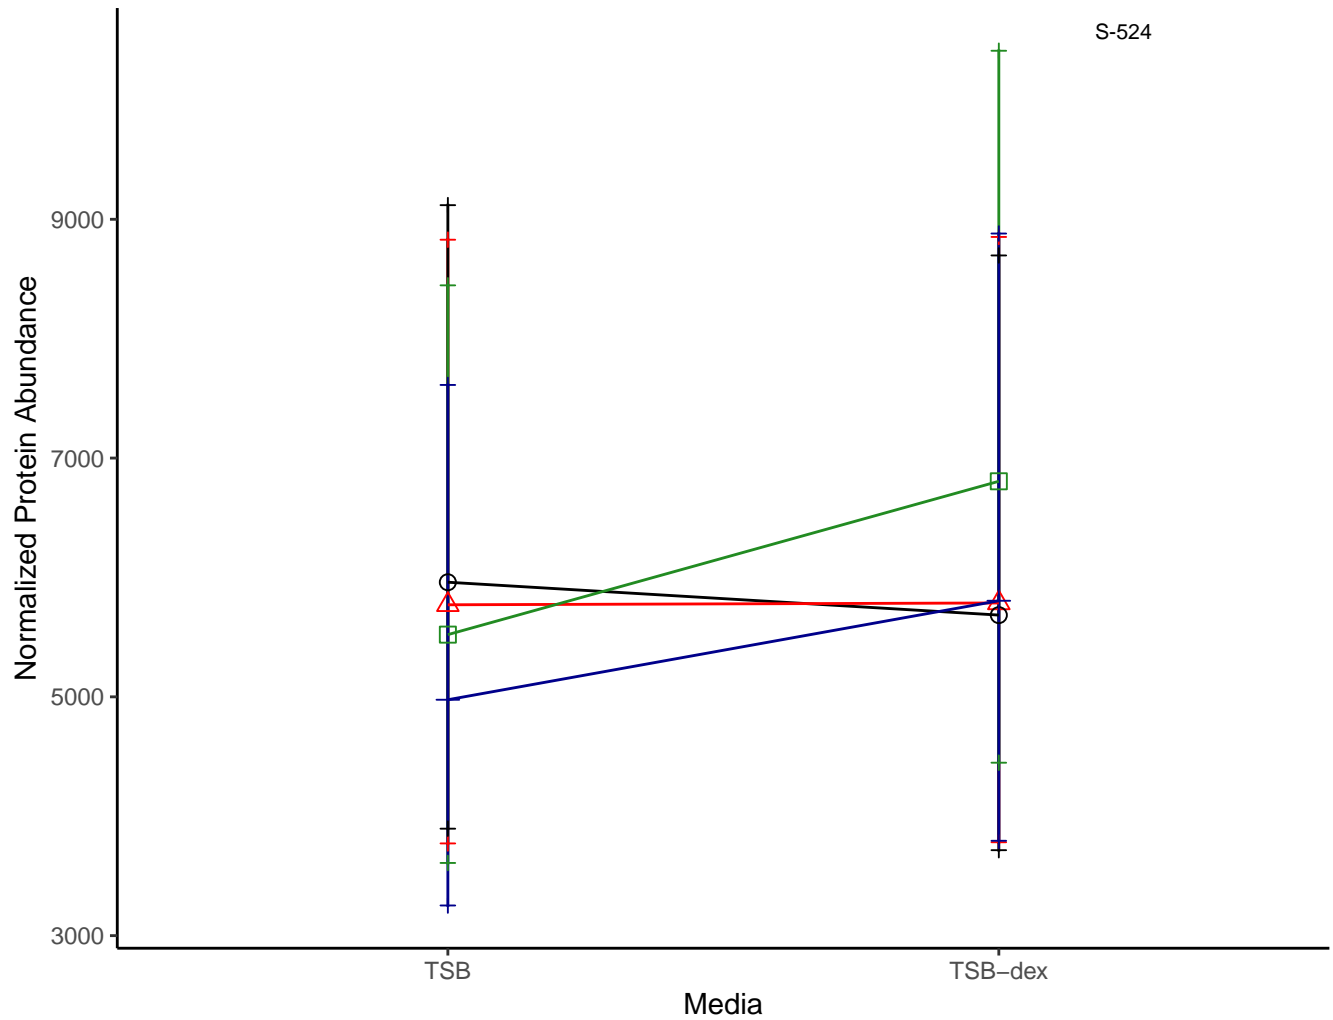

- ⊕ SA564
- △ SA564- $\Delta hptRS$
- ⊞ SA564- $\Delta ccpA$
- + SA564- $\Delta hptRS/ccpA$

# ARGI\_STAAM

S-525

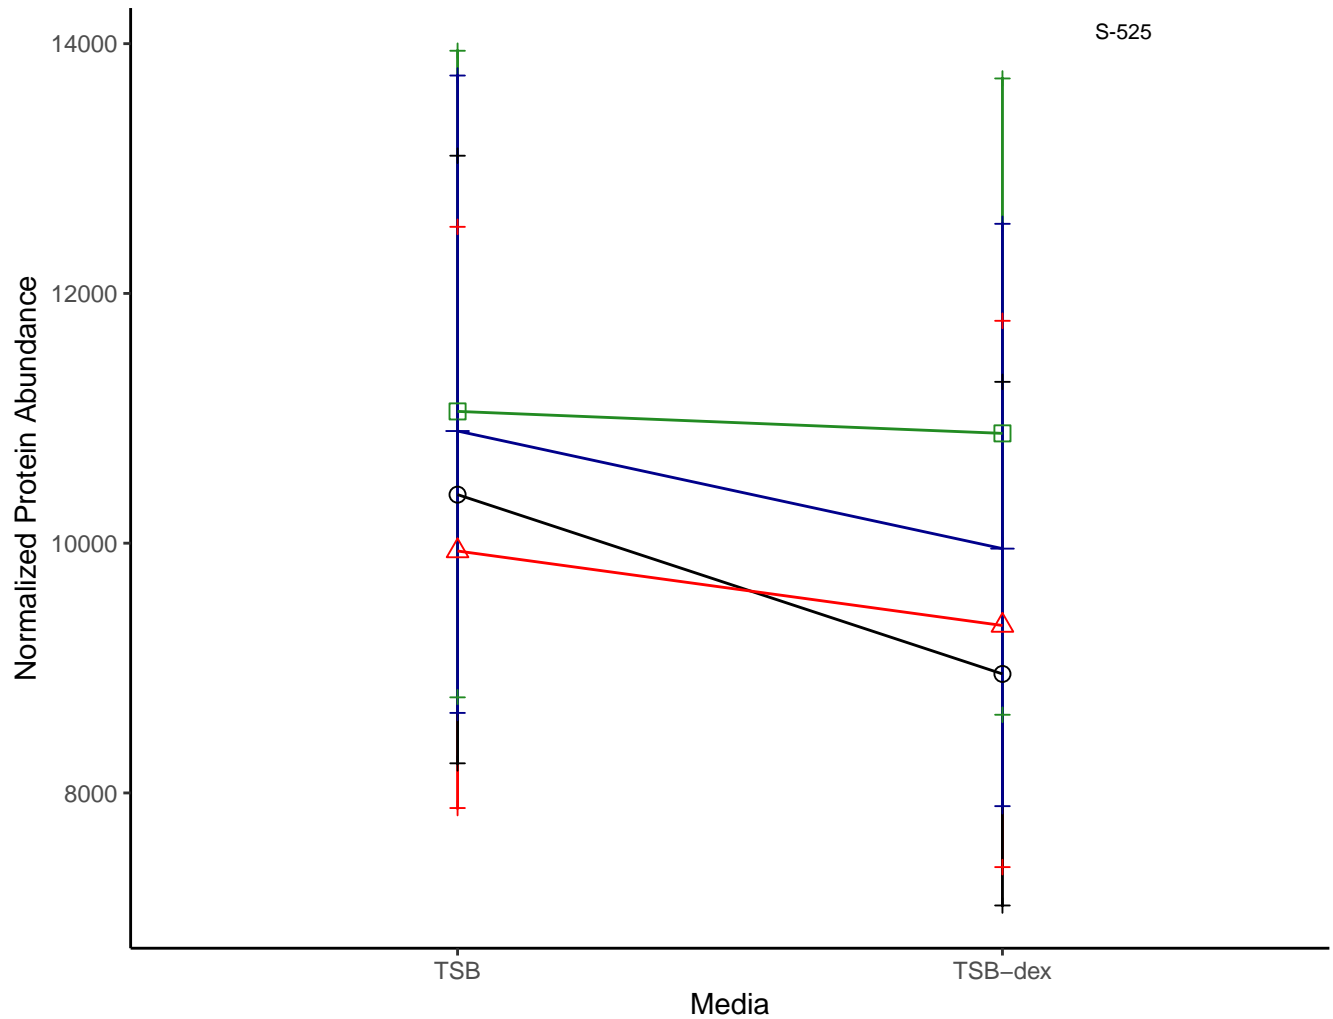

- ⊕ SA564
- △ SA564-ΔhptRS
- ⊞ SA564-ΔccpA
- + SA564-ΔhptRS/ccpA

# ARGR\_STAAM

S-526

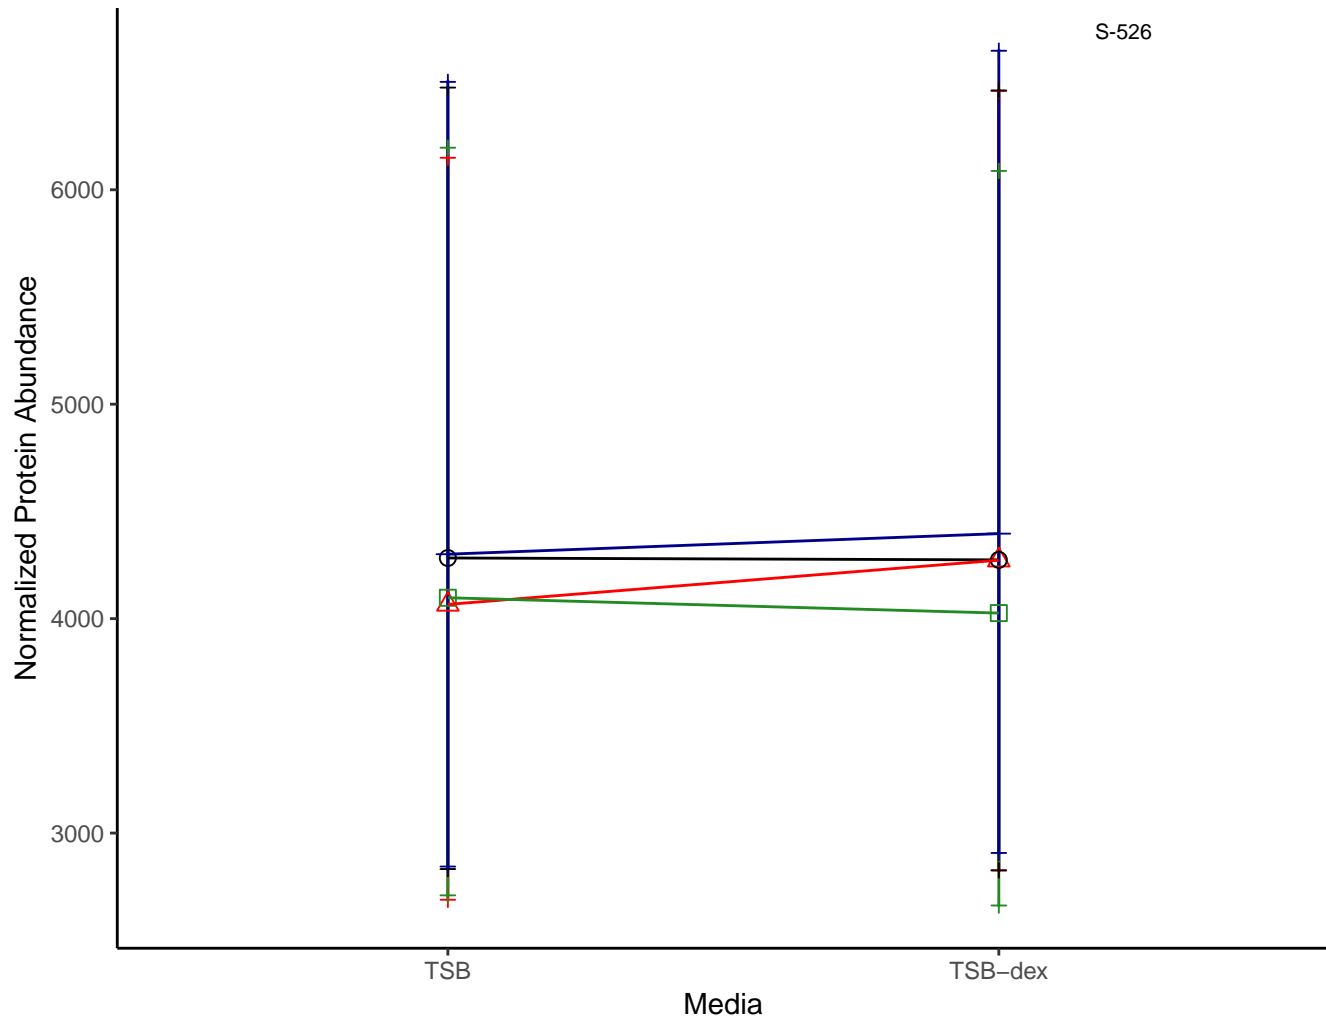

- ⊕ SA564
- △ SA564- $\Delta$ *hptRS*
- ⊞ SA564- $\Delta$ *ccpA*
- + SA564- $\Delta$ *hptRS/ccpA*

## ARLR\_STAAM

S-527

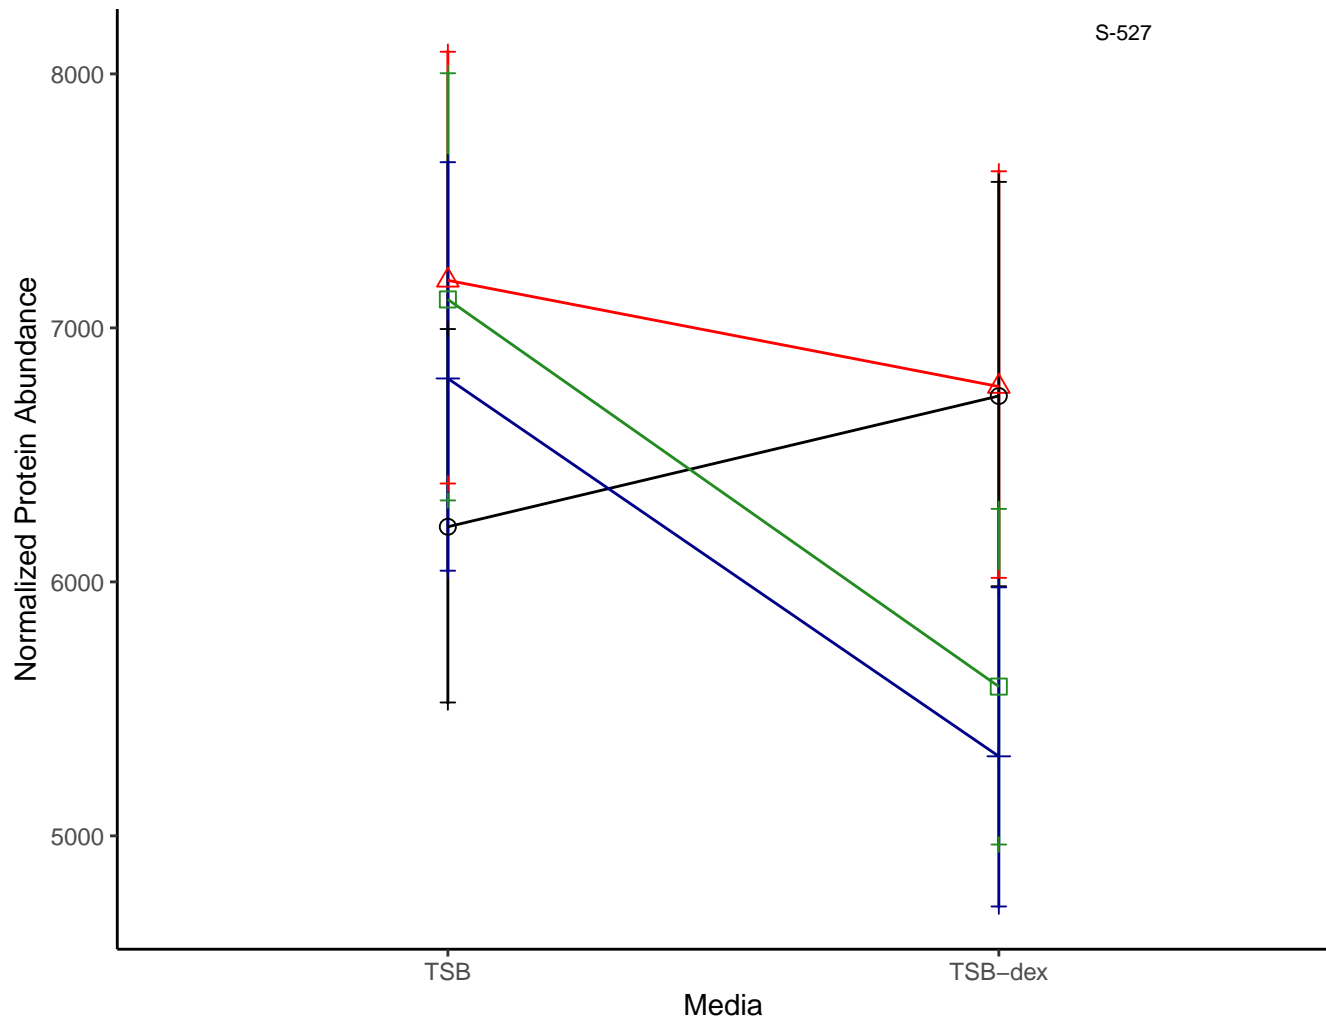

- ⊕ SA564
- △ SA564- $\Delta hptRS$
- ⊞ SA564- $\Delta ccpA$
- + SA564- $\Delta hptRS/ccpA$

# ARLY\_STAAM

S-528

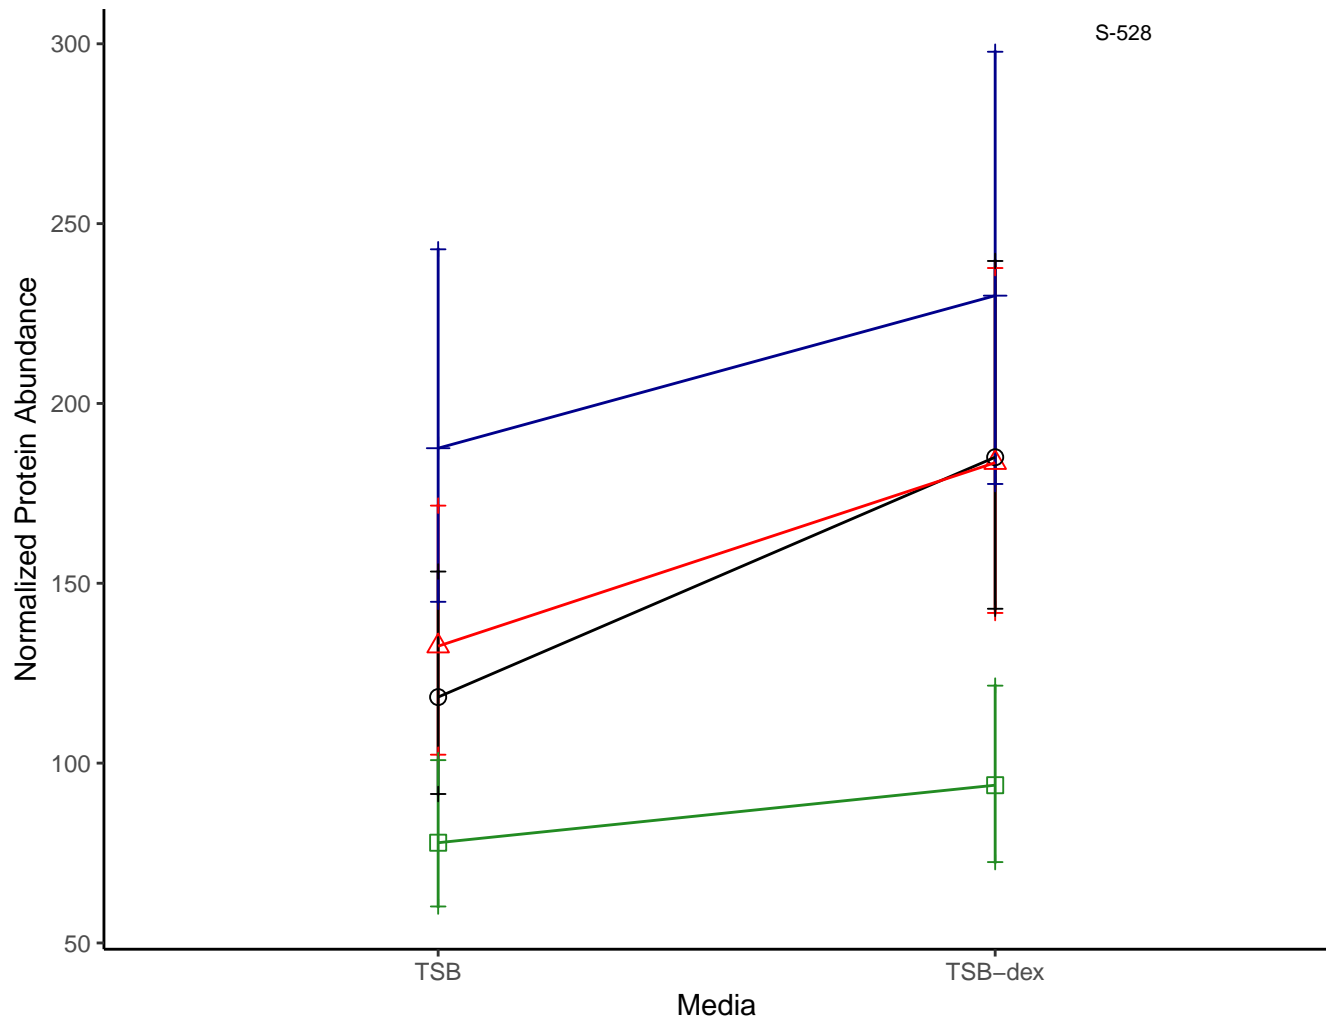

- SA564
- SA564- $\Delta$ *hptRS*
- SA564- $\Delta$ *ccpA*
- SA564- $\Delta$ *hptRS/ccpA*



# AROA\_STAAM

S-529

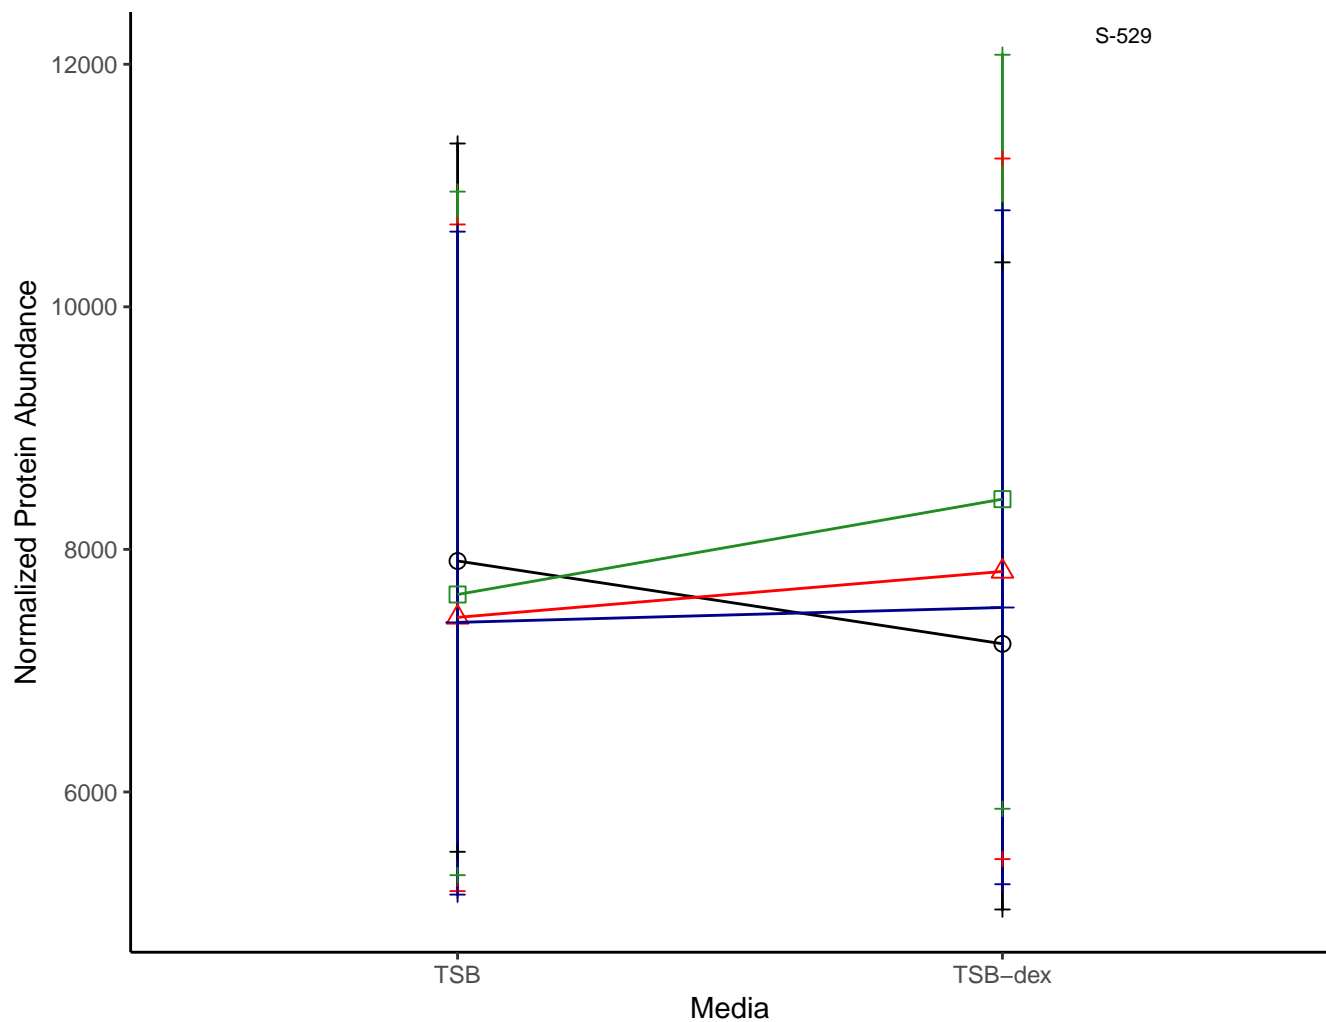

- SA564
- SA564- $\Delta hptRS$
- SA564- $\Delta ccpA$
- SA564- $\Delta hptRS/ccpA$

# AROB\_STAAM

S-530

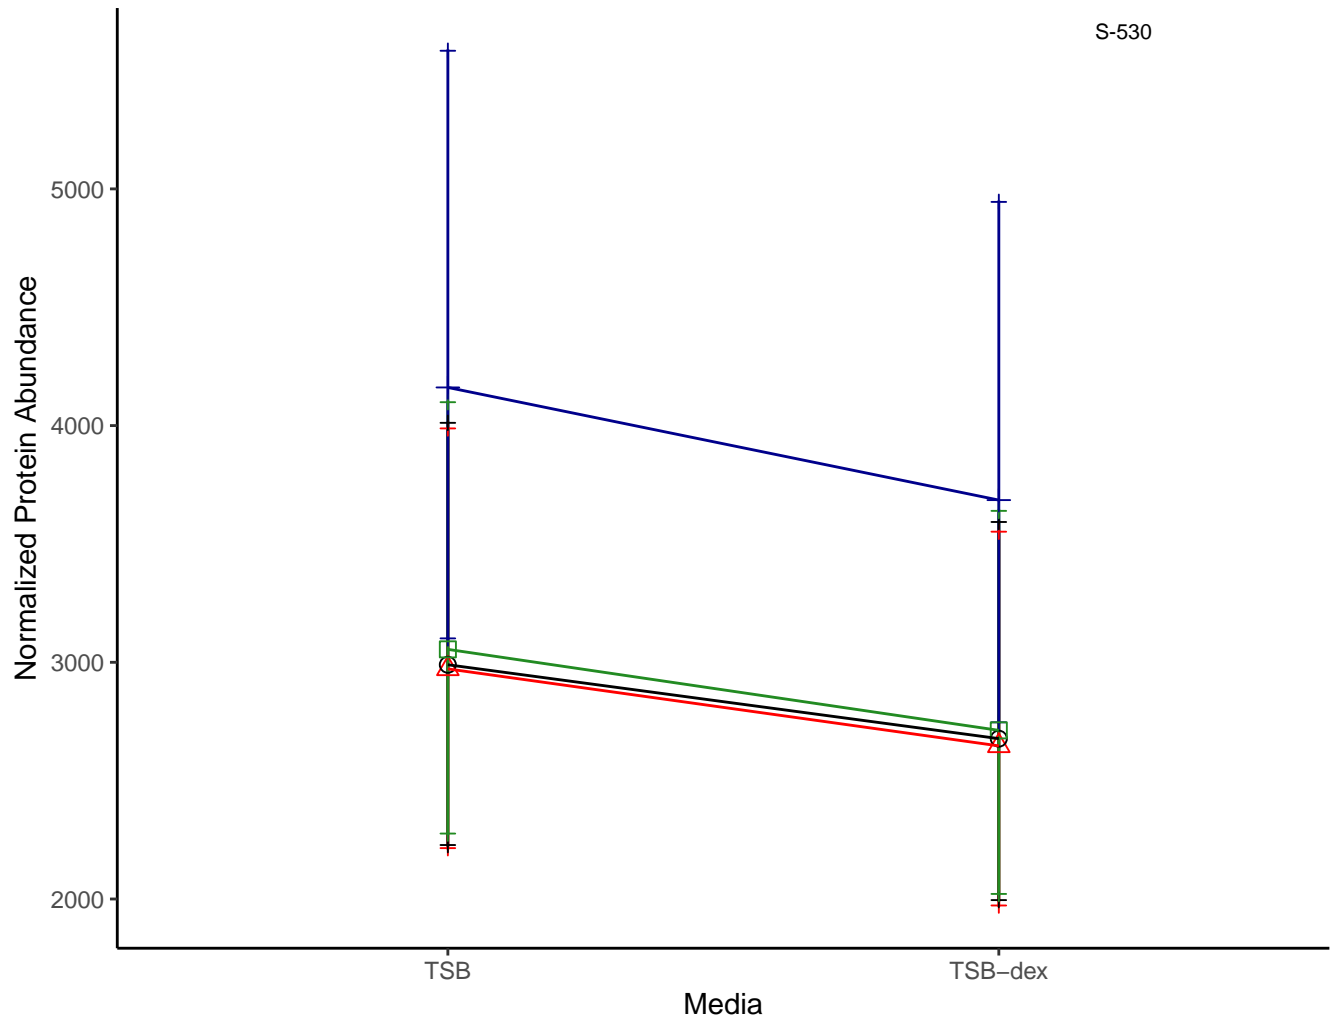

- ⊕ SA564
- △ SA564-ΔhptRS
- ⊞ SA564-ΔccpA
- + SA564-ΔhptRS/ccpA

# AROE\_STAAM

S-531

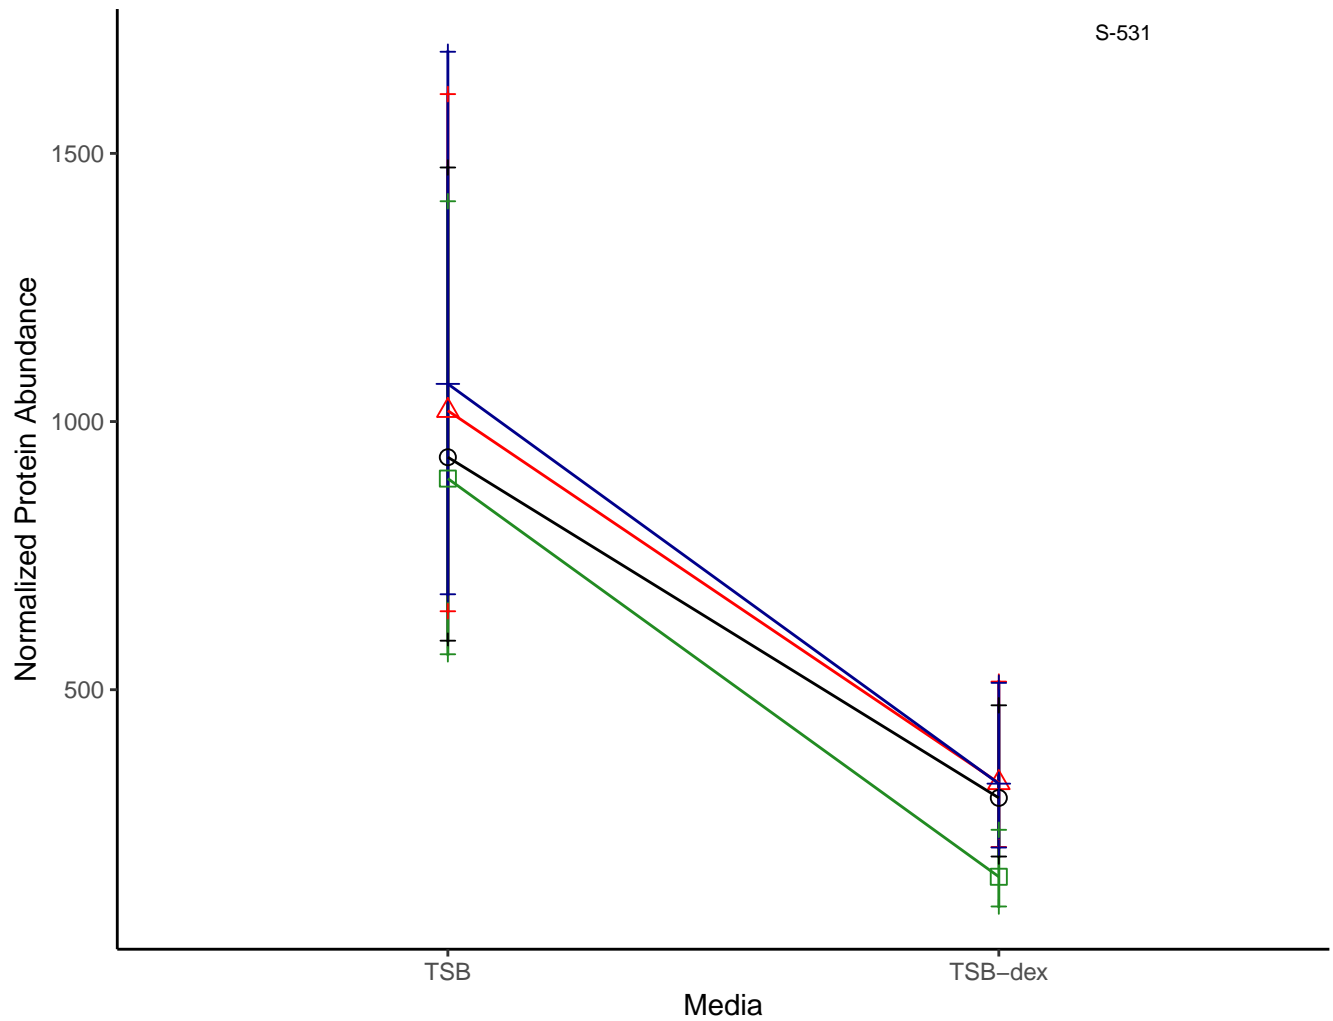

- ⊕ SA564
- △ SA564-ΔhptRS
- ⊞ SA564-ΔccpA
- + SA564-ΔhptRS/ccpA

# ASP23\_STAAM

S-532

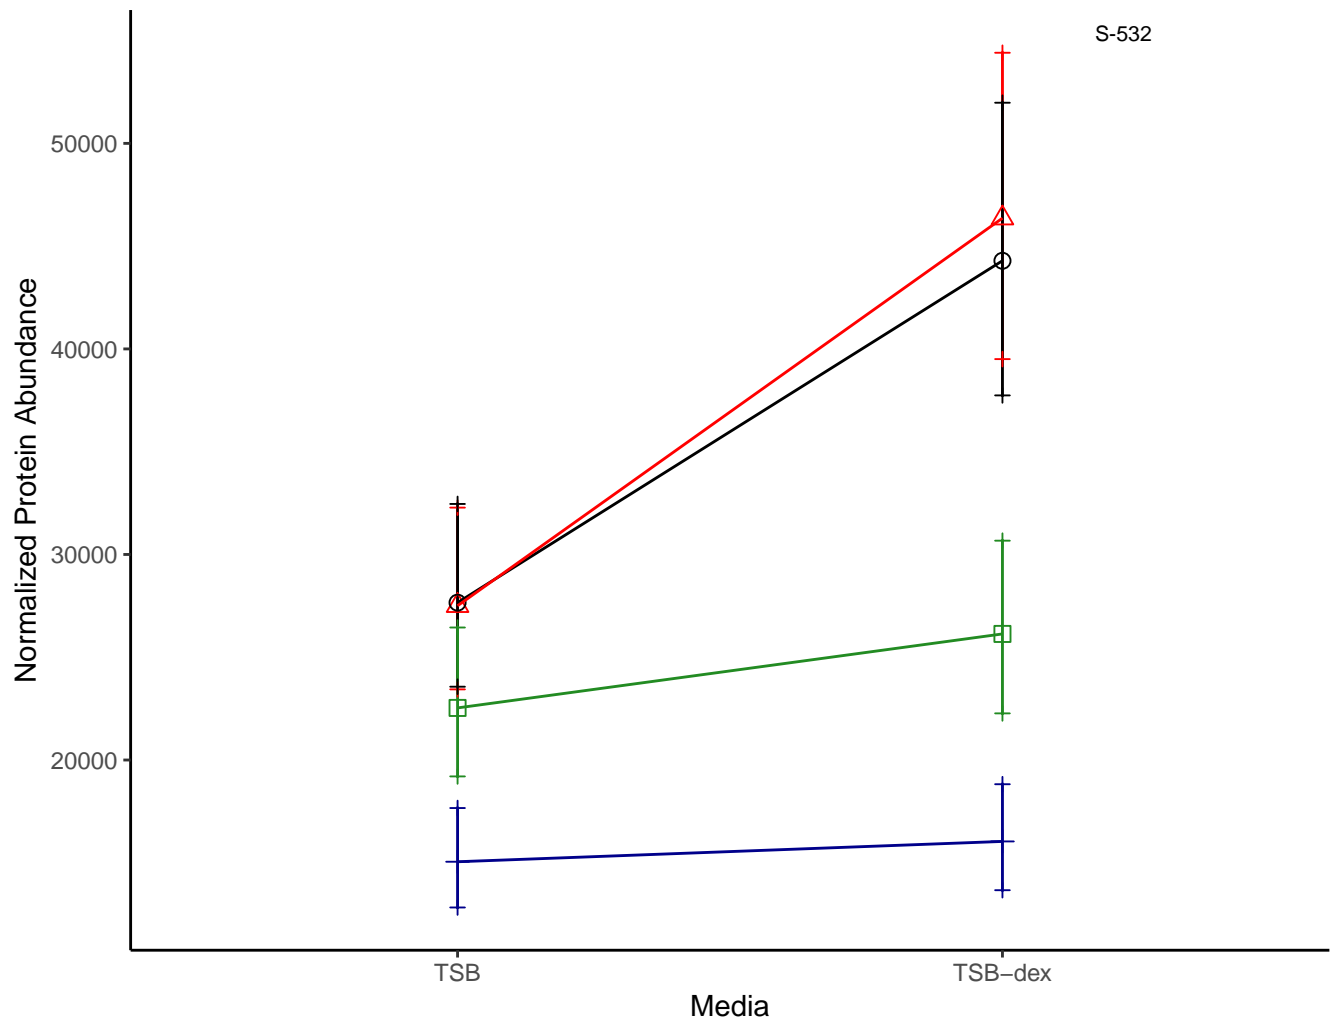

- ⊕ SA564
- △ SA564- $\Delta$ *hptRS*
- ⊞ SA564- $\Delta$ *ccpA*
- + SA564- $\Delta$ *hptRS/ccpA*

# ATL\_STAAM

S-533

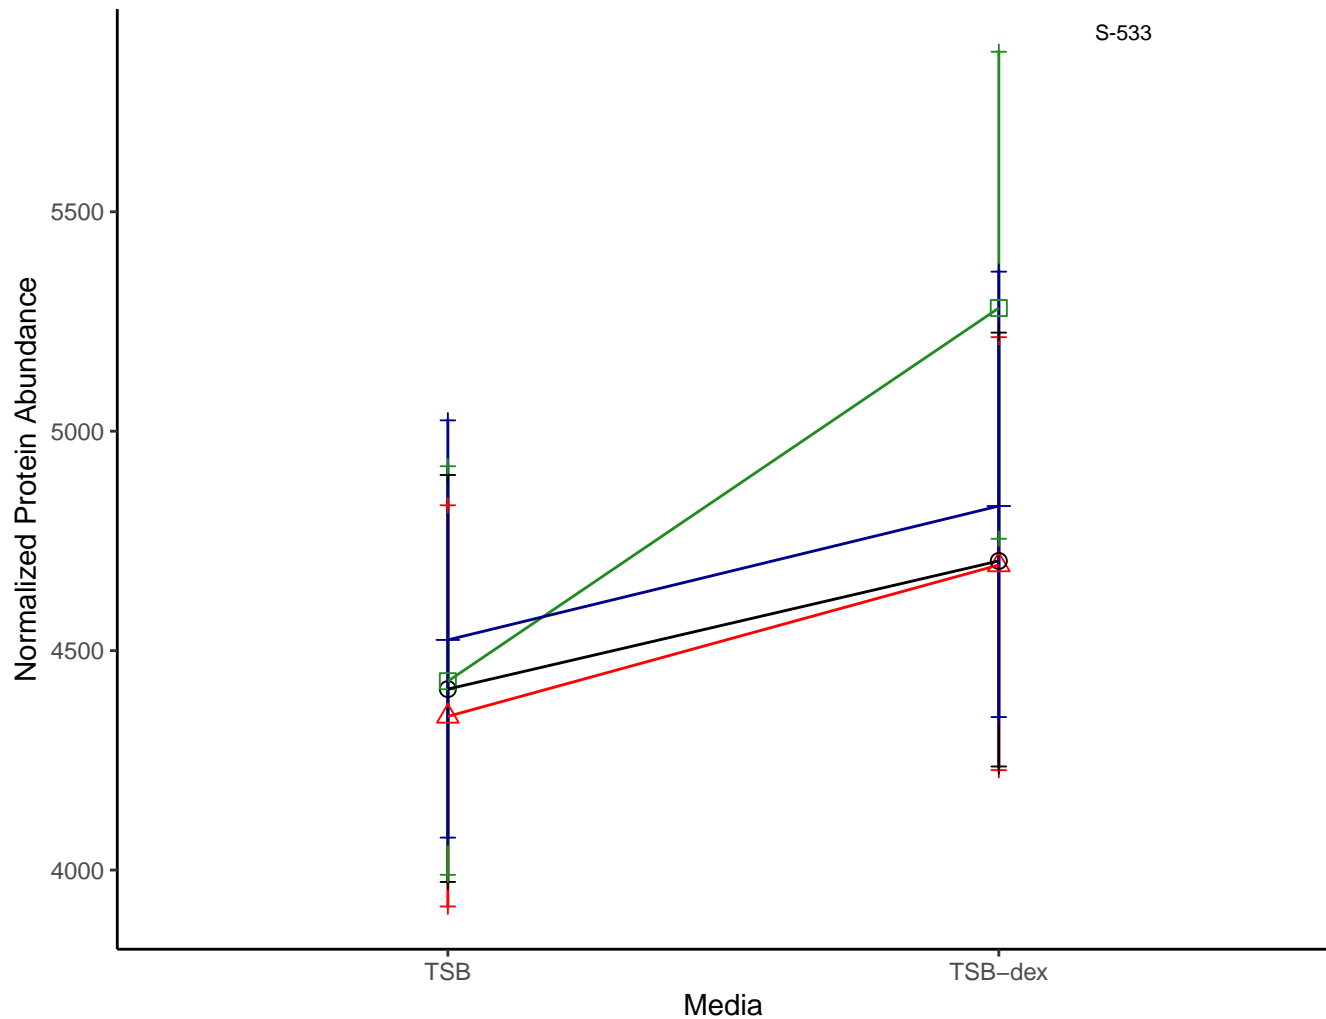

- ⊕ SA564
- △ SA564- $\Delta hptRS$
- ⊞ SA564- $\Delta ccpA$
- + SA564- $\Delta hptRS/ccpA$

# ATPA\_STAAM

S-534

Normalized Protein Abundance

16000  
14000  
12000

TSB

Media

TSB-dex

- ⊕ SA564
- △ SA564- $\Delta$ *hptRS*
- ⊞ SA564- $\Delta$ *ccpA*
- + SA564- $\Delta$ *hptRS/ccpA*

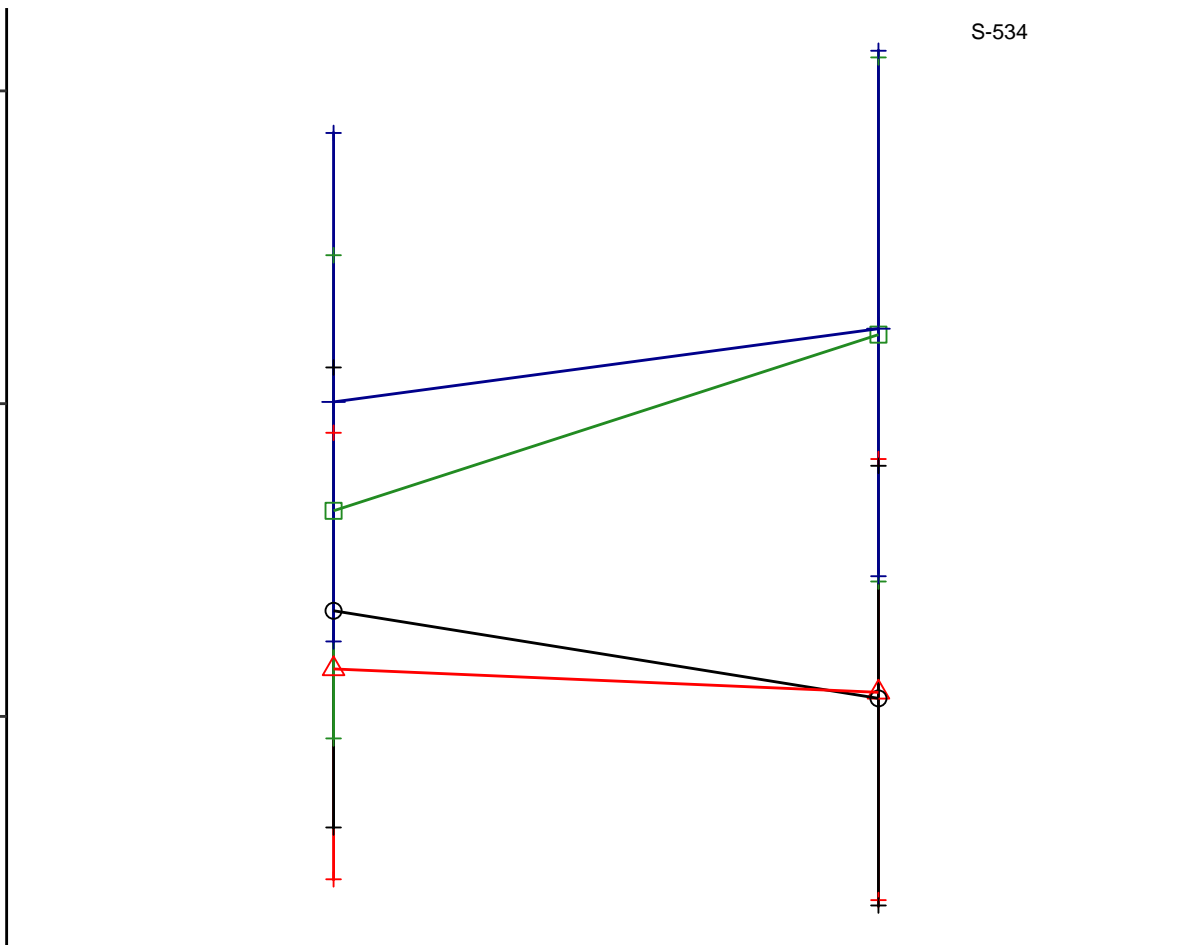

# ATPB\_STAAM

S-535

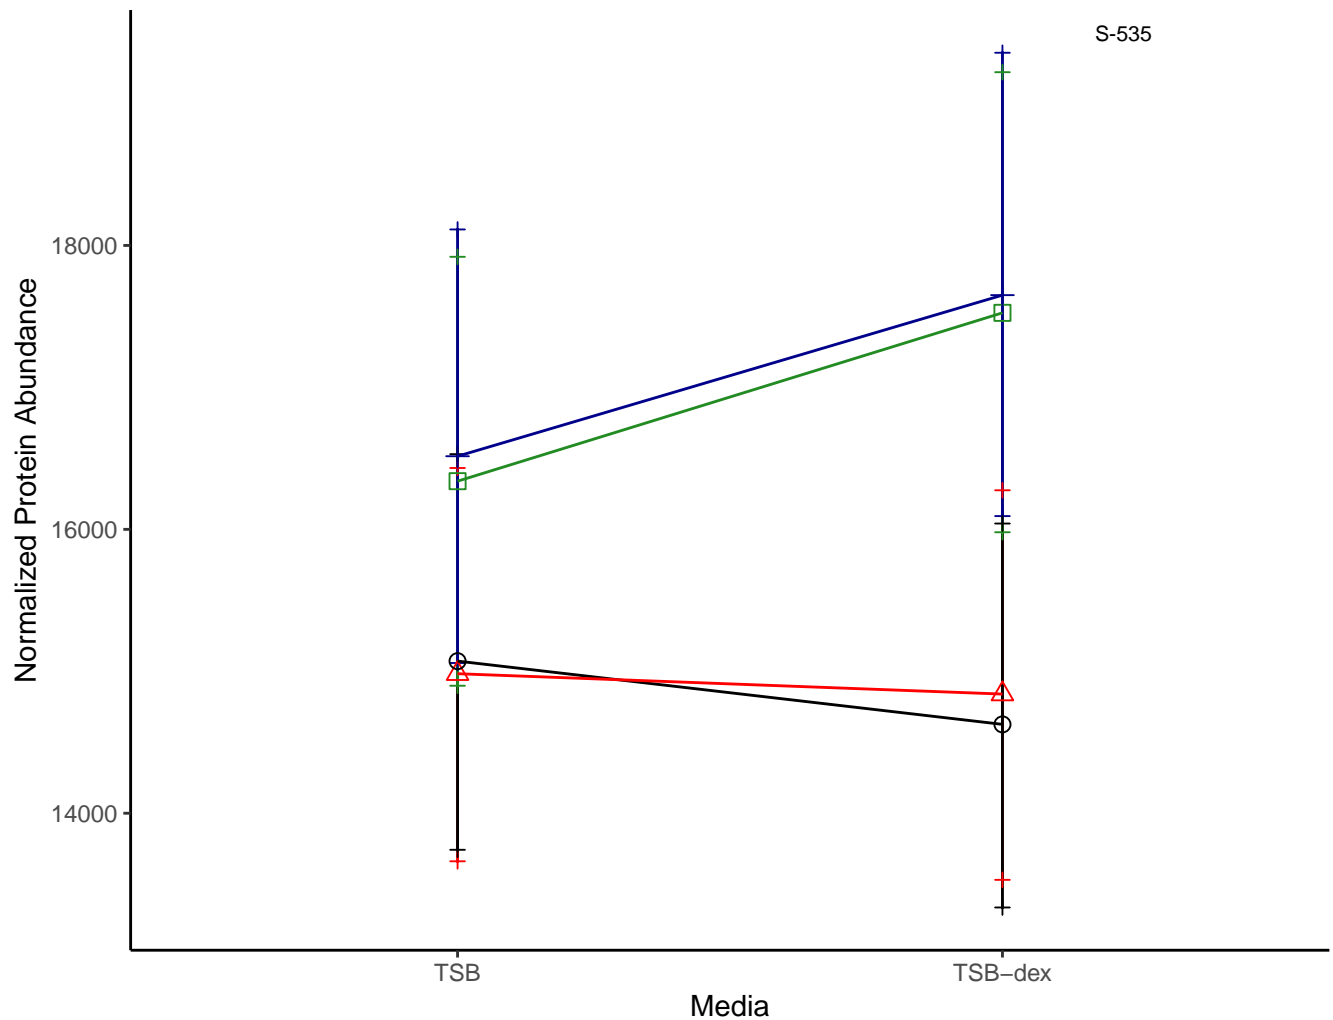

- ⊕ SA564
- △ SA564- $\Delta$ *hptRS*
- ⊞ SA564- $\Delta$ *ccpA*
- + SA564- $\Delta$ *hptRS/ccpA*

# ATPD\_STAAM

S-536

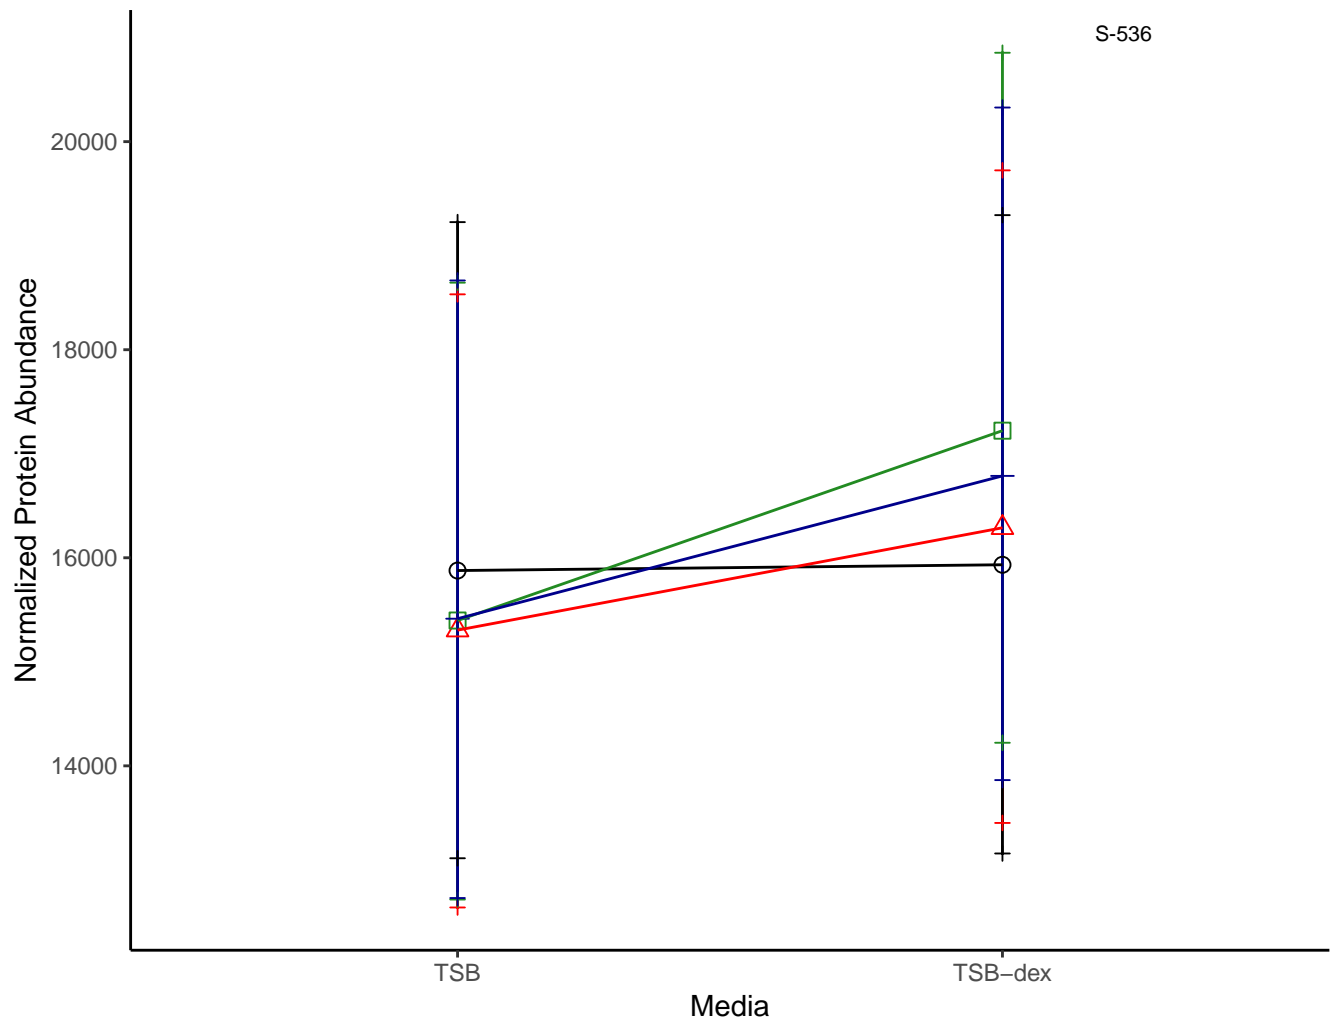

- ⊕ SA564
- △ SA564- $\Delta$ *hptRS*
- ⊞ SA564- $\Delta$ *ccpA*
- + SA564- $\Delta$ *hptRS/ccpA*



# ATPE\_STAAM

S-537

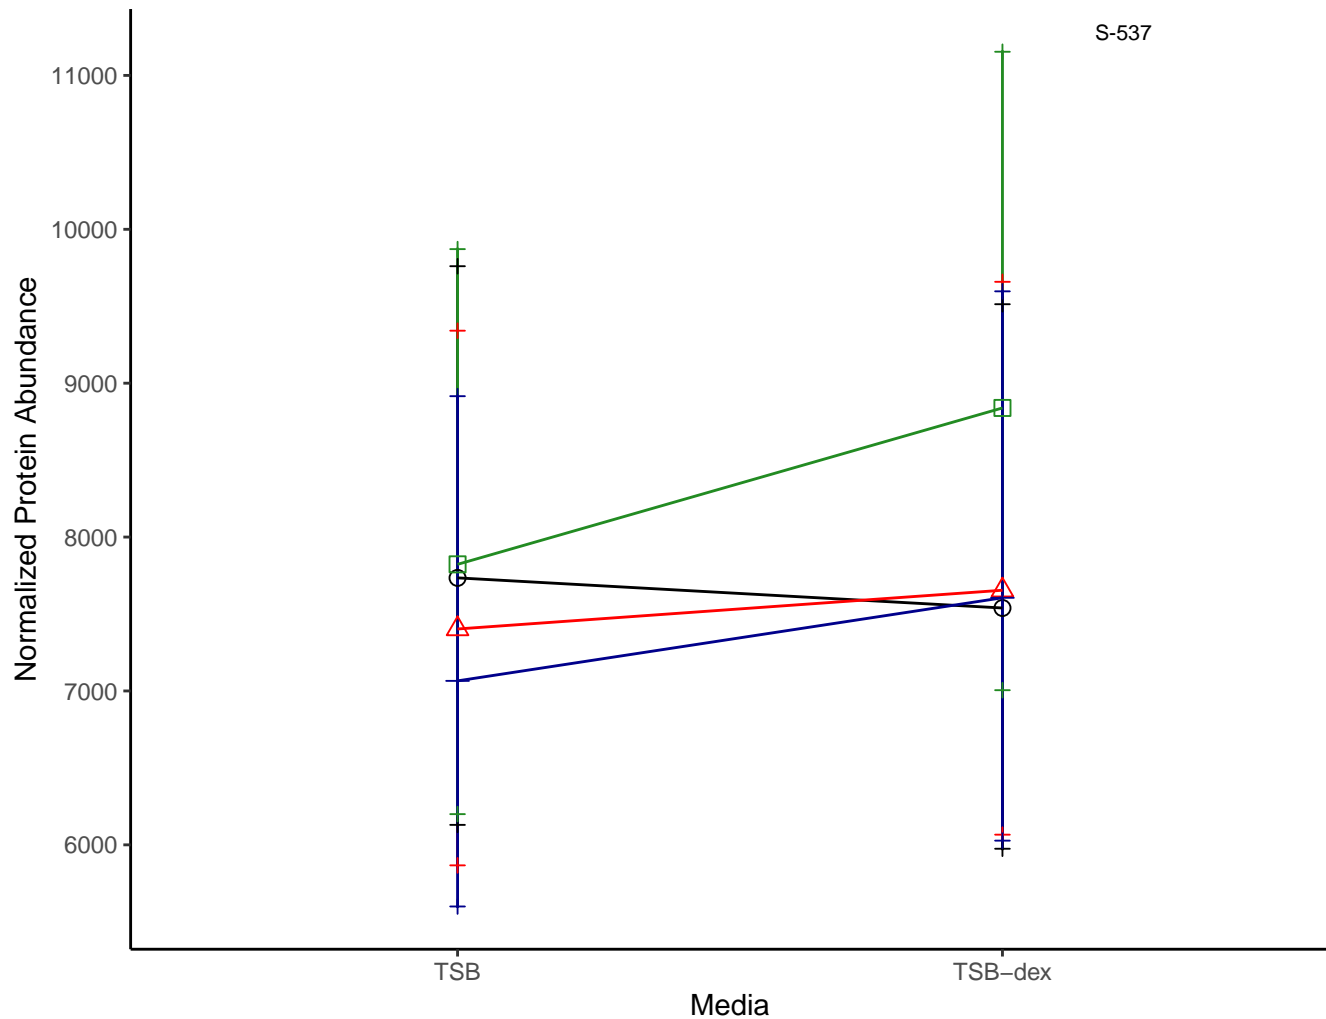

- SA564
- SA564- $\Delta hptRS$
- SA564- $\Delta ccpA$
- SA564- $\Delta hptRS/ccpA$

# ATPF\_STAAM

S-538

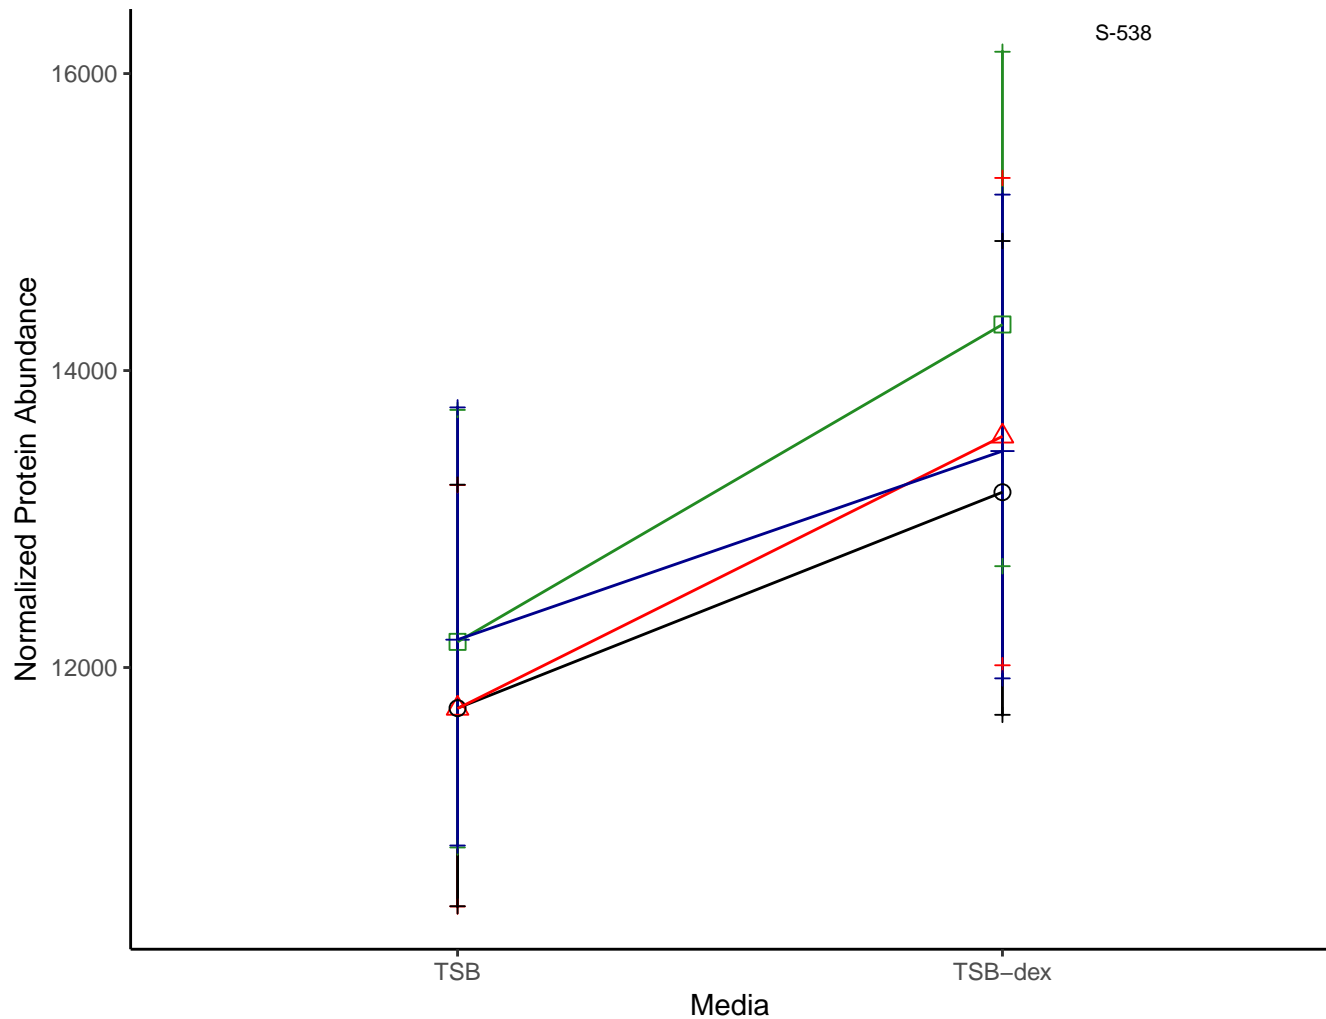

- SA564
- SA564- $\Delta$ *hptRS*
- SA564- $\Delta$ *ccpA*
- SA564- $\Delta$ *hptRS/ccpA*

# ATPG\_STAAM

S-539

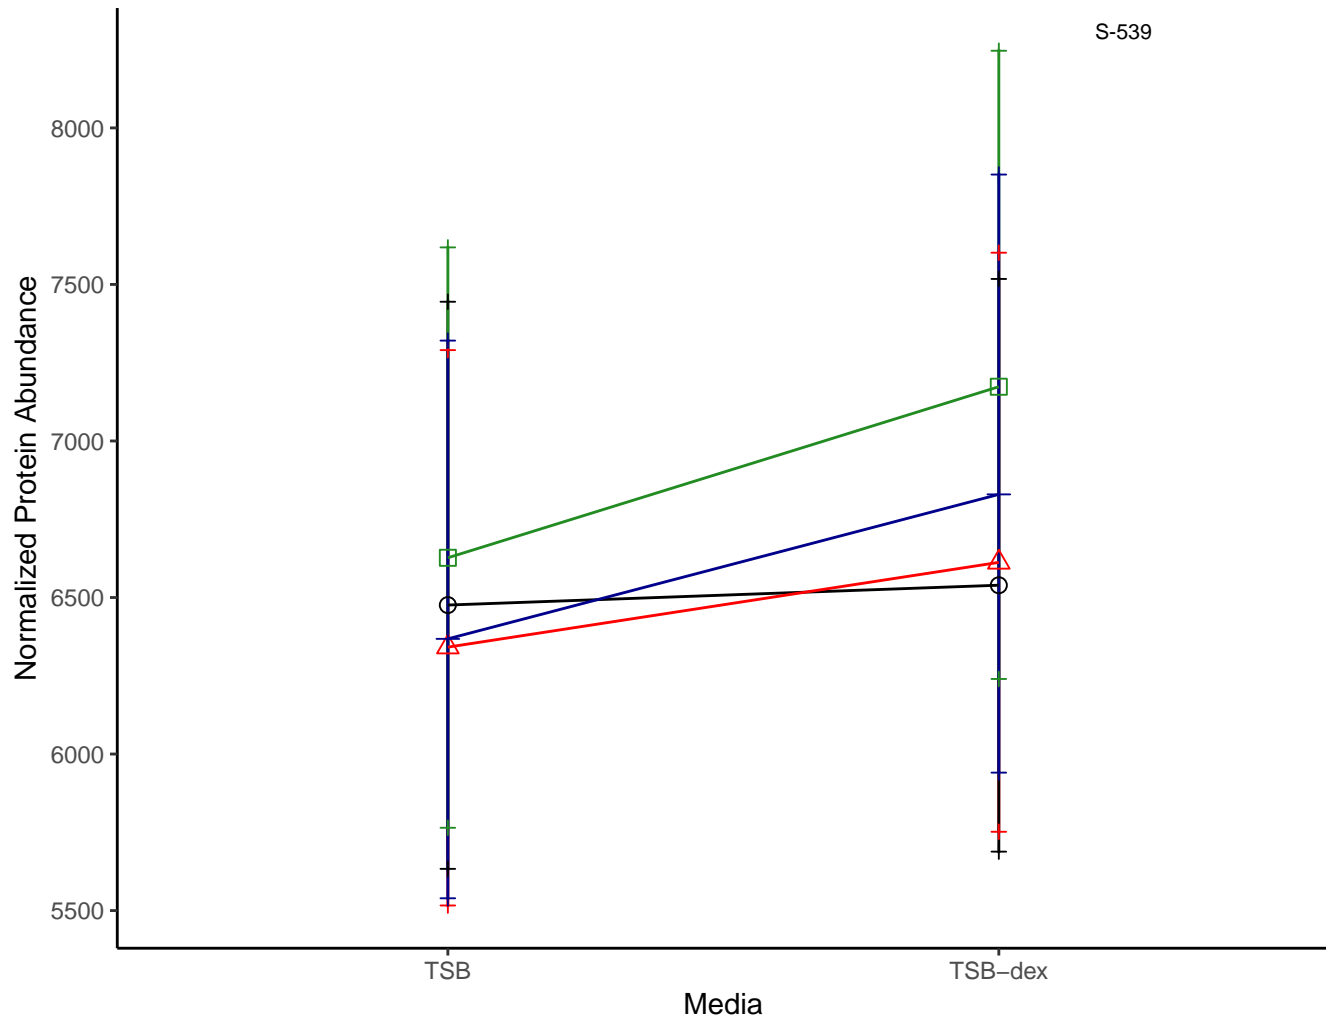

- ⊕ SA564
- △ SA564-ΔhptRS
- ⊞ SA564-ΔccpA
- + SA564-ΔhptRS/ccpA

# AZO1\_STAAM

S-540

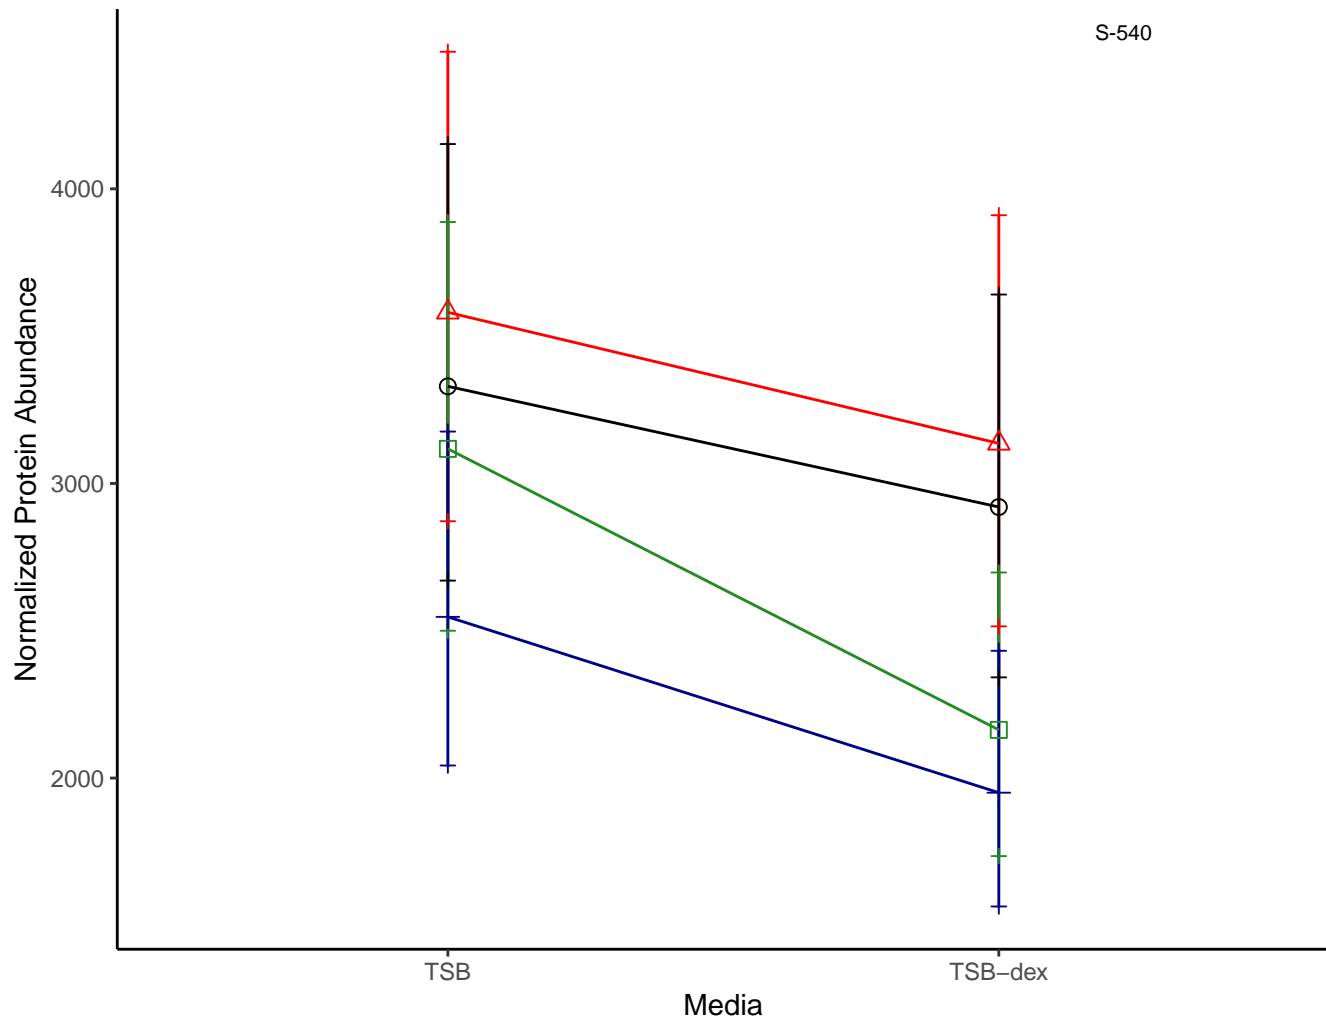

- ⊕ SA564
- △ SA564- $\Delta hptRS$
- ⊞ SA564- $\Delta ccpA$
- + SA564- $\Delta hptRS/ccpA$

# AZOR\_STAAM

S-541

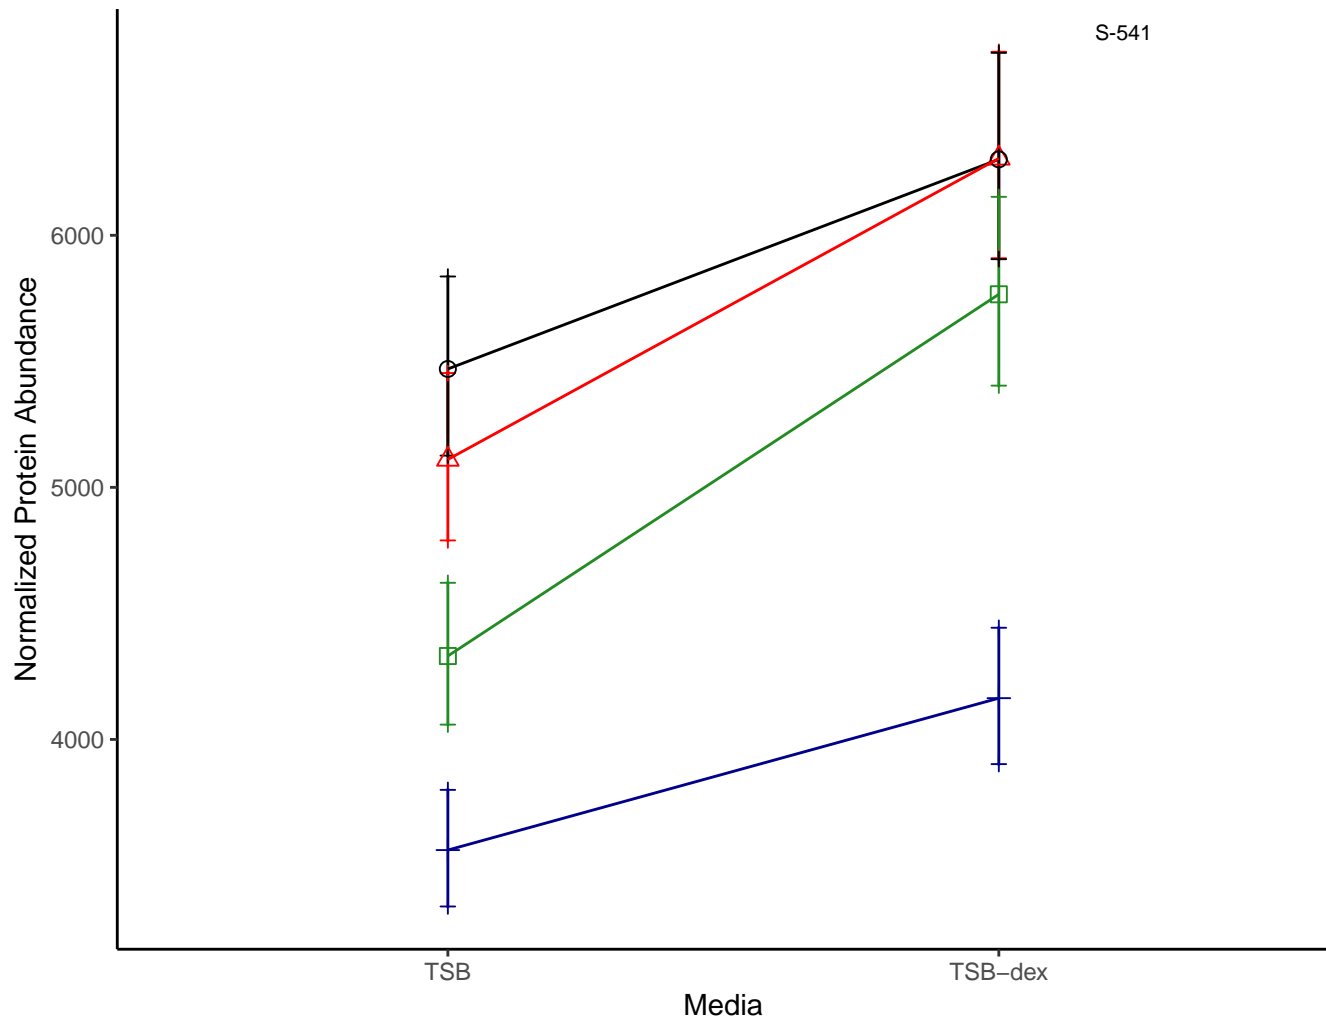

- ⊕ SA564
- △ SA564- $\Delta hptRS$
- ⊞ SA564- $\Delta ccpA$
- + SA564- $\Delta hptRS/ccpA$

# BSAA\_STAAM

S-542

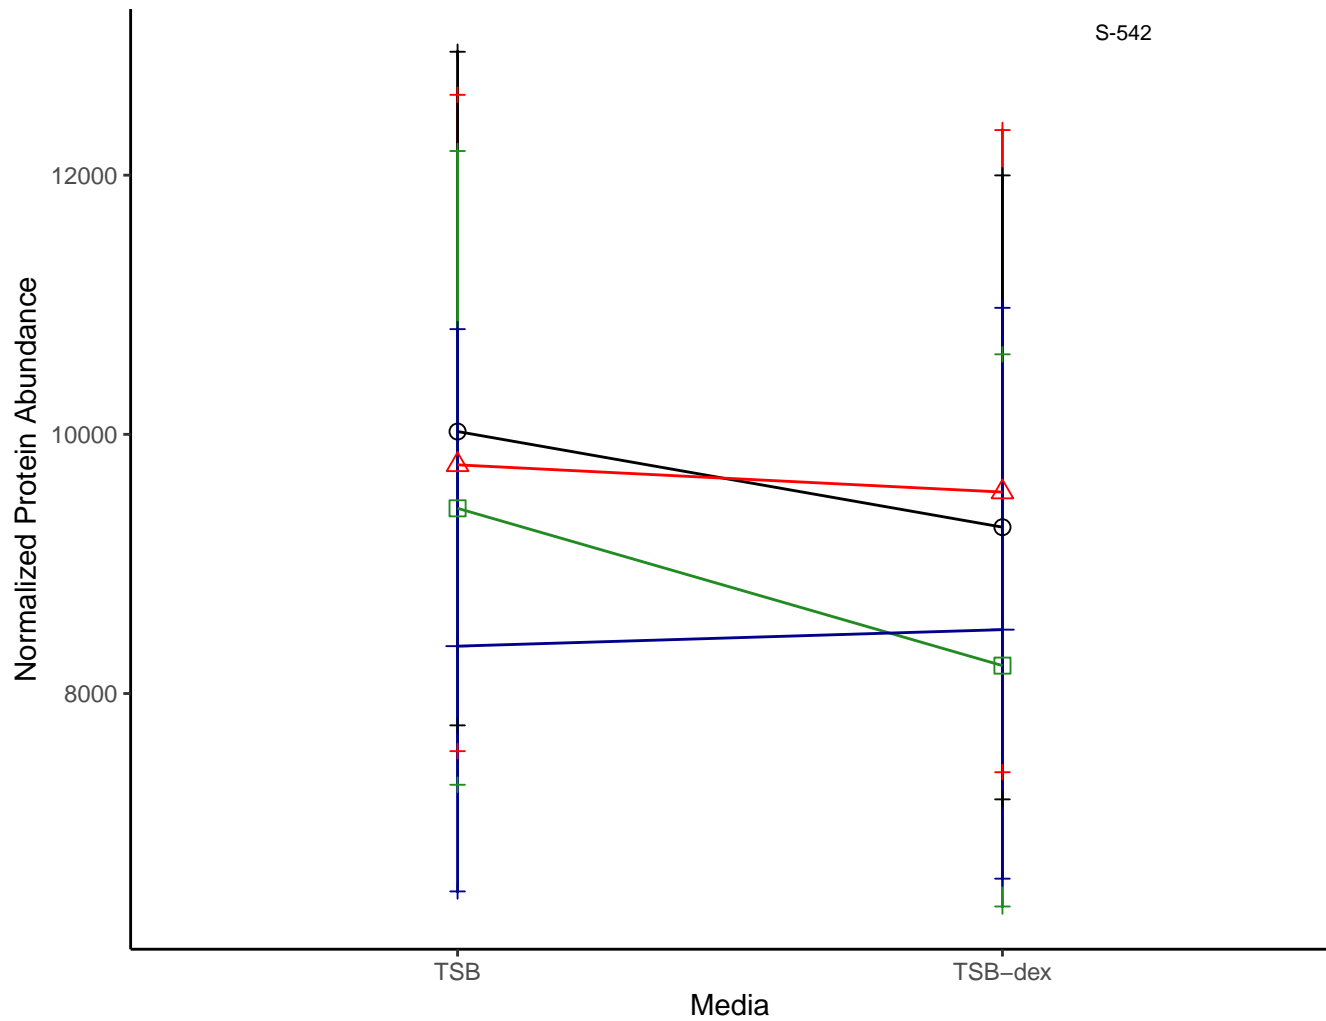

- ⊕ SA564
- △ SA564- $\Delta$ *hptRS*
- SA564- $\Delta$ *ccpA*
- + SA564- $\Delta$ *hptRS/ccpA*

# BUTA\_STAAM

S-543

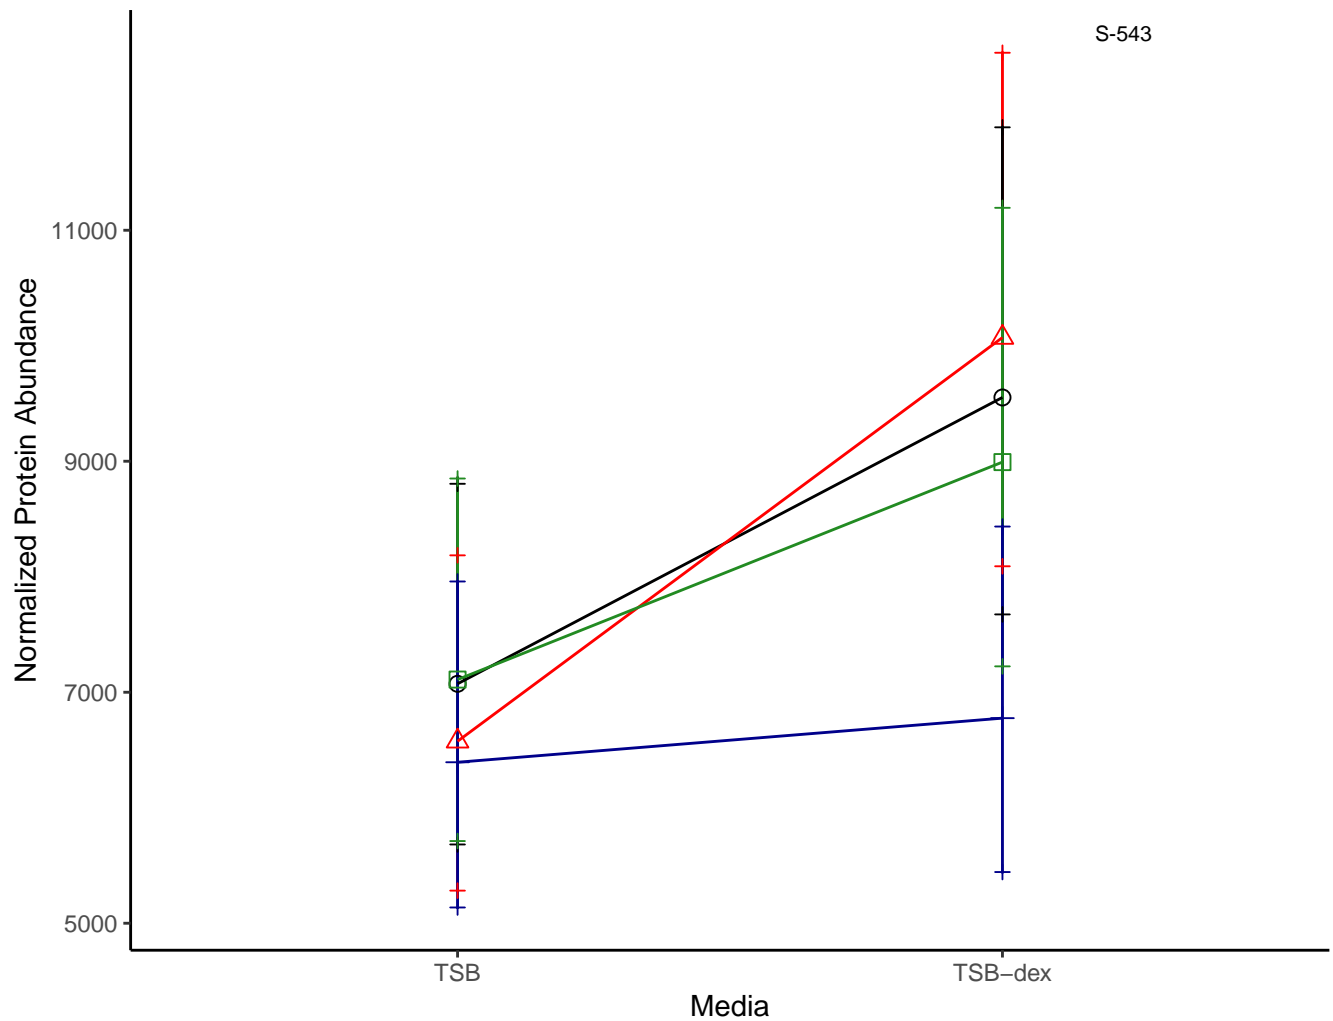

- ⊕ SA564
- △ SA564-ΔhptRS
- ⊞ SA564-ΔccpA
- + SA564-ΔhptRS/ccpA

# CARA\_STAAM

S-544

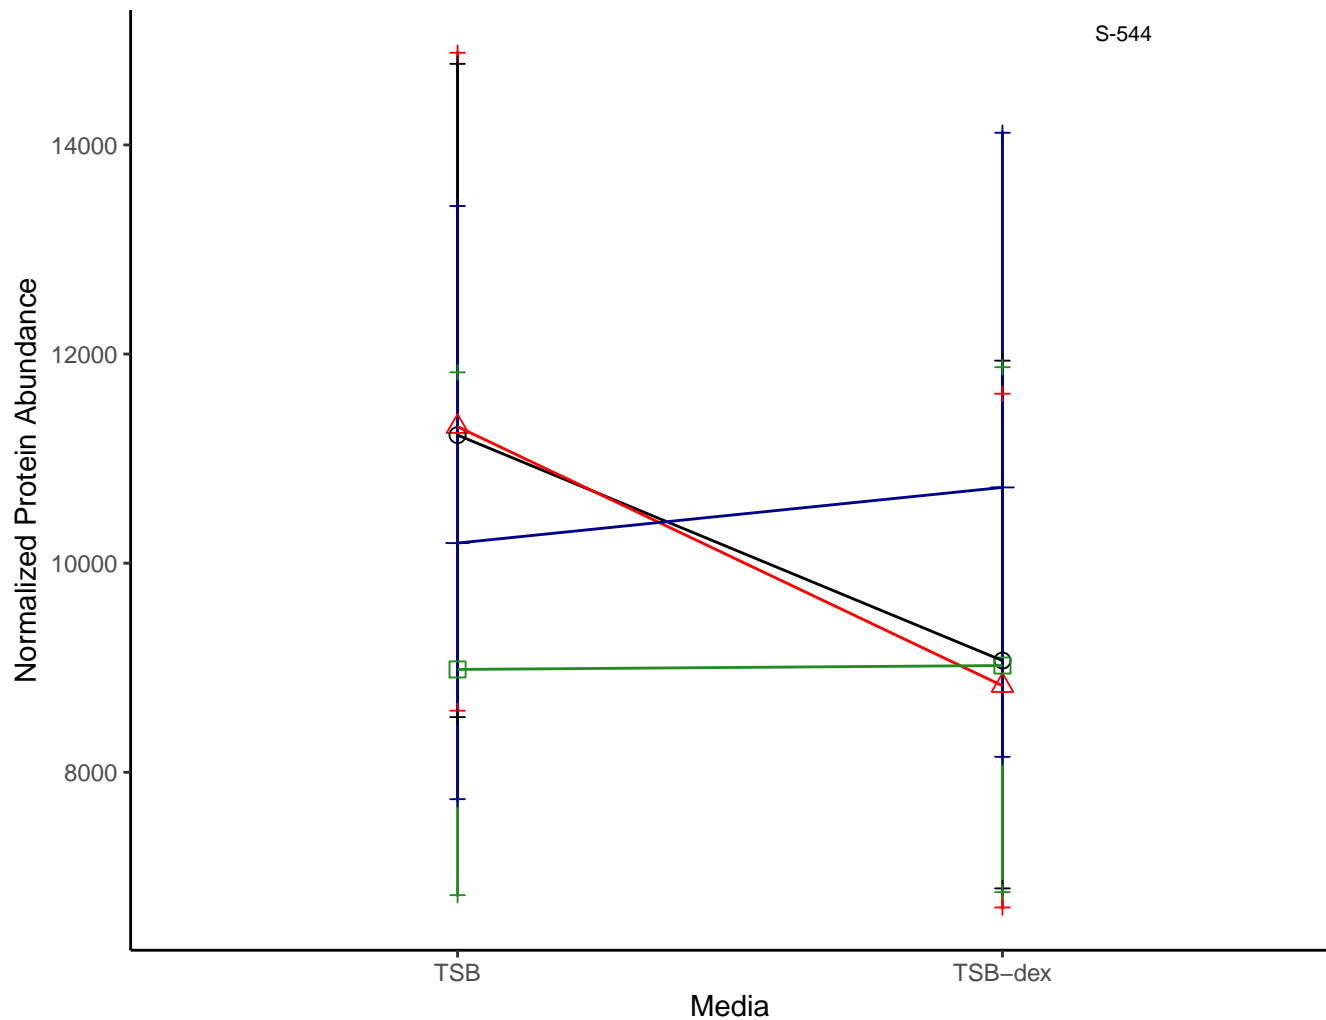

- ⊕ SA564
- △ SA564-ΔhptRS
- ⊞ SA564-ΔccpA
- + SA564-ΔhptRS/ccpA



# CARB\_STAAM

S-545

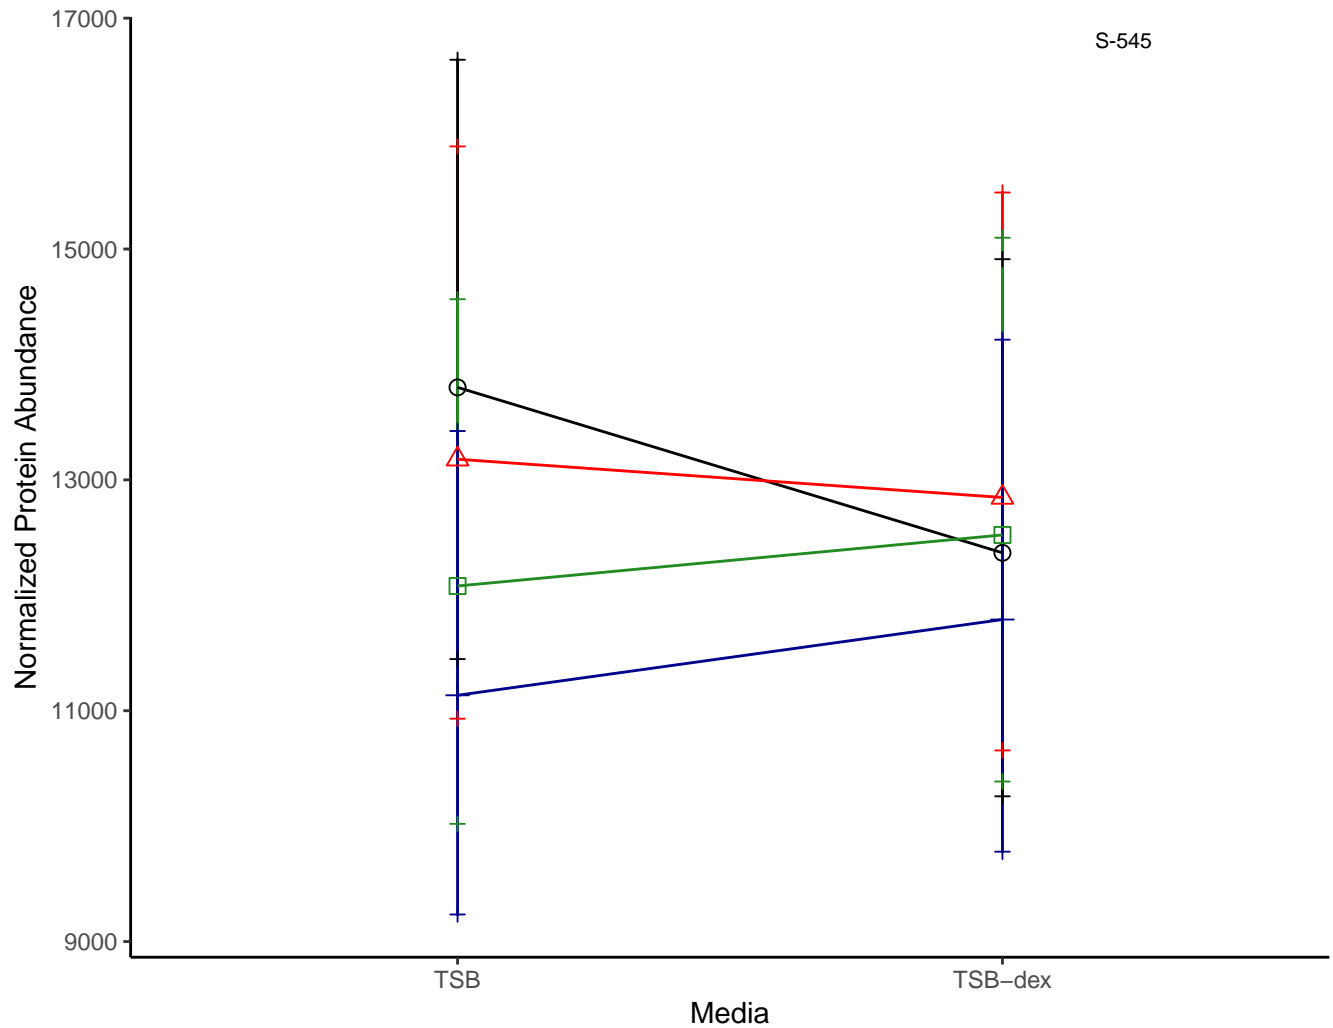

- SA564
- SA564- $\Delta$ *hptRS*
- SA564- $\Delta$ *ccpA*
- SA564- $\Delta$ *hptRS/ccpA*

# CATA\_STAAM

S-546

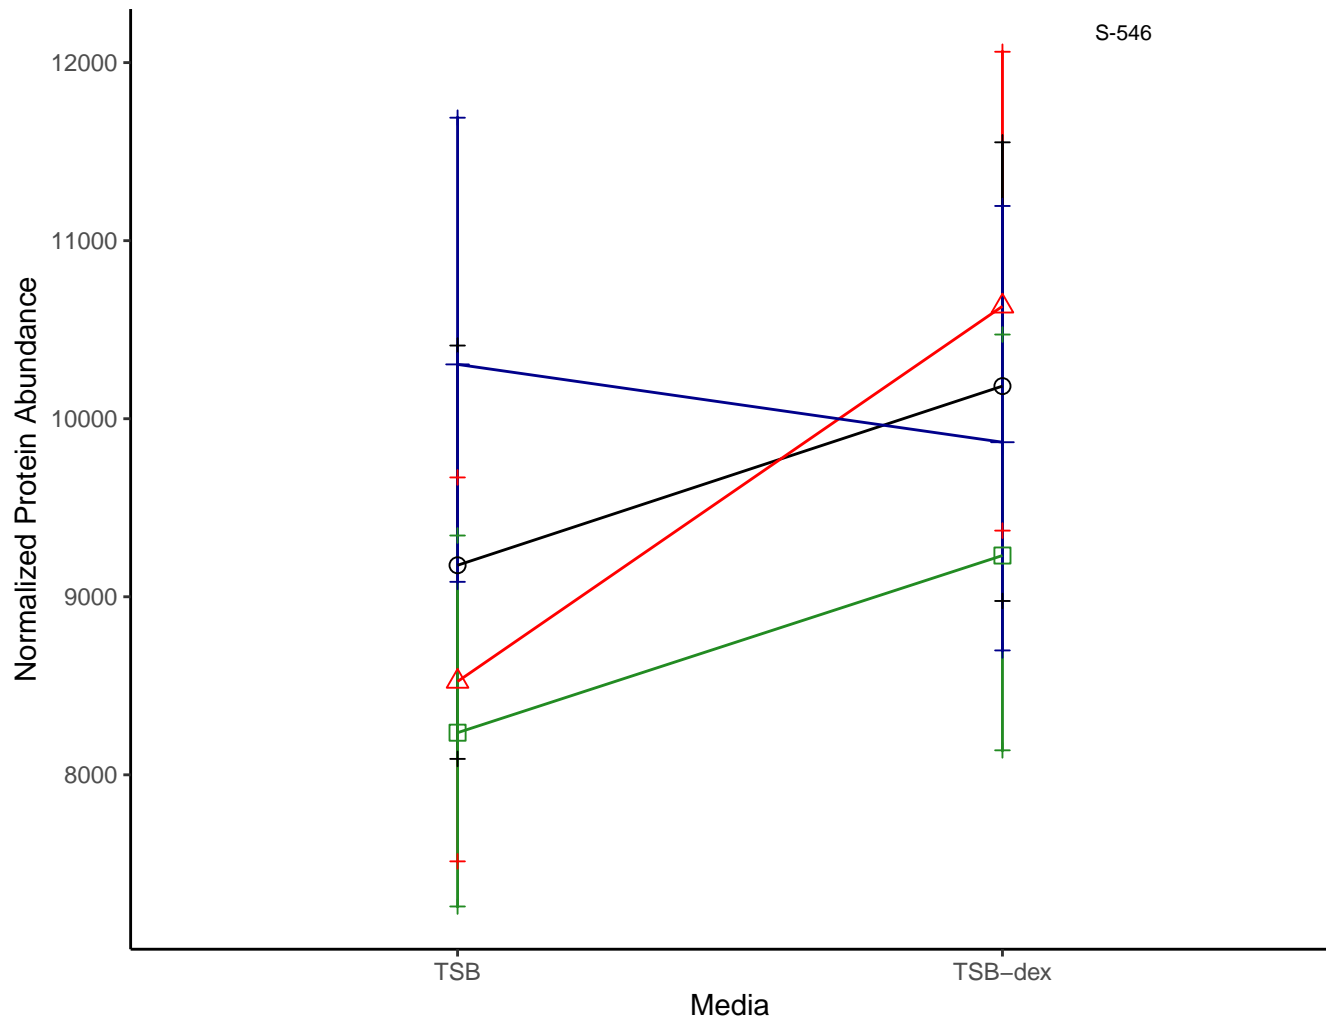

- ⊕ SA564
- △ SA564-ΔhptRS
- SA564-ΔccpA
- + SA564-ΔhptRS/ccpA

# CCPA\_STAAM

S-547

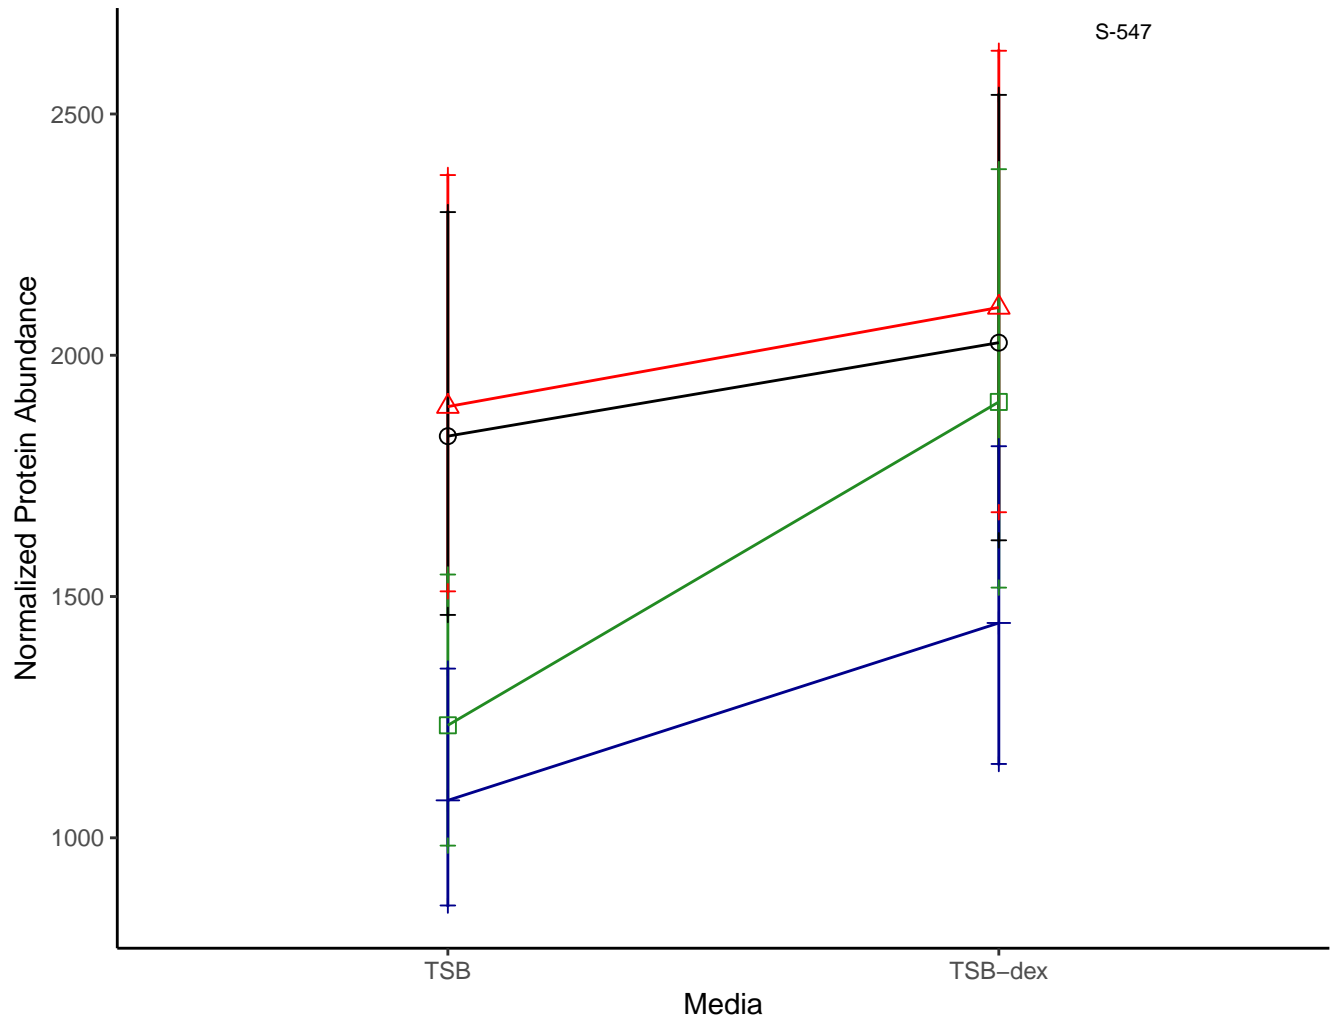

- ⊕ SA564
- △ SA564- $\Delta$ *hptRS*
- ⊞ SA564- $\Delta$ *ccpA*
- + SA564- $\Delta$ *hptRS/ccpA*

# CDR\_STAAM

S-548

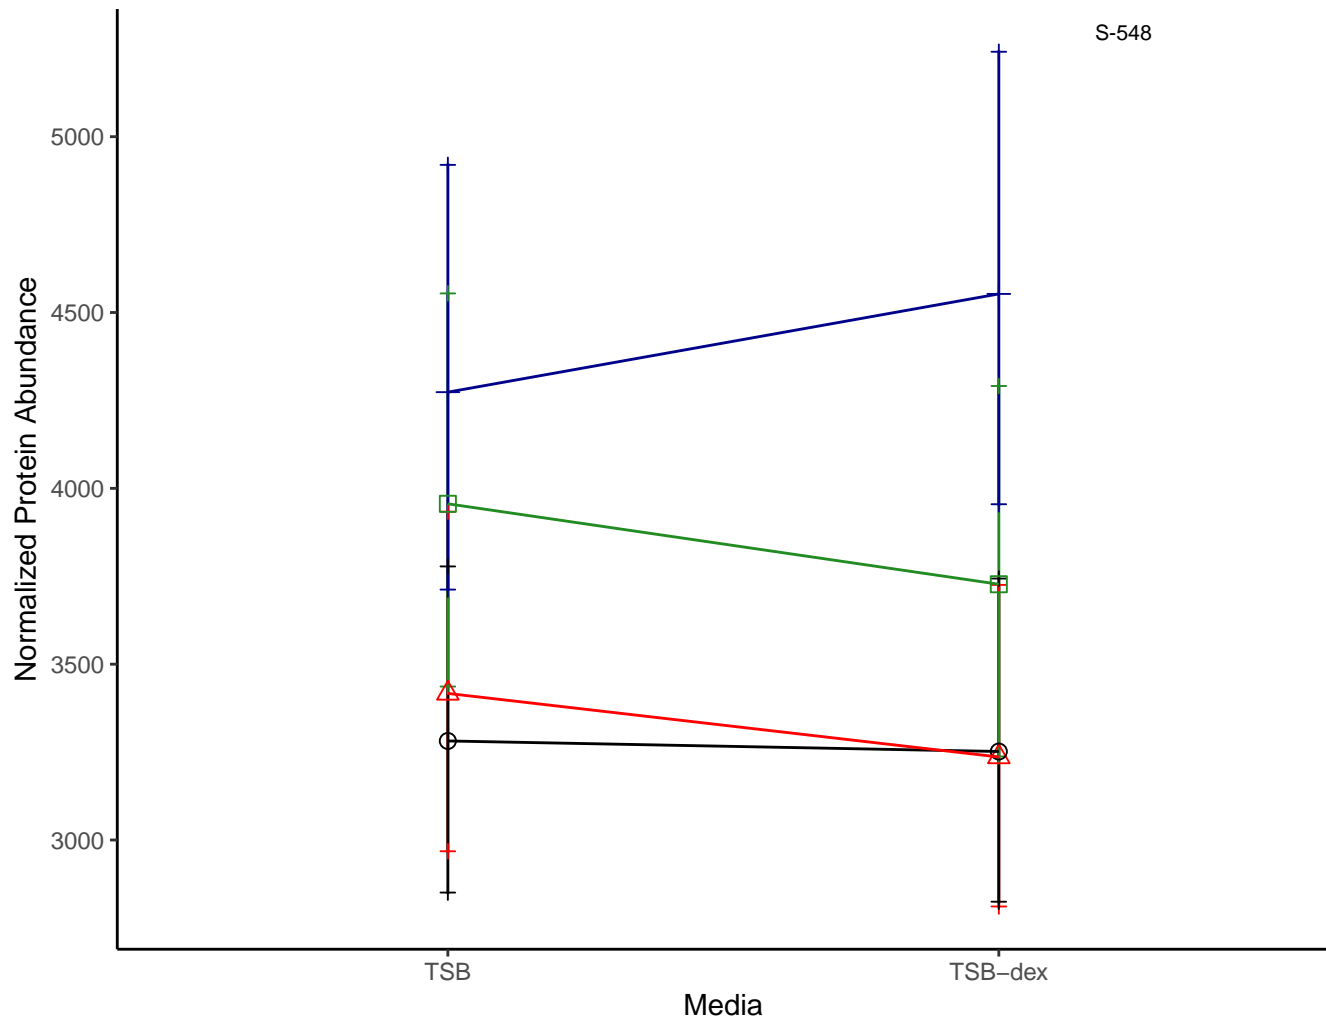

- ⊕ SA564
- △ SA564- $\Delta hptRS$
- ⊞ SA564- $\Delta ccpA$
- + SA564- $\Delta hptRS/ccpA$

# CH10\_STAAM

S-549

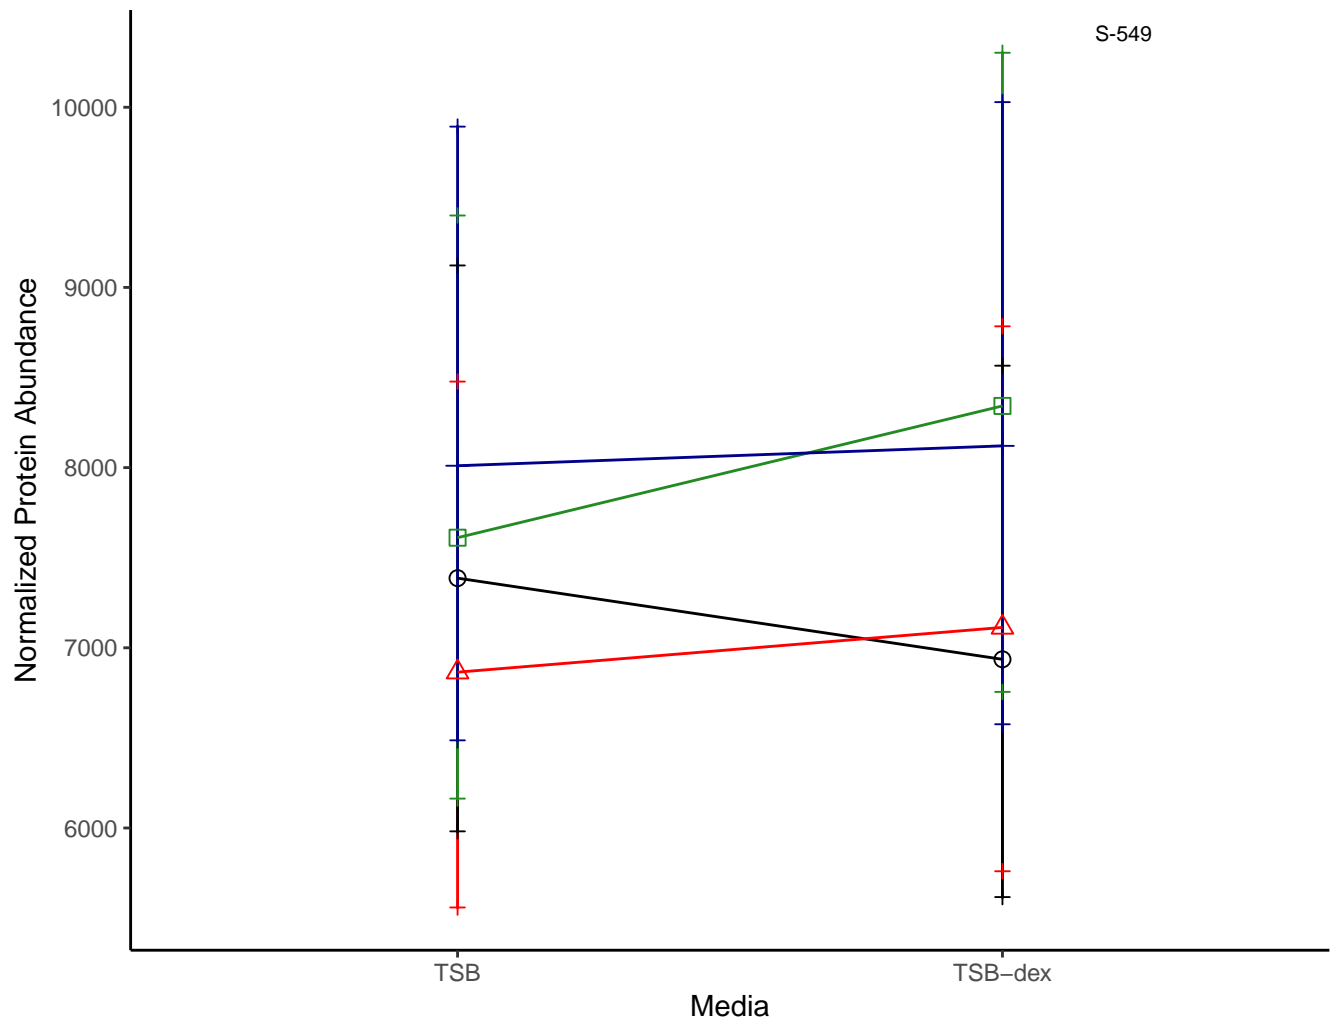

- ⊕ SA564
- △ SA564-ΔhptRS
- ⊞ SA564-ΔccpA
- + SA564-ΔhptRS/ccpA

# CH60\_STAAM

S-550

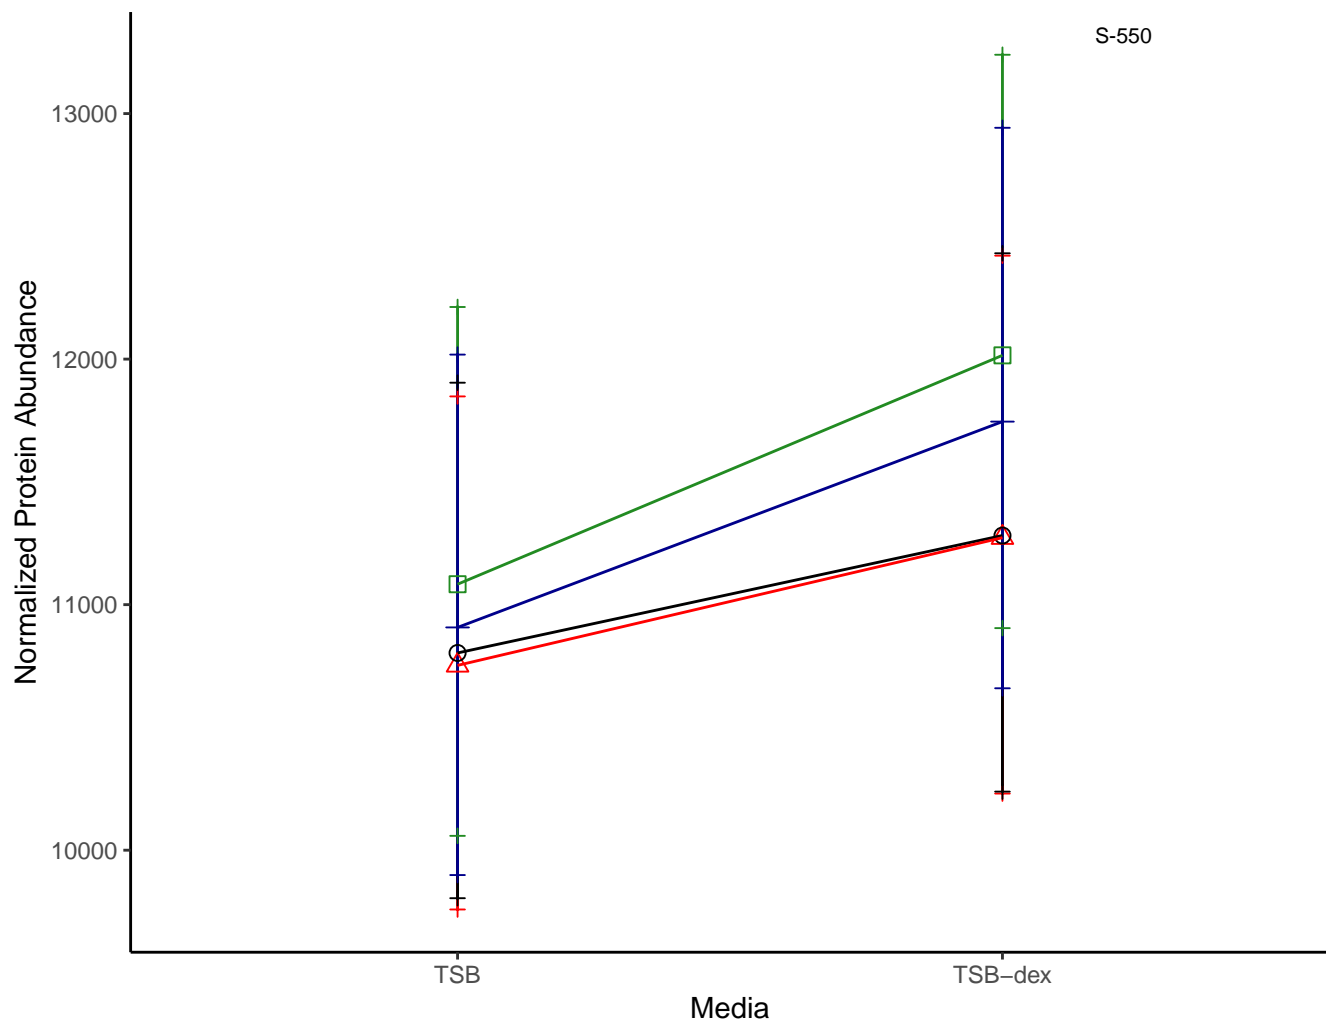

- ⊕ SA564
- △ SA564-ΔhptRS
- ⊞ SA564-ΔccpA
- + SA564-ΔhptRS/ccpA

# CLPB\_STAAM

S-551

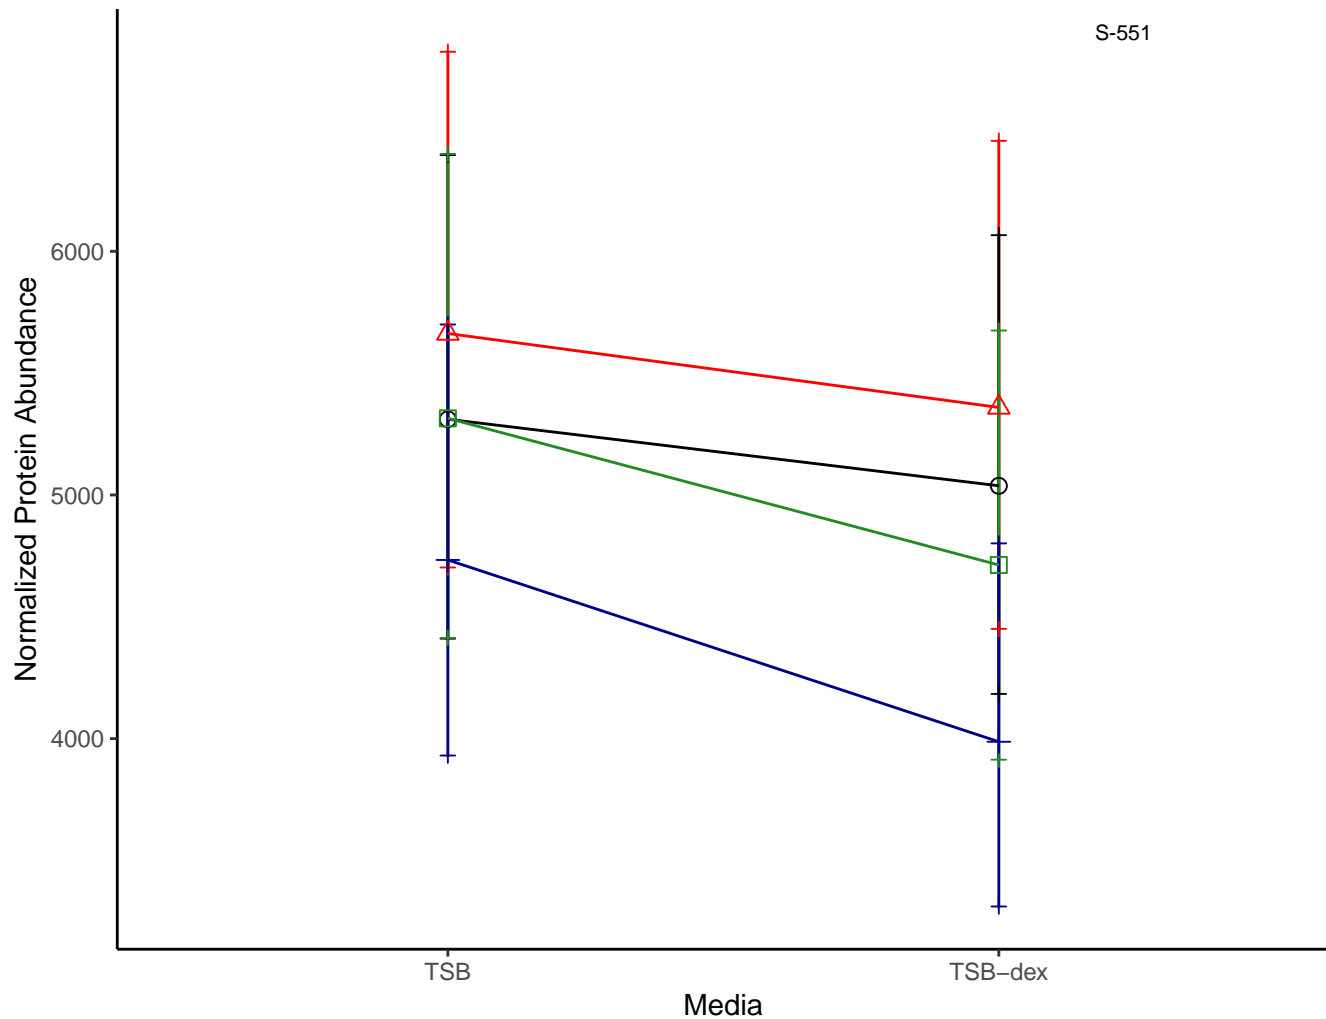

- ⊕ SA564
- △ SA564- $\Delta hptRS$
- ⊞ SA564- $\Delta ccpA$
- + SA564- $\Delta hptRS/ccpA$

# CLPC\_STAAM

S-552

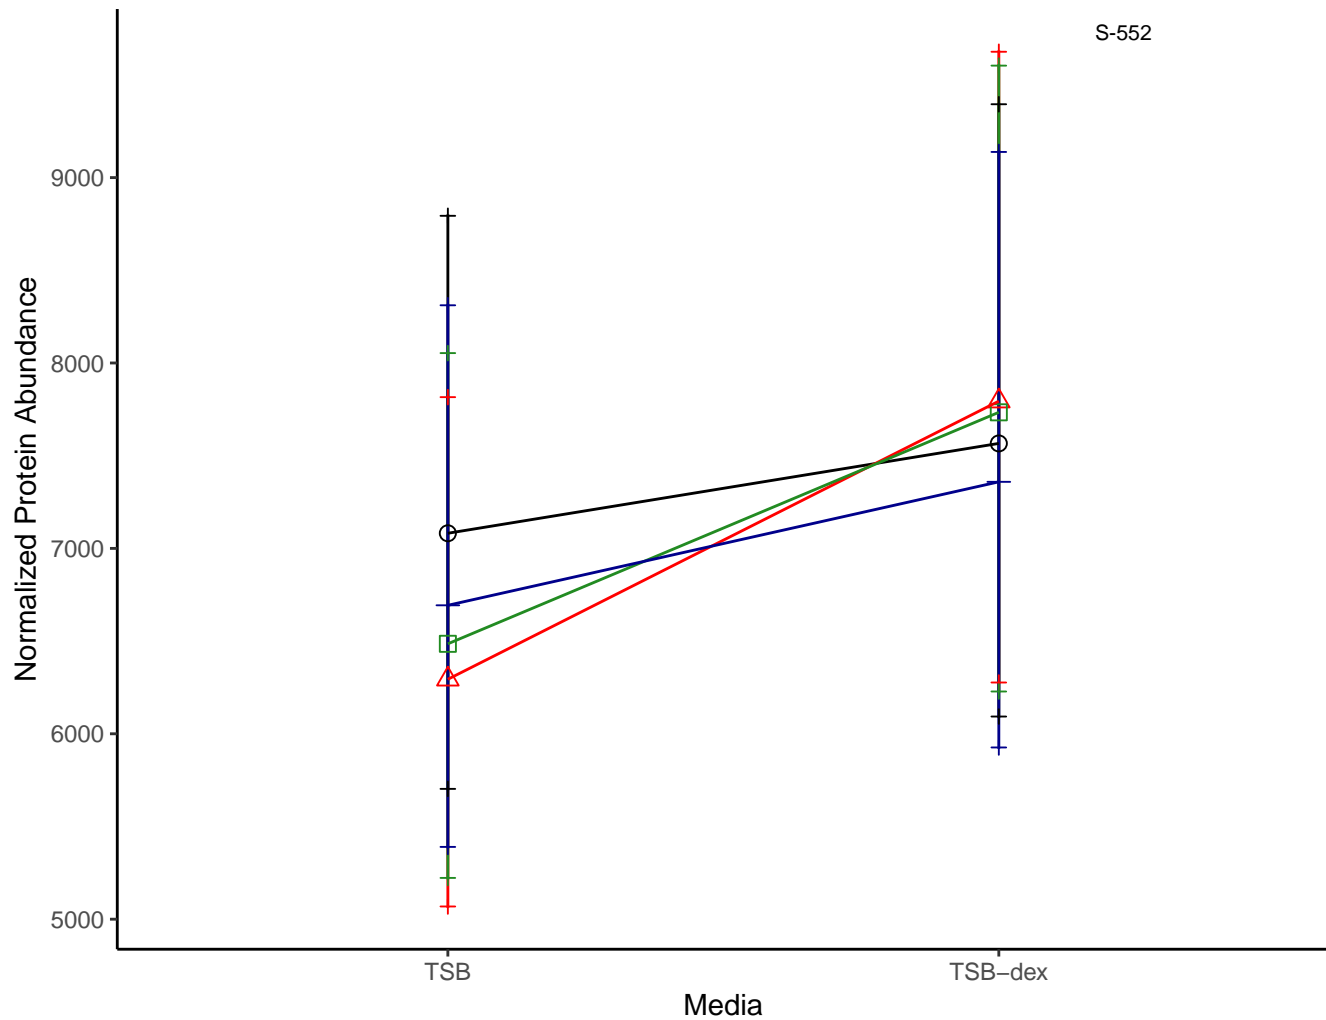

- ⊕ SA564
- △ SA564- $\Delta hptRS$
- ⊞ SA564- $\Delta ccpA$
- + SA564- $\Delta hptRS/ccpA$



# CLPL\_STAAM

S-553

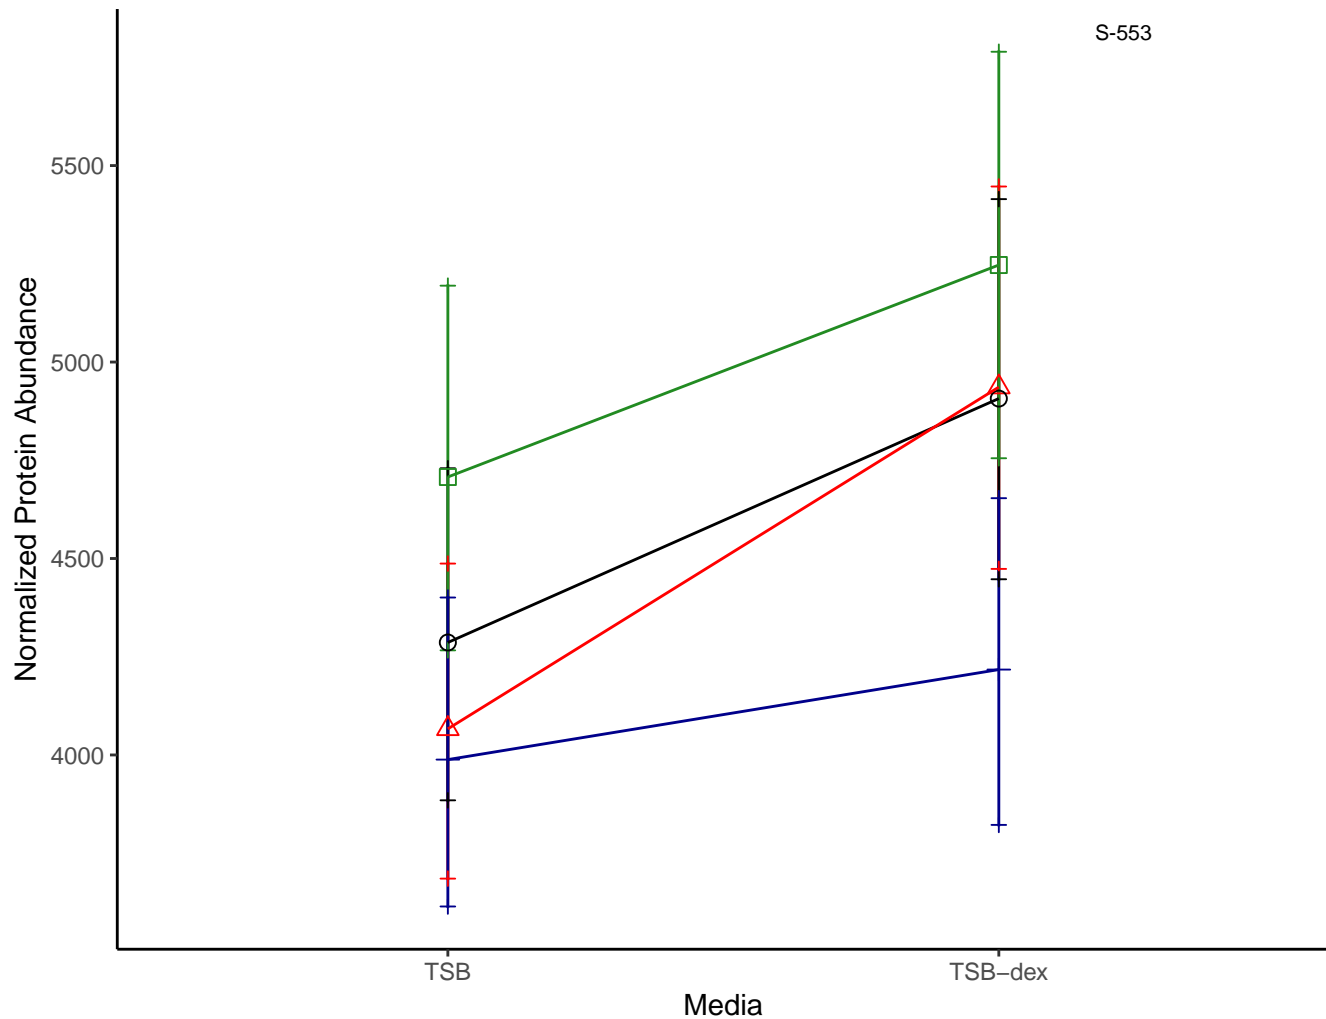

- ⊕ SA564
- △ SA564- $\Delta hptRS$
- ⊞ SA564- $\Delta ccpA$
- + SA564- $\Delta hptRS/ccpA$

# CLPP\_STAAM

S-554

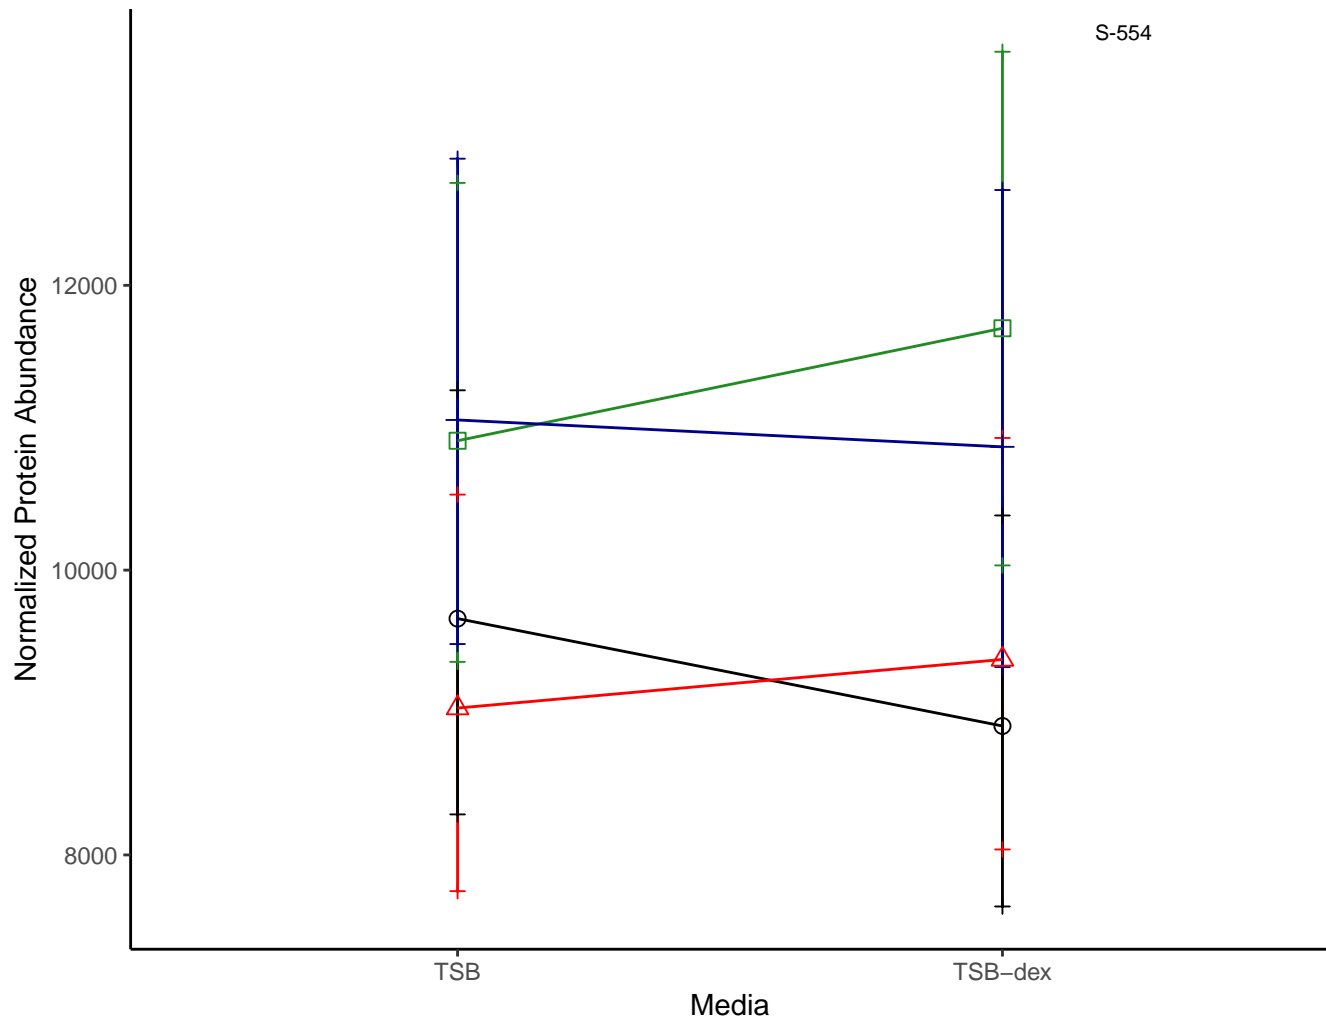

- ⊕ SA564
- △ SA564-ΔhptRS
- ⊞ SA564-ΔccpA
- + SA564-ΔhptRS/ccpA

# CLPX\_STAAM

S-555

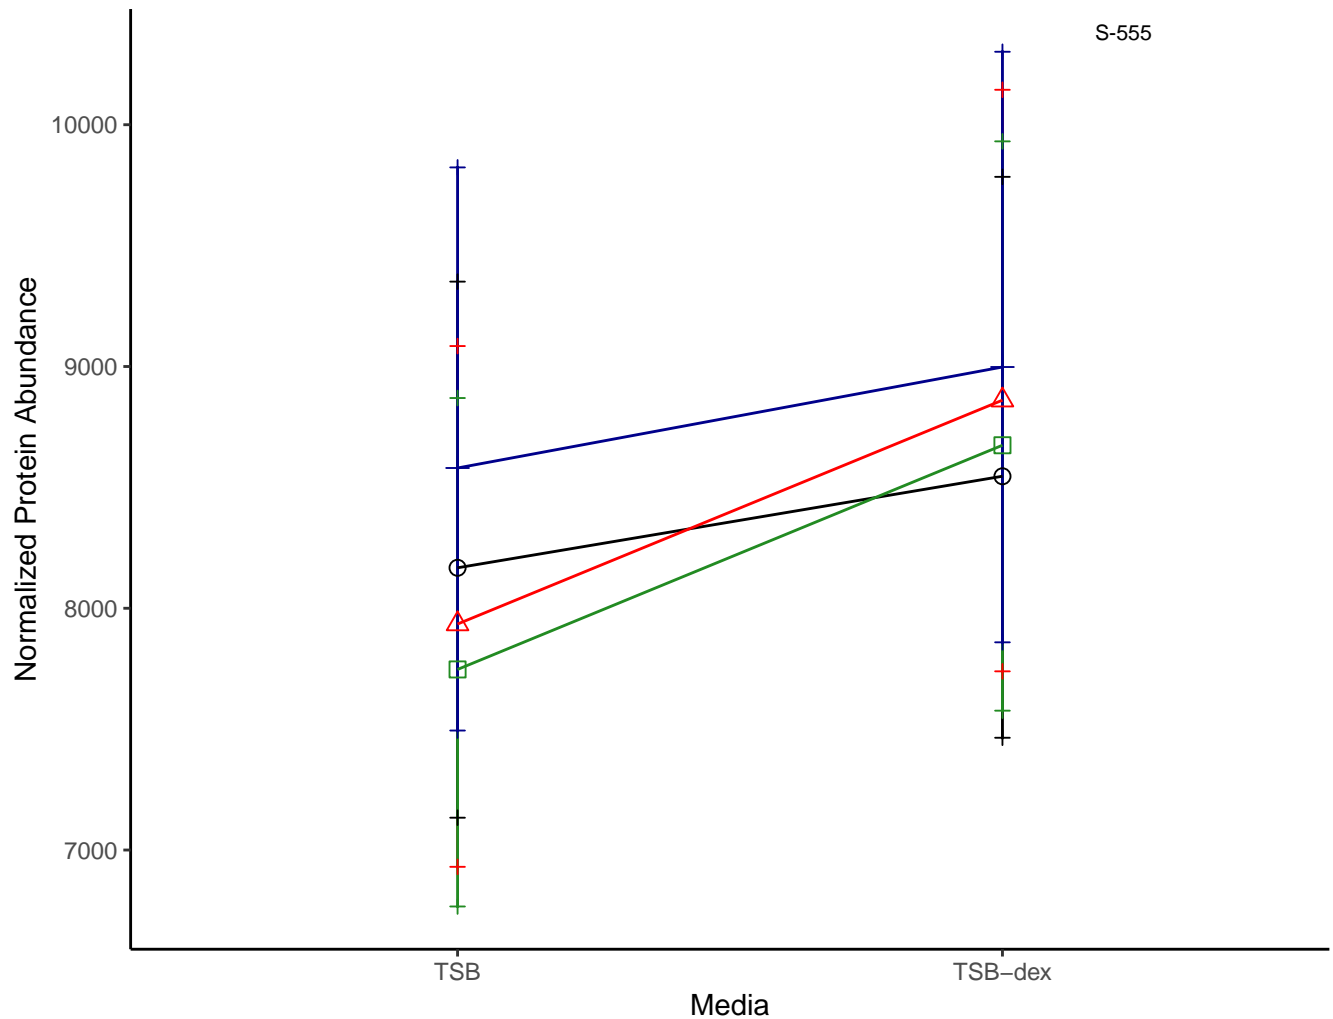

- ⊕ SA564
- △ SA564-ΔhptRS
- ⊞ SA564-ΔccpA
- + SA564-ΔhptRS/ccpA

# CODY\_STAAM

S-556

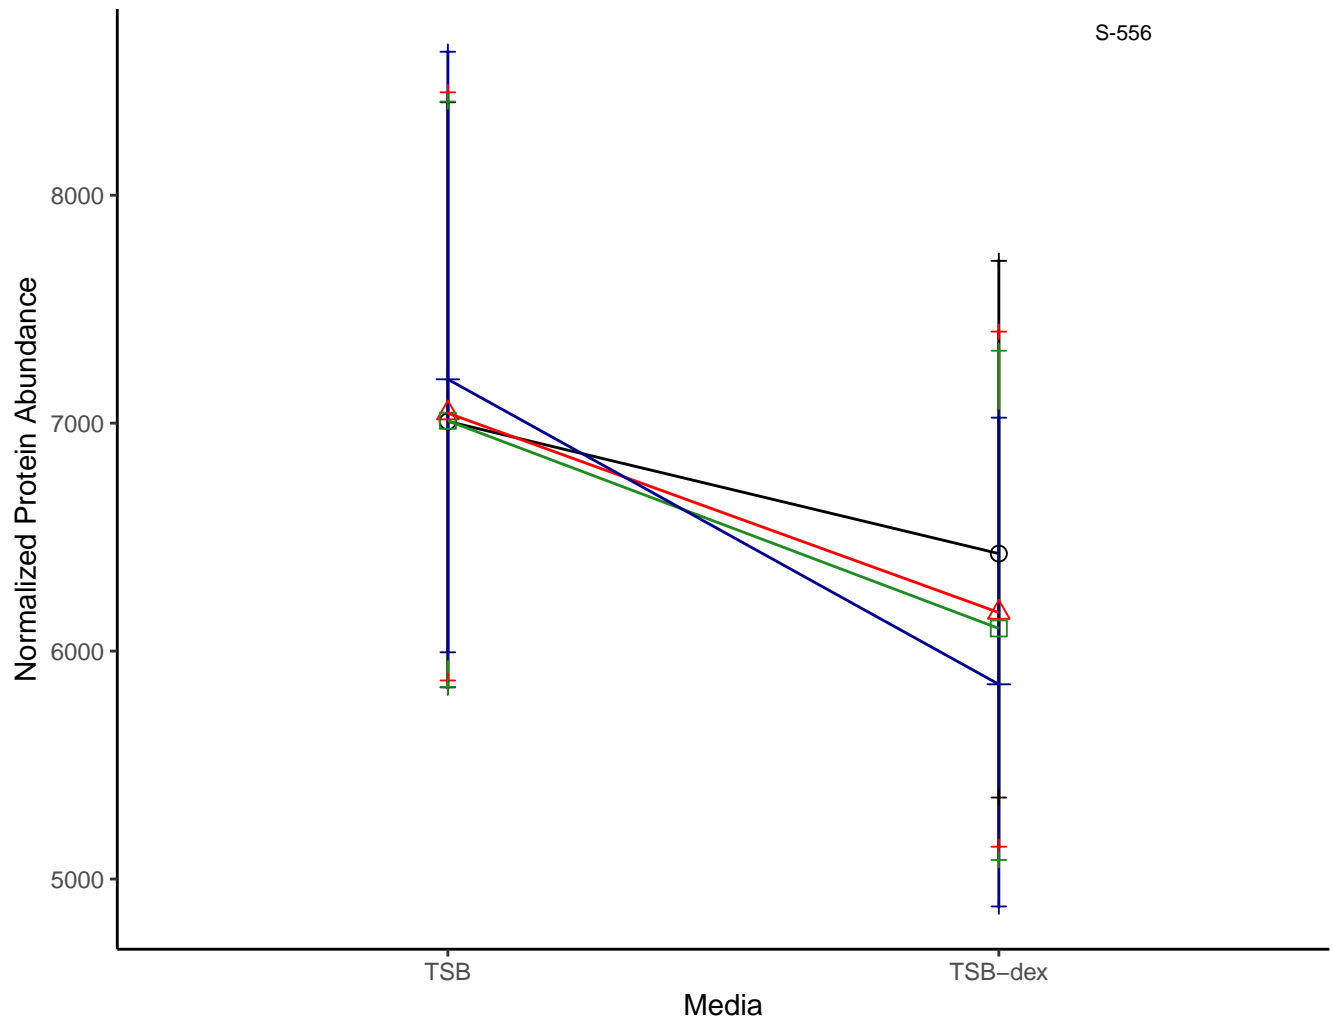

- ⊕ SA564
- △ SA564- $\Delta hptRS$
- SA564- $\Delta ccpA$
- + SA564- $\Delta hptRS/ccpA$

# COPZ\_STAAM

S-557

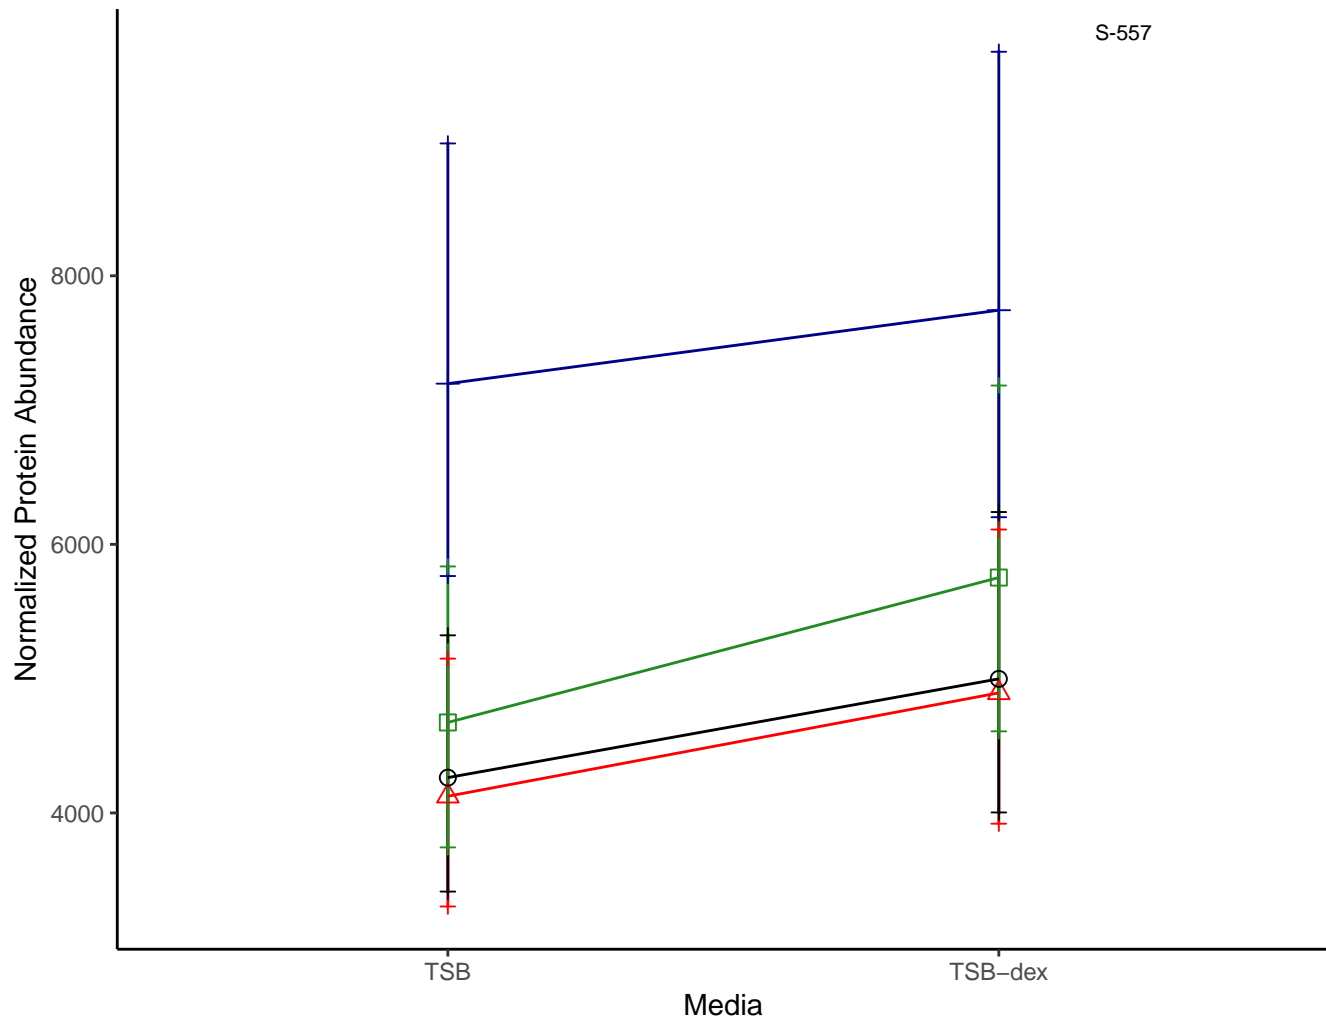

- ⊕ SA564
- △ SA564- $\Delta$ *hptRS*
- ⊞ SA564- $\Delta$ *ccpA*
- + SA564- $\Delta$ *hptRS/ccpA*

# CRTN\_STAAM

S-558

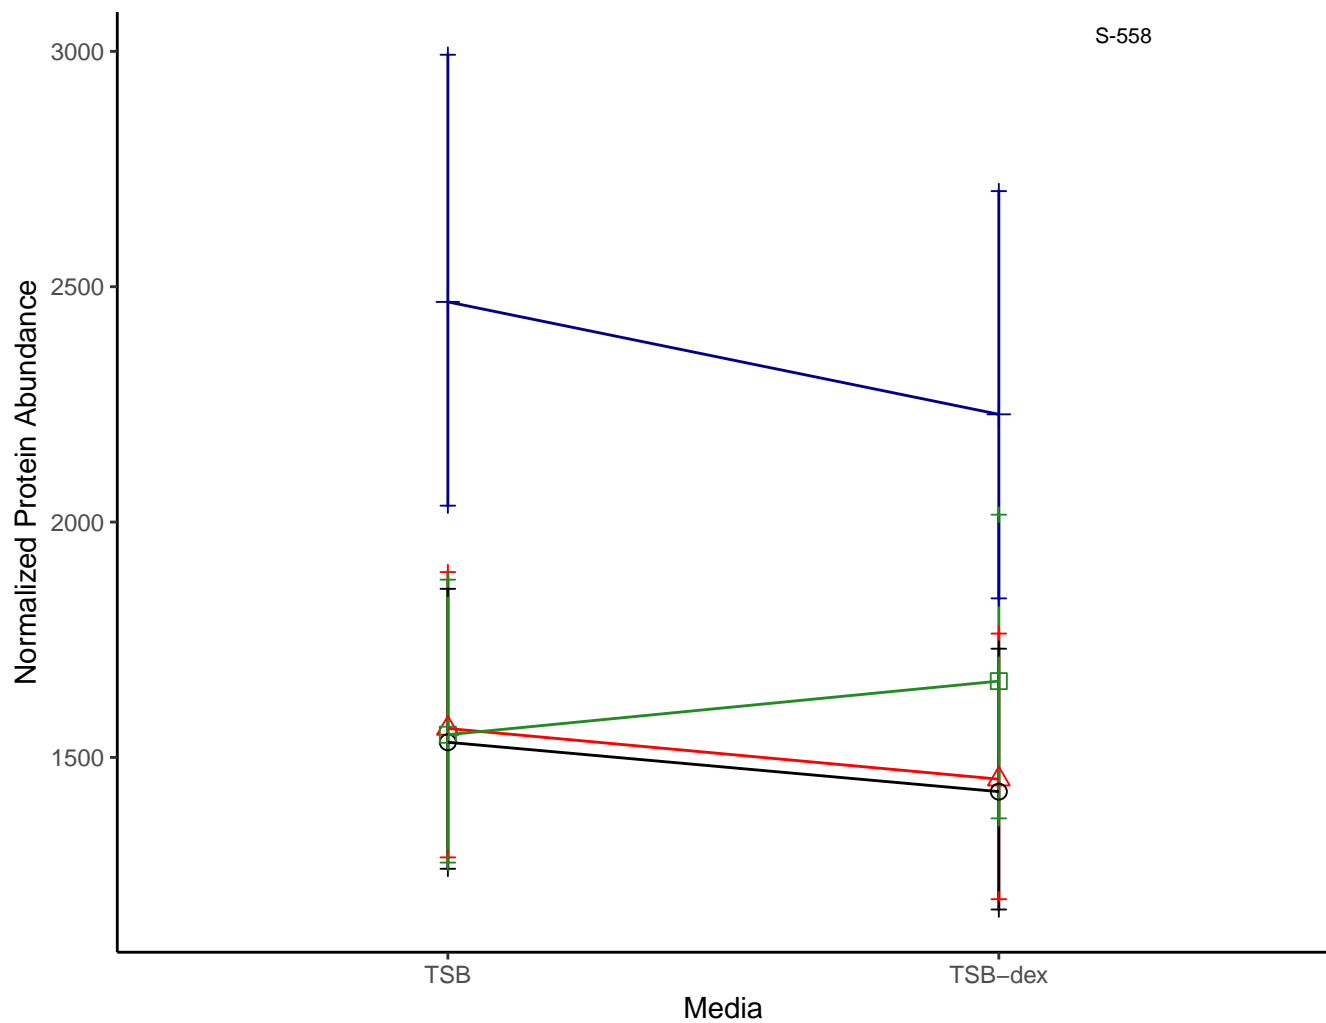

- ⊕ SA564
- △ SA564-ΔhptRS
- SA564-ΔccpA
- + SA564-ΔhptRS/ccpA

# CSD\_STAAM

S-559

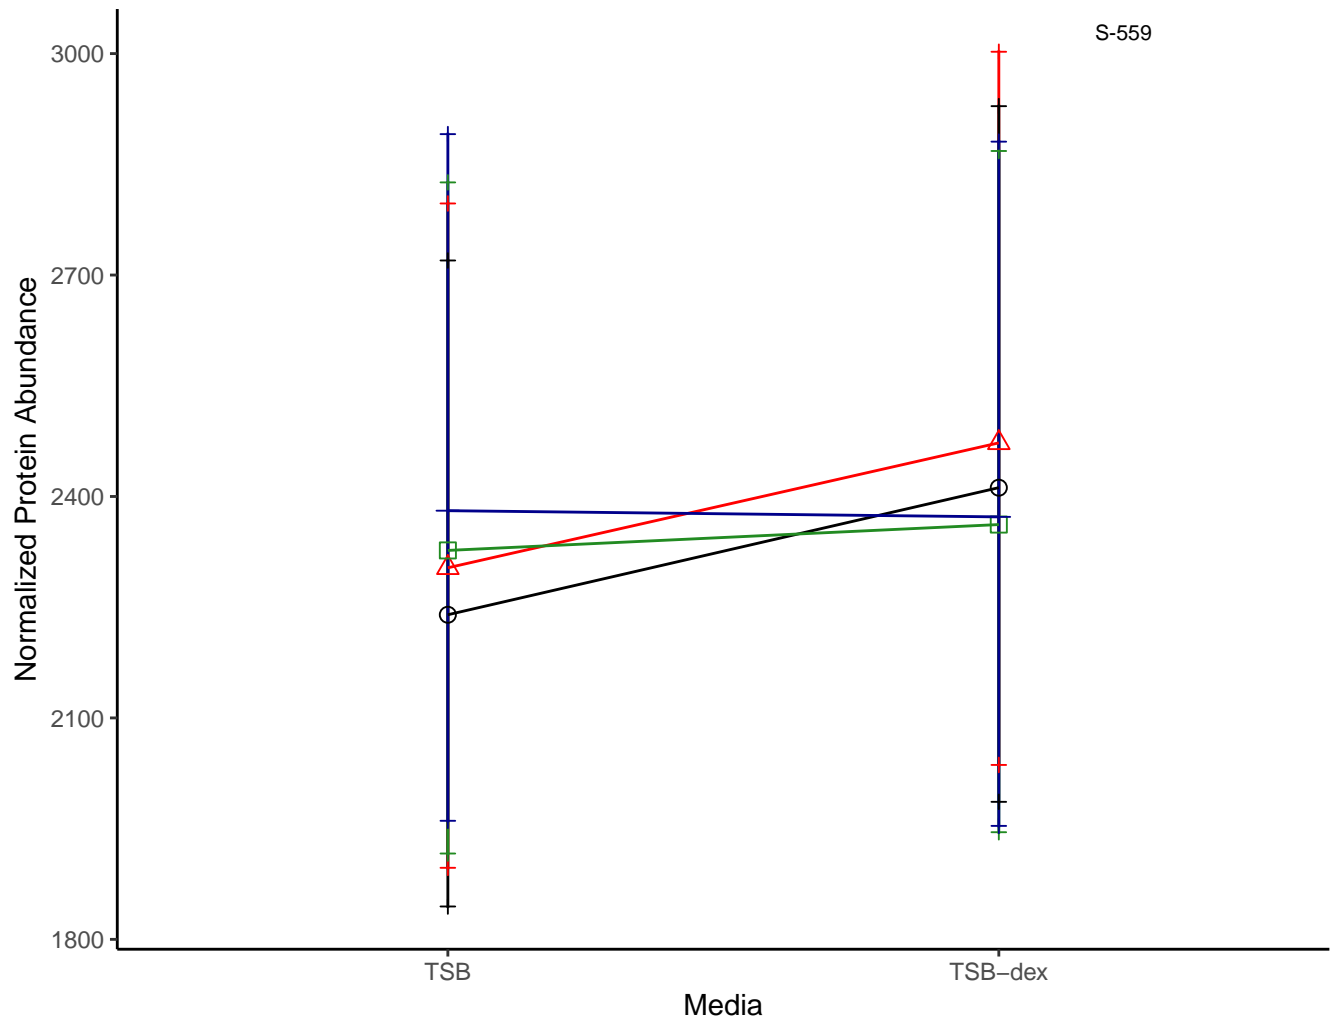

- ⊕ SA564
- △ SA564- $\Delta$ *hptRS*
- ⊞ SA564- $\Delta$ *ccpA*
- + SA564- $\Delta$ *hptRS/ccpA*

# CSHA\_STAAM

S-560

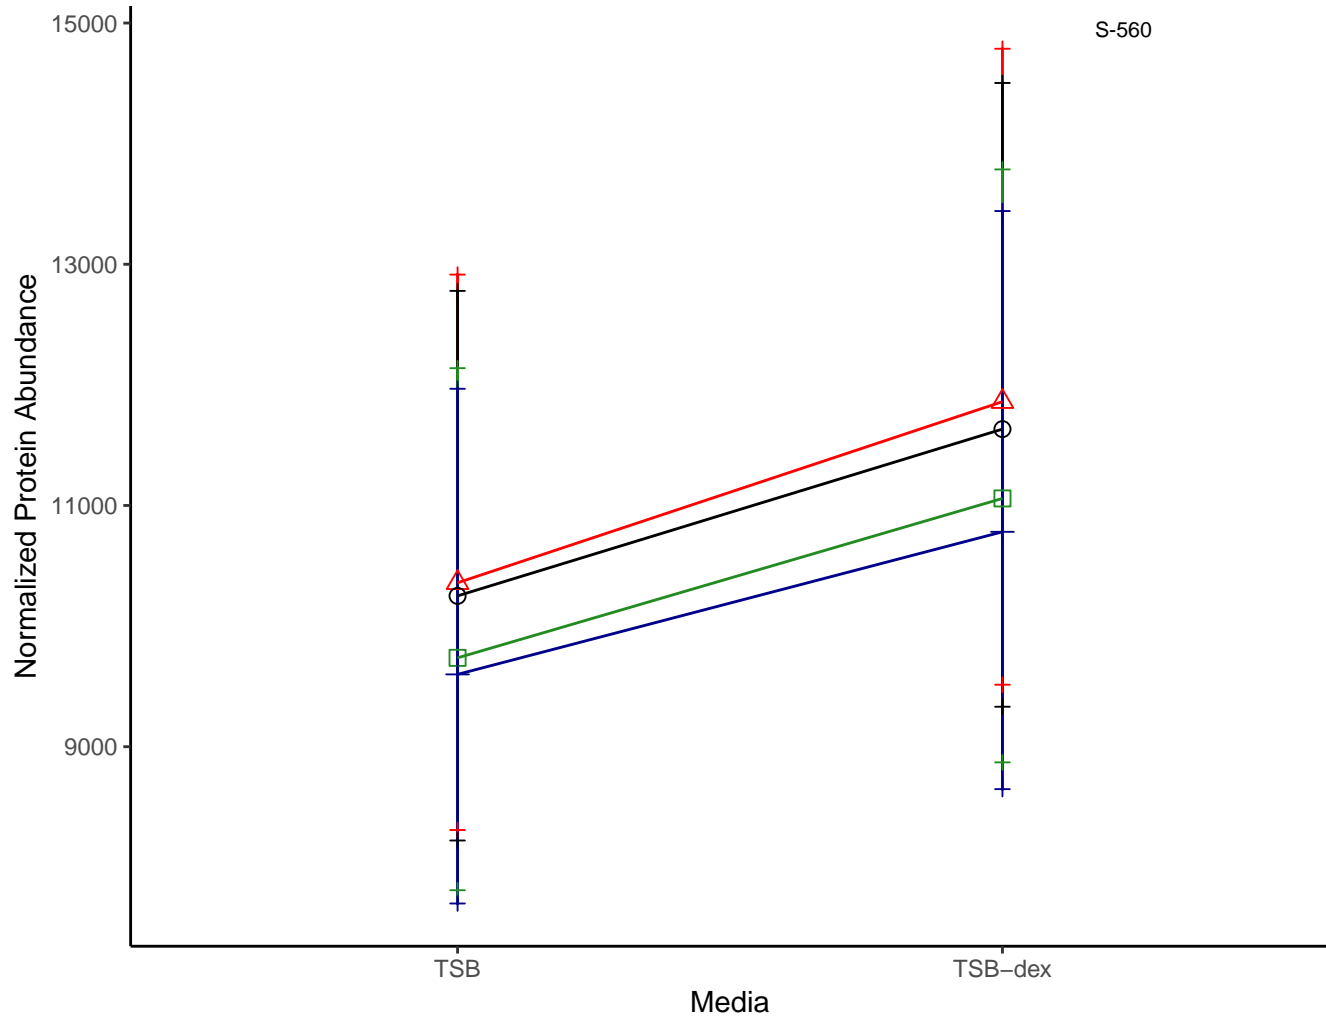

- ⊕ SA564
- △ SA564-ΔhptRS
- ⊞ SA564-ΔccpA
- + SA564-ΔhptRS/ccpA



# CSPA\_STAAM

S-561

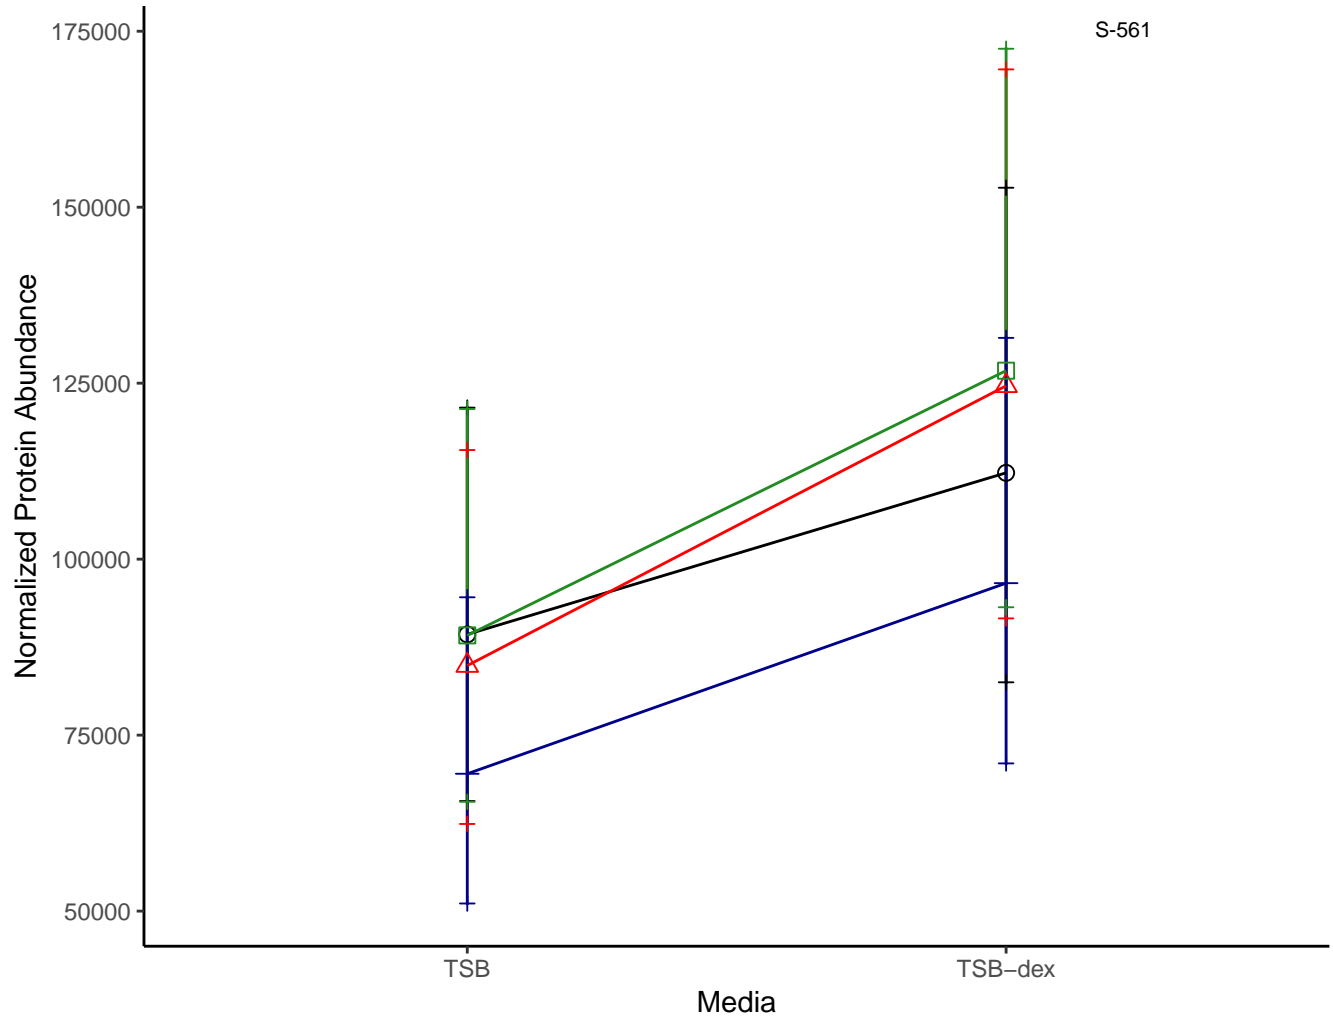

- ⊕ SA564
- △ SA564-ΔhptRS
- ⊞ SA564-ΔccpA
- ⊕ SA564-ΔhptRS/ccpA

# CTPAL\_STAAM

S-562

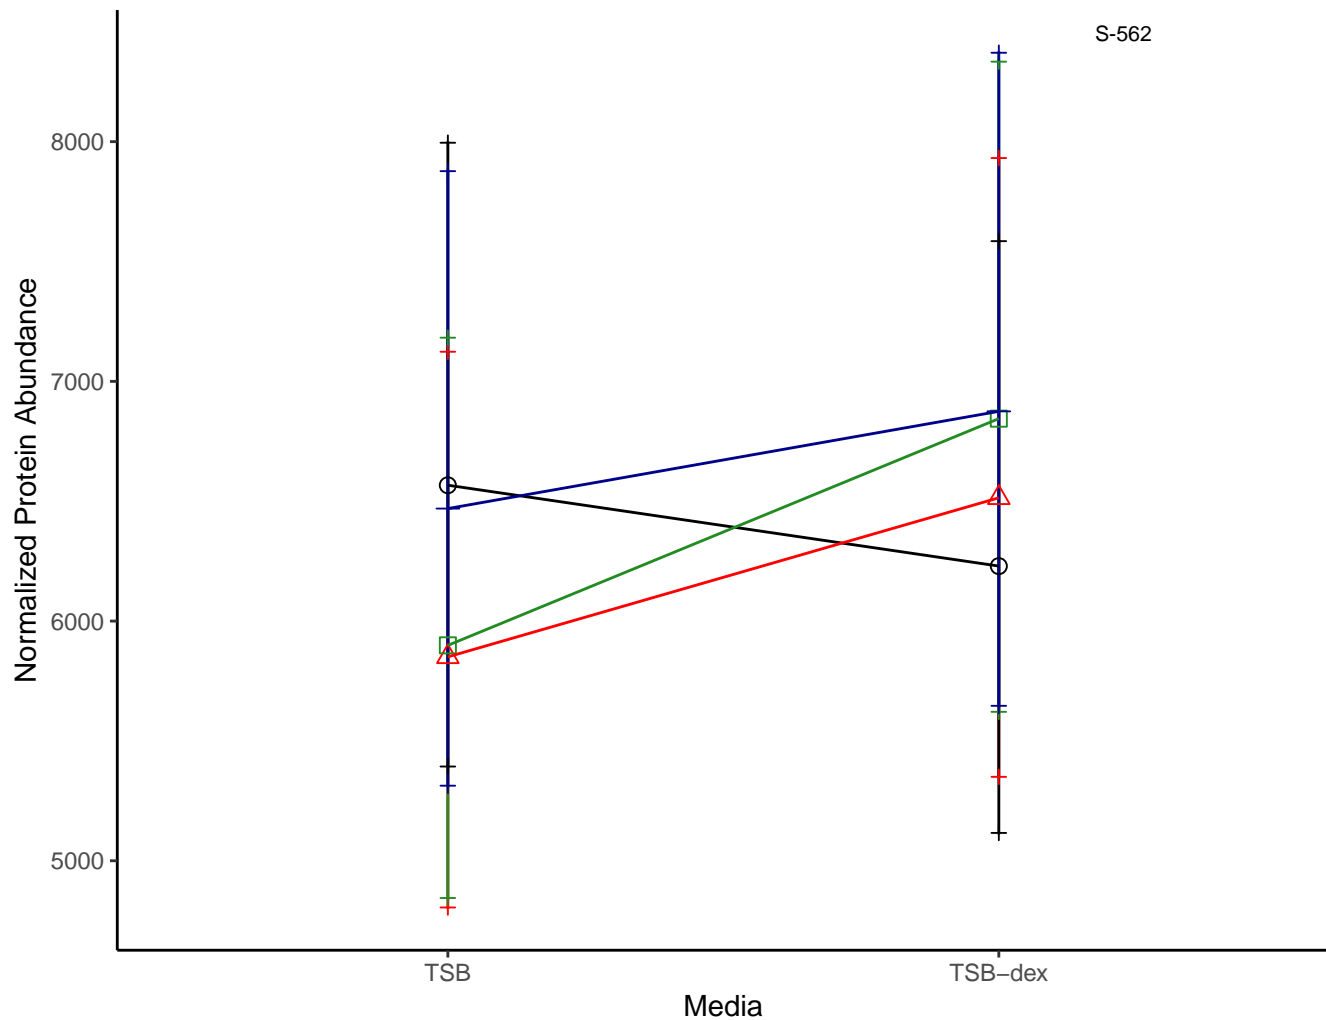

- ⊕ SA564
- △ SA564- $\Delta hptRS$
- ⊞ SA564- $\Delta ccpA$
- + SA564- $\Delta hptRS/ccpA$

# CVFB\_STAAM

S-563

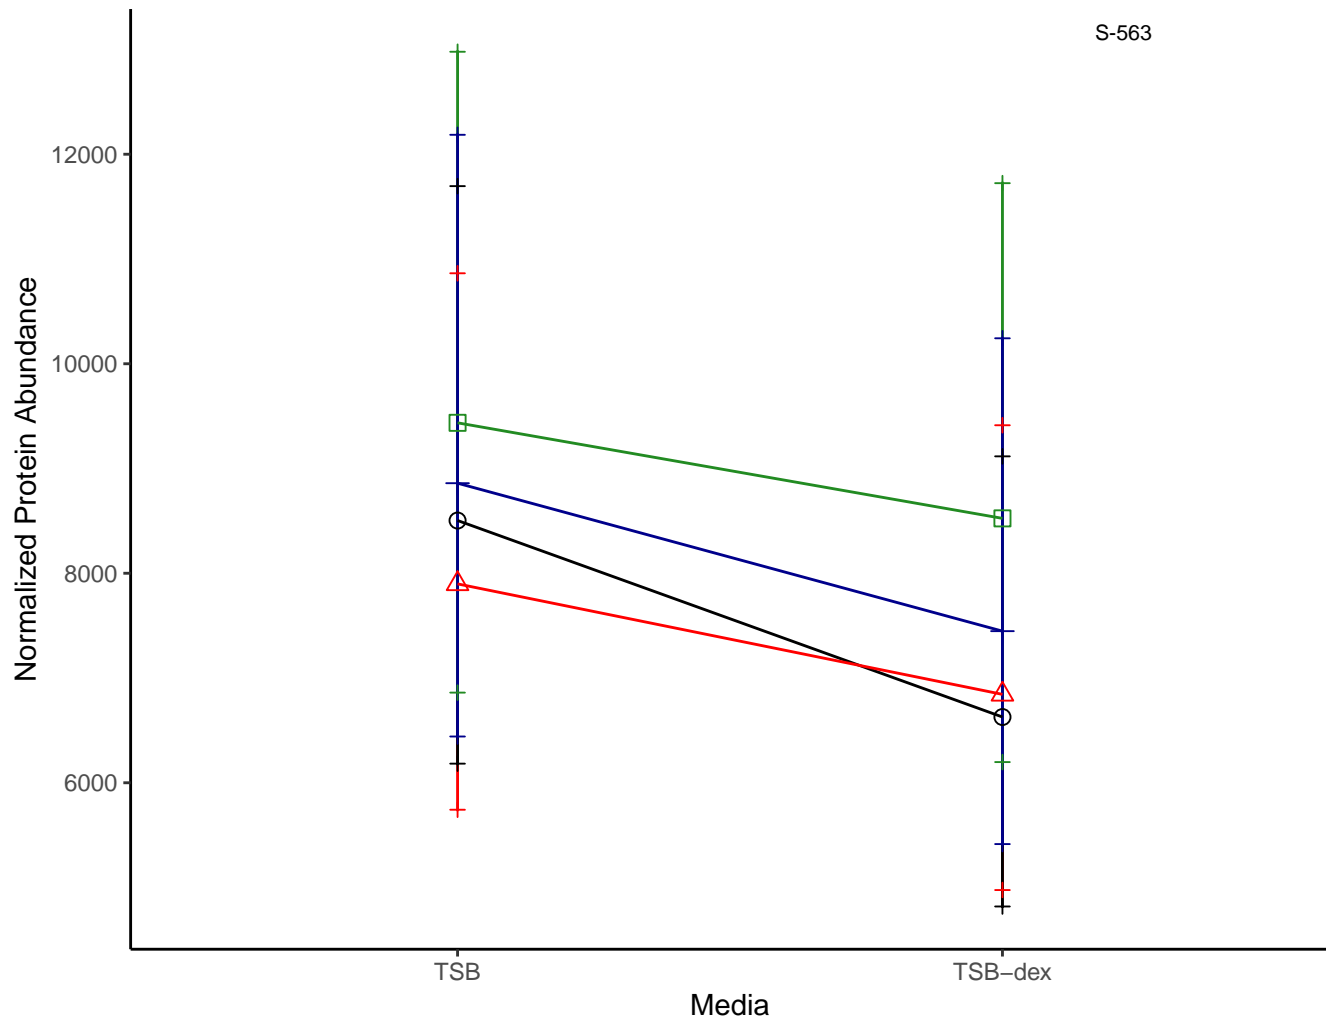

- ⊕ SA564
- △ SA564-ΔhptRS
- ⊞ SA564-ΔccpA
- + SA564-ΔhptRS/ccpA

# CYSE\_STAAM

S-564

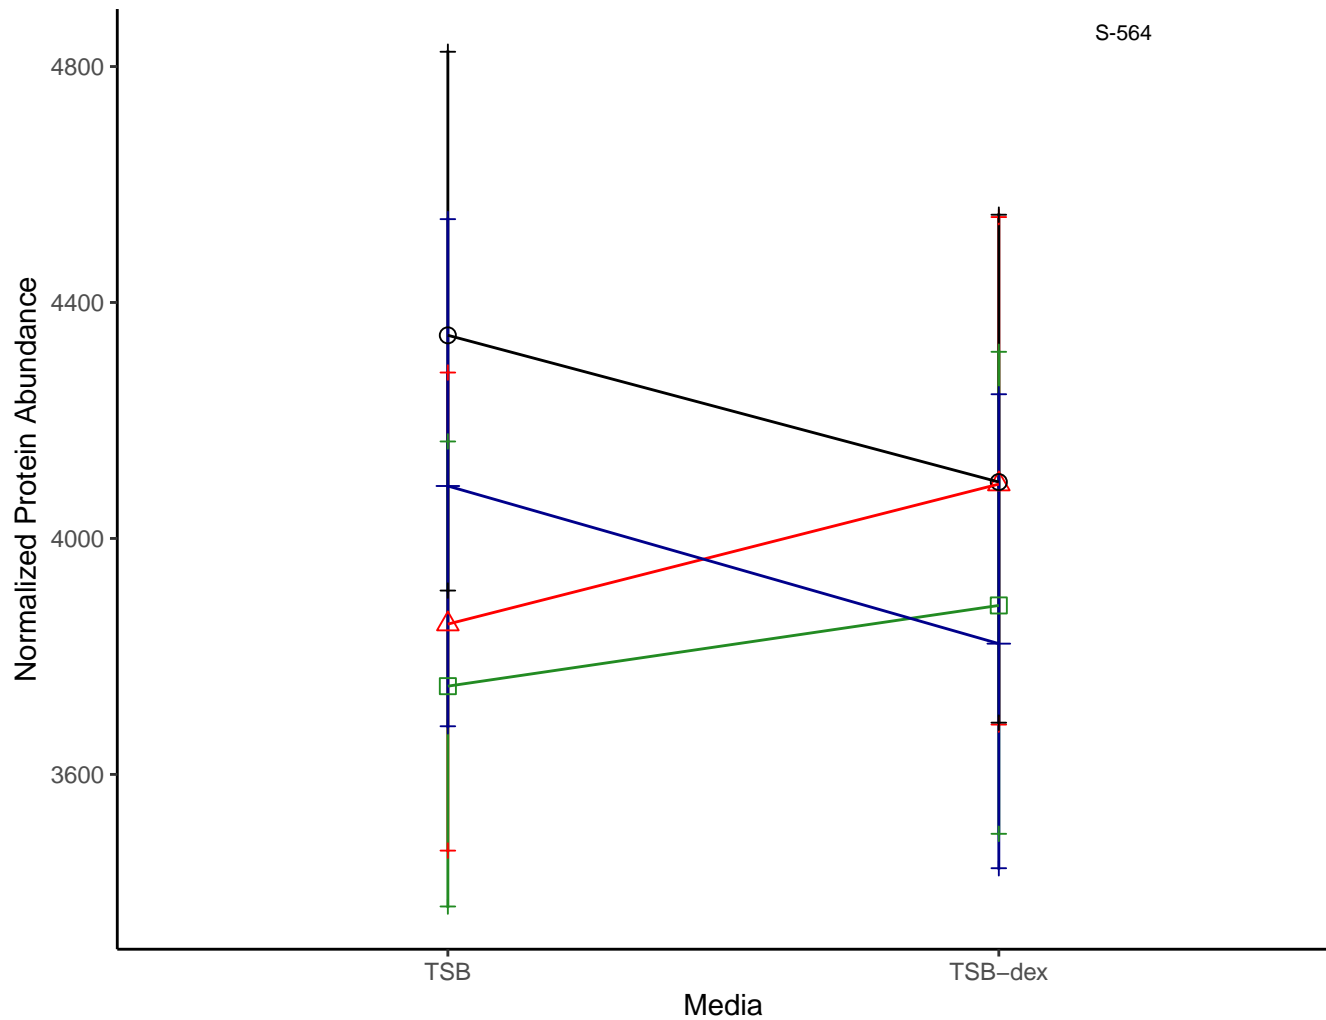

- ⊕ SA564
- △ SA564- $\Delta$ *hptRS*
- ⊞ SA564- $\Delta$ *ccpA*
- + SA564- $\Delta$ *hptRS/ccpA*

# CYSK\_STAAM

S-565

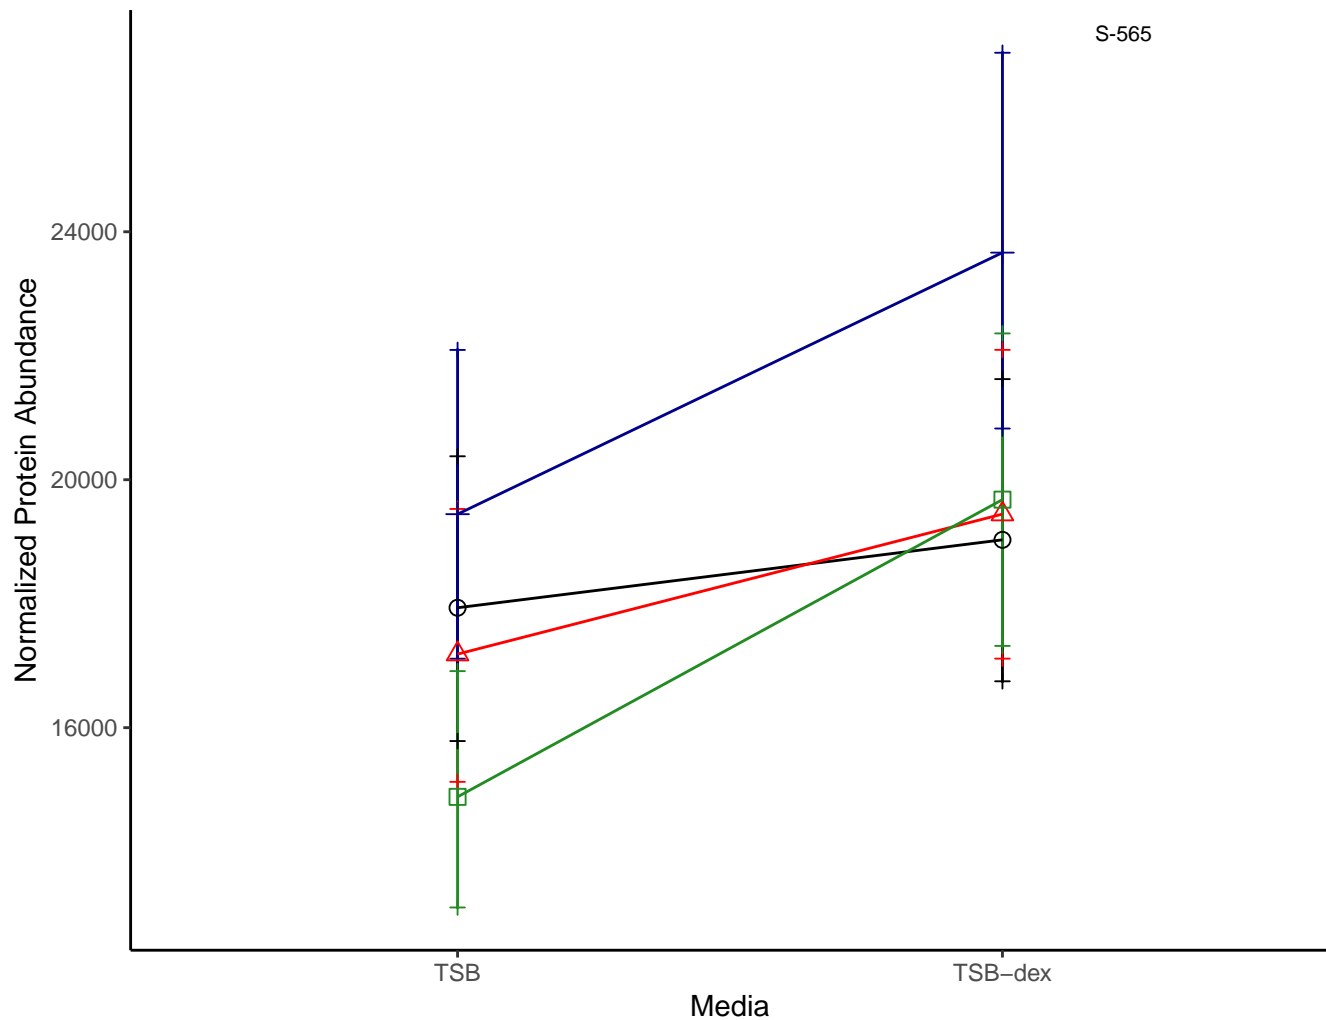

- ⊕ SA564
- △ SA564- $\Delta$ *hptRS*
- ⊞ SA564- $\Delta$ *ccpA*
- + SA564- $\Delta$ *hptRS/ccpA*

# DAAA\_STAAM

S-566

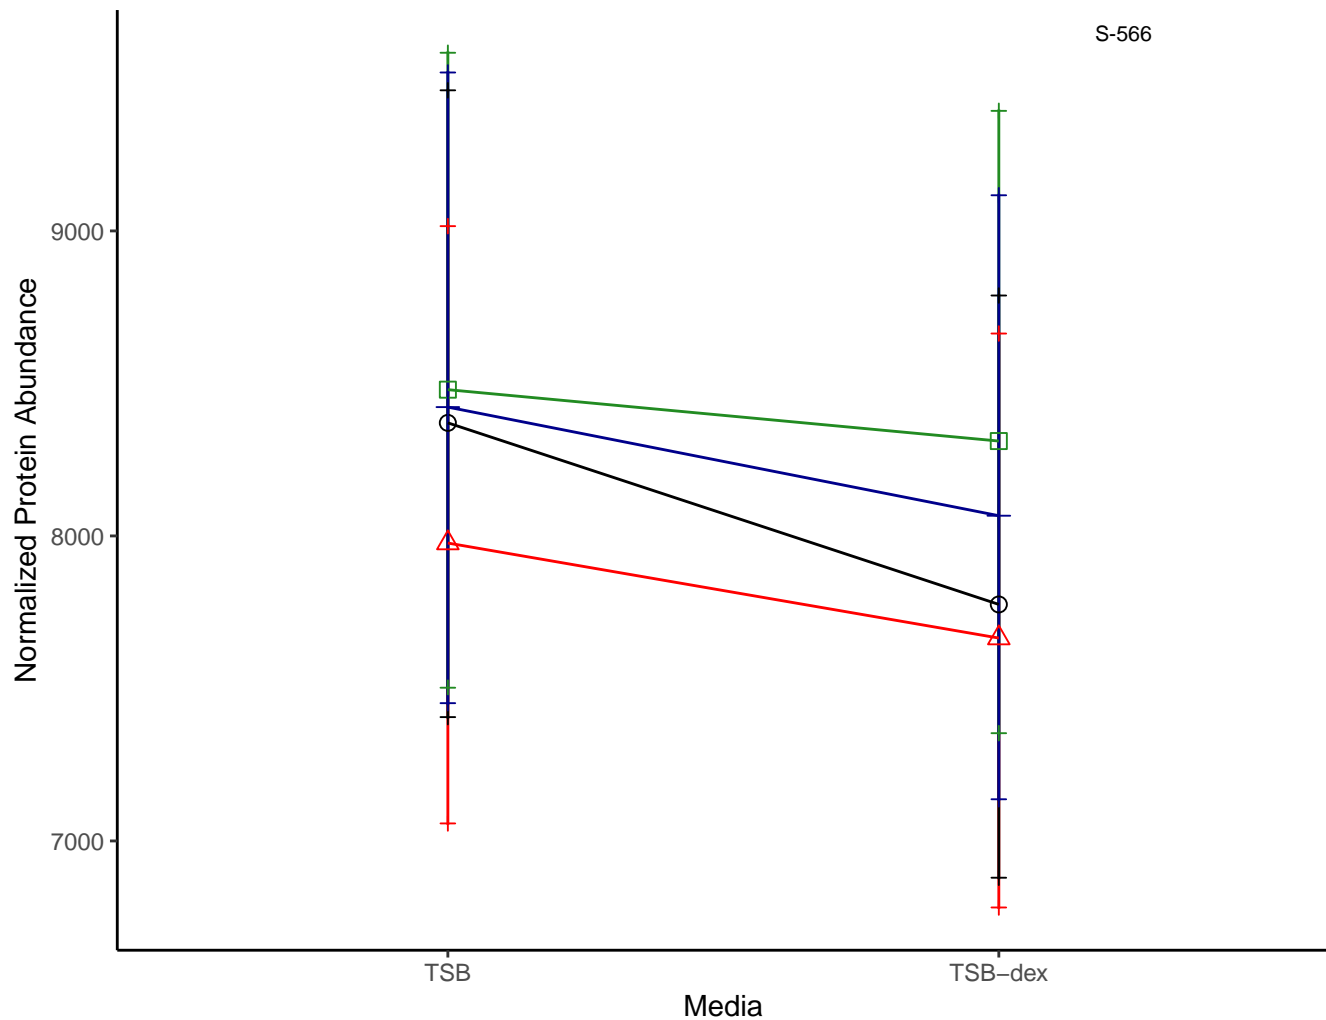

- ⊕ SA564
- △ SA564- $\Delta hptRS$
- ⊞ SA564- $\Delta ccpA$
- + SA564- $\Delta hptRS/ccpA$

# DAPB\_STAAM

S-567

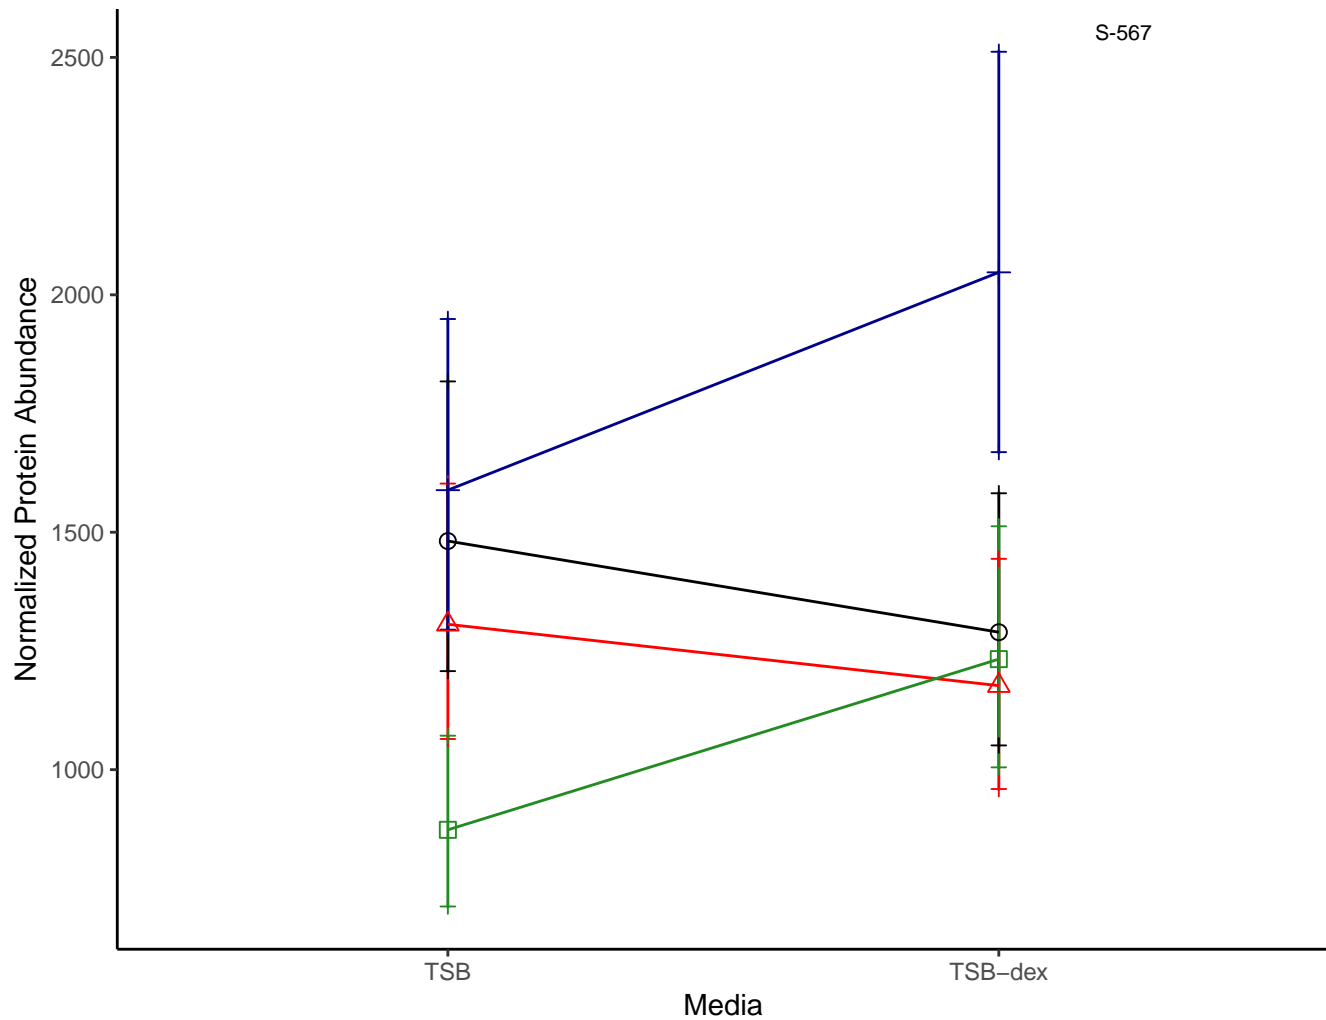

- ⊕ SA564
- △ SA564-ΔhptRS
- ⊞ SA564-ΔccpA
- + SA564-ΔhptRS/ccpA

# DAPH\_STAAM

S-568

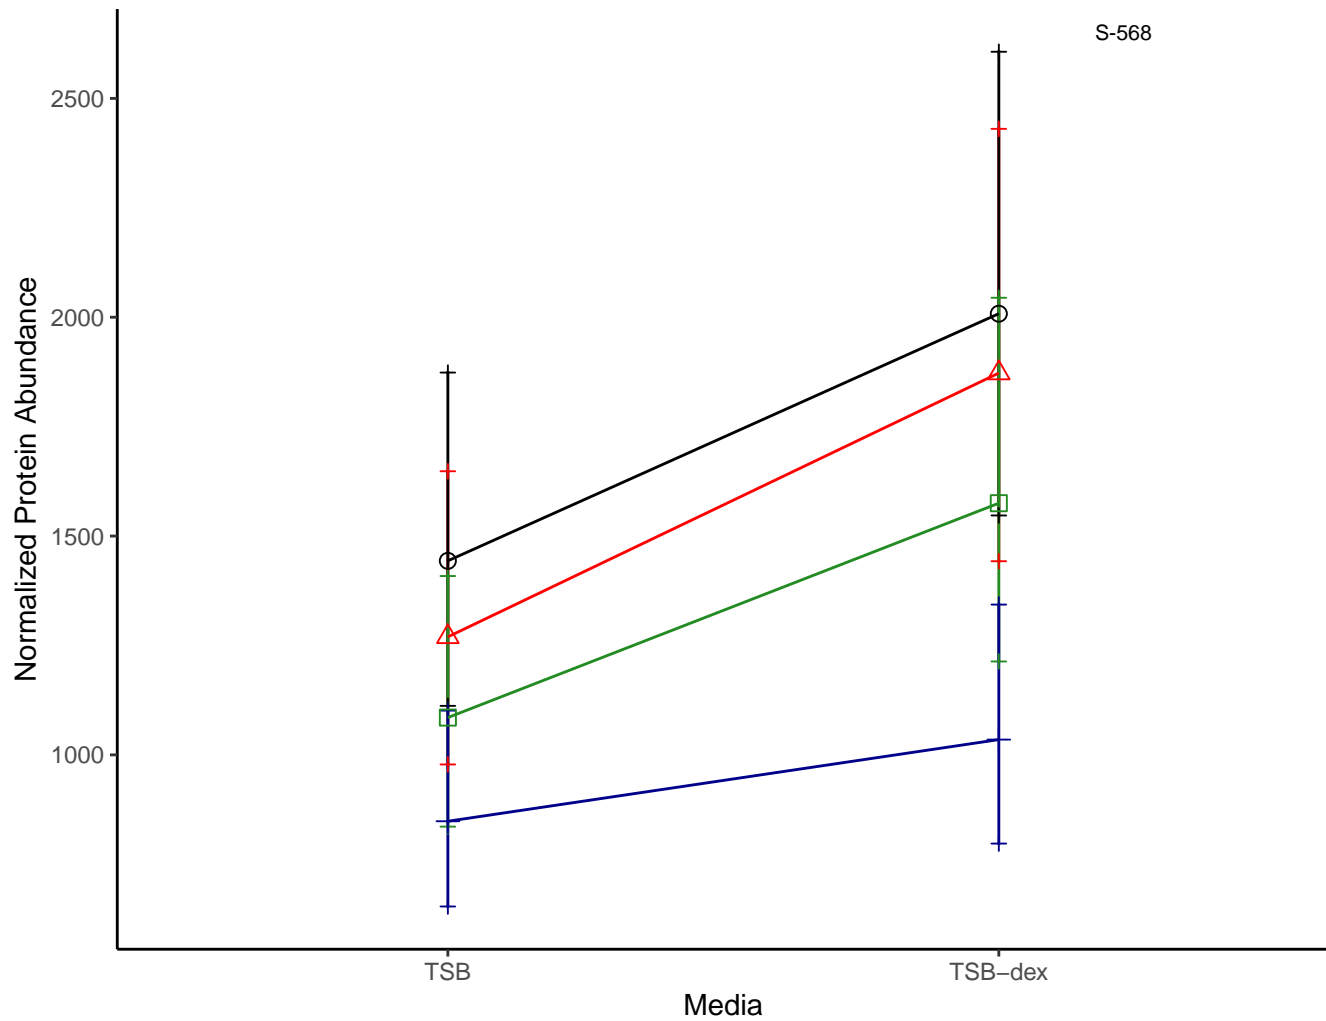

- ⊕ SA564
- △ SA564-ΔhptRS
- ⊞ SA564-ΔccpA
- + SA564-ΔhptRS/ccpA



# DBH\_STAAM

S-569

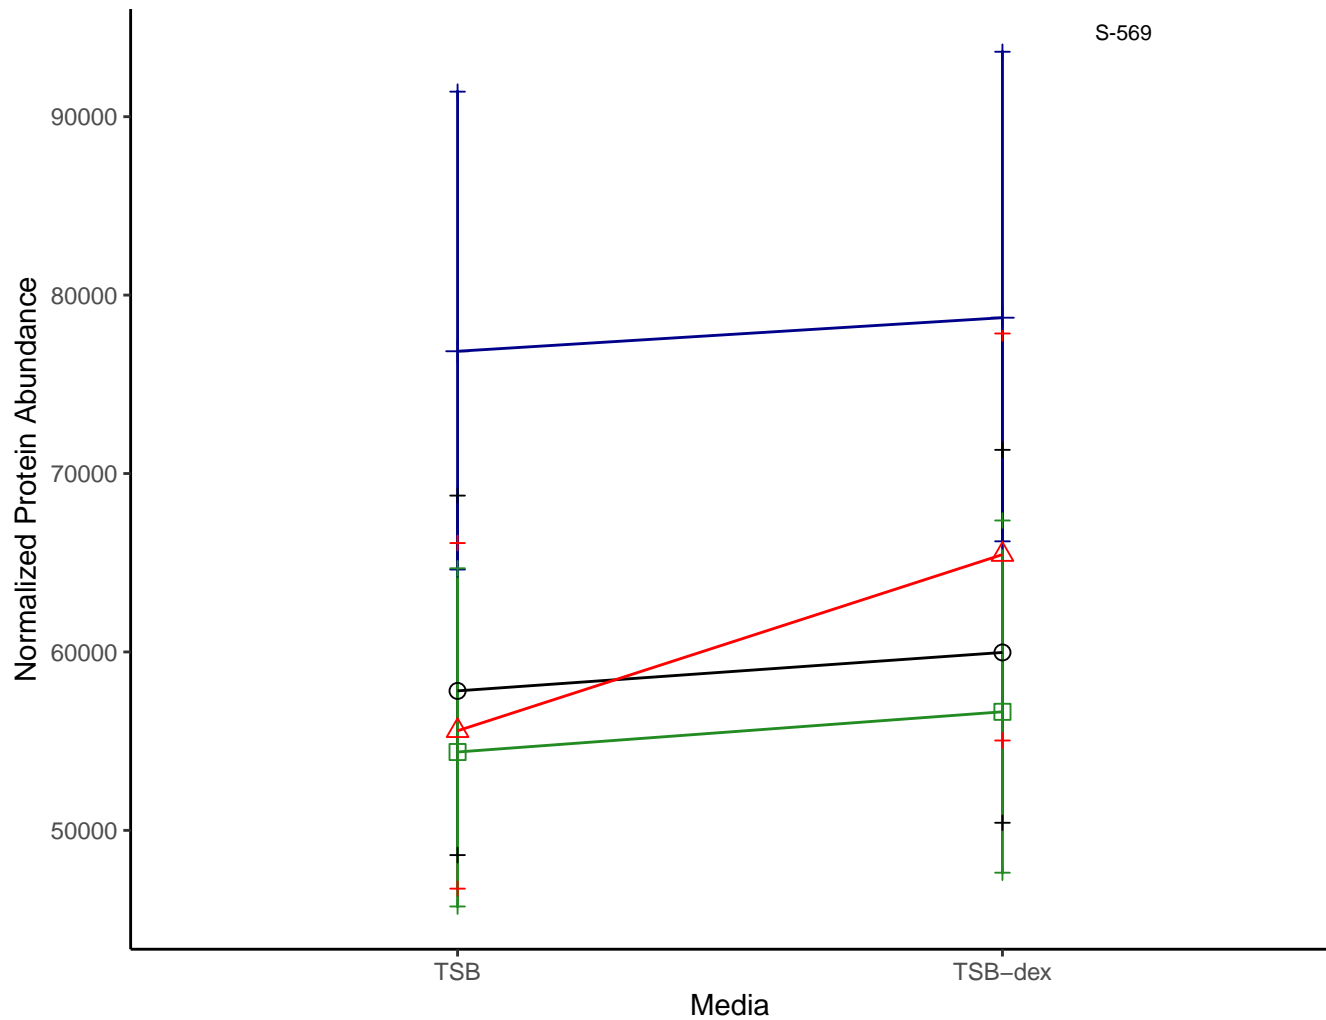

- ⊕ SA564
- △ SA564-ΔhptRS
- ⊞ SA564-ΔccpA
- + SA564-ΔhptRS/ccpA

# DCUP\_STAAM

S-570

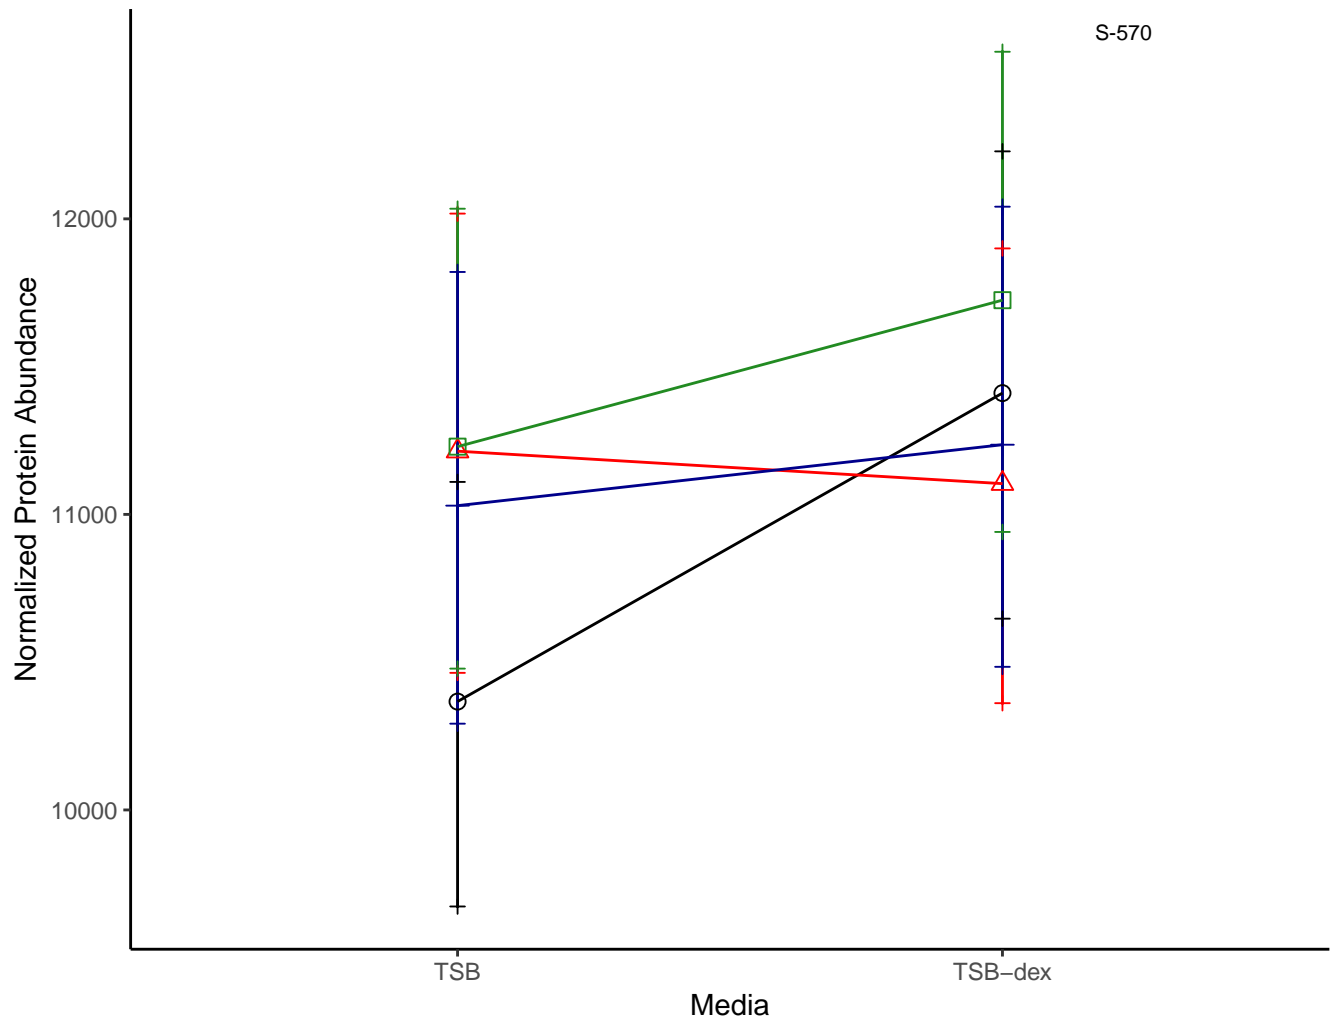

- SA564
- △ SA564- $\Delta$ *hptRS*
- SA564- $\Delta$ *ccpA*
- + SA564- $\Delta$ *hptRS/ccpA*

## DDL\_STAAM

S-571

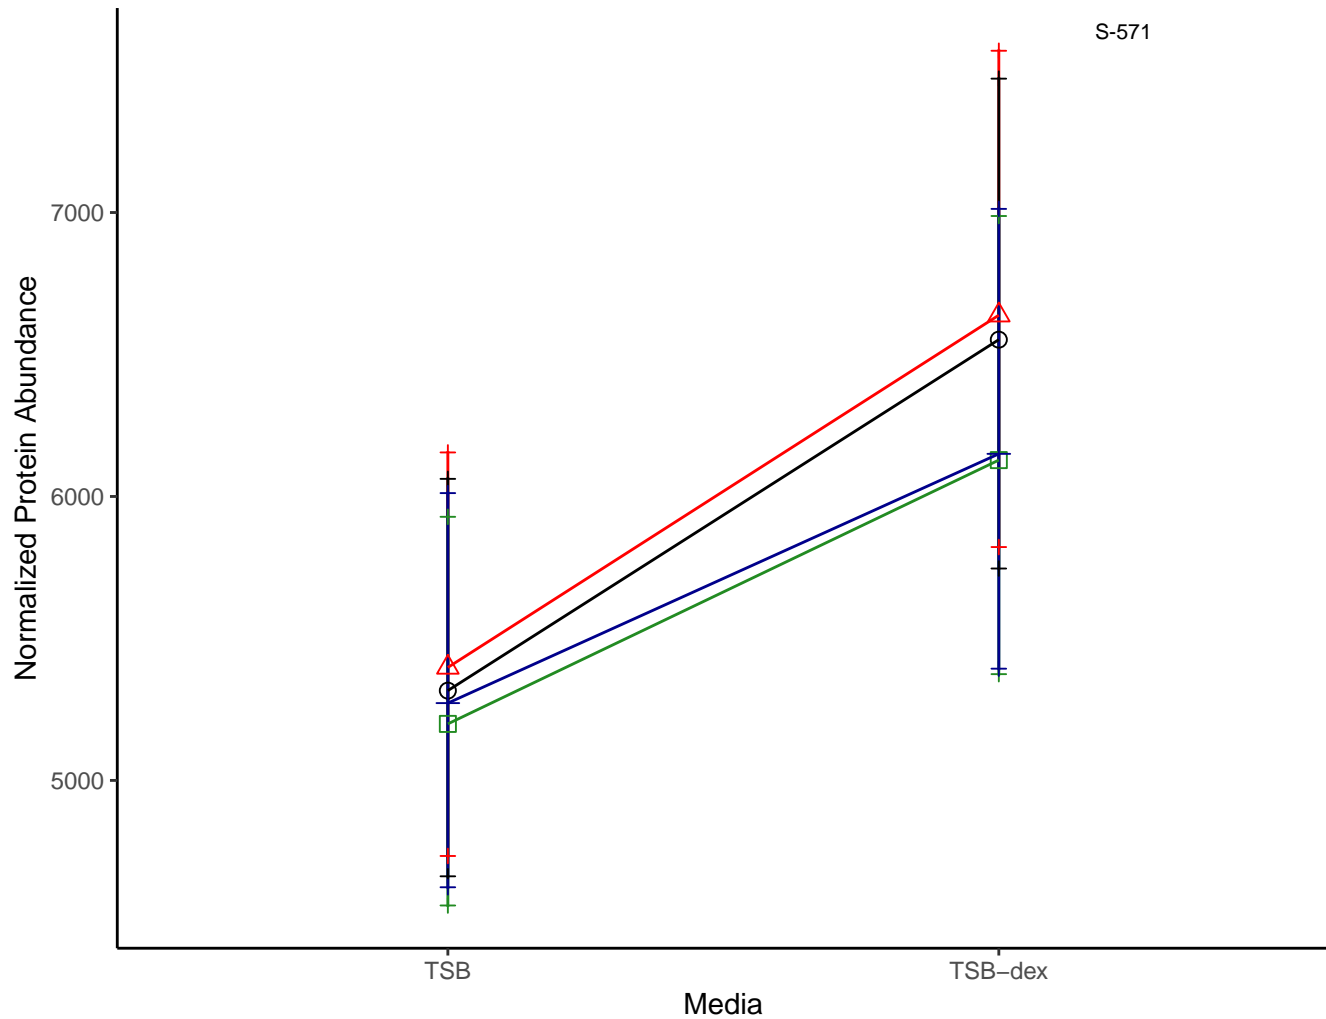

- ⊕ SA564
- △ SA564- $\Delta$ *hptRS*
- ⊞ SA564- $\Delta$ *ccpA*
- + SA564- $\Delta$ *hptRS/ccpA*

## DEF\_STAAM

S-572

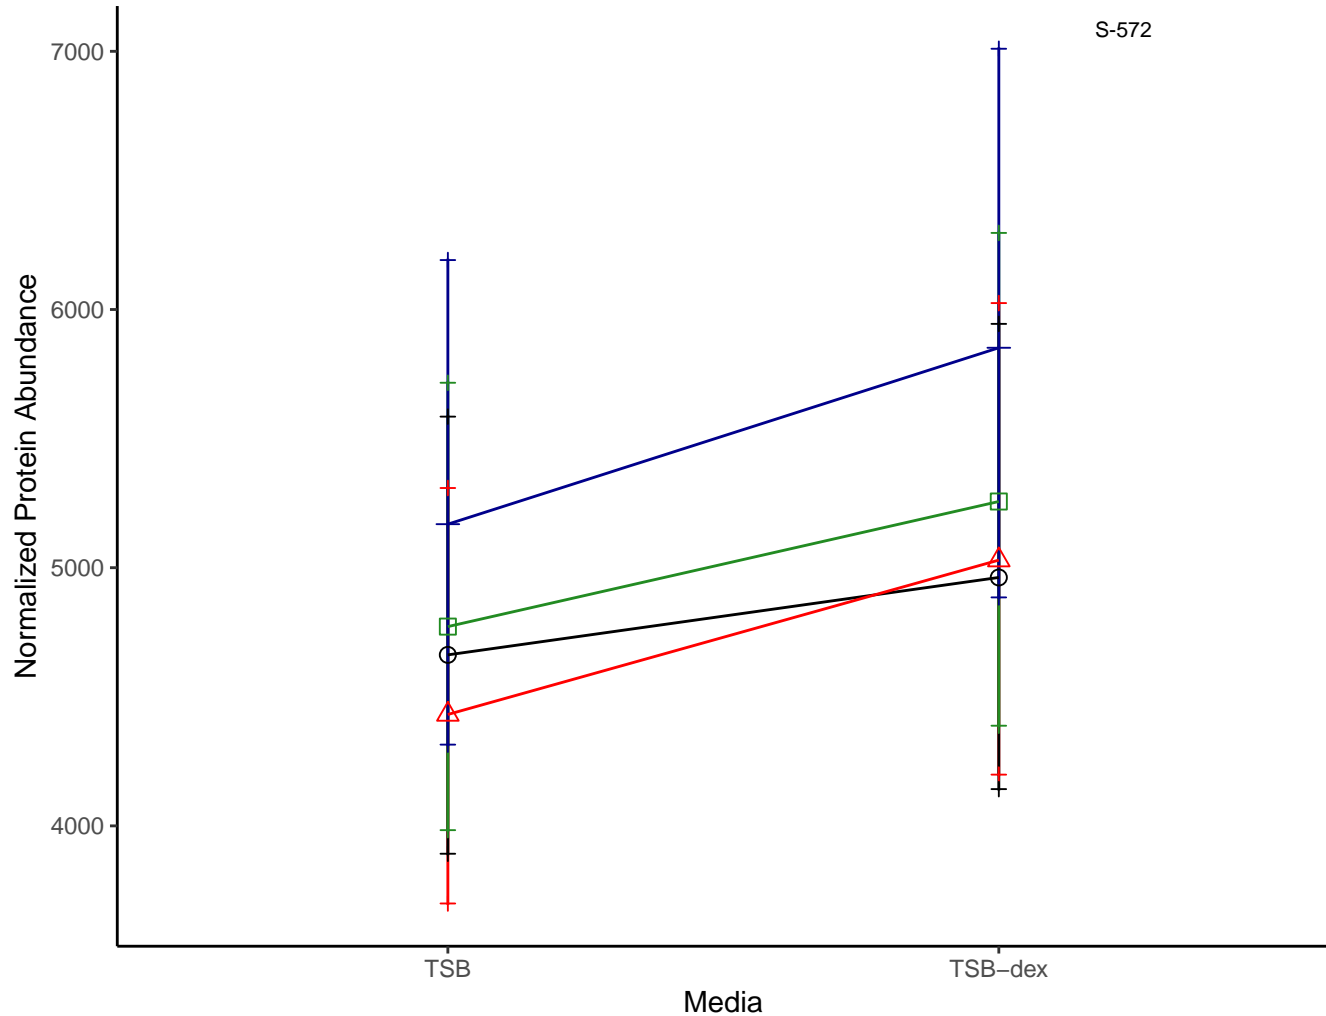

- ⊕ SA564
- △ SA564- $\Delta hptRS$
- ⊞ SA564- $\Delta ccpA$
- + SA564- $\Delta hptRS/ccpA$

# DEOB\_STAAM

S-573

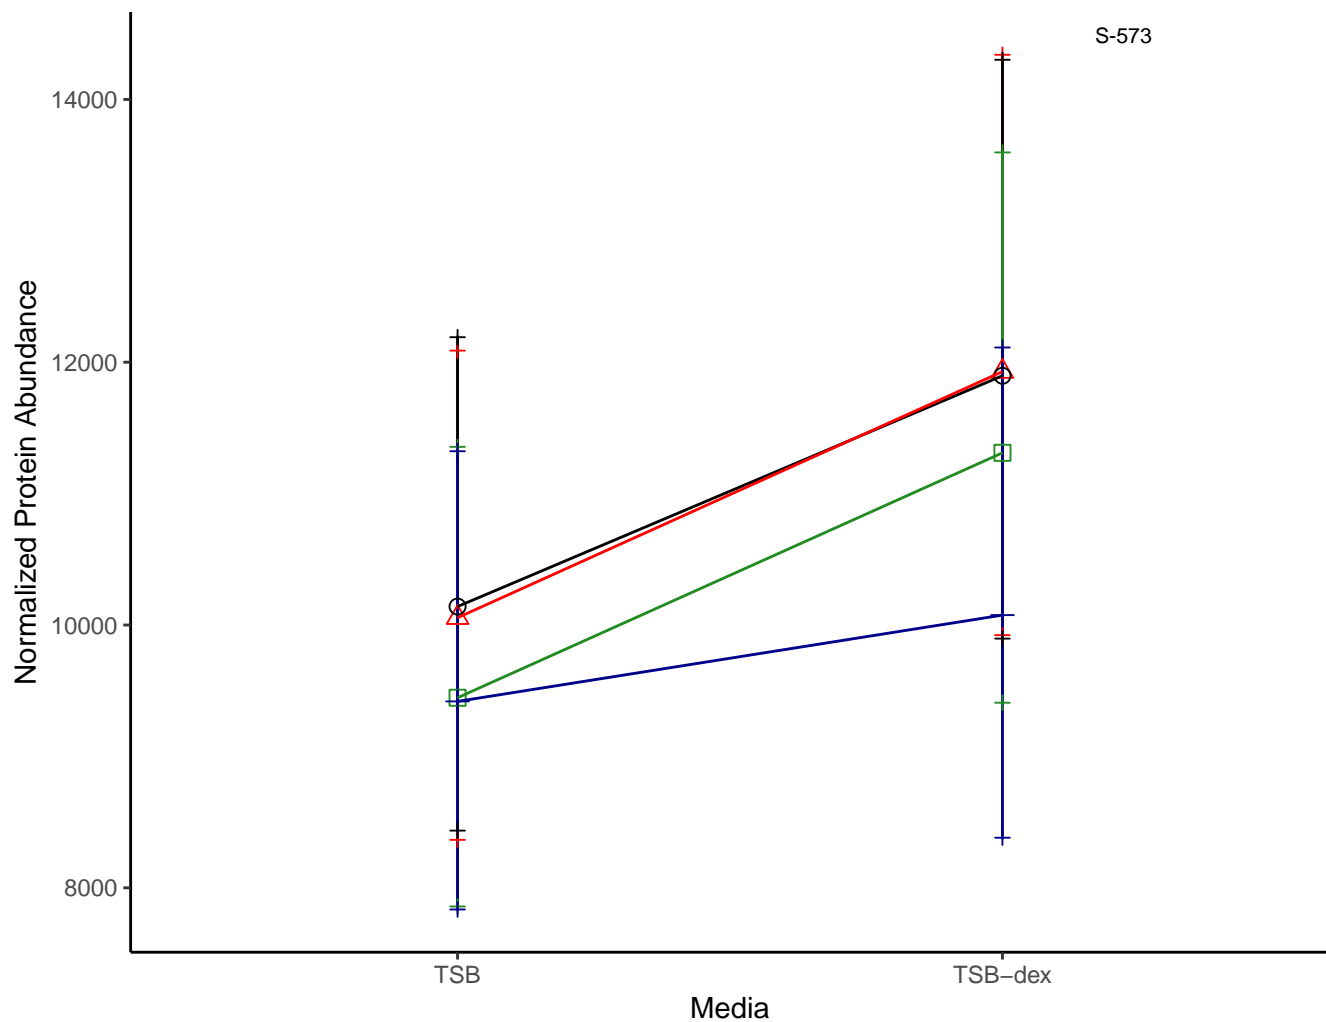

- ⊕ SA564
- △ SA564-ΔhptRS
- ⊞ SA564-ΔccpA
- + SA564-ΔhptRS/ccpA

# DEOC1\_STAAM

S-574

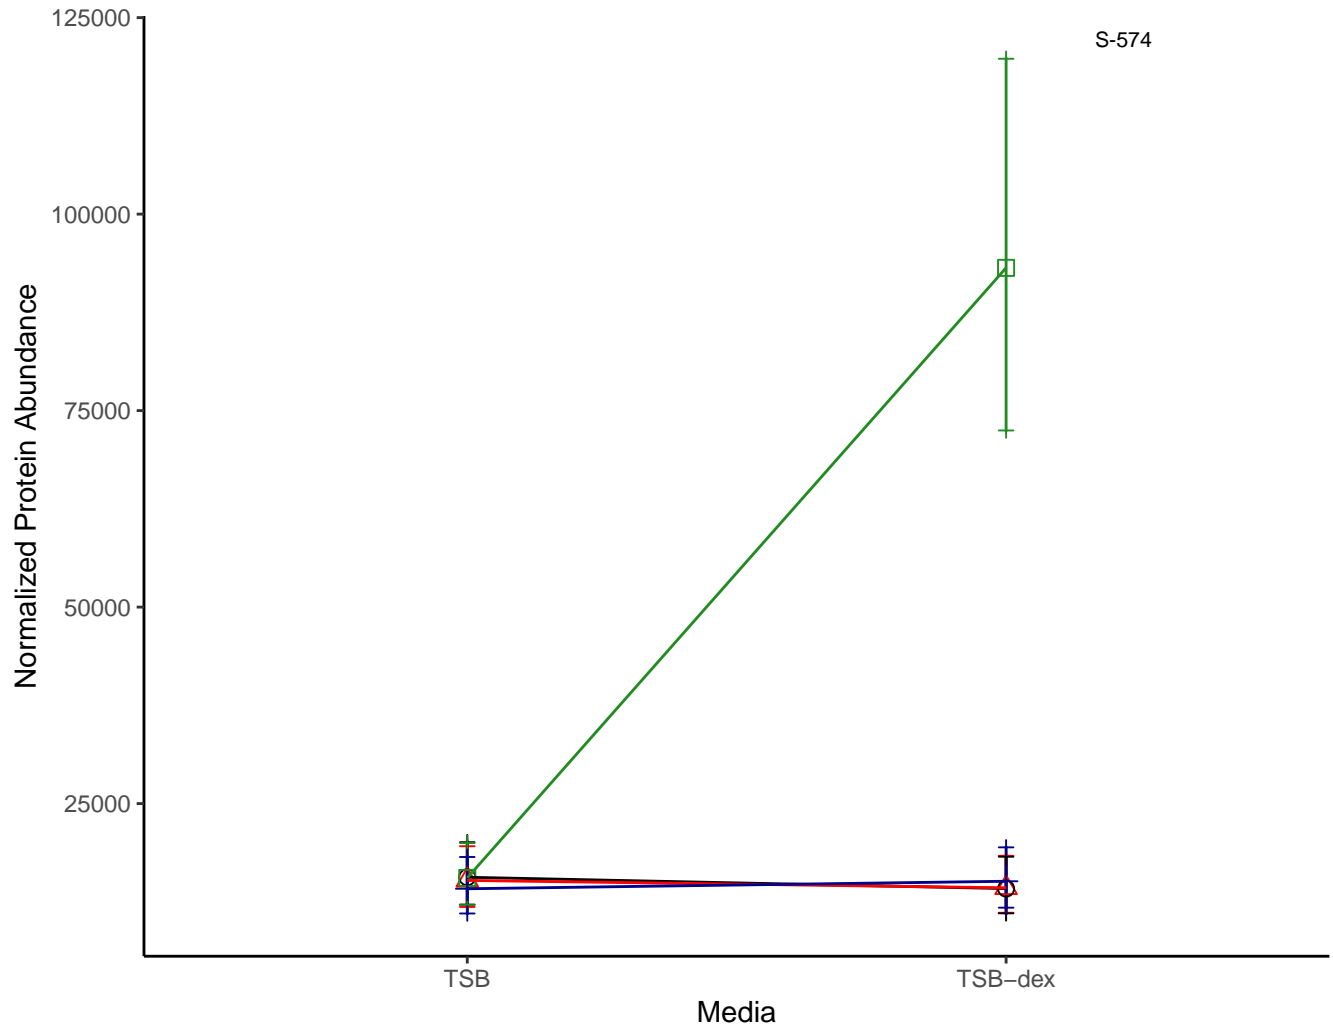

- ⊕ SA564
- △ SA564- $\Delta hptRS$
- ⊞ SA564- $\Delta ccpA$
- + SA564- $\Delta hptRS/ccpA$

# DEOC2\_STAAM

S-575

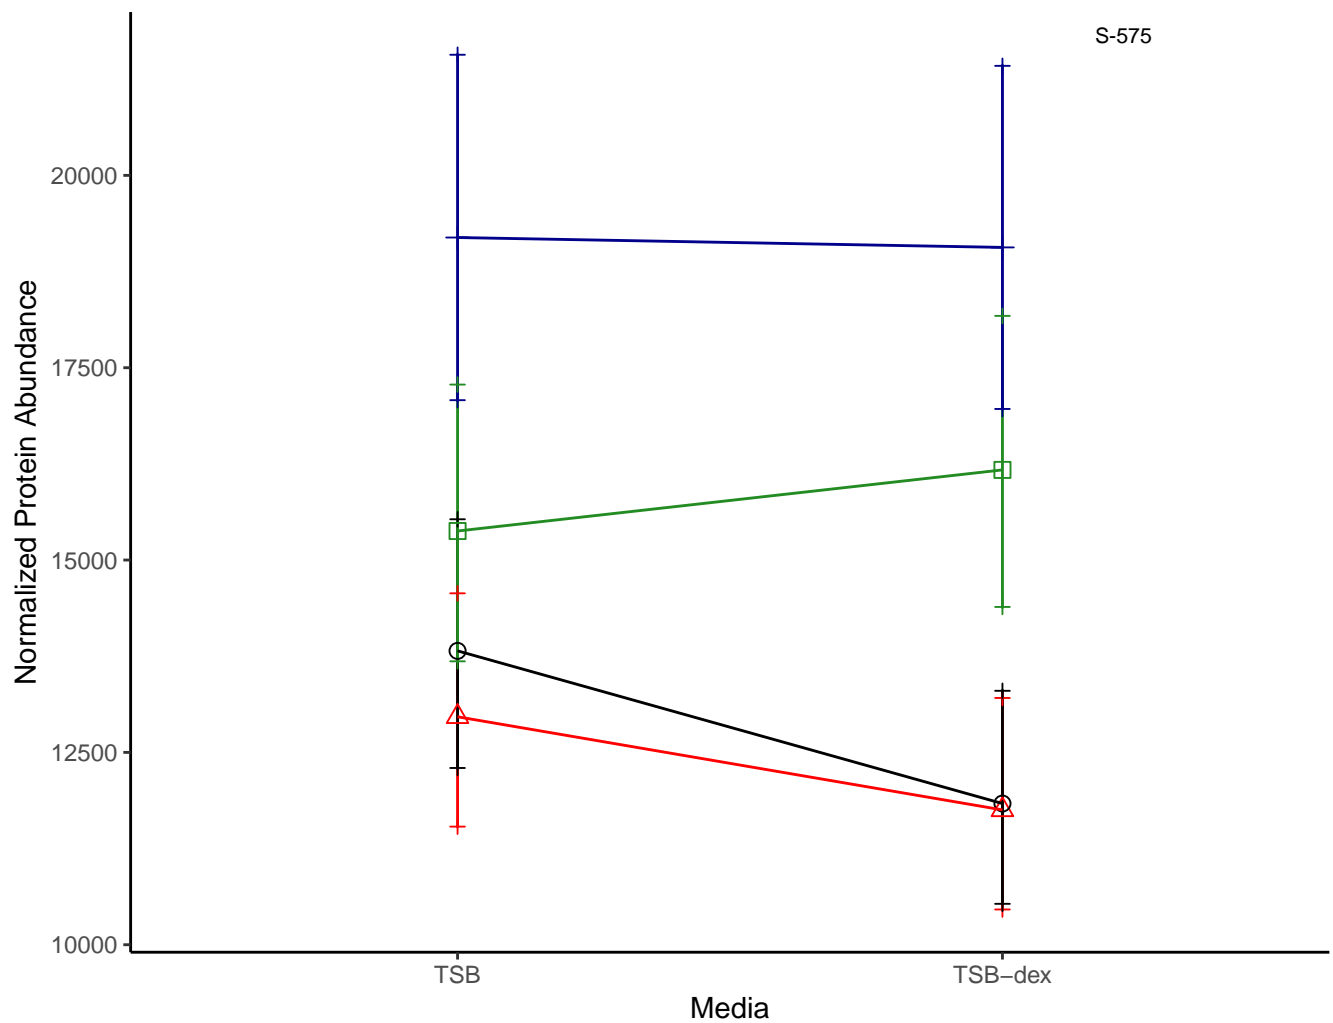

- ⊕ SA564
- △ SA564- $\Delta$ *hptRS*
- ⊞ SA564- $\Delta$ *ccpA*
- + SA564- $\Delta$ *hptRS/ccpA*

# DER\_STAAM

S-576

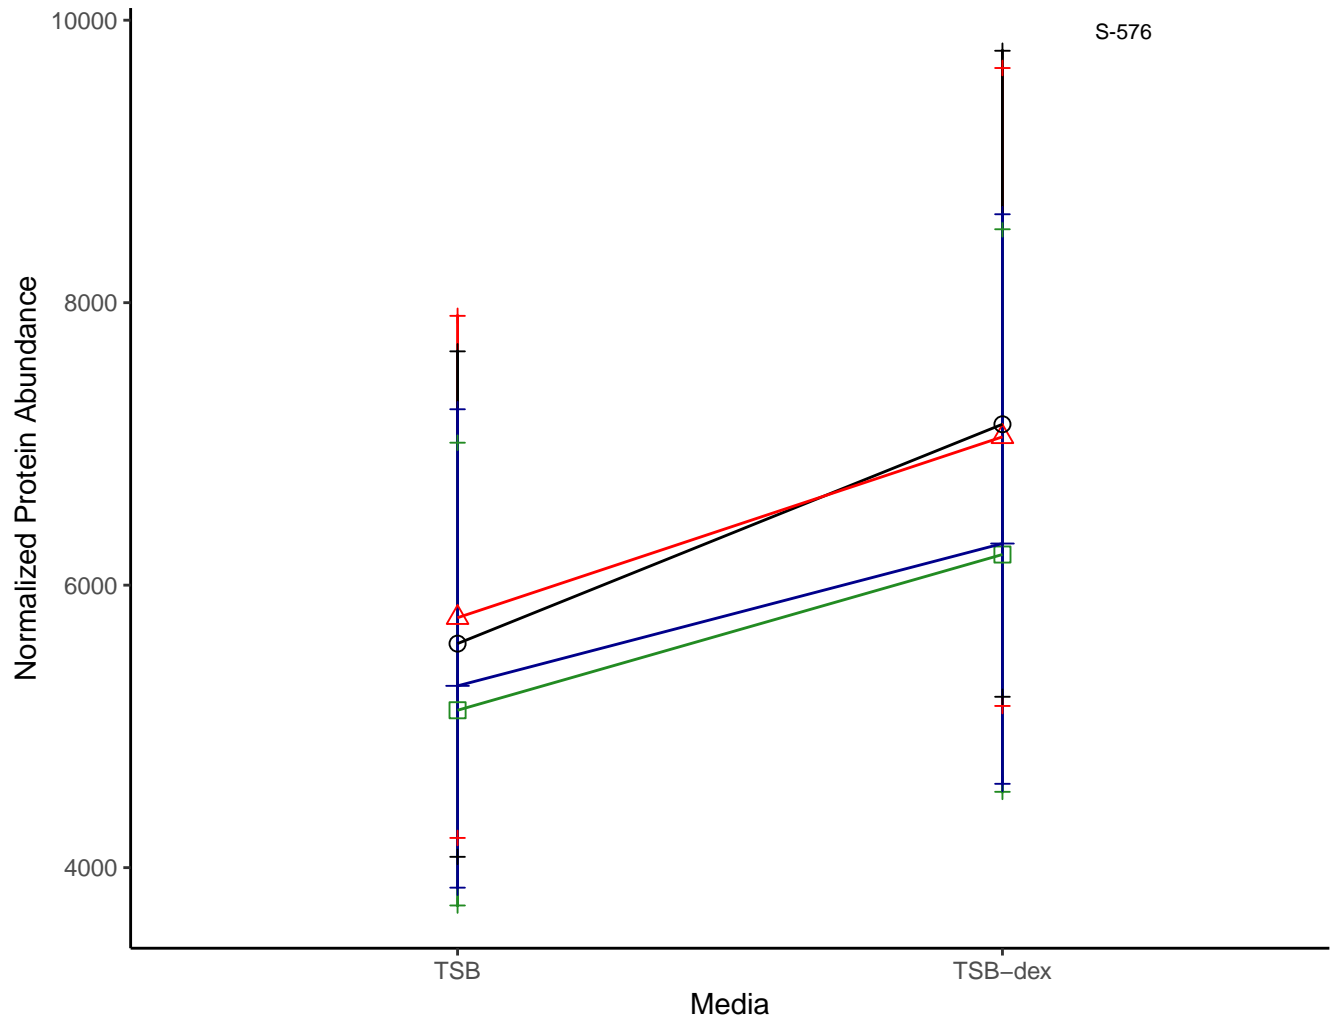

- ⊕ SA564
- △ SA564-ΔhptRS
- SA564-ΔccpA
- + SA564-ΔhptRS/ccpA



# DHA1\_STAAM

S-577

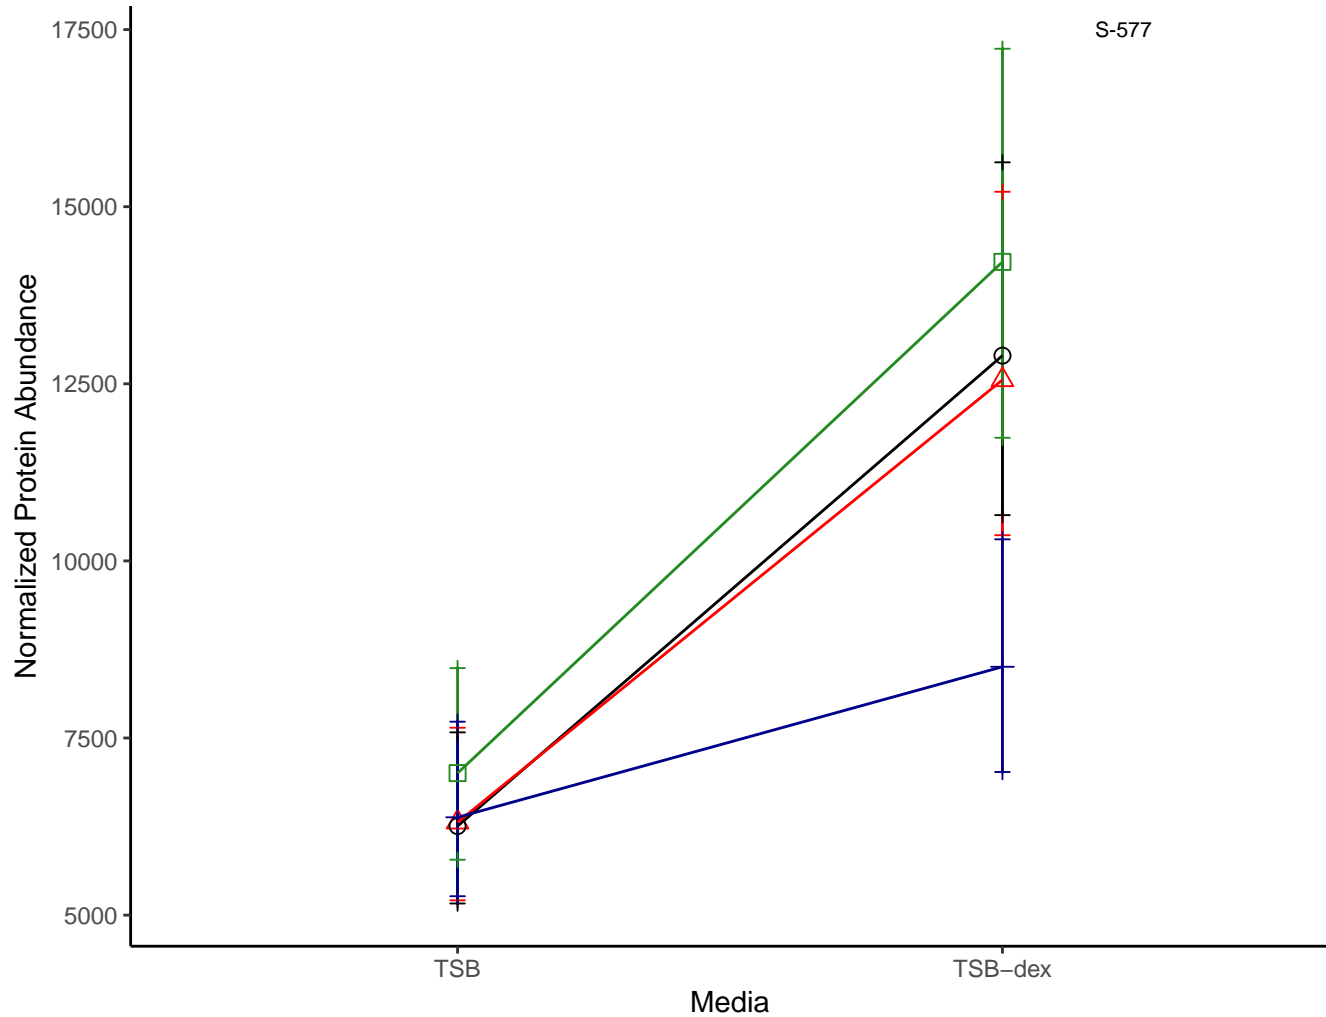

- ⊕ SA564
- △ SA564- $\Delta$ hptRS
- ⊞ SA564- $\Delta$ ccpA
- + SA564- $\Delta$ hptRS/ccpA

# DHA2\_STAAM

S-578

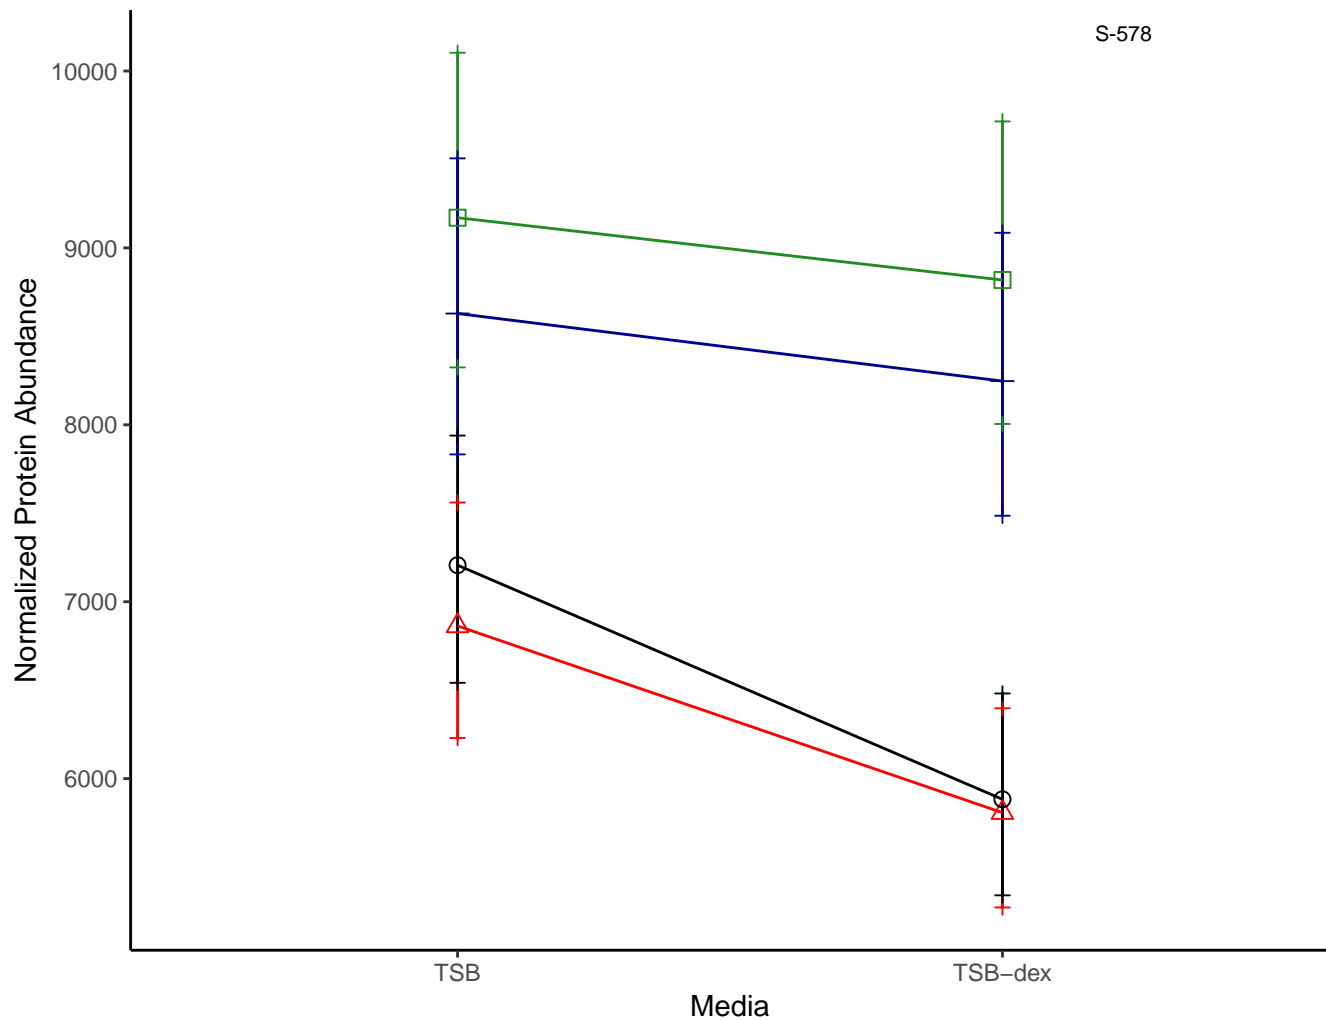

- ⊕ SA564
- △ SA564-ΔhptRS
- ⊞ SA564-ΔccpA
- + SA564-ΔhptRS/ccpA

# DHE2\_STAAM

S-579

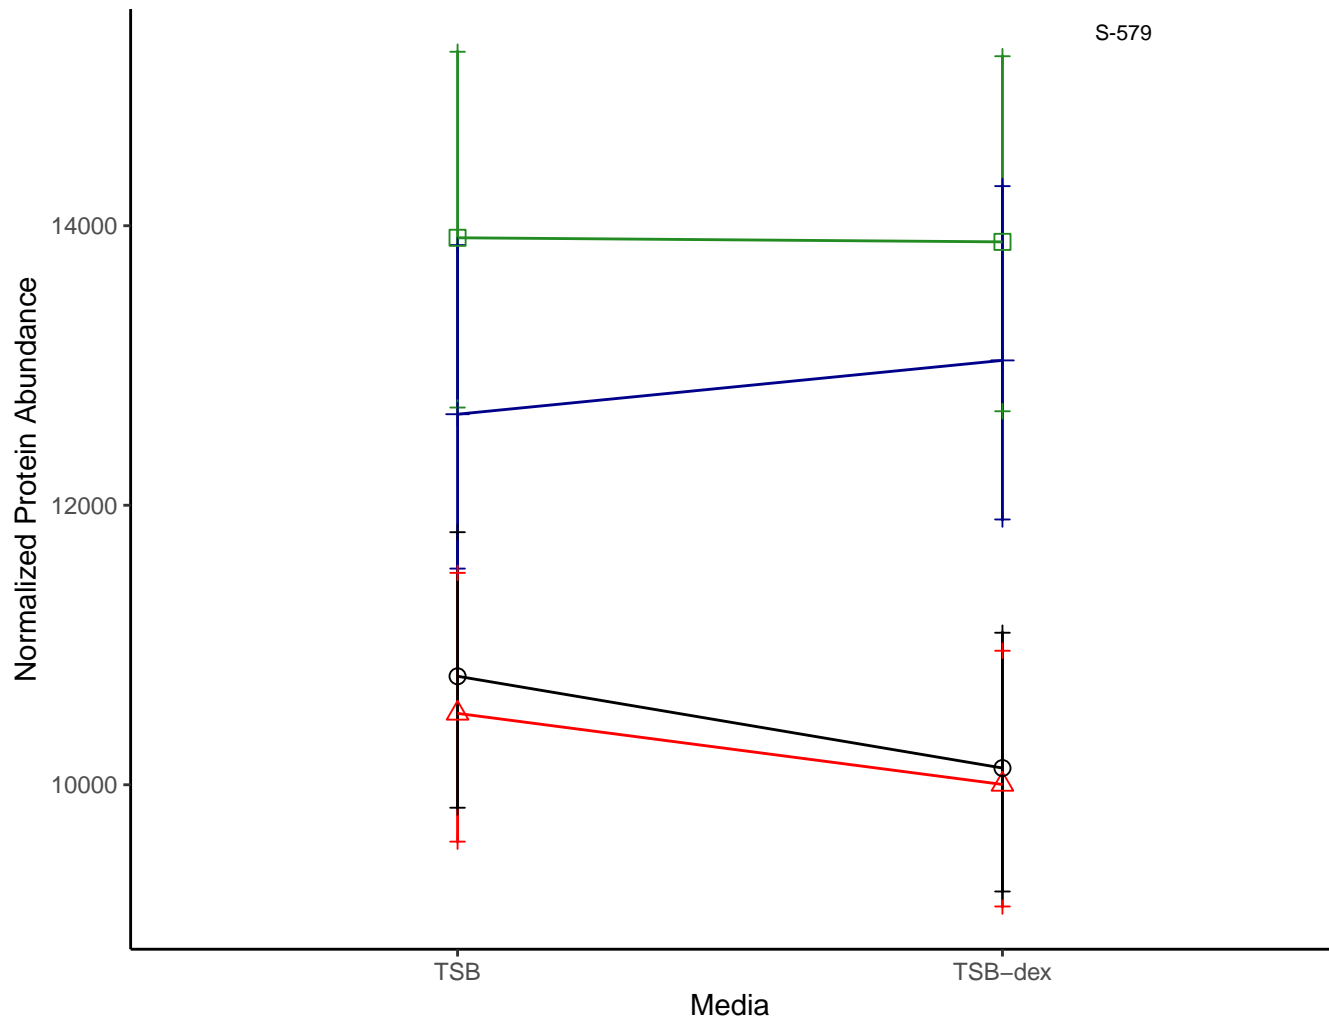

- ⊕ SA564
- △ SA564-ΔhptRS
- ⊞ SA564-ΔccpA
- + SA564-ΔhptRS/ccpA

# DHPS\_STAAM

S-580

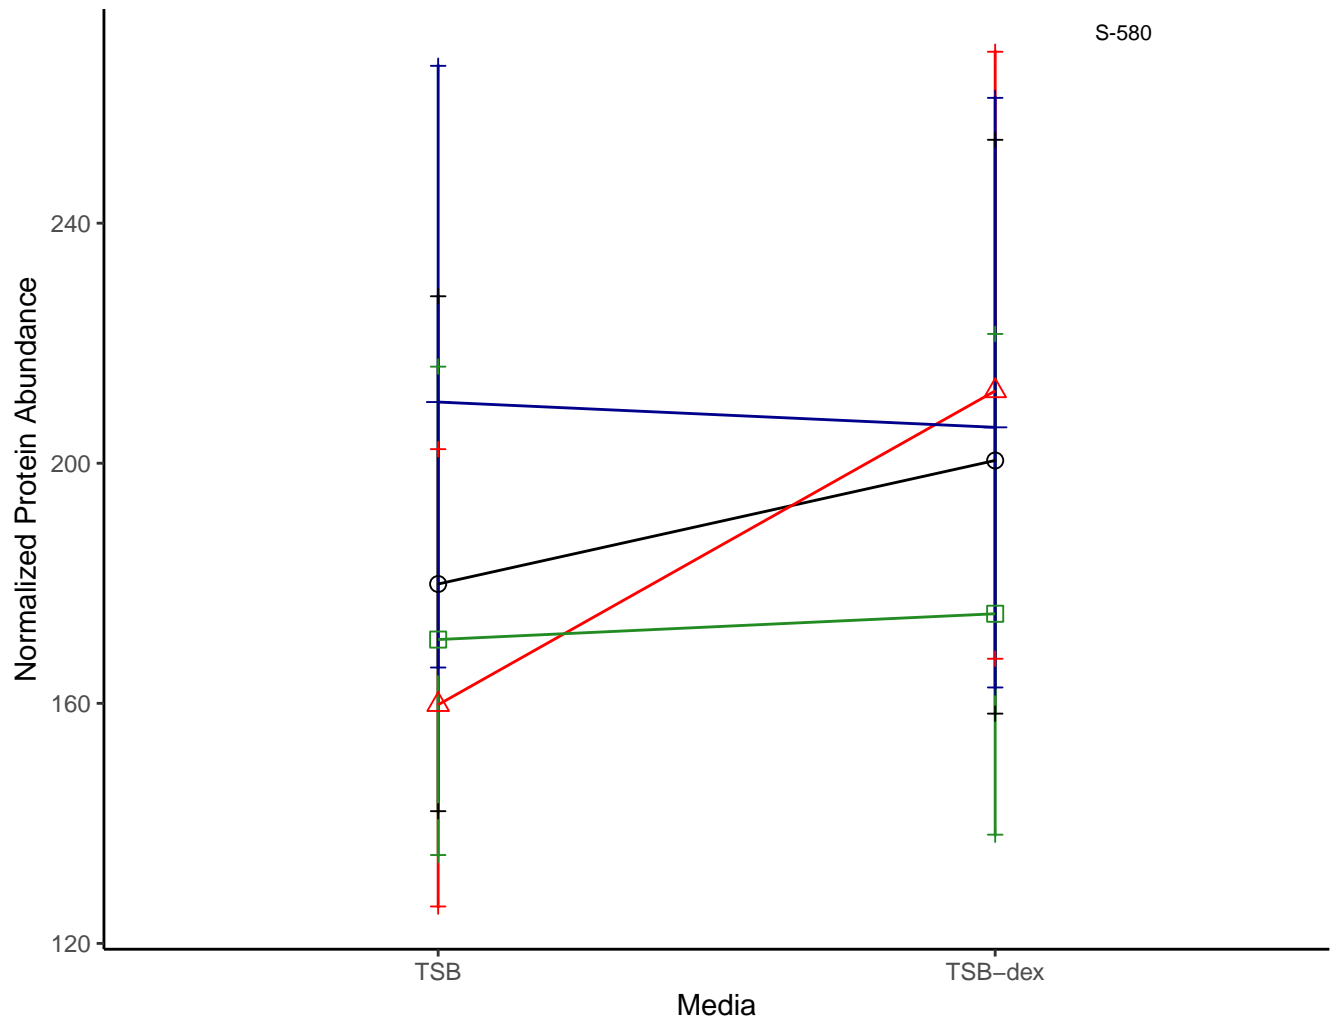

- SA564
- SA564- $\Delta$ *hptRS*
- SA564- $\Delta$ *ccpA*
- SA564- $\Delta$ *hptRS/ccpA*

# DLDH\_STAAM

S-581

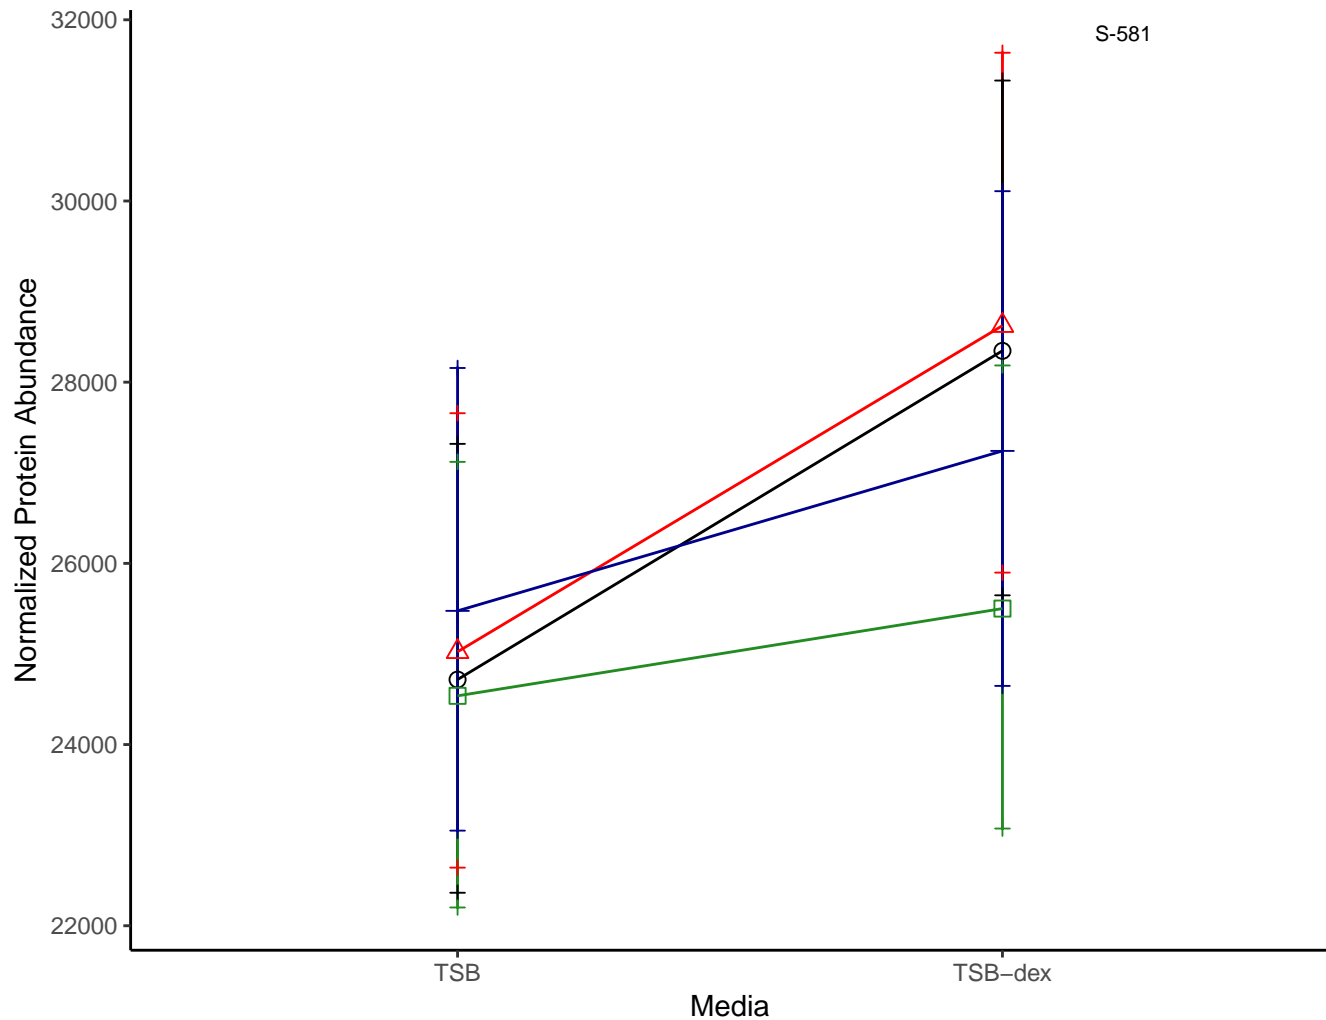

- SA564
- SA564- $\Delta$ hptRS
- SA564- $\Delta$ ccpA
- SA564- $\Delta$ hptRS/ccpA

# DLTA\_STAAM

S-582

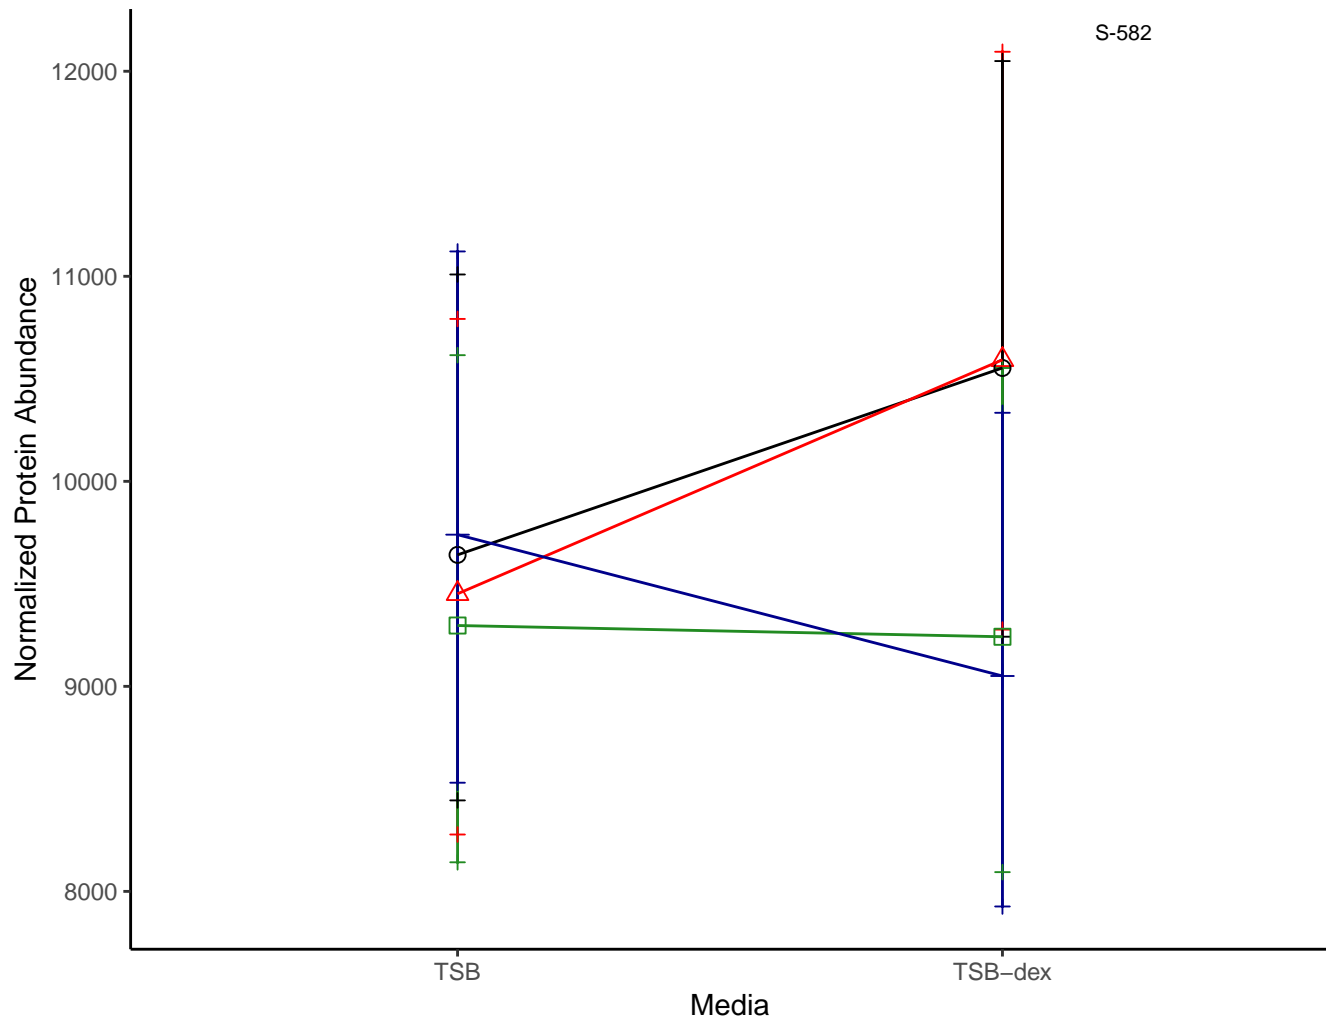

- ⊕ SA564
- △ SA564-ΔhptRS
- ⊞ SA564-ΔccpA
- + SA564-ΔhptRS/ccpA

# DLTC\_STAAM

S-583

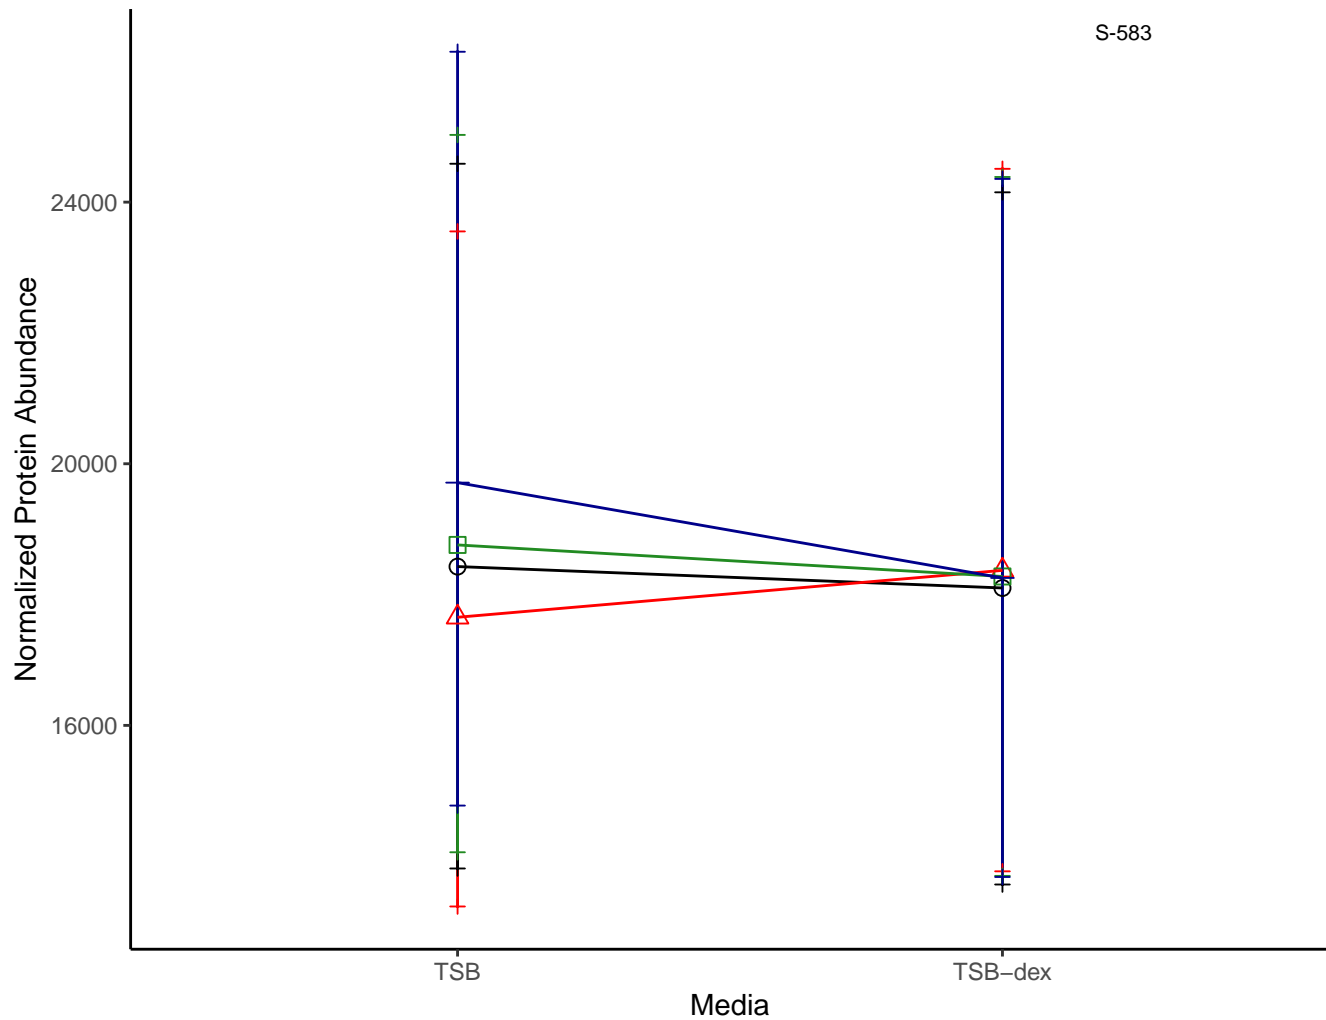

- ⊕ SA564
- △ SA564-ΔhptRS
- ⊞ SA564-ΔccpA
- + SA564-ΔhptRS/ccpA

# DNAA\_STAAM

S-584

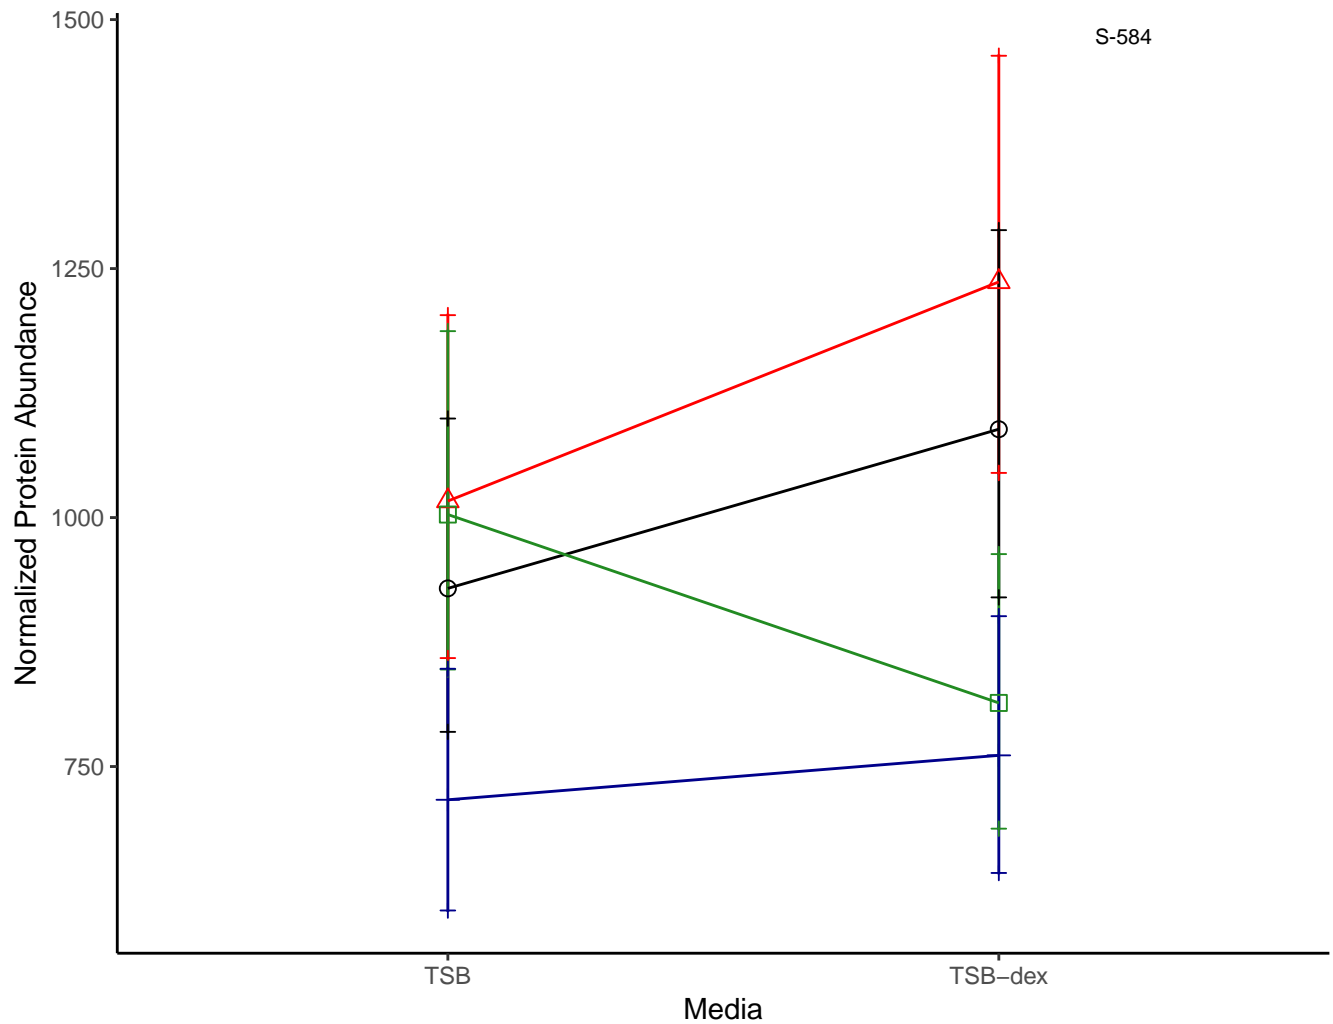

- ⊕ SA564
- △ SA564- $\Delta$ *hptRS*
- ⊞ SA564- $\Delta$ *ccpA*
- ⊕ SA564- $\Delta$ *hptRS/ccpA*



# DNAG\_STAAM

S-585

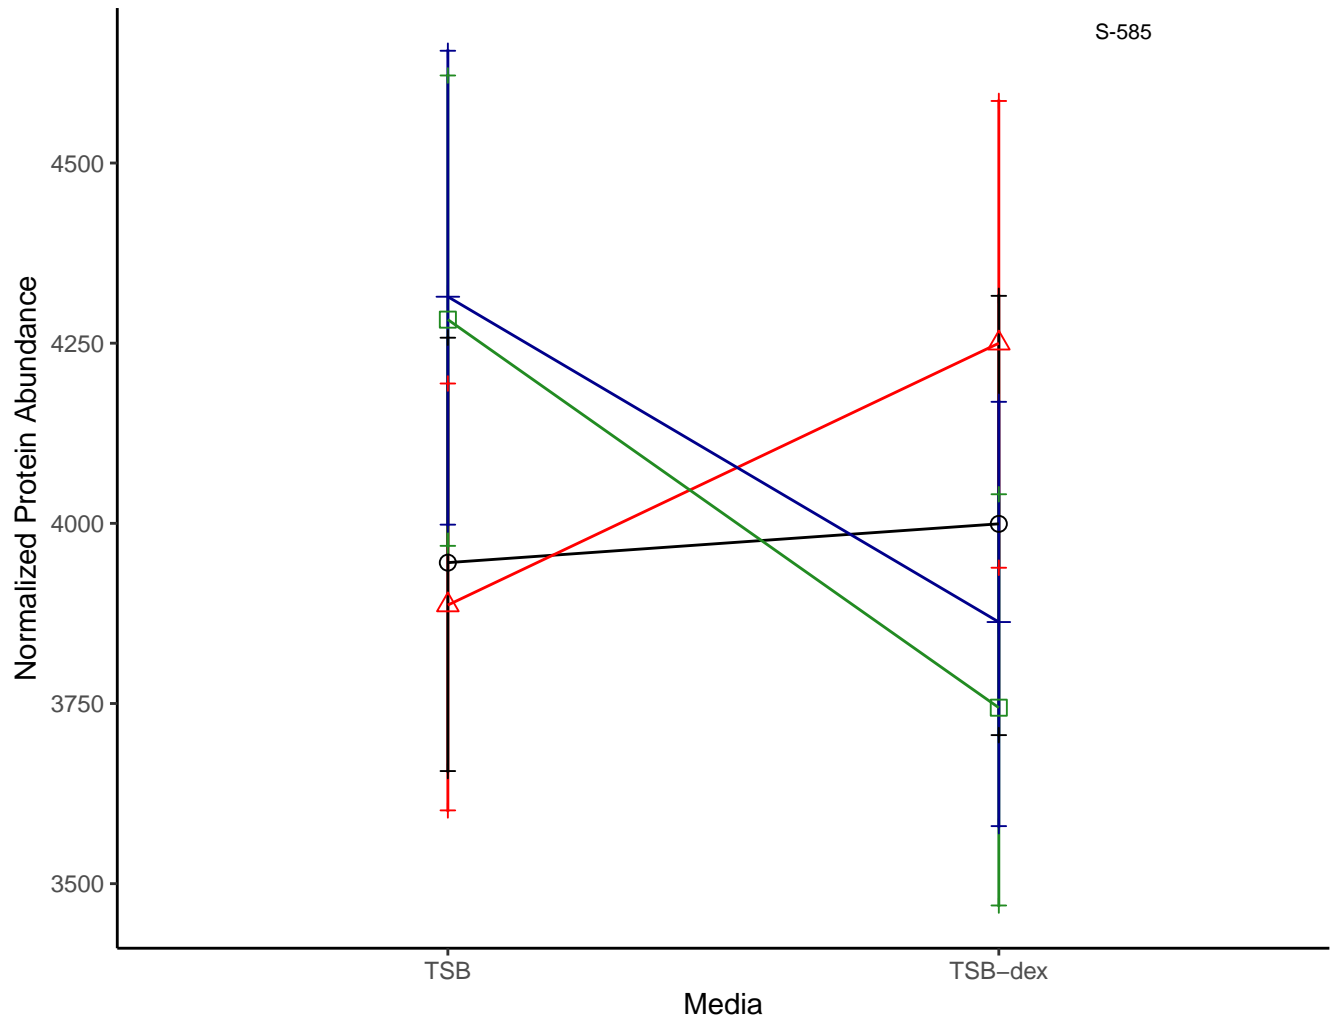

- ⊕ SA564
- △ SA564-ΔhptRS
- ⊞ SA564-ΔccpA
- + SA564-ΔhptRS/ccpA

# DNAJ\_STAAM

S-586

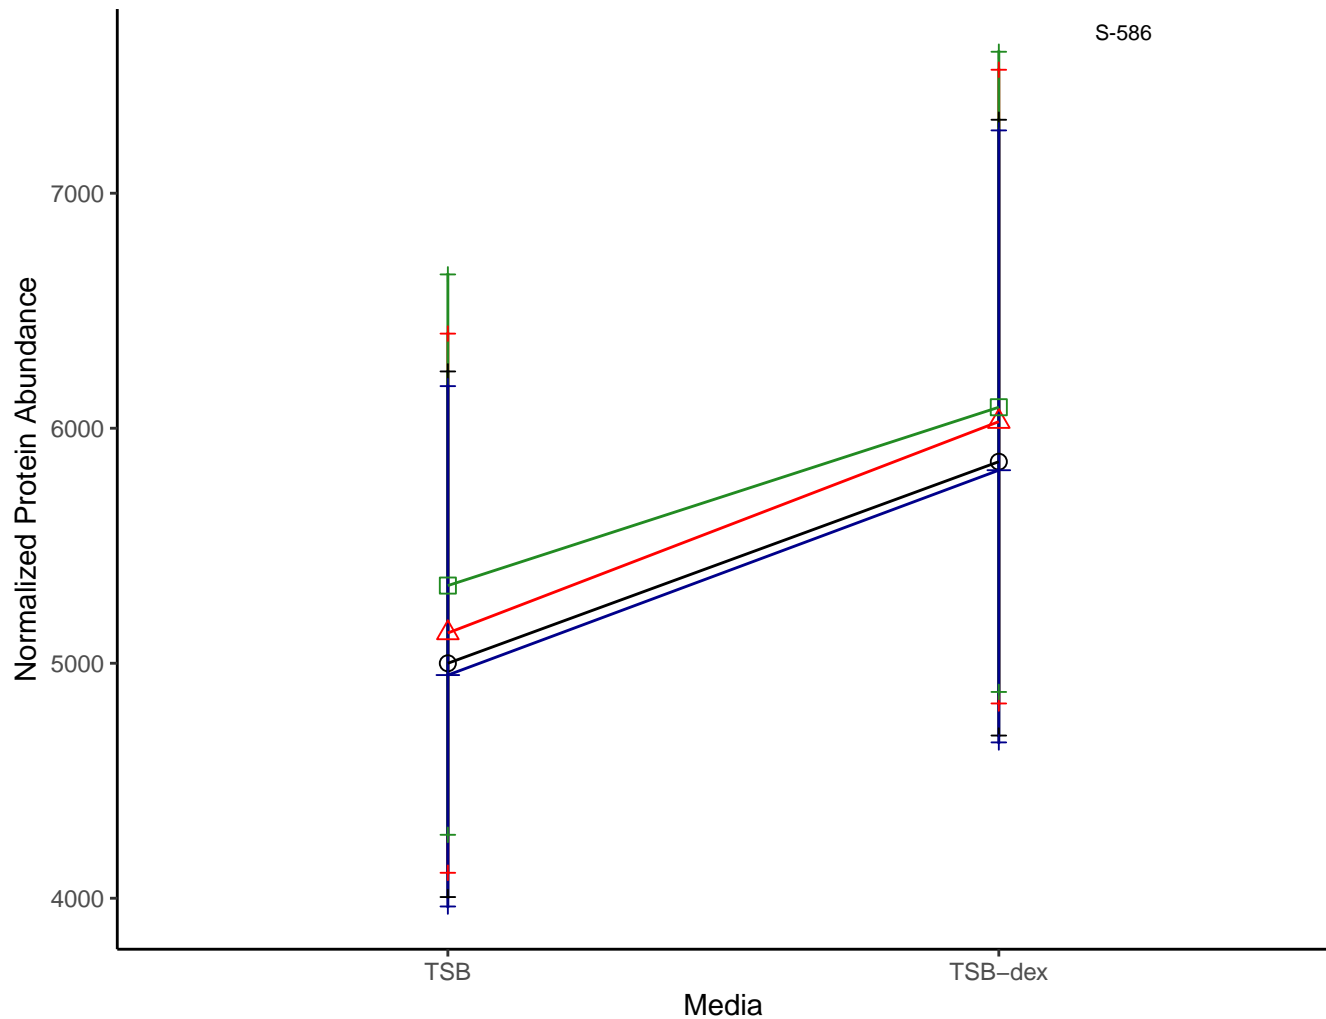

- ⊕ SA564
- △ SA564- $\Delta hptRS$
- ⊞ SA564- $\Delta ccpA$
- + SA564- $\Delta hptRS/ccpA$

# DNAK\_STAAM

S-587

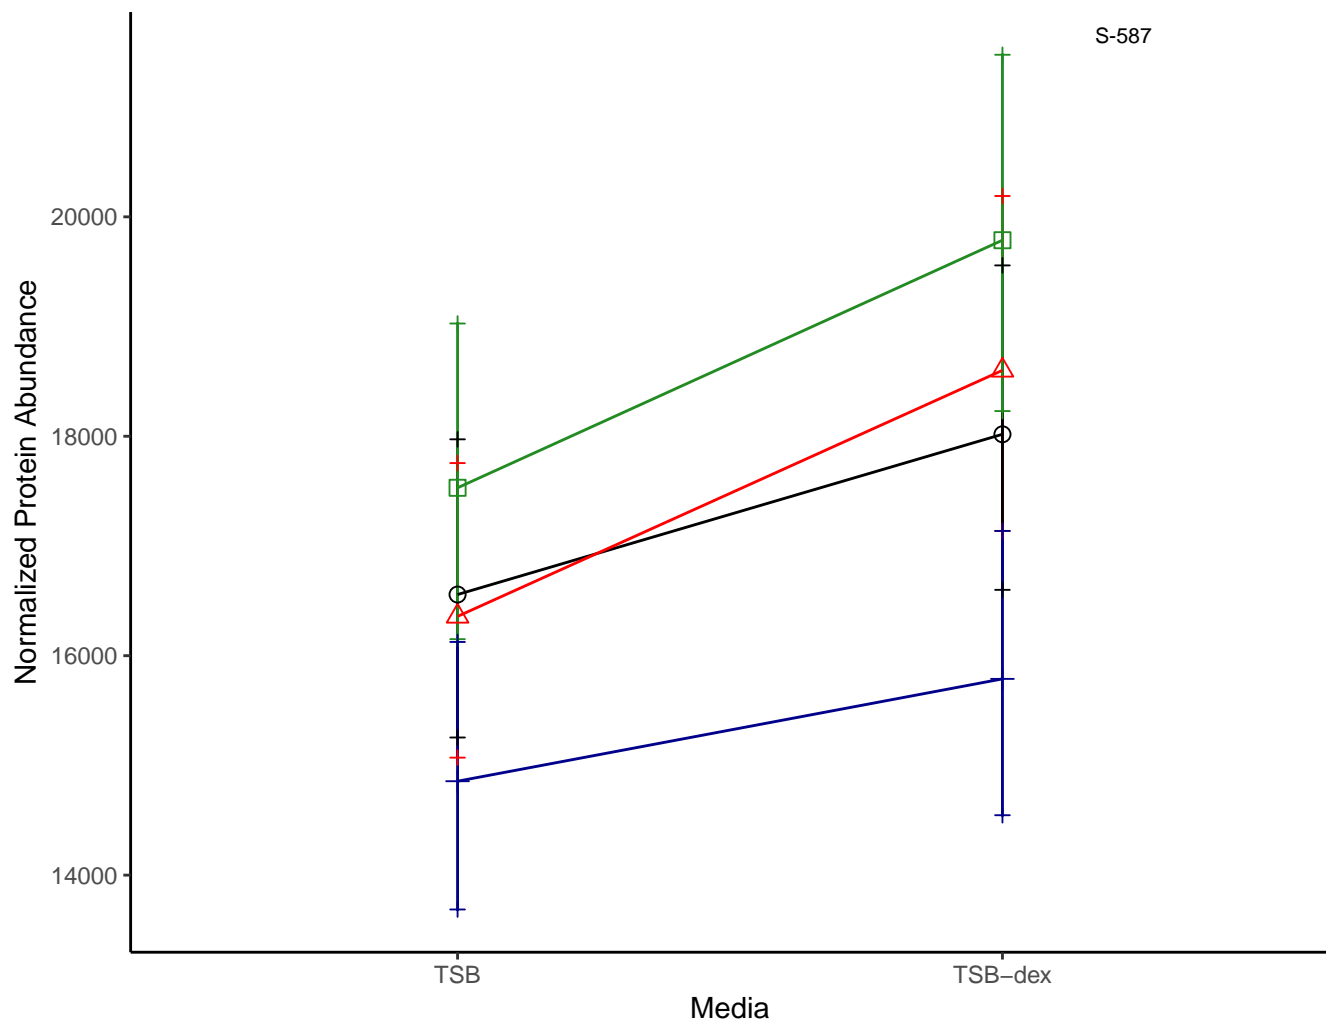

- ⊕ SA564
- △ SA564-ΔhptRS
- ⊞ SA564-ΔccpA
- + SA564-ΔhptRS/ccpA

# DNLJ\_STAAM

S-588

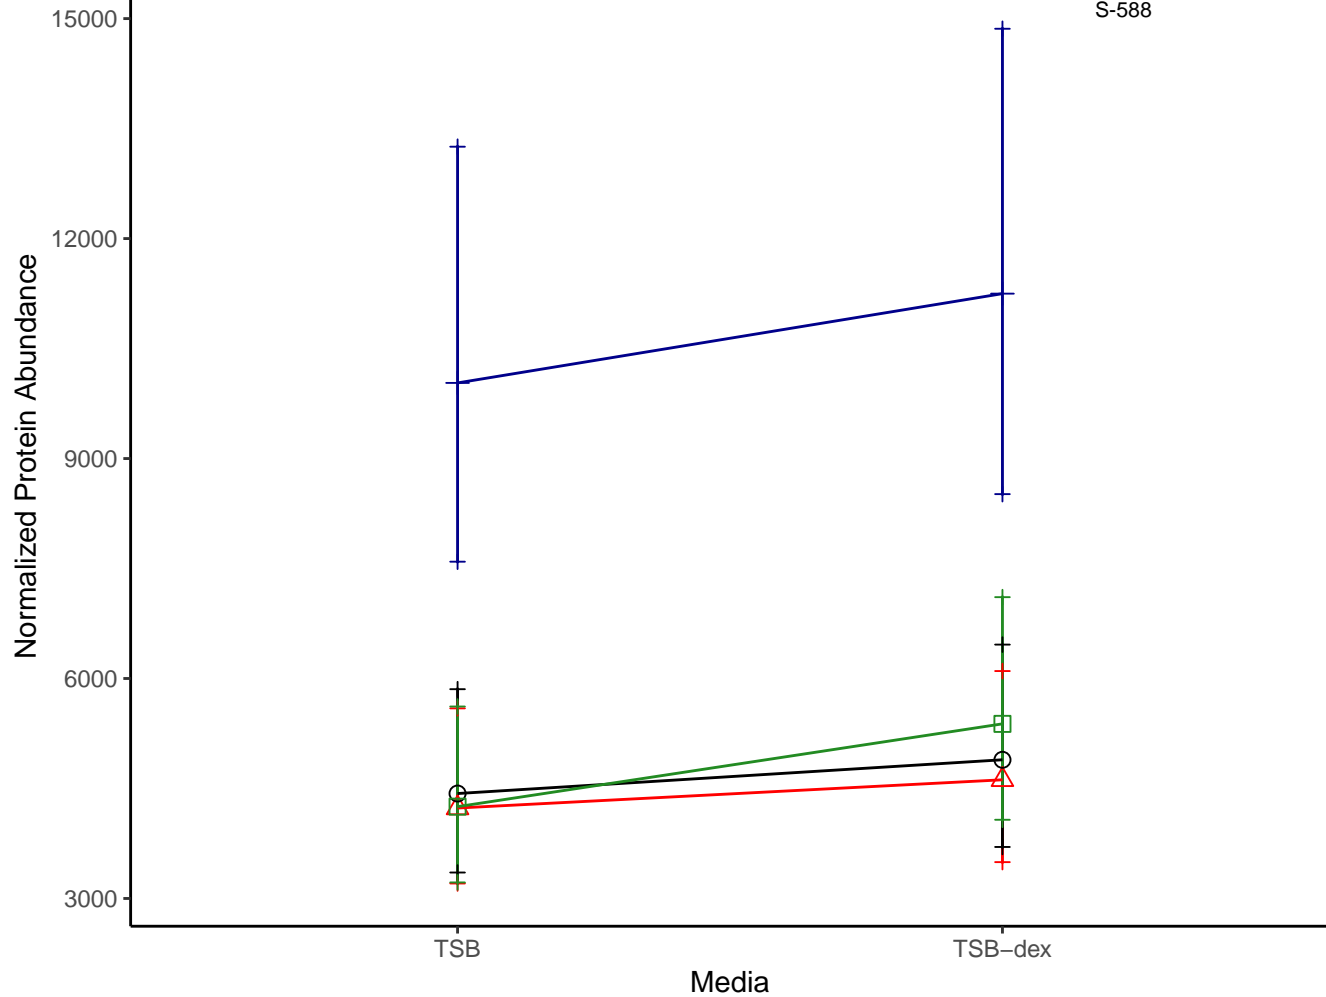

- SA564
- SA564- $\Delta$ *hptRS*
- SA564- $\Delta$ *ccpA*
- SA564- $\Delta$ *hptRS/ccpA*

# DPO3B\_STAAM

S-589

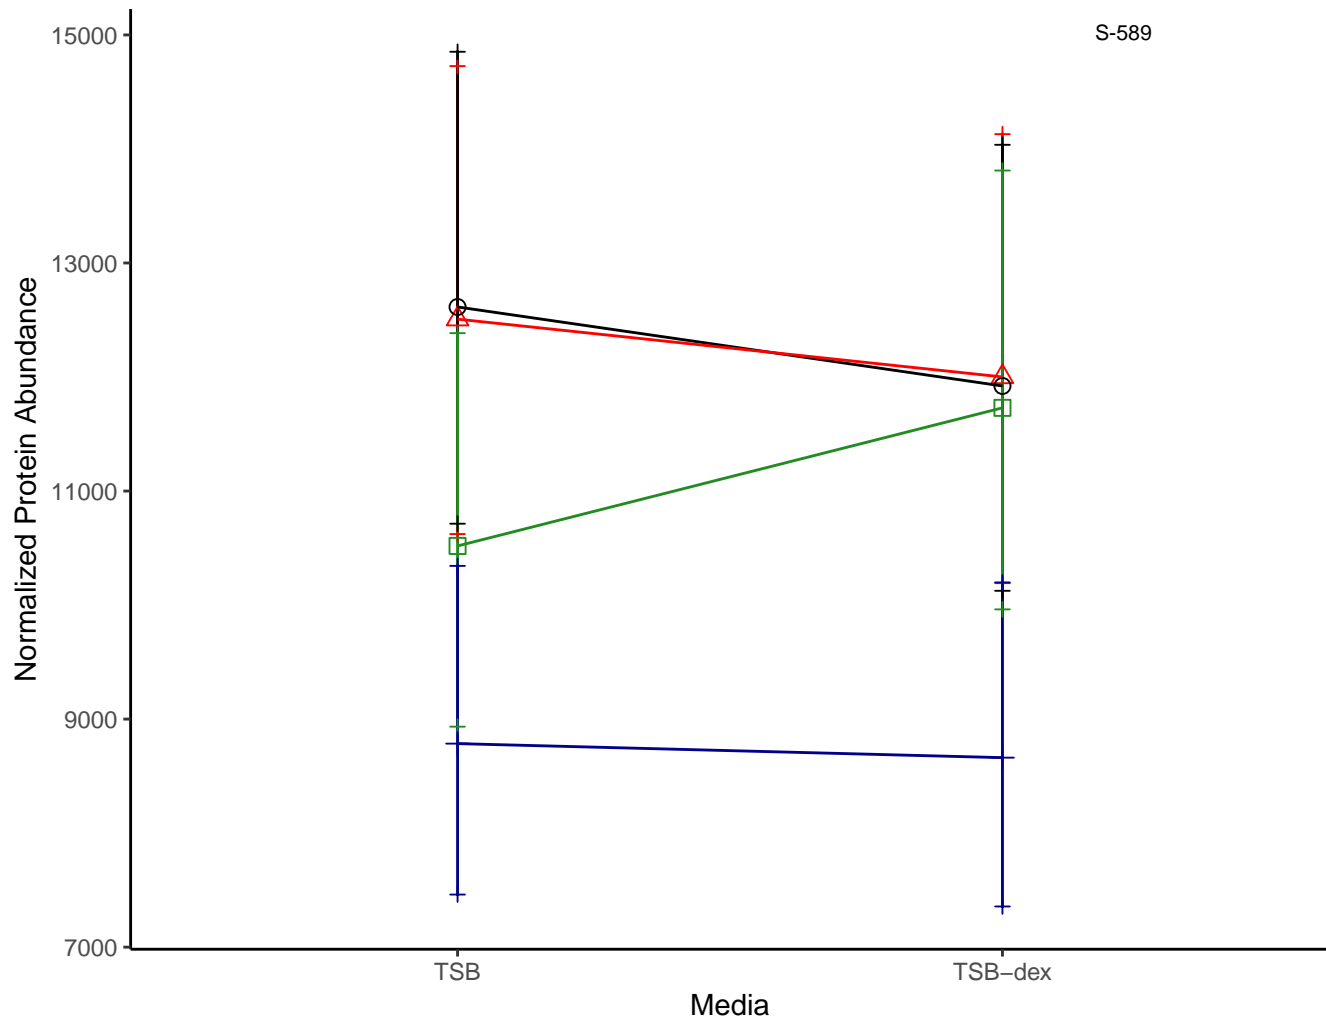

- ⊕ SA564
- △ SA564- $\Delta$ *hptRS*
- ⊞ SA564- $\Delta$ *ccpA*
- + SA564- $\Delta$ *hptRS/ccpA*

# DPO4\_STAAM

S-590

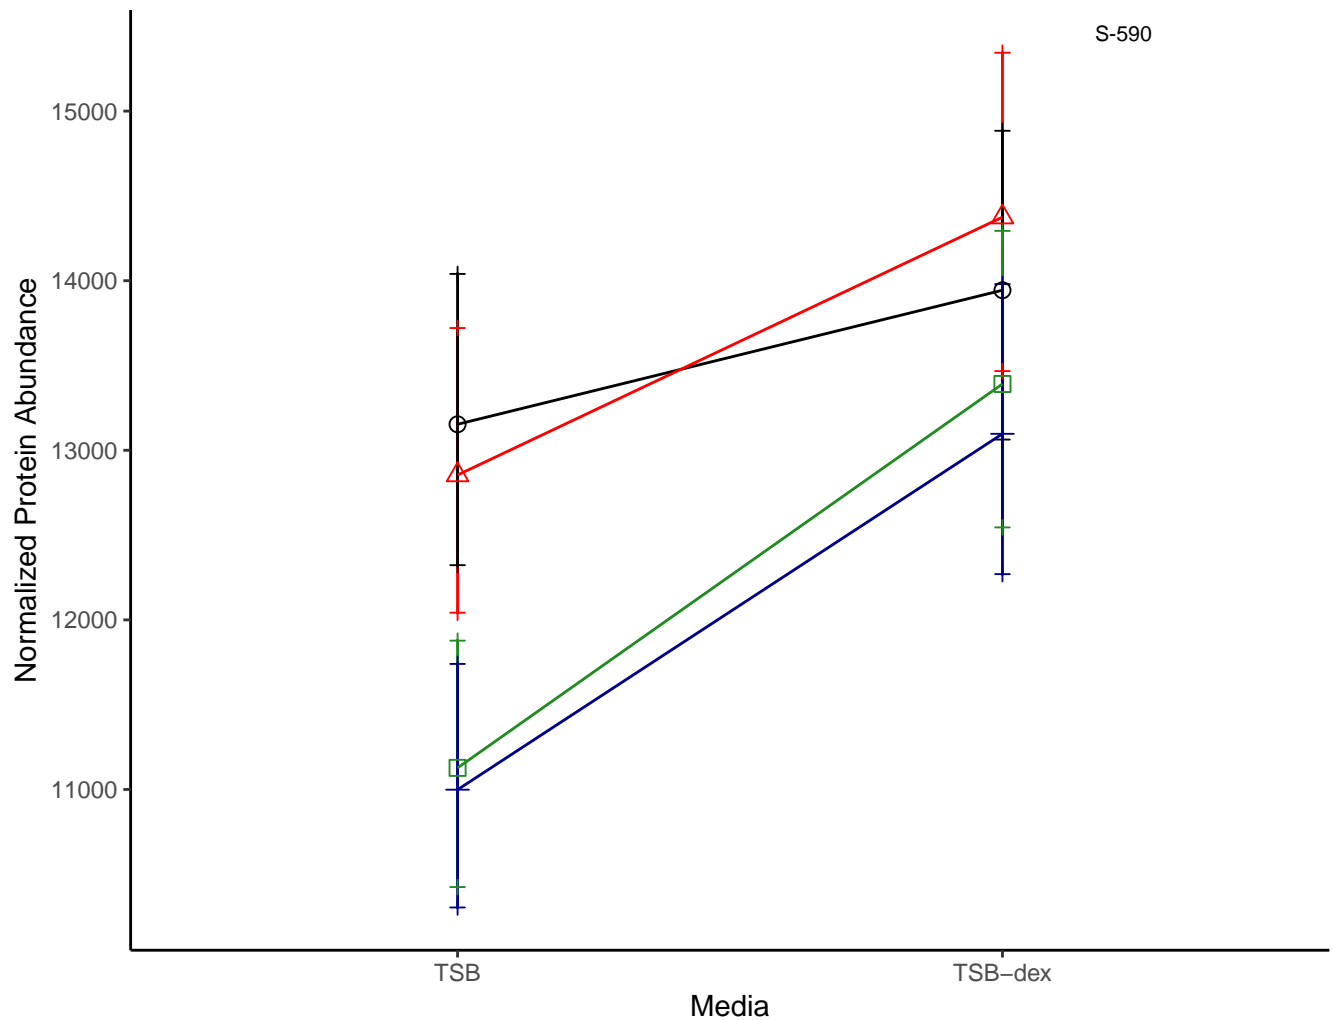

- ⊕ SA564
- △ SA564-ΔhptRS
- ⊞ SA564-ΔccpA
- + SA564-ΔhptRS/ccpA

# DTD\_STAAM

S-591

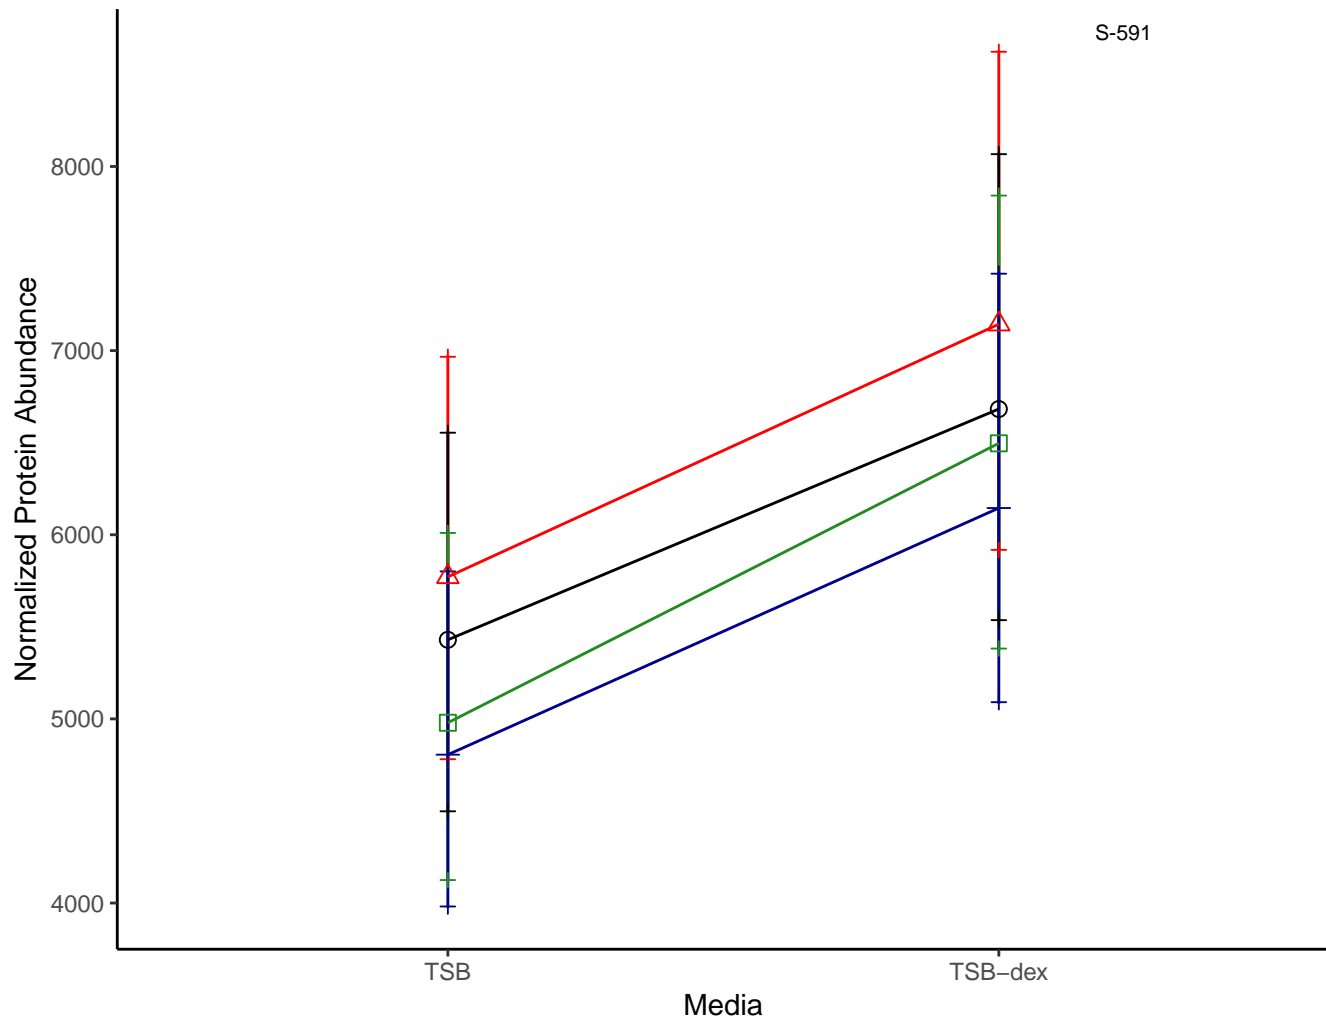

- ⊕ SA564
- △ SA564-ΔhptRS
- ⊞ SA564-ΔccpA
- + SA564-ΔhptRS/ccpA

# DYR\_STAAM

S-592

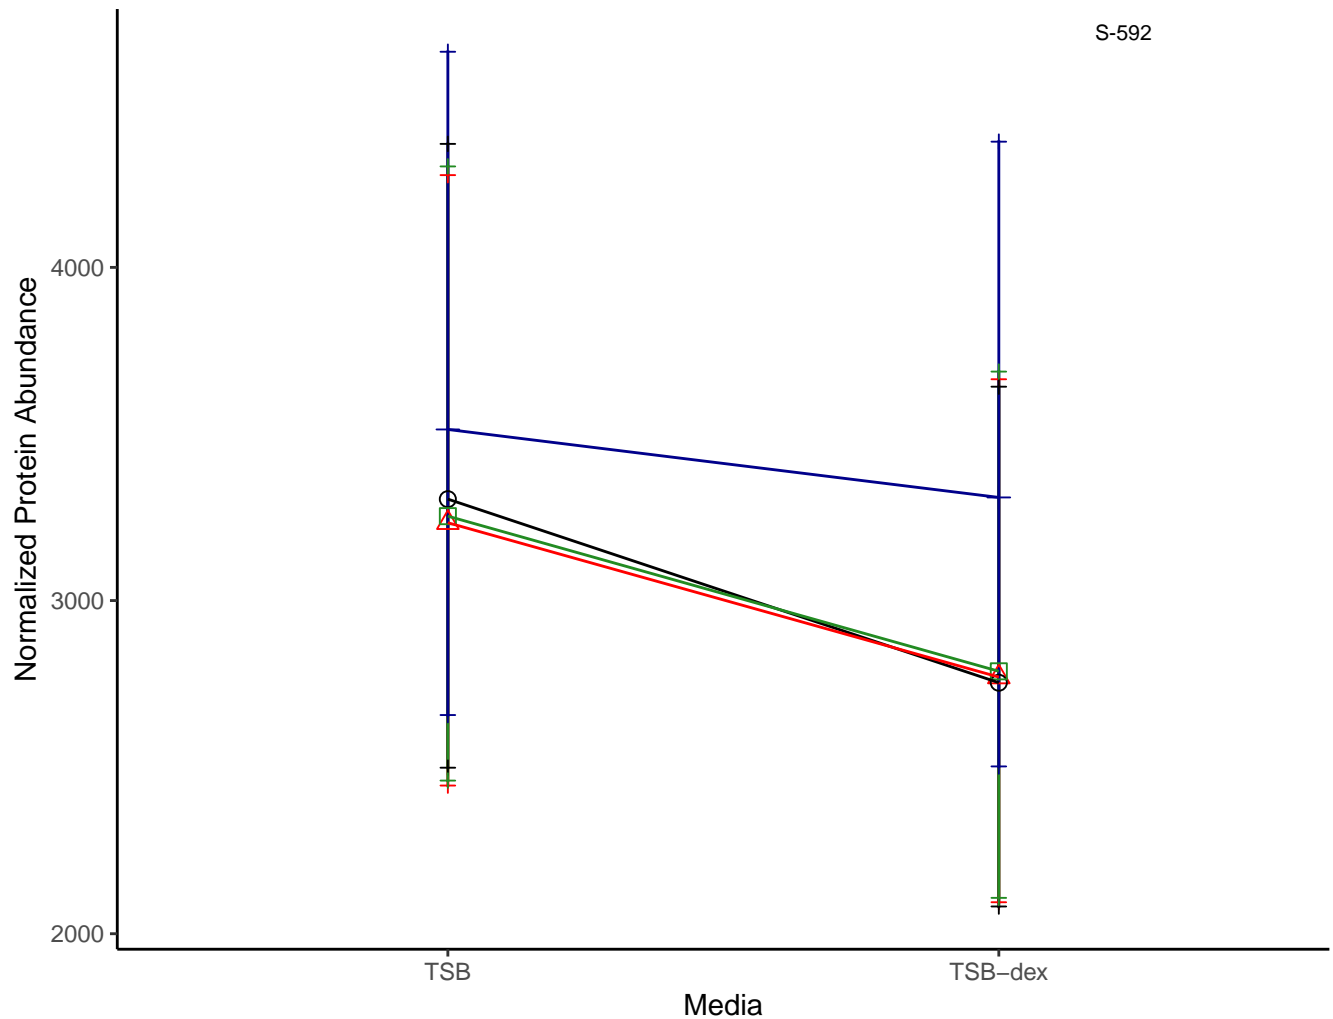

- ⊕ SA564
- △ SA564- $\Delta hptRS$
- SA564- $\Delta ccpA$
- + SA564- $\Delta hptRS/ccpA$



# EBPS\_STAAM

S-593

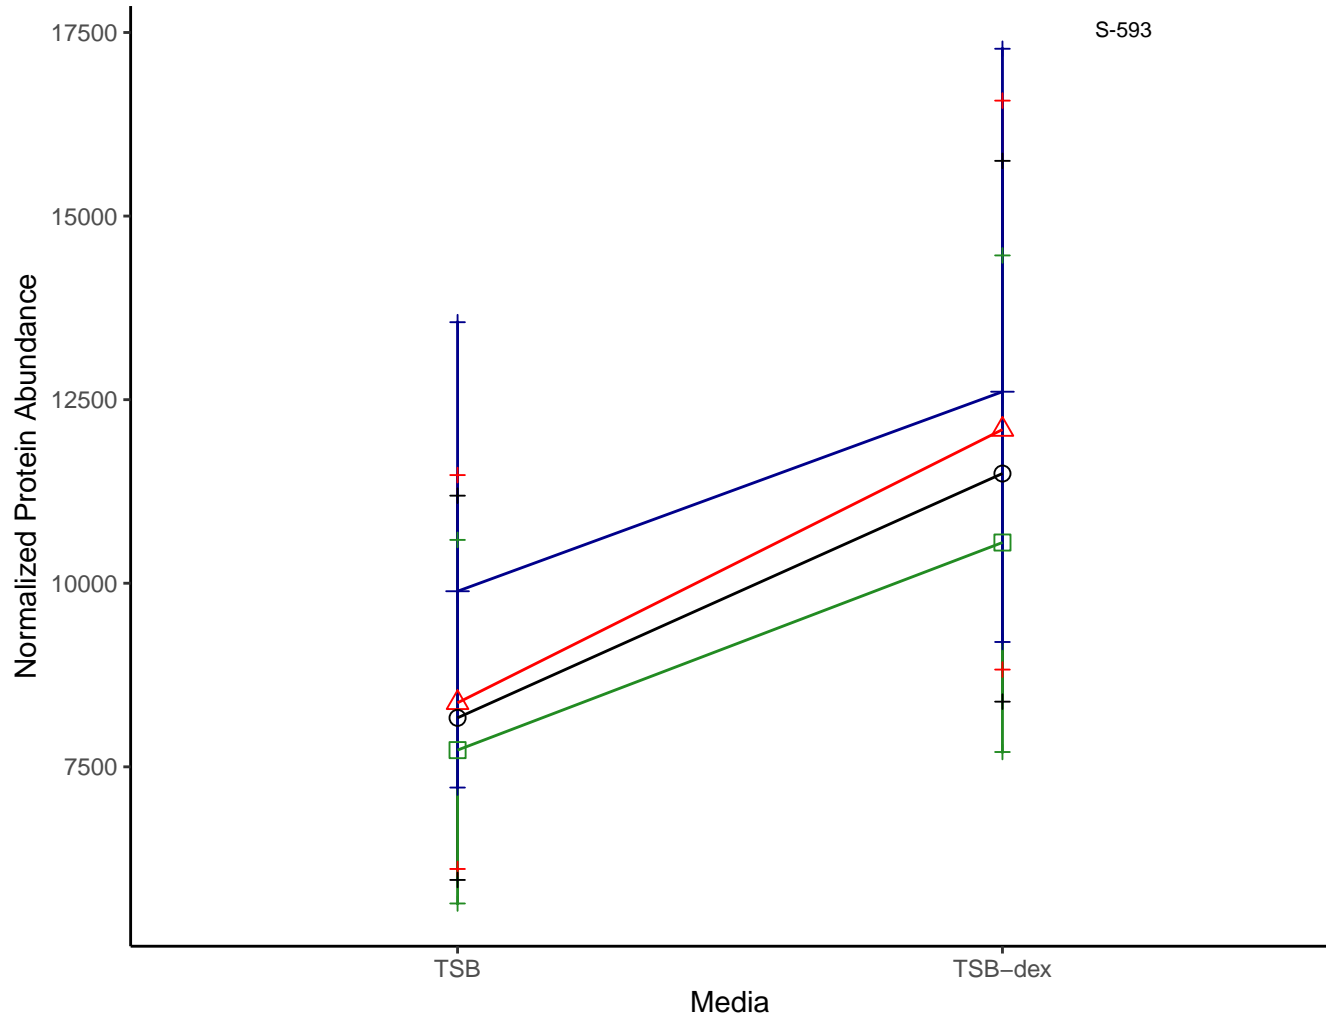

- ⊕ SA564
- △ SA564-ΔhptRS
- SA564-ΔccpA
- + SA564-ΔhptRS/ccpA

# ECFA1\_STAAM

S-594

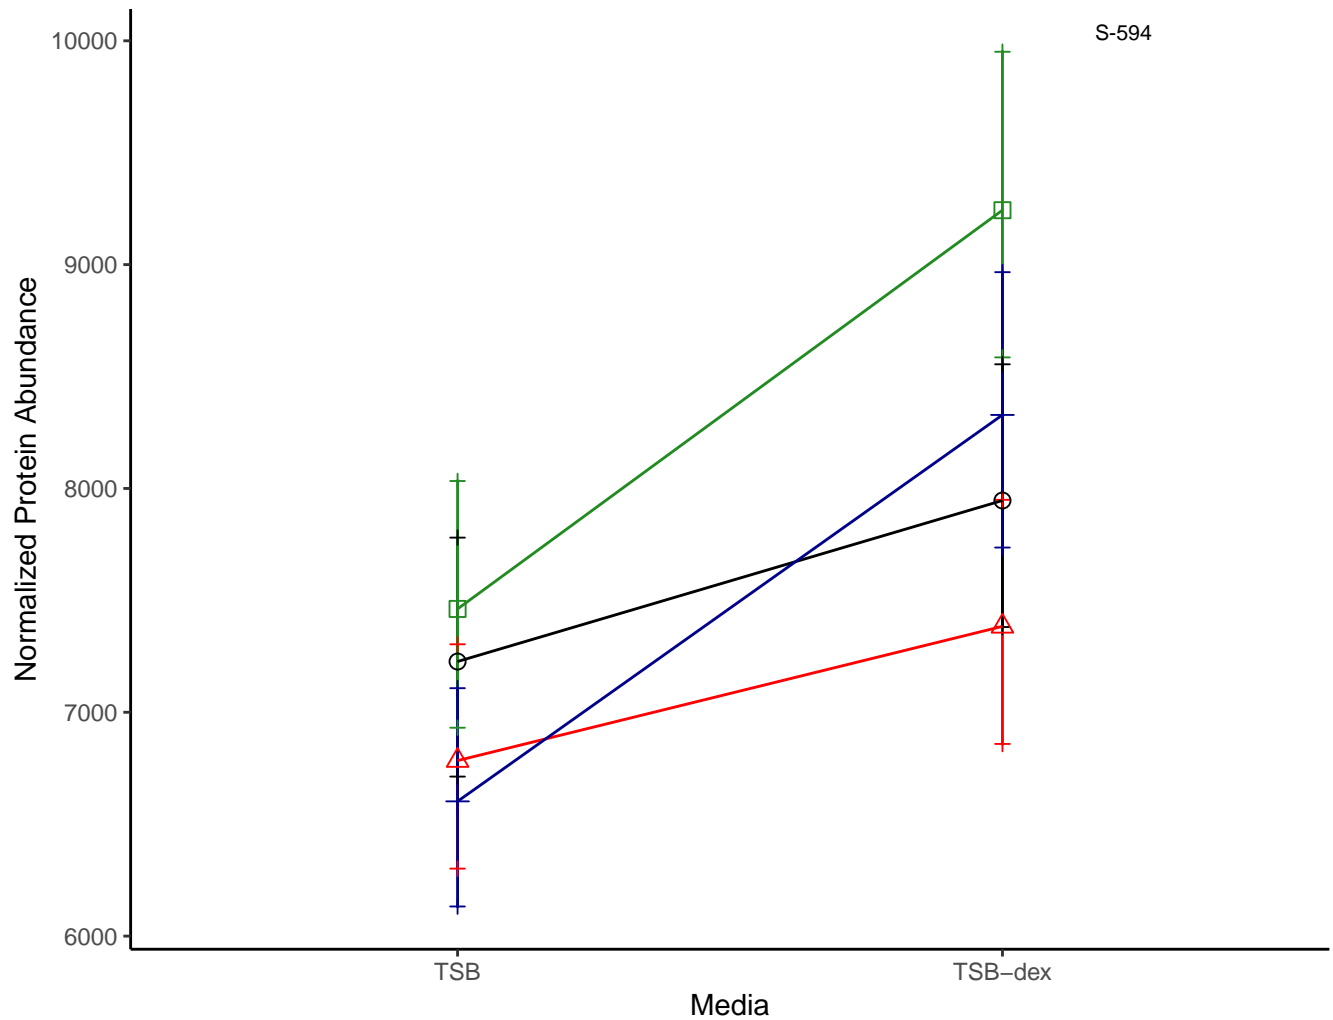

- ⊕ SA564
- △ SA564- $\Delta$ *hptRS*
- ⊞ SA564- $\Delta$ *ccpA*
- + SA564- $\Delta$ *hptRS/ccpA*

# EFG\_STAAM

S-595

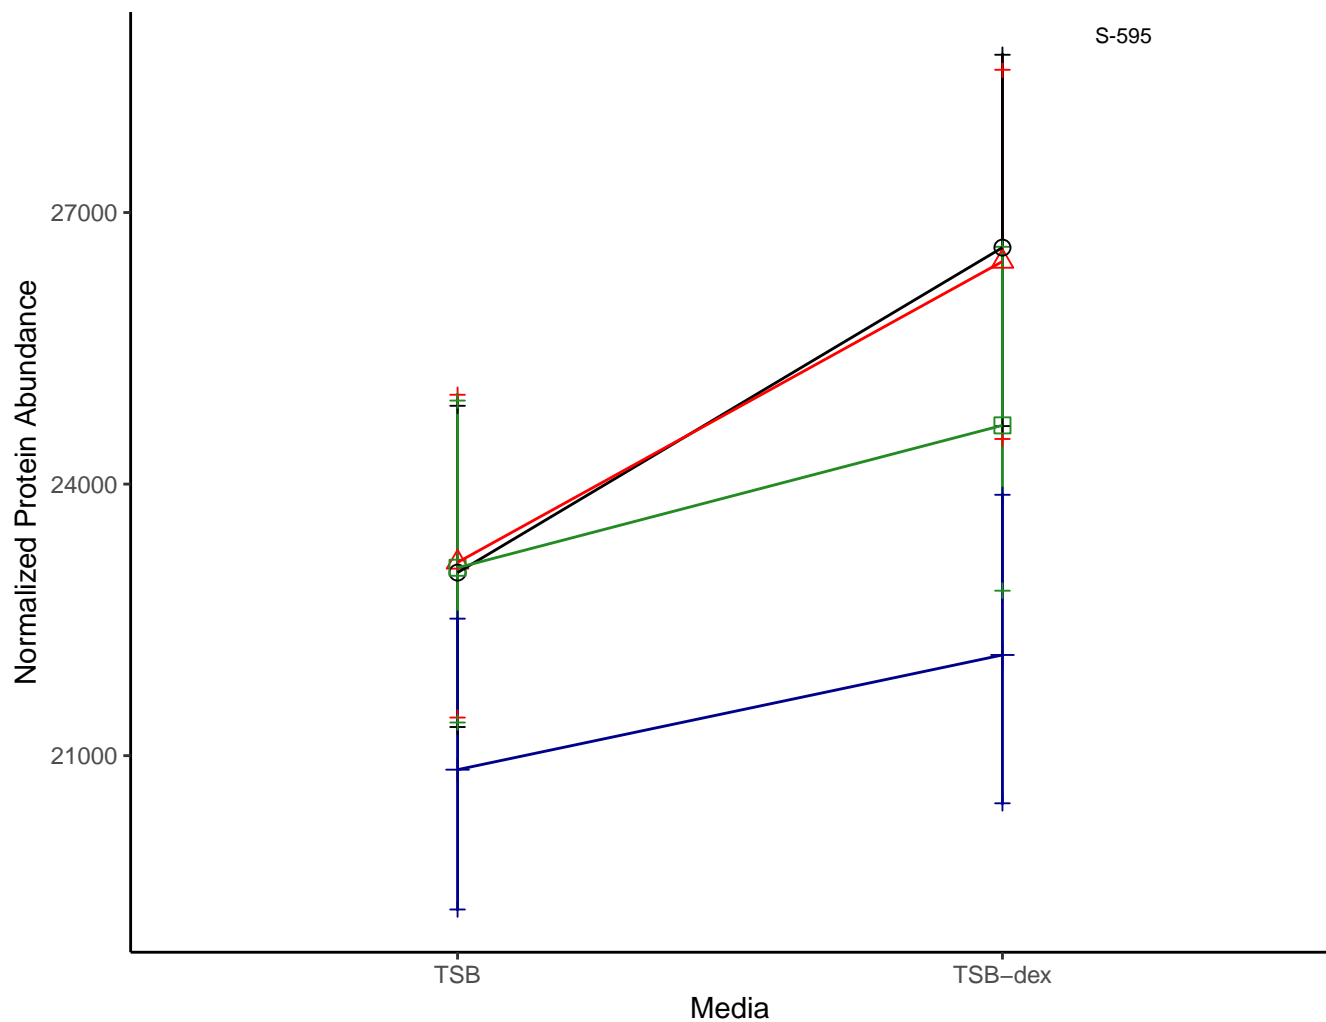

- ⊕ SA564
- △ SA564-ΔhptRS
- ⊞ SA564-ΔccpA
- + SA564-ΔhptRS/ccpA

# EFP\_STAAM

S-596

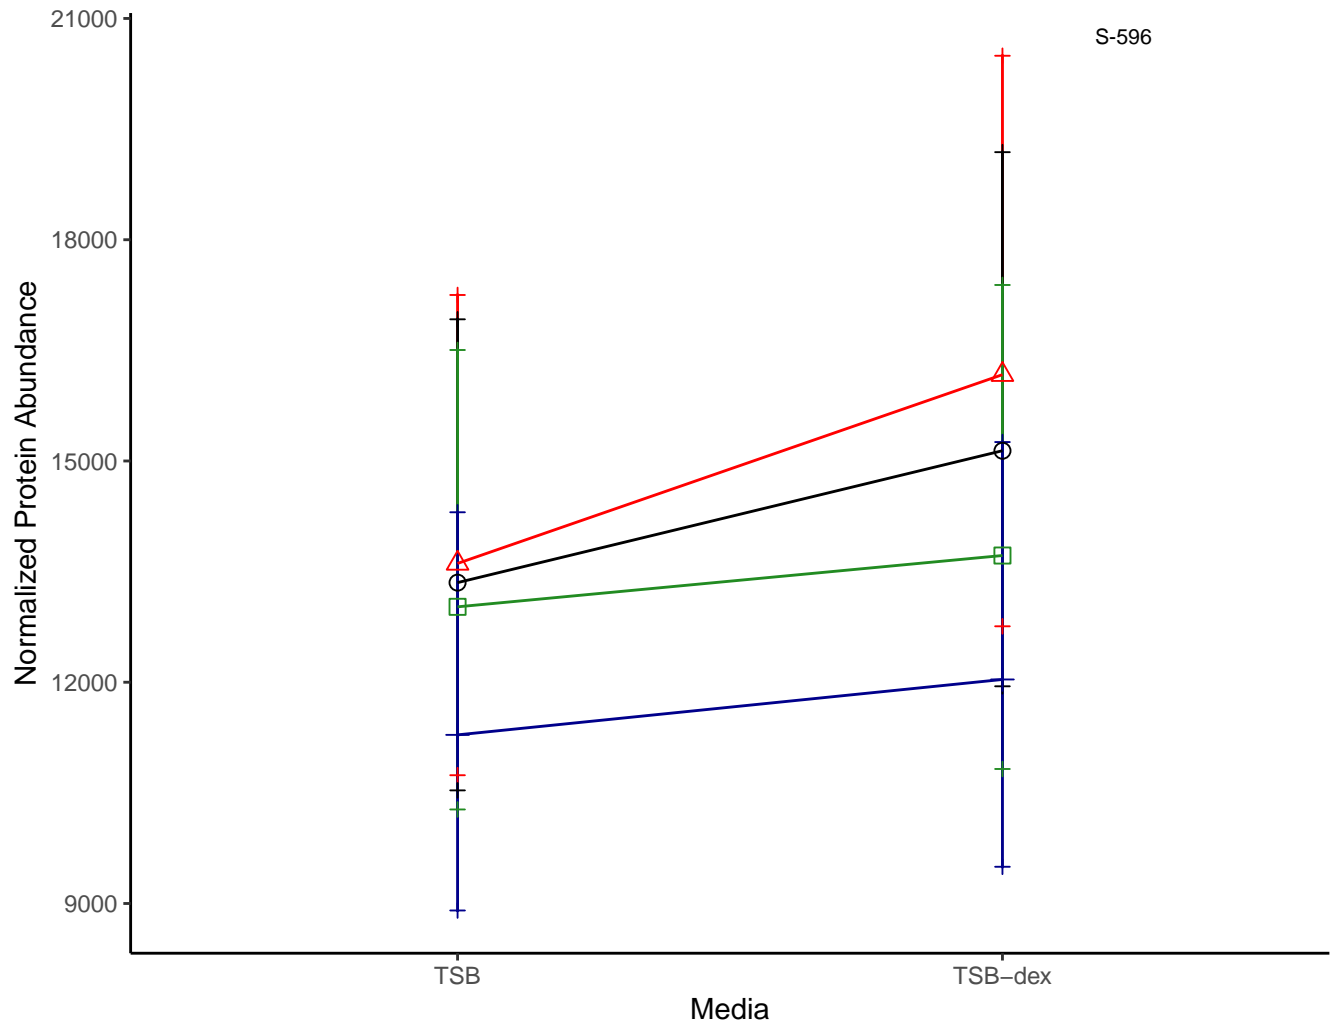

- ⊕ SA564
- △ SA564- $\Delta hptRS$
- ⊞ SA564- $\Delta ccpA$
- + SA564- $\Delta hptRS/ccpA$

# EFTS\_STAAM

S-597

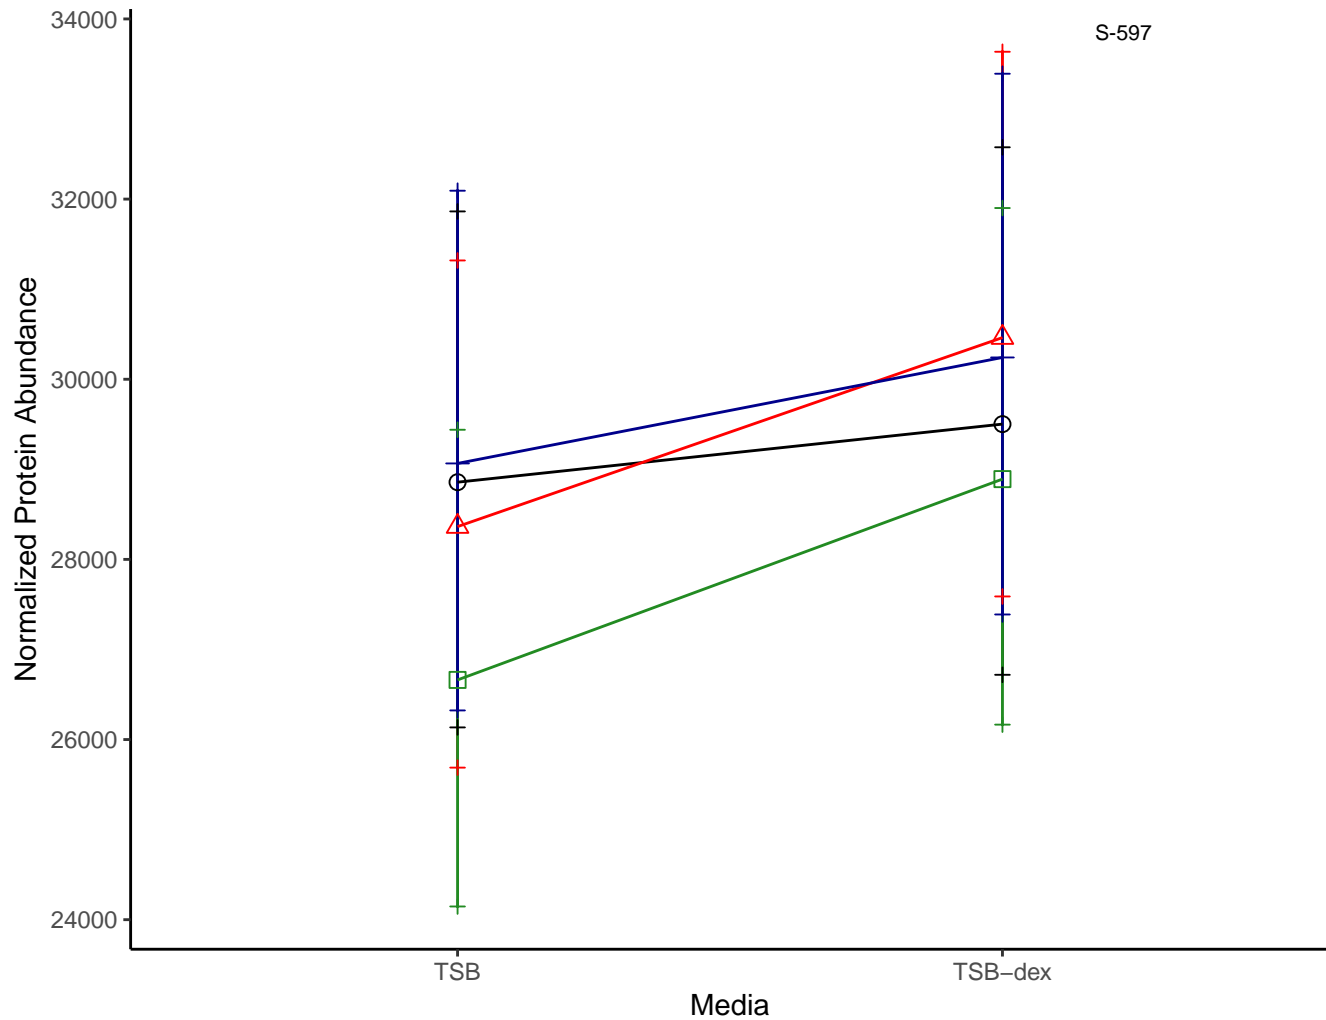

- SA564
- SA564- $\Delta$ *hptRS*
- SA564- $\Delta$ *ccpA*
- SA564- $\Delta$ *hptRS/ccpA*

# EFTU\_STAAM

S-598

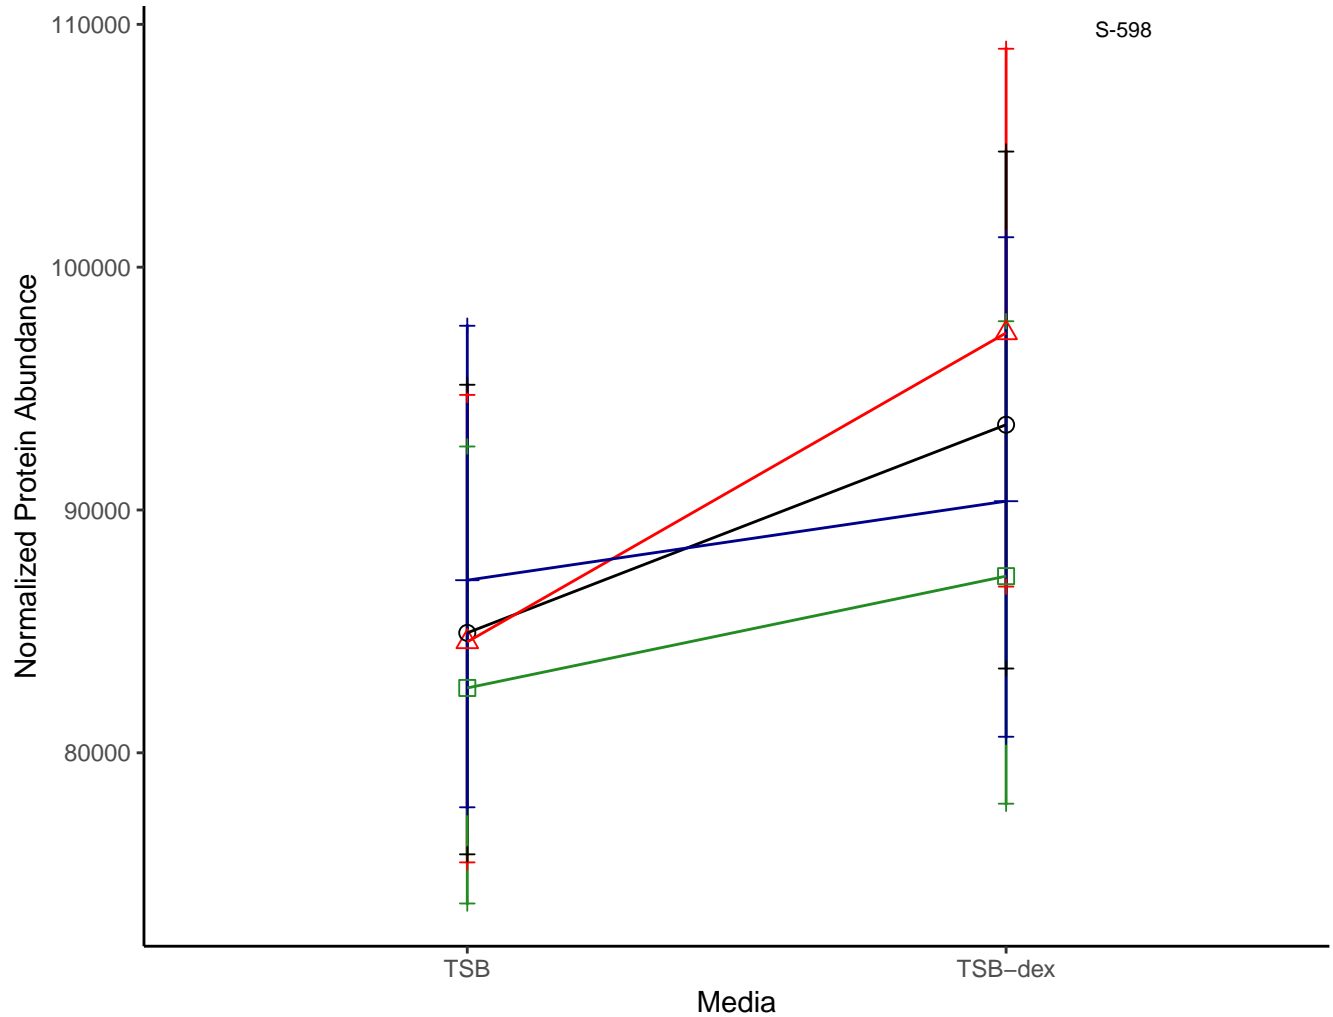

- ⊕ SA564
- △ SA564- $\Delta hptRS$
- ⊞ SA564- $\Delta ccpA$
- + SA564- $\Delta hptRS/ccpA$

# ENO\_STAAM

S-599

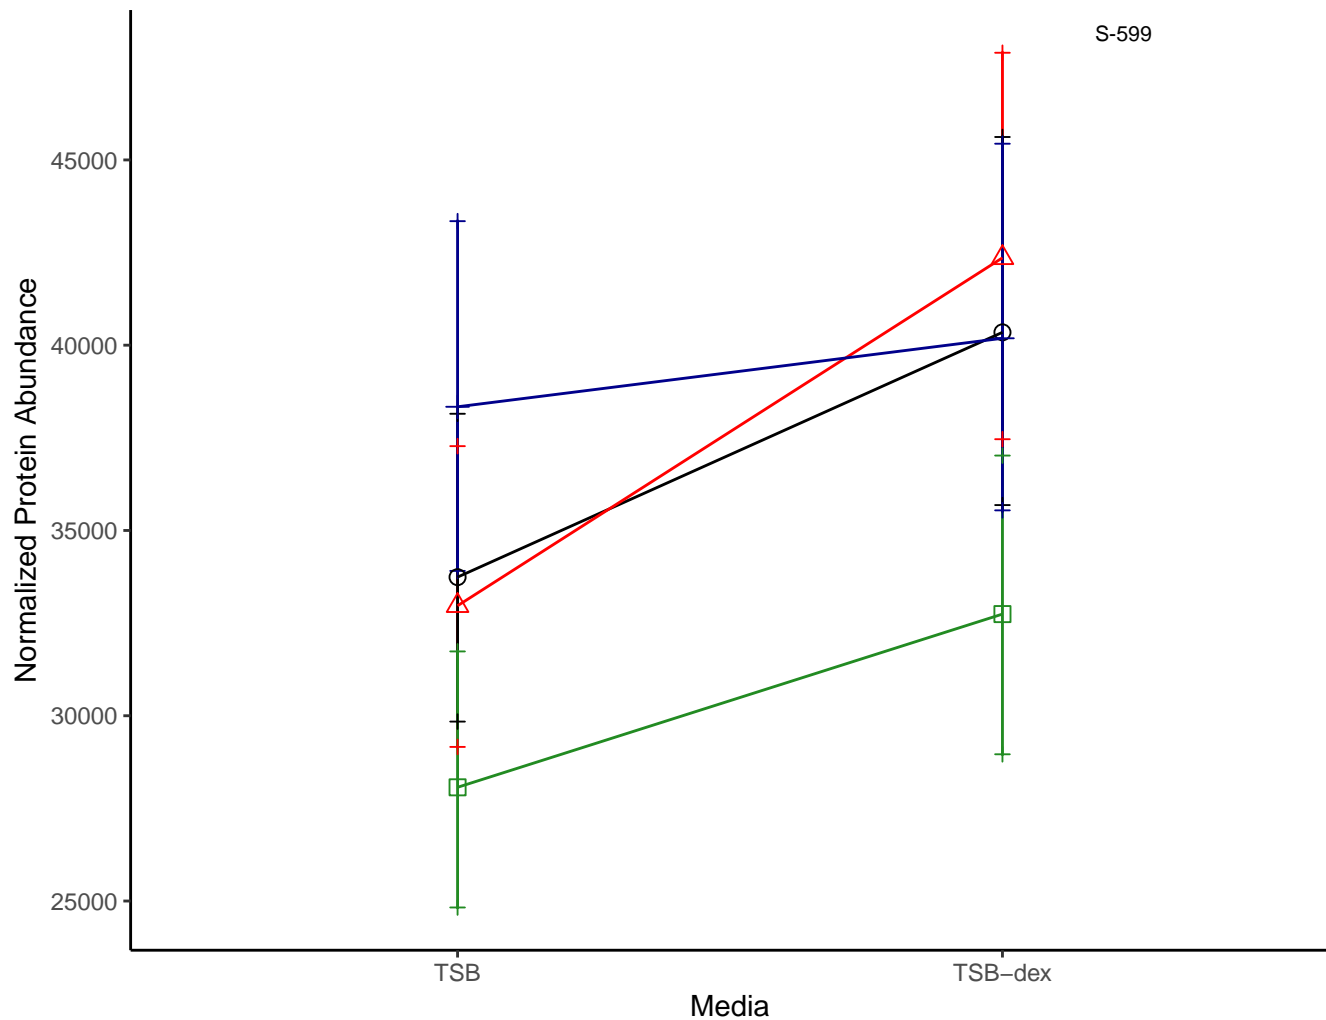

- ⊕ SA564
- △ SA564- $\Delta$ *hptRS*
- ⊞ SA564- $\Delta$ *ccpA*
- + SA564- $\Delta$ *hptRS/ccpA*

# ERA\_STAAM

S-600

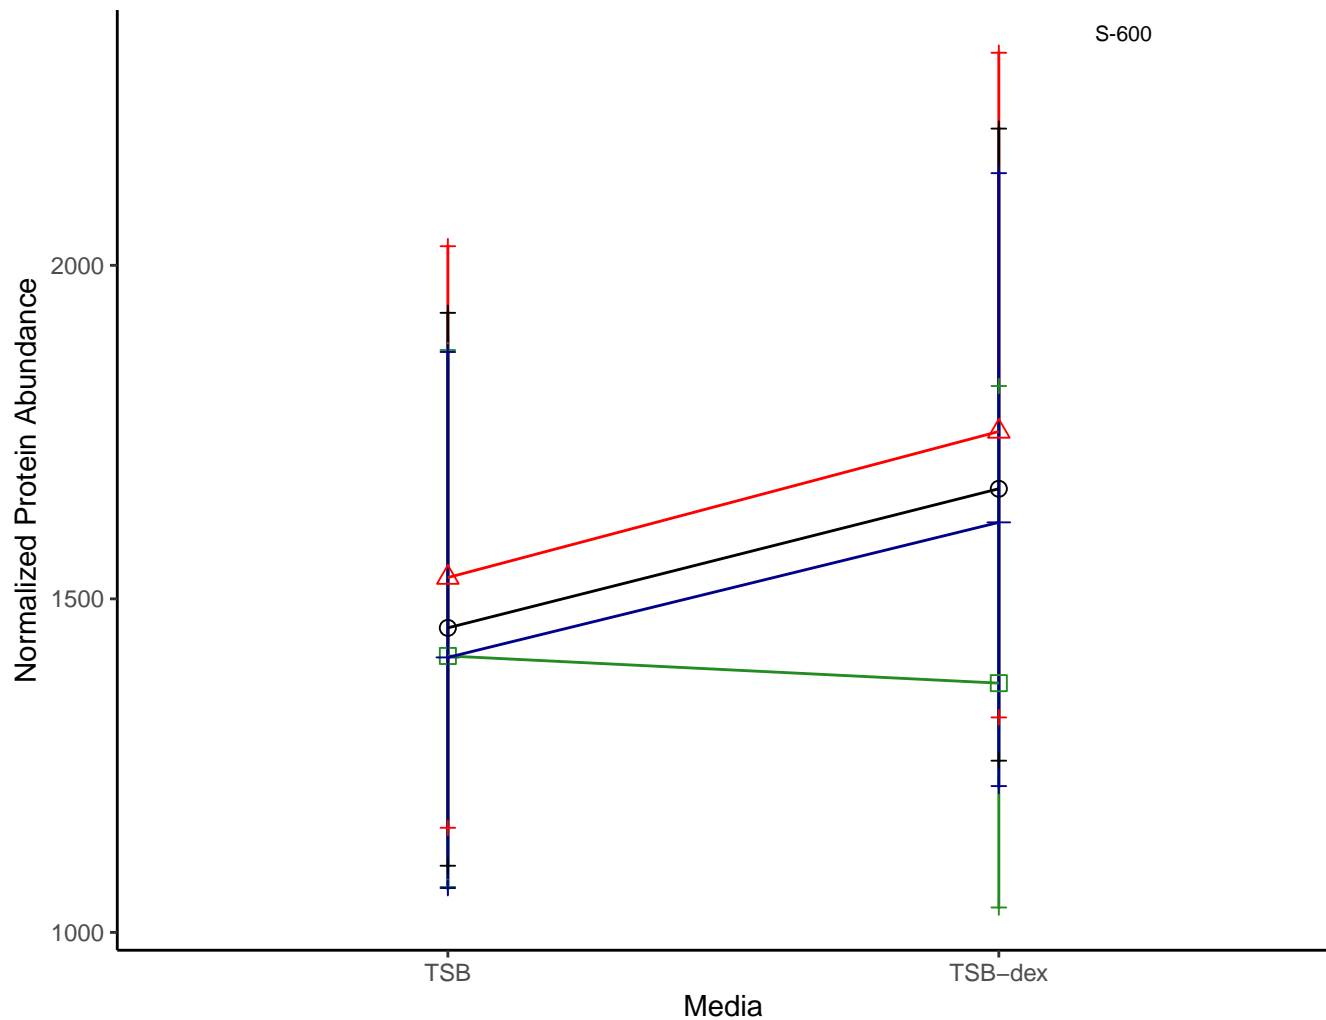

- ⊕ SA564
- △ SA564-ΔhptRS
- ⊞ SA564-ΔccpA
- + SA564-ΔhptRS/ccpA



# ERMA\_STAAM

S-601

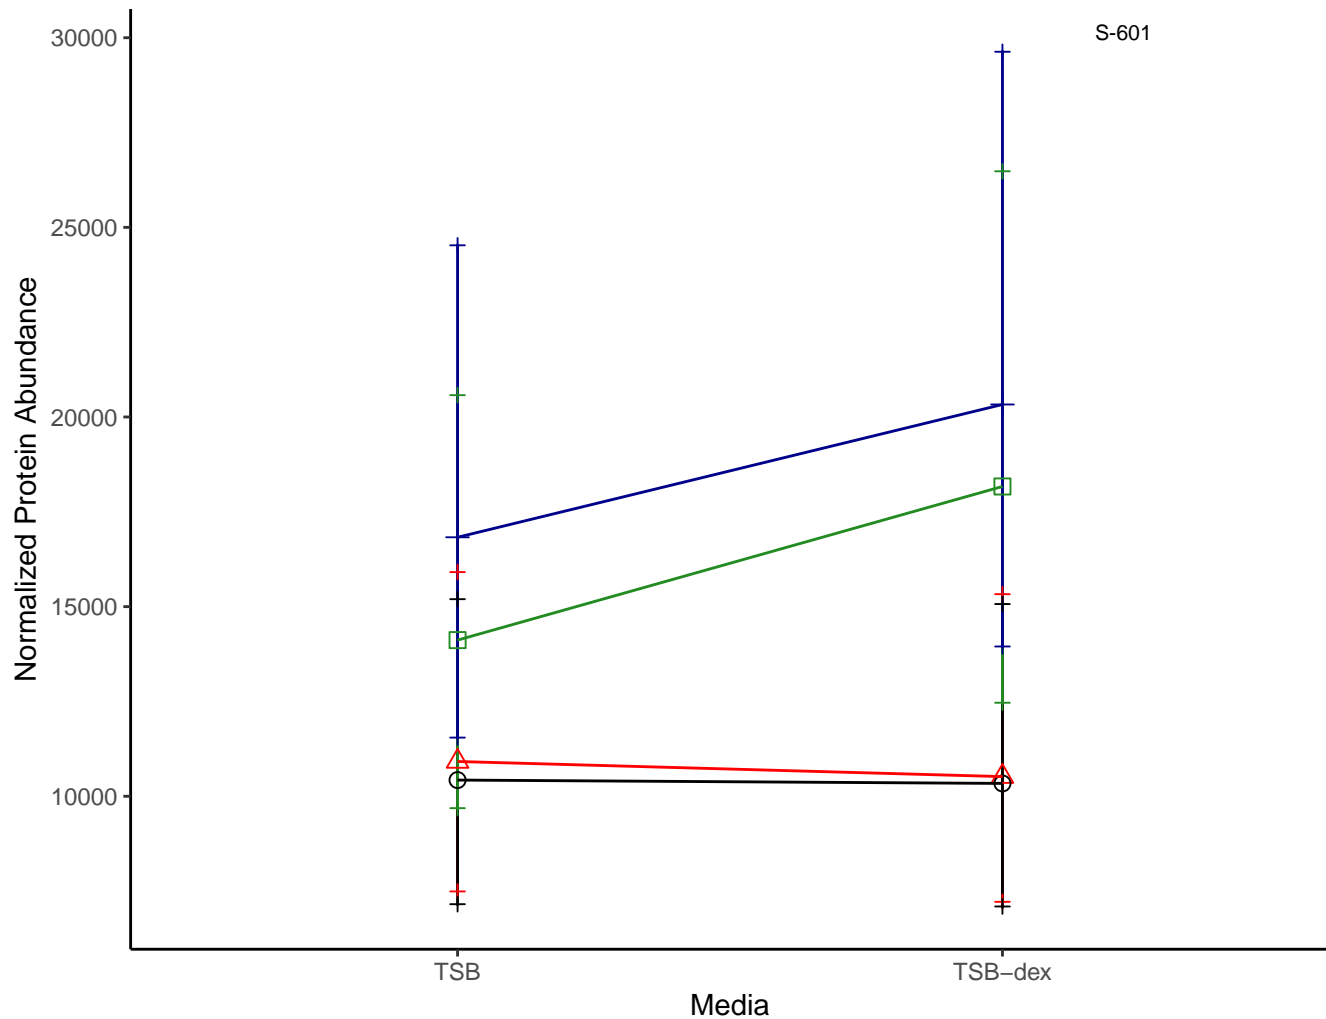

- ⊕ SA564
- △ SA564-ΔhptRS
- SA564-ΔccpA
- + SA564-ΔhptRS/ccpA

# ESSA\_STAAM

S-602

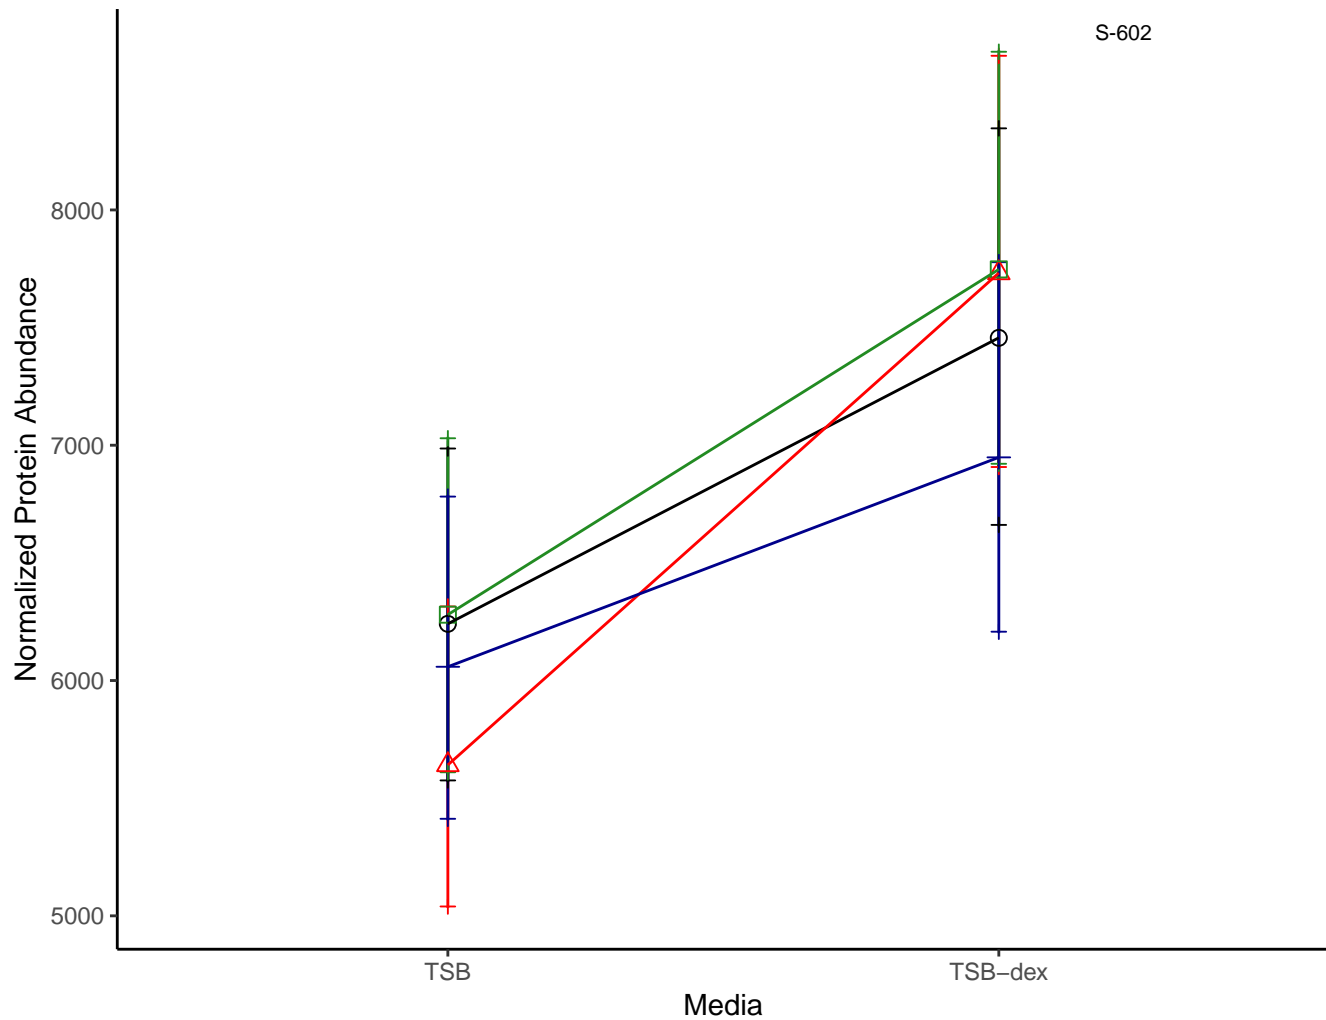

- ⊕ SA564
- △ SA564- $\Delta hptRS$
- ⊞ SA564- $\Delta ccpA$
- + SA564- $\Delta hptRS/ccpA$

# ESXA\_STAAM

S-603

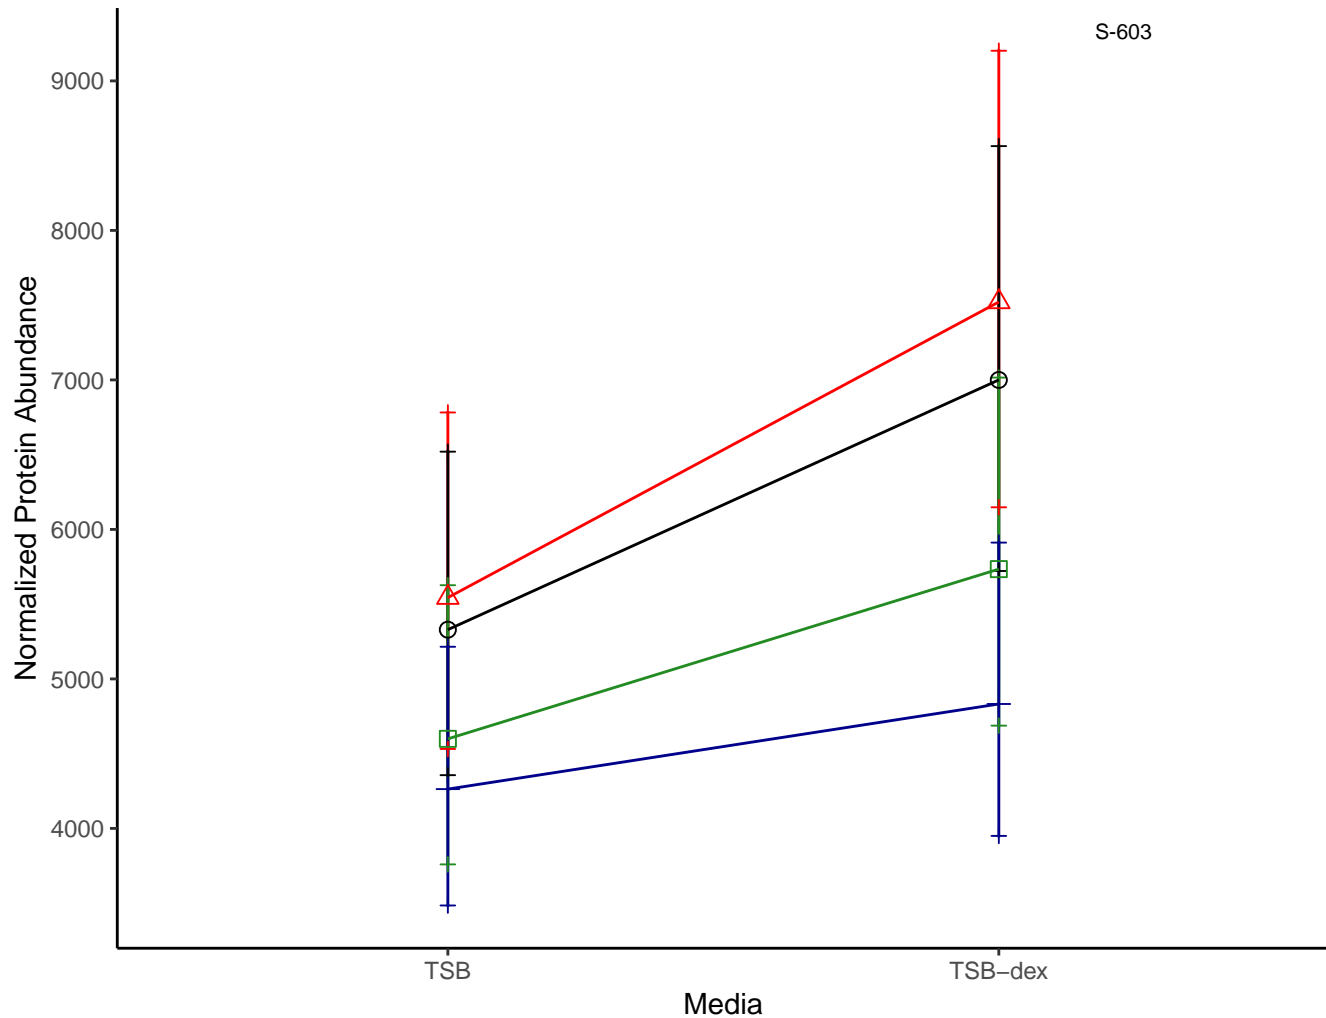

- ⊕ SA564
- △ SA564-ΔhptRS
- ⊞ SA564-ΔccpA
- ⊕ SA564-ΔhptRS/ccpA

# EX7L\_STAAM

S-604

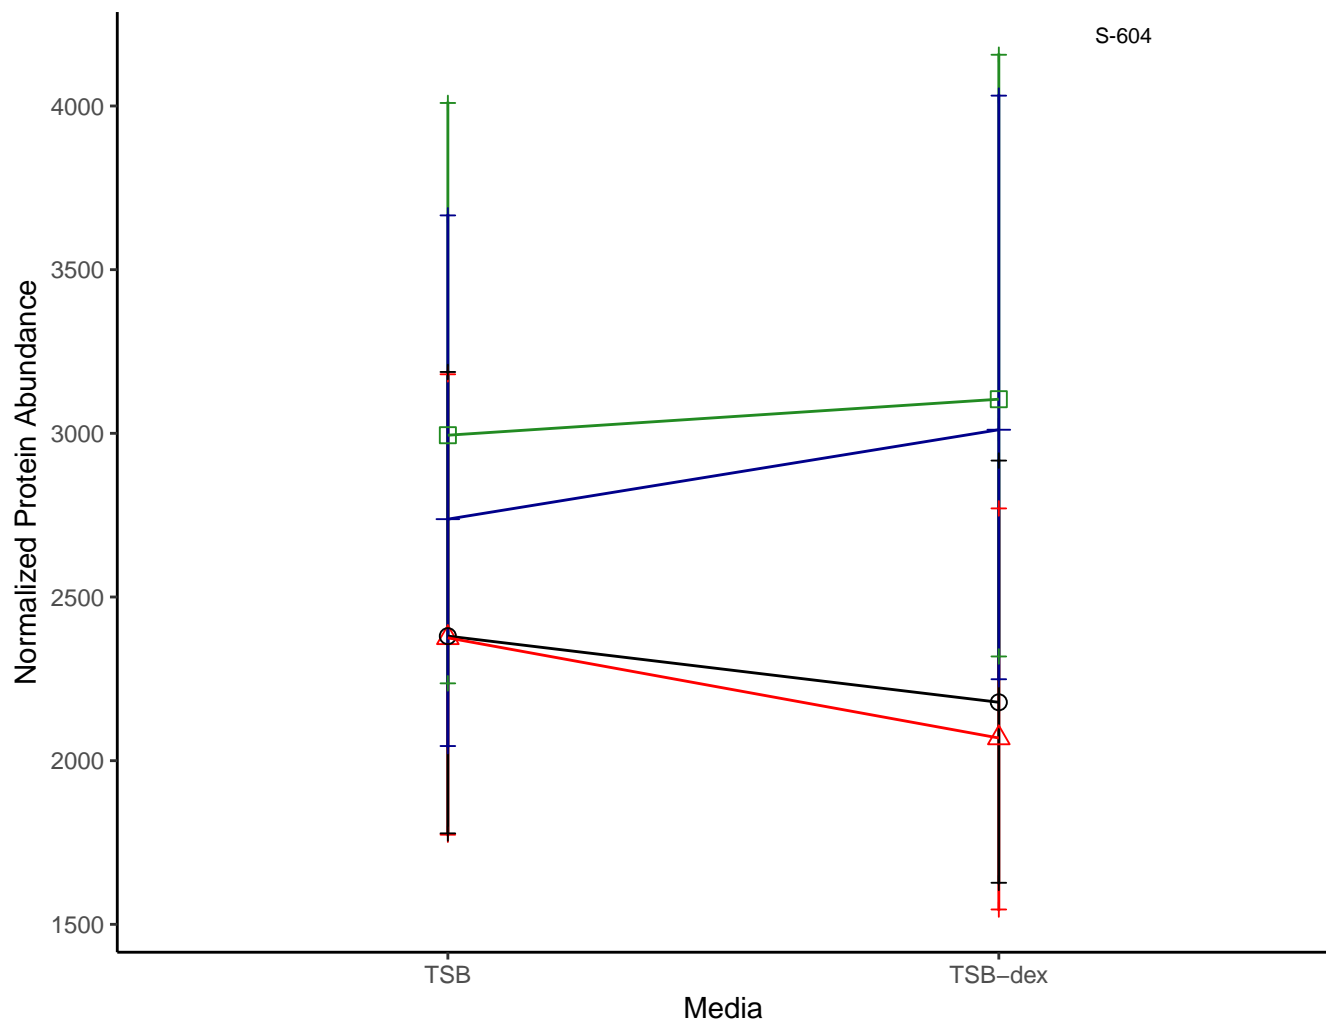

- ⊕ SA564
- △ SA564-ΔhptRS
- ⊞ SA564-ΔccpA
- + SA564-ΔhptRS/ccpA

# EZRA\_STAAM

S-605

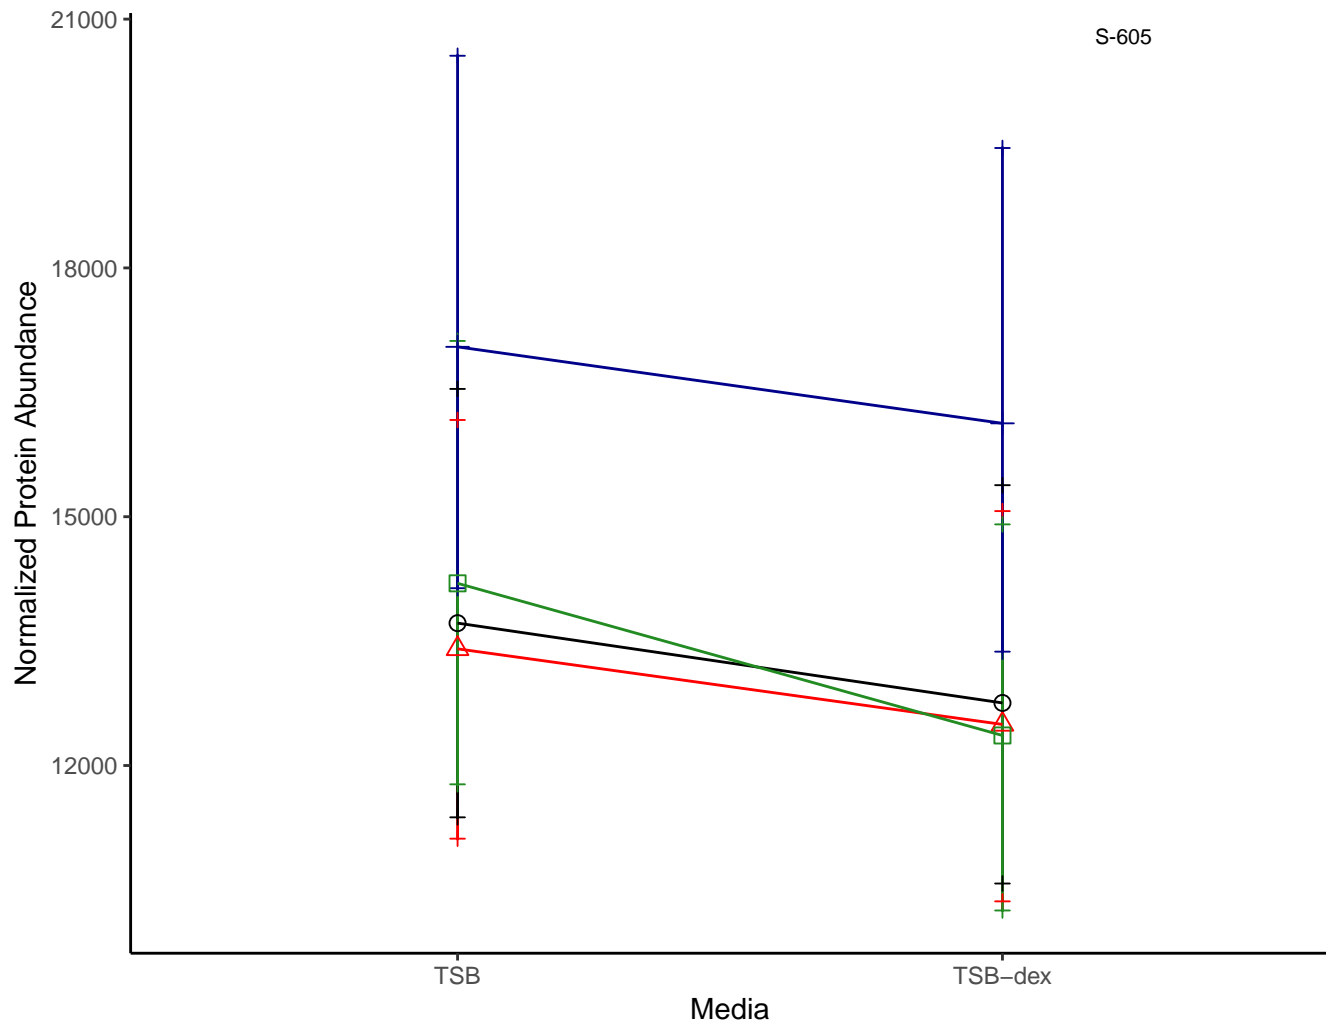

- SA564
- △ SA564- $\Delta$ *hptRS*
- SA564- $\Delta$ *ccpA*
- + SA564- $\Delta$ *hptRS/ccpA*

# FABD\_STAAM

S-606

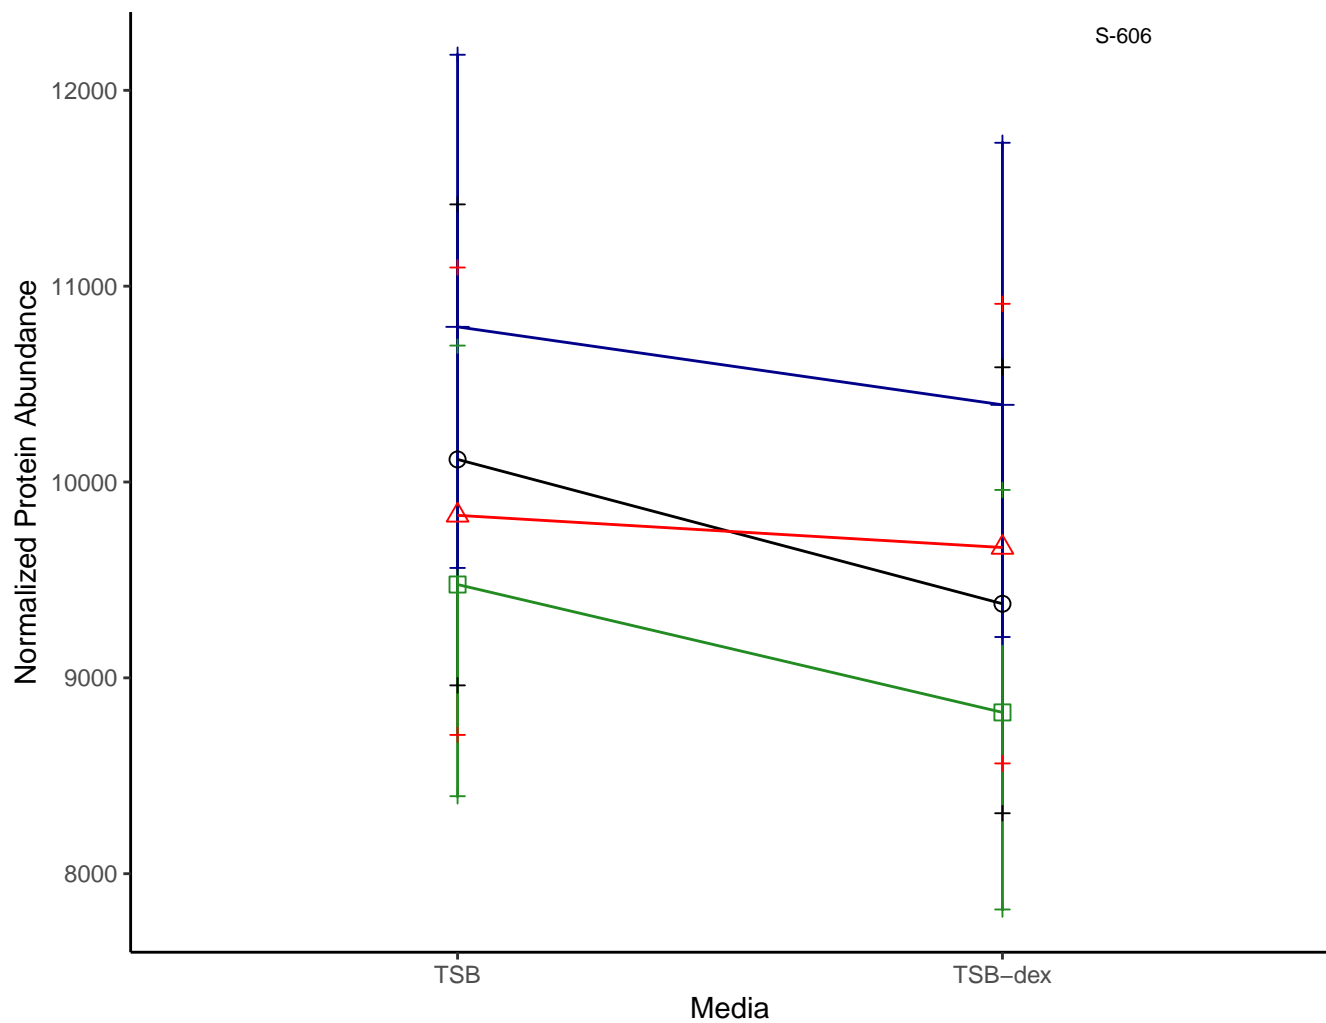

- ⊕ SA564
- △ SA564-ΔhptRS
- ⊞ SA564-ΔccpA
- + SA564-ΔhptRS/ccpA

# FABF\_STAAM

S-607

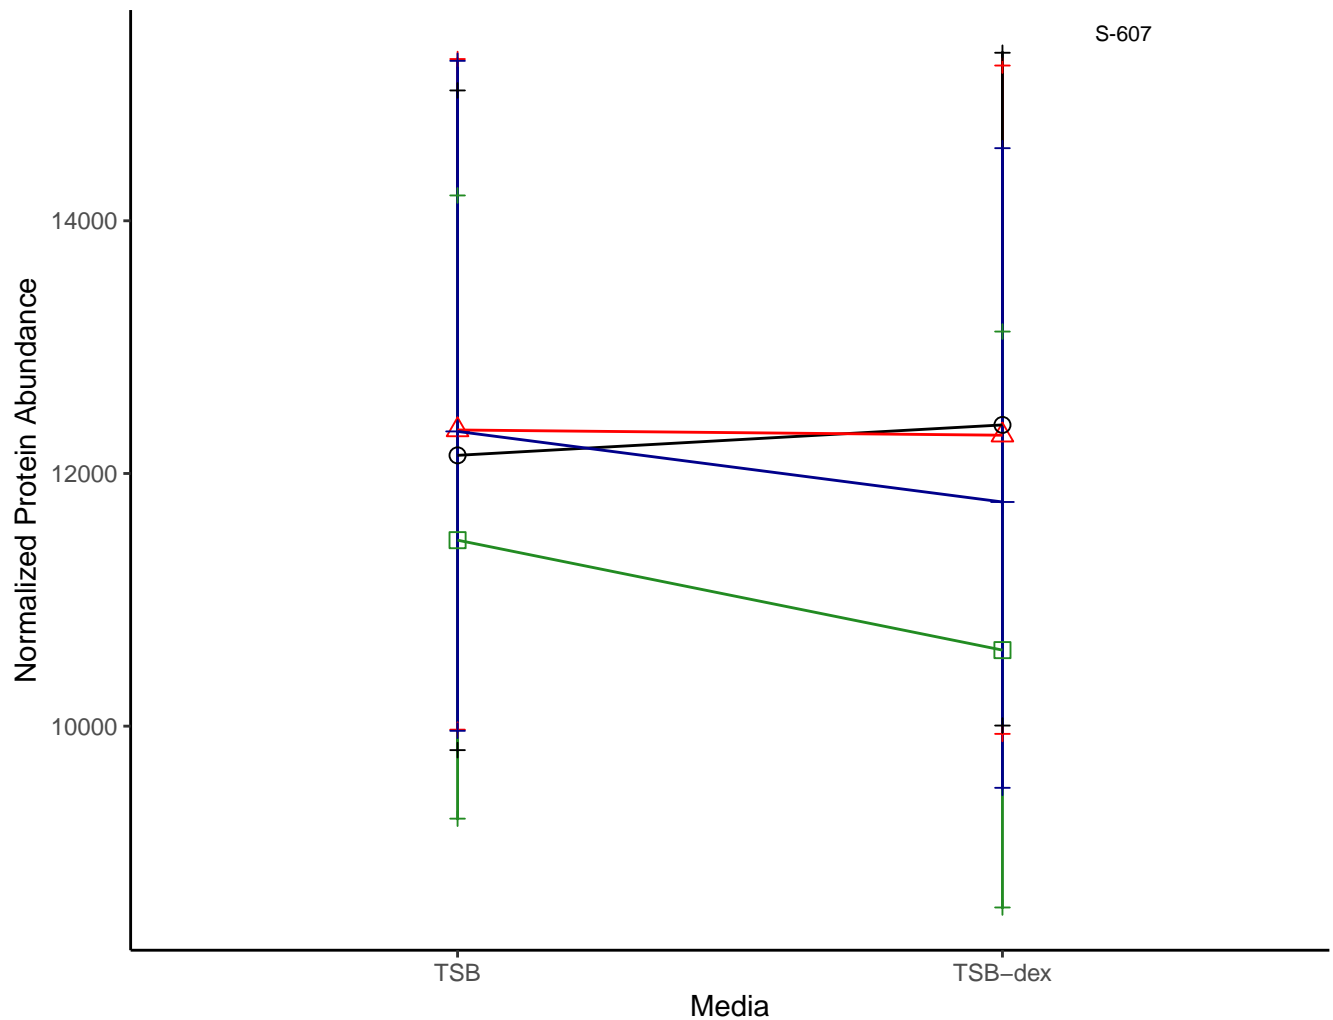

- SA564
- SA564- $\Delta hptRS$
- SA564- $\Delta ccpA$
- SA564- $\Delta hptRS/ccpA$

# FABG\_STAAM

S-608

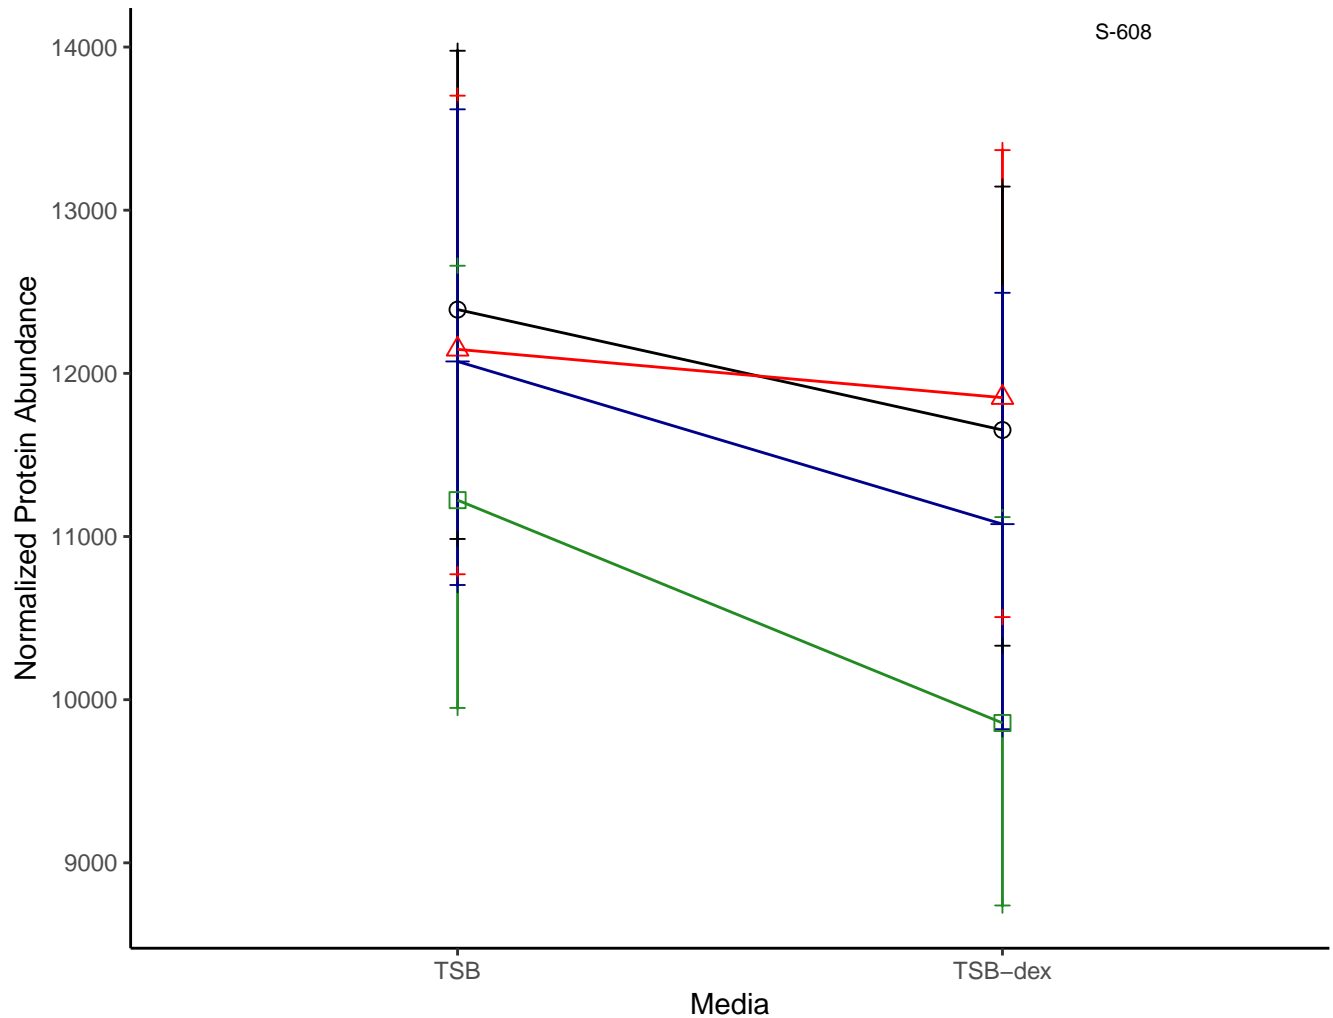

- ⊕ SA564
- △ SA564- $\Delta$ *hptRS*
- SA564- $\Delta$ *ccpA*
- + SA564- $\Delta$ *hptRS/ccpA*



# FABH\_STAAM

S-609

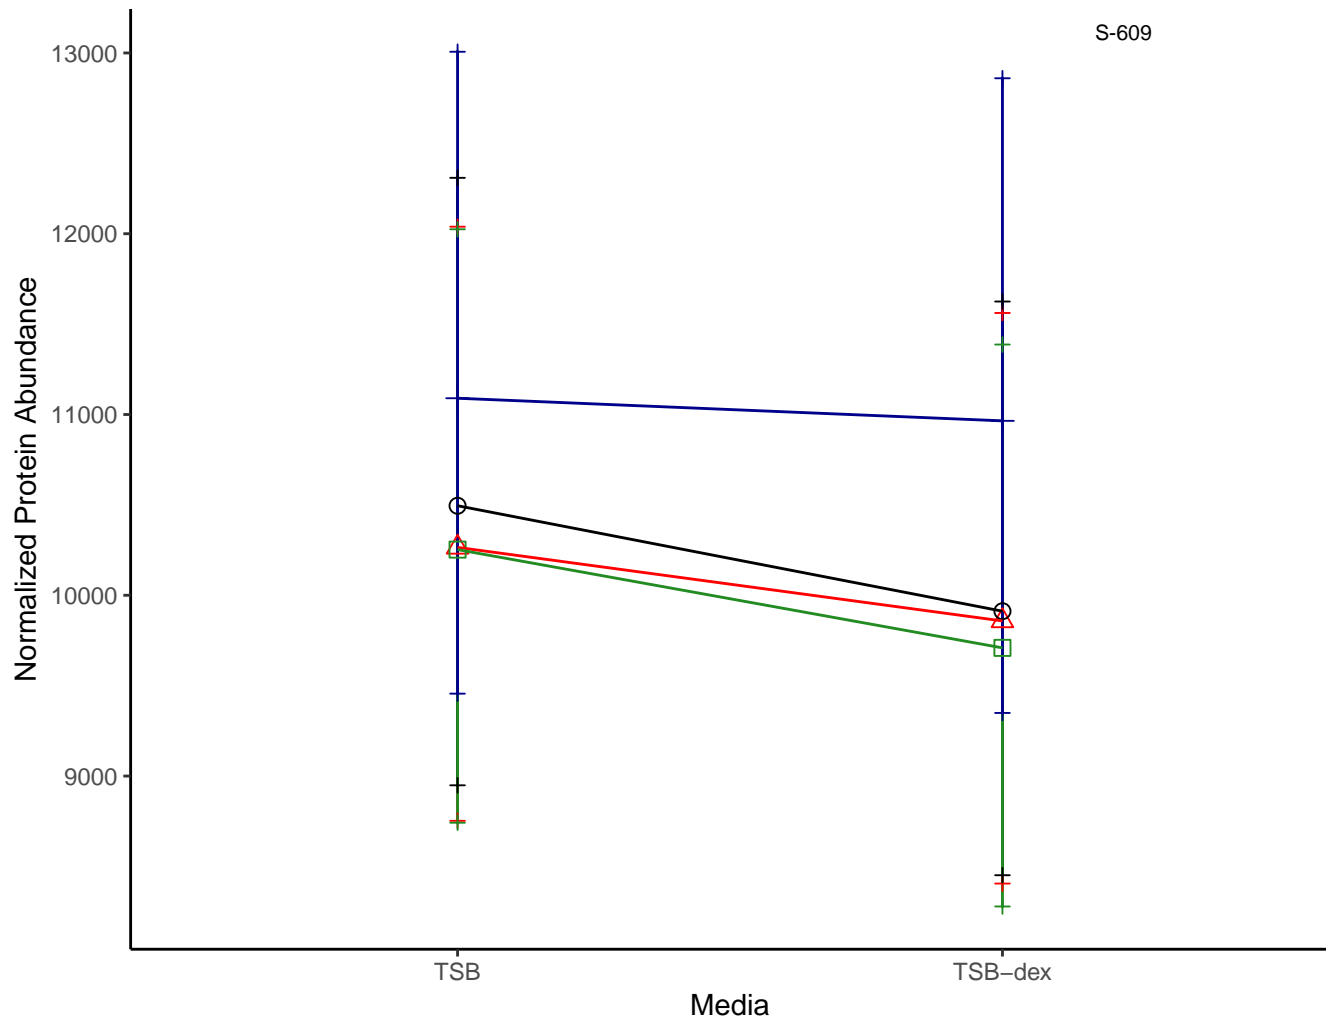

- ⊕ SA564
- △ SA564- $\Delta$ *hptRS*
- ⊞ SA564- $\Delta$ *ccpA*
- + SA564- $\Delta$ *hptRS/ccpA*

# FABZ\_STAAM

S-610

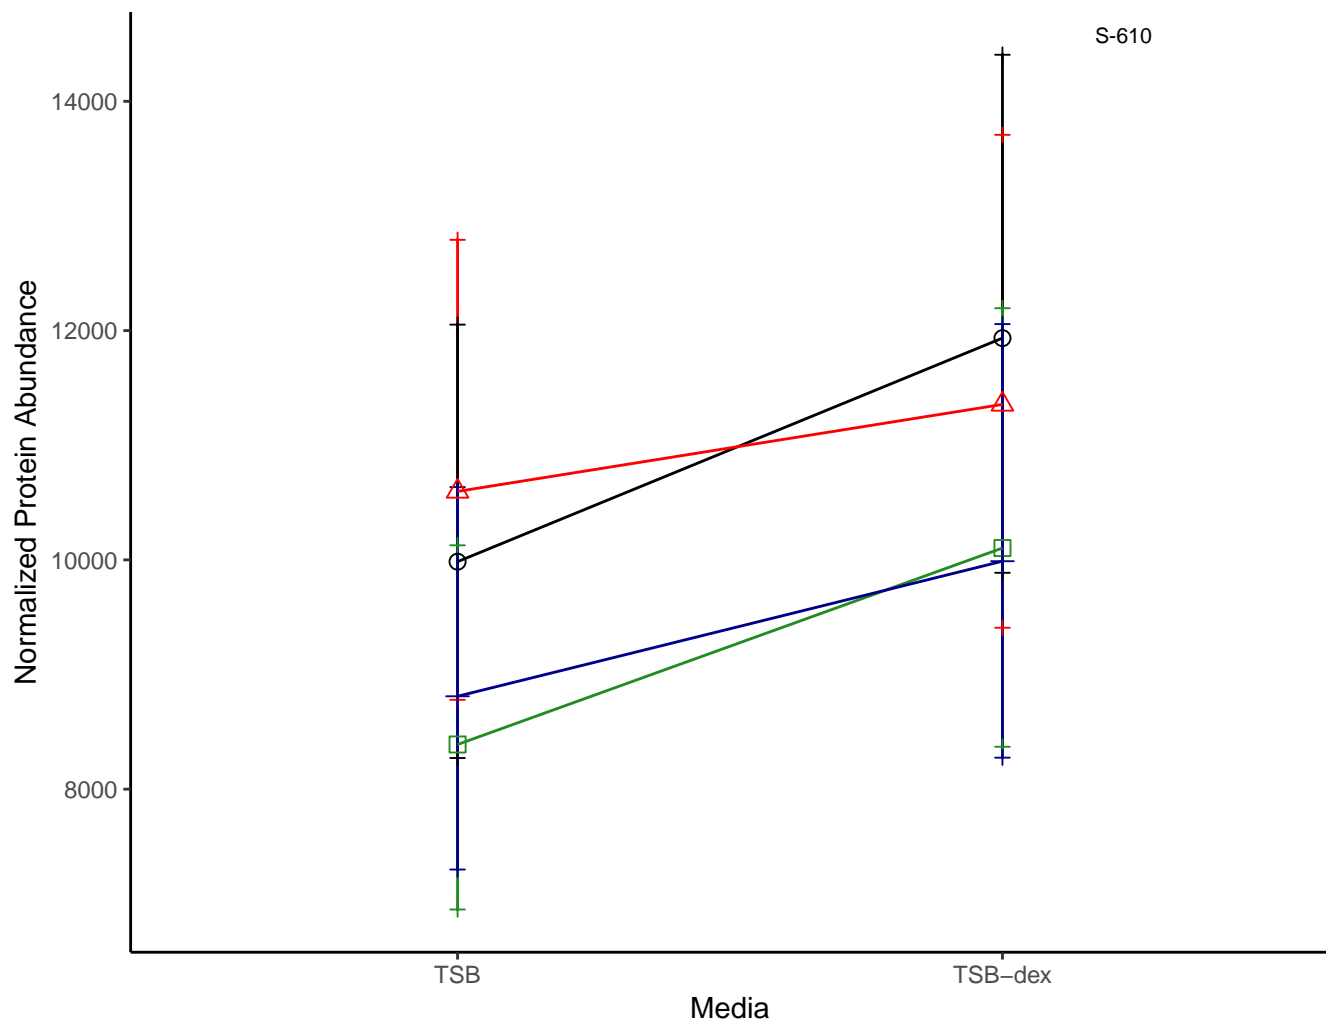

- ⊕ SA564
- △ SA564-ΔhptRS
- ⊞ SA564-ΔccpA
- + SA564-ΔhptRS/ccpA

# FEMA\_STAAM

S-611

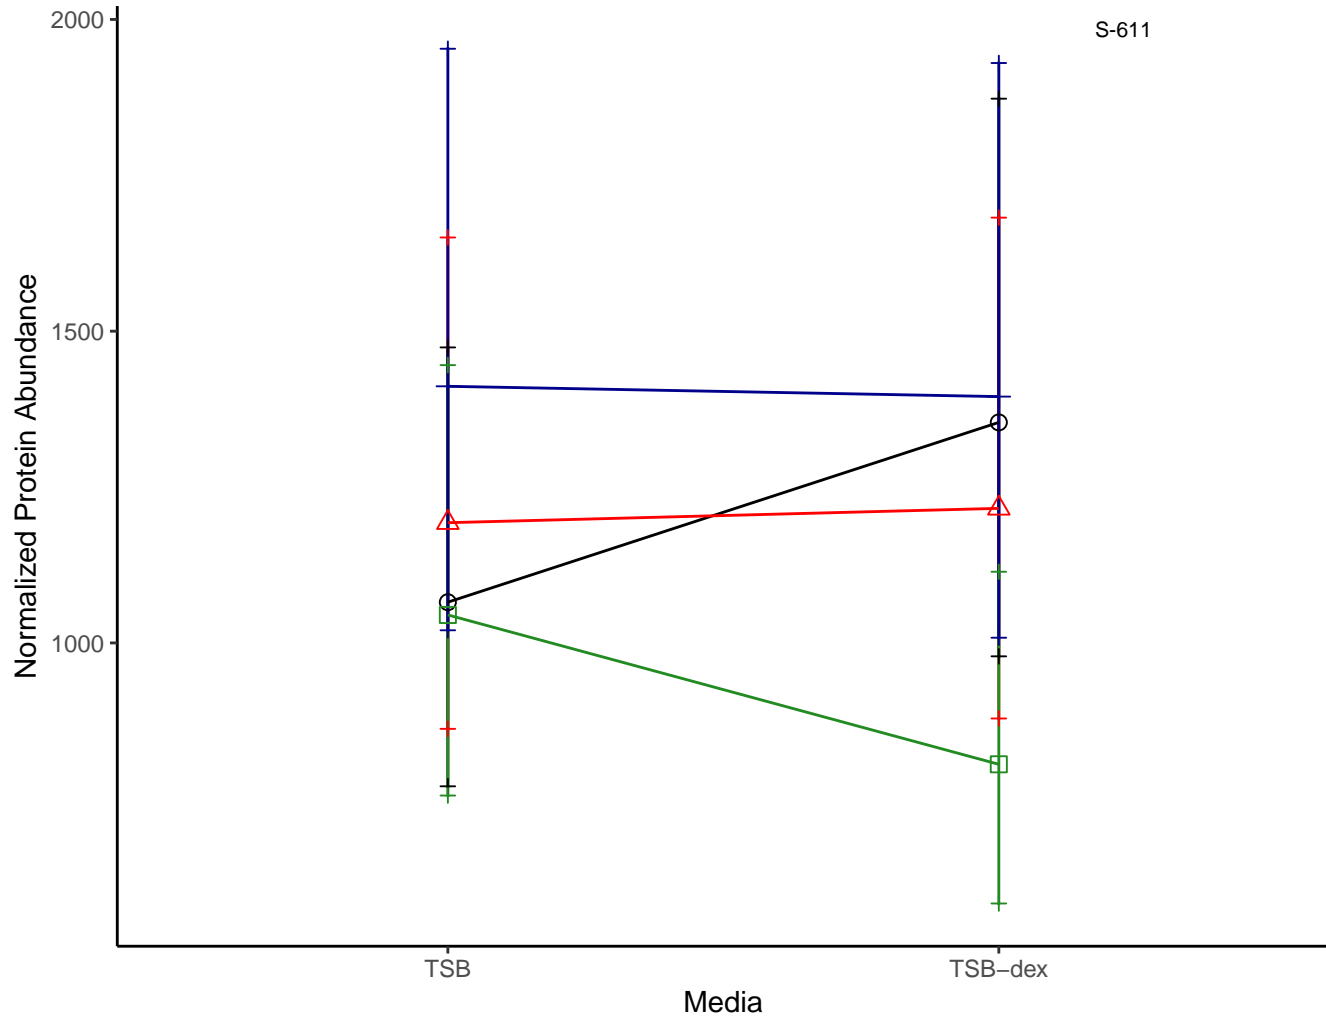

- ⊕ SA564
- △ SA564-ΔhptRS
- ⊞ SA564-ΔccpA
- + SA564-ΔhptRS/ccpA

# FEMB\_STAAM

S-612

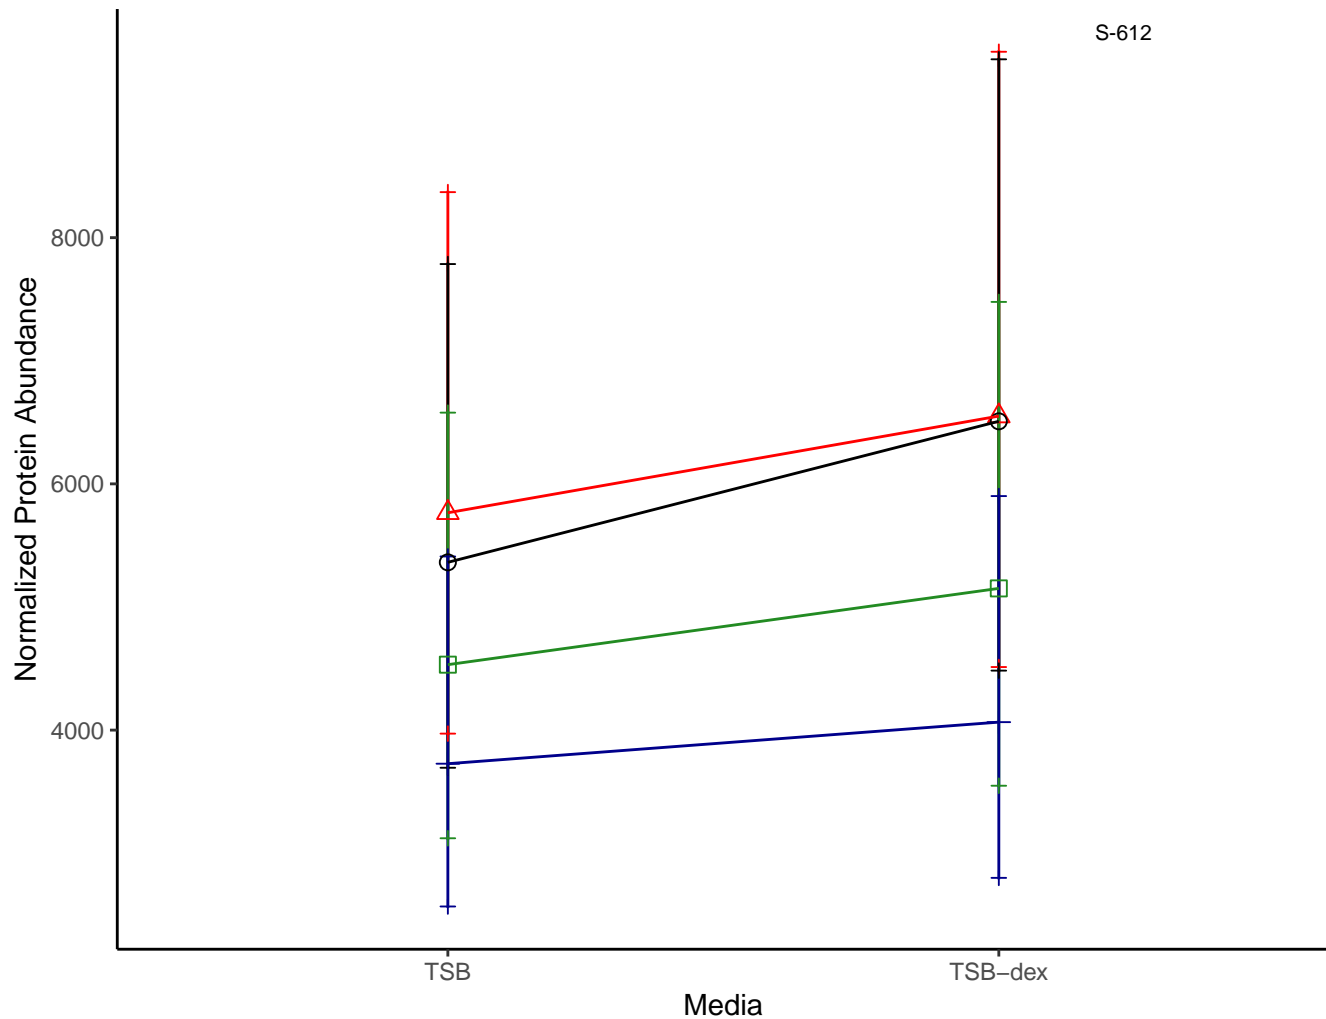

- ⊕ SA564
- △ SA564-ΔhptRS
- ⊞ SA564-ΔccpA
- ⊕ SA564-ΔhptRS/ccpA

# FEMX\_STAAM

S-613

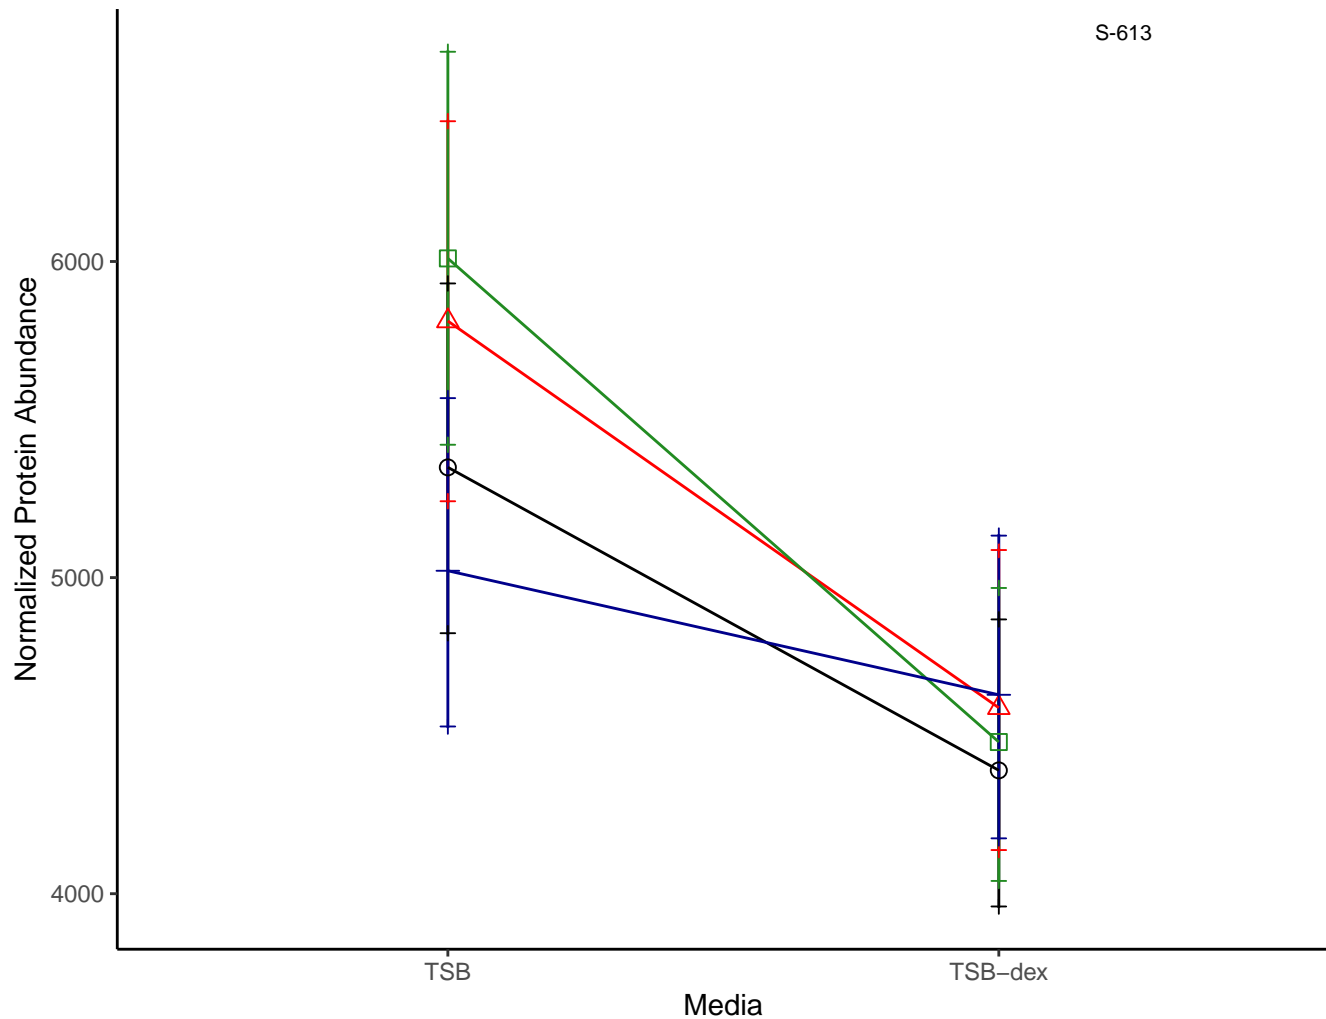

- ⊕ SA564
- △ SA564- $\Delta hptRS$
- ⊞ SA564- $\Delta ccpA$
- + SA564- $\Delta hptRS/ccpA$

# FENR\_STAAM

S-614

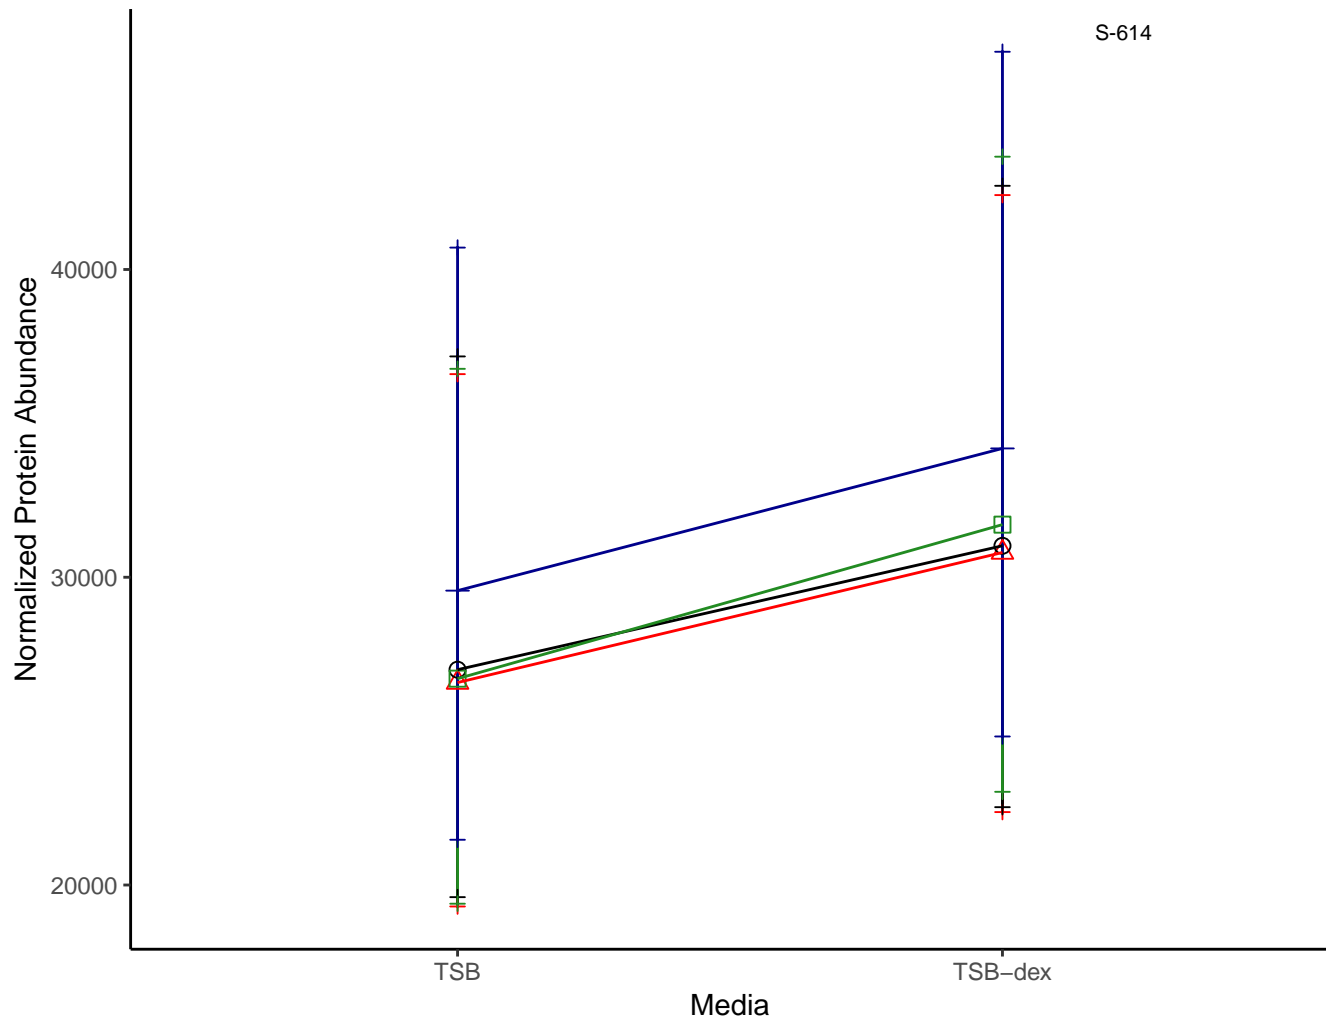

- ⊕ SA564
- △ SA564-ΔhptRS
- SA564-ΔccpA
- + SA564-ΔhptRS/ccpA

# FLIPR\_STAAM

S-615

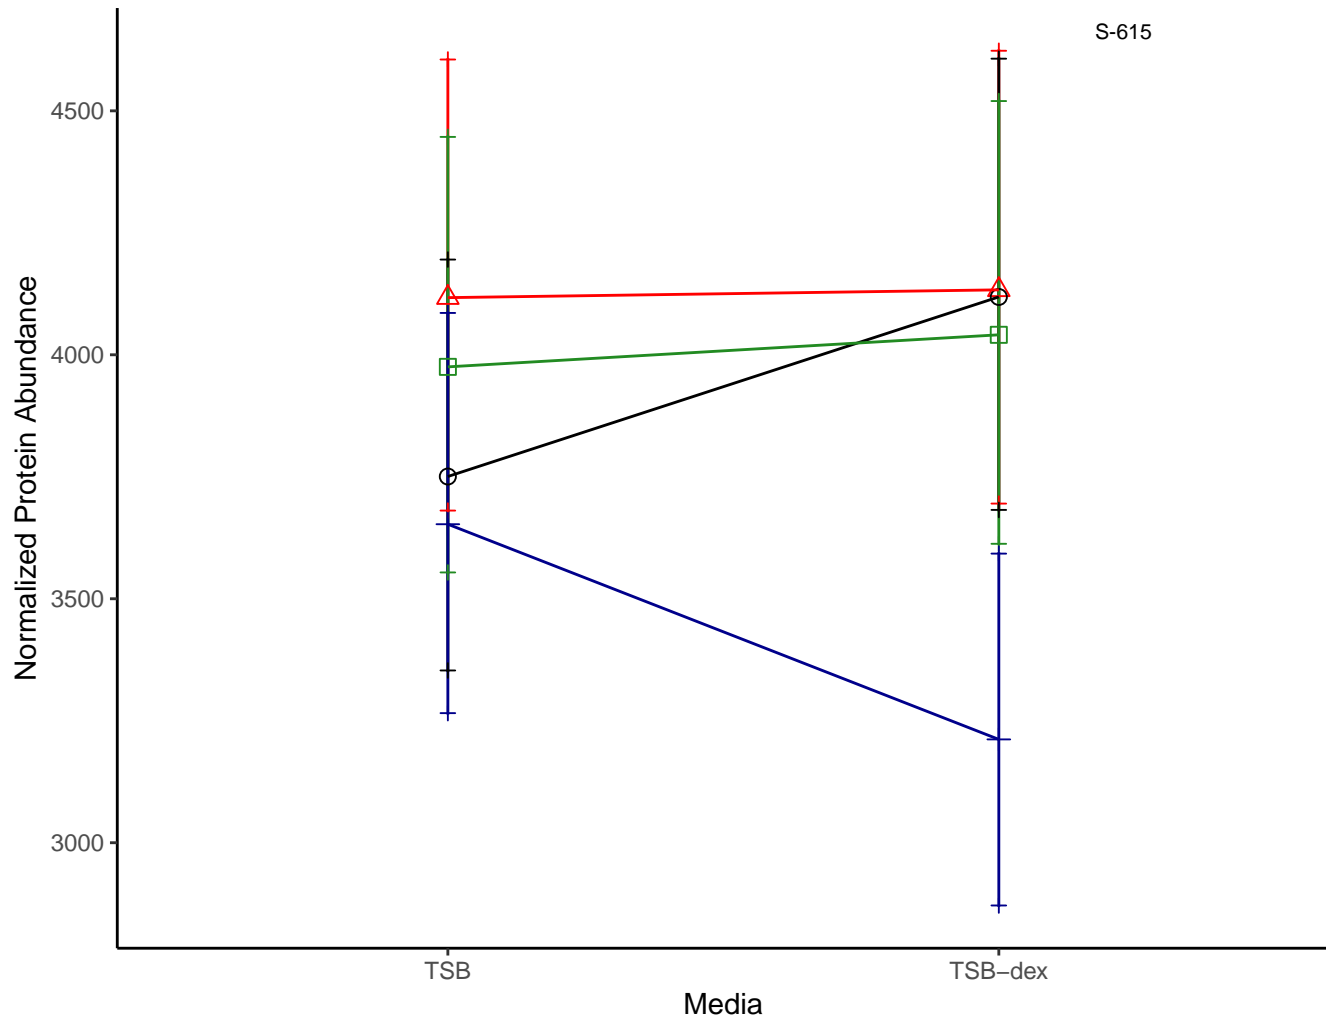

- ⊕ SA564
- △ SA564- $\Delta$ *hptRS*
- ⊞ SA564- $\Delta$ *ccpA*
- + SA564- $\Delta$ *hptRS/ccpA*

# FMT\_STAAM

S-616

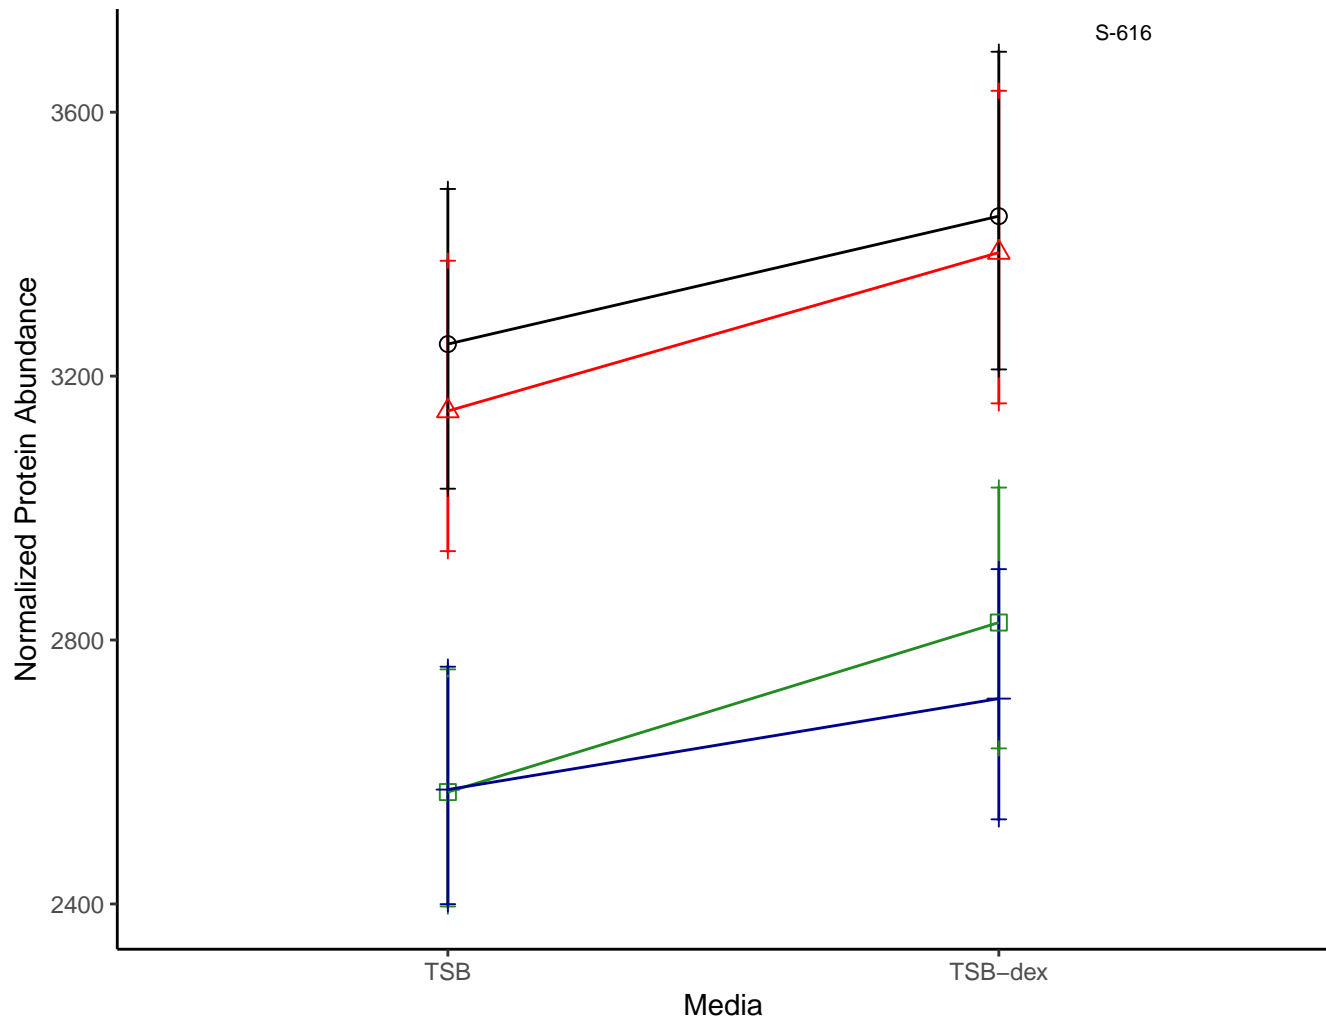

- ⊕ SA564
- △ SA564-ΔhptRS
- ⊞ SA564-ΔccpA
- + SA564-ΔhptRS/ccpA



# FMTA\_STAAM

S-617

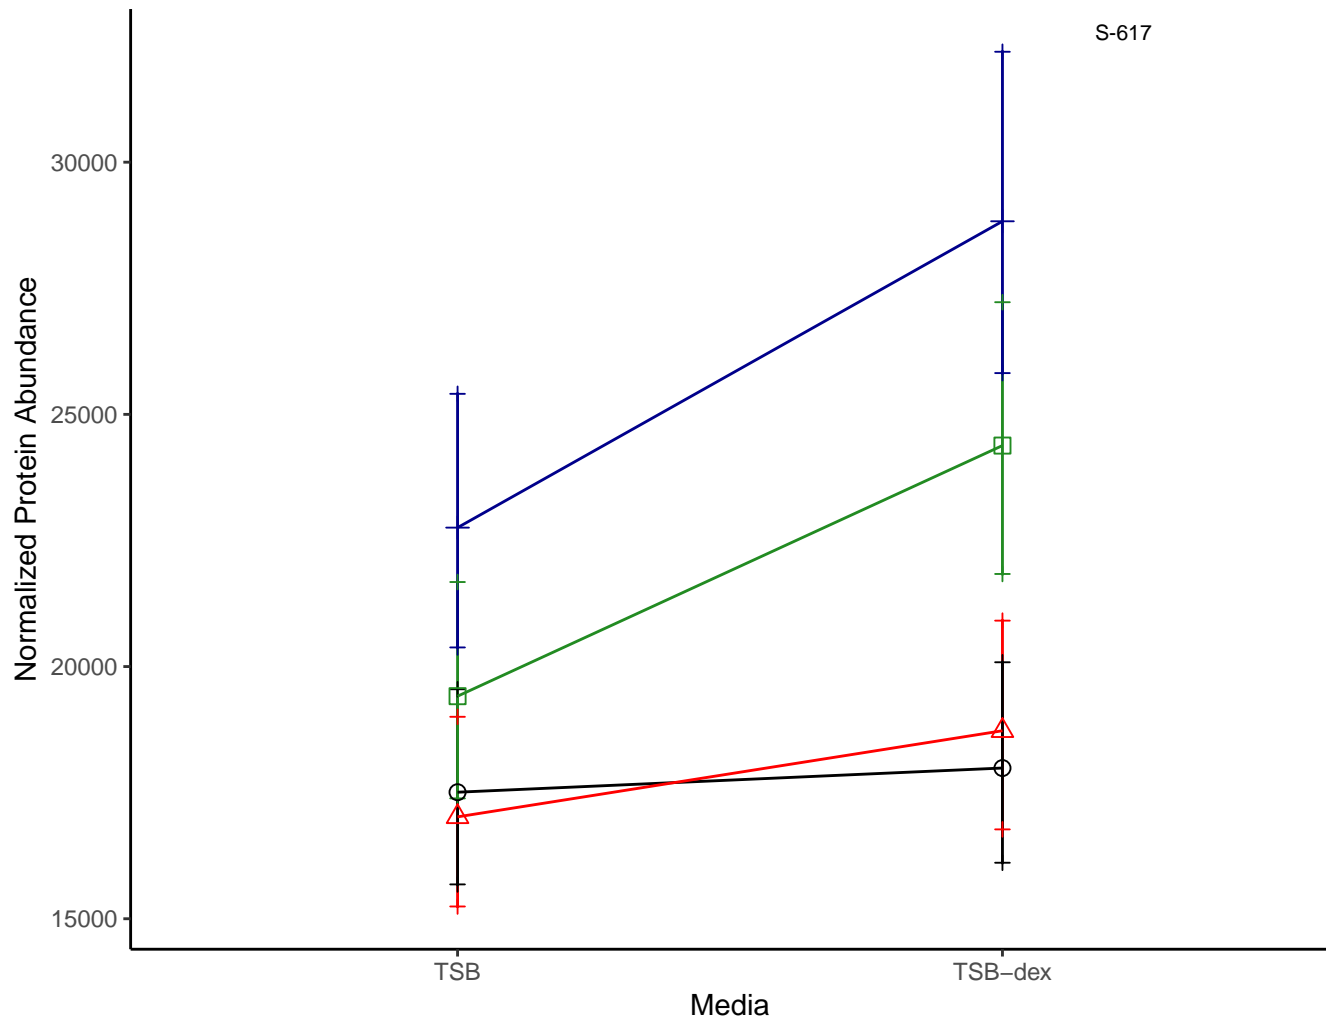

- ⊕ SA564
- △ SA564- $\Delta$ *hptRS*
- ⊞ SA564- $\Delta$ *ccpA*
- + SA564- $\Delta$ *hptRS/ccpA*

# FOLB\_STAAM

S-618

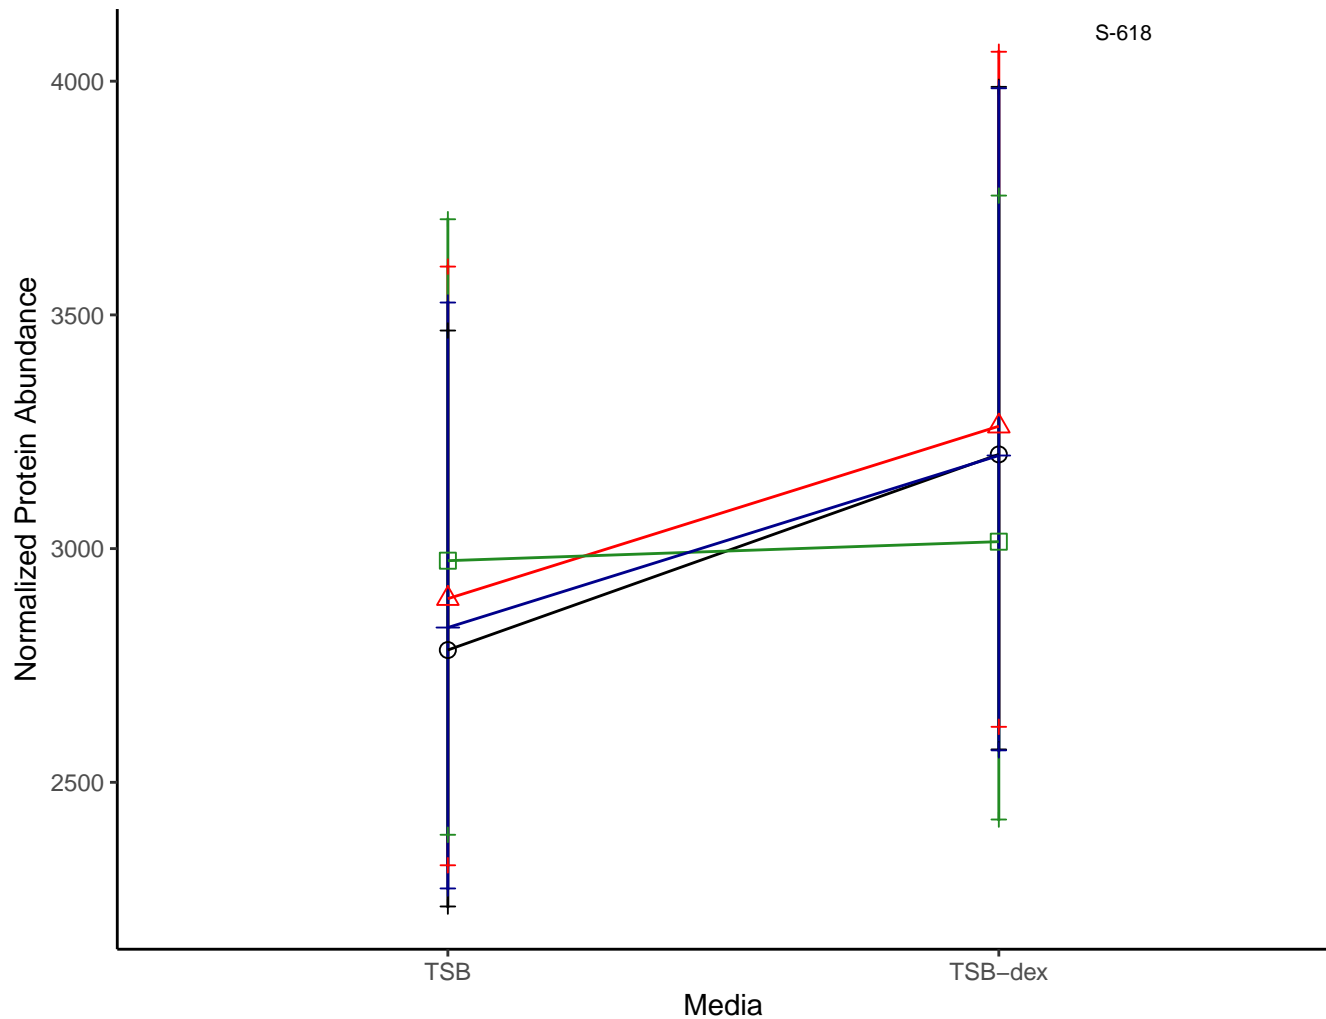

- ⊕ SA564
- △ SA564- $\Delta$ *hptRS*
- ⊞ SA564- $\Delta$ *ccpA*
- + SA564- $\Delta$ *hptRS/ccpA*

# FOLD\_STAAM

S-619

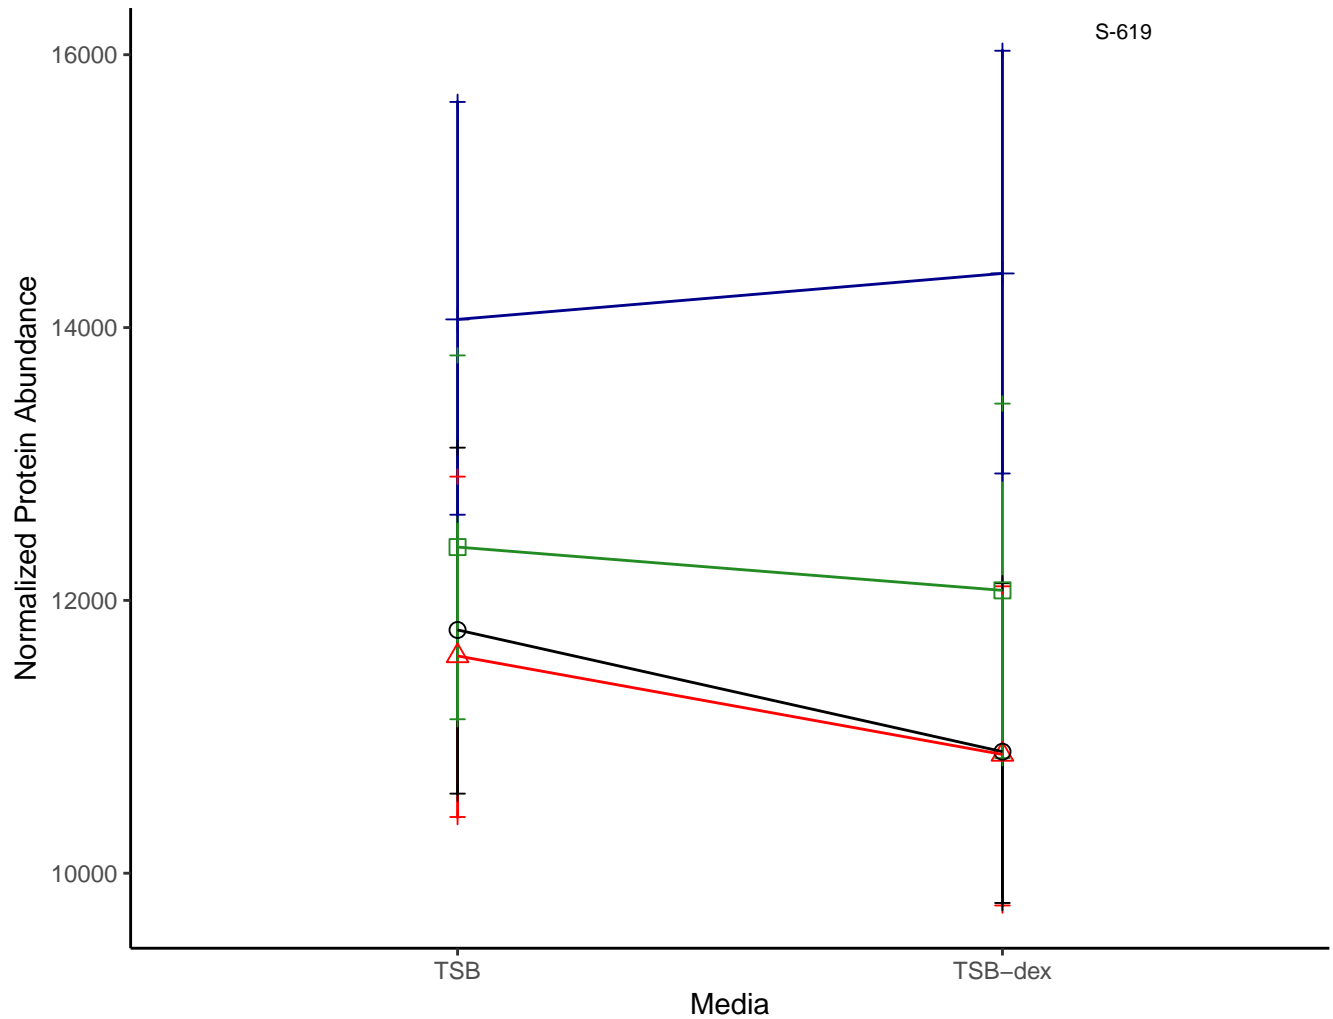

- ⊕ SA564
- △ SA564- $\Delta$ *hptRS*
- ⊞ SA564- $\Delta$ *ccpA*
- + SA564- $\Delta$ *hptRS/ccpA*

# FTHS\_STAAM

S-620

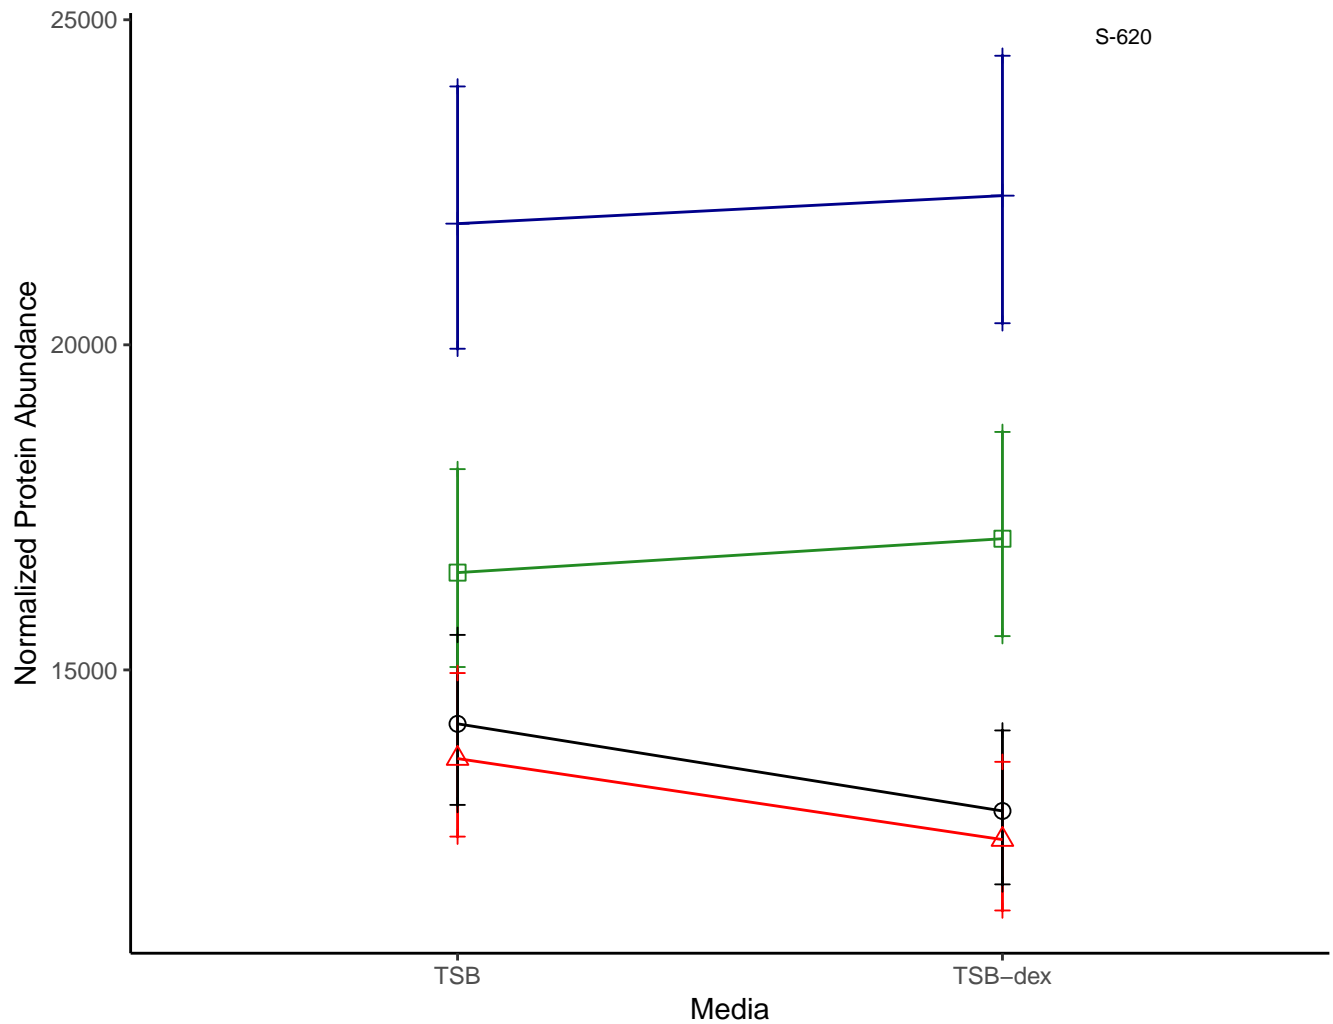

- ⊕ SA564
- △ SA564- $\Delta$ *hptRS*
- ⊞ SA564- $\Delta$ *ccpA*
- + SA564- $\Delta$ *hptRS/ccpA*

# FTN\_STAAM

S-621

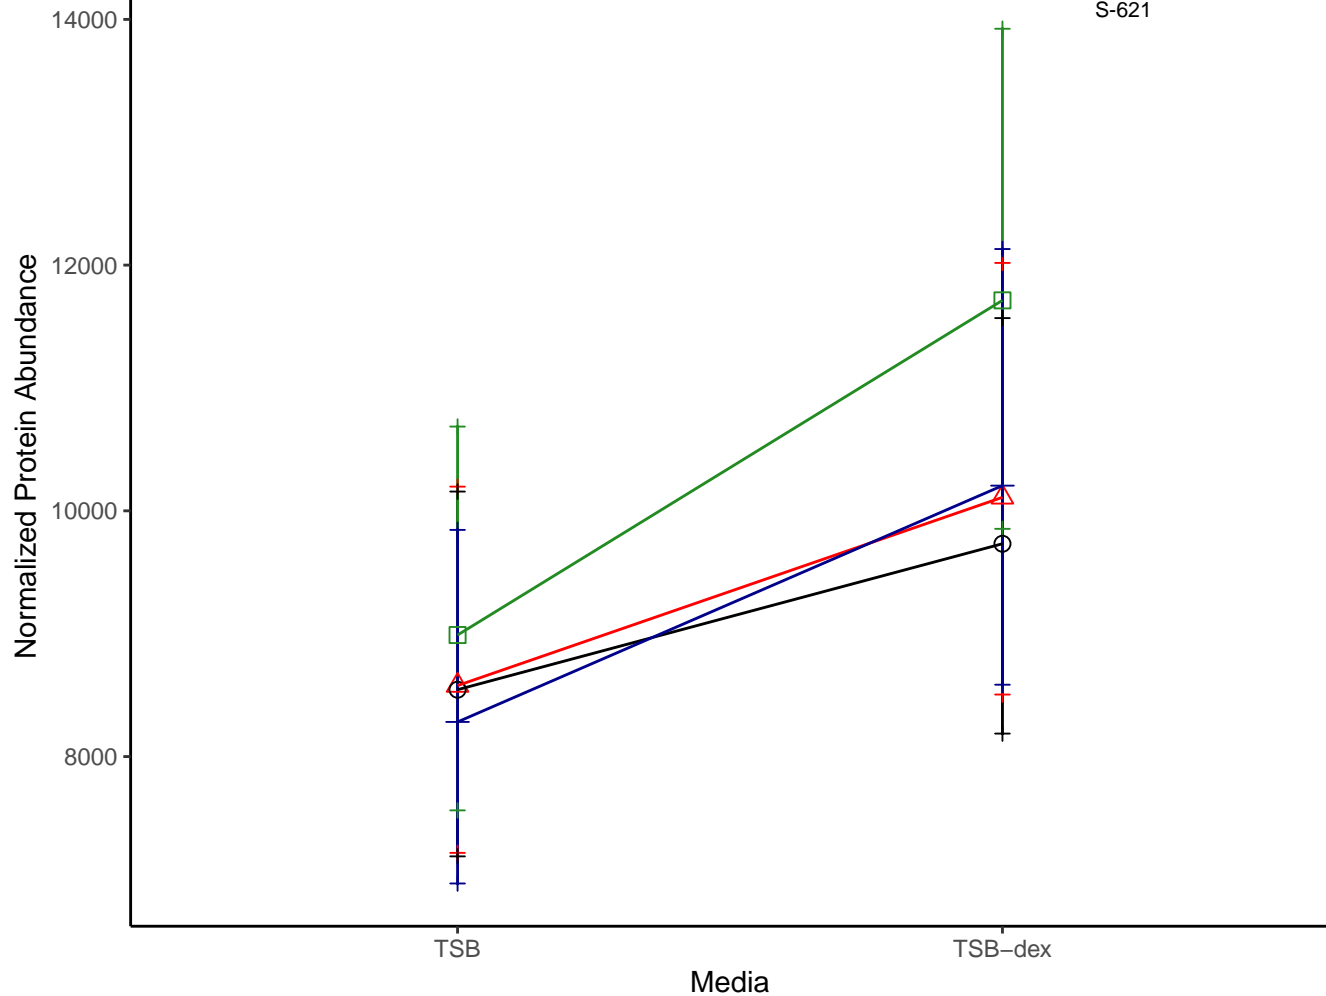

- ⊕ SA564
- △ SA564-ΔhptRS
- ⊞ SA564-ΔccpA
- + SA564-ΔhptRS/ccpA

# FTSA\_STAAM

S-622

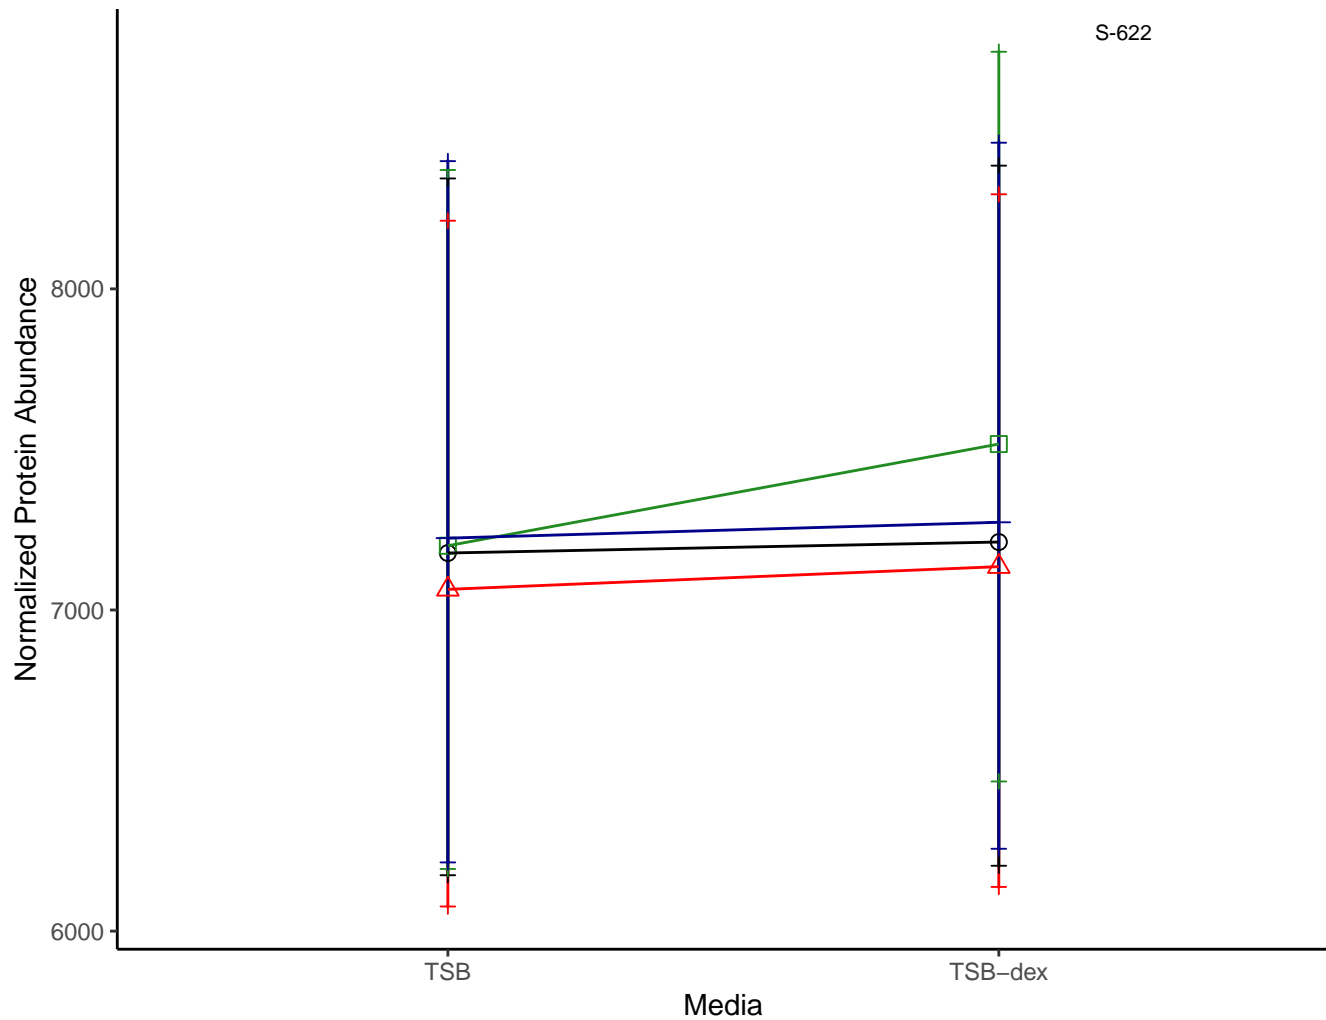

- ⊕ SA564
- △ SA564- $\Delta hptRS$
- ⊞ SA564- $\Delta ccpA$
- + SA564- $\Delta hptRS/ccpA$

# FTSZ\_STAAM

S-623

Normalized Protein Abundance

20000  
18000  
16000

TSB

Media

TSB-dex

- ⊕ SA564
- △ SA564- $\Delta hptRS$
- ⊞ SA564- $\Delta ccpA$
- + SA564- $\Delta hptRS/ccpA$

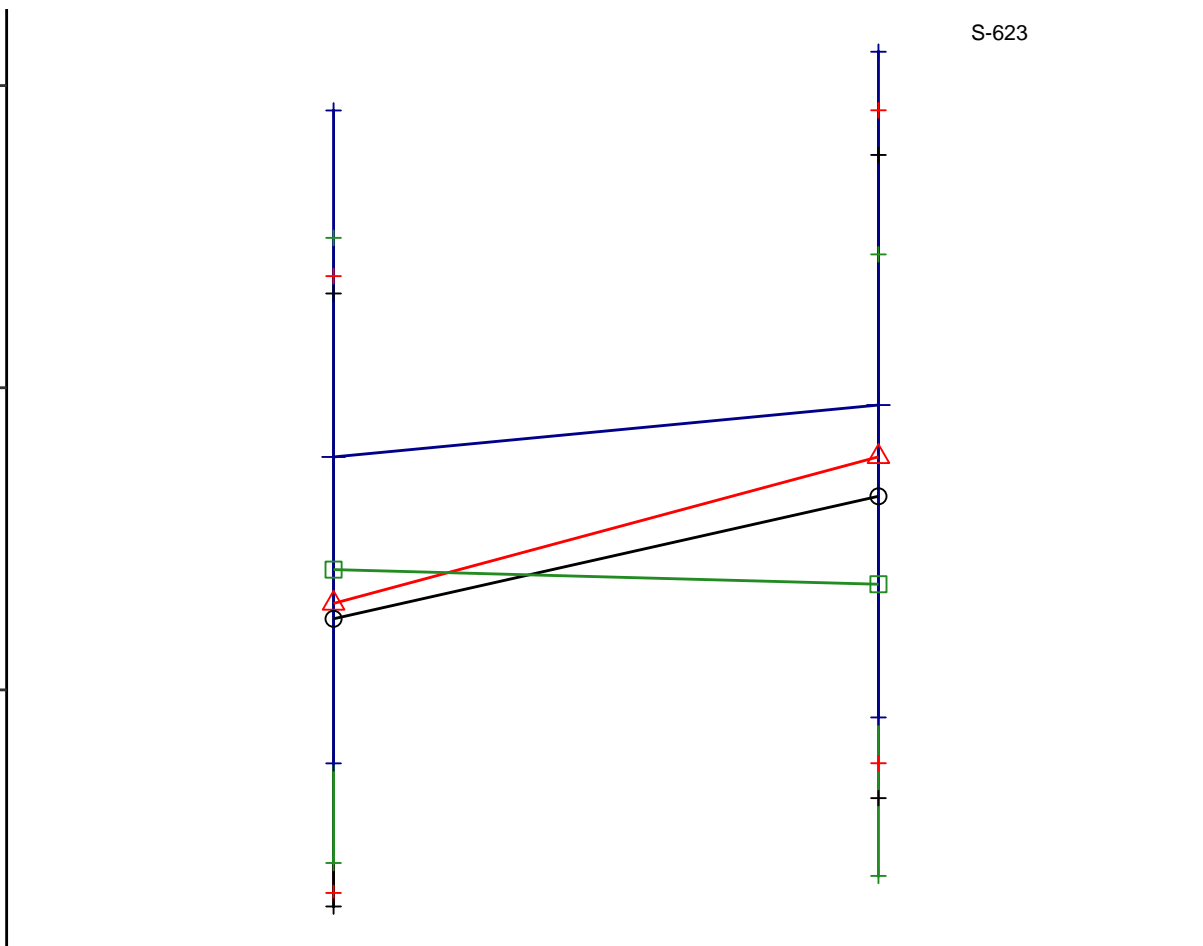

# FUMC\_STAAM

S-624

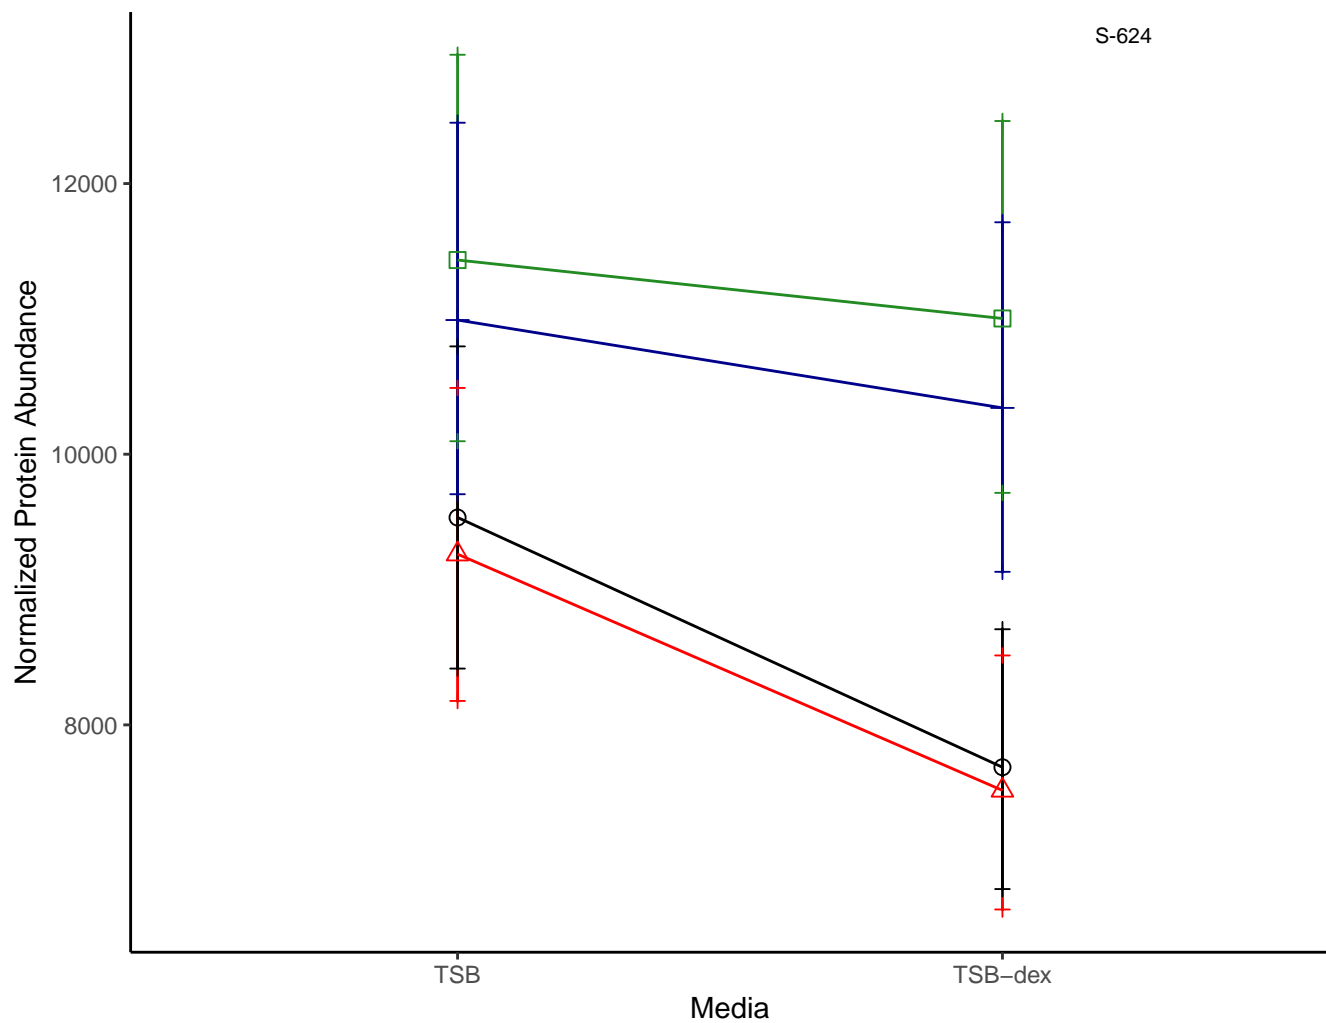

- SA564
- △ SA564- $\Delta hptRS$
- SA564- $\Delta ccpA$
- + SA564- $\Delta hptRS/ccpA$



# G3P1\_STAAM

S-625

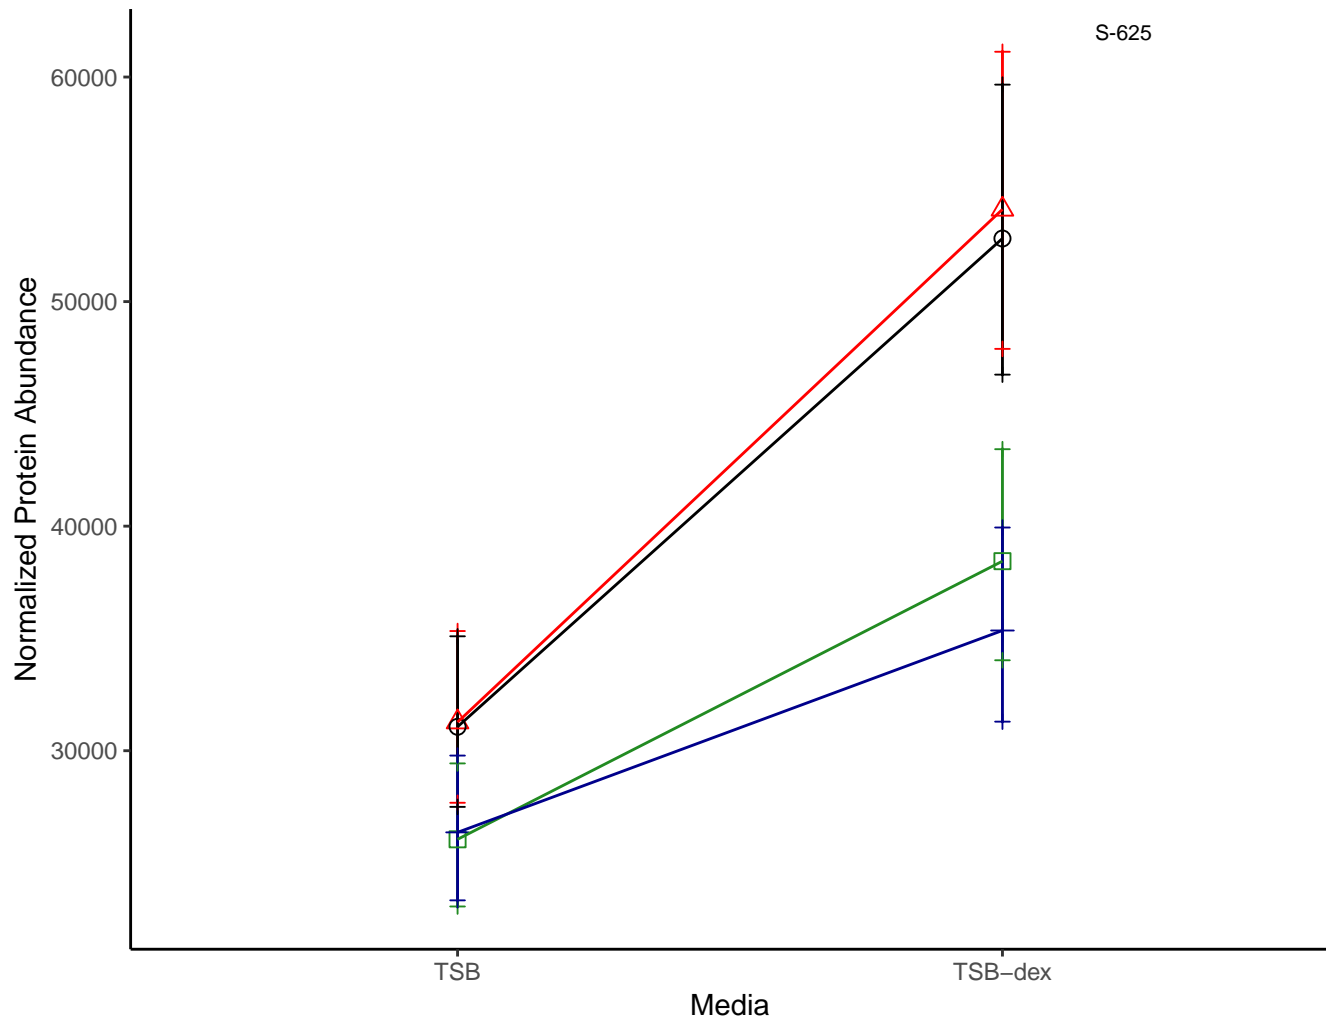

- SA564
- SA564- $\Delta$ *hptRS*
- SA564- $\Delta$ *ccpA*
- SA564- $\Delta$ *hptRS/ccpA*

# G3P2\_STAAM

S-626

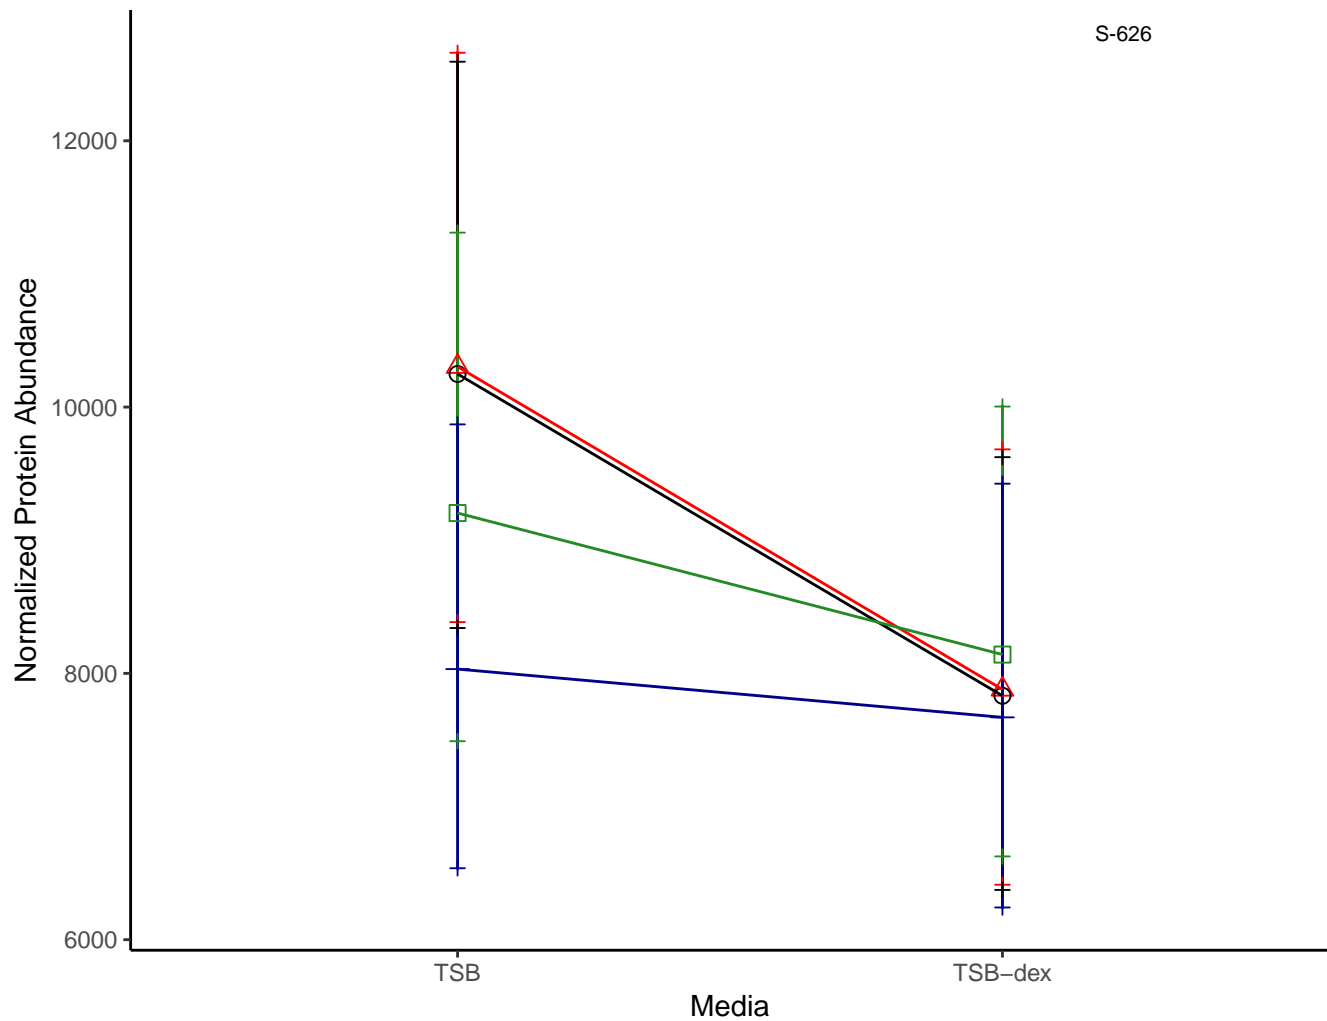

- ⊕ SA564
- △ SA564- $\Delta hptRS$
- ⊞ SA564- $\Delta ccpA$
- + SA564- $\Delta hptRS/ccpA$

# G6PI\_STAAM

S-627

Normalized Protein Abundance

22500  
20000  
17500  
15000

TSB

Media

TSB-dex

- ⊕ SA564
- △ SA564- $\Delta$ *hptRS*
- ⊞ SA564- $\Delta$ *ccpA*
- + SA564- $\Delta$ *hptRS/ccpA*

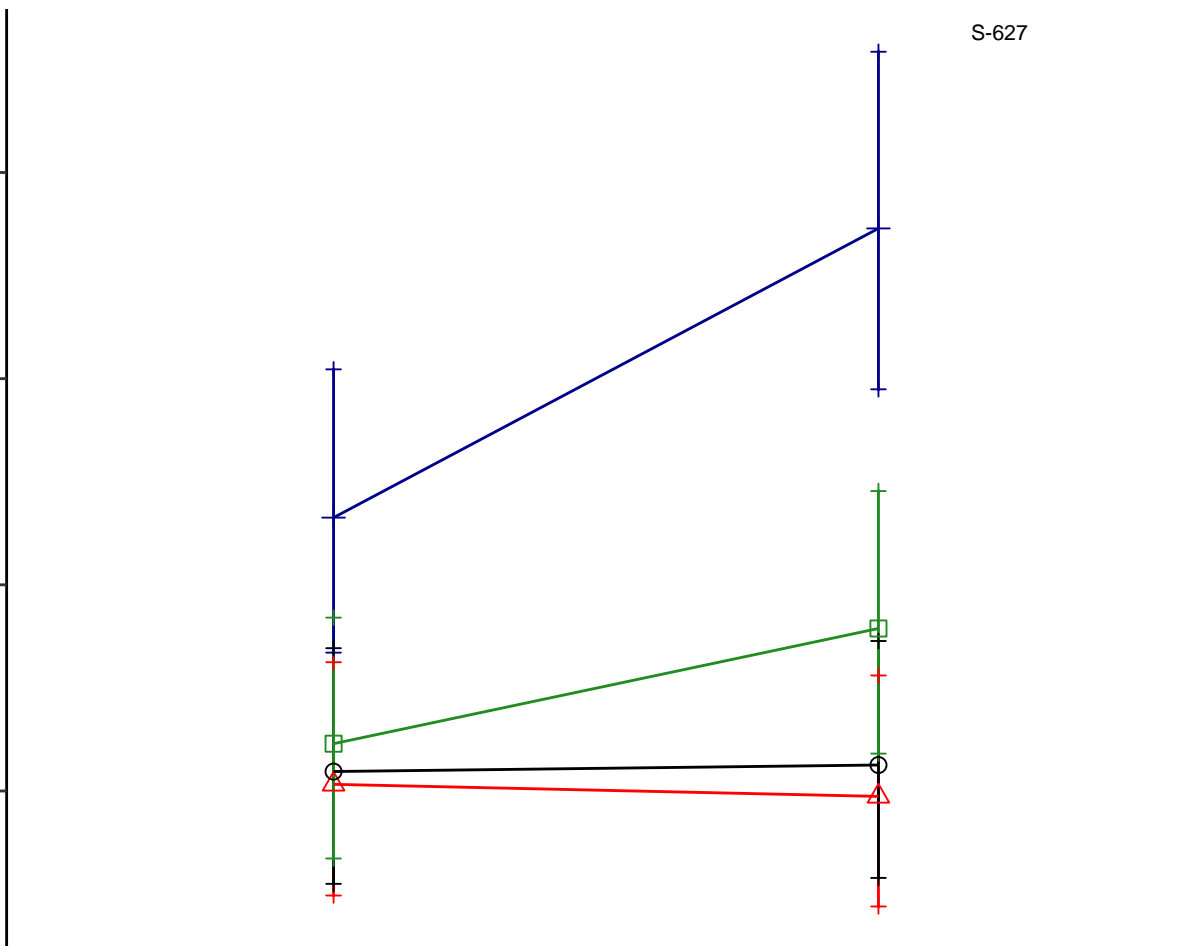

# GATA\_STAAM

S-628

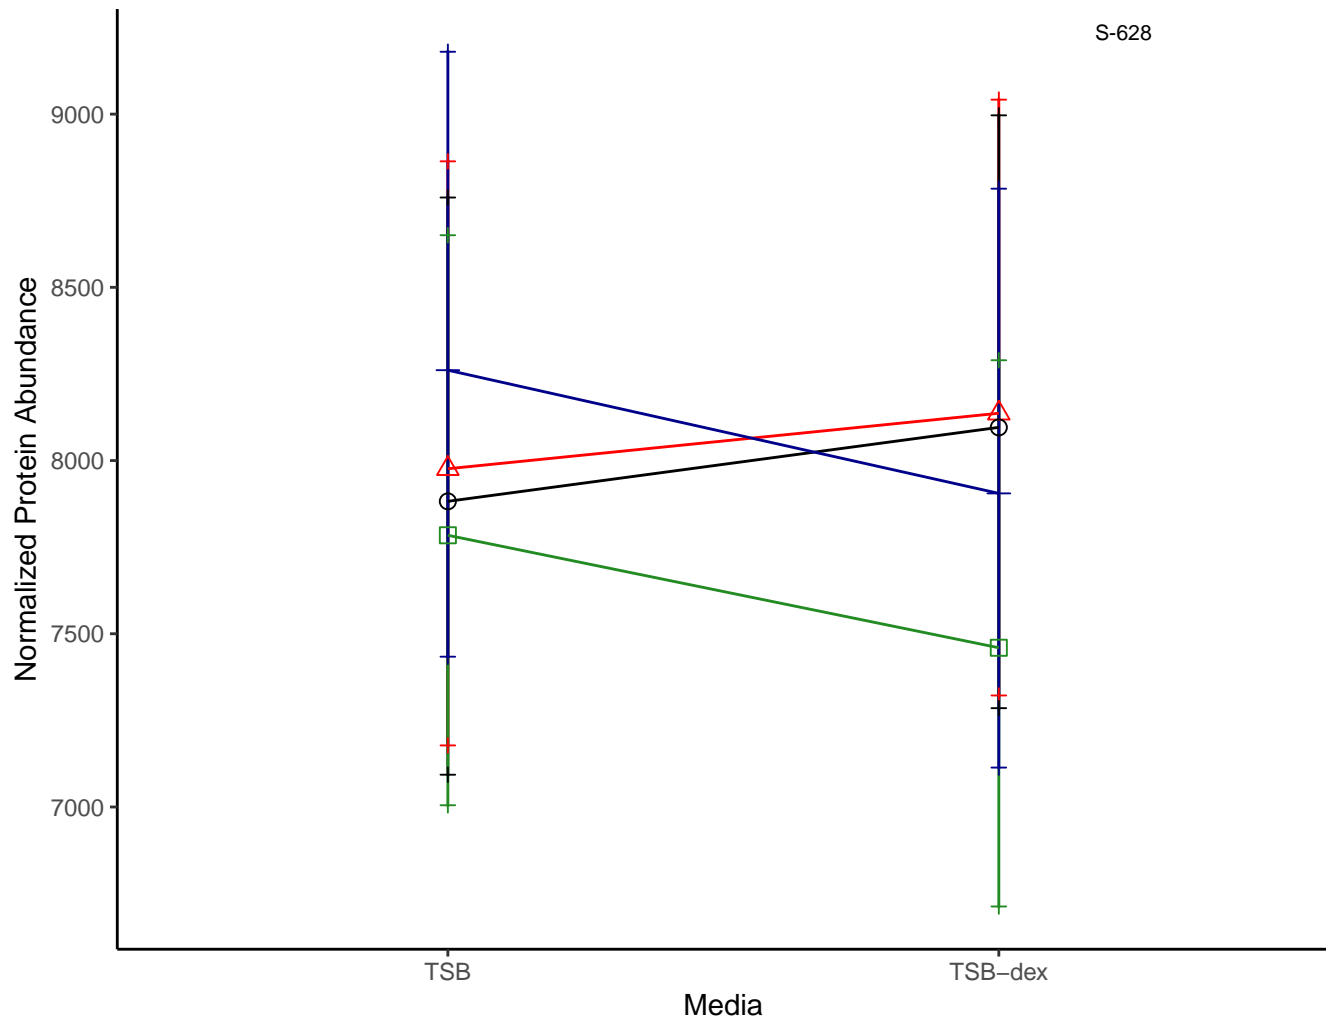

- ⊕ SA564
- △ SA564- $\Delta$ *hptRS*
- ⊞ SA564- $\Delta$ *ccpA*
- + SA564- $\Delta$ *hptRS/ccpA*

# GATB\_STAAM

S-629

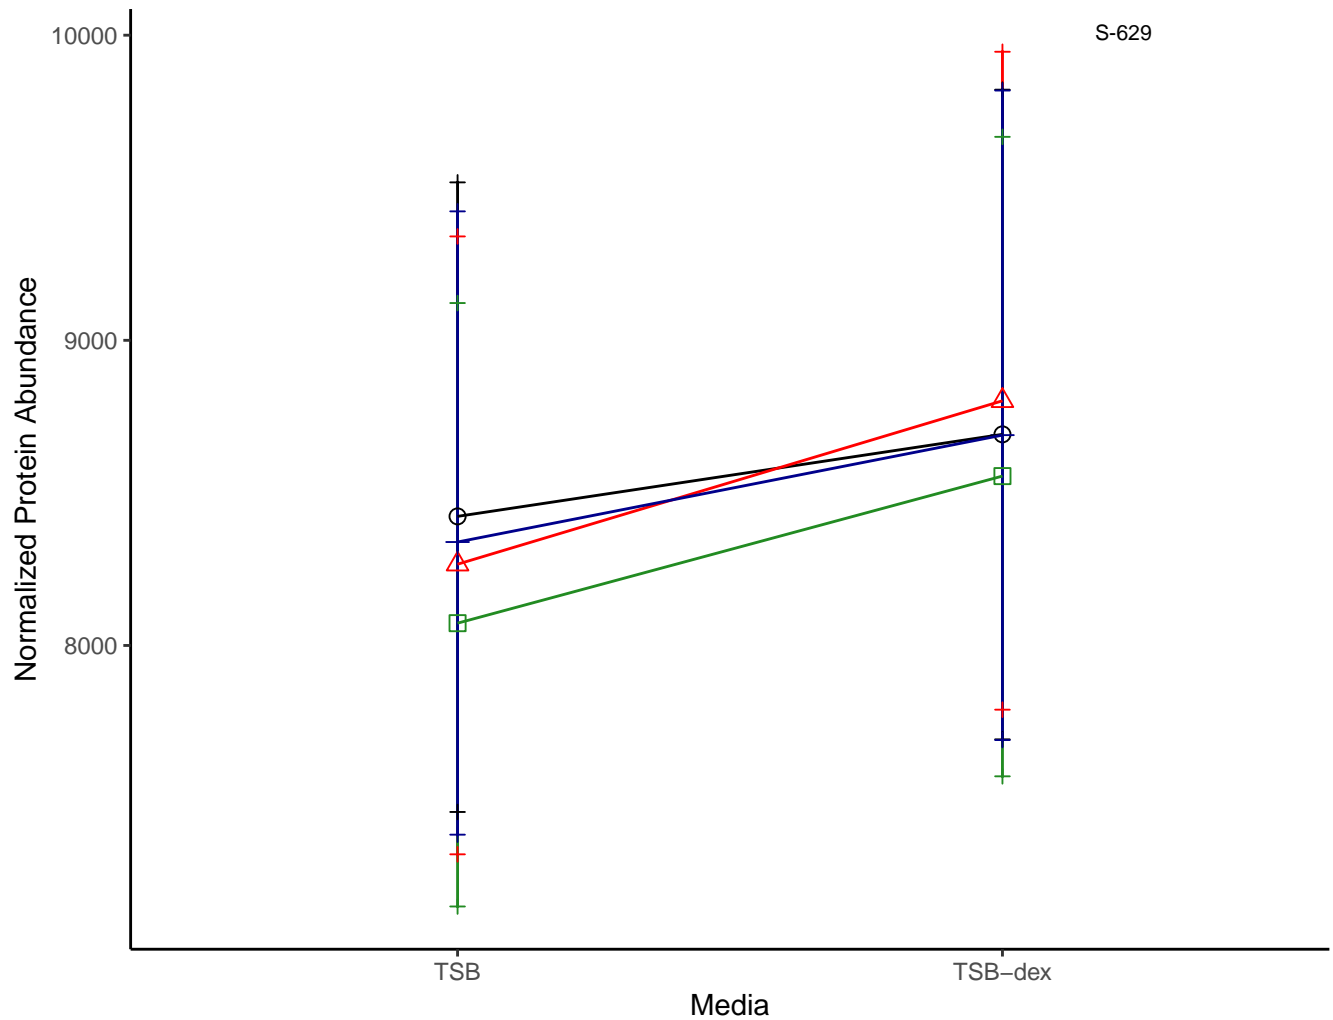

- ⊕ SA564
- △ SA564- $\Delta$ hptRS
- SA564- $\Delta$ ccpA
- + SA564- $\Delta$ hptRS/ccpA

# GATC\_STAAM

S-630

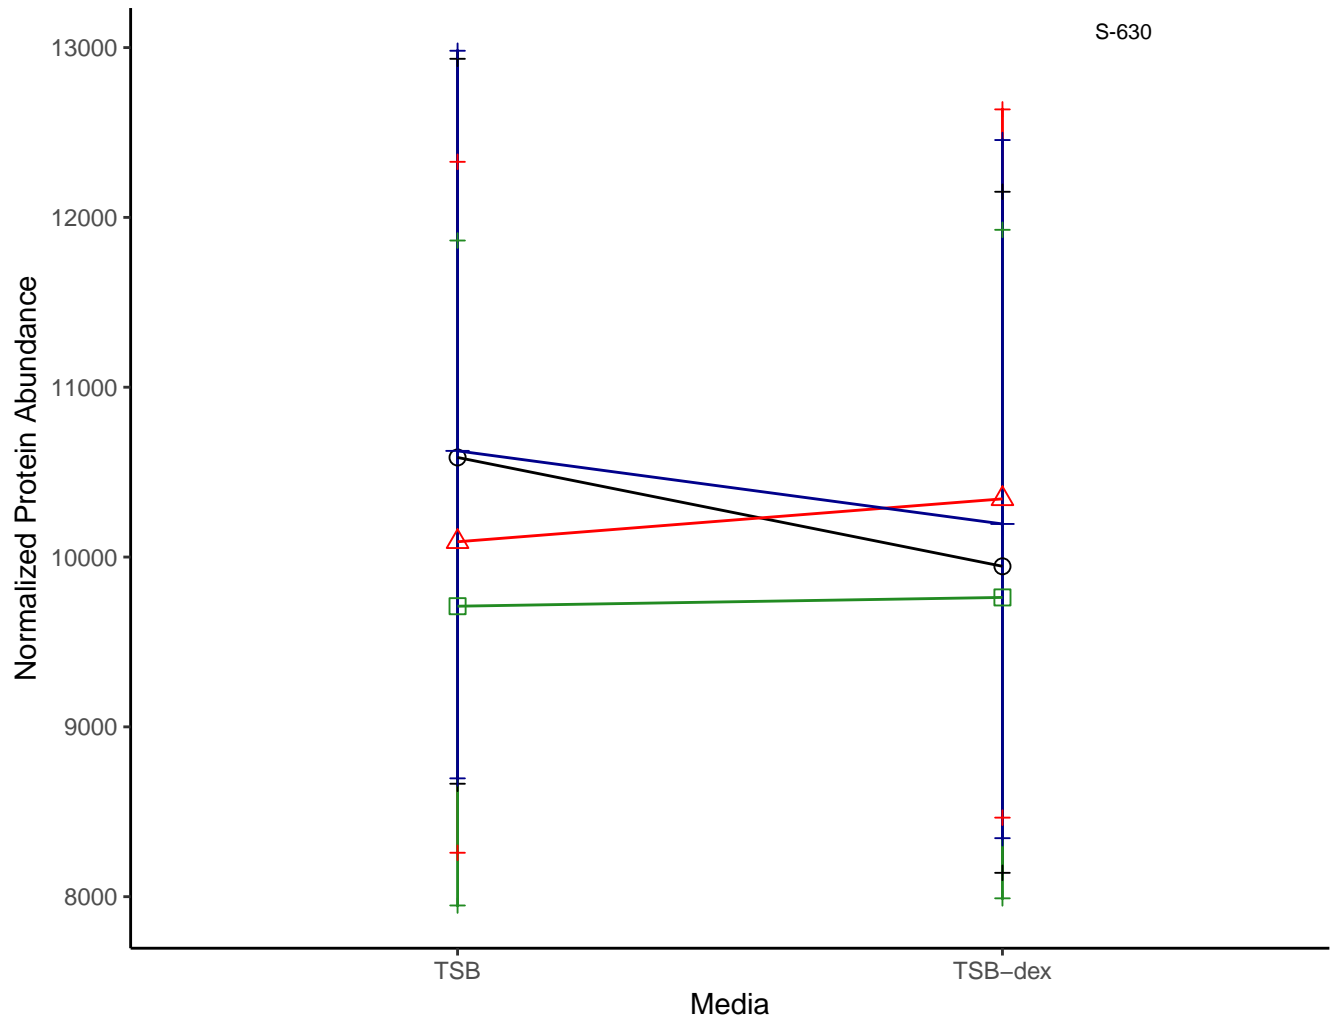

- ⊕ SA564
- △ SA564- $\Delta$ *hptRS*
- ⊞ SA564- $\Delta$ *ccpA*
- + SA564- $\Delta$ *hptRS/ccpA*

# GCH4\_STAAM

S-631

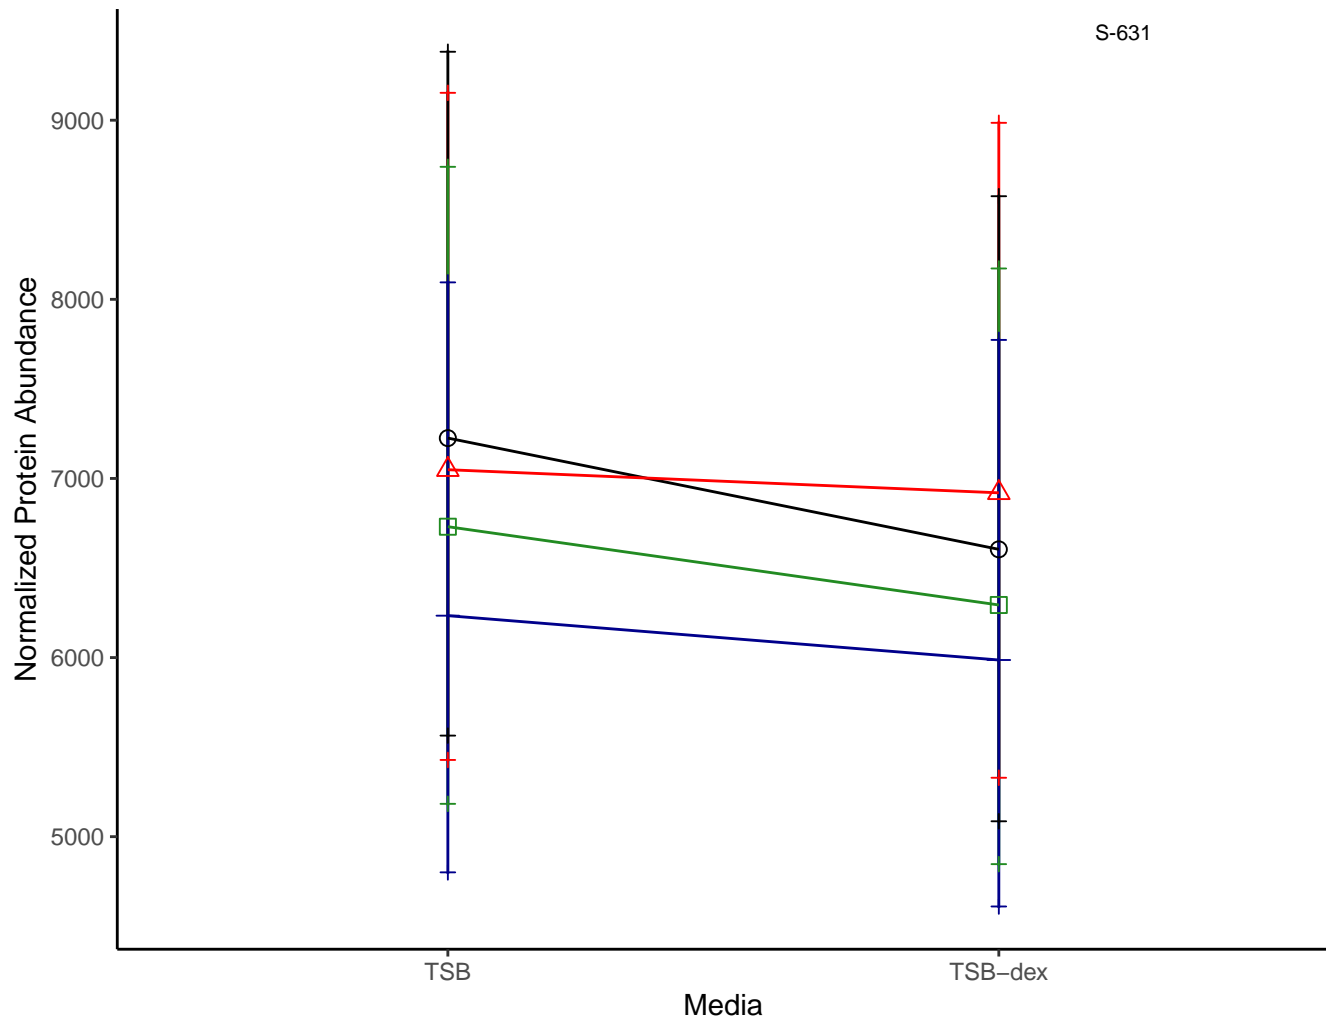

- ⊕ SA564
- △ SA564- $\Delta hptRS$
- ⊞ SA564- $\Delta ccpA$
- + SA564- $\Delta hptRS/ccpA$

# GCSH\_STAAM

S-632

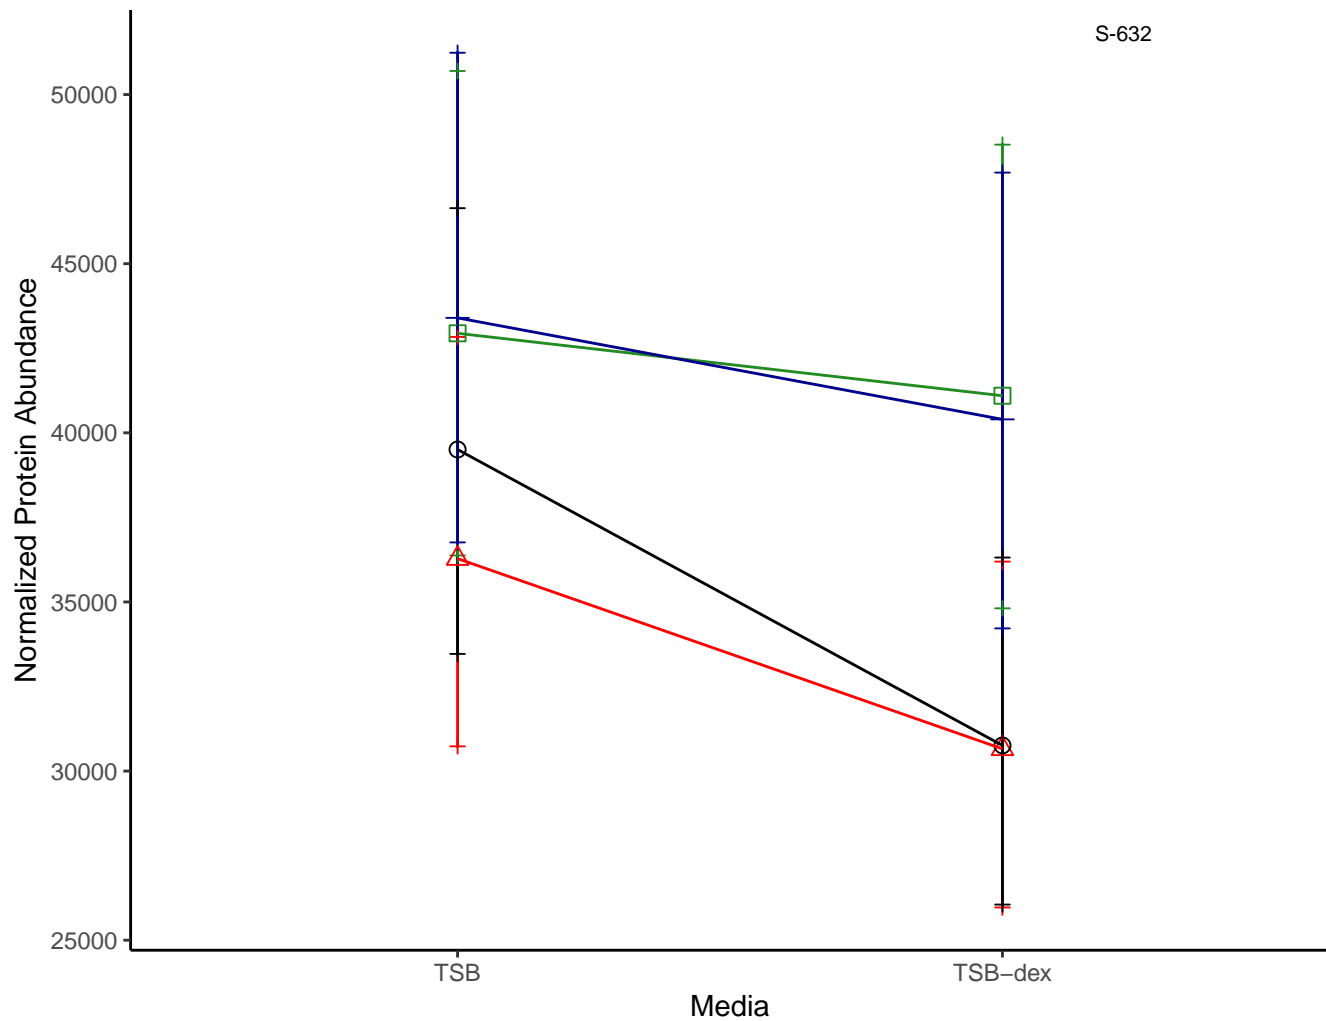

- ⊕ SA564
- △ SA564- $\Delta$ *hptRS*
- ⊞ SA564- $\Delta$ *ccpA*
- + SA564- $\Delta$ *hptRS/ccpA*



# GCSPA\_STAAM

S-633

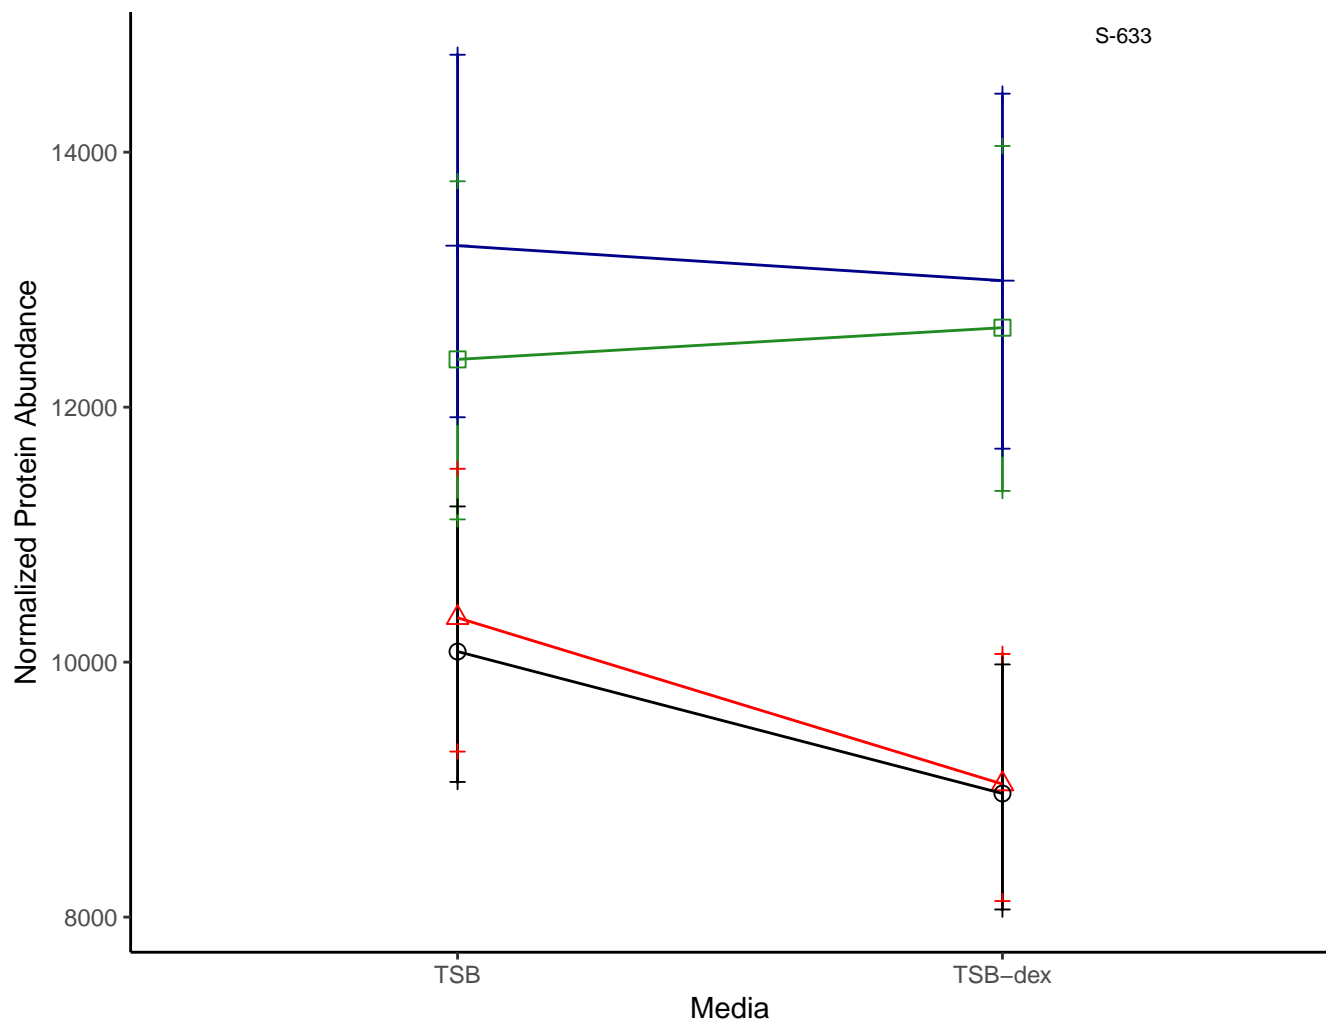

- ⊕ SA564
- △ SA564-ΔhptRS
- ⊞ SA564-ΔccpA
- + SA564-ΔhptRS/ccpA

# GCSPB\_STAAM

S-634

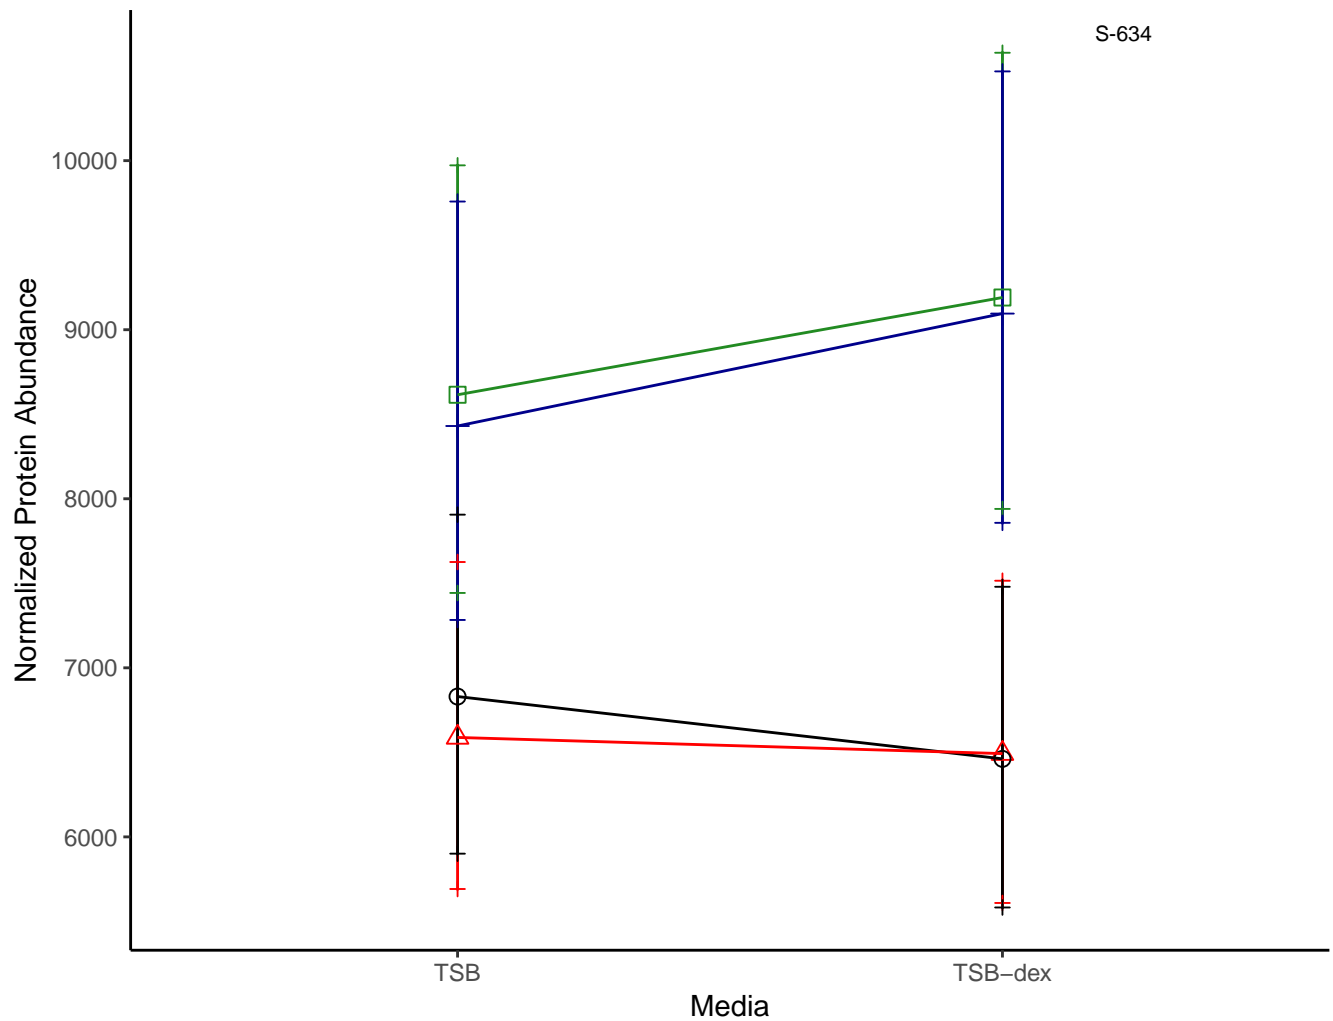

- ⊕ SA564
- △ SA564- $\Delta$ *hptRS*
- ⊞ SA564- $\Delta$ *ccpA*
- + SA564- $\Delta$ *hptRS/ccpA*

# GCST\_STAAM

S-635

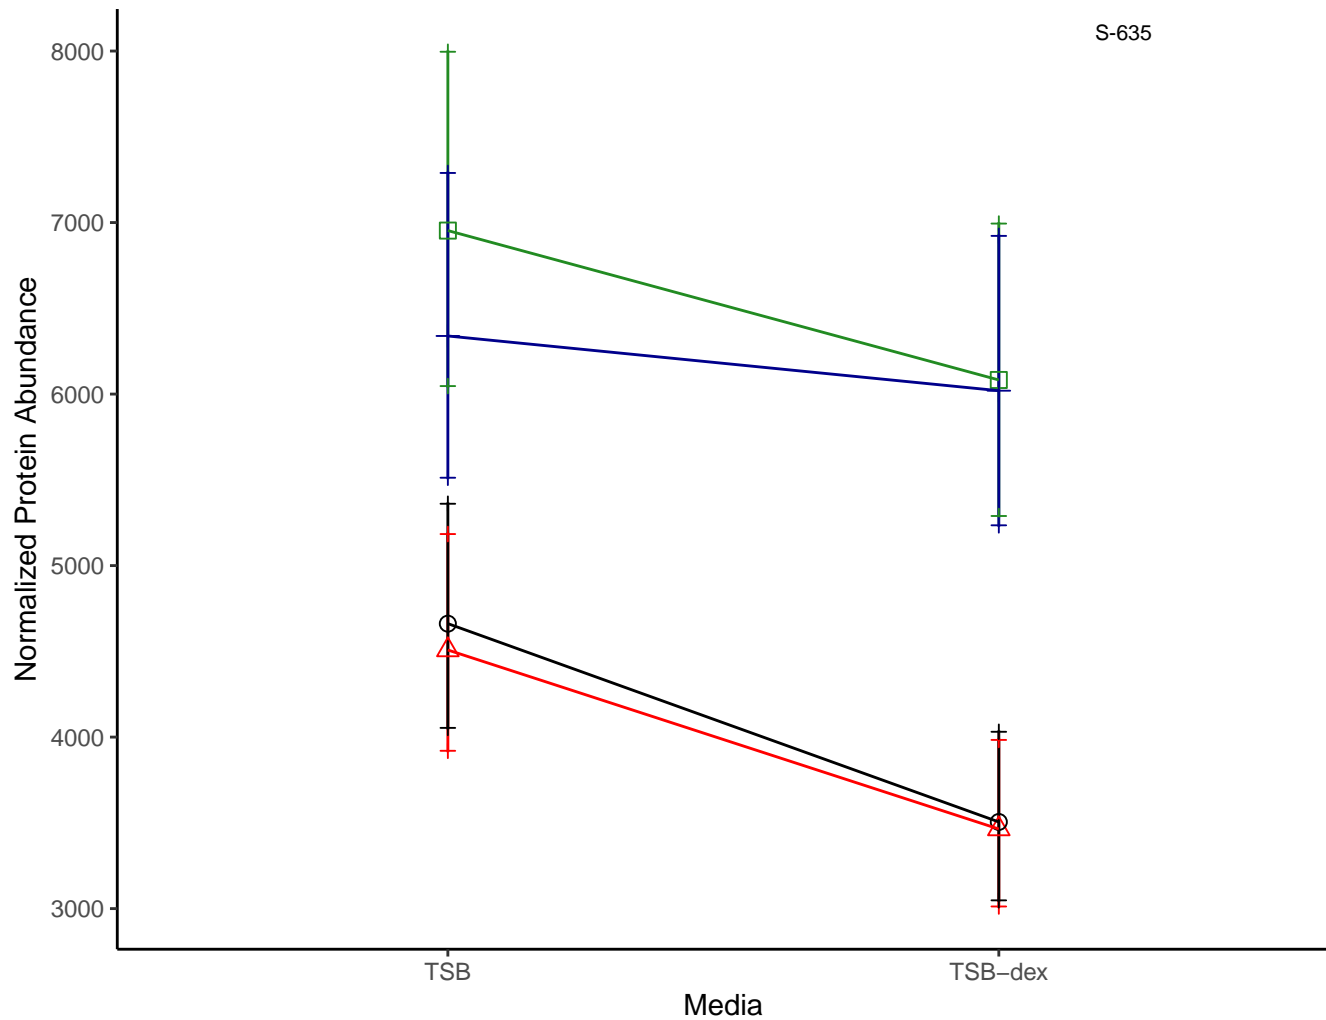

- ⊕ SA564
- △ SA564- $\Delta$ *hptRS*
- ⊞ SA564- $\Delta$ *ccpA*
- + SA564- $\Delta$ *hptRS/ccpA*

# GLMM\_STAAM

S-636

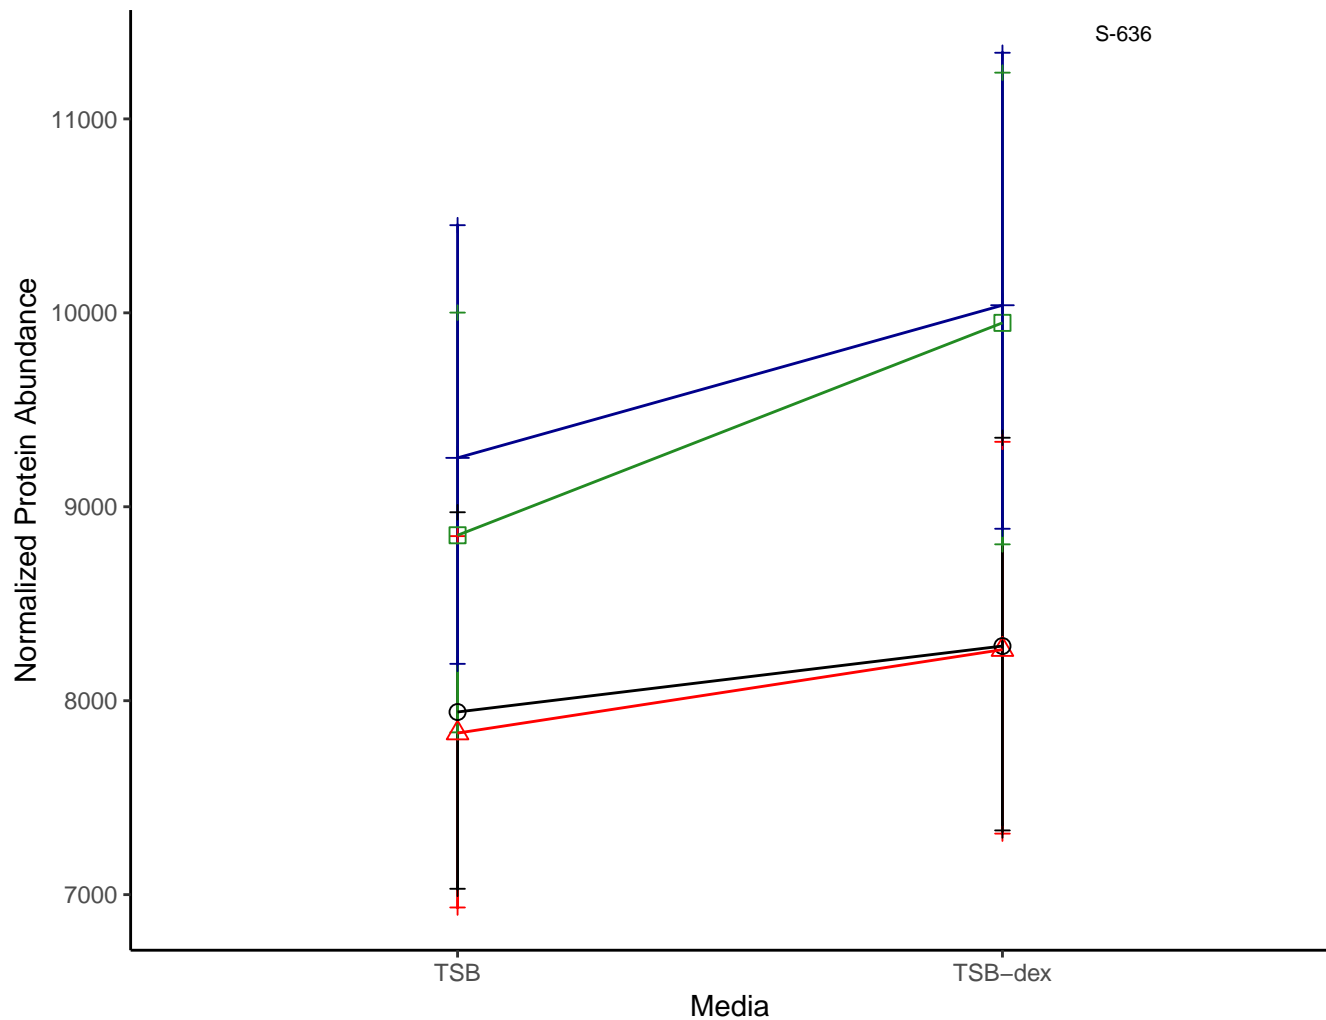

- ⊕ SA564
- △ SA564-ΔhptRS
- ⊞ SA564-ΔccpA
- + SA564-ΔhptRS/ccpA

# GLMS\_STAAM

S-637

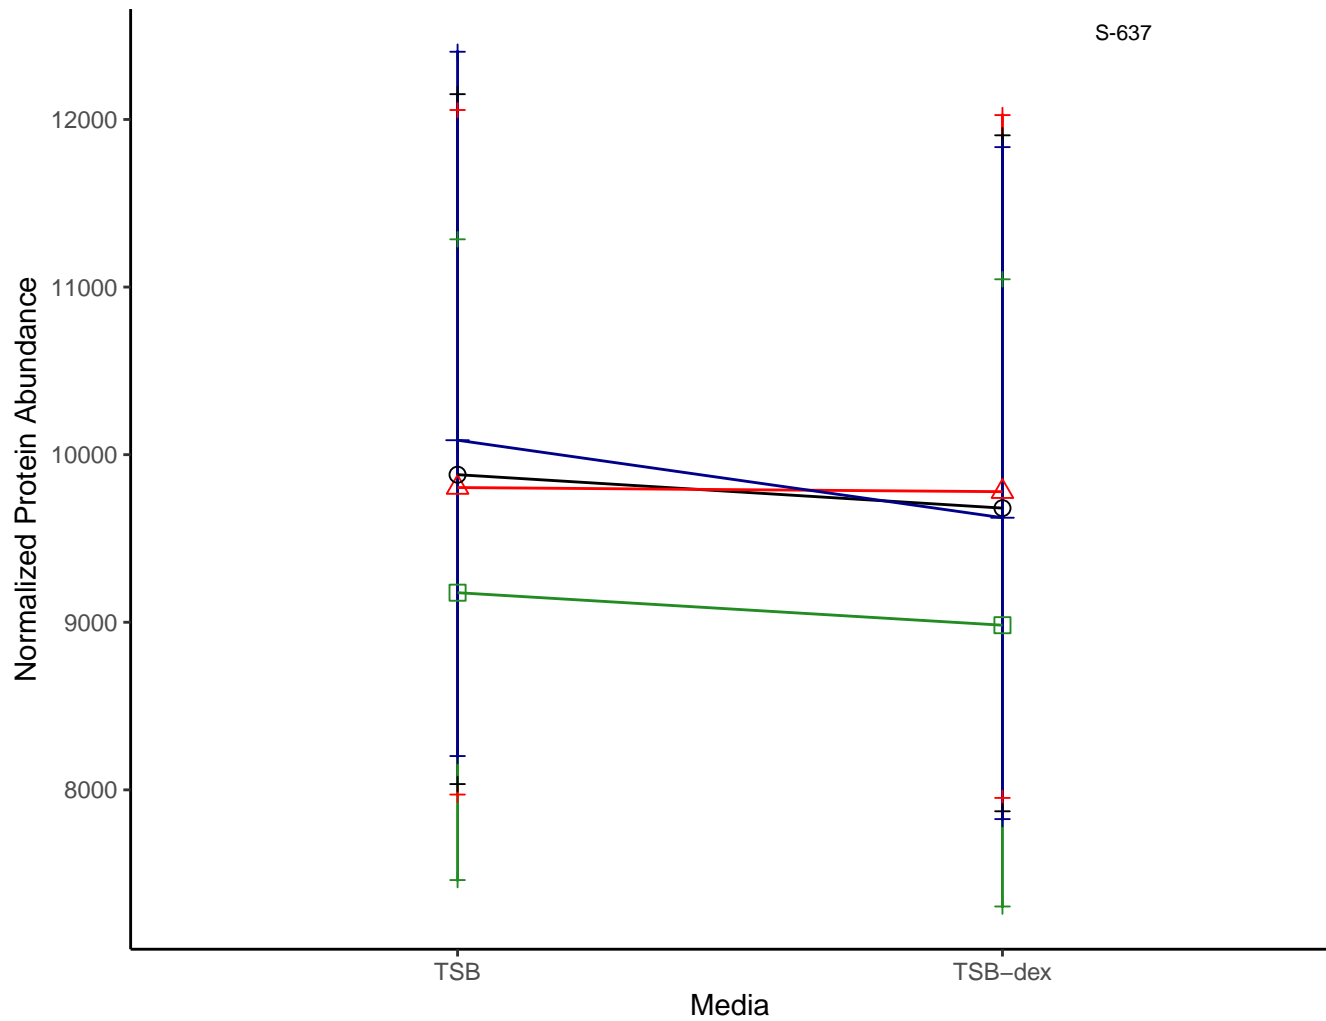

- ⊕ SA564
- △ SA564- $\Delta hptRS$
- ⊞ SA564- $\Delta ccpA$
- + SA564- $\Delta hptRS/ccpA$

# GLMU\_STAAM

S-638

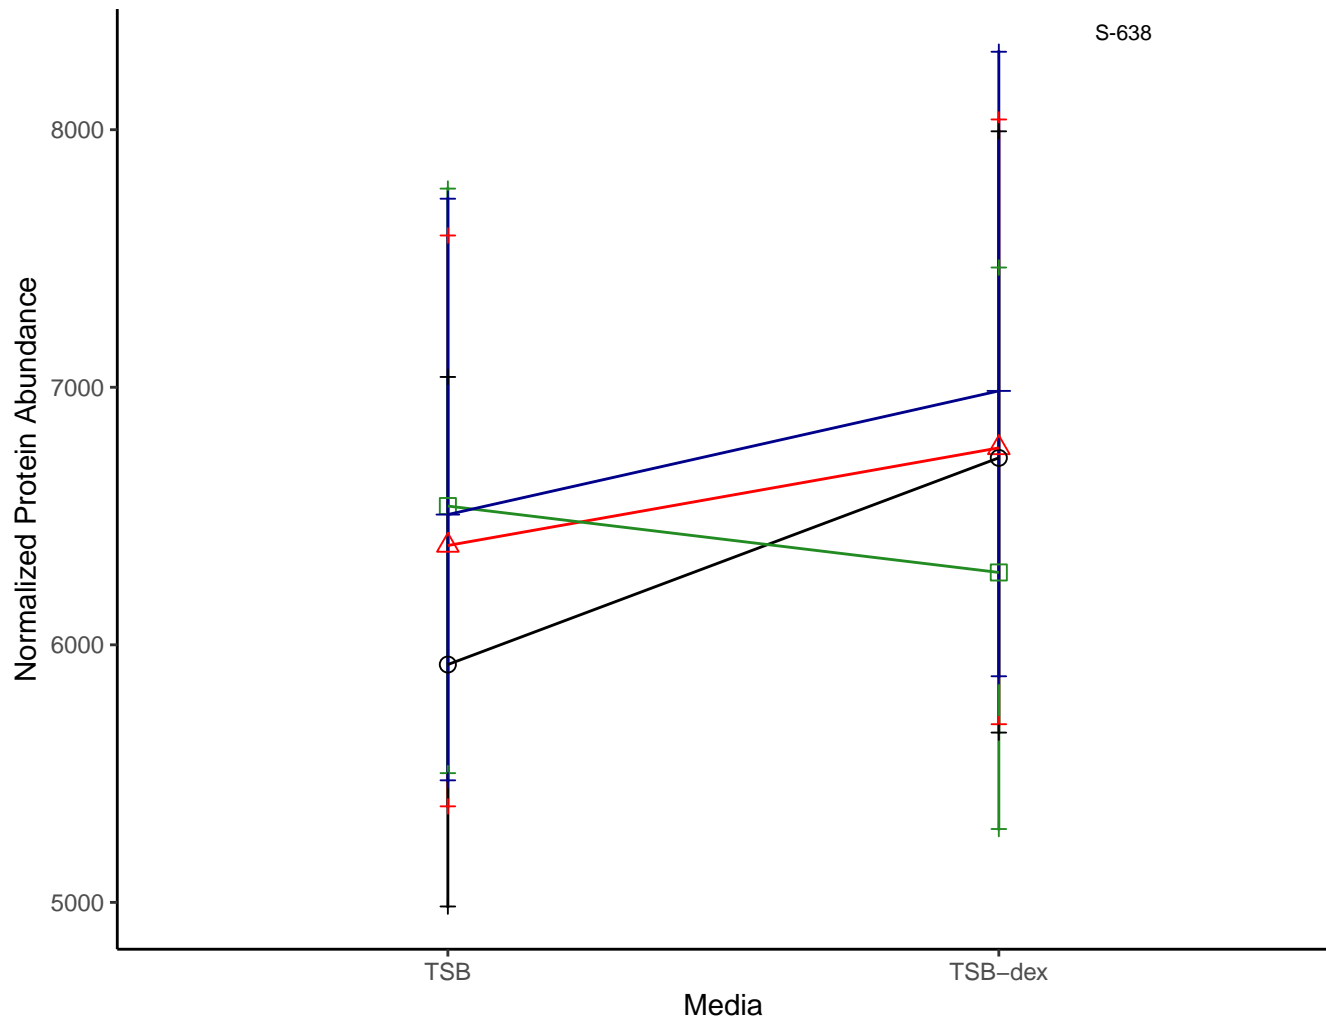

- ⊕ SA564
- △ SA564-ΔhptRS
- ⊞ SA564-ΔccpA
- + SA564-ΔhptRS/ccpA

# GLNA\_STAAM

S-639

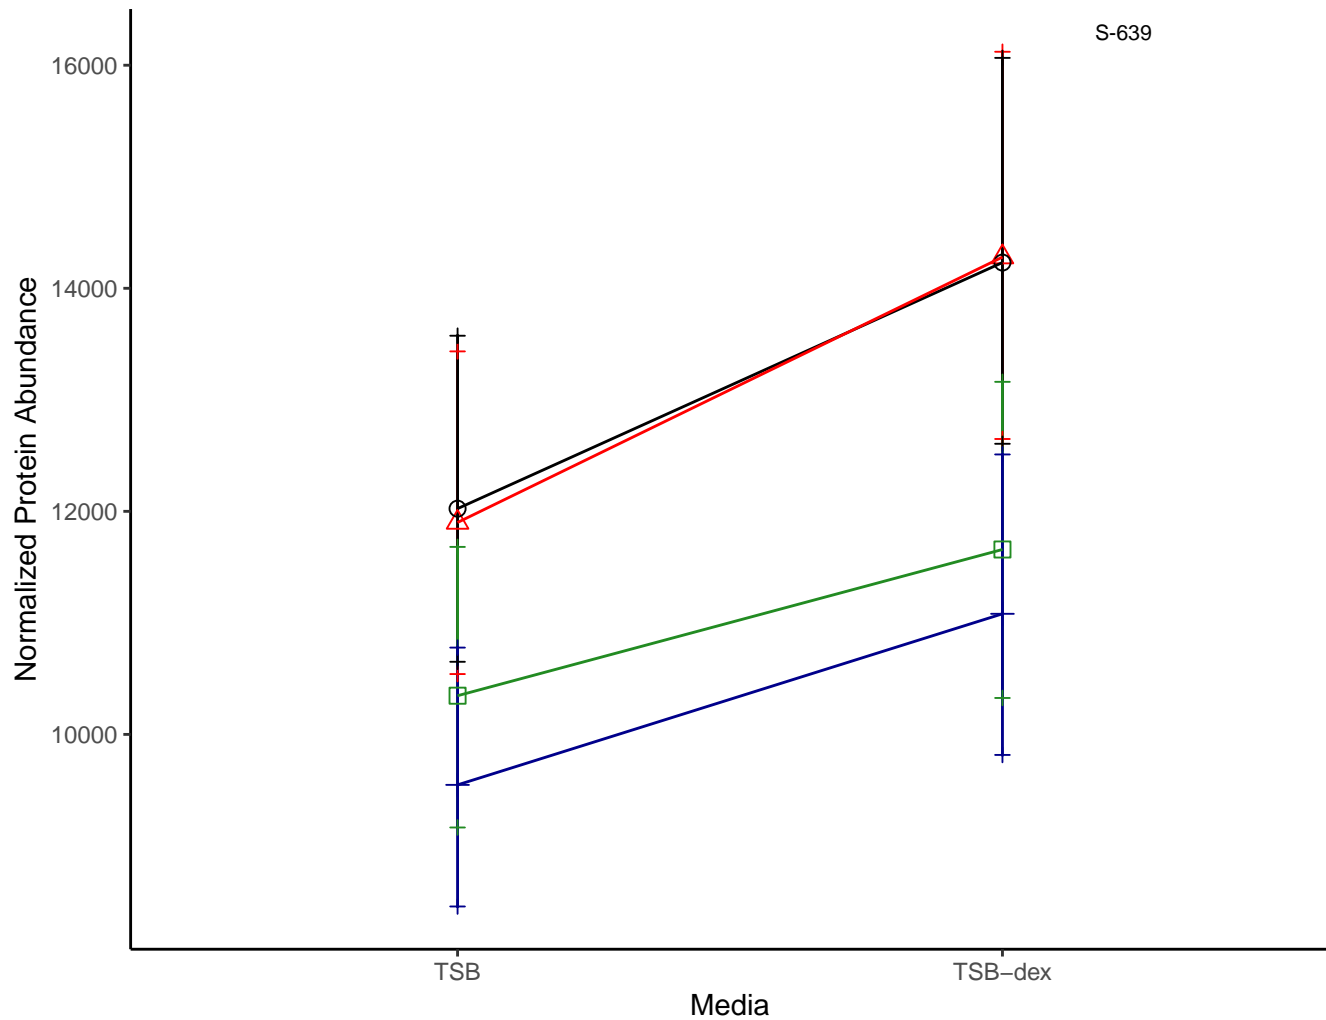

- ⊕ SA564
- △ SA564-ΔhptRS
- ⊞ SA564-ΔccpA
- + SA564-ΔhptRS/ccpA

# GLPD\_STAAM

S-640

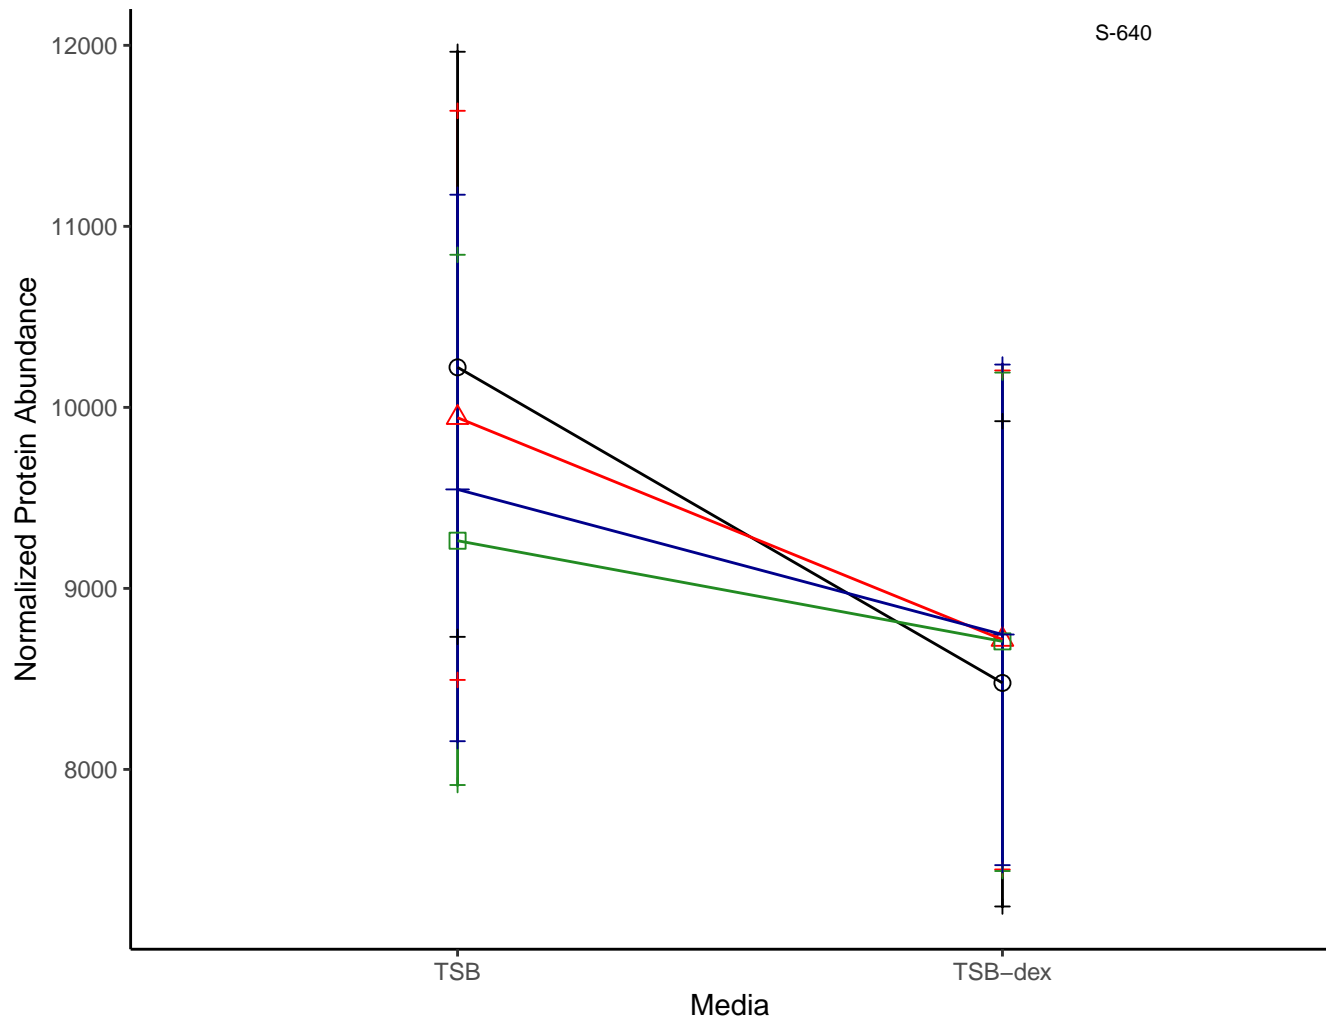

- ⊕ SA564
- △ SA564- $\Delta$ *hptRS*
- ⊞ SA564- $\Delta$ *ccpA*
- + SA564- $\Delta$ *hptRS/ccpA*



# GLPK\_STAAM

S-641

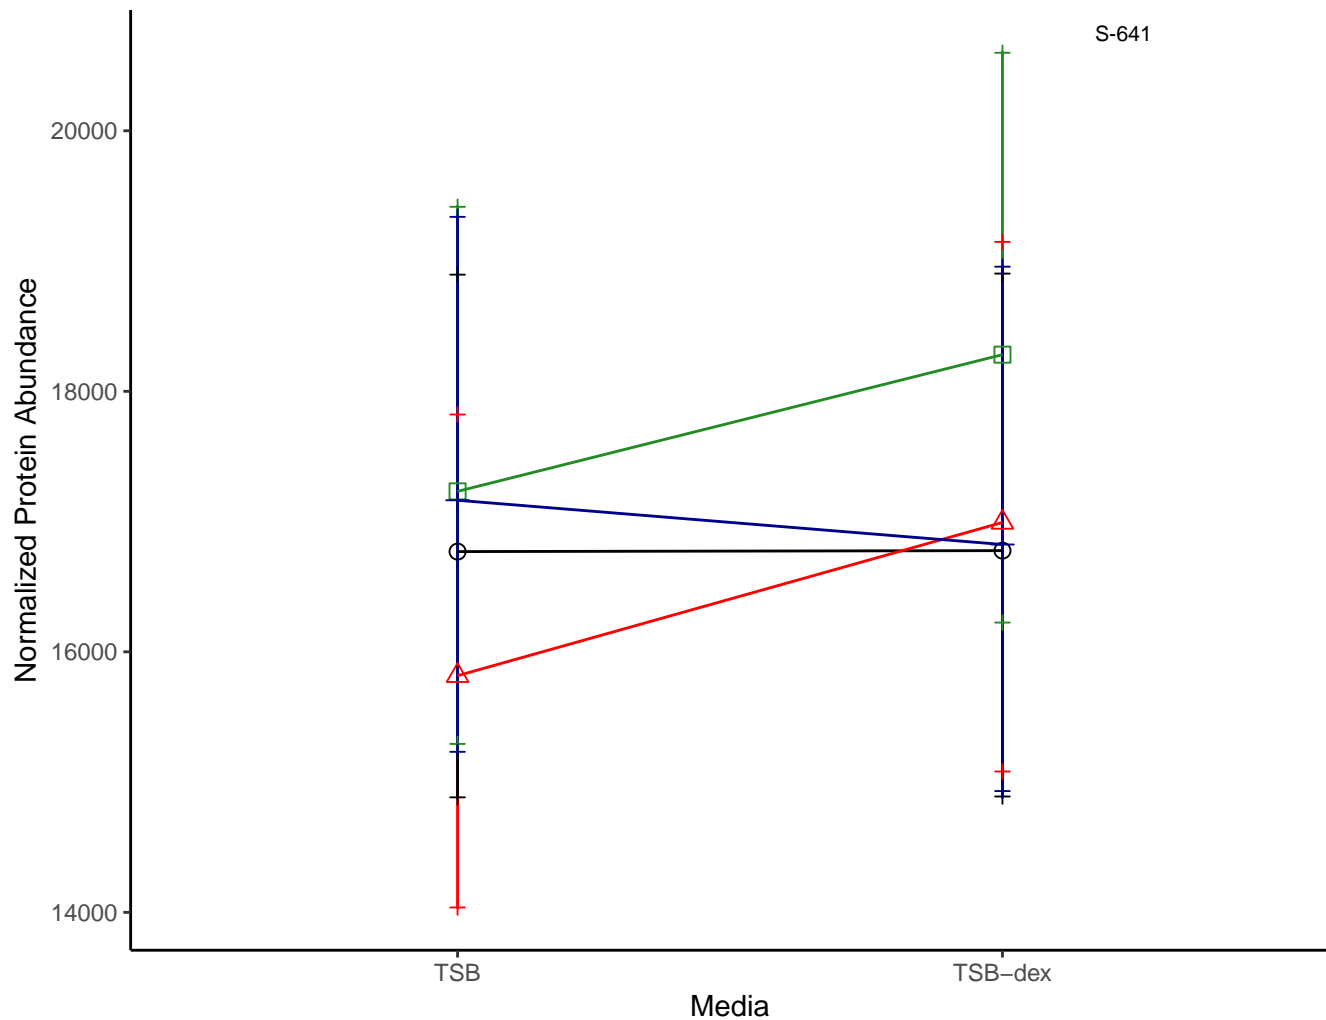

- ⊕ SA564
- △ SA564- $\Delta$ *hptRS*
- ⊞ SA564- $\Delta$ *ccpA*
- + SA564- $\Delta$ *hptRS/ccpA*

# GLYA\_STAAM

S-642

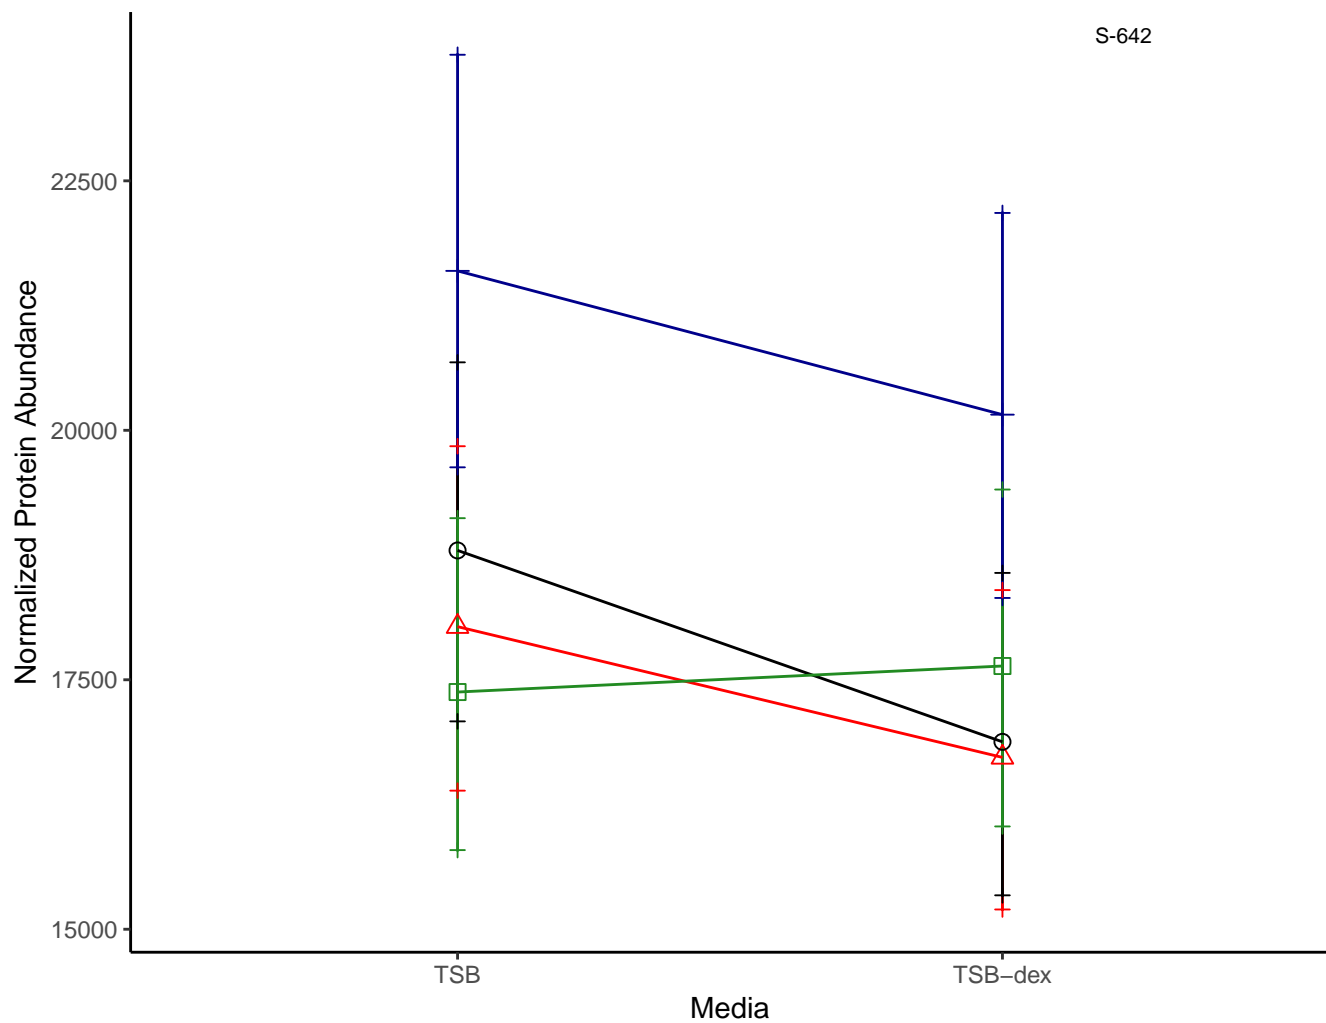

- ⊕ SA564
- △ SA564- $\Delta$ *hptRS*
- ⊞ SA564- $\Delta$ *ccpA*
- + SA564- $\Delta$ *hptRS/ccpA*

# GPDA\_STAAM

S-643

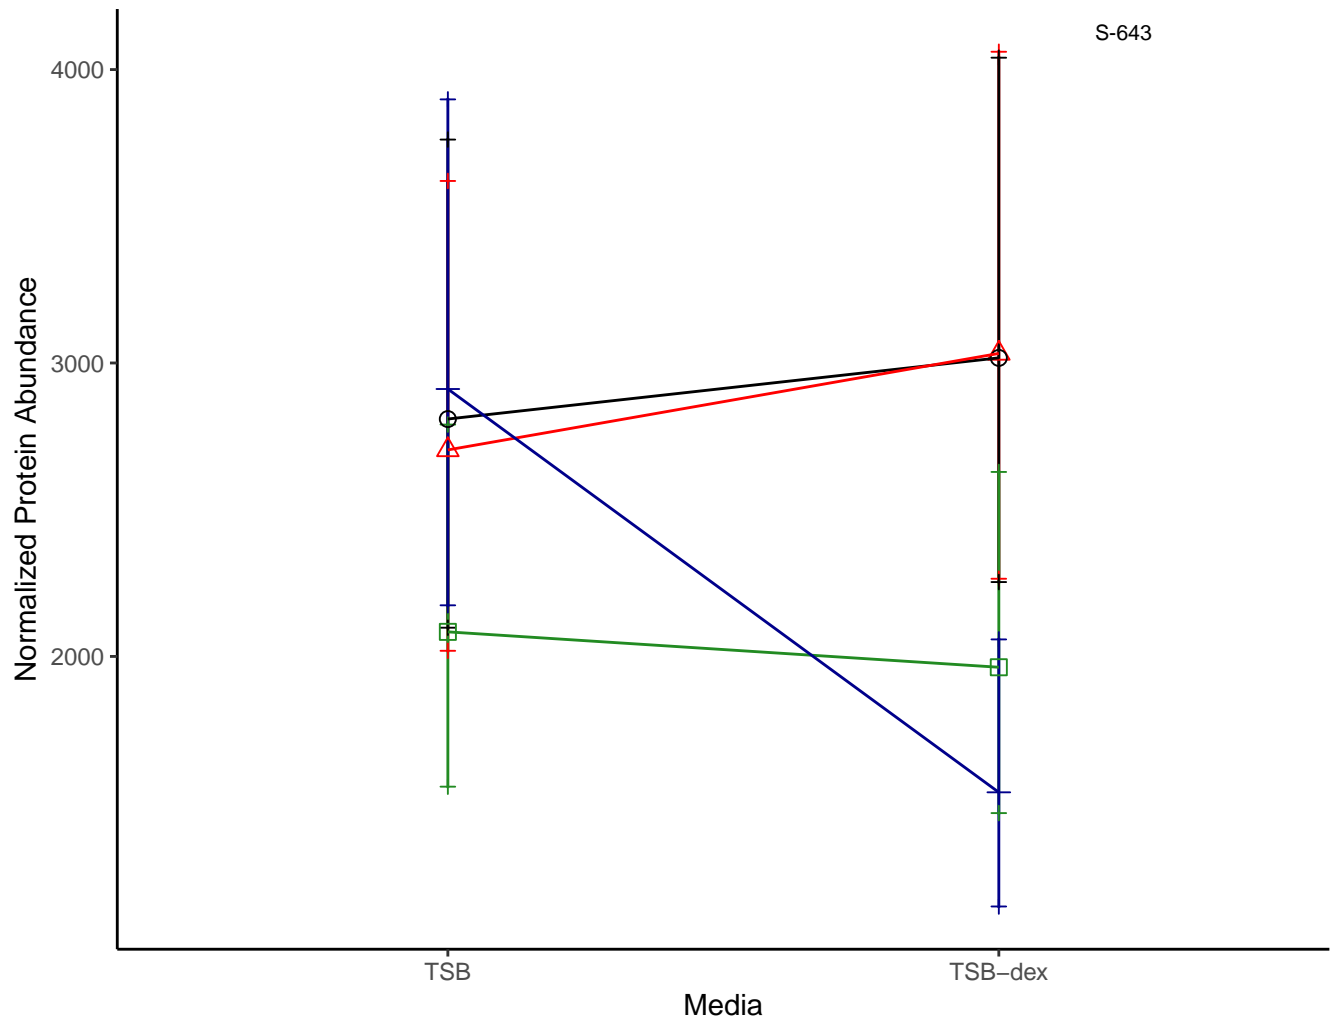

- ⊕ SA564
- △ SA564-ΔhptRS
- ⊞ SA564-ΔccpA
- + SA564-ΔhptRS/ccpA

# GPMA\_STAAM

S-644

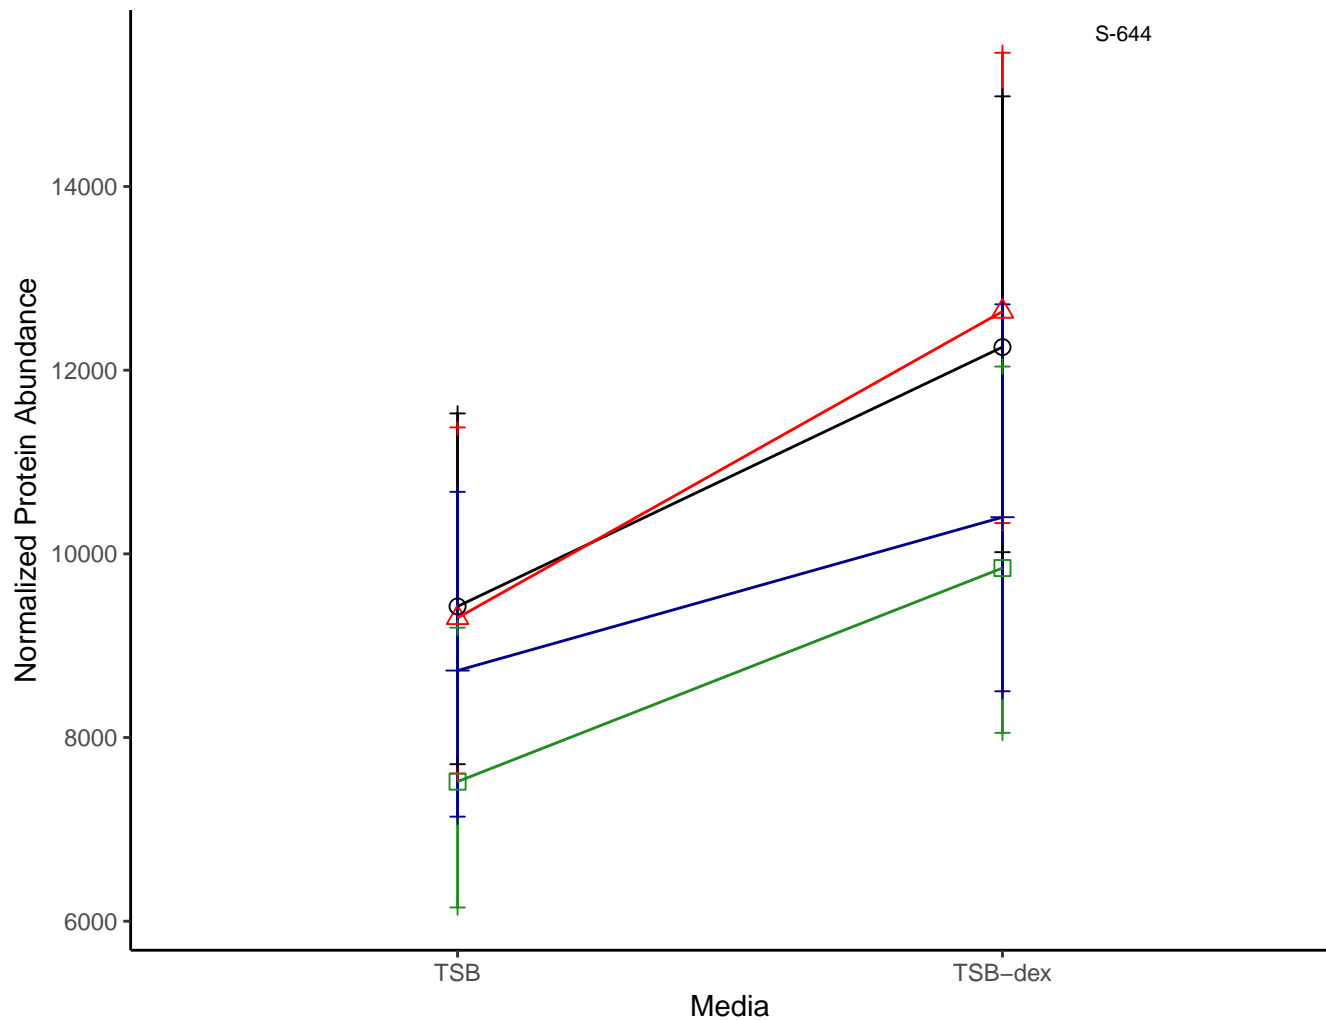

- ⊕ SA564
- △ SA564- $\Delta hptRS$
- ⊞ SA564- $\Delta ccpA$
- + SA564- $\Delta hptRS/ccpA$

# GPMI\_STAAM

S-645

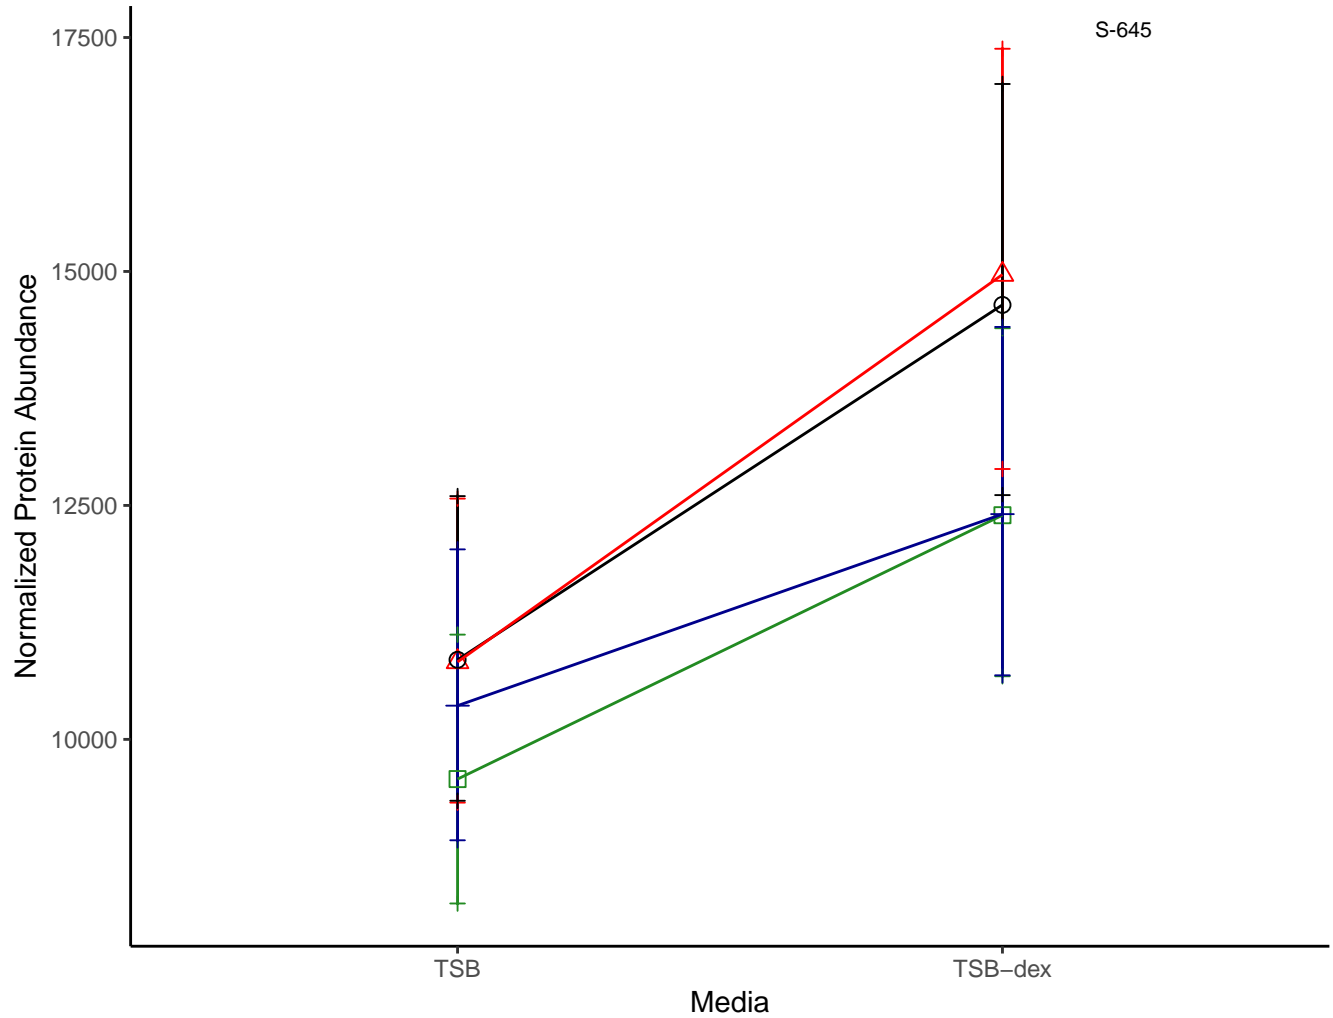

- ⊕ SA564
- △ SA564-ΔhptRS
- ⊞ SA564-ΔccpA
- + SA564-ΔhptRS/ccpA

# GPSB\_STAAM

S-646

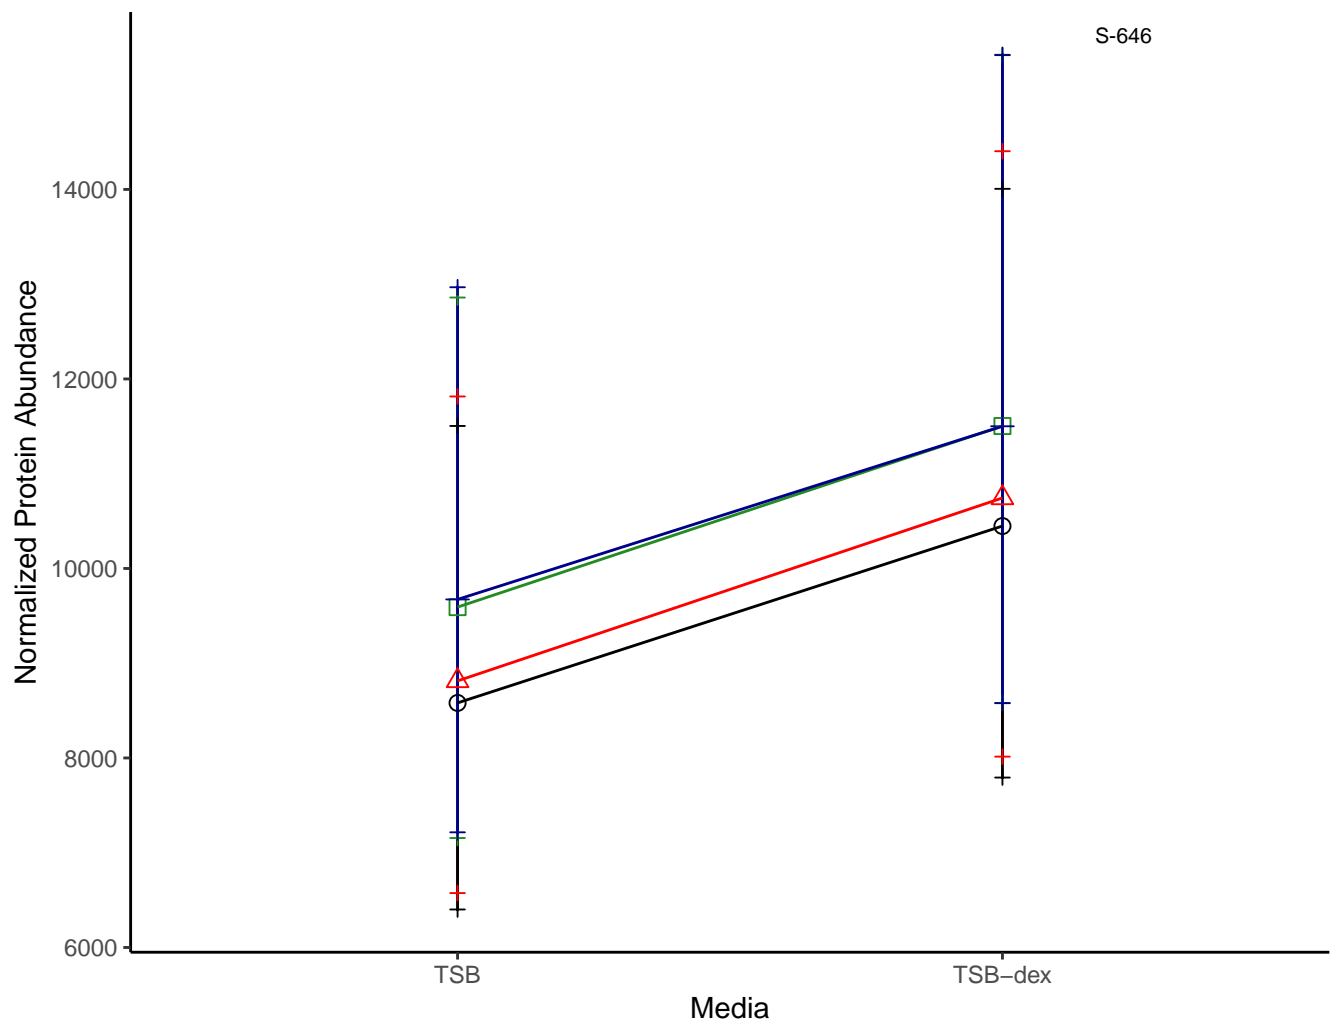

- ⊕ SA564
- △ SA564-ΔhptRS
- ⊞ SA564-ΔccpA
- + SA564-ΔhptRS/ccpA

# GRAR\_STAAM

S-647

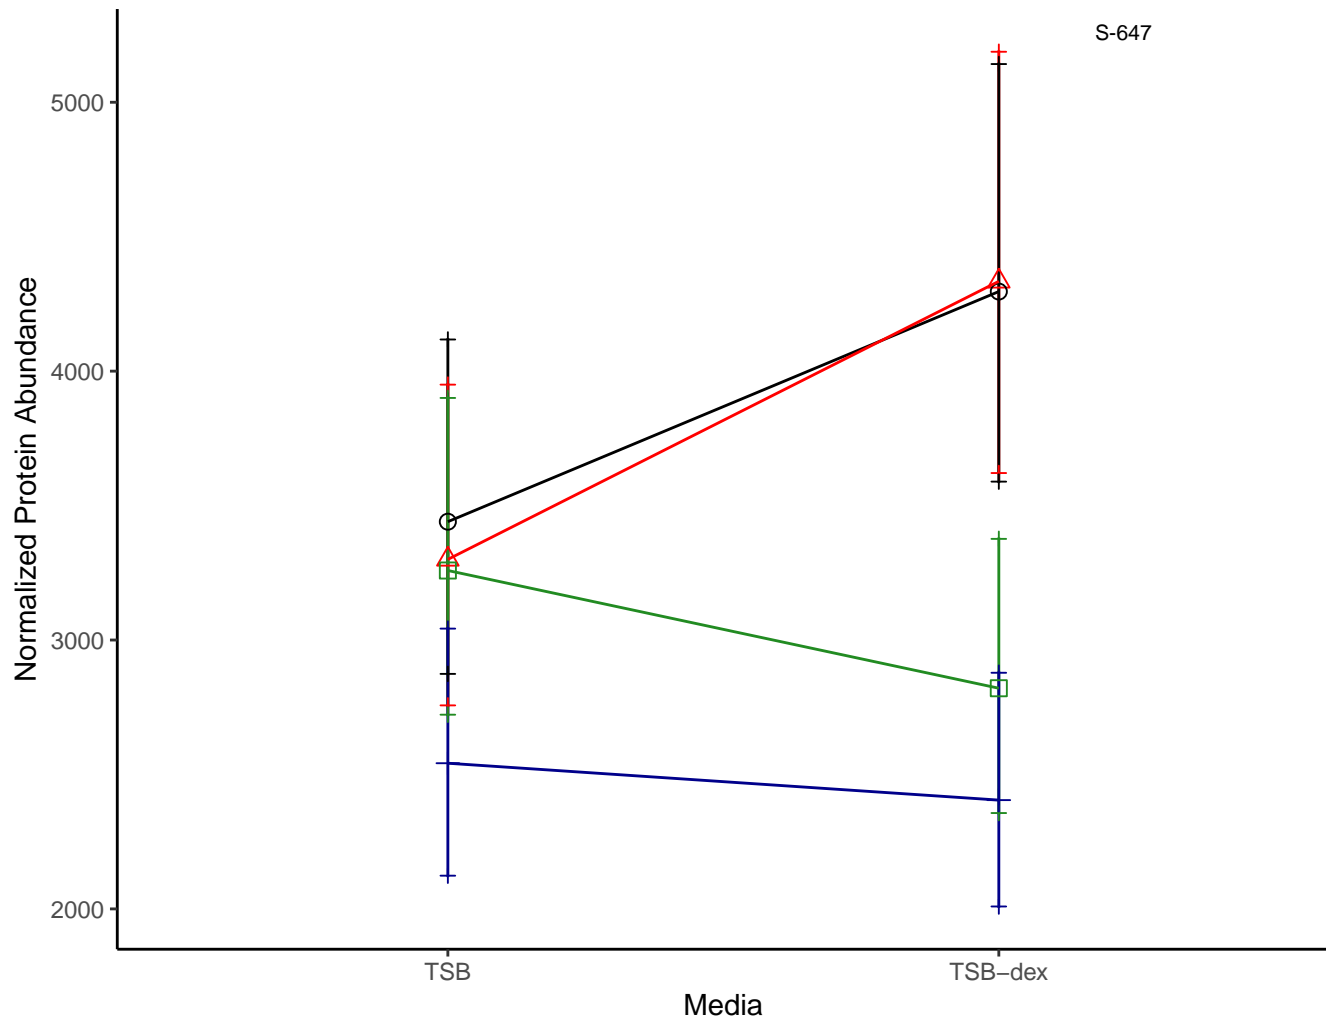

- ⊕ SA564
- △ SA564- $\Delta hptRS$
- ⊞ SA564- $\Delta ccpA$
- + SA564- $\Delta hptRS/ccpA$

# GREY\_STAAM

S-648

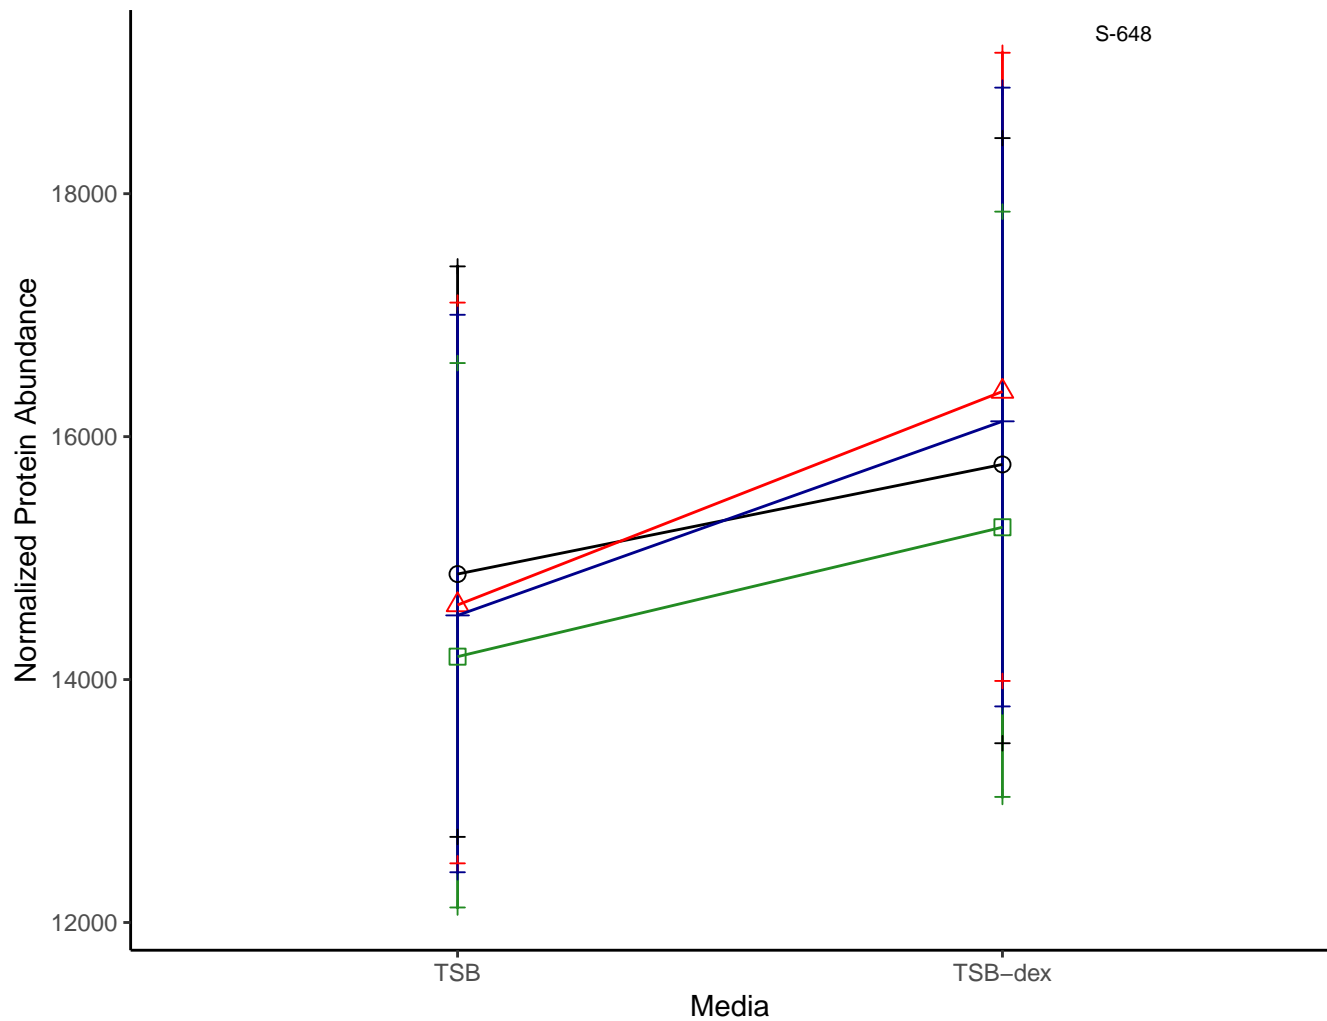

- ⊕ SA564
- △ SA564- $\Delta$ *hptRS*
- ⊞ SA564- $\Delta$ *ccpA*
- + SA564- $\Delta$ *hptRS/ccpA*



# GRPE\_STAAM

S-649

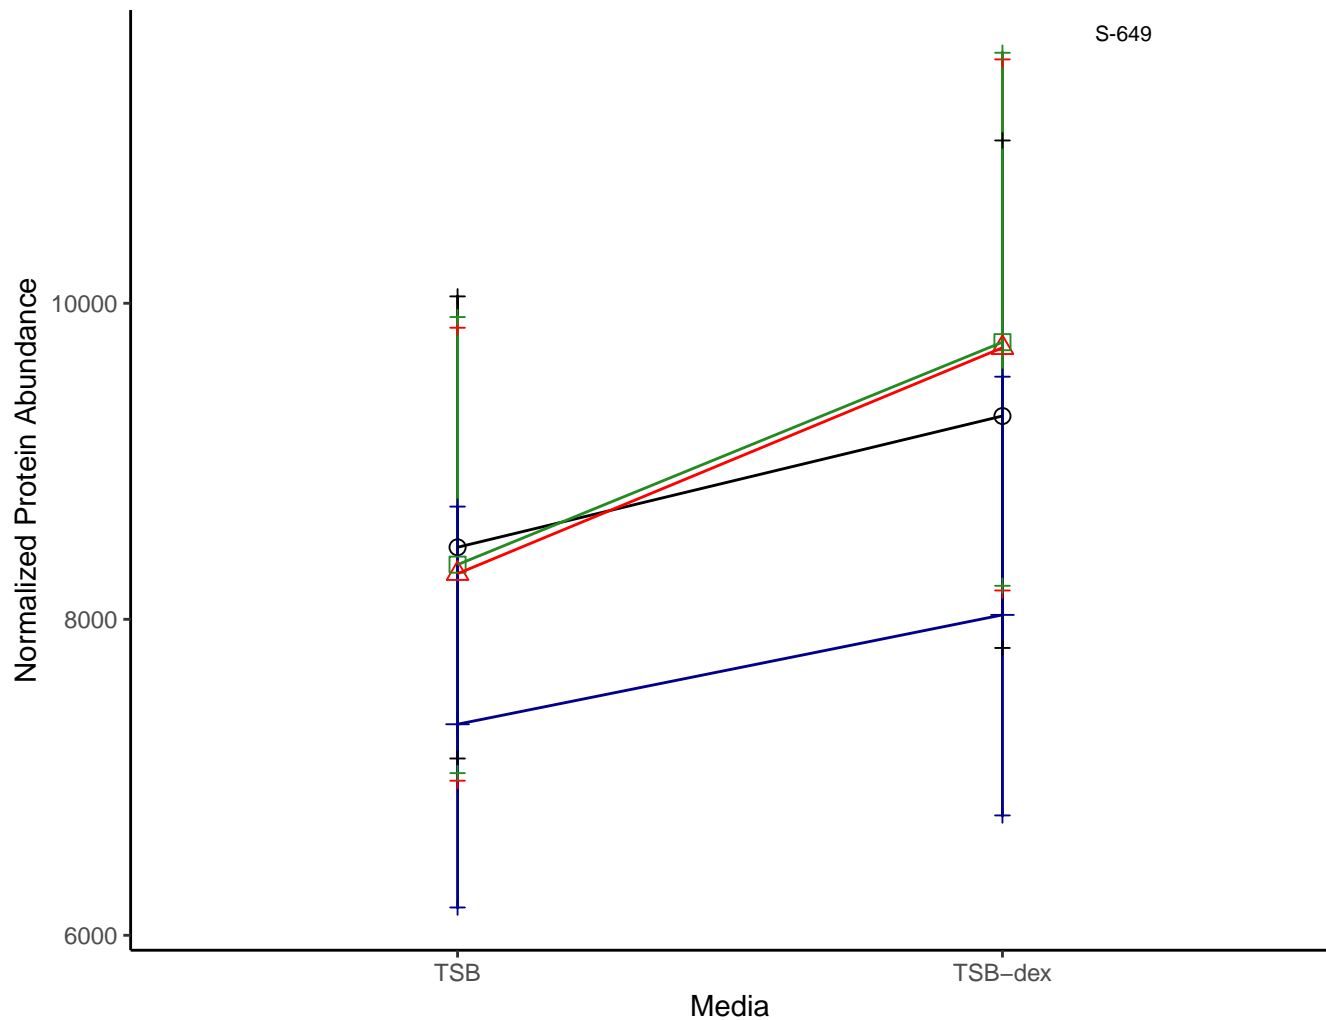

- ⊕ SA564
- △ SA564- $\Delta$ *hptRS*
- ⊞ SA564- $\Delta$ *ccpA*
- + SA564- $\Delta$ *hptRS/ccpA*

# GSA1\_STAAM

S-650

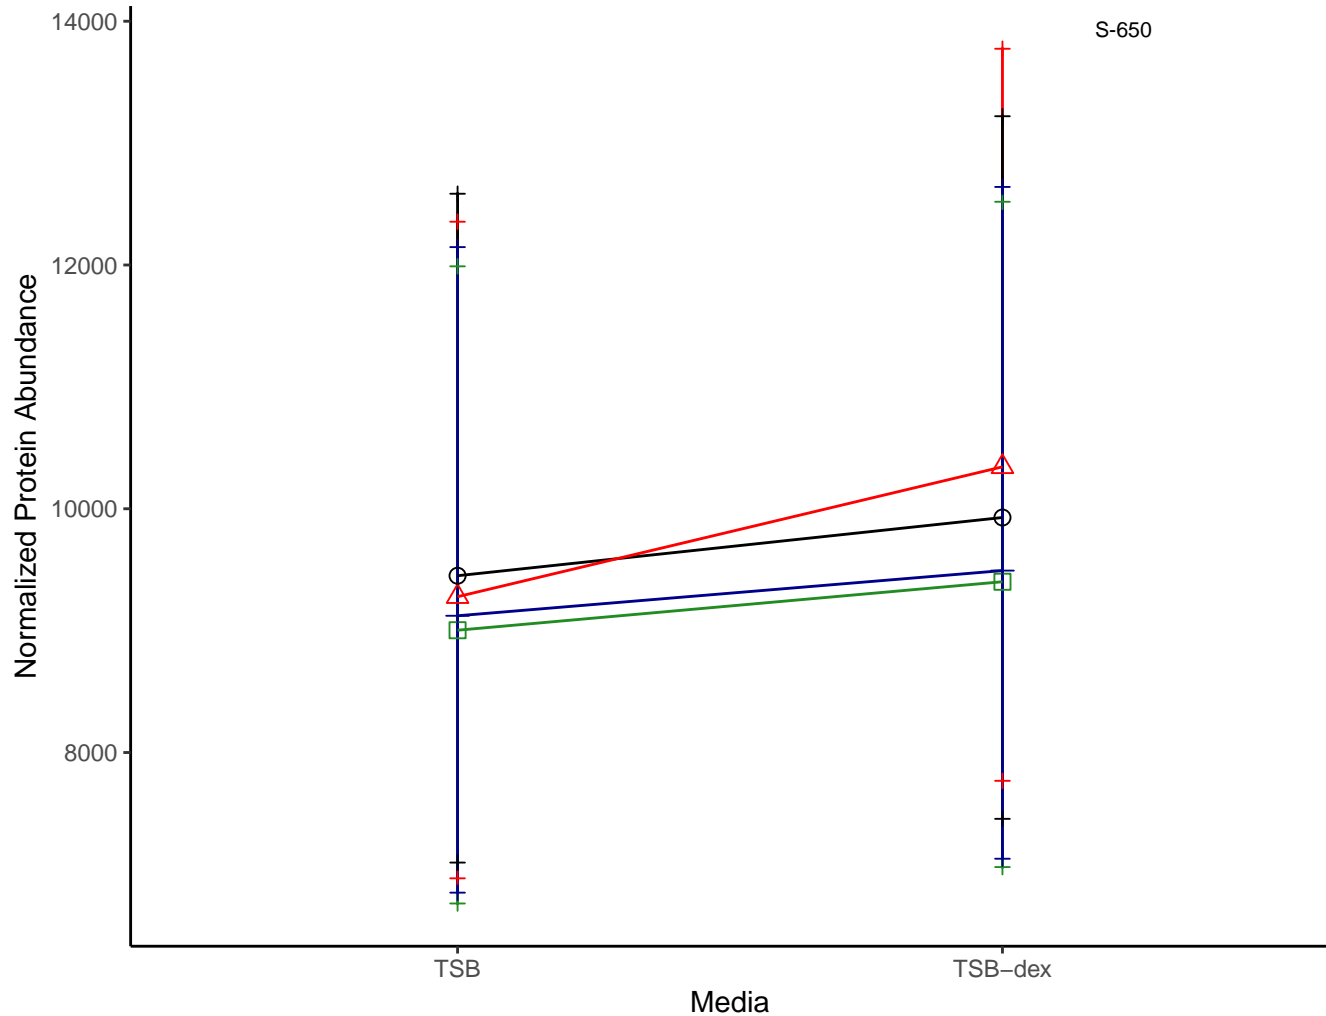

- ⊕ SA564
- △ SA564- $\Delta$ *hptRS*
- SA564- $\Delta$ *ccpA*
- + SA564- $\Delta$ *hptRS/ccpA*

# GSA2\_STAAM

S-651

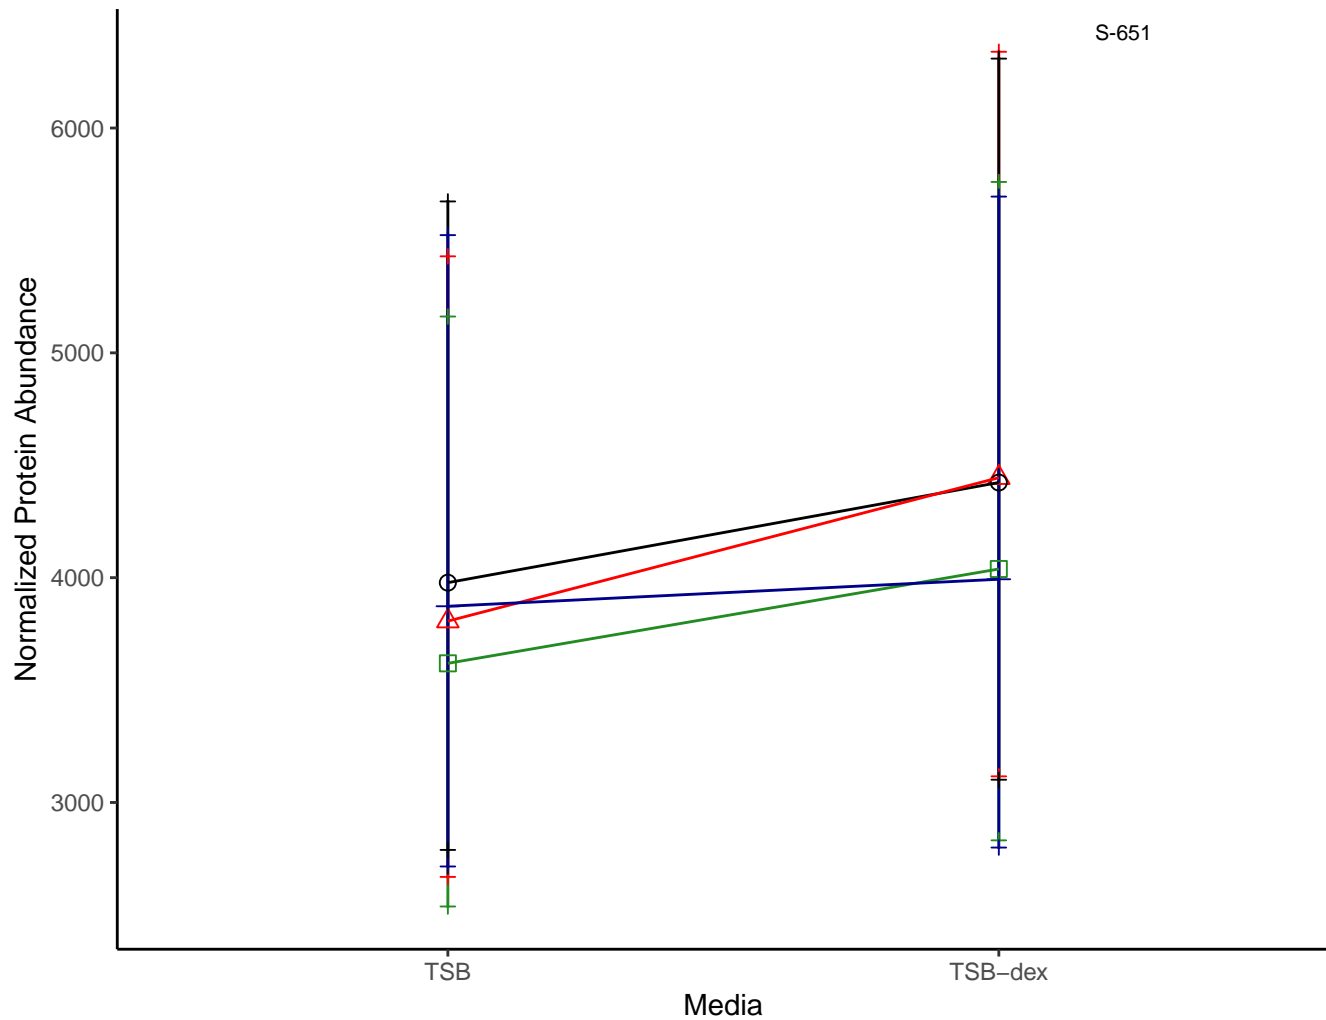

- SA564
- SA564- $\Delta$ *hptRS*
- SA564- $\Delta$ *ccpA*
- SA564- $\Delta$ *hptRS/ccpA*

# GTAB\_STAAM

S-652

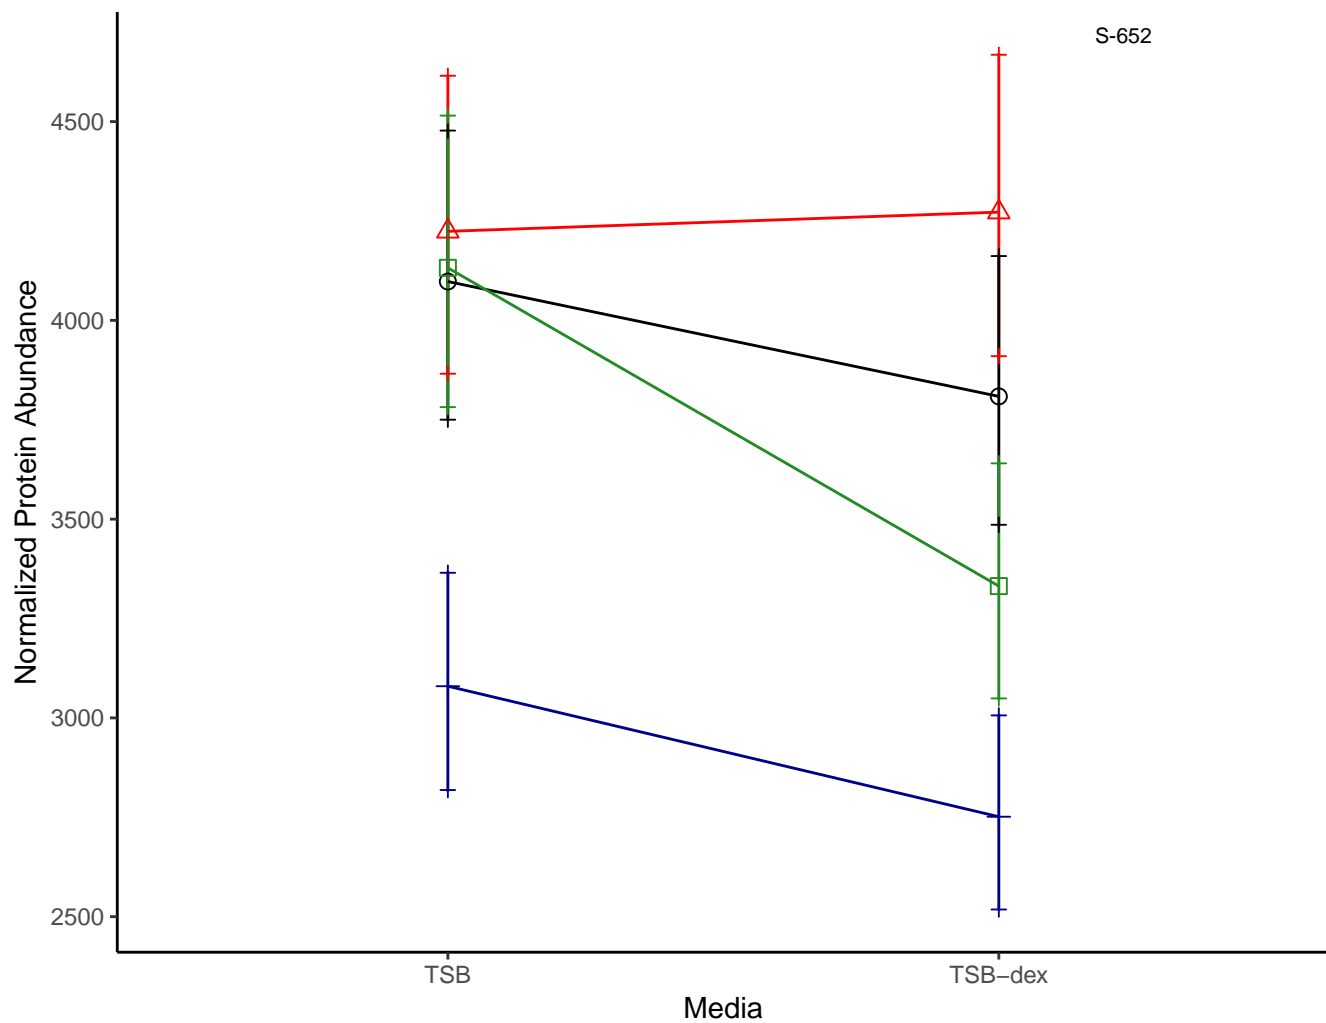

- ⊕ SA564
- △ SA564- $\Delta hptRS$
- ⊞ SA564- $\Delta ccpA$
- + SA564- $\Delta hptRS/ccpA$

# GUAA\_STAAM

S-653

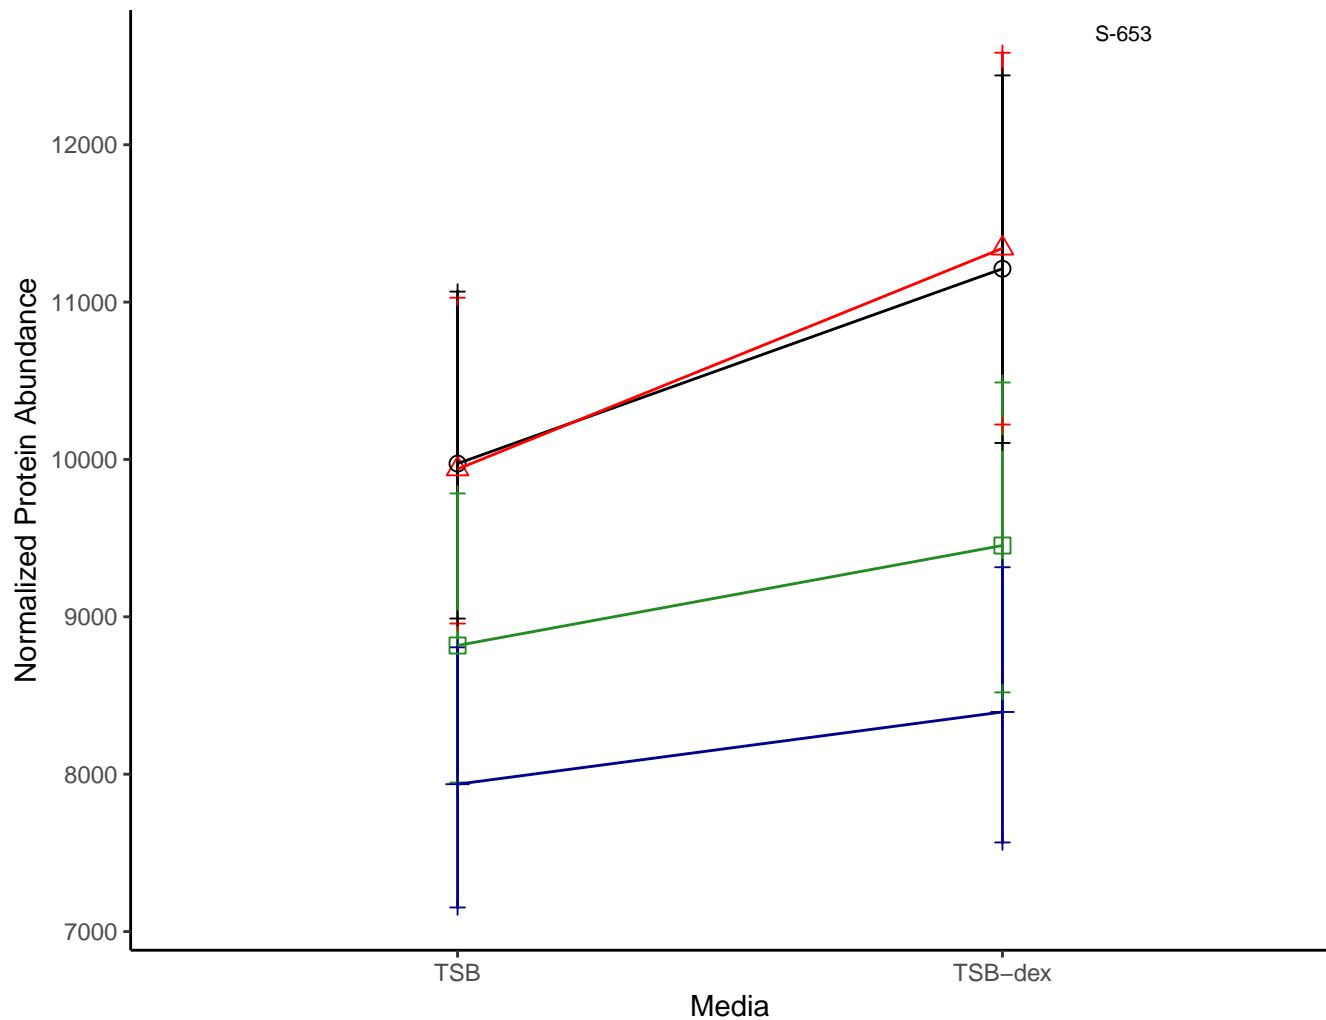

- ⊕ SA564
- △ SA564-ΔhptRS
- ⊞ SA564-ΔccpA
- + SA564-ΔhptRS/ccpA

# GUAC\_STAAM

S-654

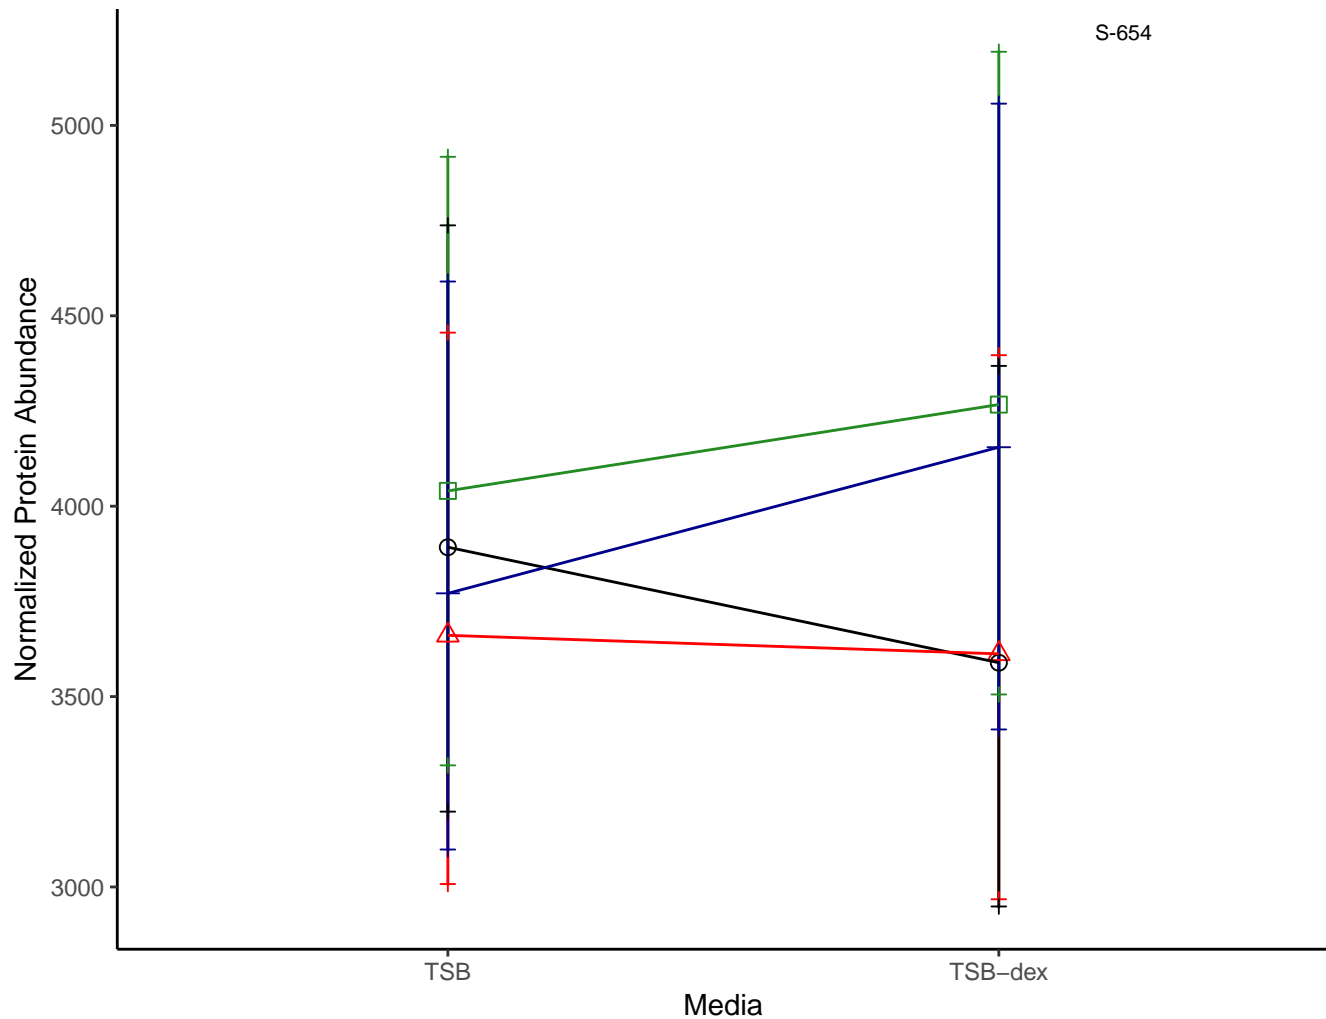

- ⊕ SA564
- △ SA564- $\Delta$ *hptRS*
- ⊞ SA564- $\Delta$ *ccpA*
- + SA564- $\Delta$ *hptRS/ccpA*

# GYRB\_STAAM

S-655

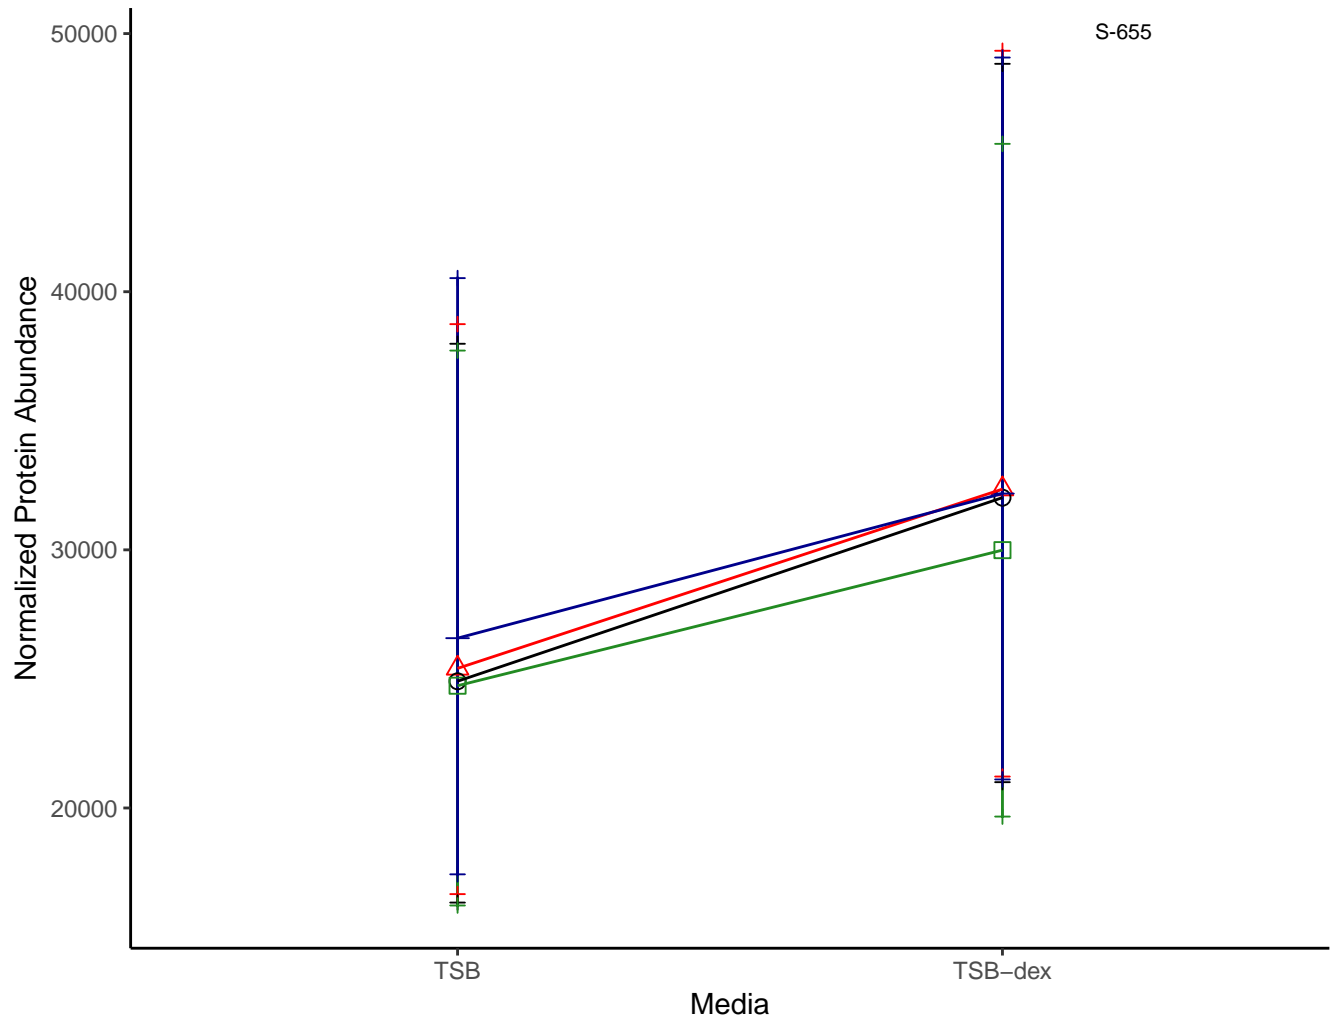

- ⊕ SA564
- △ SA564-ΔhptRS
- SA564-ΔccpA
- + SA564-ΔhptRS/ccpA

# HCHA\_STAAM

S-656

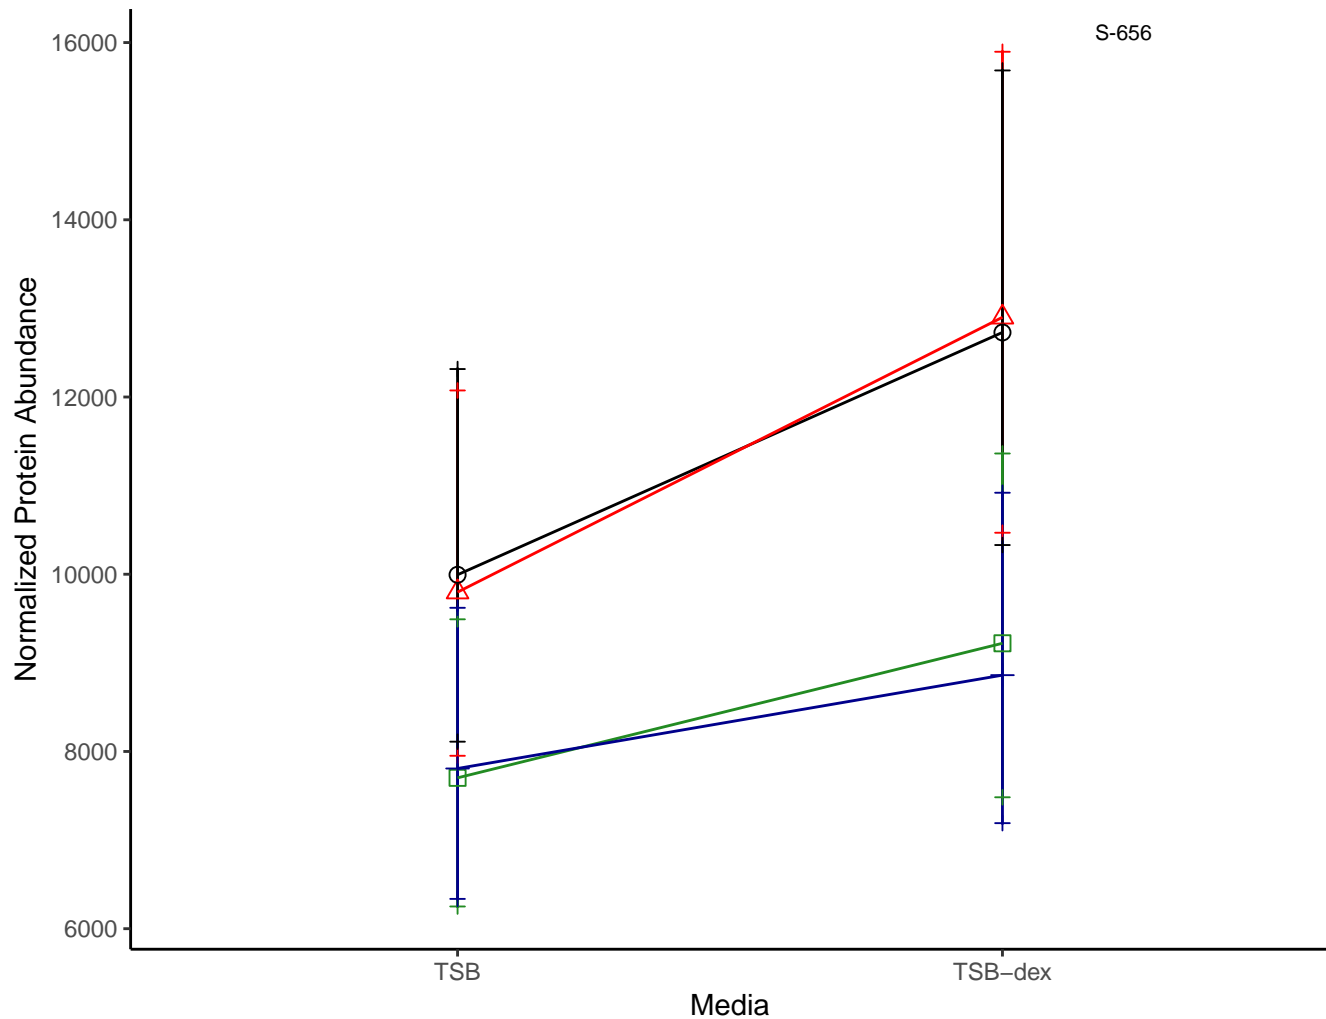

- ⊕ SA564
- △ SA564- $\Delta$ *hptRS*
- SA564- $\Delta$ *ccpA*
- + SA564- $\Delta$ *hptRS/ccpA*



# HEM2\_STAAM

S-657

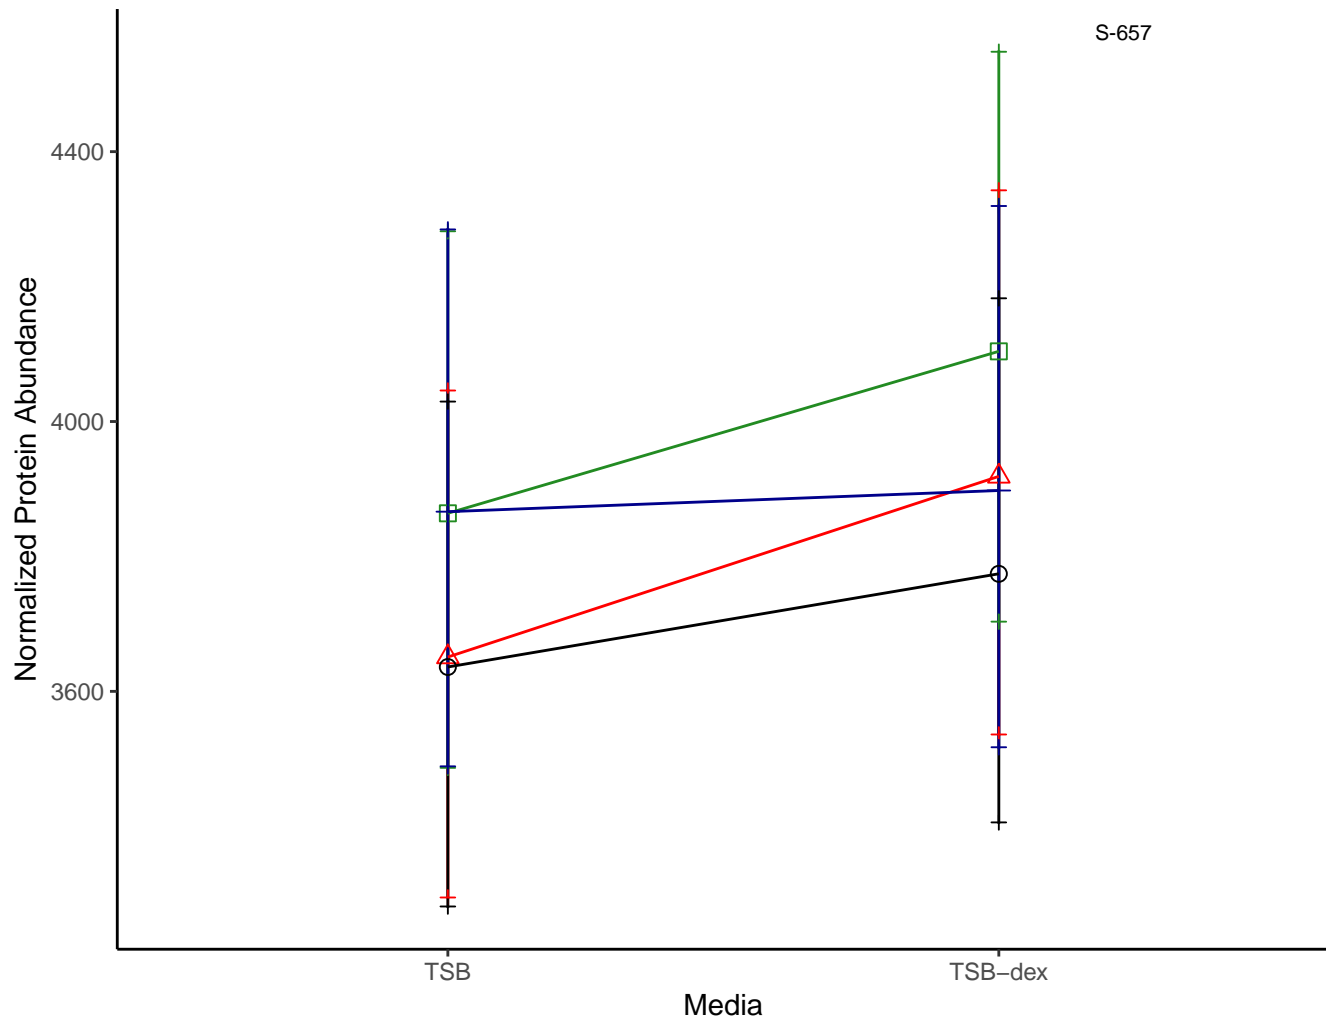

- ⊕ SA564
- △ SA564- $\Delta$ *hptRS*
- ⊞ SA564- $\Delta$ *ccpA*
- + SA564- $\Delta$ *hptRS/ccpA*

# HEM3\_STAAM

S-658

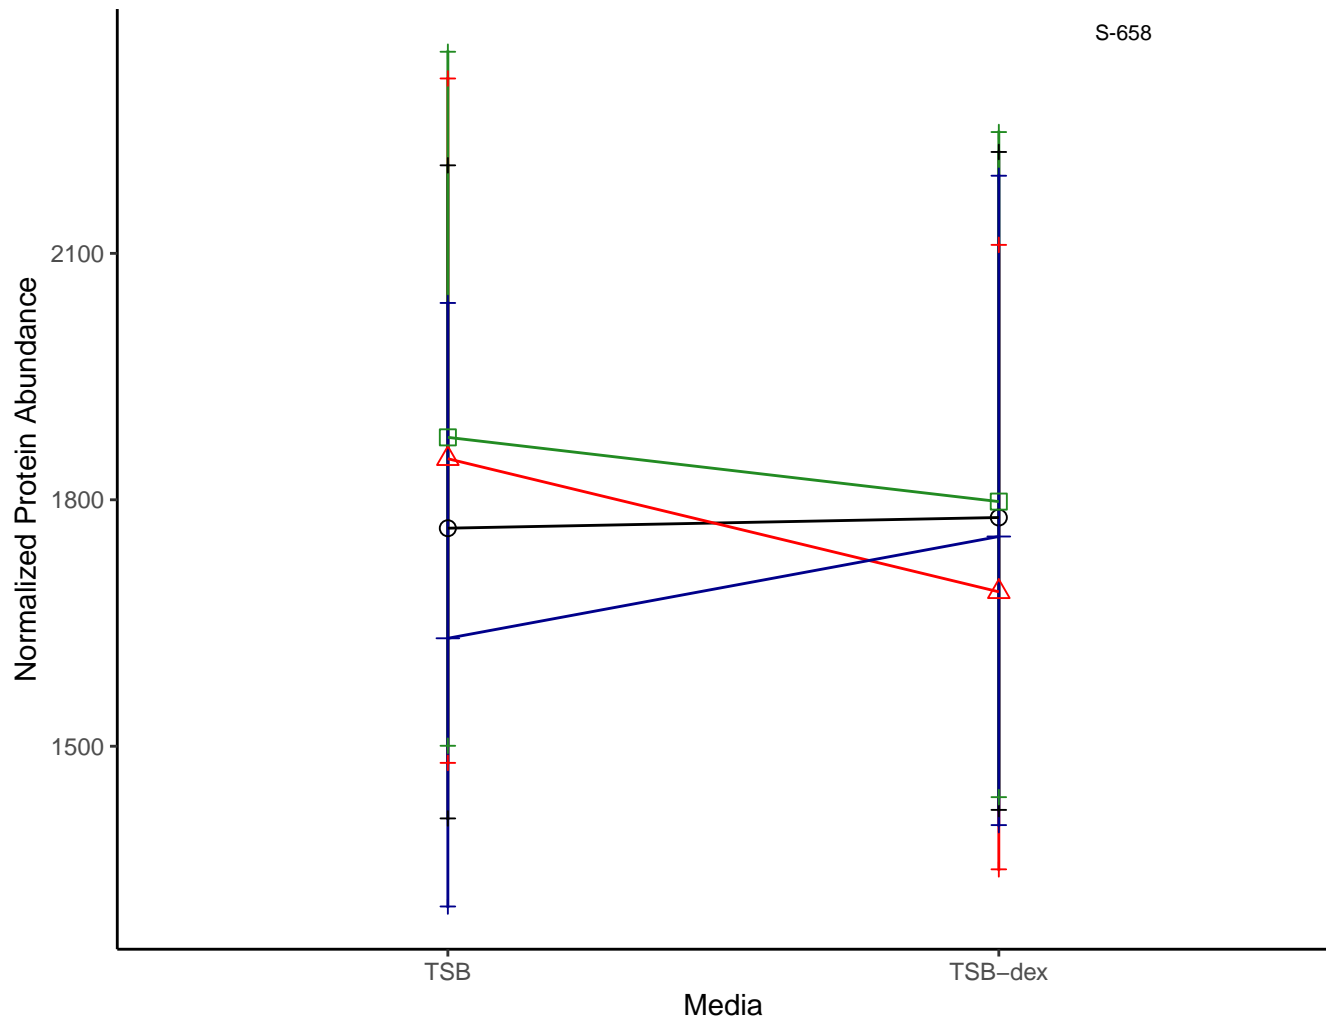

- ⊕ SA564
- △ SA564-ΔhptRS
- ⊞ SA564-ΔccpA
- + SA564-ΔhptRS/ccpA

# HLD\_STAAM

S-659

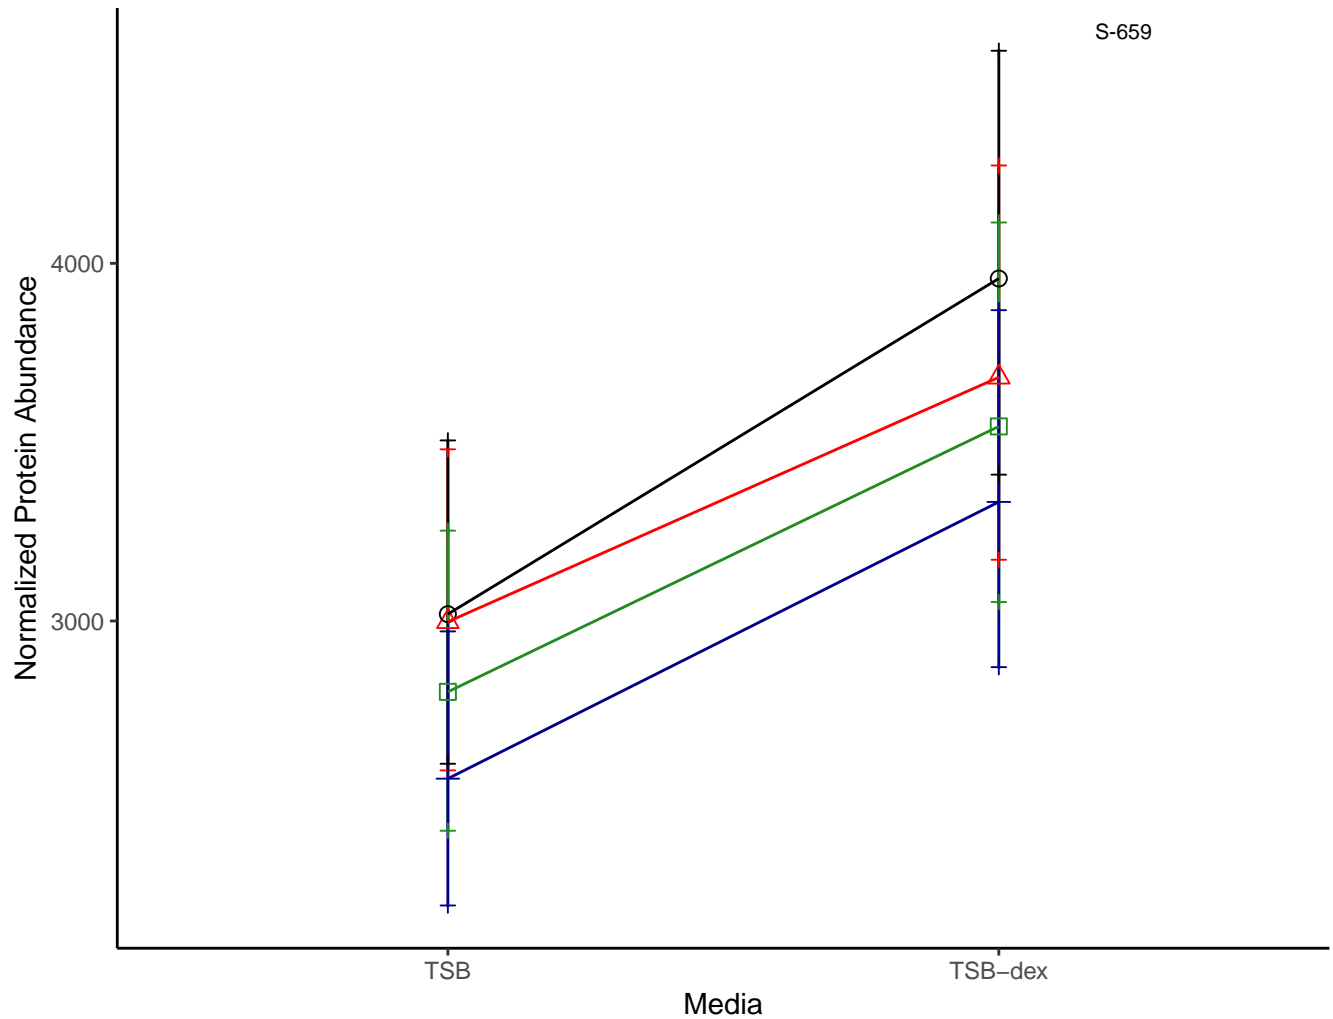

- ⊕ SA564
- △ SA564-ΔhptRS
- ⊞ SA564-ΔccpA
- + SA564-ΔhptRS/ccpA

# HPRK\_STAAM

S-660

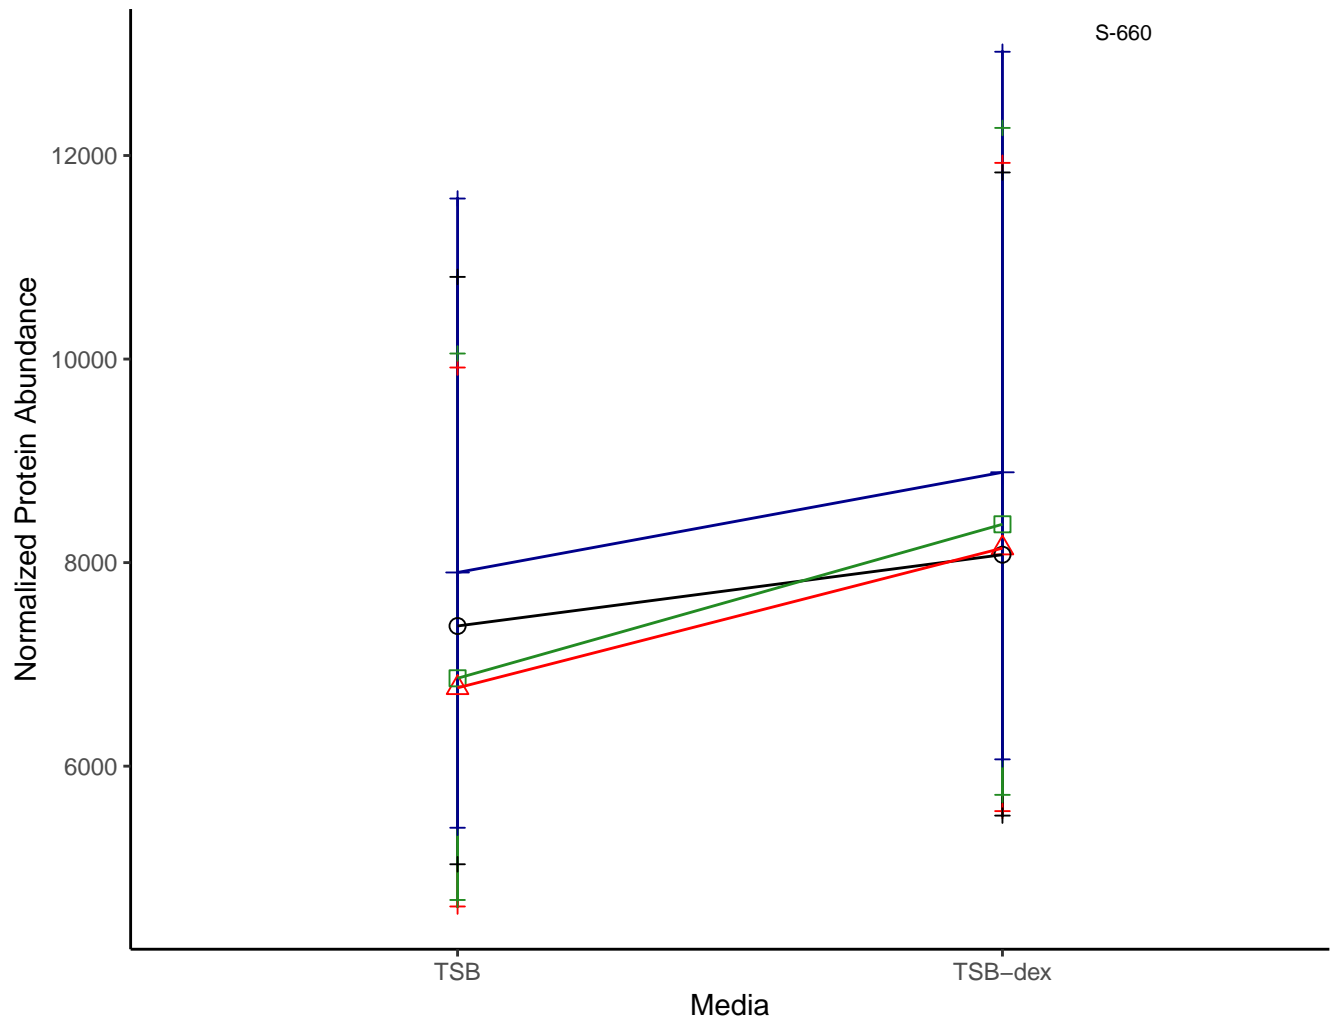

- ⊕ SA564
- △ SA564- $\Delta hptRS$
- ⊞ SA564- $\Delta ccpA$
- + SA564- $\Delta hptRS/ccpA$

# HPRT\_STAAM

S-661

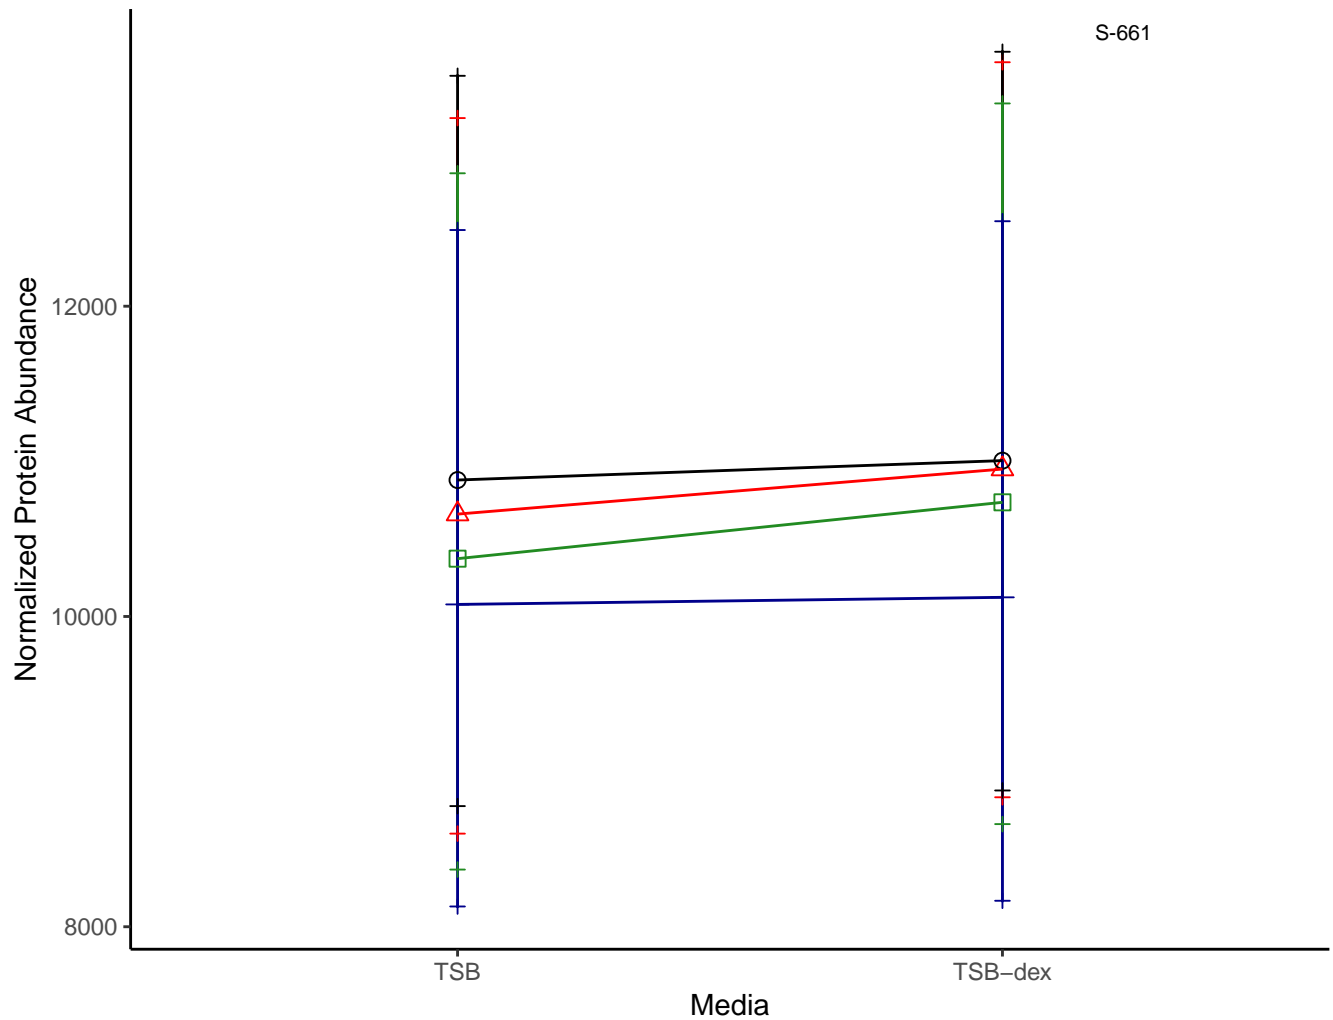

- SA564
- SA564- $\Delta hptRS$
- SA564- $\Delta ccpA$
- SA564- $\Delta hptRS/ccpA$

# HPS\_STAAM

S-662

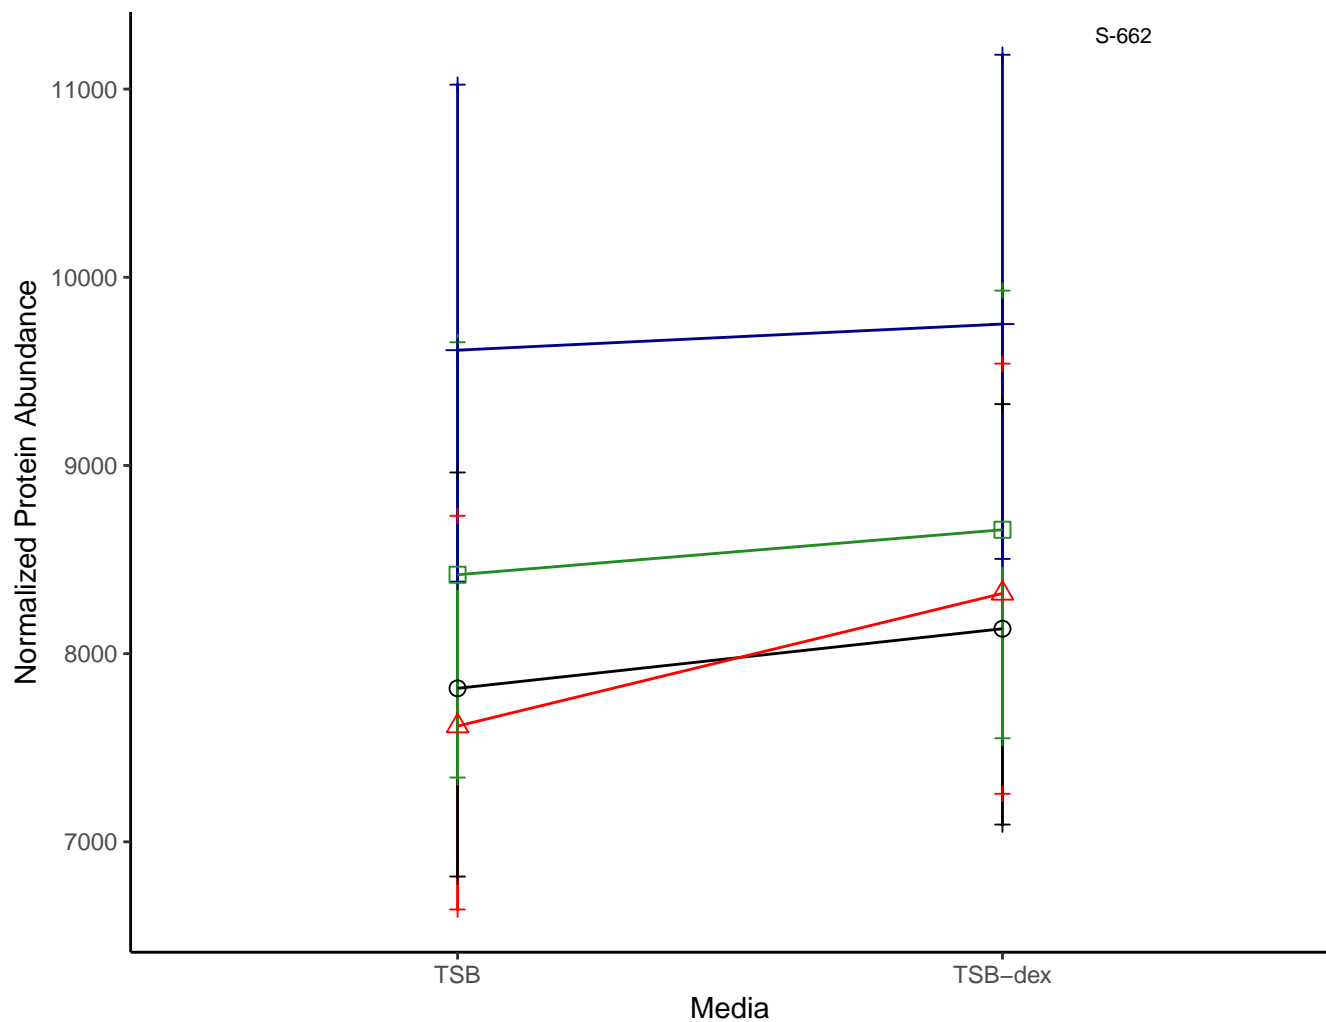

- ⊕ SA564
- △ SA564-ΔhptRS
- ⊞ SA564-ΔccpA
- + SA564-ΔhptRS/ccpA

# HRTA\_STAAM

S-663

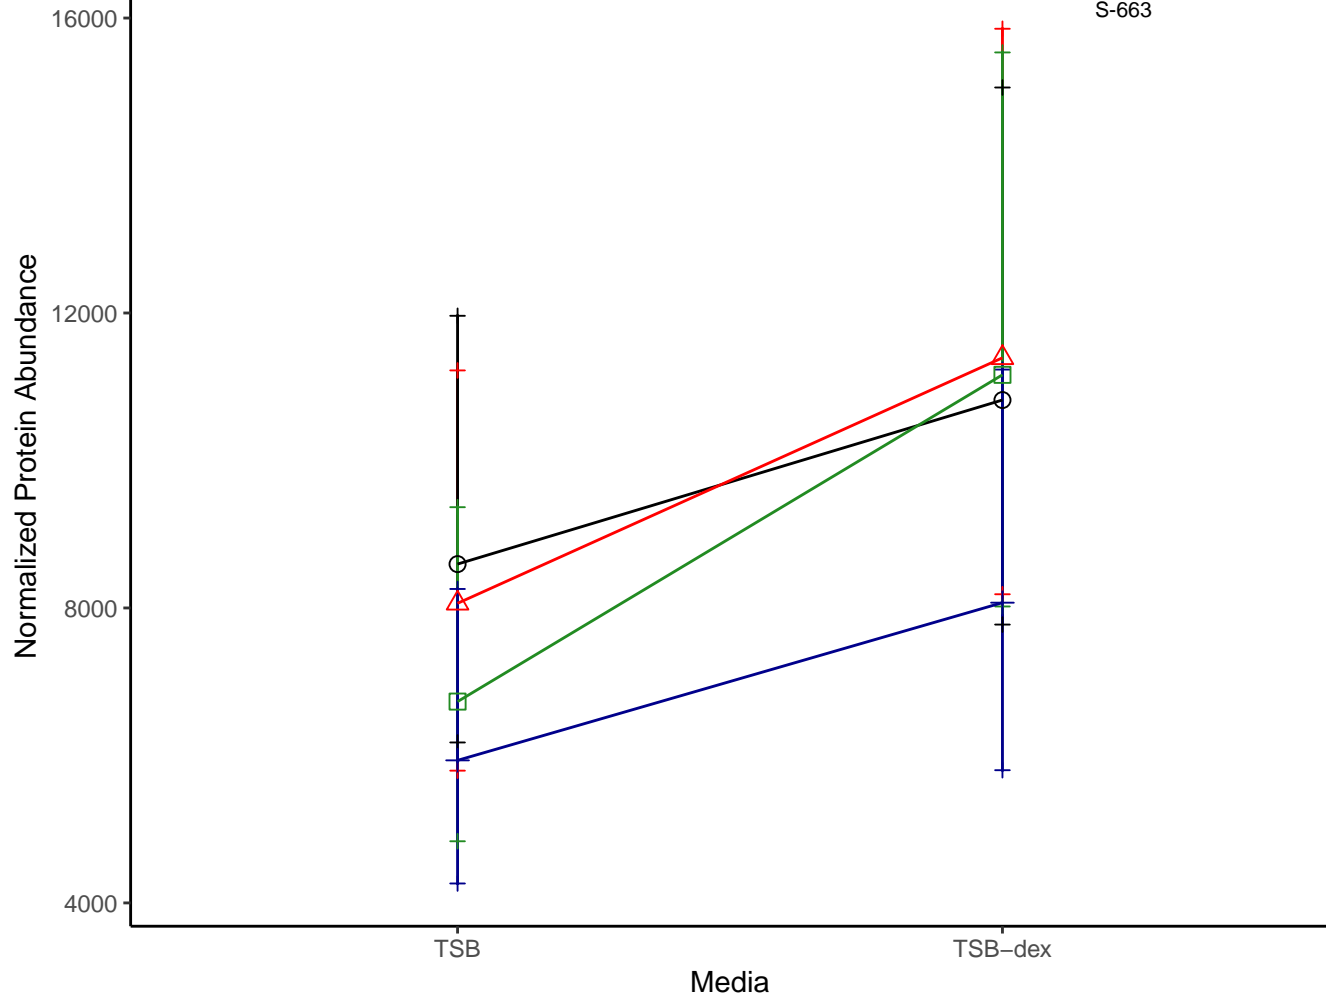

- ⊕ SA564
- △ SA564-ΔhptRS
- ⊞ SA564-ΔccpA
- + SA564-ΔhptRS/ccpA

# HSLO\_STAAM

S-664

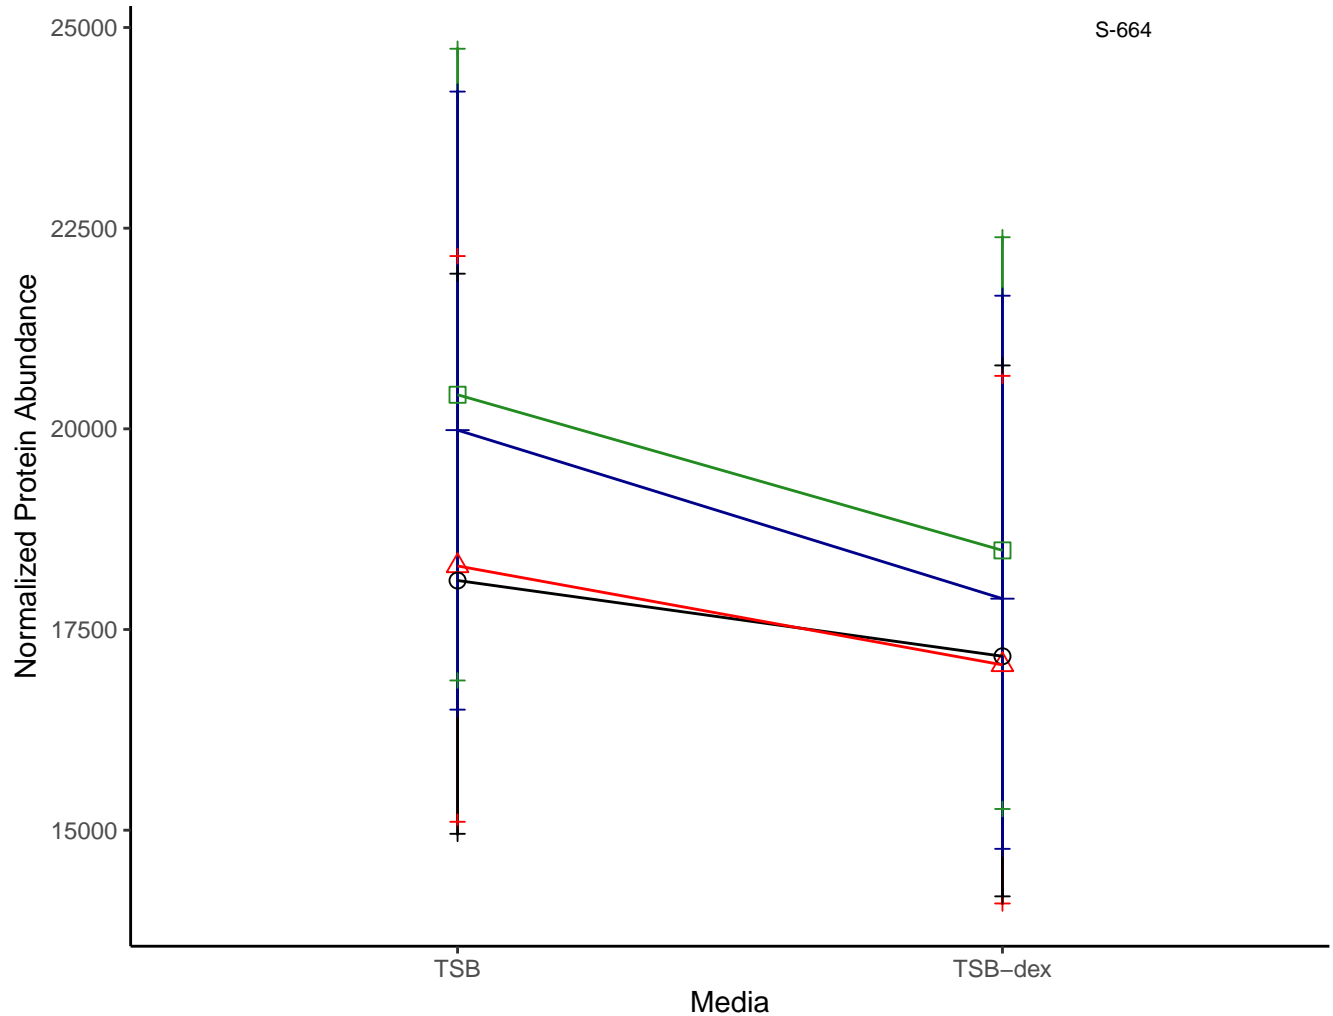

- ⊕ SA564
- △ SA564-ΔhptRS
- ⊞ SA564-ΔccpA
- + SA564-ΔhptRS/ccpA



# HSLU\_STAAM

S-665

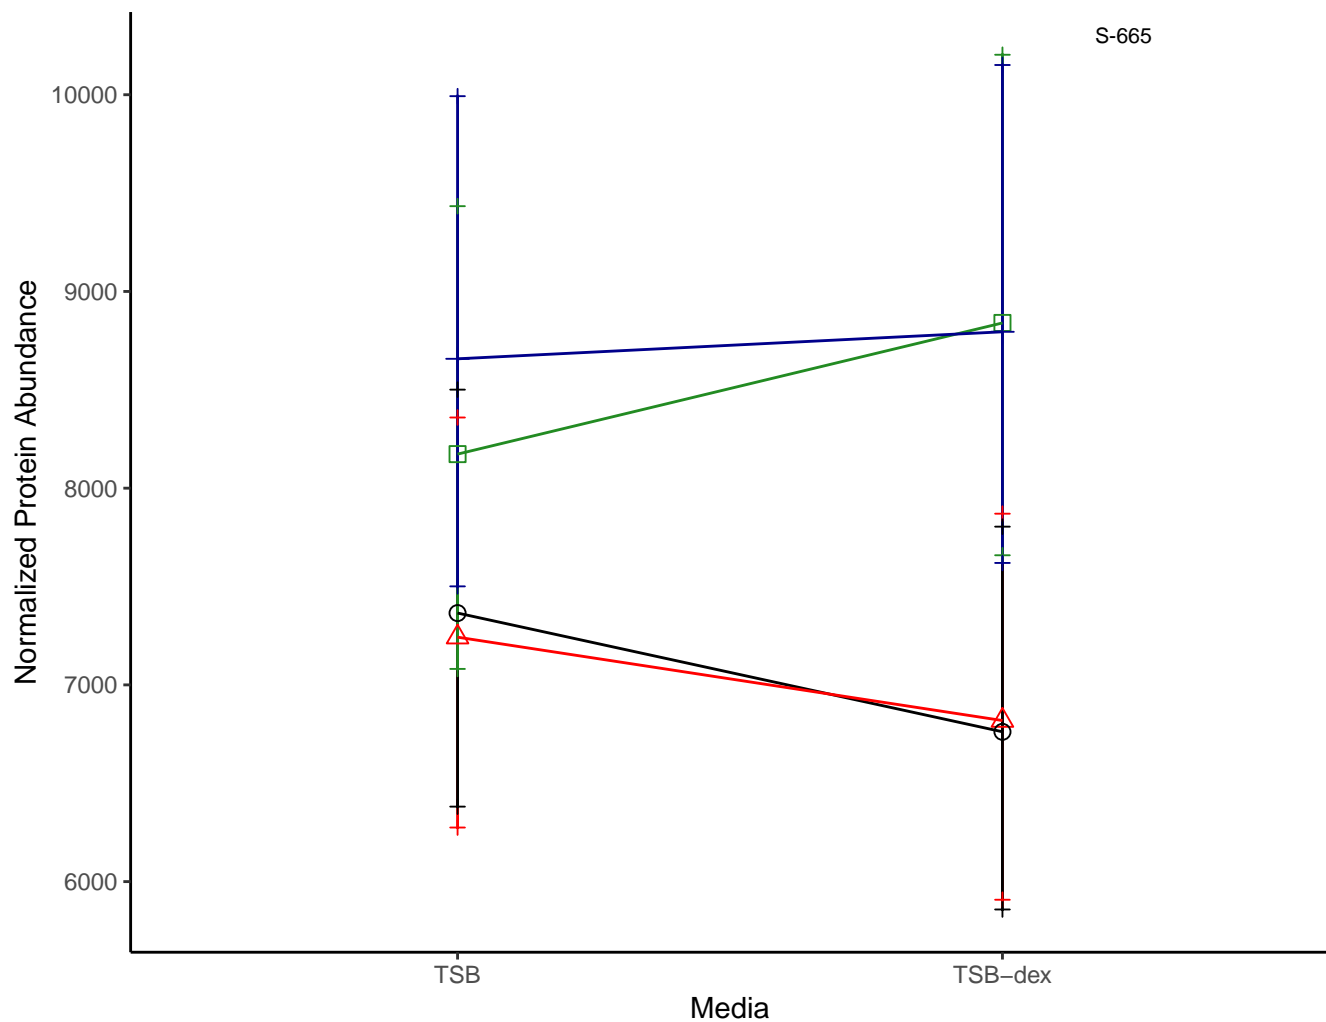

- ⊕ SA564
- △ SA564-ΔhptRS
- ⊠ SA564-ΔccpA
- + SA564-ΔhptRS/ccpA

# HSLV\_STAAM

S-666

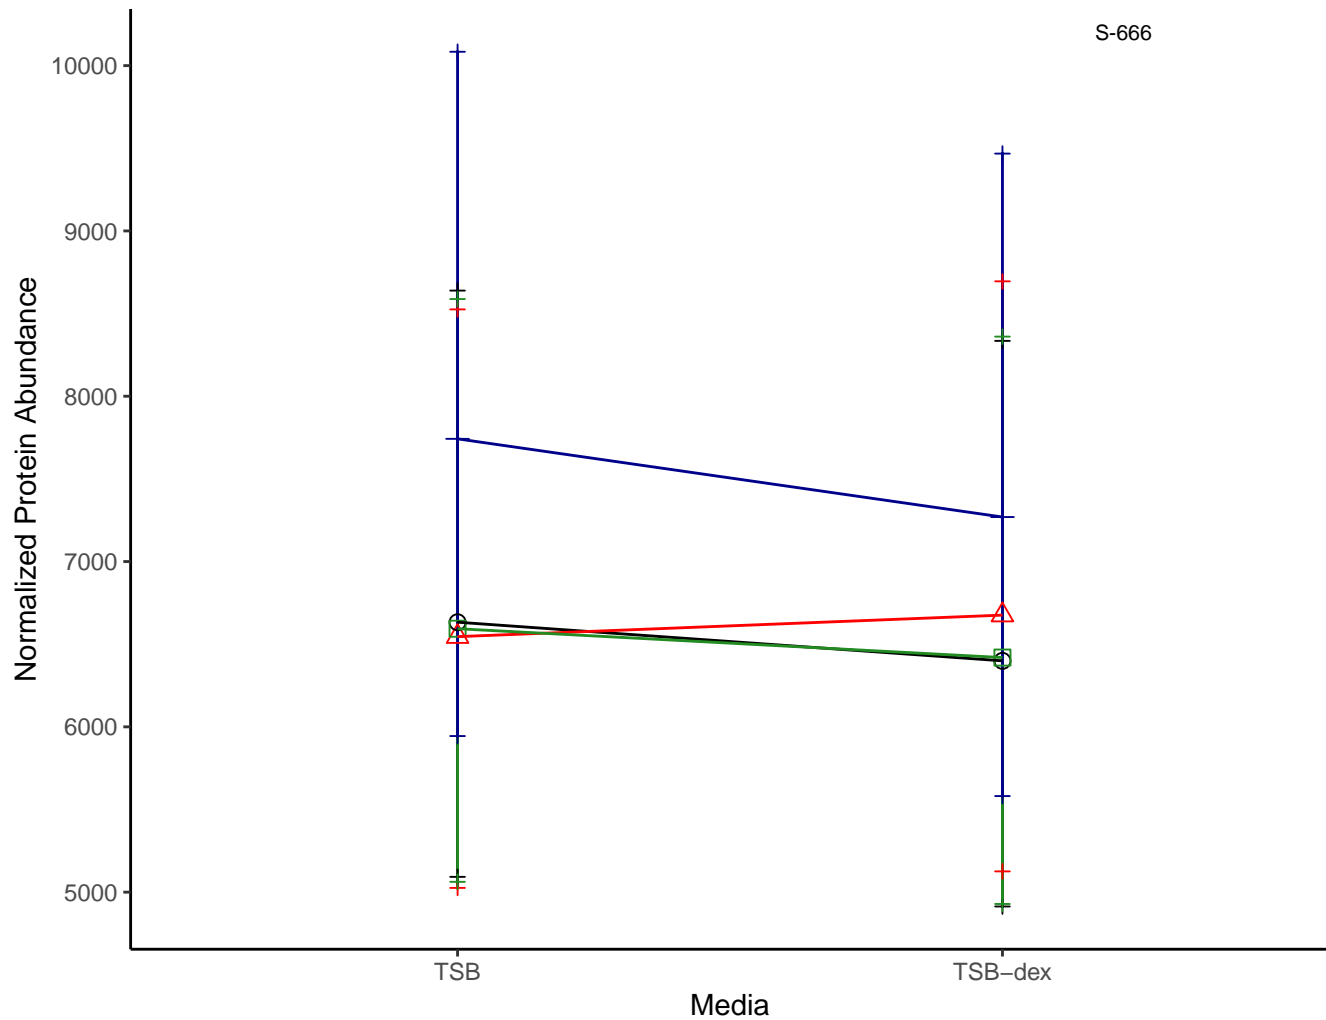

- ⊕ SA564
- △ SA564- $\Delta$ *hptRS*
- ⊞ SA564- $\Delta$ *ccpA*
- + SA564- $\Delta$ *hptRS/ccpA*

# HUTH\_STAAM

S-667

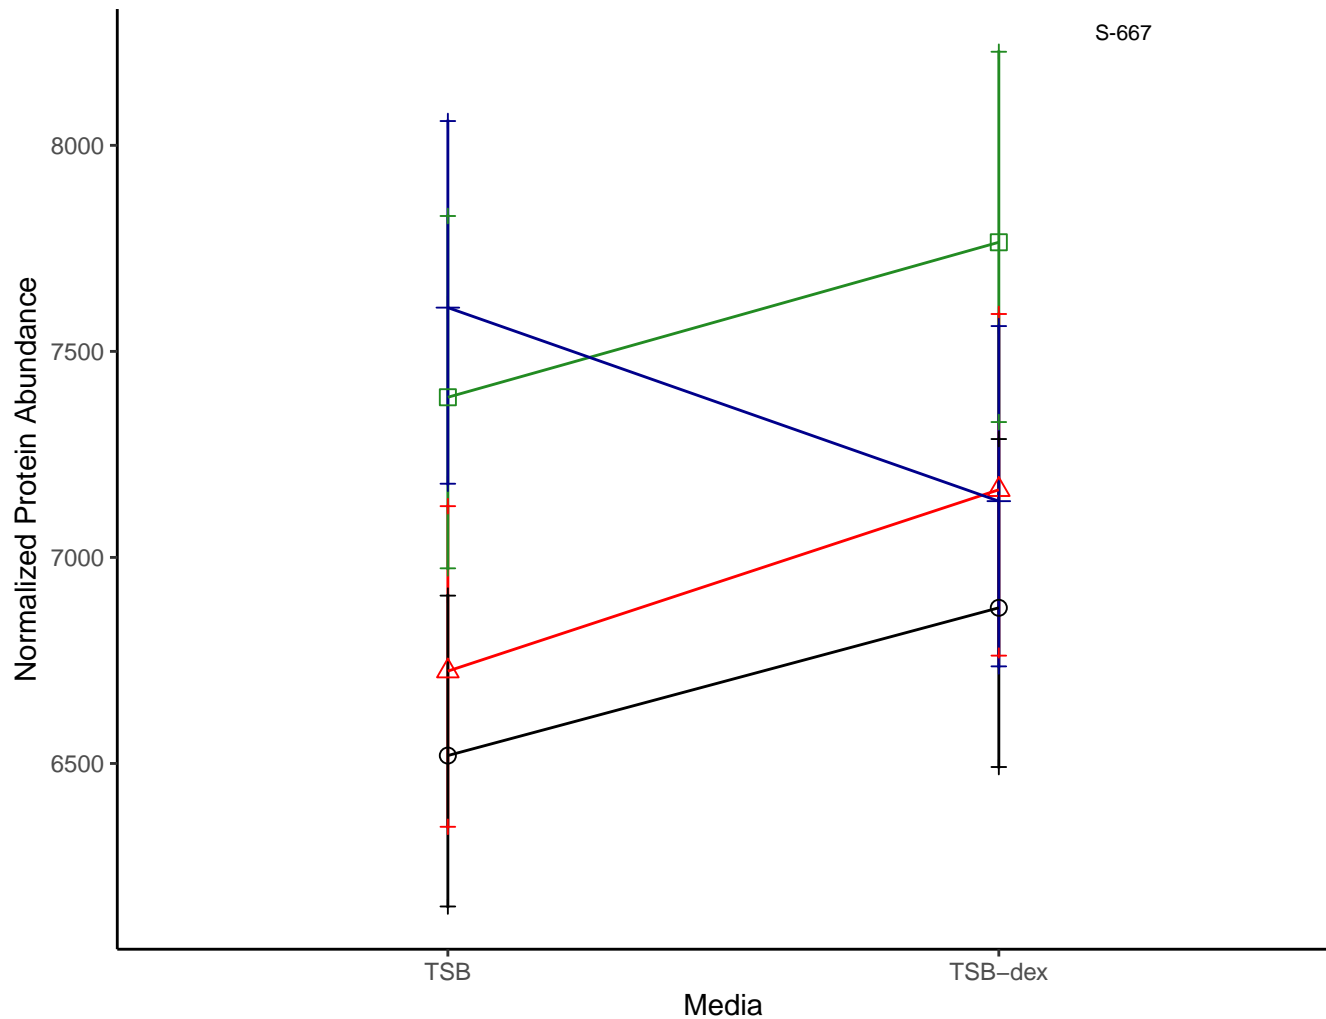

- ⊕ SA564
- △ SA564- $\Delta$ *hptRS*
- ⊠ SA564- $\Delta$ *ccpA*
- + SA564- $\Delta$ *hptRS/ccpA*

# HUTI\_STAAM

S-668

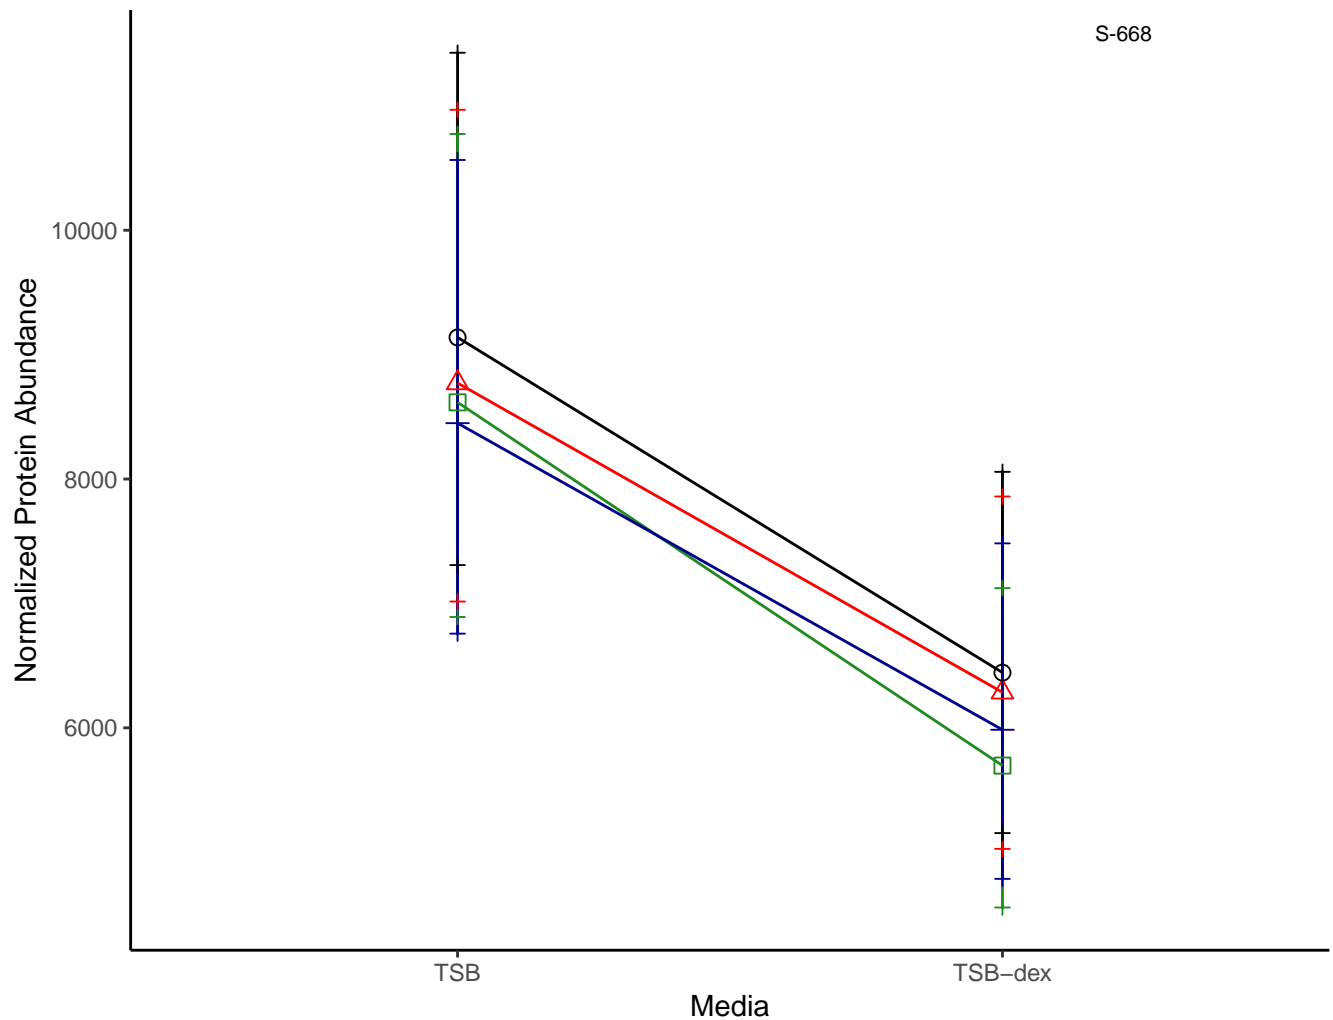

- ⊕ SA564
- △ SA564-ΔhptRS
- ⊞ SA564-ΔccpA
- + SA564-ΔhptRS/ccpA

# HUTU\_STAAM

S-669

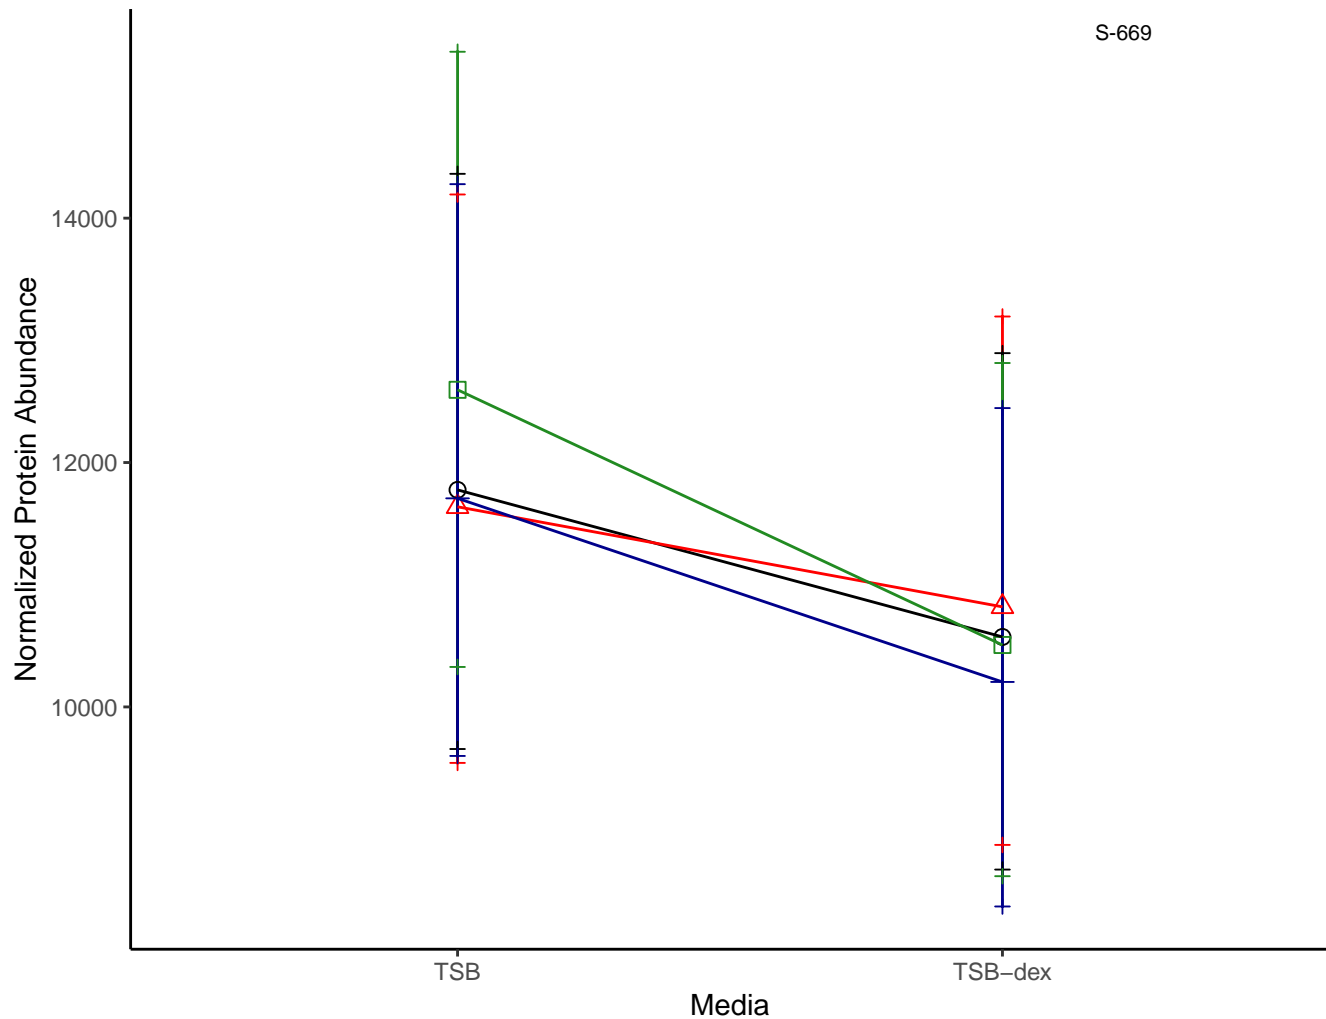

- ⊕ SA564
- △ SA564- $\Delta$ *hptRS*
- ⊞ SA564- $\Delta$ *ccpA*
- + SA564- $\Delta$ *hptRS/ccpA*

# ICAB\_STAAM

S-670

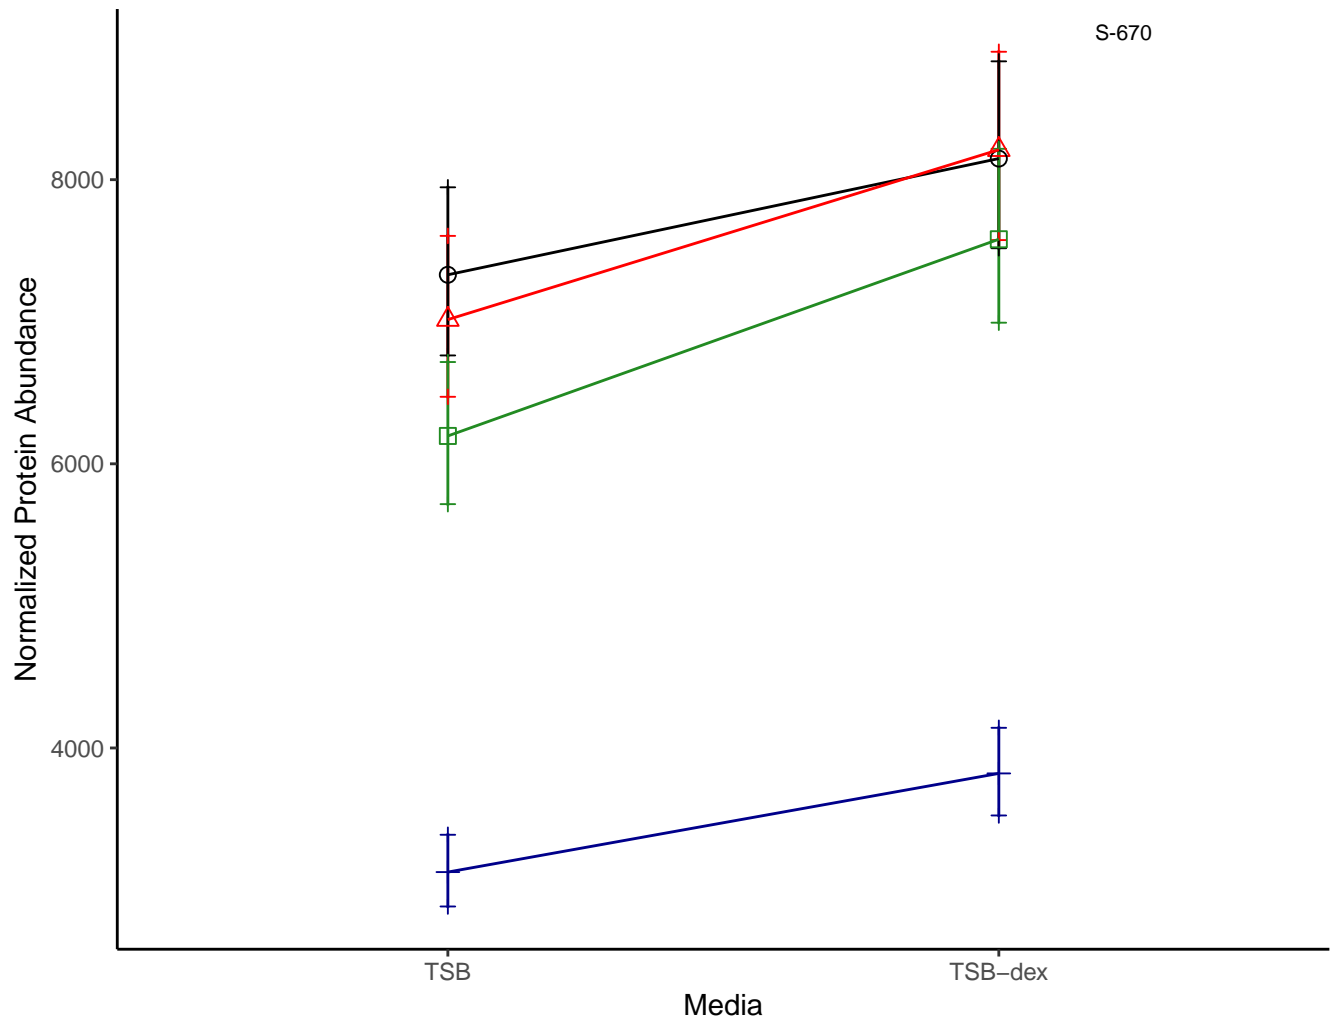

- ⊕ SA564
- △ SA564- $\Delta$ *hptRS*
- ⊞ SA564- $\Delta$ *ccpA*
- ⊕ SA564- $\Delta$ *hptRS/ccpA*

# IDH\_STAAM

S-671

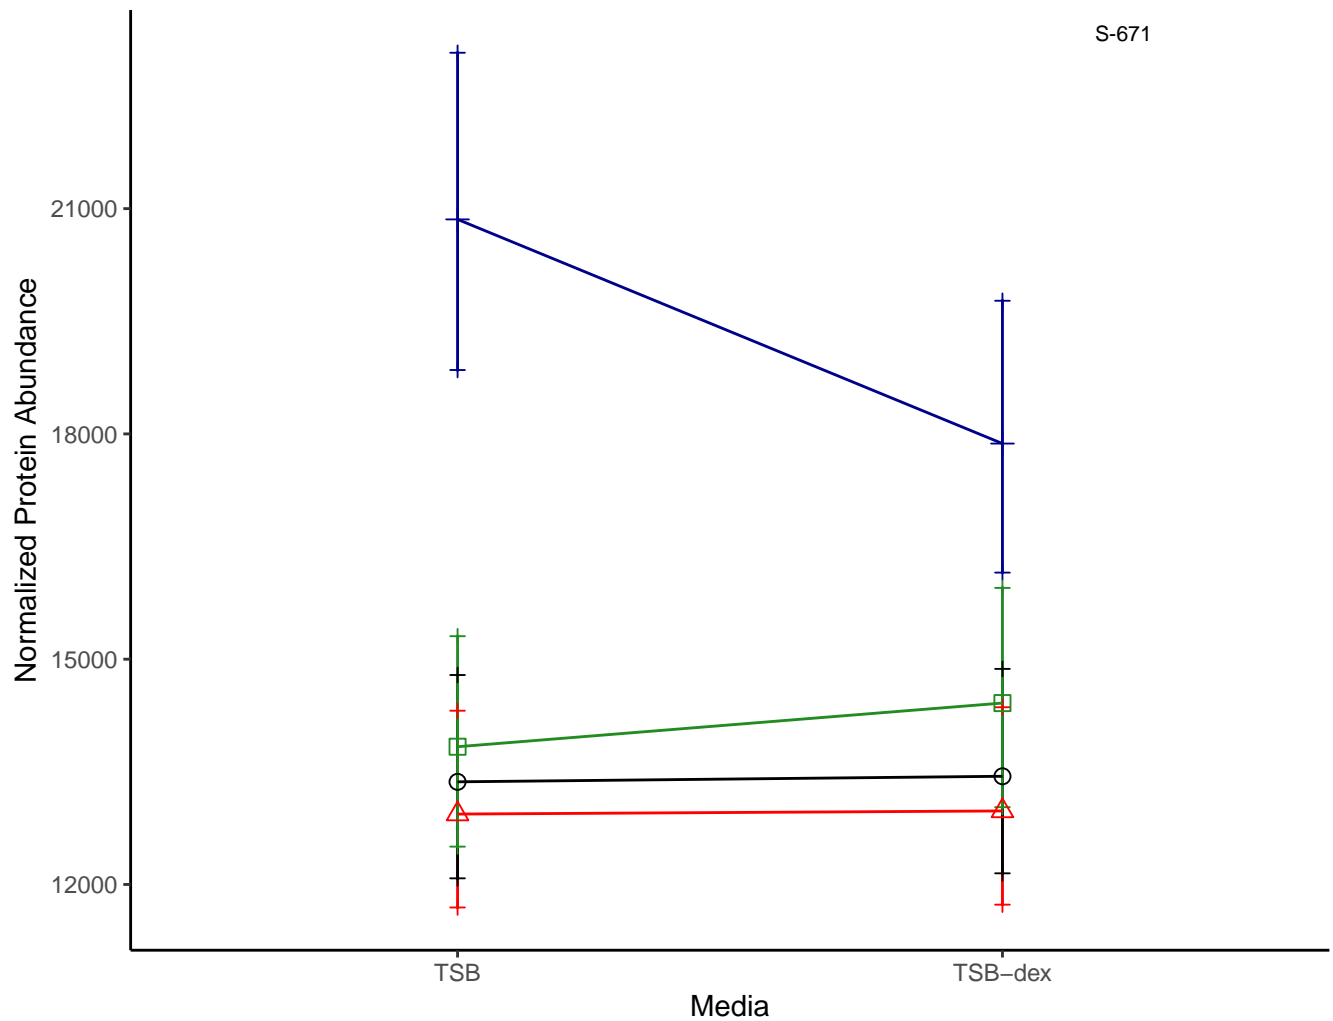

- ⊕ SA564
- △ SA564- $\Delta$ hptRS
- ⊞ SA564- $\Delta$ ccpA
- + SA564- $\Delta$ hptRS/ccpA

# IF1\_STAAM

S-672

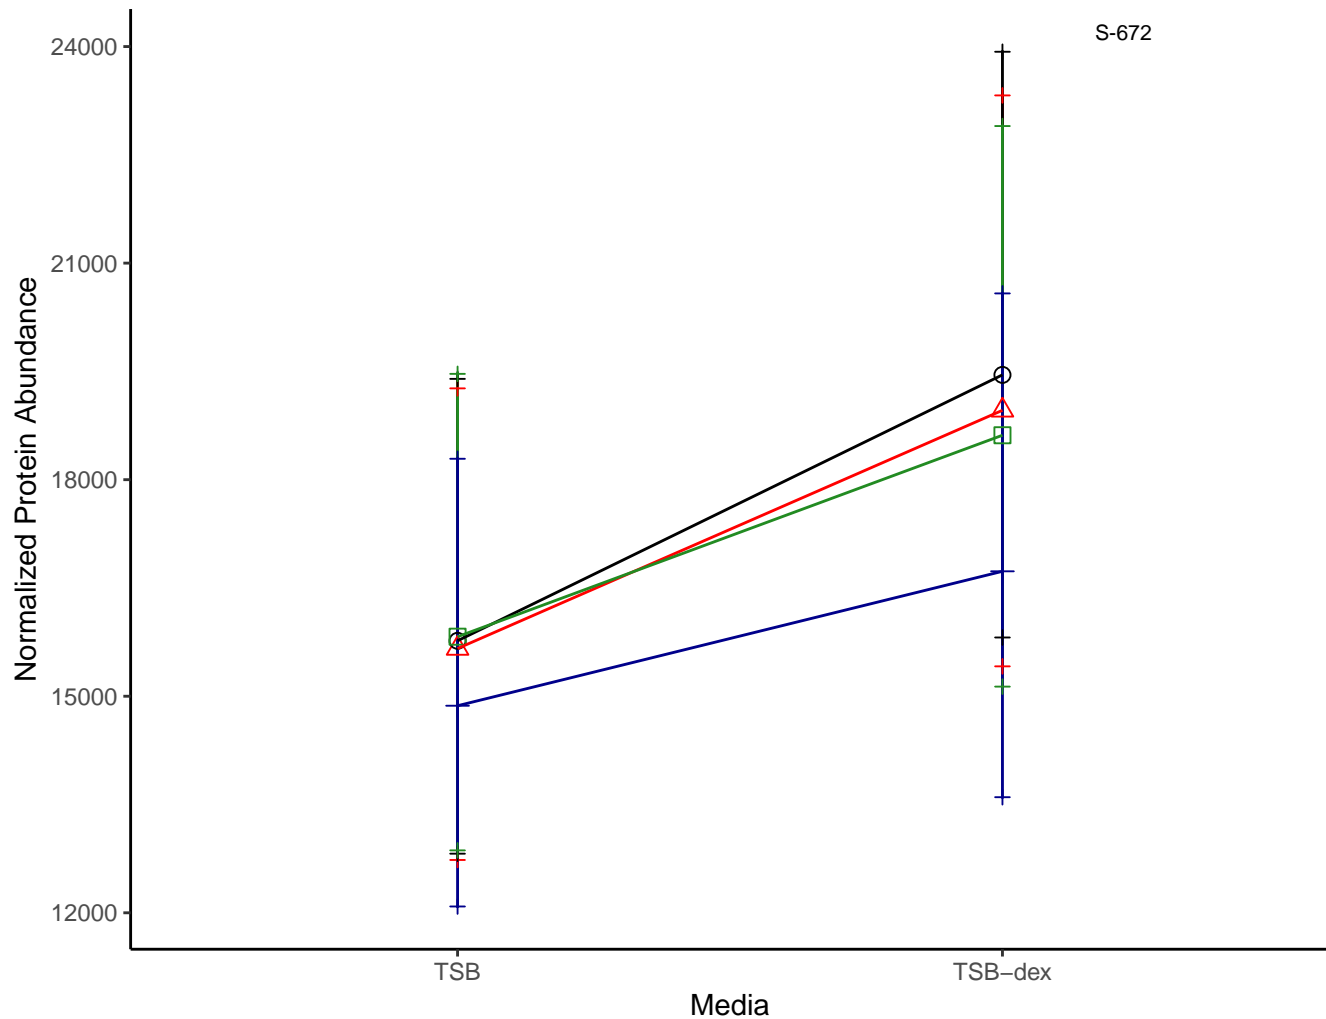

- ⊕ SA564
- △ SA564- $\Delta$ *hptRS*
- ⊞ SA564- $\Delta$ *ccpA*
- + SA564- $\Delta$ *hptRS/ccpA*



# IF2\_STAAM

S-673

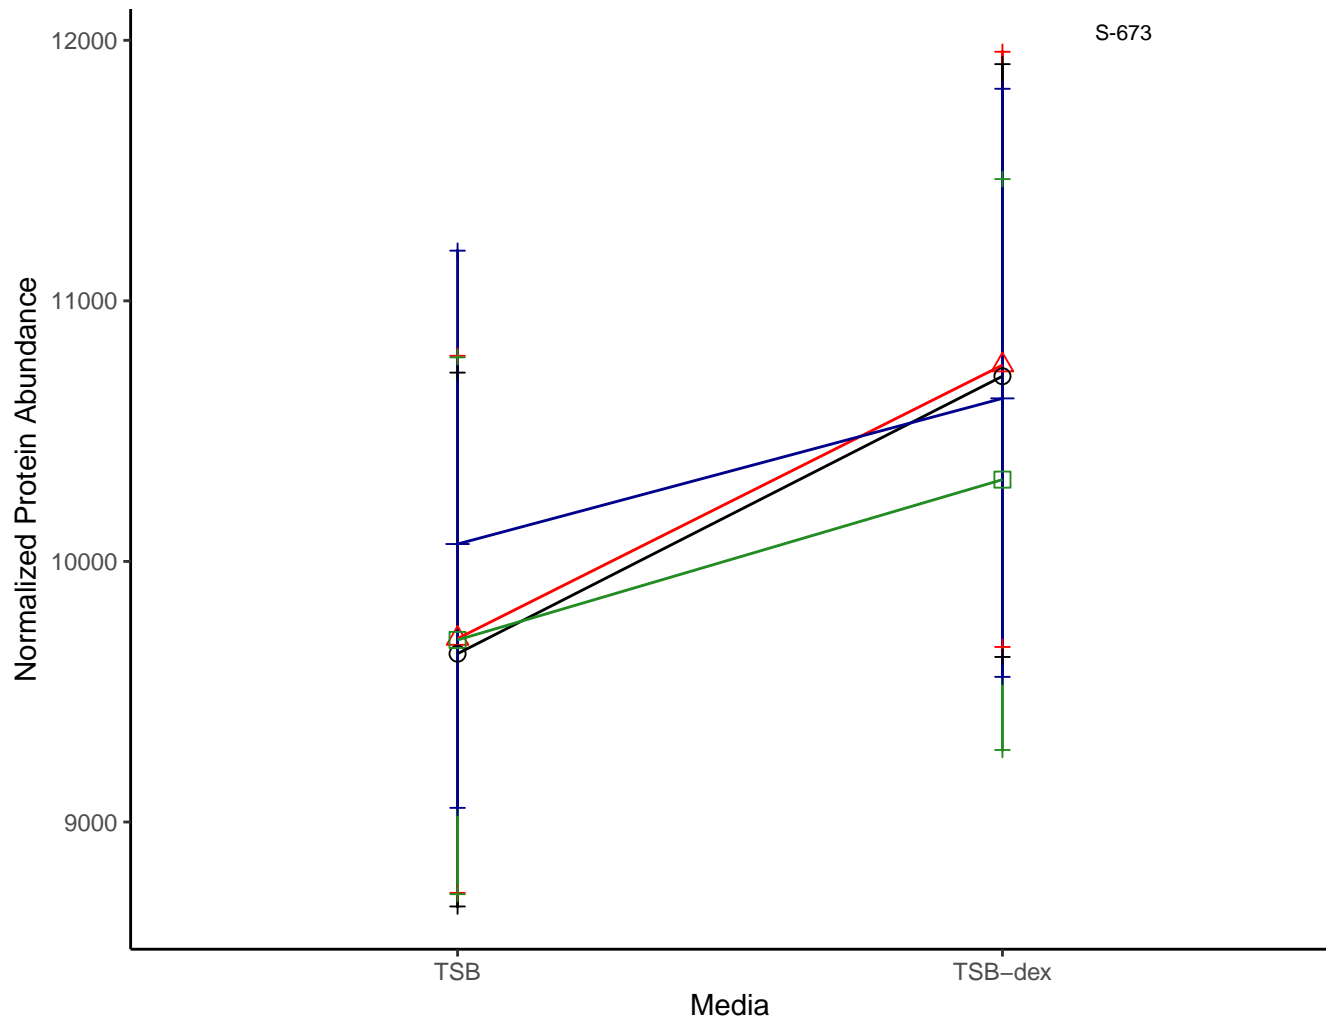

- ⊕ SA564
- △ SA564- $\Delta$ *hptRS*
- ⊞ SA564- $\Delta$ *ccpA*
- + SA564- $\Delta$ *hptRS/ccpA*

# IF3\_STAAM

S-674

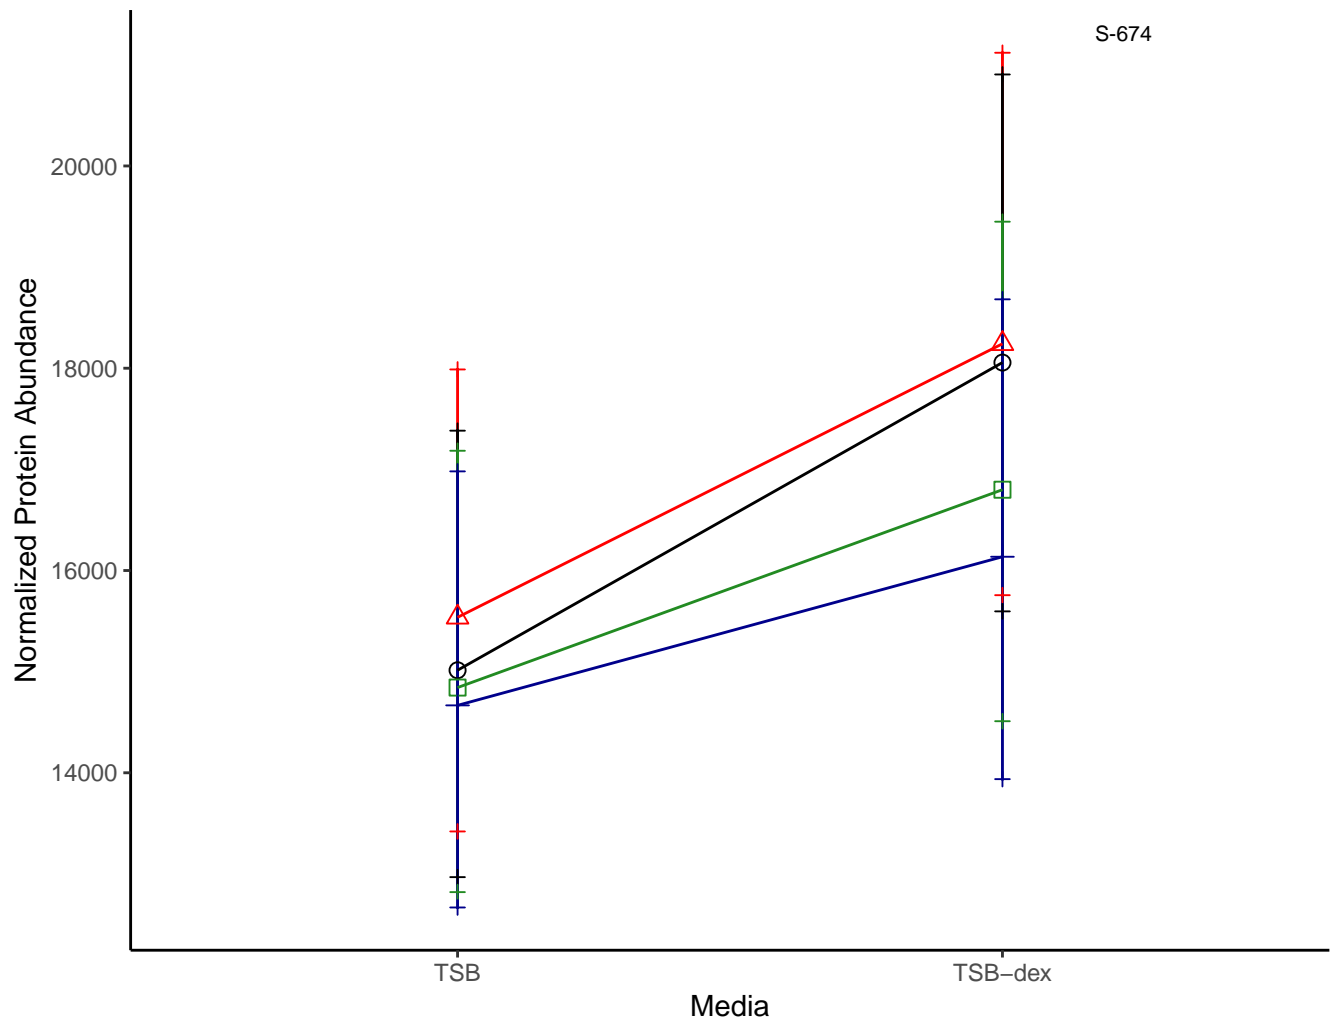

- ⊕ SA564
- △ SA564-ΔhptRS
- ⊞ SA564-ΔccpA
- + SA564-ΔhptRS/ccpA

# ILVC\_STAAM

S-675

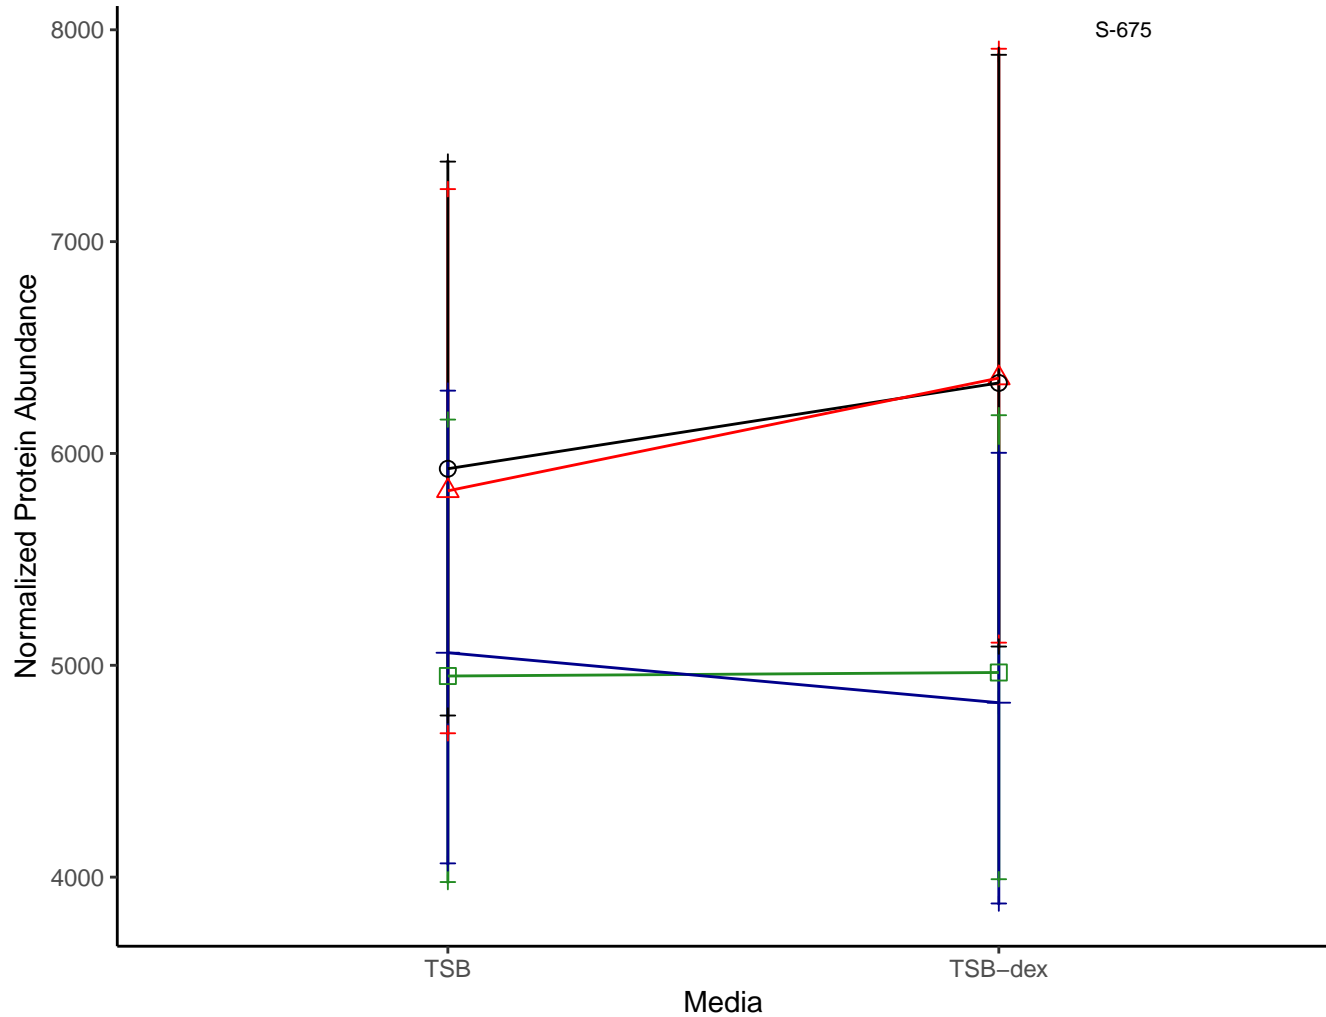

- ⊕ SA564
- △ SA564- $\Delta hptRS$
- ⊞ SA564- $\Delta ccpA$
- + SA564- $\Delta hptRS/ccpA$

# ILVE\_STAAM

S-676

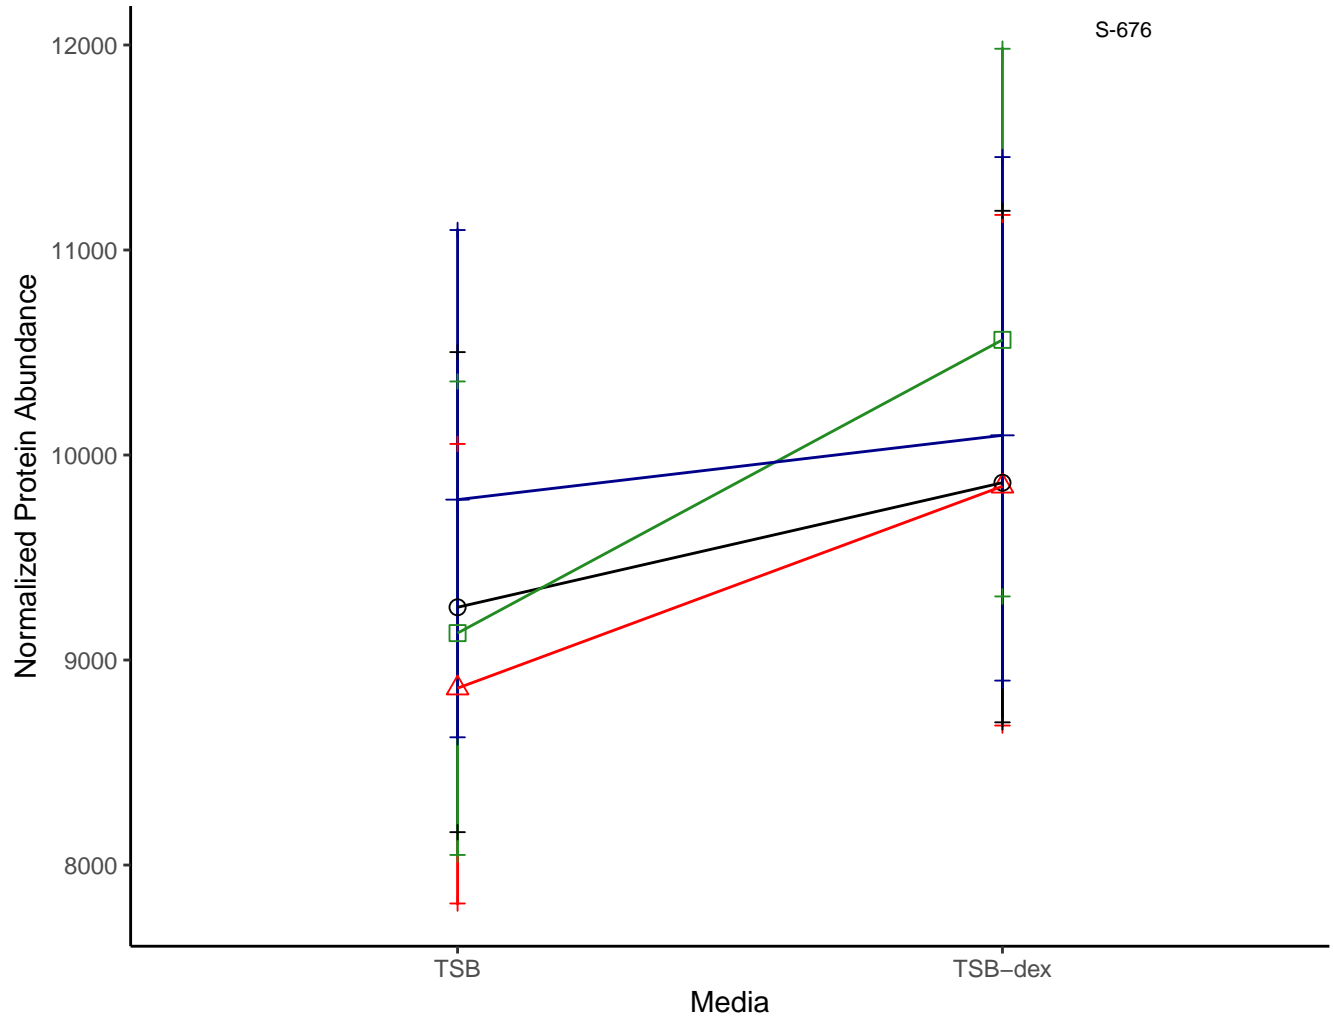

- ⊕ SA564
- △ SA564- $\Delta$ *hptRS*
- ⊞ SA564- $\Delta$ *ccpA*
- + SA564- $\Delta$ *hptRS/ccpA*

# IMDH\_STAAM

S-677

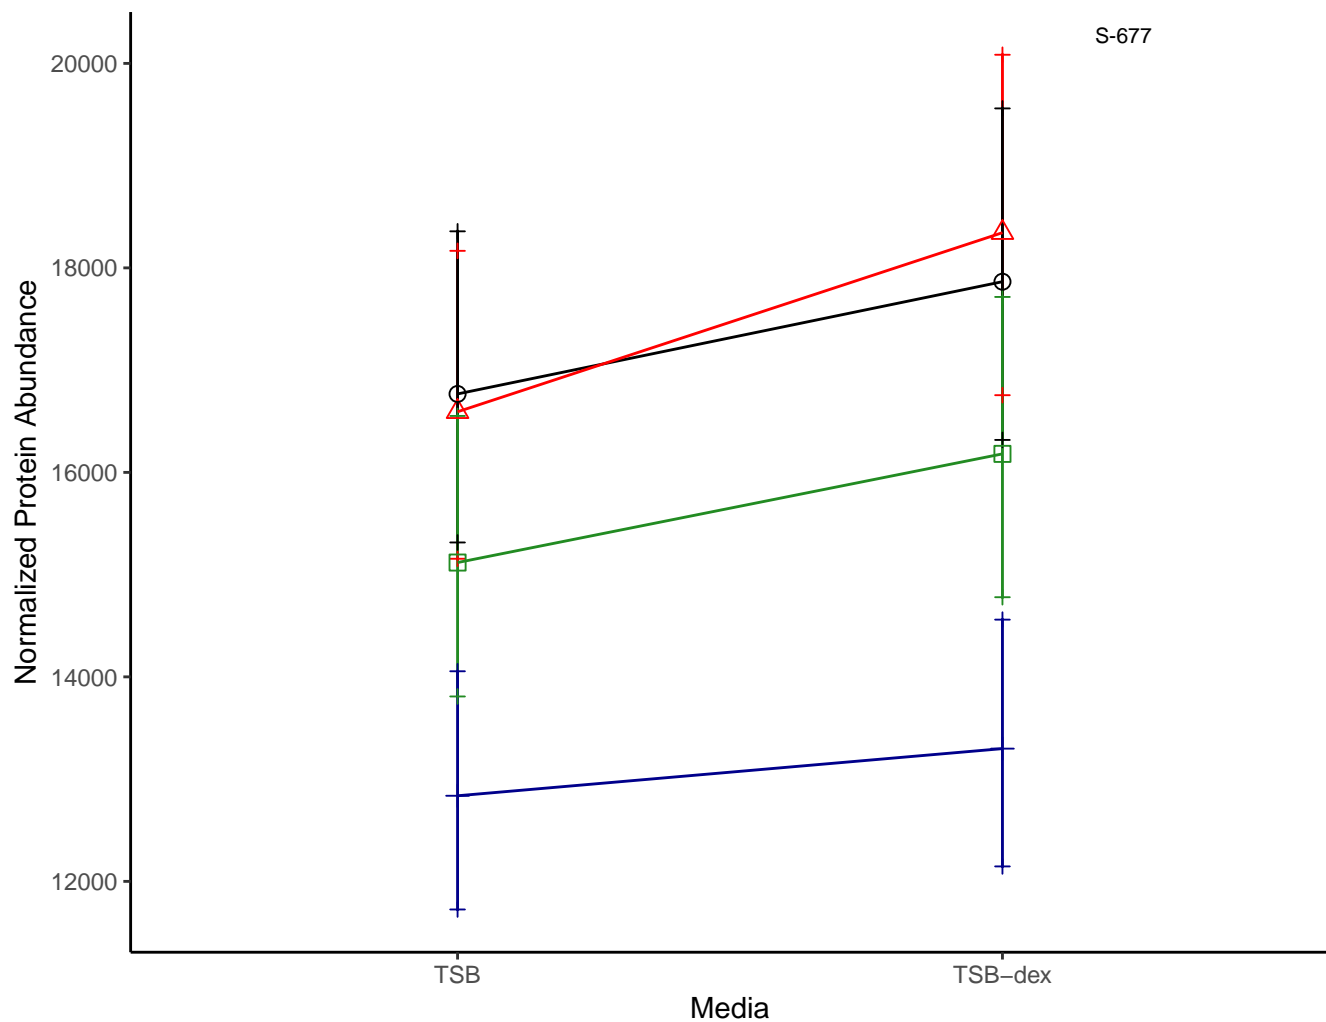

- ⊕ SA564
- △ SA564-ΔhptRS
- ⊞ SA564-ΔccpA
- + SA564-ΔhptRS/ccpA

# ISAA\_STAAM

S-678

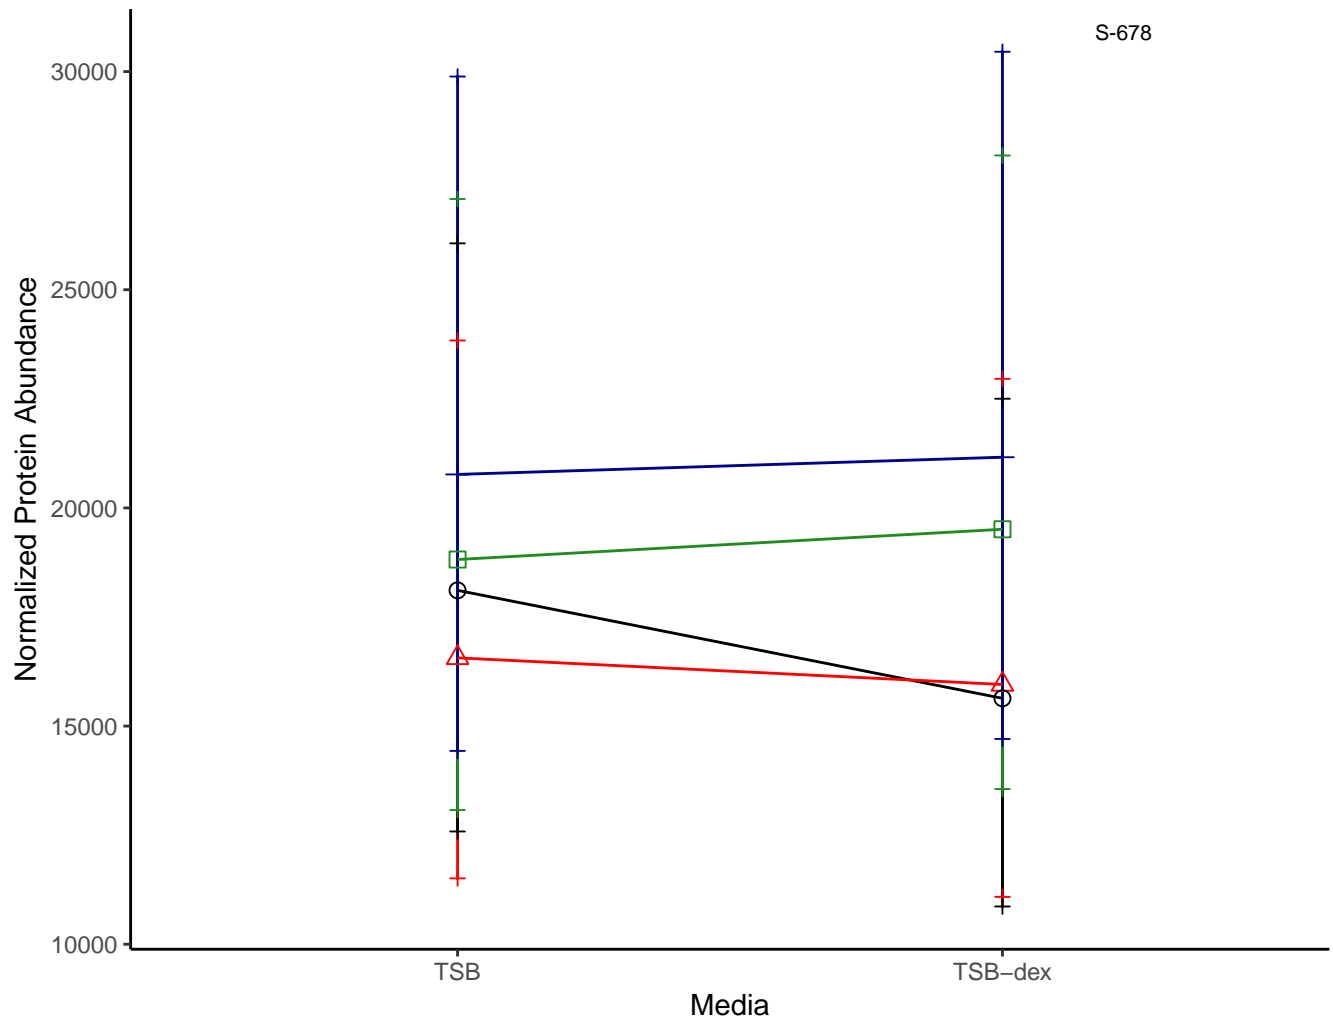

- ⊕ SA564
- △ SA564-ΔhptRS
- ⊞ SA564-ΔccpA
- + SA564-ΔhptRS/ccpA

# ISPD1\_STAAM

S-679

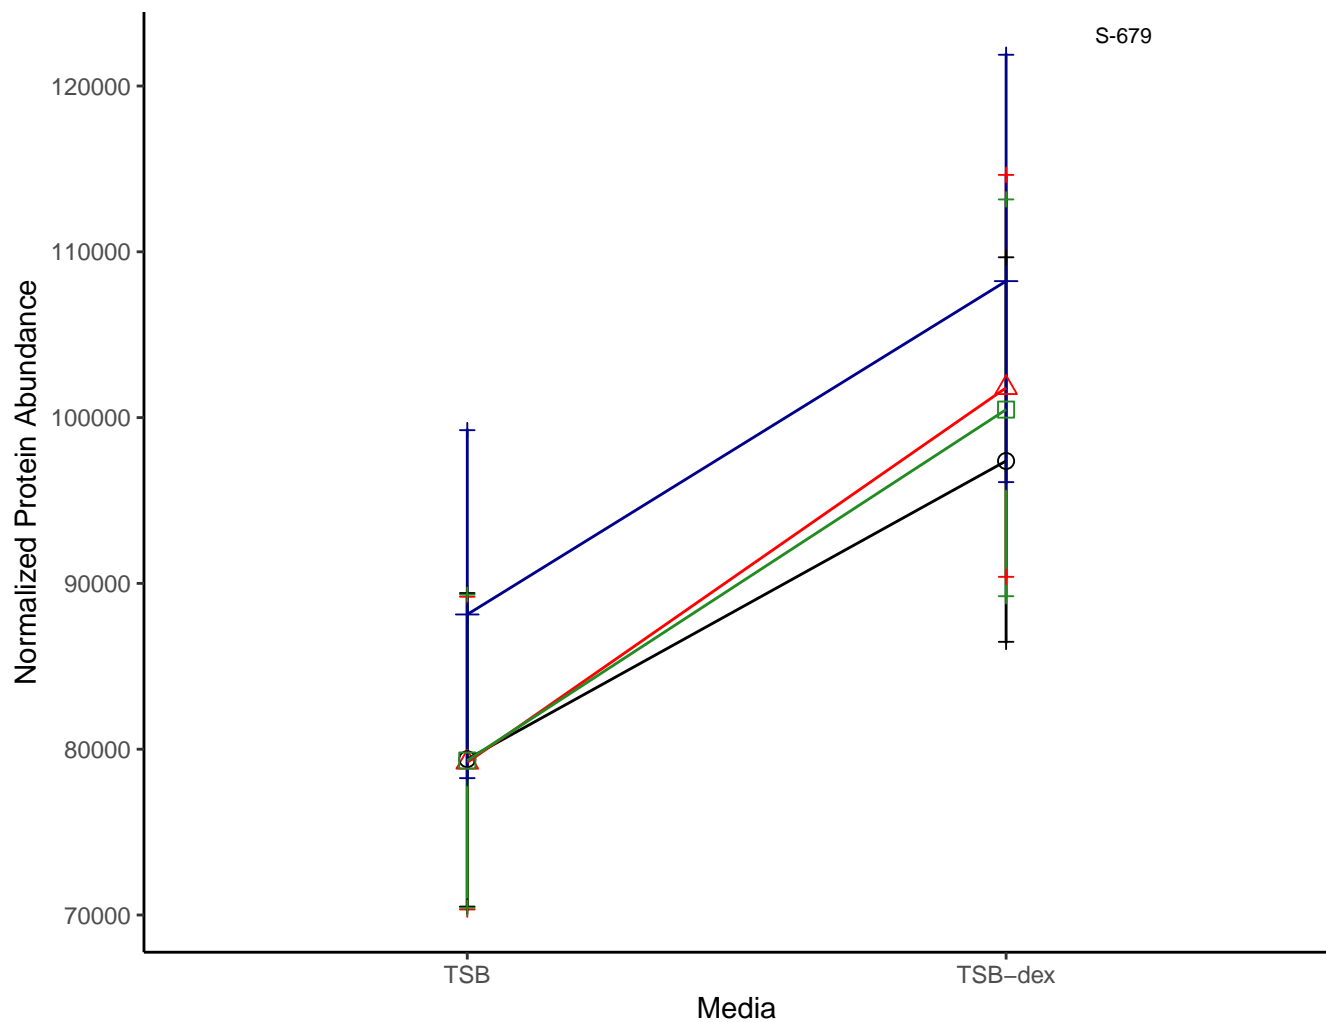

- ⊕ SA564
- △ SA564- $\Delta hptRS$
- ⊞ SA564- $\Delta ccpA$
- + SA564- $\Delta hptRS/ccpA$

## ISPD2\_STAAM

S-680

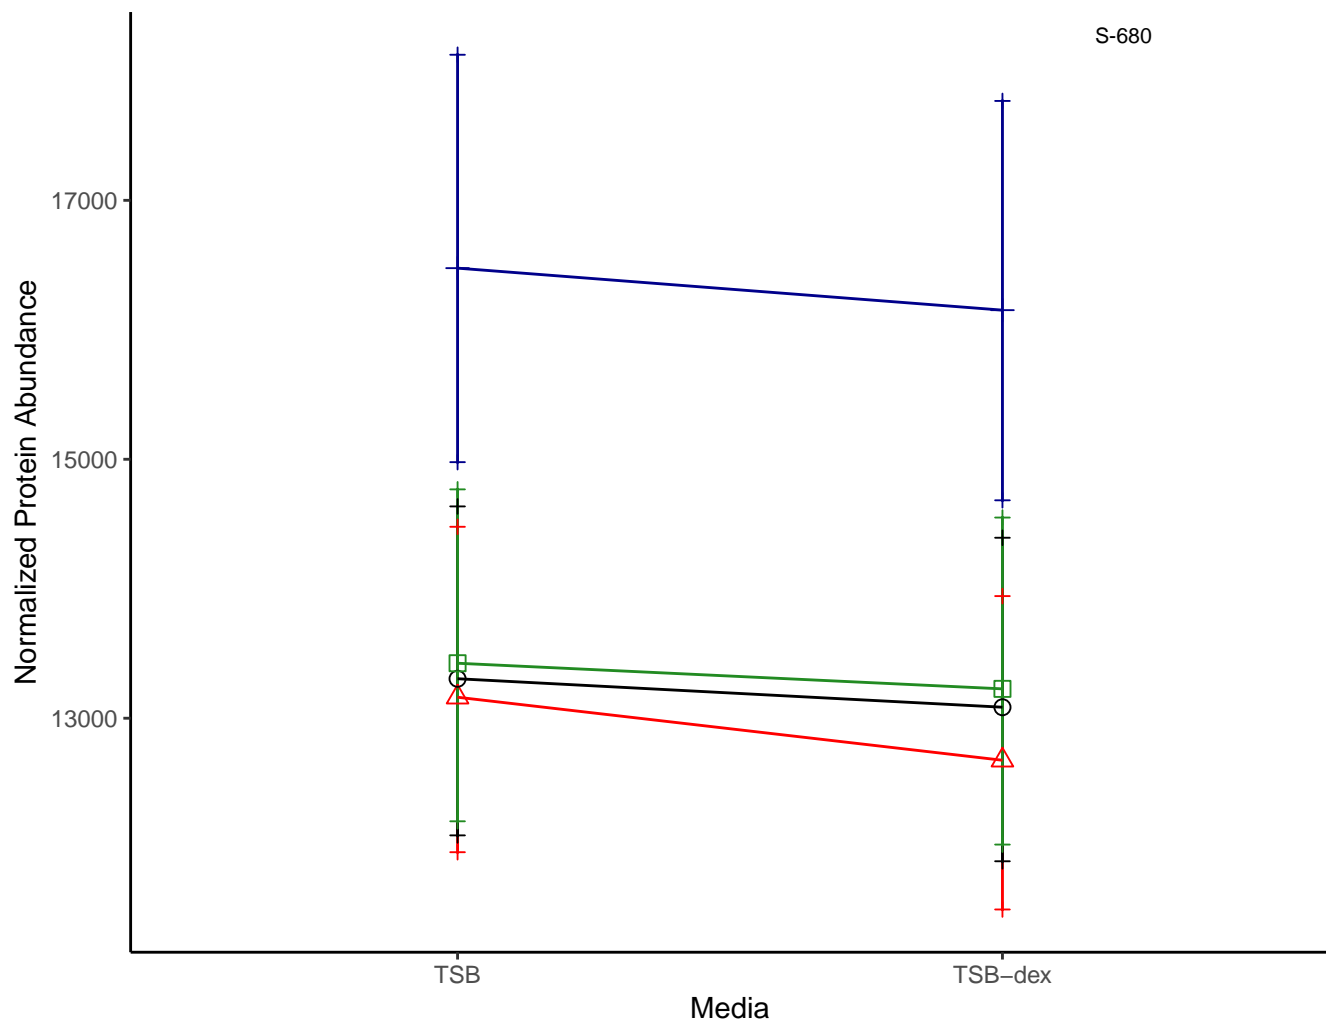

- SA564
- △ SA564- $\Delta$ *hptRS*
- SA564- $\Delta$ *ccpA*
- + SA564- $\Delta$ *hptRS/ccpA*



# ISPE\_STAAM

S-681

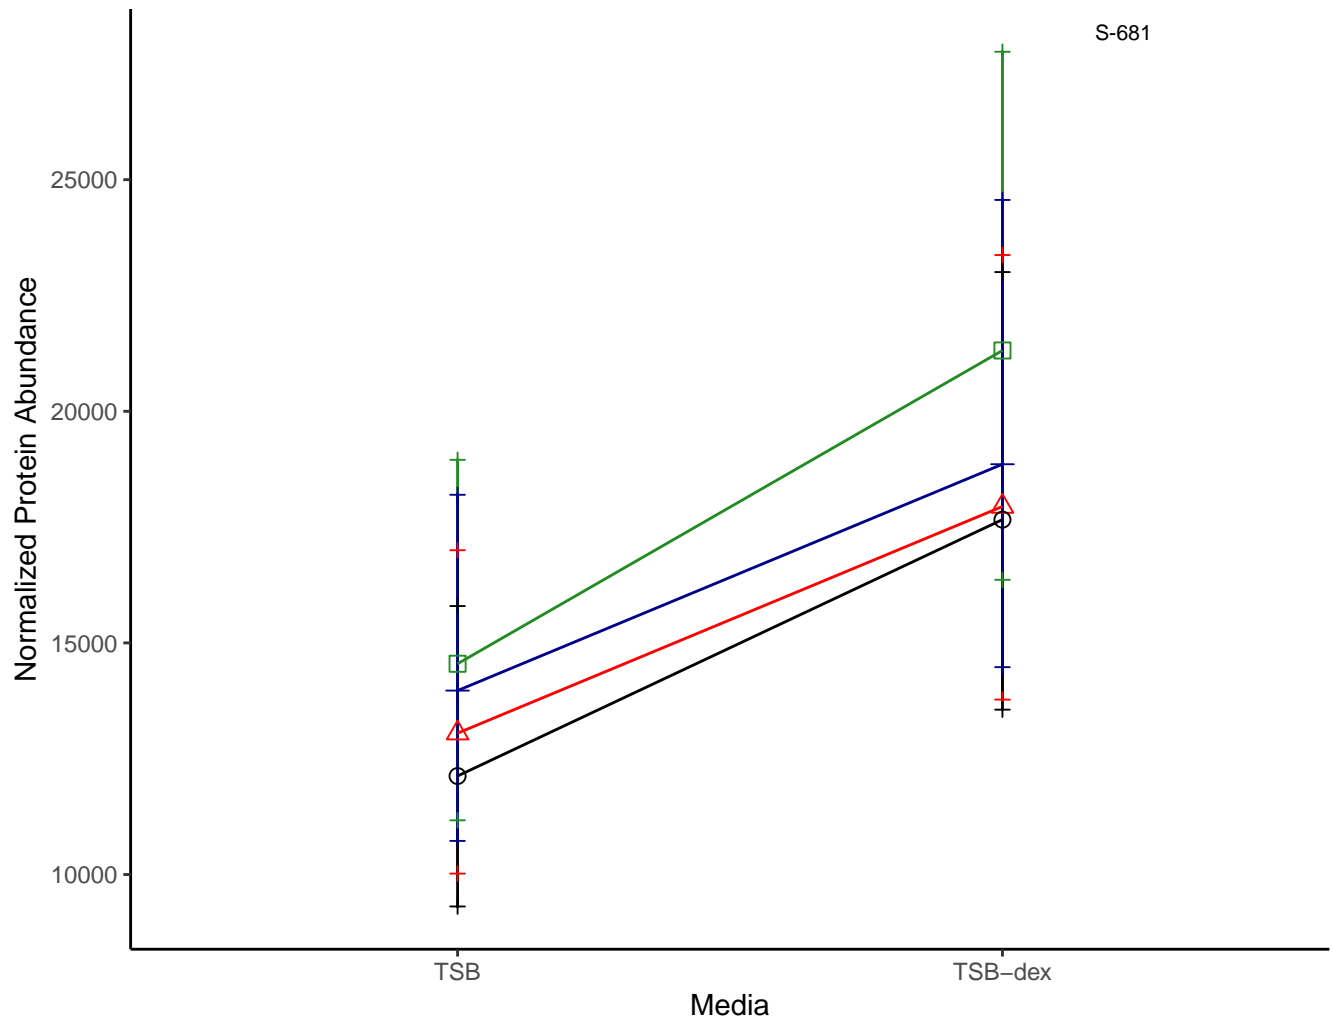

- ⊕ SA564
- △ SA564-ΔhptRS
- ⊞ SA564-ΔccpA
- + SA564-ΔhptRS/ccpA

# KAD\_STAAM

S-682

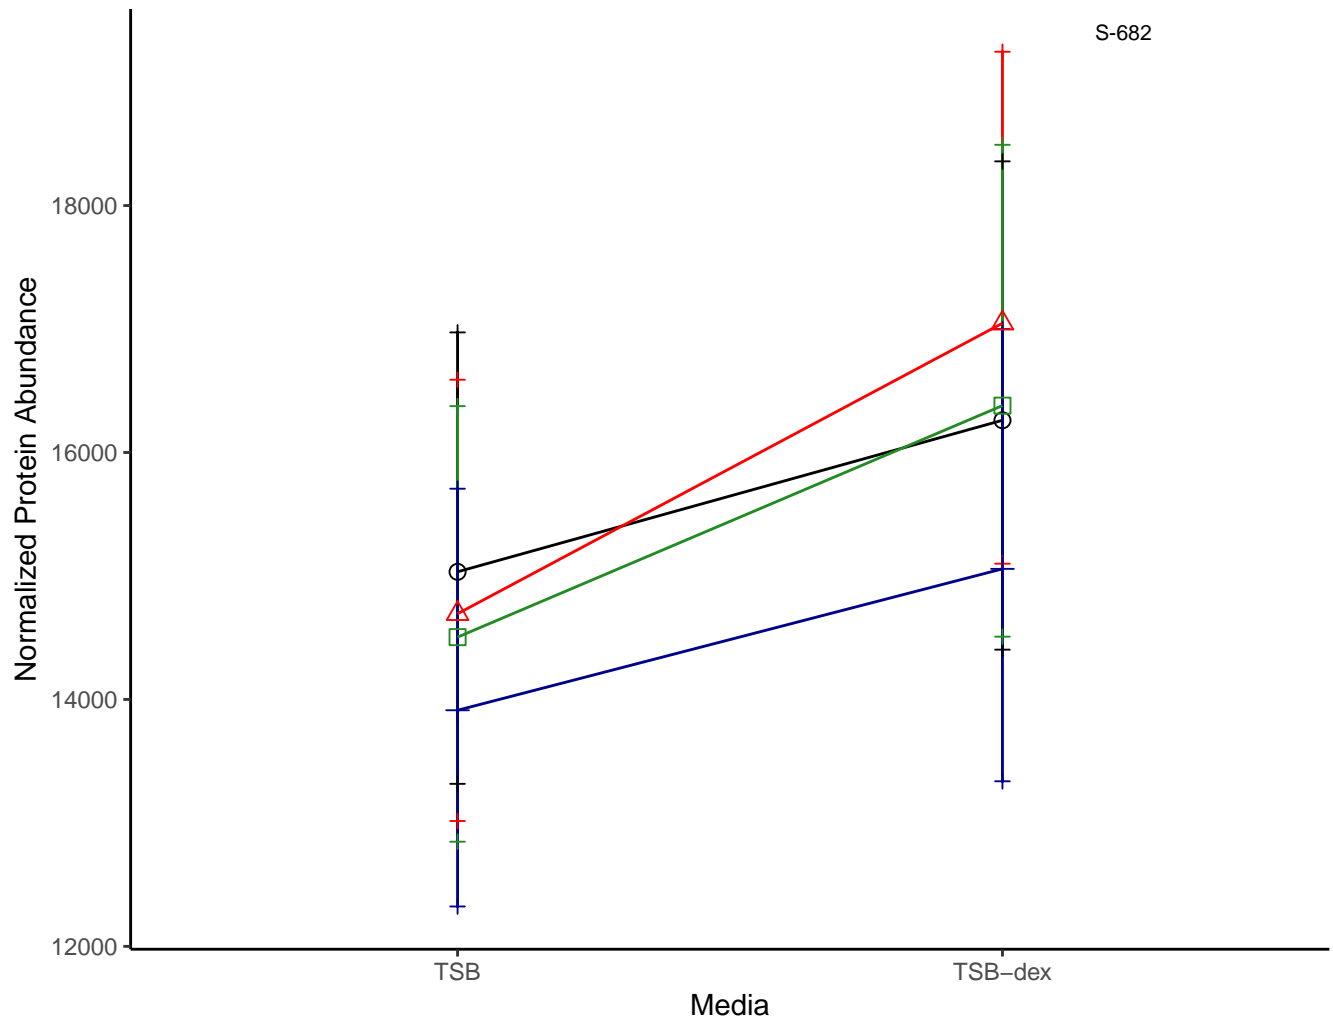

- ⊕ SA564
- △ SA564-ΔhptRS
- ⊞ SA564-ΔccpA
- + SA564-ΔhptRS/ccpA

# KCY\_STAAM

S-683

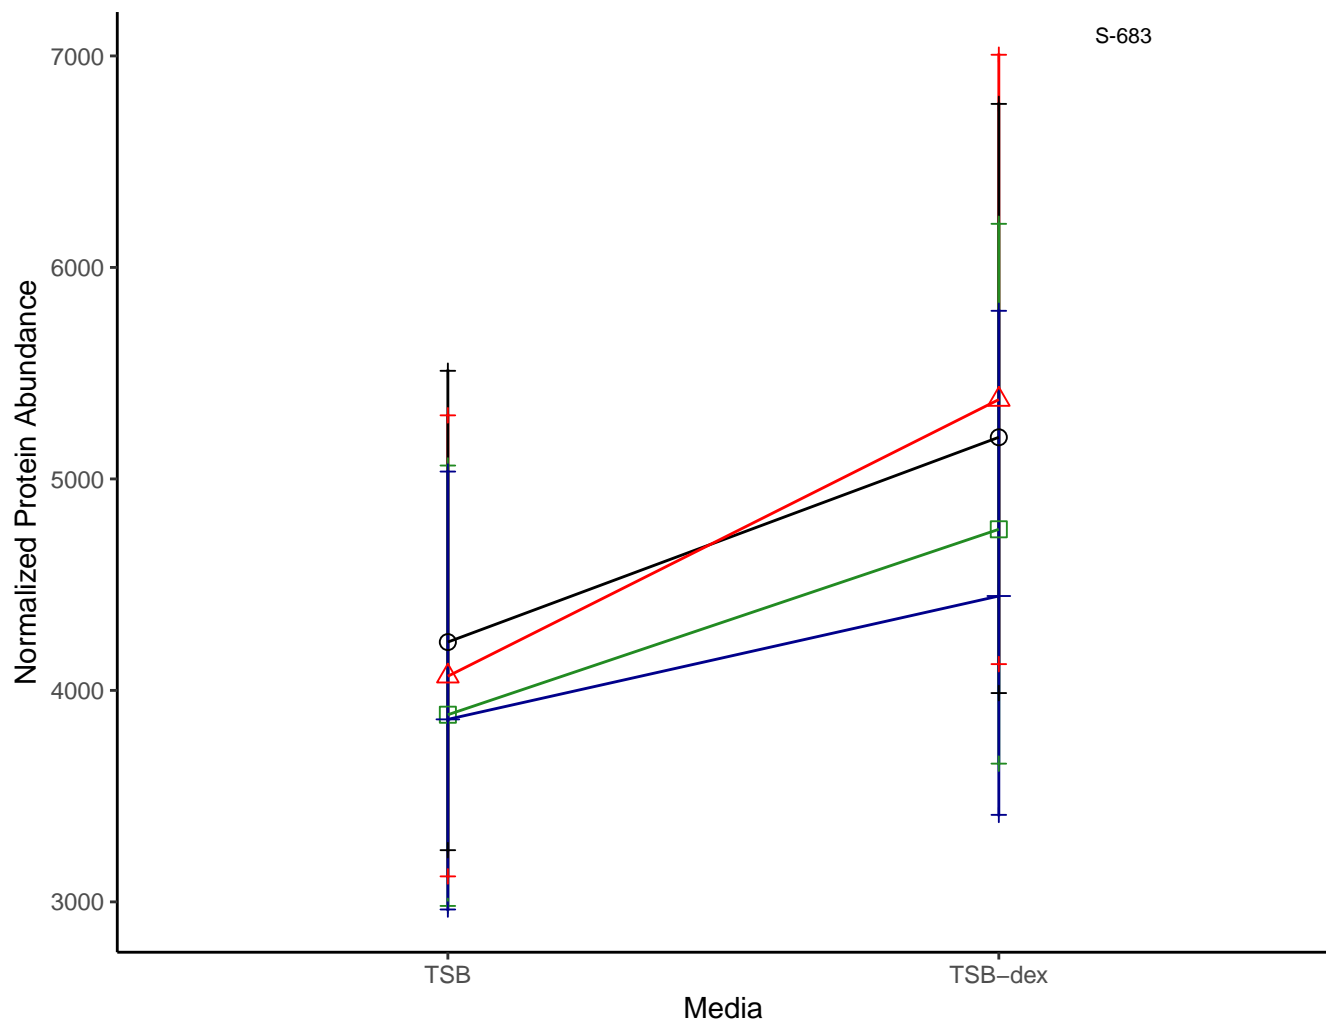

- ⊕ SA564
- △ SA564- $\Delta hptRS$
- ⊞ SA564- $\Delta ccpA$
- + SA564- $\Delta hptRS/ccpA$

# KITH\_STAAM

S-684

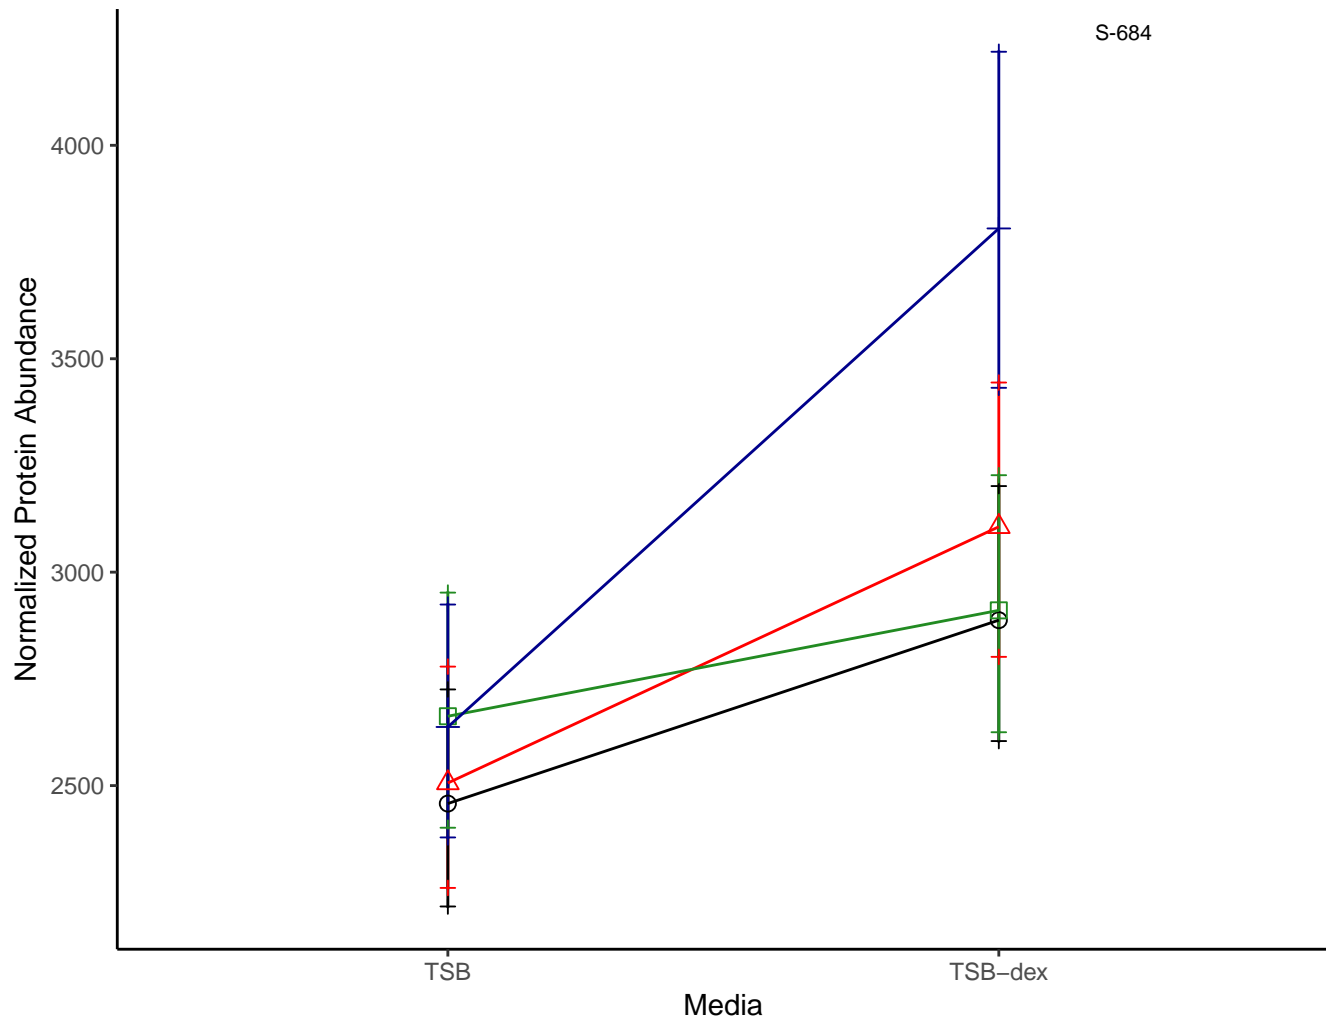

- ⊕ SA564
- △ SA564-ΔhptRS
- ⊞ SA564-ΔccpA
- + SA564-ΔhptRS/ccpA

# KPRS\_STAAM

S-685

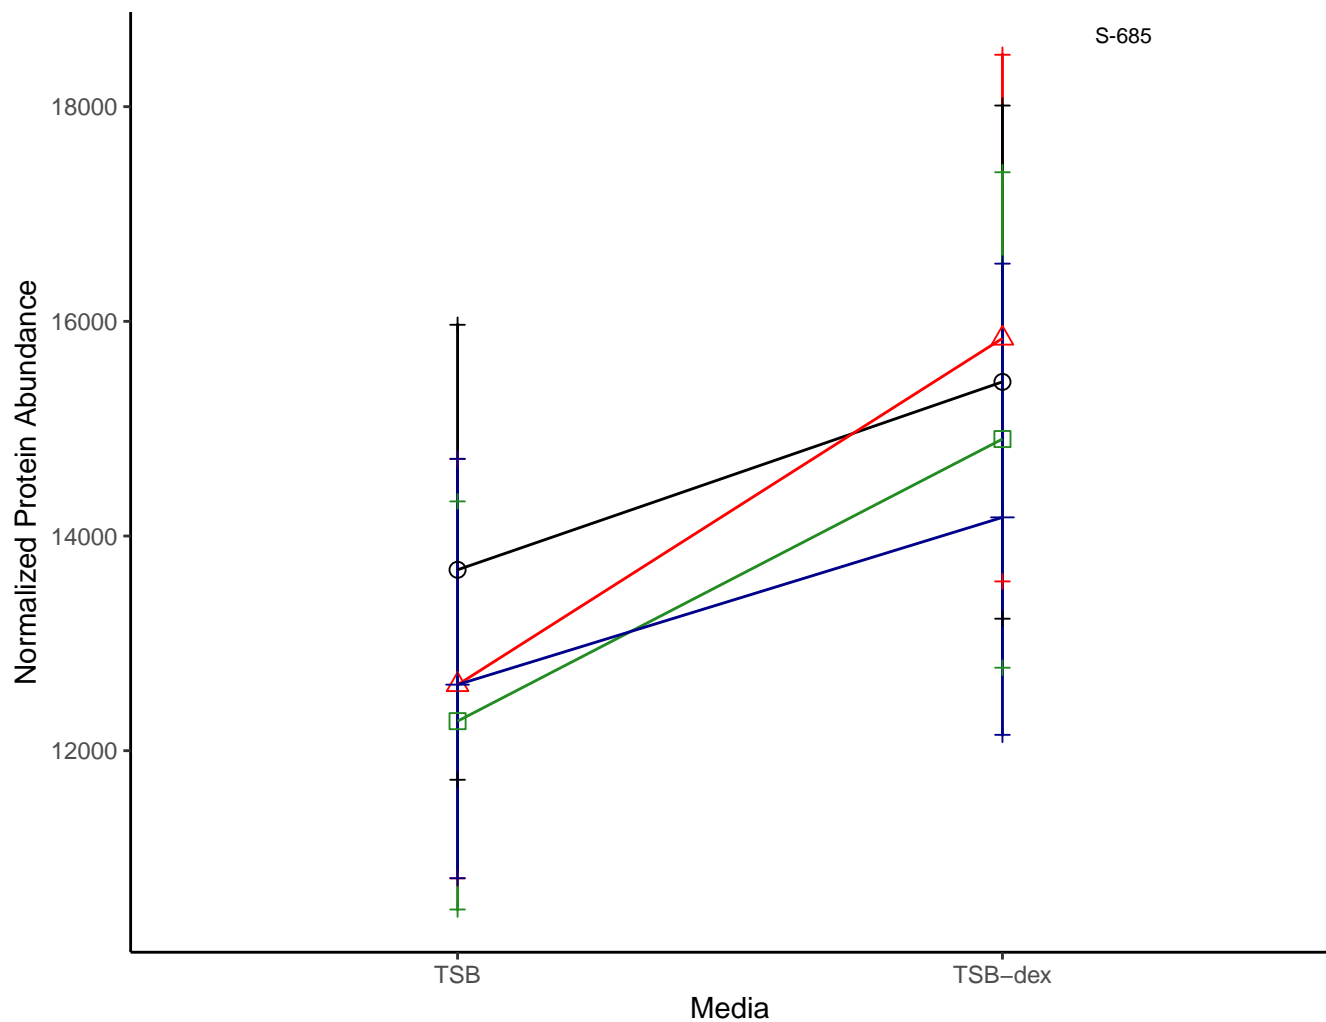

- ⊕ SA564
- △ SA564-ΔhptRS
- ⊞ SA564-ΔccpA
- + SA564-ΔhptRS/ccpA

# KPYK\_STAAM

S-686

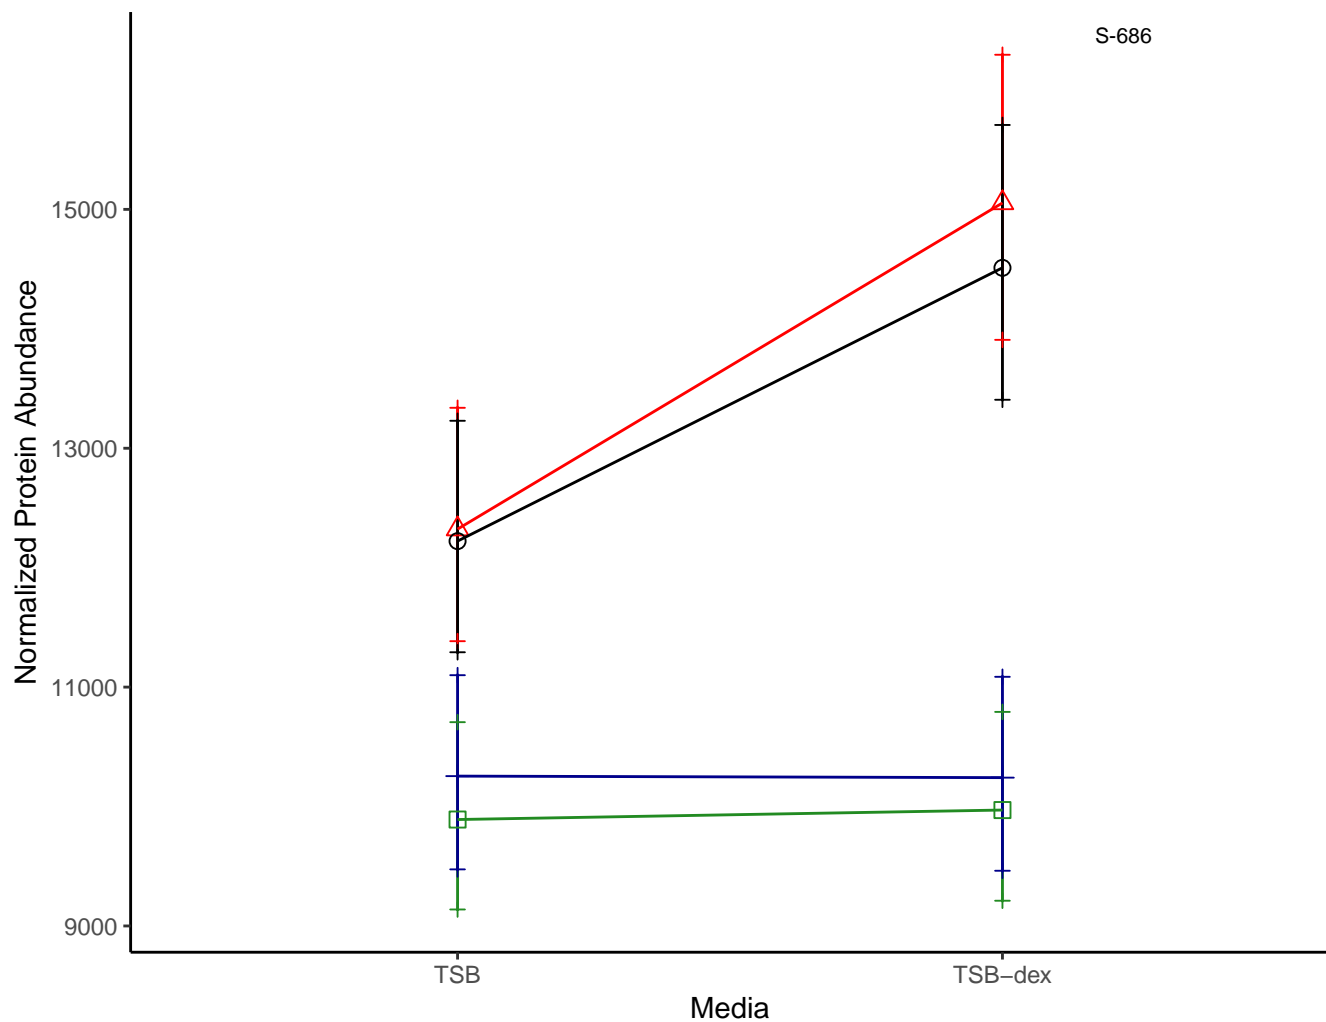

- SA564
- SA564- $\Delta$ *hptRS*
- SA564- $\Delta$ *ccpA*
- SA564- $\Delta$ *hptRS/ccpA*

# KTHY\_STAAM

S-687

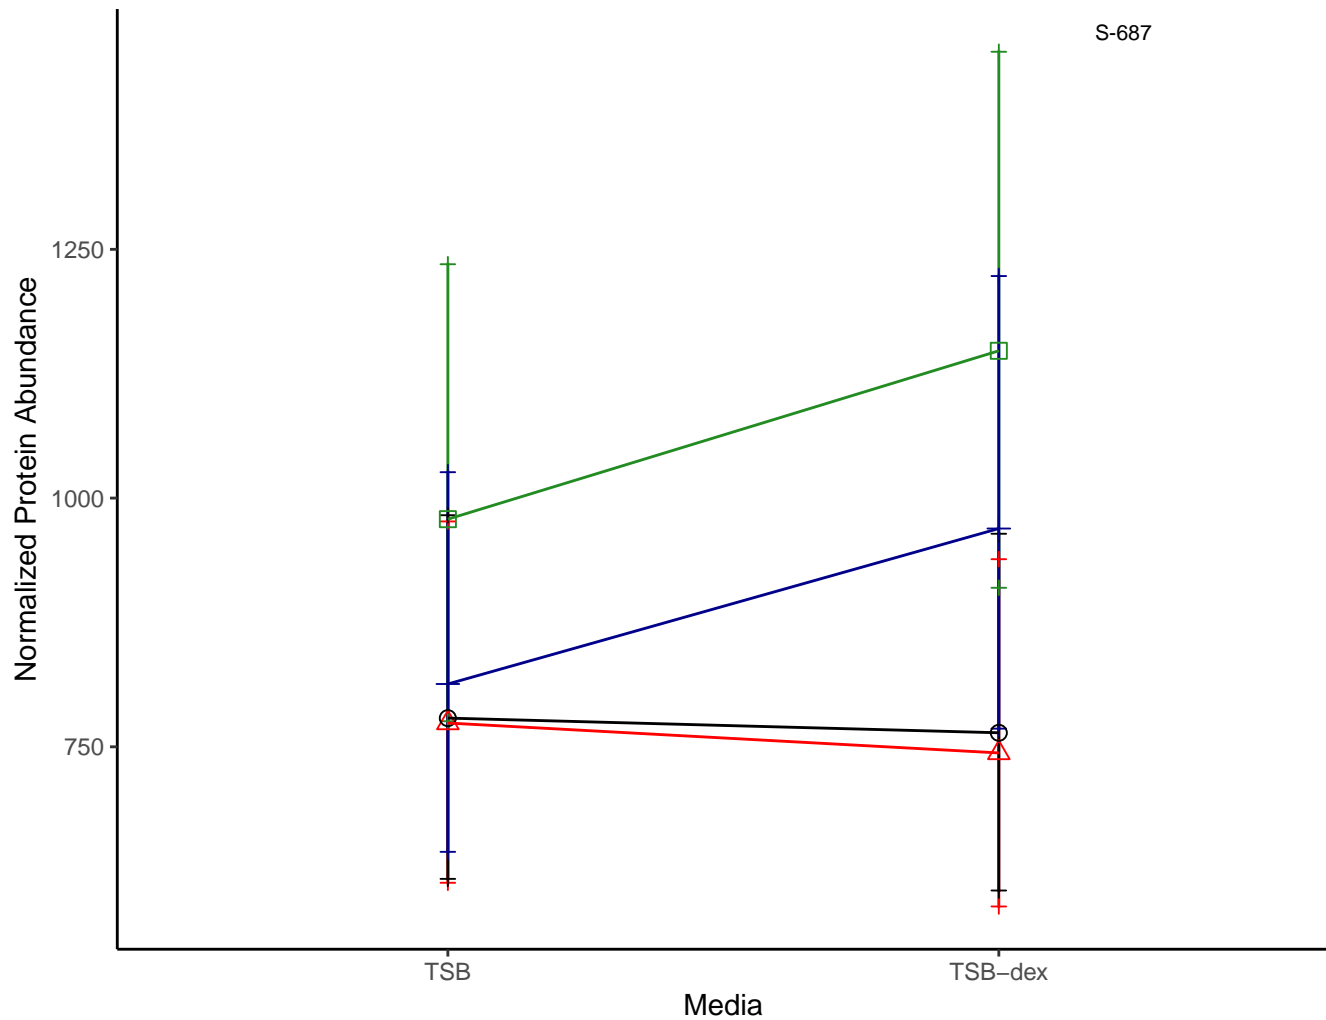

- ⊕ SA564
- △ SA564-ΔhptRS
- ⊞ SA564-ΔccpA
- + SA564-ΔhptRS/ccpA

# LACA\_STAAM

S-688

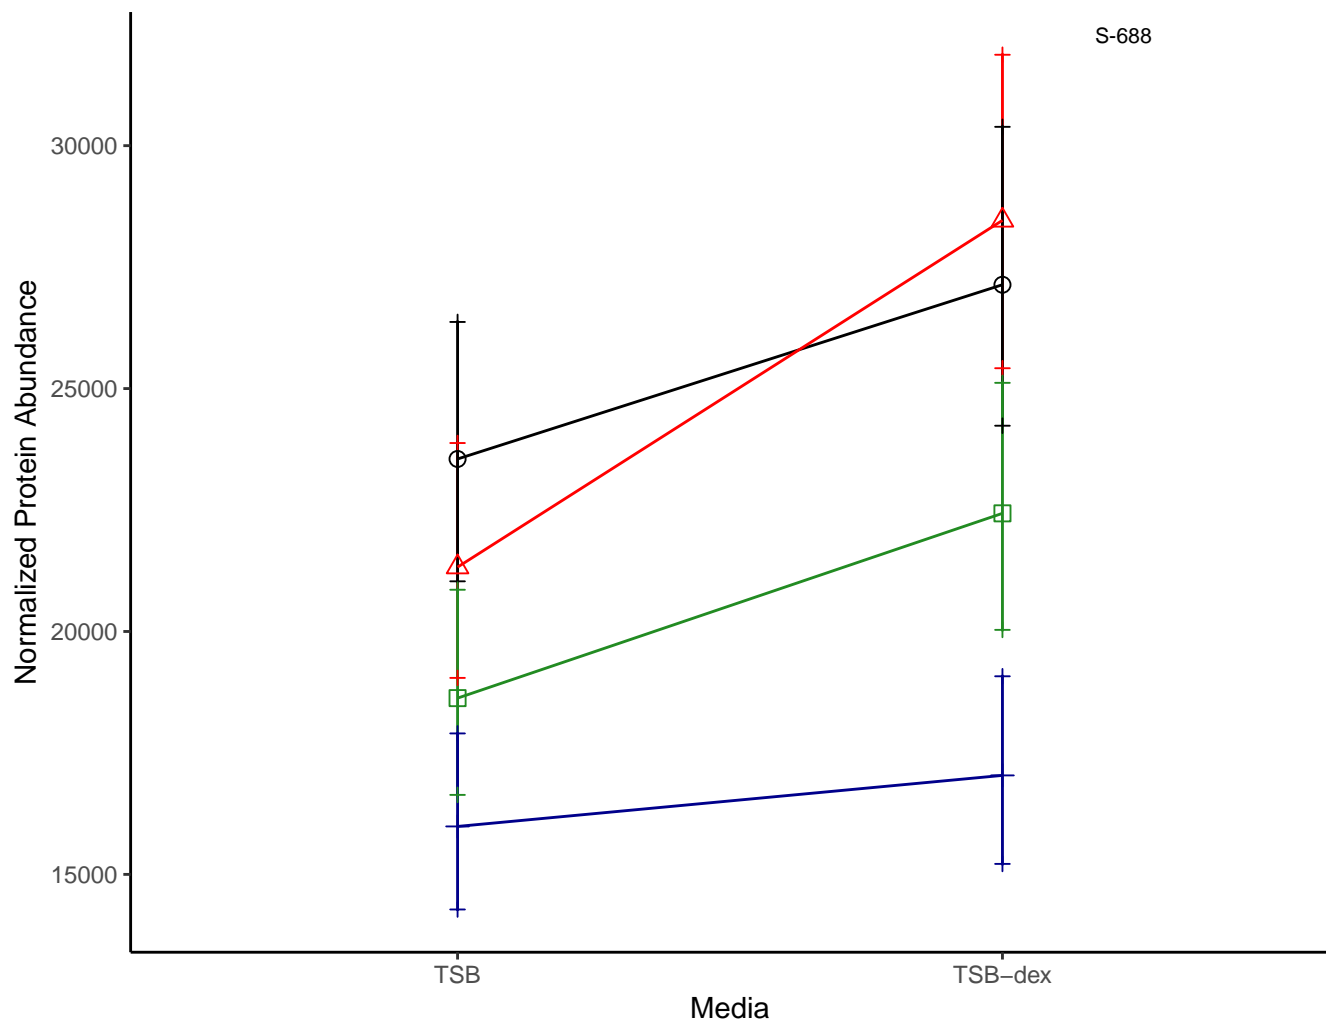

- ⊕ SA564
- △ SA564-ΔhptRS
- ⊞ SA564-ΔccpA
- + SA564-ΔhptRS/ccpA



# LDH1\_STAAM

S-689

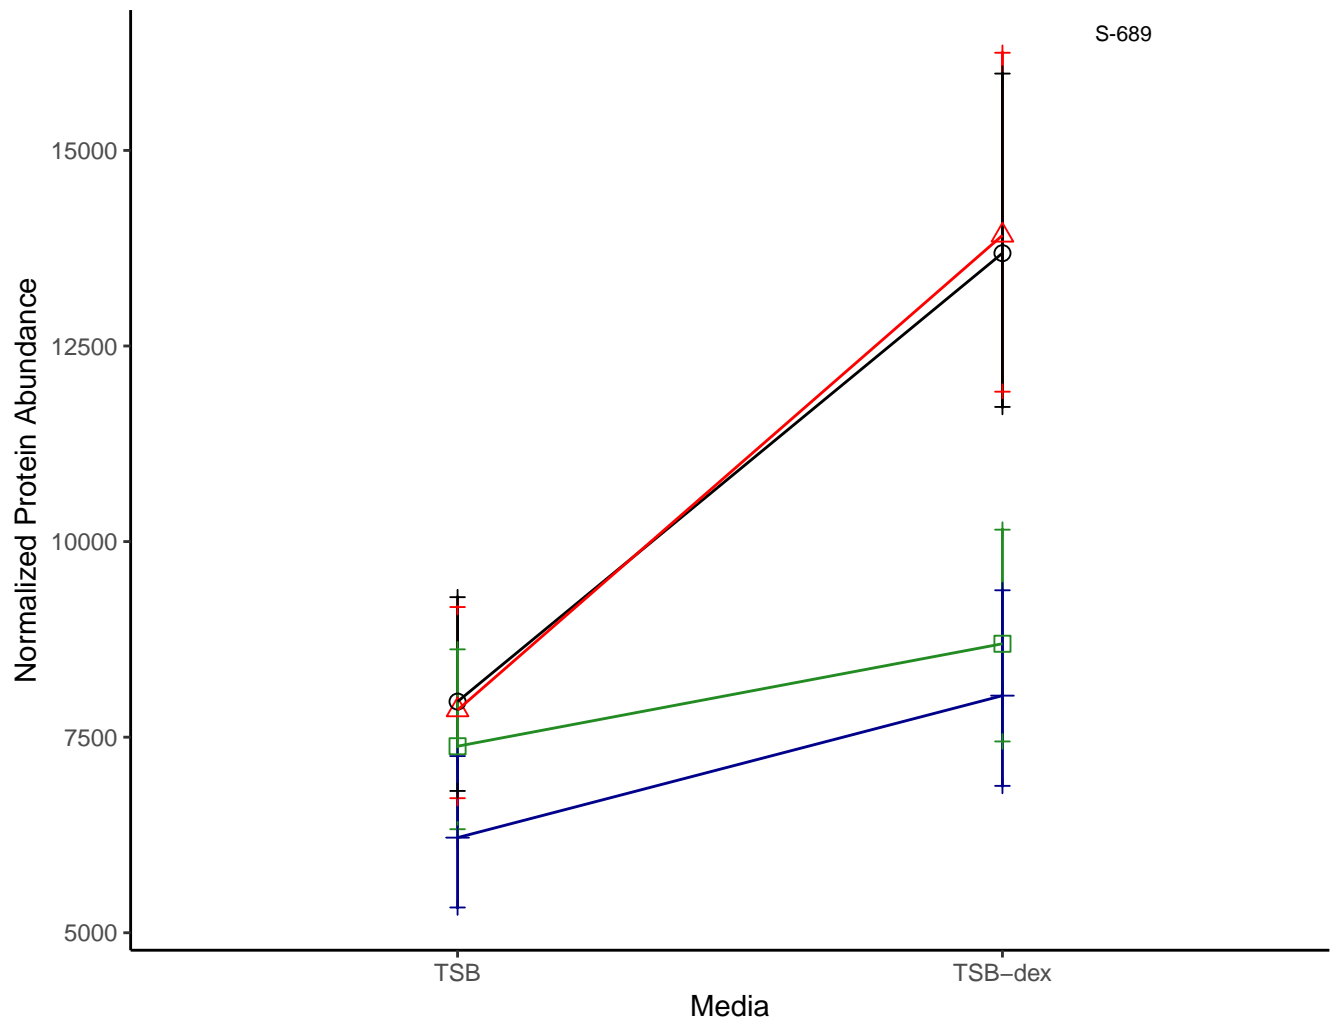

- SA564
- SA564- $\Delta$ hptRS
- SA564- $\Delta$ ccpA
- SA564- $\Delta$ hptRS/ccpA

# LDH2\_STAAM

S-690

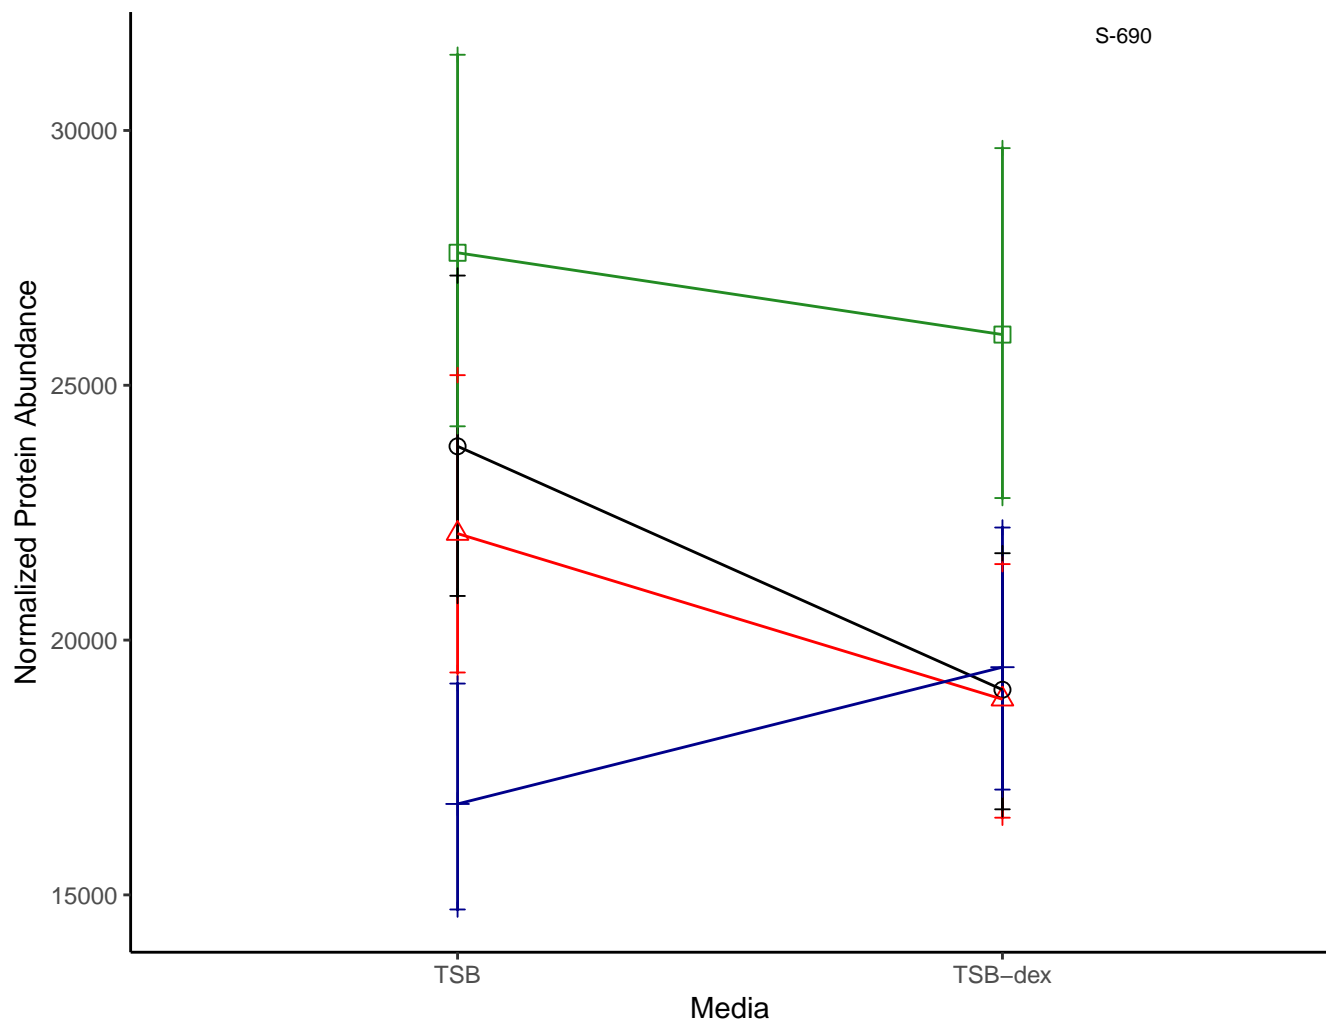

- ⊕ SA564
- △ SA564- $\Delta$ *hptRS*
- ⊞ SA564- $\Delta$ *ccpA*
- + SA564- $\Delta$ *hptRS/ccpA*

## LDHD\_STAAM

S-691

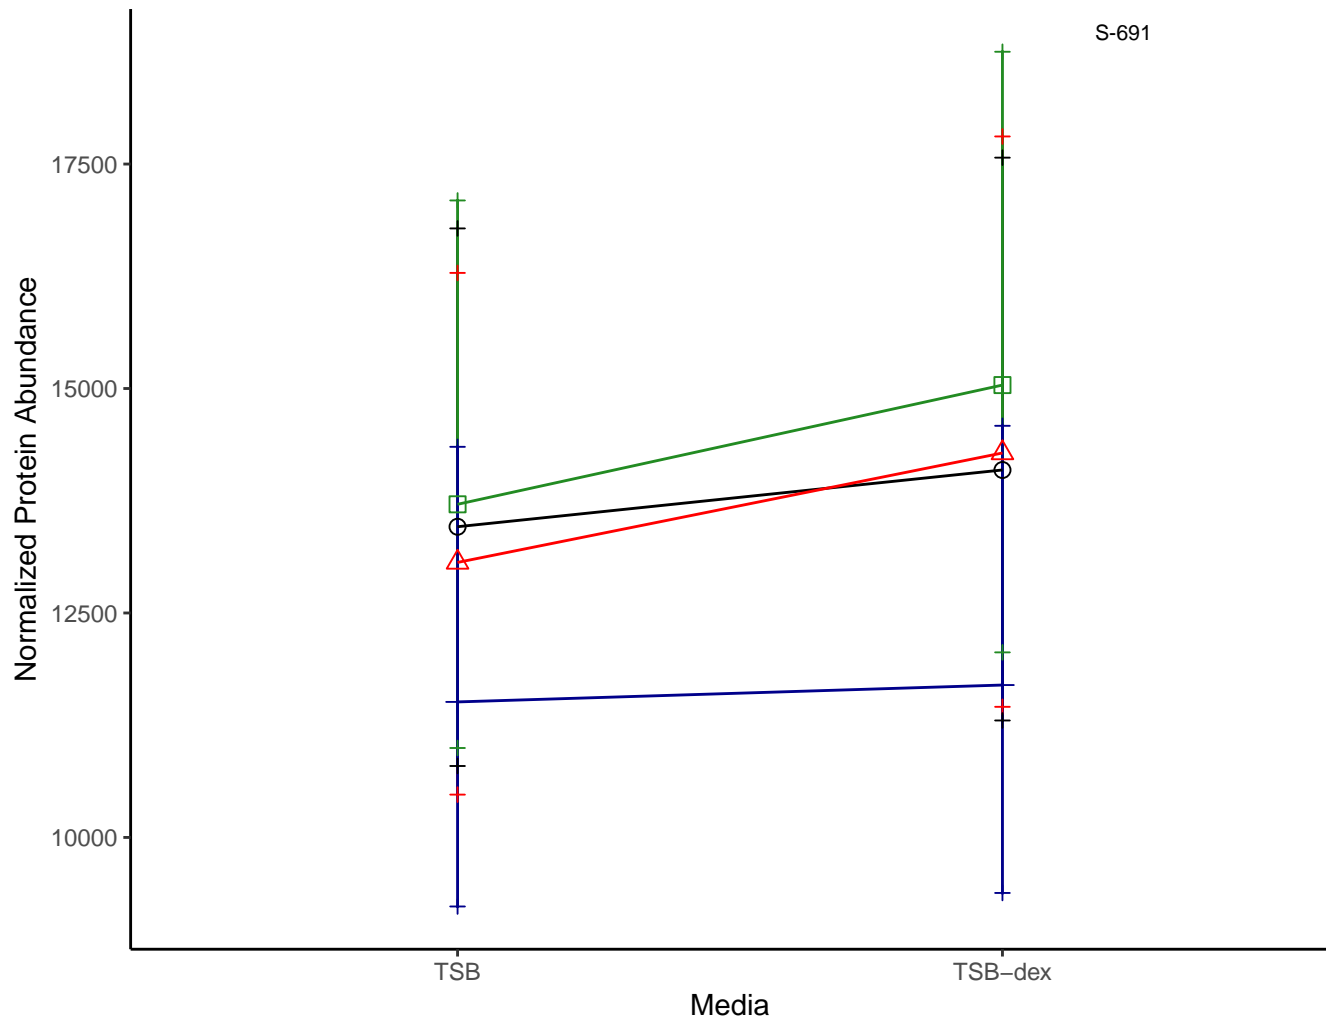

- SA564
- SA564- $\Delta hptRS$
- SA564- $\Delta ccpA$
- SA564- $\Delta hptRS/ccpA$

# LEP\_STAAM

S-692

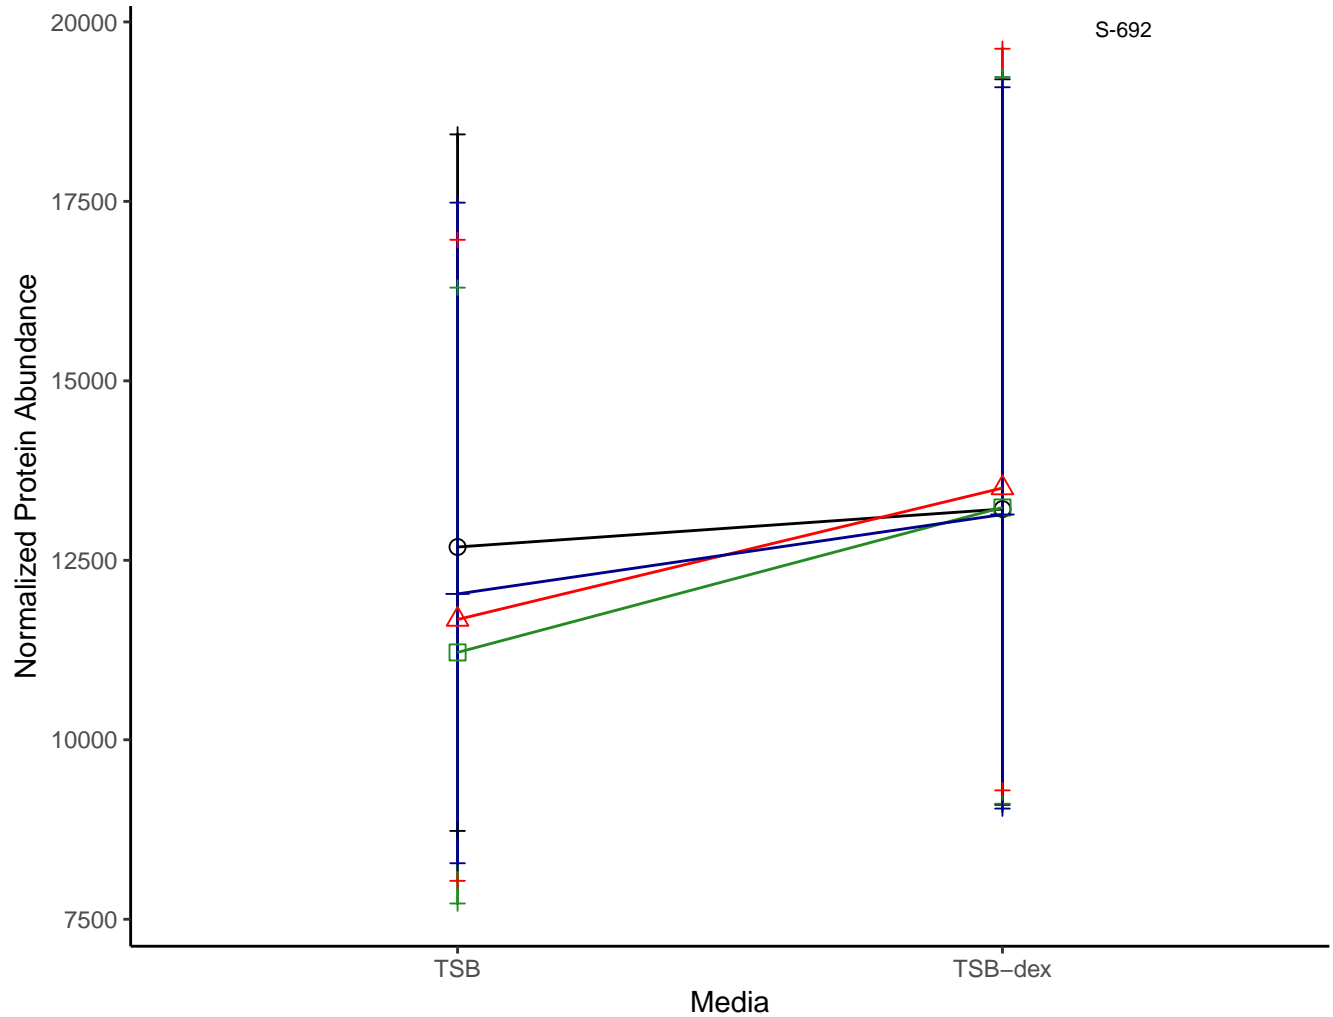

- SA564
- SA564- $\Delta$ *hptRS*
- SA564- $\Delta$ *ccpA*
- SA564- $\Delta$ *hptRS/ccpA*

# LEPA\_STAAM

S-693

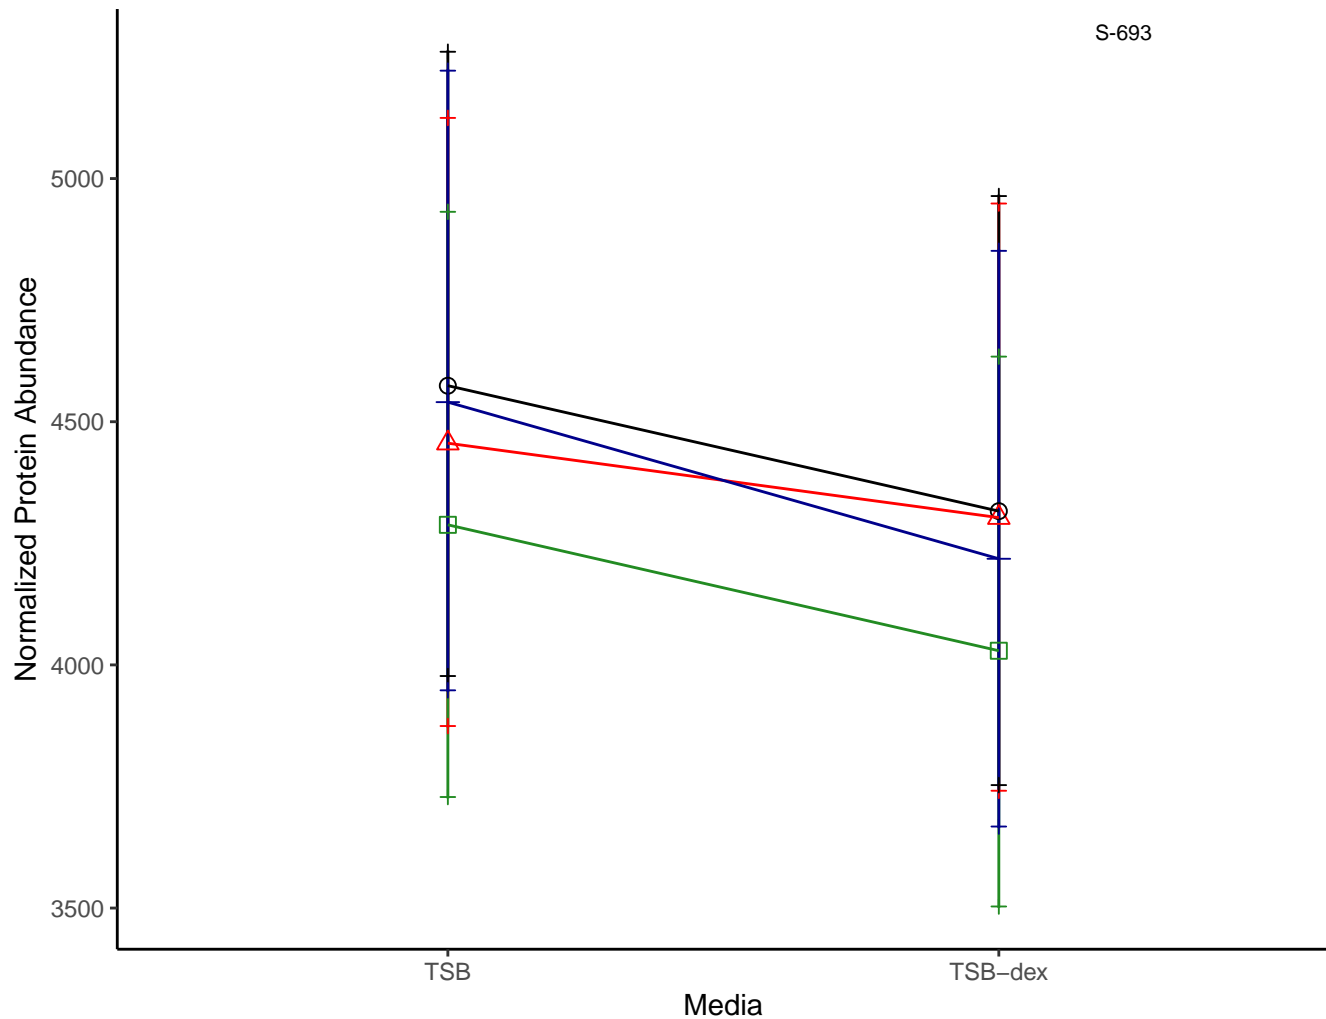

- ⊕ SA564
- △ SA564- $\Delta hptRS$
- ⊞ SA564- $\Delta ccpA$
- + SA564- $\Delta hptRS/ccpA$

# LEU1\_STAAM

S-694

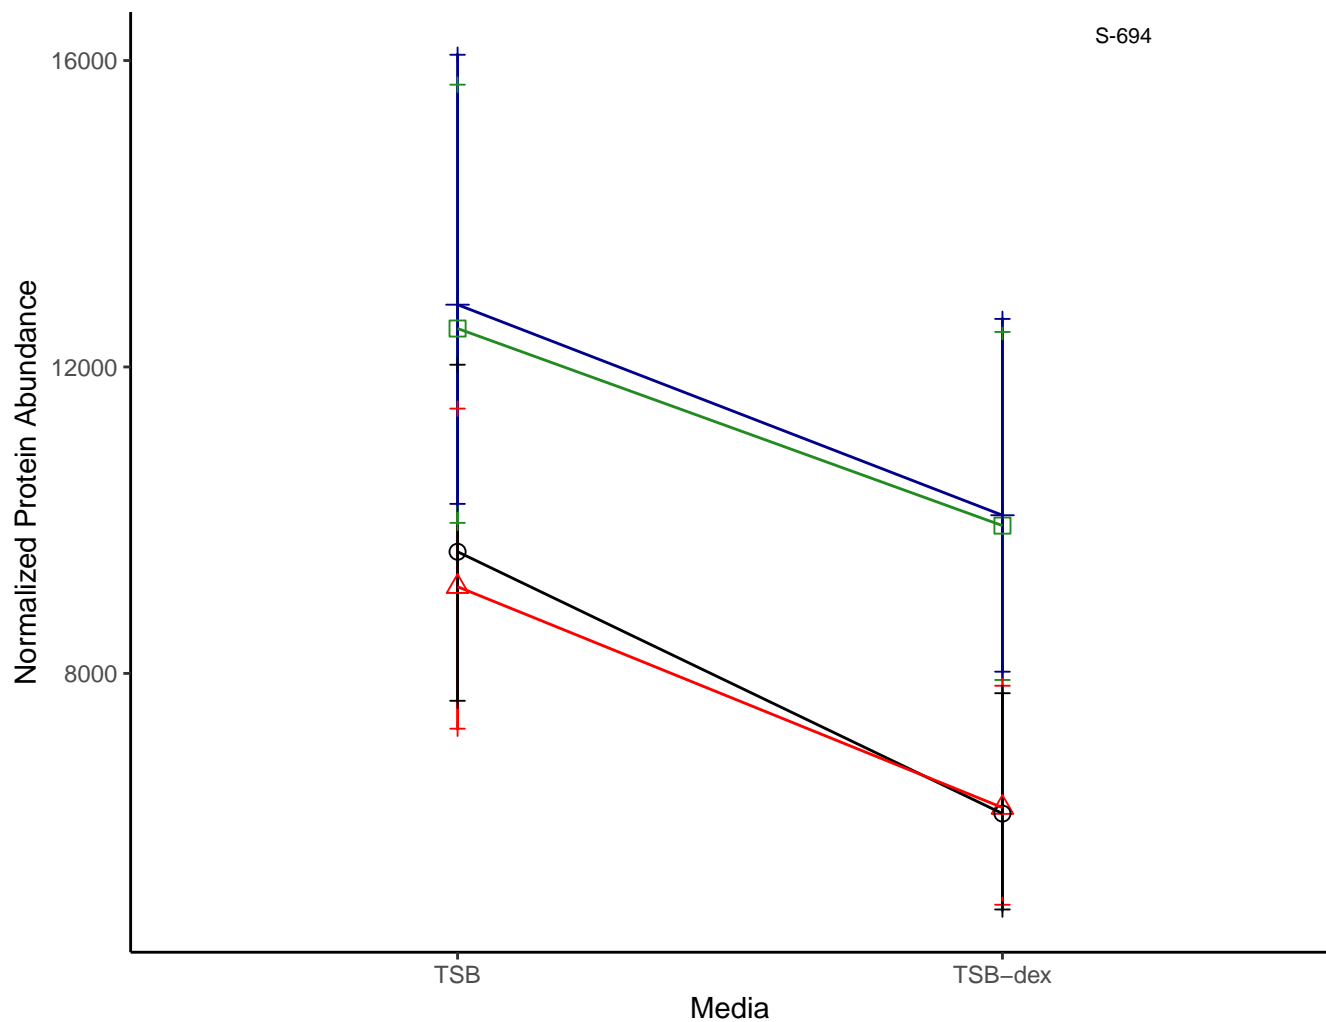

- ⊕ SA564
- △ SA564- $\Delta$ *hptRS*
- ⊞ SA564- $\Delta$ *ccpA*
- + SA564- $\Delta$ *hptRS/ccpA*

# LIPA\_STAAM

S-695

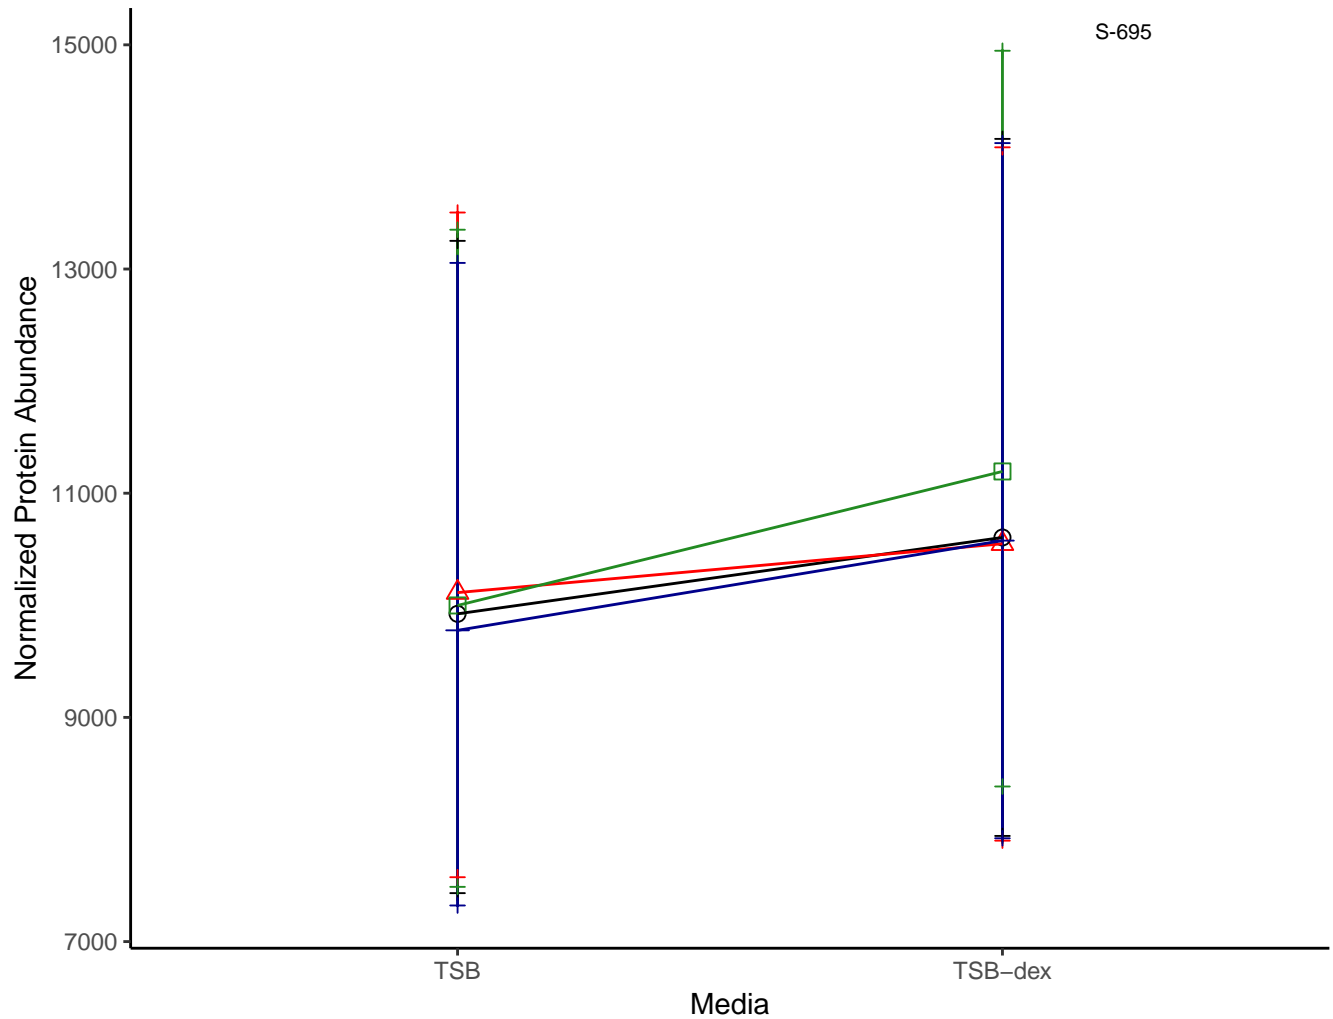

- SA564
- SA564- $\Delta hptRS$
- SA564- $\Delta ccpA$
- SA564- $\Delta hptRS/ccpA$

# LUXS\_STAAM

S-696

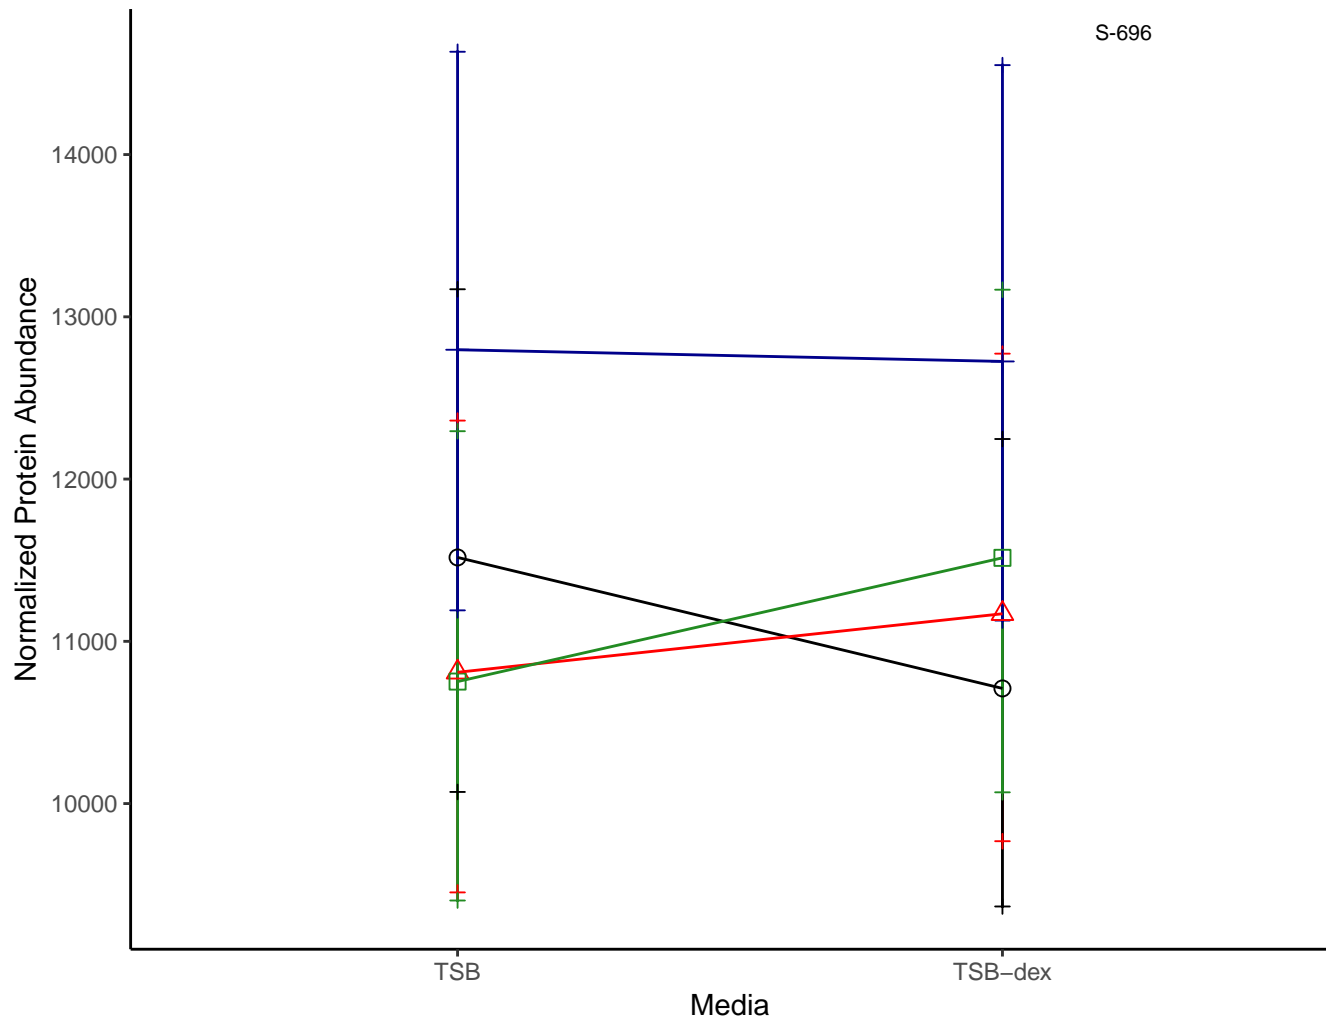

- ⊕ SA564
- △ SA564- $\Delta$ *hptRS*
- SA564- $\Delta$ *ccpA*
- + SA564- $\Delta$ *hptRS/ccpA*



# LYTH\_STAAM

S-697

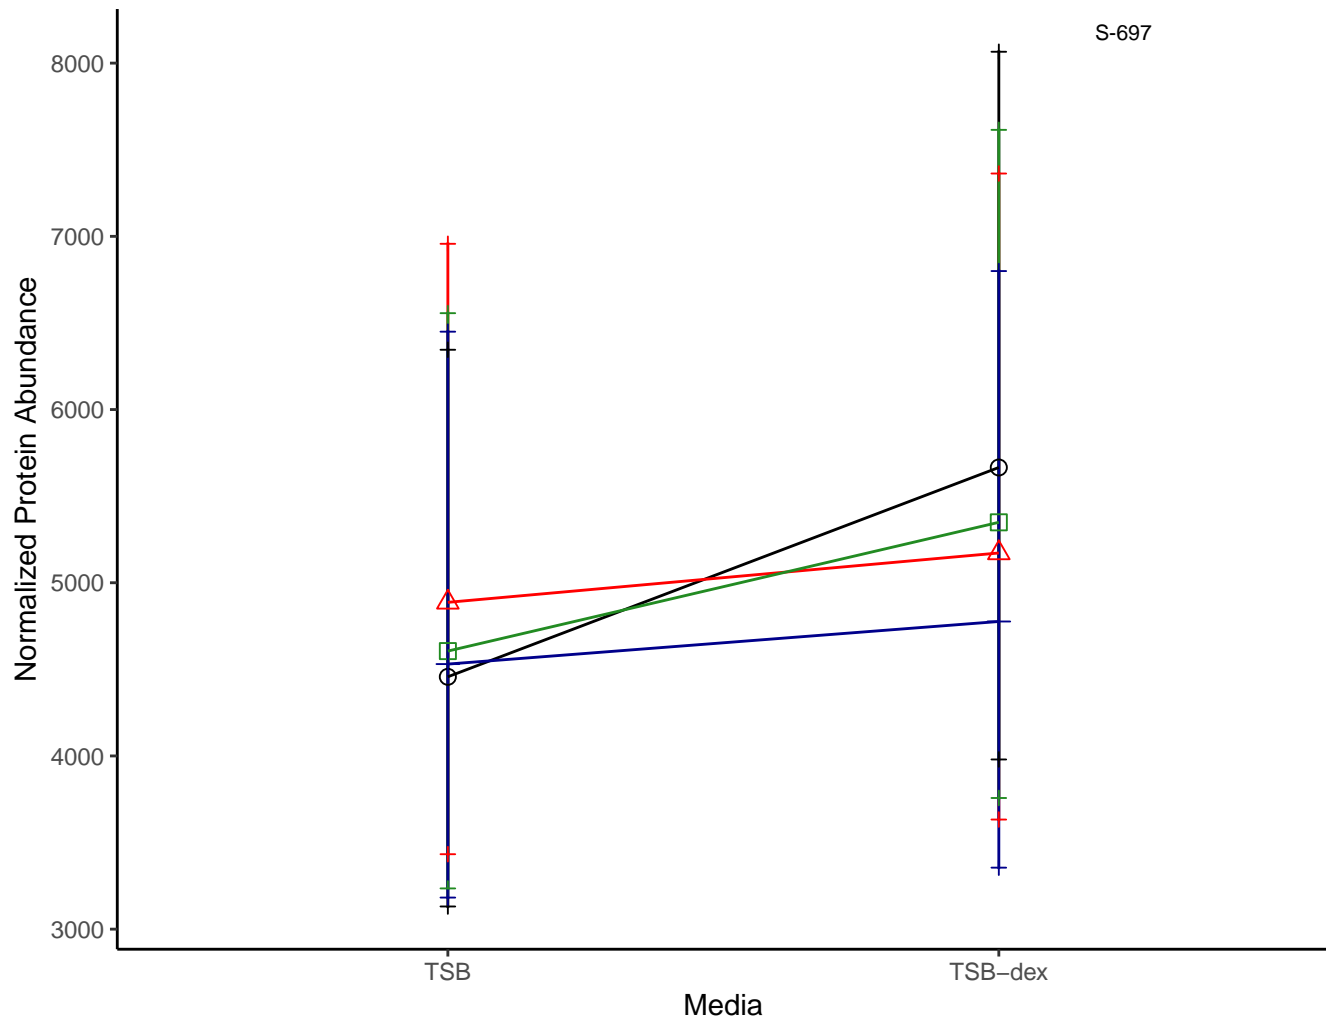

- ⊕ SA564
- △ SA564- $\Delta hptRS$
- ⊞ SA564- $\Delta ccpA$
- + SA564- $\Delta hptRS/ccpA$

# LYTN\_STAAM

S-698

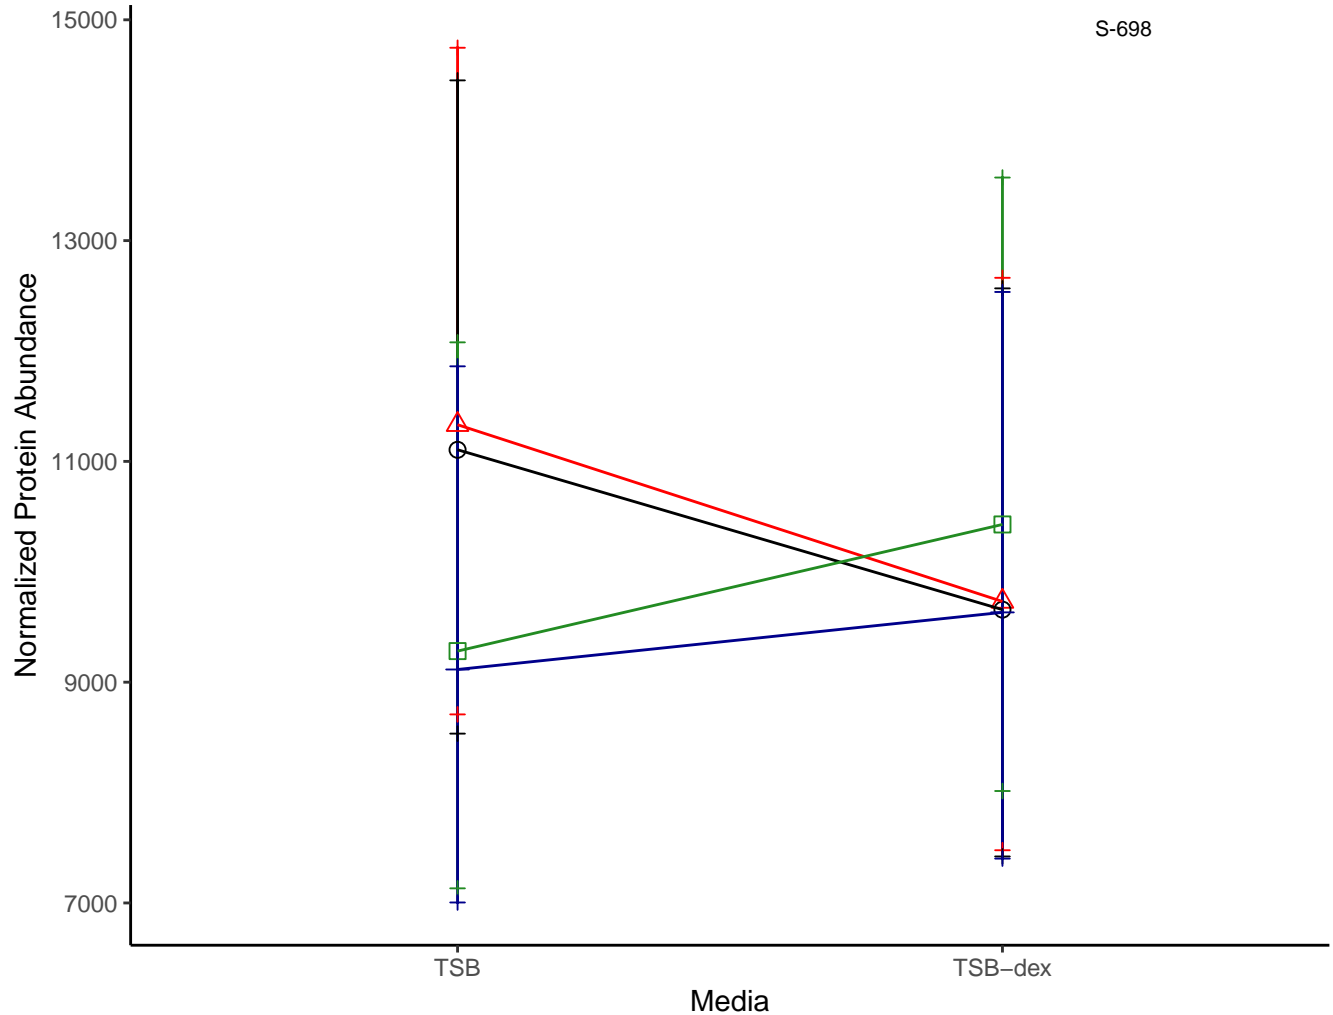

- ⊕ SA564
- △ SA564- $\Delta$ *hptRS*
- ⊞ SA564- $\Delta$ *ccpA*
- + SA564- $\Delta$ *hptRS/ccpA*

# MAP\_STAAM

S-699

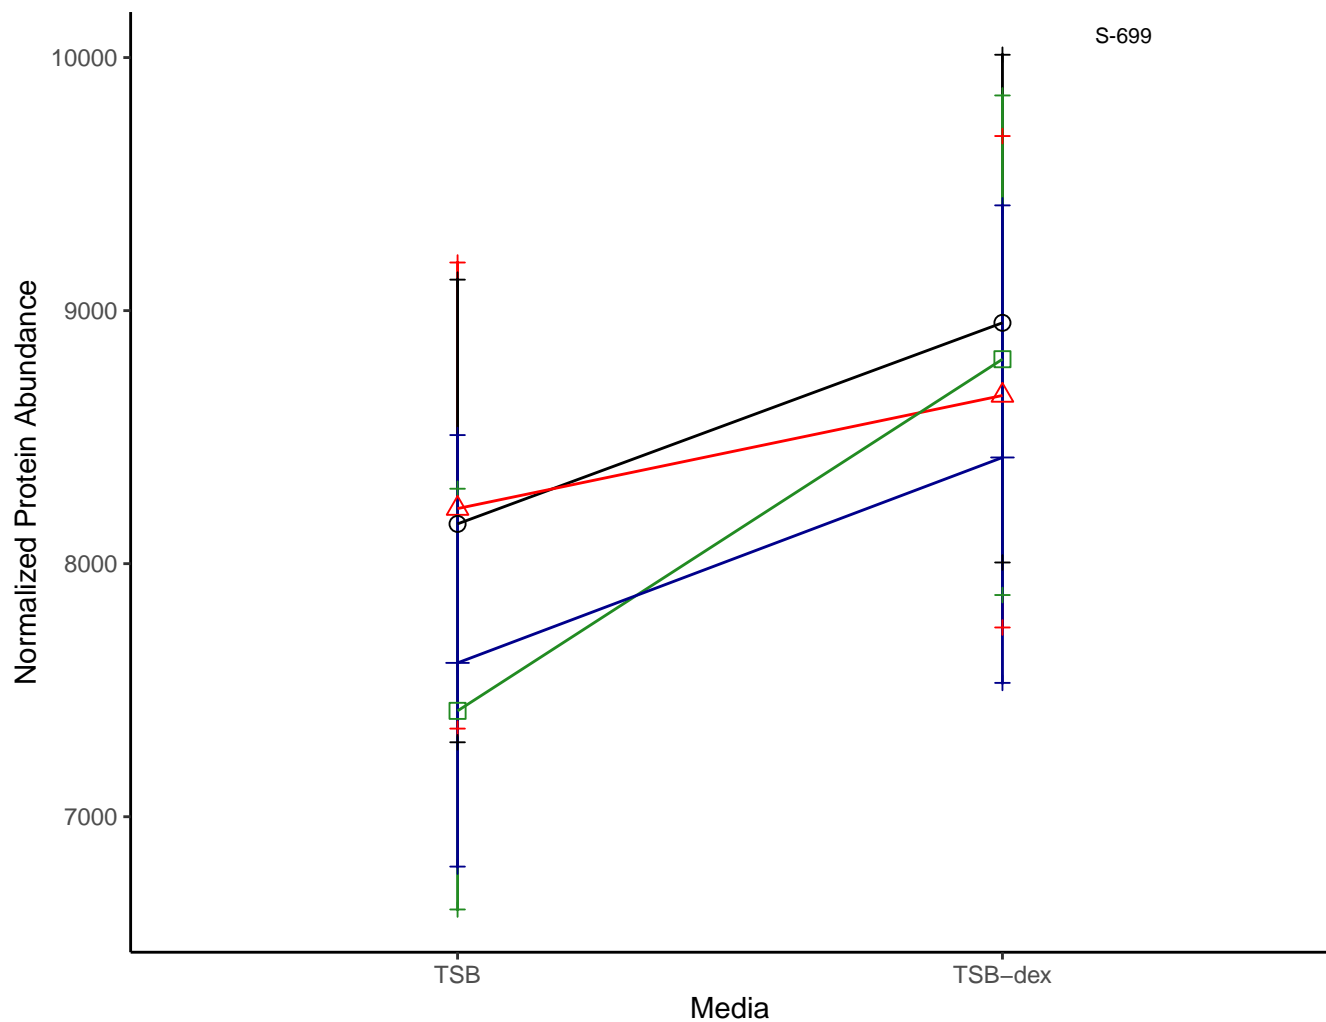

- ⊕ SA564
- △ SA564- $\Delta$ *hptRS*
- ⊞ SA564- $\Delta$ *ccpA*
- + SA564- $\Delta$ *hptRS/ccpA*

# MAP1\_STAAM

S-700

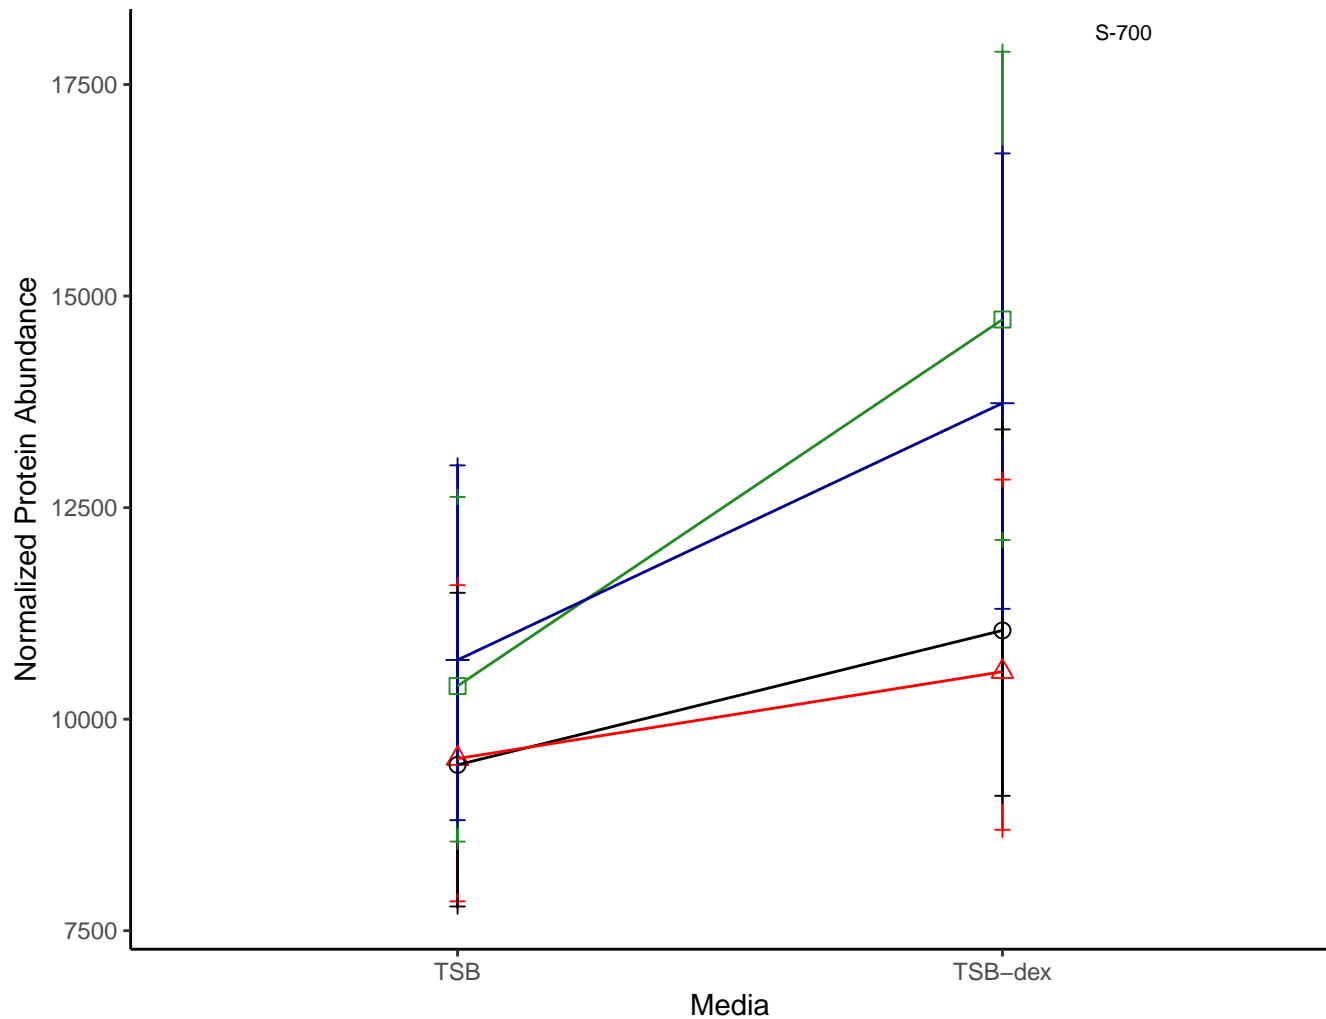

- ⊕ SA564
- △ SA564- $\Delta$ *hptRS*
- ⊞ SA564- $\Delta$ *ccpA*
- + SA564- $\Delta$ *hptRS/ccpA*

# MAZF\_STAAM

S-701

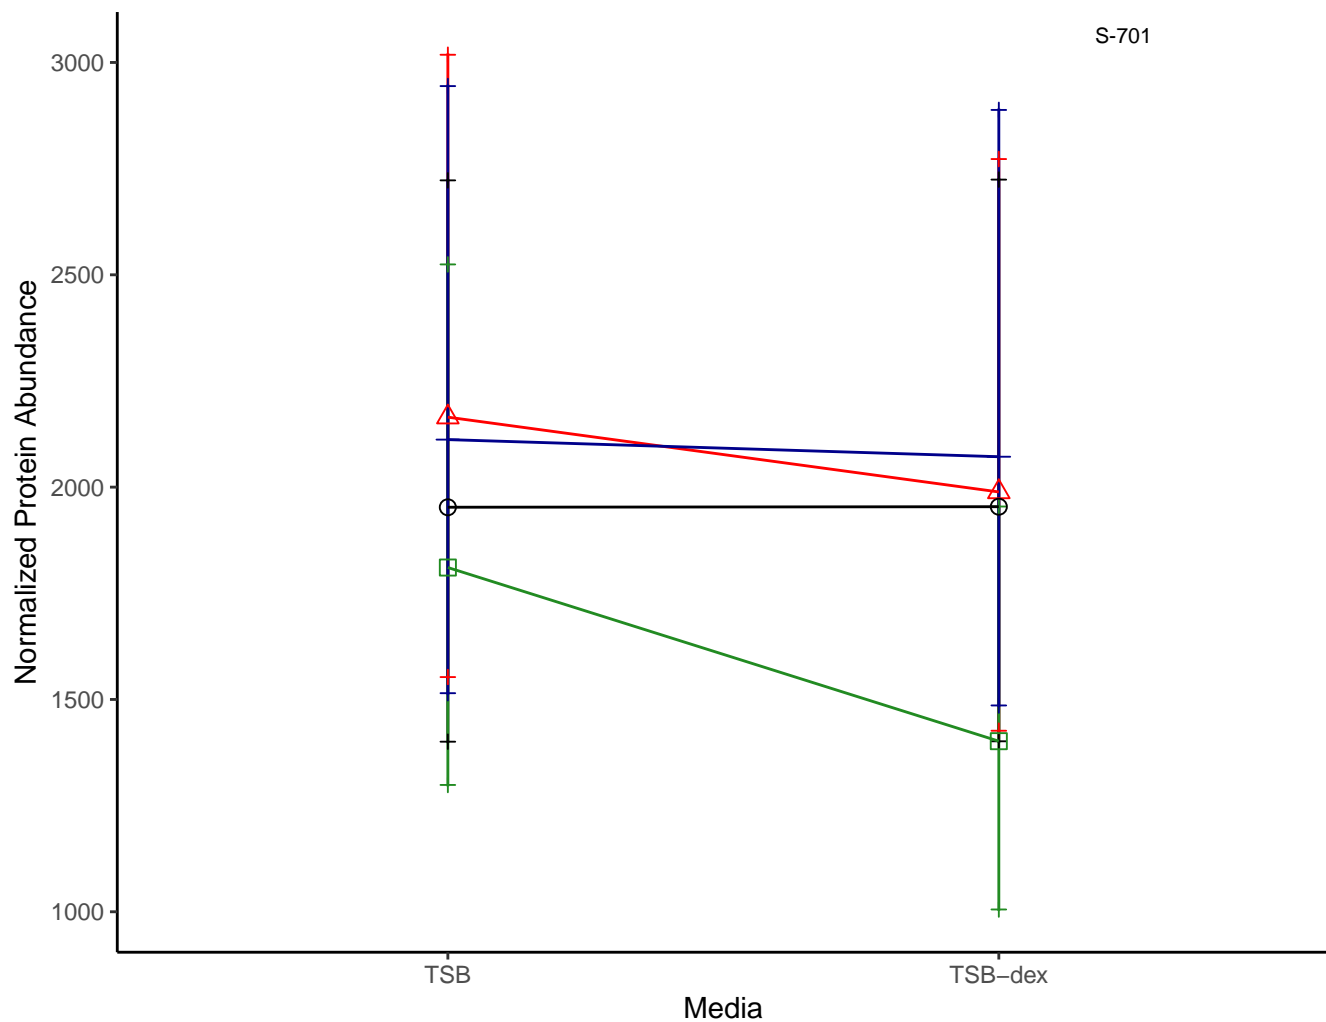

- ⊕ SA564
- △ SA564- $\Delta hptRS$
- ⊞ SA564- $\Delta ccpA$
- + SA564- $\Delta hptRS/ccpA$

# MENB\_STAAM

S-702

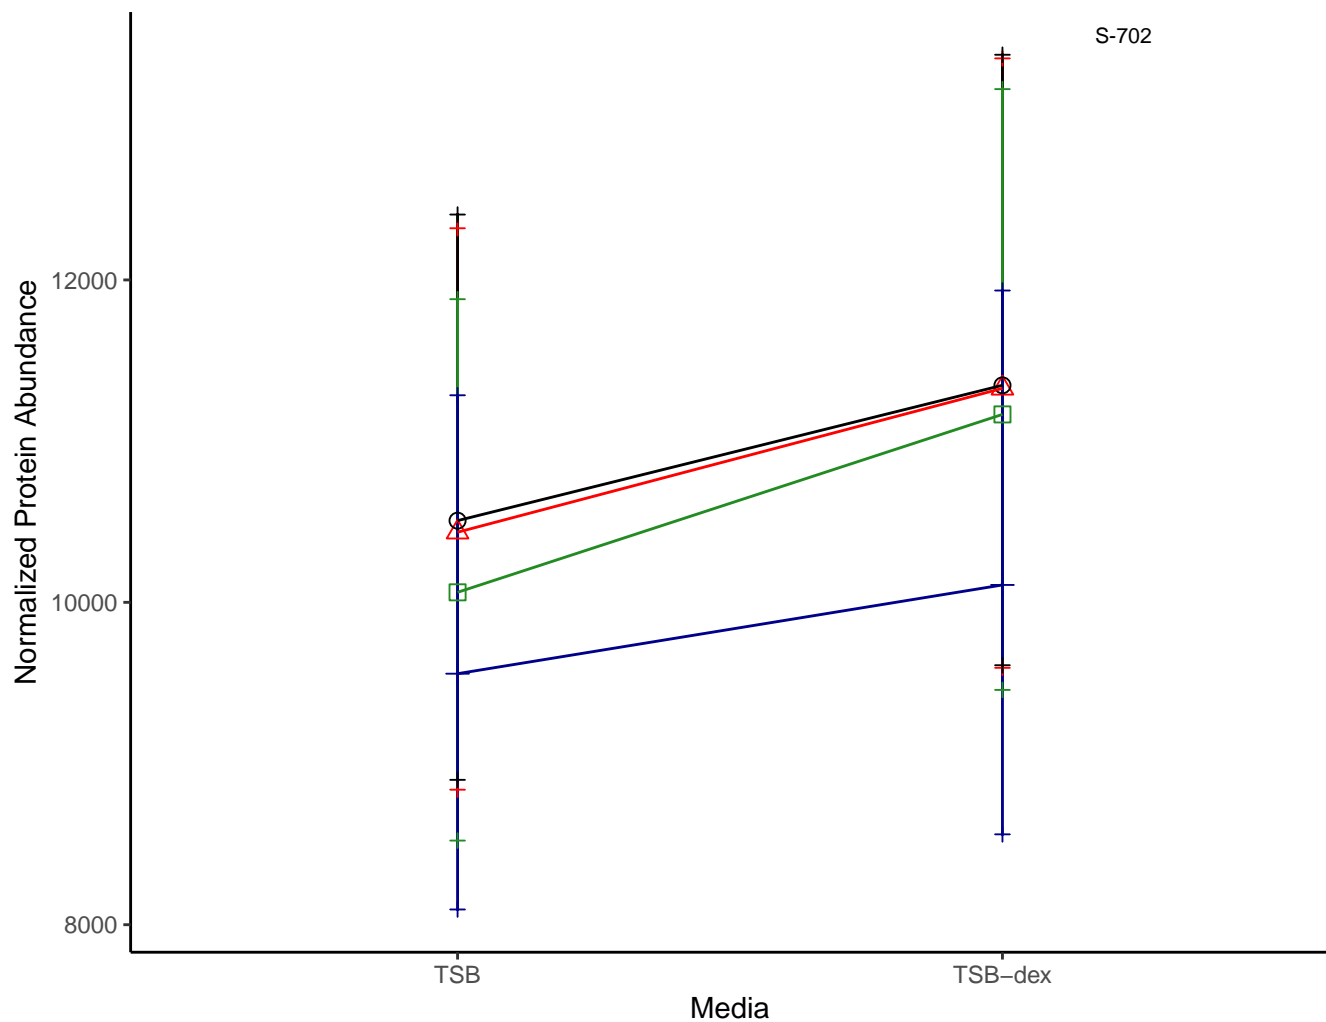

- ⊕ SA564
- △ SA564- $\Delta$ *hptRS*
- ⊞ SA564- $\Delta$ *ccpA*
- + SA564- $\Delta$ *hptRS/ccpA*

# MENG\_STAAM

S-703

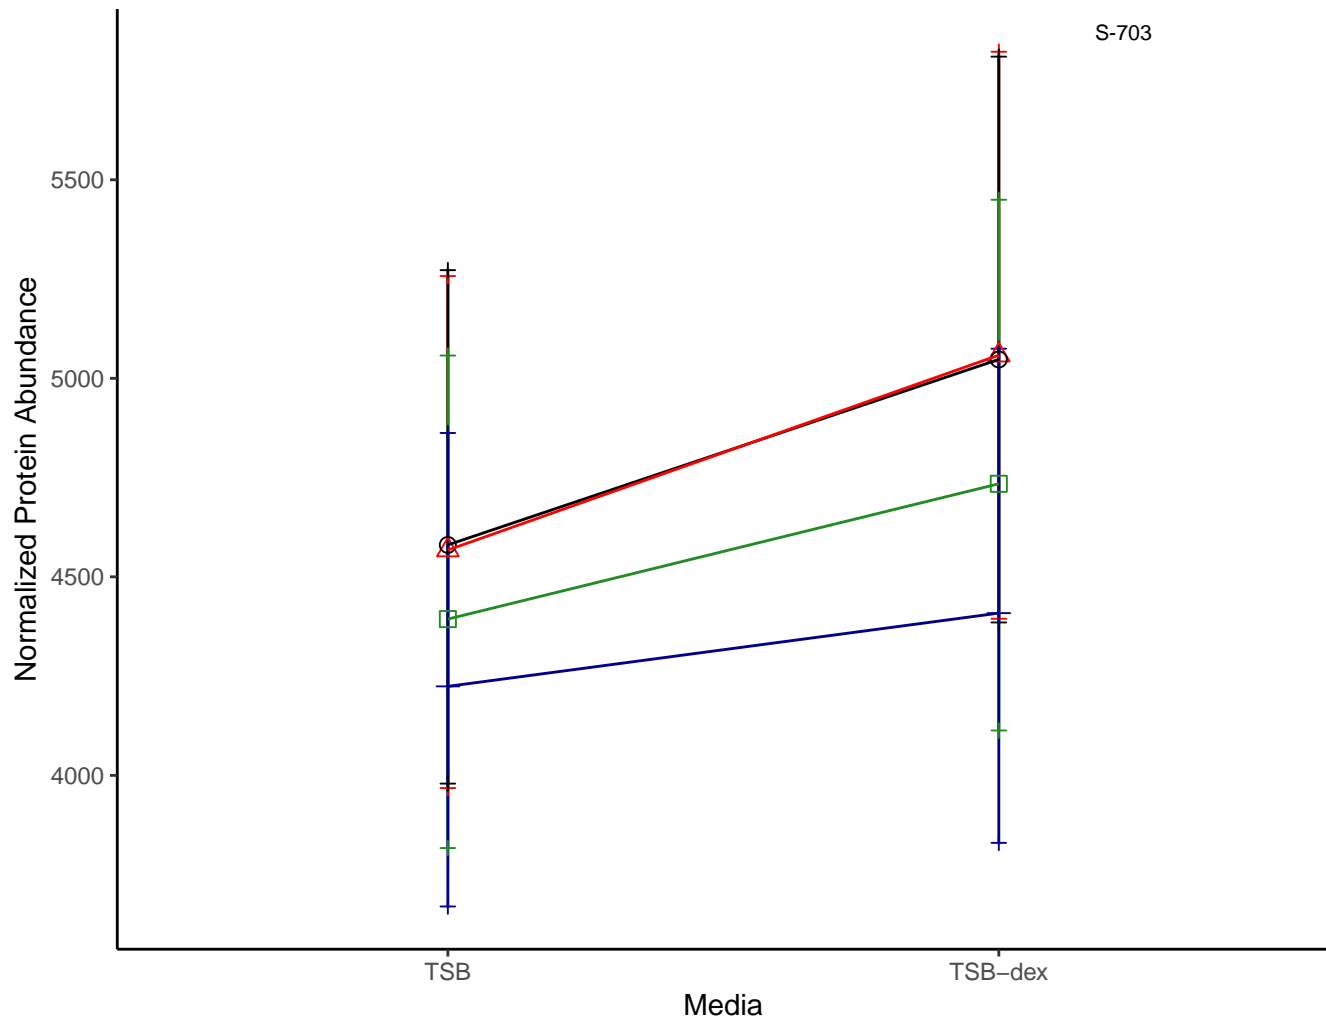

- ⊕ SA564
- △ SA564- $\Delta hptRS$
- ⊞ SA564- $\Delta ccpA$
- + SA564- $\Delta hptRS/ccpA$

# METK\_STAAM

S-704

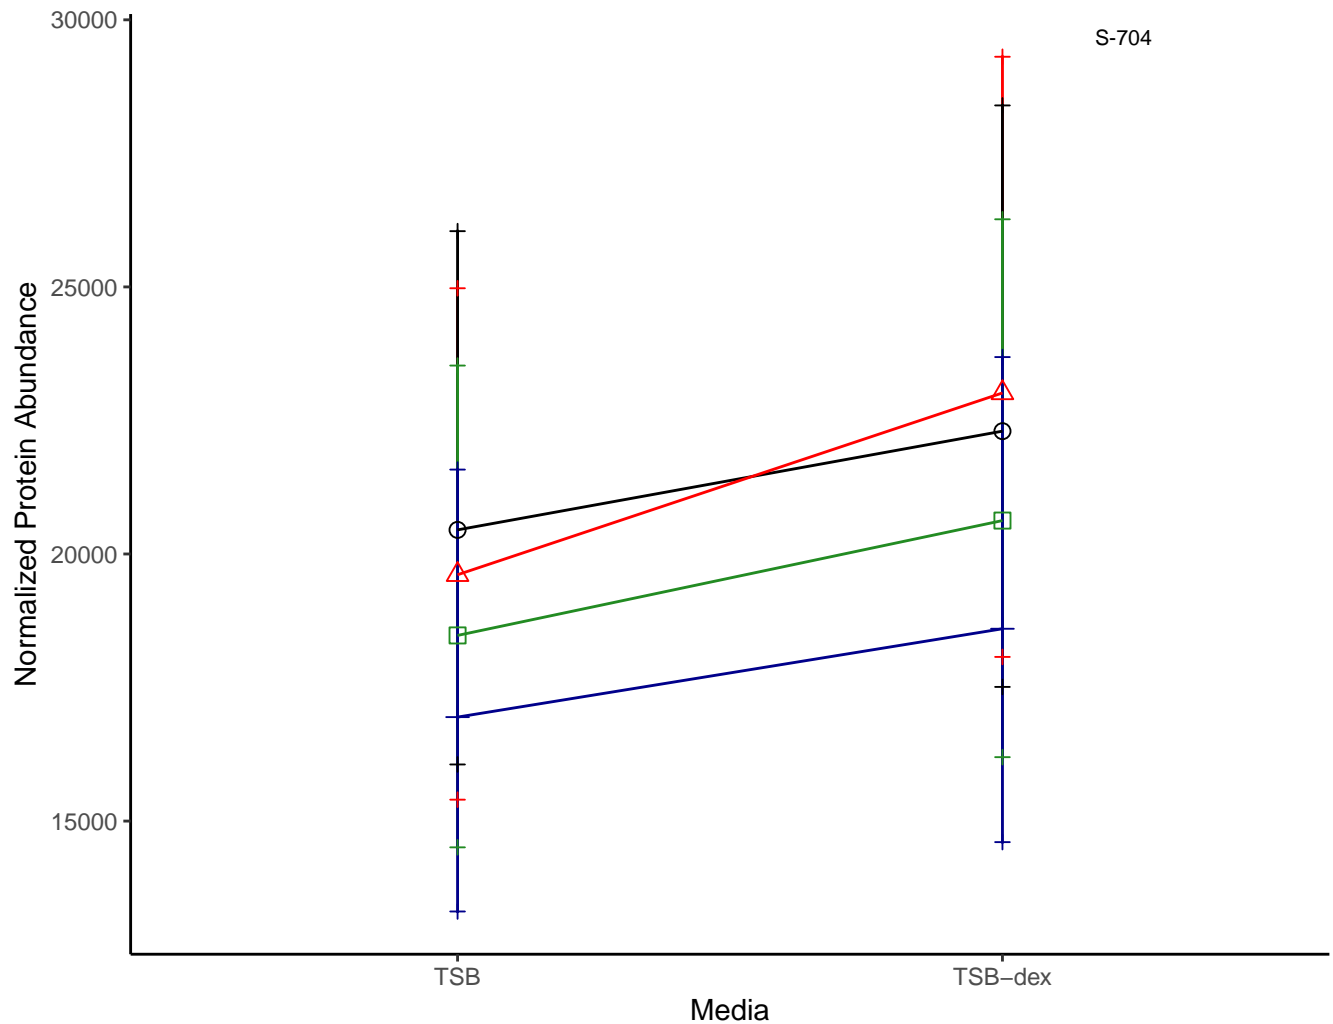

- ⊕ SA564
- △ SA564-ΔhptRS
- SA564-ΔccpA
- + SA564-ΔhptRS/ccpA



# METN2\_STAAM

S-705

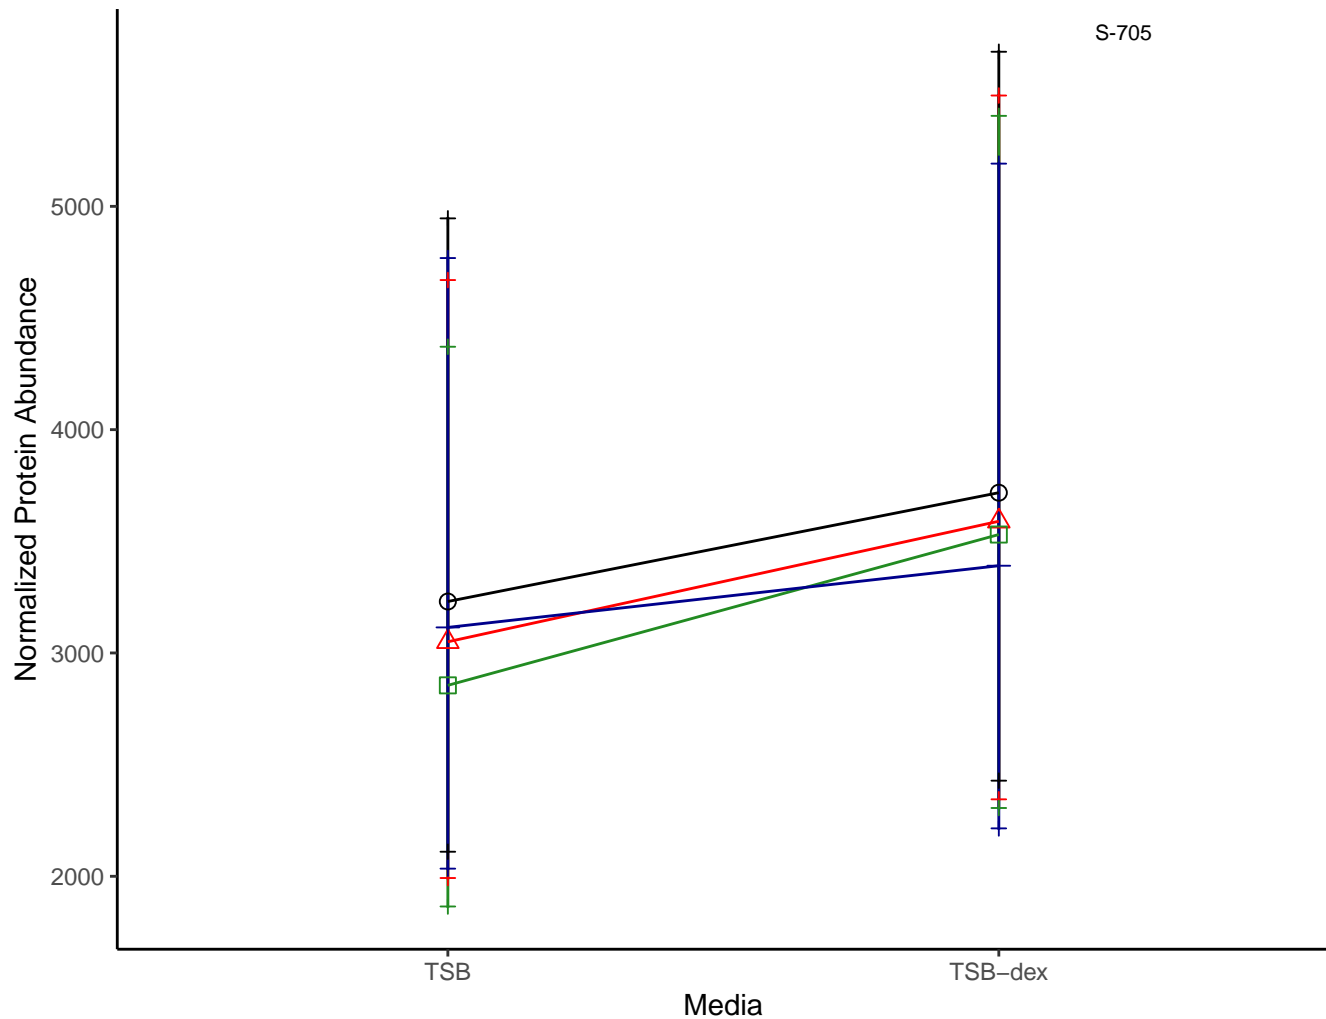

- ⊕ SA564
- △ SA564- $\Delta hptRS$
- ⊞ SA564- $\Delta ccpA$
- + SA564- $\Delta hptRS/ccpA$

# MGRA\_STAAM

S-706

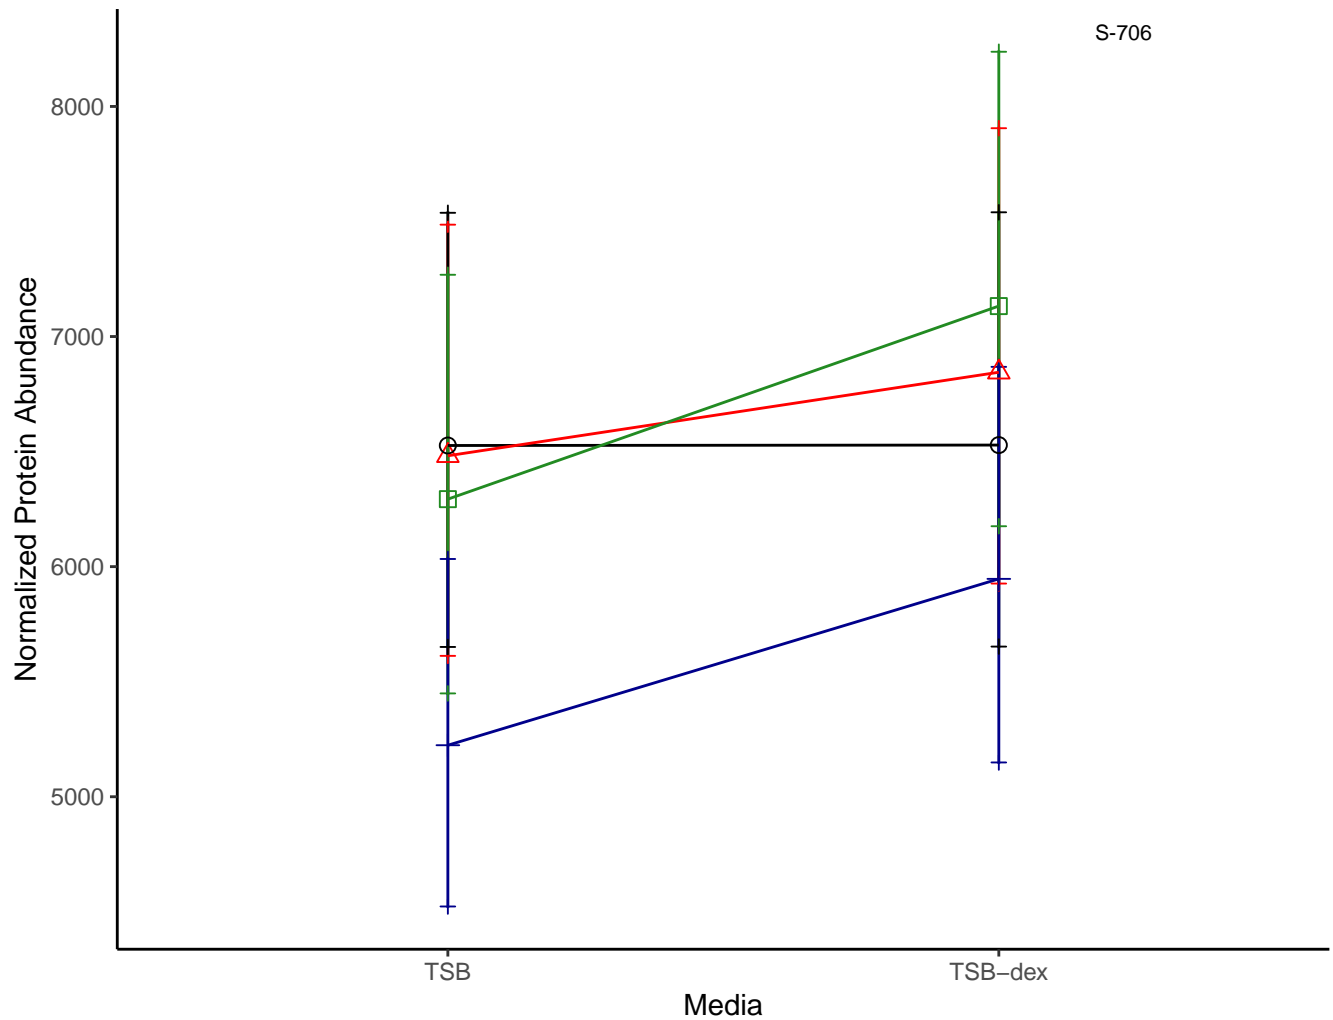

- ⊕ SA564
- △ SA564-ΔhptRS
- ⊞ SA564-ΔccpA
- + SA564-ΔhptRS/ccpA

# MIAB\_STAAM

S-707

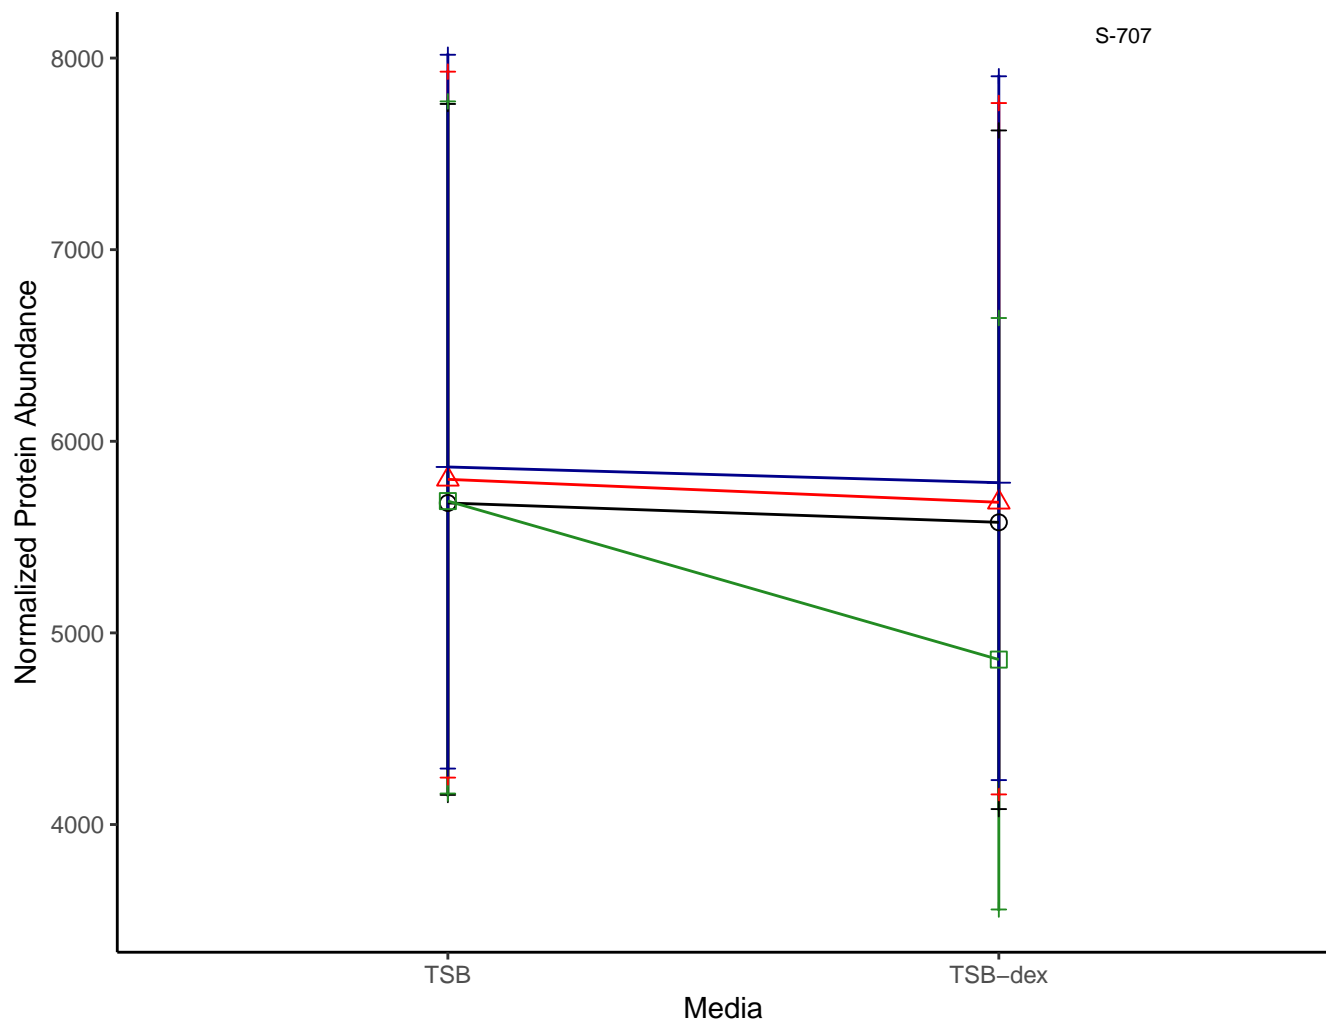

- ⊕ SA564
- △ SA564-ΔhptRS
- ⊞ SA564-ΔccpA
- ⊕ SA564-ΔhptRS/ccpA

# MNME\_STAAM

S-708

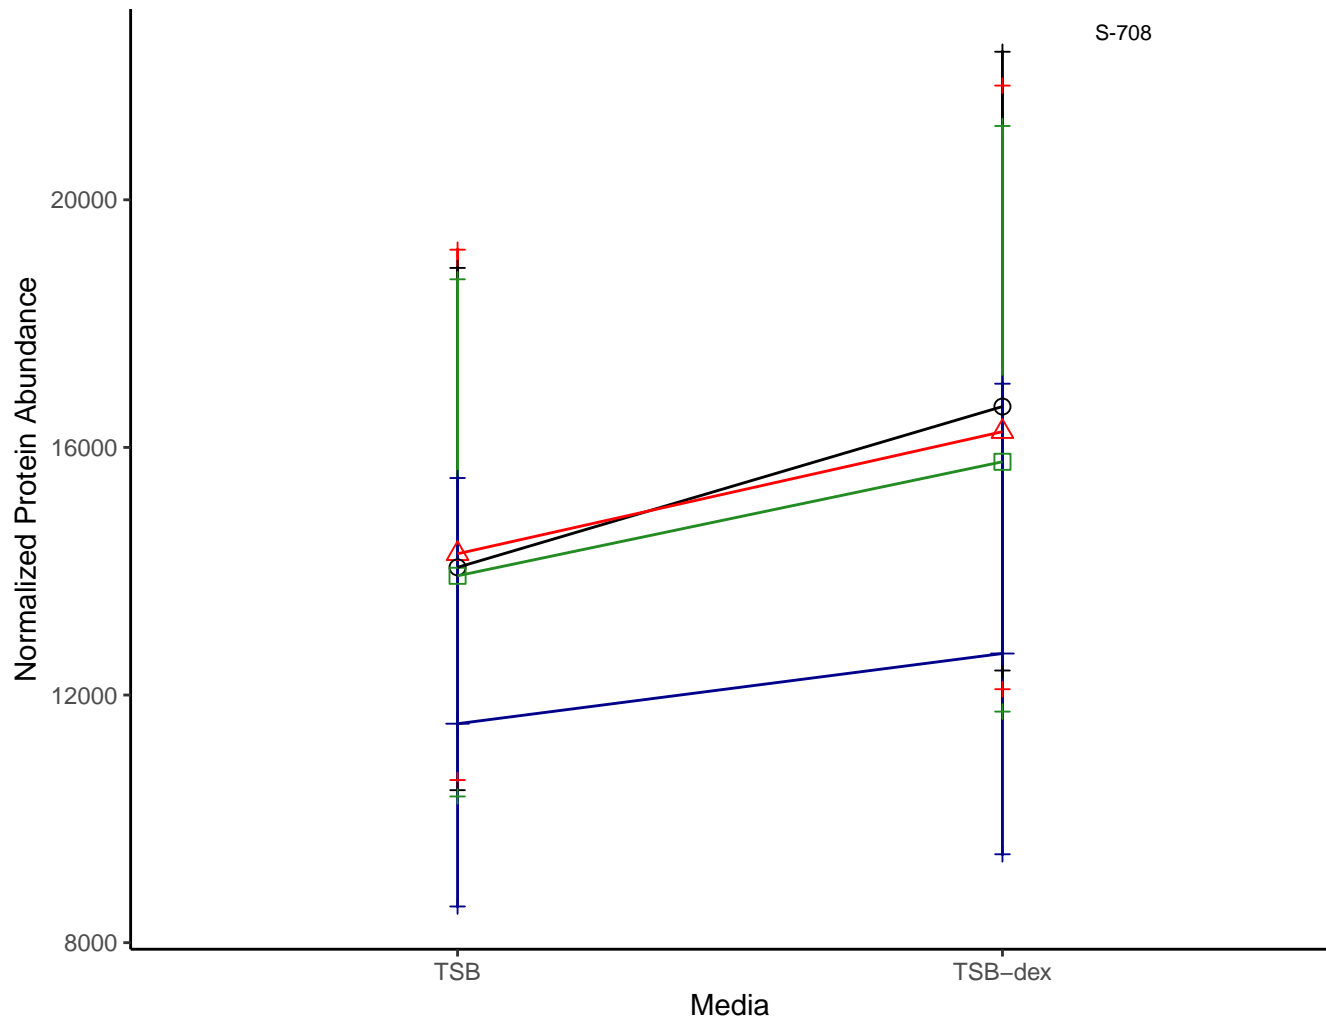

- ⊕ SA564
- △ SA564- $\Delta$ *hptRS*
- ⊞ SA564- $\Delta$ *ccpA*
- + SA564- $\Delta$ *hptRS/ccpA*

# MNMG\_STAAM

S-709

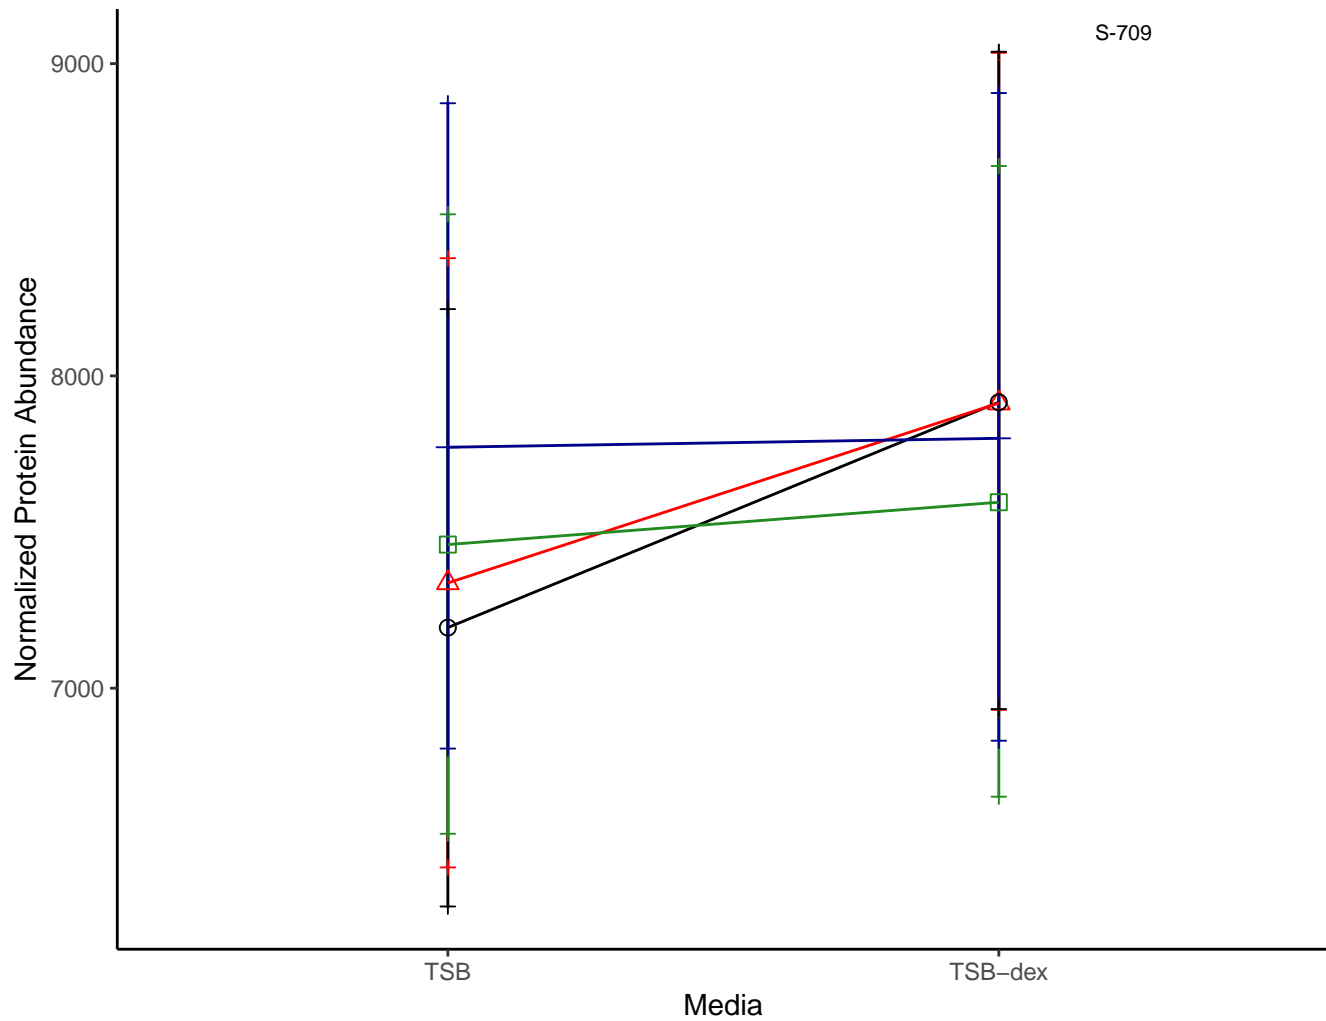

- ⊕ SA564
- △ SA564- $\Delta$ *hptRS*
- ⊞ SA564- $\Delta$ *ccpA*
- + SA564- $\Delta$ *hptRS/ccpA*

# MOAC\_STAAM

S-710

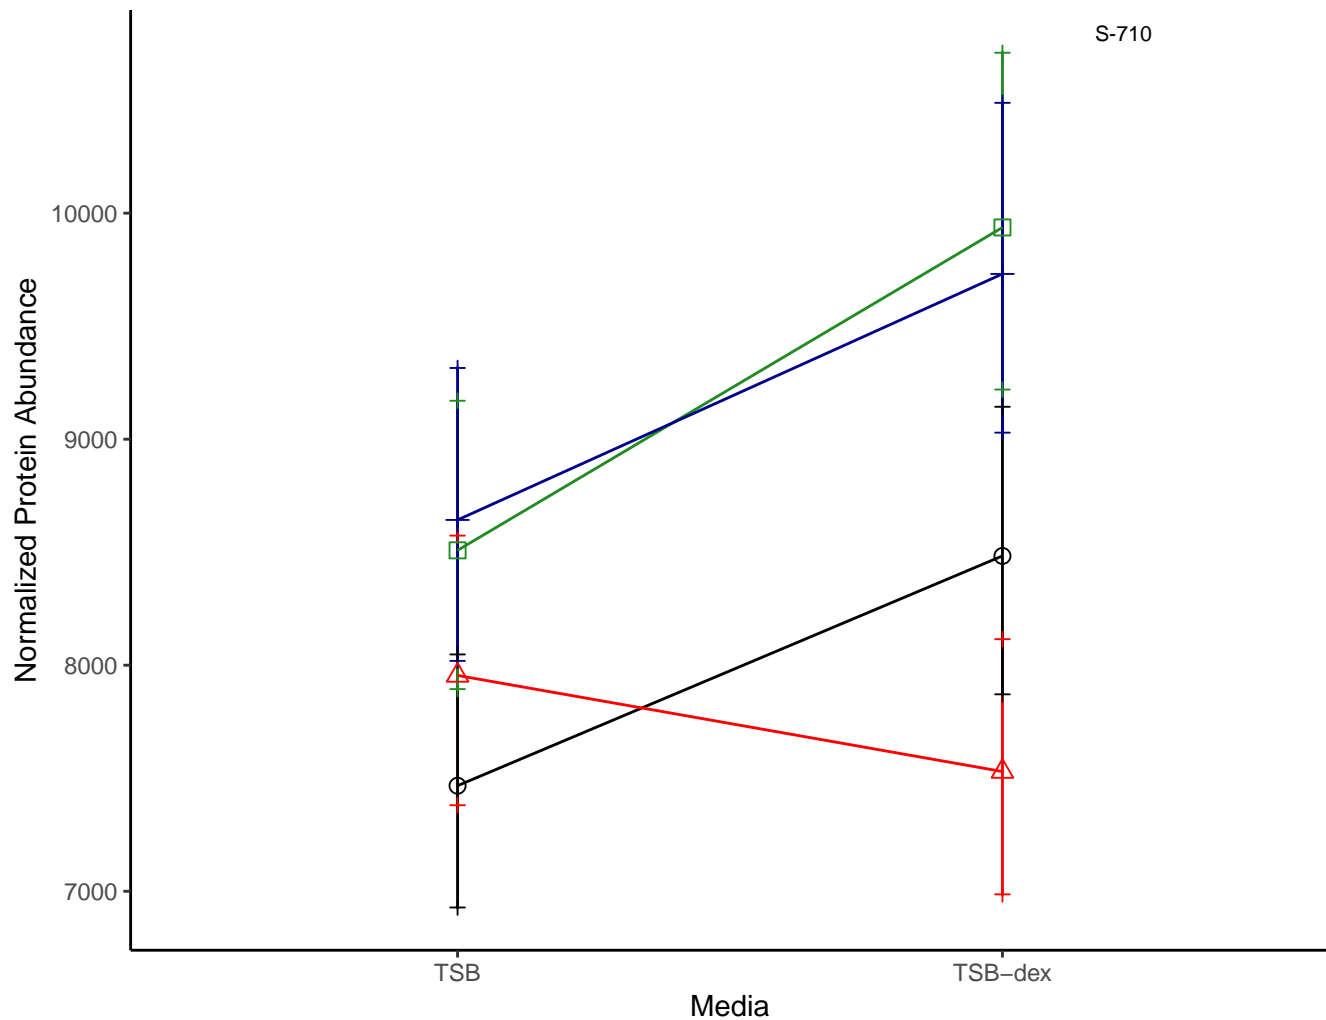

- ⊕ SA564
- △ SA564-ΔhptRS
- ⊞ SA564-ΔccpA
- + SA564-ΔhptRS/ccpA

# MOEA\_STAAM

S-711

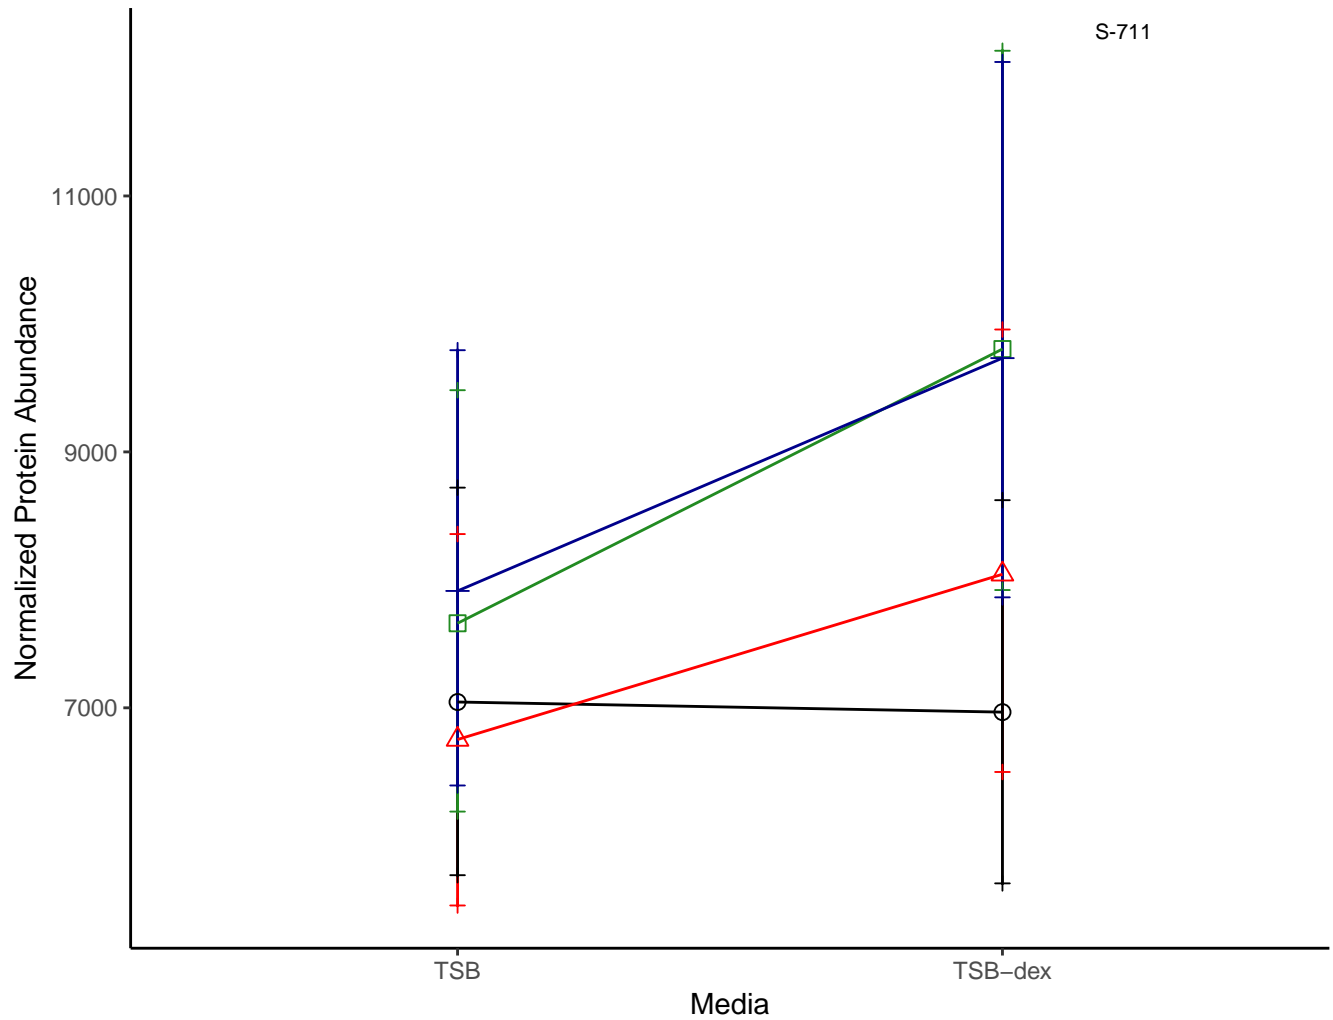

- ⊕ SA564
- △ SA564-ΔhptRS
- ⊞ SA564-ΔccpA
- + SA564-ΔhptRS/ccpA

## MQO2\_STAAM

S-712

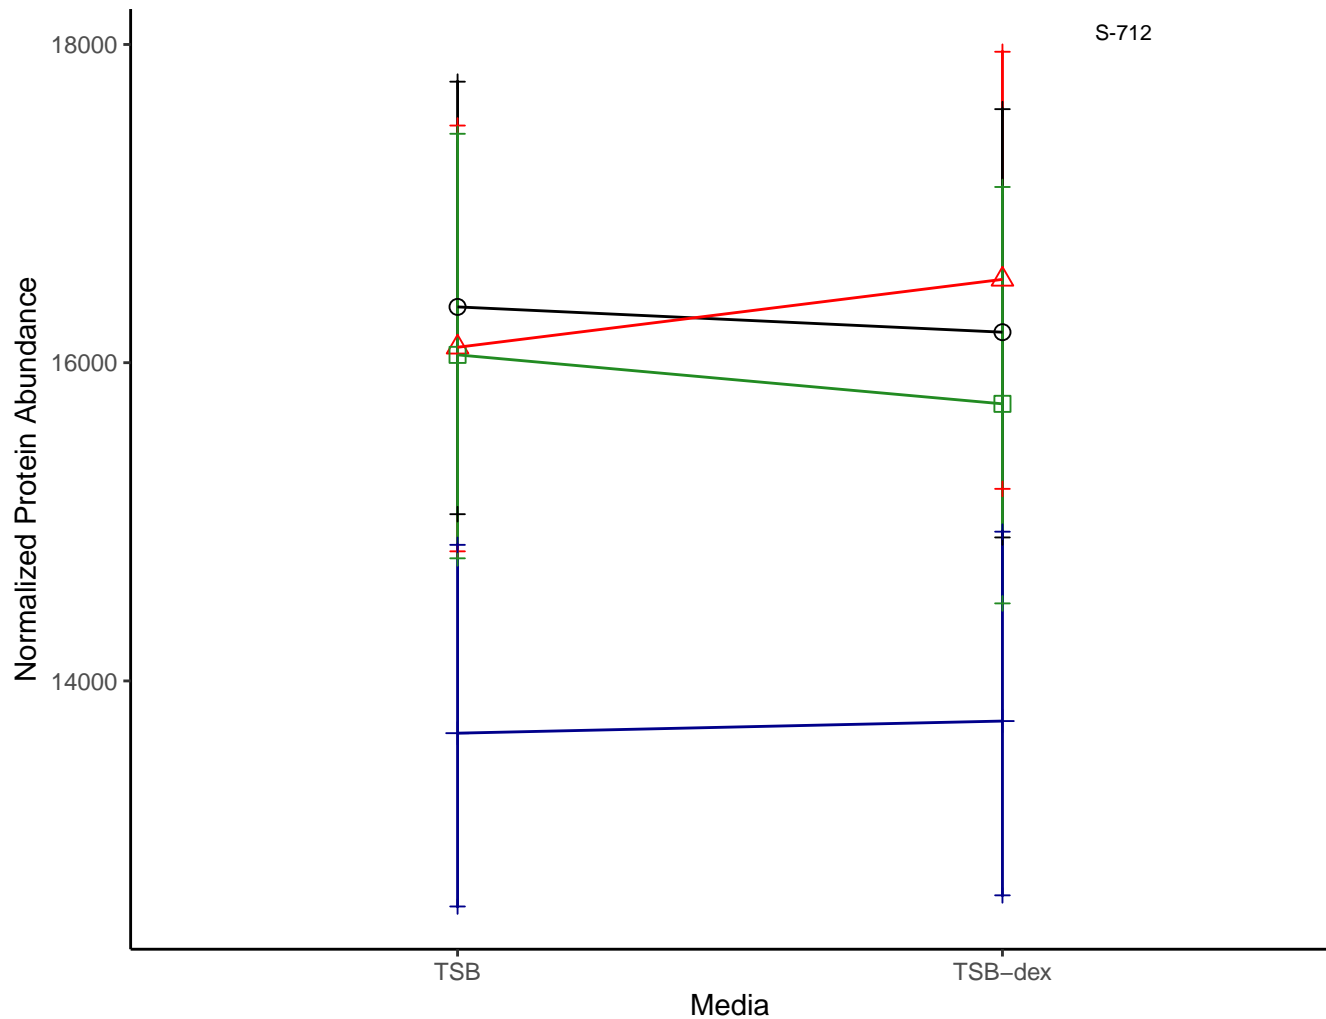

- SA564
- SA564- $\Delta hptRS$
- SA564- $\Delta ccpA$
- SA564- $\Delta hptRS/ccpA$



# MSRA1\_STAAM

S-713

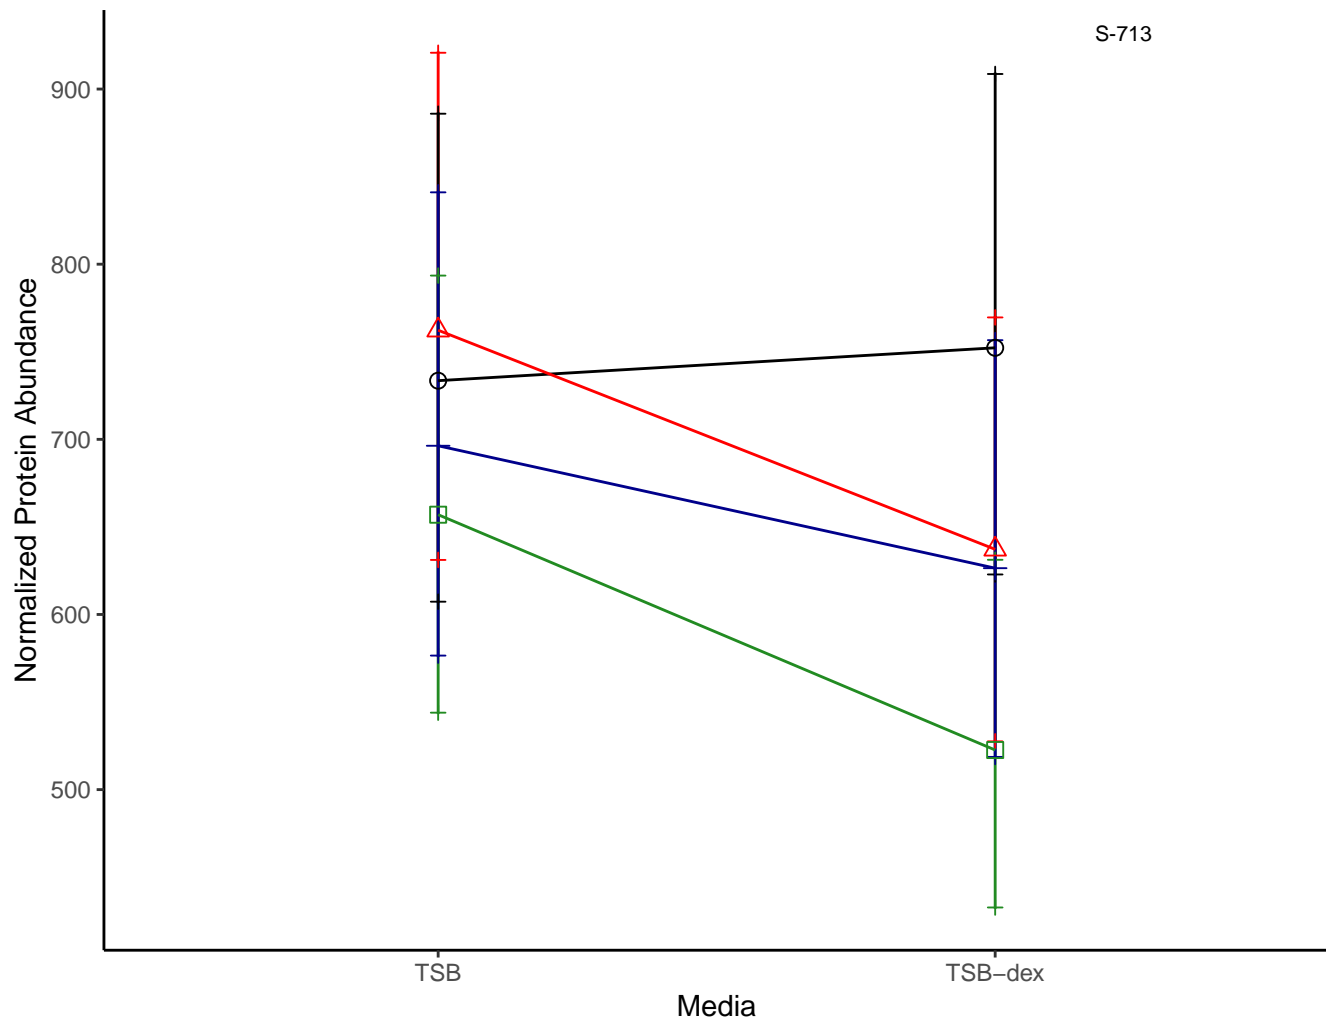

- SA564
- SA564- $\Delta$ *hptRS*
- SA564- $\Delta$ *ccpA*
- SA564- $\Delta$ *hptRS/ccpA*

# MSRA2\_STAAM

S-714

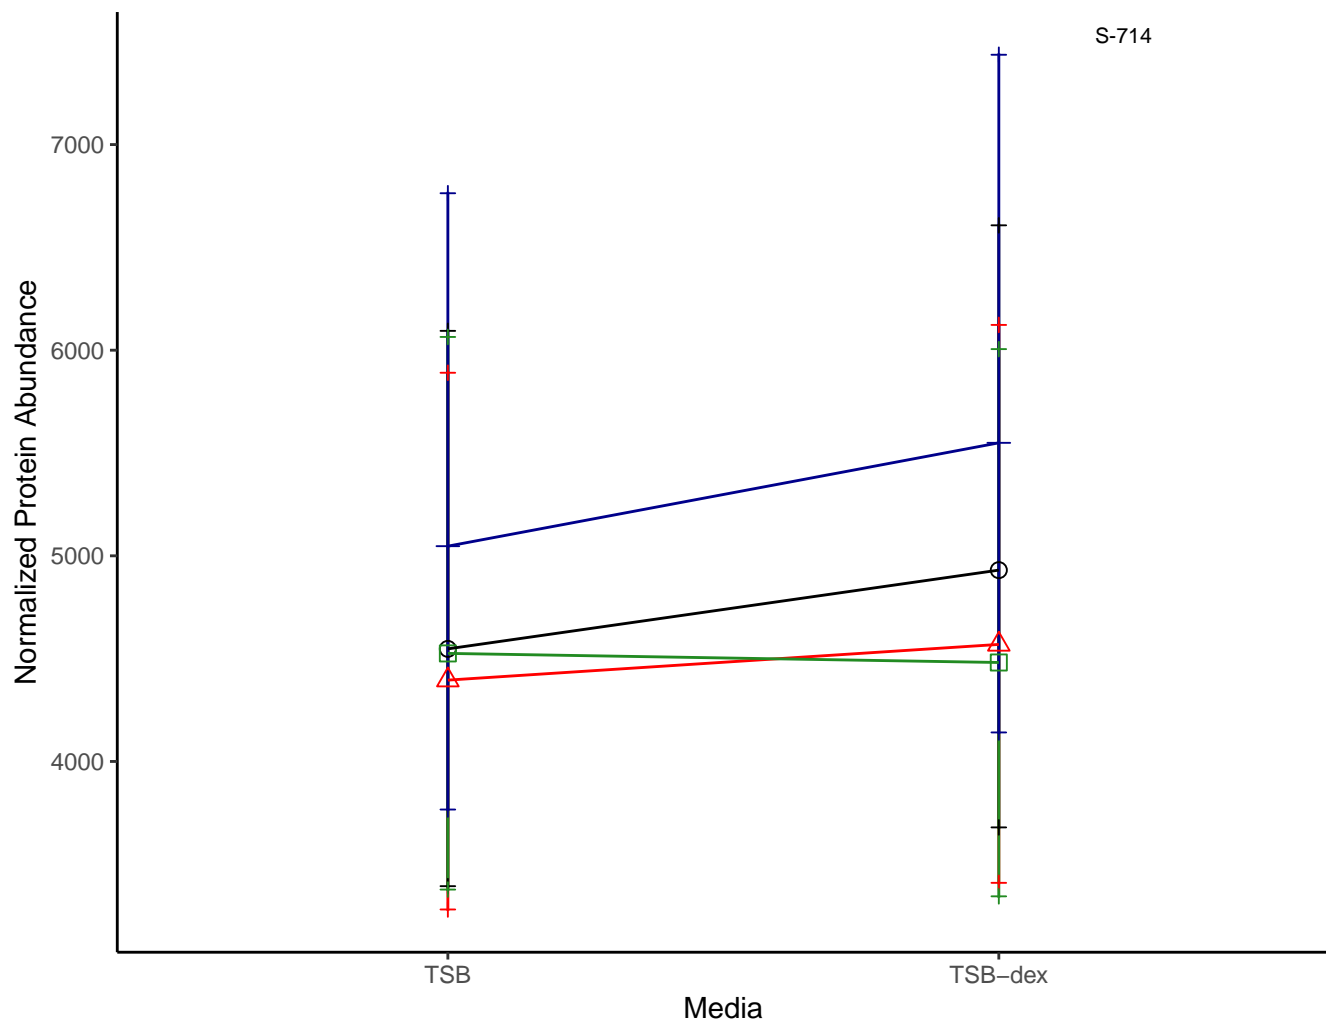

- ⊕ SA564
- △ SA564- $\Delta$ *hptRS*
- ⊞ SA564- $\Delta$ *ccpA*
- + SA564- $\Delta$ *hptRS/ccpA*

# MSRB\_STAAM

S-715

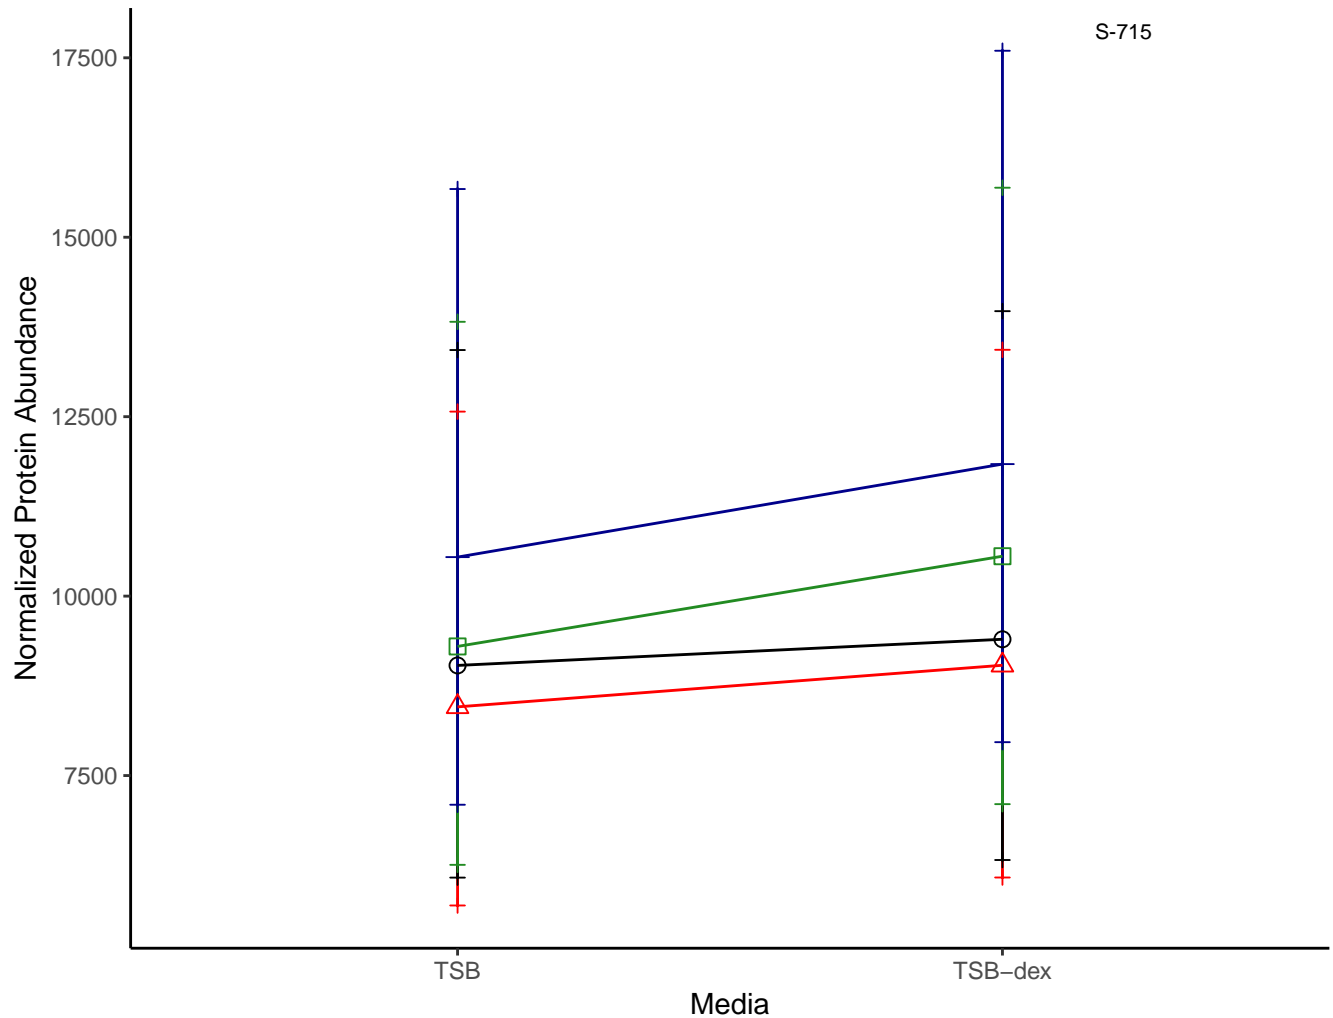

- ⊕ SA564
- △ SA564- $\Delta$ *hptRS*
- SA564- $\Delta$ *ccpA*
- + SA564- $\Delta$ *hptRS/ccpA*

# MTLD\_STAAM

S-716

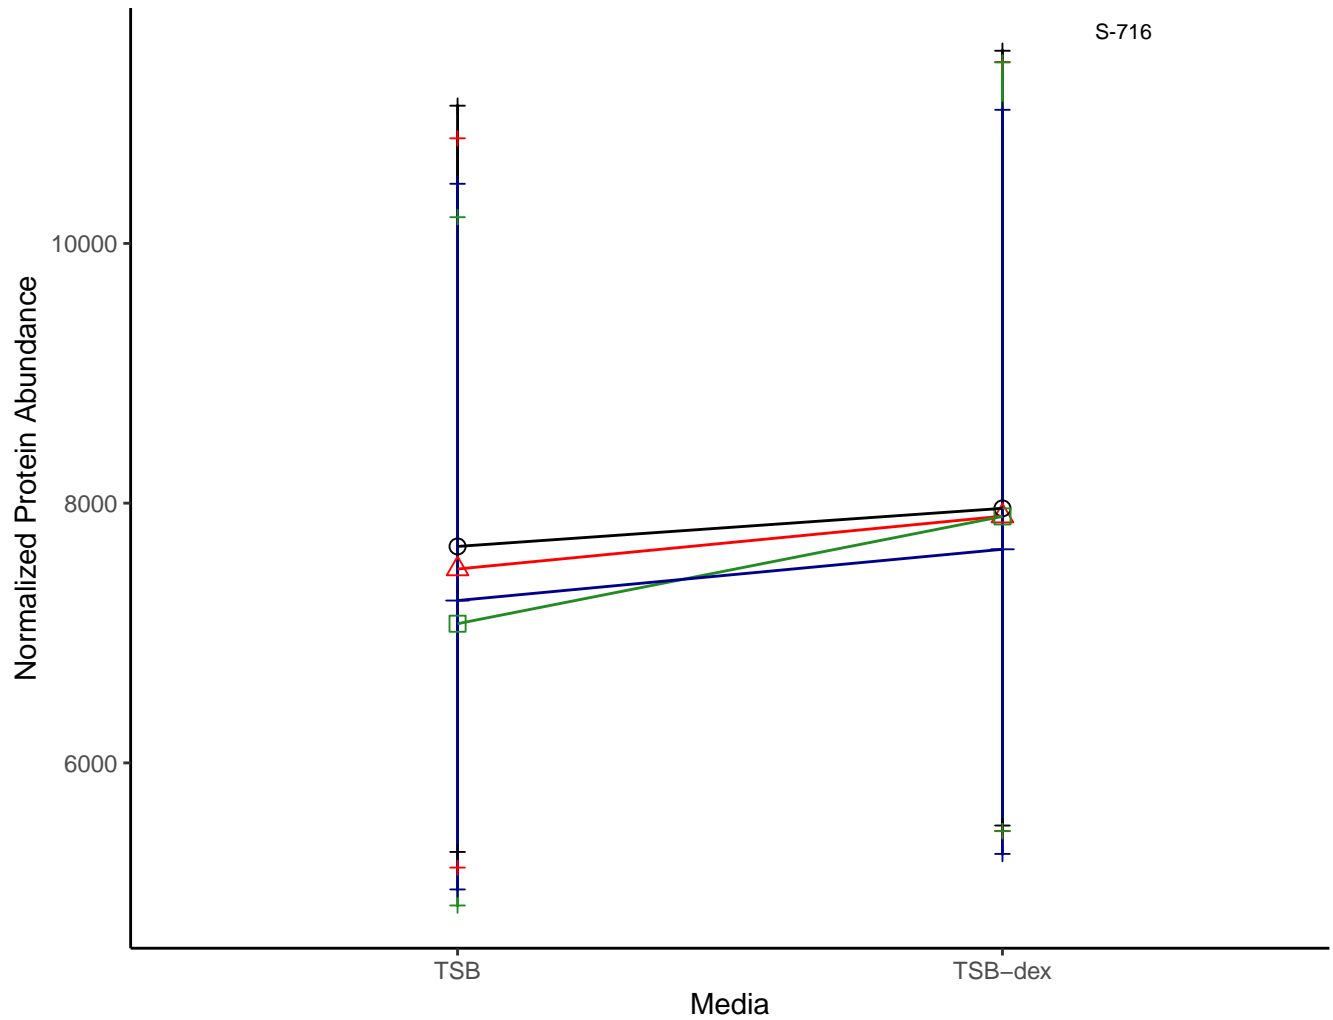

- SA564
- SA564- $\Delta hptRS$
- SA564- $\Delta ccpA$
- SA564- $\Delta hptRS/ccpA$

# MTNN\_STAAM

S-717

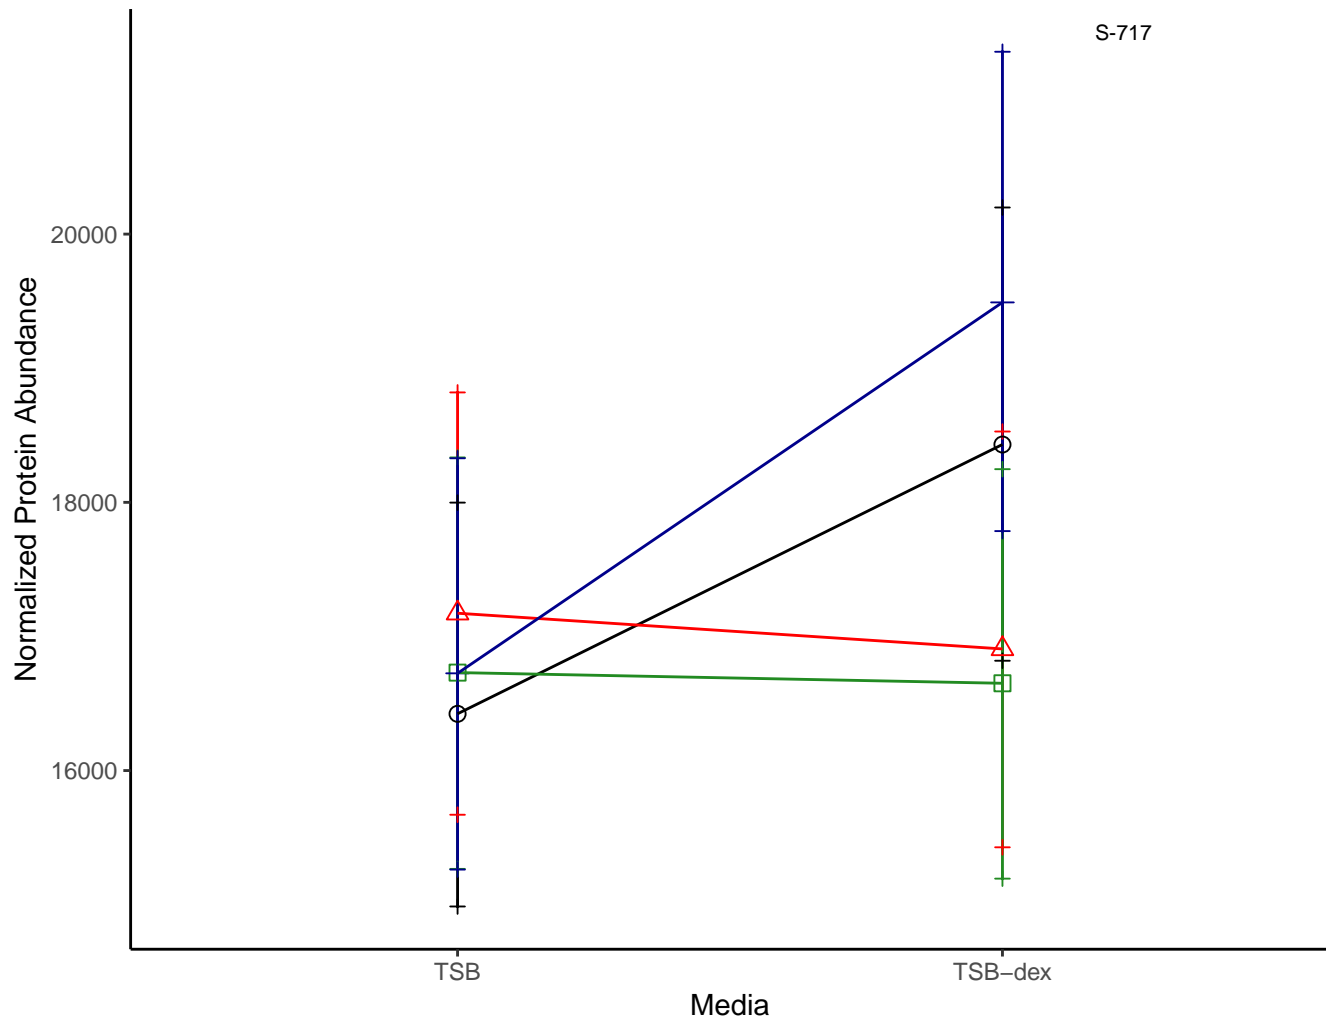

- ⊕ SA564
- △ SA564-ΔhptRS
- ⊞ SA564-ΔccpA
- + SA564-ΔhptRS/ccpA

# MURA1\_STAAM

S-718

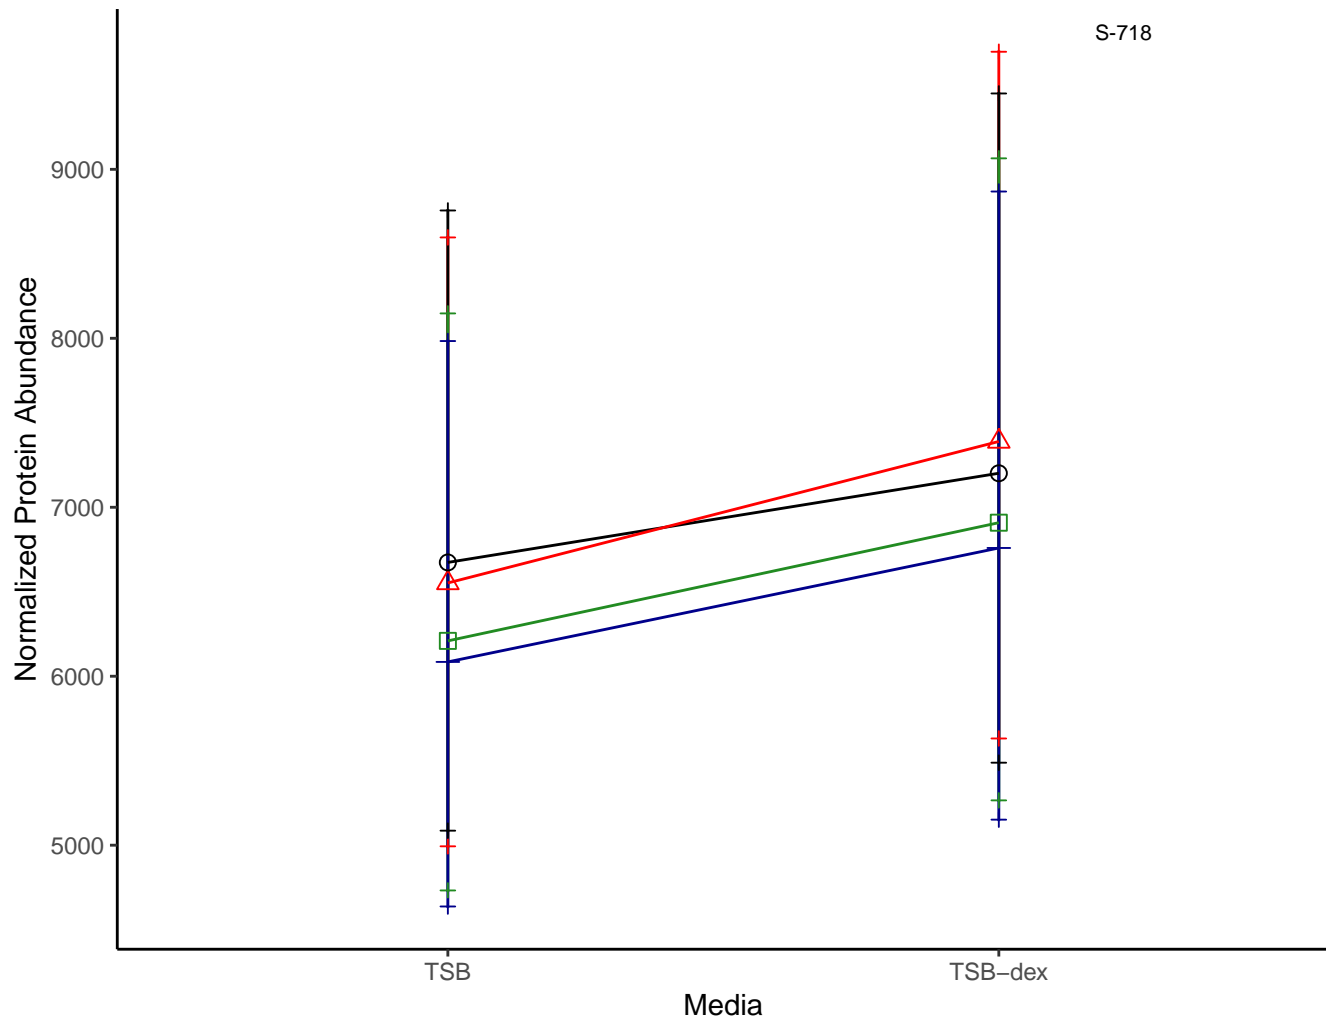

- ⊕ SA564
- △ SA564- $\Delta hptRS$
- ⊞ SA564- $\Delta ccpA$
- + SA564- $\Delta hptRS/ccpA$

# MURA2\_STAAM

S-719

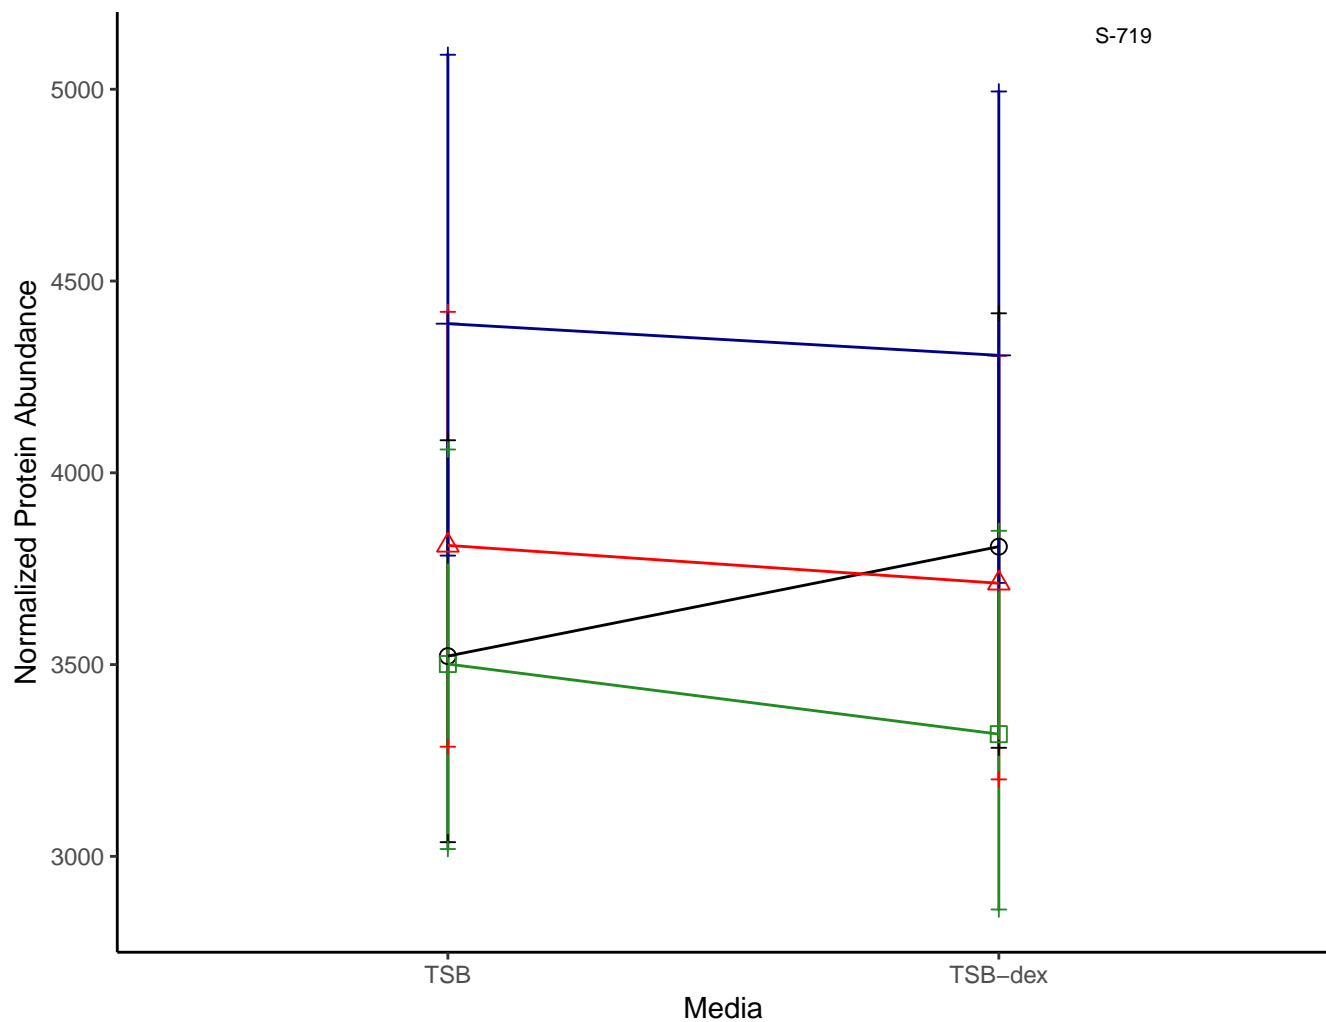

- ⊕ SA564
- △ SA564- $\Delta hptRS$
- ⊞ SA564- $\Delta ccpA$
- + SA564- $\Delta hptRS/ccpA$

# MURC\_STAAM

S-720

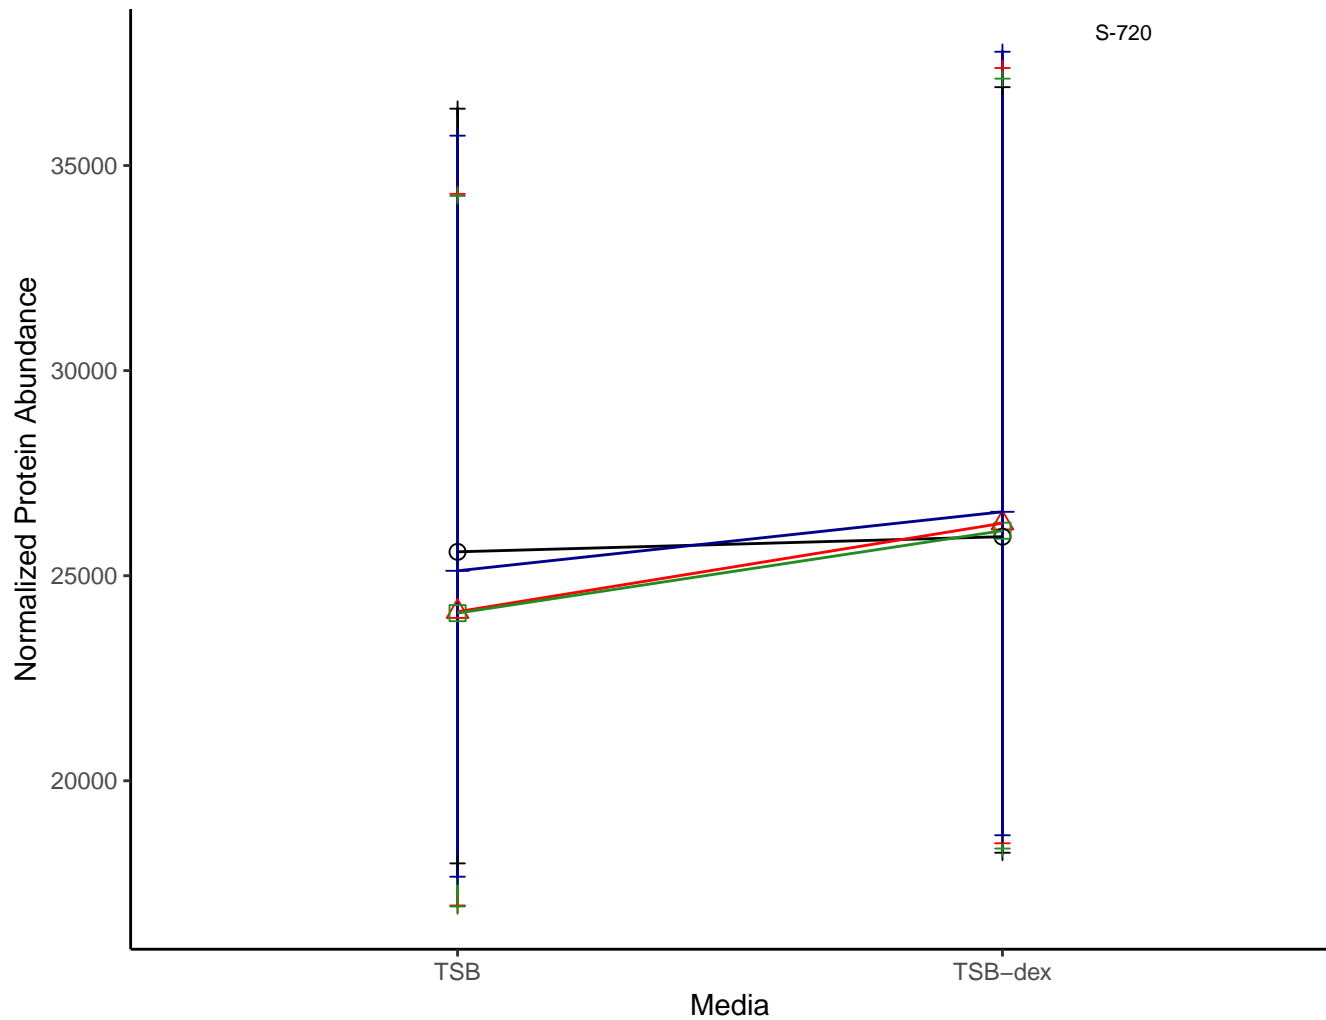

- ⊕ SA564
- △ SA564- $\Delta$ *hptRS*
- ⊞ SA564- $\Delta$ *ccpA*
- + SA564- $\Delta$ *hptRS/ccpA*



# MURD\_STAAM

S-721

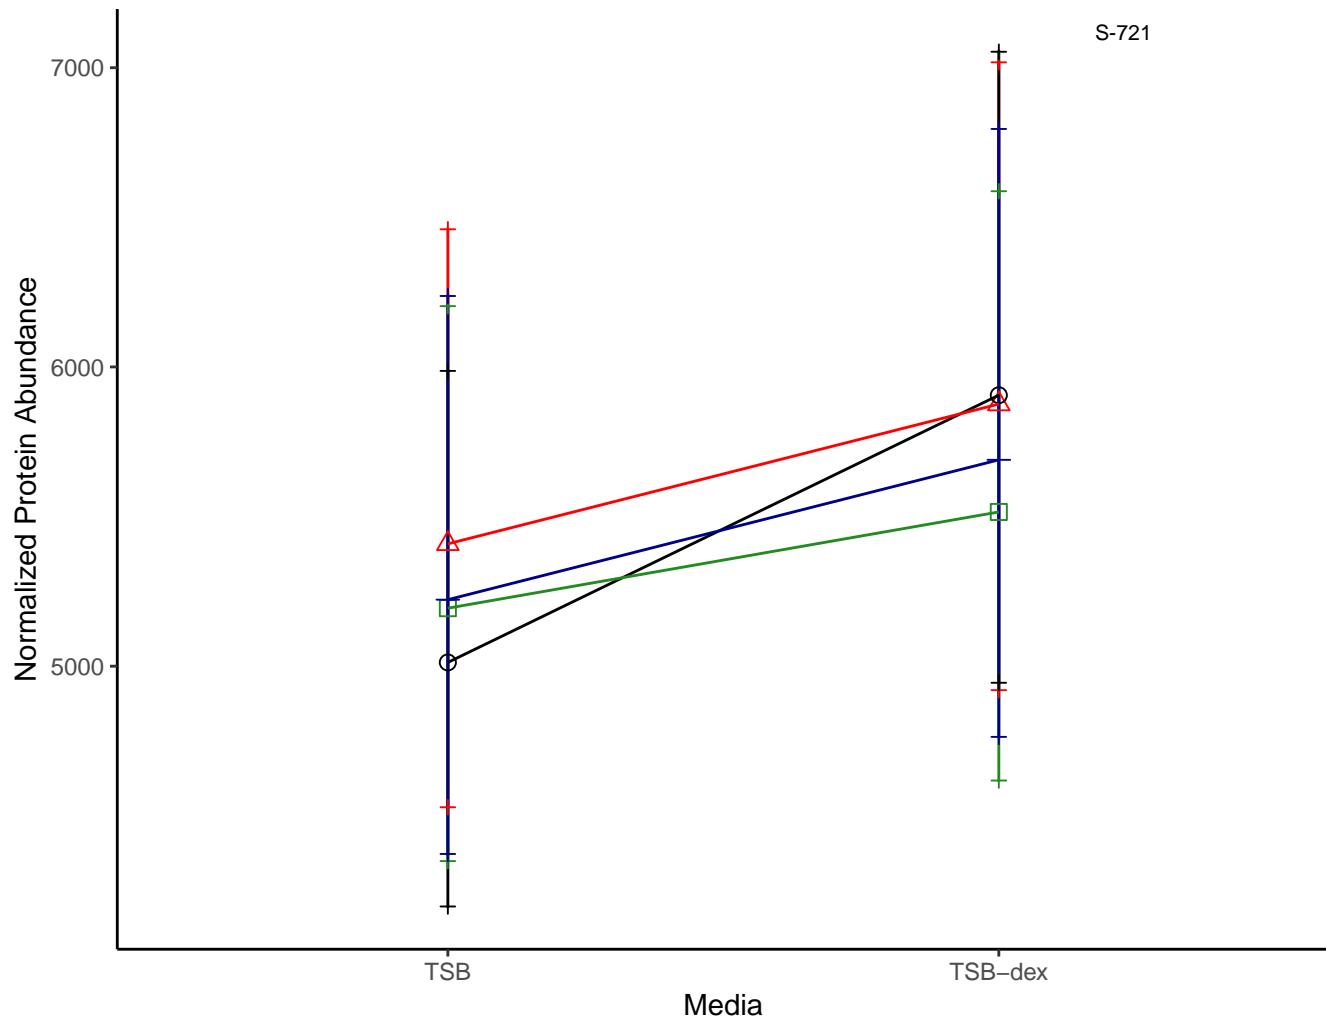

- SA564
- SA564- $\Delta$ *hptRS*
- SA564- $\Delta$ *ccpA*
- SA564- $\Delta$ *hptRS/ccpA*

# MURE\_STAAM

S-722

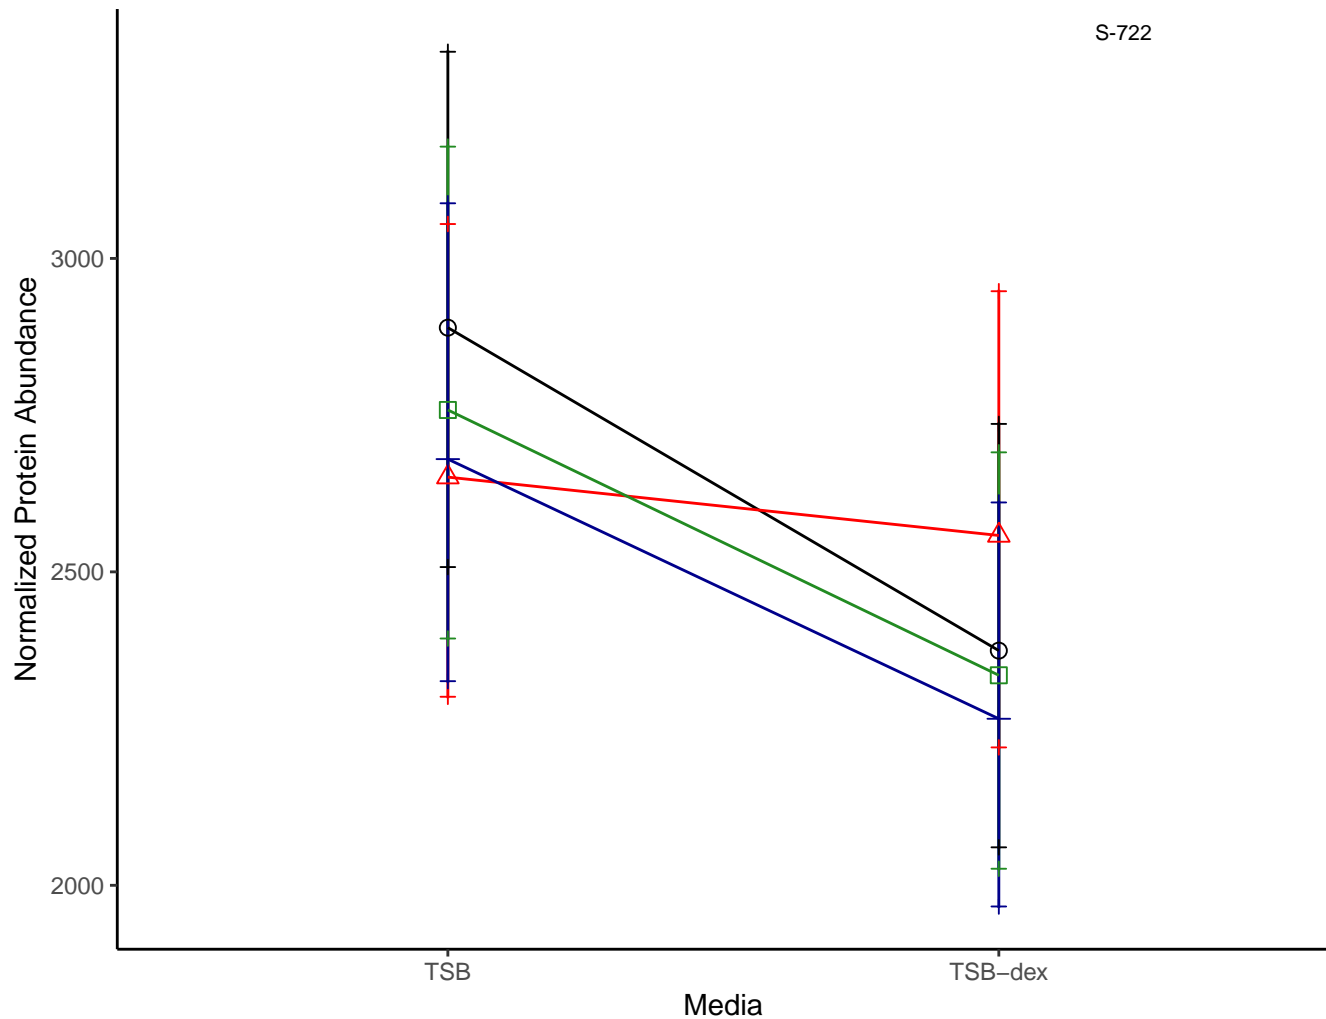

- ⊕ SA564
- △ SA564- $\Delta$ *hptRS*
- ⊞ SA564- $\Delta$ *ccpA*
- + SA564- $\Delta$ *hptRS/ccpA*

# MURG\_STAAM

S-723

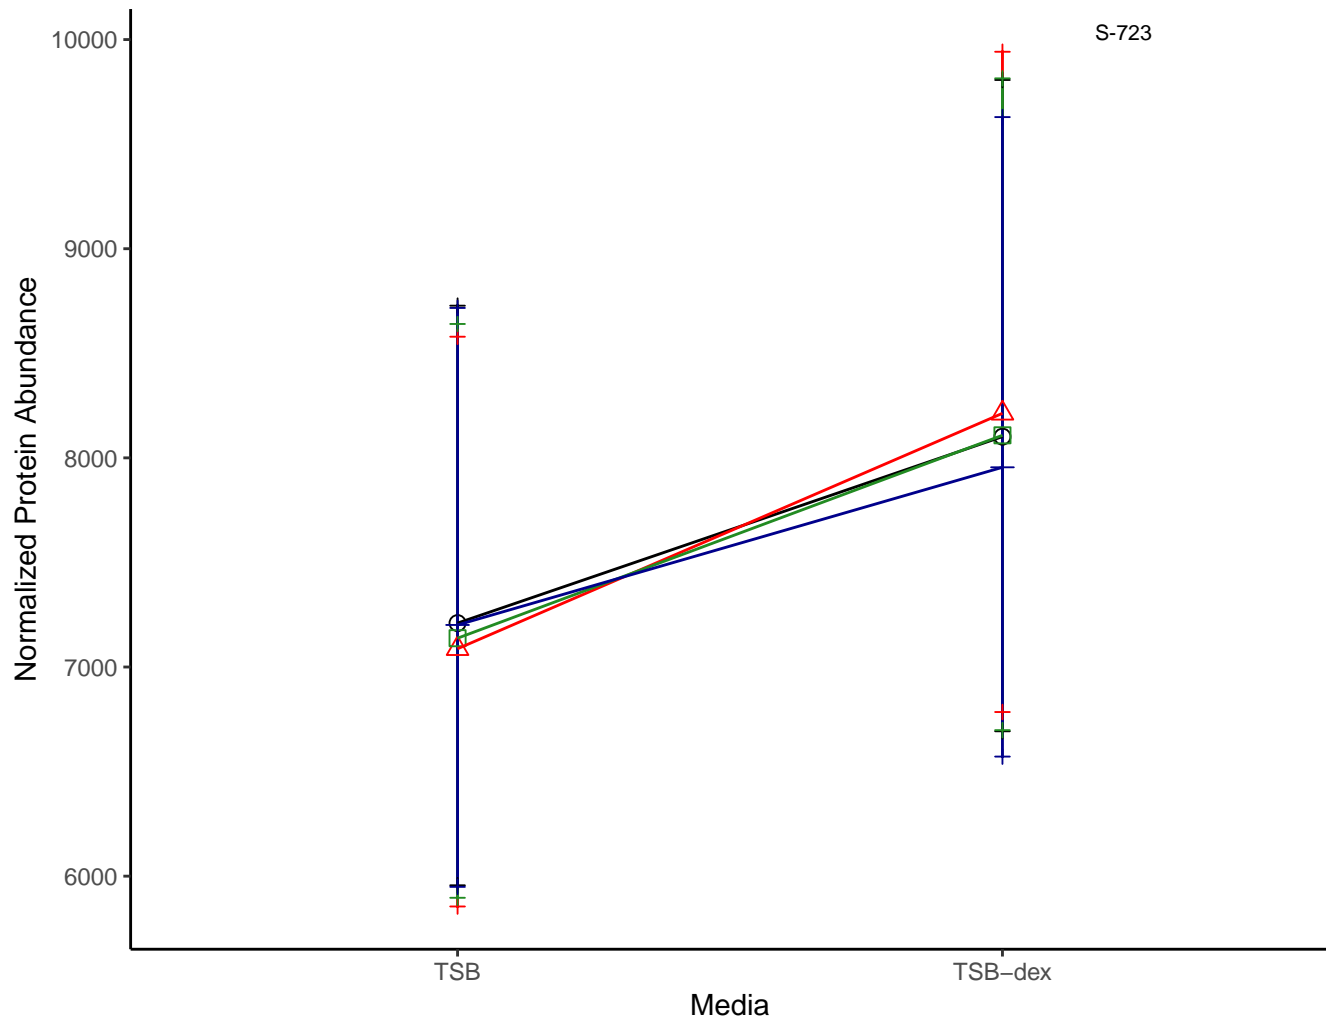

- ⊕ SA564
- △ SA564- $\Delta hptRS$
- ⊞ SA564- $\Delta ccpA$
- + SA564- $\Delta hptRS/ccpA$

# MURI\_STAAM

S-724

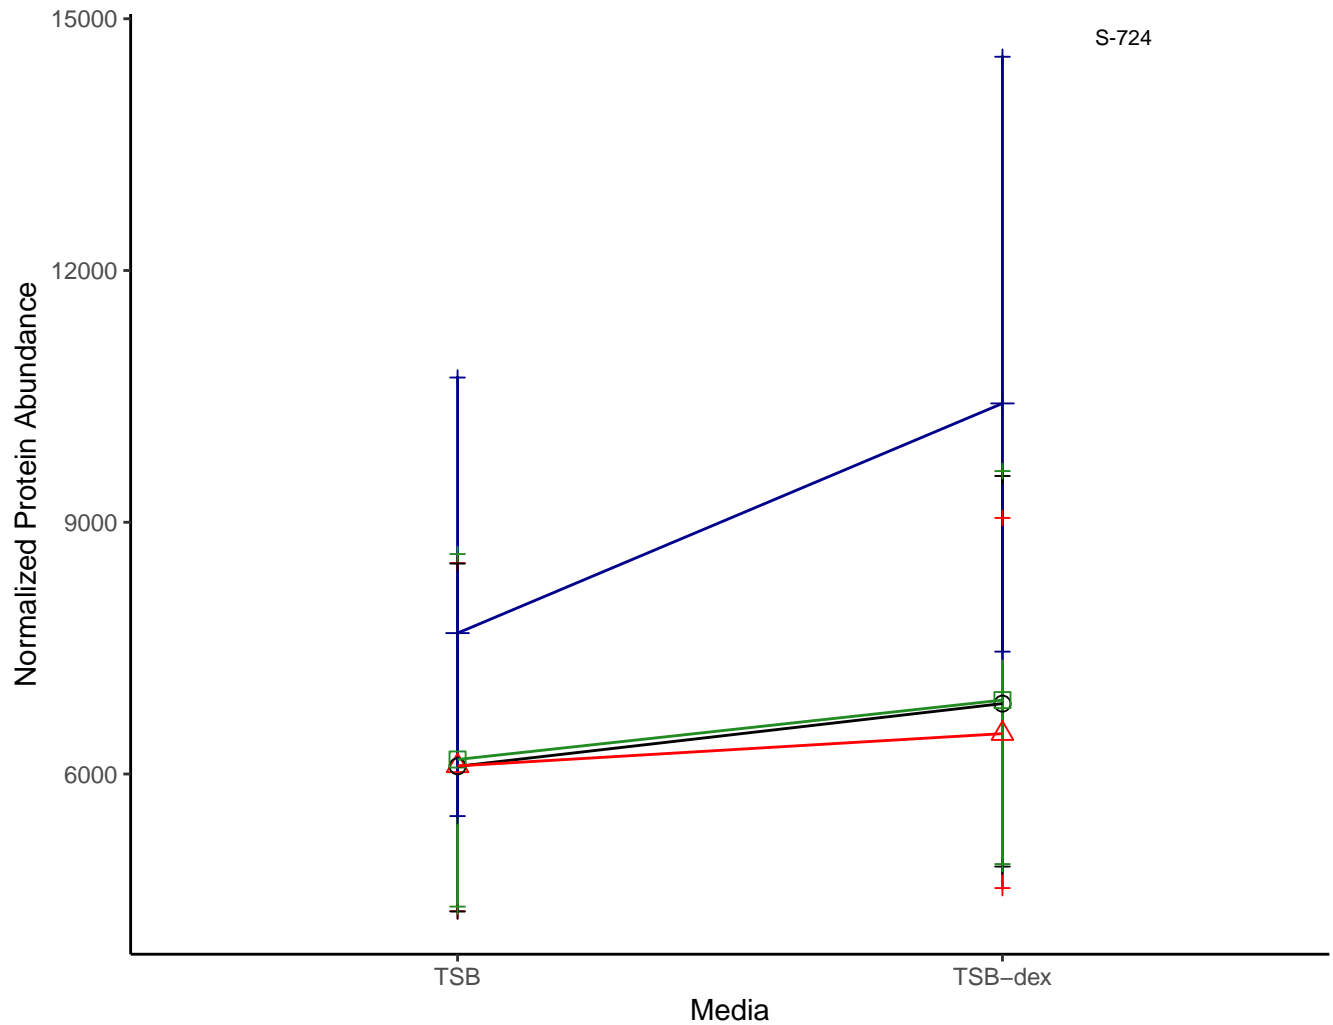

- ⊕ SA564
- △ SA564- $\Delta$ *hptRS*
- ⊞ SA564- $\Delta$ *ccpA*
- + SA564- $\Delta$ *hptRS/ccpA*

# MUTS\_STAAM

S-725

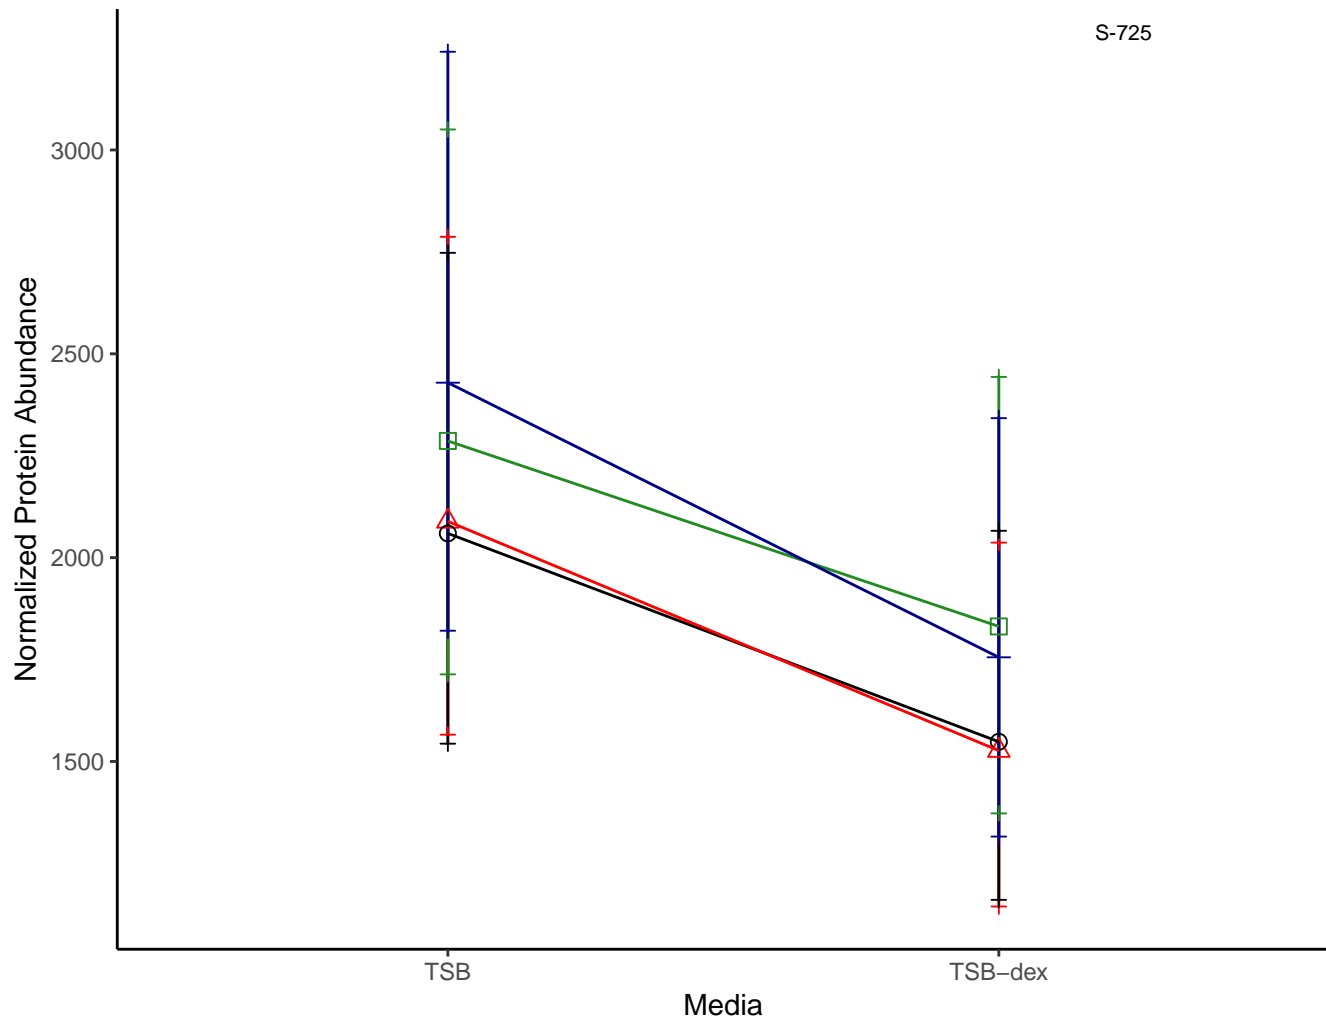

- ⊕ SA564
- △ SA564-ΔhptRS
- ⊞ SA564-ΔccpA
- + SA564-ΔhptRS/ccpA

# NADD\_STAAM

S-726

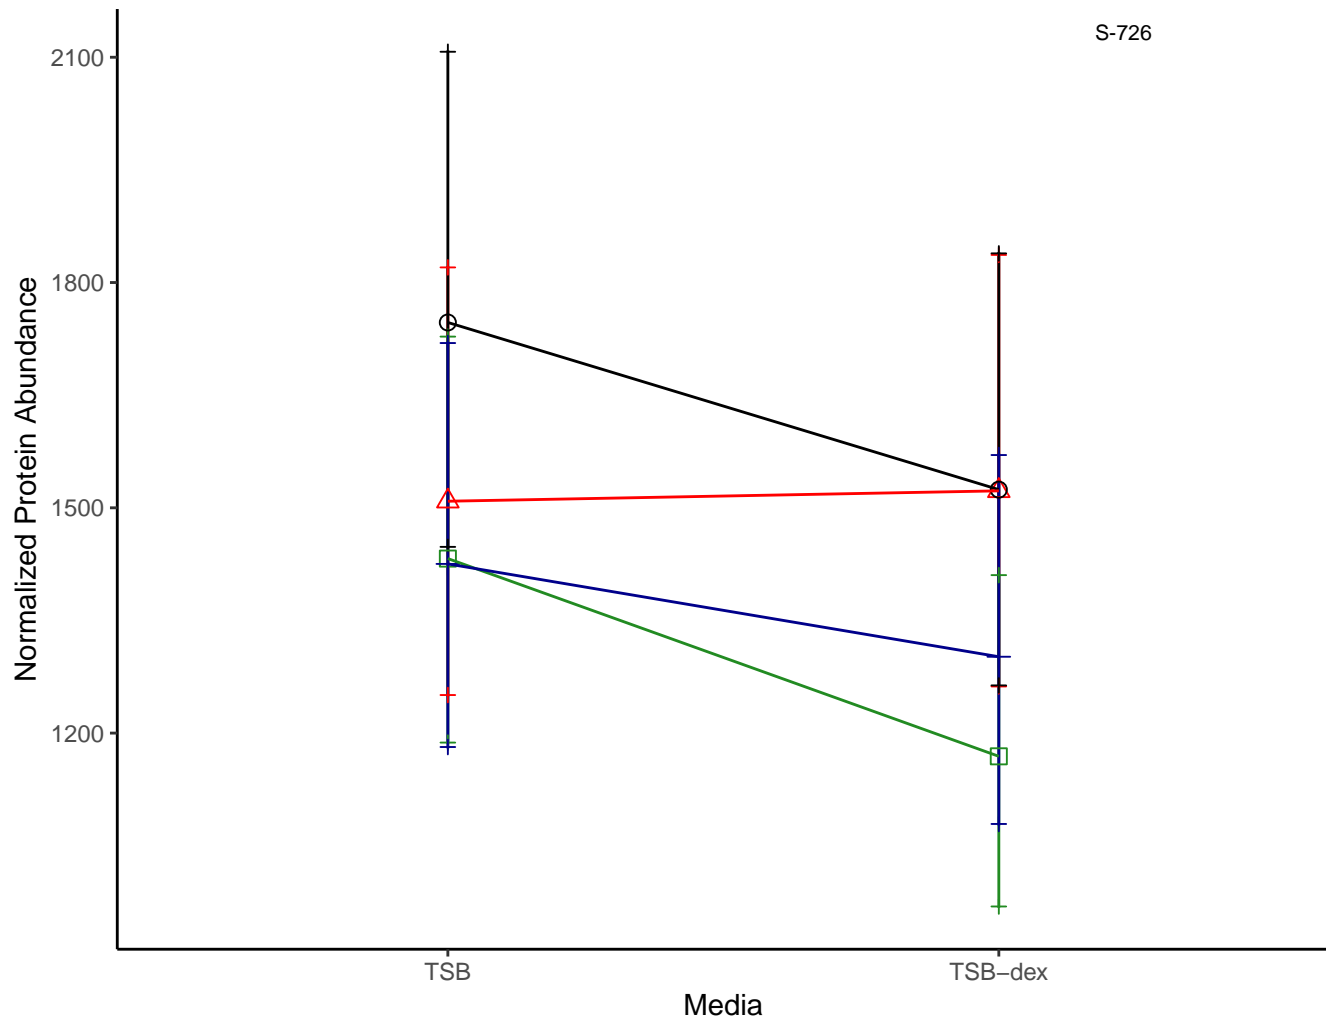

- ⊕ SA564
- △ SA564- $\Delta hptRS$
- ⊞ SA564- $\Delta ccpA$
- + SA564- $\Delta hptRS/ccpA$

# NADE\_STAAM

S-727

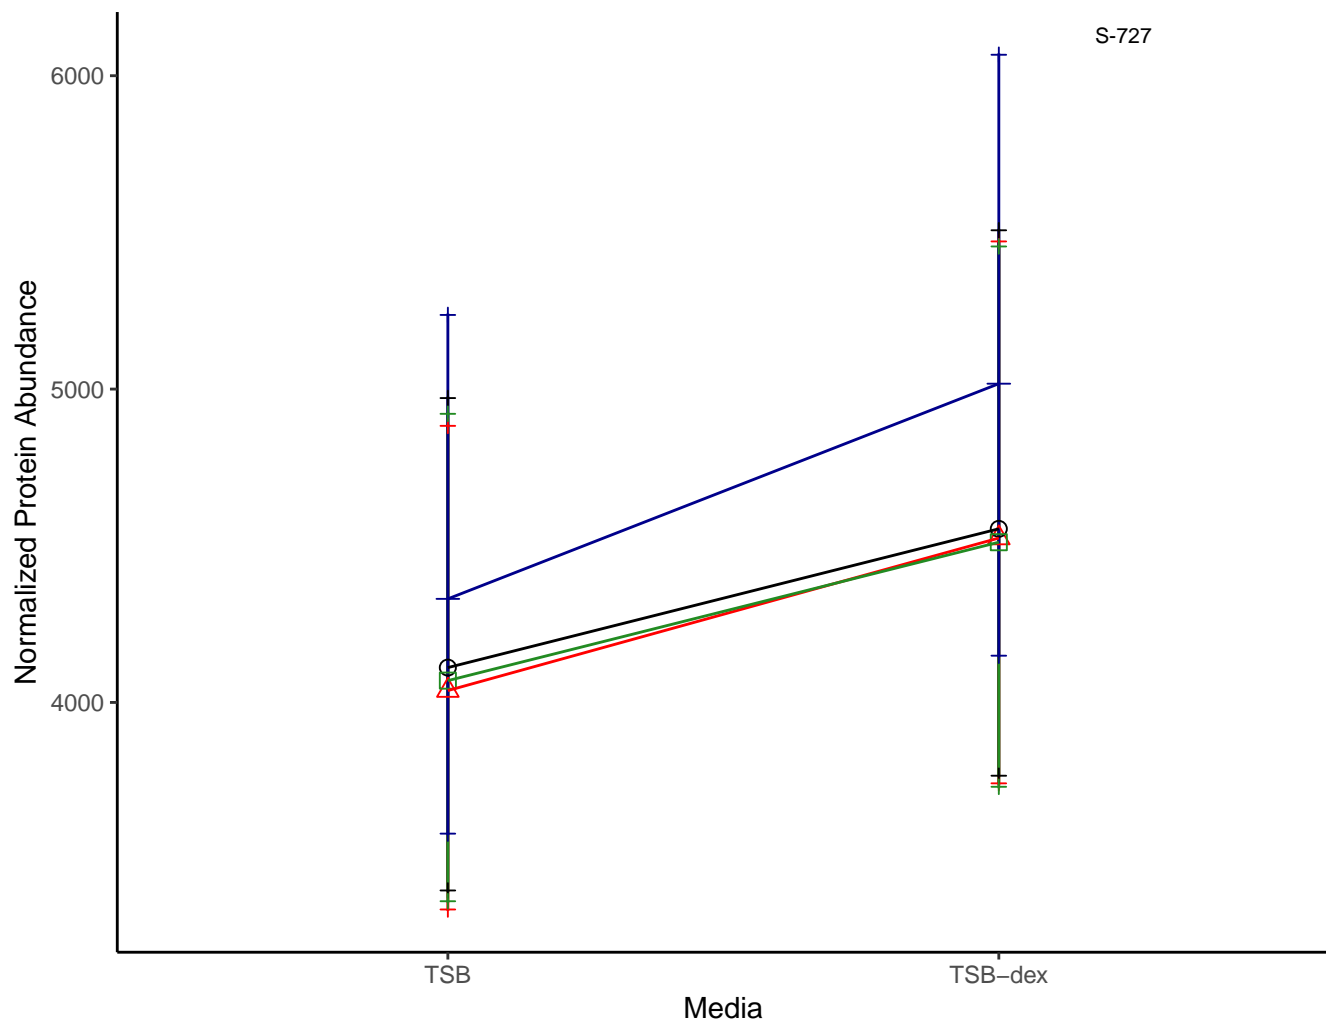

- ⊕ SA564
- △ SA564-ΔhptRS
- SA564-ΔccpA
- + SA564-ΔhptRS/ccpA

# NAGD\_STAAM

S-728

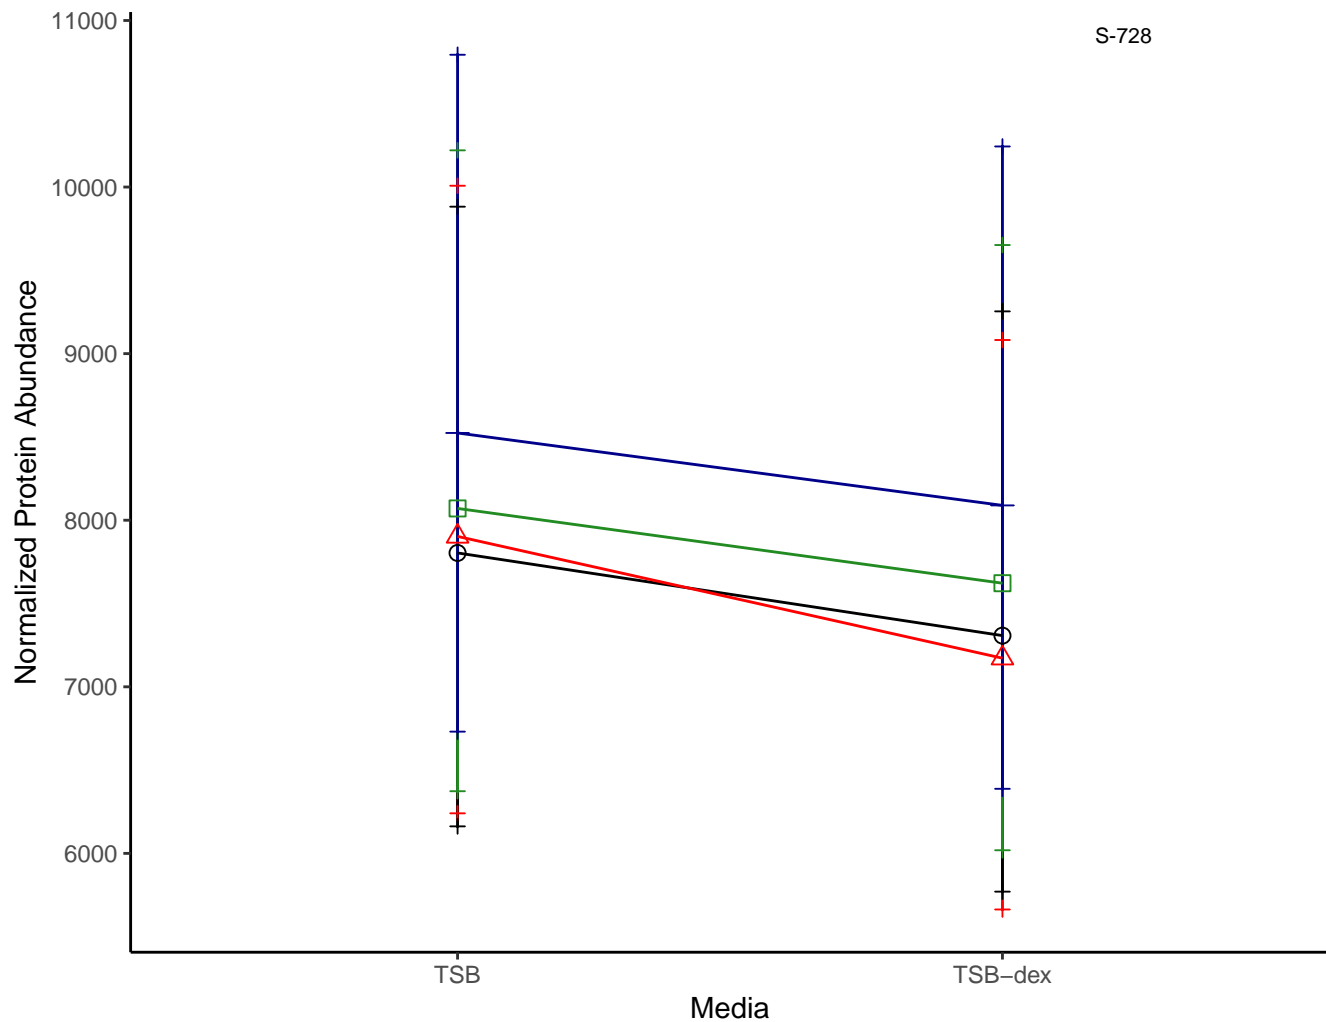

- ⊕ SA564
- △ SA564-ΔhptRS
- ⊞ SA564-ΔccpA
- + SA564-ΔhptRS/ccpA



# NDK\_STAAM

S-729

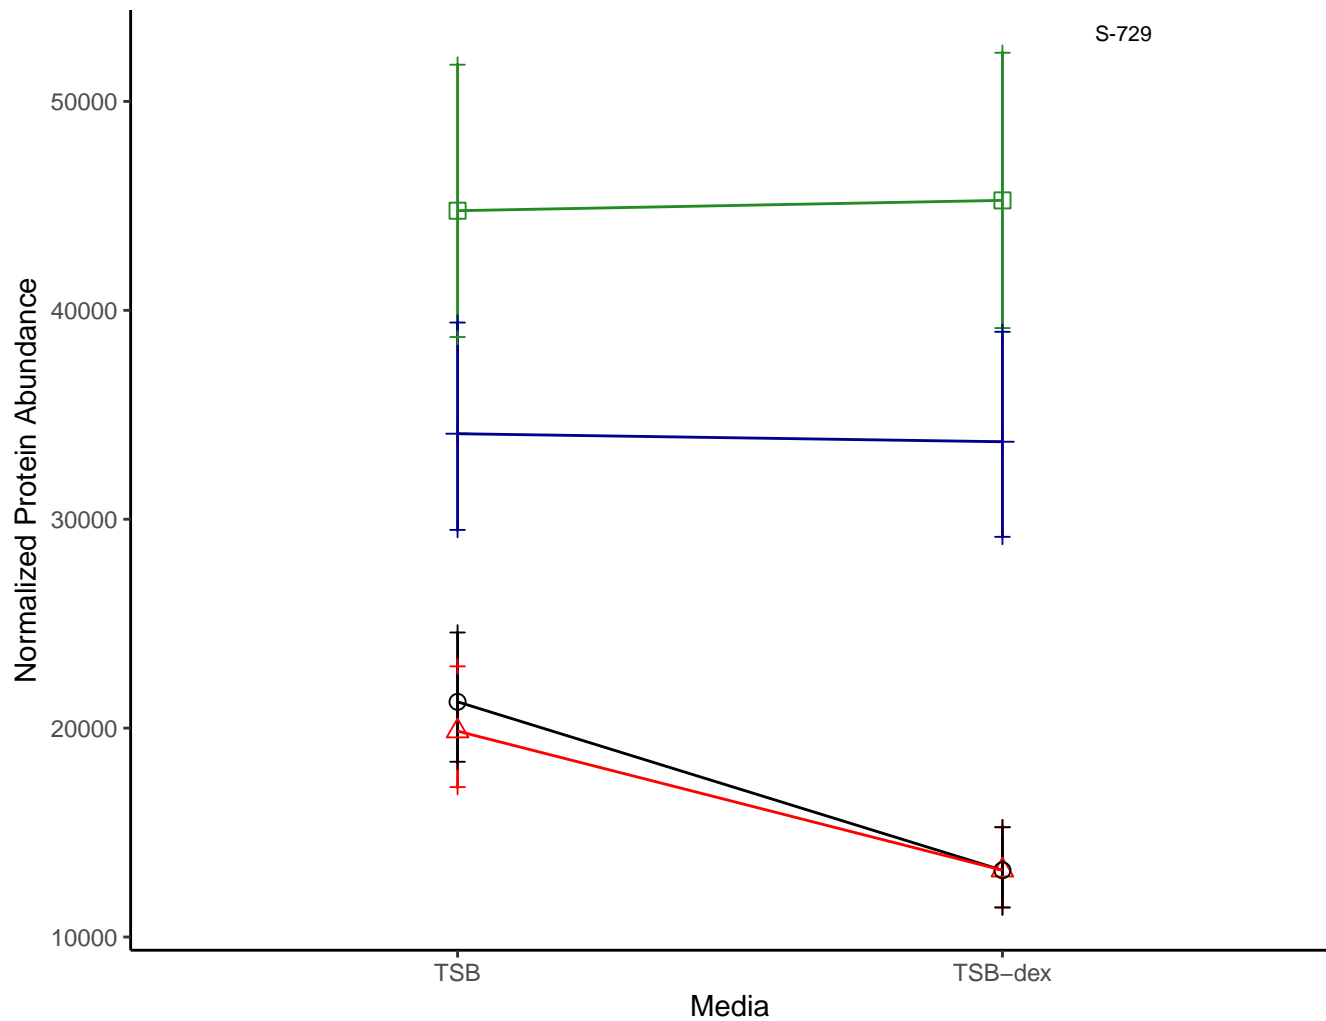

- ⊕ SA564
- △ SA564- $\Delta$ *hptRS*
- ⊞ SA564- $\Delta$ *ccpA*
- + SA564- $\Delta$ *hptRS/ccpA*

## NRDR\_STAAM

S-730

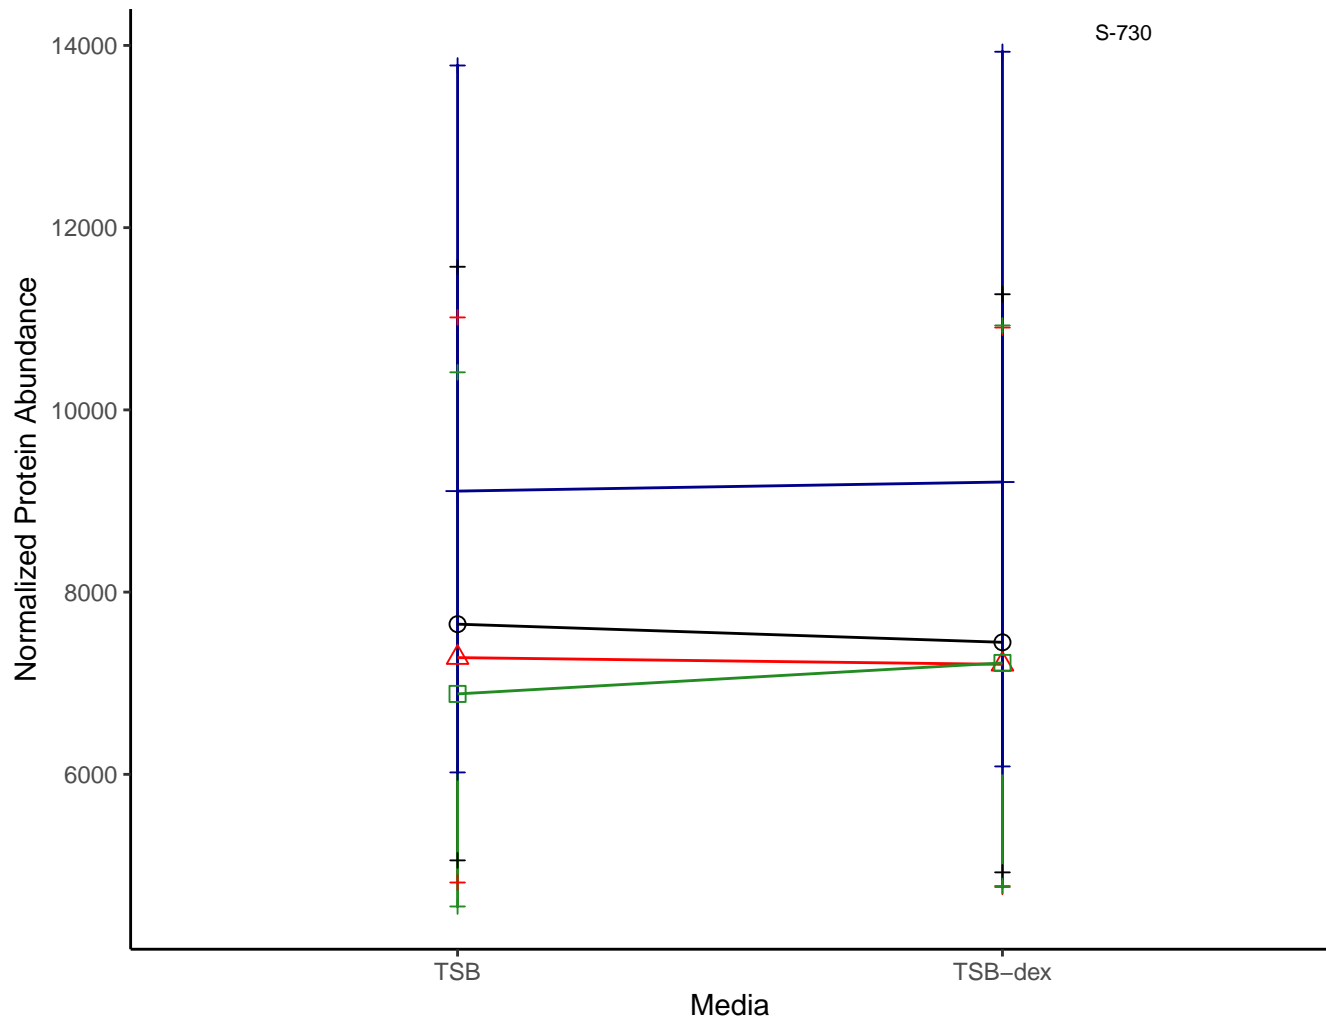

- ⊕ SA564
- △ SA564- $\Delta$ *hptRS*
- ⊞ SA564- $\Delta$ *ccpA*
- + SA564- $\Delta$ *hptRS/ccpA*

# NREB\_STAAM

S-731

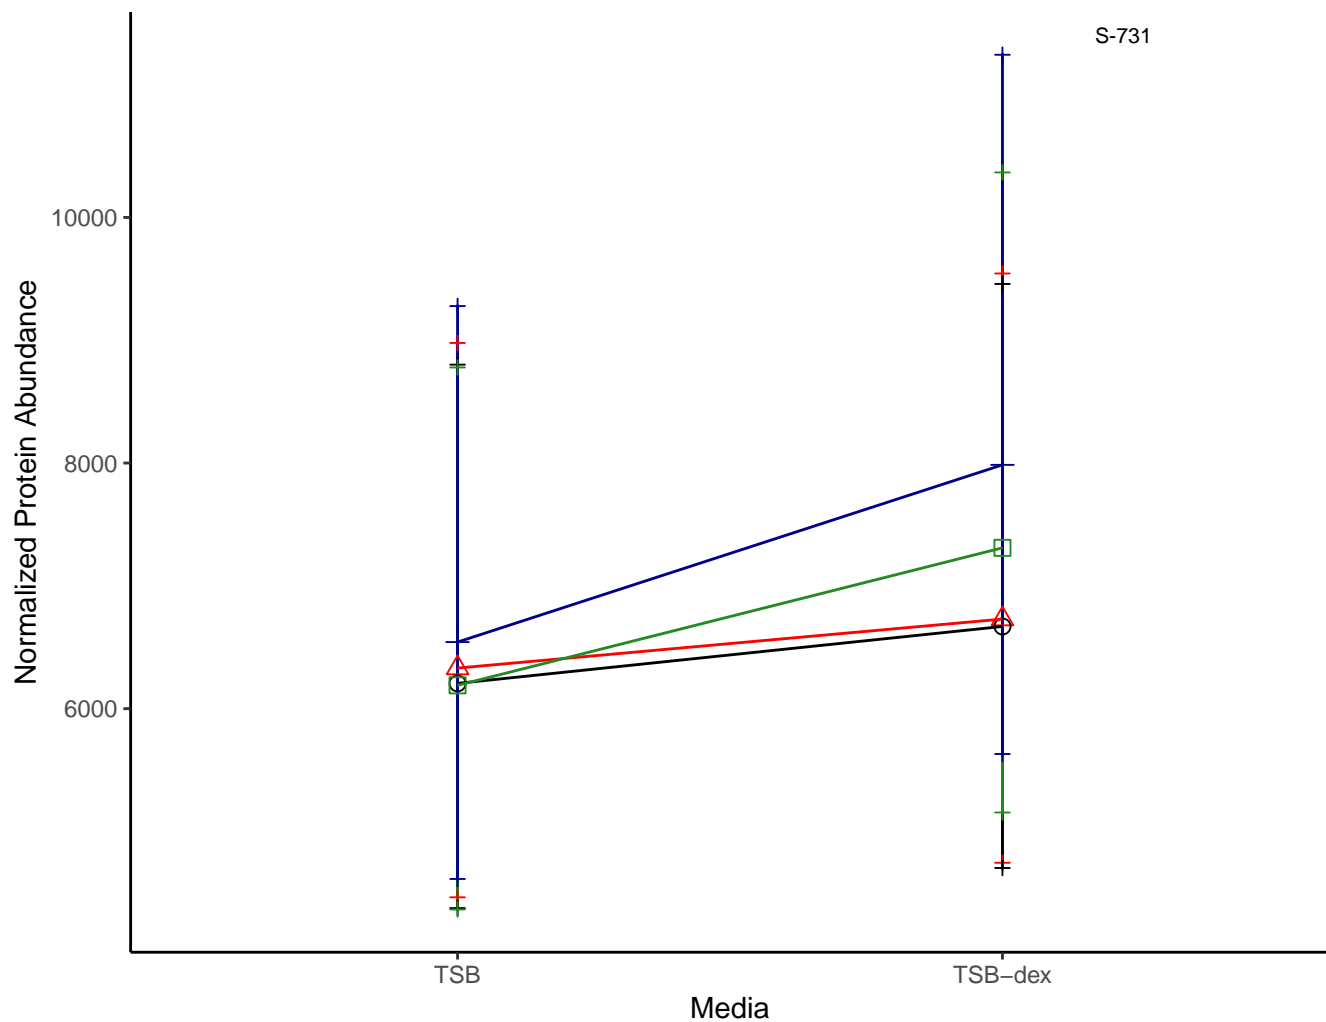

- ⊕ SA564
- △ SA564- $\Delta$ *hptRS*
- SA564- $\Delta$ *ccpA*
- + SA564- $\Delta$ *hptRS/ccpA*

# NUSG\_STAAM

S-732

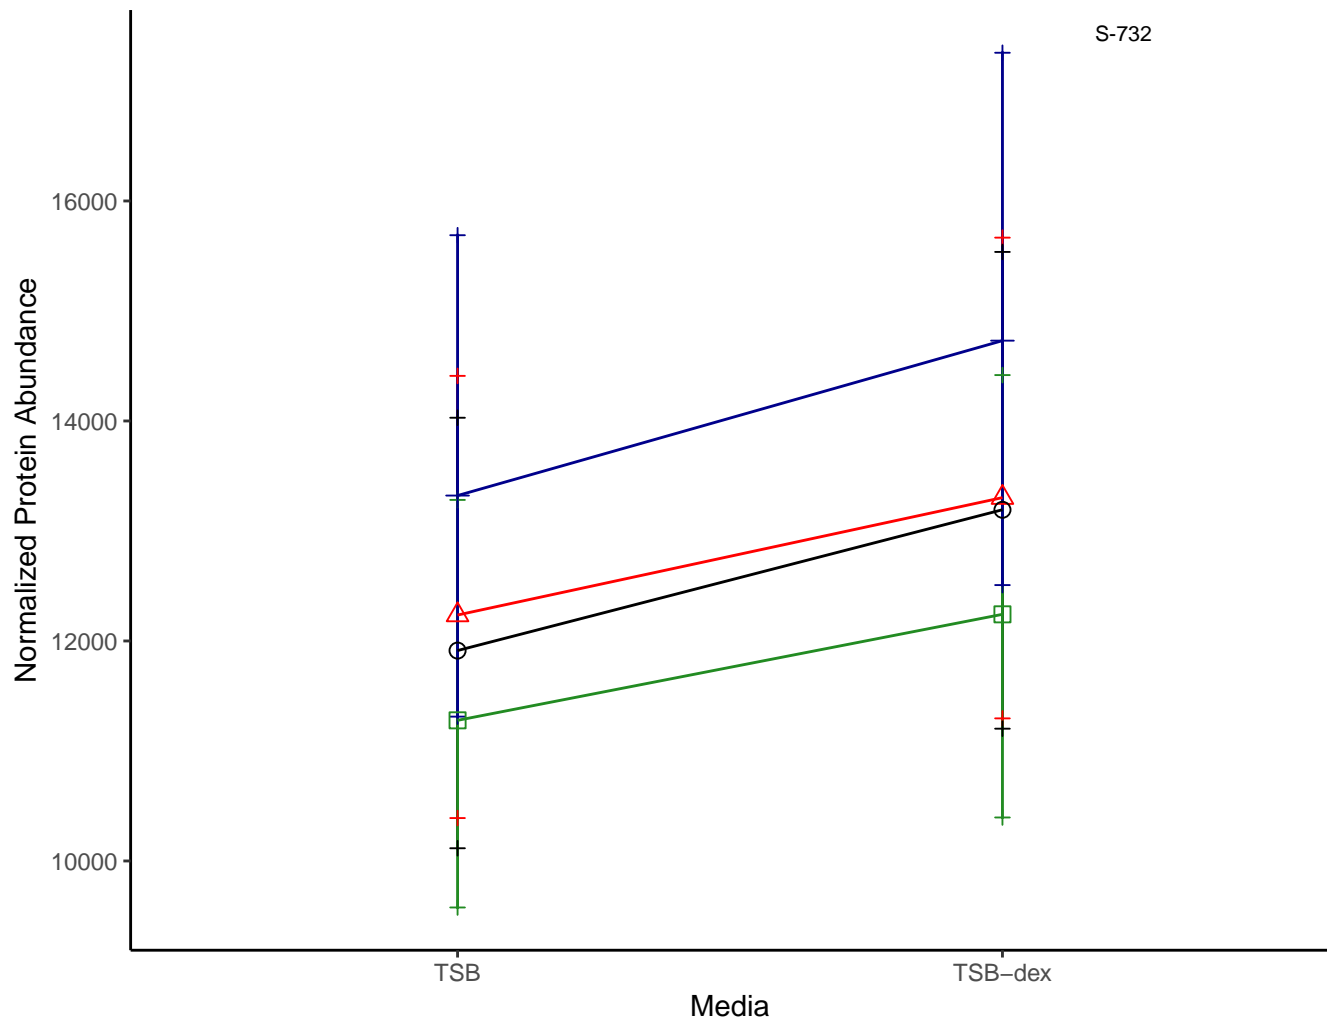

- ⊕ SA564
- △ SA564-ΔhptRS
- ⊞ SA564-ΔccpA
- + SA564-ΔhptRS/ccpA

# OAT2\_STAAM

S-733

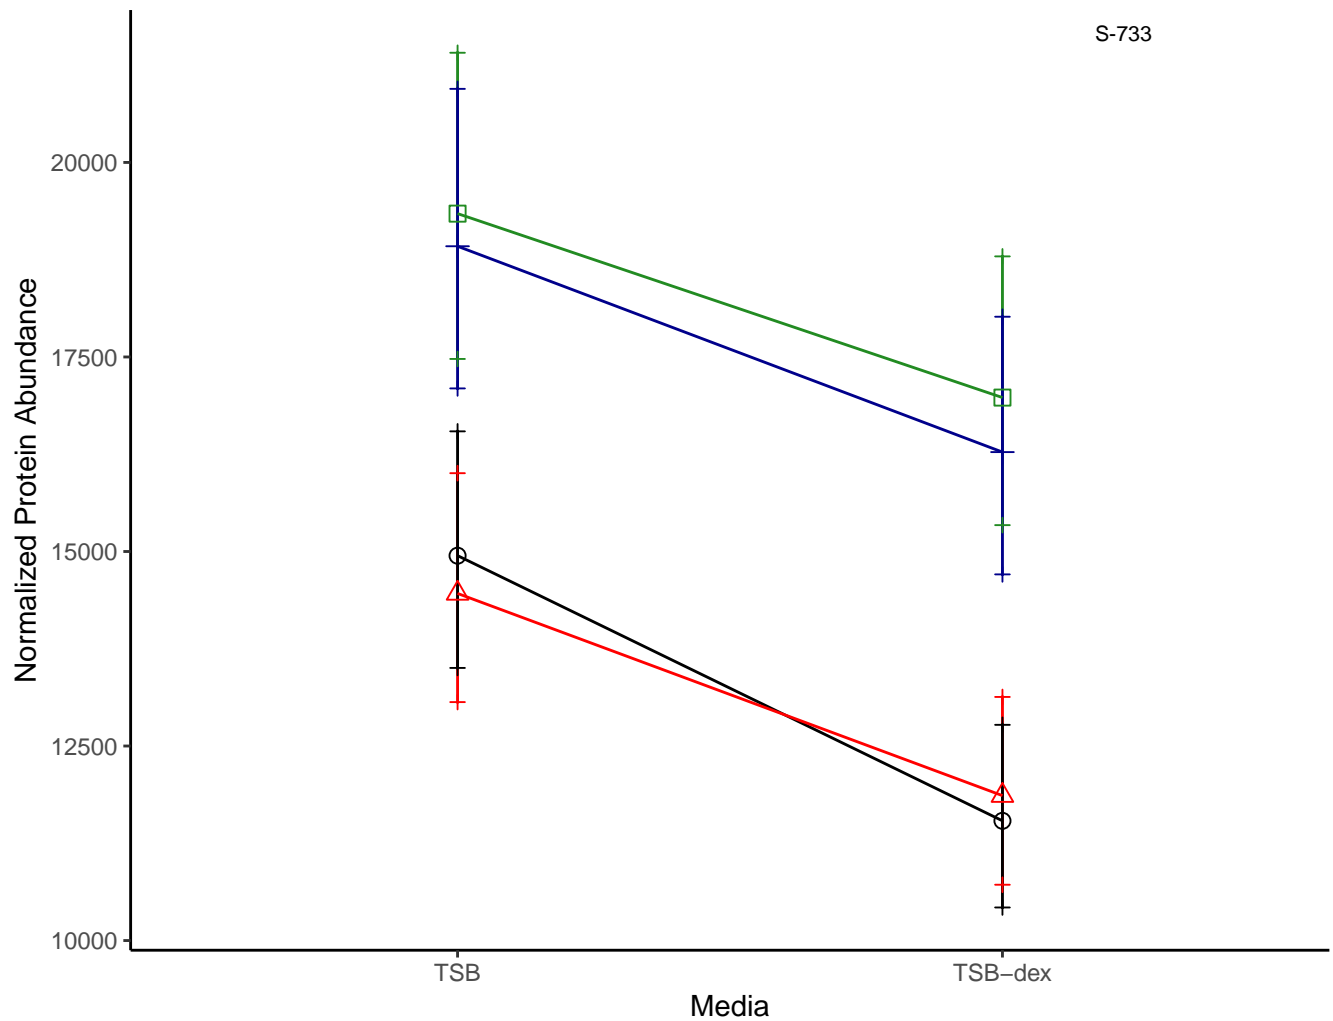

- ⊕ SA564
- △ SA564- $\Delta$ *hptRS*
- ⊞ SA564- $\Delta$ *ccpA*
- + SA564- $\Delta$ *hptRS/ccpA*

# OBG\_STAAM

S-734

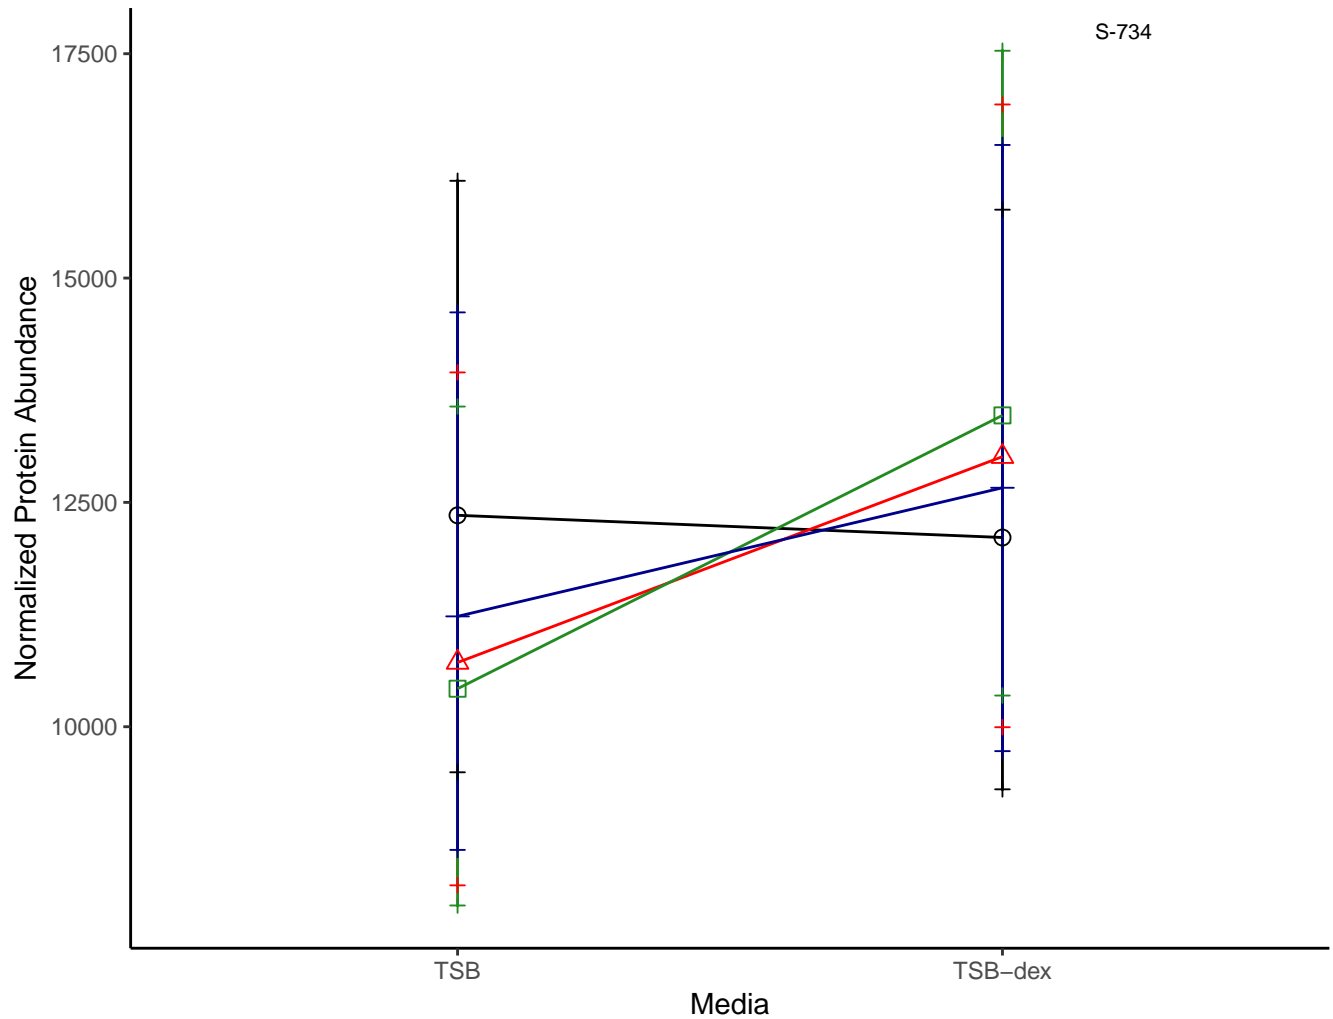

- ⊕ SA564
- △ SA564- $\Delta$ hptRS
- ⊞ SA564- $\Delta$ ccpA
- + SA564- $\Delta$ hptRS/ccpA

# ODO1\_STAAM

S-735

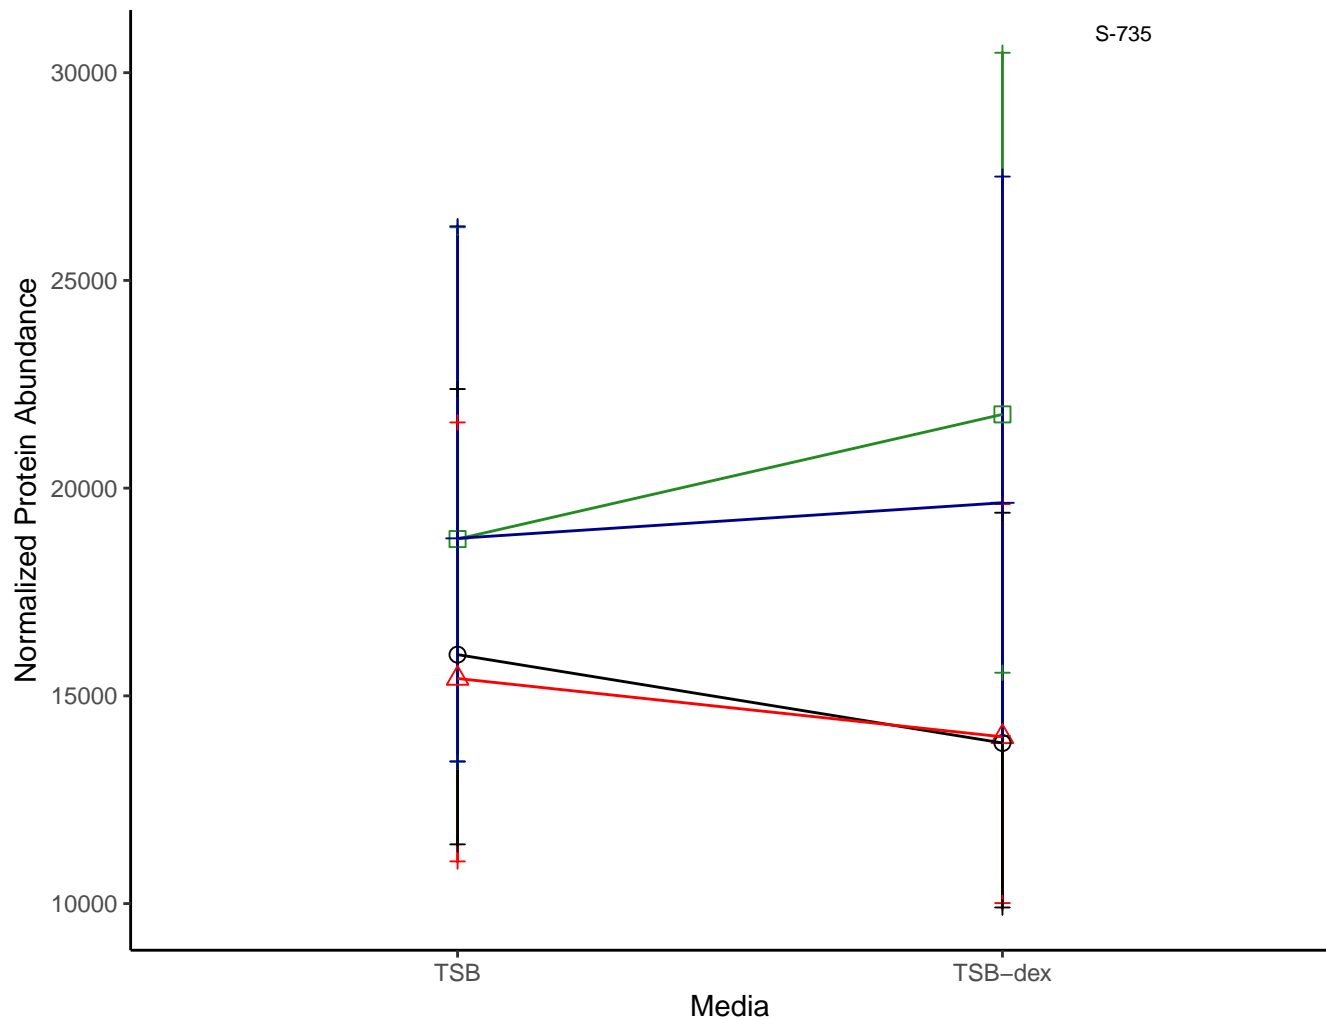

- ⊕ SA564
- △ SA564- $\Delta$ *hptRS*
- ⊞ SA564- $\Delta$ *ccpA*
- + SA564- $\Delta$ *hptRS/ccpA*

# ODO2\_STAAM

S-736

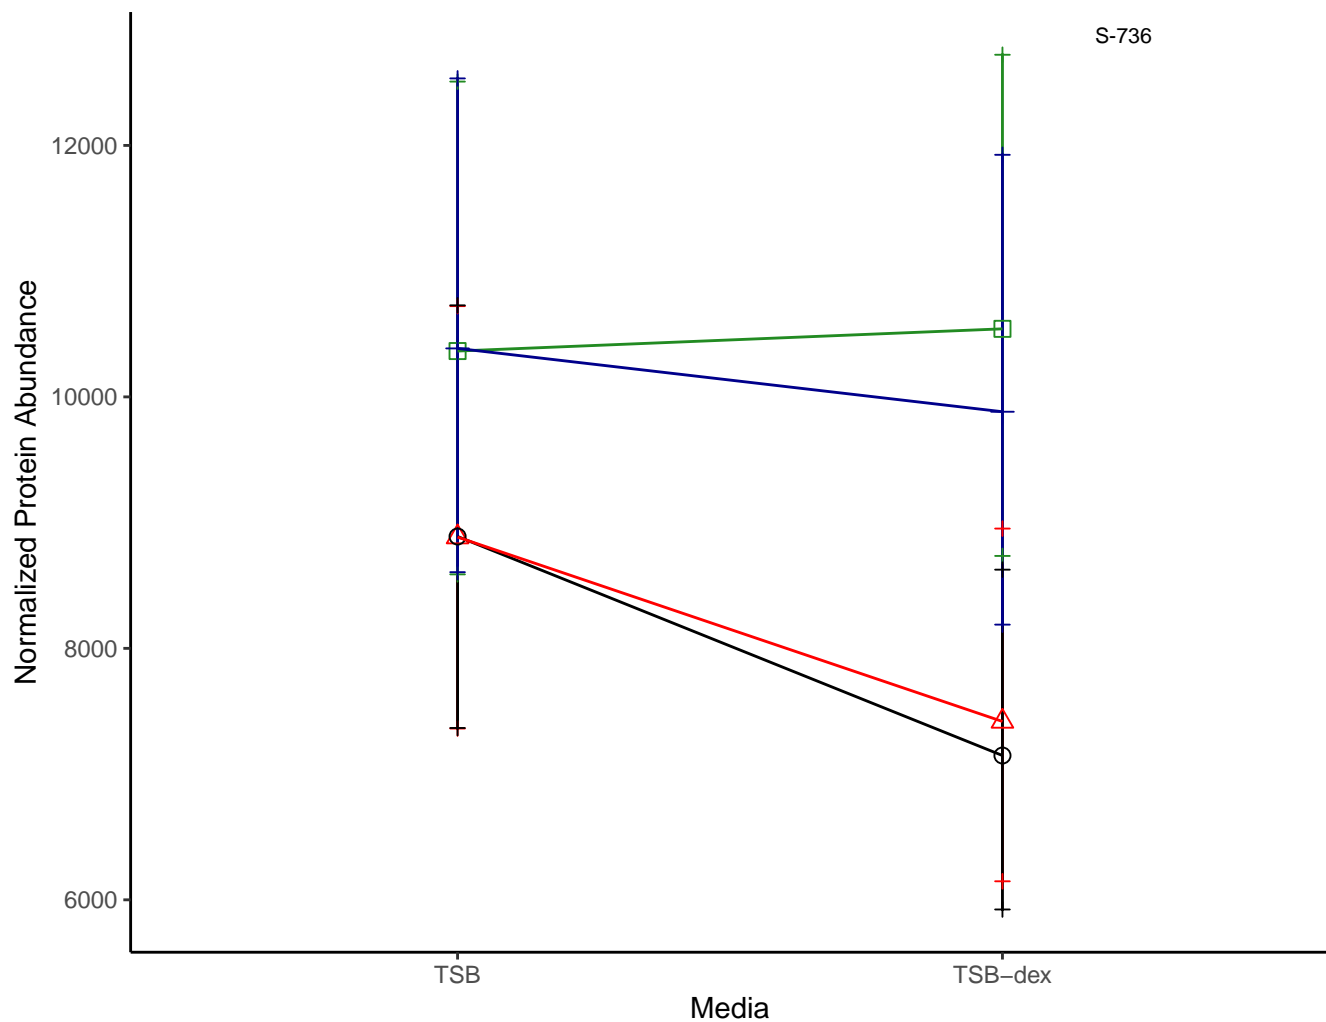

- ⊕ SA564
- △ SA564-ΔhptRS
- ⊞ SA564-ΔccpA
- ⊕ SA564-ΔhptRS/ccpA



# ODP2\_STAAM

S-737

Normalized Protein Abundance

30000

25000

TSB

TSB-dex

Media

- ⊕ SA564
- △ SA564- $\Delta$ *hptRS*
- ⊞ SA564- $\Delta$ *ccpA*
- + SA564- $\Delta$ *hptRS/ccpA*

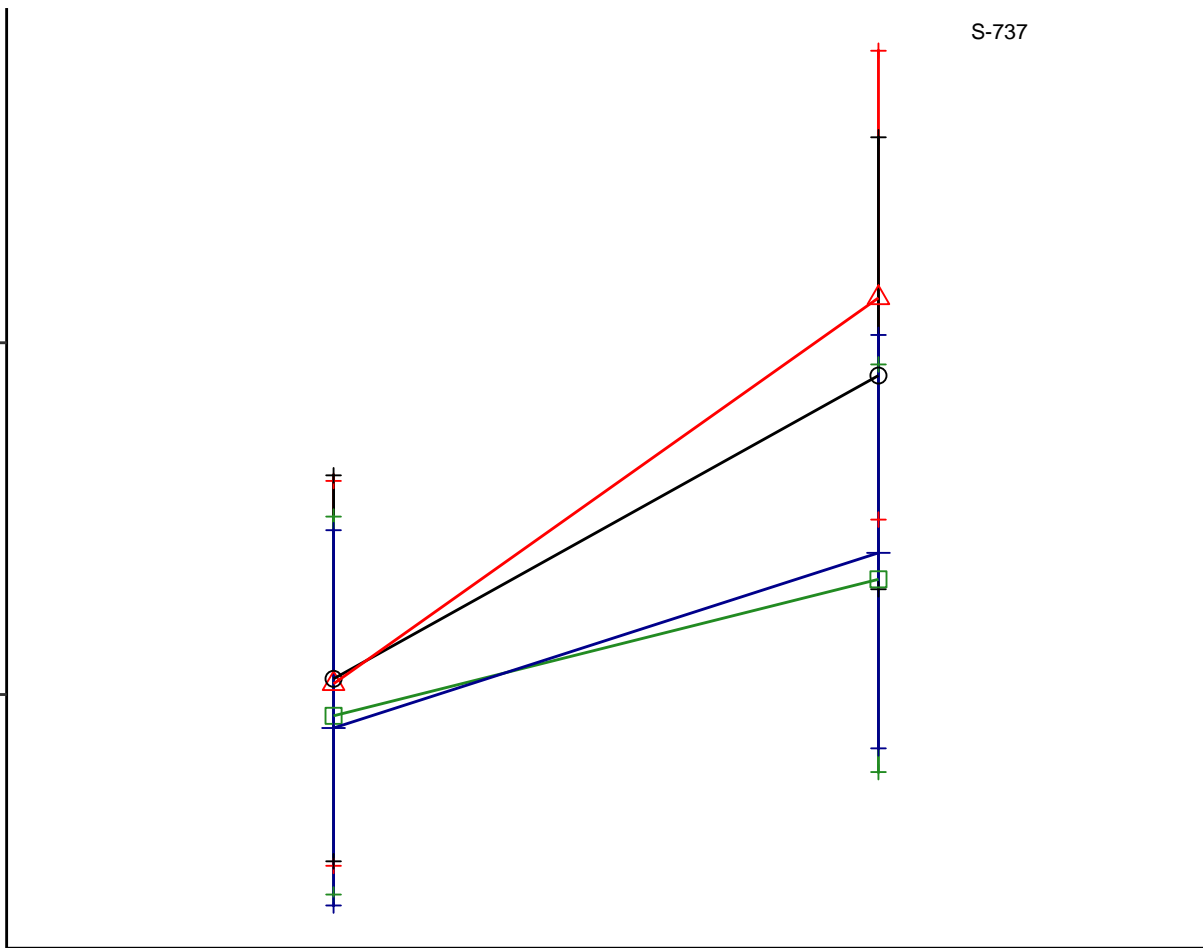

# ODPA\_STAAM

S-738

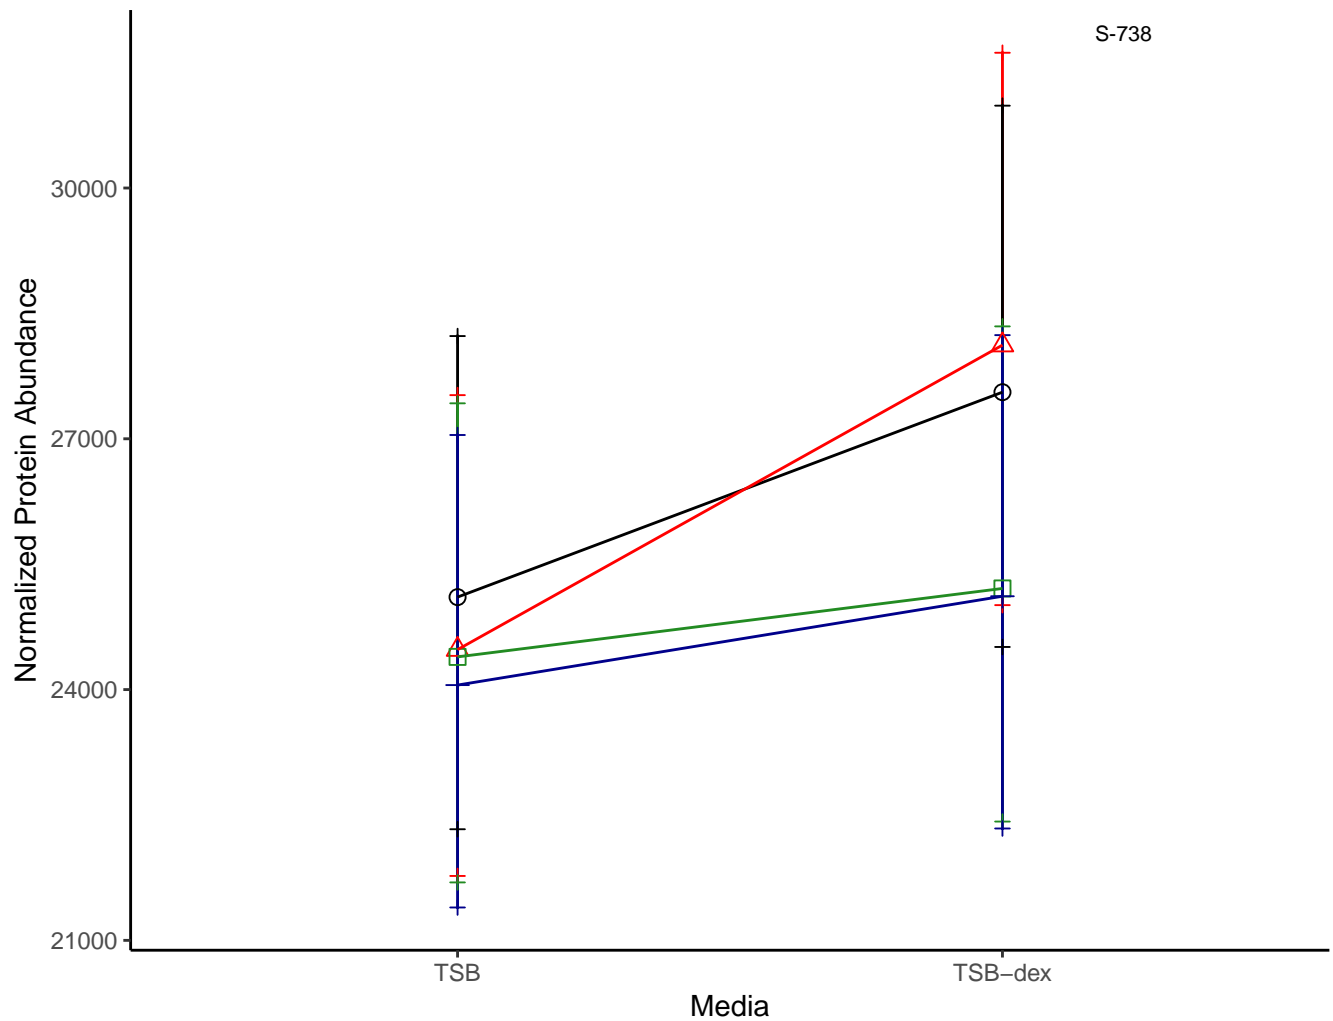

- ⊕ SA564
- △ SA564-ΔhptRS
- ⊞ SA564-ΔccpA
- + SA564-ΔhptRS/ccpA

# ODPB\_STAAM

S-739

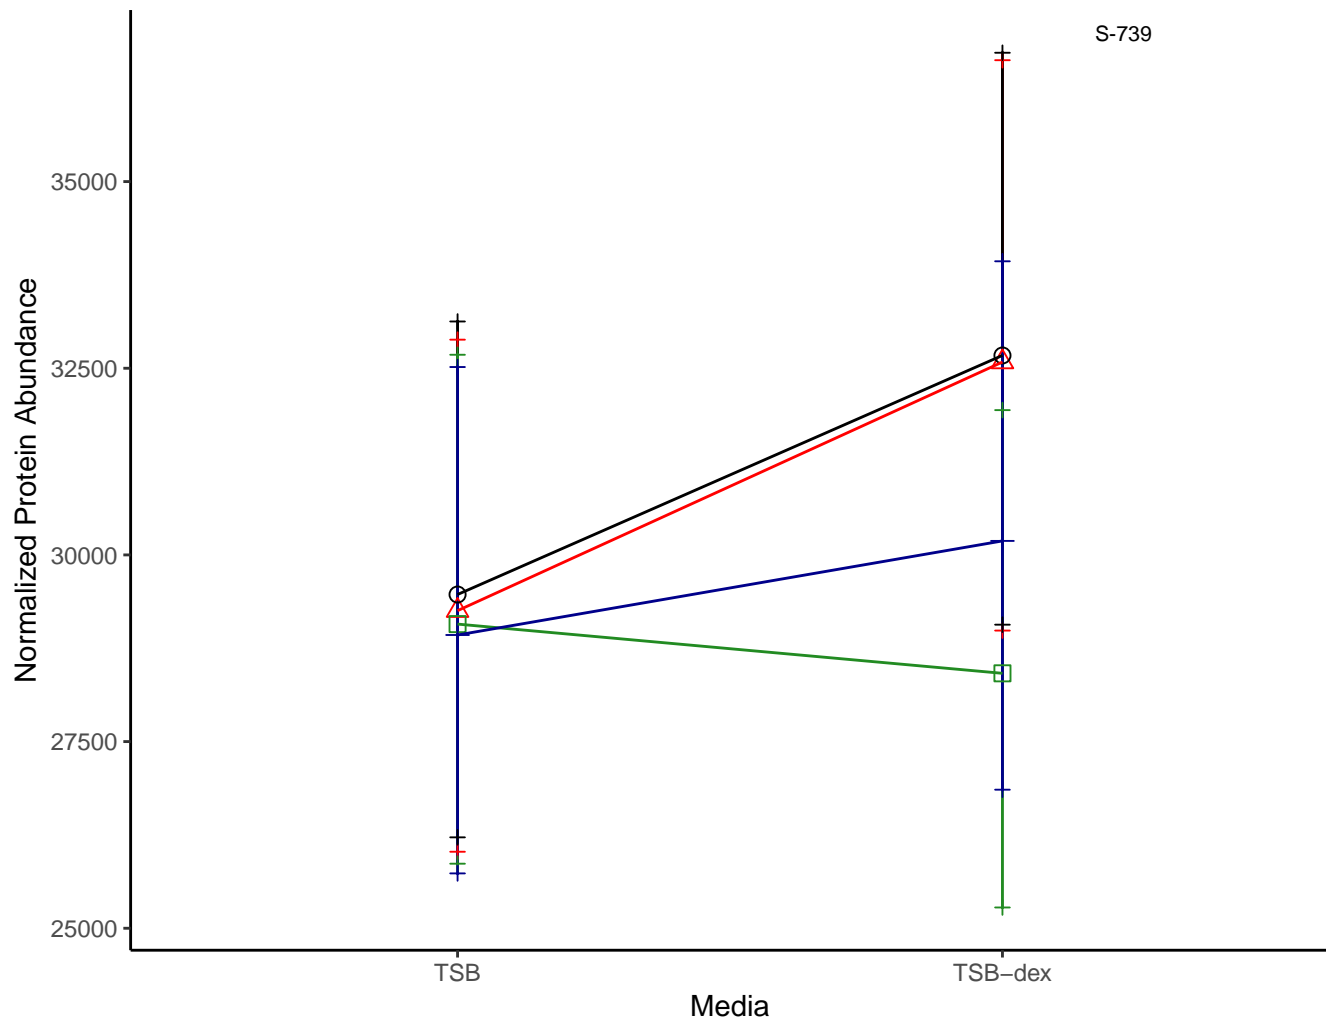

- ⊕ SA564
- △ SA564- $\Delta hptRS$
- ⊞ SA564- $\Delta ccpA$
- + SA564- $\Delta hptRS/ccpA$

# OHRL\_STAAM

S-740

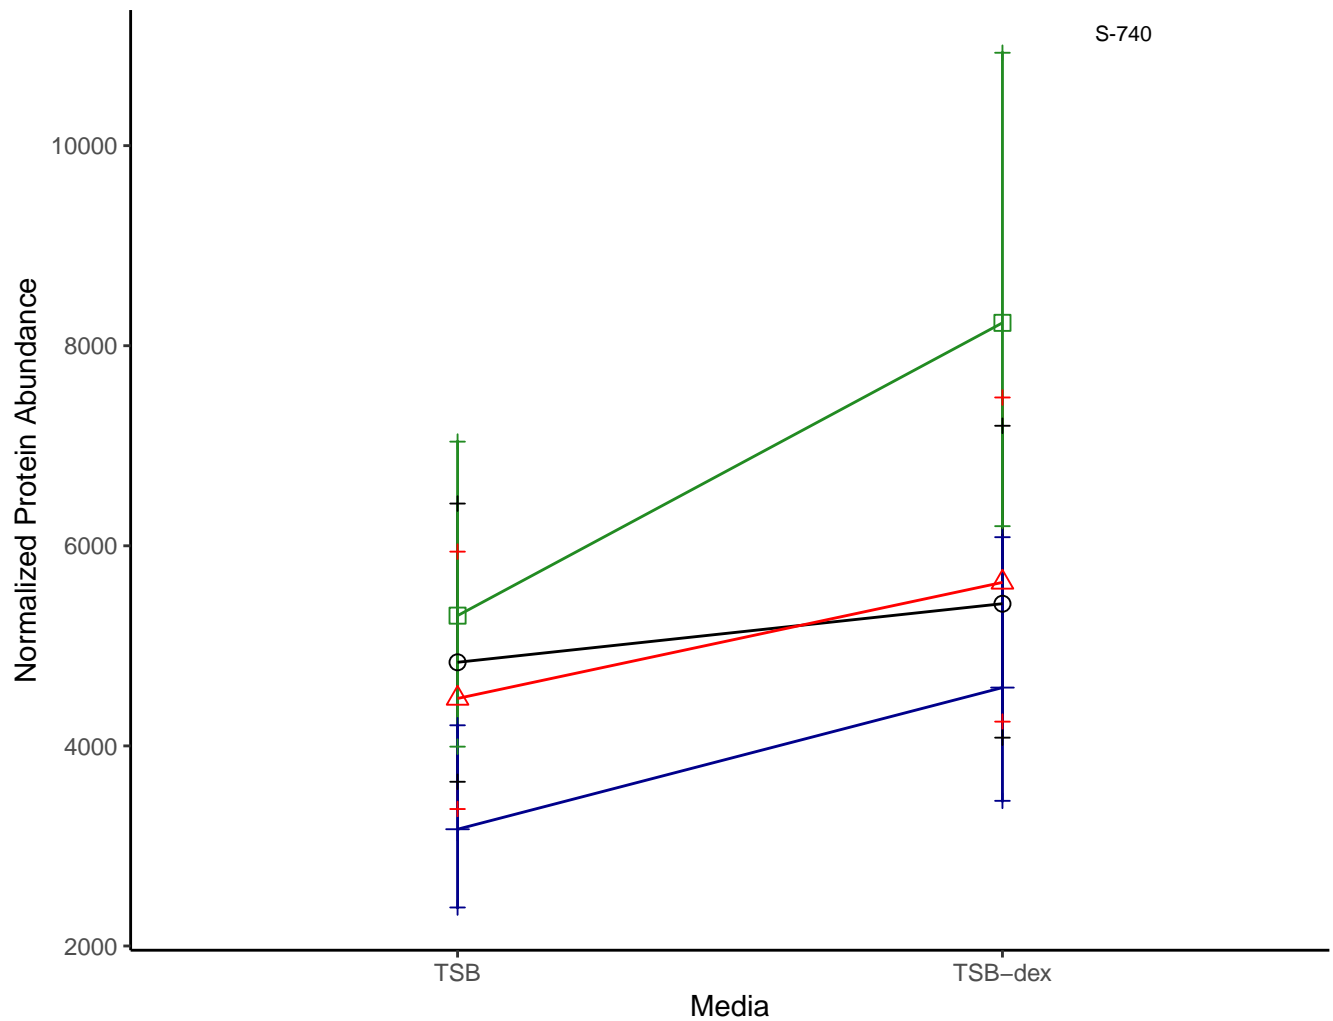

- ⊕ SA564
- △ SA564-ΔhptRS
- ⊞ SA564-ΔccpA
- + SA564-ΔhptRS/ccpA

# OTC\_STAAM

S-741

Normalized Protein Abundance

15000

10000

TSB

TSB-dex

Media

- ⊕ SA564
- △ SA564- $\Delta$ *hptRS*
- ⊞ SA564- $\Delta$ *ccpA*
- + SA564- $\Delta$ *hptRS/ccpA*

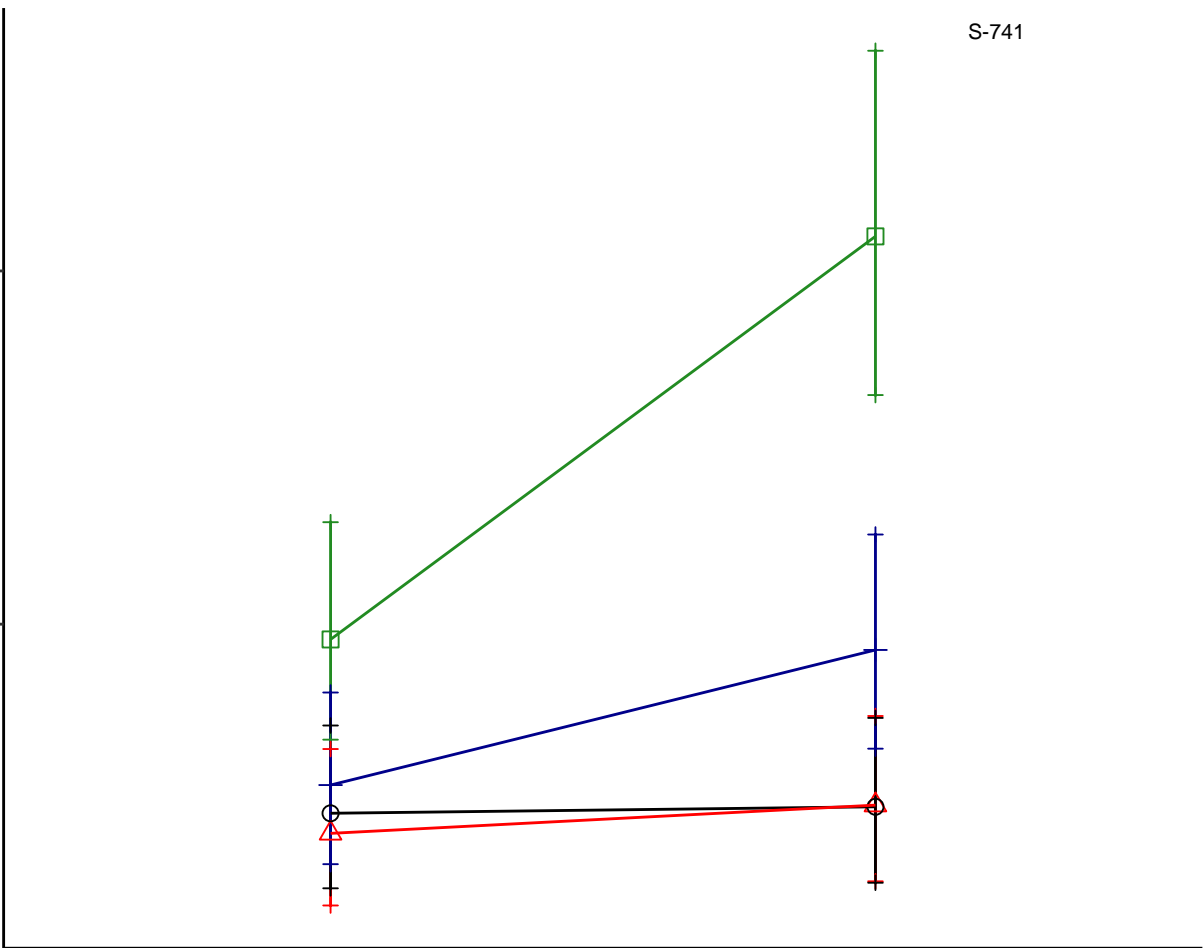

# OTCC\_STAAM

S-742

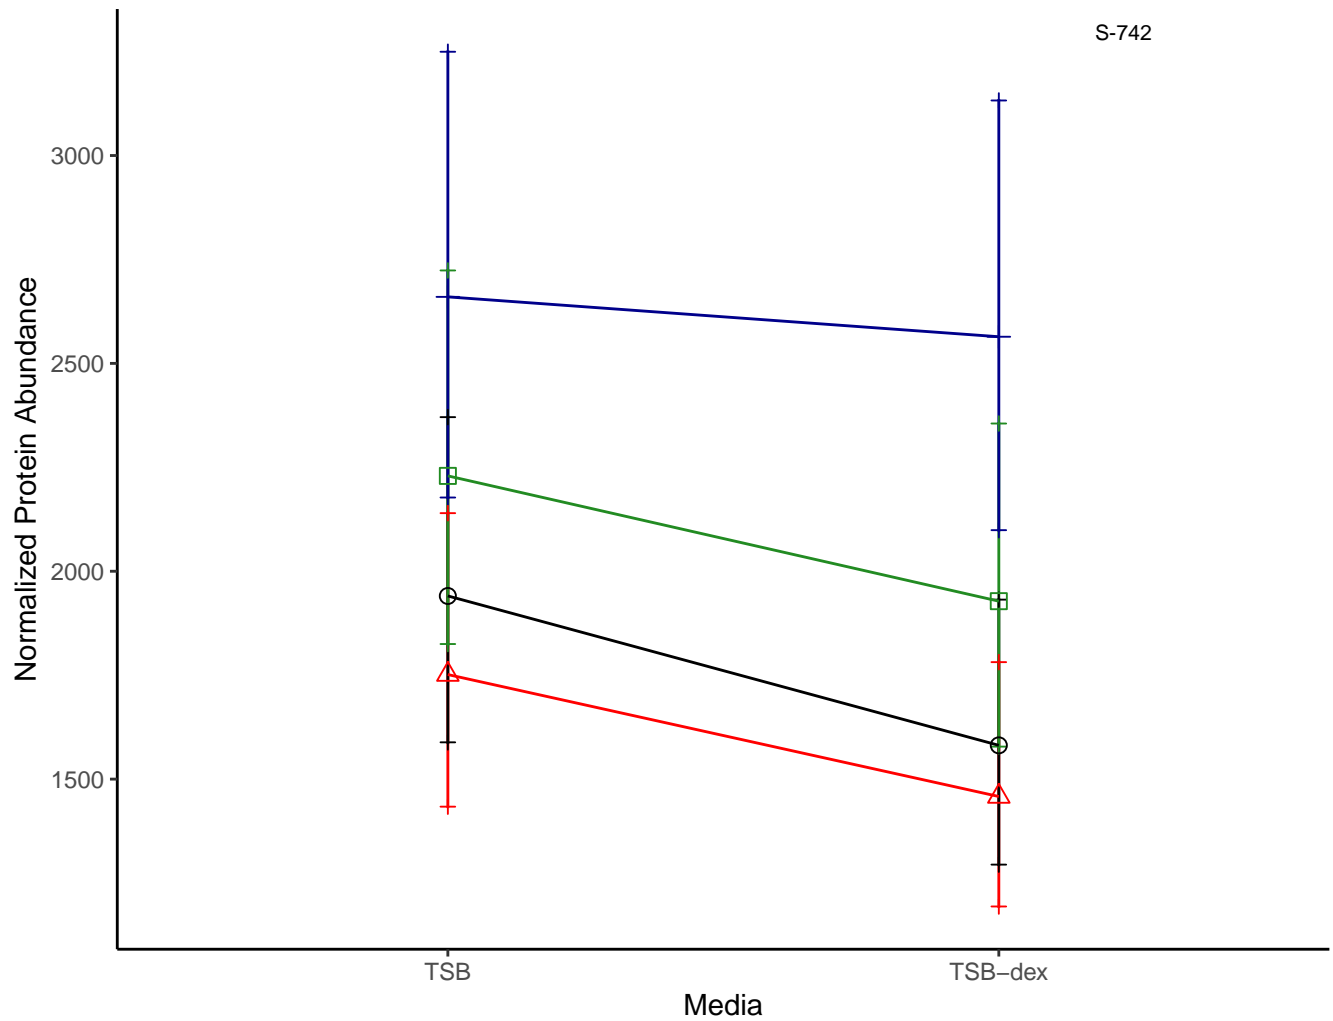

- ⊕ SA564
- △ SA564-ΔhptRS
- ⊞ SA564-ΔccpA
- + SA564-ΔhptRS/ccpA

# P5CR\_STAAM

S-743

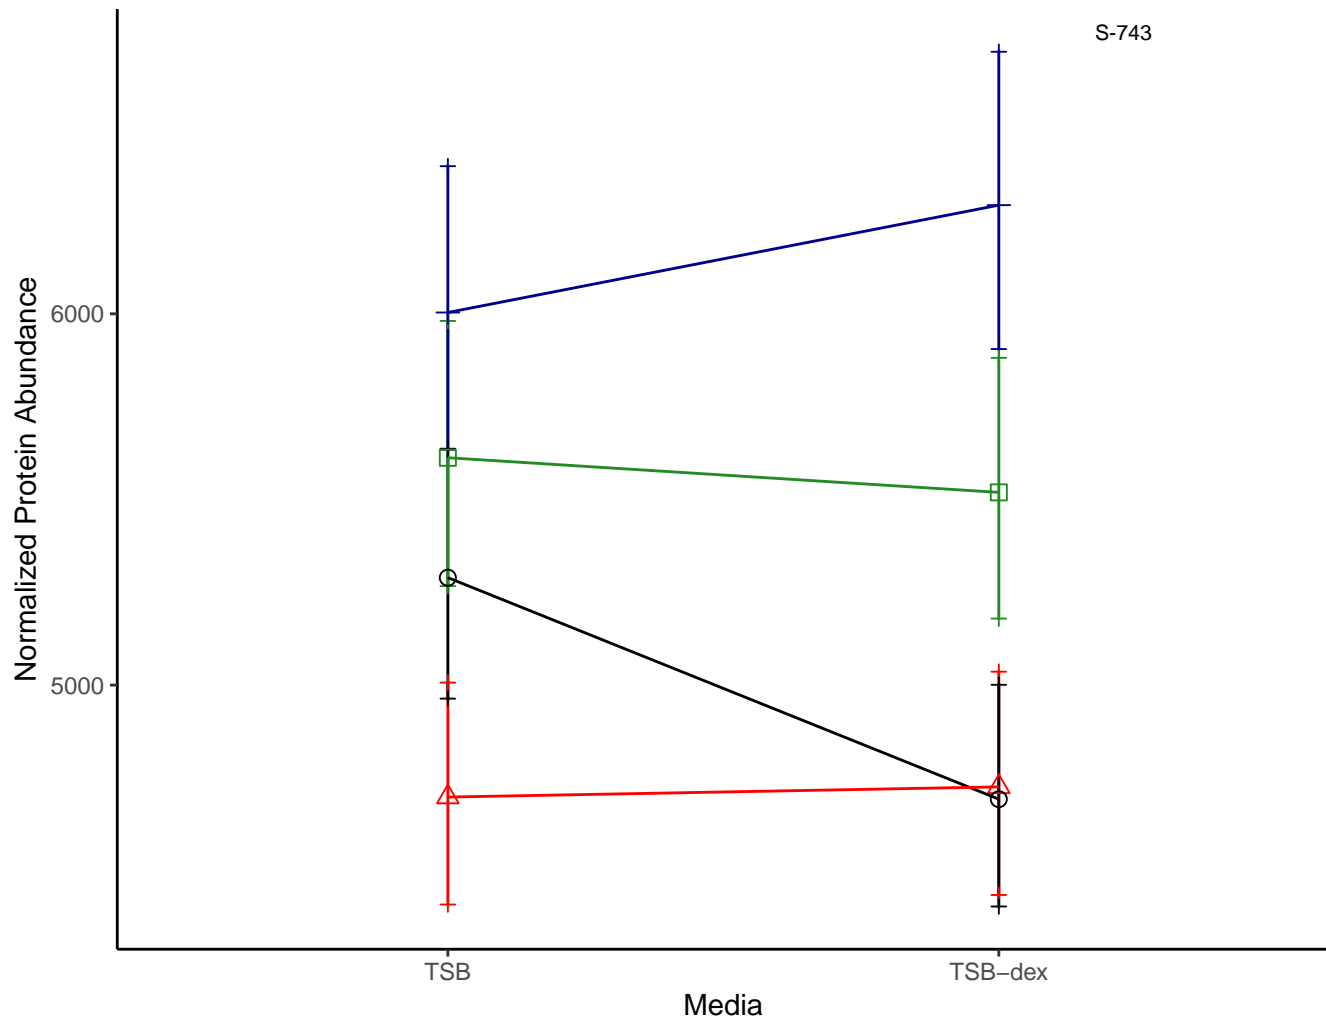

- ⊕ SA564
- △ SA564- $\Delta$ *hptRS*
- ⊞ SA564- $\Delta$ *ccpA*
- + SA564- $\Delta$ *hptRS/ccpA*

# PANB\_STAAM

S-744

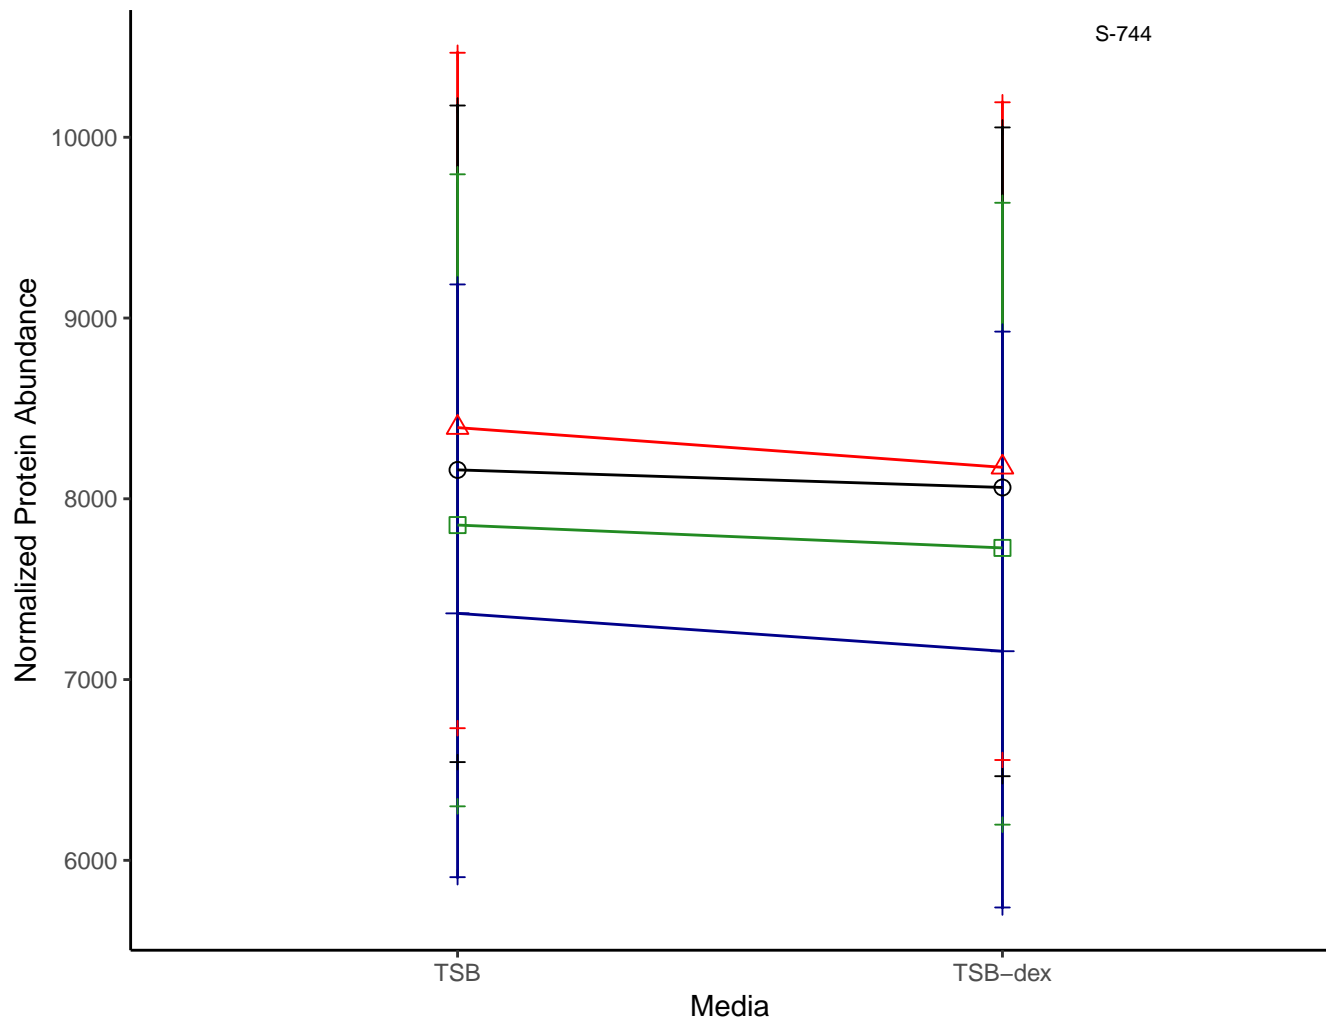

- ⊕ SA564
- △ SA564-Δ*hptRS*
- ⊞ SA564-Δ*ccpA*
- + SA564-Δ*hptRS/ccpA*



# PAND\_STAAM

S-745

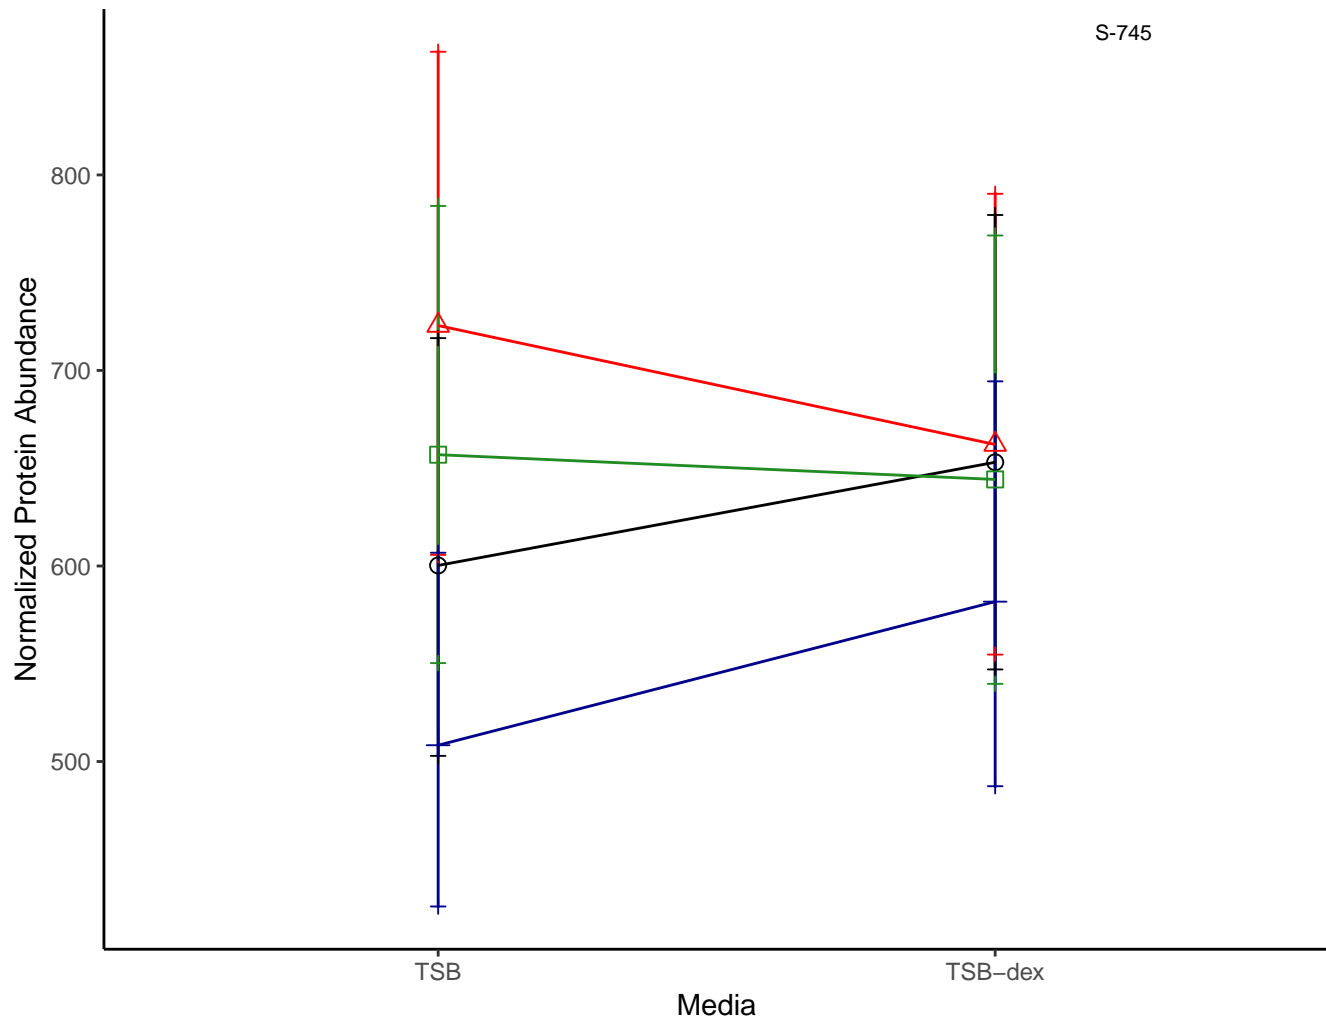

- SA564
- SA564- $\Delta hptRS$
- SA564- $\Delta ccpA$
- SA564- $\Delta hptRS/ccpA$

# PARC\_STAAM

S-746

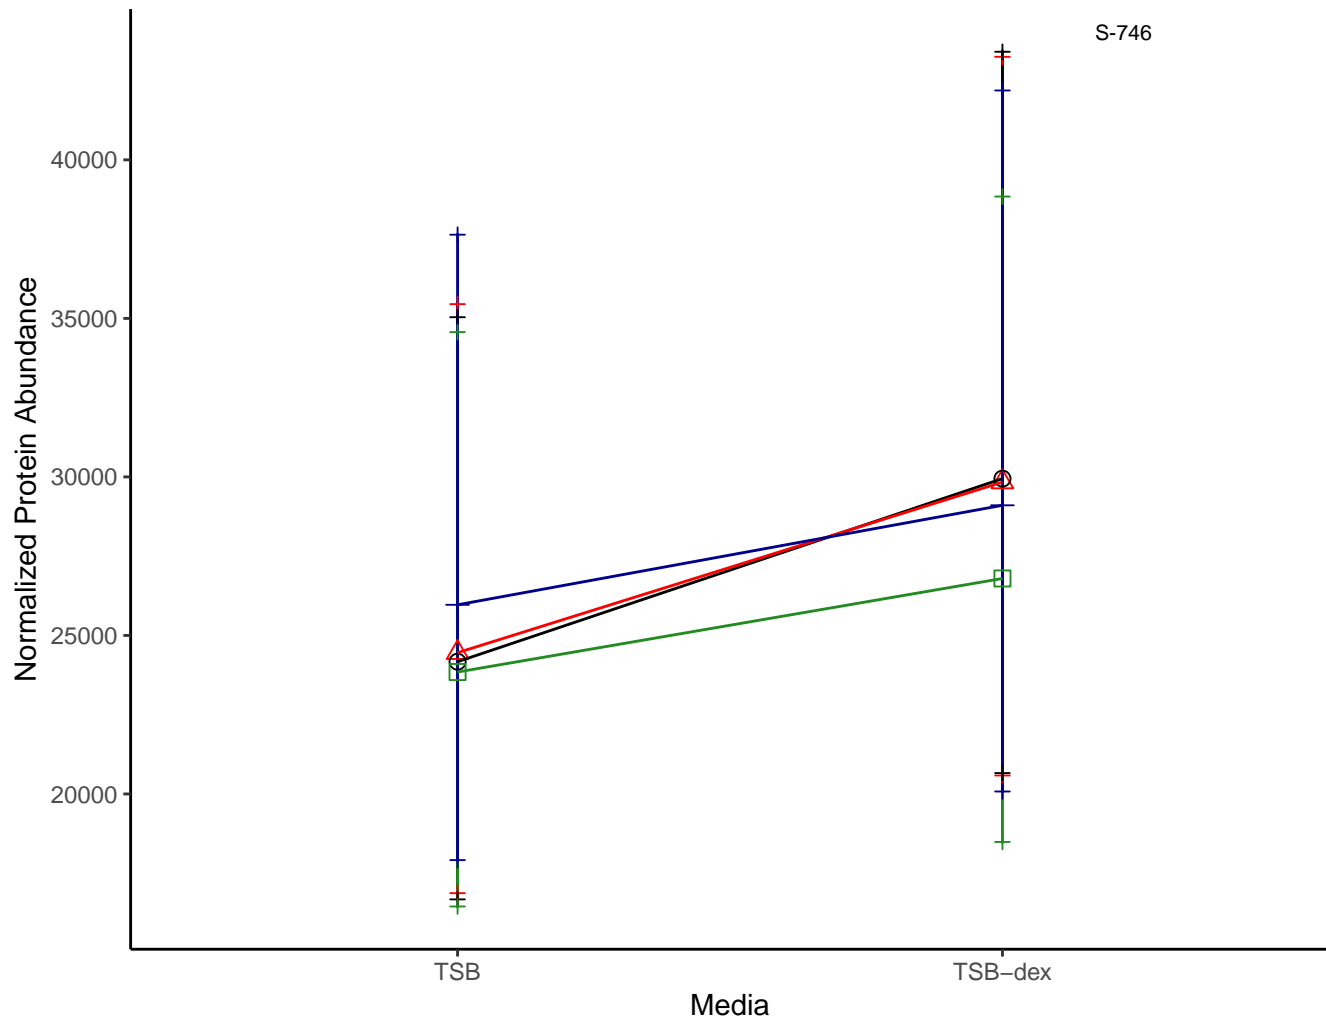

- ⊕ SA564
- △ SA564- $\Delta$ *hptRS*
- ⊞ SA564- $\Delta$ *ccpA*
- + SA564- $\Delta$ *hptRS/ccpA*

# PCKA\_STAAM

S-747

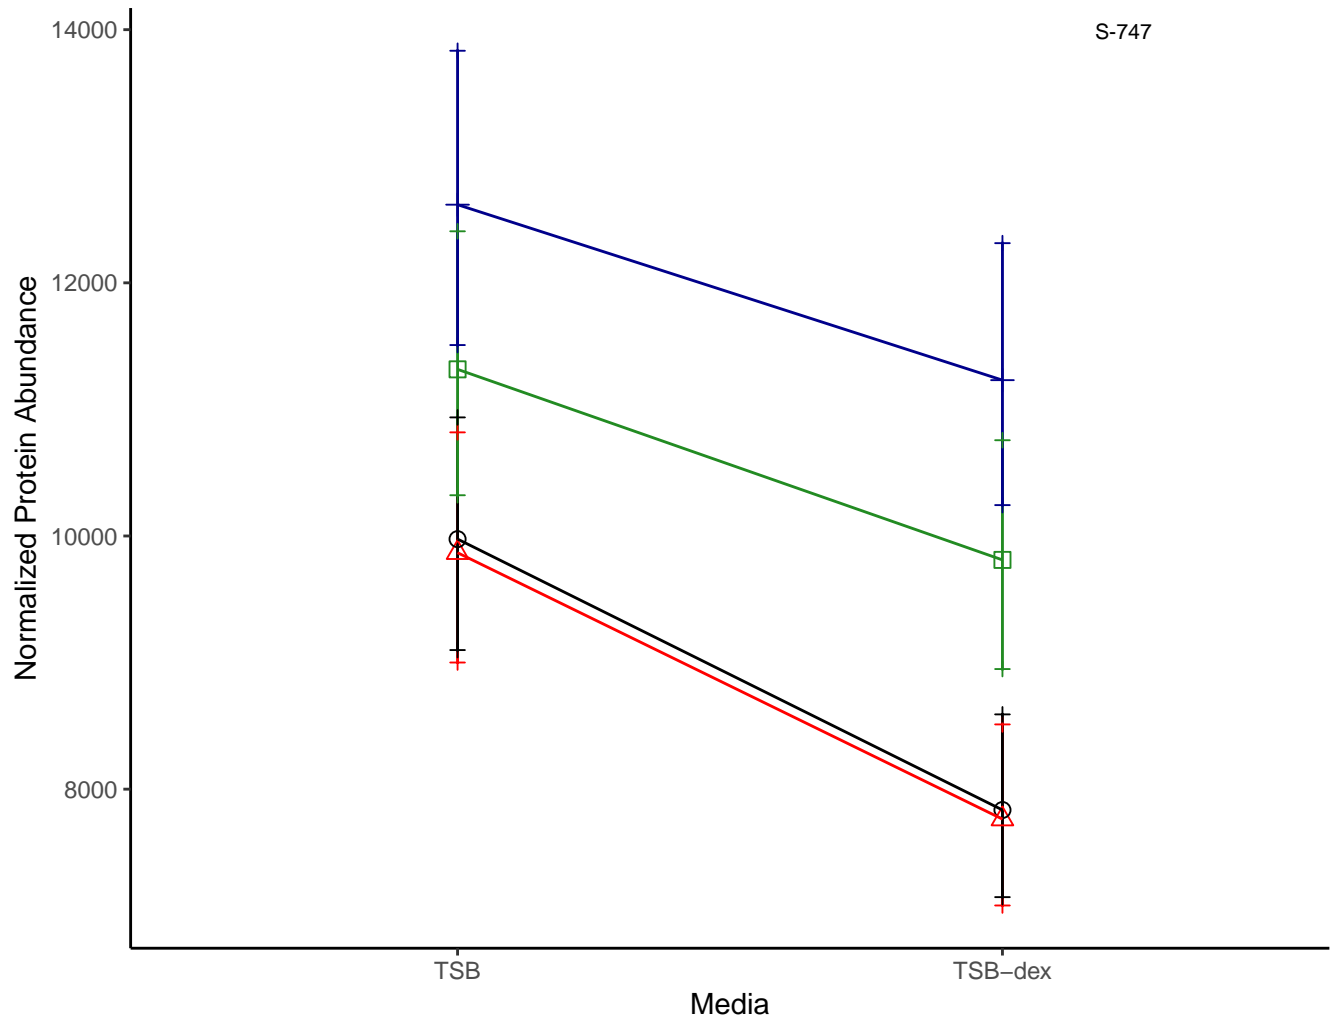

- ⊕ SA564
- △ SA564- $\Delta$ *hptRS*
- ⊞ SA564- $\Delta$ *ccpA*
- + SA564- $\Delta$ *hptRS/ccpA*

# PCRA\_STAAM

S-748

Normalized Protein Abundance

2000

1500

TSB

TSB-dex

Media

- ⊕ SA564
- △ SA564- $\Delta$ *hptRS*
- ⊞ SA564- $\Delta$ *ccpA*
- + SA564- $\Delta$ *hptRS/ccpA*

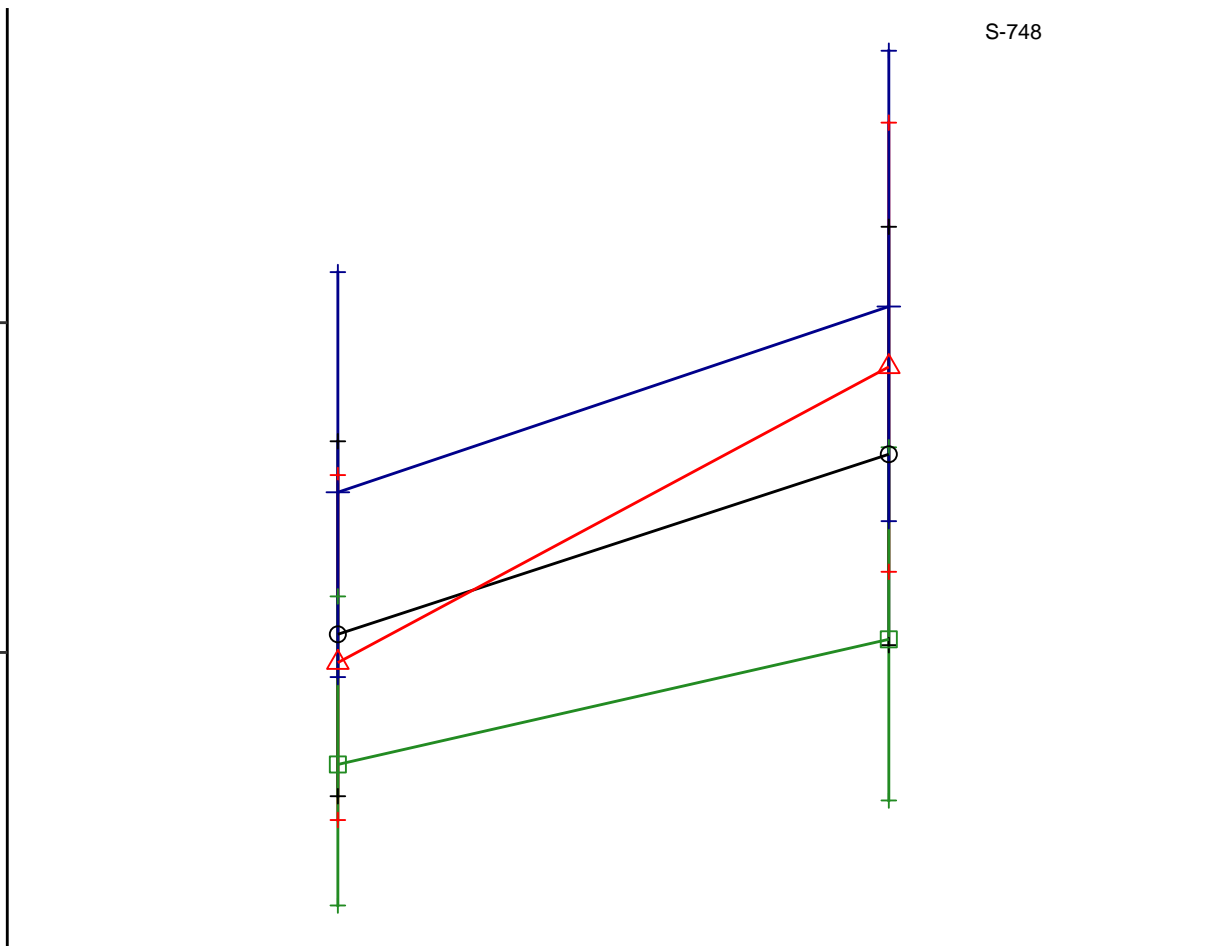

# PDP\_STAAM

S-749

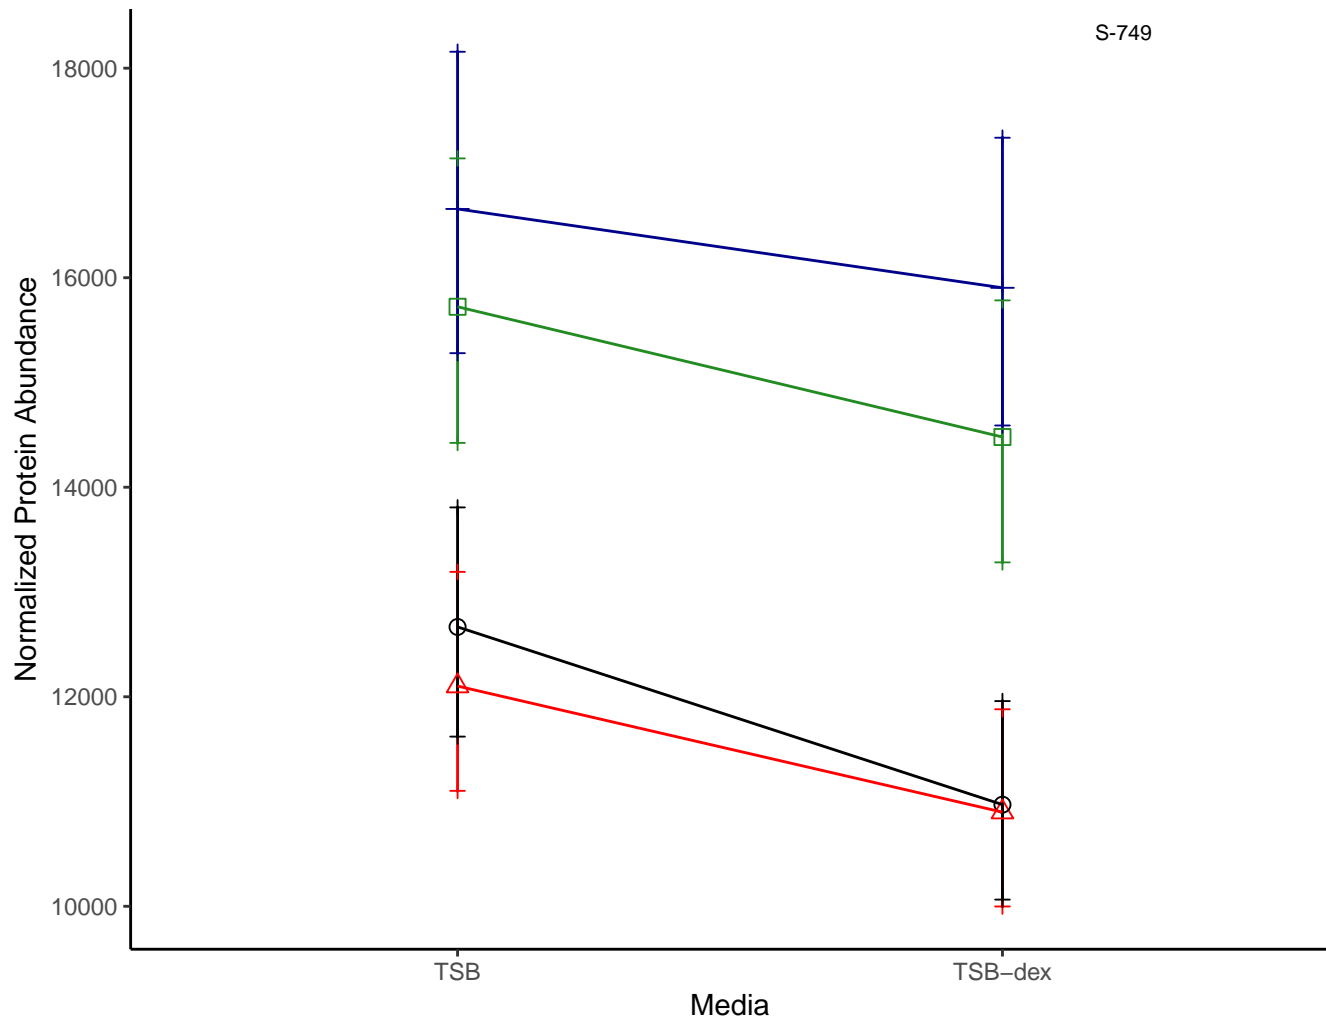

- ⊕ SA564
- △ SA564- $\Delta$ *hptRS*
- ⊞ SA564- $\Delta$ *ccpA*
- + SA564- $\Delta$ *hptRS/ccpA*

# PDRP\_STAAM

S-750

Normalized Protein Abundance

15000  
10000  
5000

TSB

Media

TSB-dex

- ⊕ SA564
- △ SA564- $\Delta$ *hptRS*
- ⊞ SA564- $\Delta$ *ccpA*
- + SA564- $\Delta$ *hptRS/ccpA*

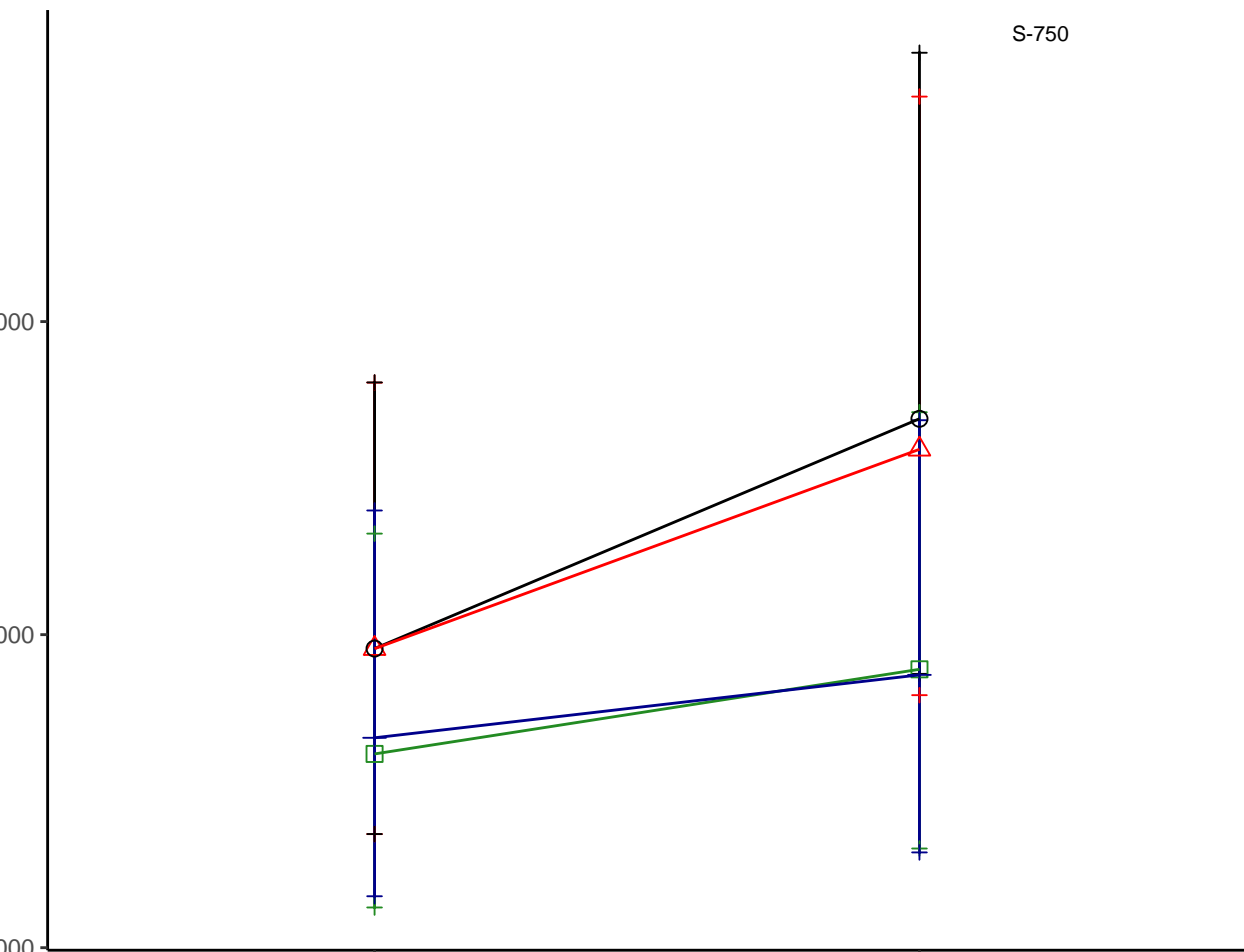

# PDXS\_STAAM

S-751

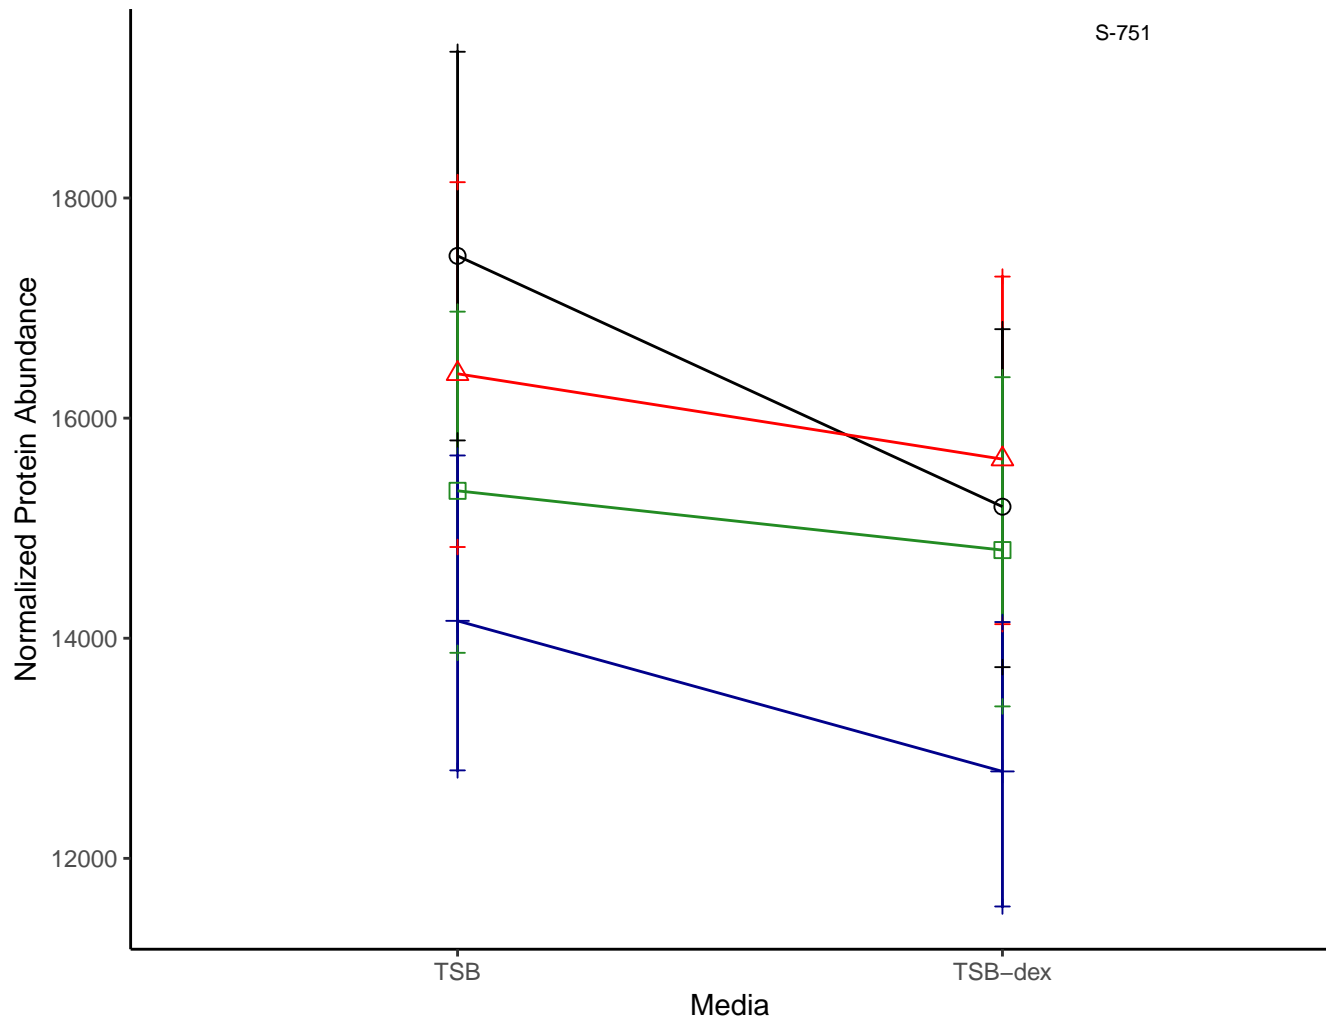

- SA564
- △ SA564-Δ*hptRS*
- SA564-Δ*ccpA*
- + SA564-Δ*hptRS/ccpA*

# PDXT\_STAAM

S-752

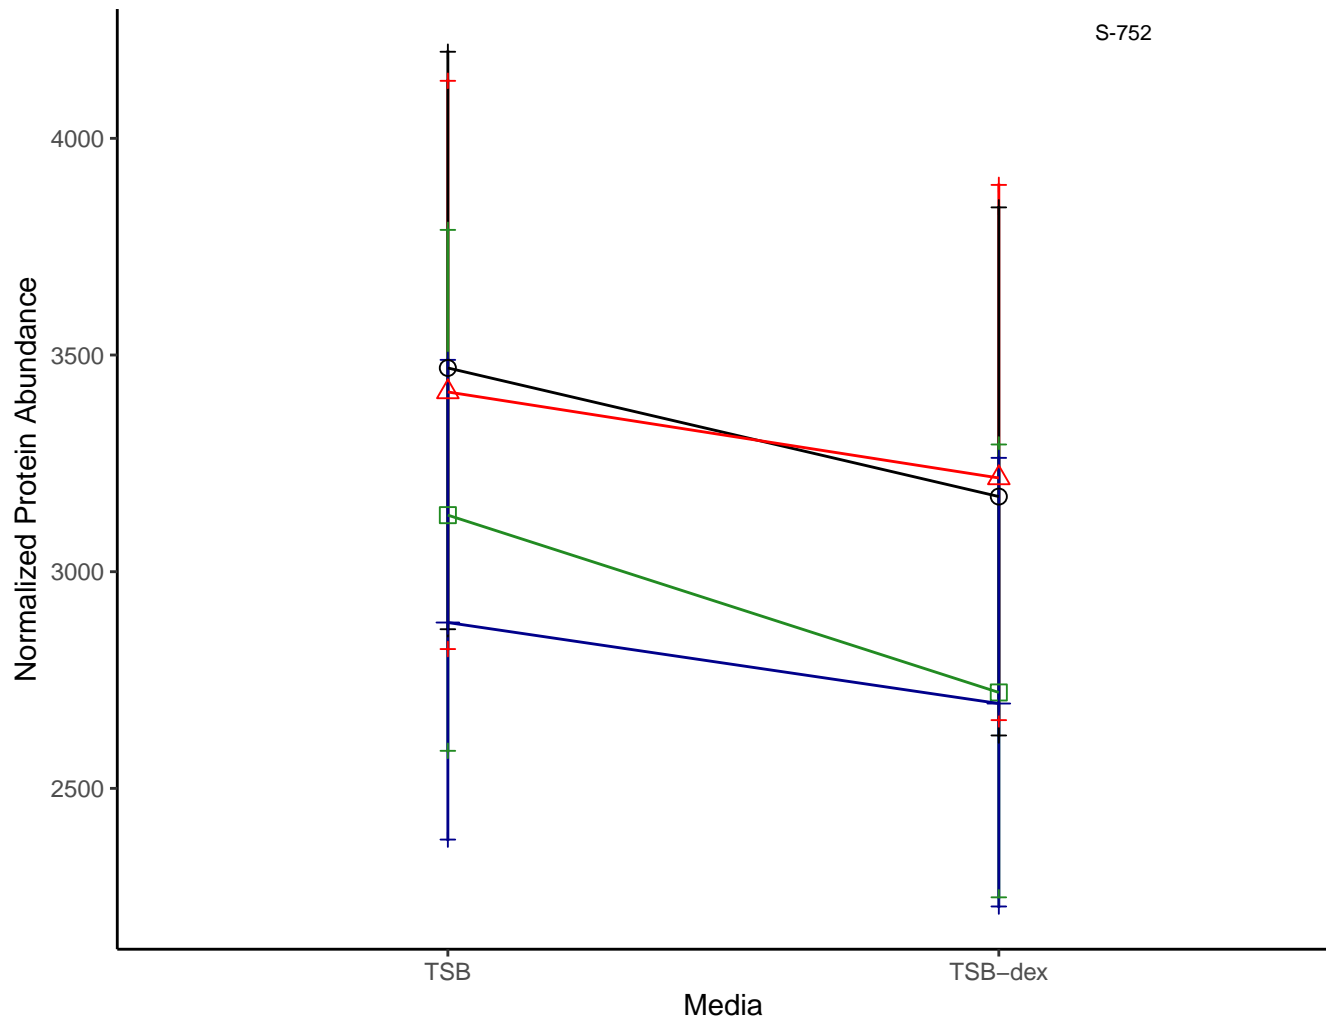

- ⊕ SA564
- △ SA564-ΔhptRS
- ⊞ SA564-ΔccpA
- + SA564-ΔhptRS/ccpA



# PEPVL\_STAAM

S-753

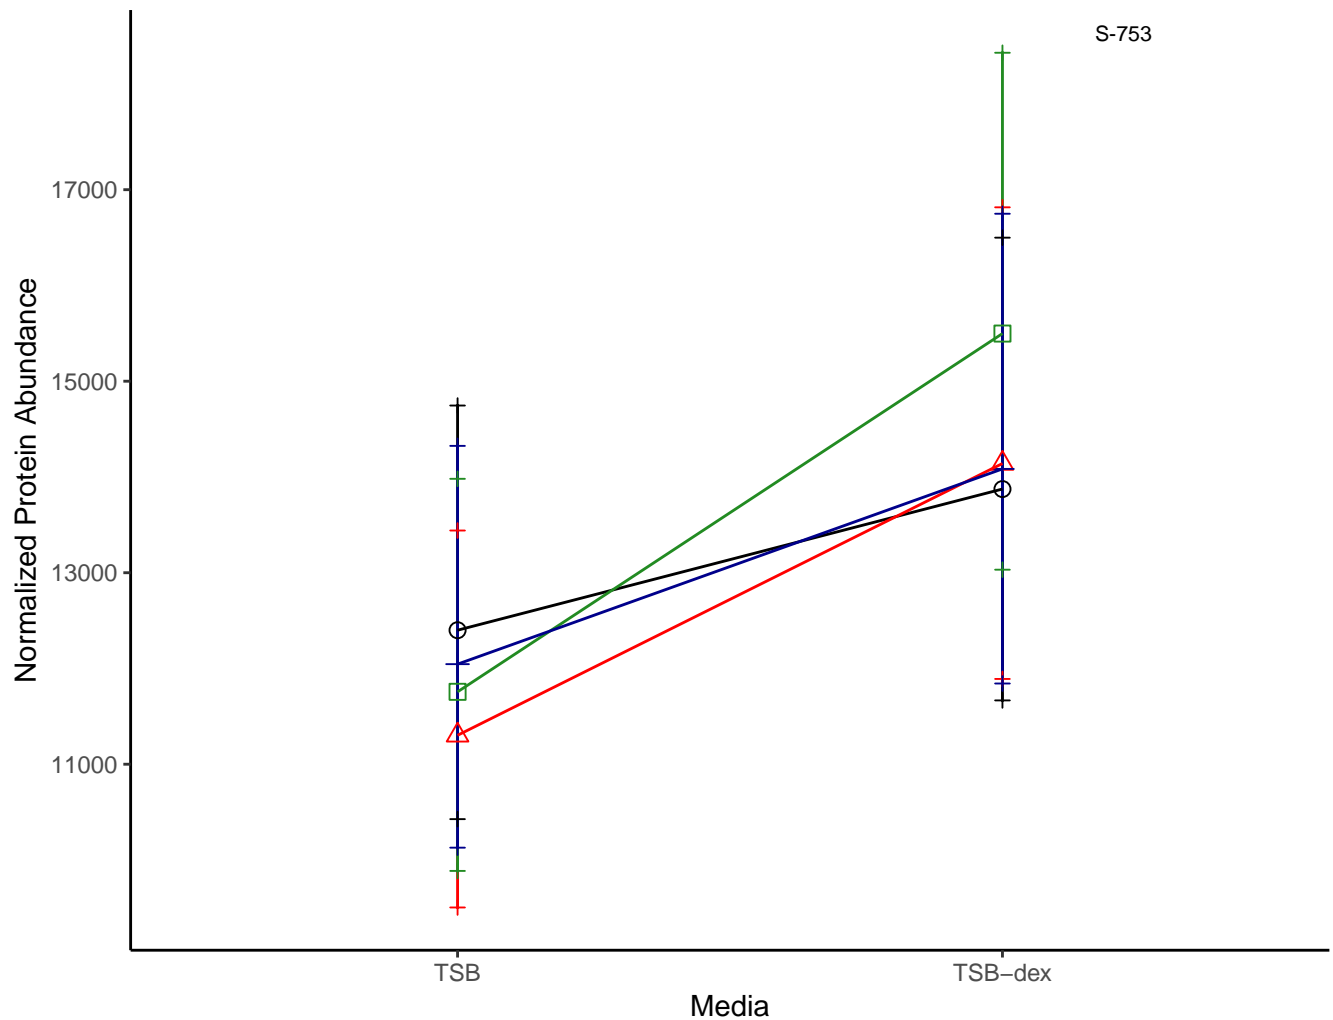

- ⊕ SA564
- △ SA564- $\Delta$ *hptRS*
- ⊞ SA564- $\Delta$ *ccpA*
- + SA564- $\Delta$ *hptRS/ccpA*

# PERR\_STAAM

S-754

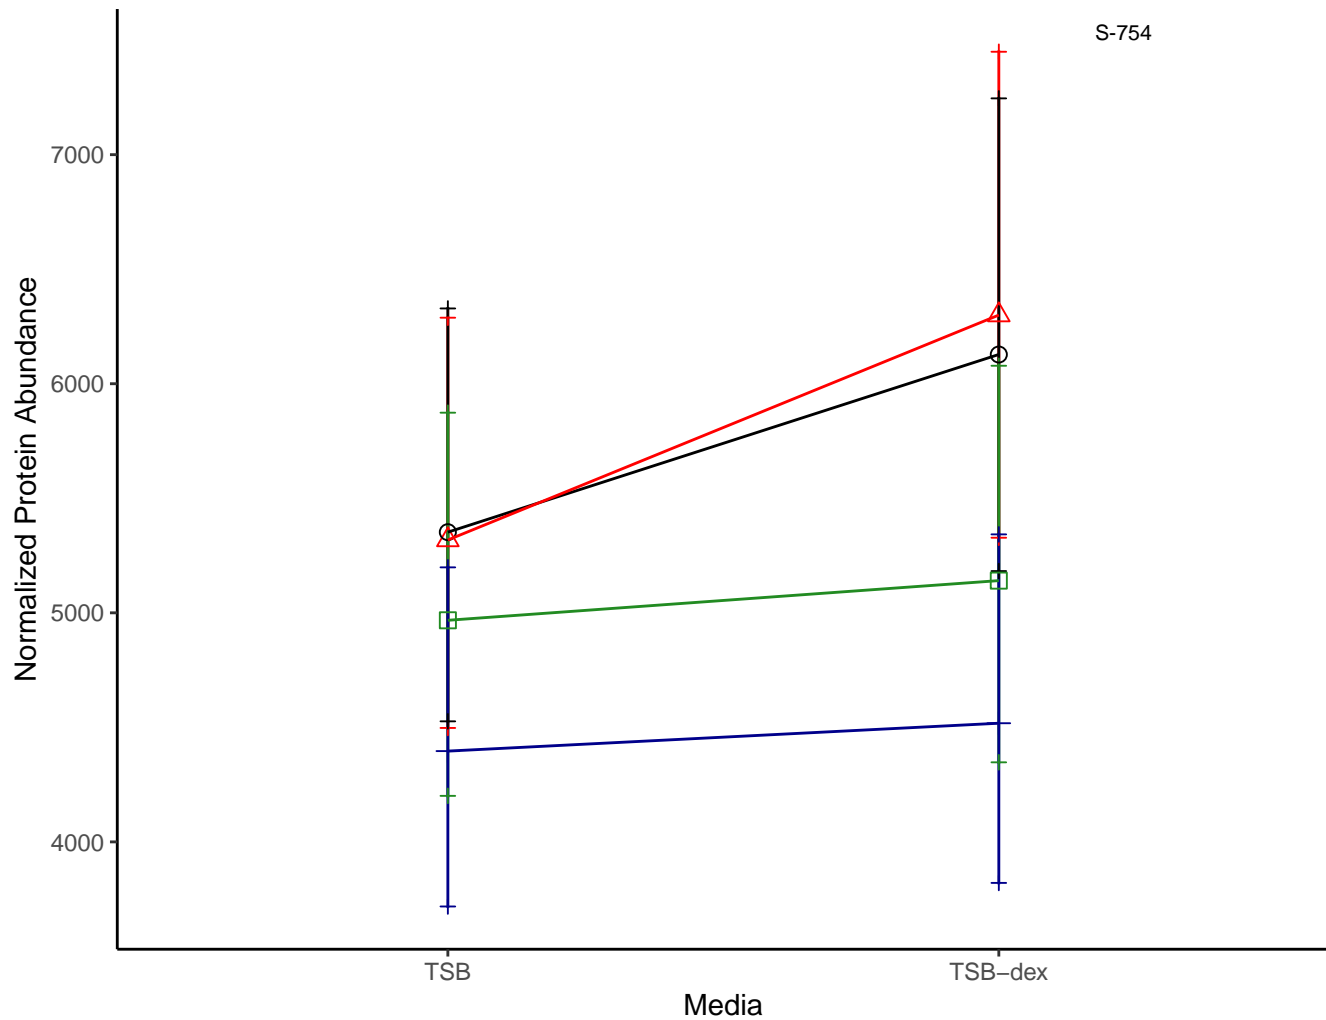

- ⊕ SA564
- △ SA564-ΔhptRS
- ⊞ SA564-ΔccpA
- + SA564-ΔhptRS/ccpA

# PFKA\_STAAM

S-755

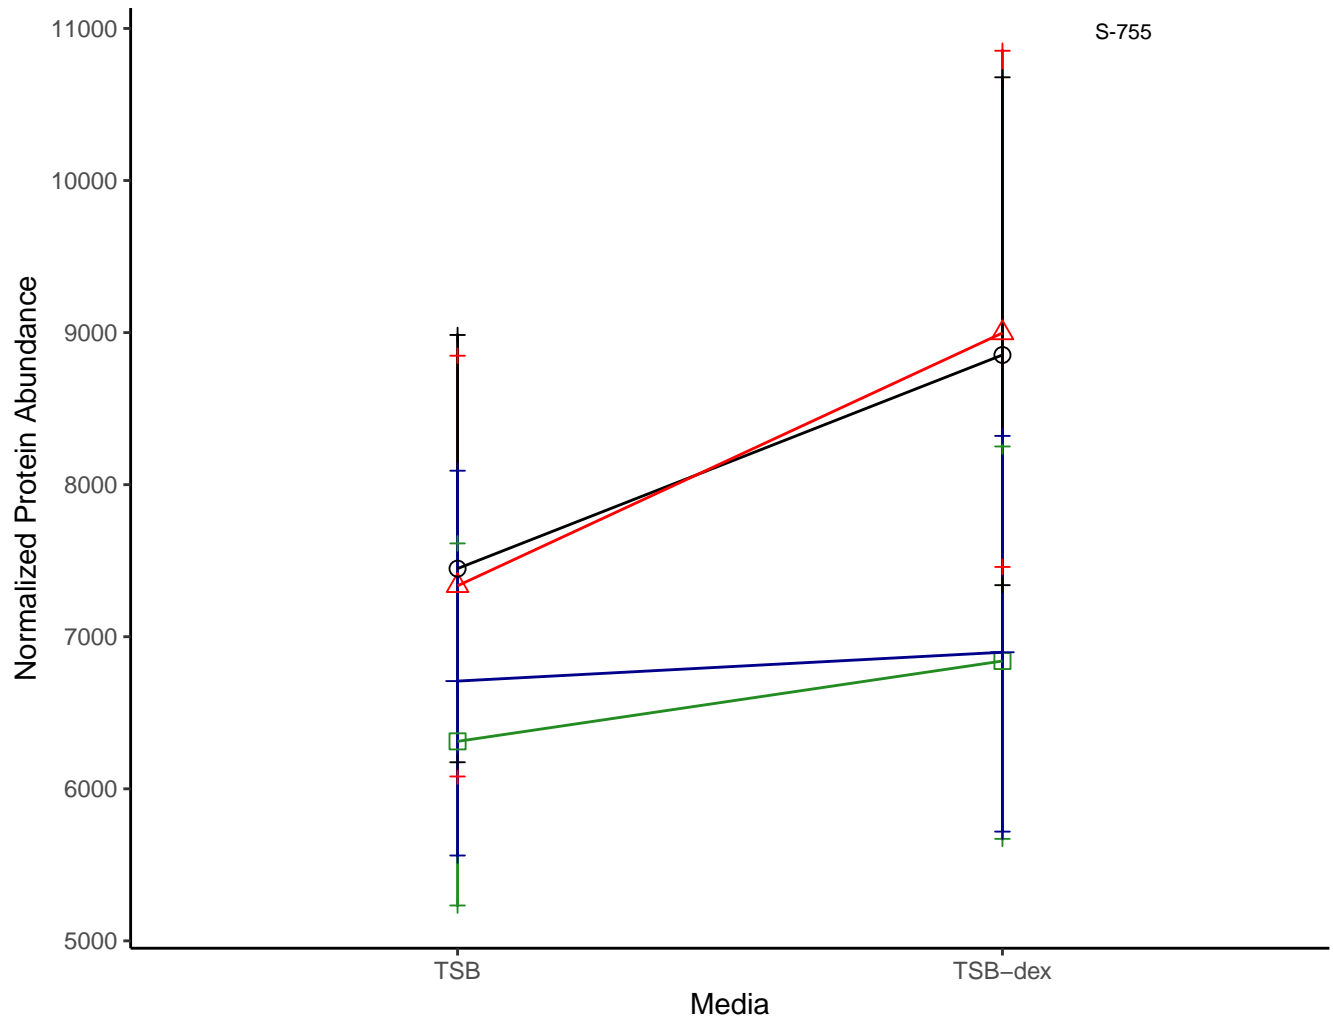

- ⊕ SA564
- △ SA564-ΔhptRS
- ⊞ SA564-ΔccpA
- + SA564-ΔhptRS/ccpA

# PFLA\_STAAM

S-756

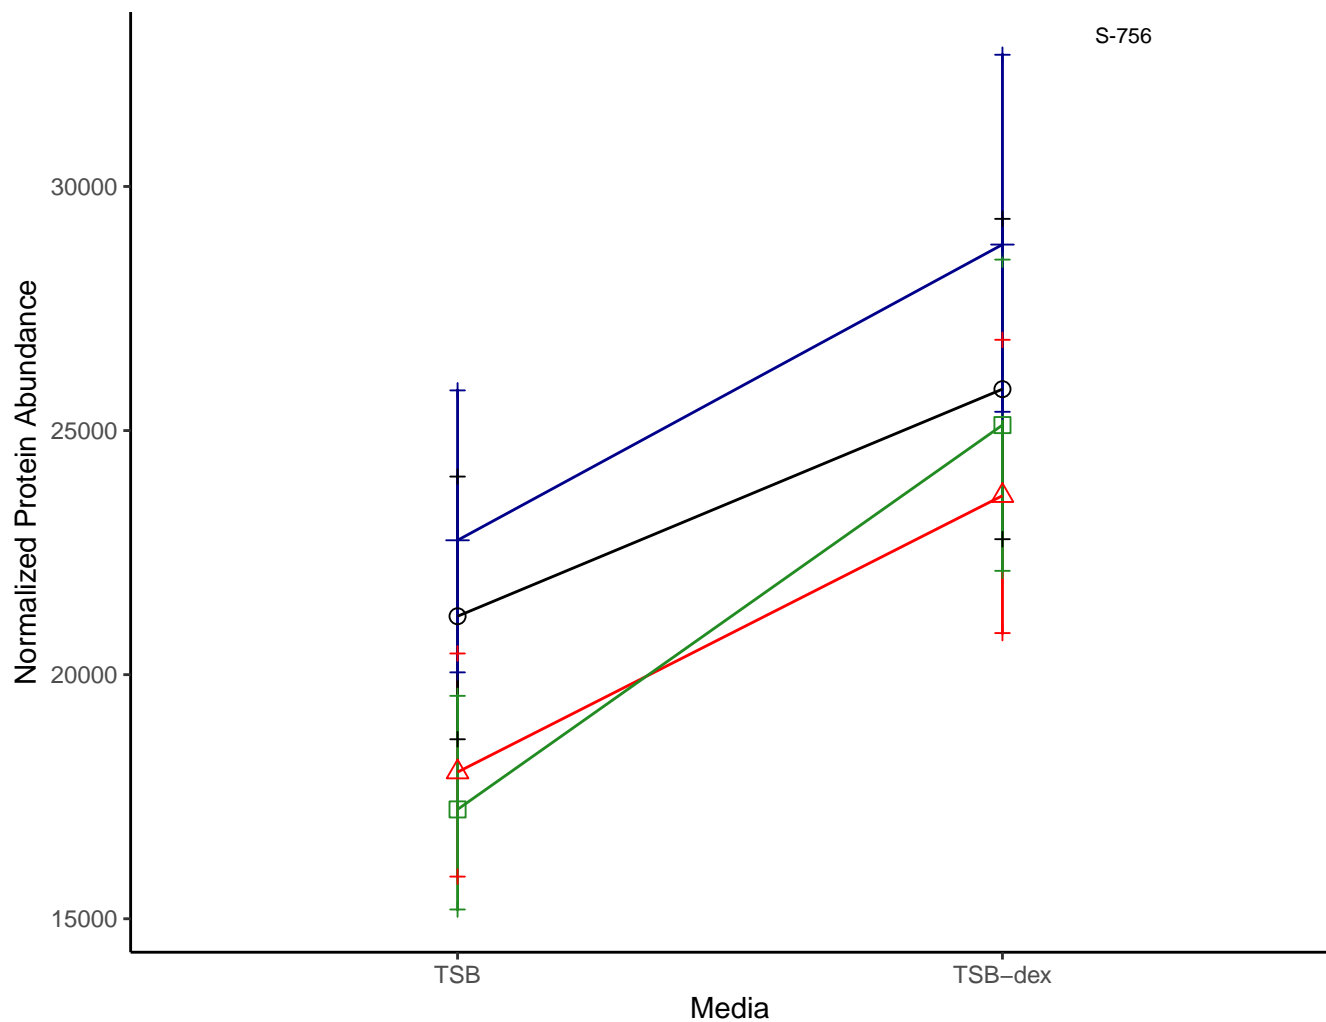

- ⊕ SA564
- △ SA564- $\Delta$ *hptRS*
- ⊞ SA564- $\Delta$ *ccpA*
- + SA564- $\Delta$ *hptRS/ccpA*

# PFLB\_STAAM

S-757

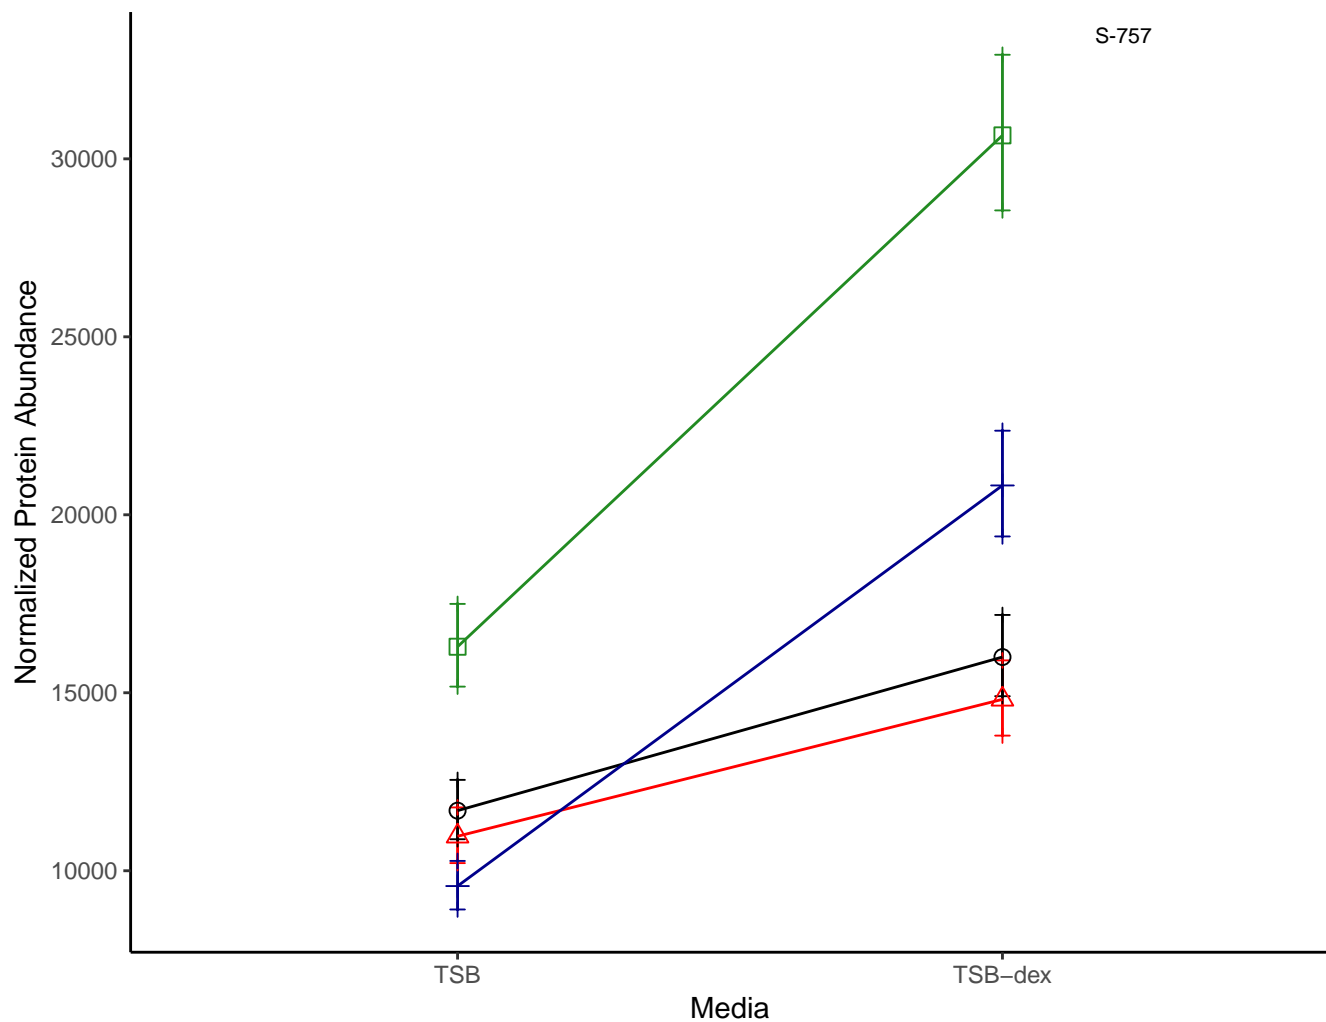

- ⊕ SA564
- △ SA564-ΔhptRS
- ⊞ SA564-ΔccpA
- + SA564-ΔhptRS/ccpA

# PGCA\_STAAM

S-758

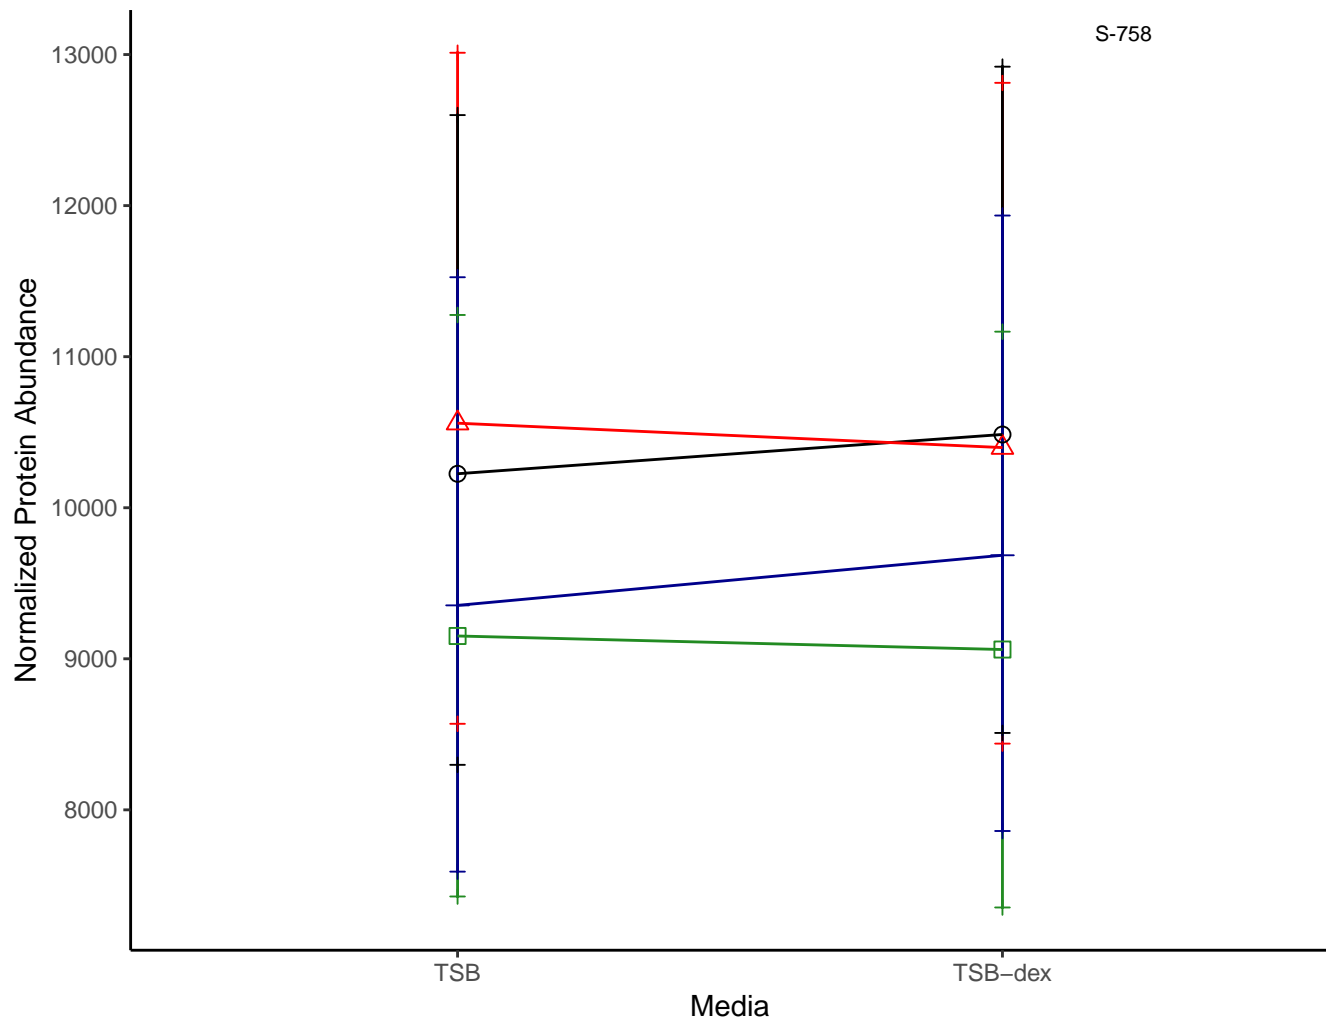

- ⊕ SA564
- △ SA564- $\Delta$ *hptRS*
- ⊞ SA564- $\Delta$ *ccpA*
- + SA564- $\Delta$ *hptRS/ccpA*

# PGK\_STAAM

S-759

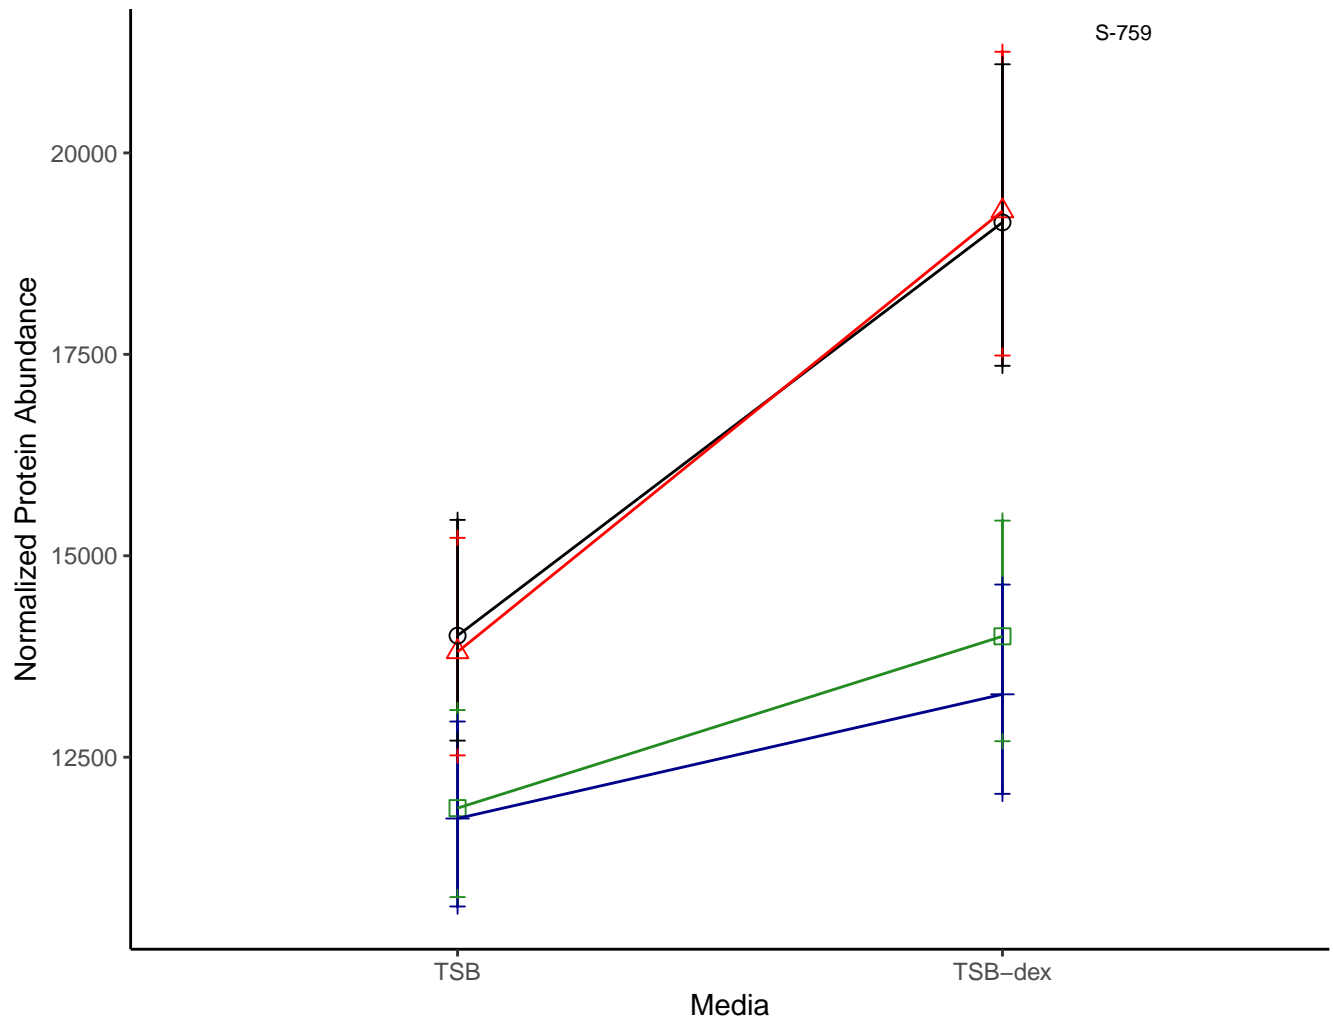

- ⊕ SA564
- △ SA564- $\Delta hptRS$
- ⊞ SA564- $\Delta ccpA$
- + SA564- $\Delta hptRS/ccpA$

# PHNC\_STAAM

S-760

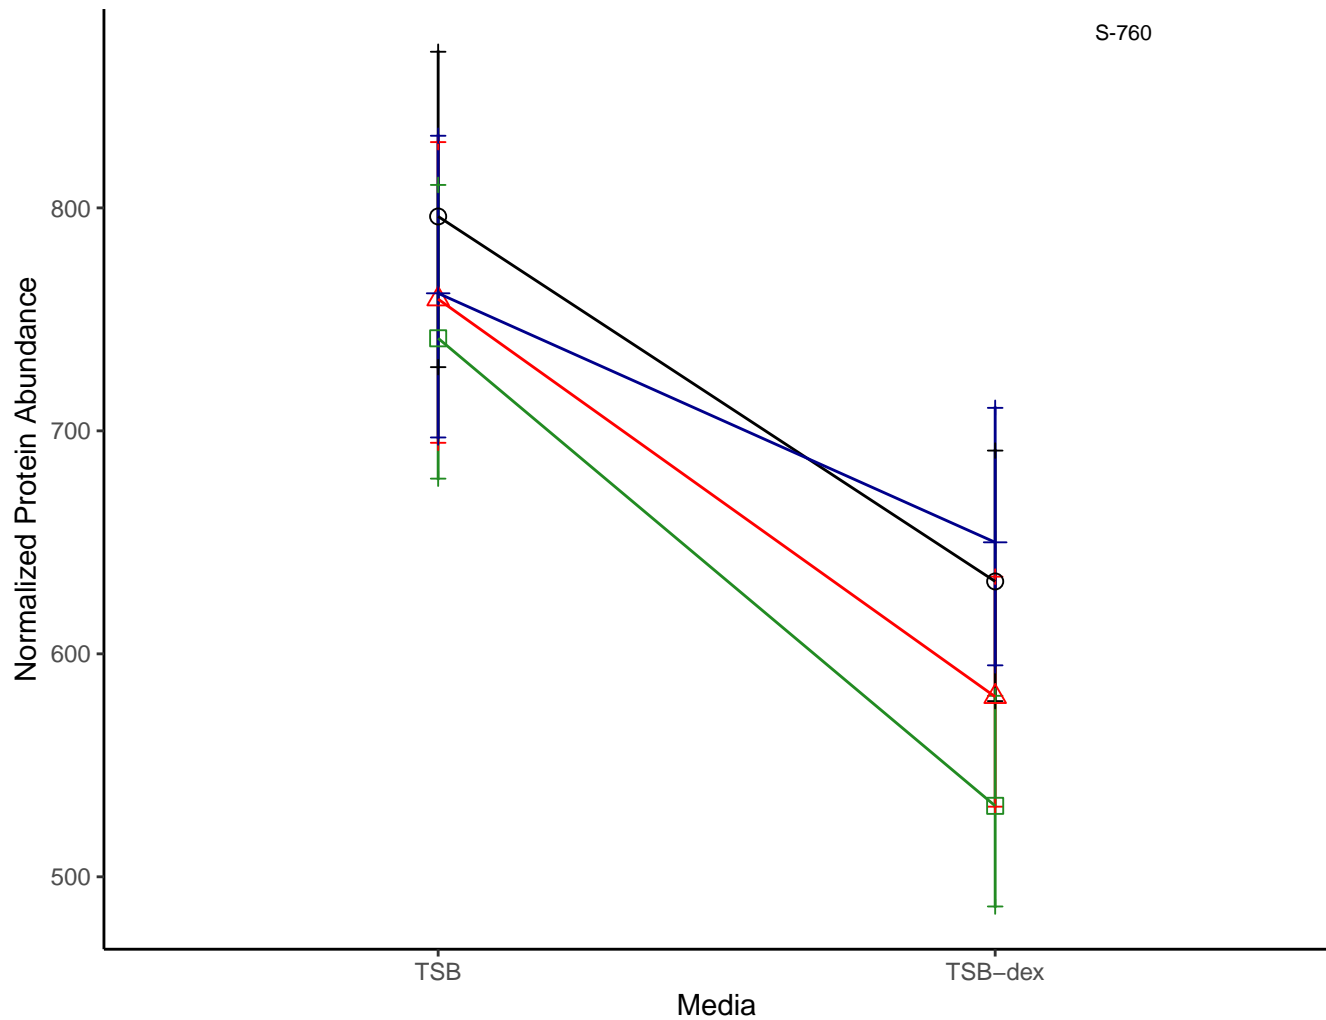

- ⊕ SA564
- △ SA564-ΔhptRS
- ⊞ SA564-ΔccpA
- ⊕ SA564-ΔhptRS/ccpA



# PLSX\_STAAM

S-761

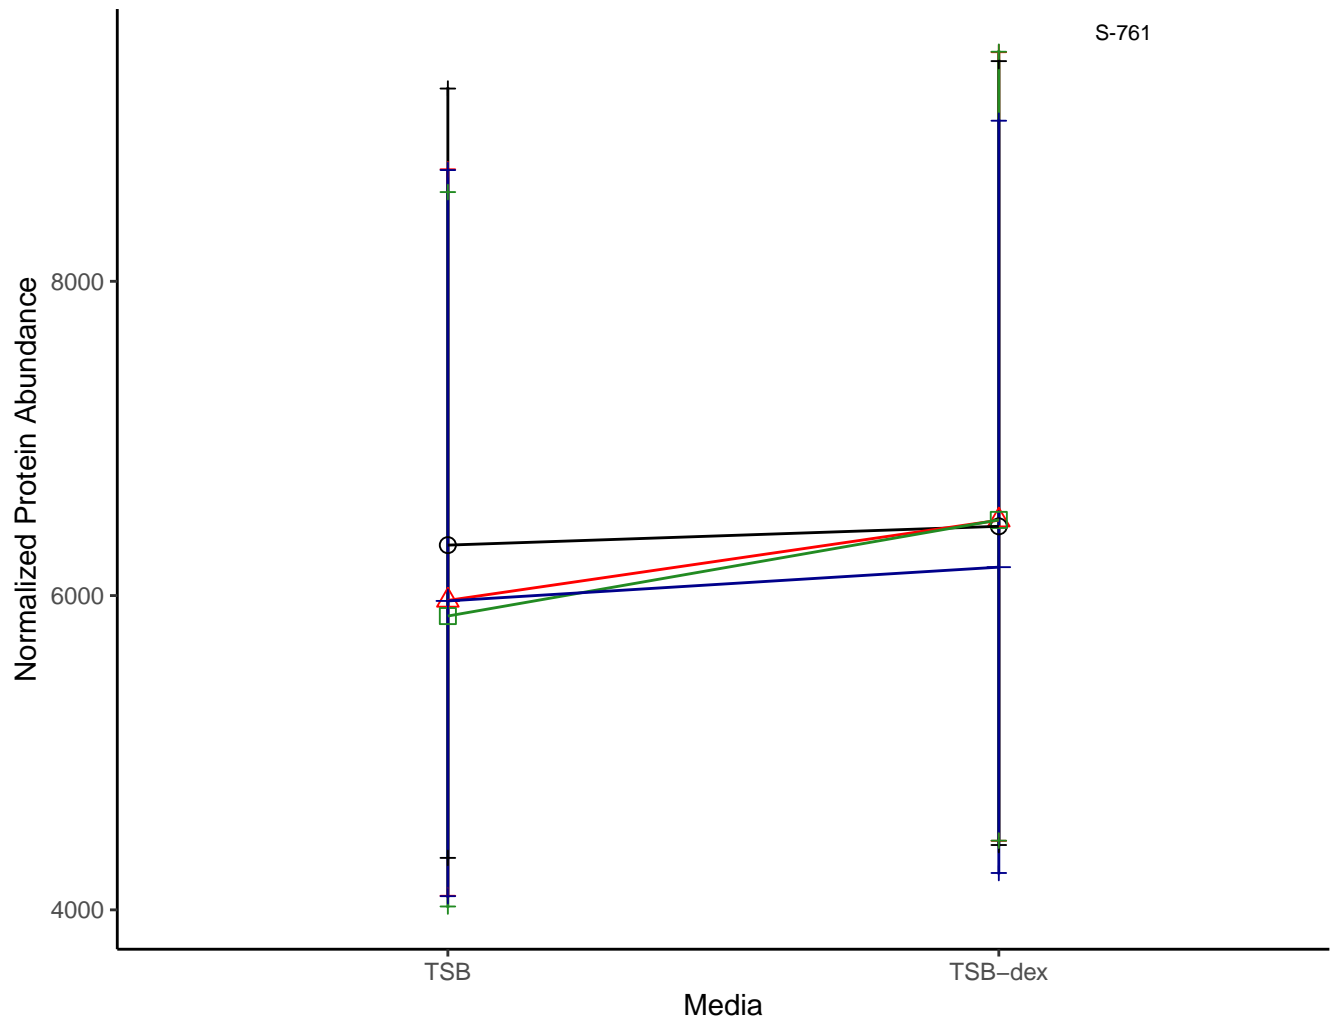

- ⊕ SA564
- △ SA564- $\Delta$ *hptRS*
- ⊞ SA564- $\Delta$ *ccpA*
- + SA564- $\Delta$ *hptRS/ccpA*

# PNP\_STAAM

S-762

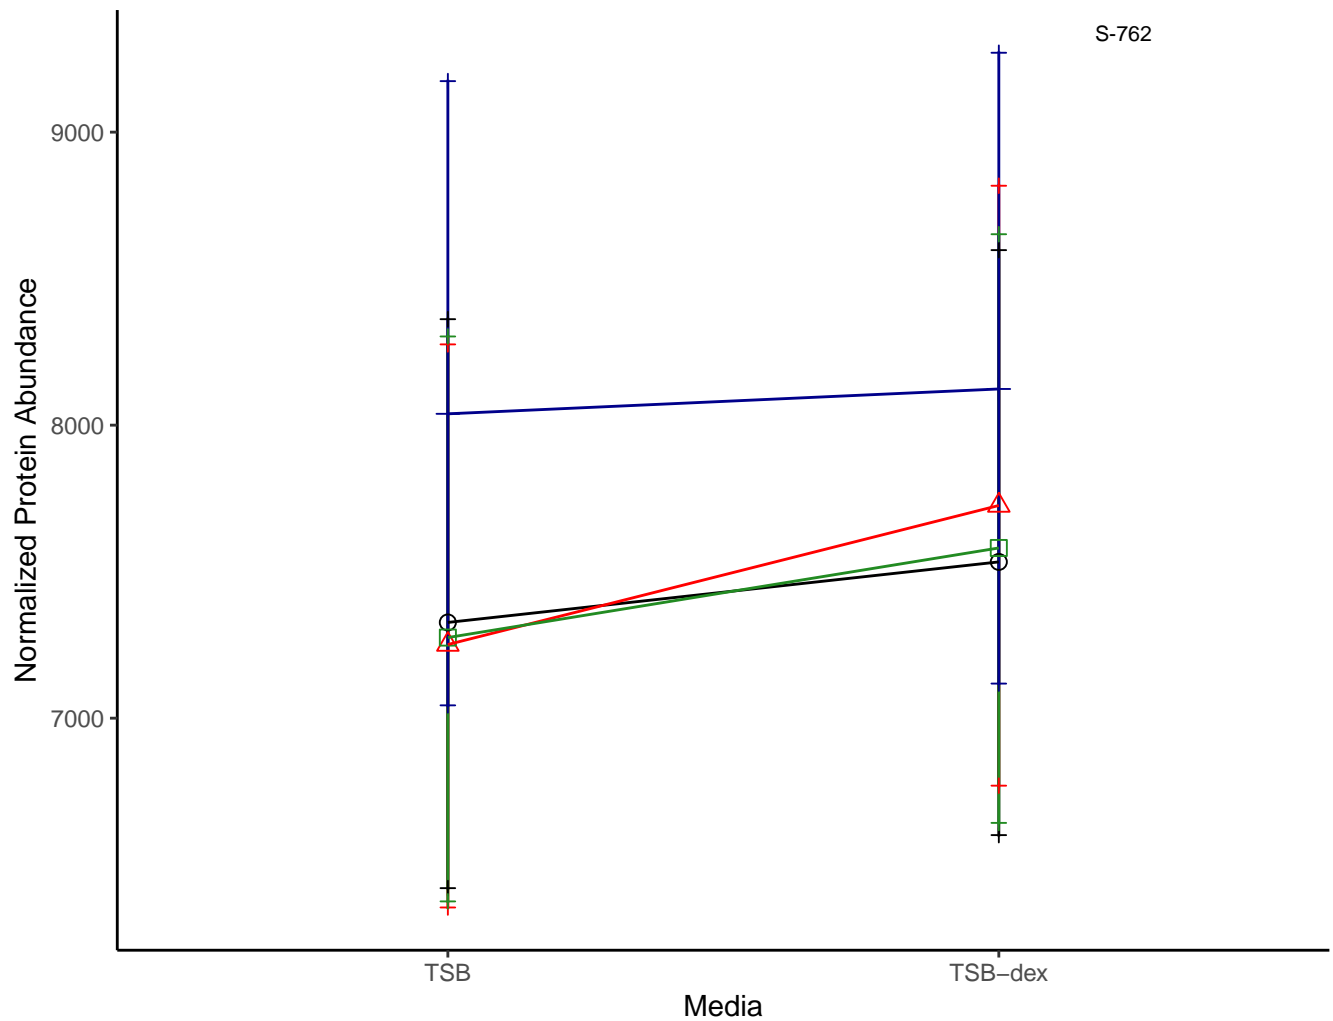

- ⊕ SA564
- △ SA564- $\Delta hptRS$
- ⊞ SA564- $\Delta ccpA$
- + SA564- $\Delta hptRS/ccpA$

# PPAC\_STAAM

S-763

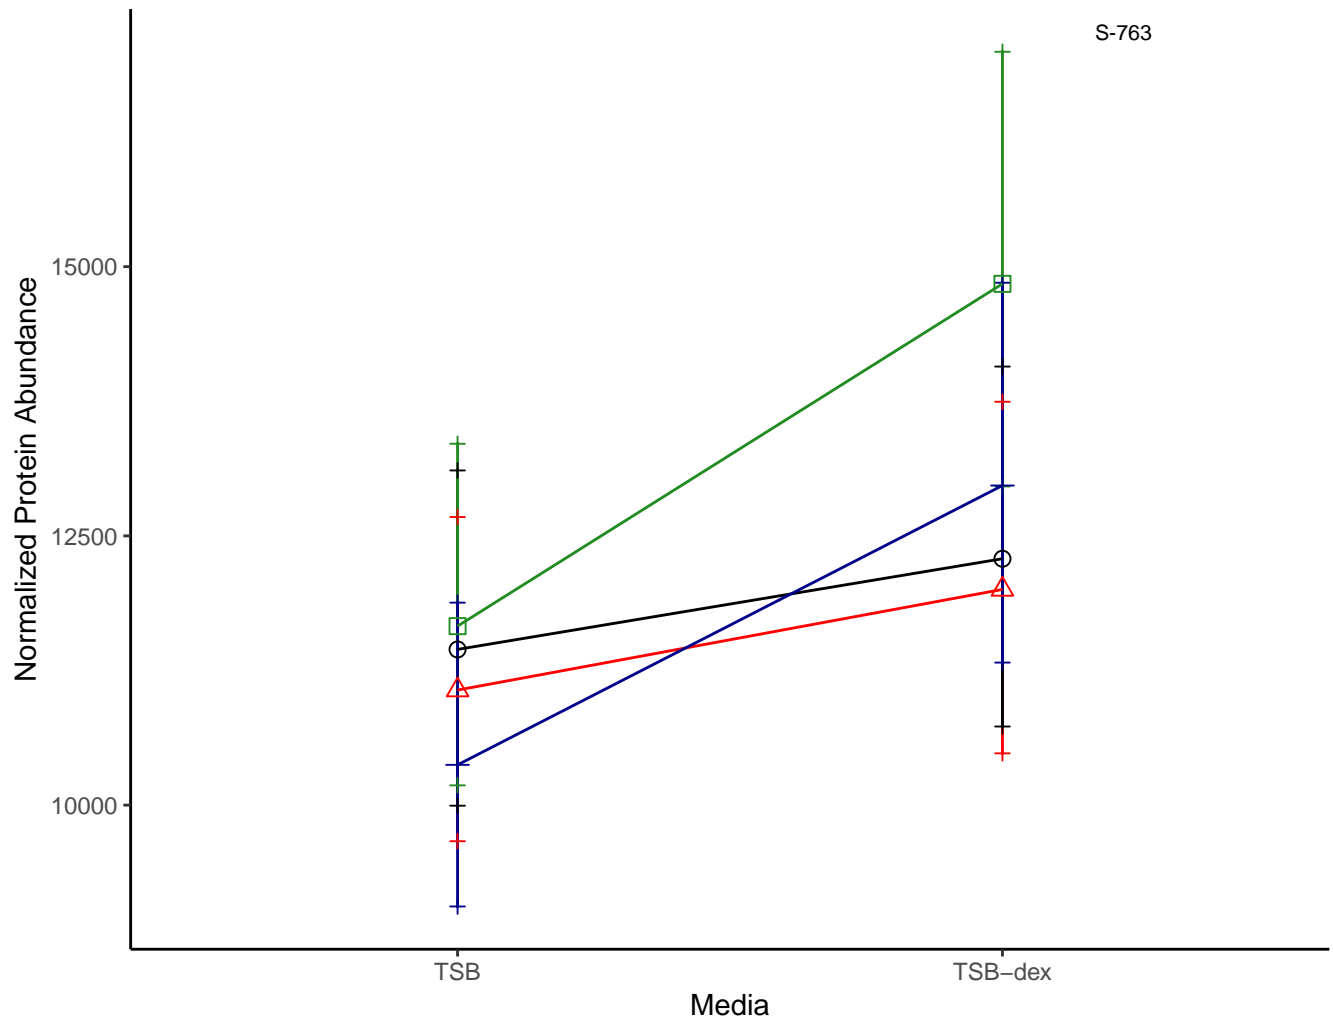

- ⊕ SA564
- △ SA564- $\Delta hptRS$
- ⊞ SA564- $\Delta ccpA$
- + SA564- $\Delta hptRS/ccpA$

# PPAT\_STAAM

S-764

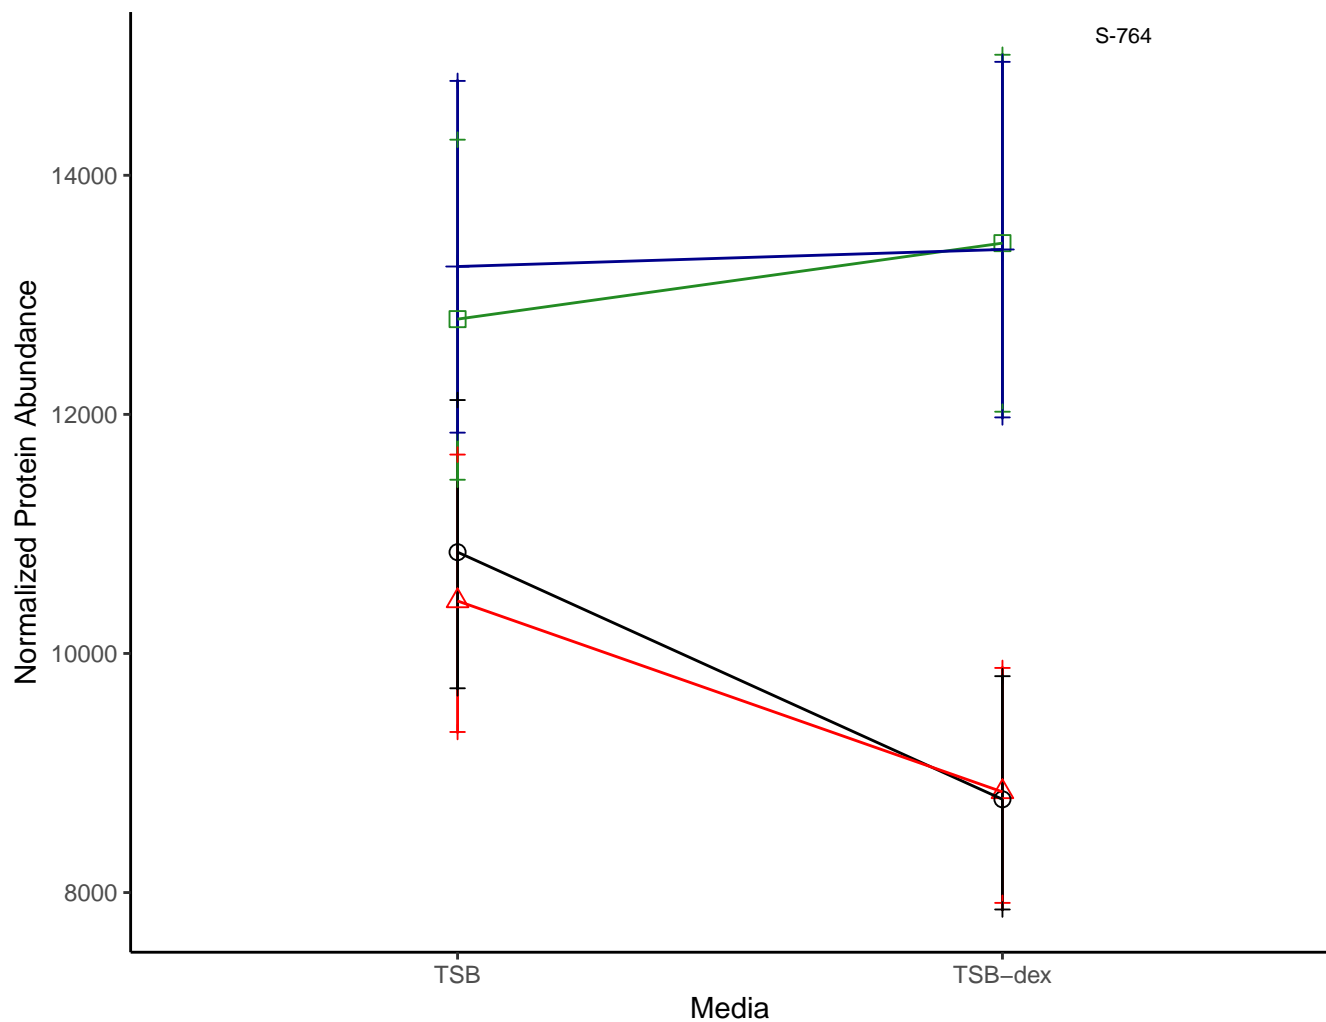

- ⊕ SA564
- △ SA564-ΔhptRS
- ⊞ SA564-ΔccpA
- + SA564-ΔhptRS/ccpA

# PPI1\_STAAM

S-765

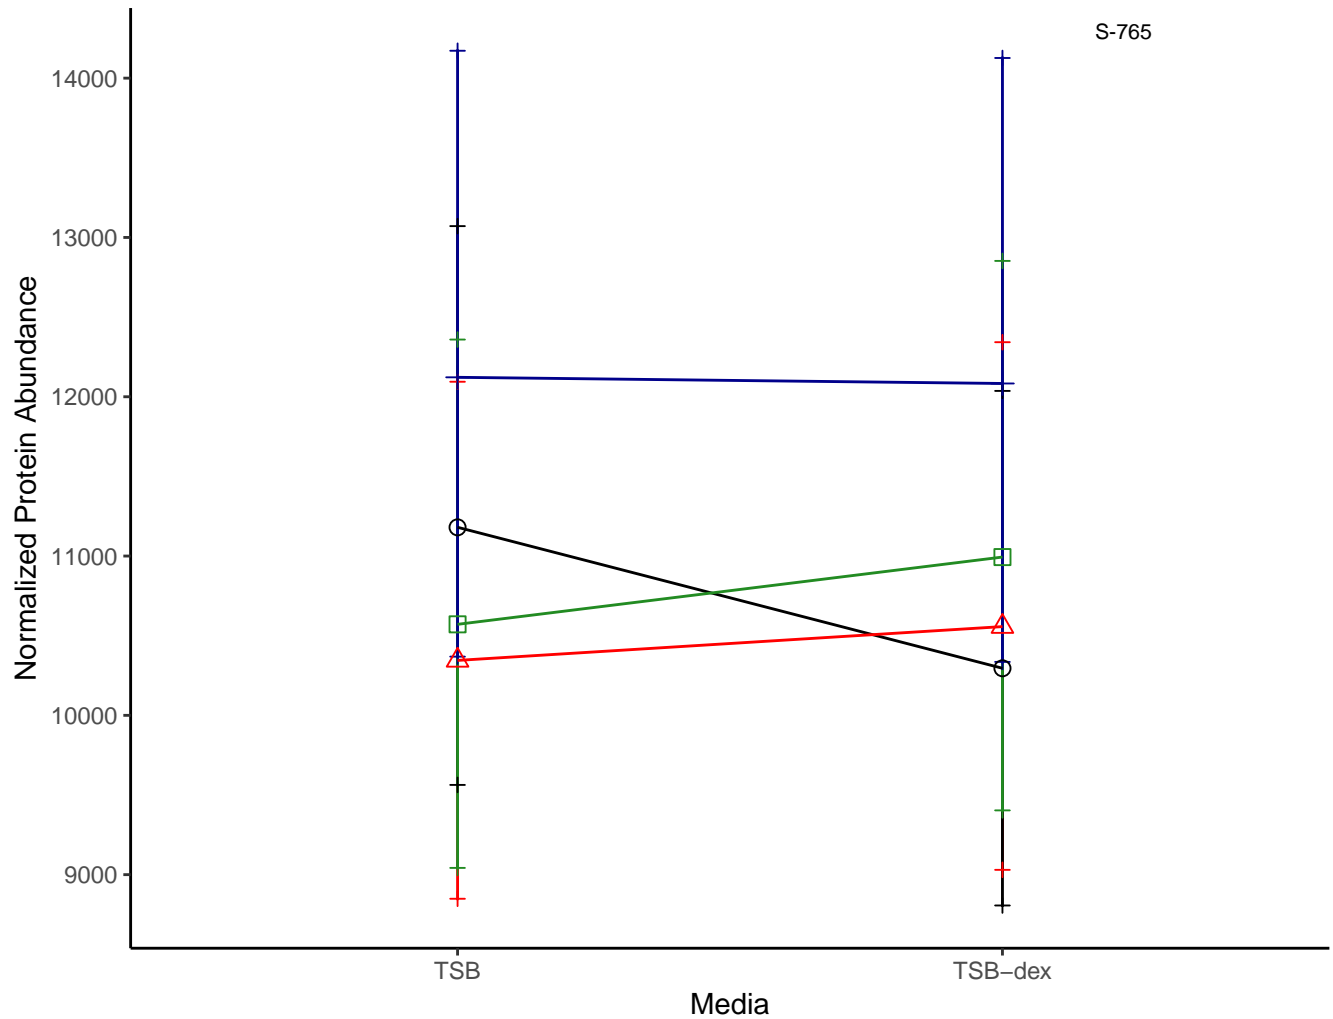

- ⊕ SA564
- △ SA564- $\Delta$ *hptRS*
- ⊞ SA564- $\Delta$ *ccpA*
- + SA564- $\Delta$ *hptRS/ccpA*

# PRSA\_STAAM

S-766

Normalized Protein Abundance

14000  
12000  
10000  
8000

TSB

Media

TSB-dex

- ⊕ SA564
- △ SA564- $\Delta$ *hptRS*
- ⊞ SA564- $\Delta$ *ccpA*
- + SA564- $\Delta$ *hptRS/ccpA*

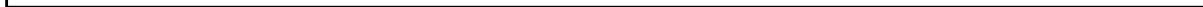

# PSTB\_STAAM

S-767

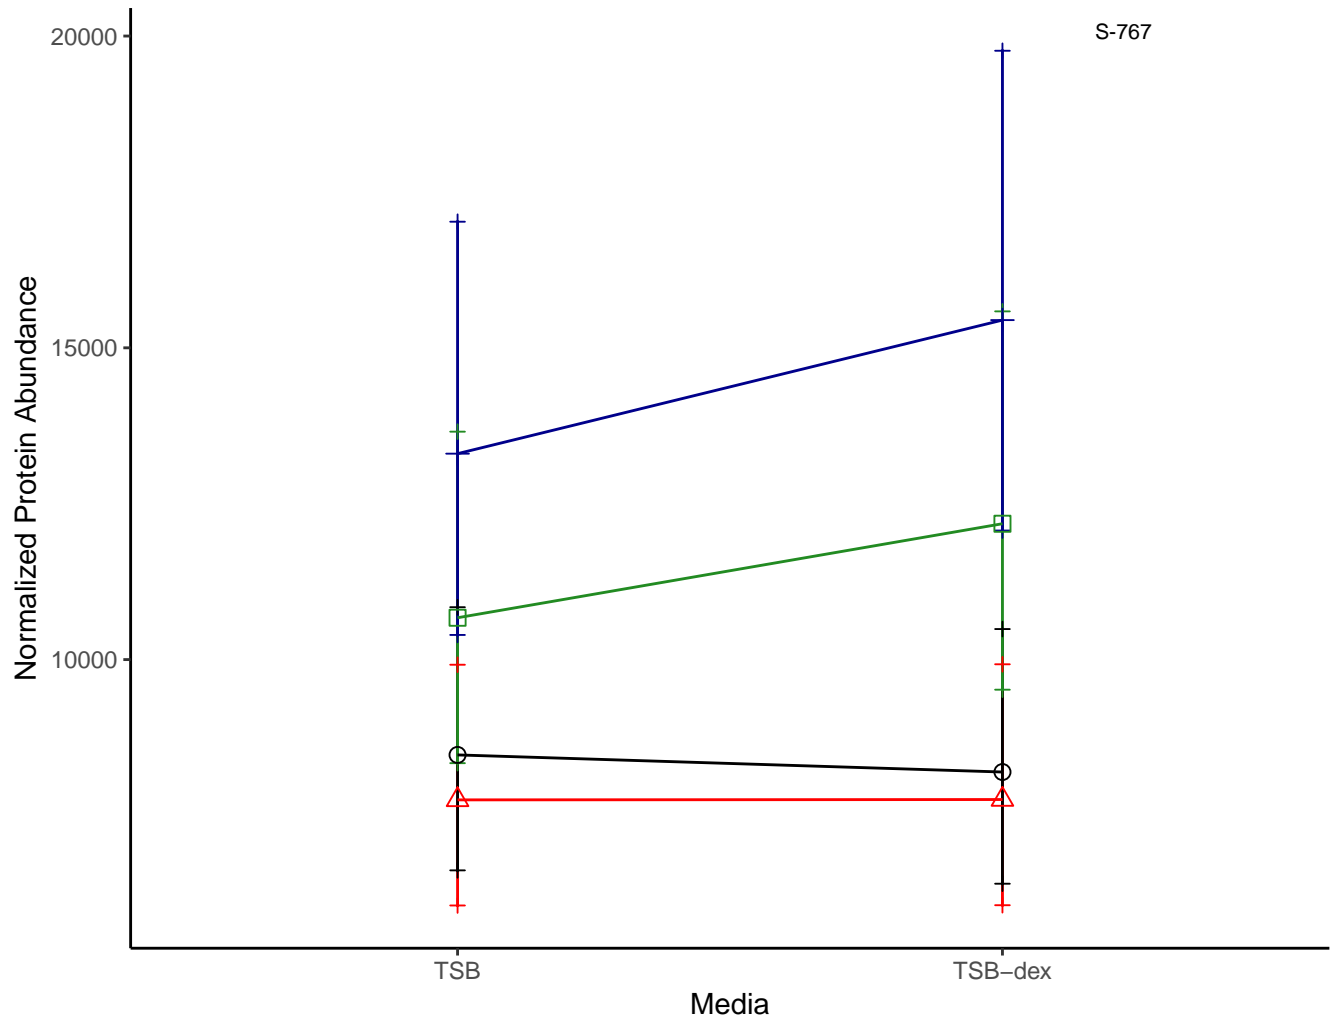

- ⊕ SA564
- △ SA564- $\Delta$ *hptRS*
- ⊞ SA564- $\Delta$ *ccpA*
- + SA564- $\Delta$ *hptRS/ccpA*

# PSTS\_STAAM

S-768

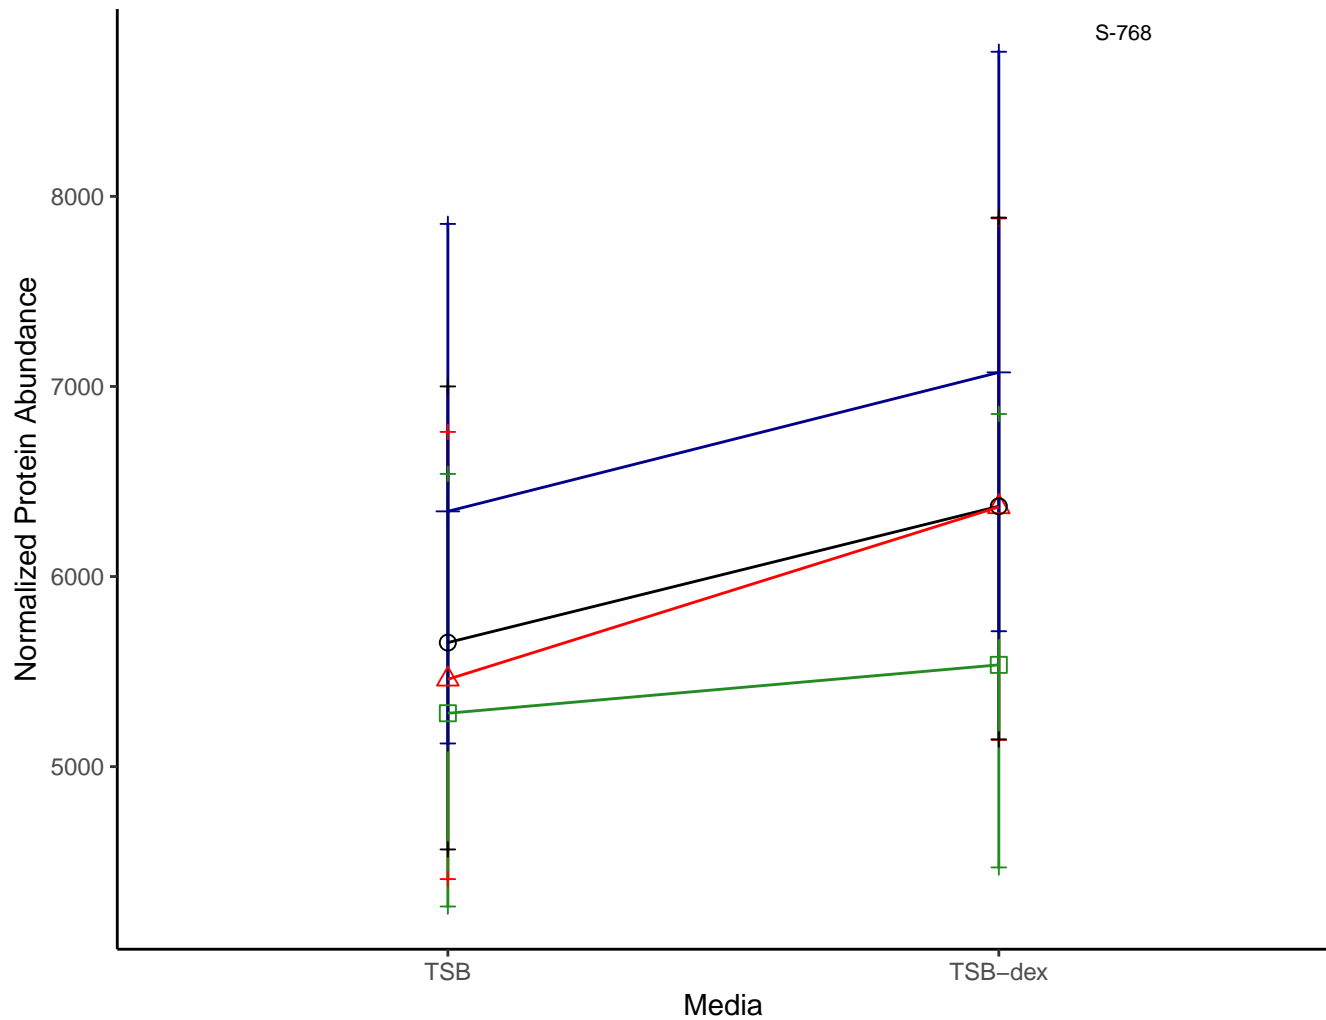

- ⊕ SA564
- △ SA564- $\Delta hptRS$
- ⊞ SA564- $\Delta ccpA$
- + SA564- $\Delta hptRS/ccpA$



# PT1\_STAAM

S-769

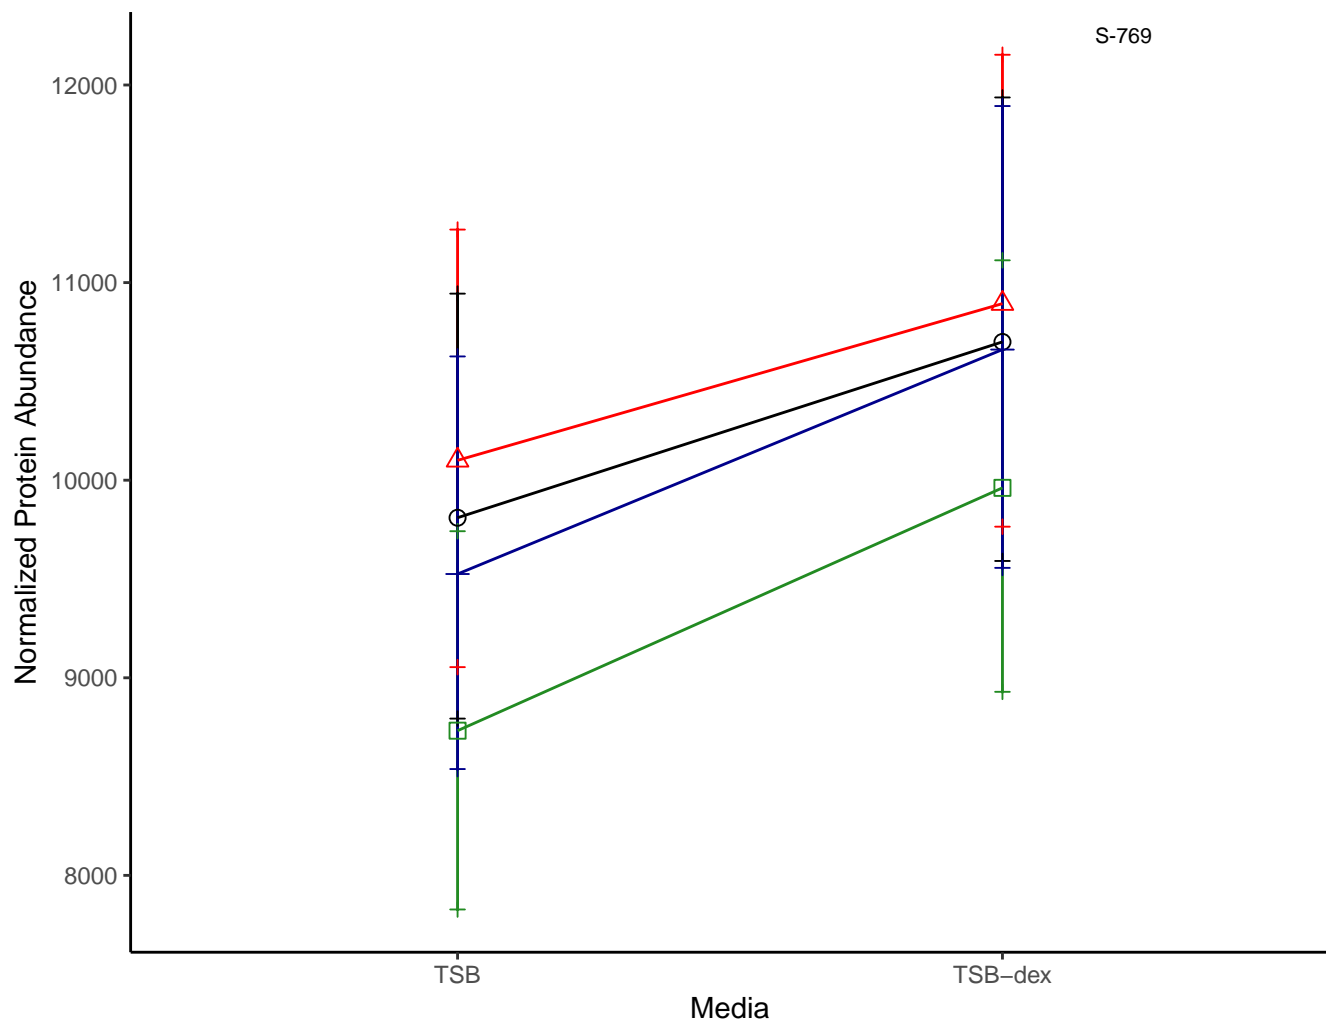

- ⊕ SA564
- △ SA564-ΔhptRS
- ⊞ SA564-ΔccpA
- + SA564-ΔhptRS/ccpA

## PTAS\_STAAM

S-770

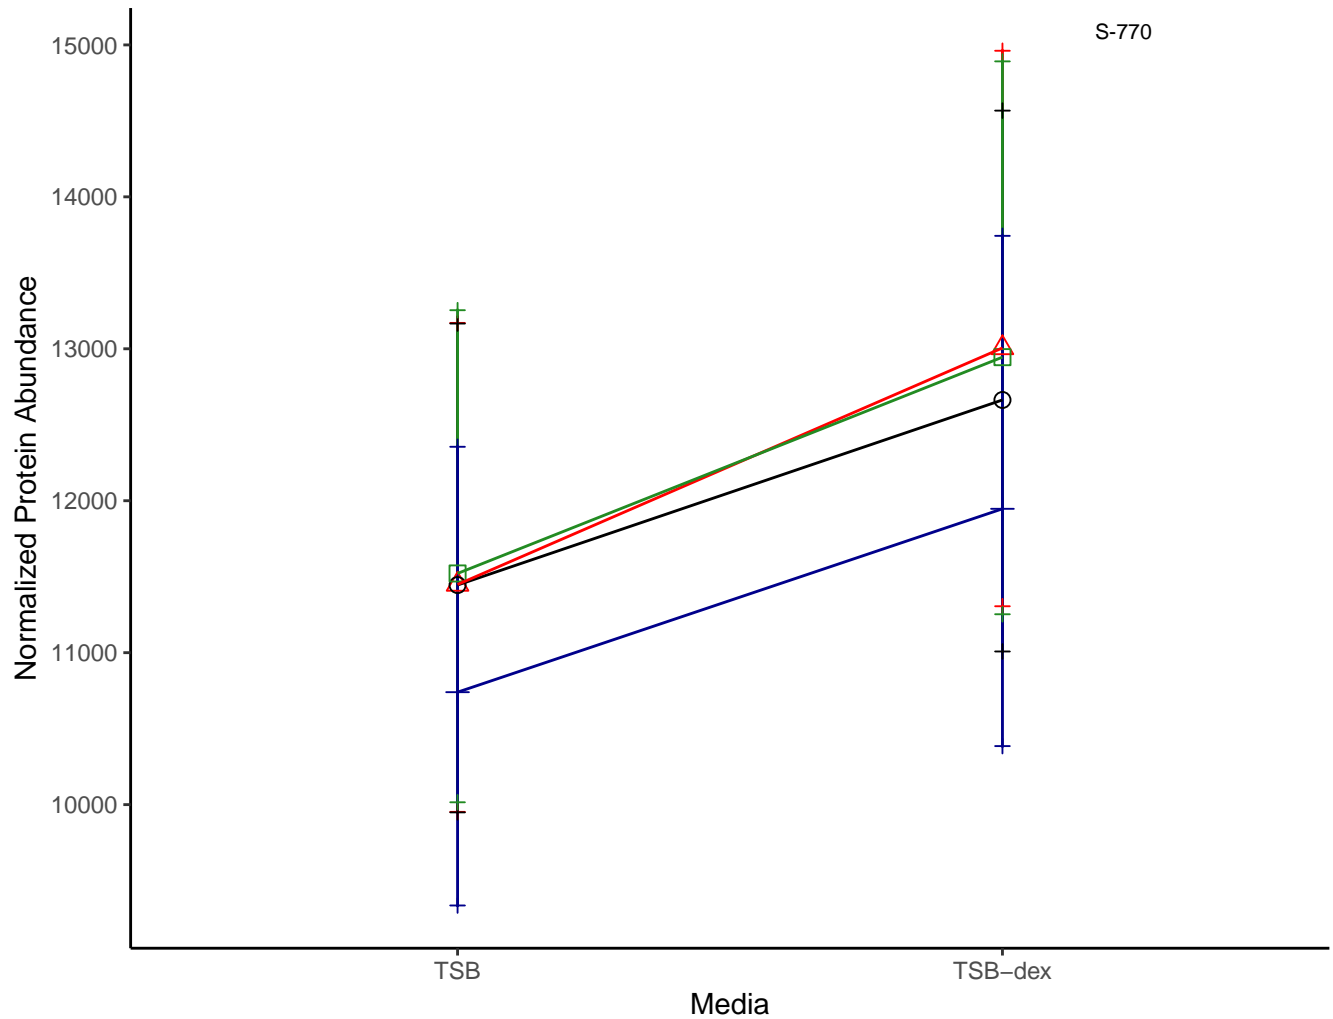

- SA564
- SA564- $\Delta$ *hptRS*
- SA564- $\Delta$ *ccpA*
- SA564- $\Delta$ *hptRS/ccpA*

# PTG3C\_STAAM

S-771

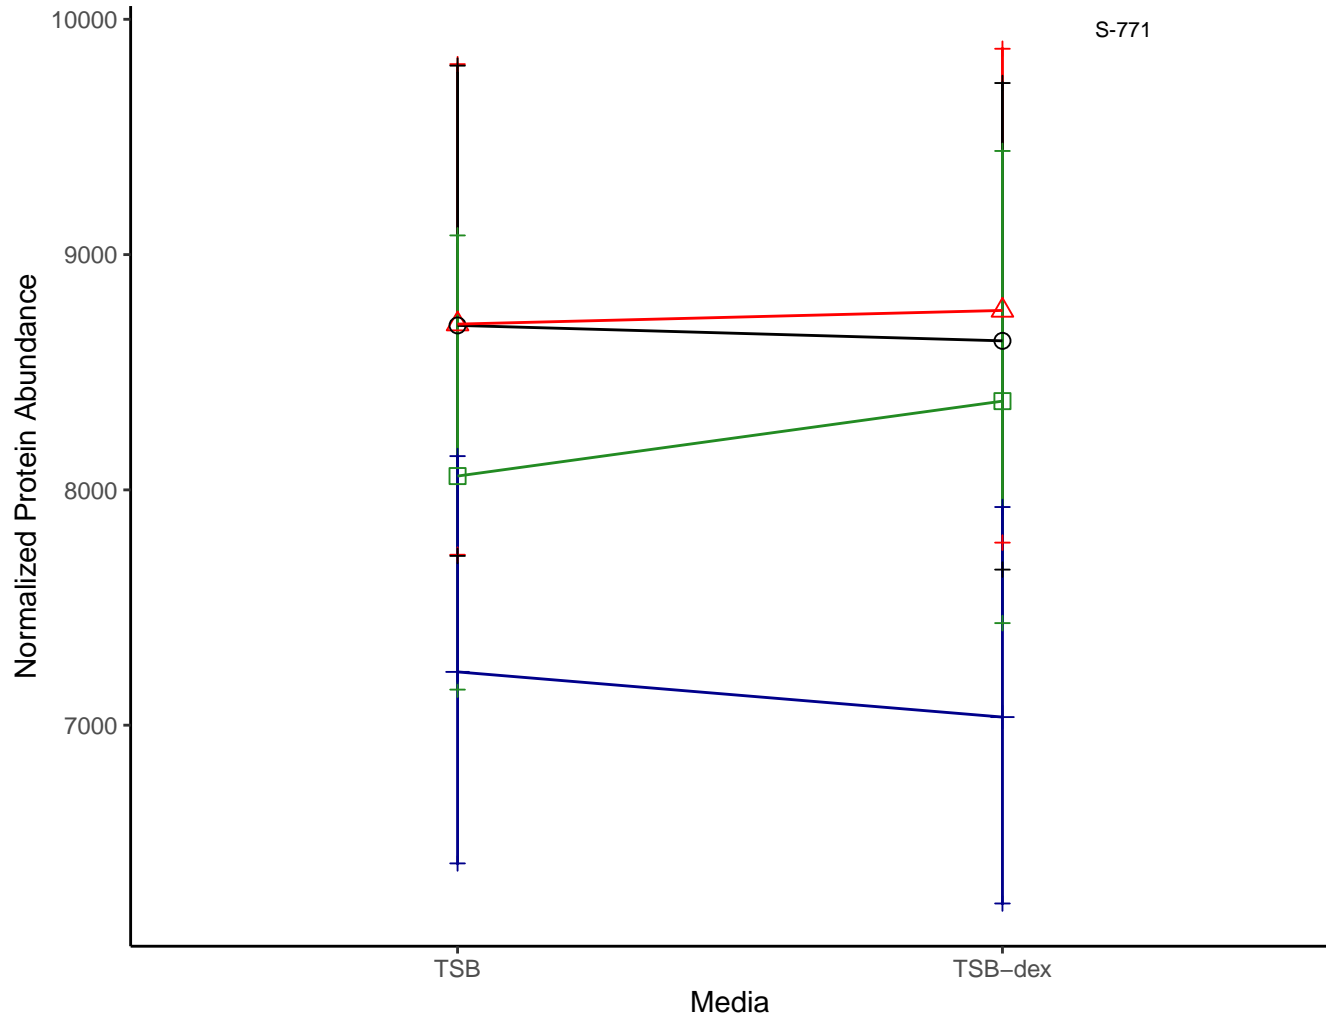

- SA564
- SA564- $\Delta$ *hptRS*
- SA564- $\Delta$ *ccpA*
- SA564- $\Delta$ *hptRS/ccpA*

## PTGA\_STAAM

S-772

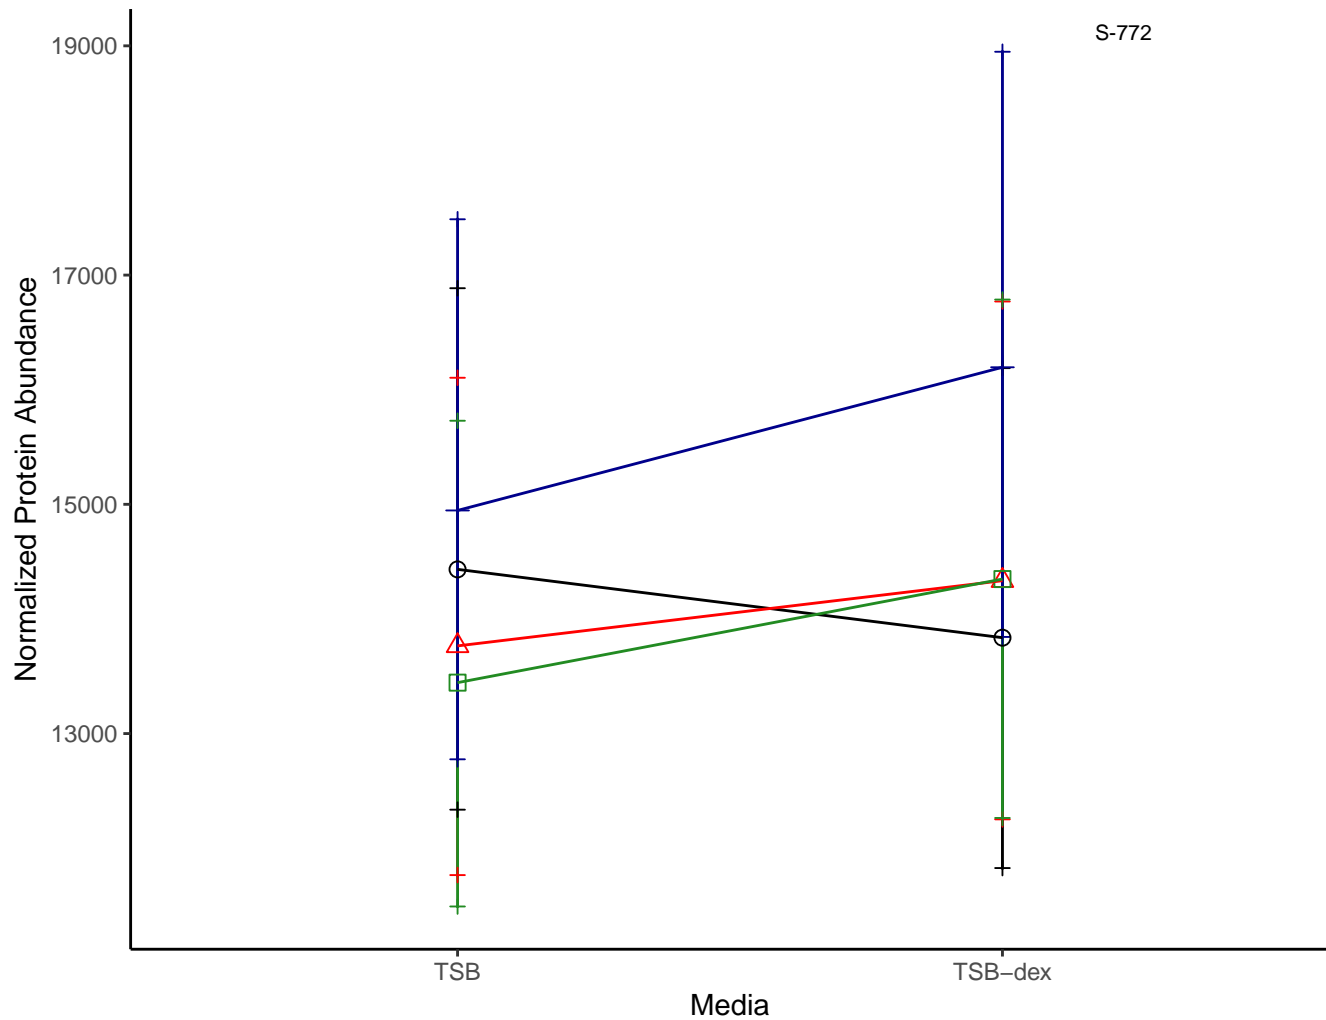

- ⊕ SA564
- △ SA564- $\Delta$ *hptRS*
- ⊞ SA564- $\Delta$ *ccpA*
- + SA564- $\Delta$ *hptRS/ccpA*

# PTH\_STAAM

S-773

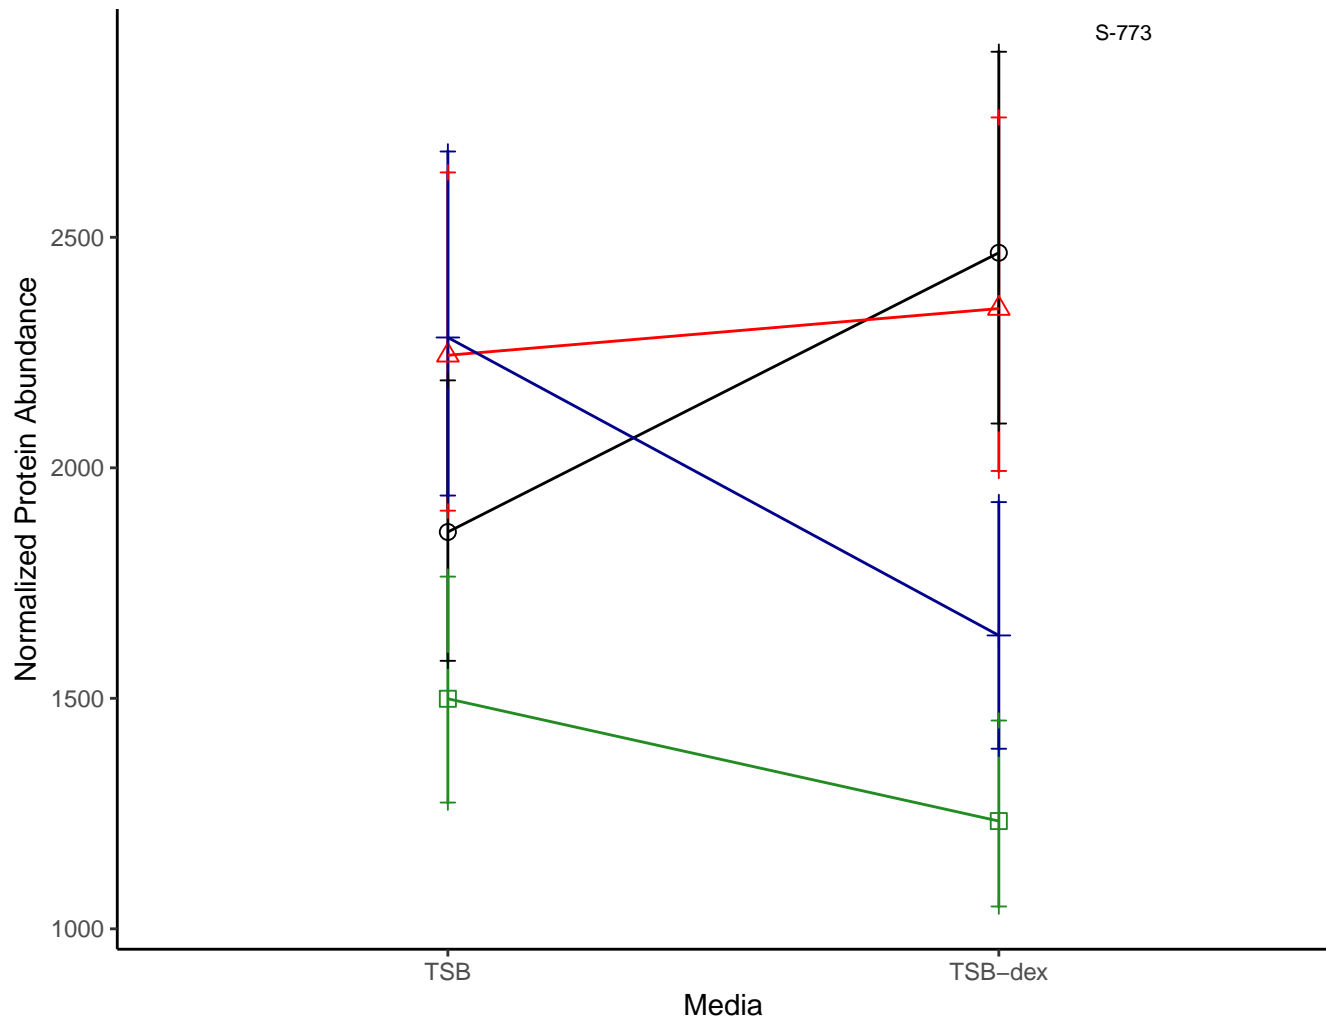

- ⊕ SA564
- △ SA564-ΔhptRS
- ⊞ SA564-ΔccpA
- + SA564-ΔhptRS/ccpA

# PTHP\_STAAM

S-774

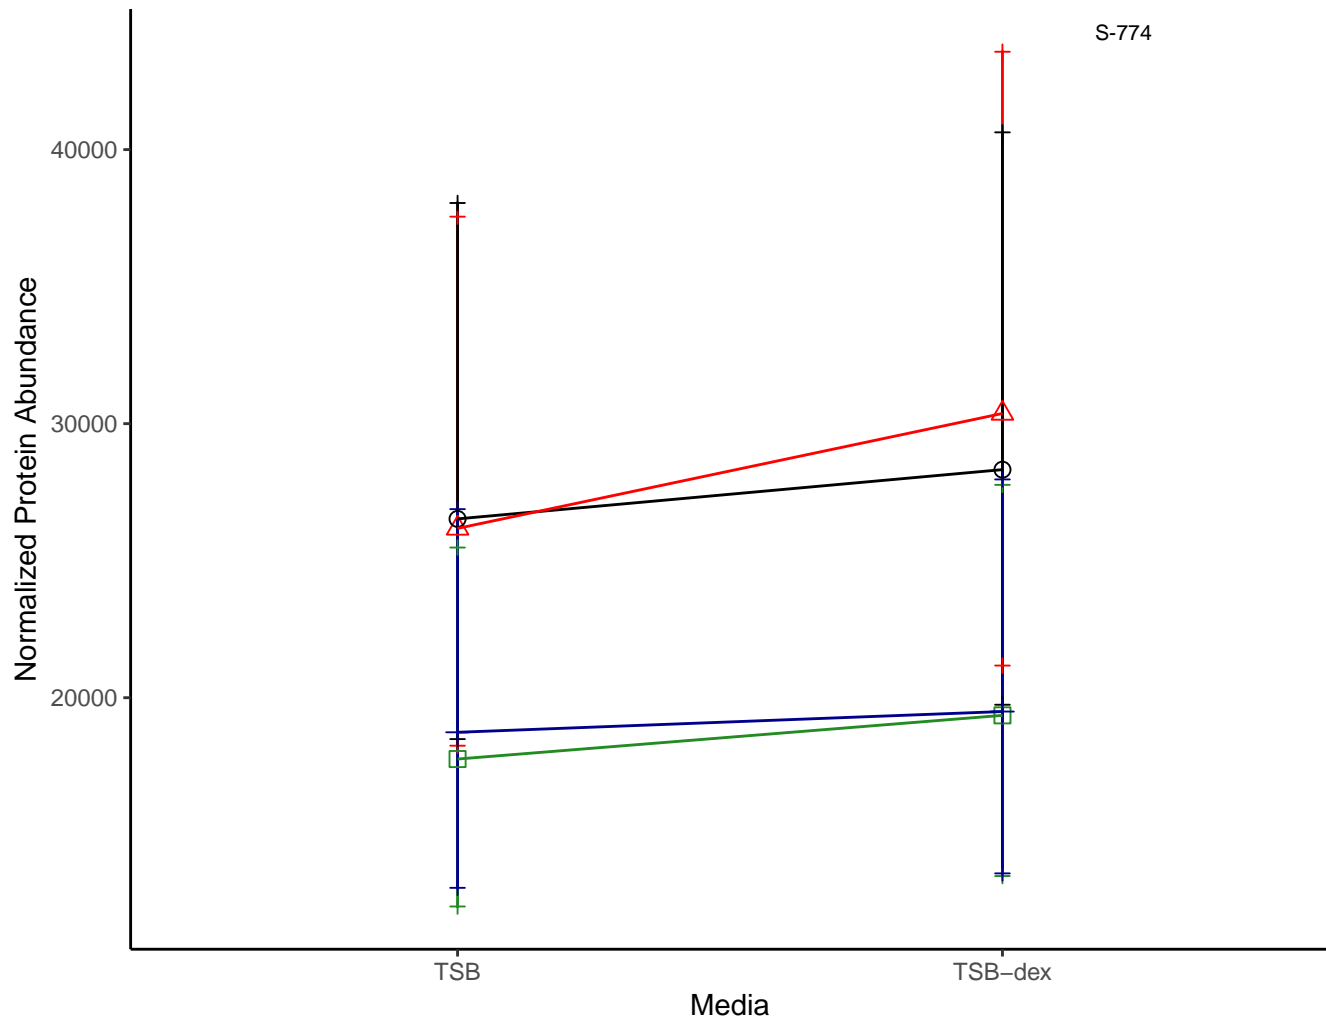

- ⊕ SA564
- △ SA564-ΔhptRS
- ⊞ SA564-ΔccpA
- + SA564-ΔhptRS/ccpA

# PTMA\_STAAM

S-775

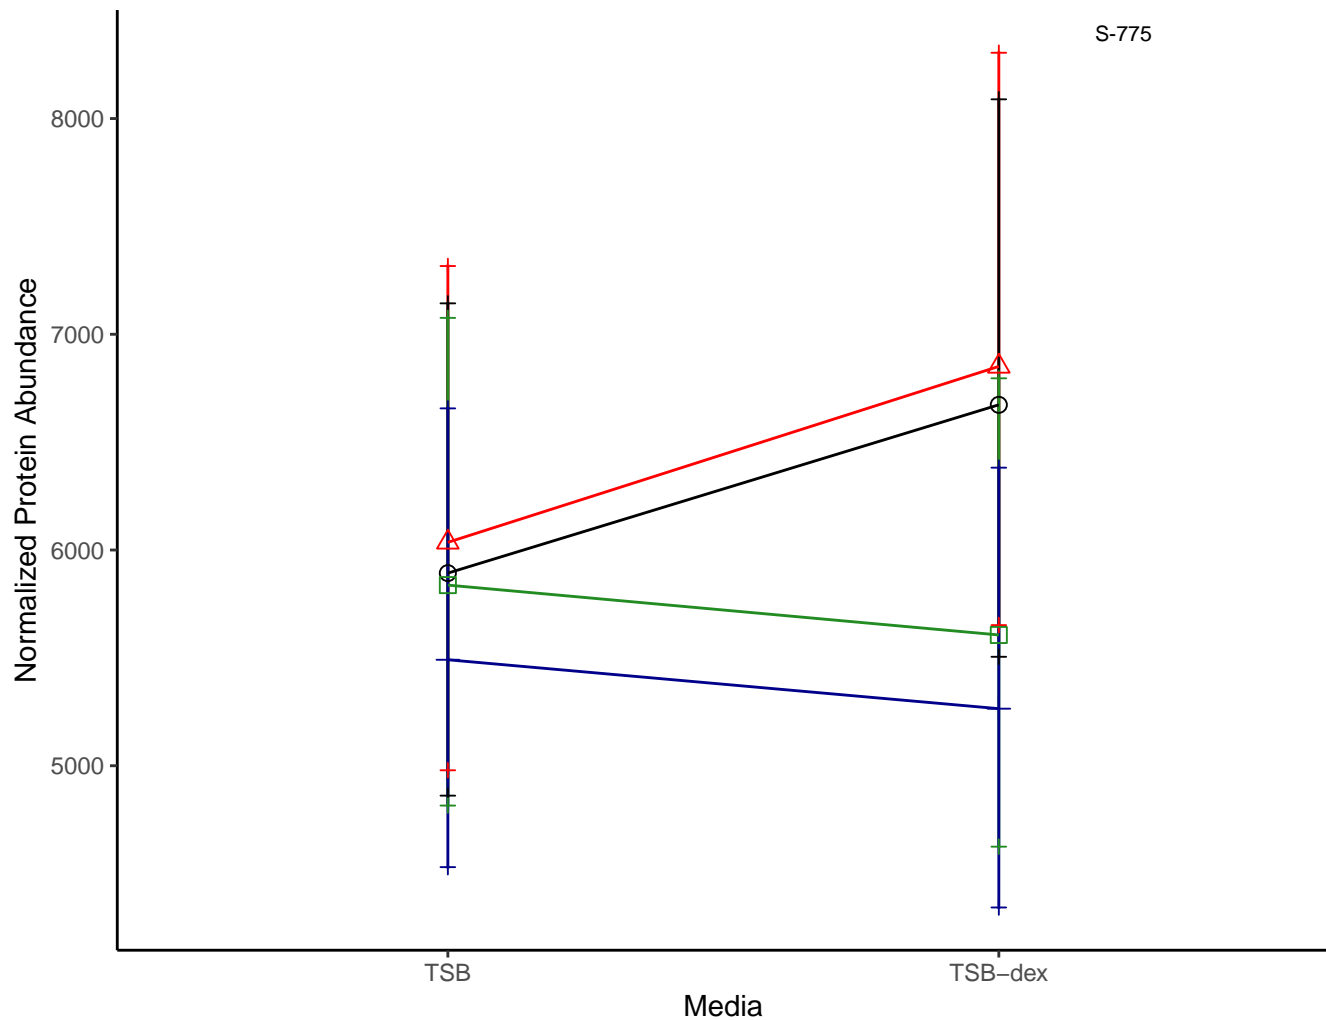

- ⊕ SA564
- △ SA564- $\Delta$ *hptRS*
- ⊞ SA564- $\Delta$ *ccpA*
- + SA564- $\Delta$ *hptRS/ccpA*

# PUR1\_STAAM

S-776

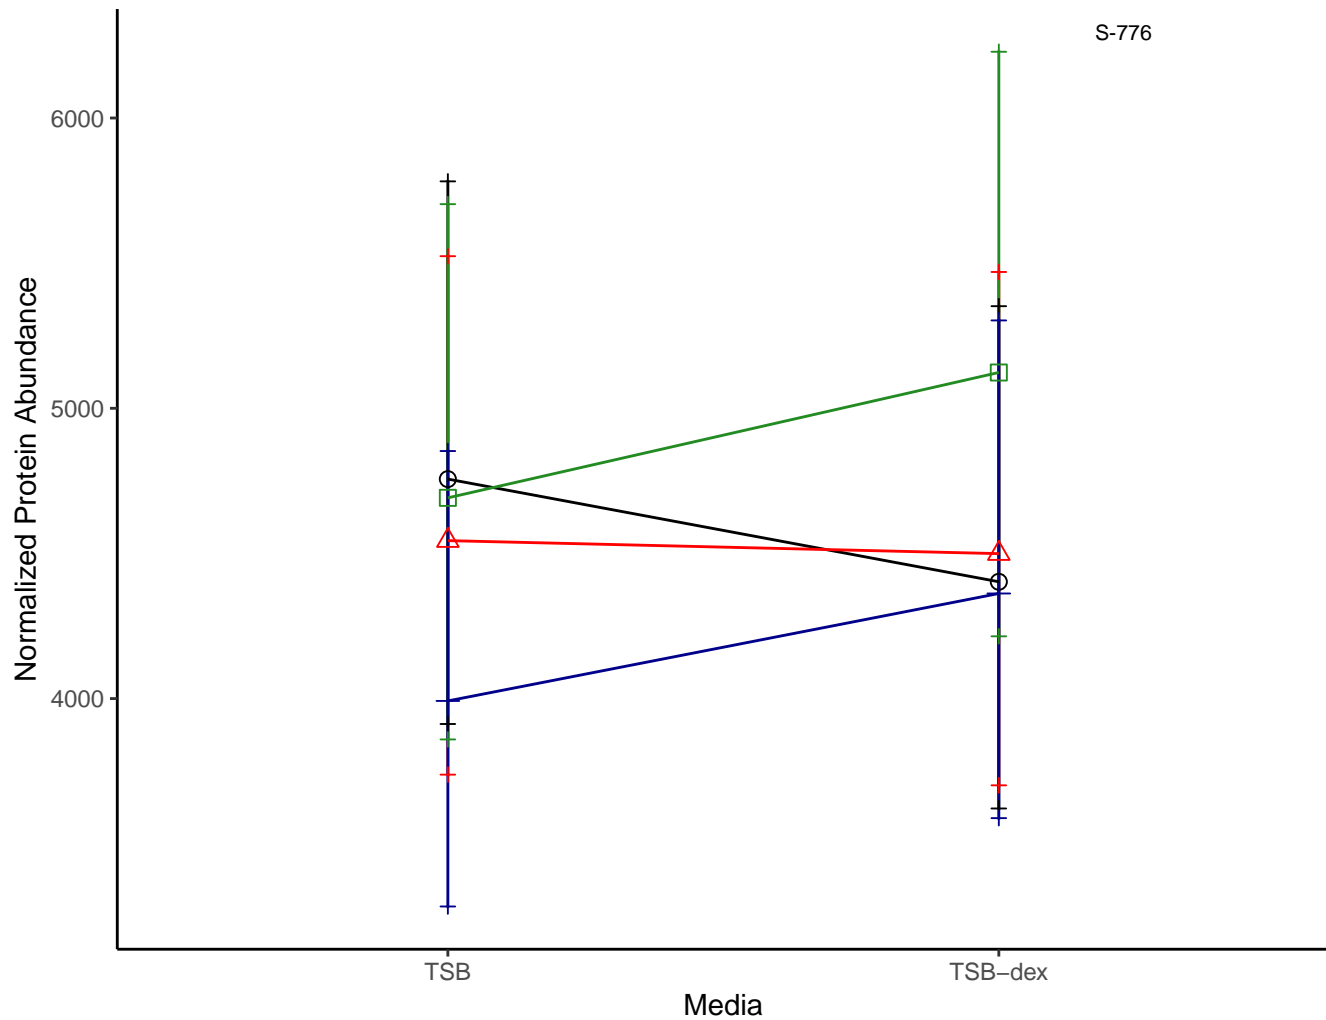

- ⊕ SA564
- △ SA564- $\Delta$ *hptRS*
- ⊞ SA564- $\Delta$ *ccpA*
- + SA564- $\Delta$ *hptRS/ccpA*



# PUR2\_STAAM

S-777

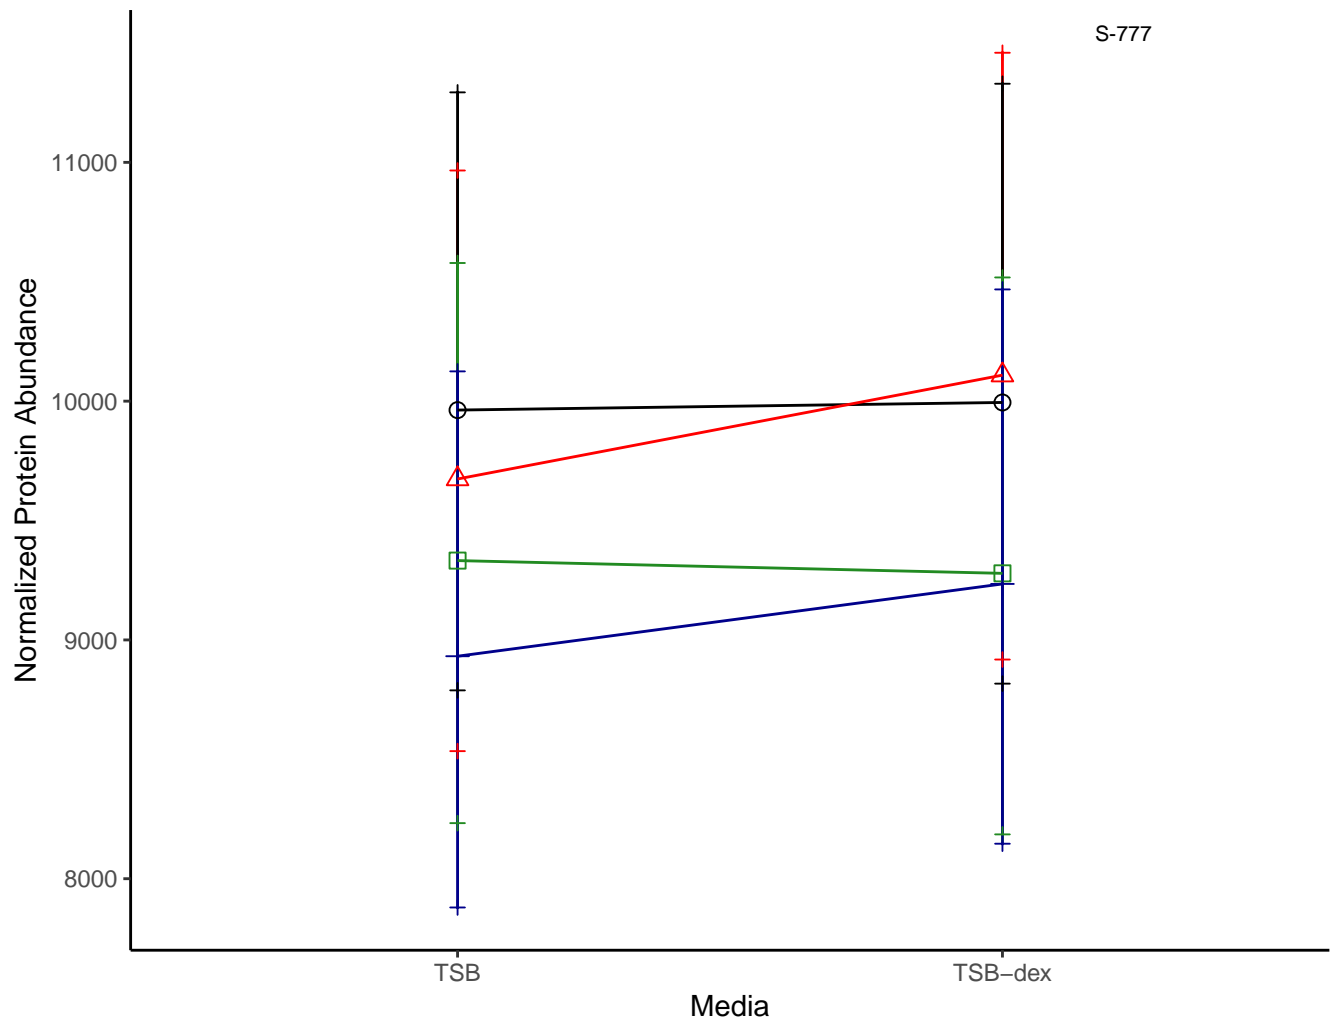

- ⊕ SA564
- △ SA564-ΔhptRS
- ⊞ SA564-ΔccpA
- + SA564-ΔhptRS/ccpA

# PUR3\_STAAM

S-778

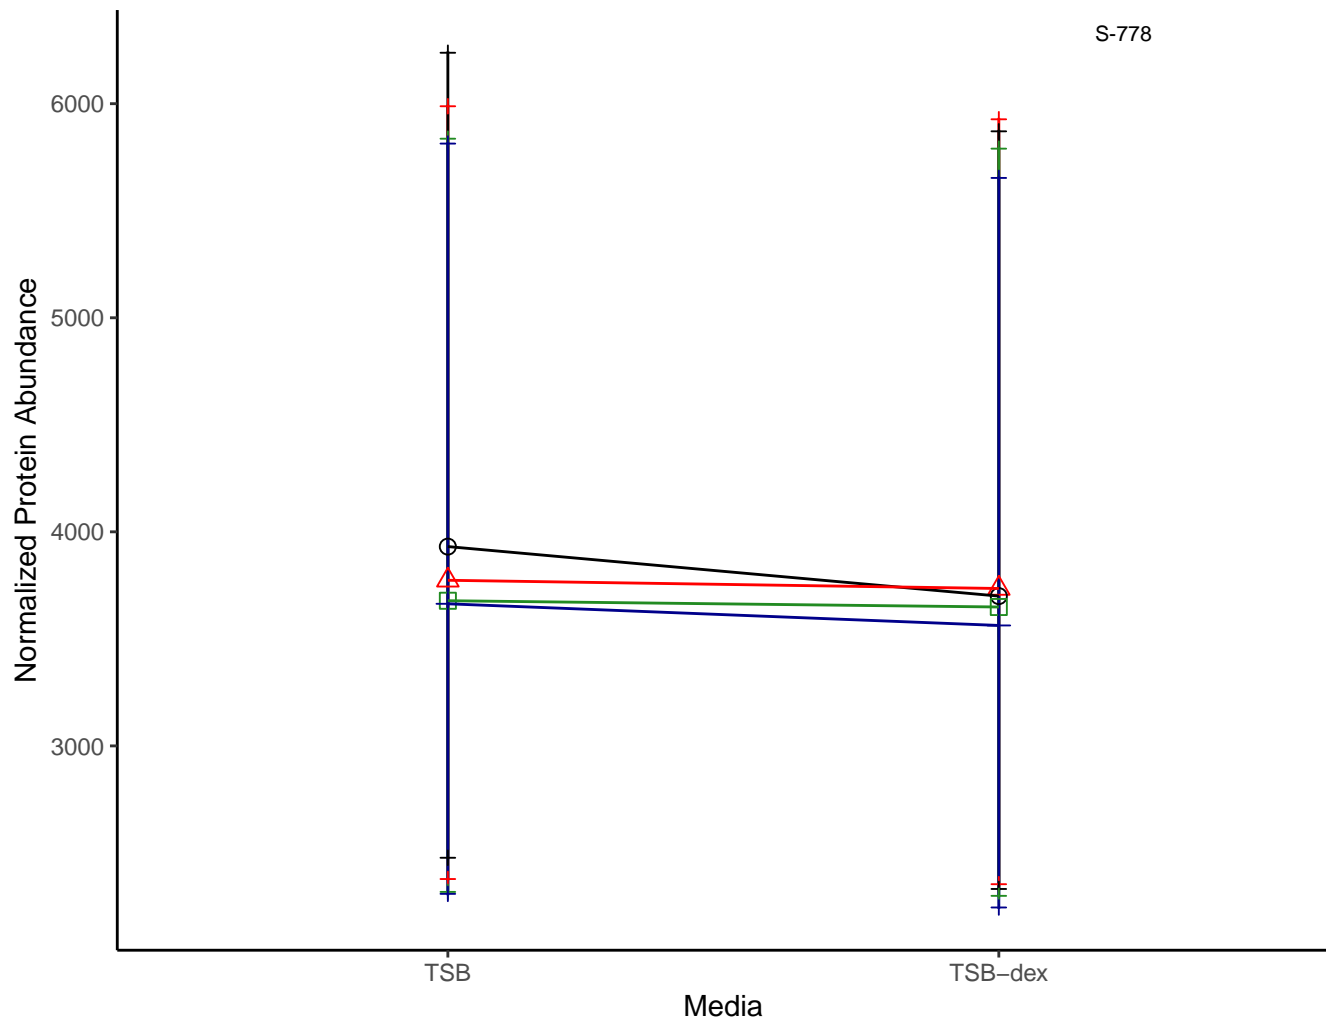

- ⊕ SA564
- △ SA564- $\Delta$ *hptRS*
- ⊞ SA564- $\Delta$ *ccpA*
- + SA564- $\Delta$ *hptRS/ccpA*

# PUR5\_STAAM

S-779

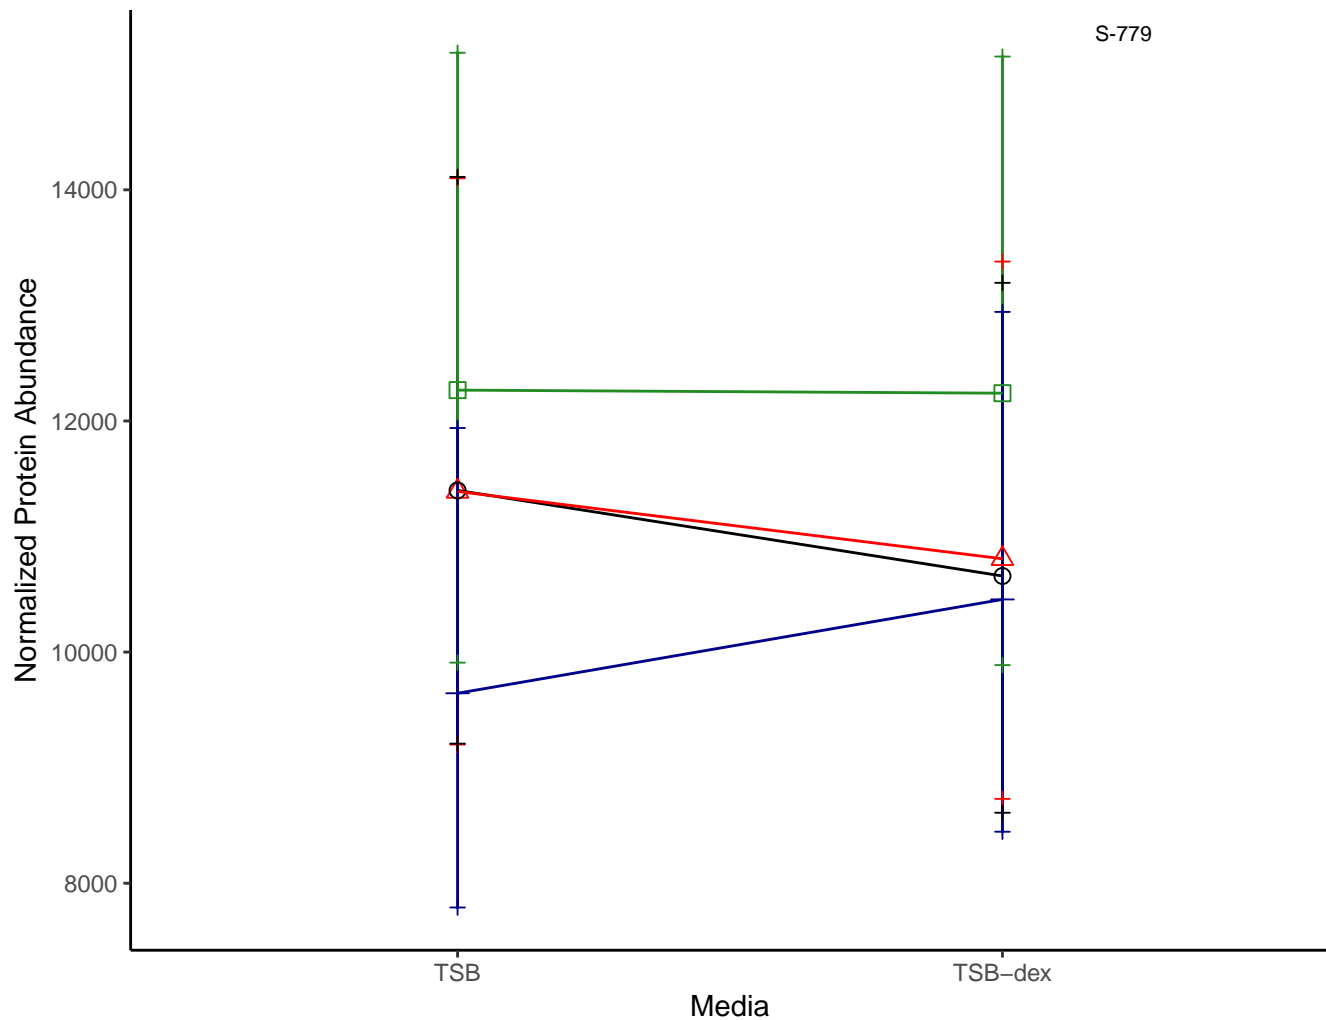

- SA564
- SA564- $\Delta$ *hptRS*
- SA564- $\Delta$ *ccpA*
- SA564- $\Delta$ *hptRS/ccpA*

# PUR7\_STAAM

S-780

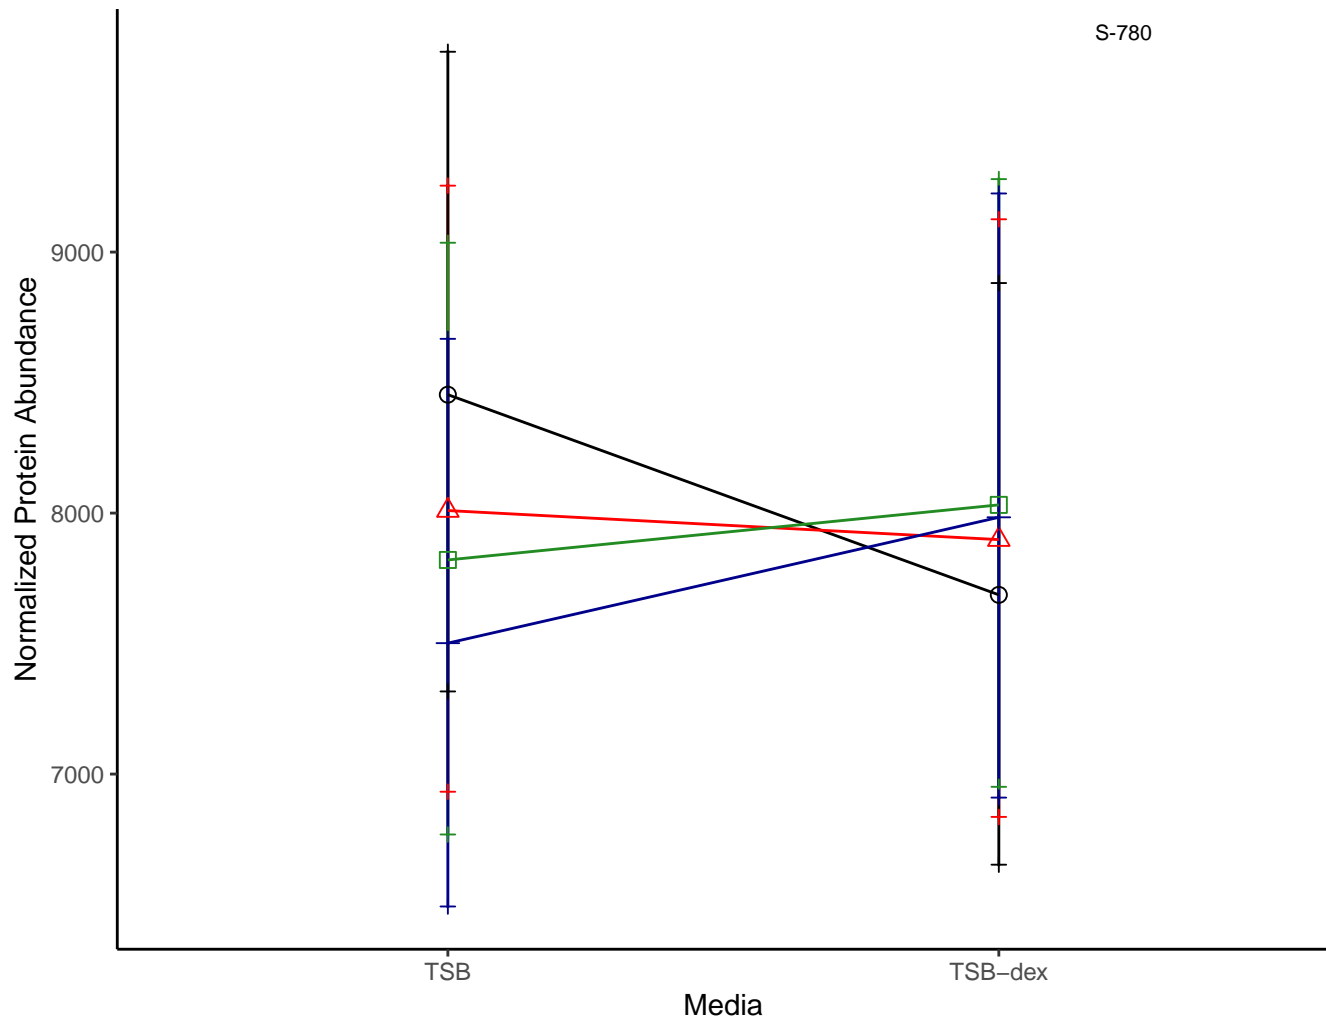

- ⊕ SA564
- △ SA564- $\Delta hptRS$
- ⊞ SA564- $\Delta ccpA$
- + SA564- $\Delta hptRS/ccpA$

# PUR8\_STAAM

S-781

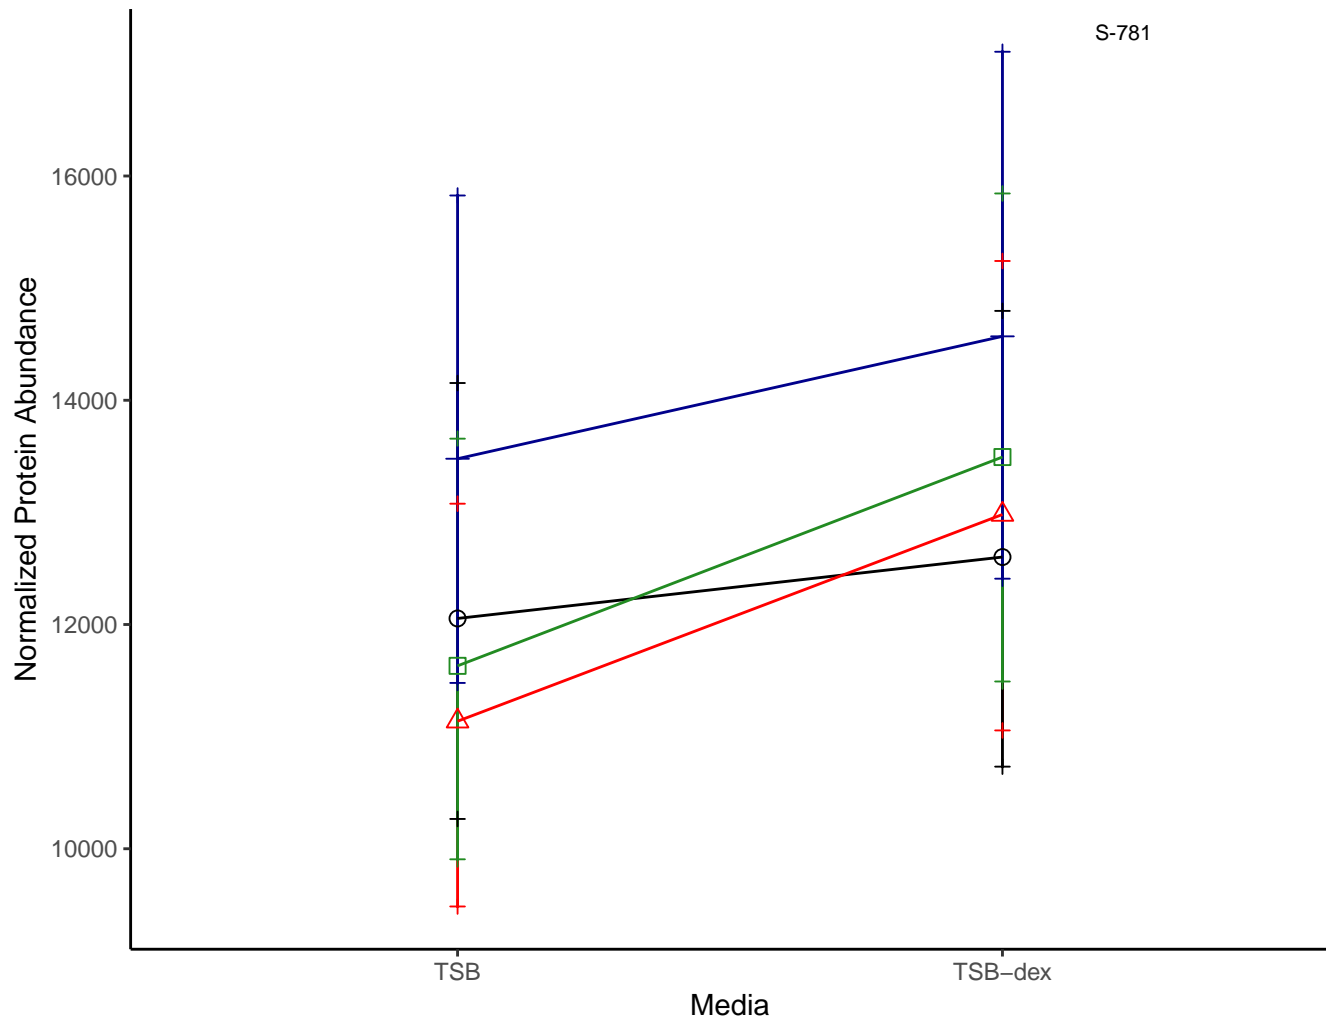

- ⊕ SA564
- △ SA564-ΔhptRS
- SA564-ΔccpA
- + SA564-ΔhptRS/ccpA

# PUR9\_STAAM

S-782

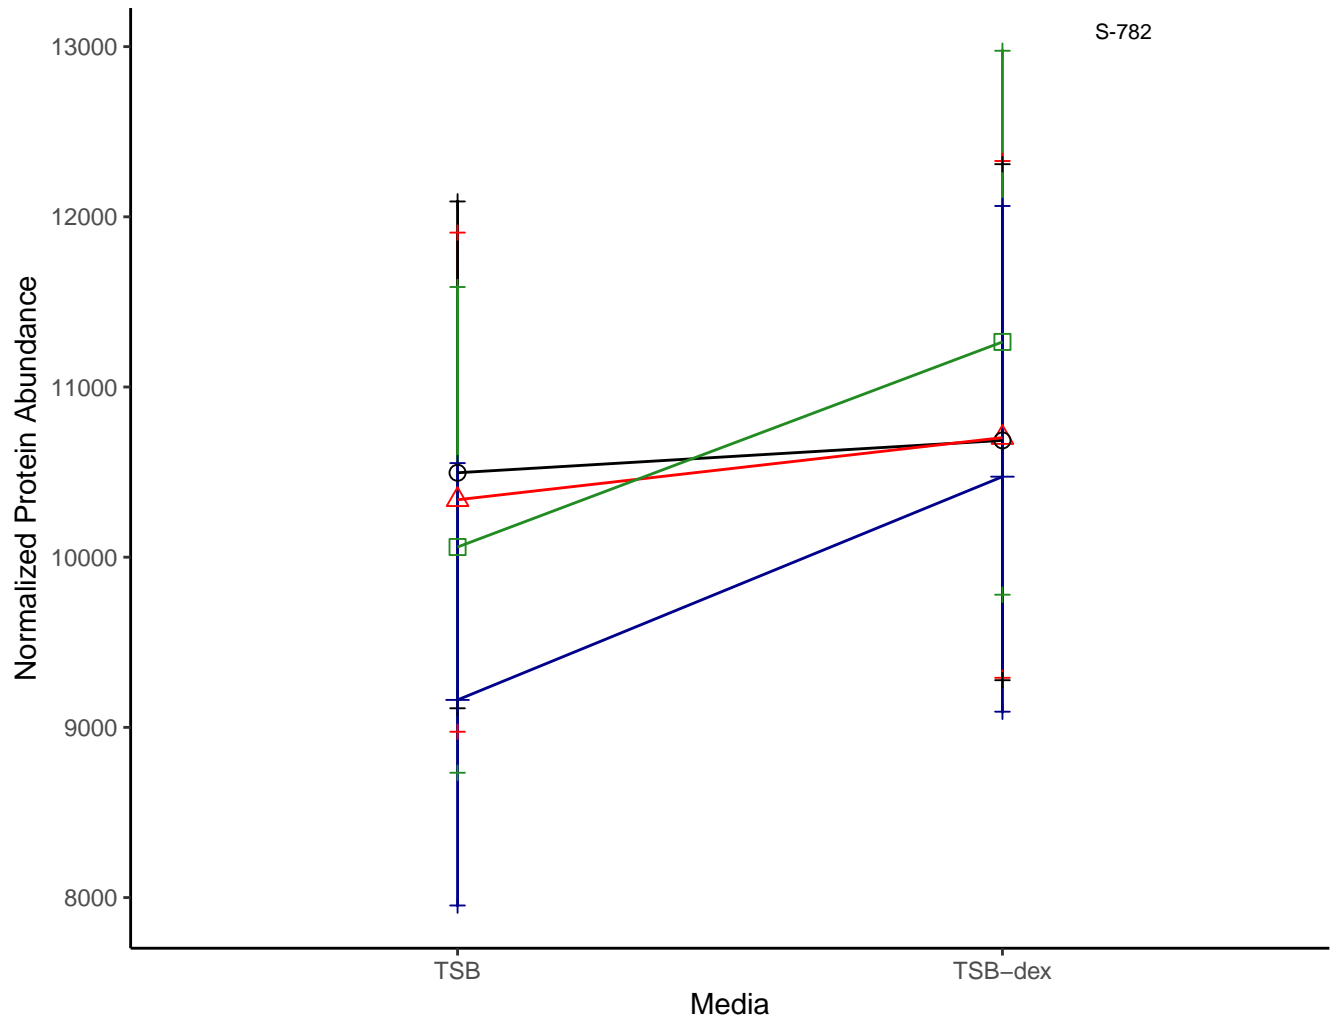

- SA564
- SA564- $\Delta$ *hptRS*
- SA564- $\Delta$ *ccpA*
- SA564- $\Delta$ *hptRS/ccpA*

# PURA\_STAAM

S-783

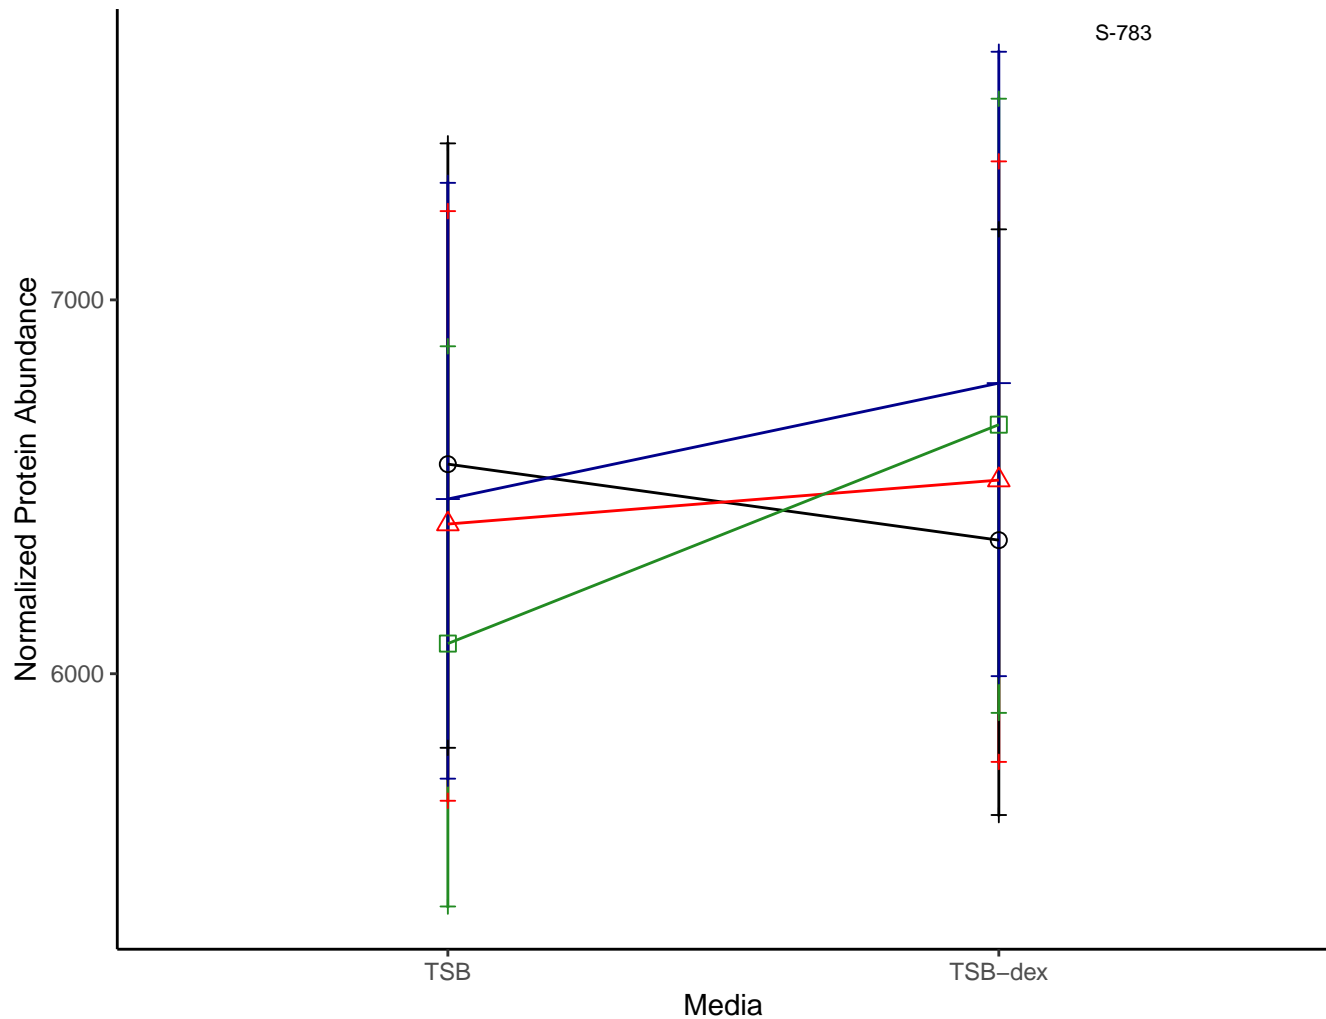

- ⊕ SA564
- △ SA564-ΔhptRS
- ⊞ SA564-ΔccpA
- + SA564-ΔhptRS/ccpA

# PURK\_STAAM

S-784

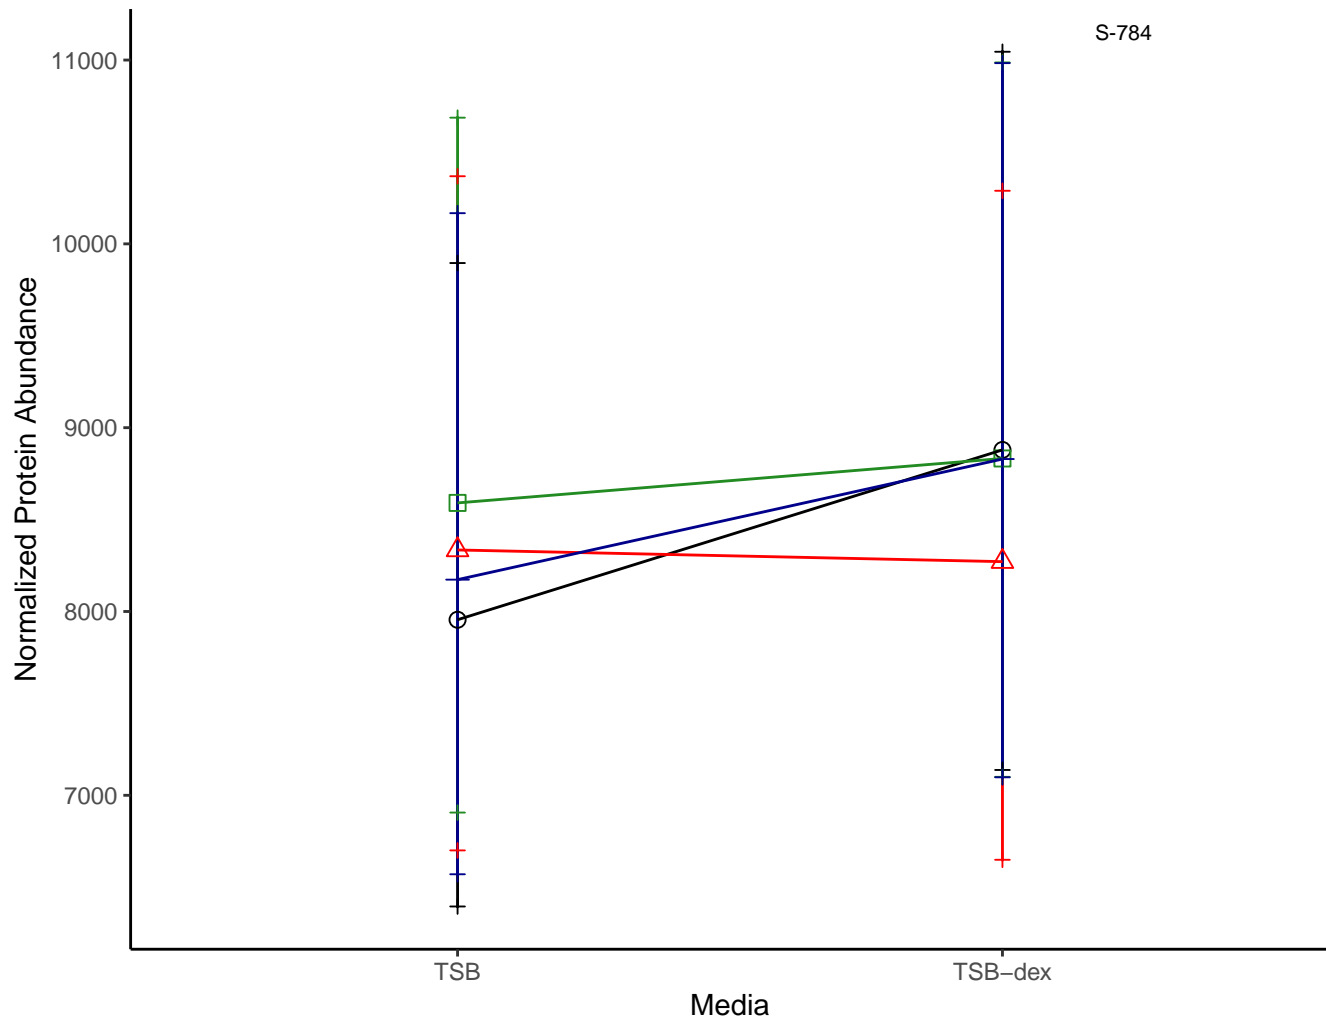

- ⊕ SA564
- △ SA564- $\Delta$ *hptRS*
- ⊞ SA564- $\Delta$ *ccpA*
- + SA564- $\Delta$ *hptRS/ccpA*



# PURL\_STAAM

S-785

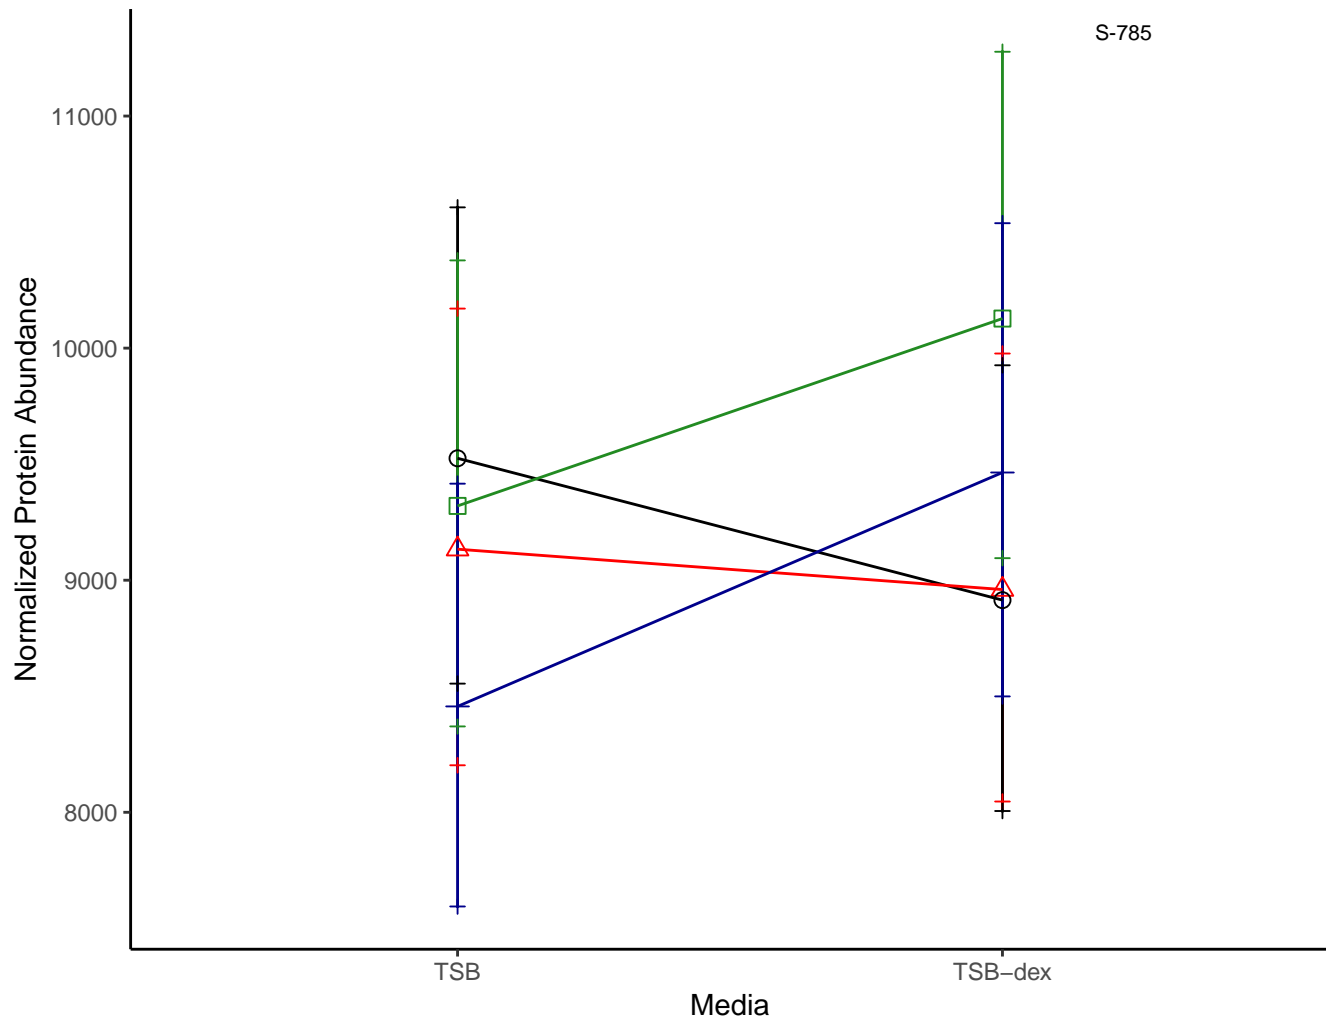

- ⊕ SA564
- △ SA564-ΔhptRS
- ⊞ SA564-ΔccpA
- + SA564-ΔhptRS/ccpA

# PURQ\_STAAM

S-786

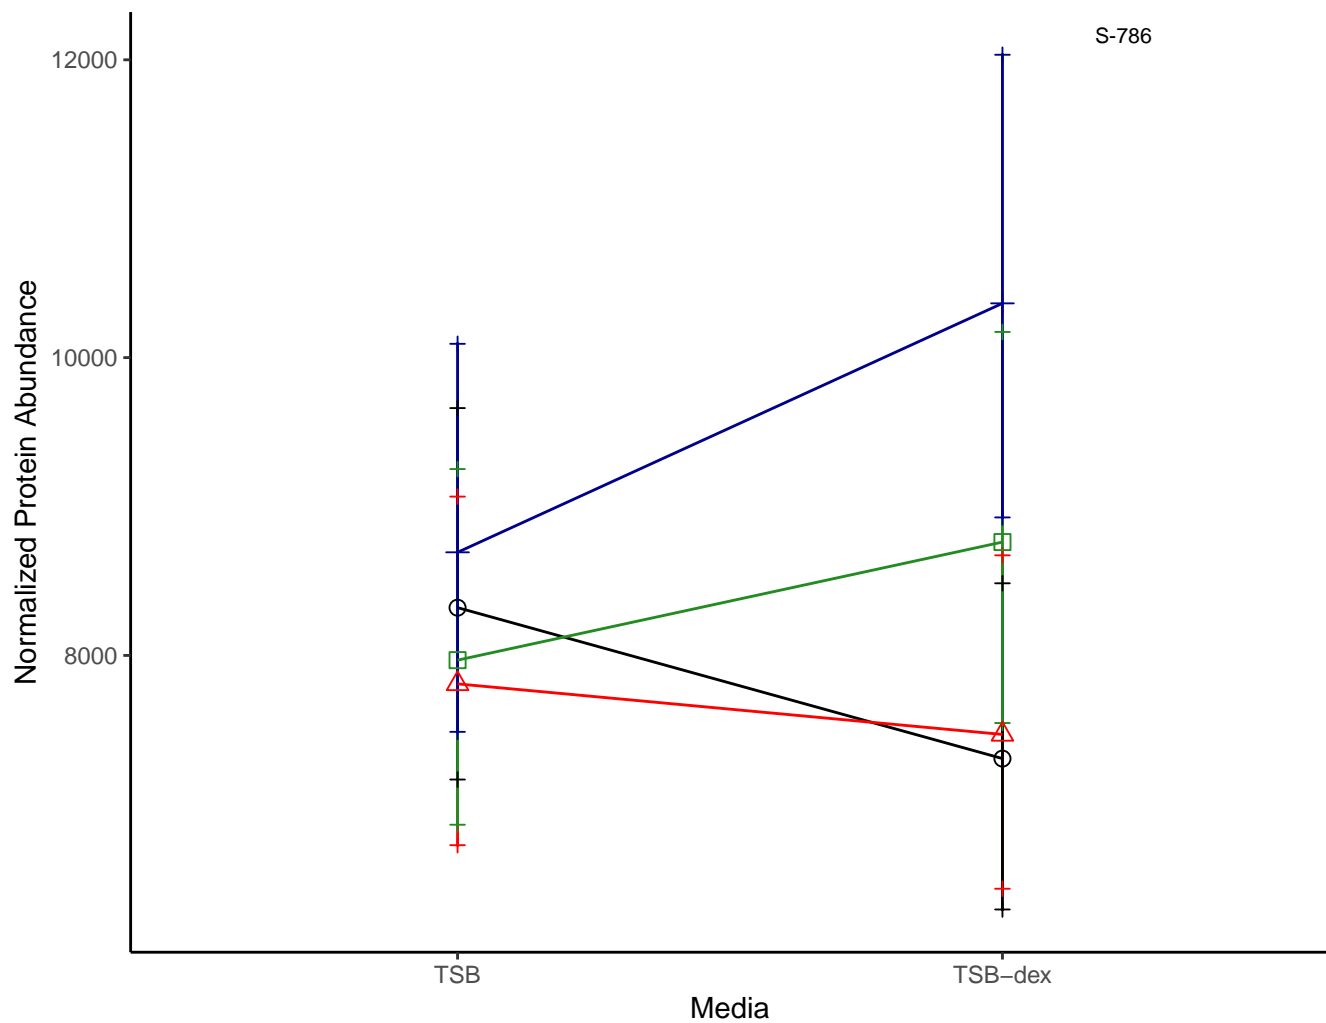

- ⊕ SA564
- △ SA564-ΔhptRS
- ⊞ SA564-ΔccpA
- + SA564-ΔhptRS/ccpA

# PYRB\_STAAM

S-787

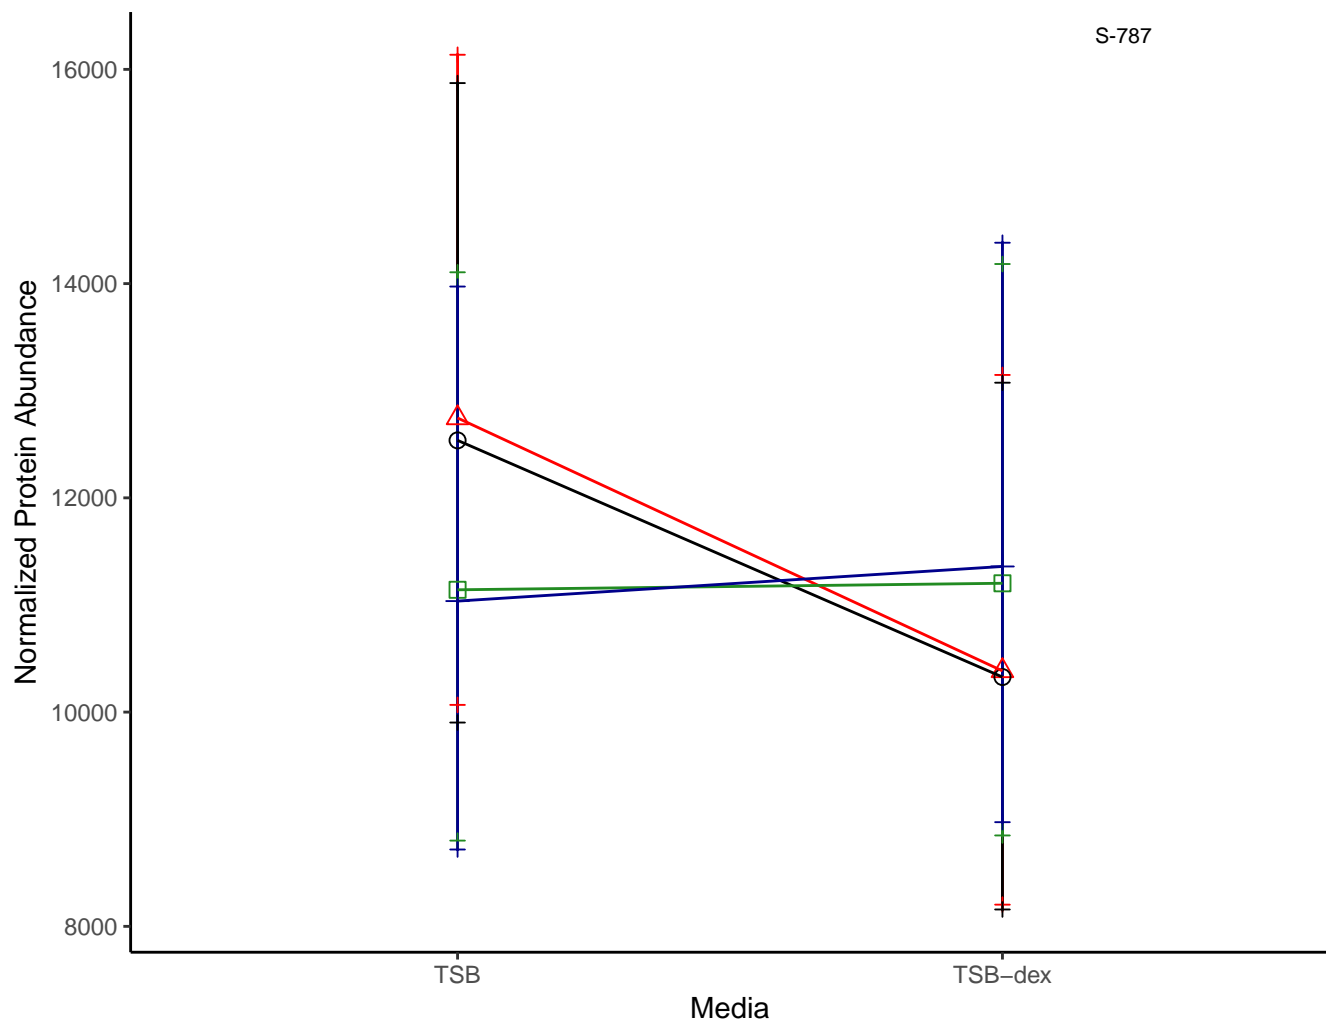

- ⊕ SA564
- △ SA564- $\Delta$ *hptRS*
- ⊞ SA564- $\Delta$ *ccpA*
- + SA564- $\Delta$ *hptRS/ccpA*

# PYRC\_STAAM

S-788

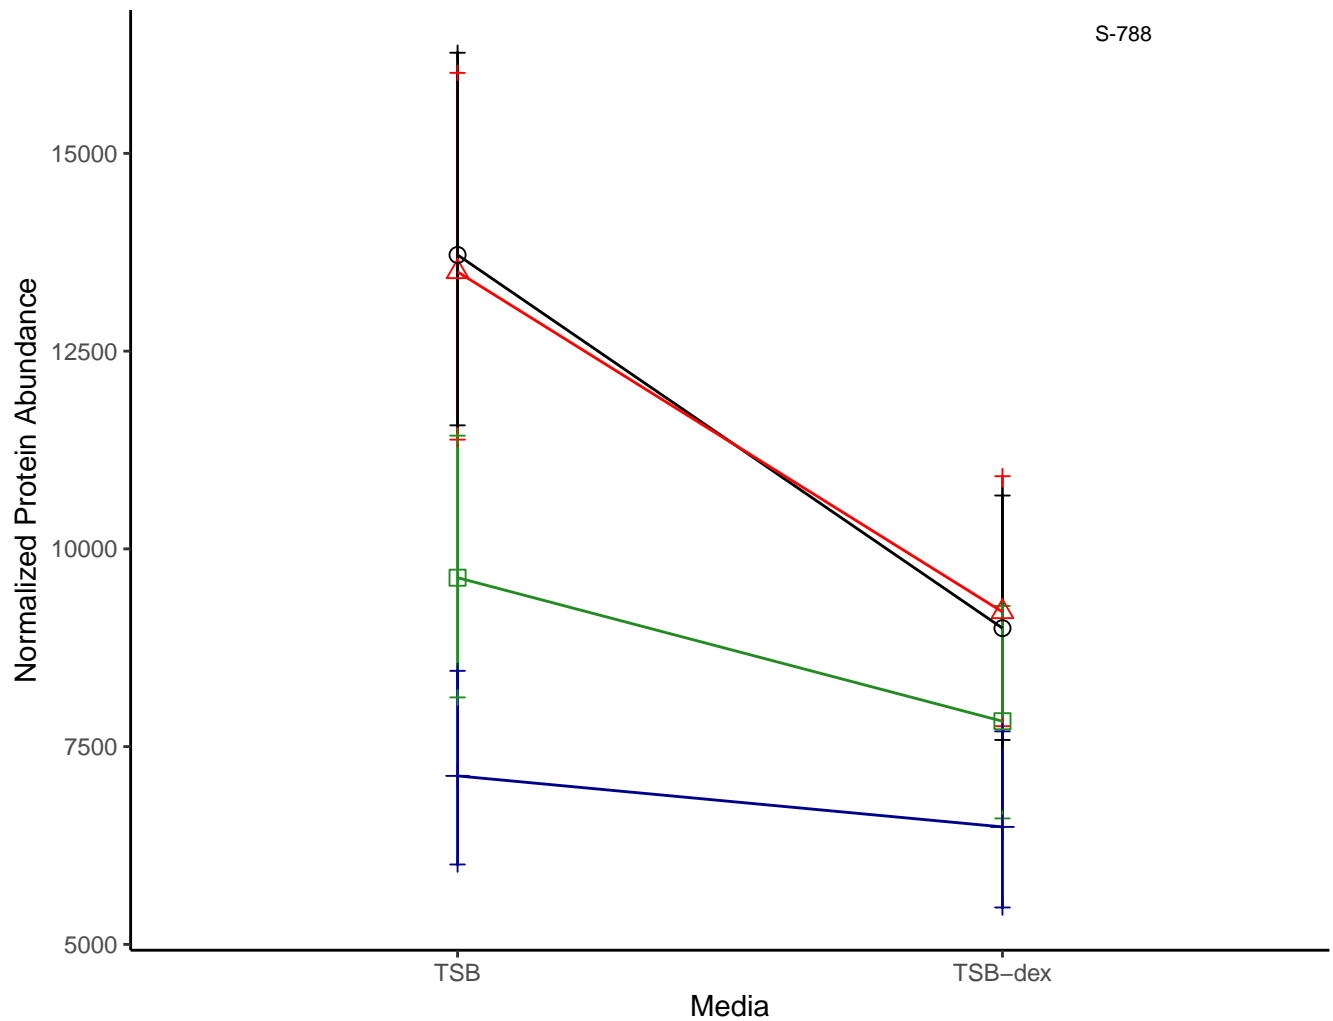

- ⊕ SA564
- △ SA564- $\Delta$ *hptRS*
- ⊞ SA564- $\Delta$ *ccpA*
- + SA564- $\Delta$ *hptRS/ccpA*

# PYRE\_STAAM

S-789

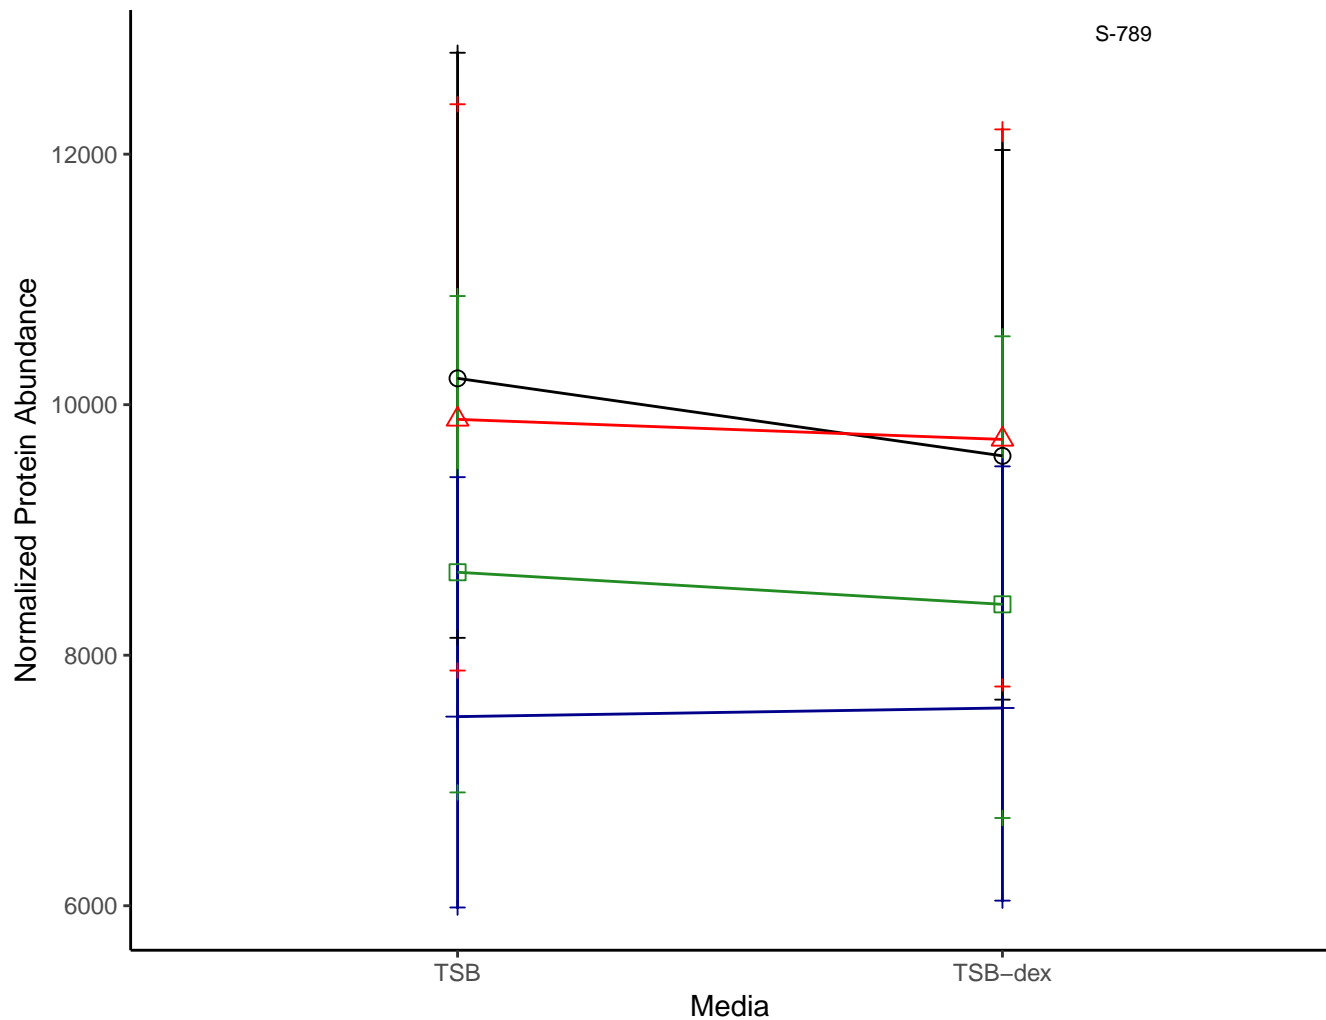

- ⊕ SA564
- △ SA564- $\Delta hptRS$
- ⊞ SA564- $\Delta ccpA$
- + SA564- $\Delta hptRS/ccpA$

# PYRF\_STAAM

S-790

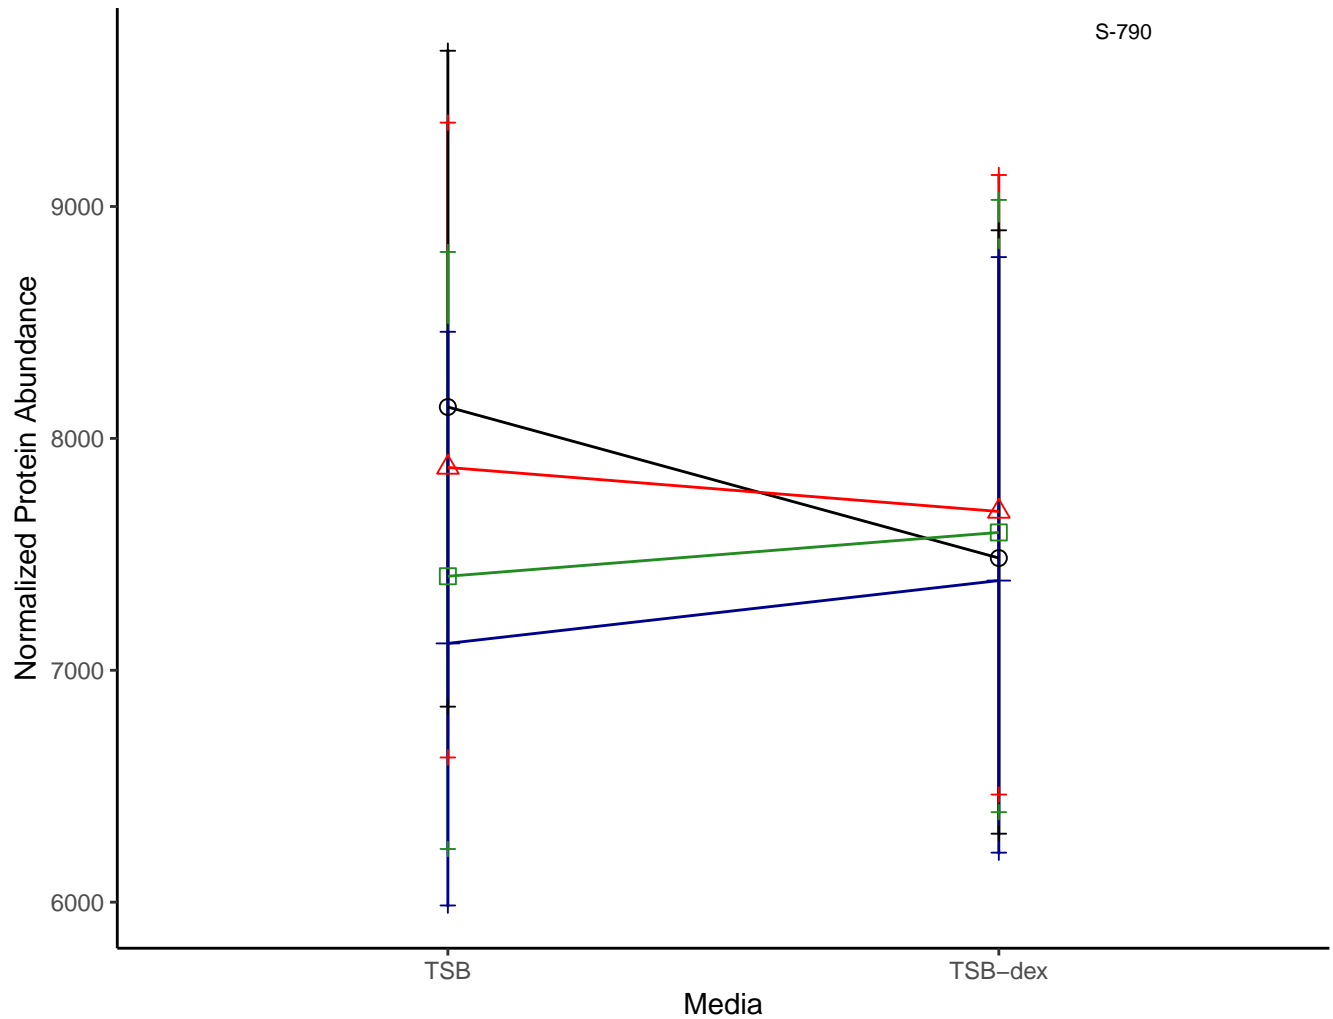

- ⊕ SA564
- △ SA564-ΔhptRS
- ⊞ SA564-ΔccpA
- + SA564-ΔhptRS/ccpA

# PYRG\_STAAM

S-791

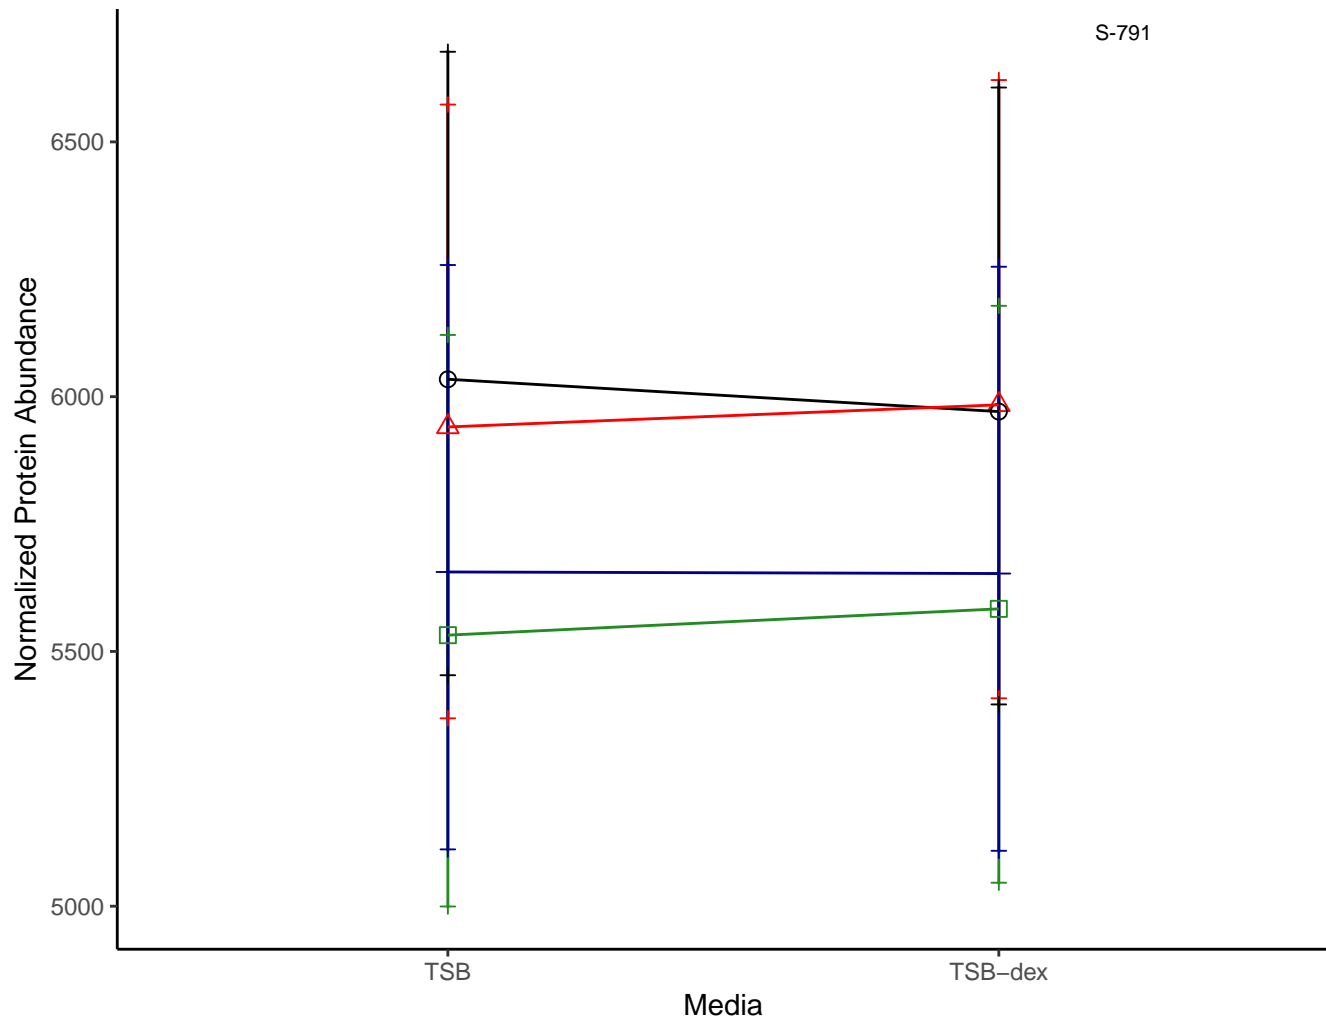

- SA564
- SA564- $\Delta$ *hptRS*
- SA564- $\Delta$ *ccpA*
- SA564- $\Delta$ *hptRS/ccpA*

# PYRH\_STAAM

S-792

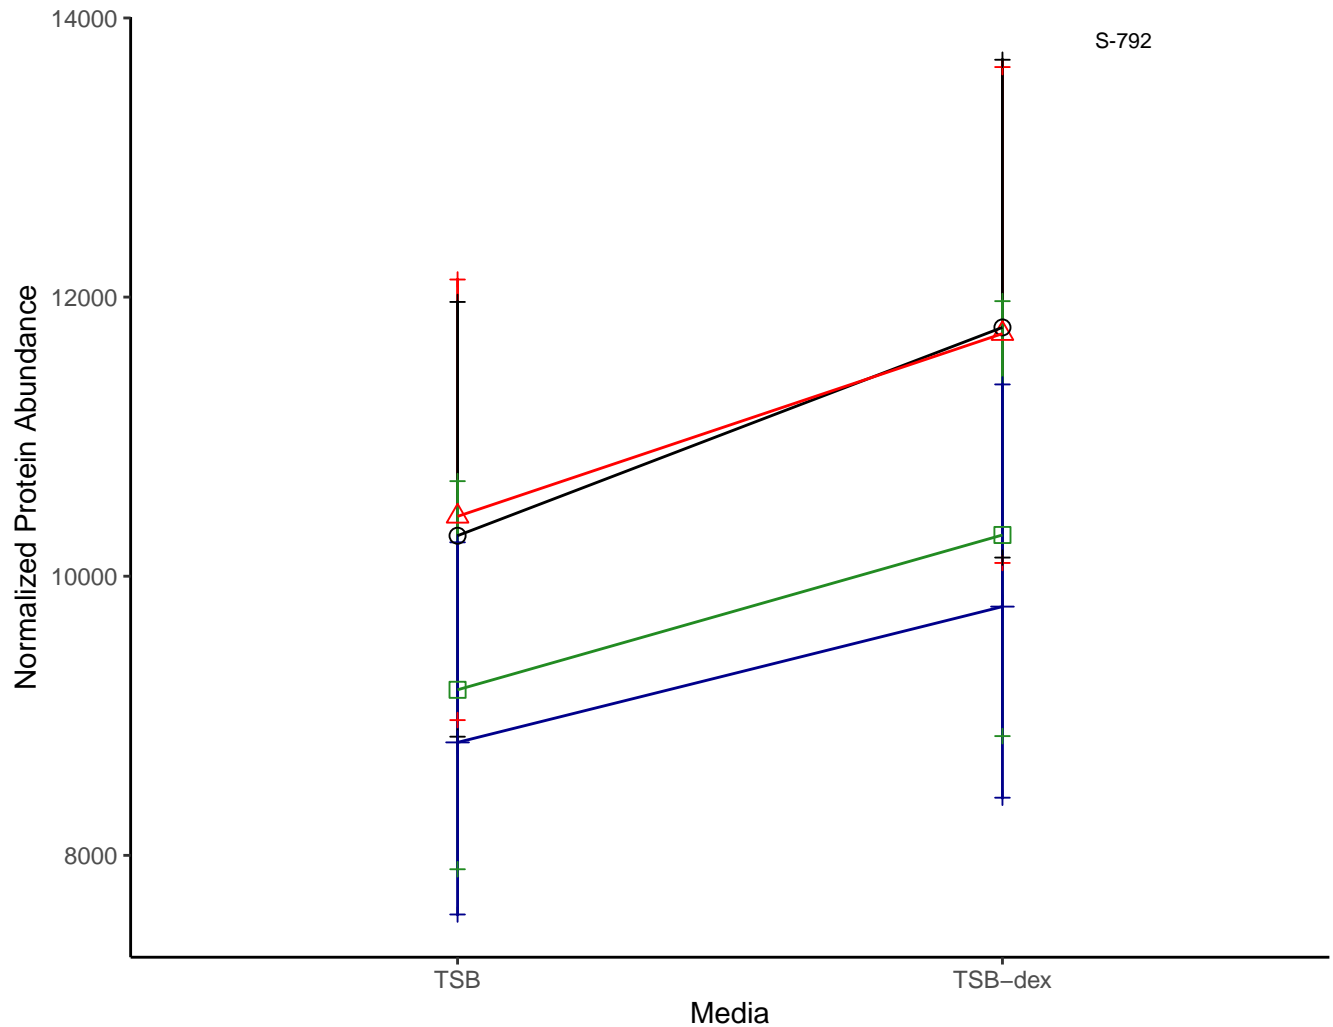

- ⊕ SA564
- △ SA564-ΔhptRS
- ⊞ SA564-ΔccpA
- + SA564-ΔhptRS/ccpA



# PYRR\_STAAM

S-793

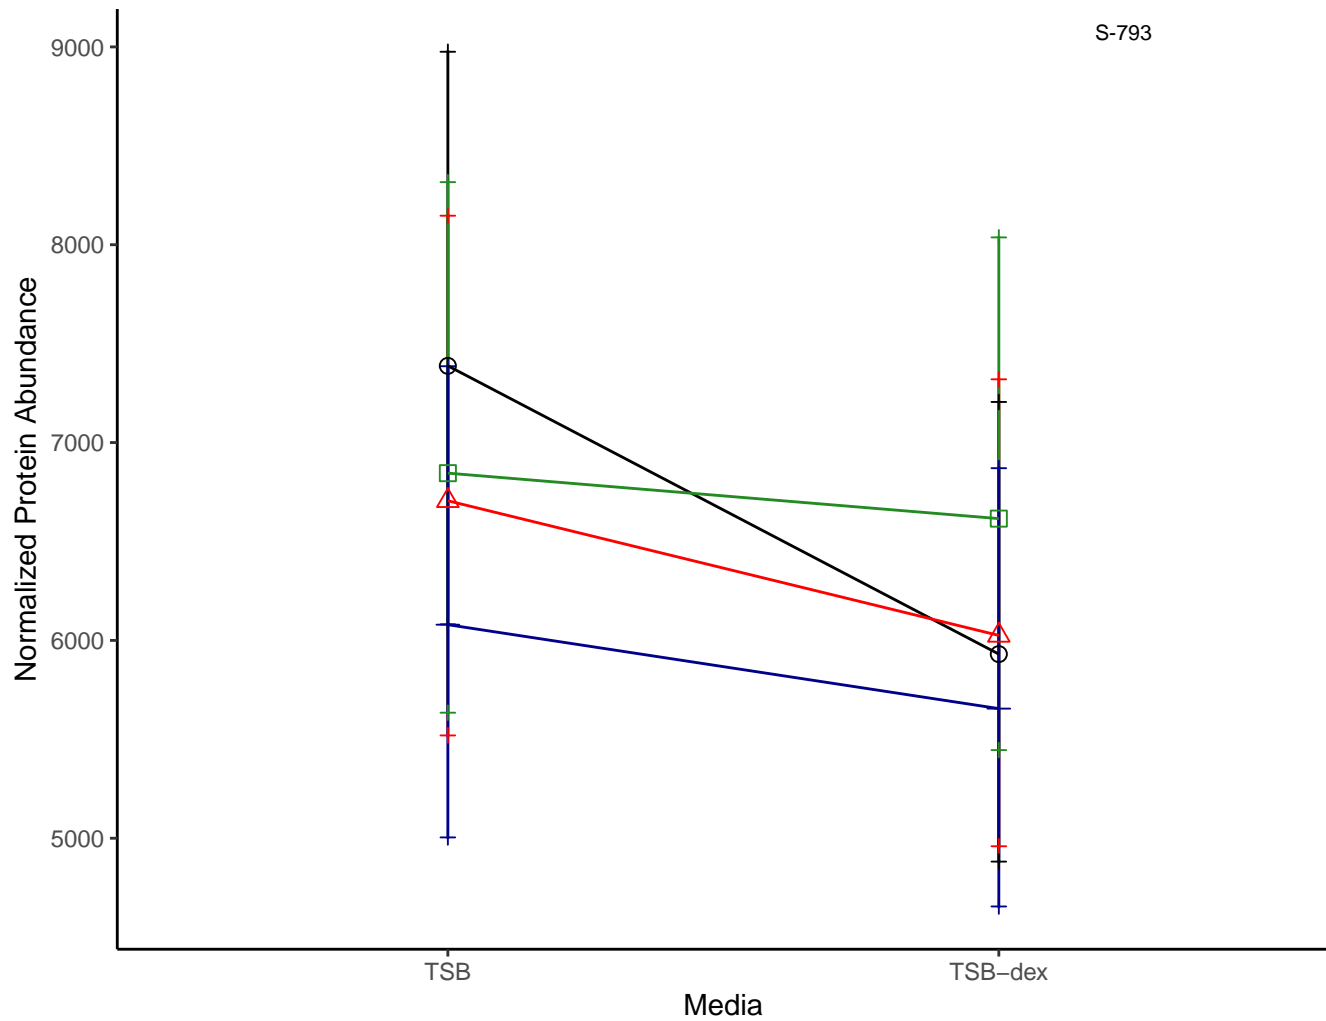

- ⊕ SA564
- △ SA564-ΔhptRS
- ⊞ SA564-ΔccpA
- ⊕ SA564-ΔhptRS/ccpA

# QOX2\_STAAM

S-794

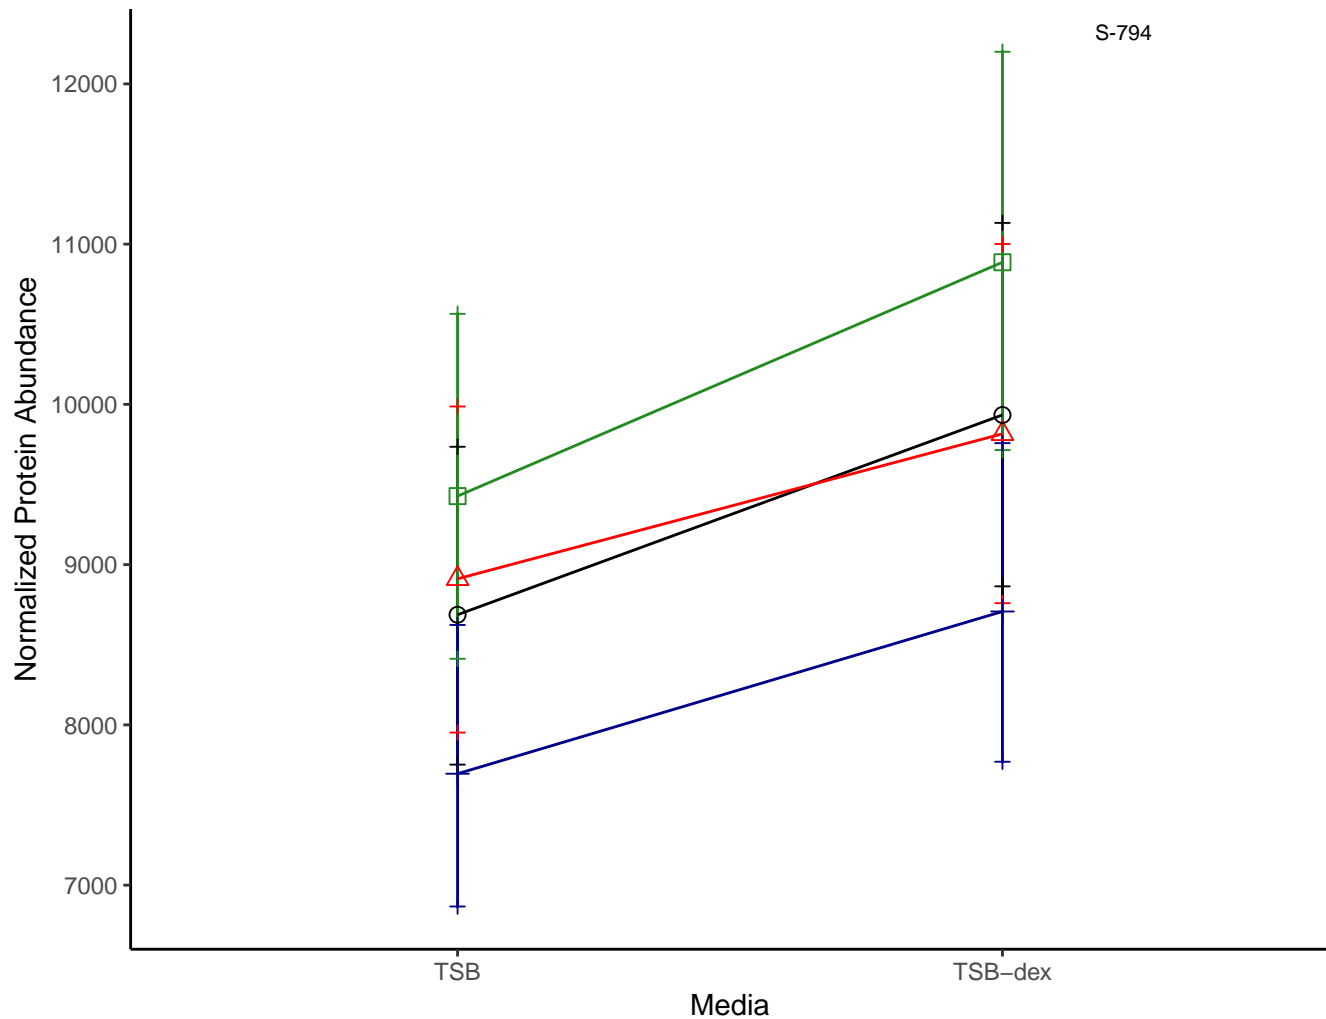

- ⊕ SA564
- △ SA564- $\Delta$ *hptRS*
- ⊞ SA564- $\Delta$ *ccpA*
- + SA564- $\Delta$ *hptRS/ccpA*

# QUEA\_STAAM

S-795

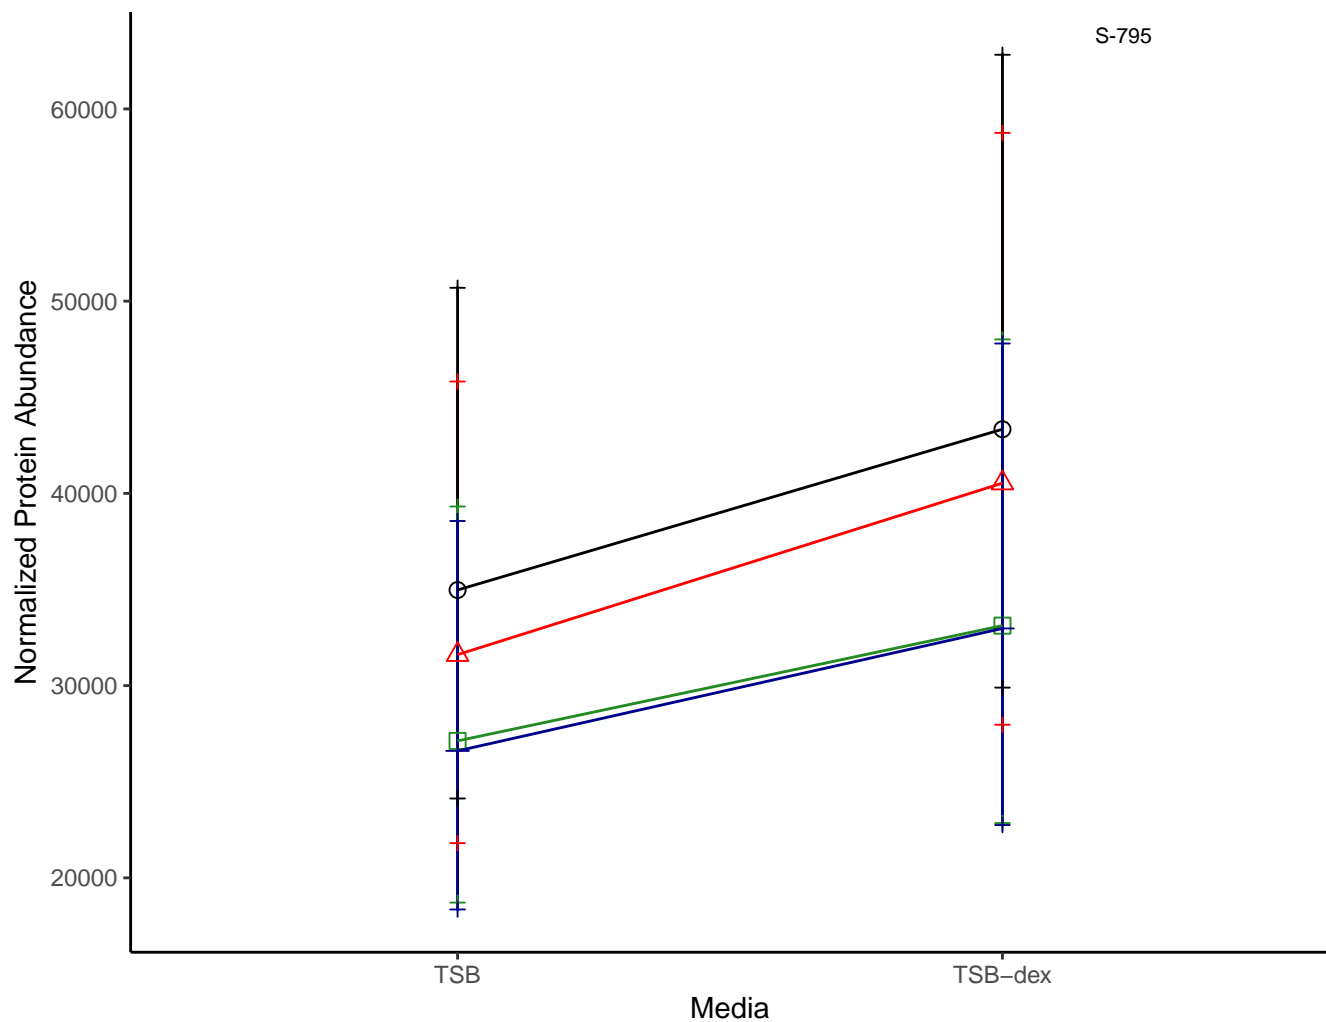

- SA564
- SA564- $\Delta$ *hptRS*
- SA564- $\Delta$ *ccpA*
- SA564- $\Delta$ *hptRS/ccpA*

# QUEC\_STAAM

S-796

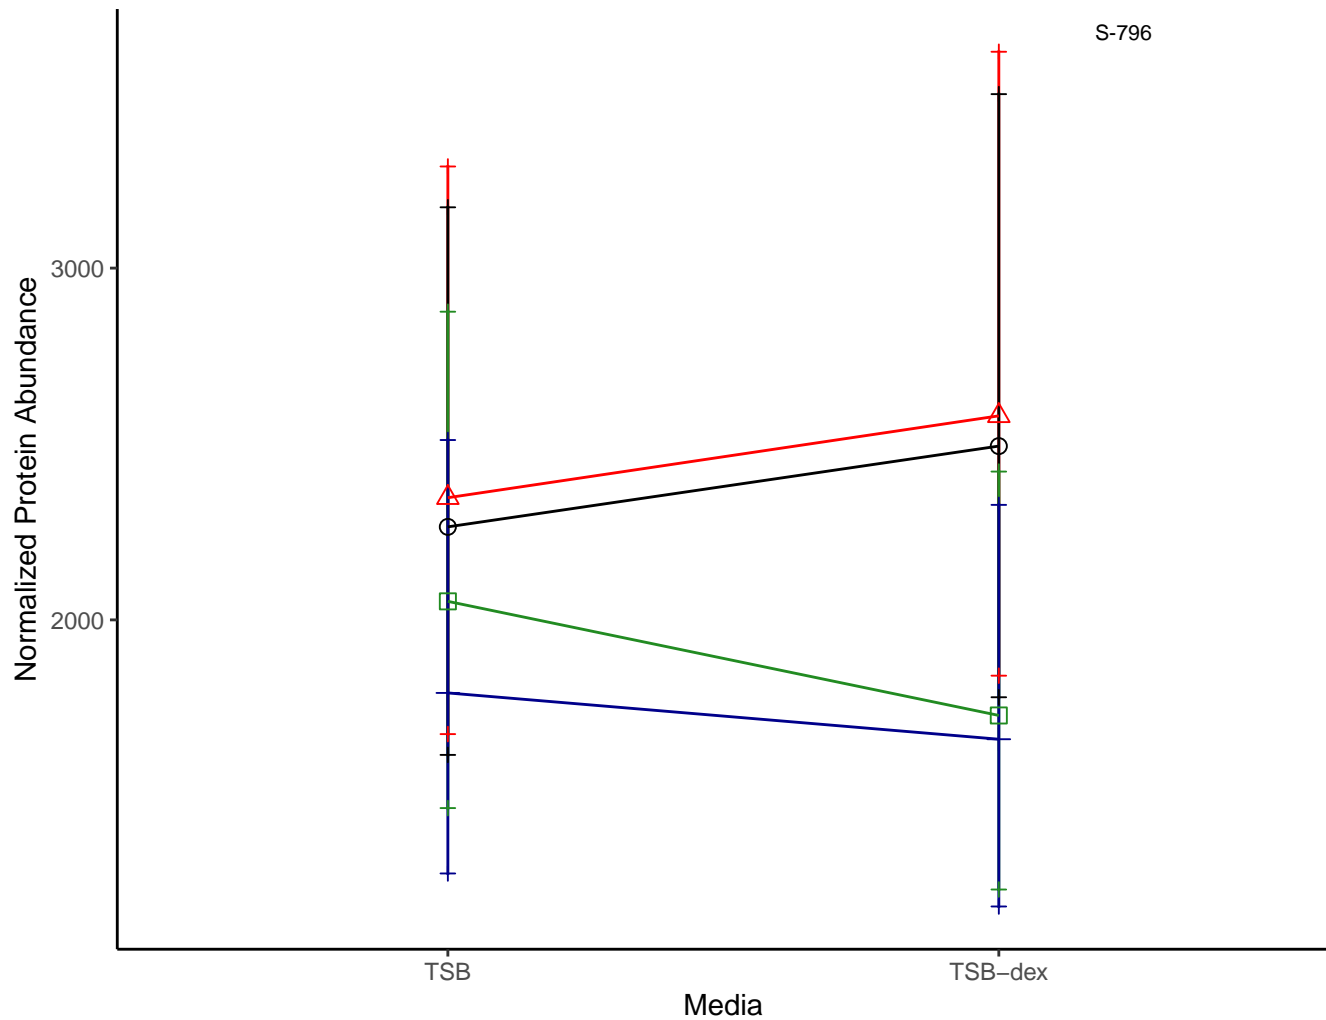

- ⊕ SA564
- △ SA564- $\Delta hptRS$
- ⊞ SA564- $\Delta ccpA$
- + SA564- $\Delta hptRS/ccpA$

# RBFA\_STAAM

S-797

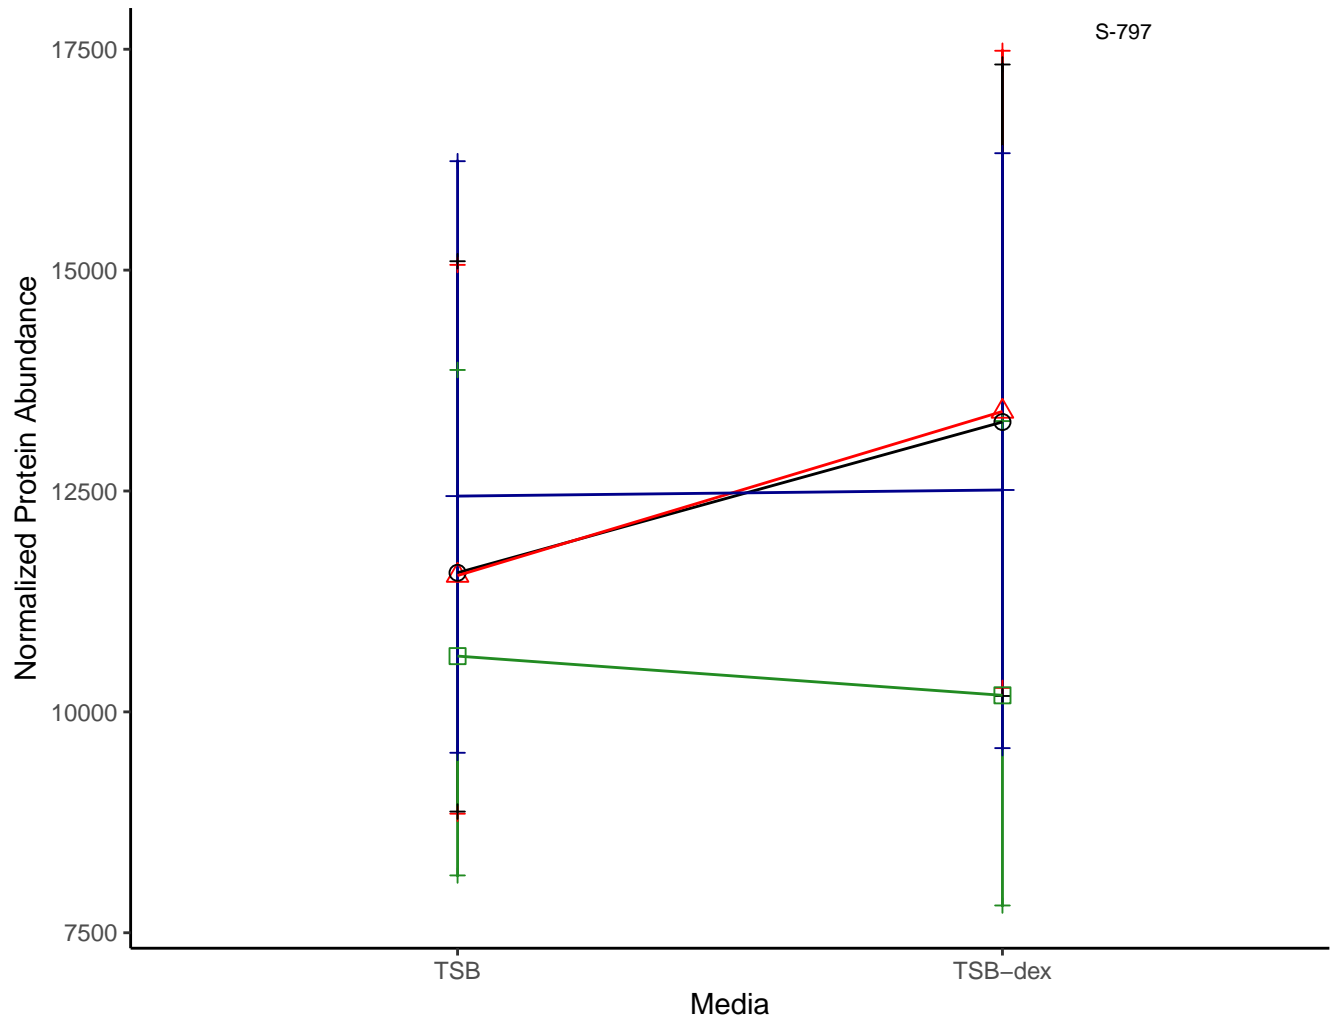

- ⊕ SA564
- △ SA564- $\Delta$ hptRS
- ⊞ SA564- $\Delta$ ccpA
- + SA564- $\Delta$ hptRS/ccpA

# RECA\_STAAM

S-798

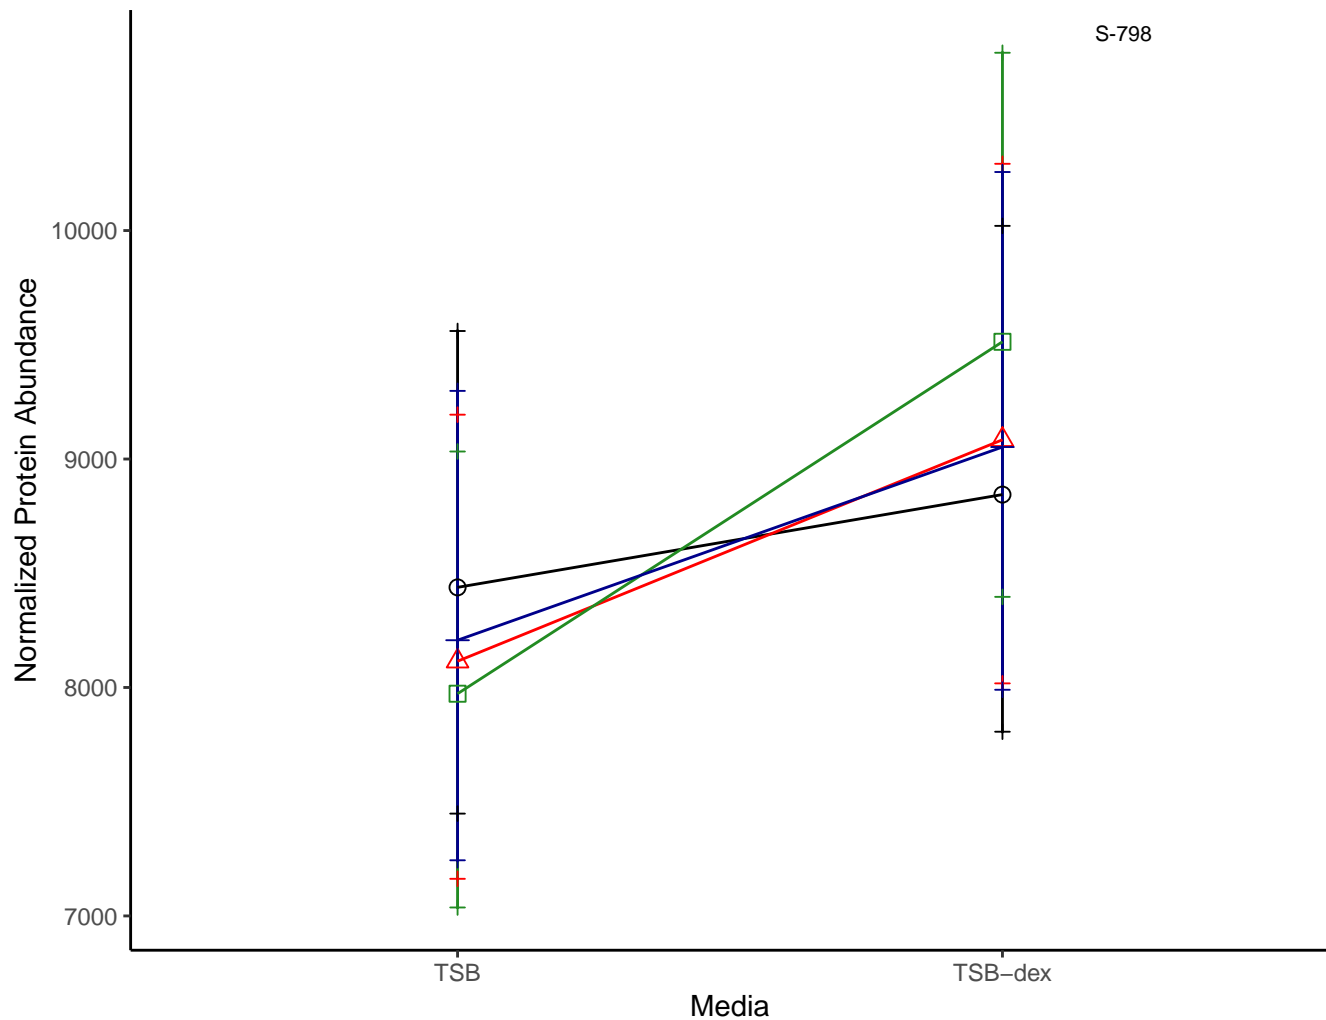

- ⊕ SA564
- △ SA564-ΔhptRS
- ⊞ SA564-ΔccpA
- + SA564-ΔhptRS/ccpA

# RELA\_STAAM

S-799

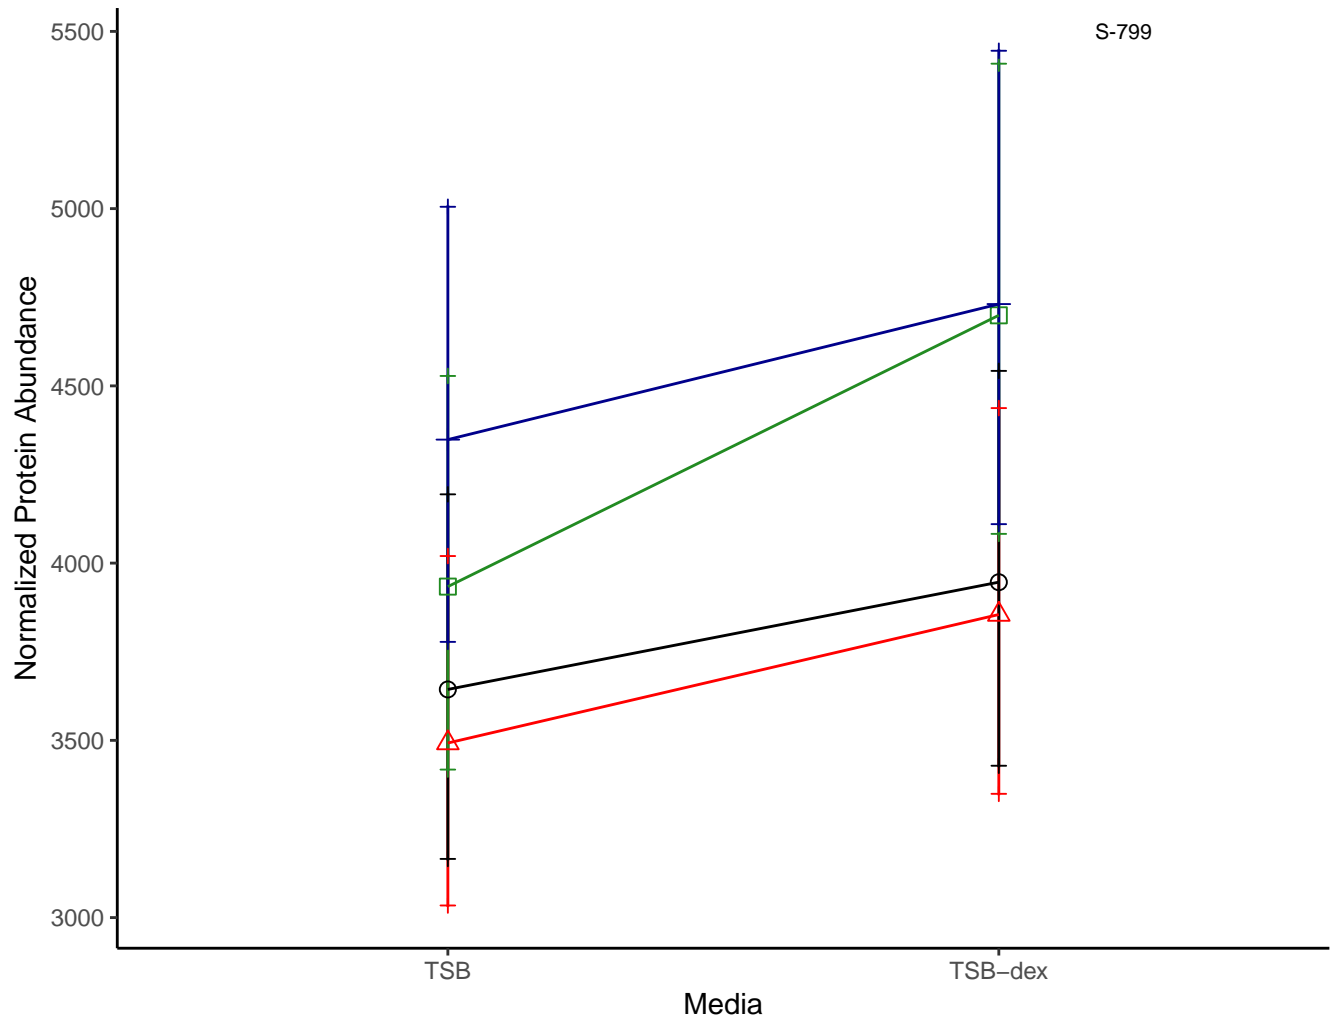

- ⊕ SA564
- △ SA564-ΔhptRS
- ⊞ SA564-ΔccpA
- + SA564-ΔhptRS/ccpA

# REX\_STAAM

S-800

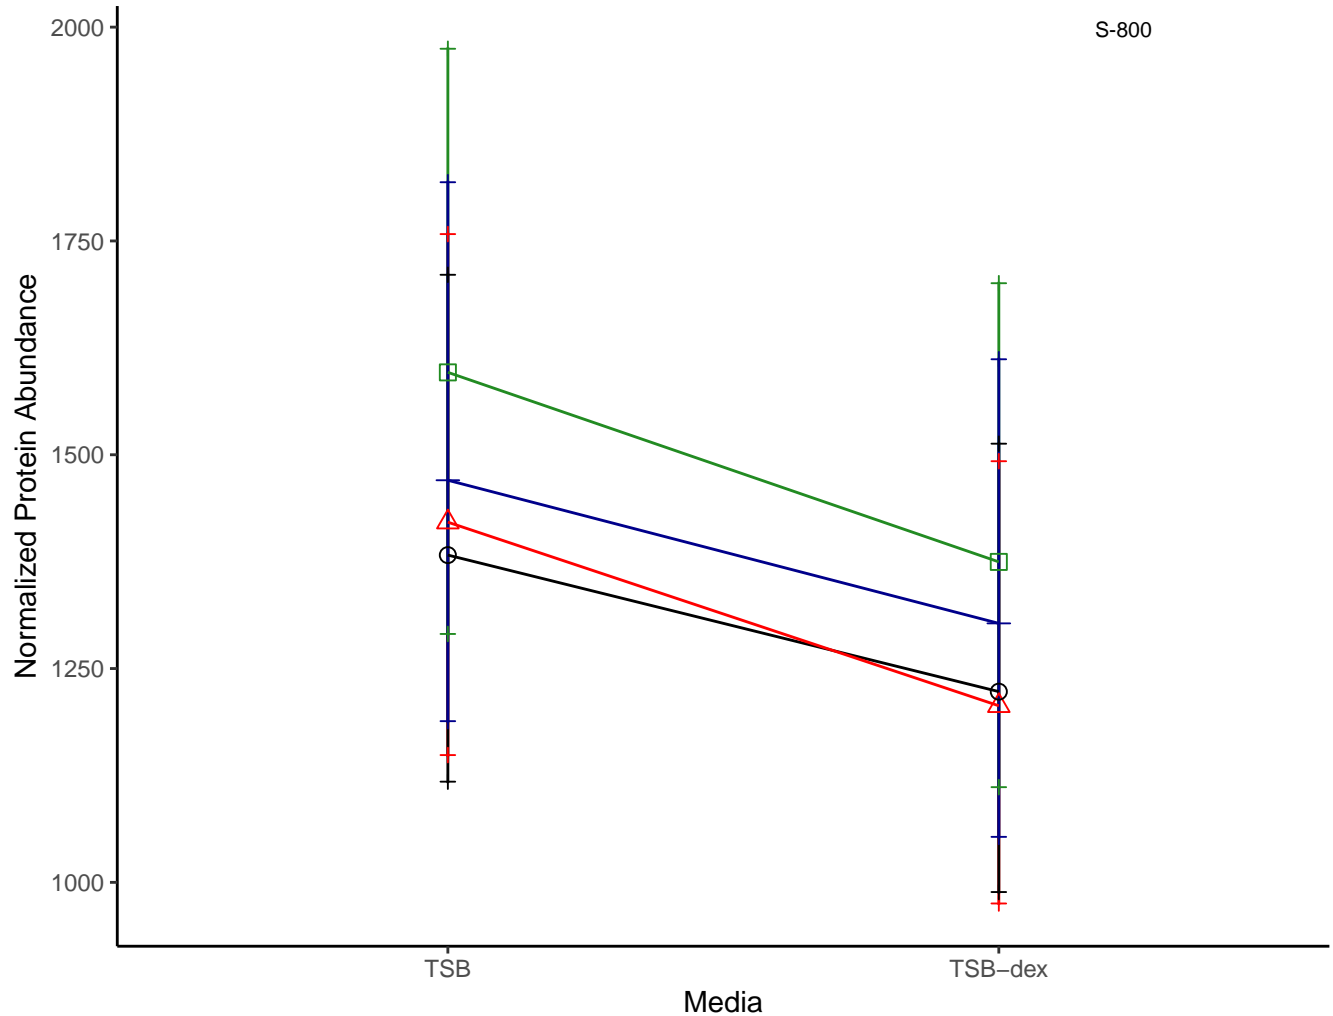

- ⊕ SA564
- △ SA564-ΔhptRS
- ⊞ SA564-ΔccpA
- + SA564-ΔhptRS/ccpA



## RF1\_STAAM

S-801

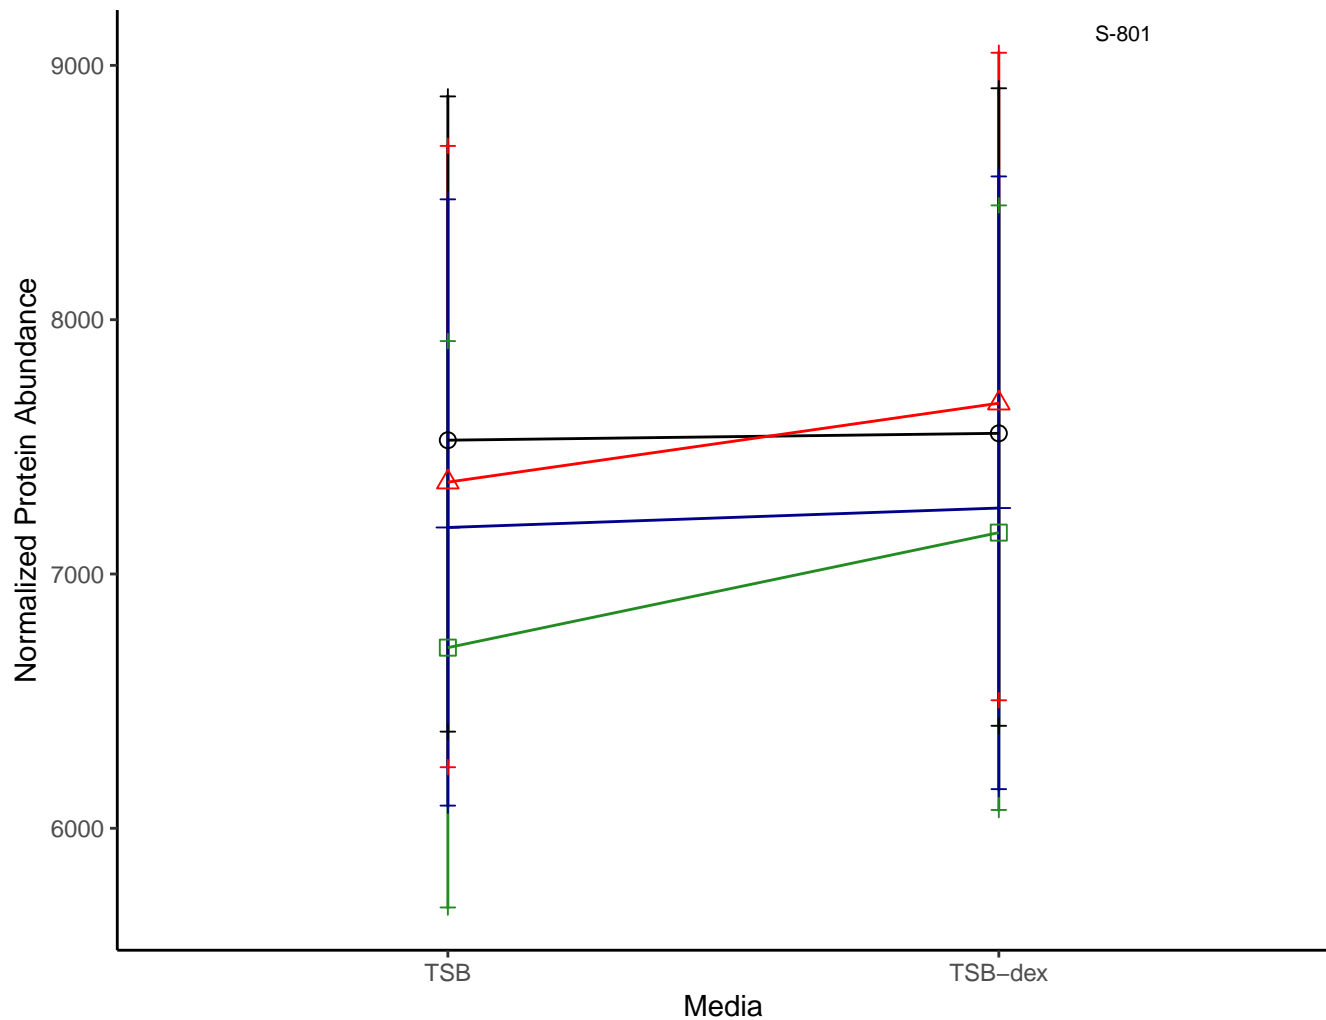

- ⊕ SA564
- △ SA564- $\Delta hptRS$
- ⊞ SA564- $\Delta ccpA$
- + SA564- $\Delta hptRS/ccpA$

# RIBBA\_STAAM

S-802

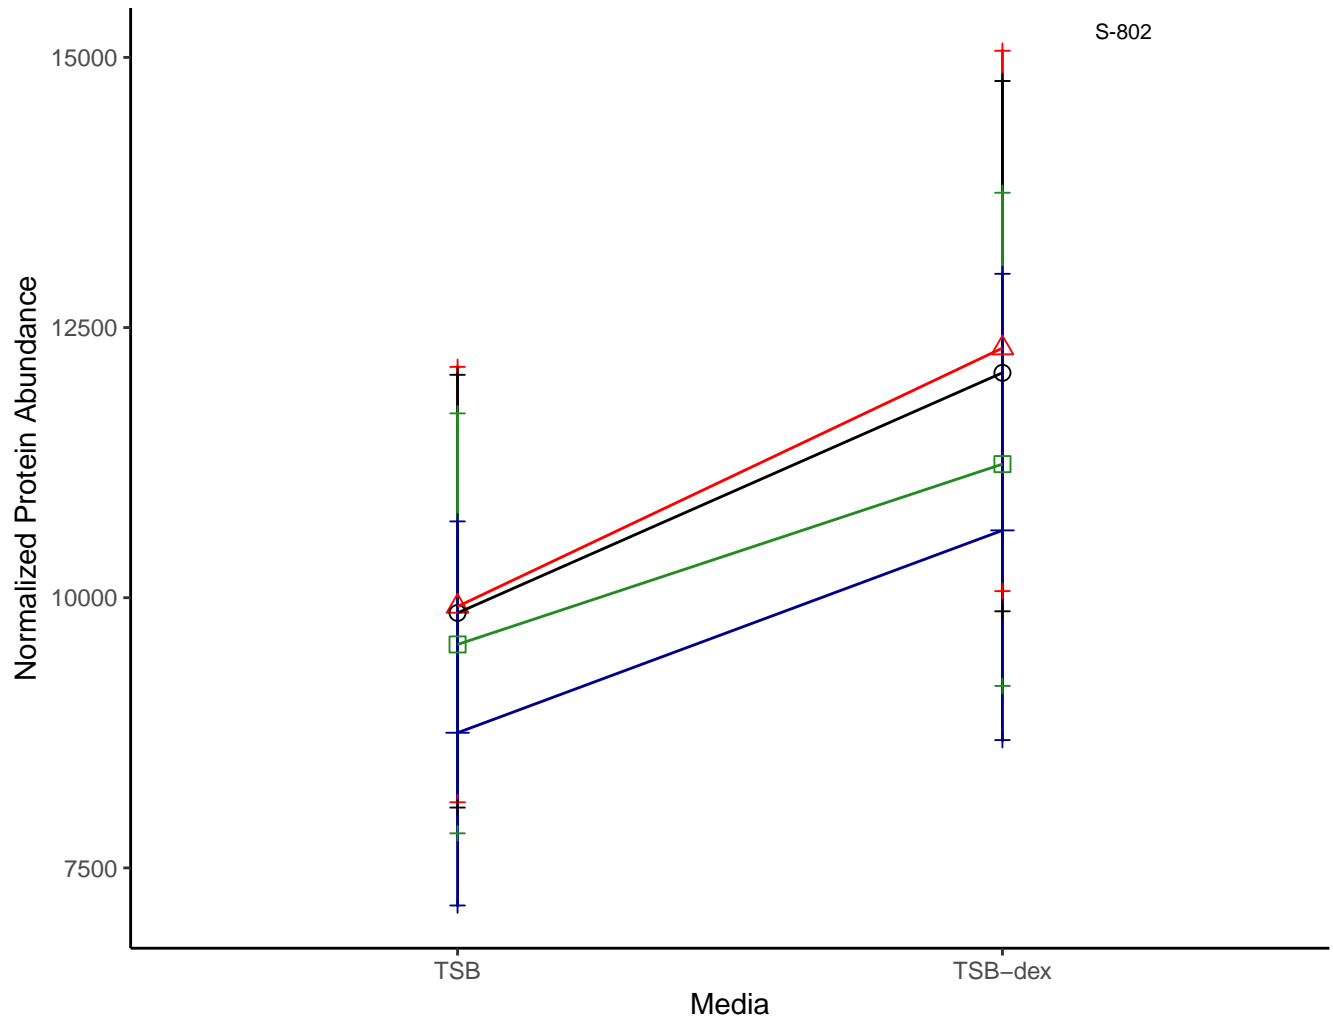

- ⊕ SA564
- △ SA564-ΔhptRS
- ⊞ SA564-ΔccpA
- + SA564-ΔhptRS/ccpA

# RIMM\_STAAM

S-803

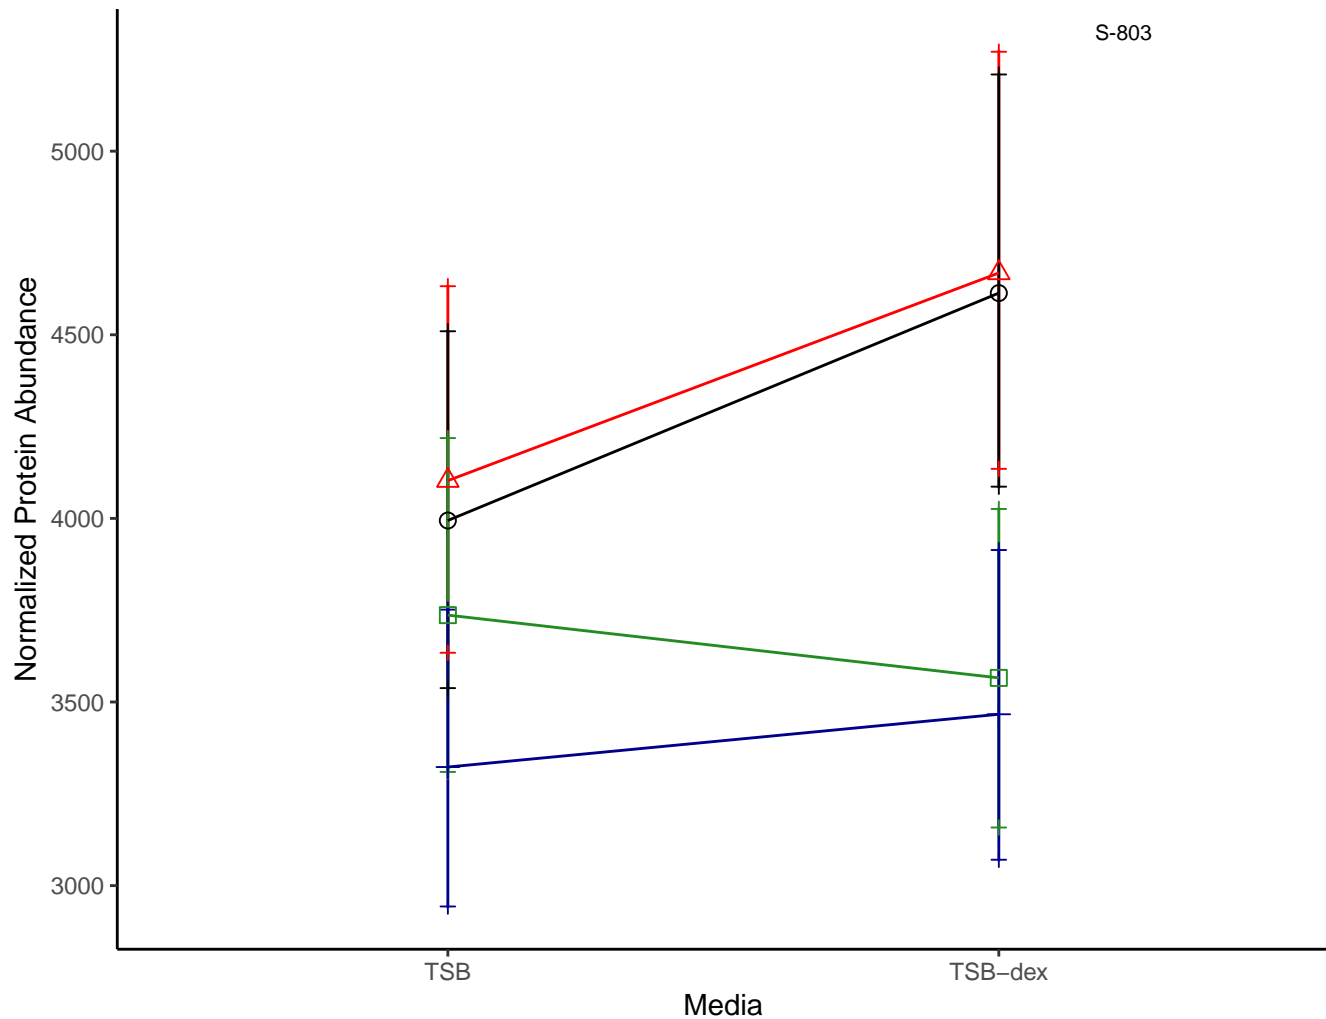

- ⊕ SA564
- △ SA564-ΔhptRS
- ⊞ SA564-ΔccpA
- + SA564-ΔhptRS/ccpA

# RISB\_STAAM

S-804

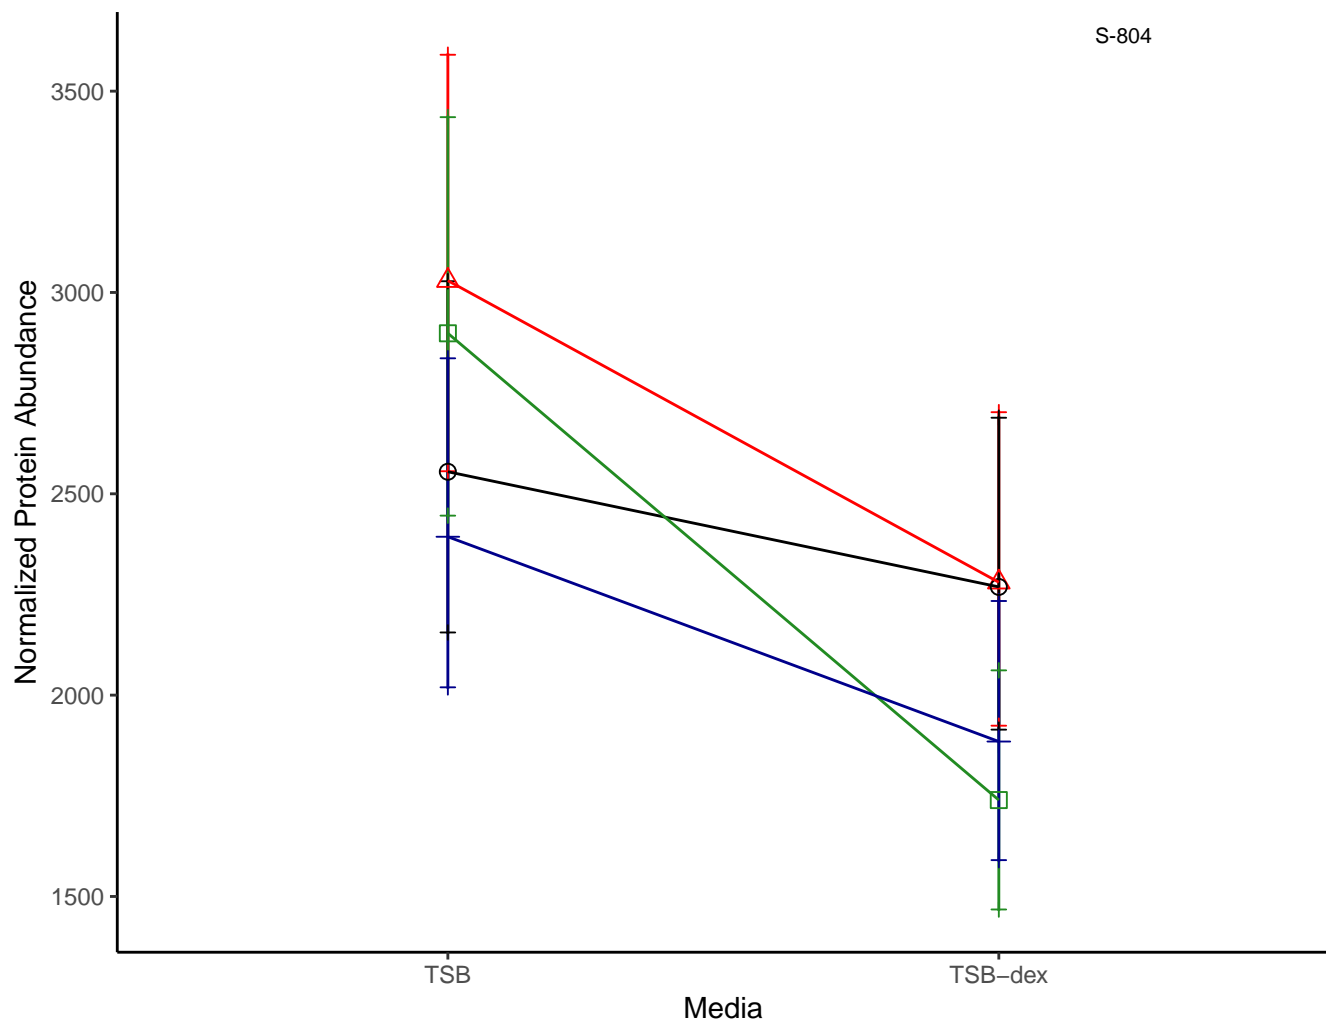

- SA564
- SA564- $\Delta hptRS$
- SA564- $\Delta ccpA$
- SA564- $\Delta hptRS/ccpA$

# RL1\_STAAM

S-805

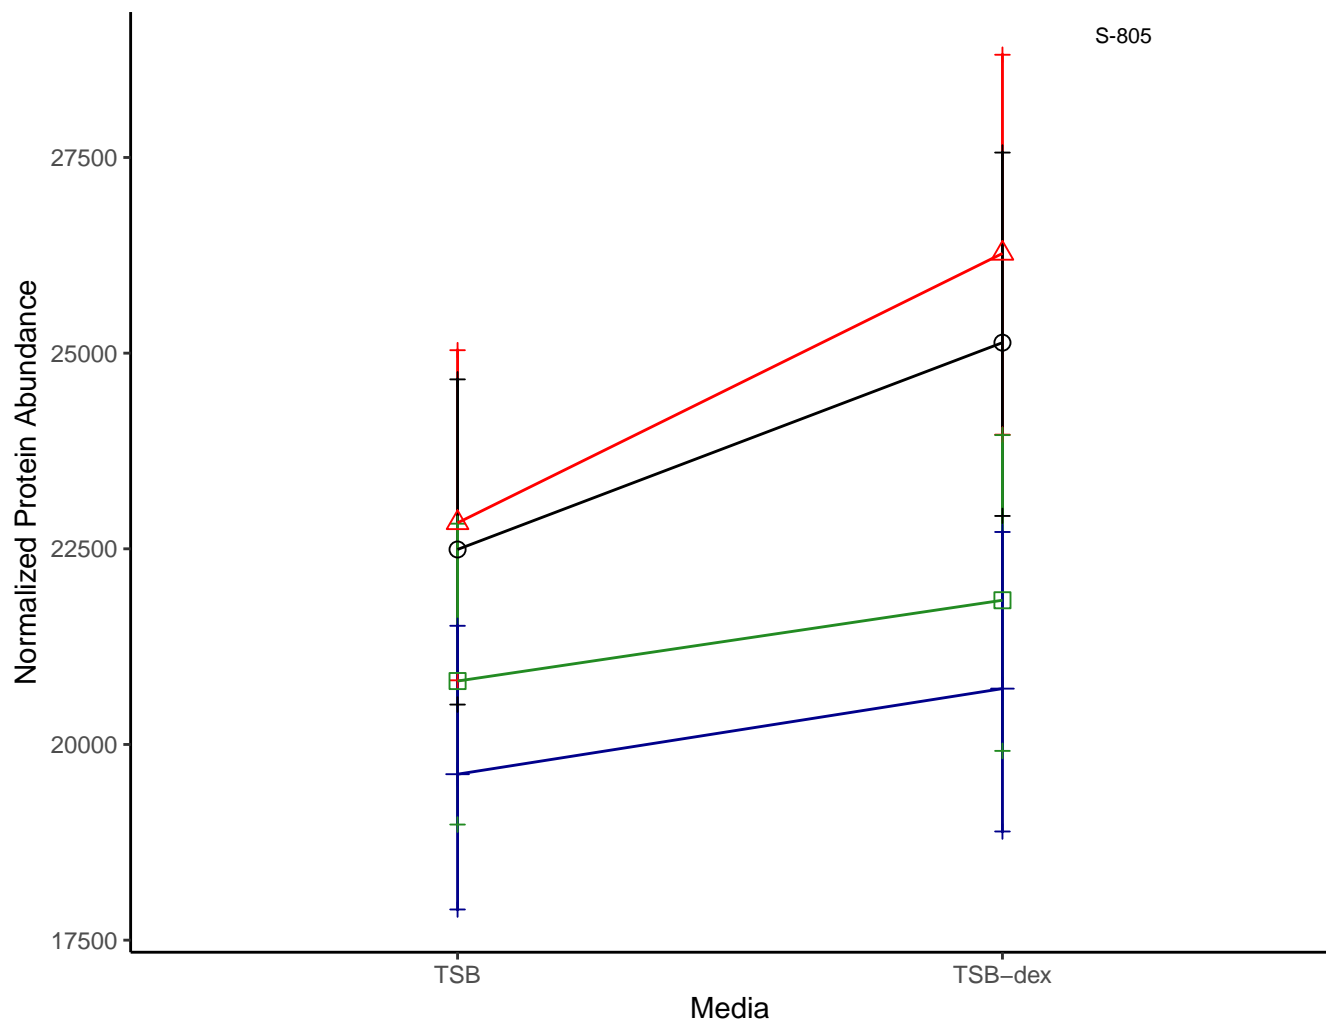

- ⊕ SA564
- △ SA564-ΔhptRS
- ⊞ SA564-ΔccpA
- + SA564-ΔhptRS/ccpA

# RL10\_STAAM

S-806

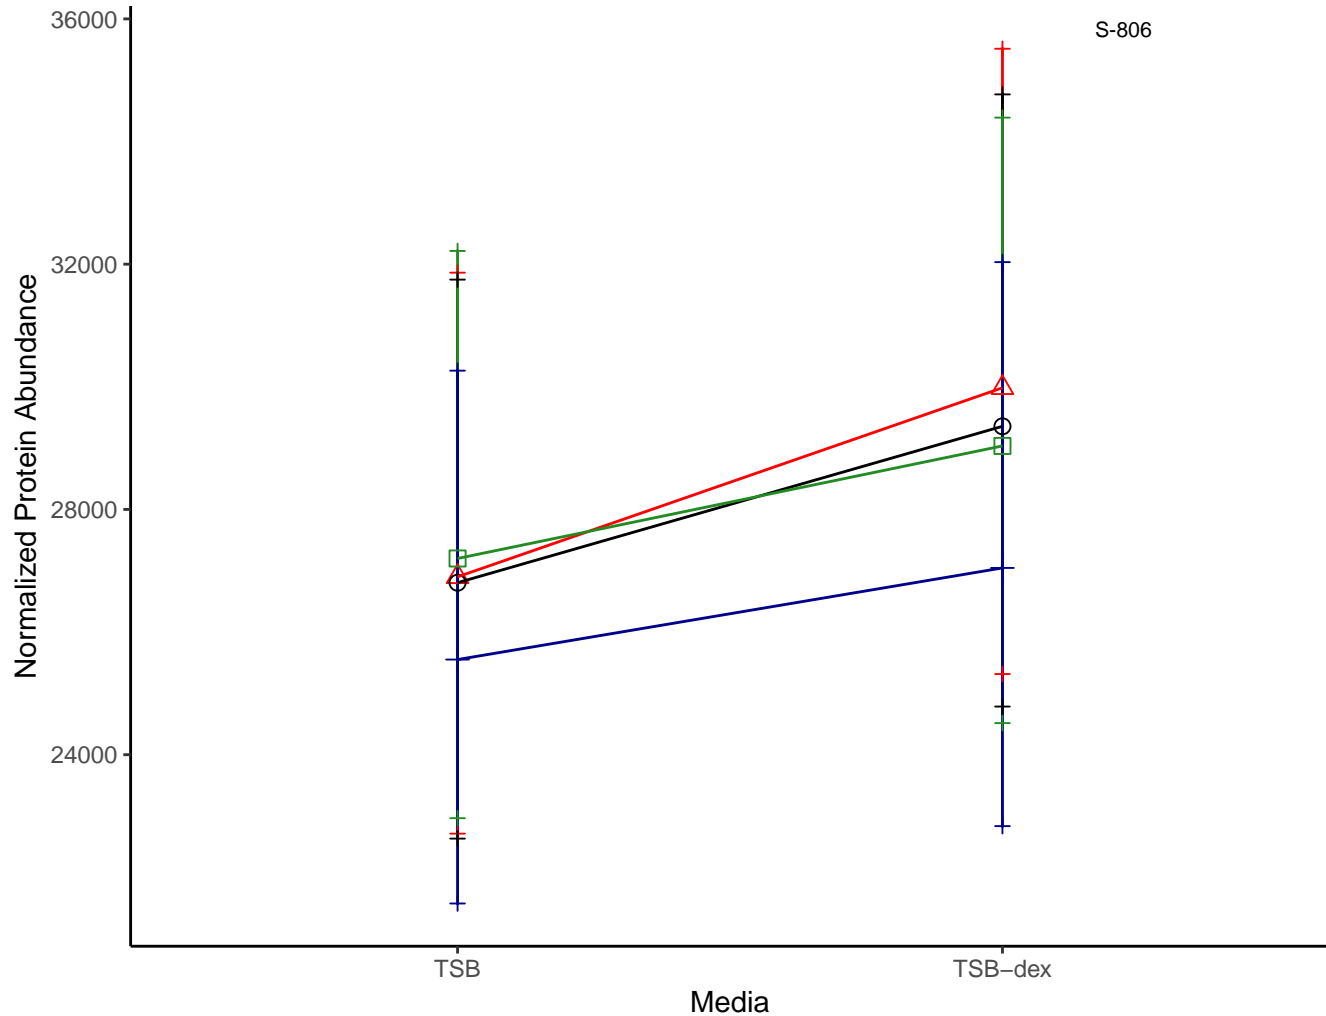

- ⊕ SA564
- △ SA564- $\Delta$ *hptRS*
- ⊞ SA564- $\Delta$ *ccpA*
- + SA564- $\Delta$ *hptRS/ccpA*

# RL11\_STAAM

S-807

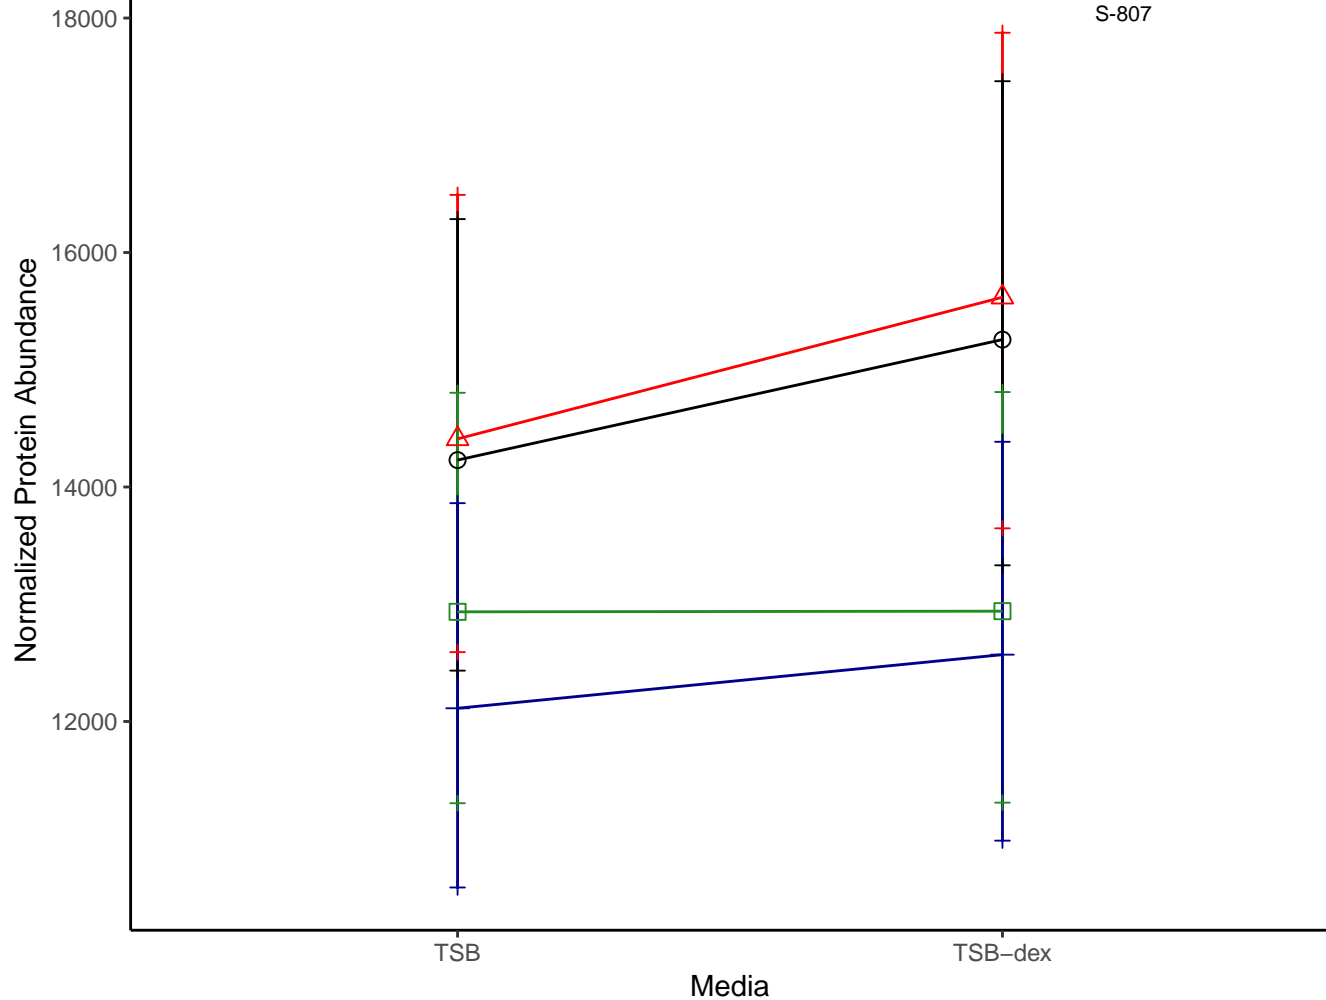

- SA564
- SA564- $\Delta$ *hptRS*
- SA564- $\Delta$ *ccpA*
- SA564- $\Delta$ *hptRS/ccpA*

# RL13\_STAAM

S-808

Normalized Protein Abundance

25000

20000

TSB

TSB-dex

Media

- ⊕ SA564
- △ SA564- $\Delta$ *hptRS*
- ⊞ SA564- $\Delta$ *ccpA*
- ⊕ SA564- $\Delta$ *hptRS/ccpA*

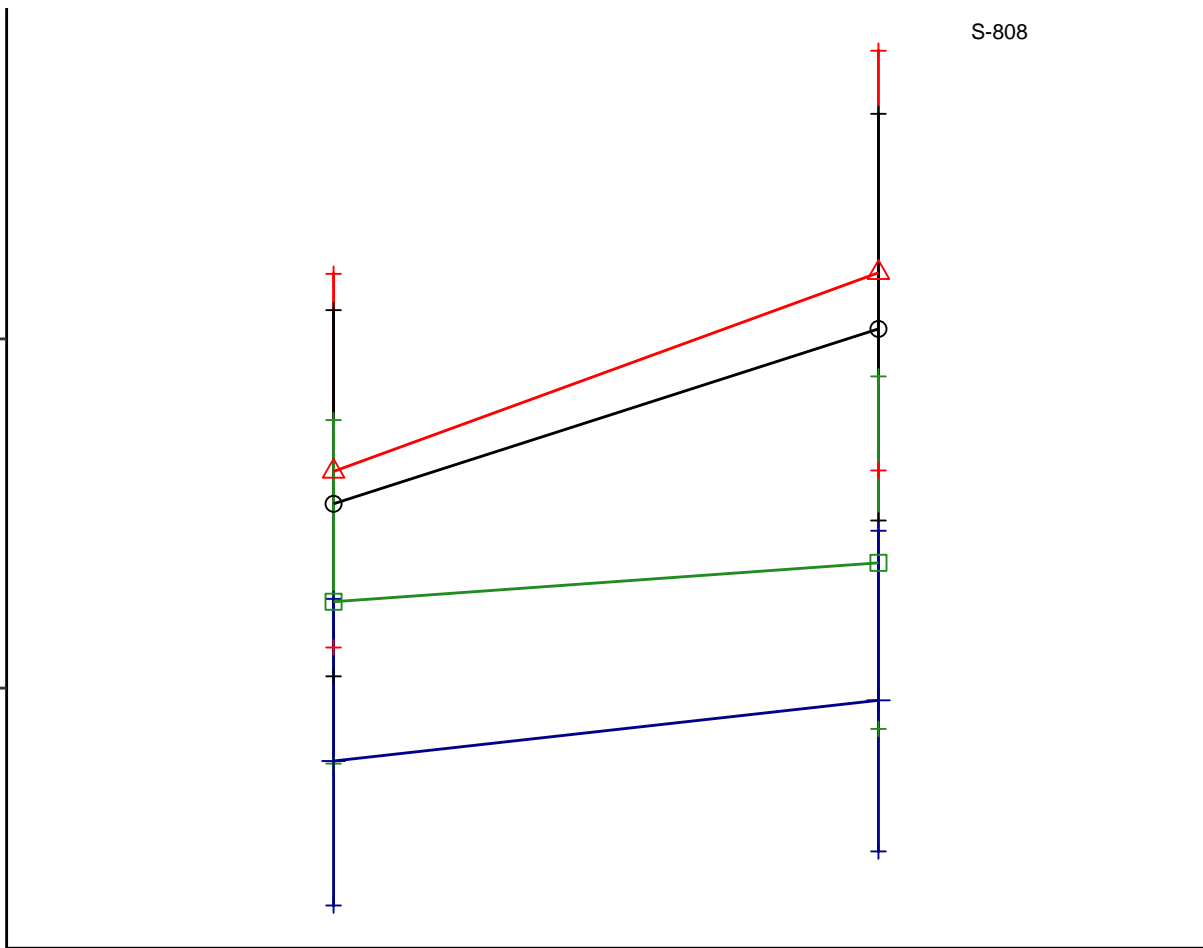



# RL14\_STAAM

S-809

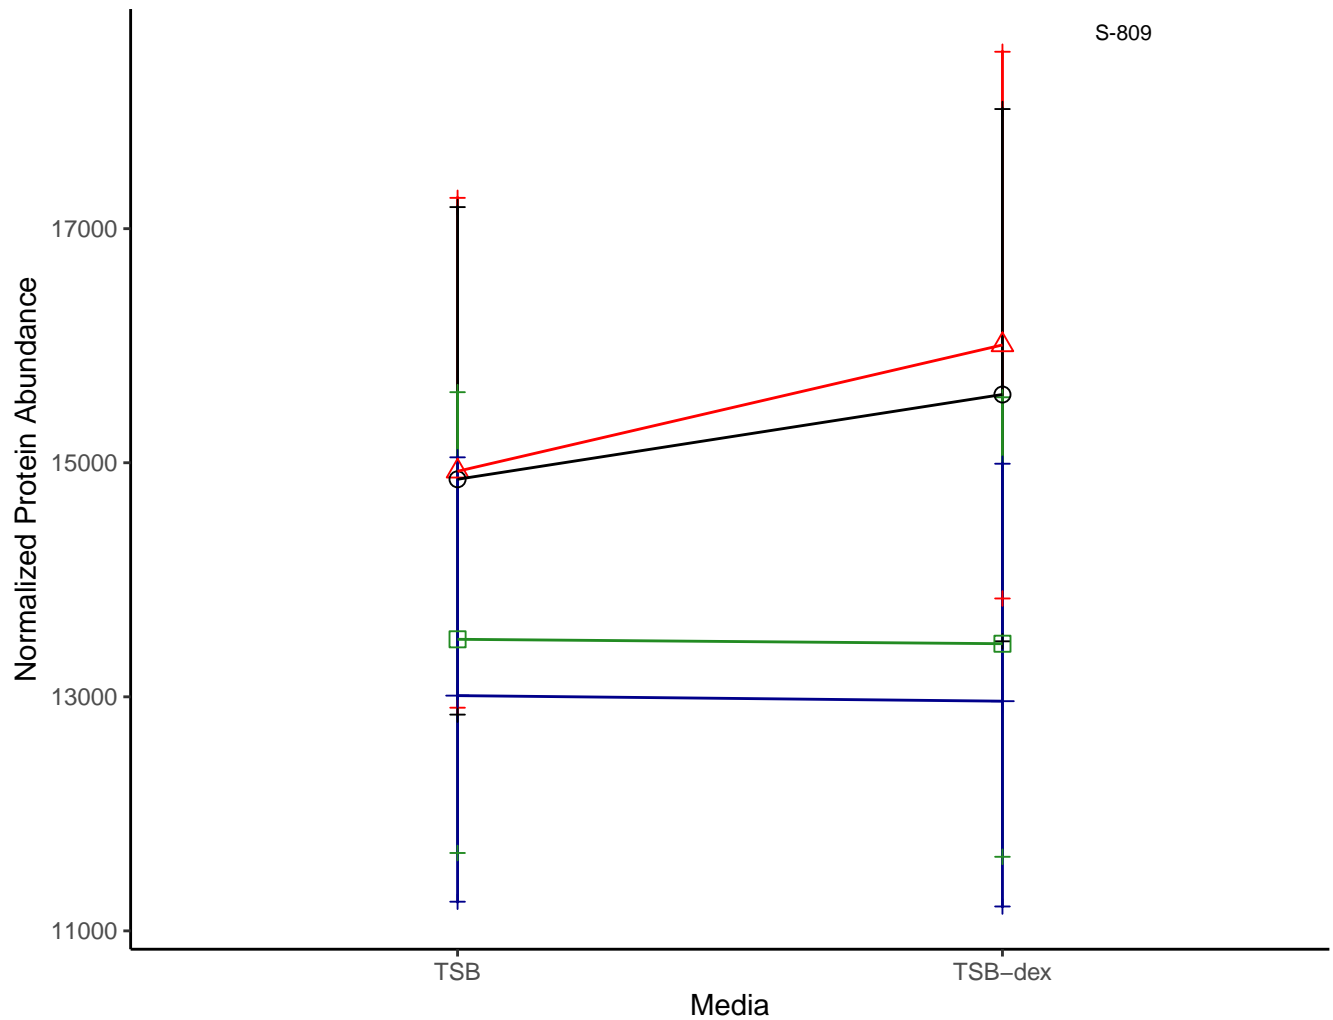

- ⊕ SA564
- △ SA564- $\Delta$ *hptRS*
- ⊞ SA564- $\Delta$ *ccpA*
- + SA564- $\Delta$ *hptRS/ccpA*

# RL15\_STAAM

S-810

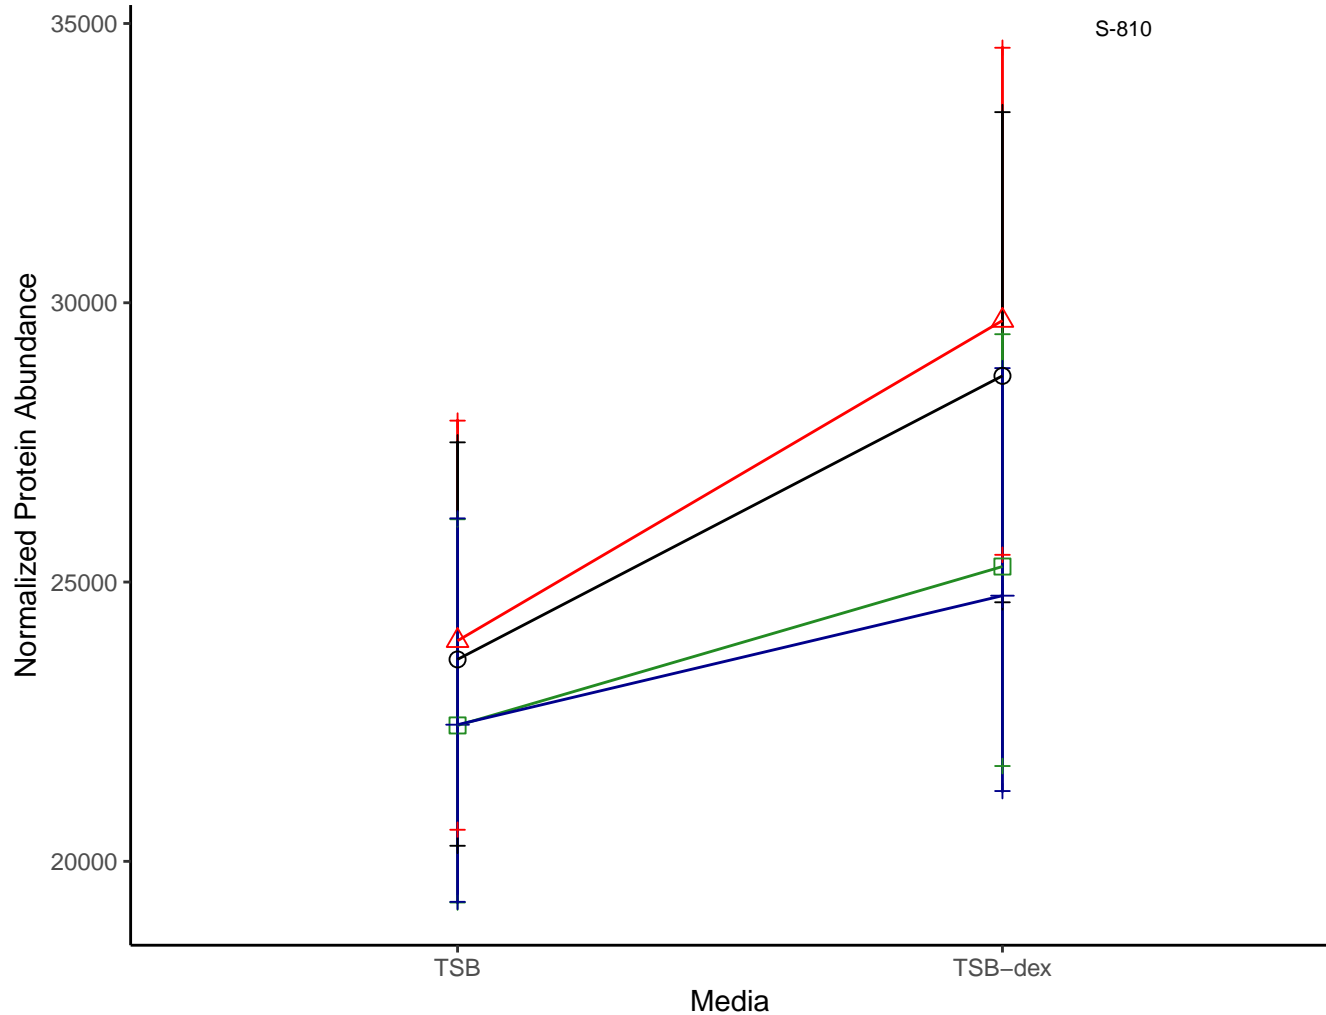

- ⊕ SA564
- △ SA564-ΔhptRS
- ⊞ SA564-ΔccpA
- + SA564-ΔhptRS/ccpA

# RL16\_STAAM

S-811

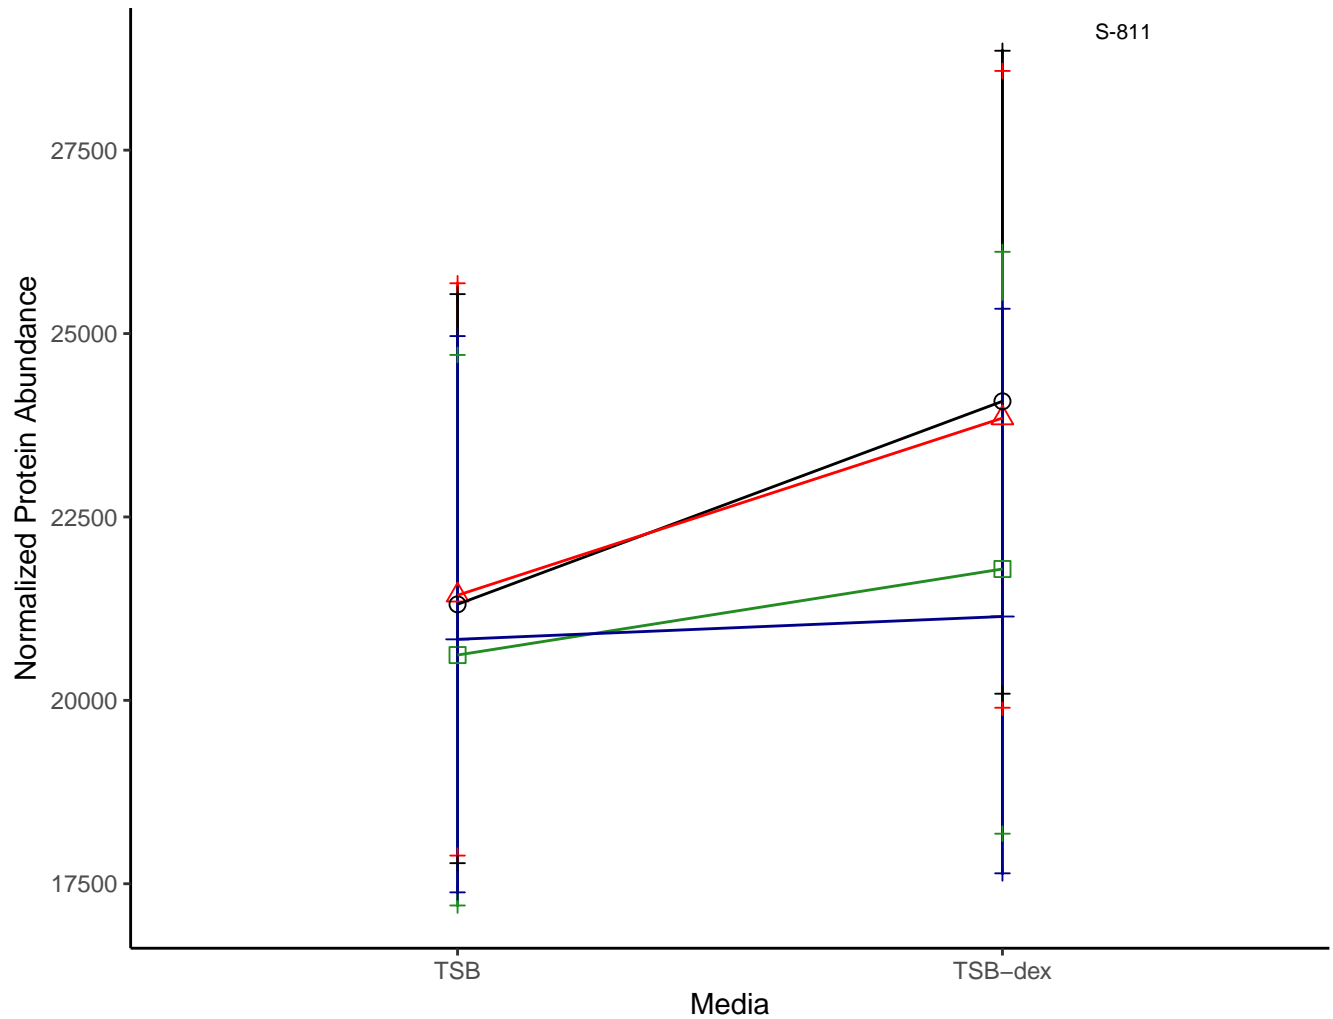

- ⊕ SA564
- △ SA564- $\Delta$ *hptRS*
- SA564- $\Delta$ *ccpA*
- + SA564- $\Delta$ *hptRS/ccpA*

# RL17\_STAAM

S-812

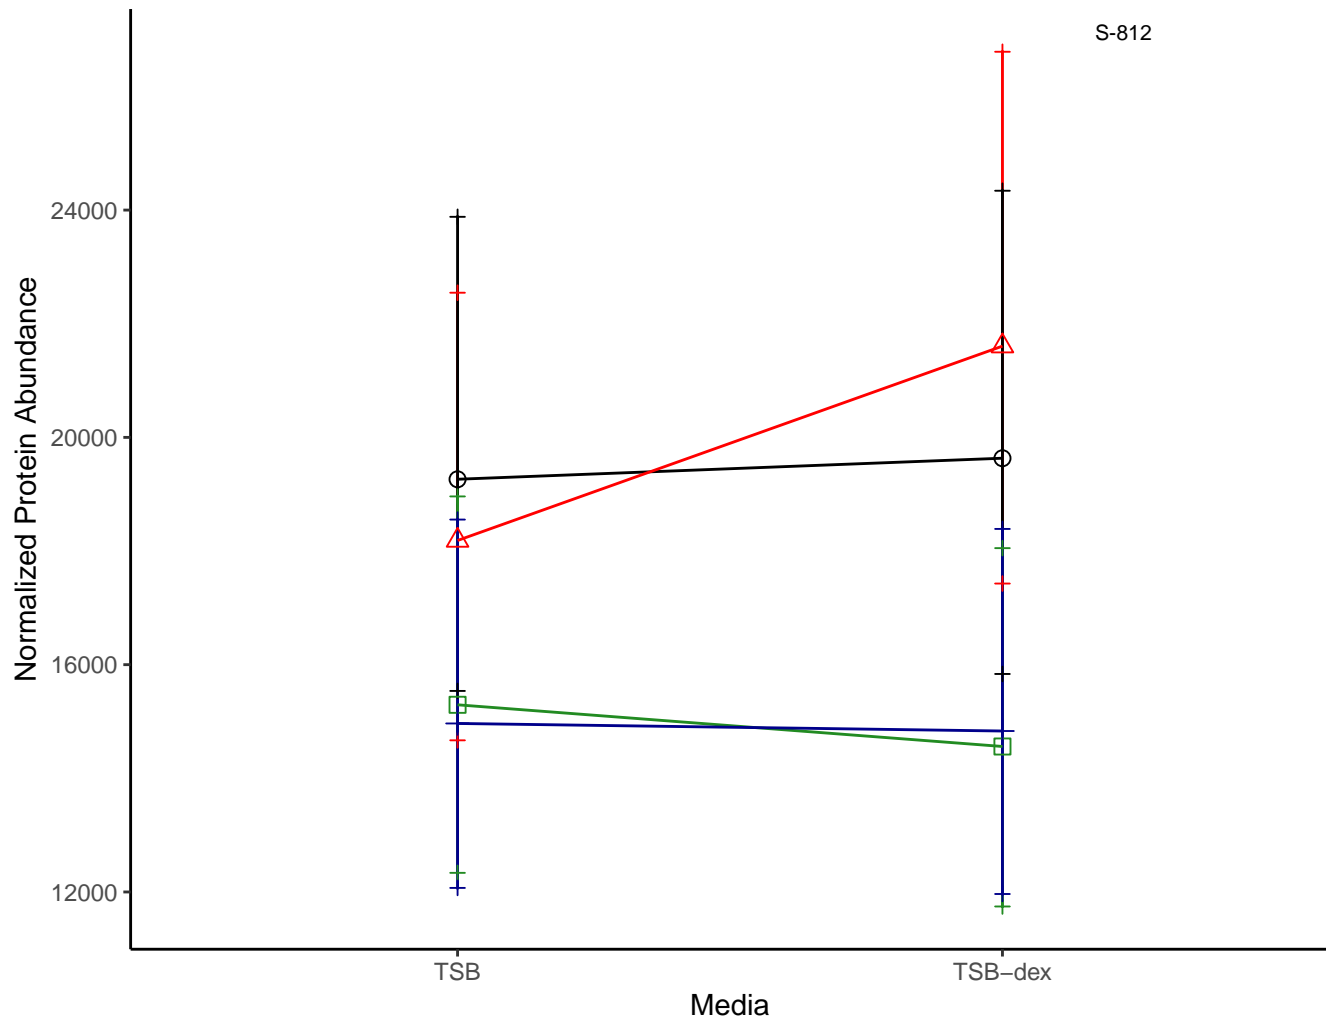

- ⊕ SA564
- △ SA564-ΔhptRS
- ⊞ SA564-ΔccpA
- + SA564-ΔhptRS/ccpA

# RL18\_STAAM

S-813

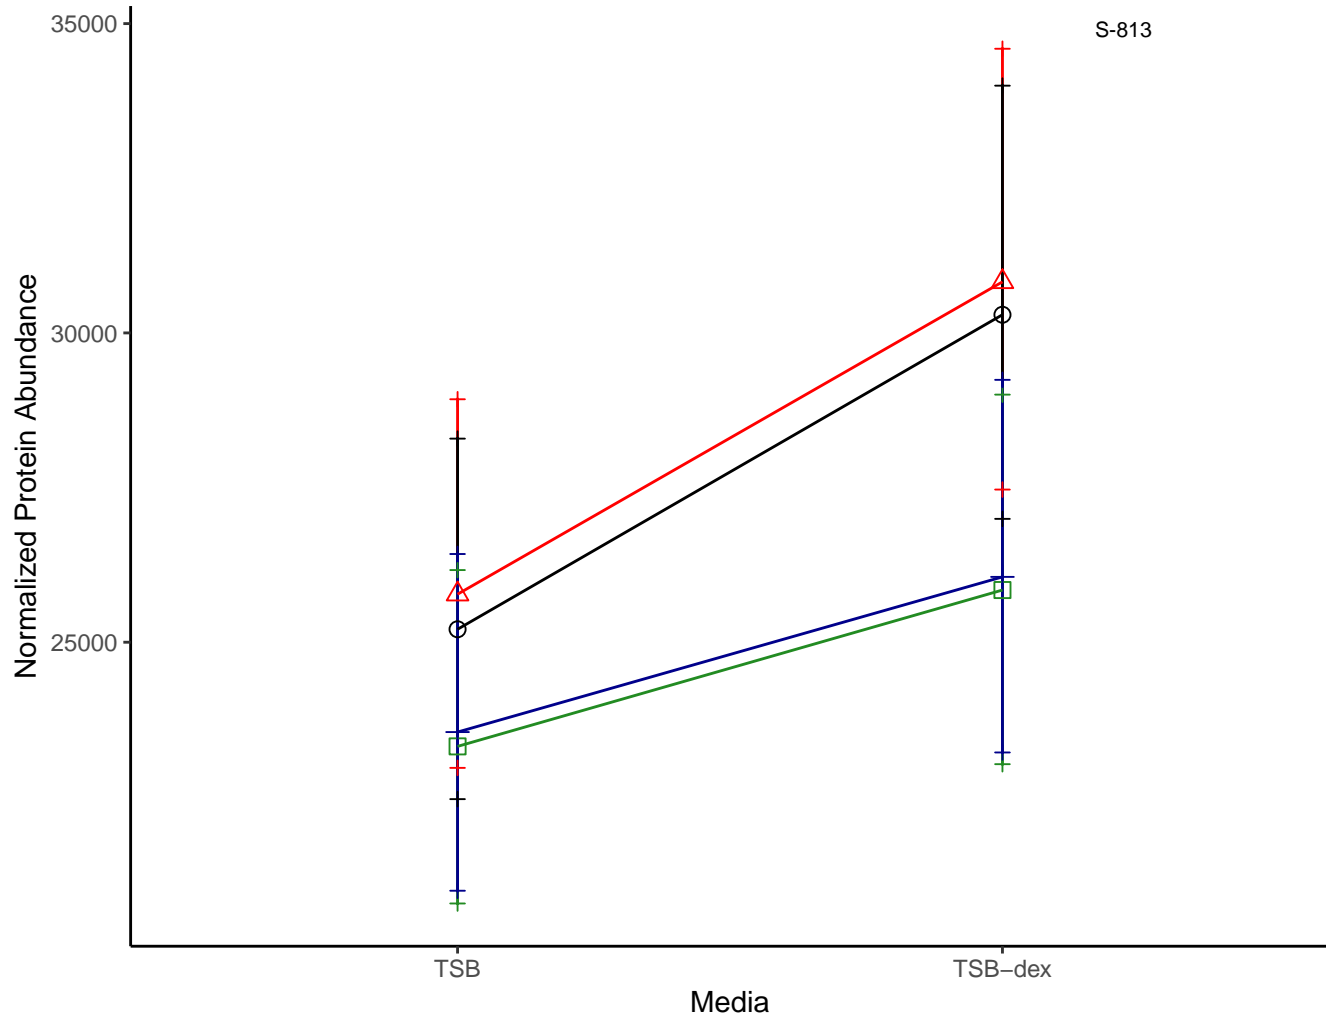

- ⊕ SA564
- △ SA564- $\Delta hptRS$
- ⊞ SA564- $\Delta ccpA$
- + SA564- $\Delta hptRS/ccpA$

# RL19\_STAAM

S-814

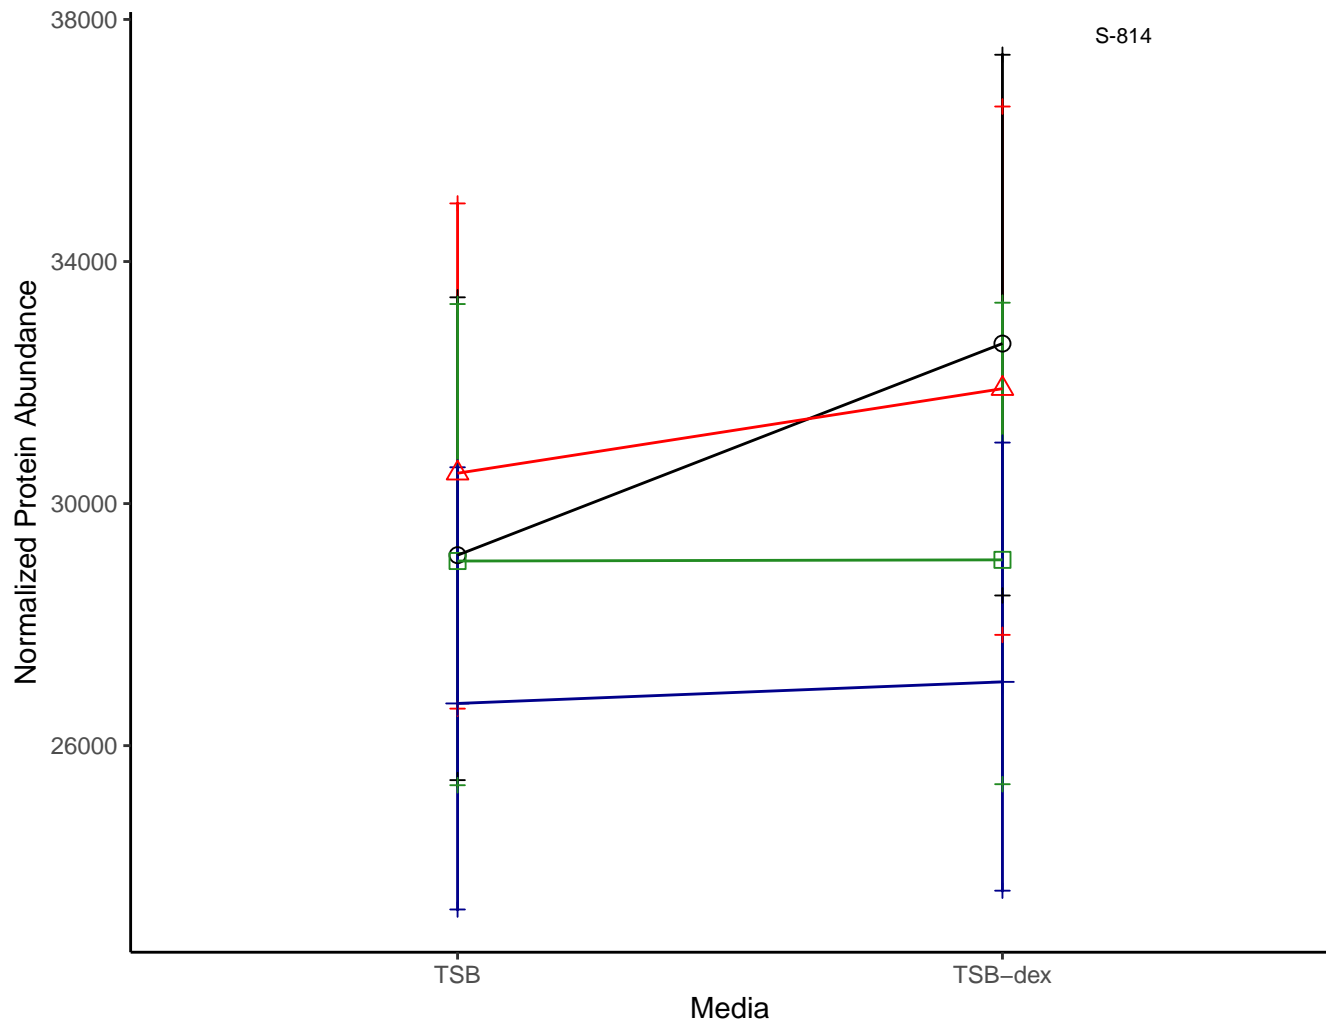

- SA564
- SA564- $\Delta$ *hptRS*
- SA564- $\Delta$ *ccpA*
- SA564- $\Delta$ *hptRS/ccpA*

# RL2\_STAAM

S-815

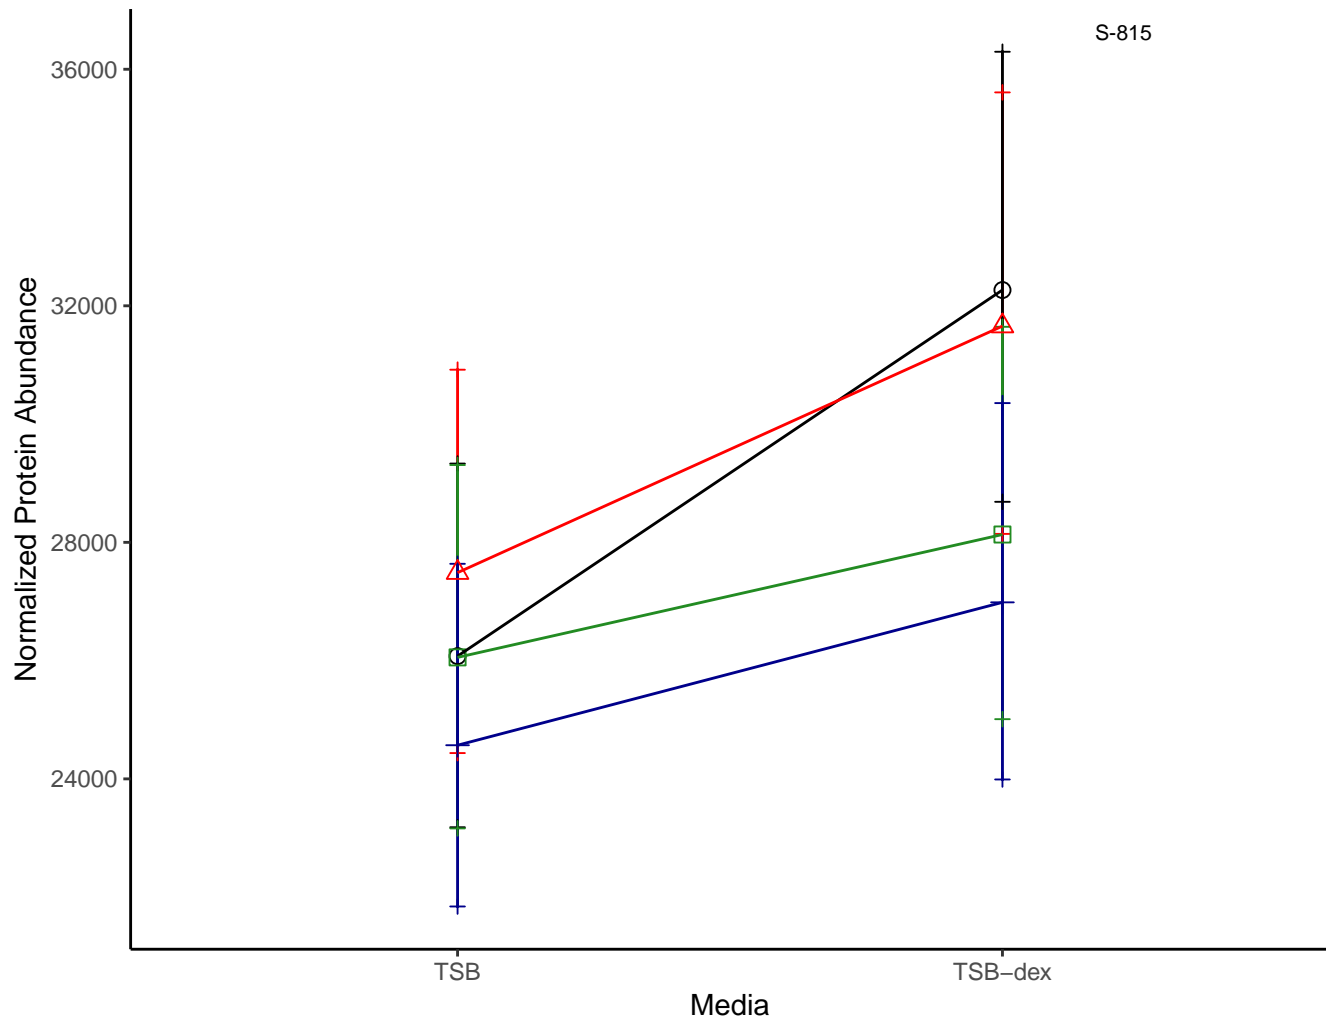

- ⊕ SA564
- △ SA564- $\Delta$ *hptRS*
- ⊞ SA564- $\Delta$ *ccpA*
- + SA564- $\Delta$ *hptRS/ccpA*

## RL20\_STAAM

S-816

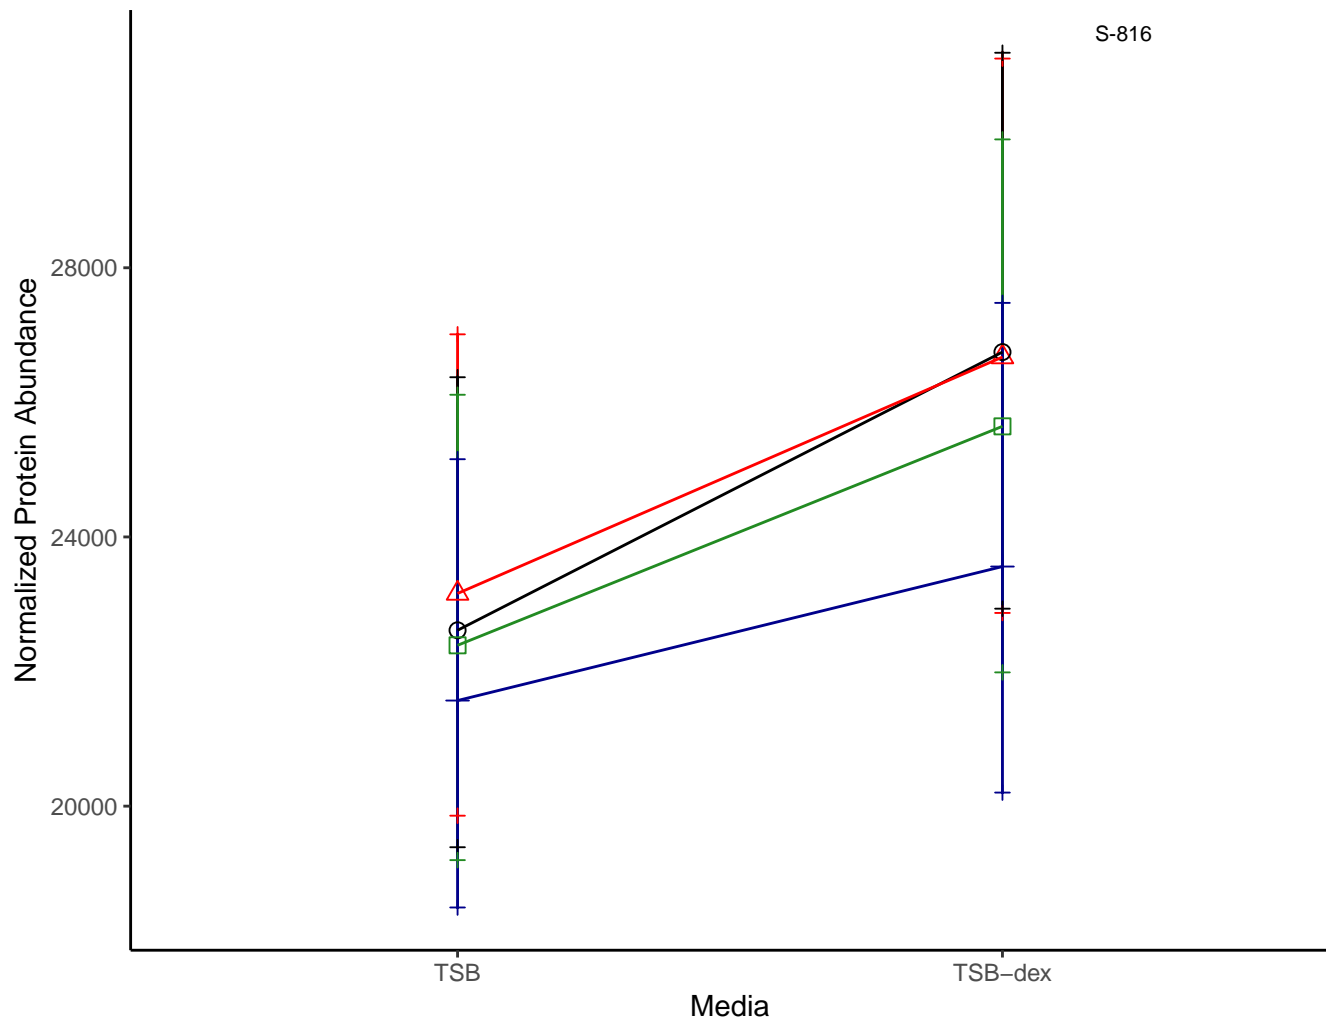

- ⊕ SA564
- △ SA564- $\Delta hptRS$
- ⊞ SA564- $\Delta ccpA$
- + SA564- $\Delta hptRS/ccpA$



# RL21\_STAAM

S-817

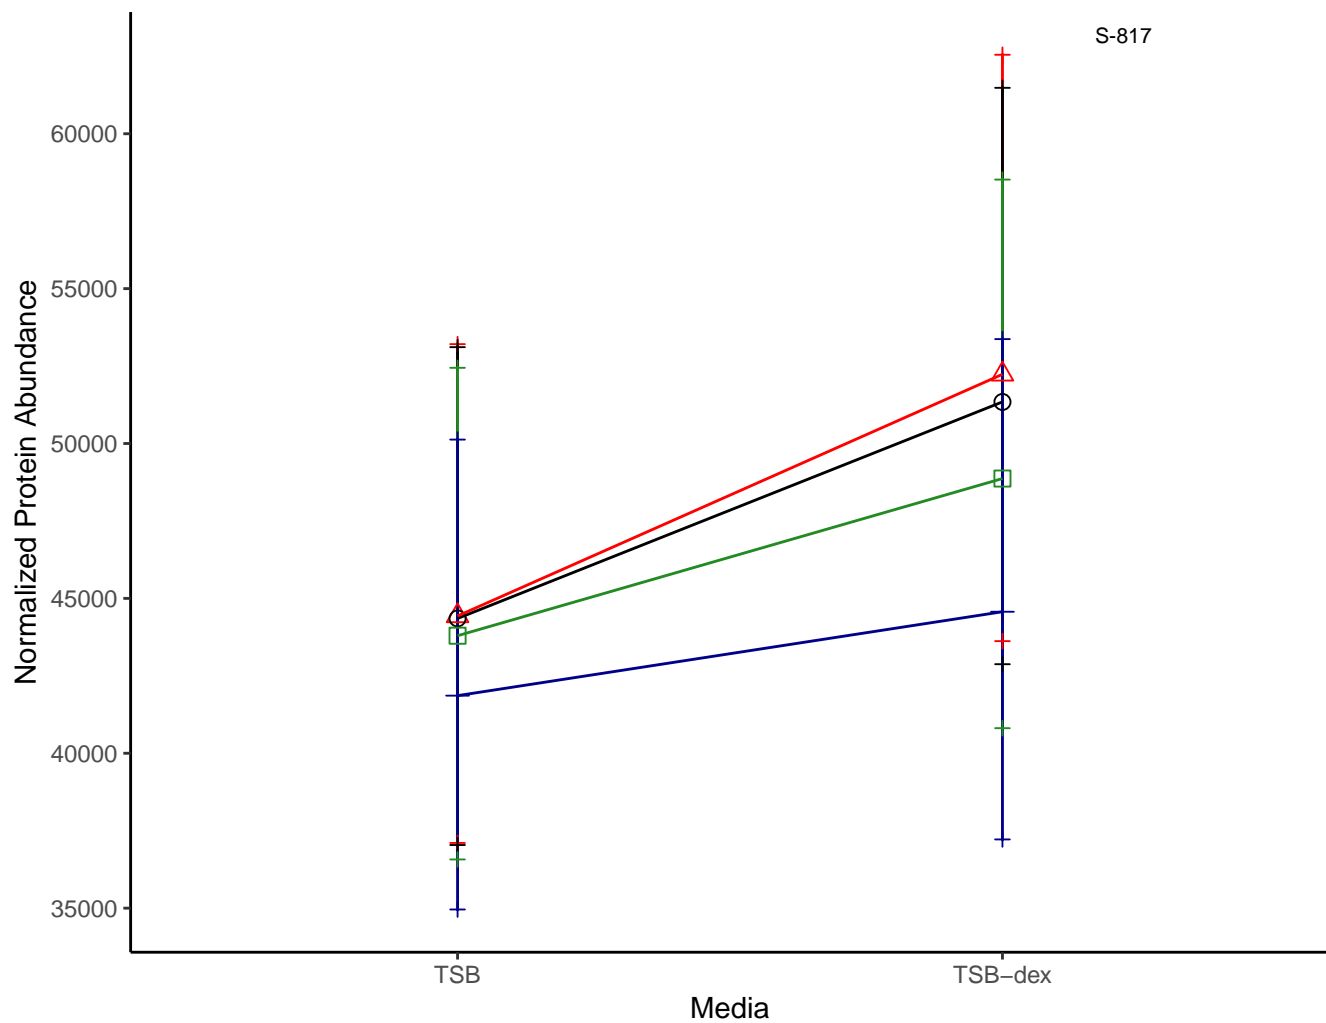

- SA564
- SA564- $\Delta$ *hptRS*
- SA564- $\Delta$ *ccpA*
- SA564- $\Delta$ *hptRS/ccpA*

# RL22\_STAAM

S-818

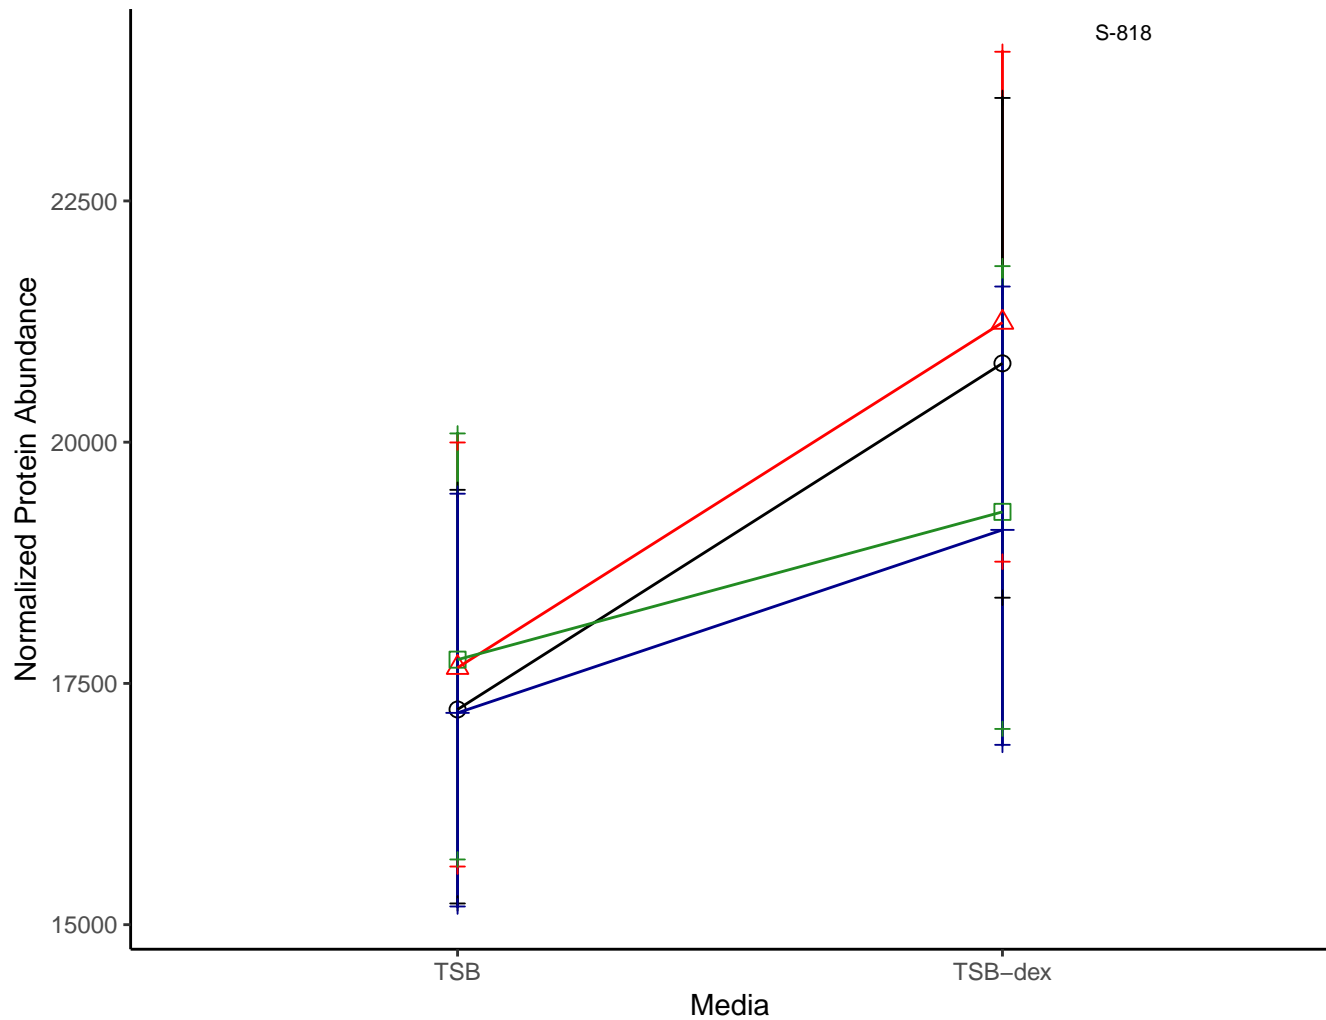

- ⊕ SA564
- △ SA564-ΔhptRS
- ⊞ SA564-ΔccpA
- + SA564-ΔhptRS/ccpA

# RL23\_STAAM

S-819

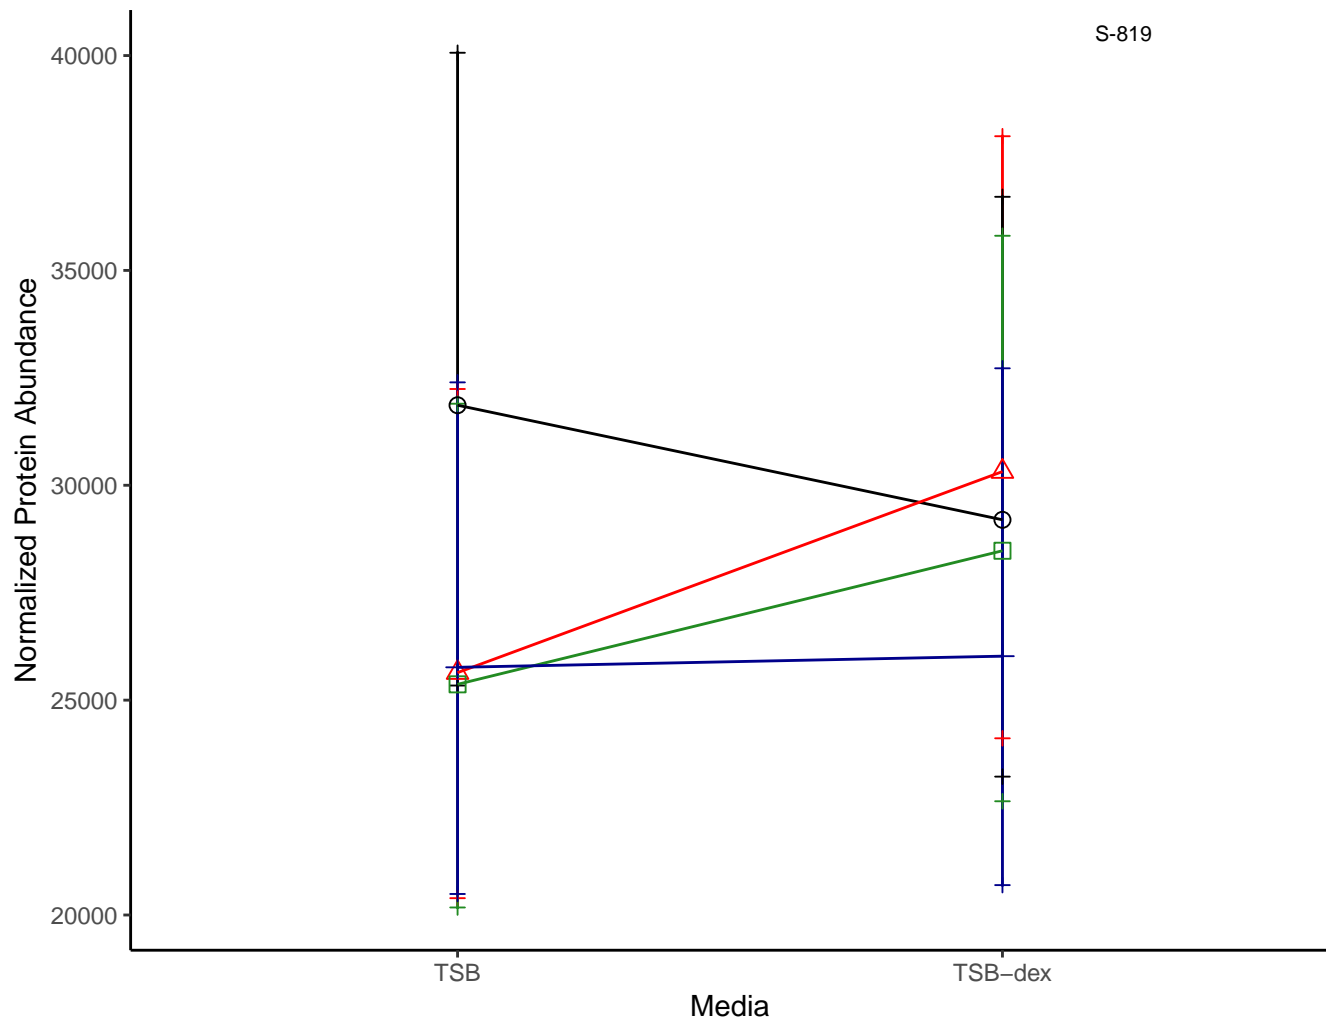

- ⊕ SA564
- △ SA564- $\Delta$ *hptRS*
- ⊞ SA564- $\Delta$ *ccpA*
- + SA564- $\Delta$ *hptRS/ccpA*

# RL24\_STAAM

S-820

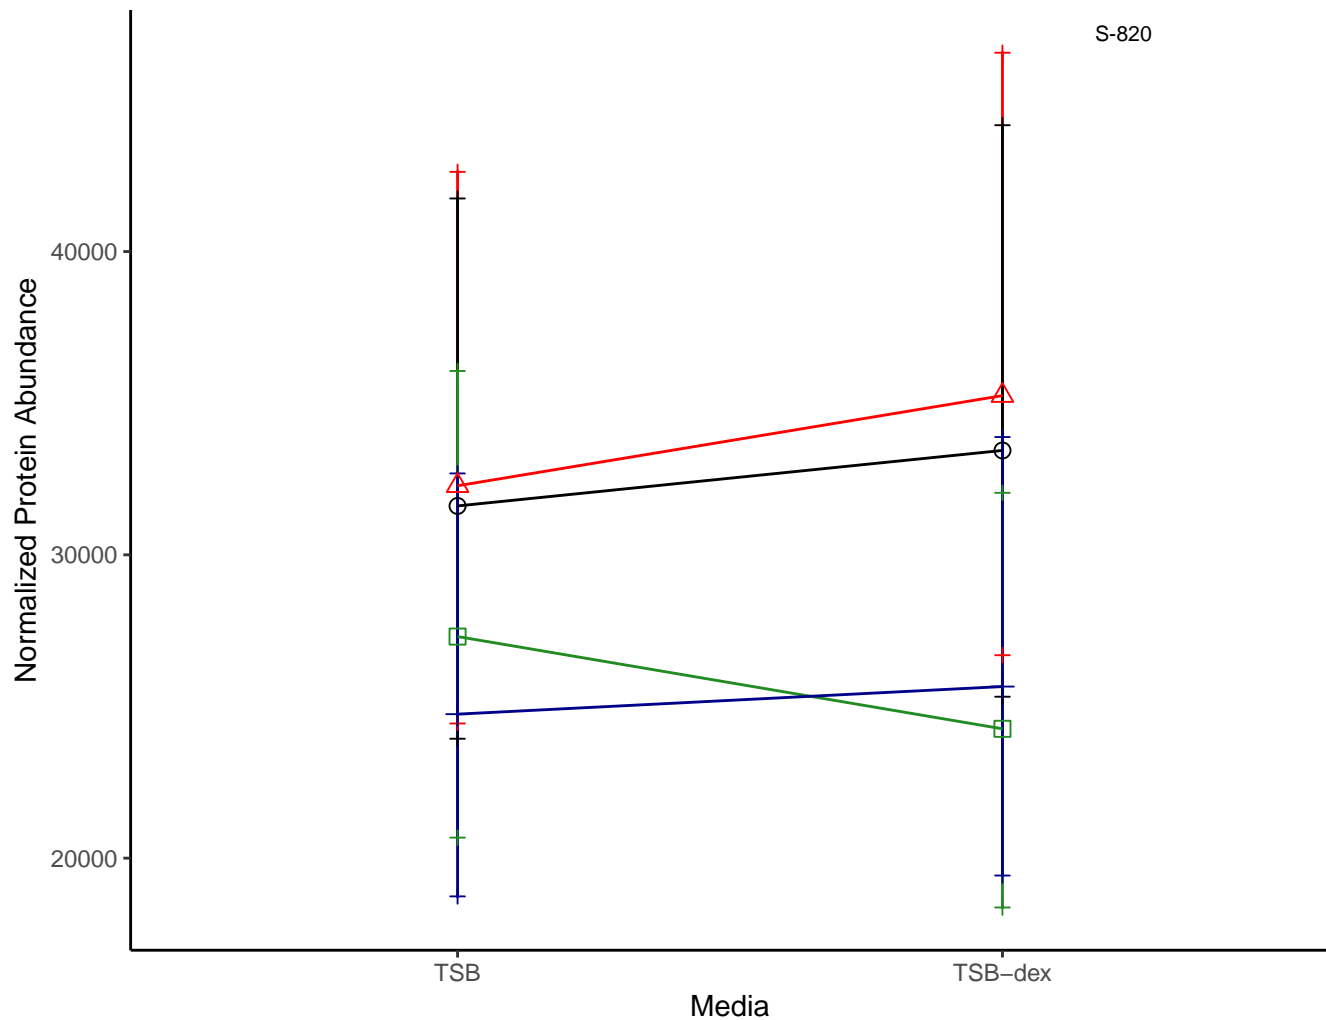

- ⊕ SA564
- △ SA564-ΔhptRS
- ⊞ SA564-ΔccpA
- + SA564-ΔhptRS/ccpA

# RL25\_STAAM

S-821

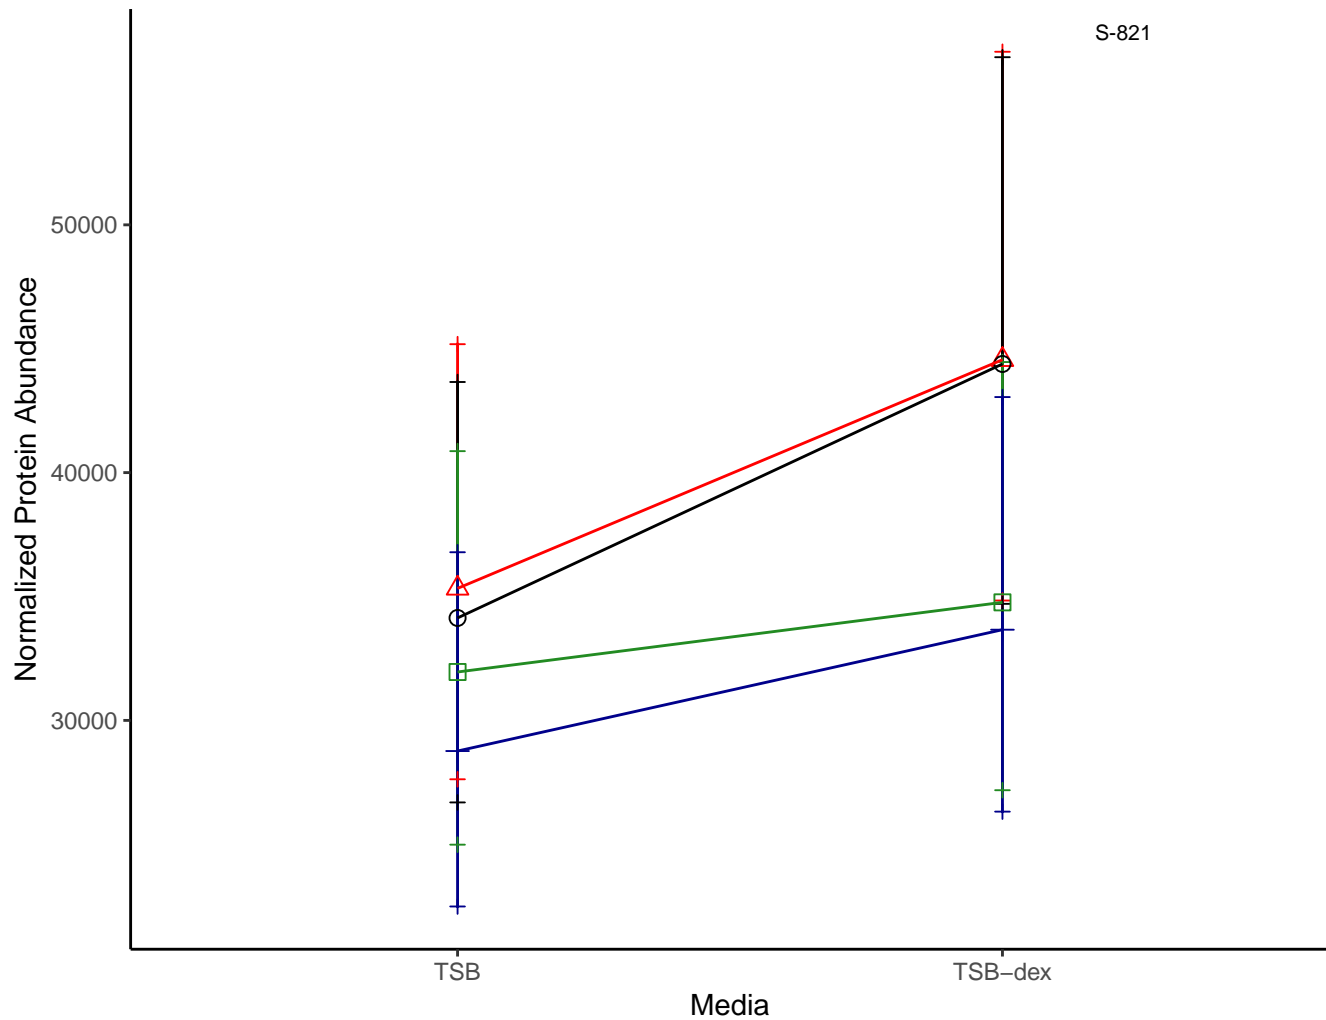

- ⊕ SA564
- △ SA564-ΔhptRS
- ⊞ SA564-ΔccpA
- + SA564-ΔhptRS/ccpA

# RL27\_STAAM

S-822

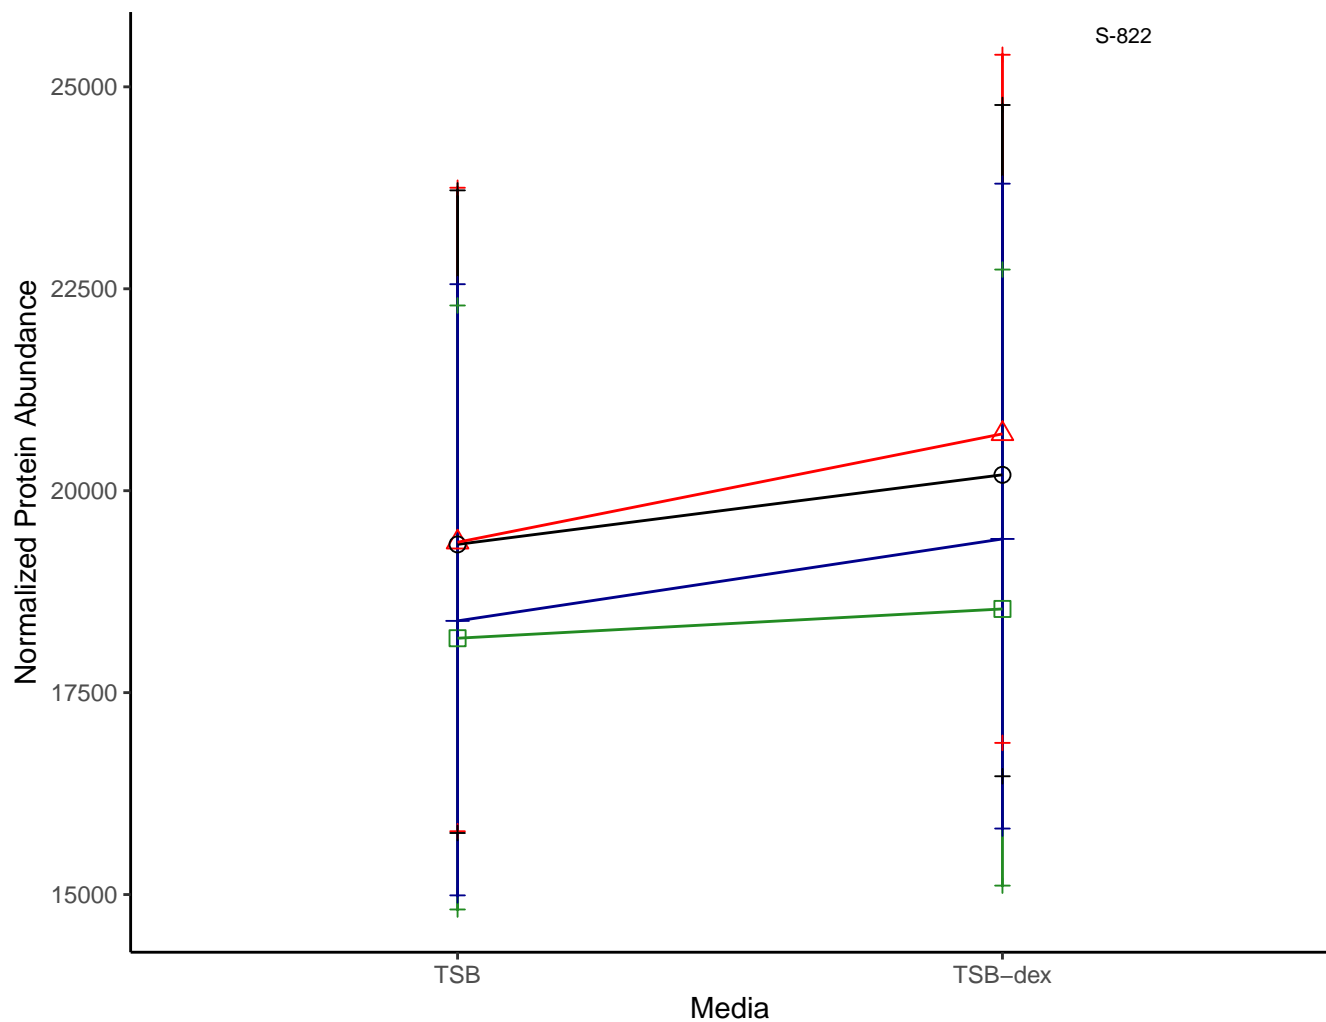

- ⊕ SA564
- △ SA564- $\Delta$ *hptRS*
- ⊞ SA564- $\Delta$ *ccpA*
- + SA564- $\Delta$ *hptRS/ccpA*

# RL28\_STAAM

S-823

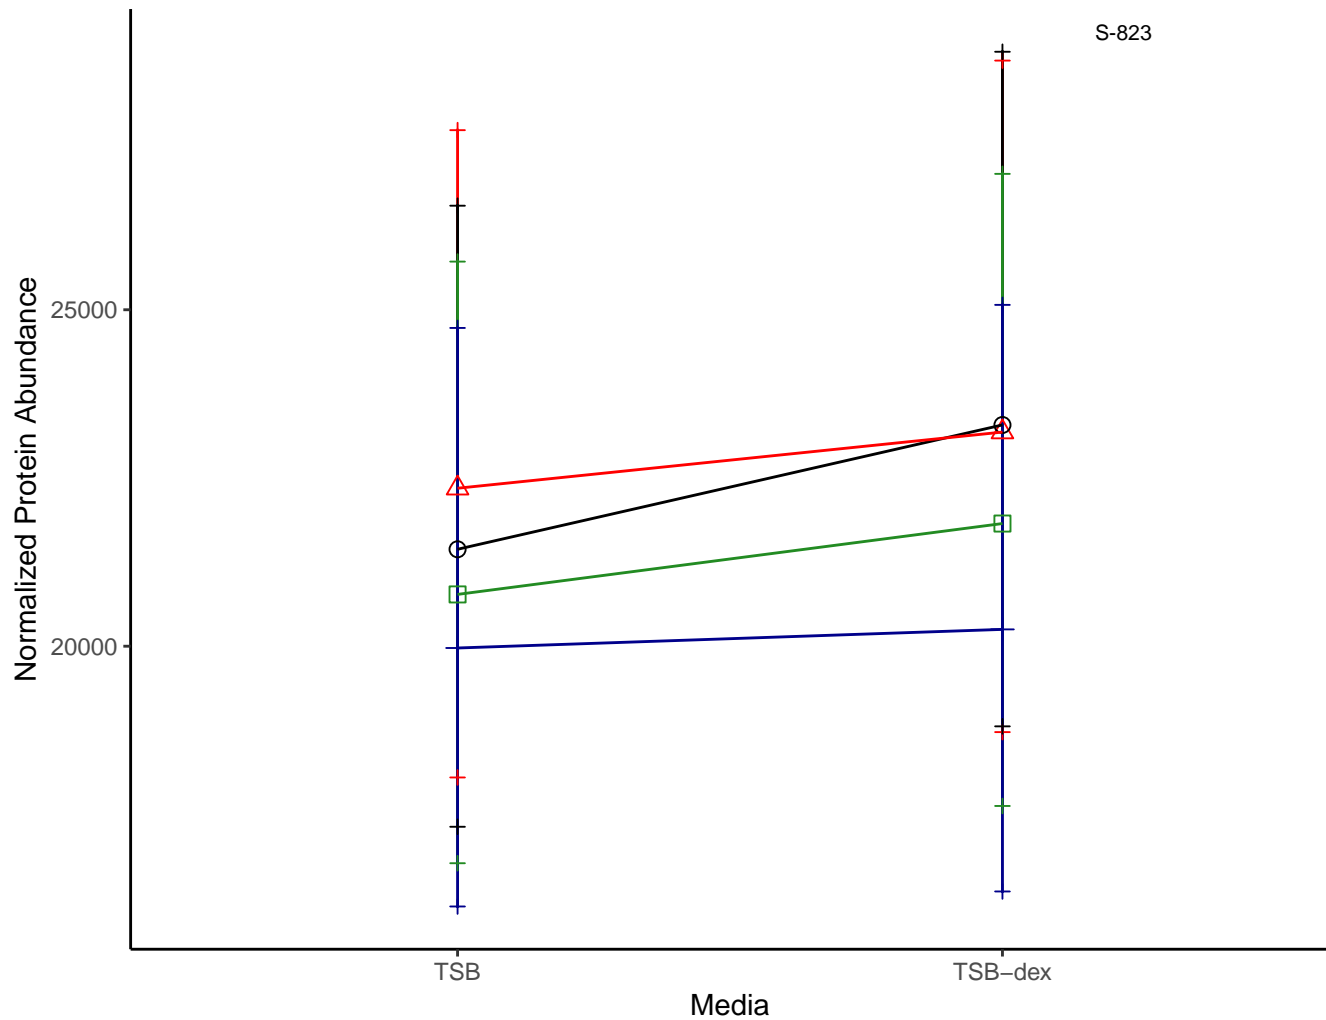

- ⊕ SA564
- △ SA564- $\Delta$ *hptRS*
- ⊞ SA564- $\Delta$ *ccpA*
- + SA564- $\Delta$ *hptRS/ccpA*

# RL29\_STAAM

S-824

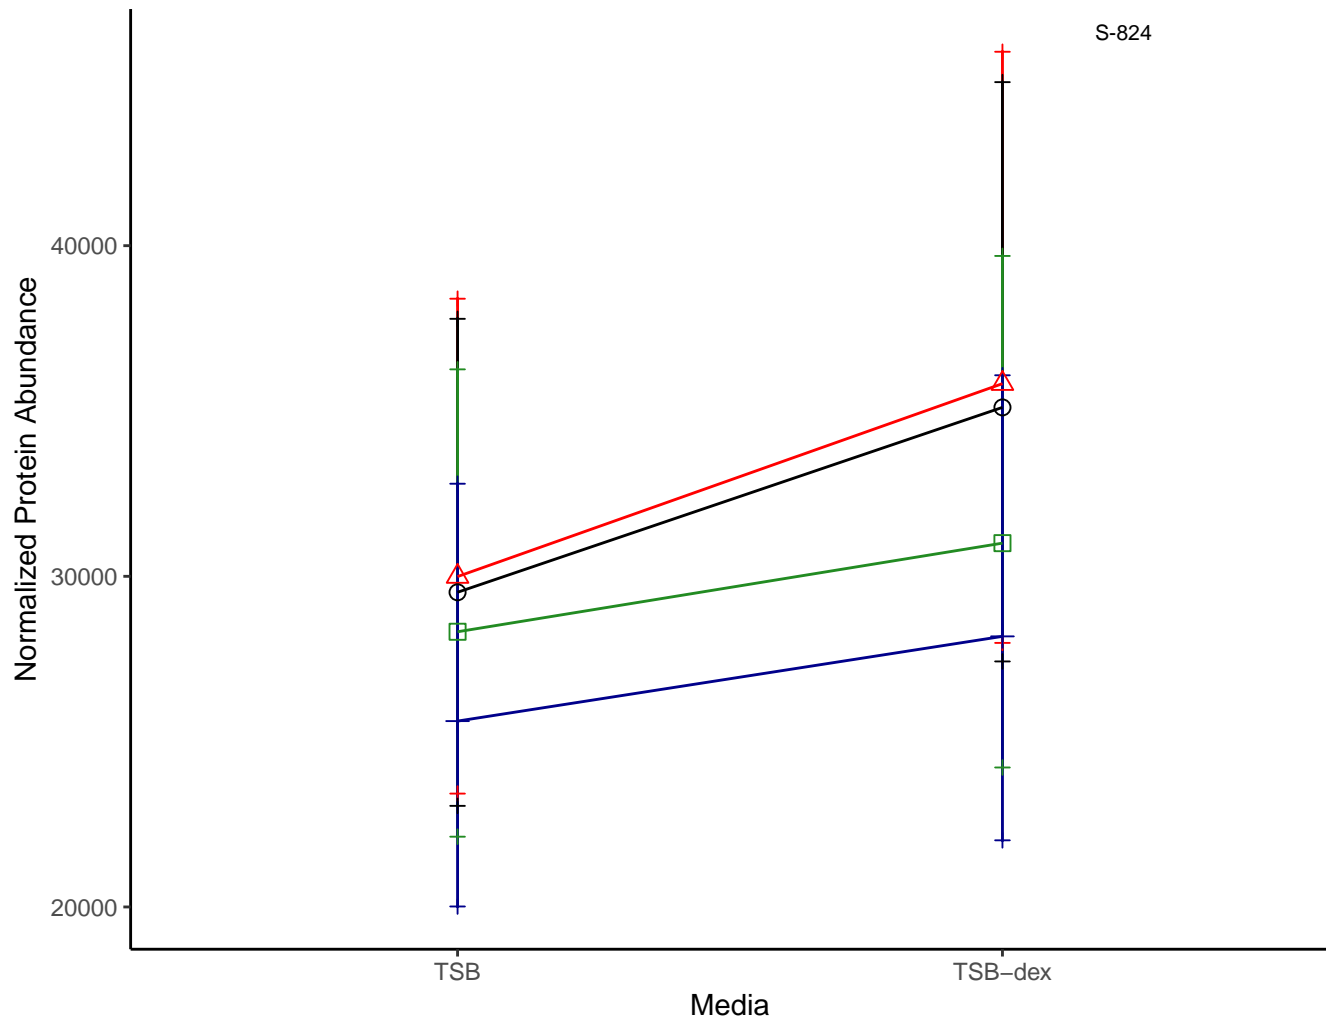

- ⊕ SA564
- △ SA564-ΔhptRS
- ⊞ SA564-ΔccpA
- + SA564-ΔhptRS/ccpA



# RL3\_STAAM

S-825

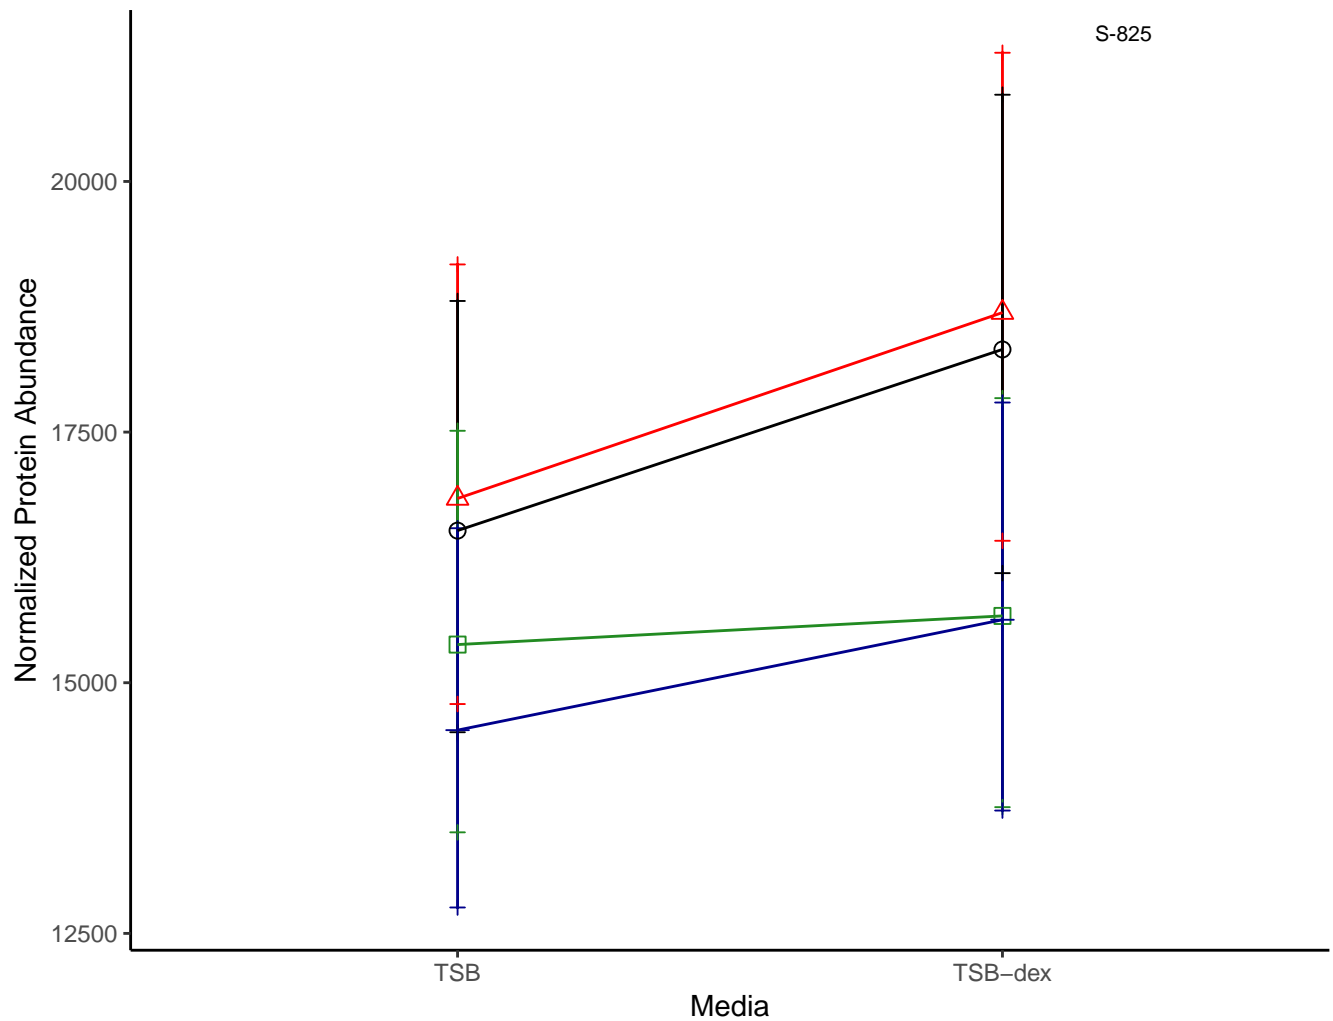

- ⊕ SA564
- △ SA564-ΔhptRS
- ⊞ SA564-ΔccpA
- + SA564-ΔhptRS/ccpA

# RL30\_STAAM

S-826

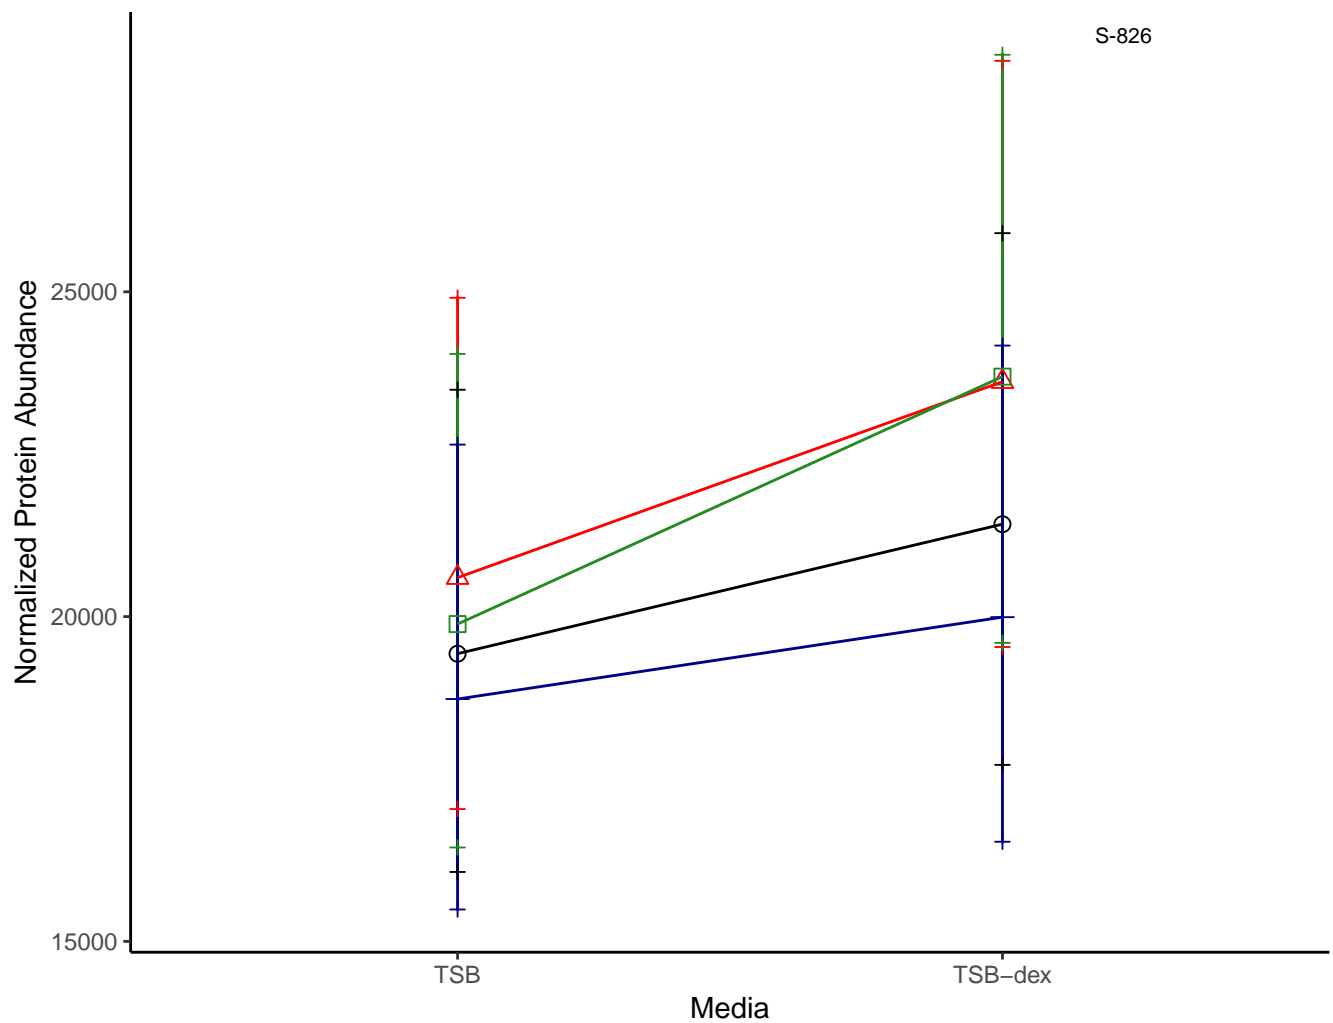

- ⊕ SA564
- △ SA564-ΔhptRS
- SA564-ΔccpA
- + SA564-ΔhptRS/ccpA

# RL31B\_STAAM

S-827

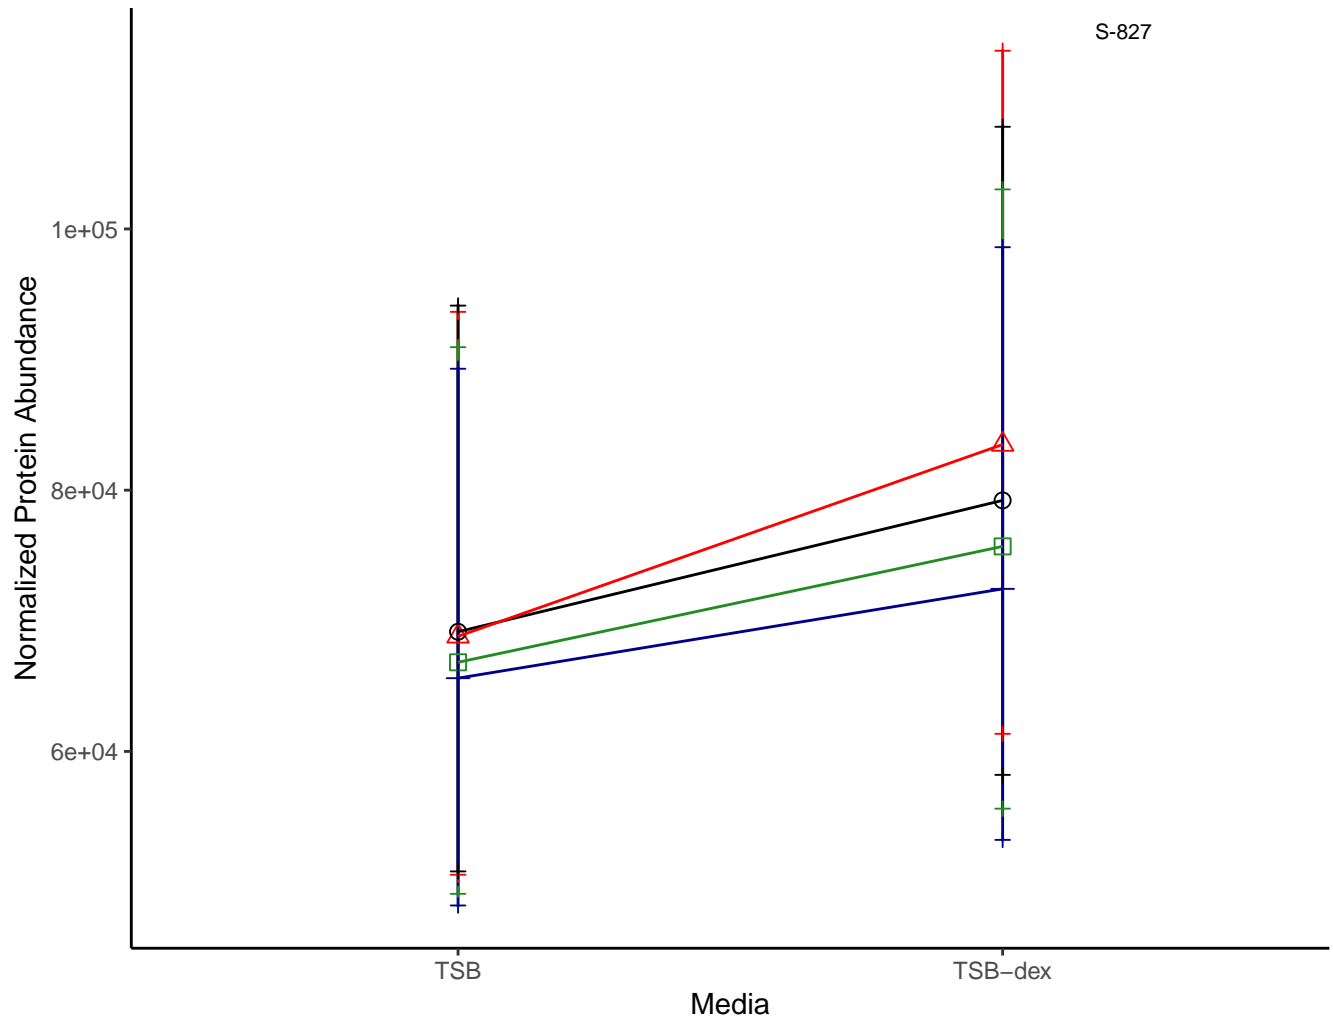

- ⊕ SA564
- △ SA564- $\Delta$ *hptRS*
- ⊞ SA564- $\Delta$ *ccpA*
- + SA564- $\Delta$ *hptRS/ccpA*

# RL32\_STAAM

S-828

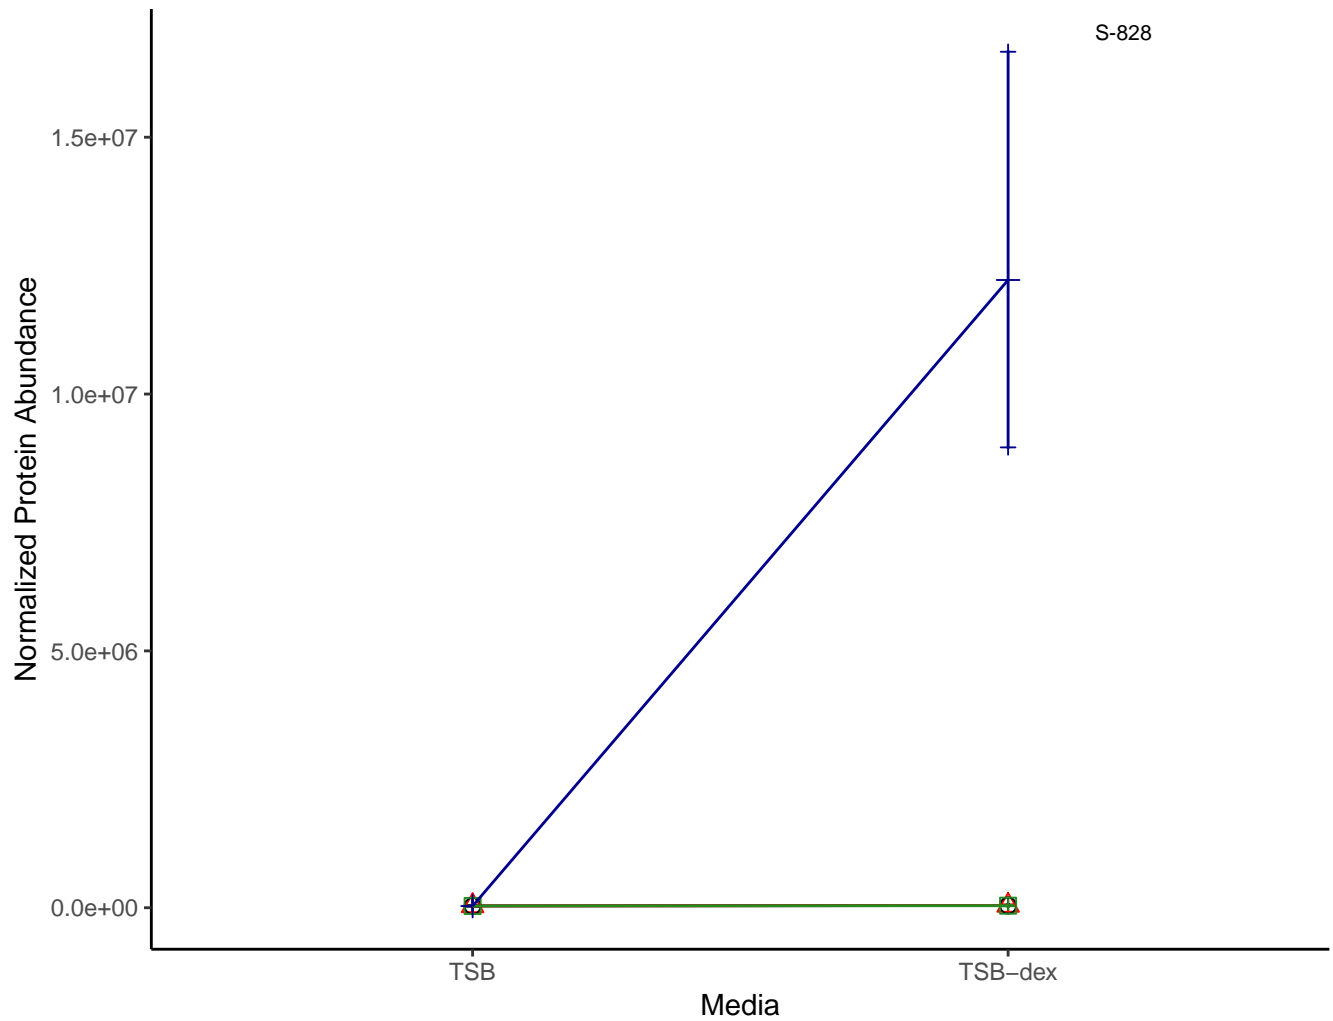

- ⊕ SA564
- △ SA564-ΔhptRS
- SA564-ΔccpA
- + SA564-ΔhptRS/ccpA

# RL331\_STAAM

S-829

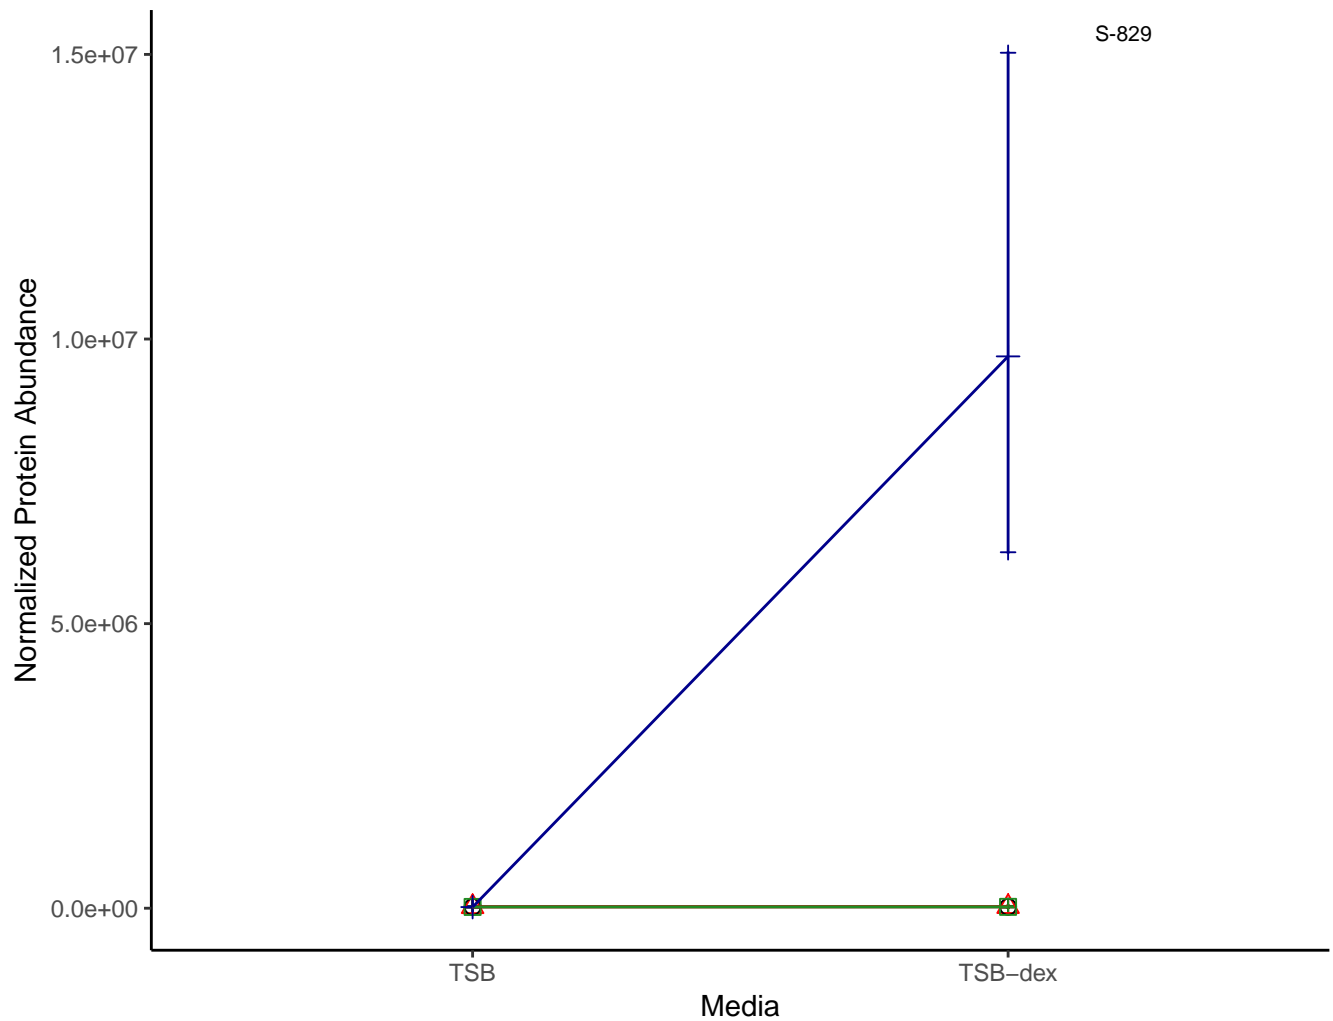

- ⊕ SA564
- △ SA564- $\Delta hptRS$
- ⊞ SA564- $\Delta ccpA$
- + SA564- $\Delta hptRS/ccpA$

# RL332\_STAAM

S-830

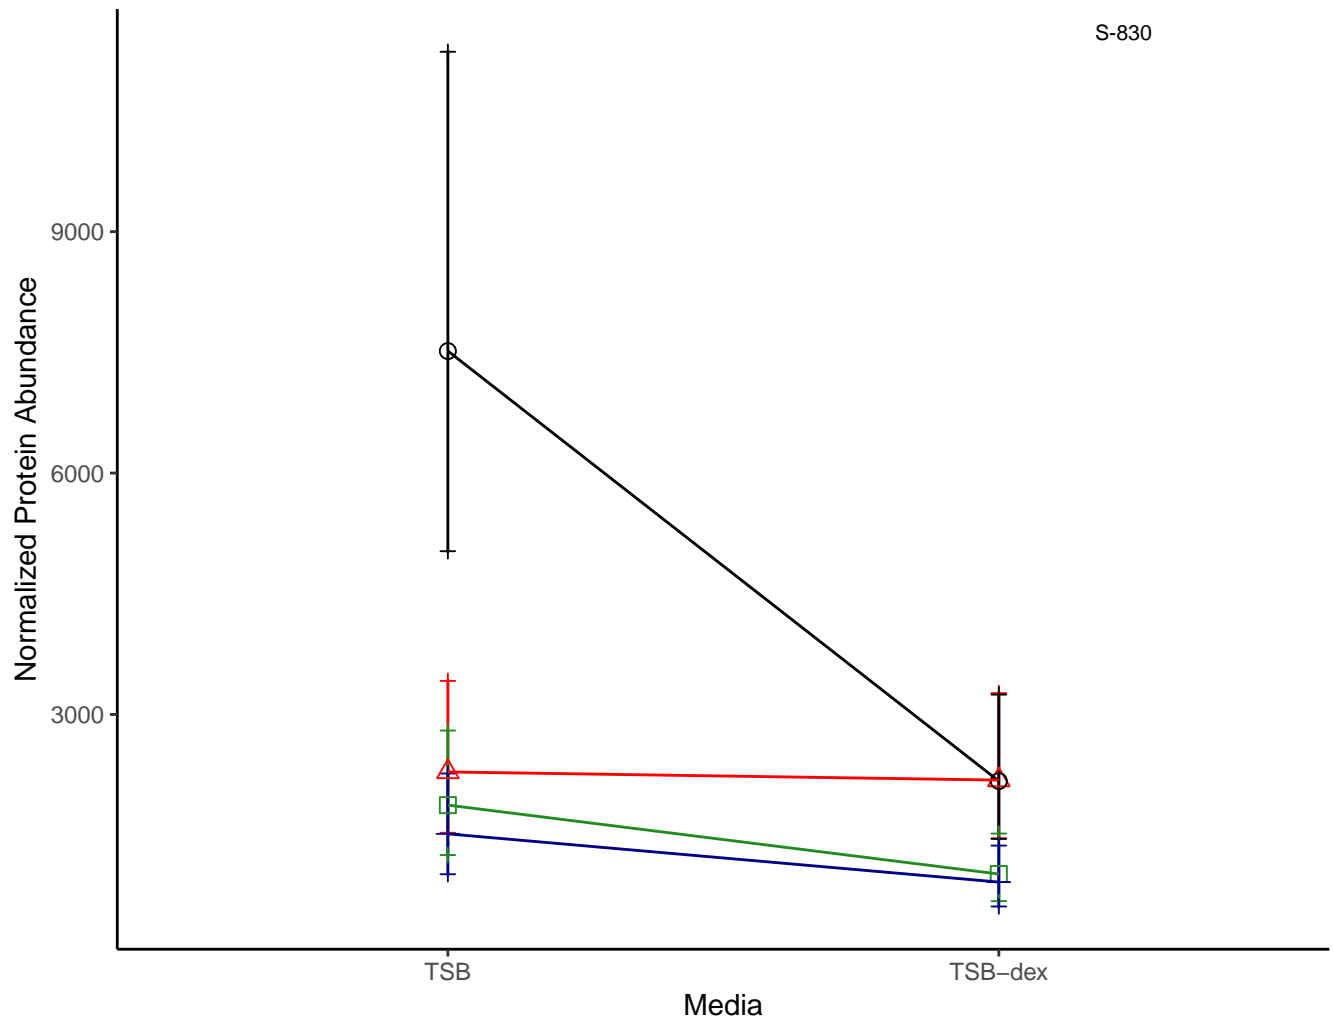

- ⊕ SA564
- △ SA564- $\Delta hptRS$
- ⊞ SA564- $\Delta ccpA$
- + SA564- $\Delta hptRS/ccpA$

# RL35\_STAAM

S-831

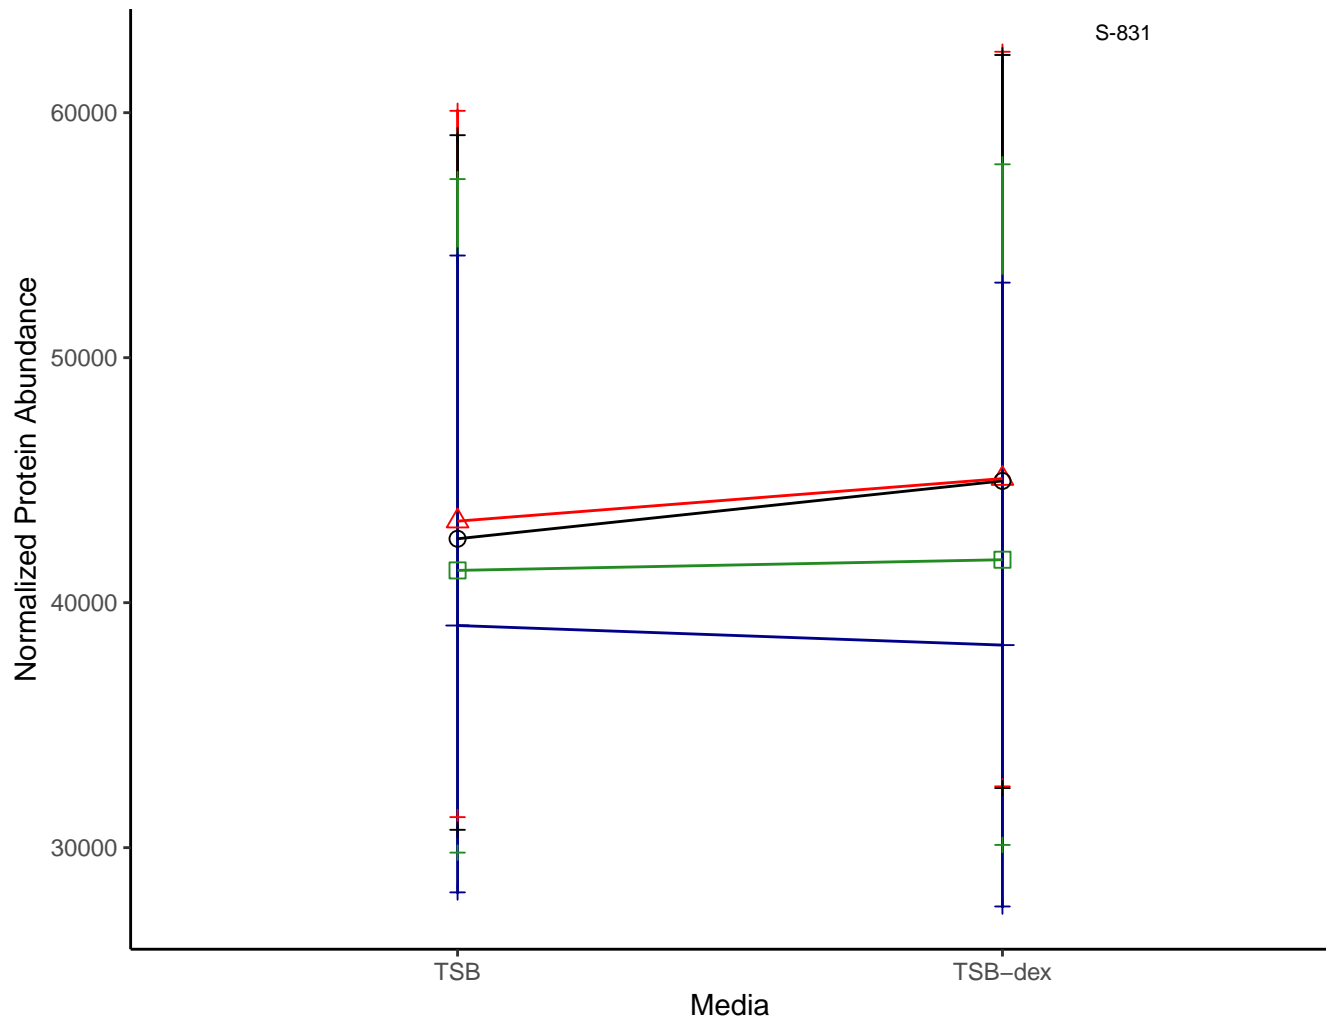

- ⊕ SA564
- △ SA564- $\Delta$ *hptRS*
- ⊞ SA564- $\Delta$ *ccpA*
- + SA564- $\Delta$ *hptRS/ccpA*

# RL36\_STAAM

S-832

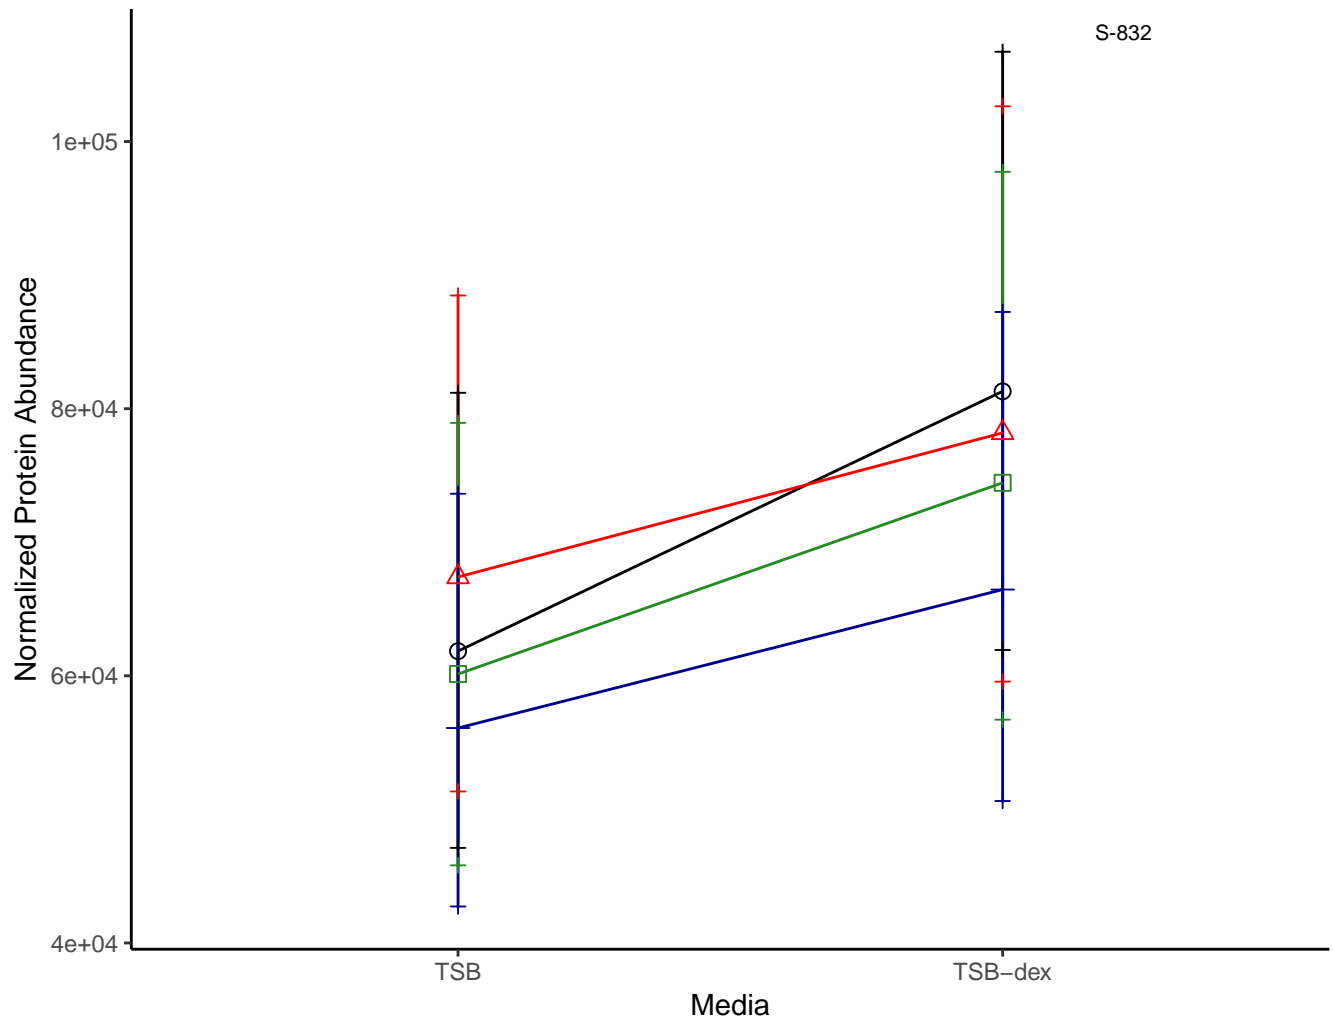

- ⊕ SA564
- △ SA564- $\Delta hptRS$
- SA564- $\Delta ccpA$
- + SA564- $\Delta hptRS/ccpA$



# RL4\_STAAM

S-833

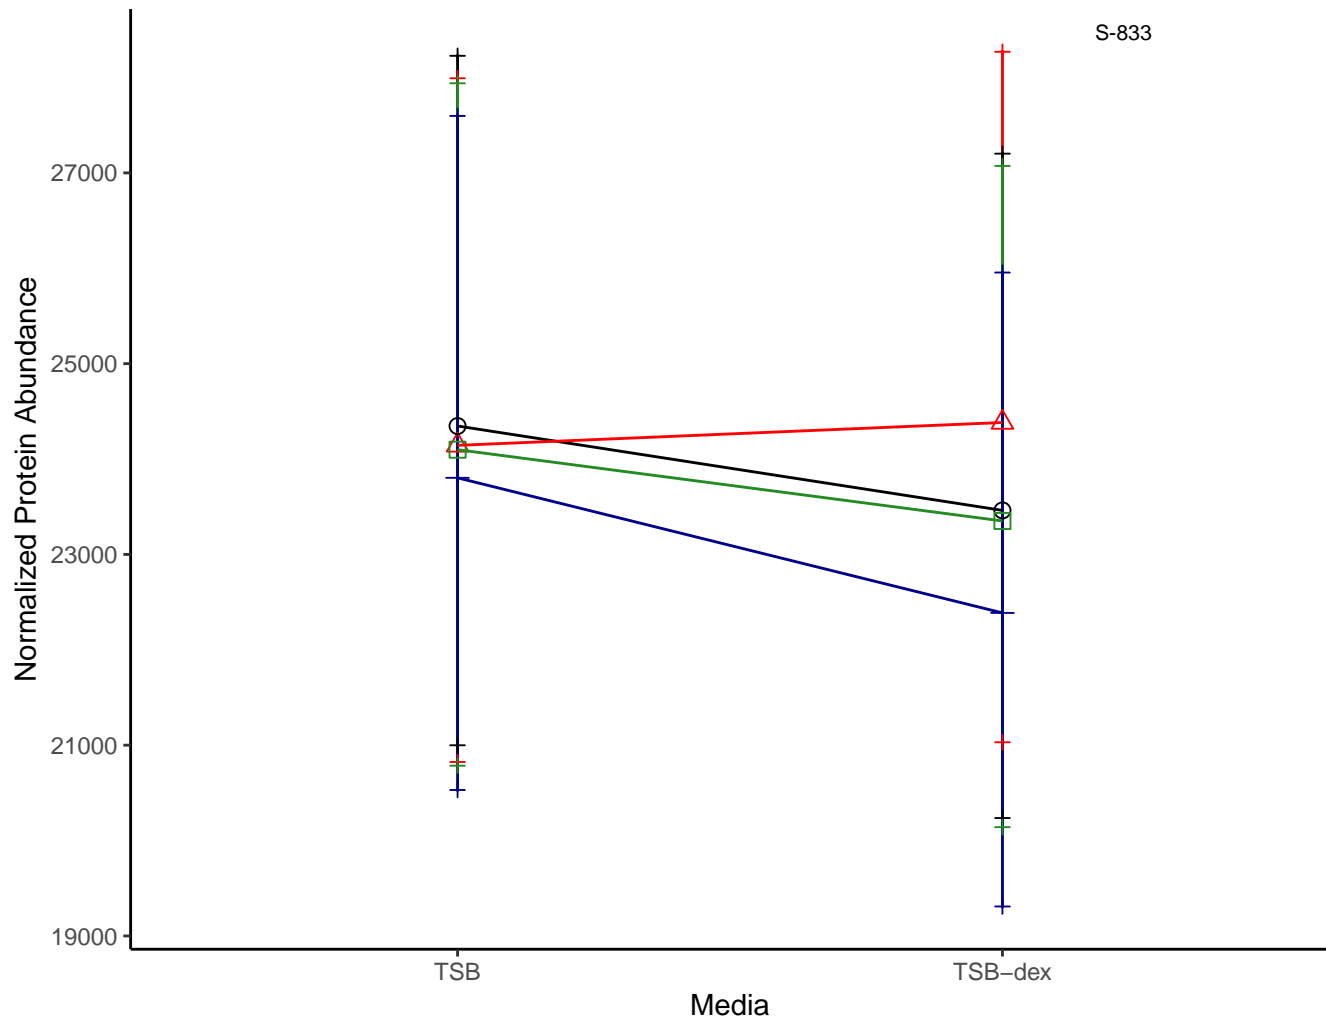

- ⊕ SA564
- △ SA564- $\Delta$ *hptRS*
- ⊞ SA564- $\Delta$ *ccpA*
- + SA564- $\Delta$ *hptRS/ccpA*

# RL5\_STAAM

S-834

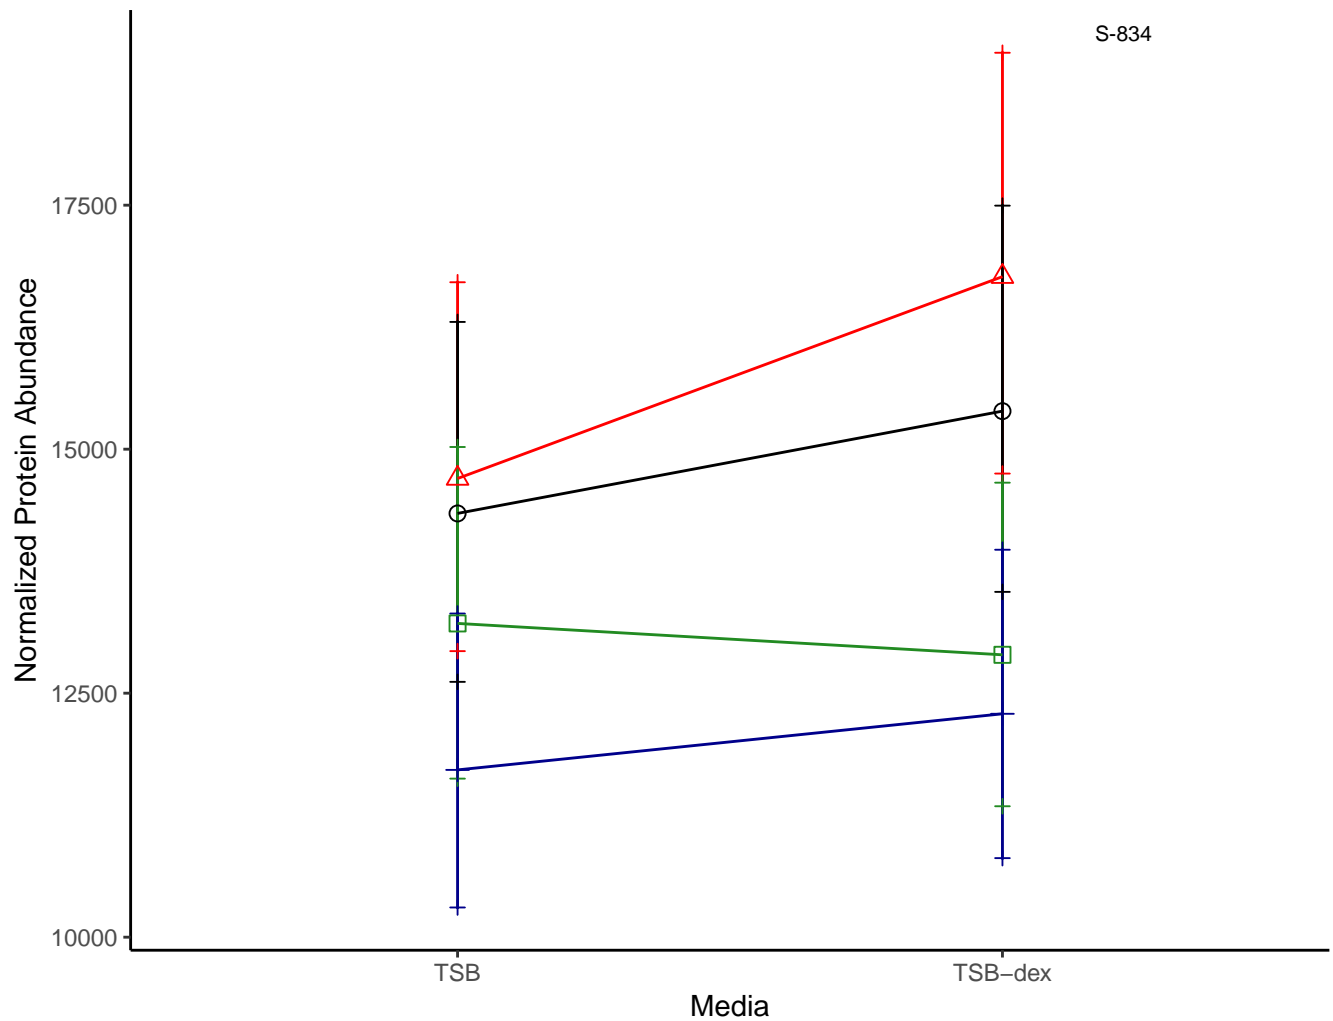

- ⊕ SA564
- △ SA564-ΔhptRS
- ⊞ SA564-ΔccpA
- + SA564-ΔhptRS/ccpA

# RL6\_STAAM

S-835

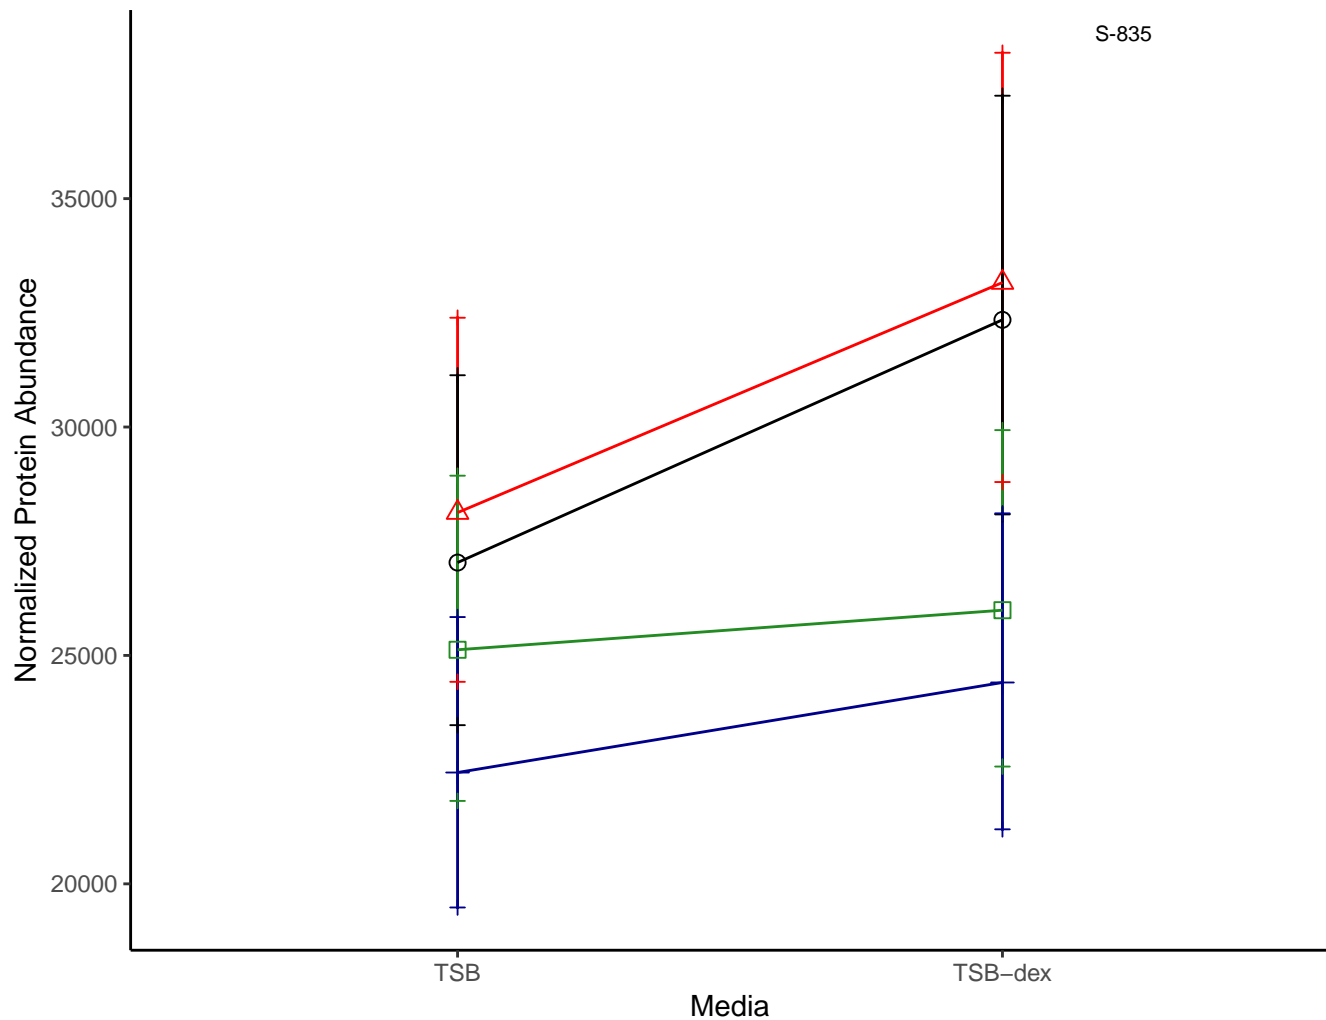

- ⊕ SA564
- △ SA564- $\Delta$ *hptRS*
- ⊞ SA564- $\Delta$ *ccpA*
- + SA564- $\Delta$ *hptRS/ccpA*

# RL7\_STAAM

S-836

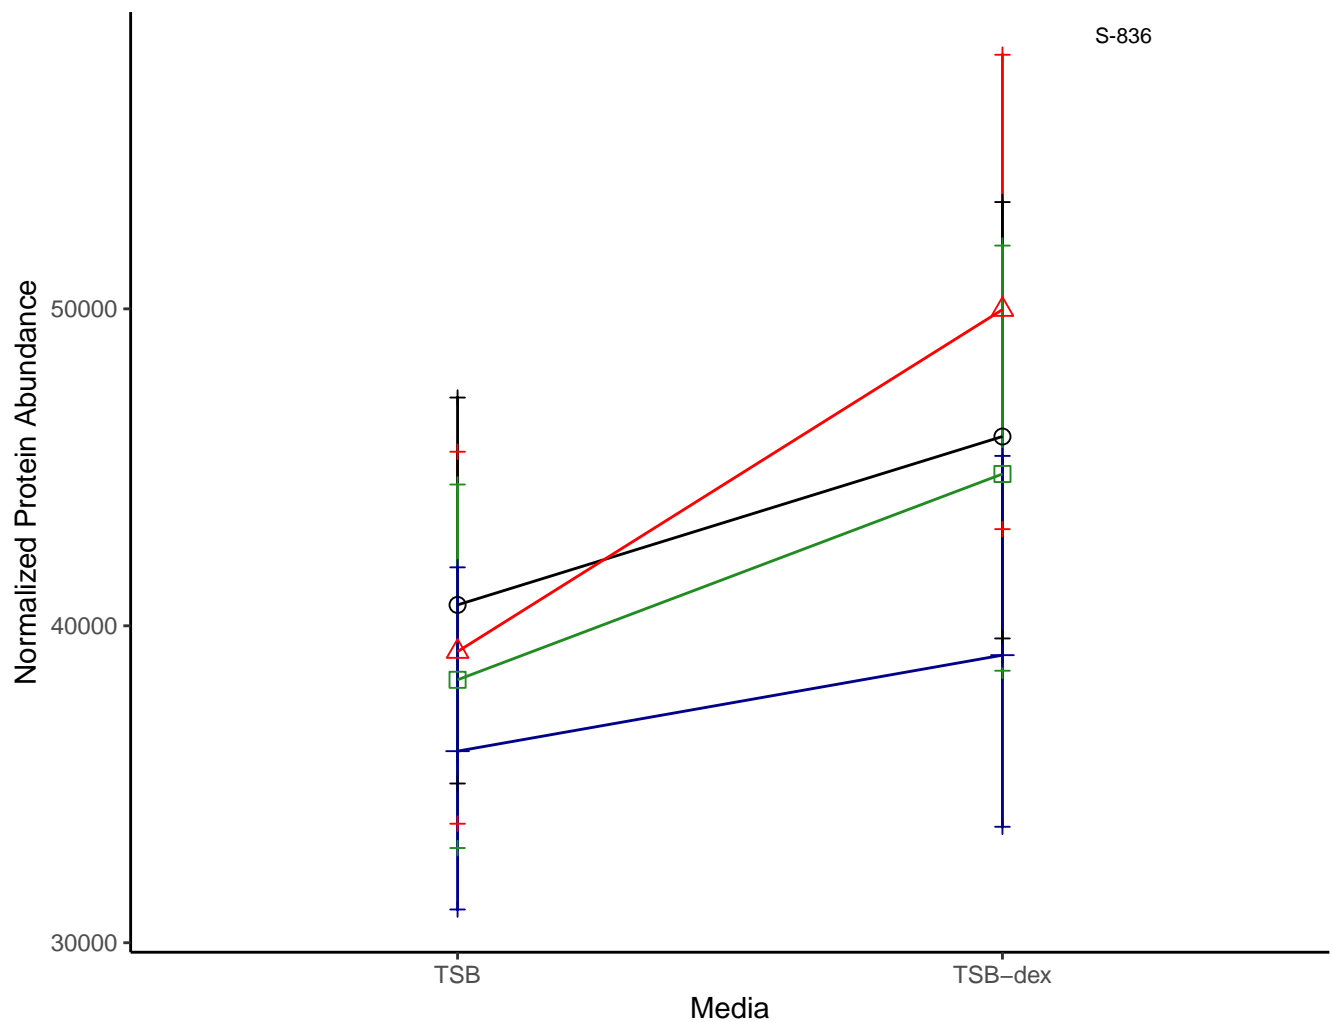

- ⊕ SA564
- △ SA564-ΔhptRS
- ⊞ SA564-ΔccpA
- + SA564-ΔhptRS/ccpA

# RL9\_STAAM

S-837

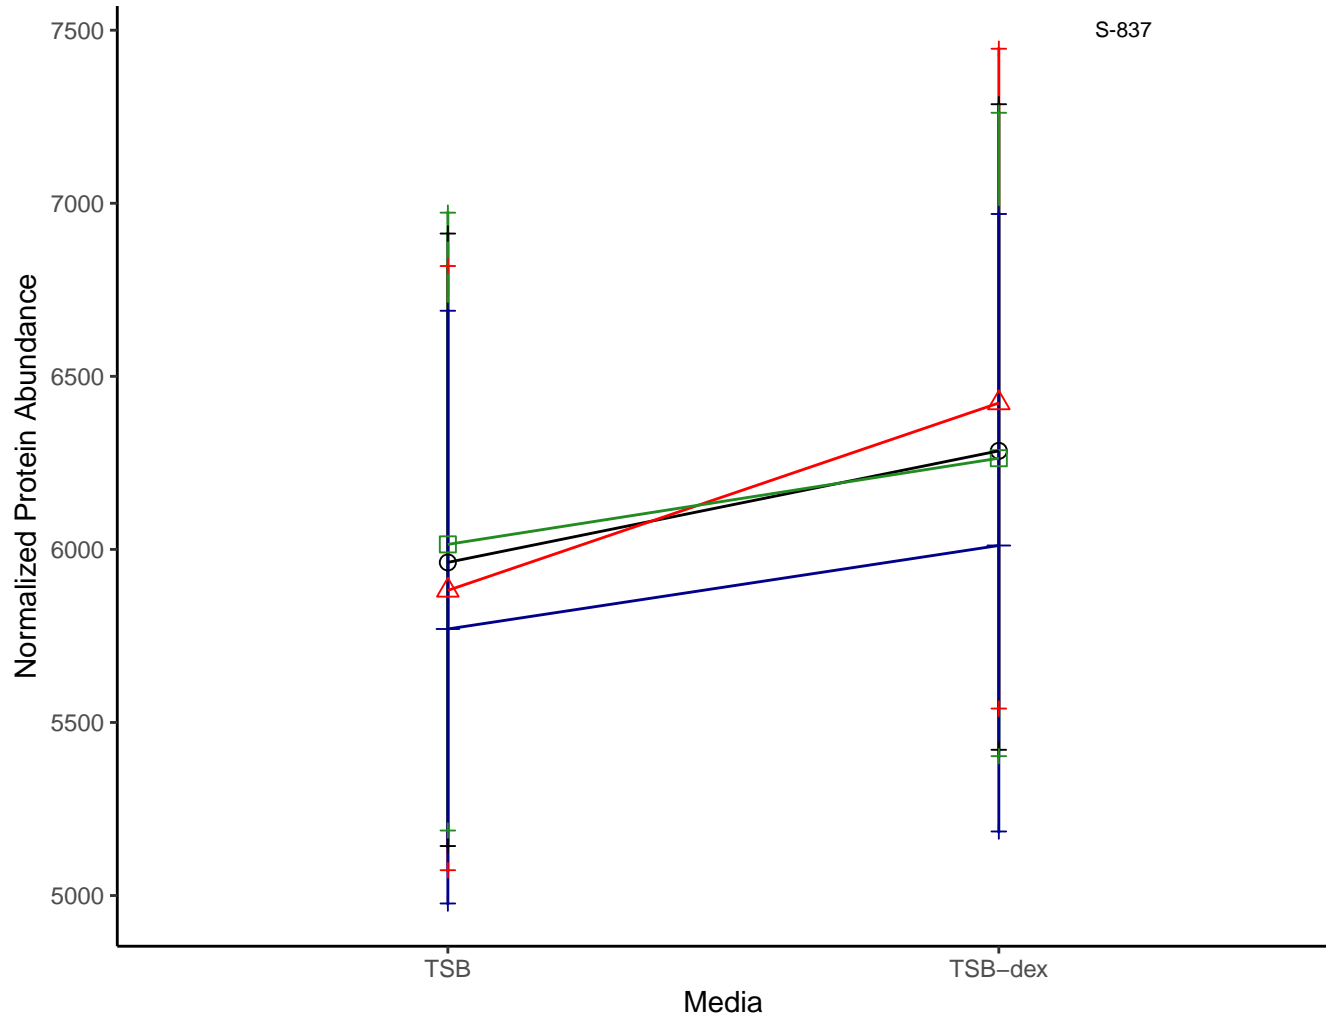

- ⊕ SA564
- △ SA564- $\Delta$ *hptRS*
- ⊞ SA564- $\Delta$ *ccpA*
- + SA564- $\Delta$ *hptRS/ccpA*

# RNJ1\_STAAM

S-838

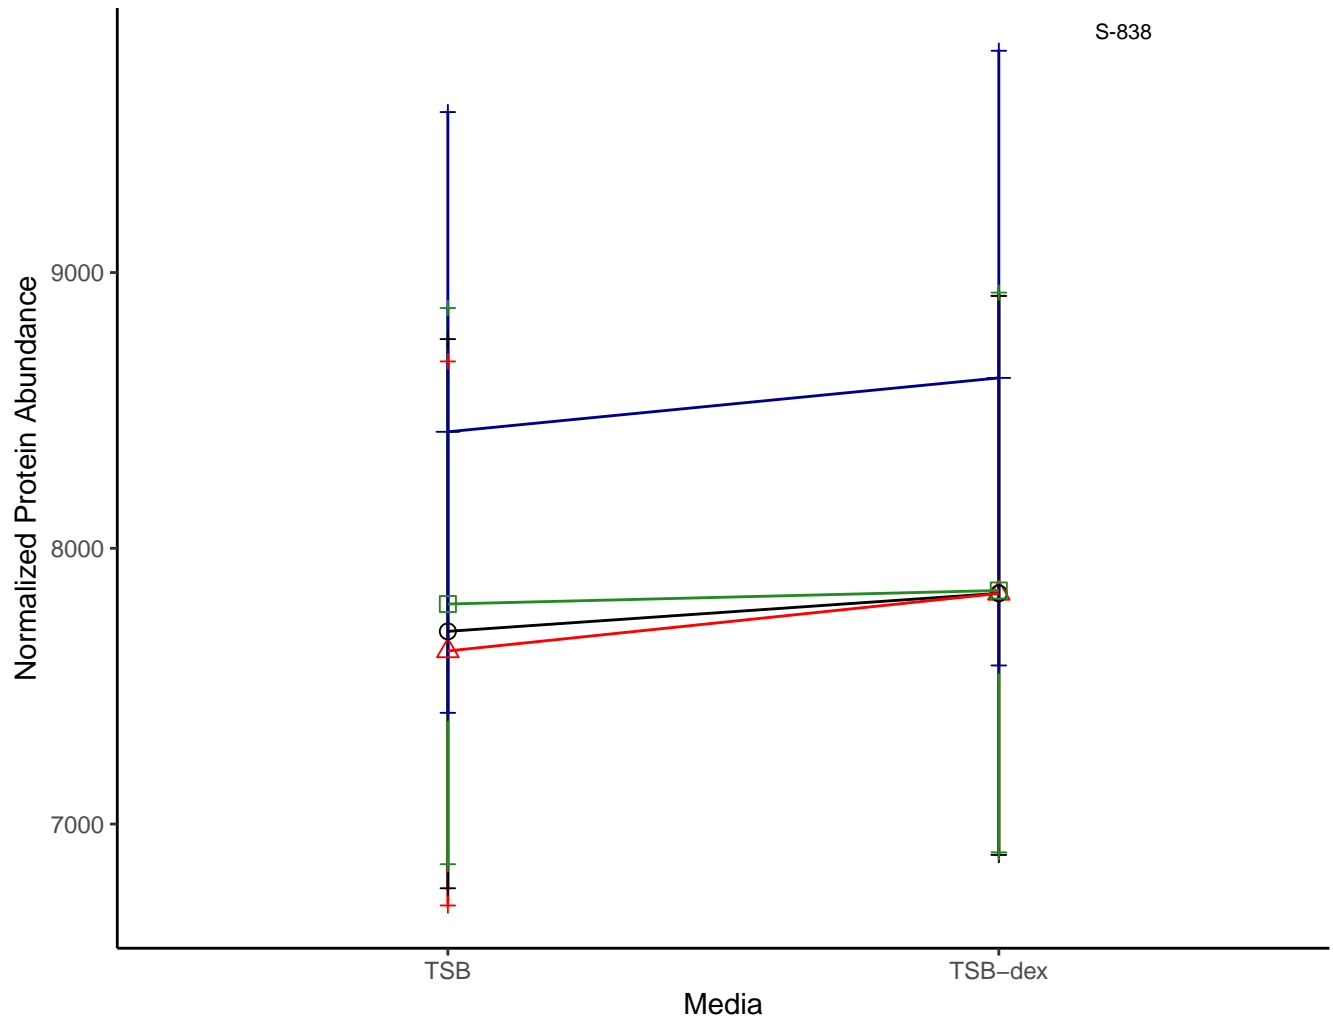

- ⊕ SA564
- △ SA564- $\Delta hptRS$
- ⊞ SA564- $\Delta ccpA$
- + SA564- $\Delta hptRS/ccpA$

# RNJ2\_STAAM

S-839

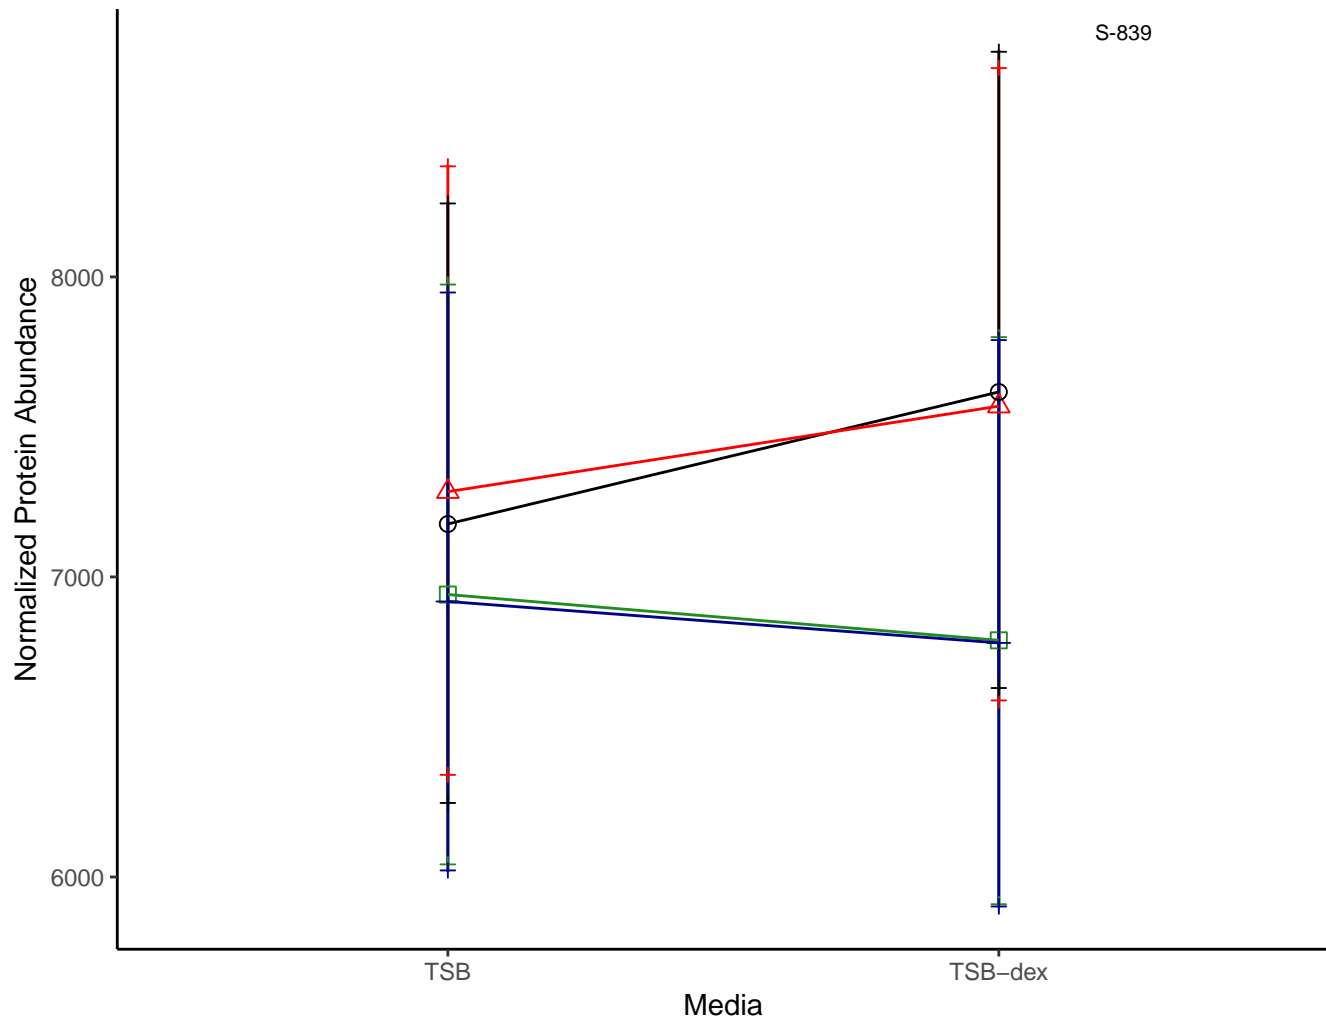

- ⊕ SA564
- △ SA564- $\Delta hptRS$
- ⊞ SA564- $\Delta ccpA$
- + SA564- $\Delta hptRS/ccpA$

# RNY\_STAAM

S-840

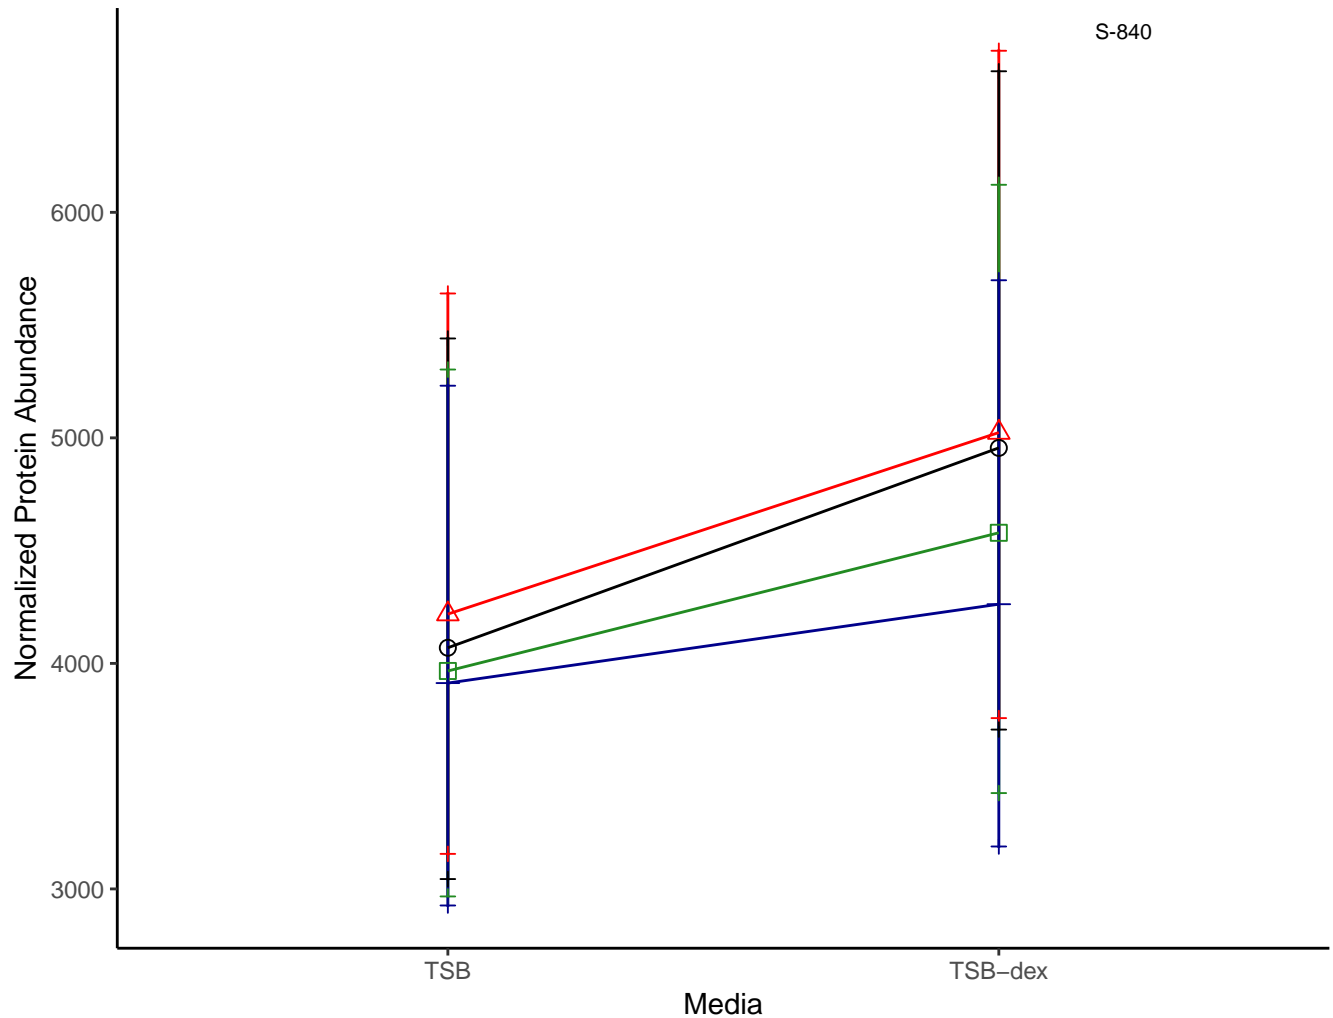

- ⊕ SA564
- △ SA564-ΔhptRS
- ⊞ SA564-ΔccpA
- + SA564-ΔhptRS/ccpA



## ROCA\_STAAM

S-841

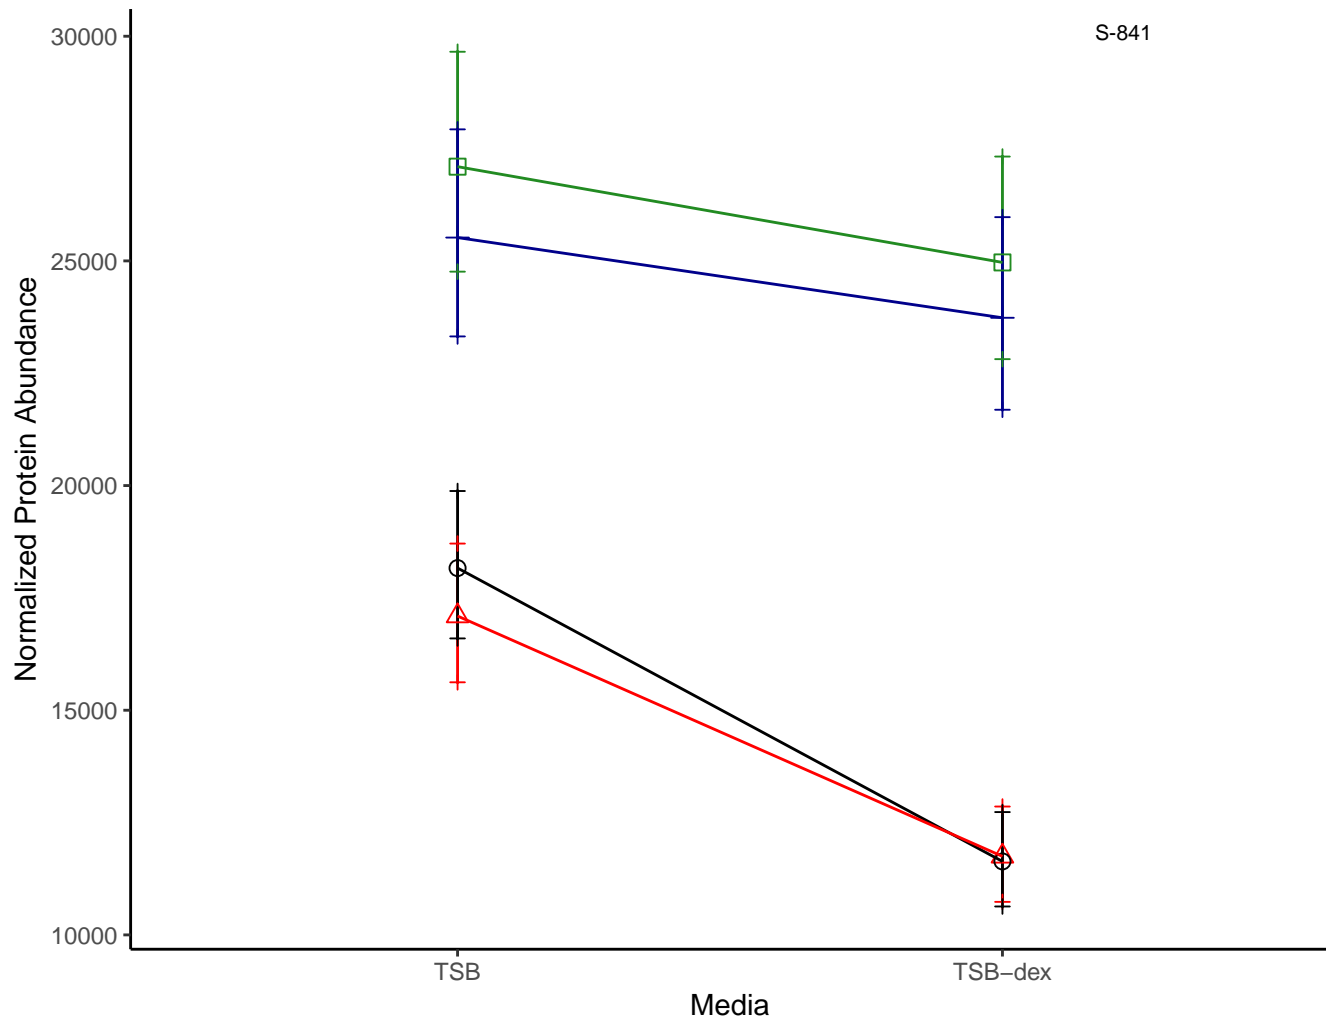

- ⊕ SA564
- △ SA564- $\Delta hptRS$
- ⊞ SA564- $\Delta ccpA$
- + SA564- $\Delta hptRS/ccpA$

# ROT\_STAAM

S-842

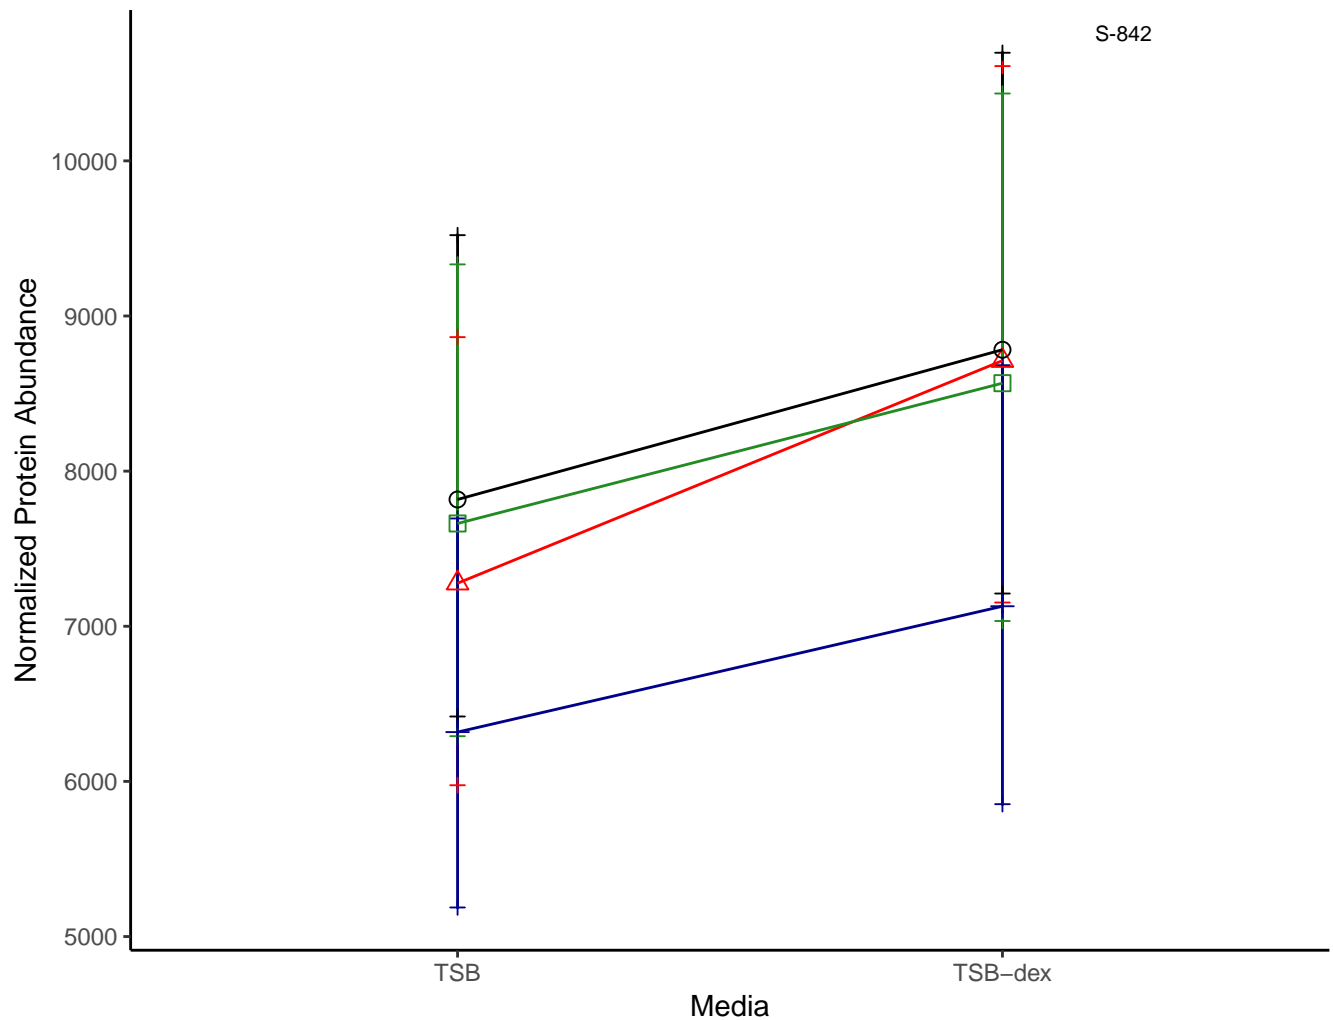

- ⊕ SA564
- △ SA564- $\Delta$ *hptRS*
- ⊞ SA564- $\Delta$ *ccpA*
- + SA564- $\Delta$ *hptRS/ccpA*

# RPOA\_STAAM

S-843

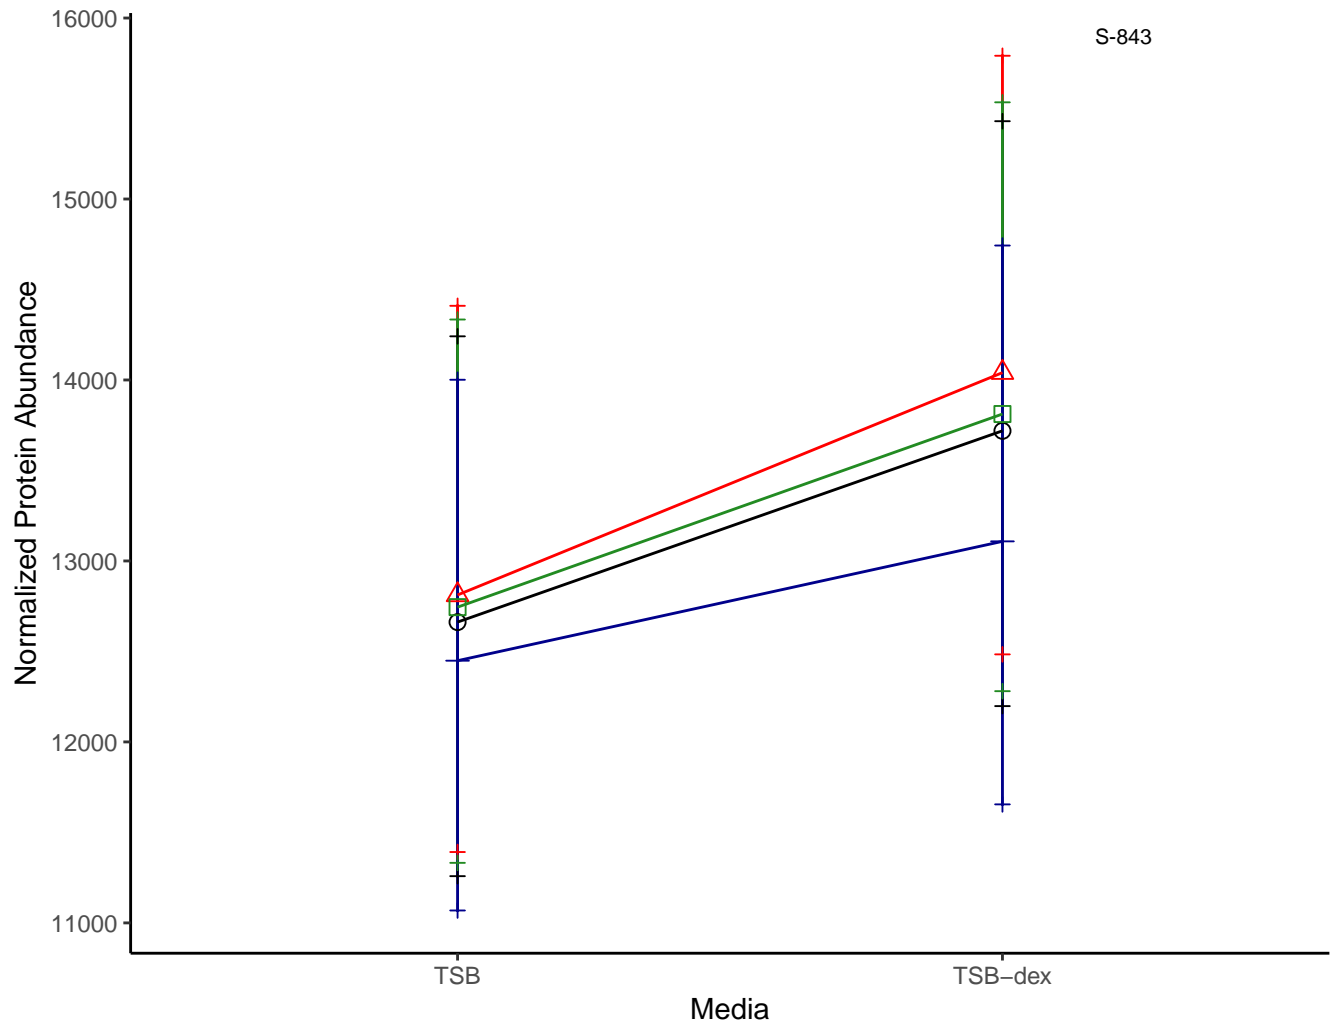

- ⊕ SA564
- △ SA564- $\Delta$ *hptRS*
- ⊞ SA564- $\Delta$ *ccpA*
- + SA564- $\Delta$ *hptRS/ccpA*

# RPOB\_STAAM

S-844

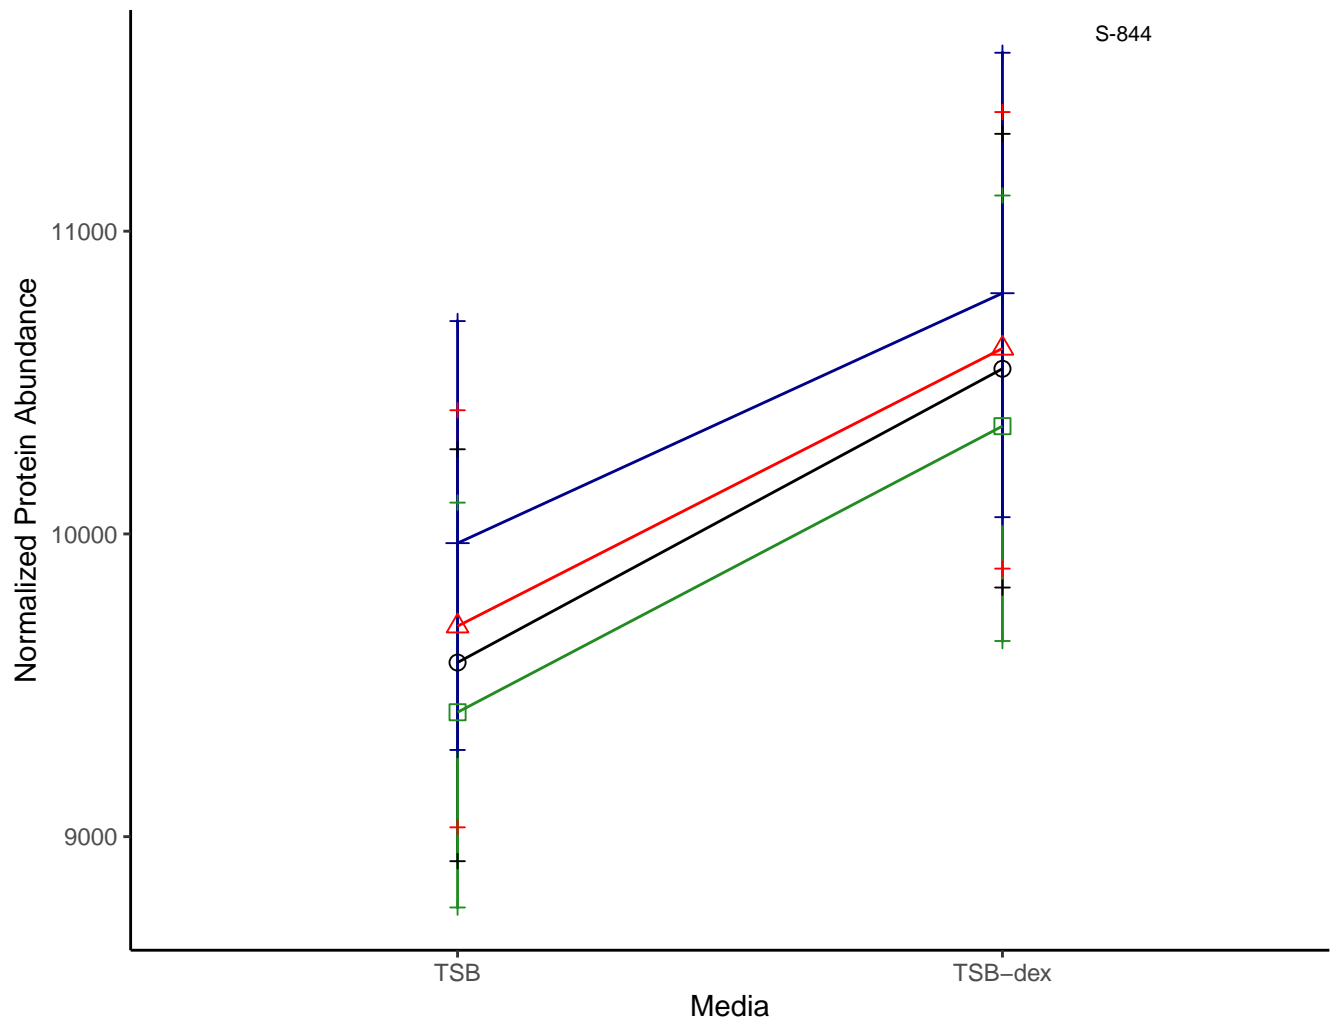

- ⊕ SA564
- △ SA564- $\Delta$ hptRS
- ⊞ SA564- $\Delta$ ccpA
- + SA564- $\Delta$ hptRS/ccpA

# RPOC\_STAAM

S-845

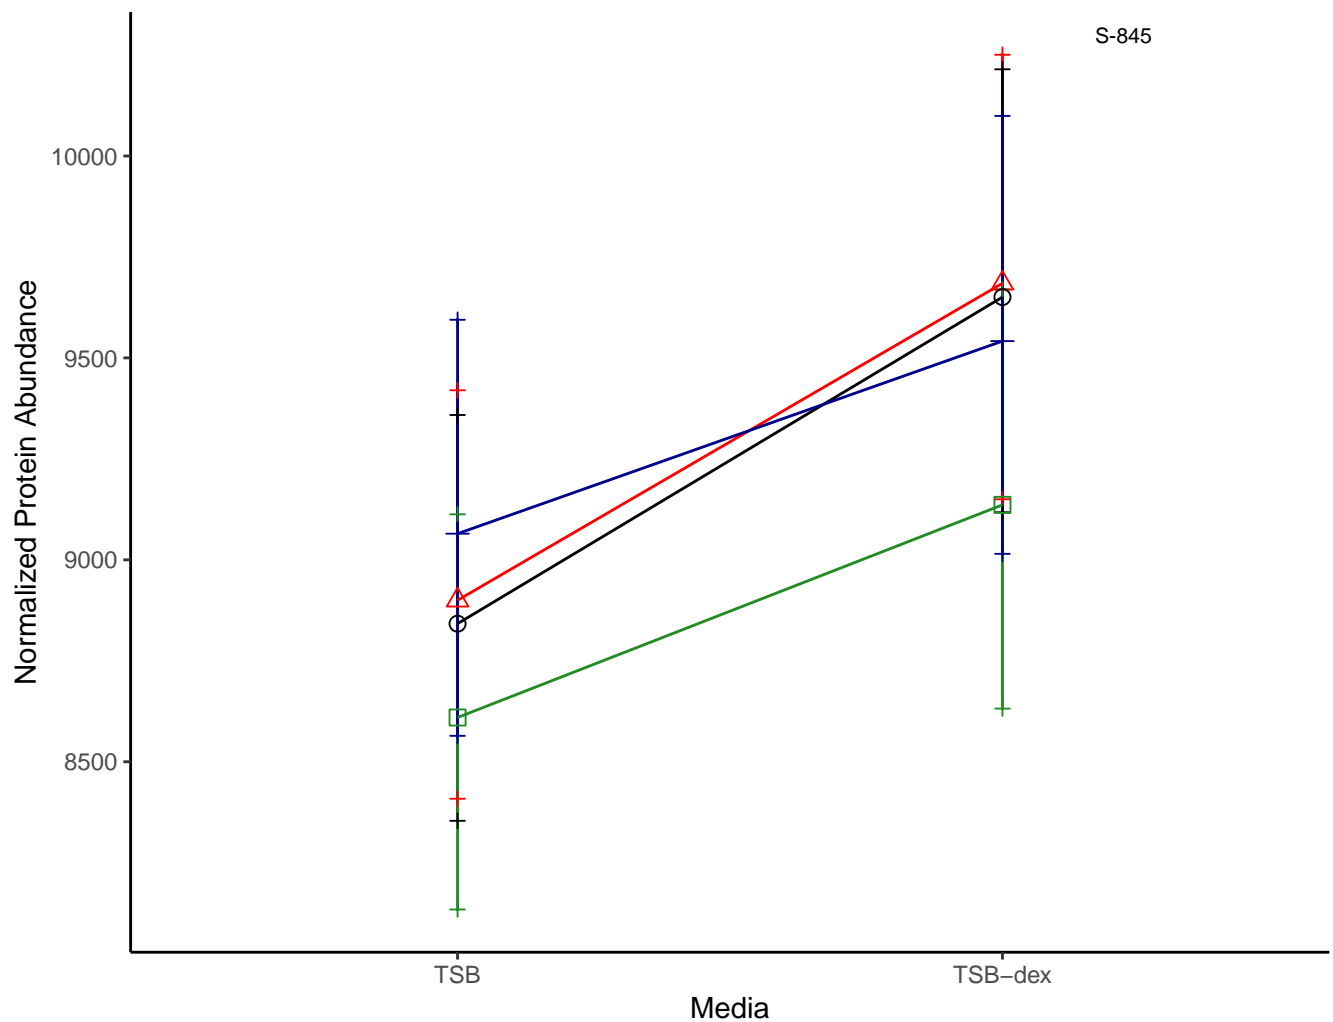

- ⊕ SA564
- △ SA564- $\Delta$ *hptRS*
- ⊞ SA564- $\Delta$ *ccpA*
- + SA564- $\Delta$ *hptRS/ccpA*

# RPOE\_STAAM

S-846

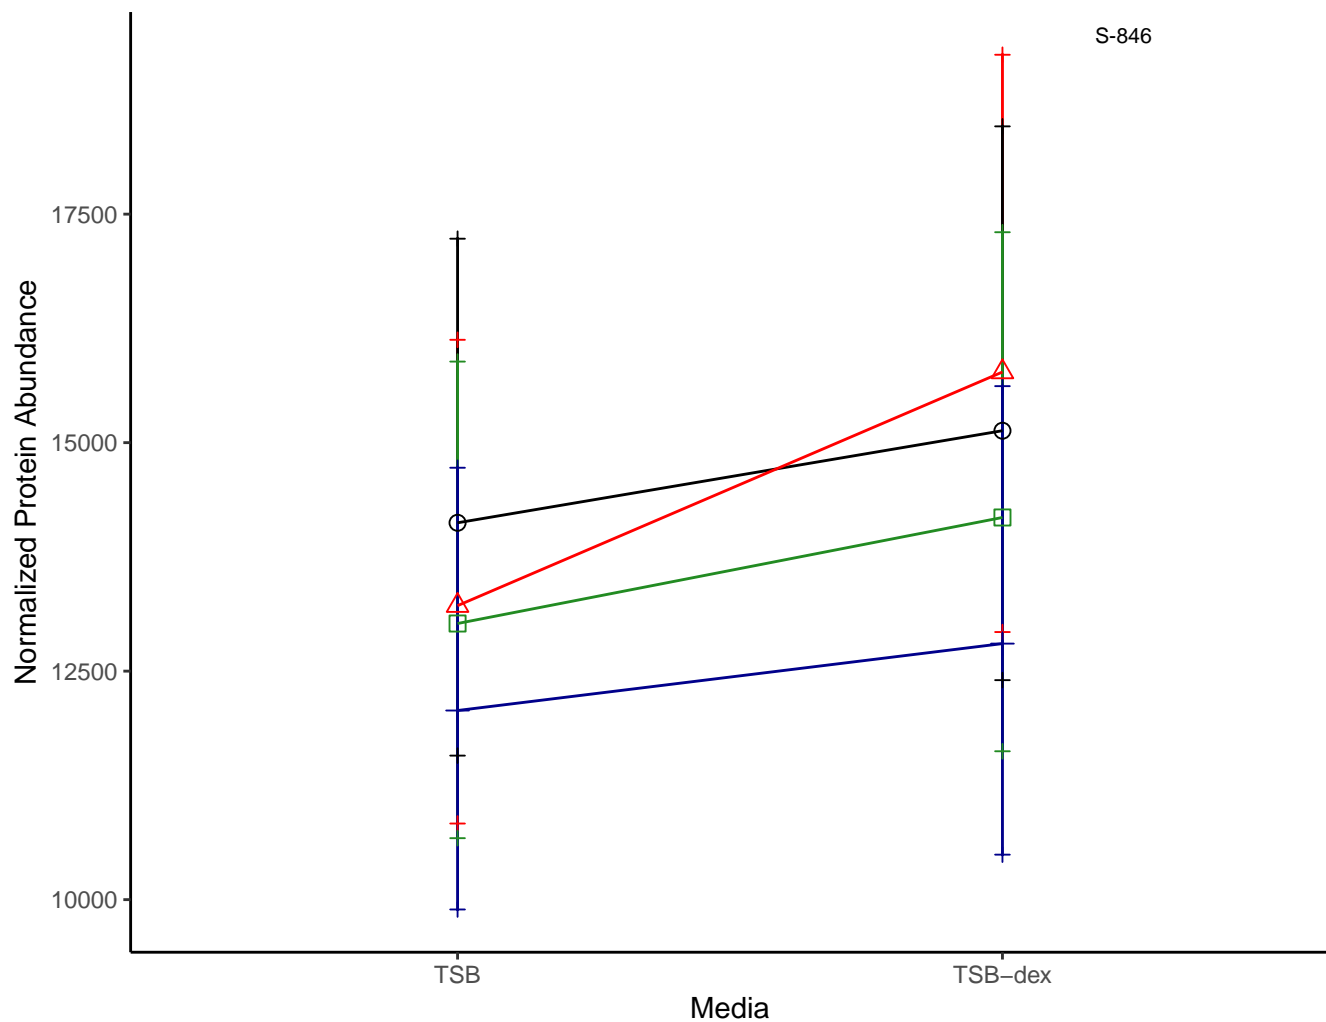

- ⊕ SA564
- △ SA564- $\Delta$ *hptRS*
- ⊞ SA564- $\Delta$ *ccpA*
- + SA564- $\Delta$ *hptRS/ccpA*

# RPOZ\_STAAM

S-847

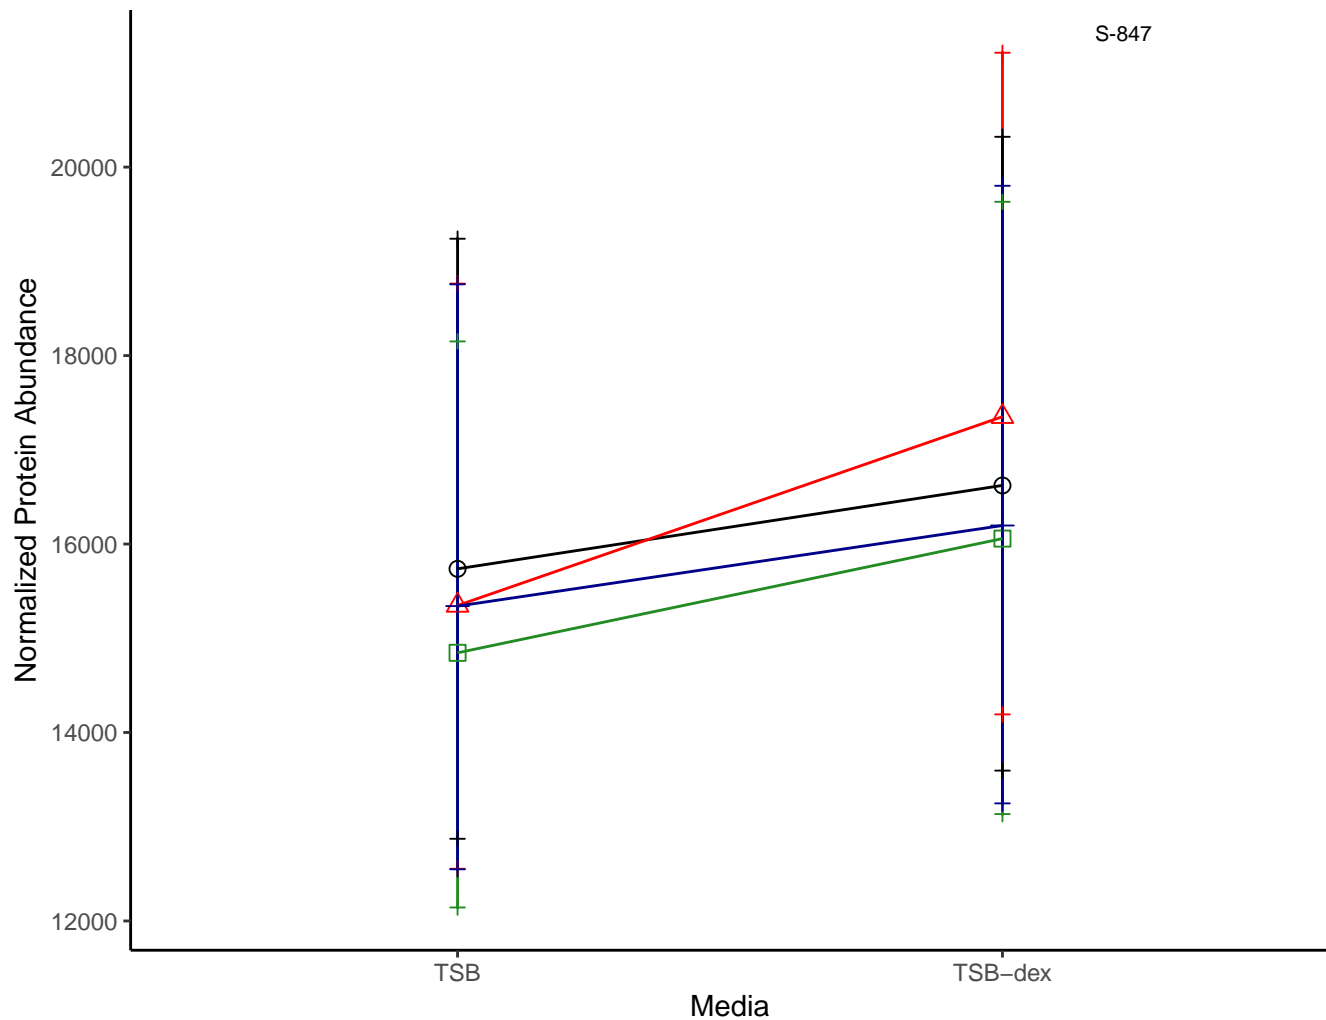

- SA564
- SA564- $\Delta$ *hptRS*
- SA564- $\Delta$ *ccpA*
- SA564- $\Delta$ *hptRS/ccpA*

# RRF\_STAAM

S-848

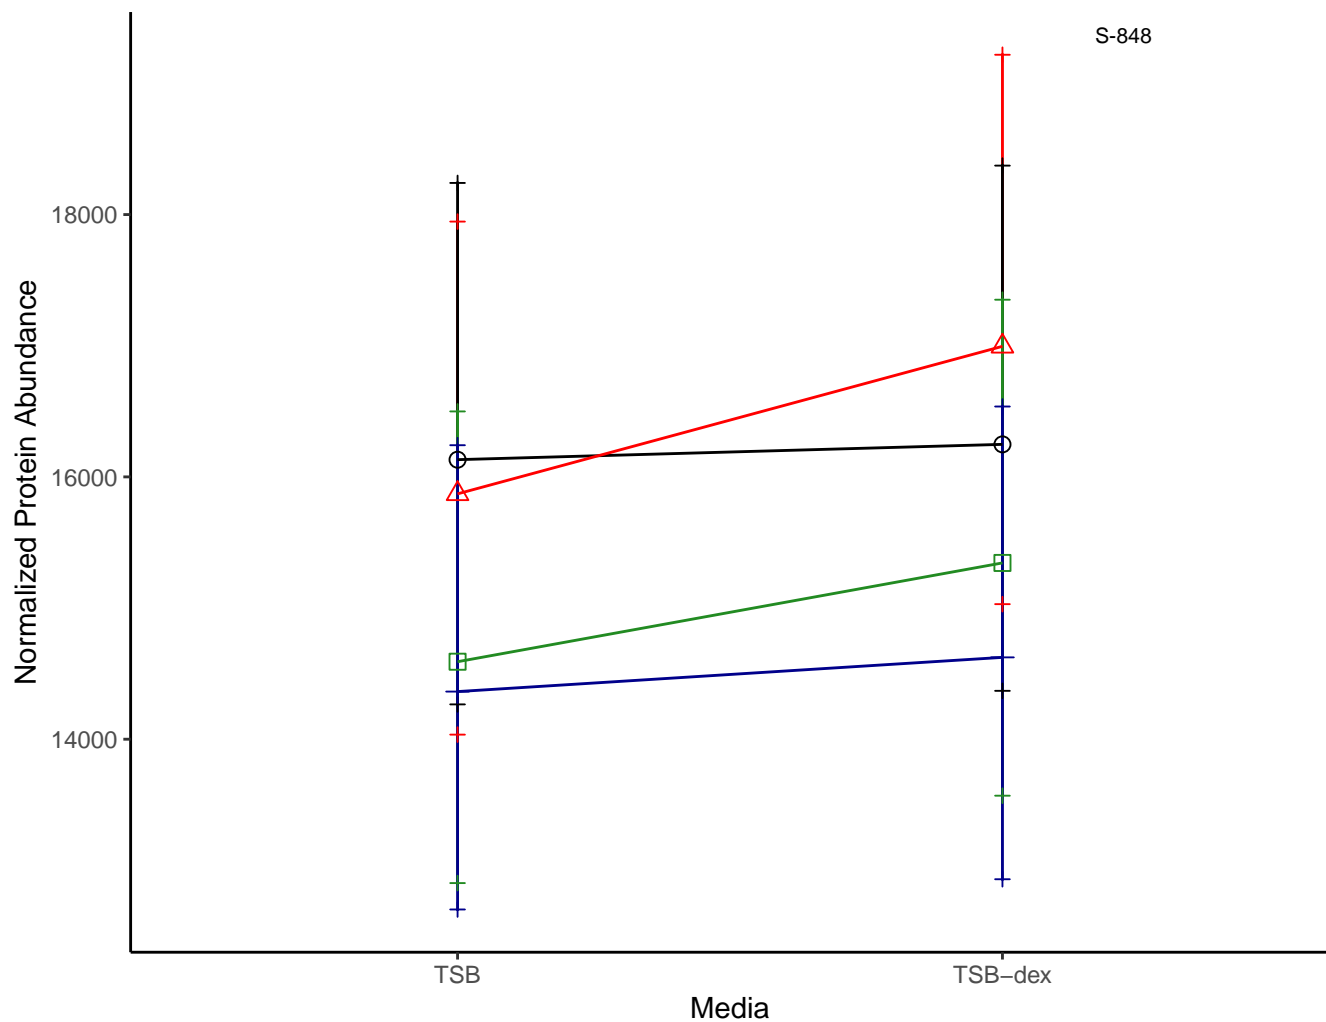

- ⊕ SA564
- △ SA564- $\Delta hptRS$
- ⊞ SA564- $\Delta ccpA$
- + SA564- $\Delta hptRS/ccpA$



# RS1\_STAAM

S-849

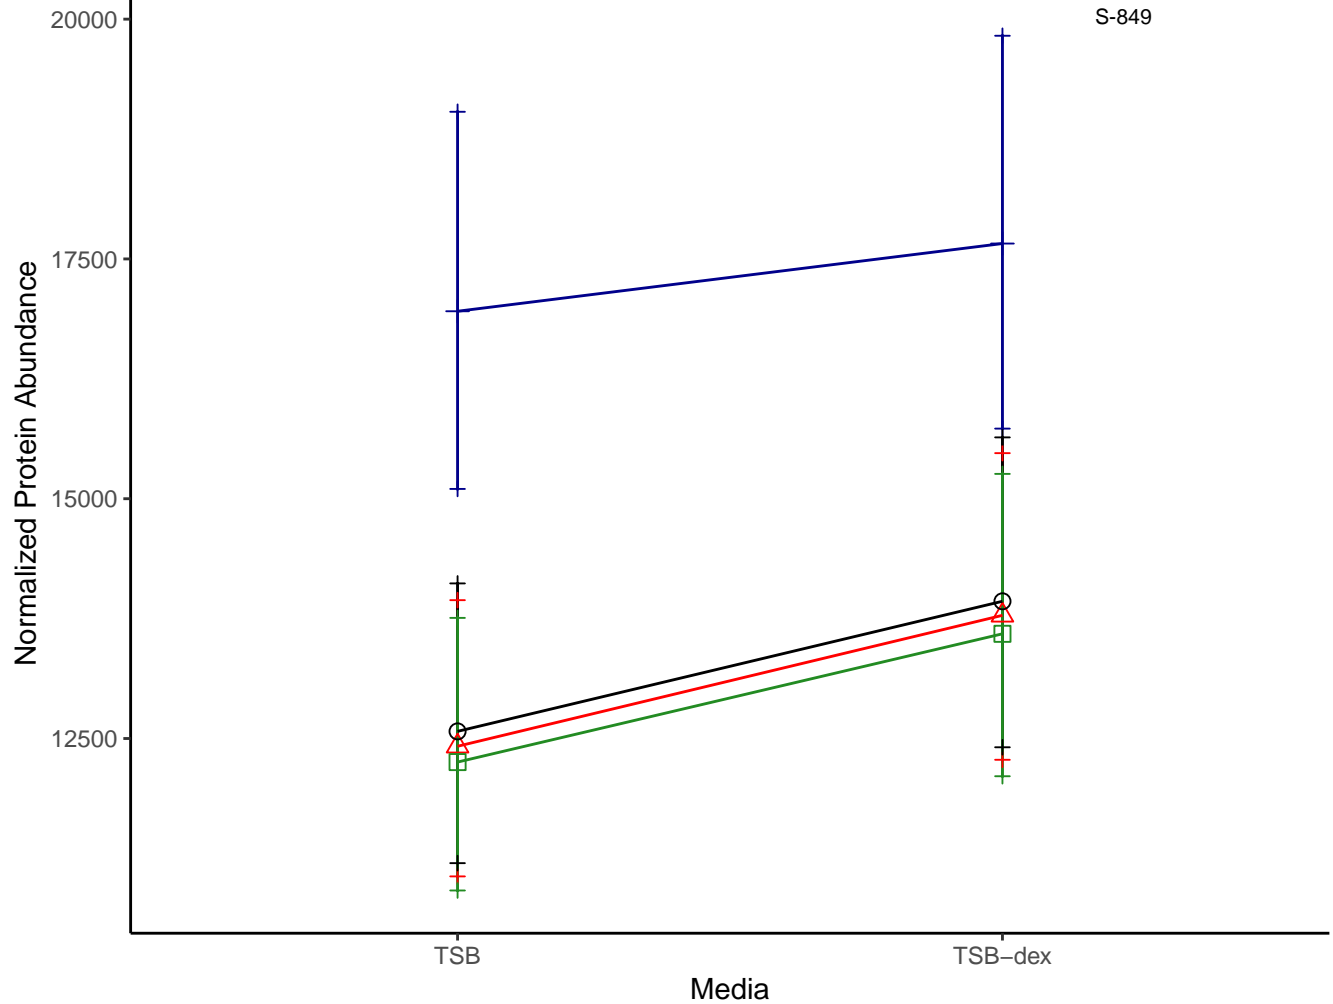

- ⊕ SA564
- △ SA564- $\Delta$ *hptRS*
- SA564- $\Delta$ *ccpA*
- + SA564- $\Delta$ *hptRS/ccpA*

# RS10\_STAAM

S-850

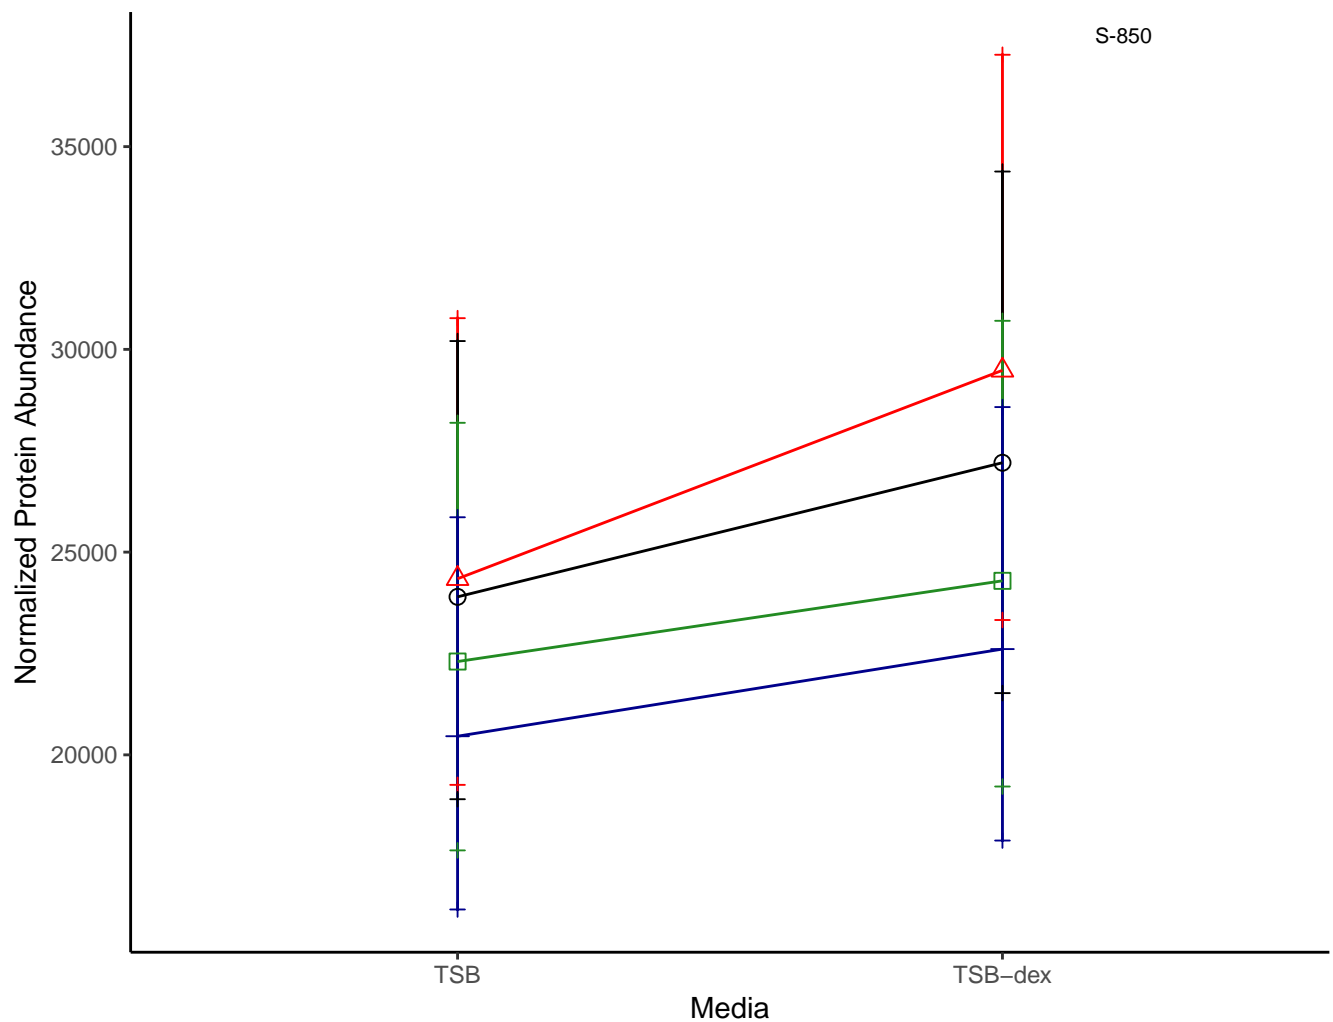

- ⊕ SA564
- △ SA564-ΔhptRS
- ⊞ SA564-ΔccpA
- + SA564-ΔhptRS/ccpA

# RS11\_STAAM

S-851

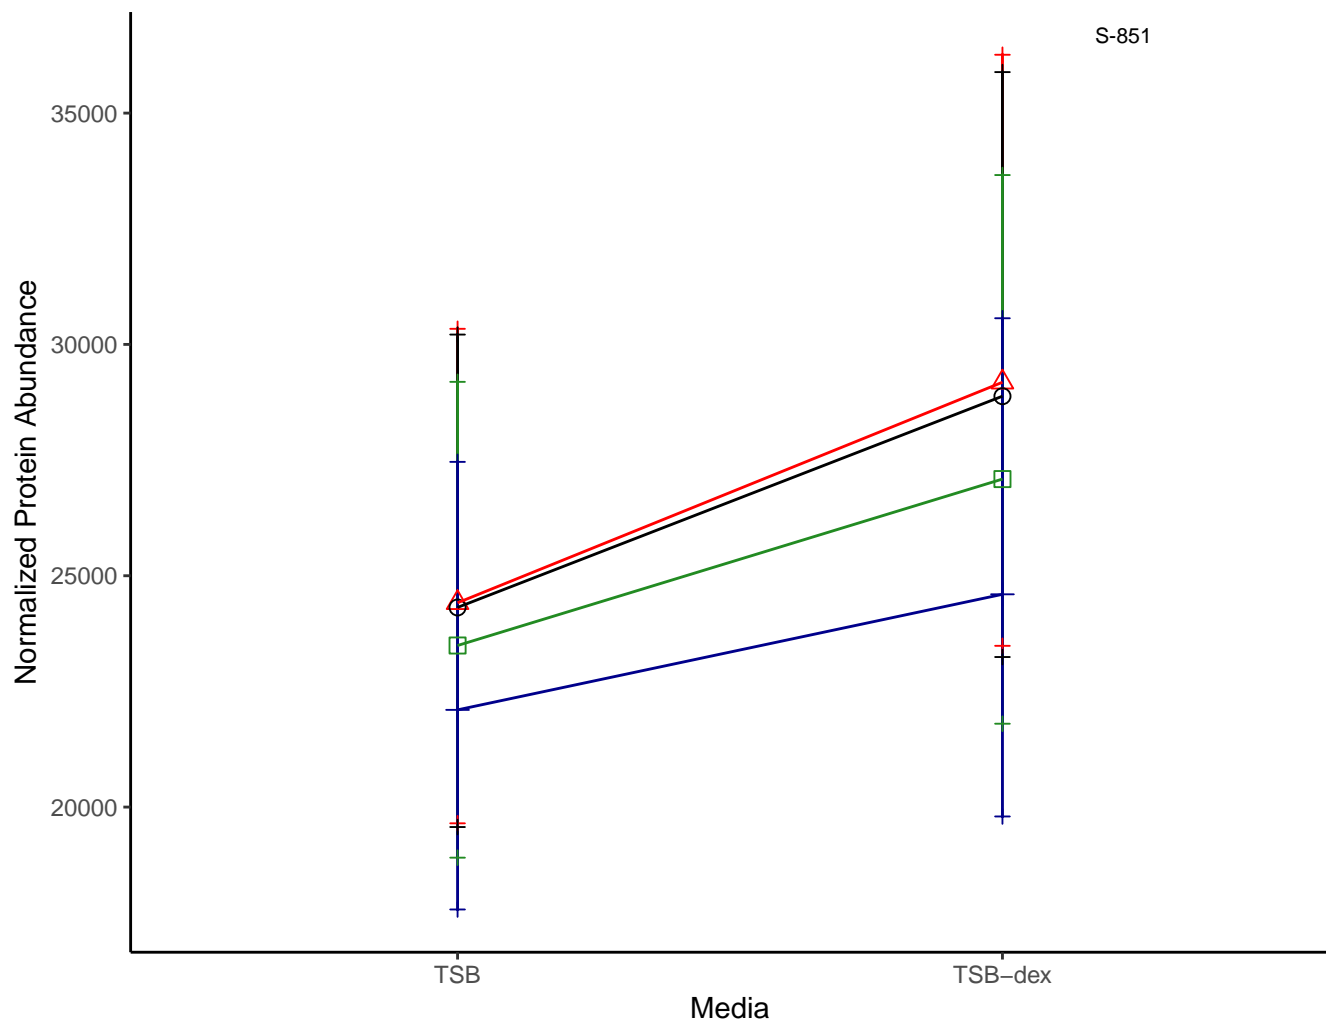

- ⊕ SA564
- △ SA564-ΔhptRS
- ⊞ SA564-ΔccpA
- + SA564-ΔhptRS/ccpA

# RS12\_STAAM

S-852

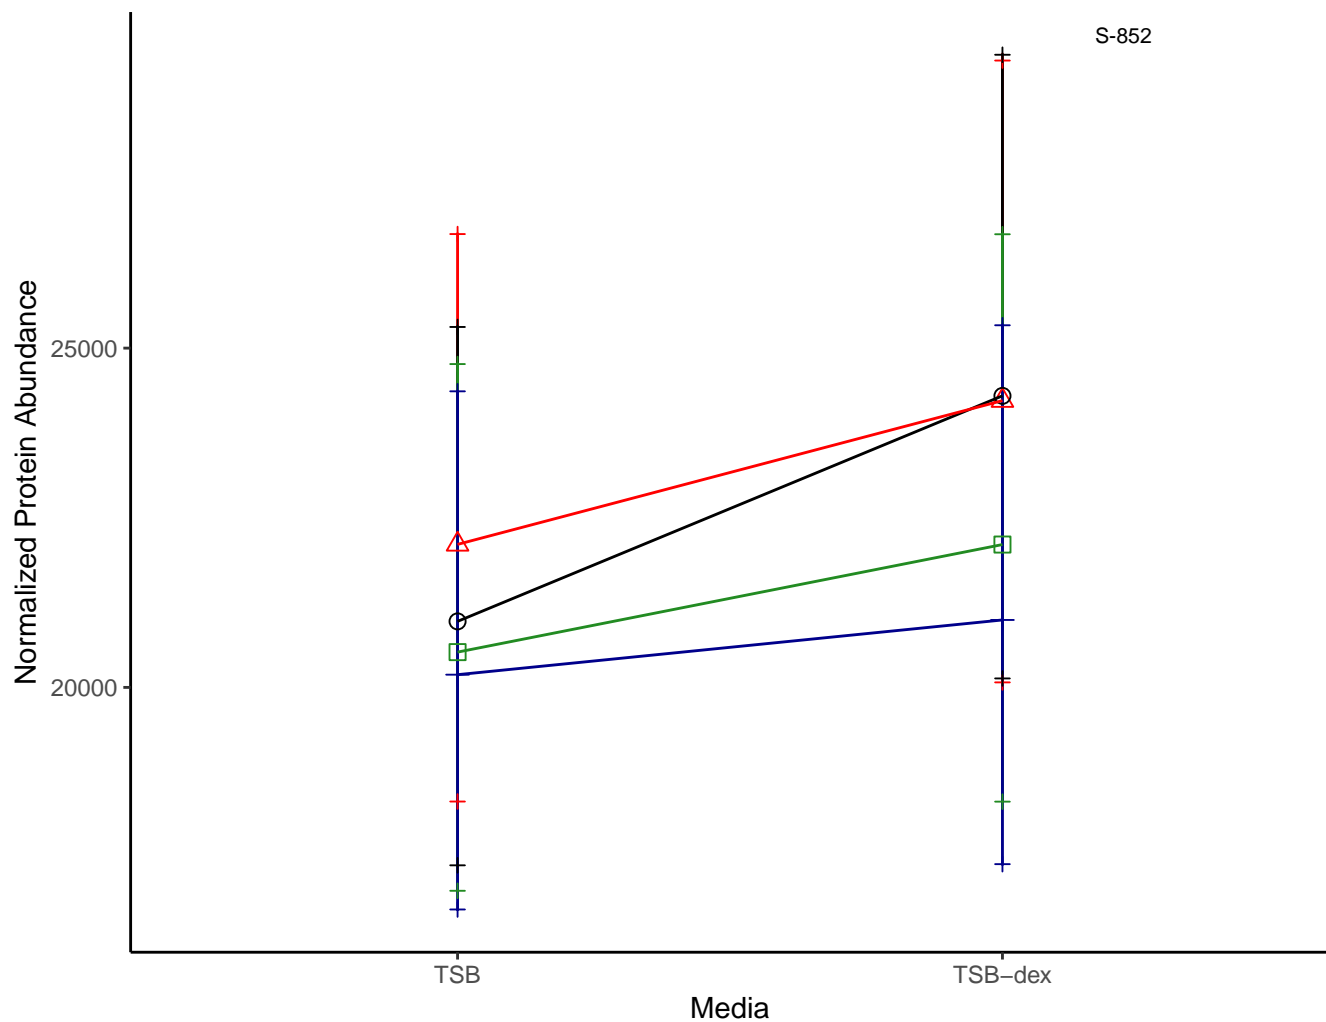

- ⊕ SA564
- △ SA564-ΔhptRS
- ⊞ SA564-ΔccpA
- + SA564-ΔhptRS/ccpA

# RS13\_STAAM

S-853

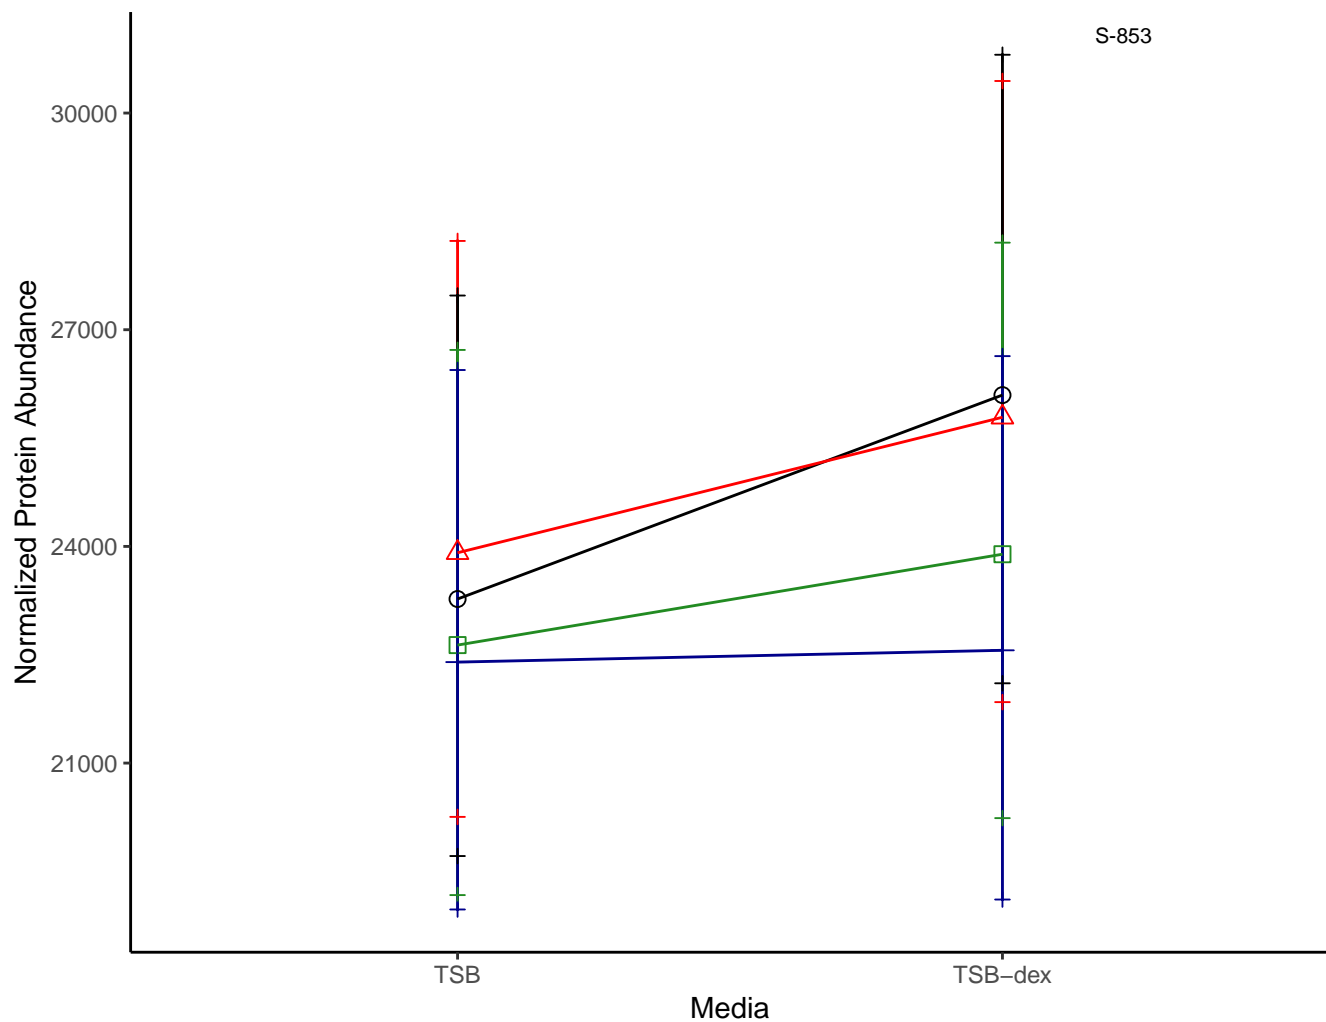

- ⊕ SA564
- △ SA564- $\Delta$ hptRS
- ⊞ SA564- $\Delta$ ccpA
- + SA564- $\Delta$ hptRS/ccpA

# RS15\_STAAM

S-854

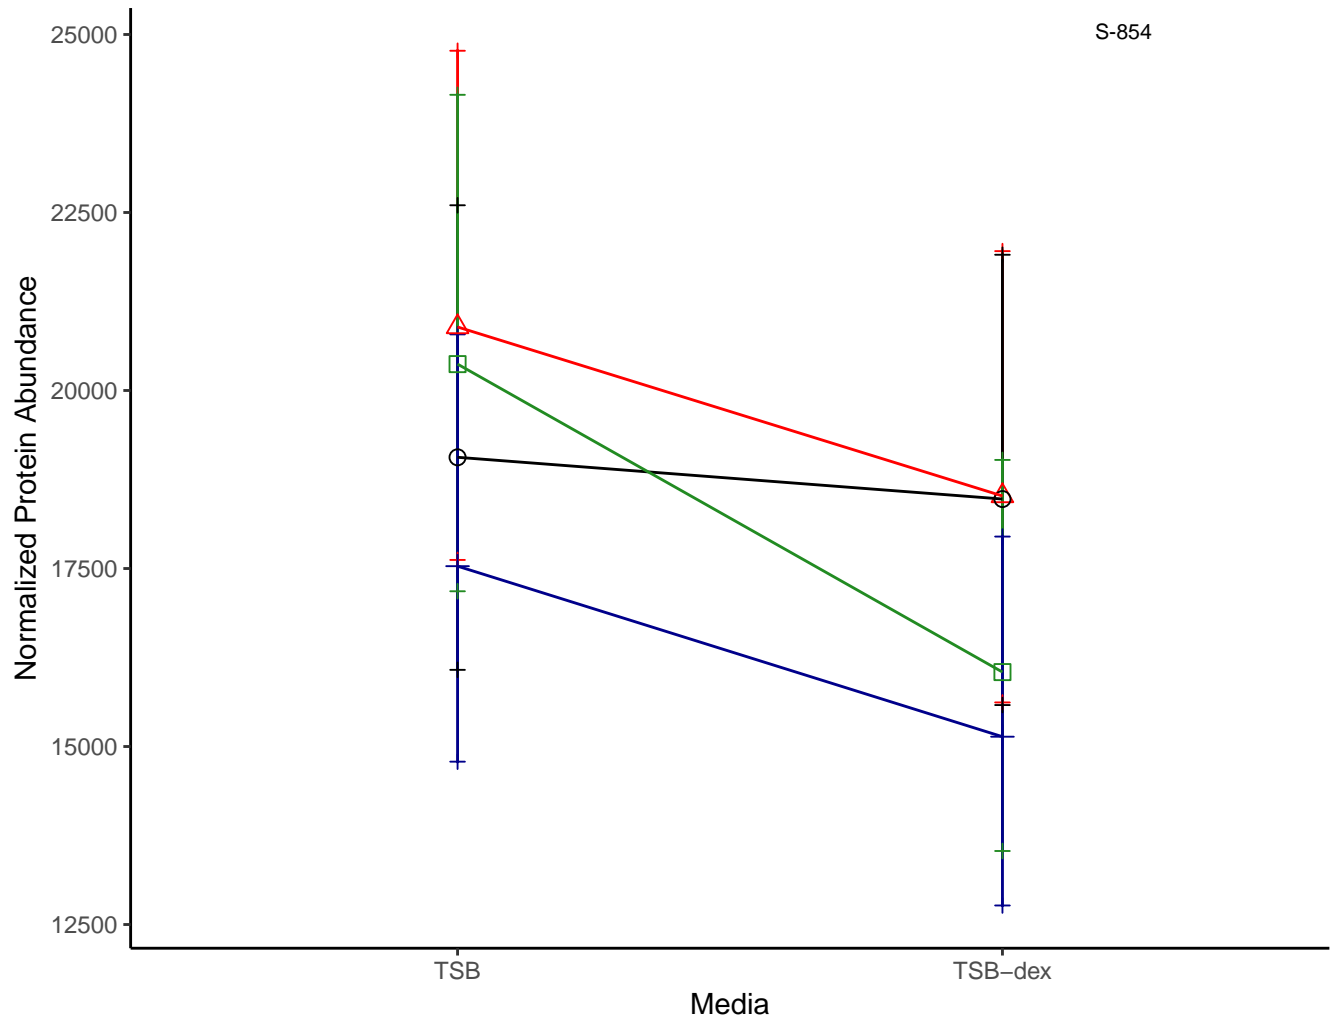

- ⊕ SA564
- △ SA564-ΔhptRS
- SA564-ΔccpA
- + SA564-ΔhptRS/ccpA

# RS16\_STAAM

S-855

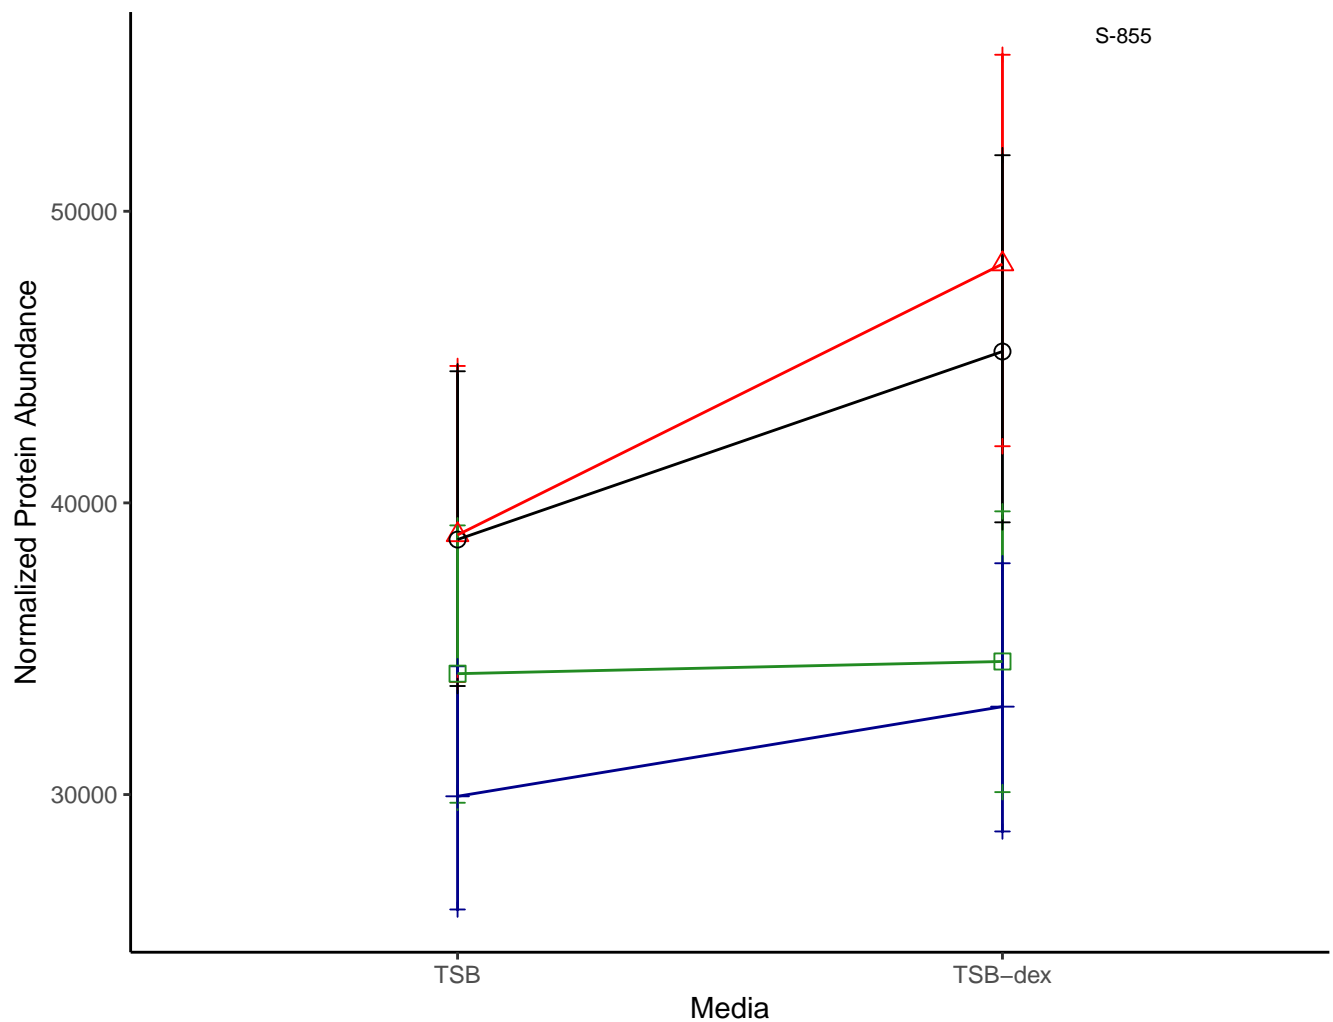

- ⊕ SA564
- △ SA564-ΔhptRS
- ⊞ SA564-ΔccpA
- + SA564-ΔhptRS/ccpA

# RS17\_STAAM

S-856

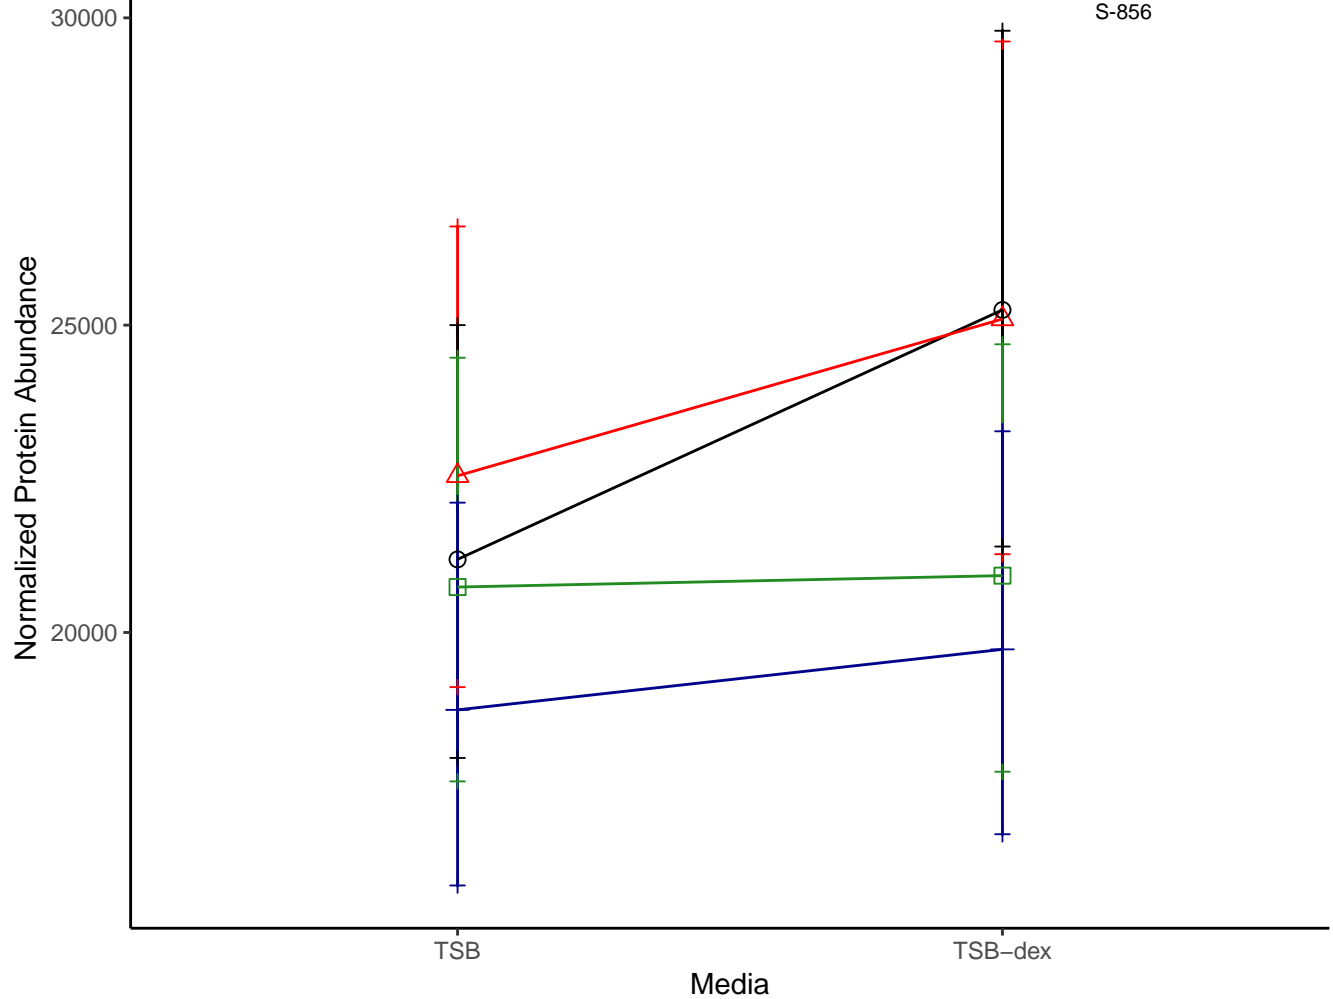

- ⊕ SA564
- △ SA564-ΔhptRS
- ⊞ SA564-ΔccpA
- ⊕ SA564-ΔhptRS/ccpA



# RS18\_STAAM

S-857

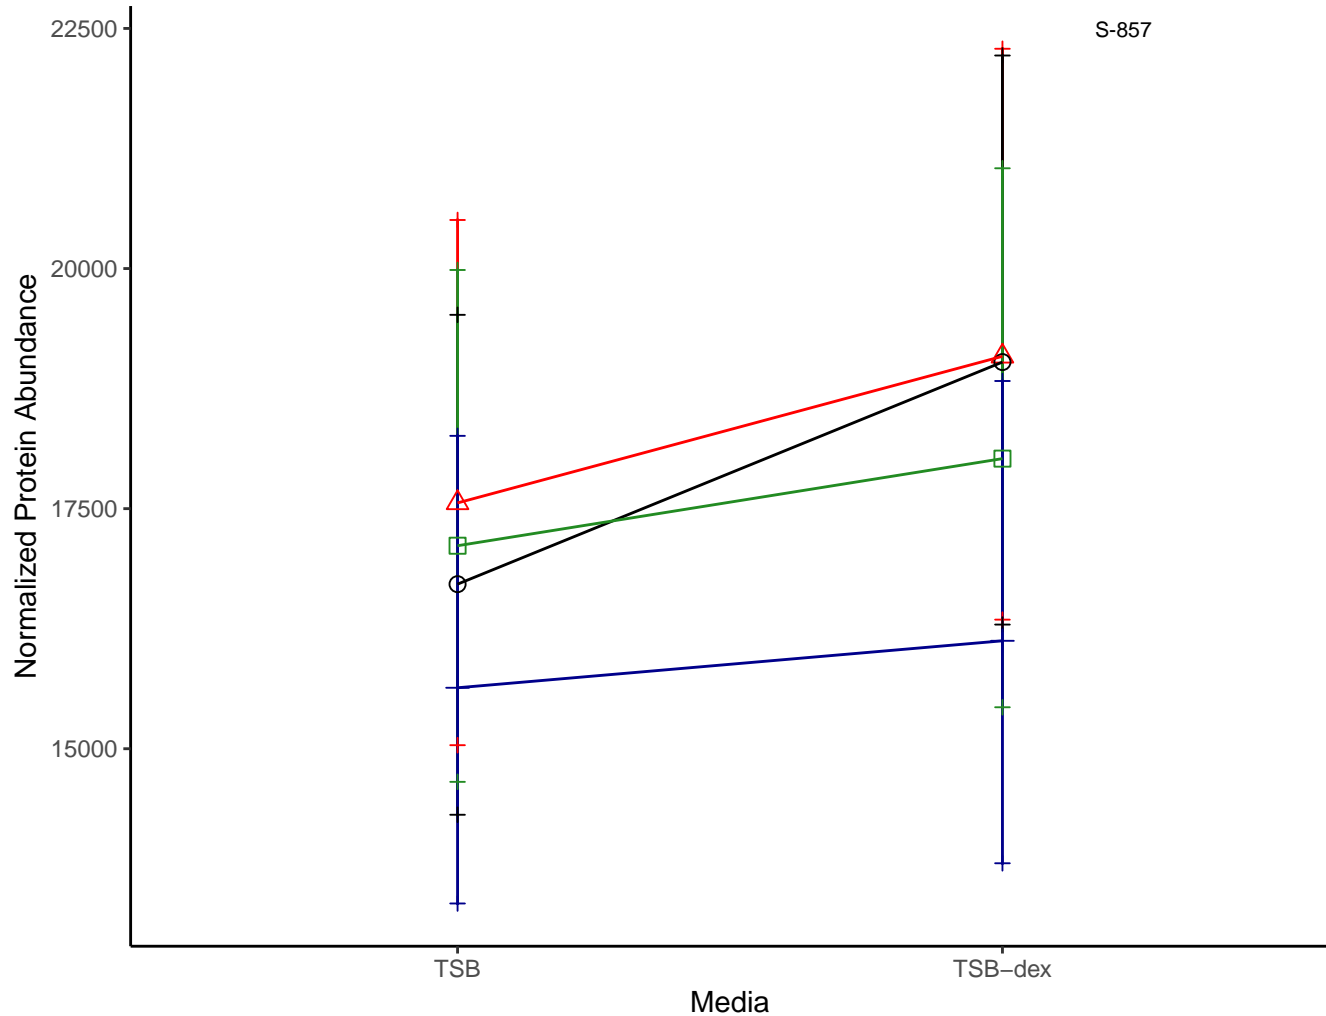

- ⊕ SA564
- △ SA564- $\Delta$ *hptRS*
- ⊞ SA564- $\Delta$ *ccpA*
- + SA564- $\Delta$ *hptRS/ccpA*

# RS19\_STAAM

S-858

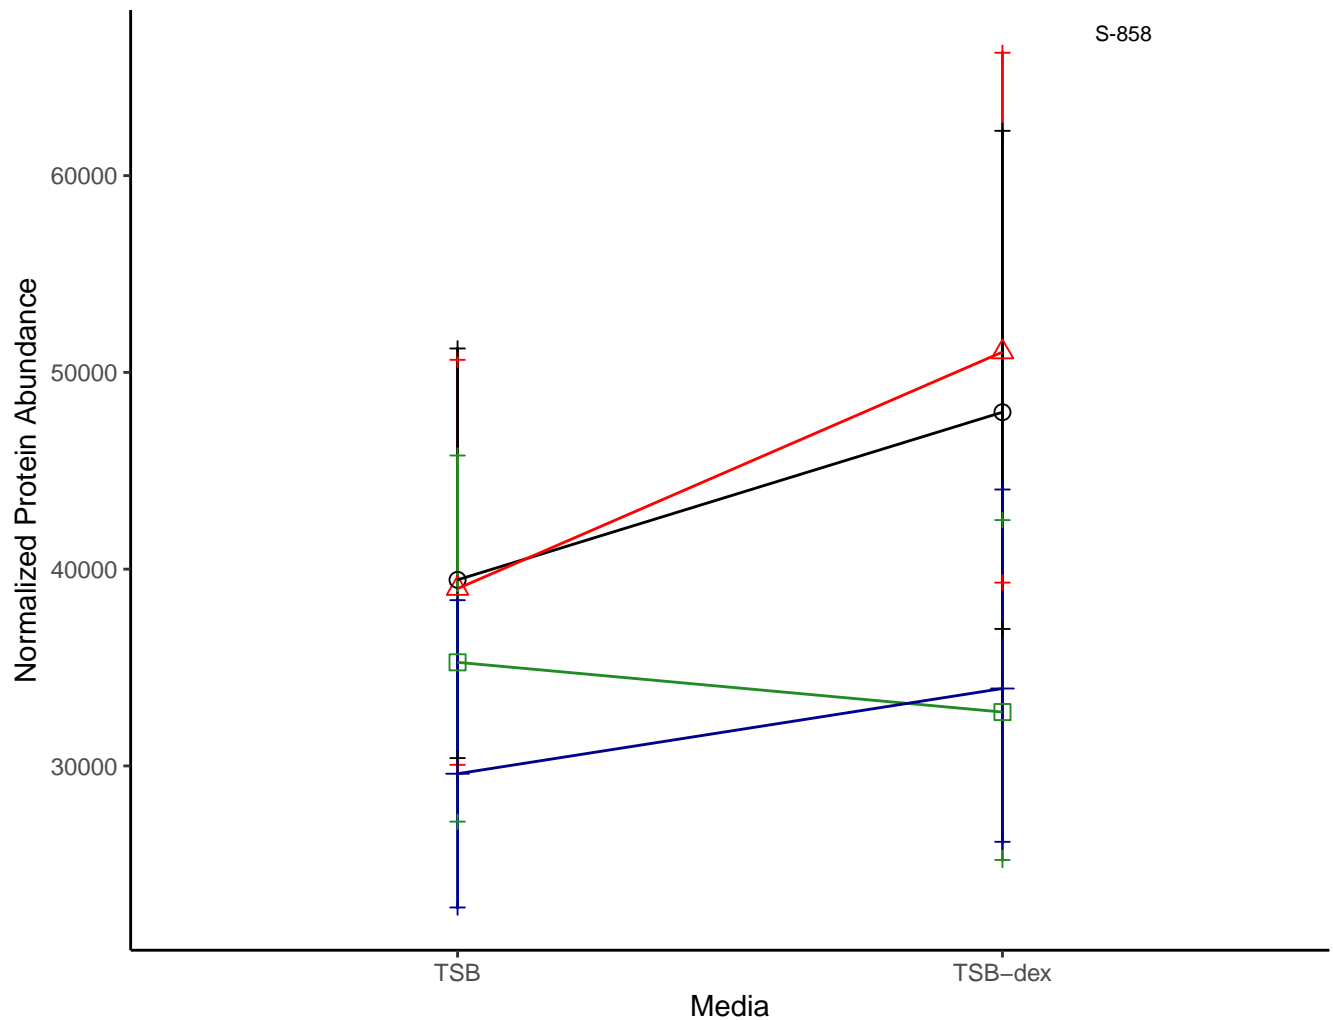

- ⊕ SA564
- △ SA564-ΔhptRS
- ⊞ SA564-ΔccpA
- + SA564-ΔhptRS/ccpA

# RS2\_STAAM

S-859

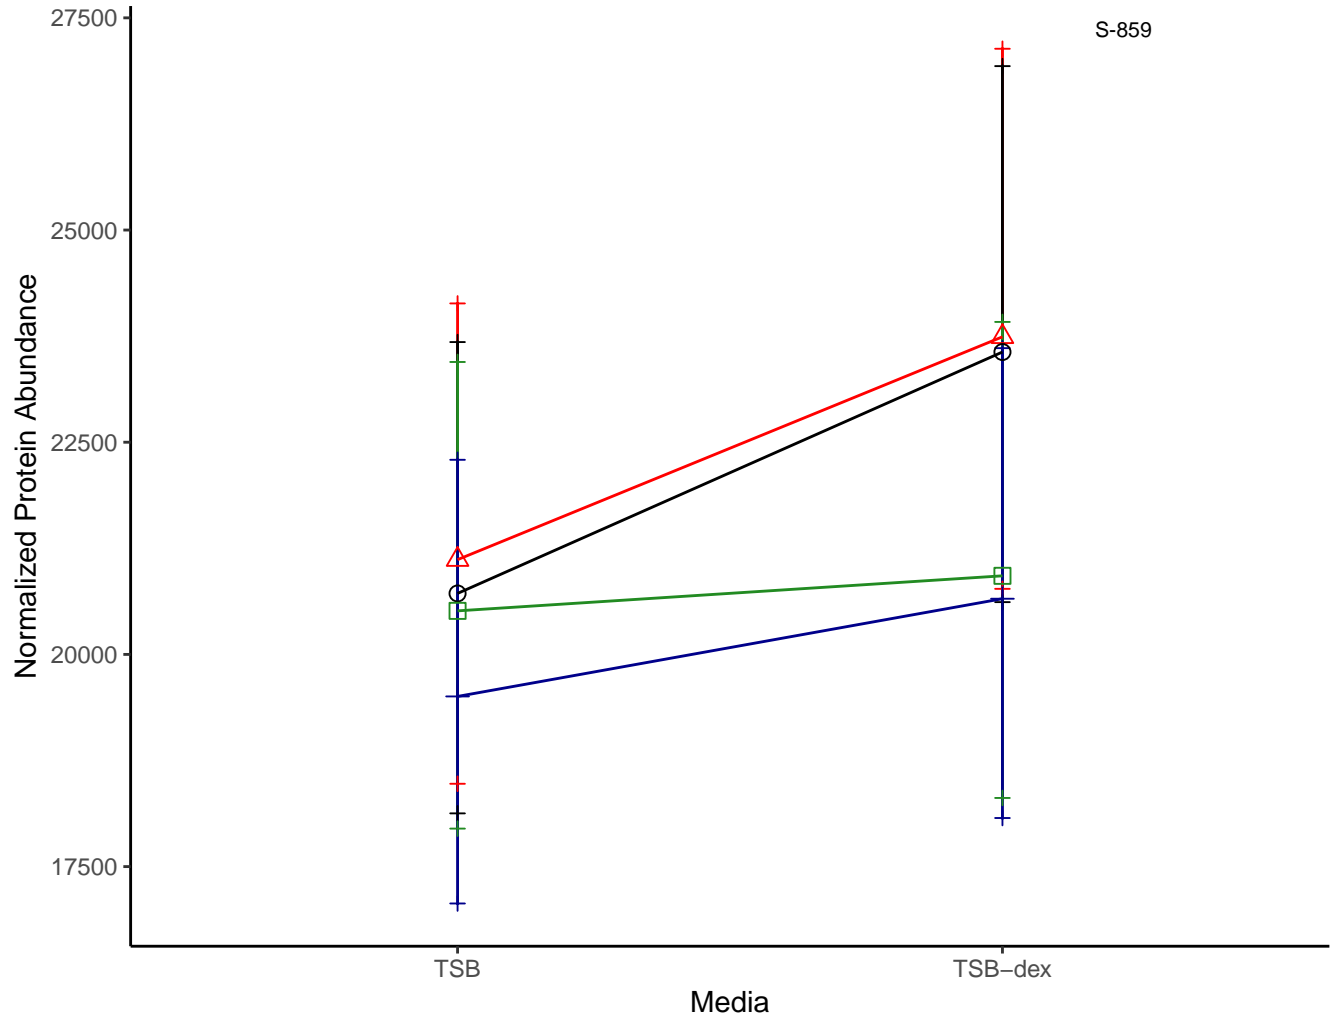

- ⊕ SA564
- △ SA564- $\Delta$ *hptRS*
- ⊞ SA564- $\Delta$ *ccpA*
- + SA564- $\Delta$ *hptRS/ccpA*

# RS20\_STAAM

S-860

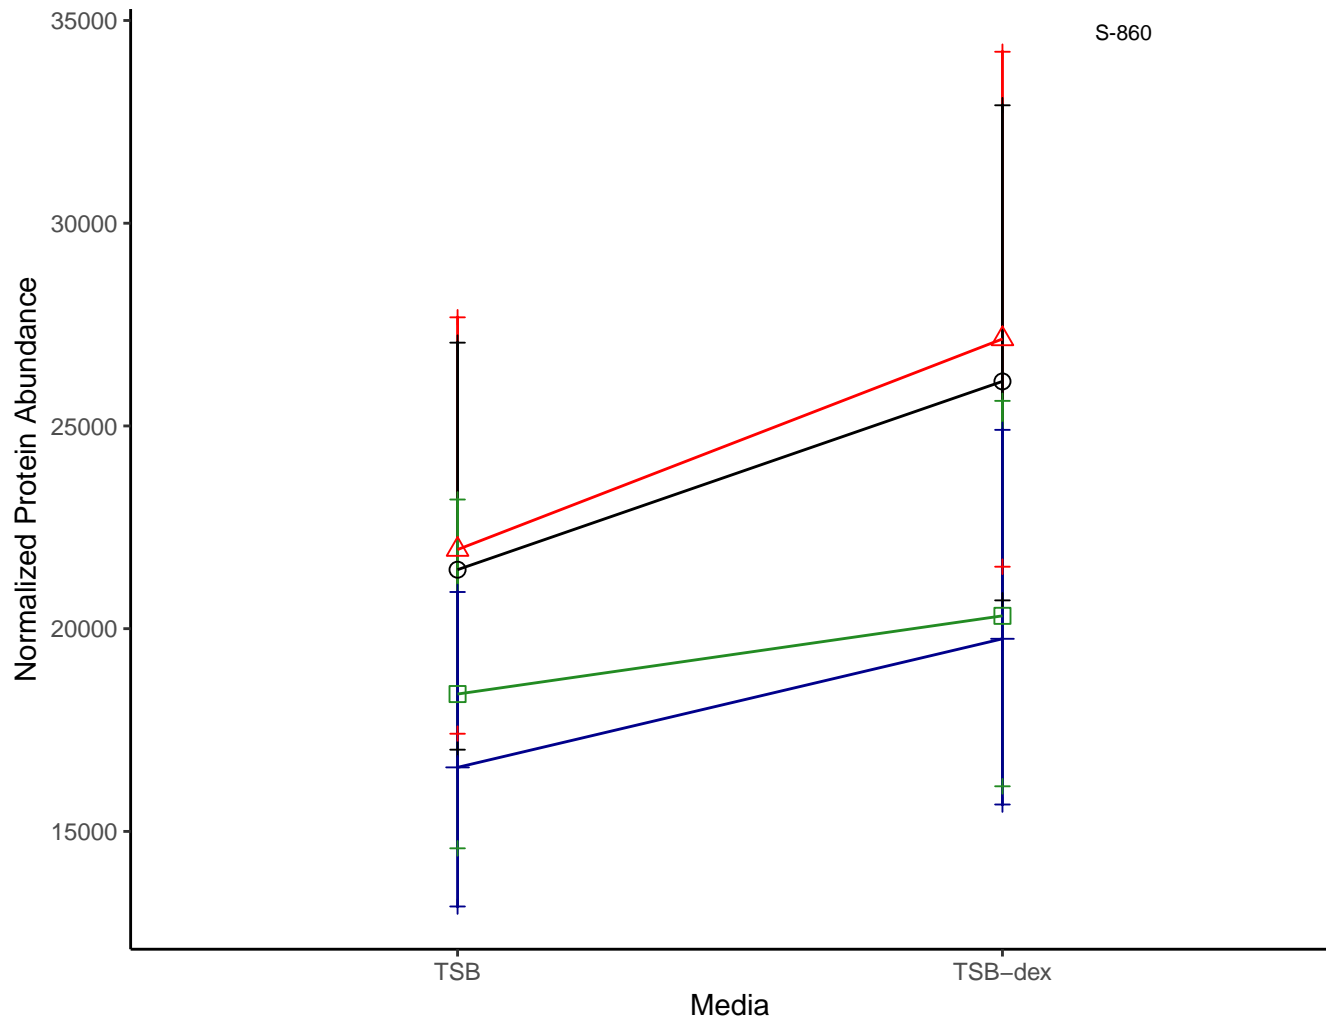

- SA564
- SA564- $\Delta hptRS$
- SA564- $\Delta ccpA$
- SA564- $\Delta hptRS/ccpA$

# RS21\_STAAM

S-861

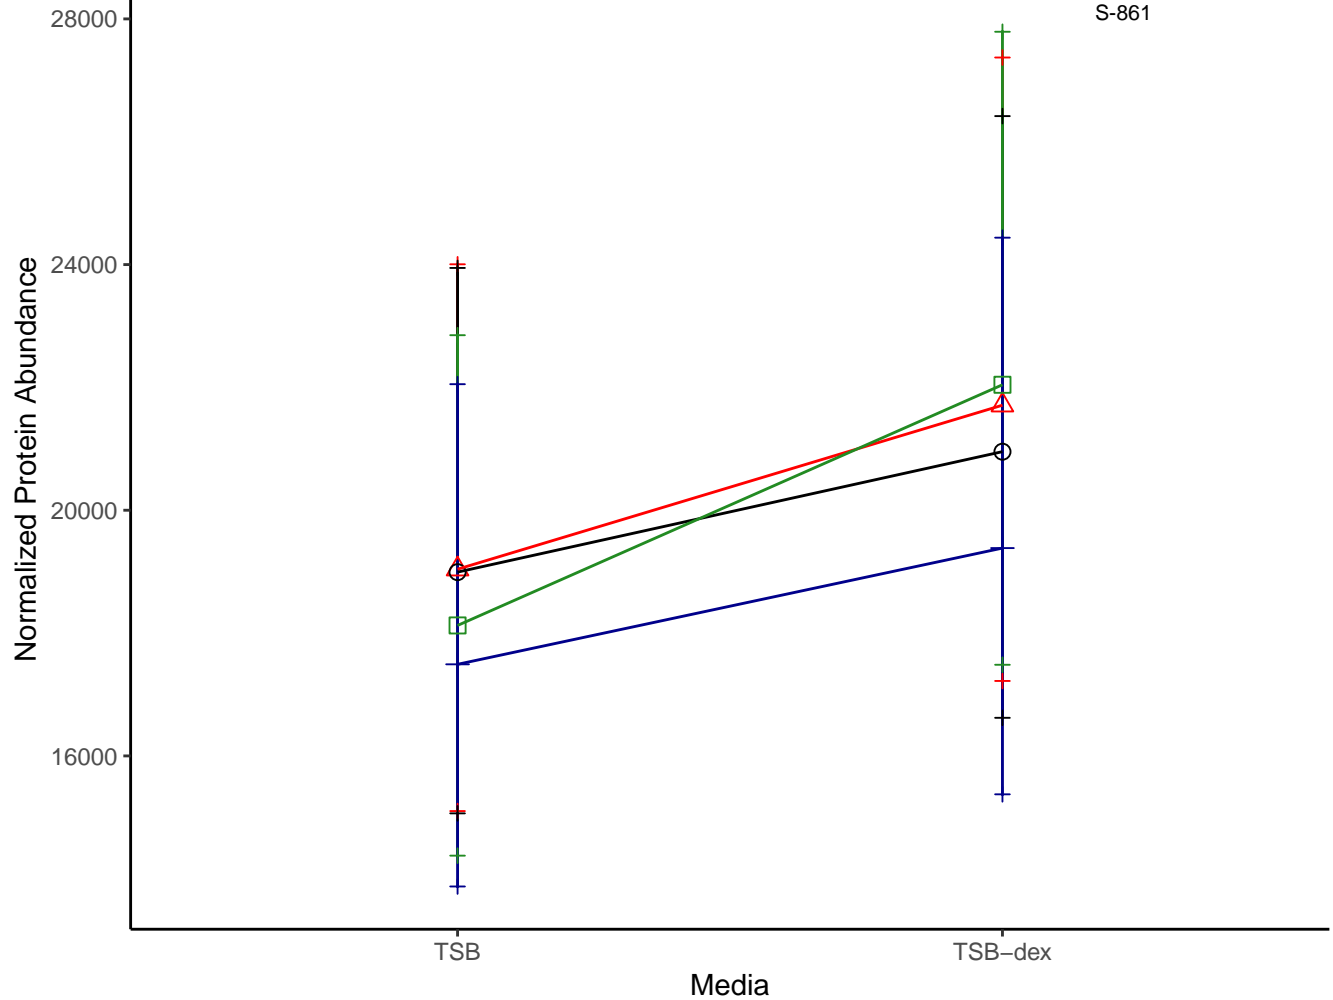

- ⊕ SA564
- △ SA564- $\Delta$ *hptRS*
- SA564- $\Delta$ *ccpA*
- + SA564- $\Delta$ *hptRS/ccpA*

# RS3\_STAAM

S-862

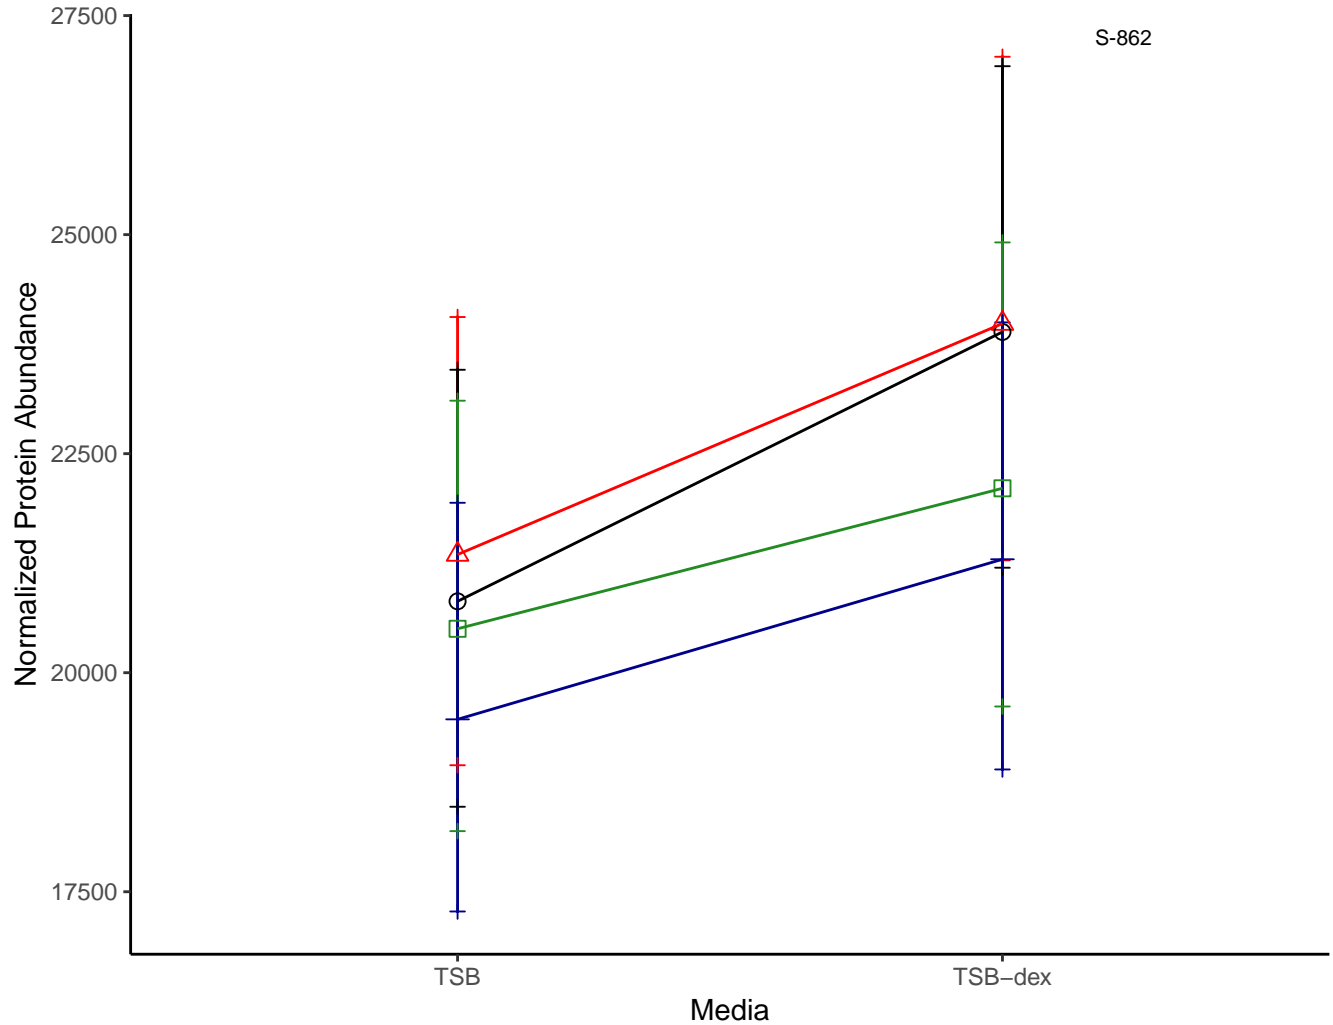

- ⊕ SA564
- △ SA564- $\Delta$ *hptRS*
- ⊞ SA564- $\Delta$ *ccpA*
- + SA564- $\Delta$ *hptRS/ccpA*

# RS4\_STAAM

S-863

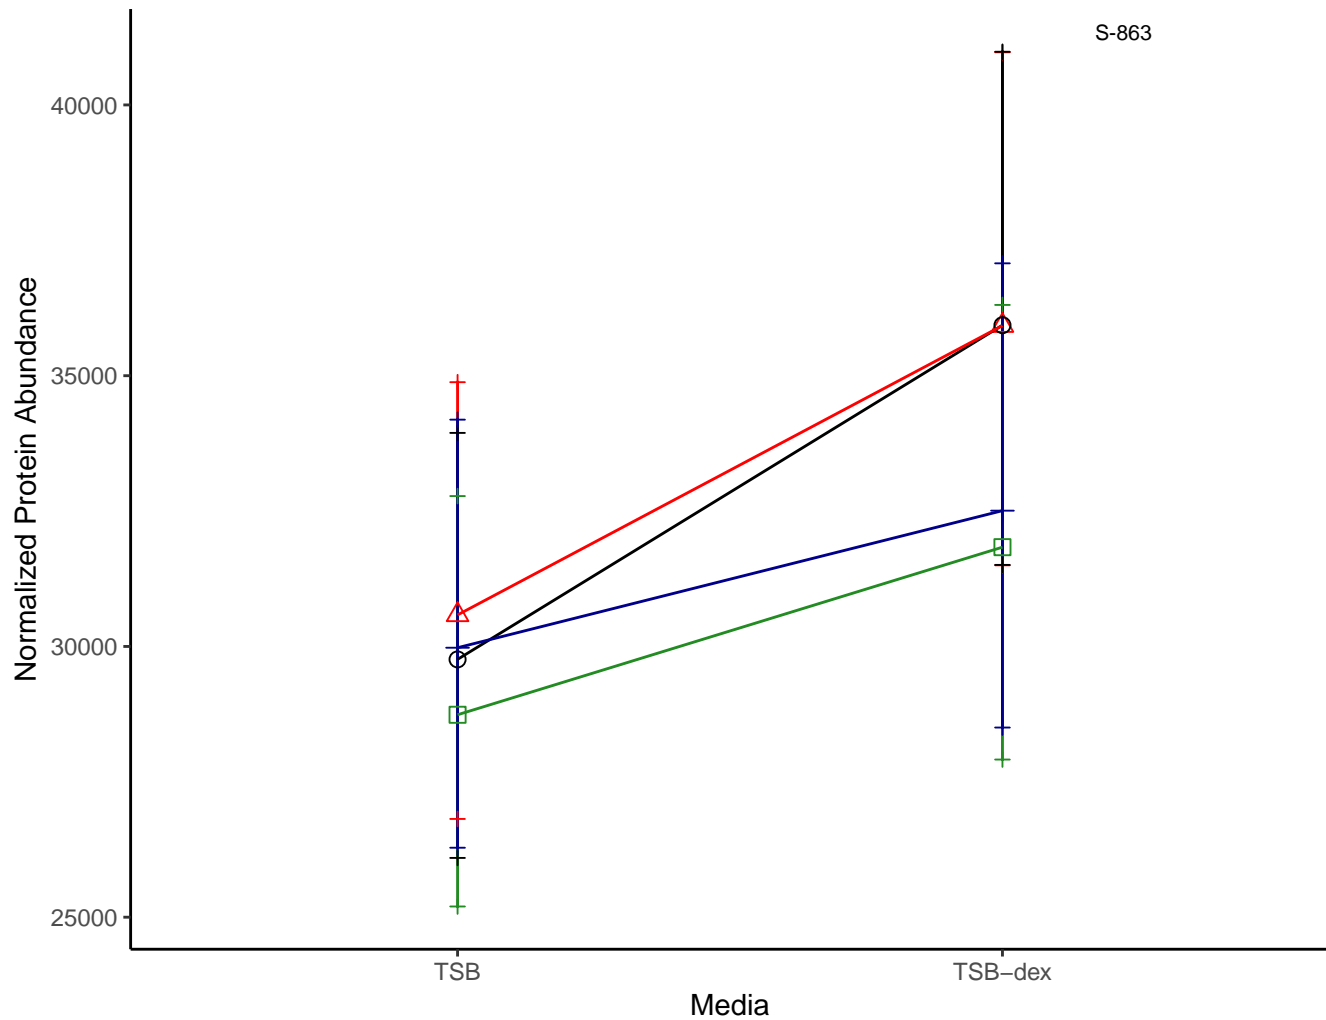

- ⊕ SA564
- △ SA564-ΔhptRS
- ⊞ SA564-ΔccpA
- + SA564-ΔhptRS/ccpA

# RS5\_STAAM

S-864

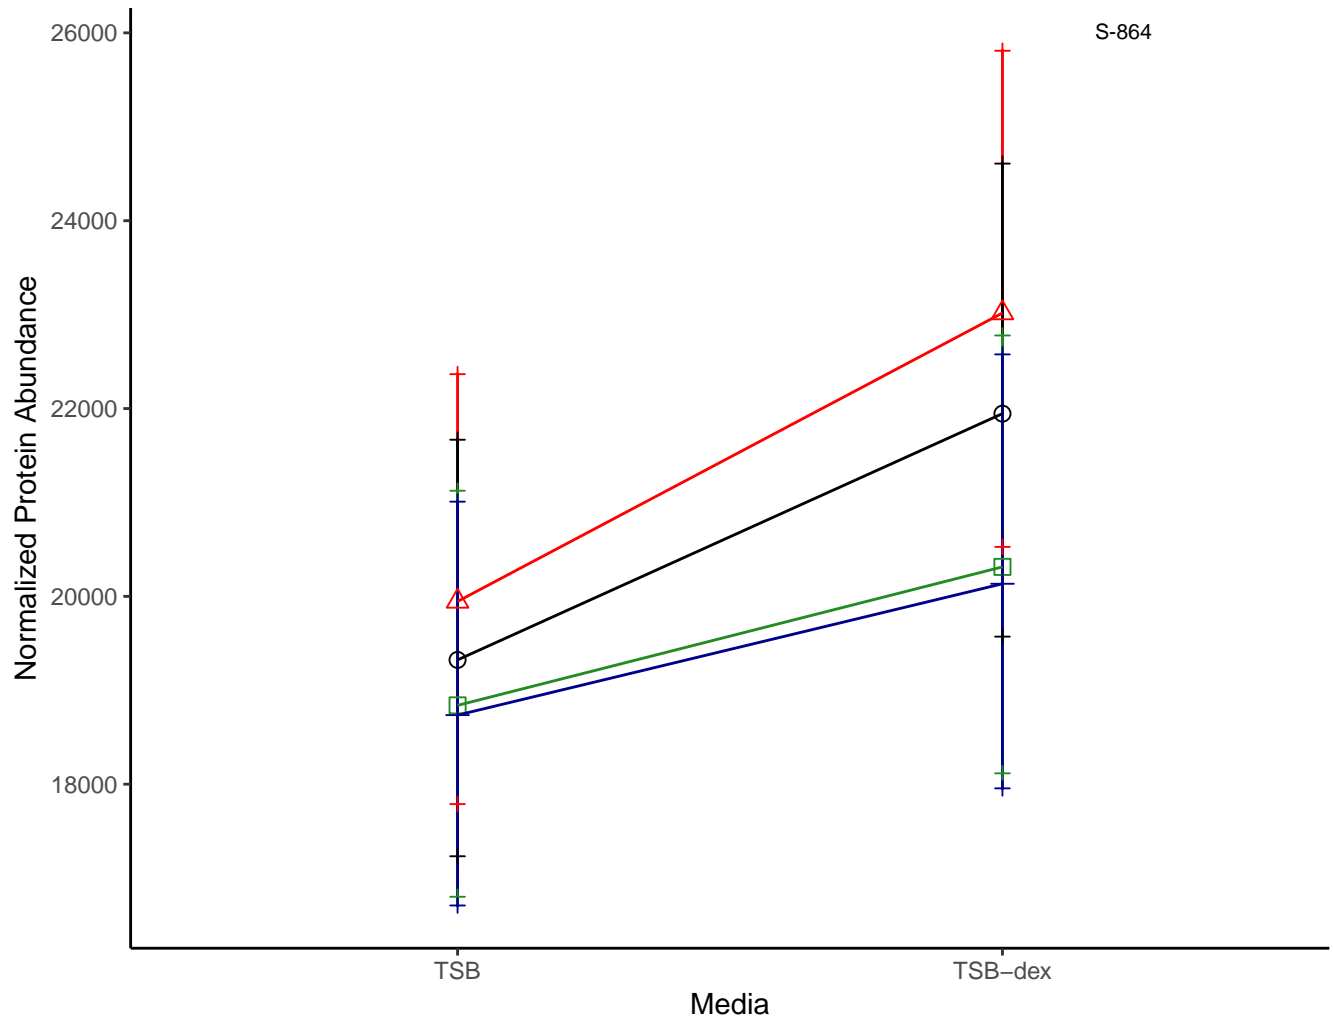

- ⊕ SA564
- △ SA564-ΔhptRS
- ⊞ SA564-ΔccpA
- + SA564-ΔhptRS/ccpA



# RS6\_STAAM

S-865

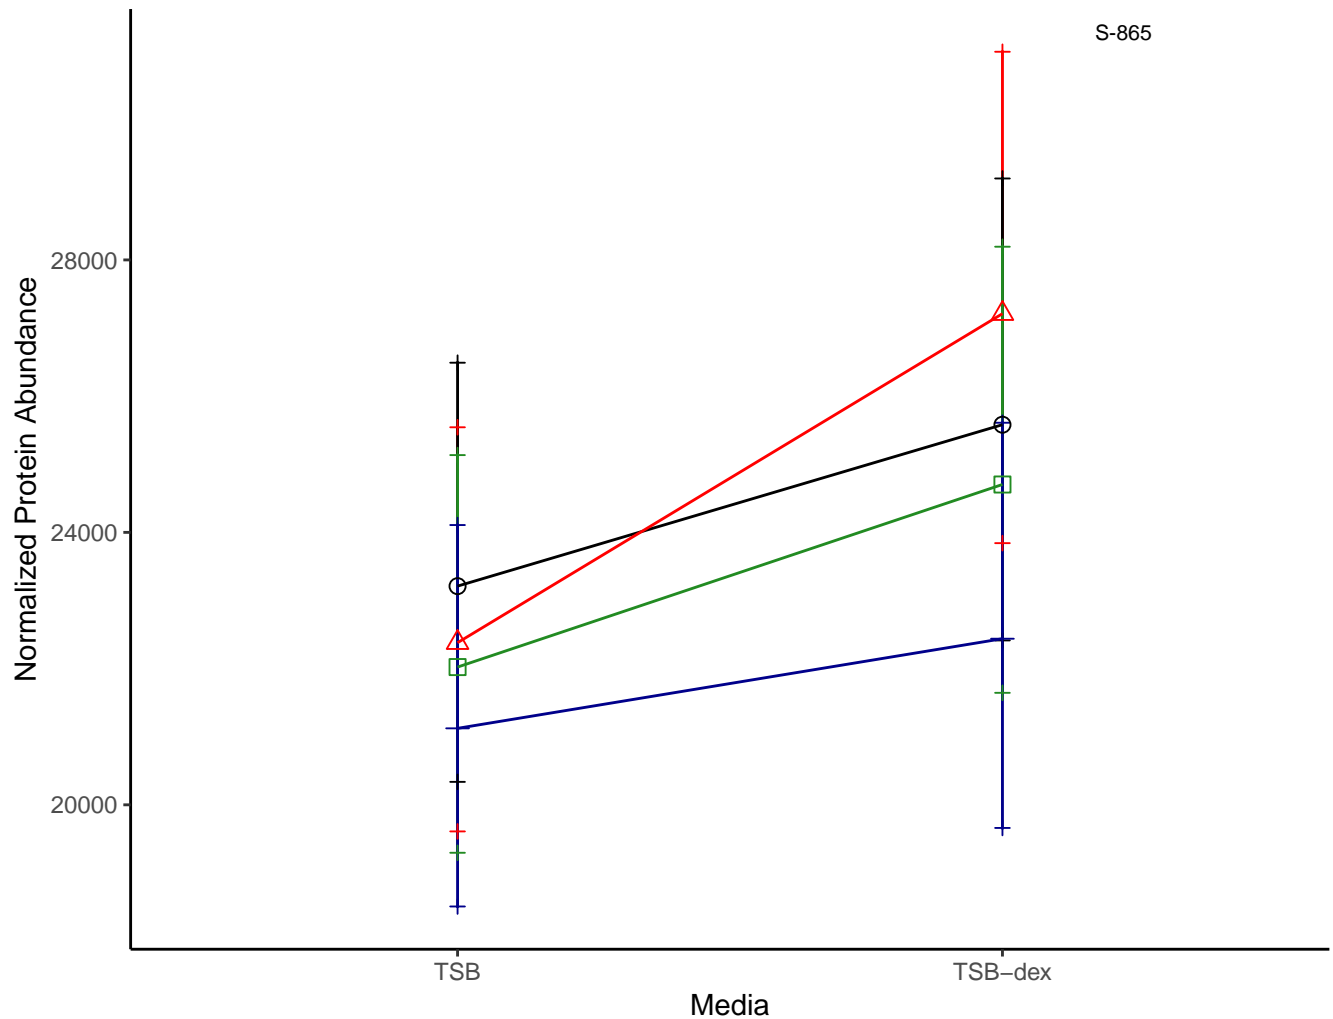

- ⊕ SA564
- △ SA564-ΔhptRS
- ⊞ SA564-ΔccpA
- + SA564-ΔhptRS/ccpA

# RS7\_STAAM

S-866

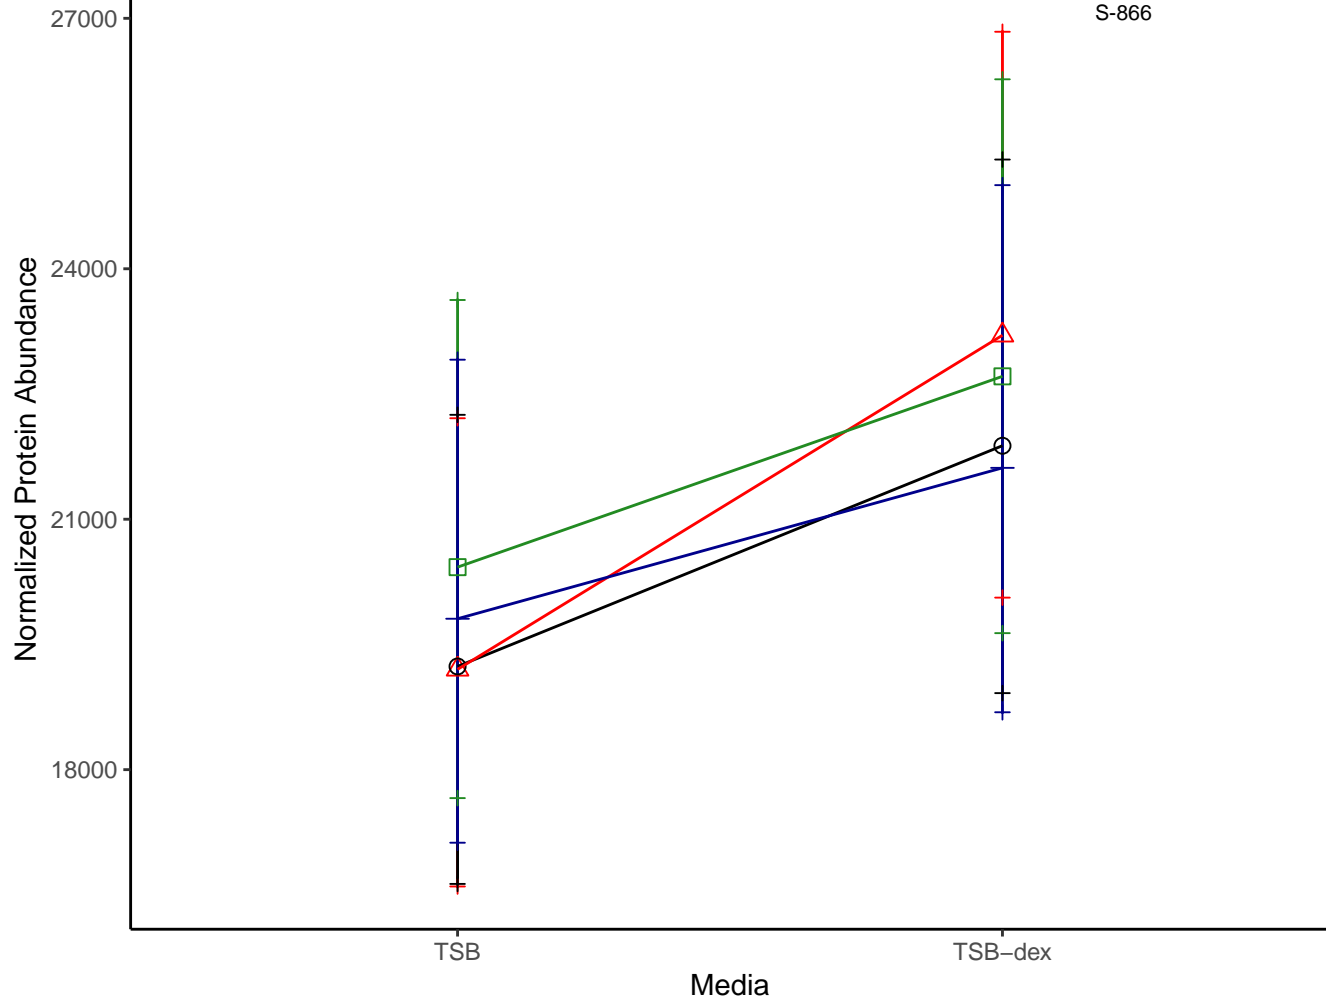

- ⊕ SA564
- △ SA564-ΔhptRS
- SA564-ΔccpA
- + SA564-ΔhptRS/ccpA

# RS8\_STAAM

S-867

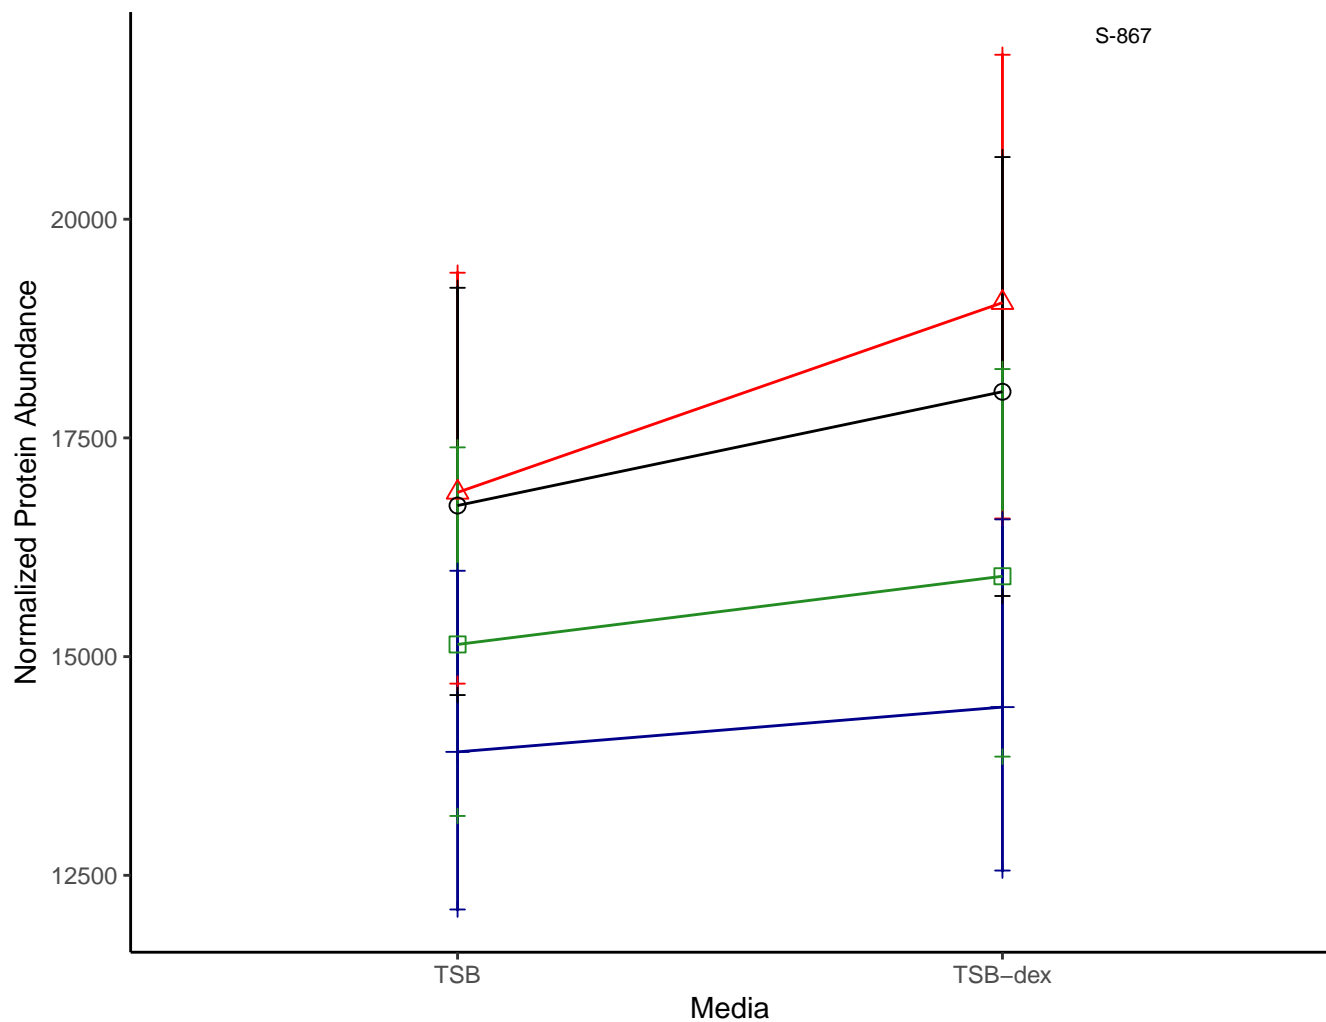

- ⊕ SA564
- △ SA564-ΔhptRS
- ⊞ SA564-ΔccpA
- + SA564-ΔhptRS/ccpA

# RS9\_STAAM

S-868

Normalized Protein Abundance

35000  
30000  
25000  
20000

TSB

TSB-dex

Media

- ⊕ SA564
- △ SA564- $\Delta$ *hptRS*
- ⊞ SA564- $\Delta$ *ccpA*
- + SA564- $\Delta$ *hptRS/ccpA*

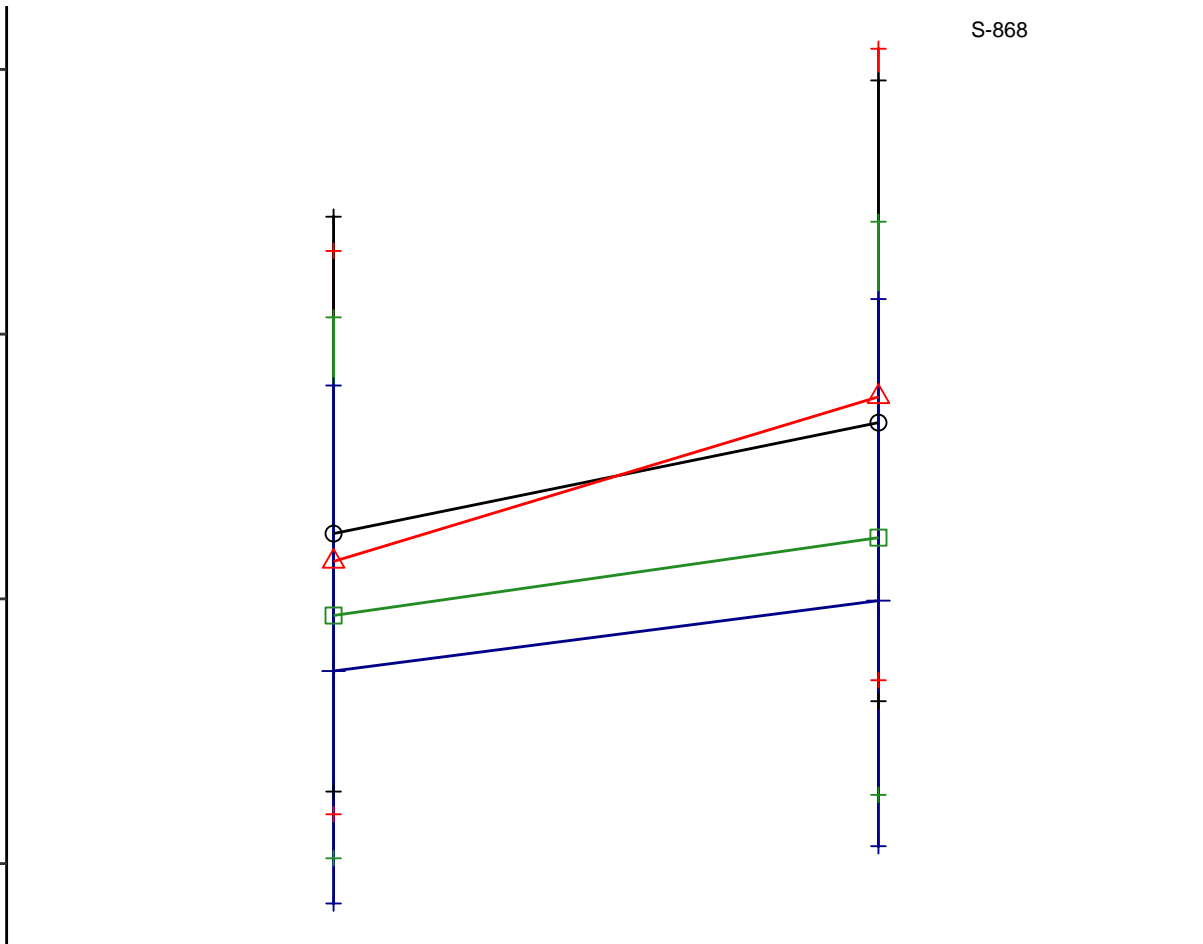

# RSBV\_STAAM

S-869

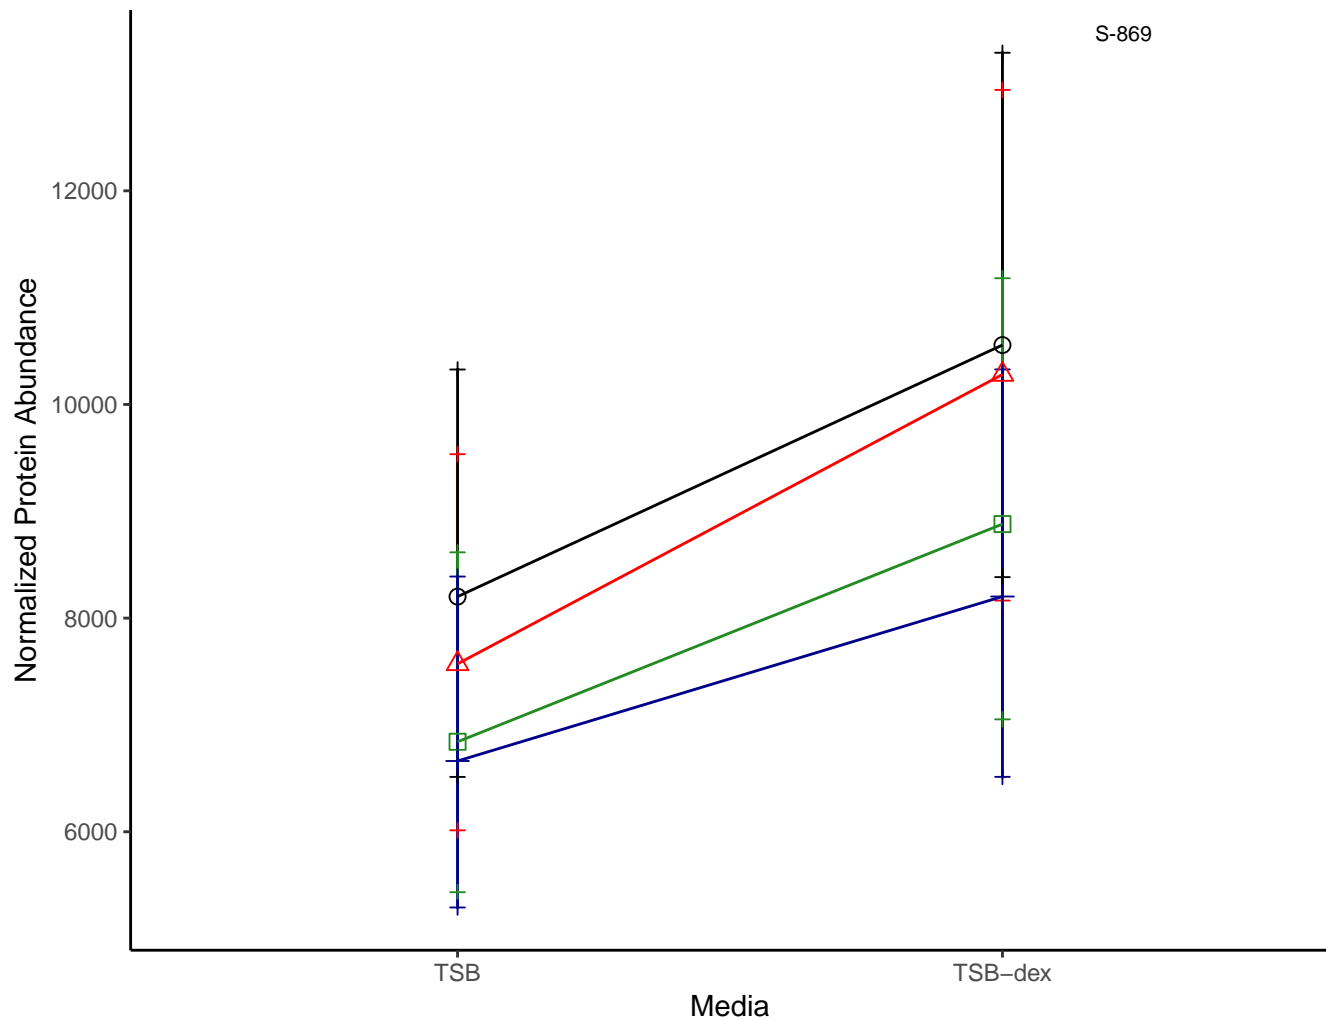

- ⊕ SA564
- △ SA564-ΔhptRS
- ⊞ SA564-ΔccpA
- + SA564-ΔhptRS/ccpA

# RSBW\_STAAM

S-870

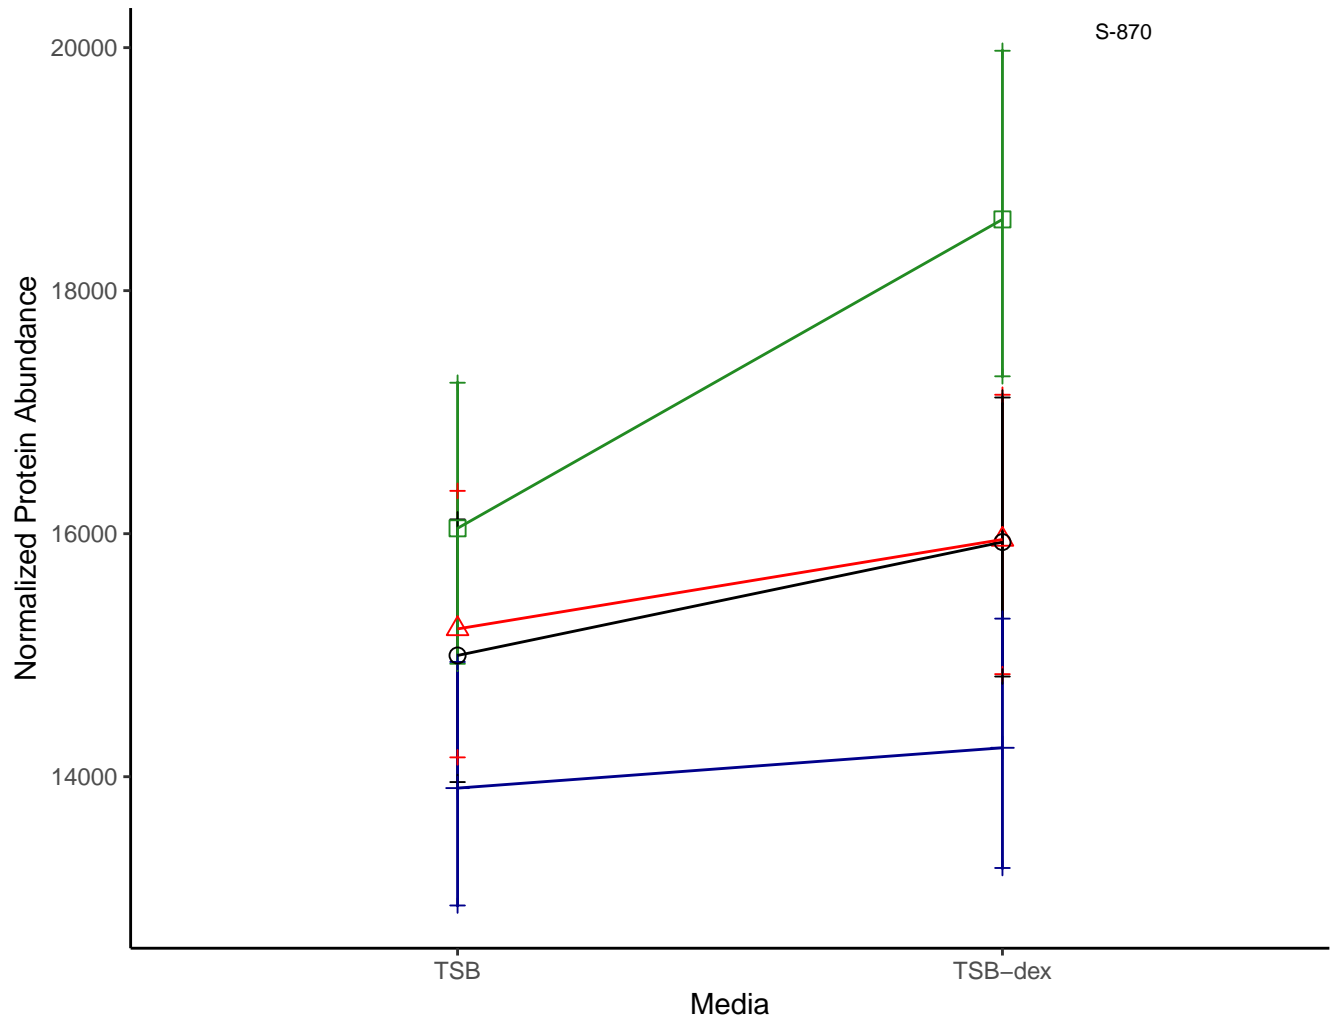

- ⊕ SA564
- △ SA564-ΔhptRS
- ⊞ SA564-ΔccpA
- + SA564-ΔhptRS/ccpA

# RSMA\_STAAM

S-871

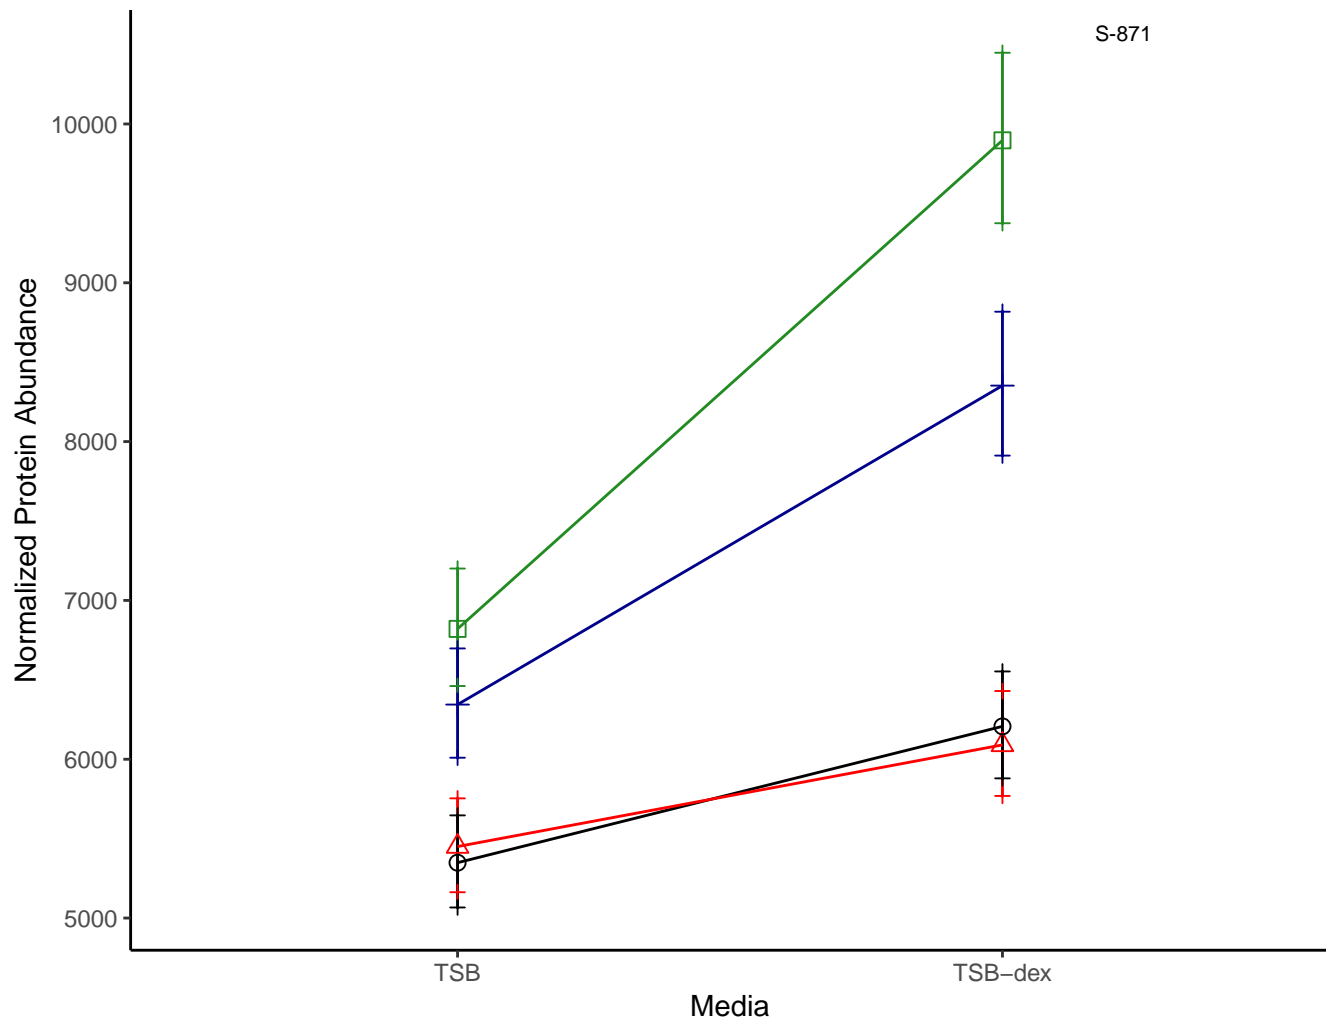

- ⊕ SA564
- △ SA564-ΔhptRS
- ⊞ SA564-ΔccpA
- + SA564-ΔhptRS/ccpA

# RSMG\_STAAM

S-872

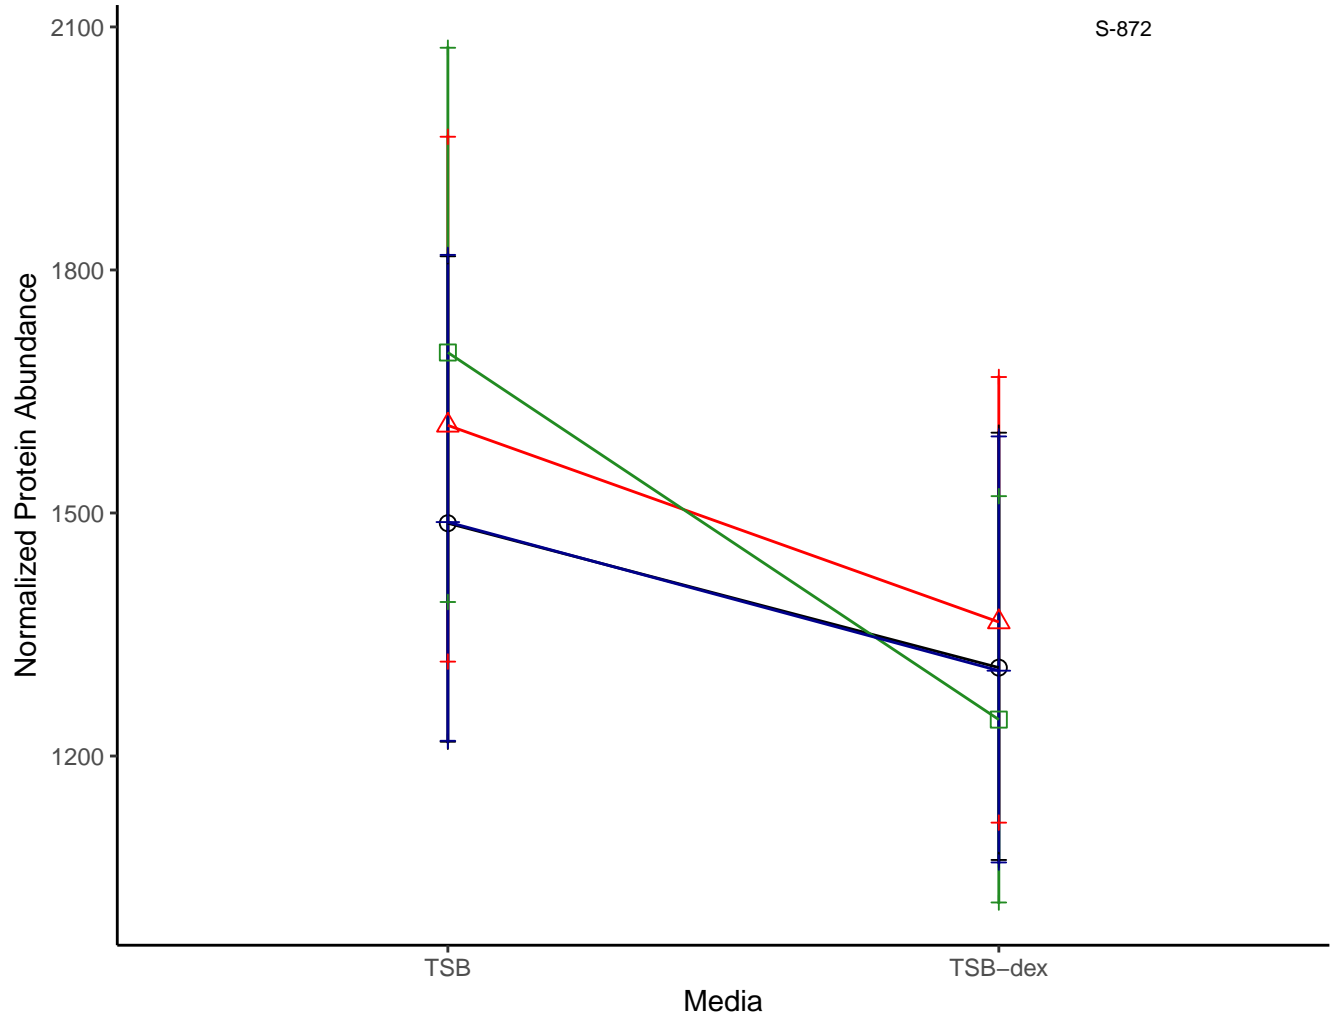

- ⊕ SA564
- △ SA564- $\Delta hptRS$
- ⊞ SA564- $\Delta ccpA$
- + SA564- $\Delta hptRS/ccpA$



# RUVX\_STAAM

S-873

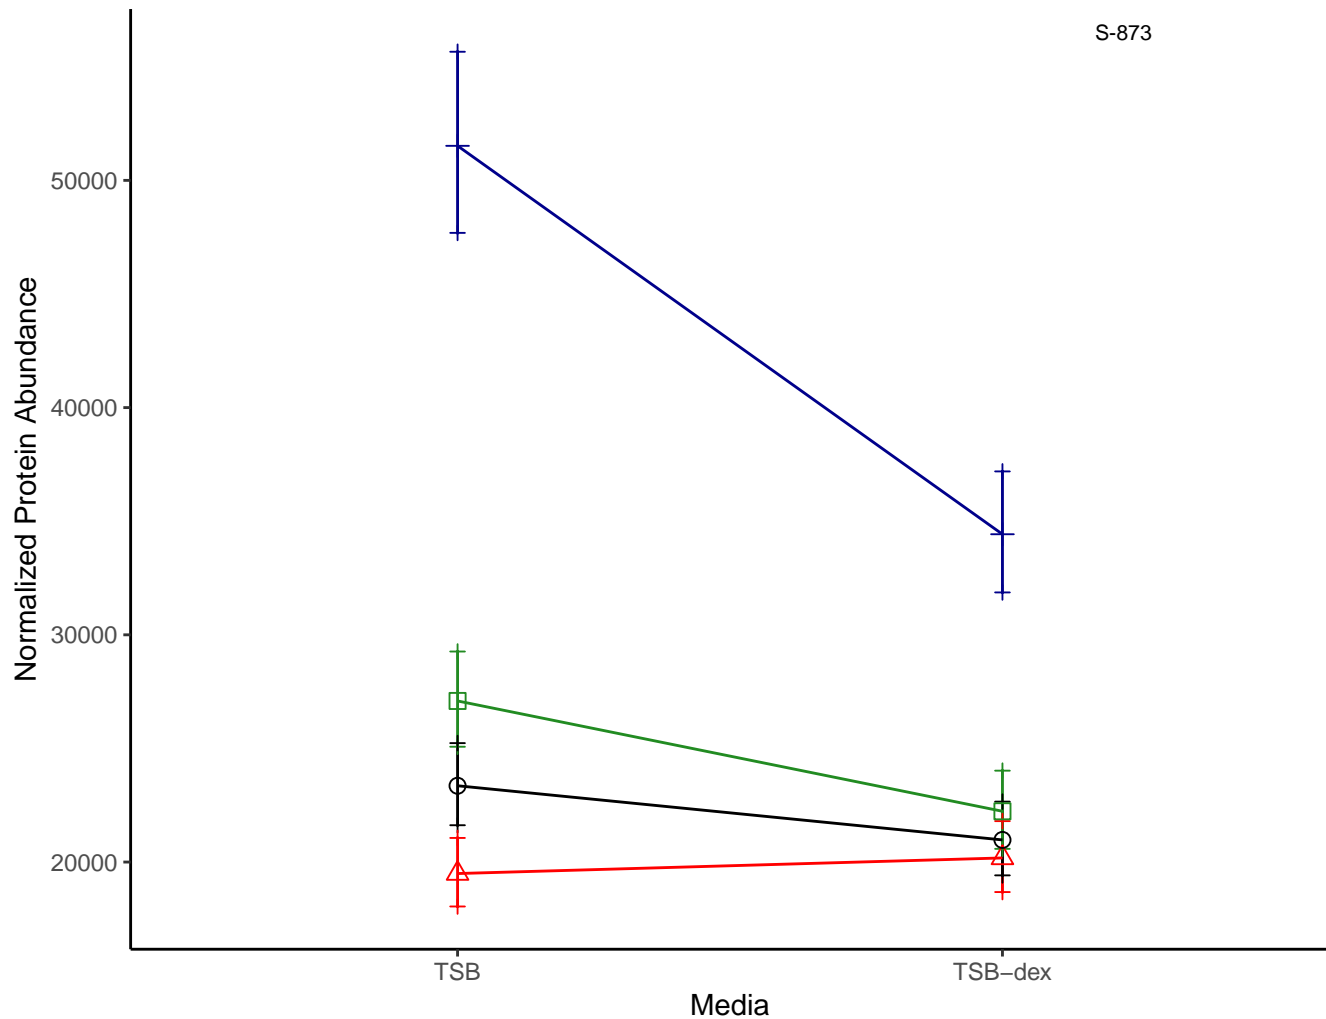

- ⊕ SA564
- △ SA564- $\Delta$ *hptRS*
- ⊞ SA564- $\Delta$ *ccpA*
- + SA564- $\Delta$ *hptRS/ccpA*

# S3AD\_STAAM

S-874

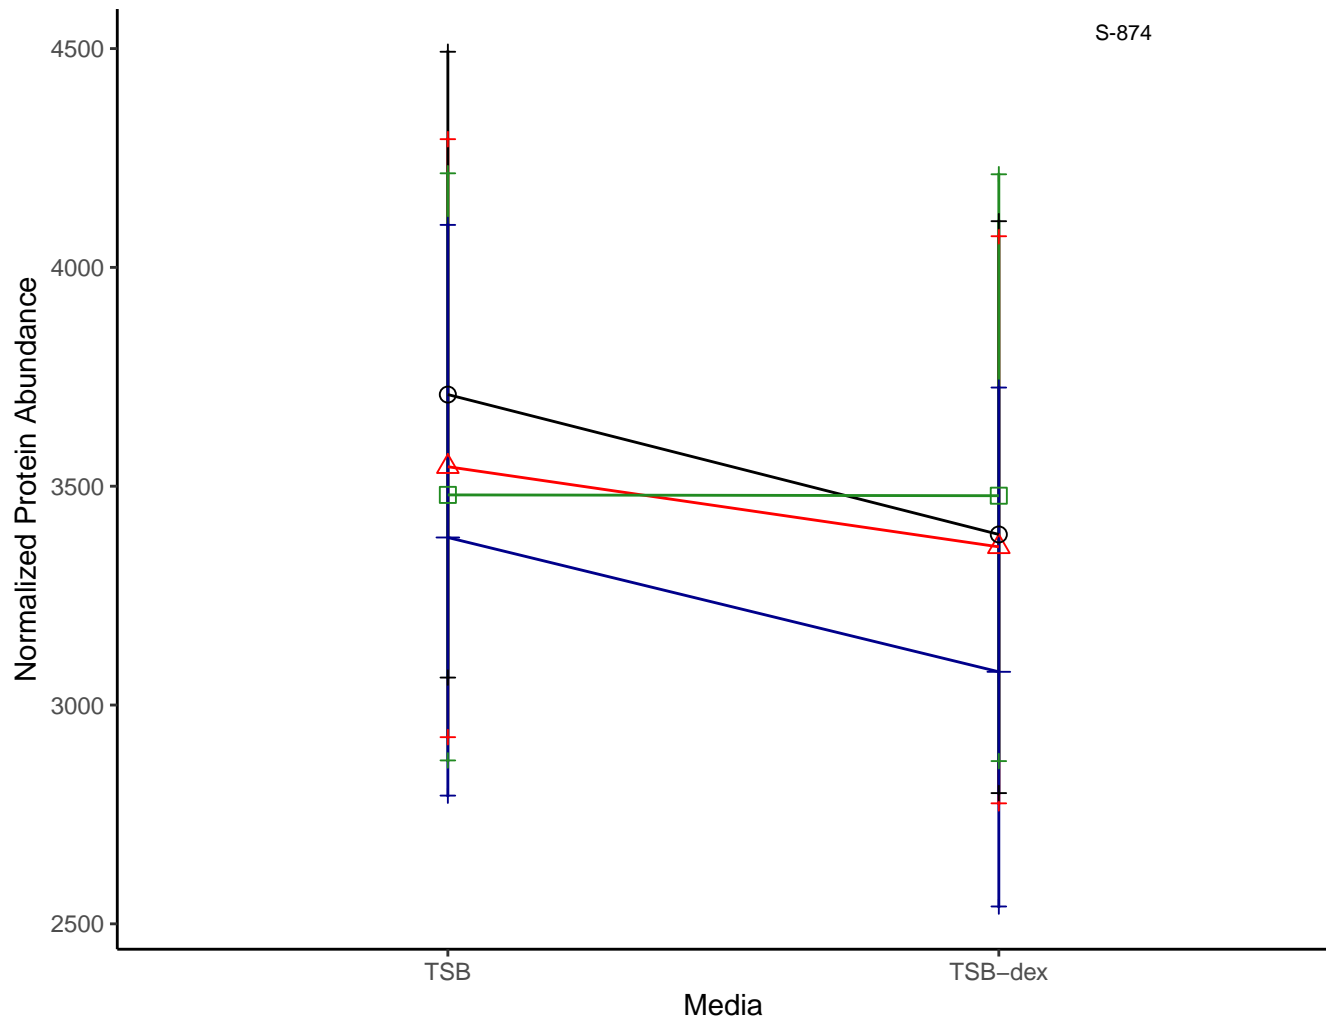

- ⊕ SA564
- △ SA564-ΔhptRS
- ⊞ SA564-ΔccpA
- + SA564-ΔhptRS/ccpA

# SAER\_STAAM

S-875

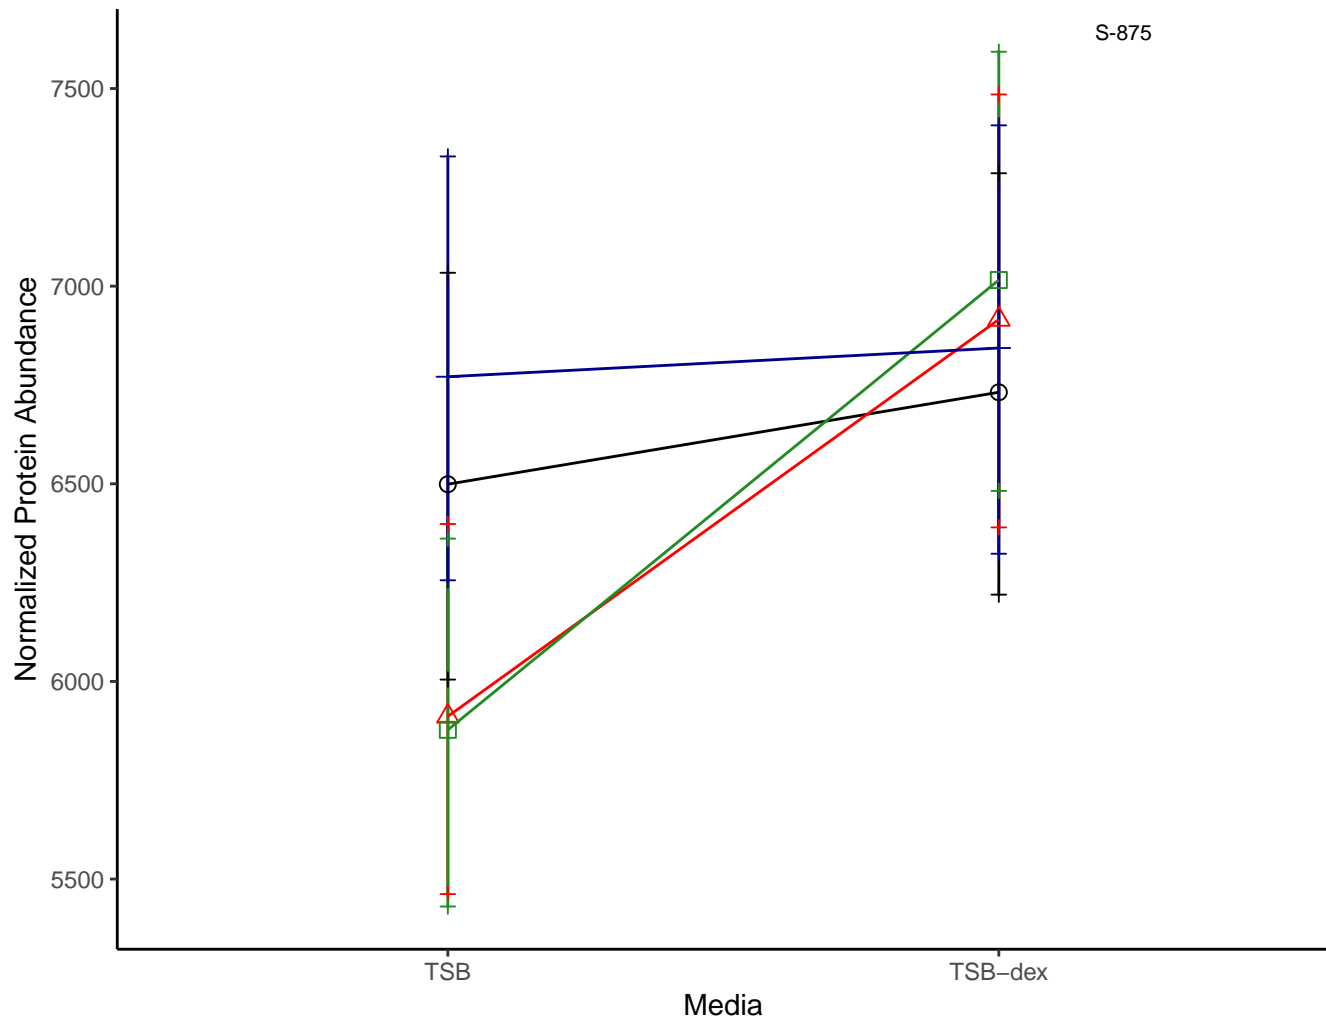

- ⊕ SA564
- △ SA564- $\Delta hptRS$
- ⊞ SA564- $\Delta ccpA$
- + SA564- $\Delta hptRS/ccpA$

# SARA\_STAAM

S-876

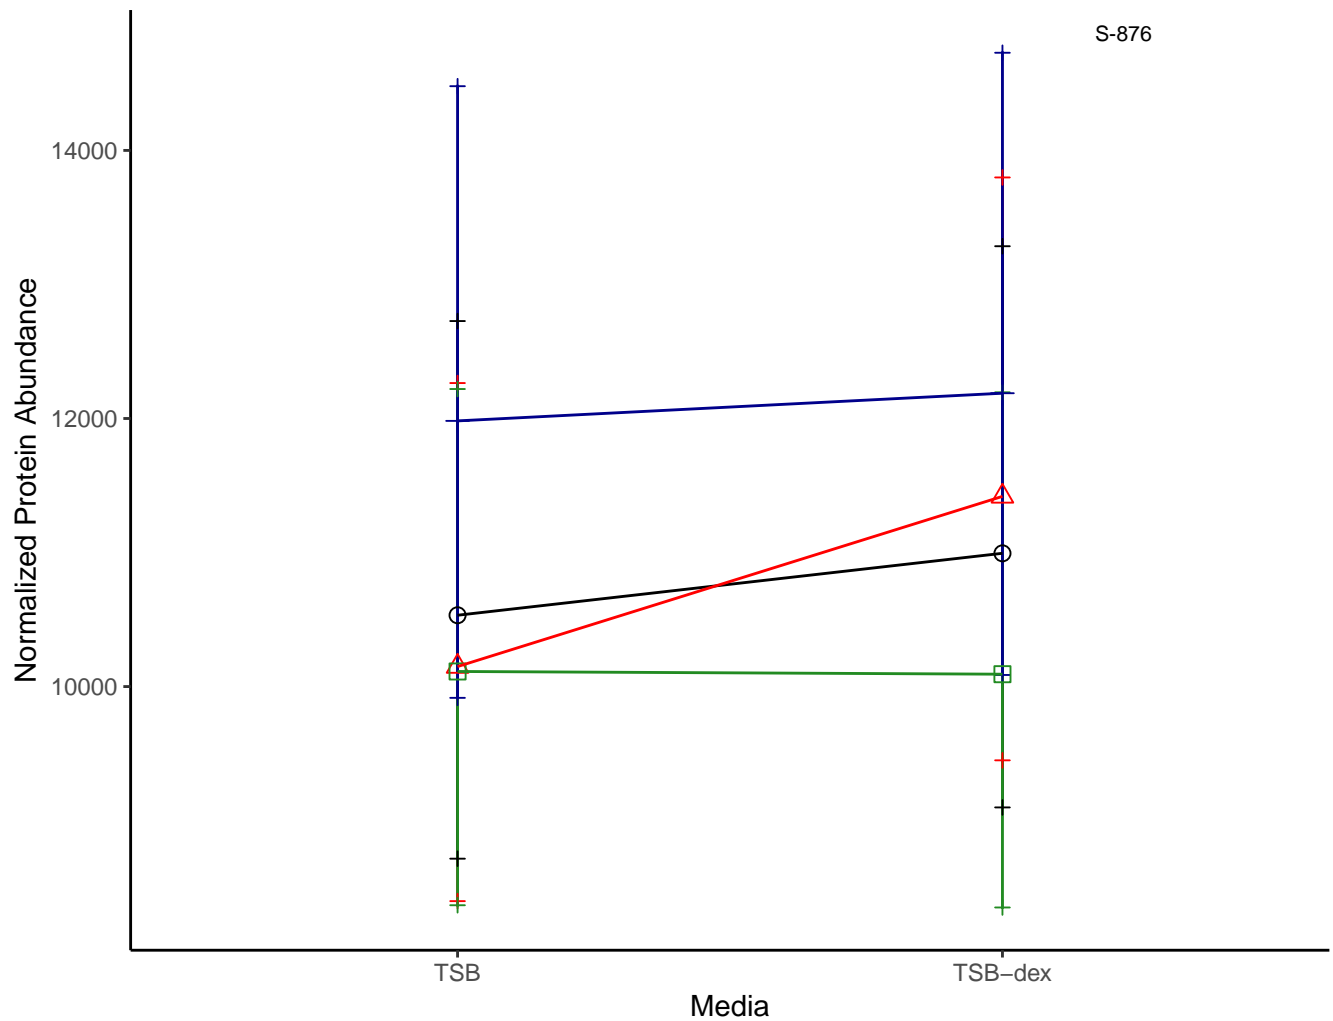

- ⊕ SA564
- △ SA564- $\Delta$ *hptRS*
- ⊞ SA564- $\Delta$ *ccpA*
- + SA564- $\Delta$ *hptRS/ccpA*

# SARR\_STAAM

S-877

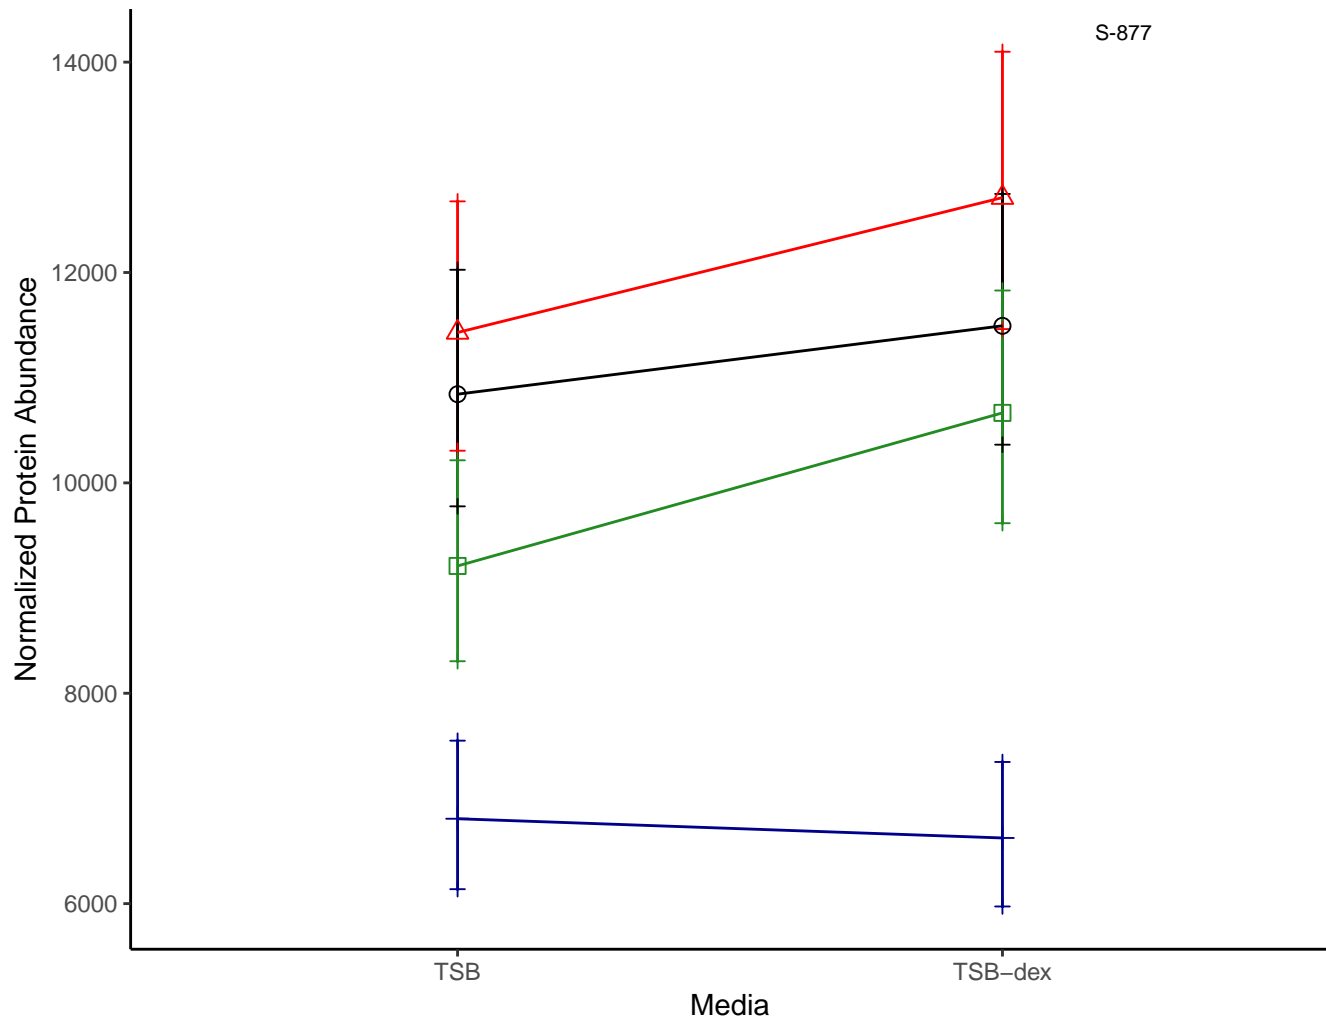

- ⊕ SA564
- △ SA564-ΔhptRS
- ⊞ SA564-ΔccpA
- + SA564-ΔhptRS/ccpA

# SARS\_STAAM

S-878

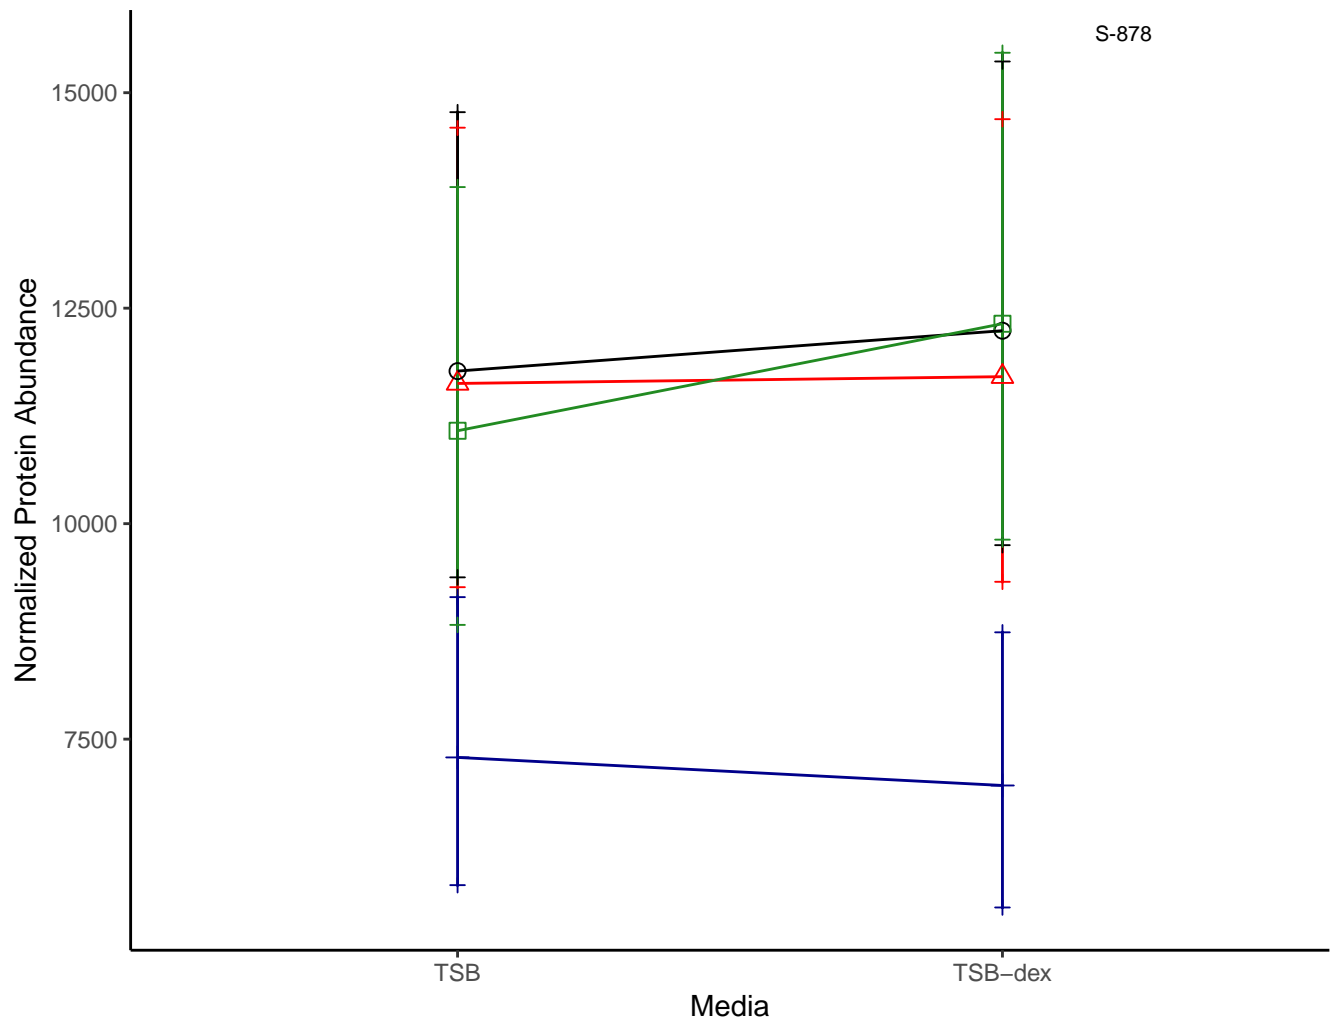

- SA564
- SA564- $\Delta$ *hptRS*
- SA564- $\Delta$ *ccpA*
- SA564- $\Delta$ *hptRS/ccpA*

# SBCC\_STAAM

S-879

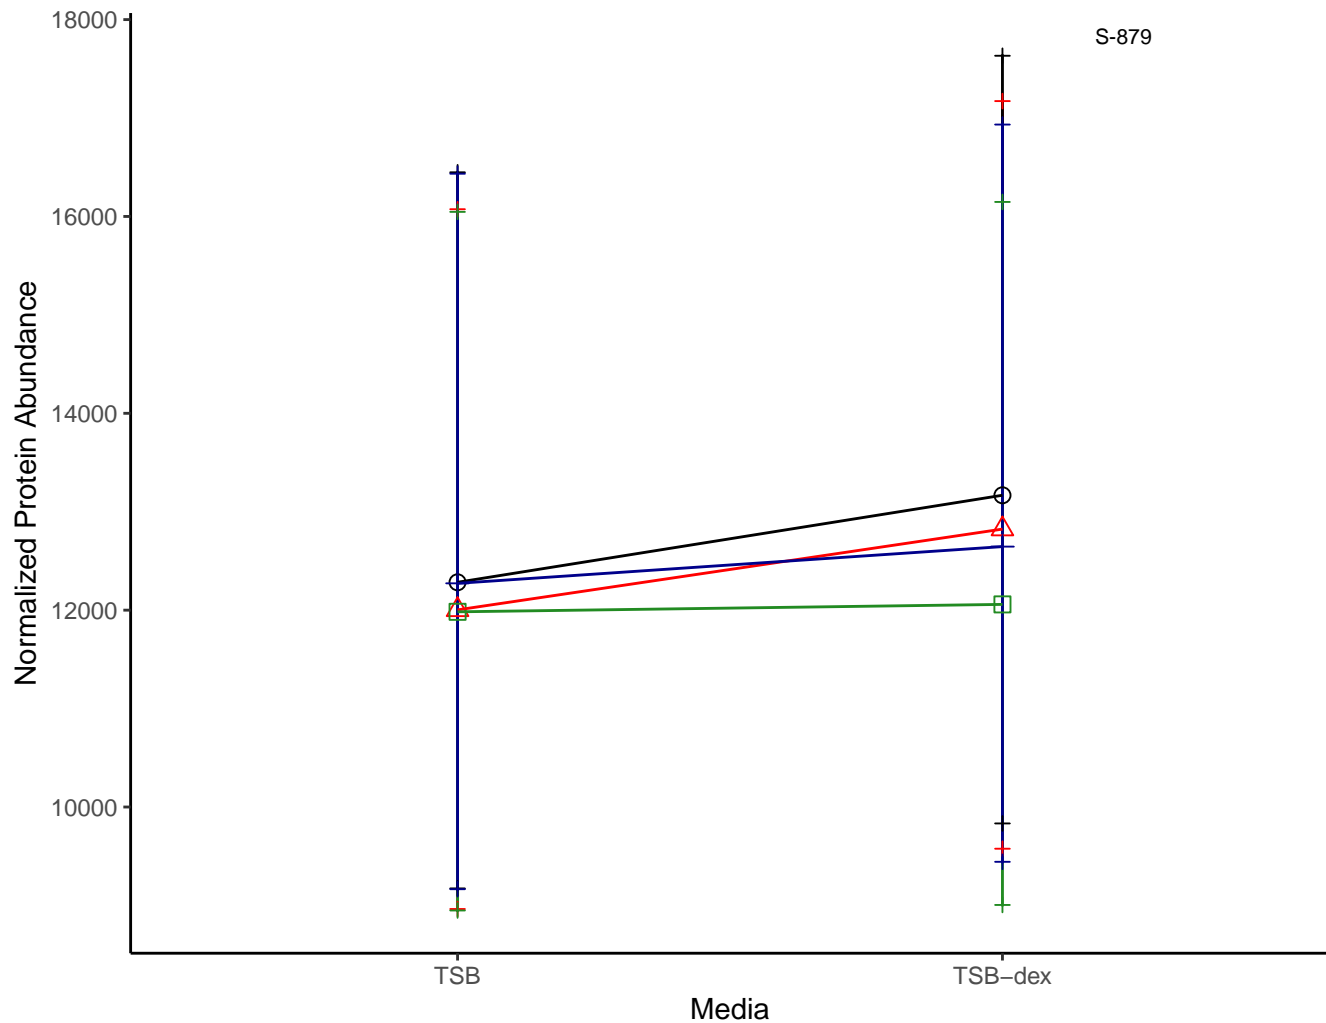

- SA564
- SA564- $\Delta$ *hptRS*
- SA564- $\Delta$ *ccpA*
- SA564- $\Delta$ *hptRS/ccpA*

# SBI\_STAAM

S-880

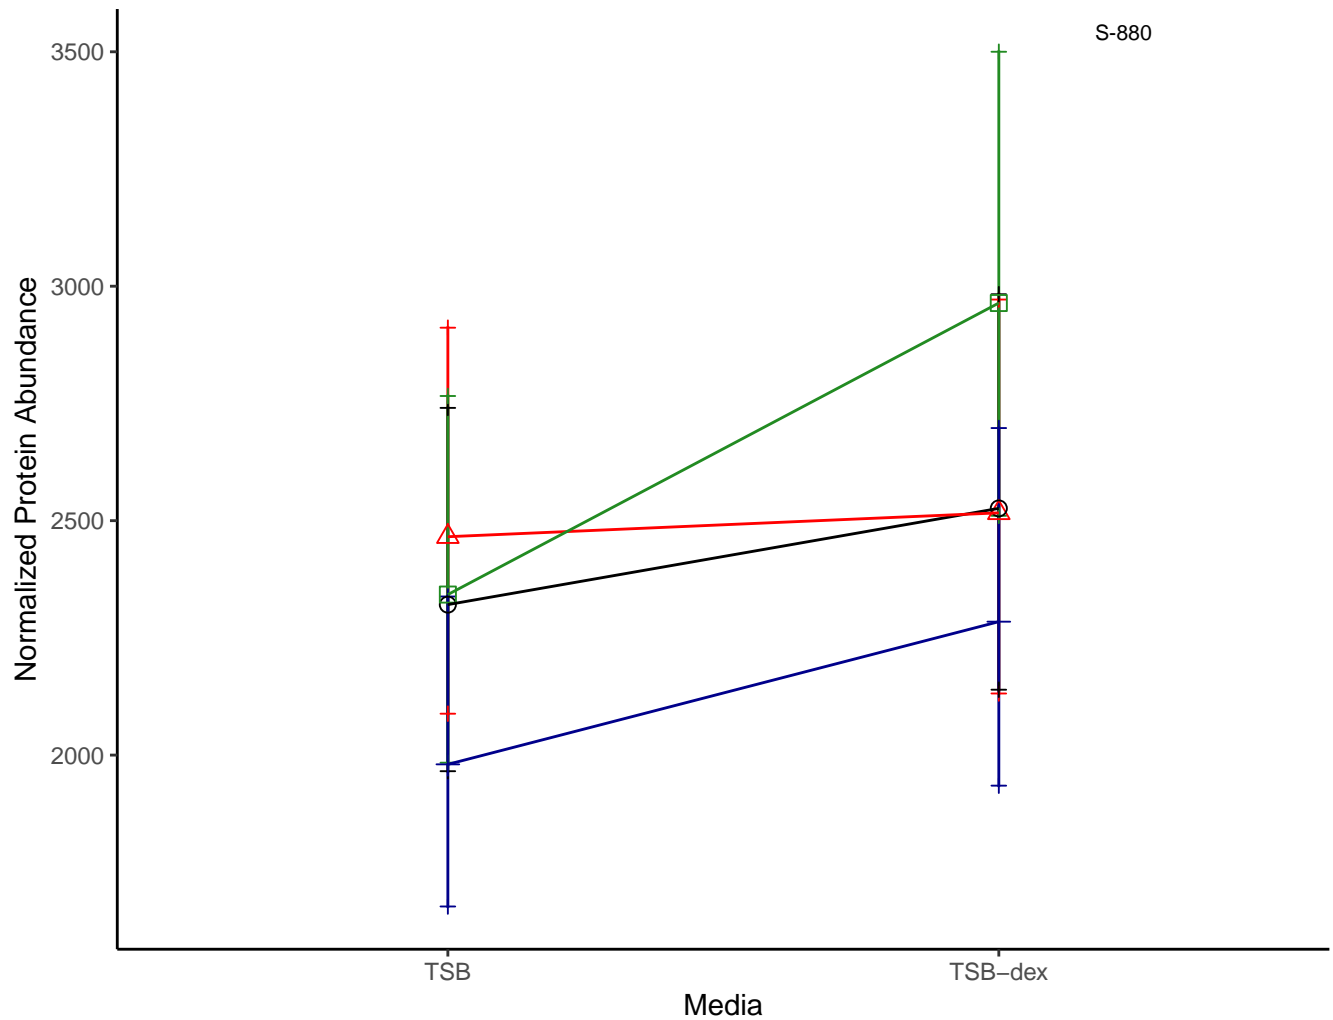

- ⊕ SA564
- △ SA564- $\Delta$ *hptRS*
- ⊞ SA564- $\Delta$ *ccpA*
- + SA564- $\Delta$ *hptRS/ccpA*



# SCPA\_STAAM

S-881

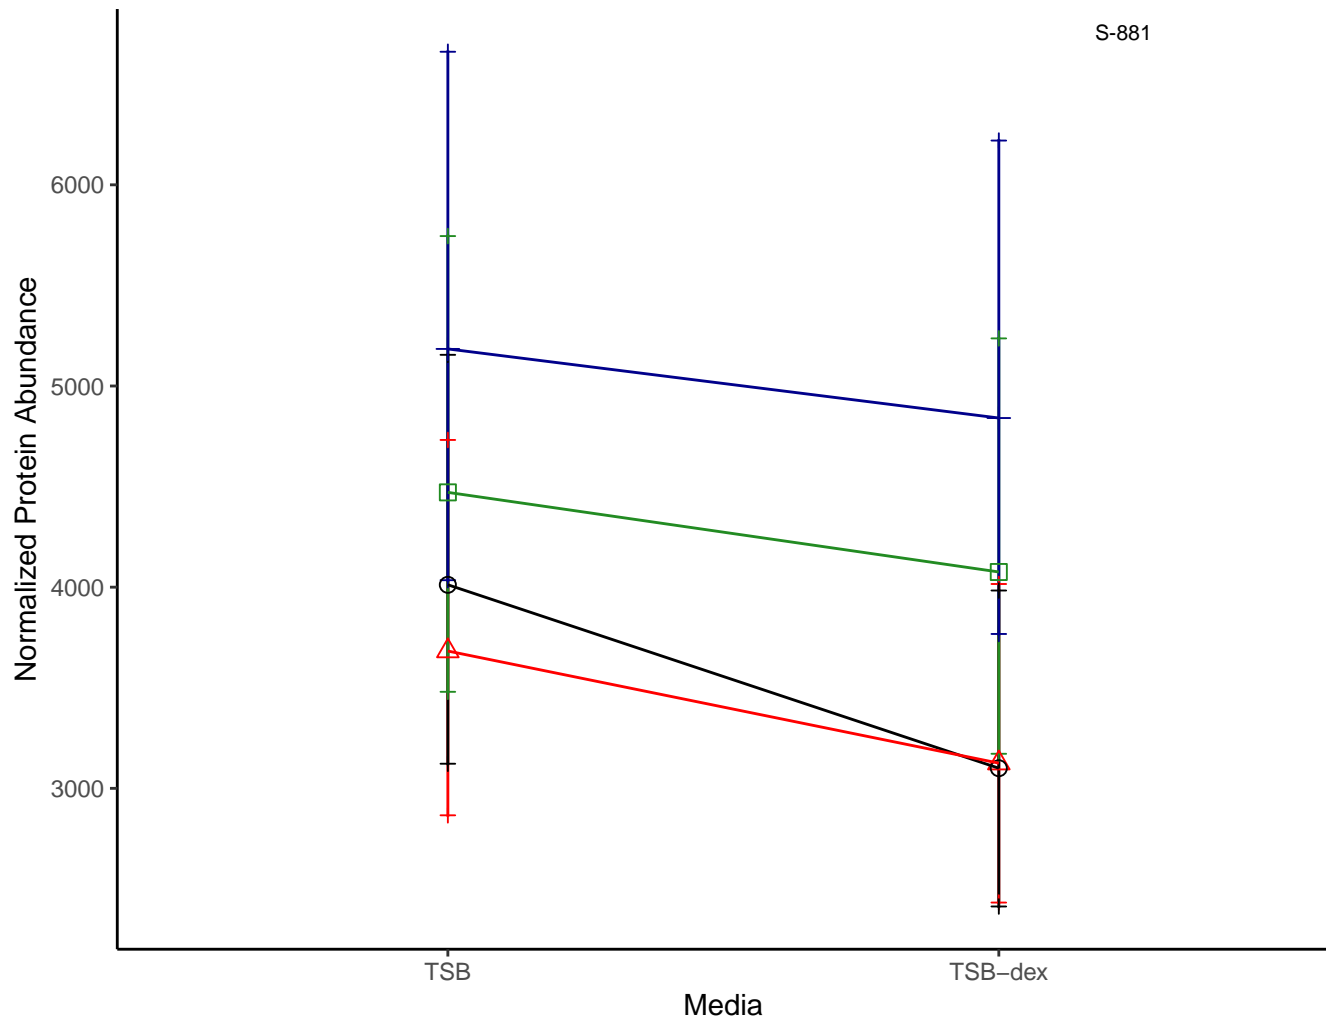

- ⊕ SA564
- △ SA564- $\Delta hptRS$
- ⊞ SA564- $\Delta ccpA$
- + SA564- $\Delta hptRS/ccpA$

# SCPB\_STAAM

S-882

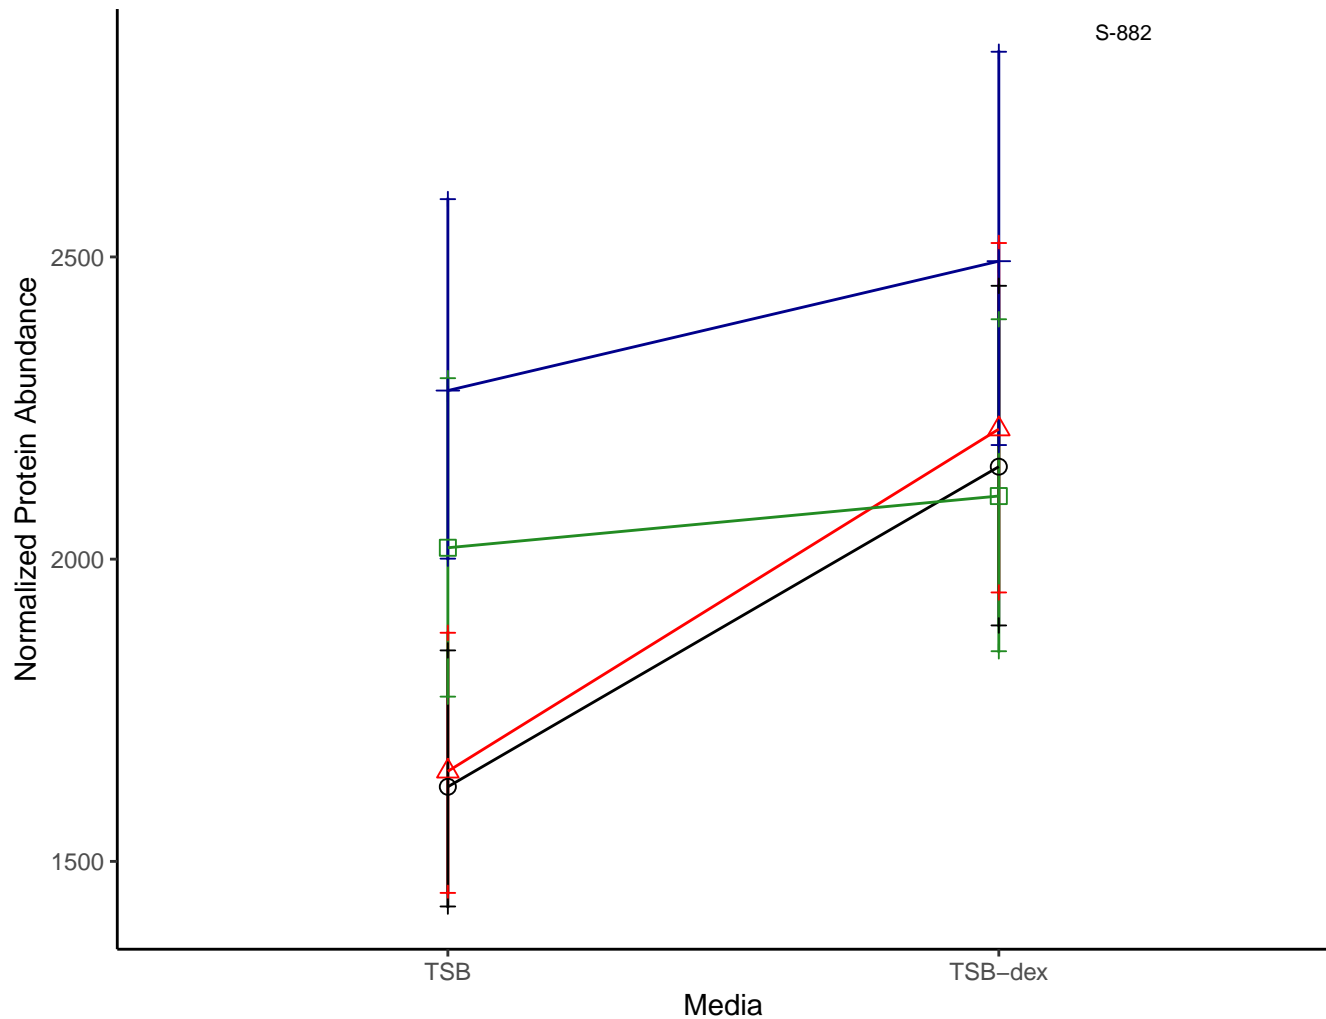

- ⊕ SA564
- △ SA564-ΔhptRS
- ⊞ SA564-ΔccpA
- + SA564-ΔhptRS/ccpA

# SECA1\_STAAM

S-883

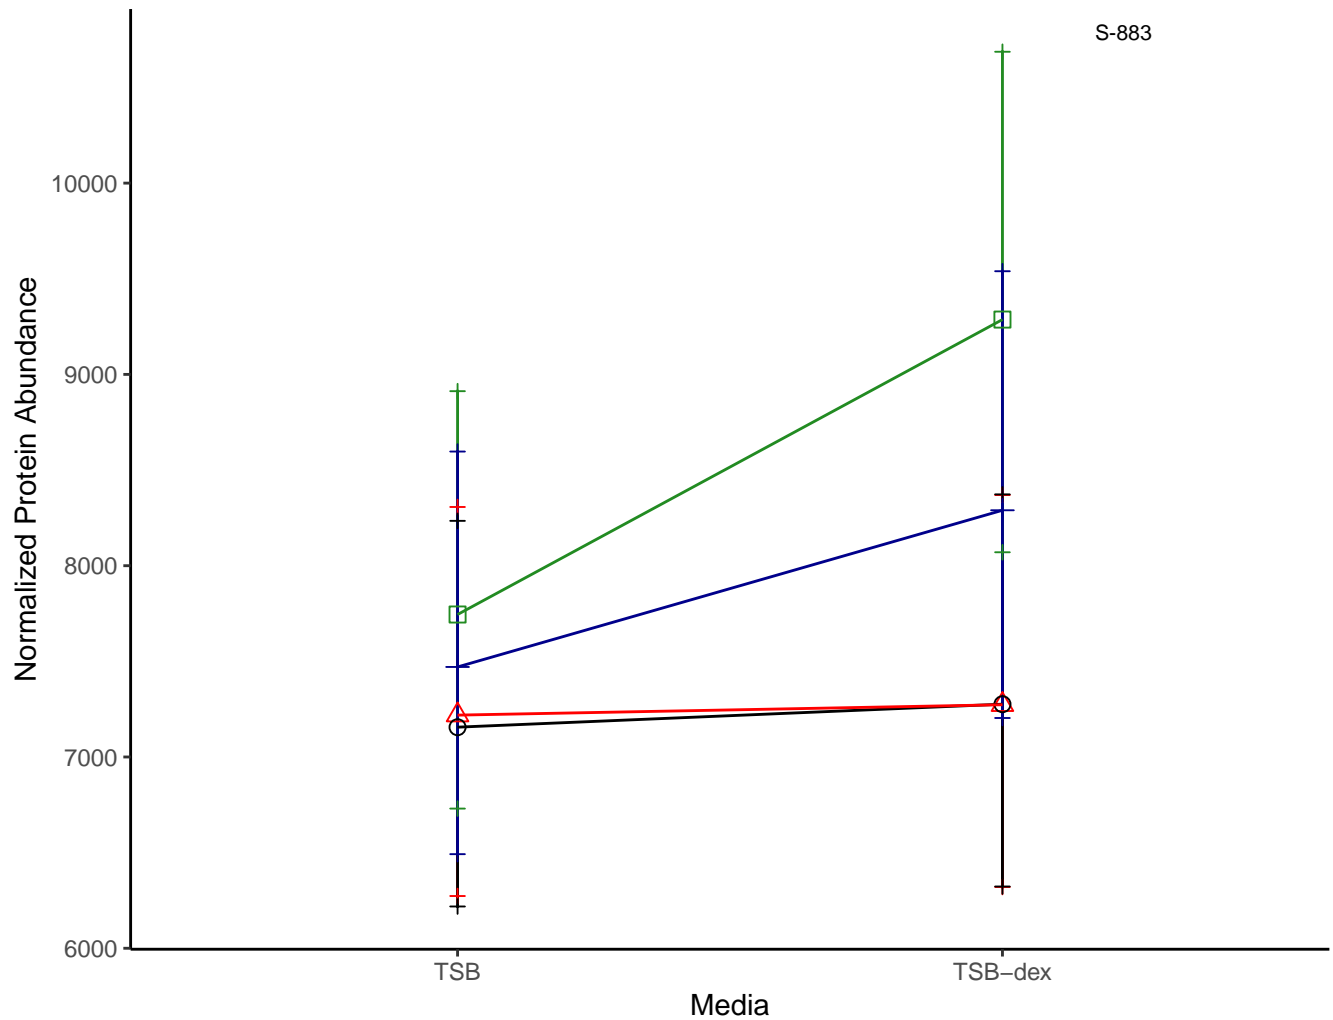

- ⊕ SA564
- △ SA564-ΔhptRS
- ⊞ SA564-ΔccpA
- + SA564-ΔhptRS/ccpA

# SIGA\_STAAM

S-884

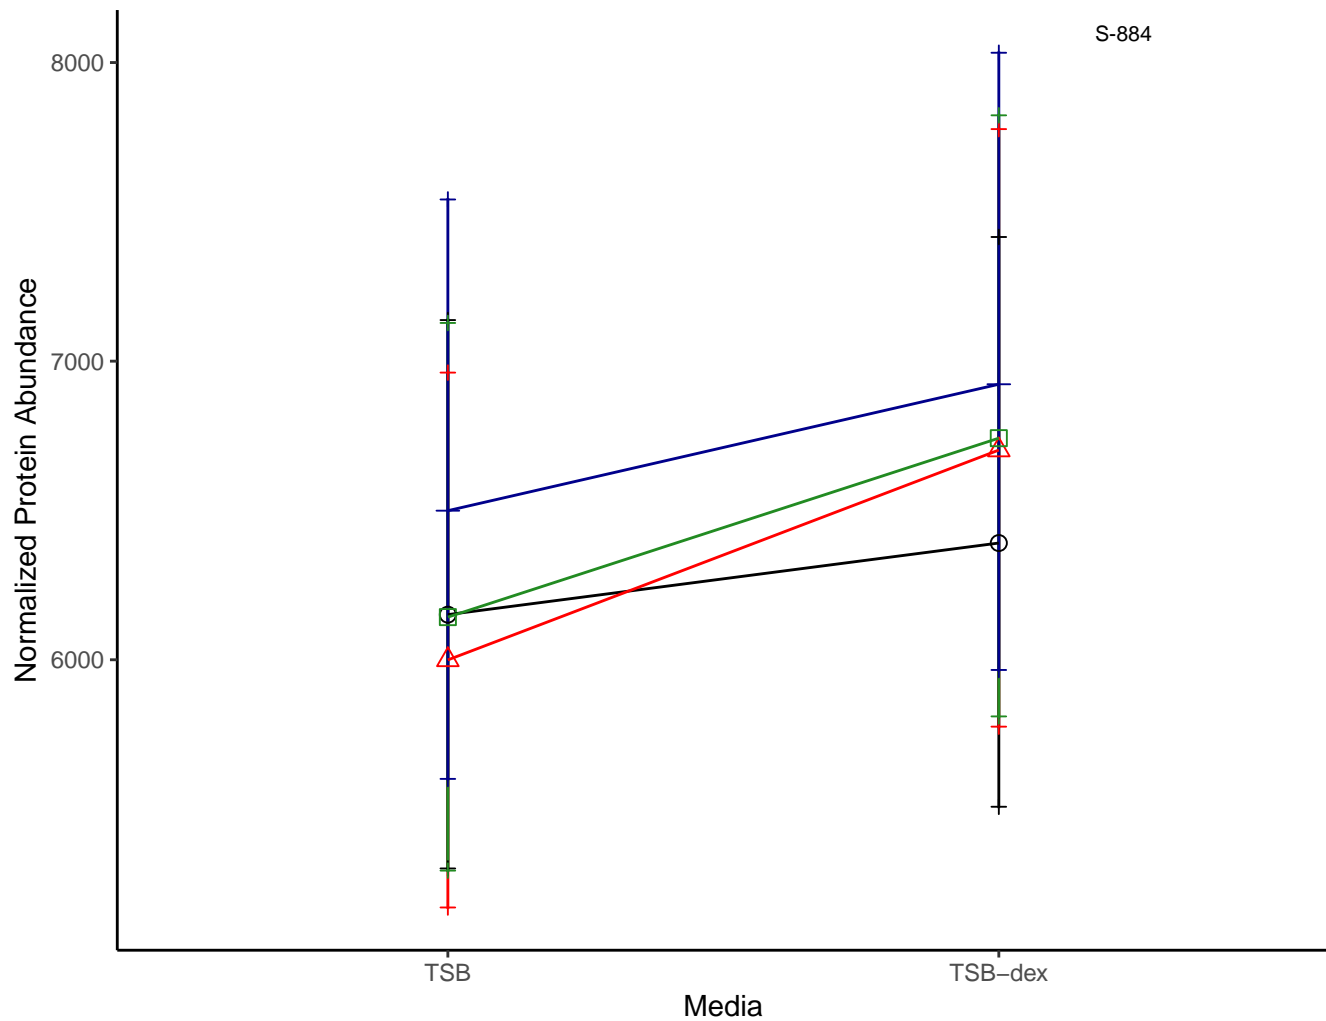

- ⊕ SA564
- △ SA564- $\Delta hptRS$
- ⊞ SA564- $\Delta ccpA$
- + SA564- $\Delta hptRS/ccpA$

# SODM1\_STAAM

S-885

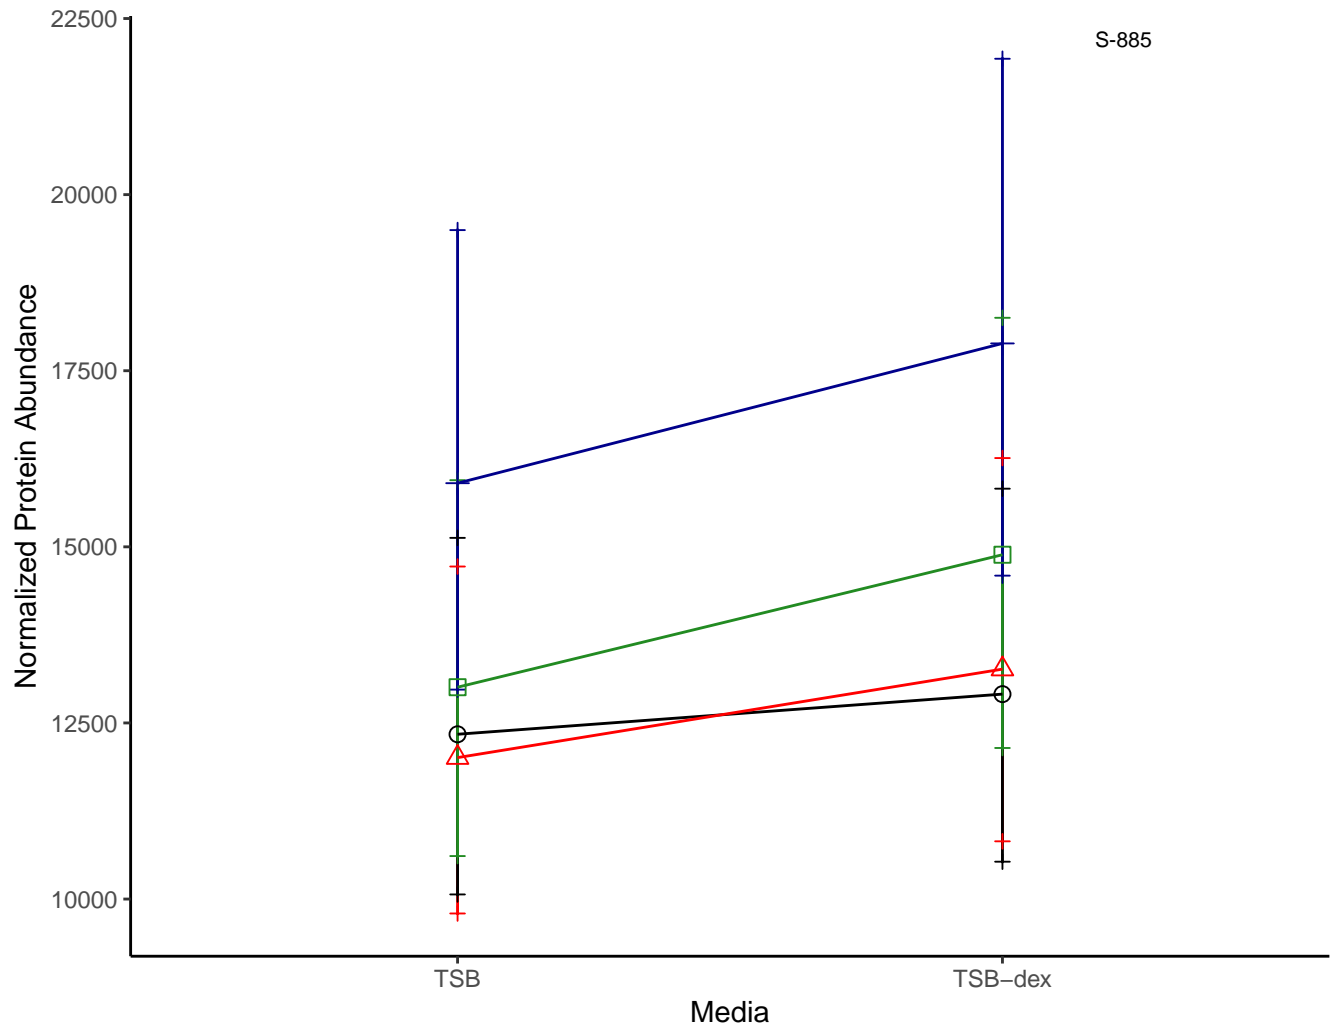

- ⊕ SA564
- △ SA564-ΔhptRS
- ⊞ SA564-ΔccpA
- + SA564-ΔhptRS/ccpA

# SODM2\_STAAM

S-886

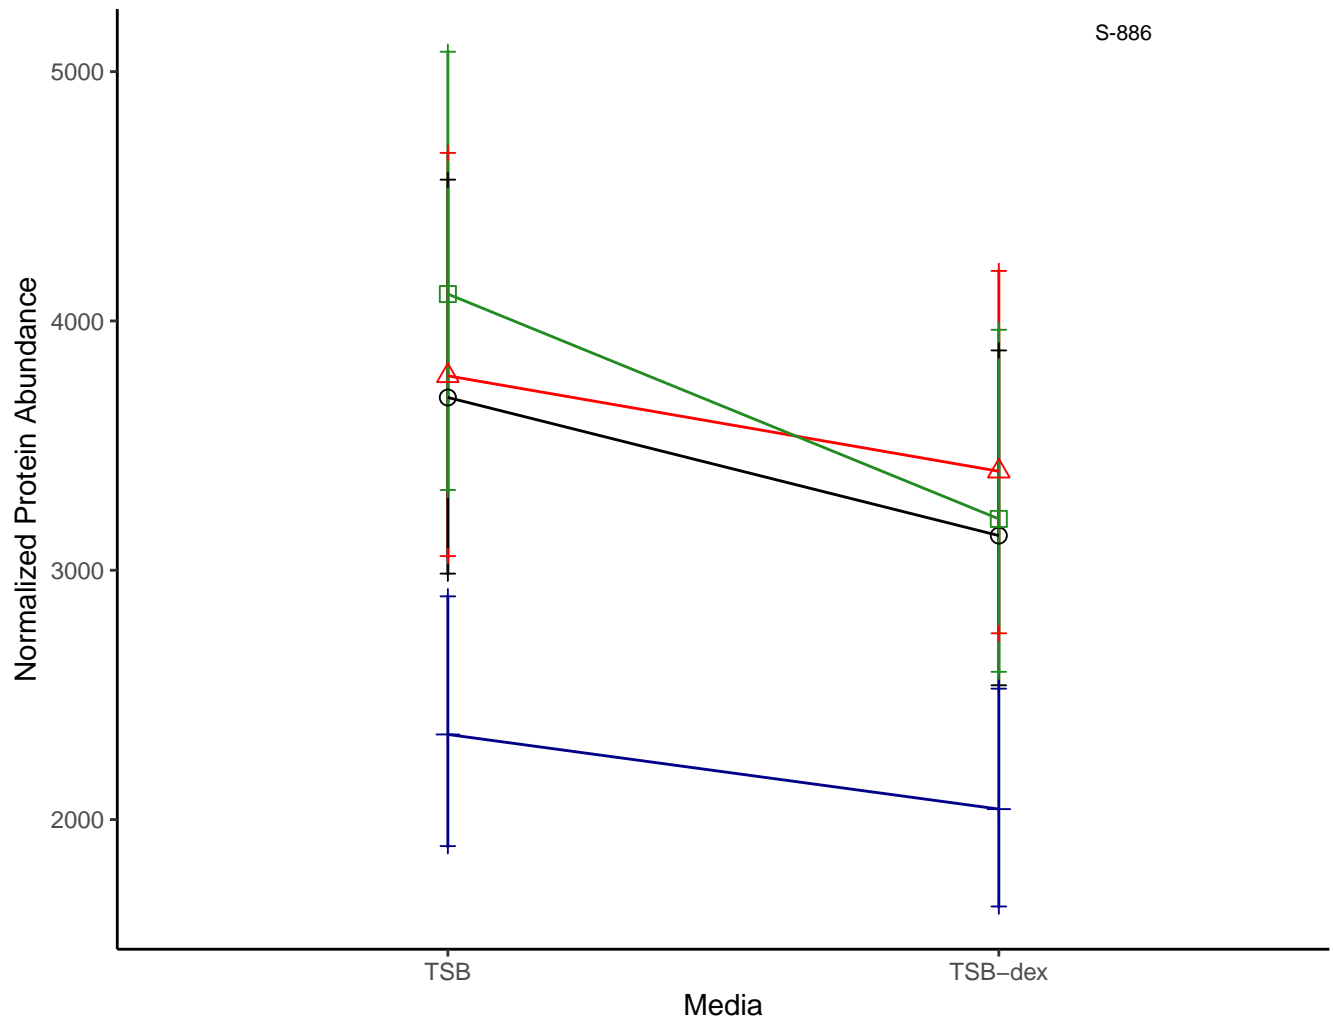

- ⊕ SA564
- △ SA564-ΔhptRS
- ⊞ SA564-ΔccpA
- + SA564-ΔhptRS/ccpA

# SP5G\_STAAM

S-887

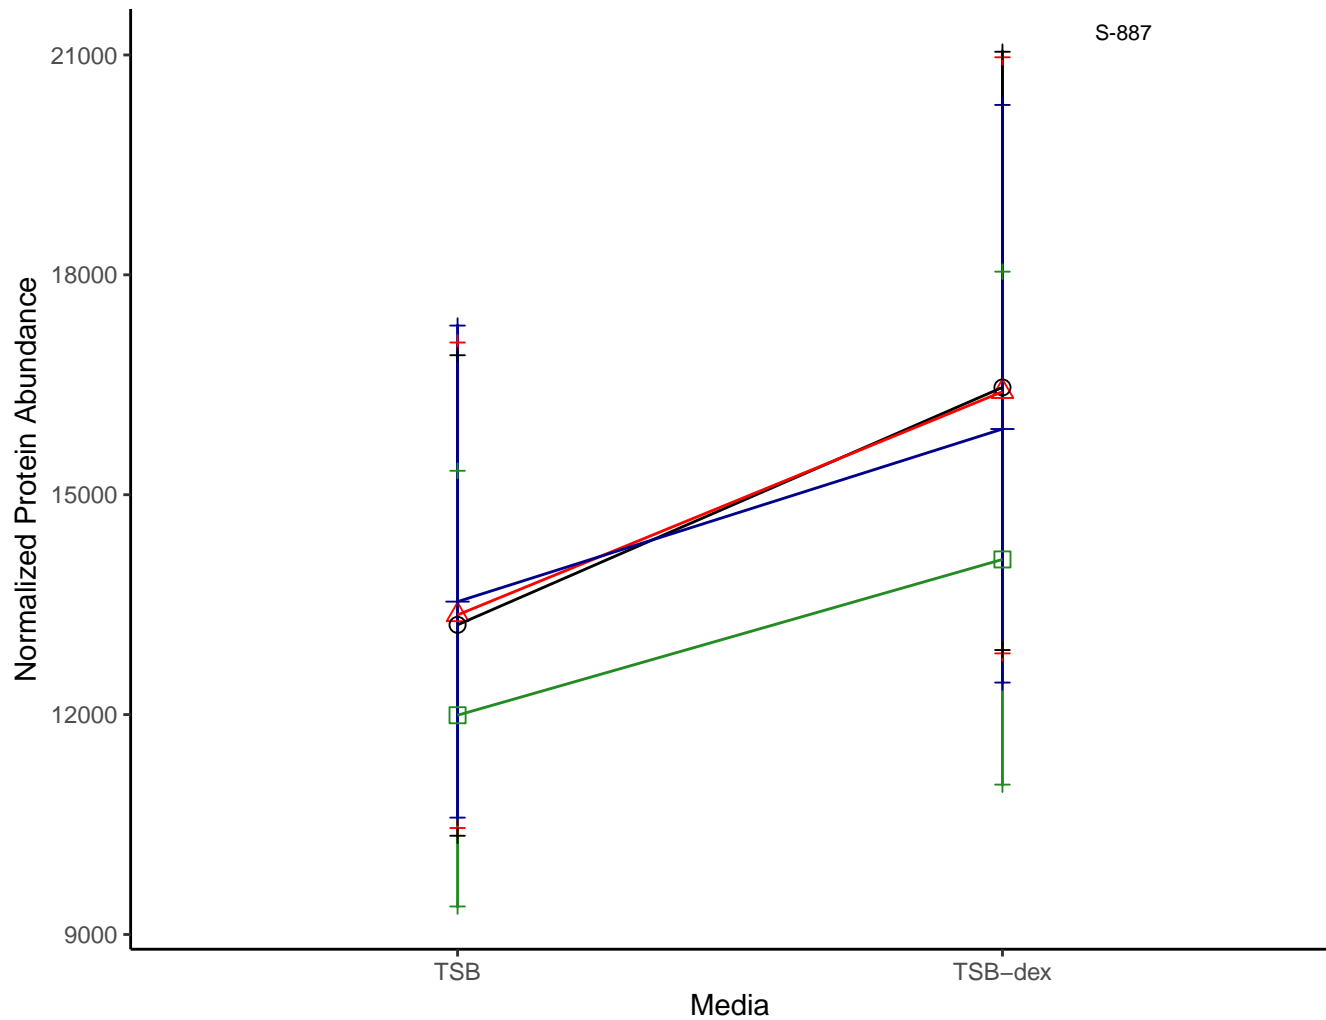

- ⊕ SA564
- △ SA564- $\Delta hptRS$
- ⊞ SA564- $\Delta ccpA$
- + SA564- $\Delta hptRS/ccpA$

# SPA\_STAAM

S-888

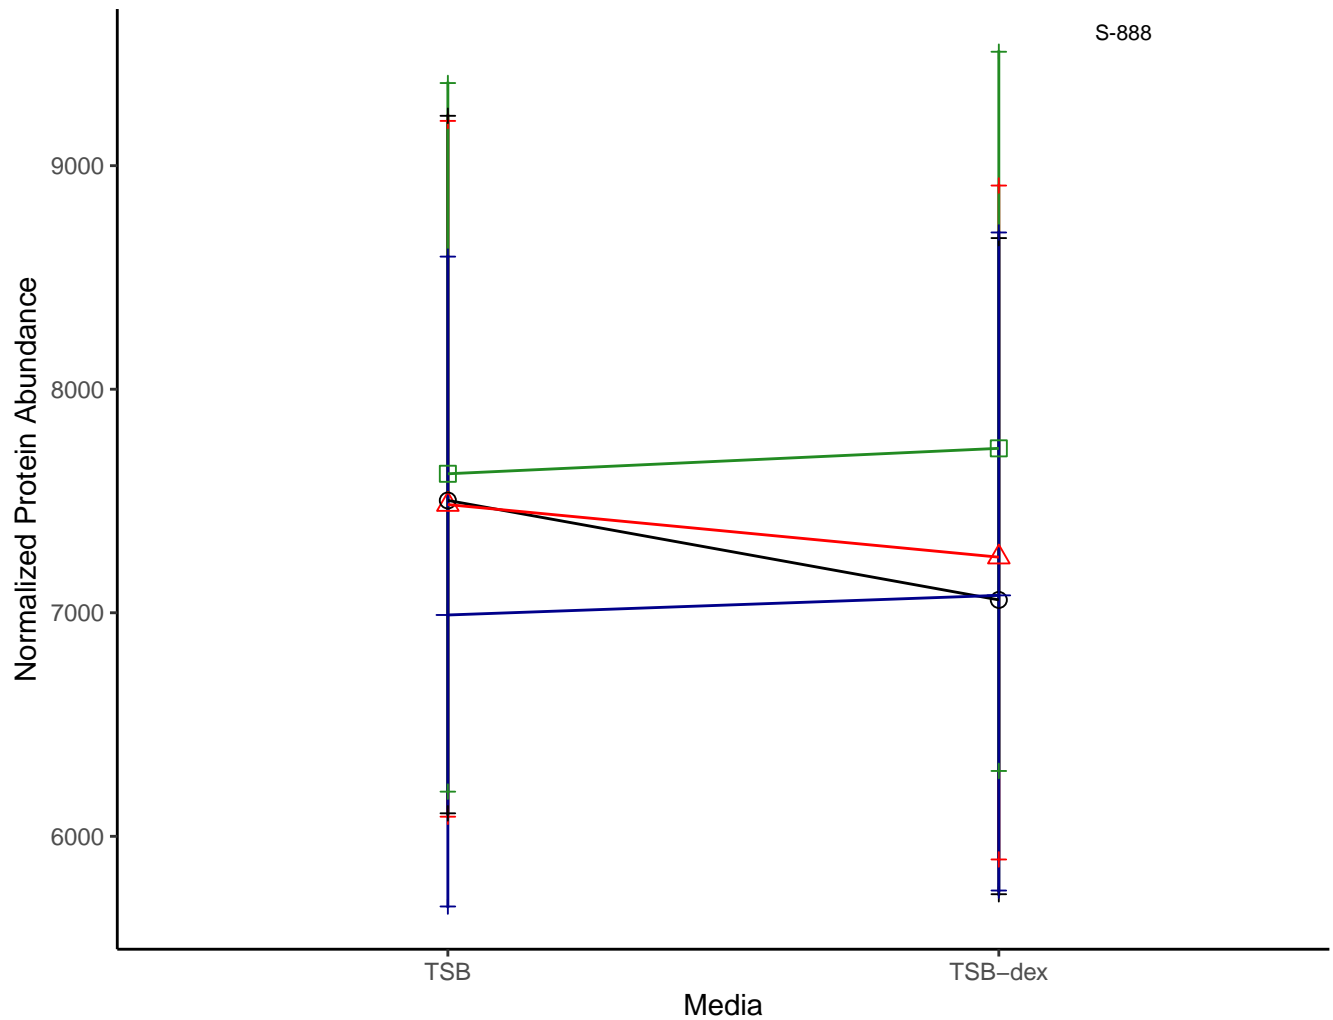

- ⊕ SA564
- △ SA564-ΔhptRS
- ⊞ SA564-ΔccpA
- + SA564-ΔhptRS/ccpA



# SPLD\_STAAM

S-889

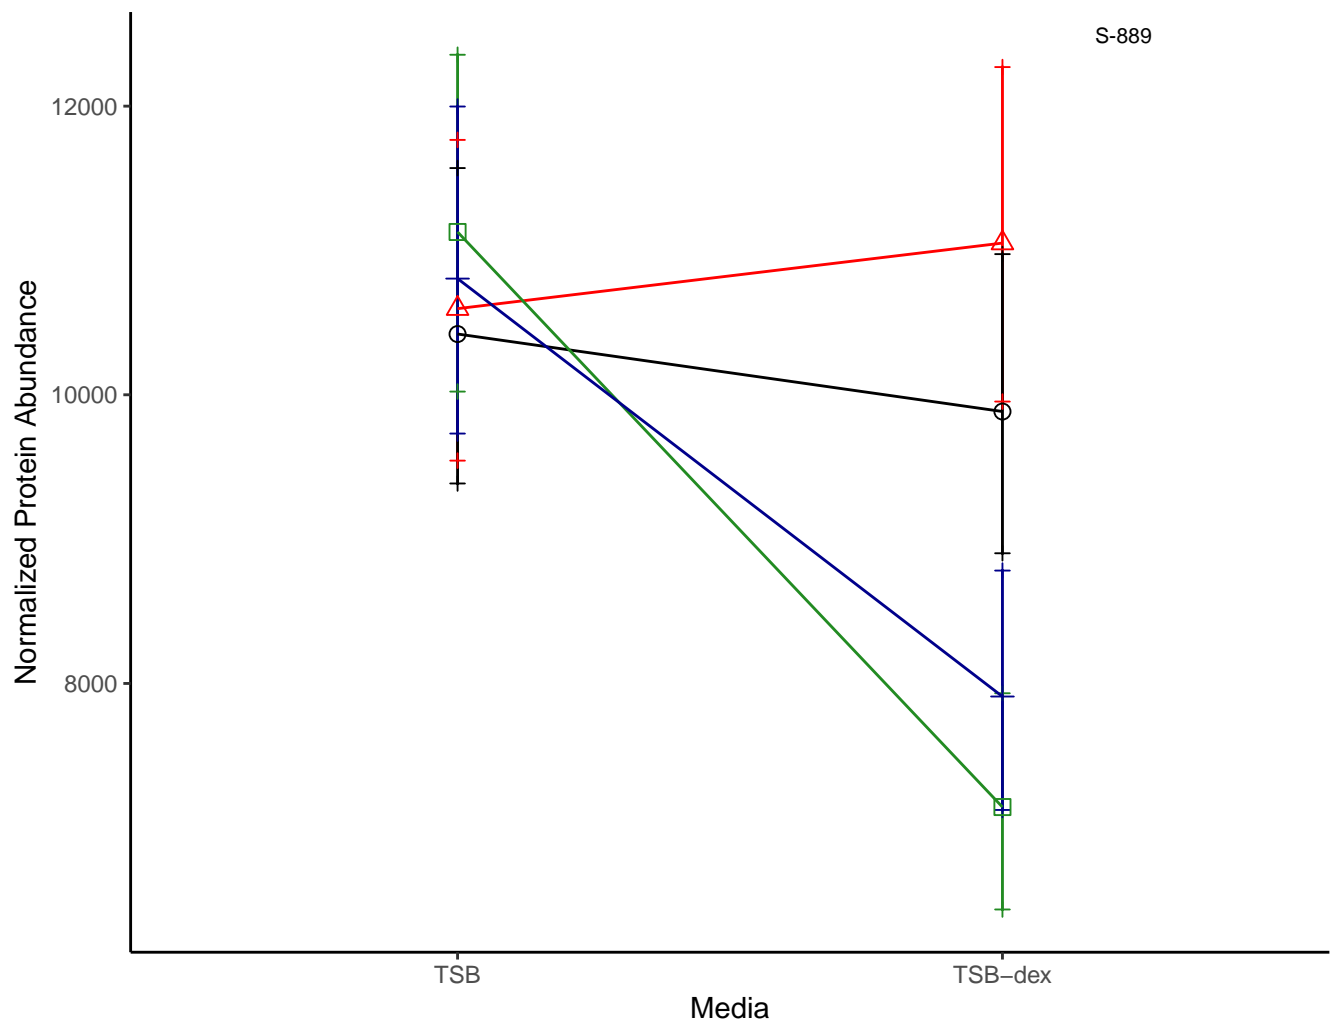

- ⊕ SA564
- △ SA564- $\Delta$ *hptRS*
- ⊞ SA564- $\Delta$ *ccpA*
- + SA564- $\Delta$ *hptRS/ccpA*

# SPX\_STAAM

S-890

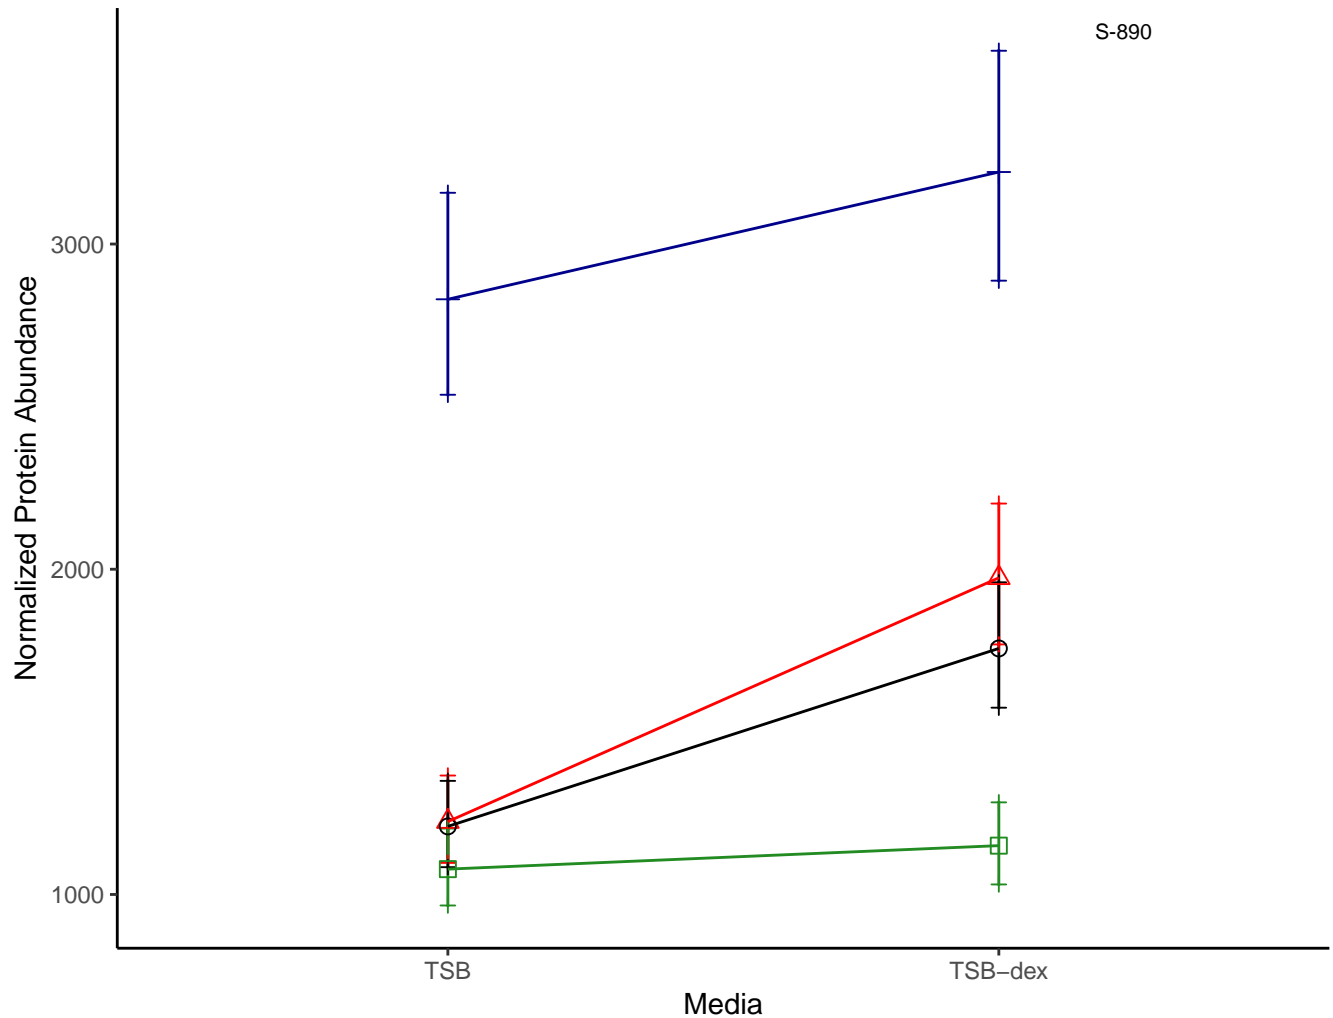

- ⊕ SA564
- △ SA564-ΔhptRS
- ⊞ SA564-ΔccpA
- + SA564-ΔhptRS/ccpA

# SRRRA\_STAAM

S-891

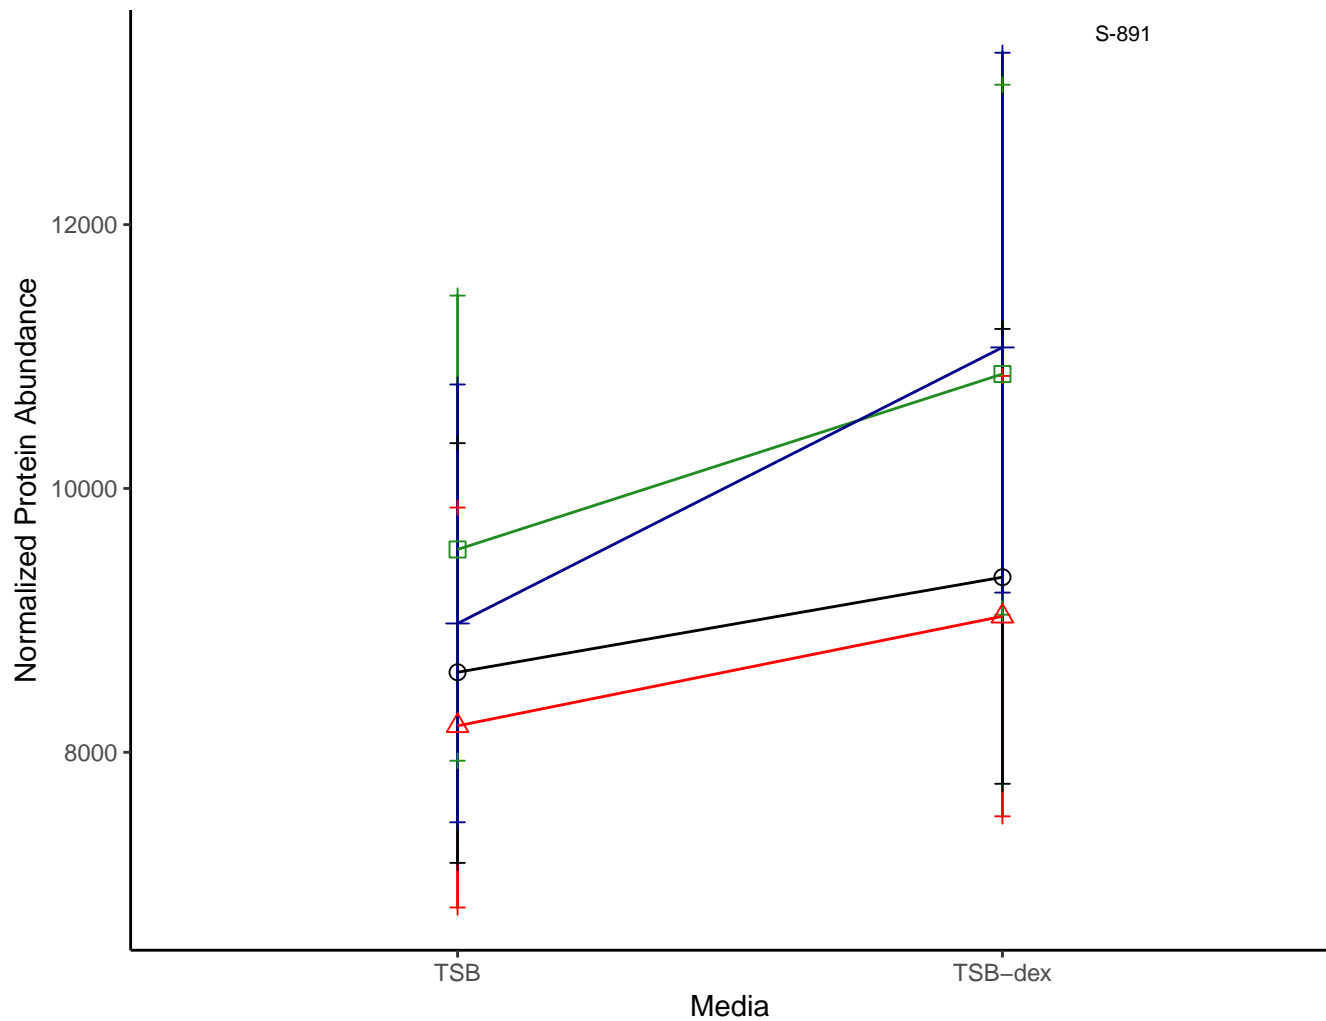

- ⊕ SA564
- △ SA564-ΔhptRS
- ⊞ SA564-ΔccpA
- + SA564-ΔhptRS/ccpA

# SSAA2\_STAAM

S-892

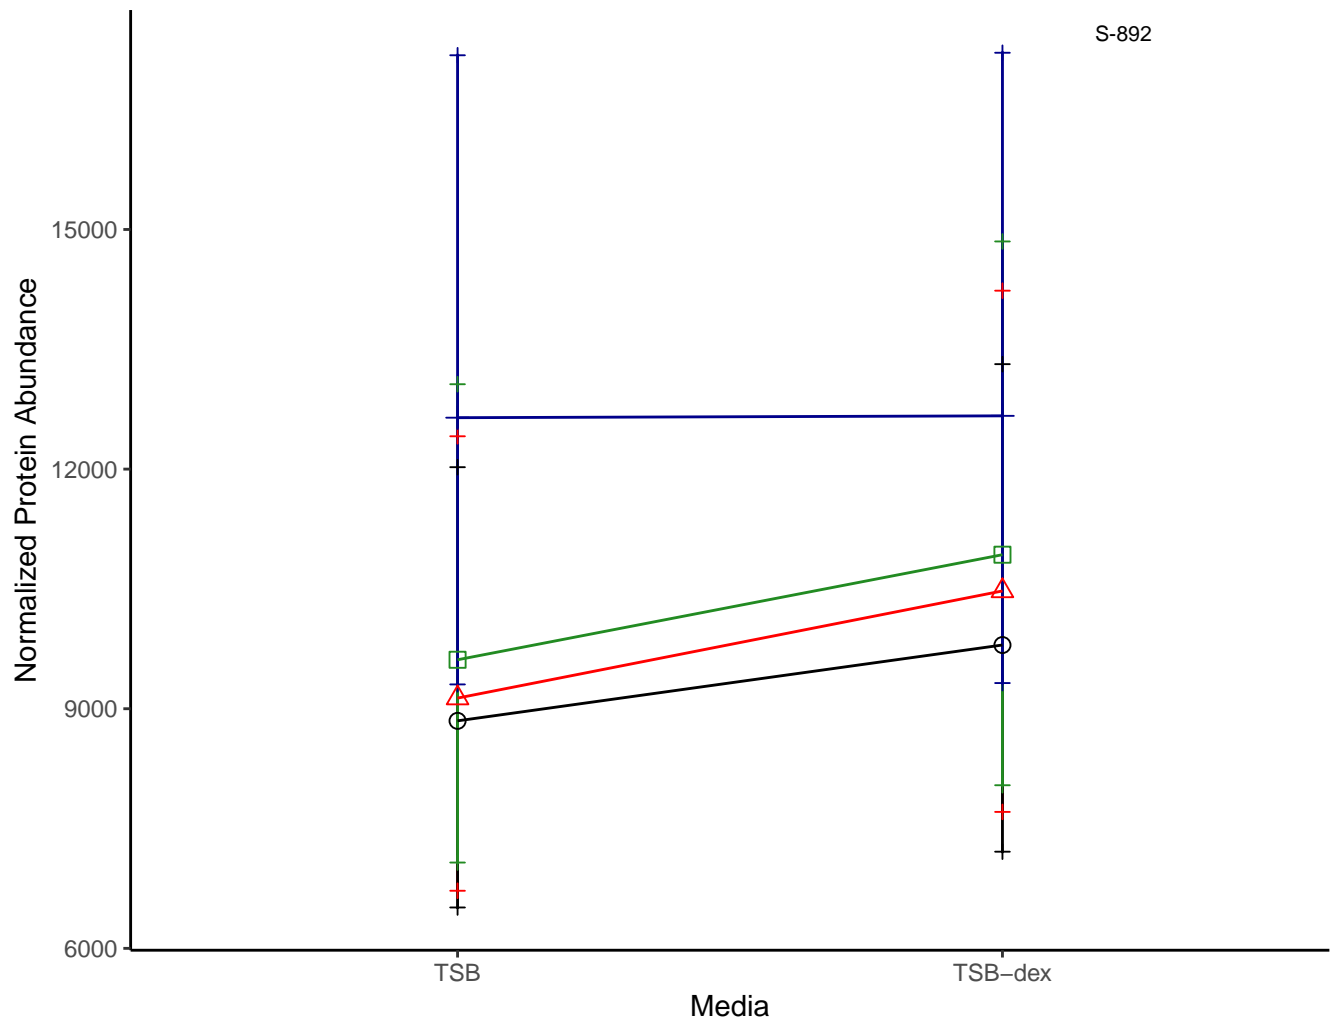

- ⊕ SA564
- △ SA564- $\Delta$ *hptRS*
- ⊞ SA564- $\Delta$ *ccpA*
- + SA564- $\Delta$ *hptRS/ccpA*

# SSB1\_STAAM

S-893

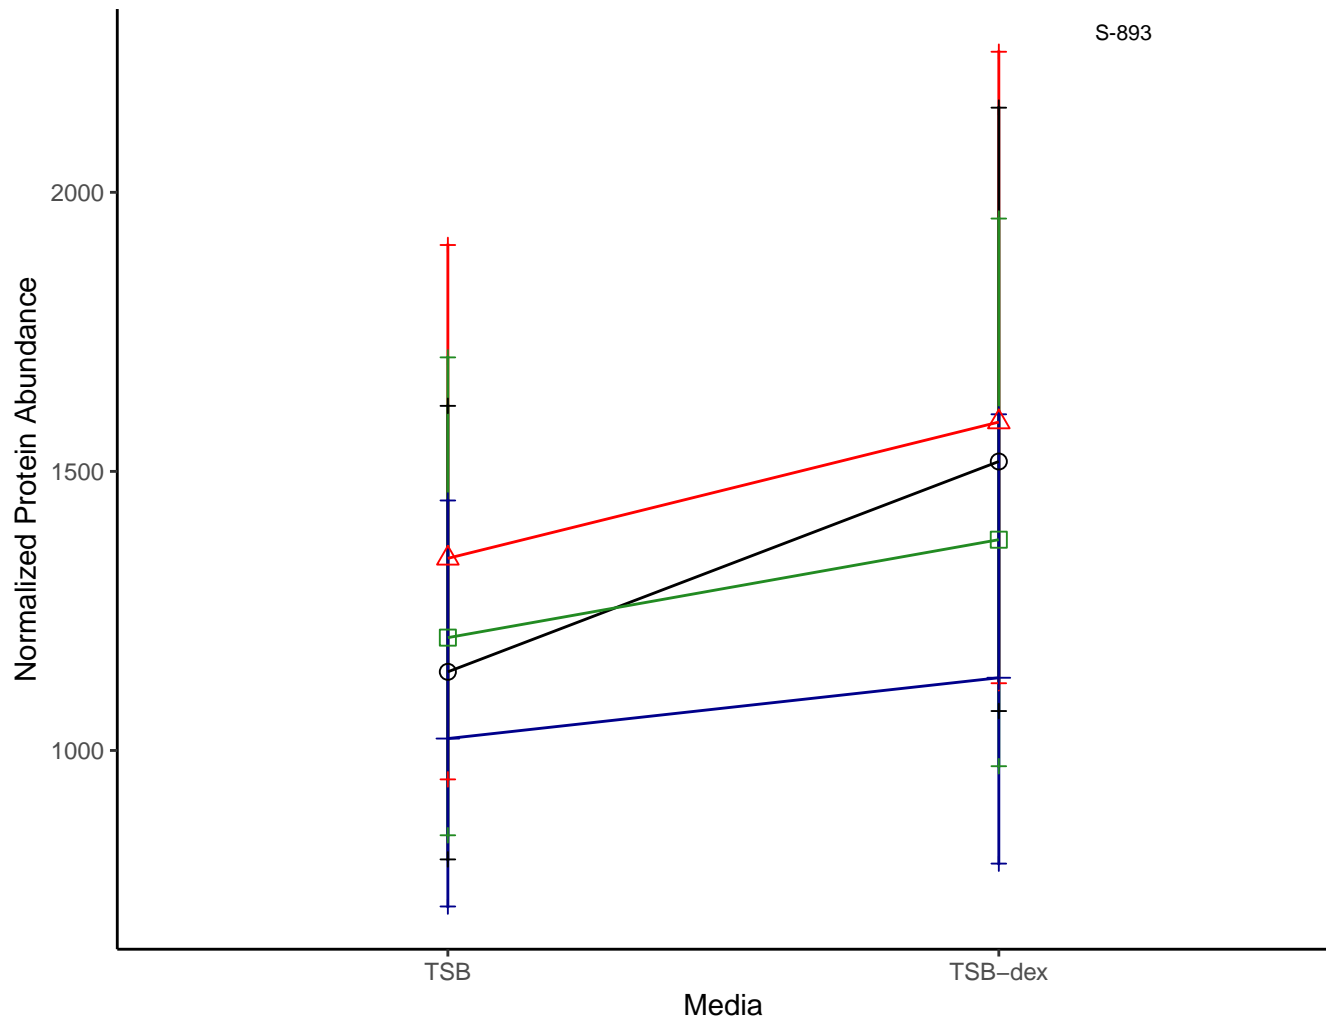

- ⊕ SA564
- △ SA564- $\Delta hptRS$
- ⊞ SA564- $\Delta ccpA$
- + SA564- $\Delta hptRS/ccpA$

# SSB2\_STAAM

S-894

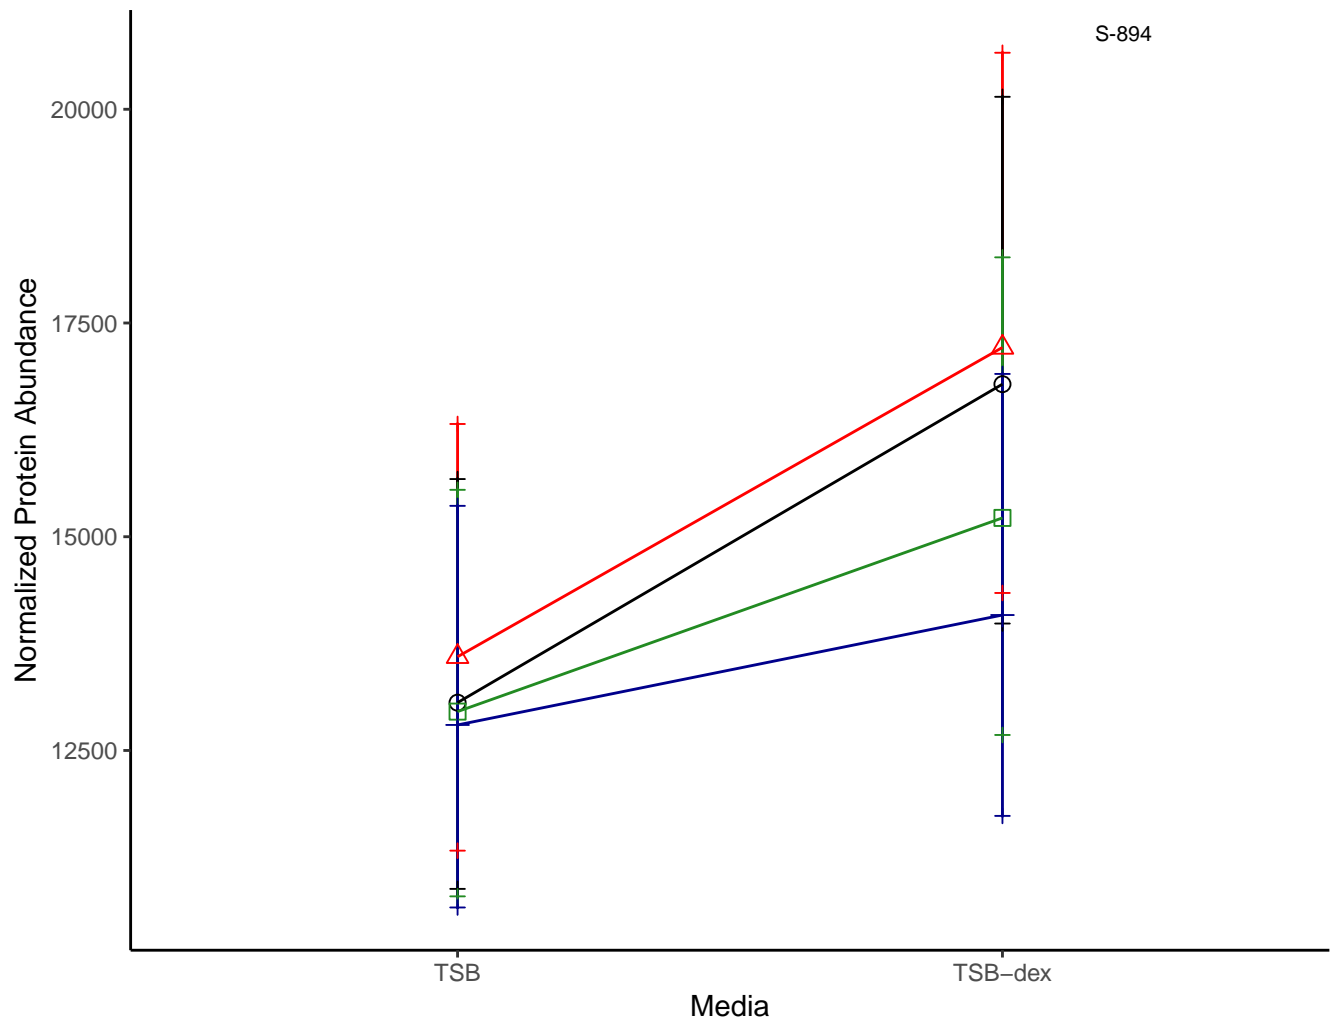

- SA564
- SA564- $\Delta hptRS$
- SA564- $\Delta ccpA$
- SA564- $\Delta hptRS/ccpA$

# SUCC\_STAAM

S-895

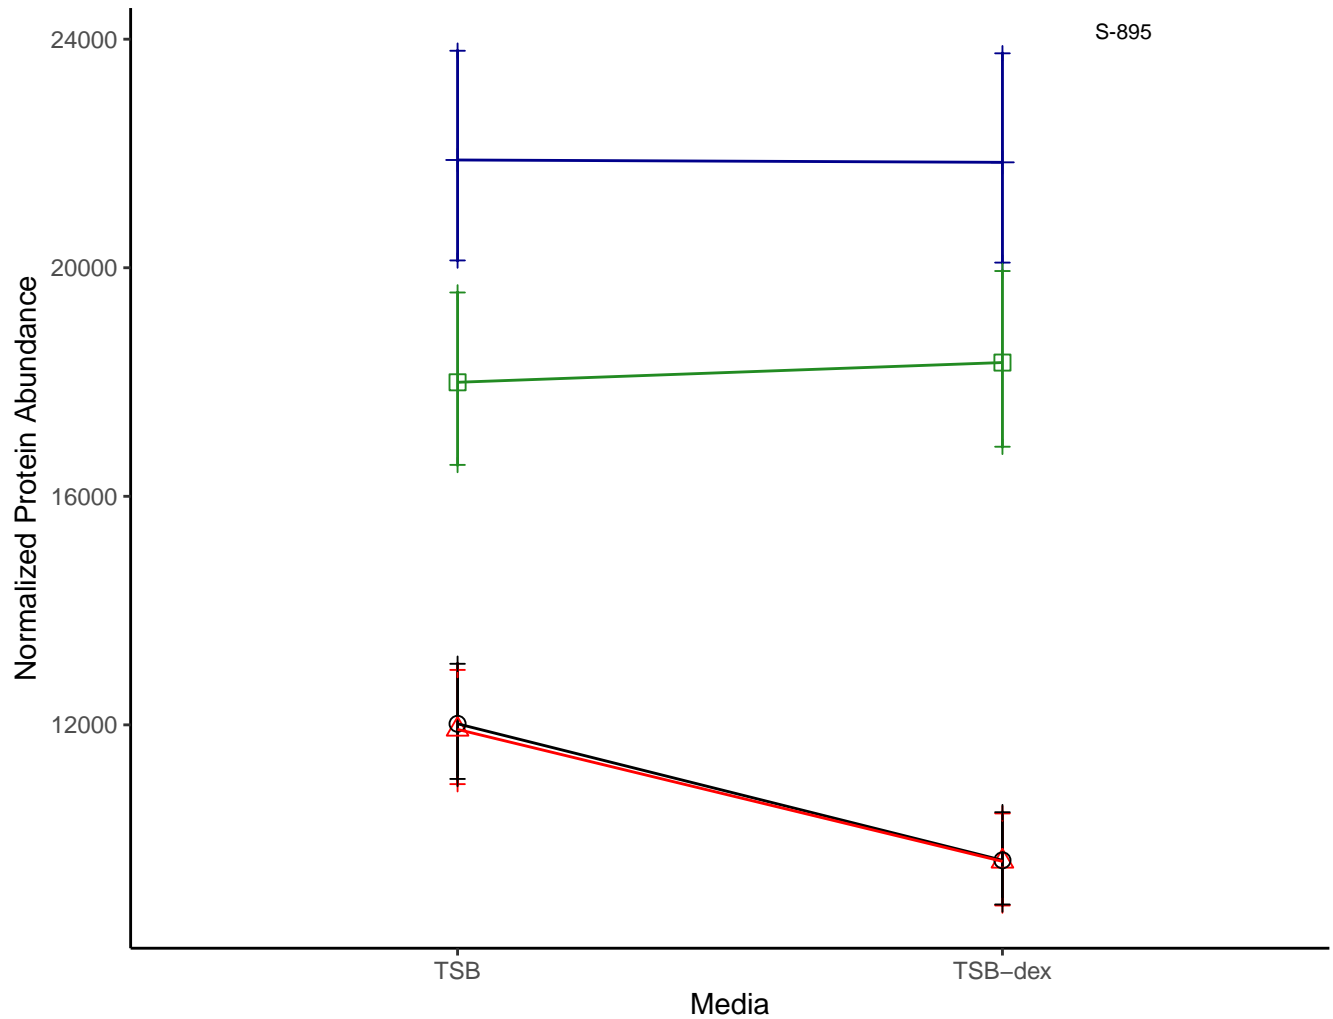

- ⊕ SA564
- △ SA564- $\Delta$ *hptRS*
- ⊞ SA564- $\Delta$ *ccpA*
- + SA564- $\Delta$ *hptRS/ccpA*

# SUCD\_STAAM

S-896

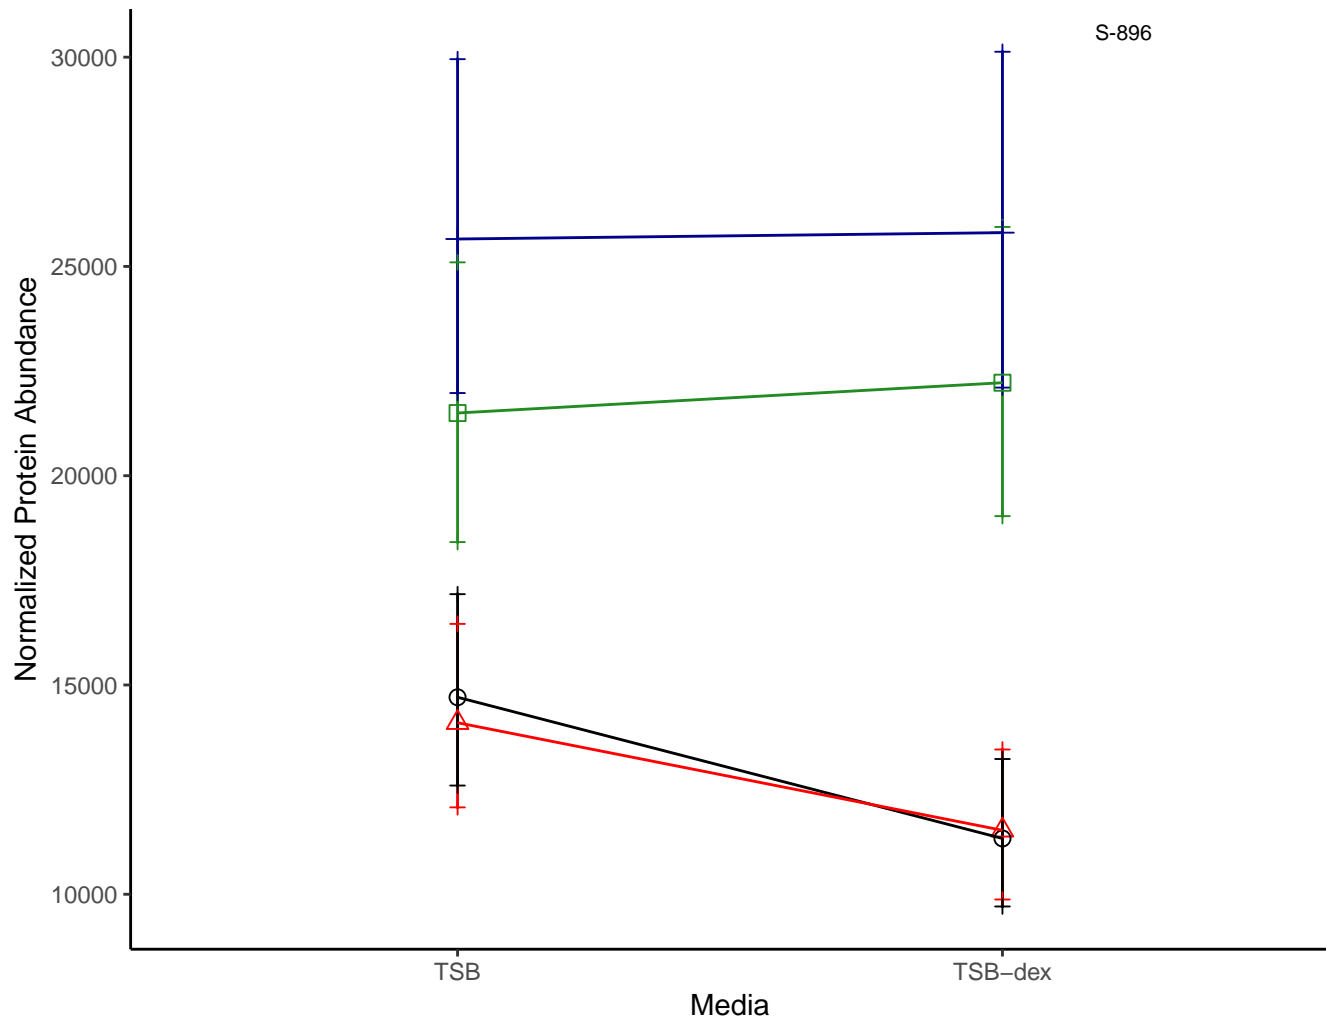

- ⊕ SA564
- △ SA564- $\Delta$ *hptRS*
- ⊞ SA564- $\Delta$ *ccpA*
- + SA564- $\Delta$ *hptRS/ccpA*



# SYA\_STAAM

S-897

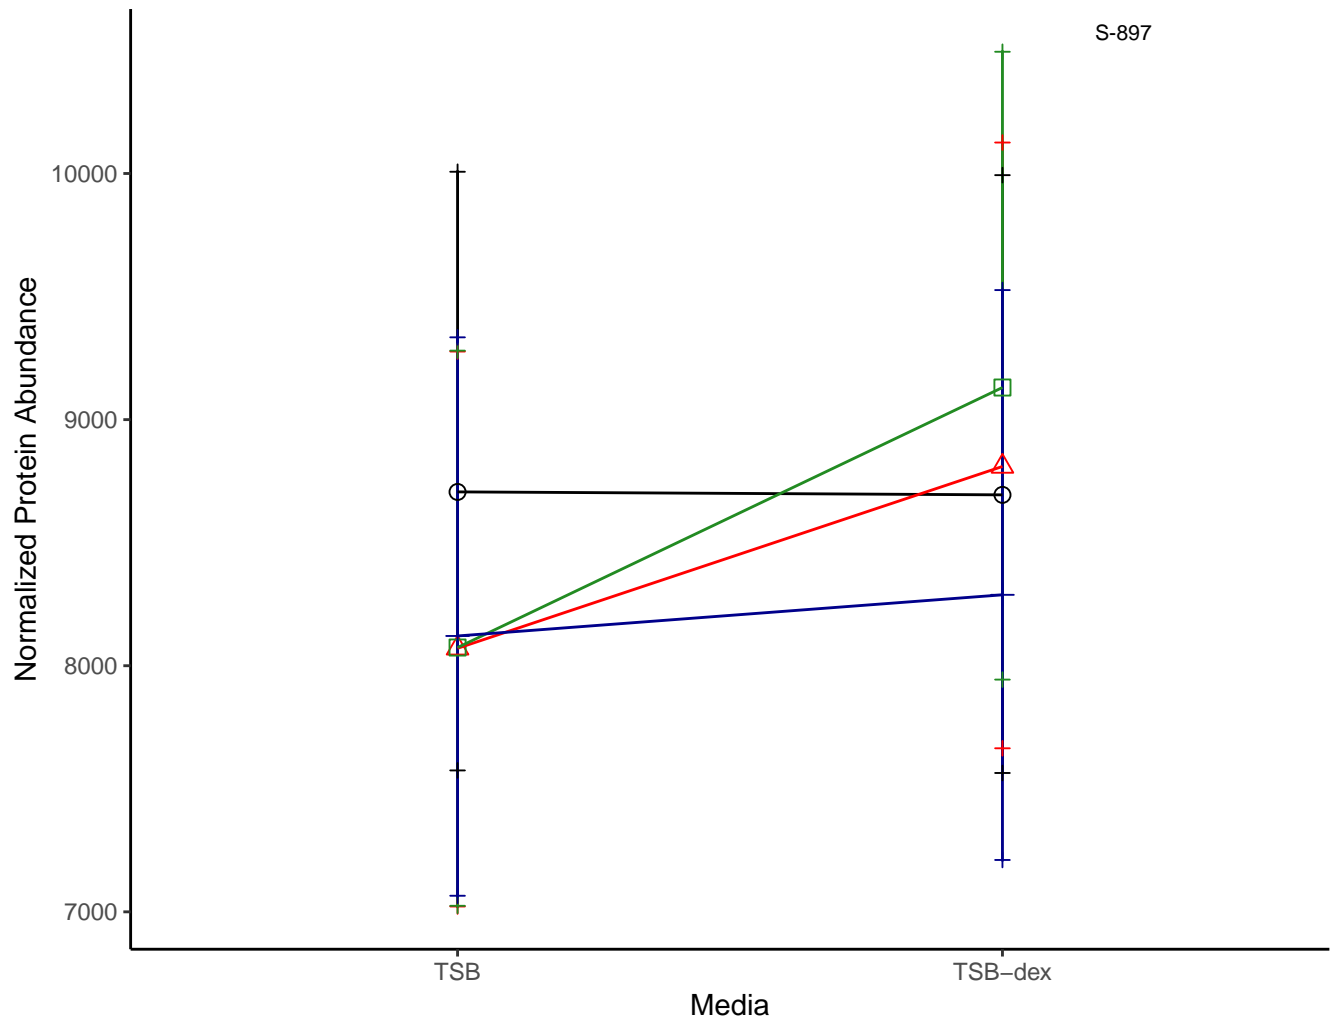

- ⊕ SA564
- △ SA564- $\Delta$ *hptRS*
- ⊞ SA564- $\Delta$ *ccpA*
- + SA564- $\Delta$ *hptRS/ccpA*

# SYC\_STAAM

S-898

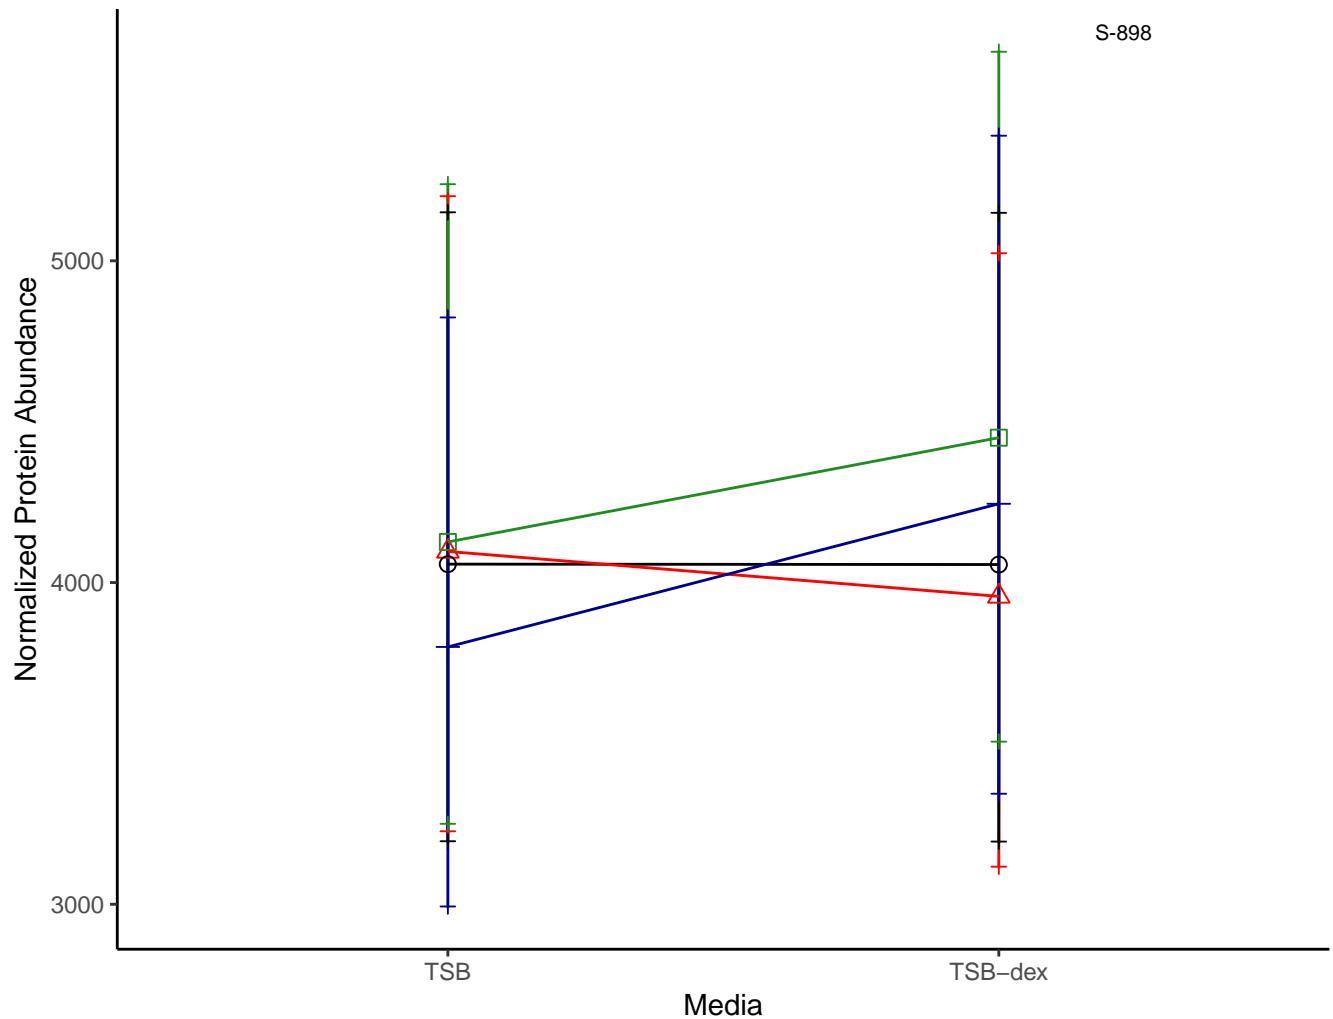

- ⊕ SA564
- △ SA564-ΔhptRS
- ⊞ SA564-ΔccpA
- + SA564-ΔhptRS/ccpA

# SYD\_STAAM

S-899

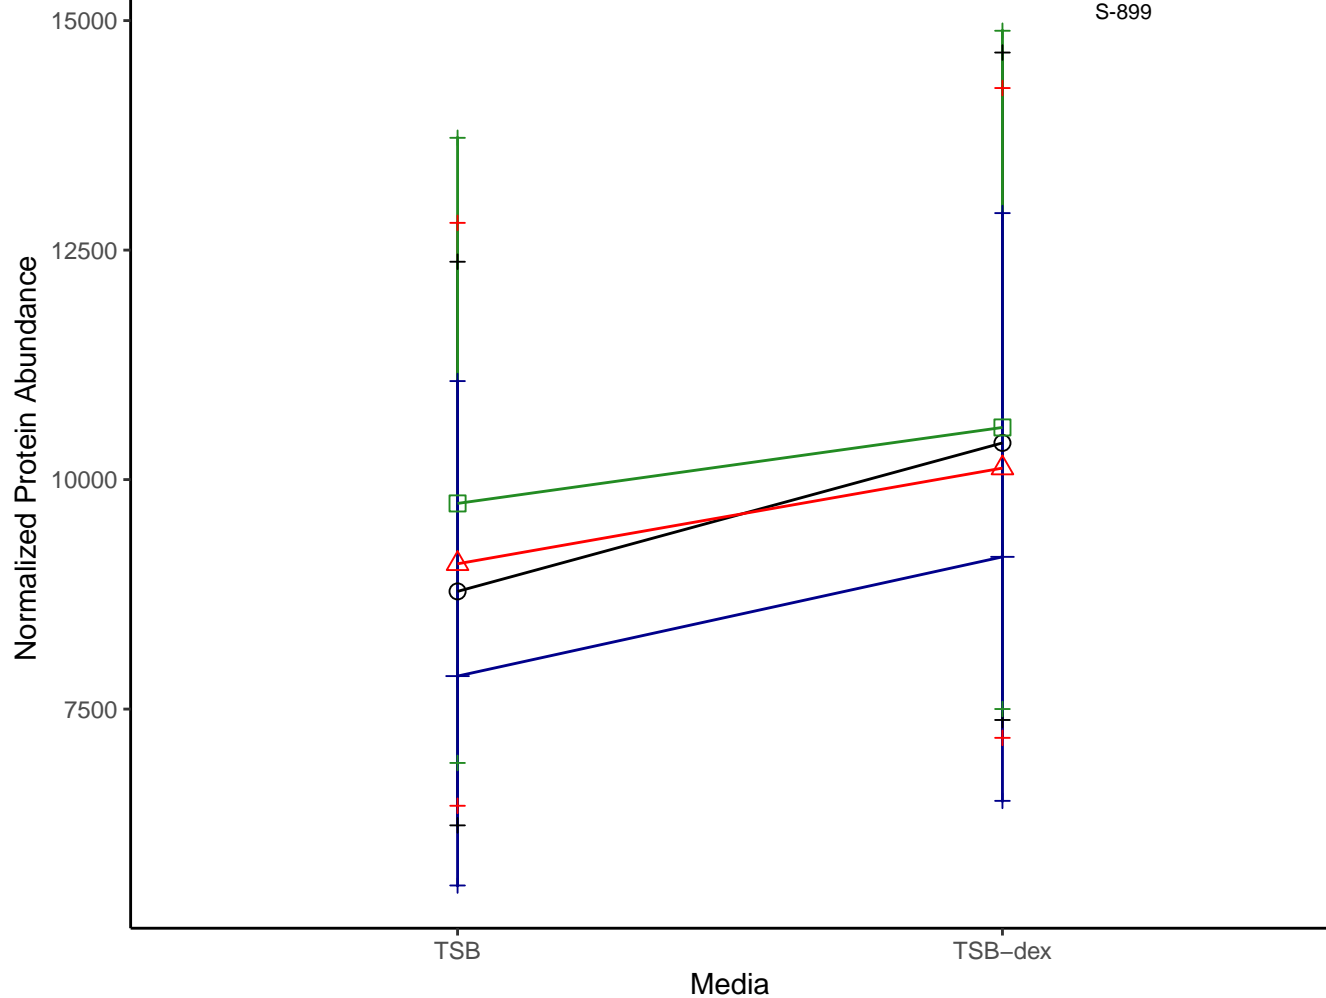

- ⊕ SA564
- △ SA564- $\Delta$ *hptRS*
- ⊞ SA564- $\Delta$ *ccpA*
- + SA564- $\Delta$ *hptRS/ccpA*

# SYE\_STAAM

S-900

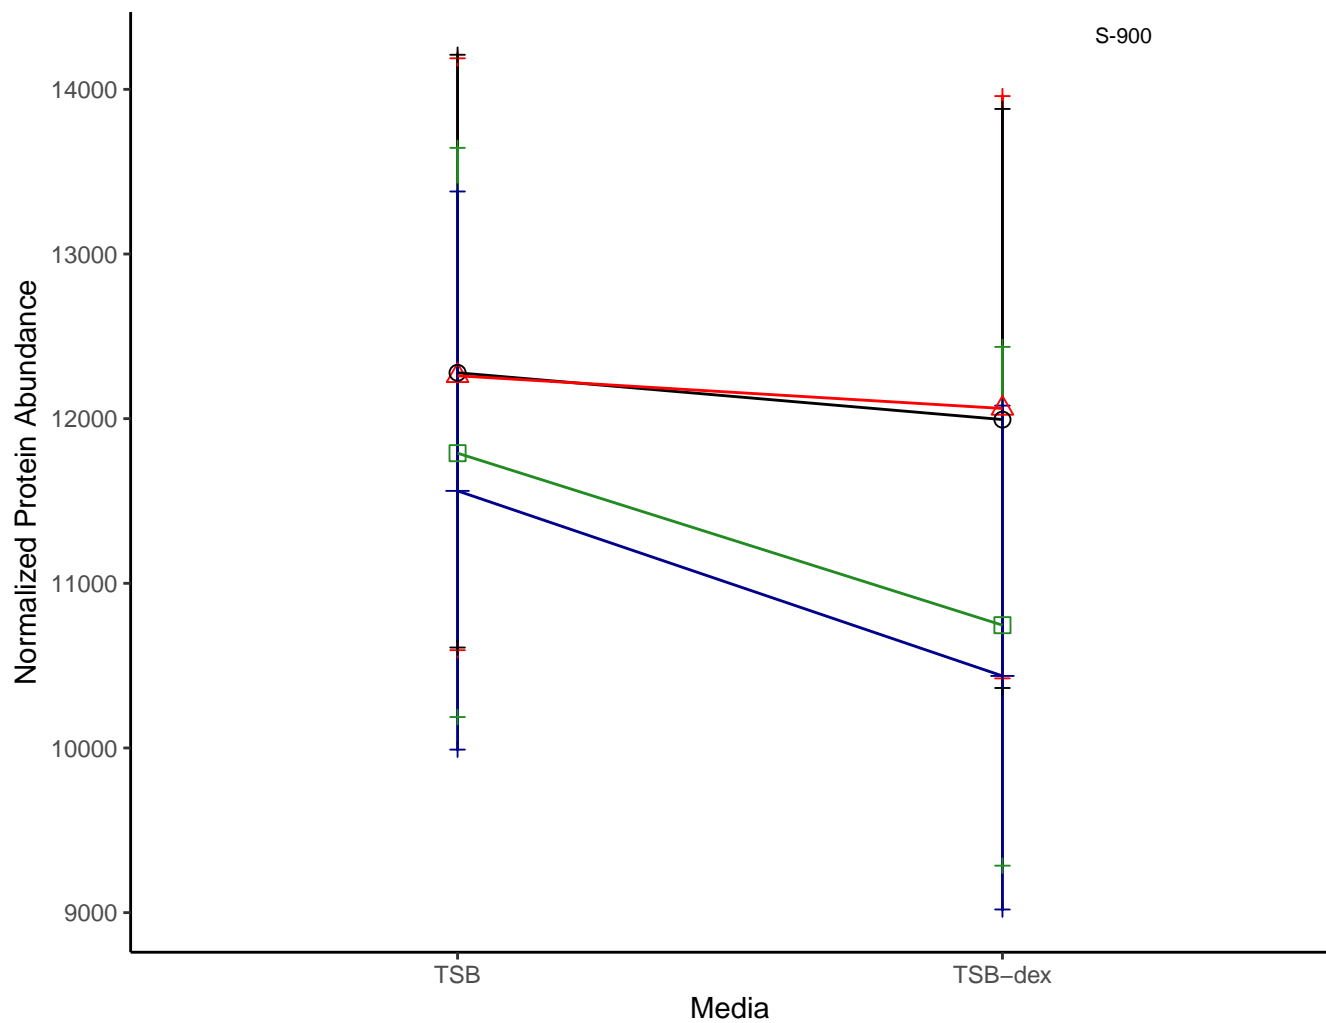

- ⊕ SA564
- △ SA564- $\Delta$ *hptRS*
- SA564- $\Delta$ *ccpA*
- + SA564- $\Delta$ *hptRS/ccpA*

# SYFB\_STAAM

S-901

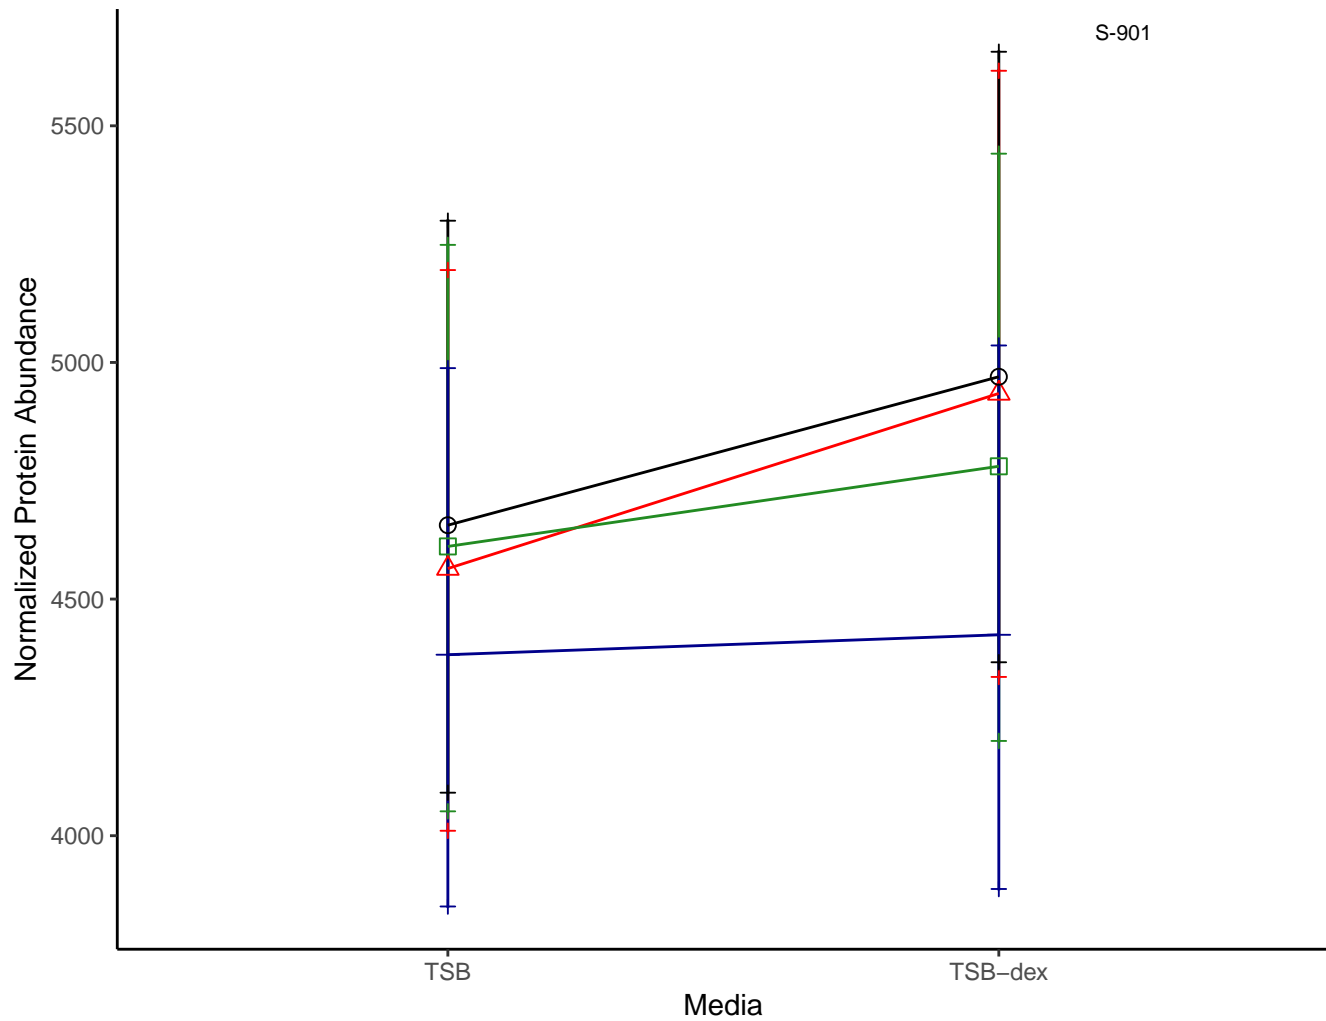

- ⊕ SA564
- △ SA564- $\Delta$ *hptRS*
- ⊞ SA564- $\Delta$ *ccpA*
- + SA564- $\Delta$ *hptRS/ccpA*

# SYG\_STAAM

S-902

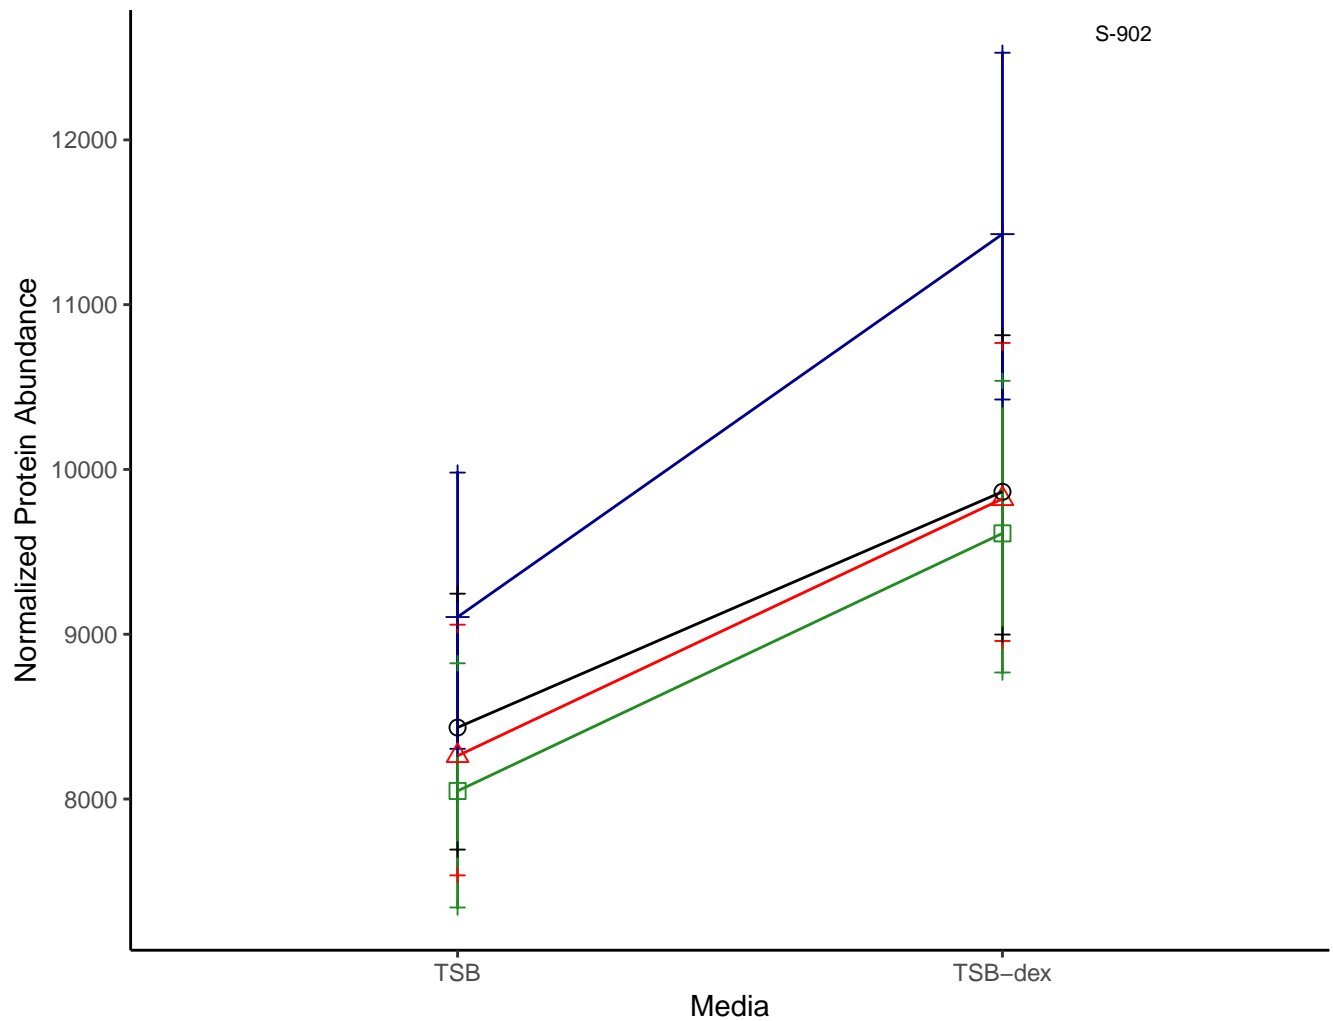

- ⊕ SA564
- △ SA564-ΔhptRS
- SA564-ΔccpA
- + SA564-ΔhptRS/ccpA

# SYH\_STAAM

S-903

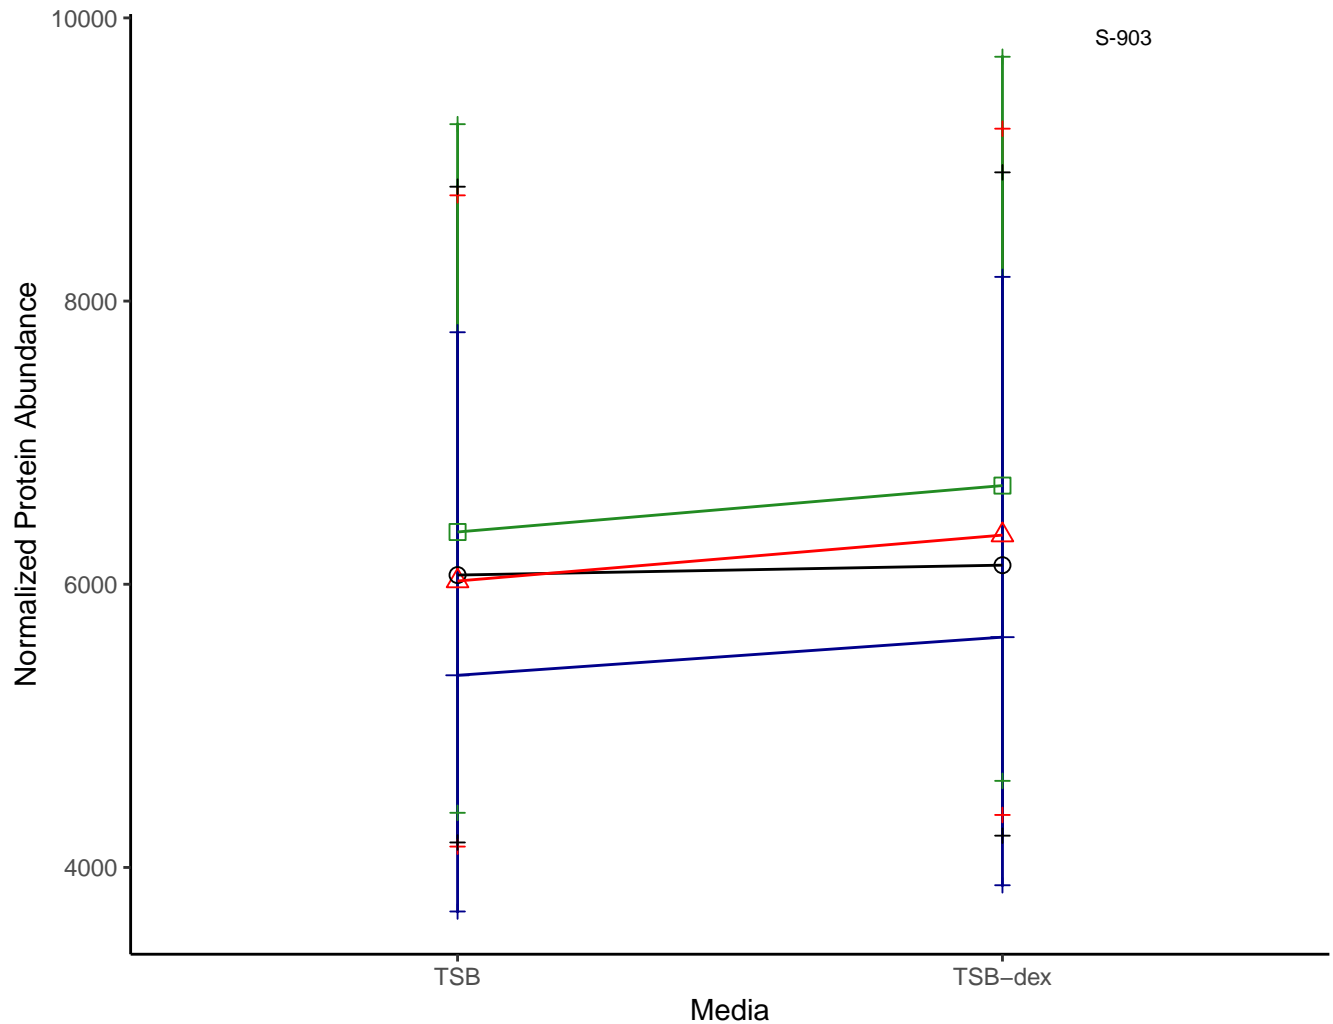

- ⊕ SA564
- △ SA564- $\Delta$ *hptRS*
- ⊞ SA564- $\Delta$ *ccpA*
- + SA564- $\Delta$ *hptRS/ccpA*

# SYI\_STAAM

S-904

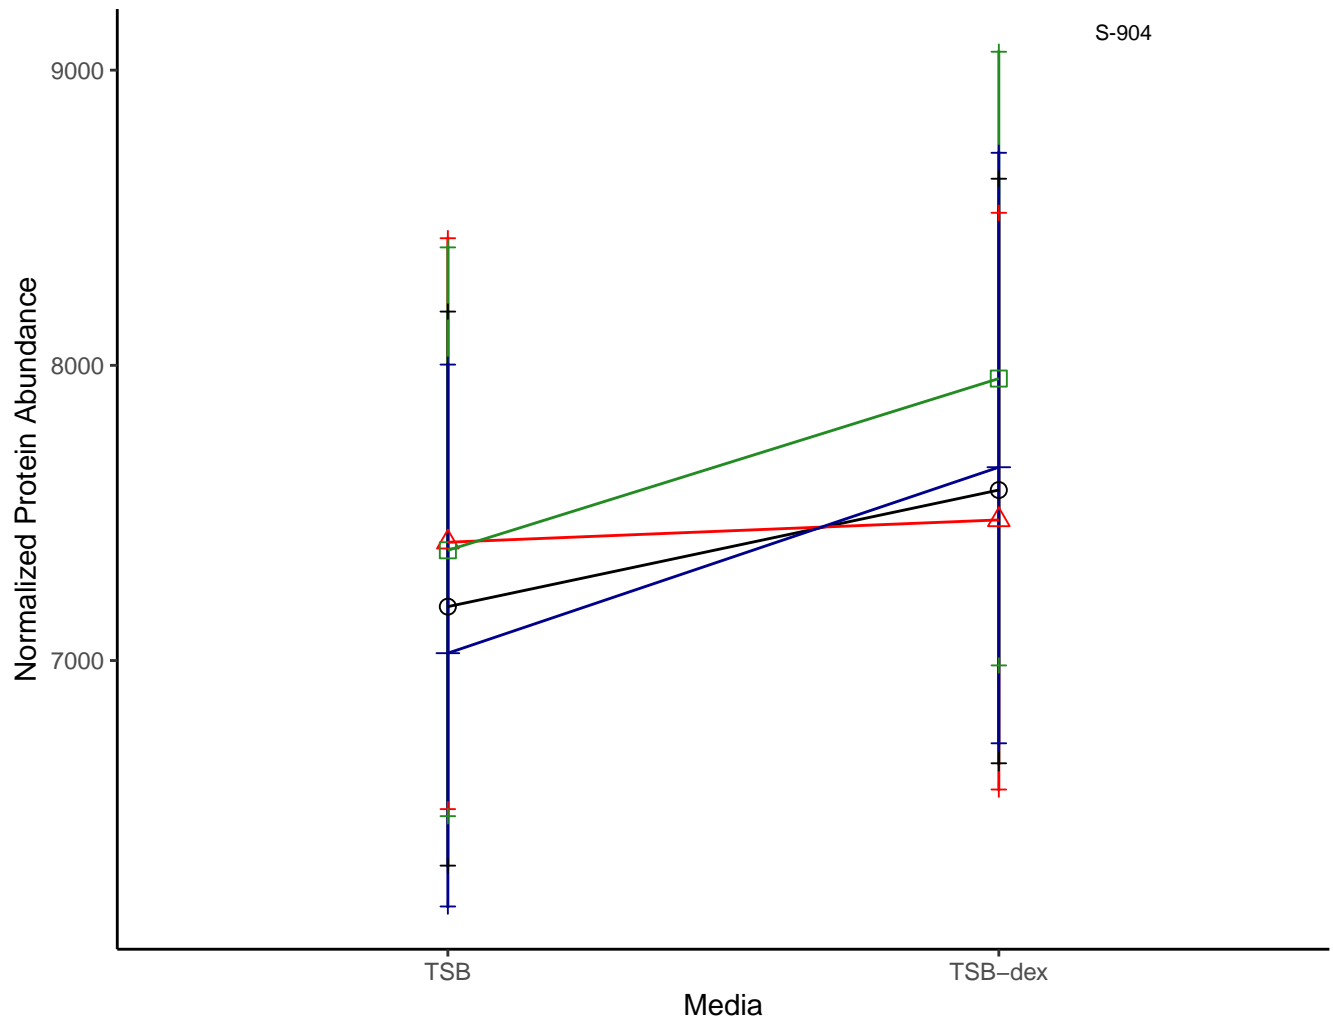

- ⊕ SA564
- △ SA564- $\Delta$ *hptRS*
- ⊞ SA564- $\Delta$ *ccpA*
- + SA564- $\Delta$ *hptRS/ccpA*



# SYK\_STAAM

S-905

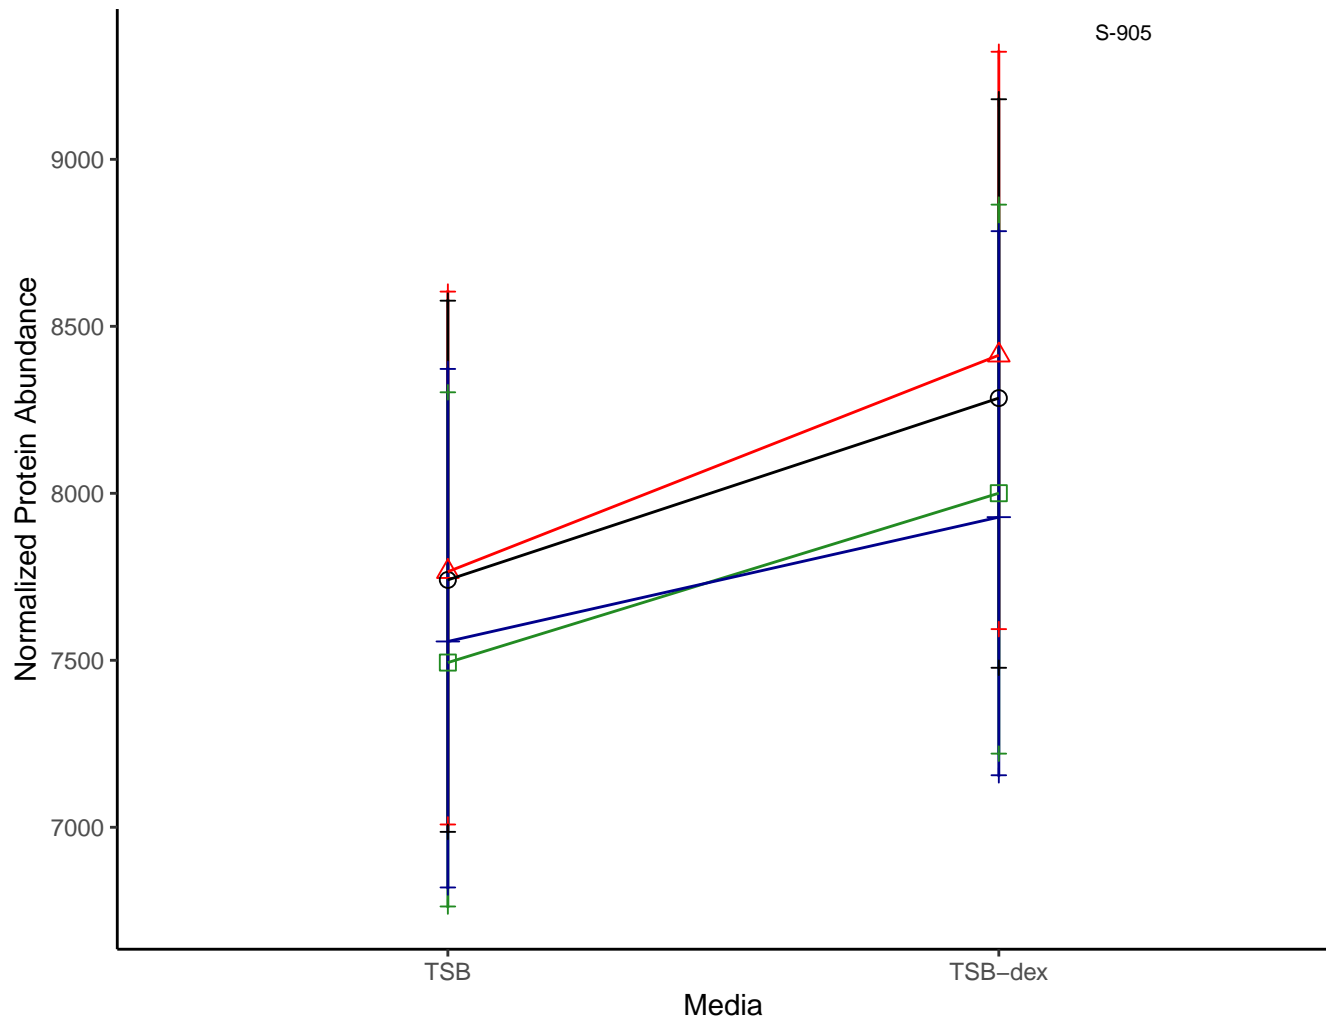

- ⊕ SA564
- △ SA564- $\Delta hptRS$
- ⊞ SA564- $\Delta ccpA$
- + SA564- $\Delta hptRS/ccpA$

# SYM\_STAAM

S-906

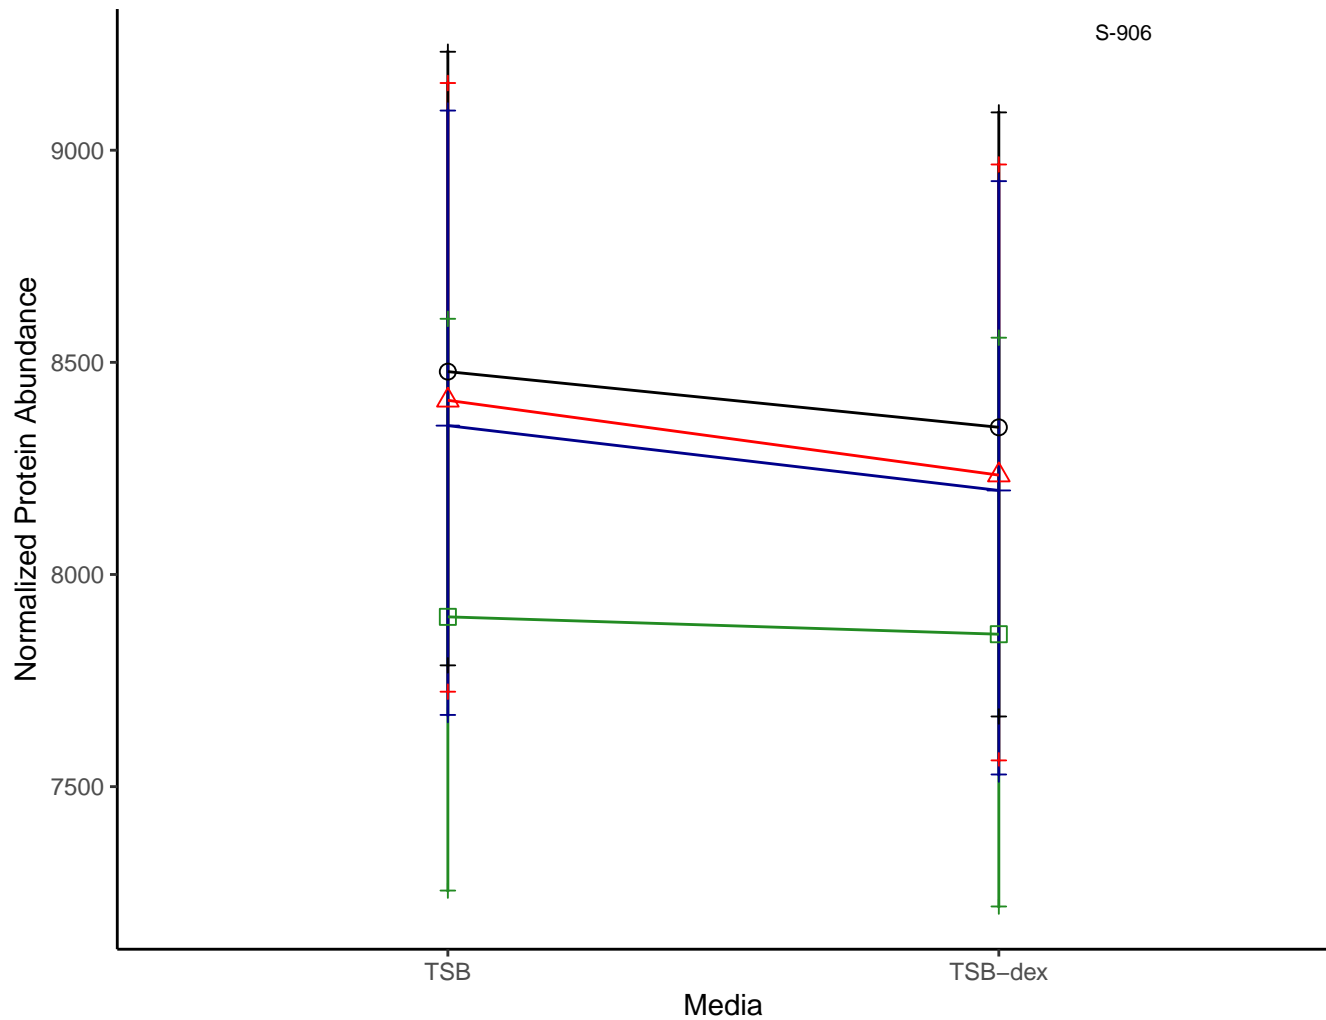

- ⊕ SA564
- △ SA564- $\Delta hptRS$
- ⊞ SA564- $\Delta ccpA$
- + SA564- $\Delta hptRS/ccpA$

# SYN\_STAAM

S-907

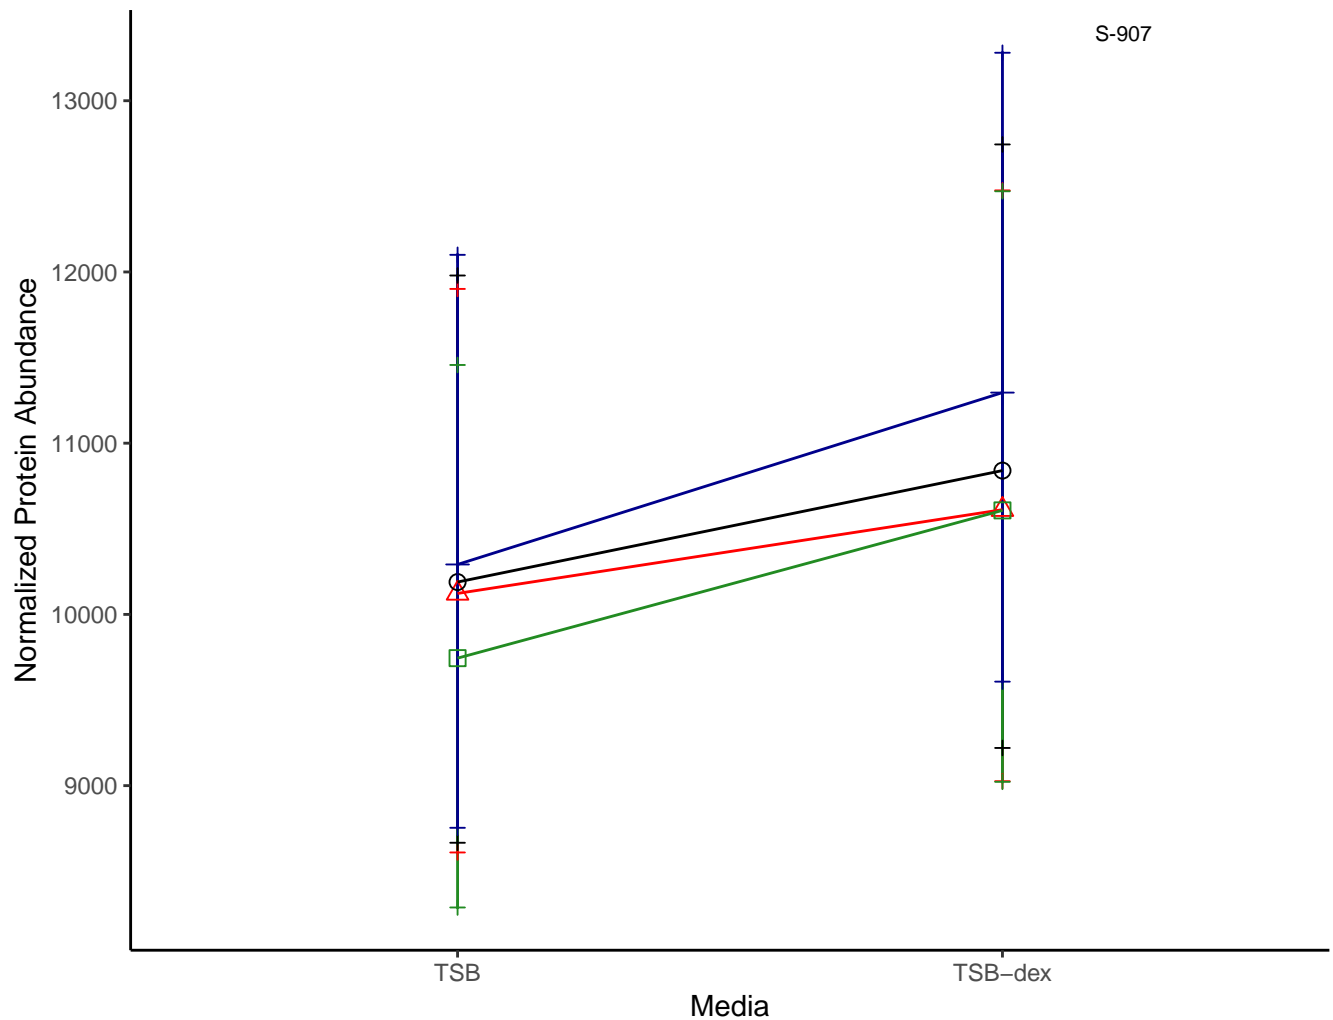

- ⊕ SA564
- △ SA564-ΔhptRS
- SA564-ΔccpA
- + SA564-ΔhptRS/ccpA

# SYP\_STAAM

S-908

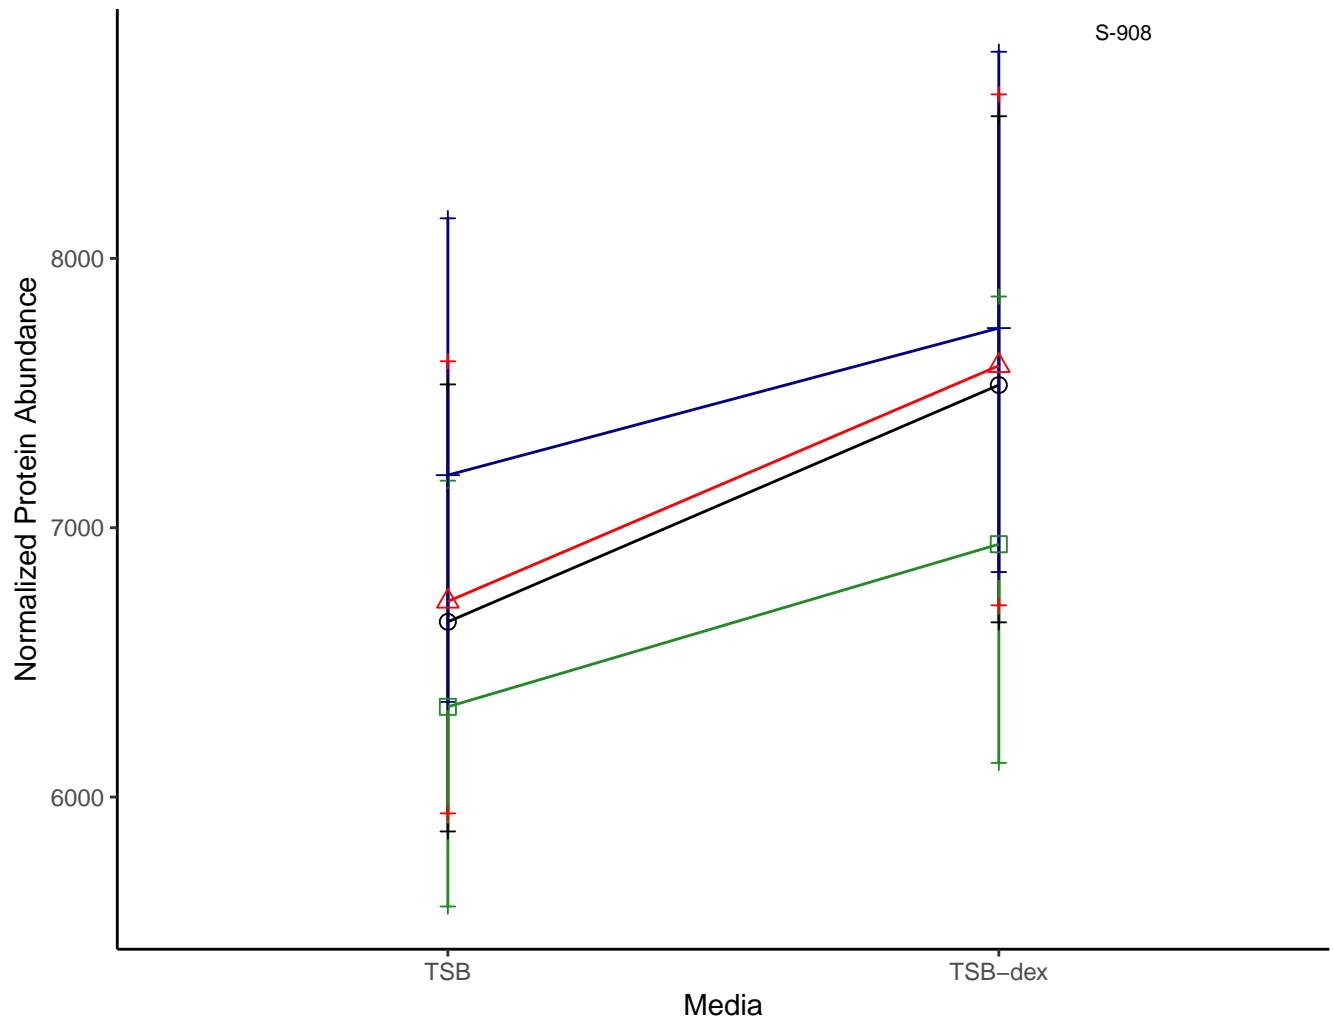

- ⊕ SA564
- △ SA564-ΔhptRS
- ⊞ SA564-ΔccpA
- + SA564-ΔhptRS/ccpA

# SYR\_STAAM

S-909

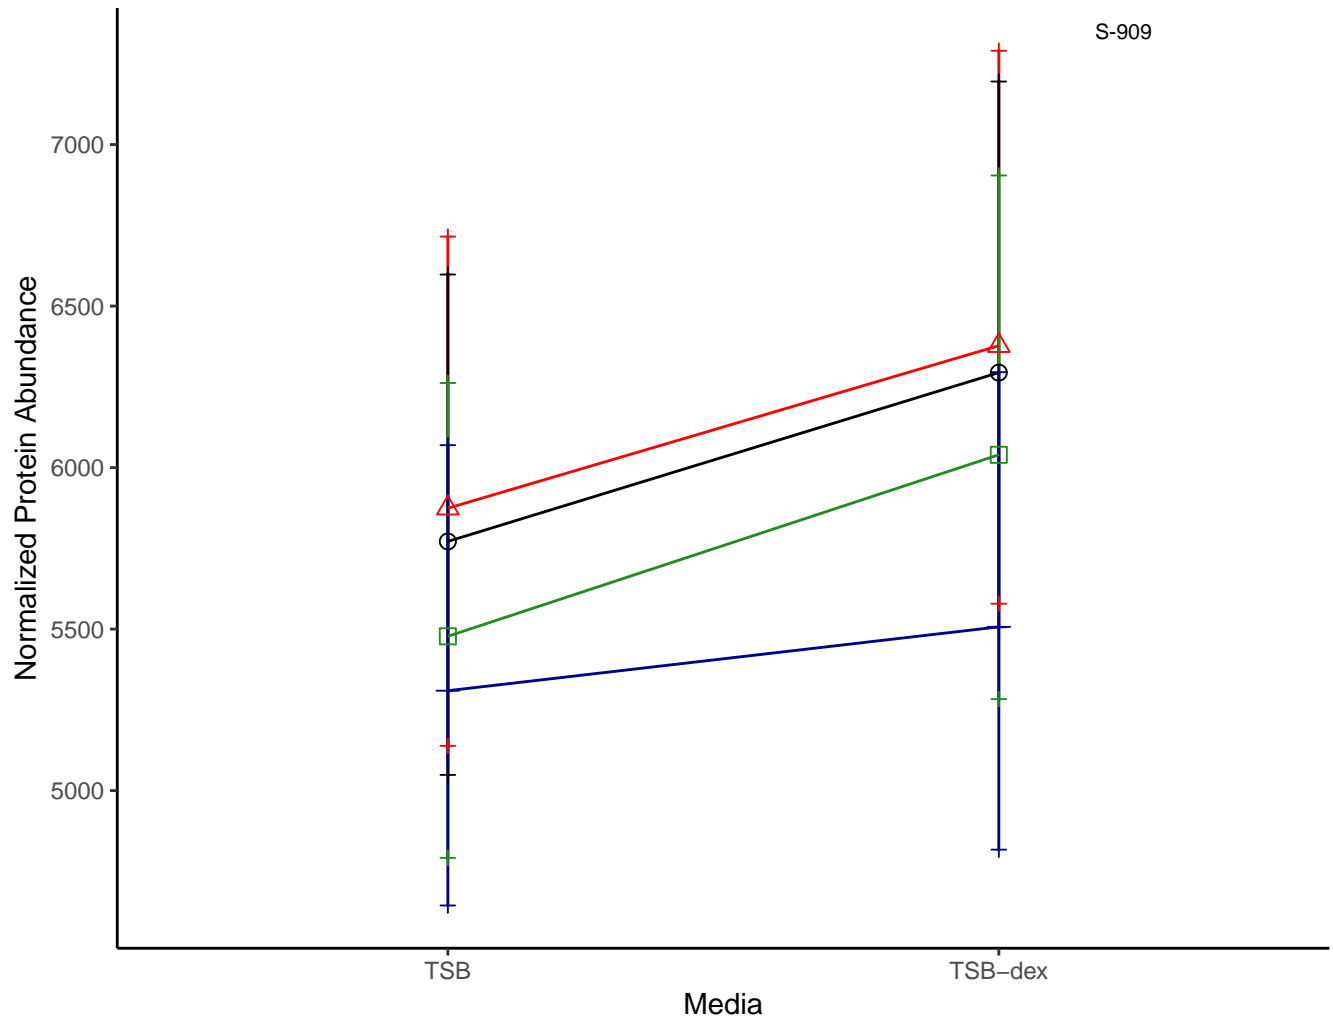

- ⊕ SA564
- △ SA564-ΔhptRS
- ⊞ SA564-ΔccpA
- + SA564-ΔhptRS/ccpA

# SYS\_STAAM

S-910

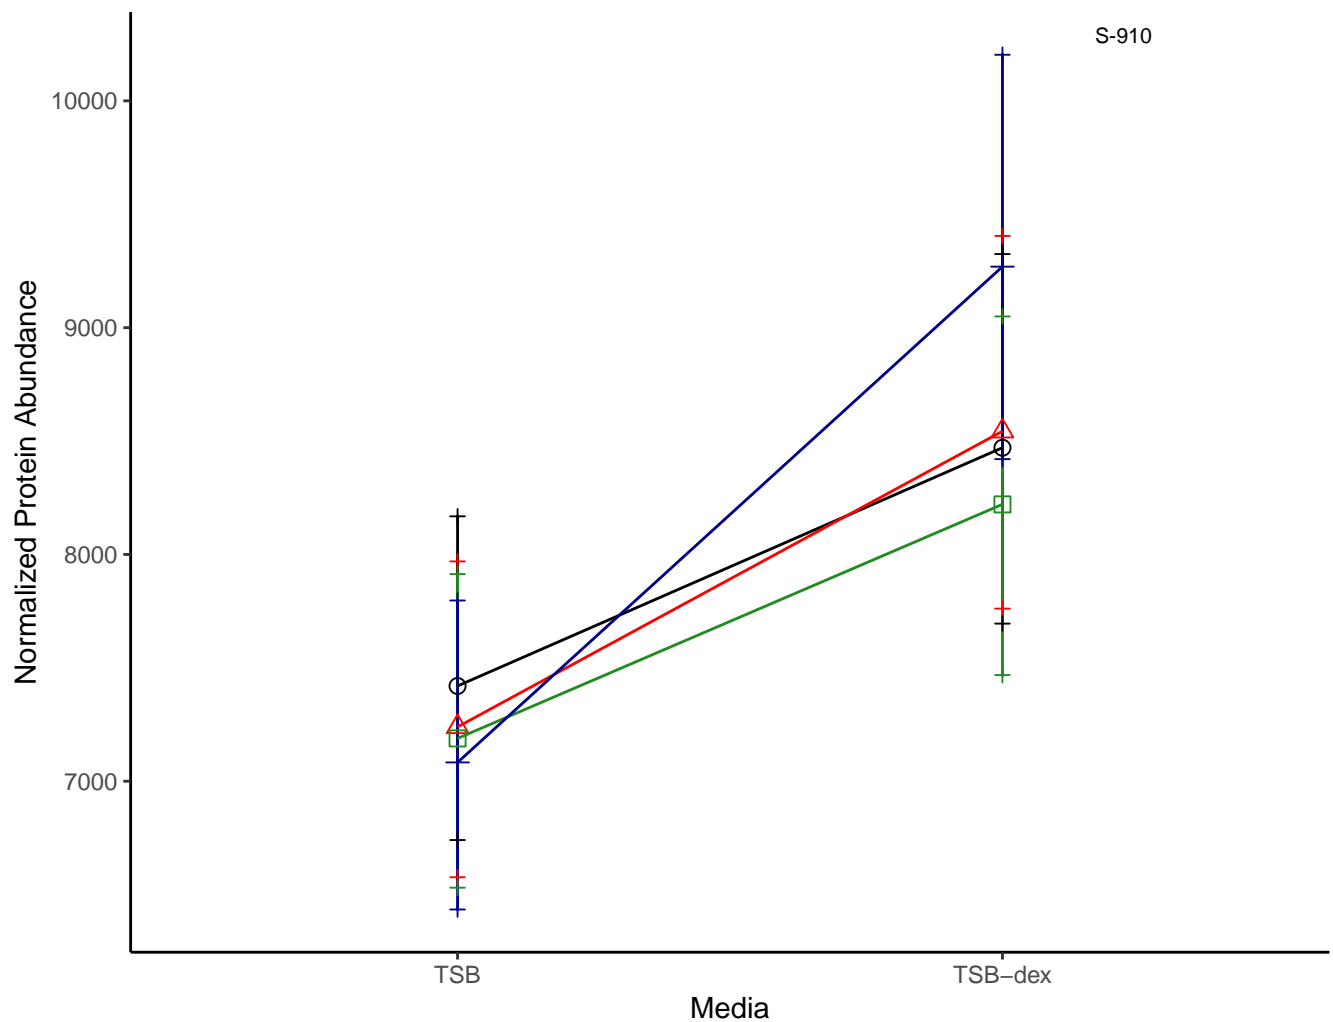

- ⊕ SA564
- △ SA564-ΔhptRS
- ⊞ SA564-ΔccpA
- + SA564-ΔhptRS/ccpA

# SYT\_STAAM

S-911

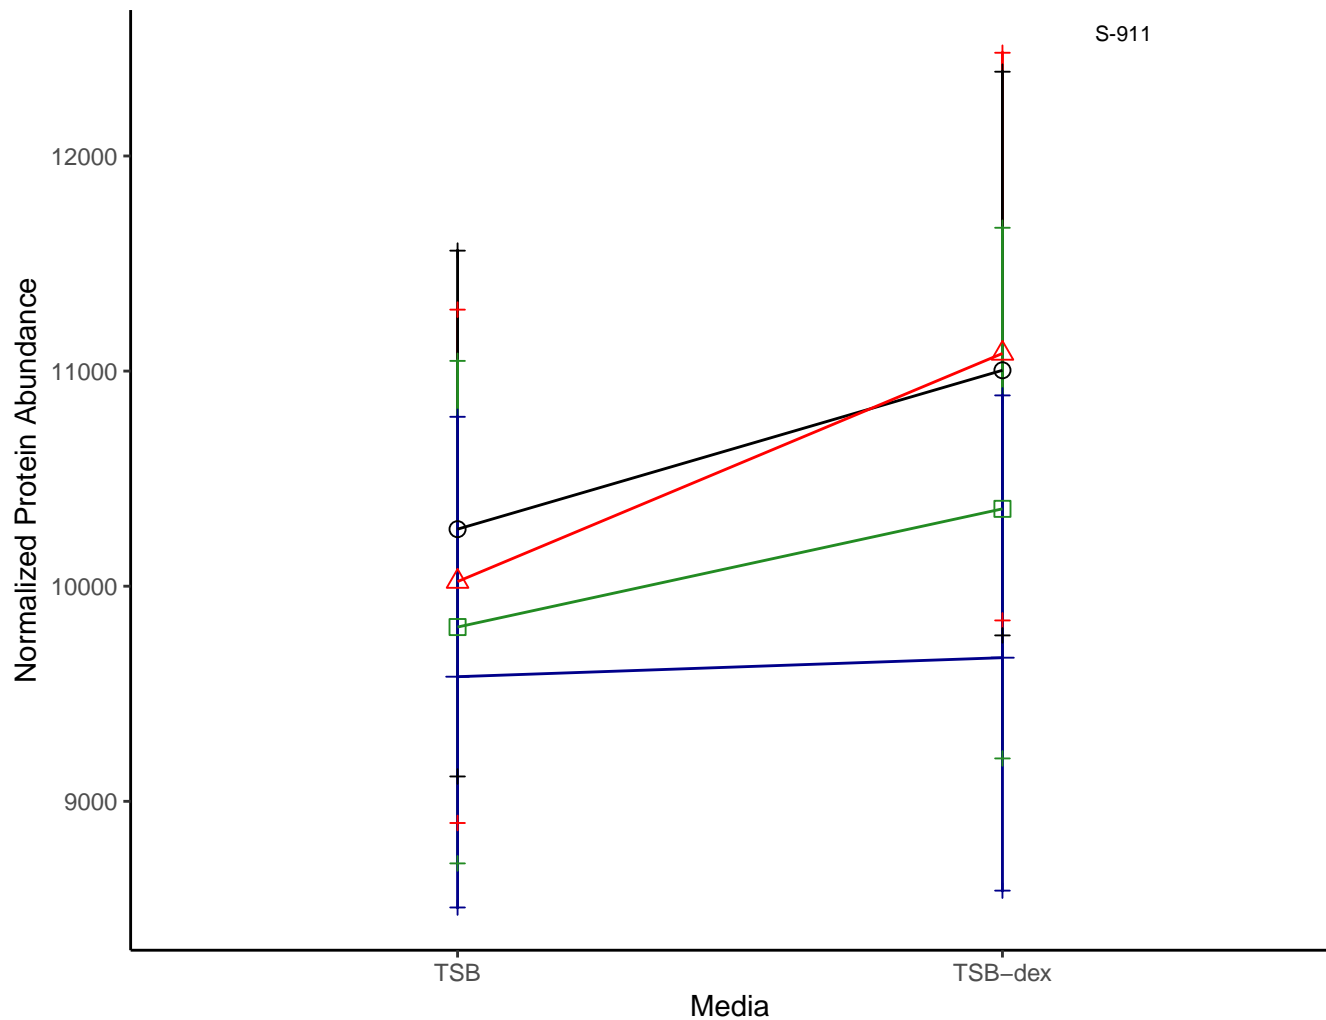

- ⊕ SA564
- △ SA564- $\Delta$ *hptRS*
- ⊞ SA564- $\Delta$ *ccpA*
- + SA564- $\Delta$ *hptRS/ccpA*

# SYV\_STAAM

S-912

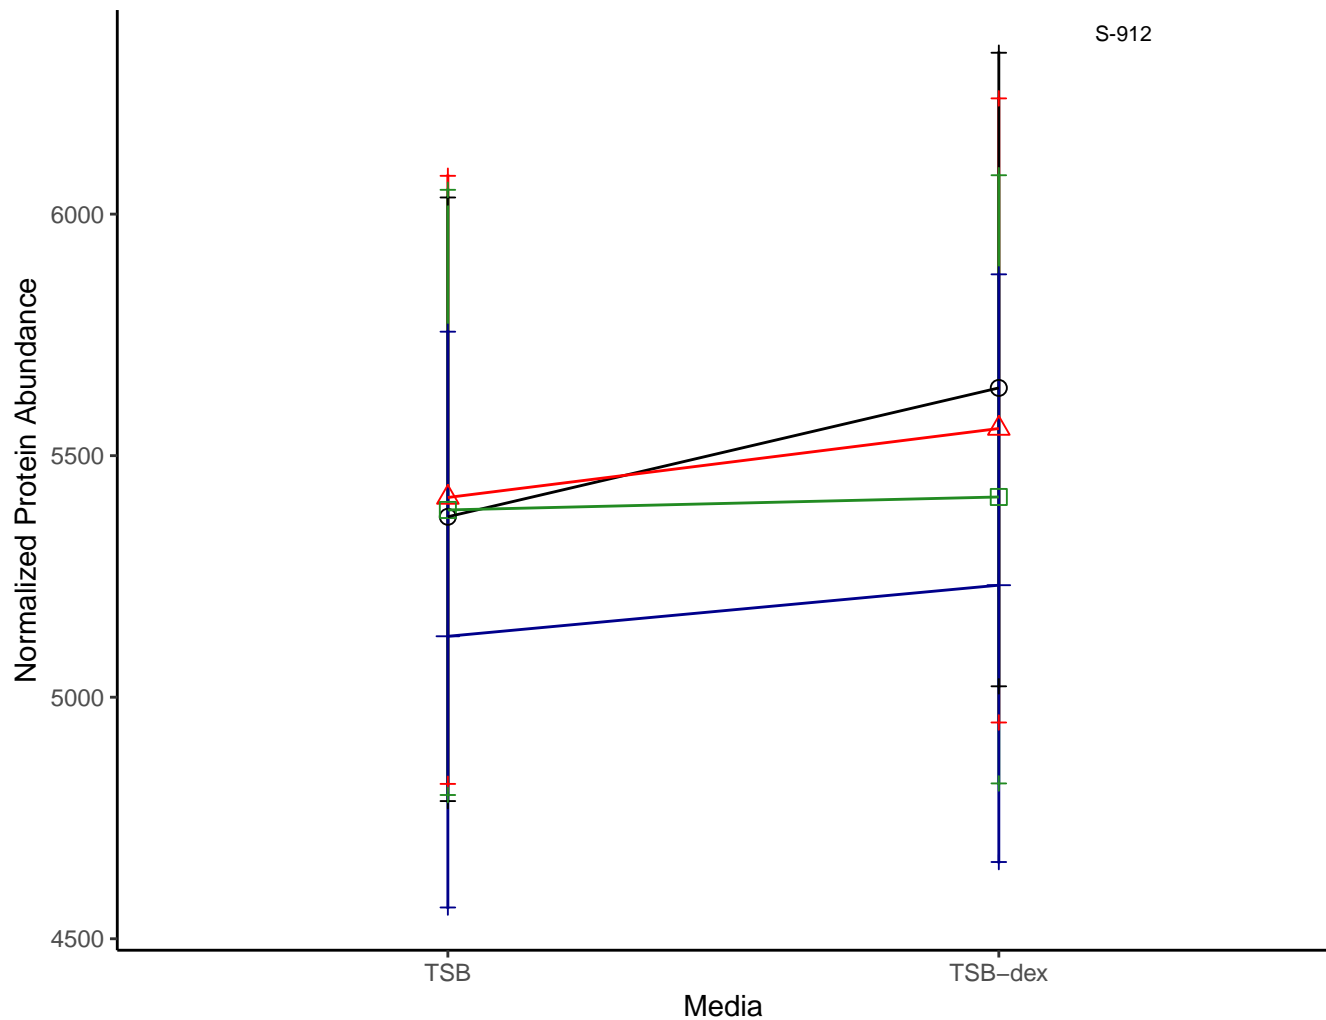

- ⊕ SA564
- △ SA564-ΔhptRS
- ⊞ SA564-ΔccpA
- + SA564-ΔhptRS/ccpA



# SYW\_STAAM

S-913

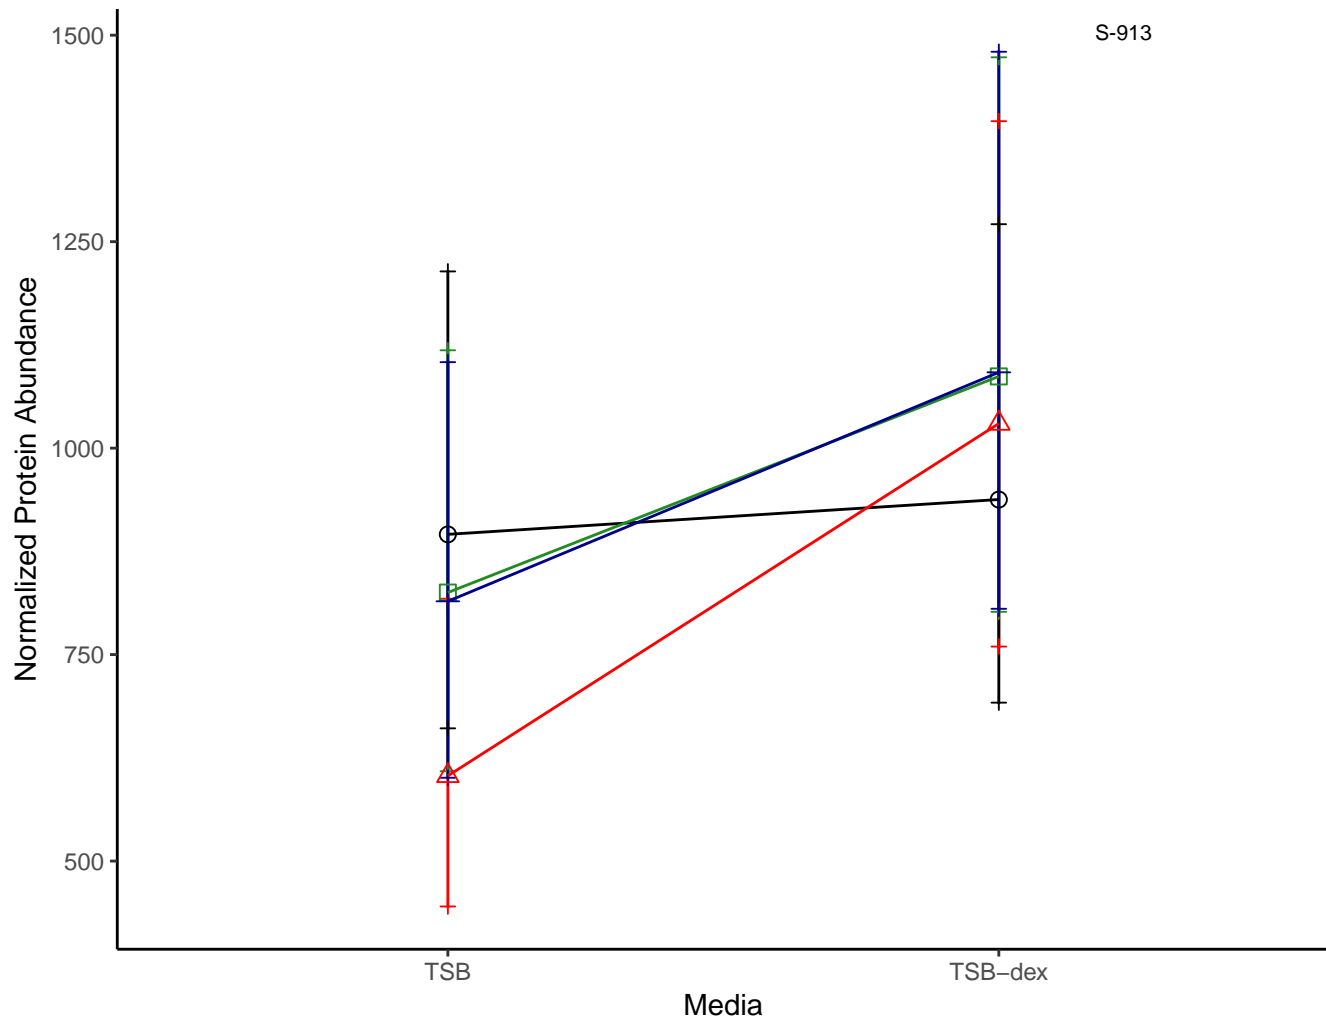

- SA564
- △ SA564- $\Delta$ *hptRS*
- SA564- $\Delta$ *ccpA*
- + SA564- $\Delta$ *hptRS/ccpA*

# SYT\_STAAM

S-914

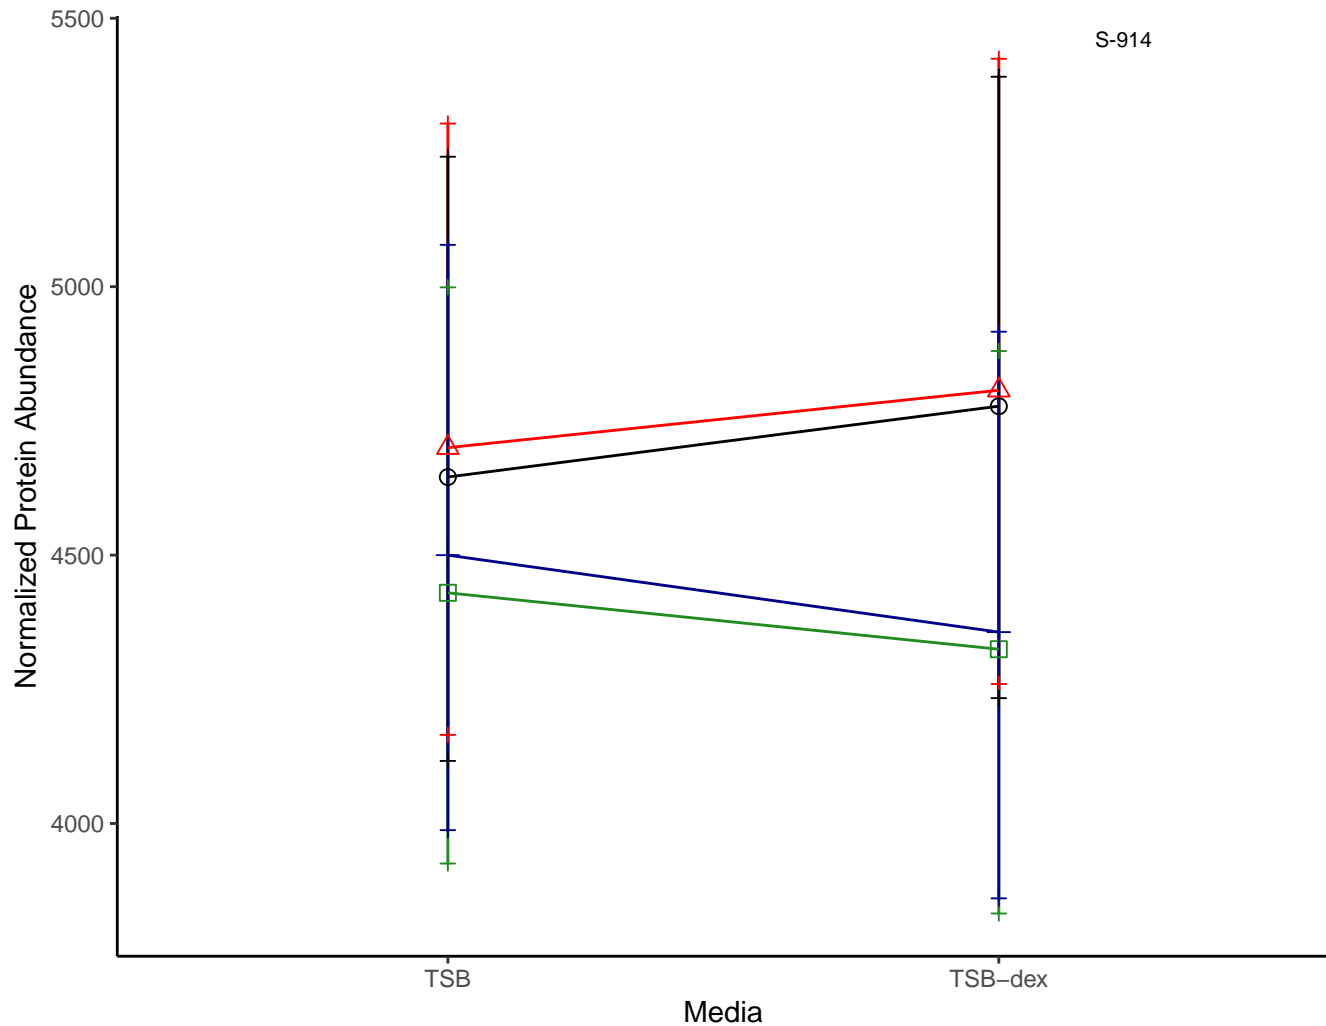

- ⊕ SA564
- △ SA564-ΔhptRS
- ⊞ SA564-ΔccpA
- + SA564-ΔhptRS/ccpA

# T431\_STAAM

S-915

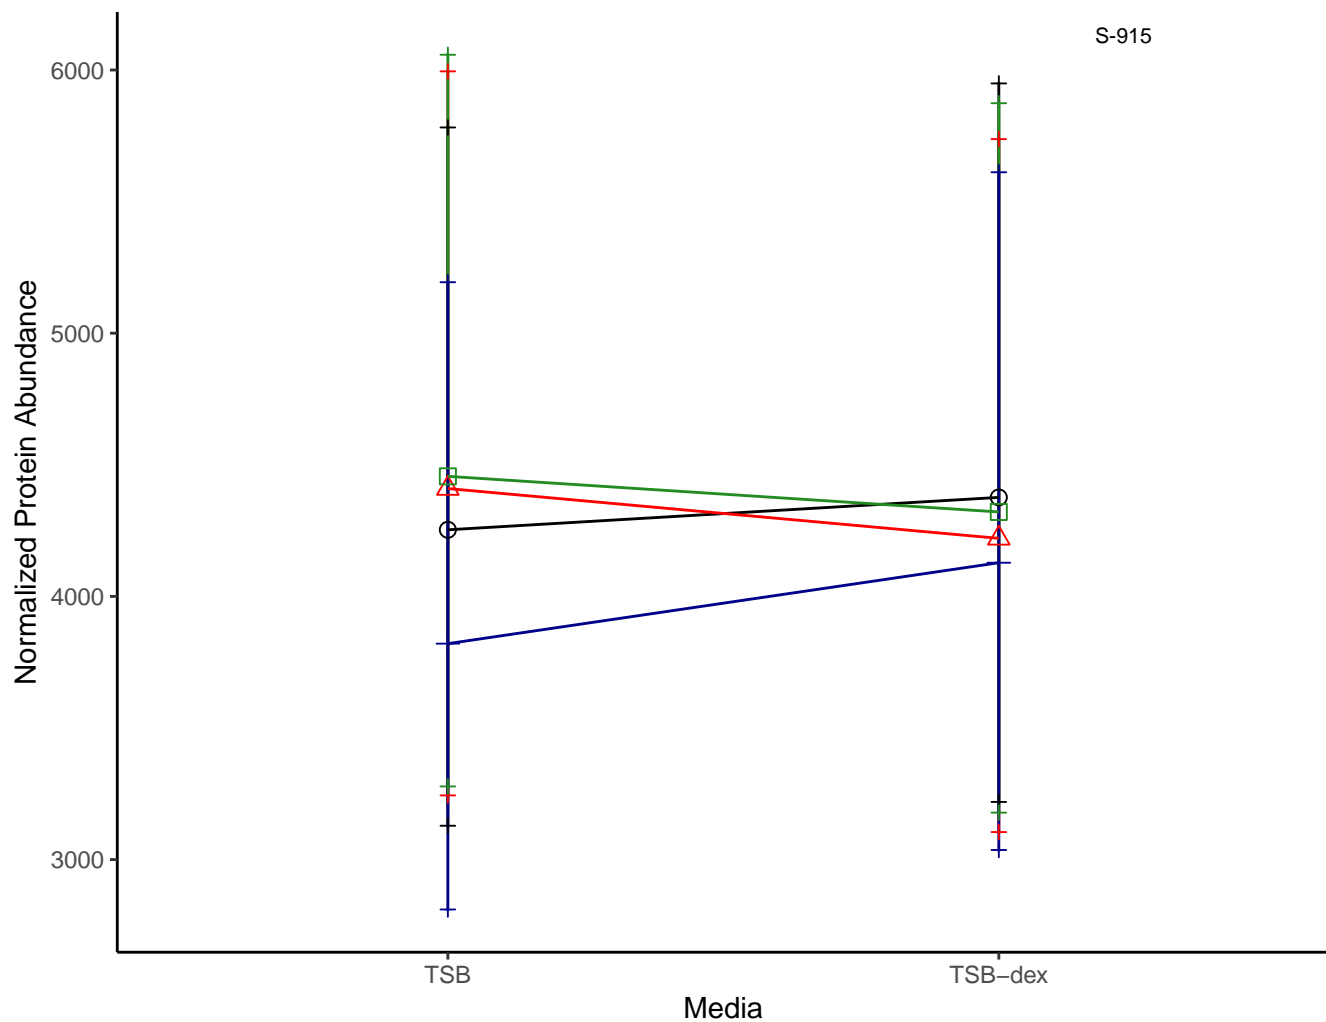

- ⊕ SA564
- △ SA564- $\Delta hptRS$
- ⊞ SA564- $\Delta ccpA$
- + SA564- $\Delta hptRS/ccpA$

# TADA\_STAAM

S-916

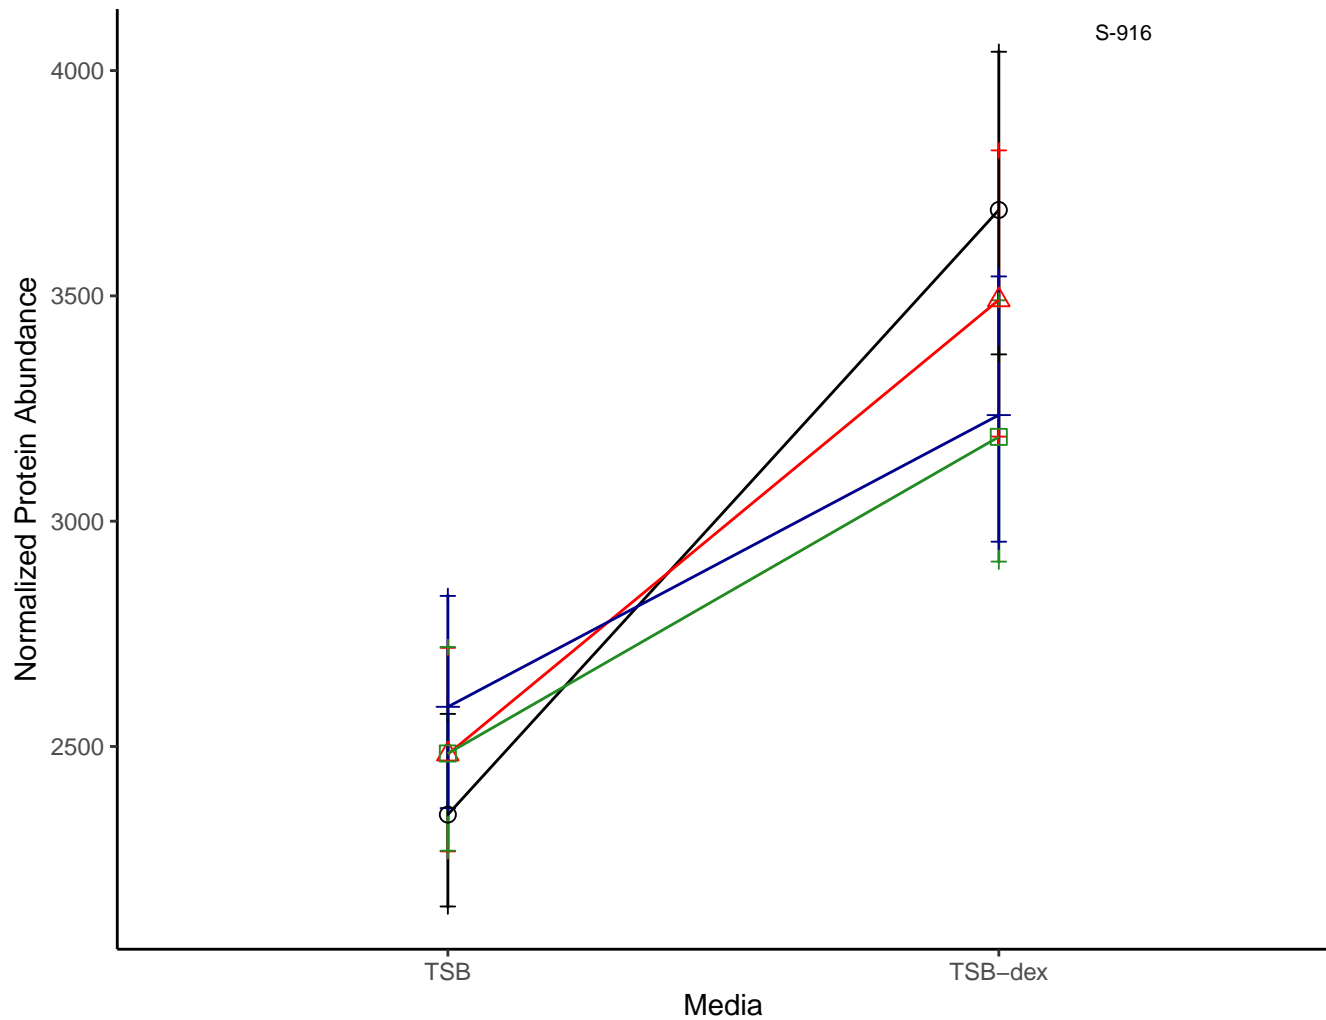

- ⊕ SA564
- △ SA564- $\Delta hptRS$
- ⊞ SA564- $\Delta ccpA$
- + SA564- $\Delta hptRS/ccpA$

## TAGA\_STAAM

S-917

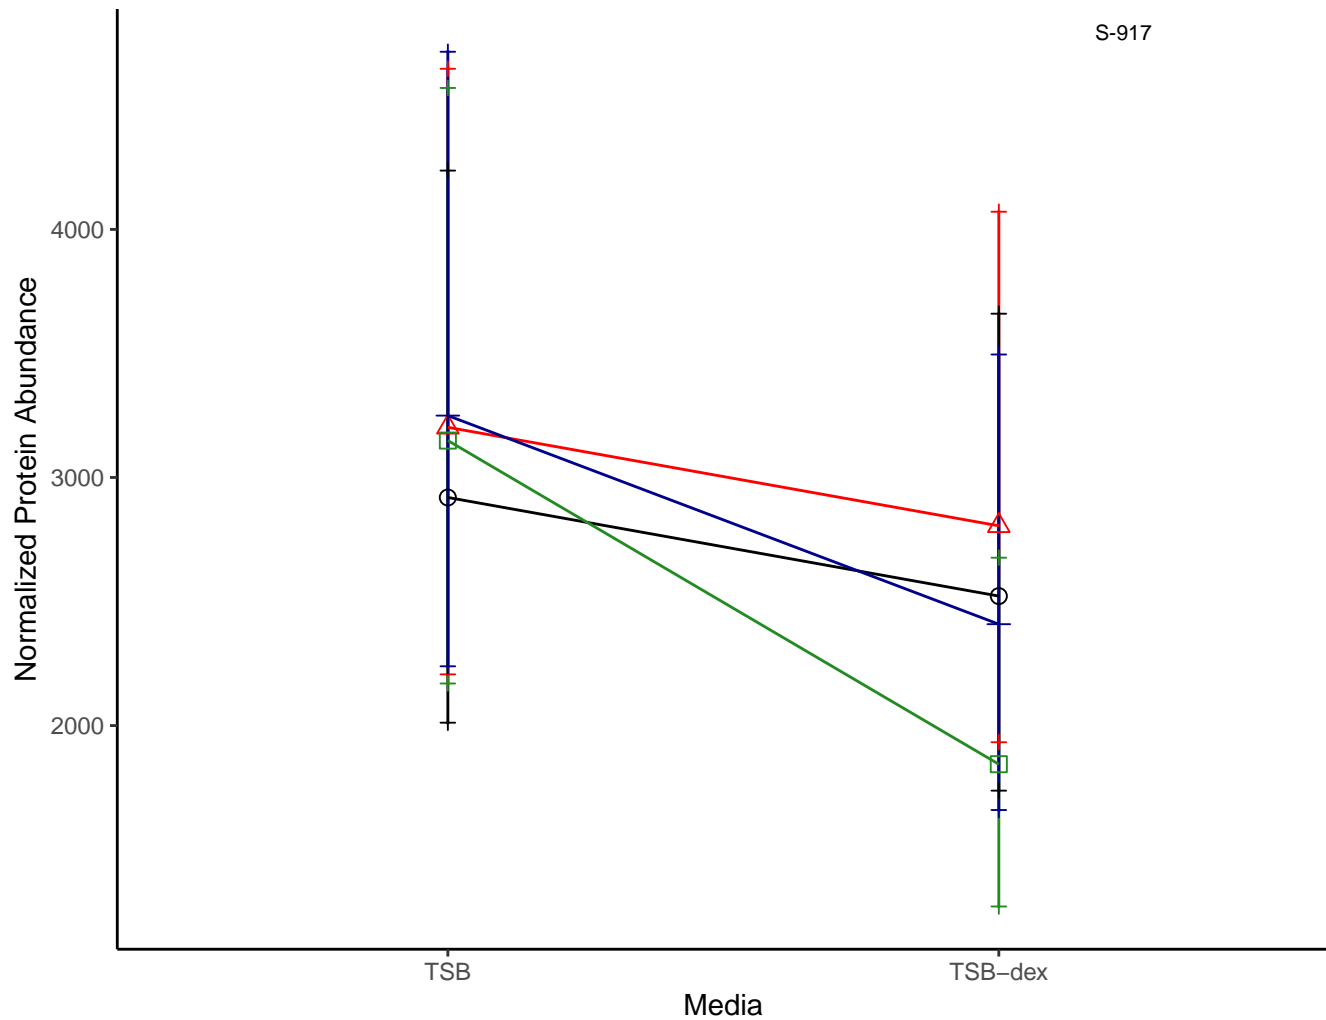

- SA564
- △ SA564-Δ*hptRS*
- SA564-Δ*ccpA*
- + SA564-Δ*hptRS/ccpA*

# TDCB\_STAAM

S-918

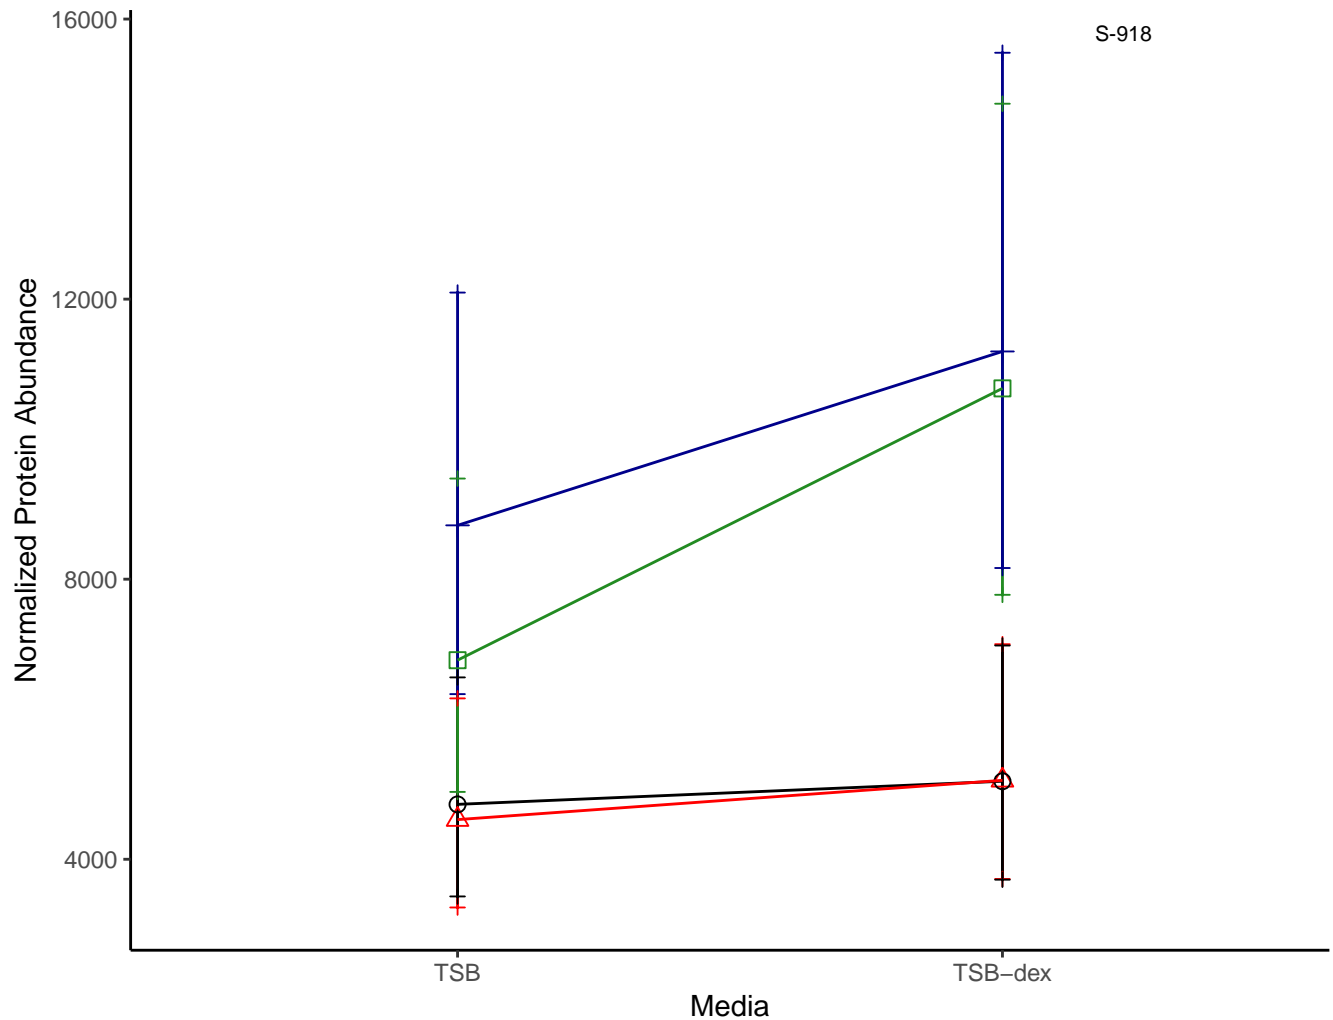

- ⊕ SA564
- △ SA564-ΔhptRS
- ⊞ SA564-ΔccpA
- + SA564-ΔhptRS/ccpA

# TELL\_STAAM

S-919

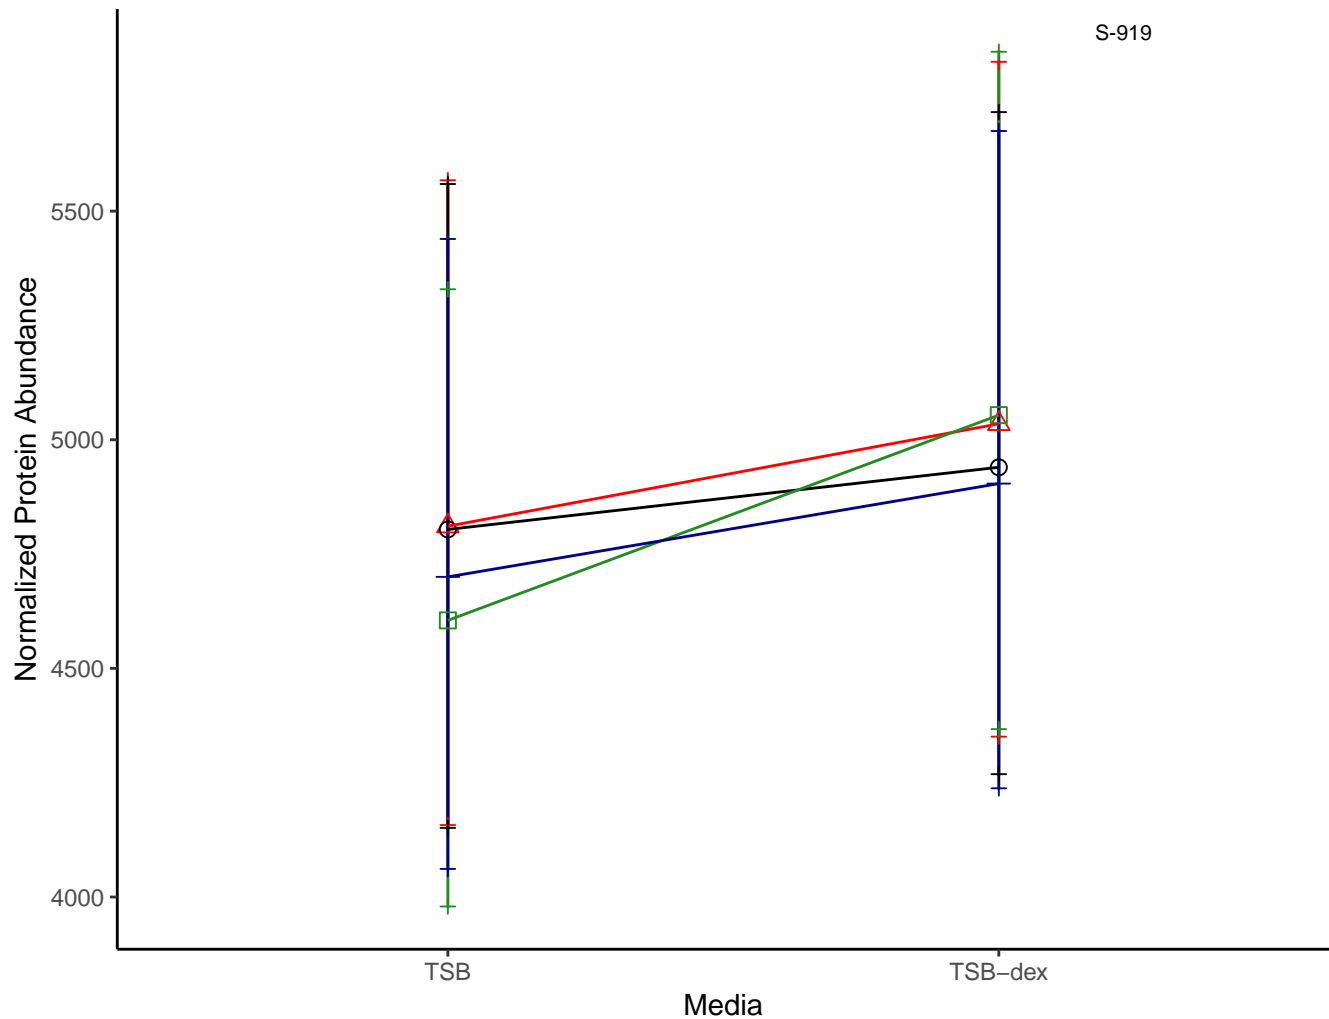

- ⊕ SA564
- △ SA564- $\Delta$ *hptRS*
- SA564- $\Delta$ *ccpA*
- + SA564- $\Delta$ *hptRS/ccpA*

# THID\_STAAM

S-920

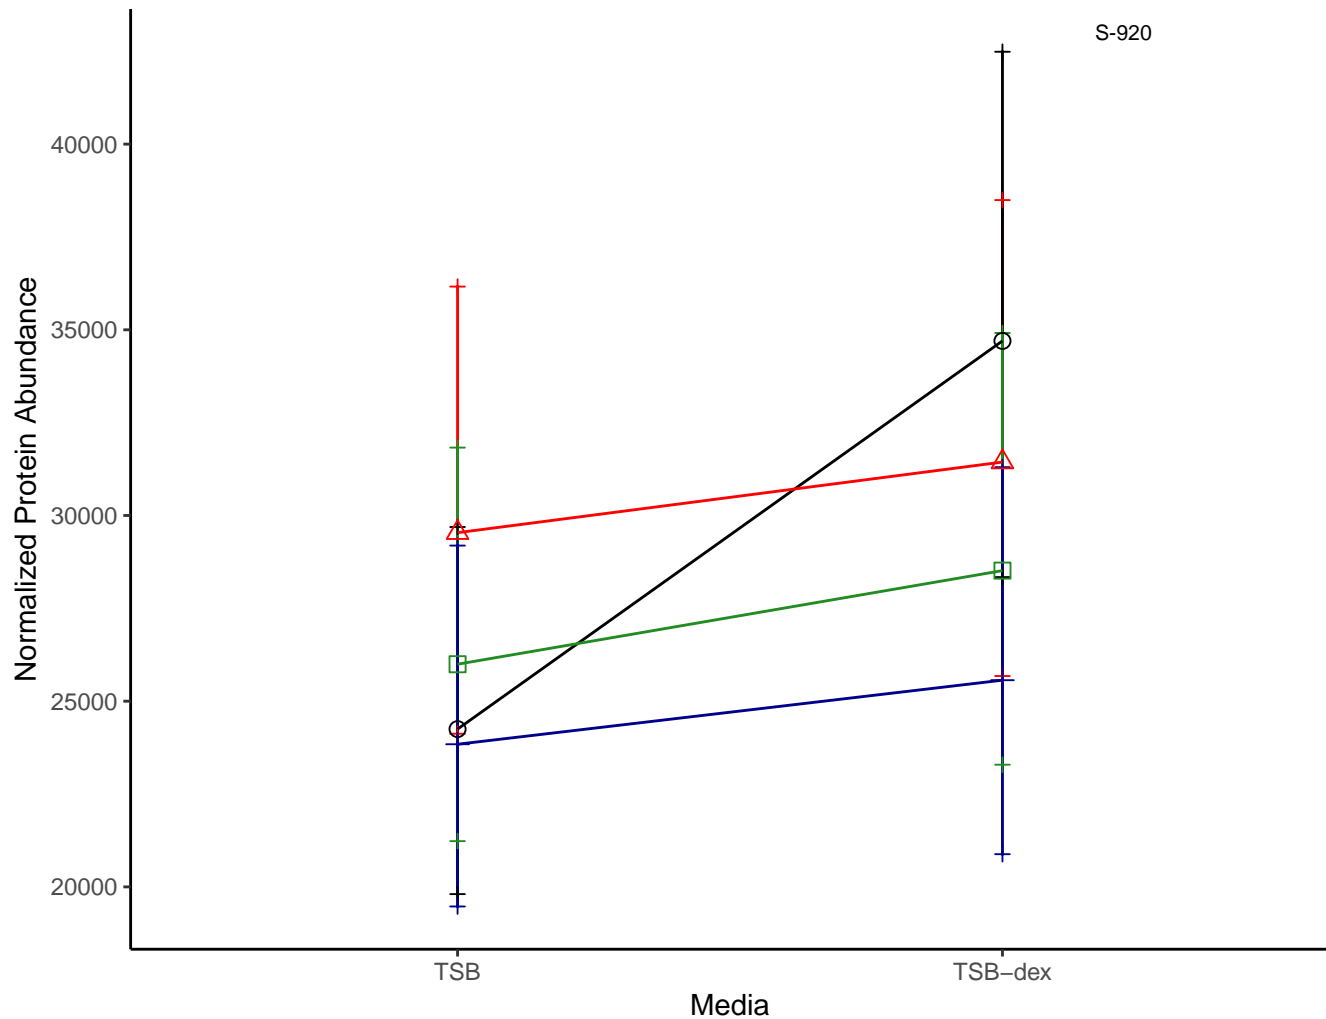

- ⊕ SA564
- △ SA564- $\Delta$ *hptRS*
- ⊞ SA564- $\Delta$ *ccpA*
- + SA564- $\Delta$ *hptRS/ccpA*



# THIM\_STAAM

S-921

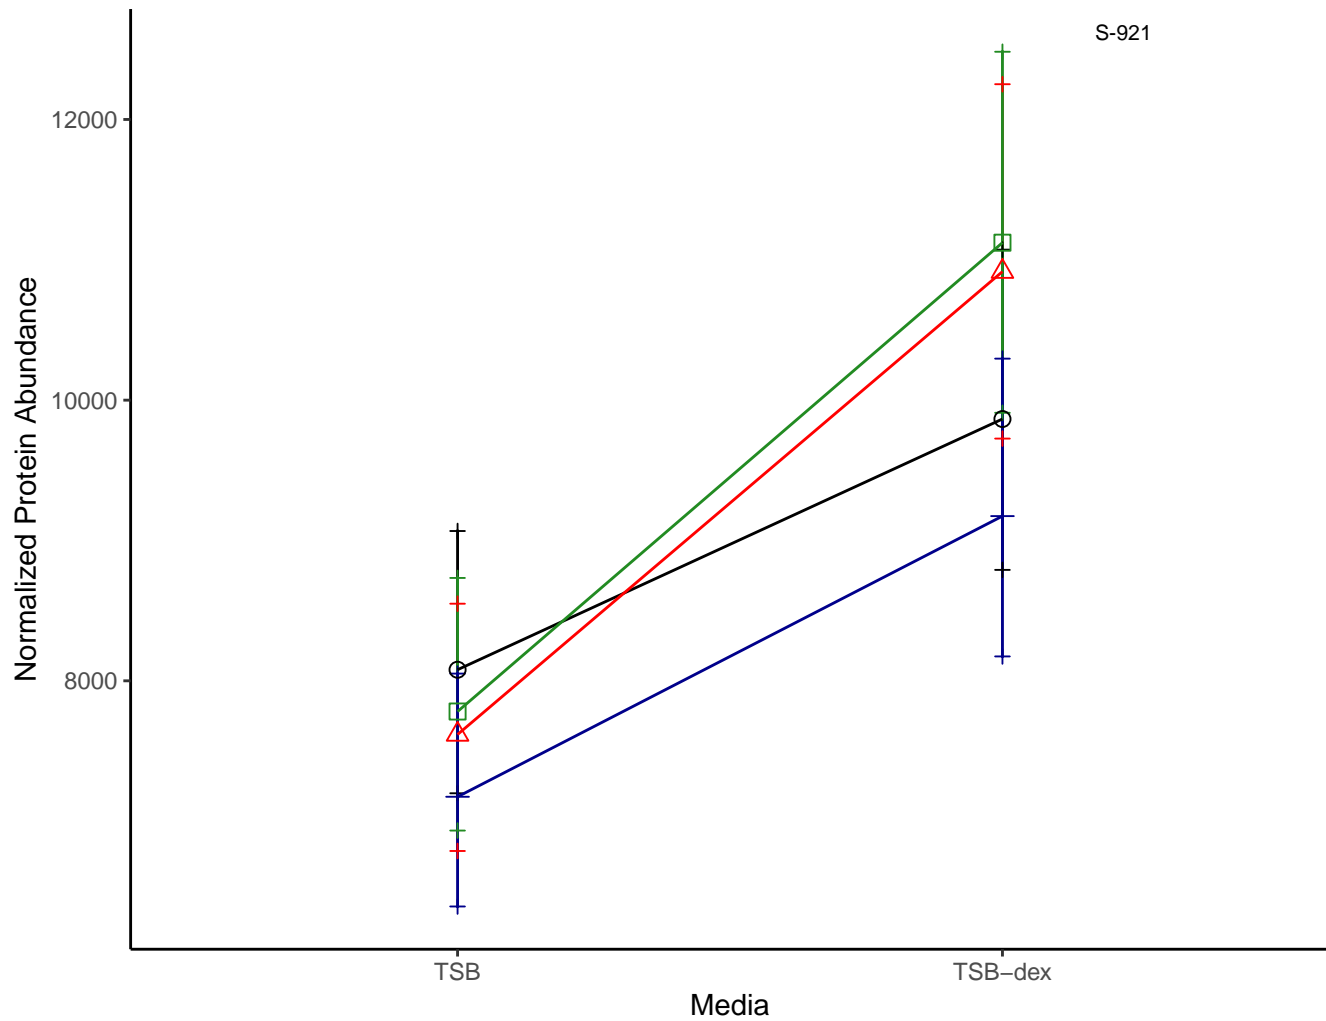

- ⊕ SA564
- △ SA564-ΔhptRS
- ⊞ SA564-ΔccpA
- + SA564-ΔhptRS/ccpA

# THIO\_STAAM

S-922

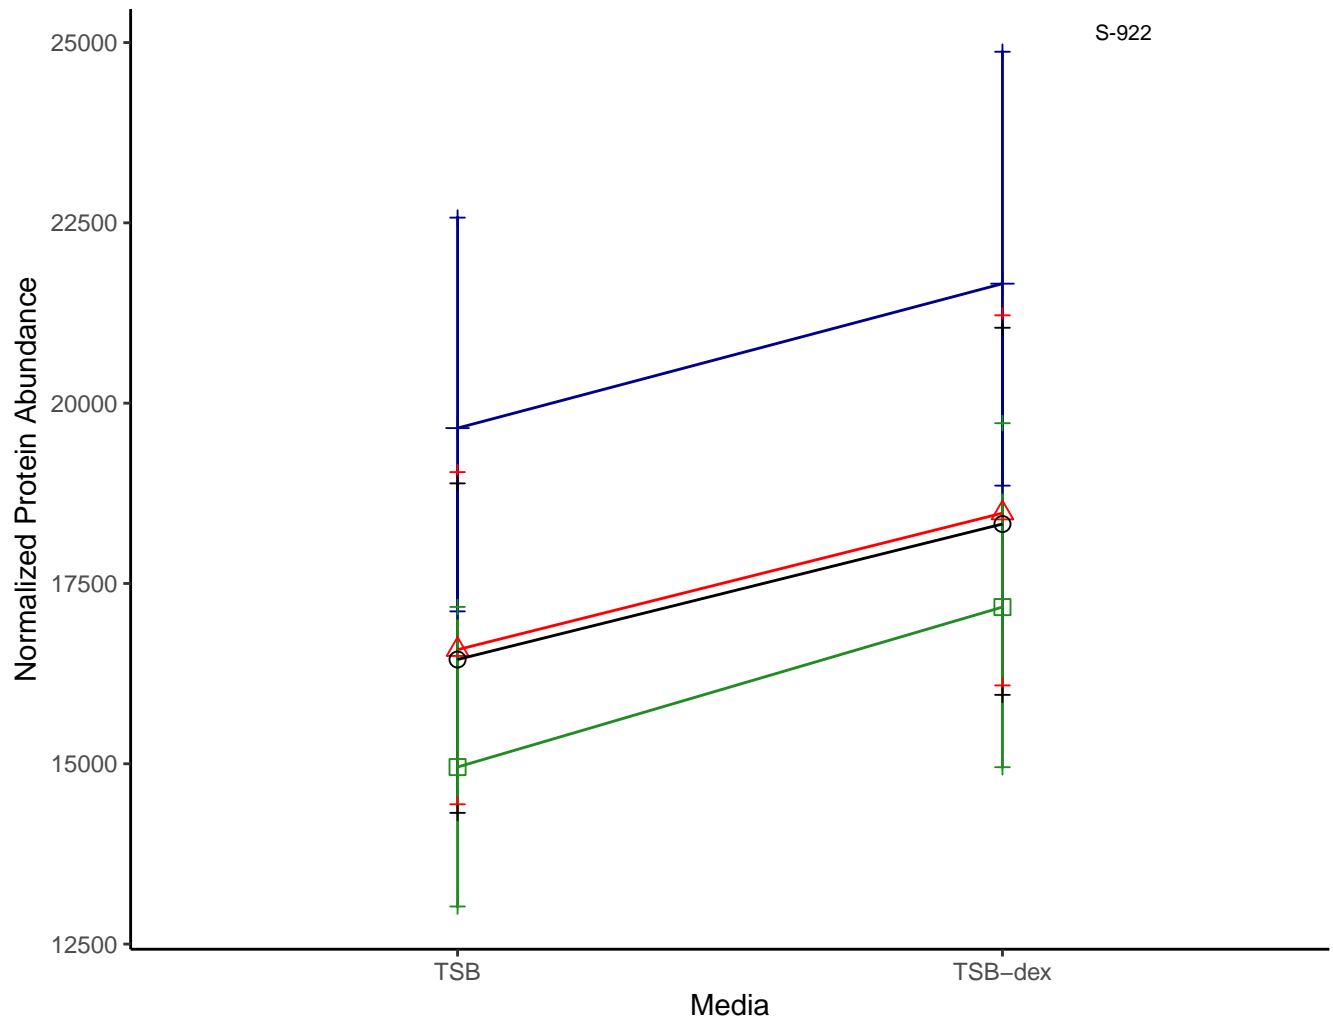

- ⊕ SA564
- △ SA564-ΔhptRS
- SA564-ΔccpA
- + SA564-ΔhptRS/ccpA

# THLA\_STAAM

S-923

Normalized Protein Abundance

14000  
12000  
10000  
8000

TSB

Media

TSB-dex

- ⊕ SA564
- △ SA564- $\Delta$ *hptRS*
- ⊞ SA564- $\Delta$ *ccpA*
- + SA564- $\Delta$ *hptRS/ccpA*

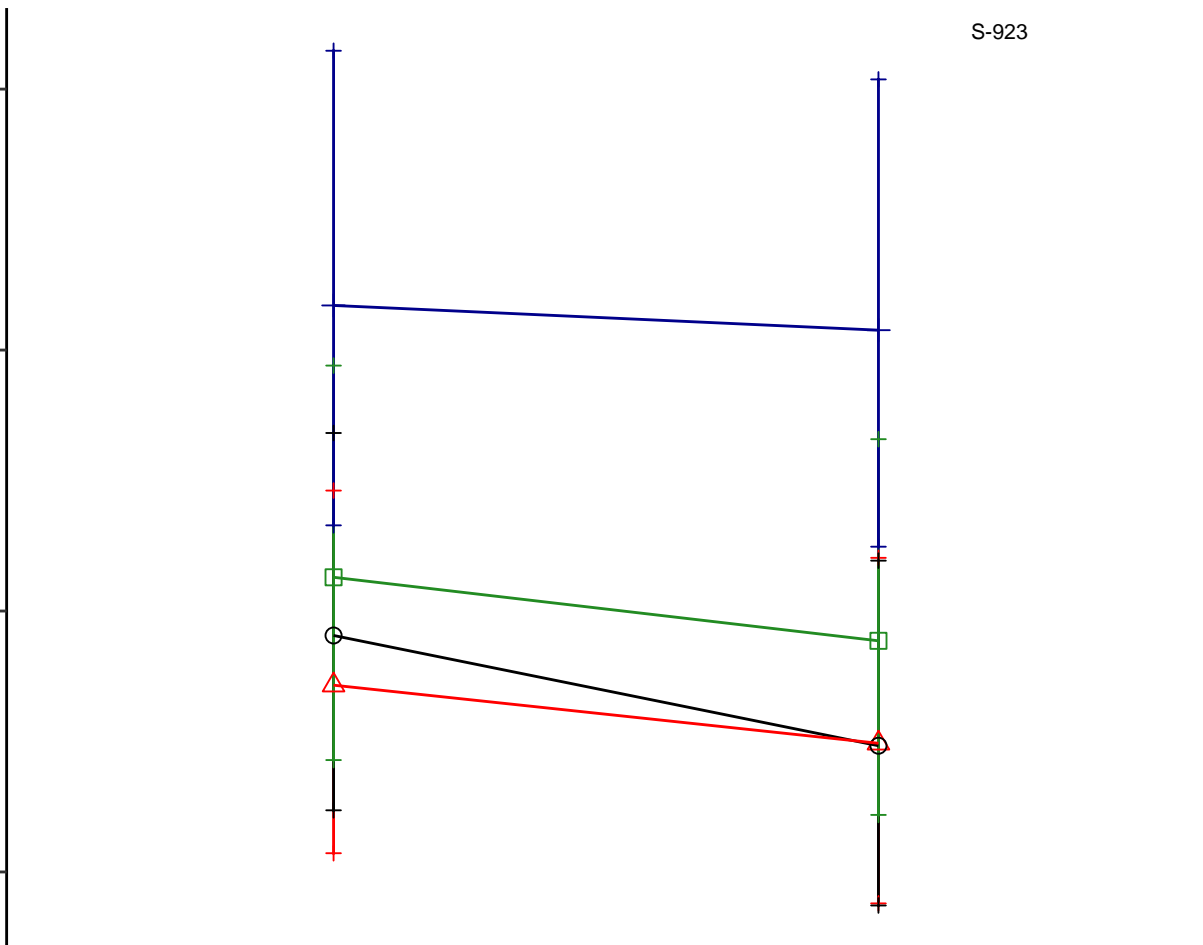

# TIG\_STAAM

S-924

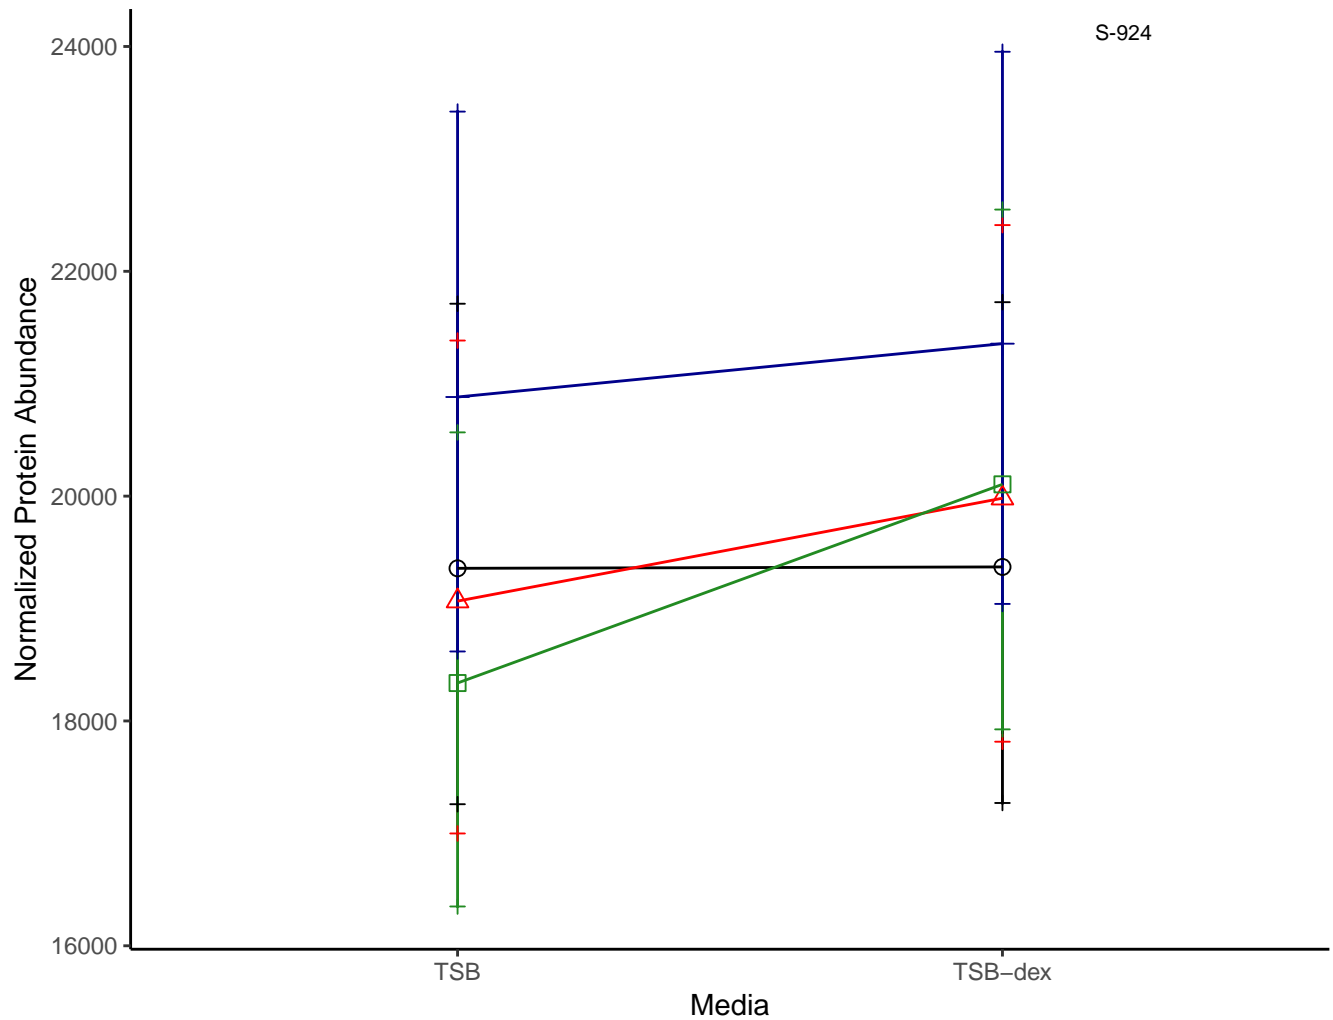

- ⊕ SA564
- △ SA564- $\Delta$ *hptRS*
- ⊞ SA564- $\Delta$ *ccpA*
- + SA564- $\Delta$ *hptRS/ccpA*

# TKT\_STAAM

S-925

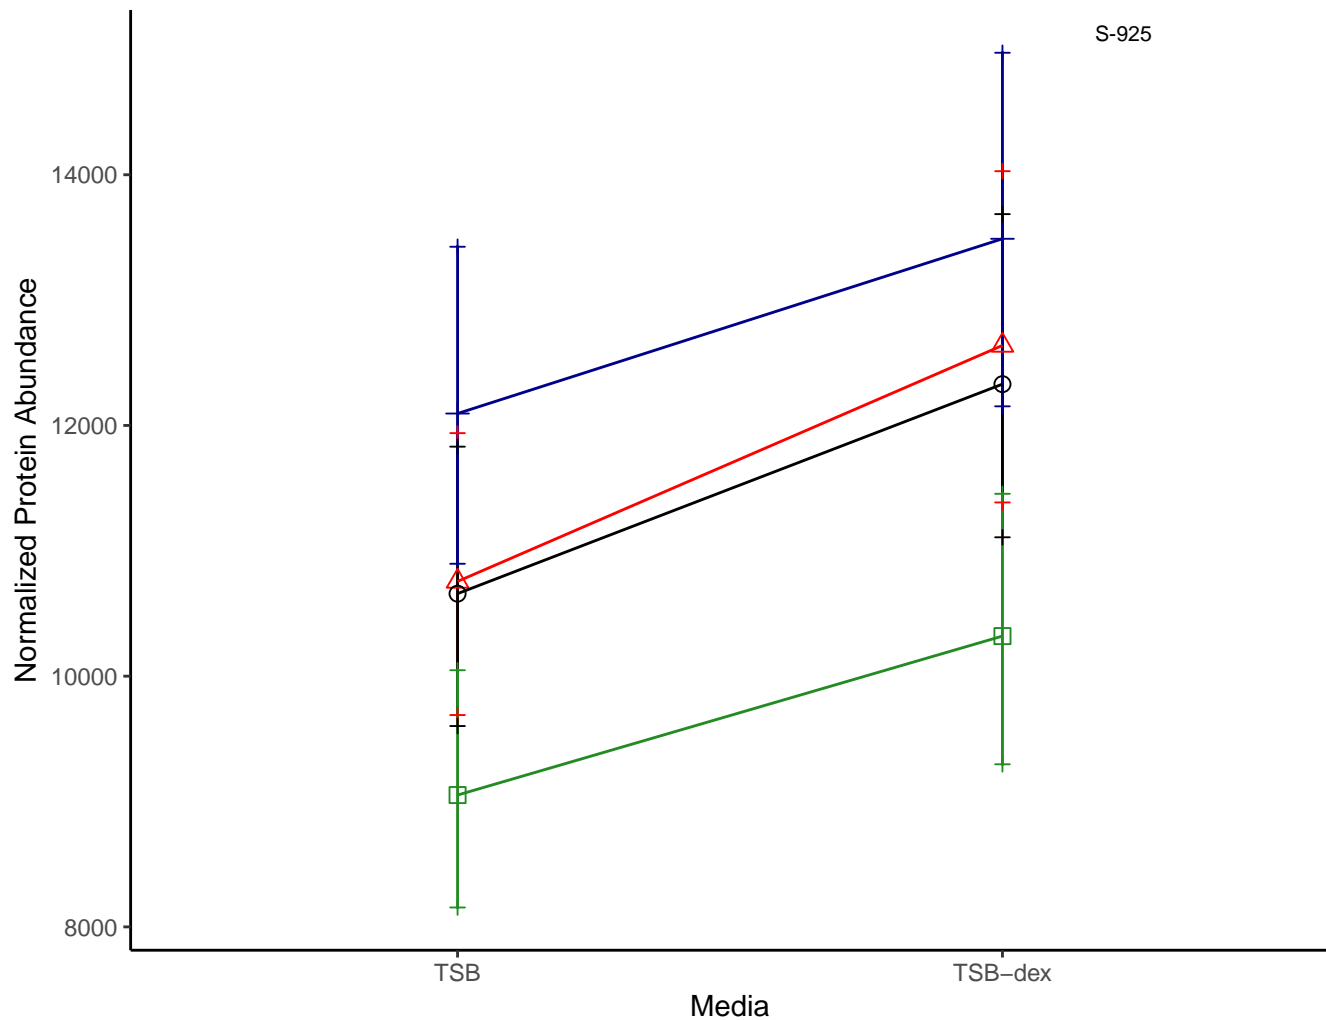

- ⊕ SA564
- △ SA564-ΔhptRS
- ⊞ SA564-ΔccpA
- + SA564-ΔhptRS/ccpA

# TOP1\_STAAM

S-926

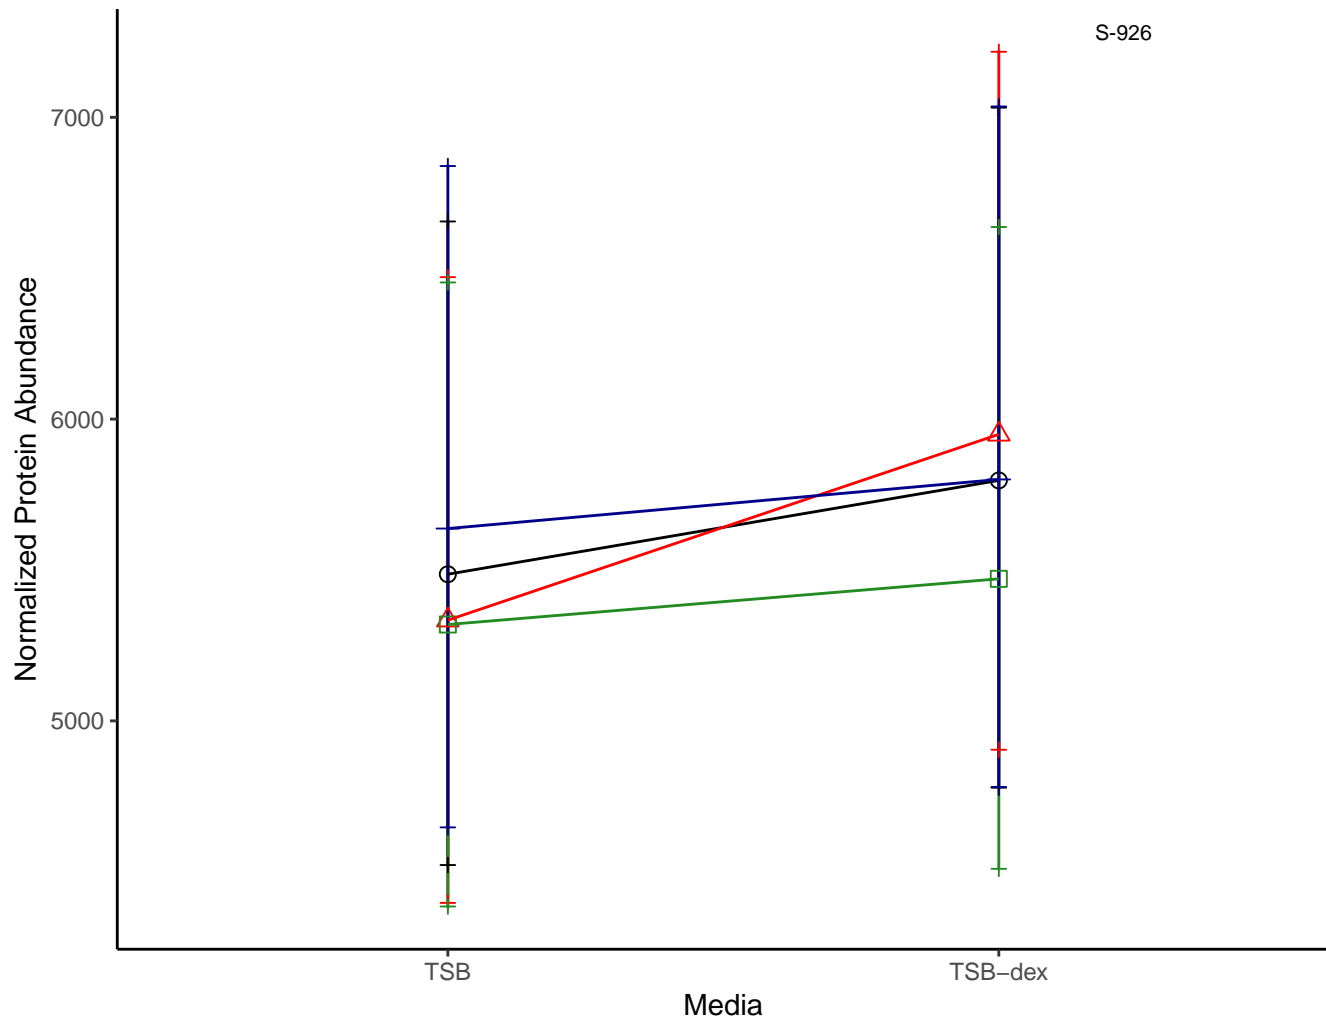

- ⊕ SA564
- △ SA564- $\Delta$ *hptRS*
- ⊞ SA564- $\Delta$ *ccpA*
- + SA564- $\Delta$ *hptRS/ccpA*

# TOP3\_STAAM

S-927

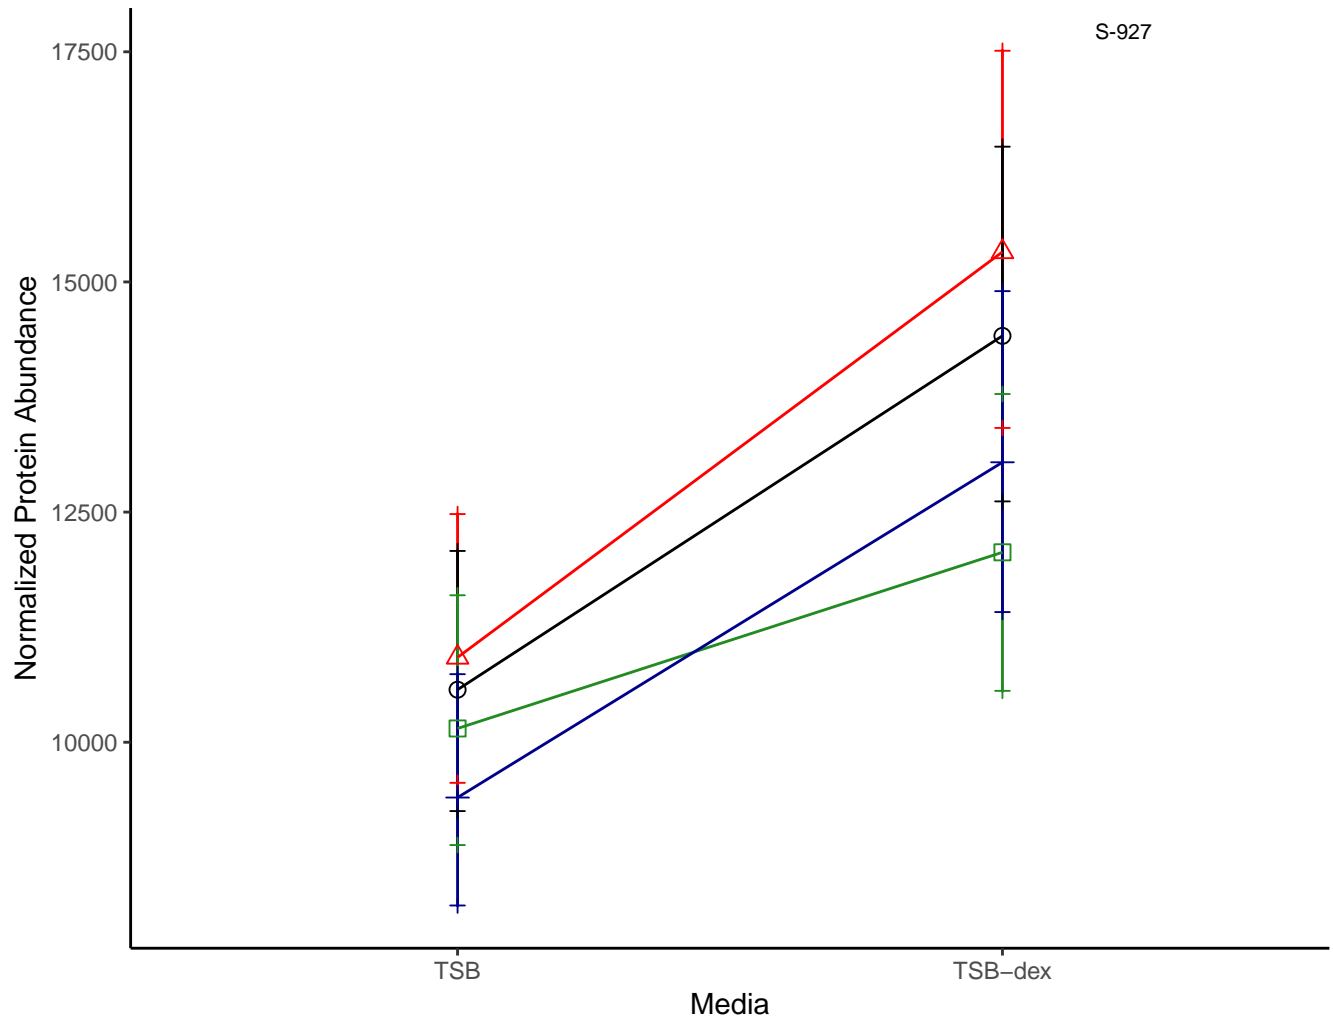

- ⊕ SA564
- △ SA564- $\Delta hptRS$
- ⊞ SA564- $\Delta ccpA$
- + SA564- $\Delta hptRS/ccpA$

# TPIS\_STAAM

S-928

Normalized Protein Abundance

20000

15000

TSB

Media

TSB-dex

- ⊕ SA564
- △ SA564- $\Delta$ *hptRS*
- ⊞ SA564- $\Delta$ *ccpA*
- + SA564- $\Delta$ *hptRS/ccpA*

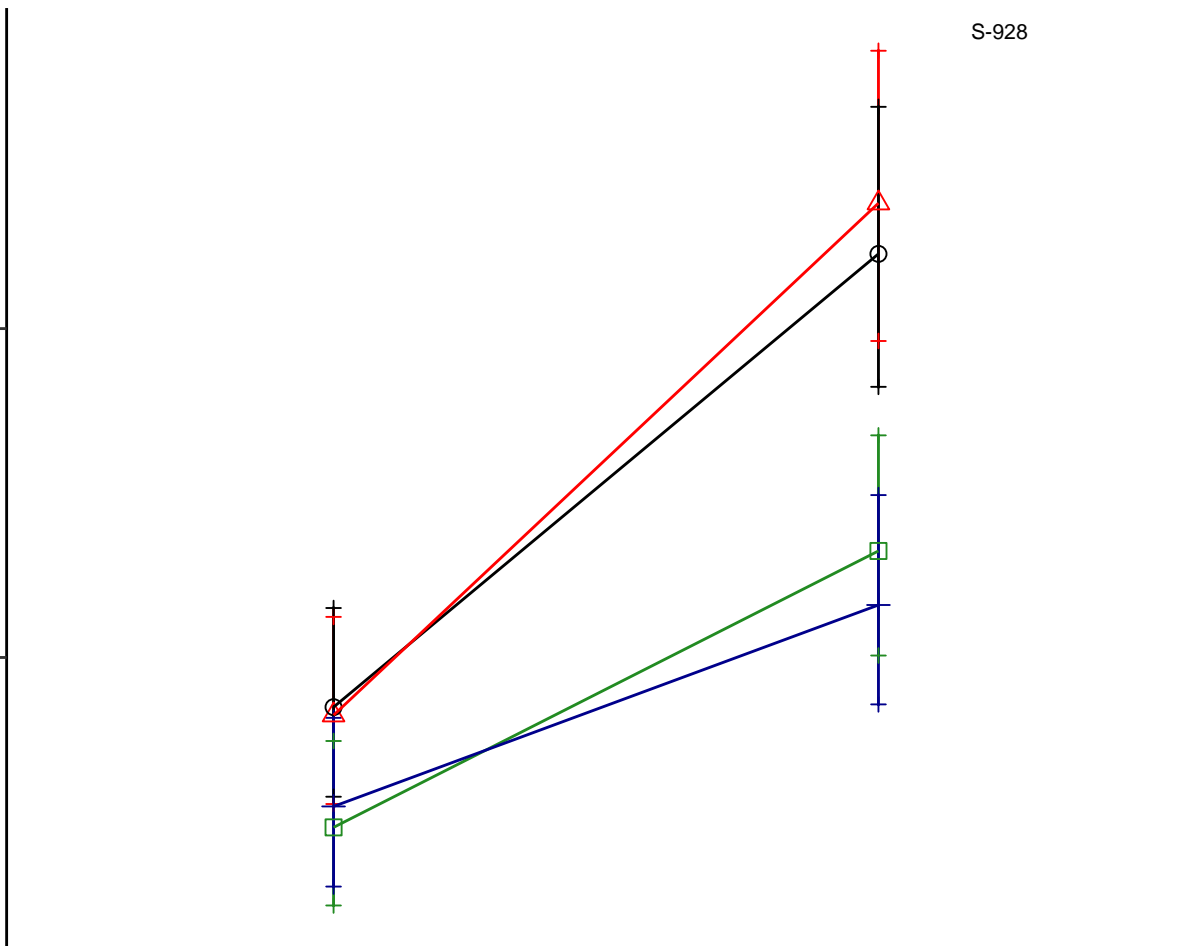



# TPX\_STAAM

S-929

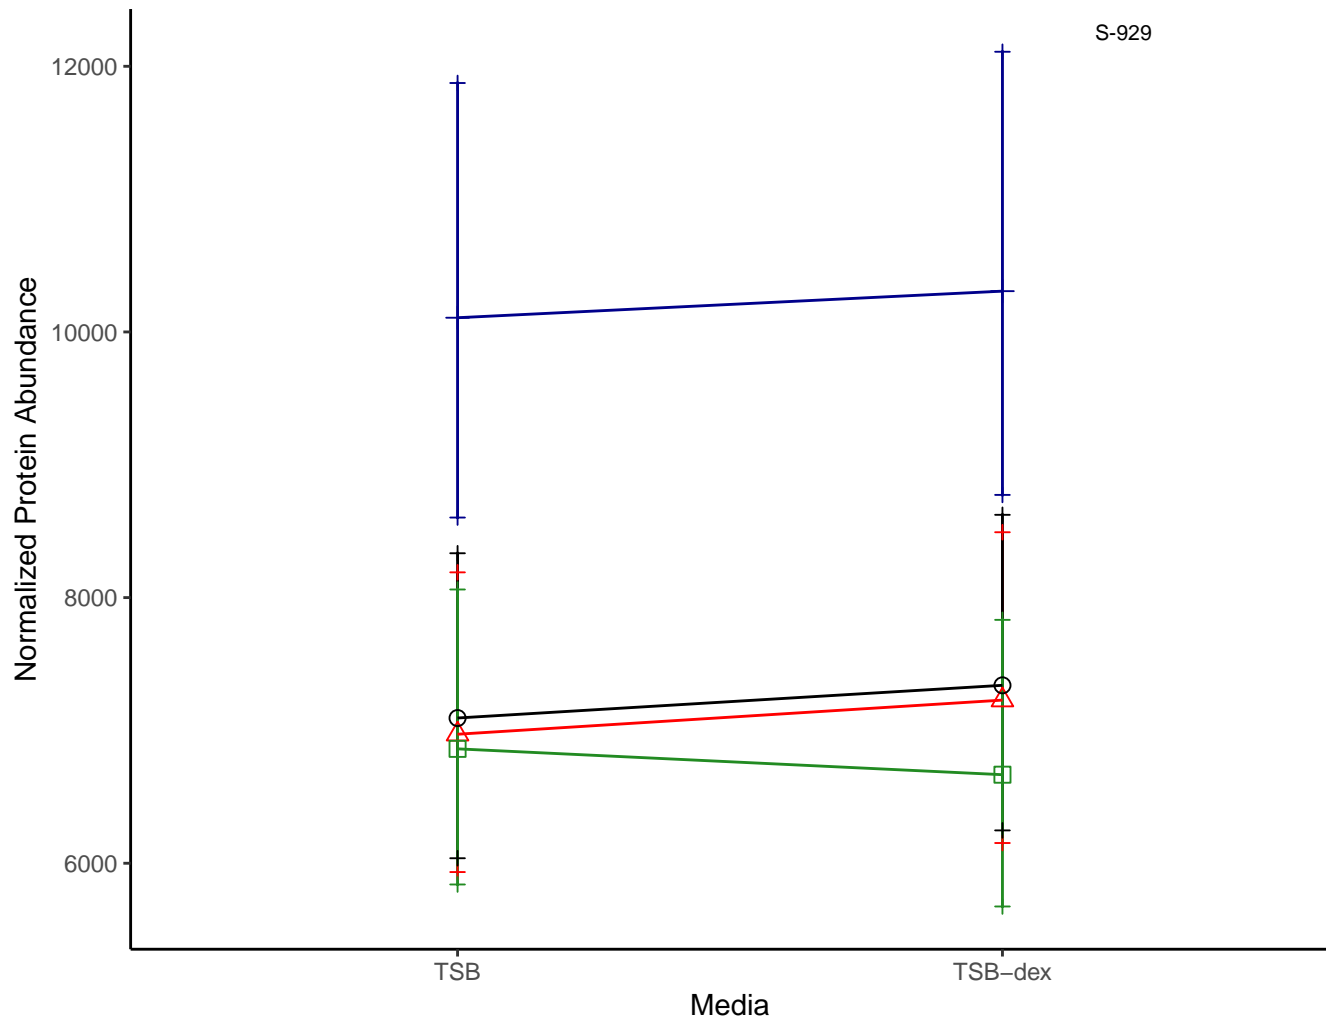

- ⊕ SA564
- △ SA564-ΔhptRS
- ⊞ SA564-ΔccpA
- + SA564-ΔhptRS/ccpA

# TRAC\_STAAM

S-930

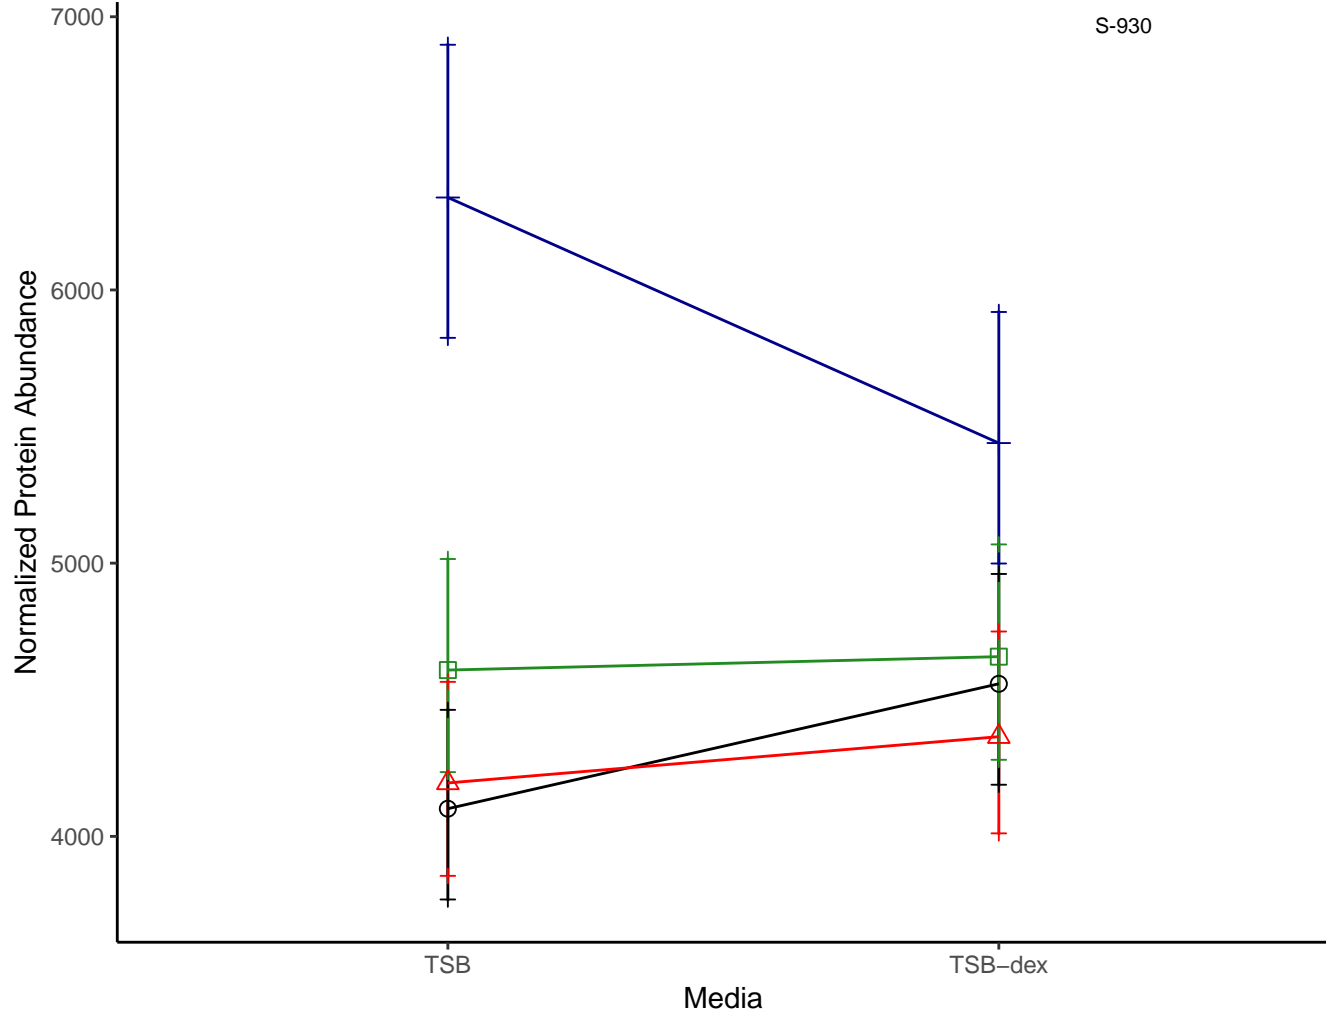

- ⊕ SA564
- △ SA564- $\Delta$ *hptRS*
- ⊞ SA564- $\Delta$ *ccpA*
- + SA564- $\Delta$ *hptRS/ccpA*

# TRAP\_STAAM

S-931

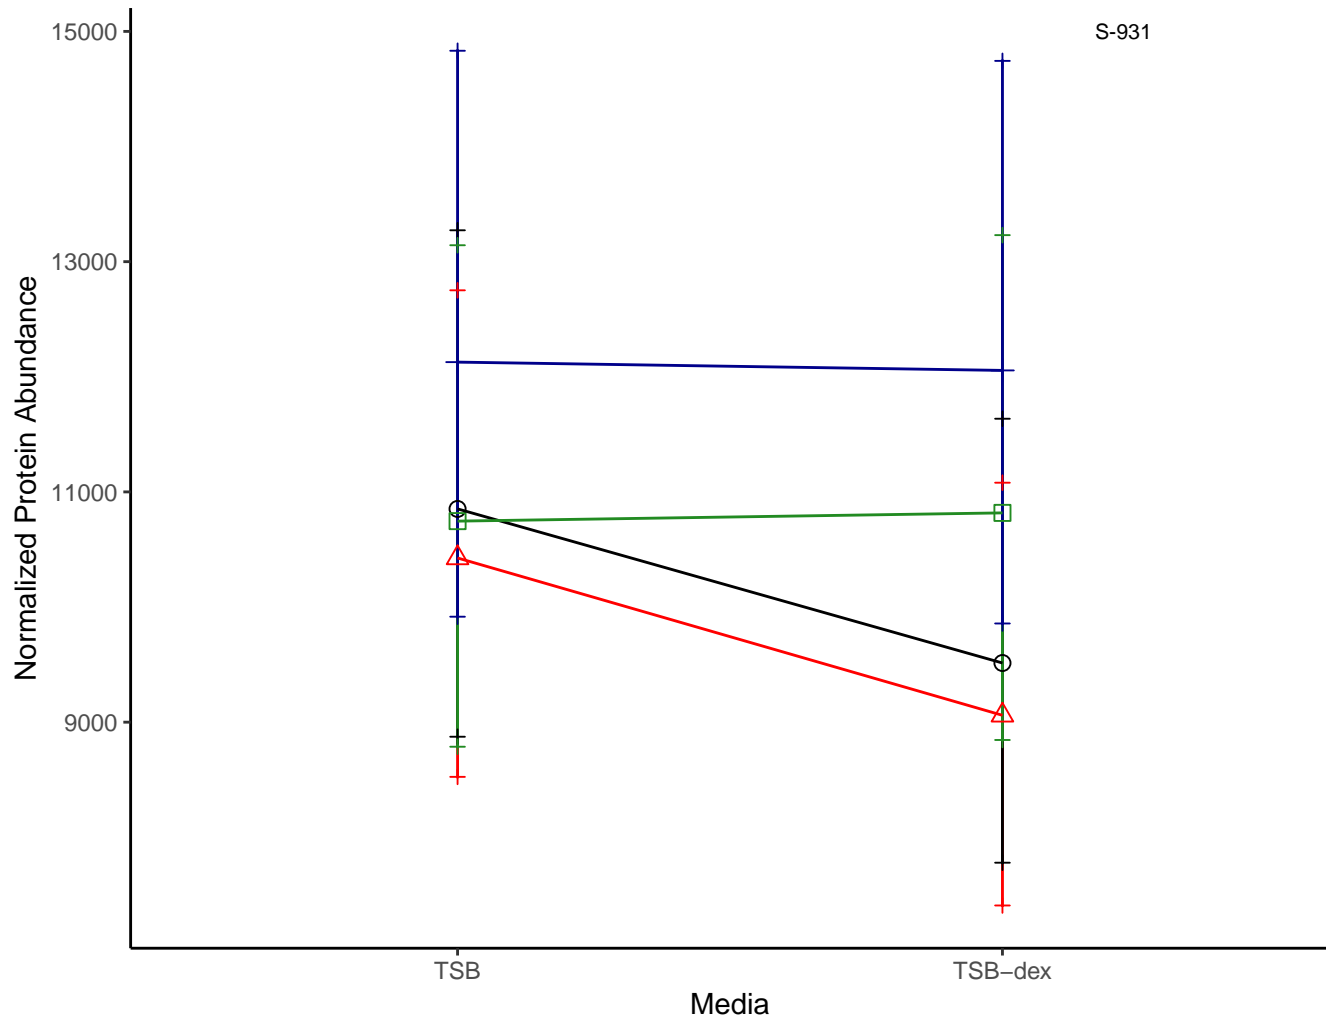

- ⊕ SA564
- △ SA564-ΔhptRS
- ⊞ SA564-ΔccpA
- + SA564-ΔhptRS/ccpA

# TRMB\_STAAM

S-932

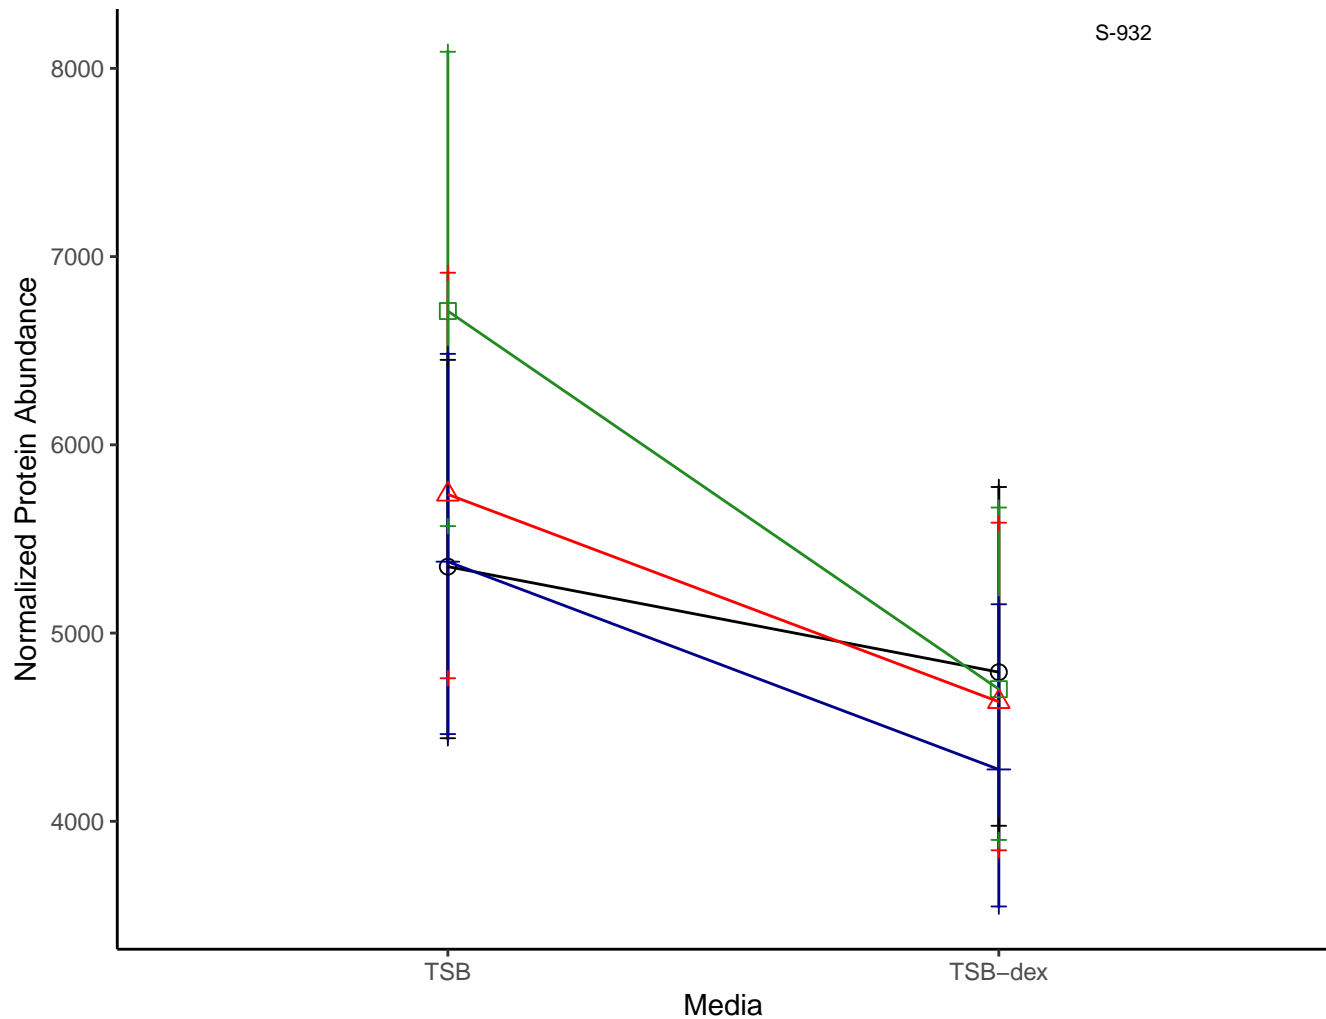

- ⊕ SA564
- △ SA564- $\Delta hptRS$
- ⊞ SA564- $\Delta ccpA$
- + SA564- $\Delta hptRS/ccpA$

## TRMFO\_STAAM

S-933

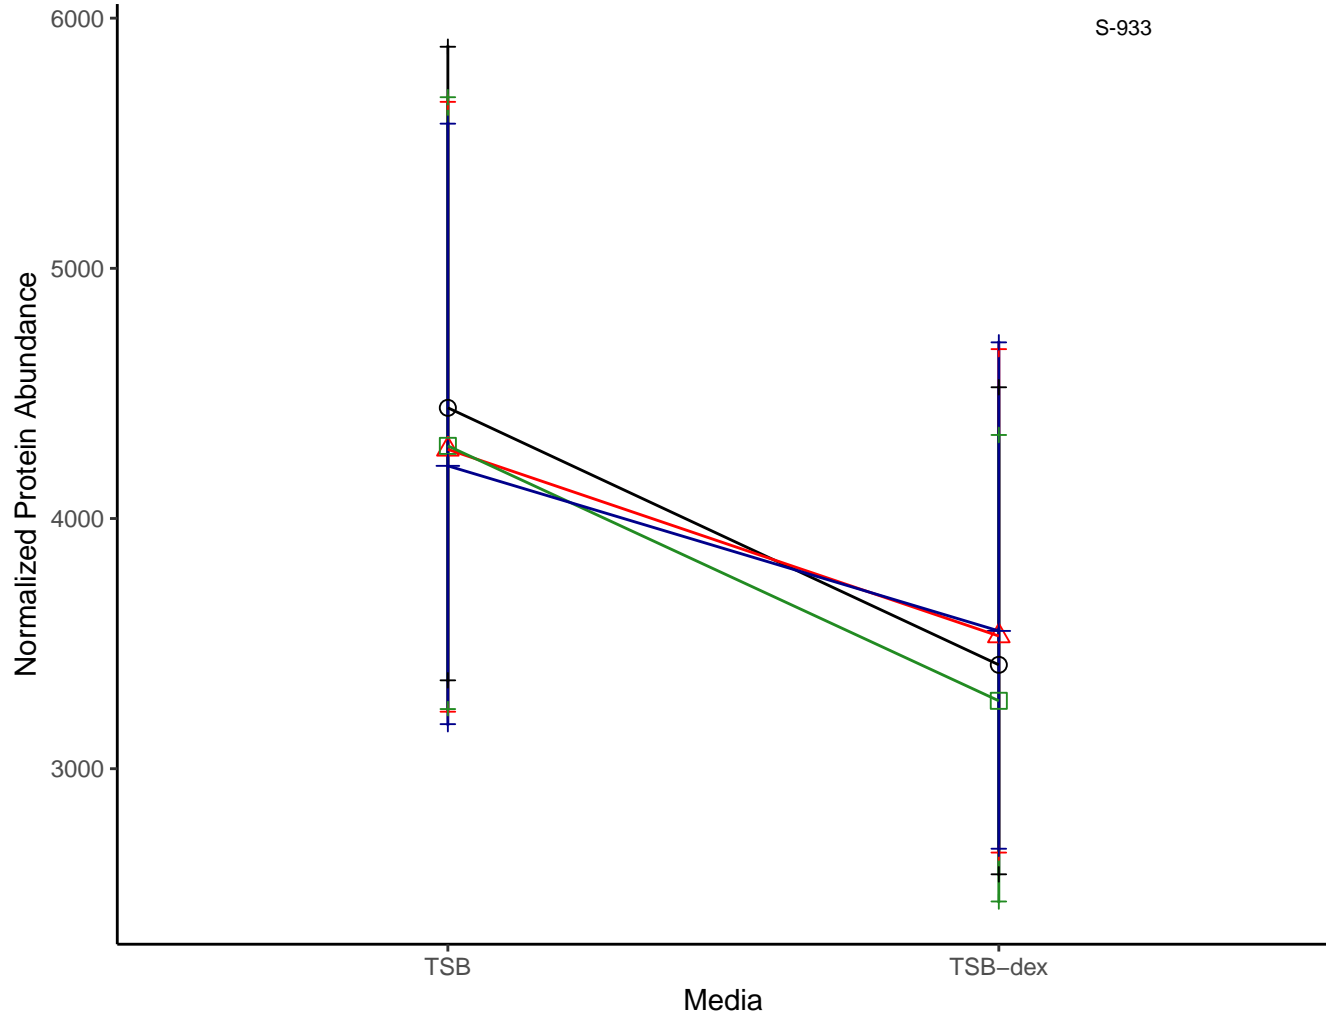

- ⊕ SA564
- △ SA564- $\Delta hptRS$
- ⊞ SA564- $\Delta ccpA$
- + SA564- $\Delta hptRS/ccpA$

# TRMHL\_STAAM

S-934

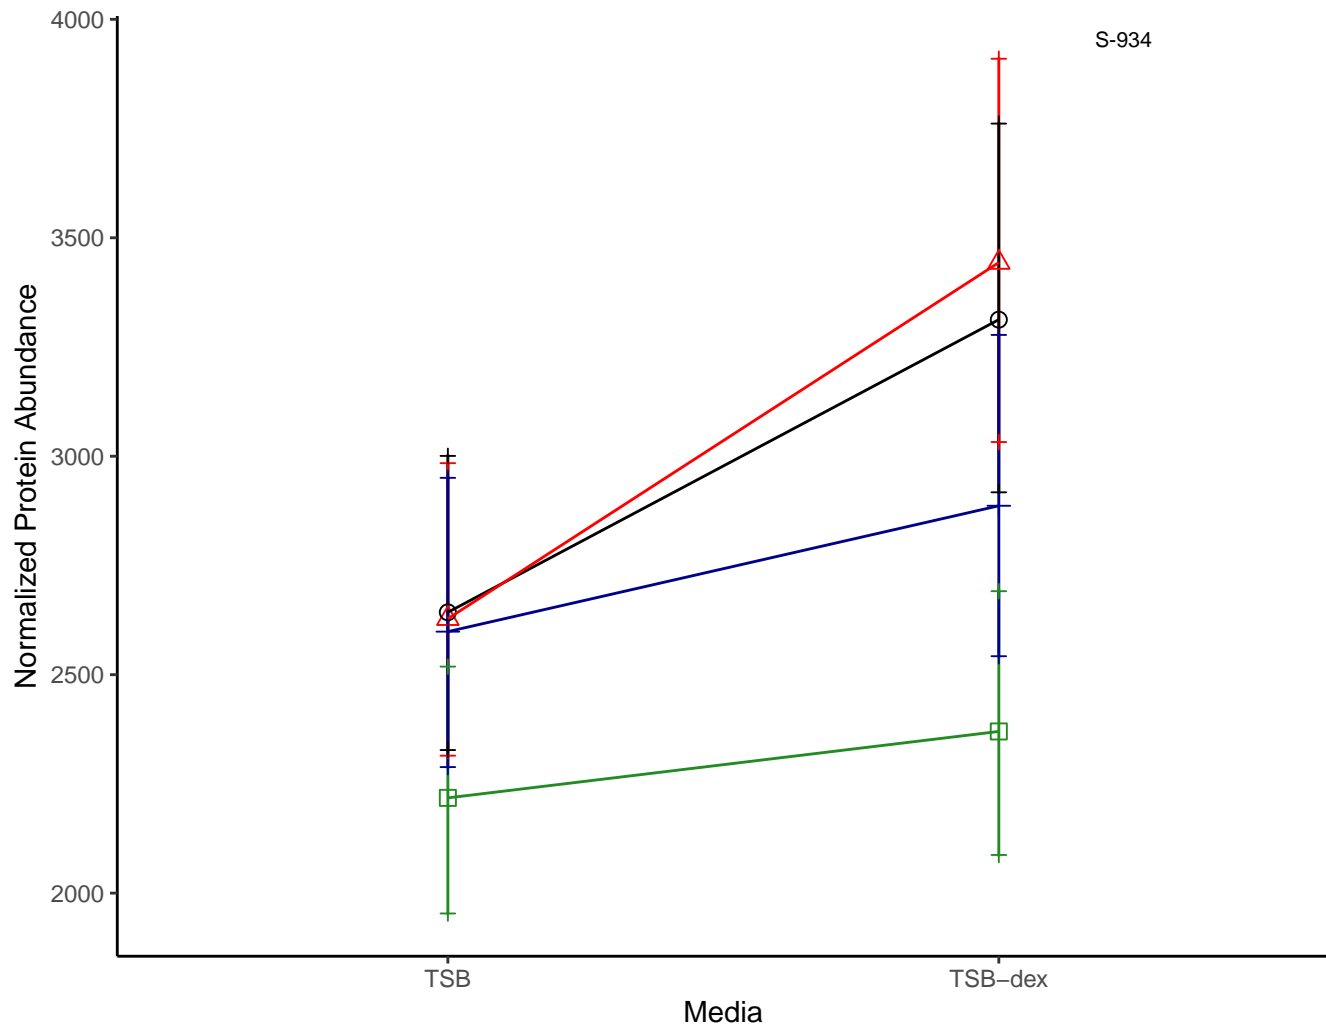

- ⊕ SA564
- △ SA564- $\Delta$ *hptRS*
- ⊞ SA564- $\Delta$ *ccpA*
- + SA564- $\Delta$ *hptRS/ccpA*

# TRPA\_STAAM

S-935

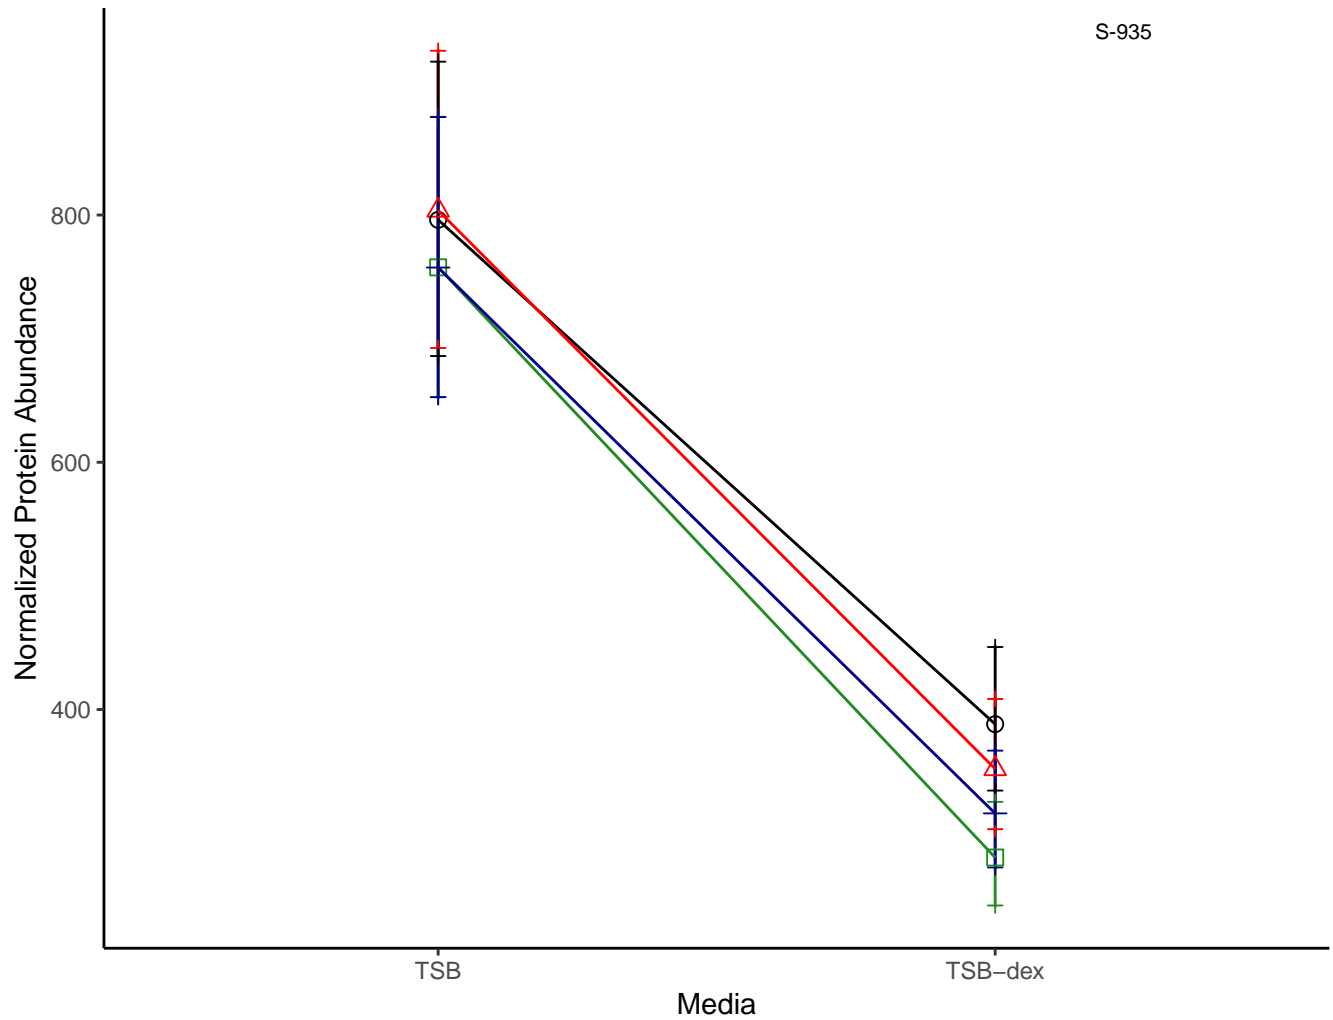

- SA564
- SA564- $\Delta$ *hptRS*
- SA564- $\Delta$ *ccpA*
- SA564- $\Delta$ *hptRS/ccpA*

# TRPF\_STAAM

S-936

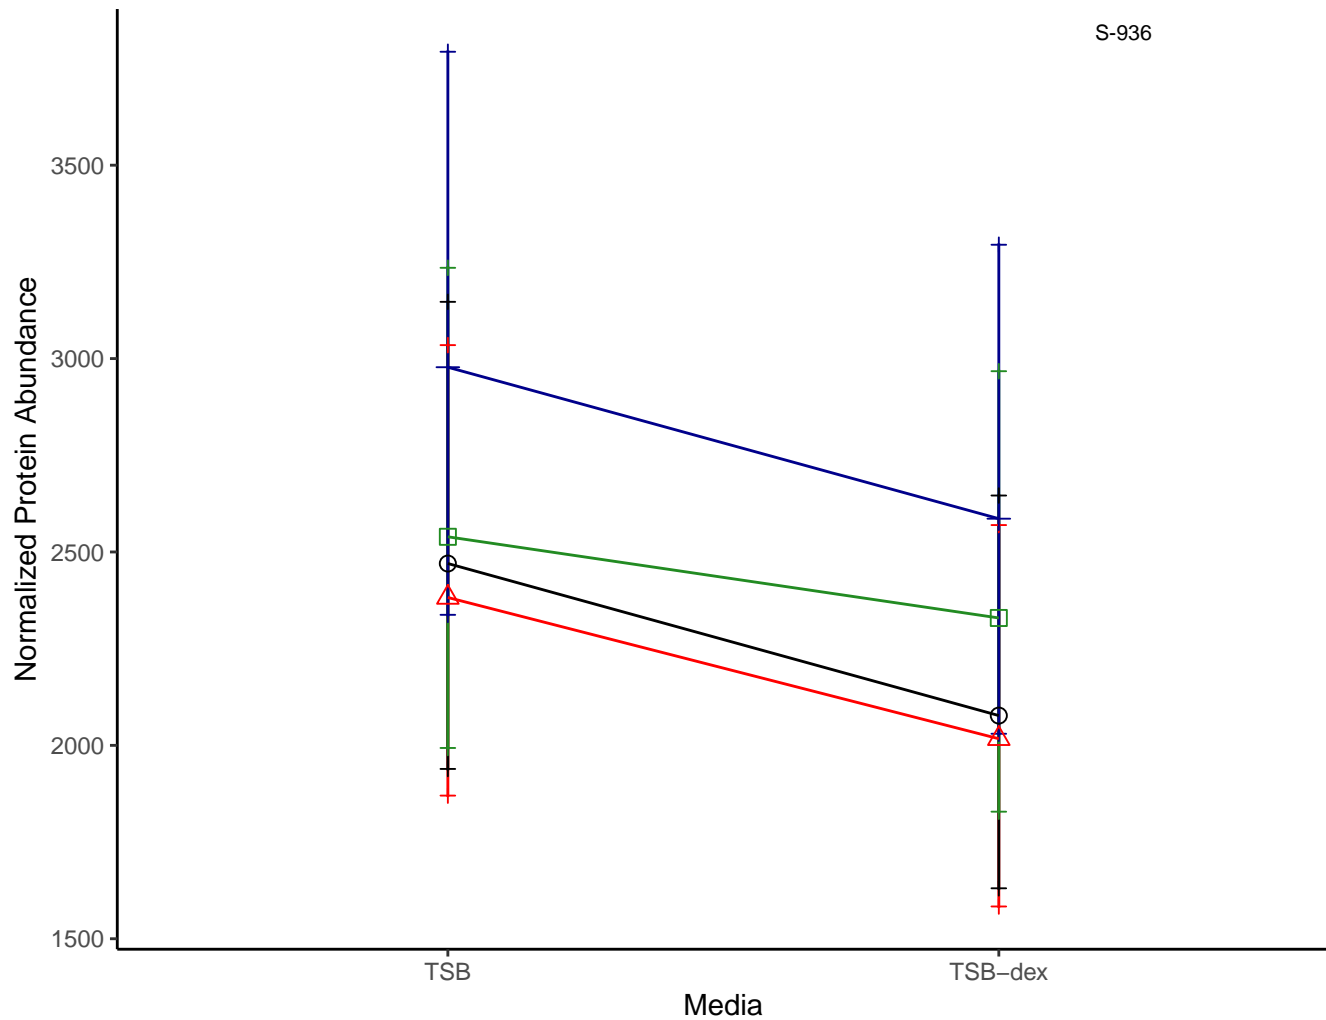

- ⊕ SA564
- △ SA564-ΔhptRS
- ⊞ SA564-ΔccpA
- + SA564-ΔhptRS/ccpA



# TRUB\_STAAM

S-937

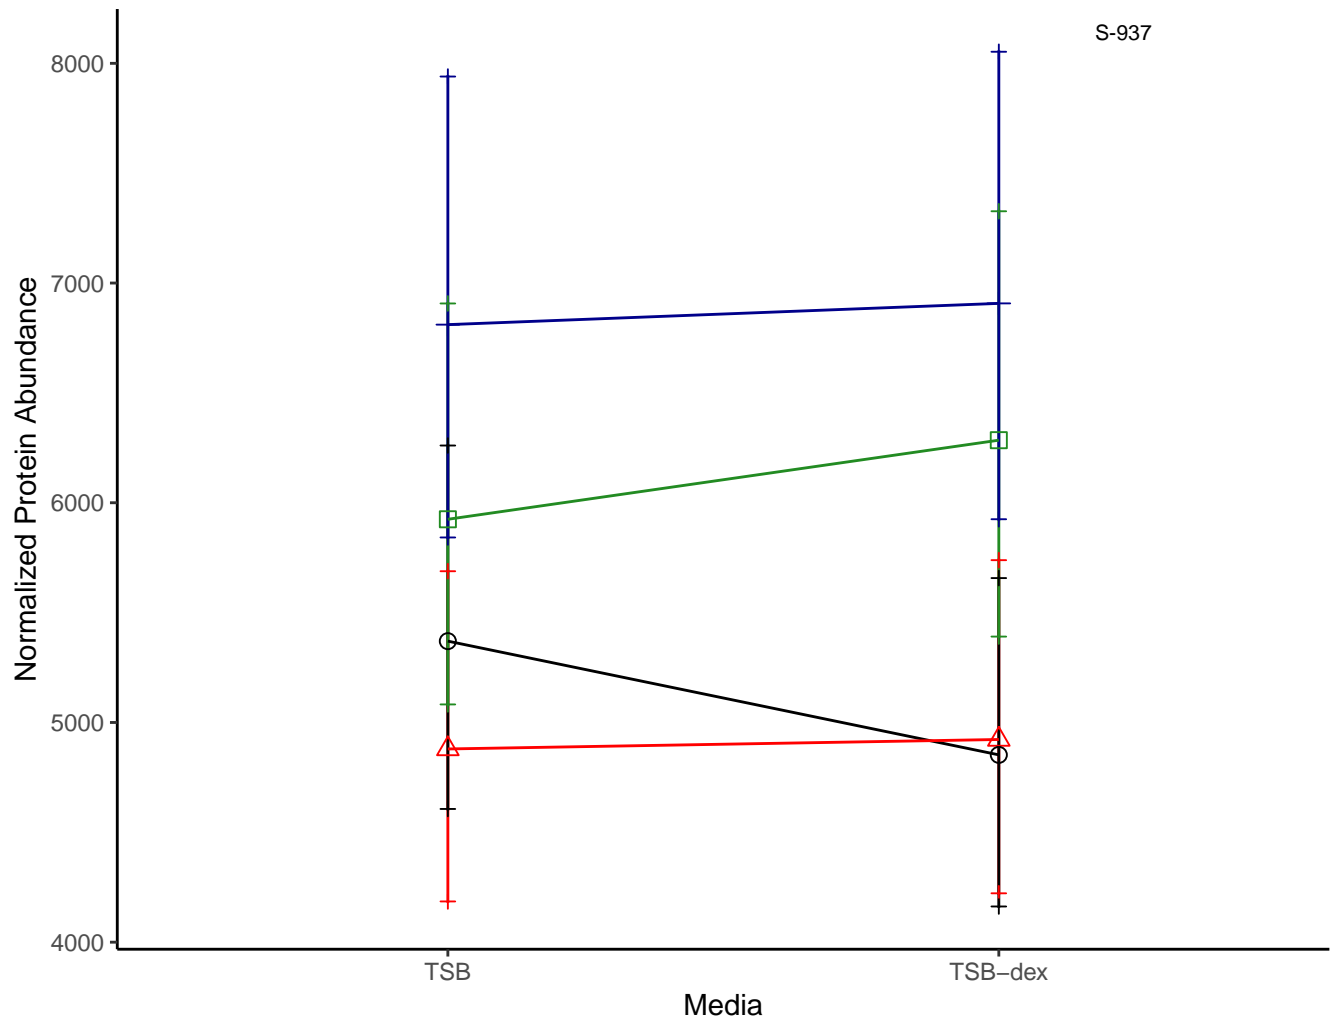

- ⊕ SA564
- △ SA564- $\Delta$ *hptRS*
- ⊞ SA564- $\Delta$ *ccpA*
- + SA564- $\Delta$ *hptRS/ccpA*

# TRXB\_STAAM

S-938

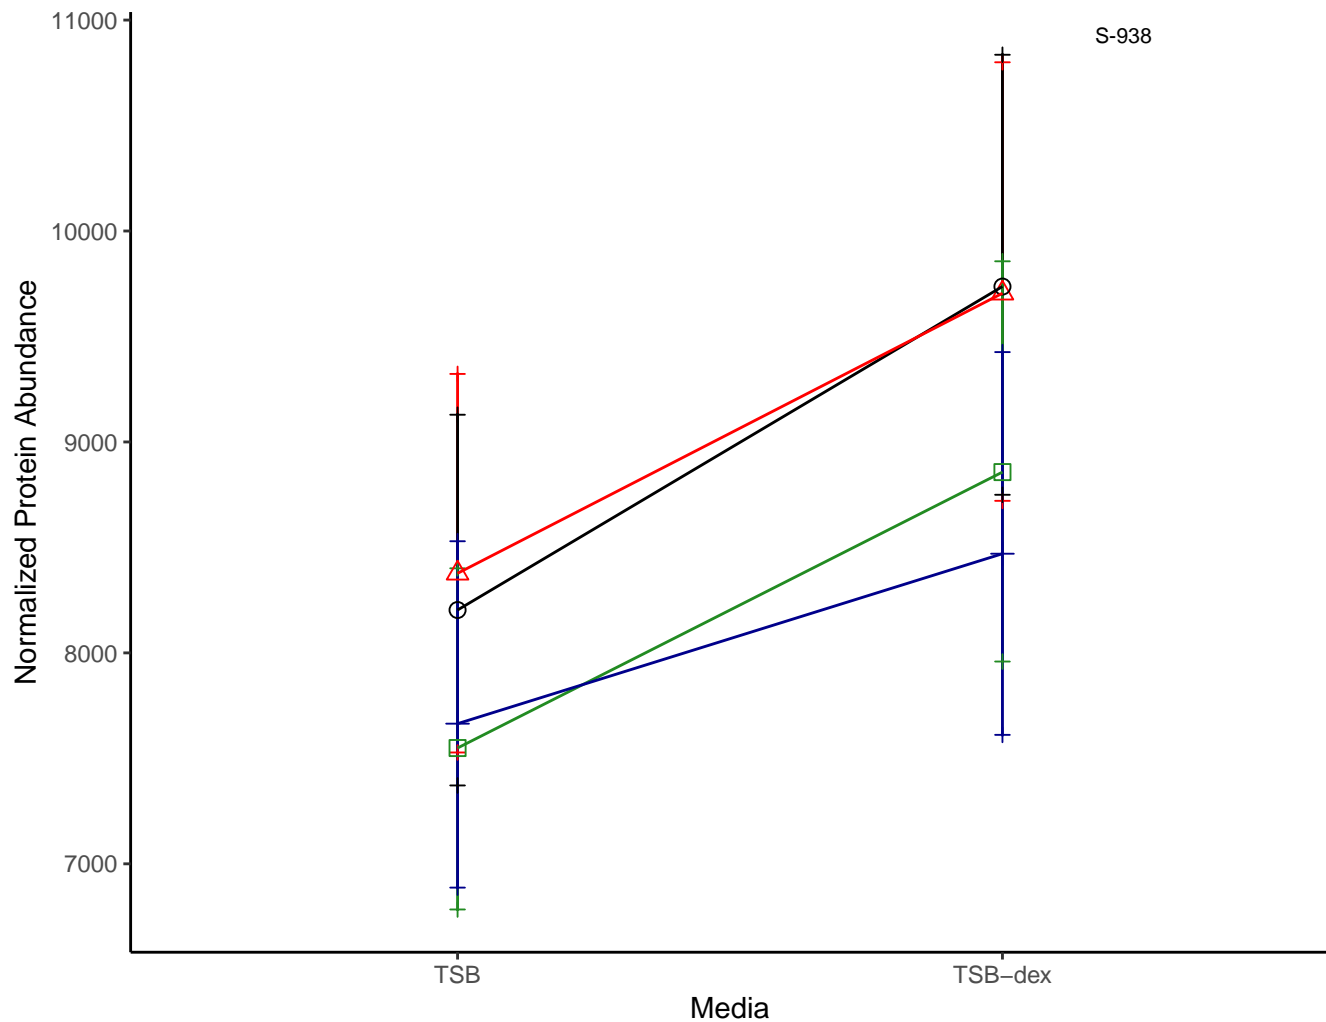

- ⊕ SA564
- △ SA564- $\Delta hptRS$
- ⊞ SA564- $\Delta ccpA$
- + SA564- $\Delta hptRS/ccpA$

# TSAD\_STAAM

S-939

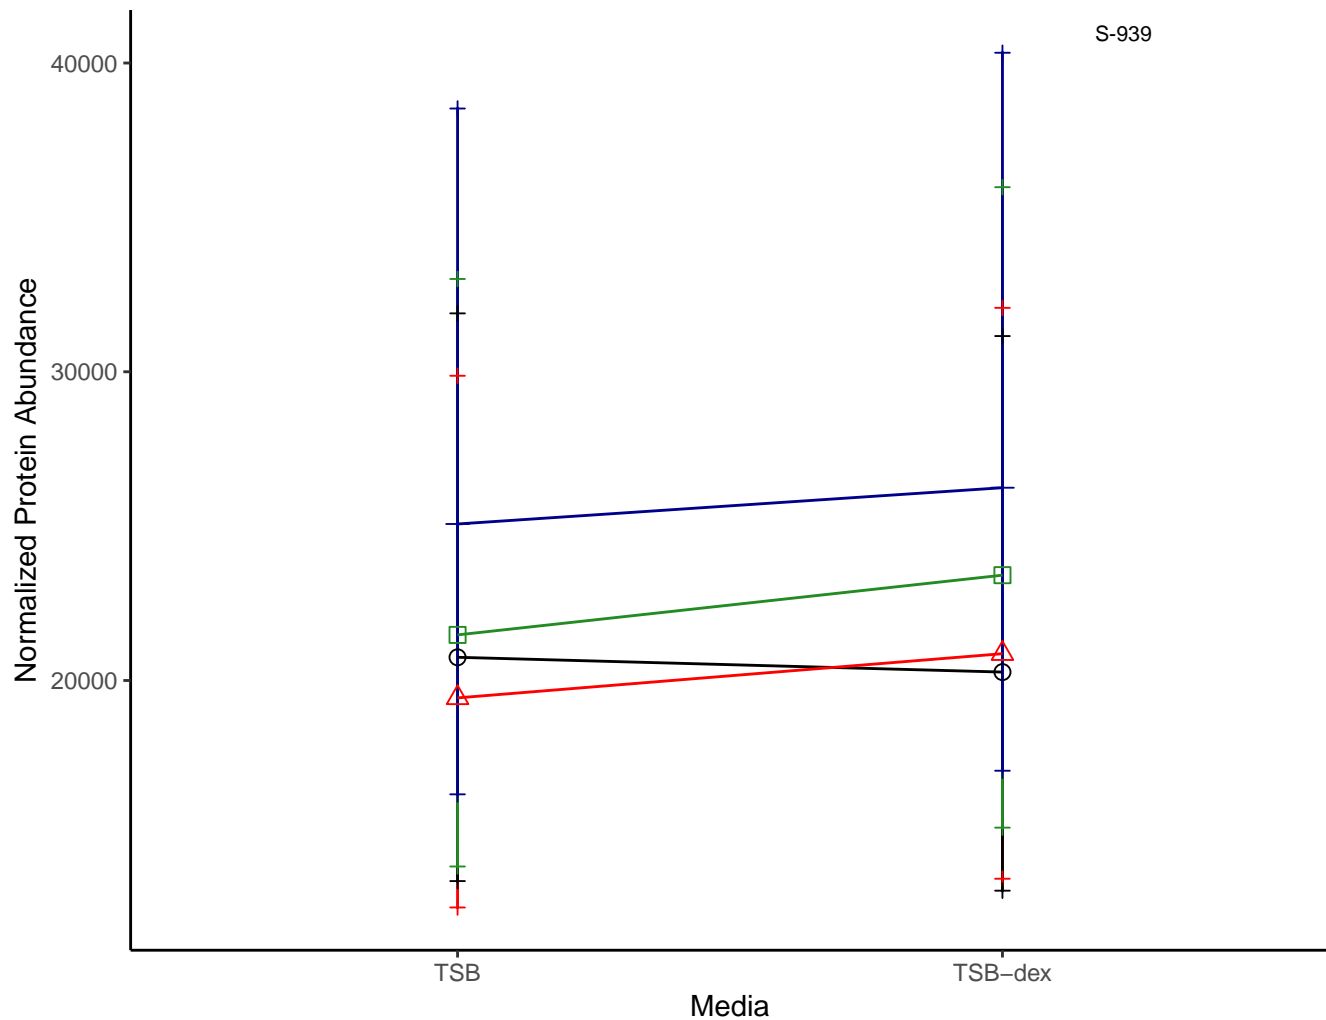

- ⊕ SA564
- △ SA564- $\Delta$ *hptRS*
- ⊞ SA564- $\Delta$ *ccpA*
- + SA564- $\Delta$ *hptRS/ccpA*

# TYRA\_STAAM

S-940

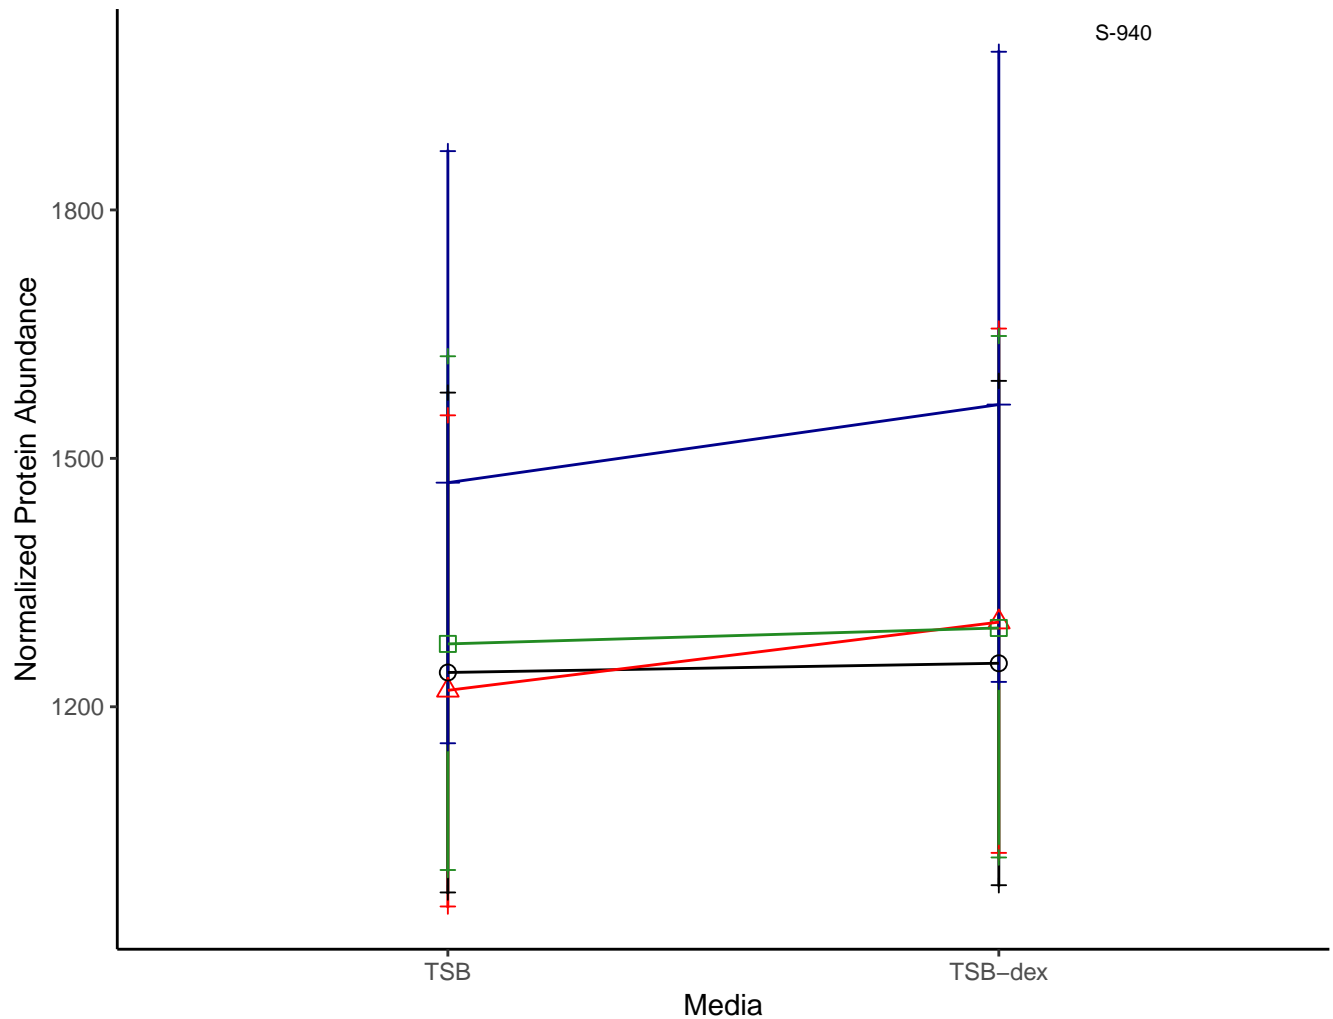

- ⊕ SA564
- △ SA564- $\Delta hptRS$
- ⊠ SA564- $\Delta ccpA$
- + SA564- $\Delta hptRS/ccpA$

# TYSY\_STAAM

S-941

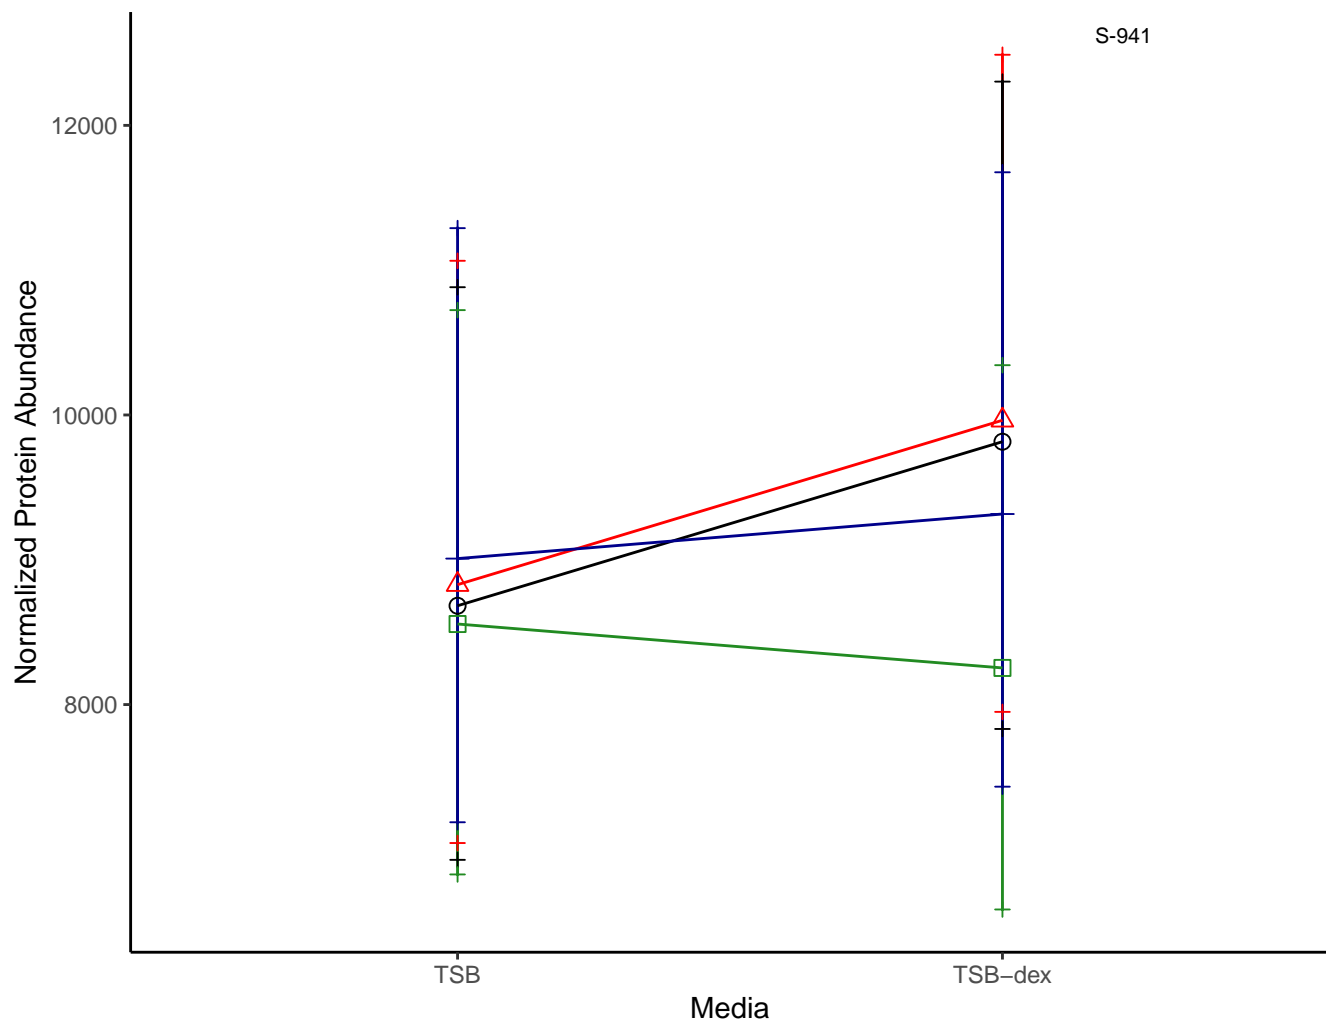

- ⊕ SA564
- △ SA564- $\Delta$ *hptRS*
- ⊞ SA564- $\Delta$ *ccpA*
- + SA564- $\Delta$ *hptRS/ccpA*

# UNG\_STAAM

S-942

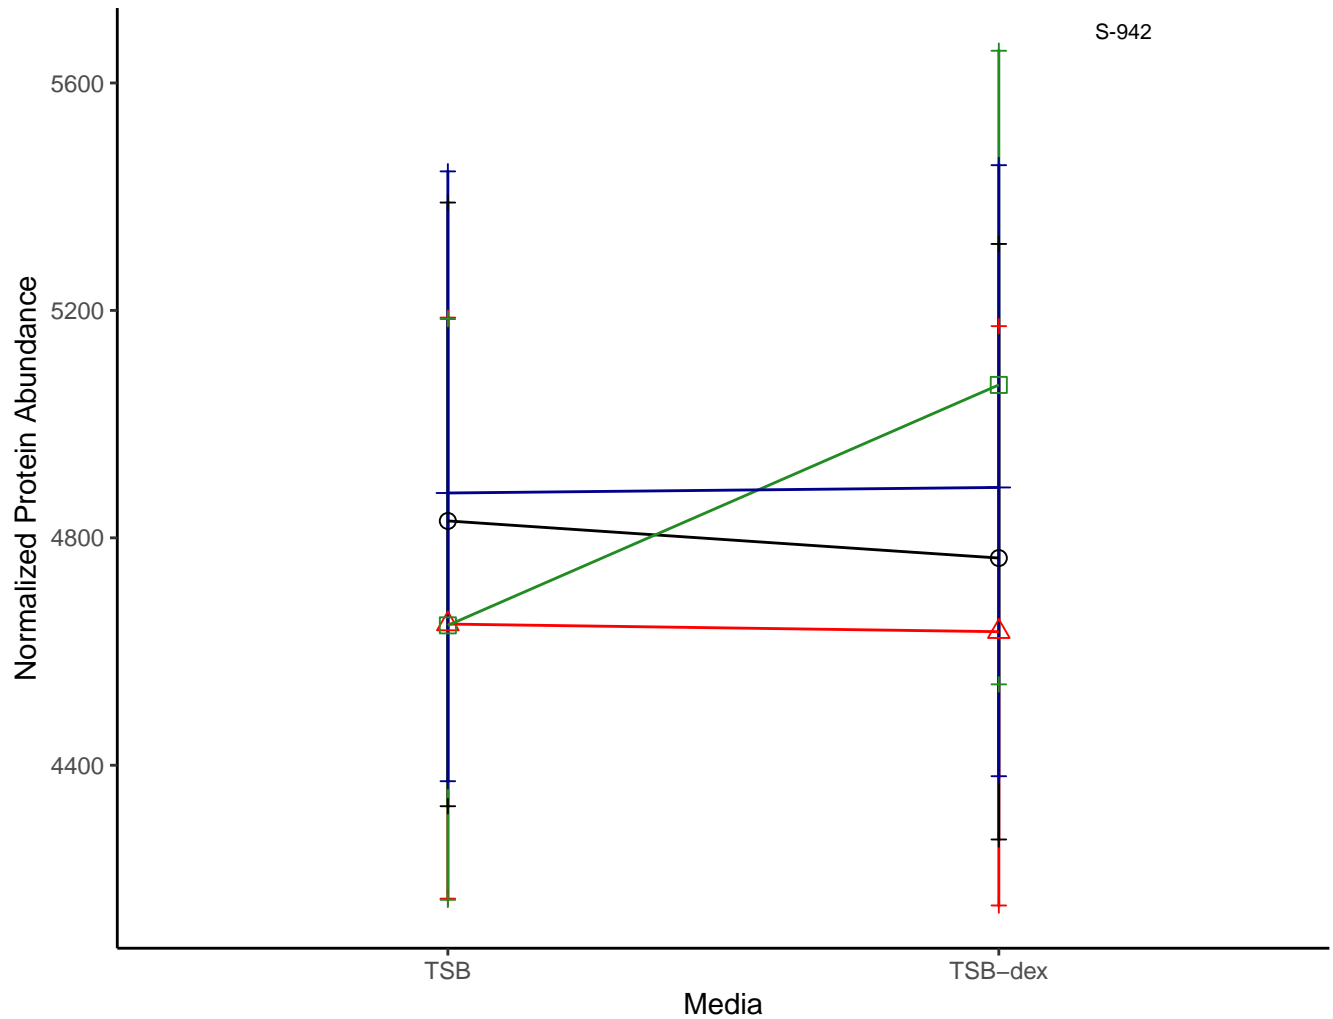

- ⊕ SA564
- △ SA564- $\Delta hptRS$
- ⊠ SA564- $\Delta ccpA$
- + SA564- $\Delta hptRS/ccpA$

# UP355\_STAAM

S-943

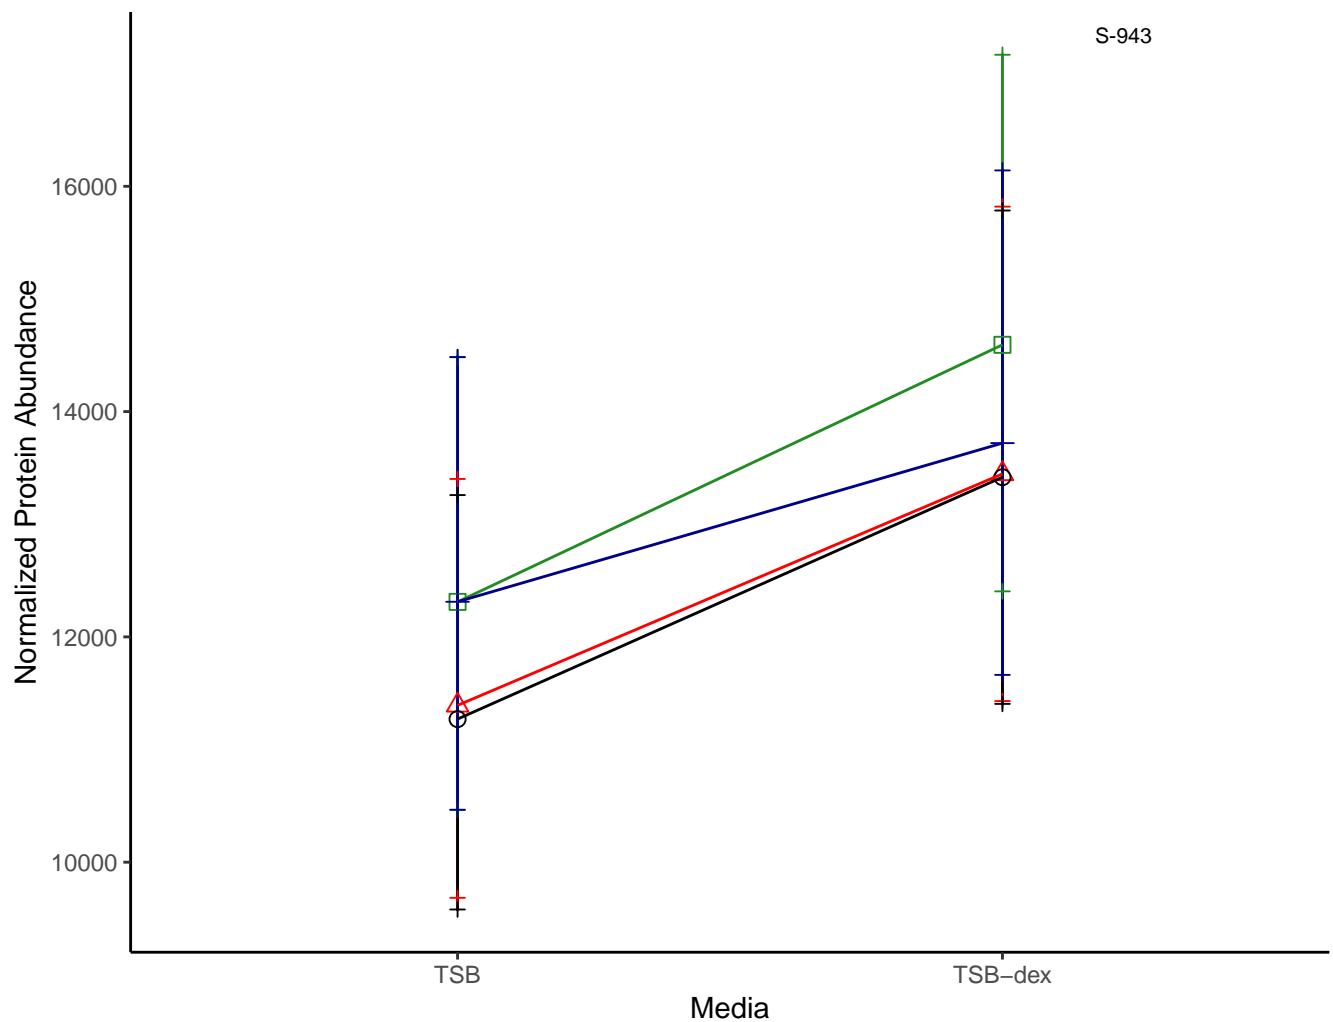

- ⊕ SA564
- △ SA564- $\Delta$ *hptRS*
- ⊞ SA564- $\Delta$ *ccpA*
- + SA564- $\Delta$ *hptRS/ccpA*

# UPP\_STAAM

S-944

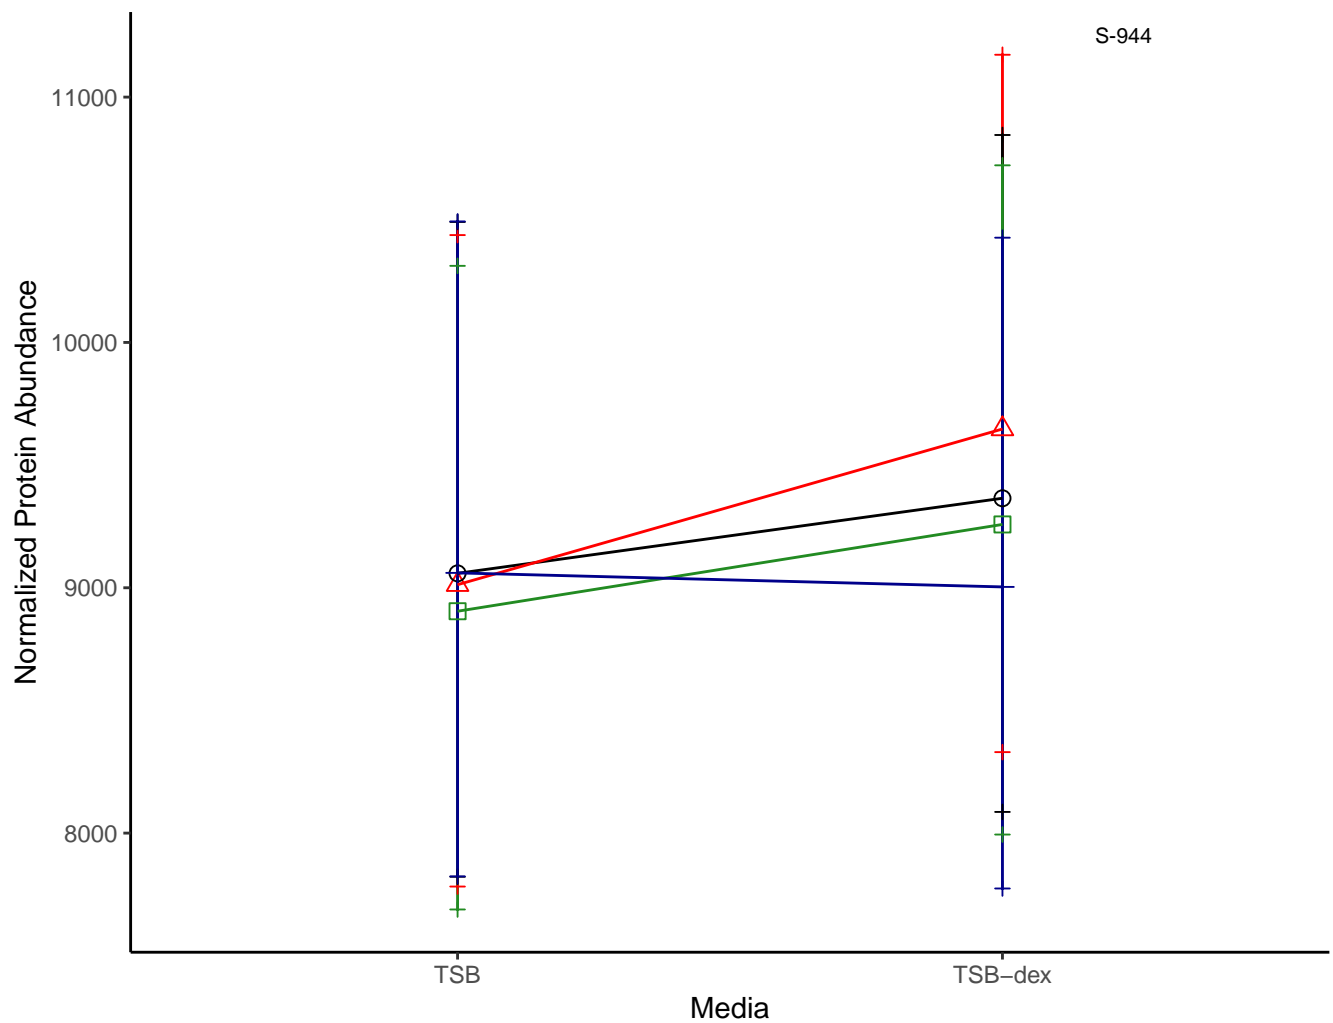

- ⊕ SA564
- △ SA564- $\Delta$ *hptRS*
- ⊞ SA564- $\Delta$ *ccpA*
- + SA564- $\Delta$ *hptRS/ccpA*



# UREE\_STAAM

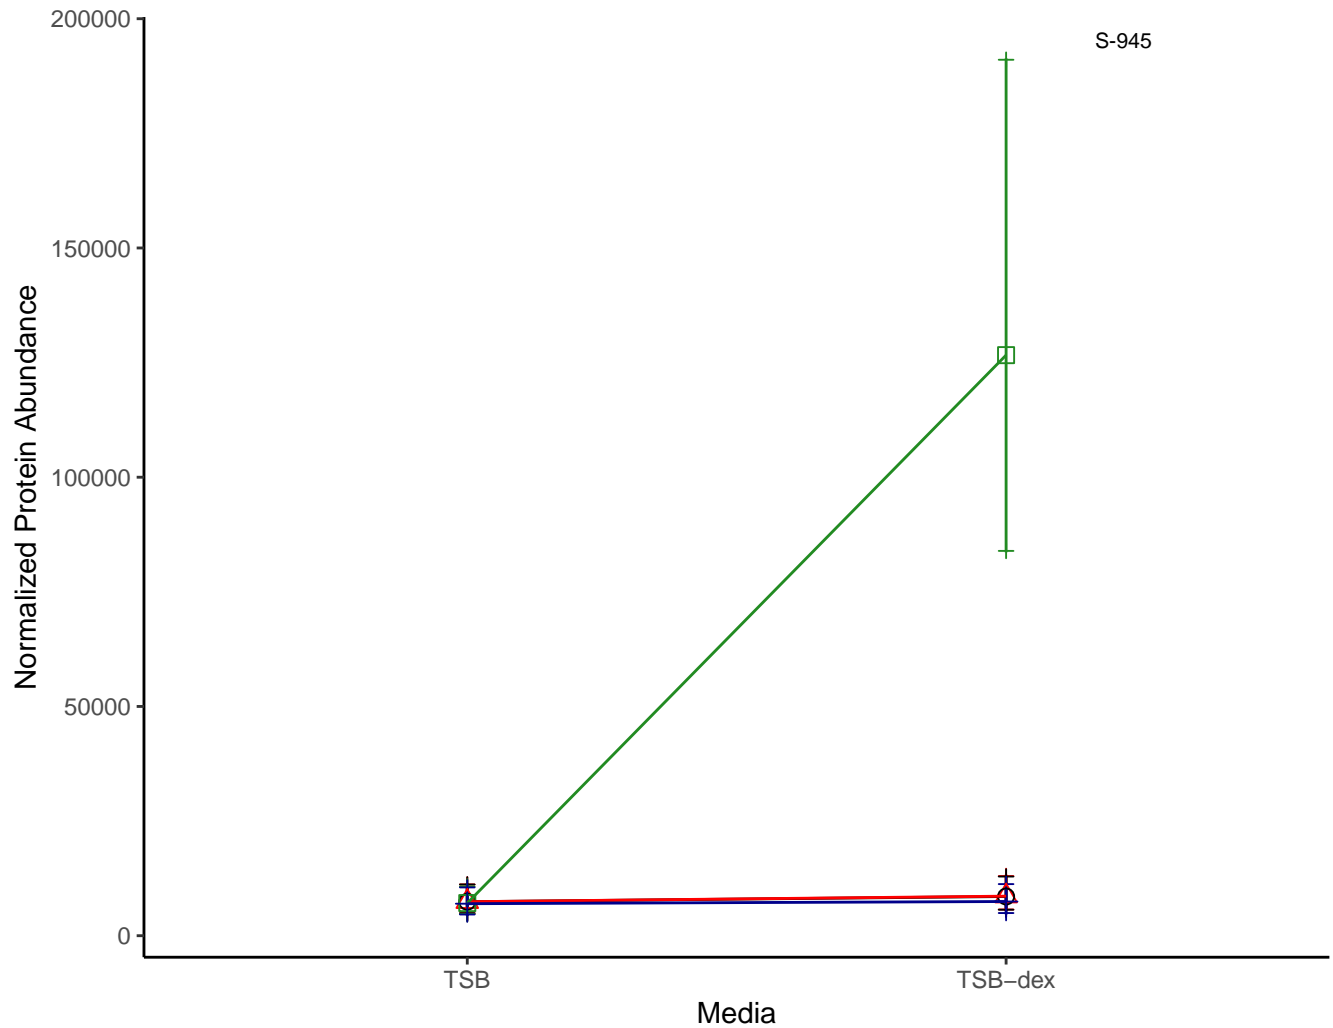

- ⊕ SA564
- △ SA564- $\Delta hptRS$
- ⊞ SA564- $\Delta ccpA$
- + SA564- $\Delta hptRS/ccpA$

# UREG\_STAAM

S-946

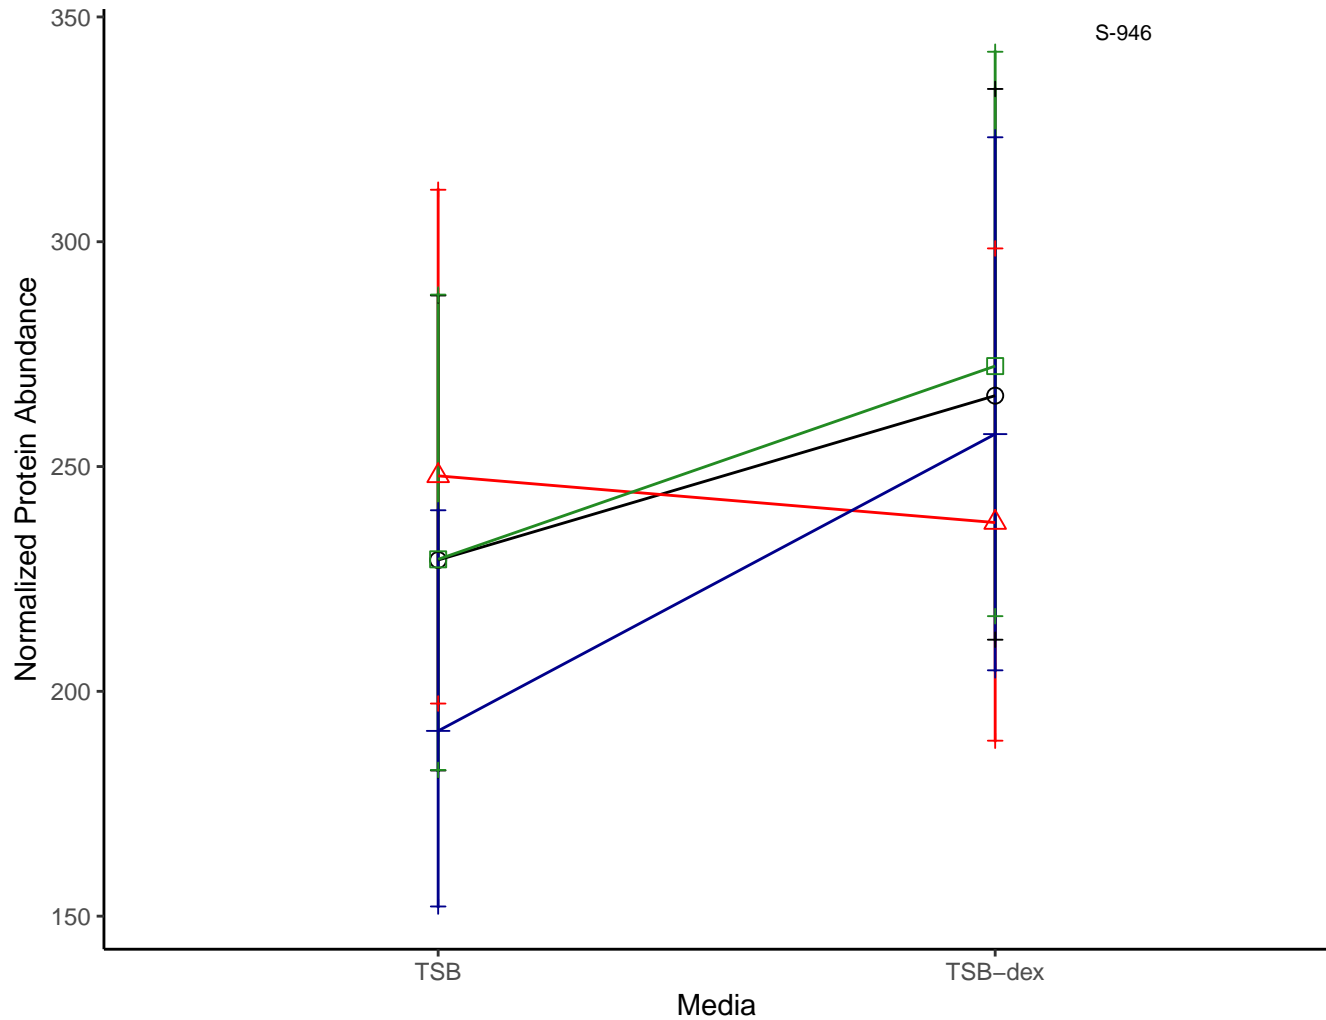

- SA564
- SA564- $\Delta$ *hptRS*
- SA564- $\Delta$ *ccpA*
- SA564- $\Delta$ *hptRS/ccpA*

# URK\_STAAM

S-947

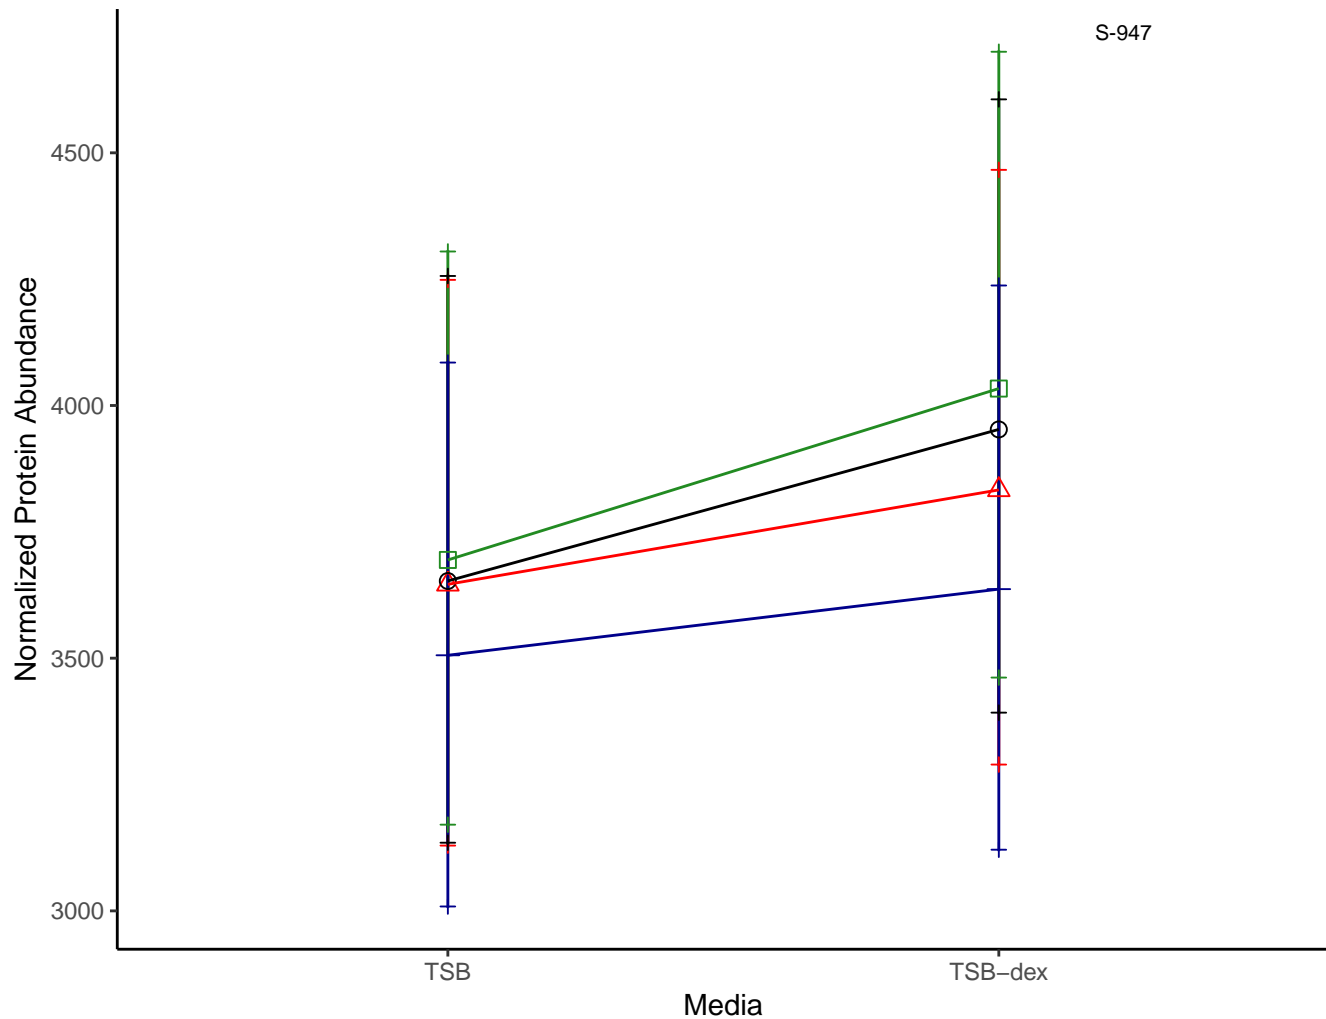

- ⊕ SA564
- △ SA564-ΔhptRS
- ⊠ SA564-ΔccpA
- + SA564-ΔhptRS/ccpA

# URTF\_STAAM

S-948

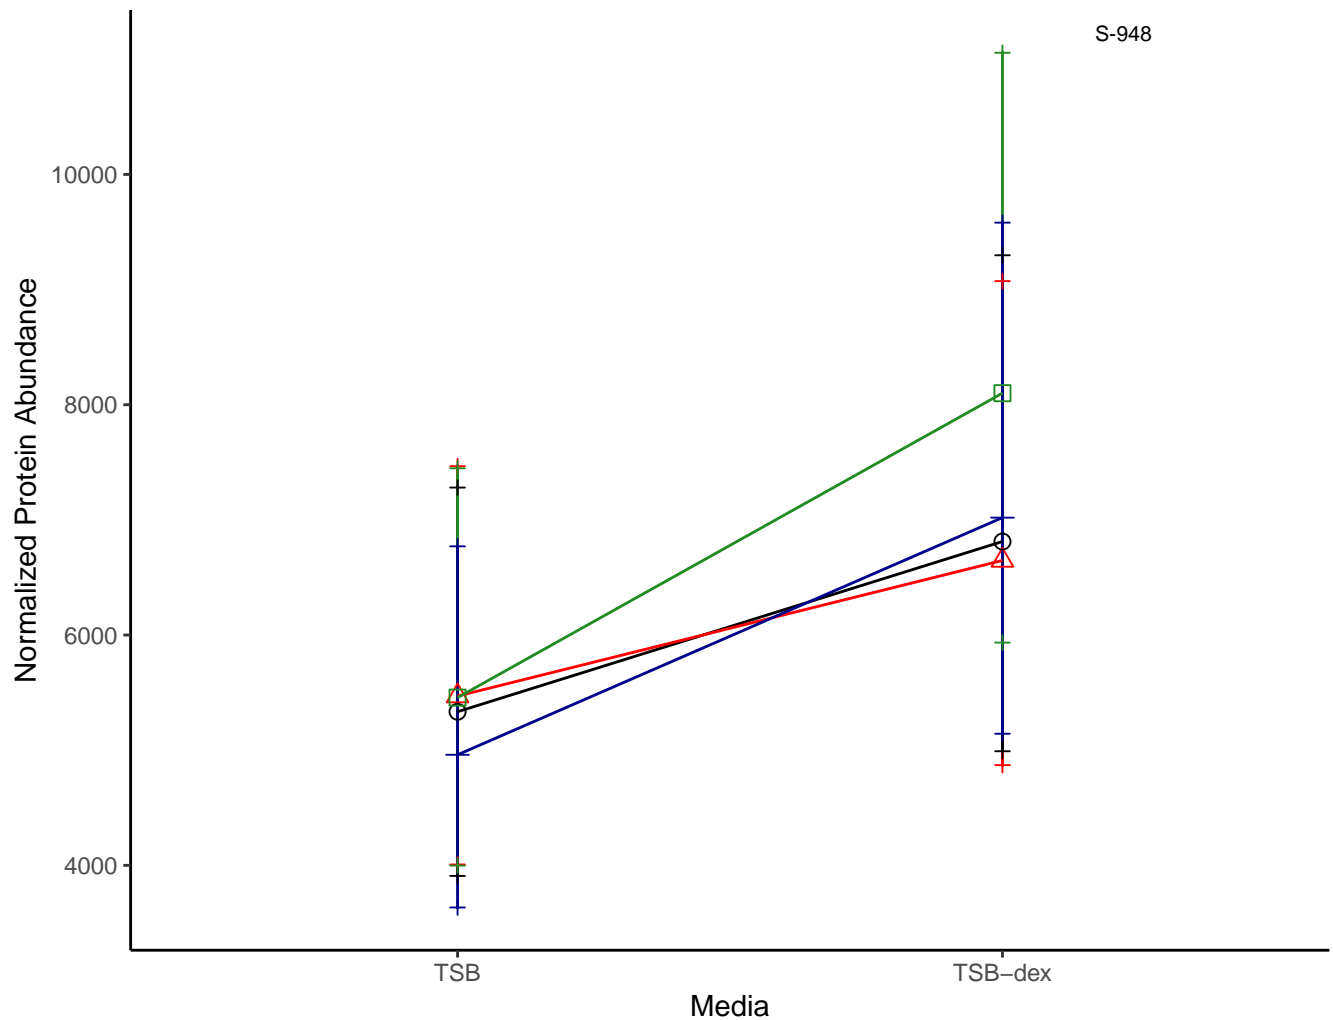

- ⊕ SA564
- △ SA564- $\Delta$ *hptRS*
- ⊞ SA564- $\Delta$ *ccpA*
- + SA564- $\Delta$ *hptRS/ccpA*

# UVRA\_STAAM

S-949

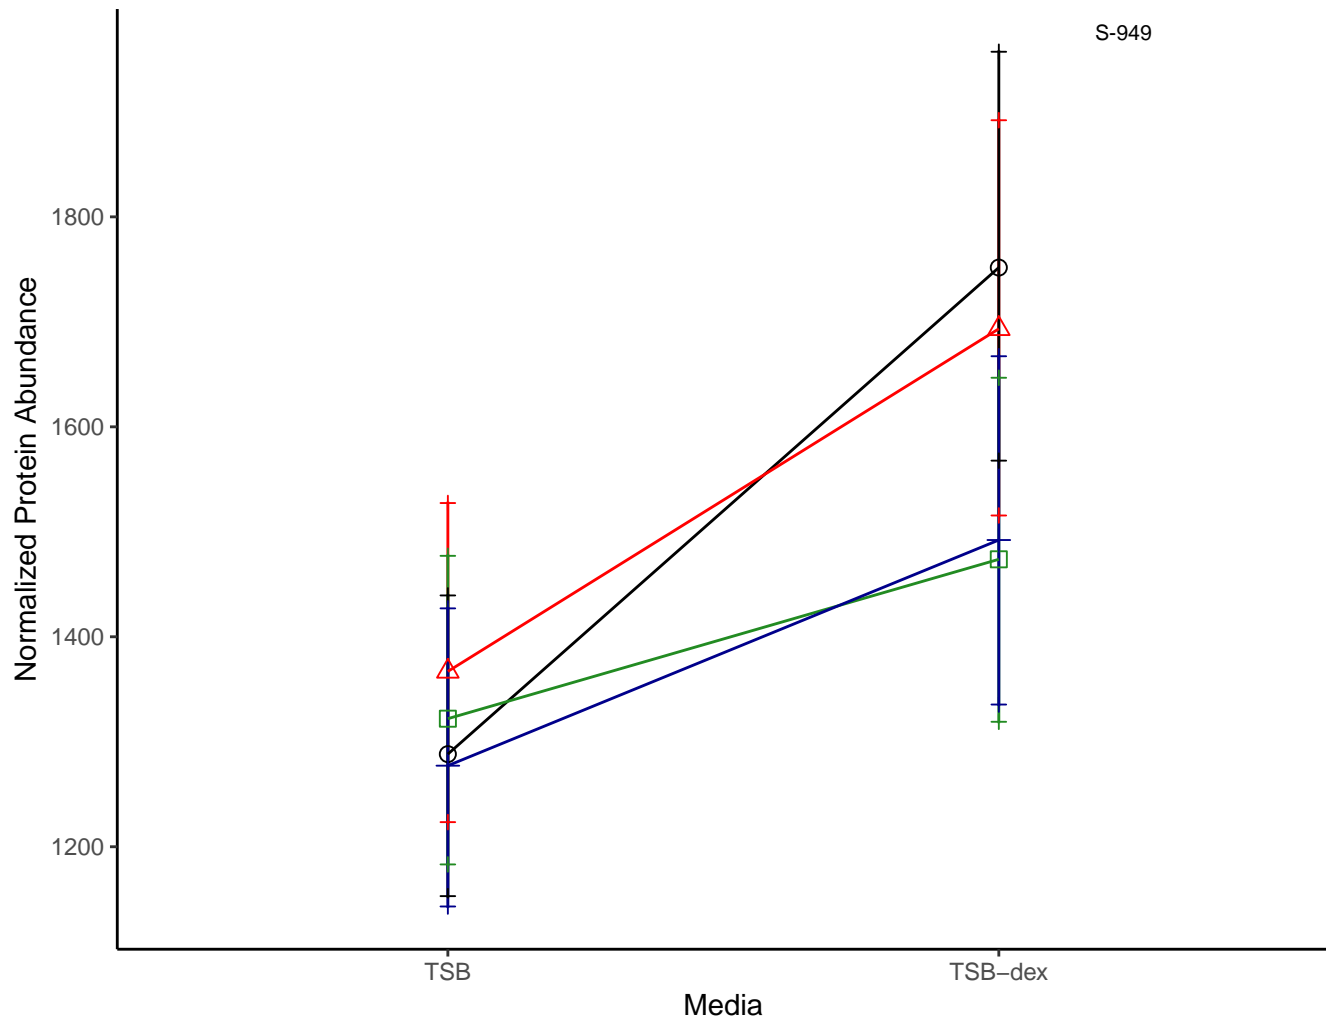

- ⊕ SA564
- △ SA564- $\Delta$ *hptRS*
- ⊞ SA564- $\Delta$ *ccpA*
- + SA564- $\Delta$ *hptRS/ccpA*

# VRAC\_STAAM

S-950

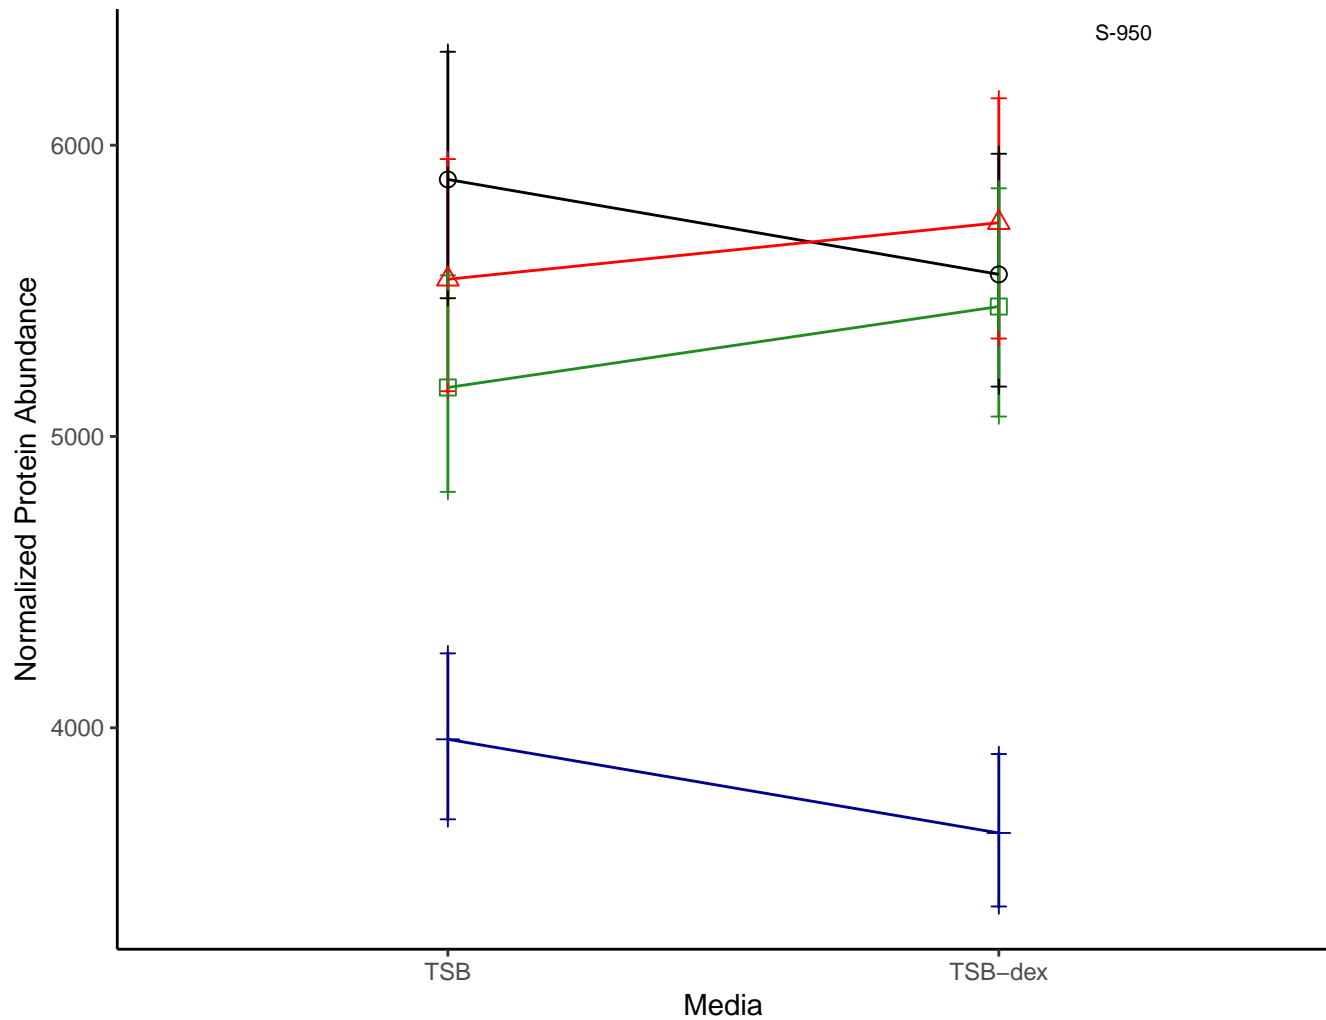

- ⊕ SA564
- △ SA564-ΔhptRS
- ⊞ SA564-ΔccpA
- ⊕ SA564-ΔhptRS/ccpA

# VRAR\_STAAM

S-951

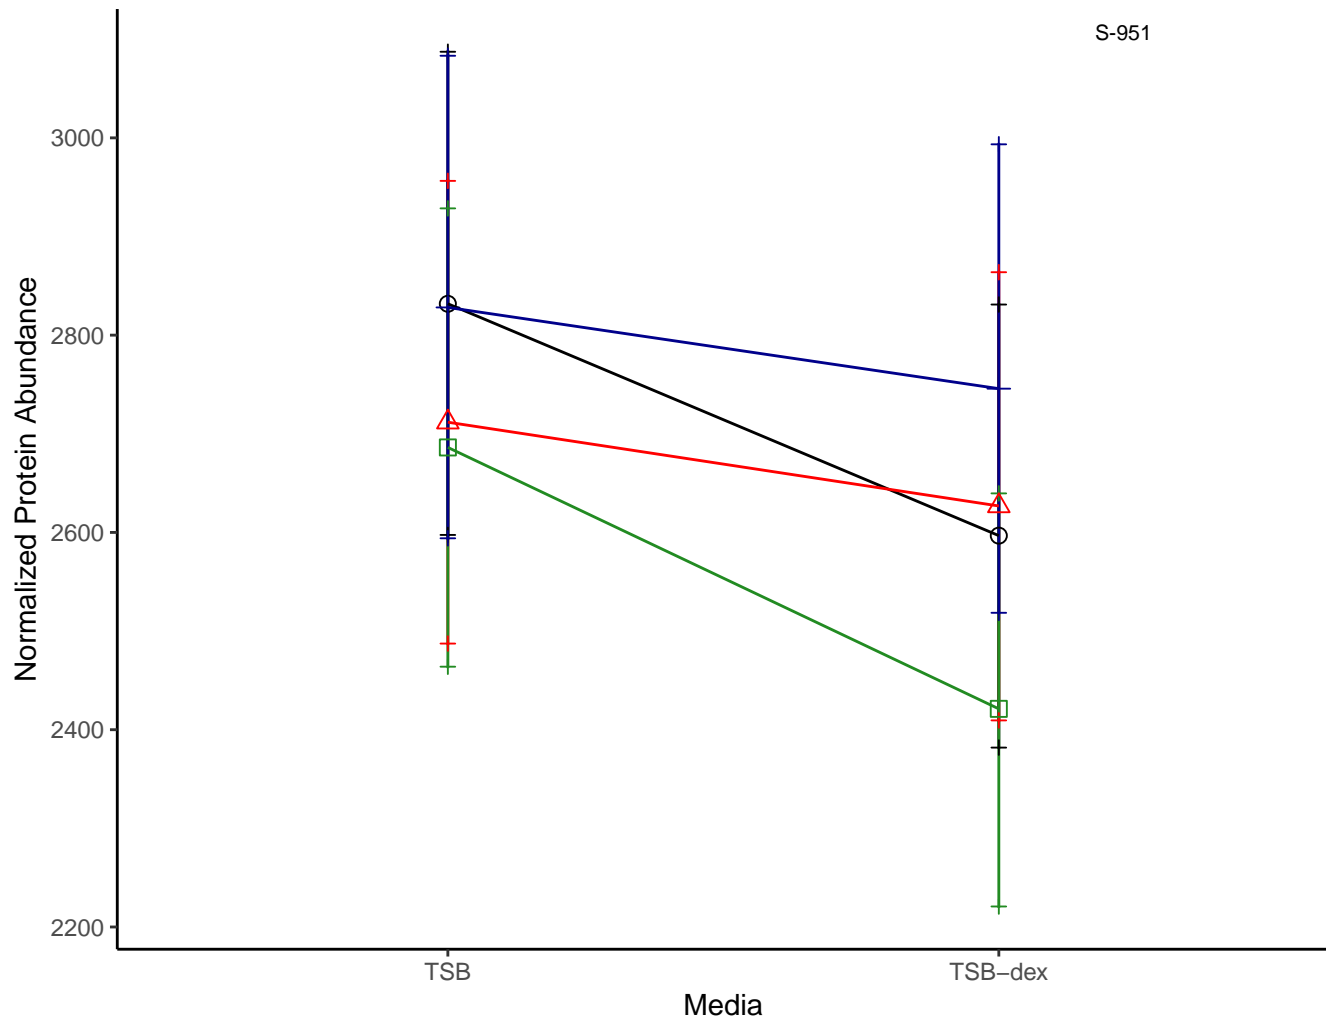

- ⊕ SA564
- △ SA564- $\Delta$ *hptRS*
- ⊞ SA564- $\Delta$ *ccpA*
- + SA564- $\Delta$ *hptRS/ccpA*

# WALK\_STAAM

S-952

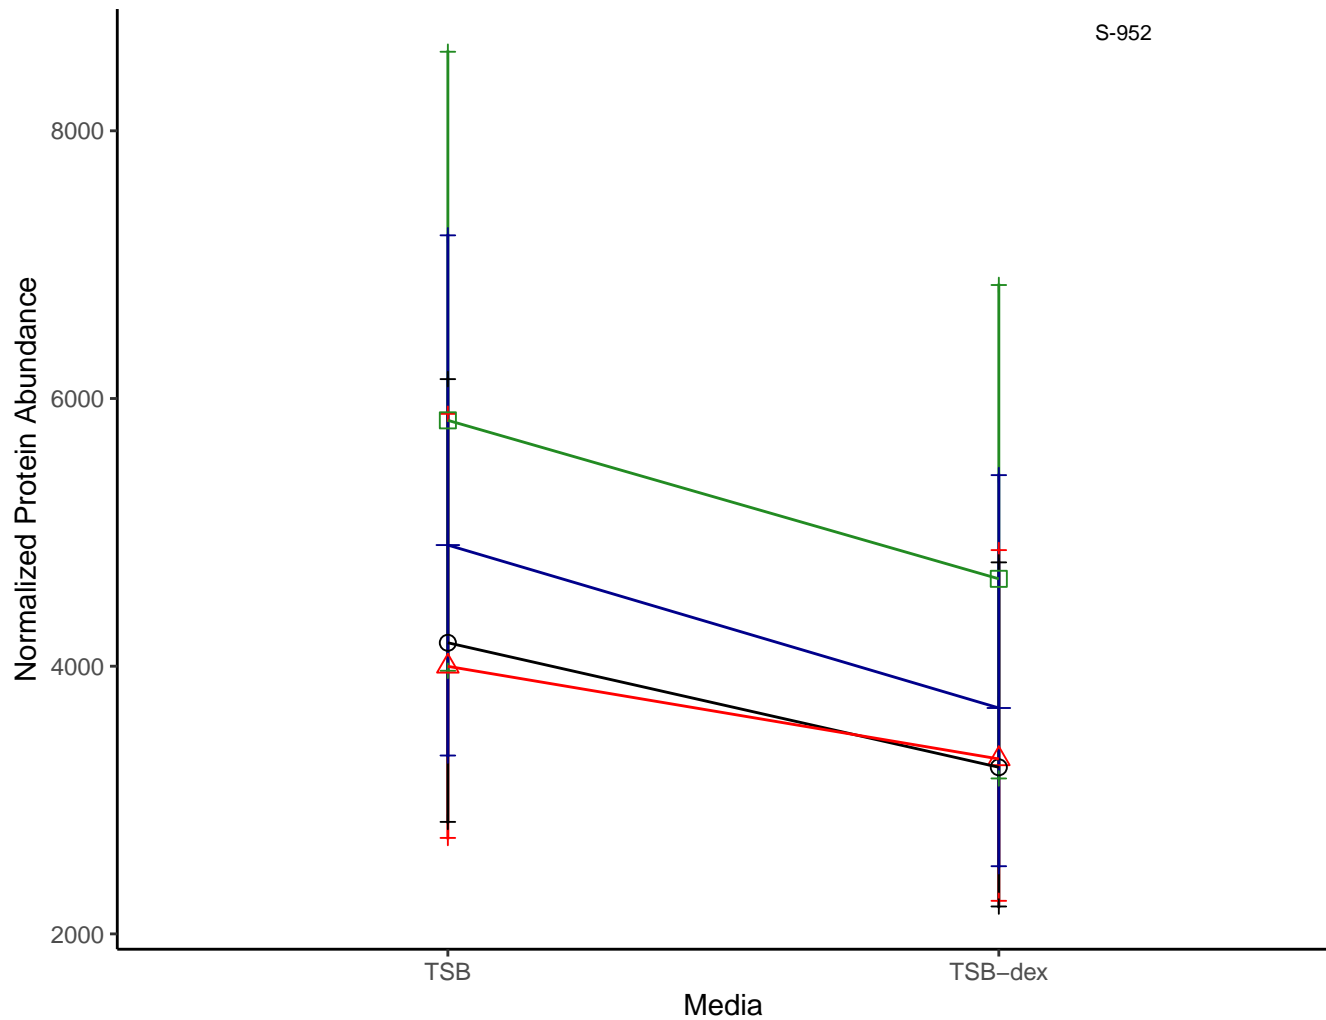

- ⊕ SA564
- △ SA564-ΔhptRS
- ⊞ SA564-ΔccpA
- + SA564-ΔhptRS/ccpA



# WALR\_STAAM

S-953

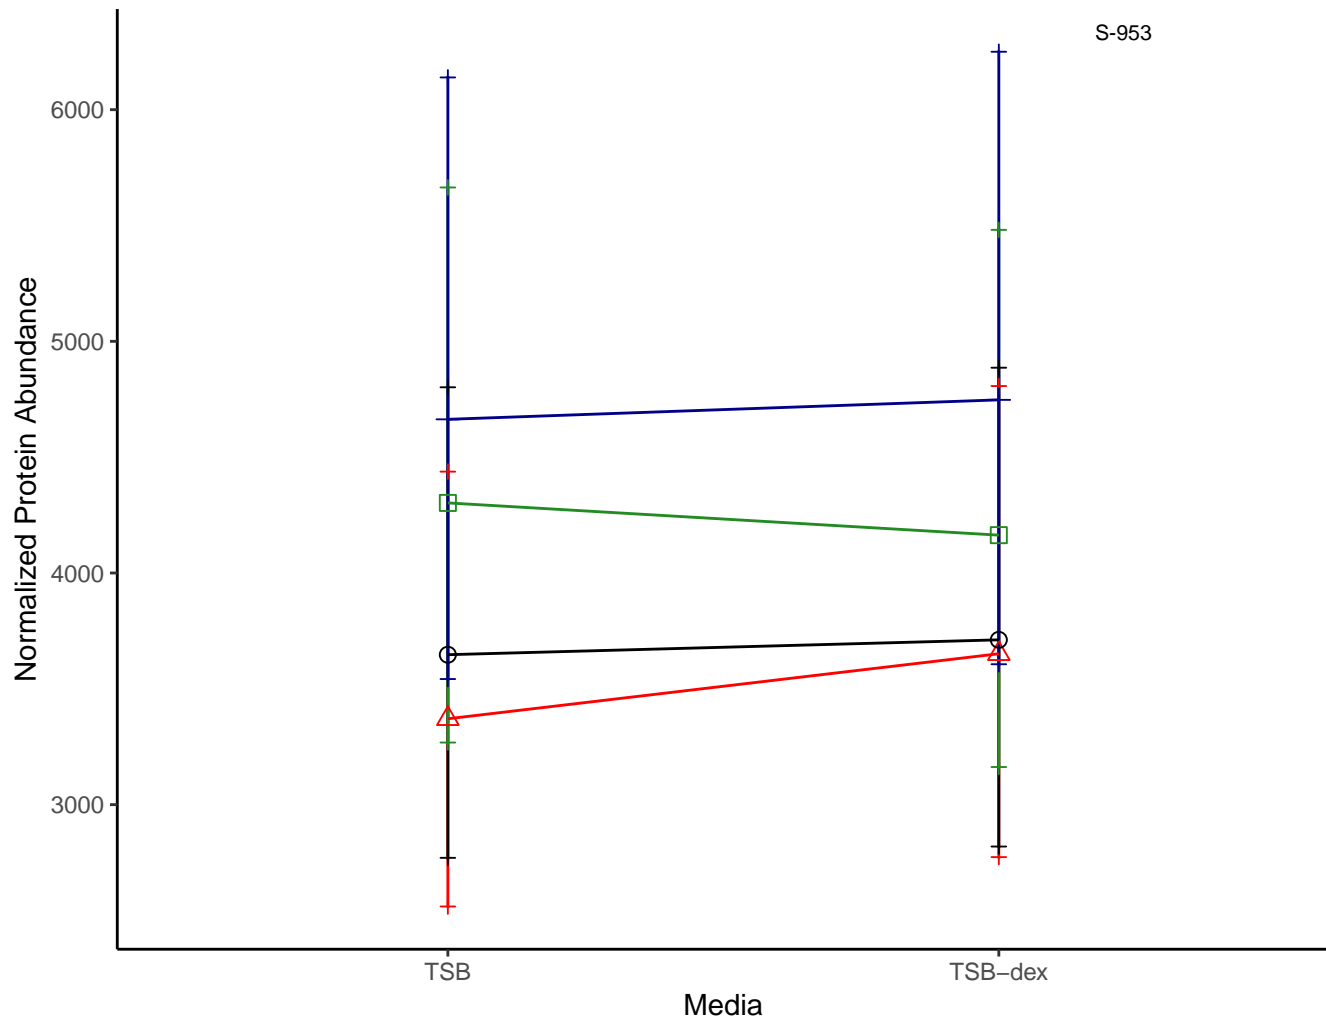

- ⊕ SA564
- △ SA564- $\Delta$ *hptRS*
- ⊞ SA564- $\Delta$ *ccpA*
- + SA564- $\Delta$ *hptRS/ccpA*

# XERD\_STAAM

S-954

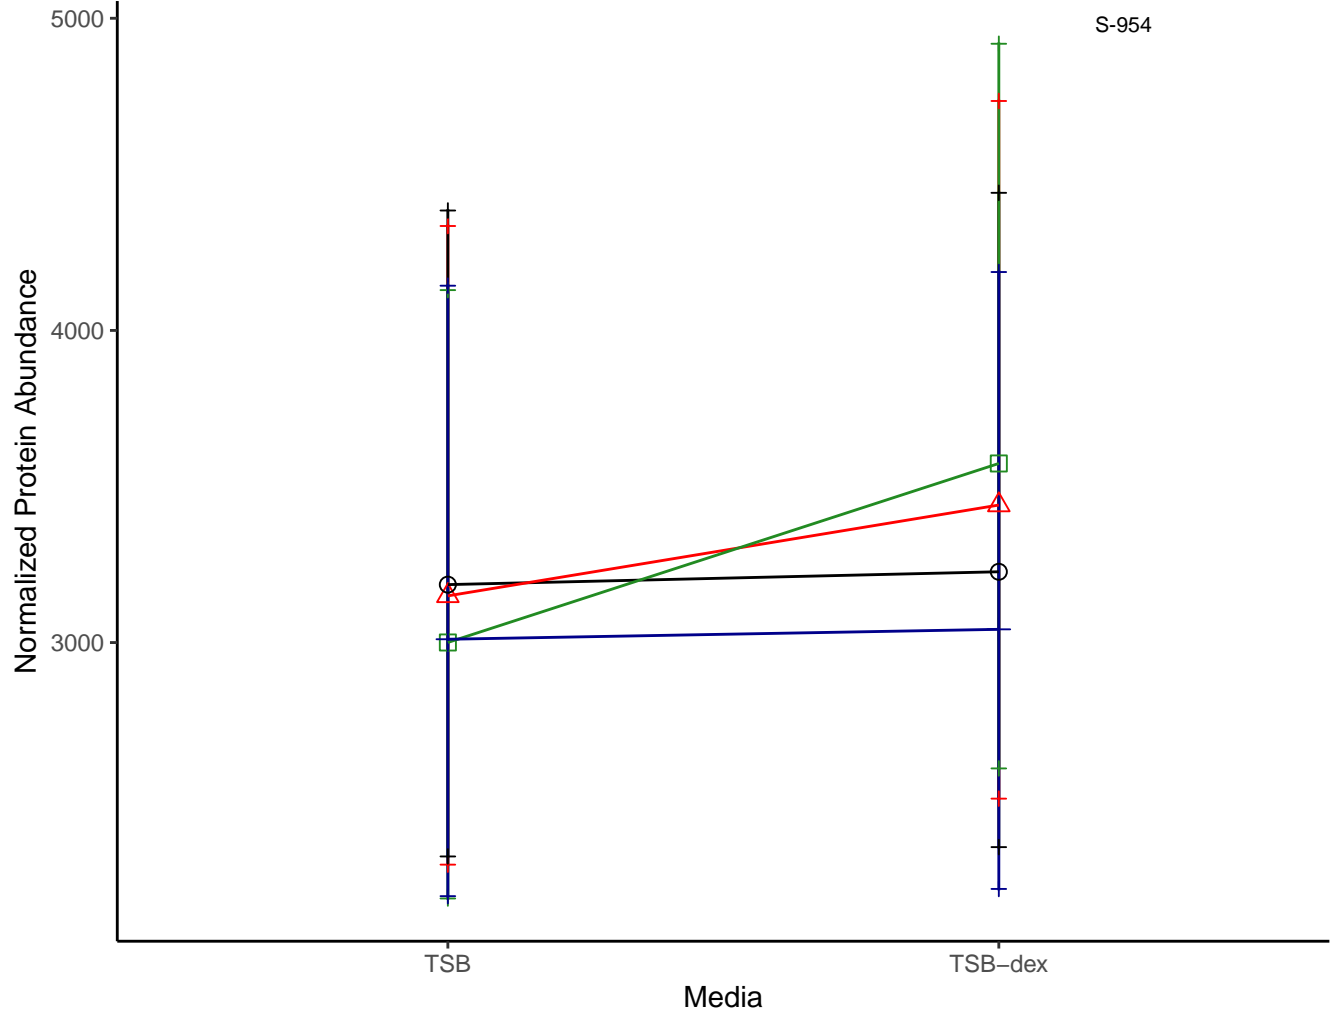

- ⊕ SA564
- △ SA564- $\Delta hptRS$
- ⊞ SA564- $\Delta ccpA$
- + SA564- $\Delta hptRS/ccpA$

# XPT\_STAAM

S-955

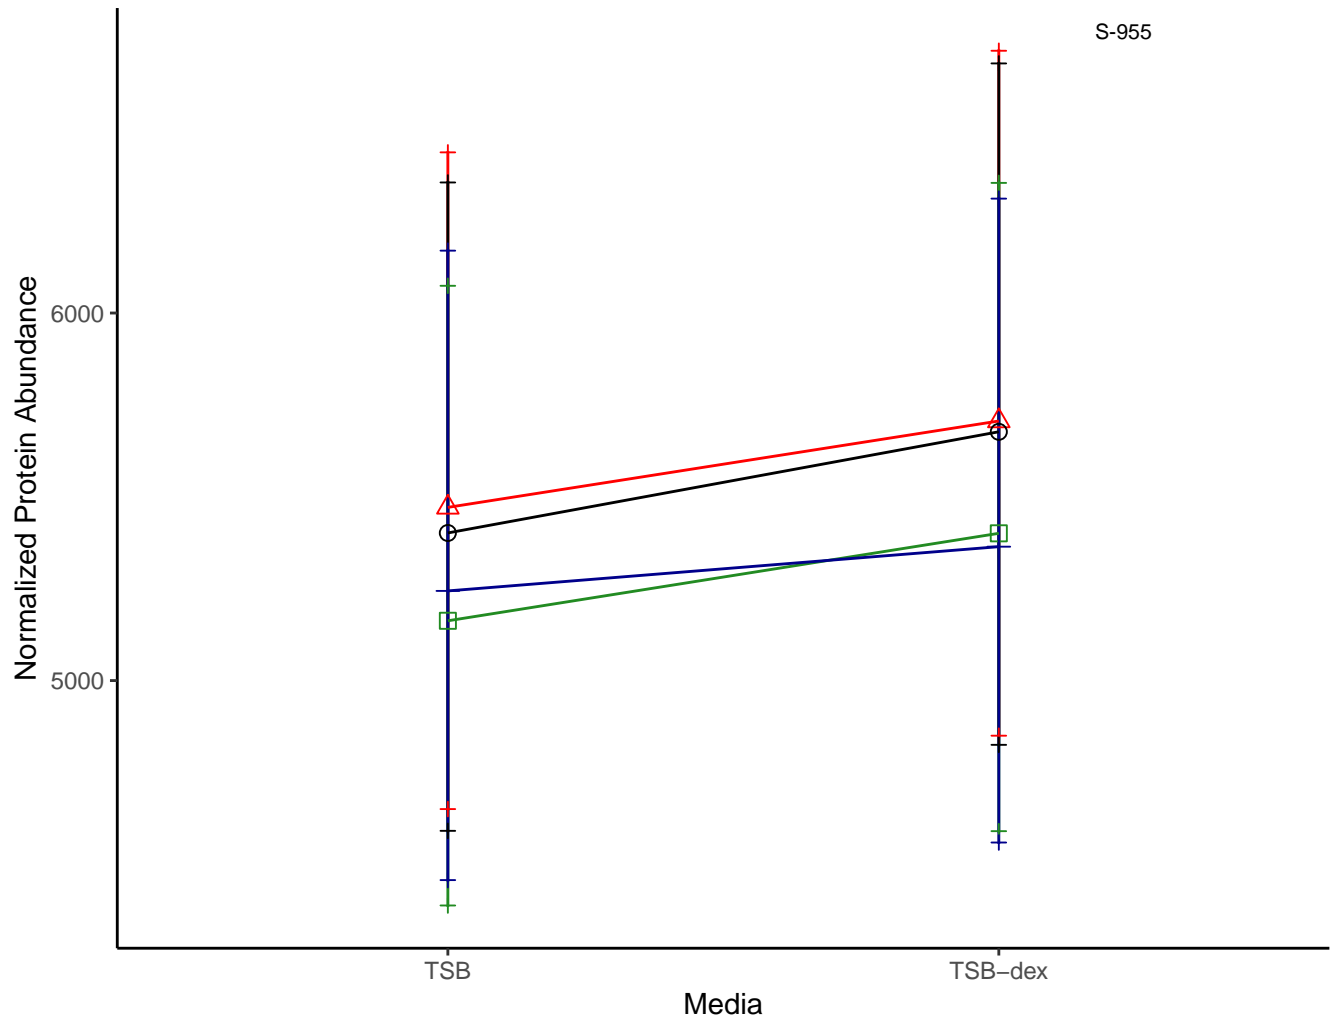

- ⊕ SA564
- △ SA564- $\Delta hptRS$
- ⊞ SA564- $\Delta ccpA$
- + SA564- $\Delta hptRS/ccpA$

# Y098\_STAAM

S-956

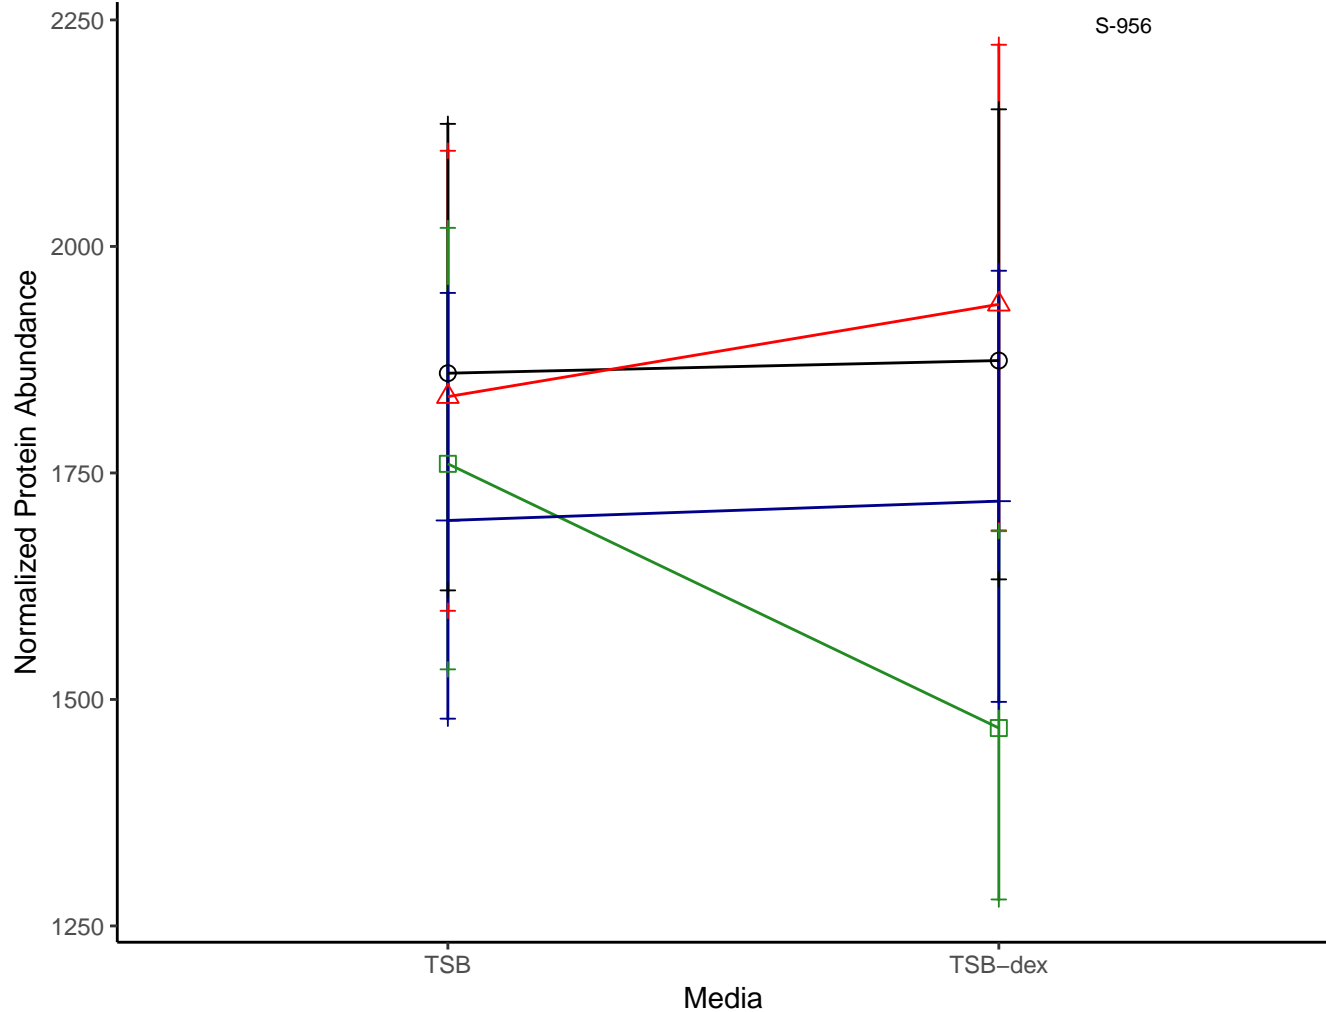

- ⊕ SA564
- △ SA564- $\Delta$ *hptRS*
- ⊞ SA564- $\Delta$ *ccpA*
- + SA564- $\Delta$ *hptRS/ccpA*

# Y099\_STAAM

S-957

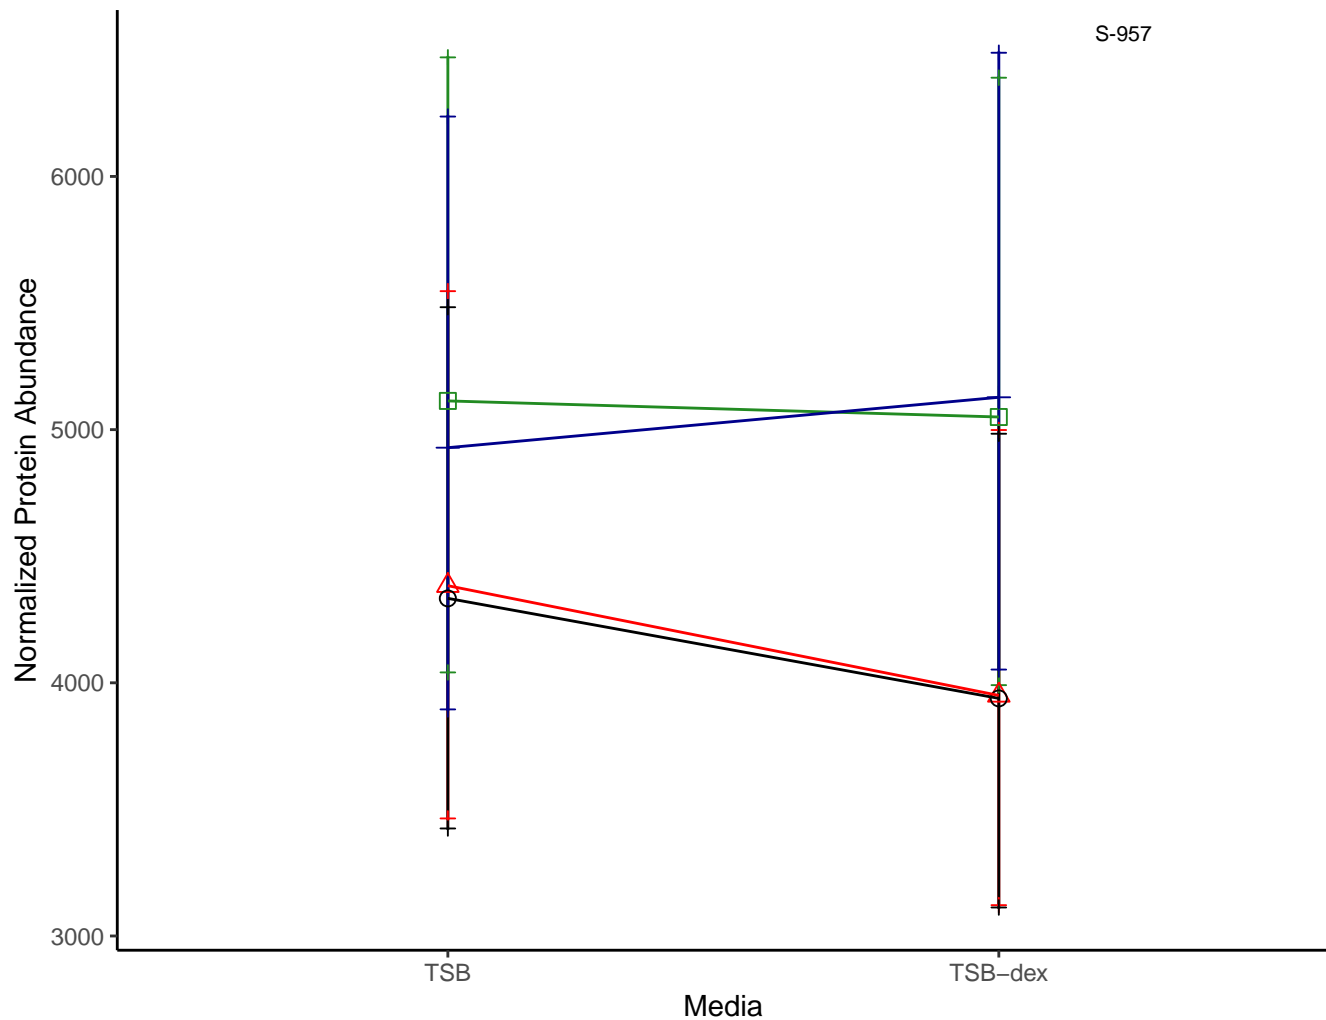

- ⊕ SA564
- △ SA564- $\Delta hptRS$
- ⊞ SA564- $\Delta ccpA$
- + SA564- $\Delta hptRS/ccpA$

# Y1015\_STAAM

S-958

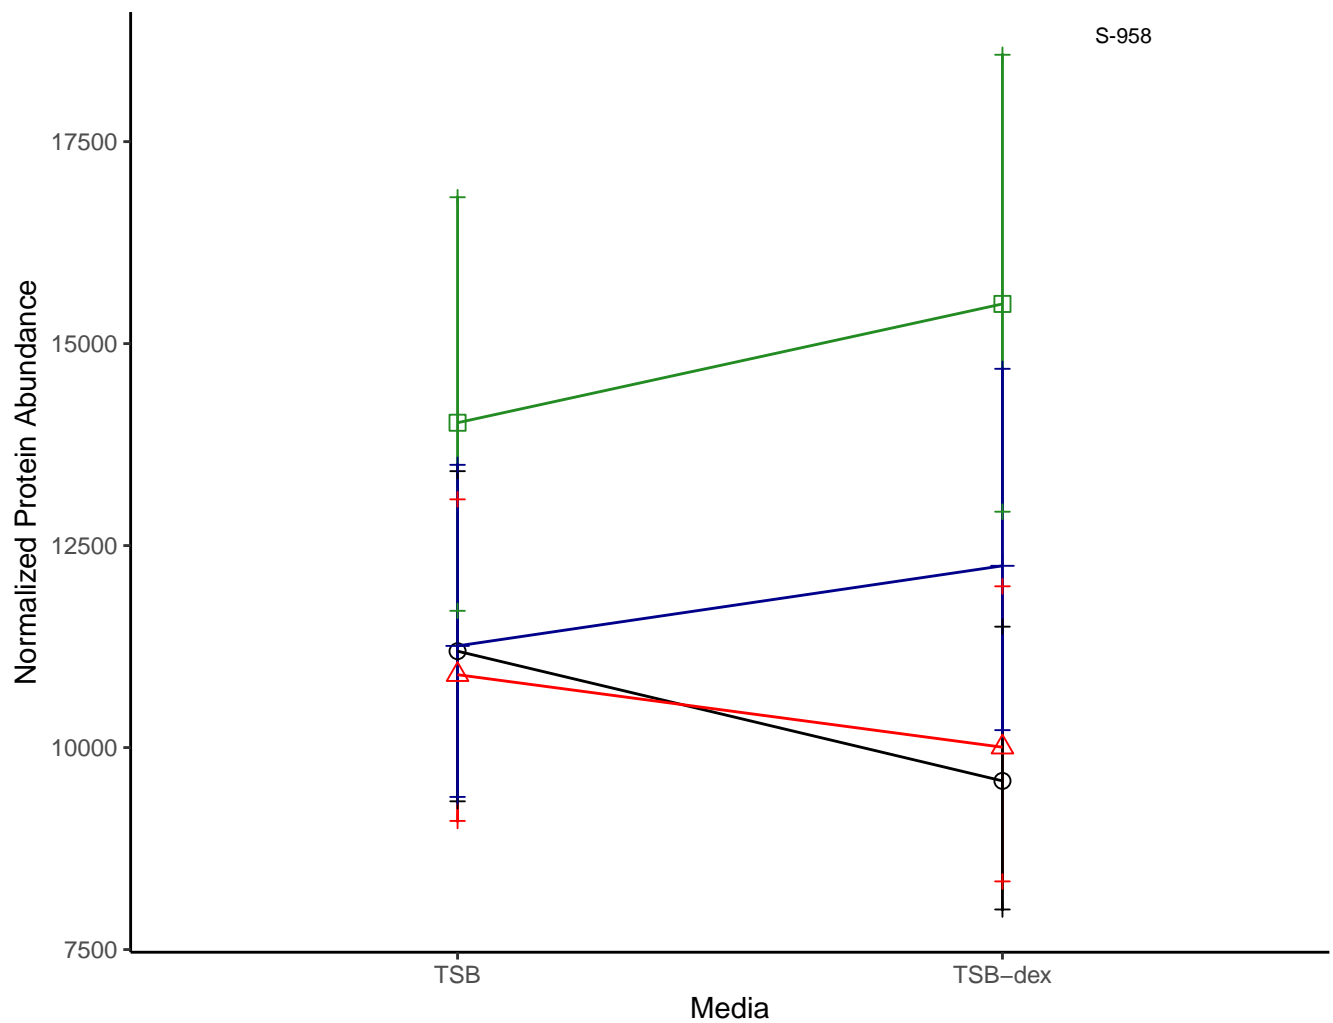

- ⊕ SA564
- △ SA564- $\Delta$ *hptRS*
- ⊞ SA564- $\Delta$ *ccpA*
- + SA564- $\Delta$ *hptRS/ccpA*

# Y1090\_STAAM

S-959

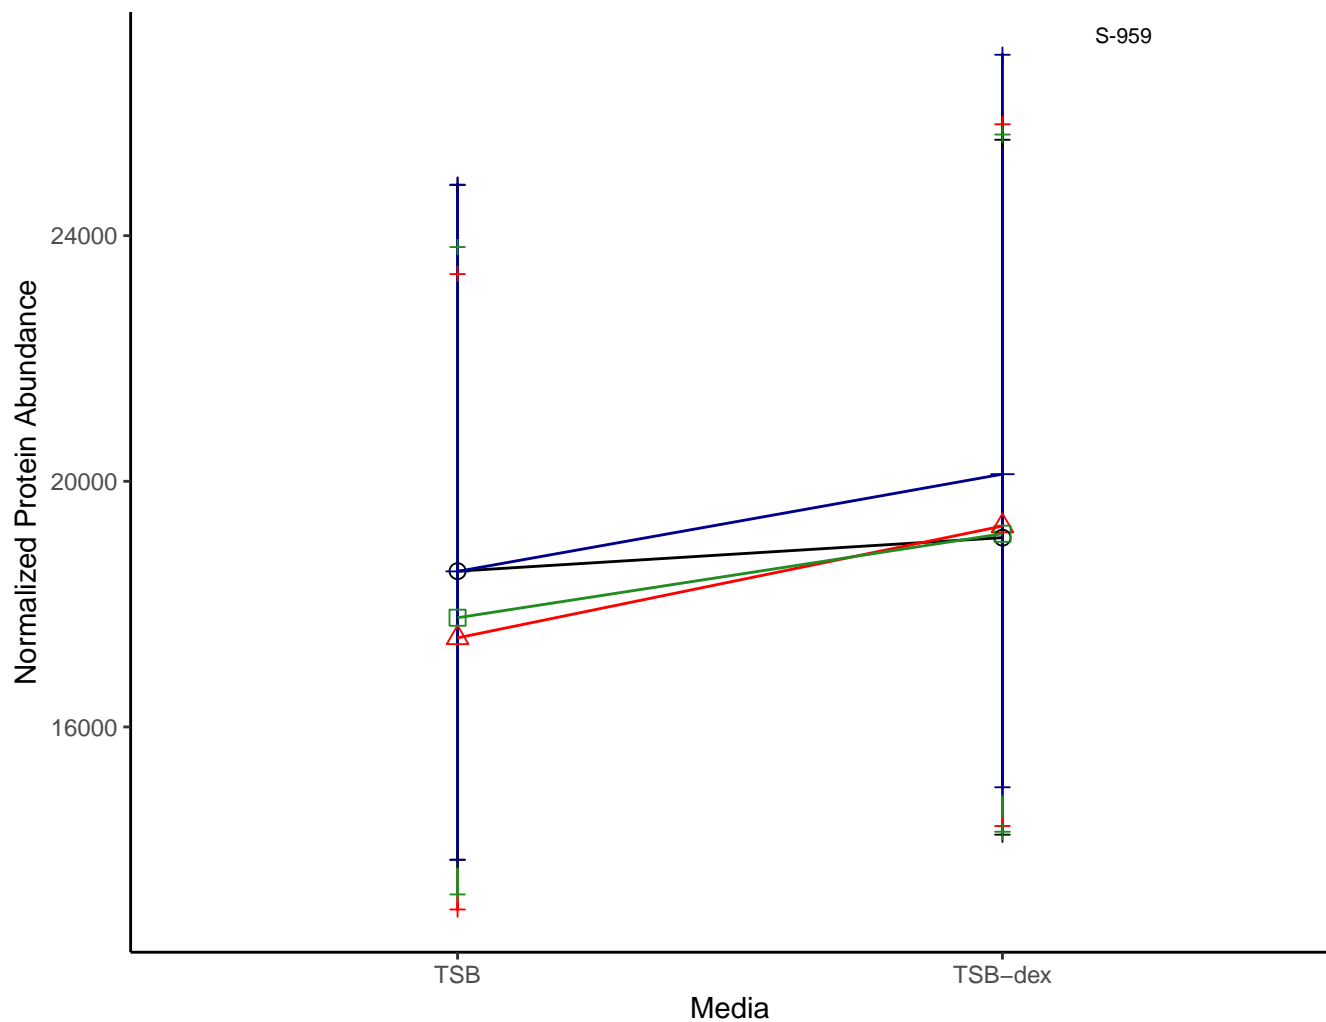

- ⊕ SA564
- △ SA564- $\Delta$ *hptRS*
- ⊞ SA564- $\Delta$ *ccpA*
- + SA564- $\Delta$ *hptRS/ccpA*

# Y1176\_STAAM

S-960

Normalized Protein Abundance

20000

15000

10000

TSB

TSB-dex

Media

- ⊕ SA564
- △ SA564- $\Delta$ *hptRS*
- ⊞ SA564- $\Delta$ *ccpA*
- + SA564- $\Delta$ *hptRS/ccpA*

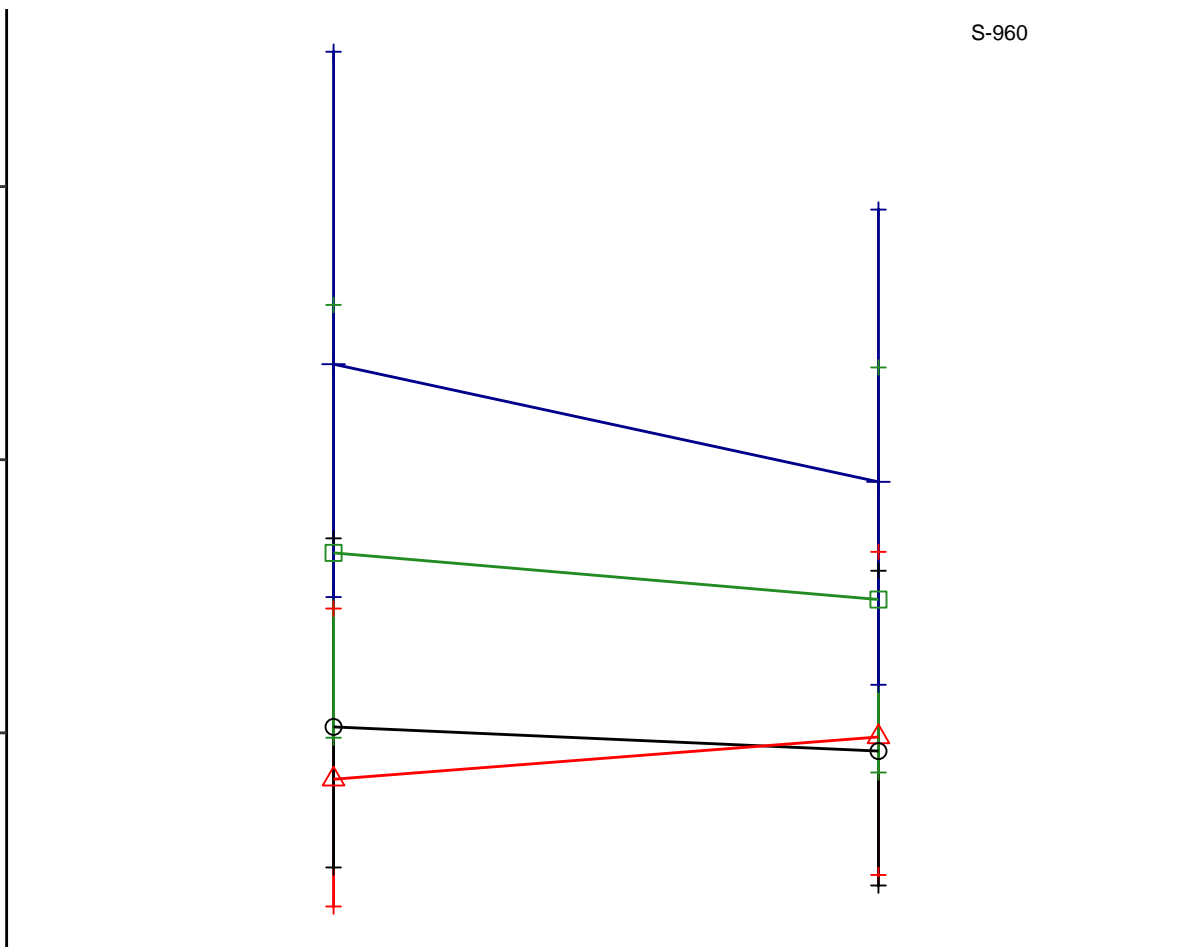



## Y1177\_STAAM

S-961

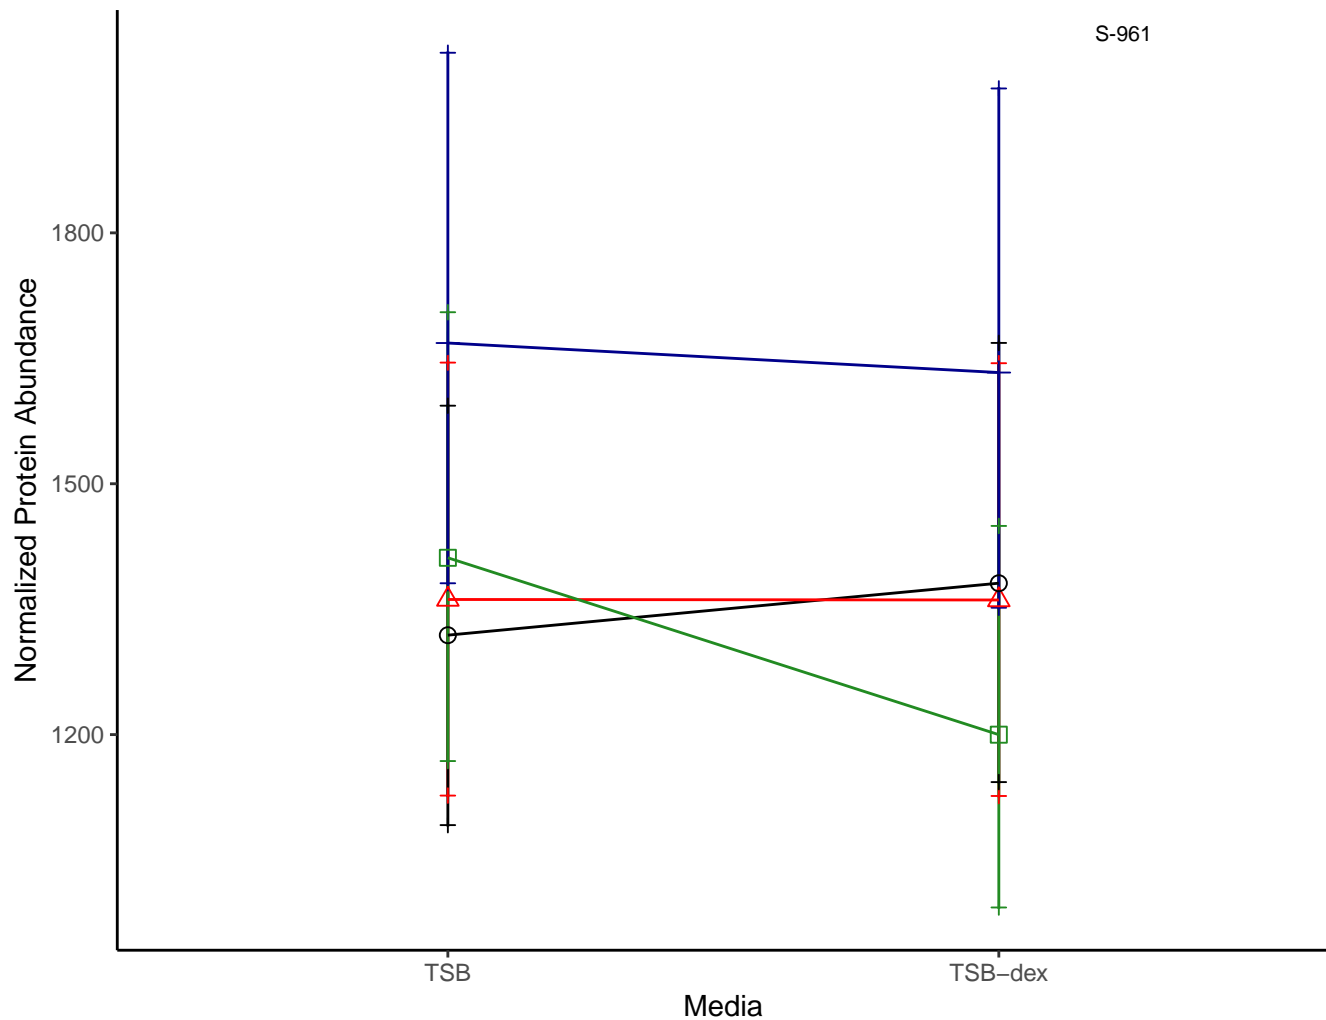

- ⊕ SA564
- △ SA564- $\Delta hptRS$
- ⊠ SA564- $\Delta ccpA$
- + SA564- $\Delta hptRS/ccpA$

# Y1187\_STAAM

S-962

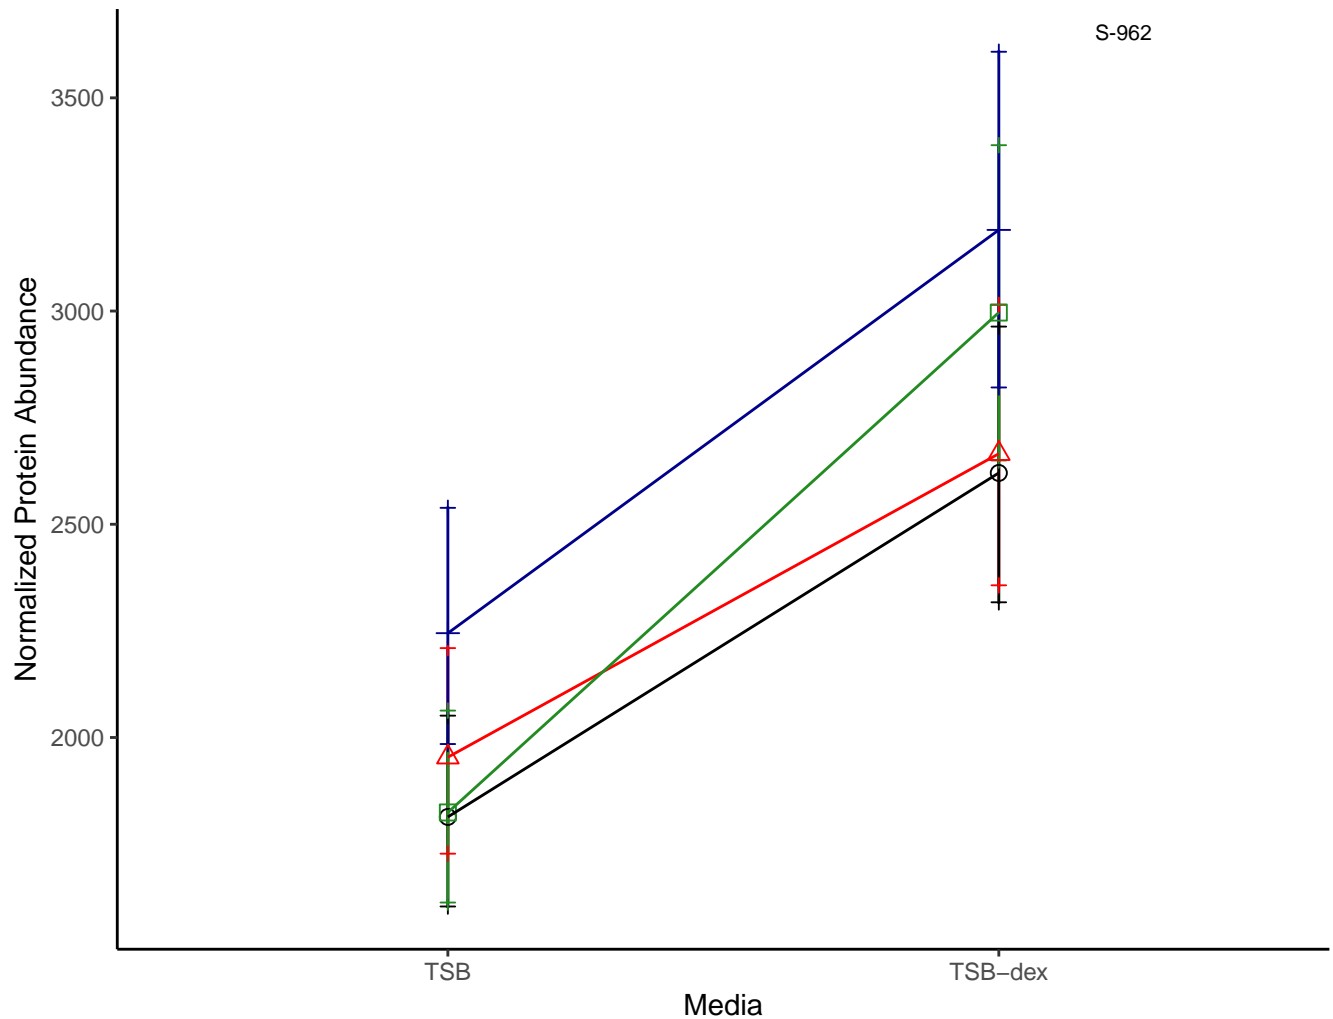

- ⊕ SA564
- △ SA564- $\Delta$ *hptRS*
- ⊞ SA564- $\Delta$ *ccpA*
- + SA564- $\Delta$ *hptRS/ccpA*

# Y1226\_STAAM

S-963

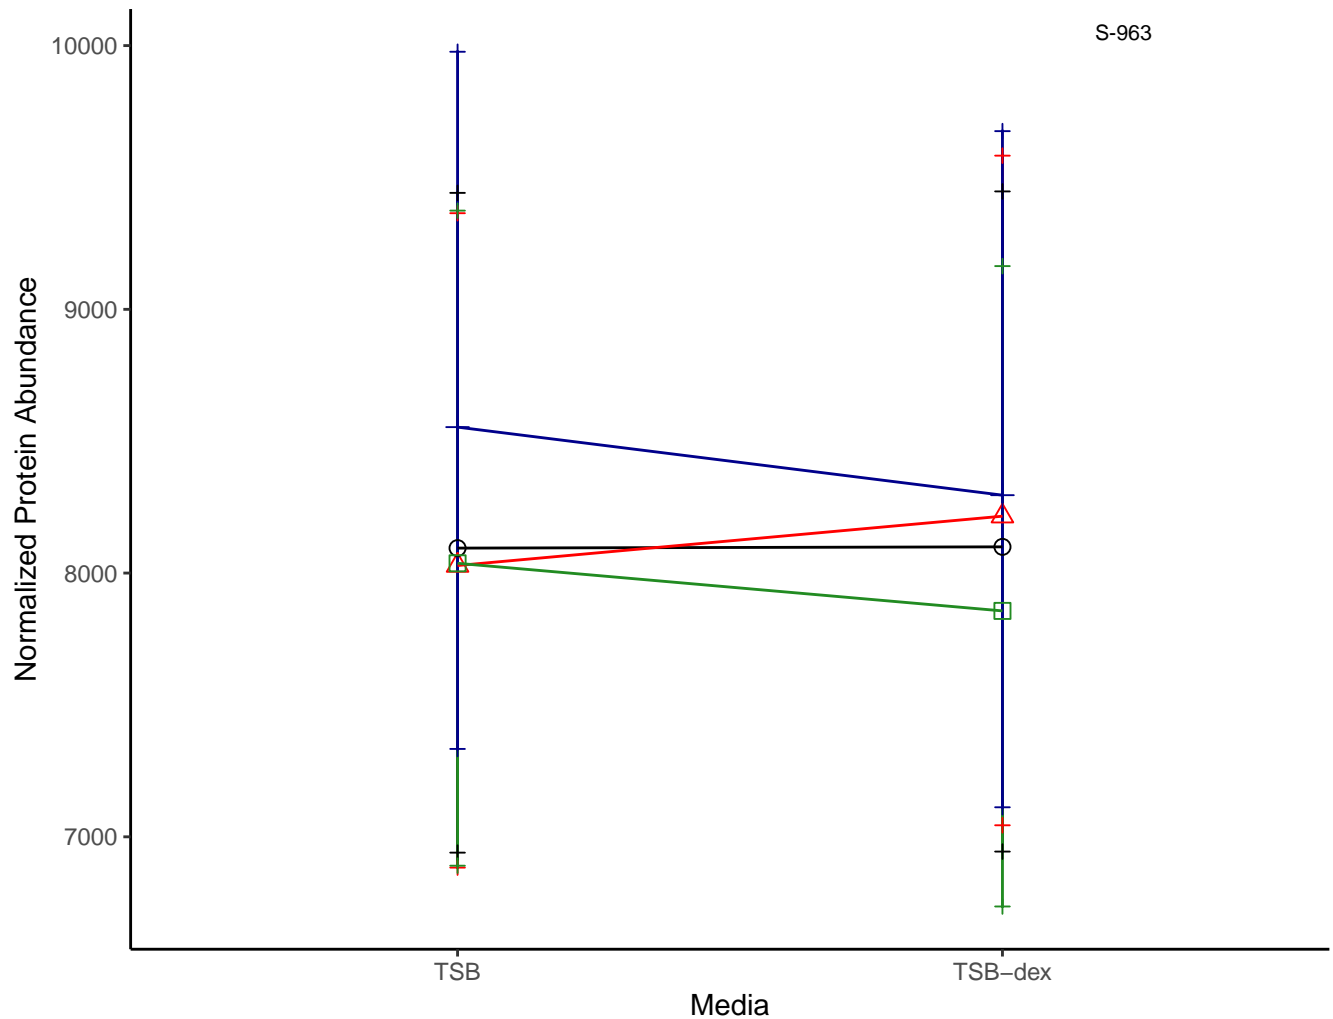

- ⊕ SA564
- △ SA564- $\Delta$ *hptRS*
- ⊞ SA564- $\Delta$ *ccpA*
- + SA564- $\Delta$ *hptRS/ccpA*

## Y1341\_STAAM

S-964

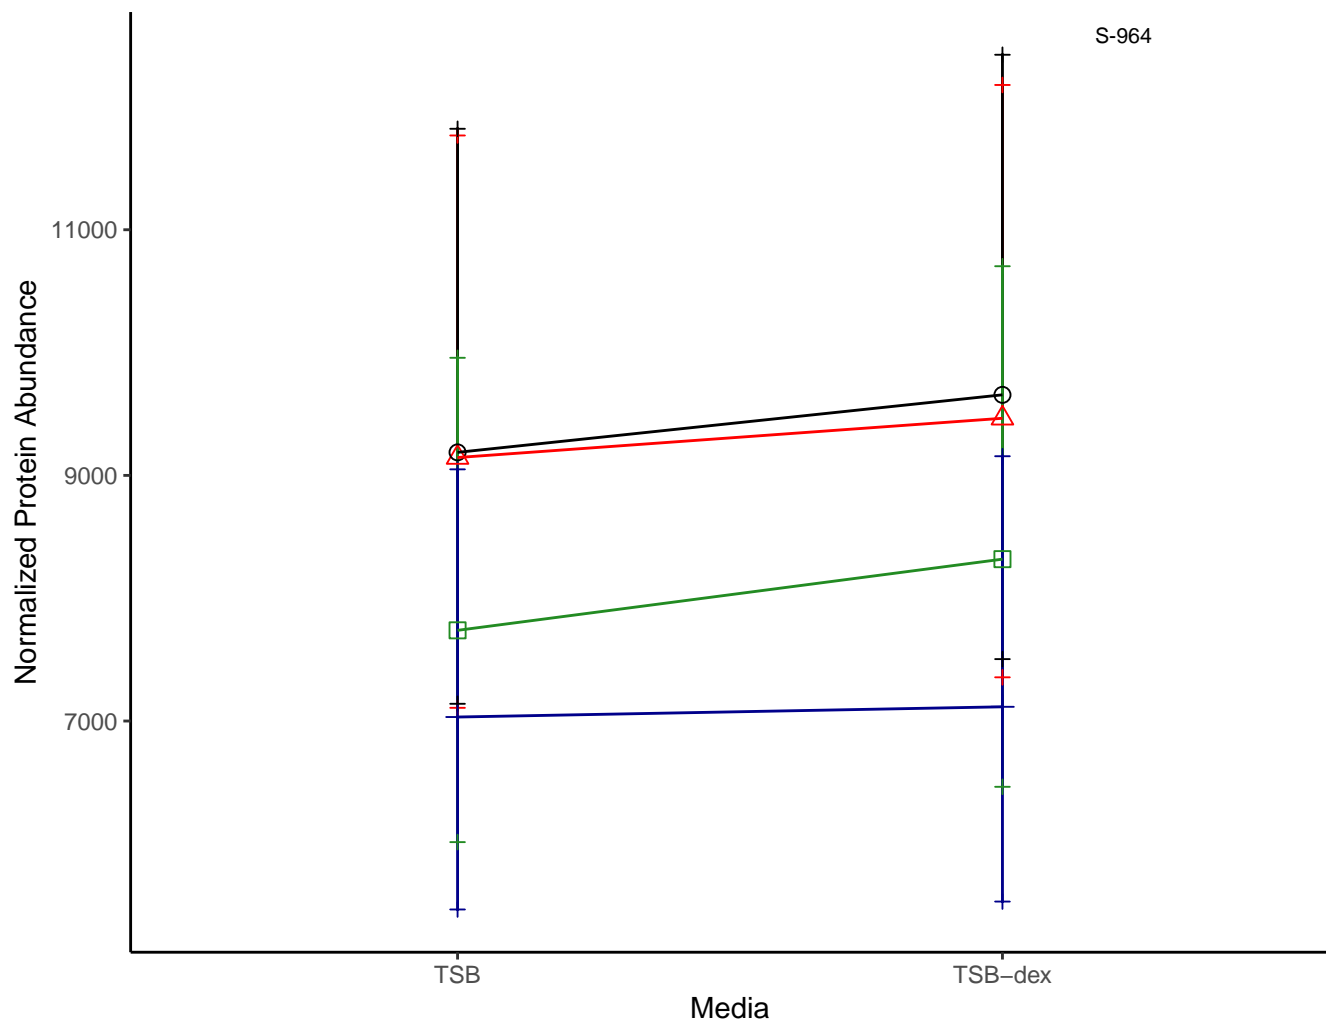

- SA564
- SA564- $\Delta$ hptRS
- SA564- $\Delta$ ccpA
- SA564- $\Delta$ hptRS/ccpA

# Y1343\_STAAM

S-965

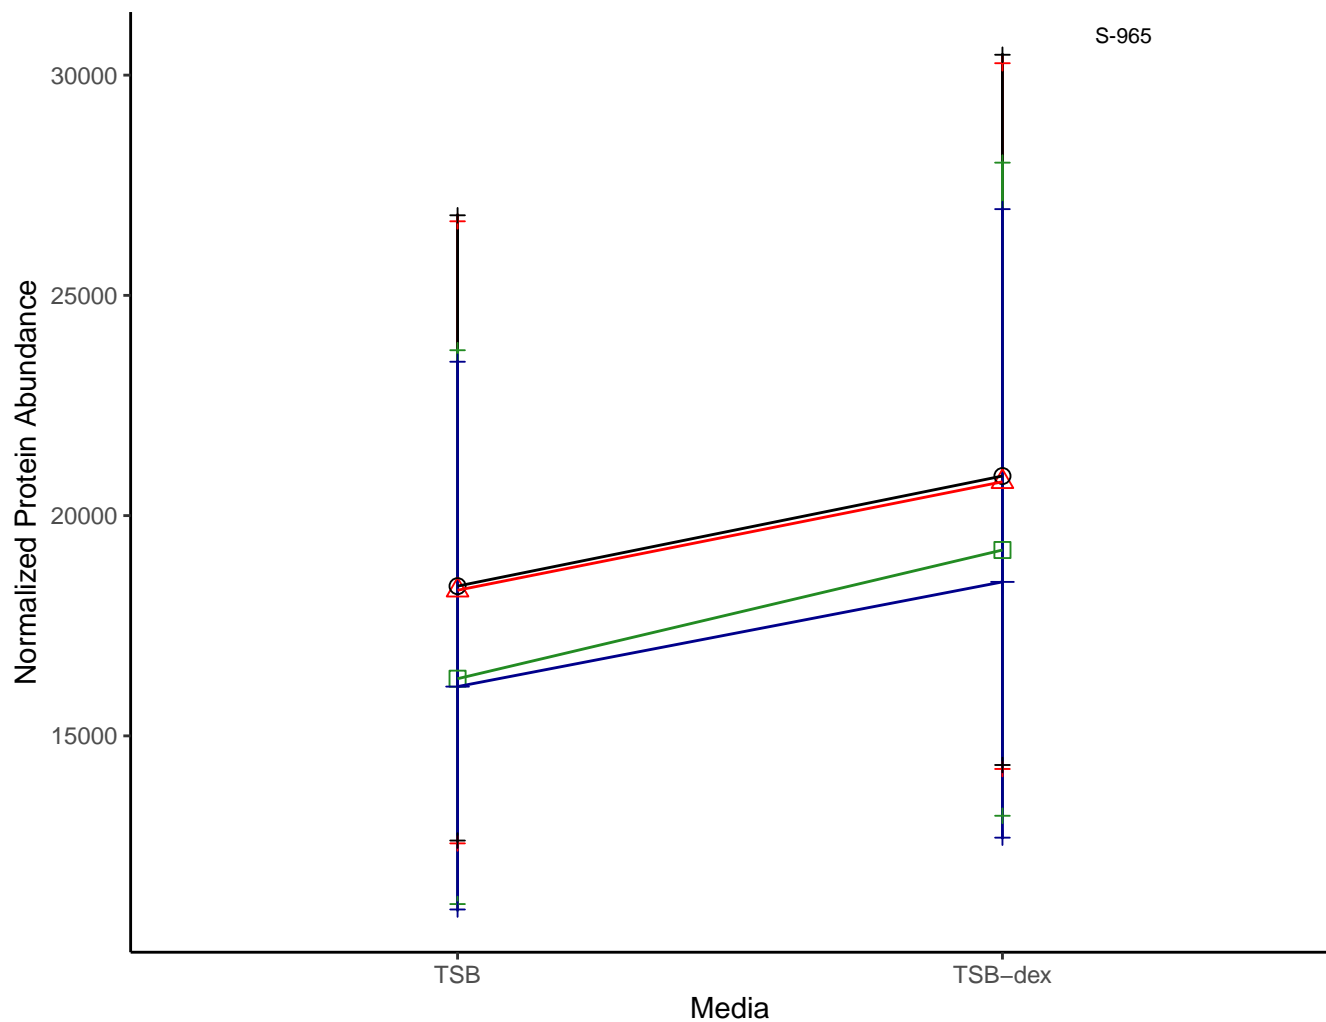

- SA564
- SA564- $\Delta$ *hptRS*
- SA564- $\Delta$ *ccpA*
- SA564- $\Delta$ *hptRS/ccpA*

# Y1352\_STAAM

S-966

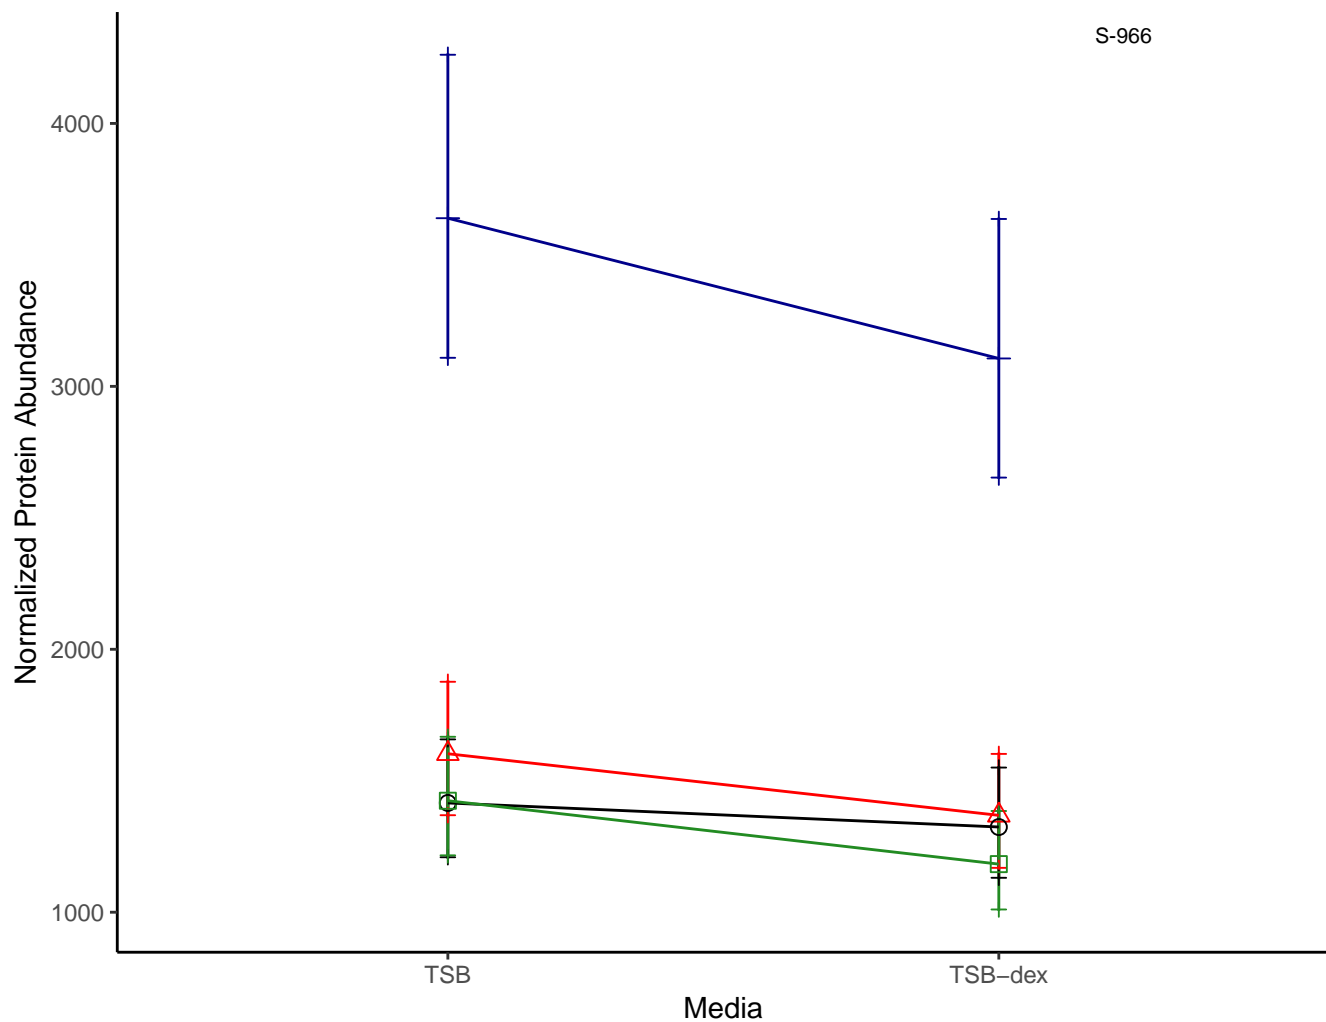

- ⊕ SA564
- △ SA564- $\Delta hptRS$
- ⊞ SA564- $\Delta ccpA$
- + SA564- $\Delta hptRS/ccpA$

# Y1363\_STAAM

S-967

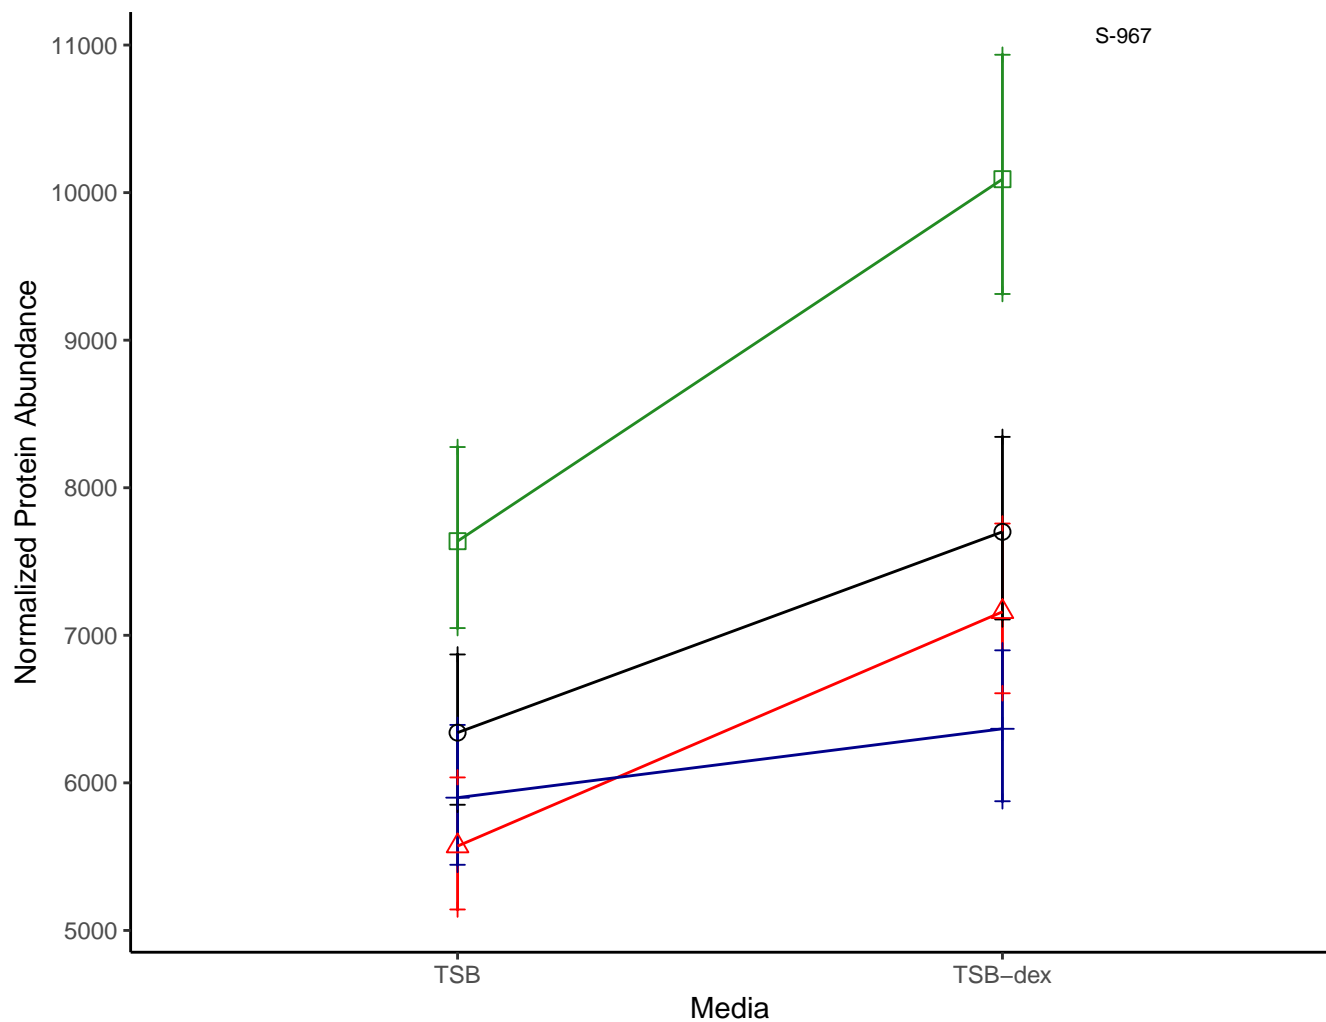

- ⊕ SA564
- △ SA564- $\Delta$ *hptRS*
- ⊞ SA564- $\Delta$ *ccpA*
- + SA564- $\Delta$ *hptRS/ccpA*

# Y1409\_STAAM

S-968

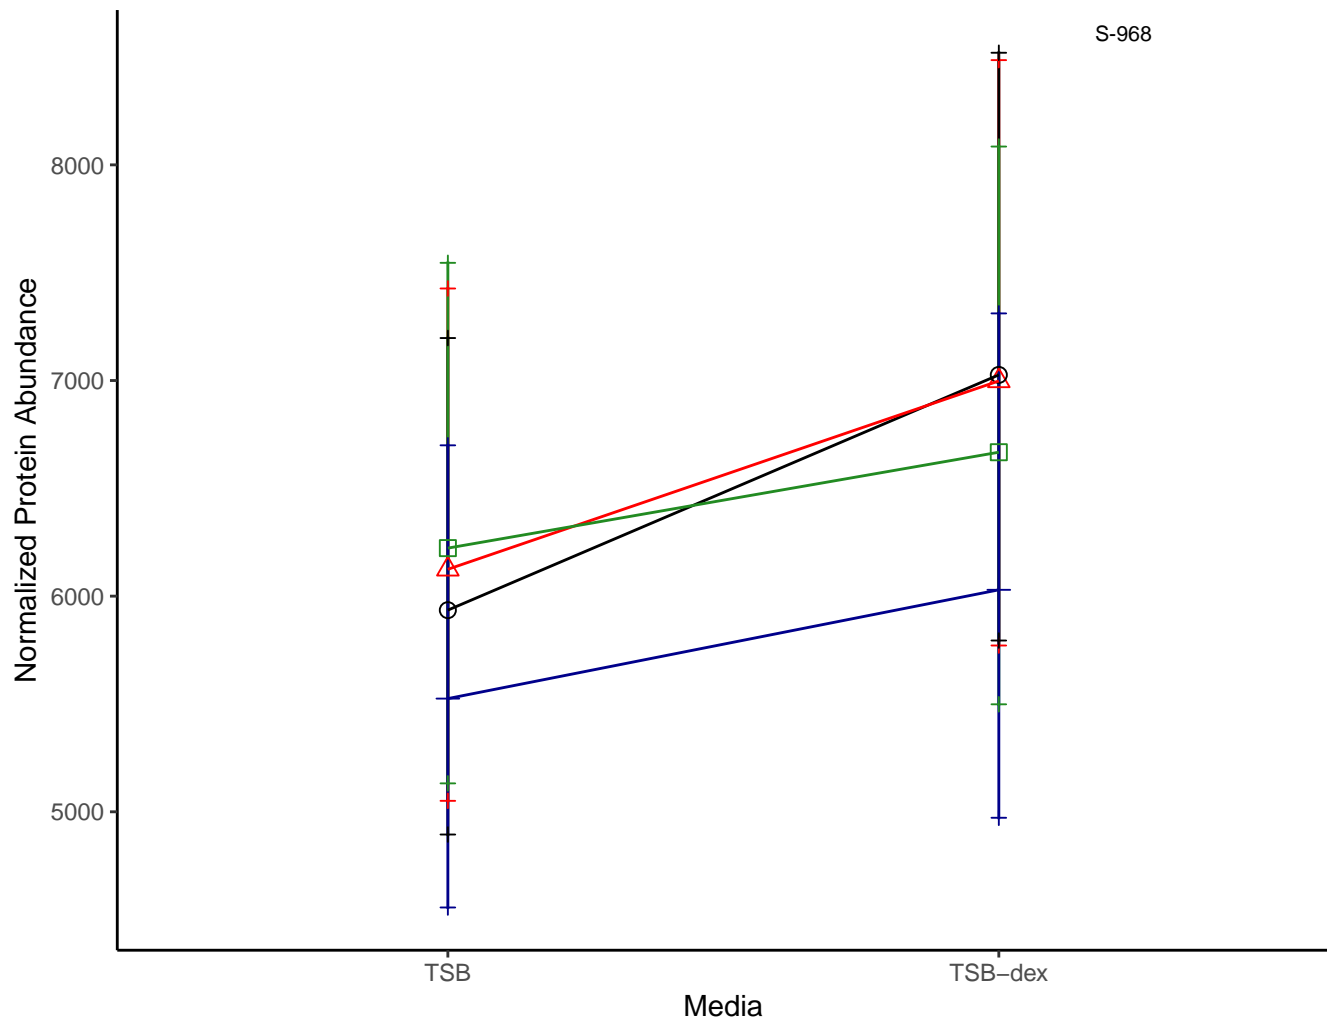

- ⊕ SA564
- △ SA564- $\Delta$ *hptRS*
- ⊞ SA564- $\Delta$ *ccpA*
- + SA564- $\Delta$ *hptRS/ccpA*



## Y1425\_STAAM

S-969

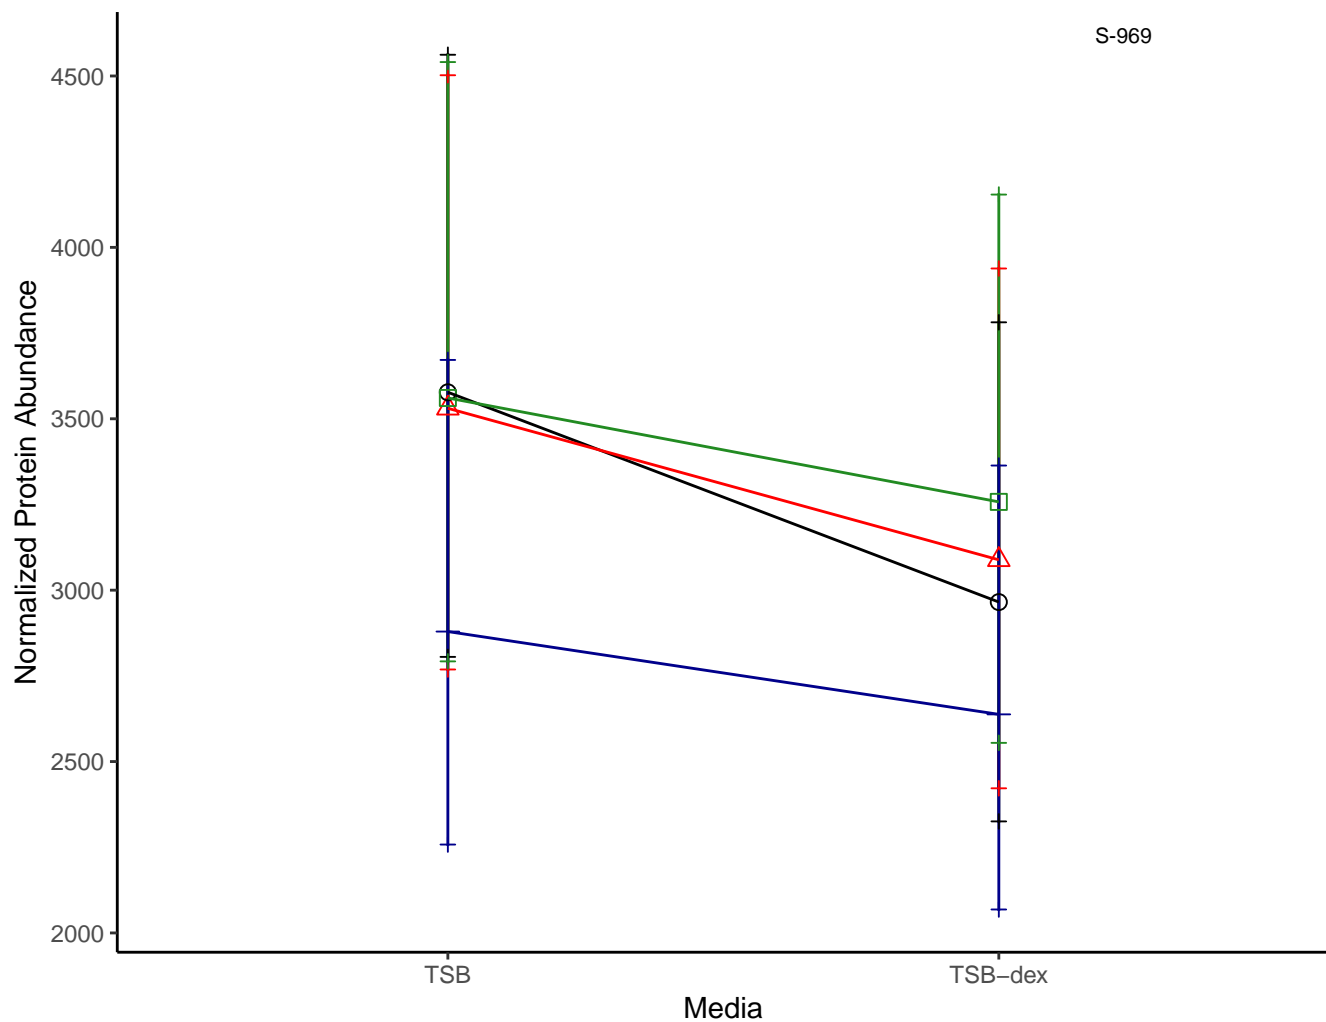

- ⊕ SA564
- △ SA564- $\Delta hptRS$
- ⊞ SA564- $\Delta ccpA$
- + SA564- $\Delta hptRS/ccpA$

## Y1462\_STAAM

S-970

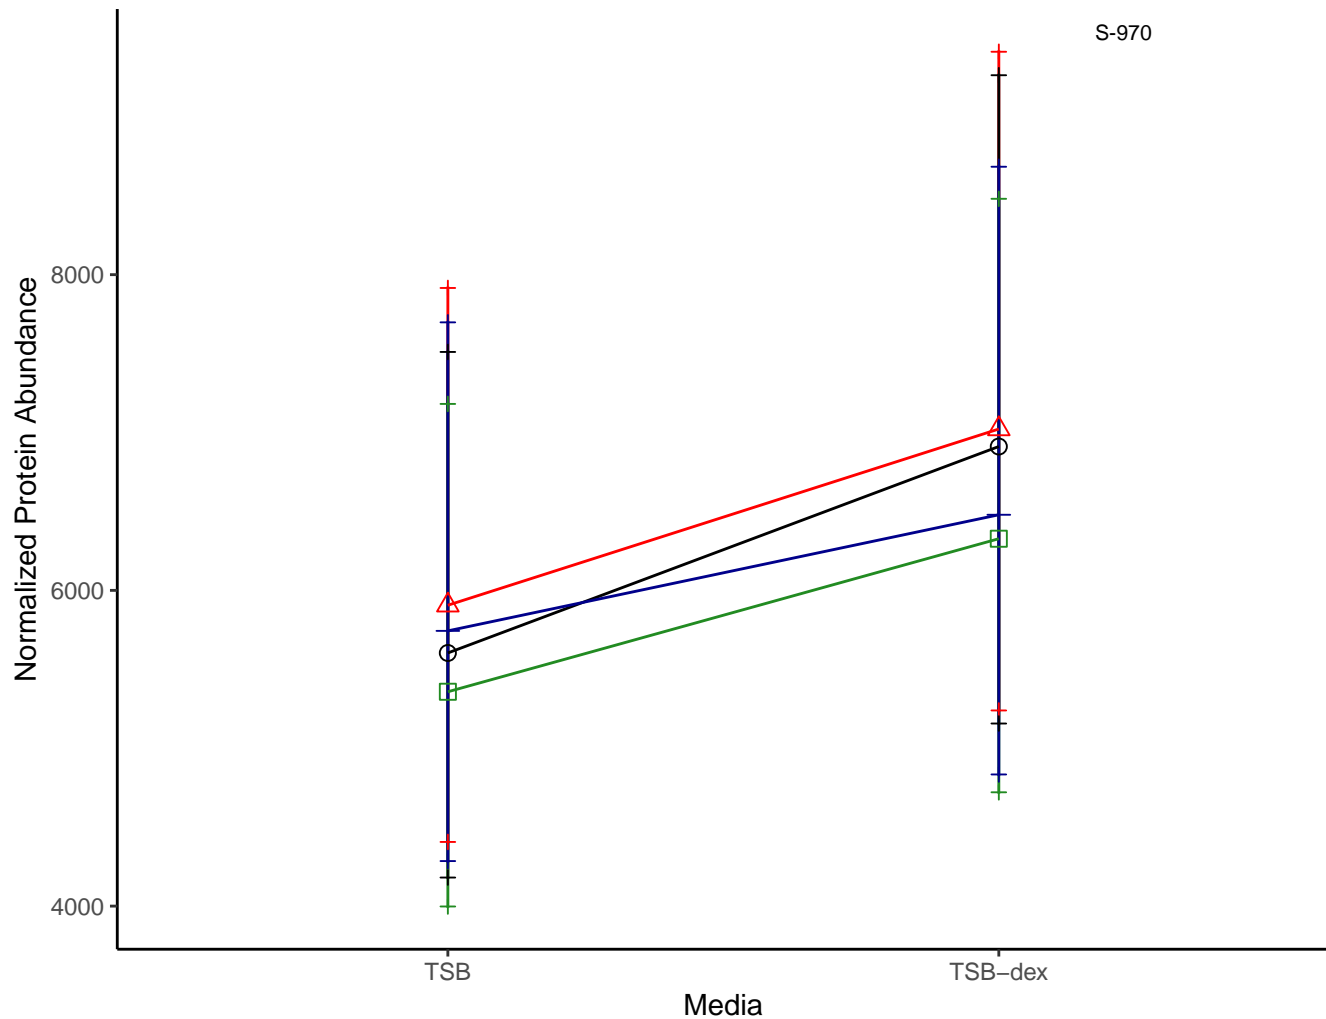

- ⊕ SA564
- △ SA564- $\Delta hptRS$
- ⊞ SA564- $\Delta ccpA$
- + SA564- $\Delta hptRS/ccpA$

# Y1514\_STAAM

S-971

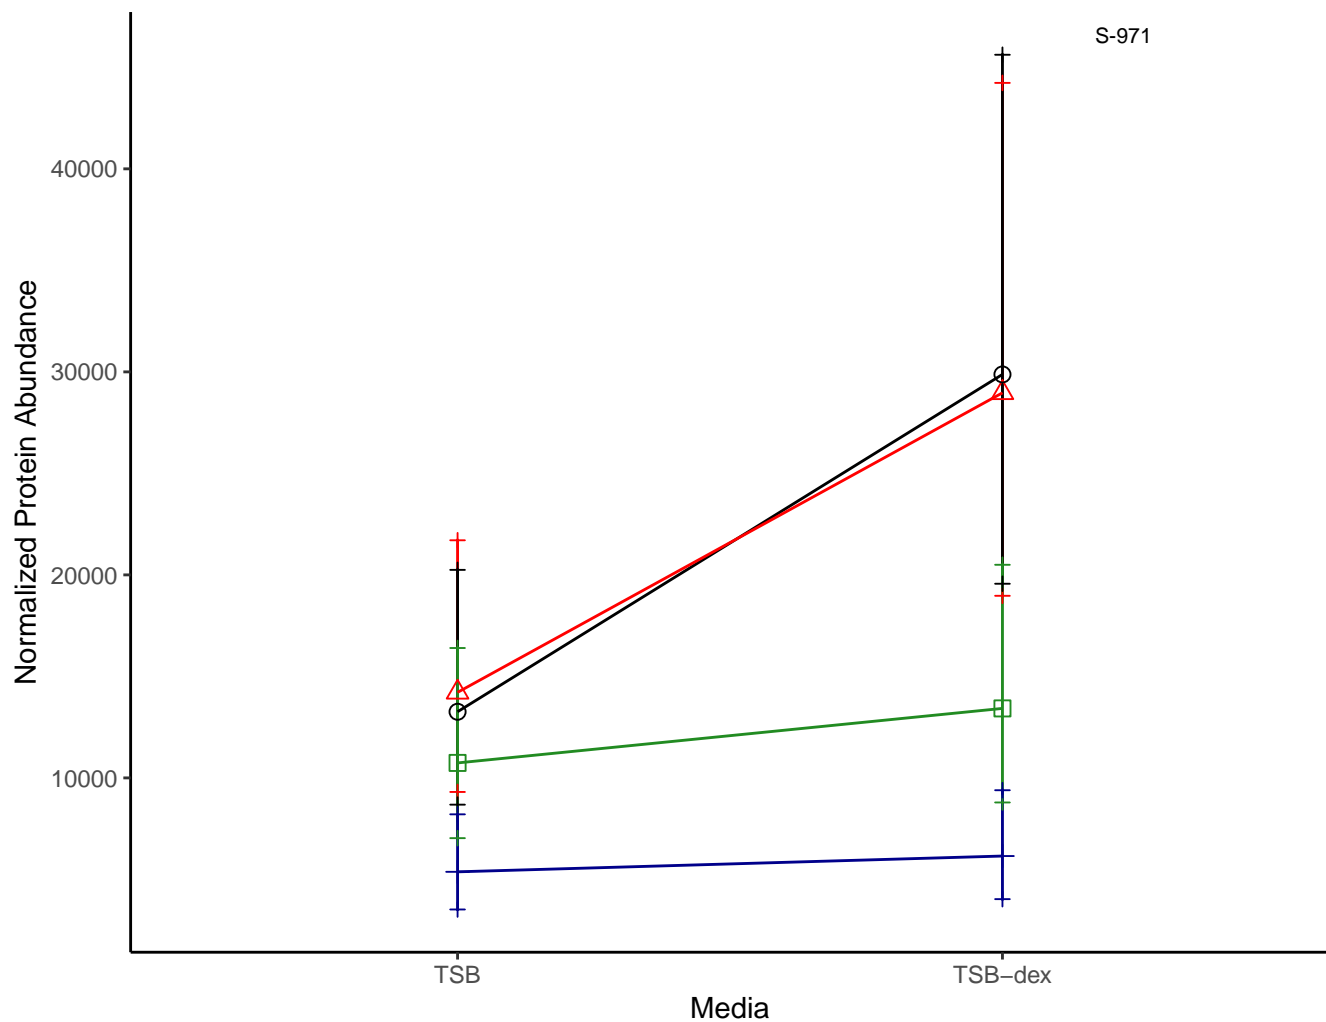

- SA564
- SA564- $\Delta$ *hptRS*
- SA564- $\Delta$ *ccpA*
- SA564- $\Delta$ *hptRS/ccpA*

## Y1573\_STAAM

S-972

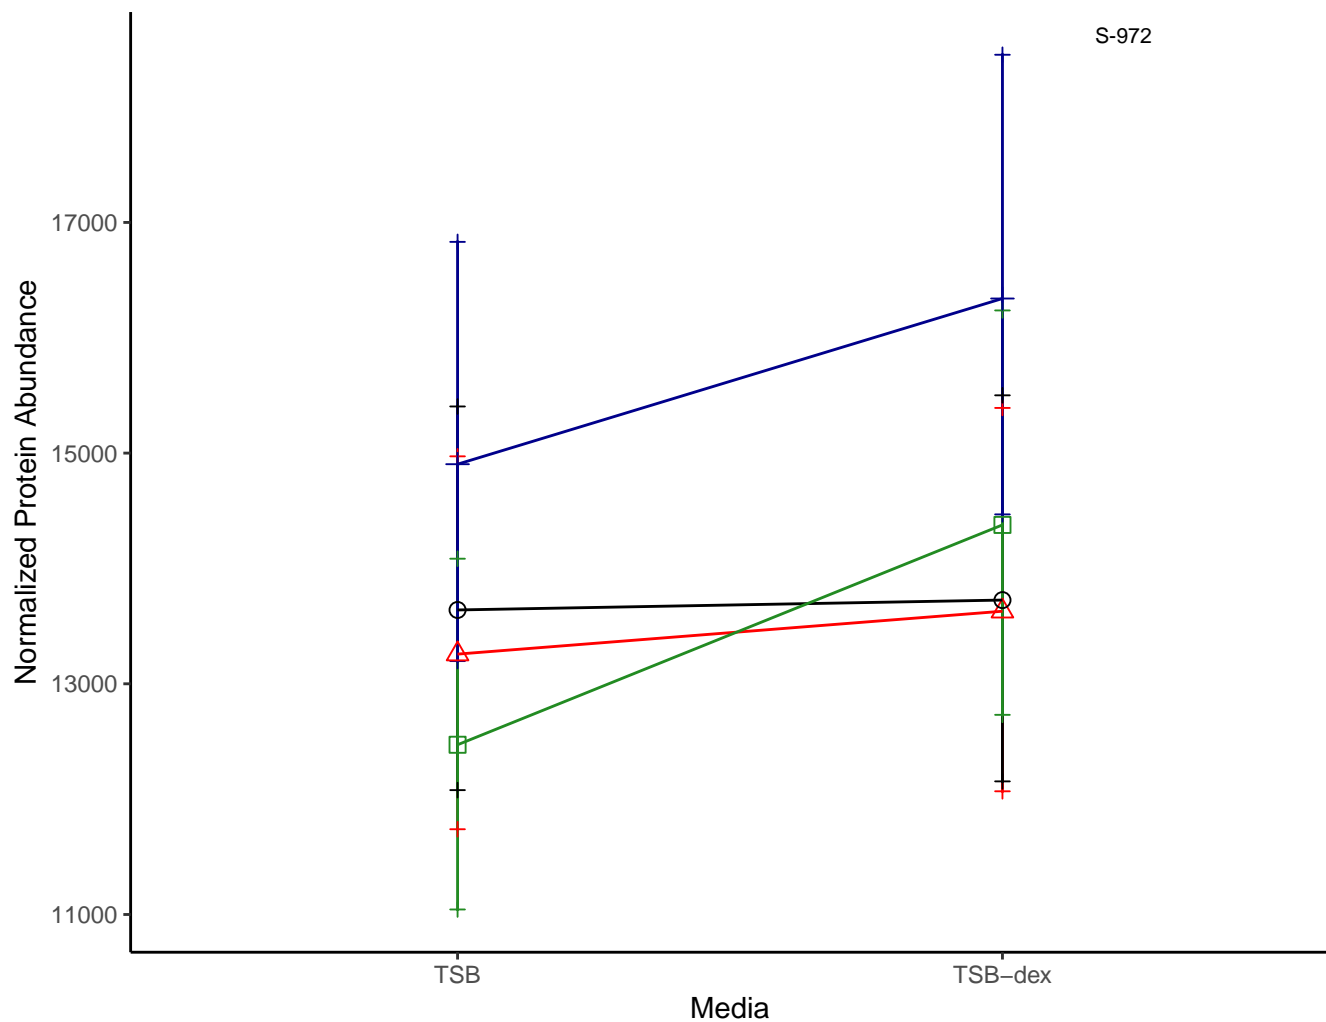

- ⊕ SA564
- △ SA564-ΔhptRS
- SA564-ΔccpA
- + SA564-ΔhptRS/ccpA

## Y1605\_STAAM

S-973

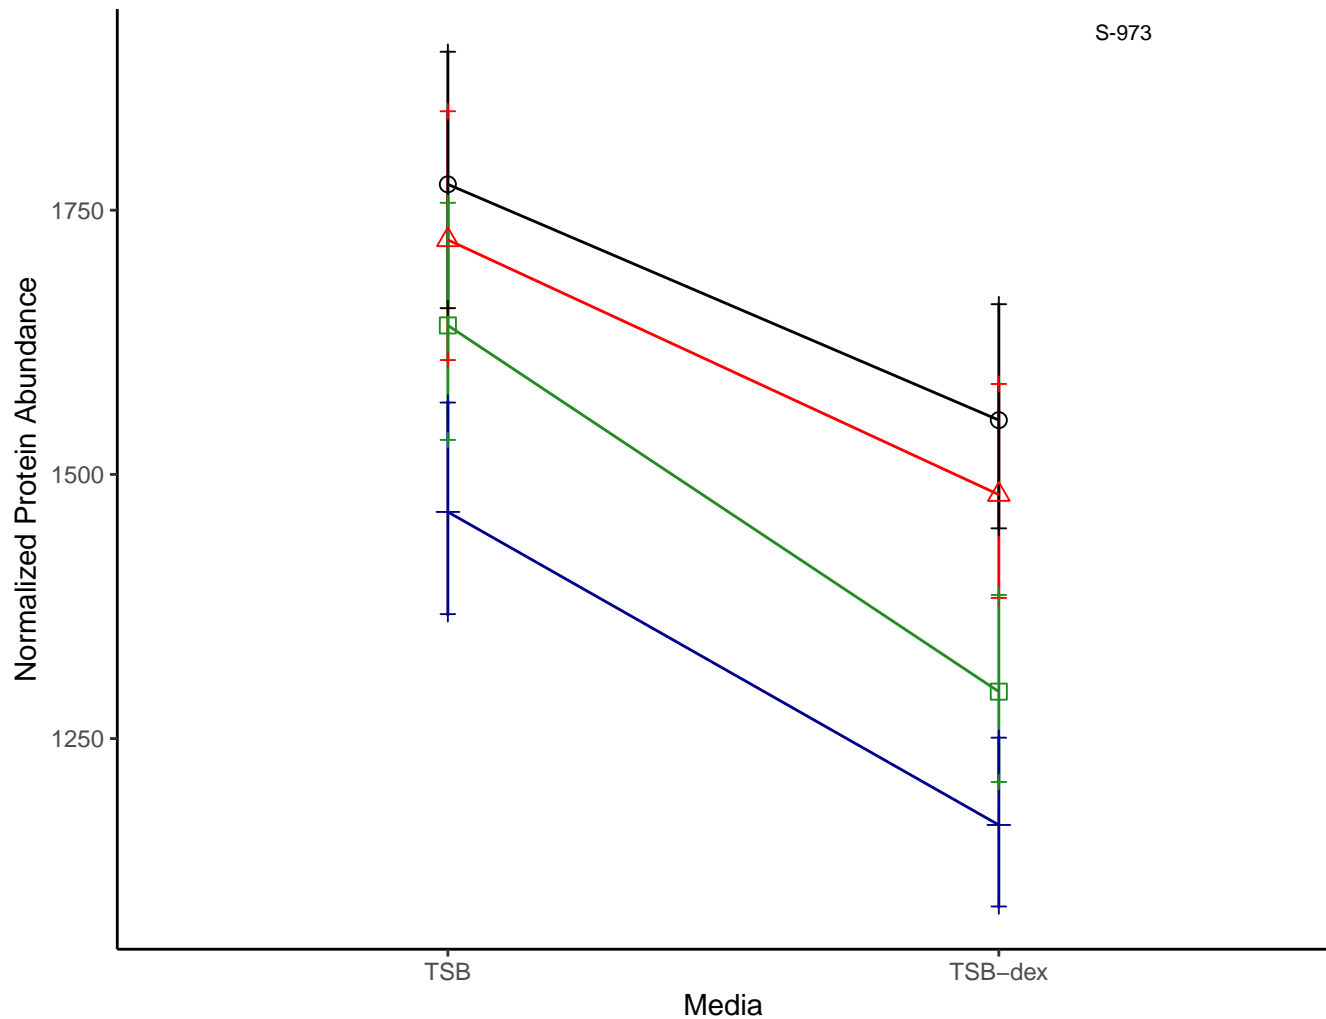

- ⊕ SA564
- △ SA564-ΔhptRS
- ⊞ SA564-ΔccpA
- + SA564-ΔhptRS/ccpA

## Y1617\_STAAM

S-974

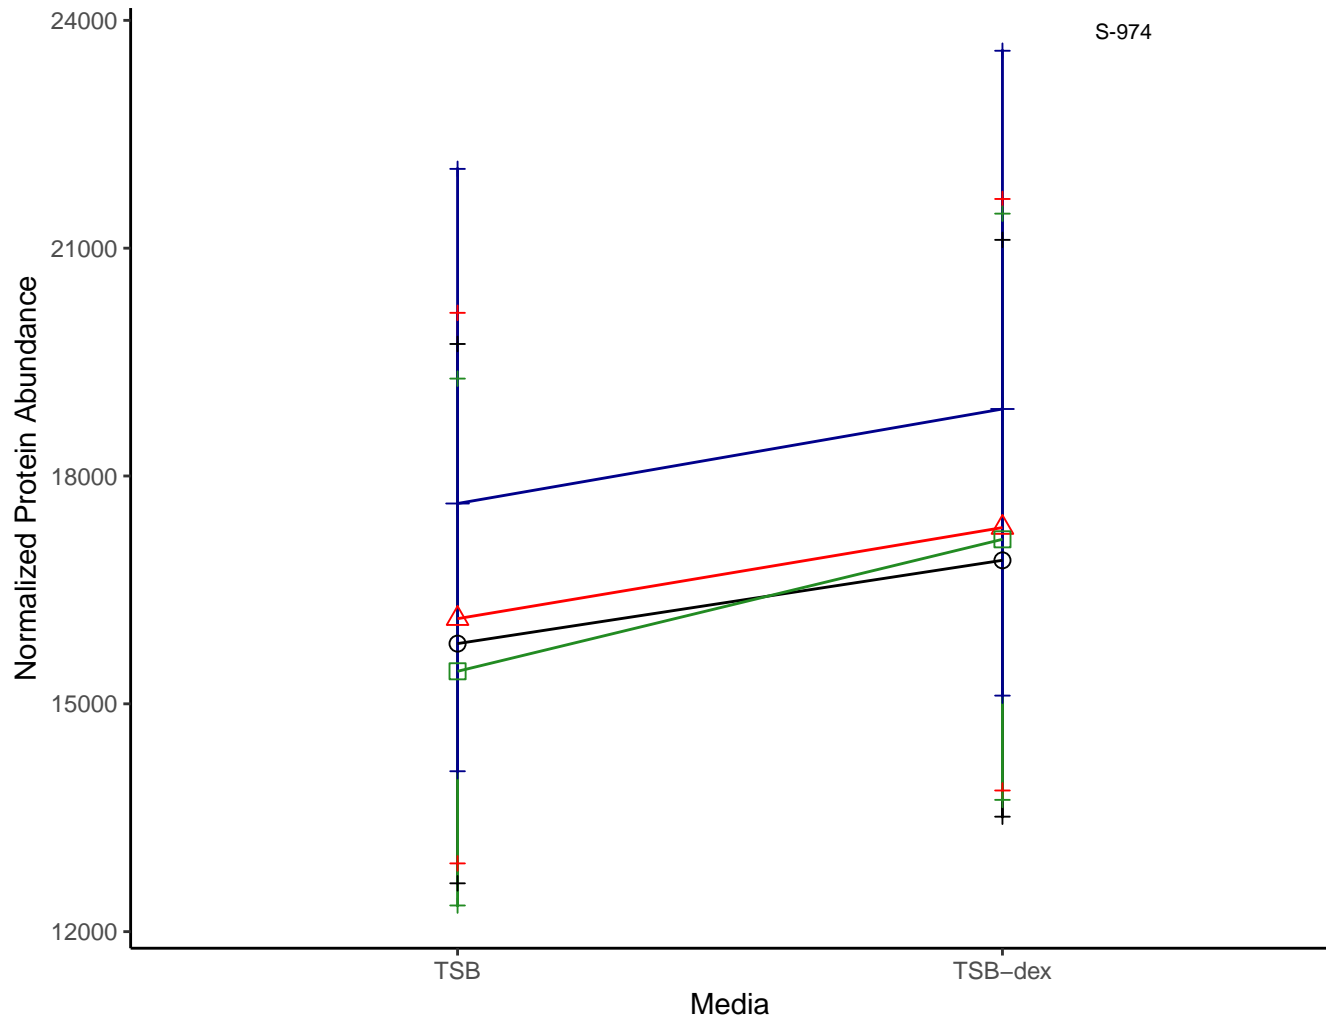

- SA564
- SA564- $\Delta$ *hptRS*
- SA564- $\Delta$ *ccpA*
- SA564- $\Delta$ *hptRS/ccpA*

# Y1625\_STAAM

S-975

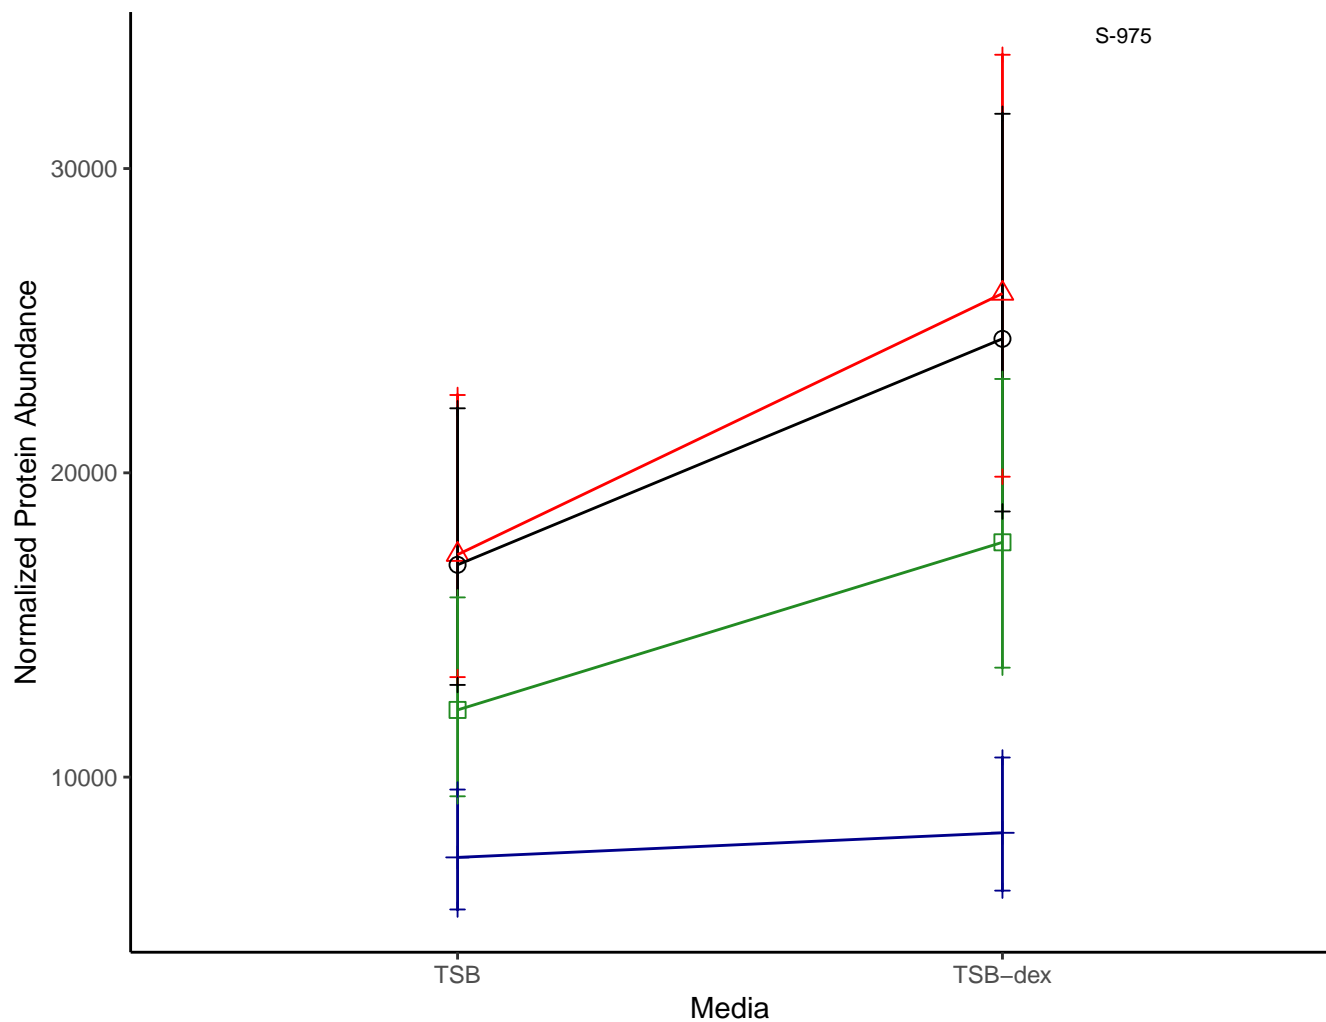

- ⊕ SA564
- △ SA564-ΔhptRS
- ⊞ SA564-ΔccpA
- + SA564-ΔhptRS/ccpA

# Y1710\_STAAM

S-976

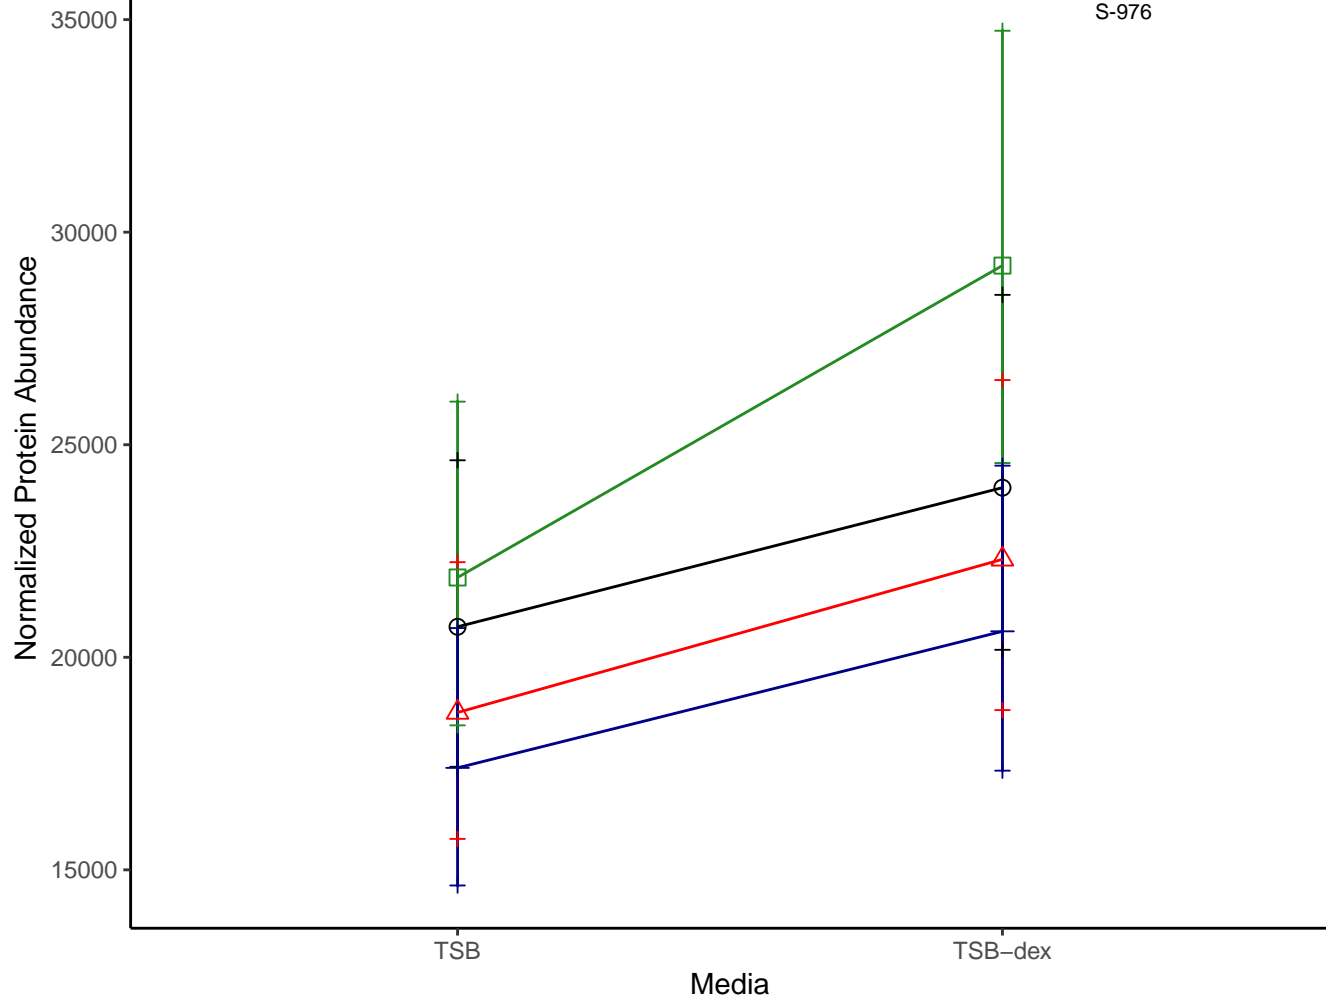

- ⊕ SA564
- △ SA564-ΔhptRS
- ⊞ SA564-ΔccpA
- + SA564-ΔhptRS/ccpA



# Y1739\_STAAM

S-977

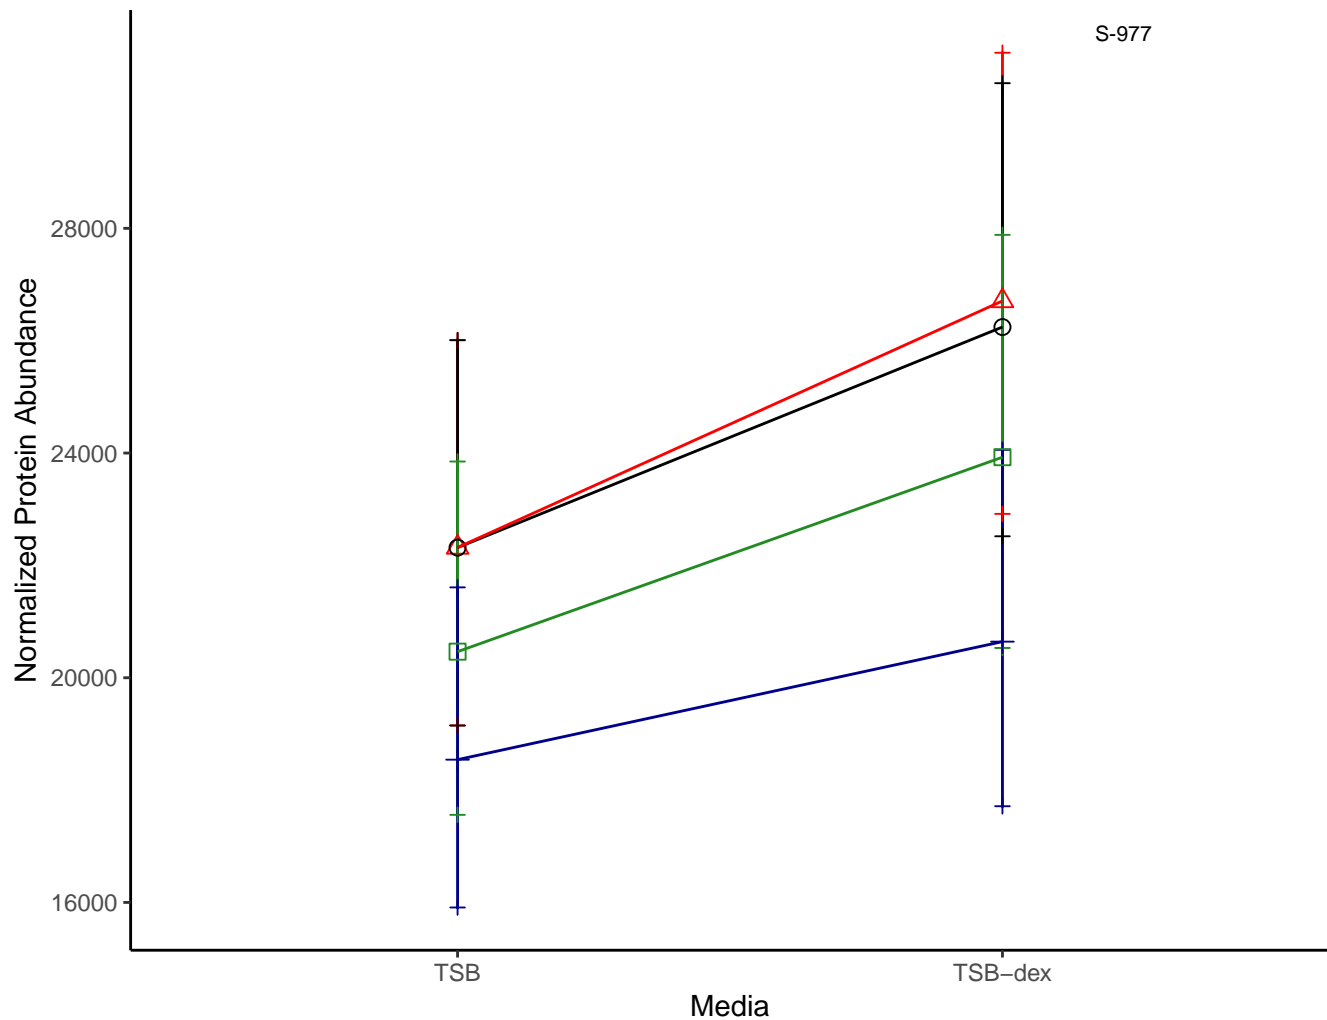

- ⊕ SA564
- △ SA564- $\Delta$ *hptRS*
- ⊞ SA564- $\Delta$ *ccpA*
- + SA564- $\Delta$ *hptRS/ccpA*

# Y1845\_STAAM

S-978

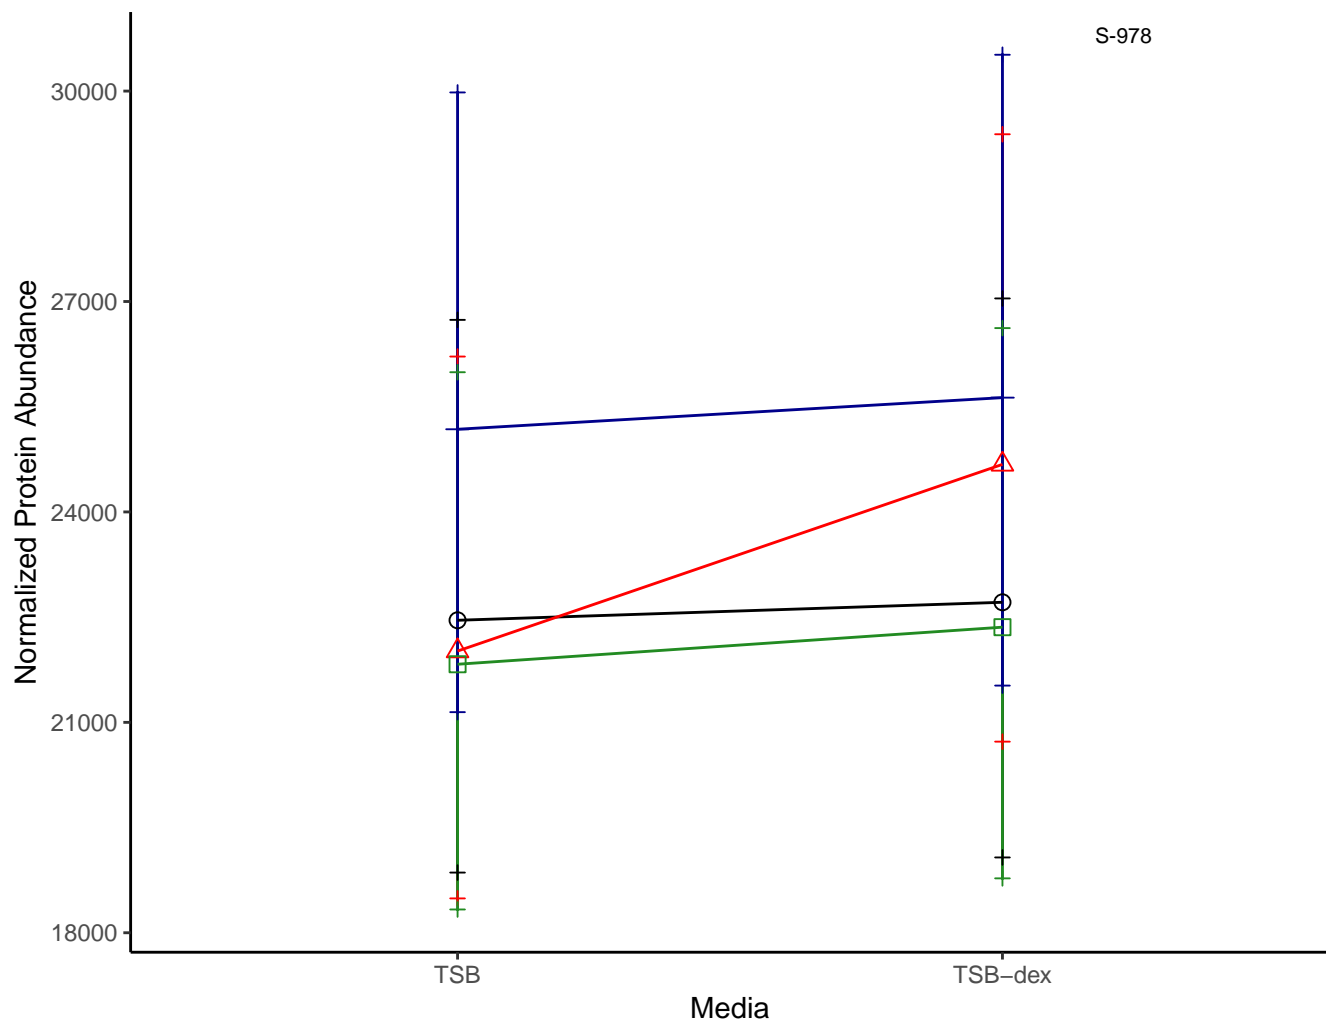

- ⊕ SA564
- △ SA564- $\Delta$ hptRS
- ⊞ SA564- $\Delta$ ccpA
- + SA564- $\Delta$ hptRS/ccpA

# Y1866\_STAAM

S-979

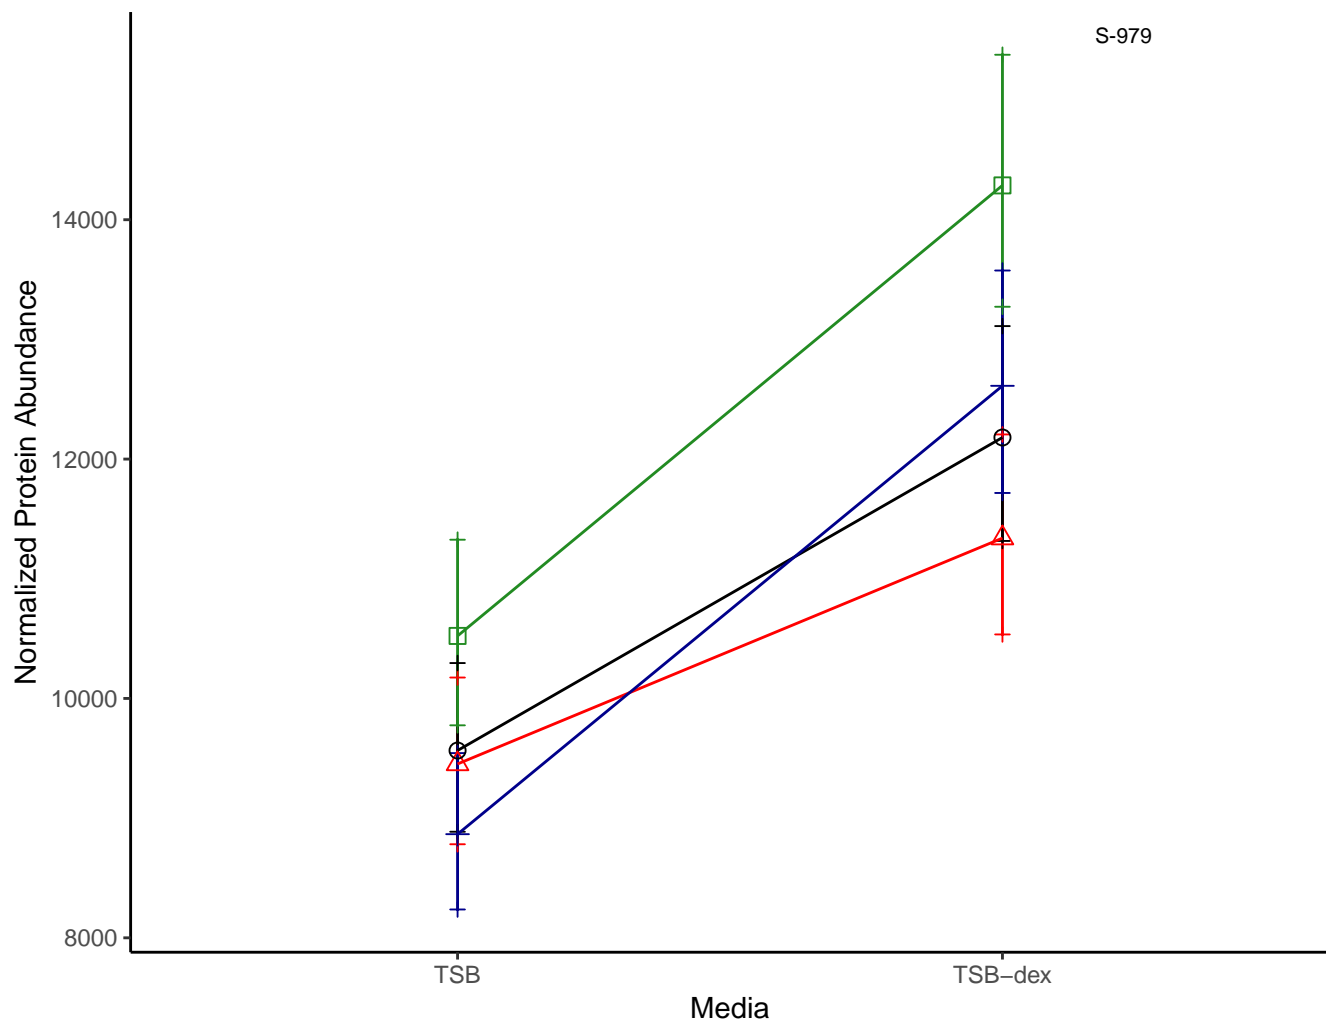

- ⊕ SA564
- △ SA564- $\Delta$ *hptRS*
- ⊞ SA564- $\Delta$ *ccpA*
- + SA564- $\Delta$ *hptRS/ccpA*

# Y1880\_STAAM

S-980

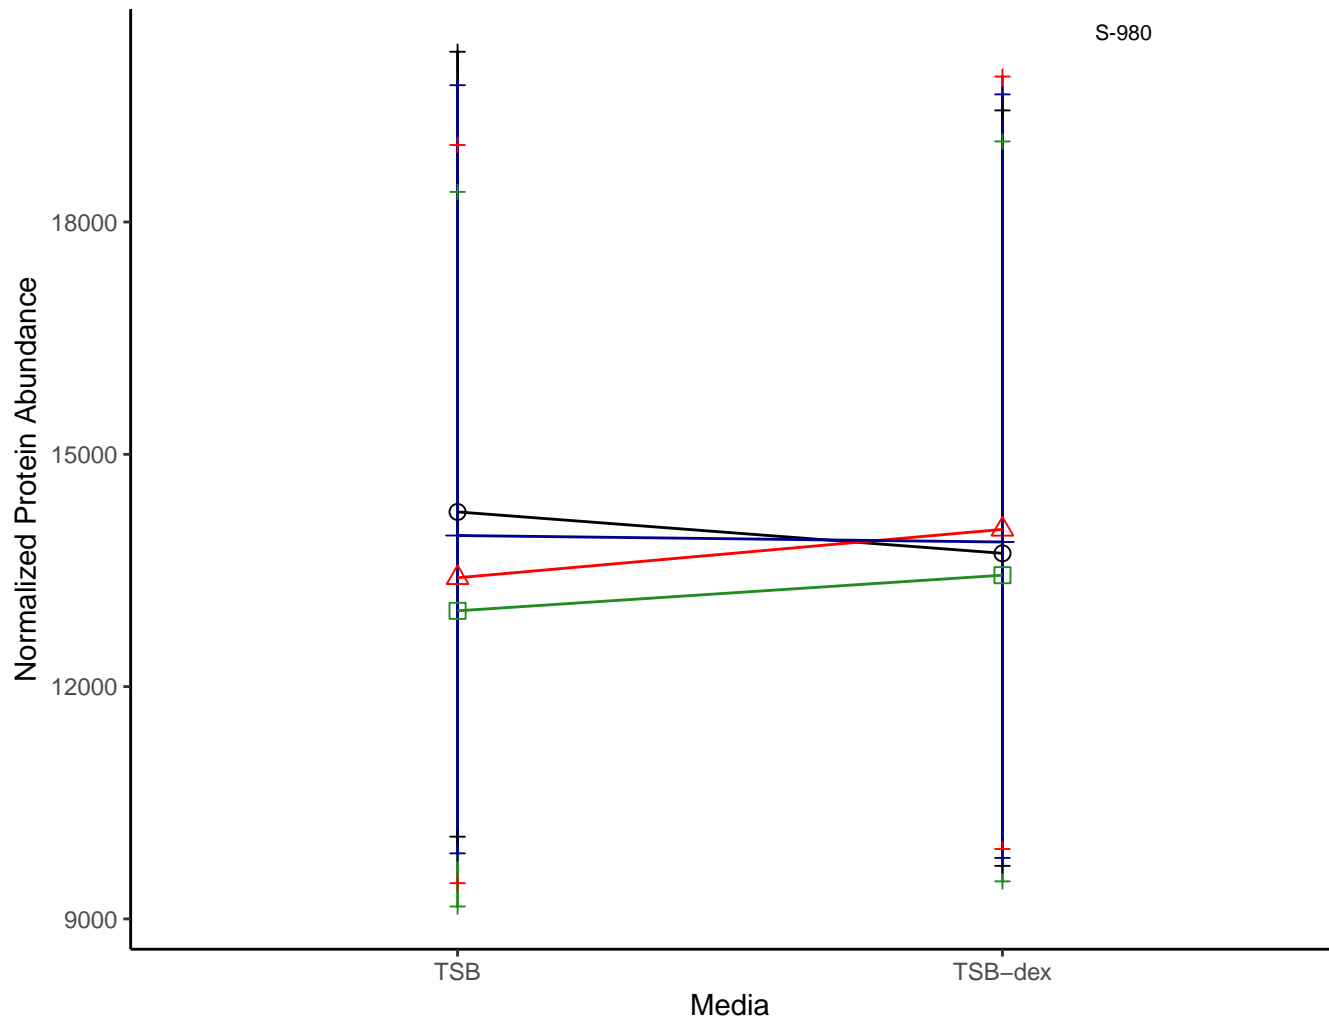

- SA564
- SA564- $\Delta$ *hptRS*
- SA564- $\Delta$ *ccpA*
- SA564- $\Delta$ *hptRS/ccpA*

# Y1921\_STAAM

S-981

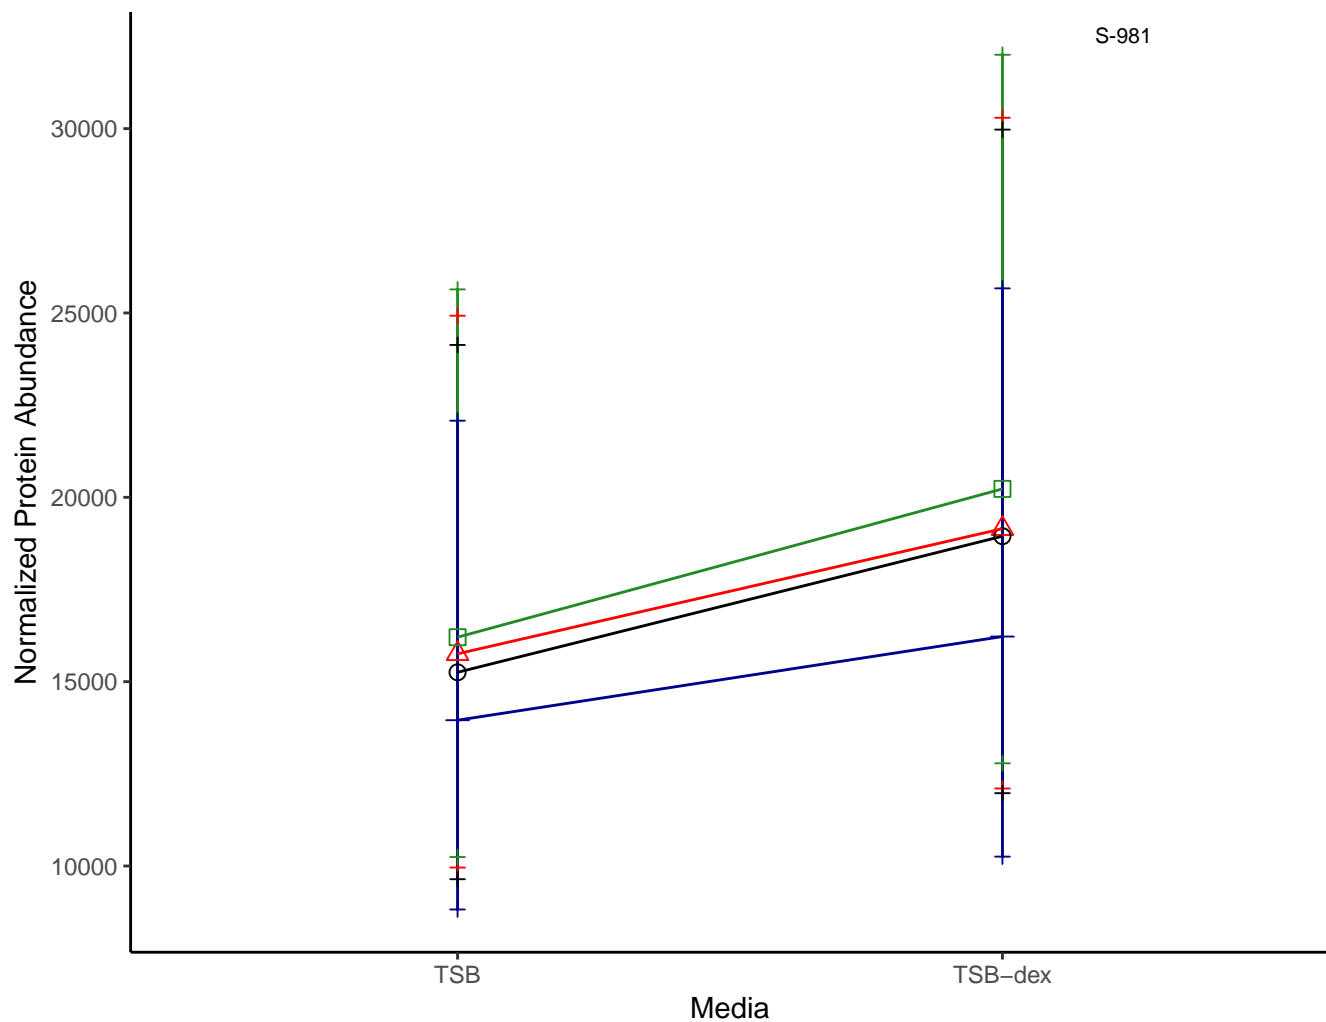

- ⊕ SA564
- △ SA564- $\Delta$ *hptRS*
- ⊞ SA564- $\Delta$ *ccpA*
- + SA564- $\Delta$ *hptRS/ccpA*

# Y2173\_STAAM

S-982

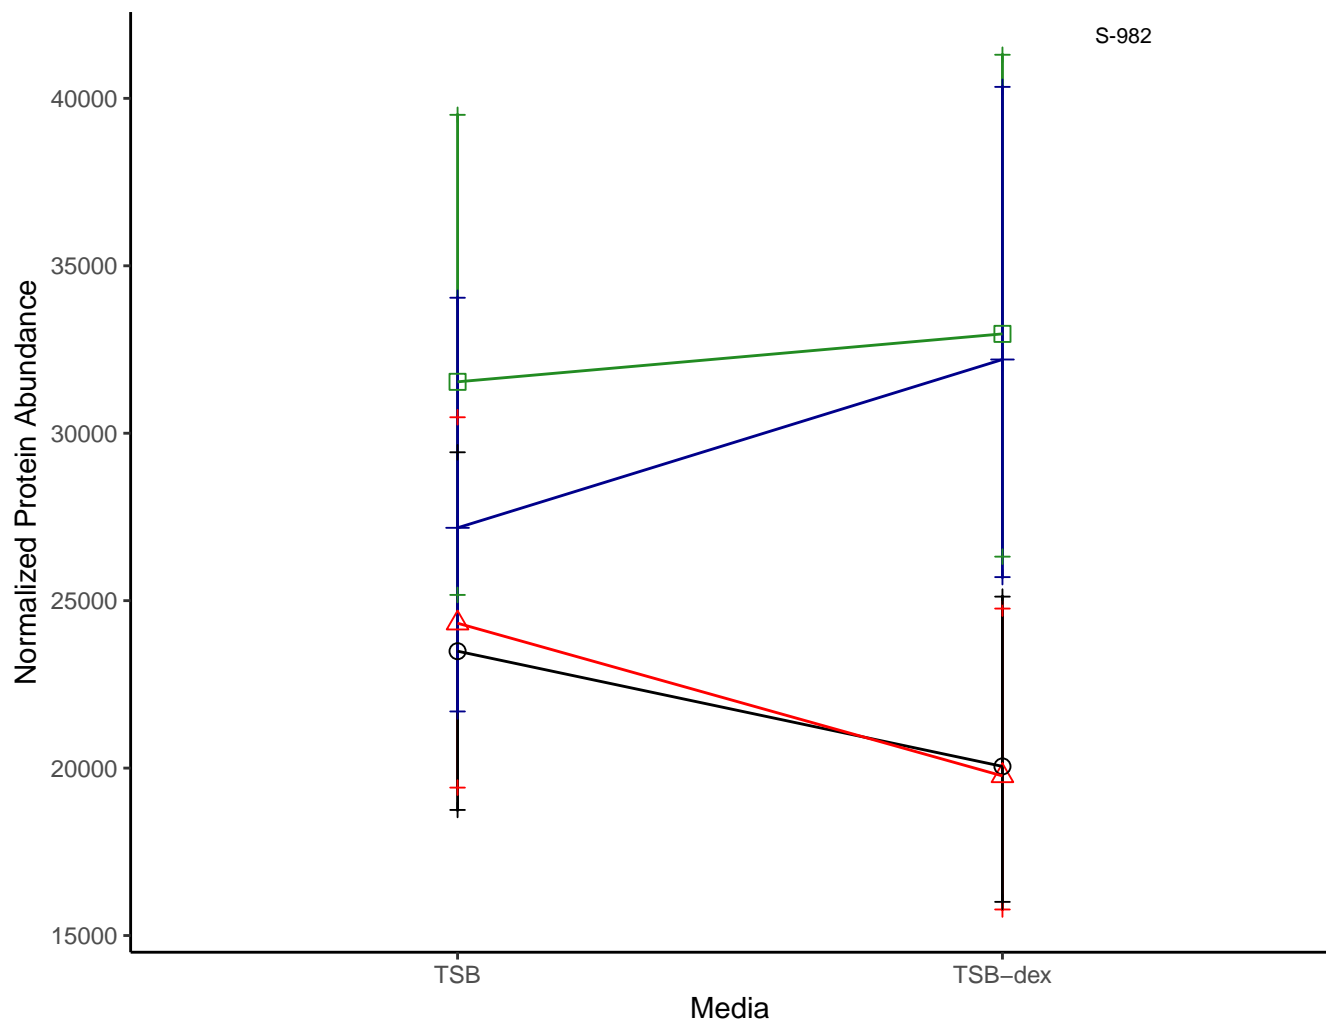

- ⊕ SA564
- △ SA564- $\Delta$ *hptRS*
- ⊞ SA564- $\Delta$ *ccpA*
- + SA564- $\Delta$ *hptRS/ccpA*

## Y2204\_STAAM

S-983

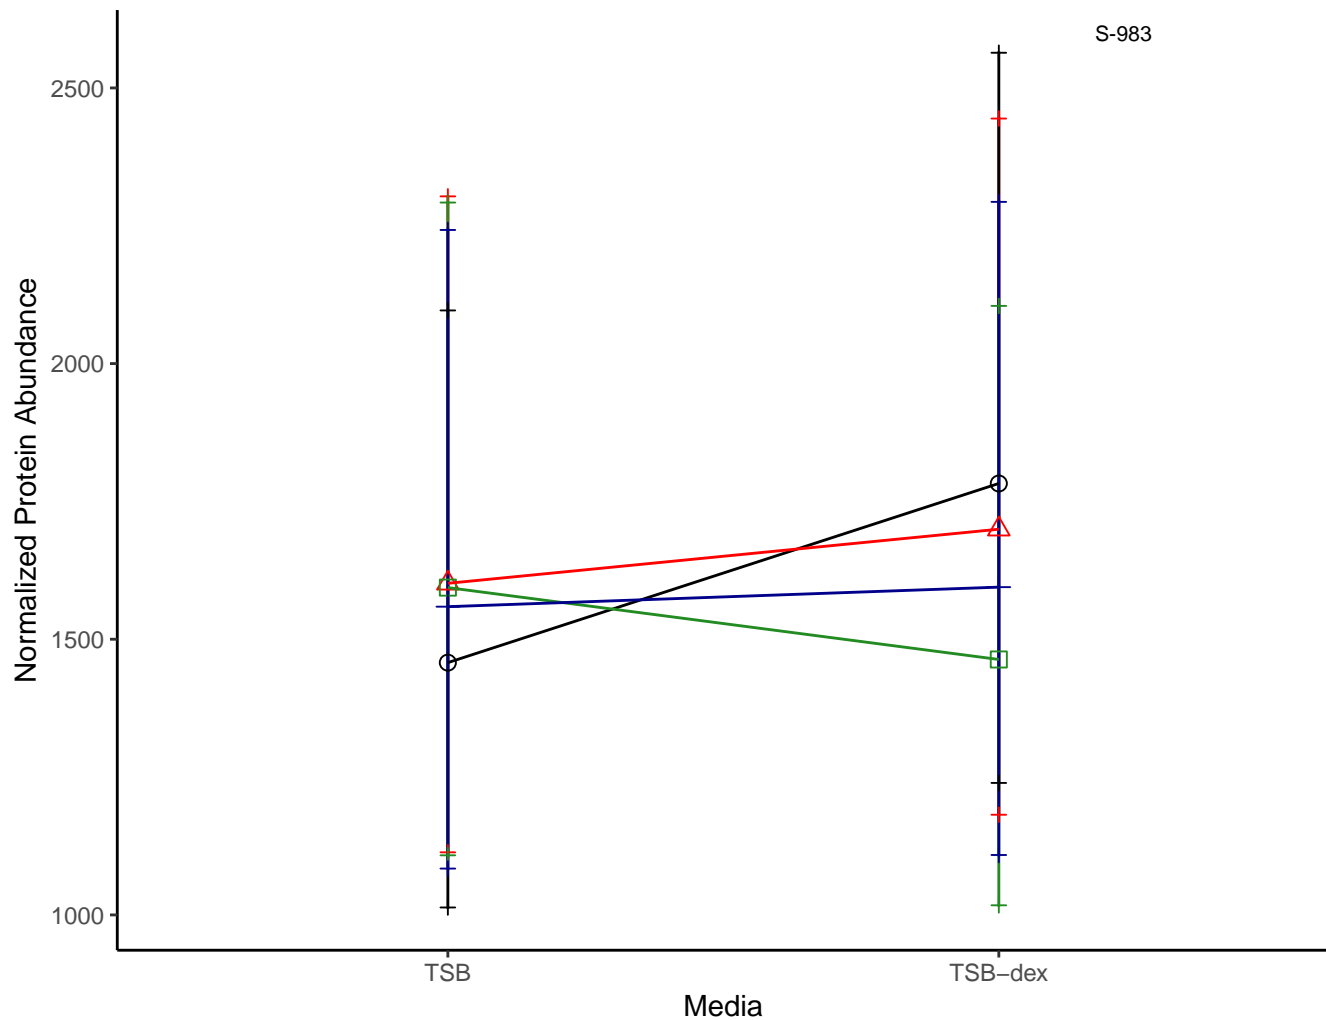

- ⊕ SA564
- △ SA564- $\Delta hptRS$
- ⊞ SA564- $\Delta ccpA$
- + SA564- $\Delta hptRS/ccpA$

# Y2265\_STAAM

S-984

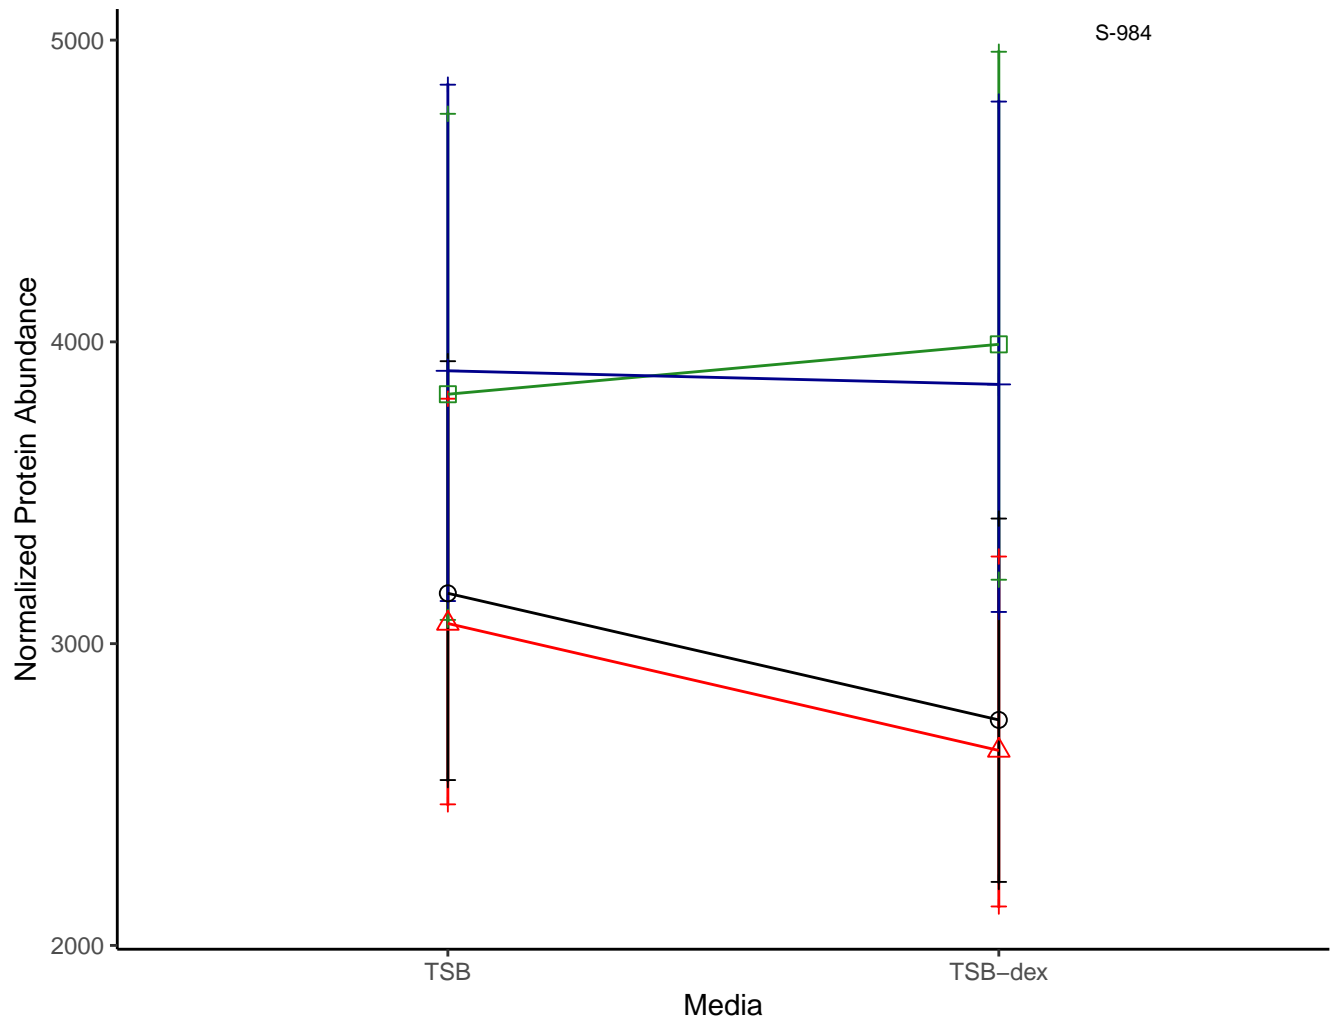

- ⊕ SA564
- △ SA564- $\Delta$ *hptRS*
- ⊞ SA564- $\Delta$ *ccpA*
- + SA564- $\Delta$ *hptRS/ccpA*



# Y2305\_STAAM

S-985

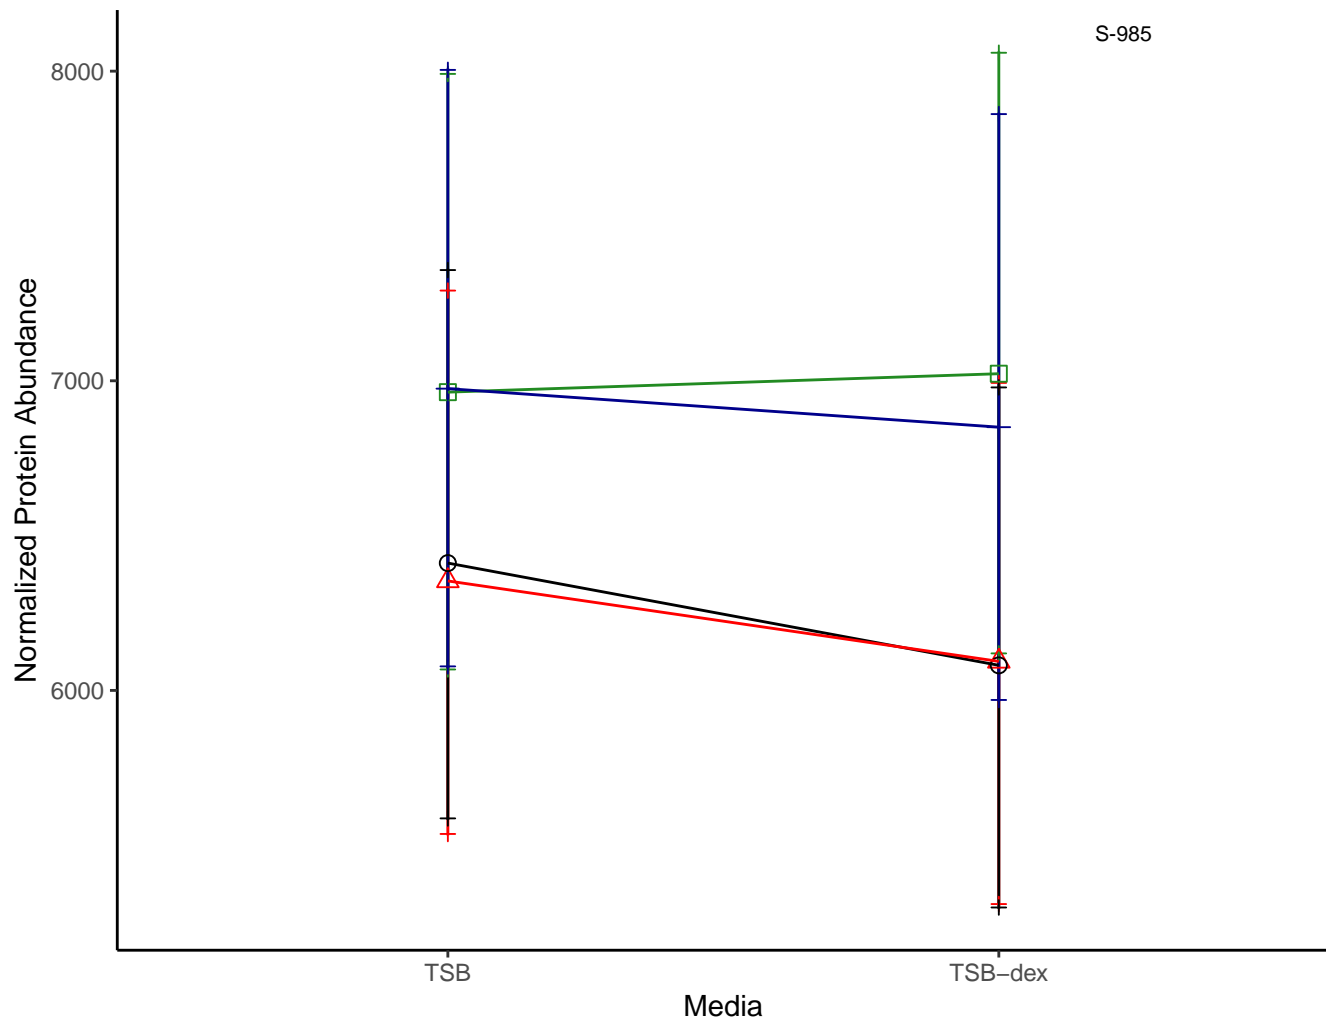

- ⊕ SA564
- △ SA564- $\Delta hptRS$
- ⊞ SA564- $\Delta ccpA$
- ⊕ SA564- $\Delta hptRS/ccpA$

# Y2363\_STAAM

S-986

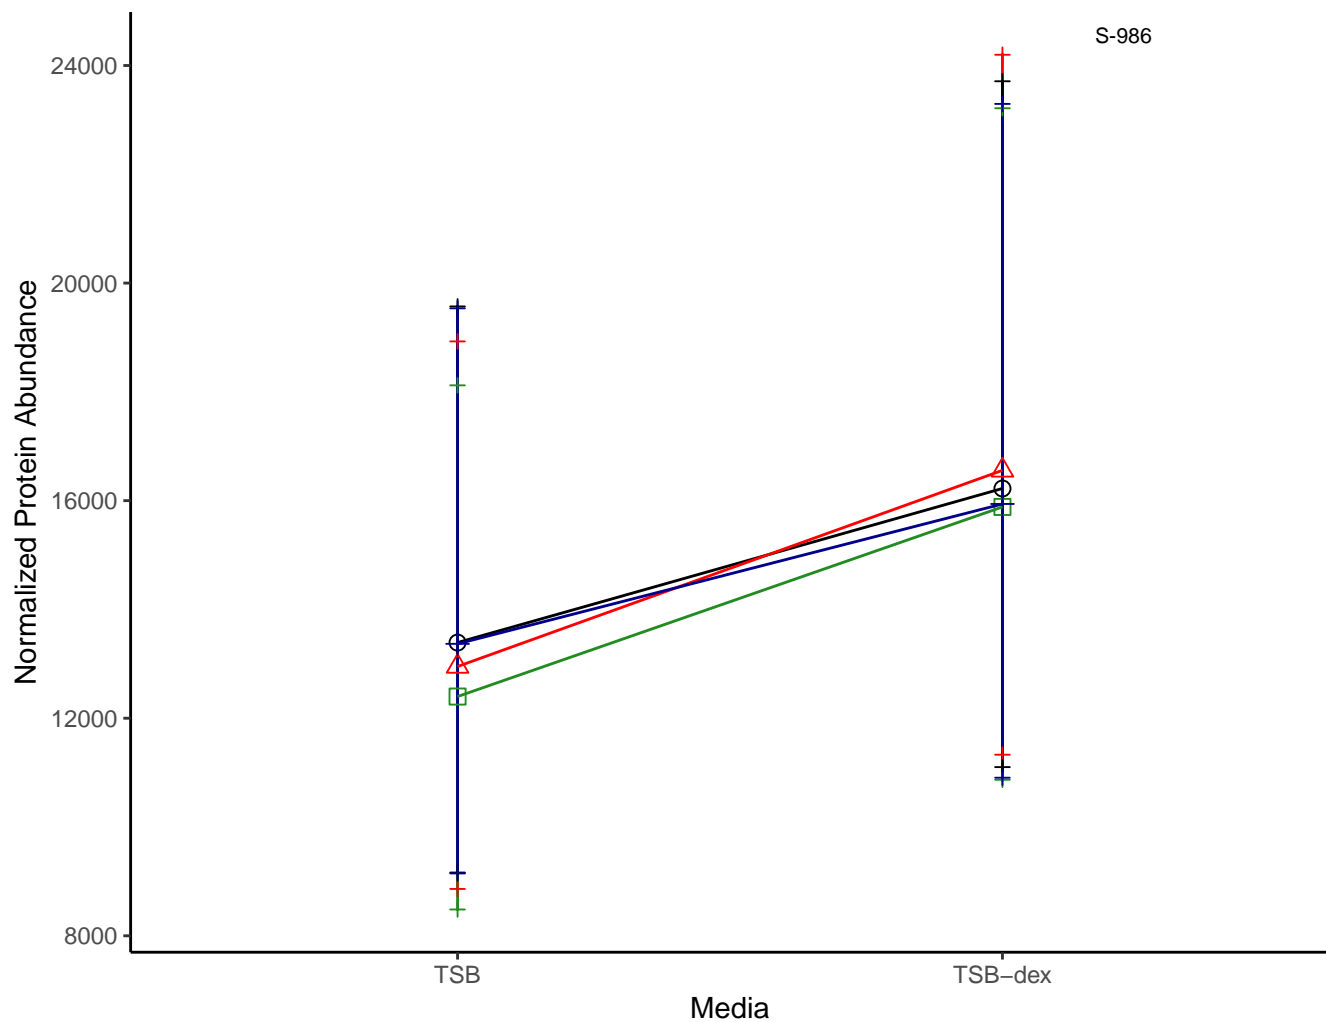

- SA564
- SA564- $\Delta$ *hptRS*
- SA564- $\Delta$ *ccpA*
- SA564- $\Delta$ *hptRS/ccpA*

# Y2368\_STAAM

S-987

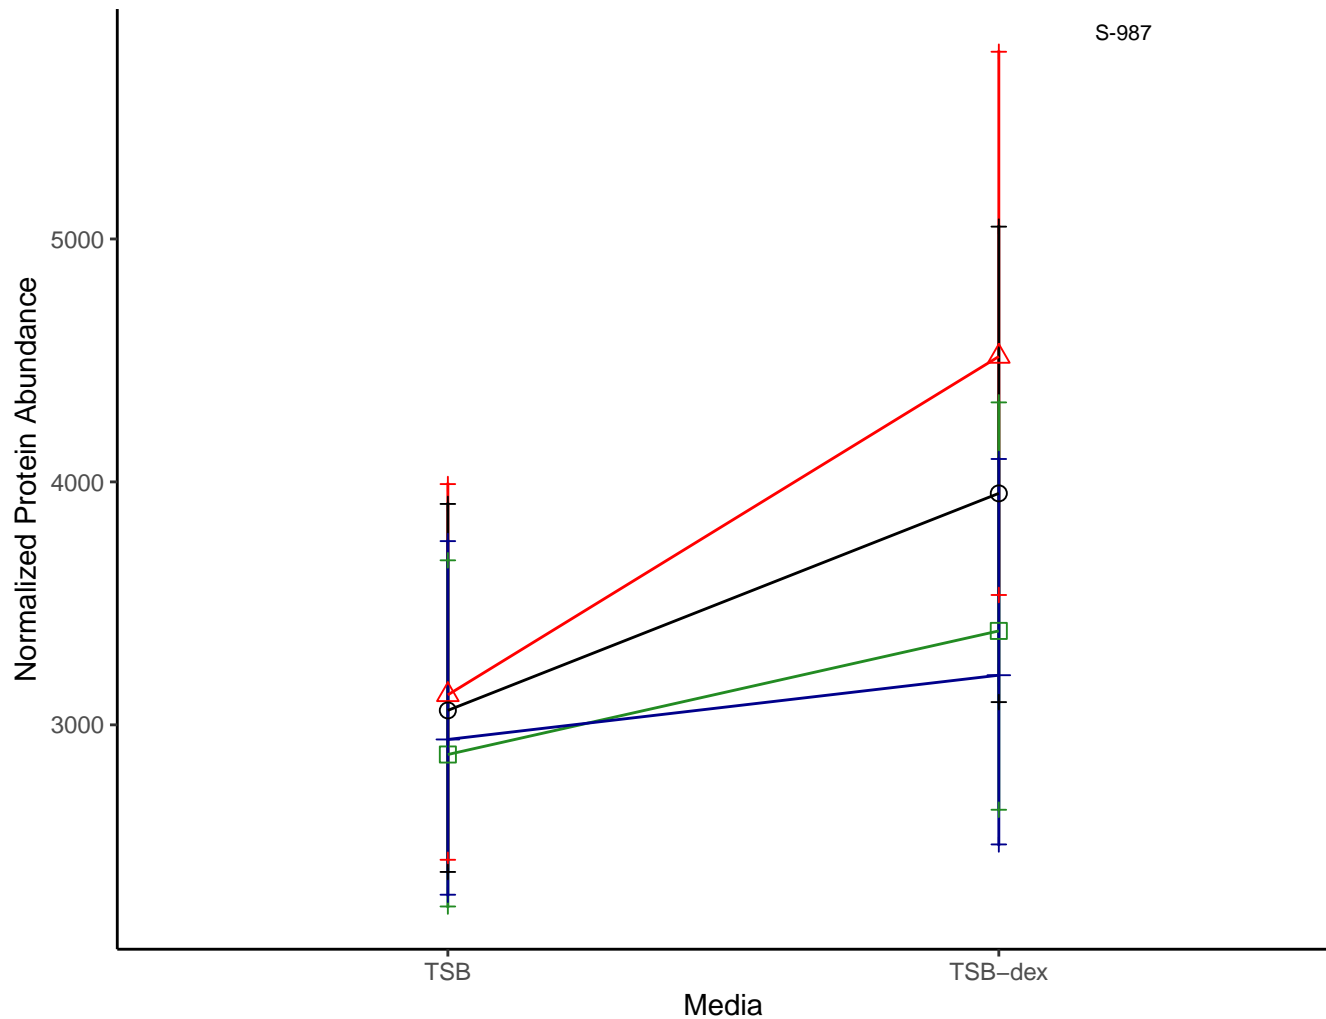

- ⊕ SA564
- △ SA564- $\Delta hptRS$
- ⊞ SA564- $\Delta ccpA$
- + SA564- $\Delta hptRS/ccpA$

# Y2478\_STAAM

S-988

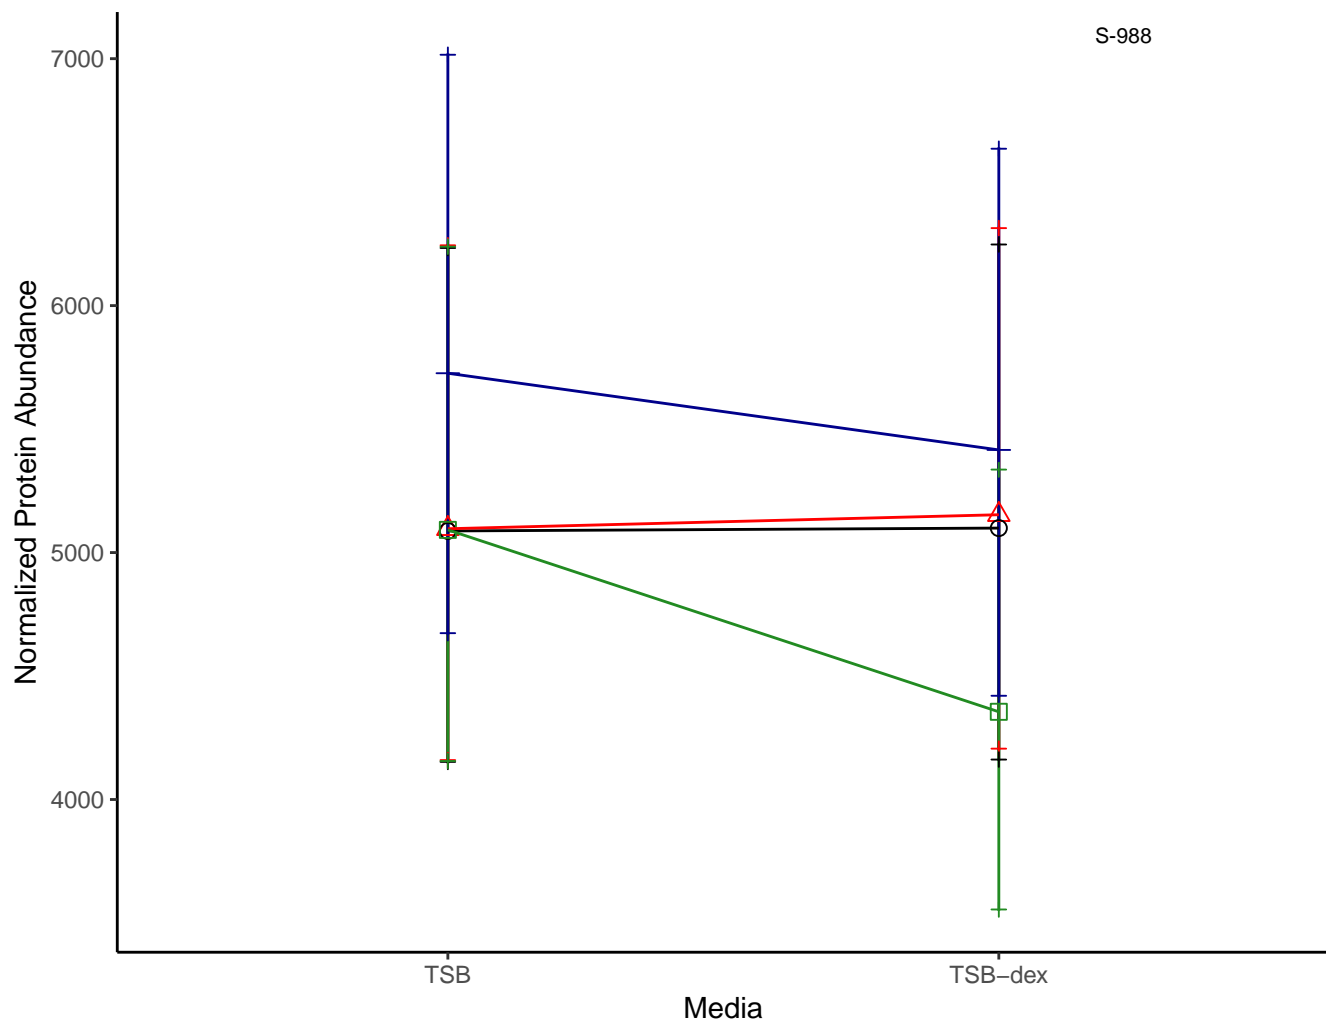

- ⊕ SA564
- △ SA564- $\Delta hptRS$
- ⊞ SA564- $\Delta ccpA$
- + SA564- $\Delta hptRS/ccpA$

## Y2523\_STAAM

S-989

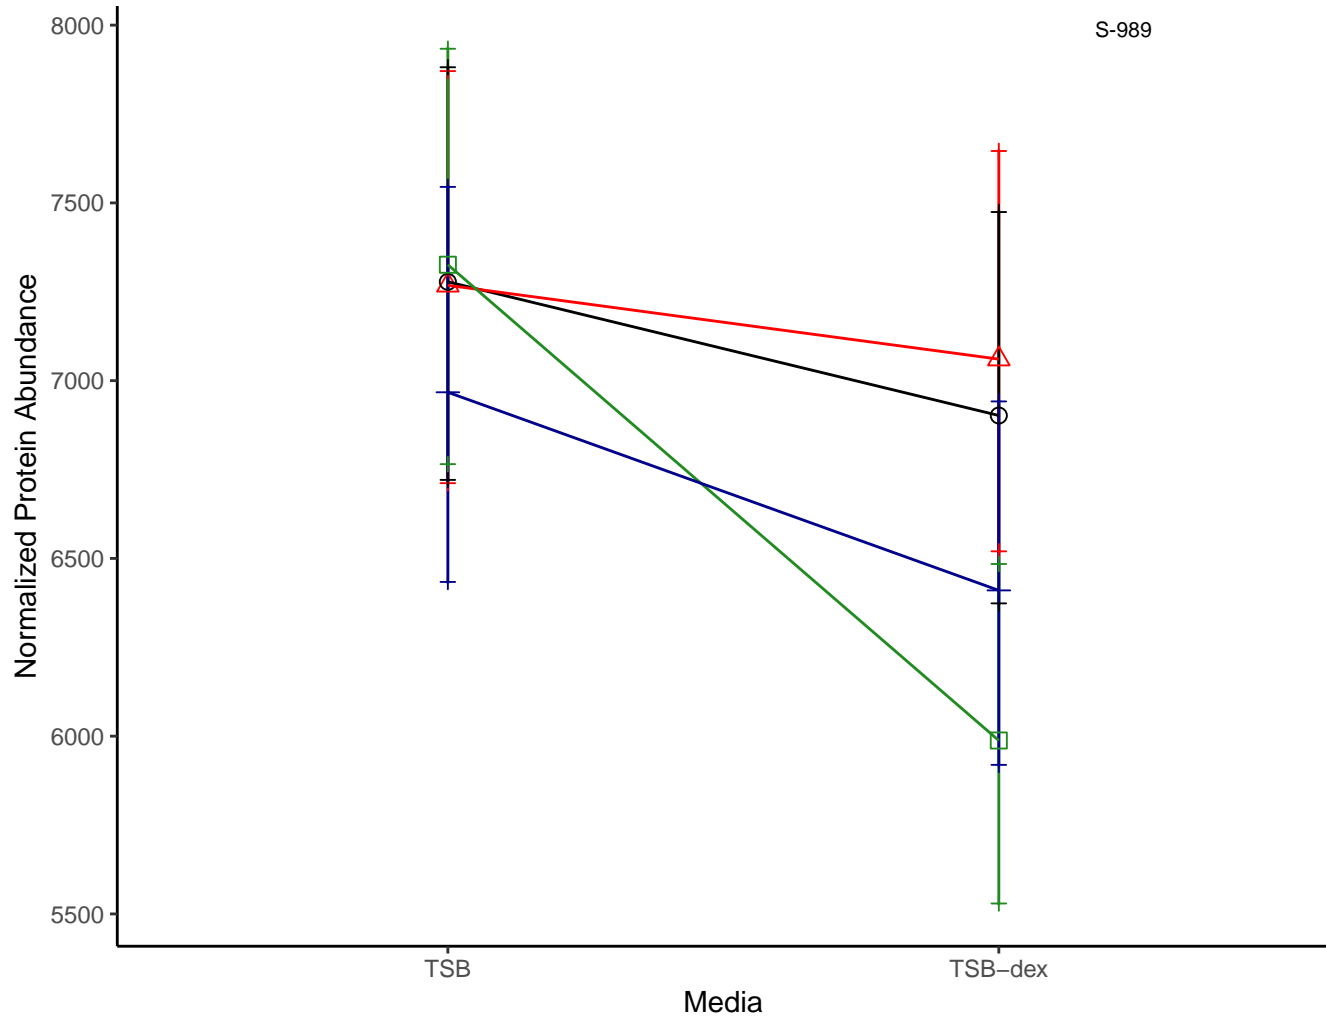

- ⊕ SA564
- △ SA564- $\Delta hptRS$
- ⊞ SA564- $\Delta ccpA$
- + SA564- $\Delta hptRS/ccpA$

# Y2573\_STAAM

S-990

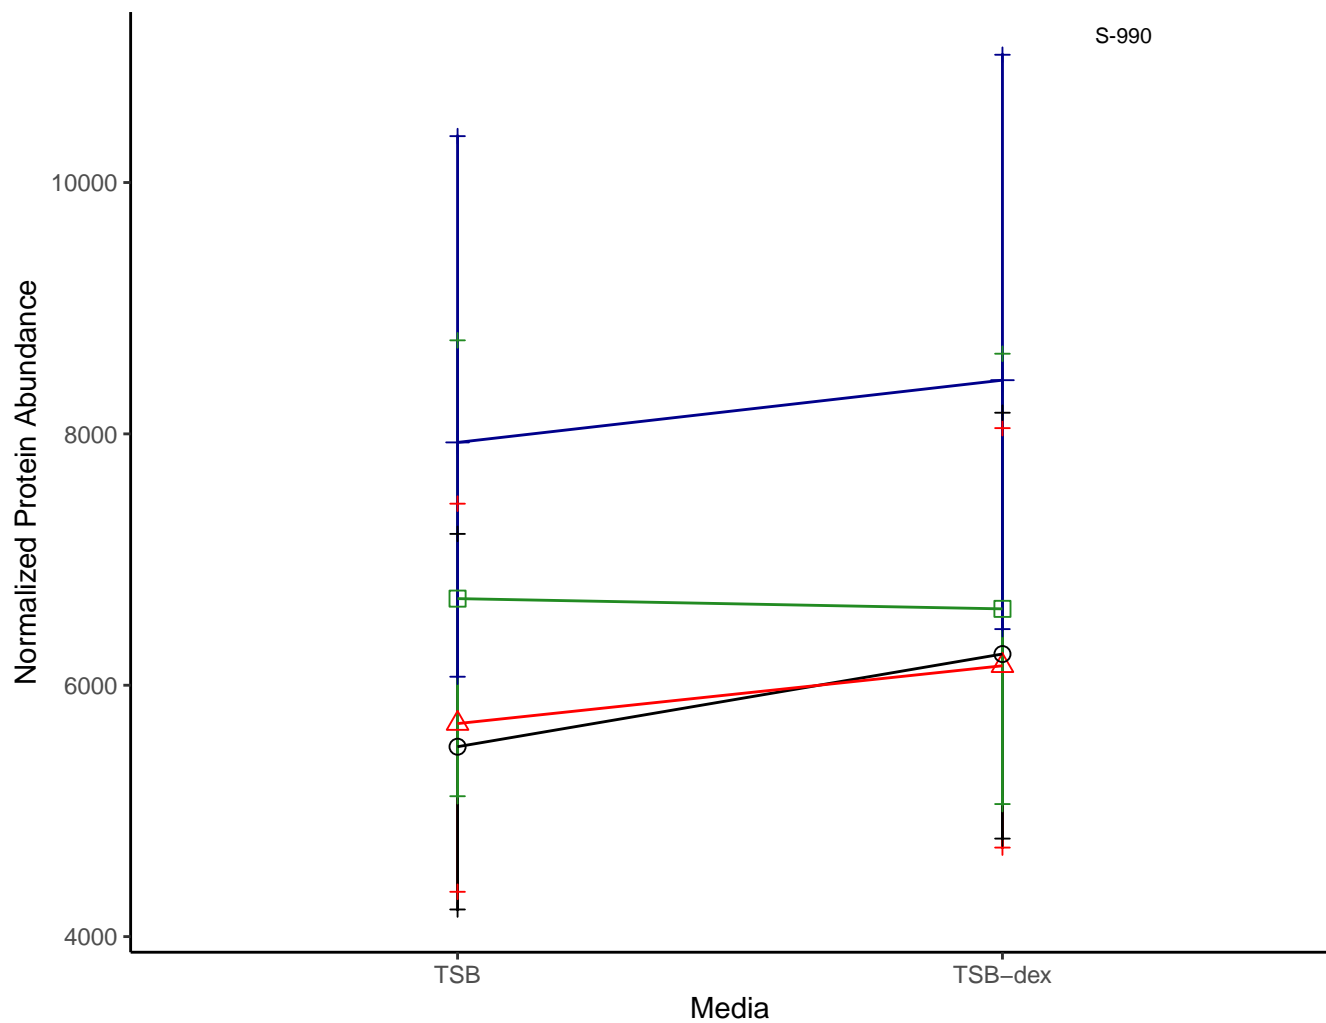

- ⊕ SA564
- △ SA564- $\Delta$ hptRS
- ⊞ SA564- $\Delta$ ccpA
- + SA564- $\Delta$ hptRS/ccpA

## Y2578\_STAAM

S-991

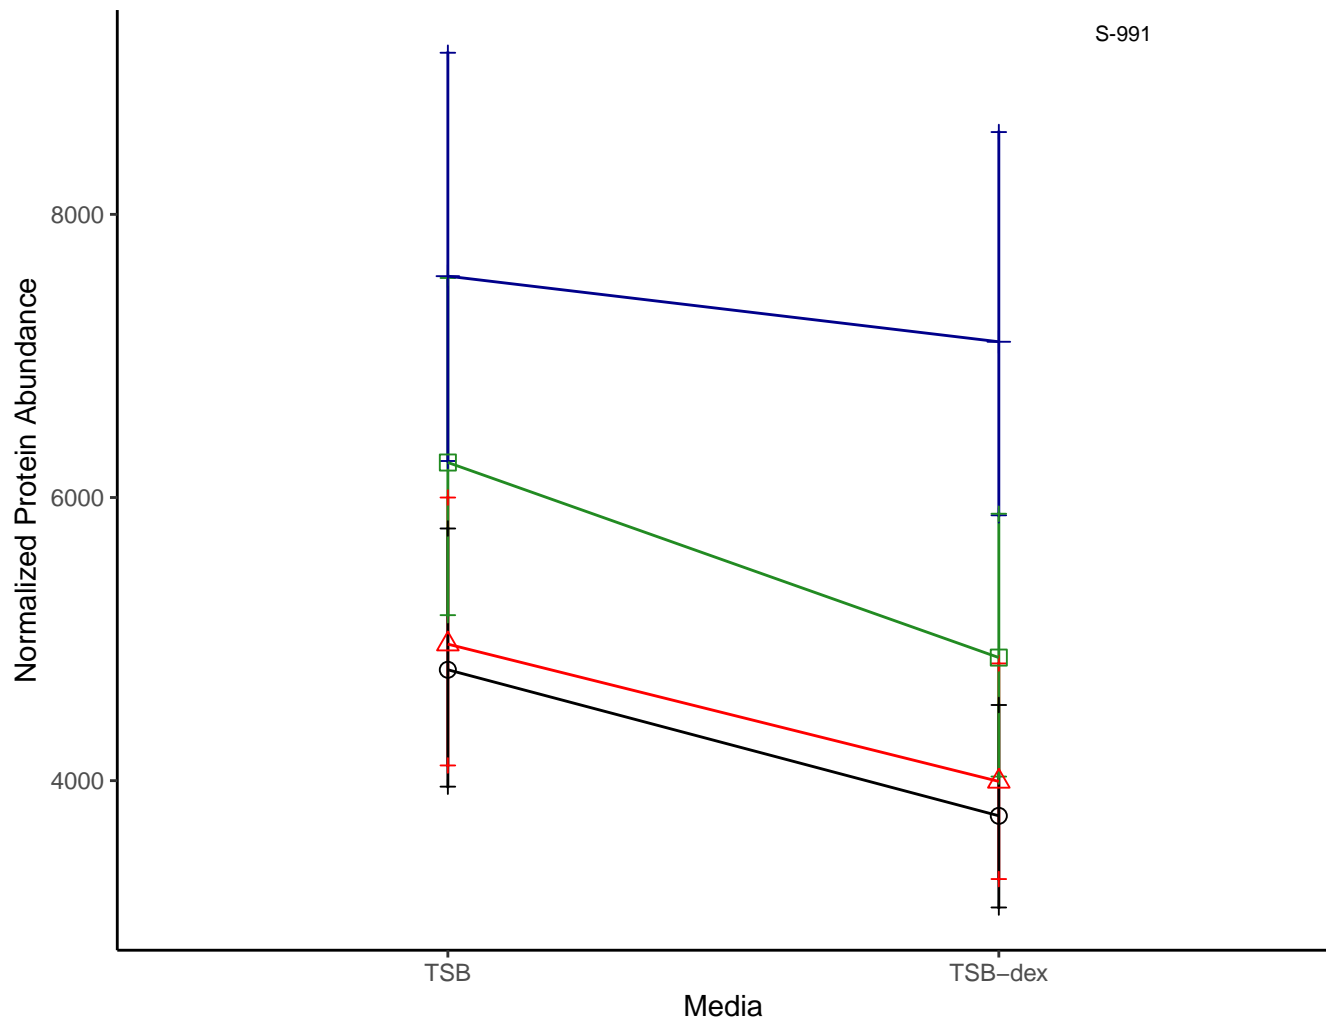

- ⊕ SA564
- △ SA564-Δ*hptRS*
- ⊞ SA564-Δ*ccpA*
- + SA564-Δ*hptRS/ccpA*

# Y2581\_STAAM

S-992

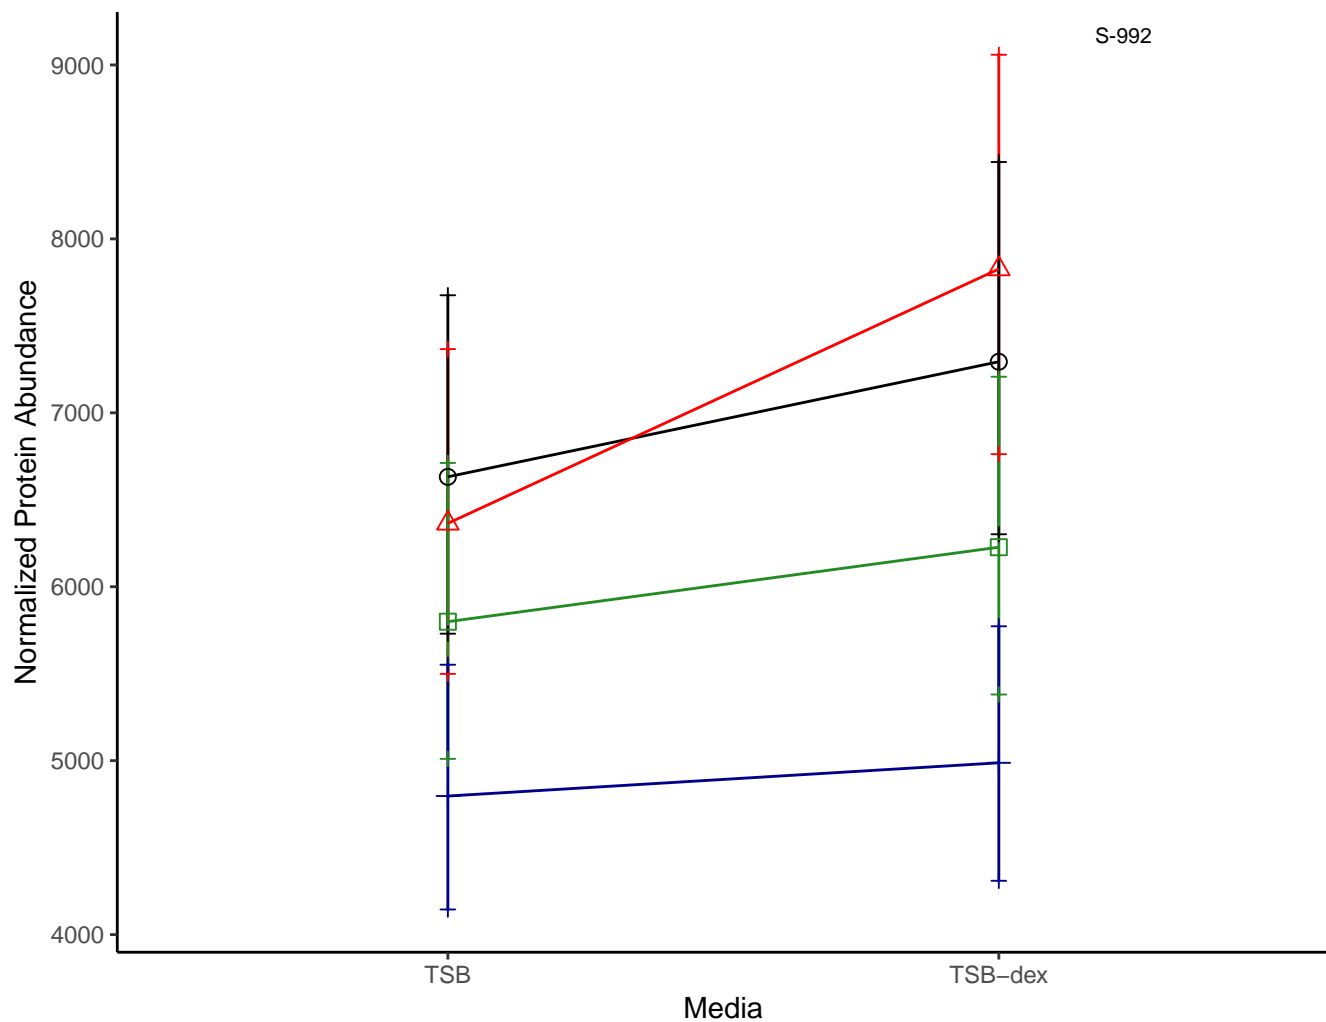

- ⊕ SA564
- △ SA564- $\Delta$ *hptRS*
- ⊞ SA564- $\Delta$ *ccpA*
- + SA564- $\Delta$ *hptRS/ccpA*



## Y2627\_STAAM

S-993

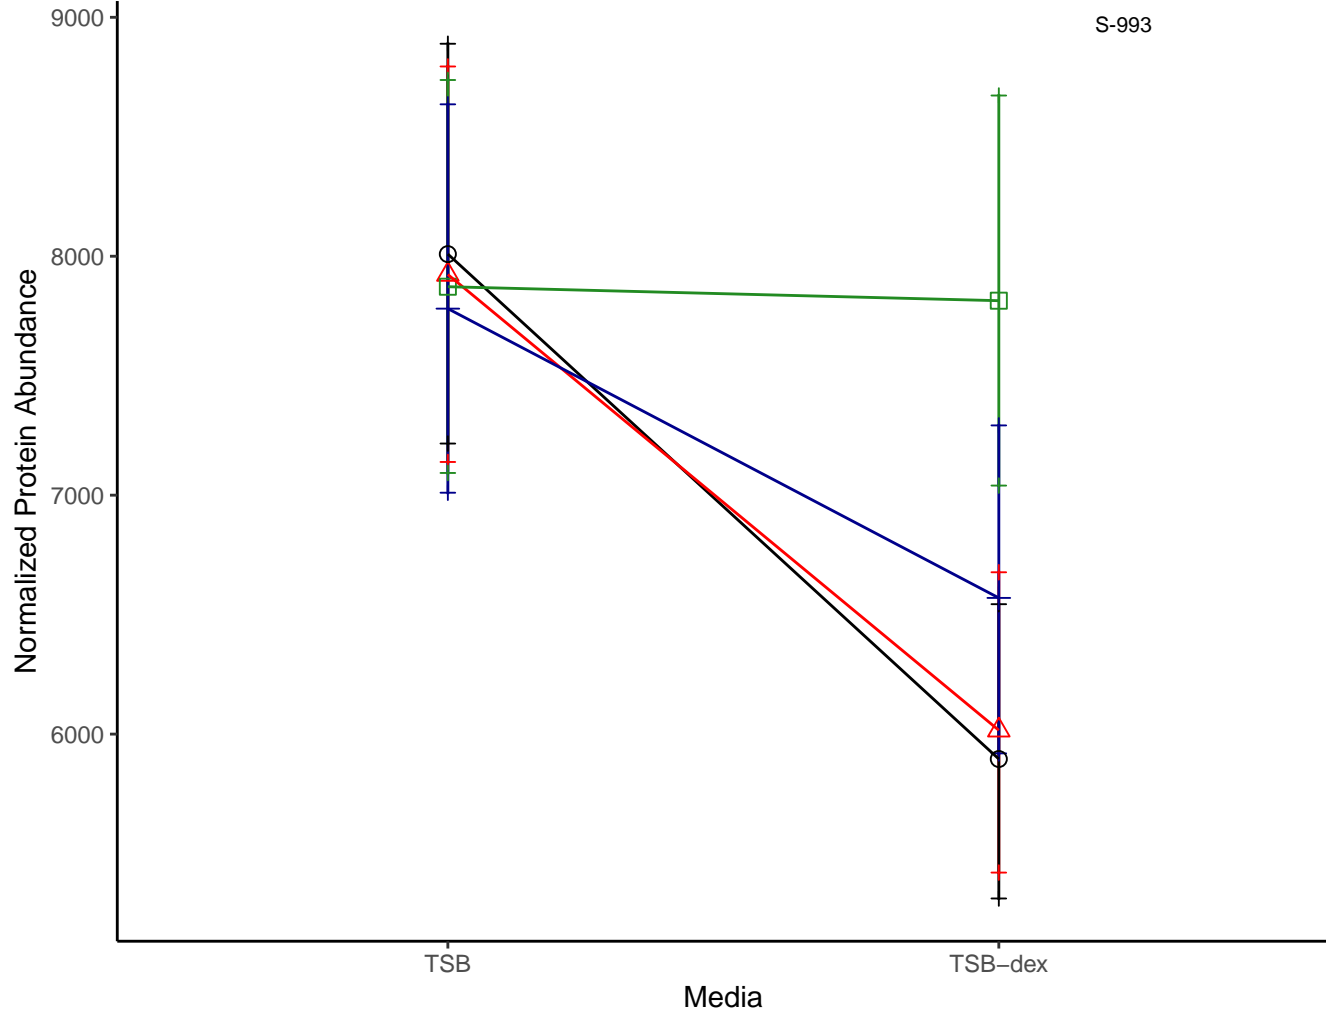

- SA564
- SA564- $\Delta hptRS$
- SA564- $\Delta ccpA$
- SA564- $\Delta hptRS/ccpA$

# Y2687\_STAAM

S-994

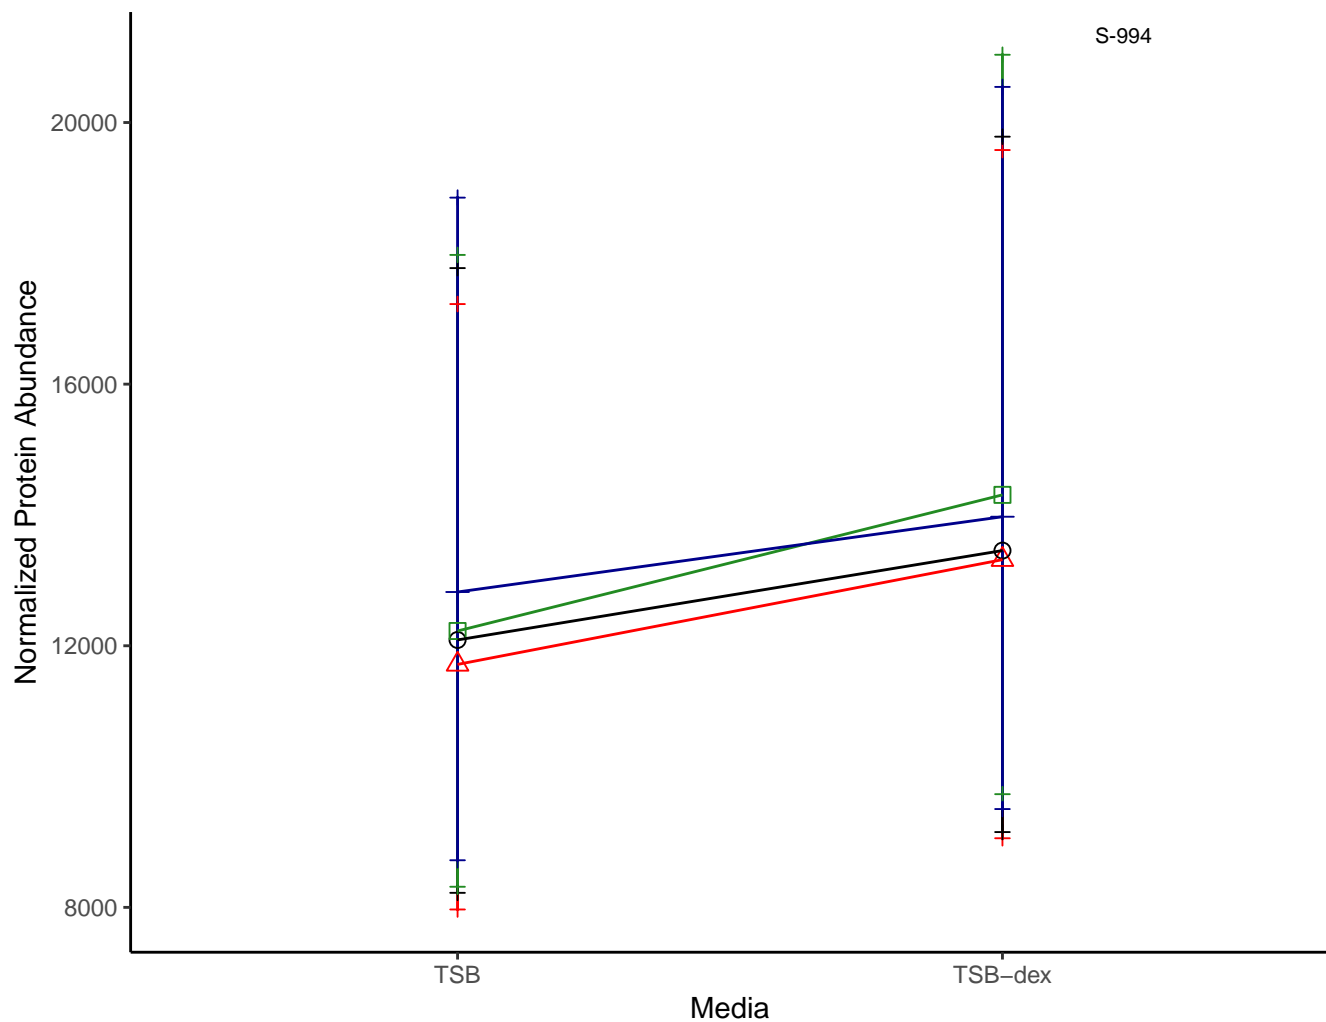

- ⊕ SA564
- △ SA564- $\Delta$ *hptRS*
- ⊞ SA564- $\Delta$ *ccpA*
- + SA564- $\Delta$ *hptRS/ccpA*

# Y2689\_STAAM

S-995

Normalized Protein Abundance

22500  
20000  
17500  
15000

TSB

Media

TSB-dex

- ⊕ SA564
- △ SA564- $\Delta$ *hptRS*
- ⊞ SA564- $\Delta$ *ccpA*
- + SA564- $\Delta$ *hptRS/ccpA*

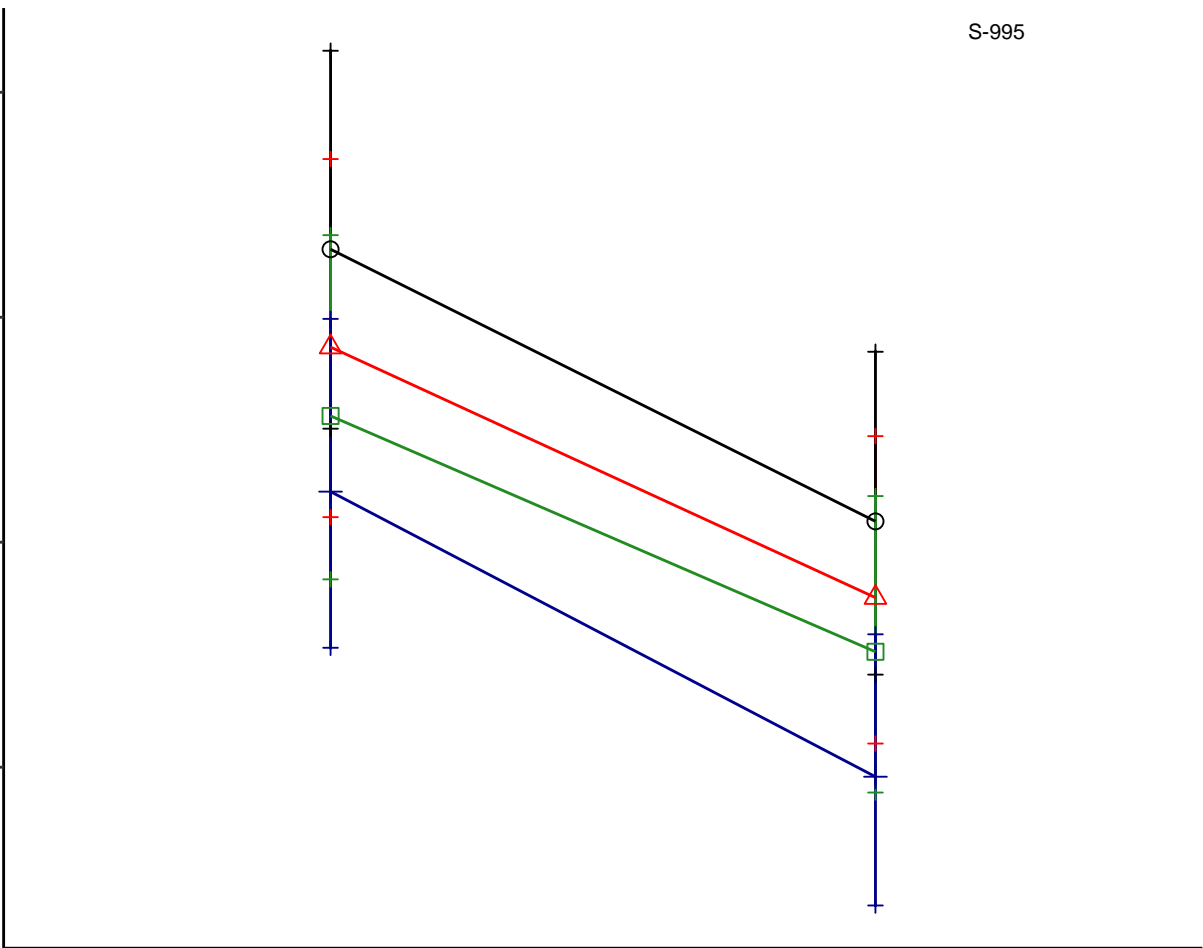

# Y385\_STAAM

S-996

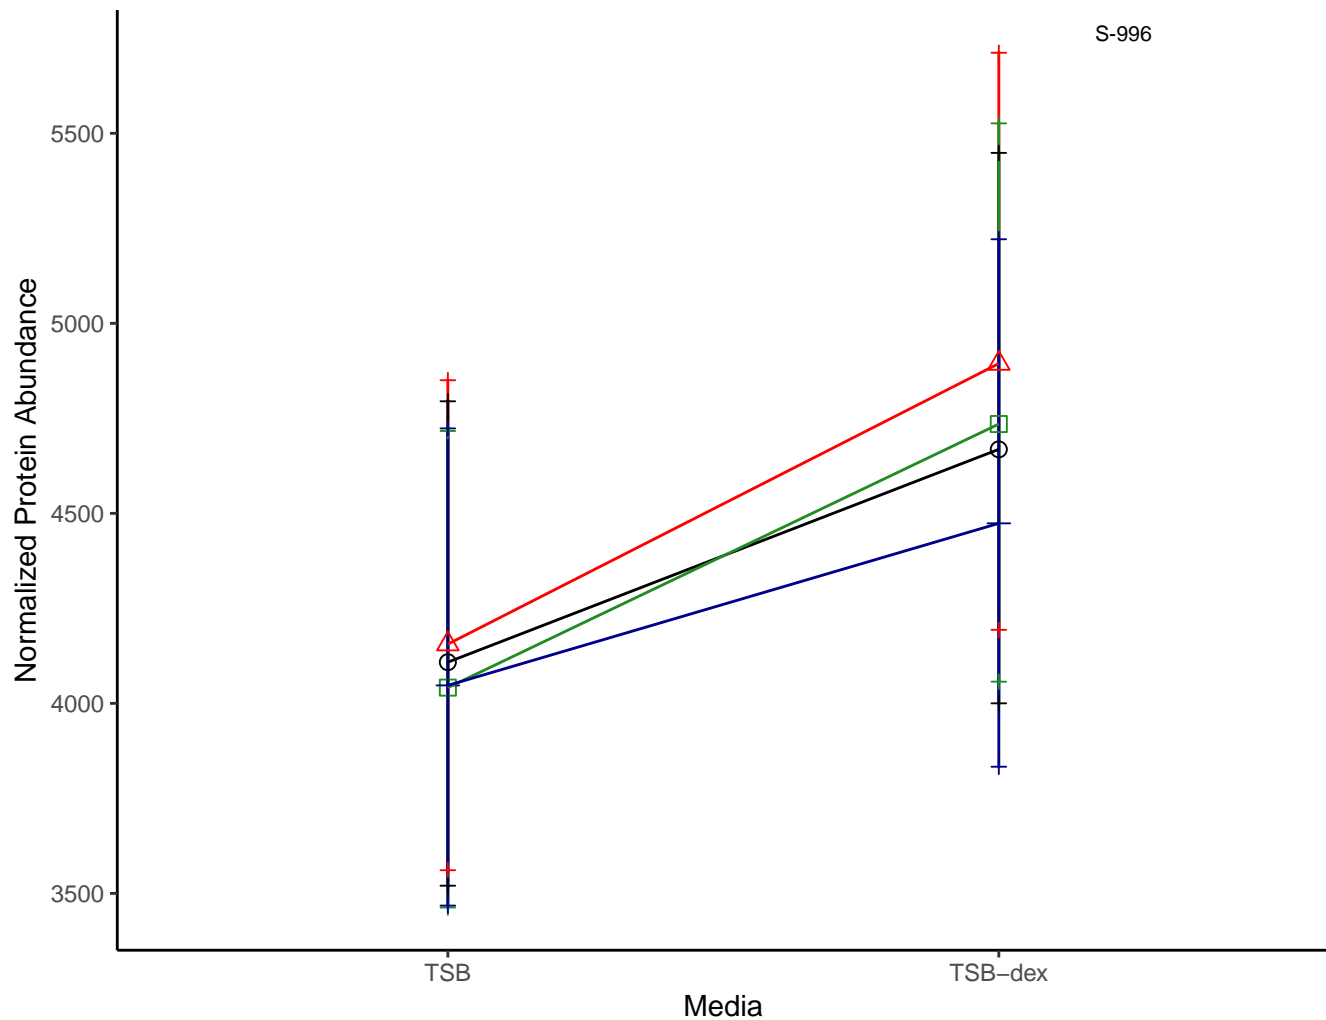

- ⊕ SA564
- △ SA564-ΔhptRS
- ⊞ SA564-ΔccpA
- + SA564-ΔhptRS/ccpA

# Y437\_STAAM

S-997

Normalized Protein Abundance

16000  
14000  
12000  
10000

TSB

Media

TSB-dex

- ⊕ SA564
- △ SA564- $\Delta$ *hptRS*
- ⊞ SA564- $\Delta$ *ccpA*
- + SA564- $\Delta$ *hptRS/ccpA*

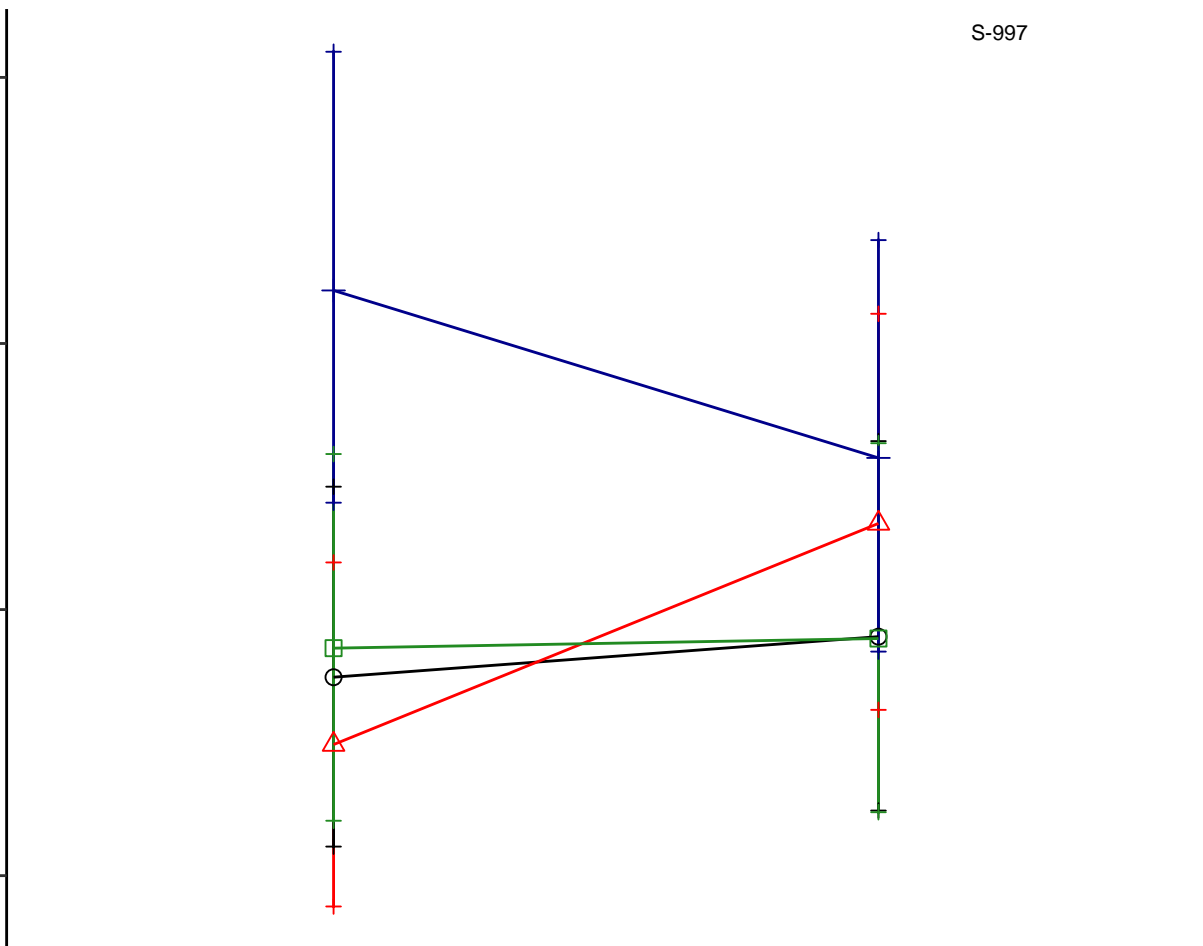

# Y479\_STAAM

S-998

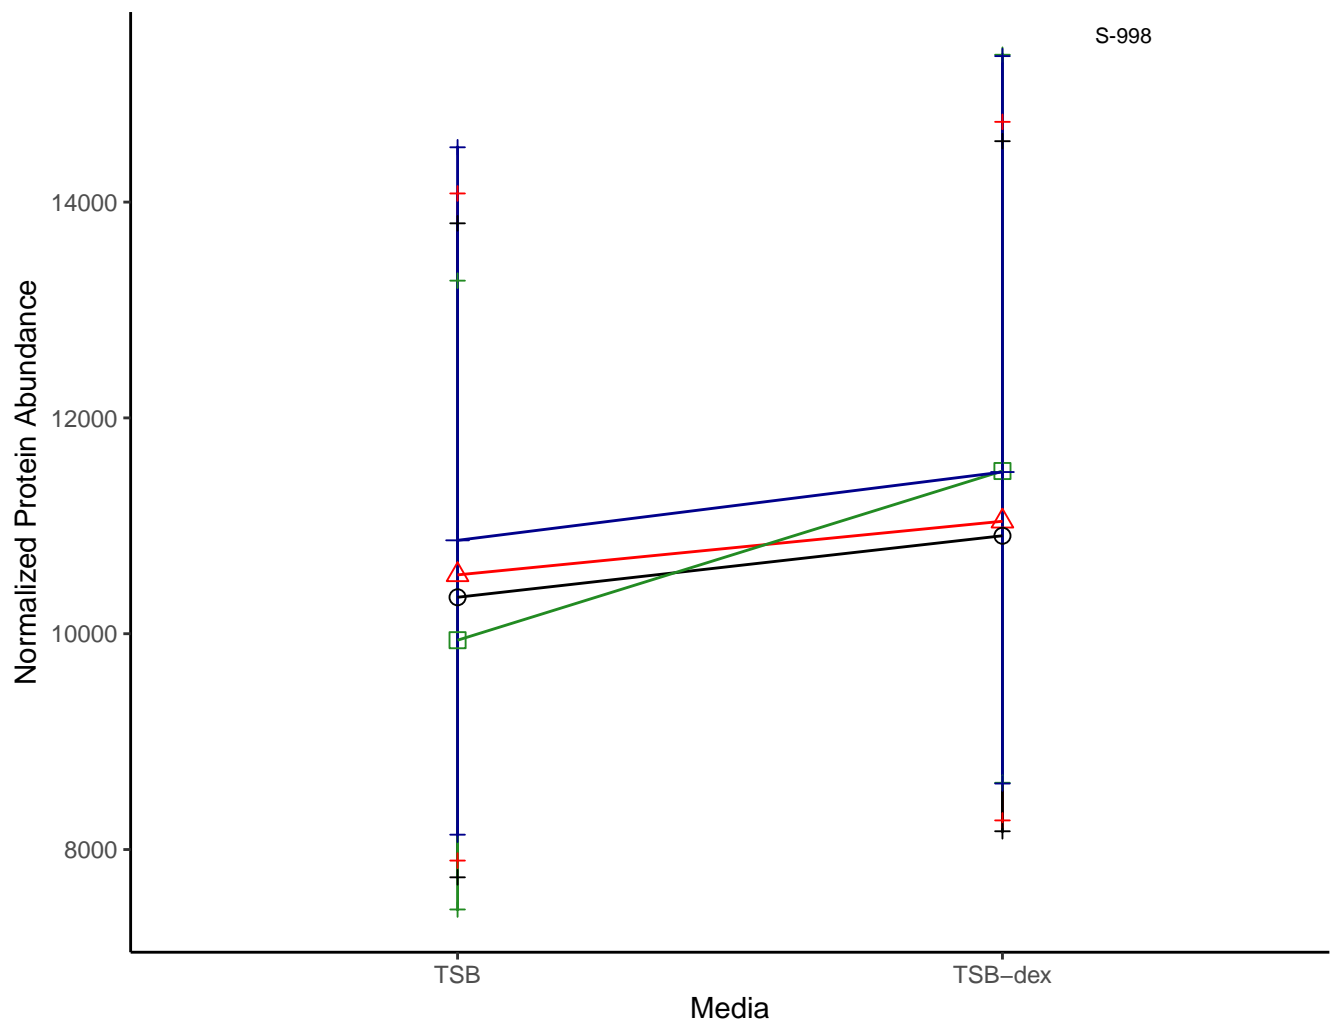

- ⊕ SA564
- △ SA564- $\Delta hptRS$
- ⊠ SA564- $\Delta ccpA$
- + SA564- $\Delta hptRS/ccpA$

# Y553\_STAAM

S-999

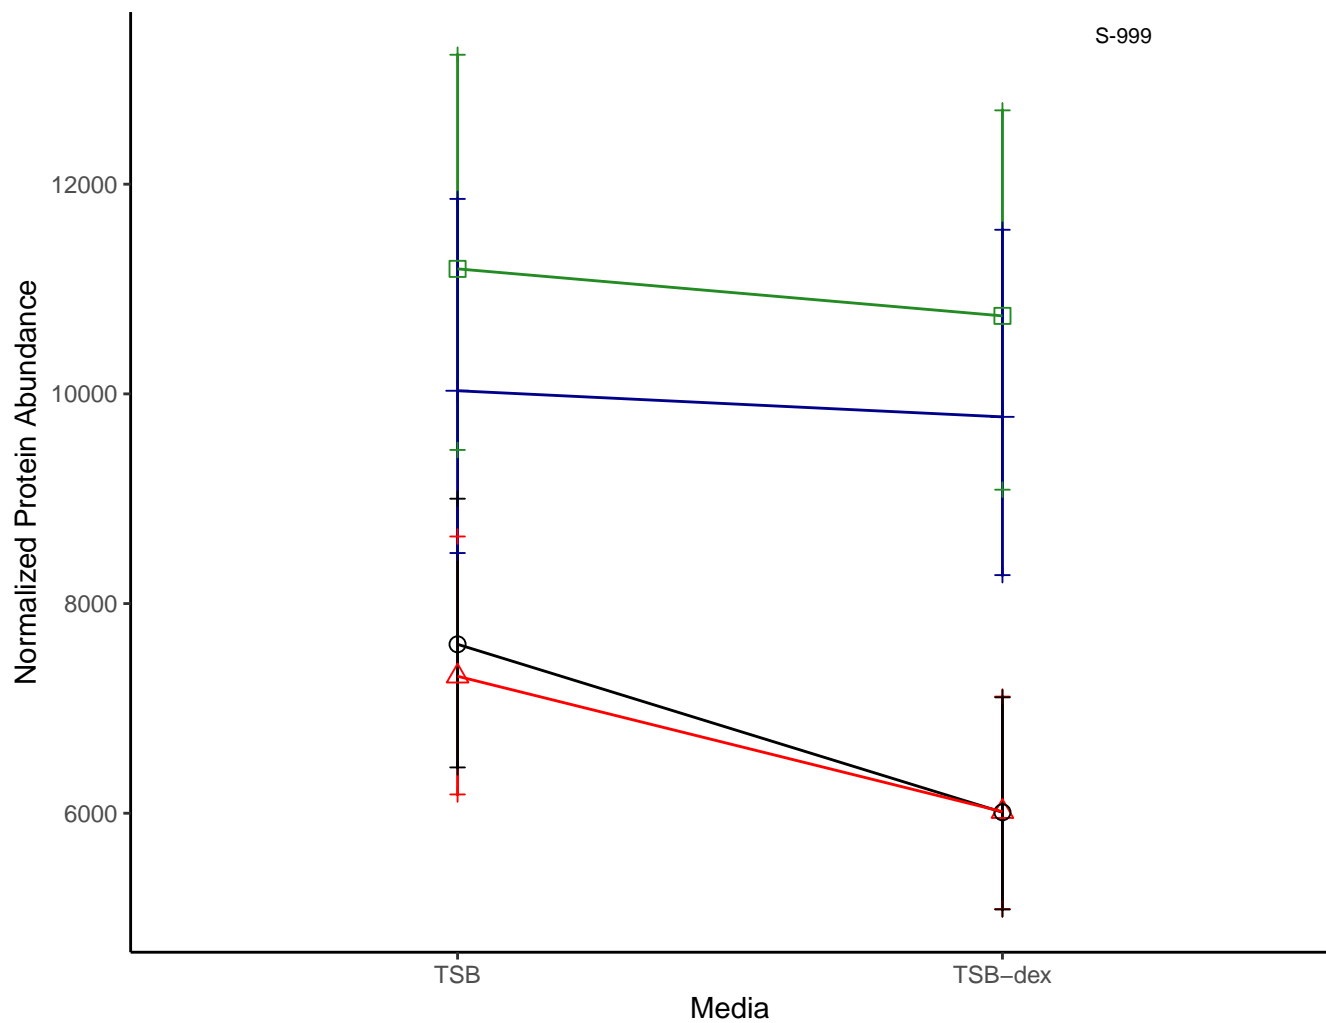

- ⊕ SA564
- △ SA564- $\Delta$ *hptRS*
- ⊞ SA564- $\Delta$ *ccpA*
- + SA564- $\Delta$ *hptRS/ccpA*

# Y587\_STAAM

S-1000

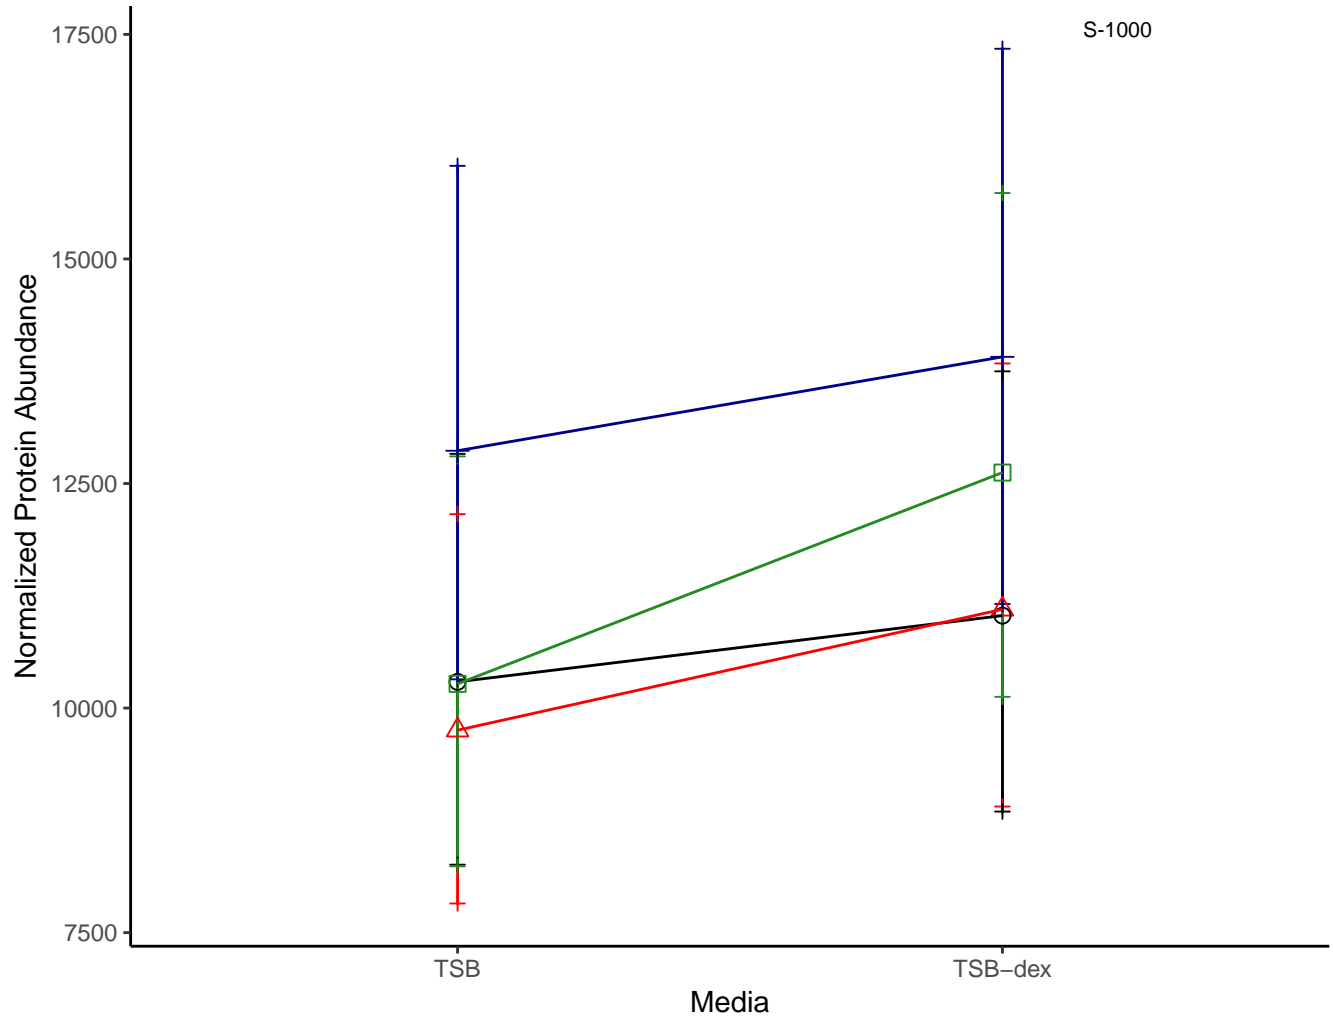

- ⊕ SA564
- △ SA564- $\Delta$ *hptRS*
- ⊞ SA564- $\Delta$ *ccpA*
- + SA564- $\Delta$ *hptRS/ccpA*



# Y669\_STAAM

S-1001

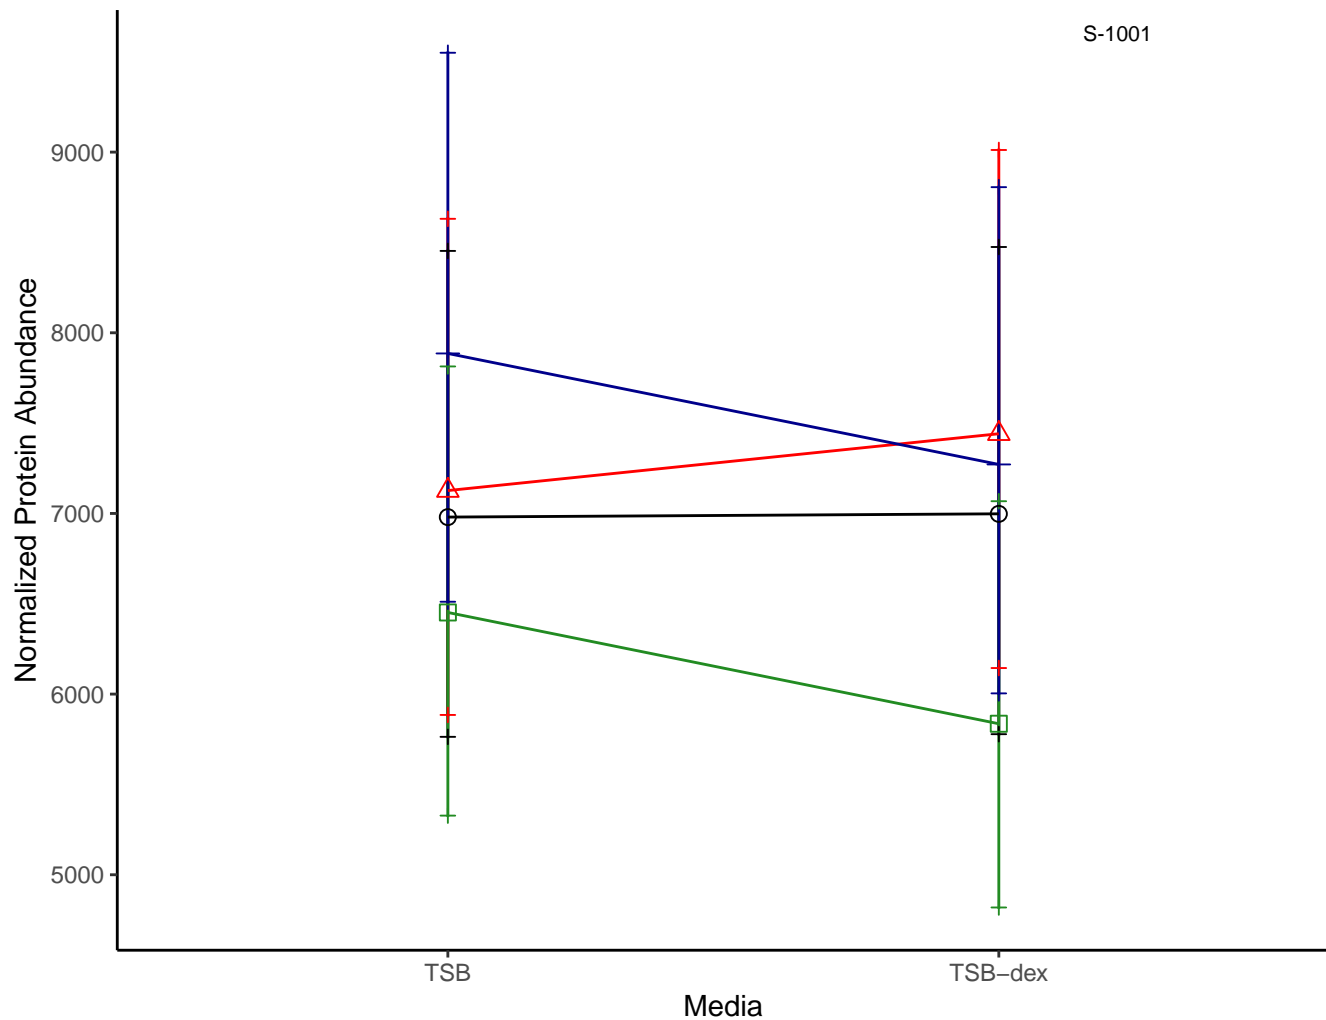

- ⊕ SA564
- △ SA564- $\Delta hptRS$
- ⊞ SA564- $\Delta ccpA$
- + SA564- $\Delta hptRS/ccpA$

# Y752\_STAAM

S-1002

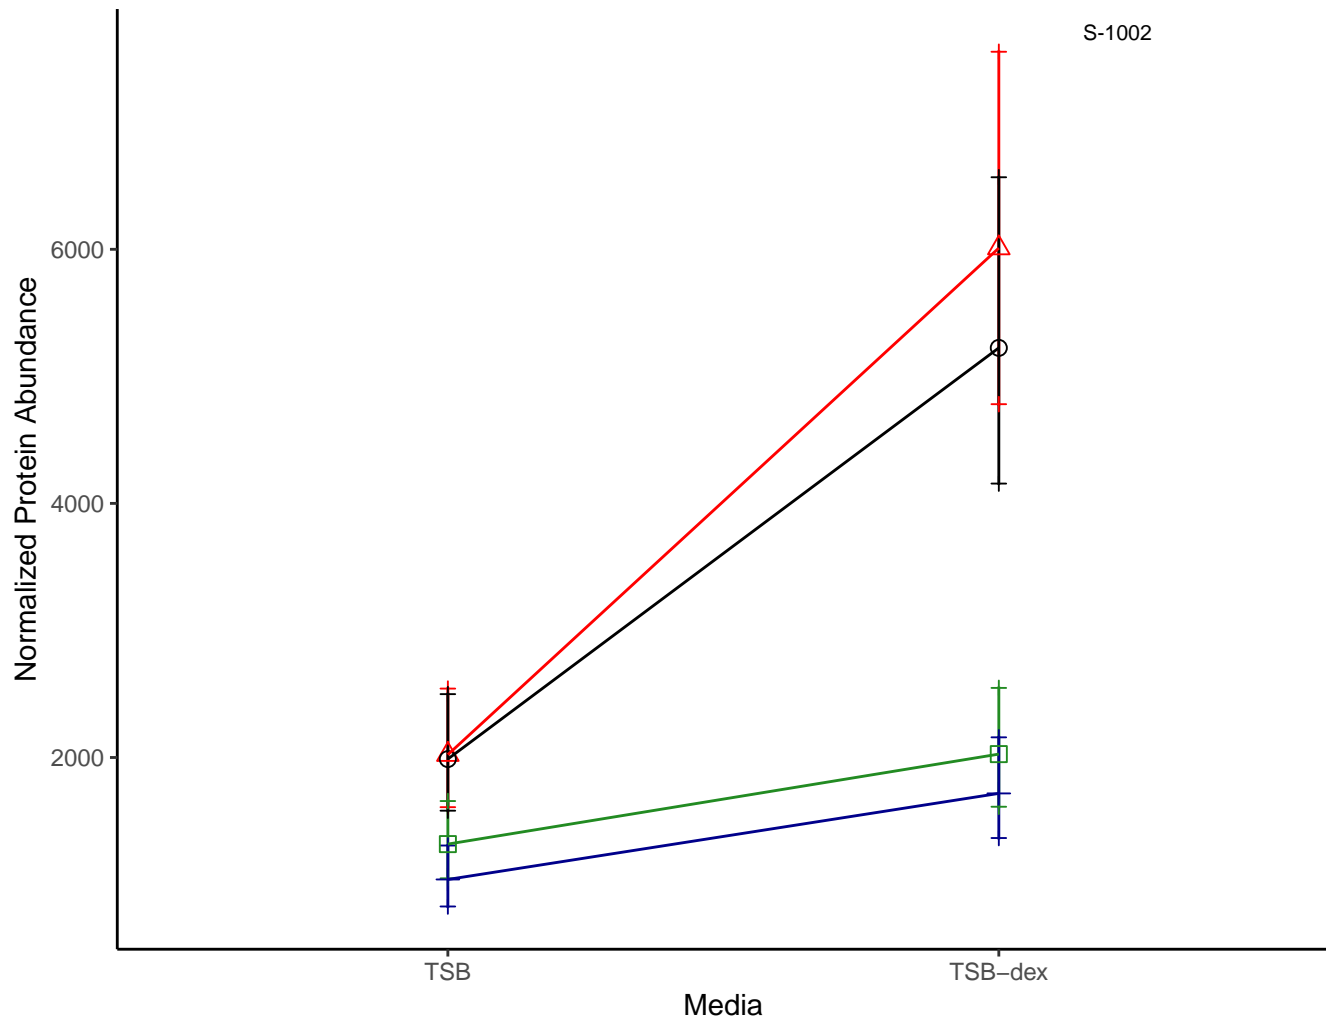

- ⊕ SA564
- △ SA564-ΔhptRS
- ⊞ SA564-ΔccpA
- + SA564-ΔhptRS/ccpA

# Y765\_STAAM

S-1003

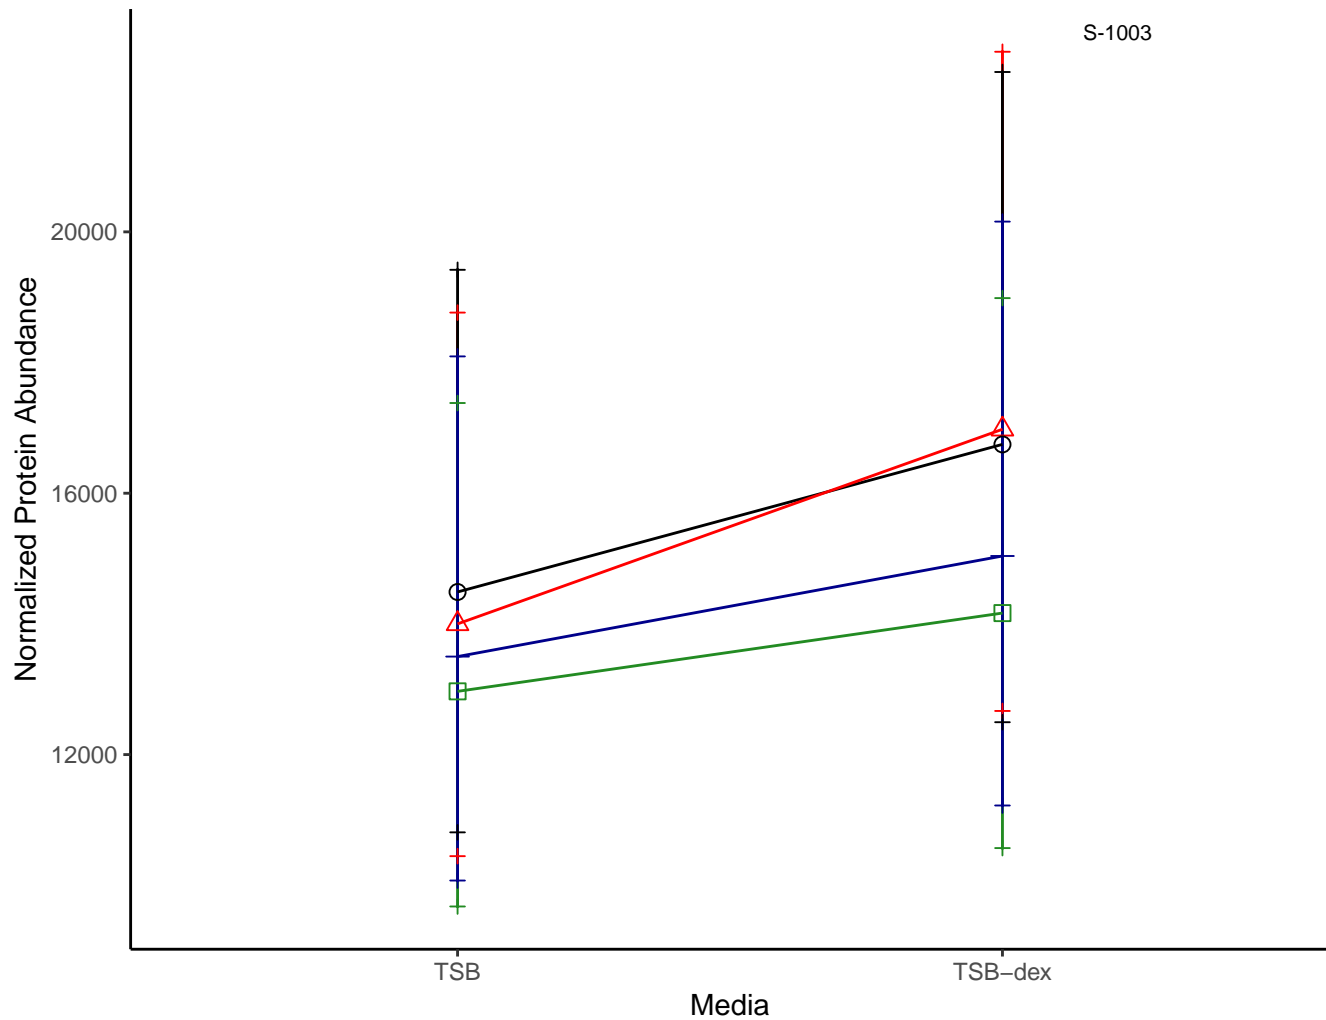

- ⊕ SA564
- △ SA564-ΔhptRS
- ⊞ SA564-ΔccpA
- + SA564-ΔhptRS/ccpA

# Y769\_STAAM

S-1004

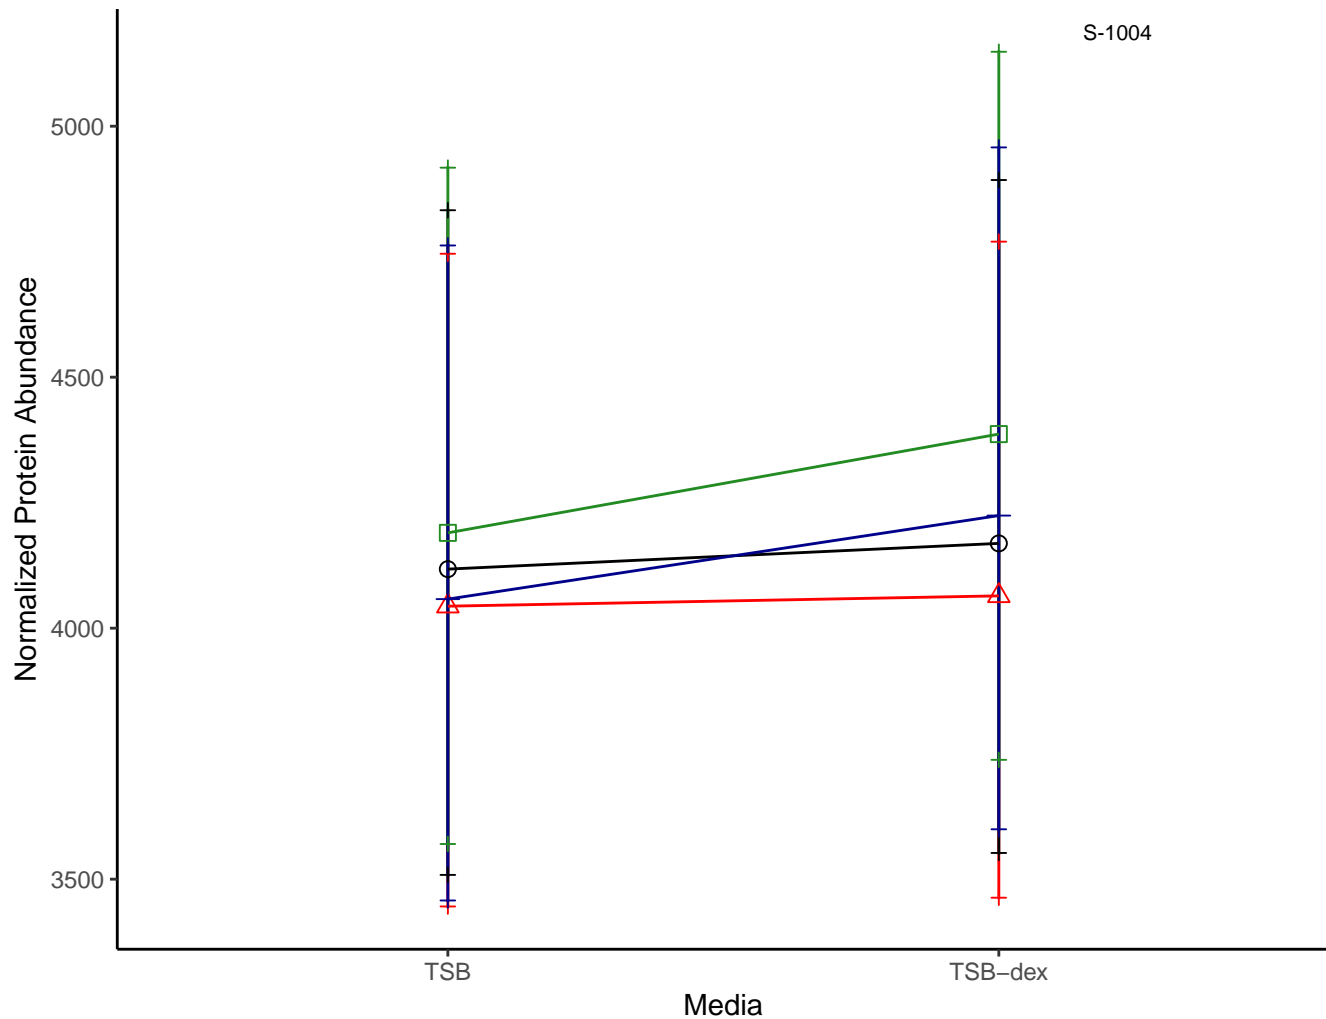

- ⊕ SA564
- △ SA564- $\Delta$ *hptRS*
- ⊞ SA564- $\Delta$ *ccpA*
- + SA564- $\Delta$ *hptRS/ccpA*

# Y840\_STAAM

S-1005

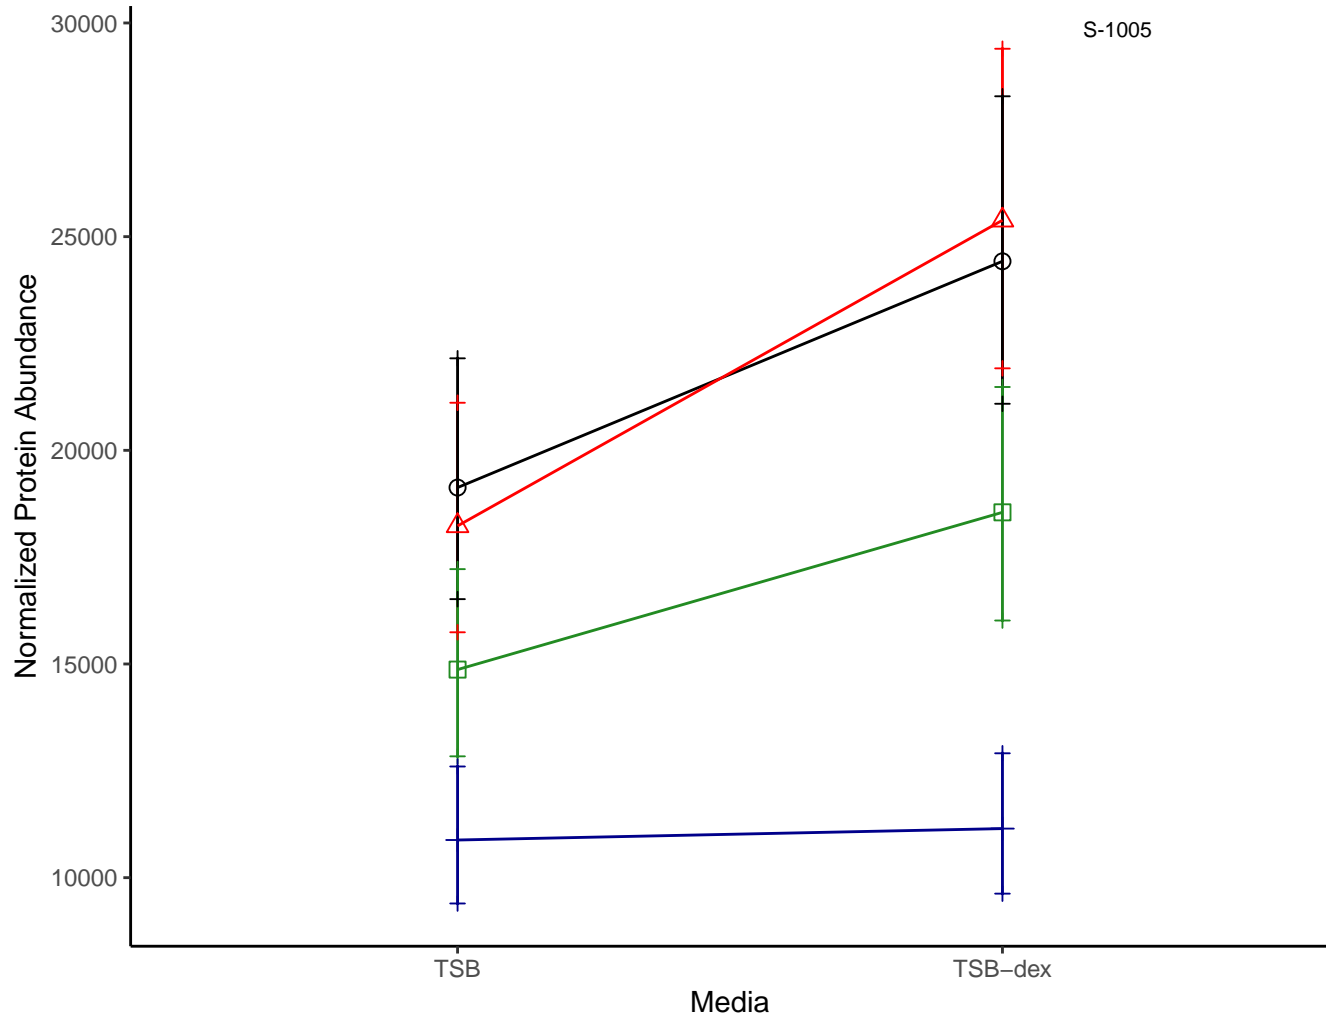

- ⊕ SA564
- △ SA564-ΔhptRS
- ⊞ SA564-ΔccpA
- + SA564-ΔhptRS/ccpA

# Y846\_STAAM

S-1006

Normalized Protein Abundance

12000  
10000  
8000

TSB

Media

TSB-dex

- ⊕ SA564
- △ SA564- $\Delta$ *hptRS*
- ⊞ SA564- $\Delta$ *ccpA*
- + SA564- $\Delta$ *hptRS/ccpA*

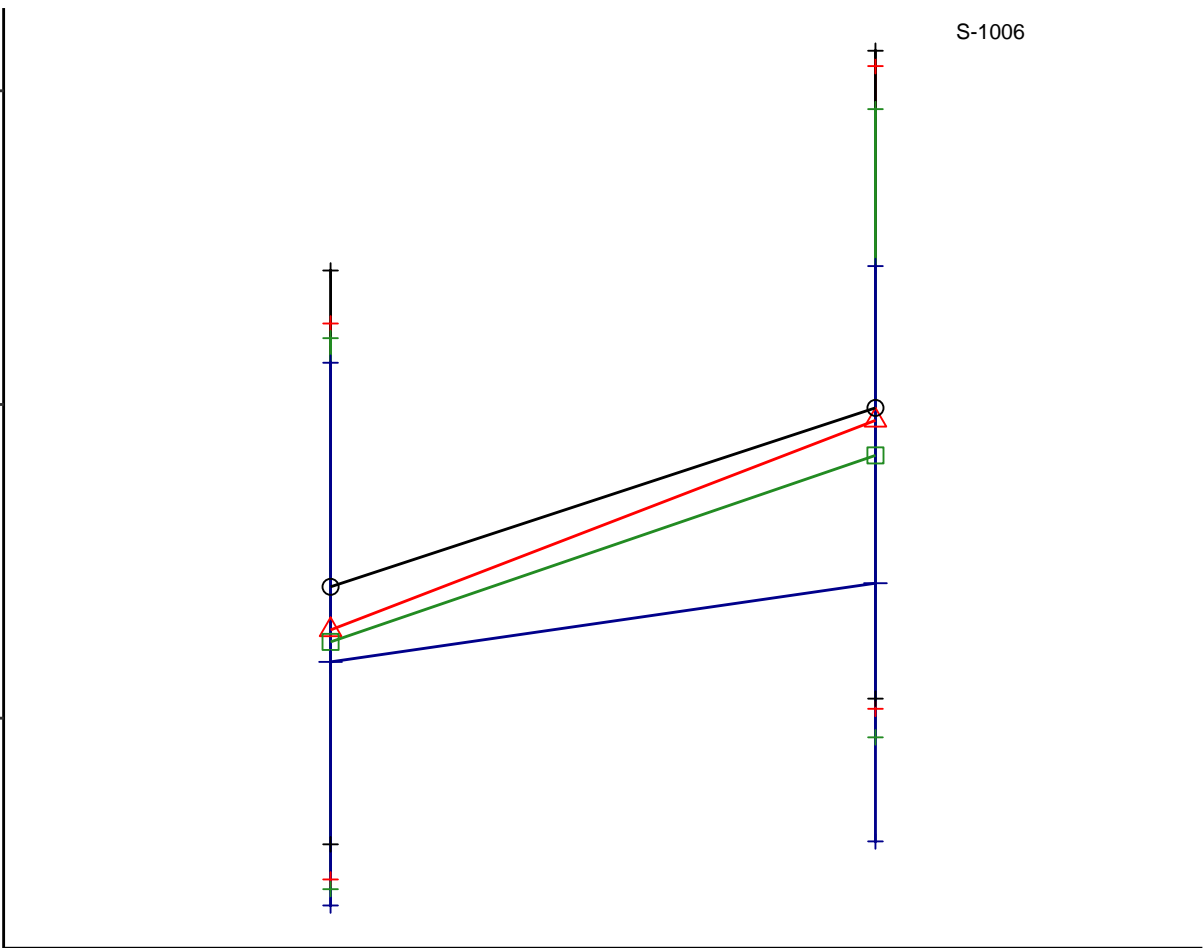

# Y941\_STAAM

S-1007

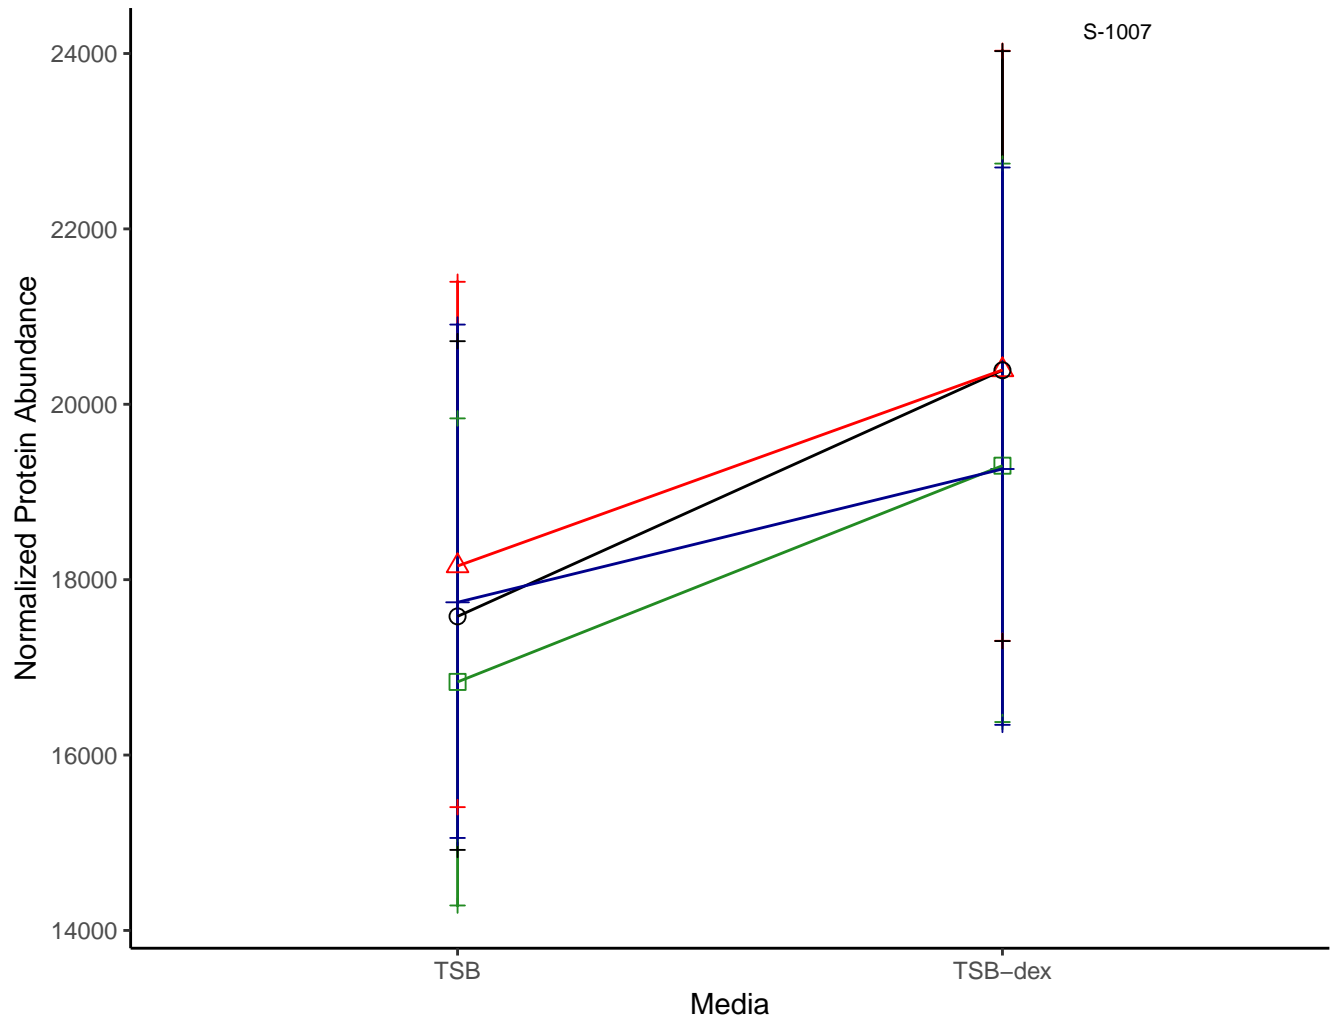

- ⊕ SA564
- △ SA564- $\Delta$ *hptRS*
- ⊞ SA564- $\Delta$ *ccpA*
- + SA564- $\Delta$ *hptRS/ccpA*

# Y968\_STAAM

S-1008

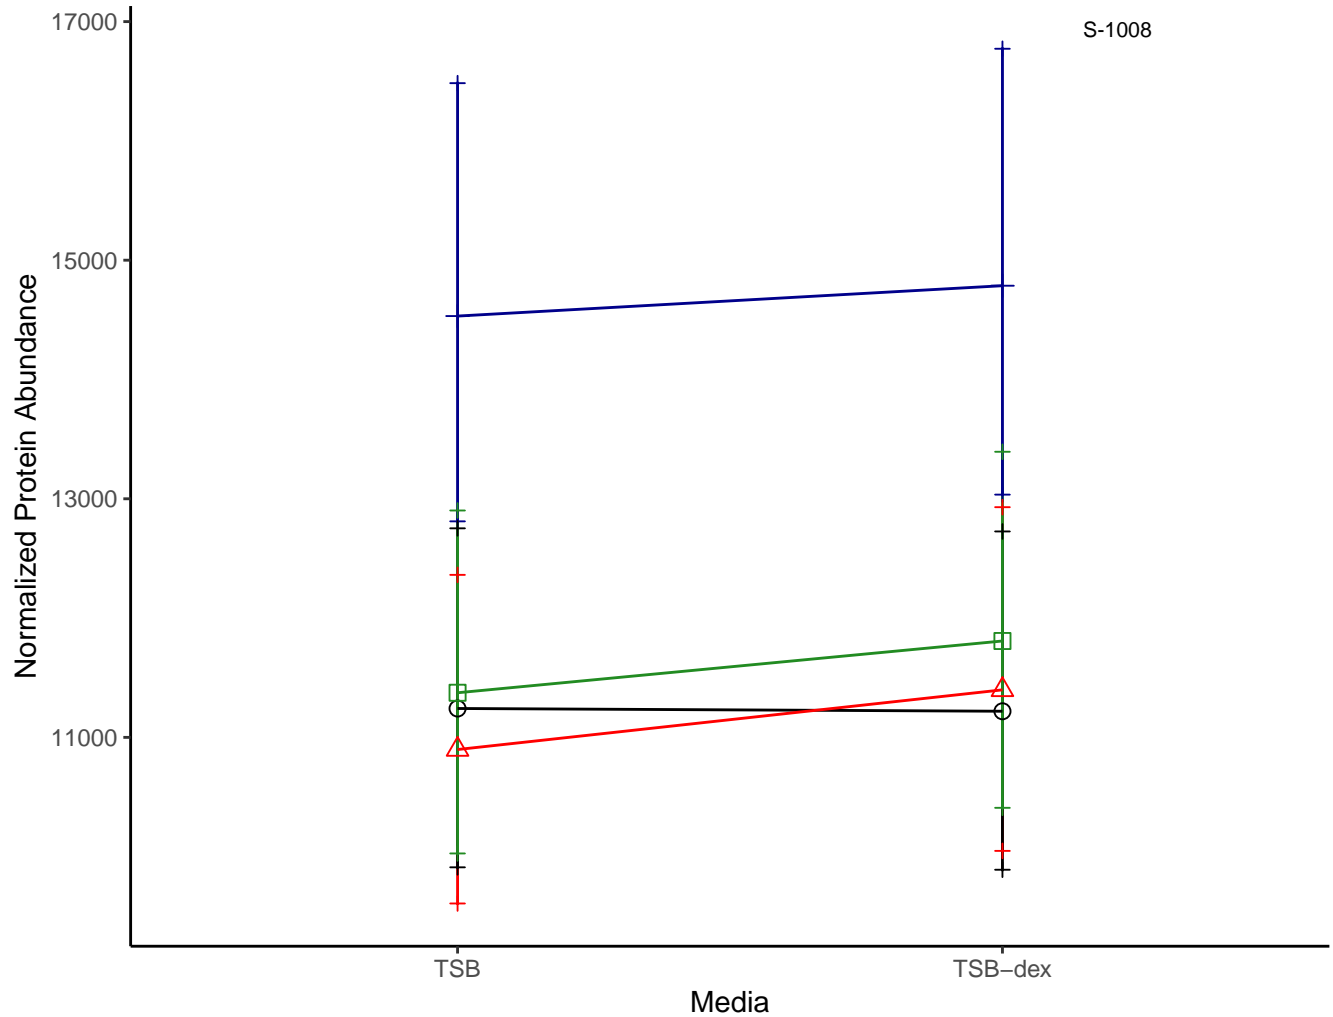

- ⊕ SA564
- △ SA564- $\Delta$ *hptRS*
- ⊞ SA564- $\Delta$ *ccpA*
- + SA564- $\Delta$ *hptRS/ccpA*



# YABA\_STAAM

S-1009

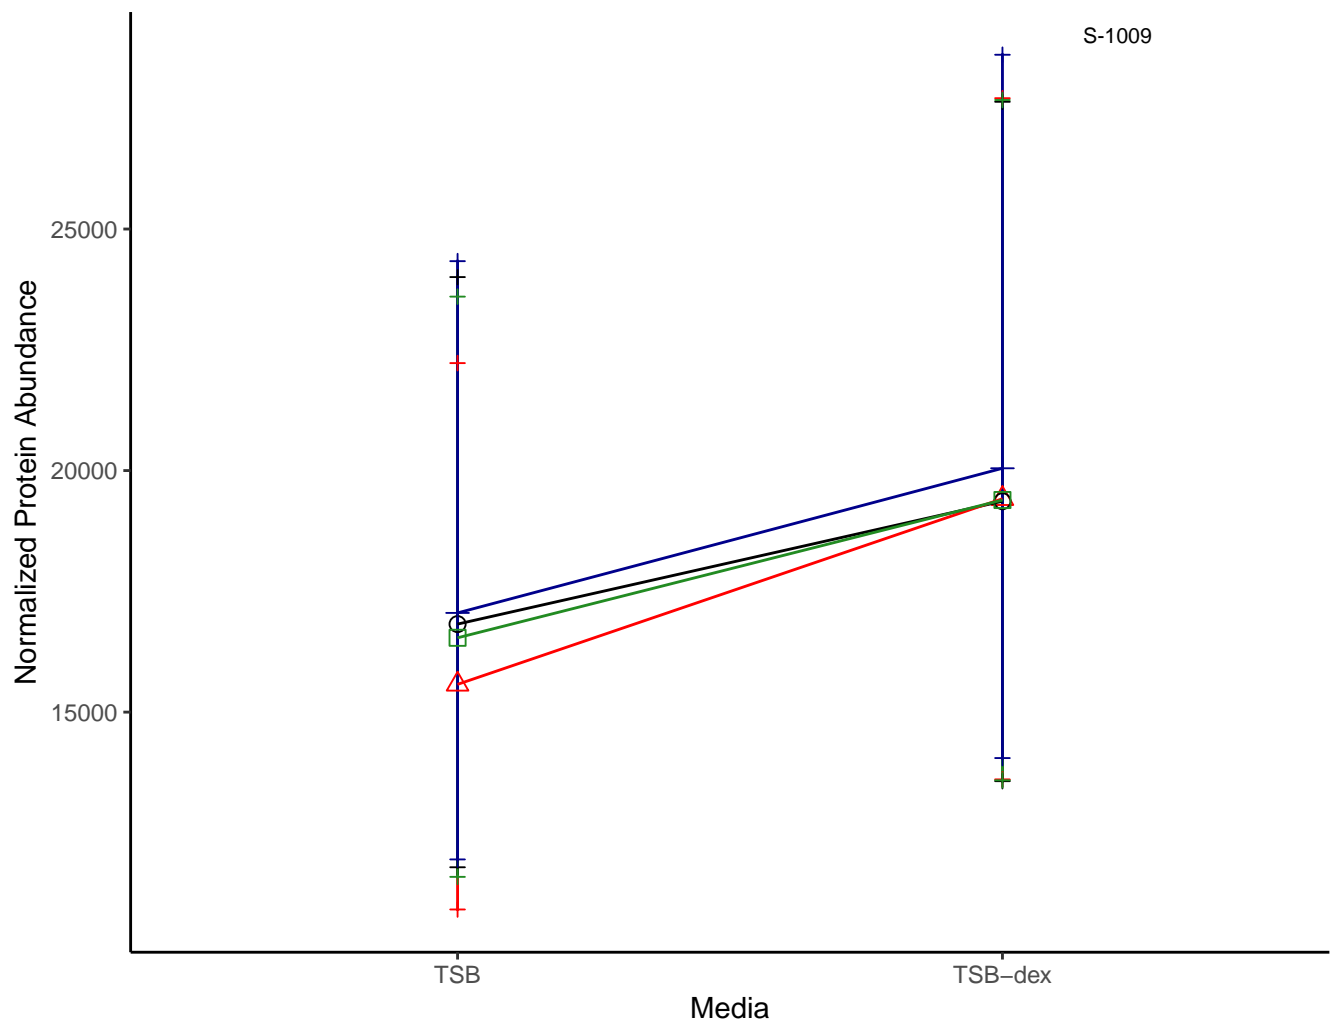

- SA564
- SA564- $\Delta hptRS$
- SA564- $\Delta ccpA$
- SA564- $\Delta hptRS/ccpA$

# YBEY\_STAAM

S-1010

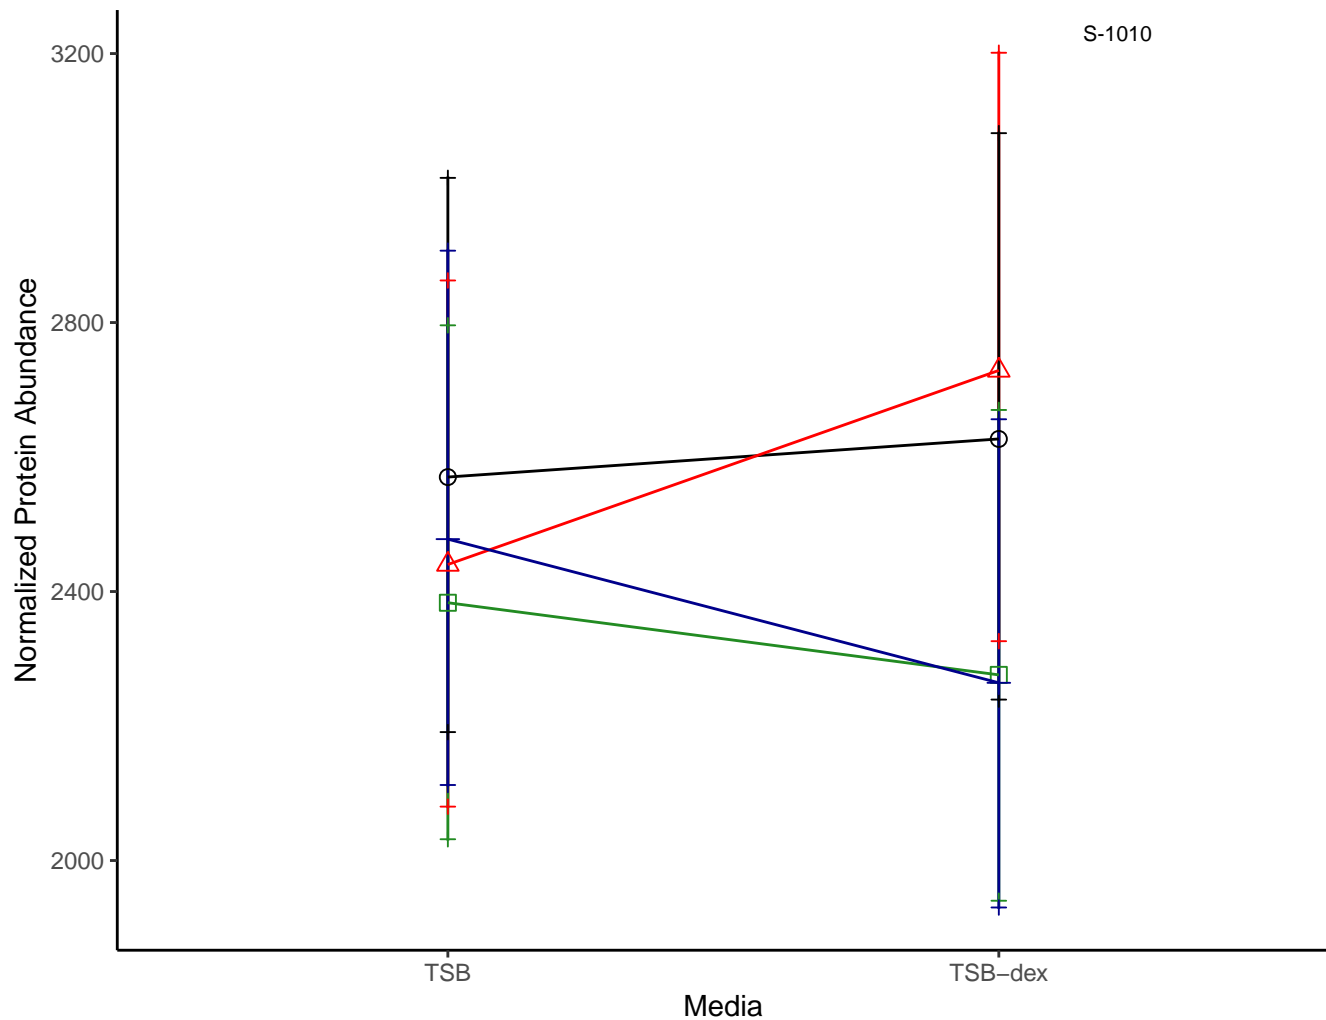

- ⊕ SA564
- △ SA564- $\Delta$ *hptRS*
- ⊞ SA564- $\Delta$ *ccpA*
- + SA564- $\Delta$ *hptRS/ccpA*

**Figure H.**

2-way analysis: s x h | m

Pages: S1011-S1512

The normalized protein abundance, lower 95% confidence interval, and upper 95% confidence interval were plotted for each protein. These plots were analyzed if a 3-way interaction was rejected and 2-way interaction was identified between strain and hour.

# 6PGD\_STAAM

S-1012

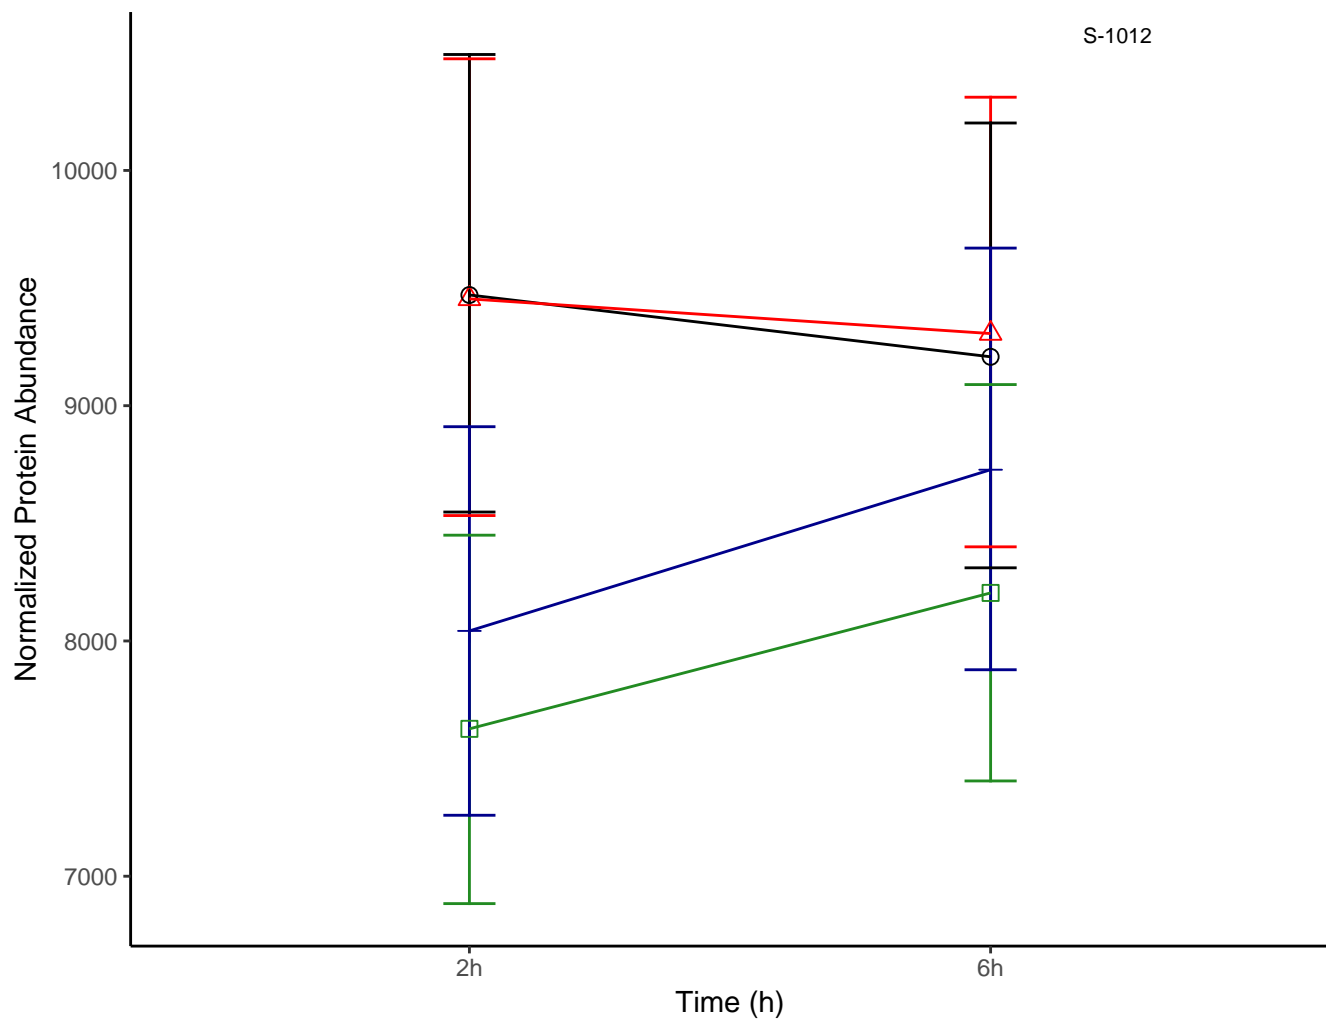

- SA564
- △ SA564- $\Delta$ *hptRS*
- SA564- $\Delta$ *ccpA*
- + SA564- $\Delta$ *hptRS/ccpA*

# ACCA\_STAAM

S-1013

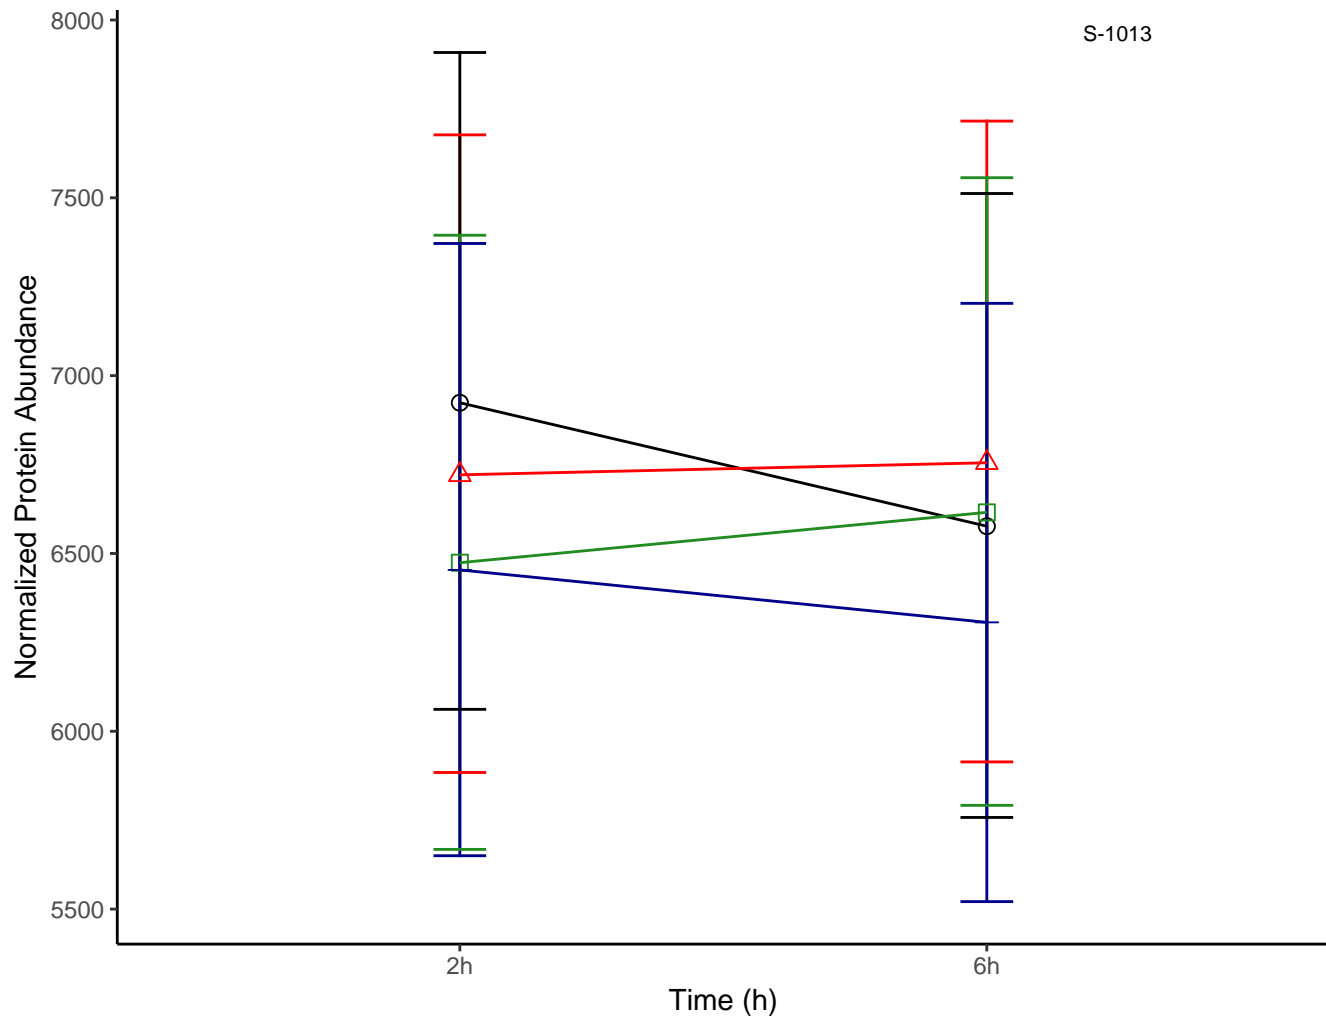

- SA564
- △ SA564- $\Delta$ *hptRS*
- SA564- $\Delta$ *ccpA*
- + SA564- $\Delta$ *hptRS/ccpA*

## ACKA\_STAAM

S-1014

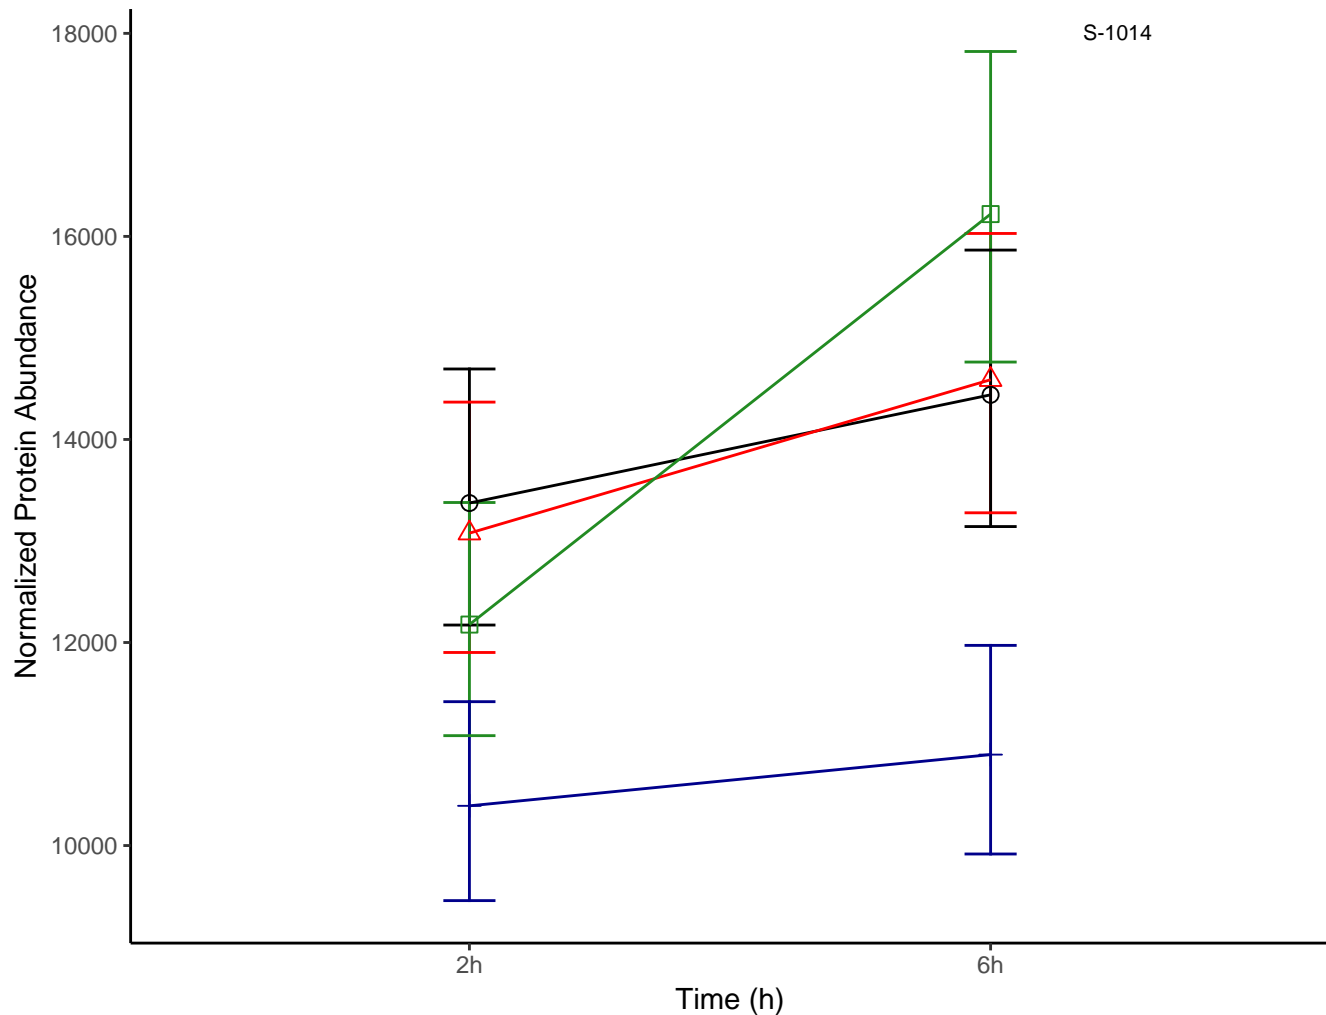

- SA564
- △ SA564- $\Delta$ hptRS
- SA564- $\Delta$ ccpA
- + SA564- $\Delta$ hptRS/ccpA

# ACON\_STAAM

S-1015

Normalized Protein Abundance

15000

10000

2h

6h

Time (h)

- SA564
- △ SA564- $\Delta$ *hptRS*
- SA564- $\Delta$ *ccpA*
- + SA564- $\Delta$ *hptRS/ccpA*

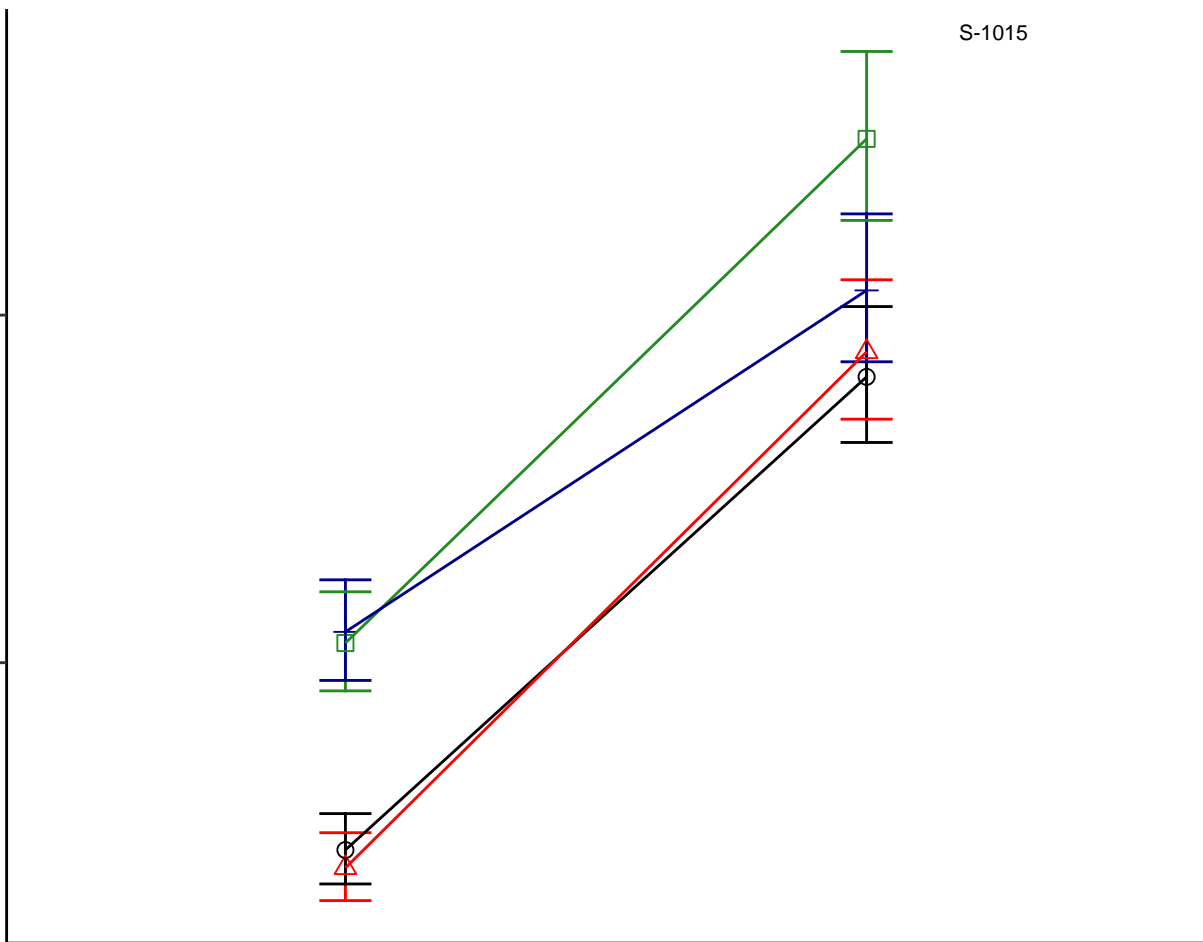

# ACP\_STAAM

S-1016

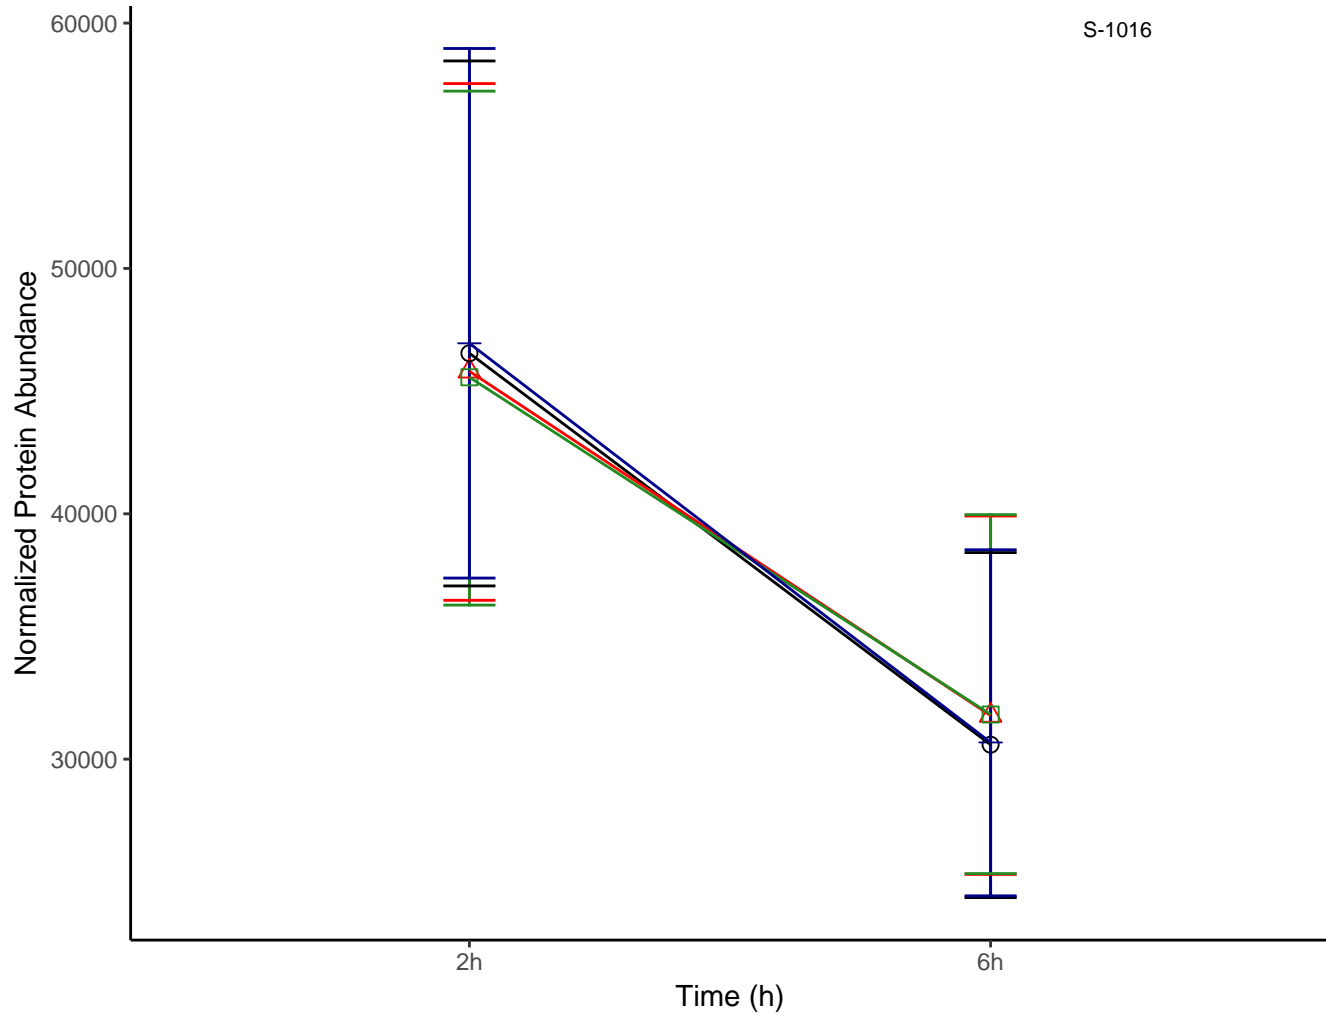

- SA564
- △ SA564- $\Delta hptRS$
- SA564- $\Delta ccpA$
- + SA564- $\Delta hptRS/ccpA$



# ADH\_STAAM

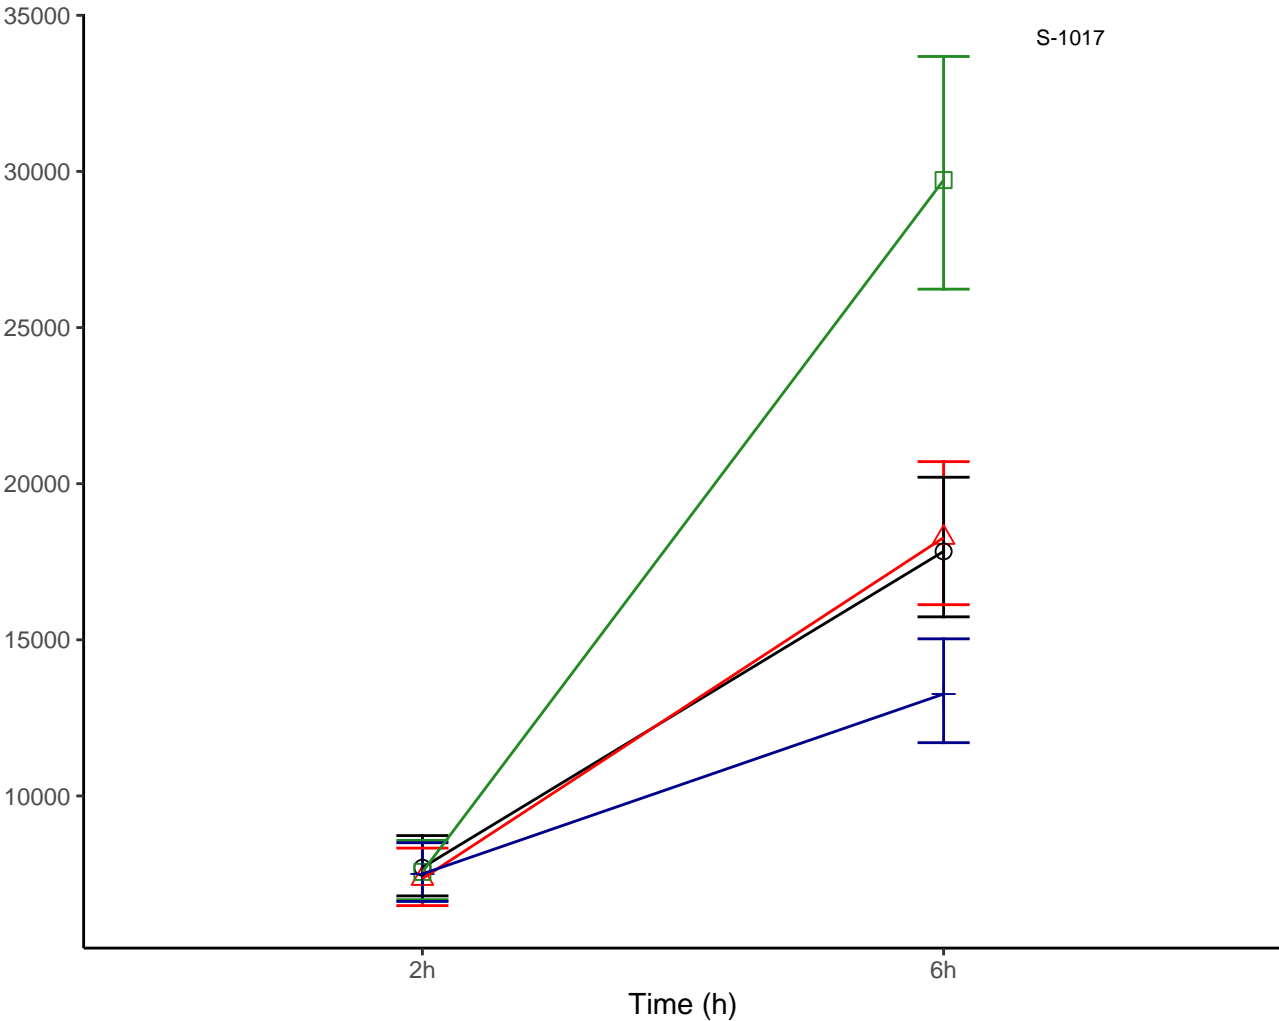

- SA564
- △ SA564- $\Delta hptRS$
- SA564- $\Delta ccpA$
- + SA564- $\Delta hptRS/ccpA$

# AHPC\_STAAM

S-1018

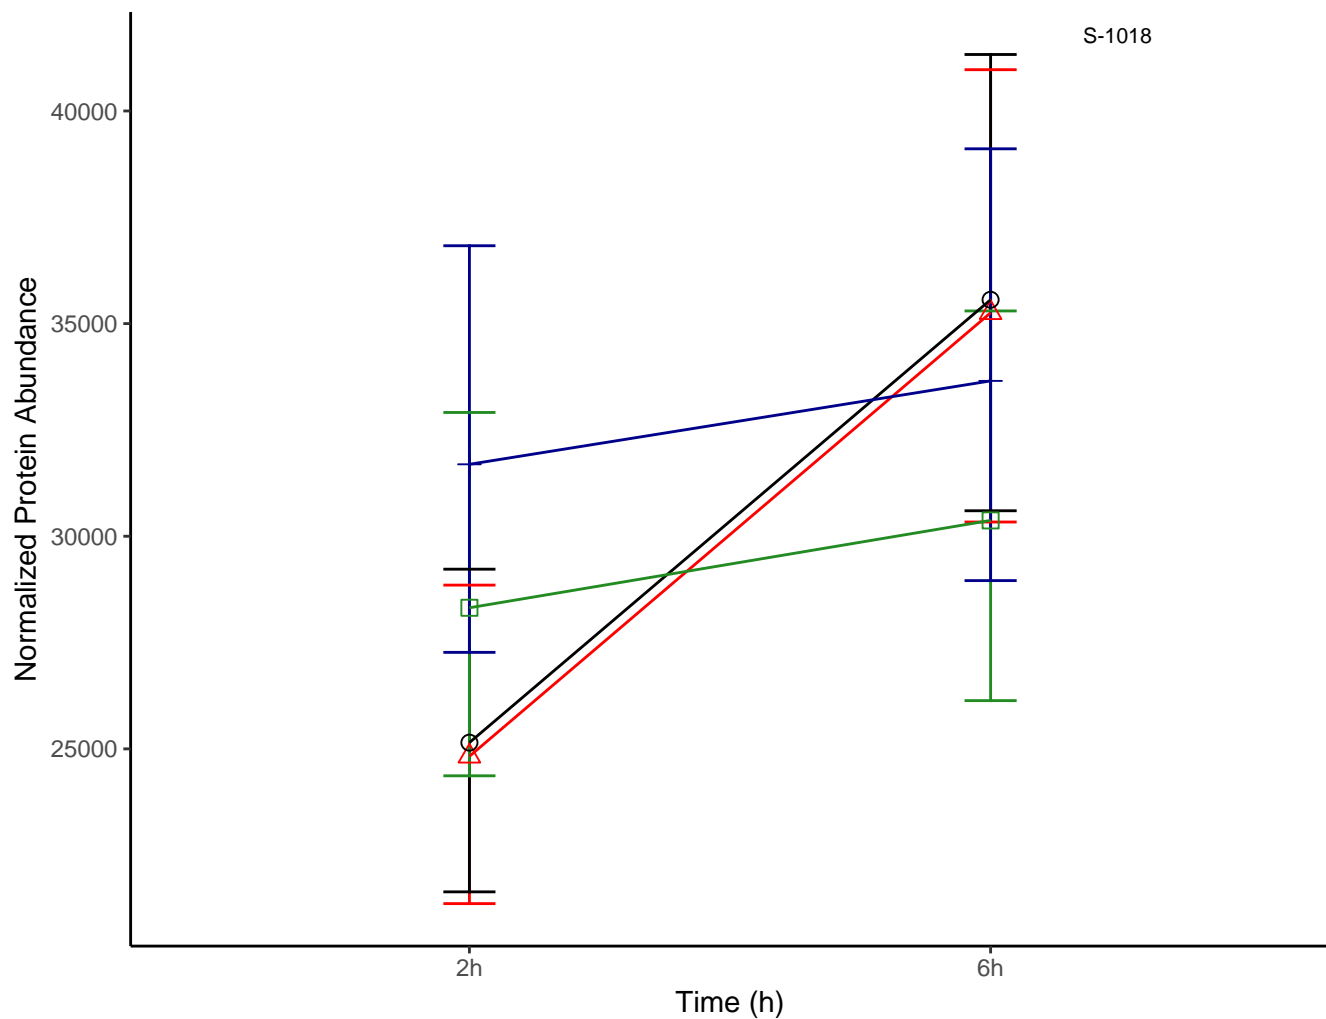

- SA564
- △ SA564- $\Delta$ hptRS
- SA564- $\Delta$ ccpA
- + SA564- $\Delta$ hptRS/ccpA

# AHPF\_STAAM

S-1019

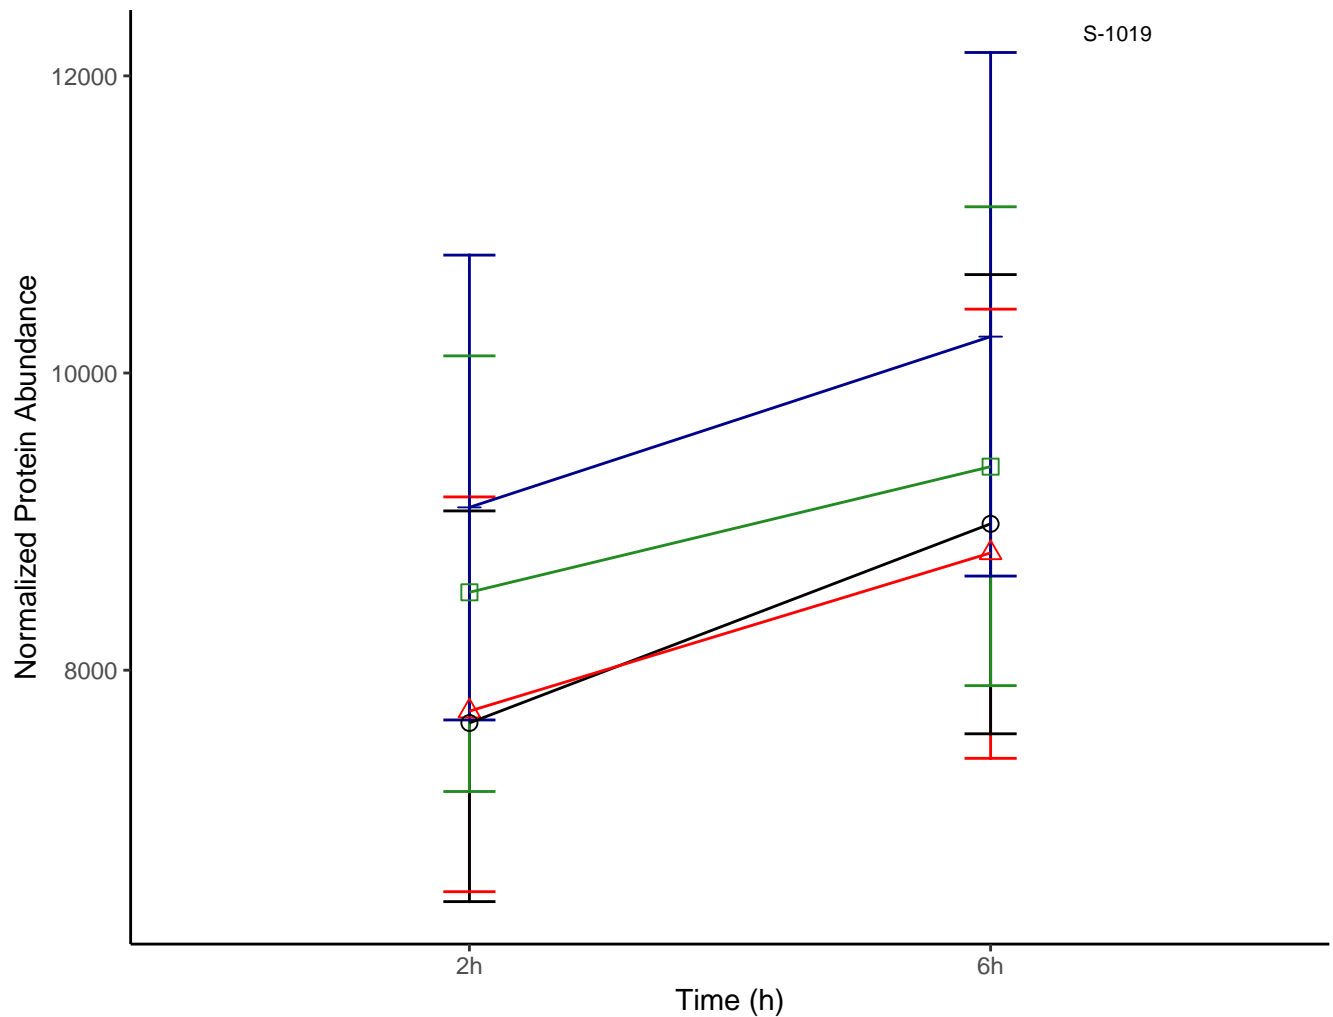

- SA564
- △ SA564- $\Delta$ *hptRS*
- SA564- $\Delta$ *ccpA*
- + SA564- $\Delta$ *hptRS/ccpA*

## ALD1\_STAAM

S-1020

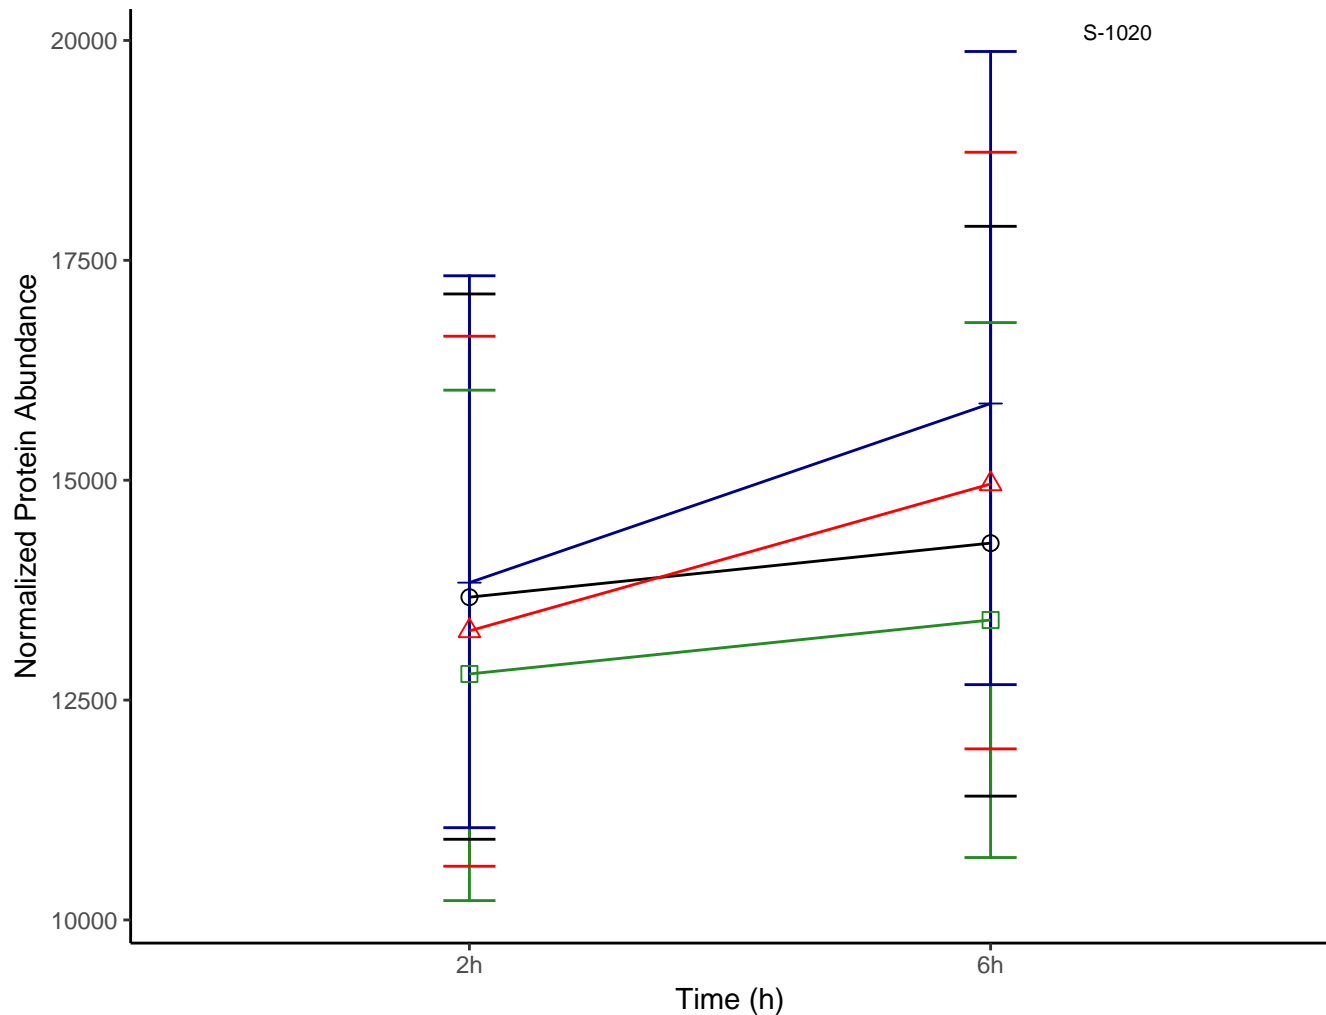

- SA564
- △ SA564- $\Delta$ *hptRS*
- SA564- $\Delta$ *ccpA*
- + SA564- $\Delta$ *hptRS/ccpA*

# ALDA\_STAAM

S-1021

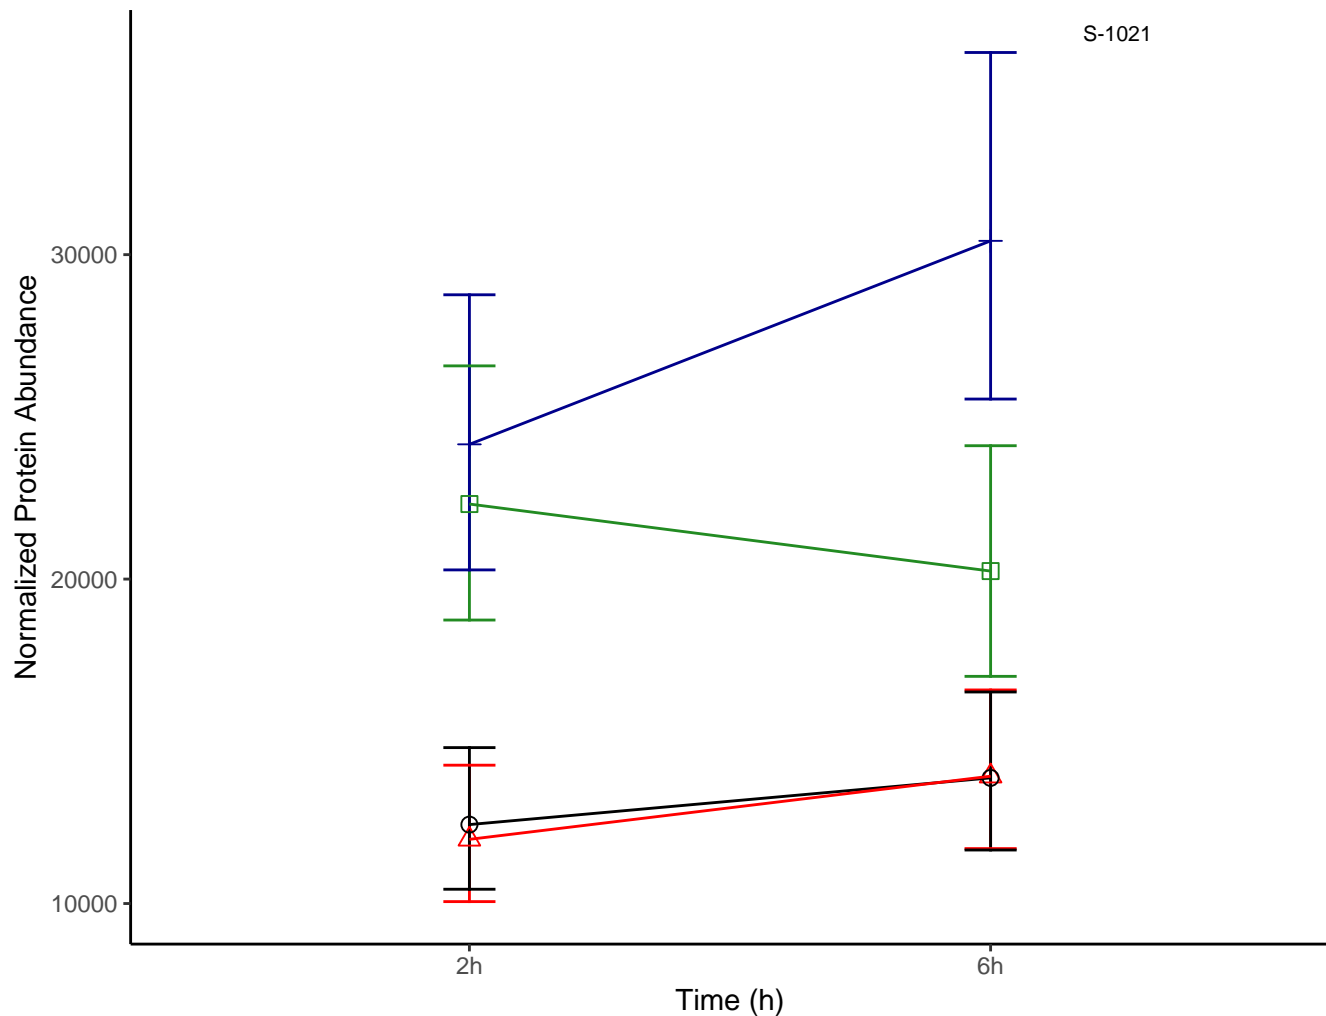

- SA564
- △ SA564- $\Delta$ *hptRS*
- SA564- $\Delta$ *ccpA*
- + SA564- $\Delta$ *hptRS/ccpA*

# ALF1\_STAAM

S-1022

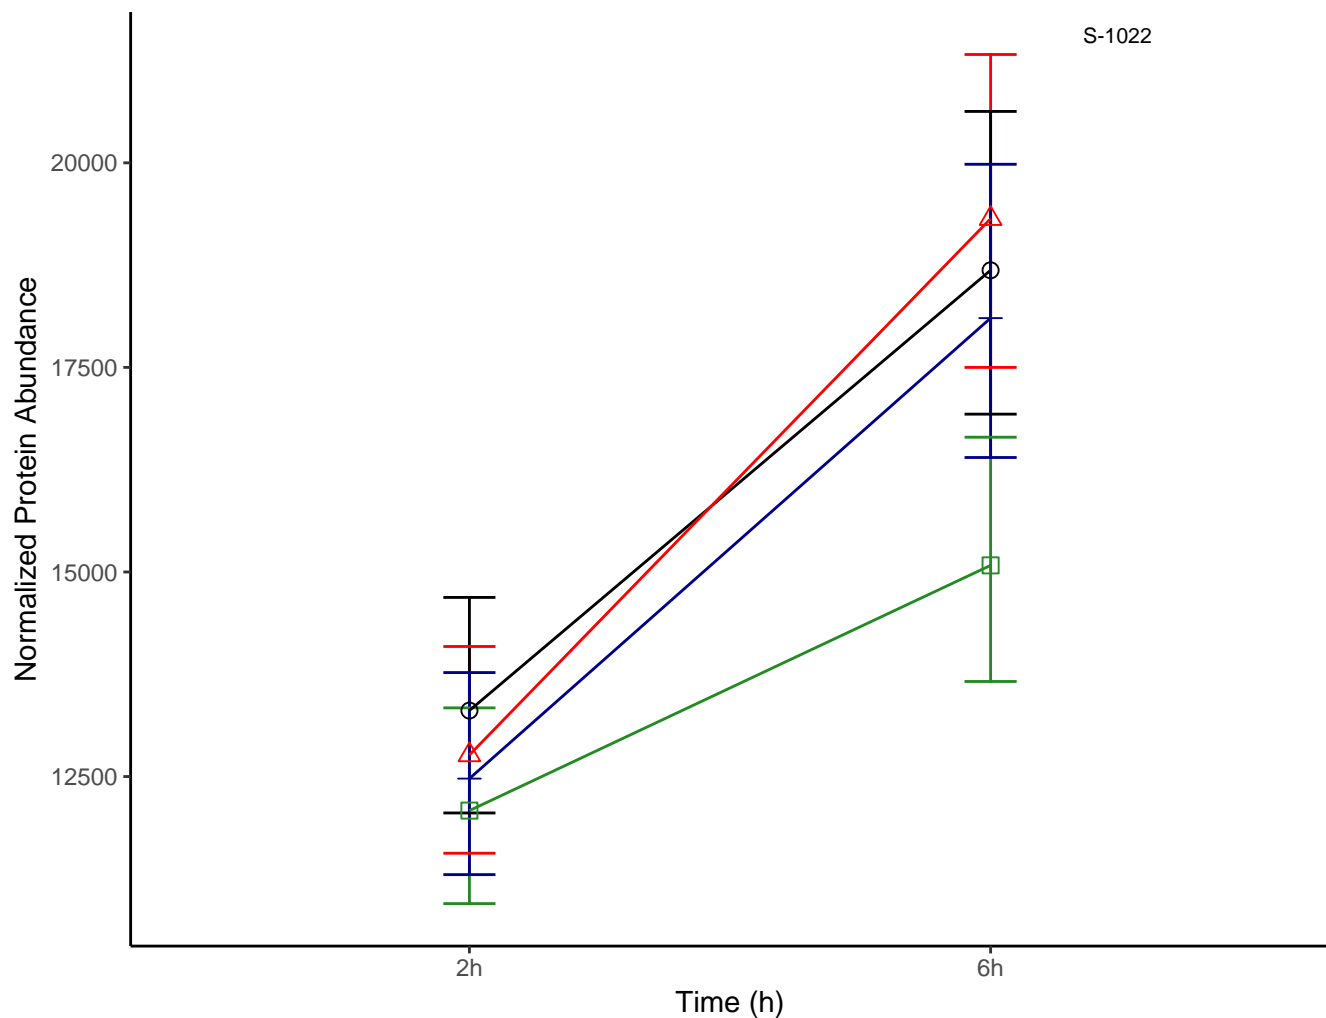

- SA564
- △ SA564- $\Delta$ *hptRS*
- SA564- $\Delta$ *ccpA*
- + SA564- $\Delta$ *hptRS/ccpA*

# ALF2\_STAAM

S-1023

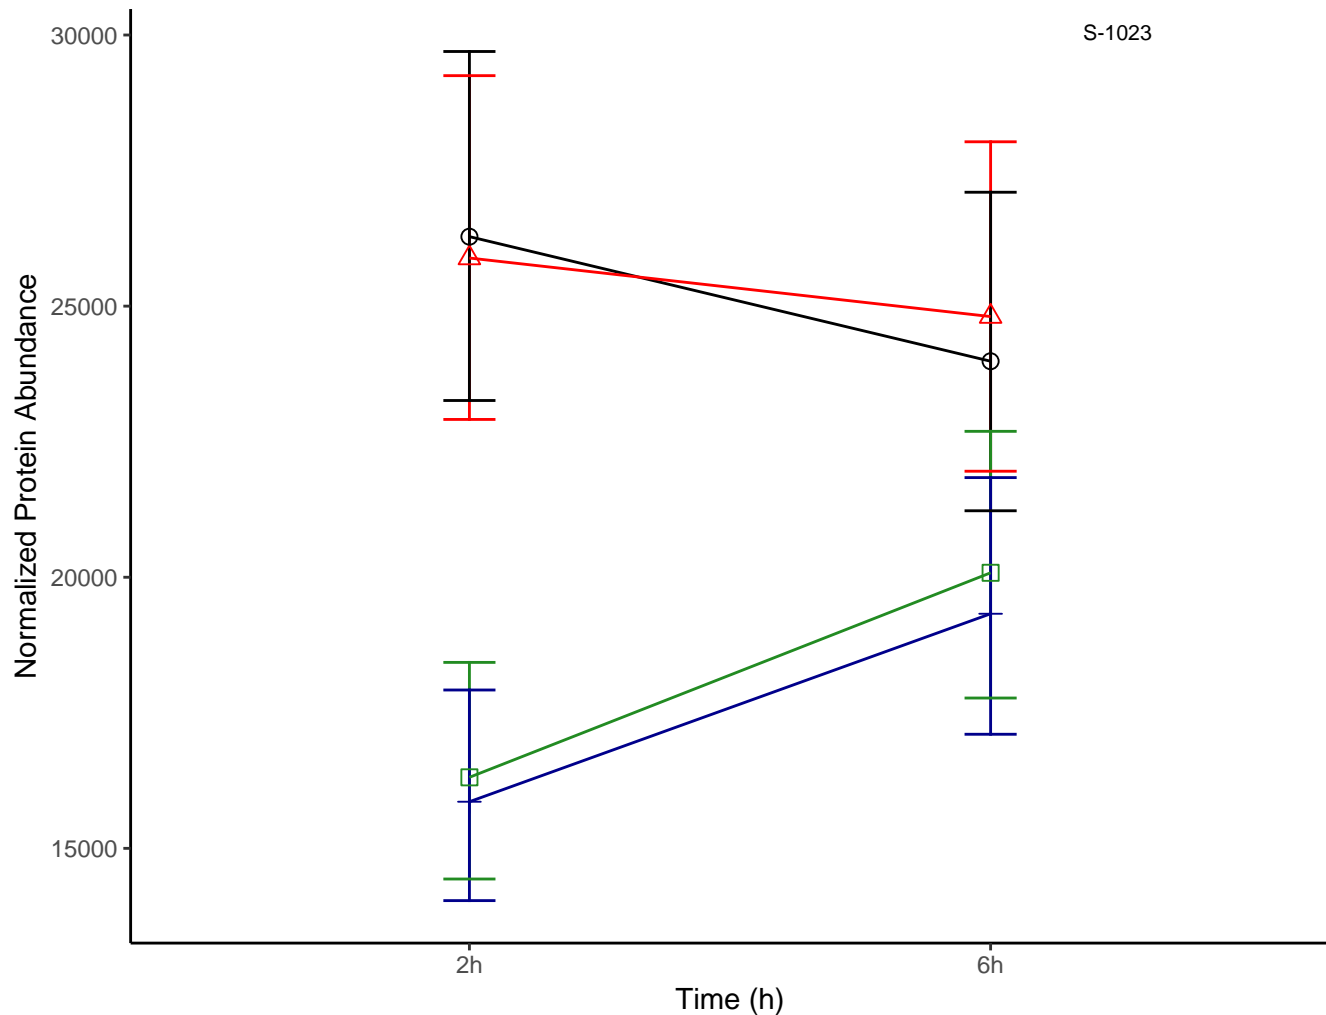

- SA564
- △ SA564- $\Delta$ *hptRS*
- SA564- $\Delta$ *ccpA*
- + SA564- $\Delta$ *hptRS/ccpA*

## APT\_STAAM

S-1024

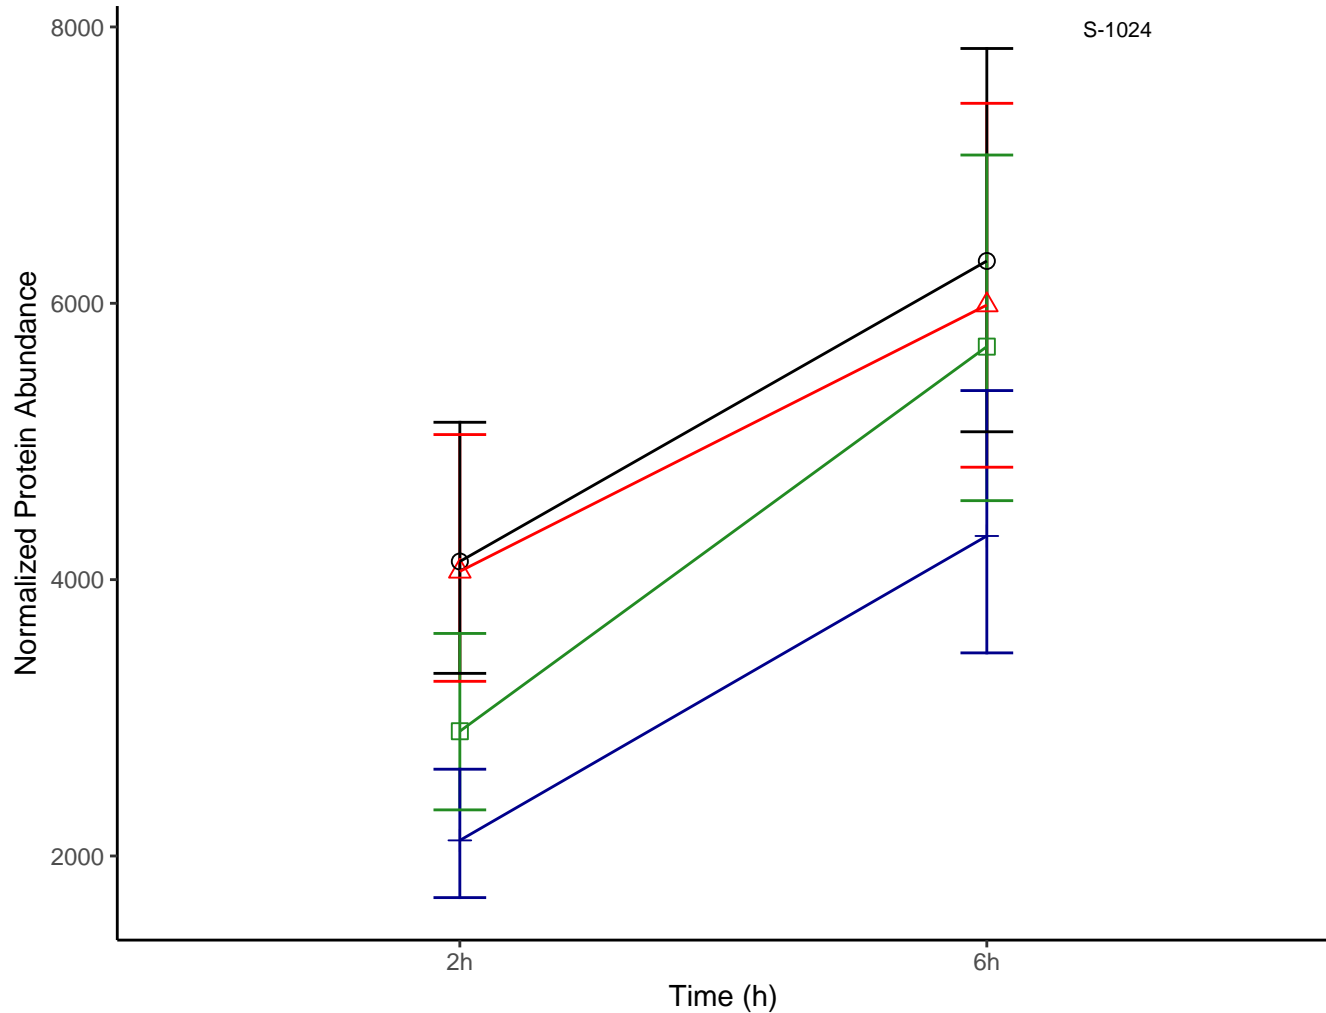

- SA564
- △ SA564- $\Delta hptRS$
- SA564- $\Delta ccpA$
- + SA564- $\Delta hptRS/ccpA$



# ARCA\_STAAM

S-1025

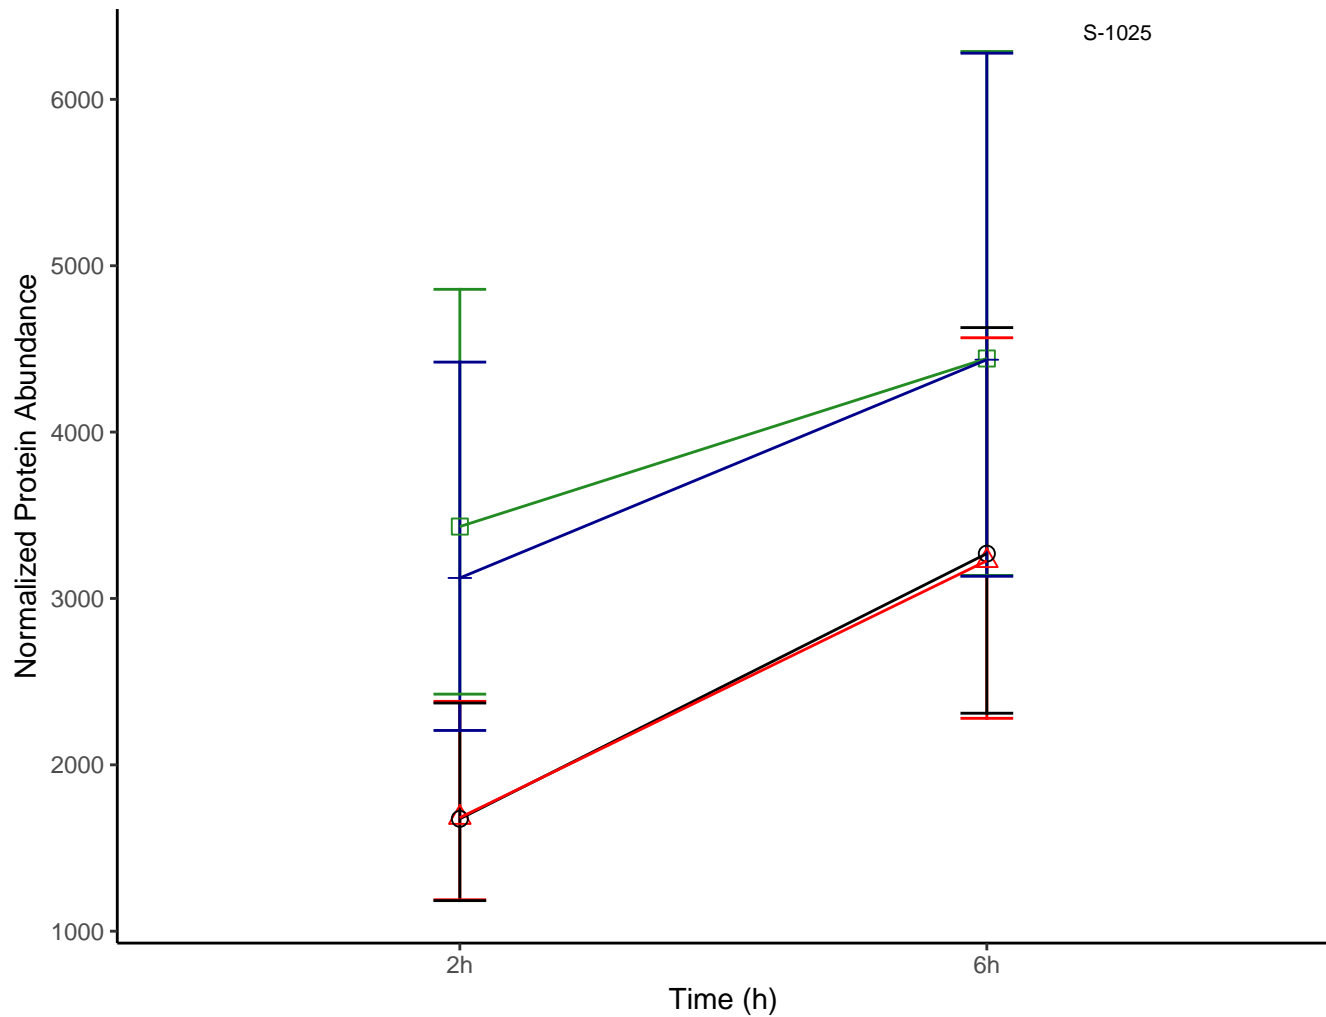

- SA564
- △ SA564- $\Delta$ hptRS
- SA564- $\Delta$ ccpA
- + SA564- $\Delta$ hptRS/ccpA

# ARCC1\_STAAM

S-1026

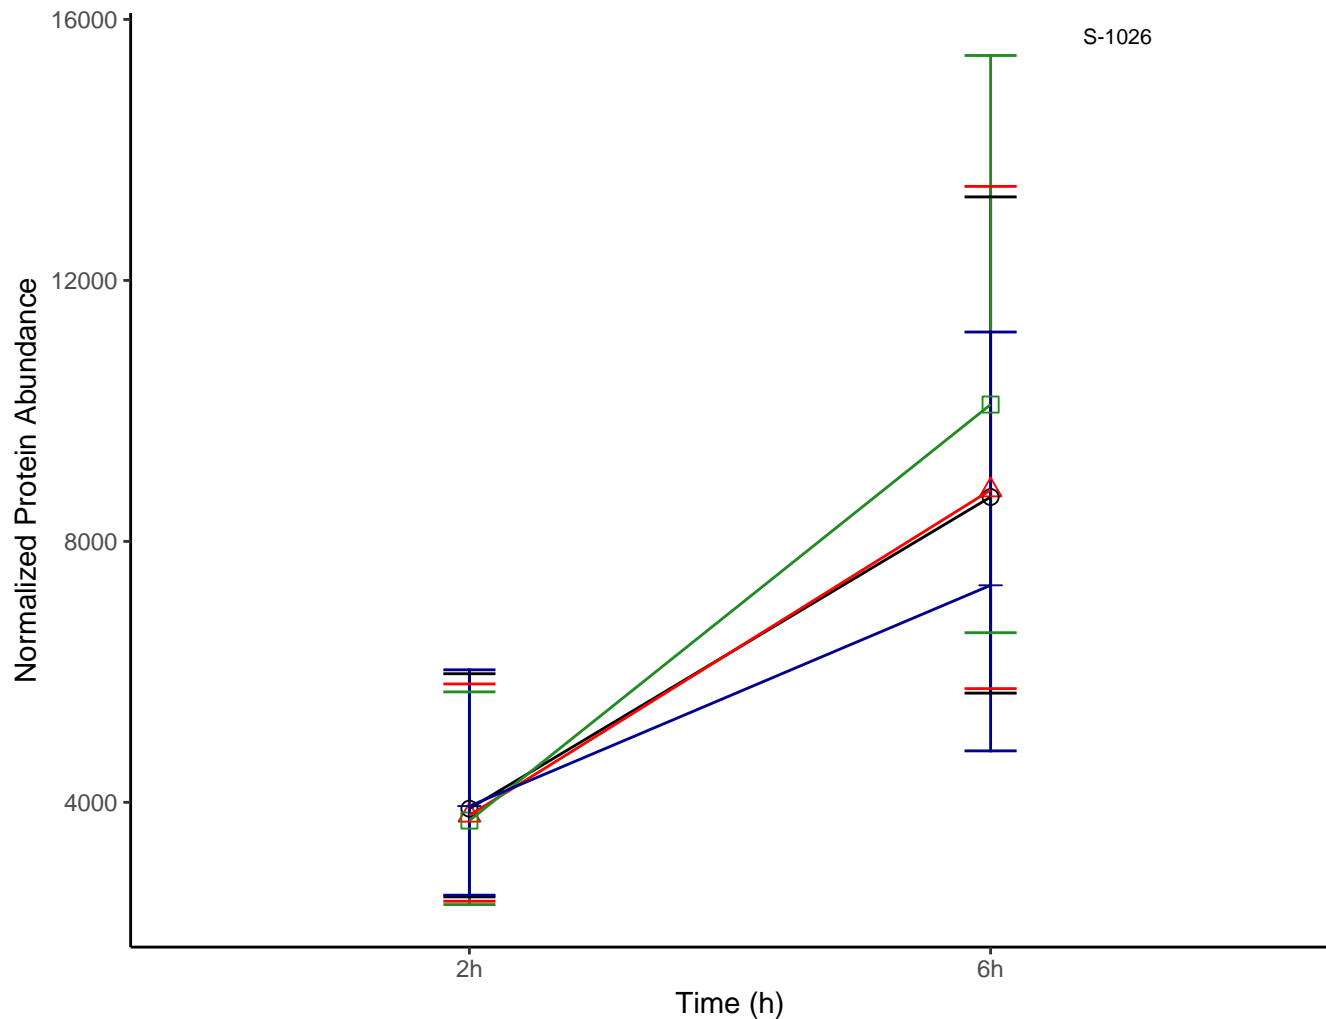

- SA564
- △ SA564- $\Delta hptRS$
- SA564- $\Delta ccpA$
- + SA564- $\Delta hptRS/ccpA$

# ARGI\_STAAM

S-1027

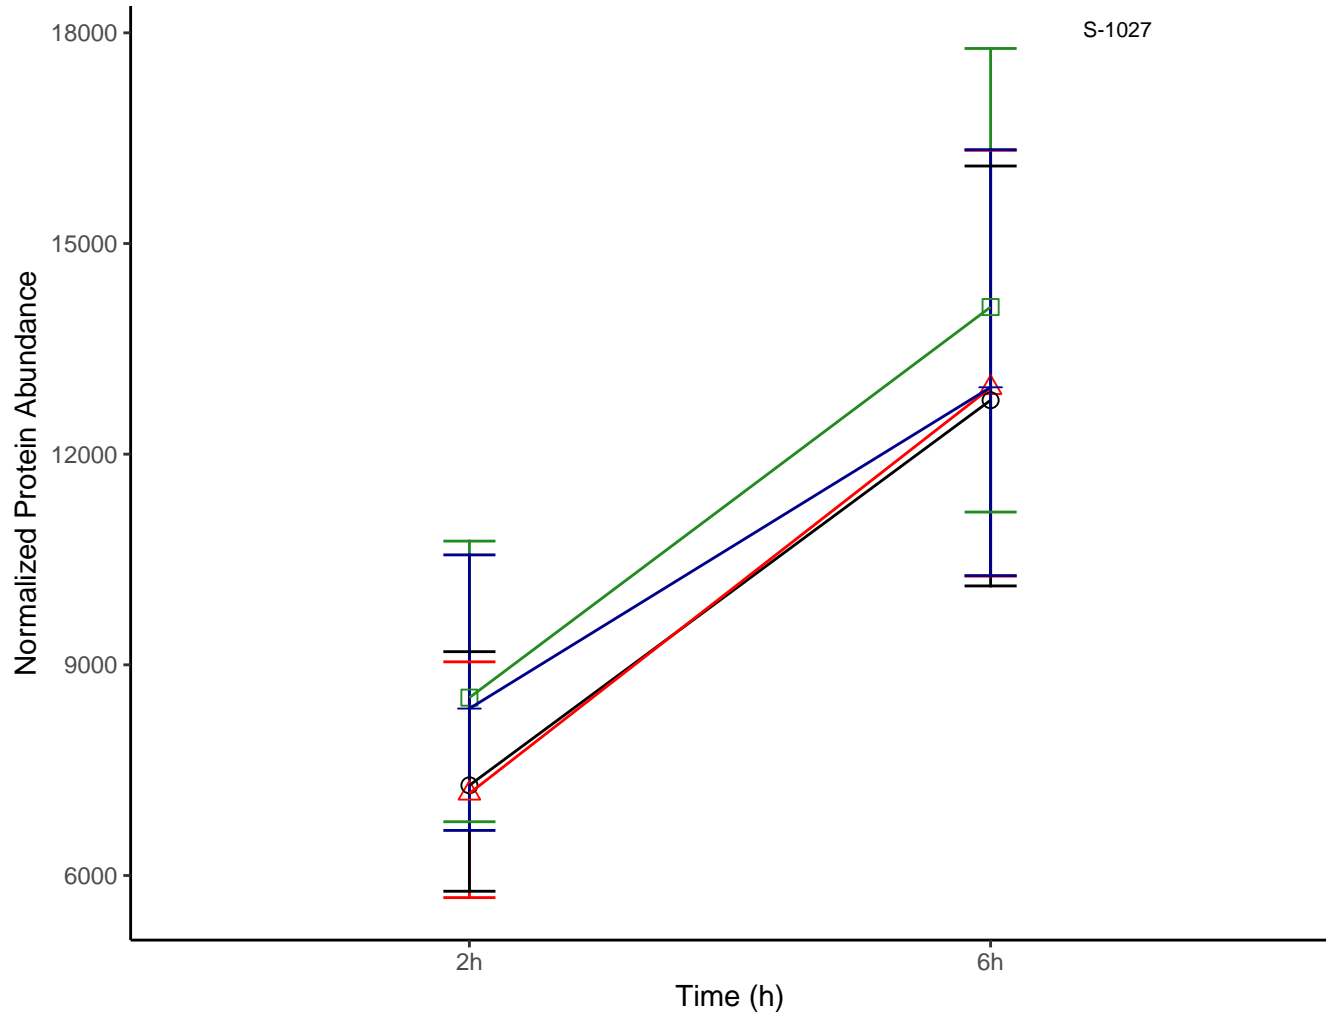

- SA564
- △ SA564- $\Delta hptRS$
- SA564- $\Delta ccpA$
- + SA564- $\Delta hptRS/ccpA$

# ARGR\_STAAM

S-1028

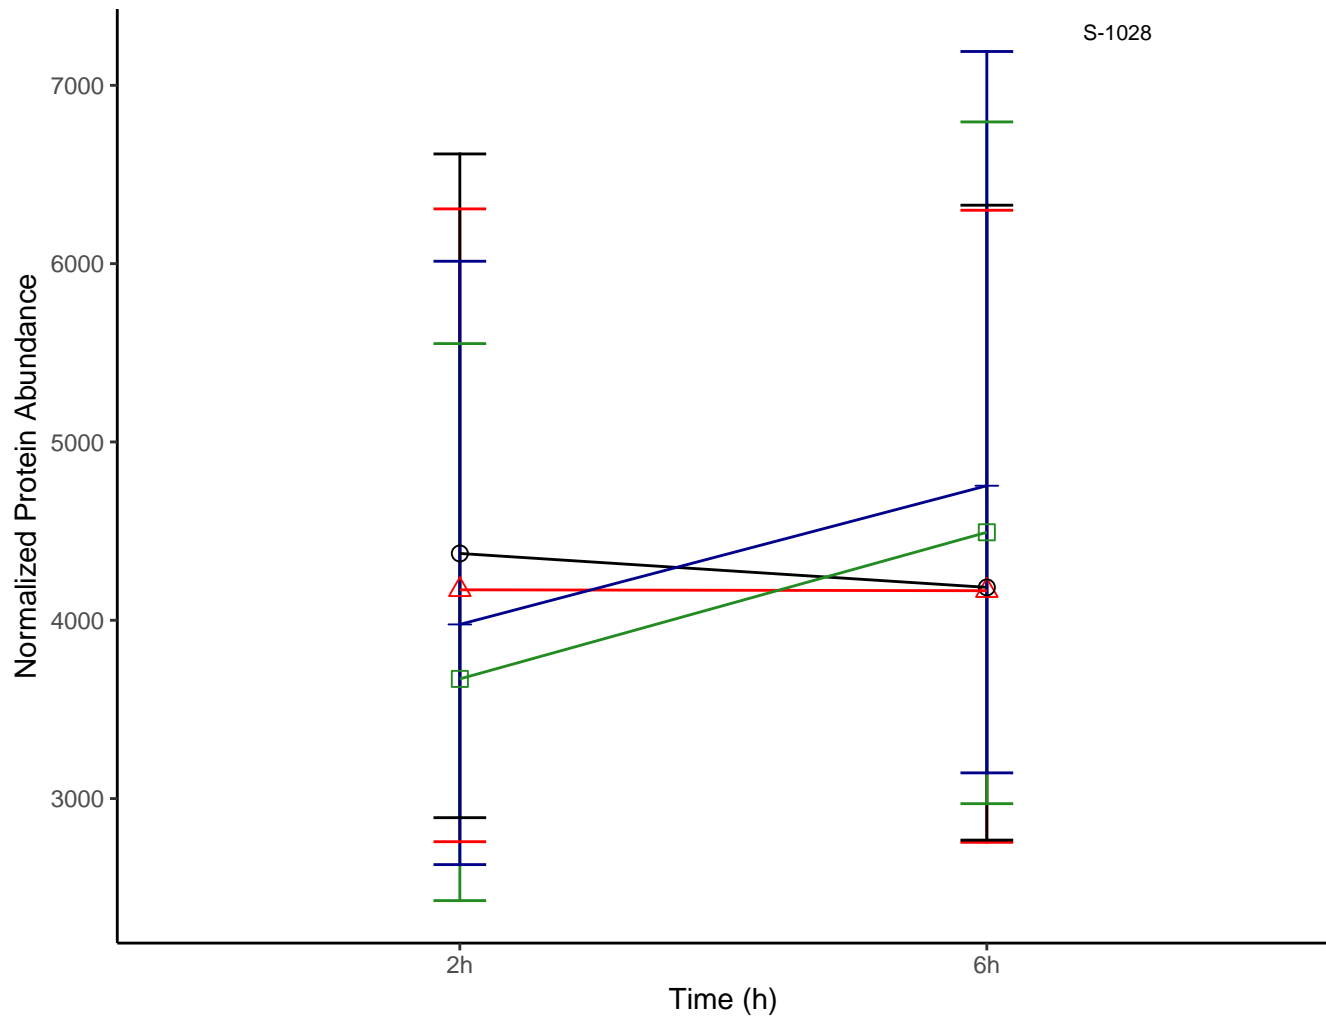

- SA564
- △ SA564- $\Delta$ *hptRS*
- SA564- $\Delta$ *ccpA*
- + SA564- $\Delta$ *hptRS/ccpA*

## ARLR\_STAAM

S-1029

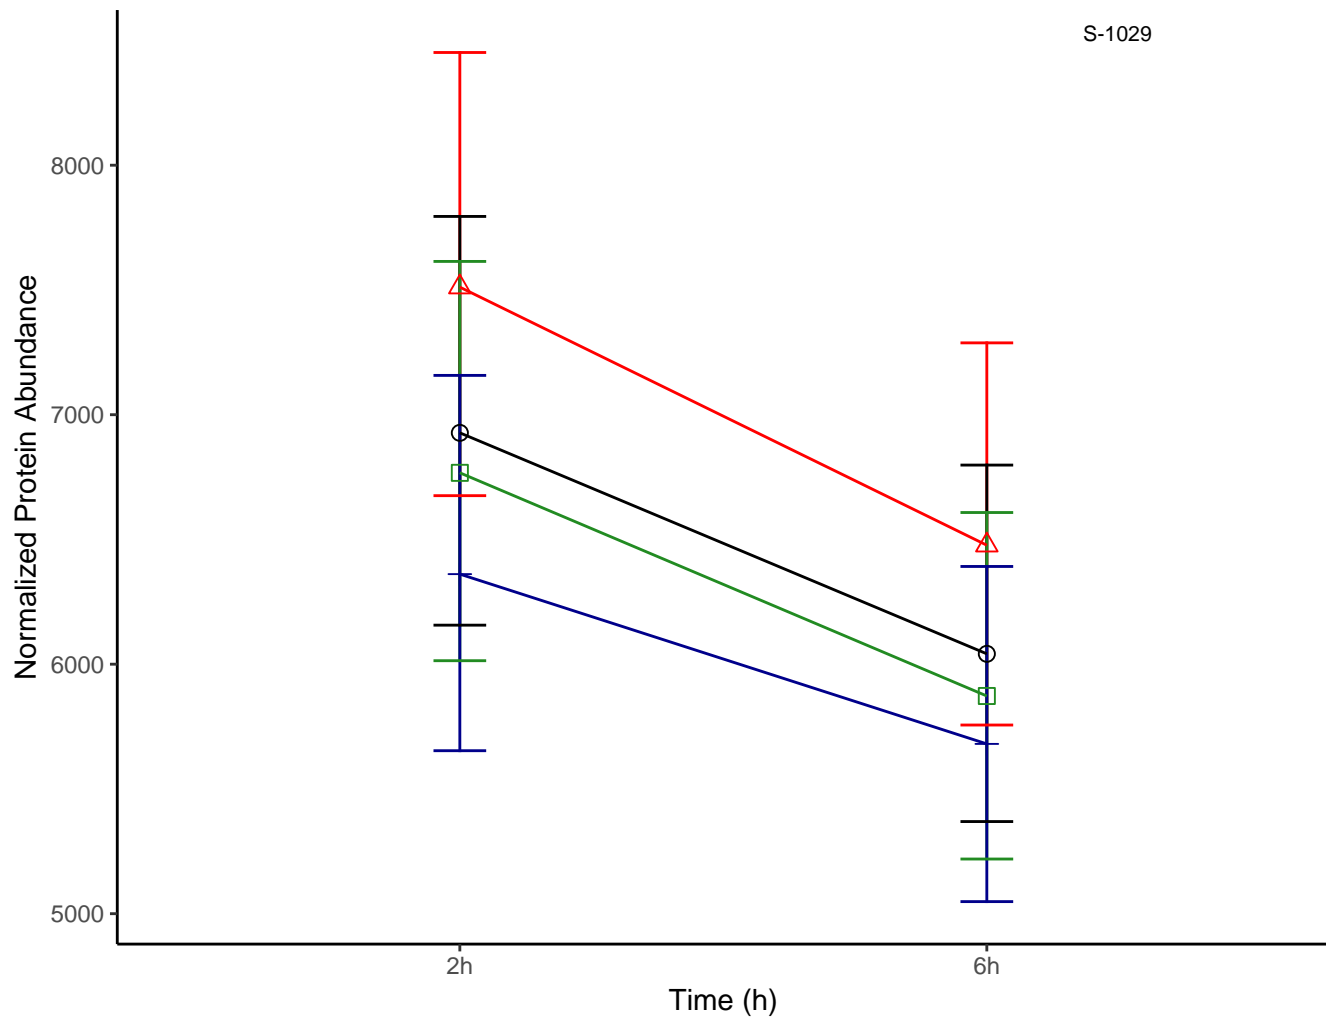

- SA564
- △ SA564- $\Delta hptRS$
- SA564- $\Delta ccpA$
- + SA564- $\Delta hptRS/ccpA$

# ARLY\_STAAM

S-1030

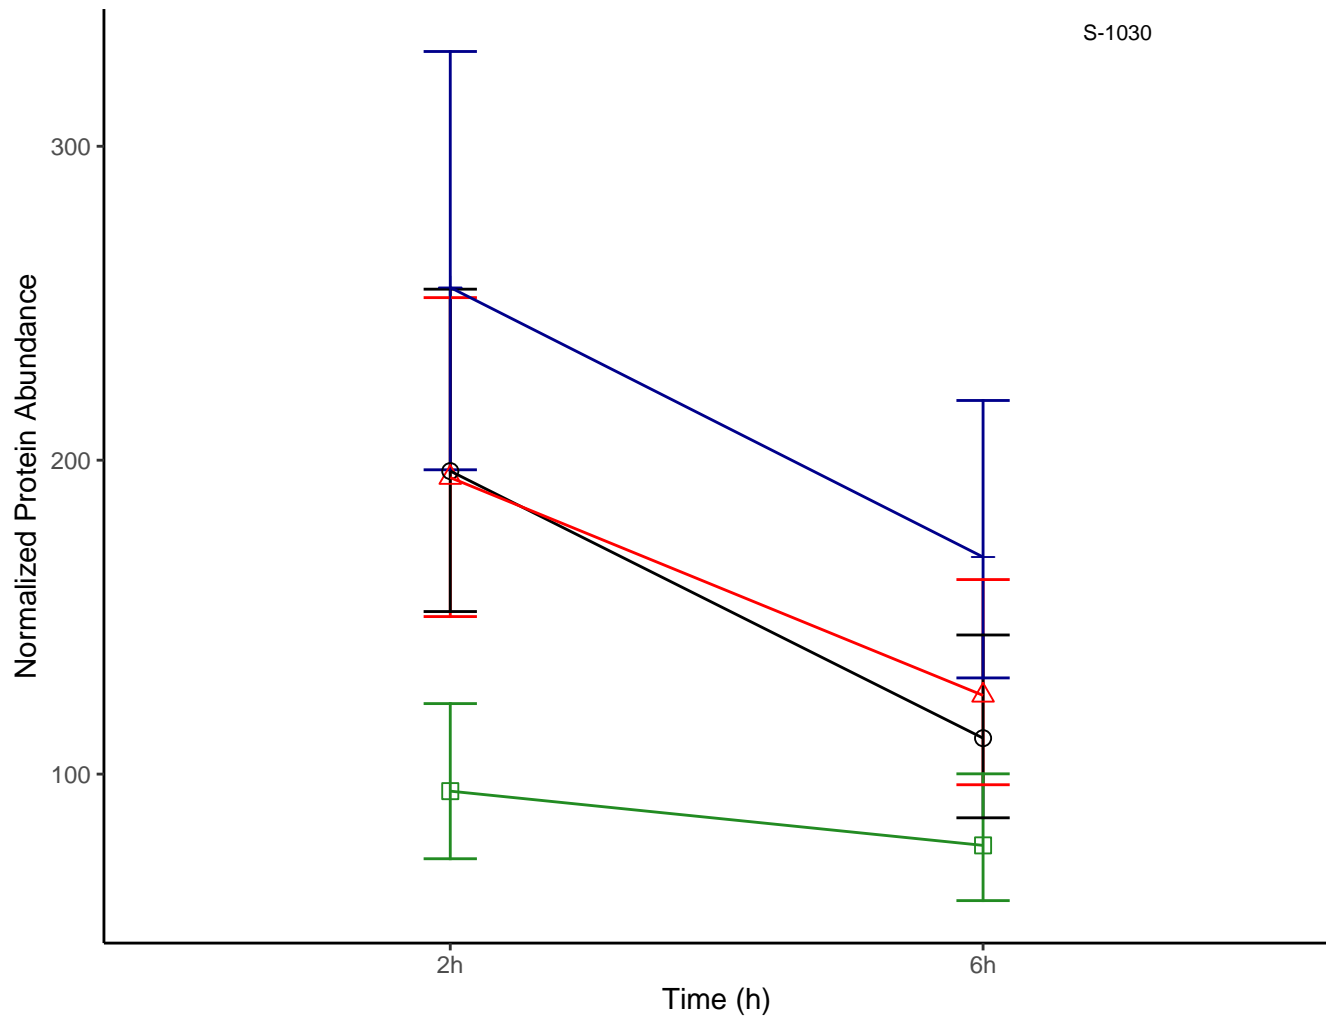

- SA564
- △ SA564- $\Delta$ *hptRS*
- SA564- $\Delta$ *ccpA*
- + SA564- $\Delta$ *hptRS/ccpA*

# AROA\_STAAM

S-1031

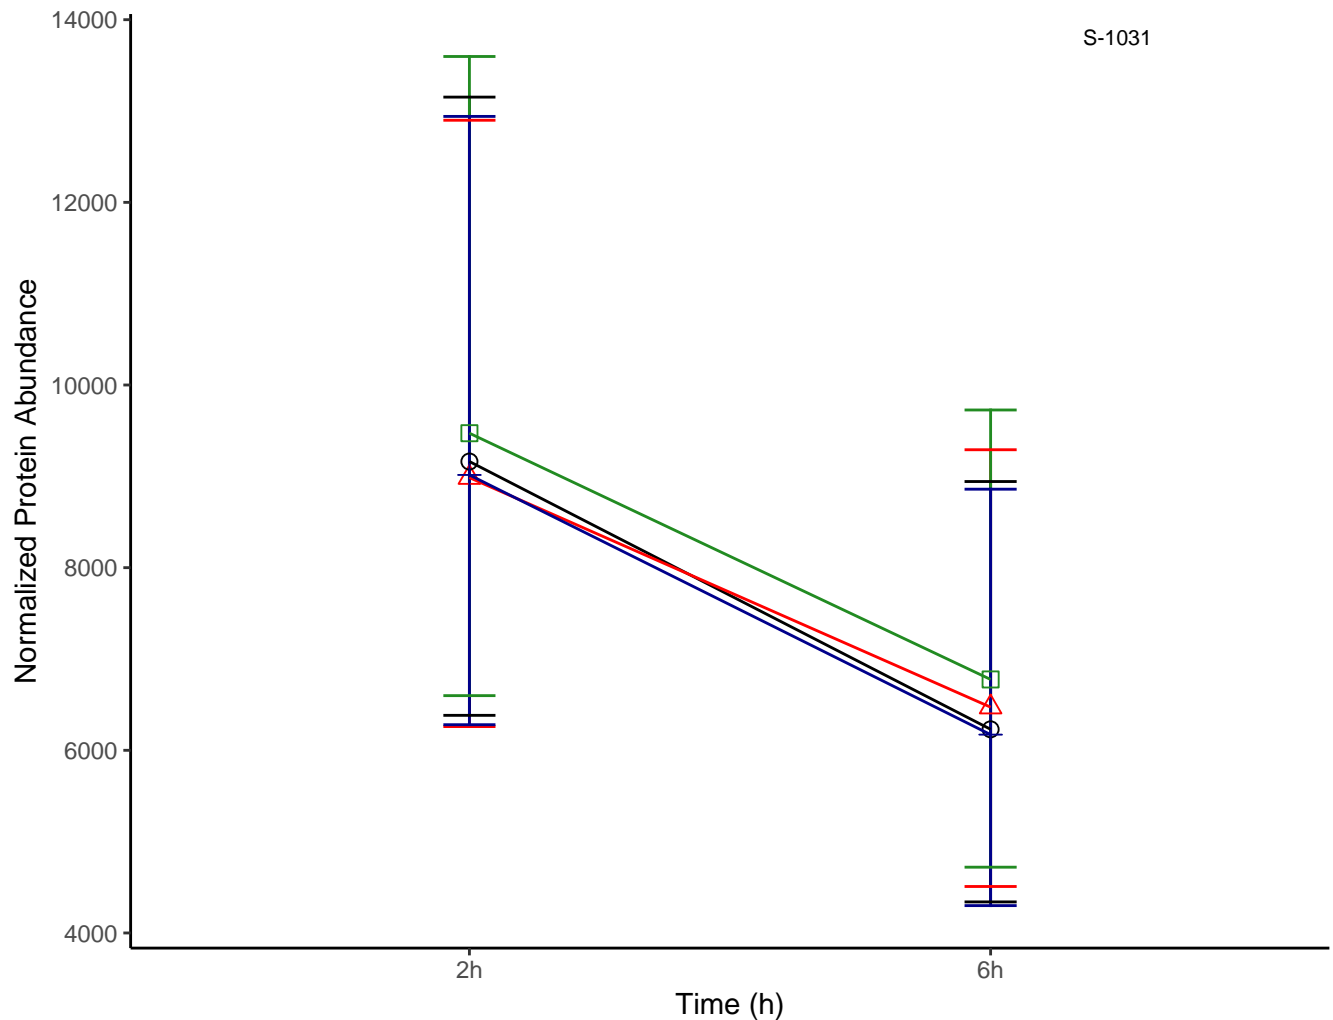

- SA564
- △ SA564-Δ*hptRS*
- SA564-Δ*ccpA*
- + SA564-Δ*hptRS/ccpA*

# AROB\_STAAM

S-1032

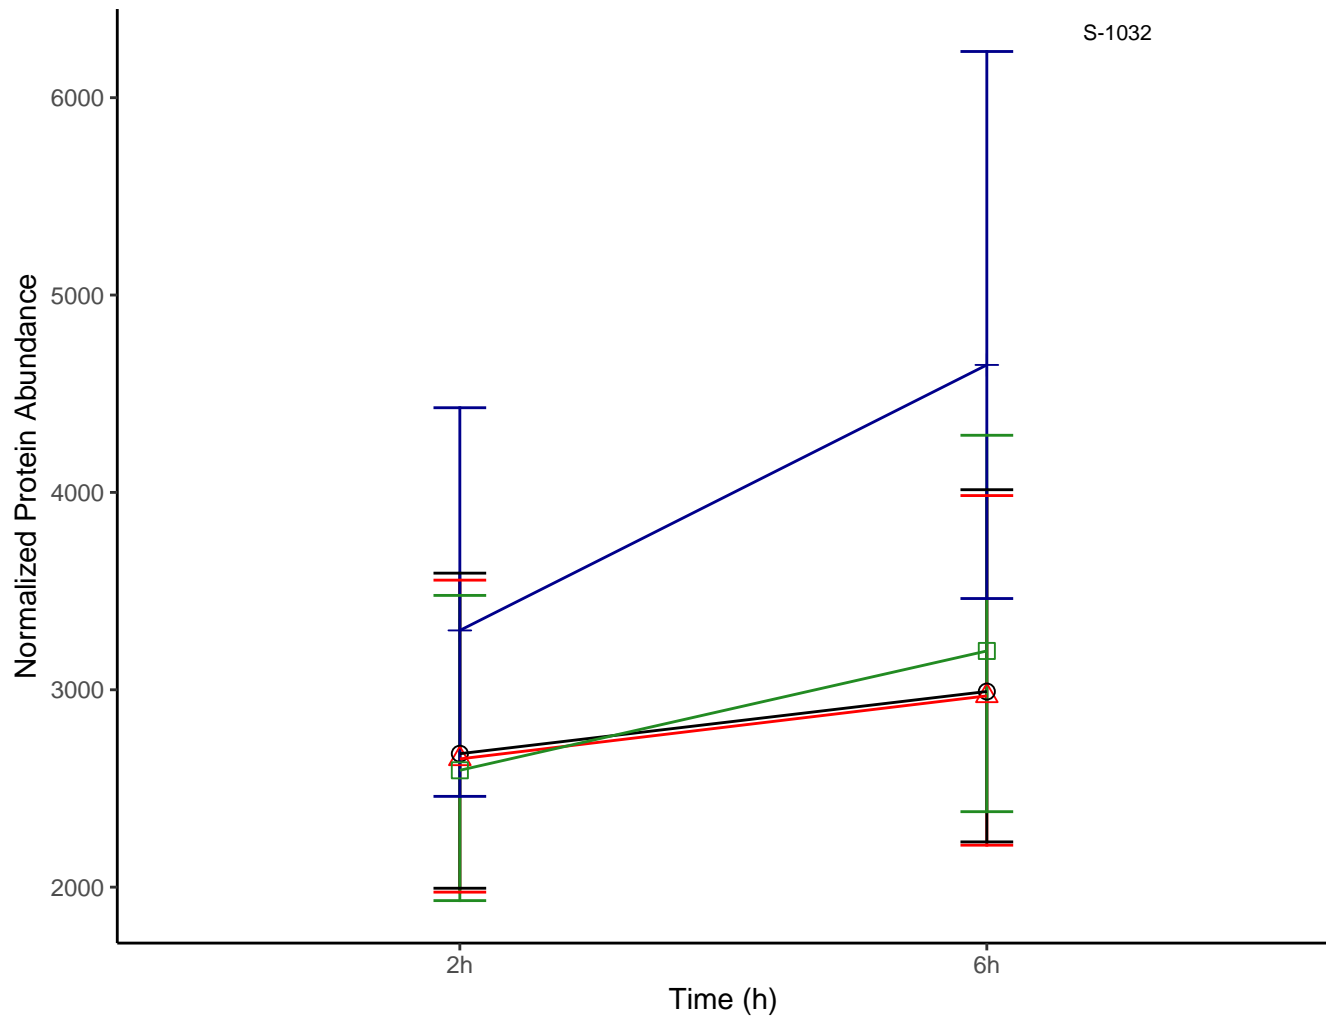

- SA564
- △ SA564-ΔhptRS
- SA564-ΔccpA
- + SA564-ΔhptRS/ccpA



# AROE\_STAAM

S-1033

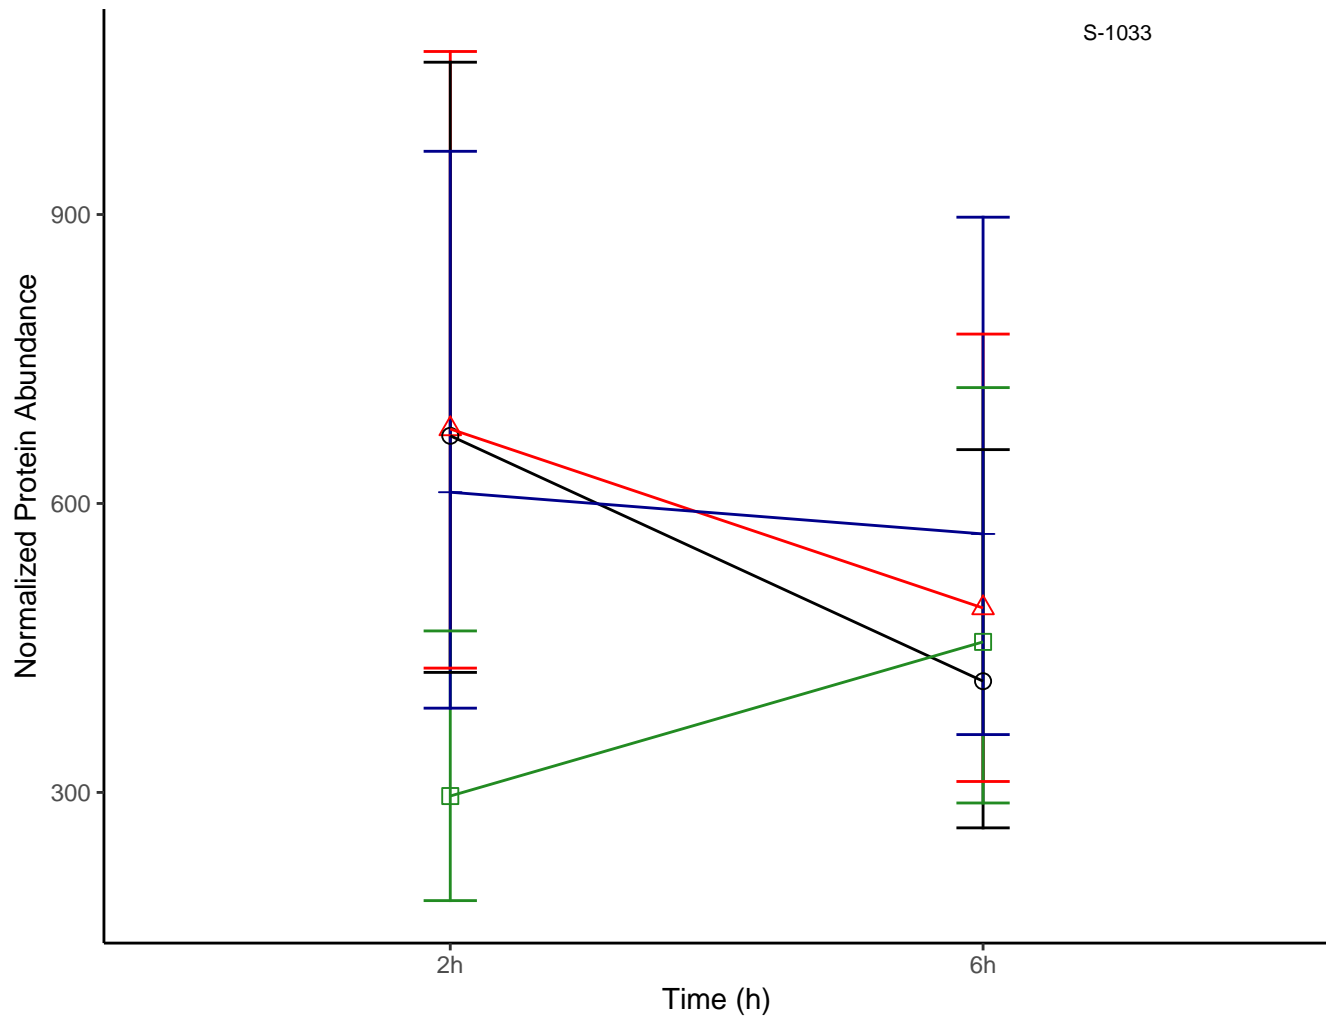

- SA564
- △ SA564- $\Delta$ *hptRS*
- SA564- $\Delta$ *ccpA*
- + SA564- $\Delta$ *hptRS/ccpA*

# ASP23\_STAAM

S-1034

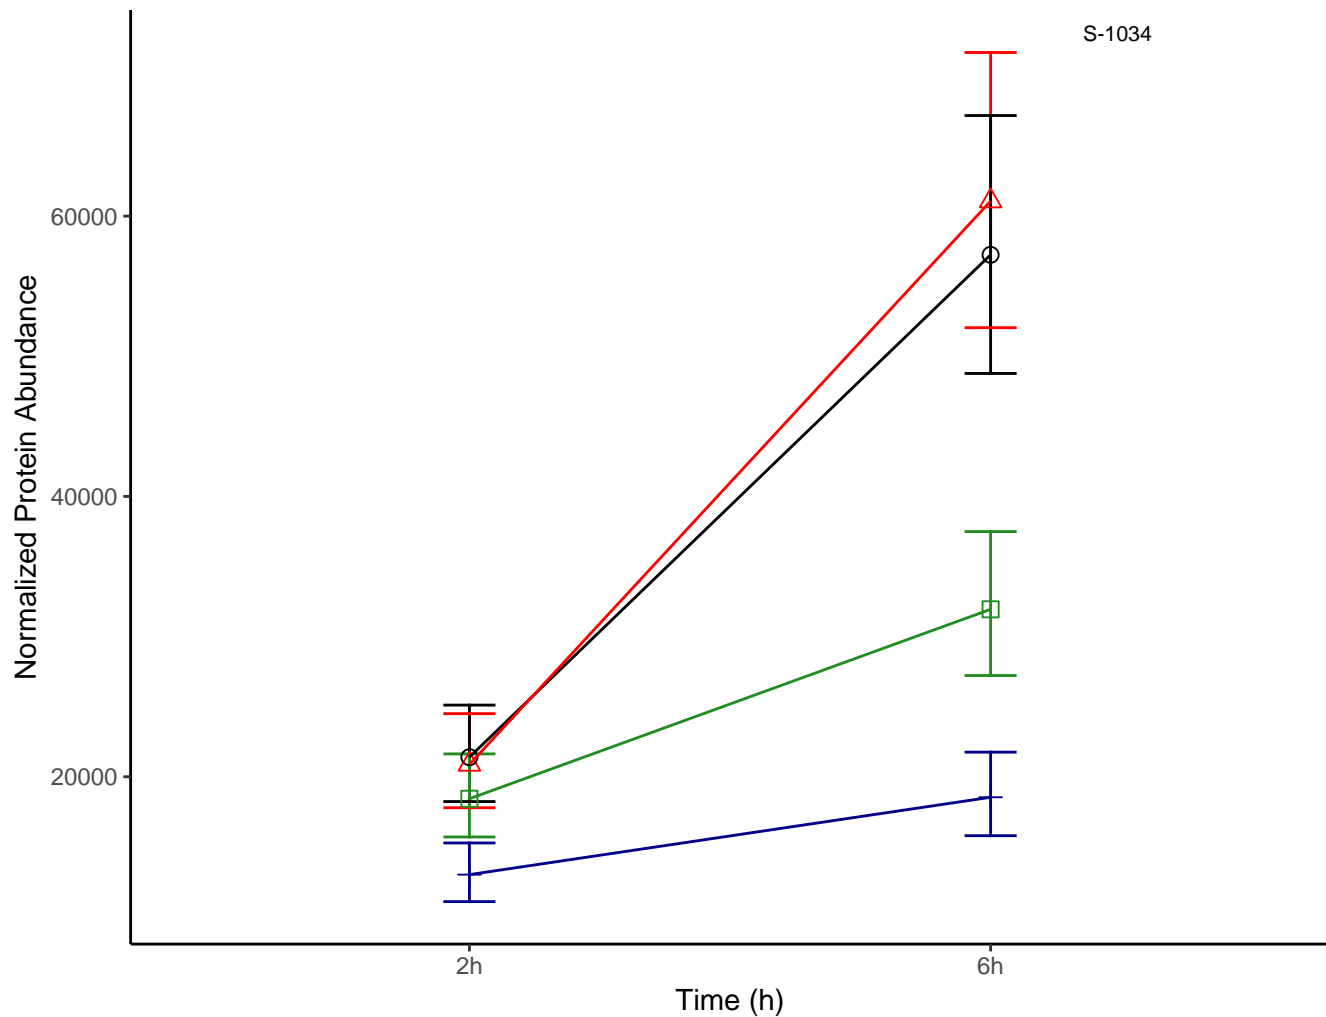

- SA564
- △ SA564- $\Delta$ *hptRS*
- SA564- $\Delta$ *ccpA*
- + SA564- $\Delta$ *hptRS/ccpA*

# ATL\_STAAM

S-1035

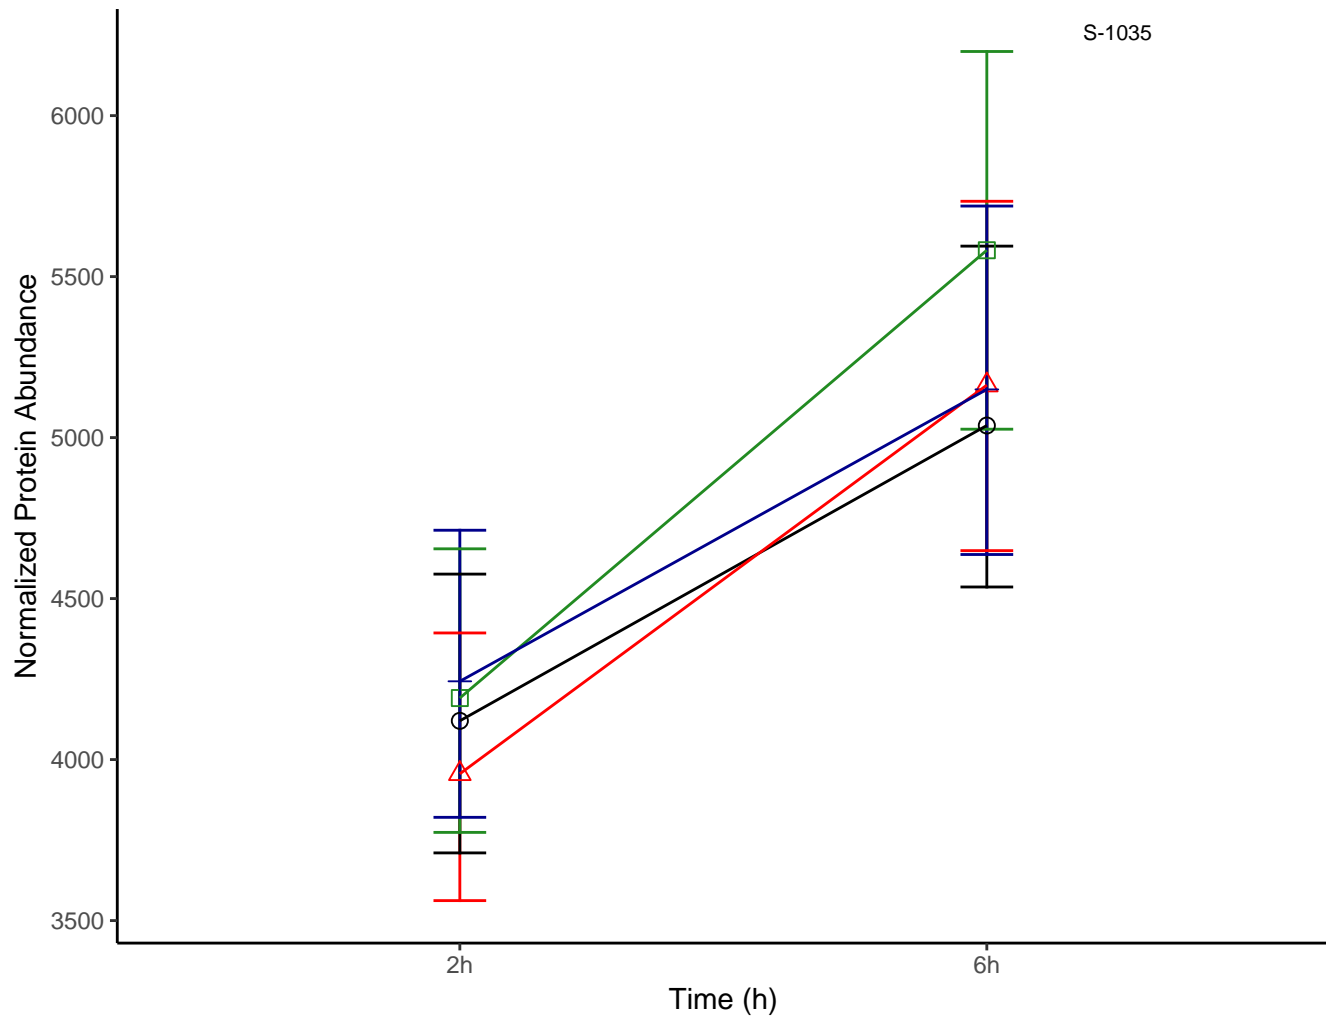

- SA564
- △ SA564- $\Delta$ *hptRS*
- SA564- $\Delta$ *ccpA*
- + SA564- $\Delta$ *hptRS/ccpA*

# ATPA\_STAAM

S-1036

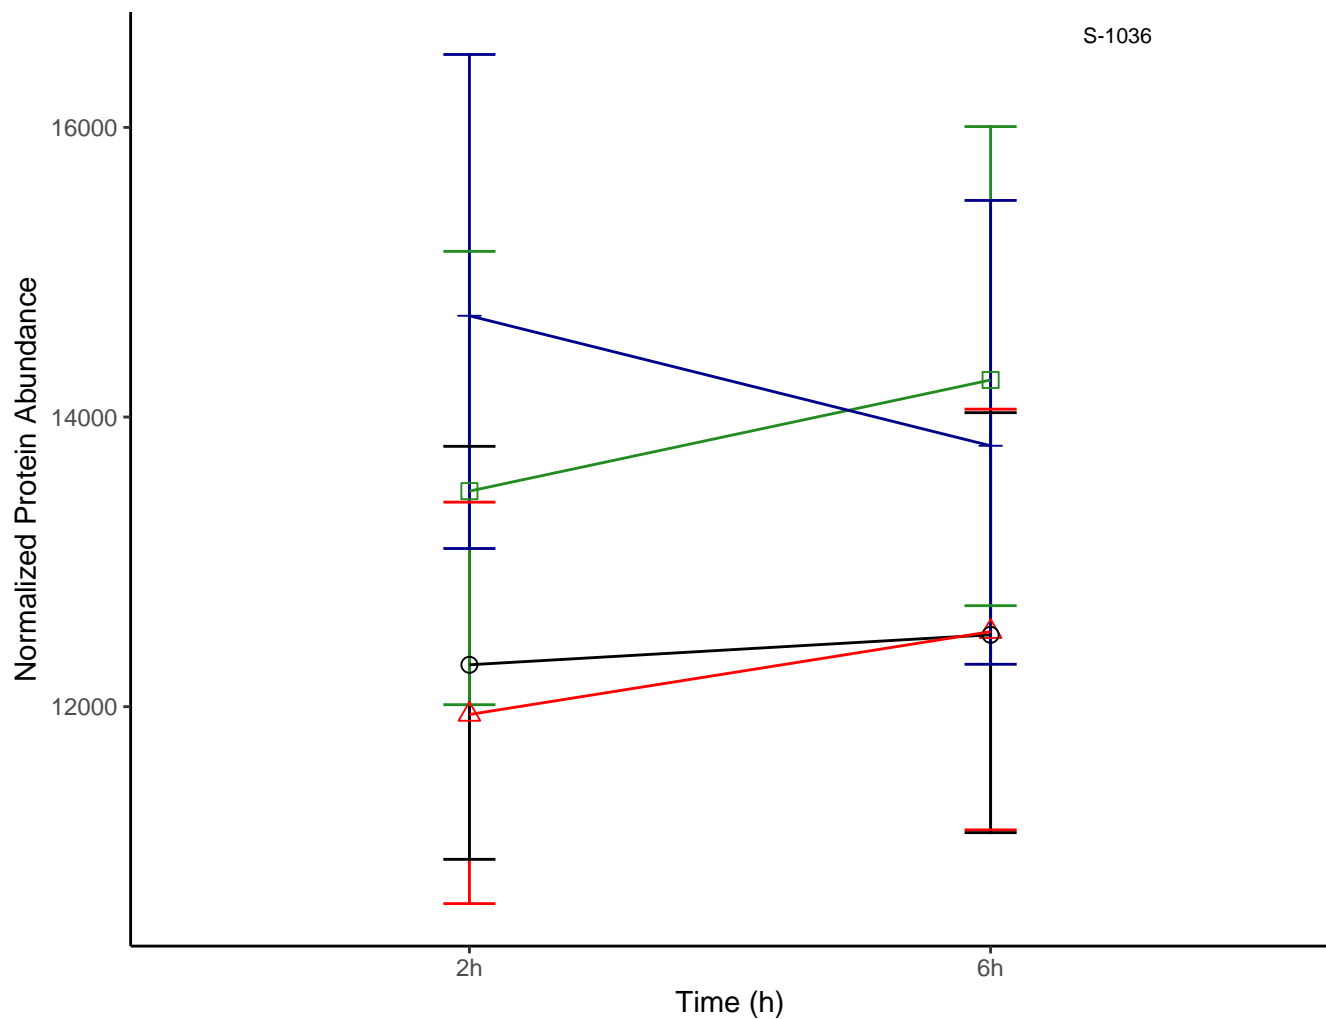

- SA564
- △ SA564- $\Delta$ *hptRS*
- SA564- $\Delta$ *ccpA*
- + SA564- $\Delta$ *hptRS/ccpA*

## ATPB\_STAAM

S-1037

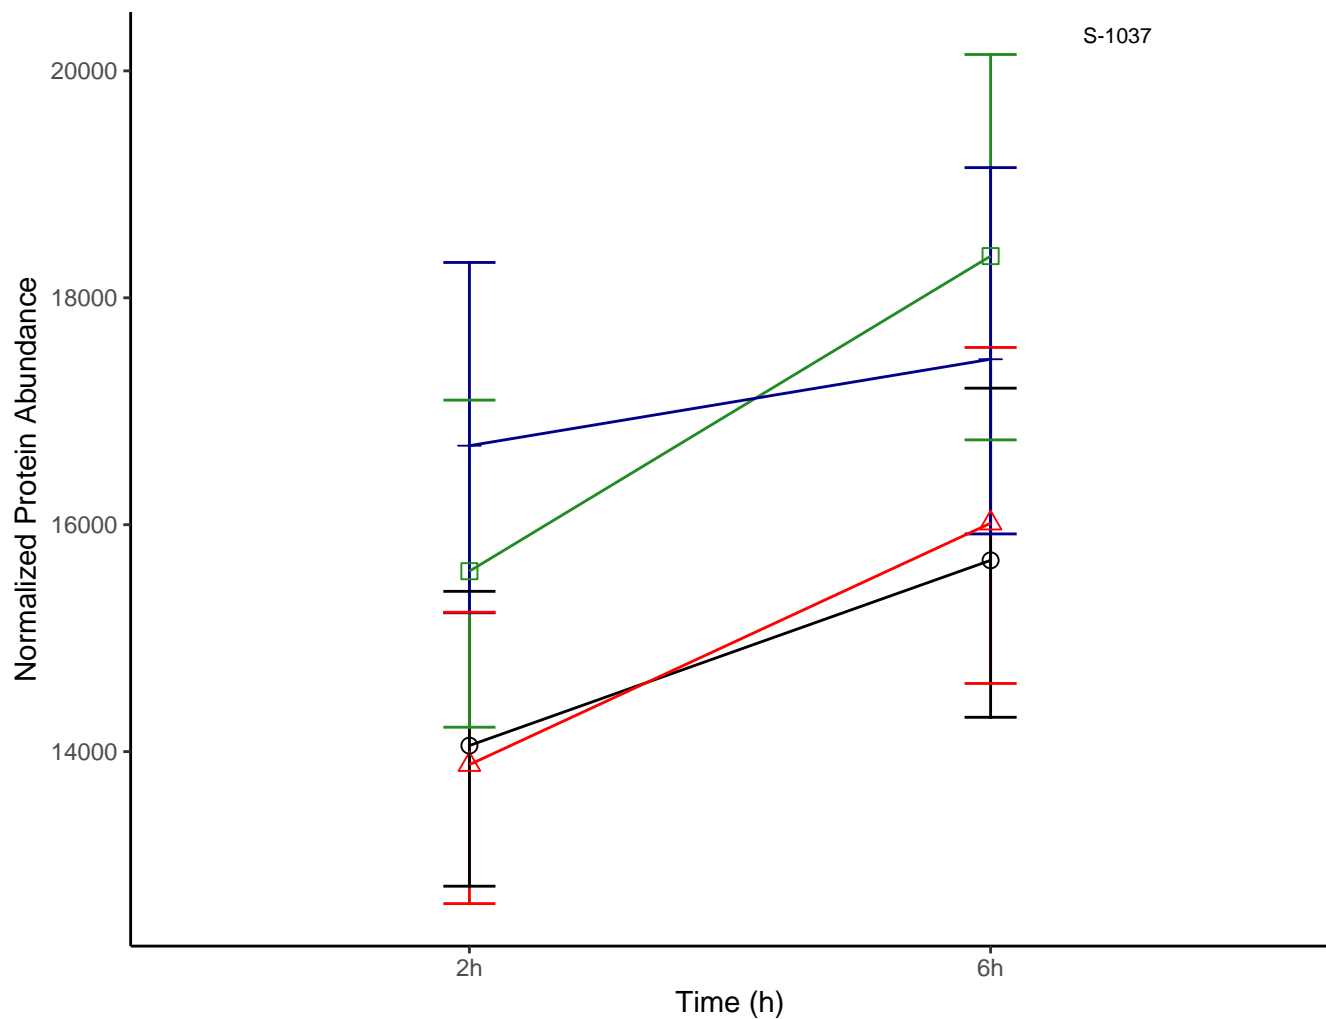

- SA564
- △ SA564- $\Delta$ *hptRS*
- SA564- $\Delta$ *ccpA*
- + SA564- $\Delta$ *hptRS/ccpA*

# ATPD\_STAAM

S-1038

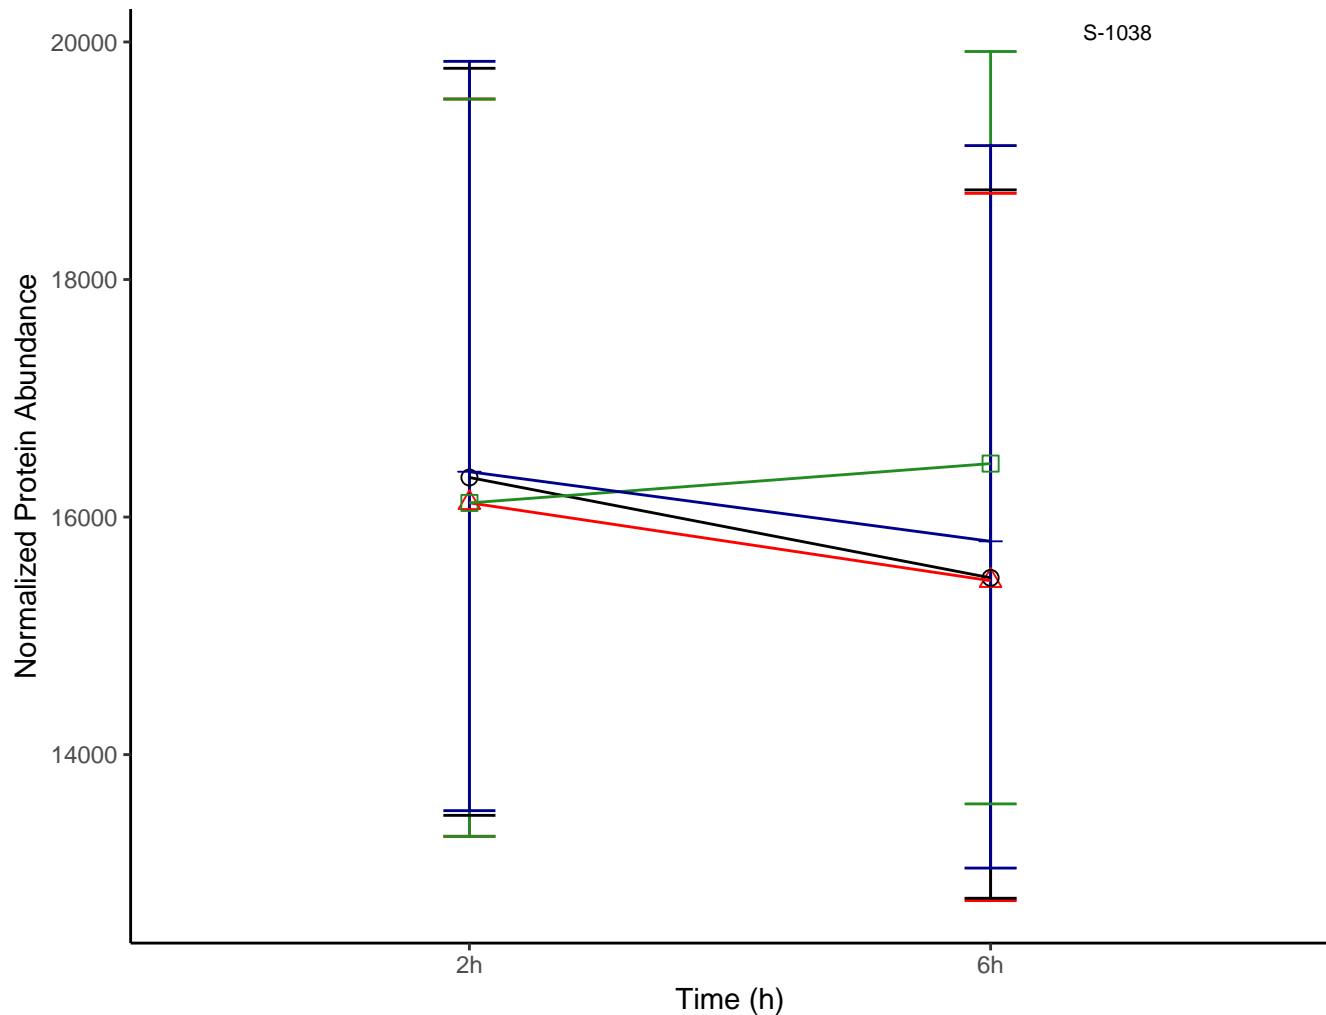

- SA564
- △ SA564- $\Delta$ *hptRS*
- SA564- $\Delta$ *ccpA*
- + SA564- $\Delta$ *hptRS/ccpA*

# ATPE\_STAAM

S-1039

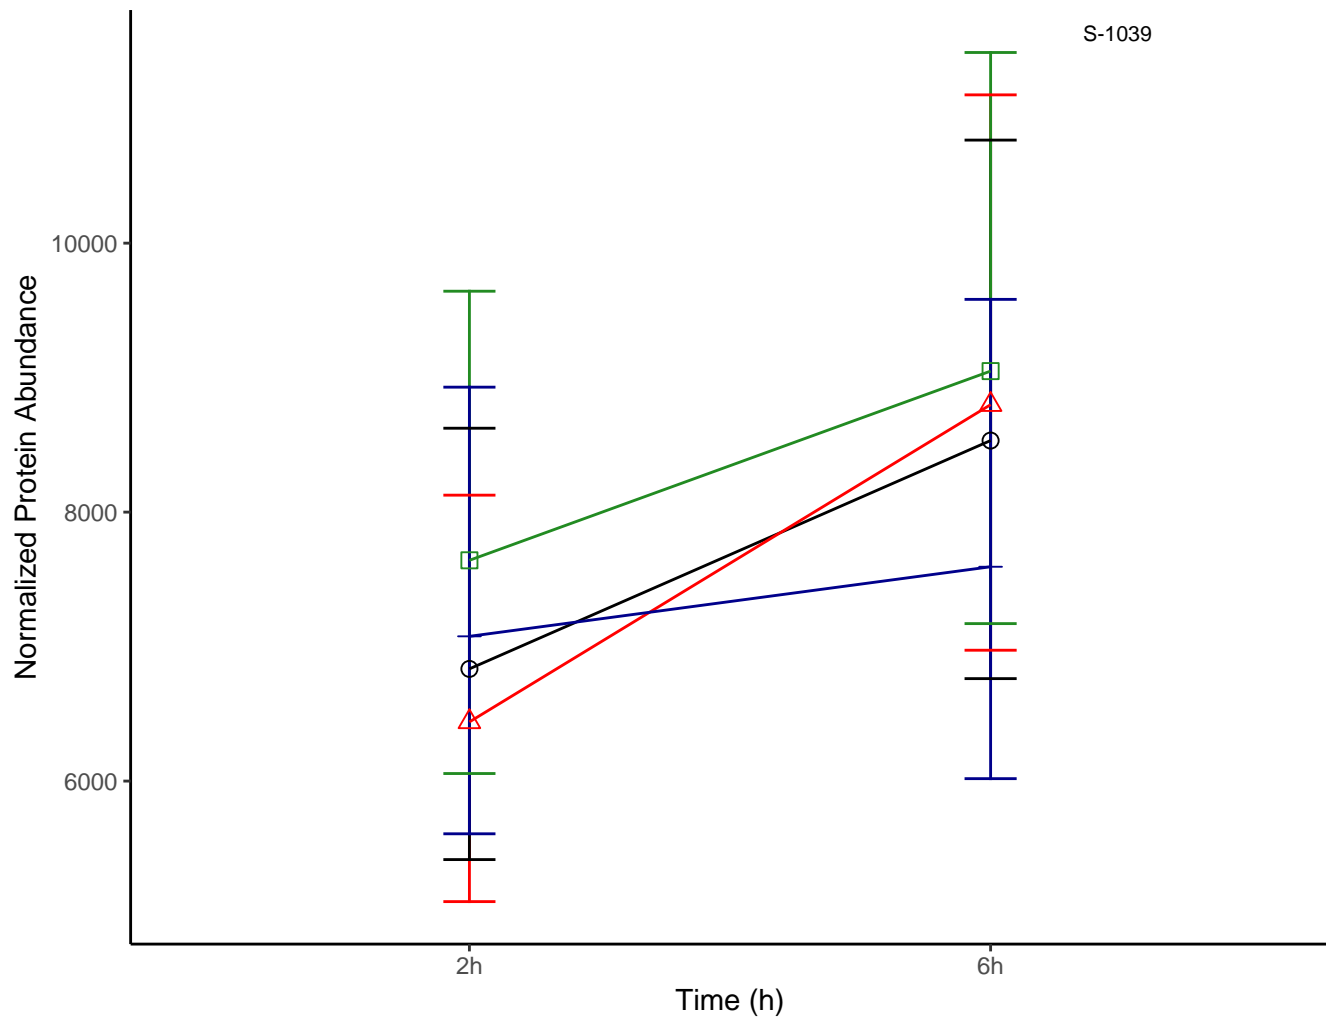

- SA564
- △ SA564- $\Delta$ hptRS
- SA564- $\Delta$ ccpA
- + SA564- $\Delta$ hptRS/ccpA

## ATPF\_STAAM

S-1040

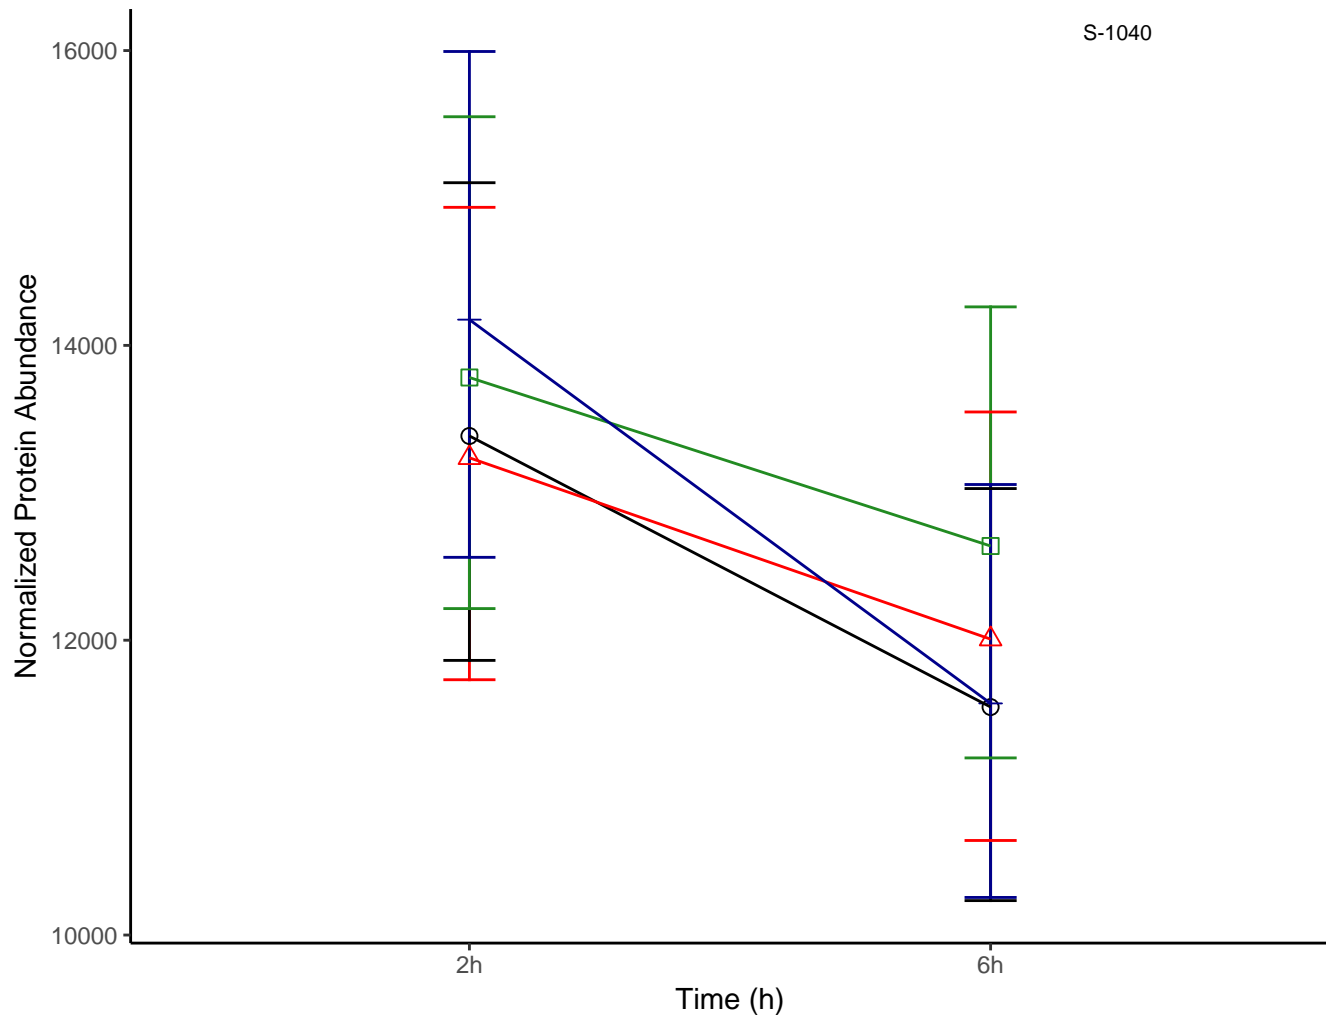

- SA564
- △ SA564- $\Delta hptRS$
- SA564- $\Delta ccpA$
- + SA564- $\Delta hptRS/ccpA$



# ATPG\_STAAM

S-1041

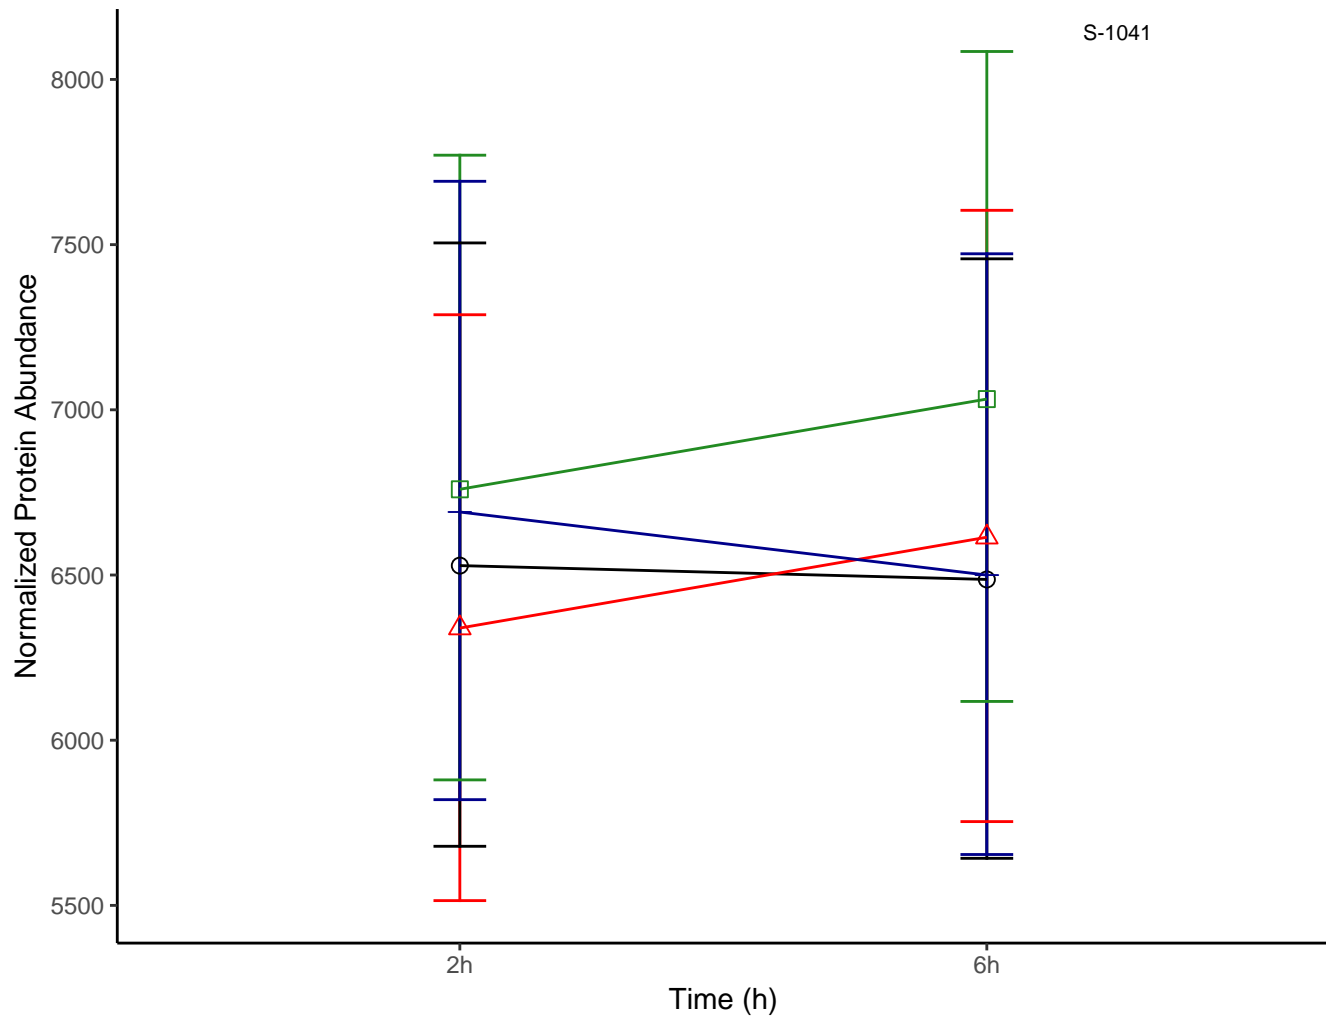

- SA564
- △ SA564- $\Delta$ *hptRS*
- SA564- $\Delta$ *ccpA*
- + SA564- $\Delta$ *hptRS/ccpA*

# AZO1\_STAAM

S-1042

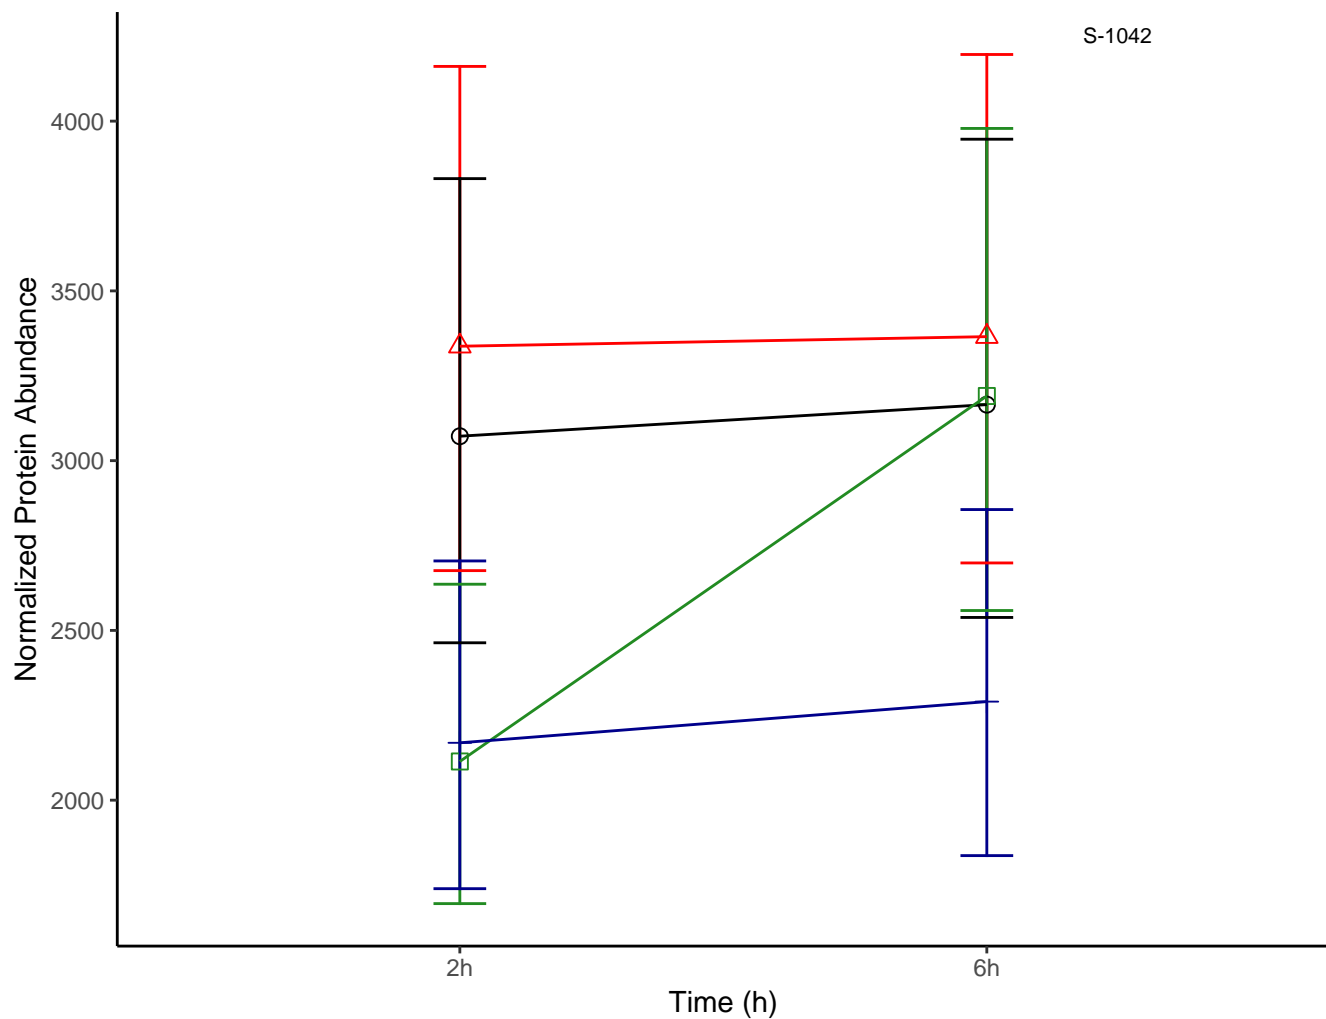

- SA564
- △ SA564-ΔhptRS
- SA564-ΔccpA
- + SA564-ΔhptRS/ccpA

# AZOR\_STAAM

S-1043

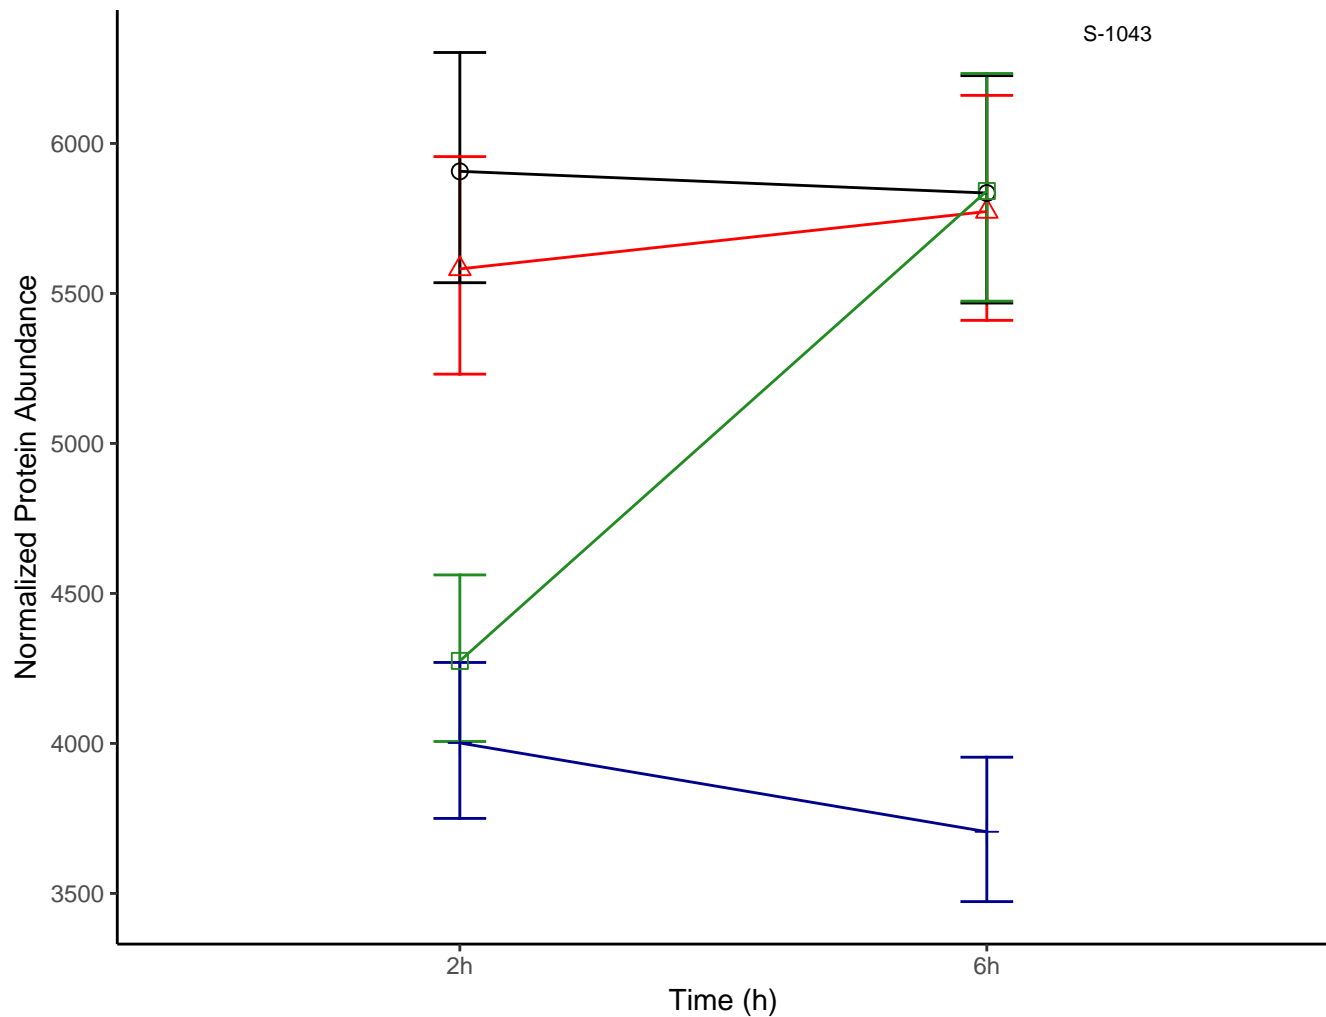

- SA564
- △ SA564- $\Delta hptRS$
- SA564- $\Delta ccpA$
- + SA564- $\Delta hptRS/ccpA$

# BSAA\_STAAM

S-1044

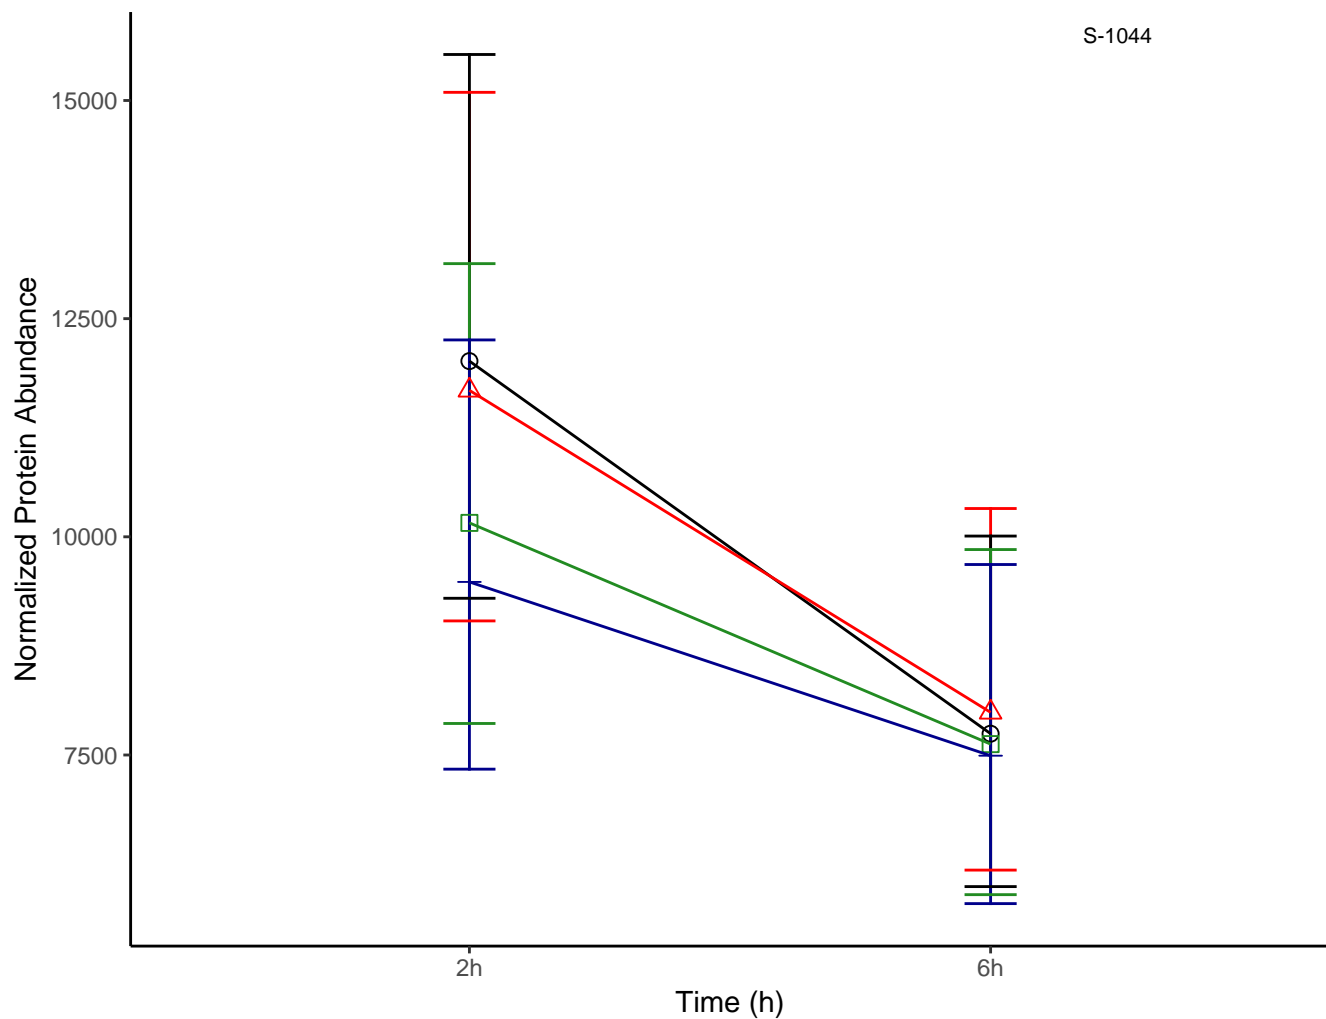

- SA564
- △ SA564- $\Delta$ *hptRS*
- SA564- $\Delta$ *ccpA*
- + SA564- $\Delta$ *hptRS/ccpA*

# BUTA\_STAAM

S-1045

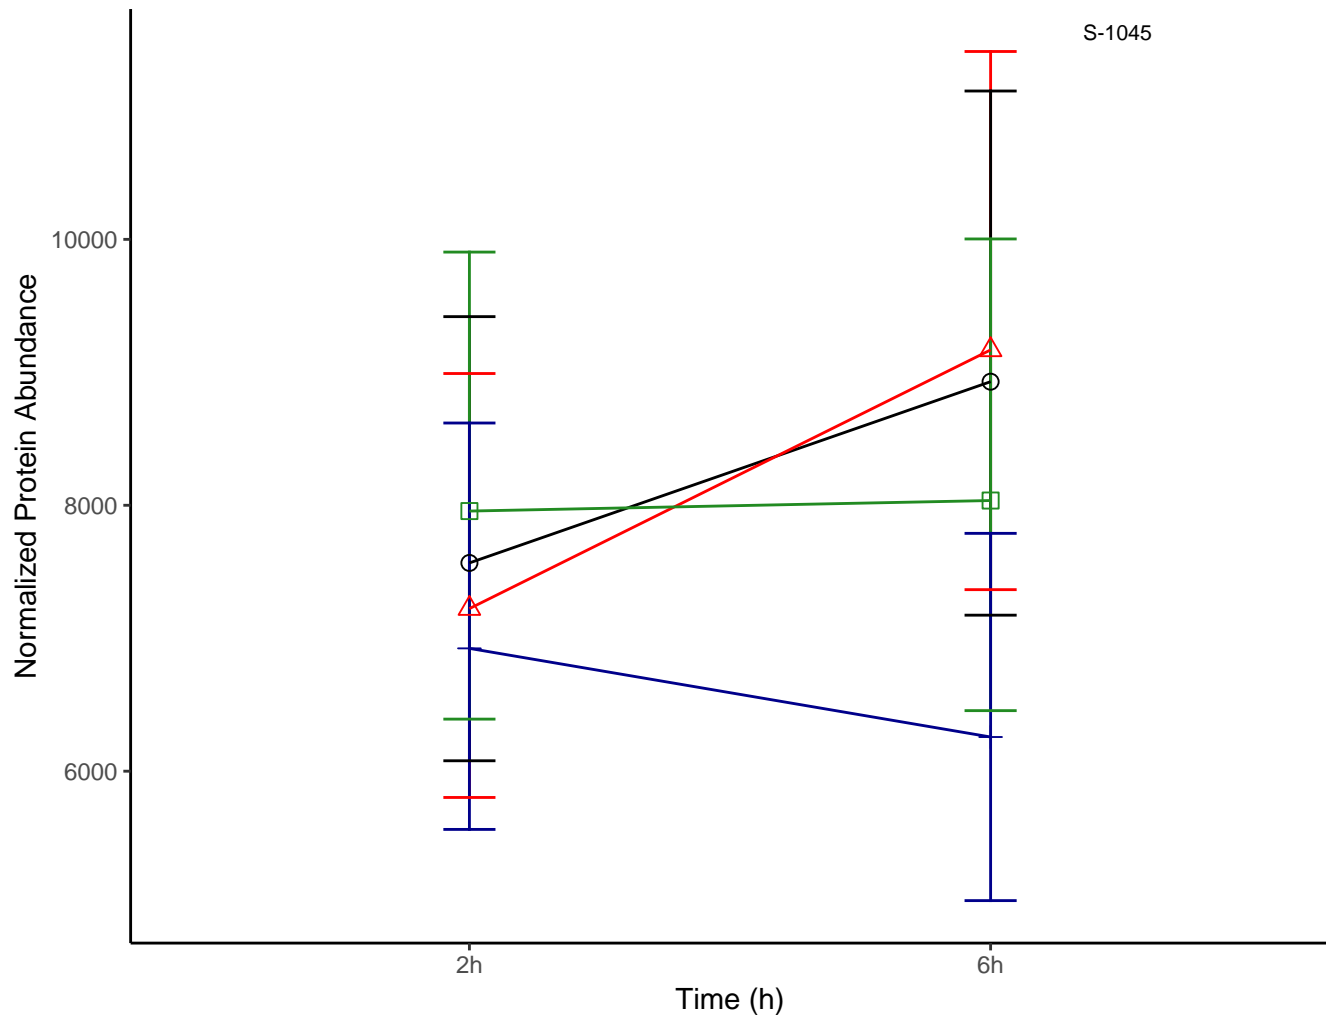

- SA564
- △ SA564- $\Delta$ *hptRS*
- SA564- $\Delta$ *ccpA*
- + SA564- $\Delta$ *hptRS/ccpA*

# CARA\_STAAM

S-1046

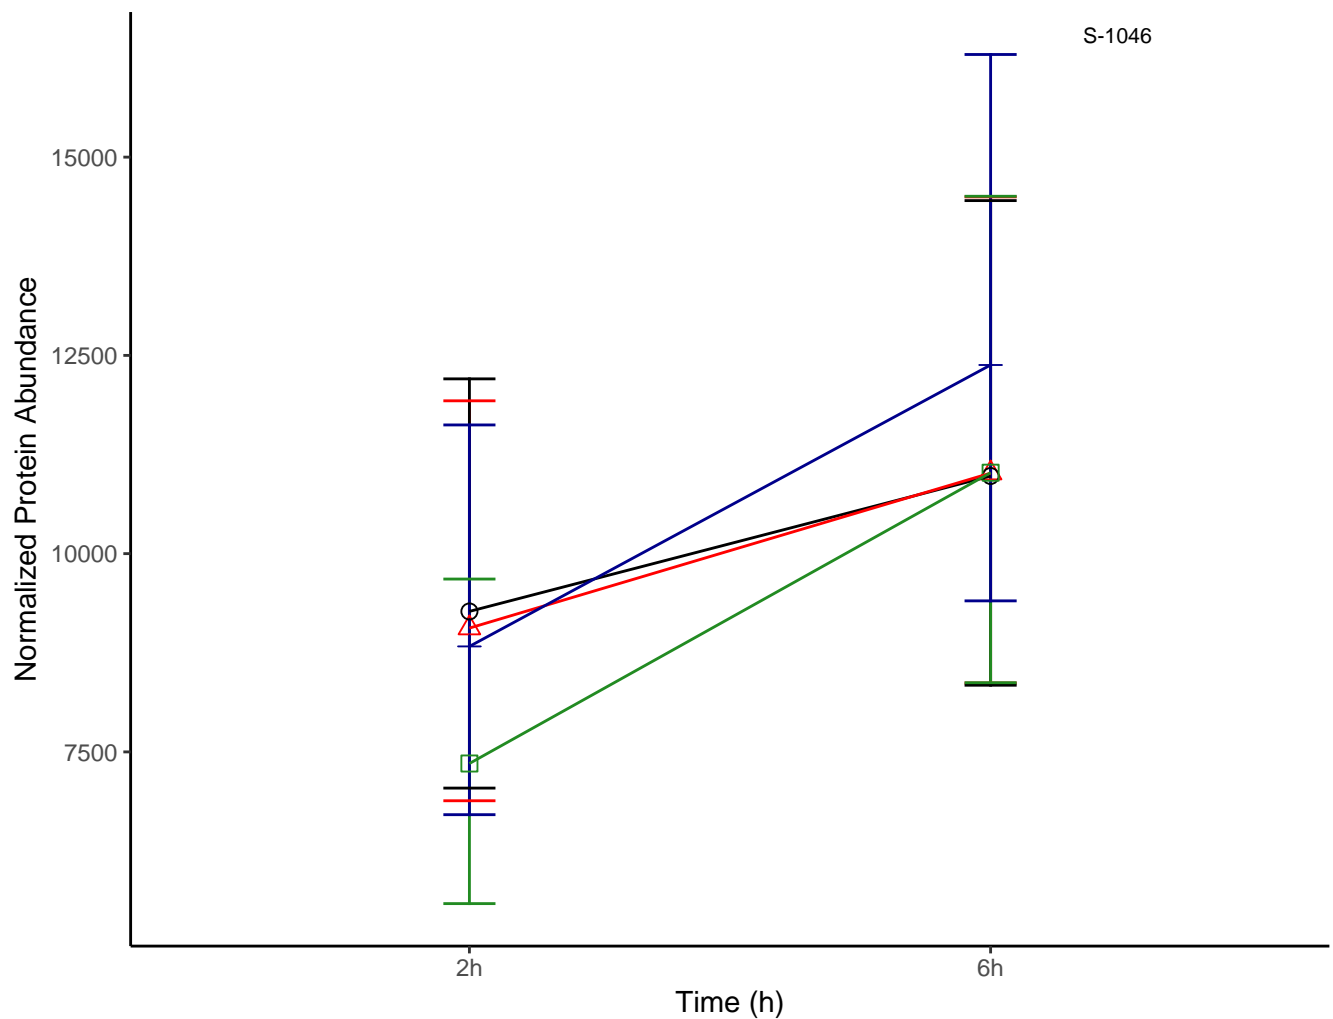

- SA564
- △ SA564- $\Delta$ *hptRS*
- SA564- $\Delta$ *ccpA*
- + SA564- $\Delta$ *hptRS/ccpA*

# CARB\_STAAM

S-1047

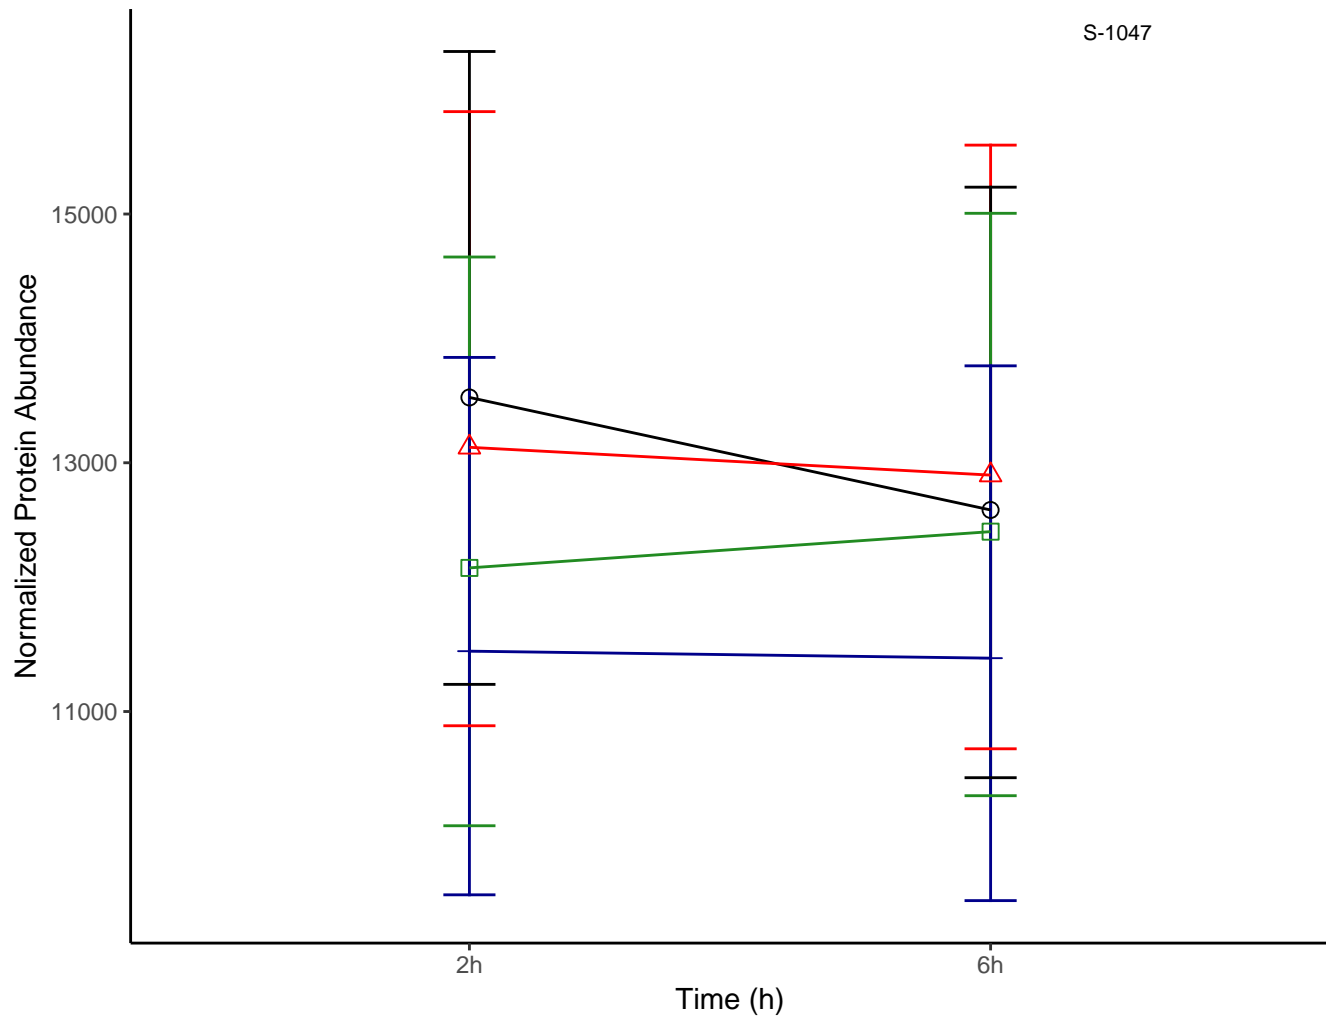

- SA564
- △ SA564- $\Delta$ hptRS
- SA564- $\Delta$ ccpA
- + SA564- $\Delta$ hptRS/ccpA

# CATA\_STAAM

S-1048

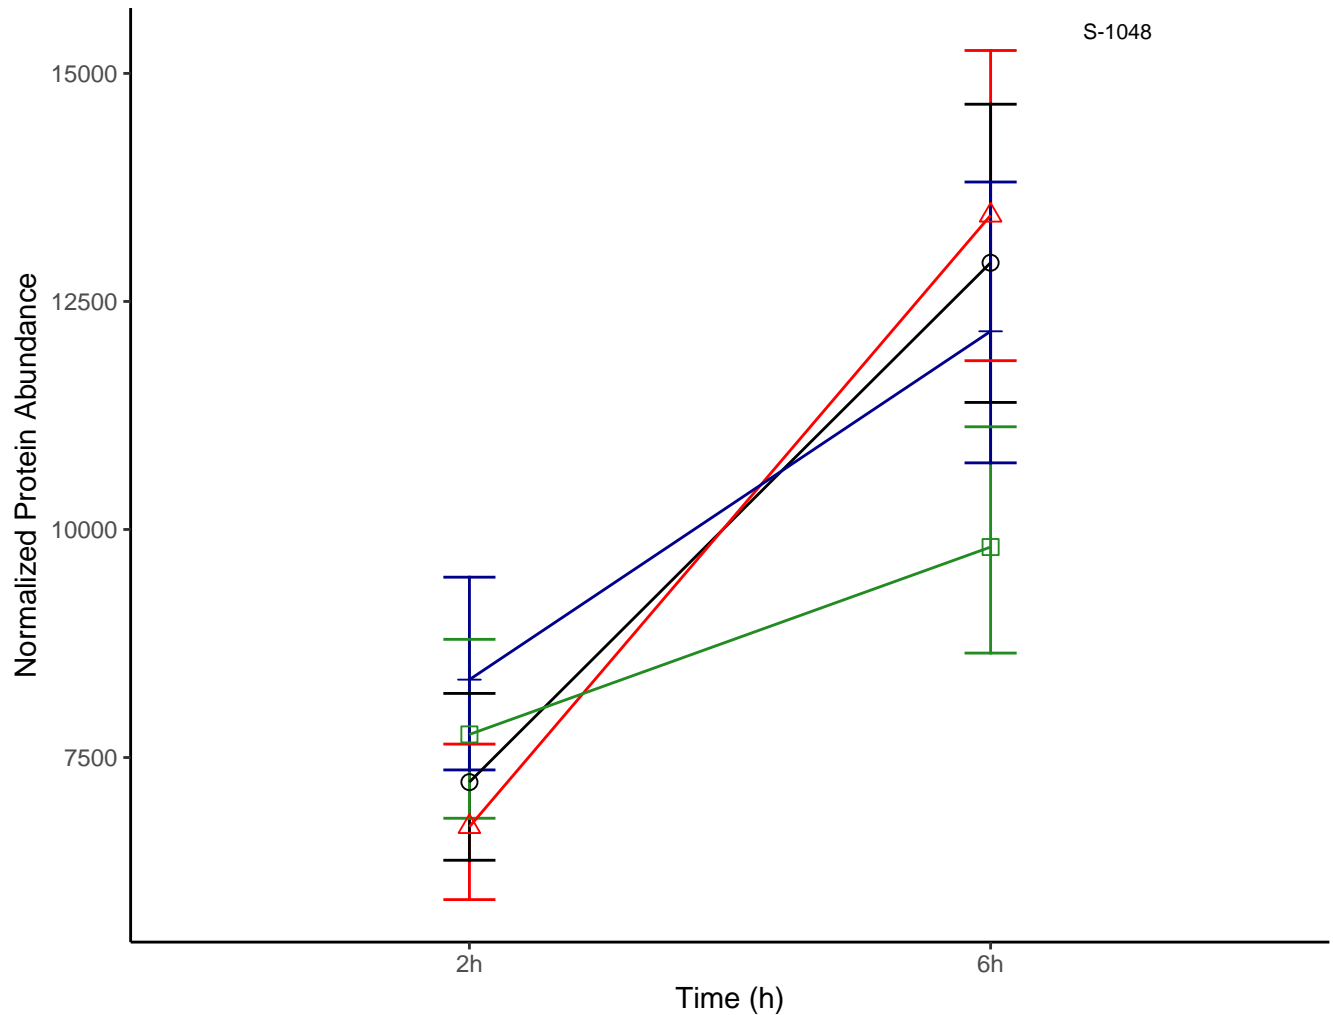

- SA564
- △ SA564- $\Delta$ hptRS
- SA564- $\Delta$ ccpA
- + SA564- $\Delta$ hptRS/ccpA



# CCPA\_STAAM

S-1049

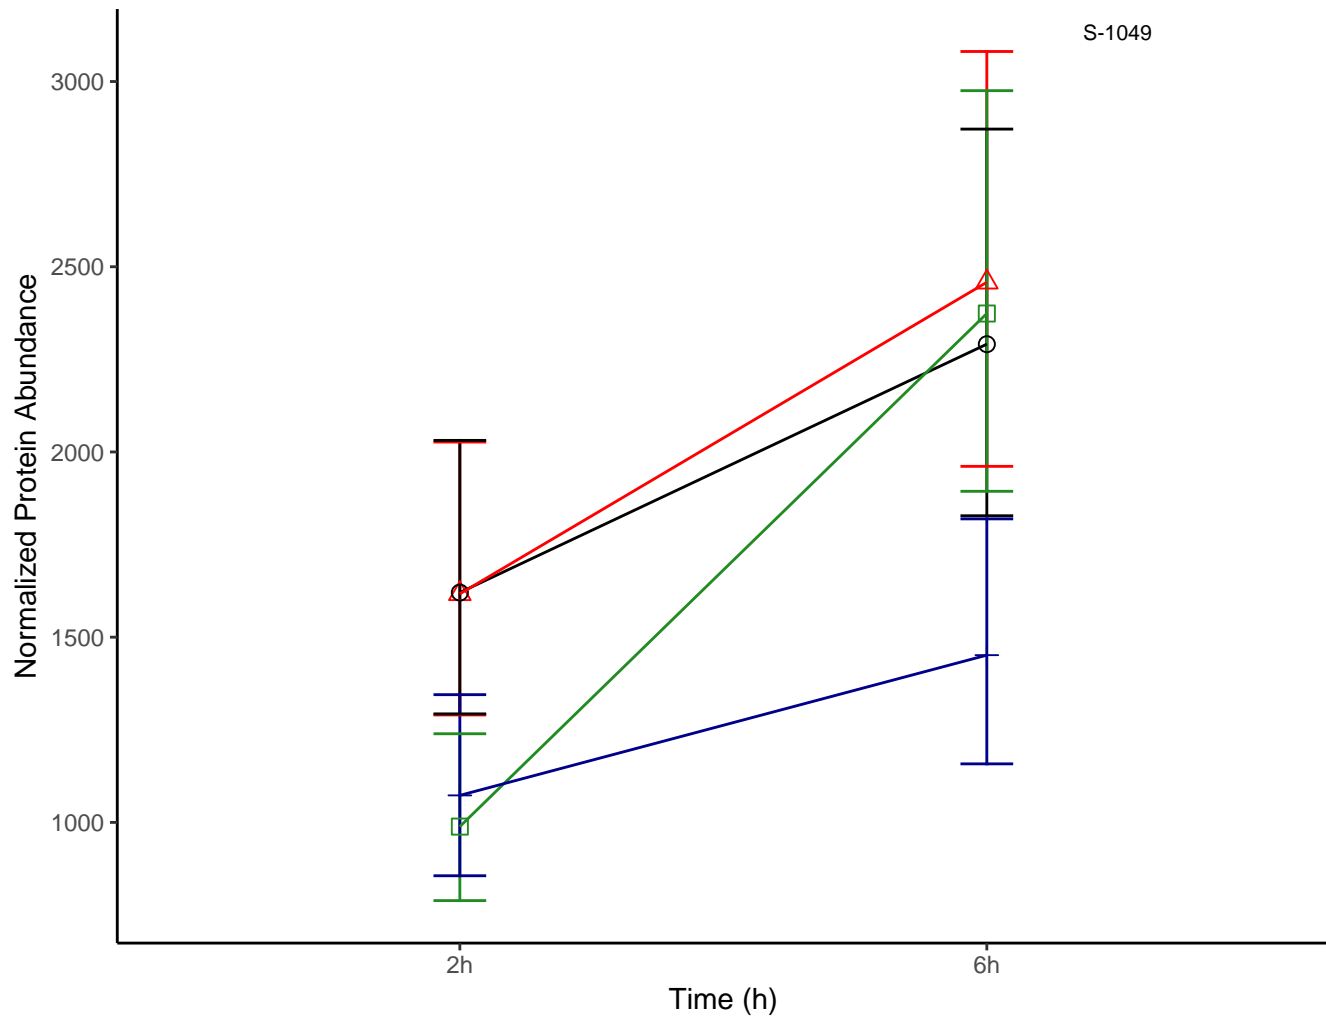

- SA564
- △ SA564- $\Delta$ *hptRS*
- SA564- $\Delta$ *ccpA*
- + SA564- $\Delta$ *hptRS/ccpA*

# CDR\_STAAM

S-1050

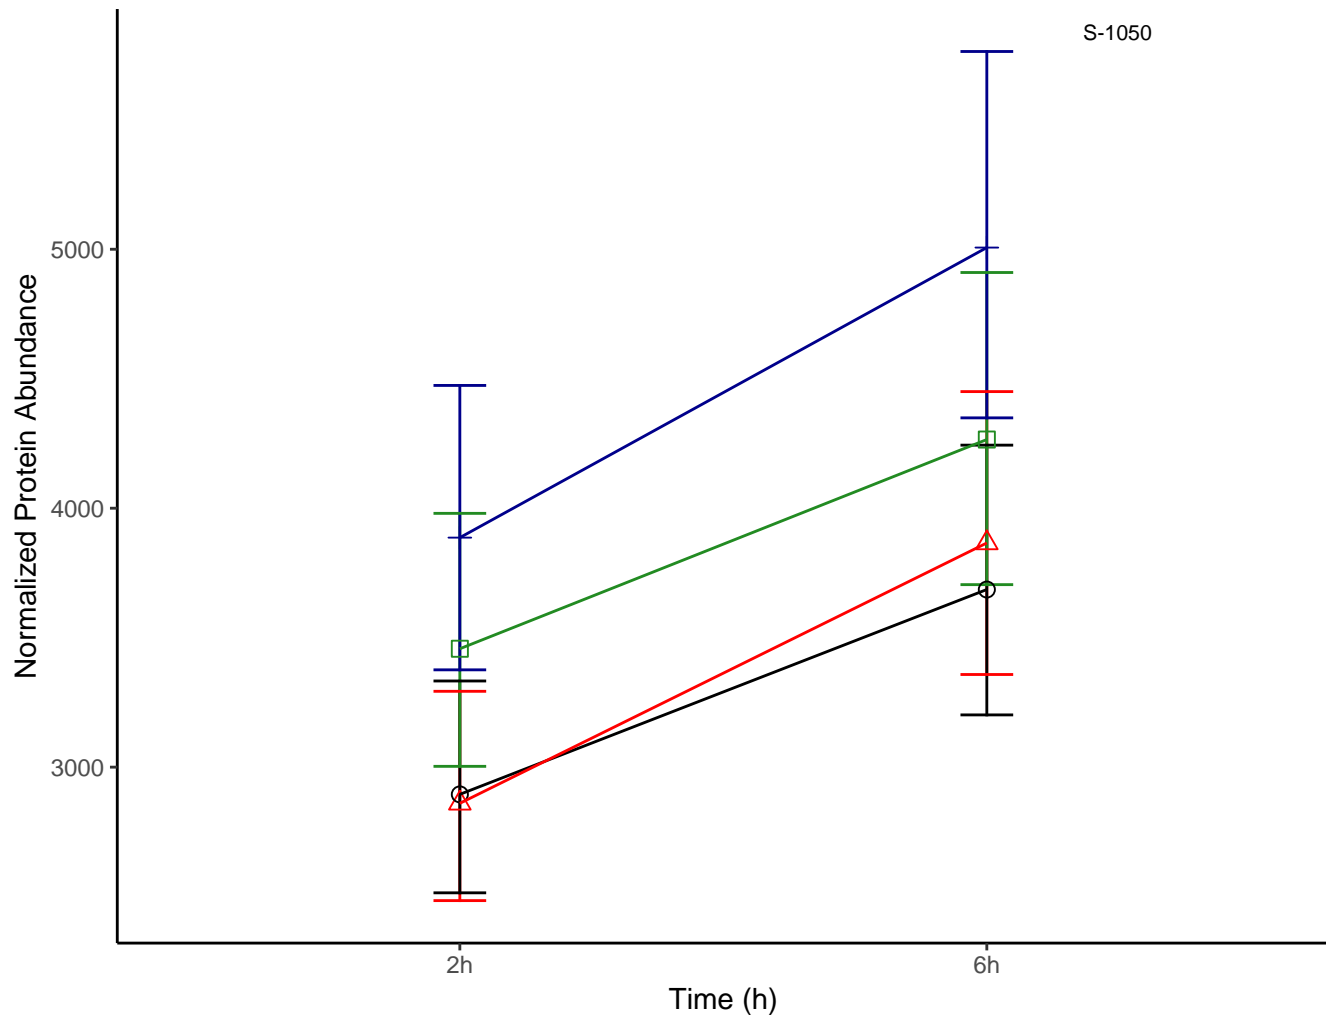

- SA564
- △ SA564- $\Delta hptRS$
- SA564- $\Delta ccpA$
- + SA564- $\Delta hptRS/ccpA$

# CH10\_STAAM

S-1051

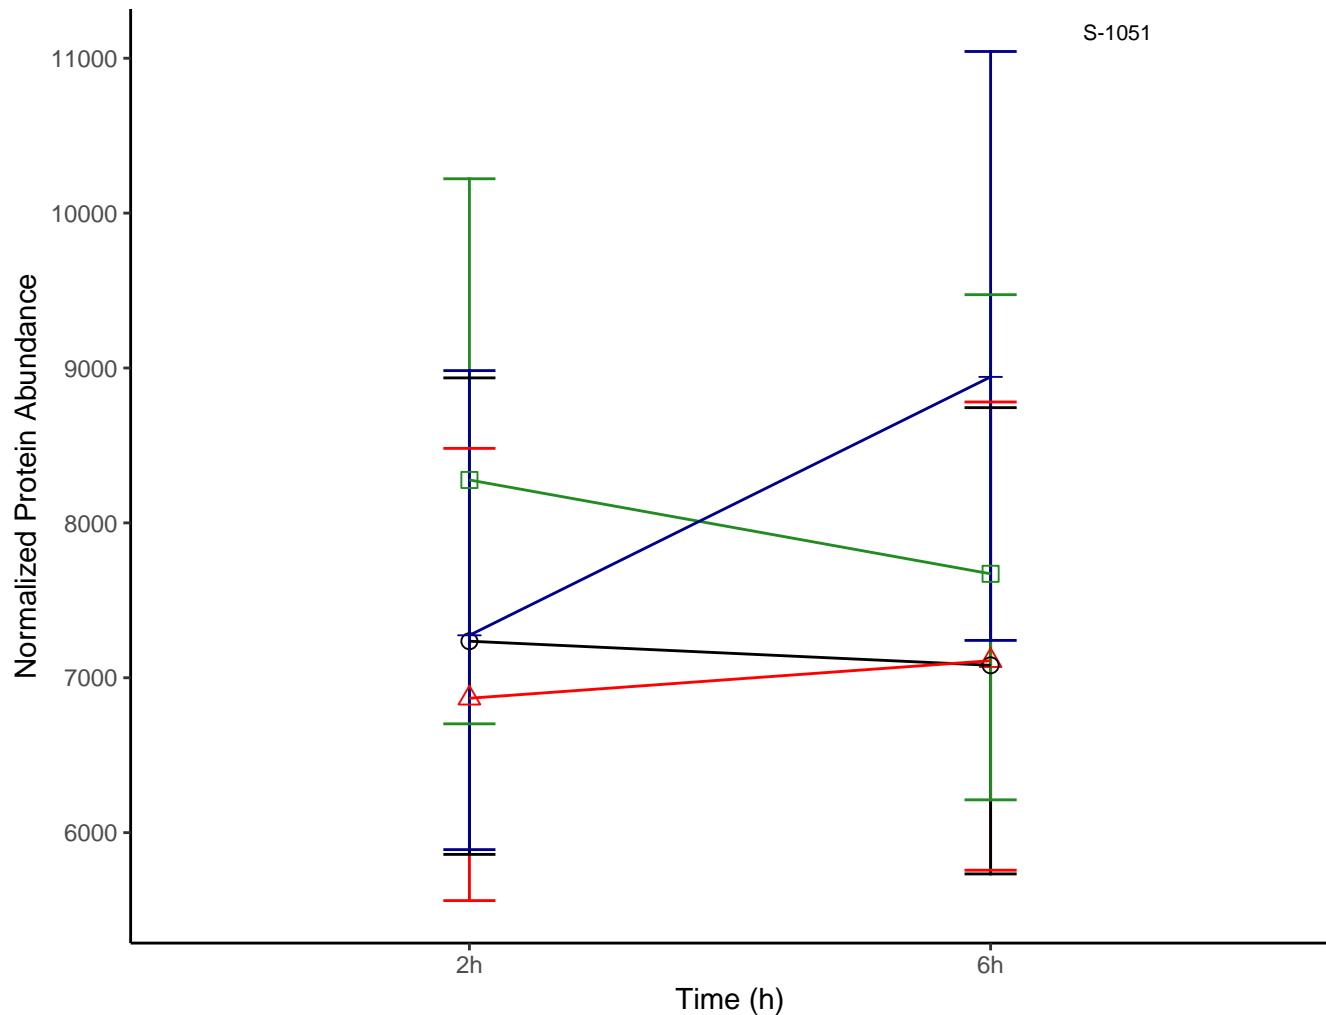

- SA564
- △ SA564- $\Delta$ *hptRS*
- SA564- $\Delta$ *ccpA*
- + SA564- $\Delta$ *hptRS/ccpA*

# CH60\_STAAM

S-1052

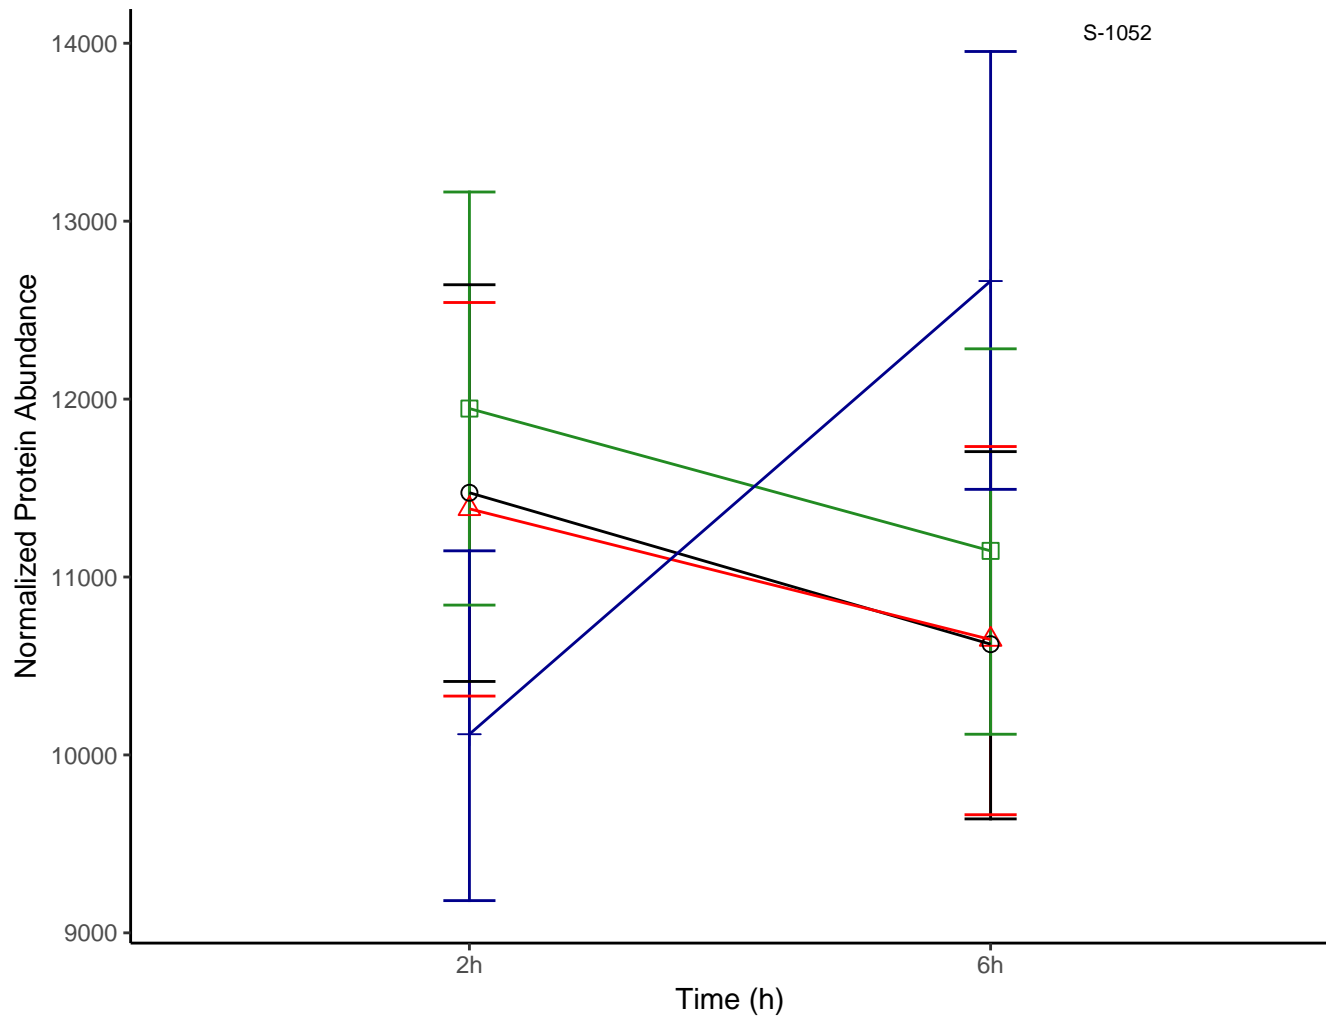

- SA564
- △ SA564- $\Delta$ *hptRS*
- SA564- $\Delta$ *ccpA*
- + SA564- $\Delta$ *hptRS/ccpA*

# CLPB\_STAAM

S-1053

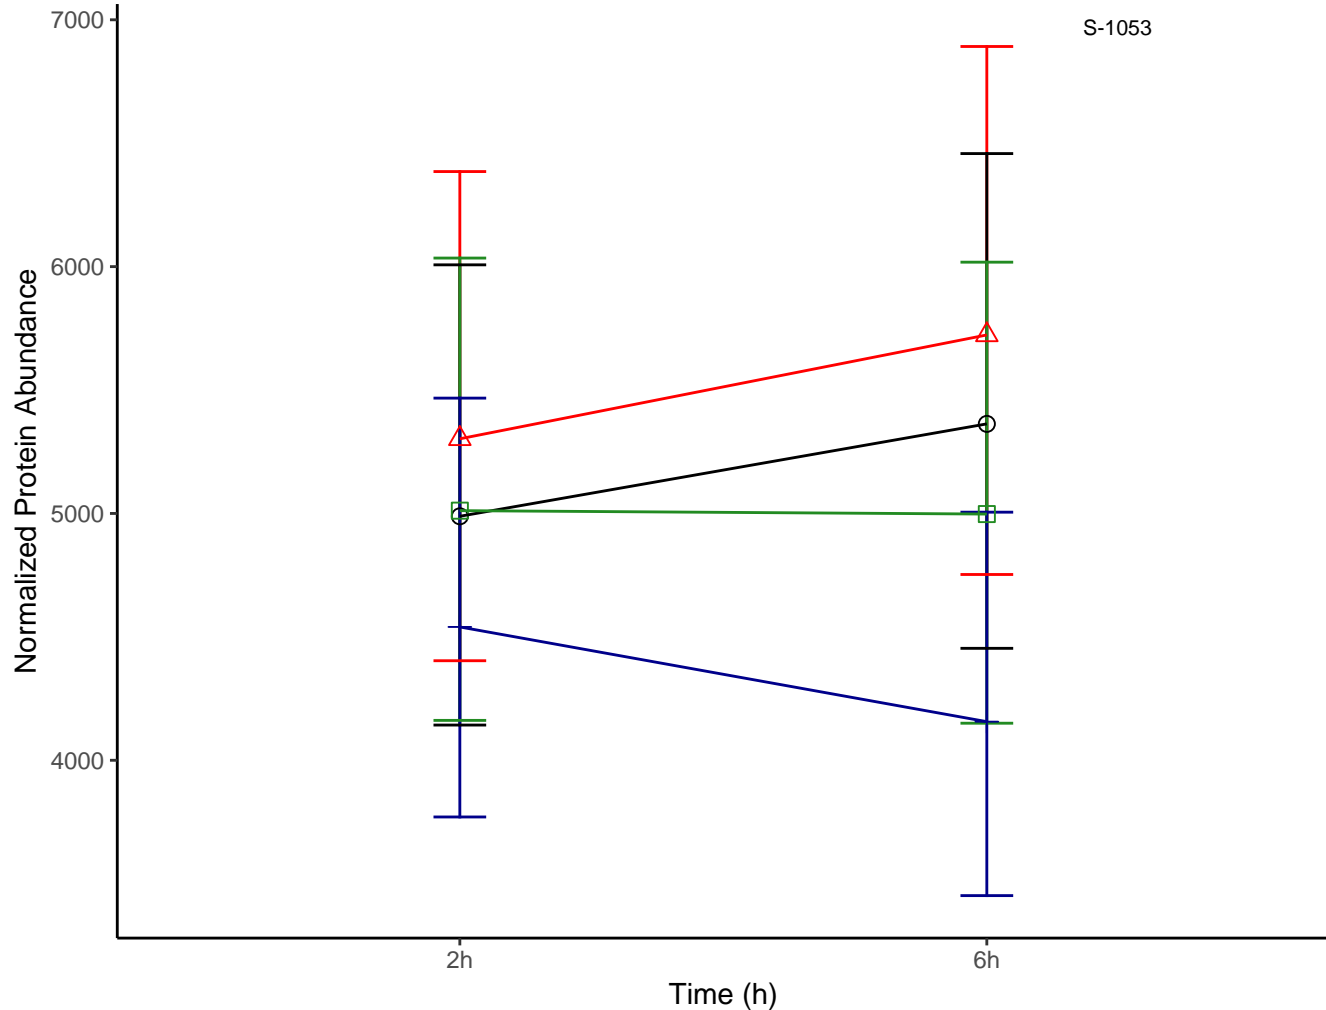

- SA564
- △ SA564- $\Delta$ *hptRS*
- SA564- $\Delta$ *ccpA*
- + SA564- $\Delta$ *hptRS/ccpA*

# CLPC\_STAAM

S-1054

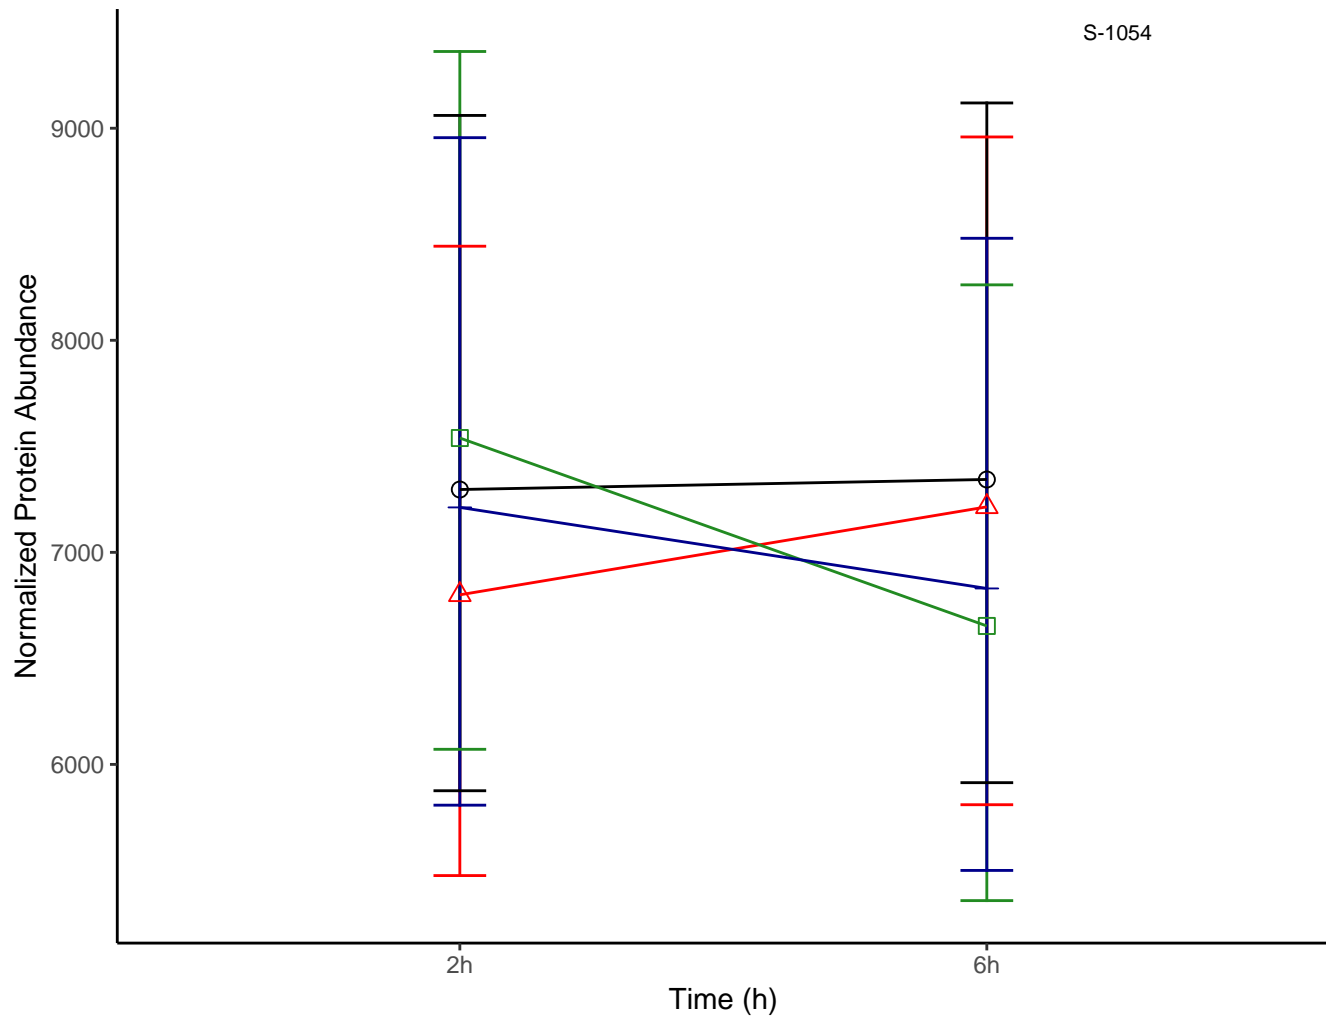

- SA564
- △ SA564- $\Delta$ *hptRS*
- SA564- $\Delta$ *ccpA*
- + SA564- $\Delta$ *hptRS/ccpA*

# CLPL\_STAAM

S-1055

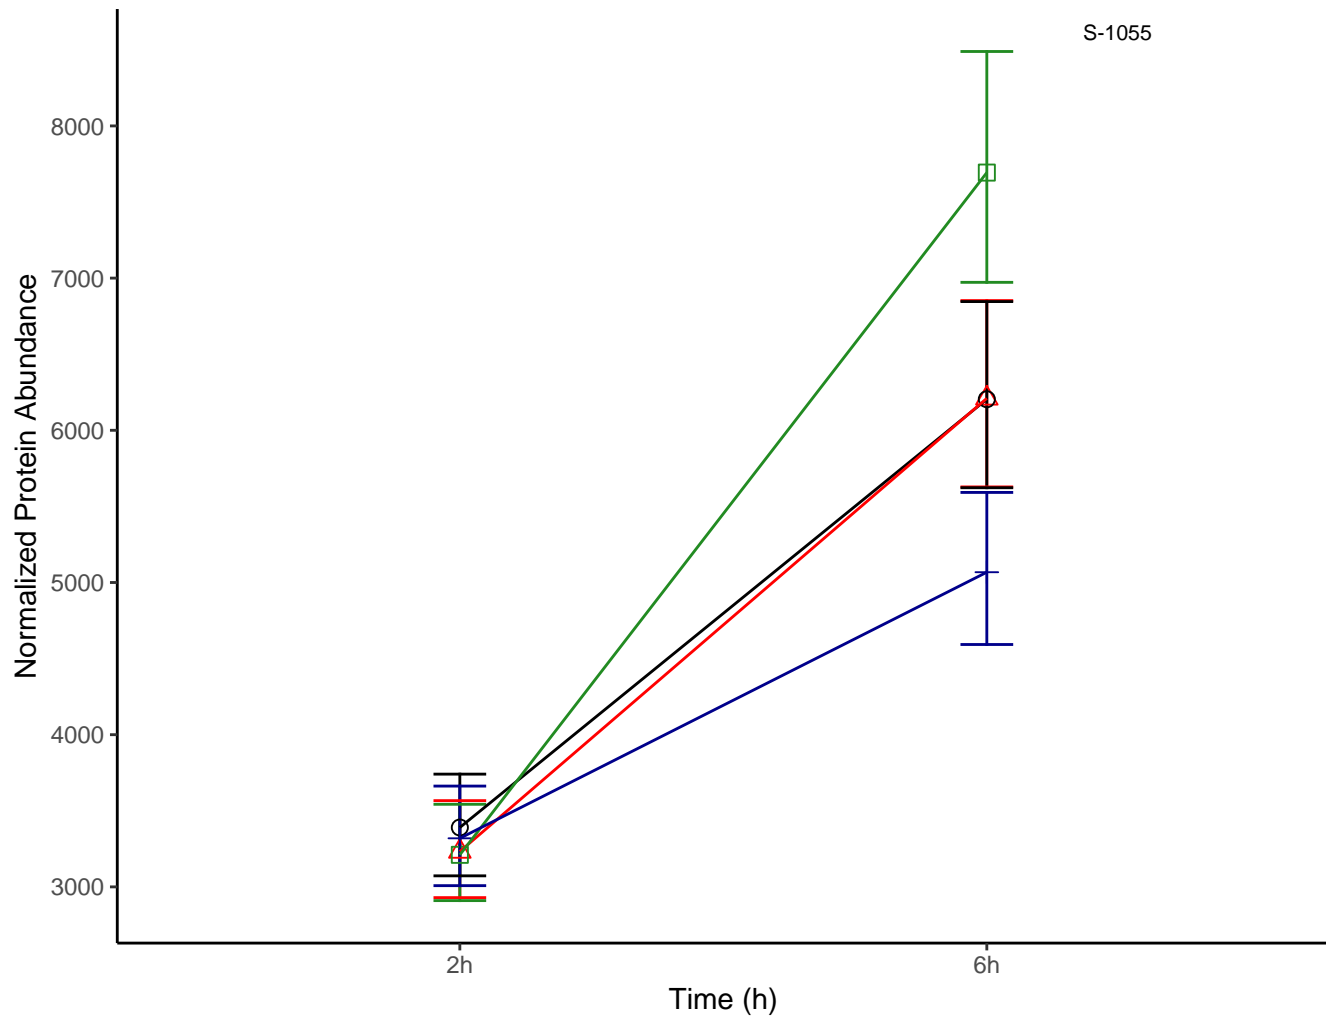

- SA564
- △ SA564- $\Delta hptRS$
- SA564- $\Delta ccpA$
- + SA564- $\Delta hptRS/ccpA$

# CLPP\_STAAM

S-1056

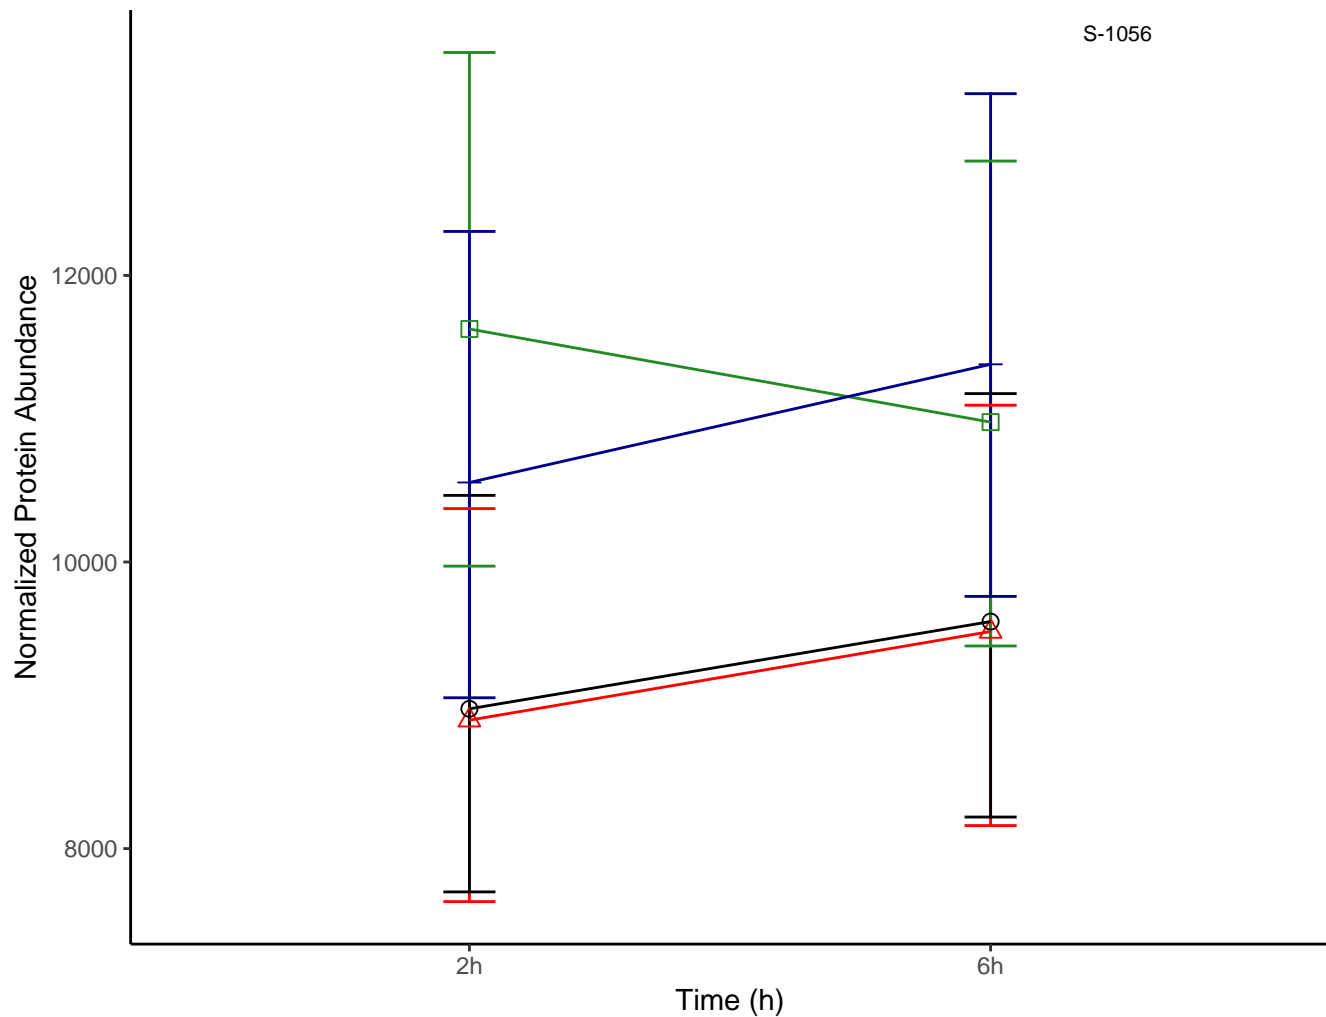

- SA564
- △ SA564- $\Delta$ *hptRS*
- SA564- $\Delta$ *ccpA*
- + SA564- $\Delta$ *hptRS/ccpA*



# CLPX\_STAAM

S-1057

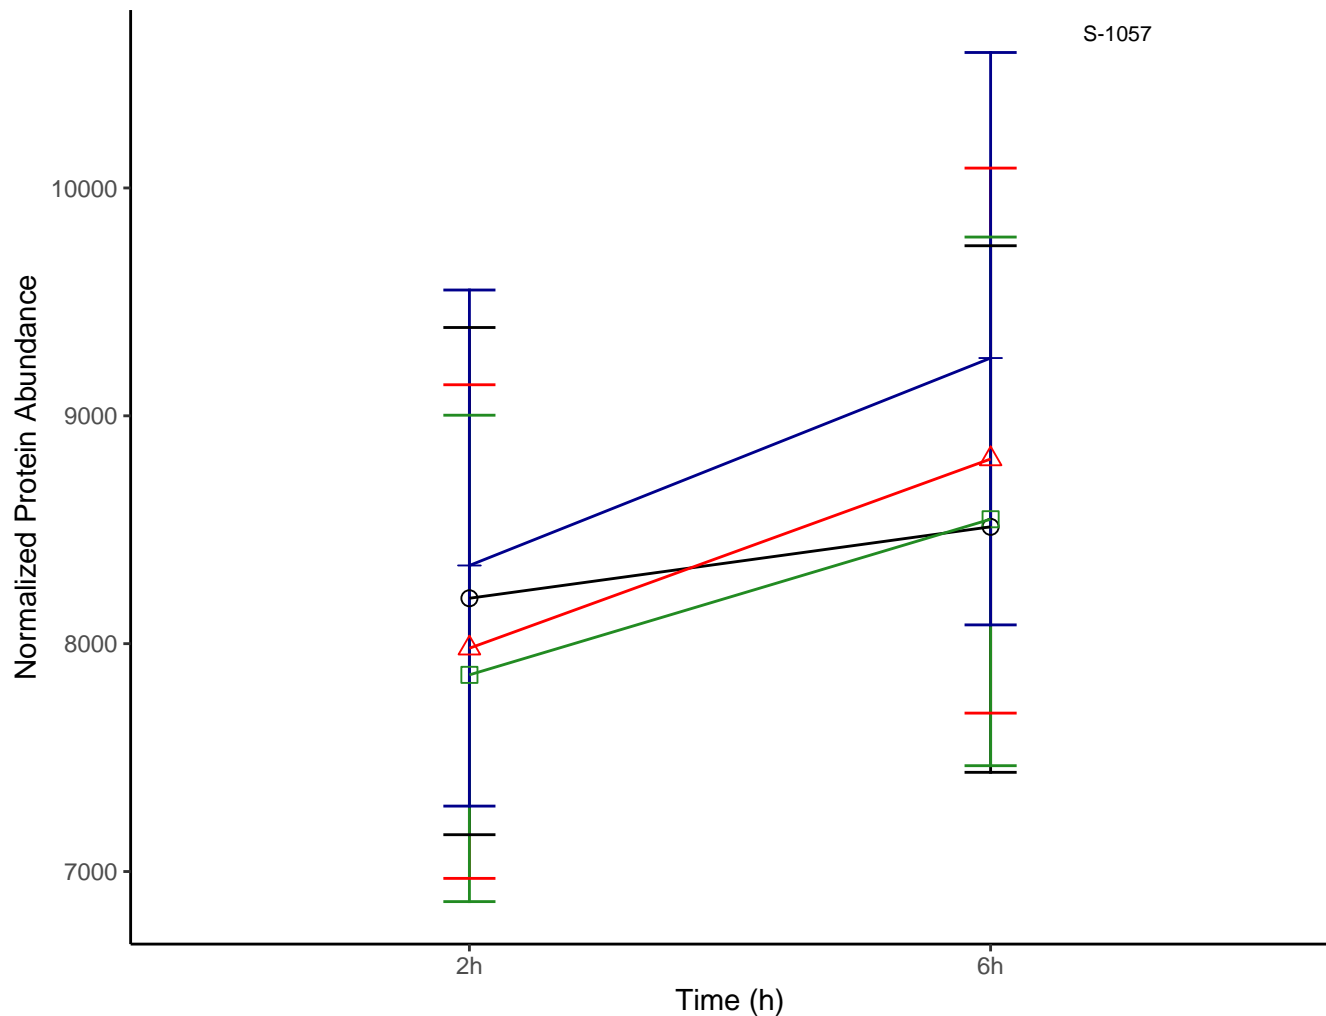

- SA564
- △ SA564- $\Delta hptRS$
- SA564- $\Delta ccpA$
- + SA564- $\Delta hptRS/ccpA$

# CODY\_STAAM

S-1058

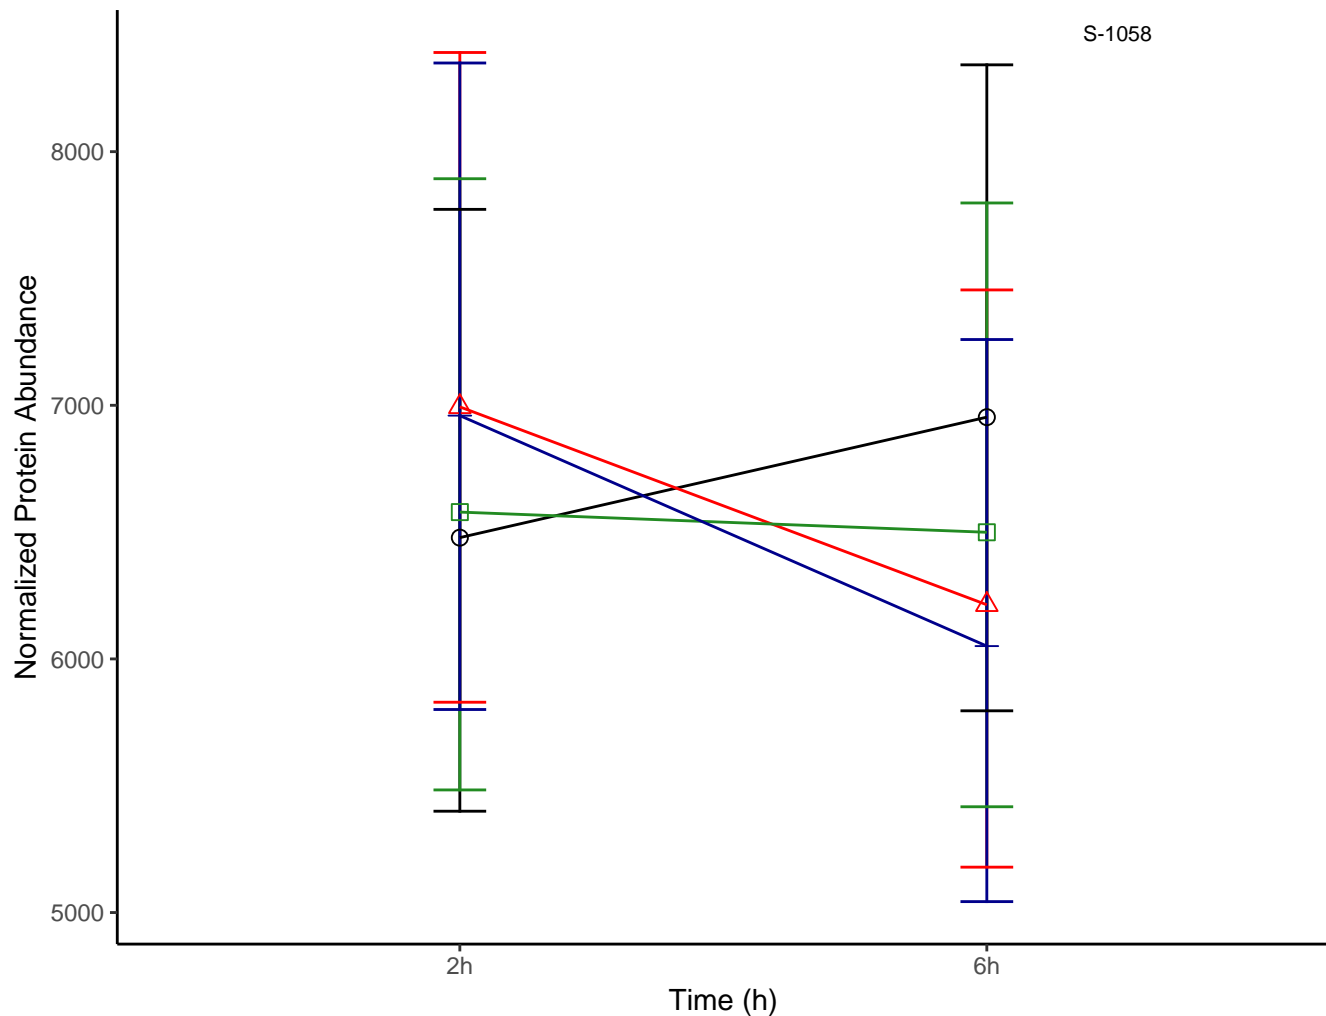

- SA564
- △ SA564- $\Delta$ *hptRS*
- SA564- $\Delta$ *ccpA*
- + SA564- $\Delta$ *hptRS/ccpA*

# COPZ\_STAAM

S-1059

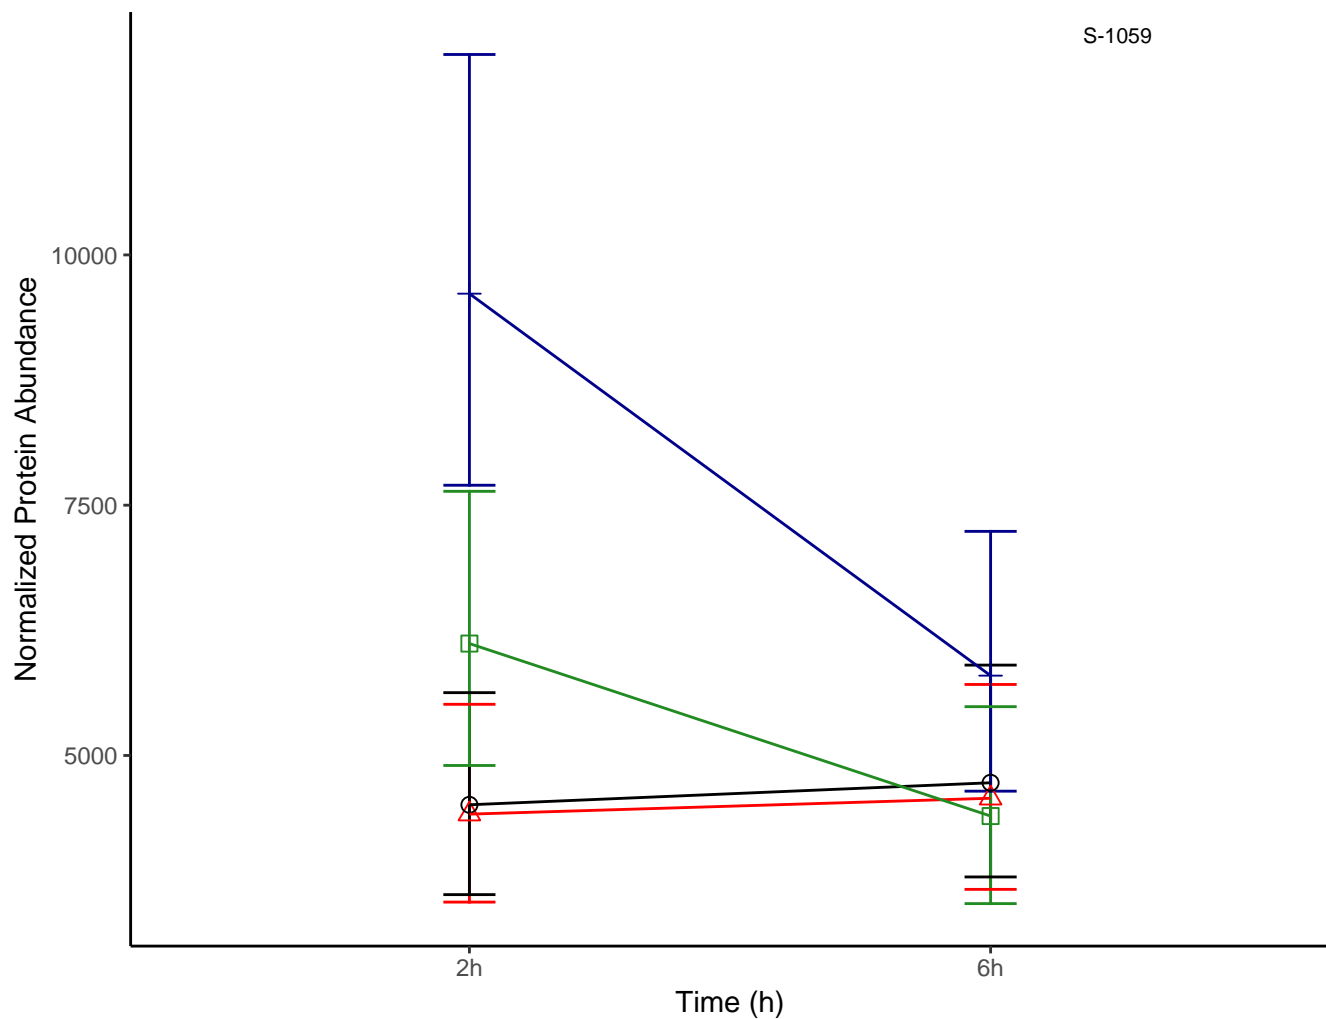

- SA564
- △ SA564- $\Delta$ *hptRS*
- SA564- $\Delta$ *ccpA*
- + SA564- $\Delta$ *hptRS/ccpA*

# CRTN\_STAAM

S-1060

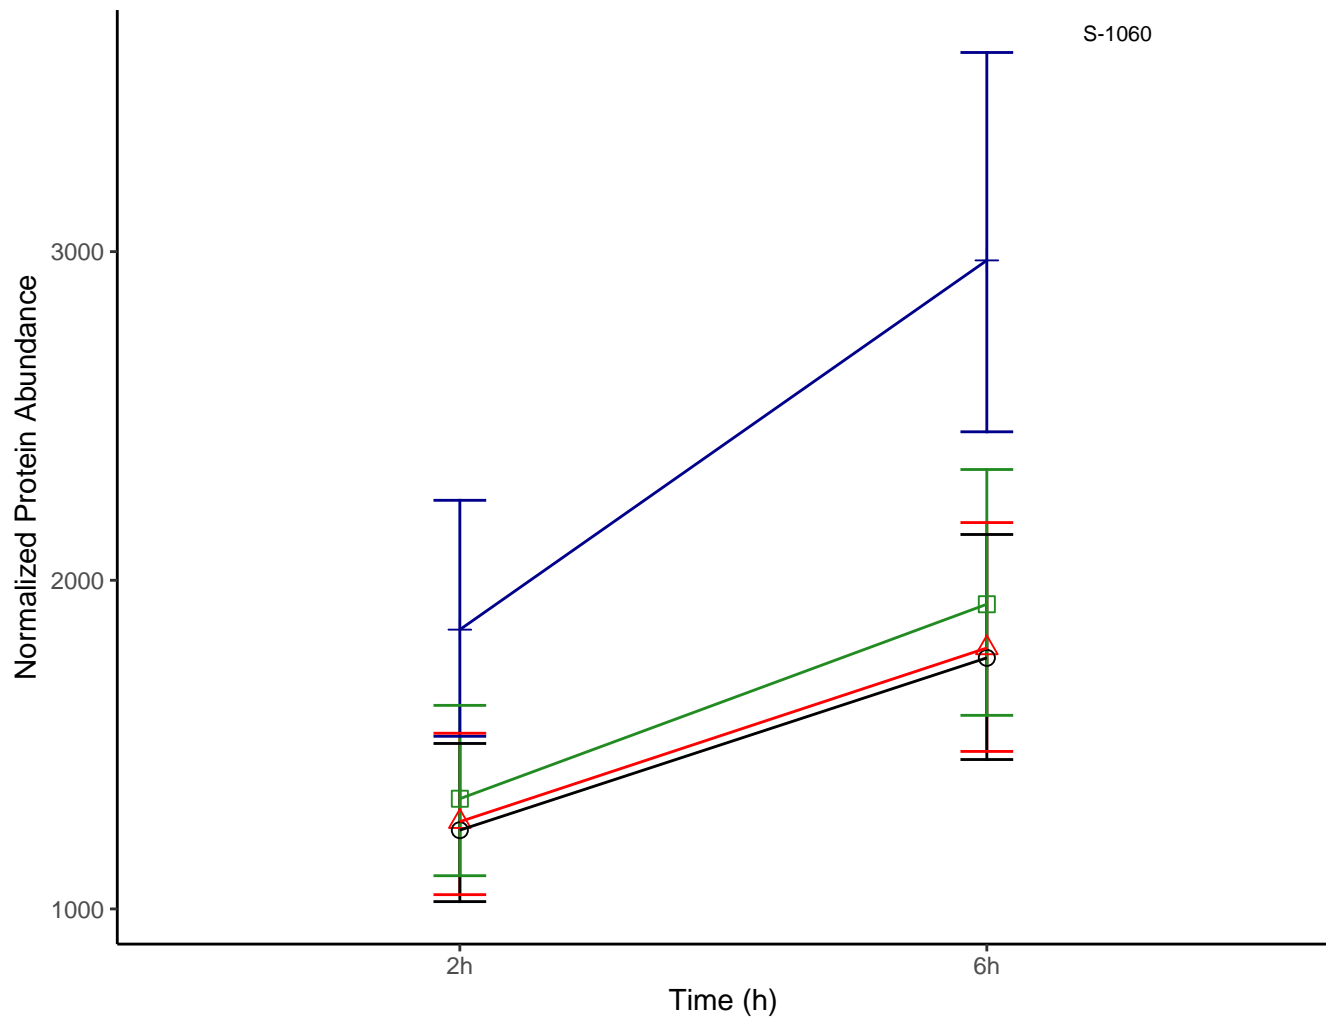

- SA564
- △ SA564- $\Delta$ *hptRS*
- SA564- $\Delta$ *ccpA*
- + SA564- $\Delta$ *hptRS/ccpA*

# CSD\_STAAM

S-1061

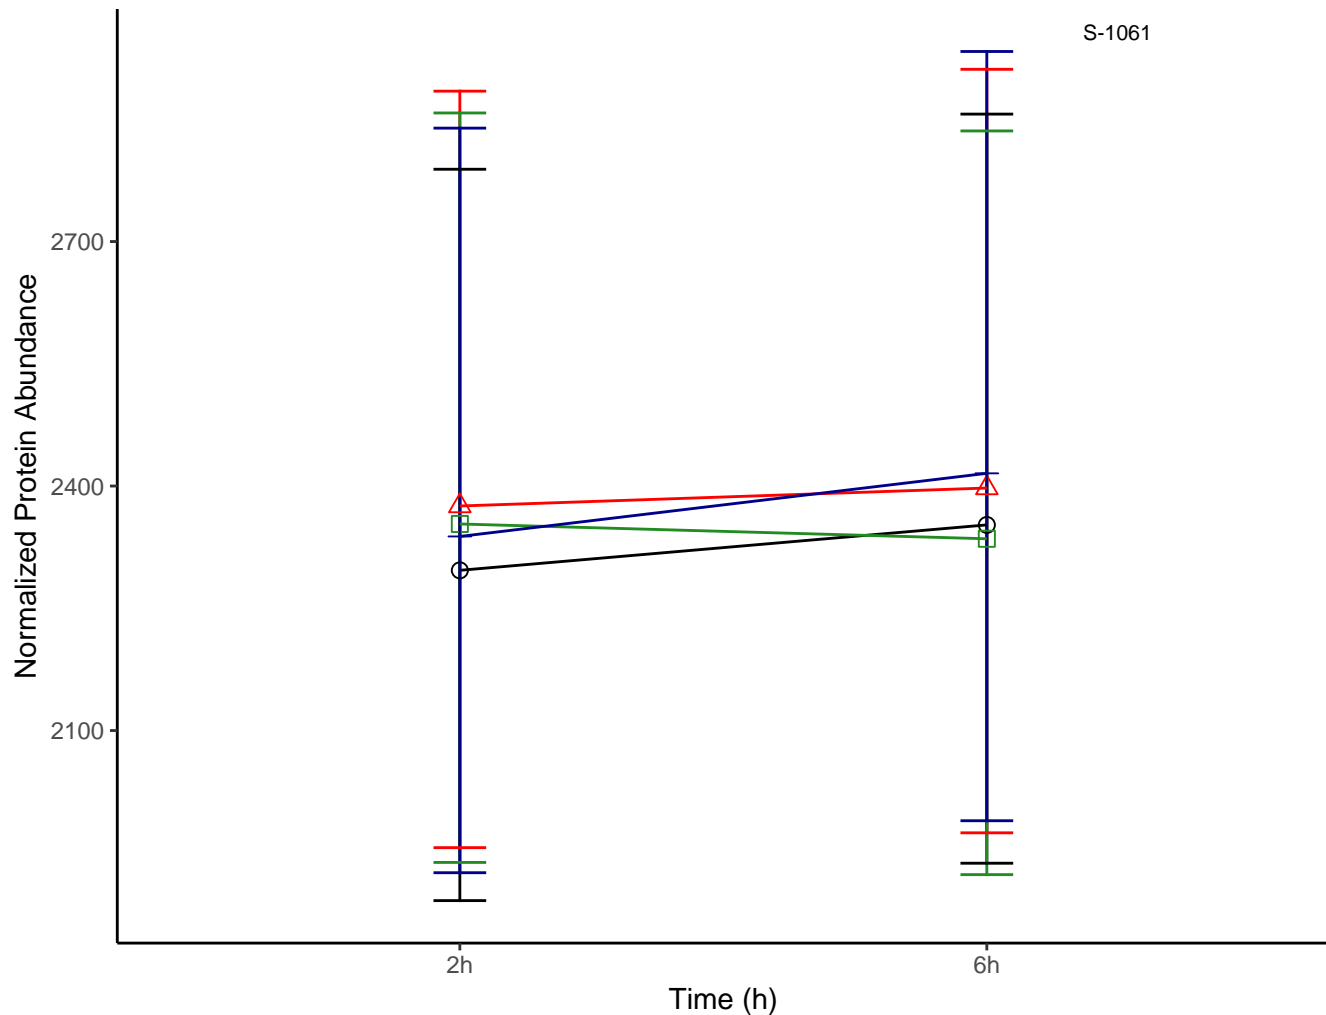

- SA564
- △ SA564-Δ*hptRS*
- SA564-Δ*ccpA*
- + SA564-Δ*hptRS/ccpA*

# CSHA\_STAAM

S-1062

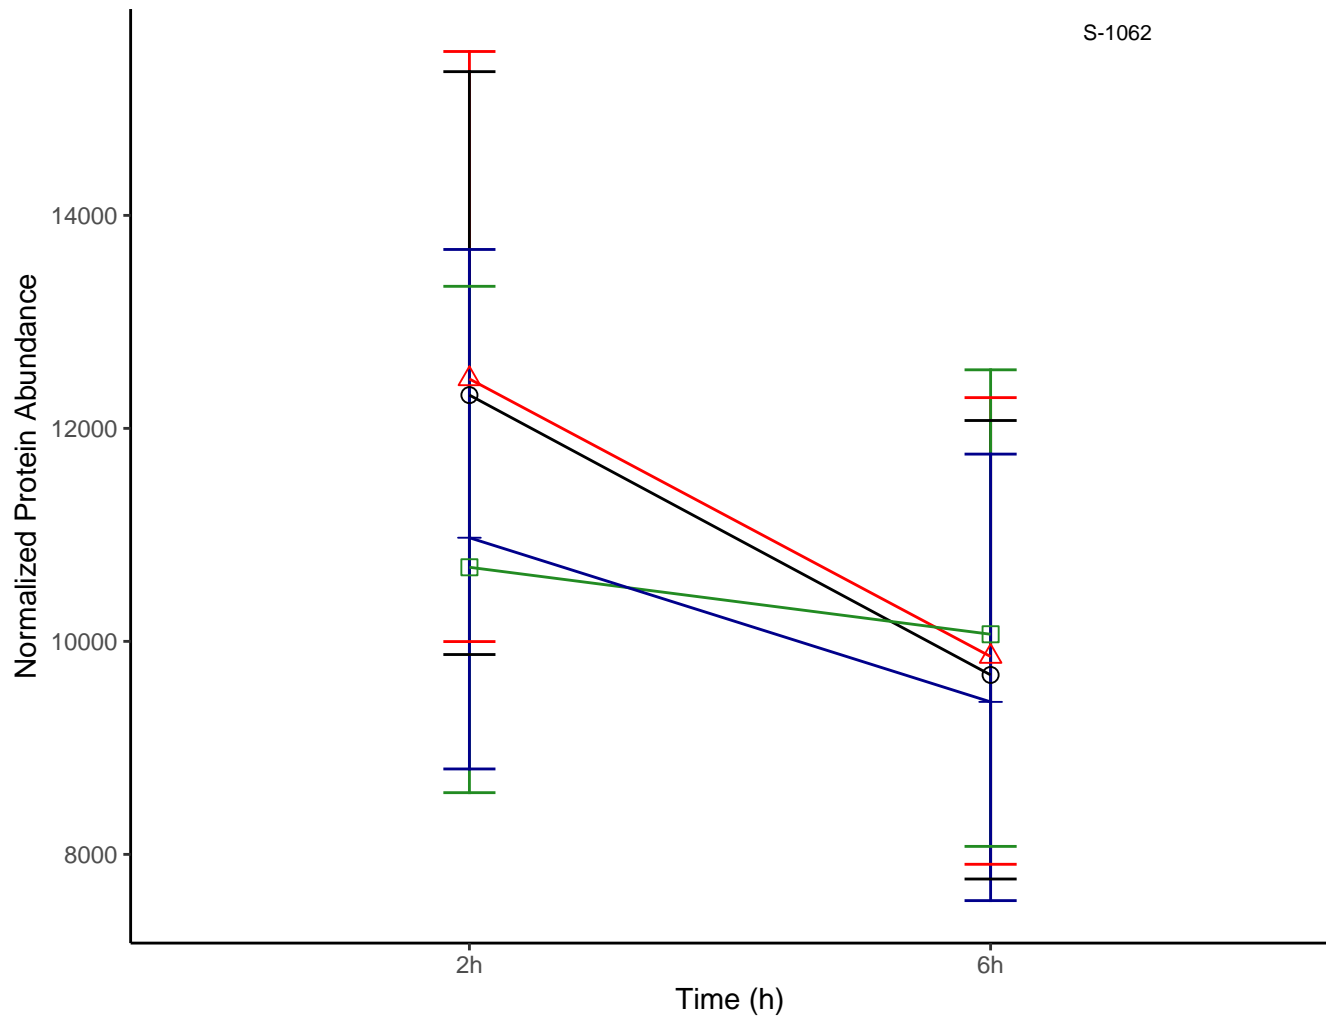

- SA564
- △ SA564- $\Delta$ *hptRS*
- SA564- $\Delta$ *ccpA*
- + SA564- $\Delta$ *hptRS/ccpA*

# CSPA\_STAAM

S-1063

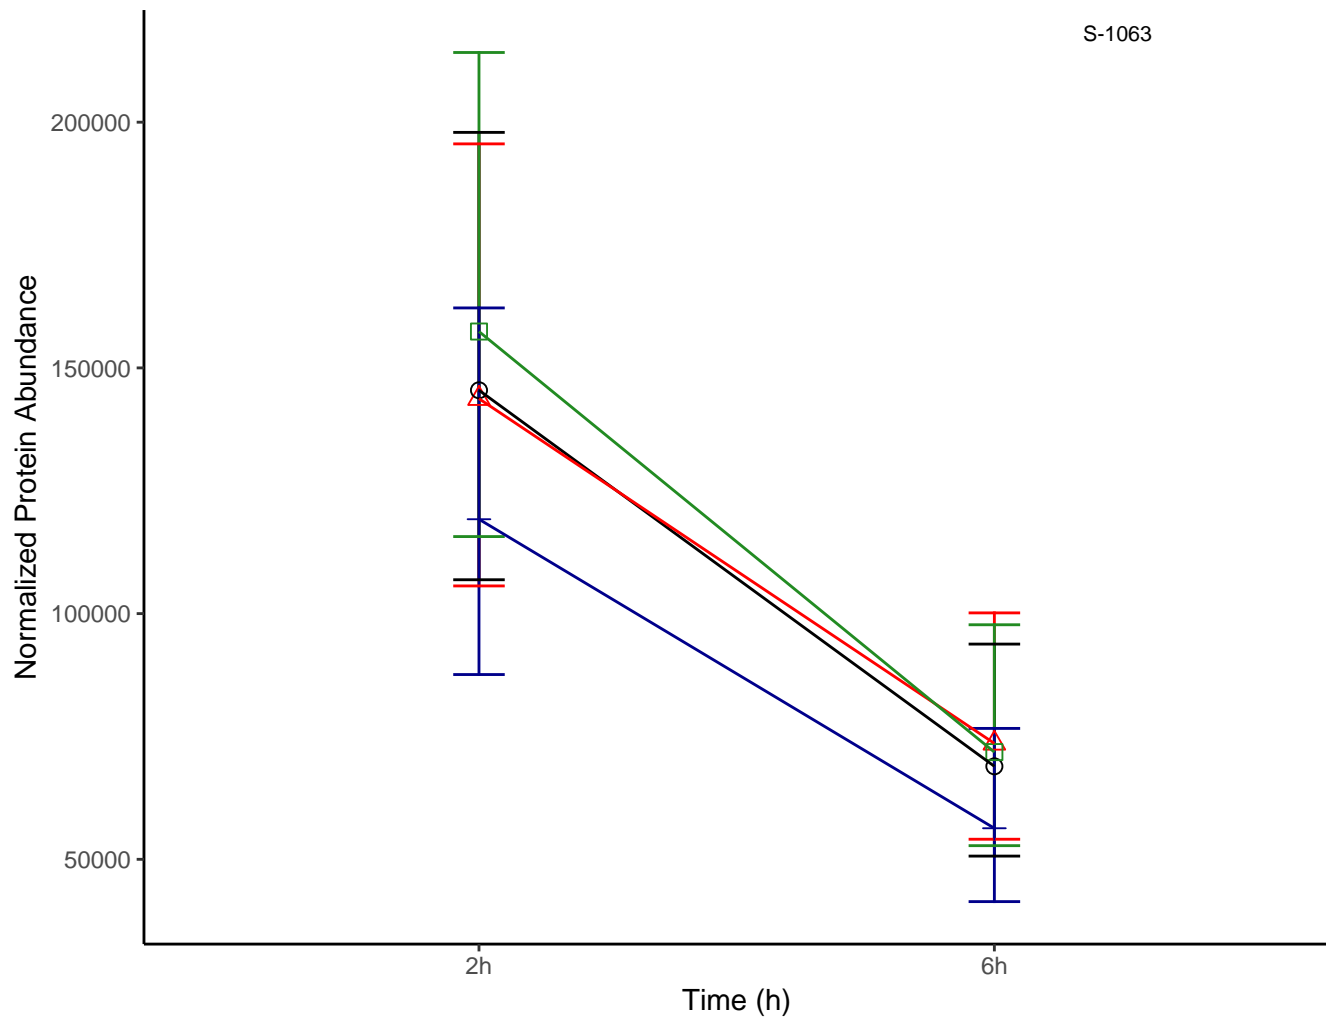

- SA564
- △ SA564-ΔhptRS
- SA564-ΔccpA
- + SA564-ΔhptRS/ccpA

# CTPAL\_STAAM

S-1064

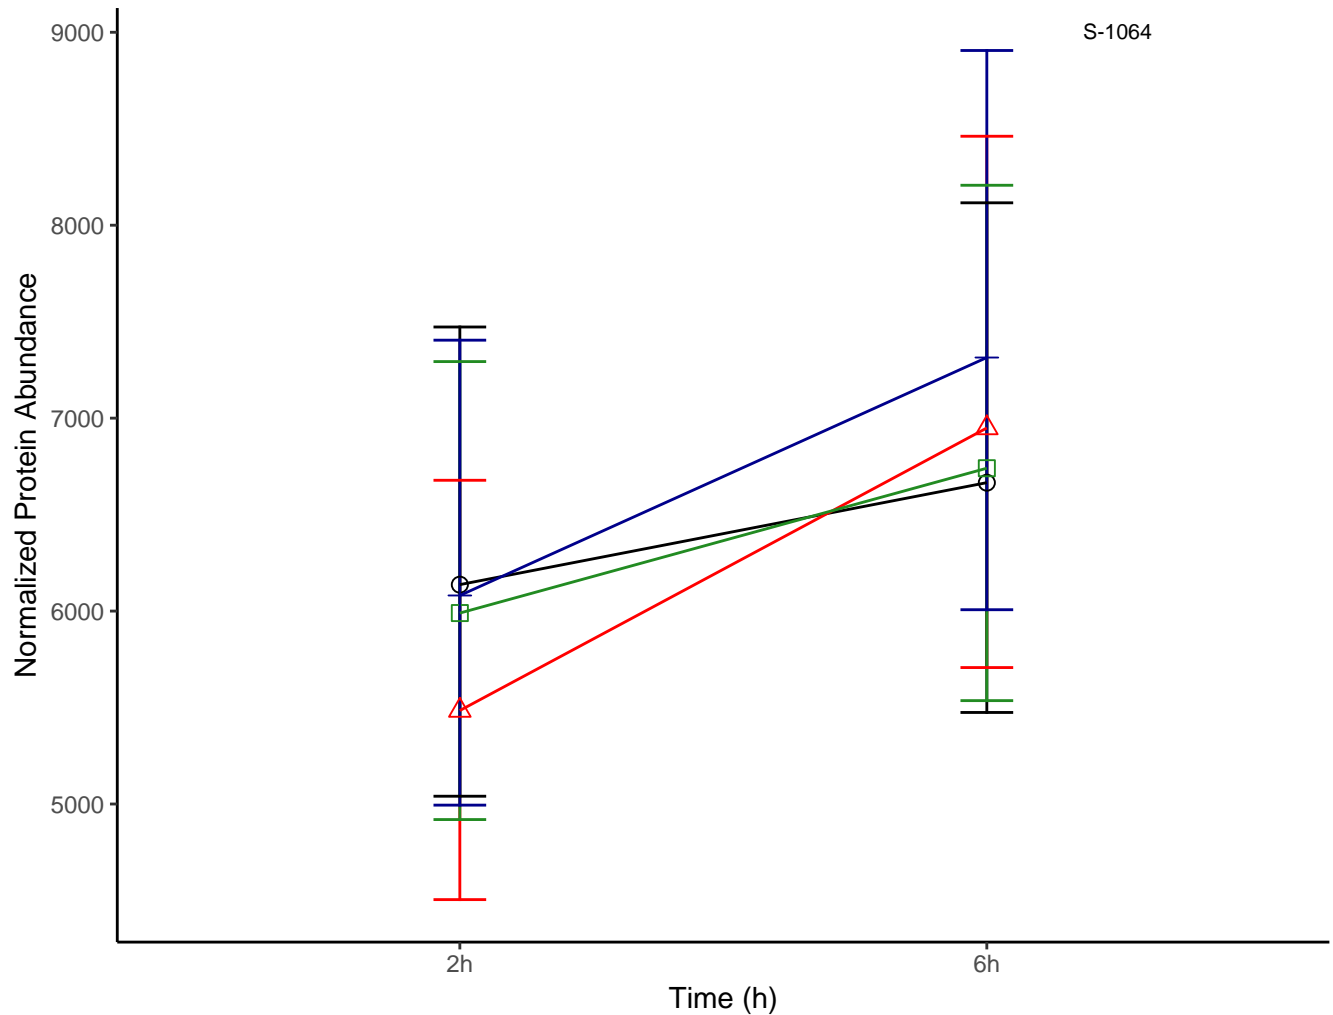

- SA564
- △ SA564- $\Delta$ hptRS
- SA564- $\Delta$ ccpA
- + SA564- $\Delta$ hptRS/ccpA



# CVFB\_STAAM

S-1065

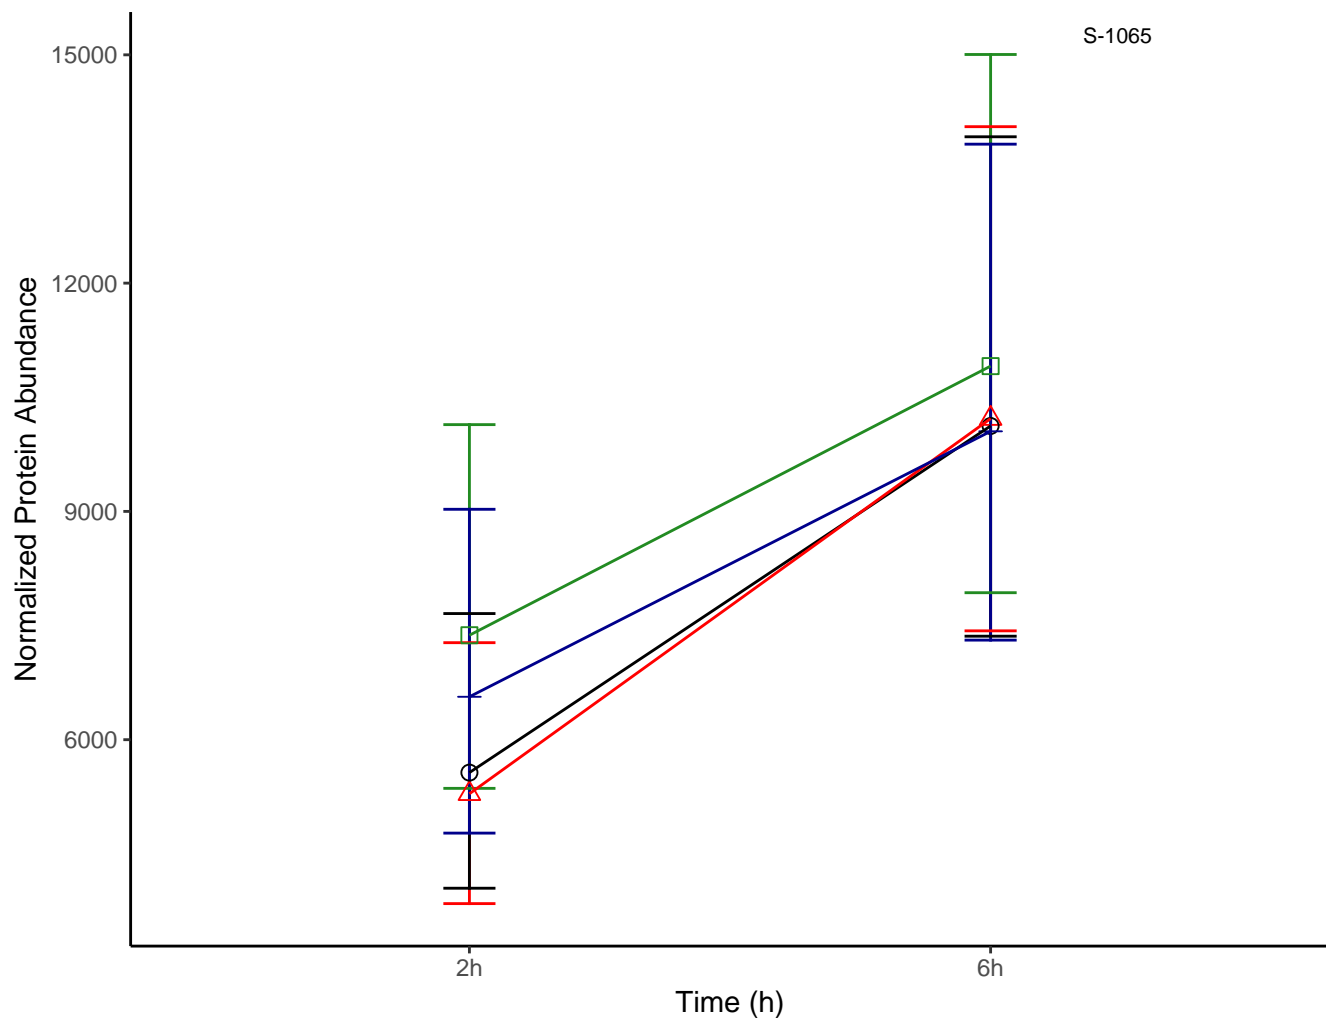

- SA564
- △ SA564- $\Delta$ *hptRS*
- SA564- $\Delta$ *ccpA*
- + SA564- $\Delta$ *hptRS/ccpA*

# CYSE\_STAAM

S-1066

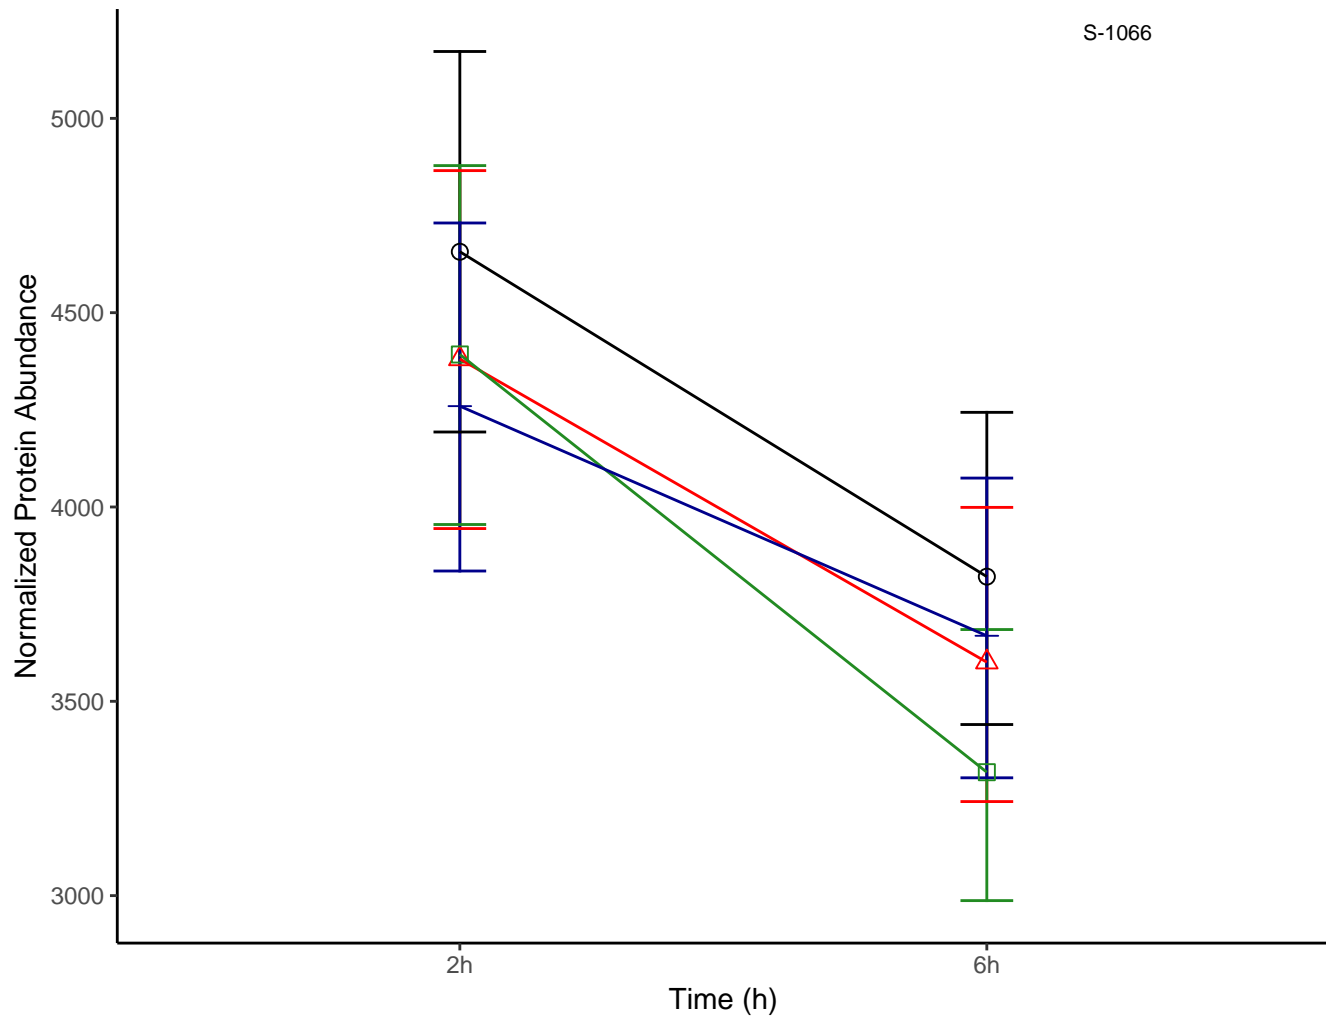

- SA564
- △ SA564- $\Delta hptRS$
- SA564- $\Delta ccpA$
- + SA564- $\Delta hptRS/ccpA$

# CYSK\_STAAM

S-1067

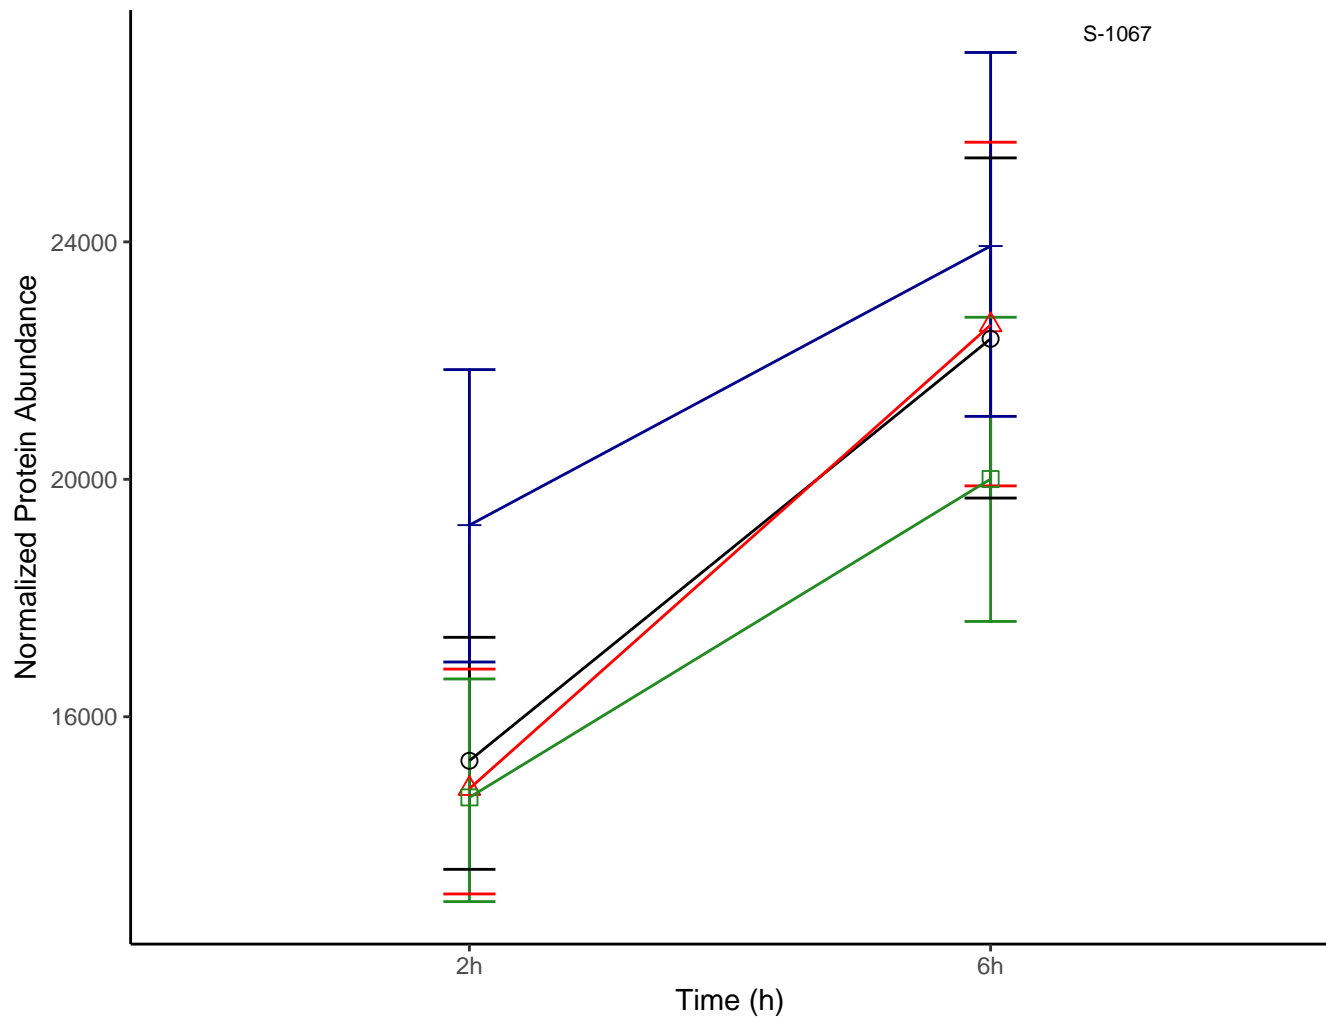

- SA564
- △ SA564- $\Delta$ *hptRS*
- SA564- $\Delta$ *ccpA*
- + SA564- $\Delta$ *hptRS/ccpA*

# DAAA\_STAAM

S-1068

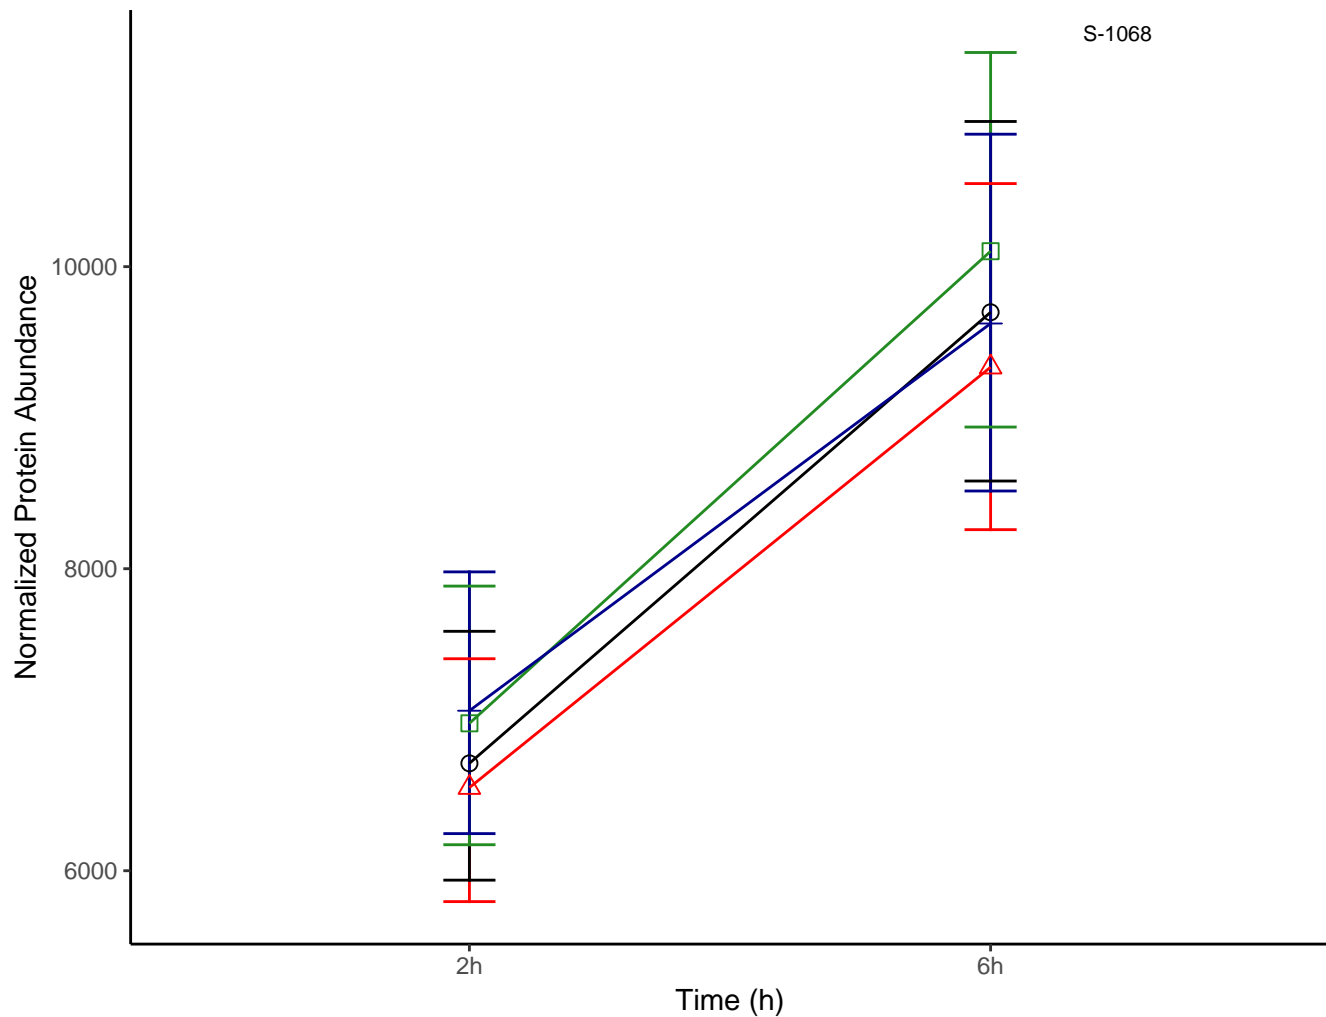

- SA564
- △ SA564- $\Delta$ *hptRS*
- SA564- $\Delta$ *ccpA*
- + SA564- $\Delta$ *hptRS/ccpA*

# DAPB\_STAAM

S-1069

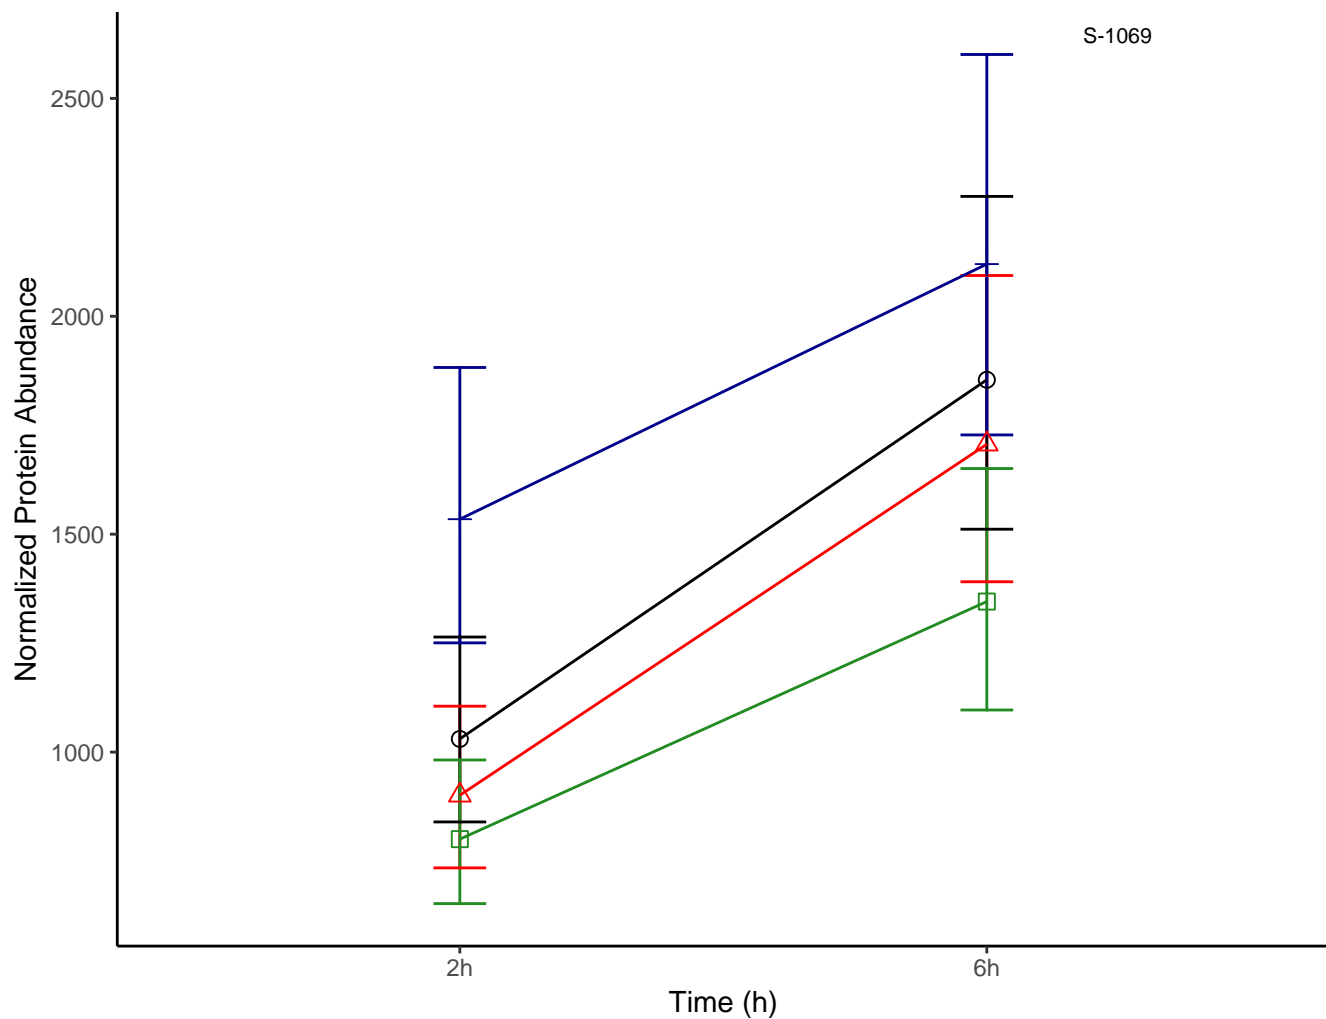

- SA564
- △ SA564- $\Delta$ *hptRS*
- SA564- $\Delta$ *ccpA*
- + SA564- $\Delta$ *hptRS/ccpA*

# DAPH\_STAAM

S-1070

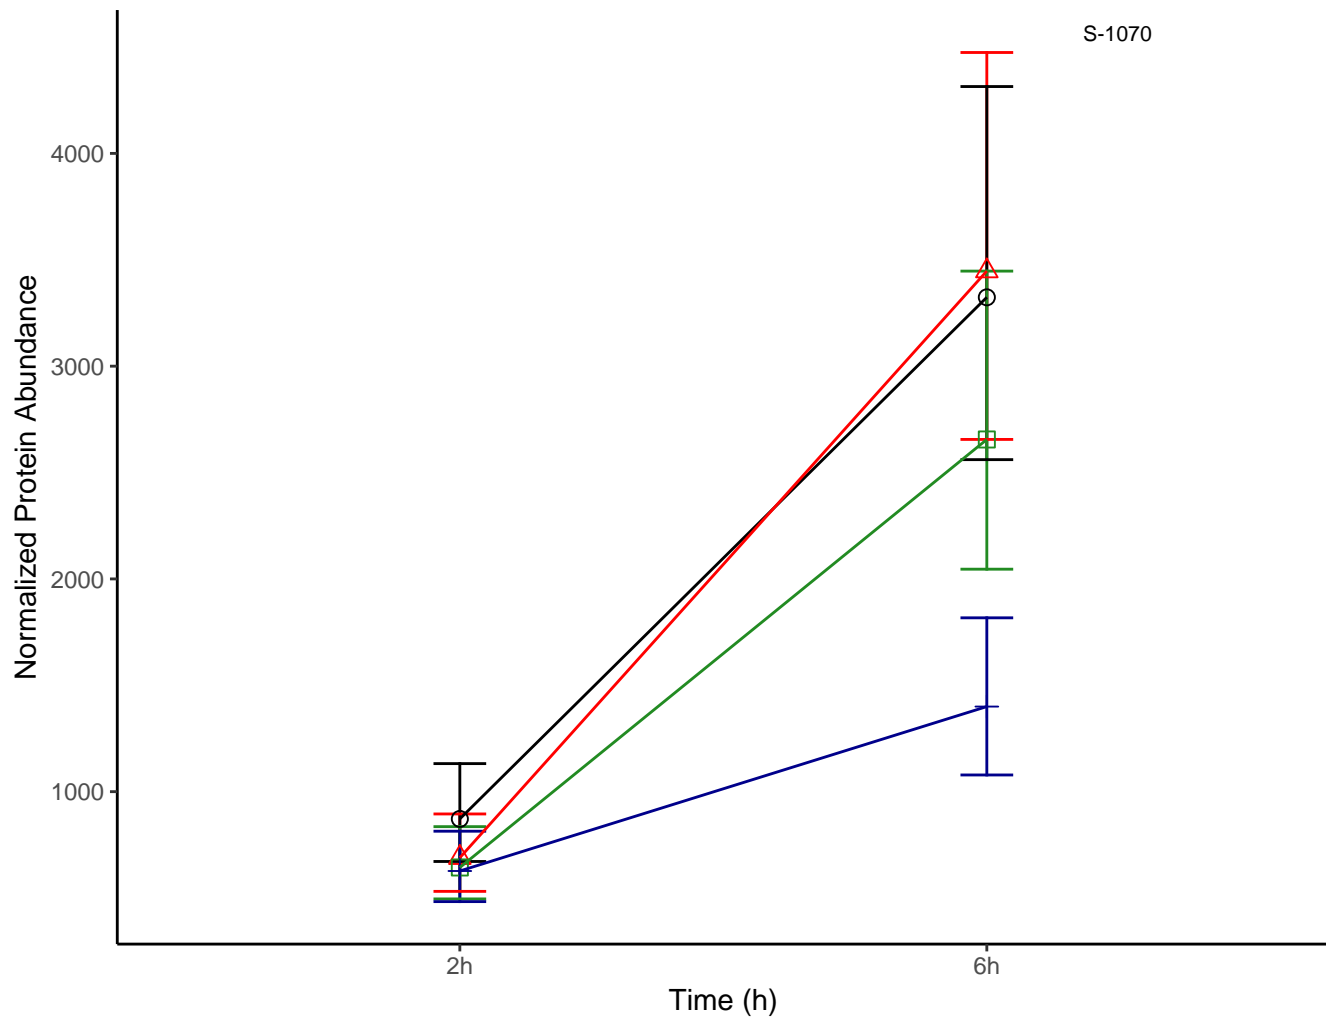

- SA564
- △ SA564- $\Delta hptRS$
- SA564- $\Delta ccpA$
- + SA564- $\Delta hptRS/ccpA$

# DBH\_STAAM

S-1071

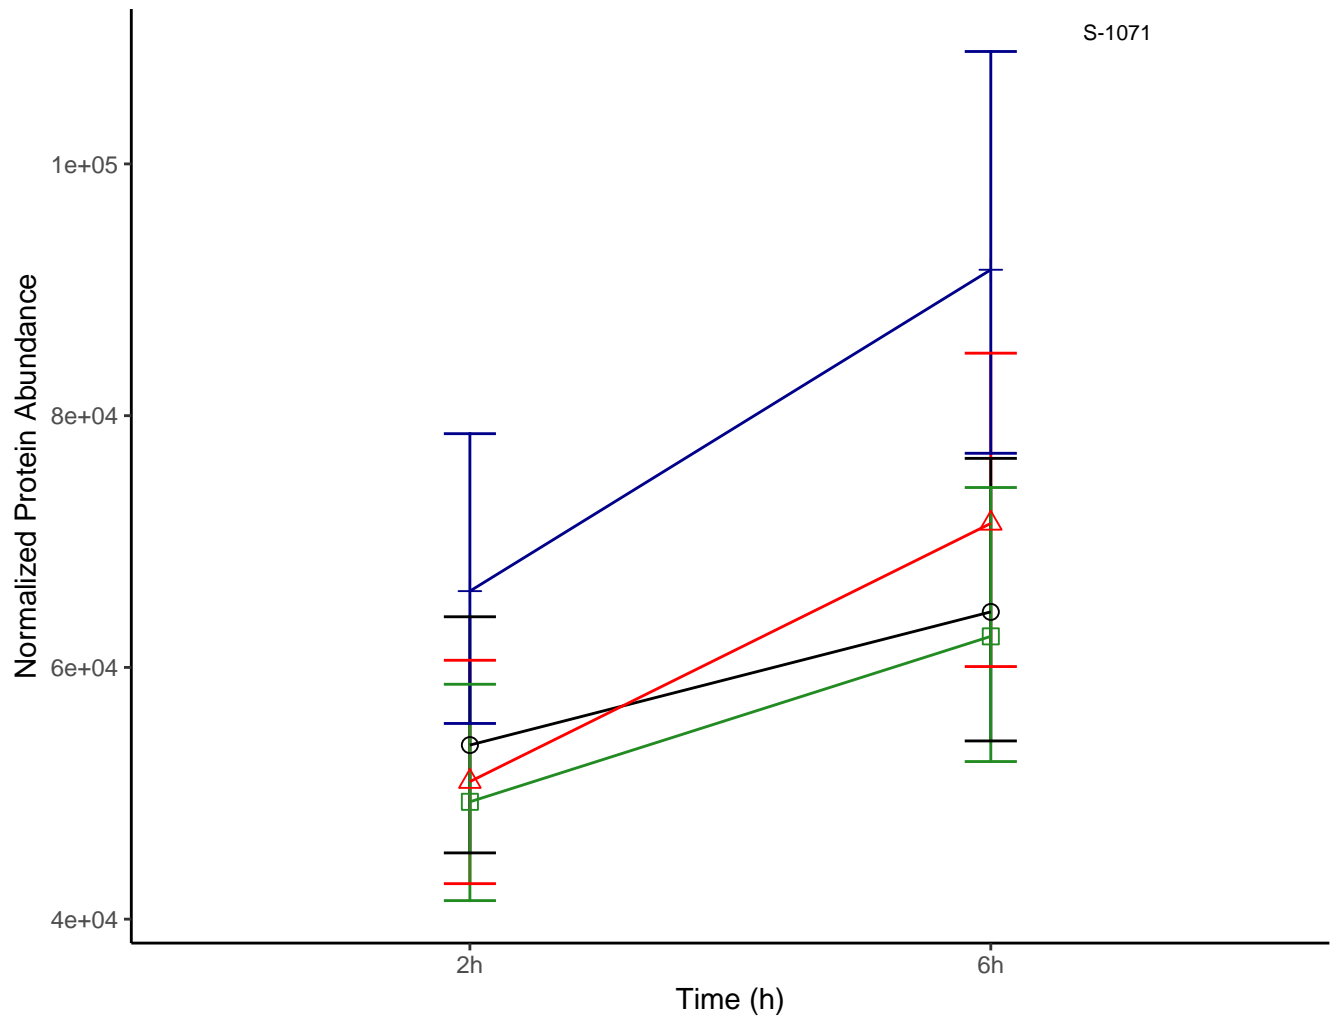

- SA564
- △ SA564- $\Delta$ hptRS
- SA564- $\Delta$ ccpA
- + SA564- $\Delta$ hptRS/ccpA

# DCUP\_STAAM

S-1072

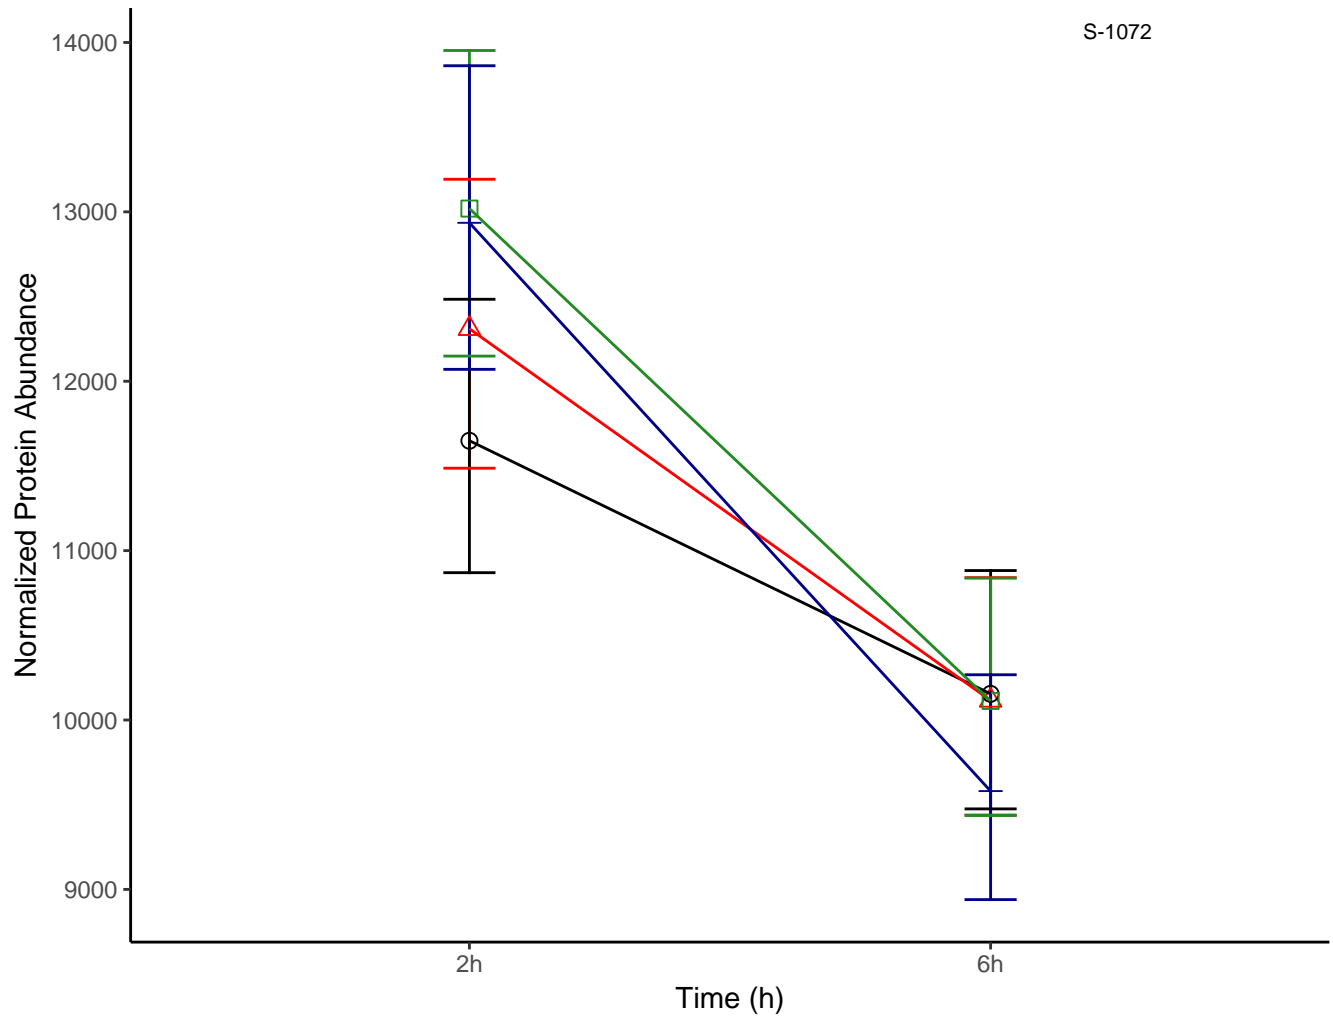

- SA564
- △ SA564-ΔhptRS
- SA564-ΔccpA
- + SA564-ΔhptRS/ccpA



## DDL\_STAAM

S-1073

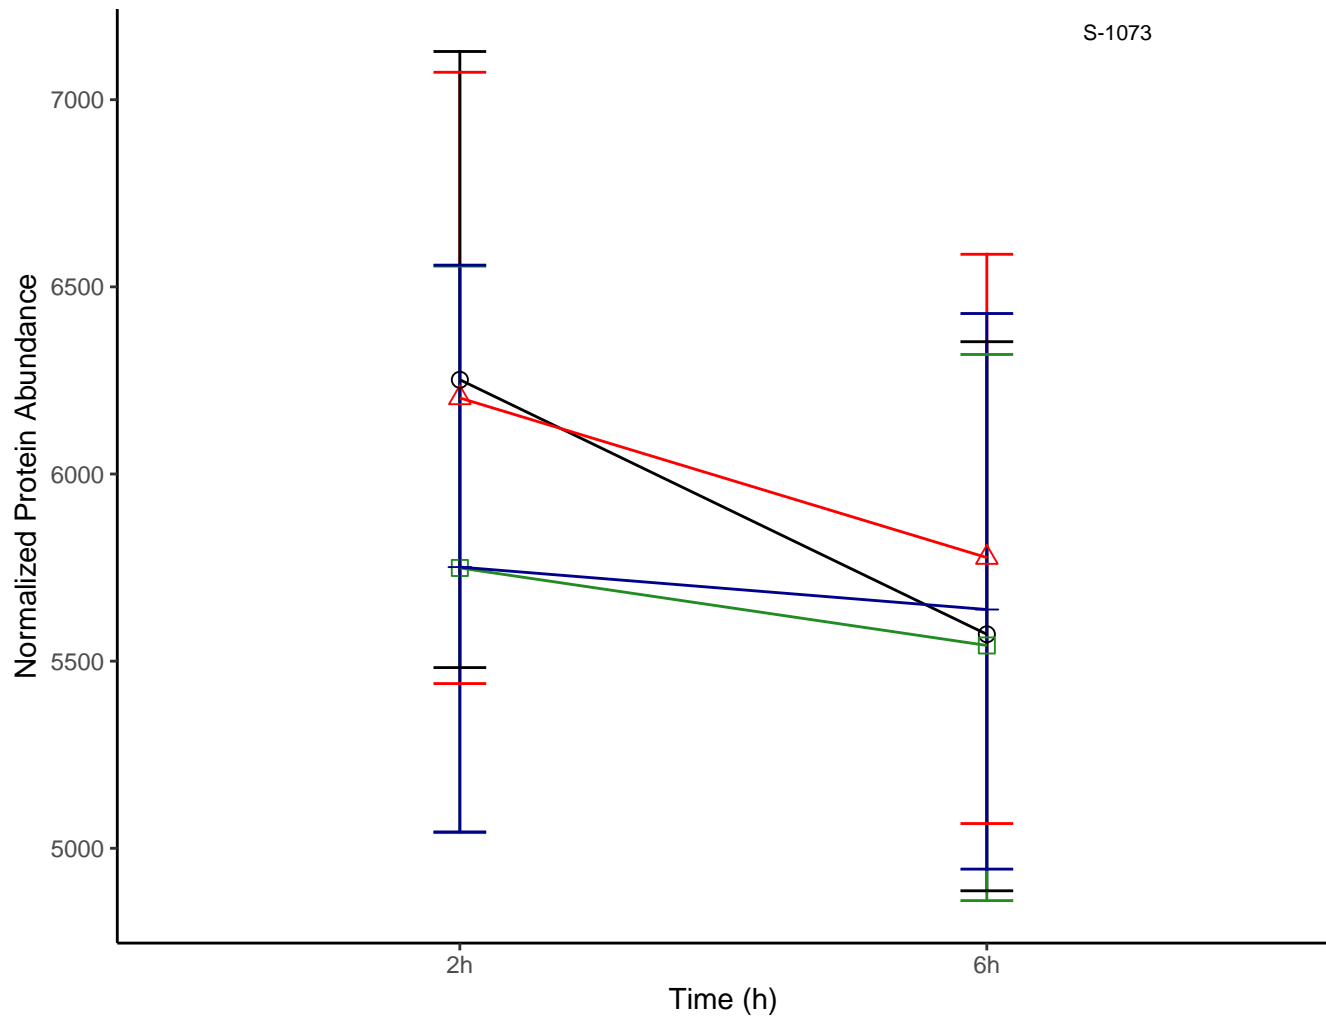

- SA564
- △ SA564- $\Delta$ *hptRS*
- SA564- $\Delta$ *ccpA*
- + SA564- $\Delta$ *hptRS/ccpA*

## DEF\_STAAM

S-1074

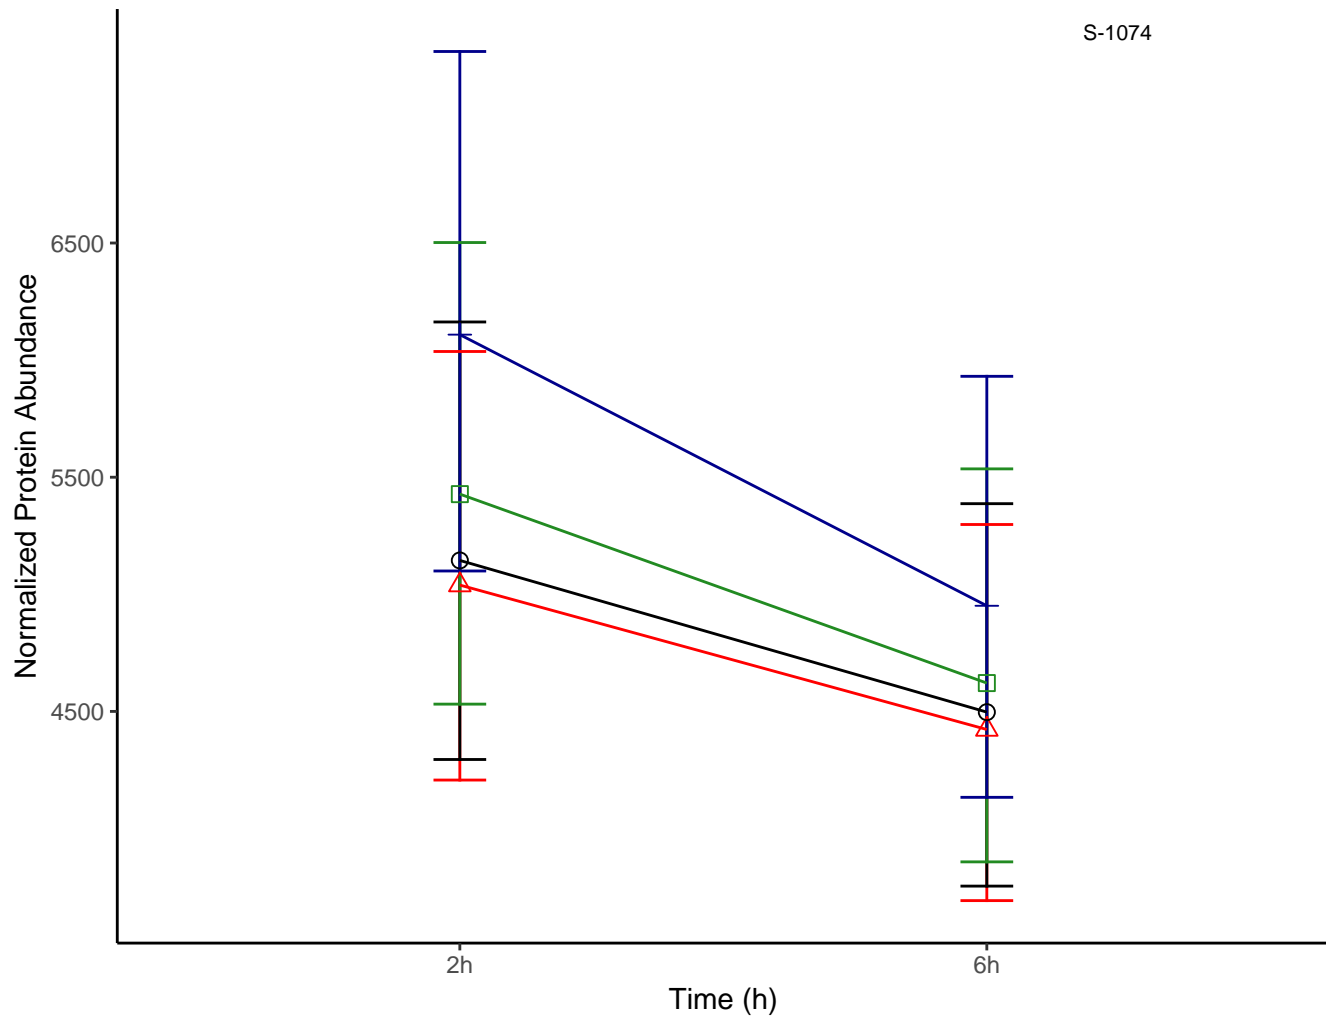

- SA564
- △ SA564- $\Delta$ *hptRS*
- SA564- $\Delta$ *ccpA*
- + SA564- $\Delta$ *hptRS/ccpA*

# DEOB\_STAAM

S-1075

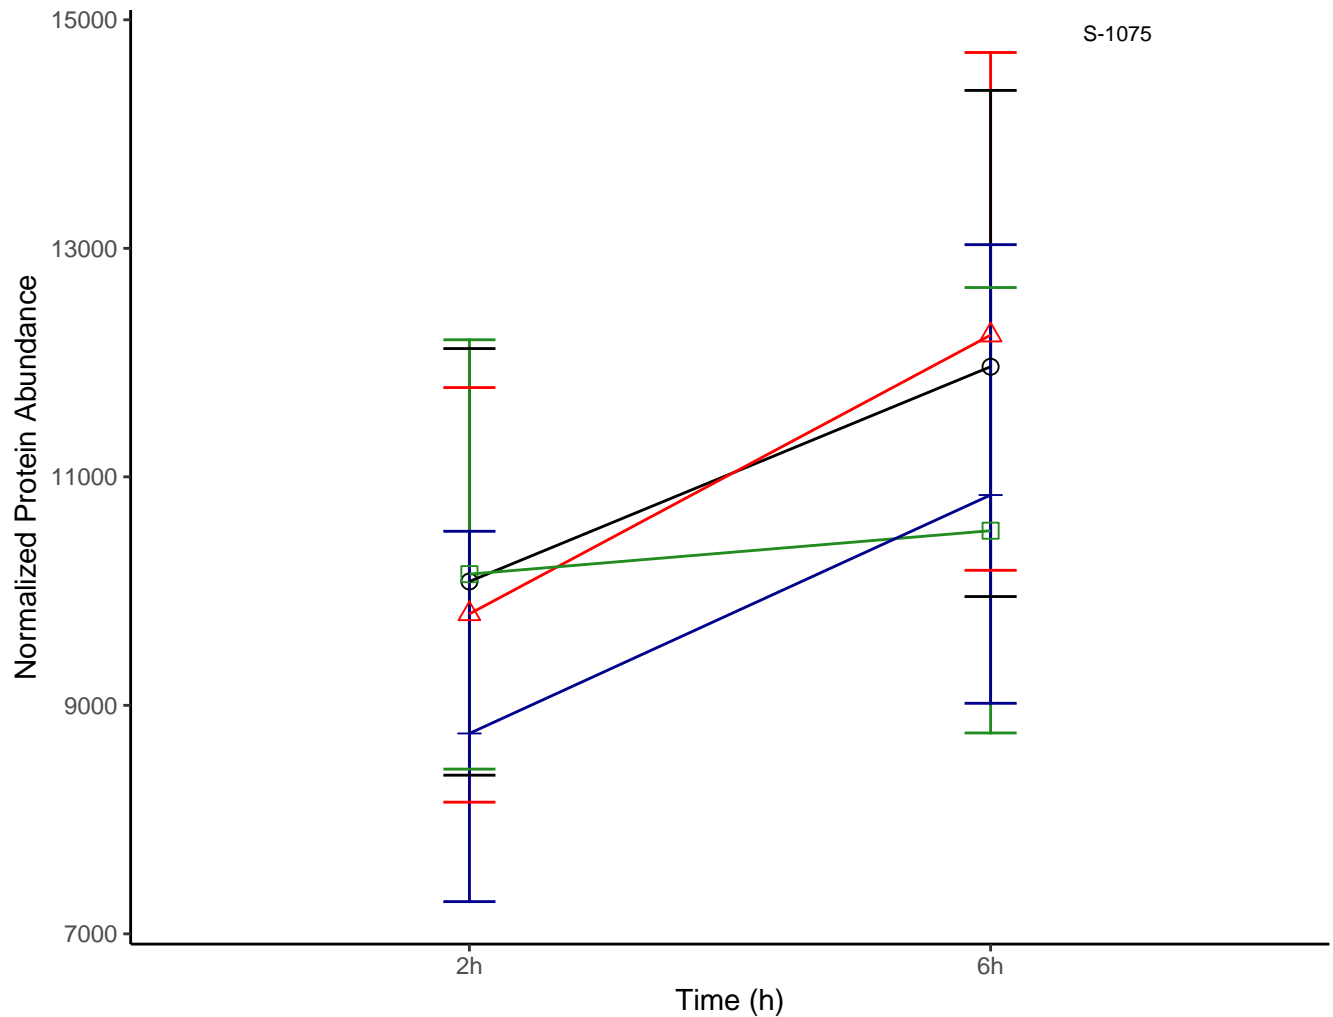

- SA564
- △ SA564- $\Delta$ hptRS
- SA564- $\Delta$ ccpA
- + SA564- $\Delta$ hptRS/ccpA

# DEOC1\_STAAM

S-1076

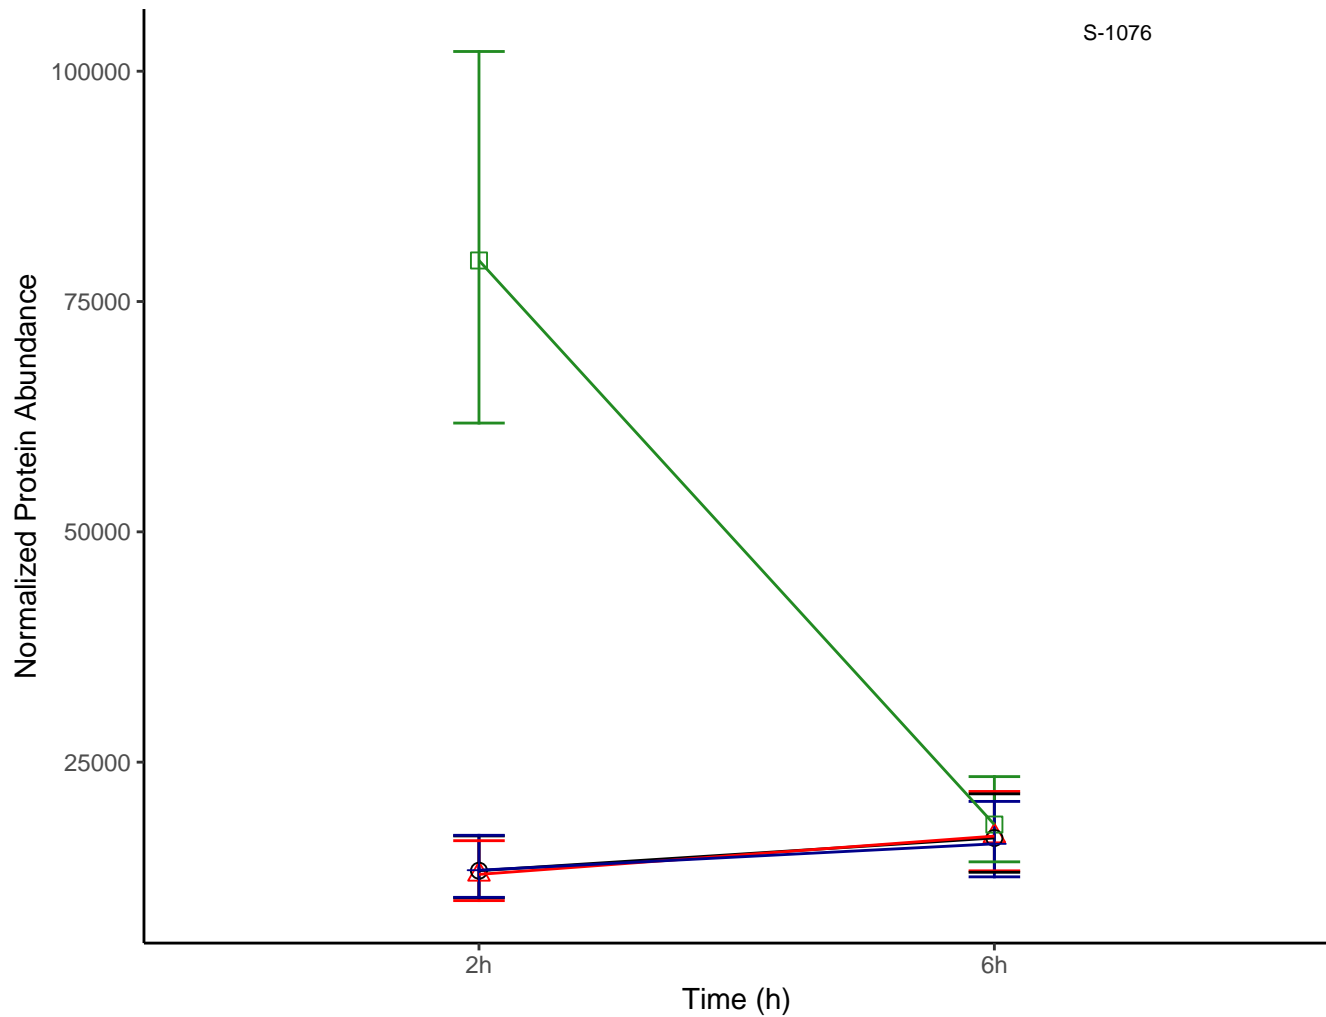

- SA564
- △ SA564- $\Delta hptRS$
- SA564- $\Delta ccpA$
- + SA564- $\Delta hptRS/ccpA$

# DEOC2\_STAAM

S-1077

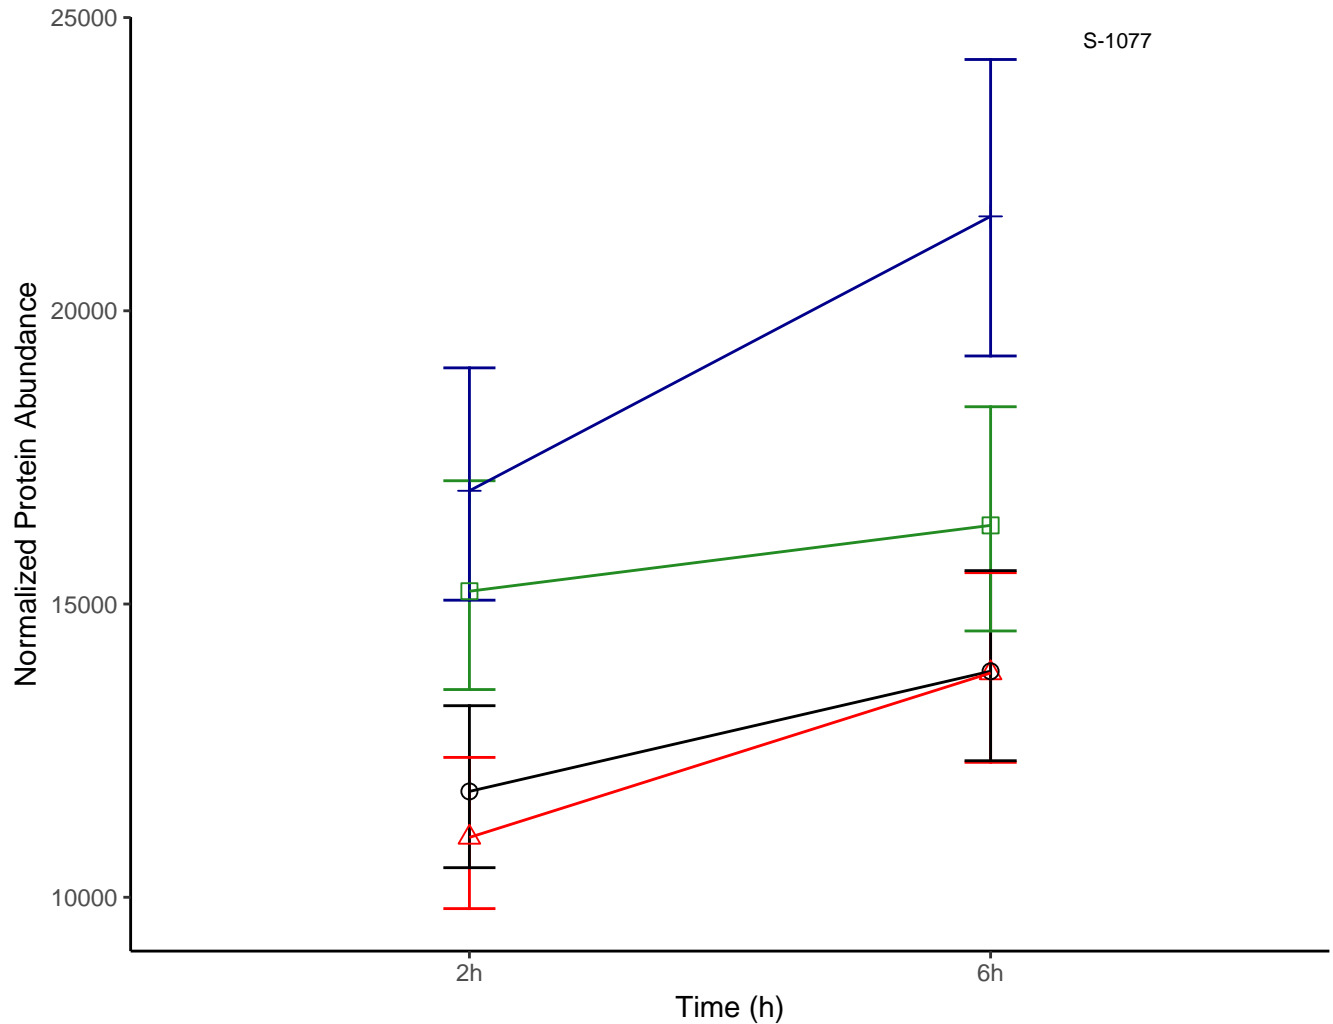

- SA564
- △ SA564- $\Delta$ *hptRS*
- SA564- $\Delta$ *ccpA*
- + SA564- $\Delta$ *hptRS/ccpA*

# DER\_STAAM

S-1078

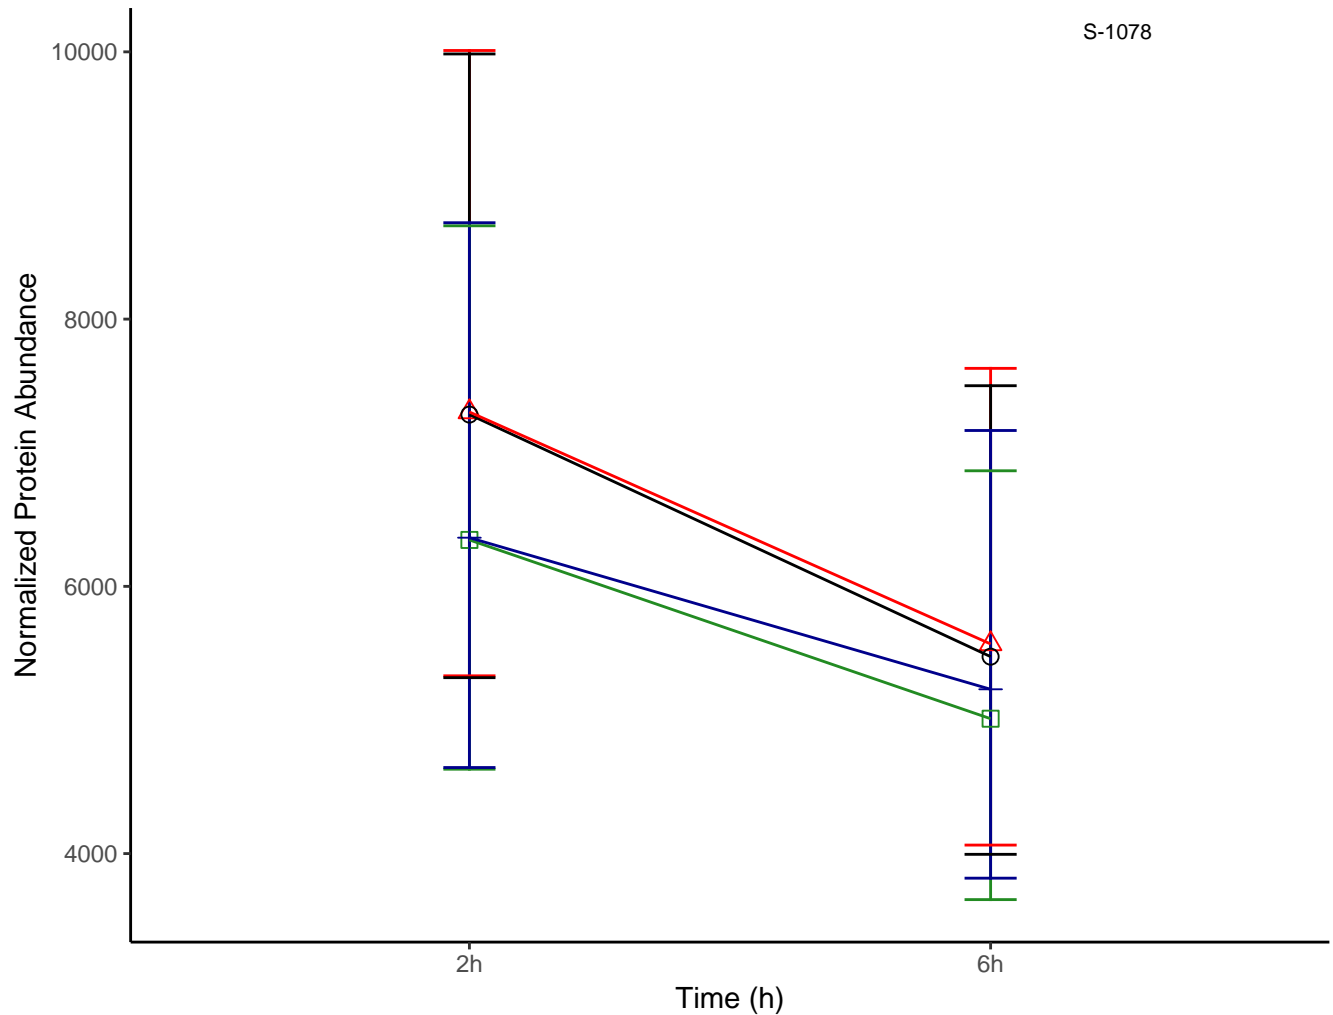

- SA564
- △ SA564- $\Delta hptRS$
- SA564- $\Delta ccpA$
- + SA564- $\Delta hptRS/ccpA$

# DHA1\_STAAM

S-1079

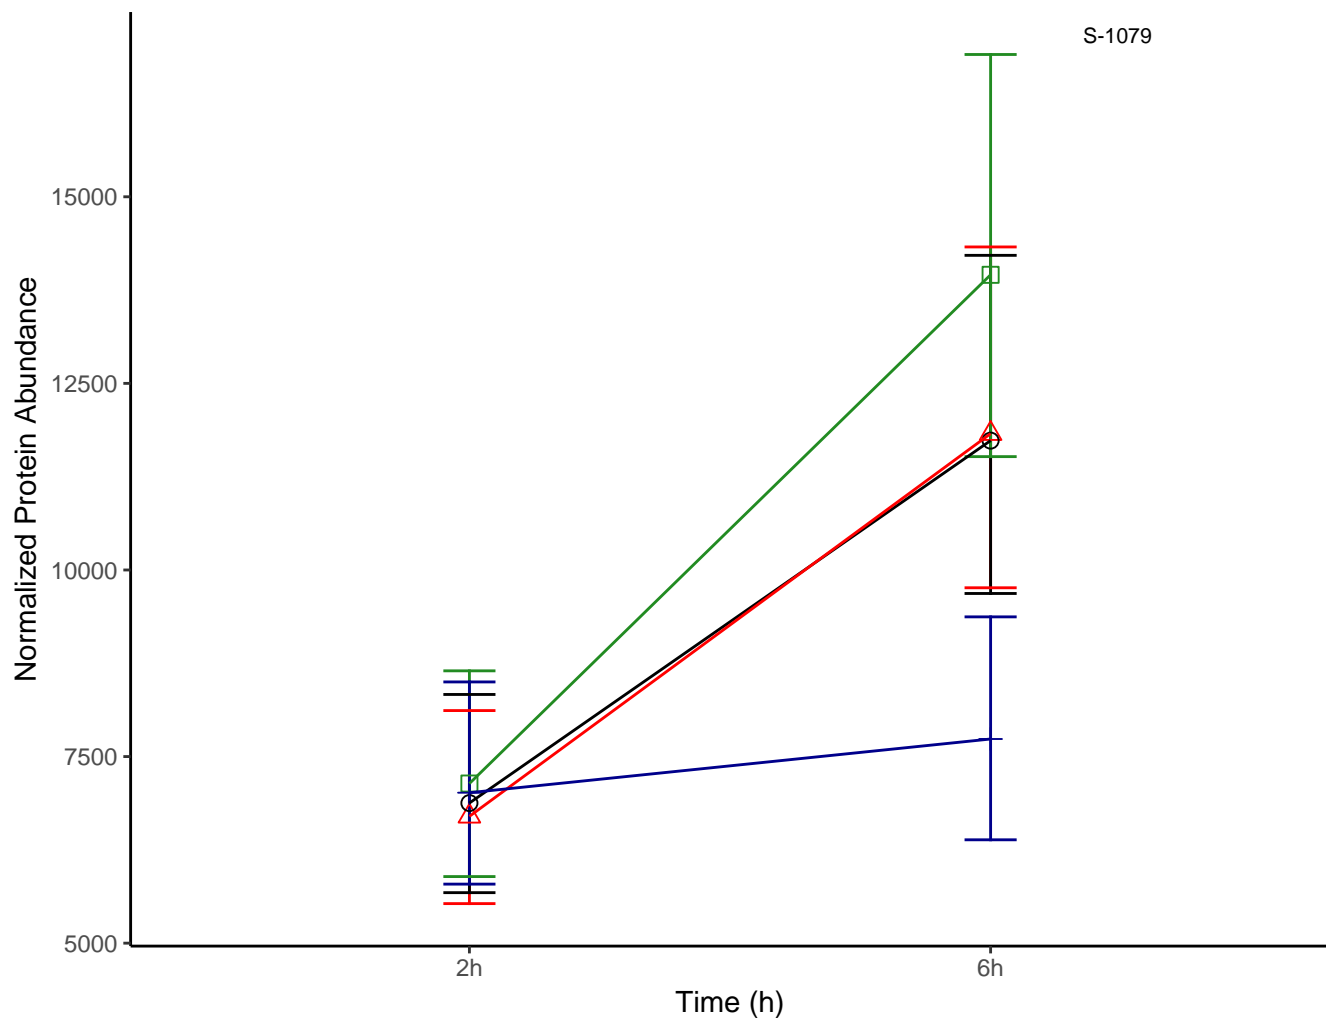

- SA564
- △ SA564- $\Delta hptRS$
- SA564- $\Delta ccpA$
- + SA564- $\Delta hptRS/ccpA$

# DHA2\_STAAM

S-1080

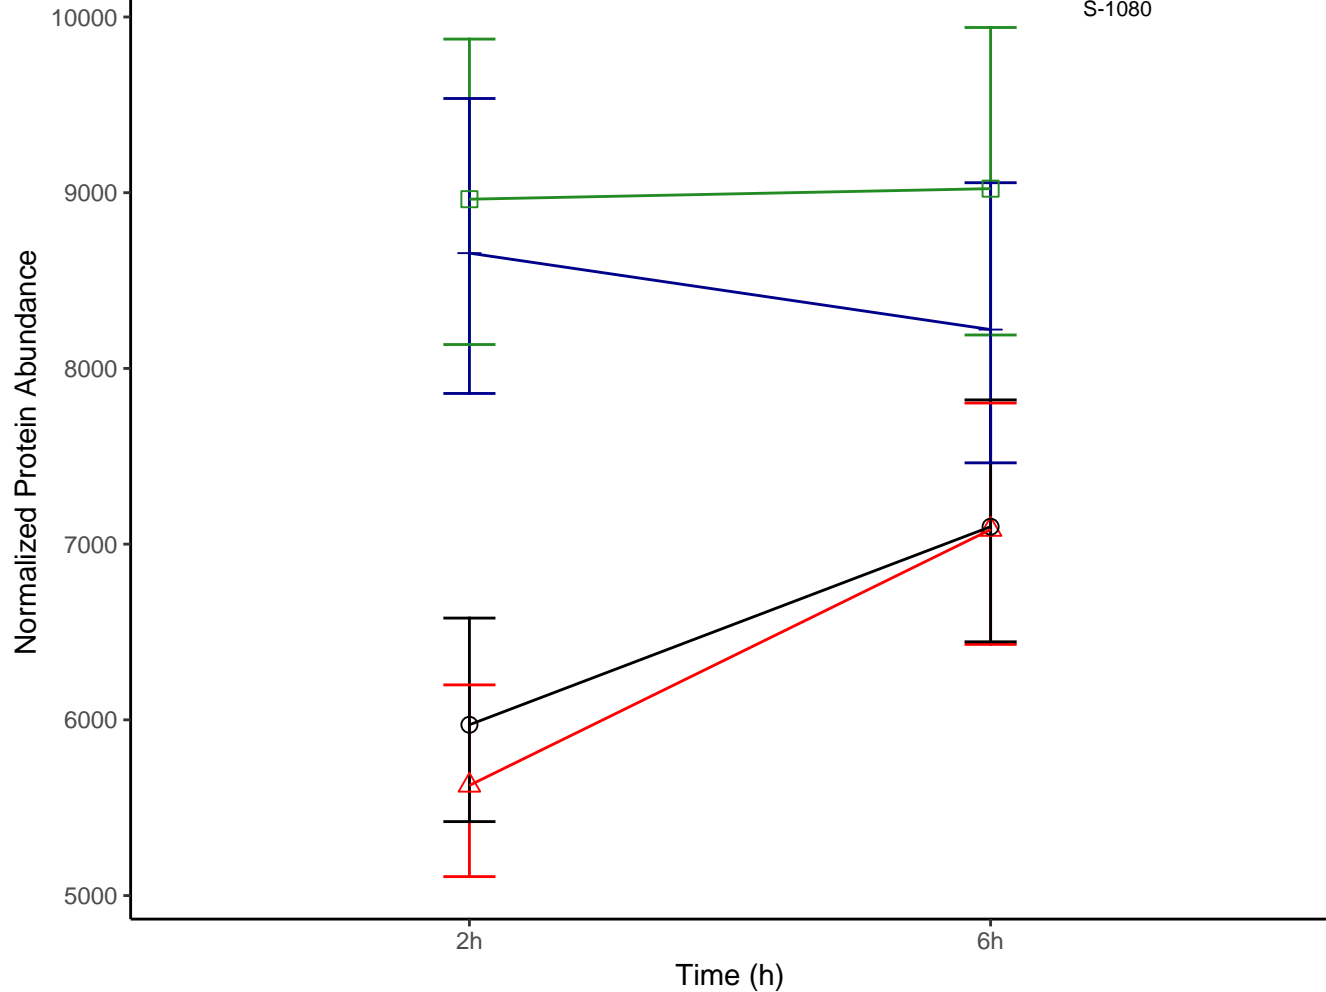

- SA564
- △ SA564- $\Delta$ hptRS
- SA564- $\Delta$ ccpA
- + SA564- $\Delta$ hptRS/ccpA



# DHE2\_STAAM

S-1081

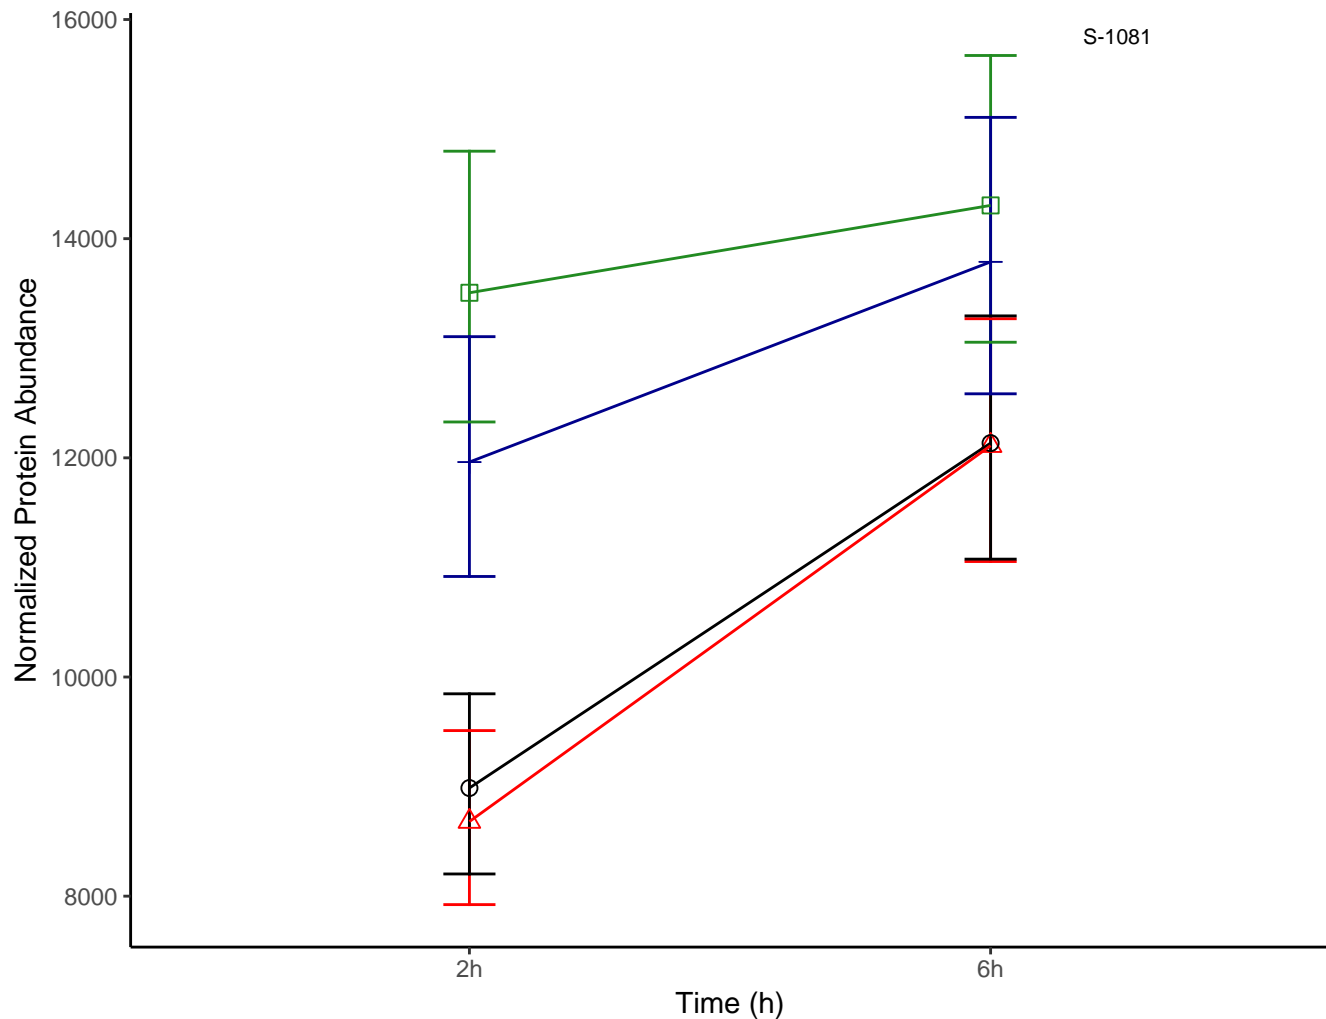

- SA564
- △ SA564- $\Delta hptRS$
- SA564- $\Delta ccpA$
- + SA564- $\Delta hptRS/ccpA$

# DHPS\_STAAM

S-1082

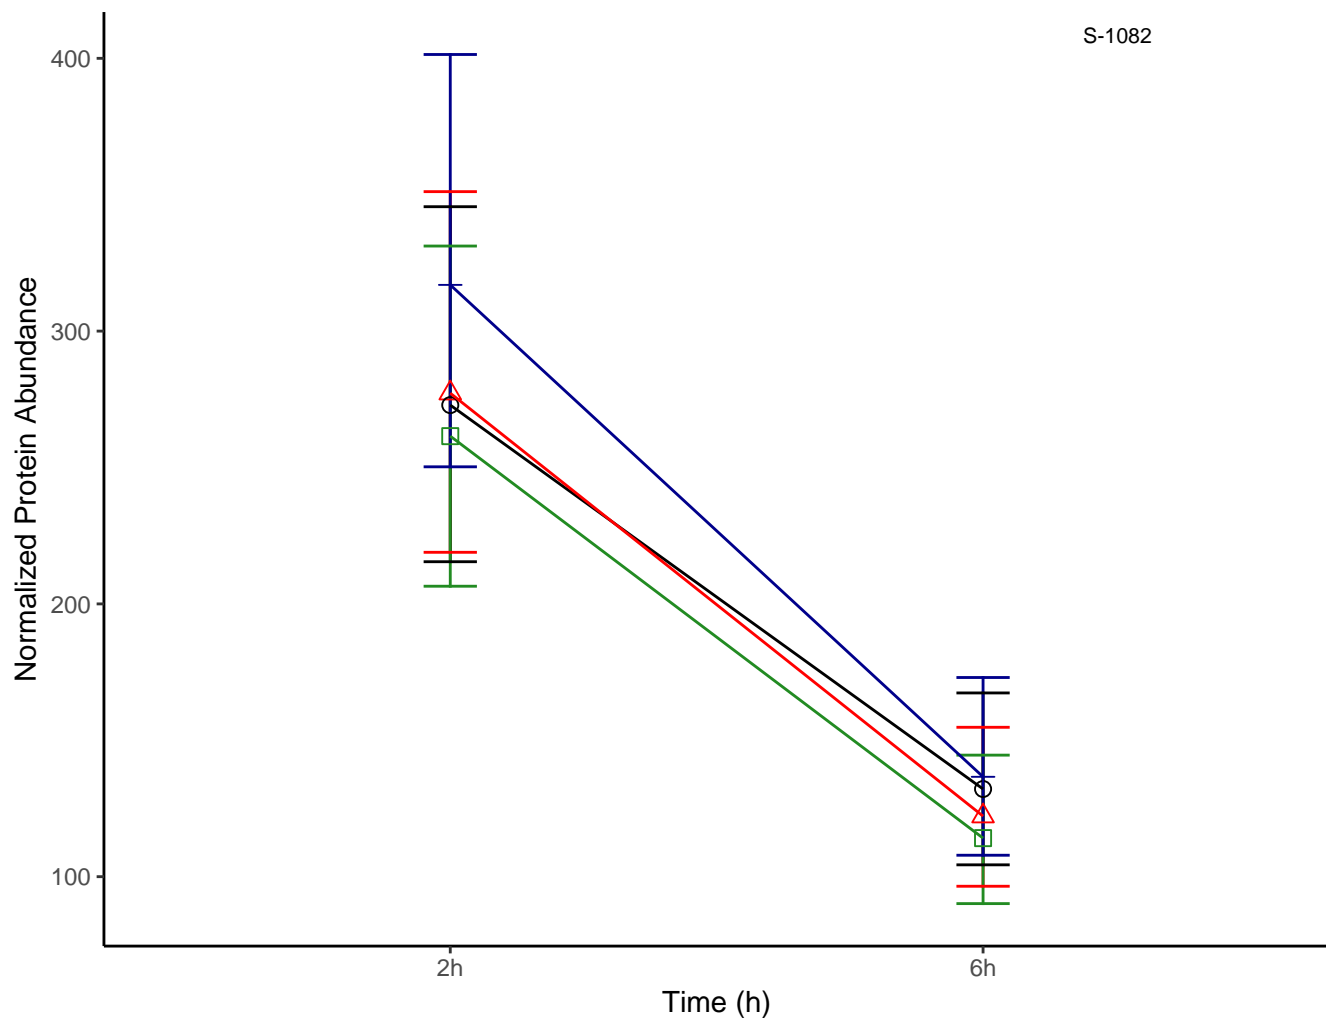

- SA564
- △ SA564- $\Delta hptRS$
- SA564- $\Delta ccpA$
- + SA564- $\Delta hptRS/ccpA$

# DLDH\_STAAM

S-1083

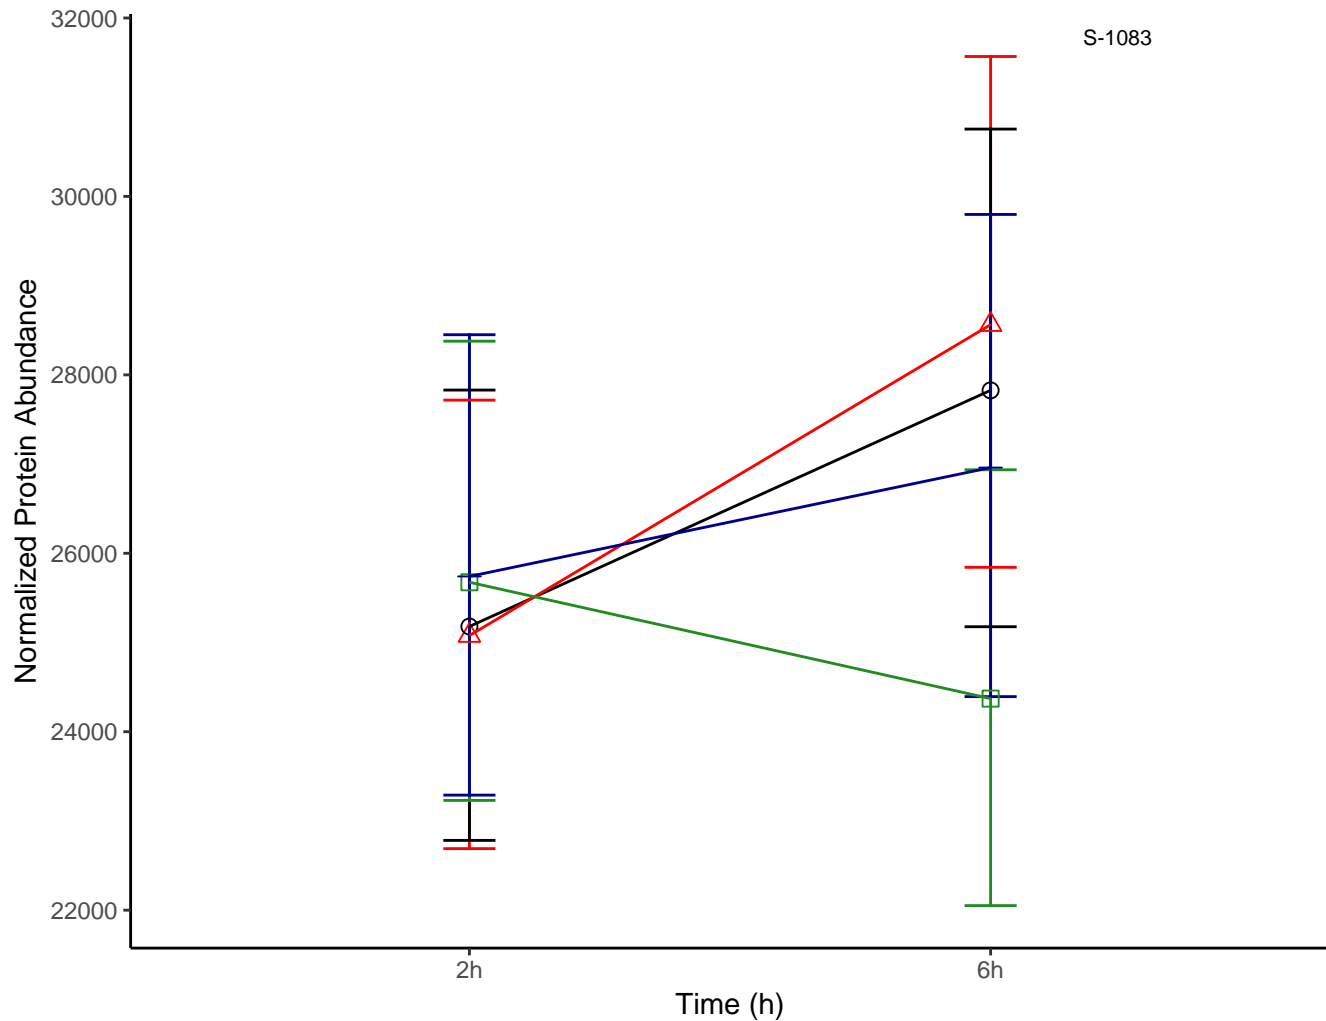

- SA564
- △ SA564- $\Delta$ hptRS
- SA564- $\Delta$ ccpA
- + SA564- $\Delta$ hptRS/ccpA

# DLTA\_STAAM

S-1084

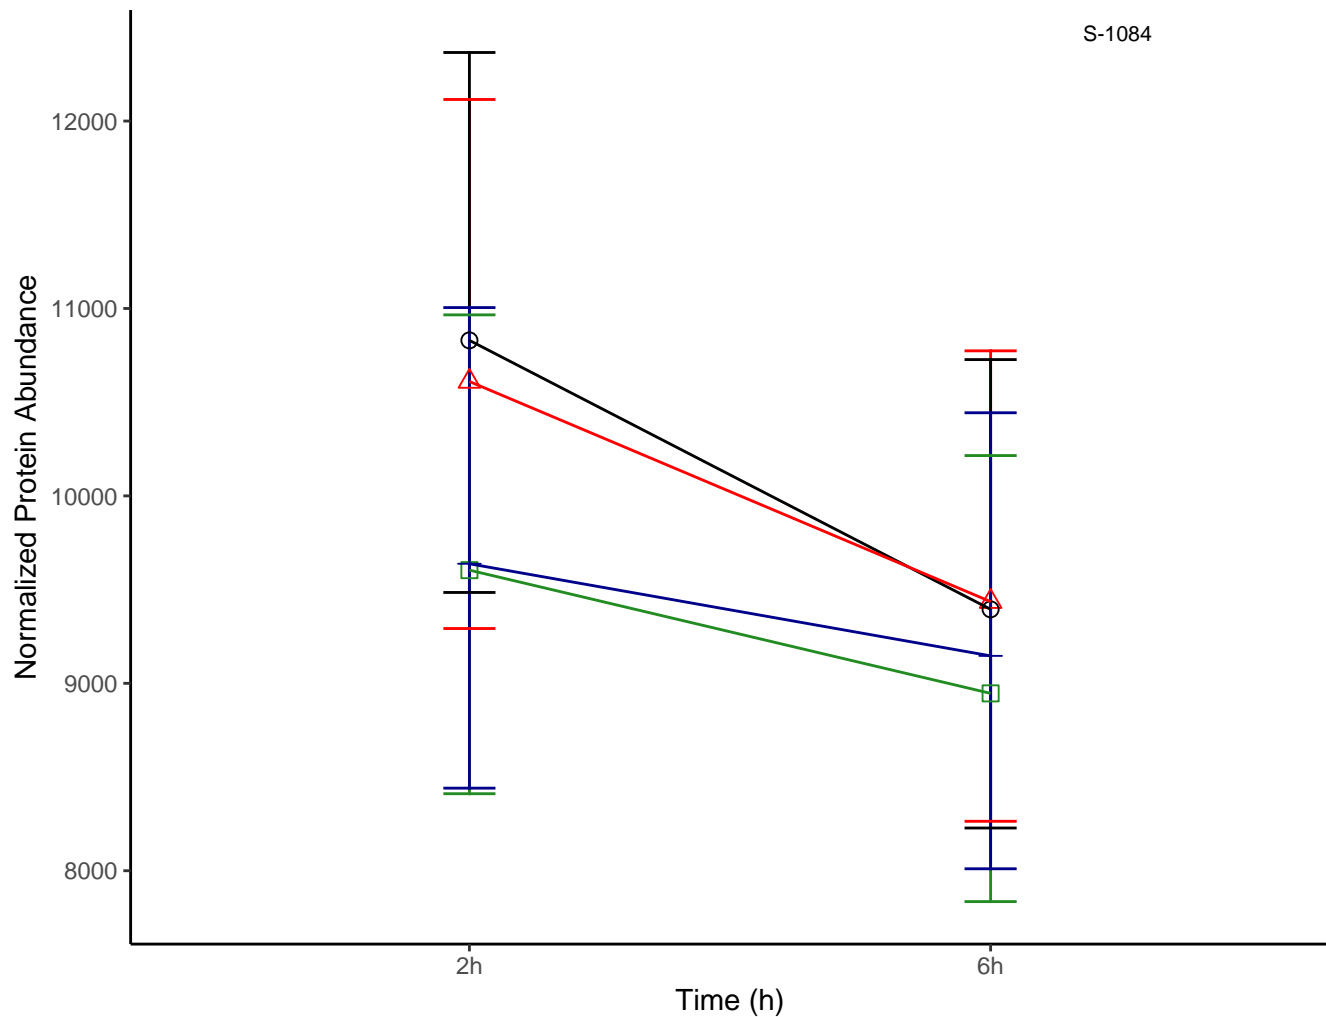

- SA564
- △ SA564- $\Delta$ *hptRS*
- SA564- $\Delta$ *ccpA*
- + SA564- $\Delta$ *hptRS/ccpA*

# DLTC\_STAAM

S-1085

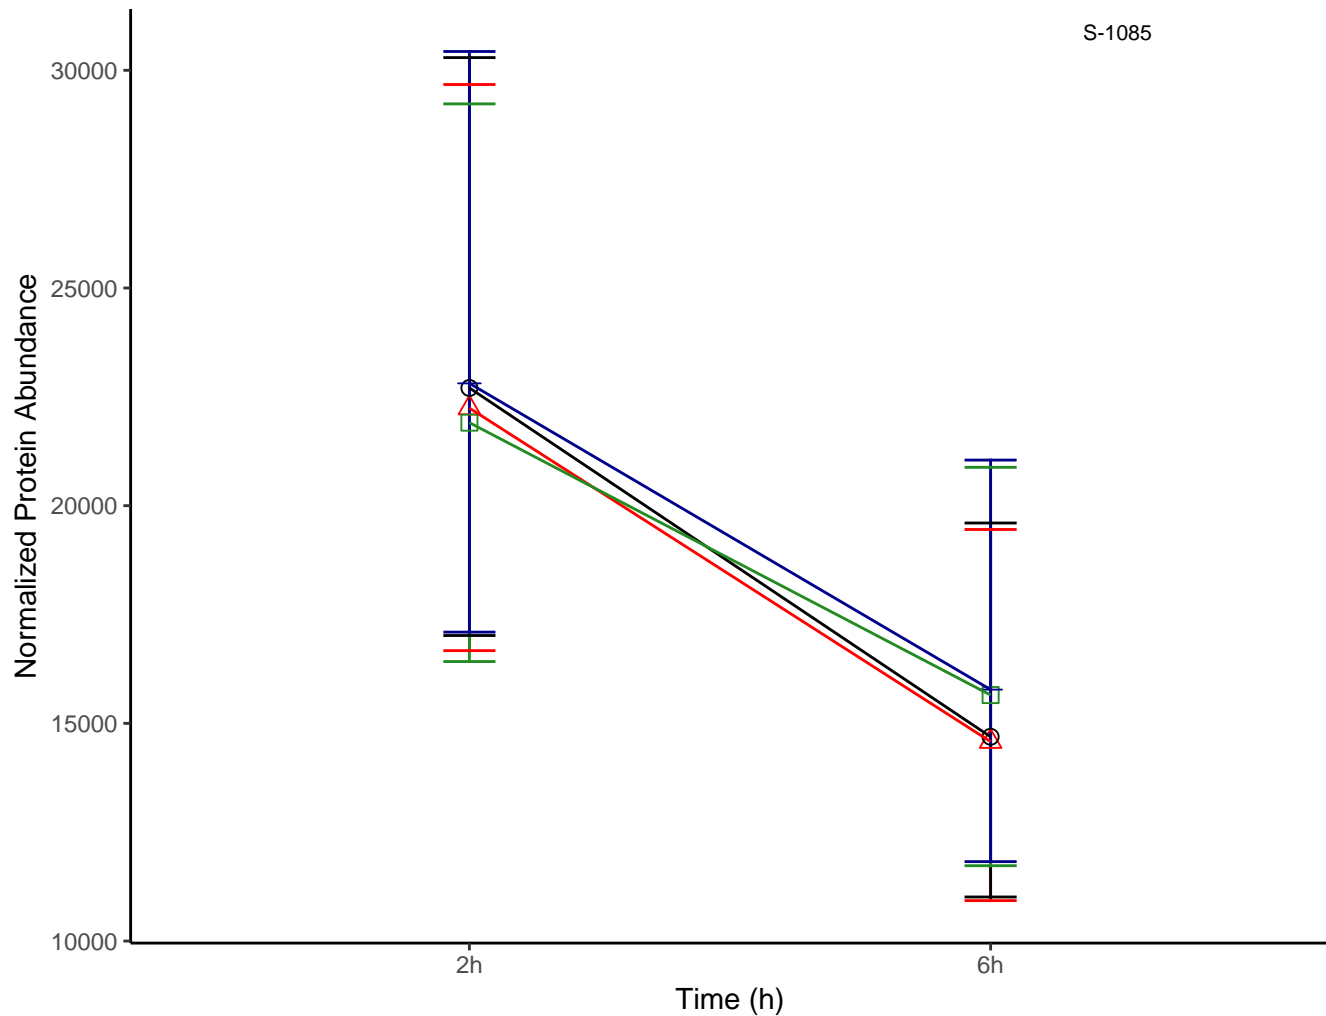

- SA564
- △ SA564- $\Delta$ *hptRS*
- SA564- $\Delta$ *ccpA*
- + SA564- $\Delta$ *hptRS/ccpA*

# DNAA\_STAAM

S-1086

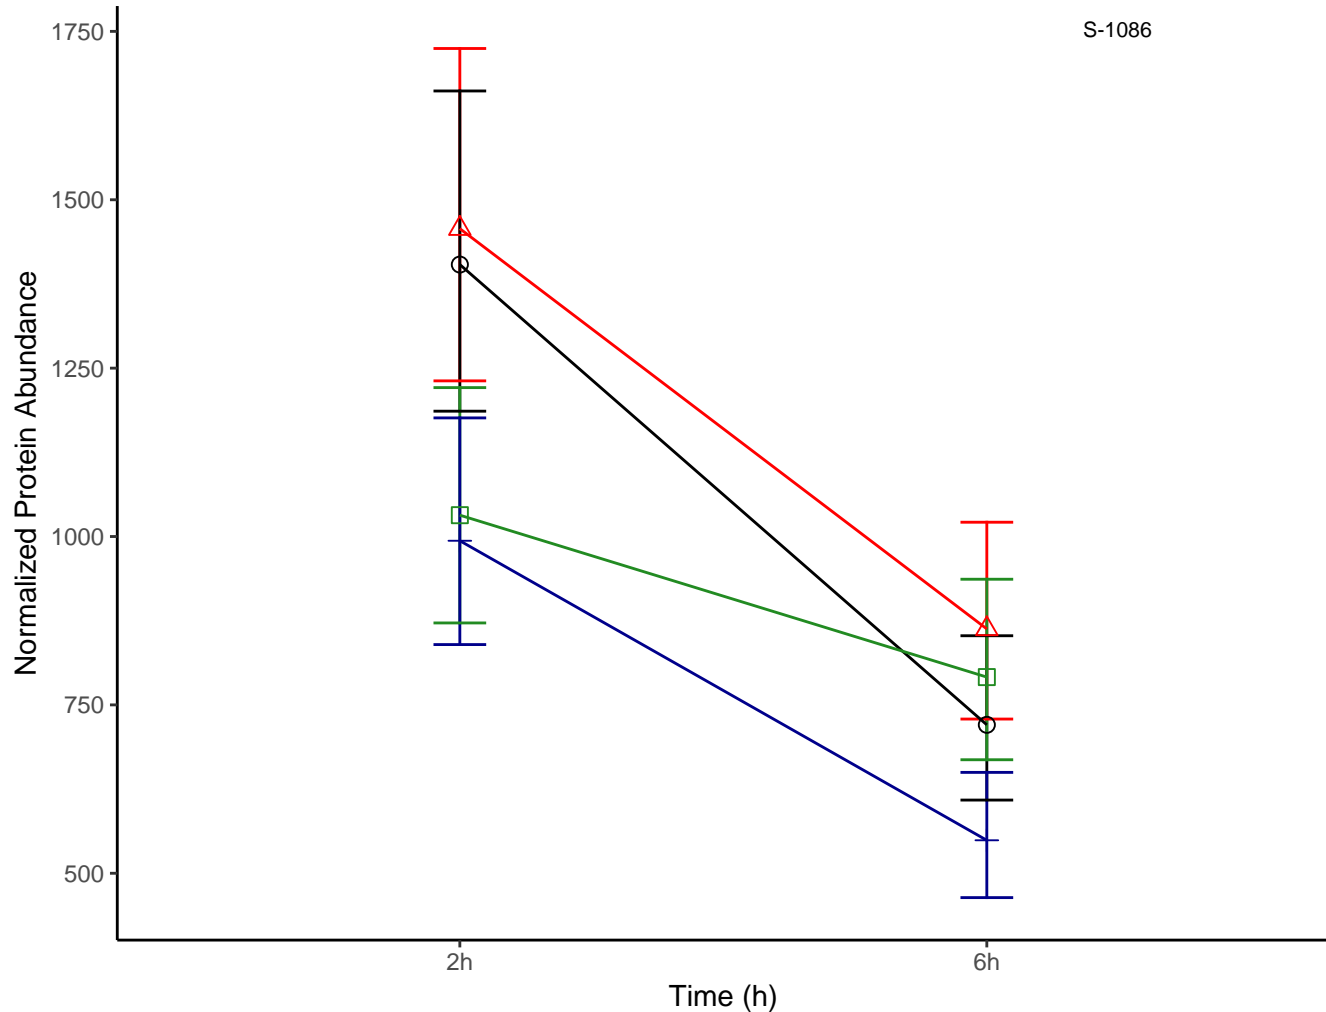

- SA564
- △ SA564- $\Delta hptRS$
- SA564- $\Delta ccpA$
- + SA564- $\Delta hptRS/ccpA$

# DNAG\_STAAM

S-1087

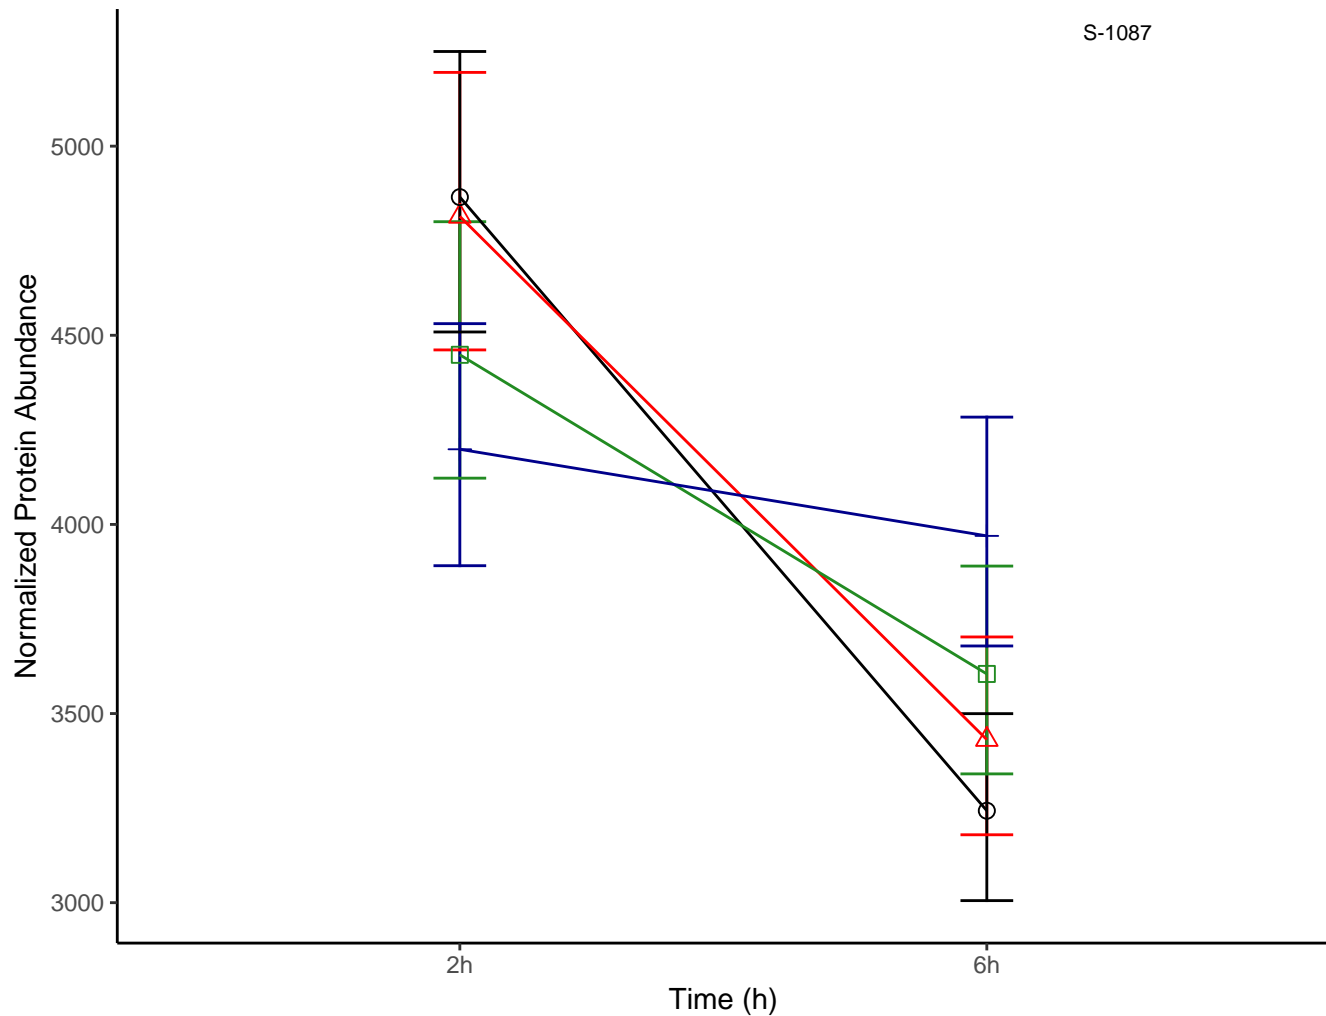

- SA564
- △ SA564- $\Delta$ *hptRS*
- SA564- $\Delta$ *ccpA*
- + SA564- $\Delta$ *hptRS/ccpA*

# DNAJ\_STAAM

S-1088

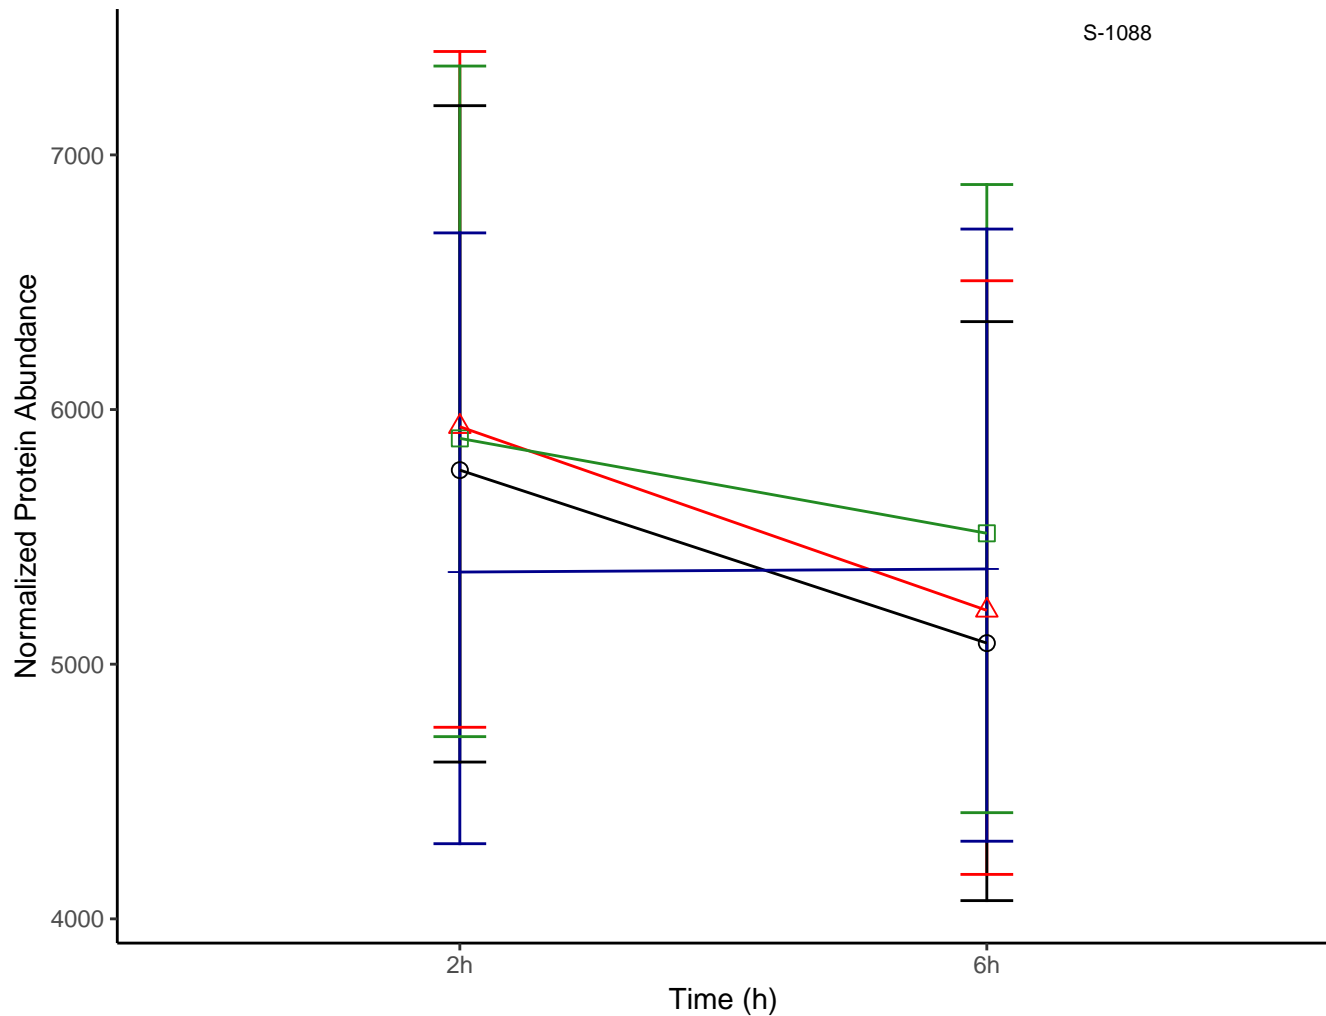

- SA564
- △ SA564- $\Delta$ *hptRS*
- SA564- $\Delta$ *ccpA*
- + SA564- $\Delta$ *hptRS/ccpA*



# DNAK\_STAAM

S-1089

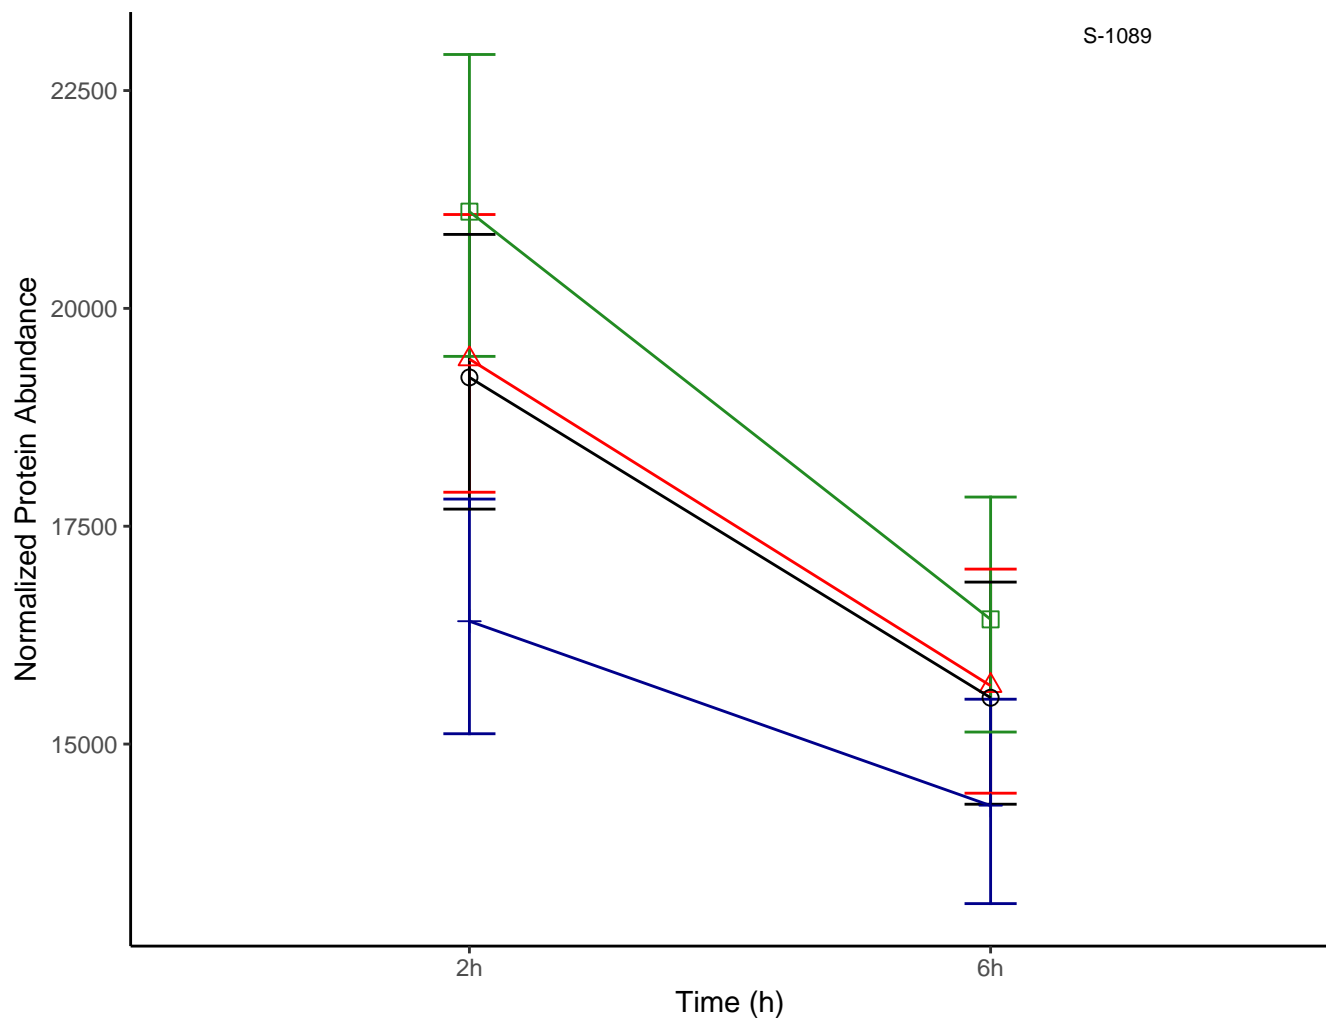

- SA564
- △ SA564- $\Delta hptRS$
- SA564- $\Delta ccpA$
- + SA564- $\Delta hptRS/ccpA$

# DNLJ\_STAAM

S-1090

Normalized Protein Abundance

16000  
12000  
8000  
4000

2h

6h

Time (h)

- SA564
- △ SA564- $\Delta$ *hptRS*
- SA564- $\Delta$ *ccpA*
- + SA564- $\Delta$ *hptRS/ccpA*

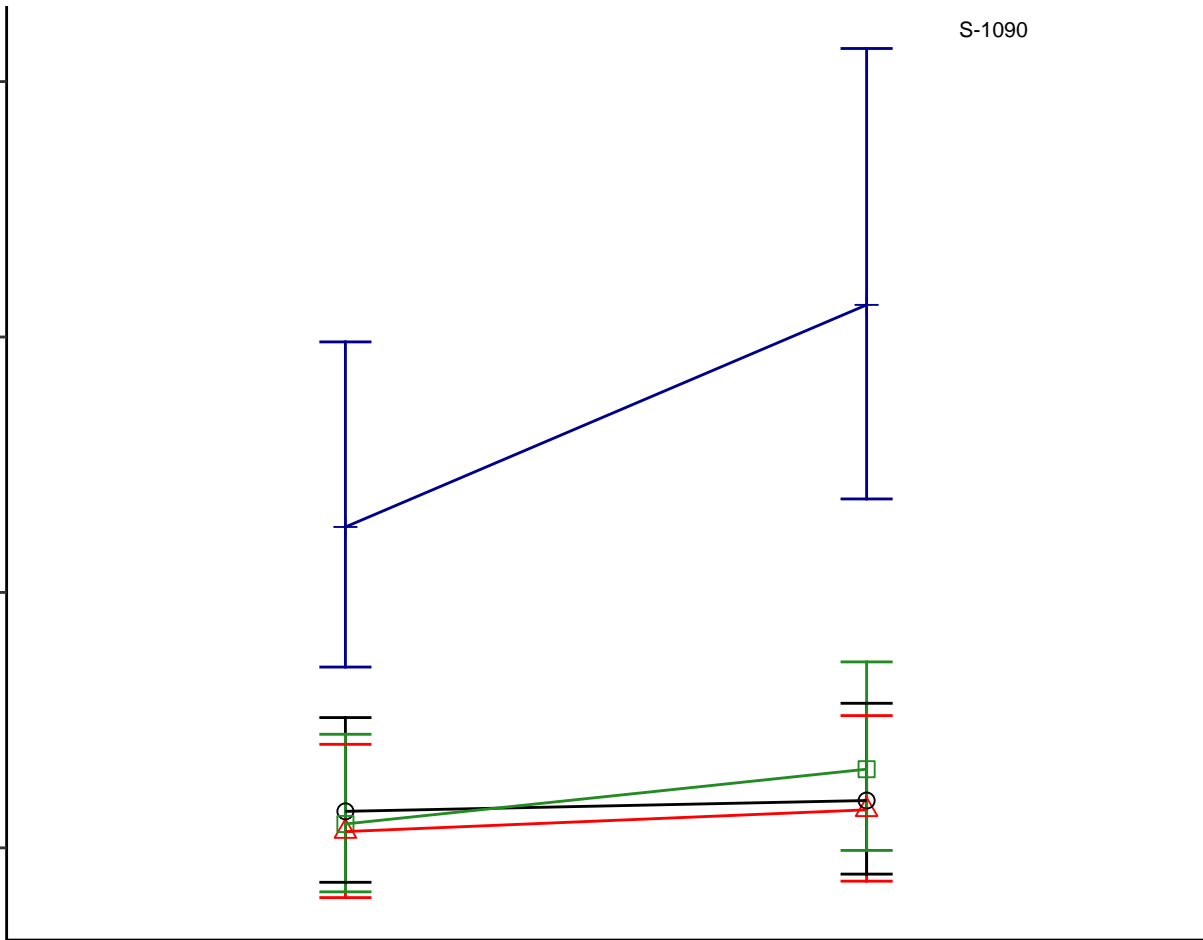

# DPO3B\_STAAM

S-1091

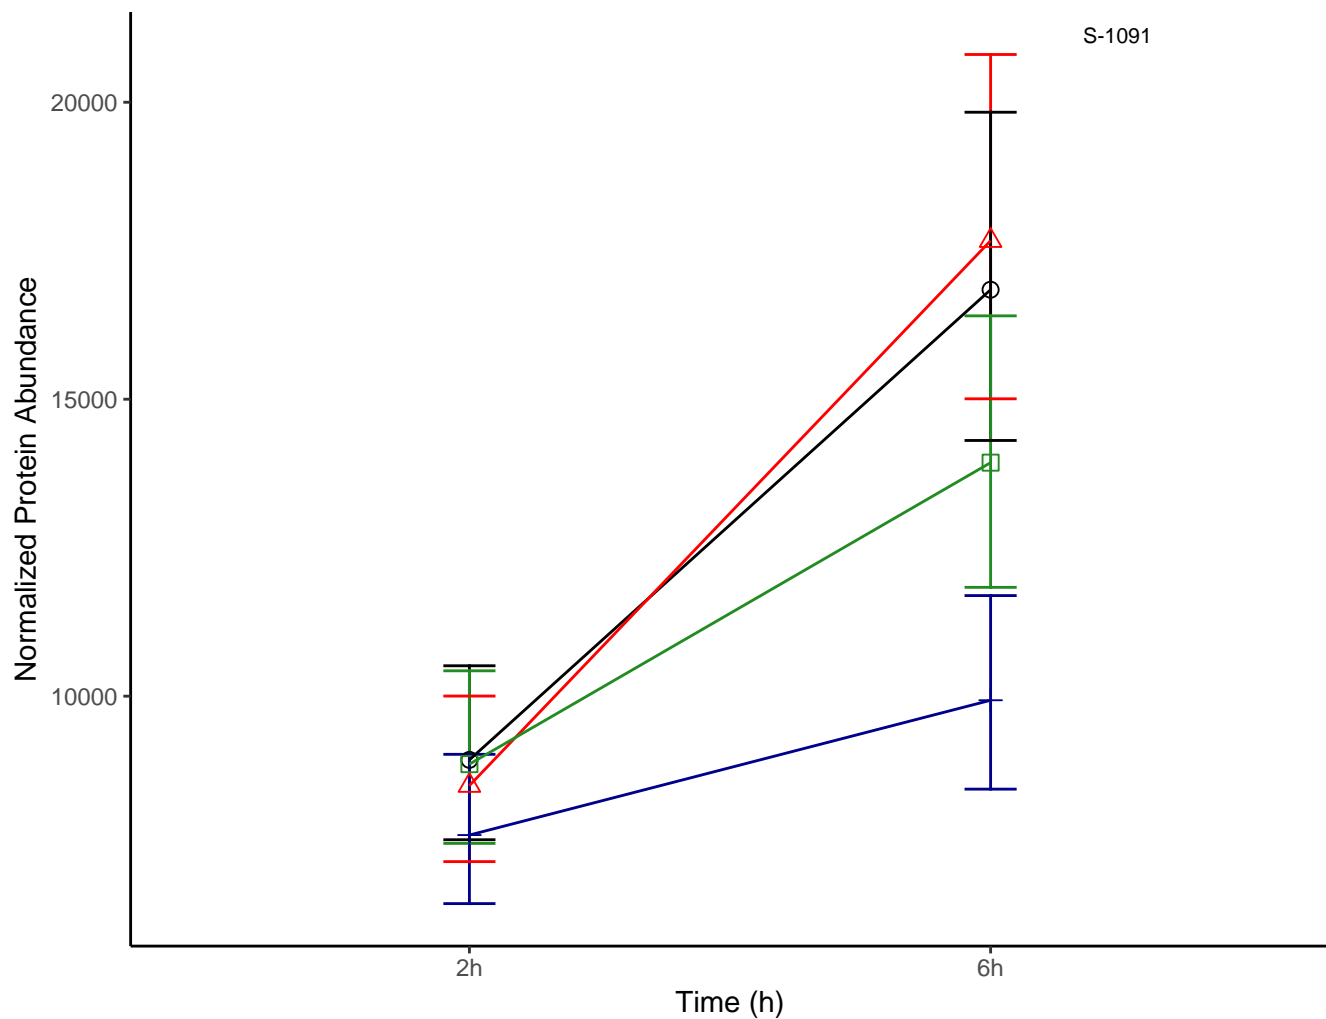

- SA564
- △ SA564- $\Delta hptRS$
- SA564- $\Delta ccpA$
- + SA564- $\Delta hptRS/ccpA$

# DPO4\_STAAM

S-1092

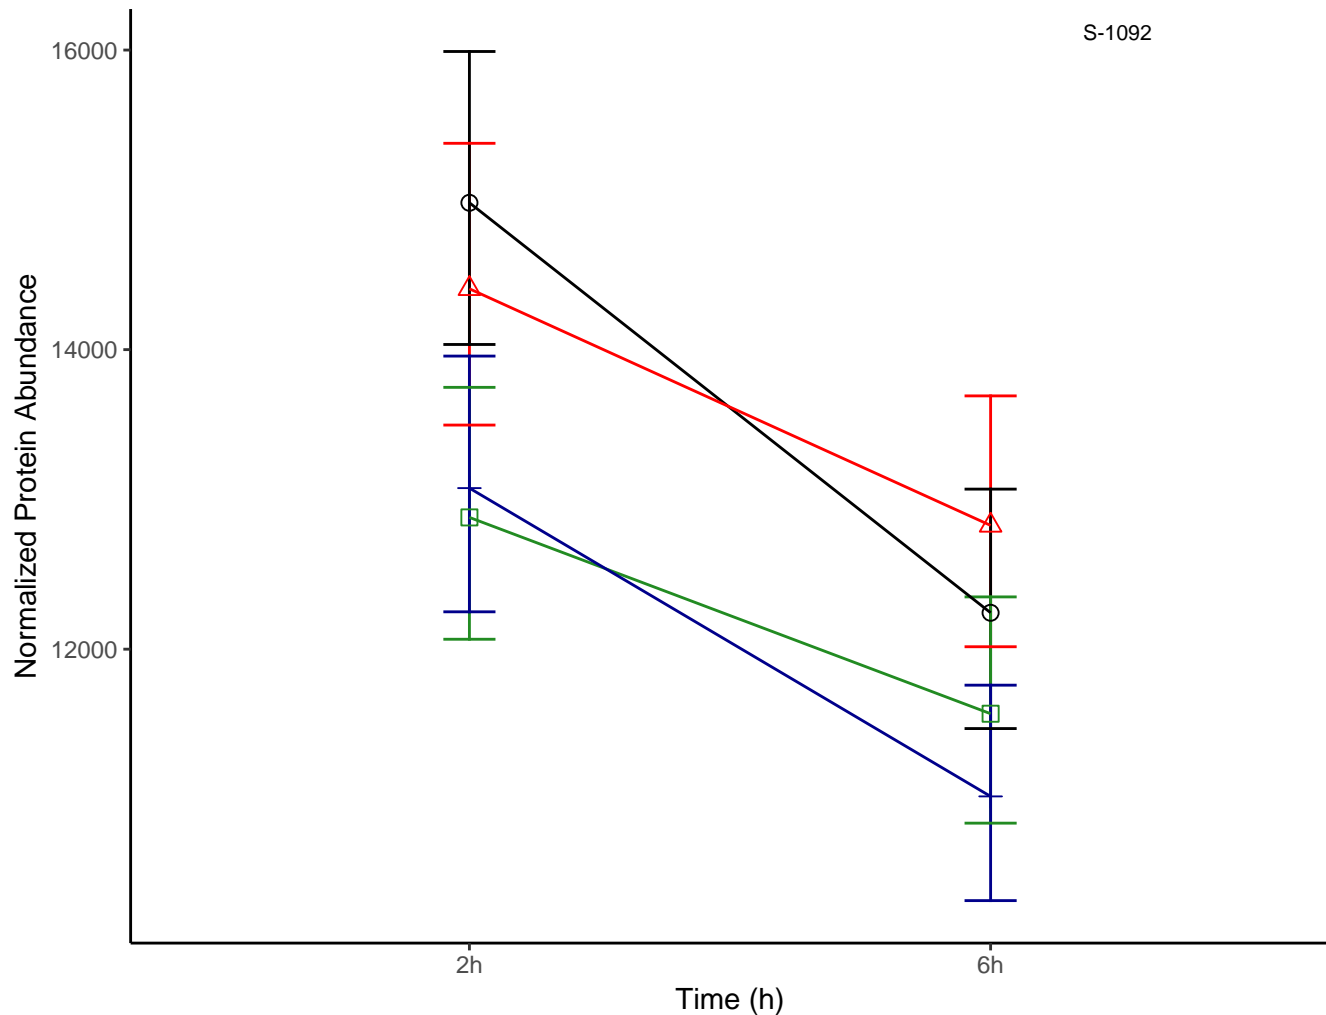

- SA564
- △ SA564- $\Delta$ *hptRS*
- SA564- $\Delta$ *ccpA*
- + SA564- $\Delta$ *hptRS/ccpA*

# DTD\_STAAM

S-1093

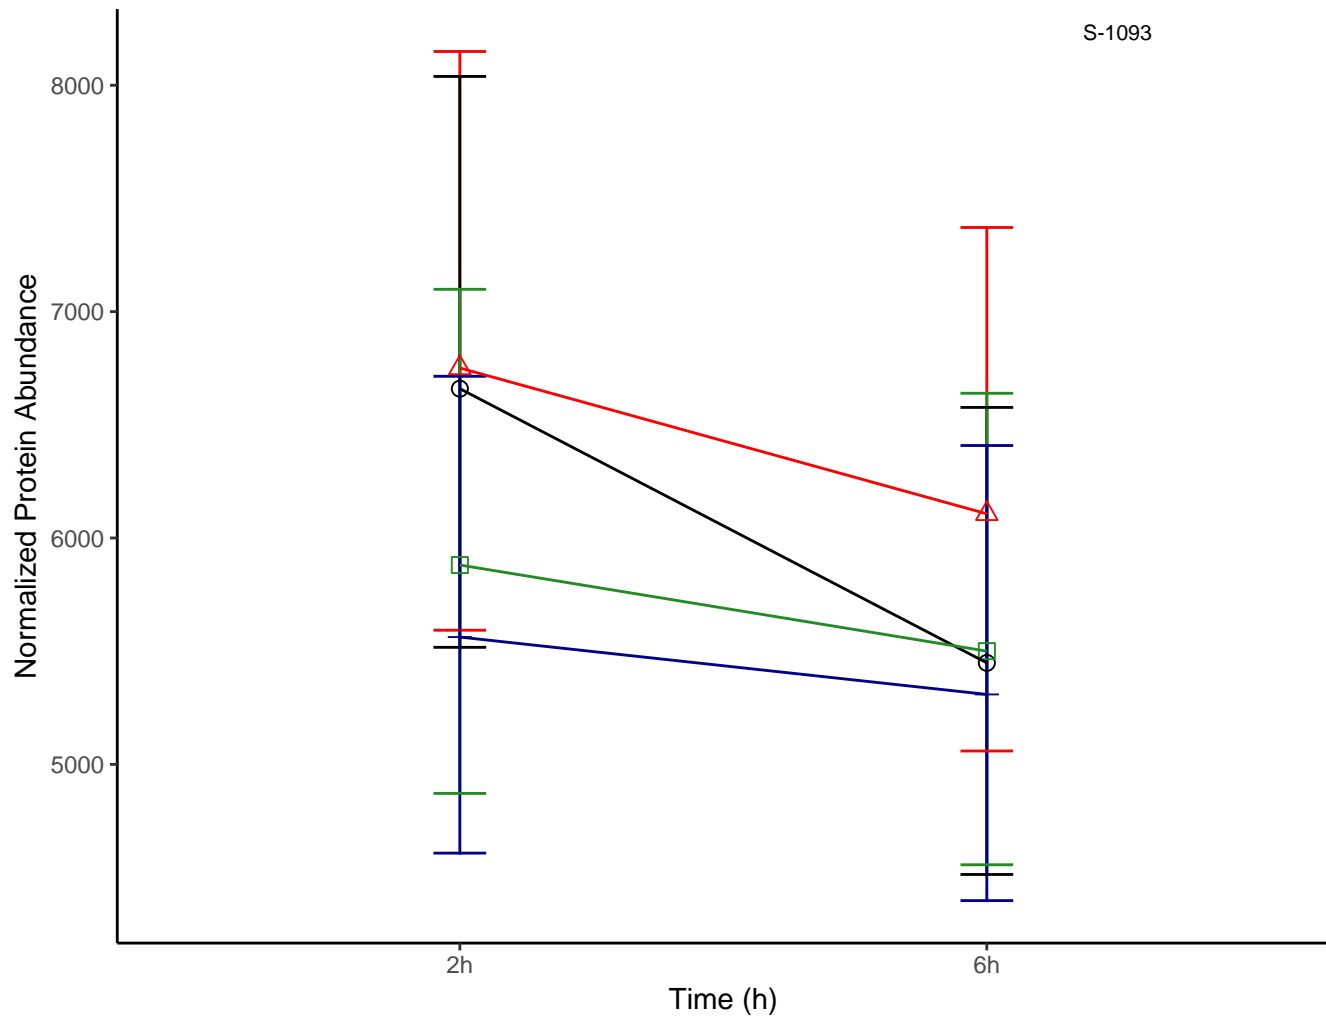

- SA564
- △ SA564- $\Delta$ *hptRS*
- SA564- $\Delta$ *ccpA*
- + SA564- $\Delta$ *hptRS/ccpA*

# DYR\_STAAM

S-1094

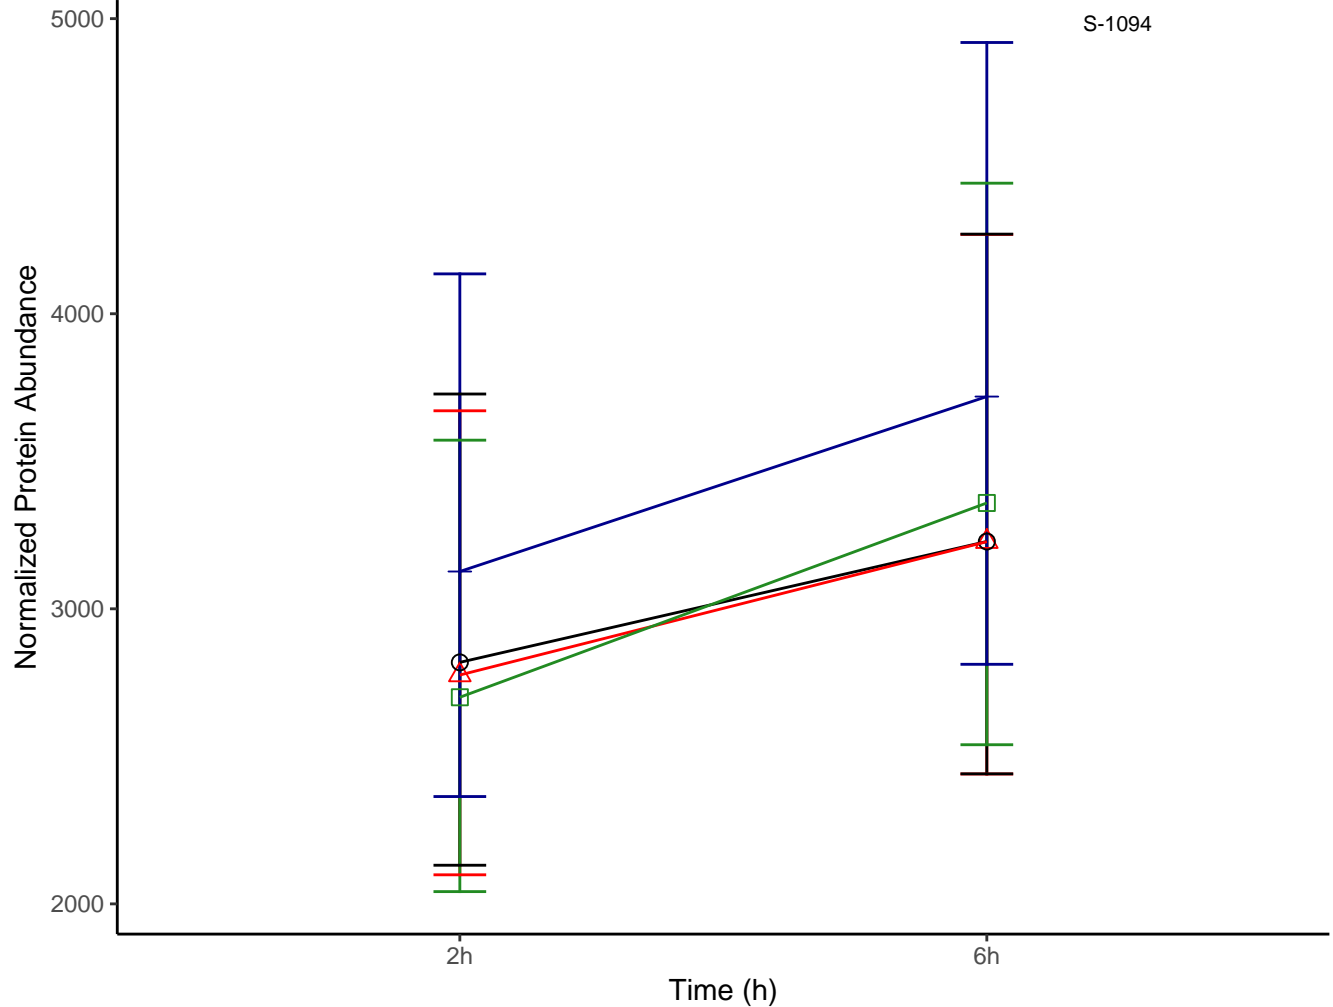

- SA564
- △ SA564- $\Delta$ *hptRS*
- SA564- $\Delta$ *ccpA*
- + SA564- $\Delta$ *hptRS/ccpA*

# EBPS\_STAAM

S-1095

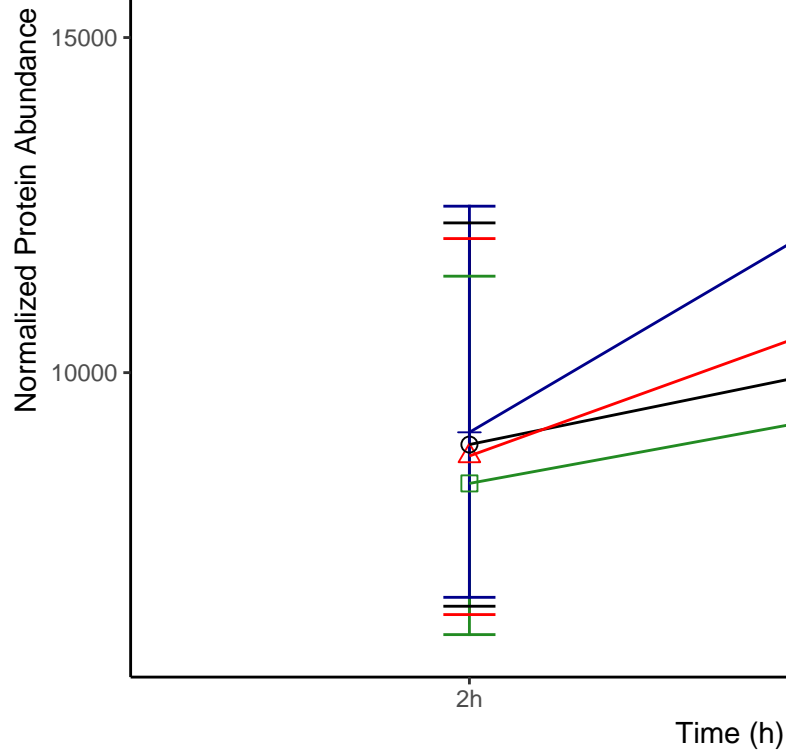

- SA564
- △ SA564- $\Delta$ hptRS
- SA564- $\Delta$ ccpA
- + SA564- $\Delta$ hptRS/ccpA

# ECFA1\_STAAM

S-1096

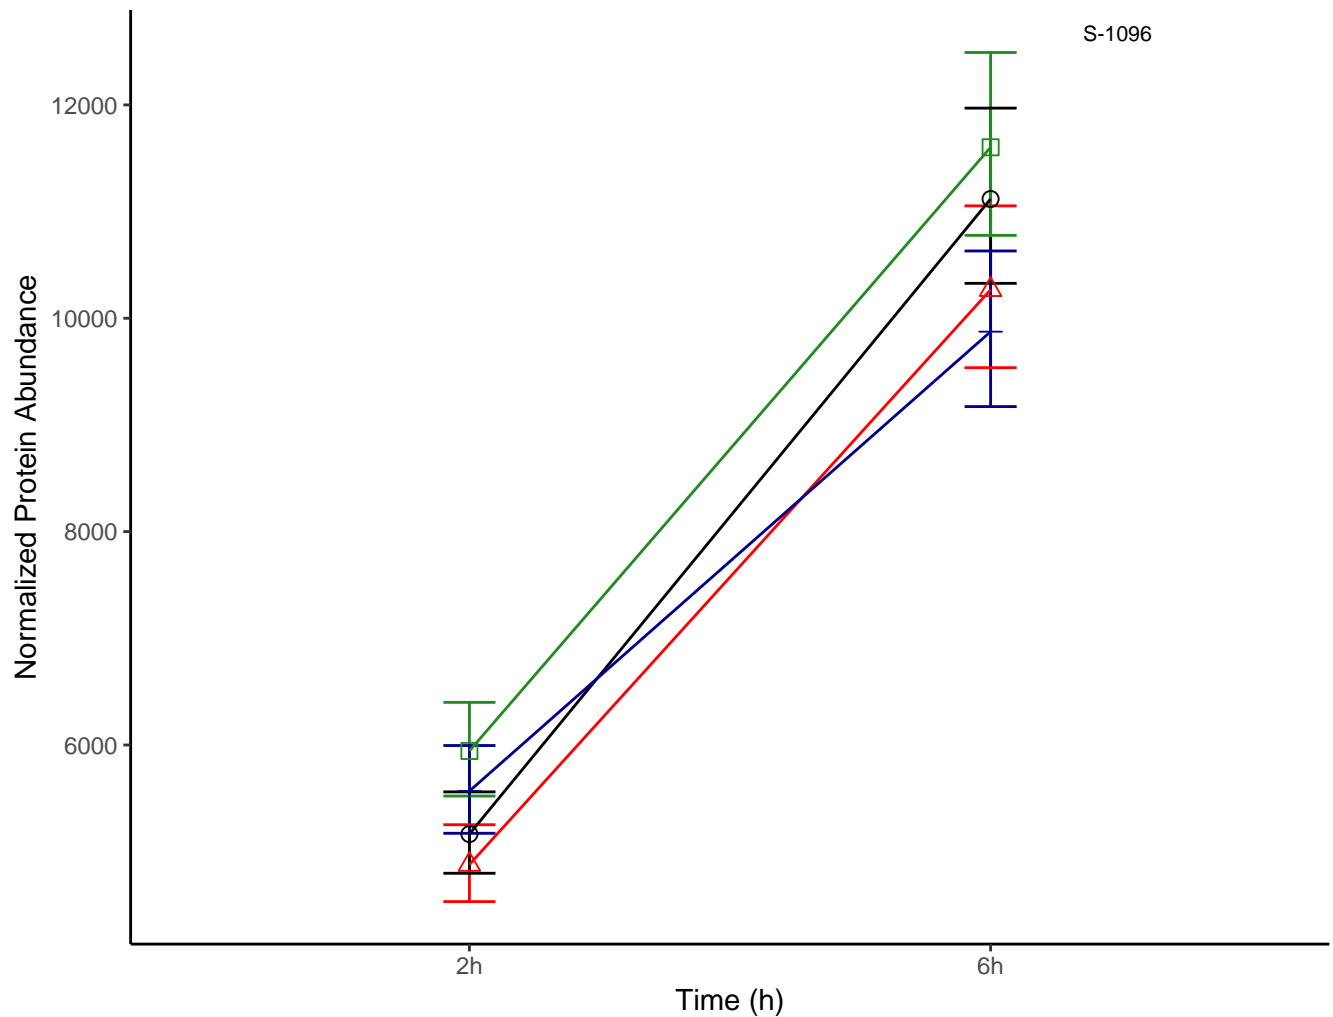

- SA564
- △ SA564- $\Delta$ *hptRS*
- SA564- $\Delta$ *ccpA*
- + SA564- $\Delta$ *hptRS/ccpA*



# EFG\_STAAM

S-1097

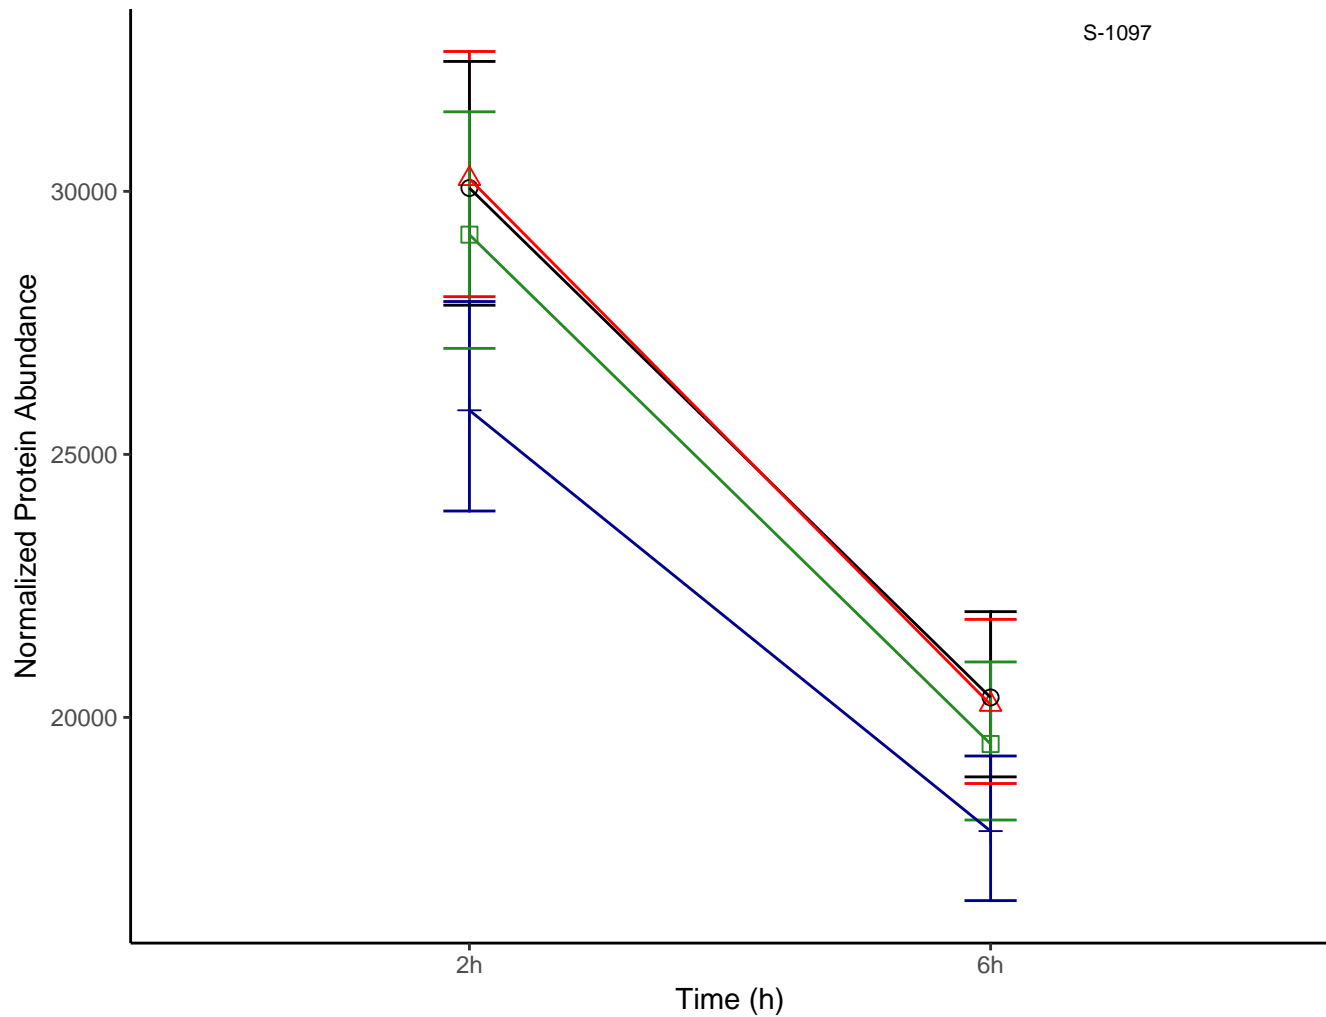

- SA564
- △ SA564- $\Delta$ *hptRS*
- SA564- $\Delta$ *ccpA*
- + SA564- $\Delta$ *hptRS/ccpA*

# EFP\_STAAM

S-1098

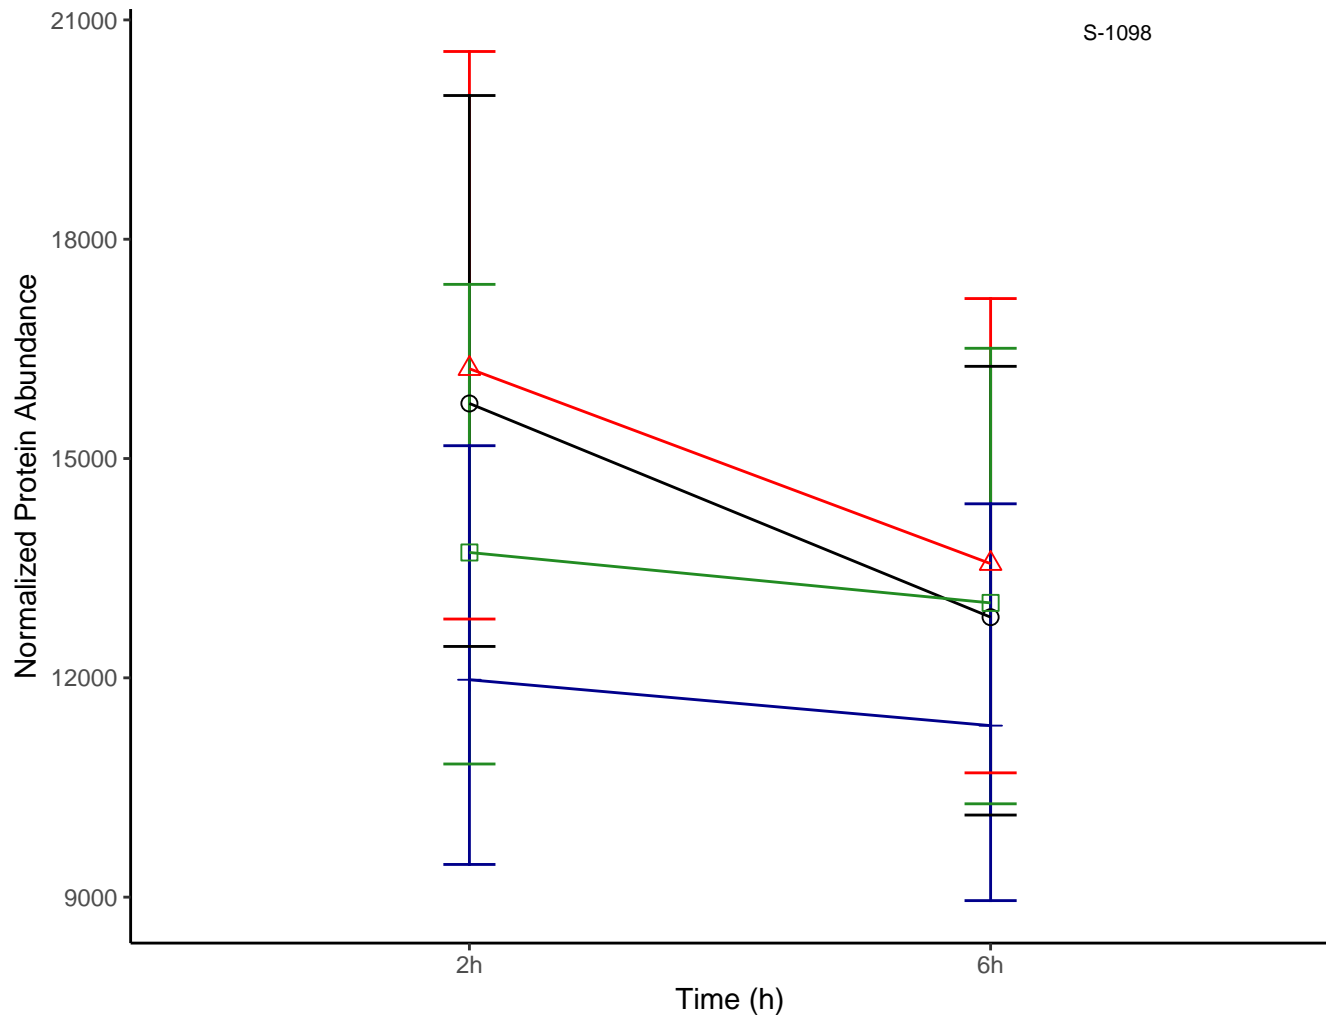

- SA564
- △ SA564-Δ*hptRS*
- SA564-Δ*ccpA*
- + SA564-Δ*hptRS/ccpA*

# EFTS\_STAAM

S-1099

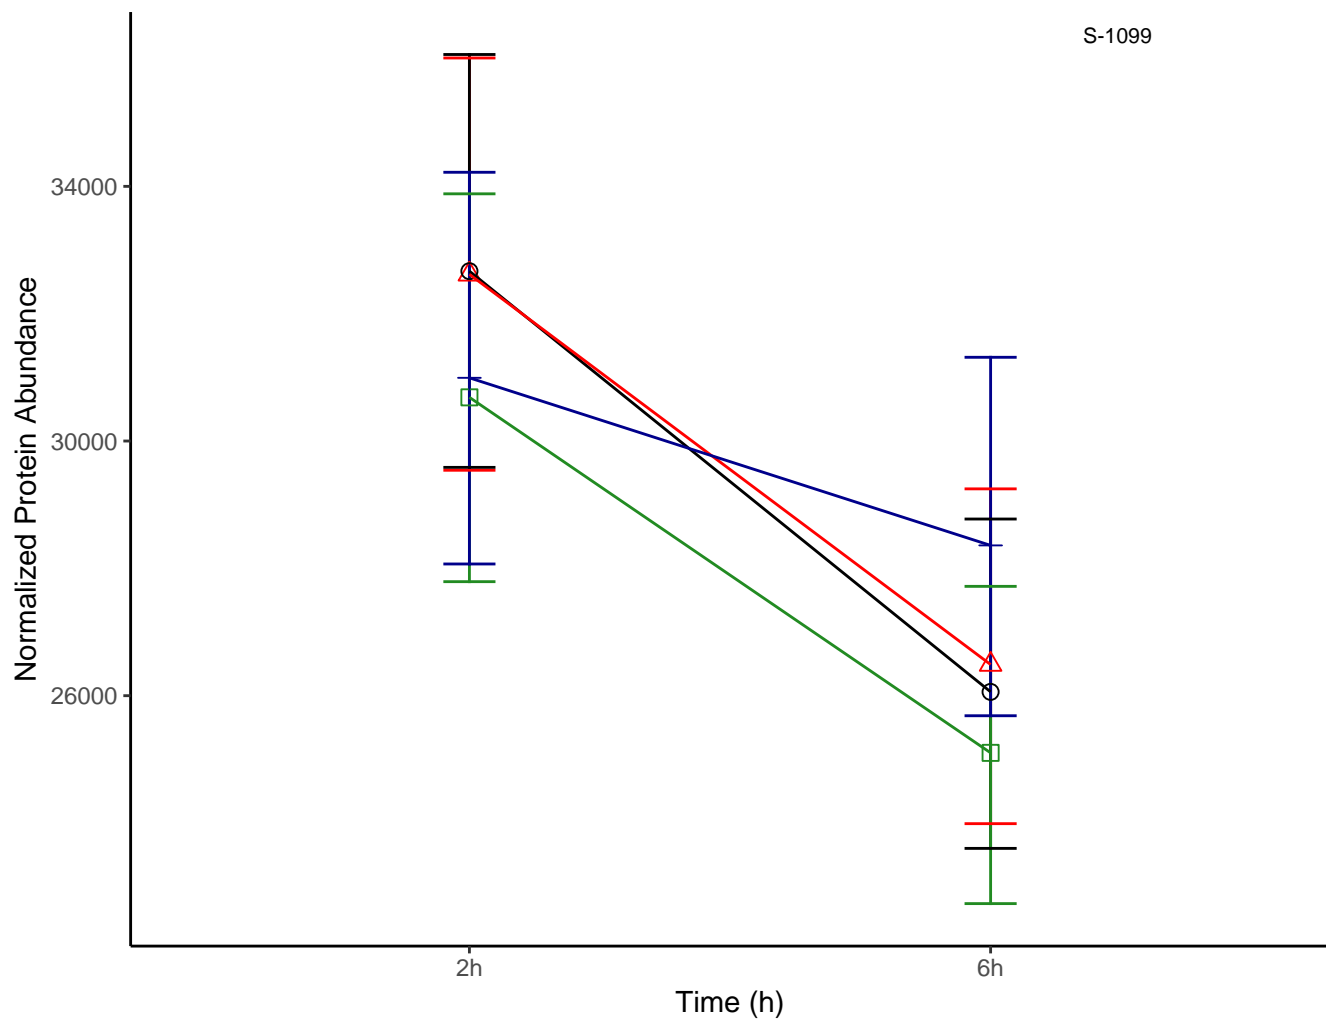

- SA564
- △ SA564- $\Delta$ *hptRS*
- SA564- $\Delta$ *ccpA*
- + SA564- $\Delta$ *hptRS/ccpA*

## EFTU\_STAAM

S-1100

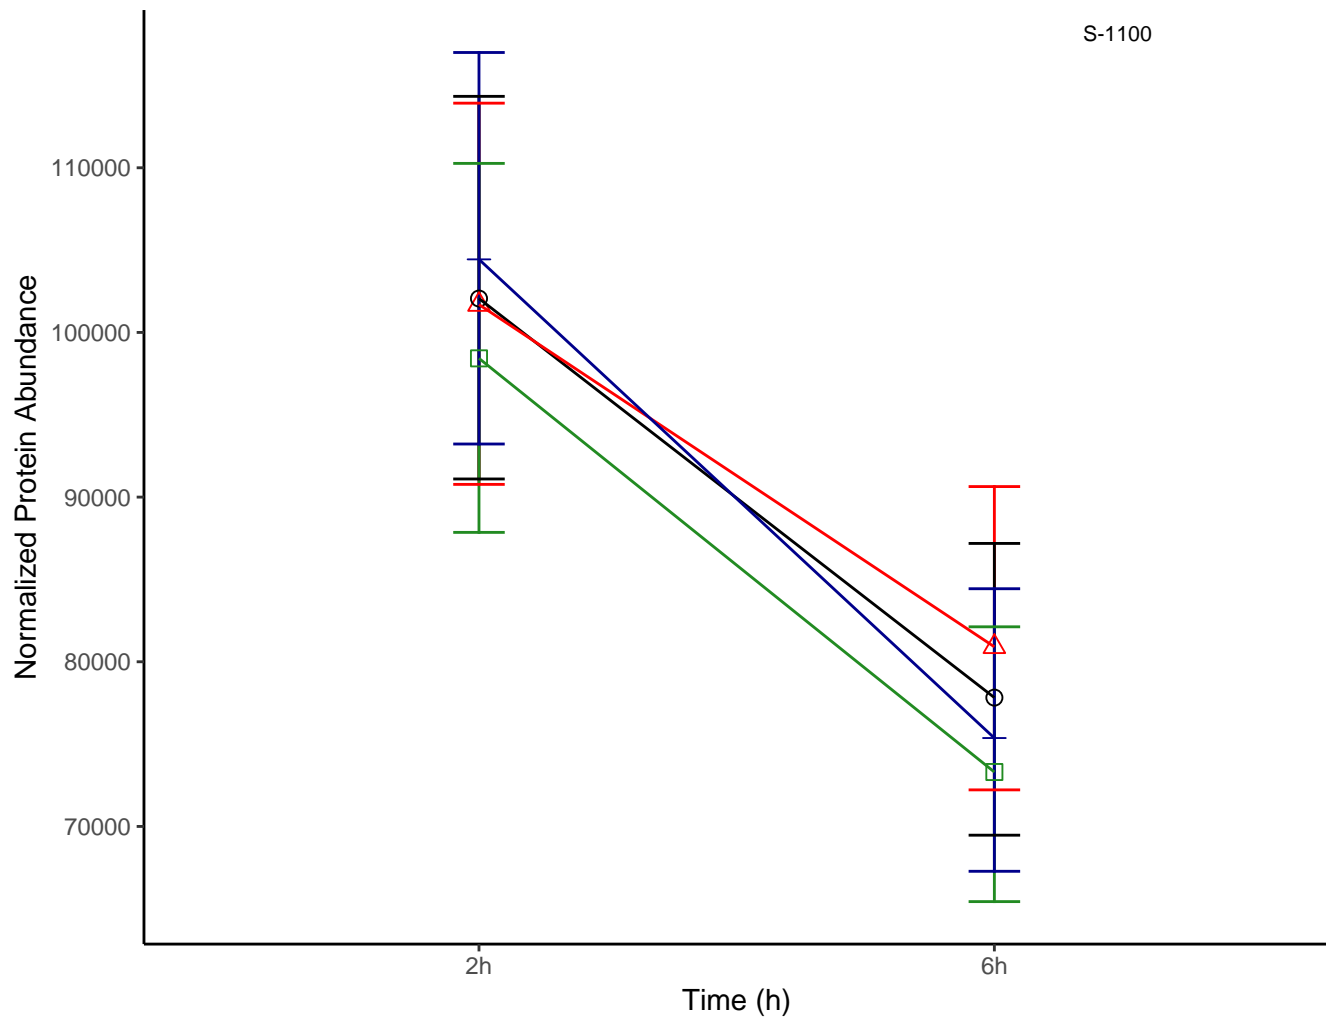

- SA564
- △ SA564- $\Delta$ *hptRS*
- SA564- $\Delta$ *ccpA*
- + SA564- $\Delta$ *hptRS/ccpA*

# ENO\_STAAM

S-1101

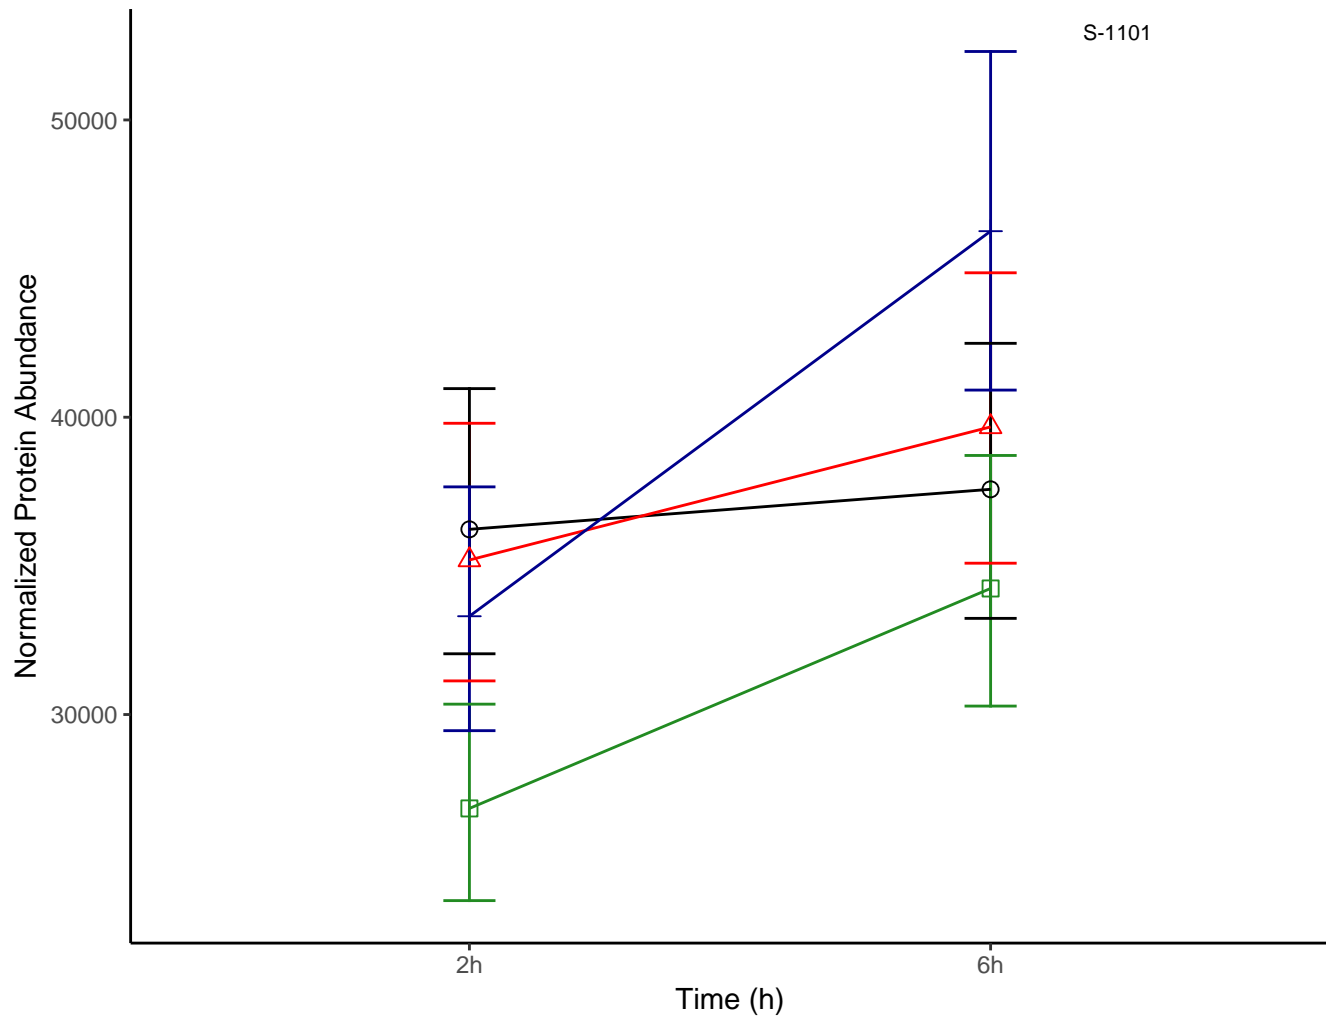

- SA564
- △ SA564- $\Delta$ hptRS
- SA564- $\Delta$ ccpA
- + SA564- $\Delta$ hptRS/ccpA

# ERA\_STAAM

S-1102

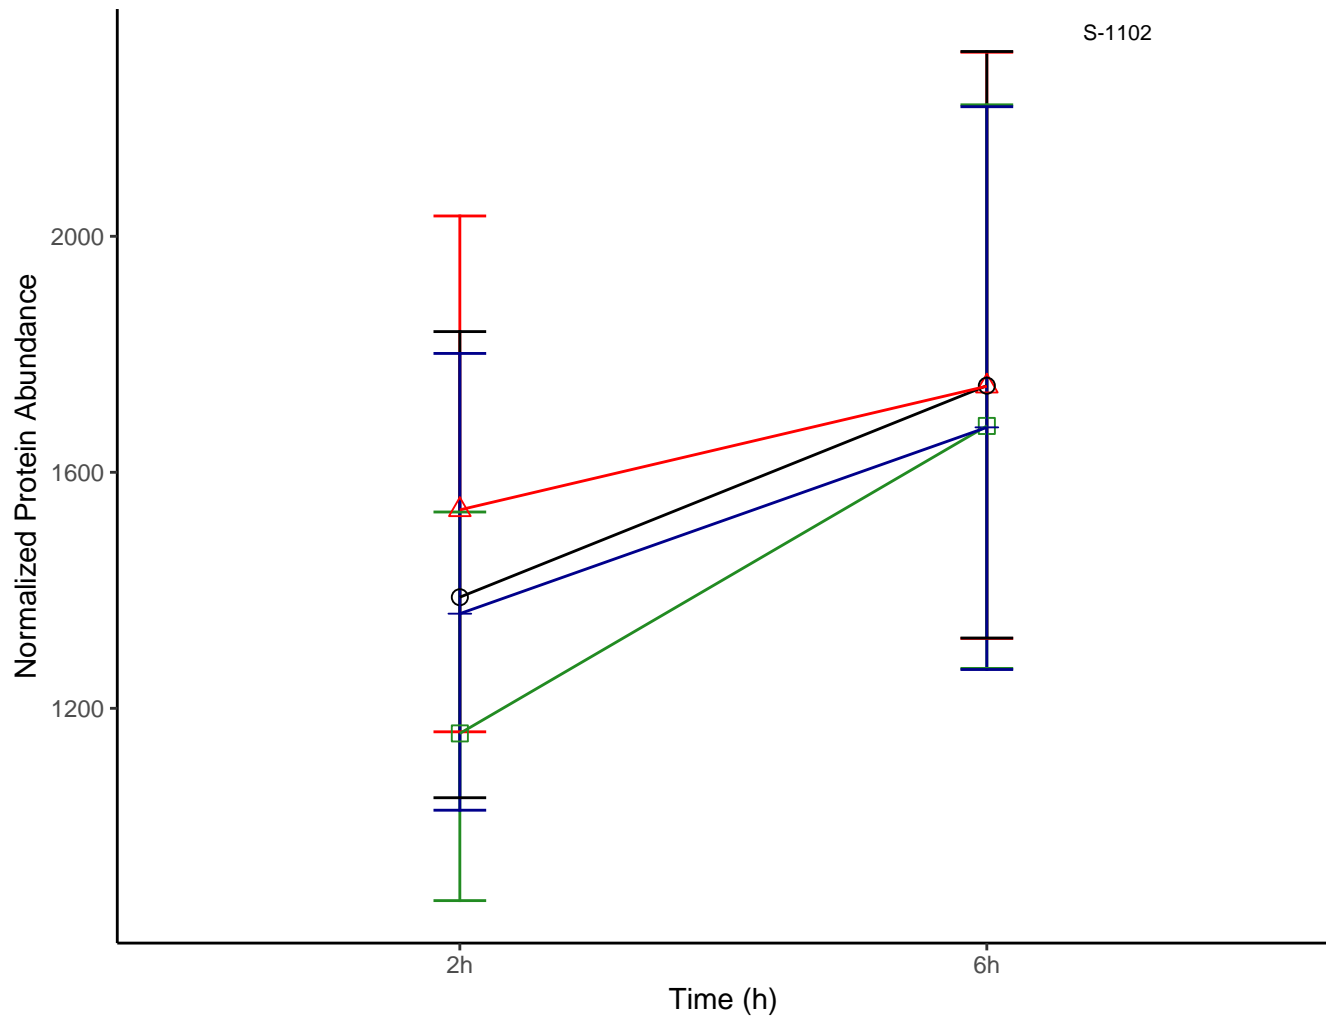

- SA564
- △ SA564- $\Delta hptRS$
- SA564- $\Delta ccpA$
- + SA564- $\Delta hptRS/ccpA$

## ERMA\_STAAM

S-1103

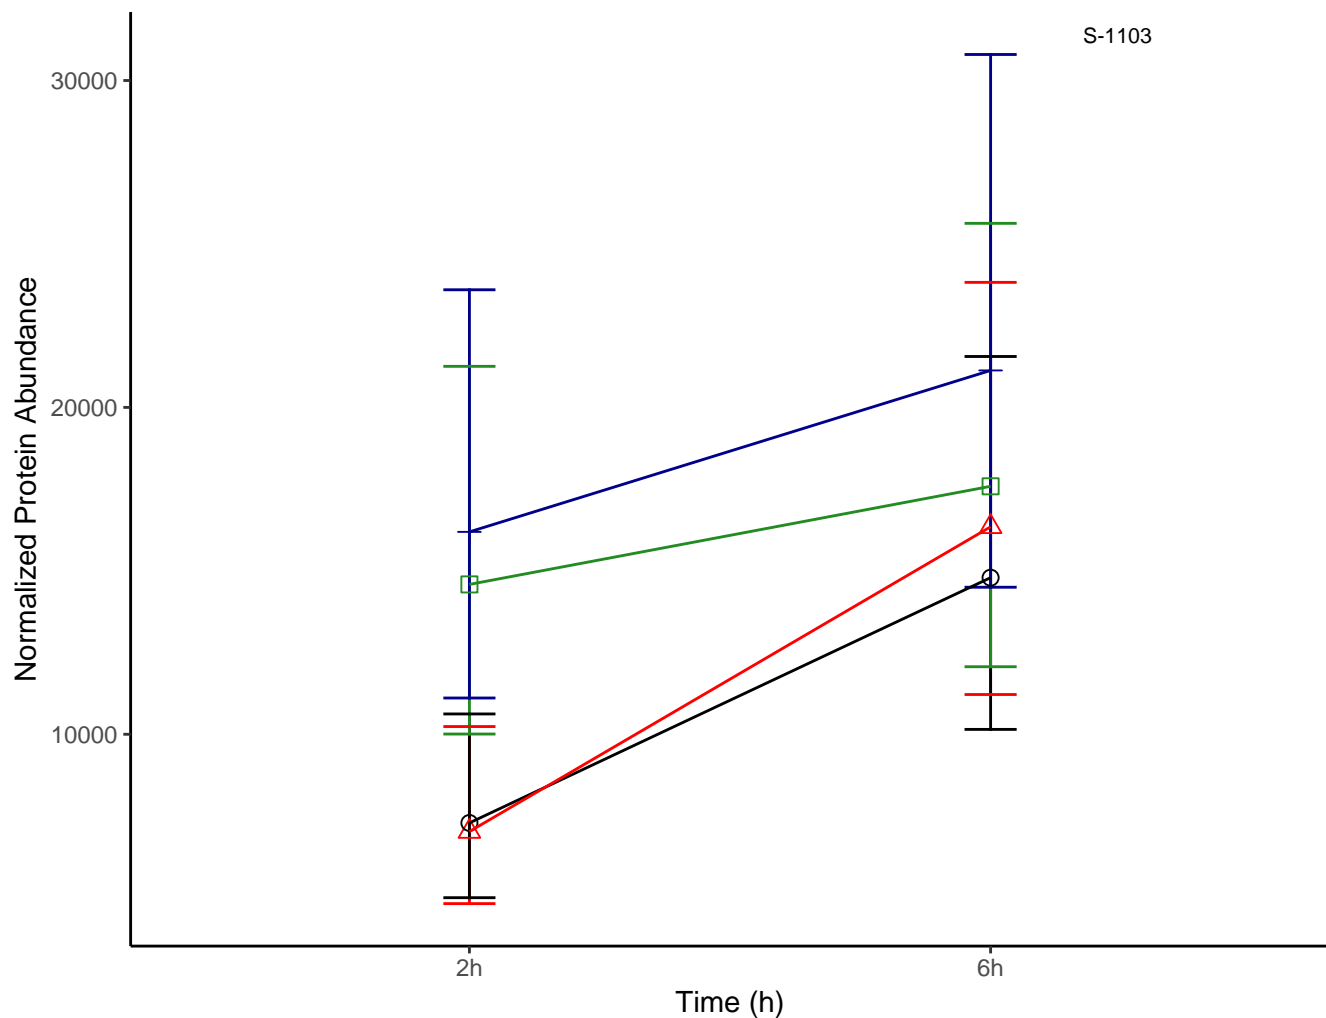

- SA564
- △ SA564- $\Delta$ *hptRS*
- SA564- $\Delta$ *ccpA*
- + SA564- $\Delta$ *hptRS/ccpA*

# ESSA\_STAAM

S-1104

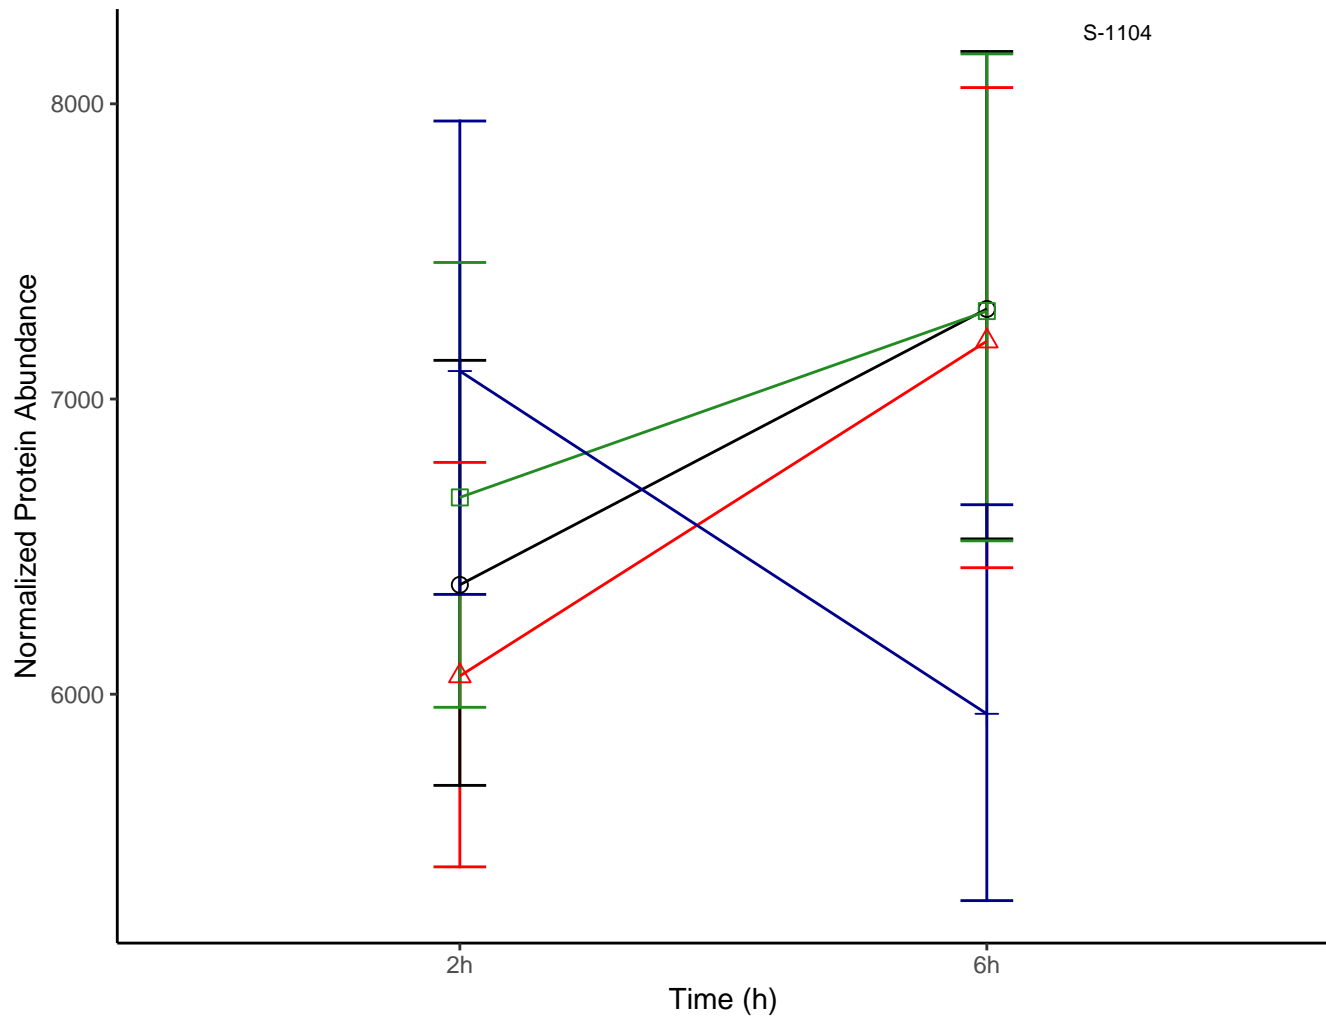

- SA564
- △ SA564- $\Delta$ *hptRS*
- SA564- $\Delta$ *ccpA*
- + SA564- $\Delta$ *hptRS/ccpA*



# ESXA\_STAAM

S-1105

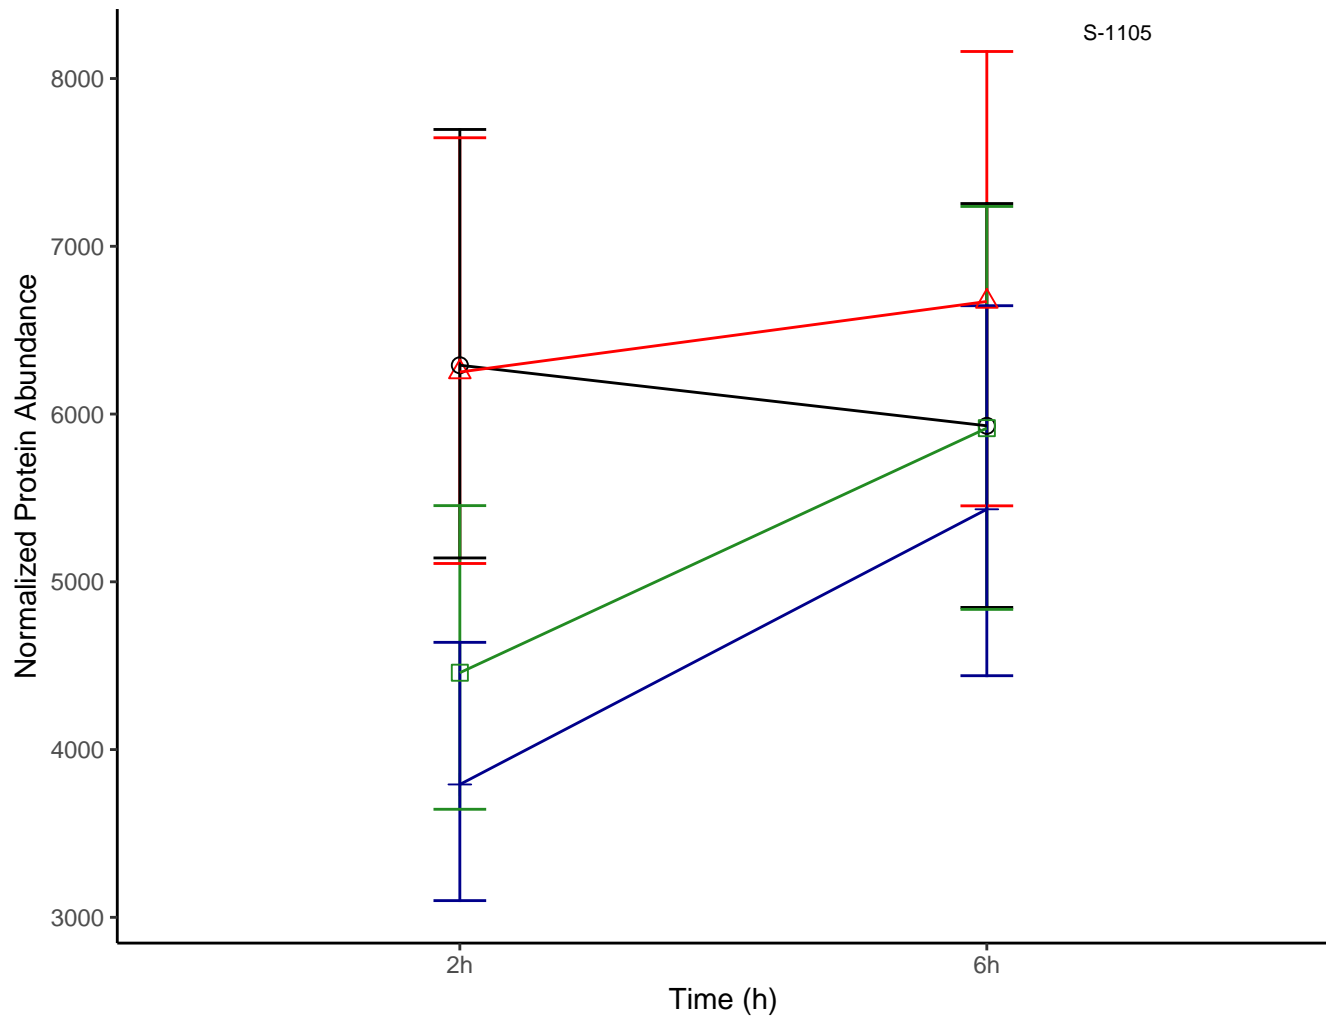

- SA564
- △ SA564- $\Delta$ *hptRS*
- SA564- $\Delta$ *ccpA*
- + SA564- $\Delta$ *hptRS/ccpA*

# EX7L\_STAAM

S-1106

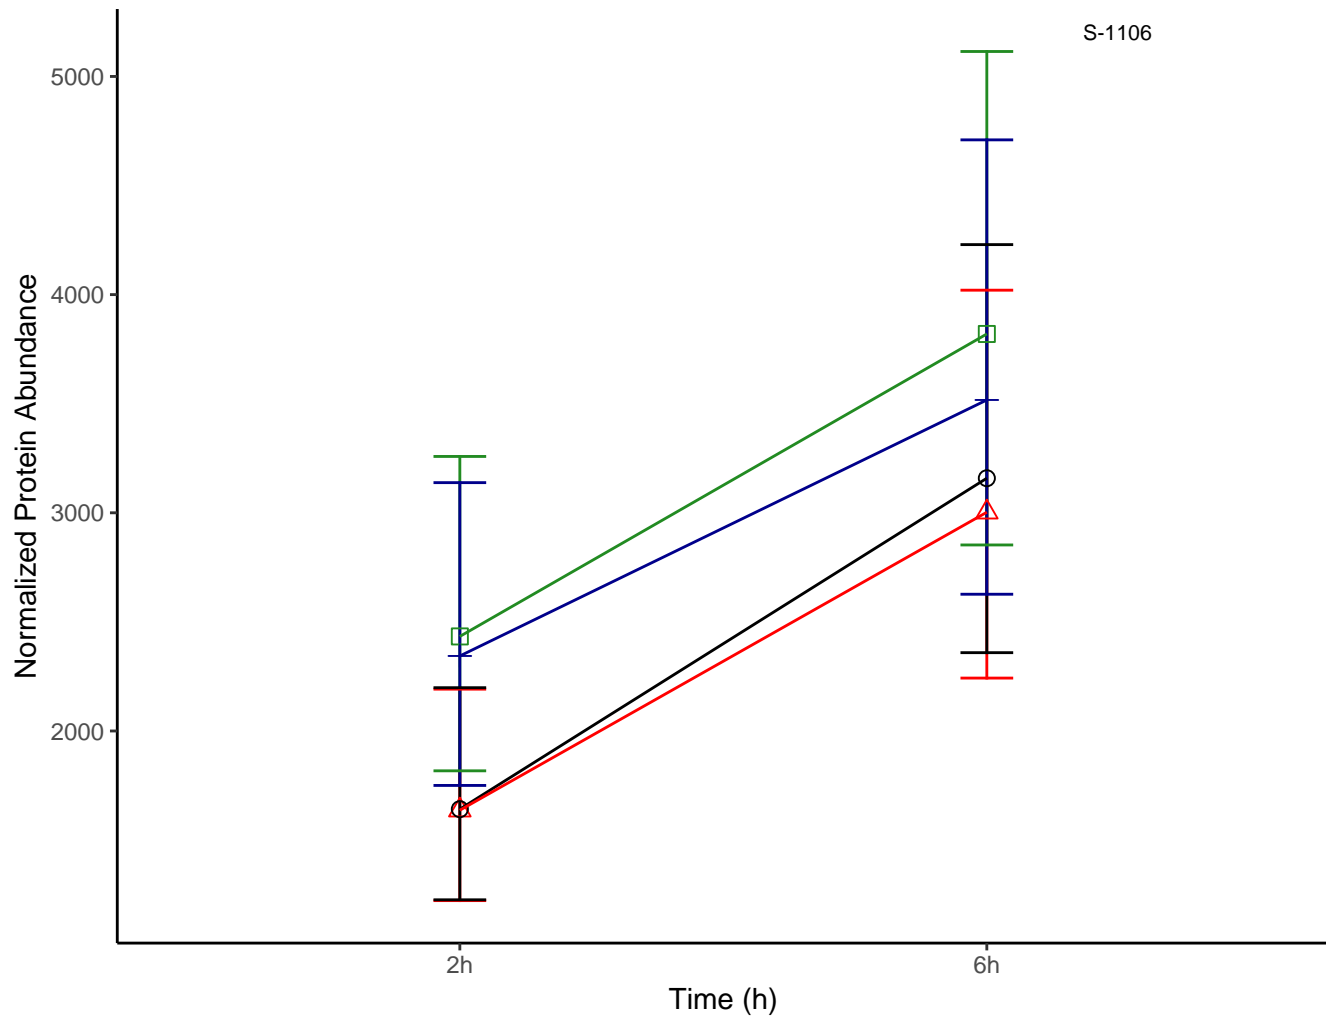

- SA564
- △ SA564- $\Delta$ *hptRS*
- SA564- $\Delta$ *ccpA*
- + SA564- $\Delta$ *hptRS/ccpA*

## EZRA\_STAAM

S-1107

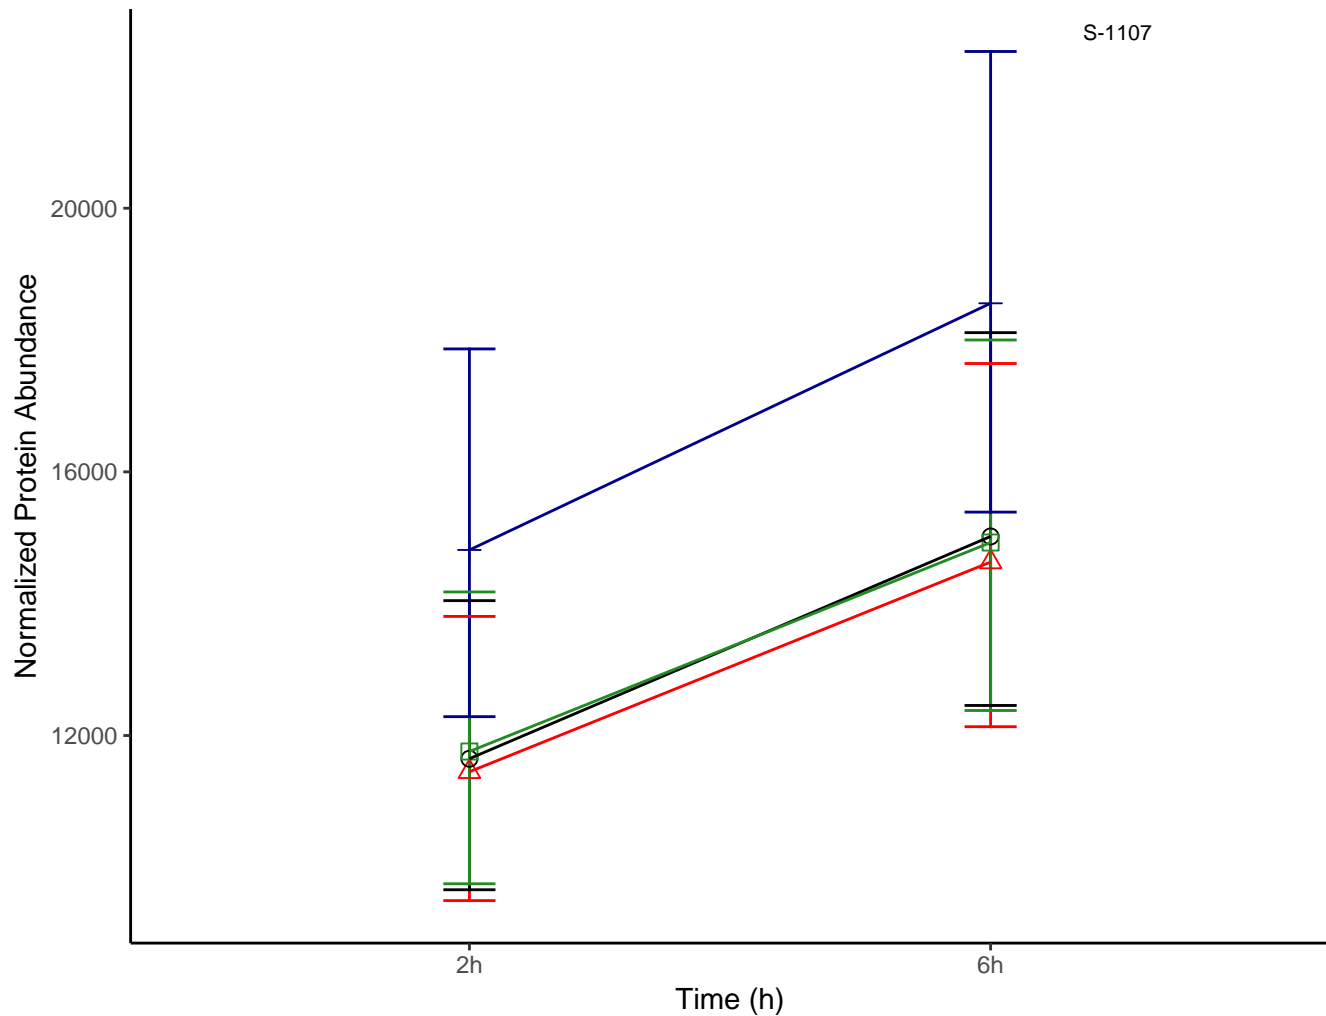

- SA564
- △ SA564- $\Delta$ *hptRS*
- SA564- $\Delta$ *ccpA*
- + SA564- $\Delta$ *hptRS/ccpA*

# FABD\_STAAM

S-1108

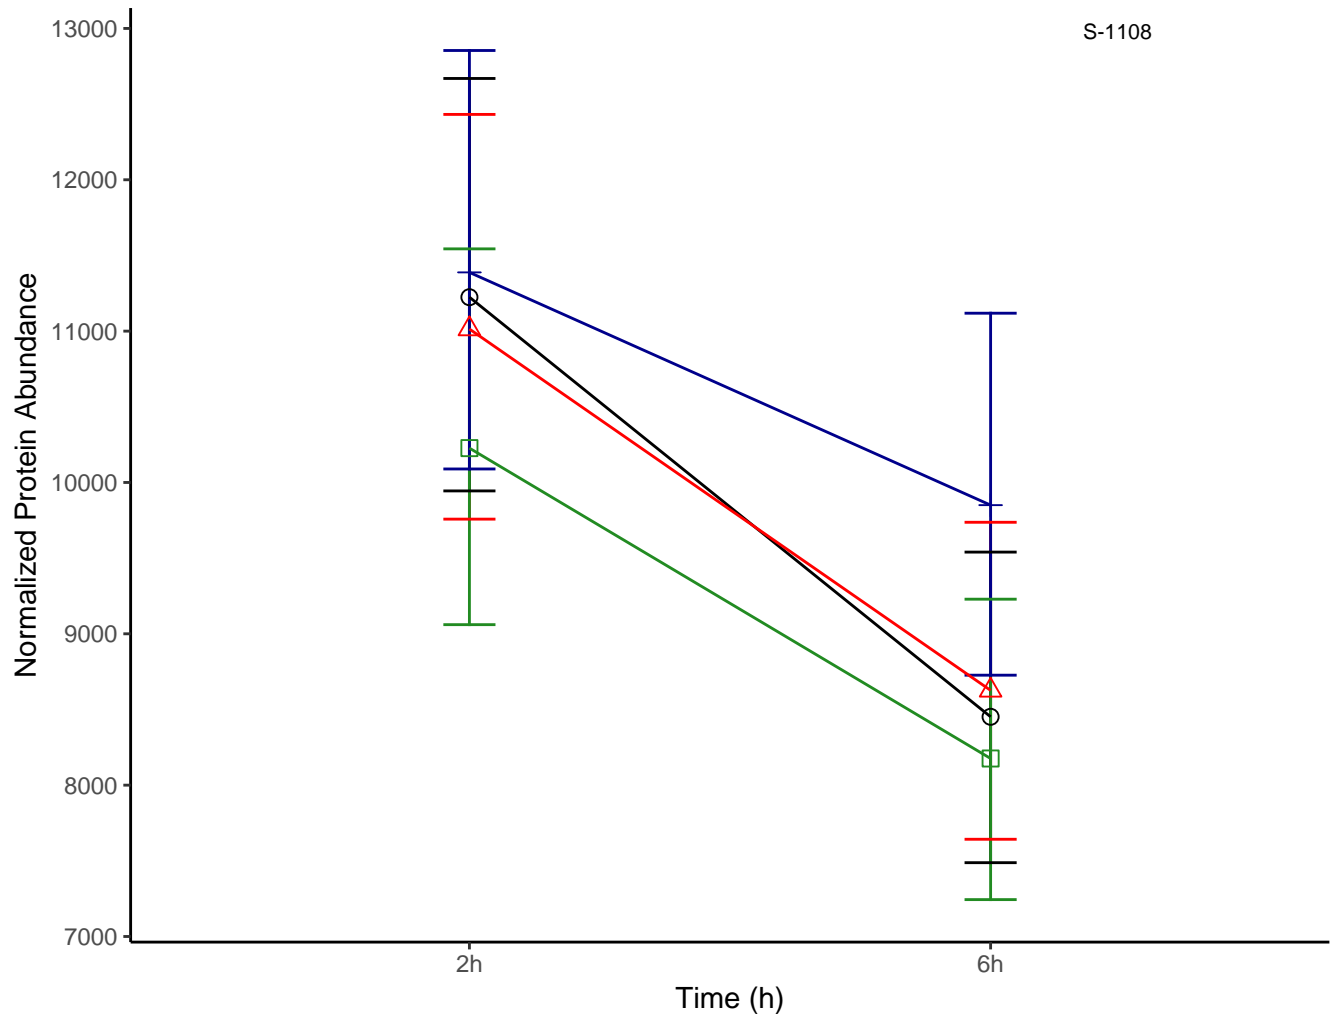

- SA564
- △ SA564- $\Delta$ *hptRS*
- SA564- $\Delta$ *ccpA*
- + SA564- $\Delta$ *hptRS/ccpA*

# FABF\_STAAM

S-1109

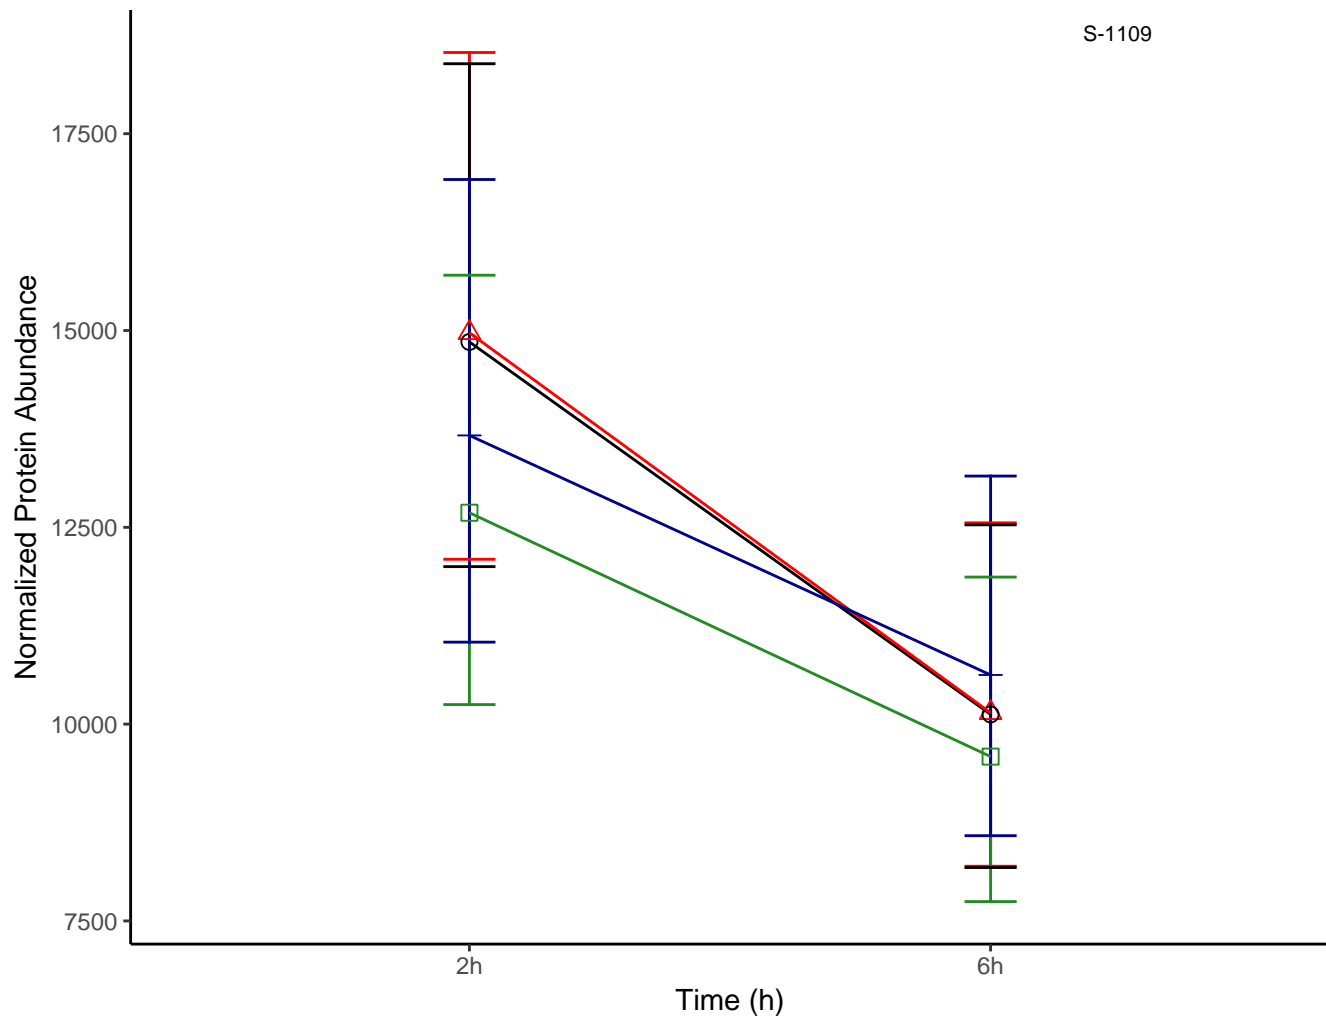

- SA564
- △ SA564- $\Delta hptRS$
- SA564- $\Delta ccpA$
- + SA564- $\Delta hptRS/ccpA$

# FABG\_STAAM

S-1110

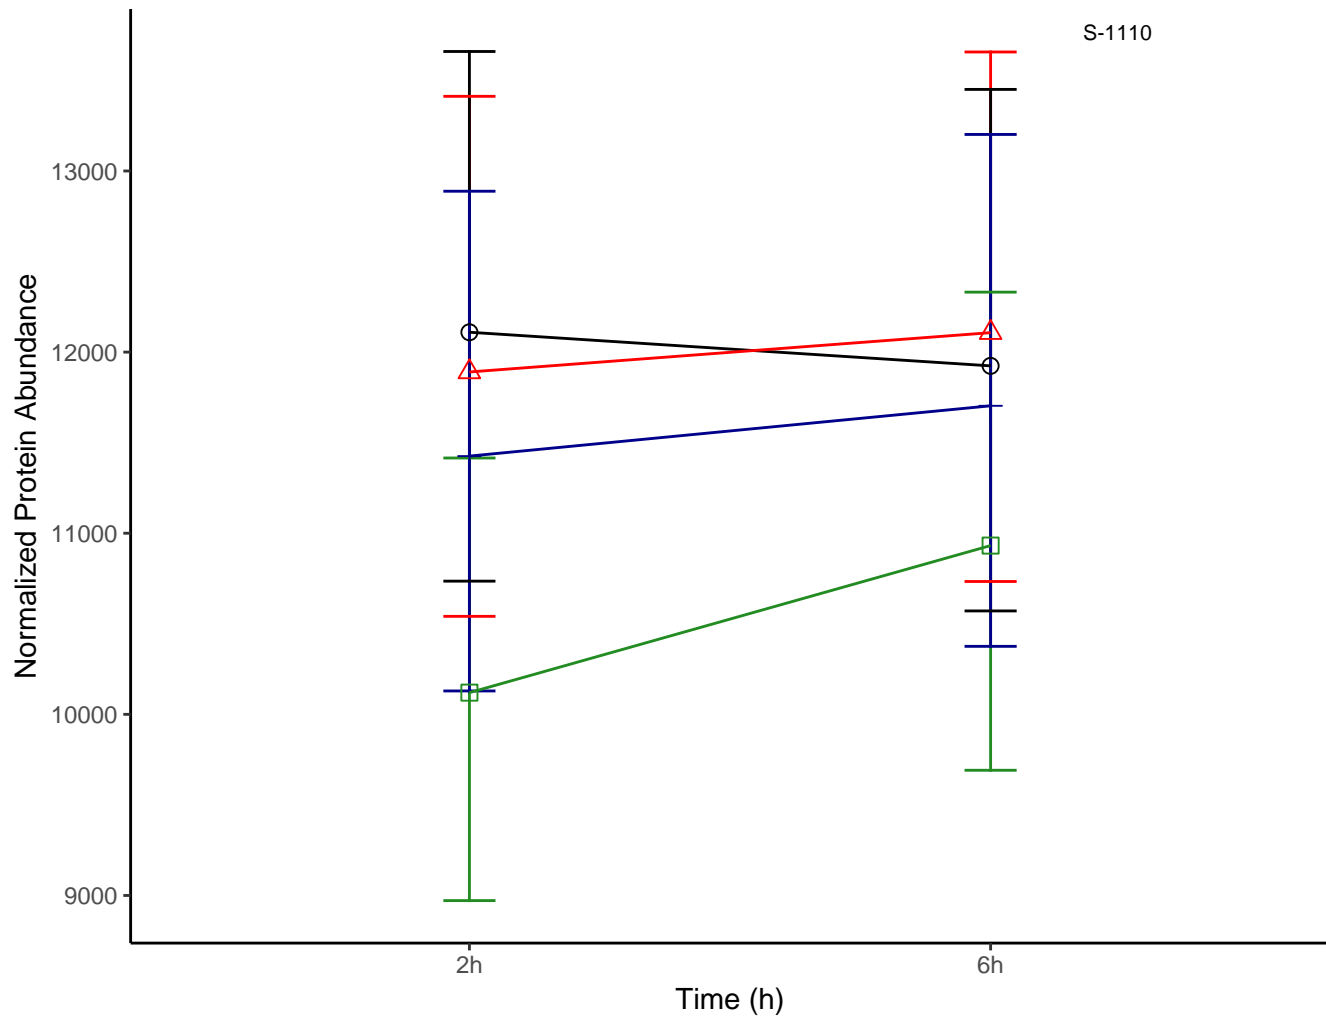

- SA564
- △ SA564- $\Delta$ hptRS
- SA564- $\Delta$ ccpA
- + SA564- $\Delta$ hptRS/ccpA

# FABH\_STAAM

S-1111

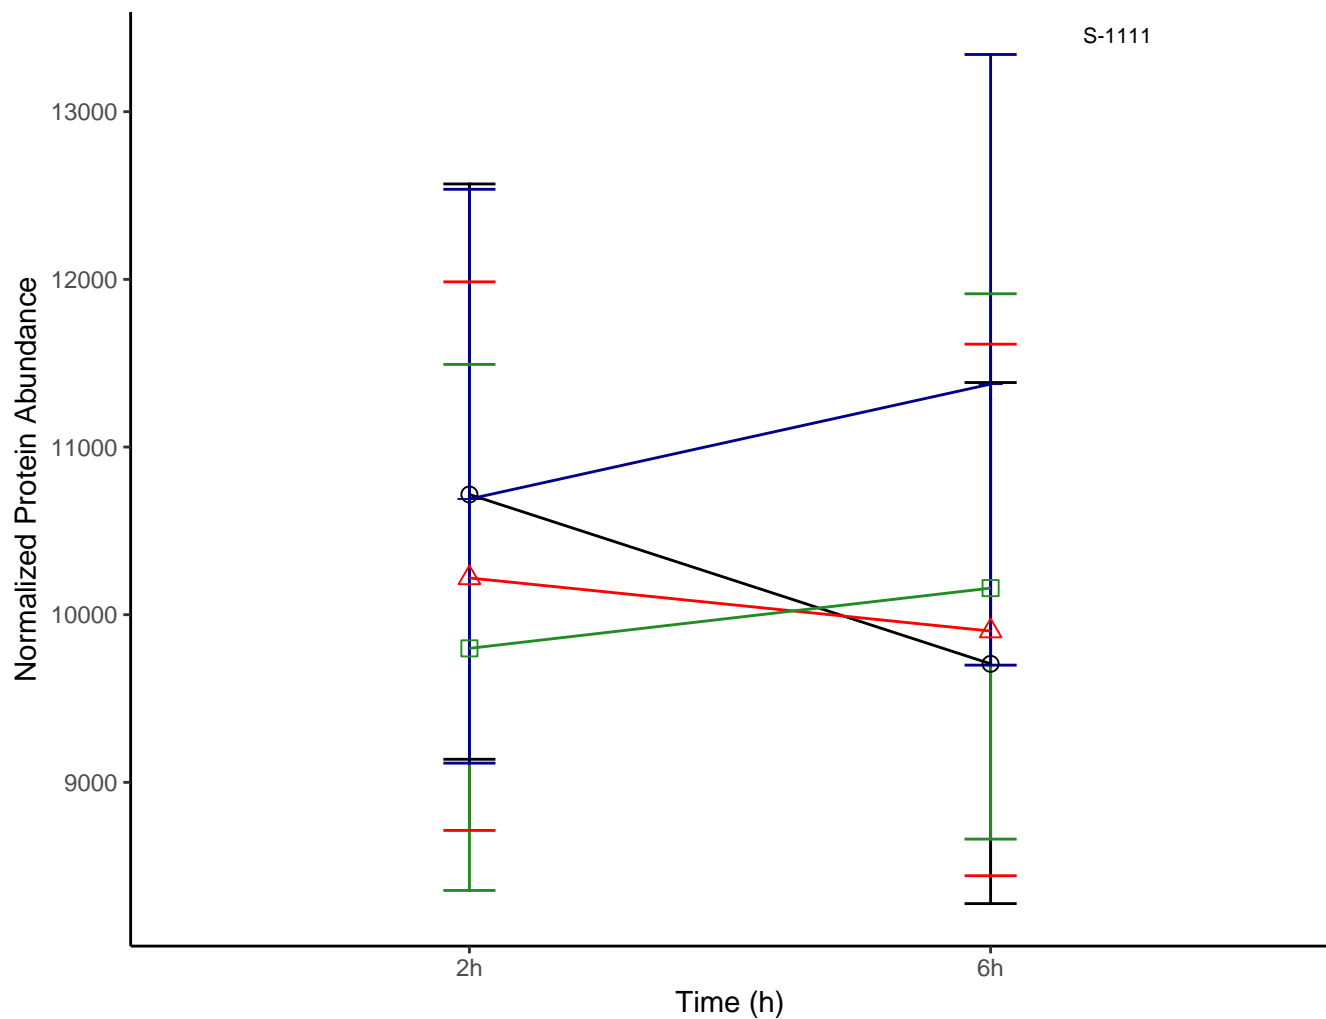

- SA564
- △ SA564- $\Delta$ hptRS
- SA564- $\Delta$ ccpA
- + SA564- $\Delta$ hptRS/ccpA

# FABZ\_STAAM

S-1112

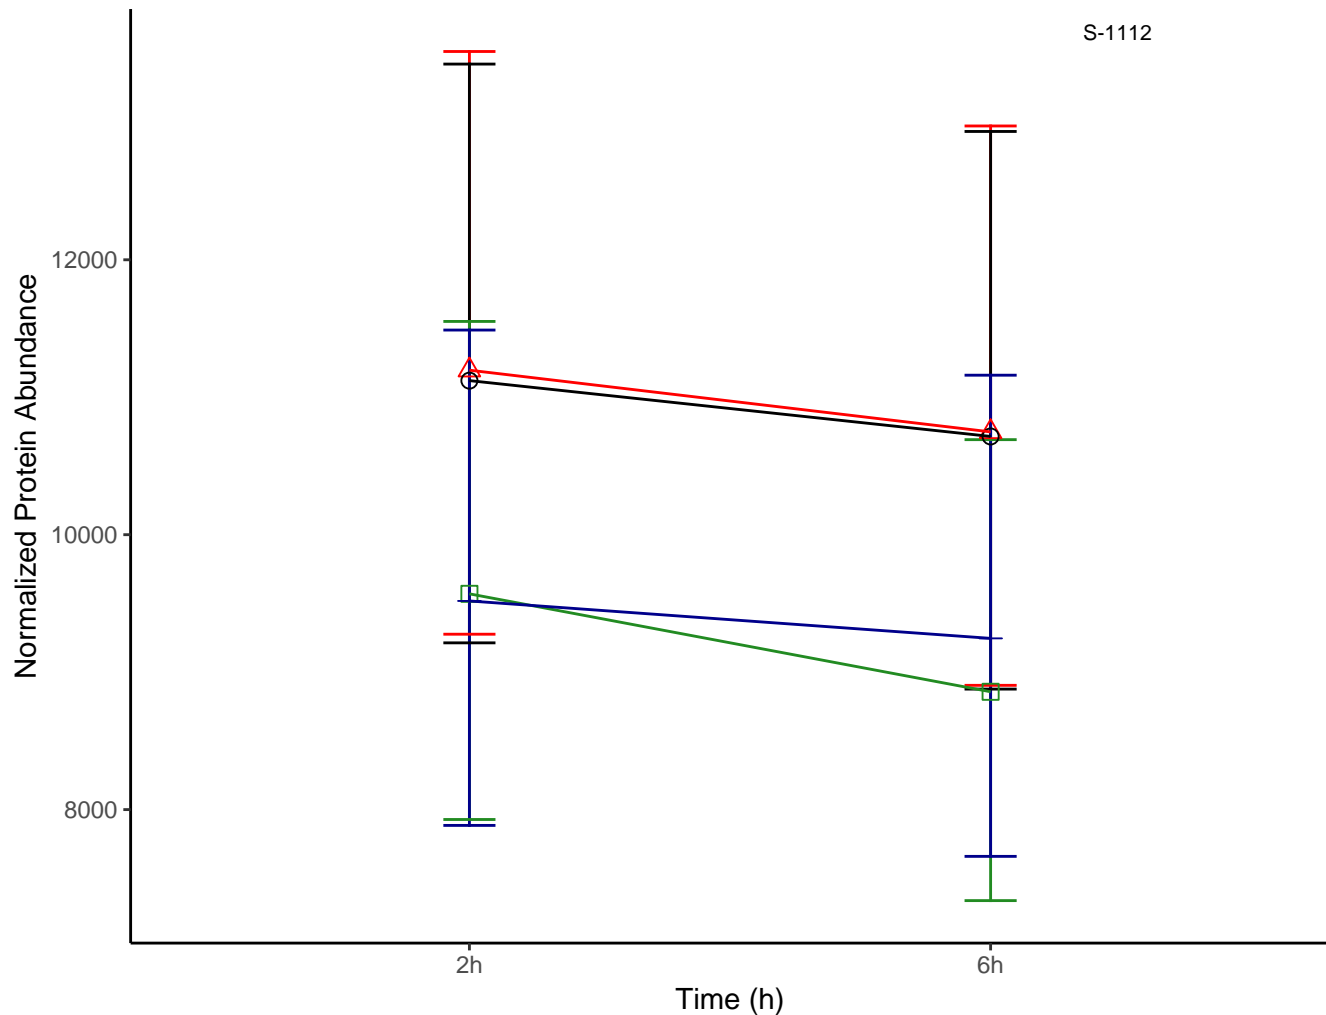

- SA564
- △ SA564- $\Delta$ *hptRS*
- SA564- $\Delta$ *ccpA*
- + SA564- $\Delta$ *hptRS/ccpA*



# FEMA\_STAAM

S-1113

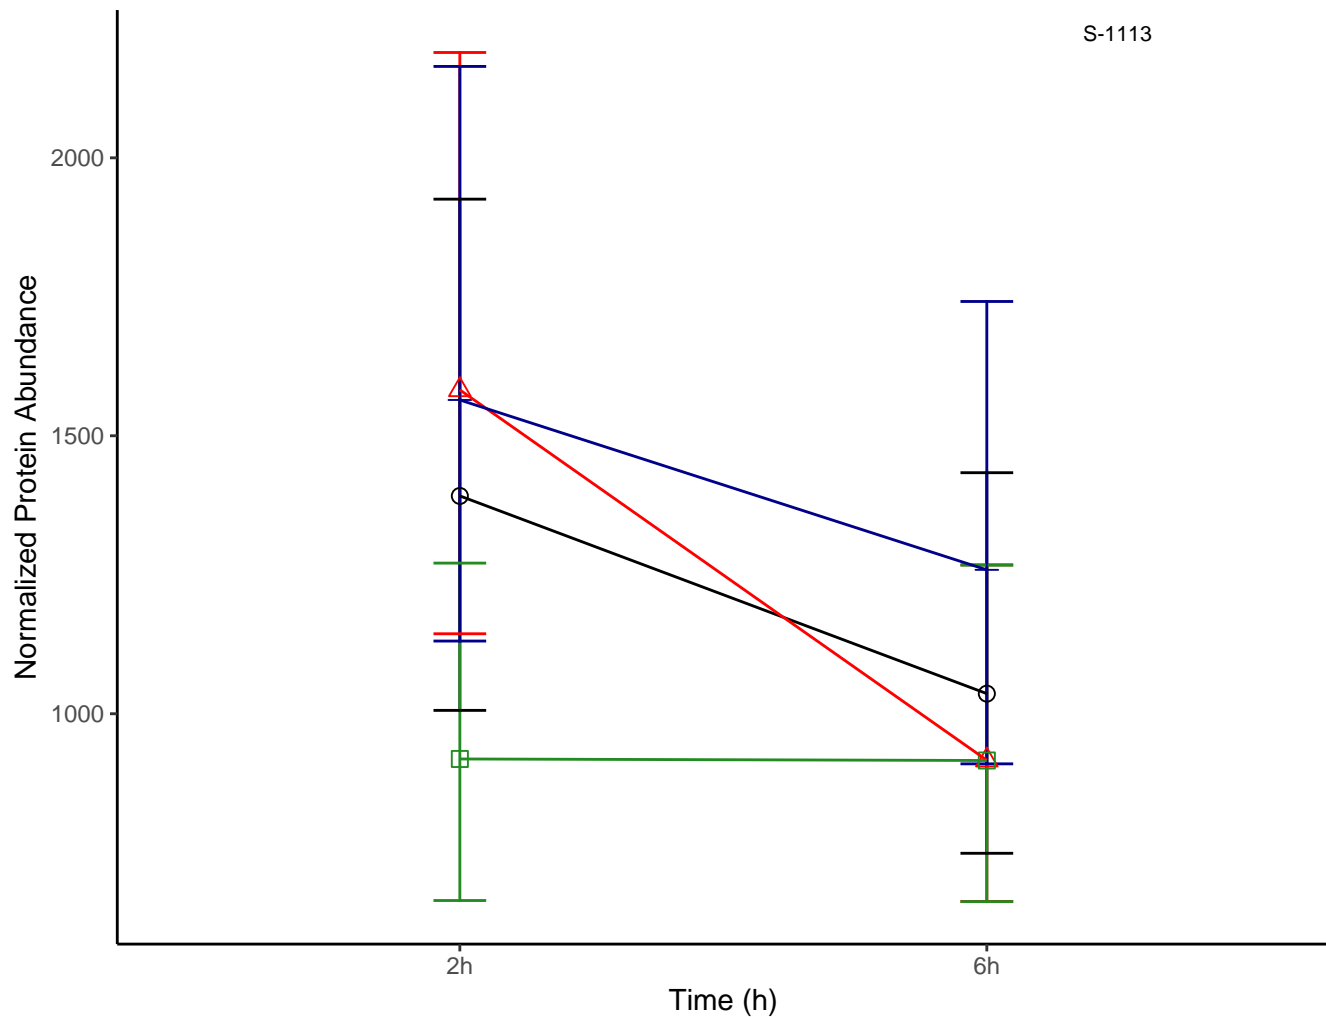

- SA564
- △ SA564- $\Delta$ *hptRS*
- SA564- $\Delta$ *ccpA*
- + SA564- $\Delta$ *hptRS/ccpA*

# FEMB\_STAAM

S-1114

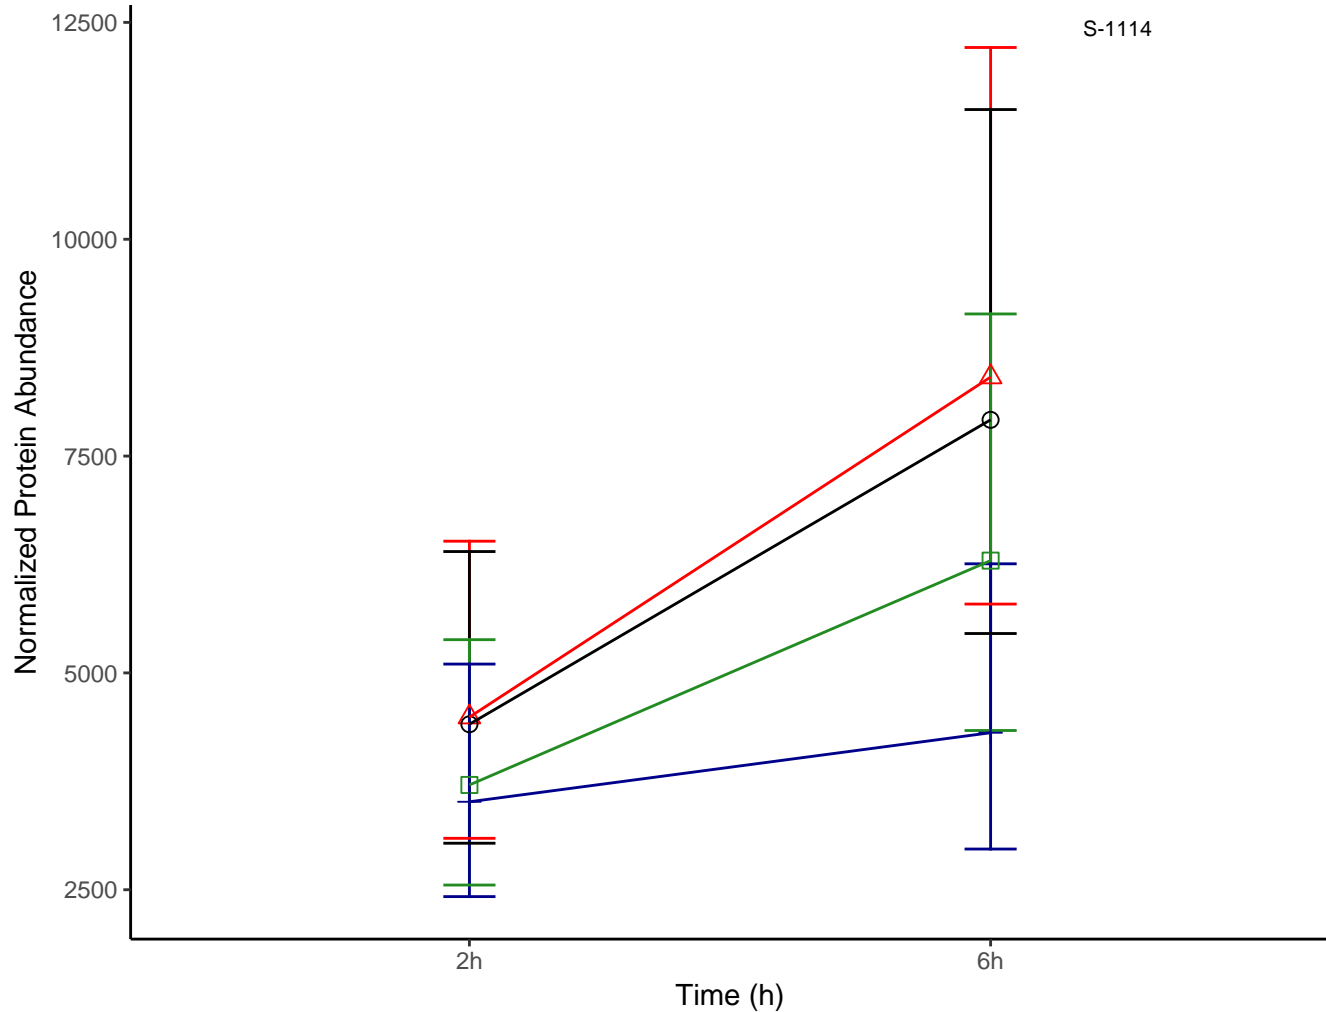

- SA564
- △ SA564- $\Delta$ hptRS
- SA564- $\Delta$ ccpA
- + SA564- $\Delta$ hptRS/ccpA

# FEMX\_STAAM

S-1115

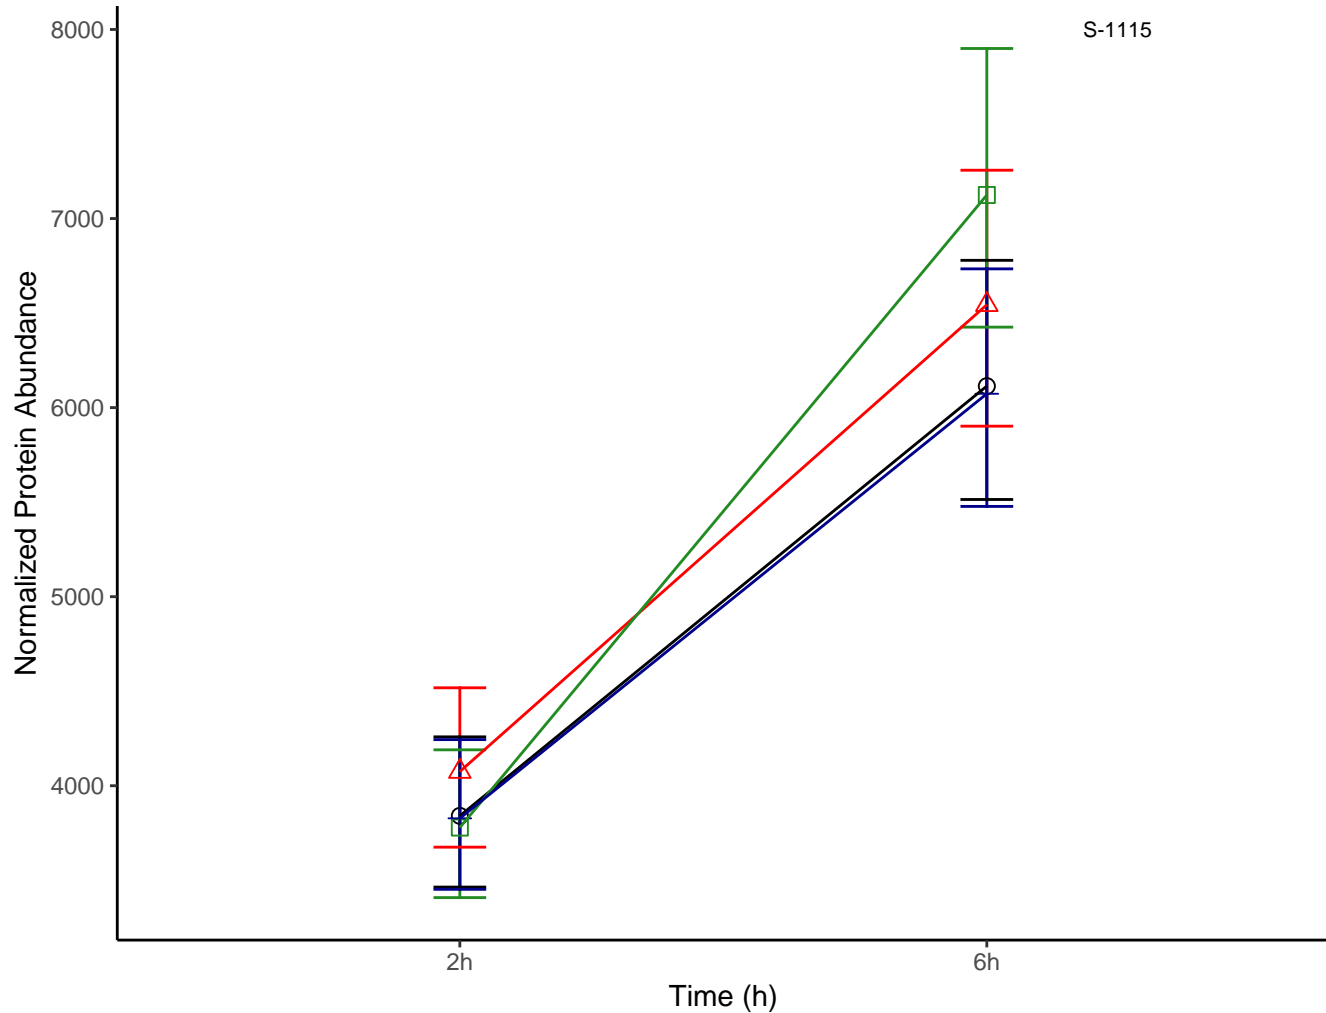

- SA564
- △ SA564- $\Delta hptRS$
- SA564- $\Delta ccpA$
- + SA564- $\Delta hptRS/ccpA$

# FENR\_STAAM

S-1116

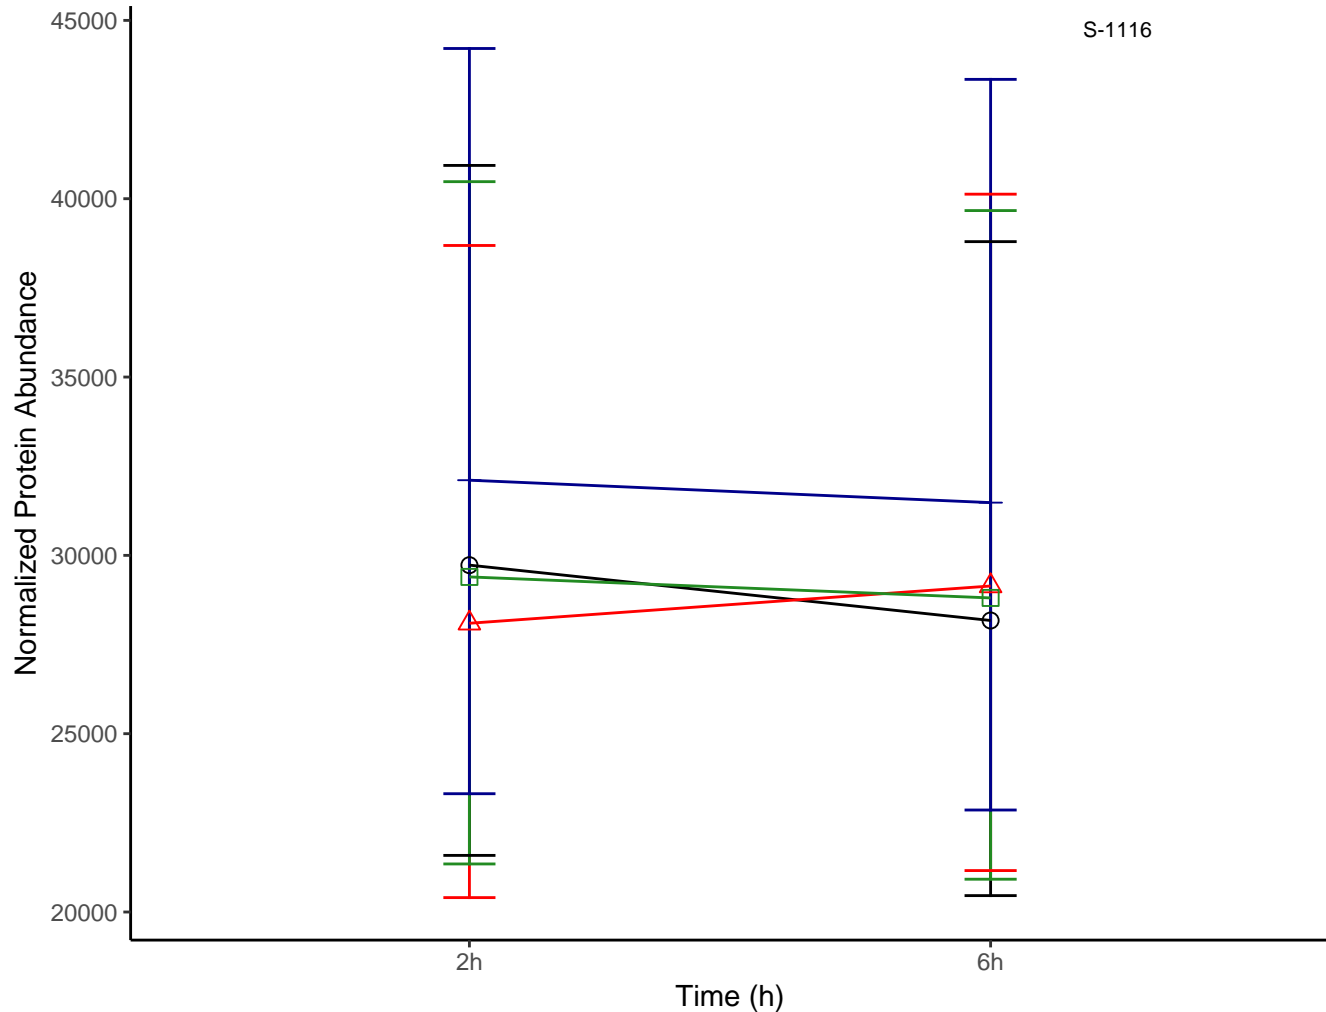

- SA564
- △ SA564- $\Delta hptRS$
- SA564- $\Delta ccpA$
- + SA564- $\Delta hptRS/ccpA$

# FLIPR\_STAAM

S-1117

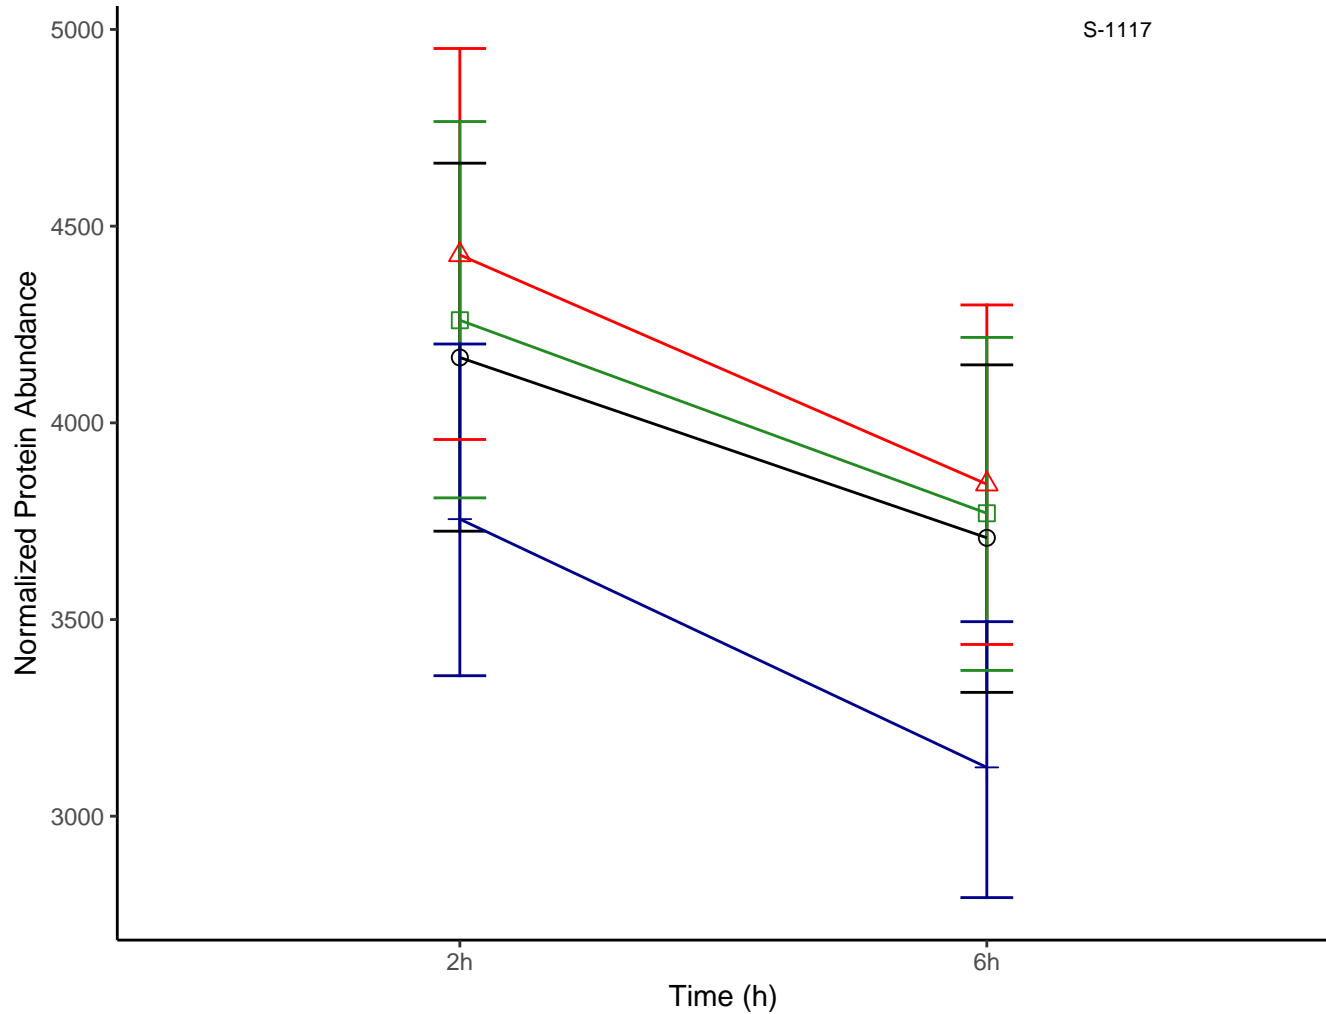

- SA564
- △ SA564- $\Delta$ *hptRS*
- SA564- $\Delta$ *ccpA*
- + SA564- $\Delta$ *hptRS/ccpA*

# FMT\_STAAM

S-1118

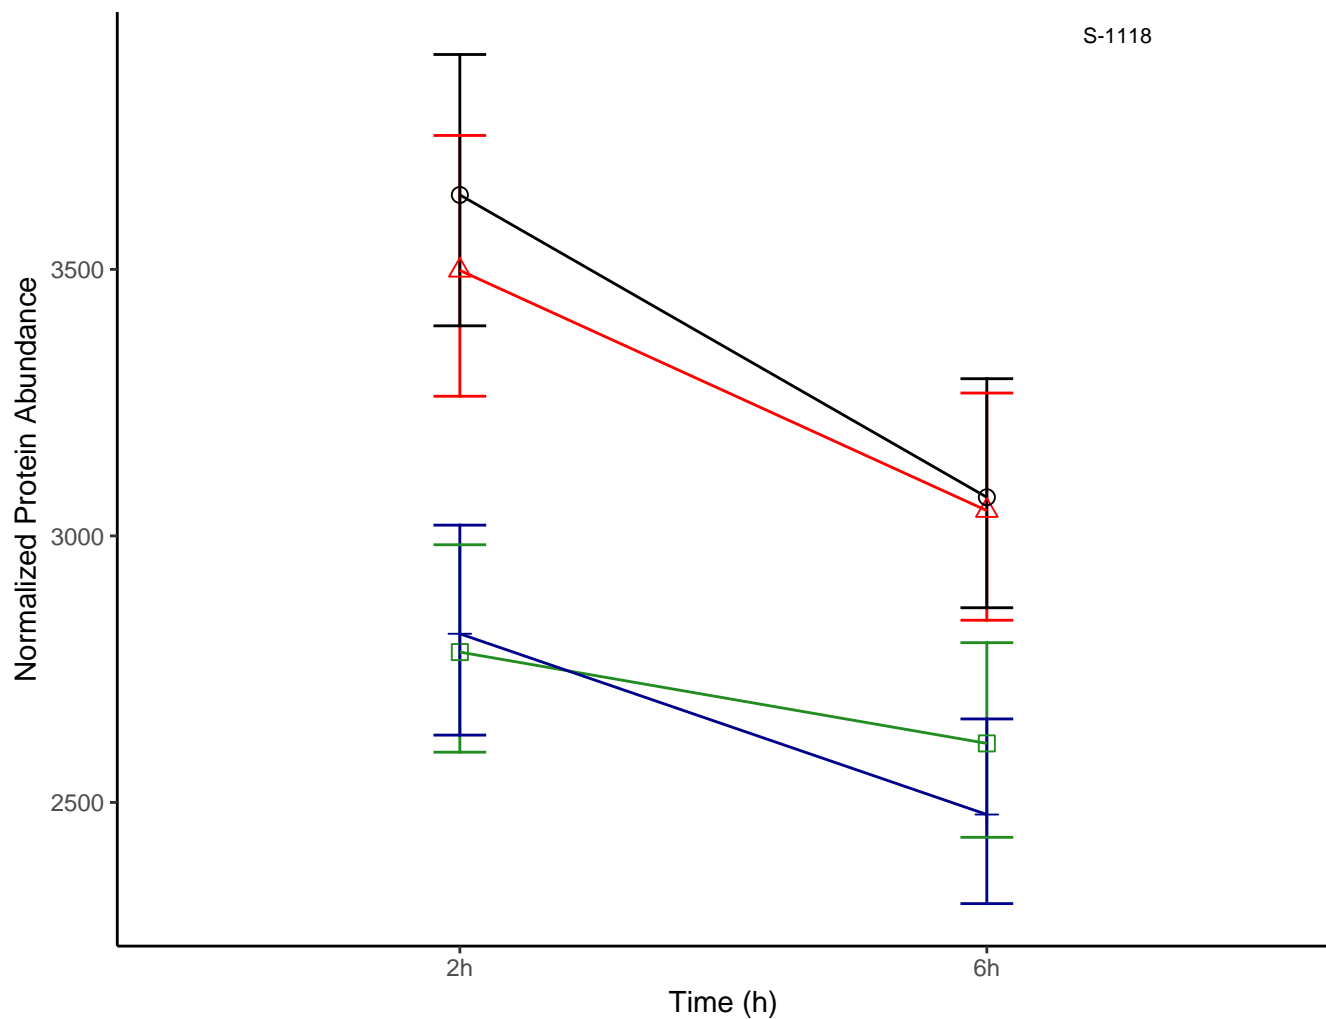

- SA564
- △ SA564- $\Delta hptRS$
- SA564- $\Delta ccpA$
- + SA564- $\Delta hptRS/ccpA$

# FMTA\_STAAM

S-1119

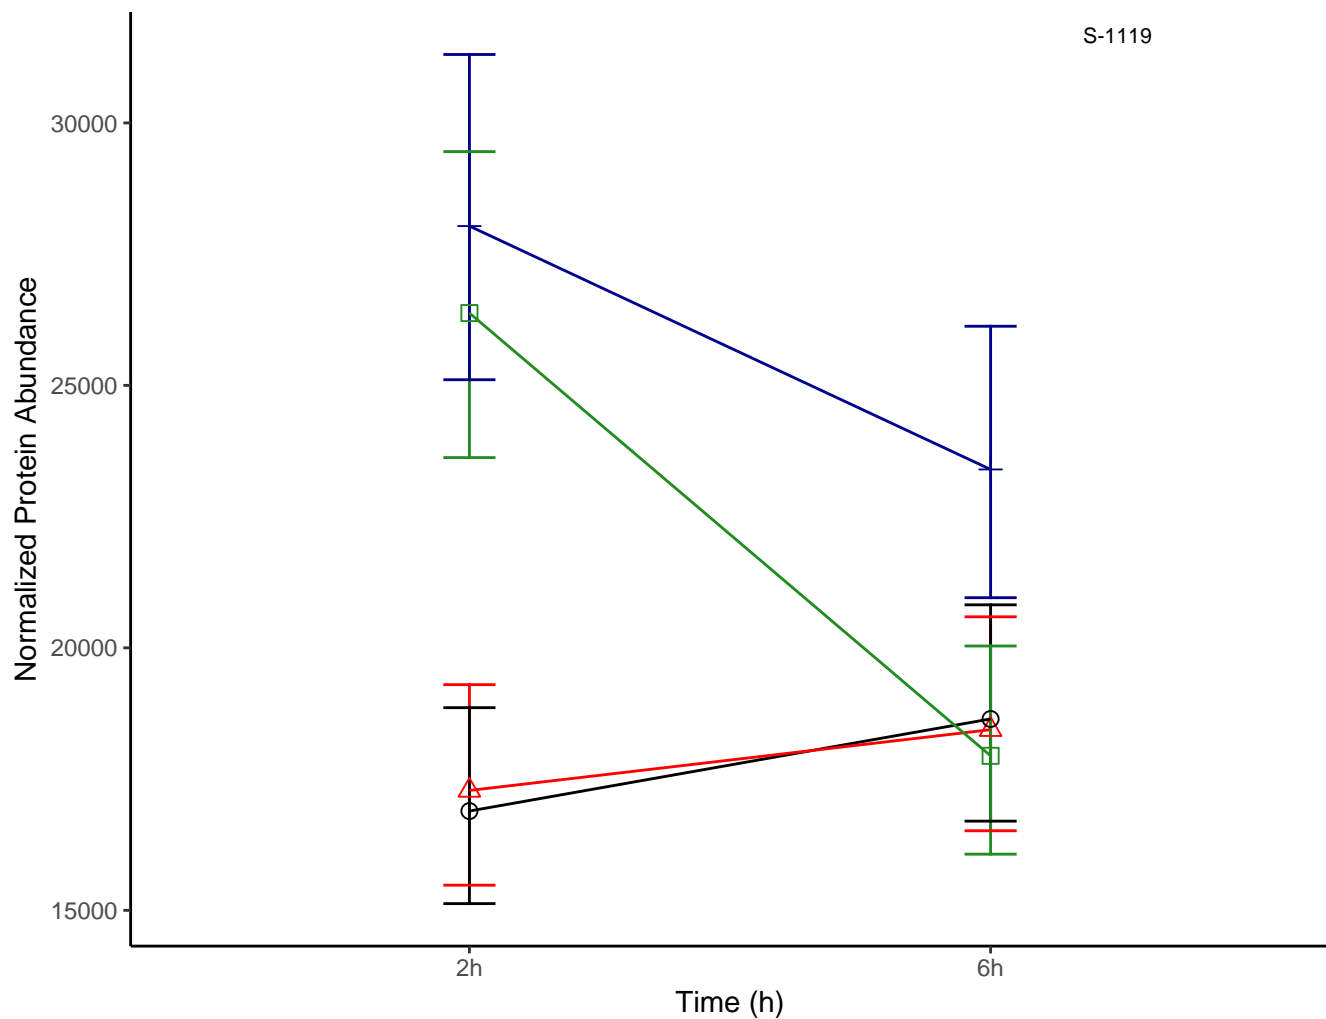

- SA564
- △ SA564- $\Delta$ *hptRS*
- SA564- $\Delta$ *ccpA*
- + SA564- $\Delta$ *hptRS/ccpA*

# FOLB\_STAAM

S-1120

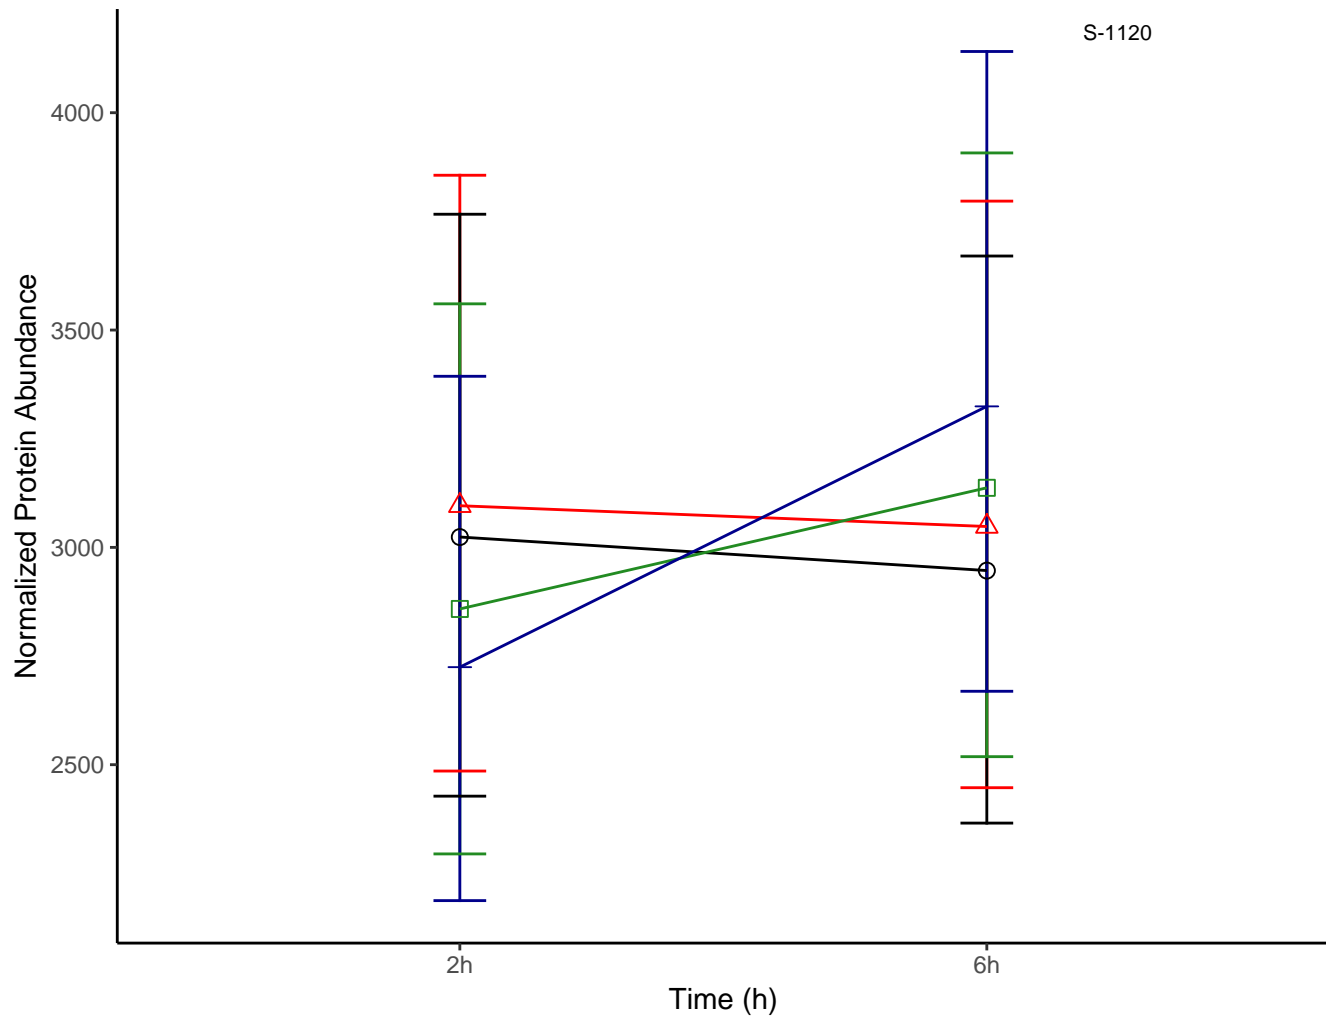

- SA564
- △ SA564- $\Delta hptRS$
- SA564- $\Delta ccpA$
- + SA564- $\Delta hptRS/ccpA$



# FOLD\_STAAM

S-1121

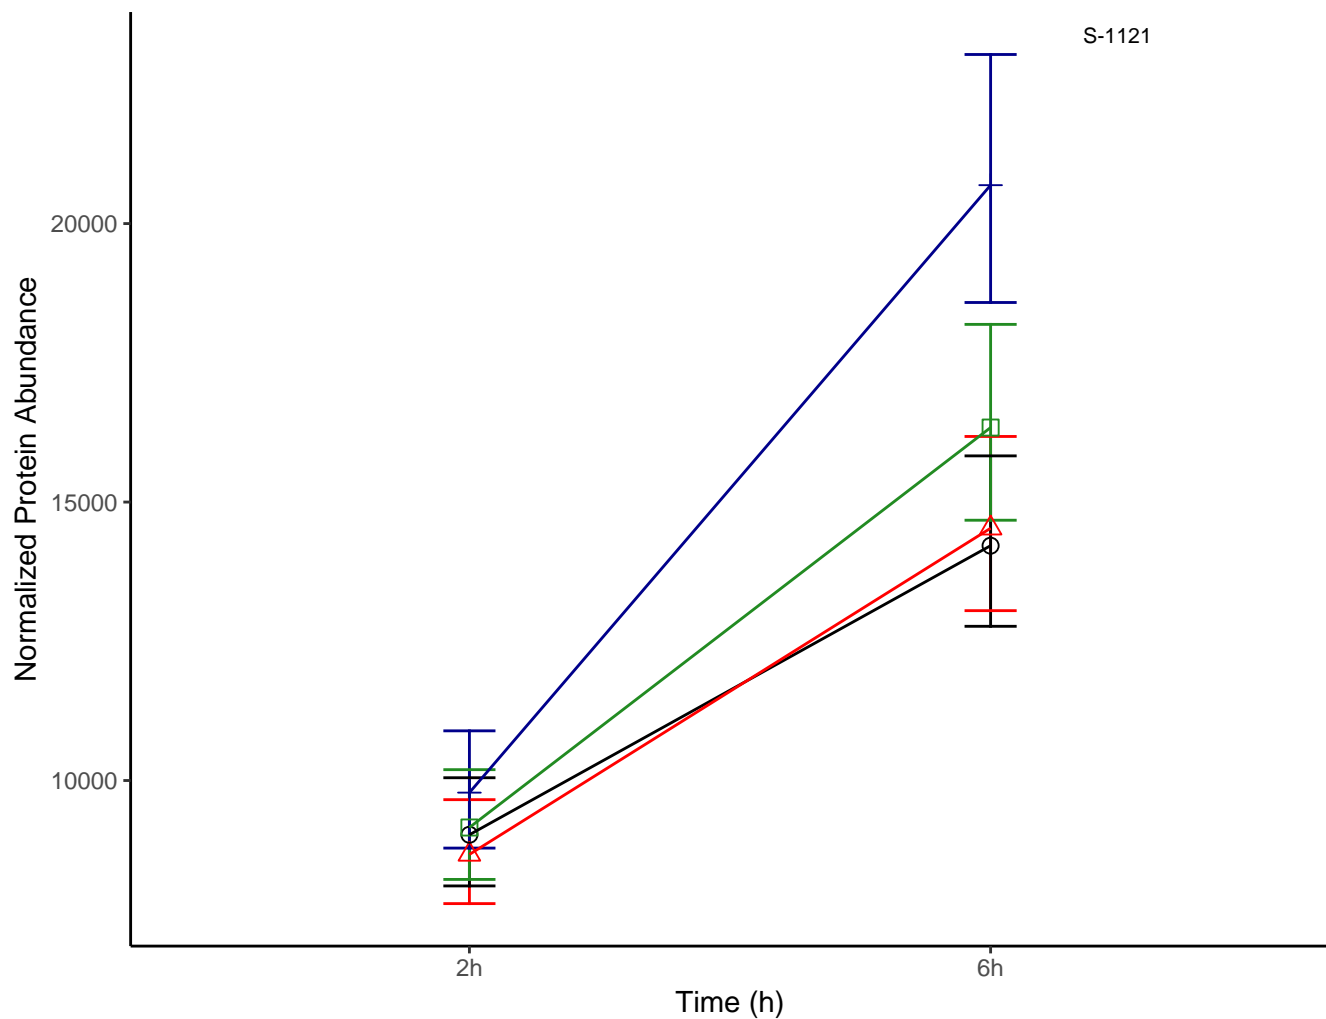

- SA564
- △ SA564- $\Delta$ *hptRS*
- SA564- $\Delta$ *ccpA*
- + SA564- $\Delta$ *hptRS/ccpA*

# FTHS\_STAAM

S-1122

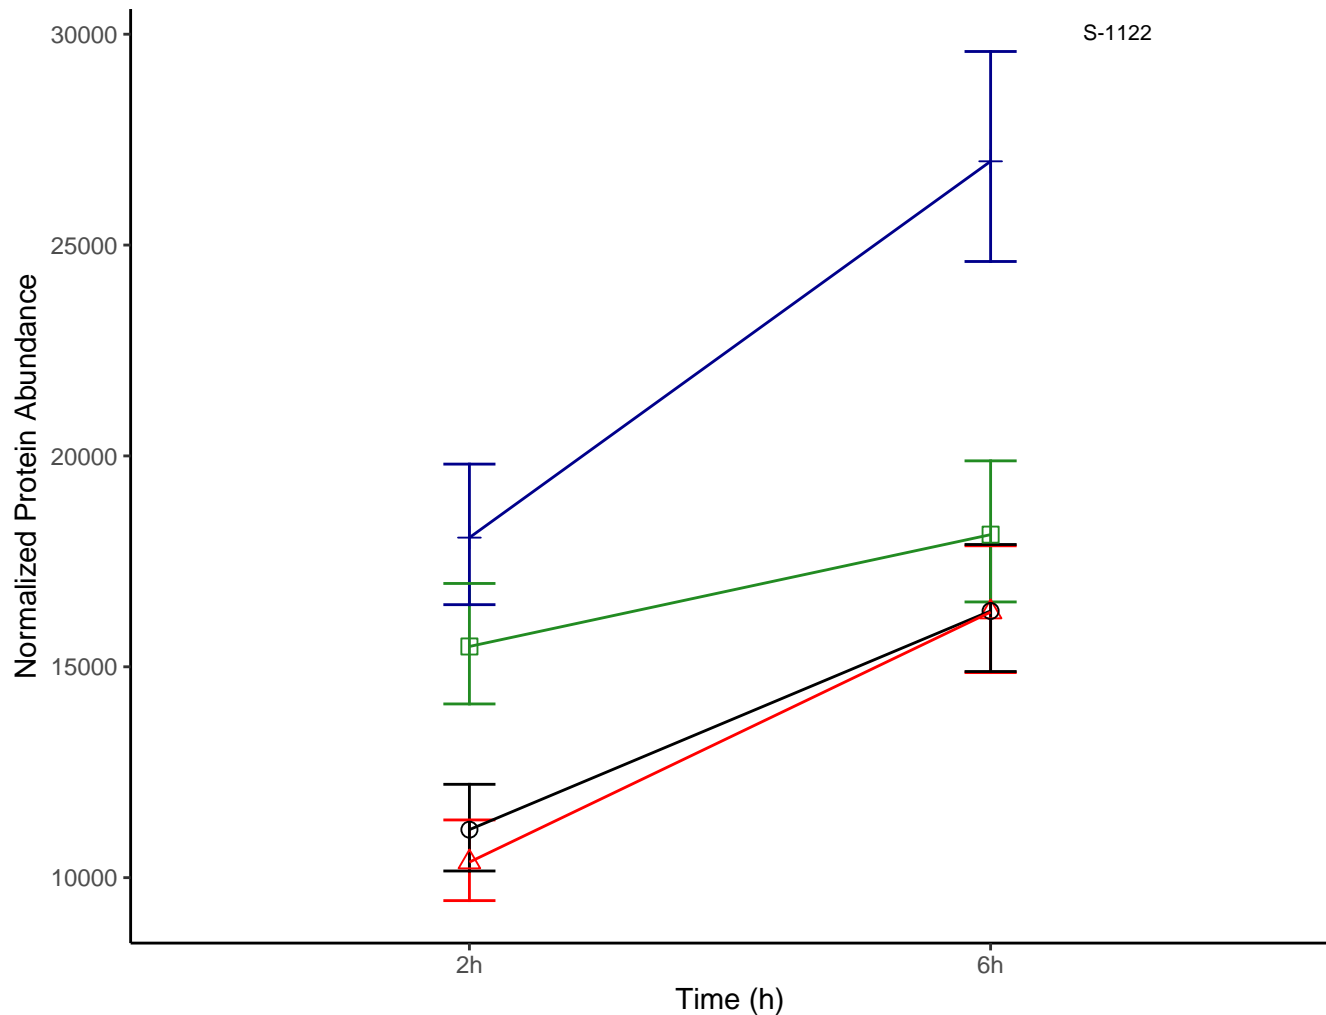

- SA564
- △ SA564- $\Delta$ *hptRS*
- SA564- $\Delta$ *ccpA*
- + SA564- $\Delta$ *hptRS/ccpA*

# FTN\_STAAM

S-1123

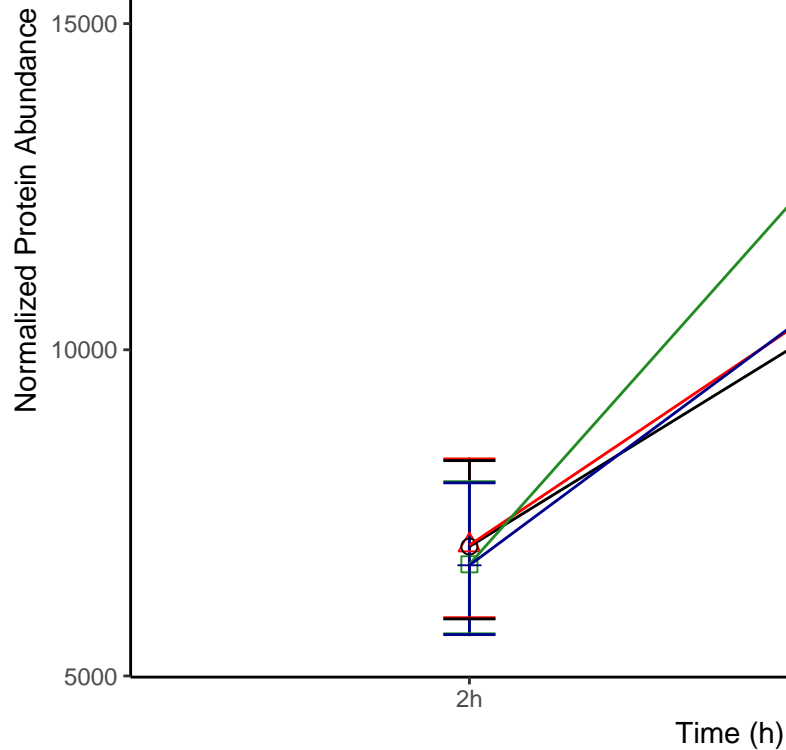

- SA564
- △ SA564- $\Delta$ *hptRS*
- SA564- $\Delta$ *ccpA*
- + SA564- $\Delta$ *hptRS/ccpA*

# FTSA\_STAAM

S-1124

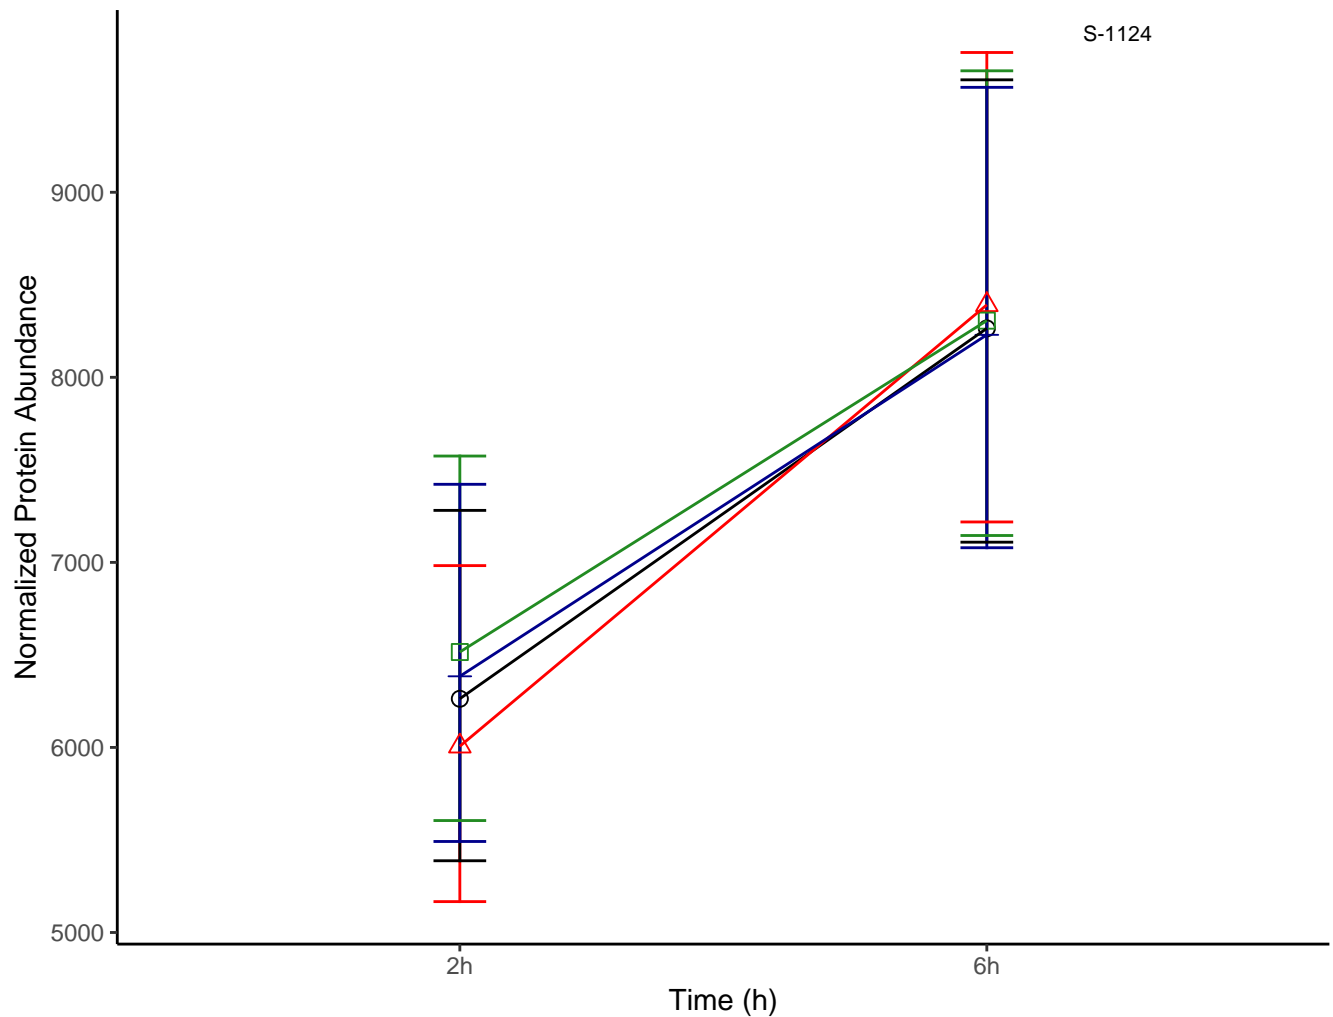

- SA564
- △ SA564- $\Delta$ *hptRS*
- SA564- $\Delta$ *ccpA*
- + SA564- $\Delta$ *hptRS/ccpA*

# FTSZ\_STAAM

S-1125

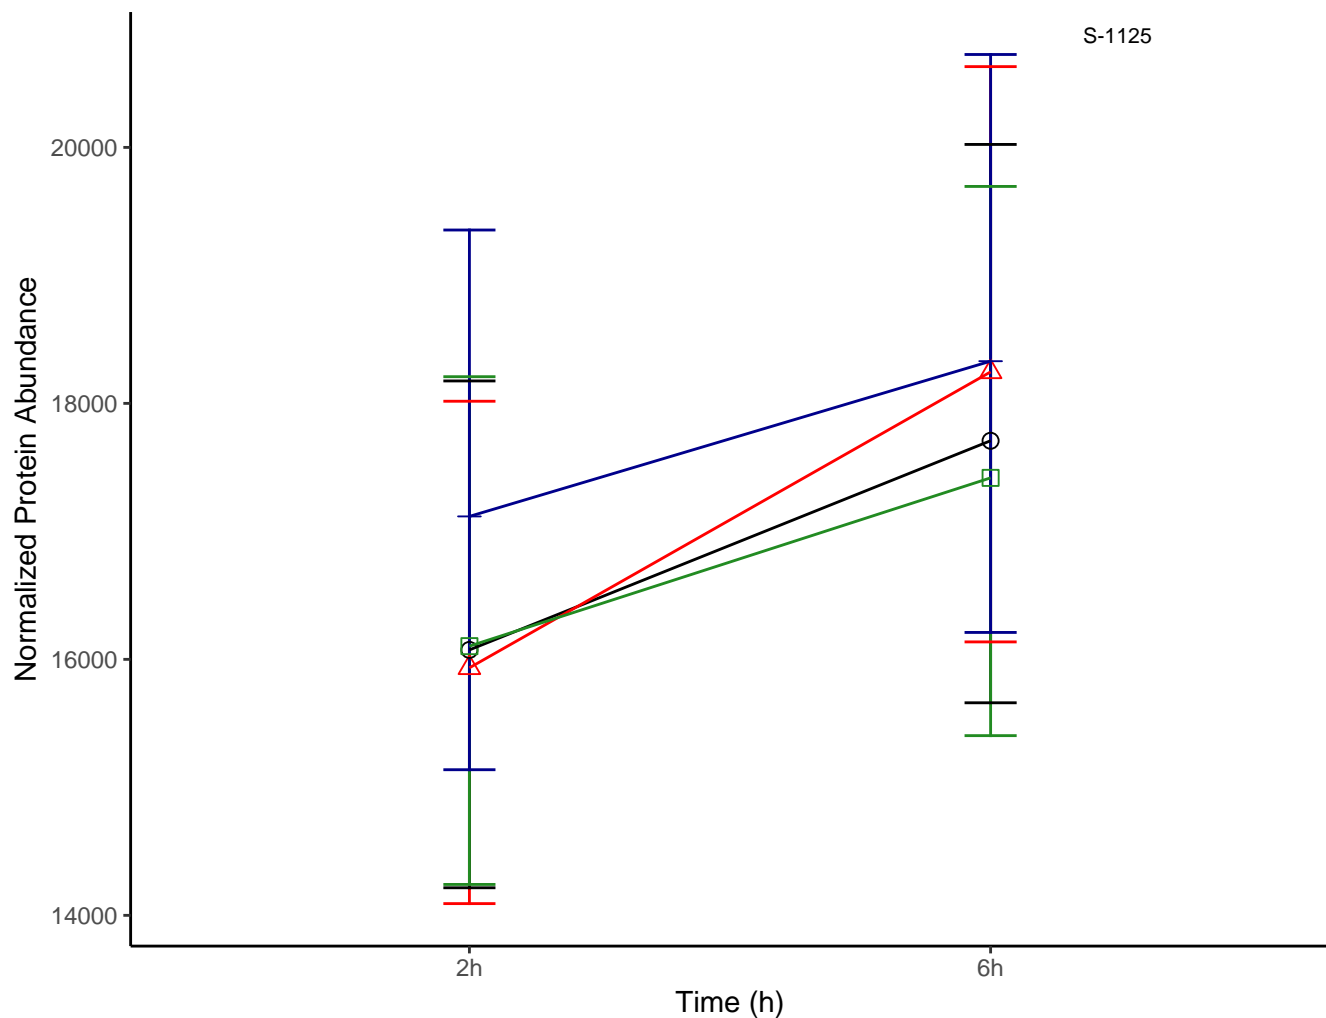

- SA564
- △ SA564- $\Delta hptRS$
- SA564- $\Delta ccpA$
- + SA564- $\Delta hptRS/ccpA$

# FUMC\_STAAM

S-1126

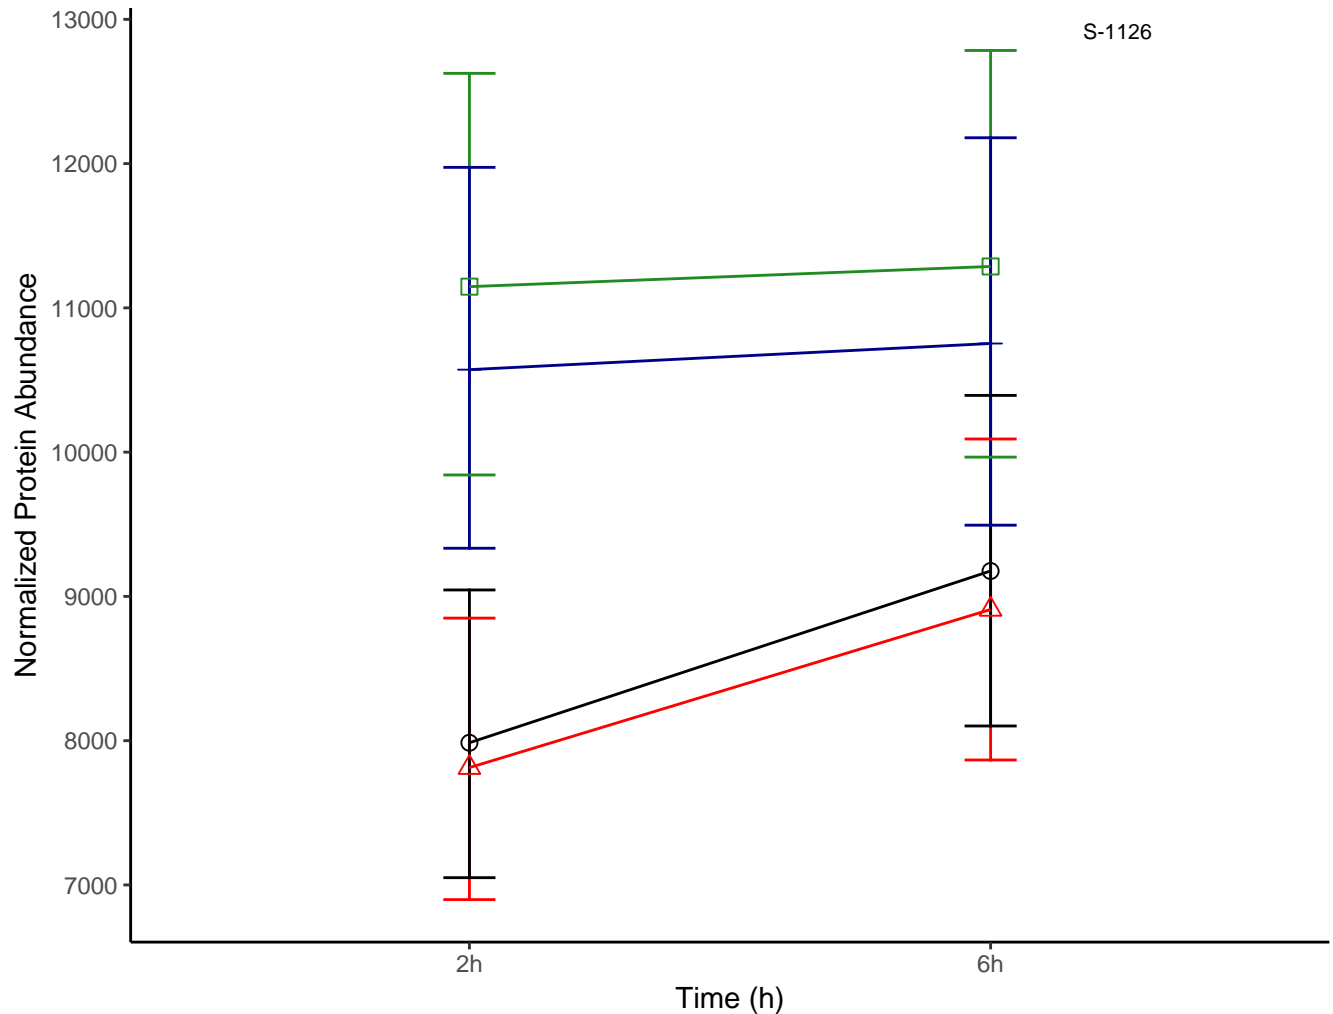

- SA564
- △ SA564- $\Delta$ *hptRS*
- SA564- $\Delta$ *ccpA*
- + SA564- $\Delta$ *hptRS/ccpA*

# G3P1\_STAAM

S-1127

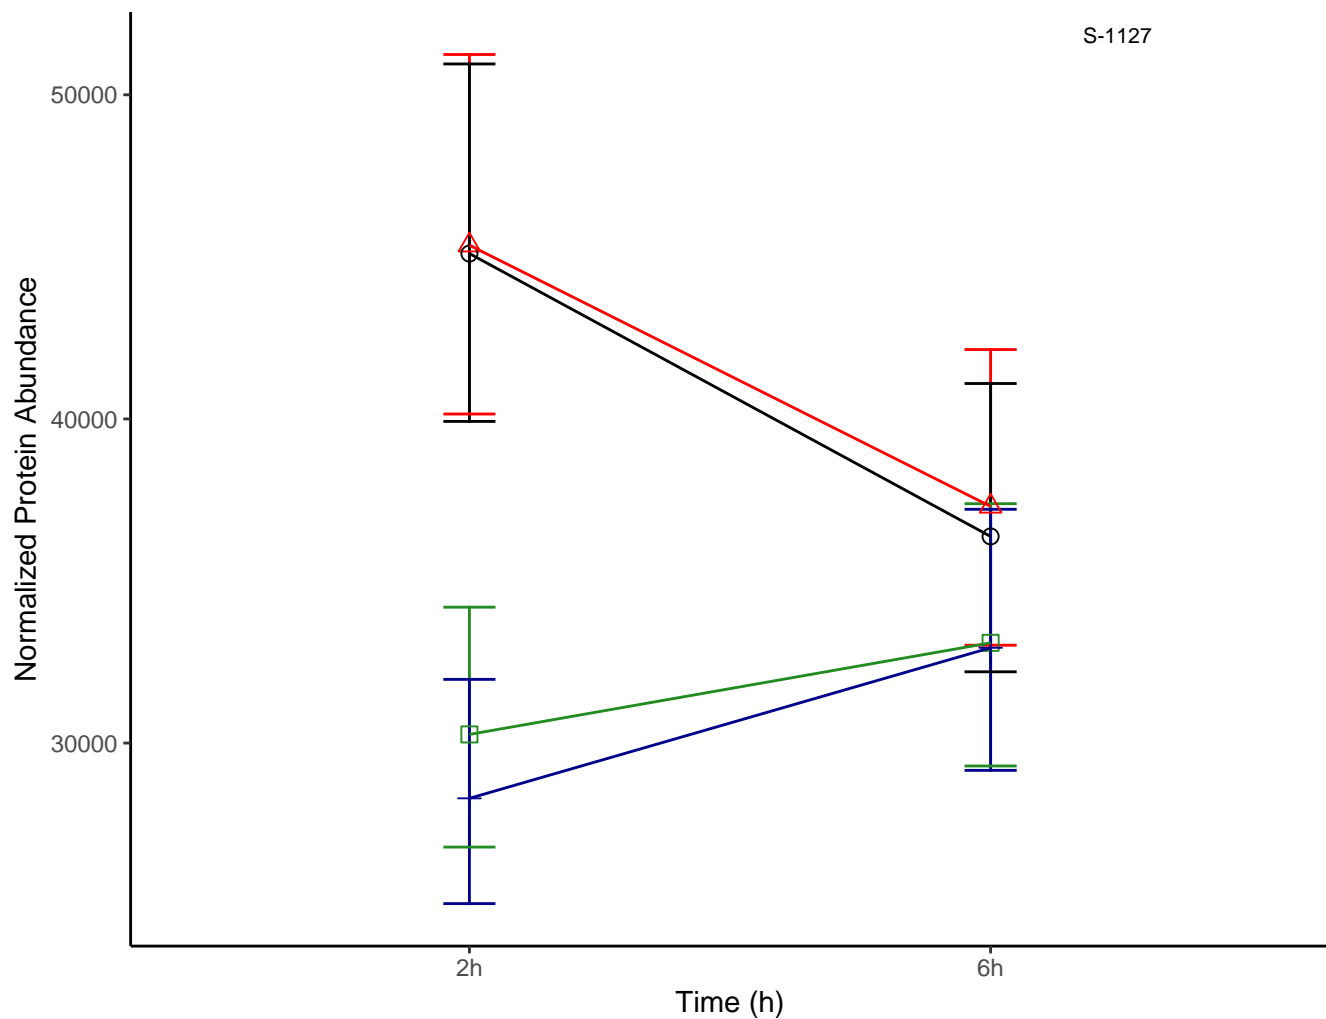

- SA564
- △ SA564- $\Delta hptRS$
- SA564- $\Delta ccpA$
- + SA564- $\Delta hptRS/ccpA$

# G3P2\_STAAM

S-1128

Normalized Protein Abundance

12000

10000

8000

2h

6h

Time (h)

- SA564
- △ SA564- $\Delta$ *hptRS*
- SA564- $\Delta$ *ccpA*
- + SA564- $\Delta$ *hptRS/ccpA*

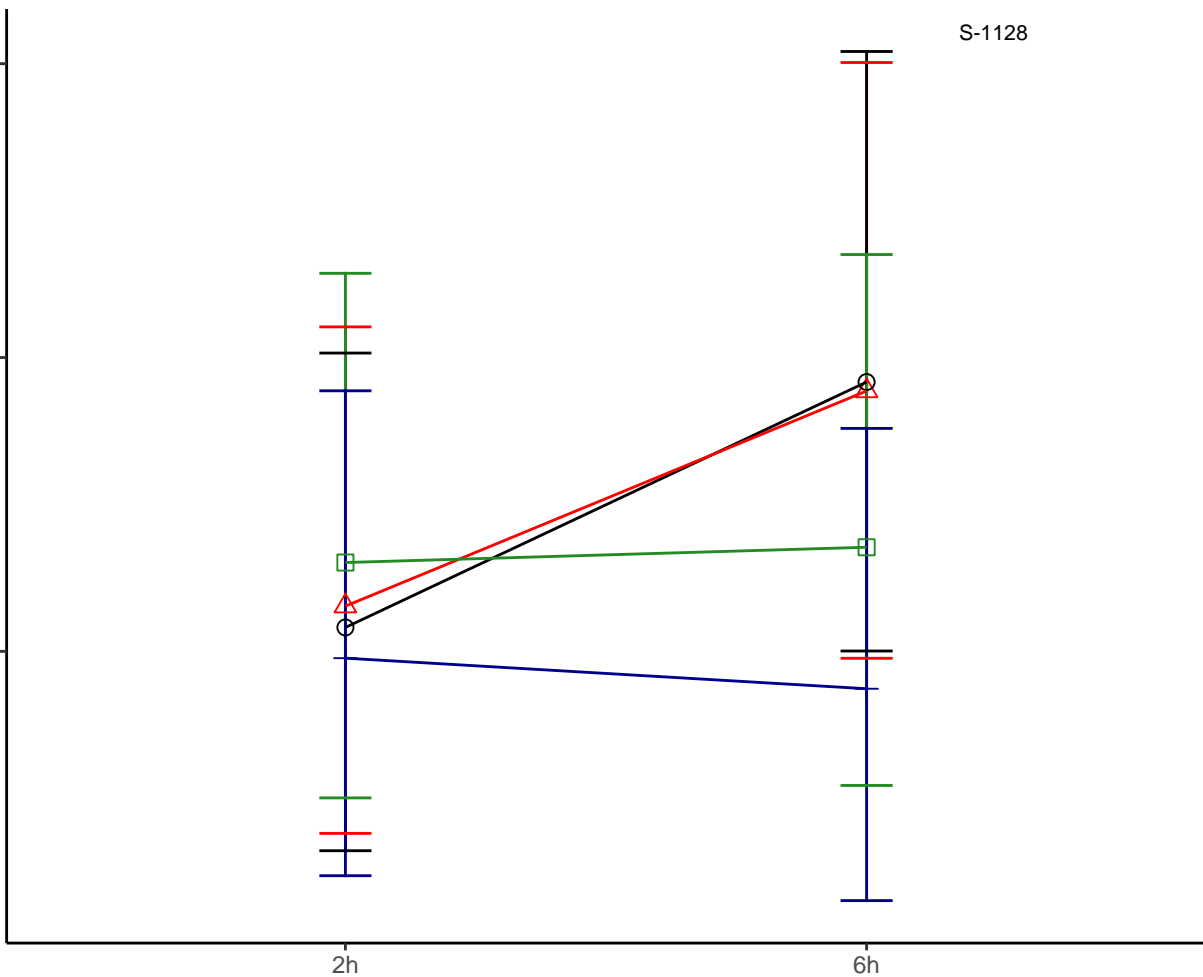



# G6PI\_STAAM

S-1129

Normalized Protein Abundance

25000

20000

15000

2h

Time (h)

6h

- SA564
- △ SA564- $\Delta hptRS$
- SA564- $\Delta ccpA$
- + SA564- $\Delta hptRS/ccpA$

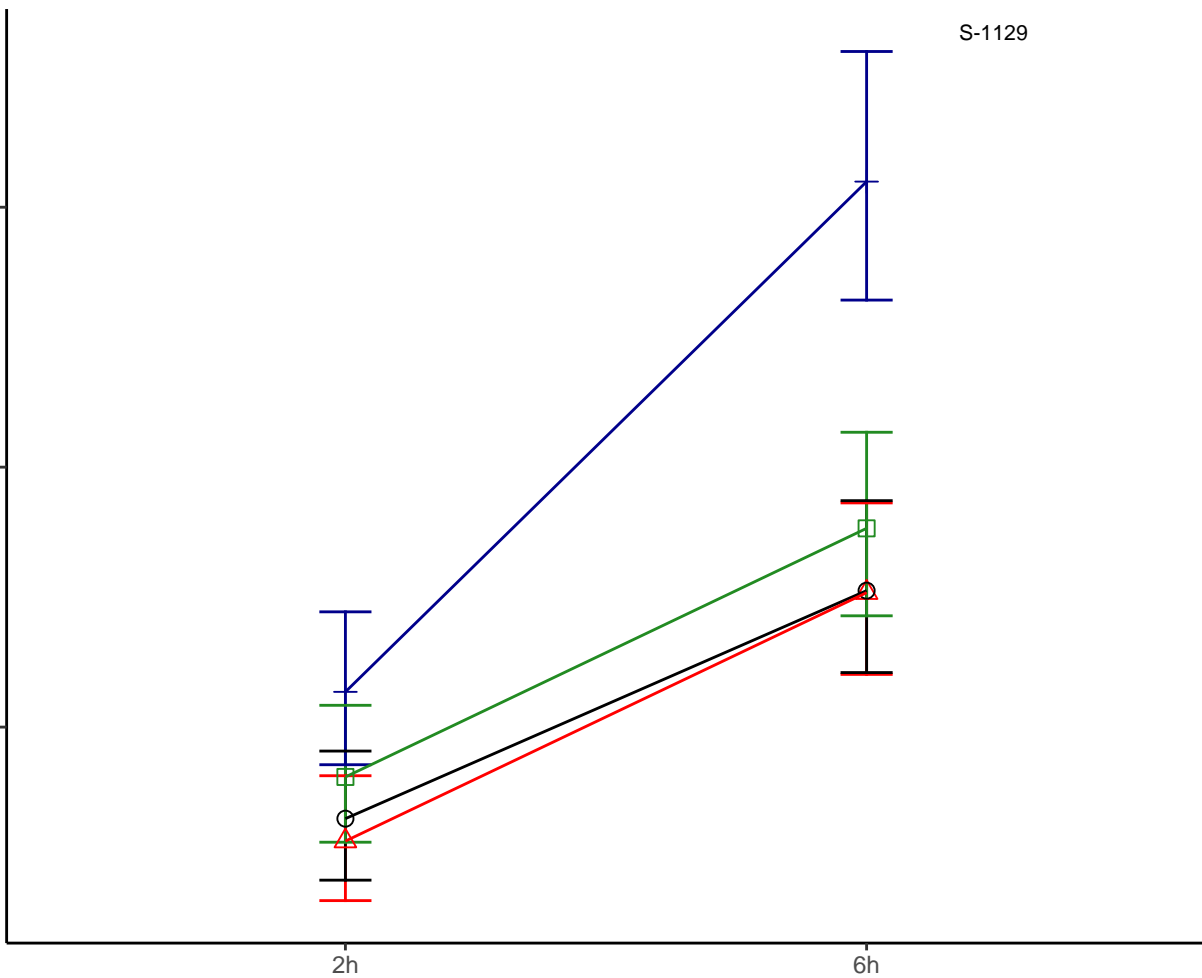

# GATA\_STAAM

S-1130

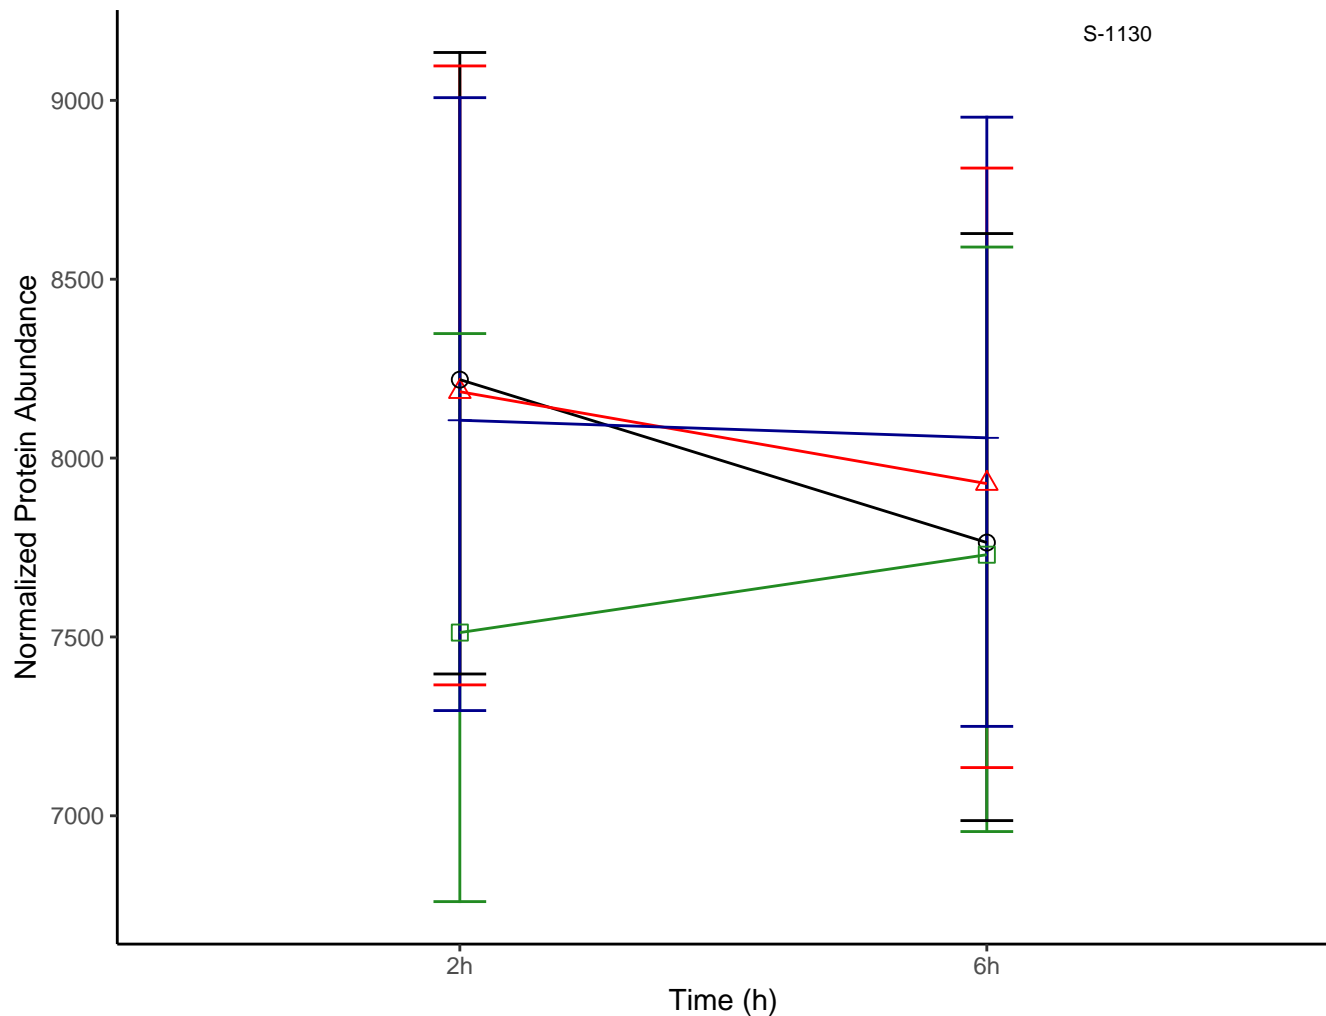

- SA564
- △ SA564- $\Delta$ hptRS
- SA564- $\Delta$ ccpA
- + SA564- $\Delta$ hptRS/ccpA

# GATB\_STAAM

S-1131

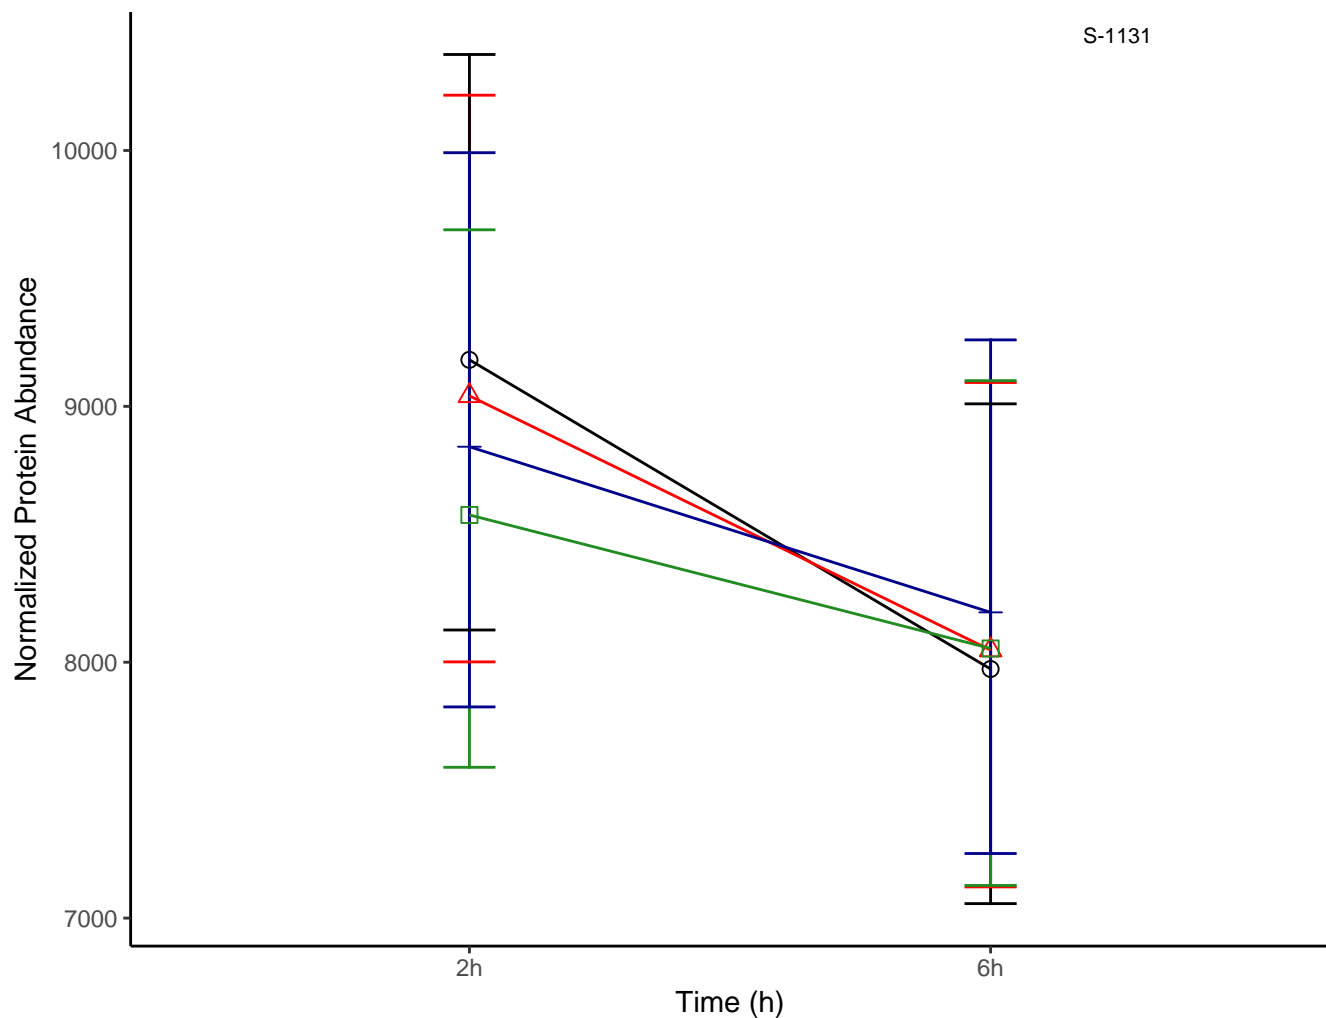

- SA564
- △ SA564- $\Delta hptRS$
- SA564- $\Delta ccpA$
- + SA564- $\Delta hptRS/ccpA$

# GATC\_STAAM

S-1132

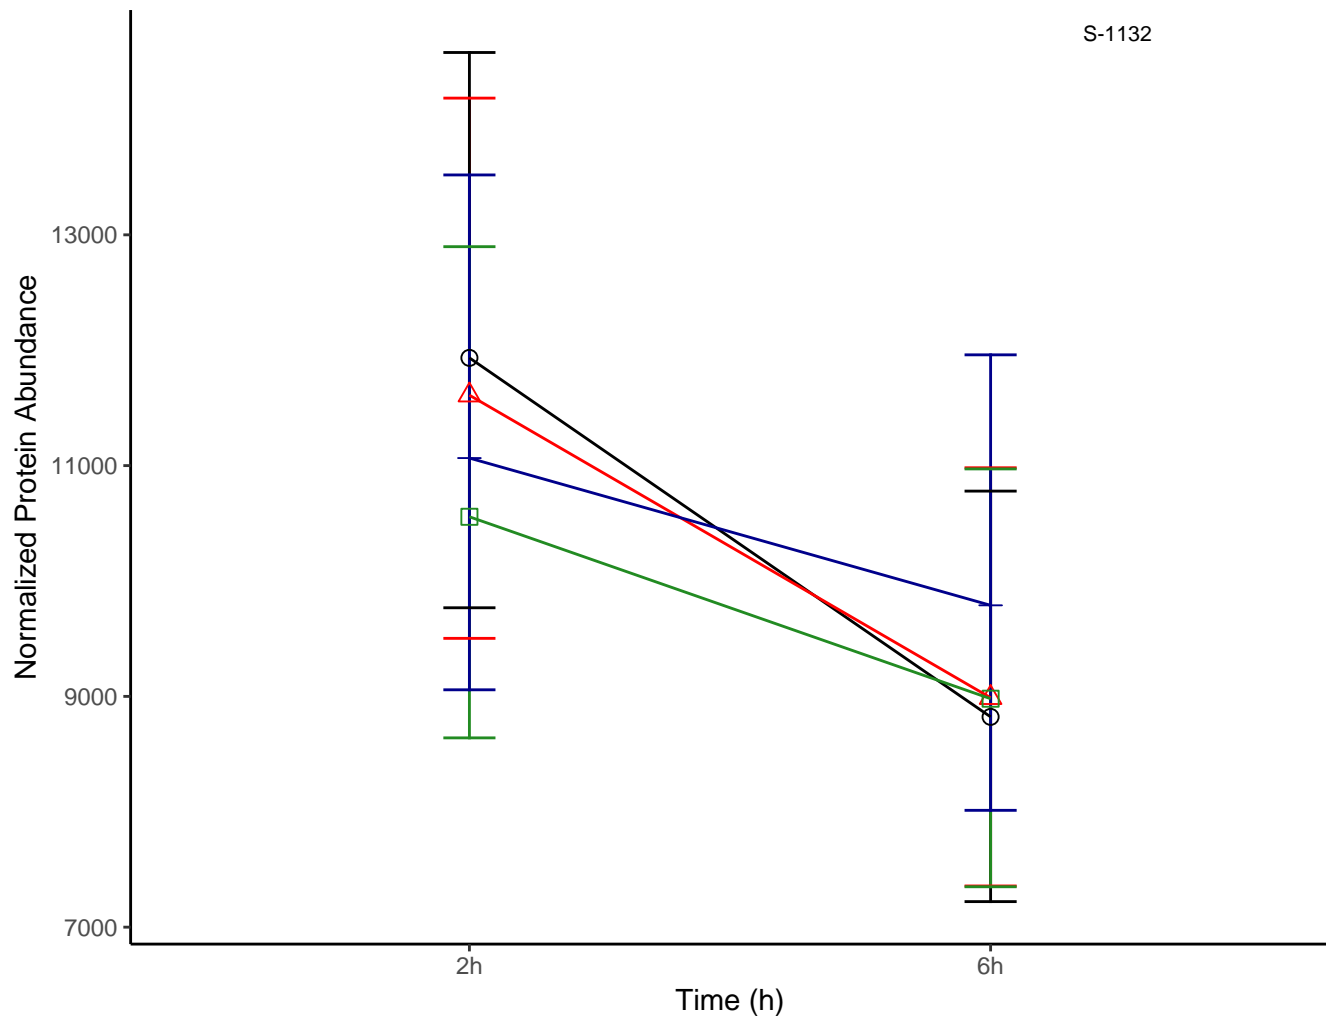

- SA564
- △ SA564- $\Delta hptRS$
- SA564- $\Delta ccpA$
- + SA564- $\Delta hptRS/ccpA$

# GCH4\_STAAM

S-1133

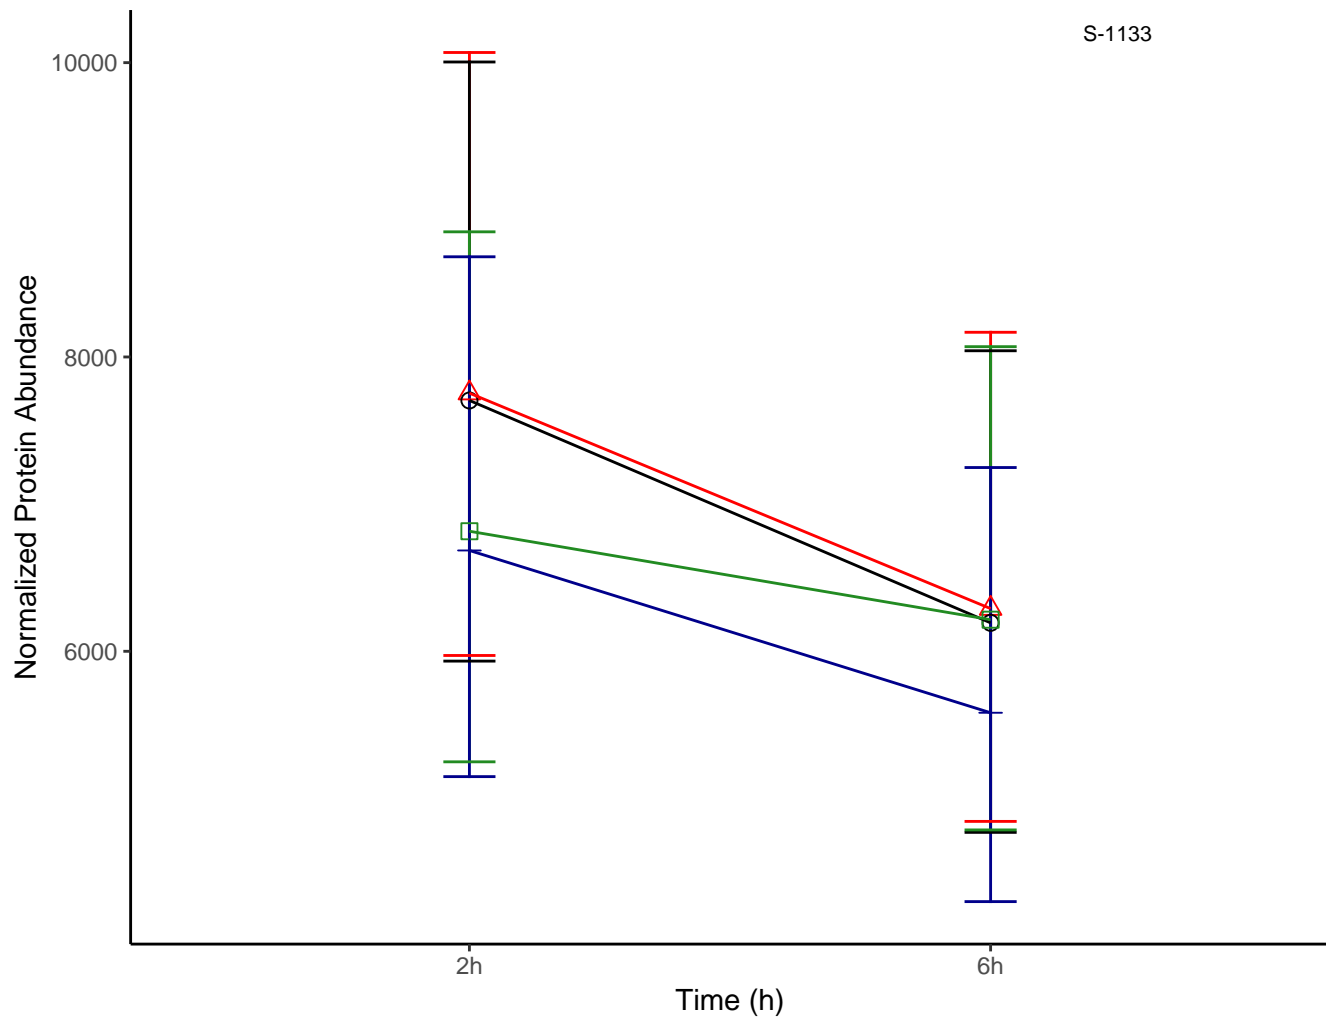

- SA564
- △ SA564-Δ*hptRS*
- SA564-Δ*ccpA*
- + SA564-Δ*hptRS/ccpA*

# GCSH\_STAAM

S-1134

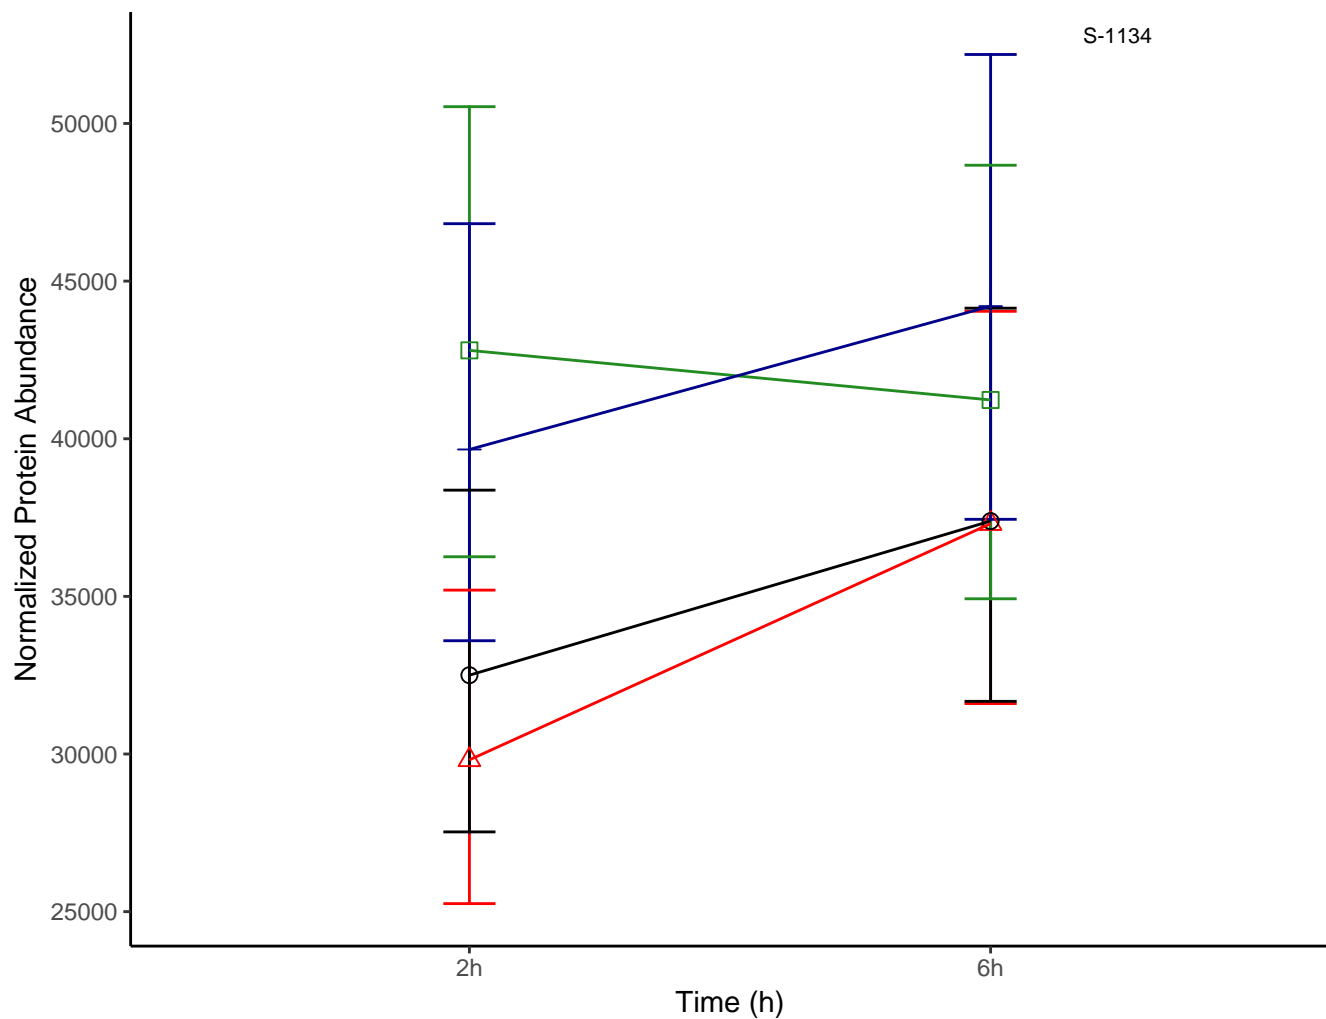

- SA564
- △ SA564- $\Delta$ hptRS
- SA564- $\Delta$ ccpA
- + SA564- $\Delta$ hptRS/ccpA

## GCSPA\_STAAM

S-1135

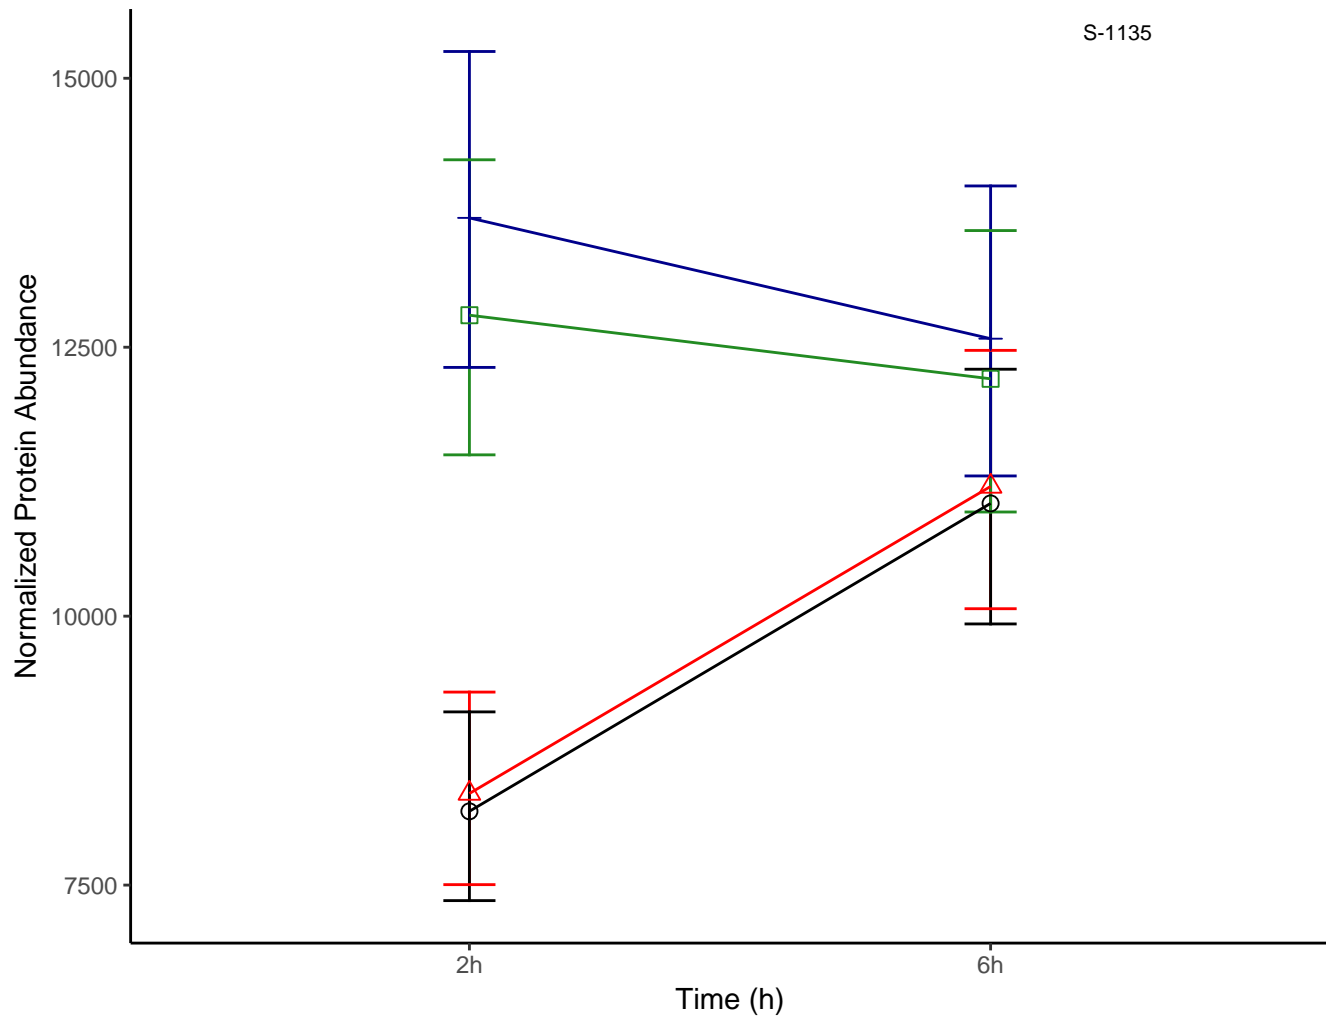

- SA564
- △ SA564- $\Delta$ *hptRS*
- SA564- $\Delta$ *ccpA*
- + SA564- $\Delta$ *hptRS/ccpA*

# GCSPB\_STAAM

S-1136

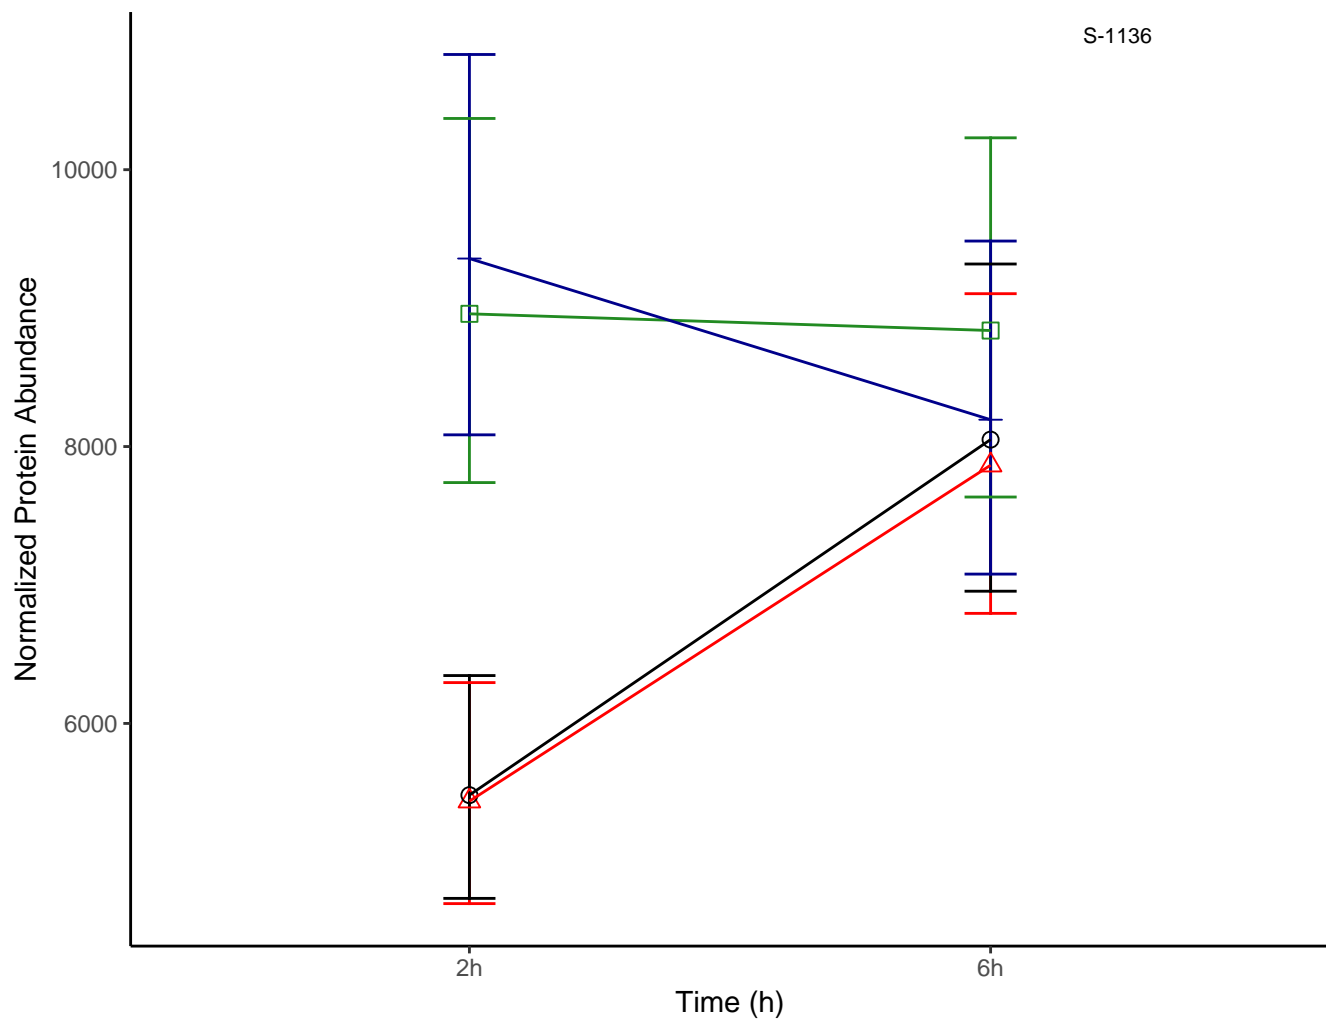

- SA564
- △ SA564- $\Delta$ *hptRS*
- SA564- $\Delta$ *ccpA*
- + SA564- $\Delta$ *hptRS/ccpA*



# GCST\_STAAM

S-1137

Normalized Protein Abundance

8000

6000

4000

2h

6h

Time (h)

- SA564
- △ SA564- $\Delta$ *hptRS*
- SA564- $\Delta$ *ccpA*
- + SA564- $\Delta$ *hptRS/ccpA*

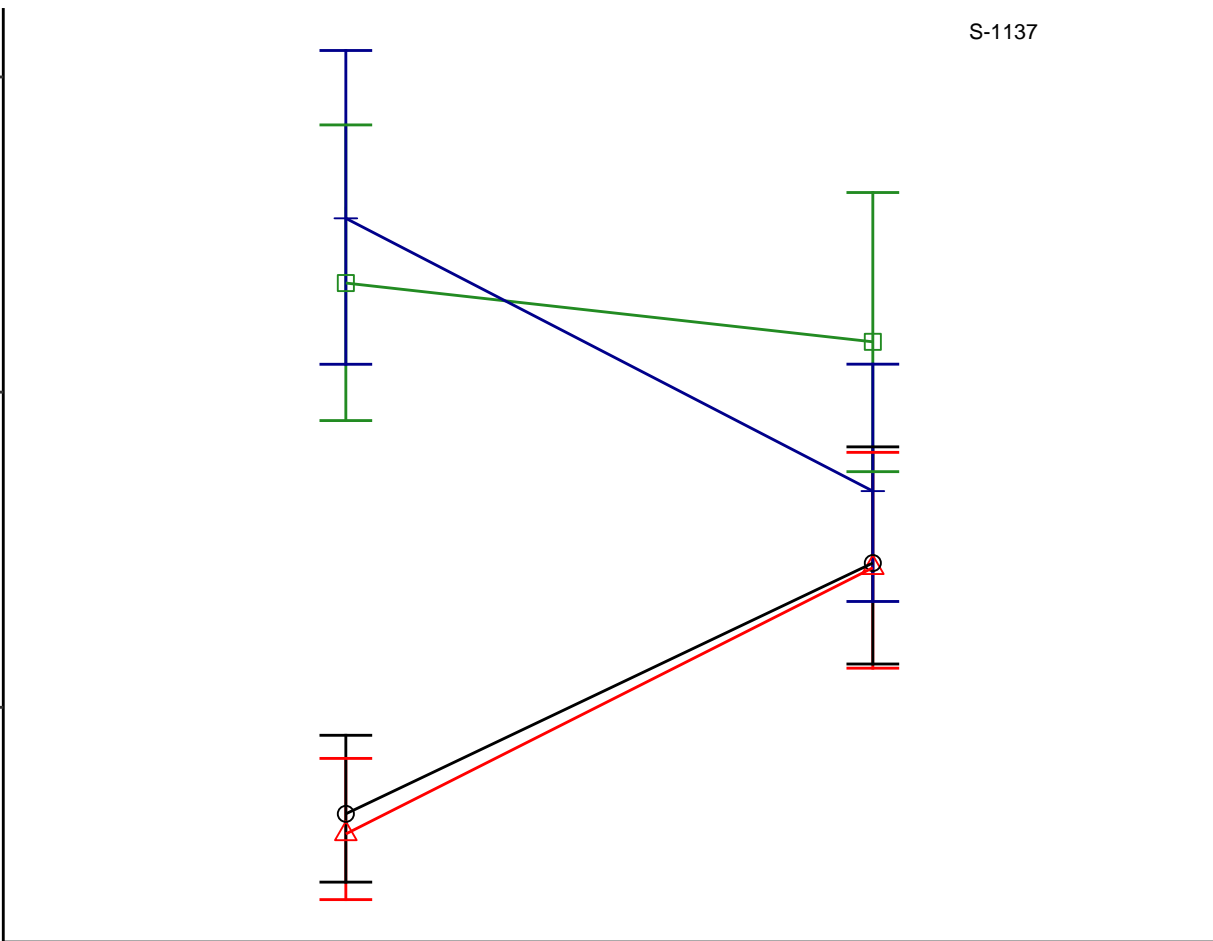

# GLMM\_STAAM

S-1138

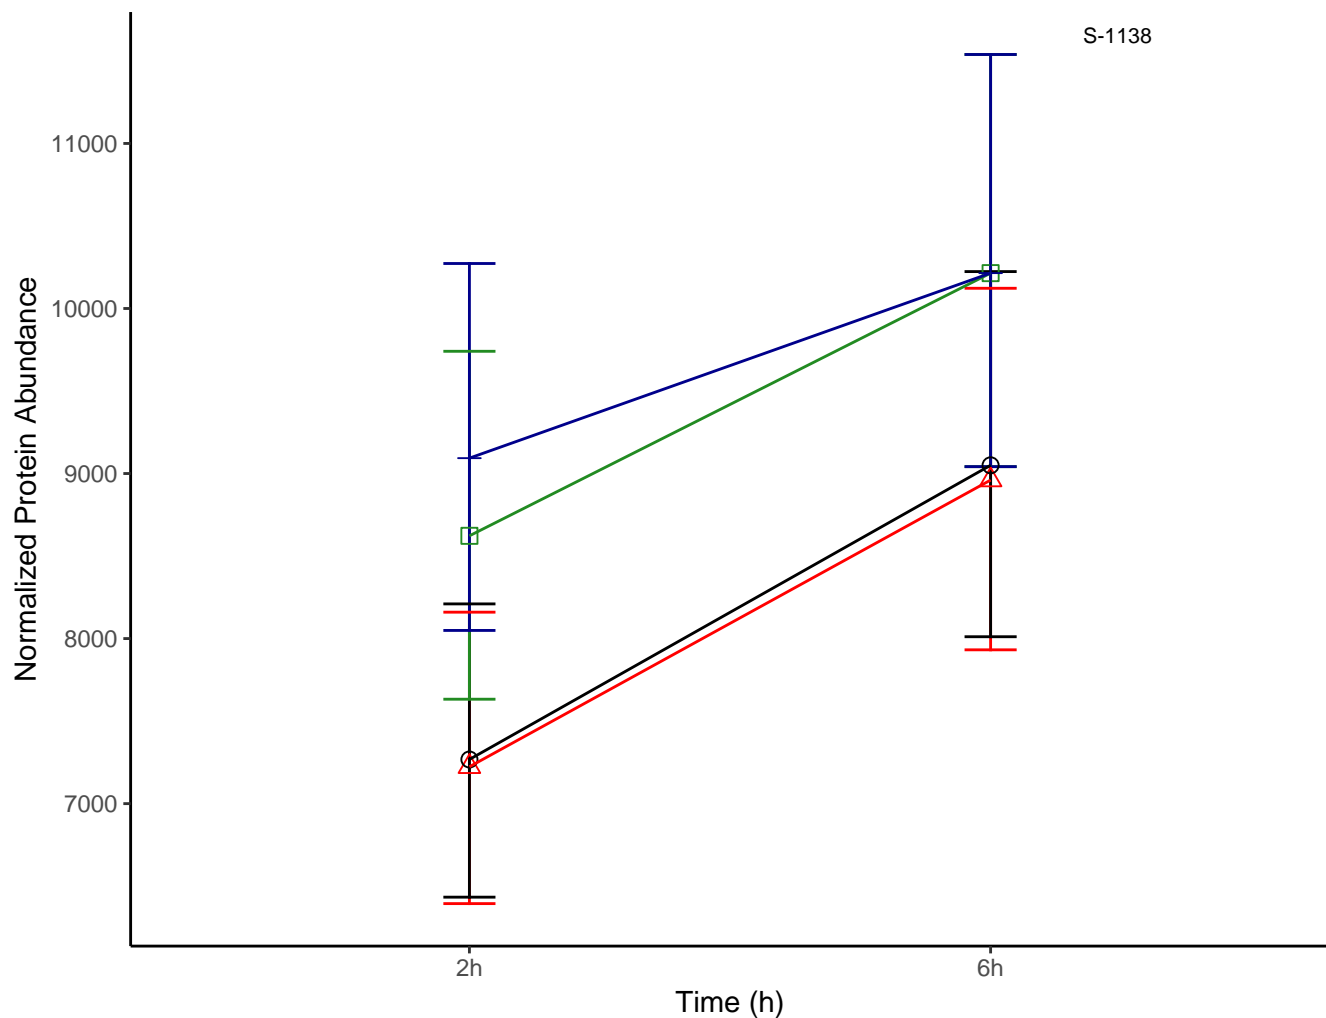

- SA564
- △ SA564- $\Delta hptRS$
- SA564- $\Delta ccpA$
- + SA564- $\Delta hptRS/ccpA$

# GLMS\_STAAM

S-1139

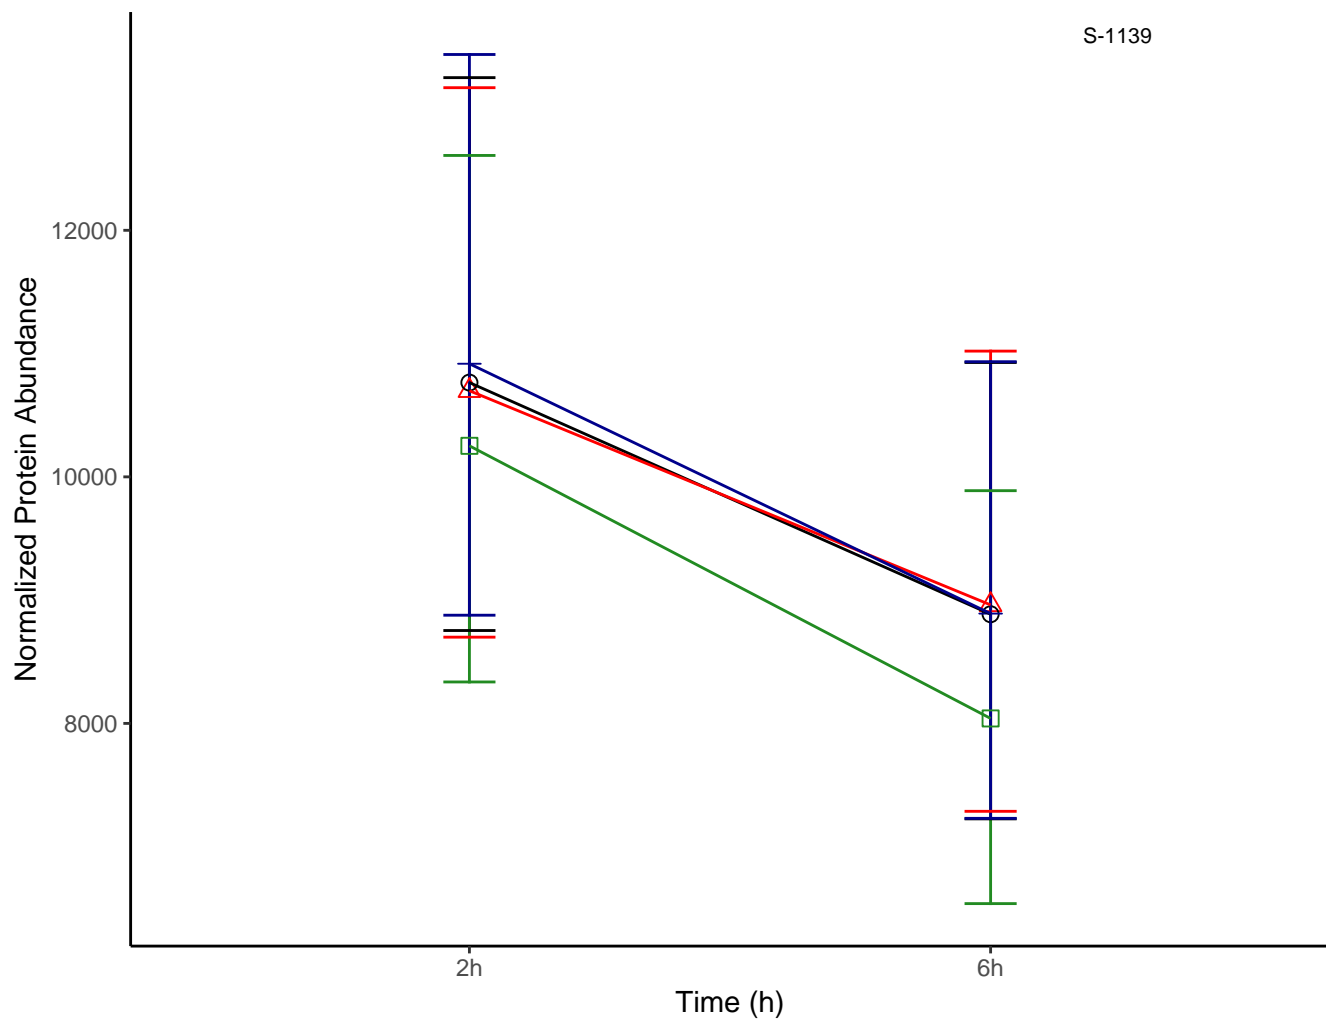

- SA564
- △ SA564- $\Delta hptRS$
- SA564- $\Delta ccpA$
- + SA564- $\Delta hptRS/ccpA$

# GLMU\_STAAM

S-1140

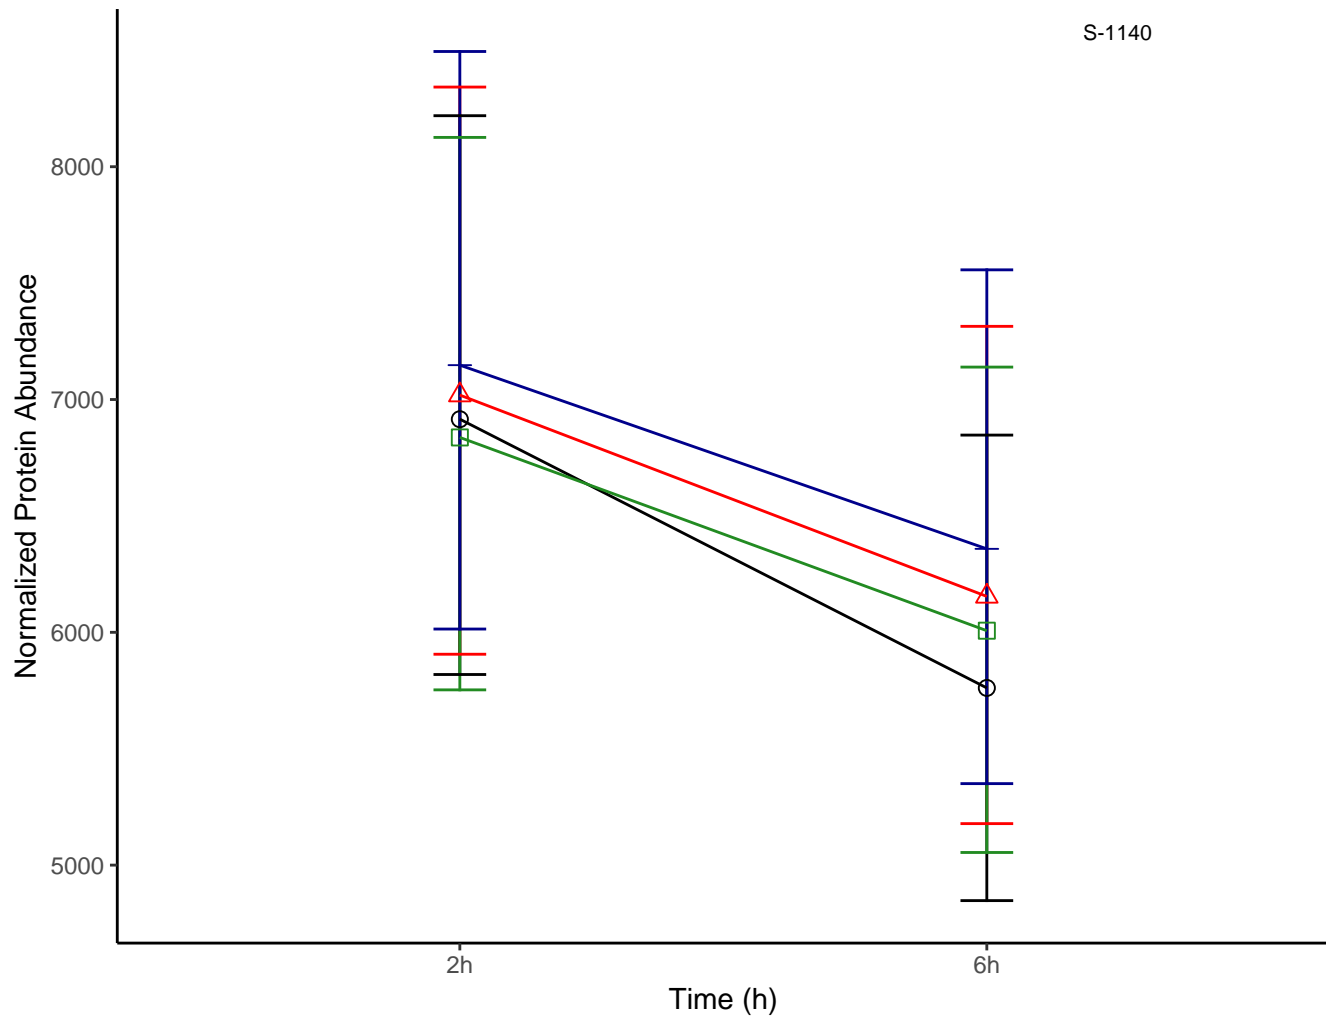

- SA564
- △ SA564- $\Delta$ *hptRS*
- SA564- $\Delta$ *ccpA*
- + SA564- $\Delta$ *hptRS/ccpA*

# GLNA\_STAAM

S-1141

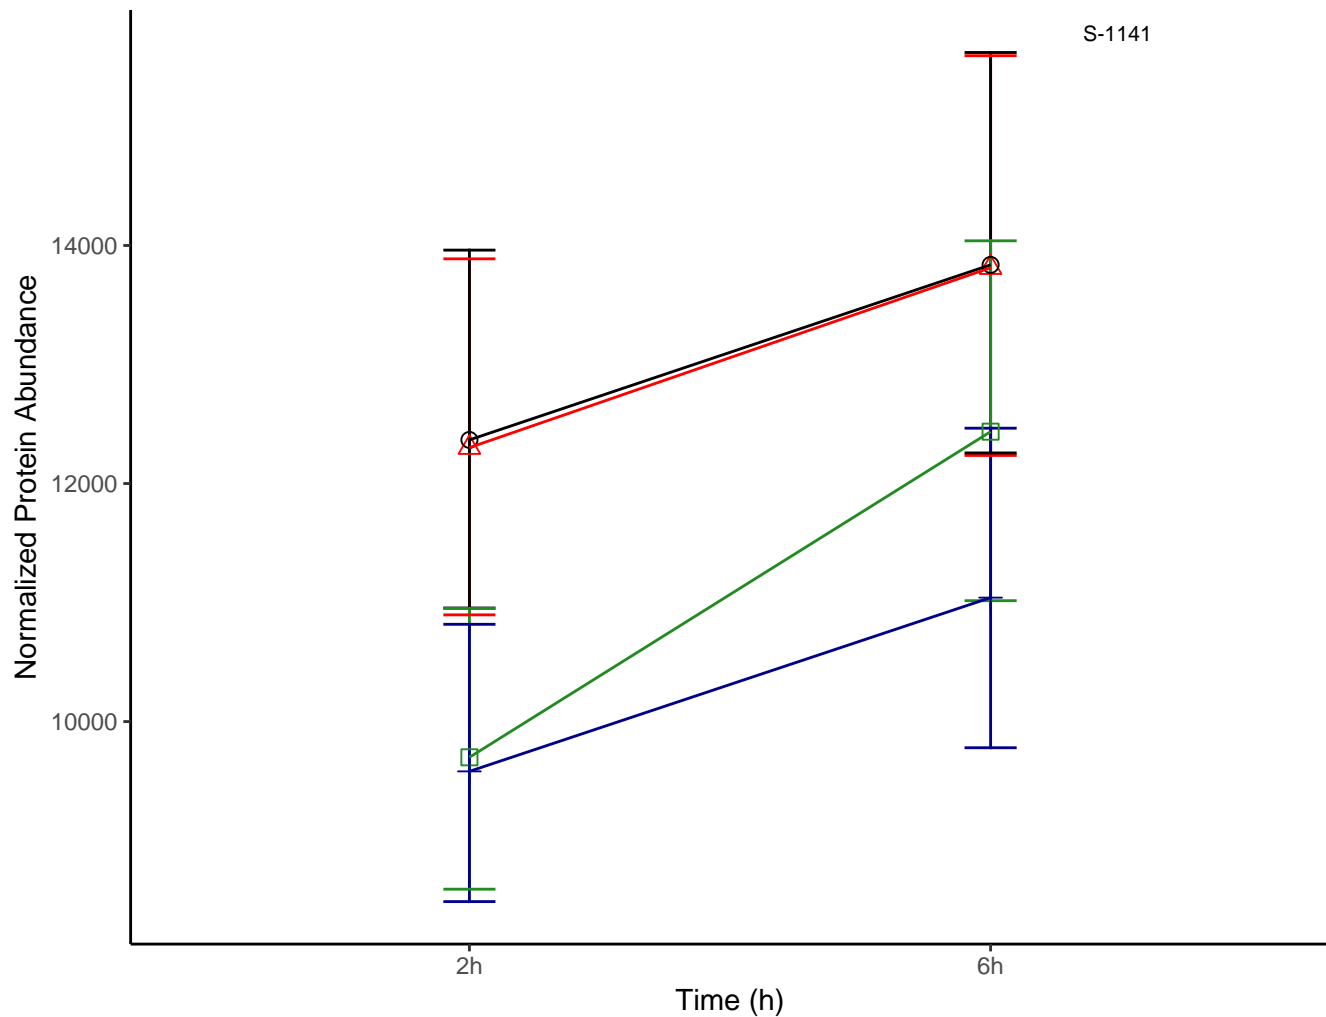

- SA564
- △ SA564- $\Delta$ *hptRS*
- SA564- $\Delta$ *ccpA*
- + SA564- $\Delta$ *hptRS/ccpA*

# GLPD\_STAAM

S-1142

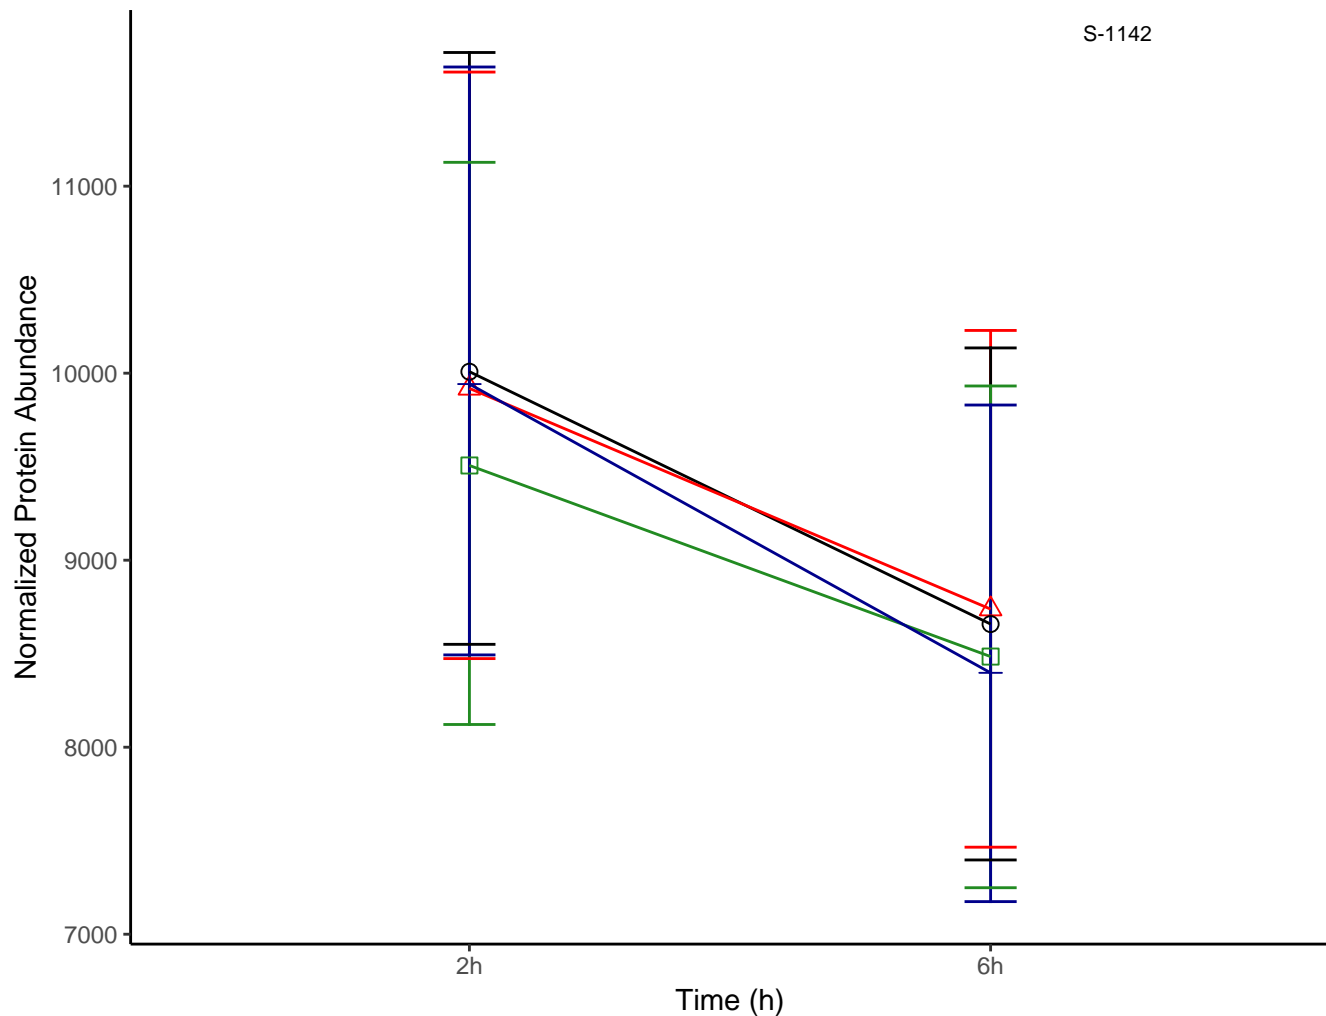

- SA564
- △ SA564- $\Delta hptRS$
- SA564- $\Delta ccpA$
- + SA564- $\Delta hptRS/ccpA$

# GLPK\_STAAM

S-1143

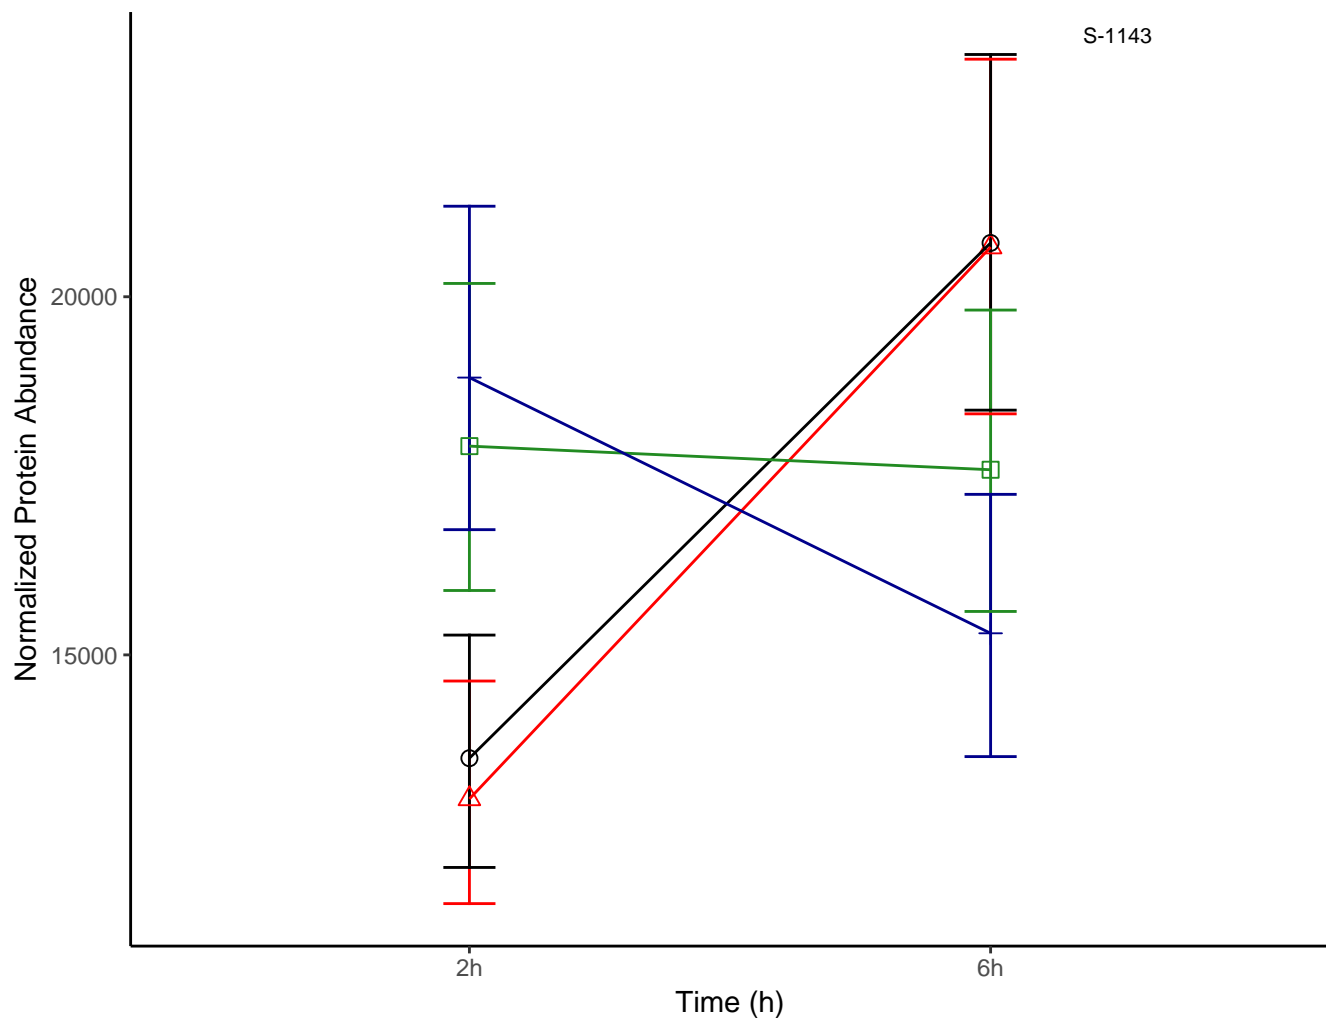

- SA564
- △ SA564- $\Delta$ hptRS
- SA564- $\Delta$ ccpA
- + SA564- $\Delta$ hptRS/ccpA

# GLYA\_STAAM

S-1144

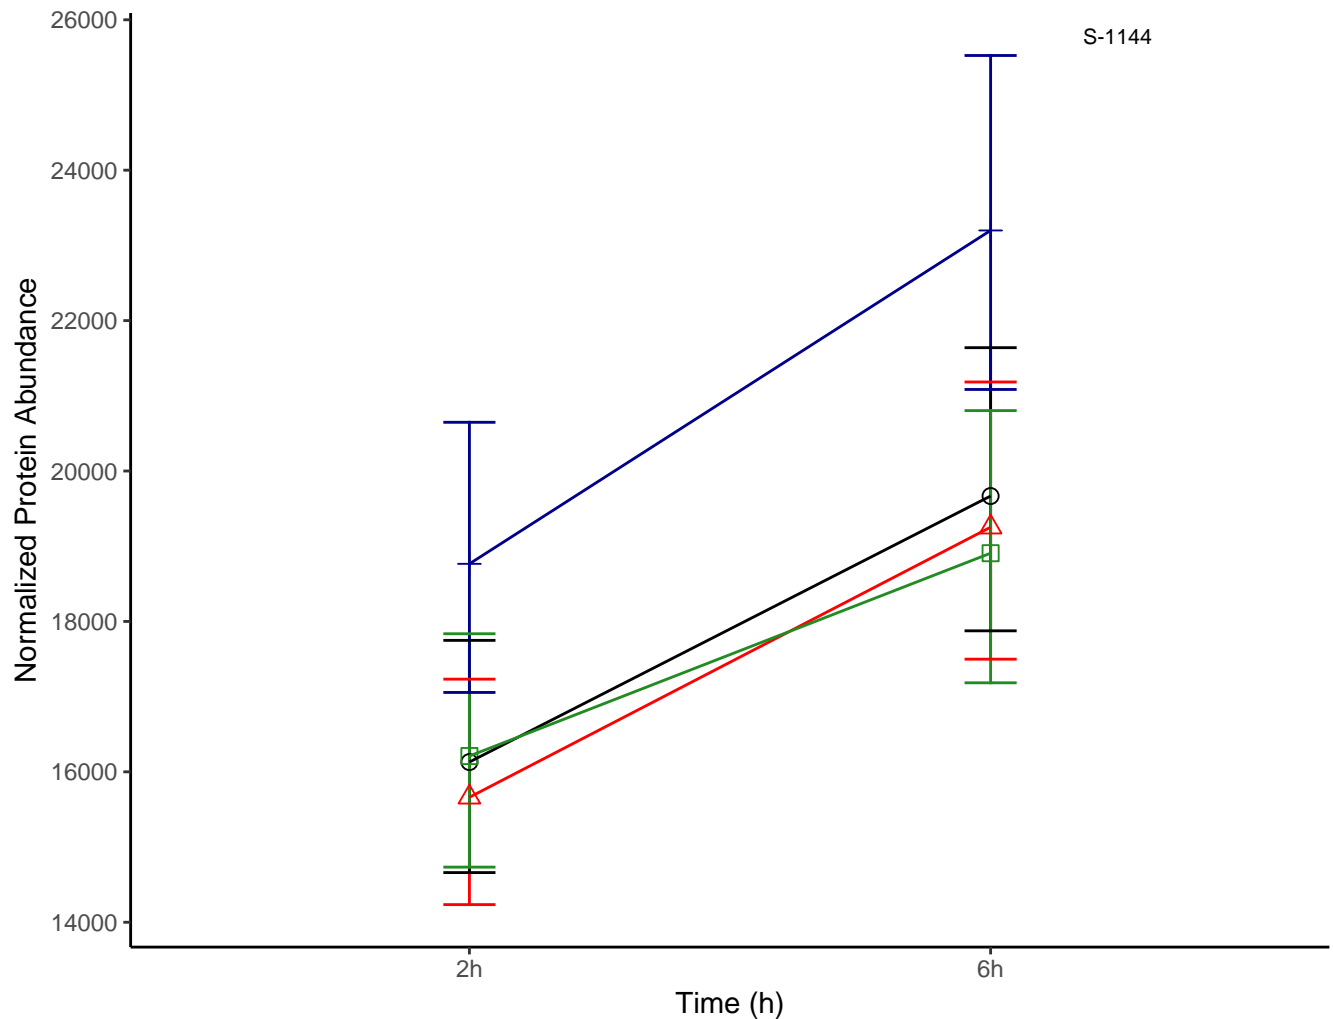

- SA564
- △ SA564- $\Delta$ hptRS
- SA564- $\Delta$ ccpA
- + SA564- $\Delta$ hptRS/ccpA



# GPDA\_STAAM

S-1145

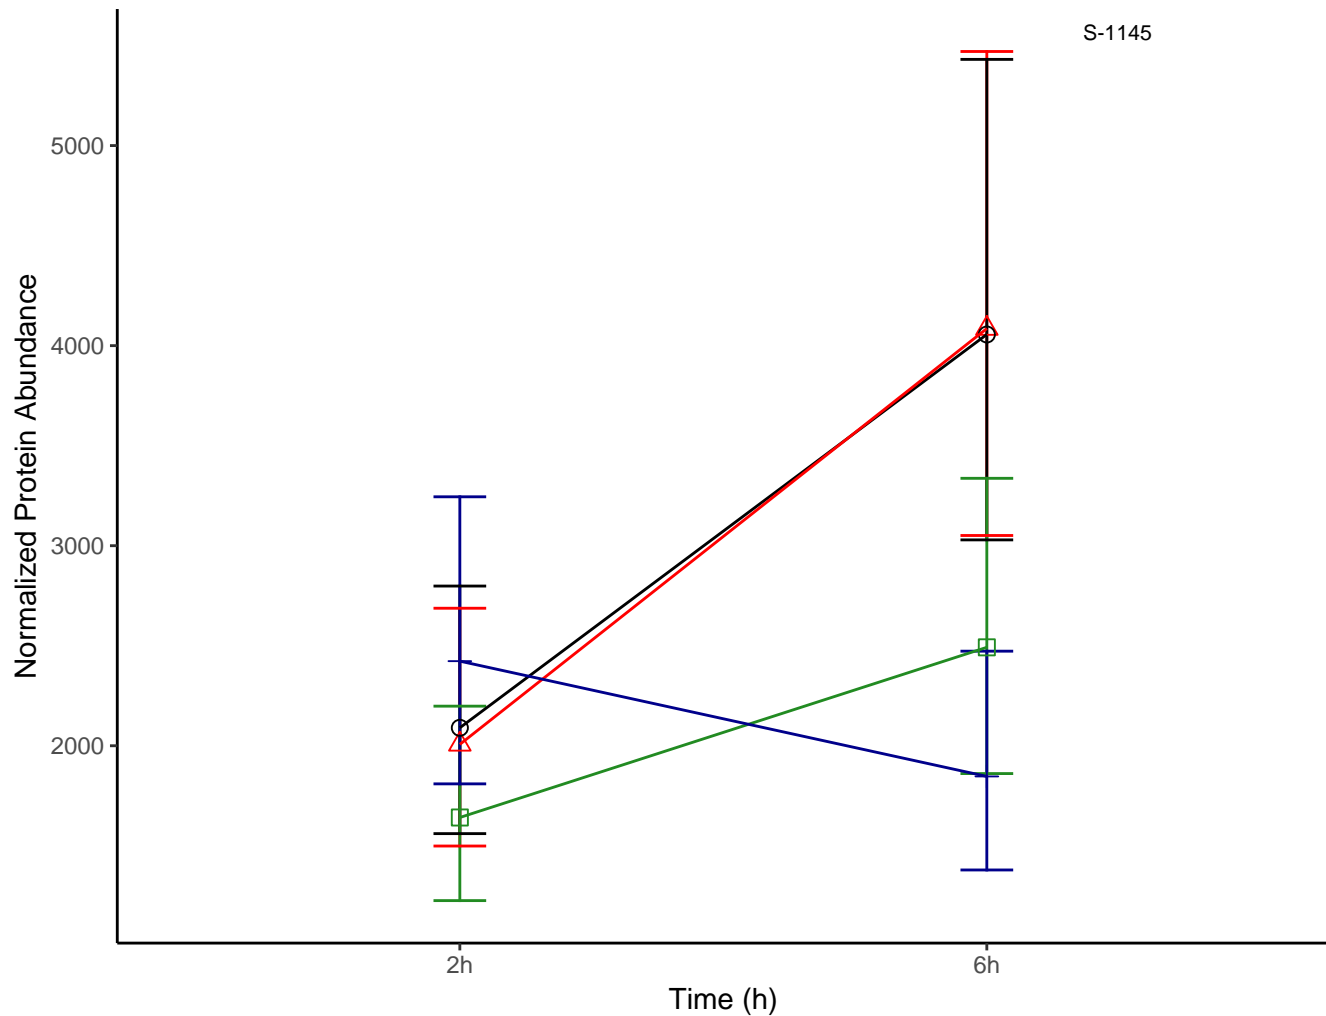

- SA564
- △ SA564- $\Delta hptRS$
- SA564- $\Delta ccpA$
- + SA564- $\Delta hptRS/ccpA$

# GPMA\_STAAM

S-1146

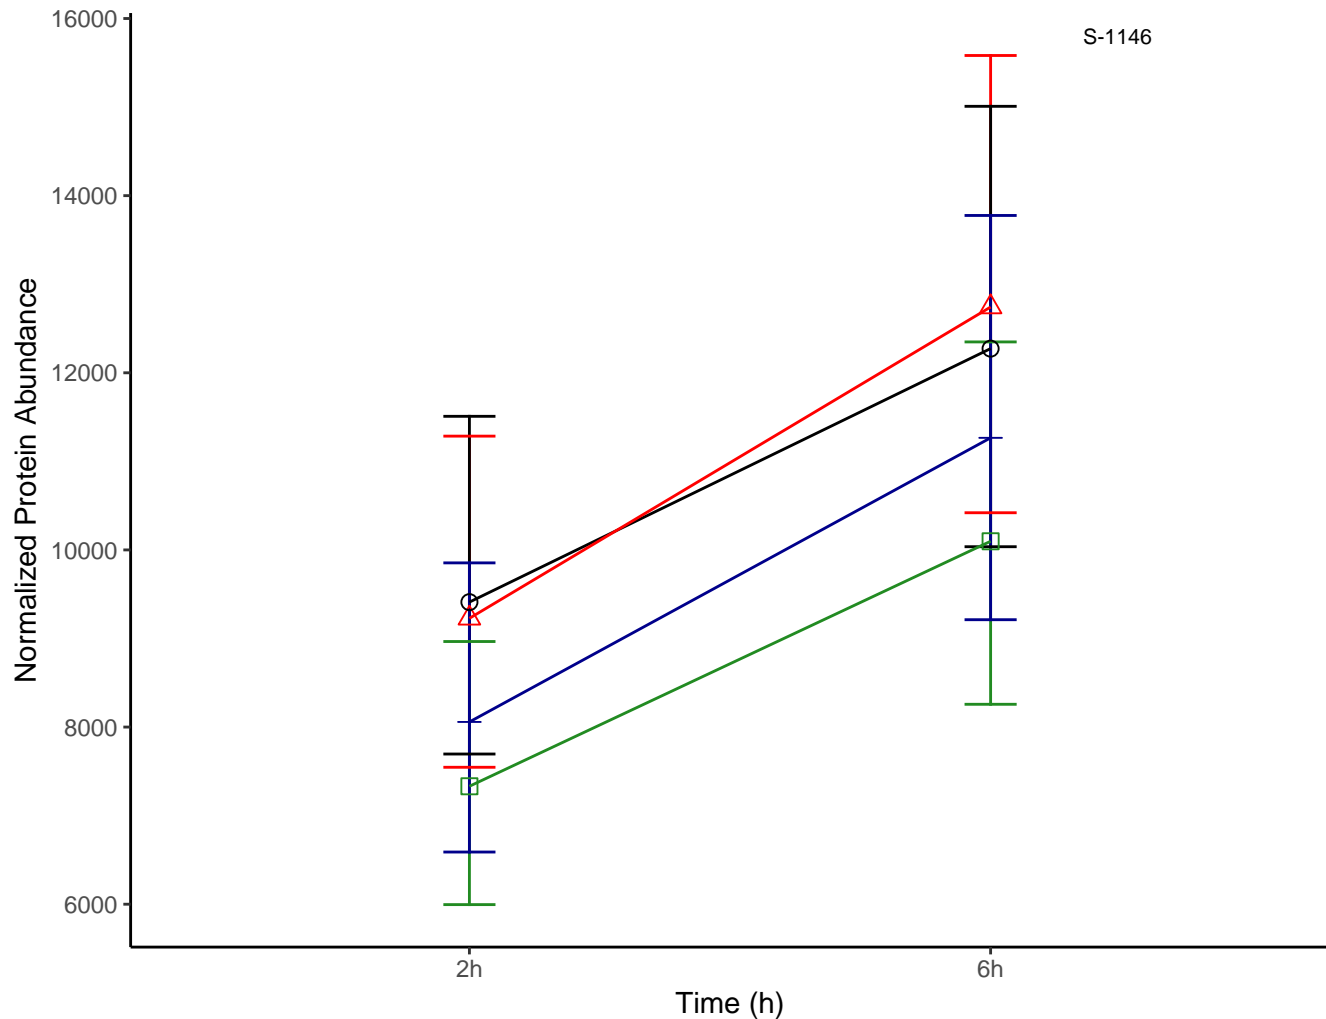

- SA564
- △ SA564- $\Delta$ *hptRS*
- SA564- $\Delta$ *ccpA*
- + SA564- $\Delta$ *hptRS/ccpA*

# GPMI\_STAAM

S-1147

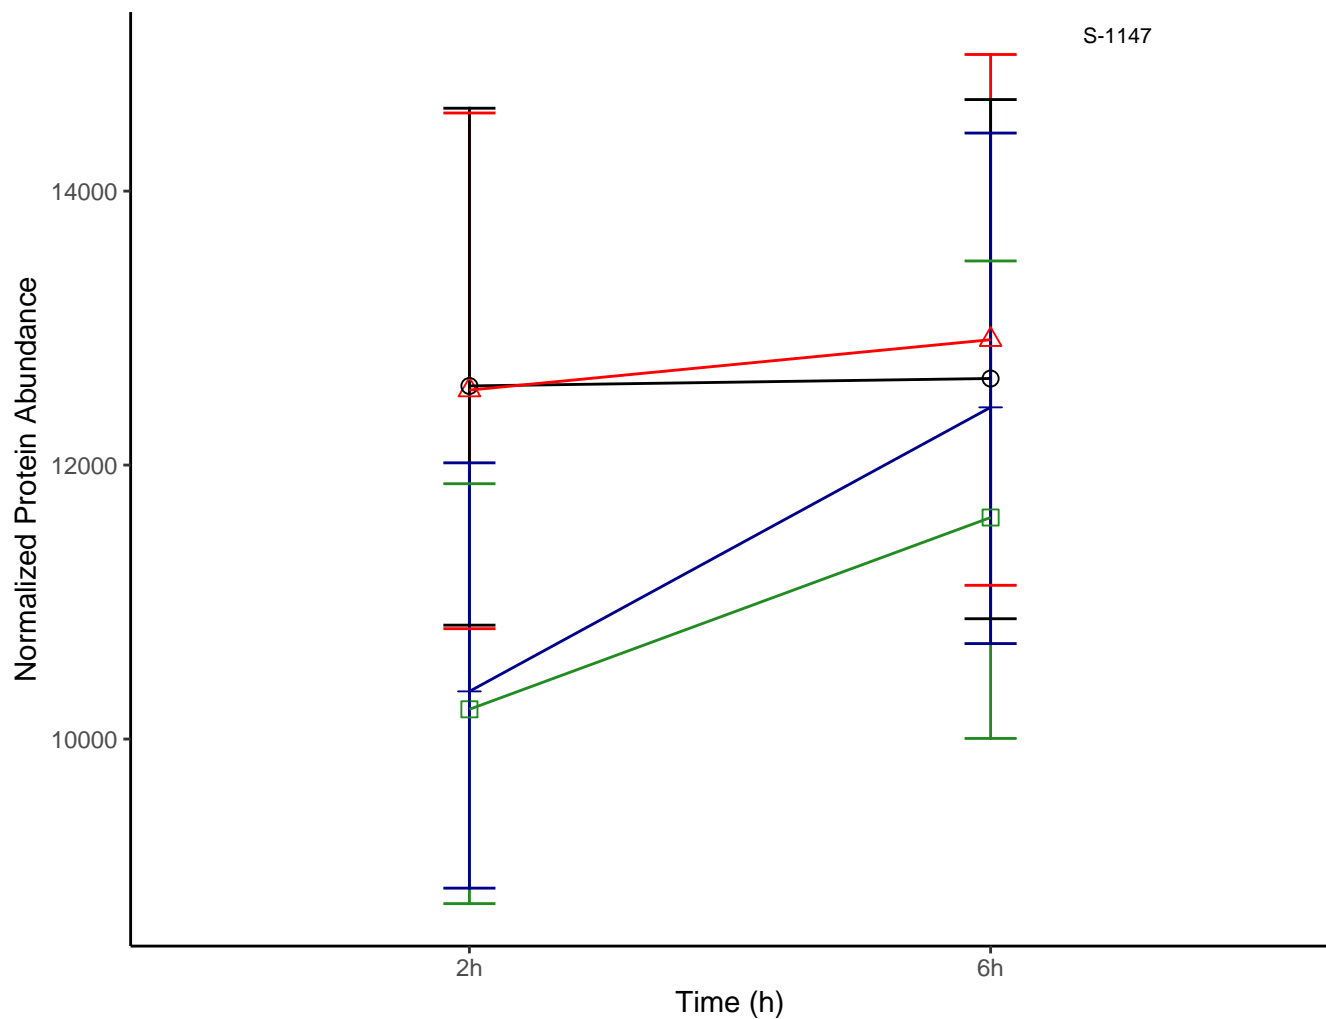

- SA564
- △ SA564- $\Delta$ hptRS
- SA564- $\Delta$ ccpA
- + SA564- $\Delta$ hptRS/ccpA

# GPSB\_STAAM

S-1148

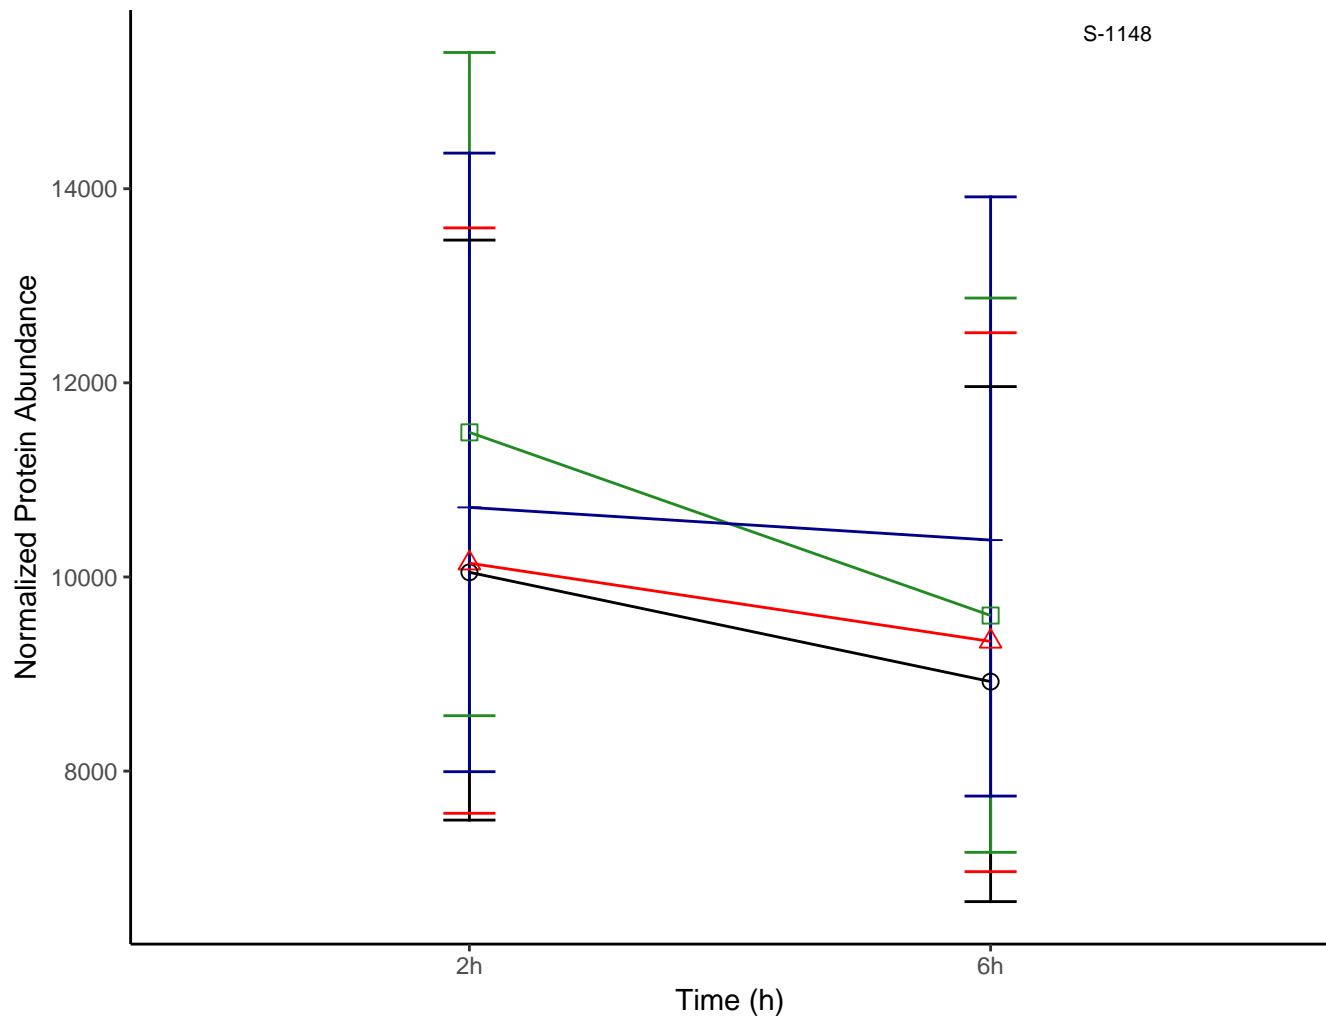

- SA564
- △ SA564- $\Delta$ *hptRS*
- SA564- $\Delta$ *ccpA*
- + SA564- $\Delta$ *hptRS/ccpA*

# GRAR\_STAAM

S-1149

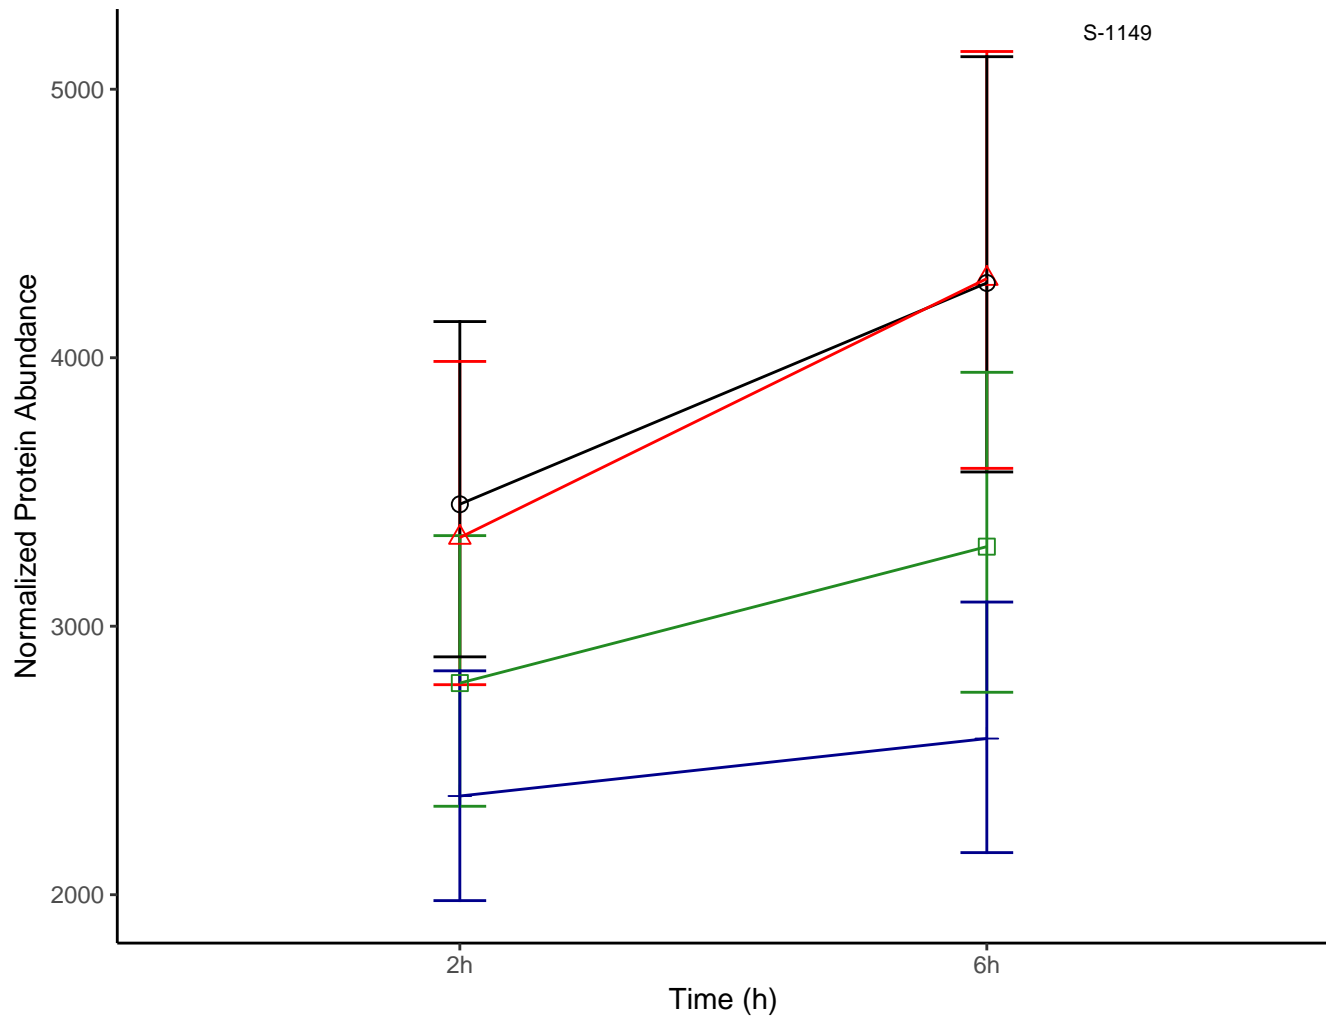

- SA564
- △ SA564- $\Delta hptRS$
- SA564- $\Delta ccpA$
- + SA564- $\Delta hptRS/ccpA$

# GRE\_A\_STAAM

S-1150

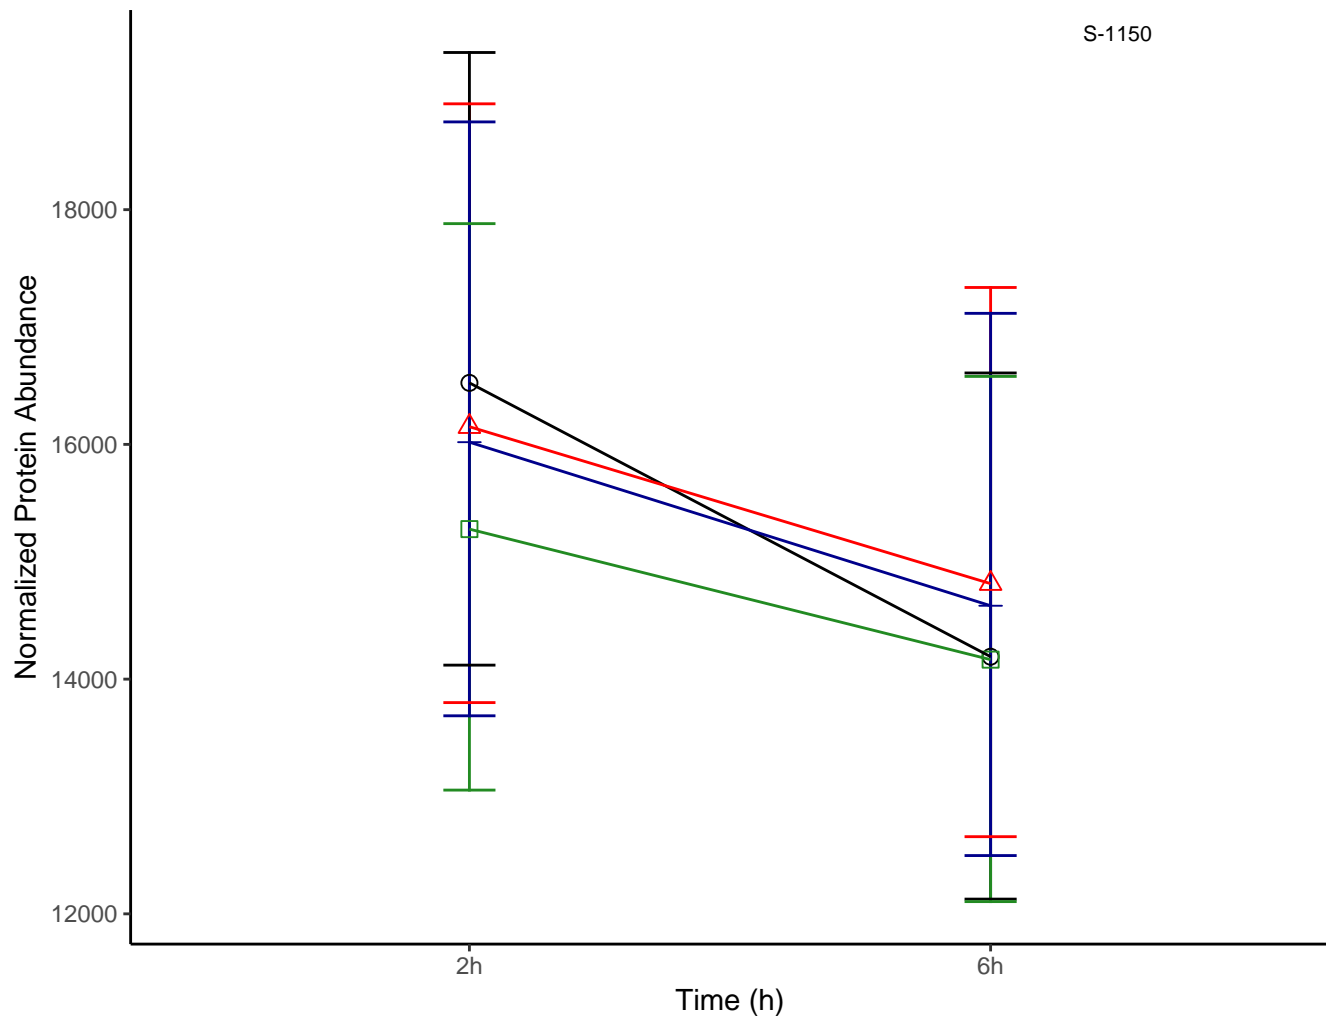

- SA564
- △ SA564- $\Delta$ *hptRS*
- SA564- $\Delta$ *ccpA*
- + SA564- $\Delta$ *hptRS/ccpA*

# GRPE\_STAAM

S-1151

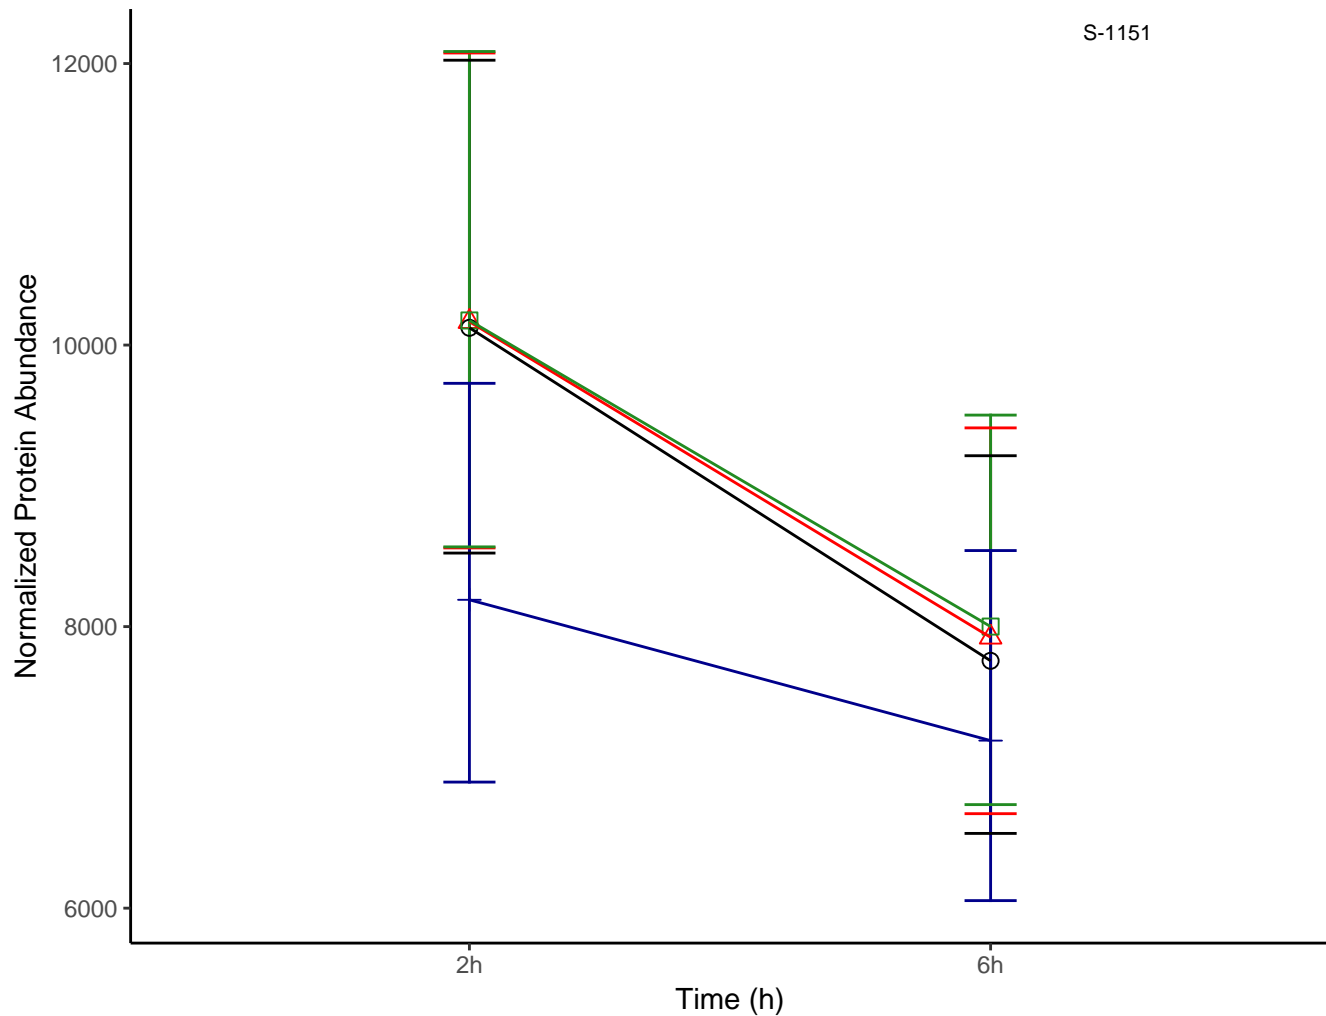

- SA564
- △ SA564- $\Delta hptRS$
- SA564- $\Delta ccpA$
- + SA564- $\Delta hptRS/ccpA$

# GSA1\_STAAM

S-1152

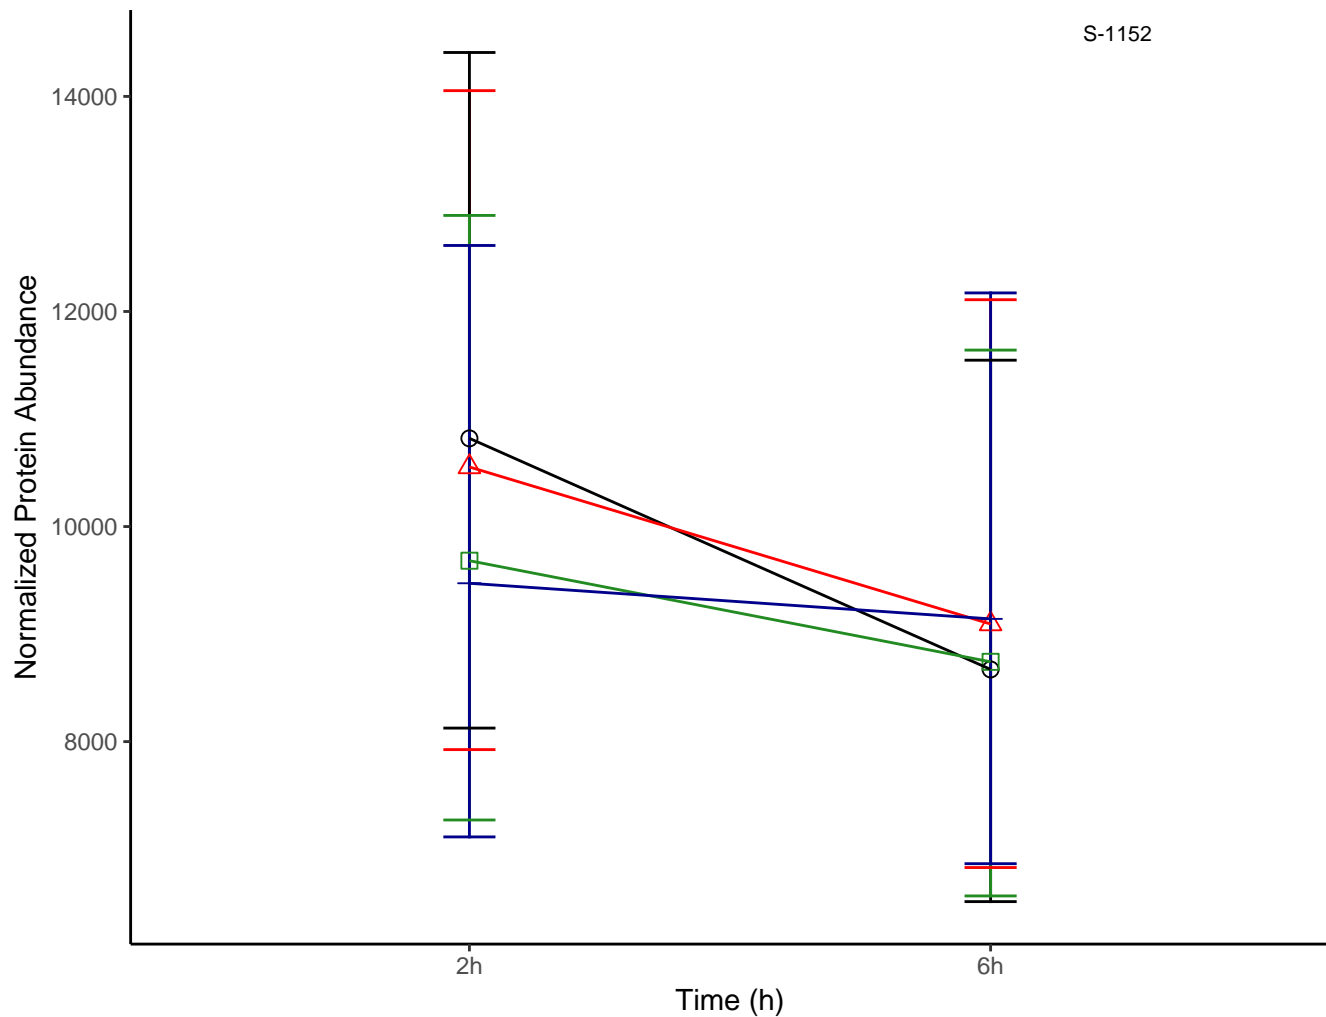

- SA564
- △ SA564- $\Delta hptRS$
- SA564- $\Delta ccpA$
- + SA564- $\Delta hptRS/ccpA$



# GSA2\_STAAM

S-1153

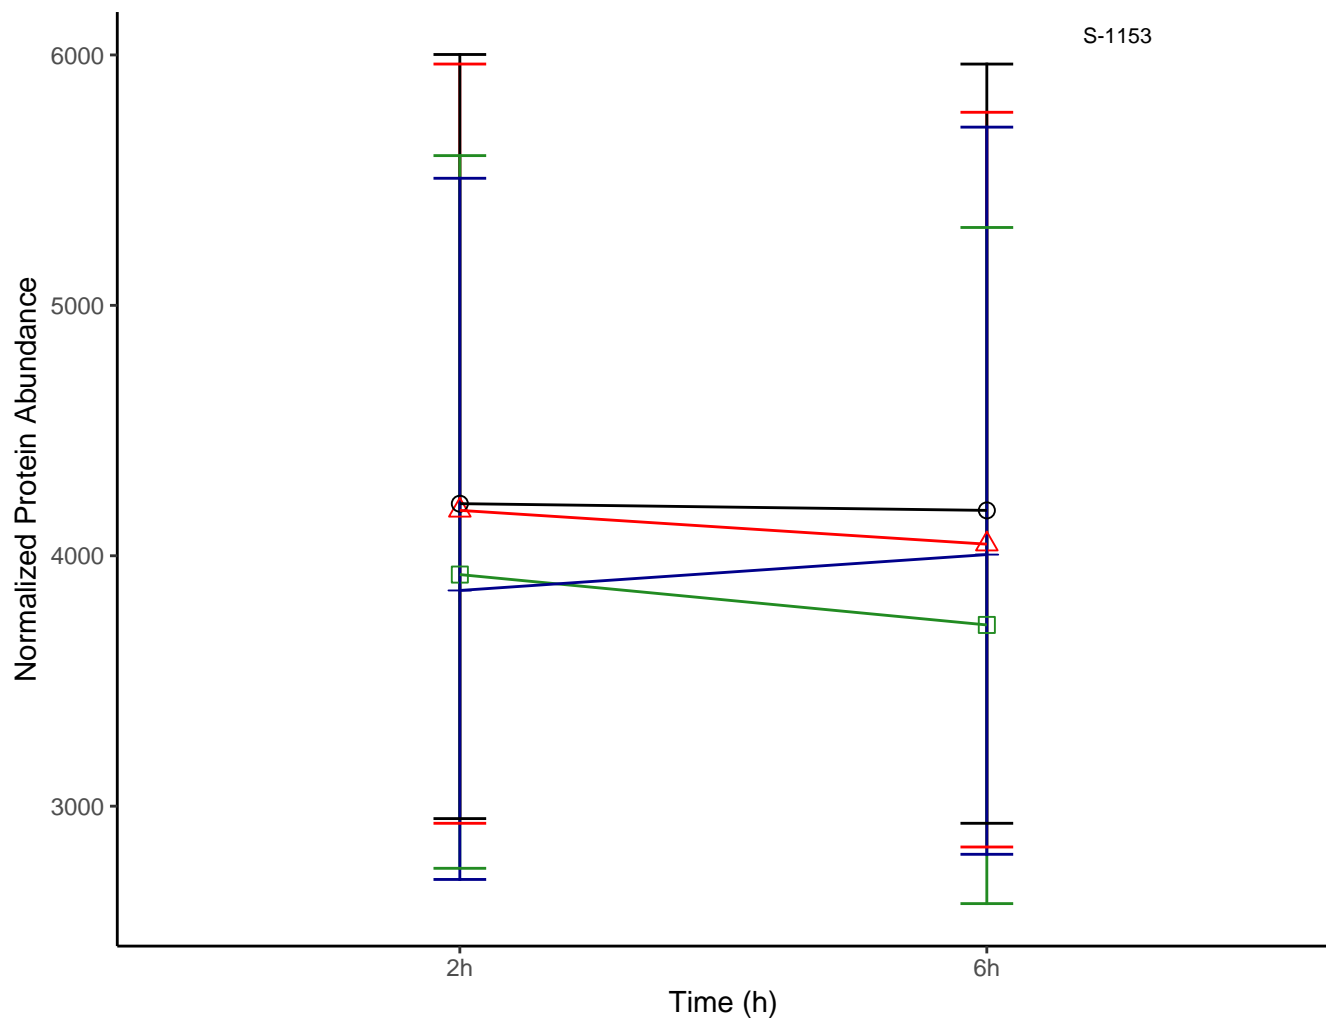

- SA564
- △ SA564- $\Delta hptRS$
- SA564- $\Delta ccpA$
- + SA564- $\Delta hptRS/ccpA$

# GTAB\_STAAM

S-1154

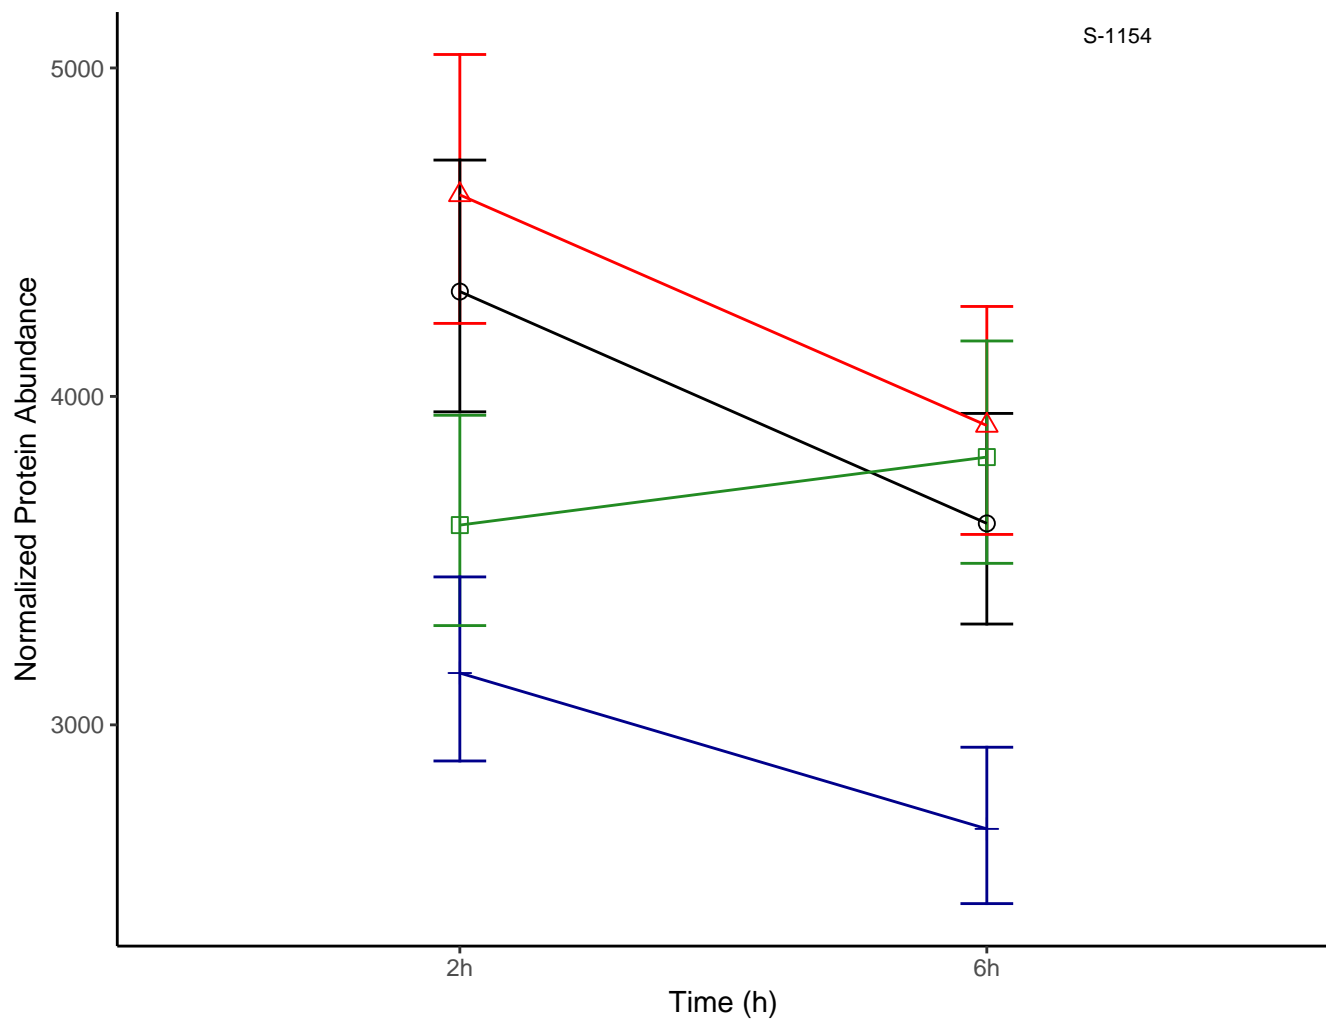

- SA564
- △ SA564- $\Delta$ *hptRS*
- SA564- $\Delta$ *ccpA*
- + SA564- $\Delta$ *hptRS/ccpA*

# GUA<sub>A</sub>\_STAAM

S-1155

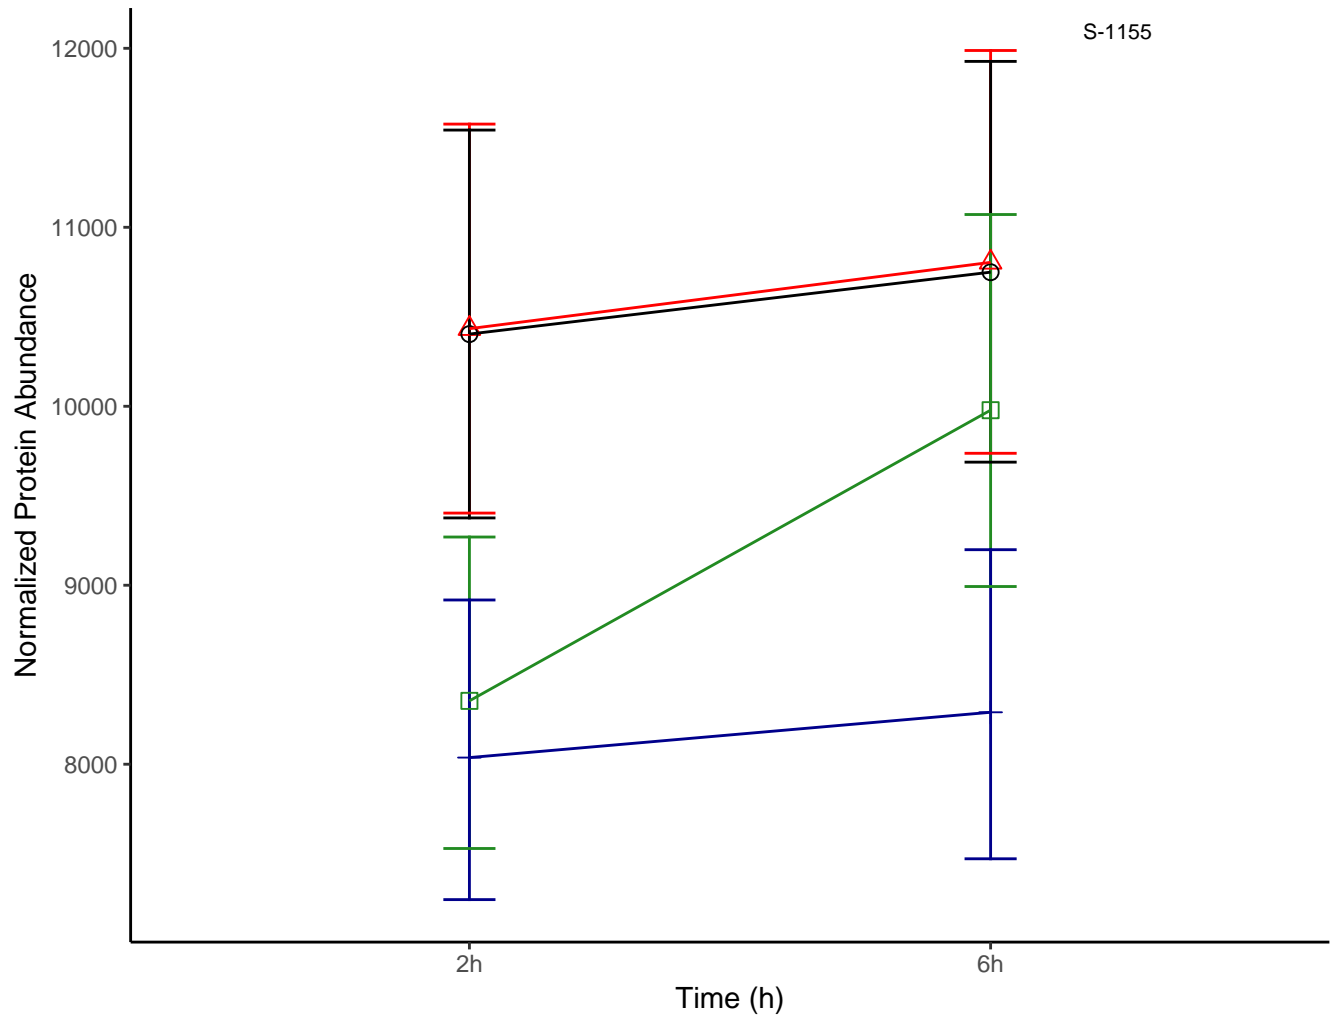

- SA564
- △ SA564- $\Delta$ *hptRS*
- SA564- $\Delta$ *ccpA*
- + SA564- $\Delta$ *hptRS/ccpA*

# GUAC\_STAAM

S-1156

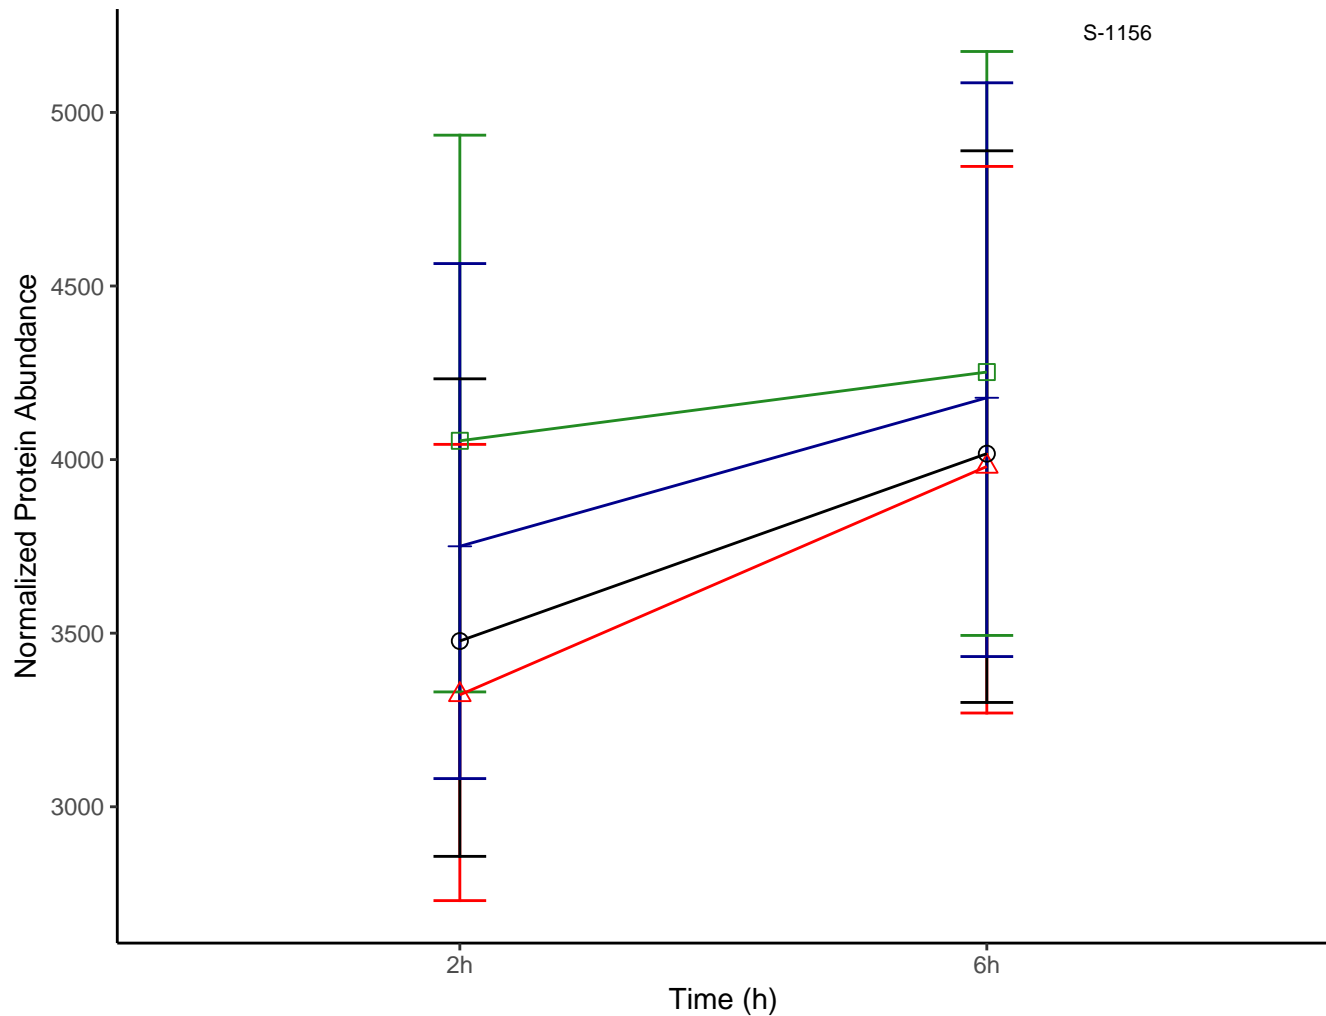

- SA564
- △ SA564-ΔhptRS
- SA564-ΔccpA
- + SA564-ΔhptRS/ccpA

# GYRB\_STAAM

S-1157

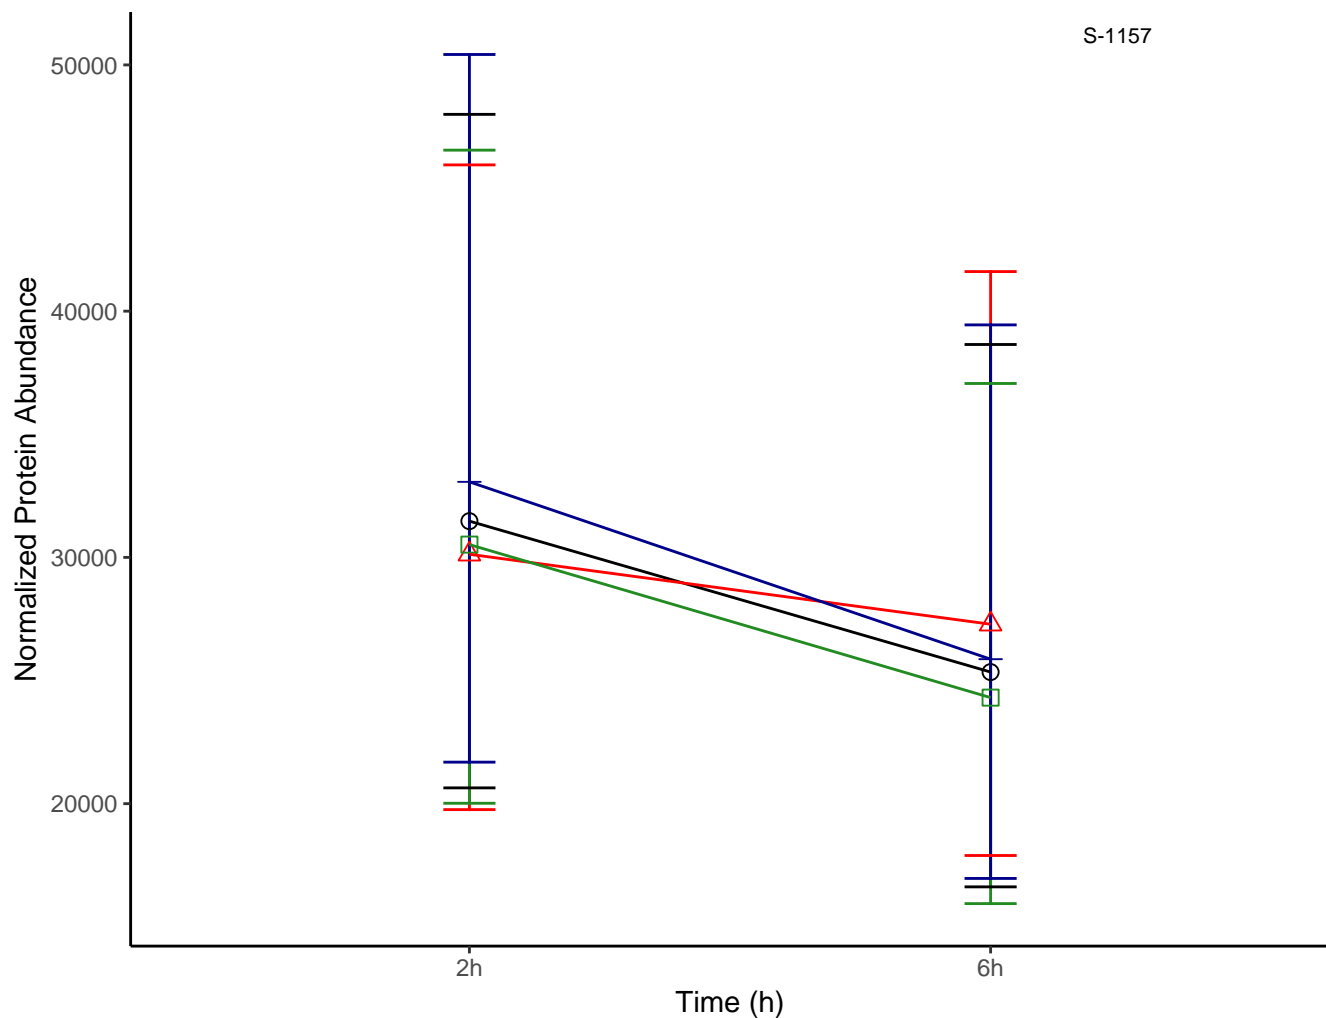

- SA564
- △ SA564- $\Delta$ *hptRS*
- SA564- $\Delta$ *ccpA*
- + SA564- $\Delta$ *hptRS/ccpA*

# HCHA\_STAAM

S-1158

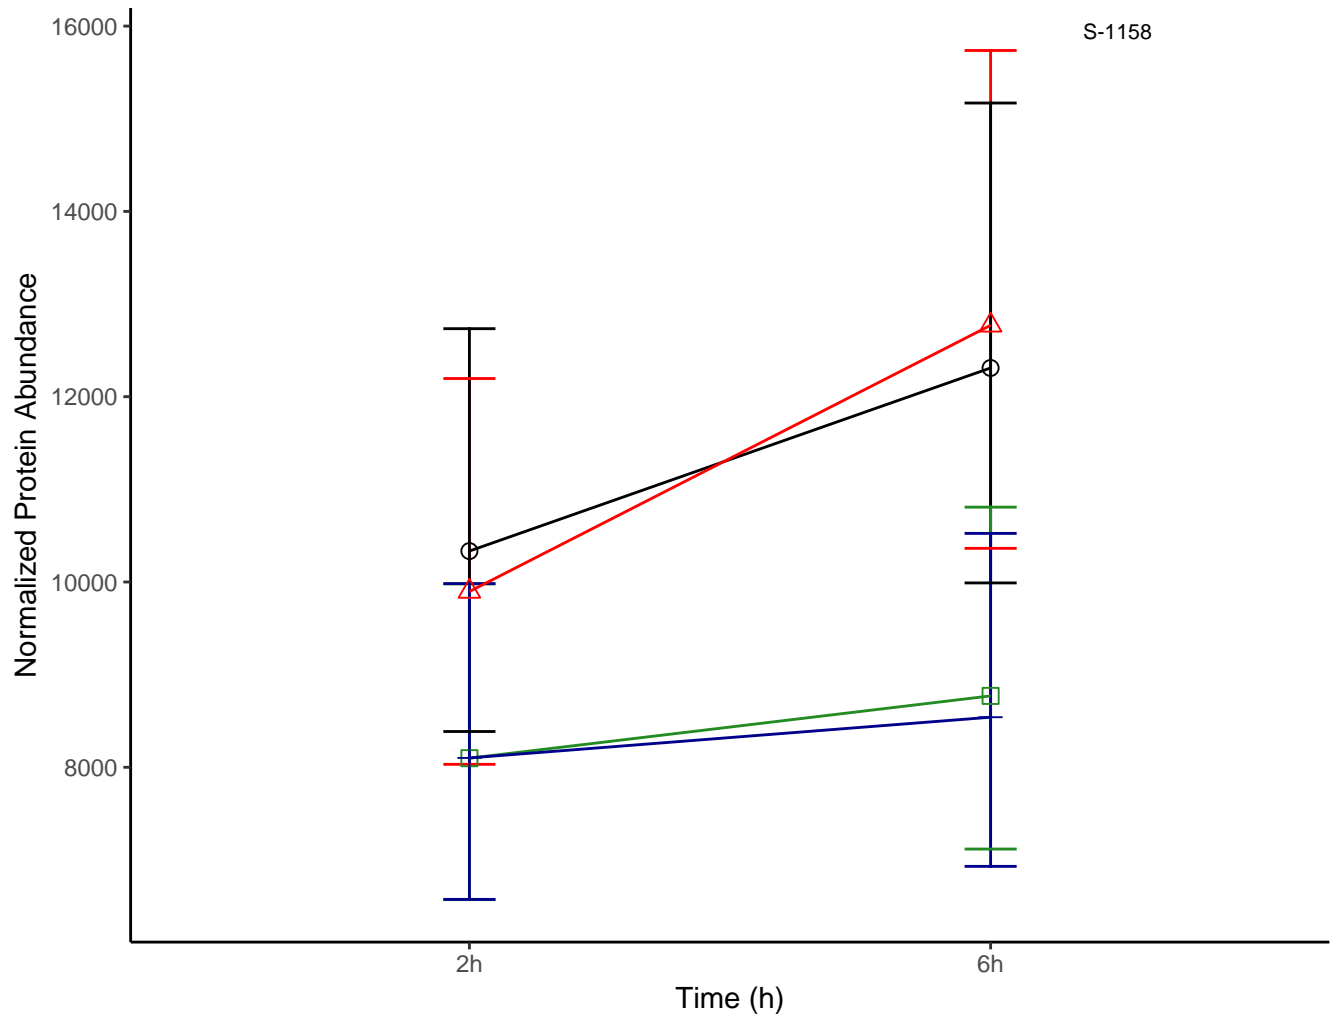

- SA564
- △ SA564- $\Delta$ *hptRS*
- SA564- $\Delta$ *ccpA*
- + SA564- $\Delta$ *hptRS/ccpA*

# HEM2\_STAAM

S-1159

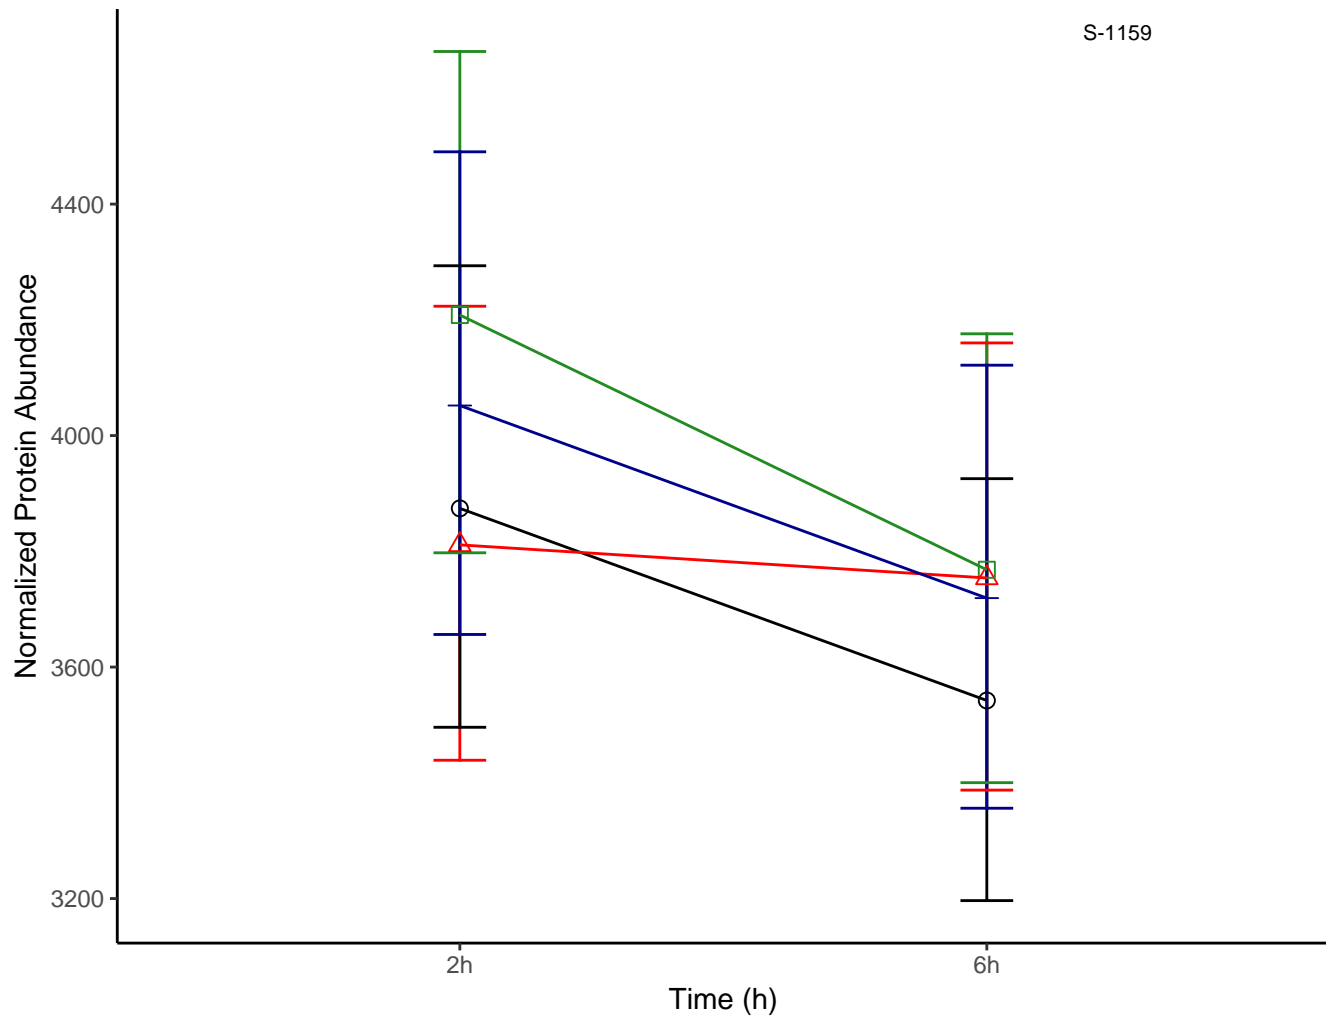

- SA564
- △ SA564- $\Delta hptRS$
- SA564- $\Delta ccpA$
- + SA564- $\Delta hptRS/ccpA$

# HEM3\_STAAM

S-1160

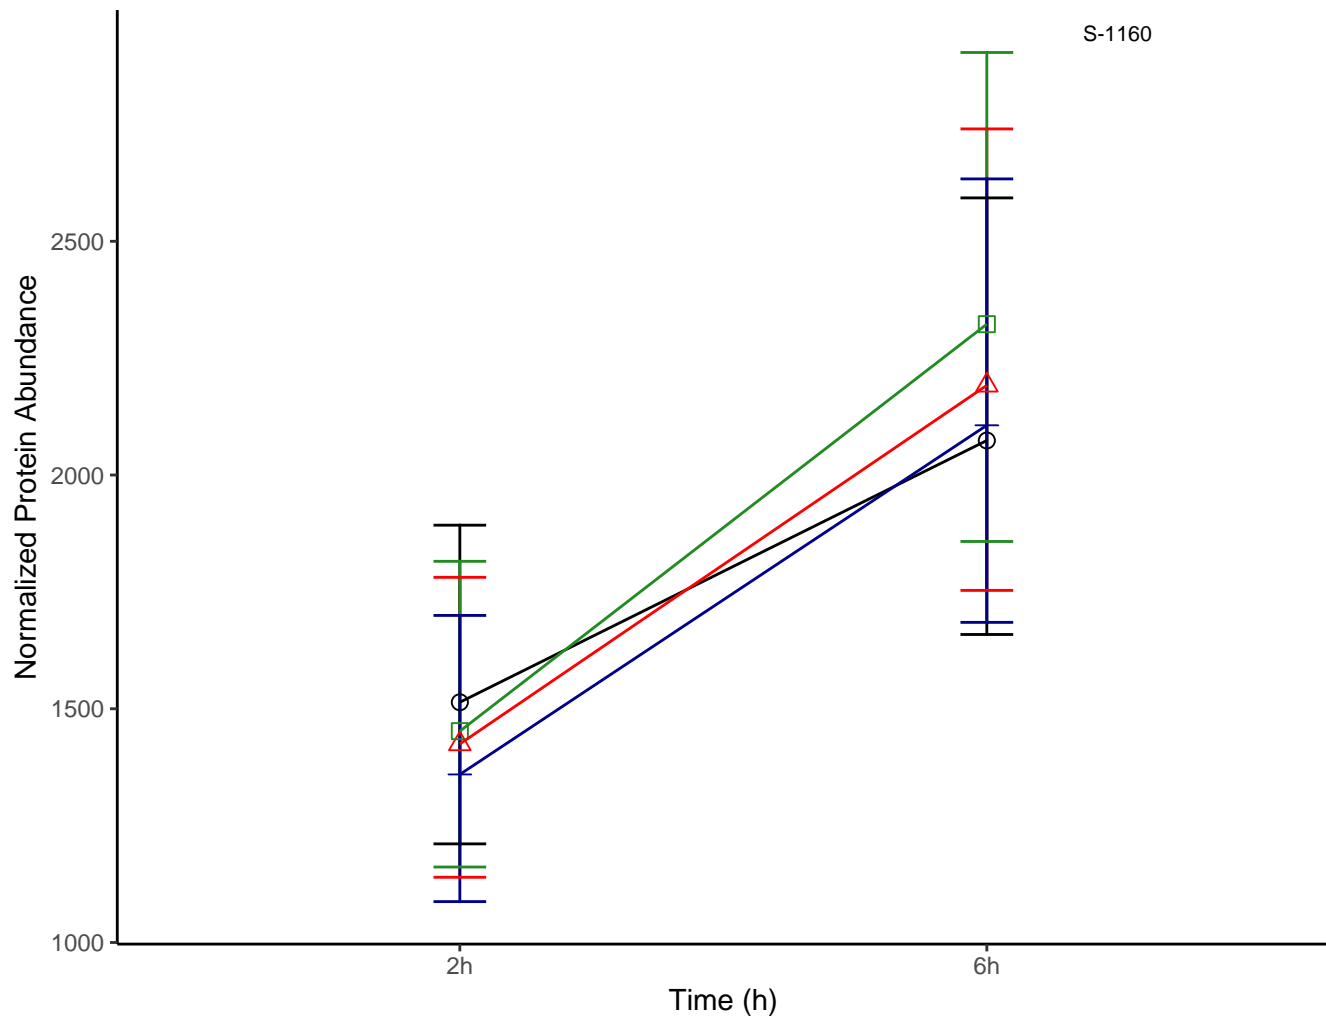

- SA564
- △ SA564-ΔhptRS
- SA564-ΔccpA
- + SA564-ΔhptRS/ccpA



# HLD\_STAAM

S-1161

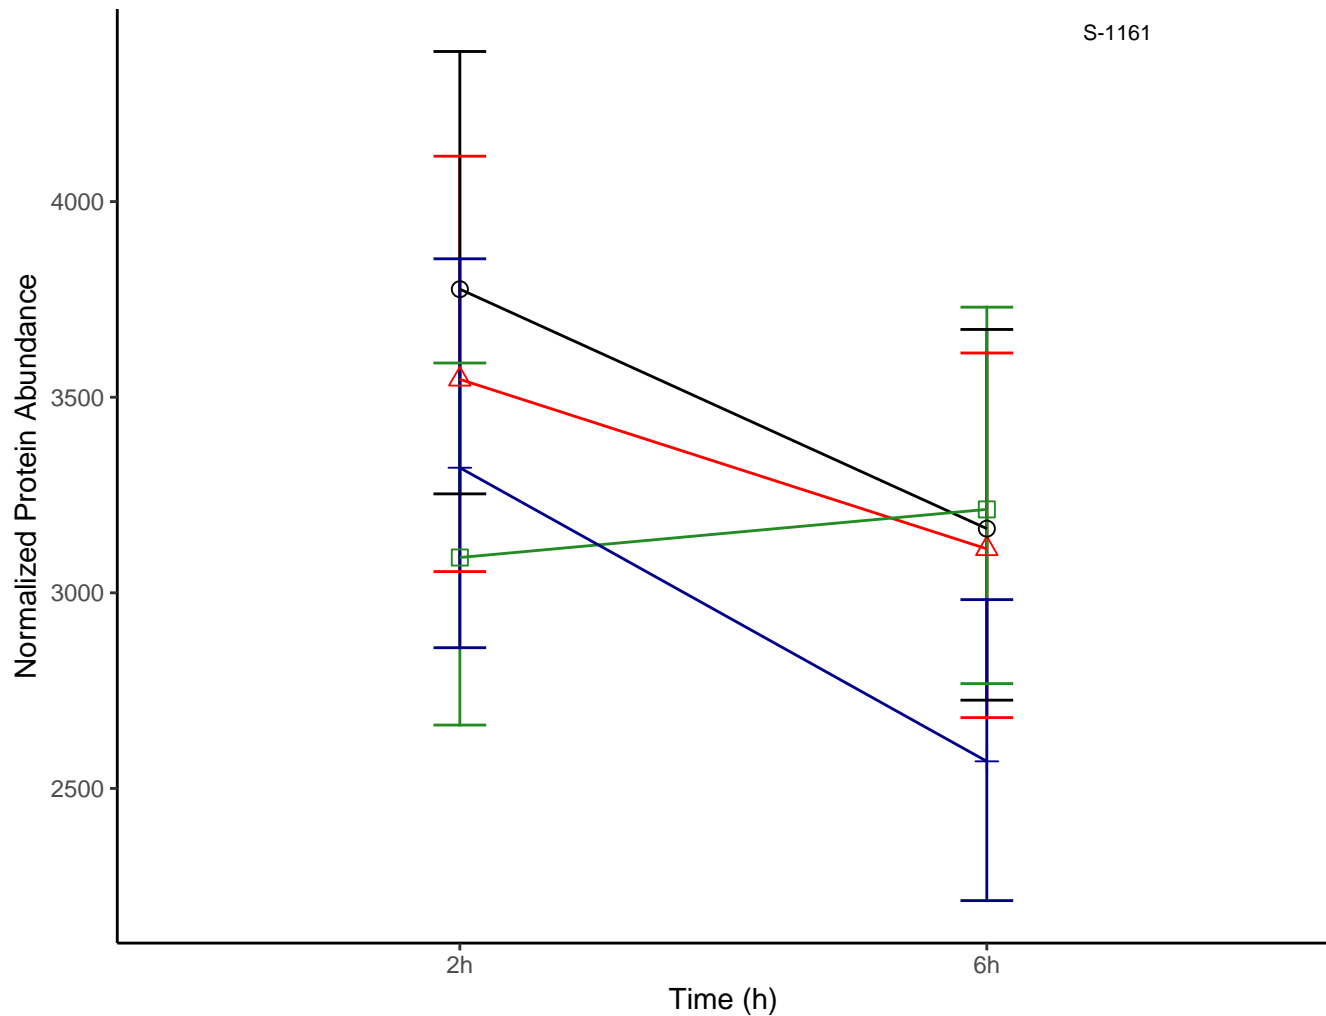

- SA564
- △ SA564- $\Delta$ *hptRS*
- SA564- $\Delta$ *ccpA*
- + SA564- $\Delta$ *hptRS/ccpA*

# HPRK\_STAAM

S-1162

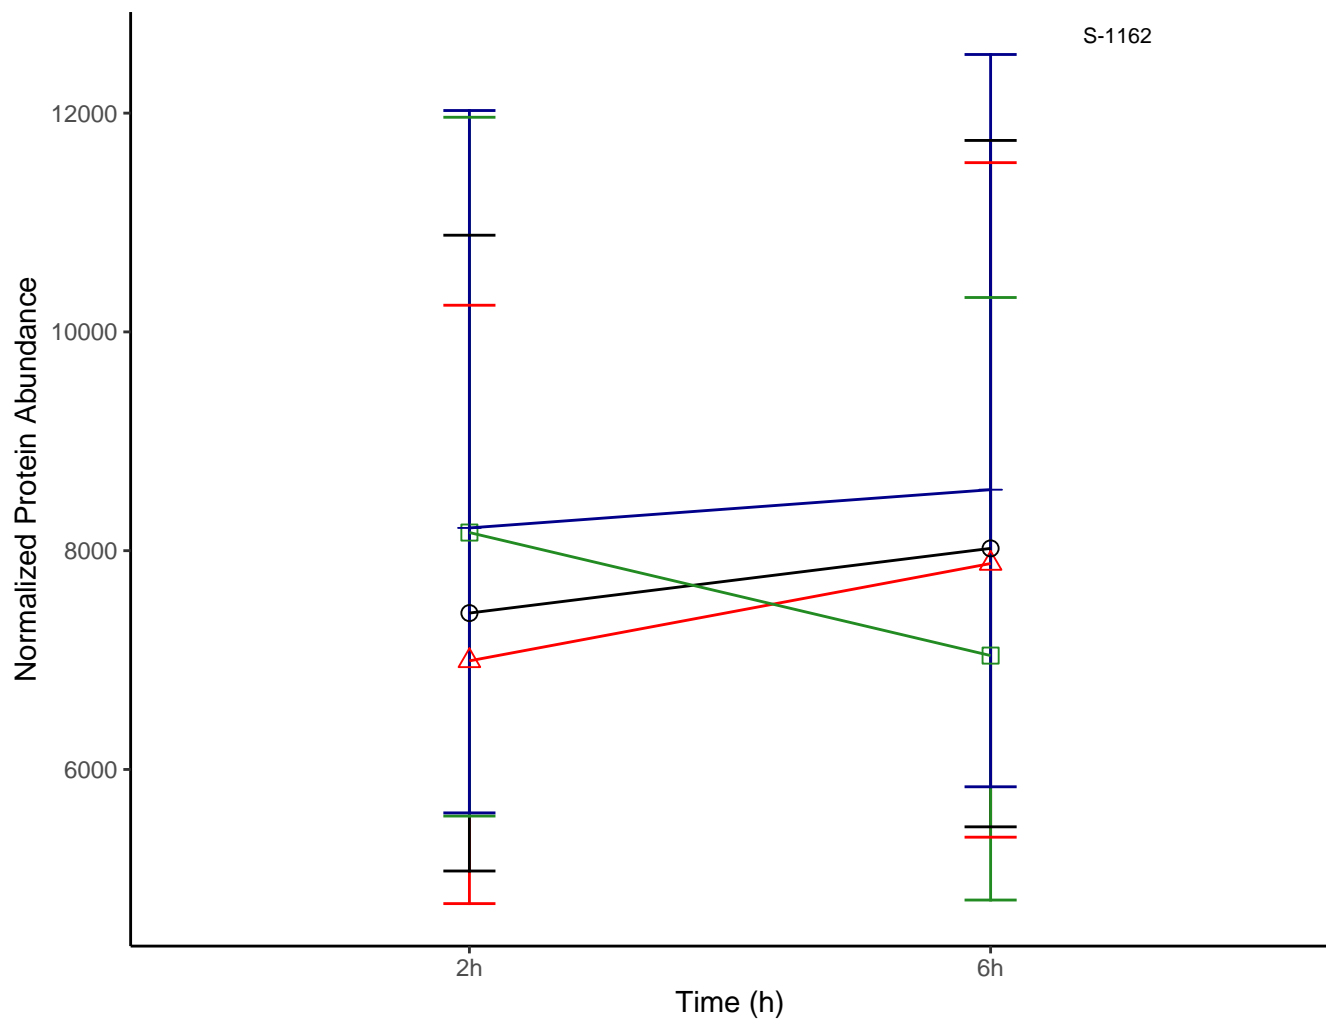

- SA564
- △ SA564- $\Delta$ hptRS
- SA564- $\Delta$ ccpA
- + SA564- $\Delta$ hptRS/ccpA

# HPRT\_STAAM

S-1163

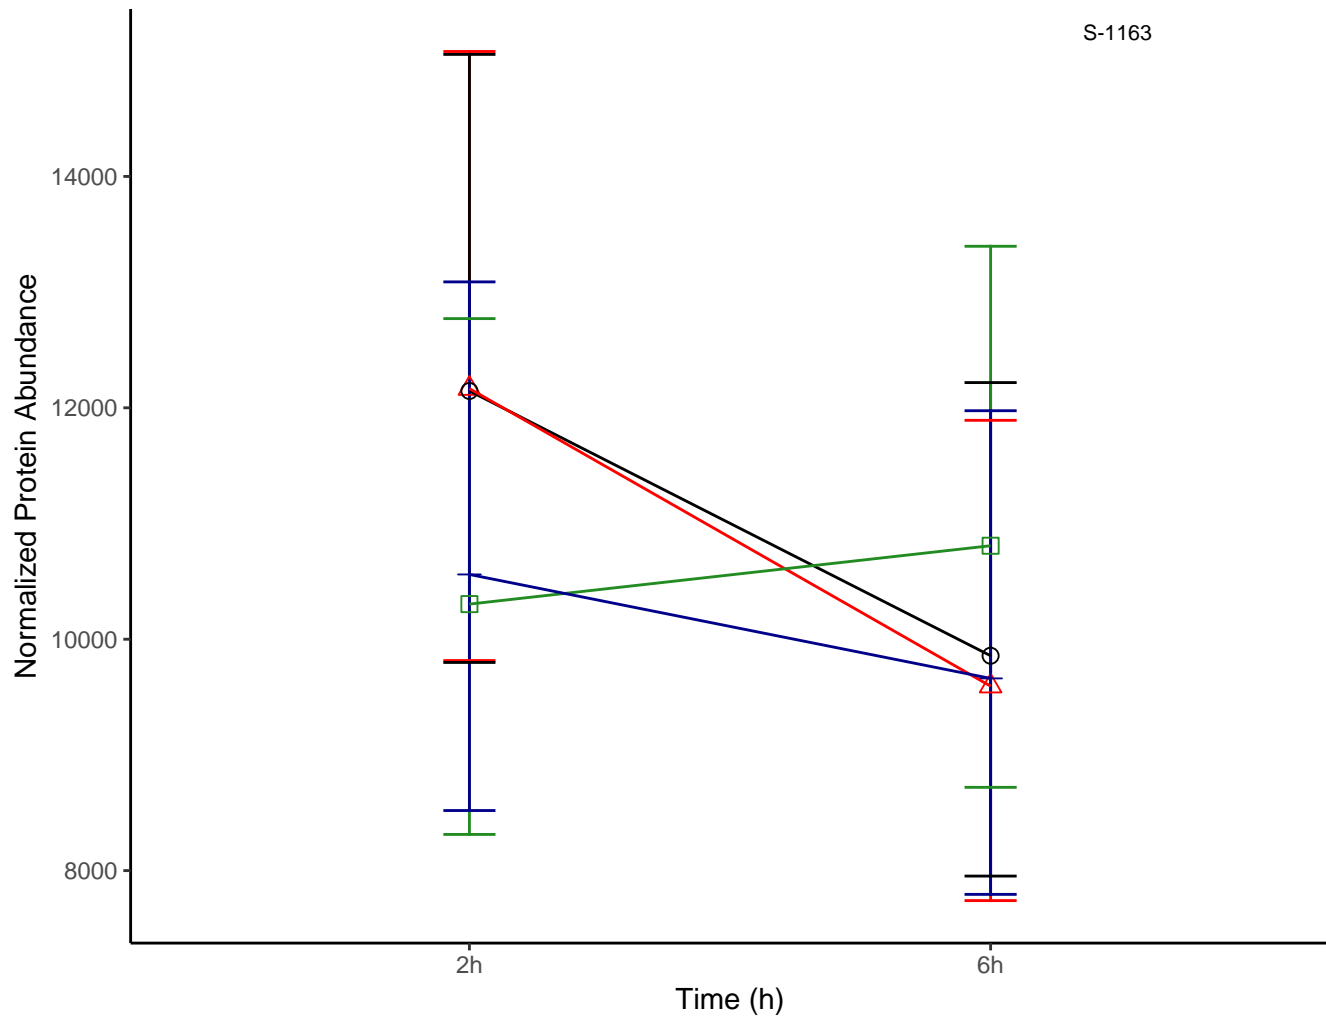

- SA564
- △ SA564- $\Delta$ *hptRS*
- SA564- $\Delta$ *ccpA*
- + SA564- $\Delta$ *hptRS/ccpA*

# HPS\_STAAM

S-1164

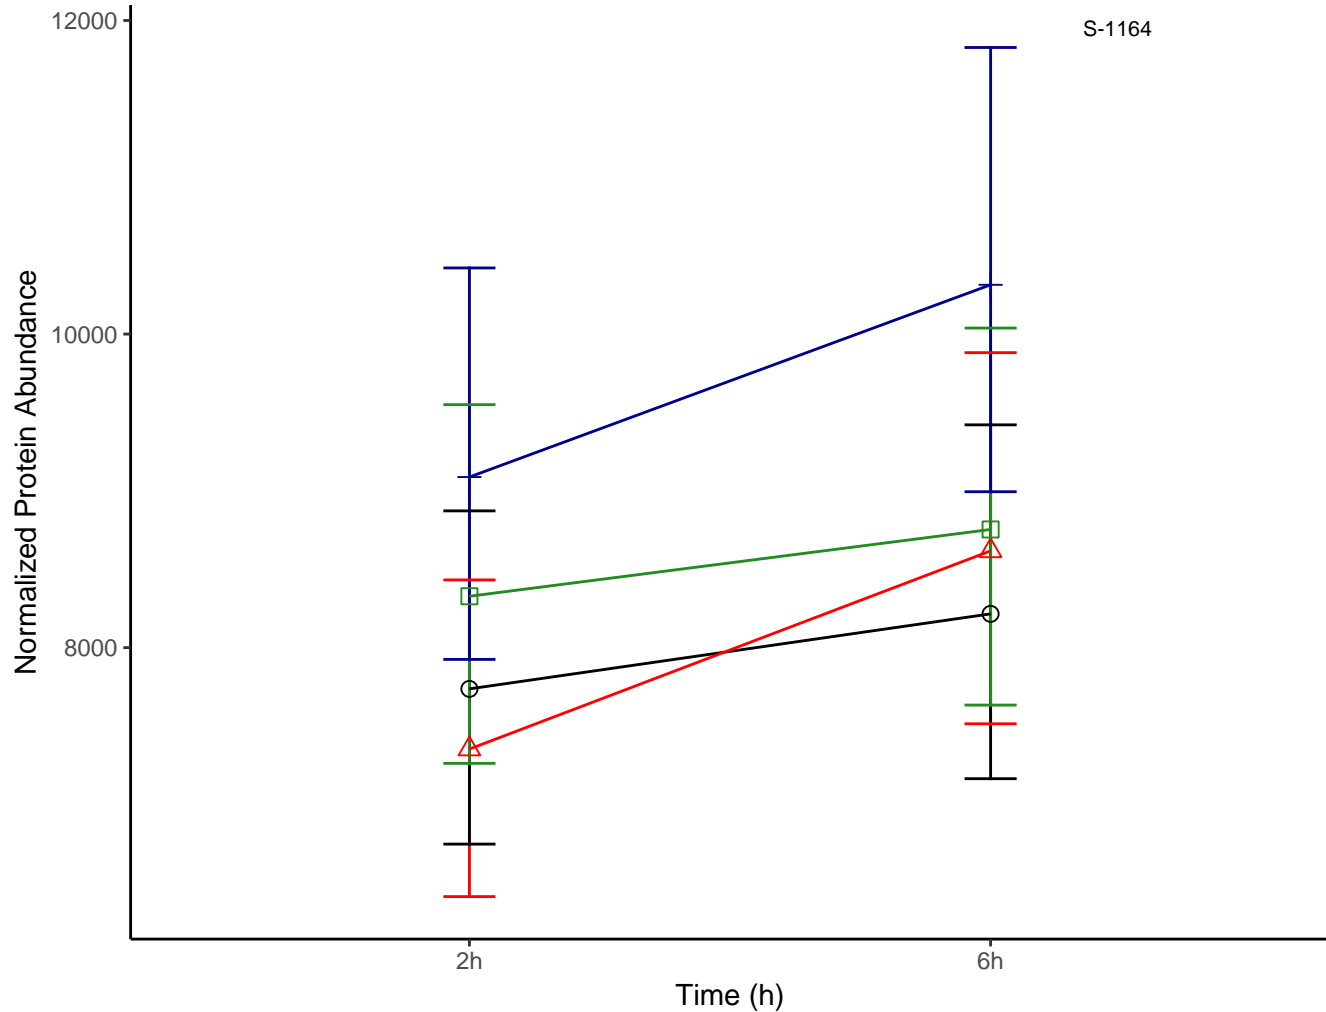

- SA564
- △ SA564- $\Delta$ hptRS
- SA564- $\Delta$ ccpA
- + SA564- $\Delta$ hptRS/ccpA

# HRTA\_STAAM

S-1165

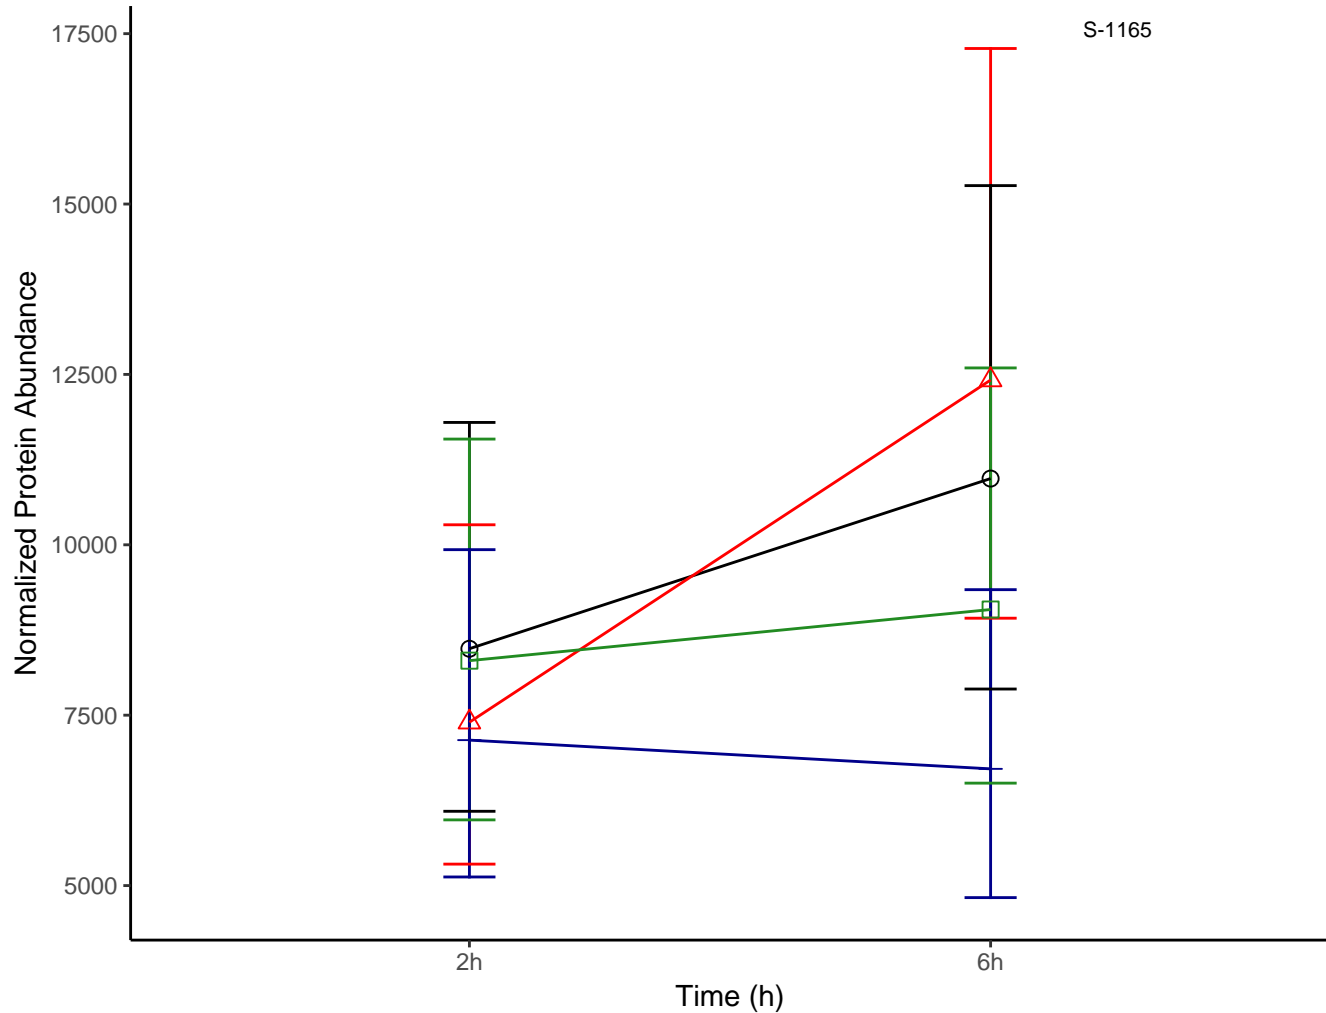

- SA564
- △ SA564- $\Delta$ hptRS
- SA564- $\Delta$ ccpA
- + SA564- $\Delta$ hptRS/ccpA

# HSLO\_STAAM

S-1166

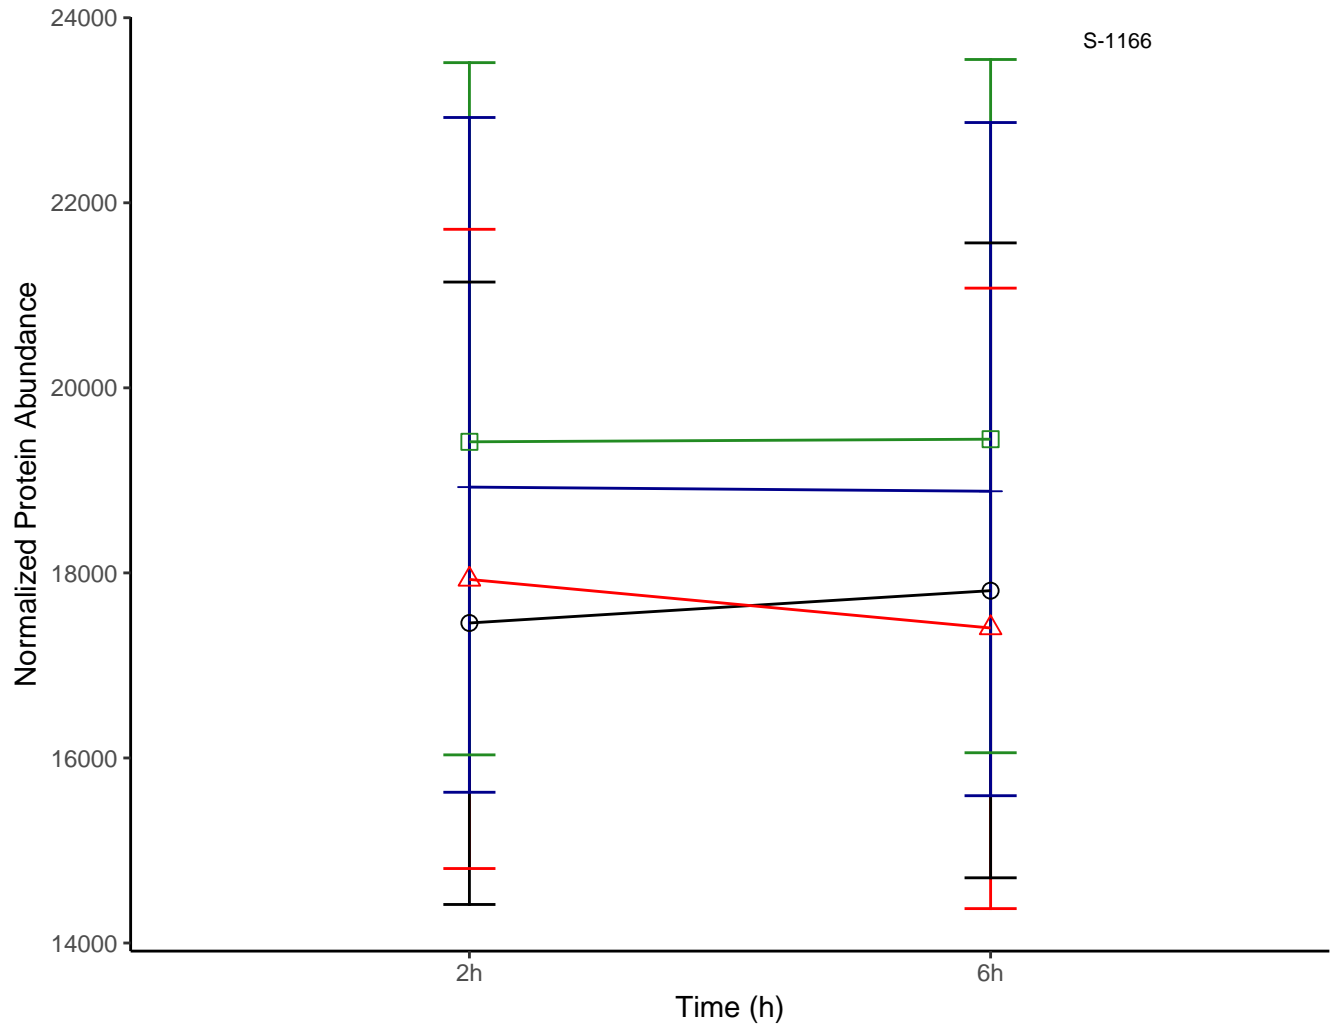

- SA564
- △ SA564- $\Delta$ hptRS
- SA564- $\Delta$ ccpA
- + SA564- $\Delta$ hptRS/ccpA

# HSLU\_STAAM

S-1167

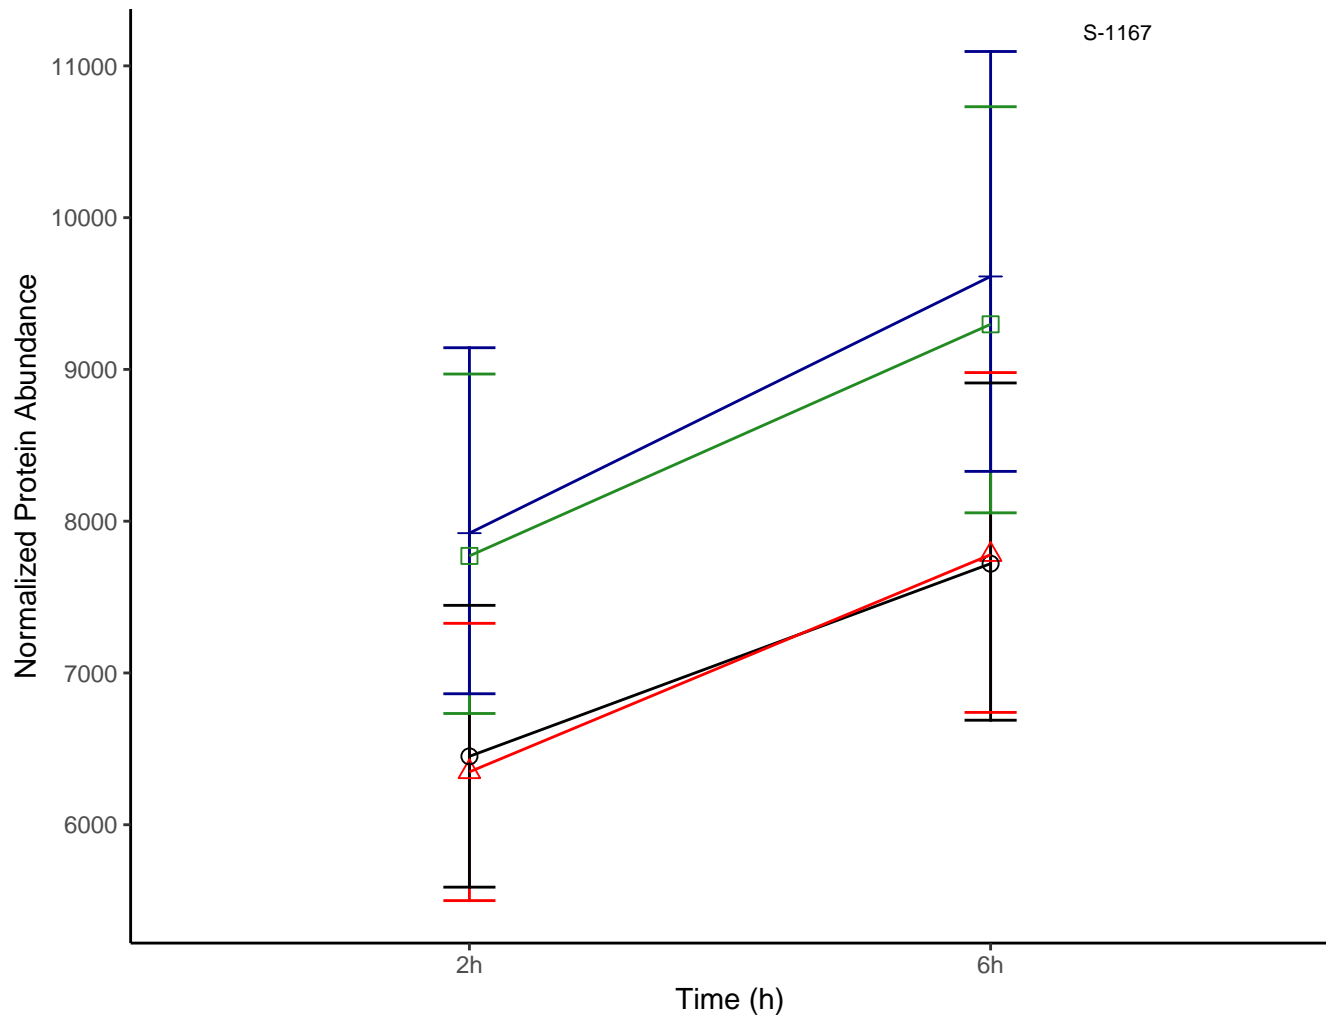

- SA564
- △ SA564- $\Delta$ *hptRS*
- SA564- $\Delta$ *ccpA*
- + SA564- $\Delta$ *hptRS/ccpA*

# HSLV\_STAAM

S-1168

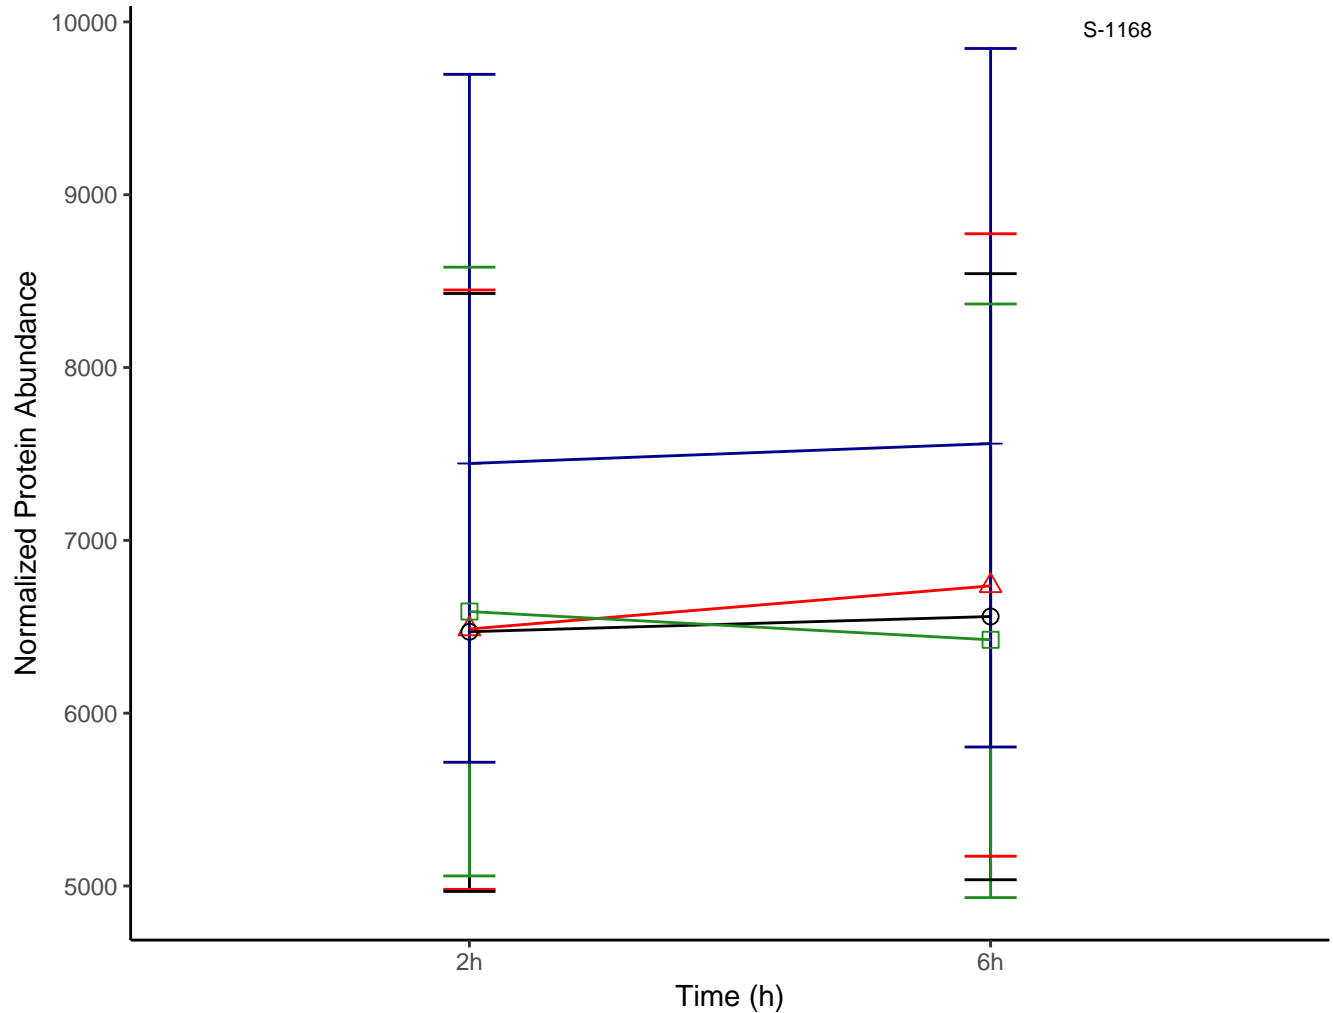

- SA564
- △ SA564- $\Delta$ *hptRS*
- SA564- $\Delta$ *ccpA*
- + SA564- $\Delta$ *hptRS/ccpA*



# HUTH\_STAAM

S-1169

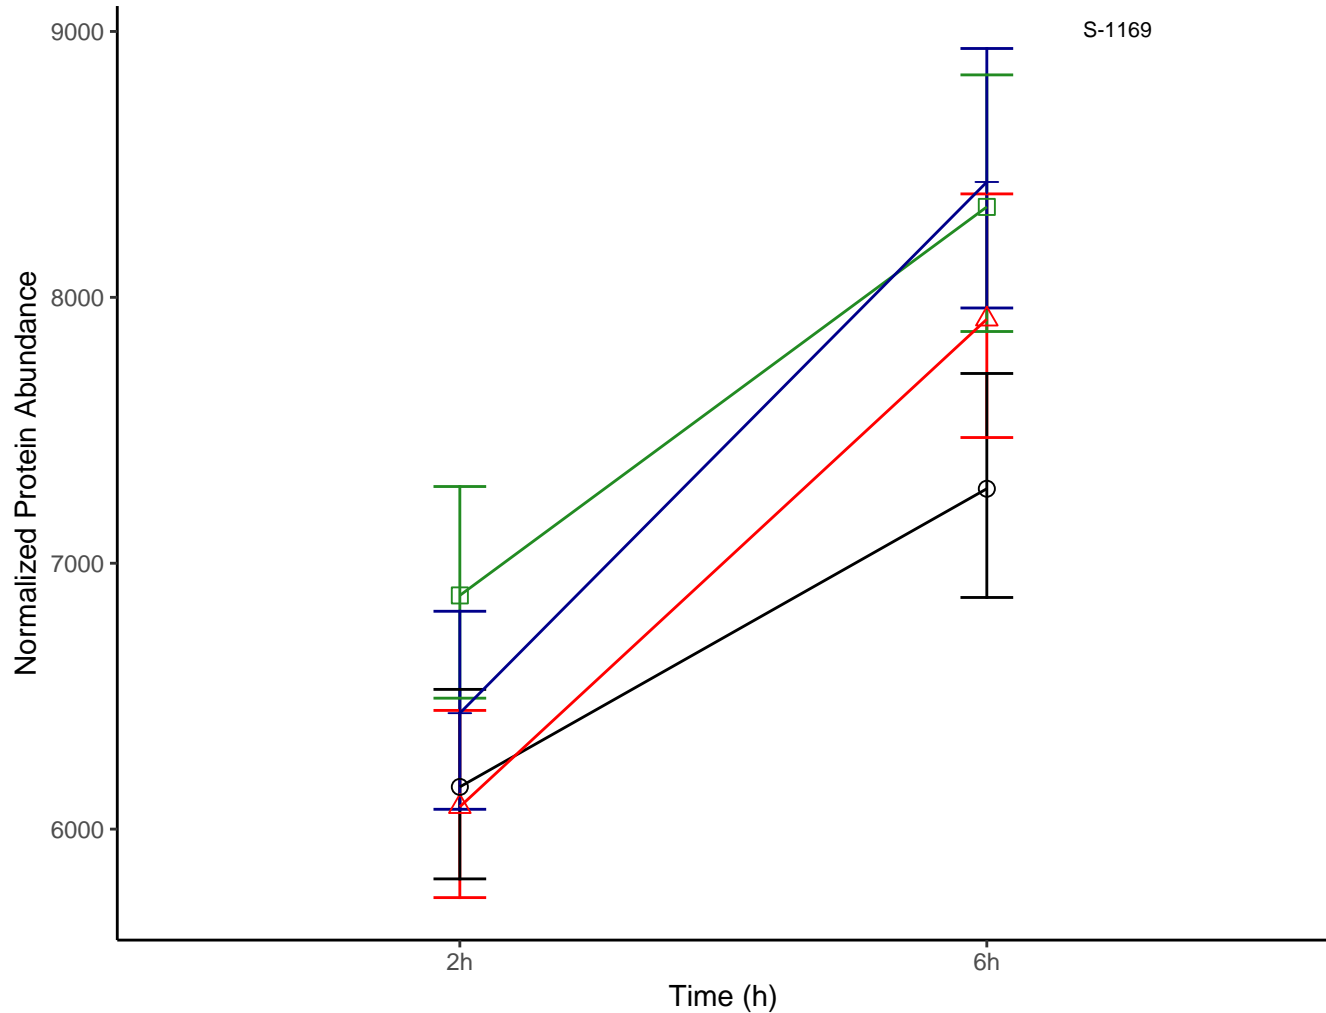

- SA564
- △ SA564- $\Delta hptRS$
- SA564- $\Delta ccpA$
- + SA564- $\Delta hptRS/ccpA$

# HUTI\_STAAM

S-1170

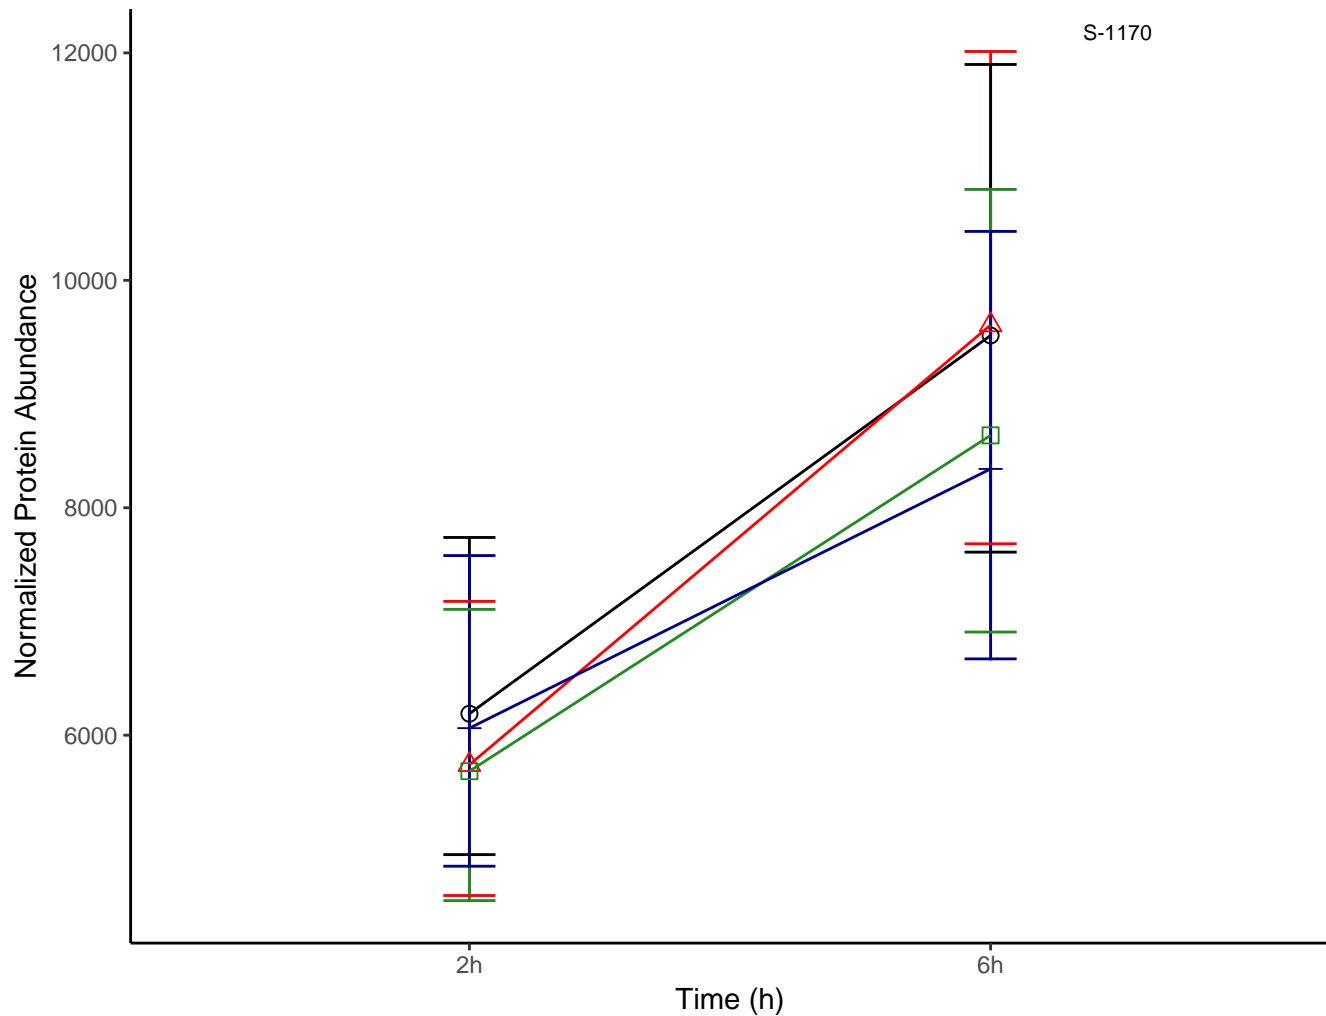

- SA564
- △ SA564- $\Delta hptRS$
- SA564- $\Delta ccpA$
- + SA564- $\Delta hptRS/ccpA$

# HUTU\_STAAM

S-1171

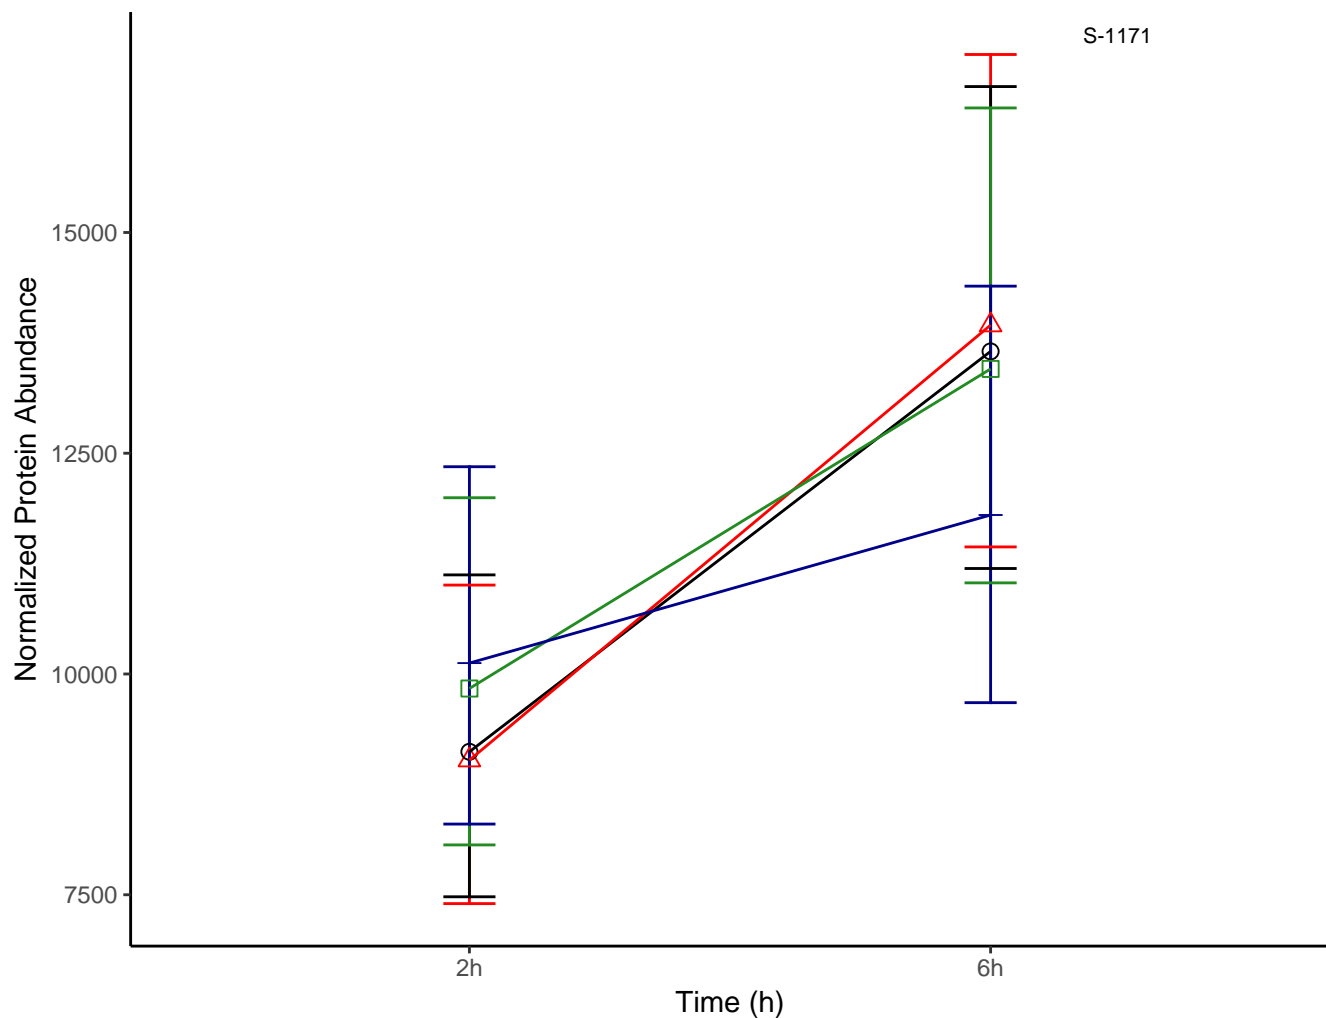

- SA564
- △ SA564- $\Delta hptRS$
- SA564- $\Delta ccpA$
- + SA564- $\Delta hptRS/ccpA$

# ICAB\_STAAM

S-1172

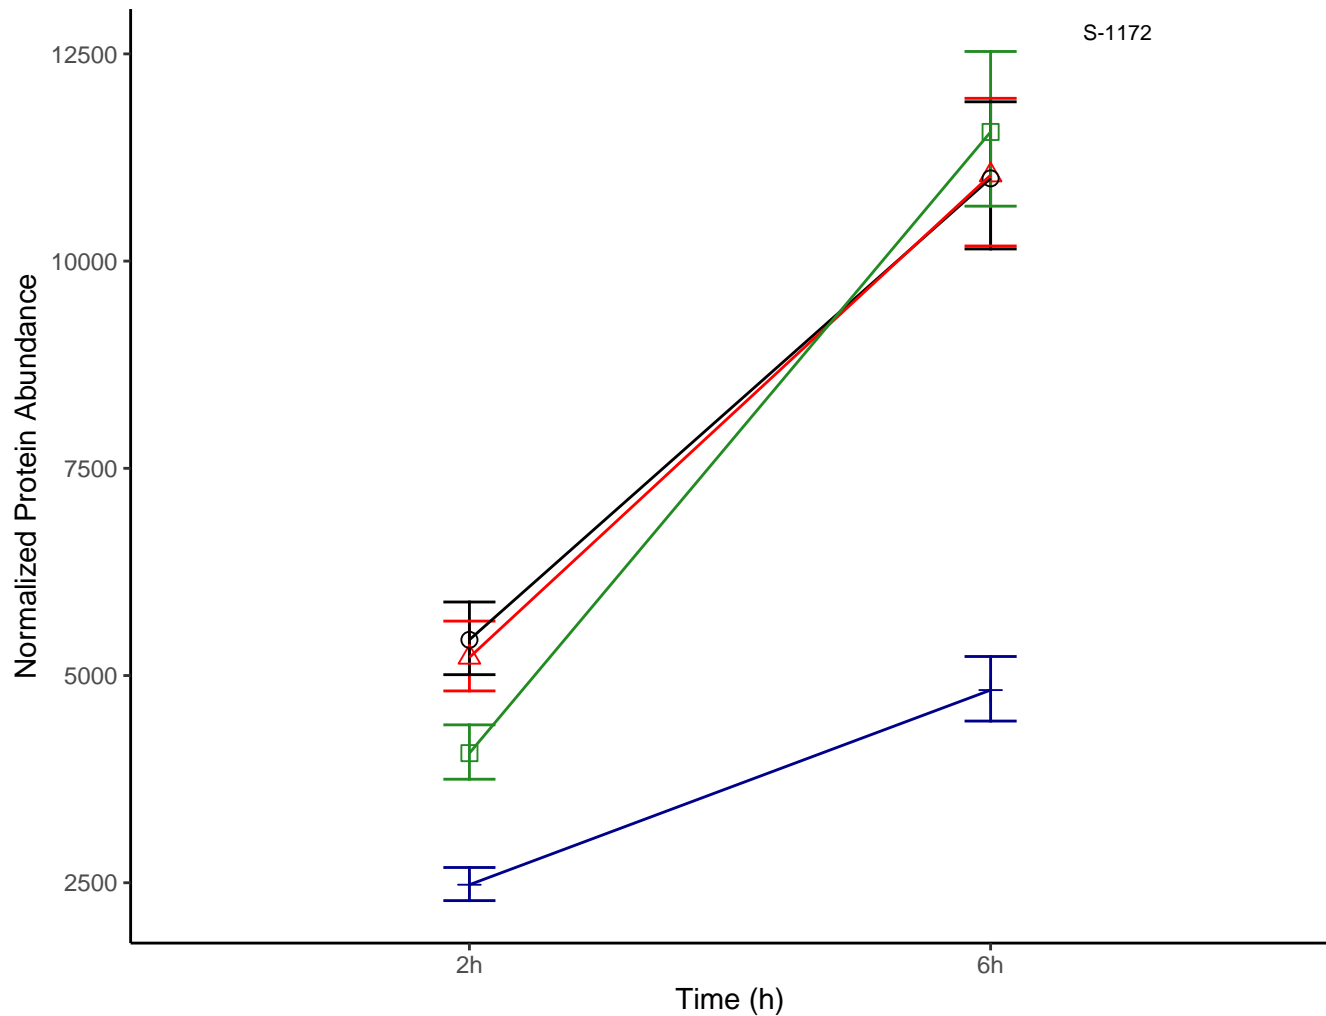

- SA564
- △ SA564- $\Delta$ hptRS
- SA564- $\Delta$ ccpA
- + SA564- $\Delta$ hptRS/ccpA

# IDH\_STAAM

S-1173

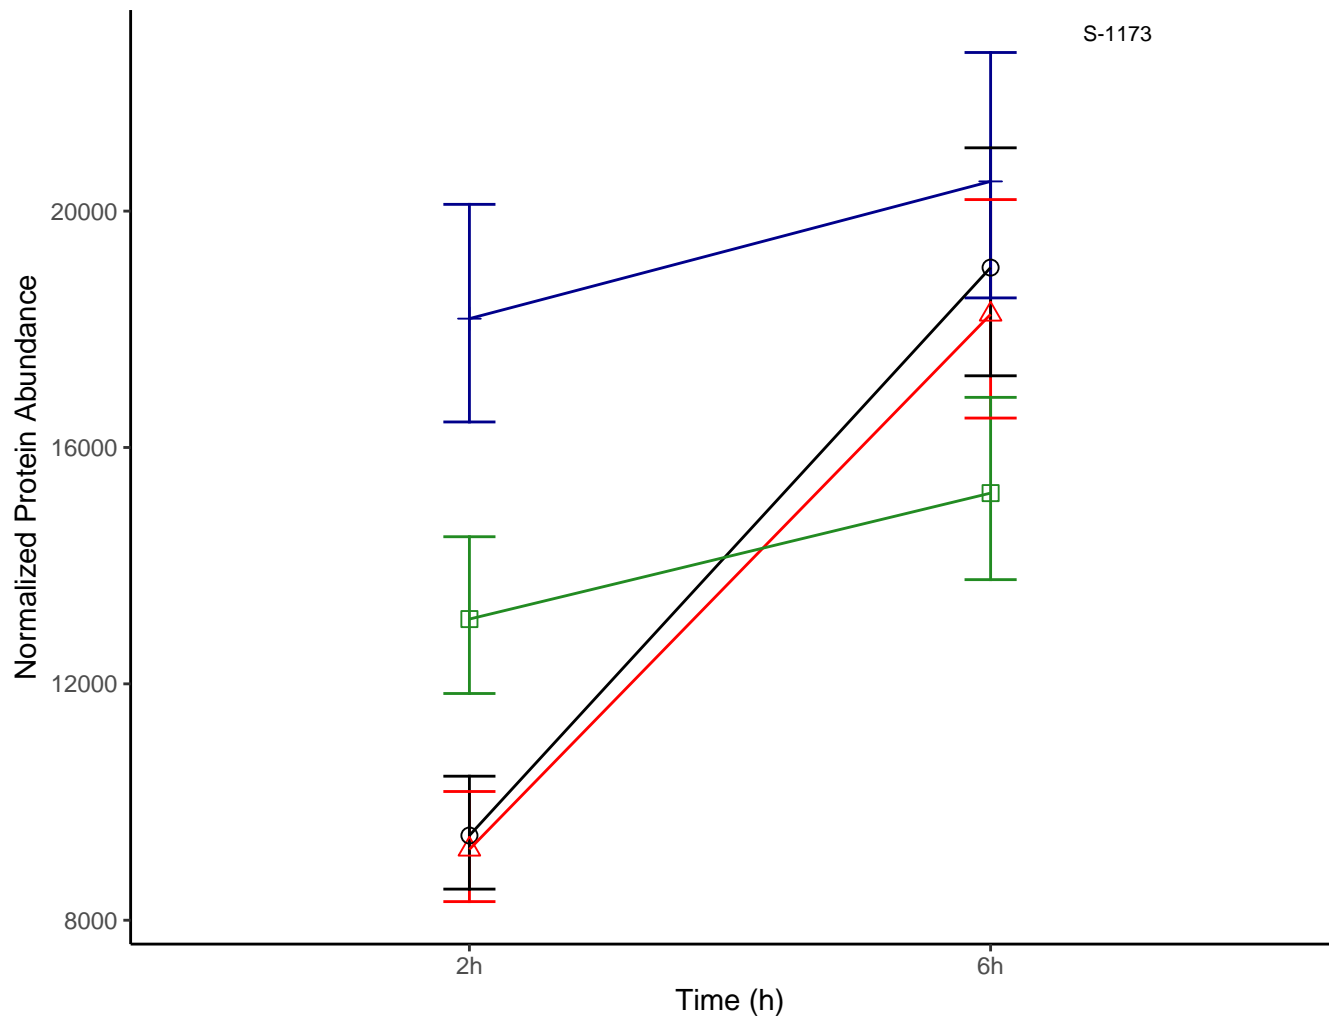

- SA564
- △ SA564- $\Delta$ *hptRS*
- SA564- $\Delta$ *ccpA*
- + SA564- $\Delta$ *hptRS/ccpA*

## IF1\_STAAM

S-1174

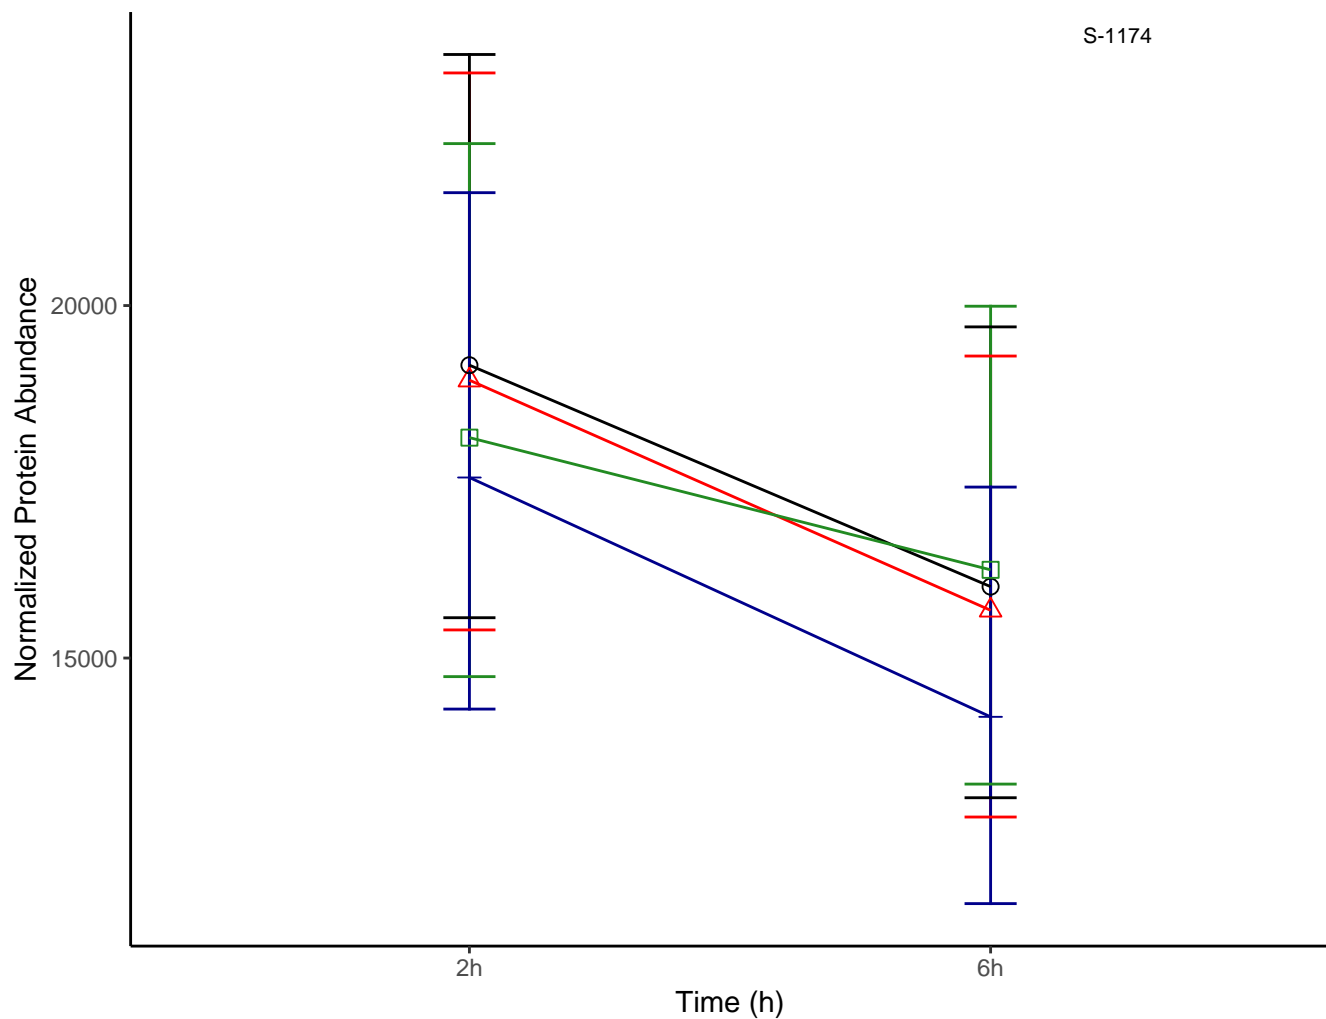

- SA564
- △ SA564- $\Delta hptRS$
- SA564- $\Delta ccpA$
- + SA564- $\Delta hptRS/ccpA$

# IF2\_STAAM

S-1175

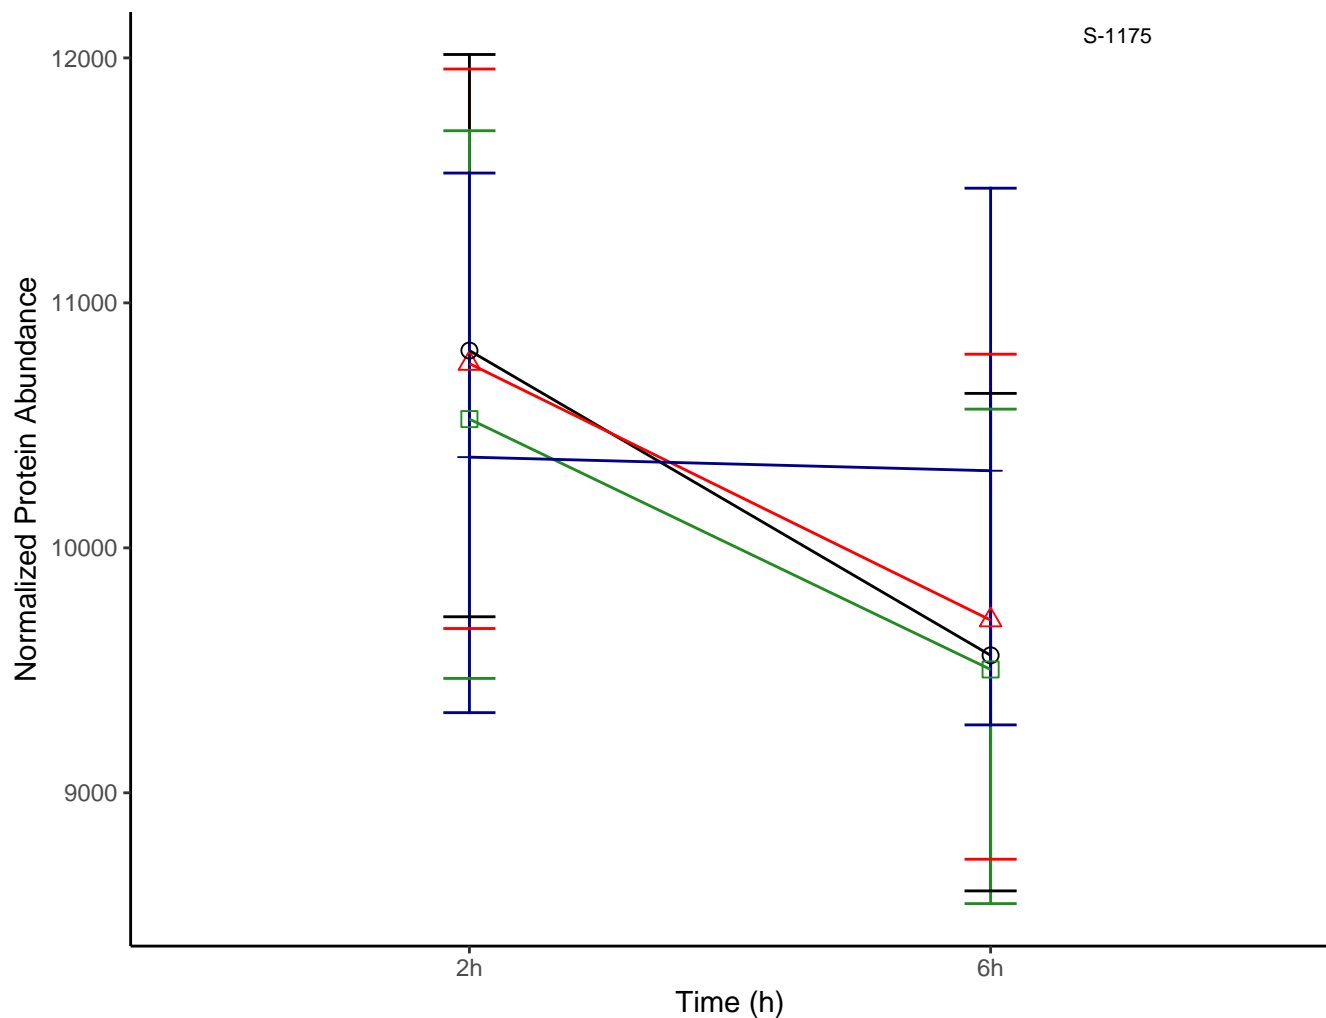

- SA564
- △ SA564- $\Delta hptRS$
- SA564- $\Delta ccpA$
- + SA564- $\Delta hptRS/ccpA$

# IF3\_STAAM

S-1176

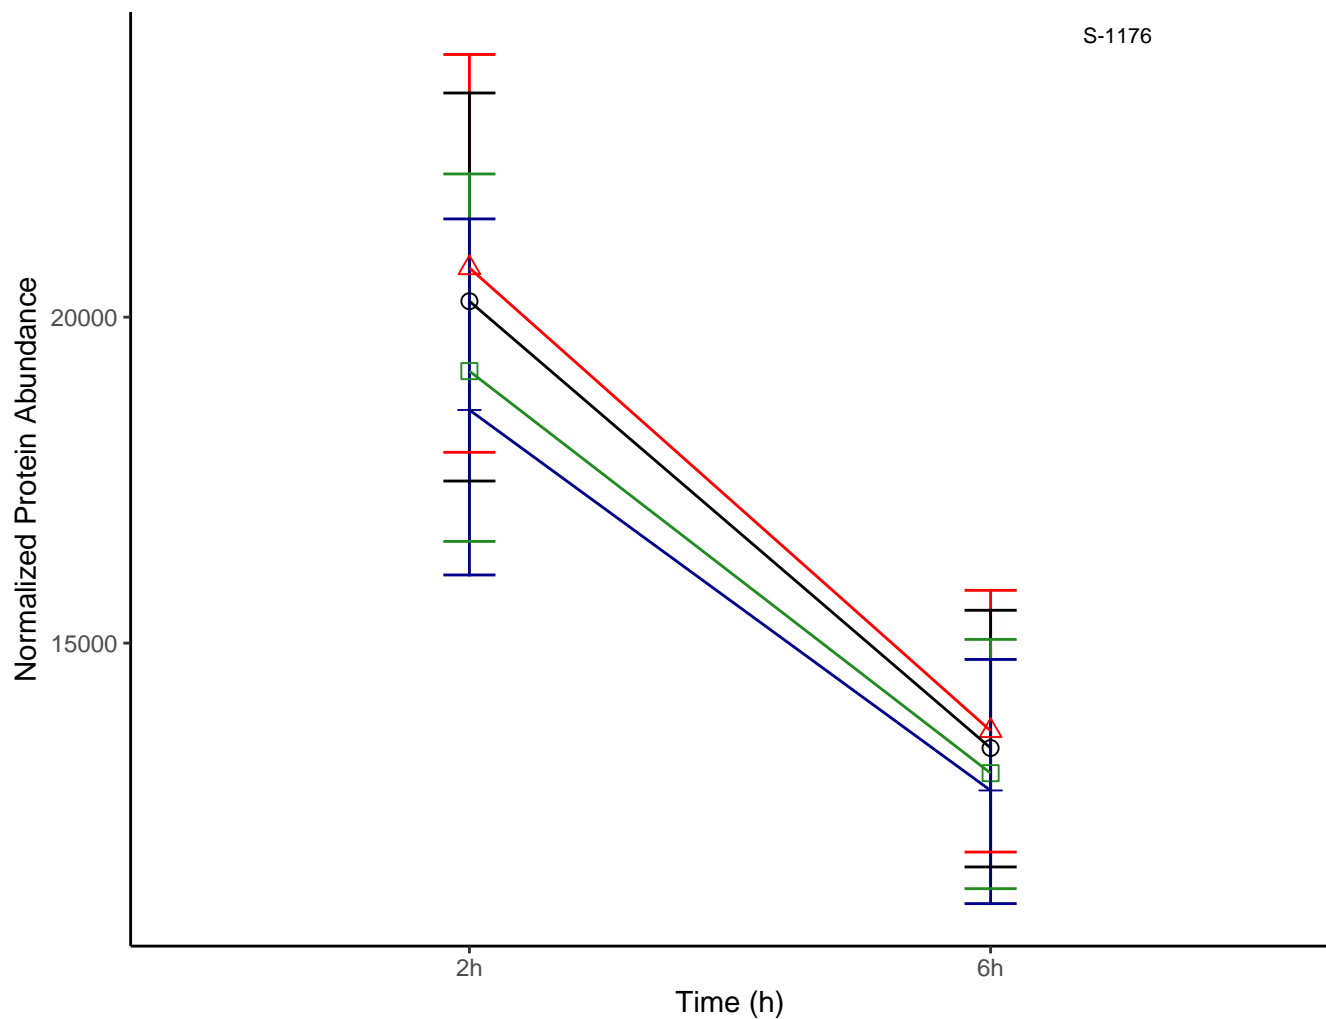

- SA564
- △ SA564- $\Delta$ *hptRS*
- SA564- $\Delta$ *ccpA*
- + SA564- $\Delta$ *hptRS/ccpA*



# ILVC\_STAAM

S-1177

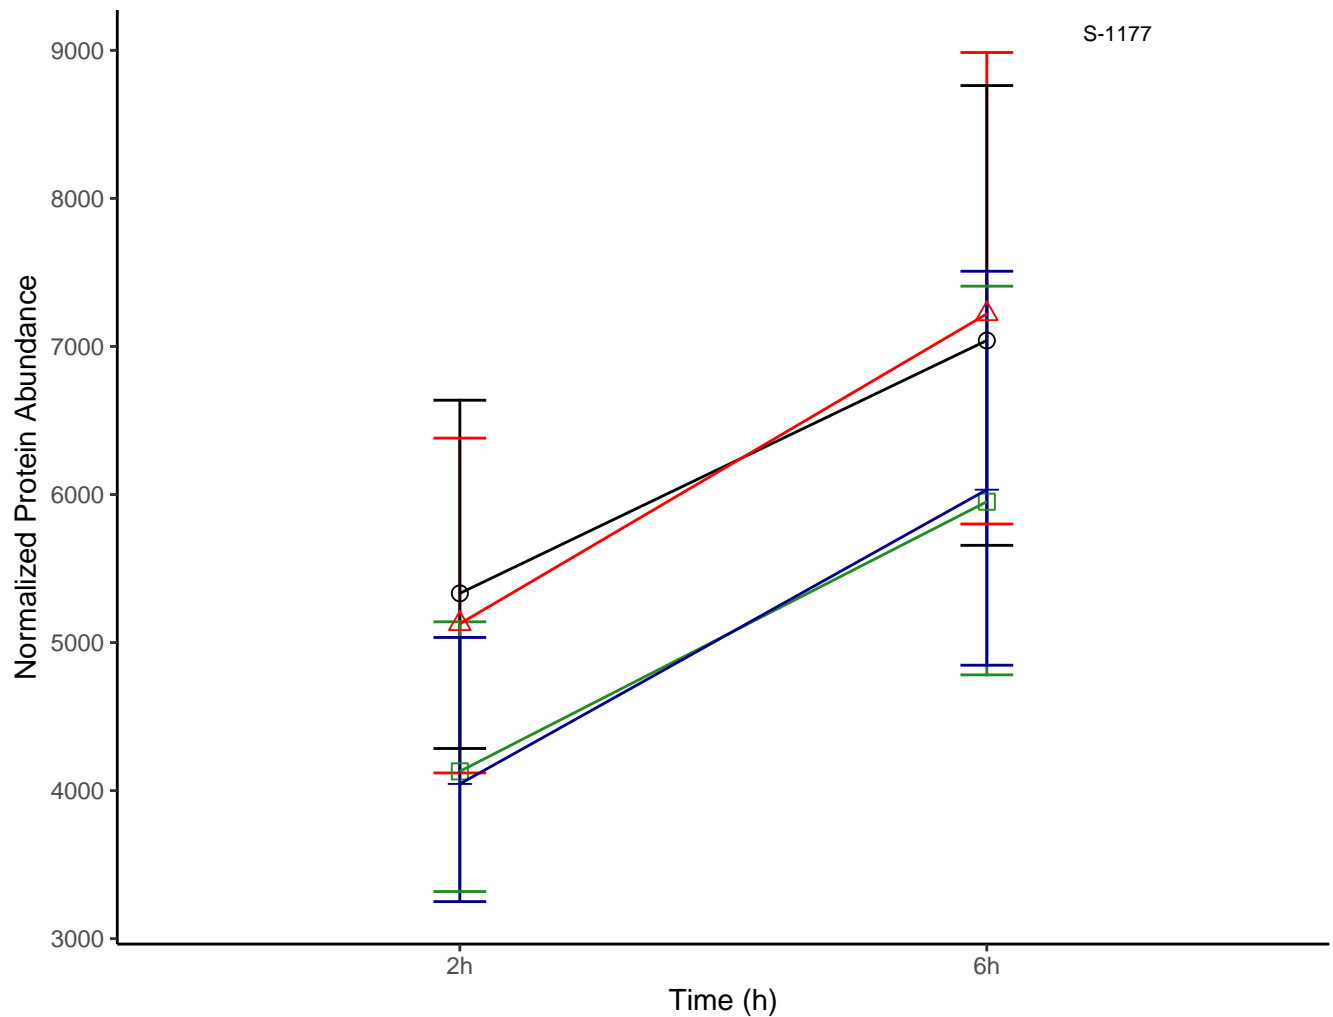

- SA564
- △ SA564-ΔhptRS
- SA564-ΔccpA
- + SA564-ΔhptRS/ccpA

# ILVE\_STAAM

S-1178

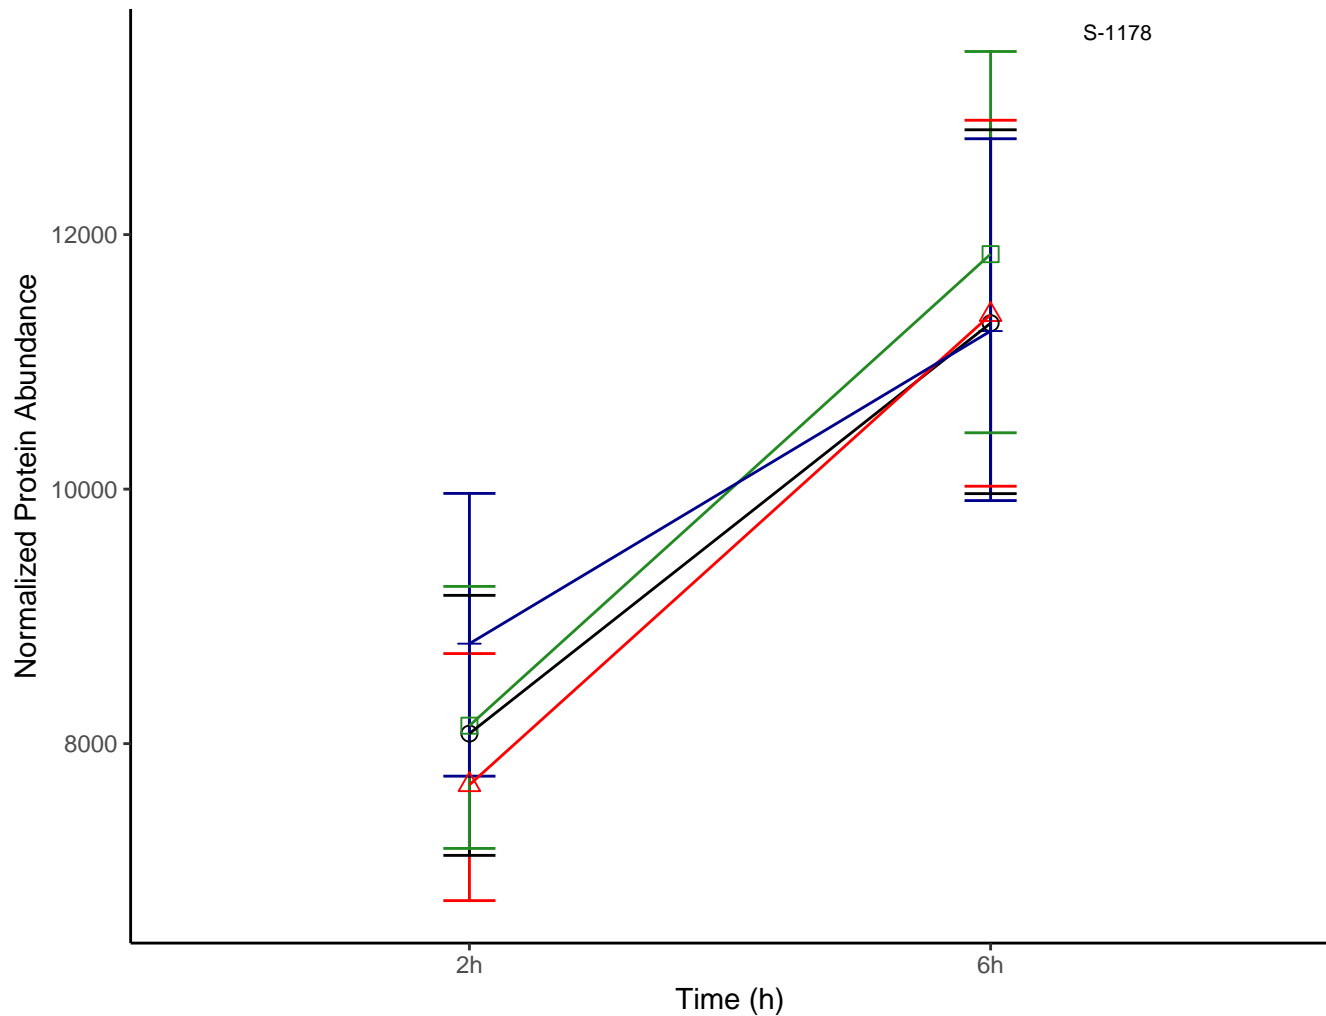

- SA564
- △ SA564- $\Delta$ *hptRS*
- SA564- $\Delta$ *ccpA*
- + SA564- $\Delta$ *hptRS/ccpA*

## IMDH\_STAAM

S-1179

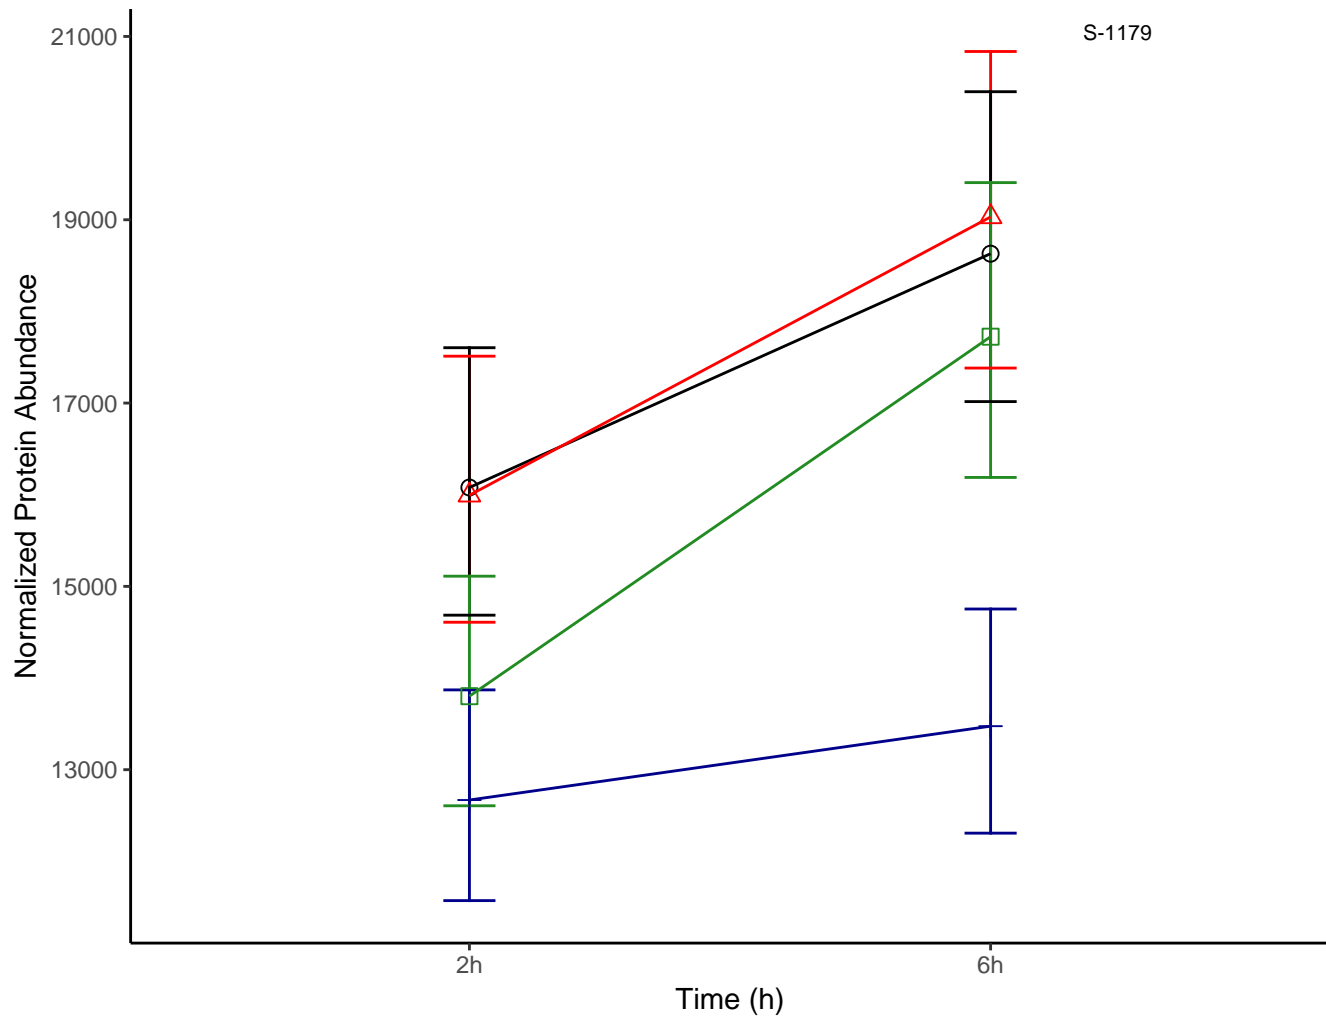

- SA564
- △ SA564- $\Delta$ *hptRS*
- SA564- $\Delta$ *ccpA*
- + SA564- $\Delta$ *hptRS/ccpA*

# ISAA\_STAAM

S-1180

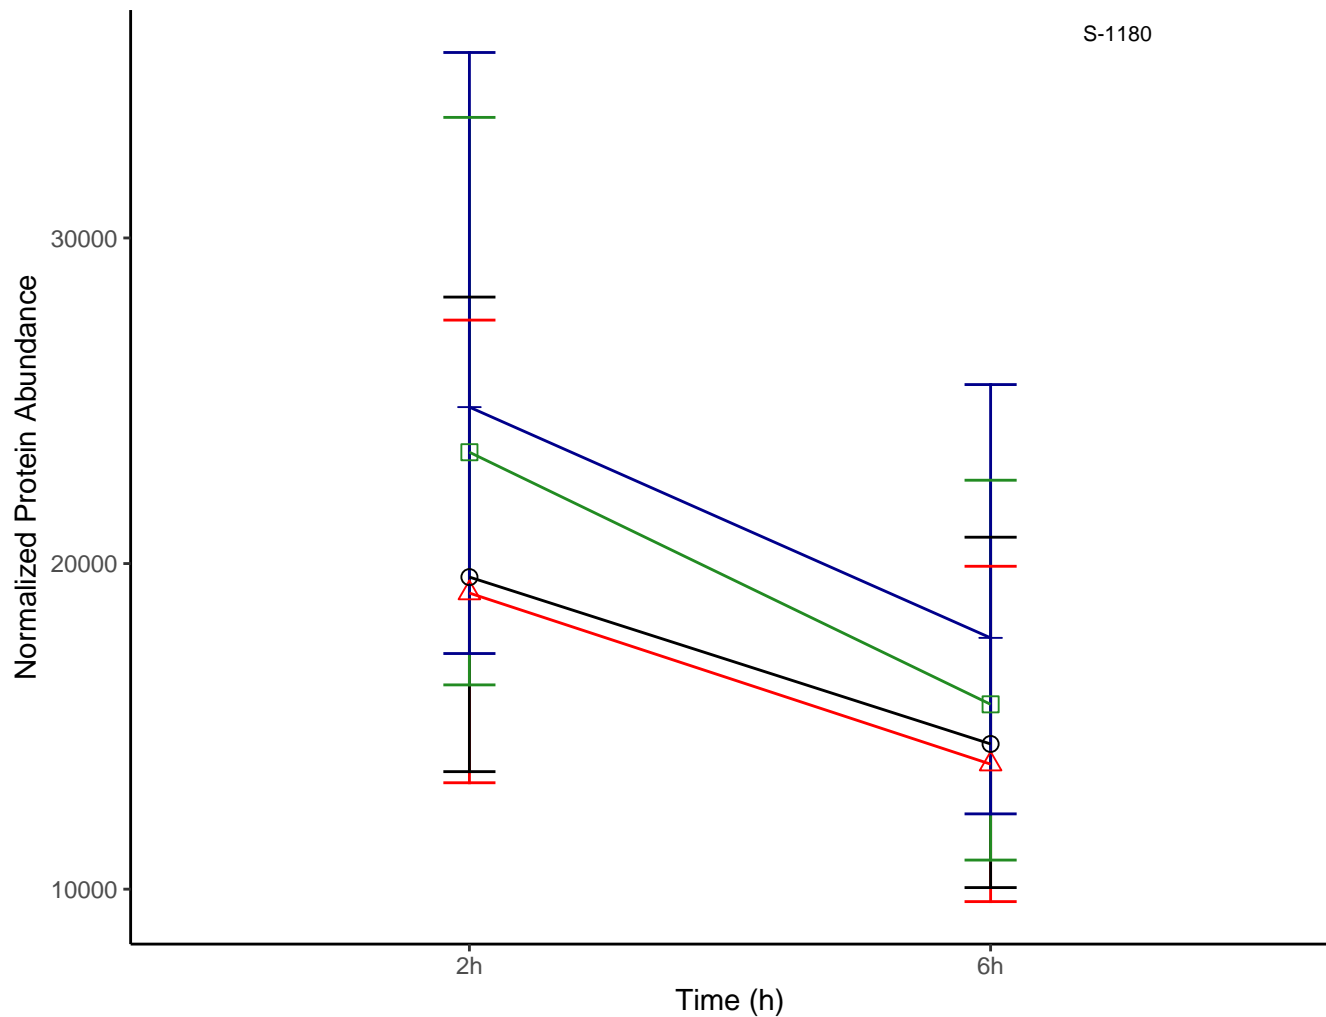

- SA564
- △ SA564- $\Delta hptRS$
- SA564- $\Delta ccpA$
- + SA564- $\Delta hptRS/ccpA$

# ISPD1\_STAAM

S-1181

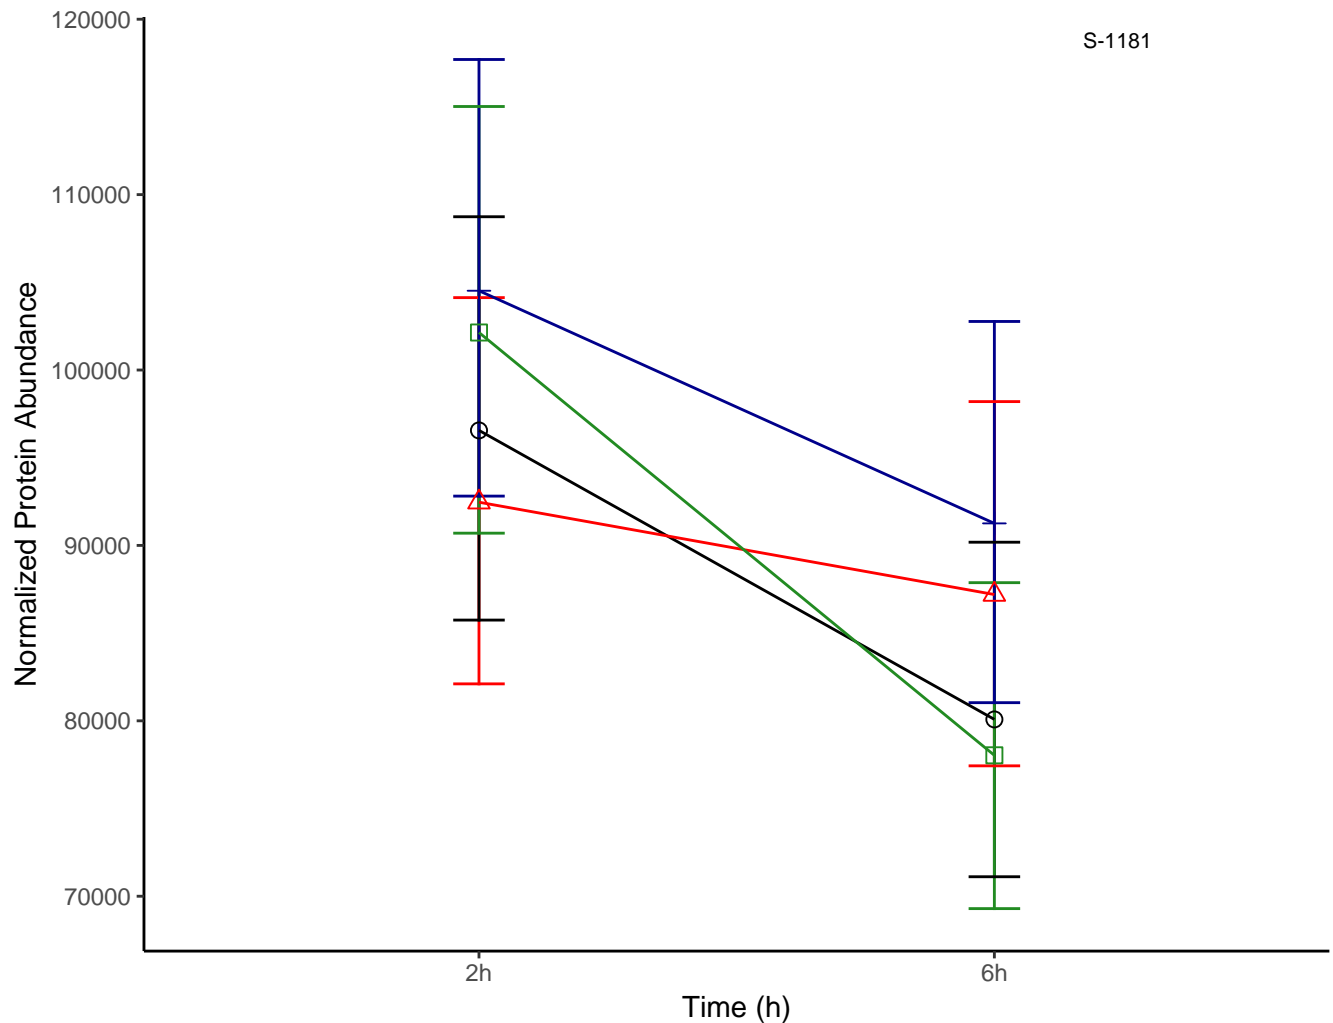

- SA564
- △ SA564- $\Delta hptRS$
- SA564- $\Delta ccpA$
- + SA564- $\Delta hptRS/ccpA$

# ISPD2\_STAAM

S-1182

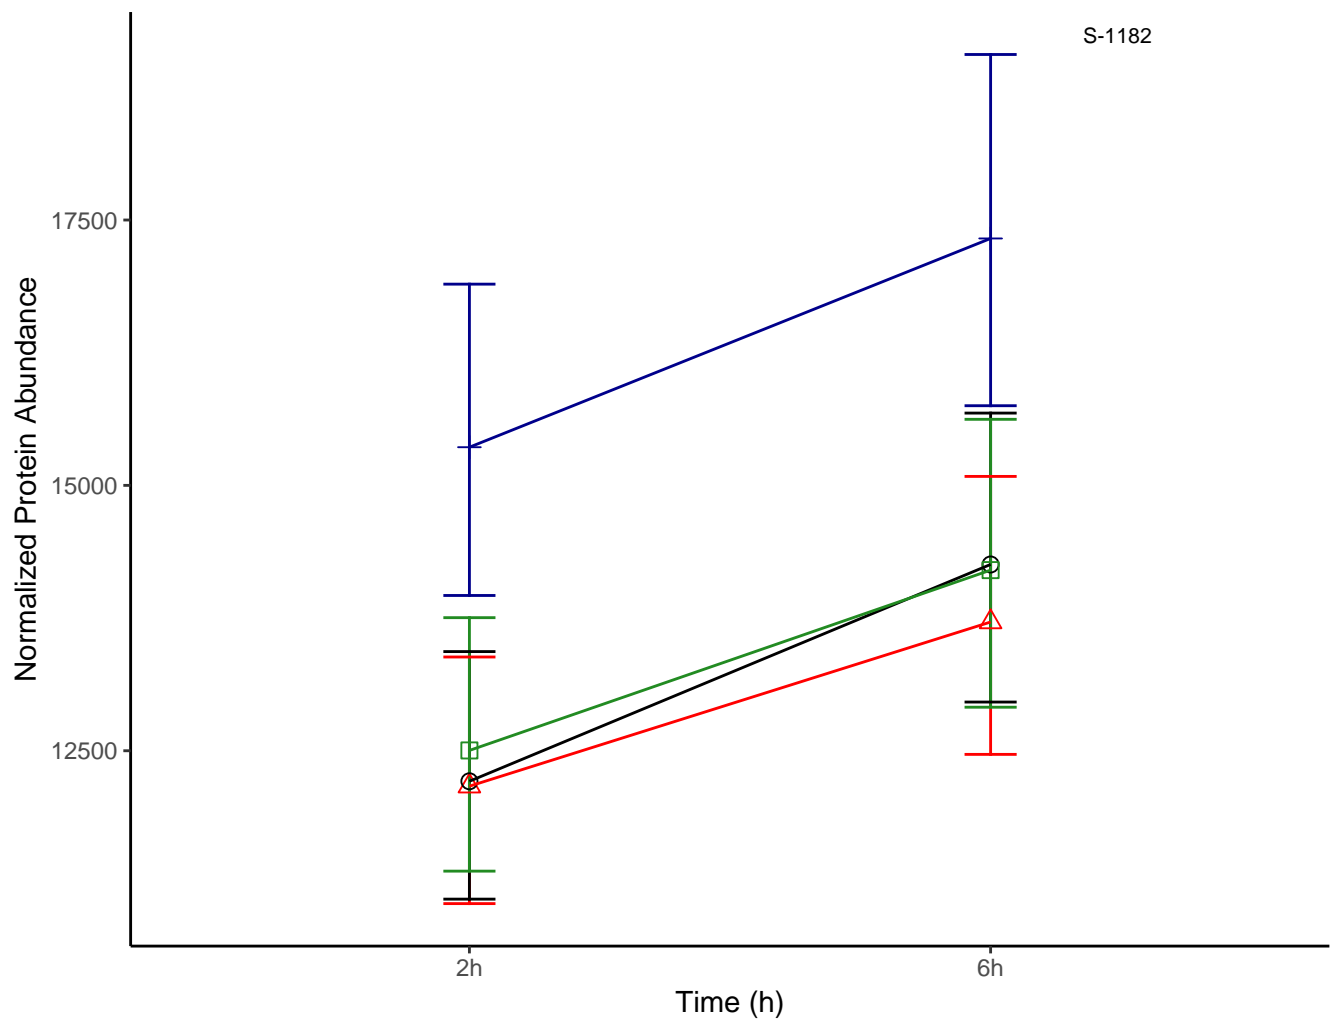

- SA564
- △ SA564- $\Delta hptRS$
- SA564- $\Delta ccpA$
- + SA564- $\Delta hptRS/ccpA$

# ISPE\_STAAM

S-1183

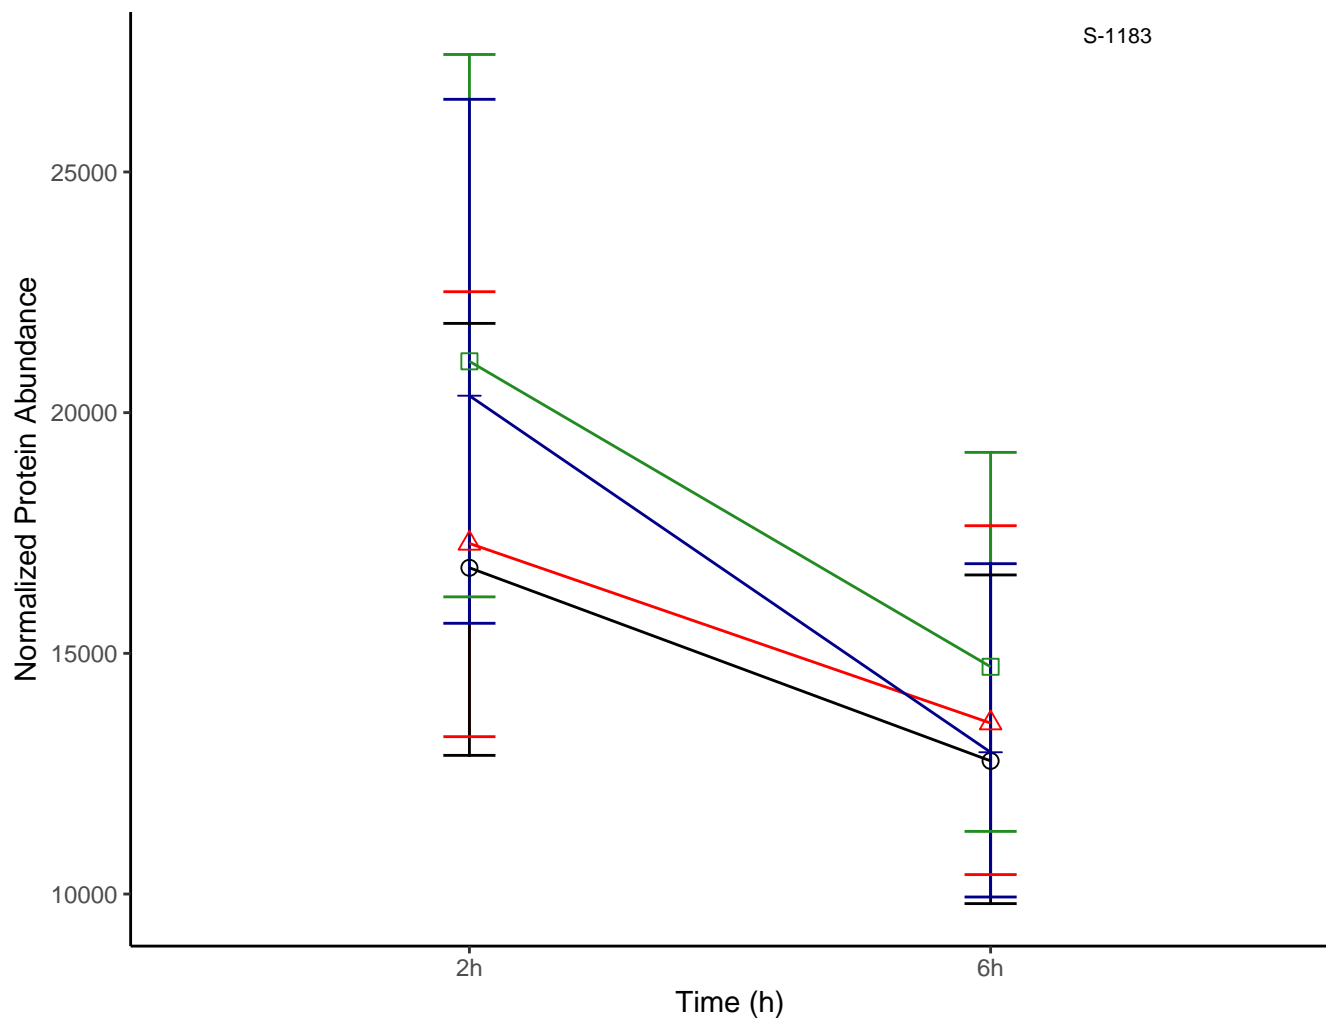

- SA564
- △ SA564- $\Delta$ *hptRS*
- SA564- $\Delta$ *ccpA*
- + SA564- $\Delta$ *hptRS/ccpA*

# KAD\_STAAM

S-1184

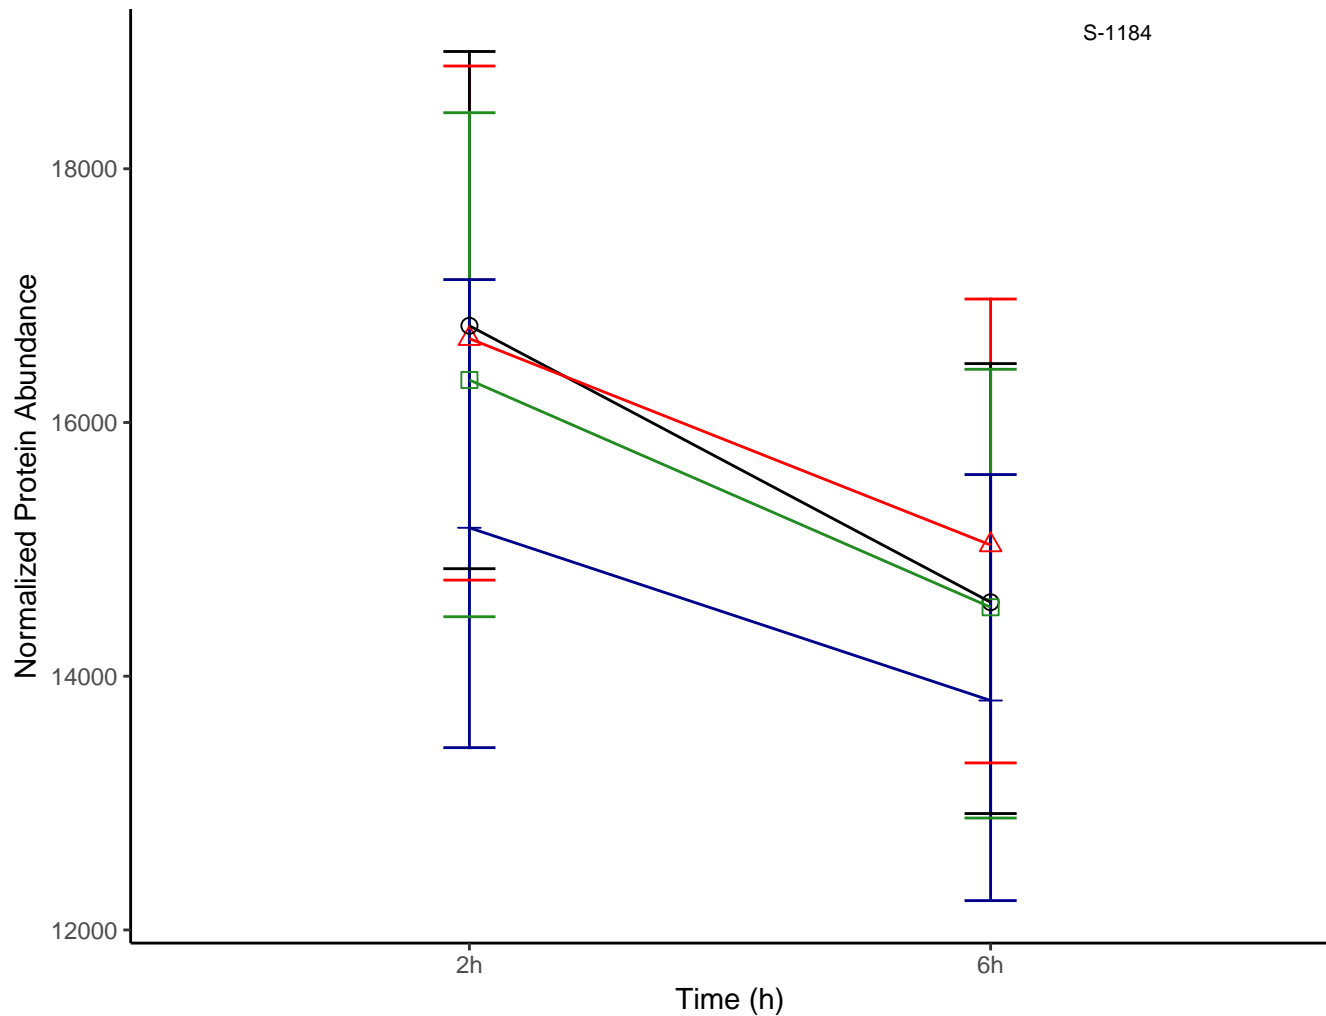

- SA564
- △ SA564- $\Delta$ *hptRS*
- SA564- $\Delta$ *ccpA*
- + SA564- $\Delta$ *hptRS/ccpA*



# KCY\_STAAM

S-1185

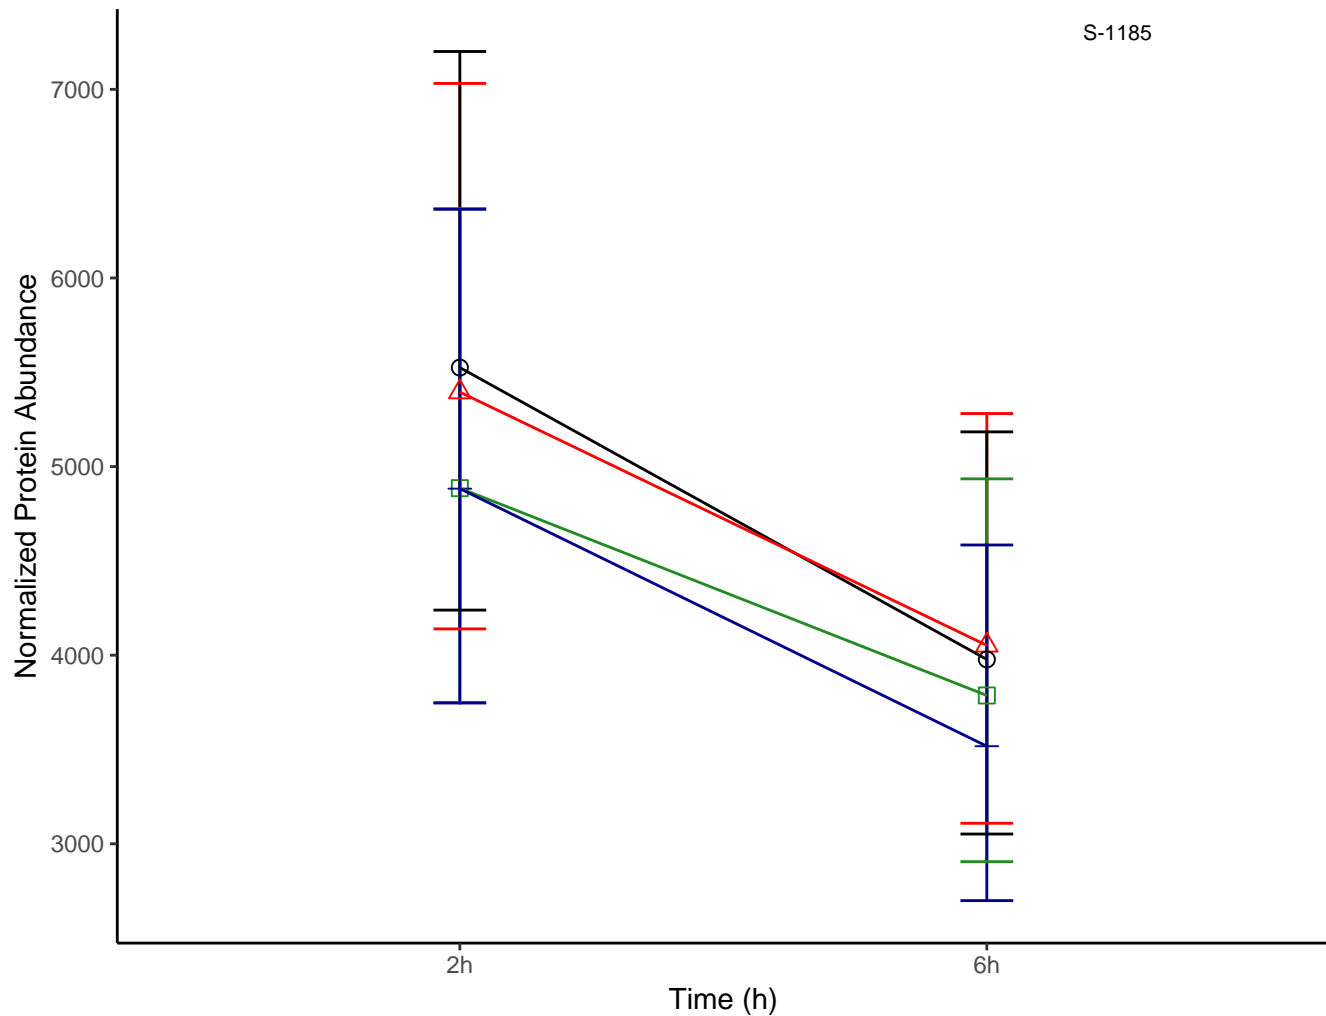

- SA564
- △ SA564- $\Delta hptRS$
- SA564- $\Delta ccpA$
- + SA564- $\Delta hptRS/ccpA$

# KITH\_STAAM

S-1186

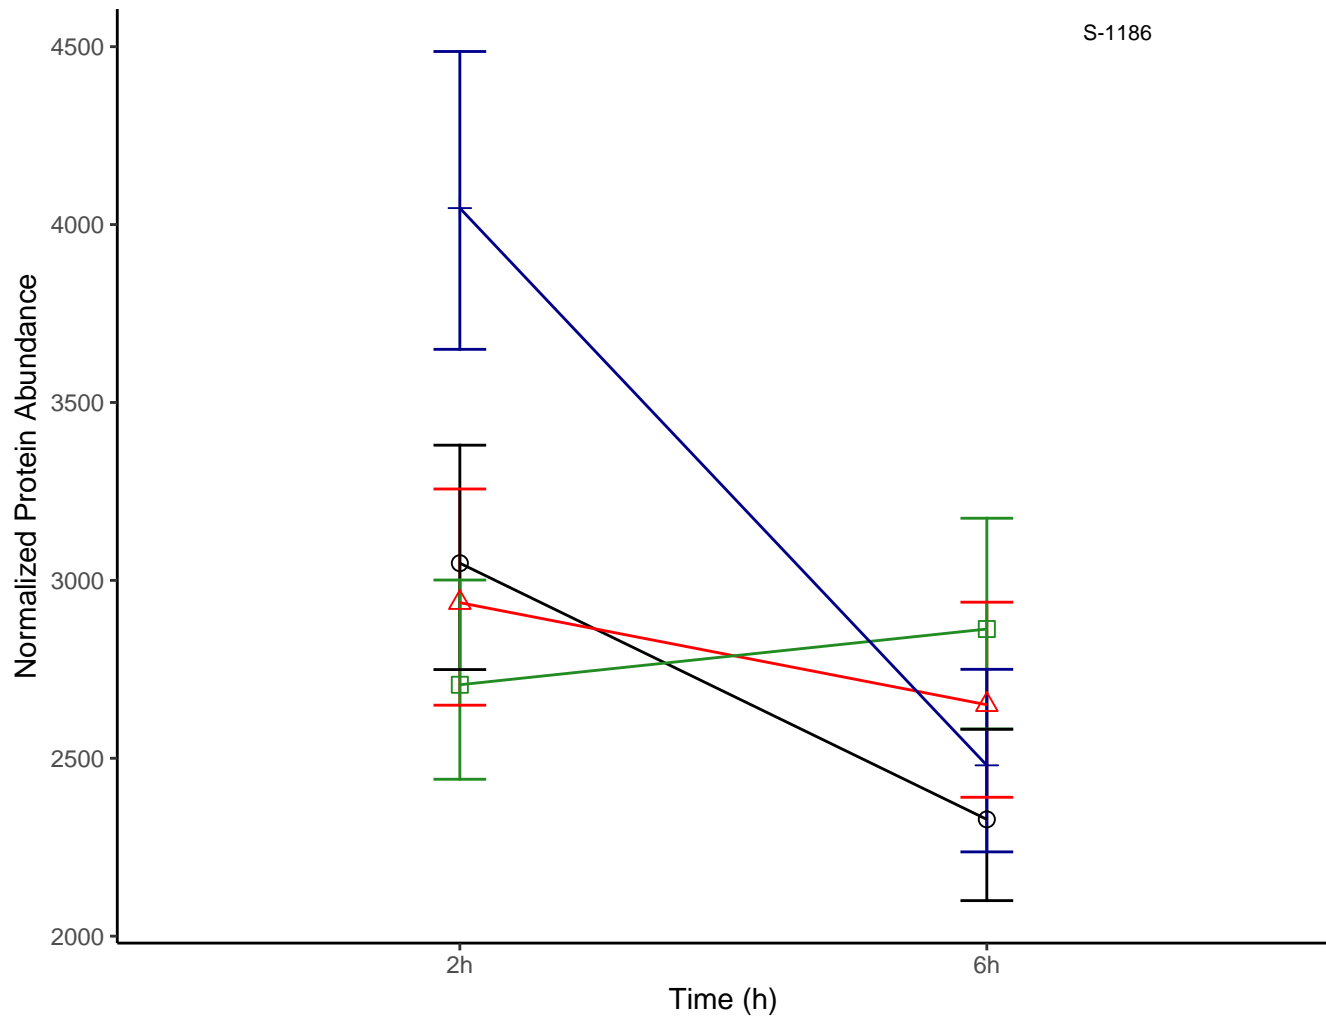

- SA564
- △ SA564- $\Delta hptRS$
- SA564- $\Delta ccpA$
- + SA564- $\Delta hptRS/ccpA$

# KPRS\_STAAM

S-1187

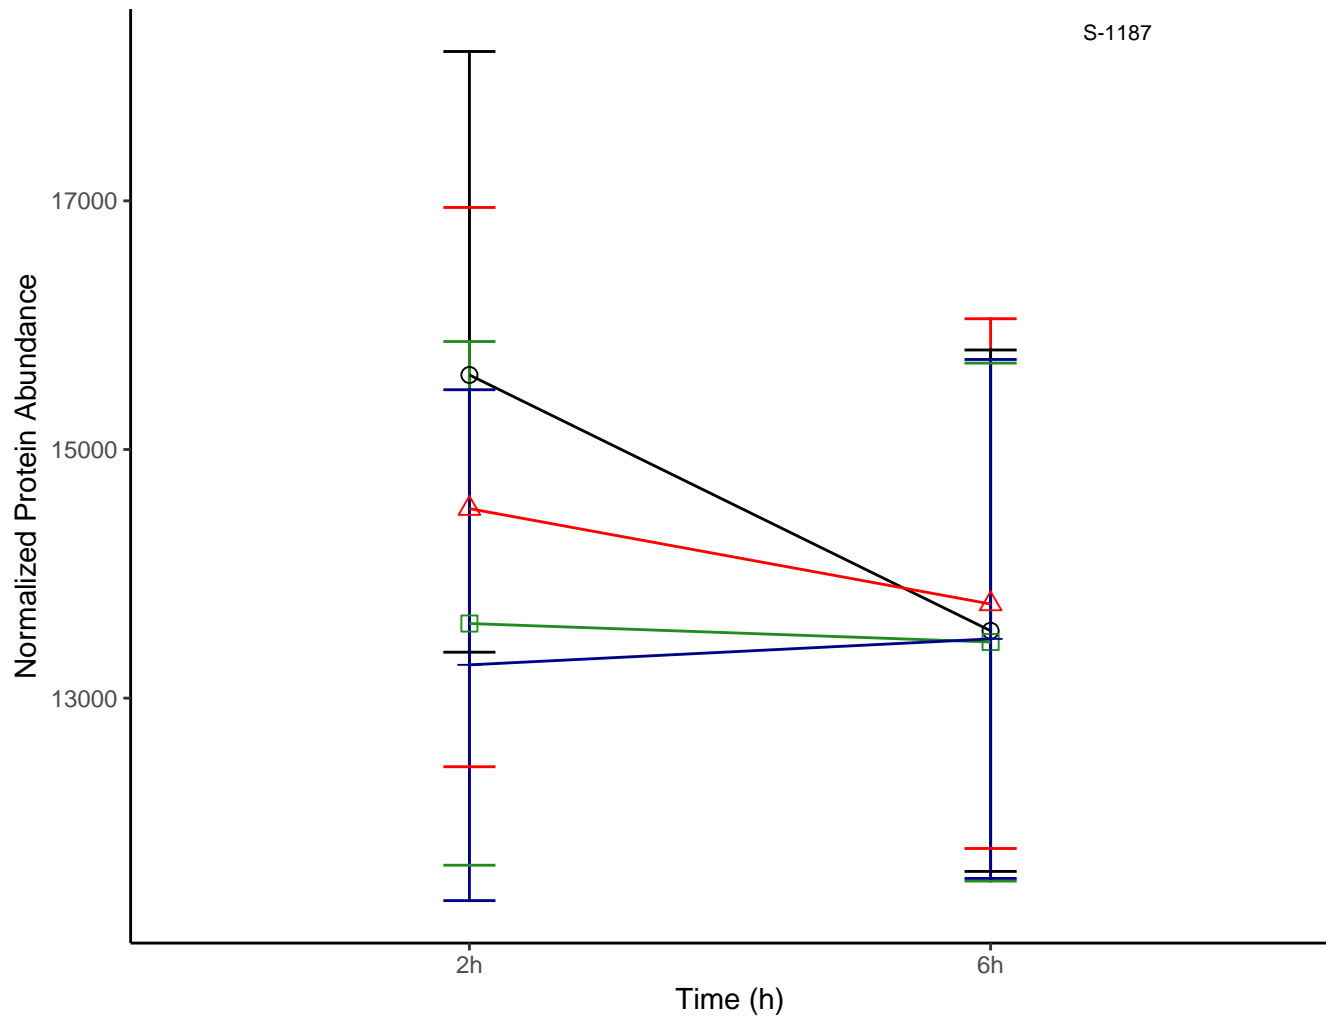

- SA564
- △ SA564- $\Delta$ *hptRS*
- SA564- $\Delta$ *ccpA*
- + SA564- $\Delta$ *hptRS/ccpA*

# KPYK\_STAAM

S-1188

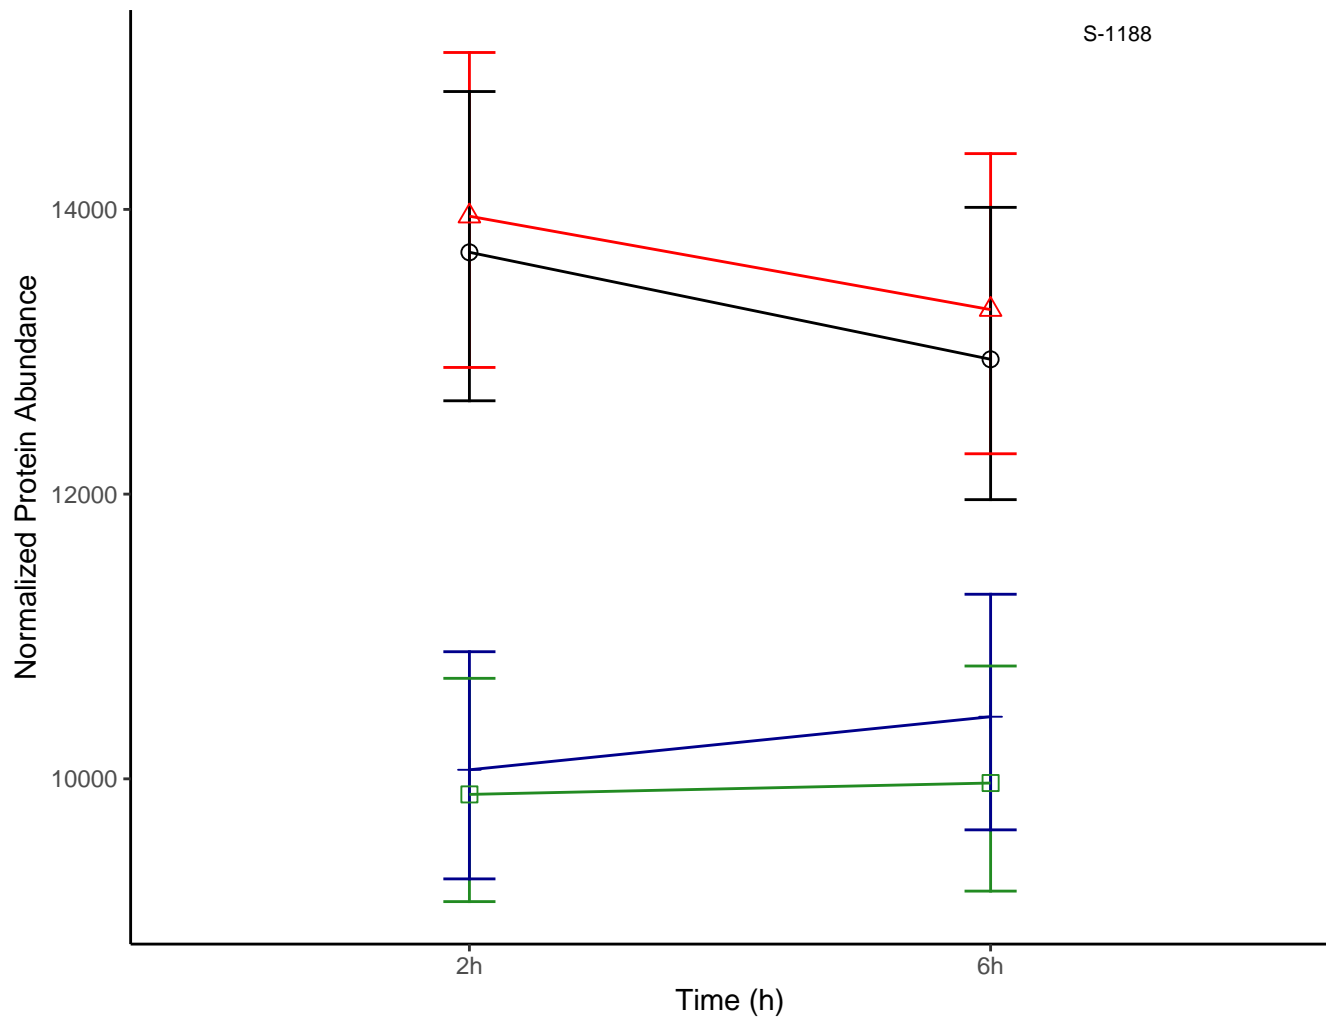

- SA564
- △ SA564- $\Delta hptRS$
- SA564- $\Delta ccpA$
- + SA564- $\Delta hptRS/ccpA$

# KTHY\_STAAM

S-1189

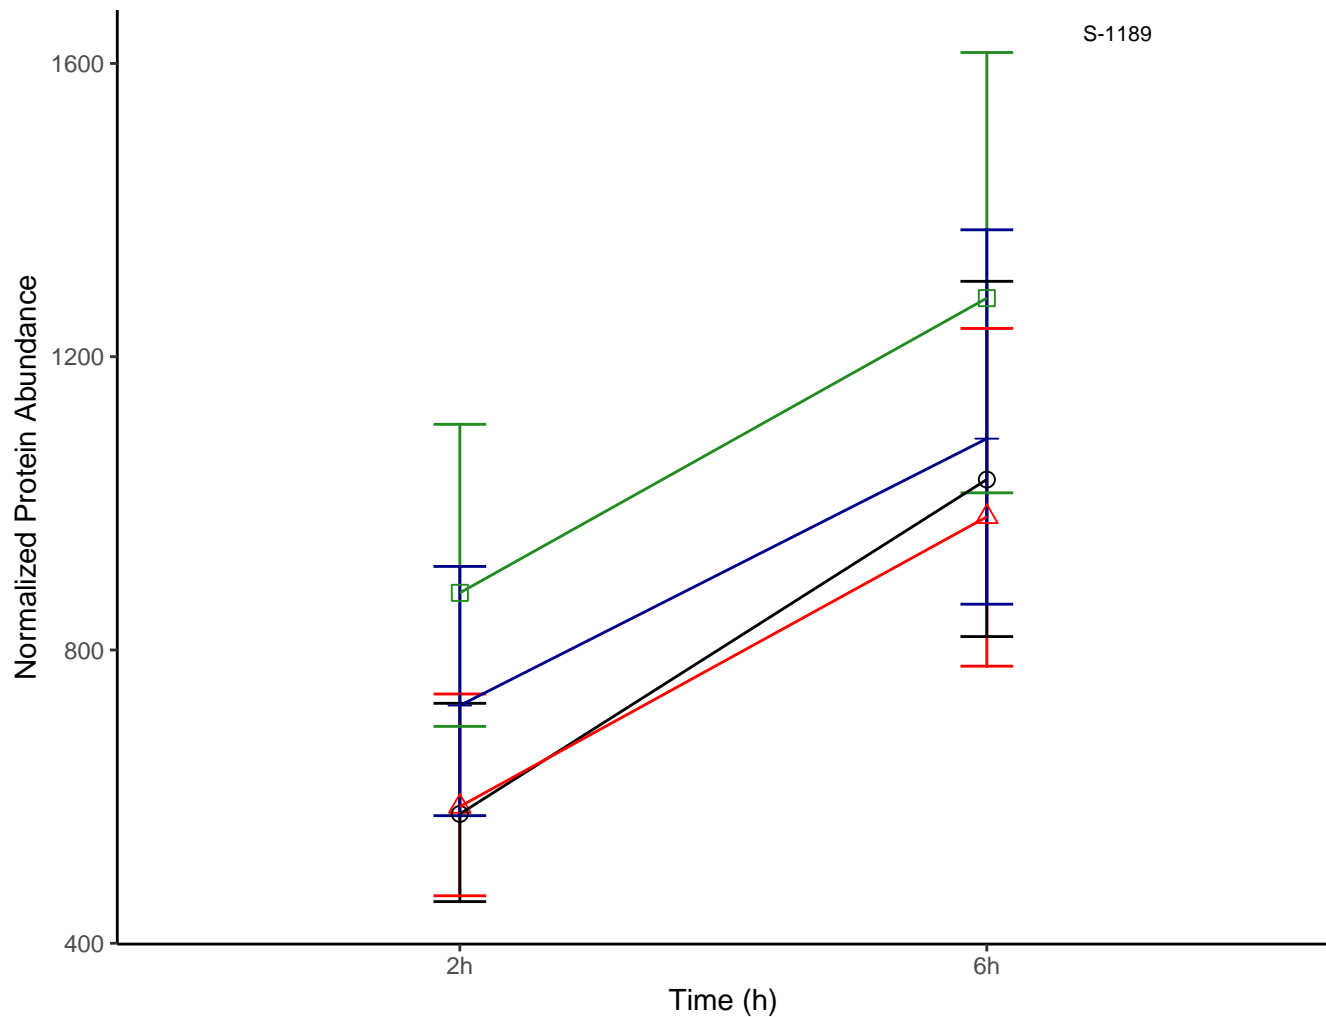

- SA564
- △ SA564- $\Delta hptRS$
- SA564- $\Delta ccpA$
- + SA564- $\Delta hptRS/ccpA$

# LACA\_STAAM

S-1190

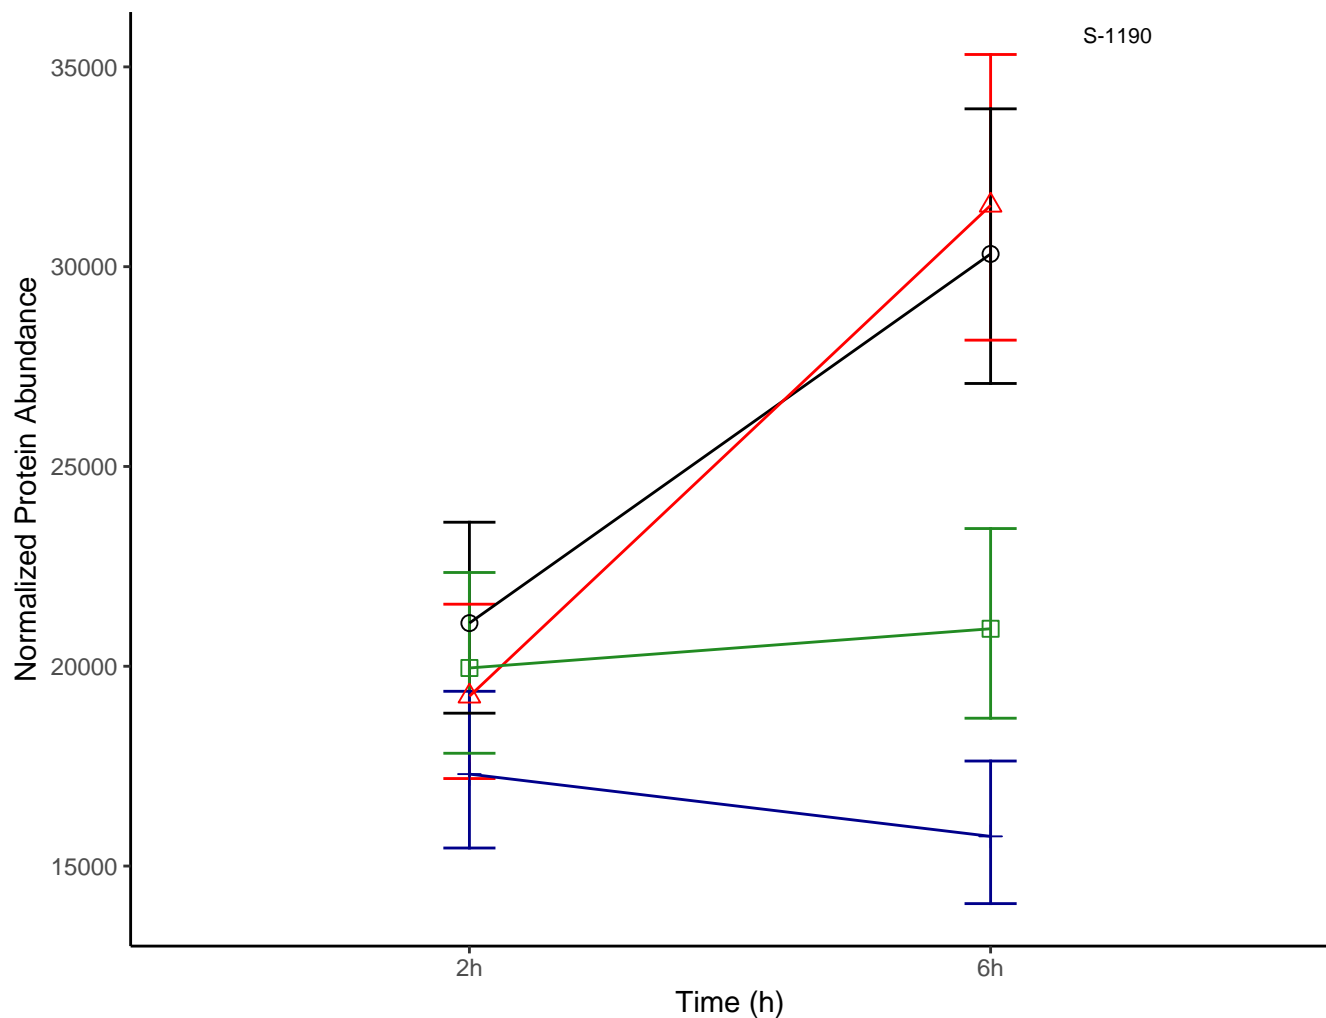

- SA564
- △ SA564- $\Delta$ *hptRS*
- SA564- $\Delta$ *ccpA*
- + SA564- $\Delta$ *hptRS/ccpA*

# LDH1\_STAAM

S-1191

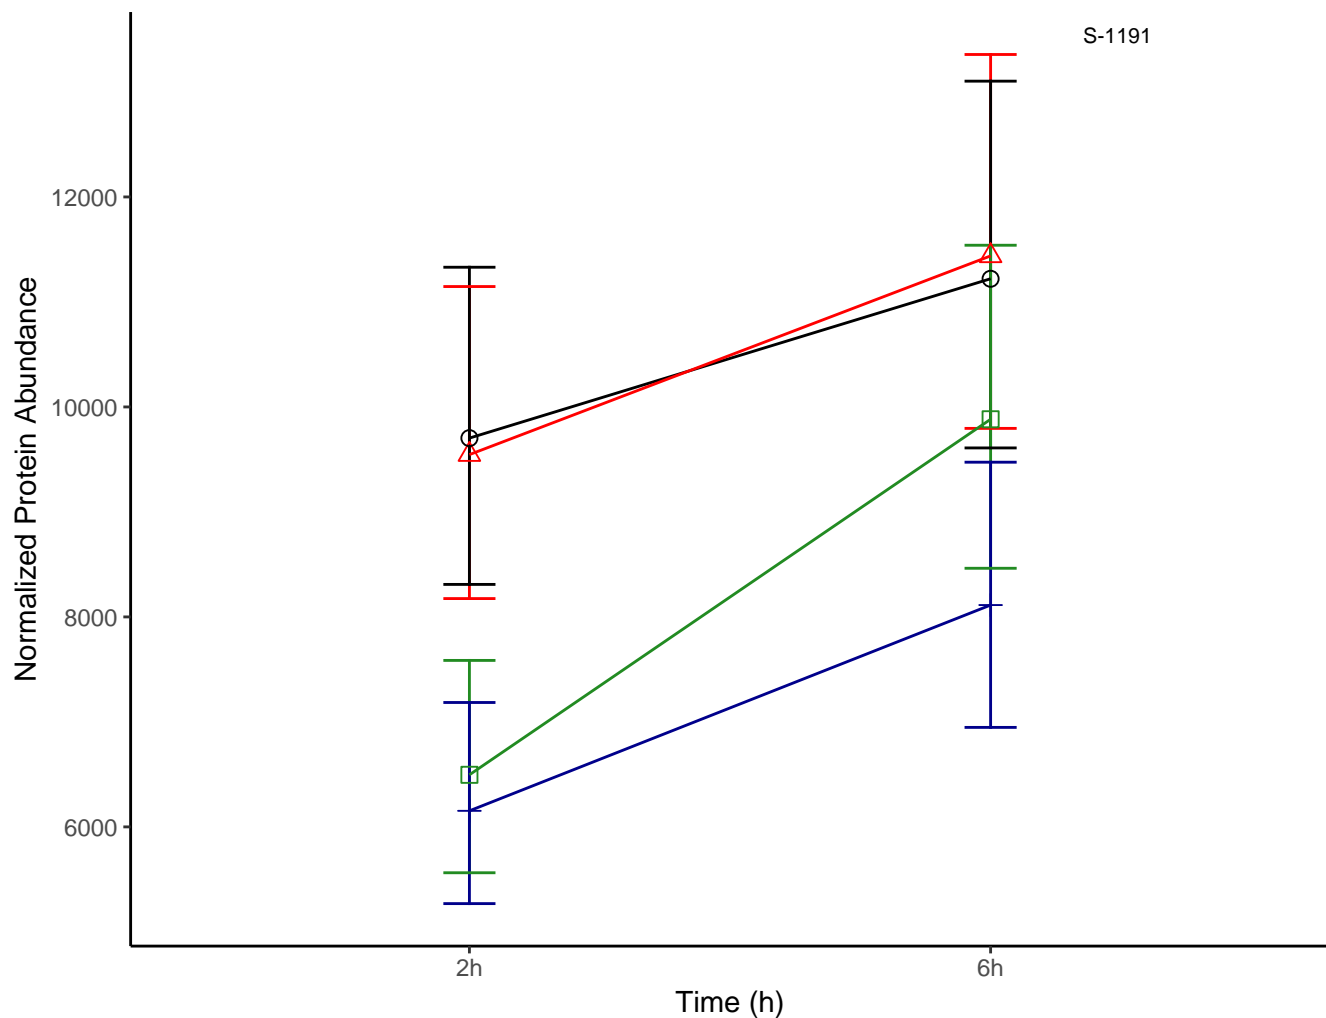

- SA564
- △ SA564- $\Delta$ *hptRS*
- SA564- $\Delta$ *ccpA*
- + SA564- $\Delta$ *hptRS/ccpA*

# LDH2\_STAAM

S-1192

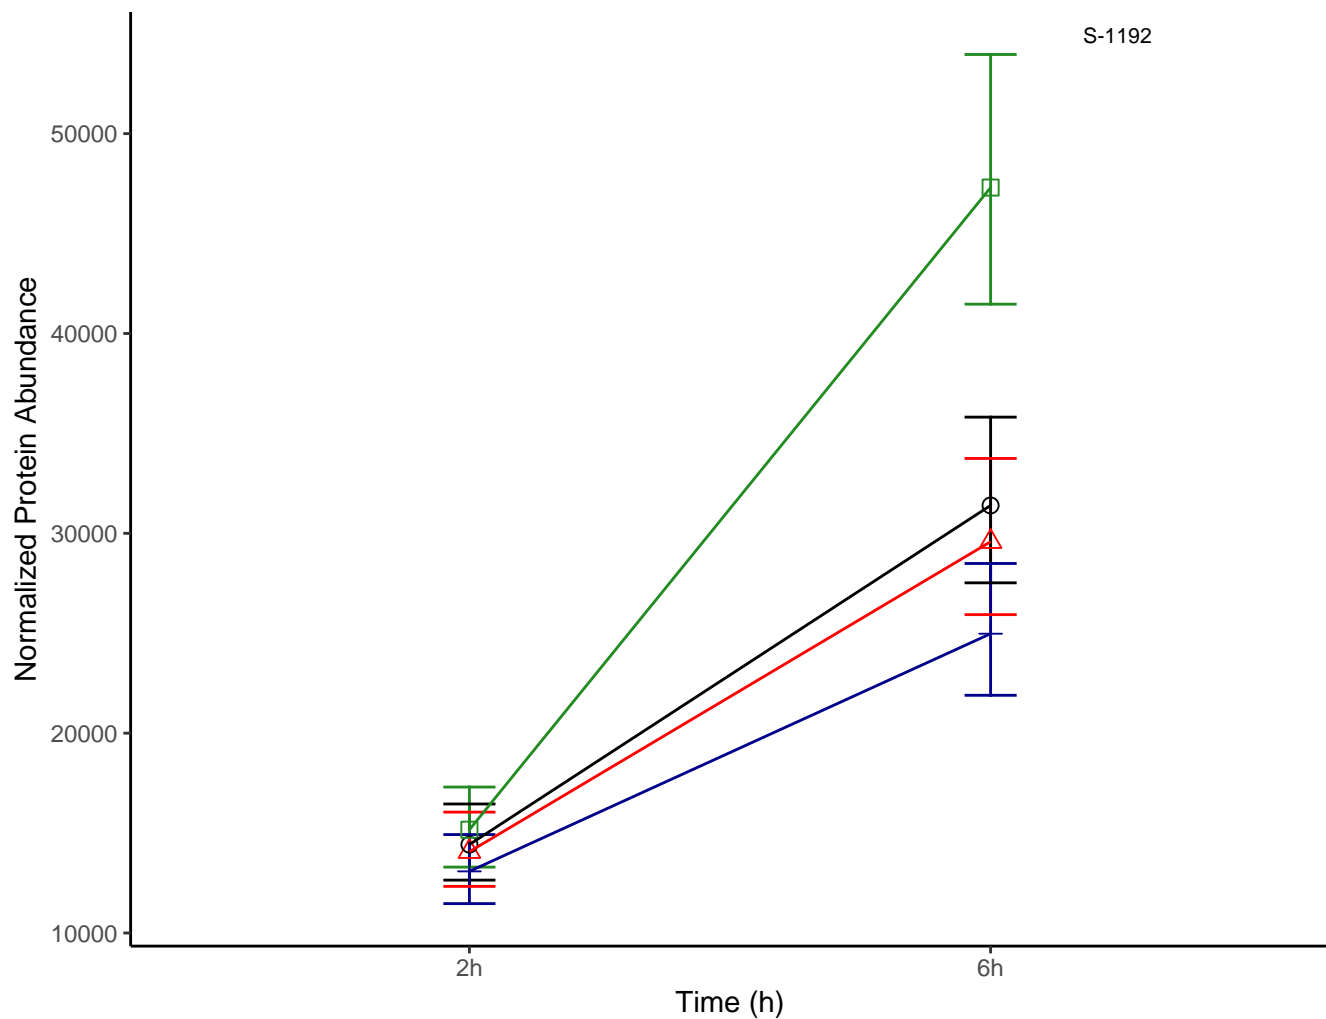

- SA564
- △ SA564- $\Delta$ hptRS
- SA564- $\Delta$ ccpA
- + SA564- $\Delta$ hptRS/ccpA



# LDHD\_STAAM

S-1193

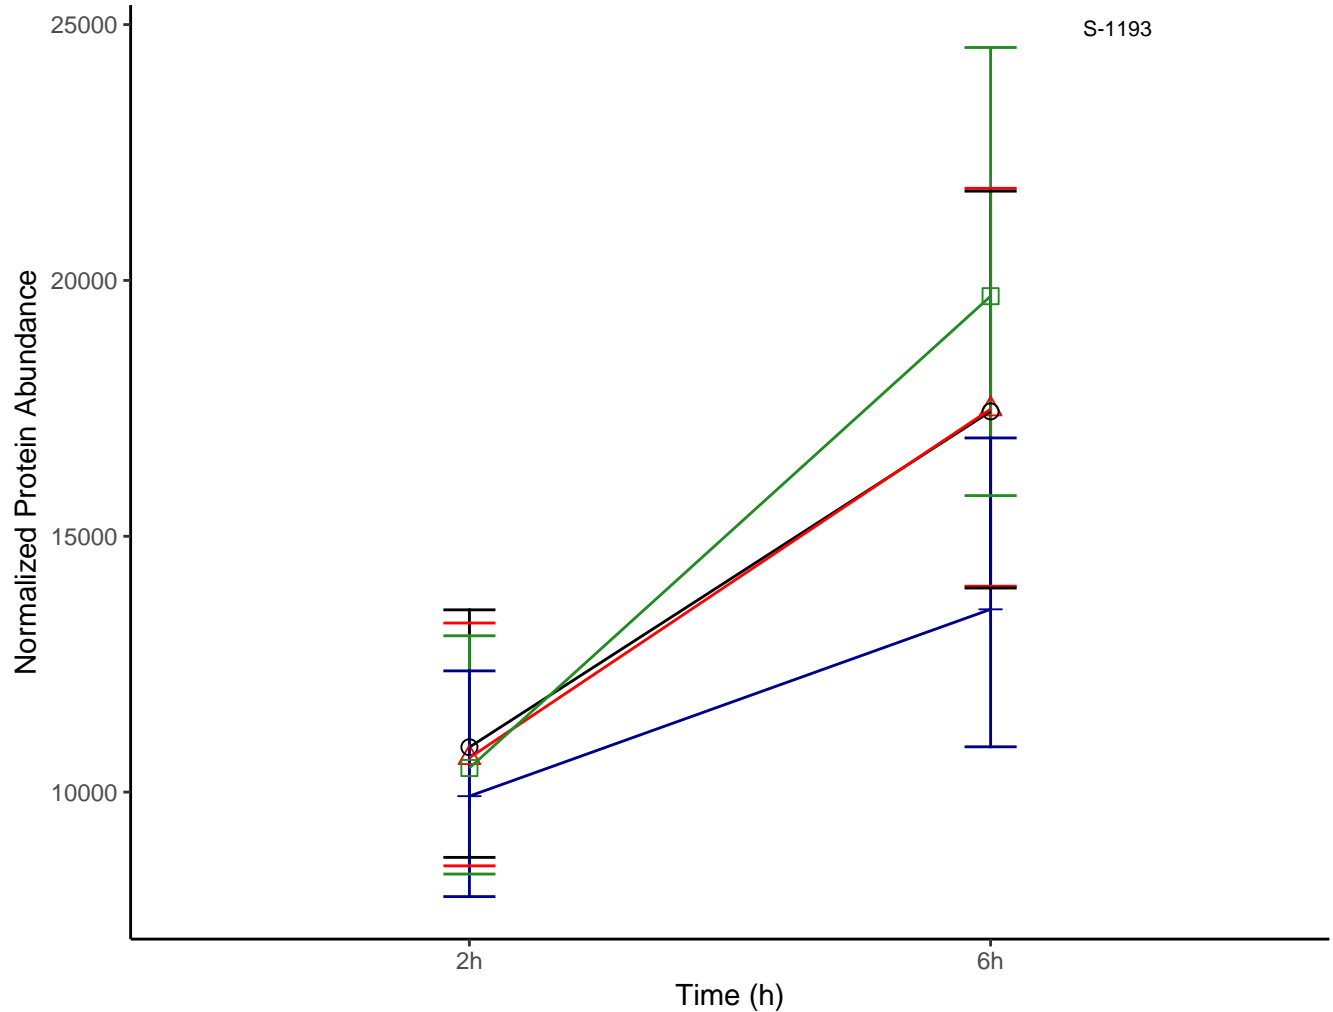

- SA564
- △ SA564- $\Delta$ *hptRS*
- SA564- $\Delta$ *ccpA*
- + SA564- $\Delta$ *hptRS/ccpA*

# LEP\_STAAM

S-1194

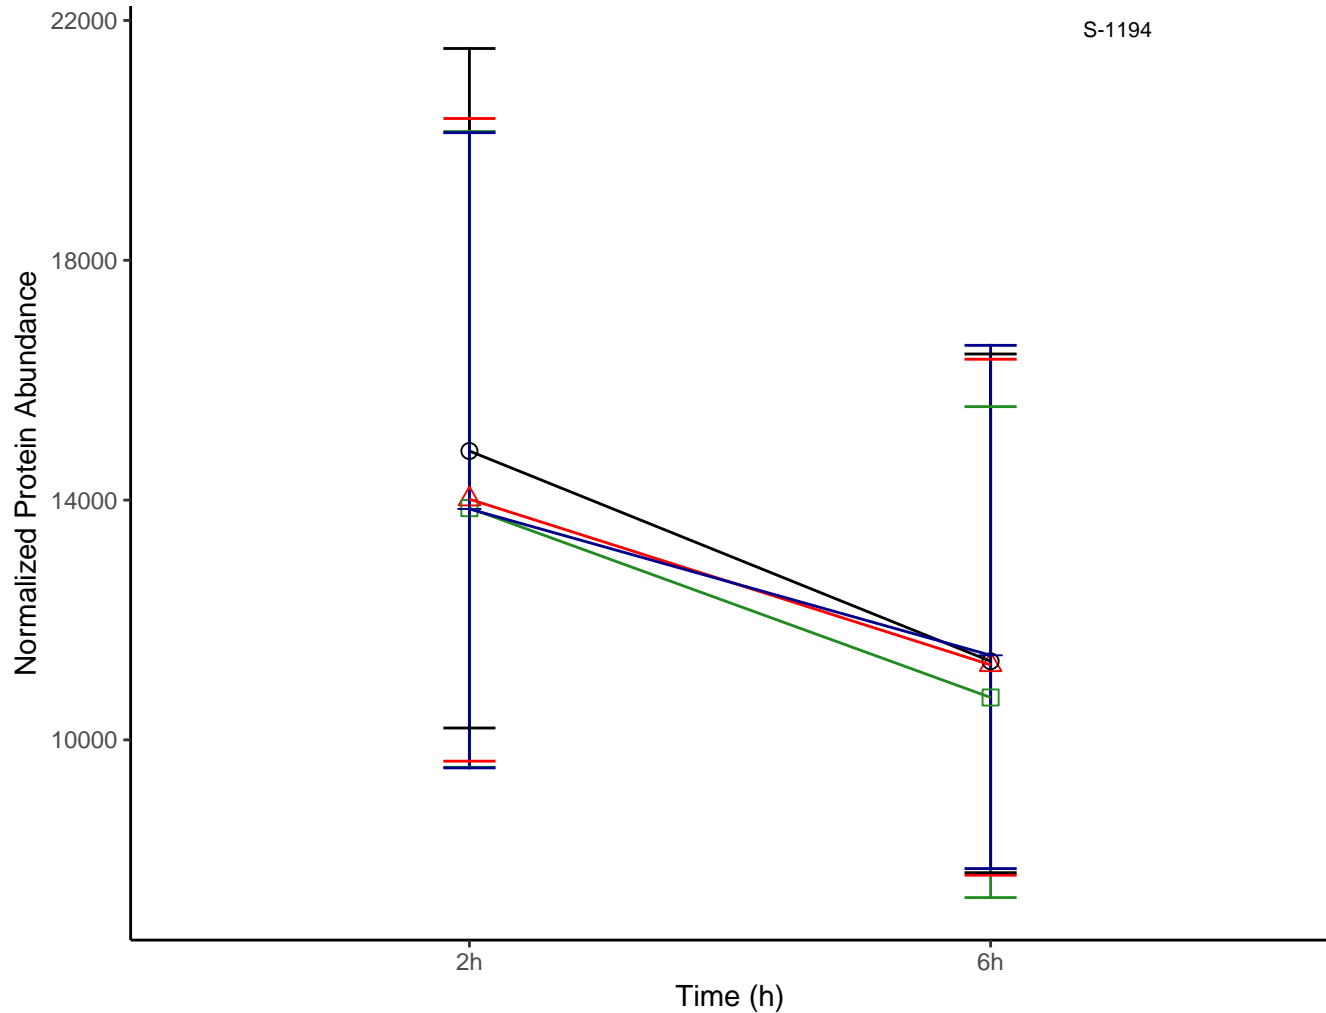

- SA564
- △ SA564- $\Delta$ *hptRS*
- SA564- $\Delta$ *ccpA*
- + SA564- $\Delta$ *hptRS/ccpA*

# LEPA\_STAAM

S-1195

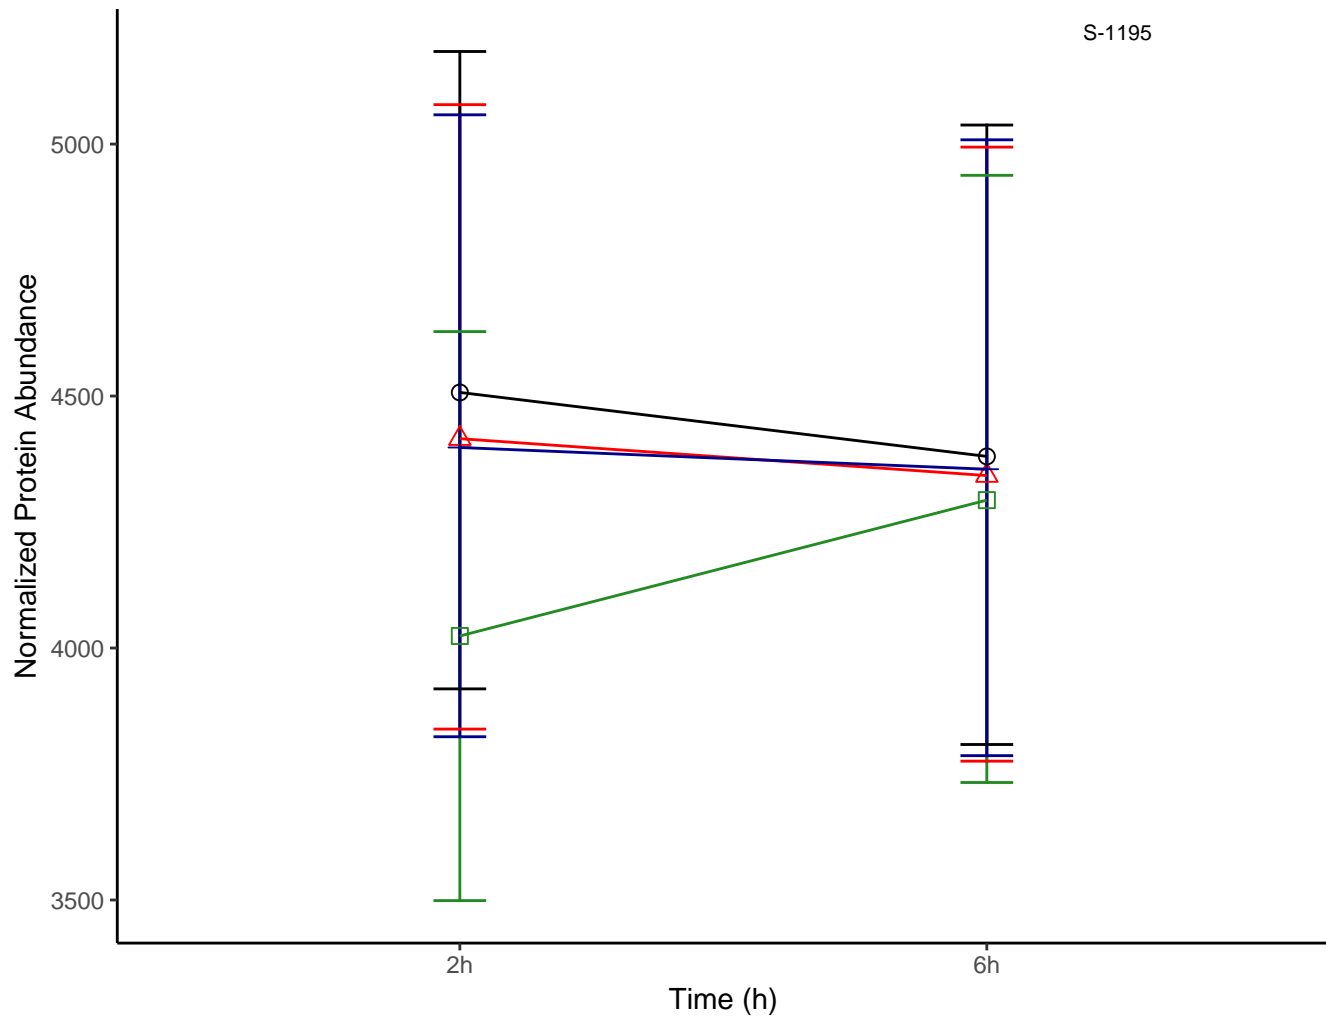

- SA564
- △ SA564- $\Delta$ *hptRS*
- SA564- $\Delta$ *ccpA*
- + SA564- $\Delta$ *hptRS/ccpA*

# LEU1\_STAAM

S-1196

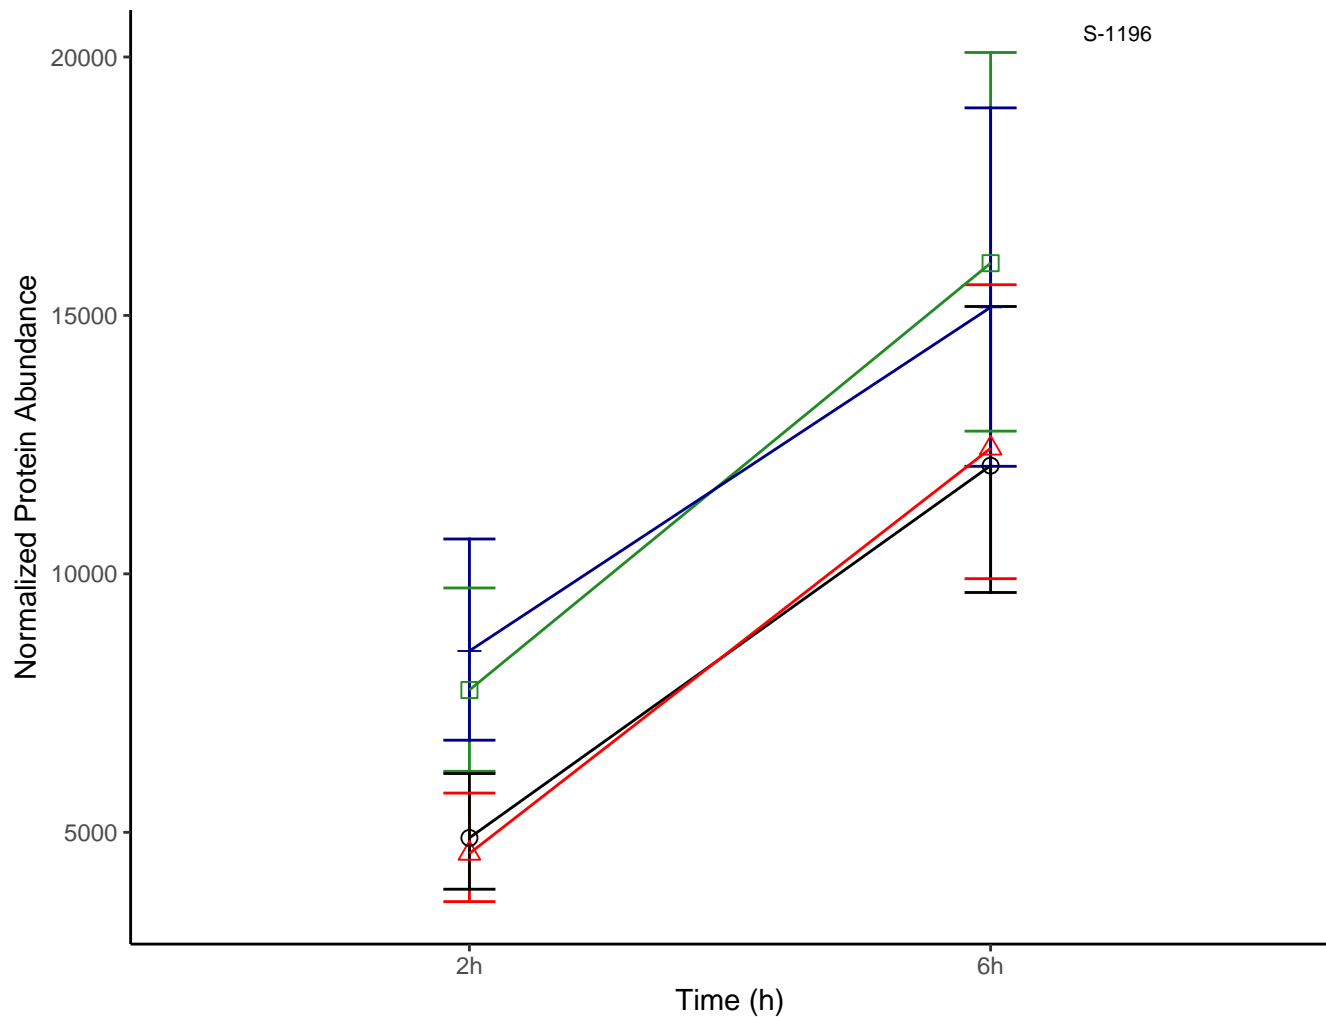

- SA564
- △ SA564- $\Delta hptRS$
- SA564- $\Delta ccpA$
- + SA564- $\Delta hptRS/ccpA$

# LIPA\_STAAM

S-1197

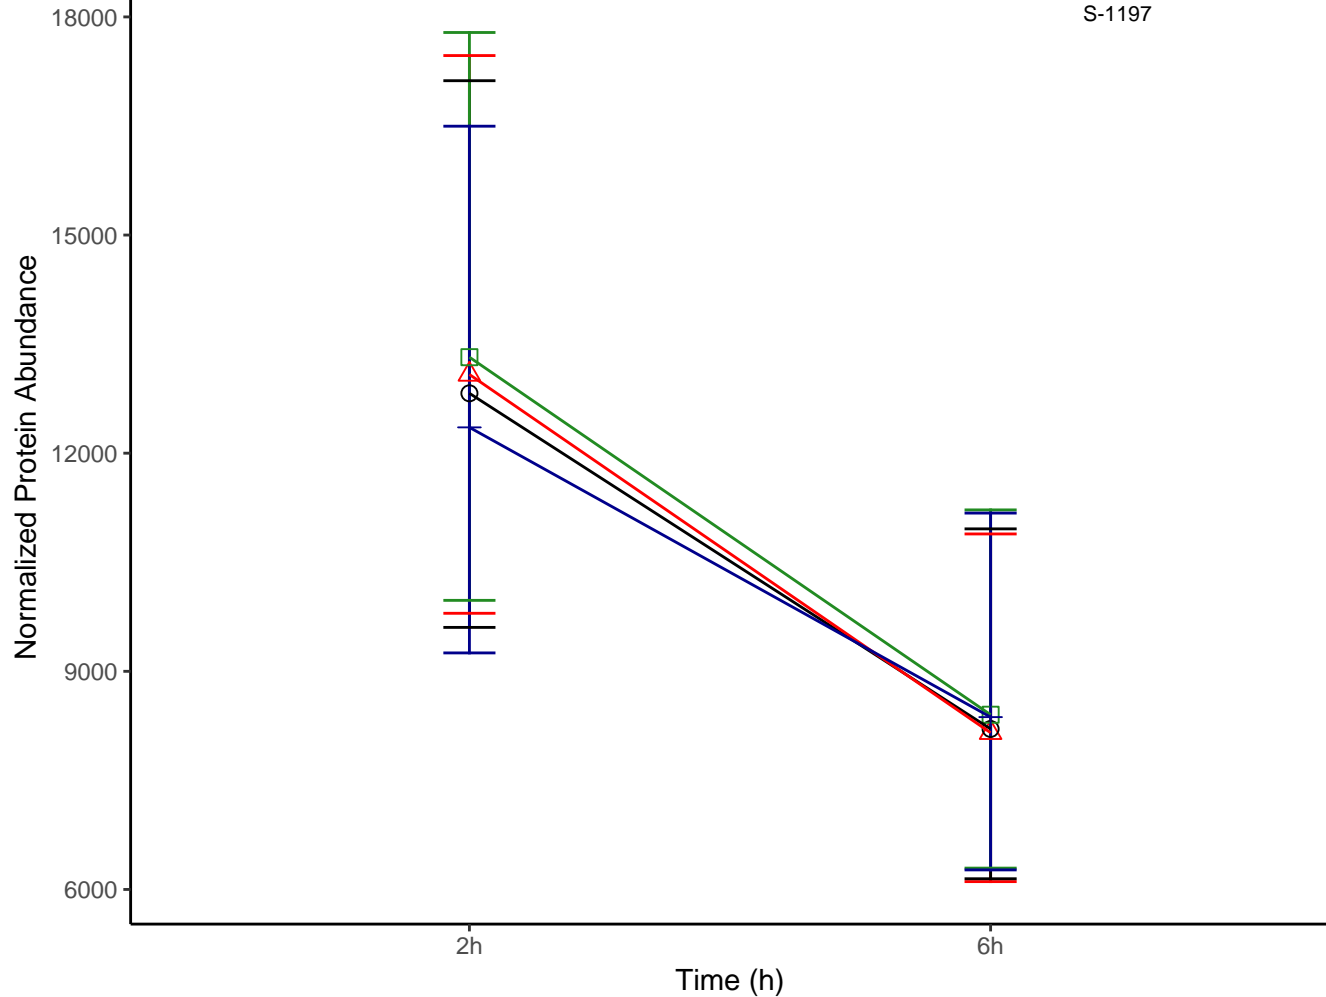

- SA564
- △ SA564- $\Delta hptRS$
- SA564- $\Delta ccpA$
- + SA564- $\Delta hptRS/ccpA$

# LUXS\_STAAM

S-1198

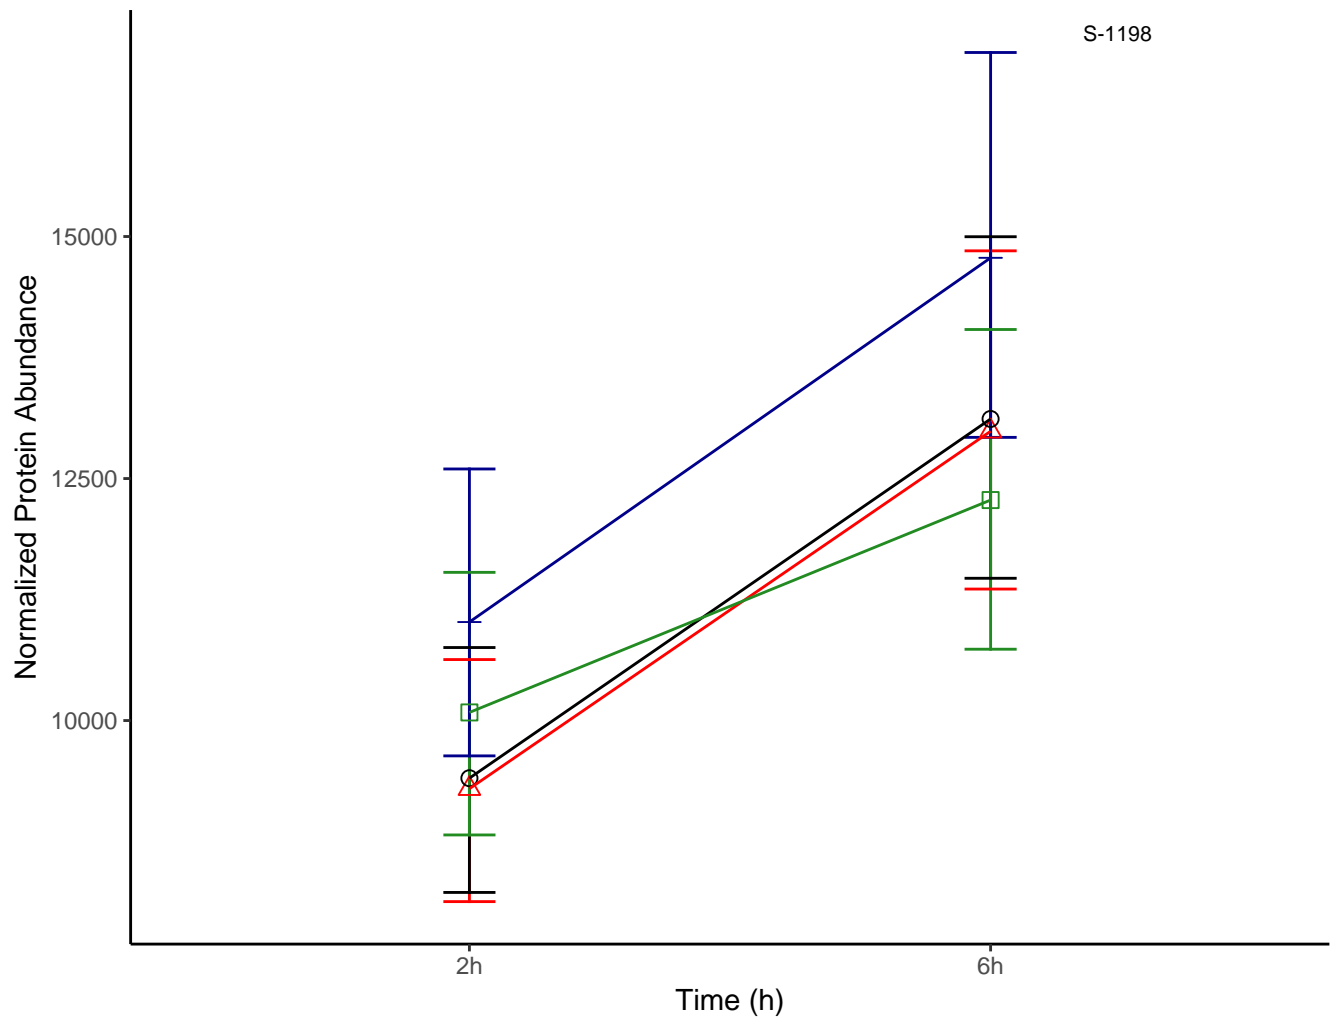

- SA564
- △ SA564- $\Delta$ hptRS
- SA564- $\Delta$ ccpA
- + SA564- $\Delta$ hptRS/ccpA

# LYTH\_STAAM

S-1199

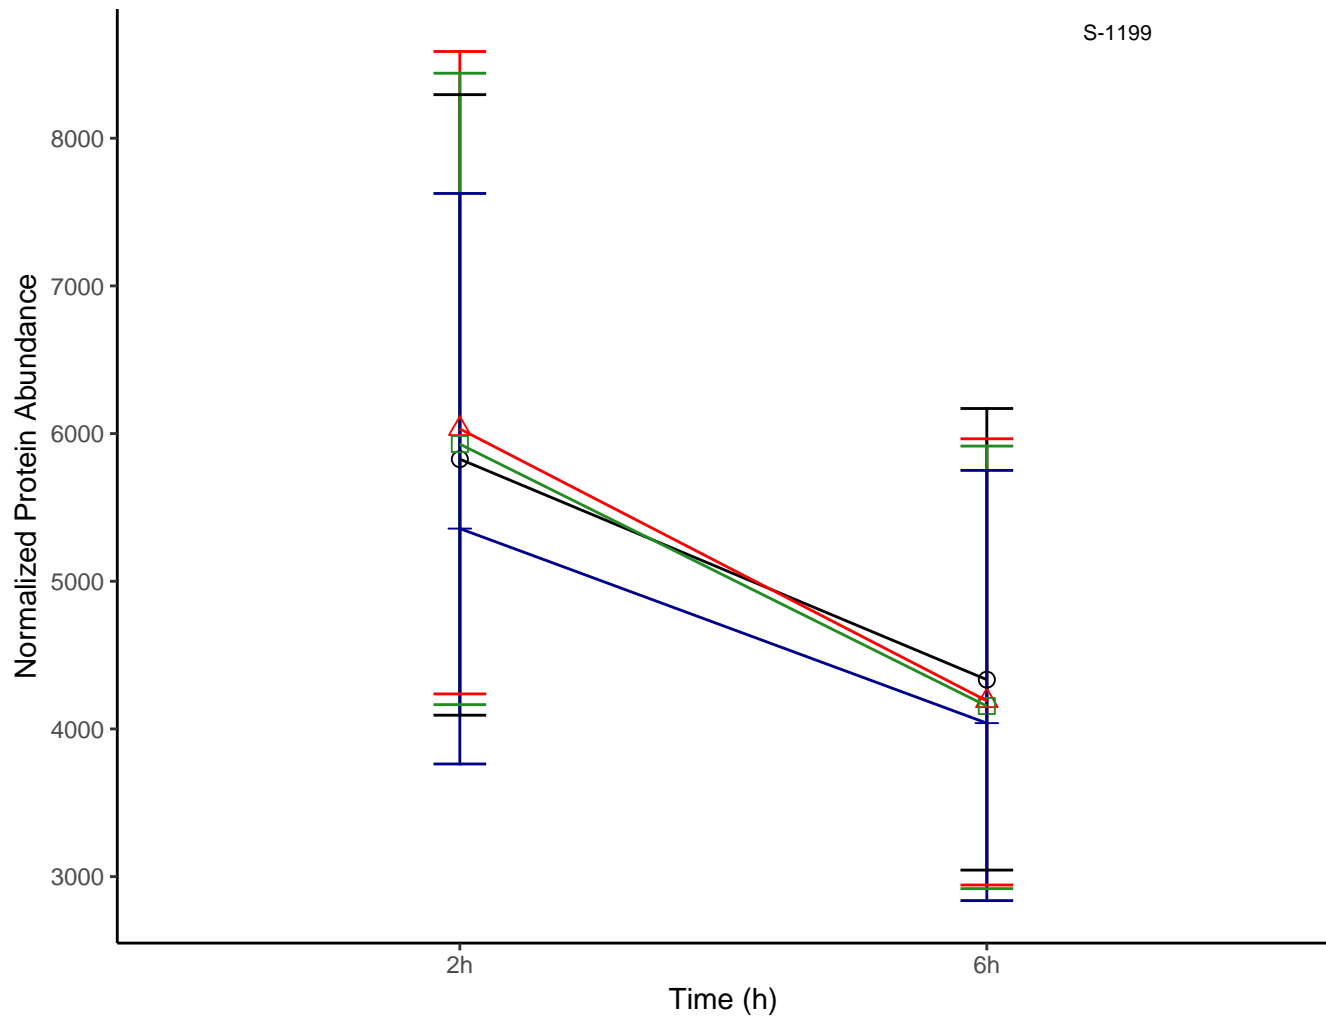

- SA564
- △ SA564-ΔhptRS
- SA564-ΔccpA
- + SA564-ΔhptRS/ccpA

# LYTN\_STAAM

S-1200

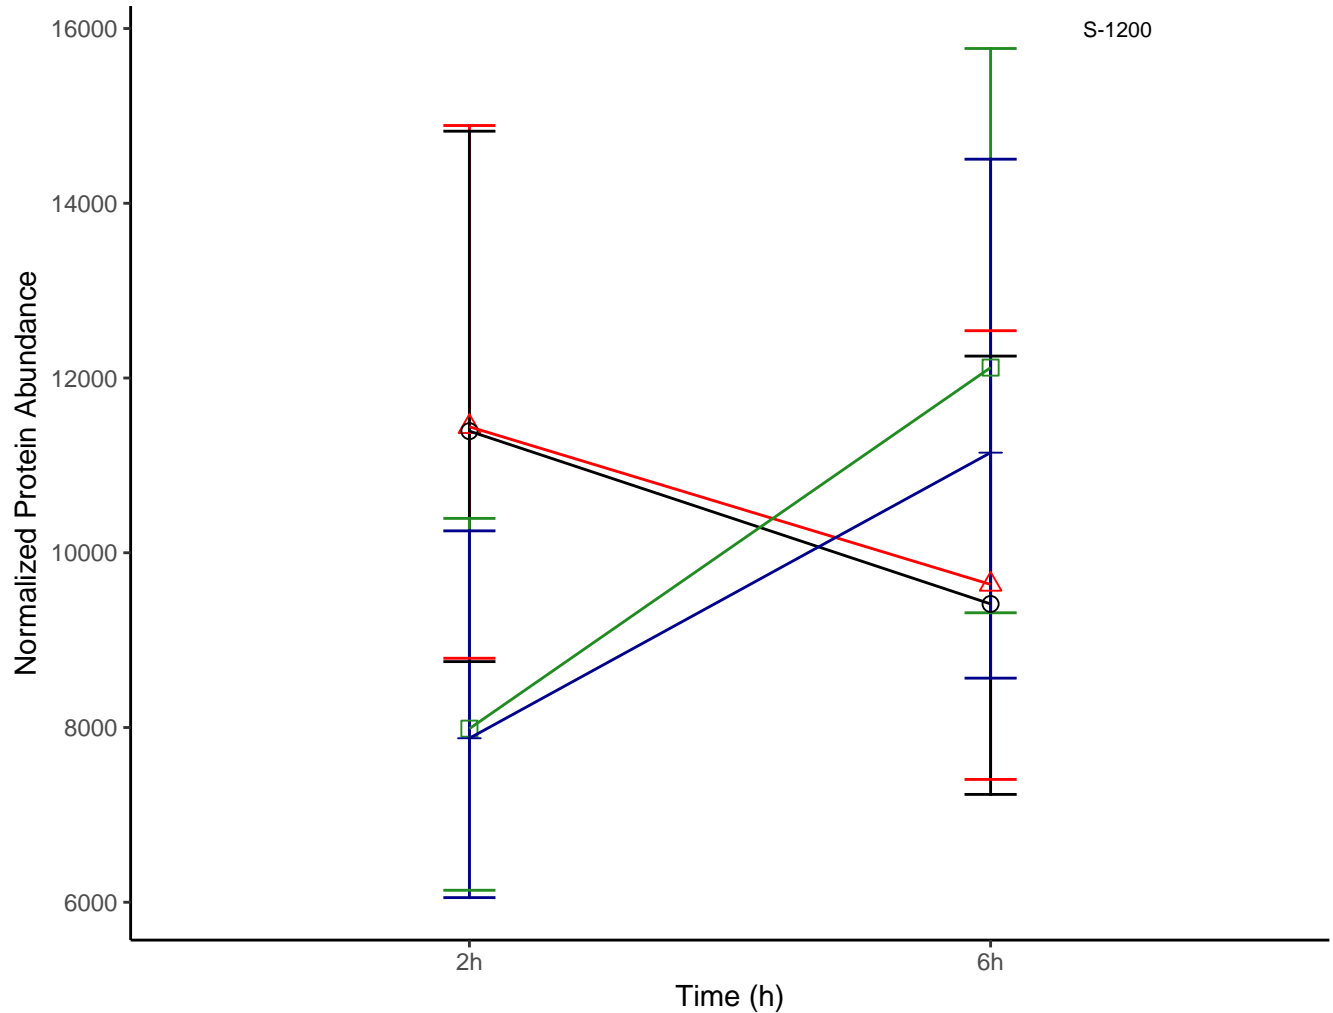

- SA564
- △ SA564- $\Delta$ *hptRS*
- SA564- $\Delta$ *ccpA*
- + SA564- $\Delta$ *hptRS/ccpA*



# MAP\_STAAM

S-1201

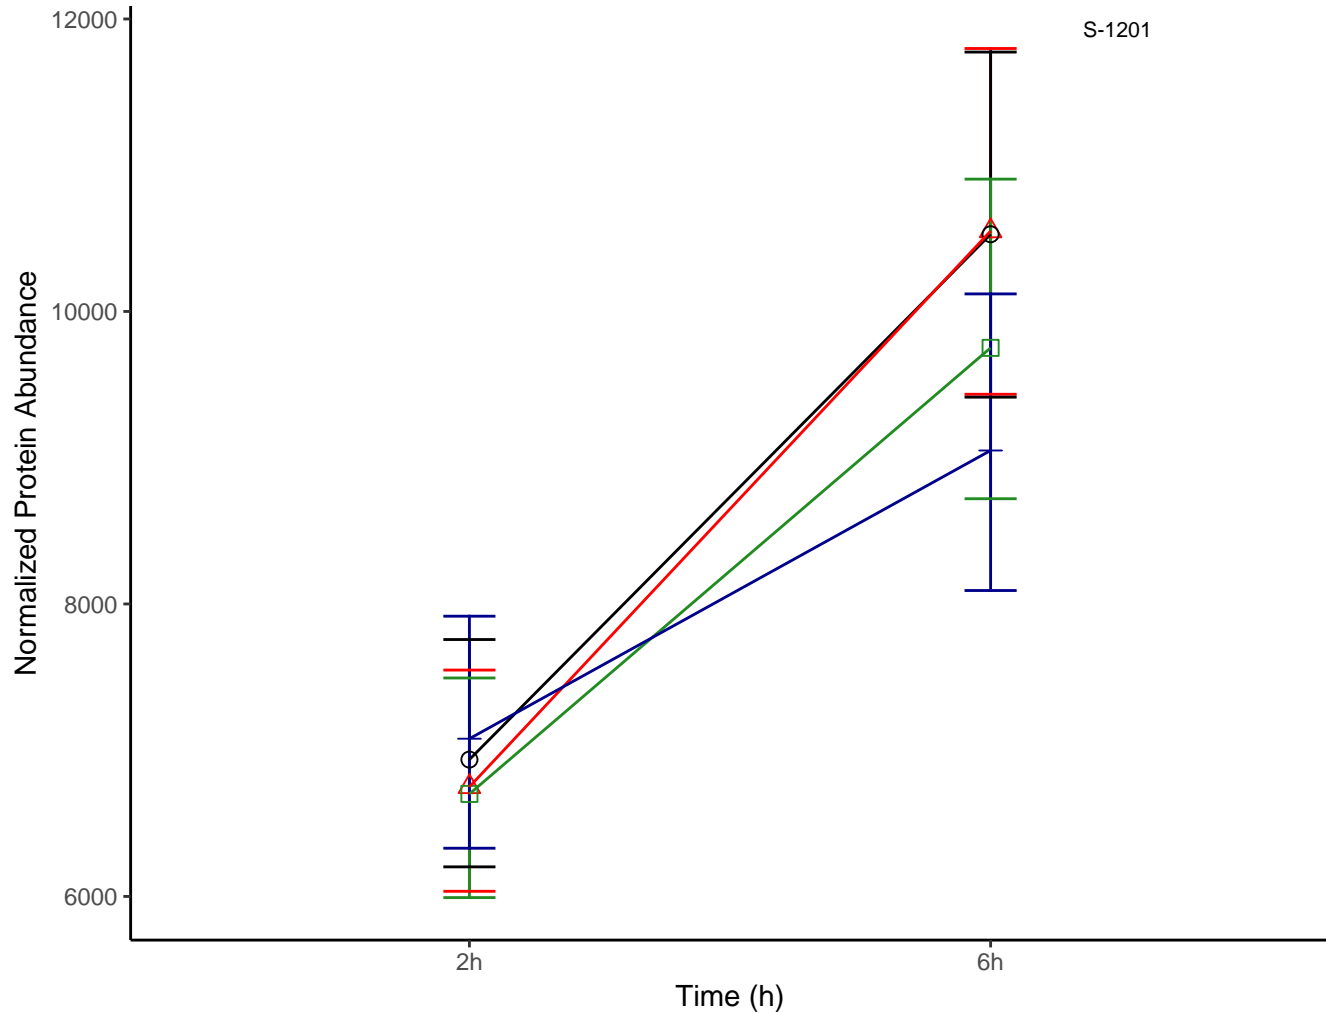

- SA564
- △ SA564- $\Delta$ *hptRS*
- SA564- $\Delta$ *ccpA*
- + SA564- $\Delta$ *hptRS/ccpA*

# MAP1\_STAAM

S-1202

Normalized Protein Abundance

17500  
15000  
12500  
10000  
7500

2h

6h

Time (h)

- SA564
- △ SA564- $\Delta$ *hptRS*
- SA564- $\Delta$ *ccpA*
- + SA564- $\Delta$ *hptRS/ccpA*

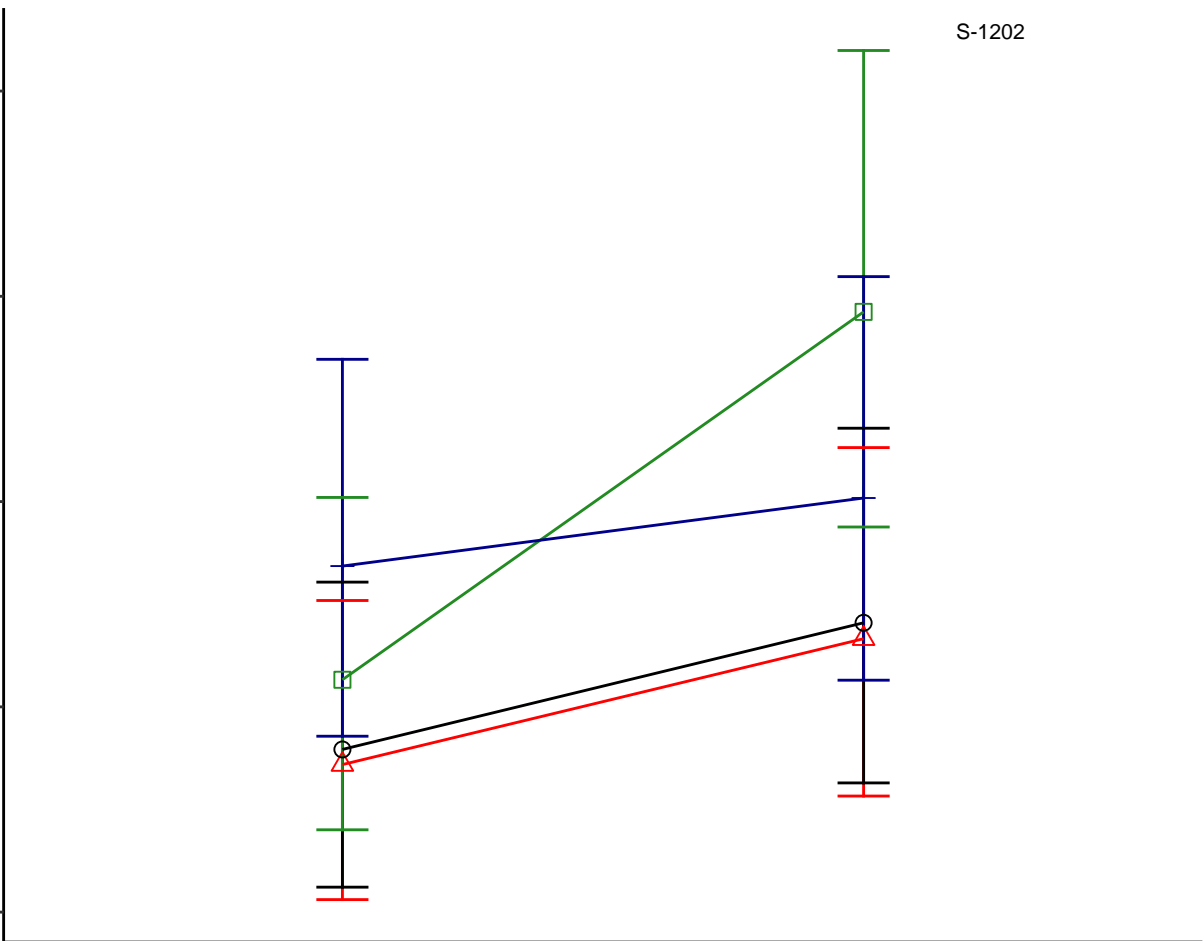

# MAZF\_STAAM

S-1203

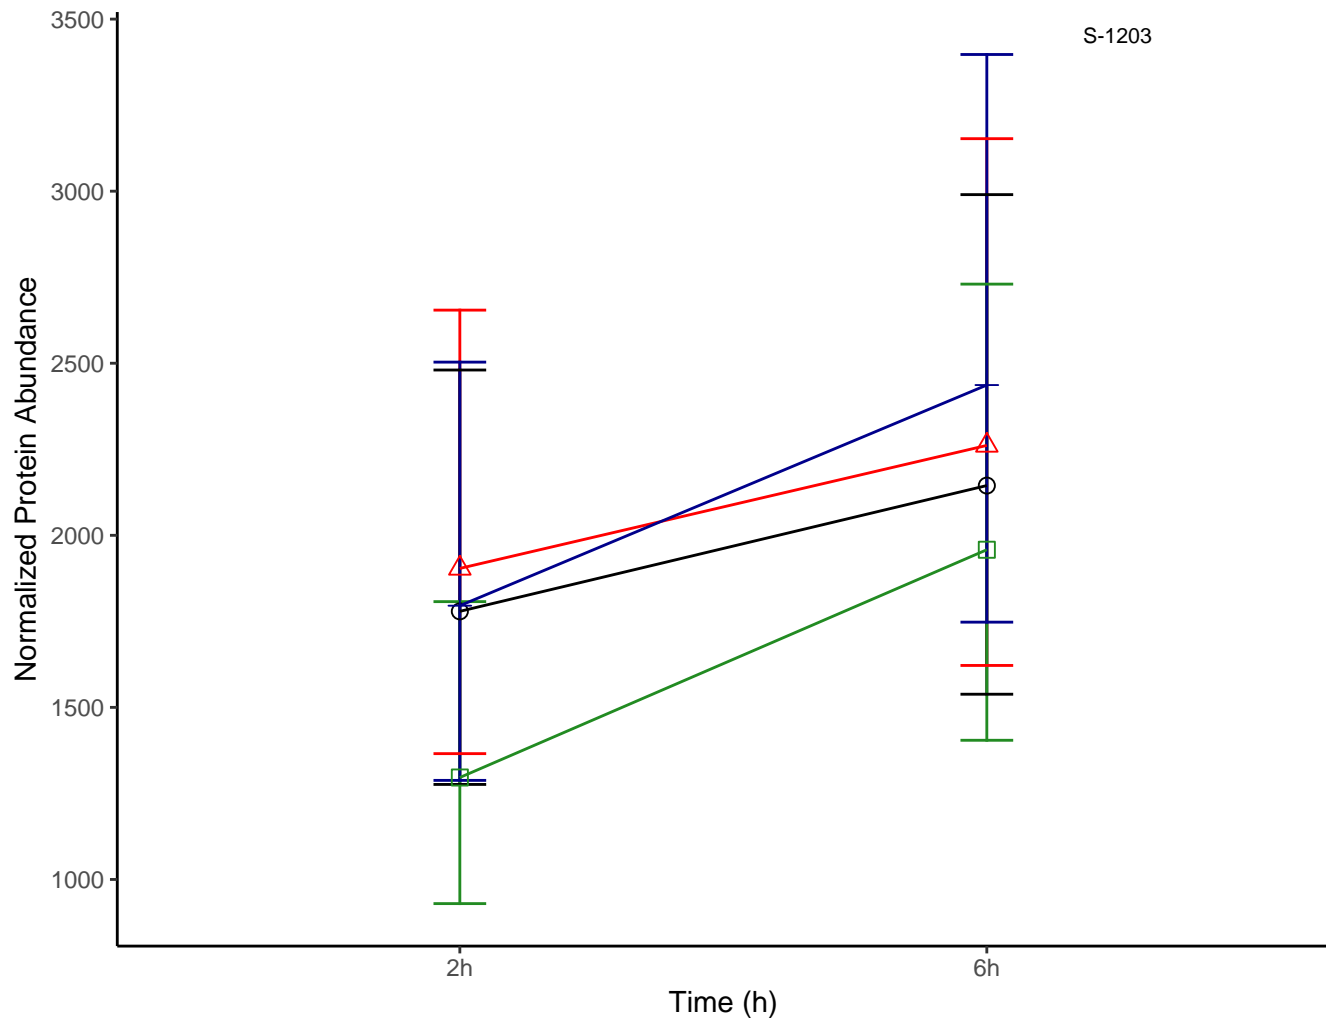

- SA564
- △ SA564- $\Delta$ hptRS
- SA564- $\Delta$ ccpA
- + SA564- $\Delta$ hptRS/ccpA

# MENB\_STAAM

S-1204

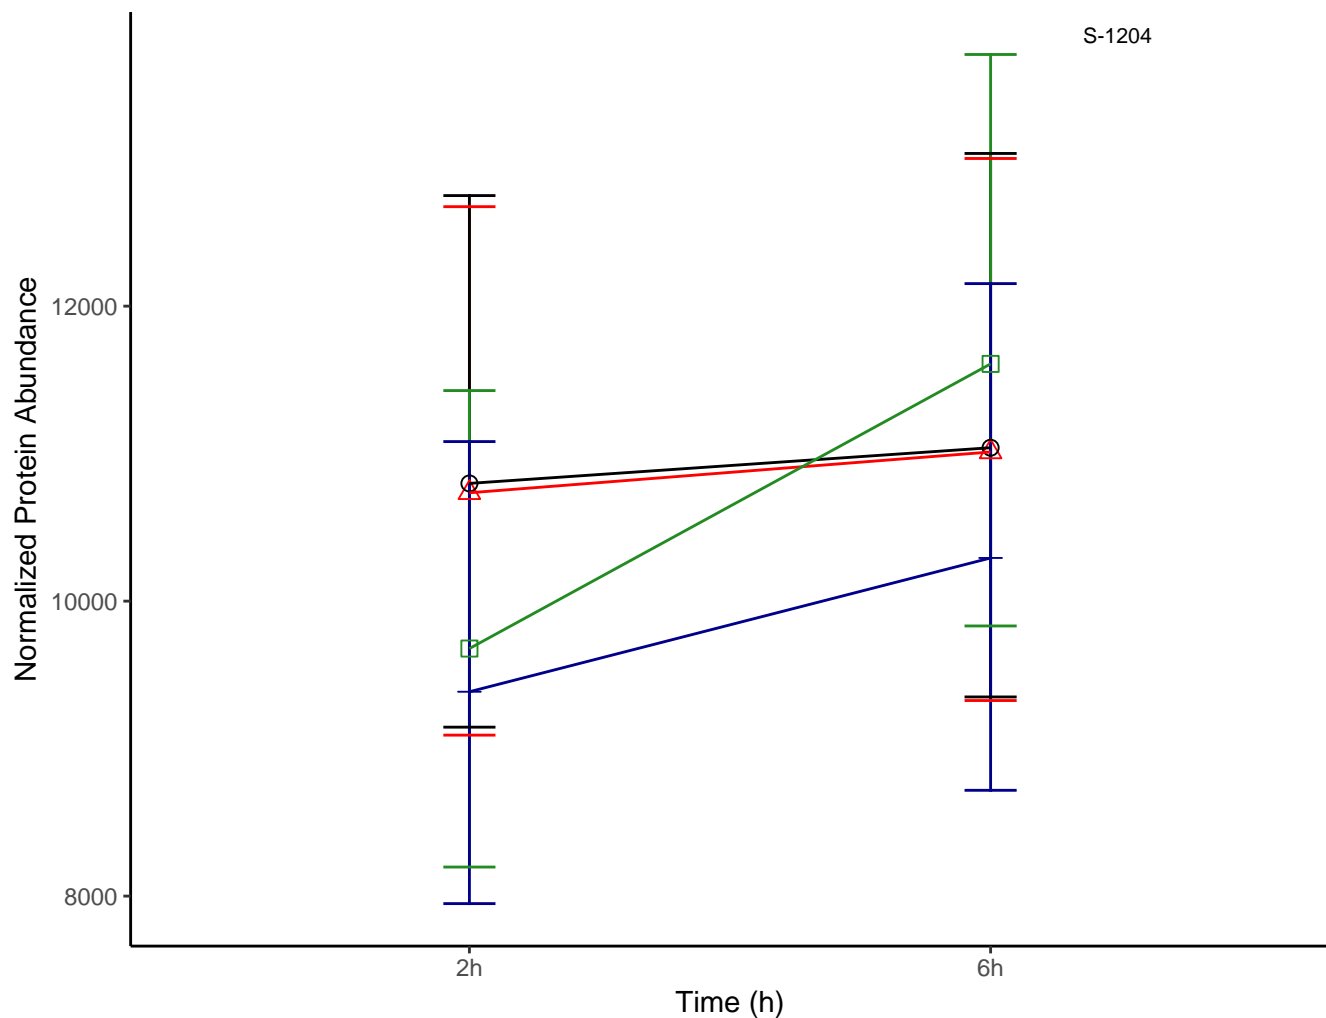

- SA564
- △ SA564- $\Delta$ hptRS
- SA564- $\Delta$ ccpA
- + SA564- $\Delta$ hptRS/ccpA

# MENG\_STAAM

S-1205

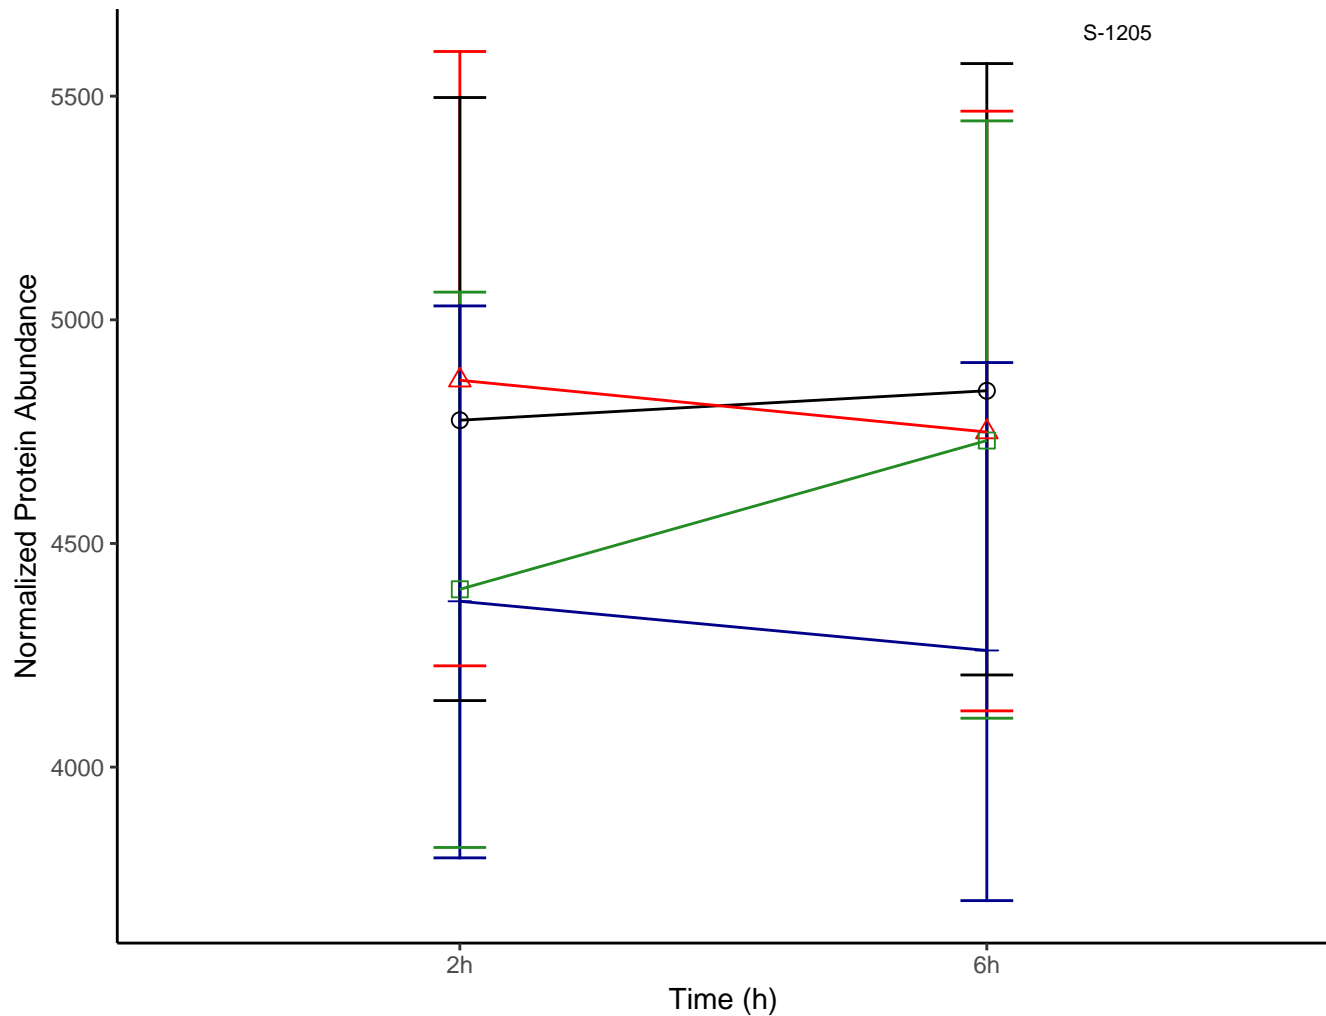

- SA564
- △ SA564- $\Delta$ *hptRS*
- SA564- $\Delta$ *ccpA*
- + SA564- $\Delta$ *hptRS/ccpA*

# METK\_STAAM

S-1206

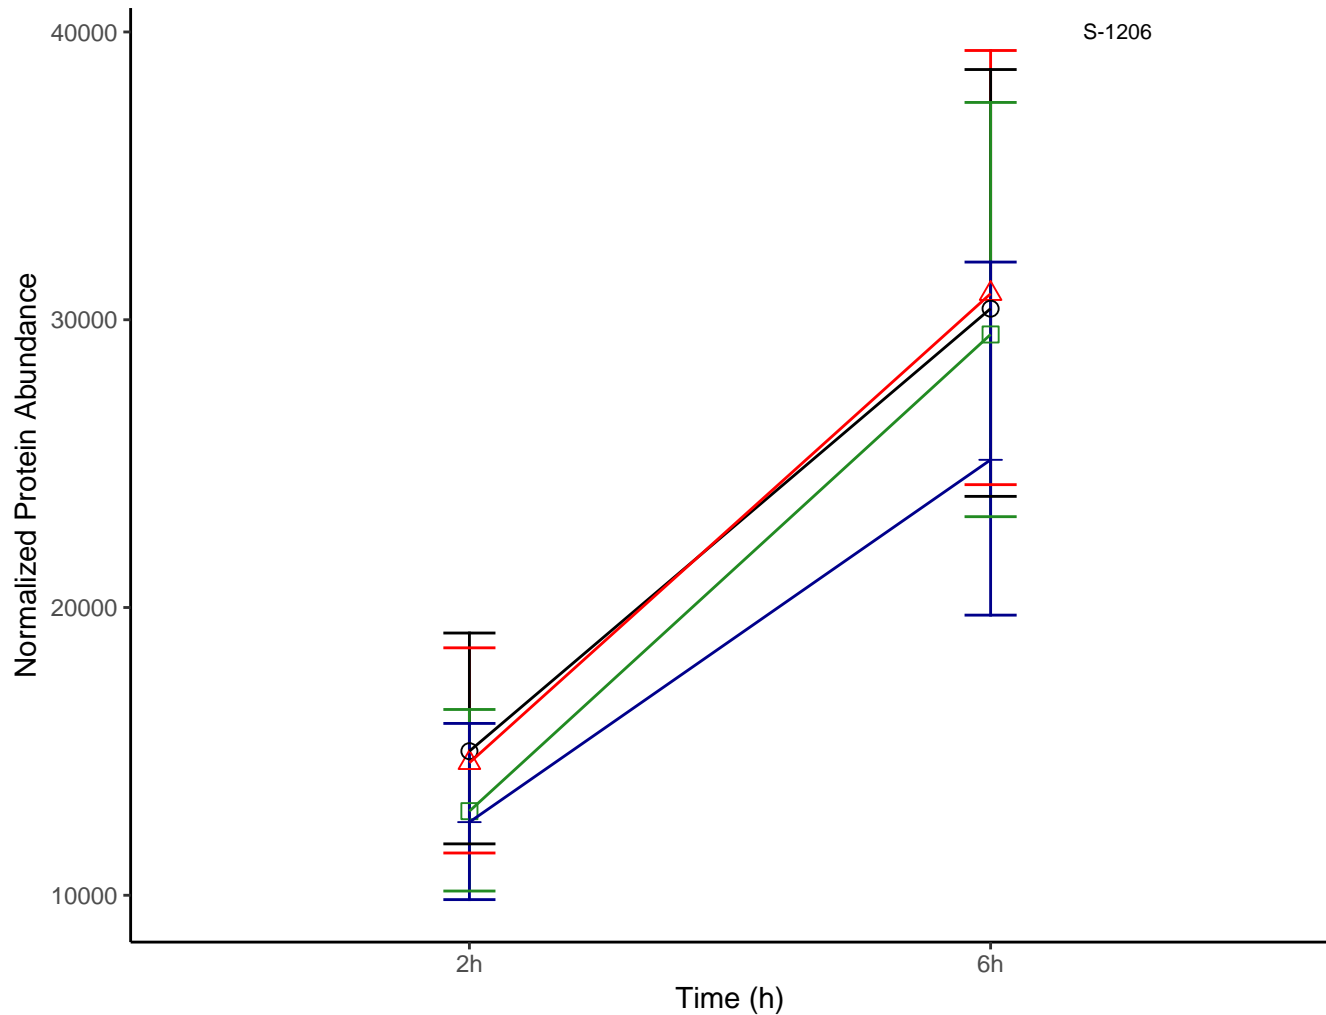

- SA564
- △ SA564- $\Delta hptRS$
- SA564- $\Delta ccpA$
- + SA564- $\Delta hptRS/ccpA$

# METN2\_STAAM

S-1207

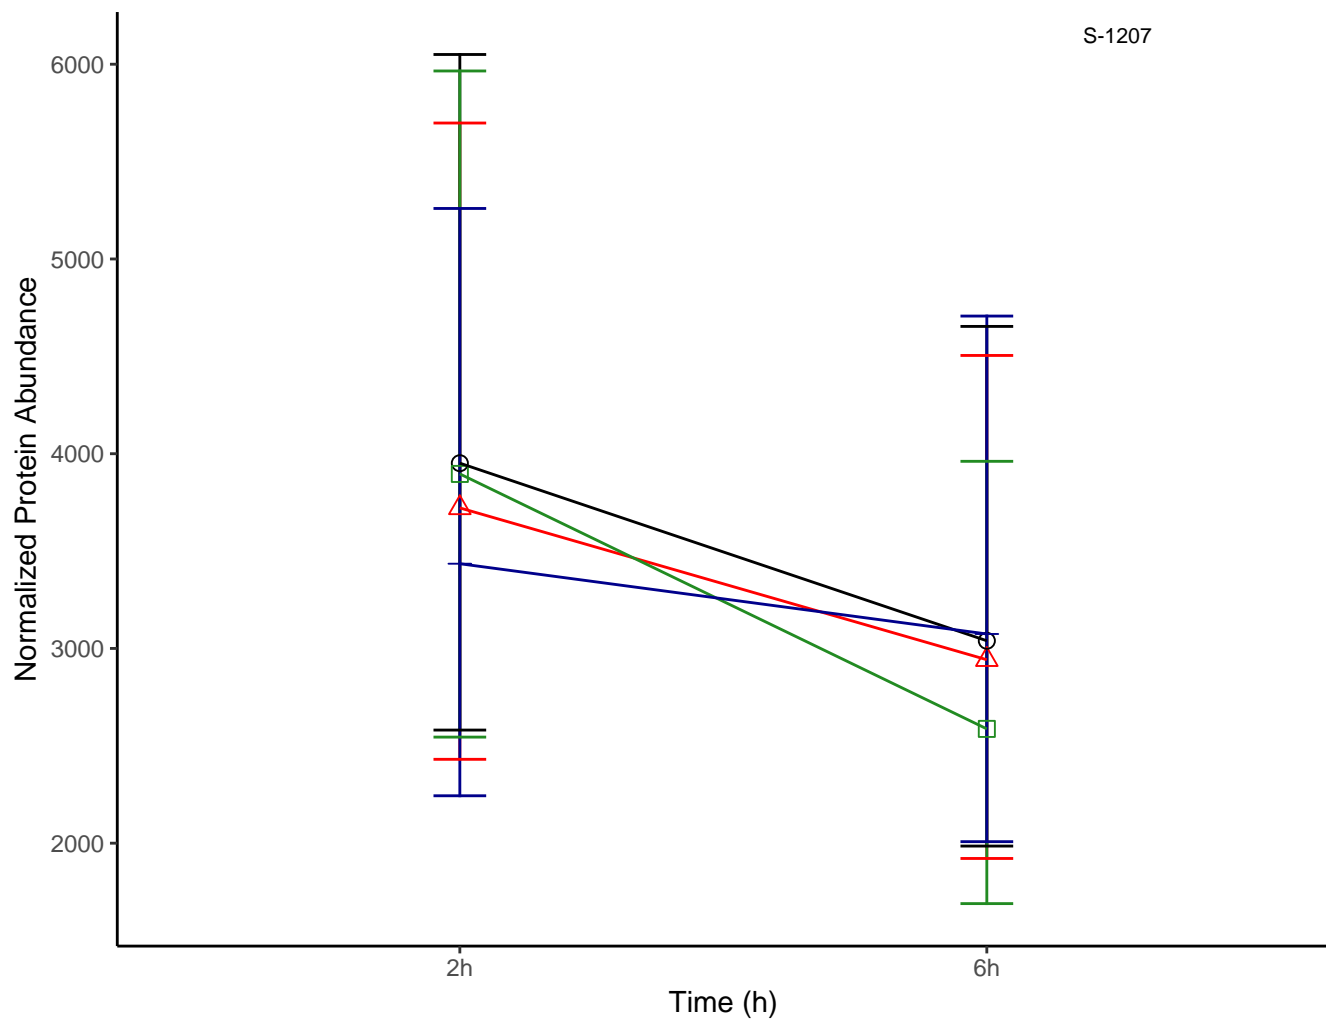

- SA564
- △ SA564- $\Delta$ *hptRS*
- SA564- $\Delta$ *ccpA*
- + SA564- $\Delta$ *hptRS/ccpA*

# MGRA\_STAAM

S-1208

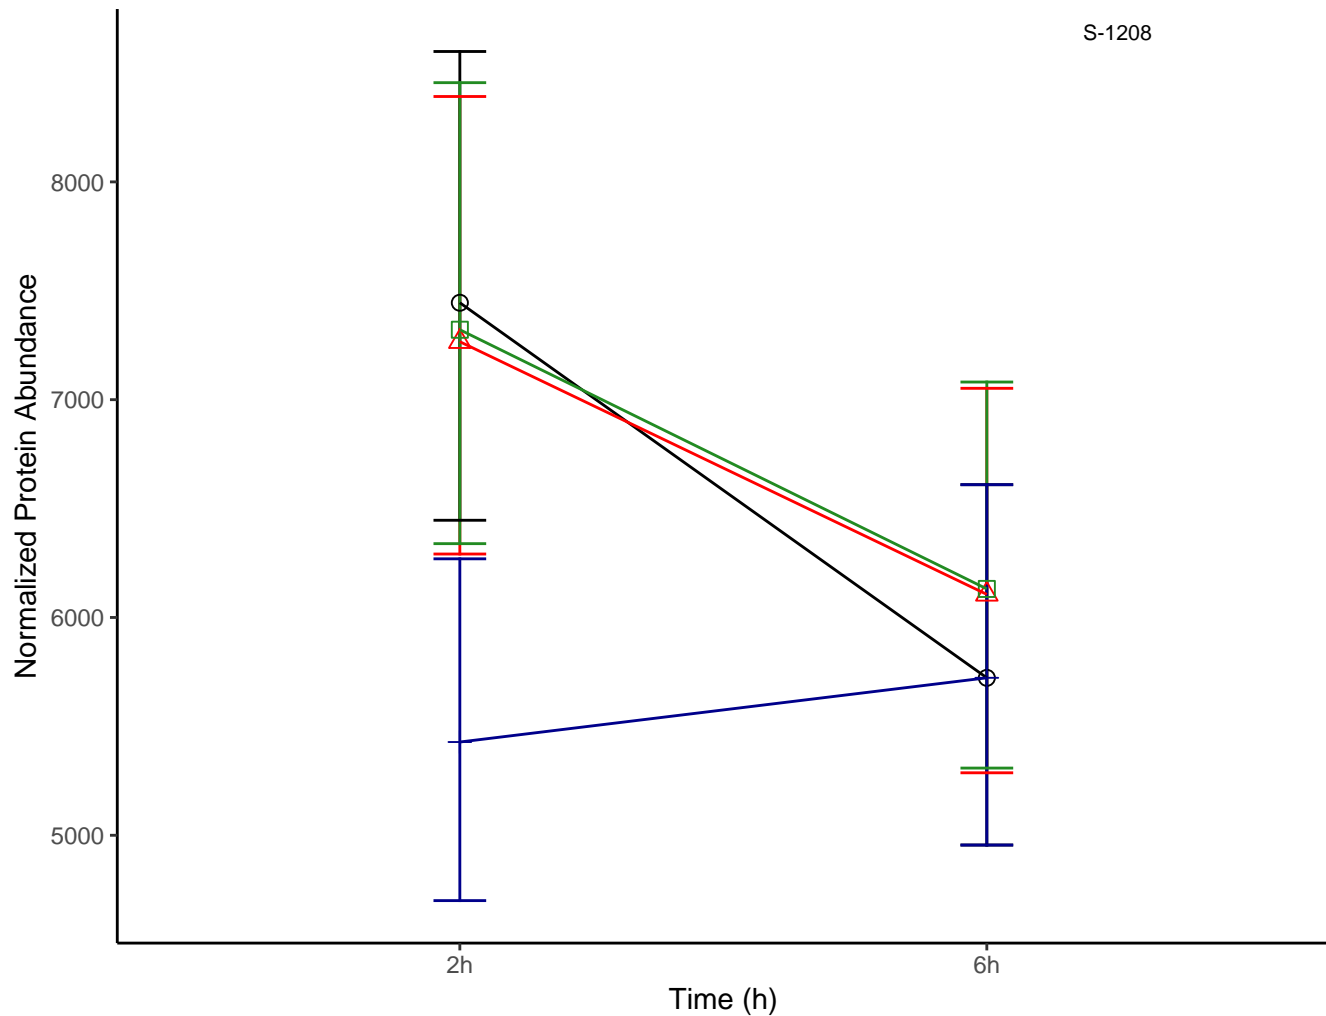

- SA564
- △ SA564- $\Delta$ *hptRS*
- SA564- $\Delta$ *ccpA*
- + SA564- $\Delta$ *hptRS/ccpA*



# MIAB\_STAAM

S-1209

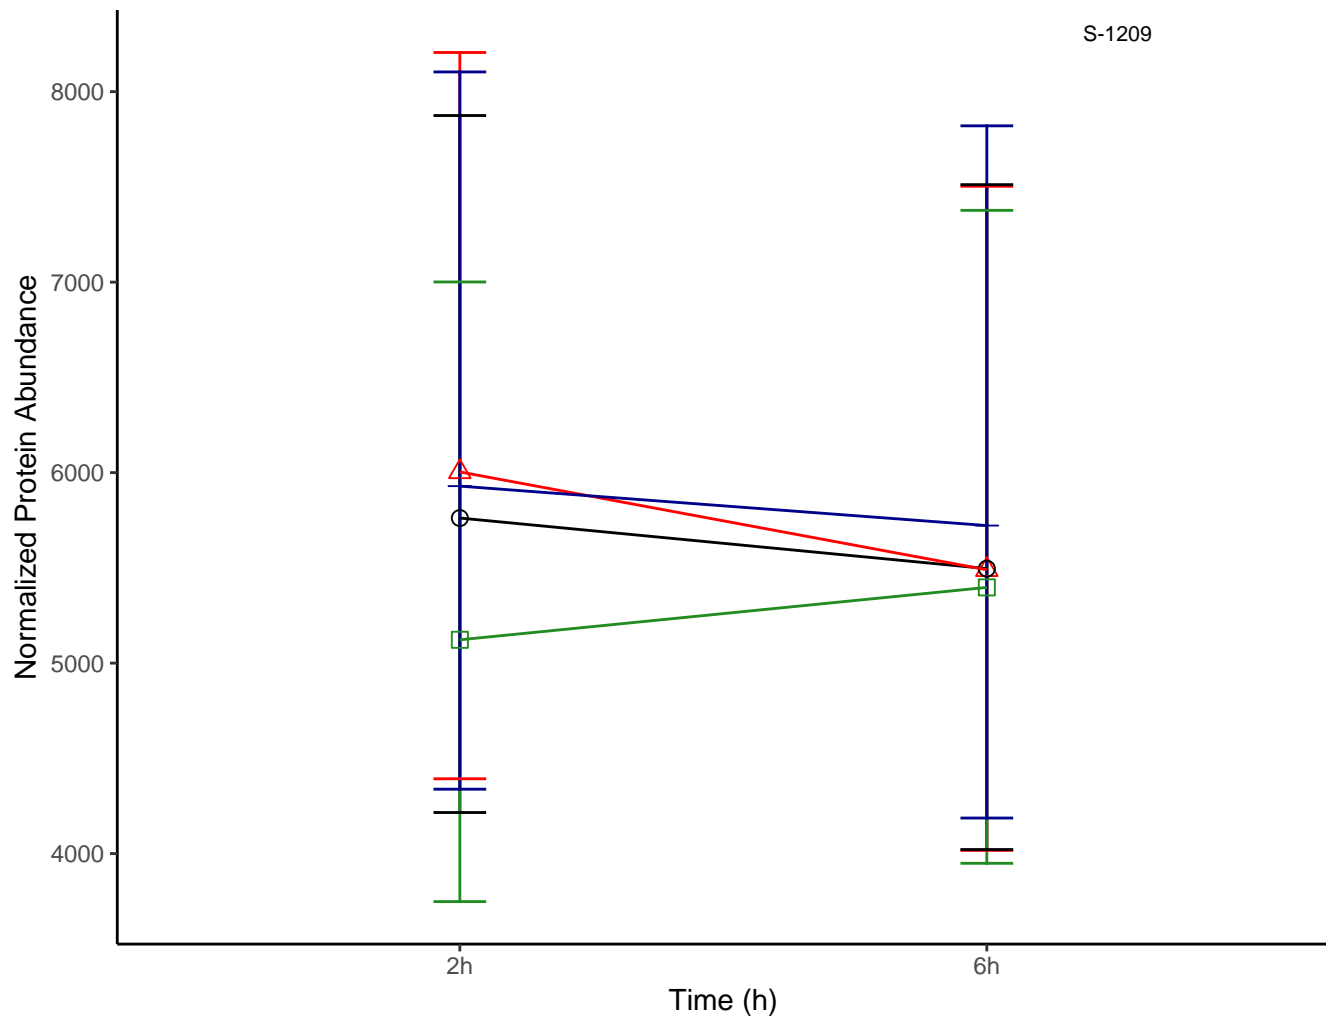

- SA564
- △ SA564- $\Delta$ *hptRS*
- SA564- $\Delta$ *ccpA*
- + SA564- $\Delta$ *hptRS/ccpA*

# MNME\_STAAM

S-1210

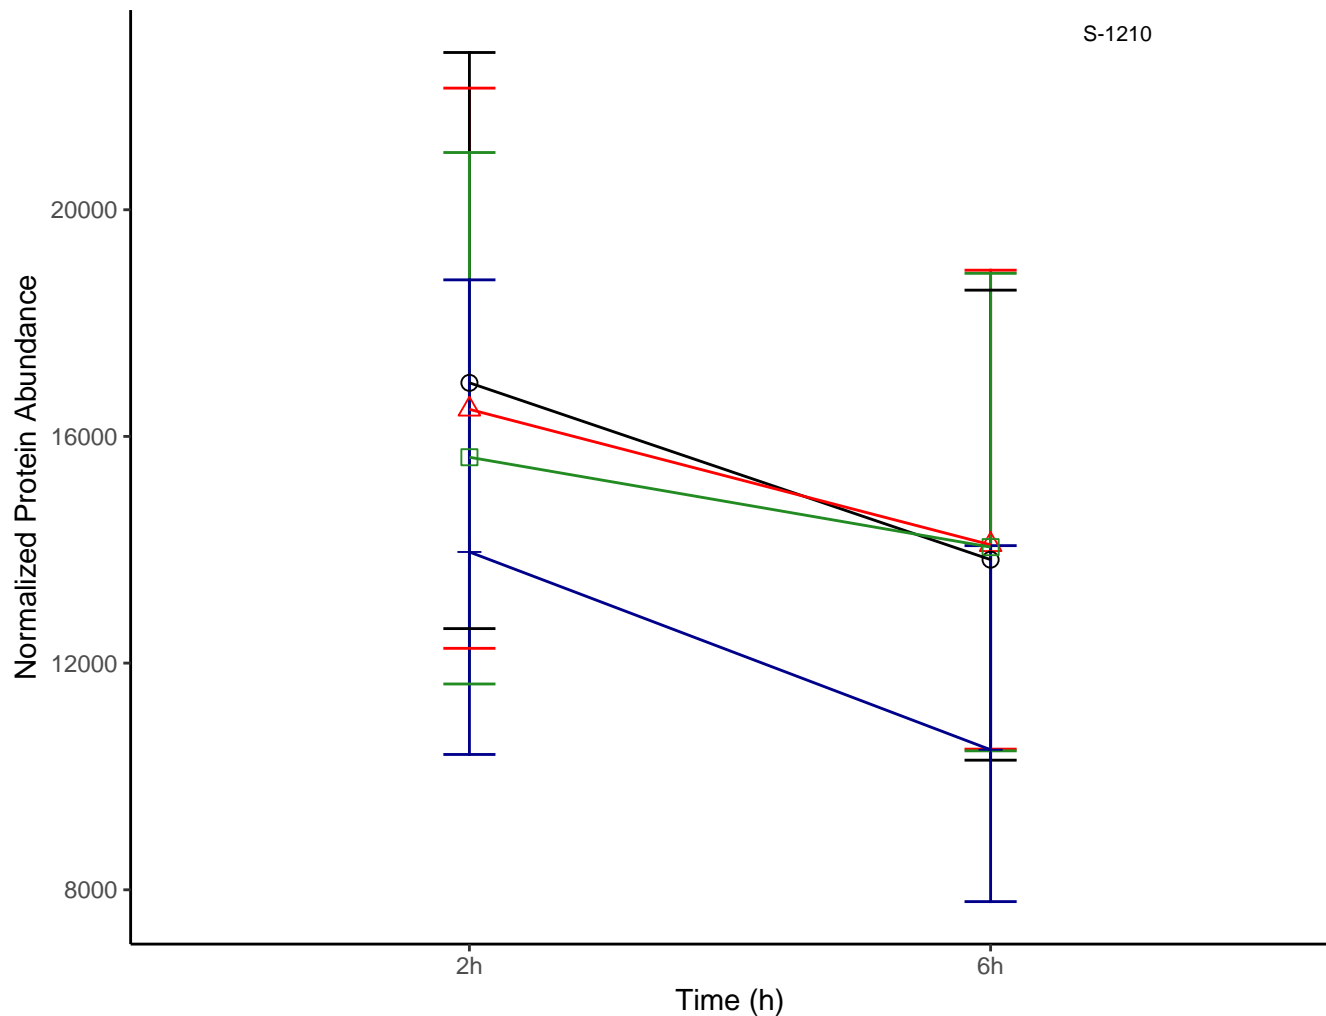

- SA564
- △ SA564-ΔhptRS
- SA564-ΔccpA
- + SA564-ΔhptRS/ccpA

# MNMG\_STAAM

S-1211

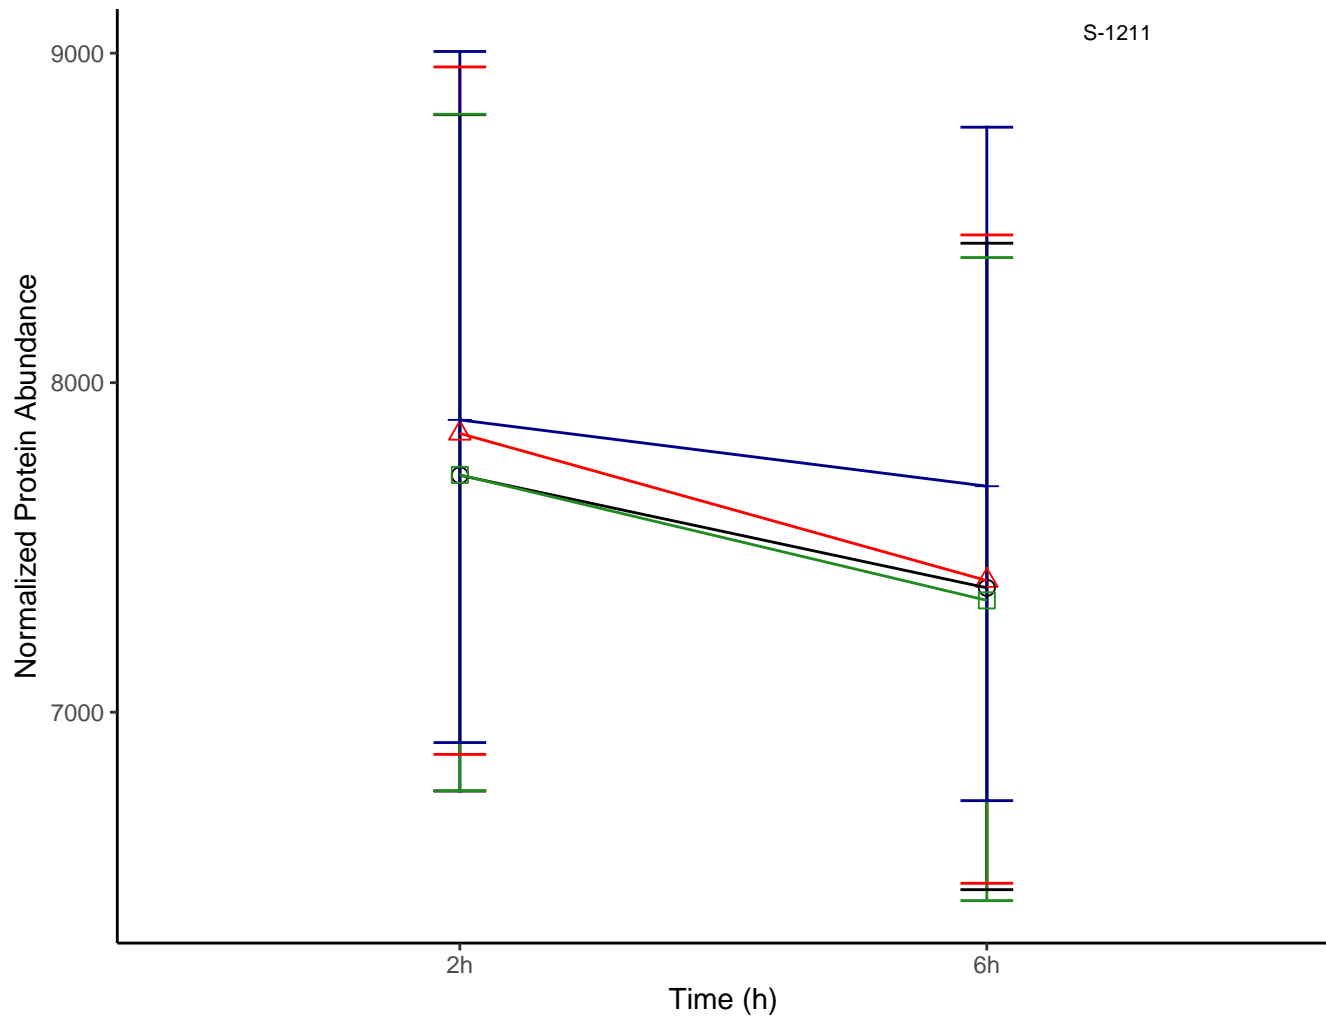

- SA564
- △ SA564- $\Delta hptRS$
- SA564- $\Delta ccpA$
- + SA564- $\Delta hptRS/ccpA$

# MOAC\_STAAM

S-1212

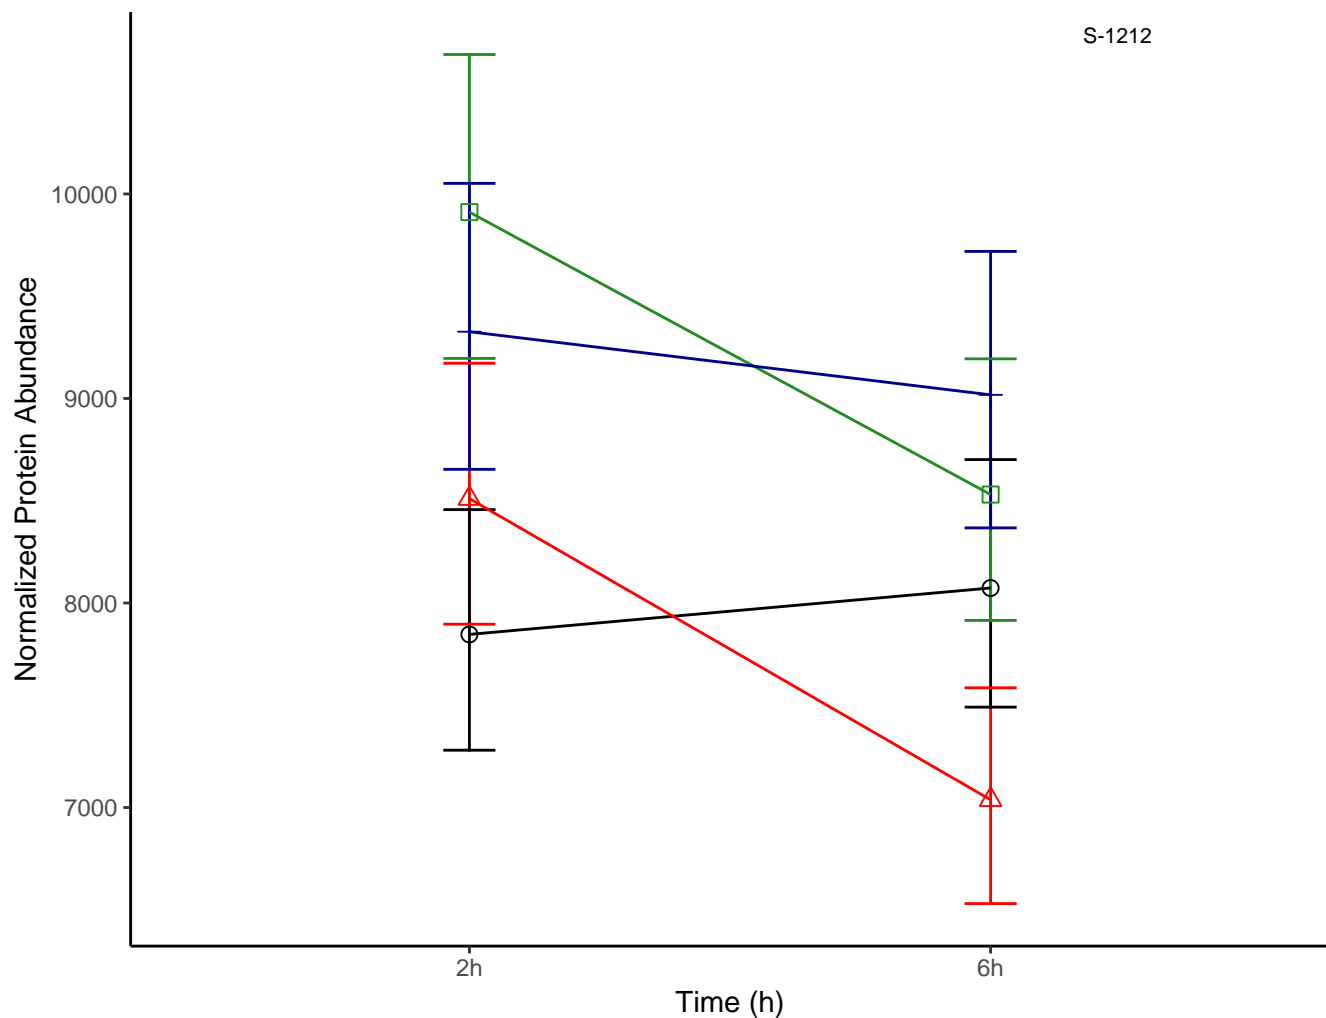

- SA564
- △ SA564- $\Delta$ *hptRS*
- SA564- $\Delta$ *ccpA*
- + SA564- $\Delta$ *hptRS/ccpA*

# MOEA\_STAAM

S-1213

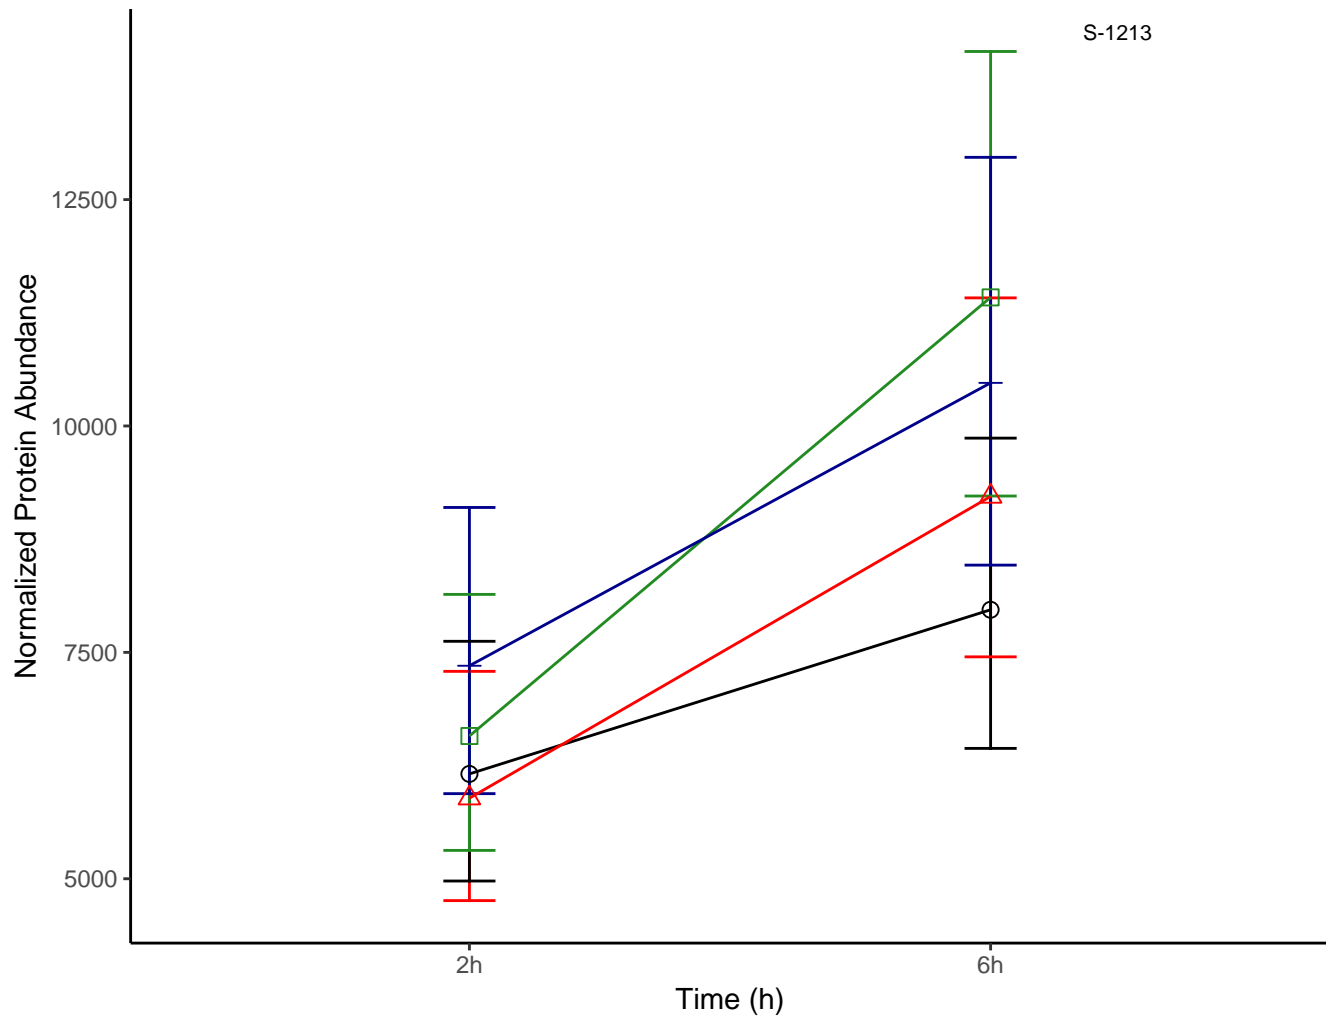

- SA564
- △ SA564- $\Delta$ *hptRS*
- SA564- $\Delta$ *ccpA*
- + SA564- $\Delta$ *hptRS/ccpA*

# MQO2\_STAAM

S-1214

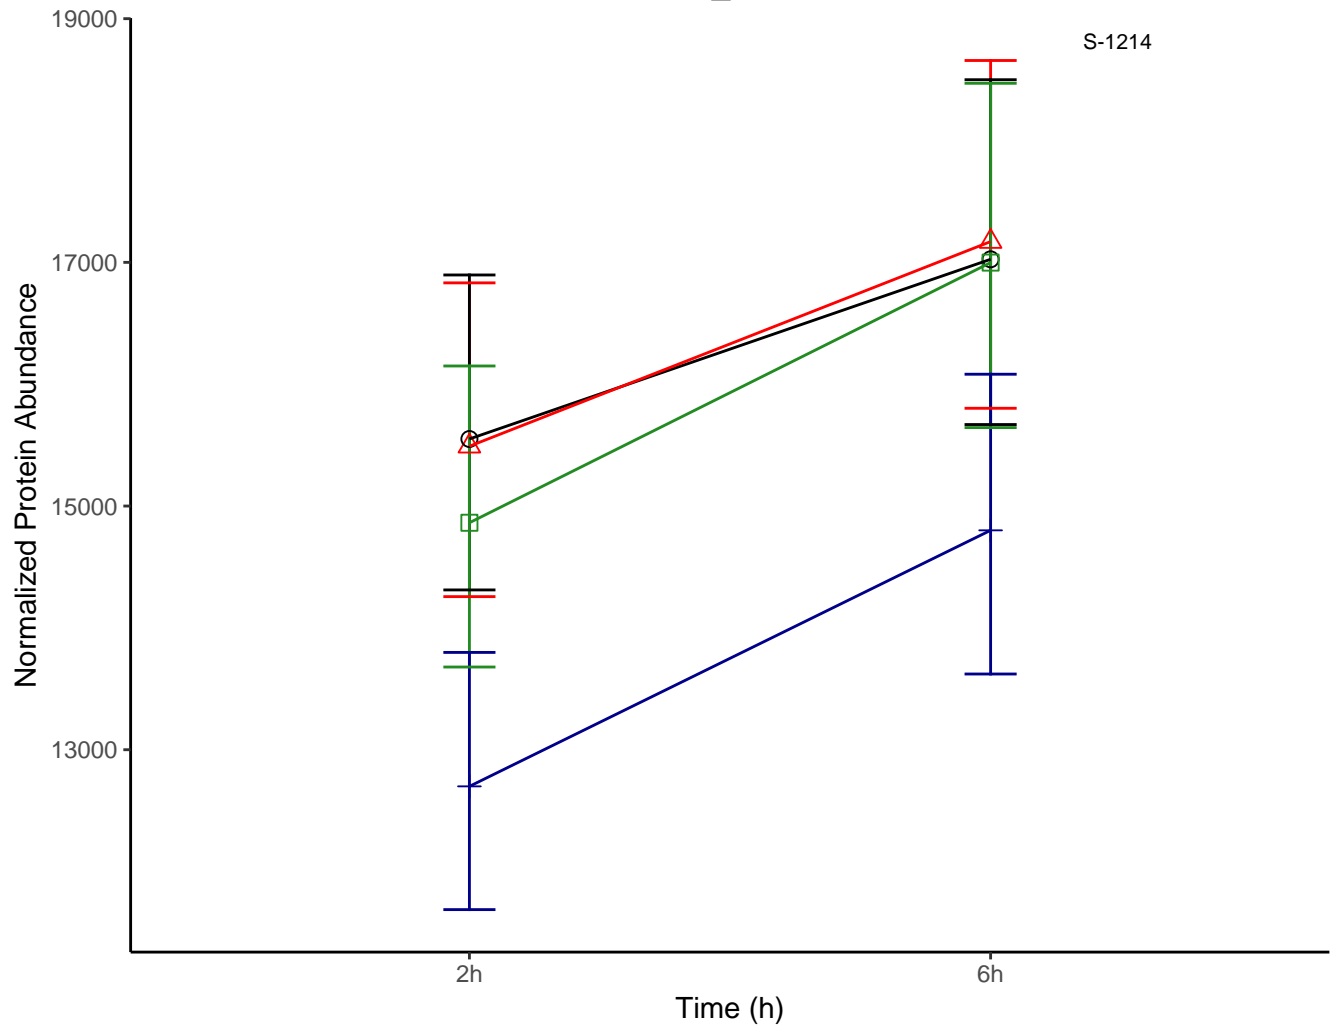

- SA564
- △ SA564- $\Delta hptRS$
- SA564- $\Delta ccpA$
- + SA564- $\Delta hptRS/ccpA$

# MSRA1\_STAAM

S-1215

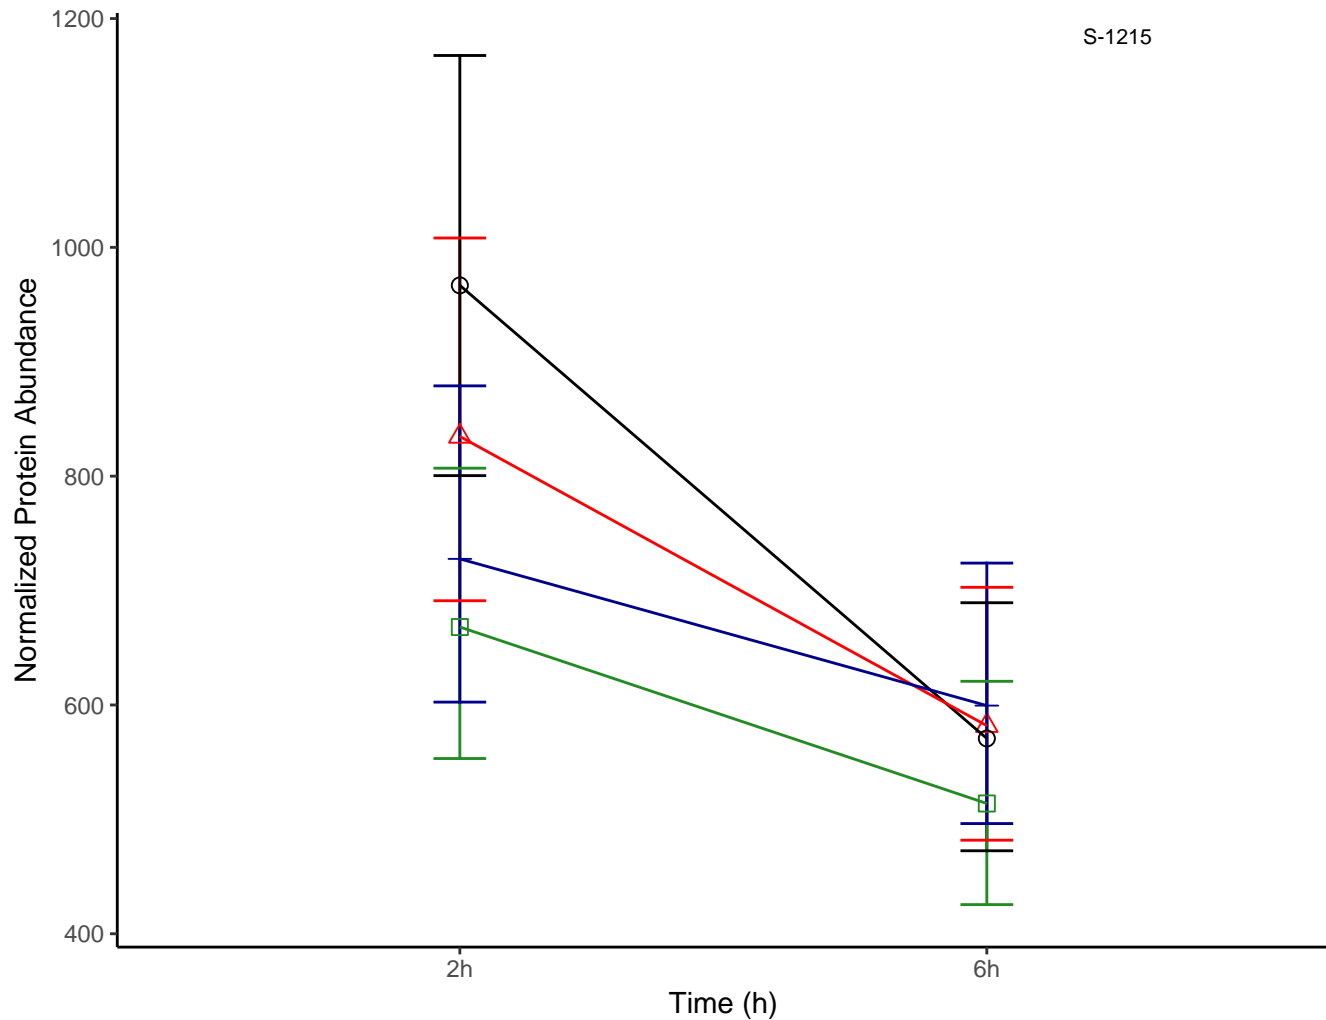

- SA564
- △ SA564- $\Delta$ *hptRS*
- SA564- $\Delta$ *ccpA*
- + SA564- $\Delta$ *hptRS/ccpA*

# MSRA2\_STAAM

S-1216

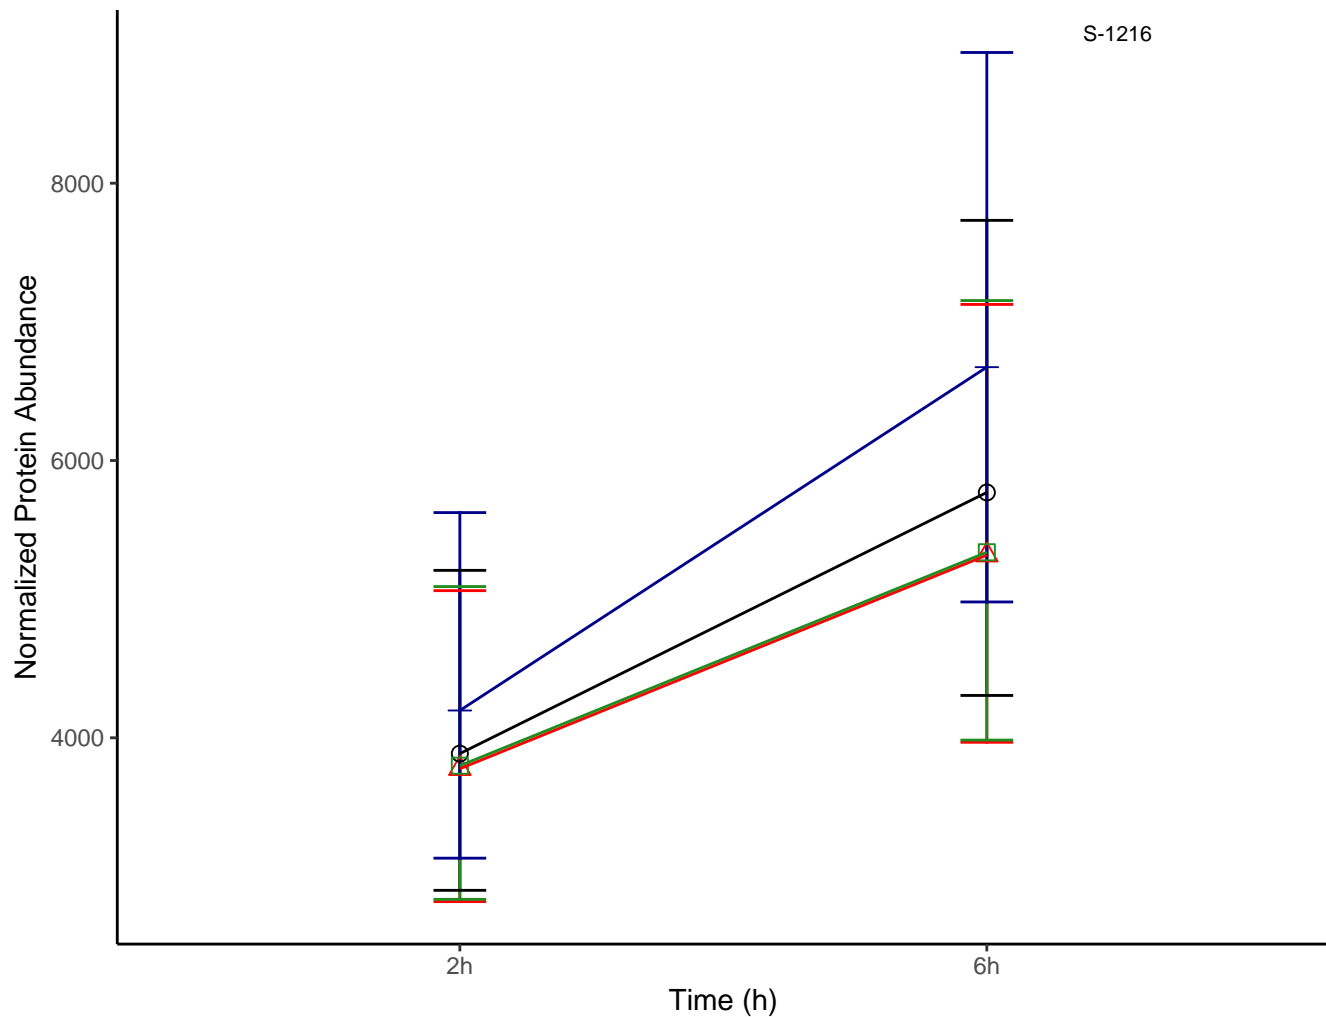

- SA564
- △ SA564-ΔhptRS
- SA564-ΔccpA
- + SA564-ΔhptRS/ccpA



# MSRB\_STAAM

S-1217

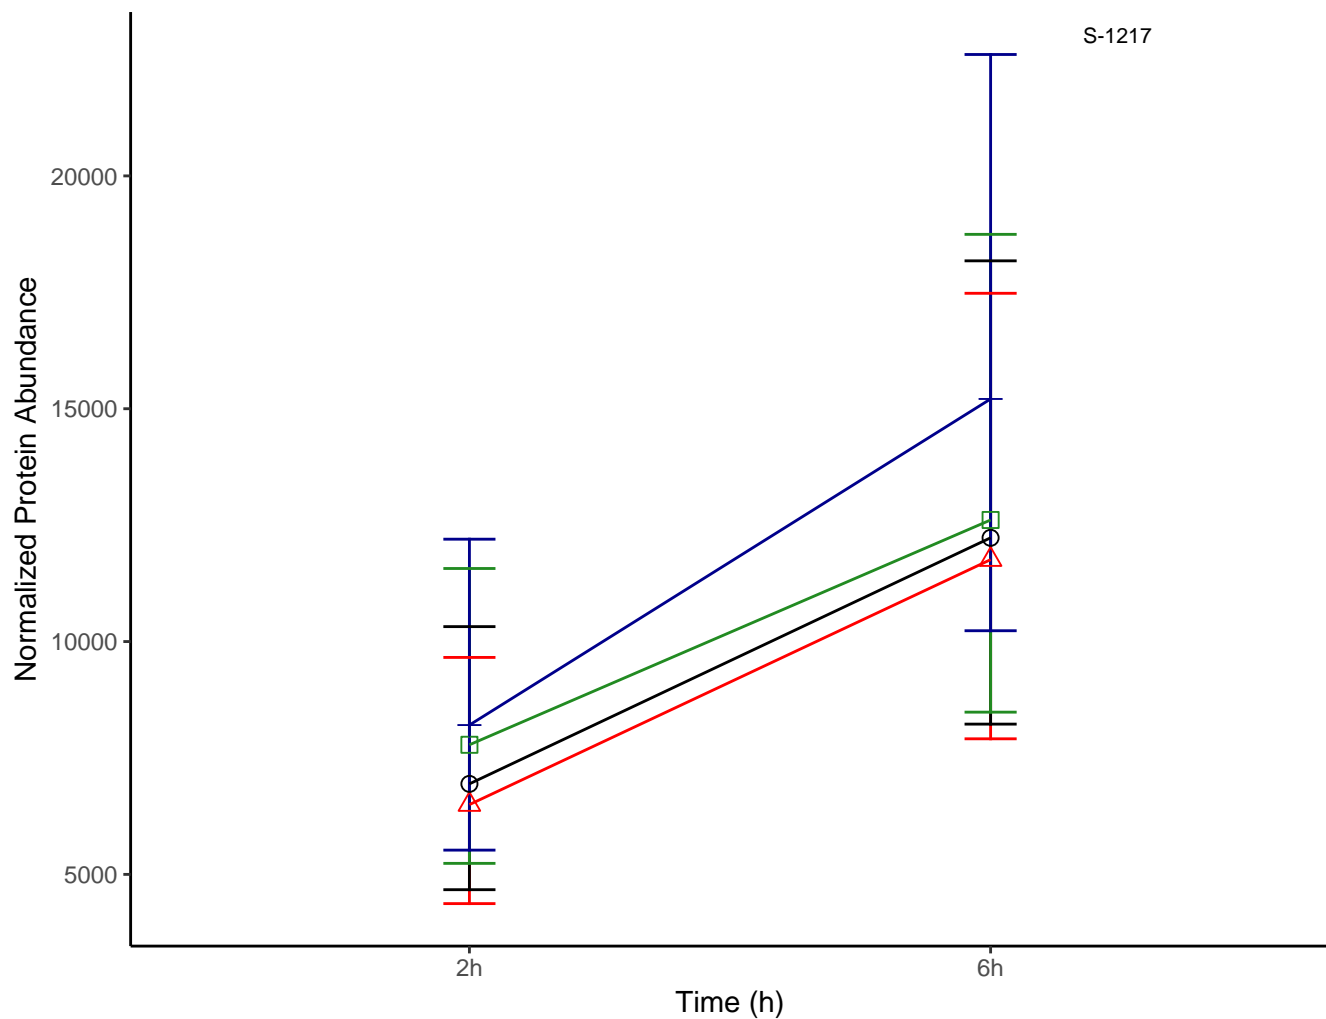

- SA564
- △ SA564- $\Delta$ hptRS
- SA564- $\Delta$ ccpA
- + SA564- $\Delta$ hptRS/ccpA

# MTLD\_STAAM

S-1218

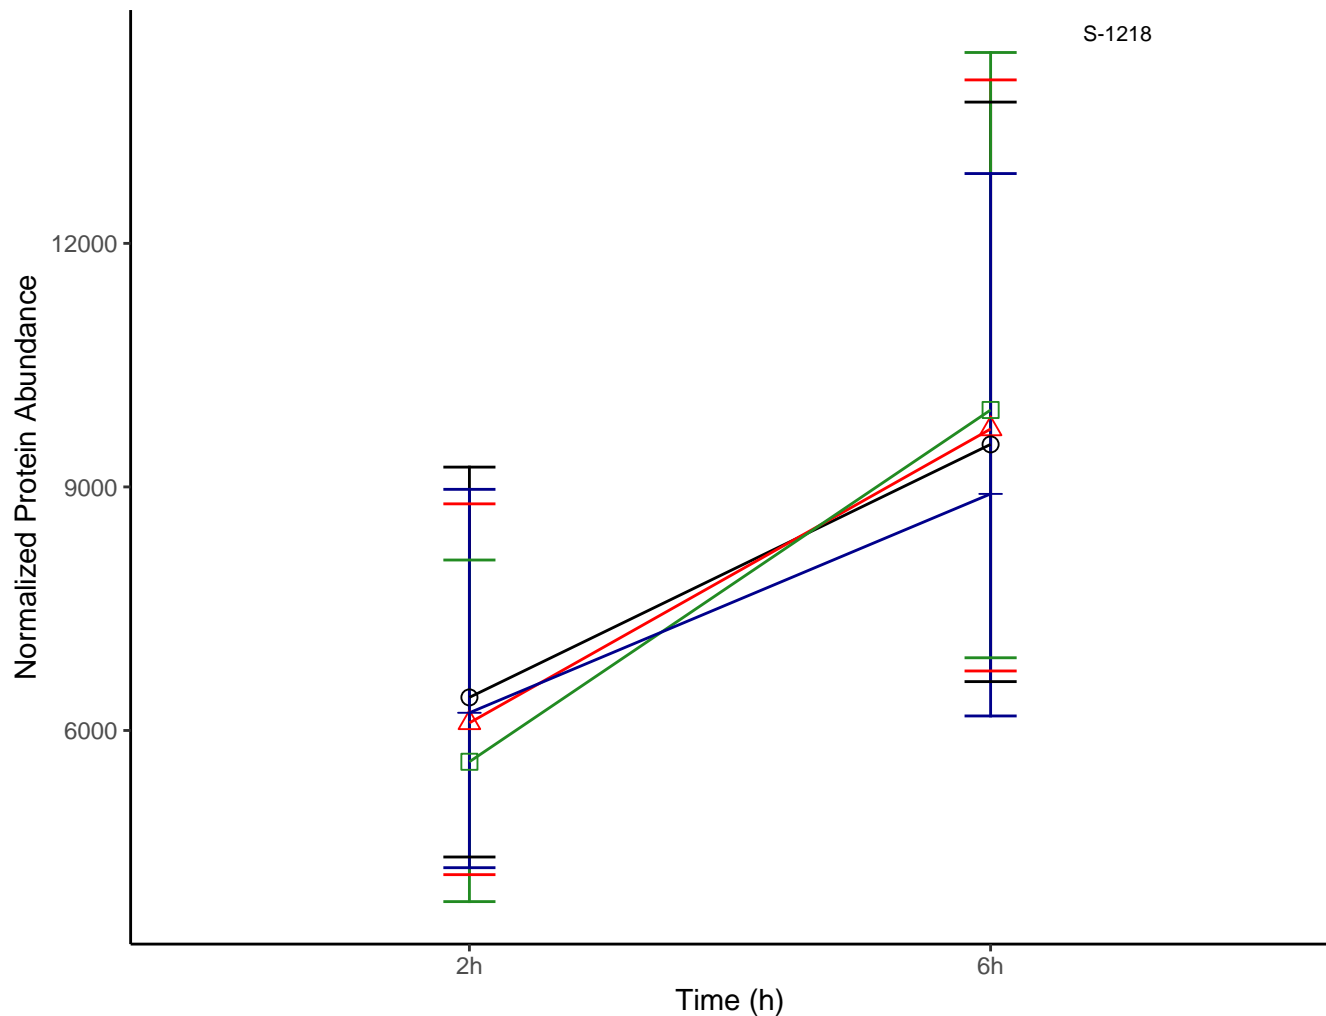

- SA564
- △ SA564- $\Delta$ *hptRS*
- SA564- $\Delta$ *ccpA*
- + SA564- $\Delta$ *hptRS/ccpA*

# MTNN\_STAAM

S-1219

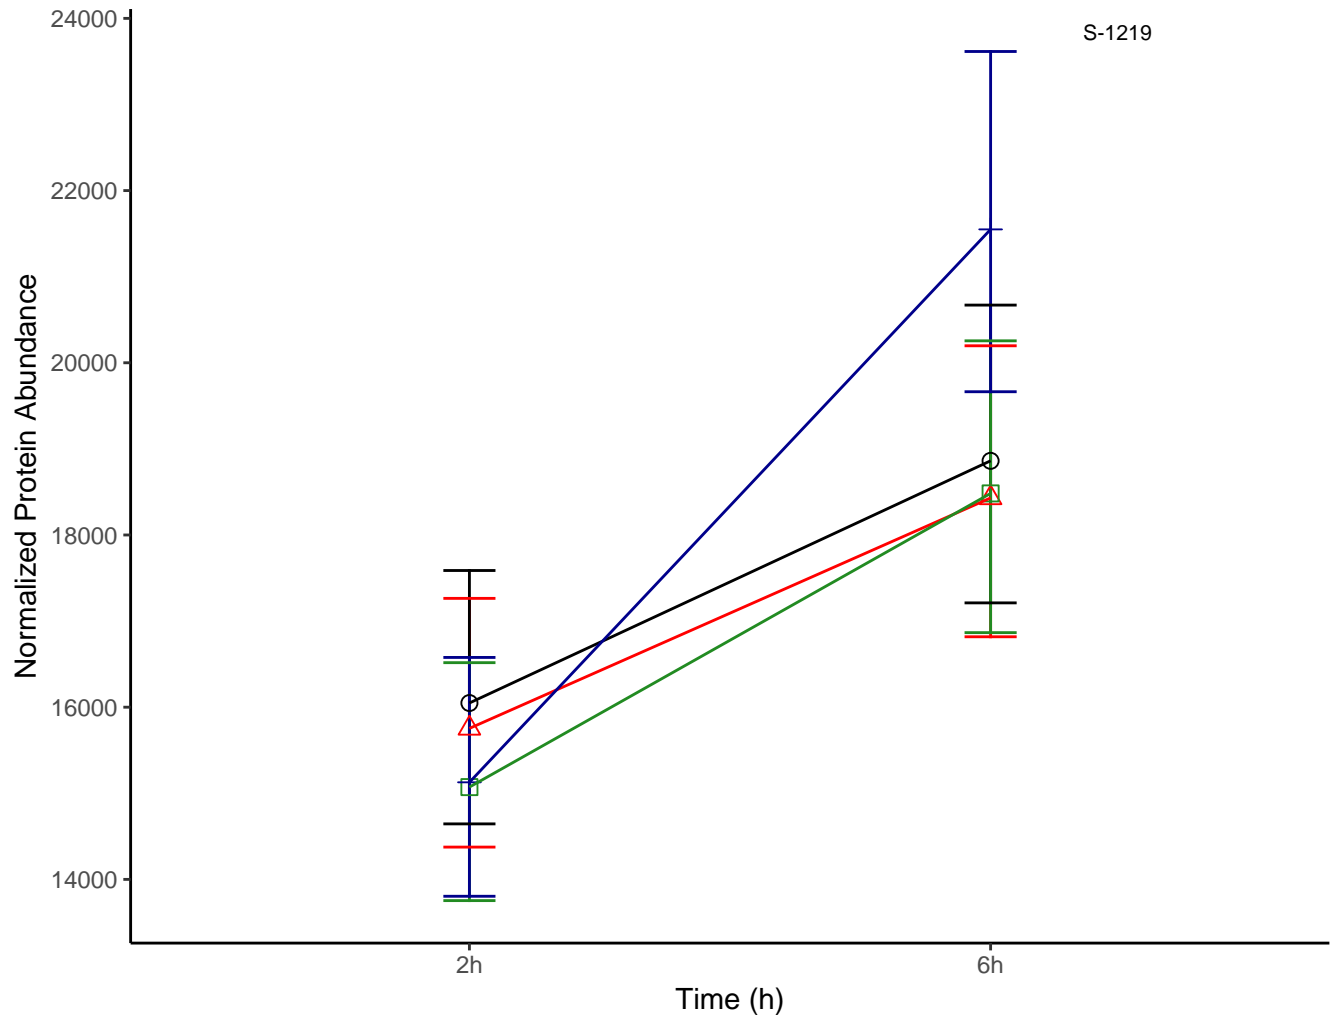

- SA564
- △ SA564- $\Delta$ *hptRS*
- SA564- $\Delta$ *ccpA*
- + SA564- $\Delta$ *hptRS/ccpA*

# MURA1\_STAAM

S-1220

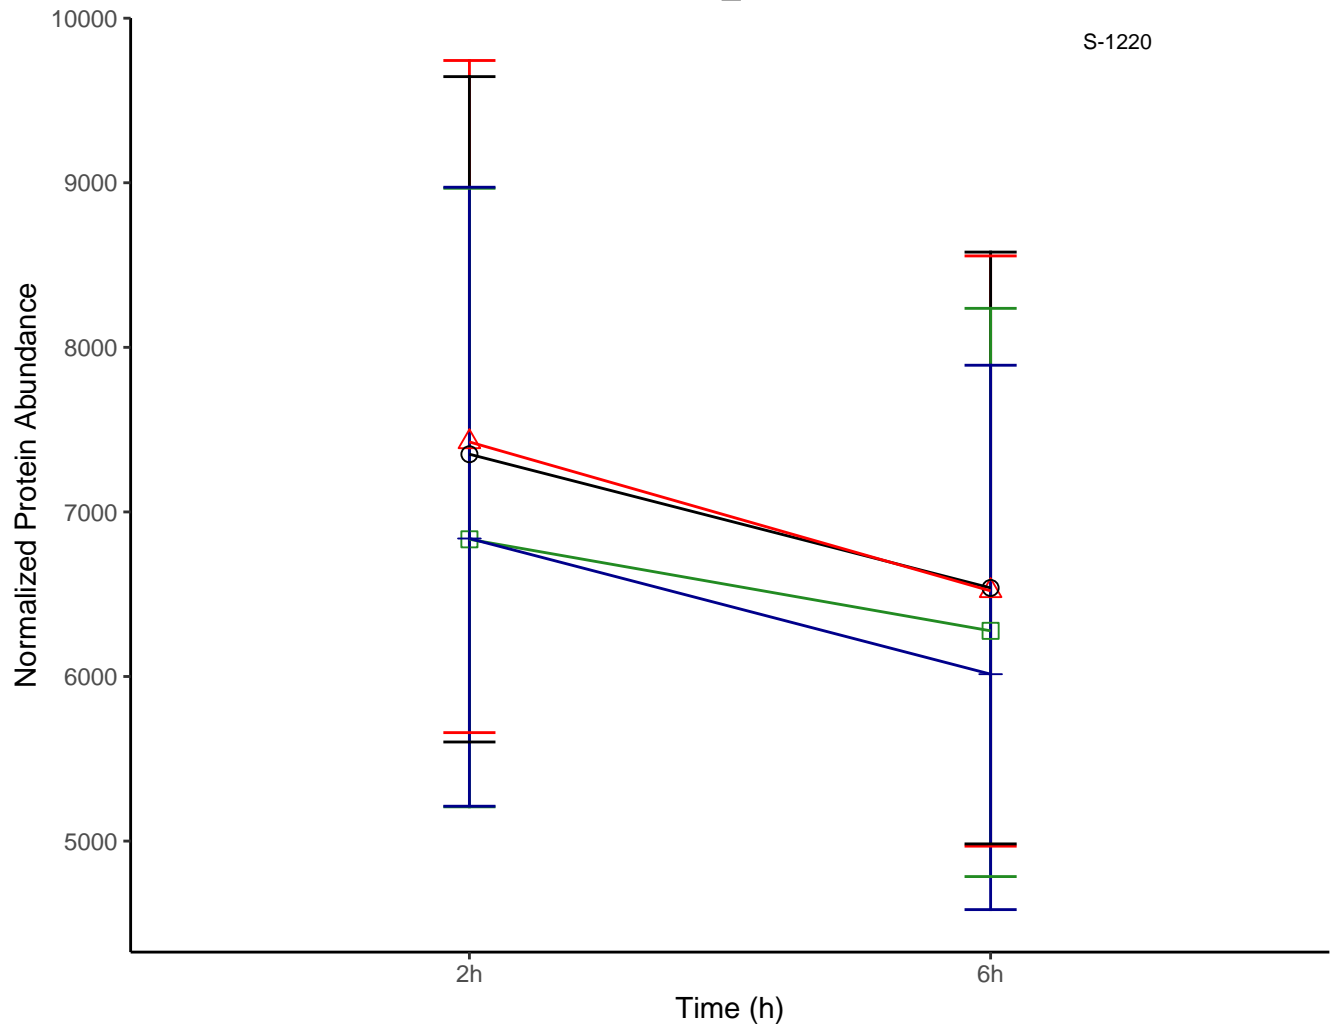

- SA564
- △ SA564- $\Delta$ *hptRS*
- SA564- $\Delta$ *ccpA*
- + SA564- $\Delta$ *hptRS/ccpA*

# MURA2\_STAAM

S-1221

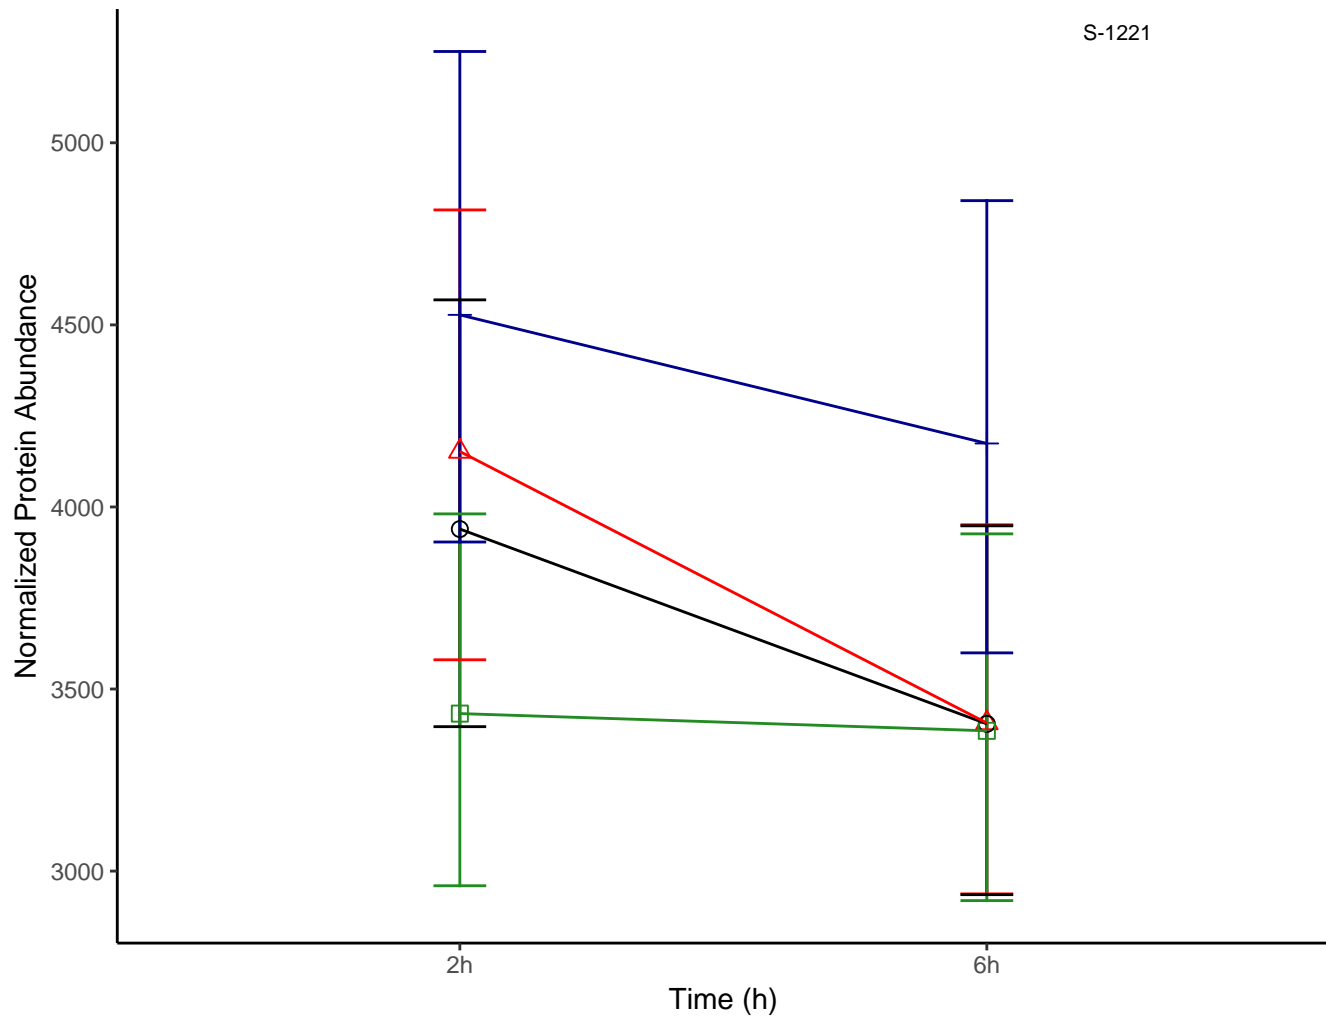

- SA564
- △ SA564- $\Delta hptRS$
- SA564- $\Delta ccpA$
- + SA564- $\Delta hptRS/ccpA$

# MURC\_STAAM

S-1222

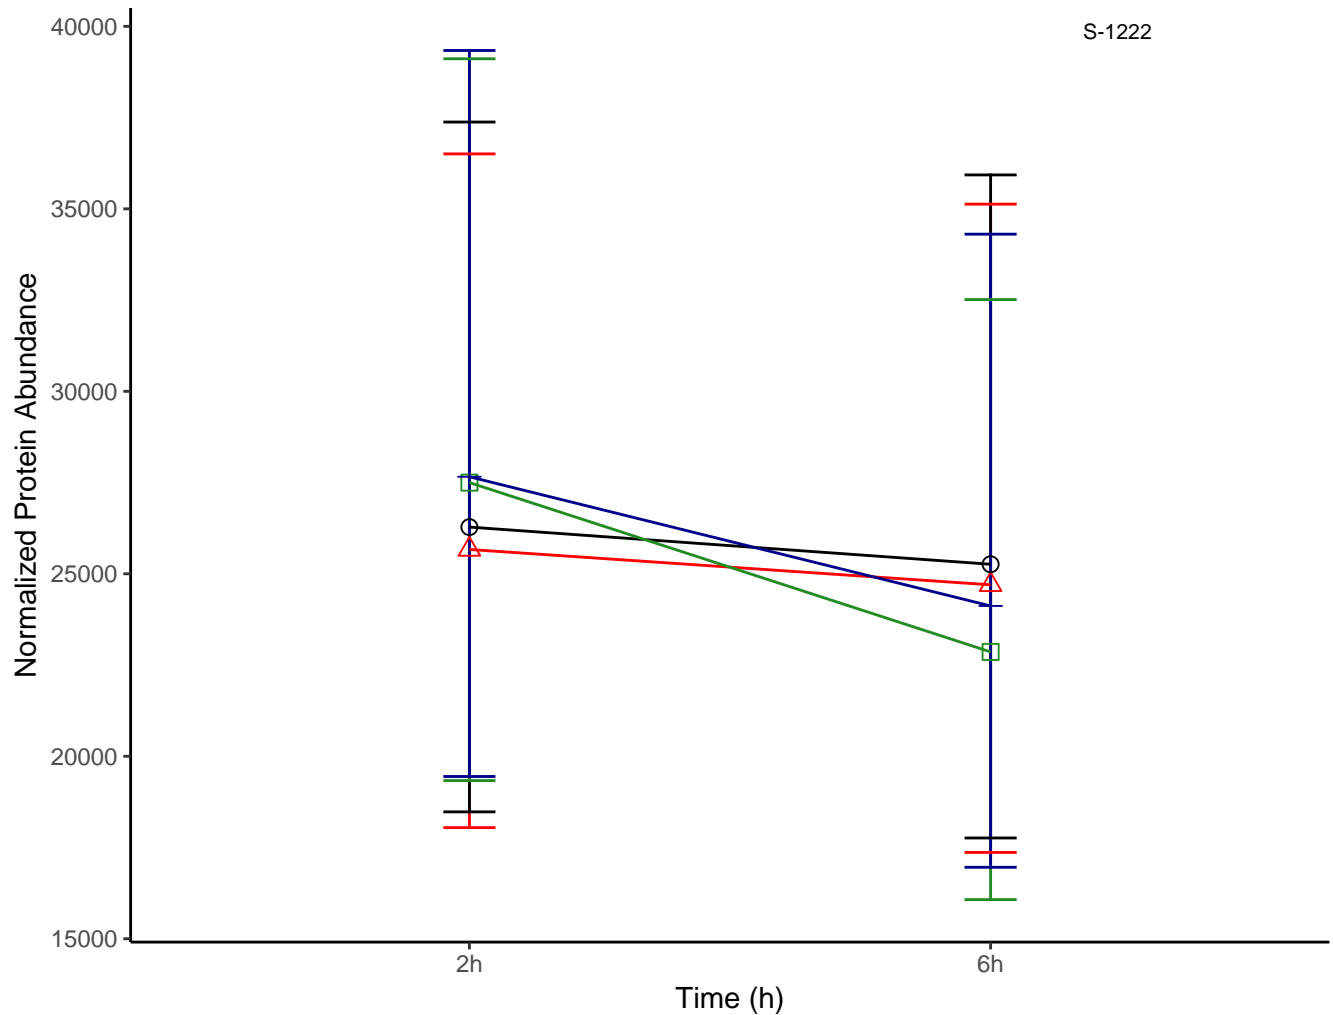

- SA564
- △ SA564- $\Delta$ *hptRS*
- SA564- $\Delta$ *ccpA*
- + SA564- $\Delta$ *hptRS/ccpA*

# MURD\_STAAM

S-1223

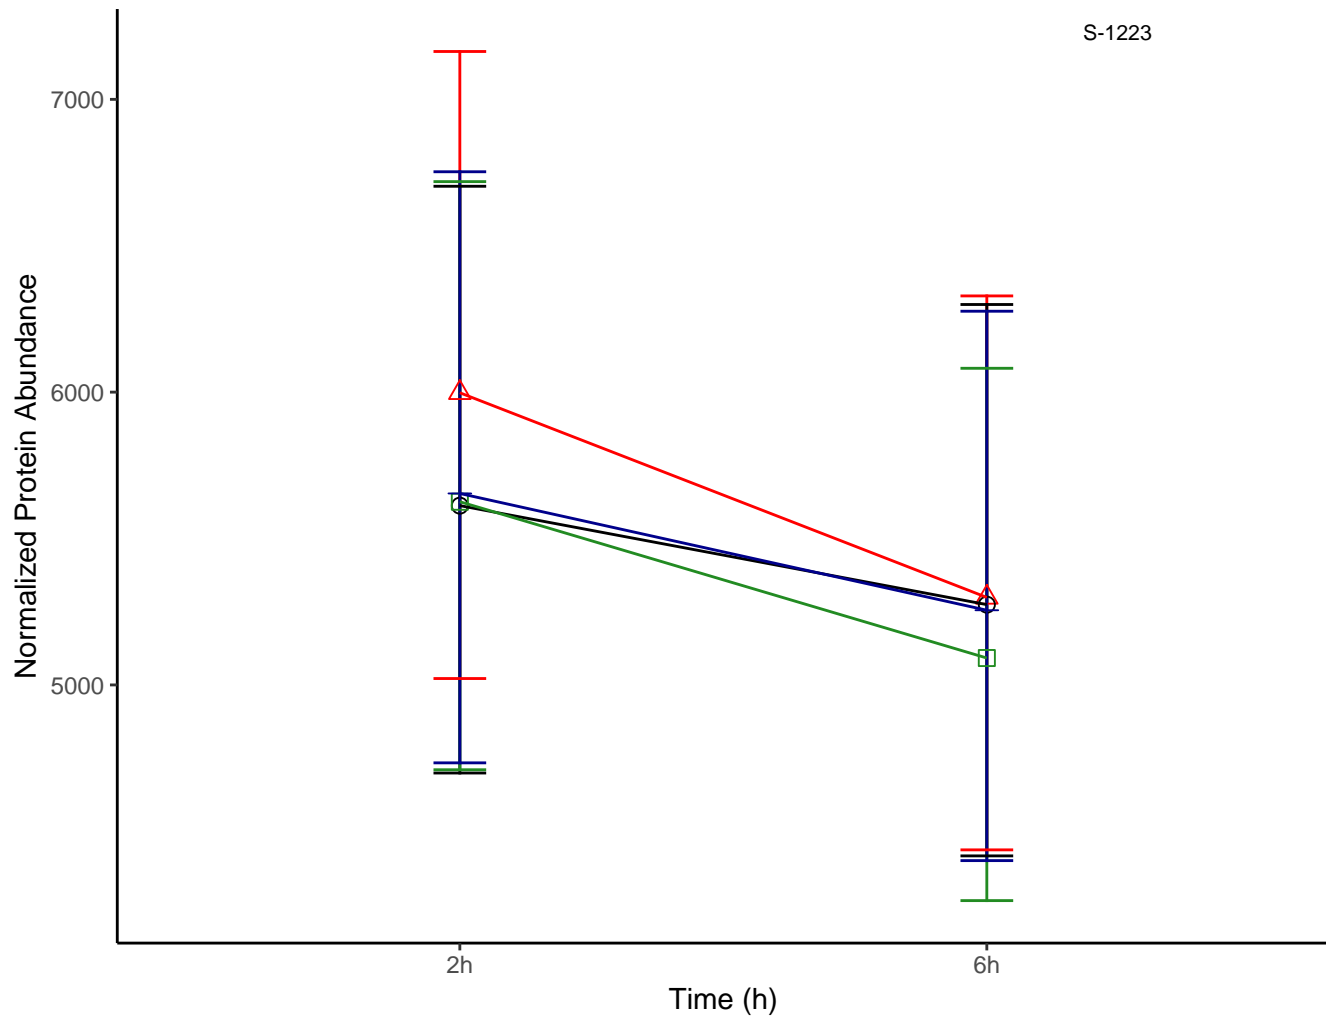

- SA564
- △ SA564- $\Delta$ *hptRS*
- SA564- $\Delta$ *ccpA*
- + SA564- $\Delta$ *hptRS/ccpA*

# MURE\_STAAM

S-1224

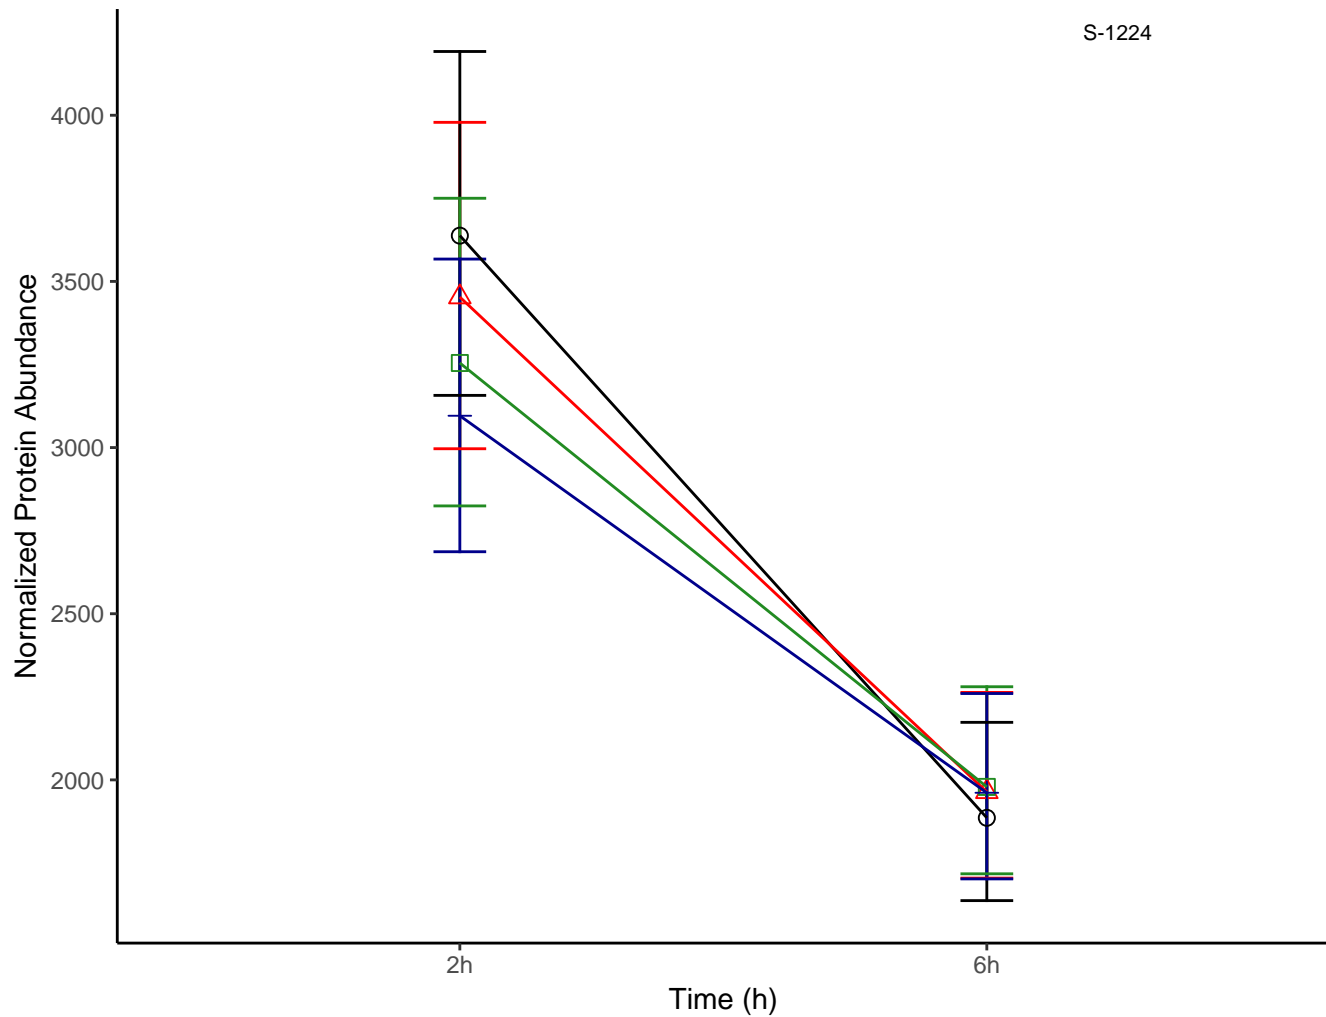

- SA564
- △ SA564- $\Delta$ *hptRS*
- SA564- $\Delta$ *ccpA*
- + SA564- $\Delta$ *hptRS/ccpA*



# MURG\_STAAM

S-1225

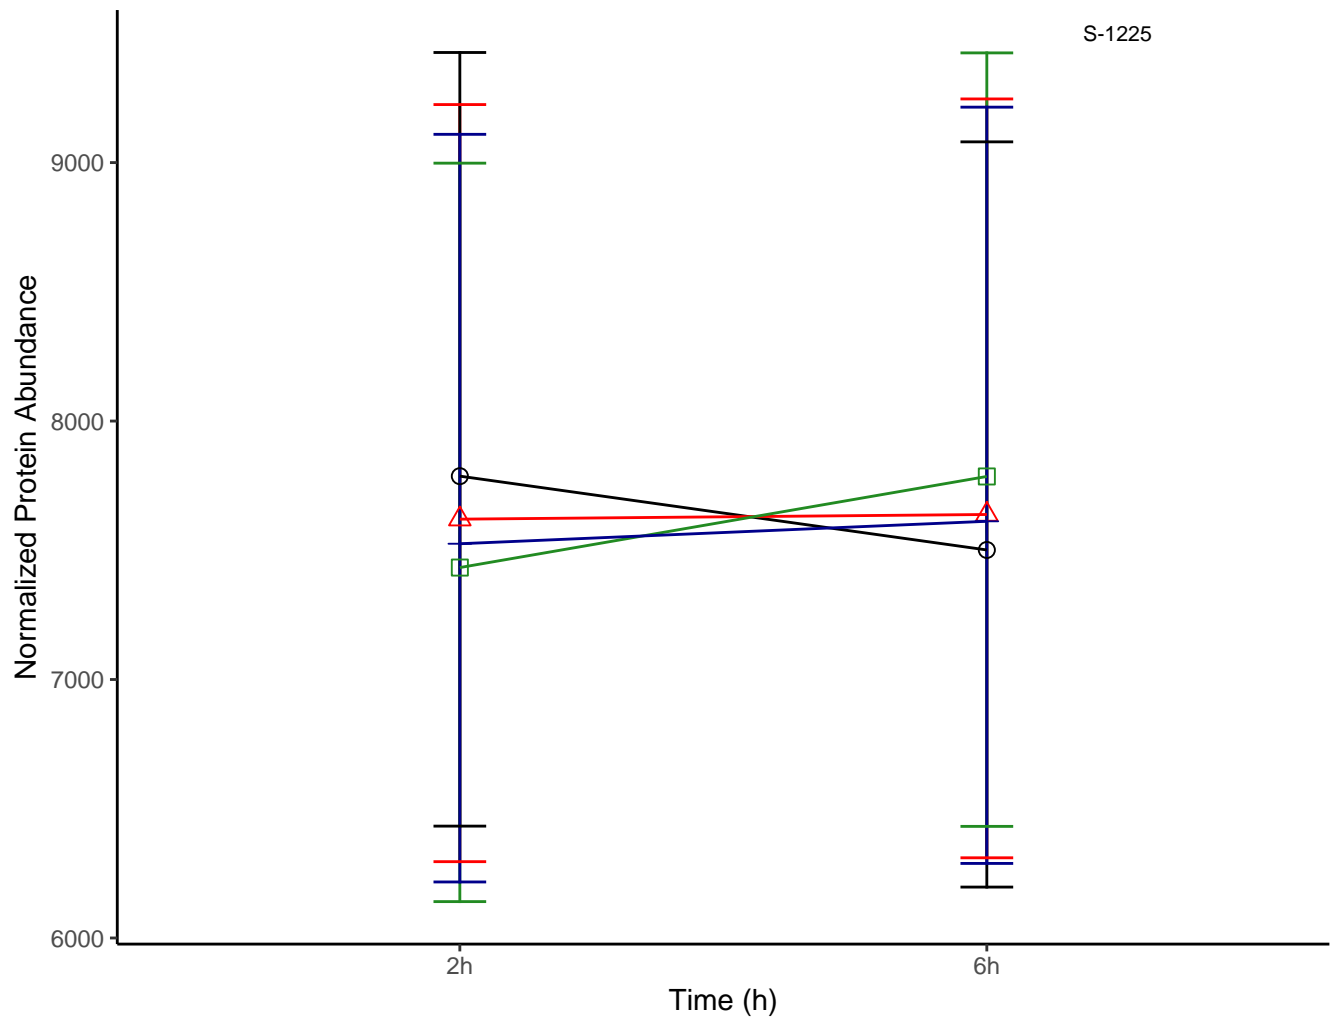

- SA564
- △ SA564- $\Delta$ *hptRS*
- SA564- $\Delta$ *ccpA*
- + SA564- $\Delta$ *hptRS/ccpA*

# MURI\_STAAM

S-1226

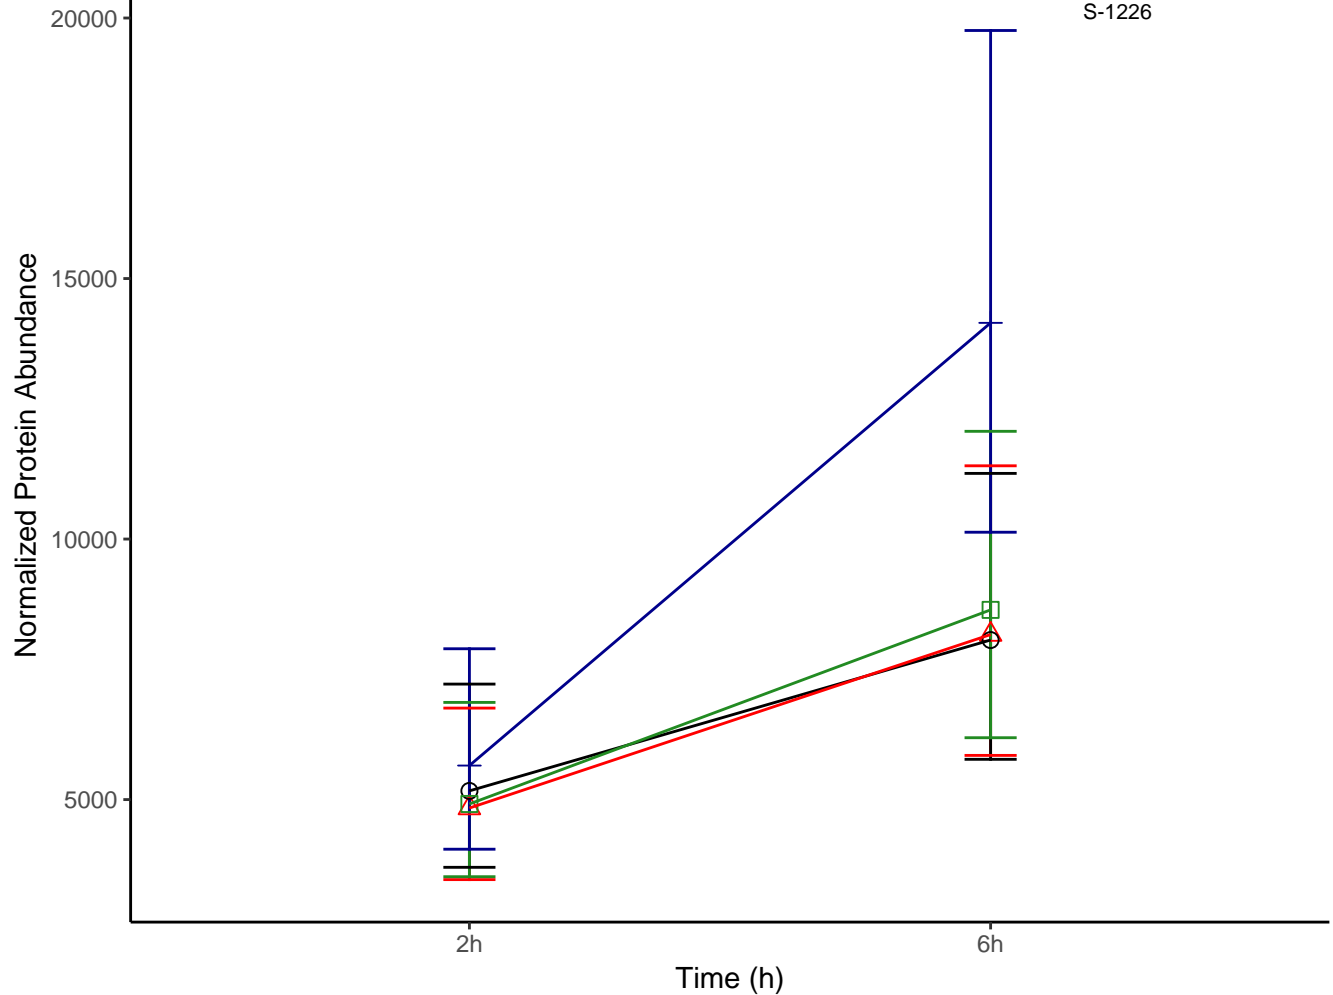

- SA564
- △ SA564- $\Delta hptRS$
- SA564- $\Delta ccpA$
- + SA564- $\Delta hptRS/ccpA$

# MUTS\_STAAM

S-1227

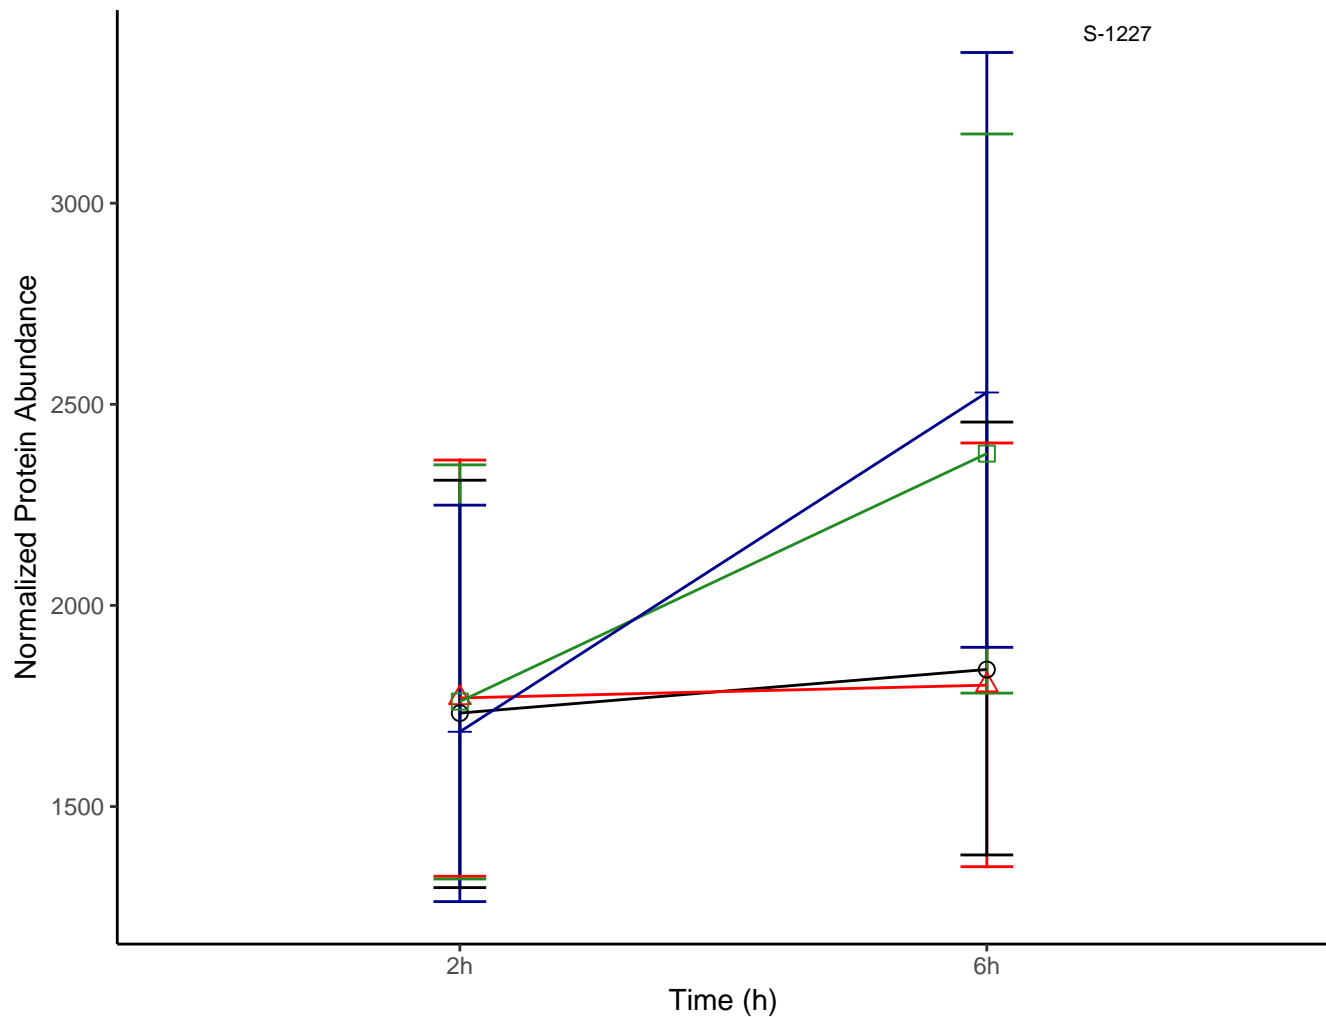

- SA564
- △ SA564- $\Delta$ *hptRS*
- SA564- $\Delta$ *ccpA*
- + SA564- $\Delta$ *hptRS/ccpA*

# NADD\_STAAM

S-1228

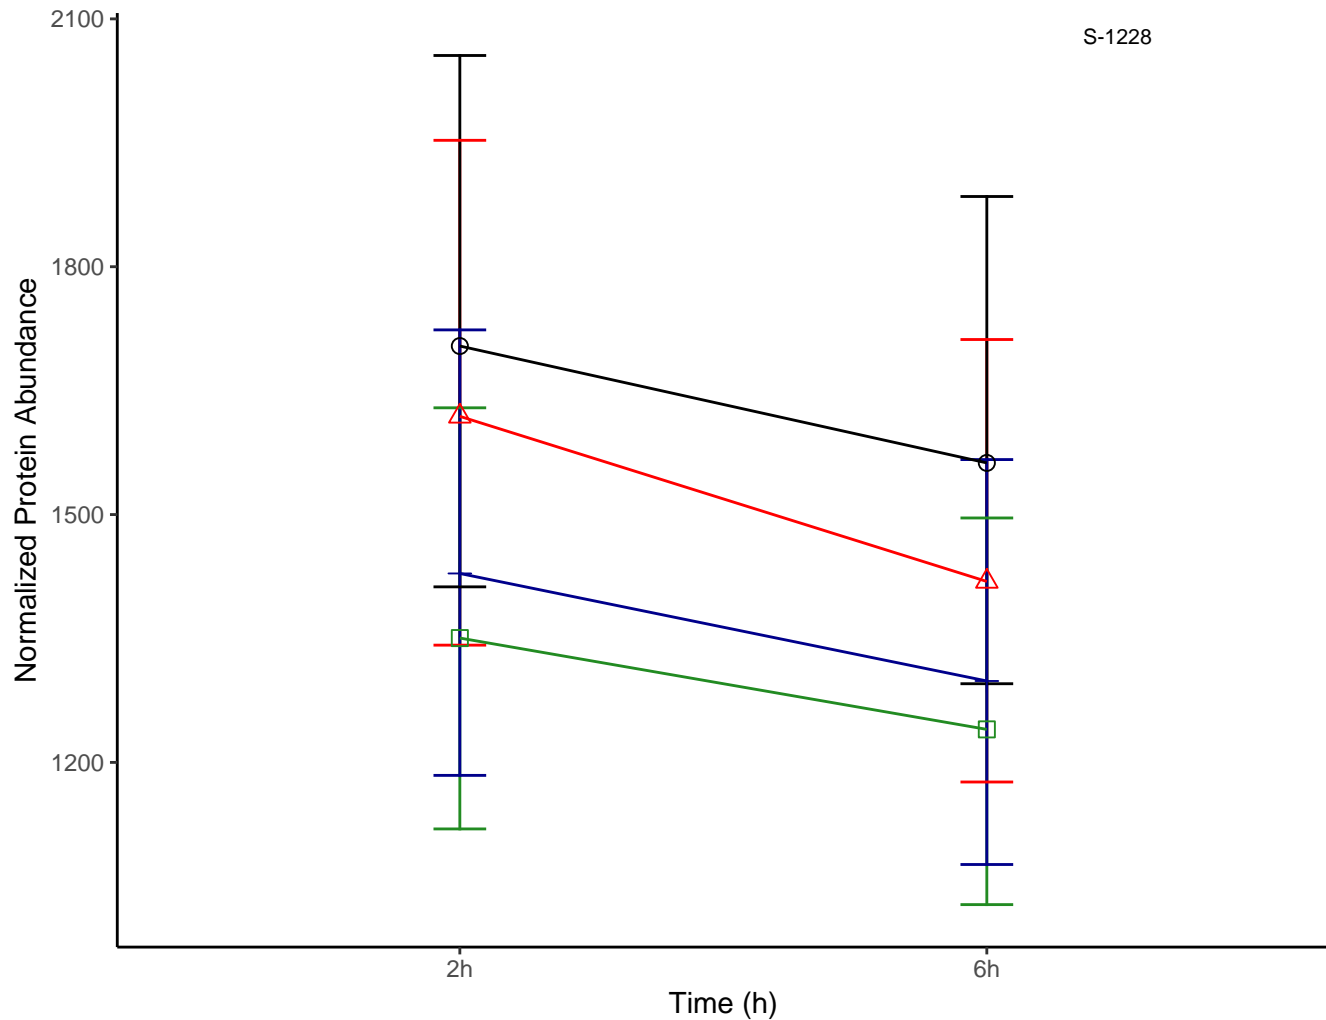

- SA564
- △ SA564- $\Delta$ *hptRS*
- SA564- $\Delta$ *ccpA*
- + SA564- $\Delta$ *hptRS/ccpA*

# NADE\_STAAM

S-1229

Normalized Protein Abundance

6000

5000

4000

2h

6h

Time (h)

- SA564
- △ SA564- $\Delta$ *hptRS*
- SA564- $\Delta$ *ccpA*
- + SA564- $\Delta$ *hptRS/ccpA*

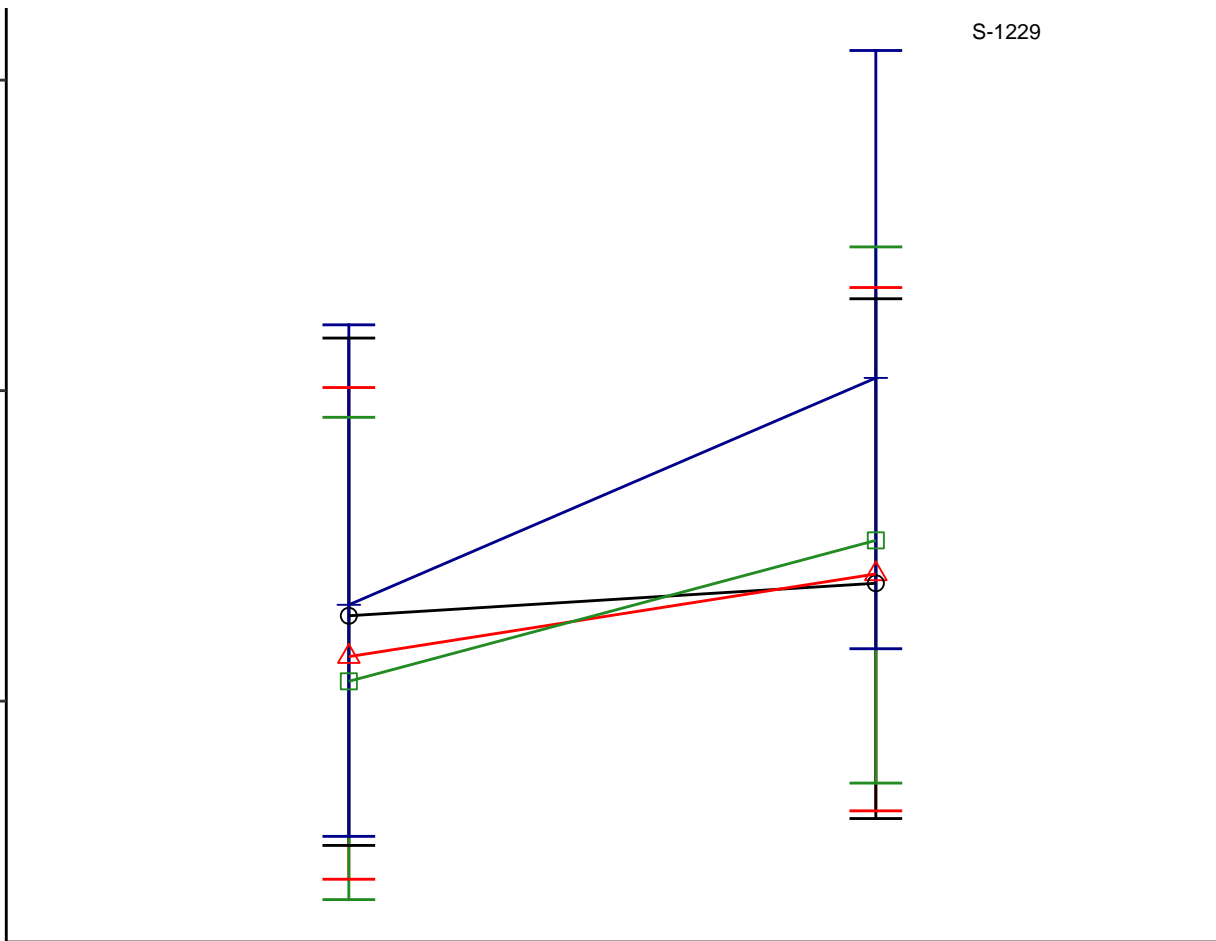

# NAGD\_STAAM

S-1230

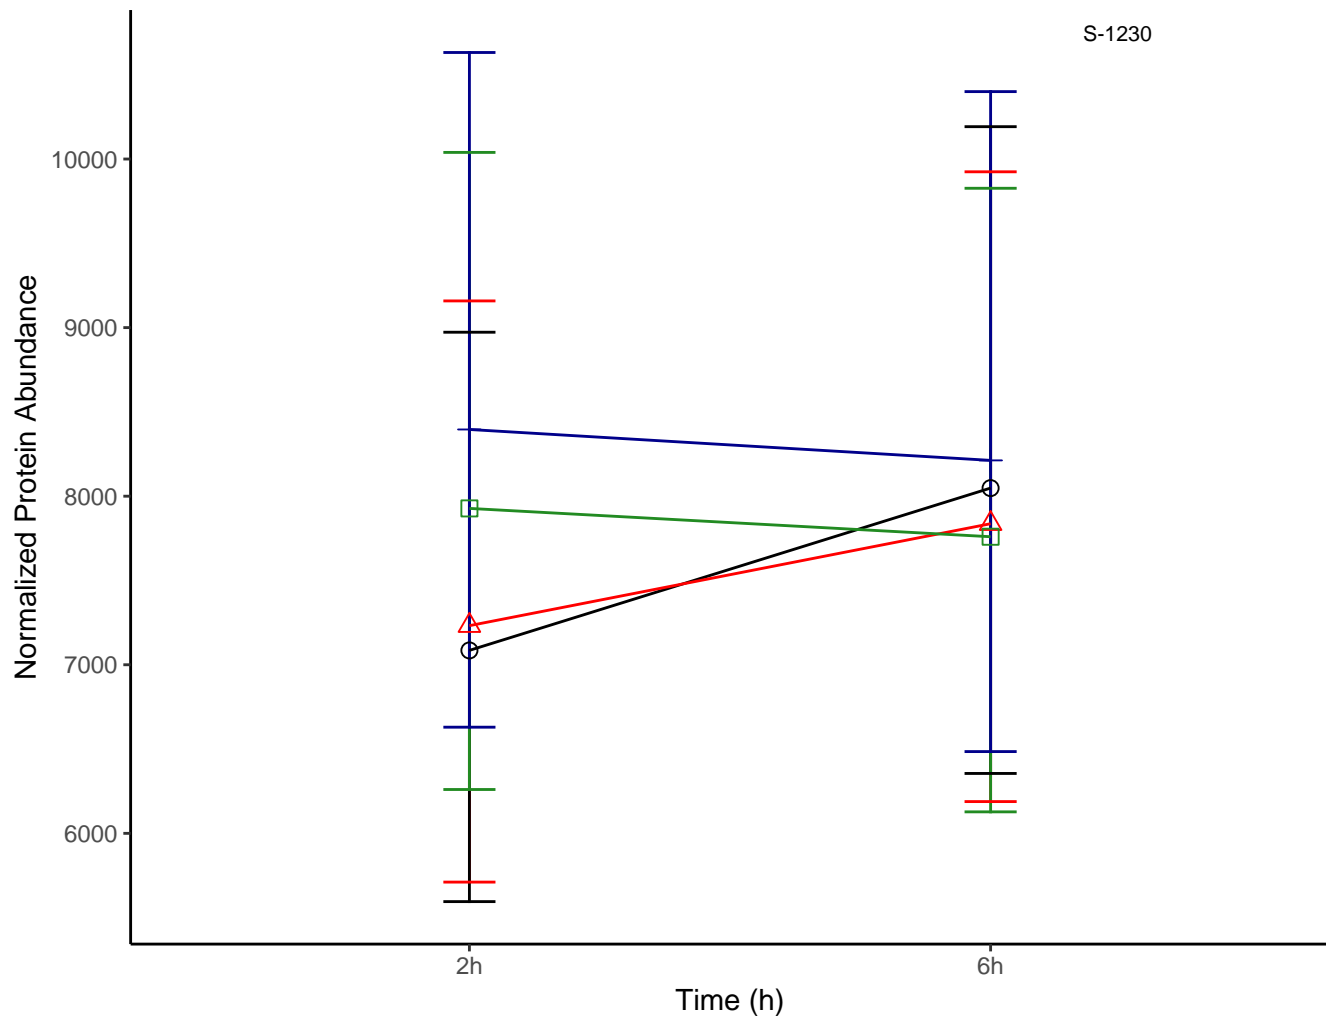

- SA564
- △ SA564- $\Delta$ hptRS
- SA564- $\Delta$ ccpA
- + SA564- $\Delta$ hptRS/ccpA

# NDK\_STAAM

S-1231

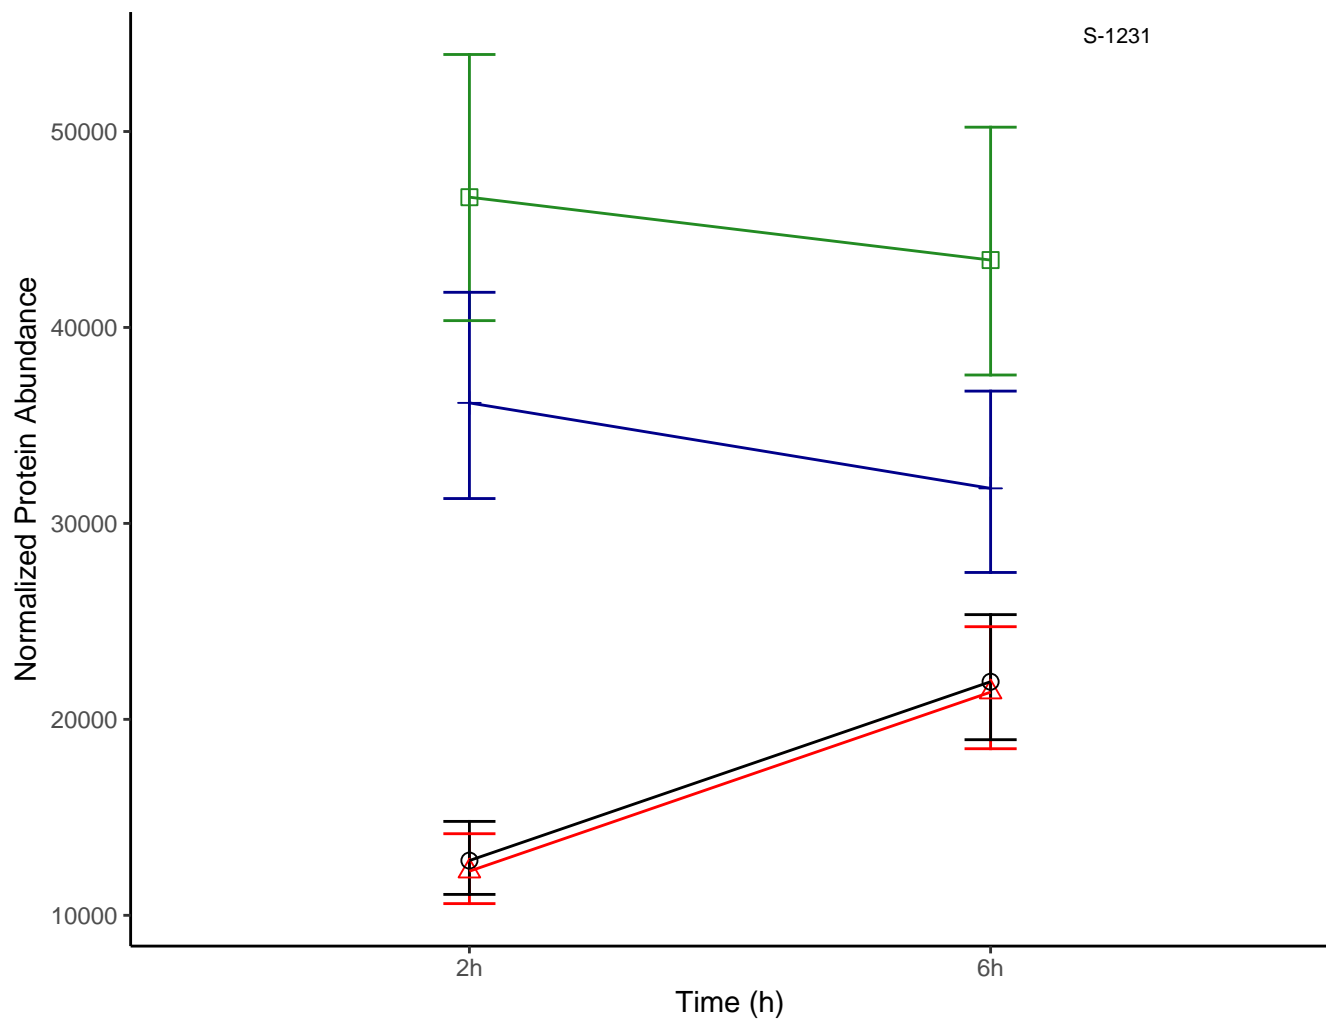

- SA564
- △ SA564- $\Delta$ *hptRS*
- SA564- $\Delta$ *ccpA*
- + SA564- $\Delta$ *hptRS/ccpA*

# NRDR\_STAAM

S-1232

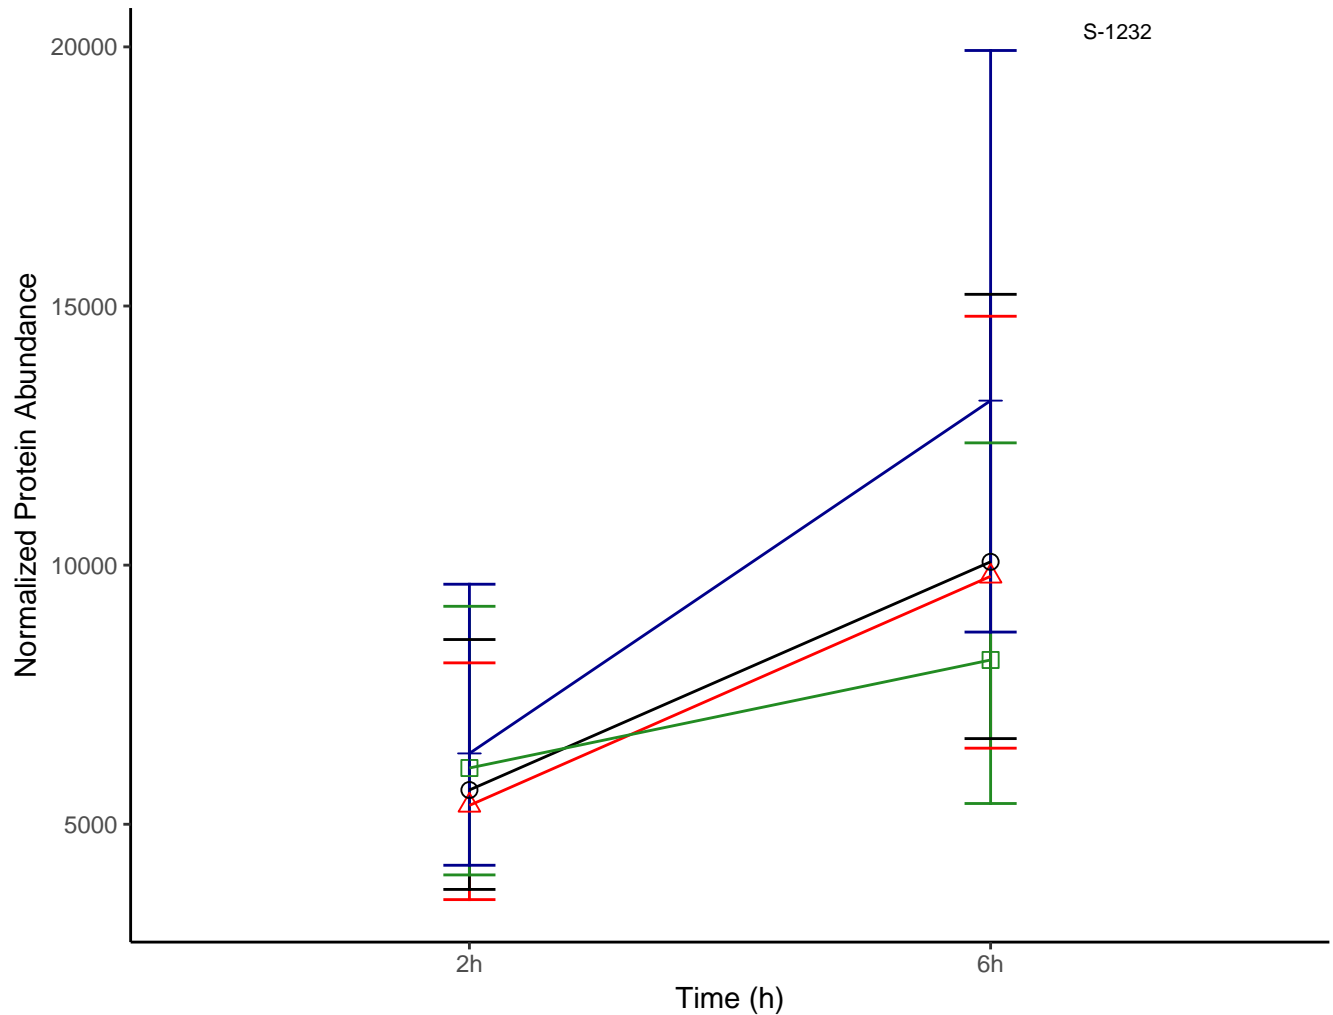

- SA564
- △ SA564- $\Delta$ hptRS
- SA564- $\Delta$ ccpA
- + SA564- $\Delta$ hptRS/ccpA



# NREB\_STAAM

S-1233

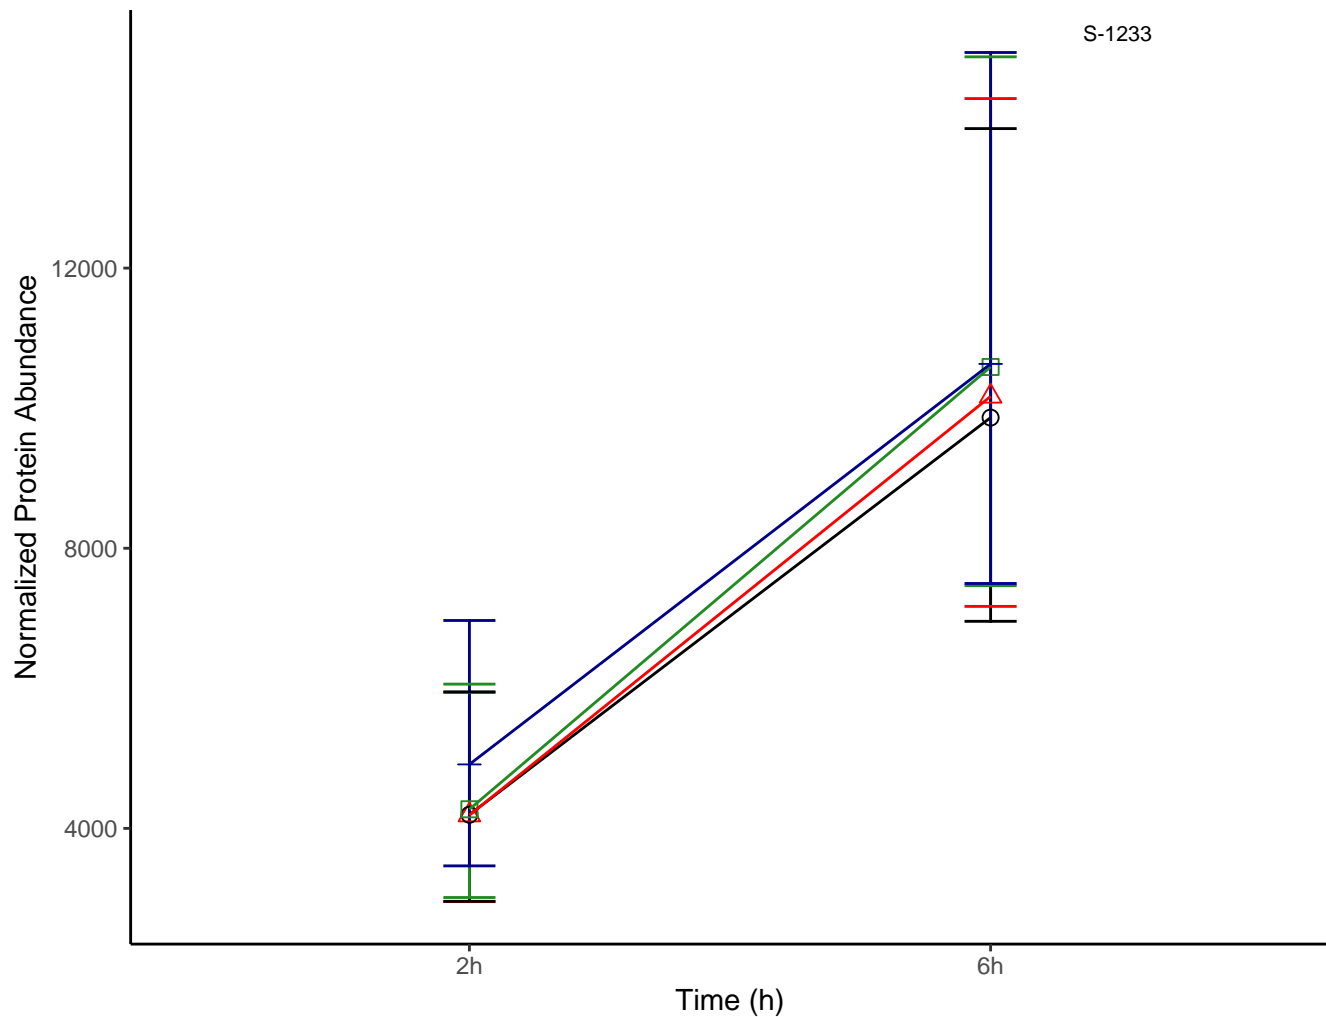

- SA564
- △ SA564- $\Delta hptRS$
- SA564- $\Delta ccpA$
- + SA564- $\Delta hptRS/ccpA$

# NUSG\_STAAM

S-1234

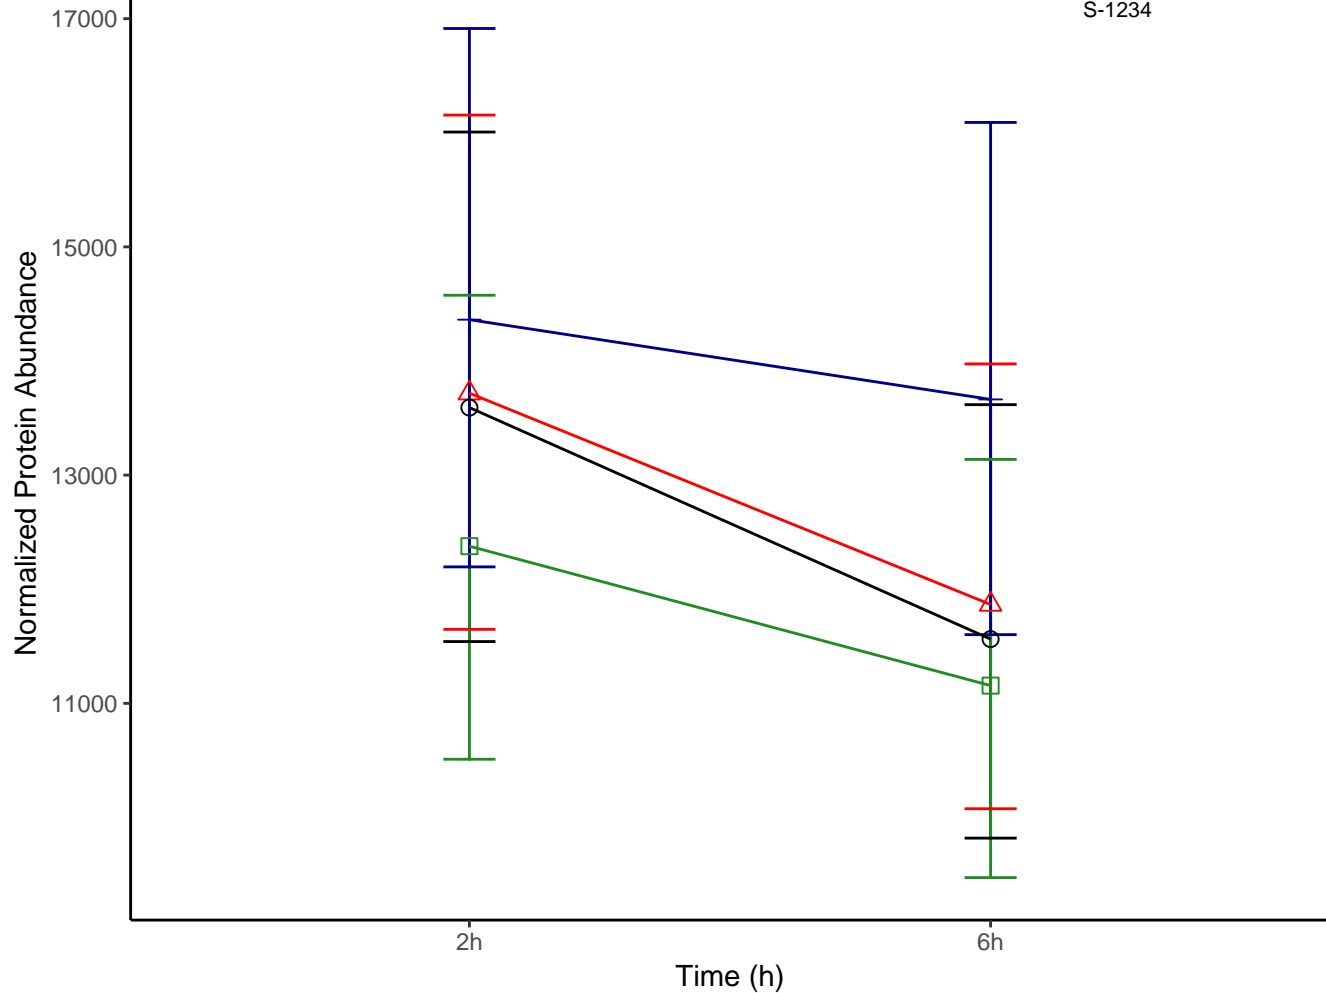

- SA564
- △ SA564- $\Delta hptRS$
- SA564- $\Delta ccpA$
- + SA564- $\Delta hptRS/ccpA$

# OAT2\_STAAM

S-1235

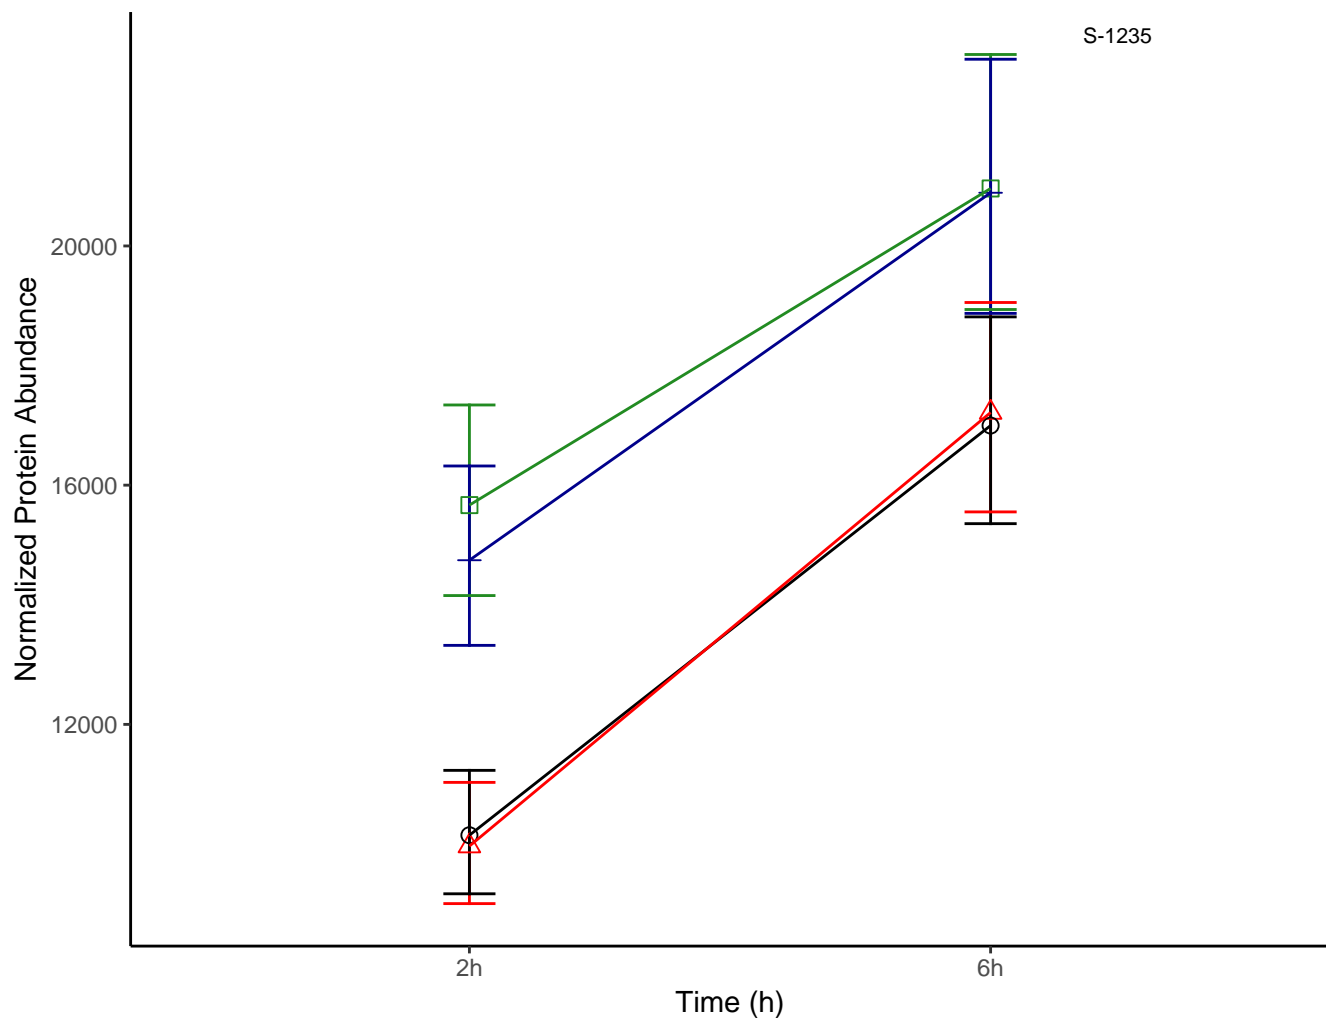

- SA564
- △ SA564- $\Delta$ hptRS
- SA564- $\Delta$ ccpA
- + SA564- $\Delta$ hptRS/ccpA

# OBG\_STAAM

S-1236

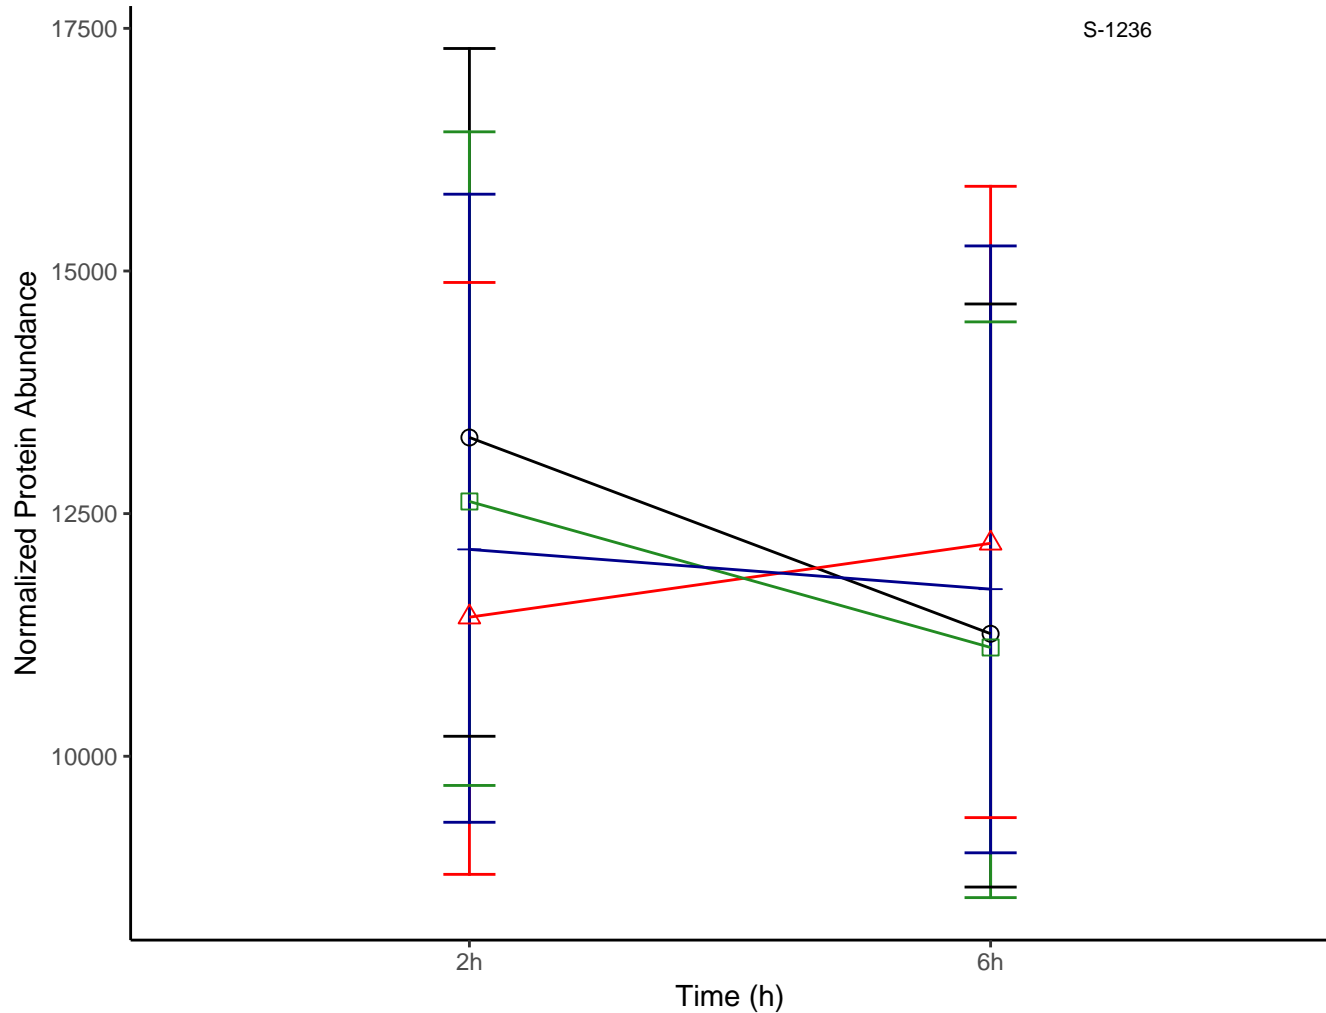

- SA564
- △ SA564- $\Delta$ *hptRS*
- SA564- $\Delta$ *ccpA*
- + SA564- $\Delta$ *hptRS/ccpA*

# ODO1\_STAAM

S-1237

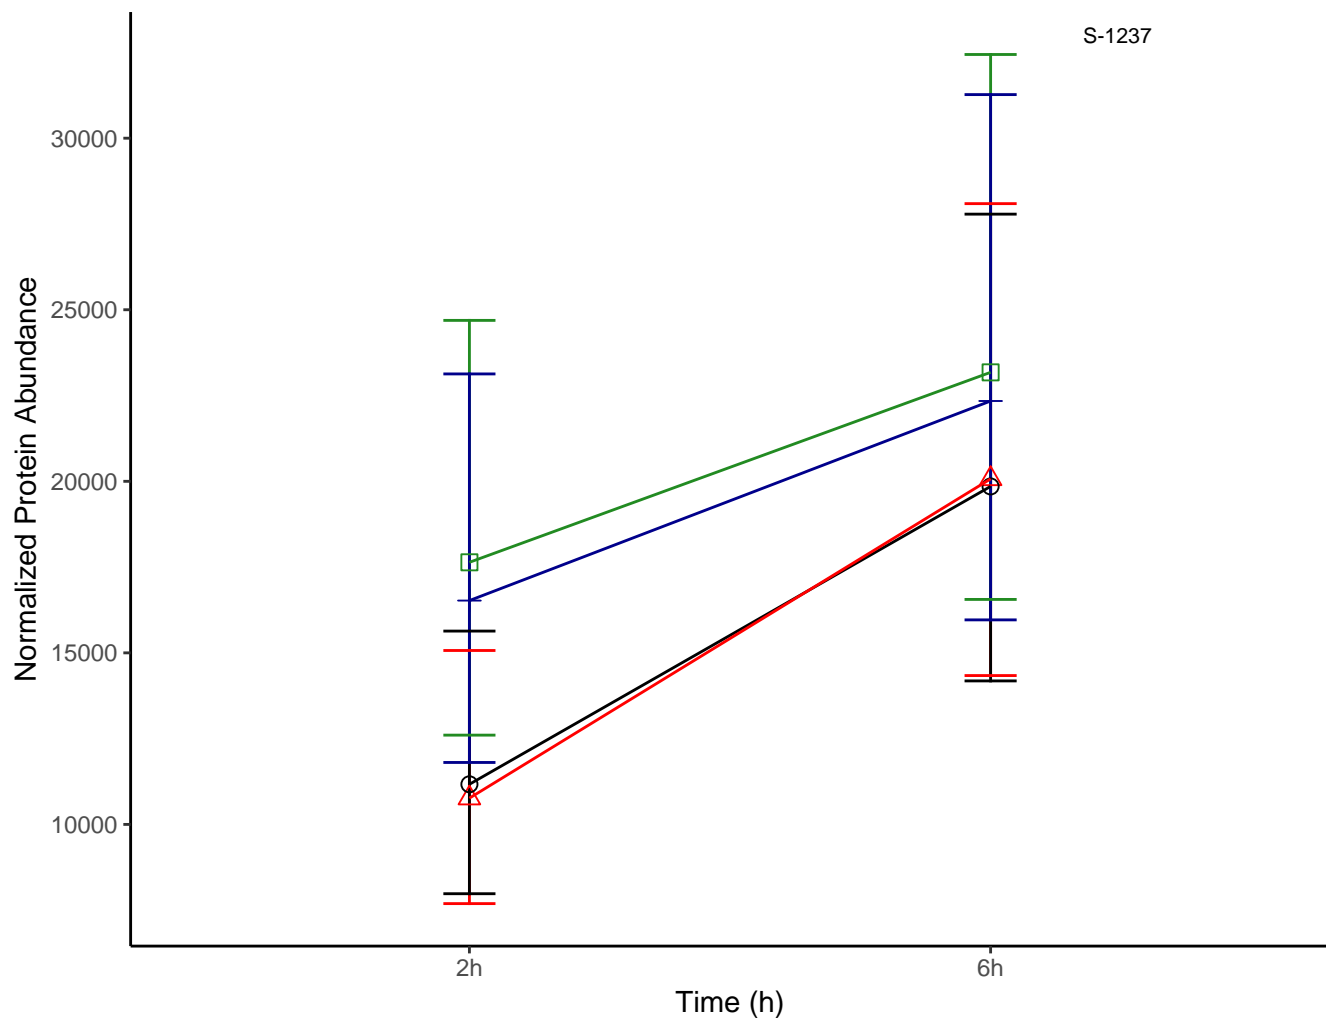

- SA564
- △ SA564- $\Delta hptRS$
- SA564- $\Delta ccpA$
- + SA564- $\Delta hptRS/ccpA$

# ODO2\_STAAM

S-1238

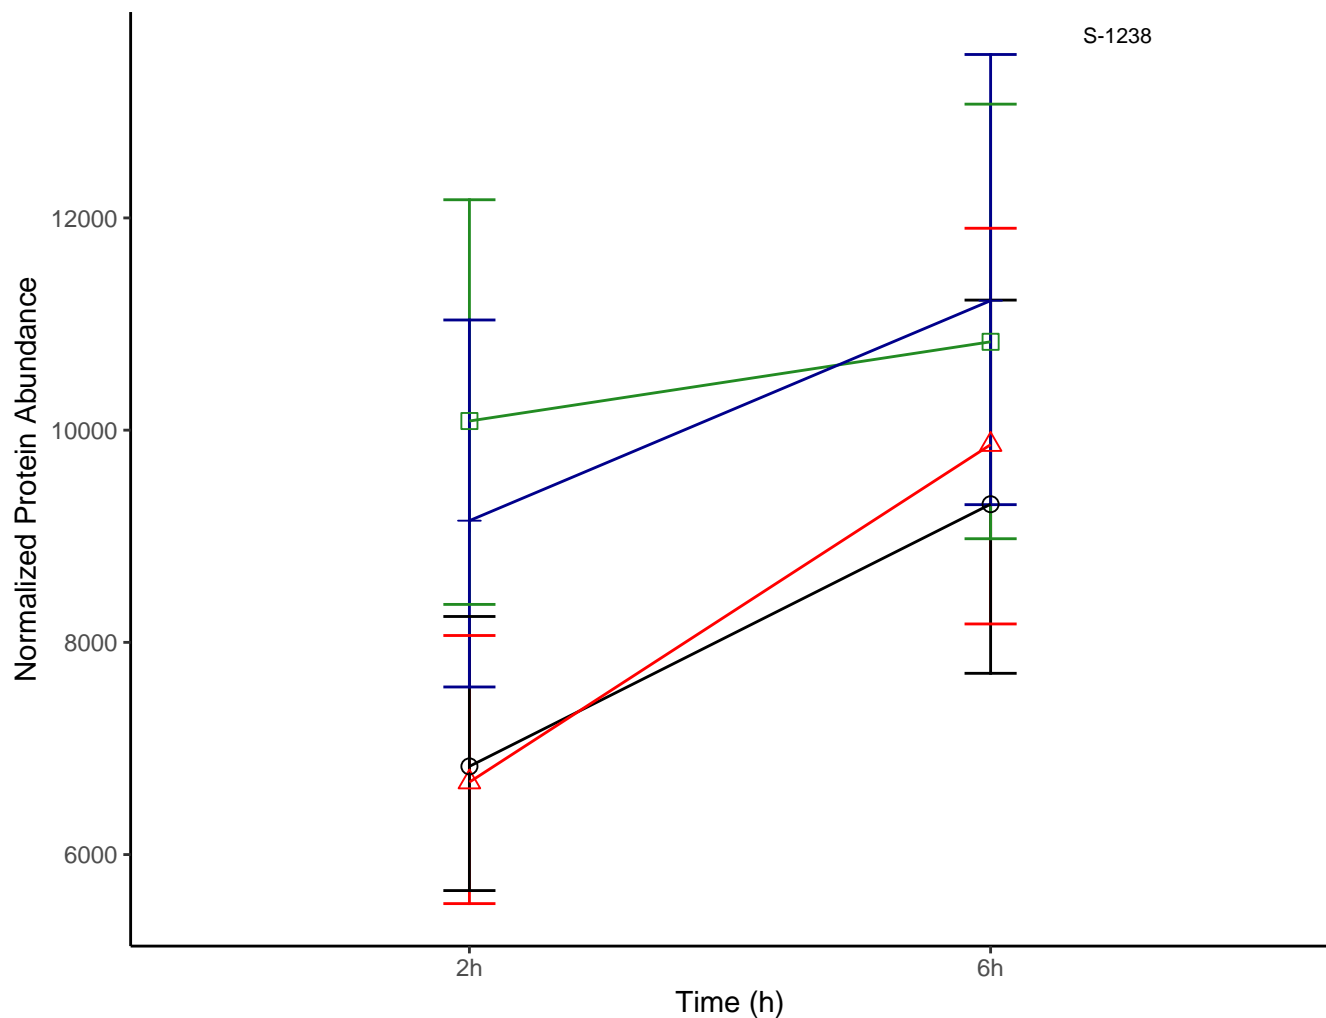

- SA564
- △ SA564-ΔhptRS
- SA564-ΔccpA
- + SA564-ΔhptRS/ccpA

# ODP2\_STAAM

S-1239

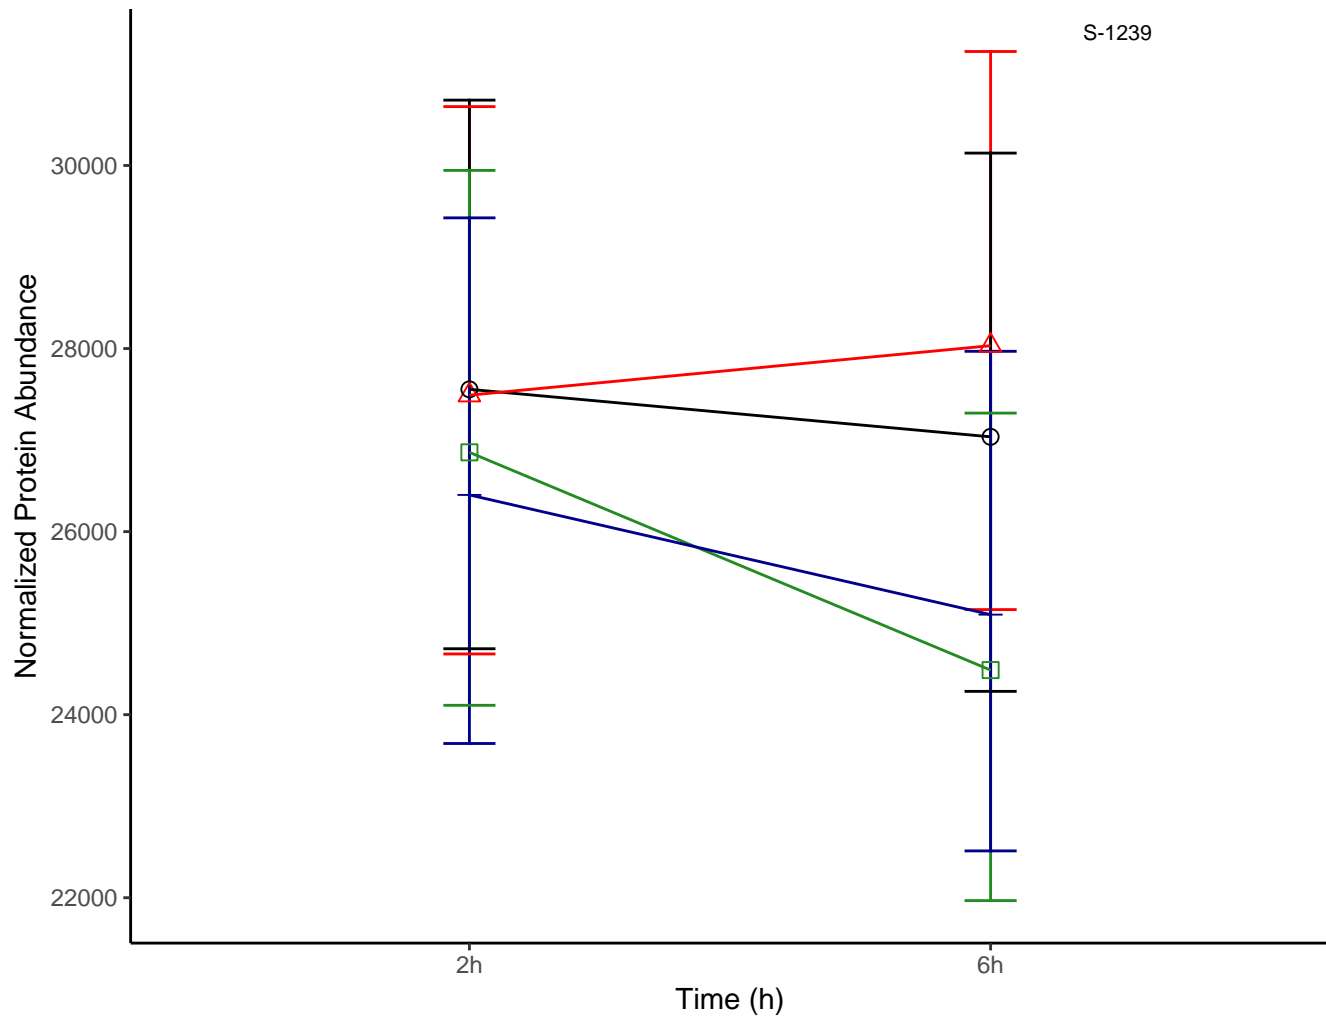

- SA564
- △ SA564- $\Delta$ hptRS
- SA564- $\Delta$ ccpA
- + SA564- $\Delta$ hptRS/ccpA

# ODPA\_STAAM

S-1240

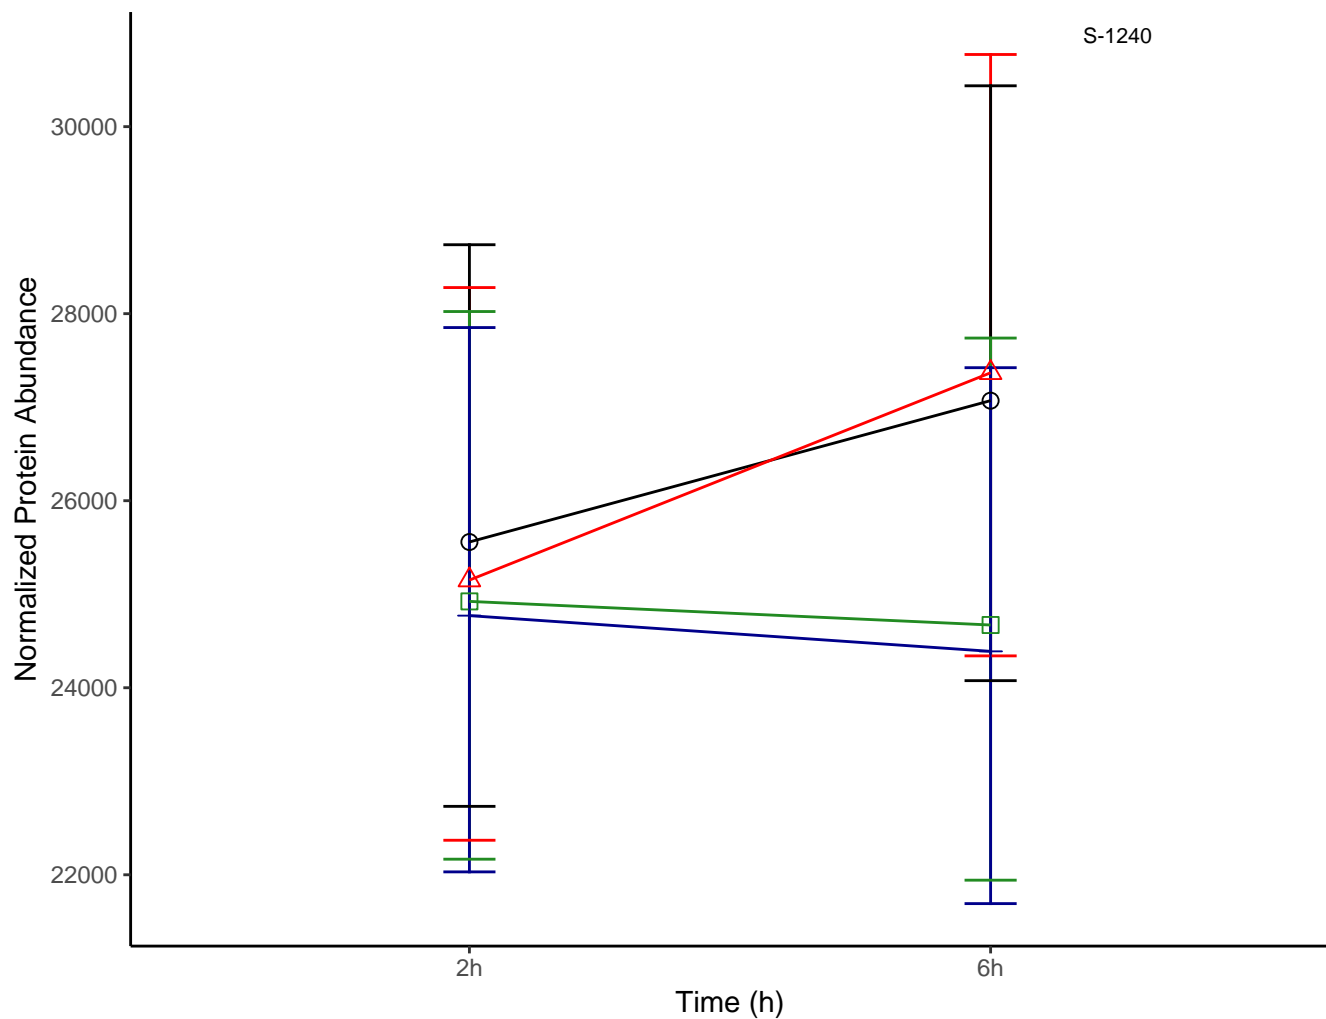

- SA564
- △ SA564- $\Delta$ hptRS
- SA564- $\Delta$ ccpA
- + SA564- $\Delta$ hptRS/ccpA



# ODPB\_STAAM

S-1241

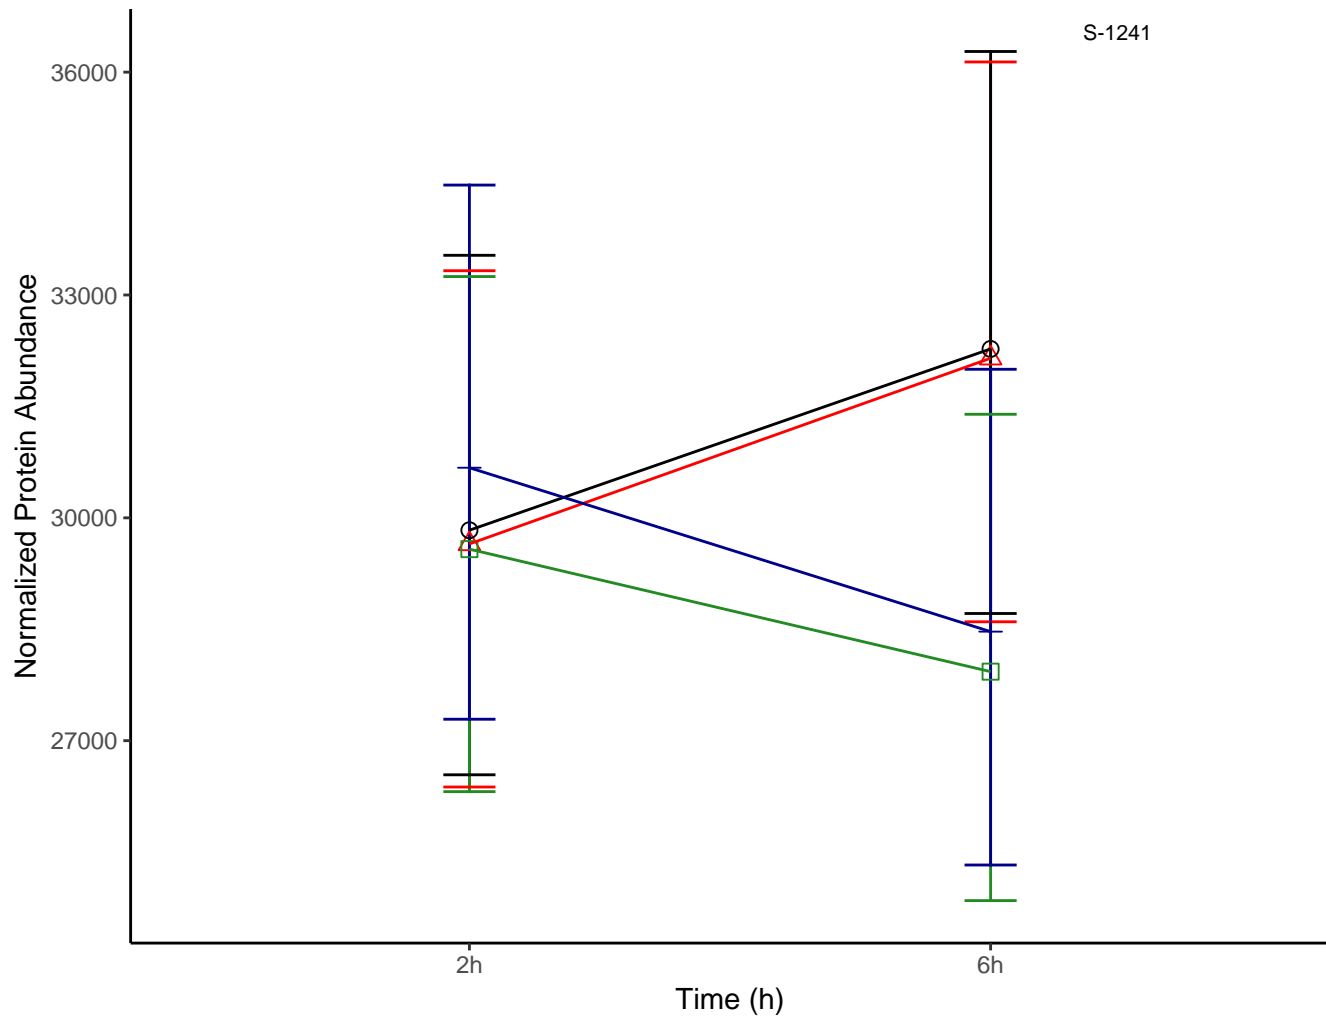

- SA564
- △ SA564- $\Delta$ *hptRS*
- SA564- $\Delta$ *ccpA*
- + SA564- $\Delta$ *hptRS/ccpA*

# OHRL\_STAAM

S-1242

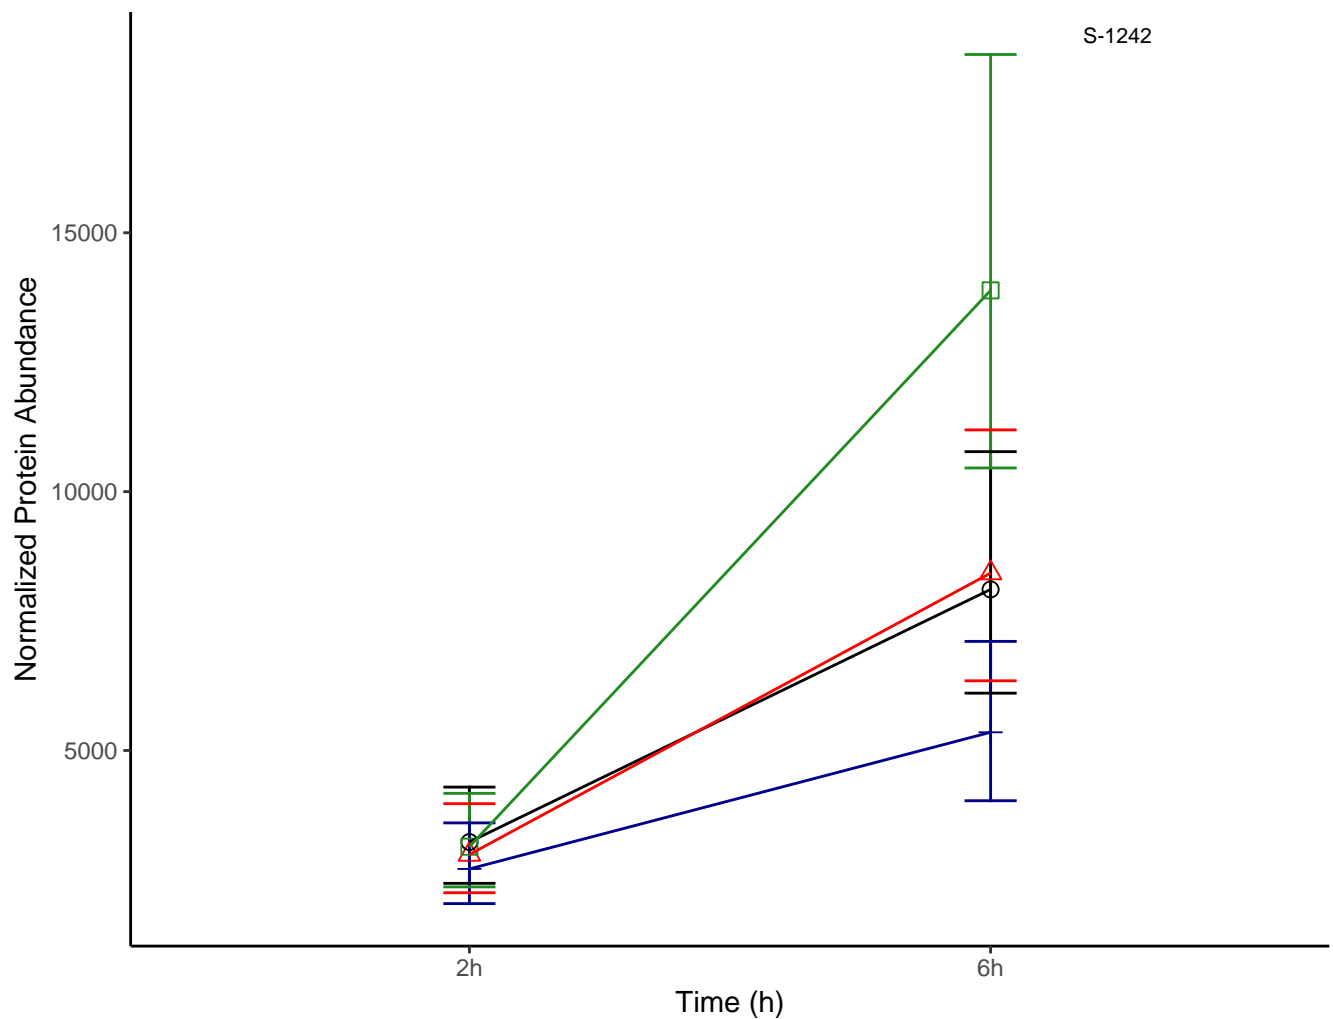

- SA564
- △ SA564- $\Delta$ *hptRS*
- SA564- $\Delta$ *ccpA*
- + SA564- $\Delta$ *hptRS/ccpA*

# OTC\_STAAM

S-1243

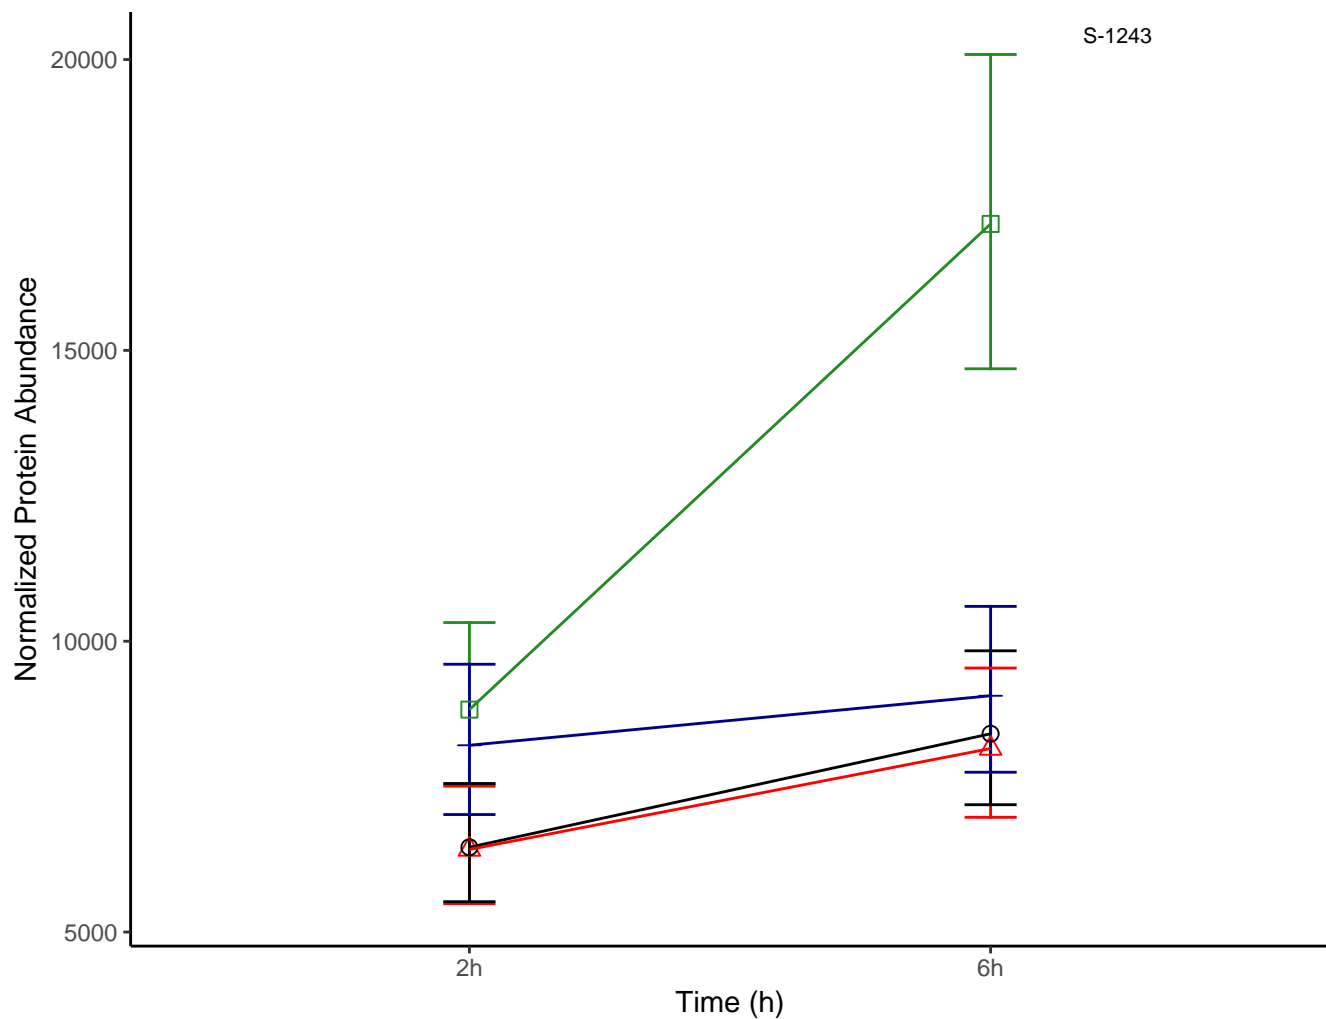

- SA564
- △ SA564- $\Delta$ *hptRS*
- SA564- $\Delta$ *ccpA*
- + SA564- $\Delta$ *hptRS/ccpA*

# OTCC\_STAAM

S-1244

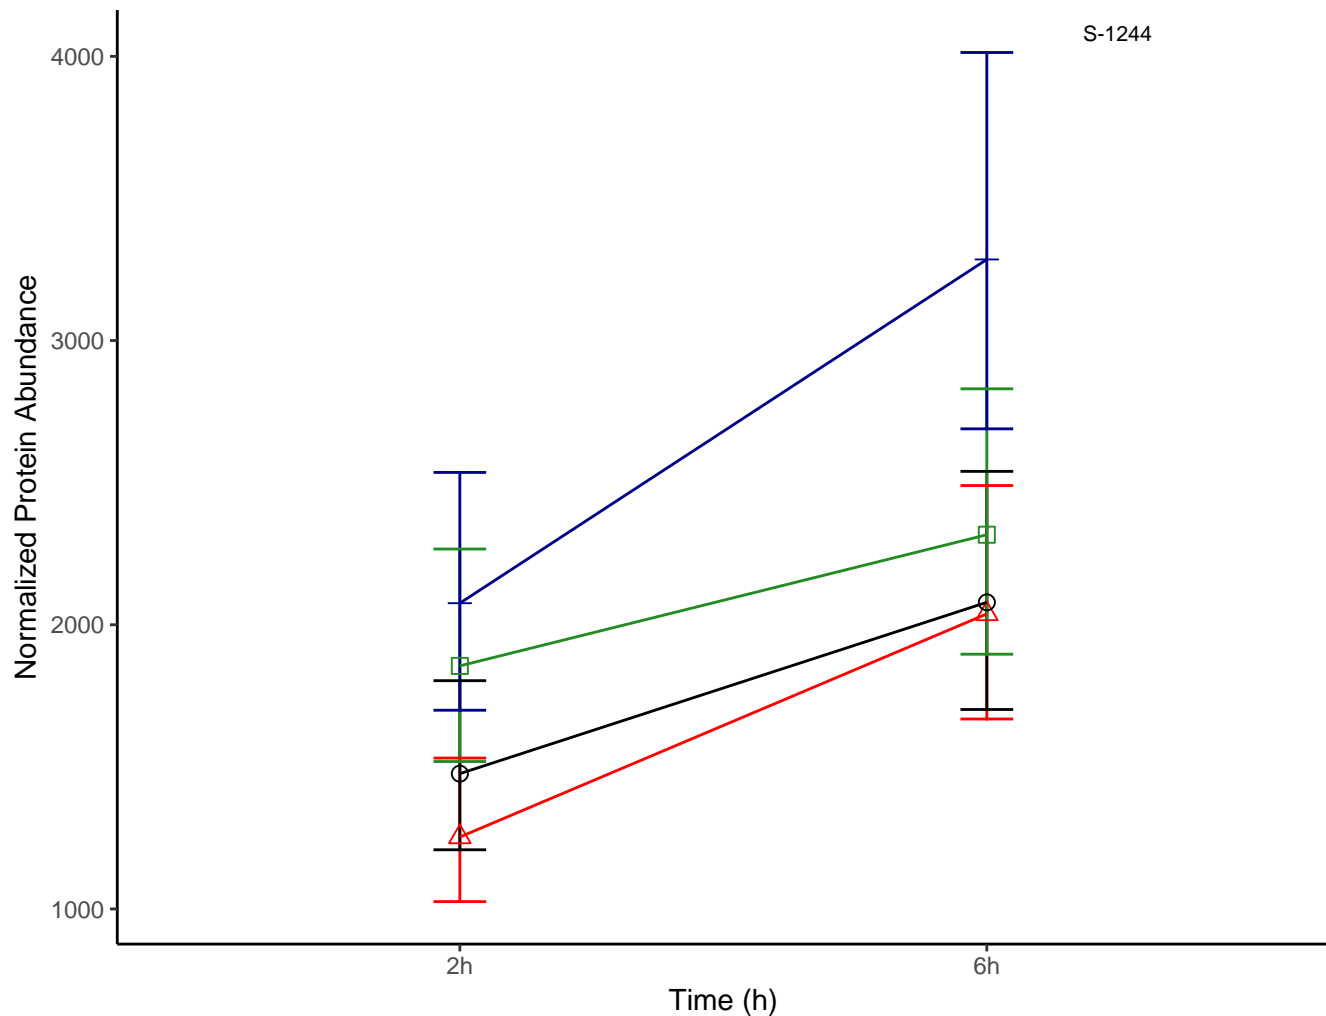

- SA564
- △ SA564- $\Delta$ hptRS
- SA564- $\Delta$ ccpA
- + SA564- $\Delta$ hptRS/ccpA

# P5CR\_STAAM

S-1245

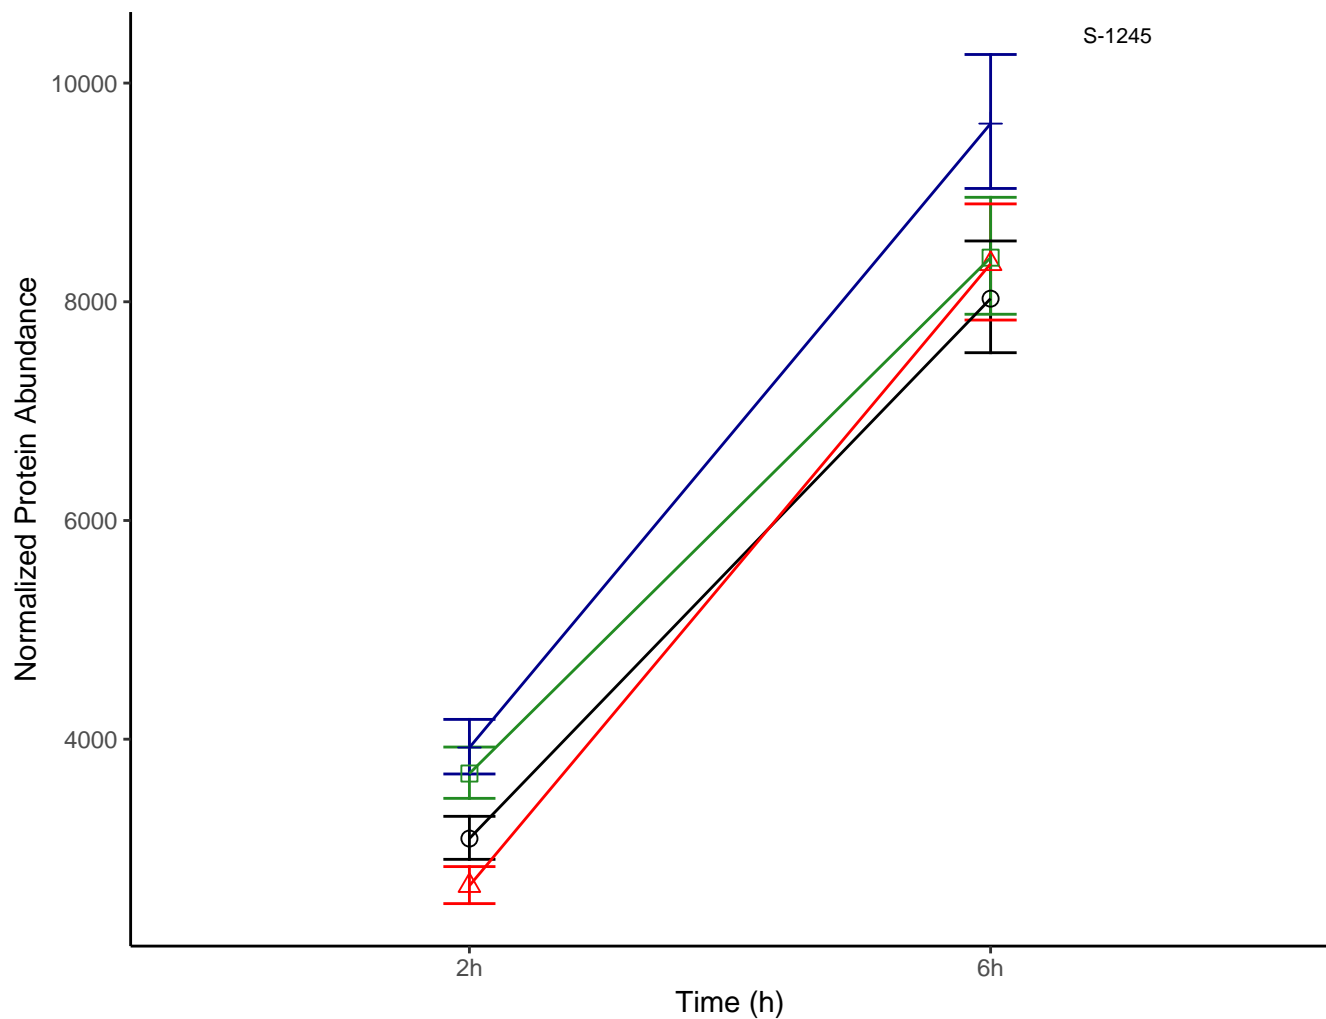

- SA564
- △ SA564- $\Delta hptRS$
- SA564- $\Delta ccpA$
- + SA564- $\Delta hptRS/ccpA$

# PANB\_STAAM

S-1246

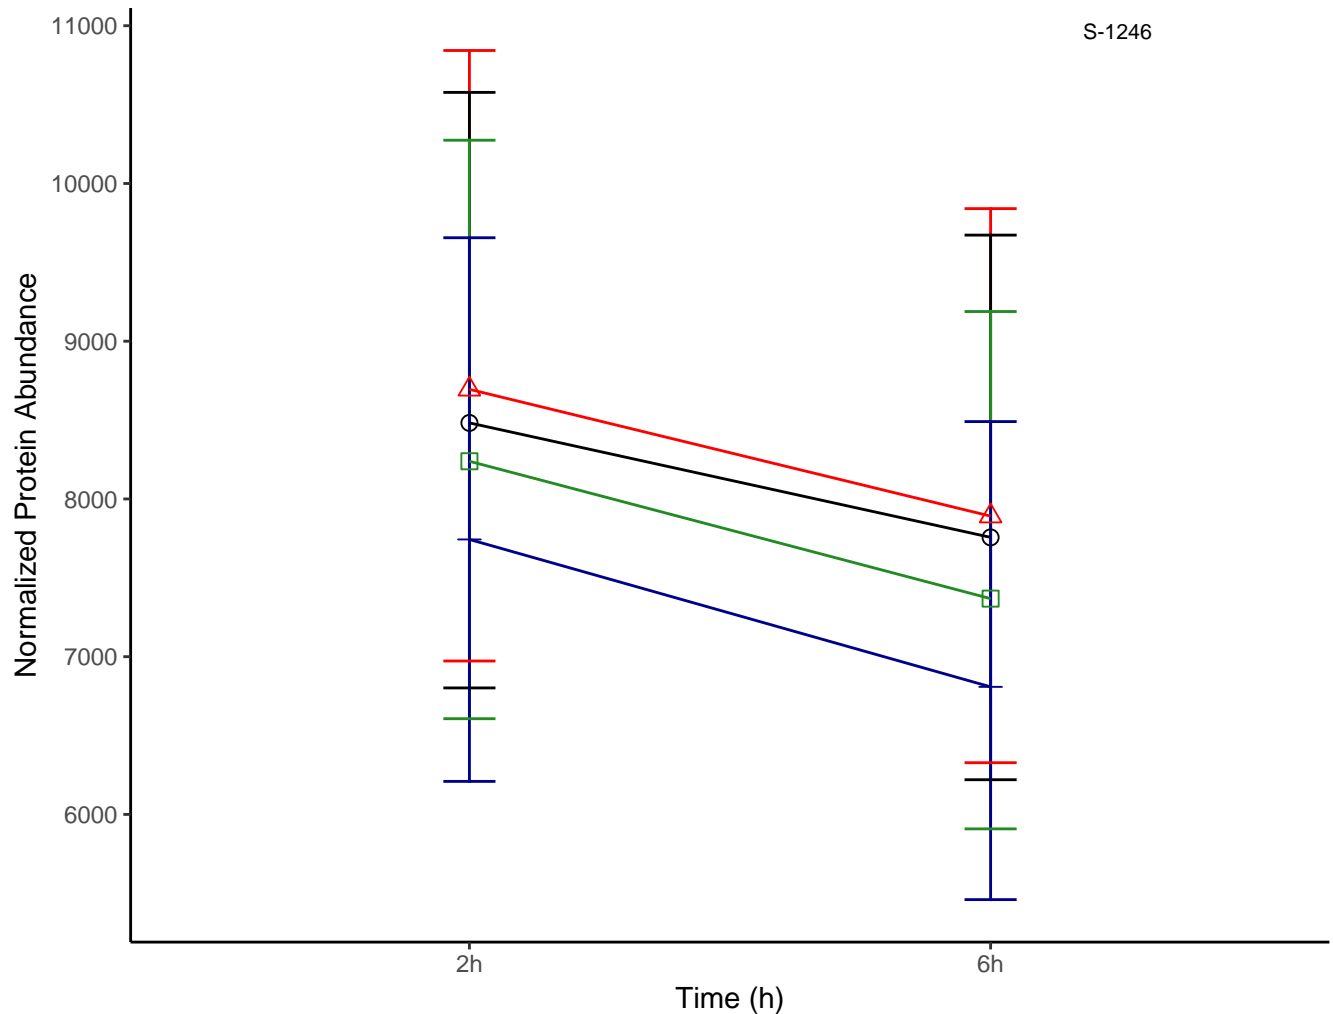

- SA564
- △ SA564- $\Delta hptRS$
- SA564- $\Delta ccpA$
- + SA564- $\Delta hptRS/ccpA$

# PAND\_STAAM

S-1247

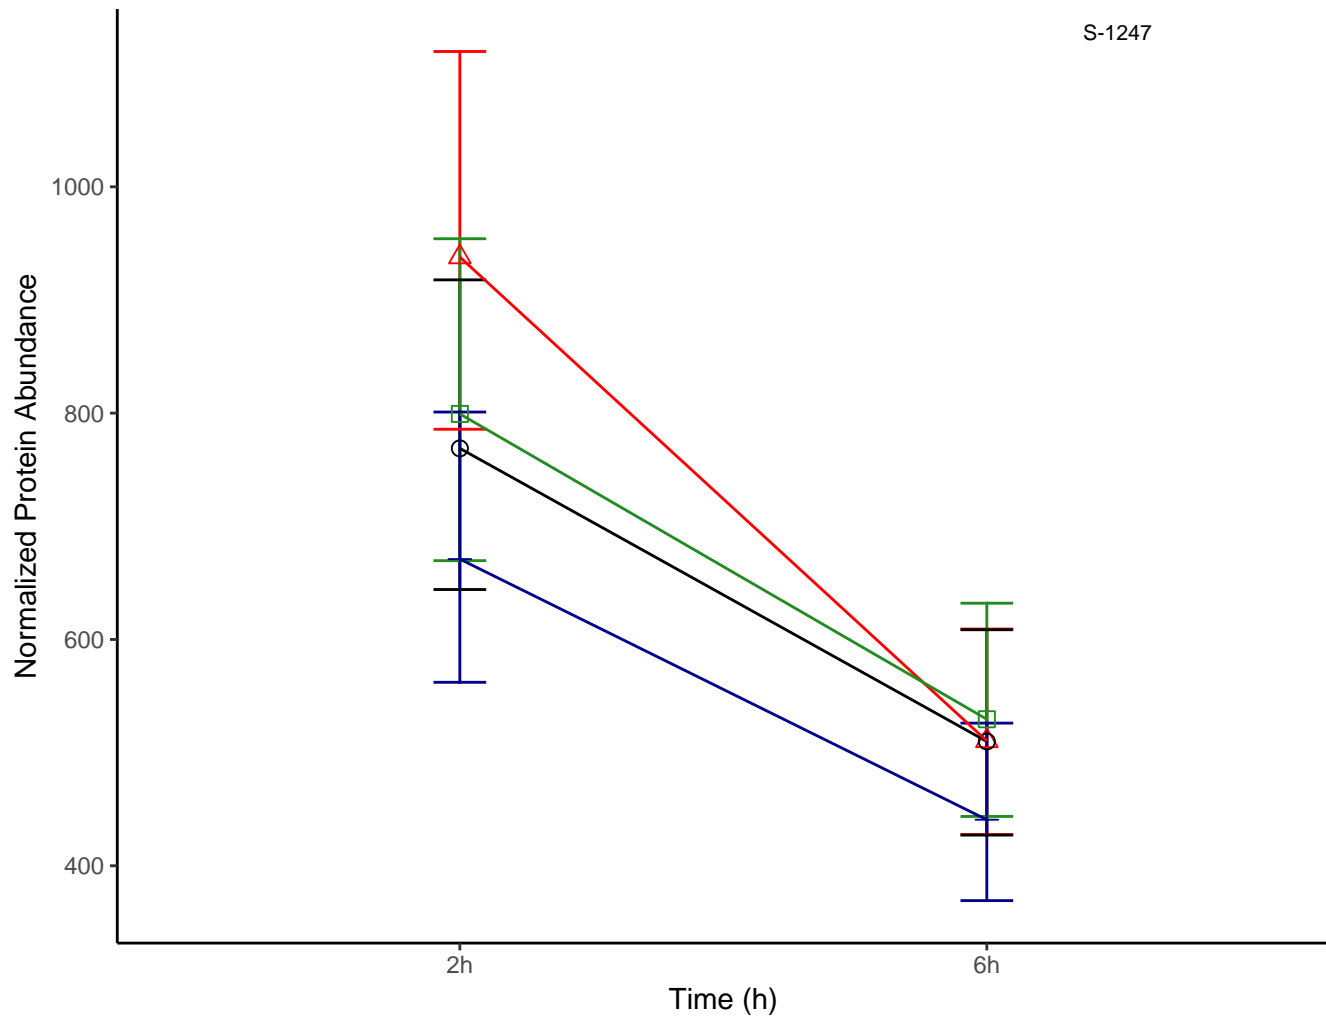

- SA564
- △ SA564- $\Delta$ *hptRS*
- SA564- $\Delta$ *ccpA*
- + SA564- $\Delta$ *hptRS/ccpA*

# PARC\_STAAM

S-1248

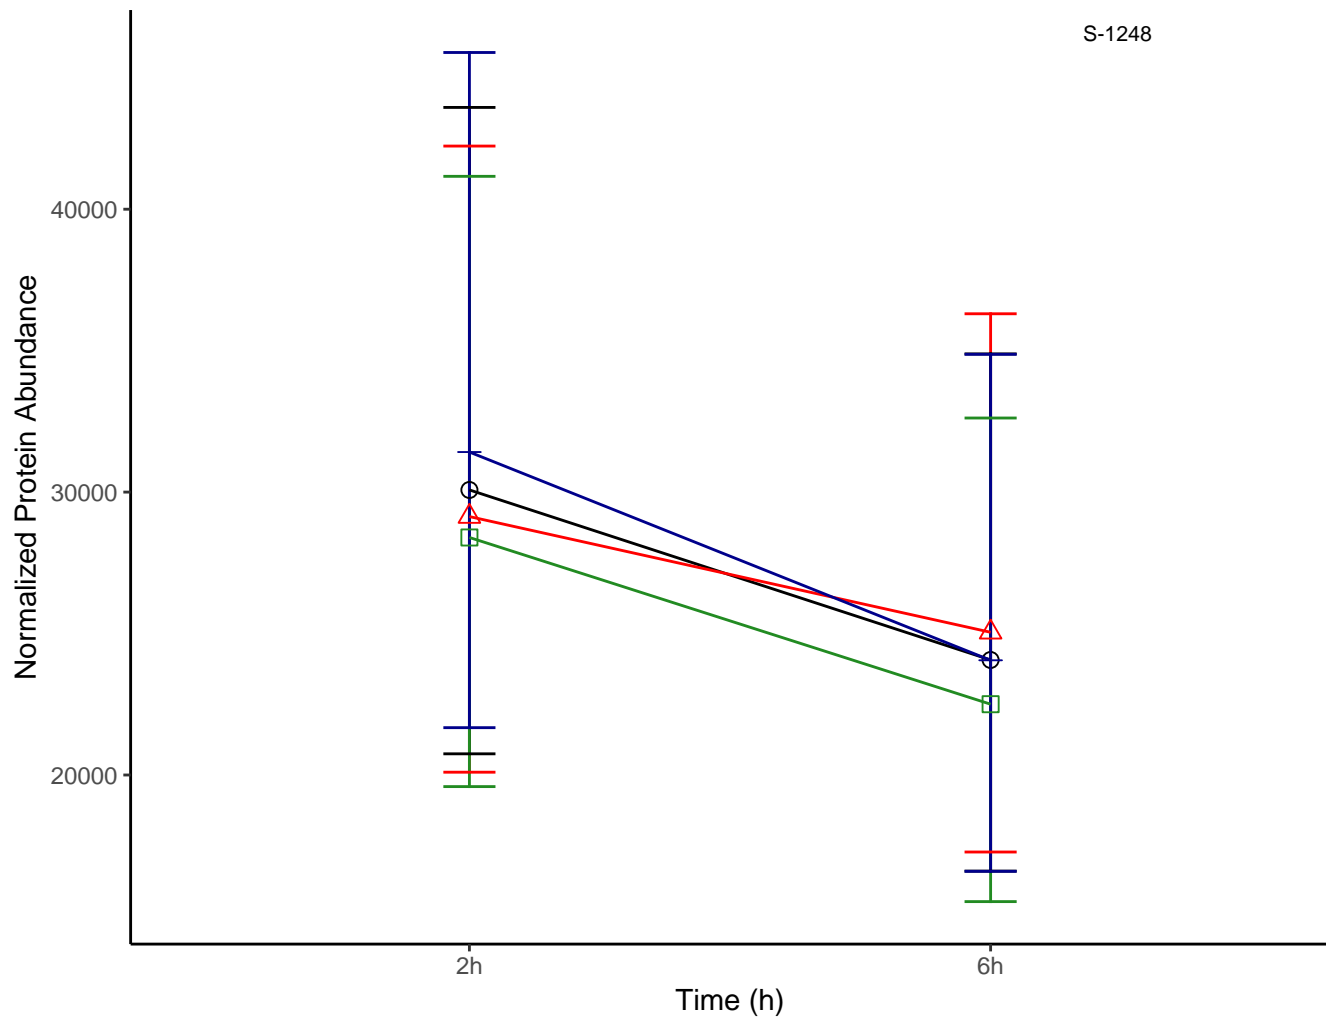

- SA564
- △ SA564- $\Delta hptRS$
- SA564- $\Delta ccpA$
- + SA564- $\Delta hptRS/ccpA$



# PCKA\_STAAM

S-1249

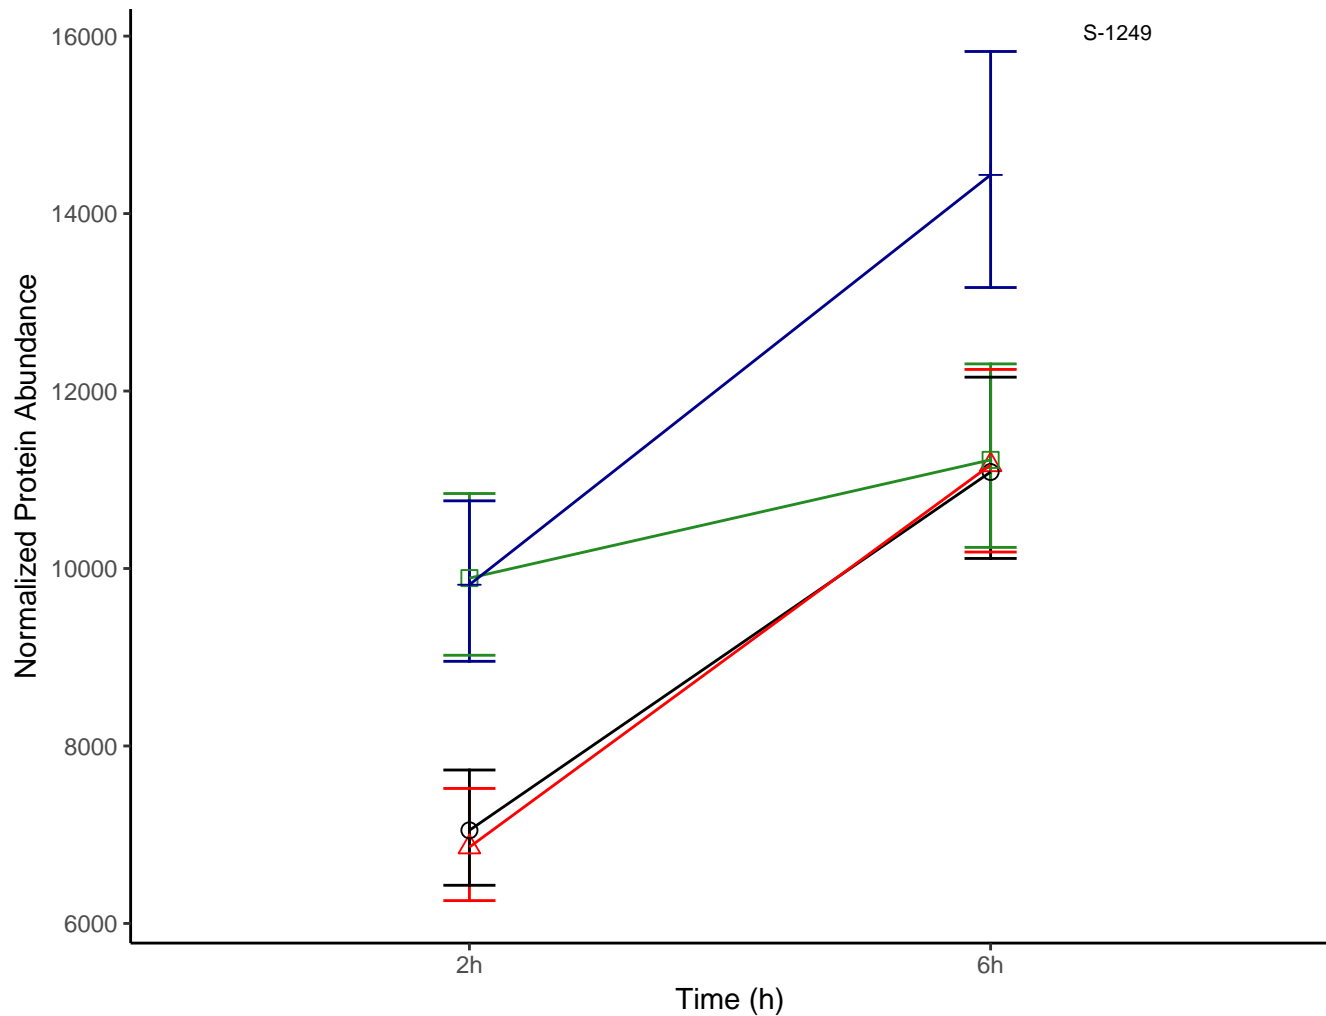

- SA564
- △ SA564- $\Delta$ *hptRS*
- SA564- $\Delta$ *ccpA*
- + SA564- $\Delta$ *hptRS/ccpA*

# PCRA\_STAAM

S-1250

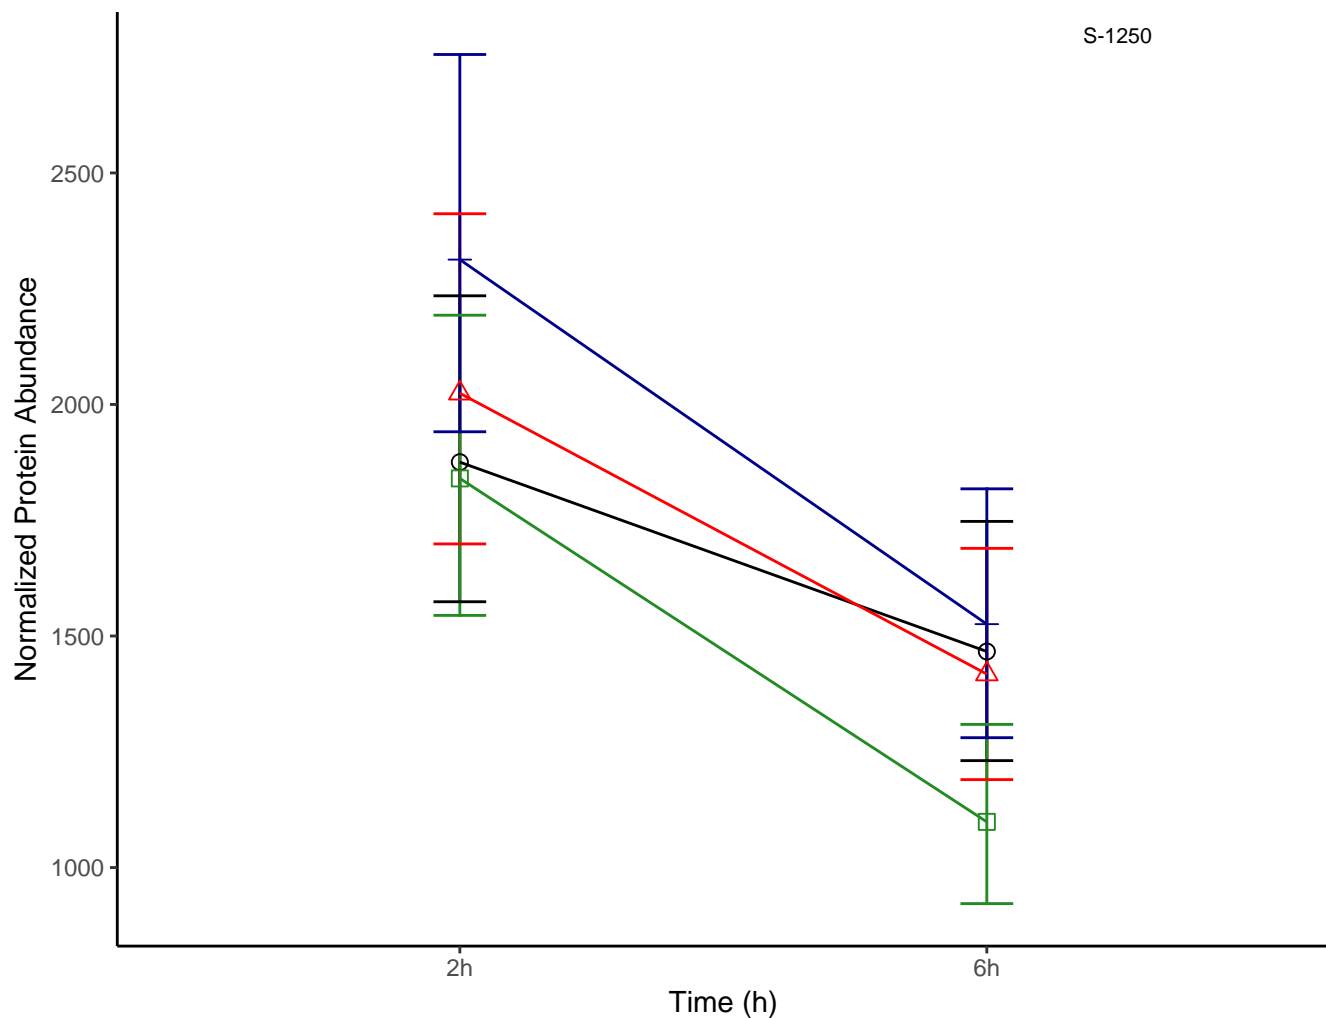

- SA564
- △ SA564- $\Delta$ *hptRS*
- SA564- $\Delta$ *ccpA*
- + SA564- $\Delta$ *hptRS/ccpA*

# PDP\_STAAM

S-1251

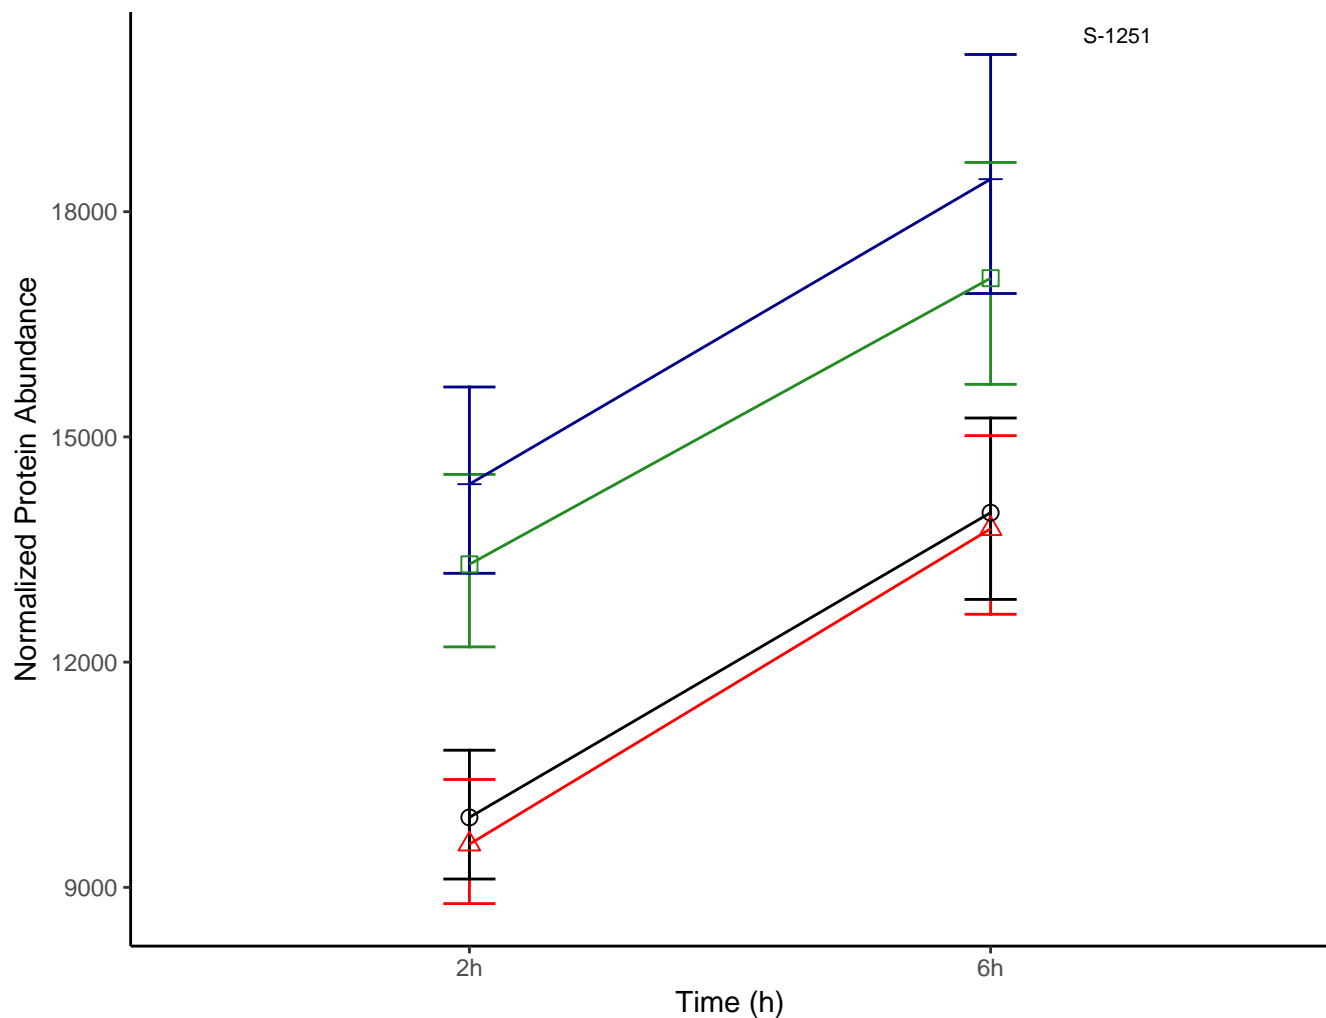

- SA564
- △ SA564- $\Delta hptRS$
- SA564- $\Delta ccpA$
- + SA564- $\Delta hptRS/ccpA$

# PDRP\_STAAM

S-1252

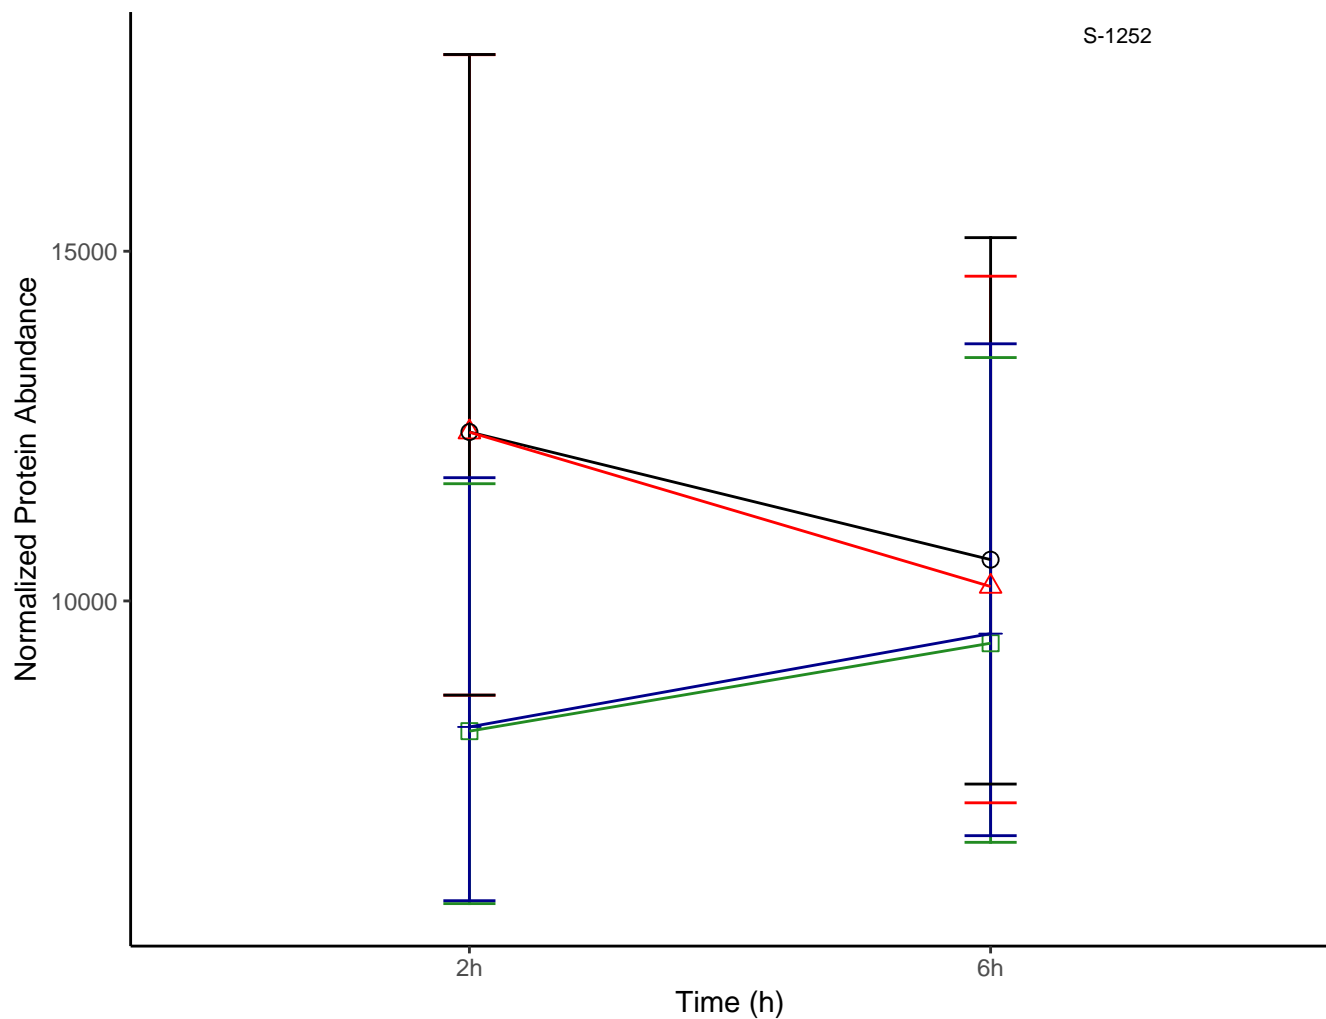

- SA564
- △ SA564- $\Delta$ *hptRS*
- SA564- $\Delta$ *ccpA*
- + SA564- $\Delta$ *hptRS/ccpA*

# PDXS\_STAAM

S-1253

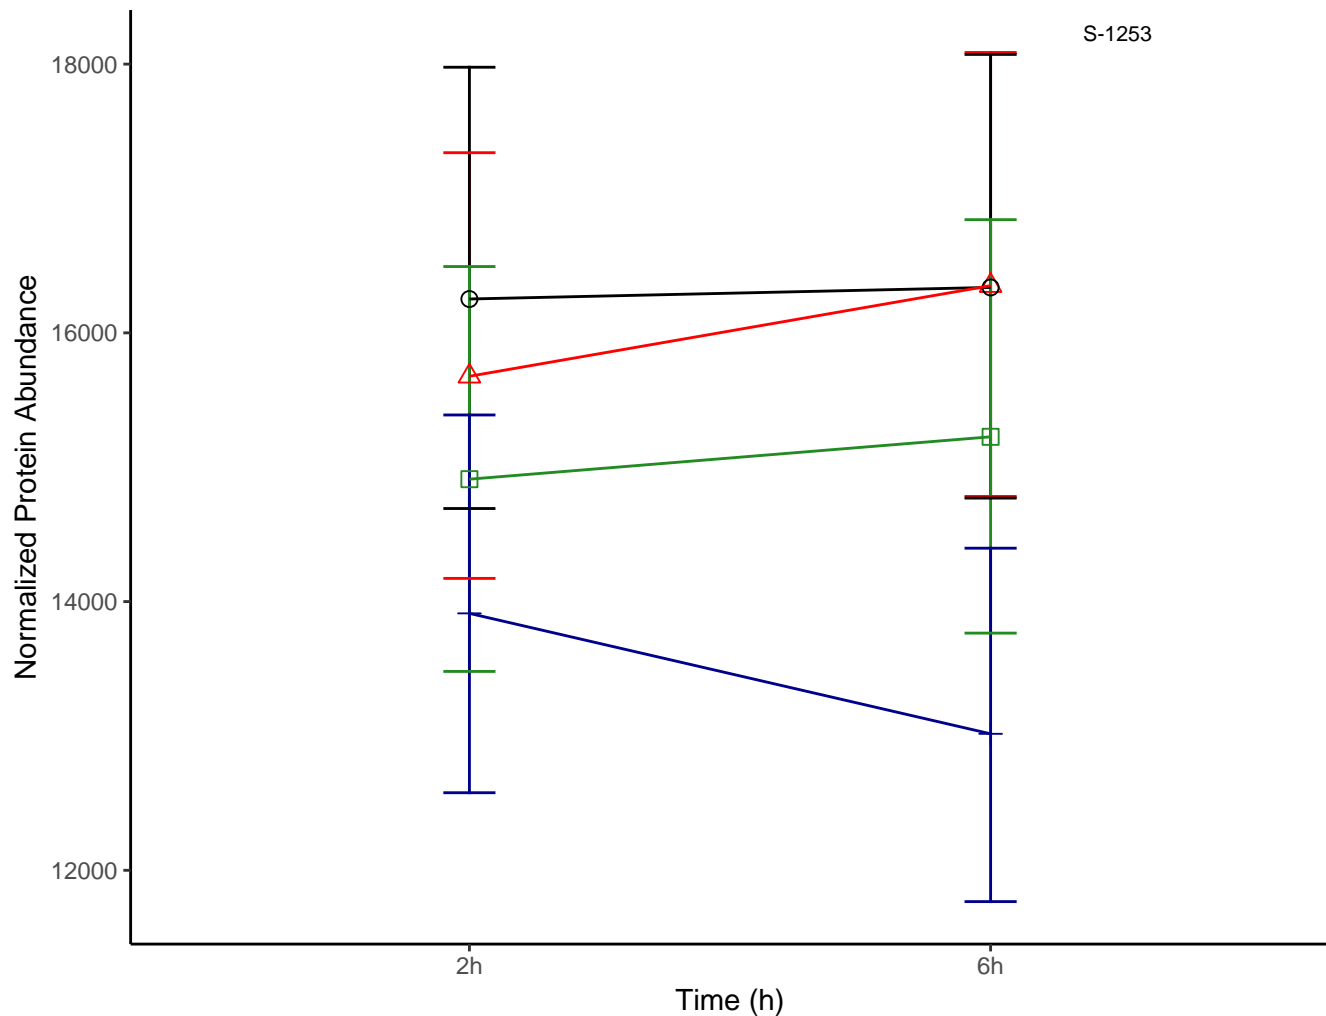

- SA564
- △ SA564- $\Delta$ *hptRS*
- SA564- $\Delta$ *ccpA*
- + SA564- $\Delta$ *hptRS/ccpA*

# PDXT\_STAAM

S-1254

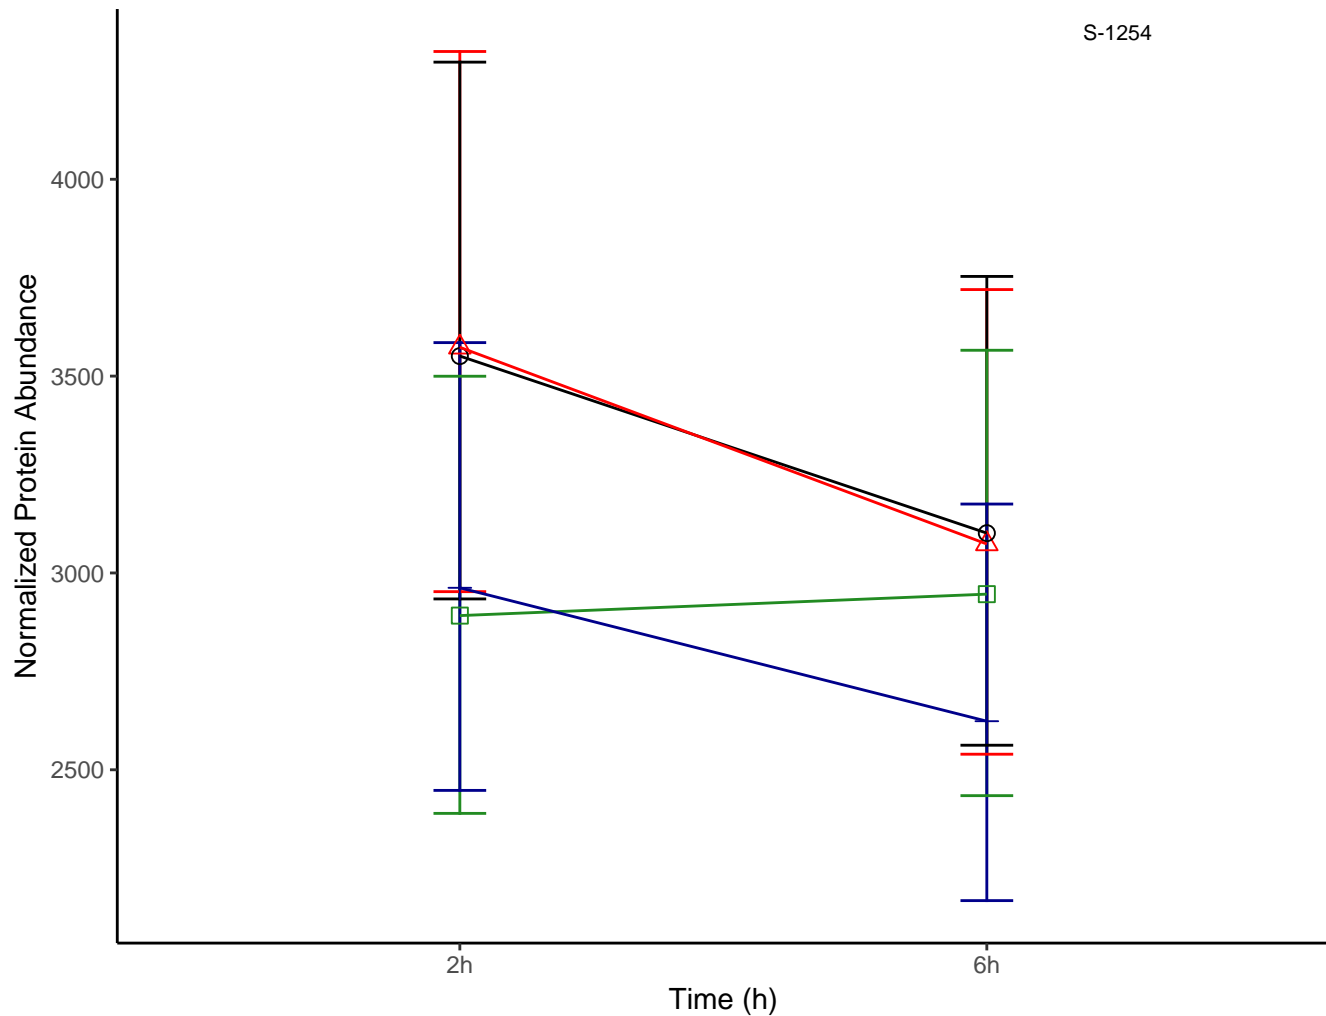

- SA564
- △ SA564- $\Delta$ *hptRS*
- SA564- $\Delta$ *ccpA*
- + SA564- $\Delta$ *hptRS/ccpA*

# PEPVL\_STAAM

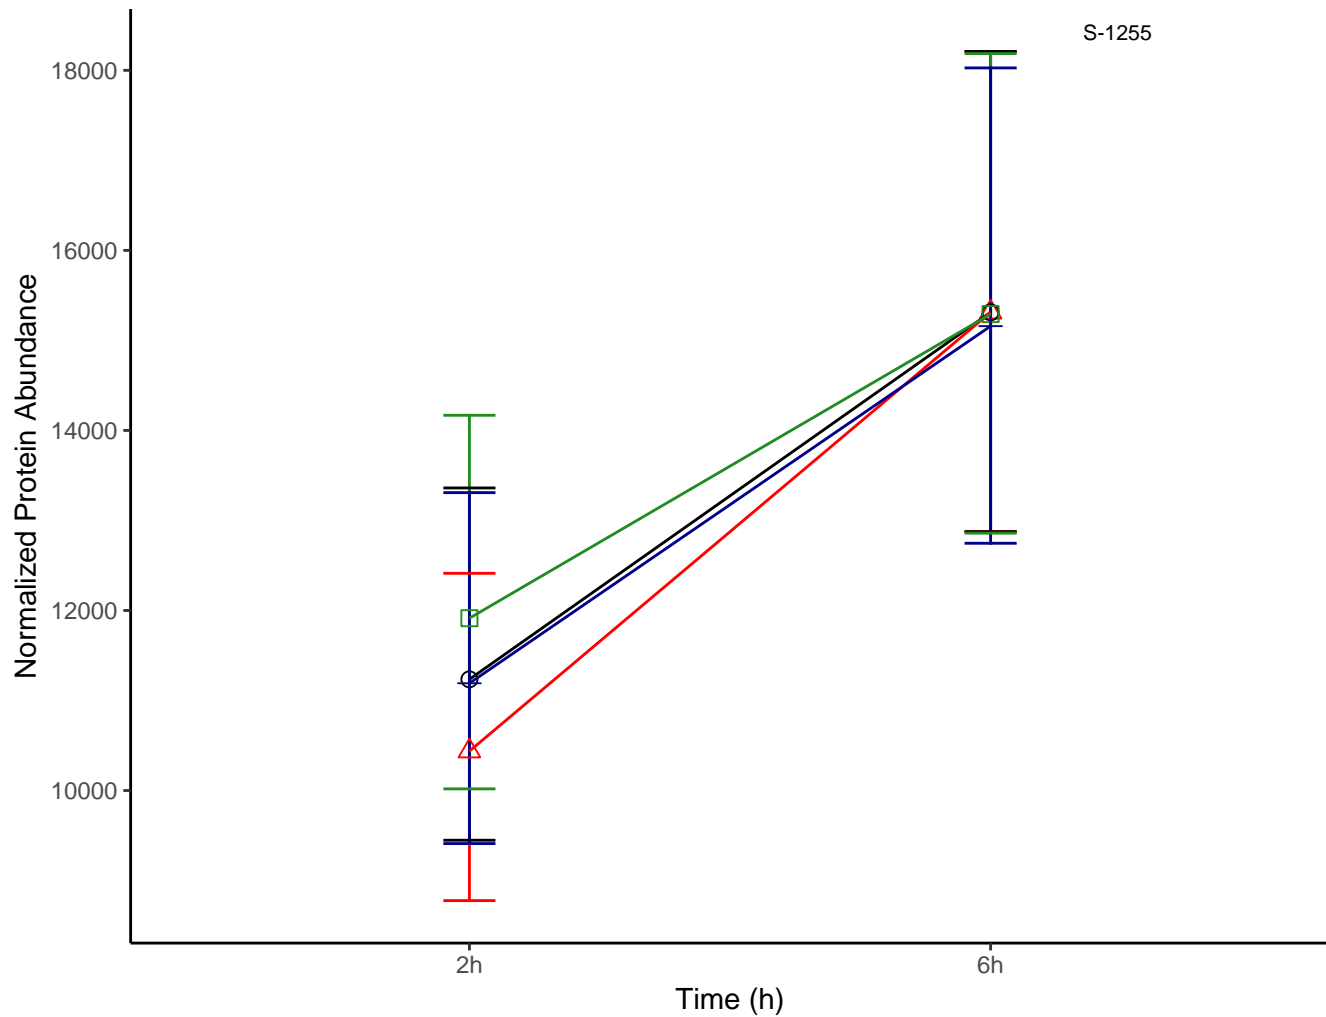

- SA564
- △ SA564- $\Delta hptRS$
- SA564- $\Delta ccpA$
- + SA564- $\Delta hptRS/ccpA$

# PERR\_STAAM

S-1256

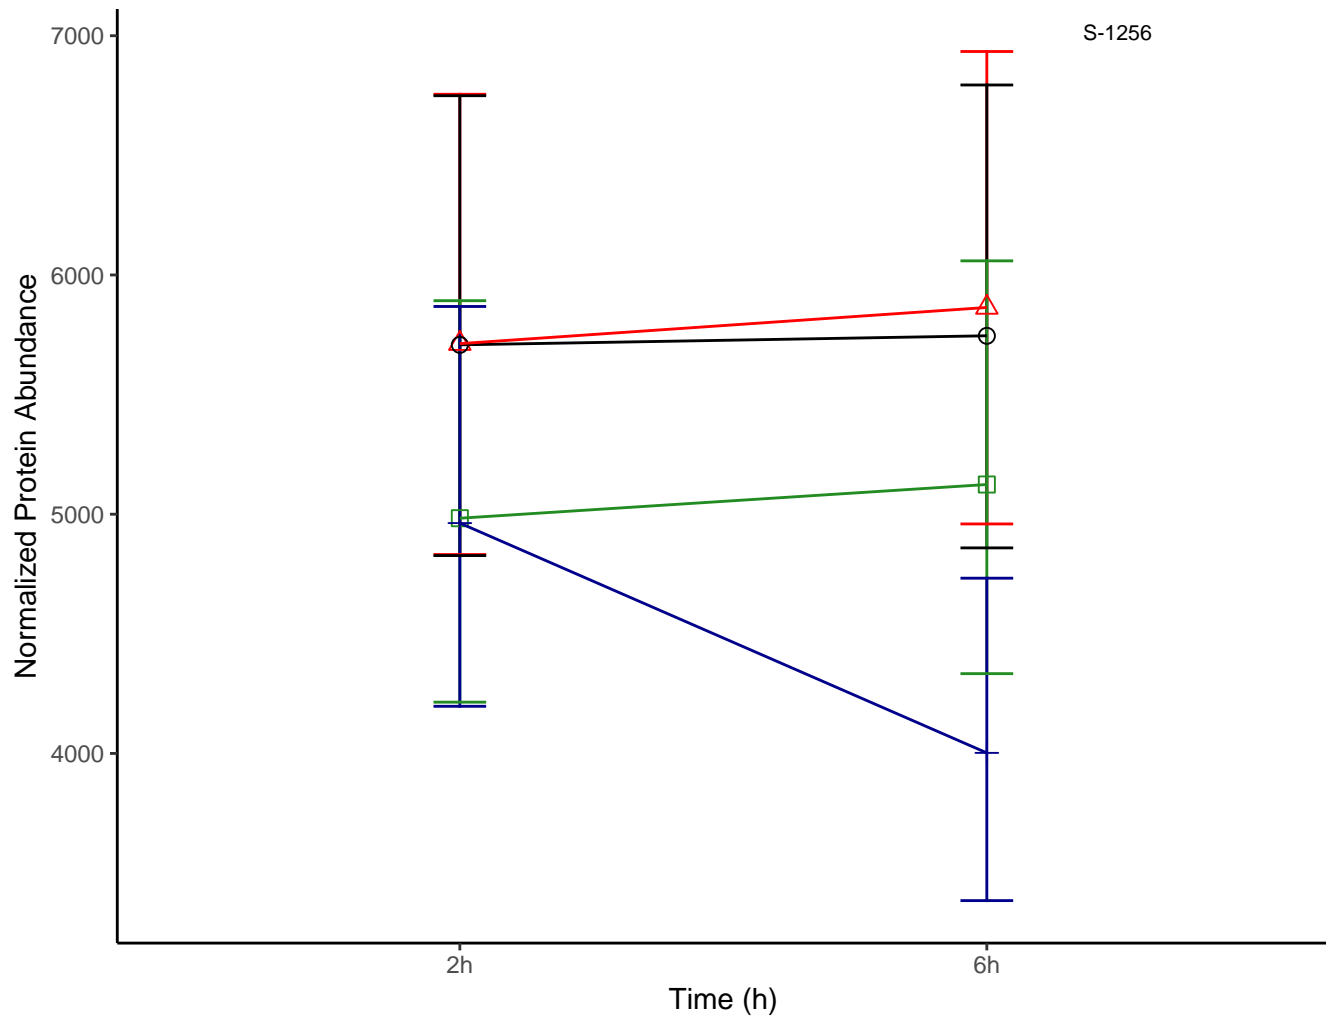

- SA564
- △ SA564- $\Delta$ *hptRS*
- SA564- $\Delta$ *ccpA*
- + SA564- $\Delta$ *hptRS/ccpA*



# PFKA\_STAAM

S-1257

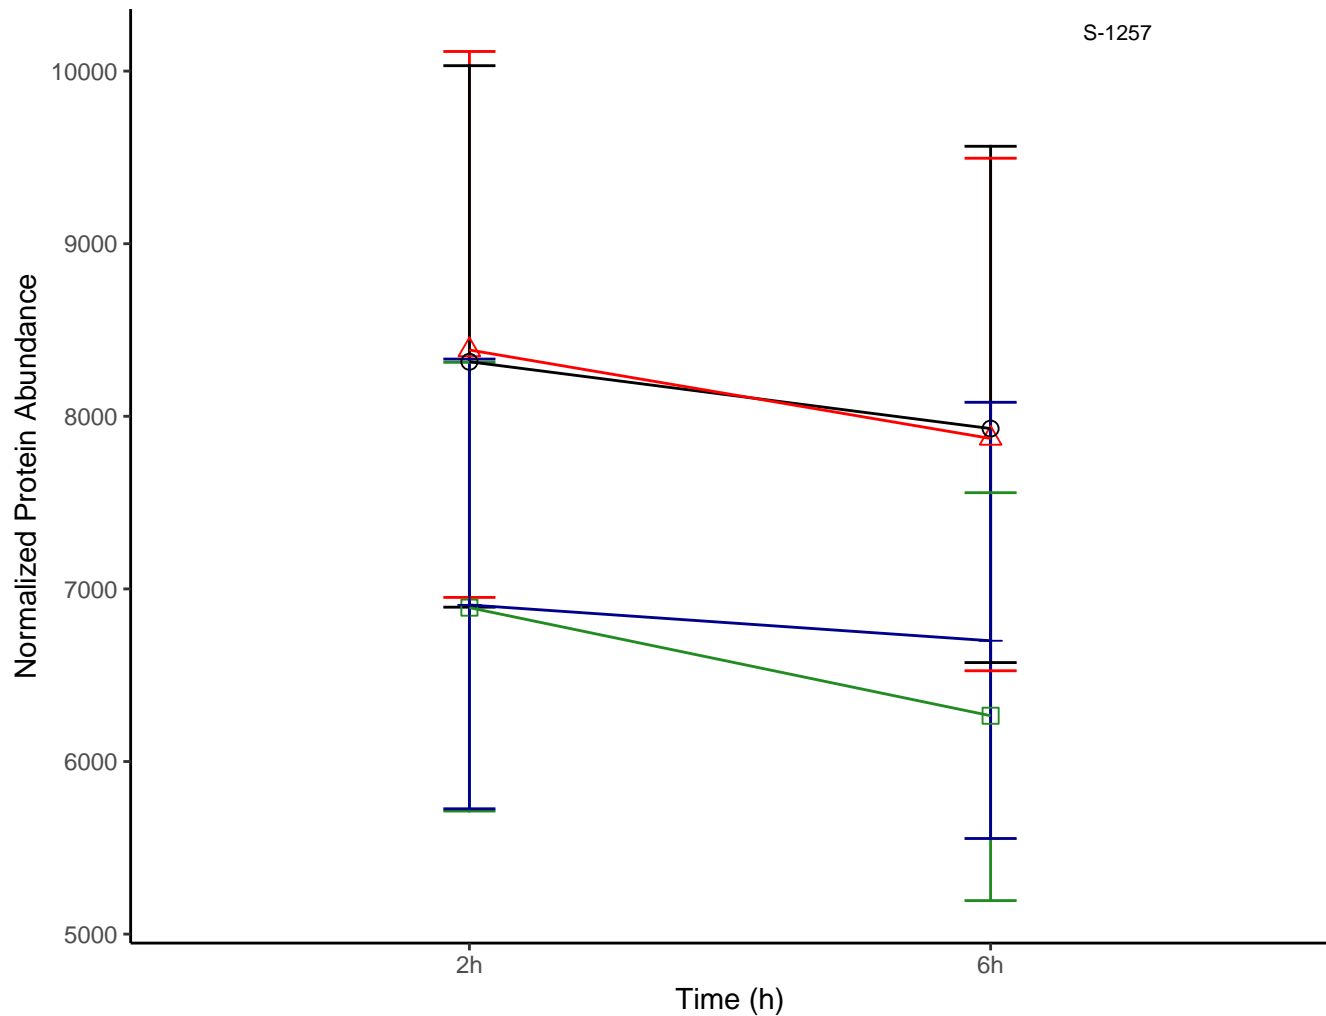

- SA564
- △ SA564- $\Delta$ hptRS
- SA564- $\Delta$ ccpA
- + SA564- $\Delta$ hptRS/ccpA

# PFLA\_STAAM

S-1258

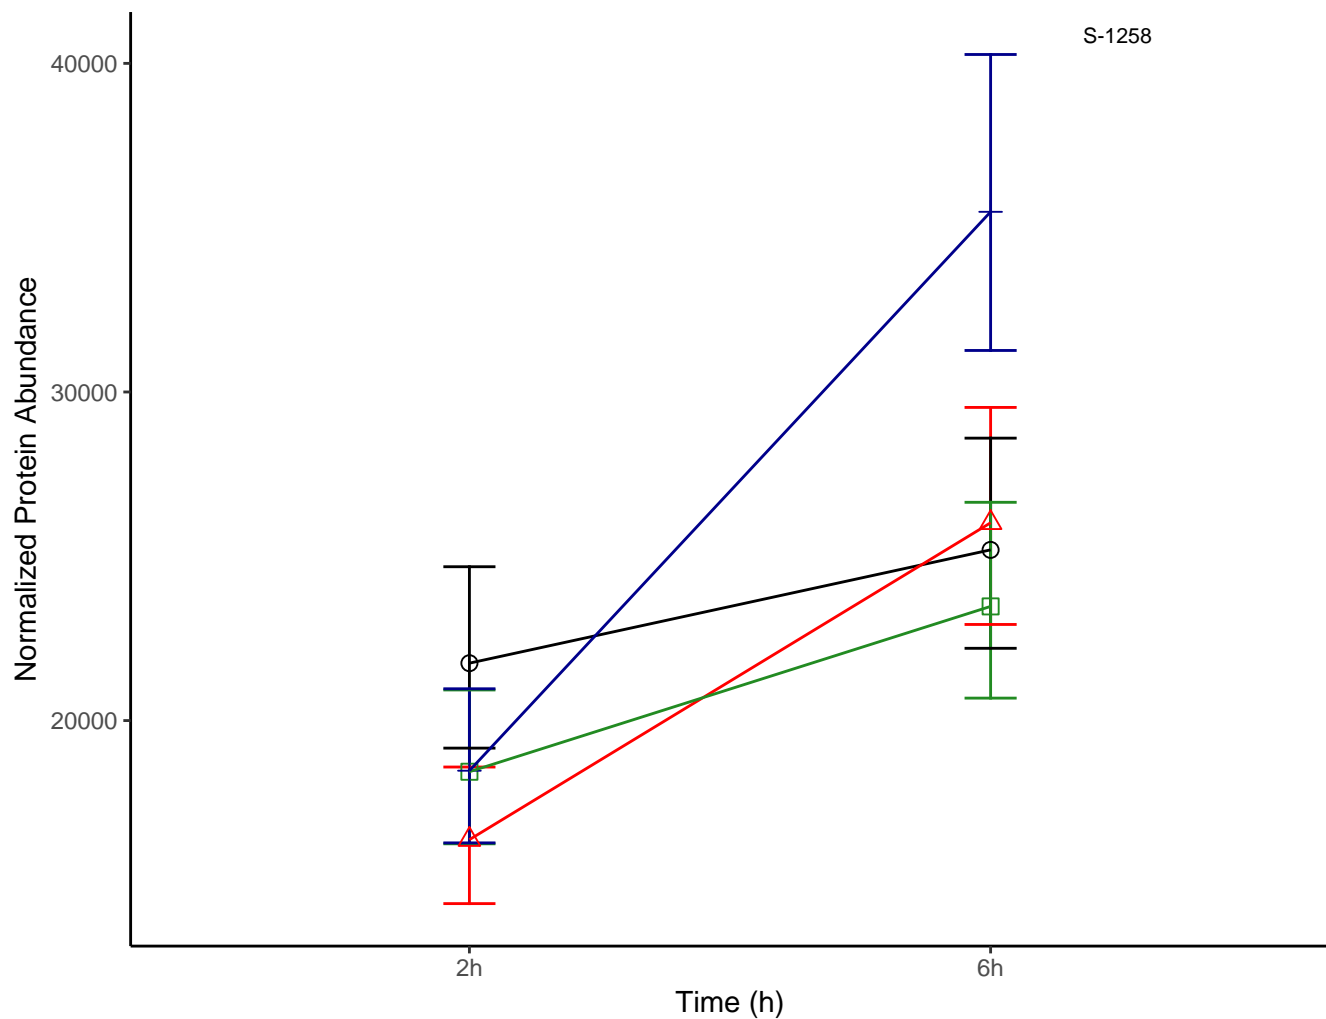

- SA564
- △ SA564- $\Delta hptRS$
- SA564- $\Delta ccpA$
- + SA564- $\Delta hptRS/ccpA$

# PFLB\_STAAM

S-1259

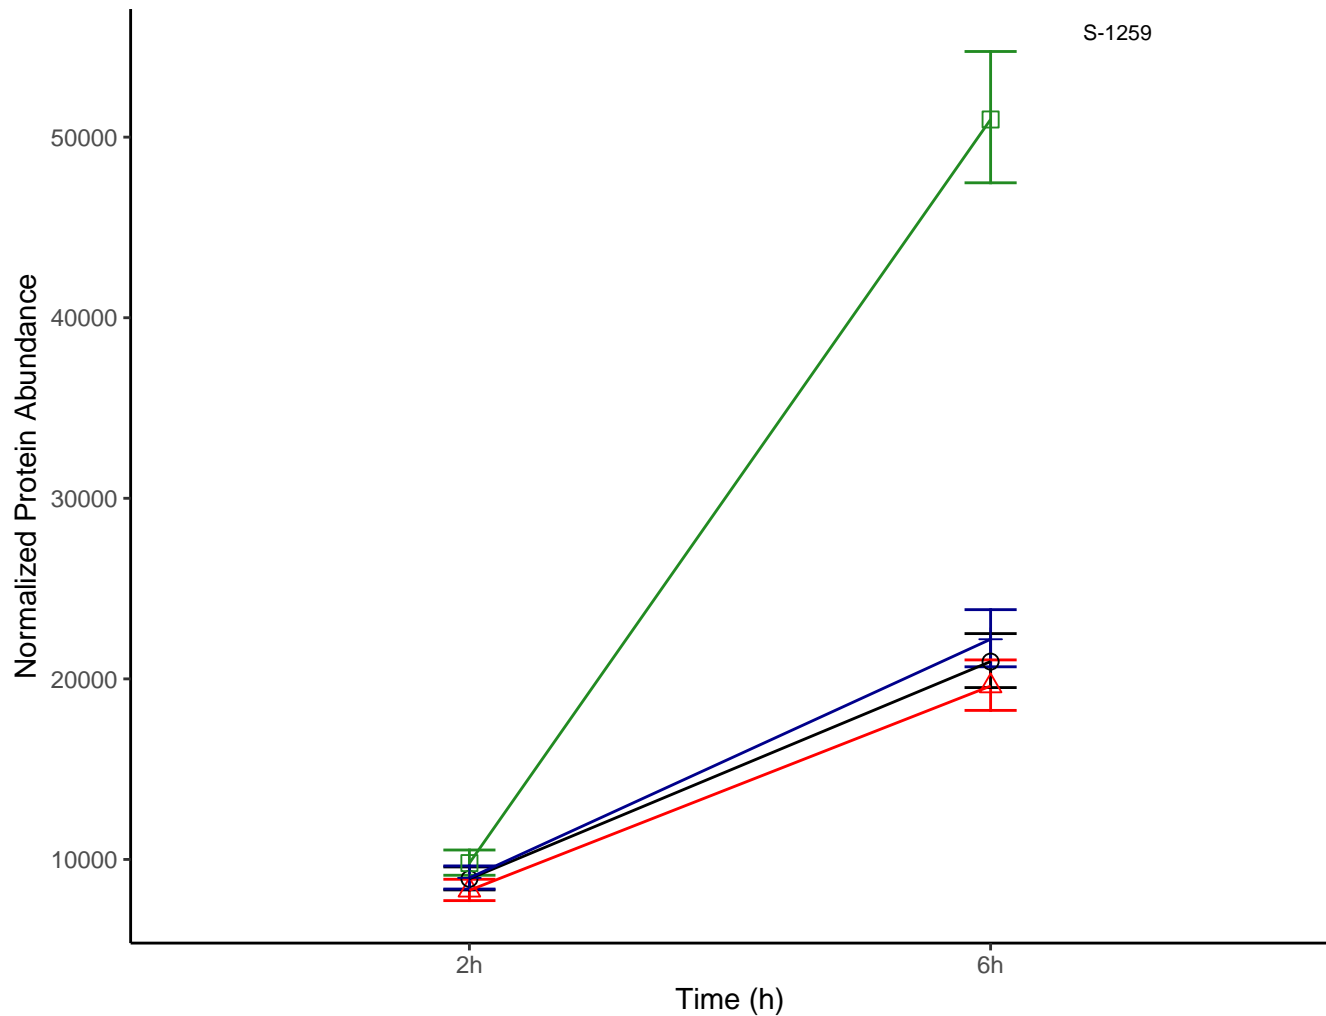

- SA564
- △ SA564- $\Delta hptRS$
- SA564- $\Delta ccpA$
- + SA564- $\Delta hptRS/ccpA$

# PGCA\_STAAM

S-1260

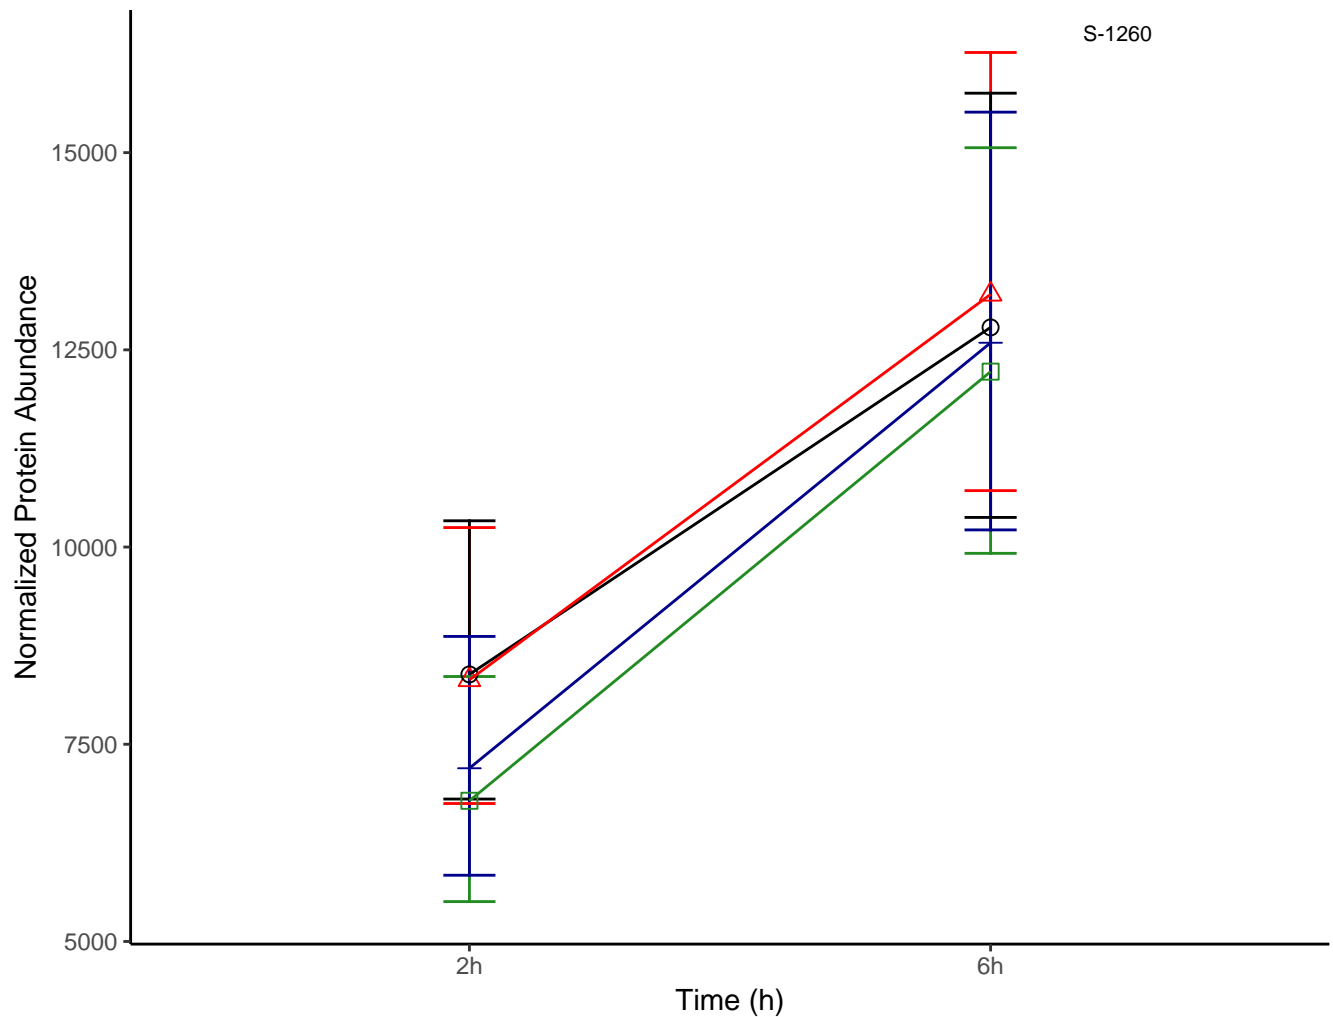

- SA564
- △ SA564- $\Delta hptRS$
- SA564- $\Delta ccpA$
- + SA564- $\Delta hptRS/ccpA$

# PGK\_STAAM

S-1261

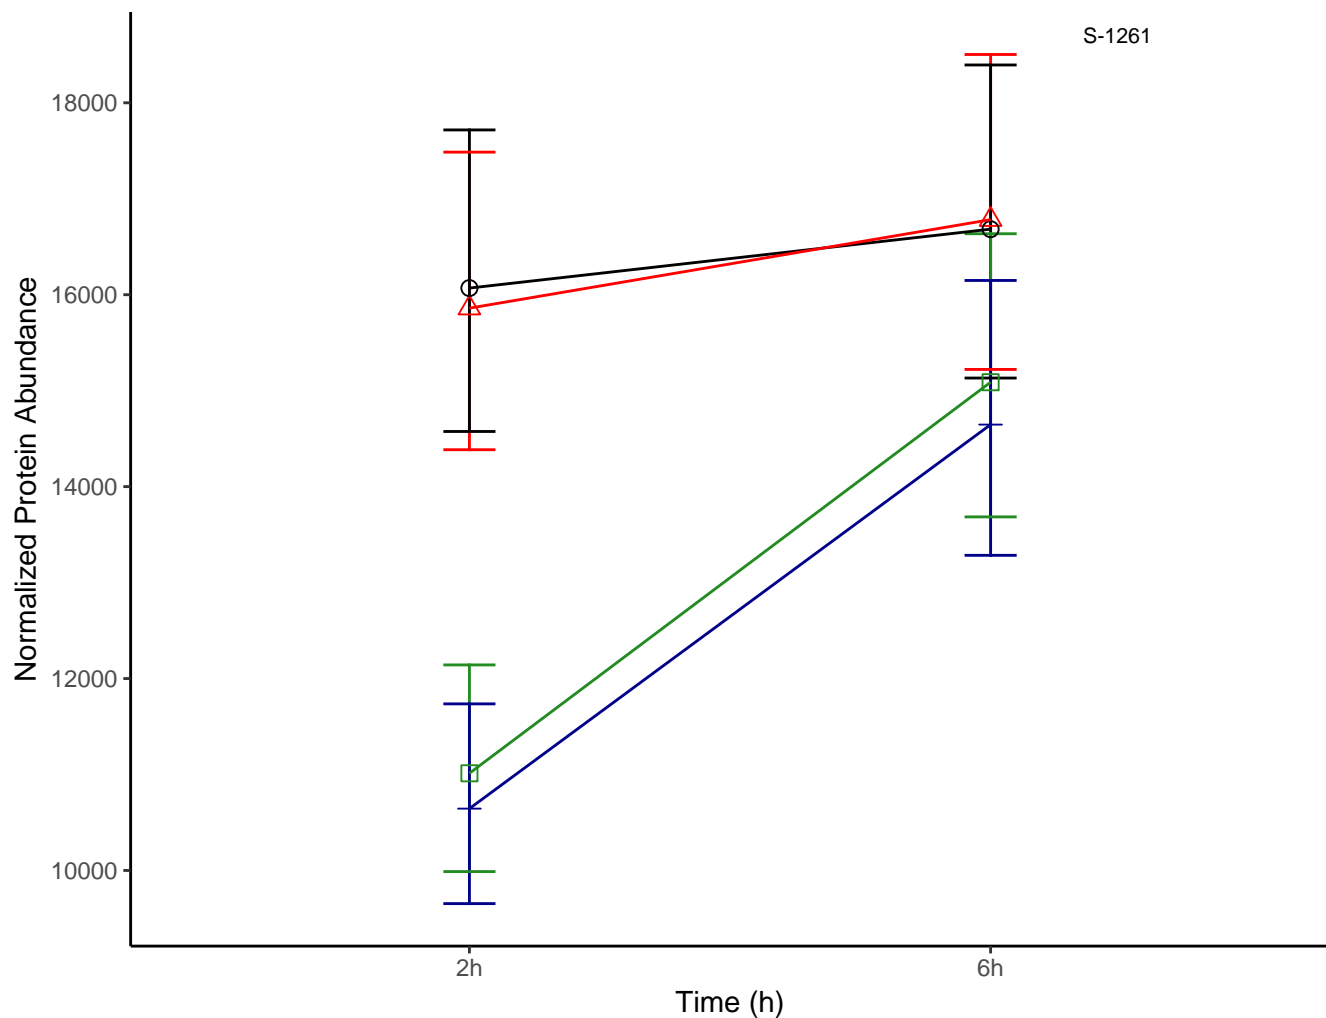

- SA564
- △ SA564- $\Delta hptRS$
- SA564- $\Delta ccpA$
- + SA564- $\Delta hptRS/ccpA$

# PHNC\_STAAM

S-1262

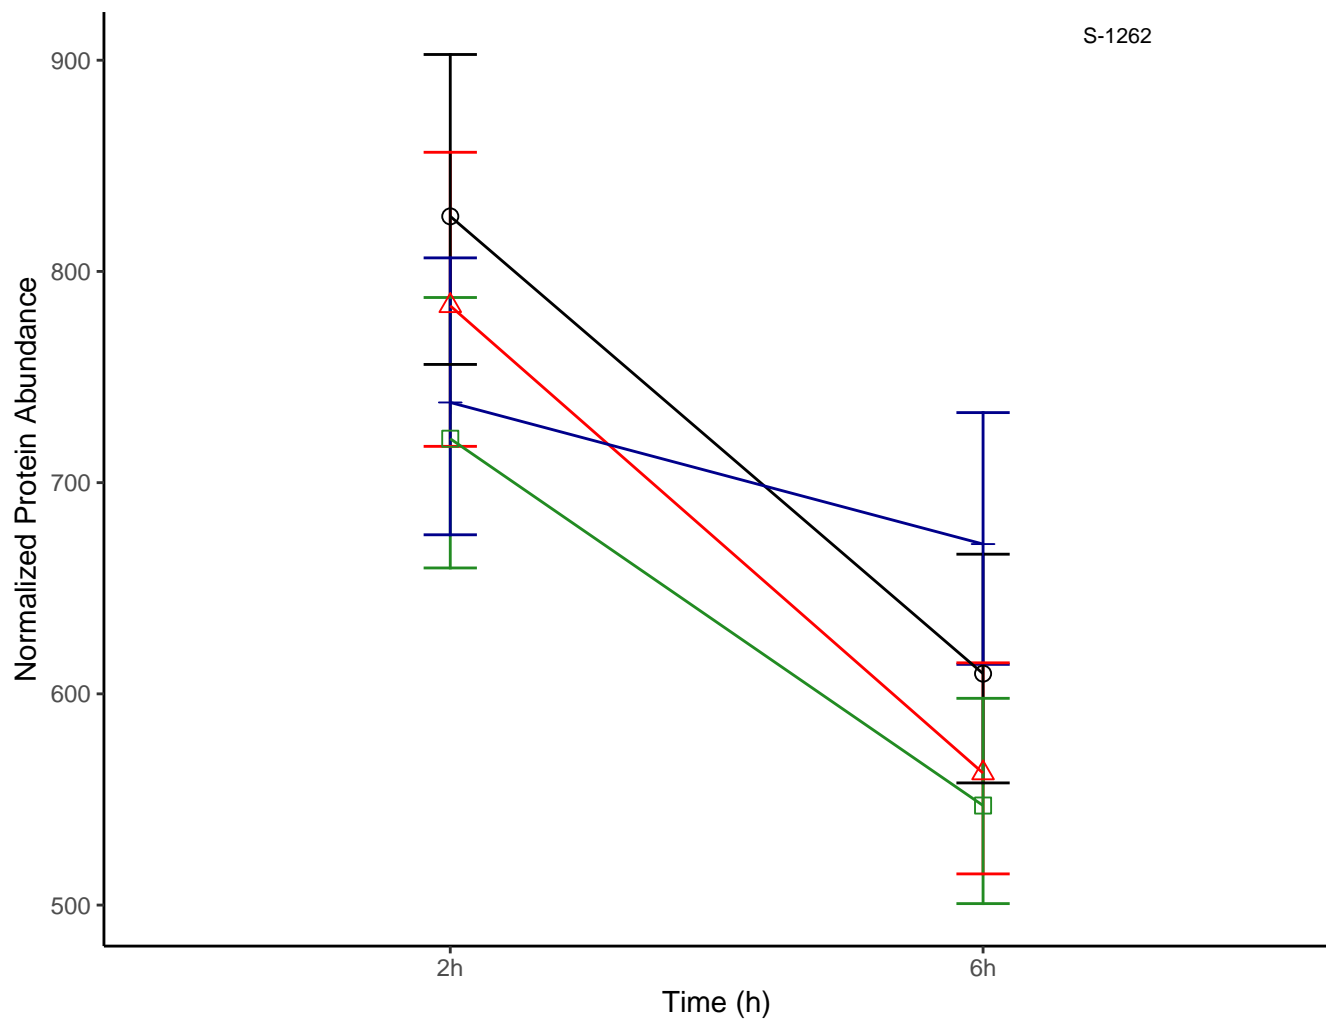

- SA564
- △ SA564- $\Delta$ *hptRS*
- SA564- $\Delta$ *ccpA*
- + SA564- $\Delta$ *hptRS/ccpA*

# PLSX\_STAAM

S-1263

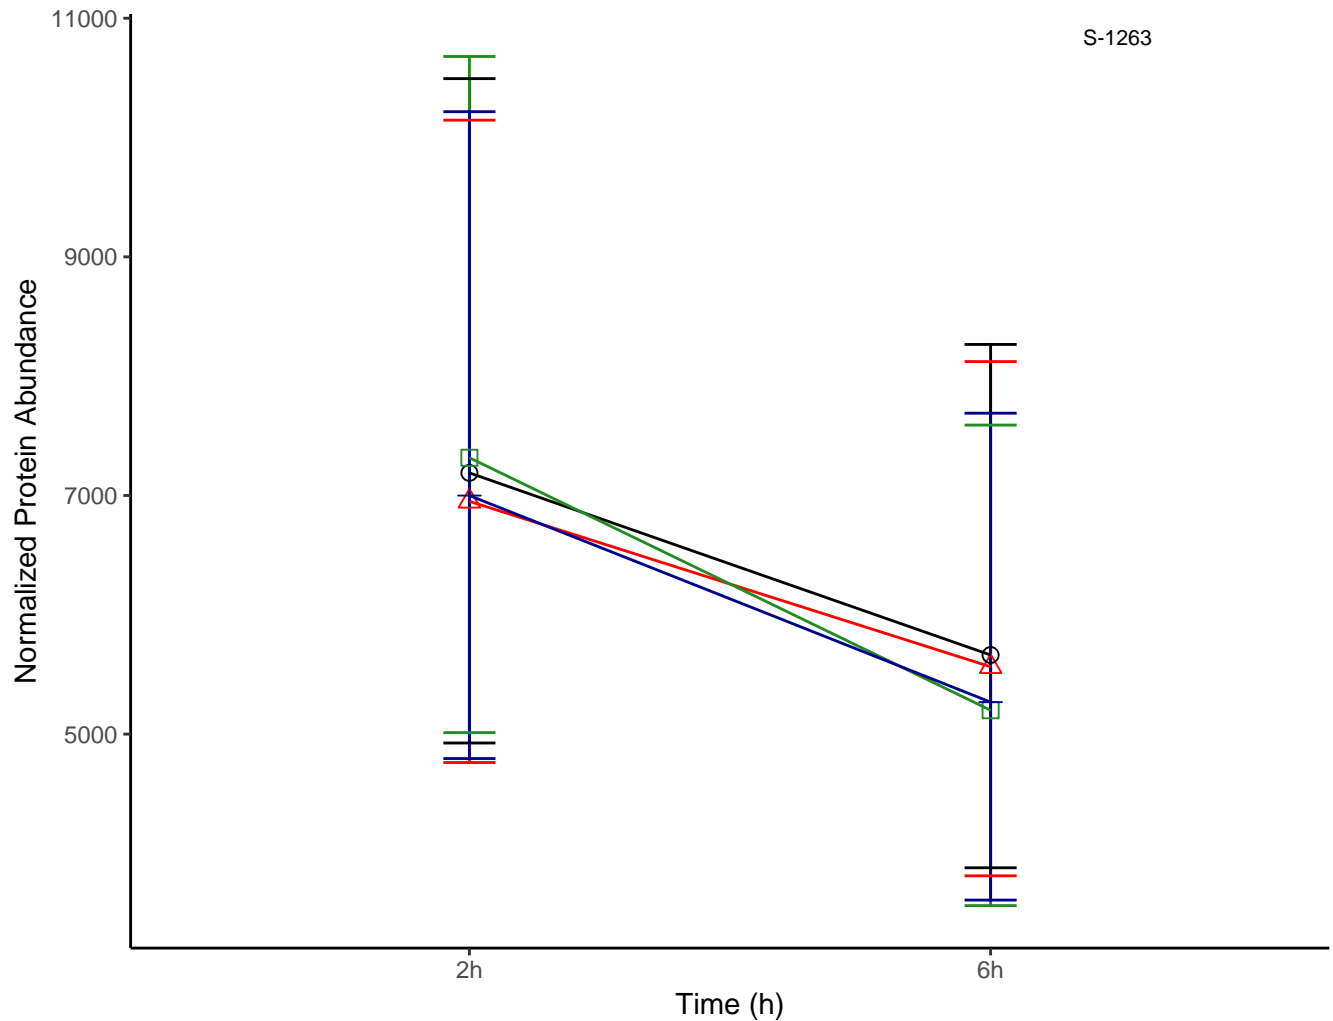

- SA564
- △ SA564- $\Delta$ *hptRS*
- SA564- $\Delta$ *ccpA*
- + SA564- $\Delta$ *hptRS/ccpA*

# PNP\_STAAM

S-1264

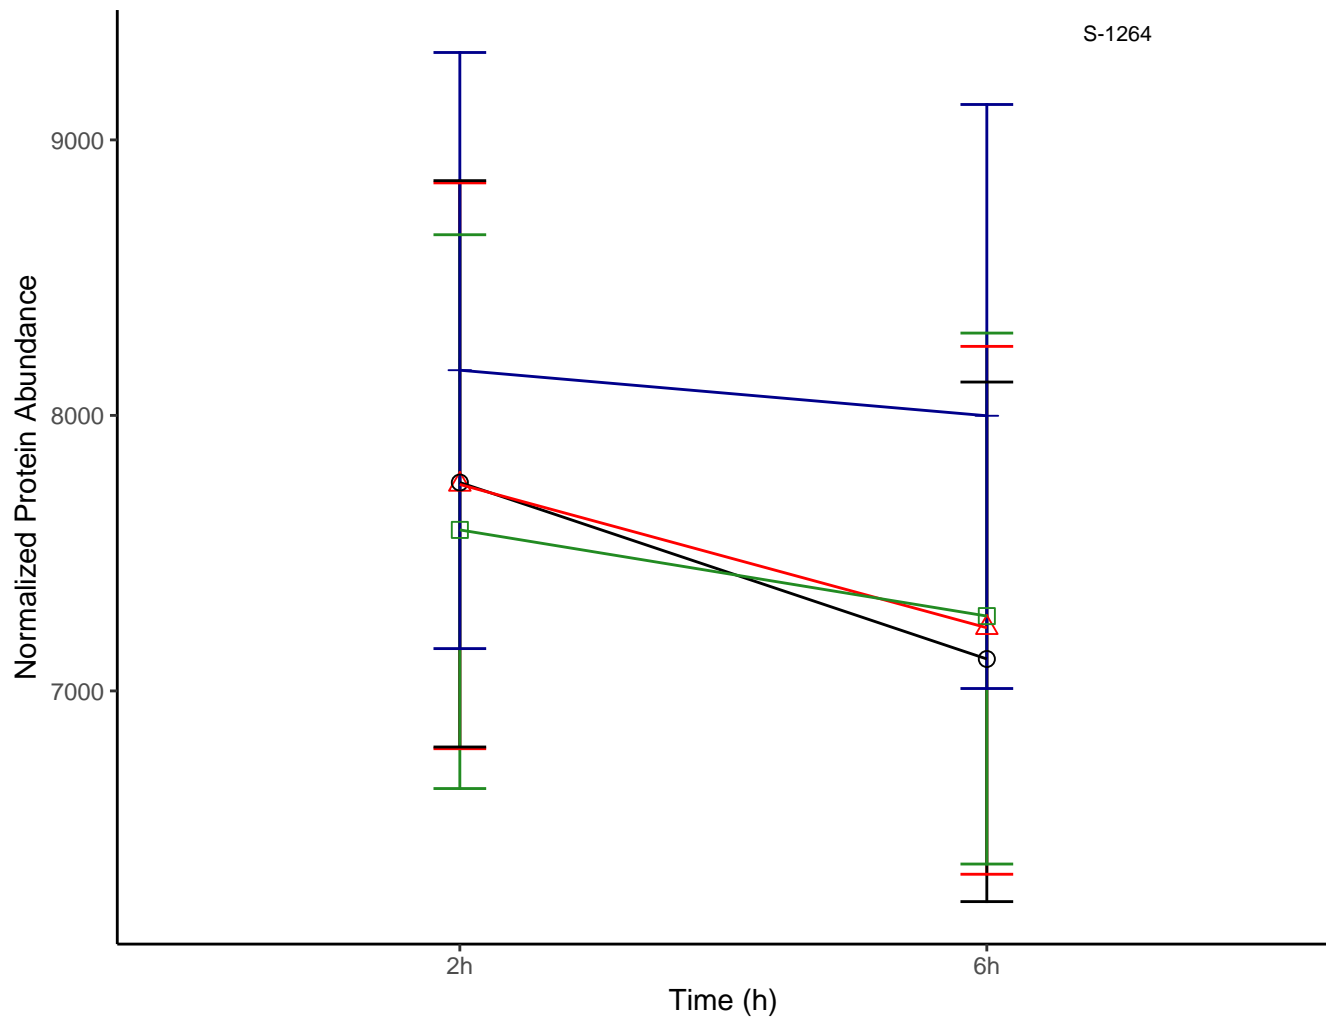

- SA564
- △ SA564- $\Delta hptRS$
- SA564- $\Delta ccpA$
- + SA564- $\Delta hptRS/ccpA$



# PPAC\_STAAM

S-1265

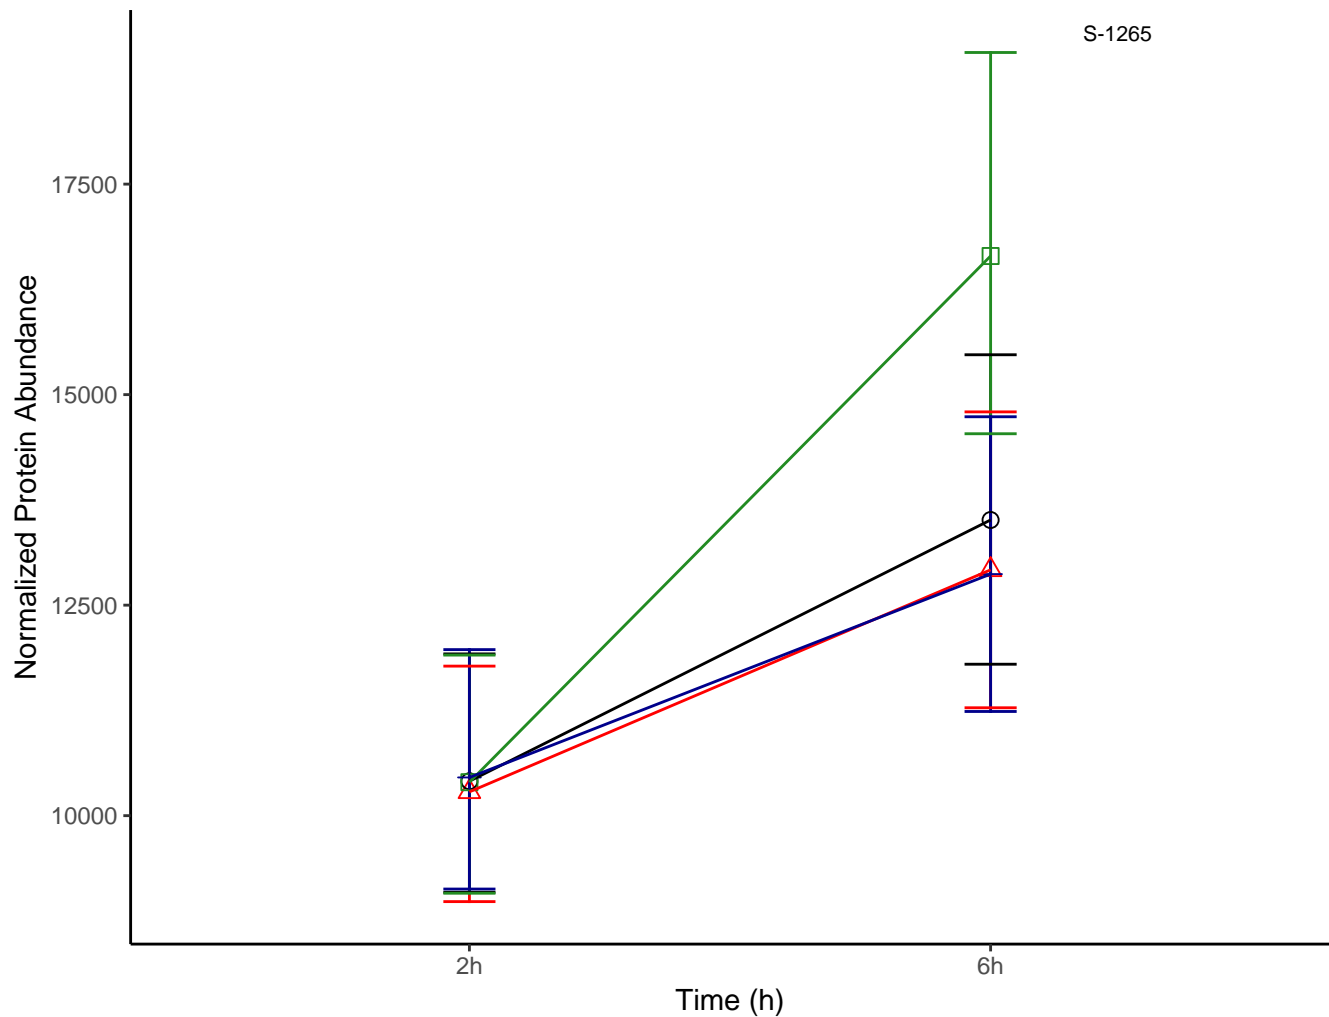

- SA564
- △ SA564- $\Delta$ *hptRS*
- SA564- $\Delta$ *ccpA*
- + SA564- $\Delta$ *hptRS/ccpA*

# PPAT\_STAAM

S-1266

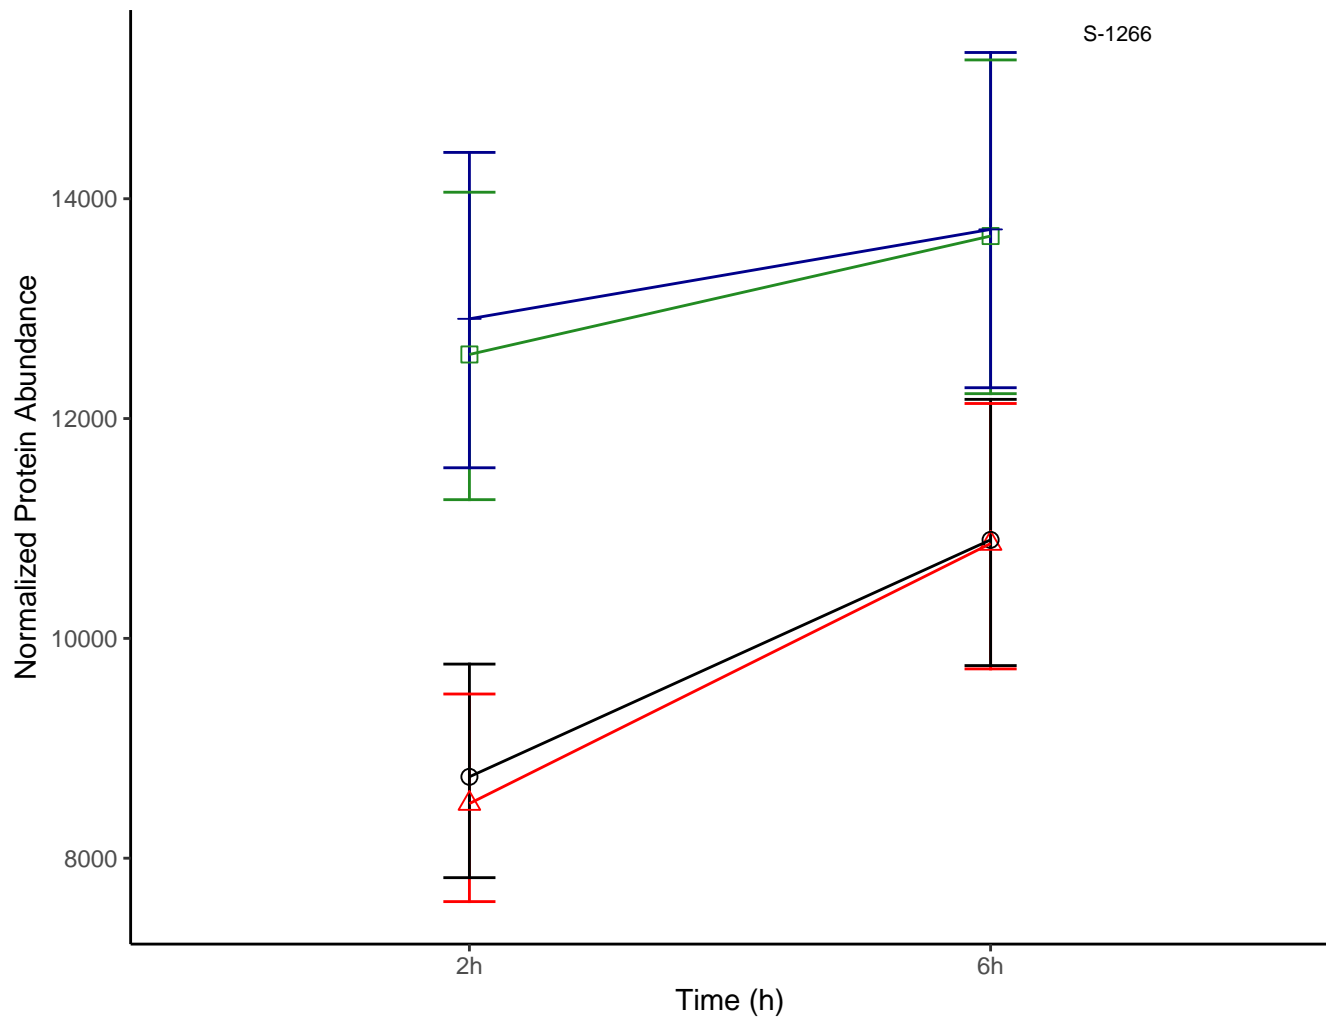

- SA564
- △ SA564- $\Delta$ *hptRS*
- SA564- $\Delta$ *ccpA*
- + SA564- $\Delta$ *hptRS/ccpA*

# PPI1\_STAAM

S-1267

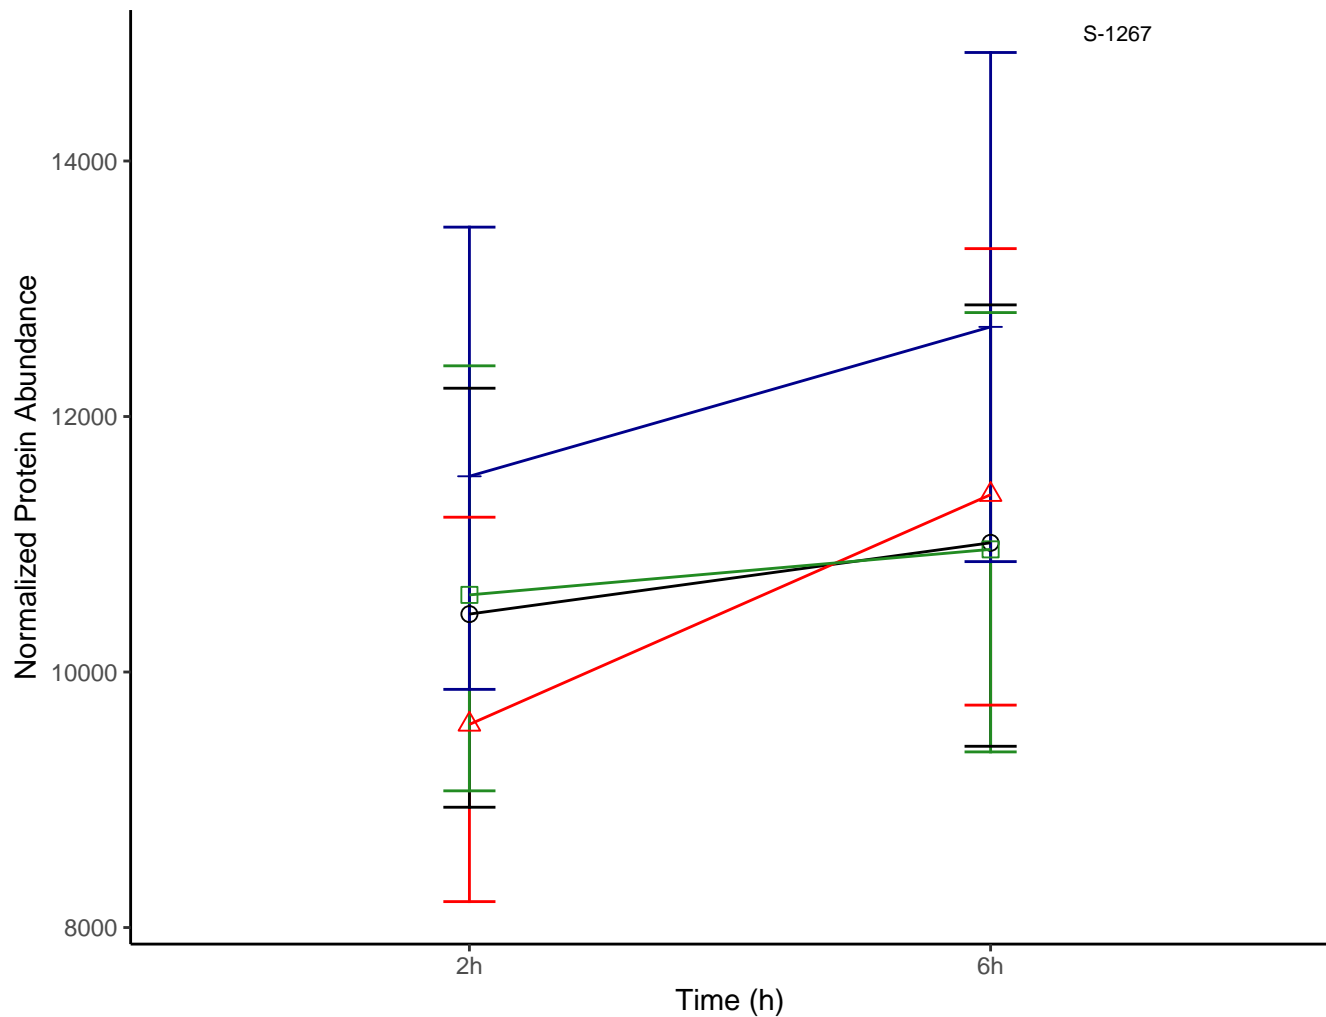

- SA564
- △ SA564- $\Delta$ hptRS
- SA564- $\Delta$ ccpA
- + SA564- $\Delta$ hptRS/ccpA

# PRSA\_STAAM

S-1268

Normalized Protein Abundance

15000  
12000  
9000

2h

6h

Time (h)

- SA564
- △ SA564- $\Delta$ *hptRS*
- SA564- $\Delta$ *ccpA*
- + SA564- $\Delta$ *hptRS/ccpA*

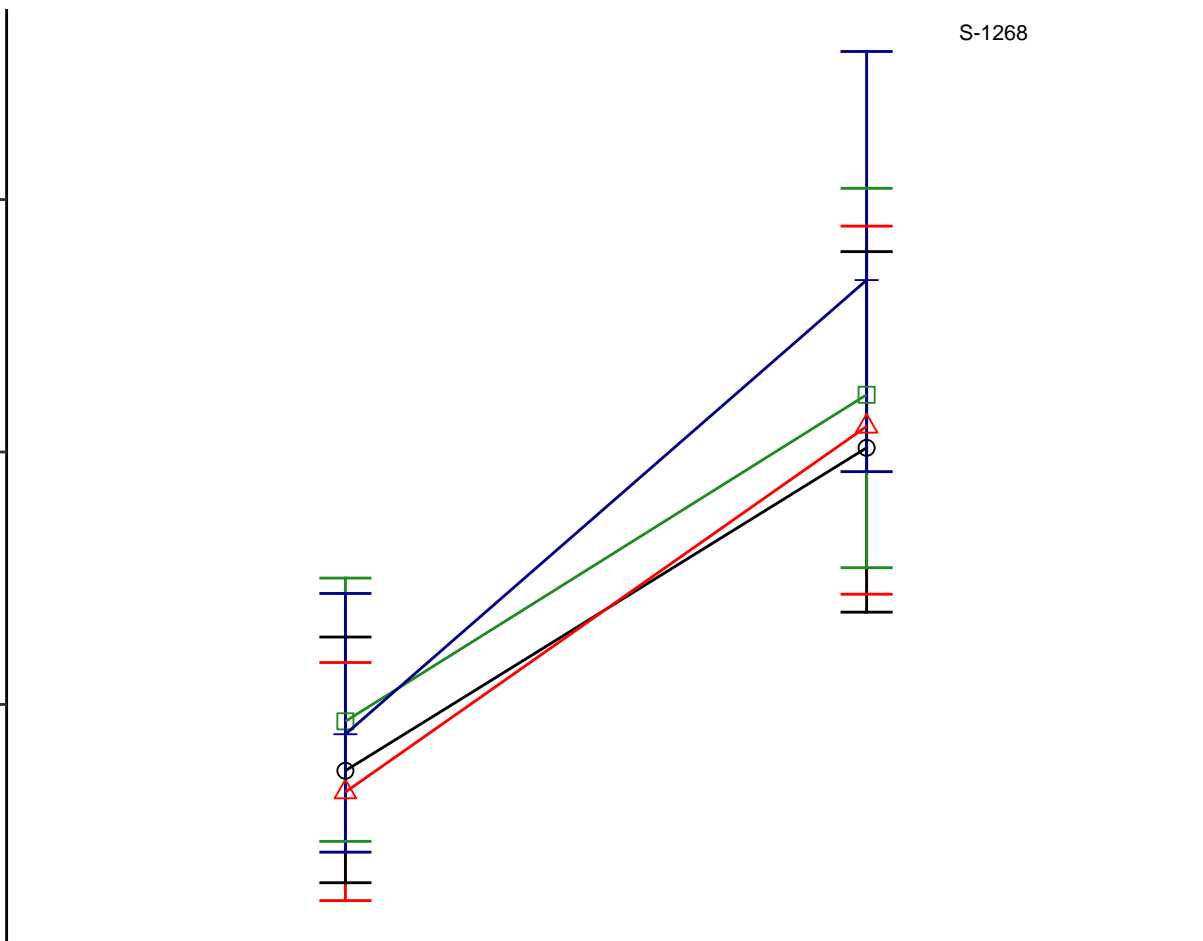

# PSTB\_STAAM

S-1269

Normalized Protein Abundance

15000

10000

2h

6h

Time (h)

- SA564
- △ SA564- $\Delta$ *hptRS*
- SA564- $\Delta$ *ccpA*
- + SA564- $\Delta$ *hptRS/ccpA*

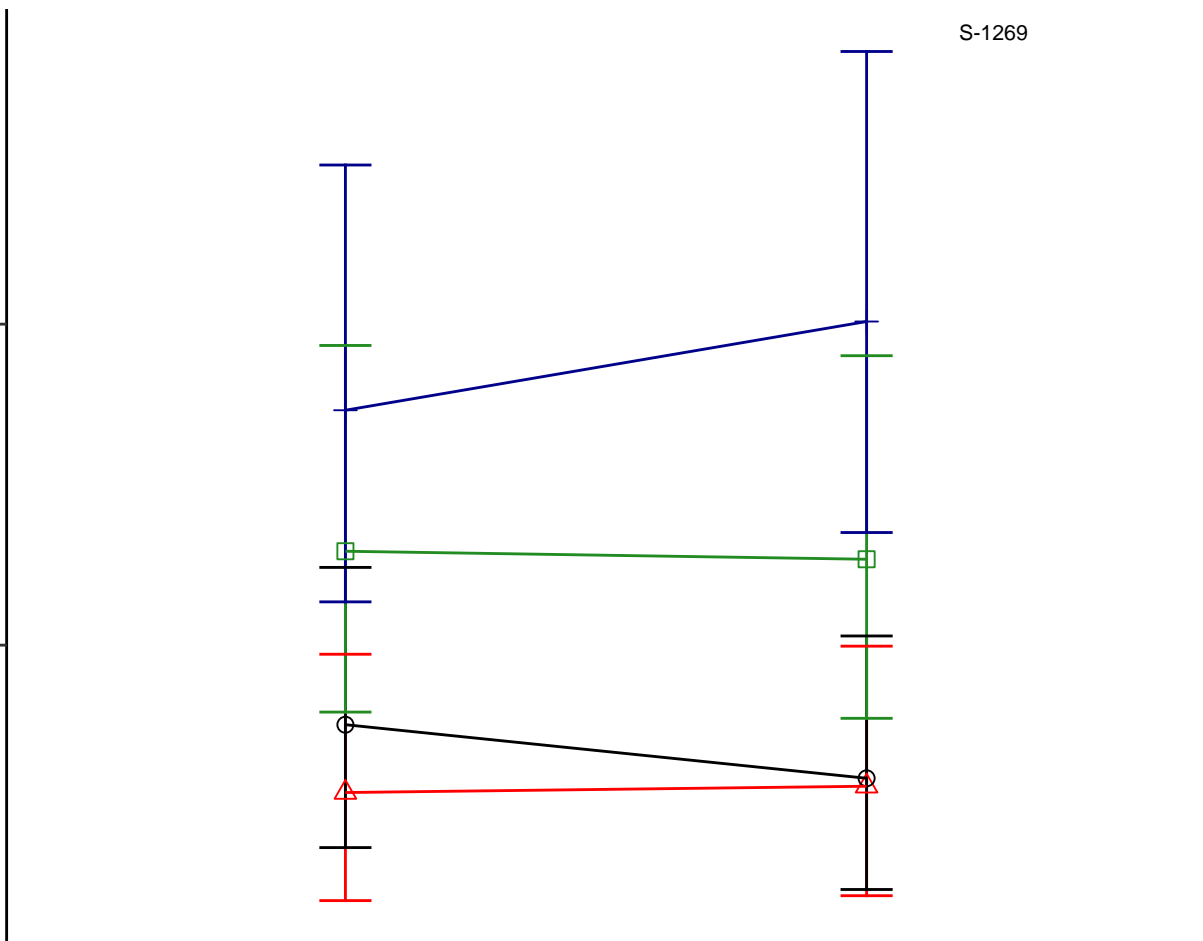

# PSTS\_STAAM

S-1270

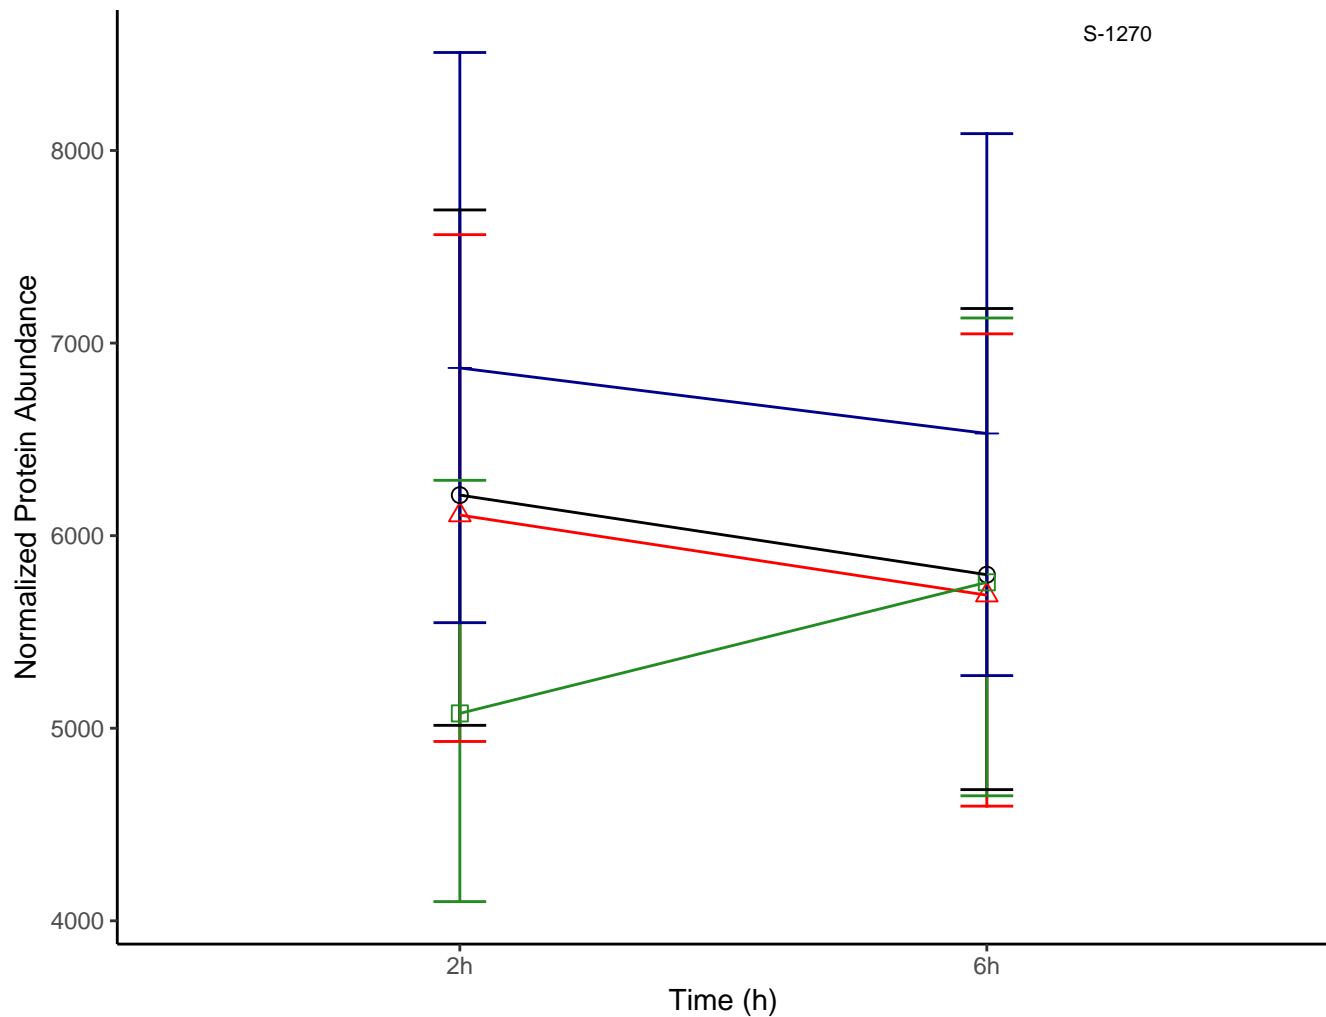

- SA564
- △ SA564- $\Delta hptRS$
- SA564- $\Delta ccpA$
- + SA564- $\Delta hptRS/ccpA$

## PT1\_STAAM

S-1271

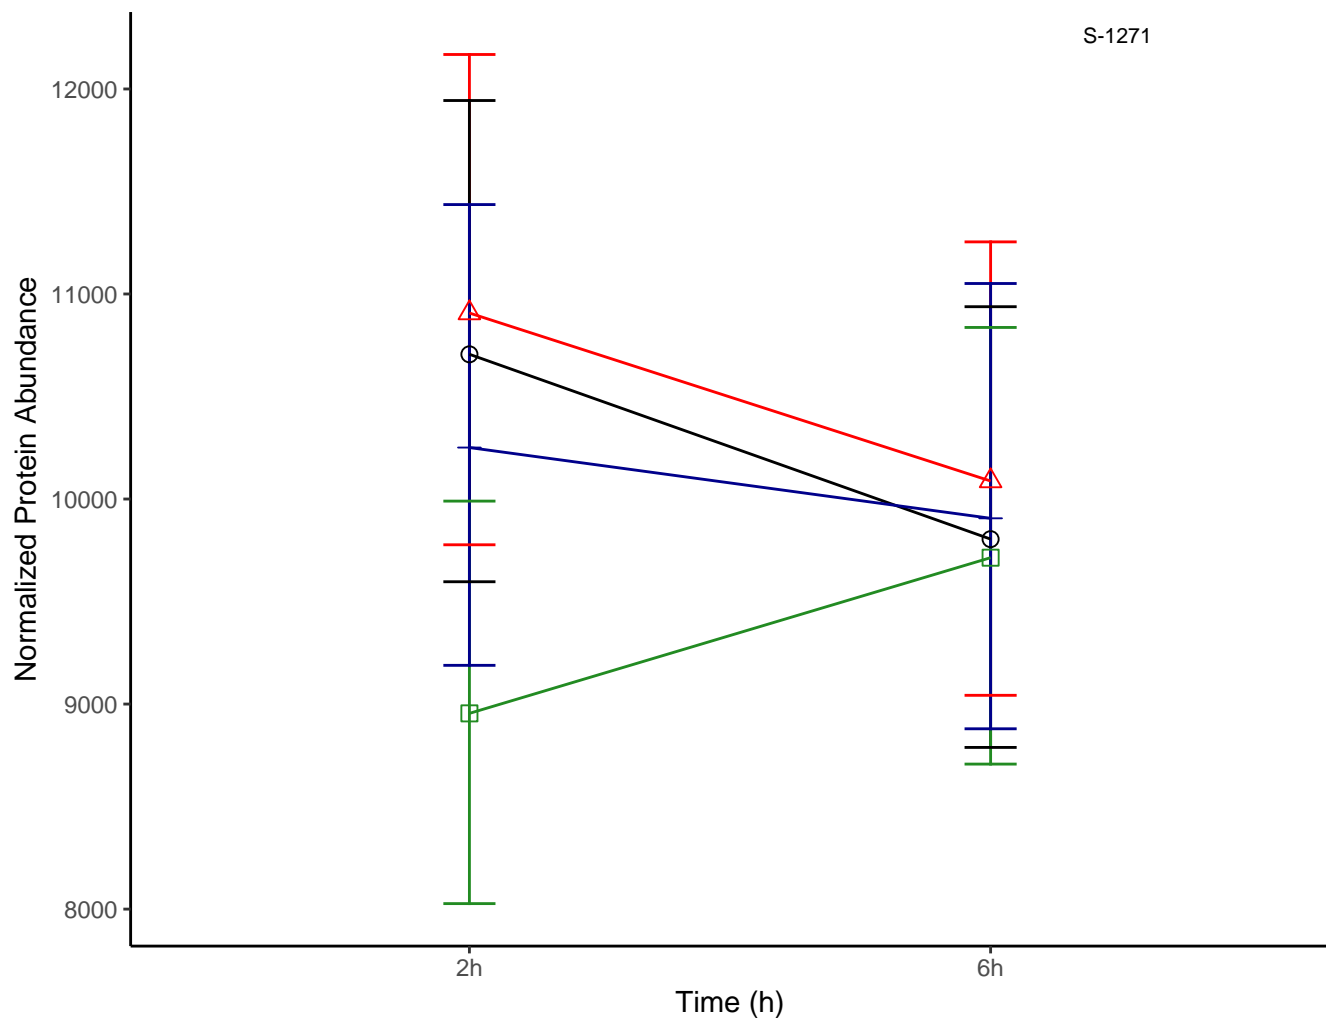

- SA564
- △ SA564- $\Delta$ hptRS
- SA564- $\Delta$ ccpA
- + SA564- $\Delta$ hptRS/ccpA

## PTAS\_STAAM

S-1272

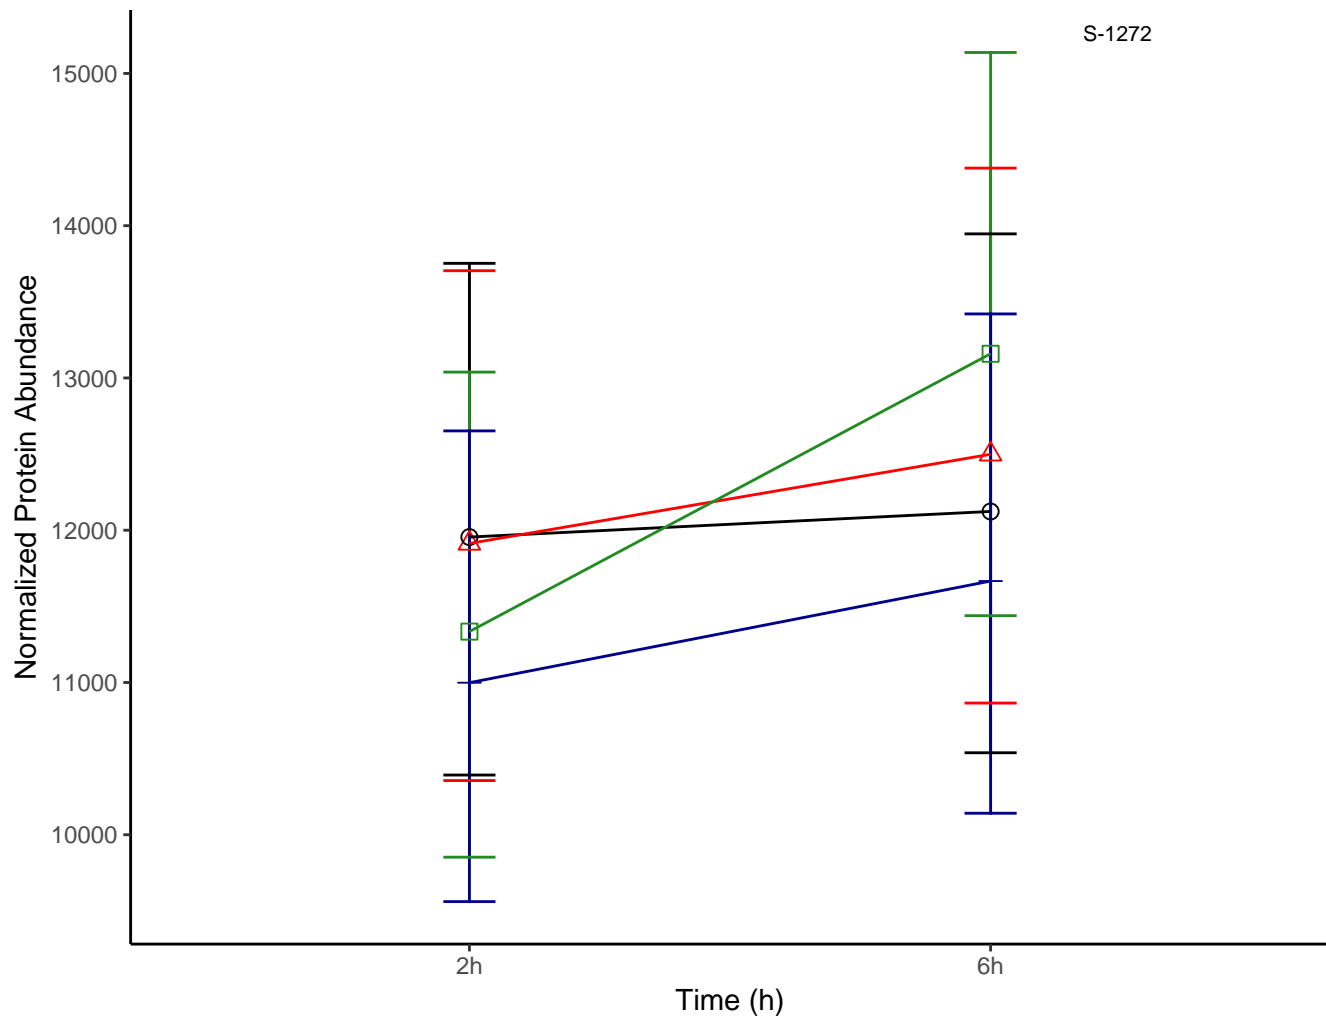

- SA564
- △ SA564- $\Delta$ hptRS
- SA564- $\Delta$ ccpA
- + SA564- $\Delta$ hptRS/ccpA



# PTG3C\_STAAM

S-1273

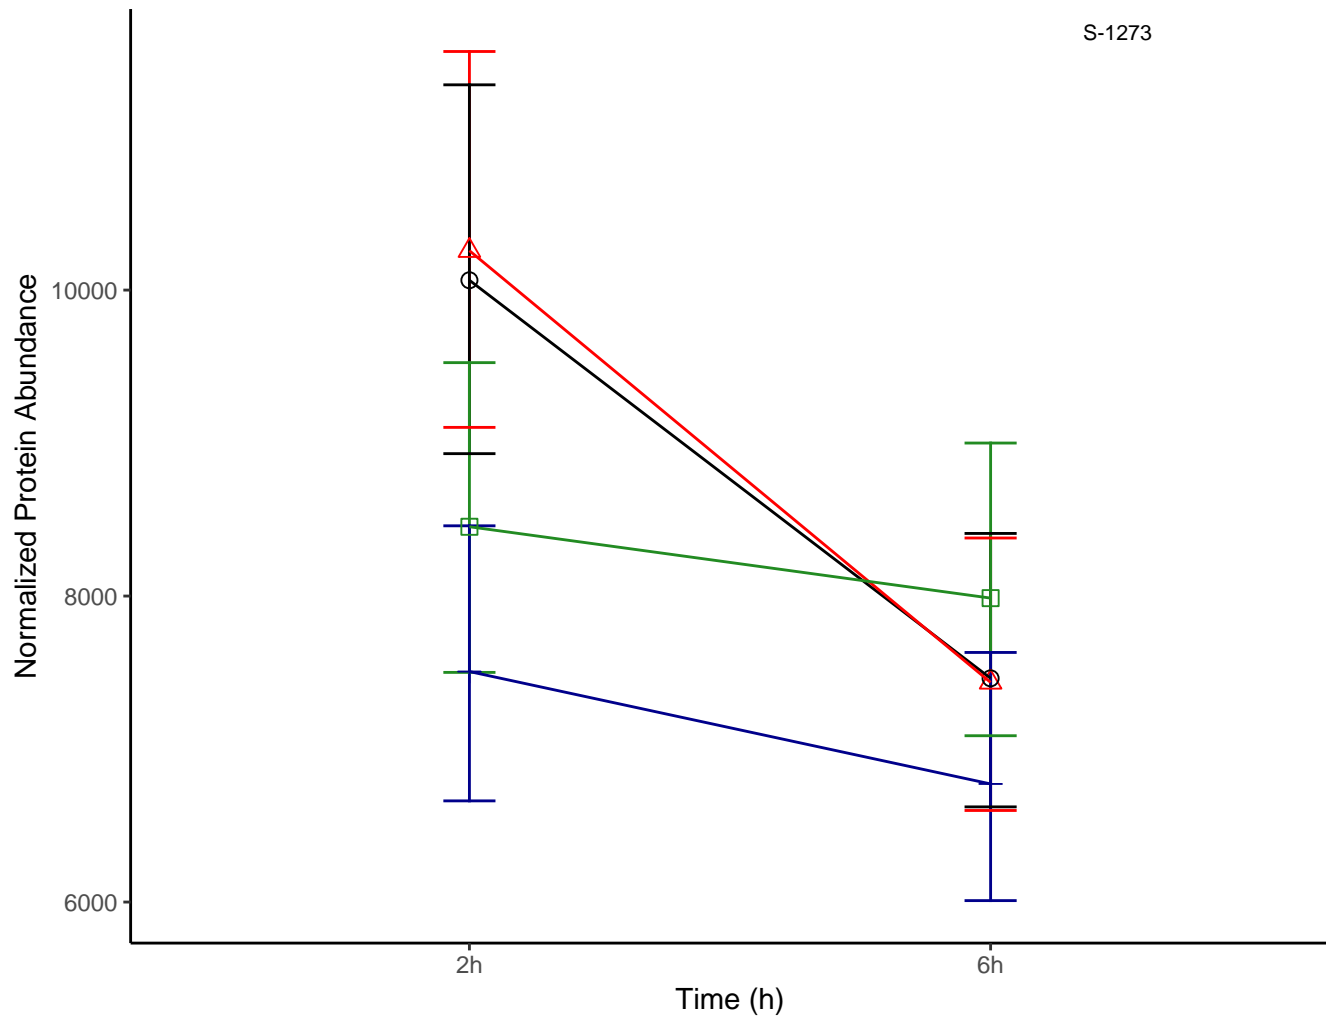

- SA564
- △ SA564- $\Delta hptRS$
- SA564- $\Delta ccpA$
- + SA564- $\Delta hptRS/ccpA$

# PTGA\_STAAM

S-1274

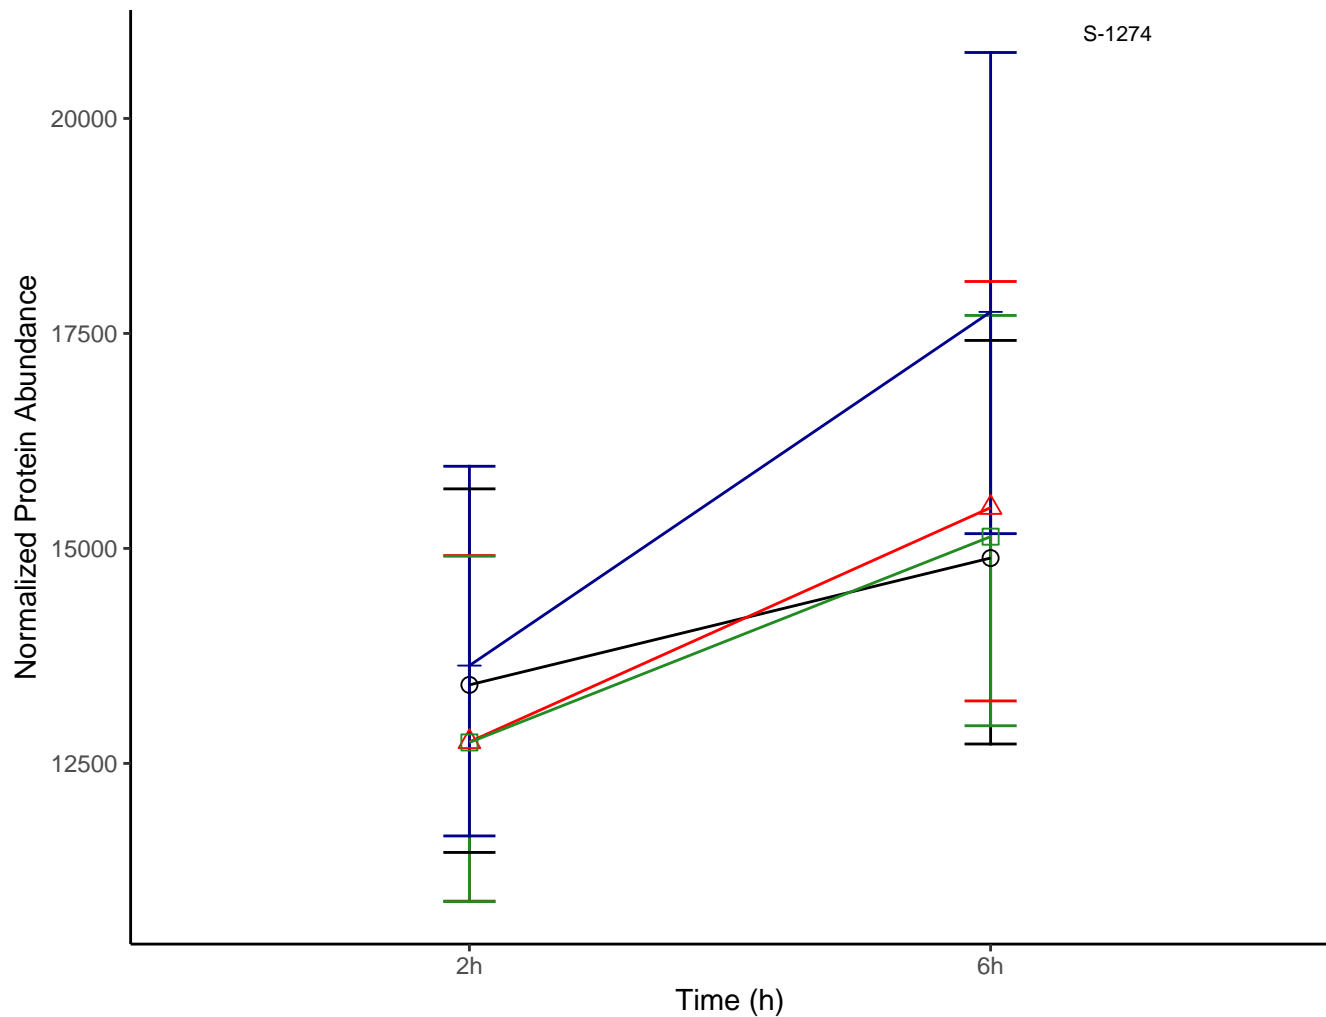

- SA564
- △ SA564- $\Delta$ *hptRS*
- SA564- $\Delta$ *ccpA*
- + SA564- $\Delta$ *hptRS/ccpA*

# PTH\_STAAM

S-1275

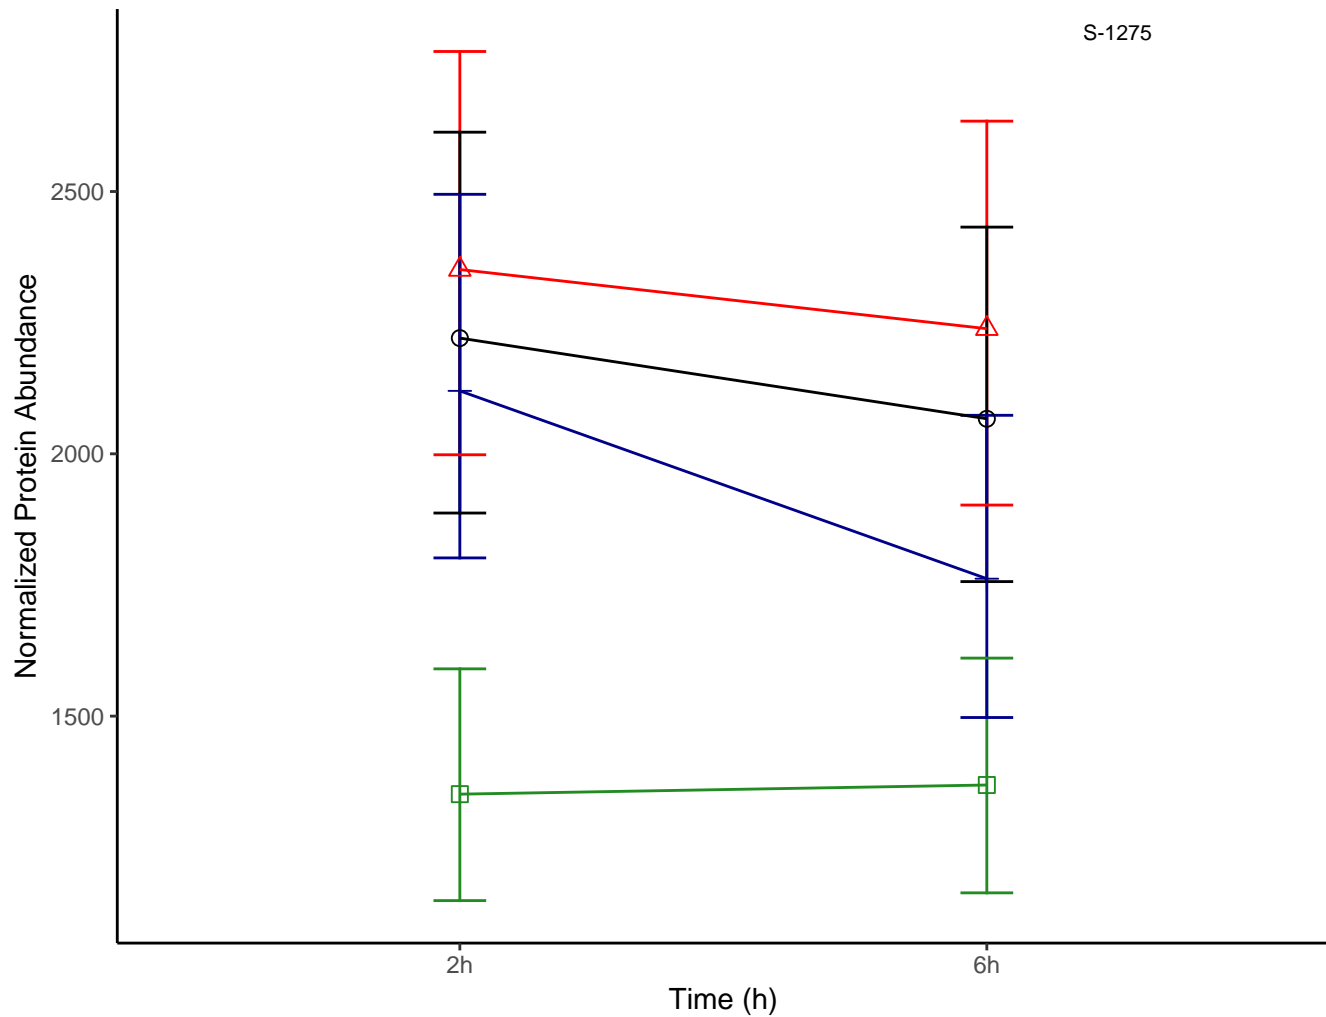

- SA564
- △ SA564- $\Delta hptRS$
- SA564- $\Delta ccpA$
- + SA564- $\Delta hptRS/ccpA$

# PTHP\_STAAM

S-1276

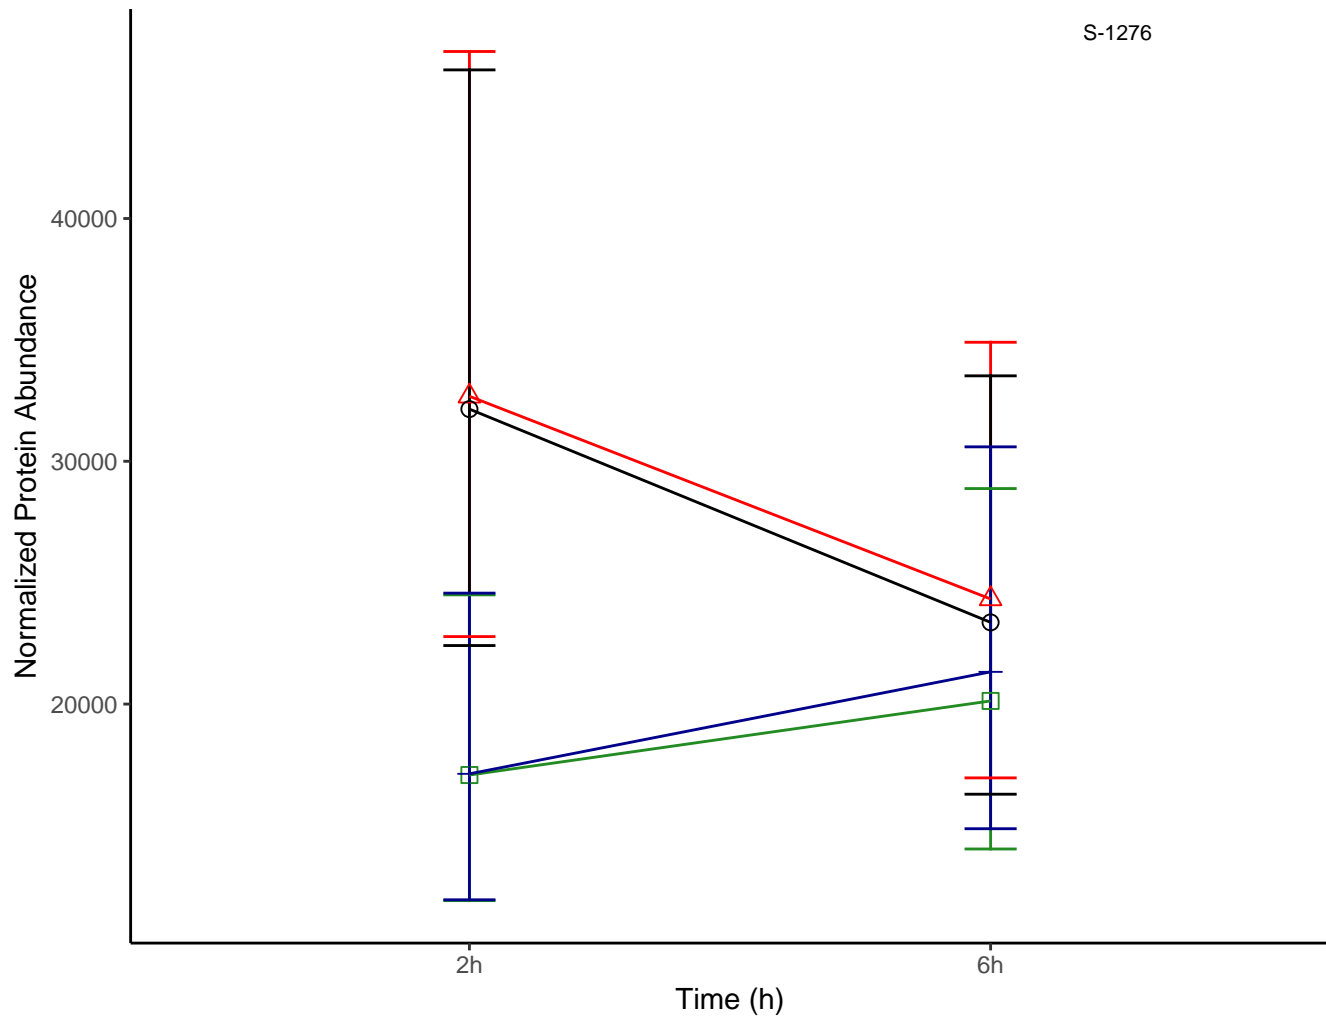

- SA564
- △ SA564- $\Delta hptRS$
- SA564- $\Delta ccpA$
- + SA564- $\Delta hptRS/ccpA$

# PTMA\_STAAM

S-1277

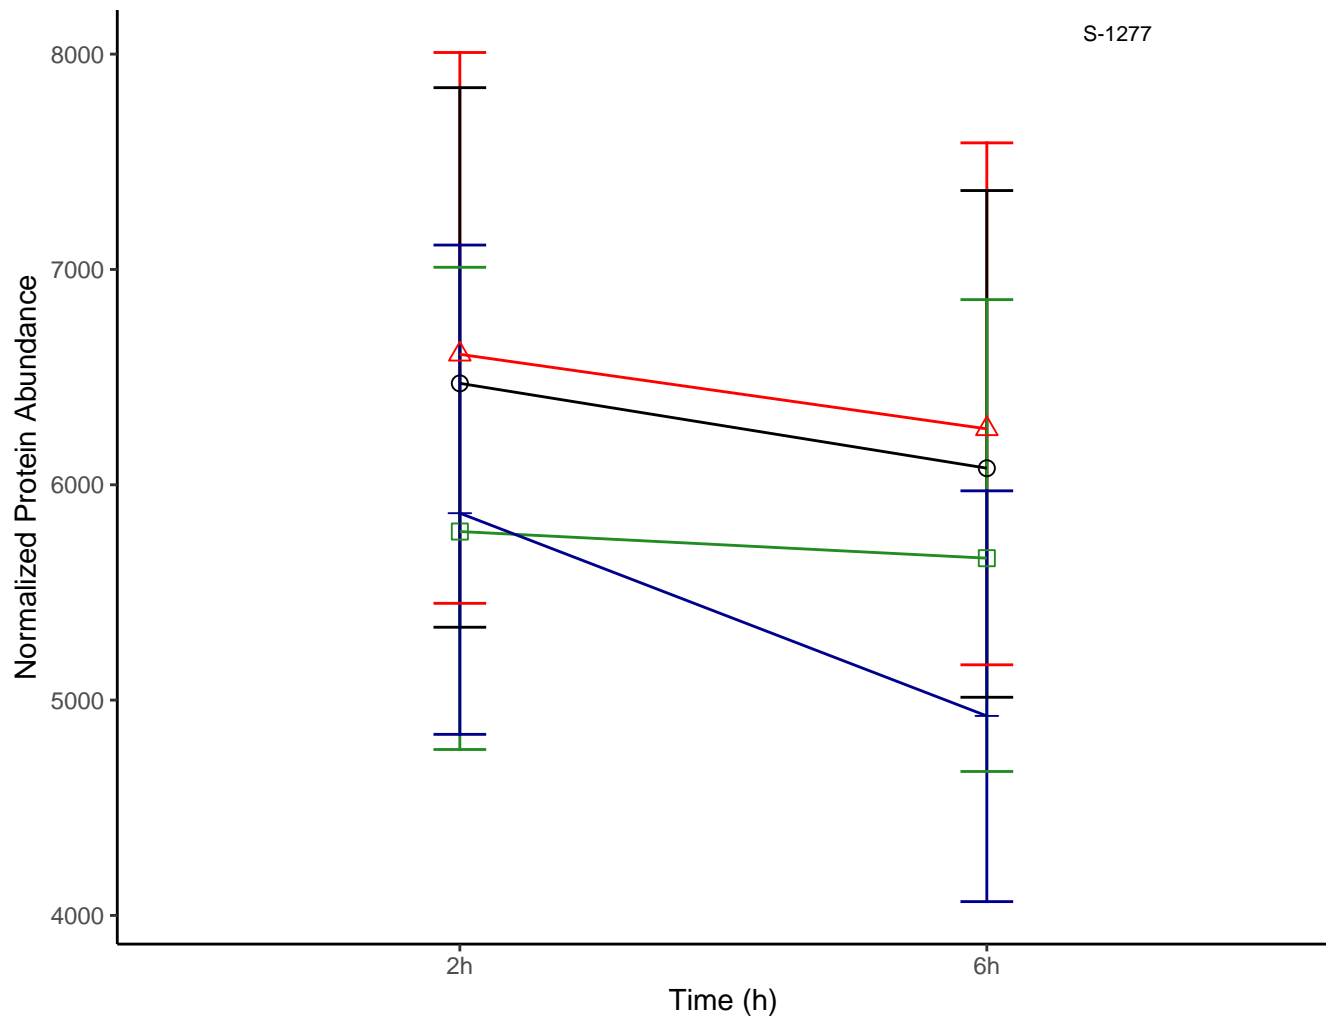

- SA564
- △ SA564- $\Delta$ *hptRS*
- SA564- $\Delta$ *ccpA*
- + SA564- $\Delta$ *hptRS/ccpA*

# PUR1\_STAAM

S-1278

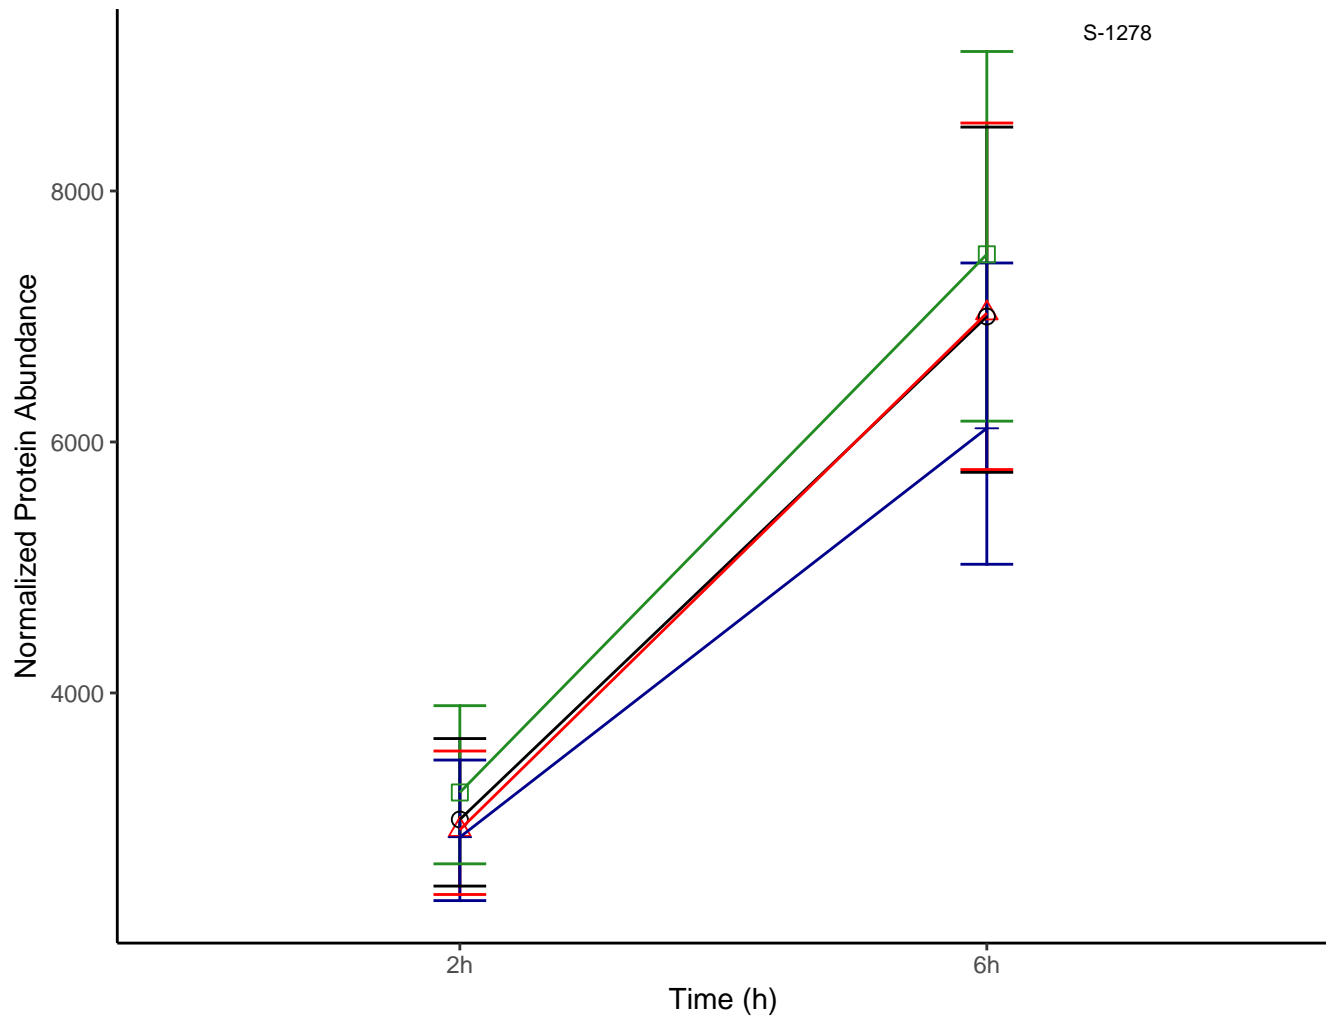

- SA564
- △ SA564- $\Delta hptRS$
- SA564- $\Delta ccpA$
- + SA564- $\Delta hptRS/ccpA$

# PUR2\_STAAM

S-1279

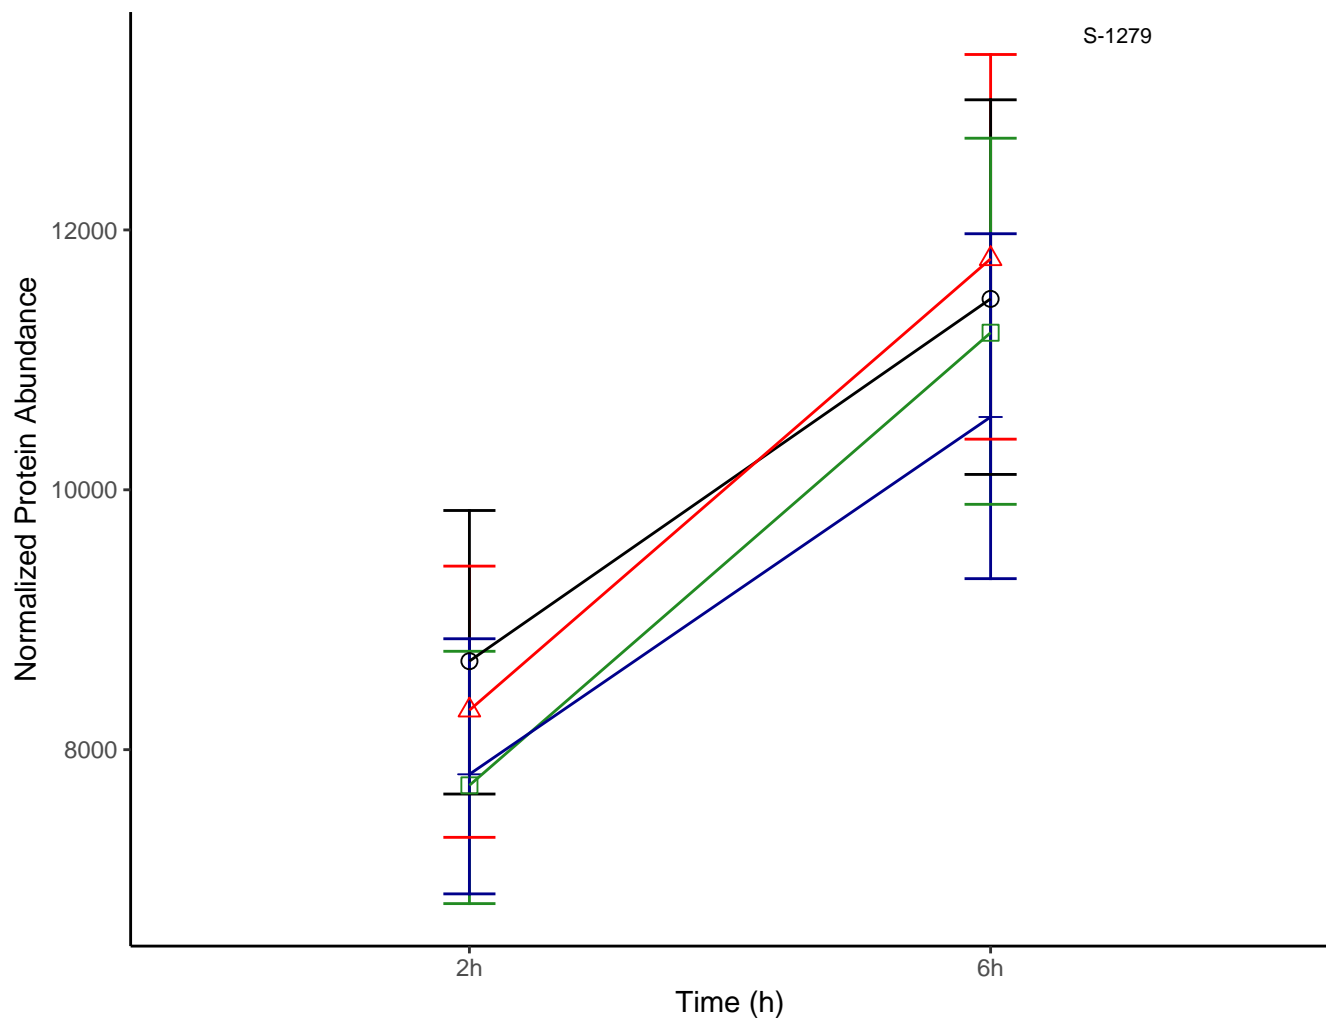

- SA564
- △ SA564- $\Delta hptRS$
- SA564- $\Delta ccpA$
- + SA564- $\Delta hptRS/ccpA$

# PUR3\_STAAM

S-1280

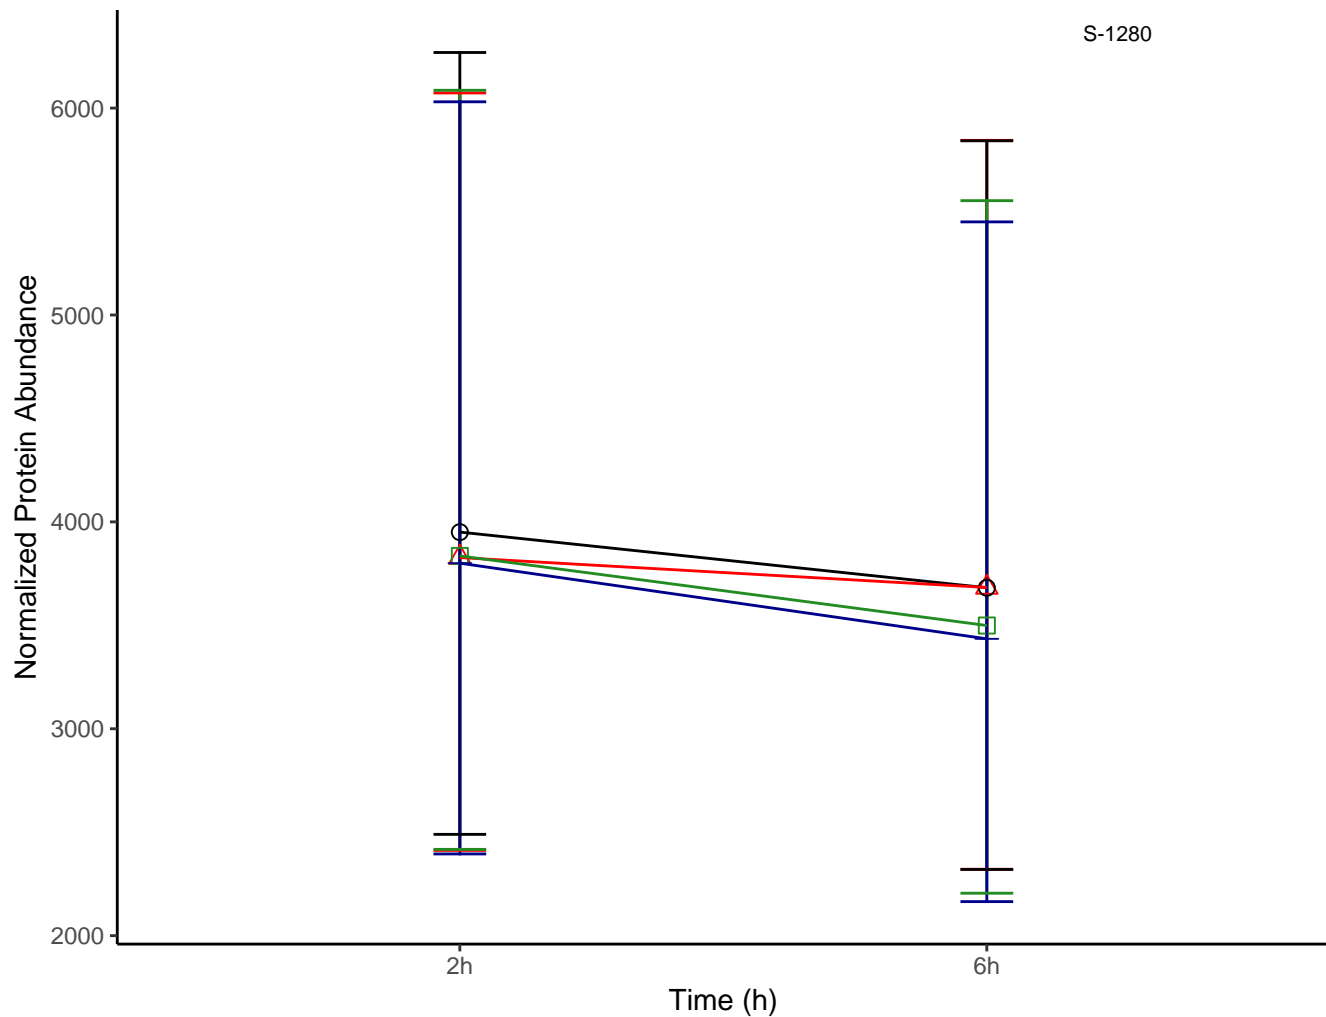

- SA564
- △ SA564- $\Delta hptRS$
- SA564- $\Delta ccpA$
- + SA564- $\Delta hptRS/ccpA$



# PUR5\_STAAM

S-1281

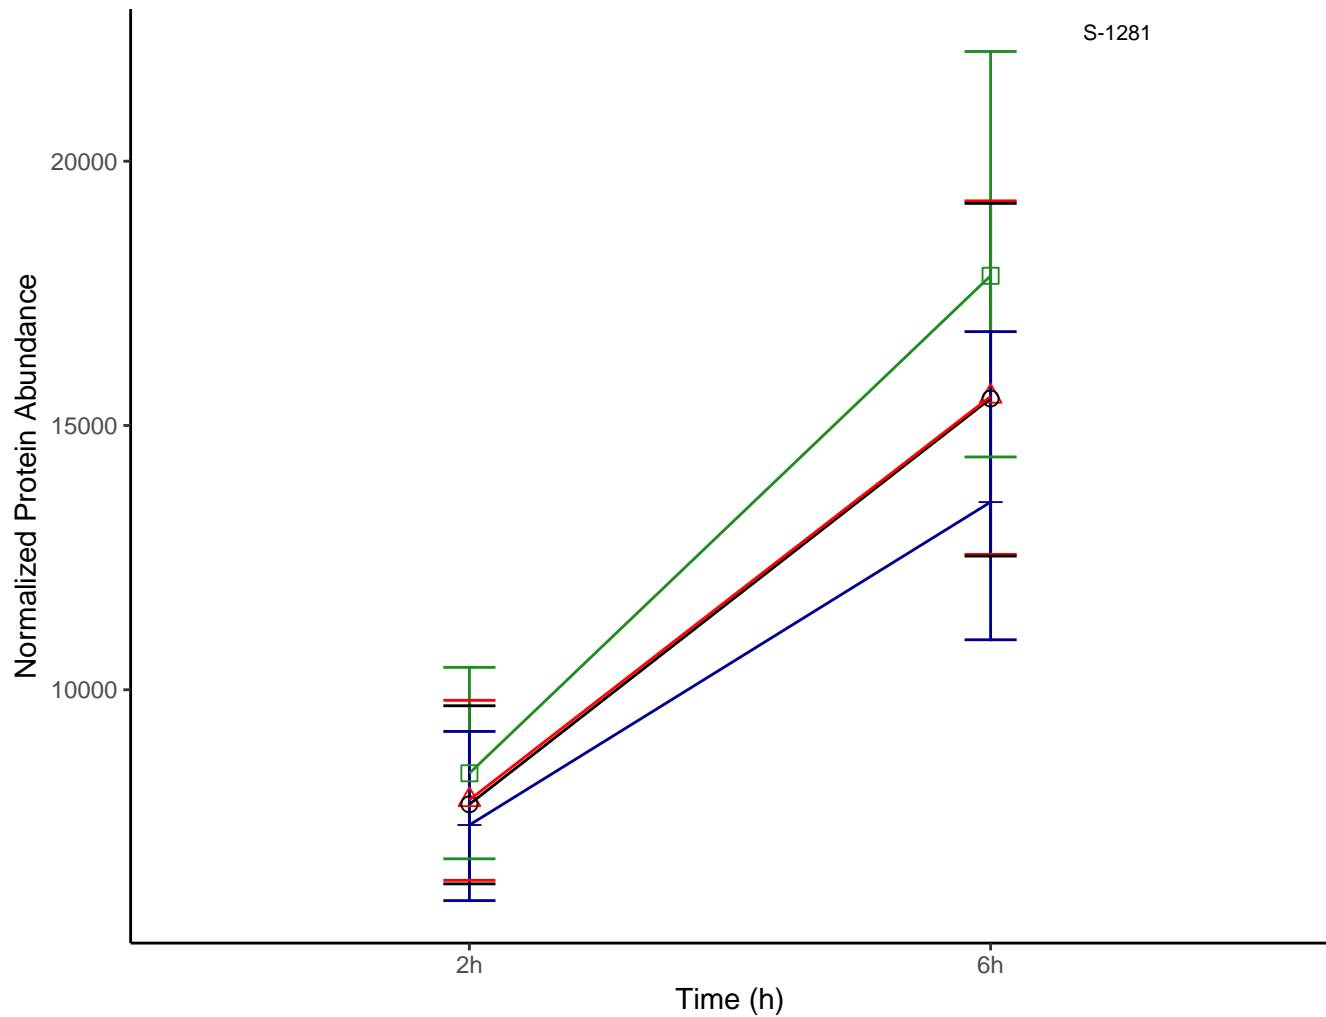

- SA564
- △ SA564- $\Delta$ *hptRS*
- SA564- $\Delta$ *ccpA*
- + SA564- $\Delta$ *hptRS/ccpA*

# PUR7\_STAAM

S-1282

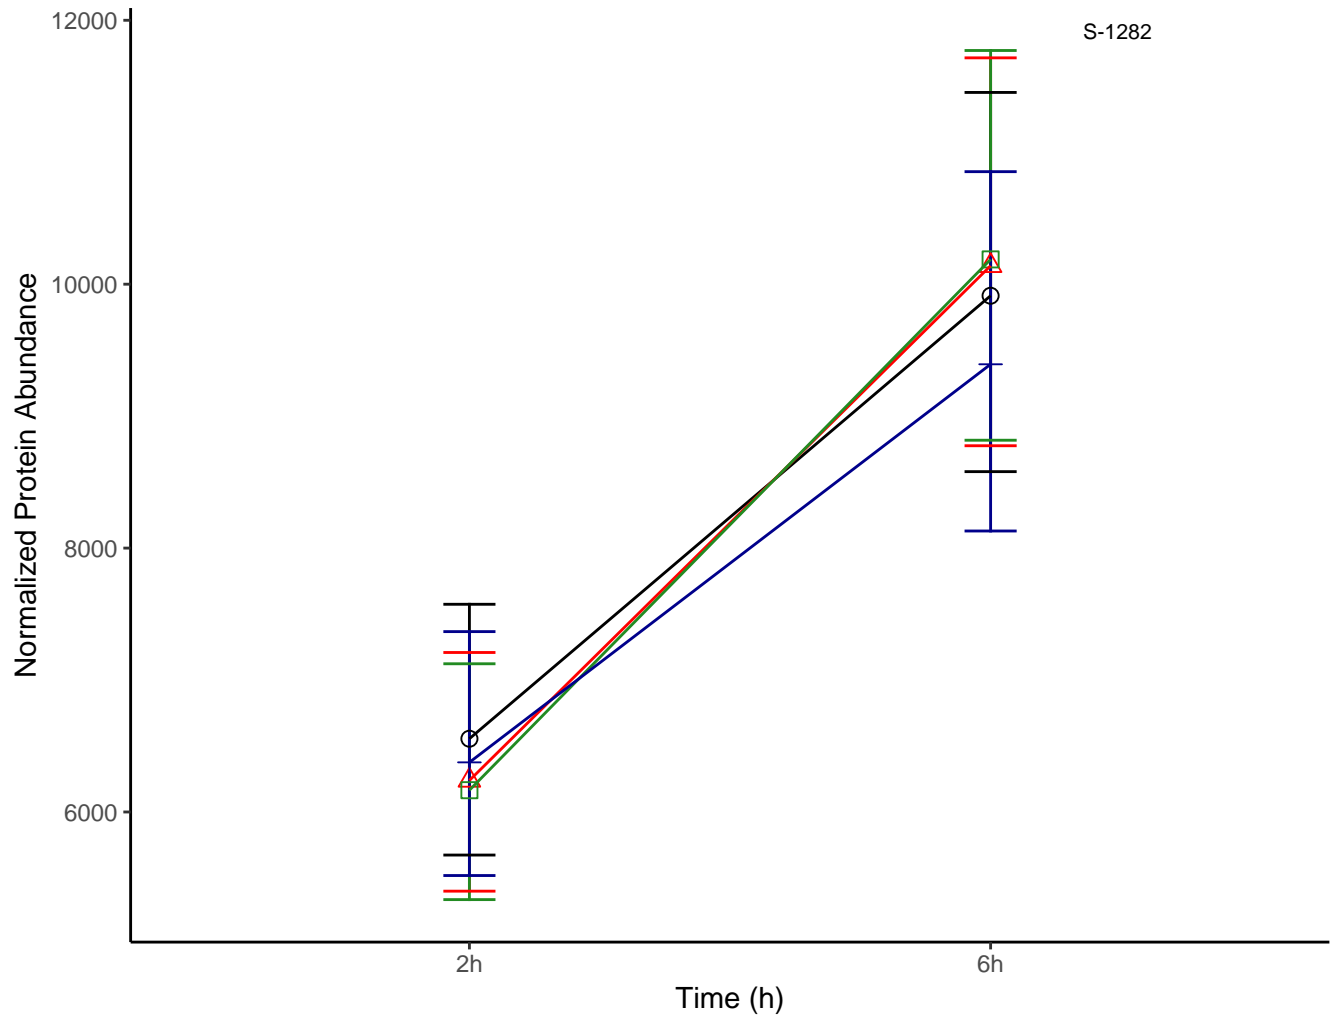

- SA564
- △ SA564- $\Delta$ *hptRS*
- SA564- $\Delta$ *ccpA*
- + SA564- $\Delta$ *hptRS/ccpA*

# PUR8\_STAAM

S-1283

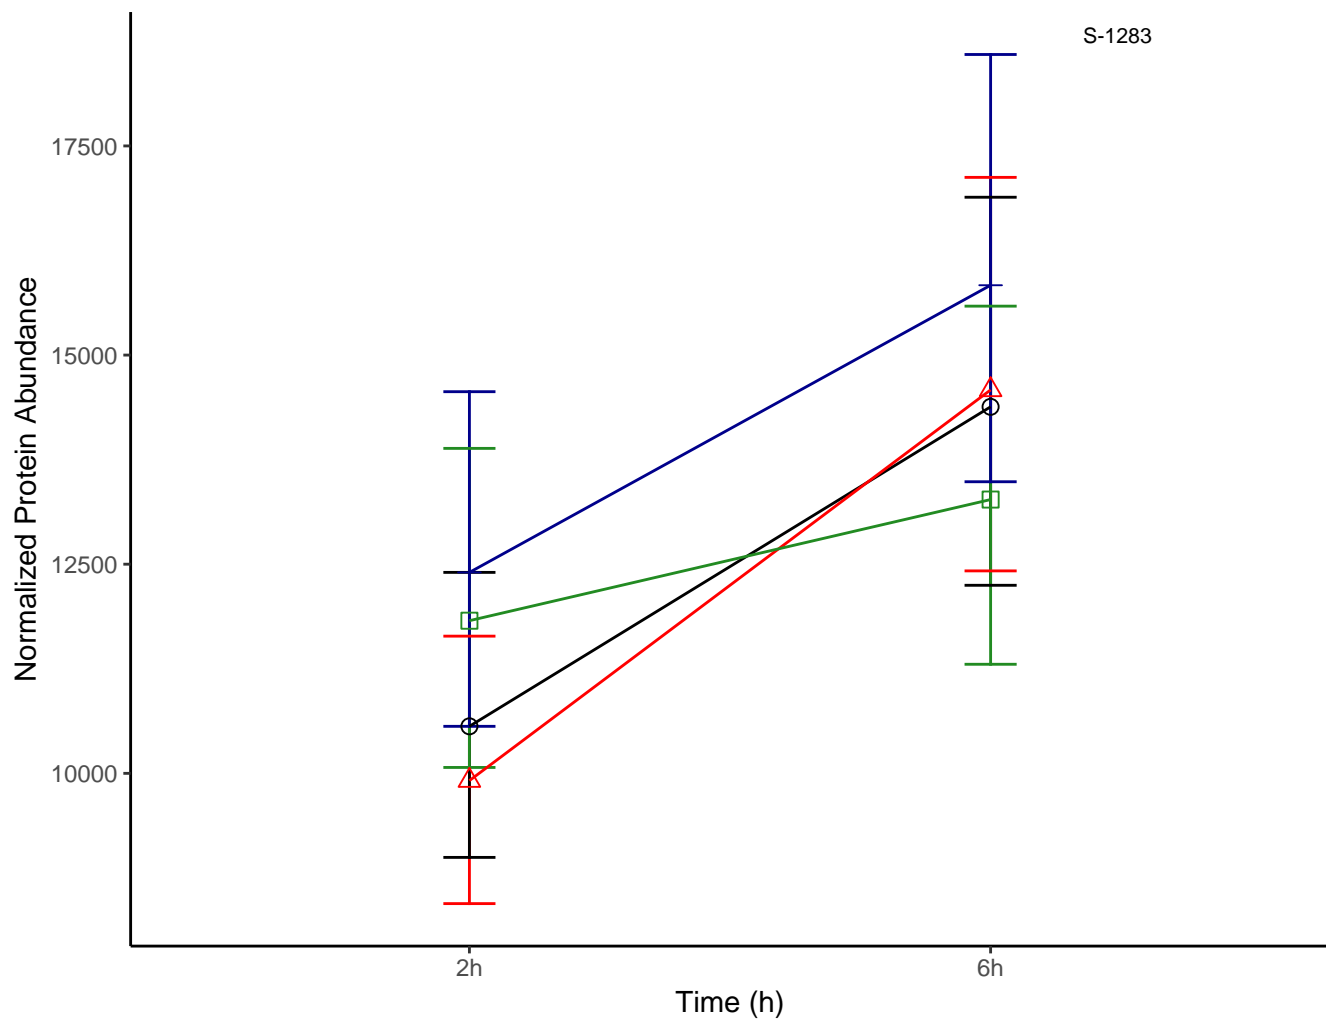

- SA564
- △ SA564- $\Delta$ hptRS
- SA564- $\Delta$ ccpA
- + SA564- $\Delta$ hptRS/ccpA

# PUR9\_STAAM

S-1284

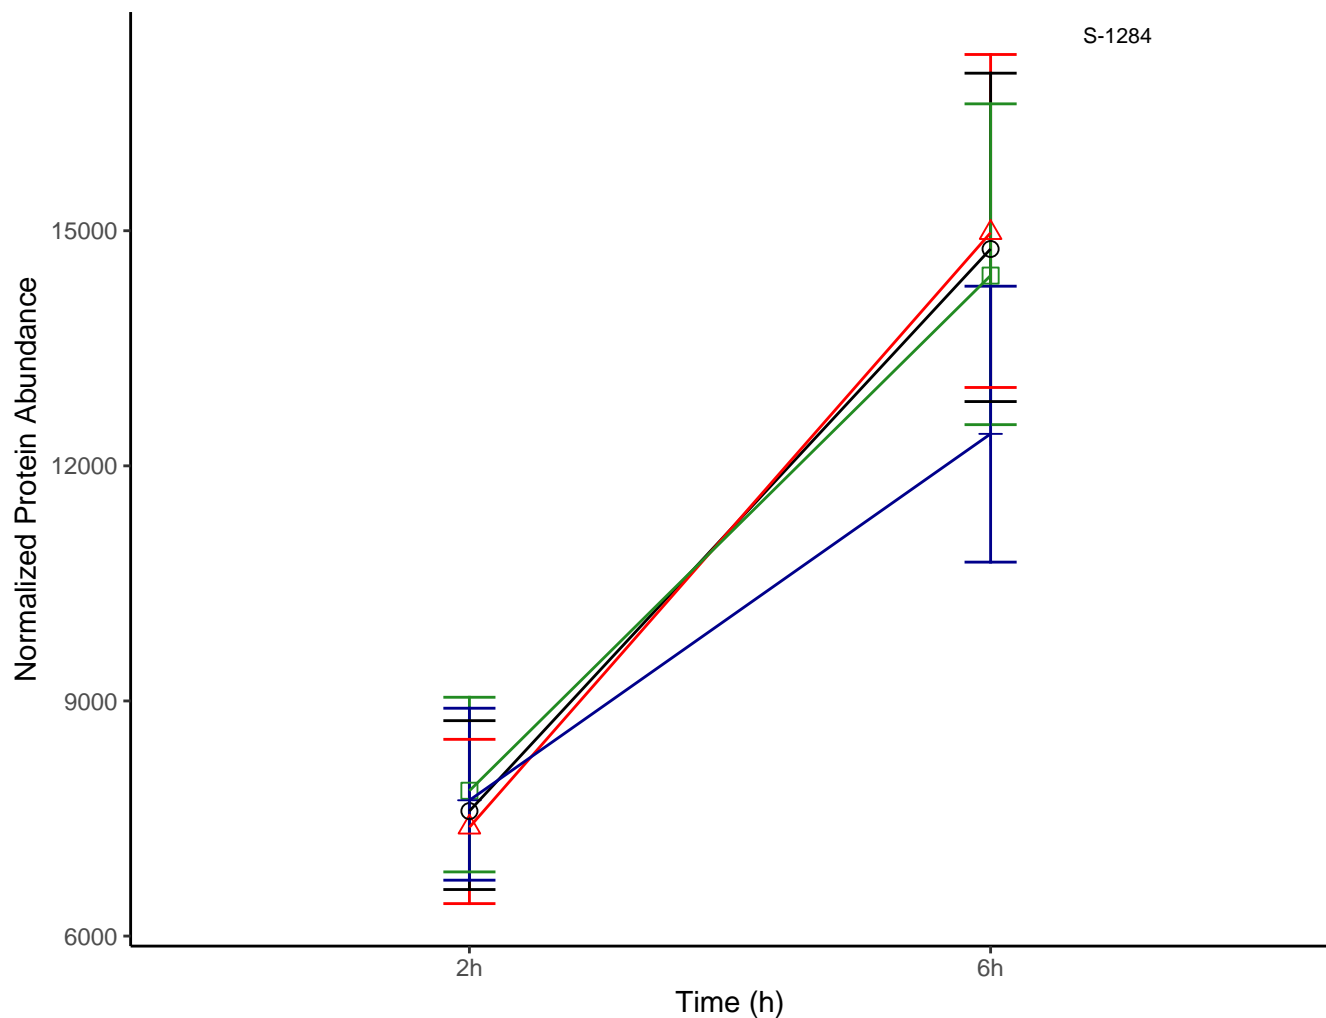

- SA564
- △ SA564- $\Delta hptRS$
- SA564- $\Delta ccpA$
- + SA564- $\Delta hptRS/ccpA$

# PURA\_STAAM

S-1285

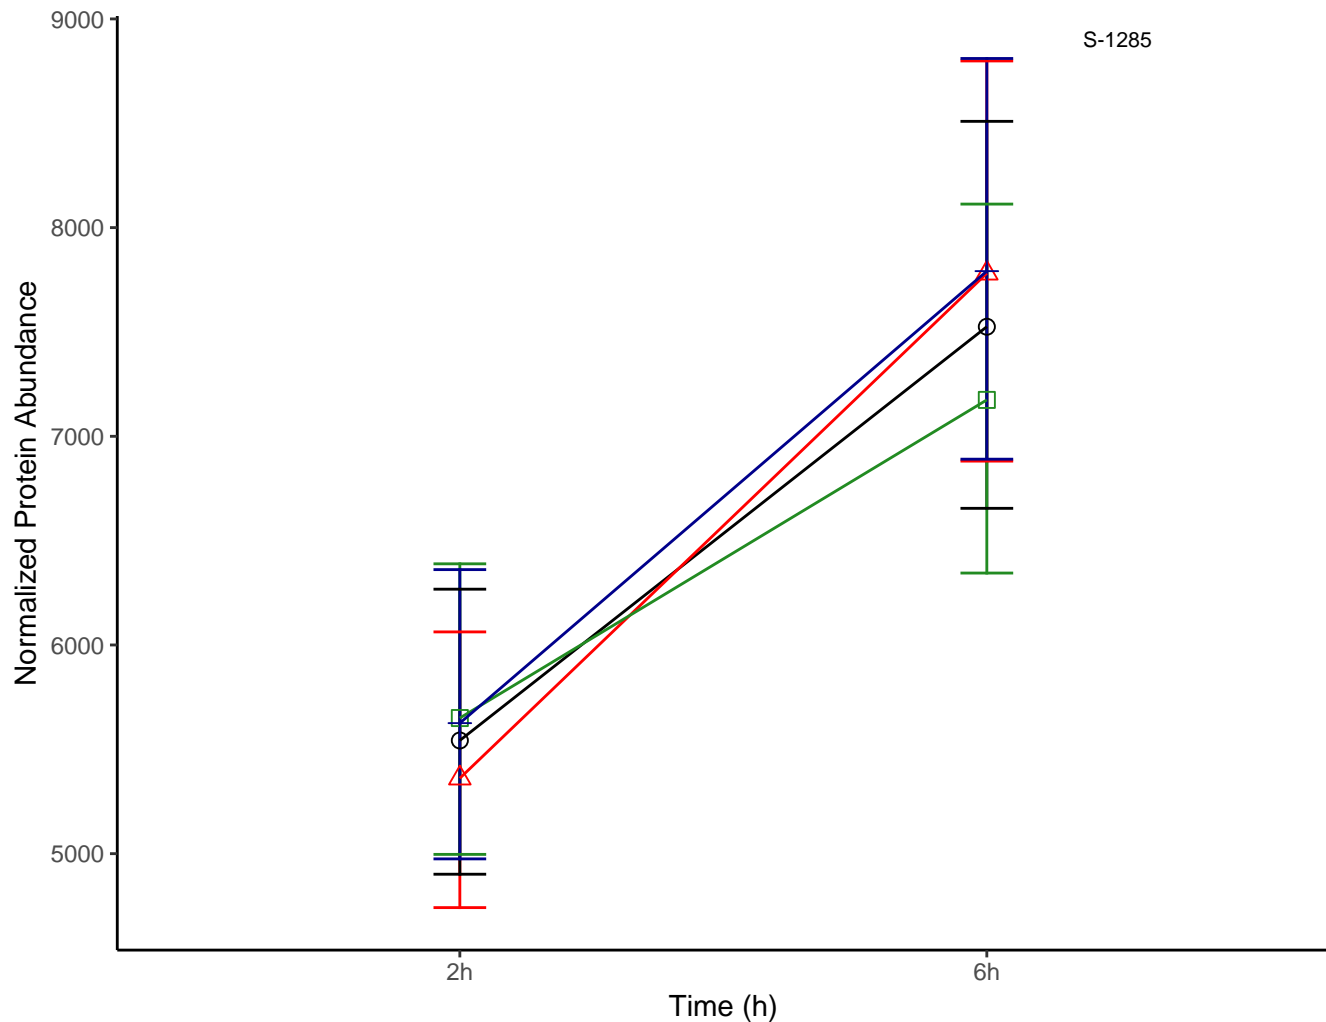

- SA564
- △ SA564- $\Delta$ *hptRS*
- SA564- $\Delta$ *ccpA*
- + SA564- $\Delta$ *hptRS/ccpA*

# PURK\_STAAM

S-1286

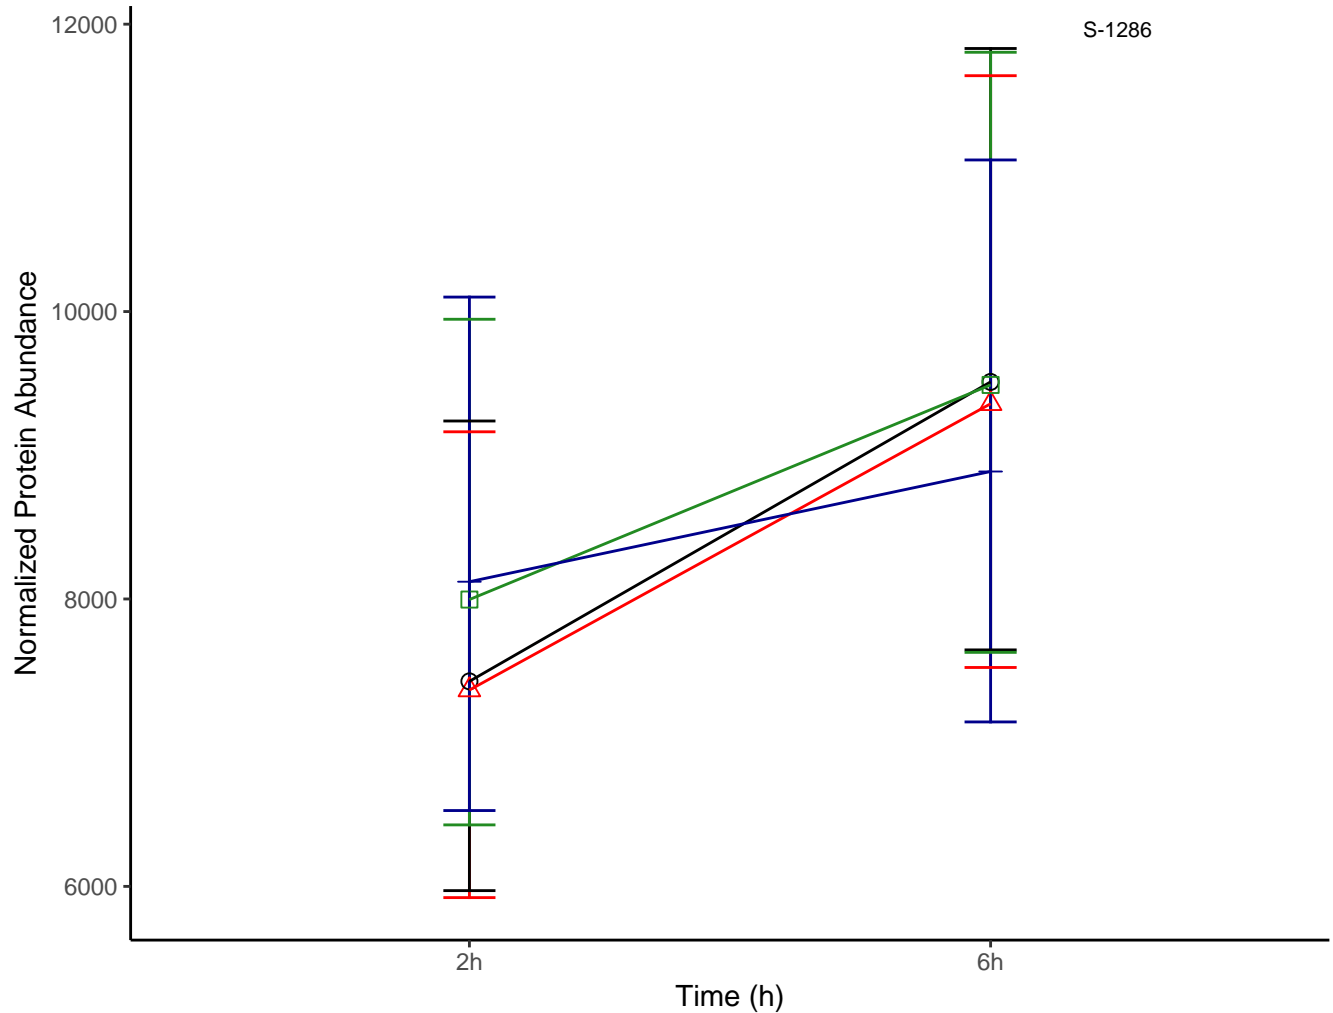

- SA564
- △ SA564- $\Delta hptRS$
- SA564- $\Delta ccpA$
- + SA564- $\Delta hptRS/ccpA$

# PURL\_STAAM

S-1287

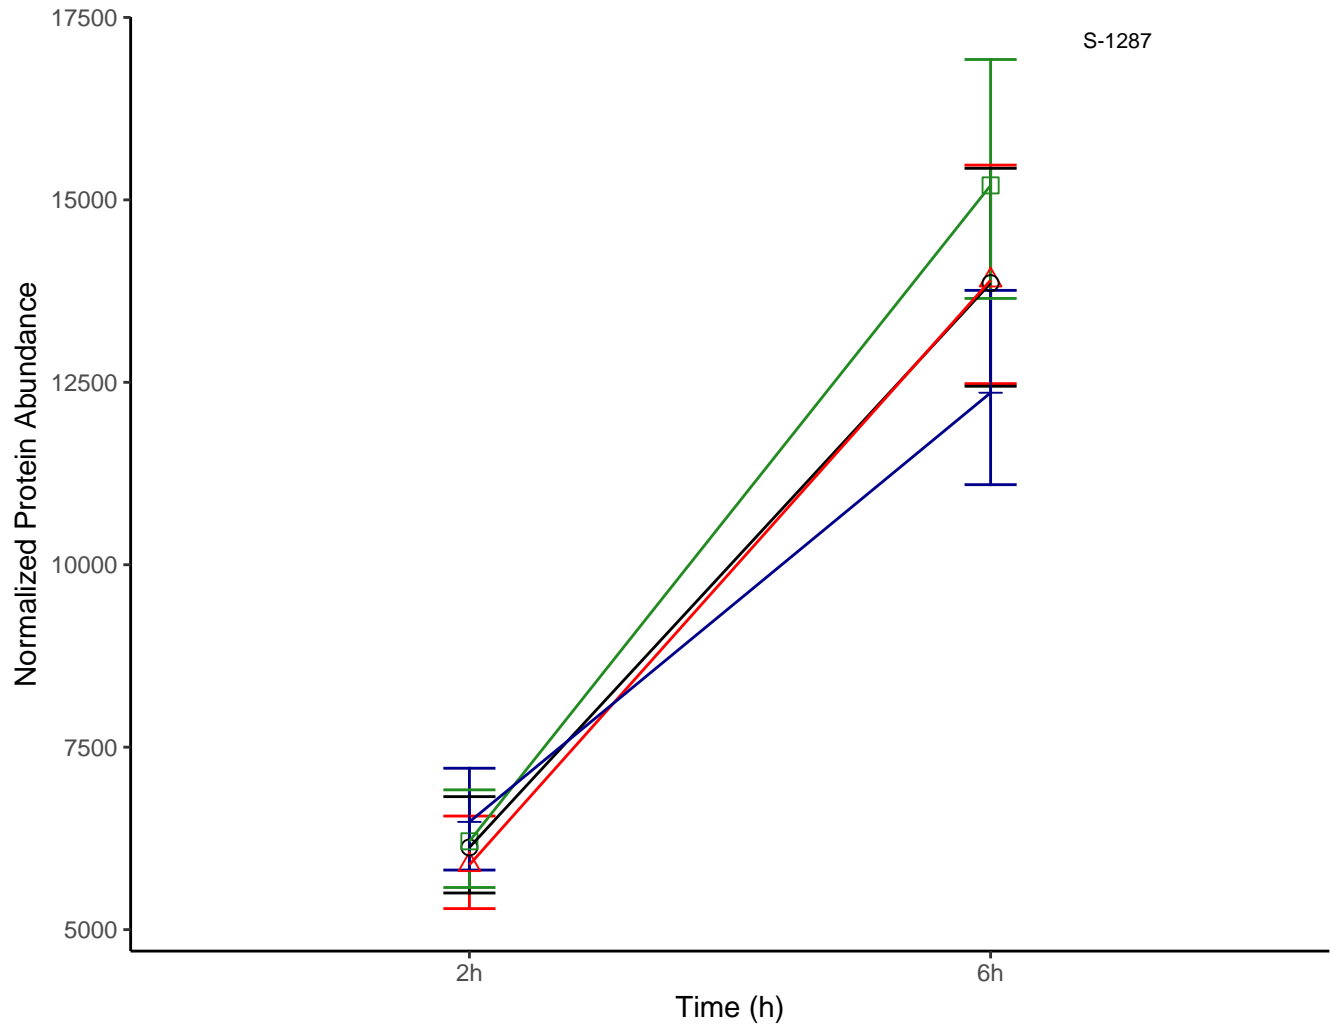

- SA564
- △ SA564- $\Delta$ *hptRS*
- SA564- $\Delta$ *ccpA*
- + SA564- $\Delta$ *hptRS/ccpA*

# PURQ\_STAAM

S-1288

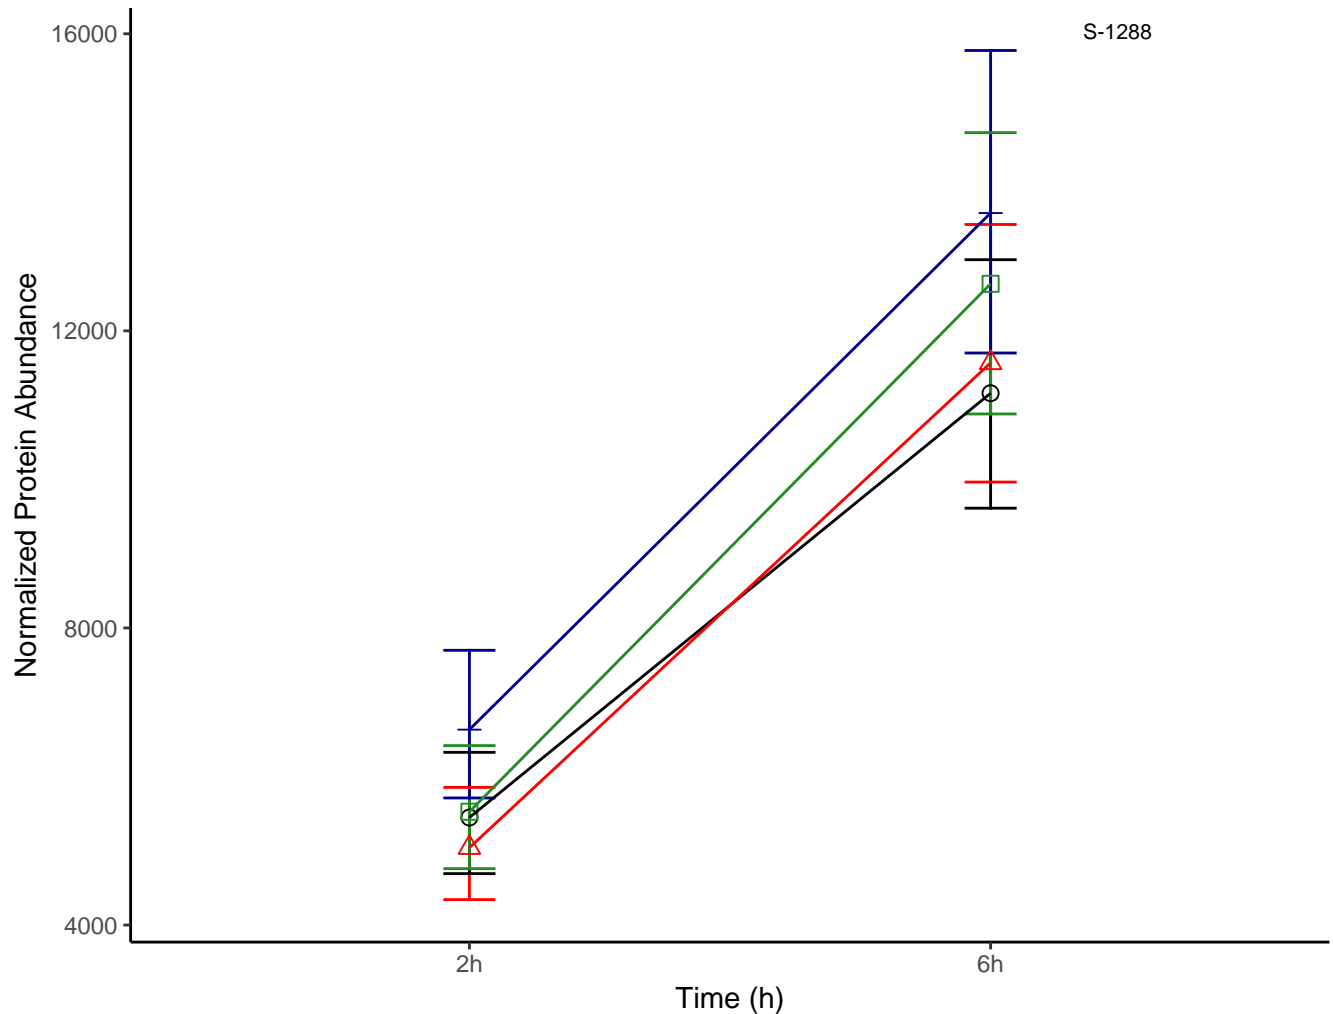

- SA564
- △ SA564- $\Delta$ *hptRS*
- SA564- $\Delta$ *ccpA*
- + SA564- $\Delta$ *hptRS/ccpA*



# PYRB\_STAAM

S-1289

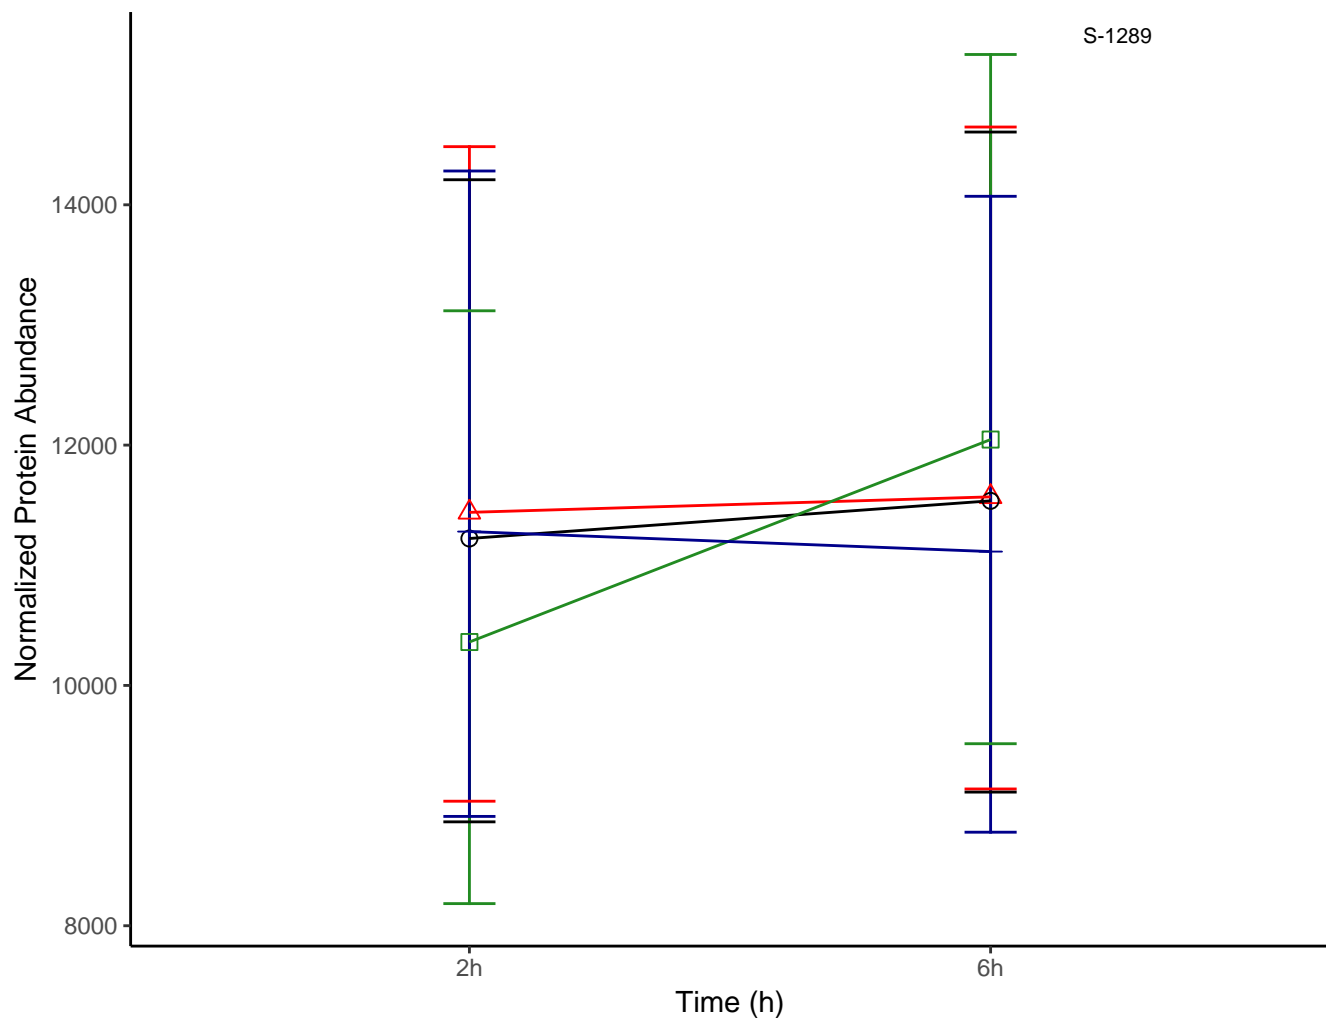

- SA564
- △ SA564- $\Delta$ *hptRS*
- SA564- $\Delta$ *ccpA*
- + SA564- $\Delta$ *hptRS/ccpA*

# PYRC\_STAAM

S-1290

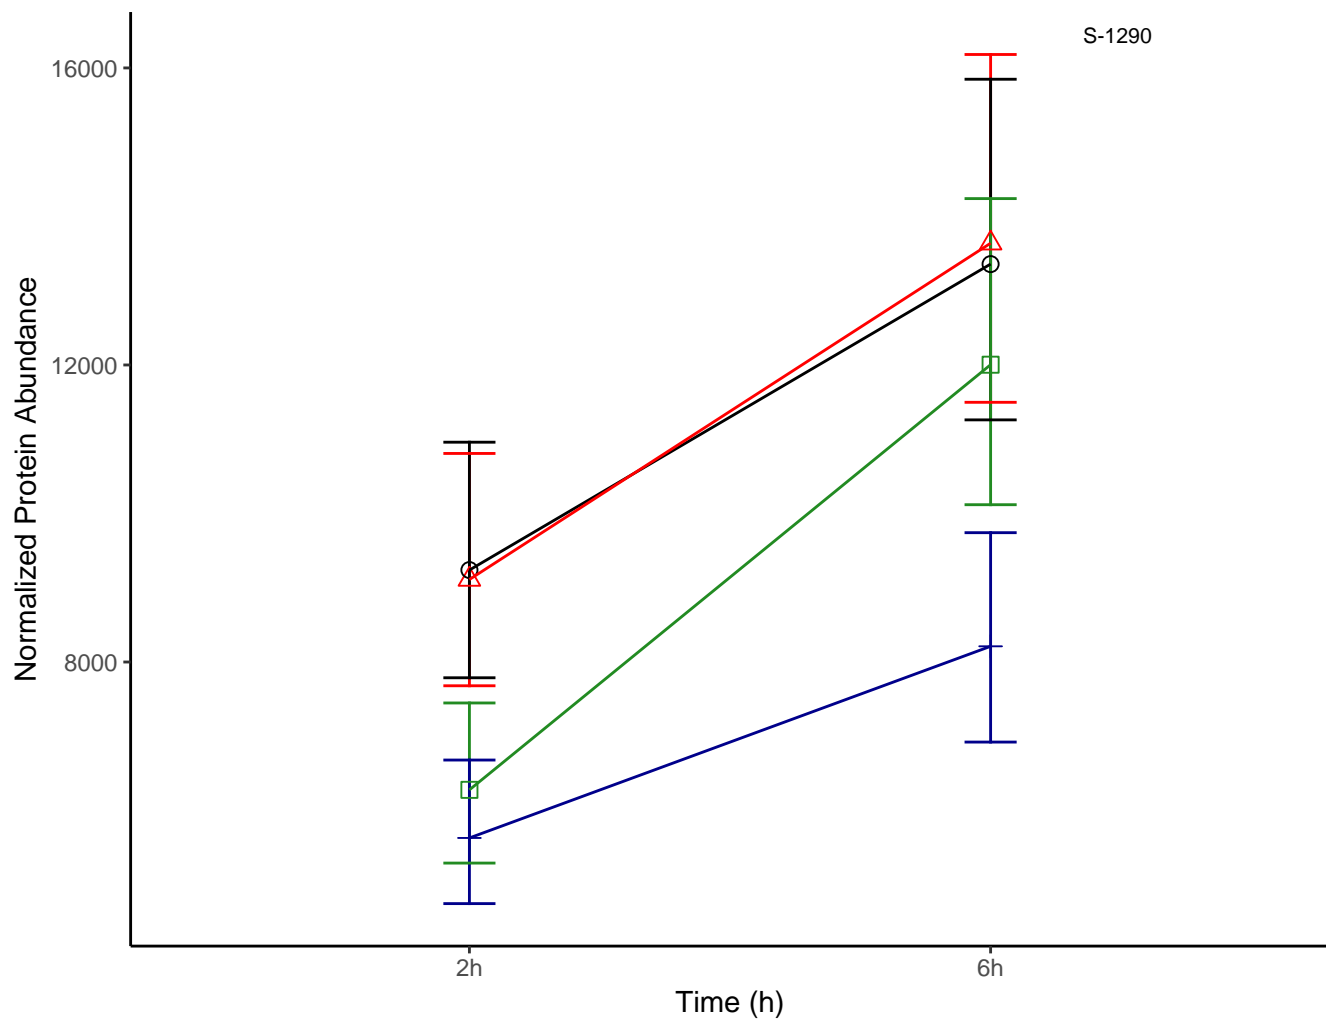

- SA564
- △ SA564- $\Delta$ *hptRS*
- SA564- $\Delta$ *ccpA*
- + SA564- $\Delta$ *hptRS/ccpA*

# PYRE\_STAAM

S-1291

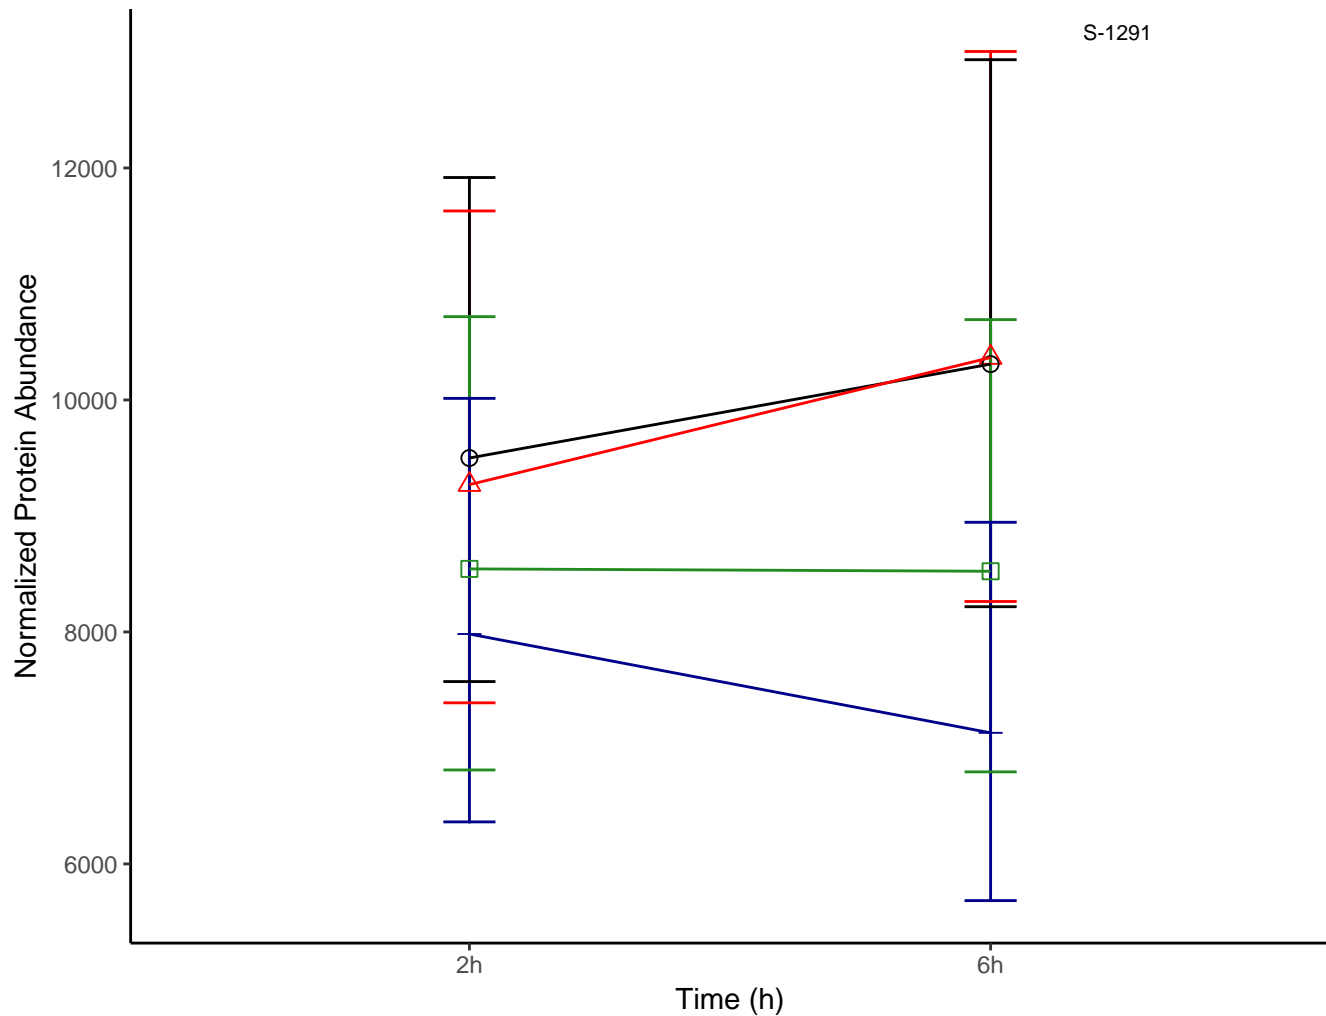

- SA564
- △ SA564- $\Delta$ hptRS
- SA564- $\Delta$ ccpA
- + SA564- $\Delta$ hptRS/ccpA

# PYRF\_STAAM

S-1292

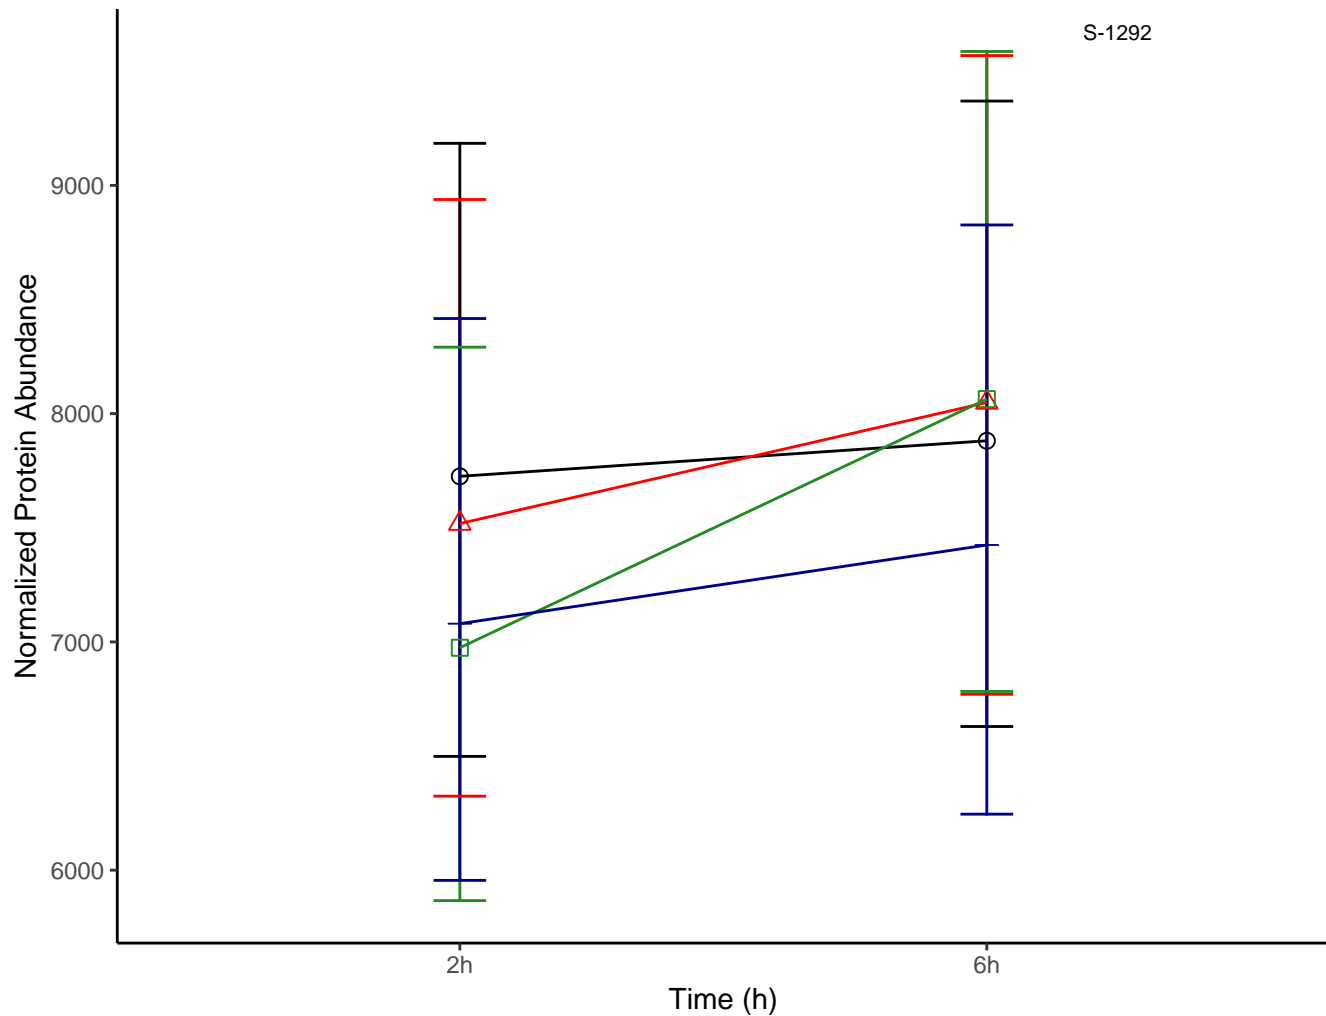

- SA564
- △ SA564-ΔhptRS
- SA564-ΔccpA
- + SA564-ΔhptRS/ccpA

# PYRG\_STAAM

S-1293

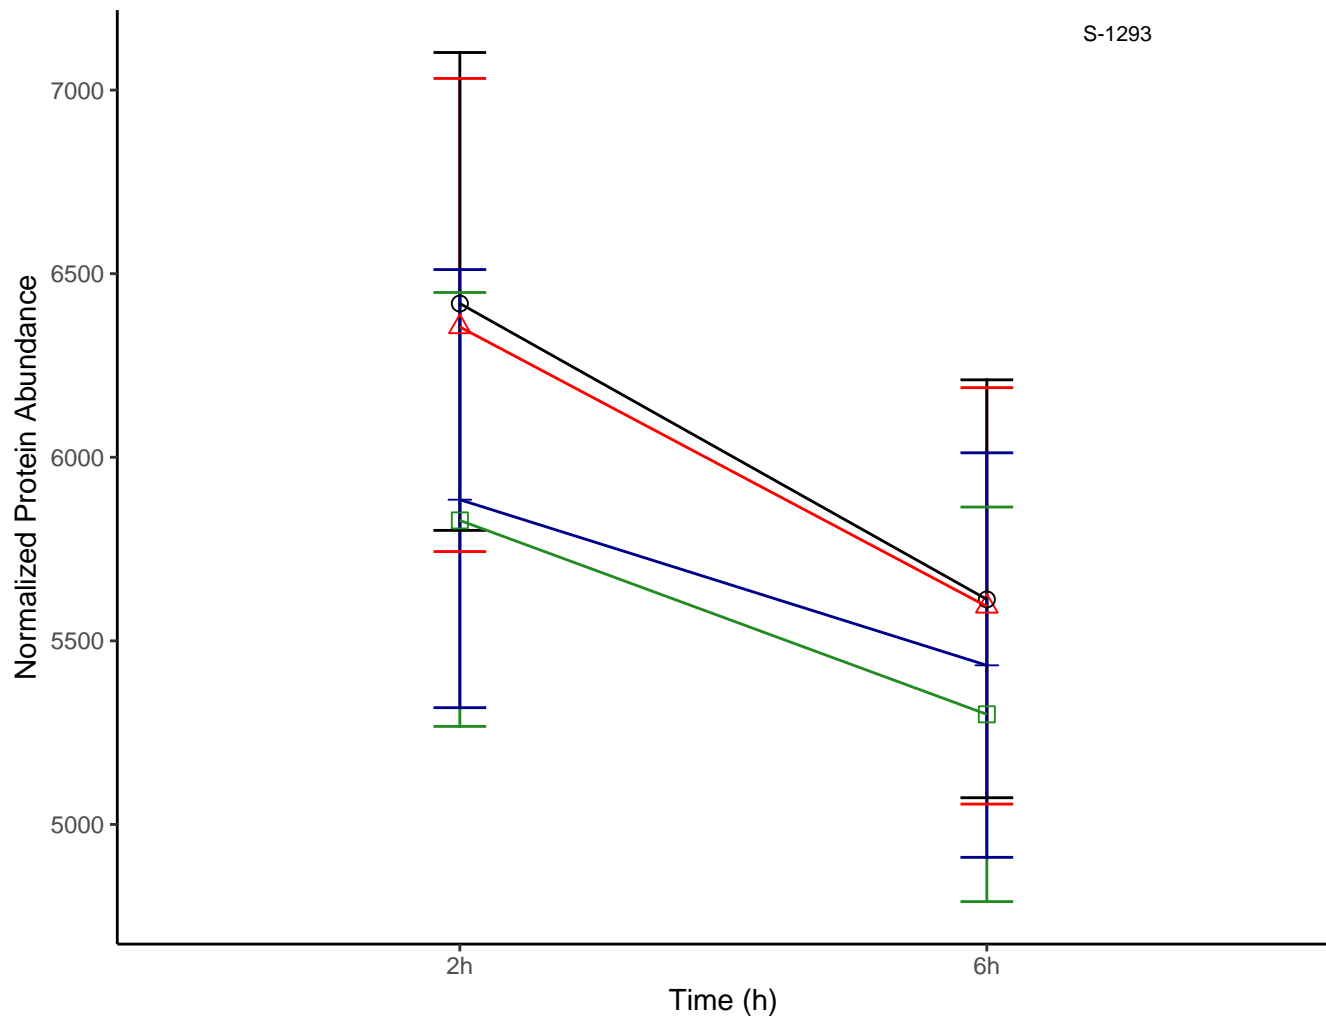

- SA564
- △ SA564- $\Delta$ *hptRS*
- SA564- $\Delta$ *ccpA*
- + SA564- $\Delta$ *hptRS/ccpA*

# PYRH\_STAAM

S-1294

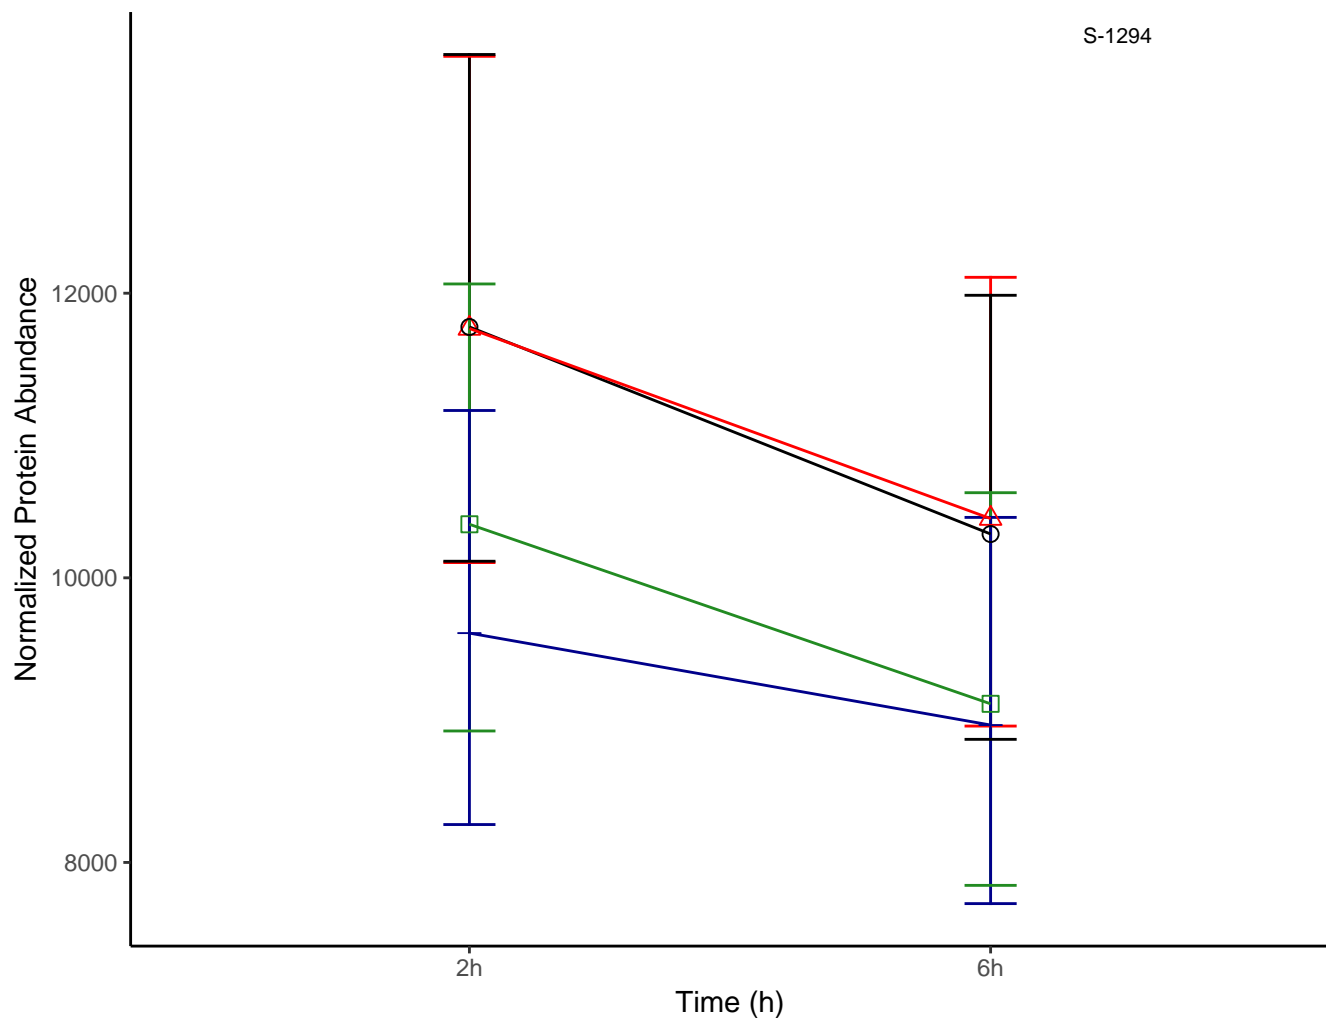

- SA564
- △ SA564-Δ*hptRS*
- SA564-Δ*ccpA*
- + SA564-Δ*hptRS/ccpA*

# PYRR\_STAAM

S-1295

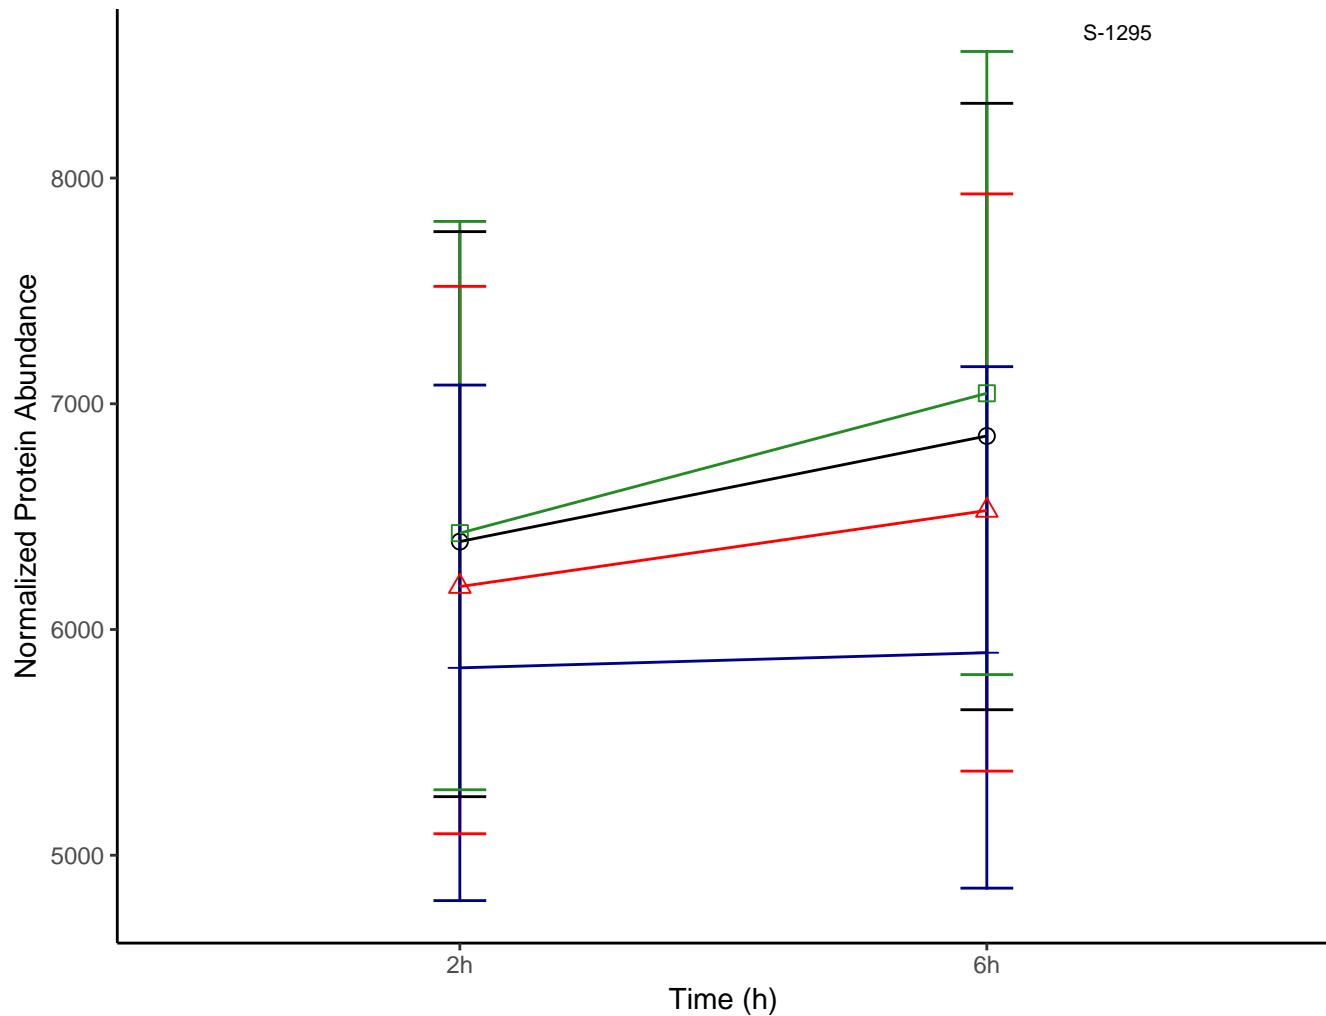

- SA564
- △ SA564- $\Delta hptRS$
- SA564- $\Delta ccpA$
- + SA564- $\Delta hptRS/ccpA$

# QOX2\_STAAM

S-1296

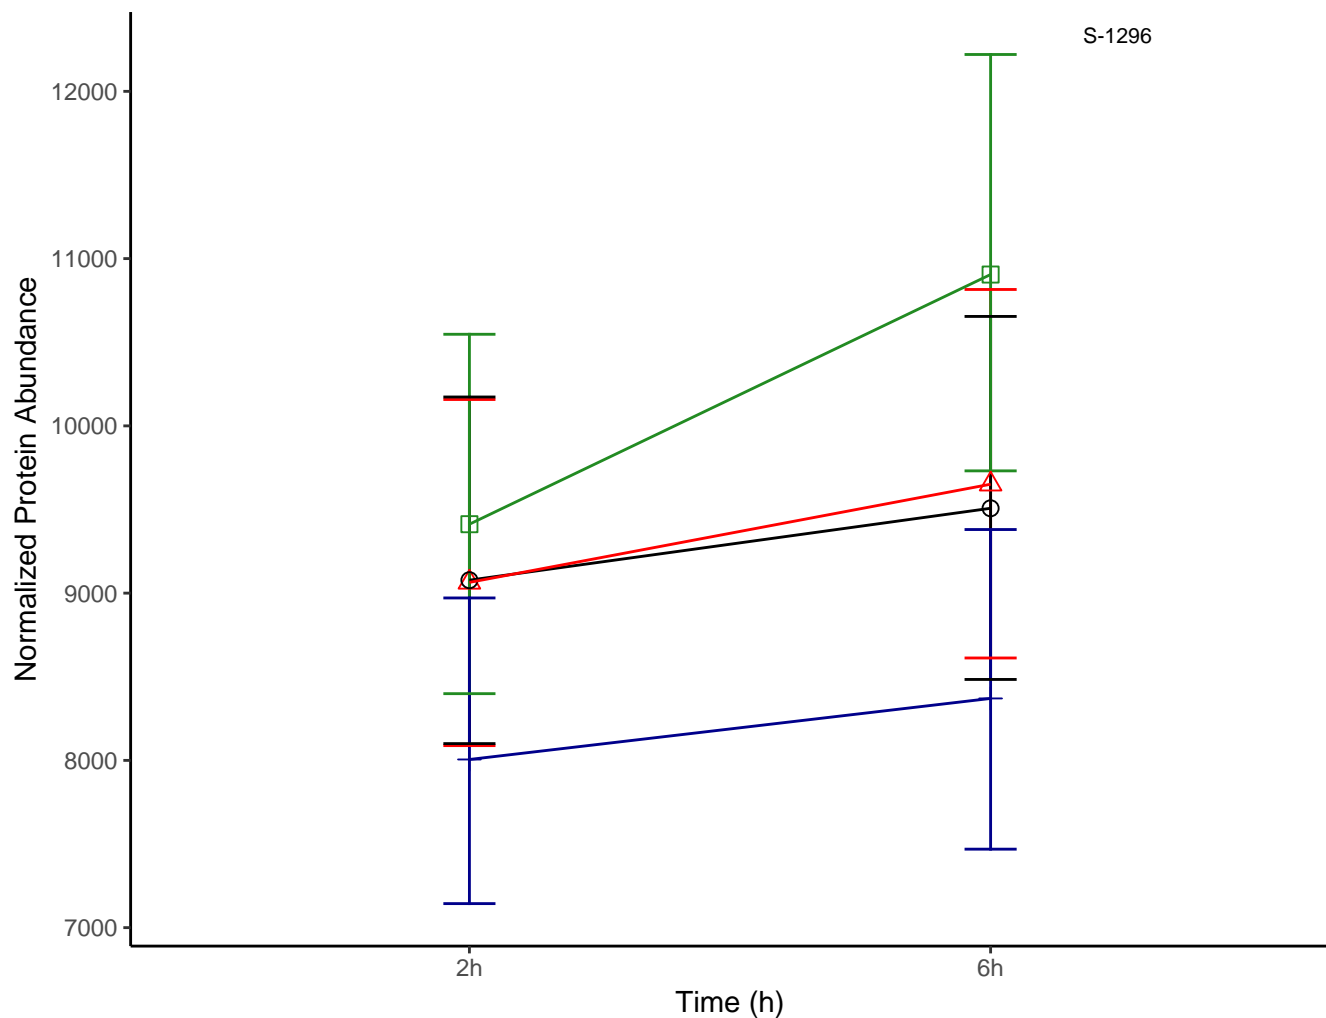

- SA564
- △ SA564- $\Delta$ hptRS
- SA564- $\Delta$ ccpA
- + SA564- $\Delta$ hptRS/ccpA



# QUEA\_STAAM

S-1297

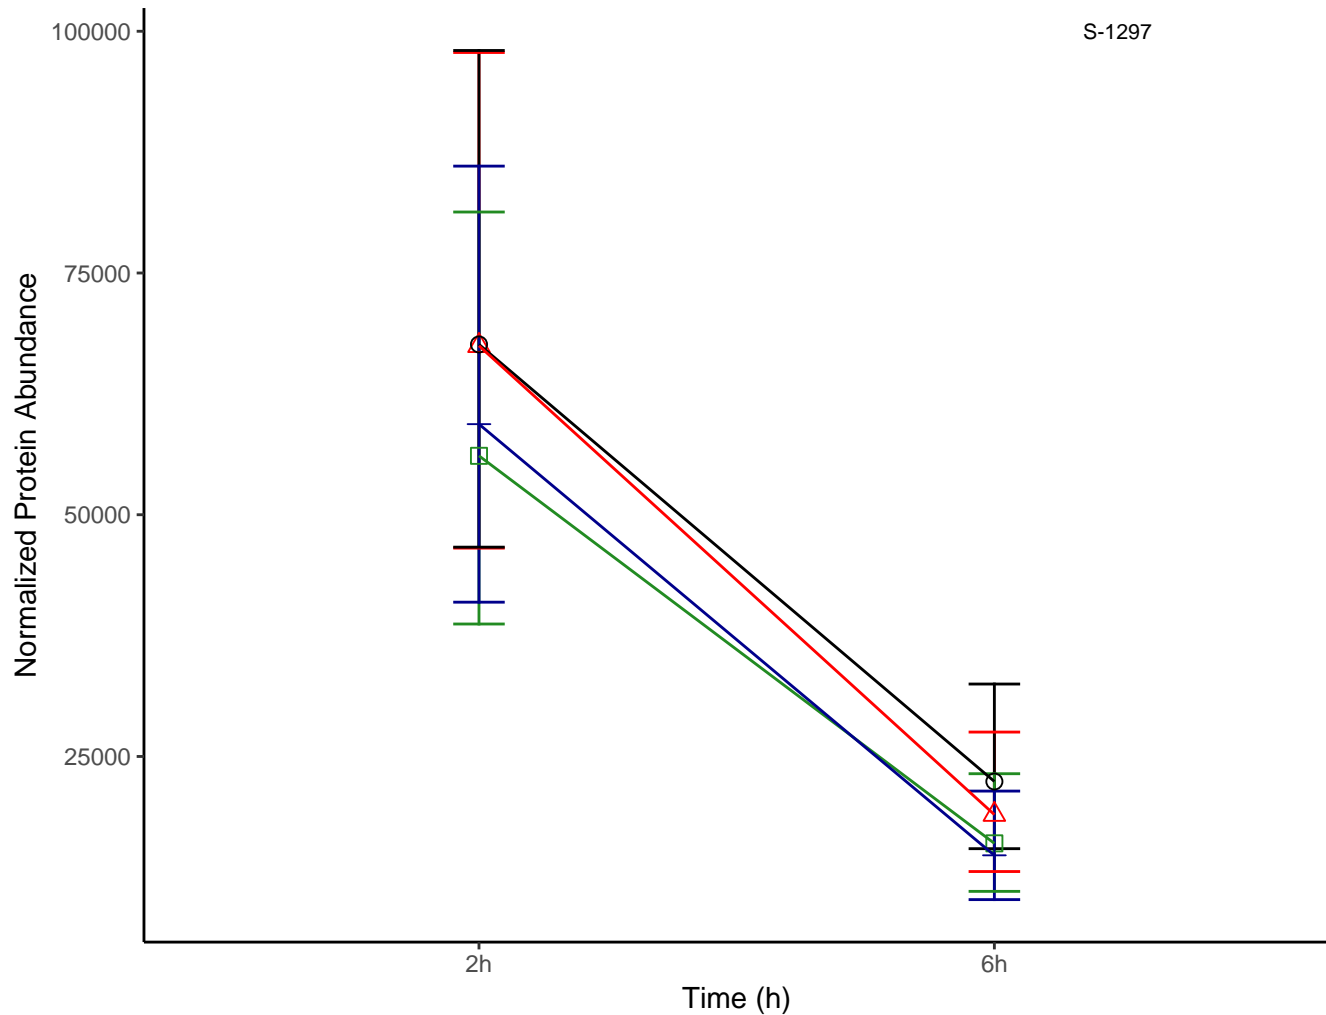

- SA564
- △ SA564- $\Delta$ *hptRS*
- SA564- $\Delta$ *ccpA*
- + SA564- $\Delta$ *hptRS/ccpA*

# QUEC\_STAAM

S-1298

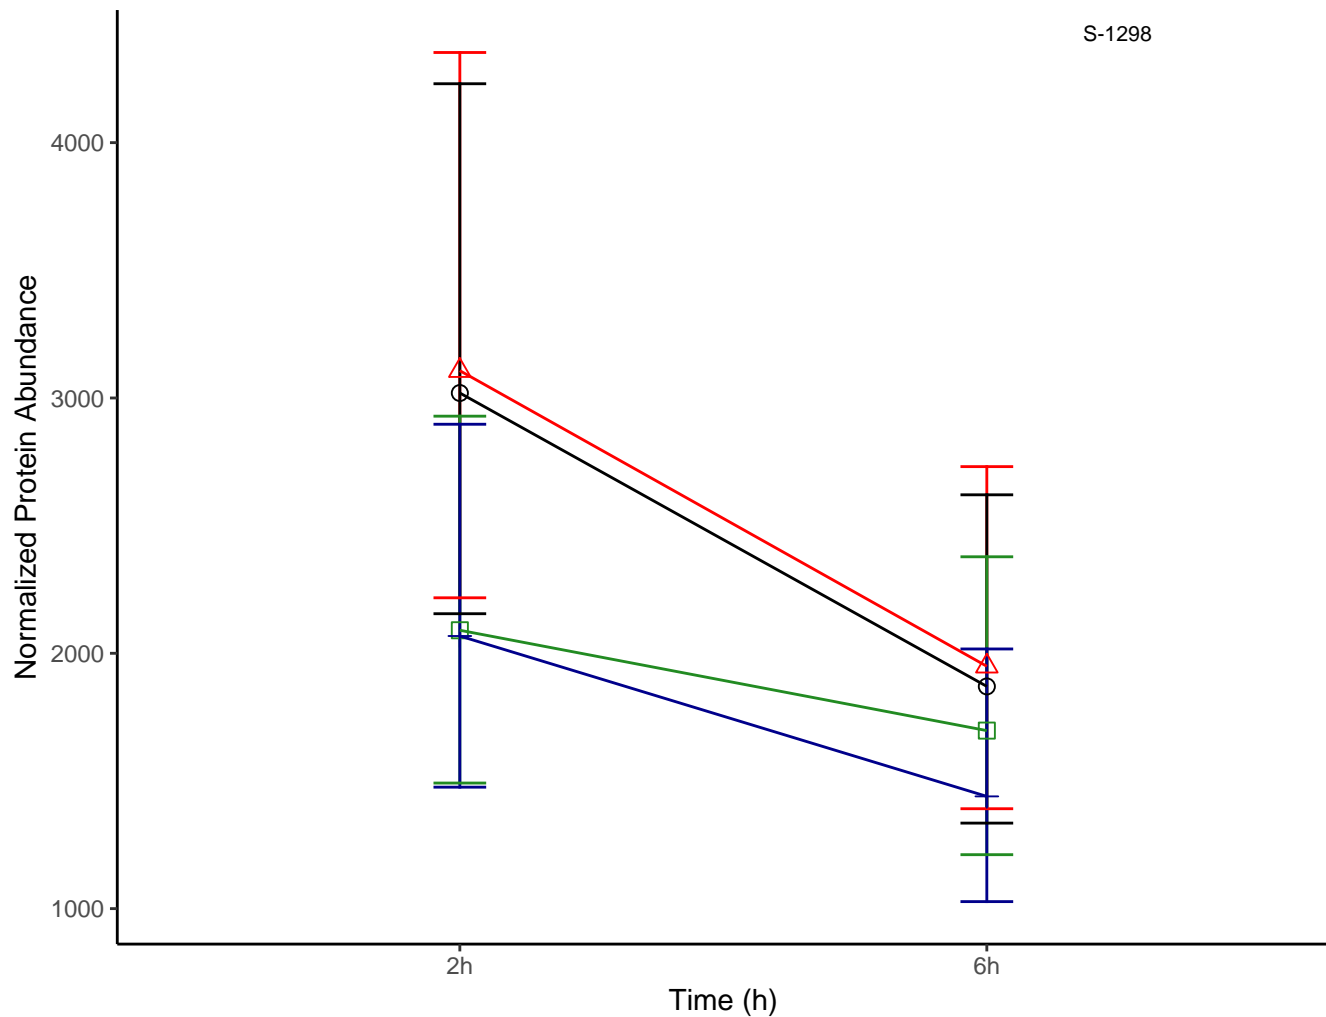

- SA564
- △ SA564- $\Delta$ hptRS
- SA564- $\Delta$ ccpA
- + SA564- $\Delta$ hptRS/ccpA

# RBFA\_STAAM

S-1299

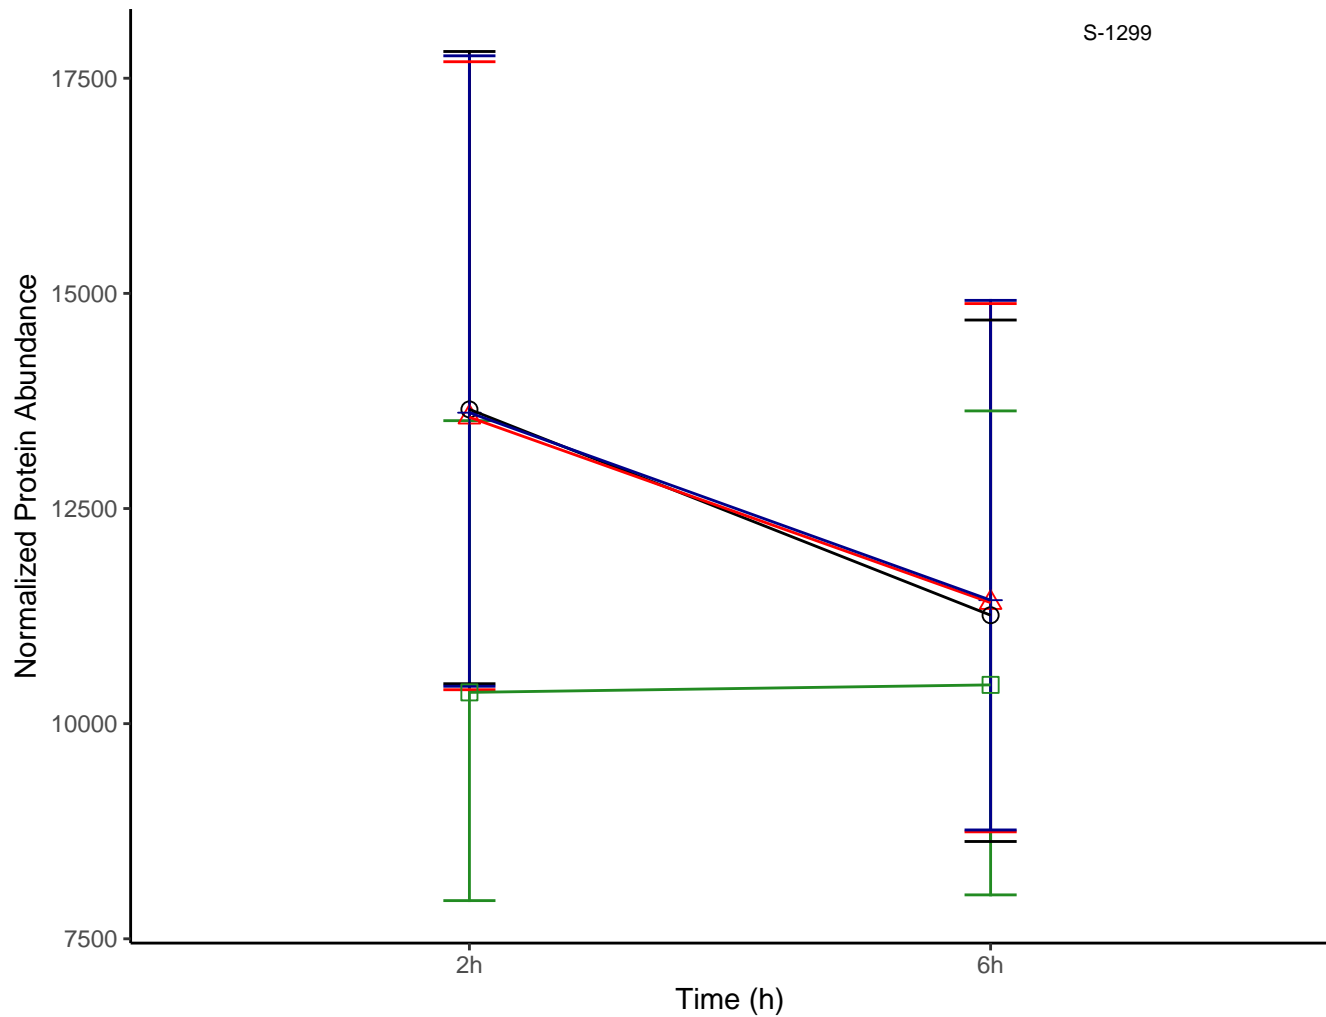

- SA564
- △ SA564- $\Delta$ *hptRS*
- SA564- $\Delta$ *ccpA*
- + SA564- $\Delta$ *hptRS/ccpA*

## RECA\_STAAM

S-1300

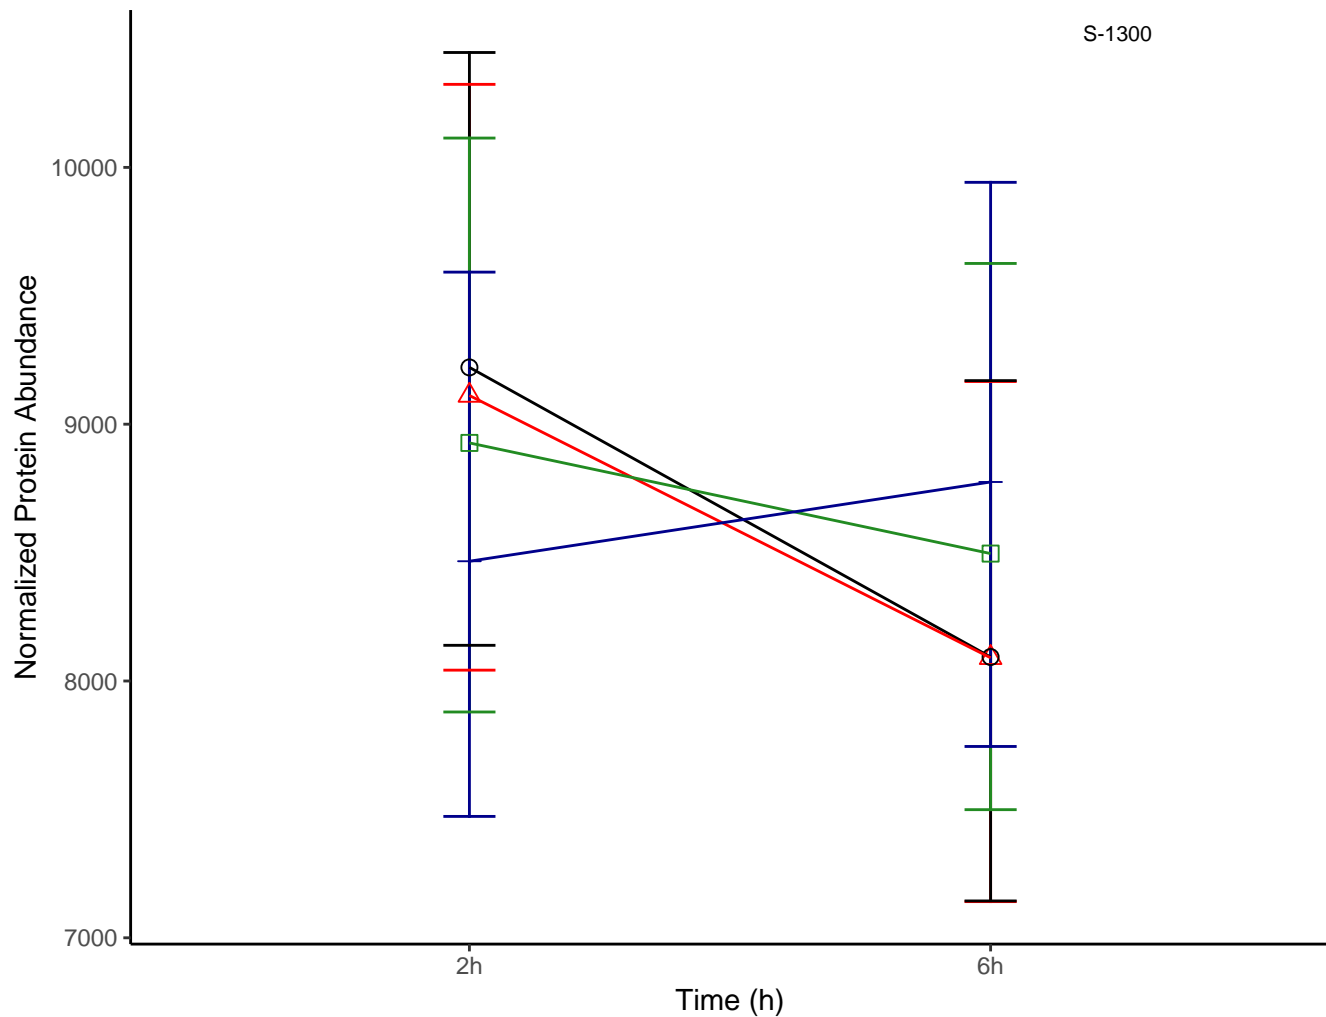

- SA564
- △ SA564- $\Delta$ hptRS
- SA564- $\Delta$ ccpA
- + SA564- $\Delta$ hptRS/ccpA

# RELA\_STAAM

S-1301

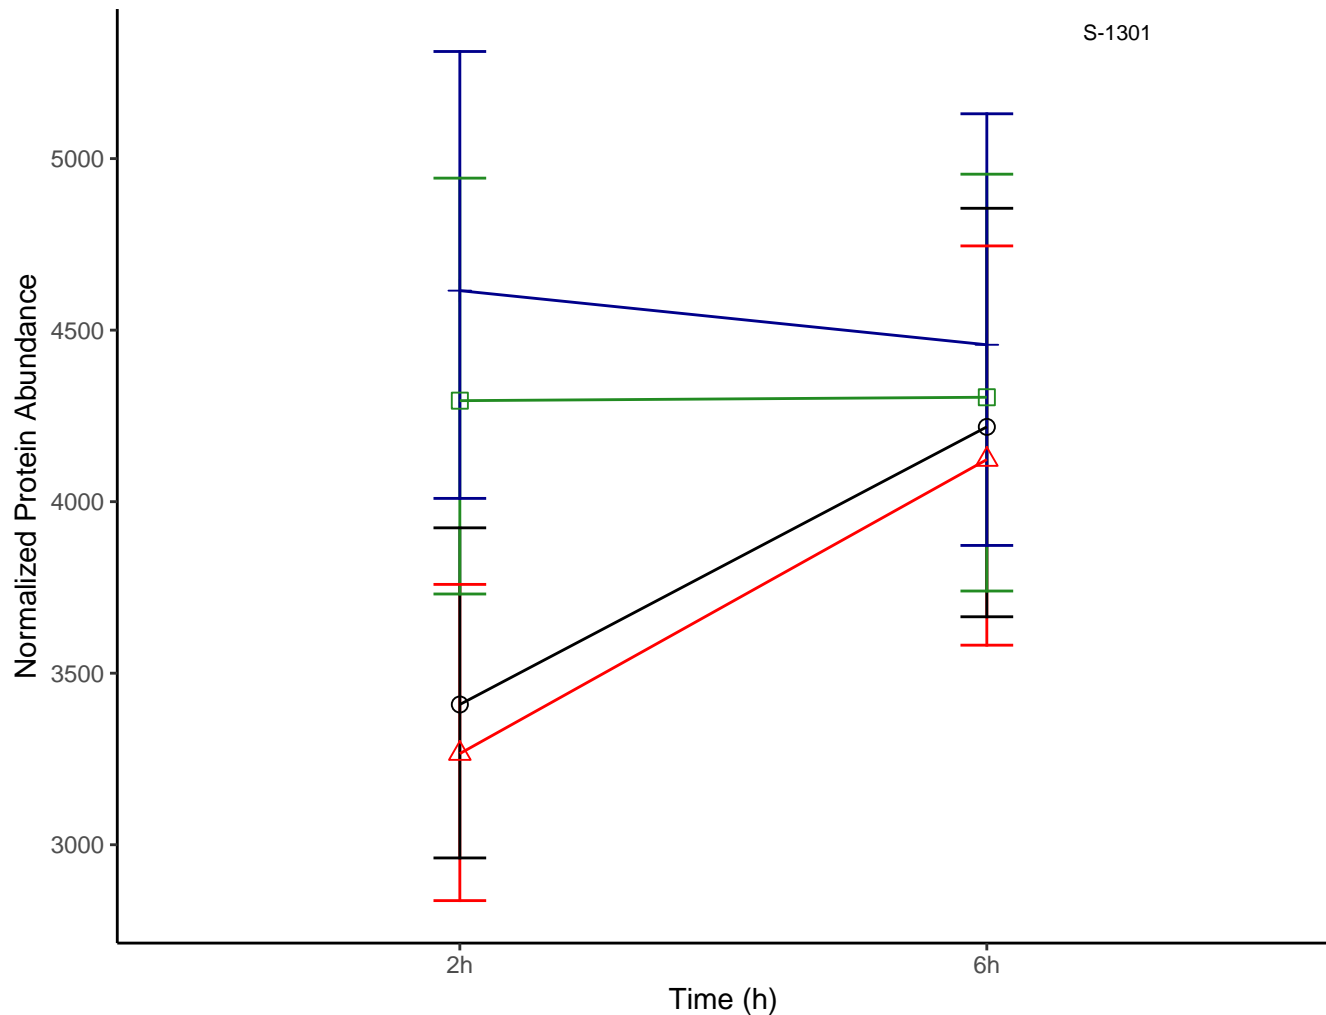

- SA564
- △ SA564- $\Delta$ hptRS
- SA564- $\Delta$ ccpA
- + SA564- $\Delta$ hptRS/ccpA

# REX\_STAAM

S-1302

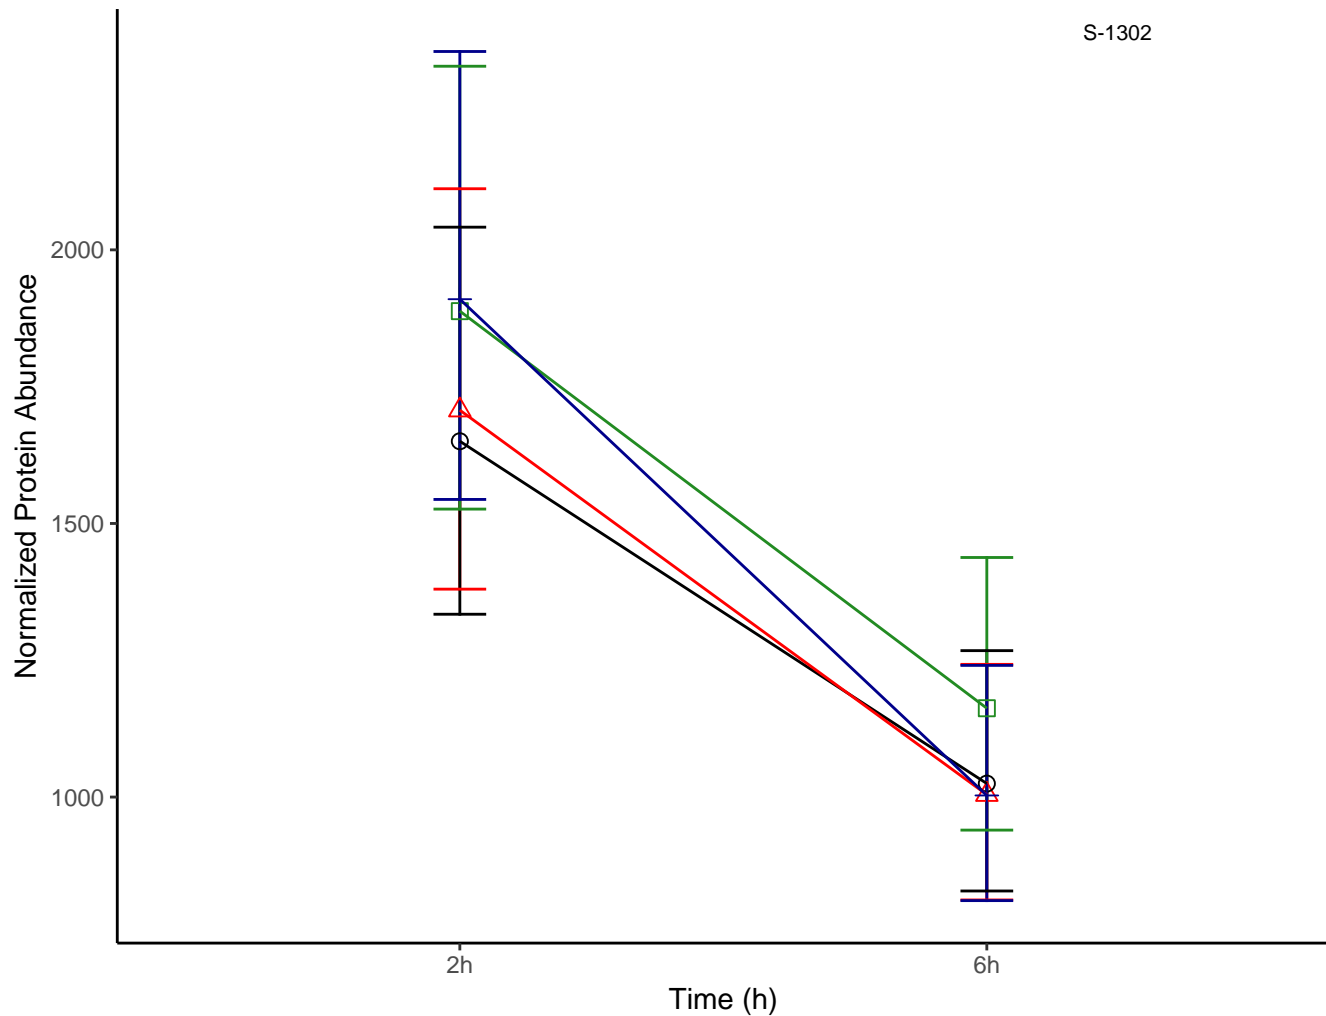

- SA564
- △ SA564- $\Delta$ hptRS
- SA564- $\Delta$ ccpA
- + SA564- $\Delta$ hptRS/ccpA

## RF1\_STAAM

S-1303

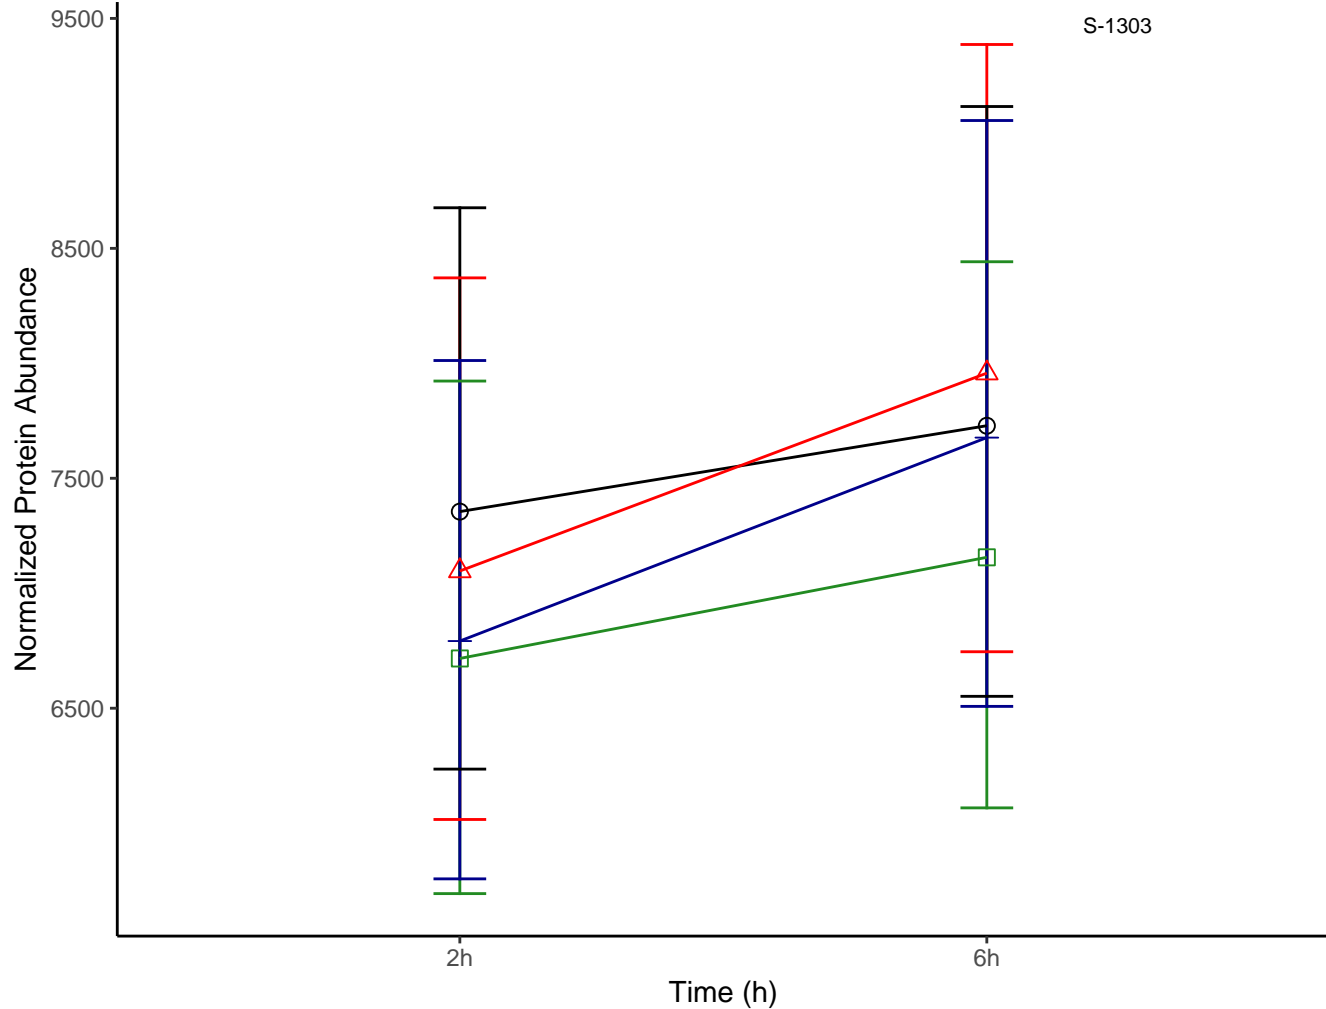

- SA564
- △ SA564- $\Delta$ hptRS
- SA564- $\Delta$ ccpA
- + SA564- $\Delta$ hptRS/ccpA

## RIBBA\_STAAM

S-1304

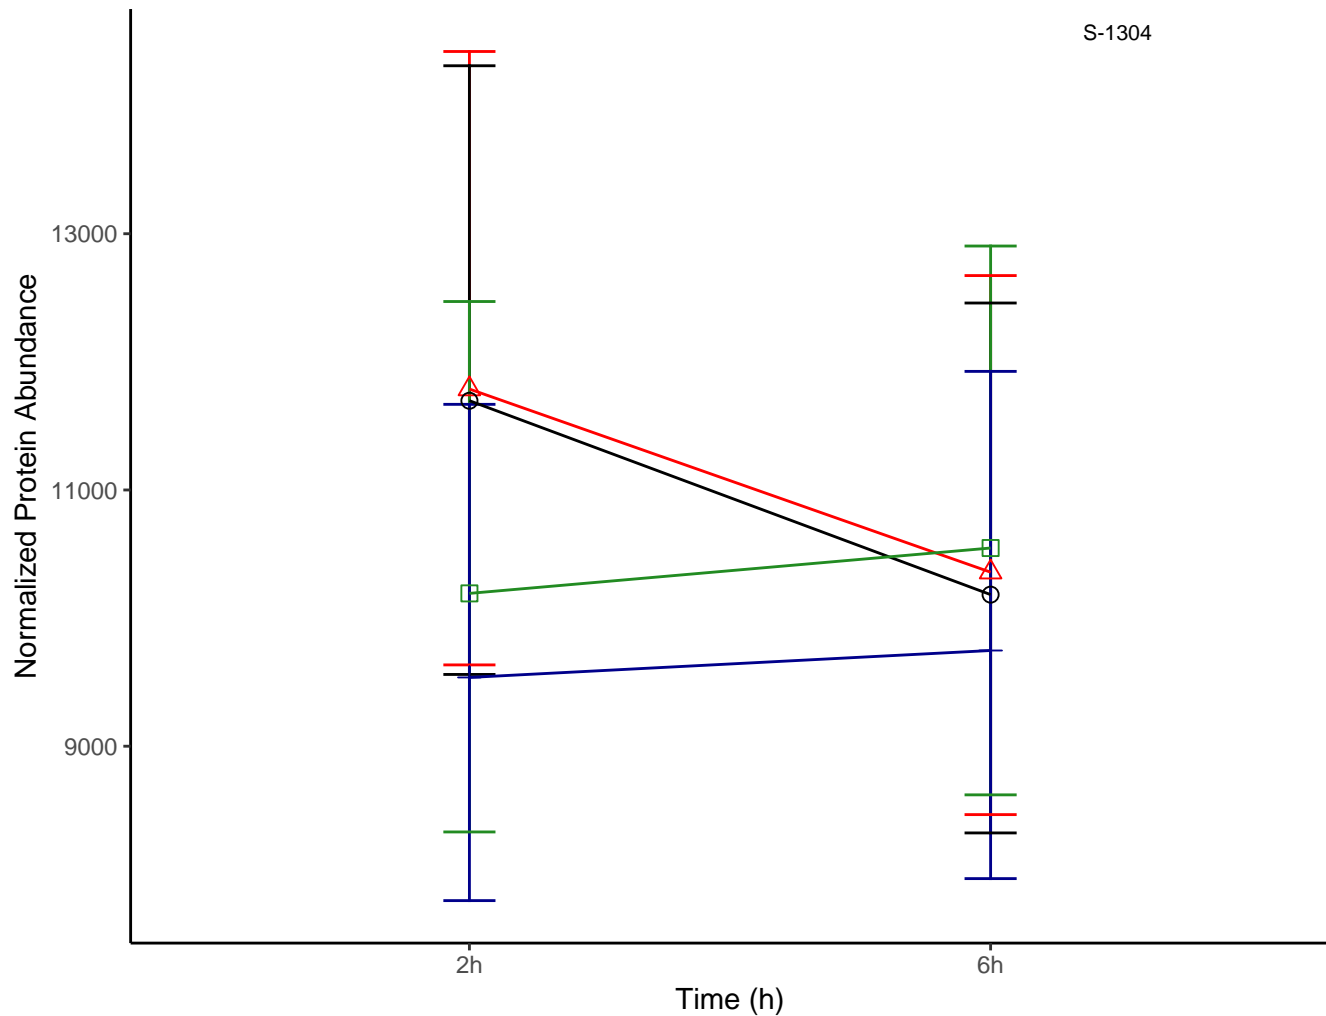

- SA564
- △ SA564- $\Delta$ *hptRS*
- SA564- $\Delta$ *ccpA*
- + SA564- $\Delta$ *hptRS/ccpA*



# RIMM\_STAAM

S-1305

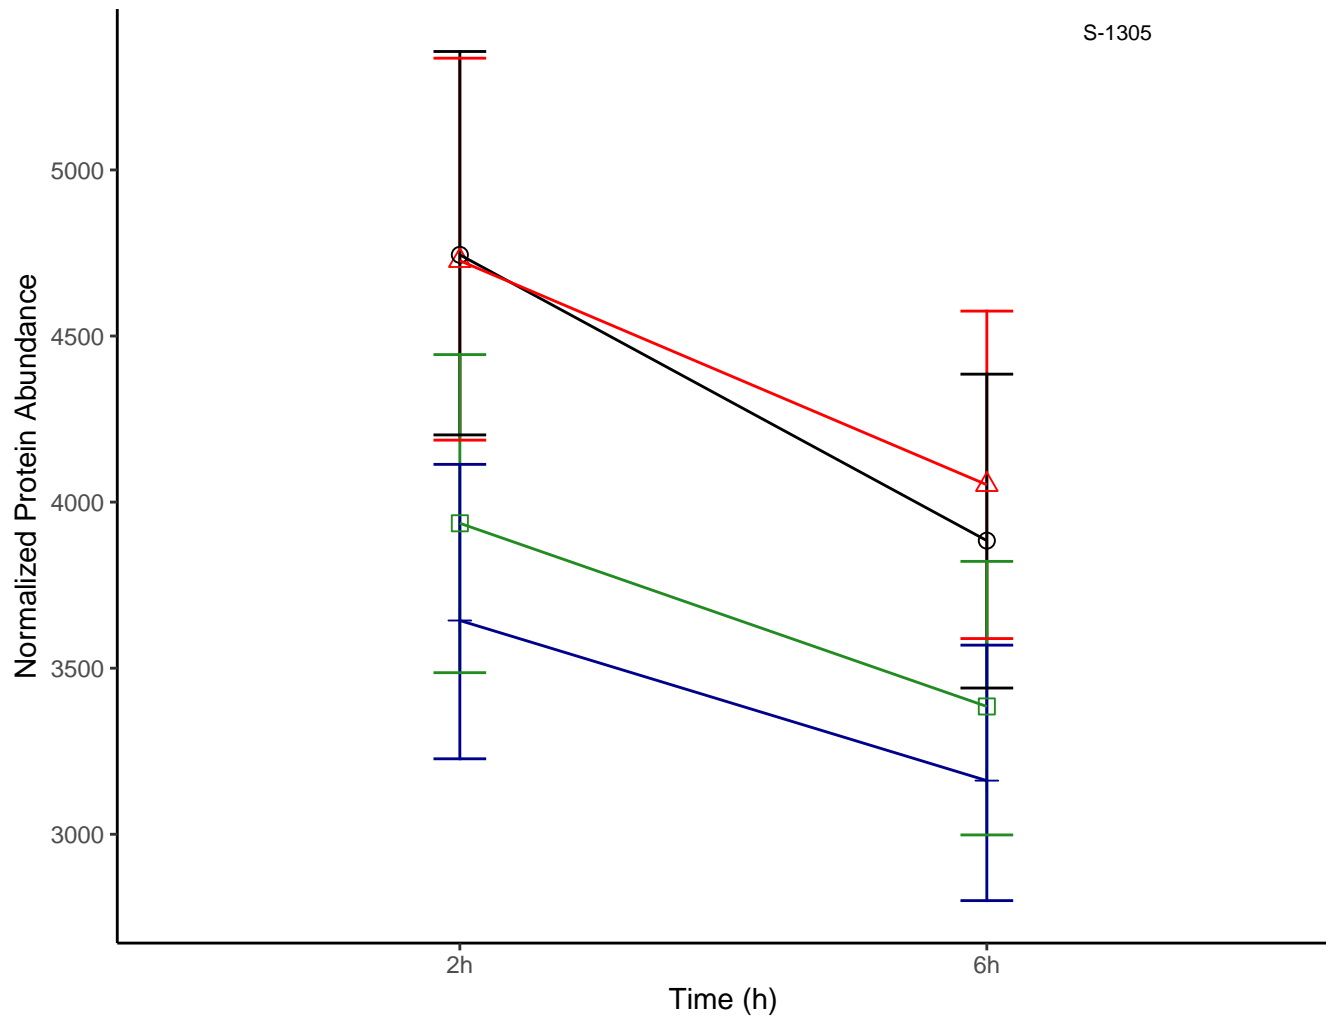

- SA564
- △ SA564- $\Delta hptRS$
- SA564- $\Delta ccpA$
- + SA564- $\Delta hptRS/ccpA$

## RISB\_STAAM

S-1306

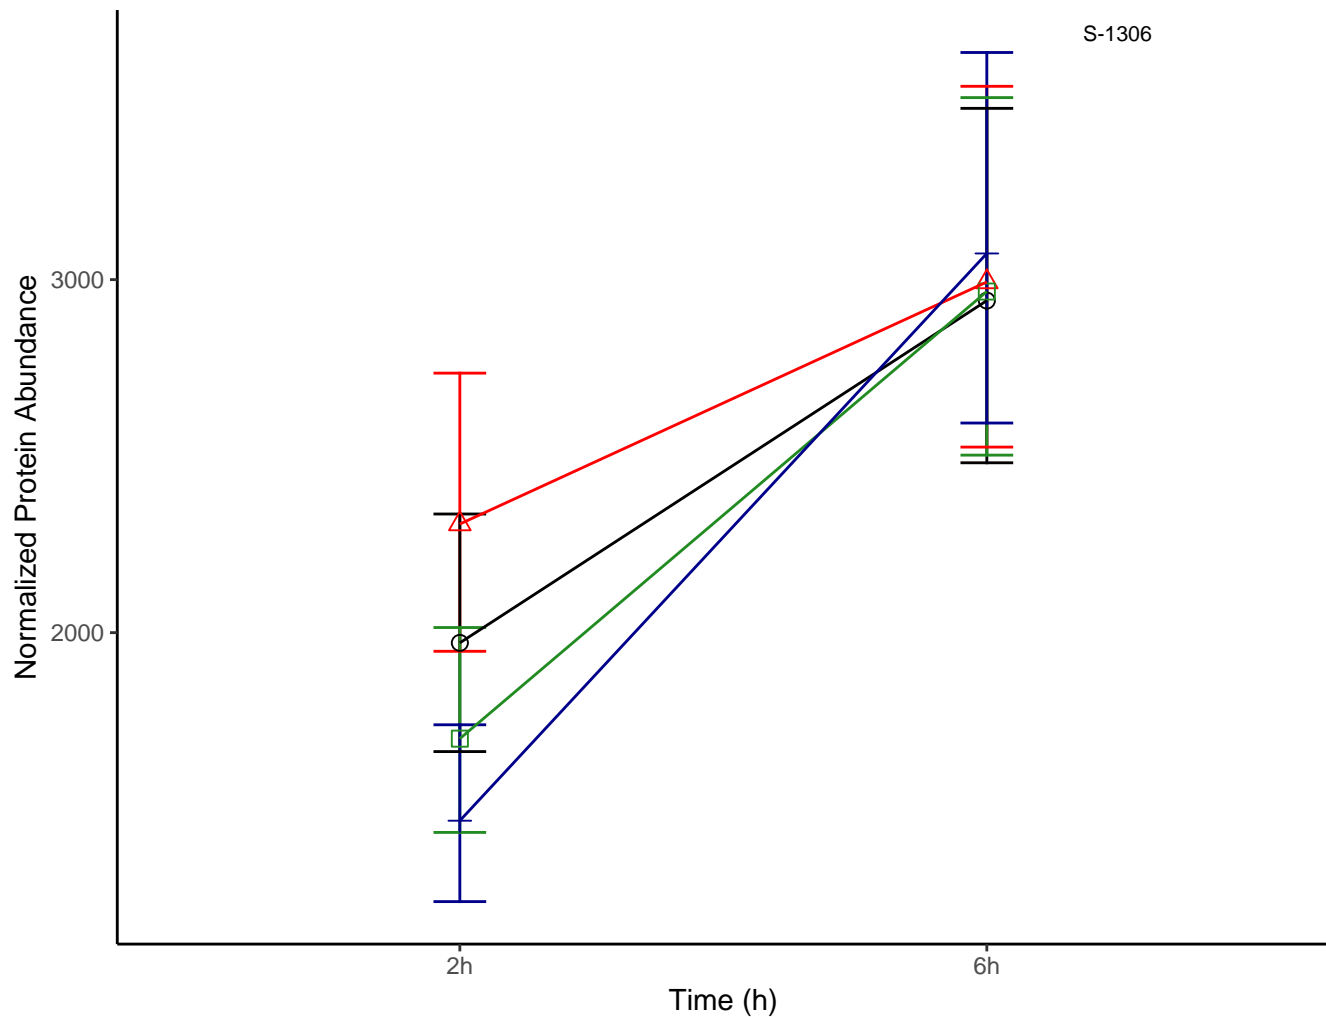

- SA564
- △ SA564- $\Delta hptRS$
- SA564- $\Delta ccpA$
- + SA564- $\Delta hptRS/ccpA$

# RL1\_STAAM

S-1307

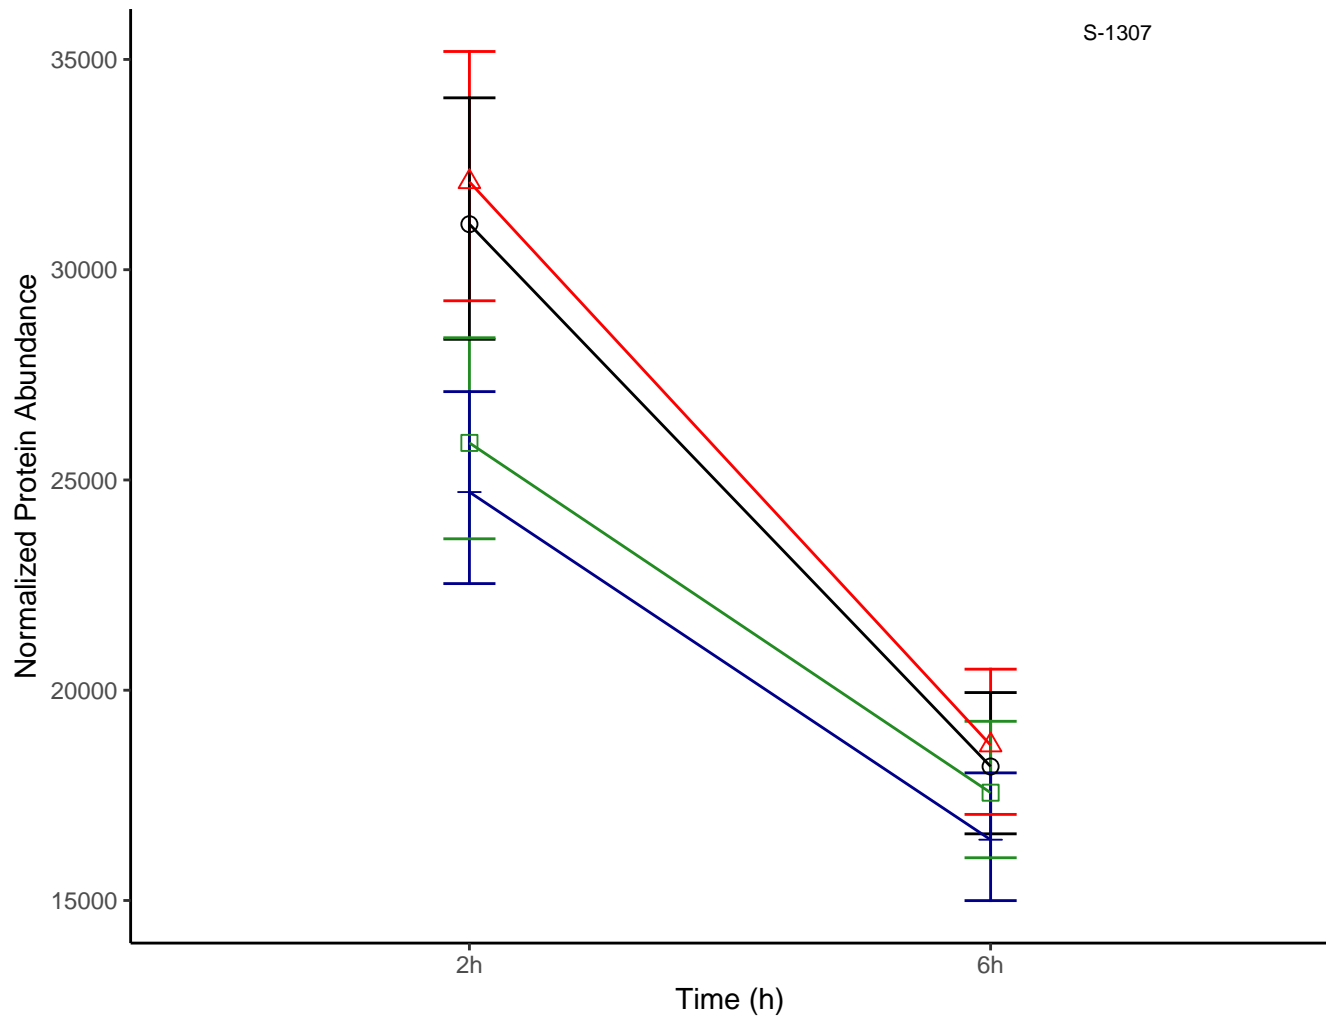

- SA564
- △ SA564- $\Delta$ *hptRS*
- SA564- $\Delta$ *ccpA*
- + SA564- $\Delta$ *hptRS/ccpA*

# RL10\_STAAM

S-1308

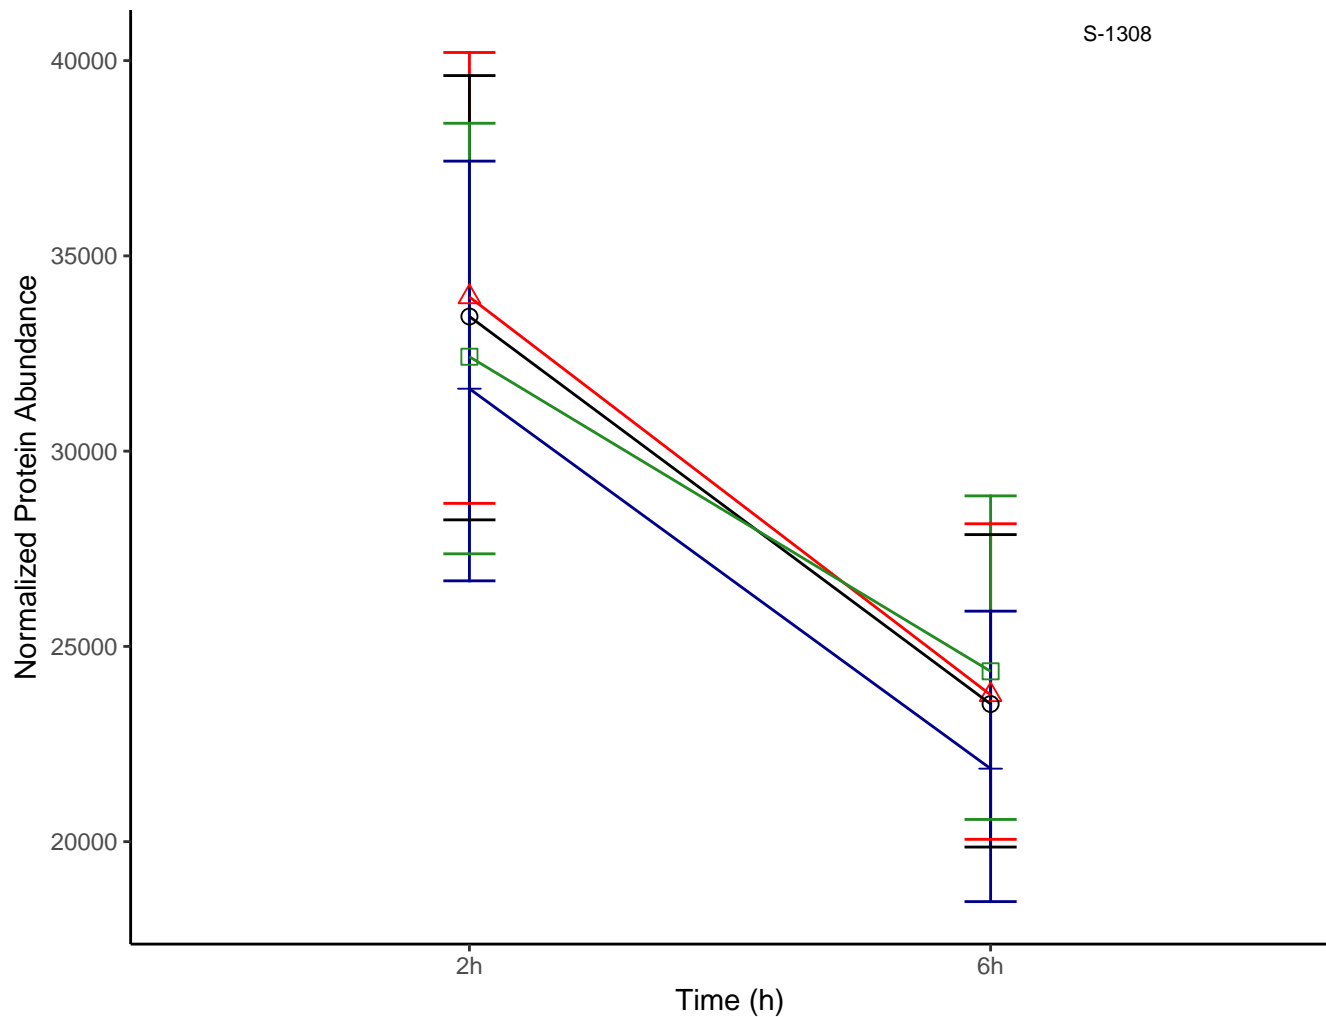

- SA564
- △ SA564- $\Delta$ *hptRS*
- SA564- $\Delta$ *ccpA*
- + SA564- $\Delta$ *hptRS/ccpA*

## RL11\_STAAM

S-1309

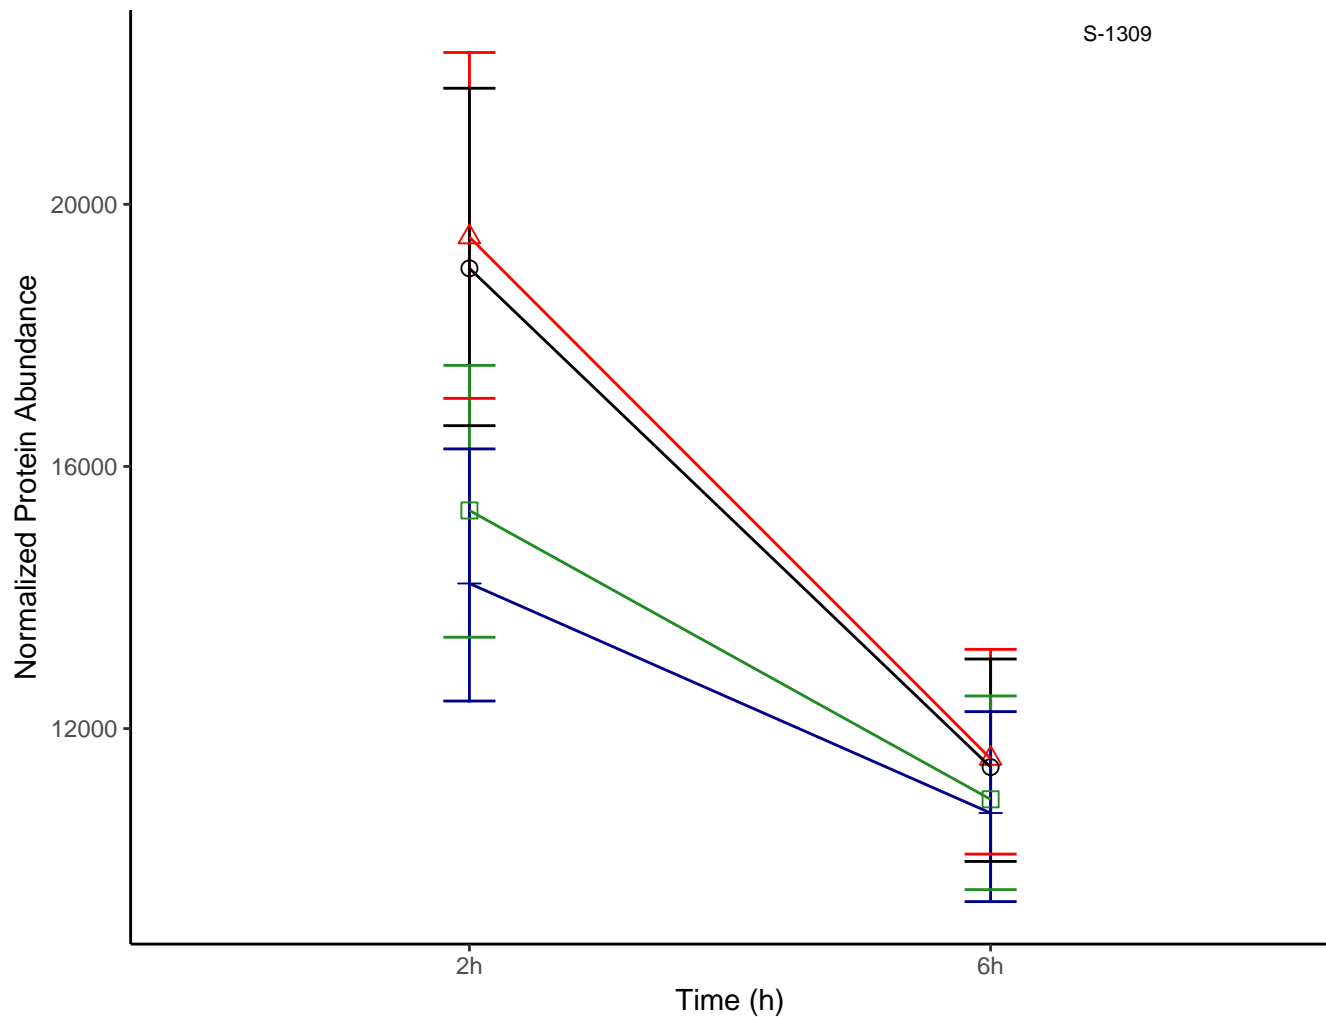

- SA564
- △ SA564- $\Delta hptRS$
- SA564- $\Delta ccpA$
- + SA564- $\Delta hptRS/ccpA$

# RL13\_STAAM

S-1310

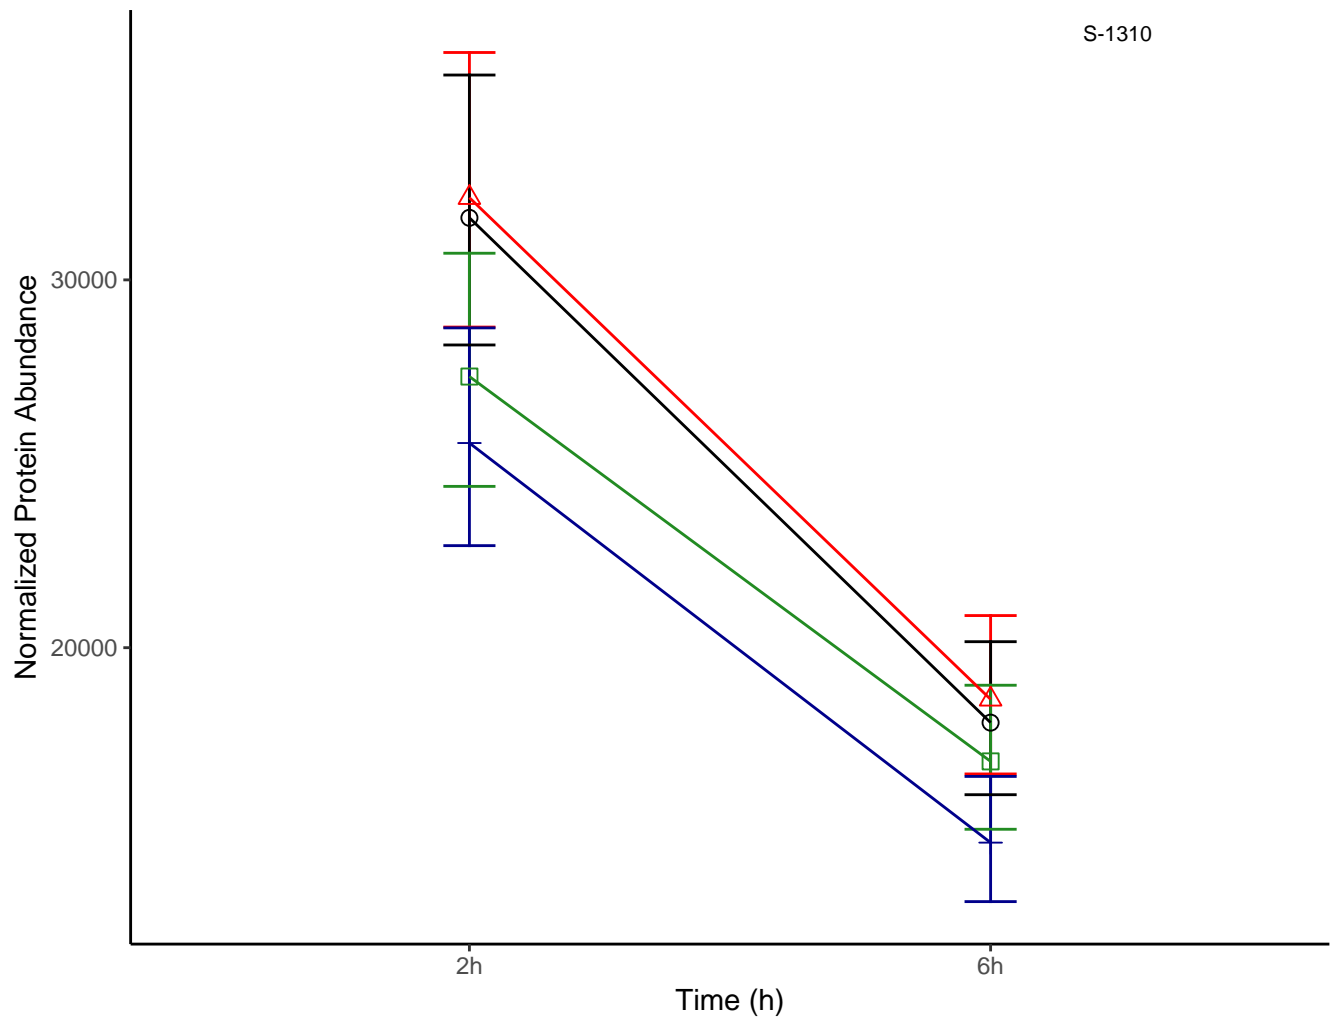

- SA564
- △ SA564- $\Delta$ *hptRS*
- SA564- $\Delta$ *ccpA*
- + SA564- $\Delta$ *hptRS/ccpA*

# RL14\_STAAM

S-1311

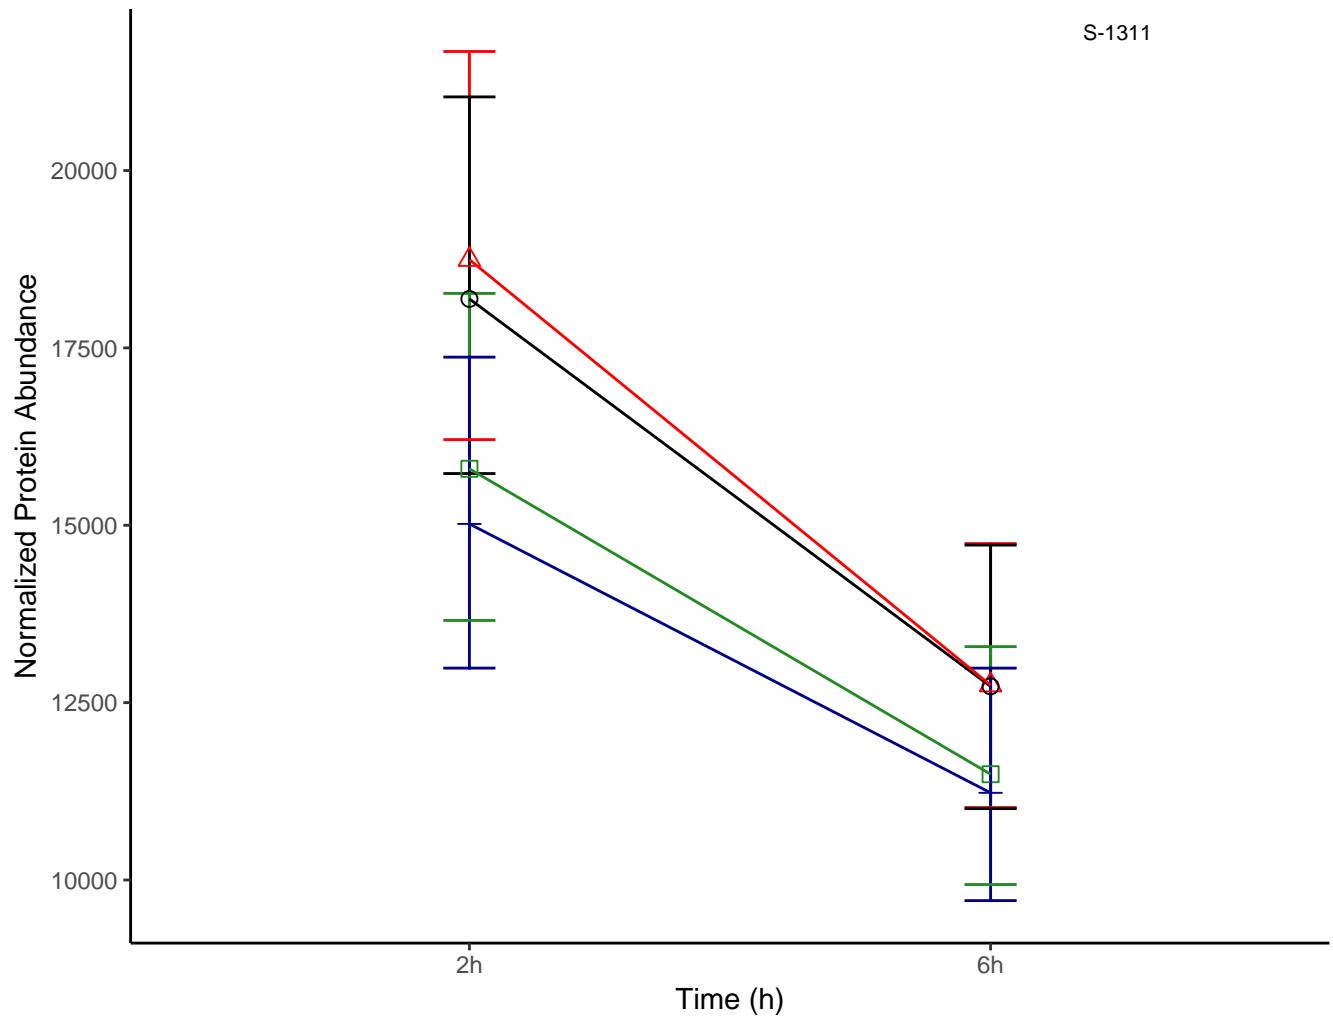

- SA564
- △ SA564- $\Delta$ *hptRS*
- SA564- $\Delta$ *ccpA*
- + SA564- $\Delta$ *hptRS/ccpA*

# RL15\_STAAM

S-1312

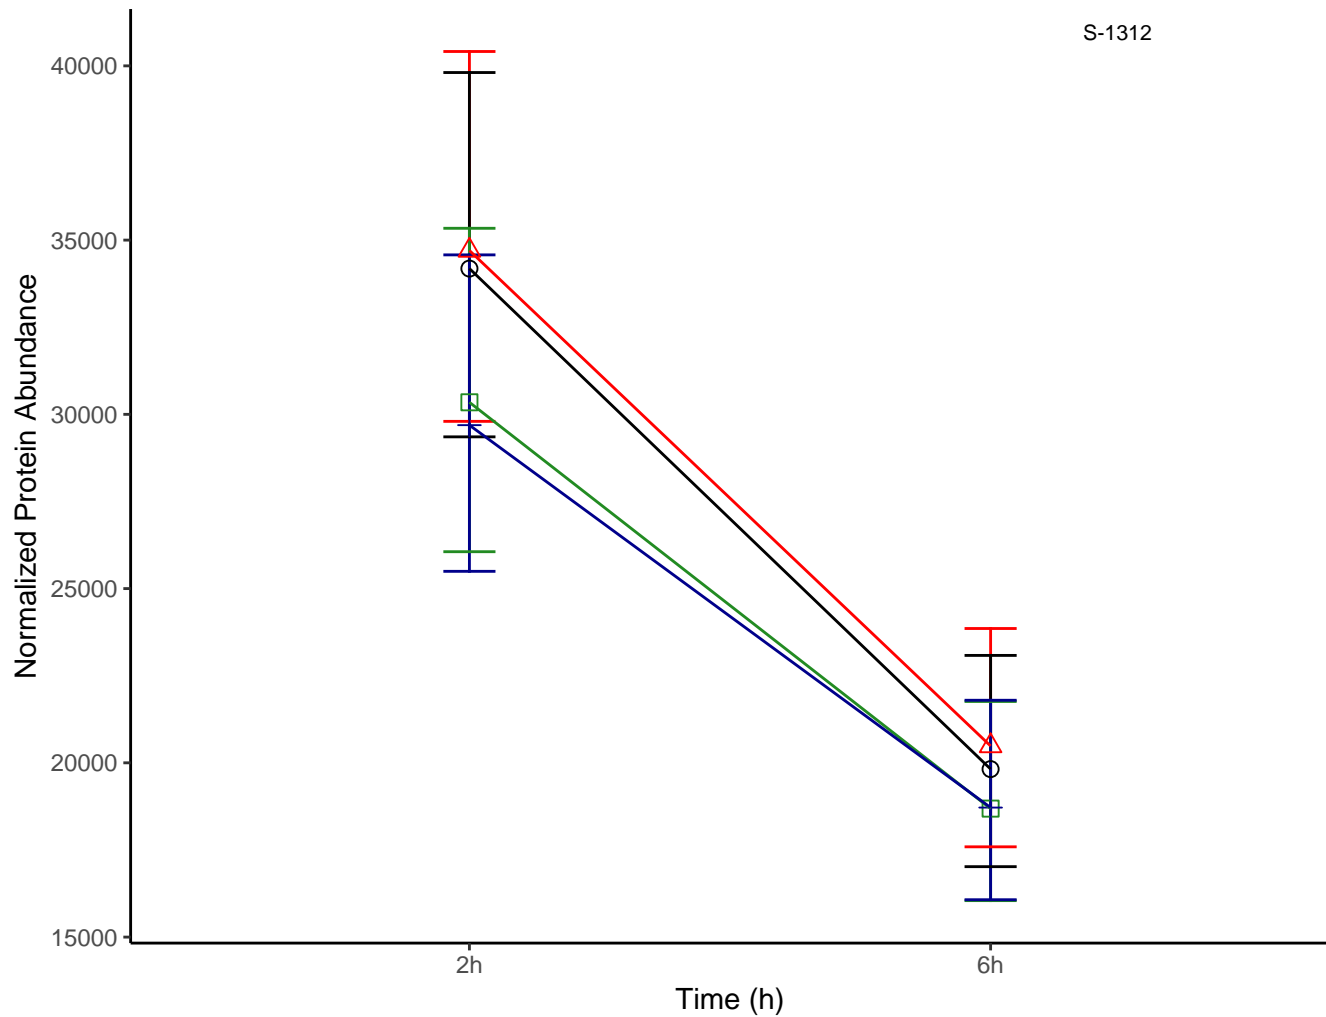

- SA564
- △ SA564-Δ*hptRS*
- SA564-Δ*ccpA*
- + SA564-Δ*hptRS/ccpA*



## RL16\_STAAM

S-1313

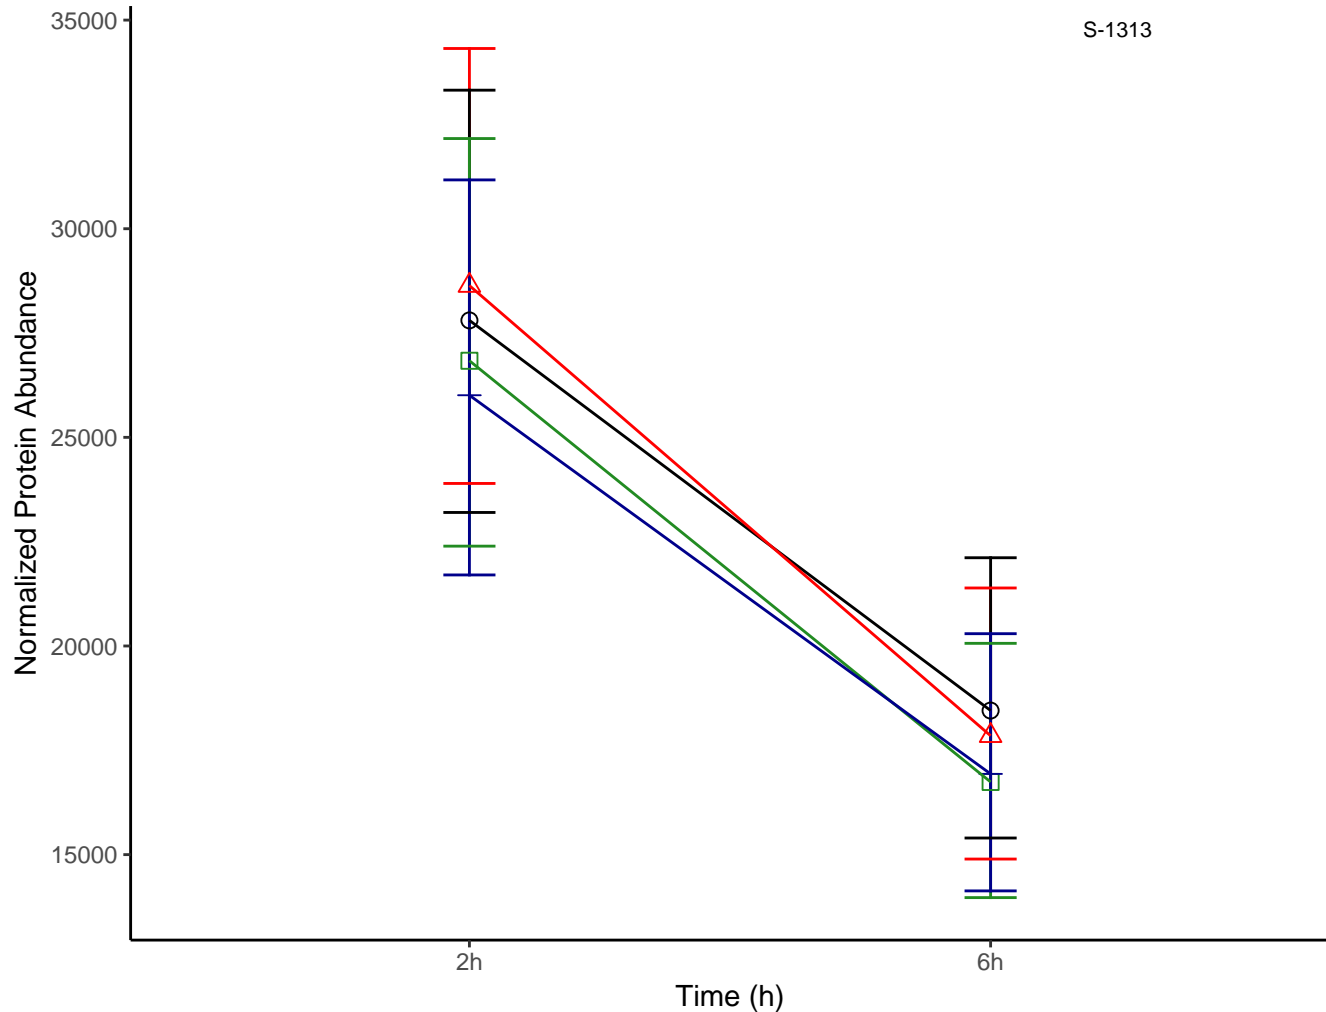

- SA564
- △ SA564- $\Delta hptRS$
- SA564- $\Delta ccpA$
- + SA564- $\Delta hptRS/ccpA$

# RL17\_STAAM

S-1314

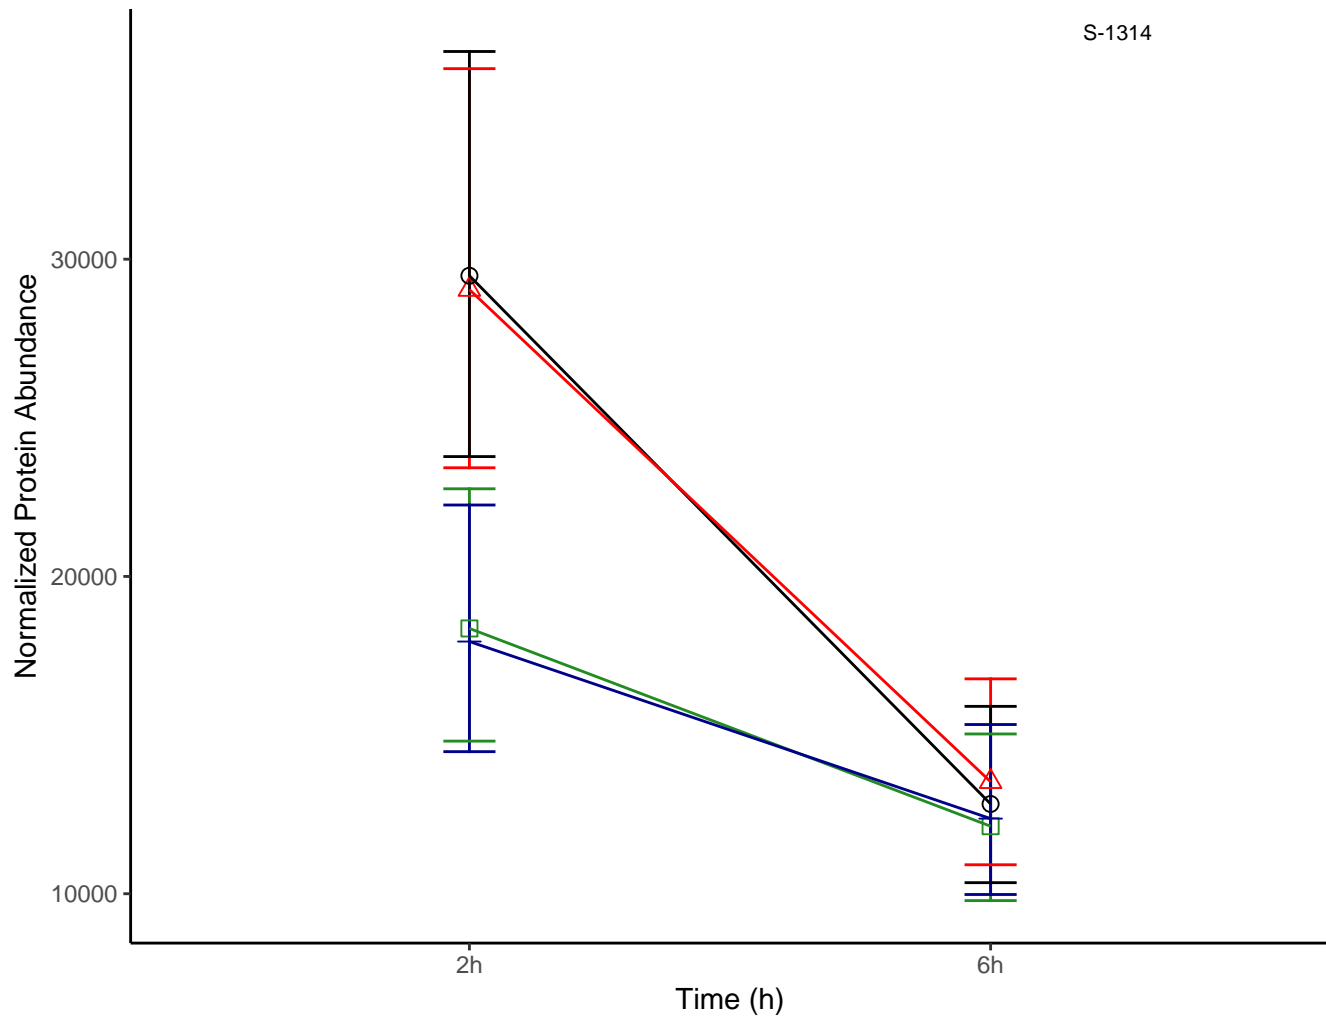

- SA564
- △ SA564- $\Delta hptRS$
- SA564- $\Delta ccpA$
- + SA564- $\Delta hptRS/ccpA$

# RL18\_STAAM

S-1315

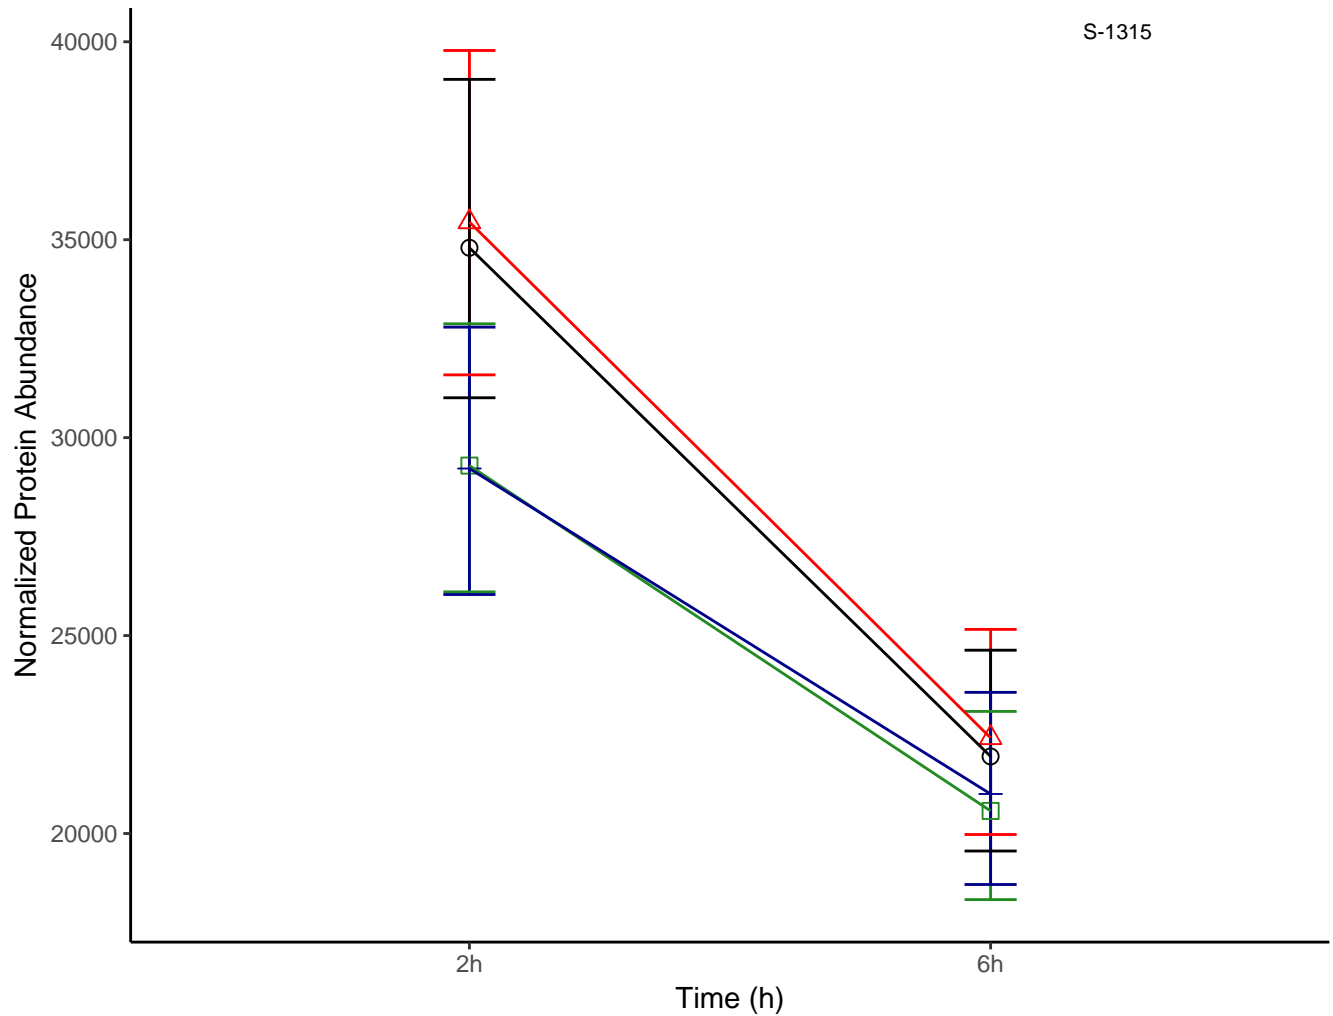

- SA564
- △ SA564-ΔhptRS
- SA564-ΔccpA
- + SA564-ΔhptRS/ccpA

# RL19\_STAAM

S-1316

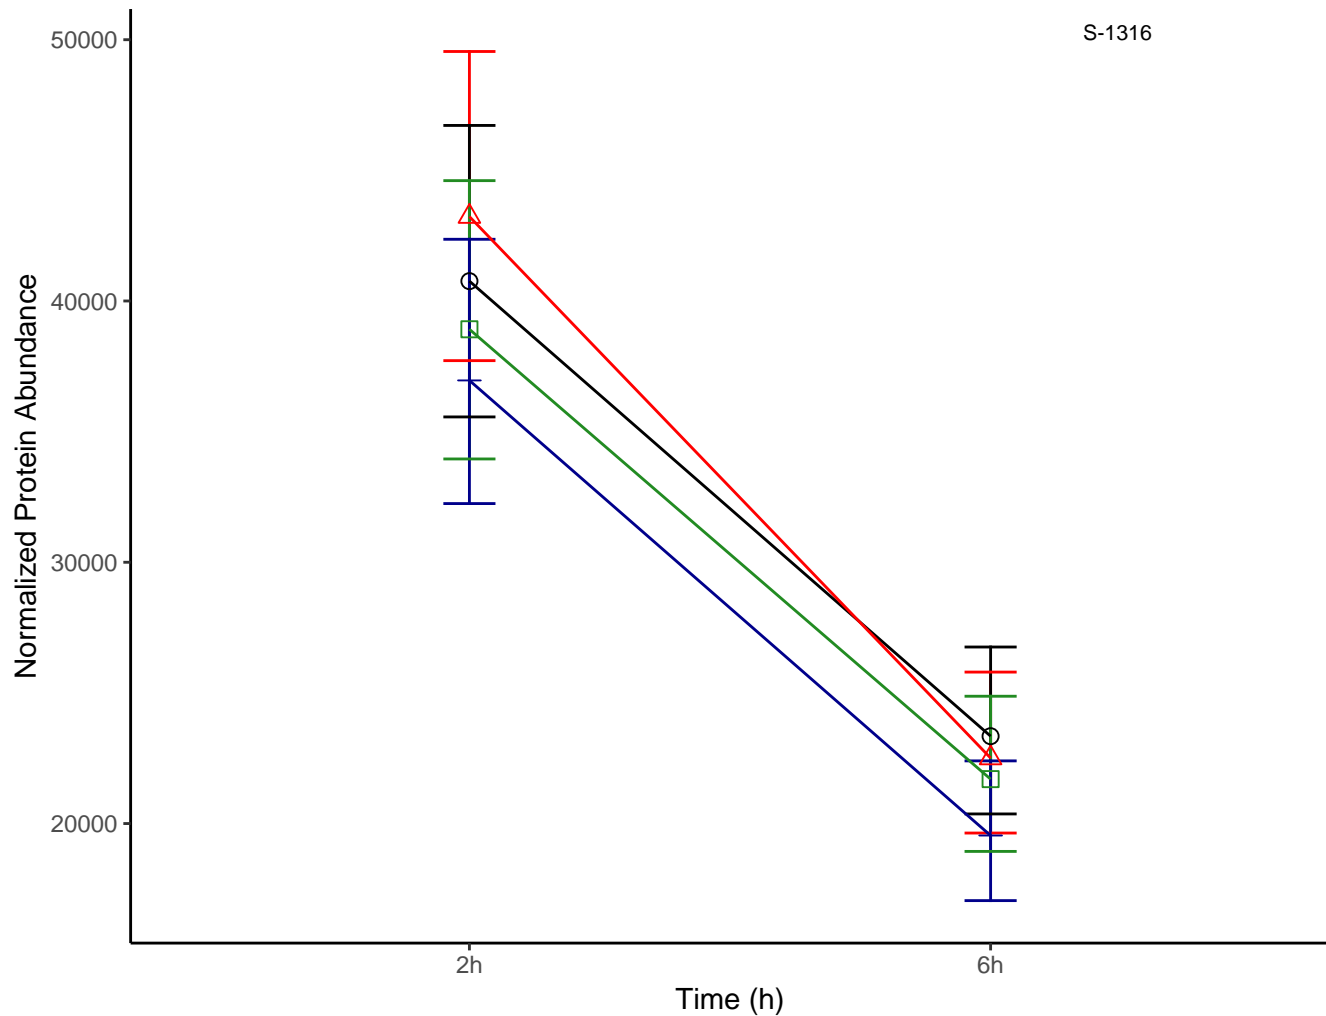

- SA564
- △ SA564- $\Delta$ *hptRS*
- SA564- $\Delta$ *ccpA*
- + SA564- $\Delta$ *hptRS/ccpA*

# RL2\_STAAM

S-1317

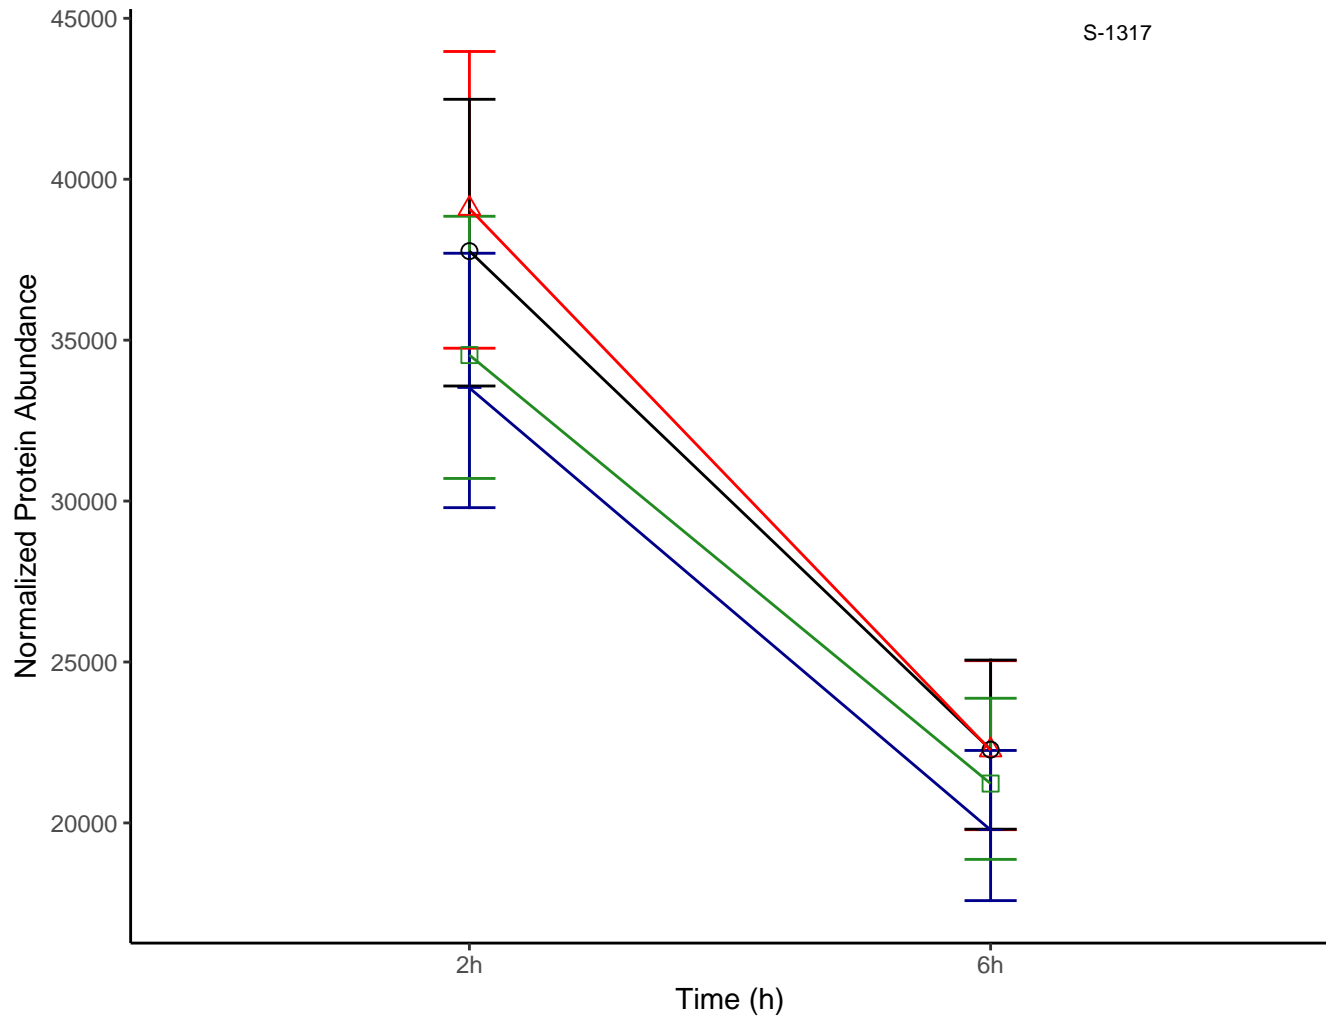

- SA564
- △ SA564- $\Delta hptRS$
- SA564- $\Delta ccpA$
- + SA564- $\Delta hptRS/ccpA$

# RL20\_STAAM

S-1318

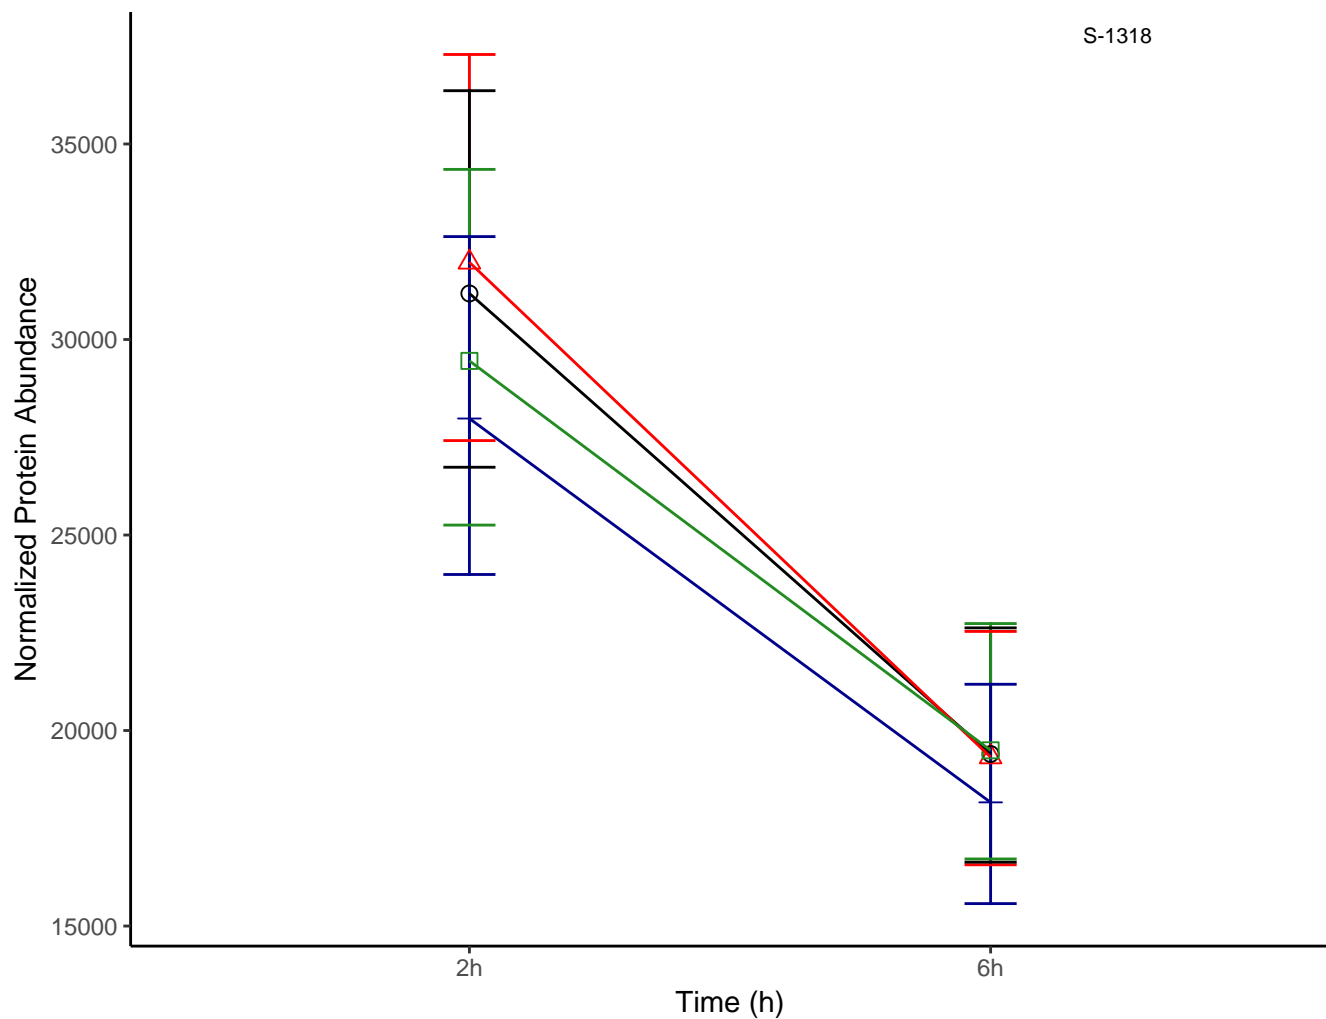

- SA564
- △ SA564-Δ*hptRS*
- SA564-Δ*ccpA*
- + SA564-Δ*hptRS/ccpA*

## RL21\_STAAM

S-1319

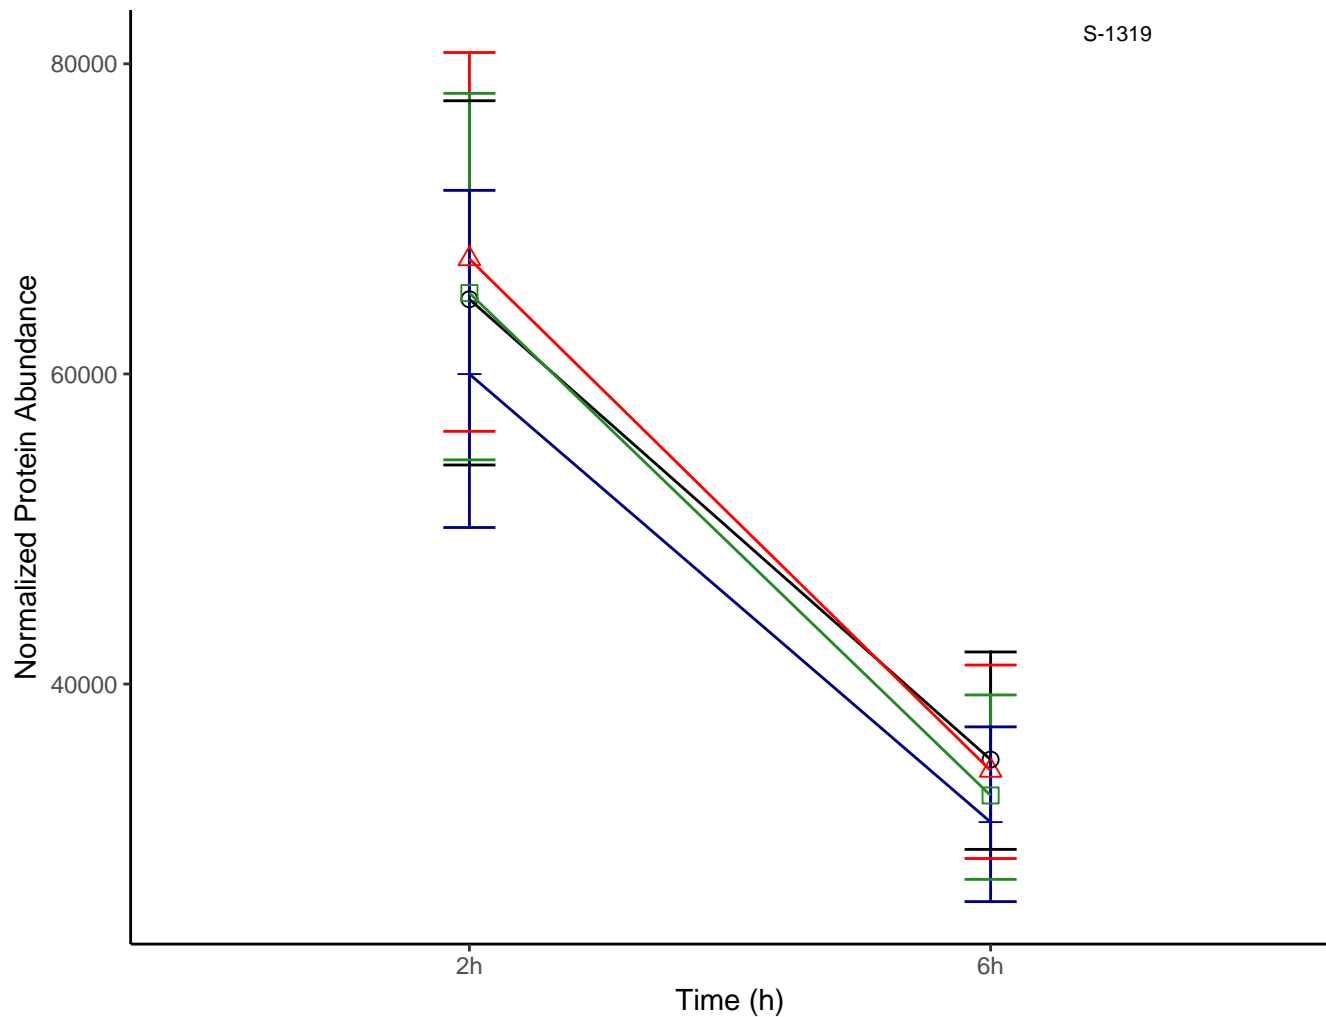

- SA564
- △ SA564- $\Delta$ *hptRS*
- SA564- $\Delta$ *ccpA*
- + SA564- $\Delta$ *hptRS/ccpA*

## RL22\_STAAM

S-1320

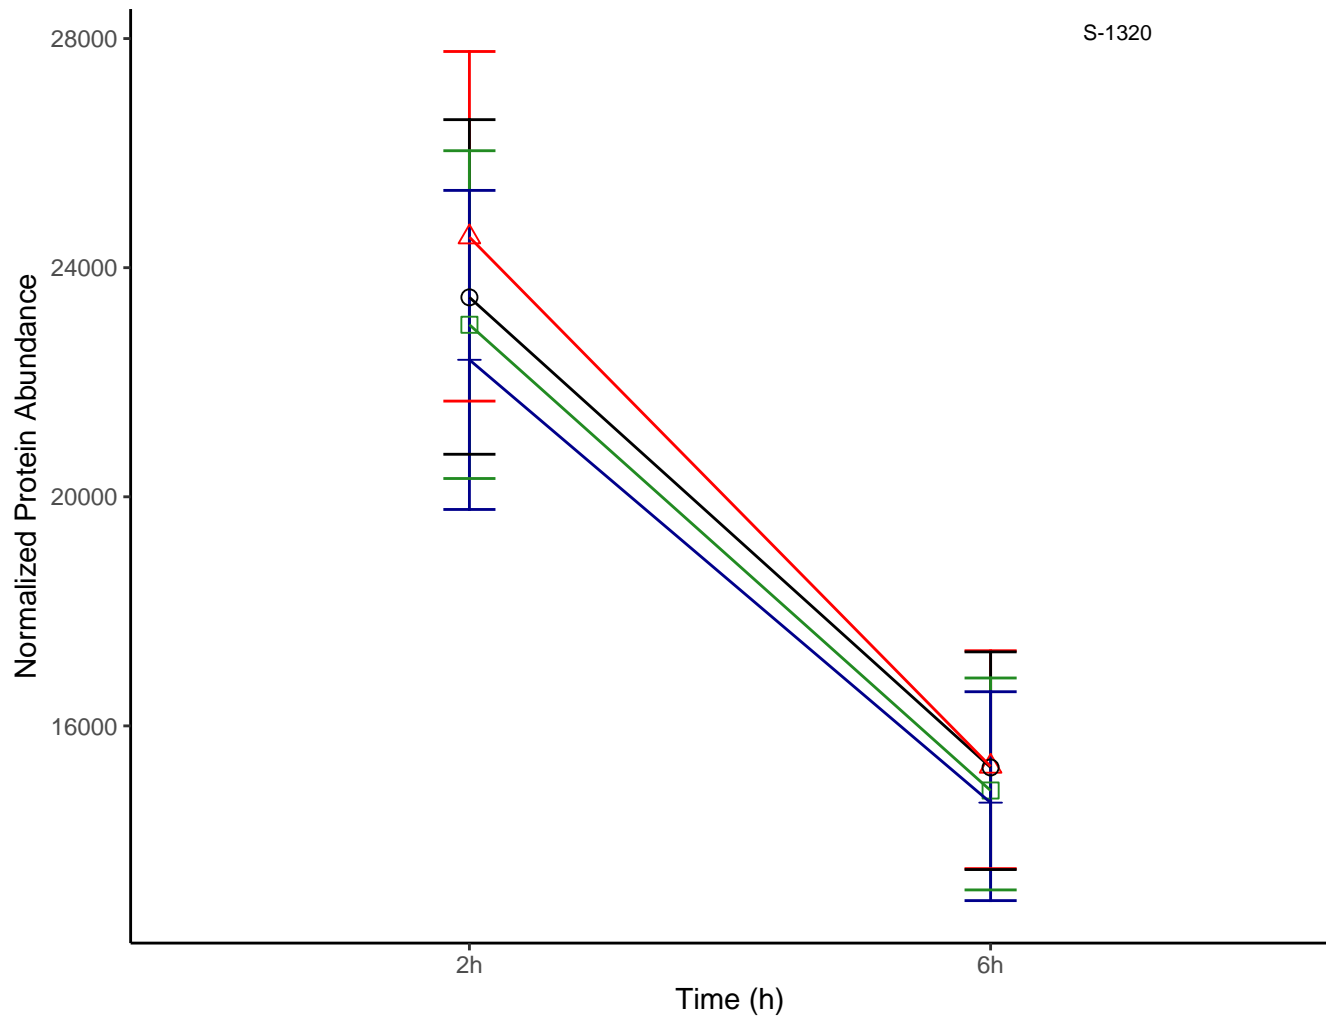

- SA564
- △ SA564- $\Delta$ *hptRS*
- SA564- $\Delta$ *ccpA*
- + SA564- $\Delta$ *hptRS/ccpA*



## RL23\_STAAM

S-1321

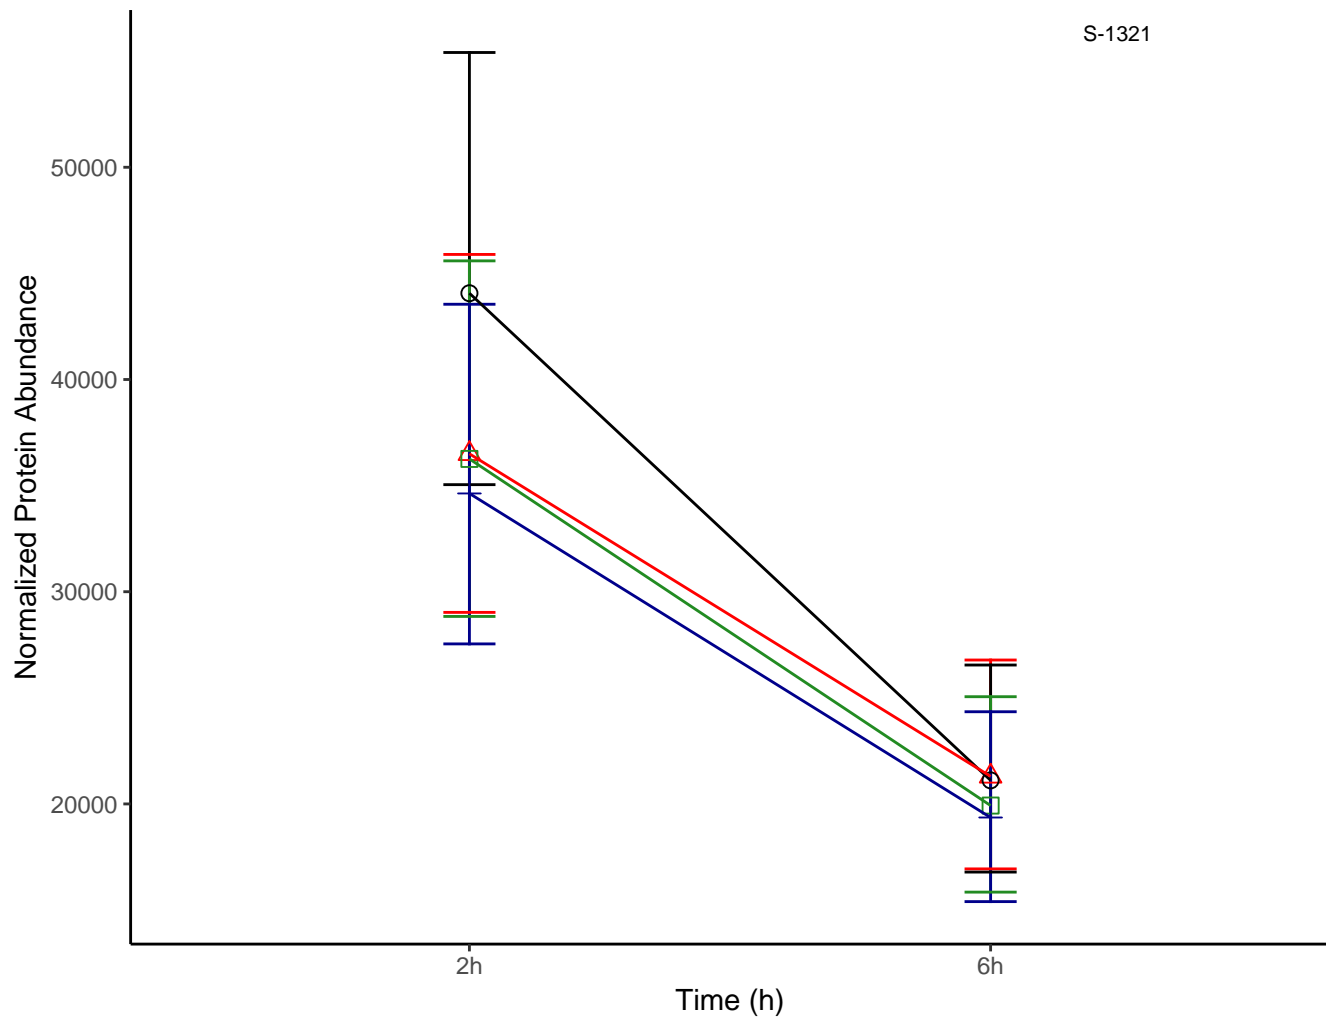

- SA564
- △ SA564- $\Delta hptRS$
- SA564- $\Delta ccpA$
- + SA564- $\Delta hptRS/ccpA$

# RL24\_STAAM

S-1322

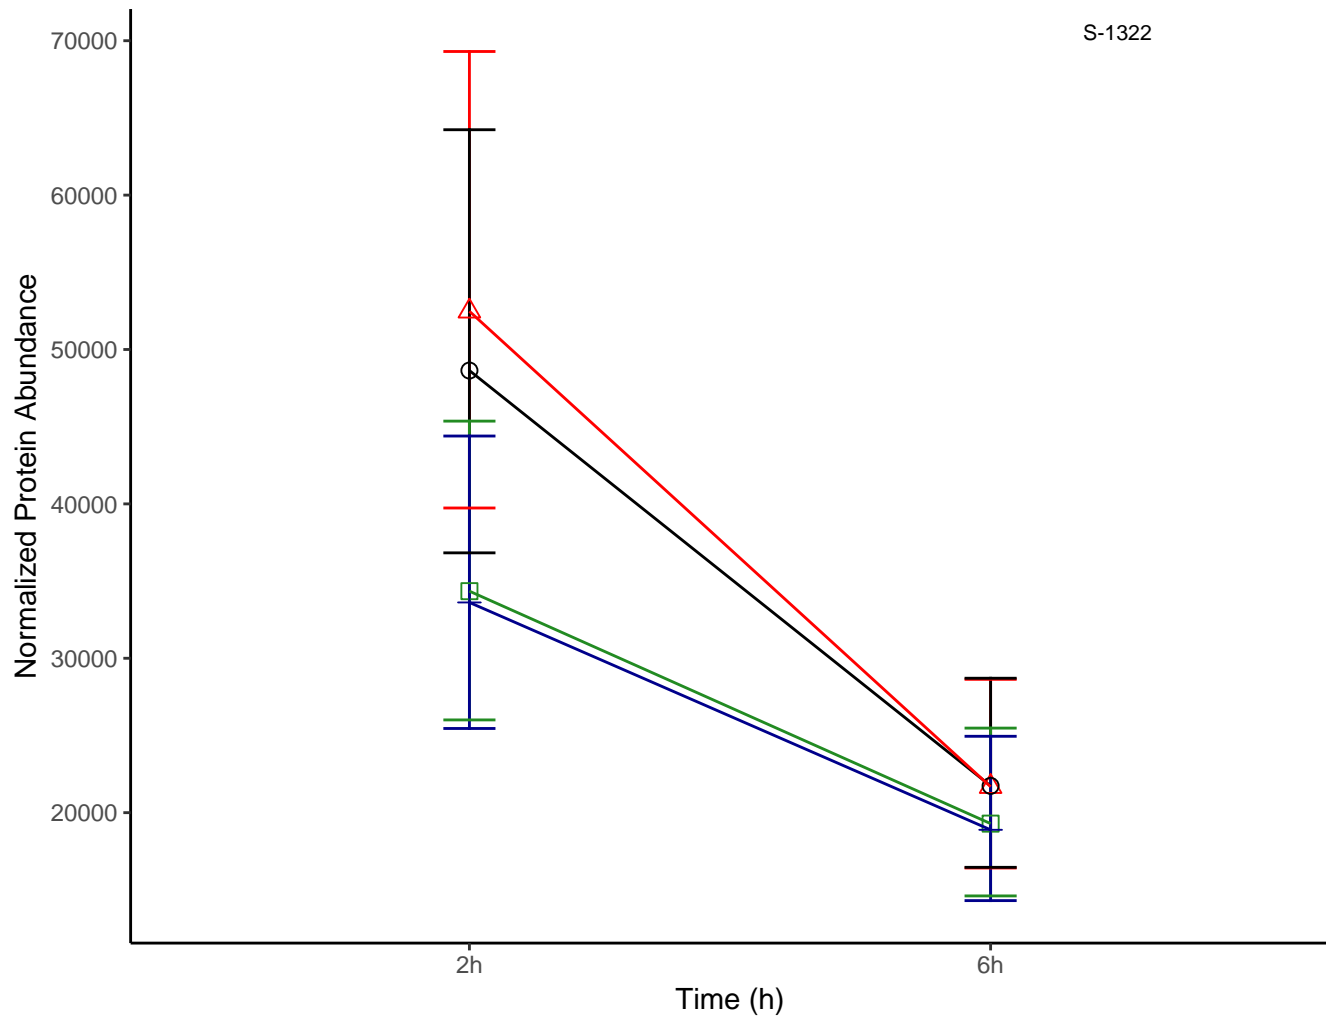

- SA564
- △ SA564- $\Delta hptRS$
- SA564- $\Delta ccpA$
- + SA564- $\Delta hptRS/ccpA$

# RL25\_STAAM

S-1323

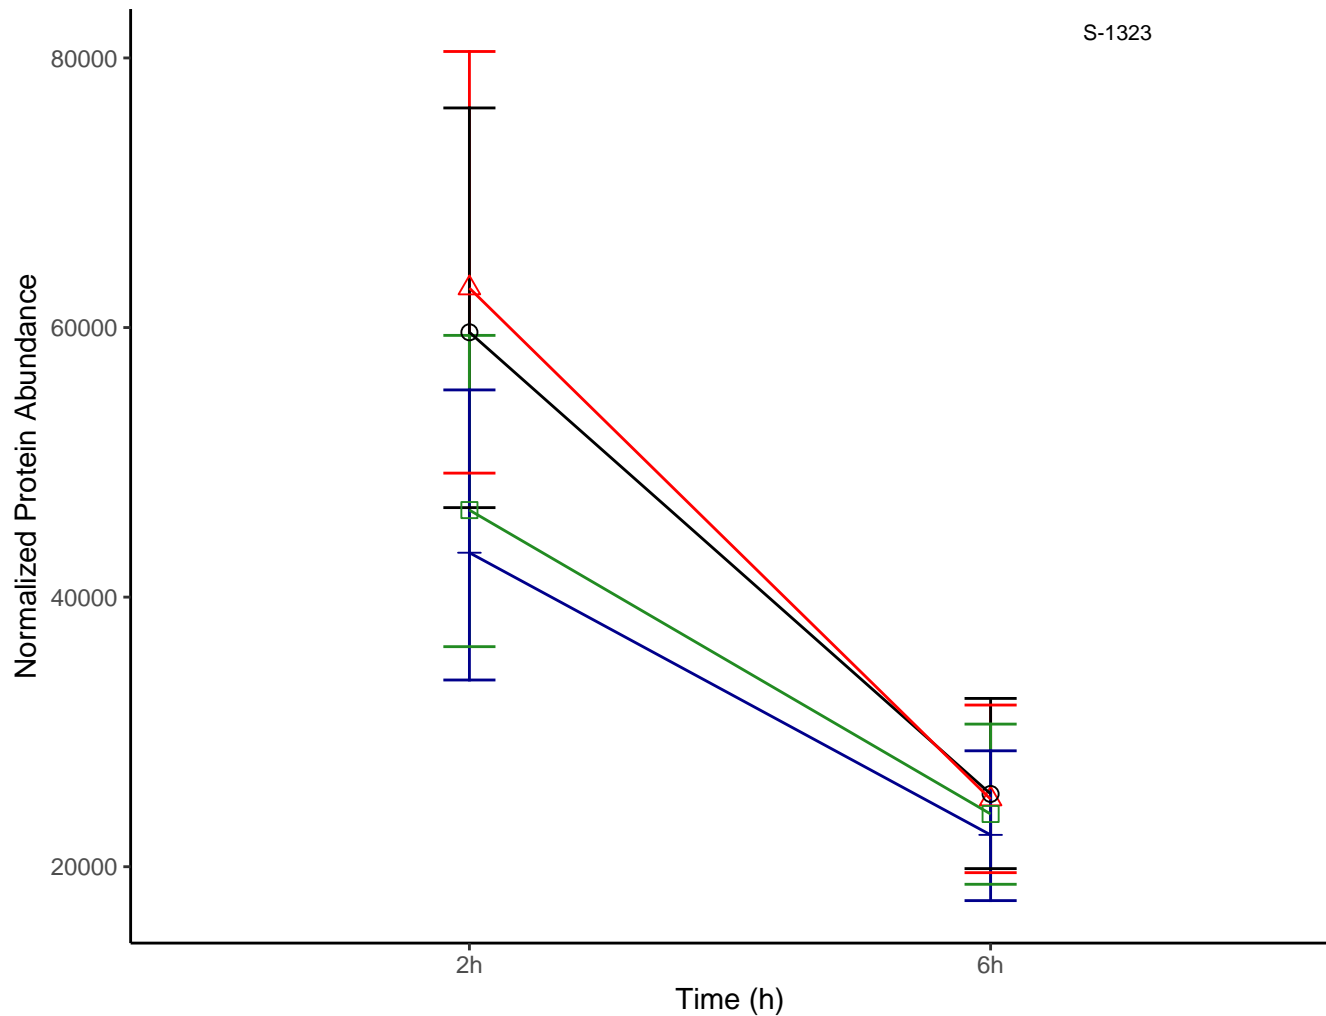

- SA564
- △ SA564- $\Delta hptRS$
- SA564- $\Delta ccpA$
- + SA564- $\Delta hptRS/ccpA$

# RL27\_STAAM

S-1324

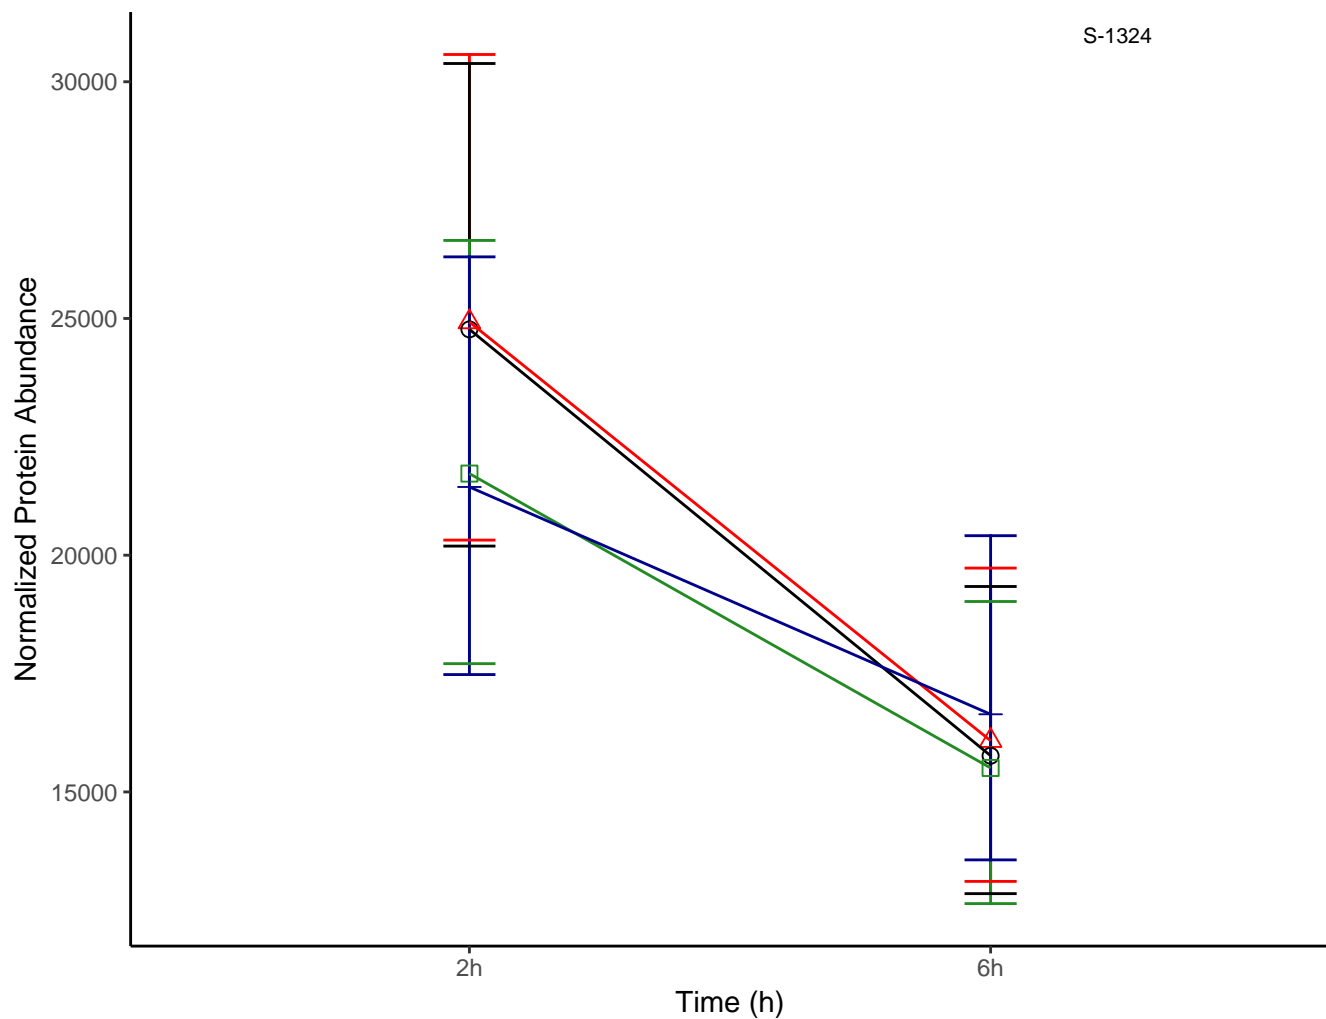

- SA564
- △ SA564- $\Delta$ *hptRS*
- SA564- $\Delta$ *ccpA*
- + SA564- $\Delta$ *hptRS/ccpA*

# RL28\_STAAM

S-1325

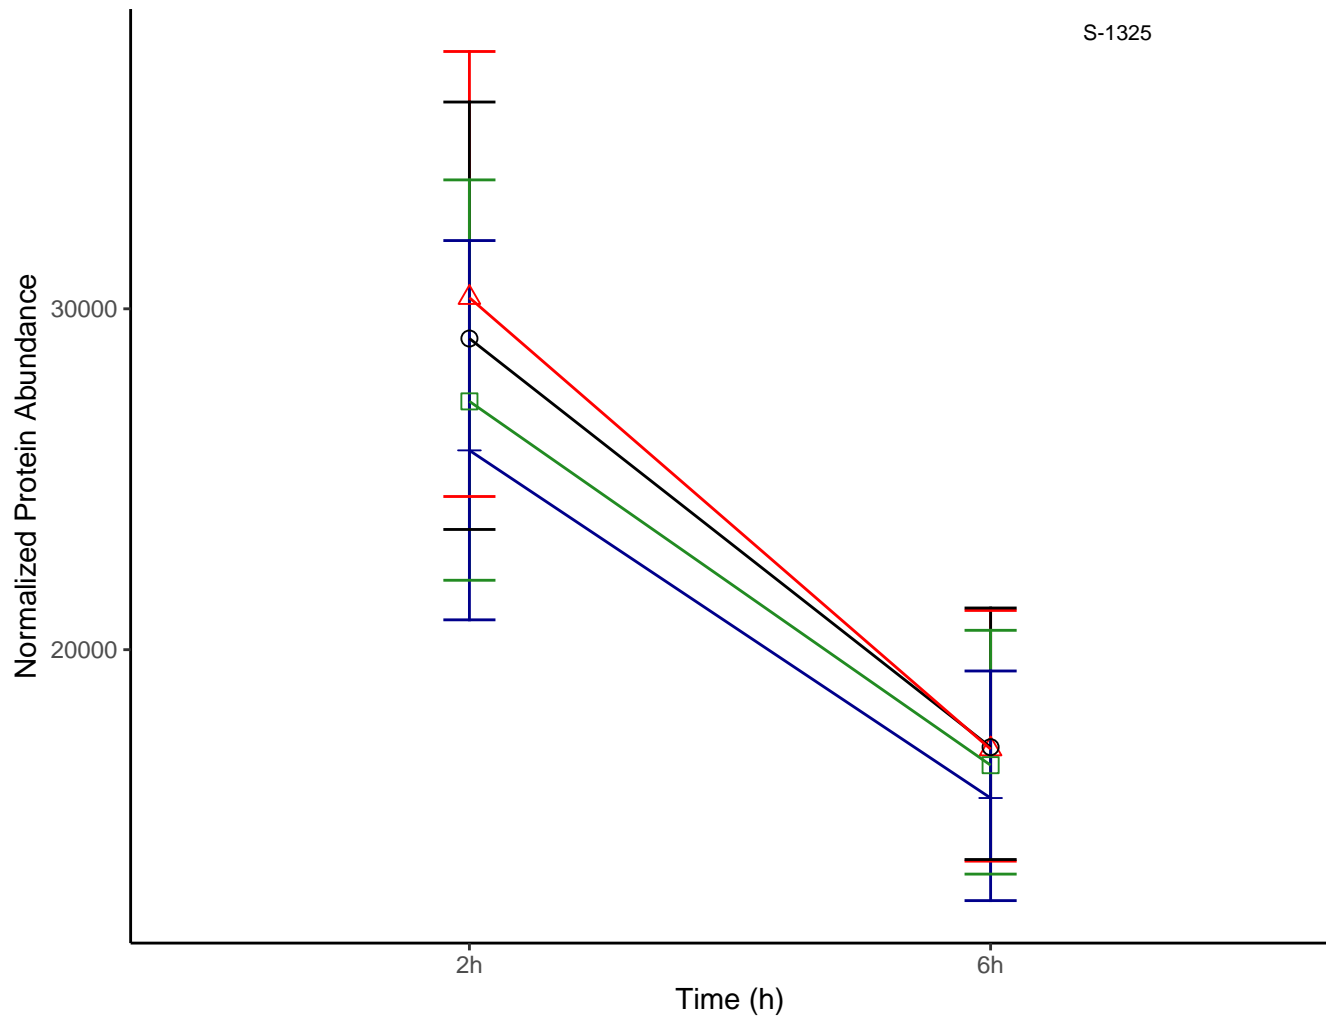

- SA564
- △ SA564- $\Delta hptRS$
- SA564- $\Delta ccpA$
- + SA564- $\Delta hptRS/ccpA$

# RL29\_STAAM

S-1326

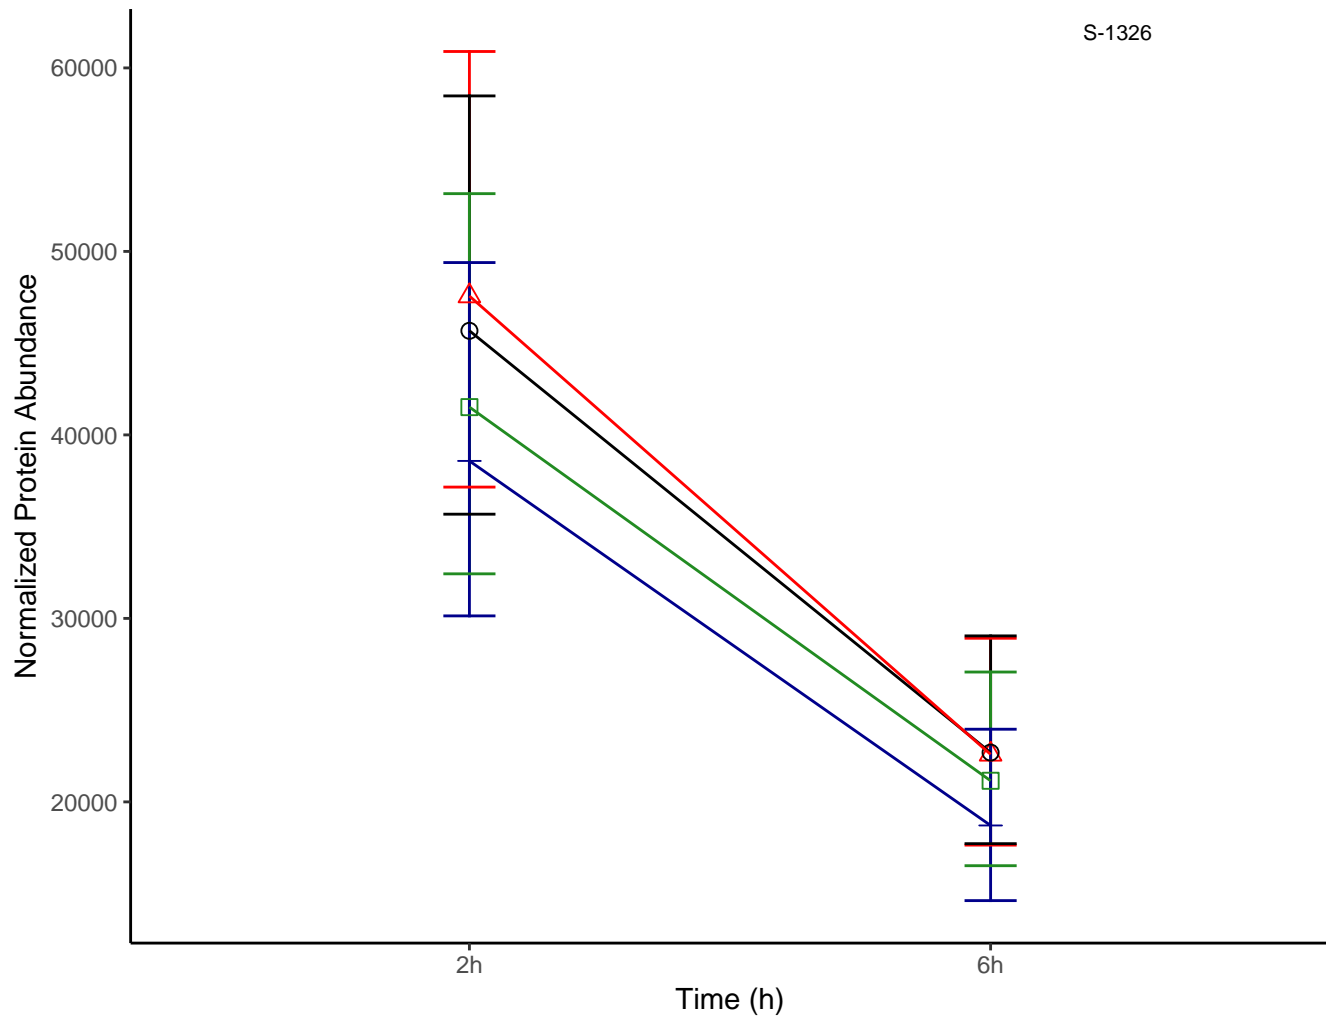

- SA564
- △ SA564- $\Delta$ *hptRS*
- SA564- $\Delta$ *ccpA*
- + SA564- $\Delta$ *hptRS/ccpA*

# RL3\_STAAM

S-1327

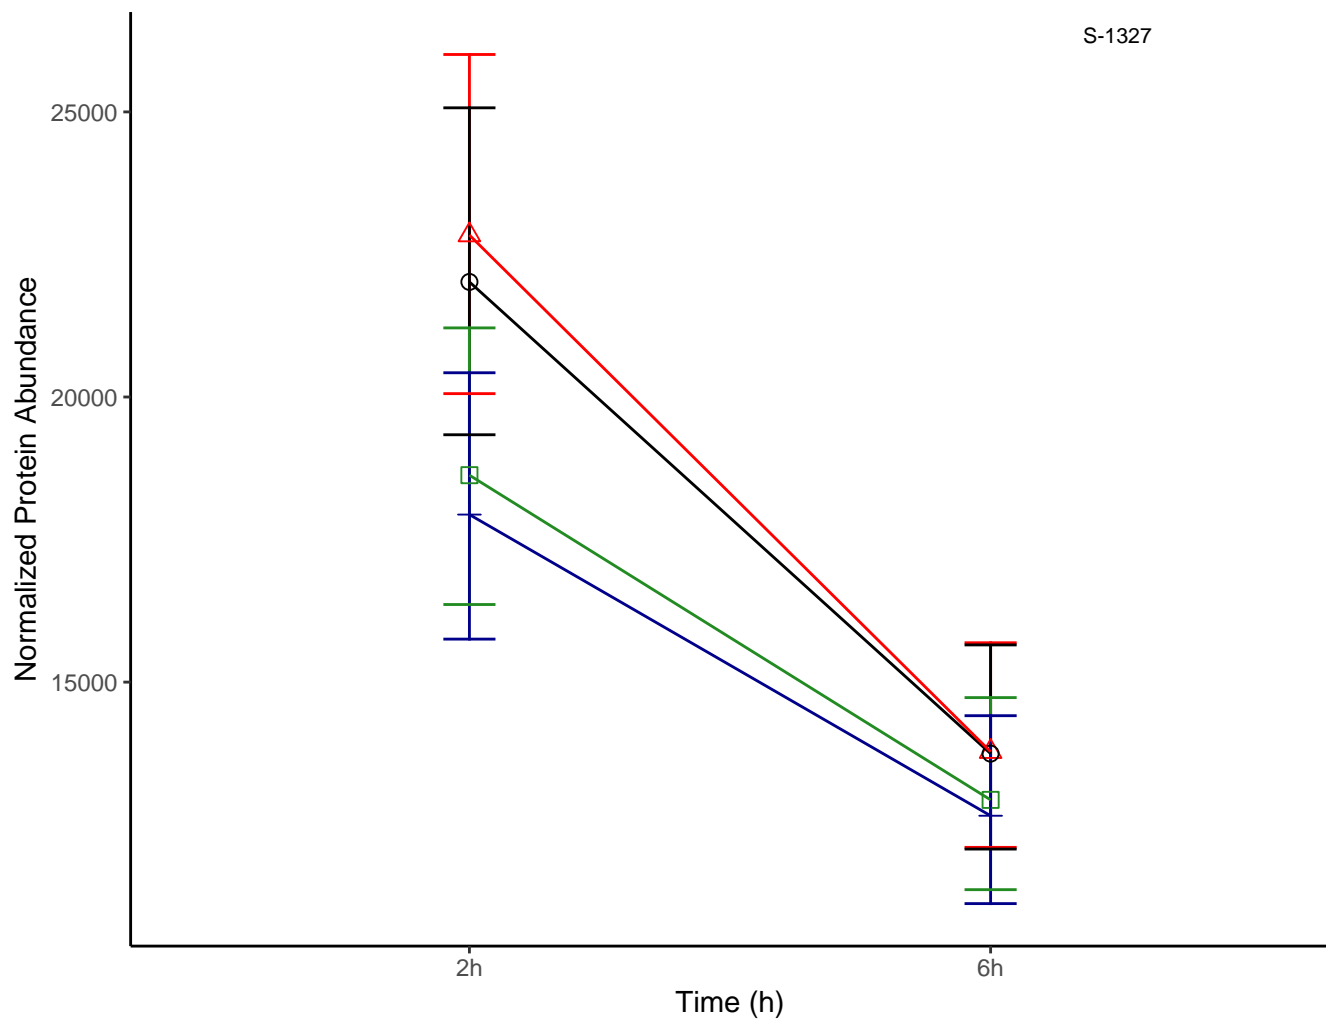

- SA564
- △ SA564- $\Delta hptRS$
- SA564- $\Delta ccpA$
- + SA564- $\Delta hptRS/ccpA$

## RL30\_STAAM

S-1328

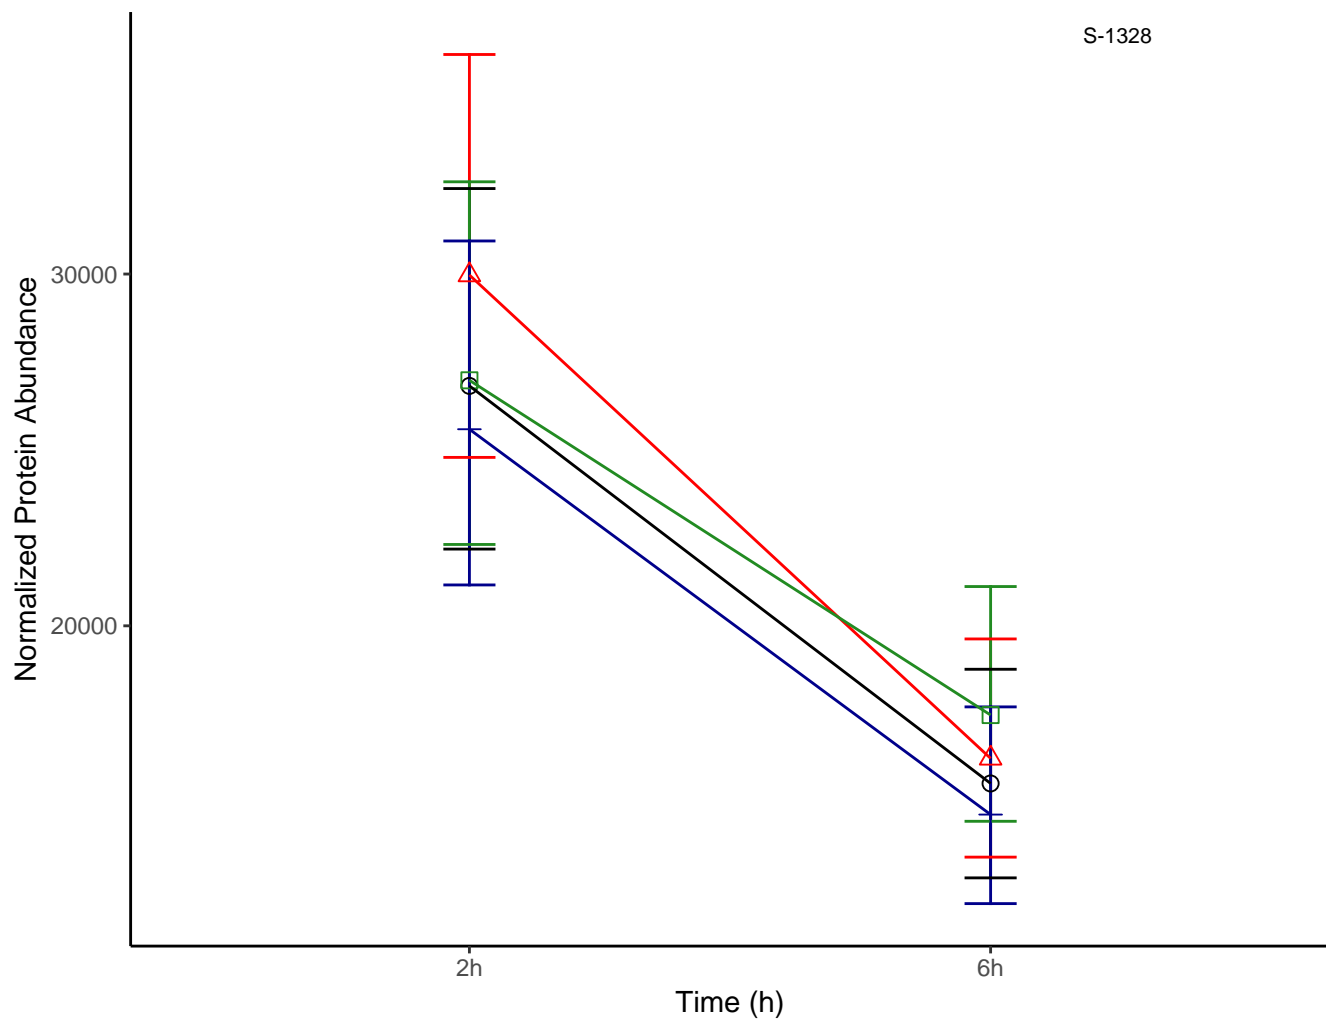

- SA564
- △ SA564-ΔhptRS
- SA564-ΔccpA
- + SA564-ΔhptRS/ccpA



## RL31B\_STAAM

S-1329

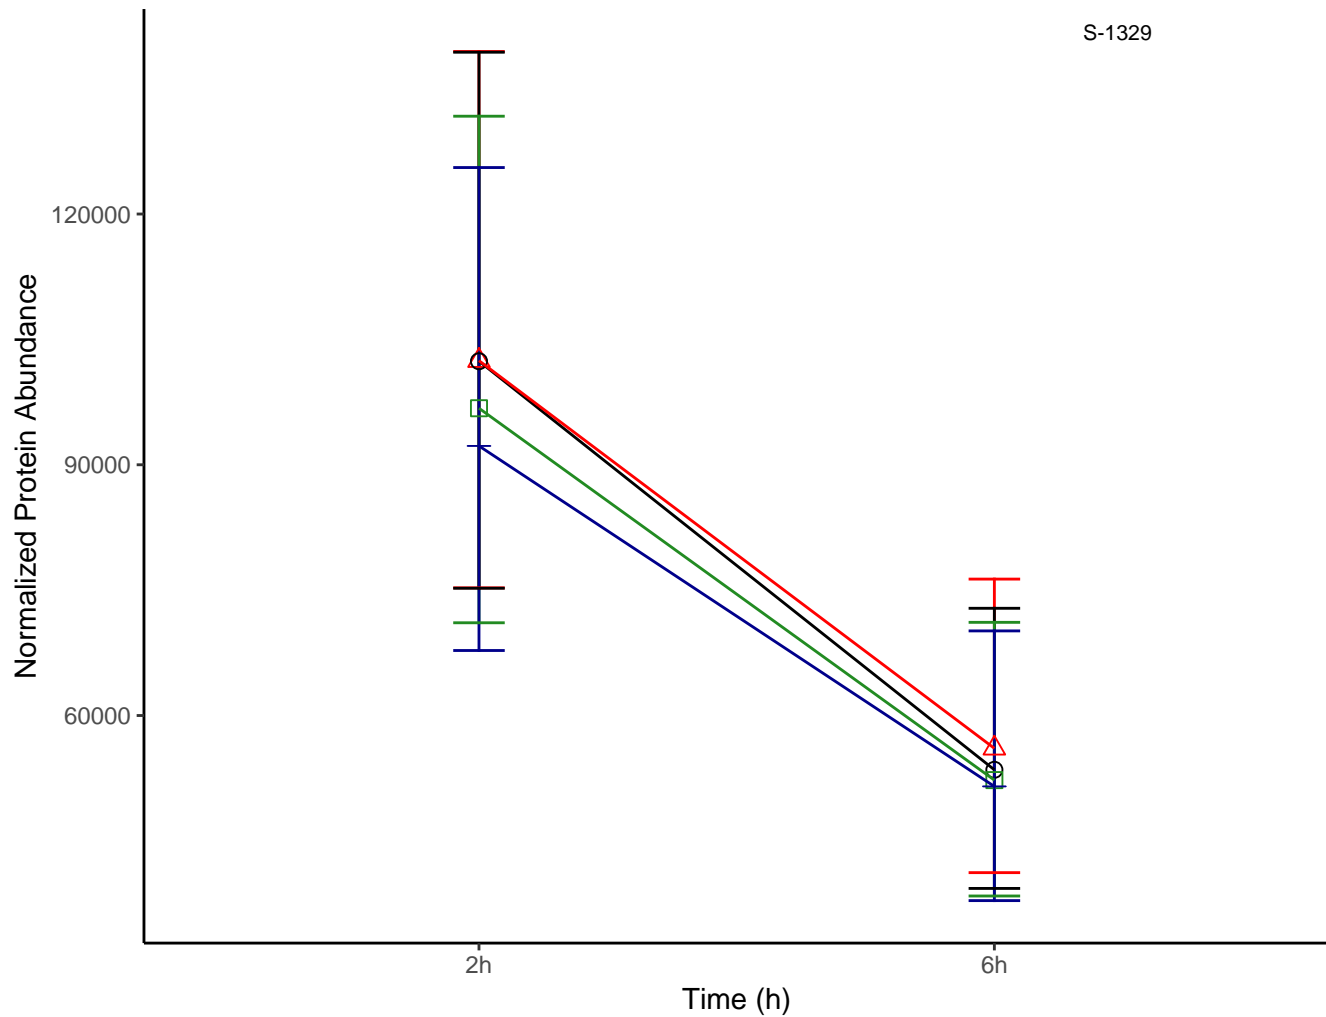

- SA564
- △ SA564- $\Delta hptRS$
- SA564- $\Delta ccpA$
- + SA564- $\Delta hptRS/ccpA$

# RL32\_STAAM

S-1330

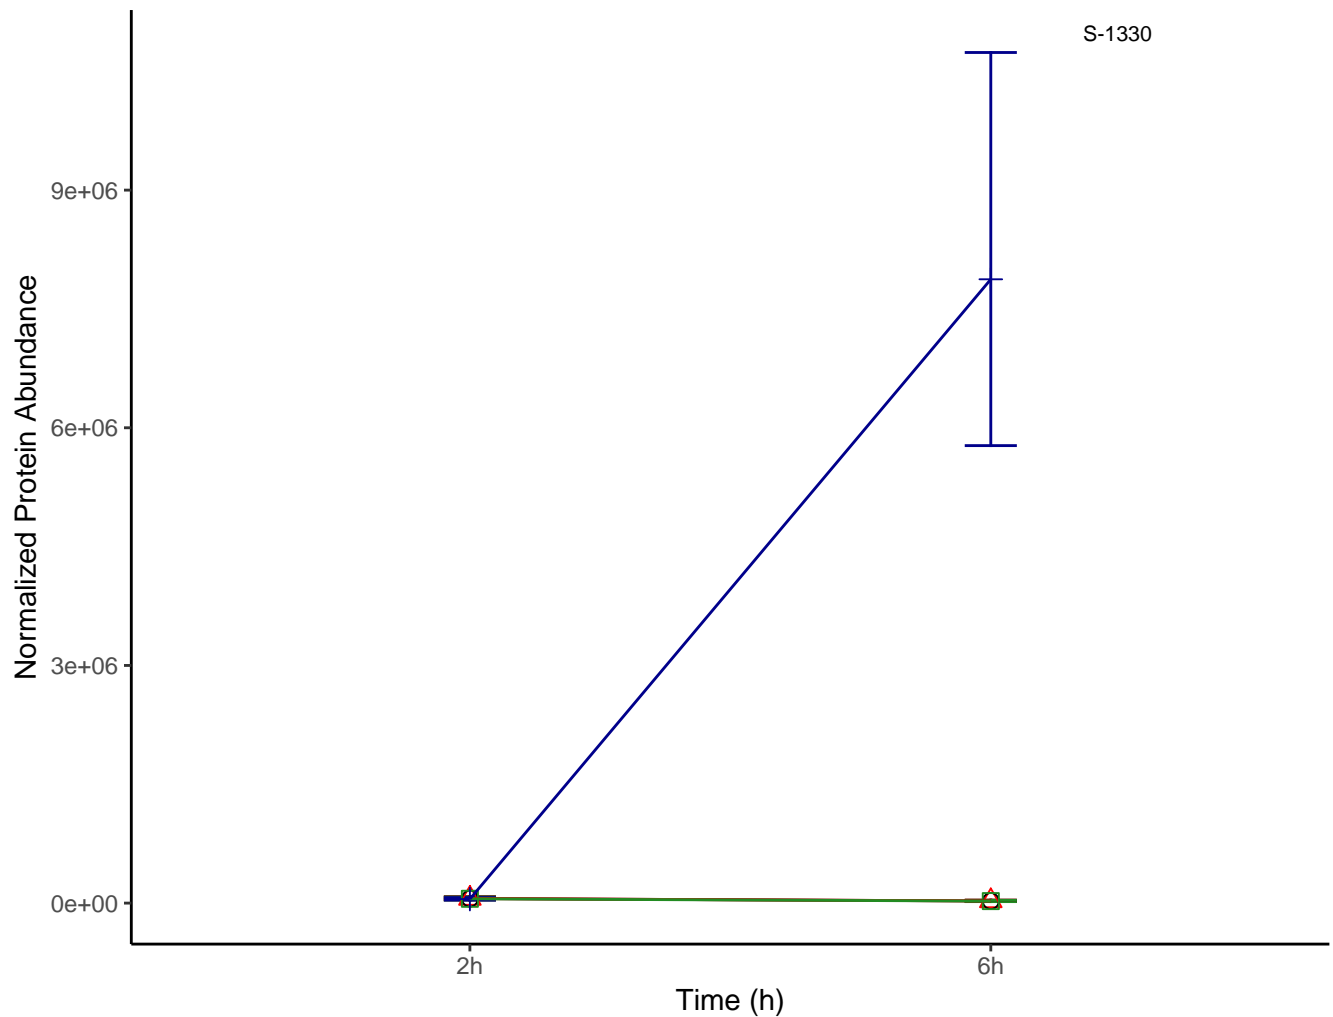

- SA564
- △ SA564- $\Delta hptRS$
- SA564- $\Delta ccpA$
- + SA564- $\Delta hptRS/ccpA$

# RL331\_STAAM

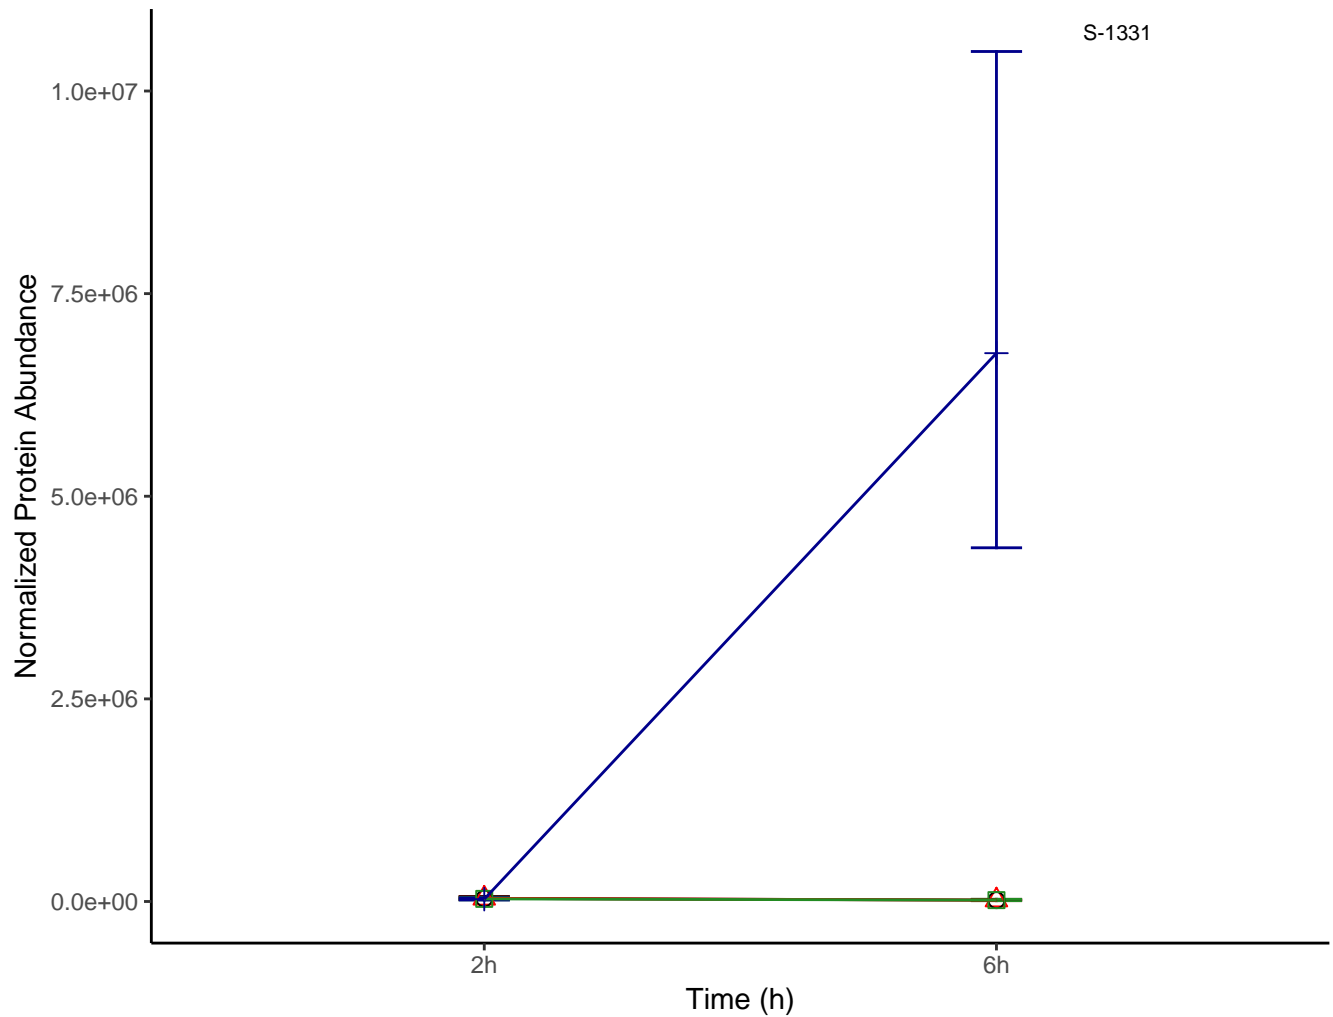

- SA564
- △ SA564- $\Delta hptRS$
- SA564- $\Delta ccpA$
- + SA564- $\Delta hptRS/ccpA$

# RL332\_STAAM

S-1332

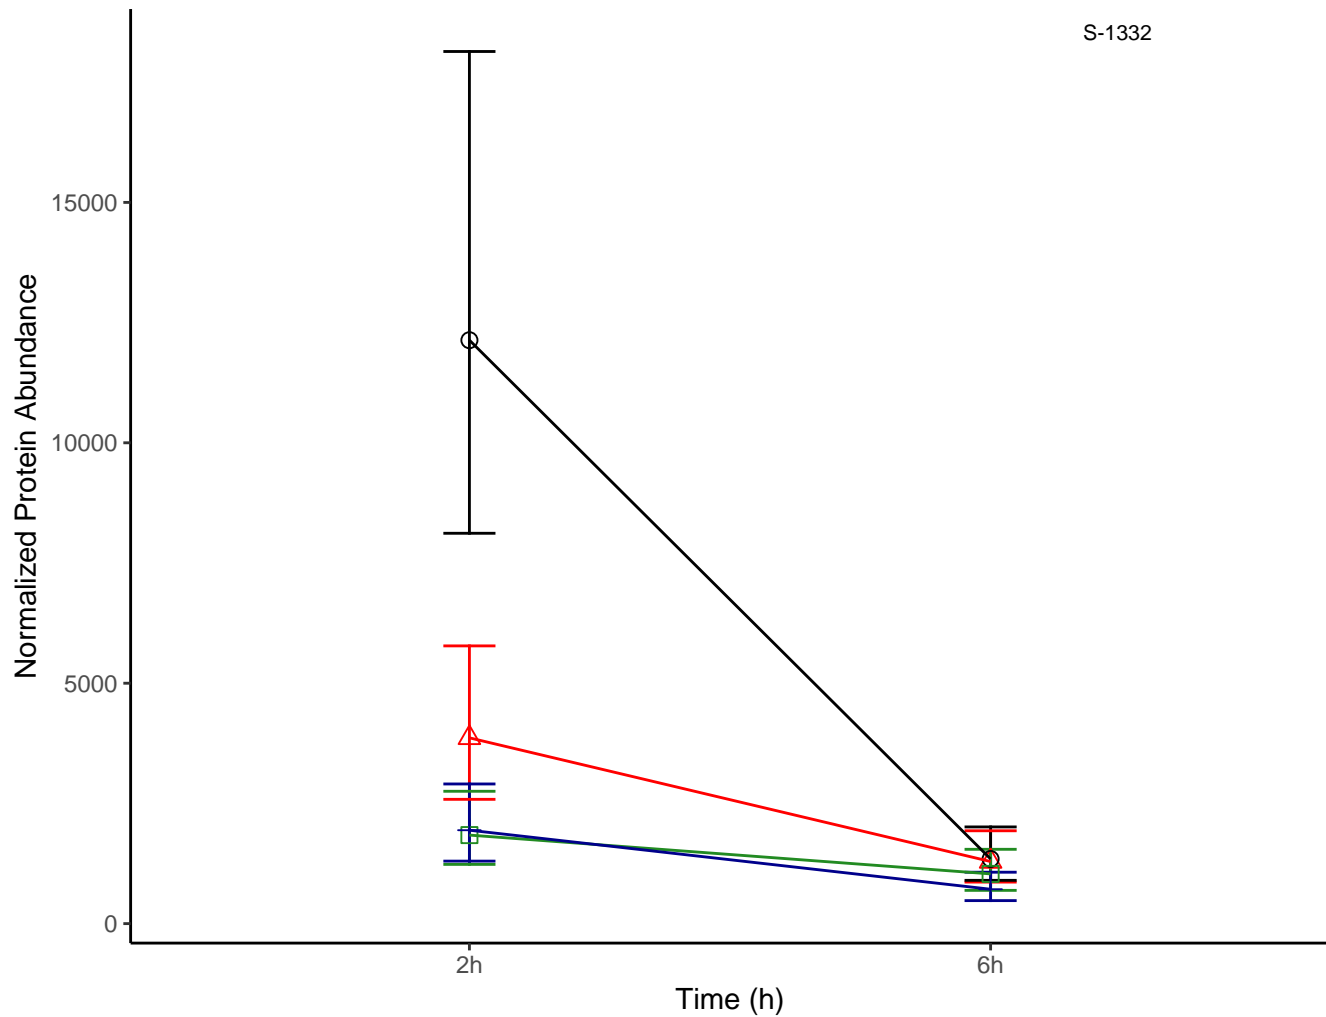

- SA564
- △ SA564- $\Delta$ *hptRS*
- SA564- $\Delta$ *ccpA*
- + SA564- $\Delta$ *hptRS/ccpA*

# RL35\_STAAM

S-1333

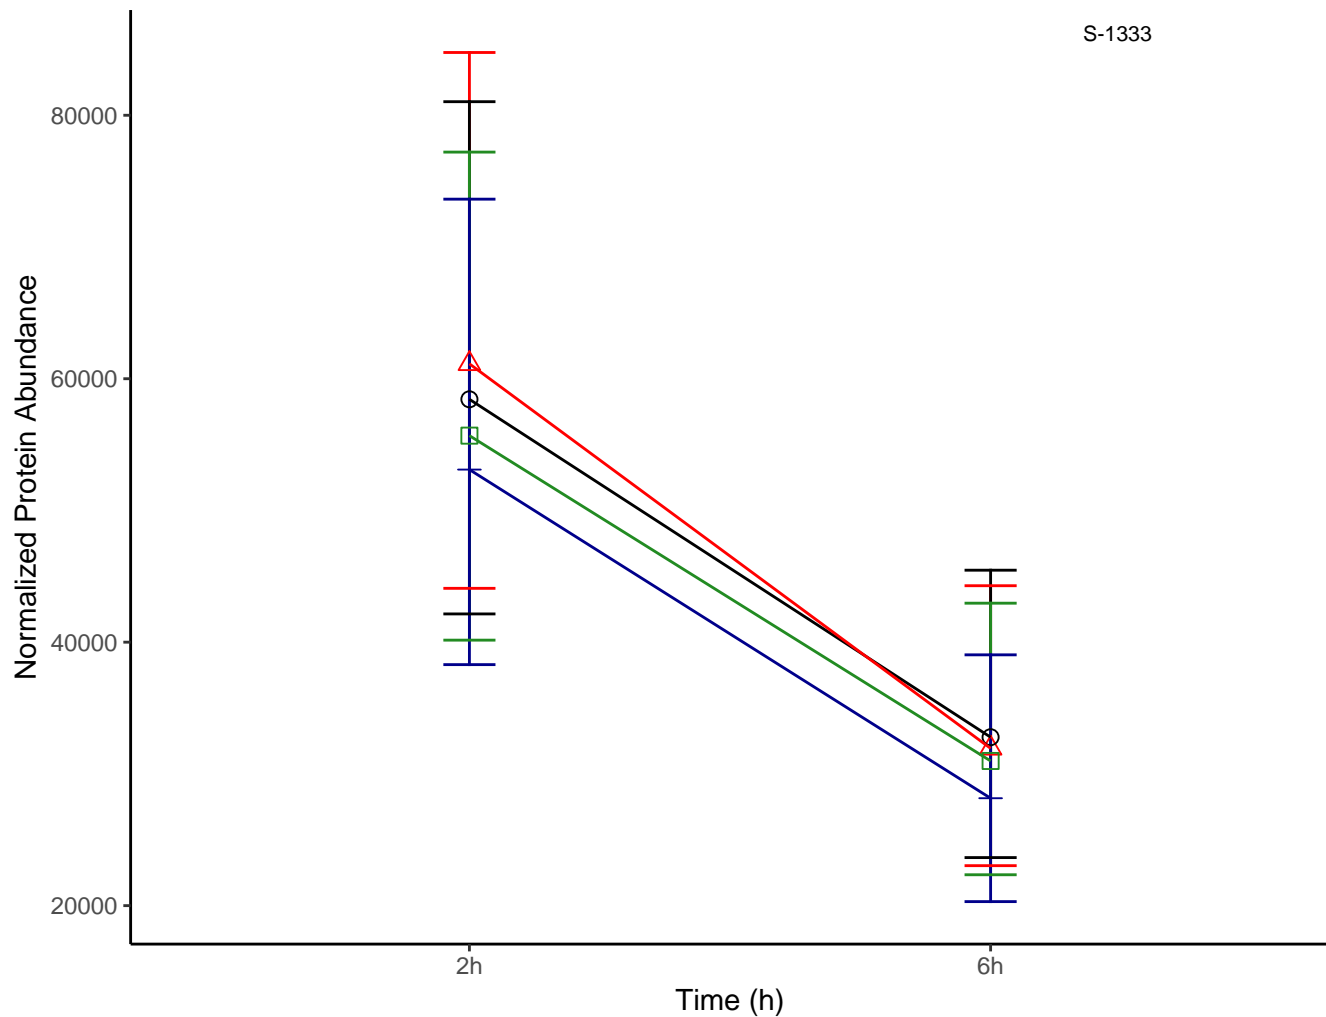

- SA564
- △ SA564- $\Delta hptRS$
- SA564- $\Delta ccpA$
- + SA564- $\Delta hptRS/ccpA$

# RL36\_STAAM

S-1334

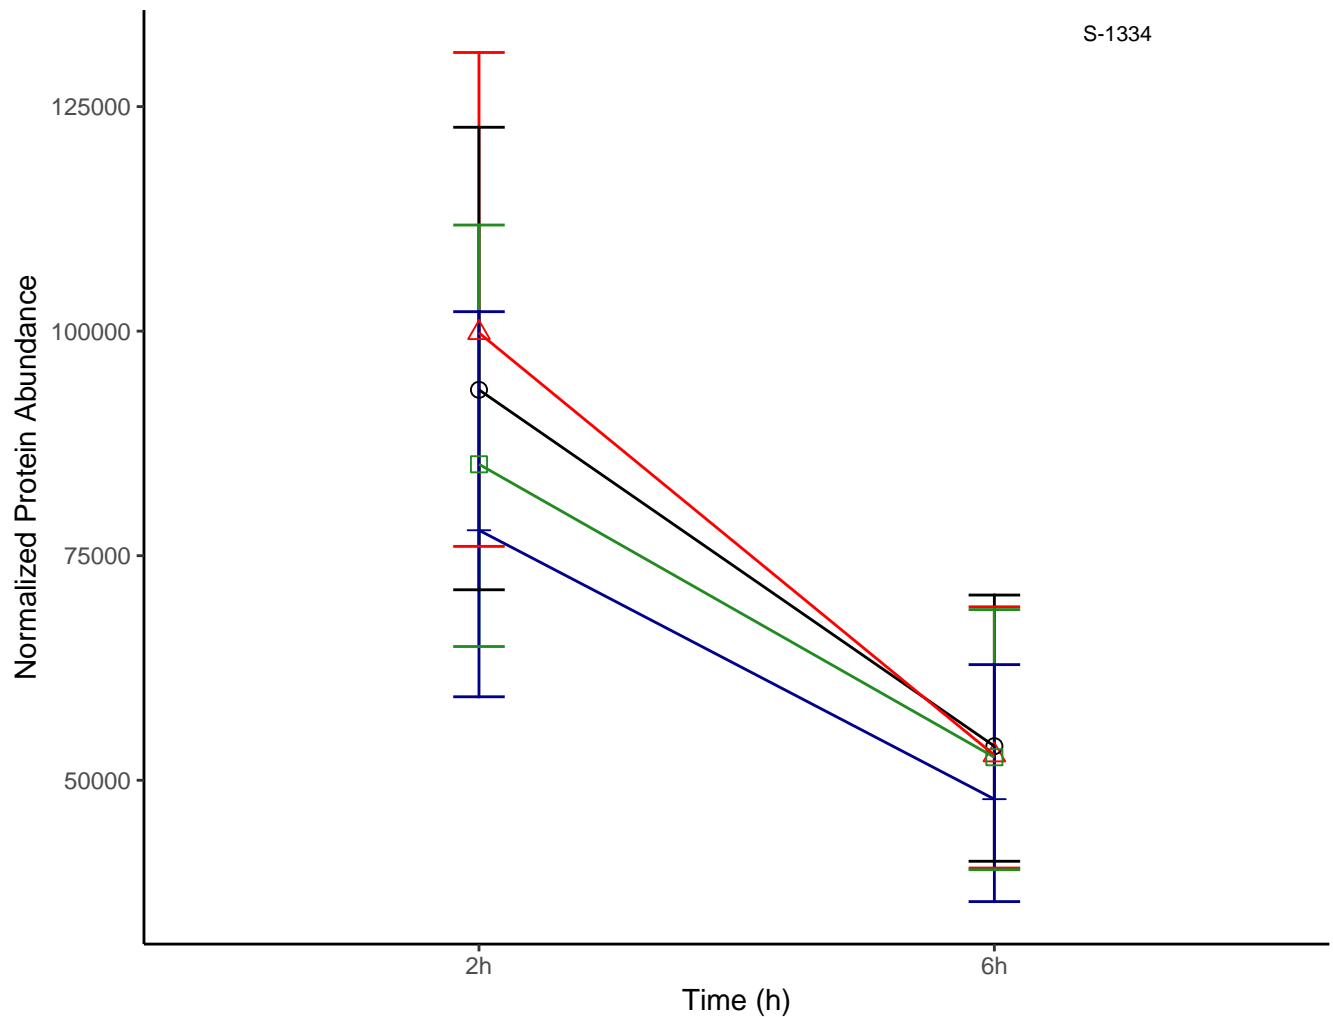

- SA564
- △ SA564- $\Delta hptRS$
- SA564- $\Delta ccpA$
- + SA564- $\Delta hptRS/ccpA$

# RL4\_STAAM

S-1335

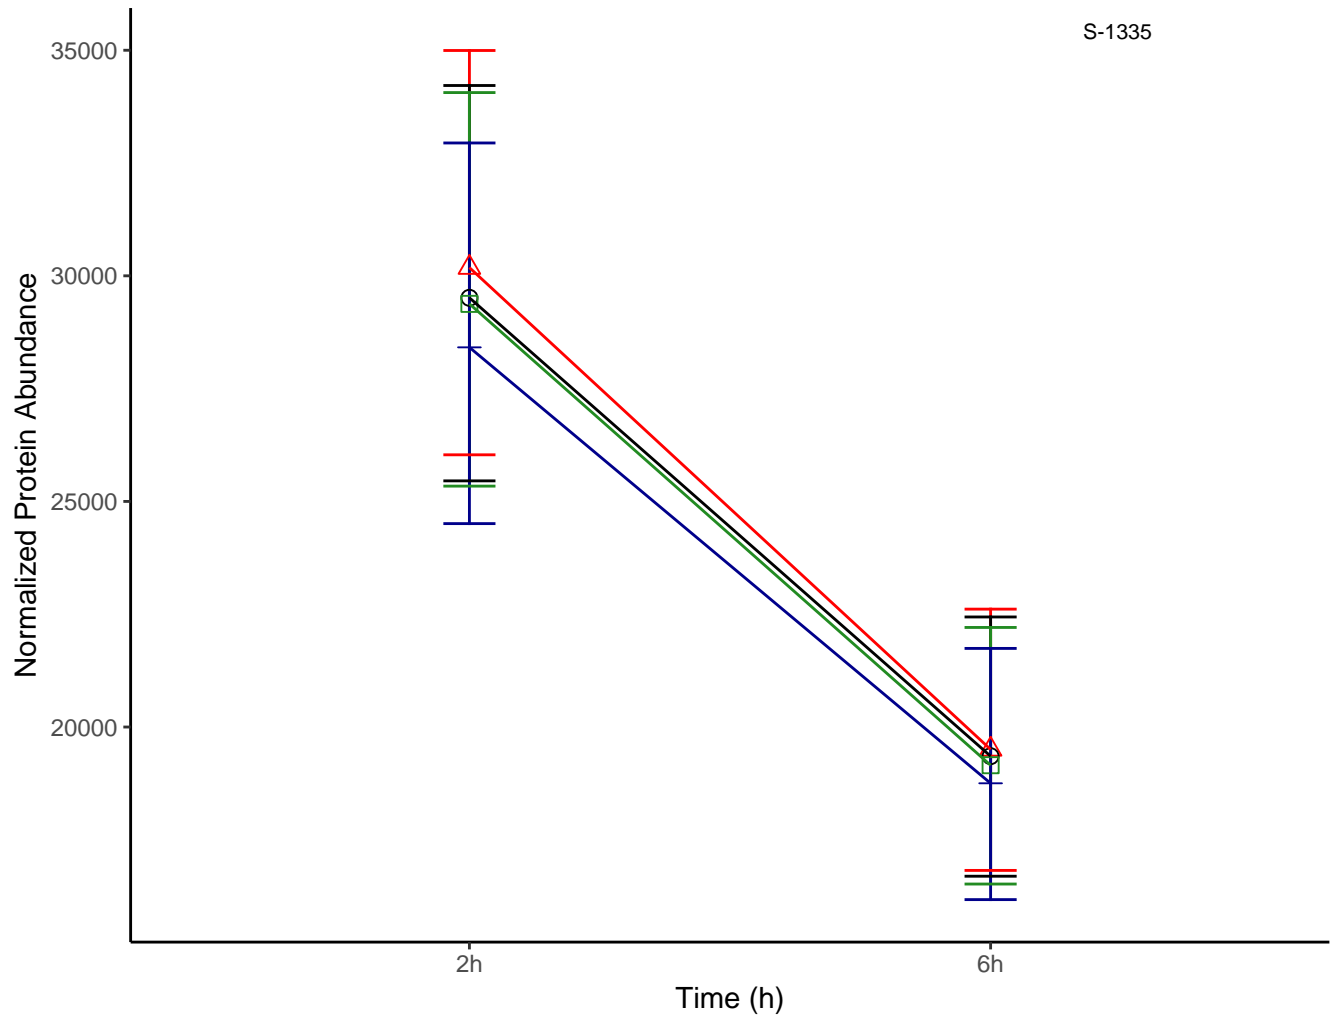

- SA564
- △ SA564- $\Delta hptRS$
- SA564- $\Delta ccpA$
- + SA564- $\Delta hptRS/ccpA$

# RL5\_STAAM

S-1336

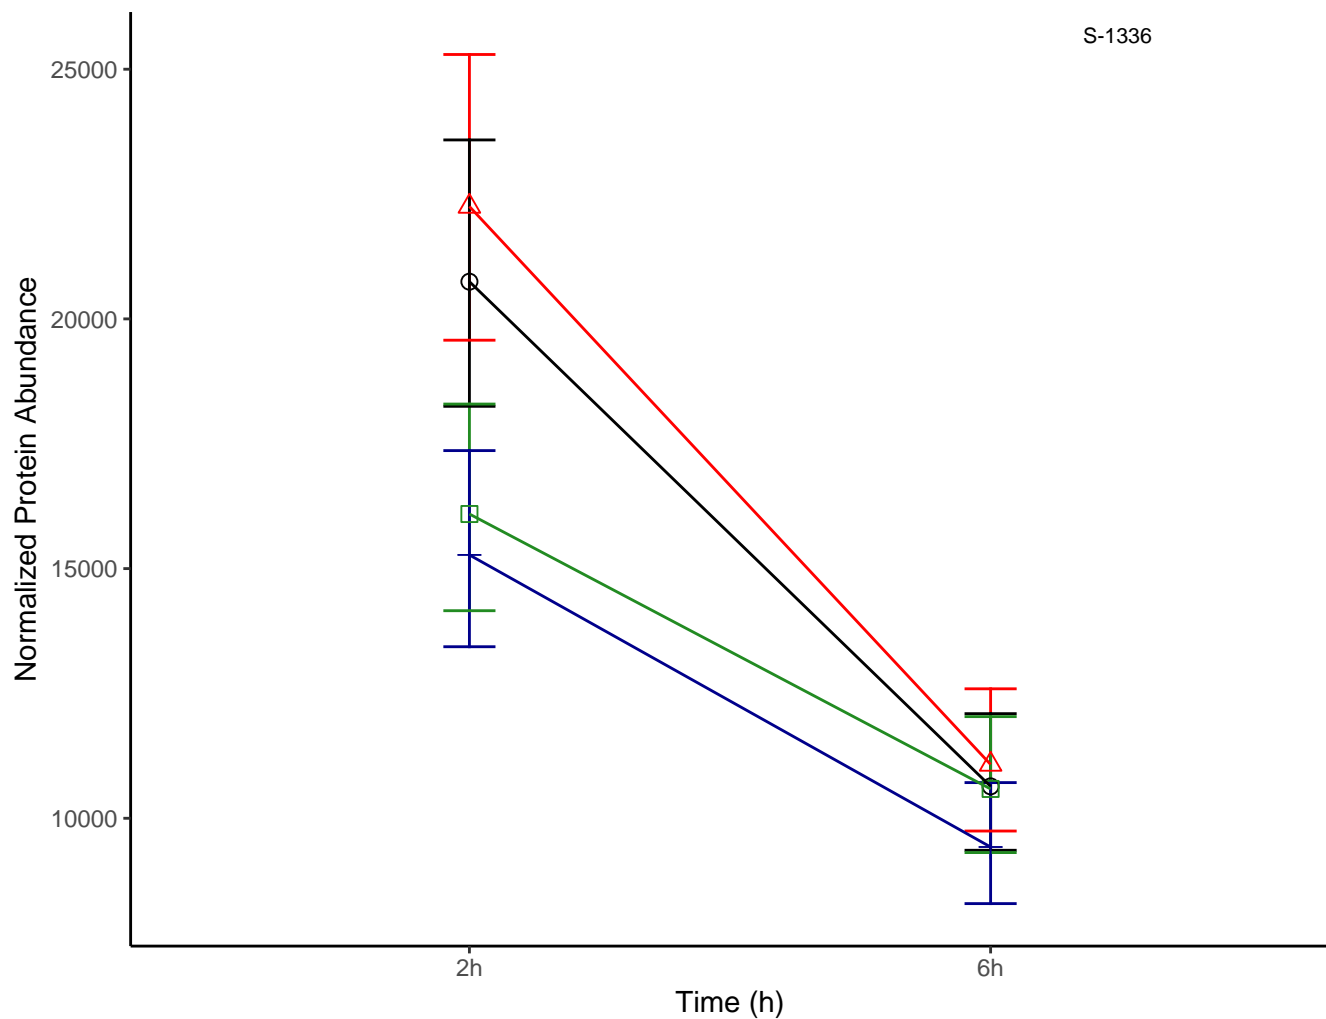

- SA564
- △ SA564- $\Delta$ *hptRS*
- SA564- $\Delta$ *ccpA*
- + SA564- $\Delta$ *hptRS/ccpA*



# RL6\_STAAM

S-1337

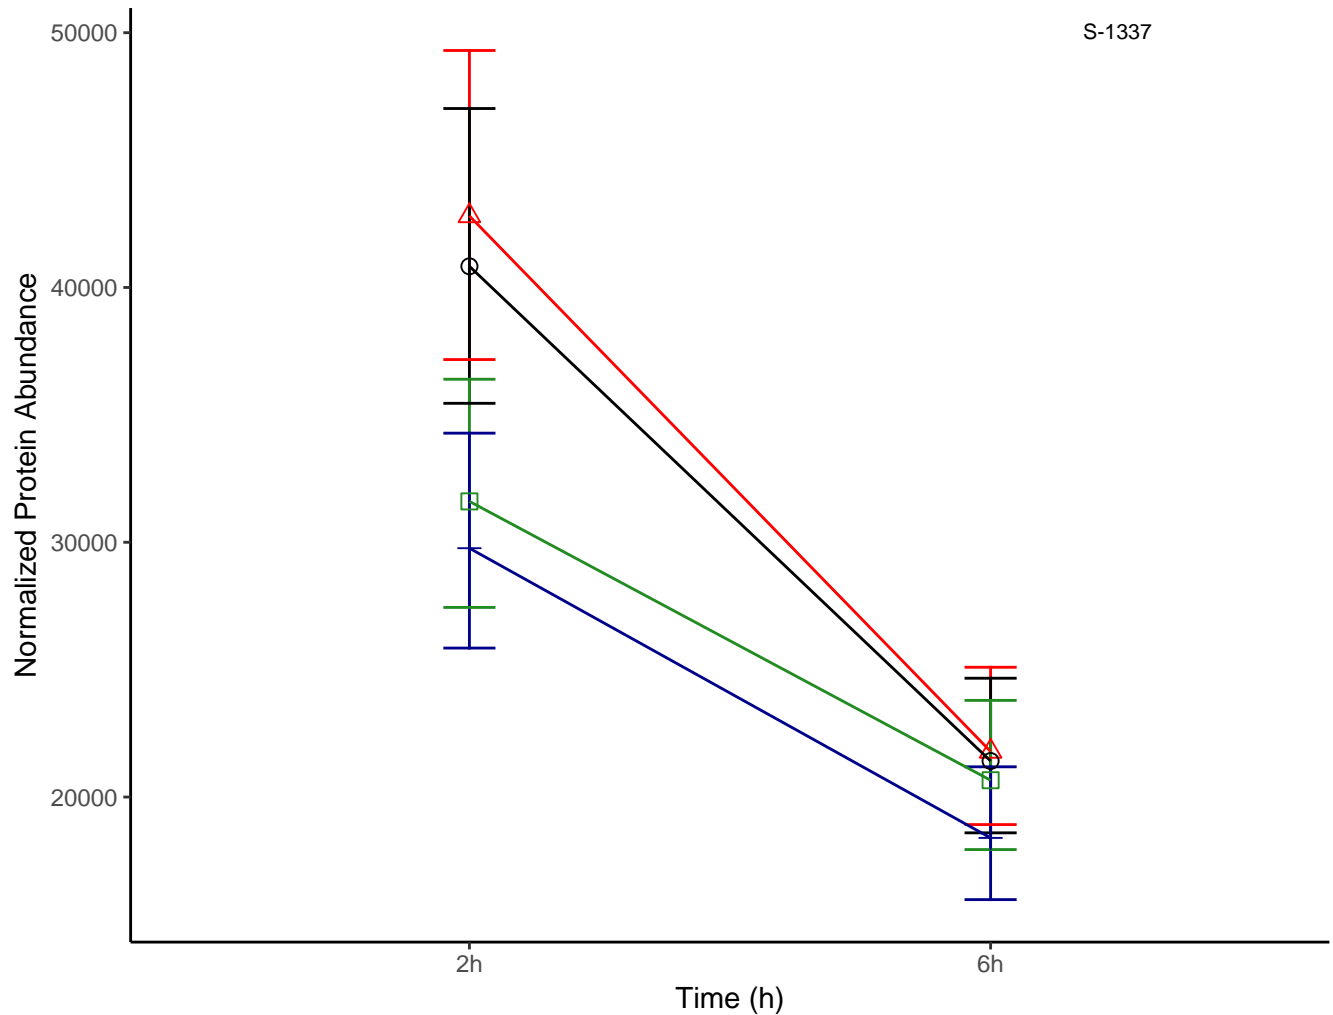

- SA564
- △ SA564- $\Delta$ *hptRS*
- SA564- $\Delta$ *ccpA*
- + SA564- $\Delta$ *hptRS/ccpA*

# RL7\_STAAM

S-1338

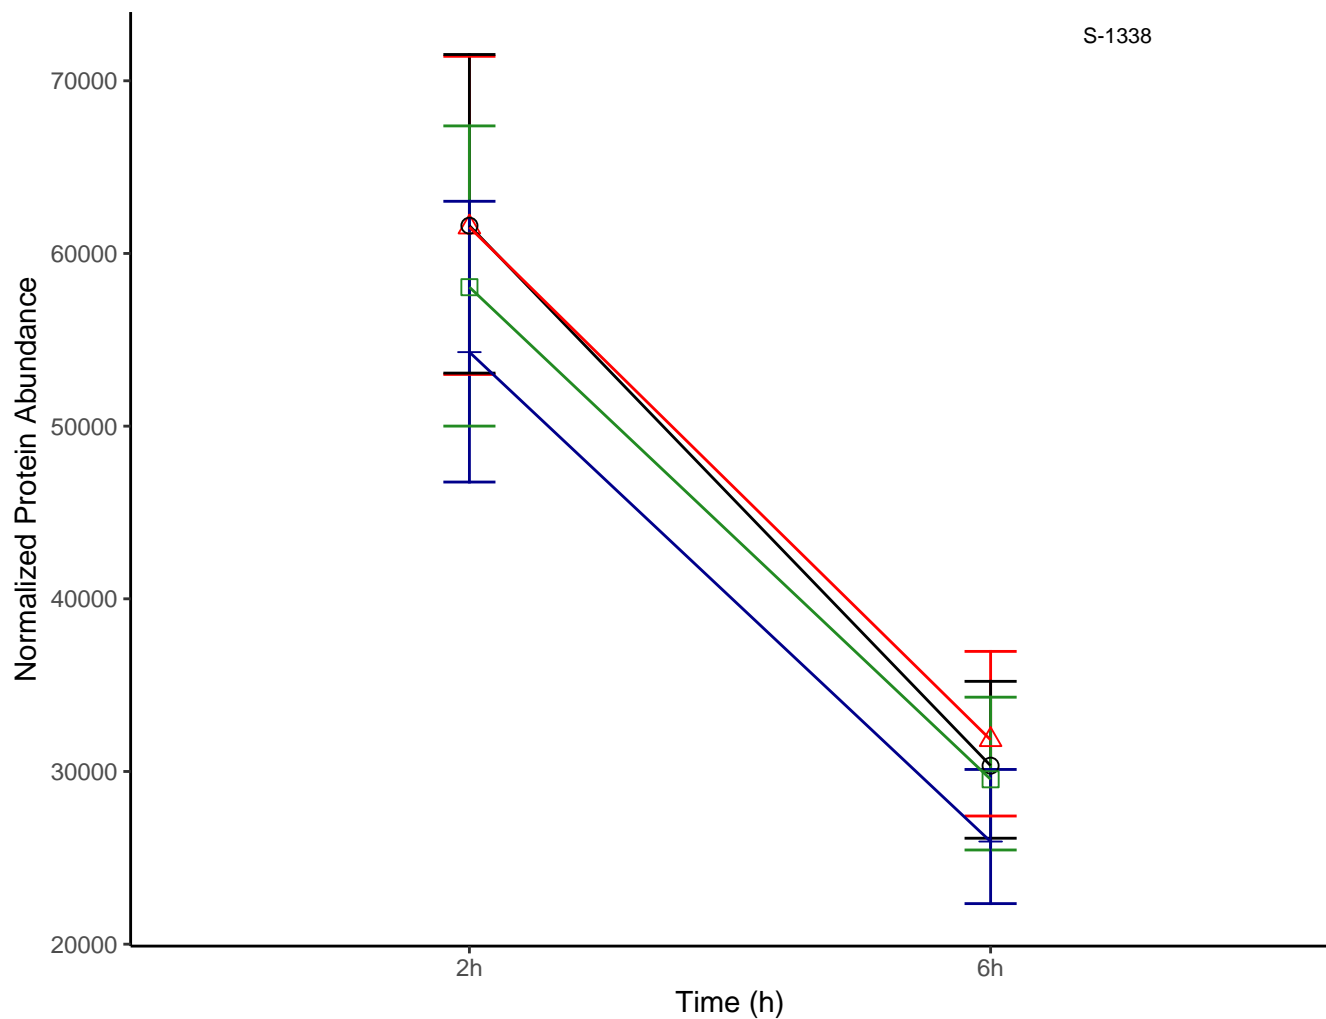

- SA564
- △ SA564- $\Delta$ *hptRS*
- SA564- $\Delta$ *ccpA*
- + SA564- $\Delta$ *hptRS/ccpA*

# RL9\_STAAM

S-1339

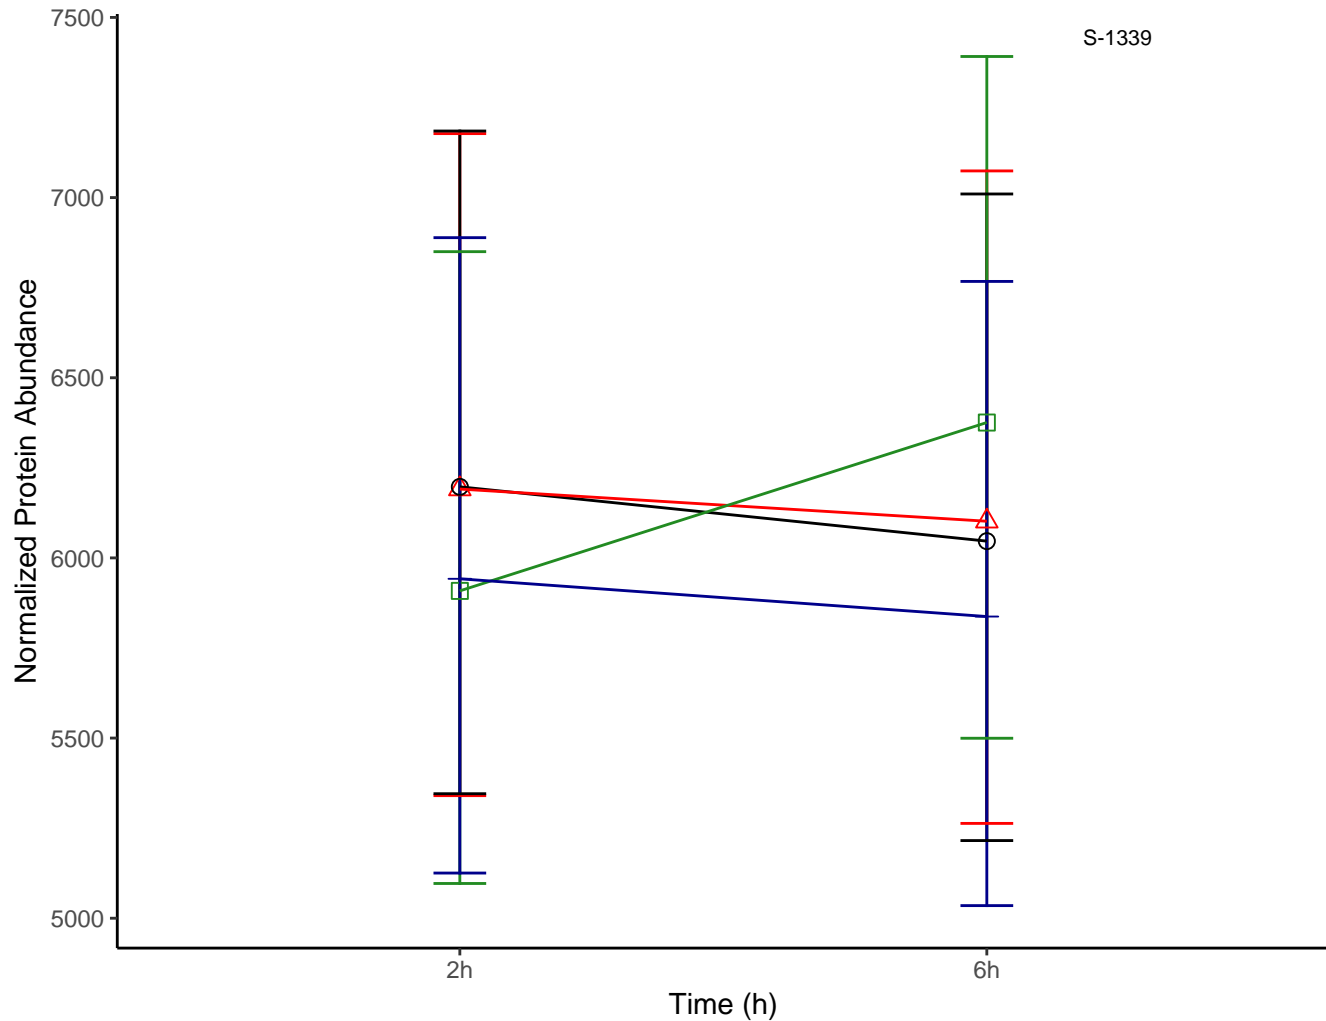

- SA564
- △ SA564- $\Delta$ *hptRS*
- SA564- $\Delta$ *ccpA*
- + SA564- $\Delta$ *hptRS/ccpA*

# RNJ1\_STAAM

S-1340

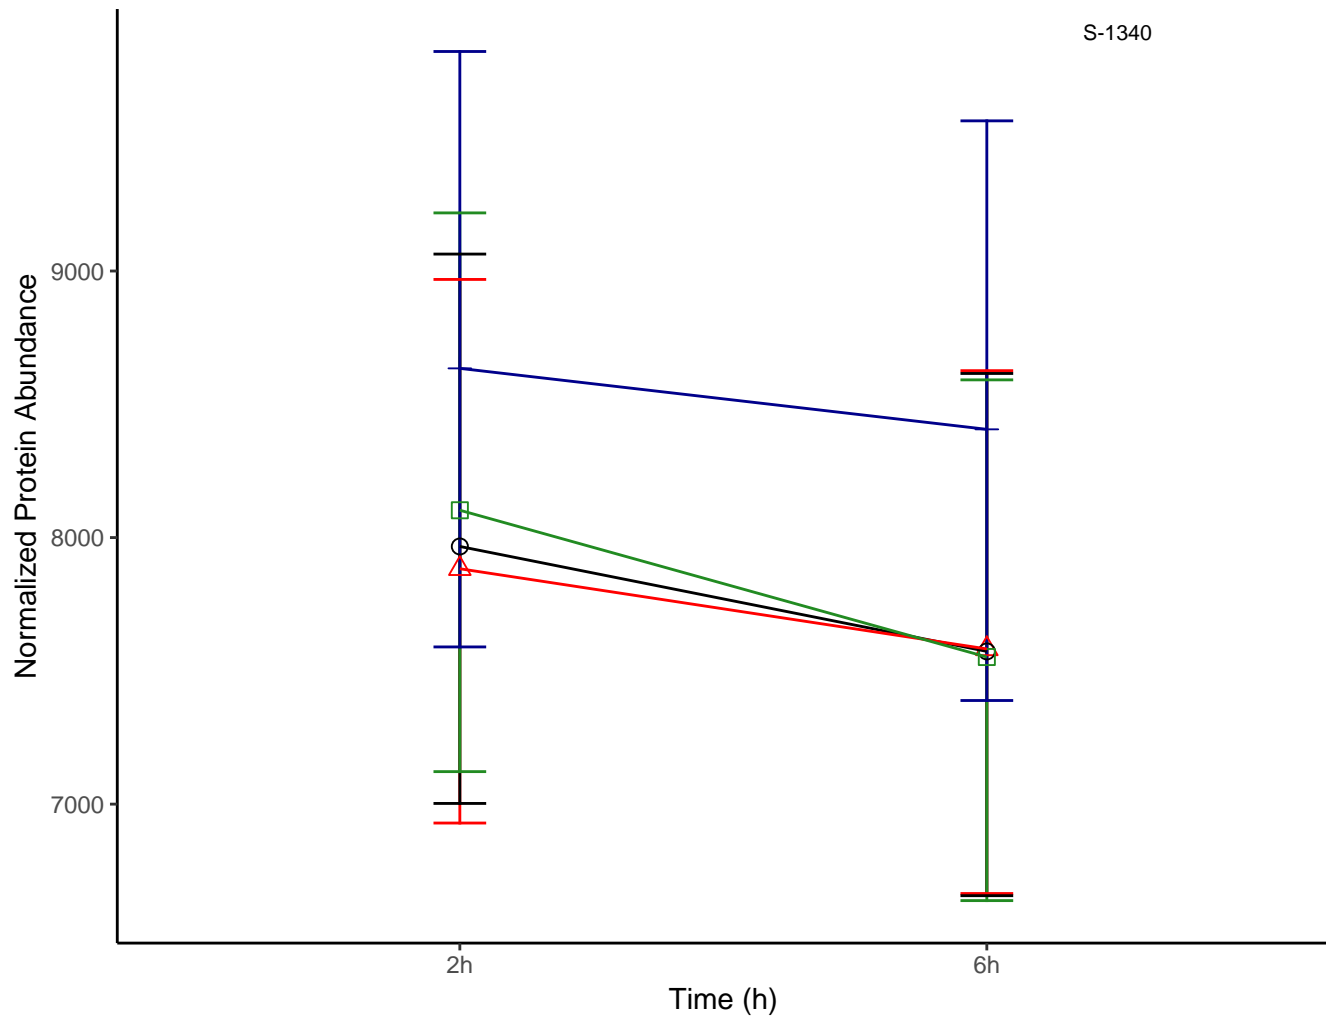

- SA564
- △ SA564- $\Delta hptRS$
- SA564- $\Delta ccpA$
- + SA564- $\Delta hptRS/ccpA$

# RNJ2\_STAAM

S-1341

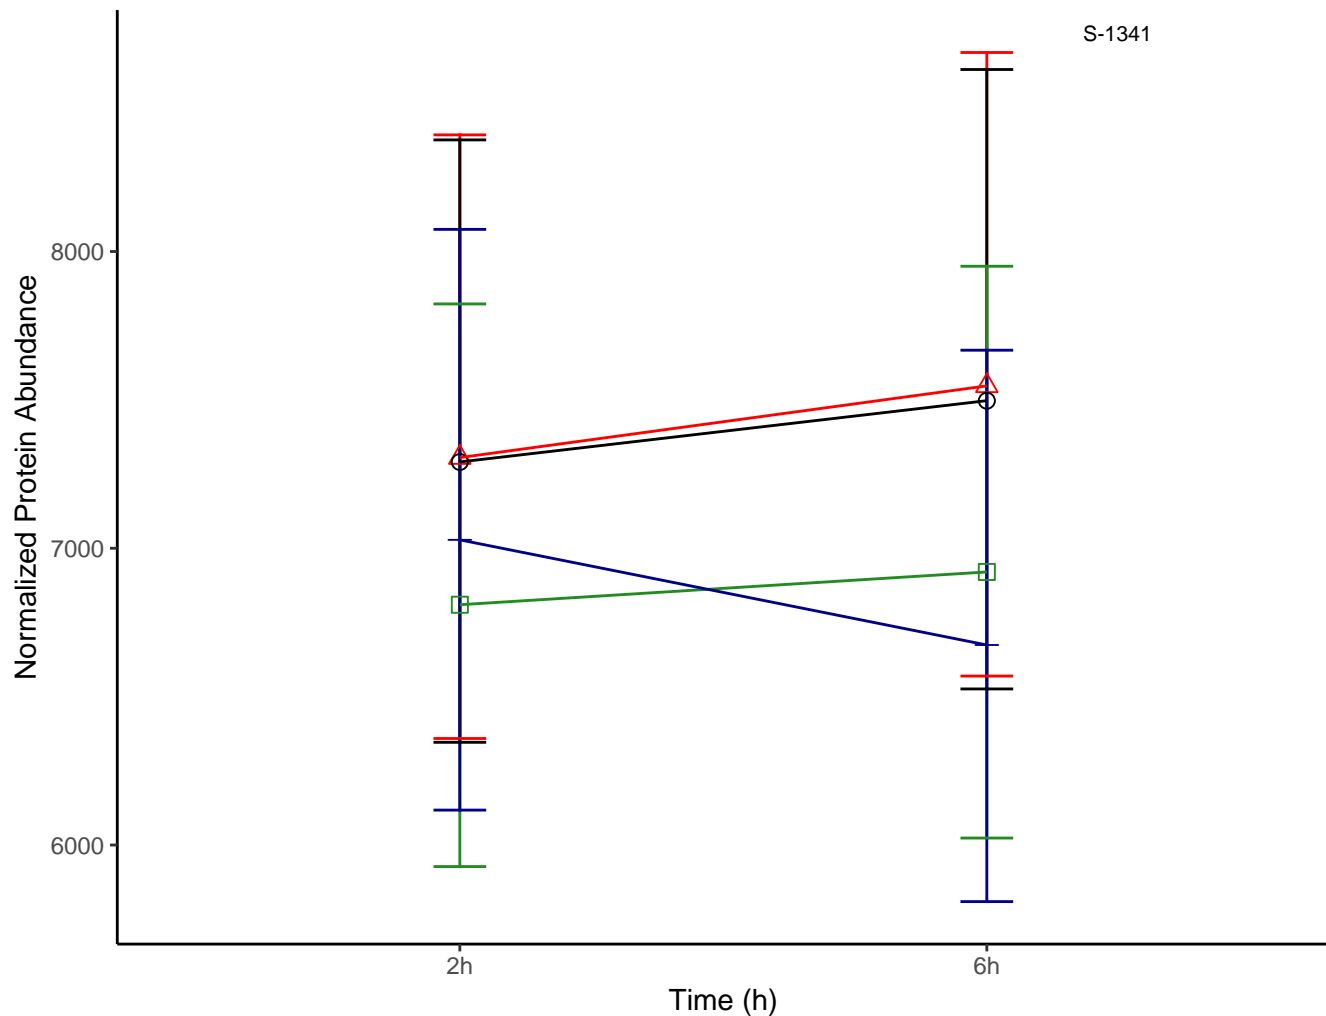

- SA564
- △ SA564- $\Delta$ *hptRS*
- SA564- $\Delta$ *ccpA*
- + SA564- $\Delta$ *hptRS/ccpA*

# RNY\_STAAM

S-1342

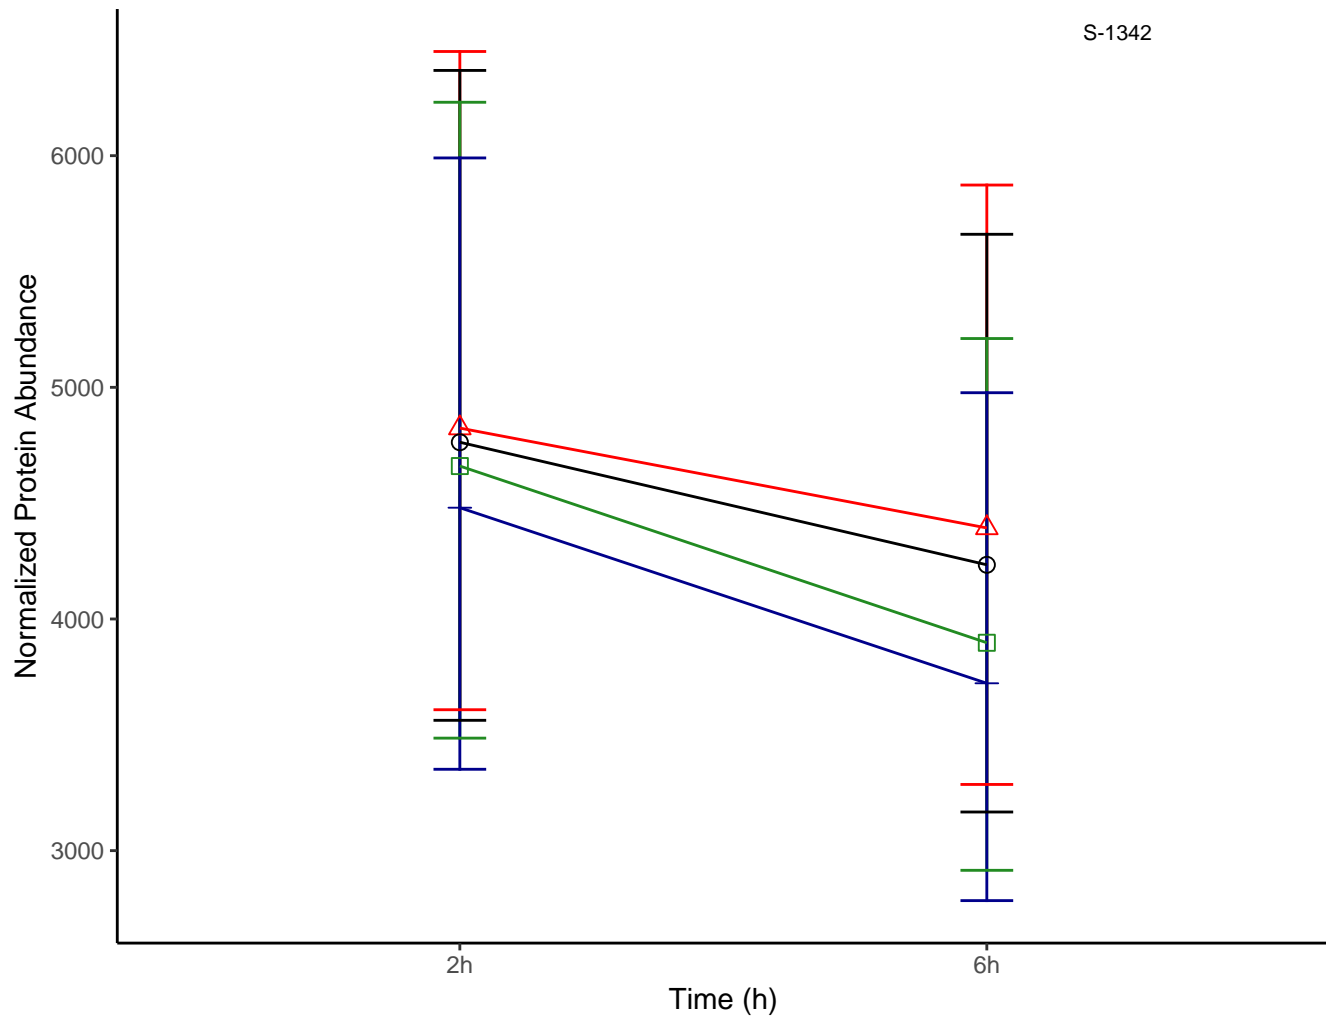

- SA564
- △ SA564- $\Delta hptRS$
- SA564- $\Delta ccpA$
- ⊕ SA564- $\Delta hptRS/ccpA$

# ROCA\_STAAM

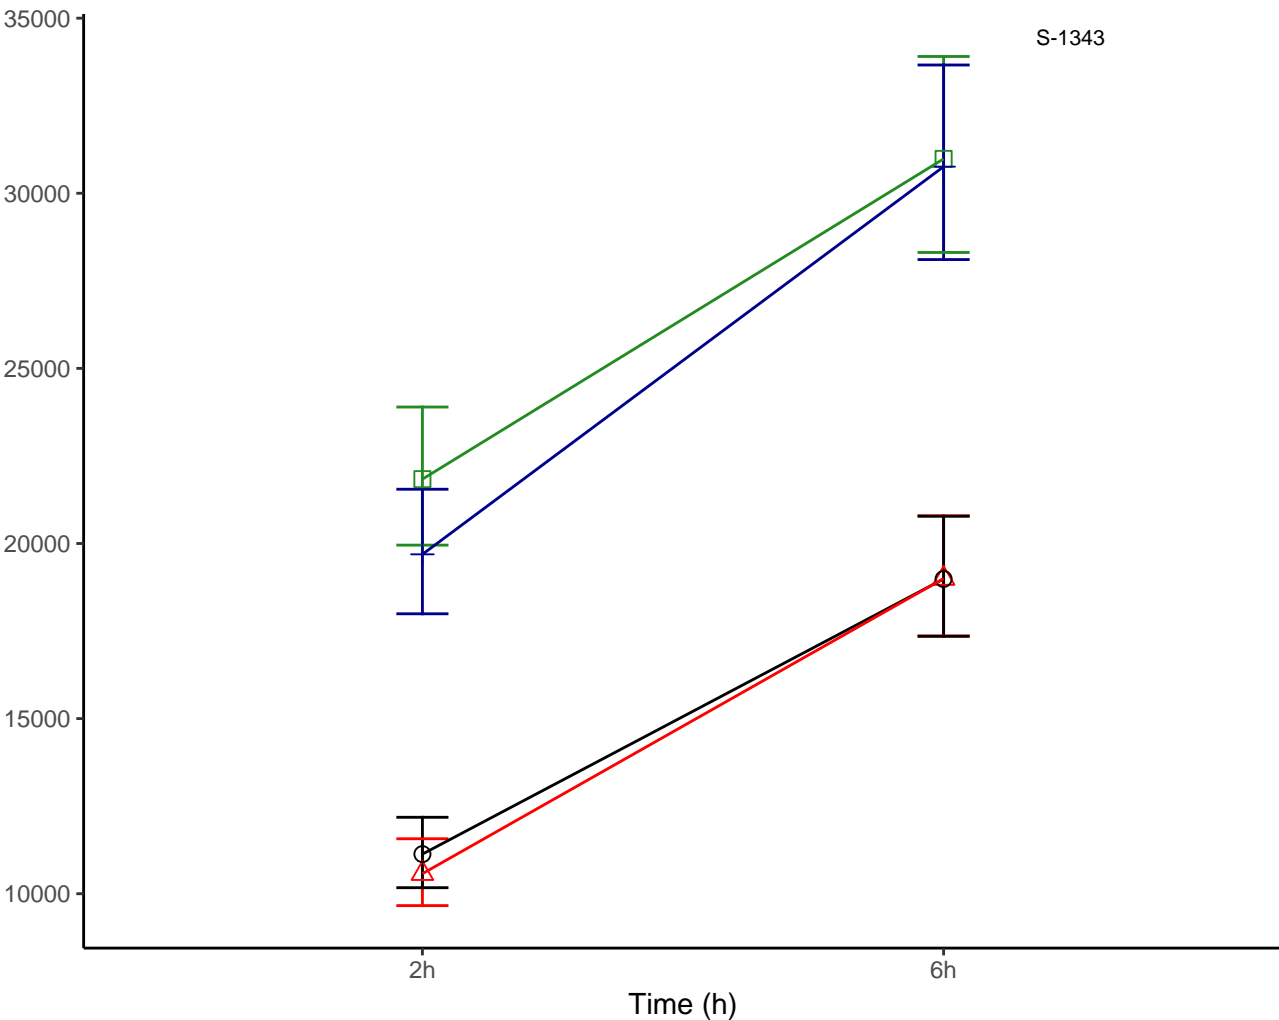

- SA564
- △ SA564- $\Delta$ *hptRS*
- SA564- $\Delta$ *ccpA*
- + SA564- $\Delta$ *hptRS/ccpA*

# ROT\_STAAM

S-1344

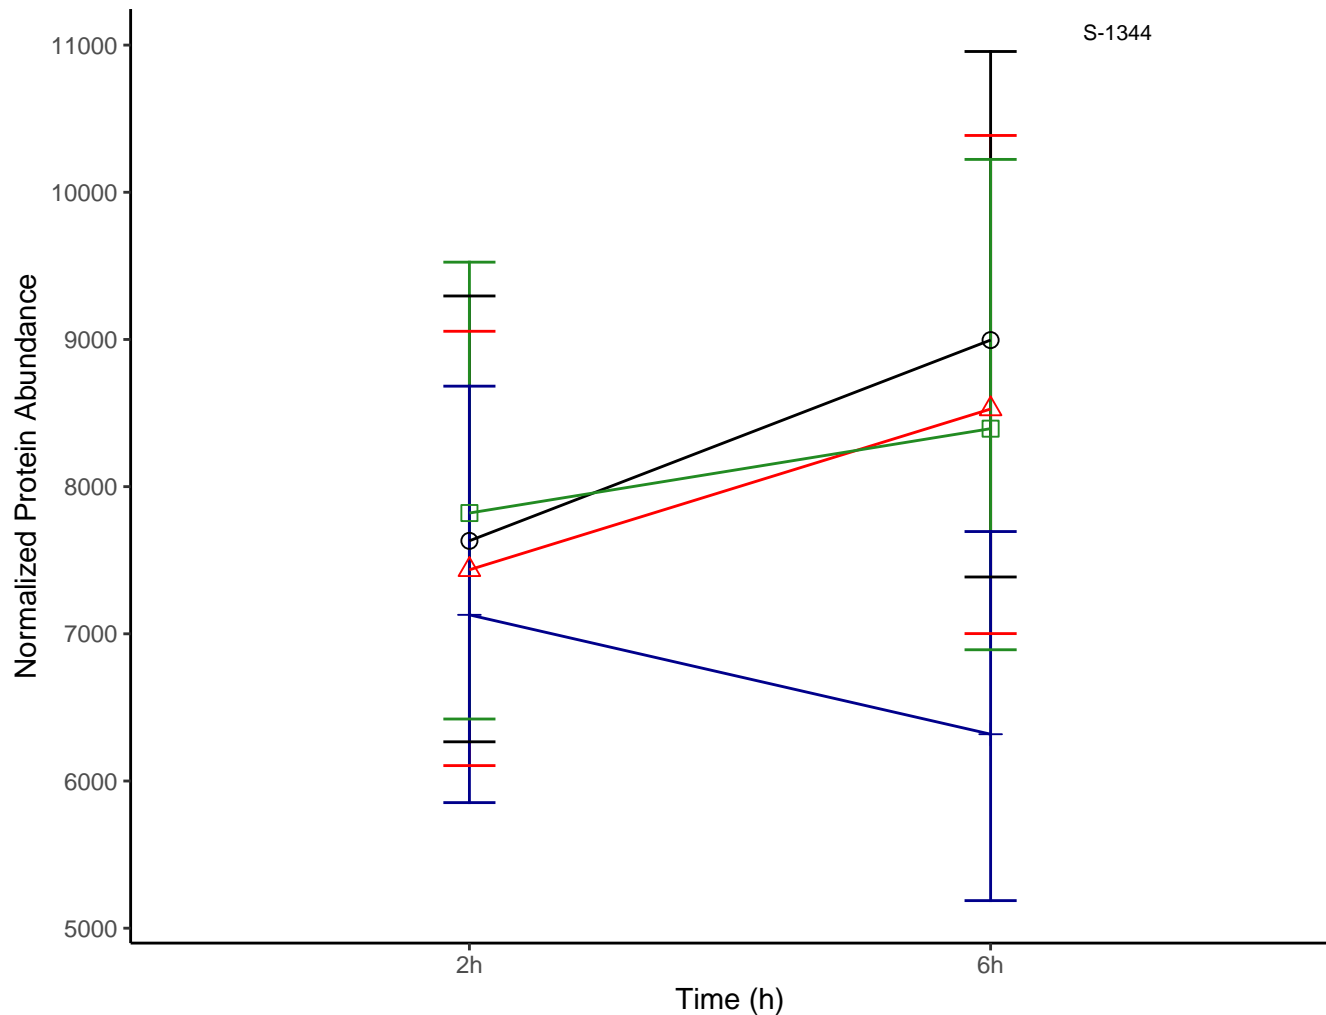

- SA564
- △ SA564- $\Delta$ hptRS
- SA564- $\Delta$ ccpA
- + SA564- $\Delta$ hptRS/ccpA



# RPOA\_STAAM

S-1345

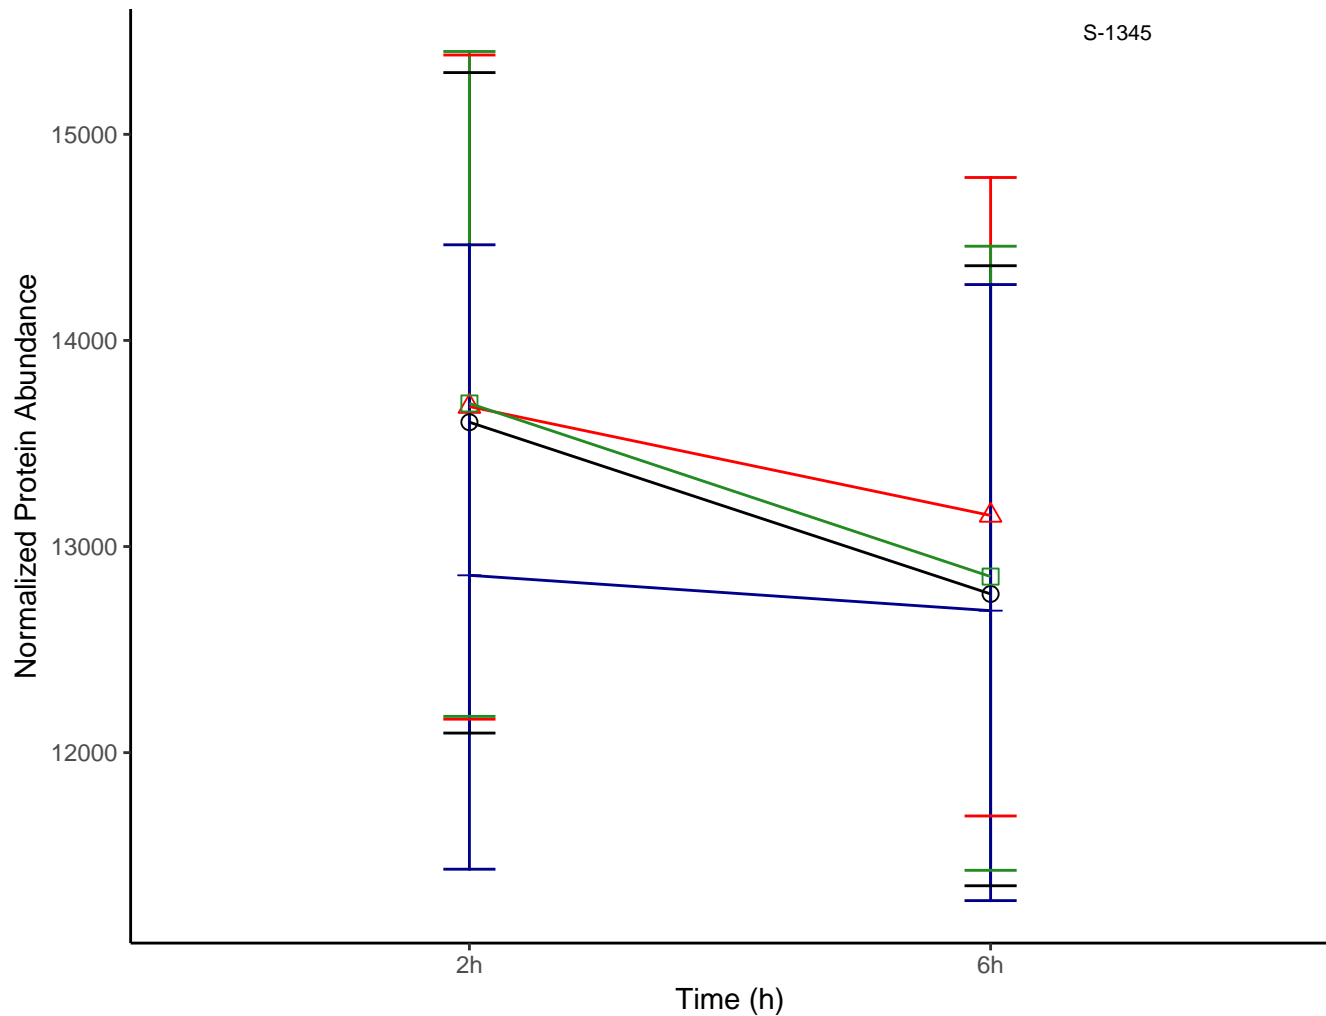

- SA564
- △ SA564- $\Delta$ *hptRS*
- SA564- $\Delta$ *ccpA*
- + SA564- $\Delta$ *hptRS/ccpA*

# RPOB\_STAAM

S-1346

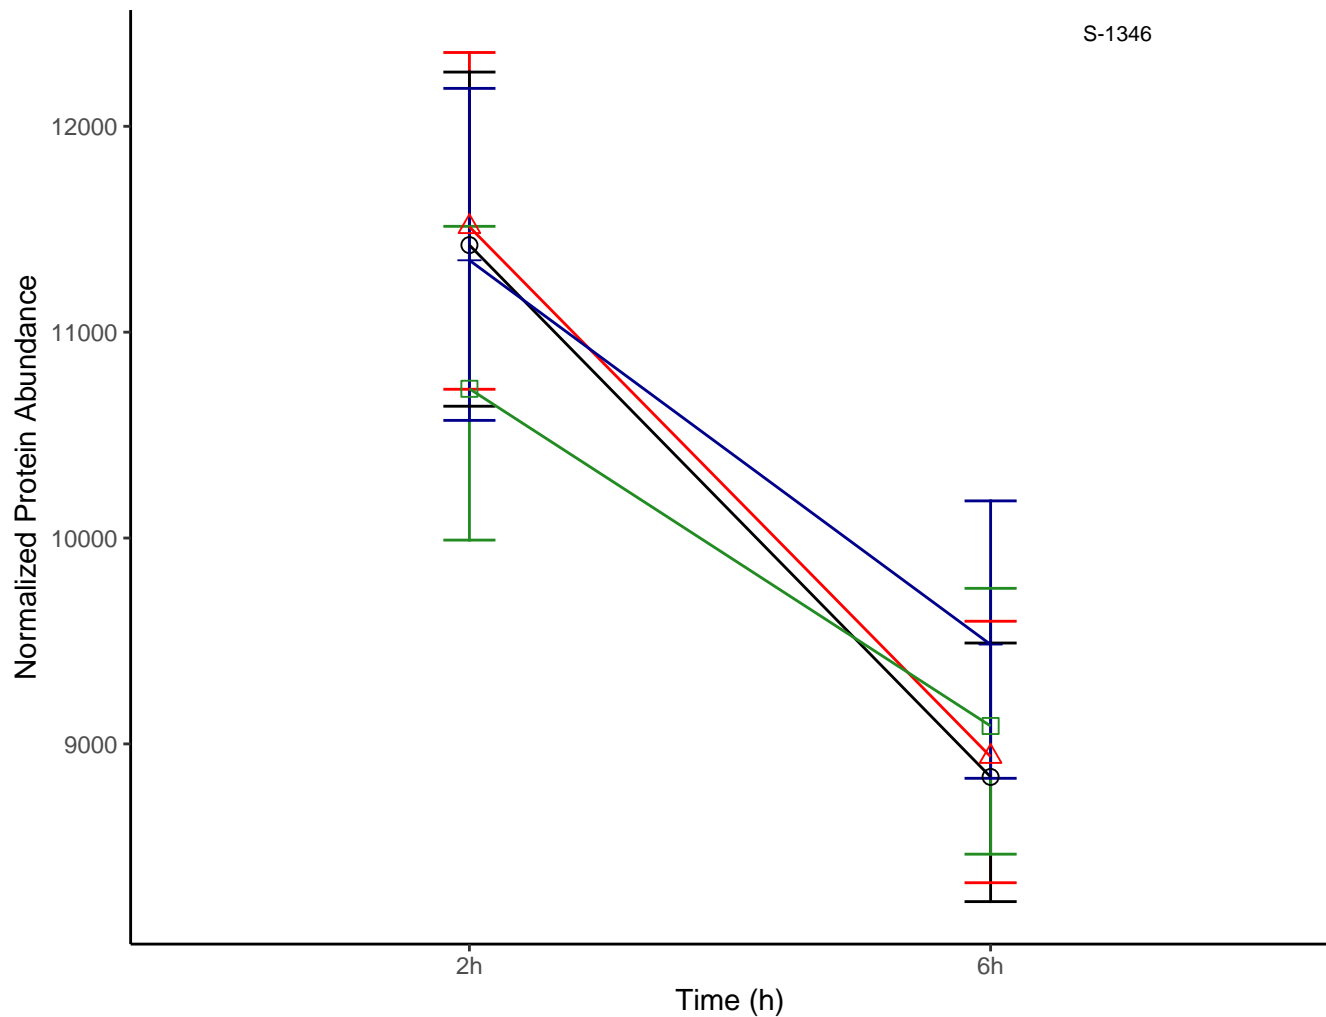

- SA564
- △ SA564- $\Delta$ *hptRS*
- SA564- $\Delta$ *ccpA*
- + SA564- $\Delta$ *hptRS/ccpA*

## RPOC\_STAAM

S-1347

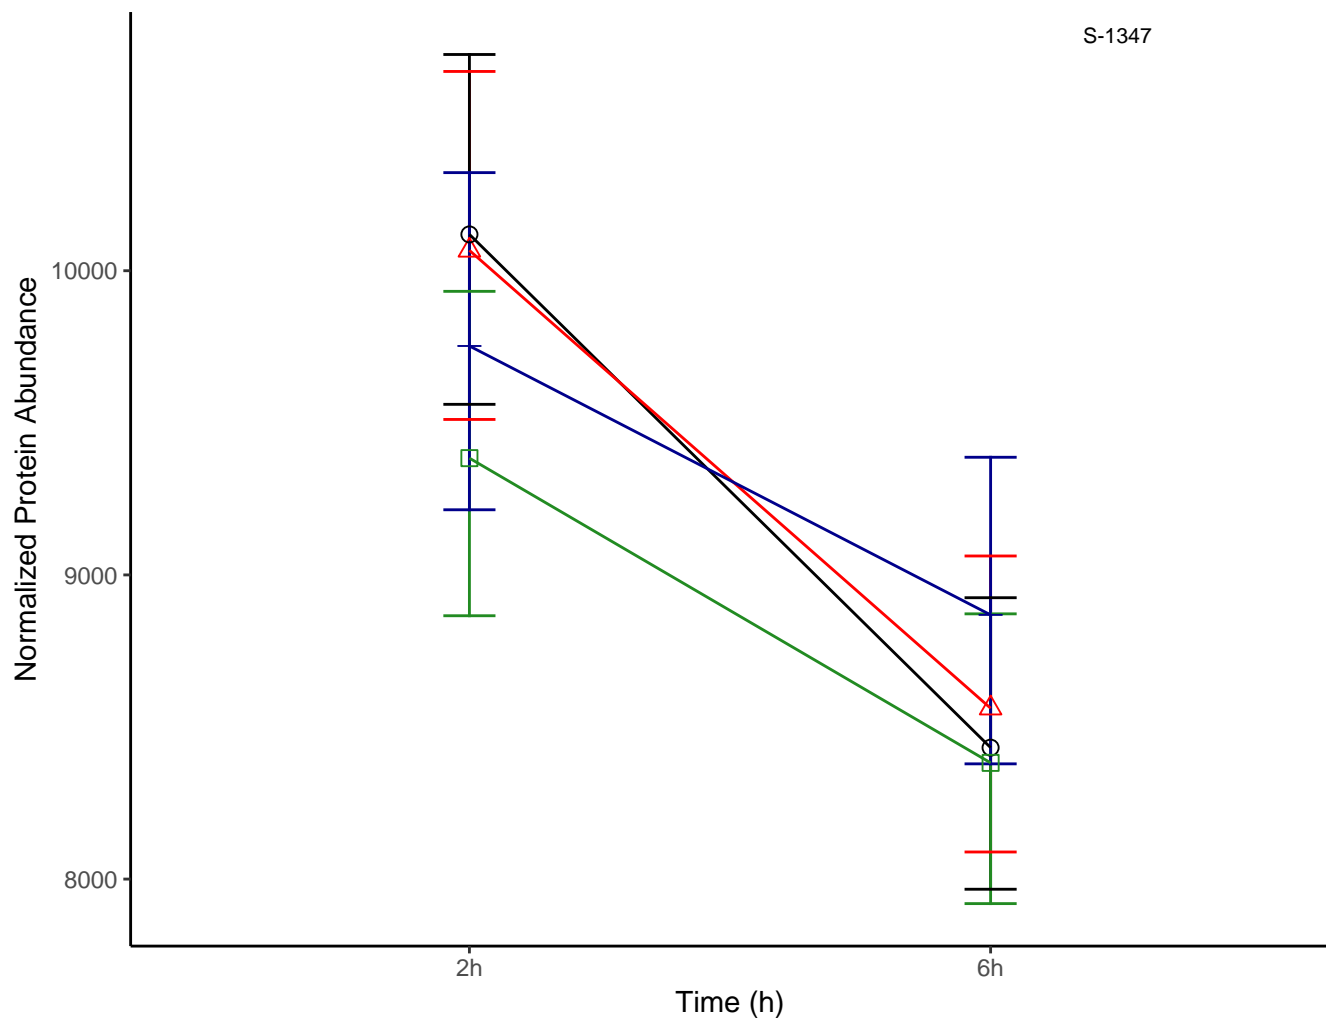

- SA564
- △ SA564- $\Delta$ *hptRS*
- SA564- $\Delta$ *ccpA*
- + SA564- $\Delta$ *hptRS/ccpA*

# RPOE\_STAAM

S-1348

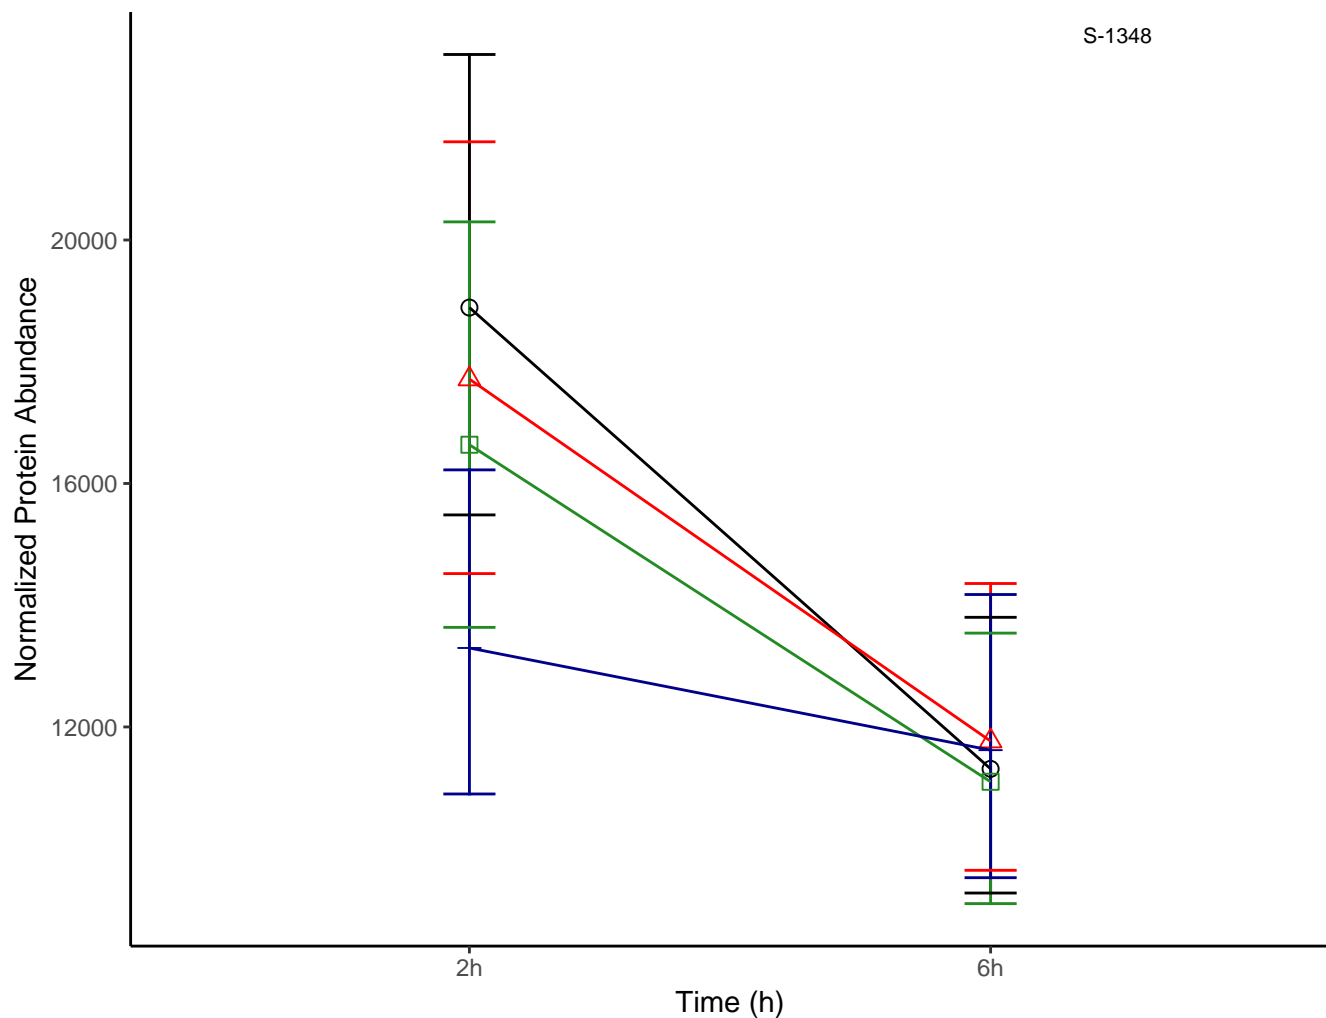

- SA564
- △ SA564- $\Delta hptRS$
- SA564- $\Delta ccpA$
- + SA564- $\Delta hptRS/ccpA$

## RPOZ\_STAAM

S-1349

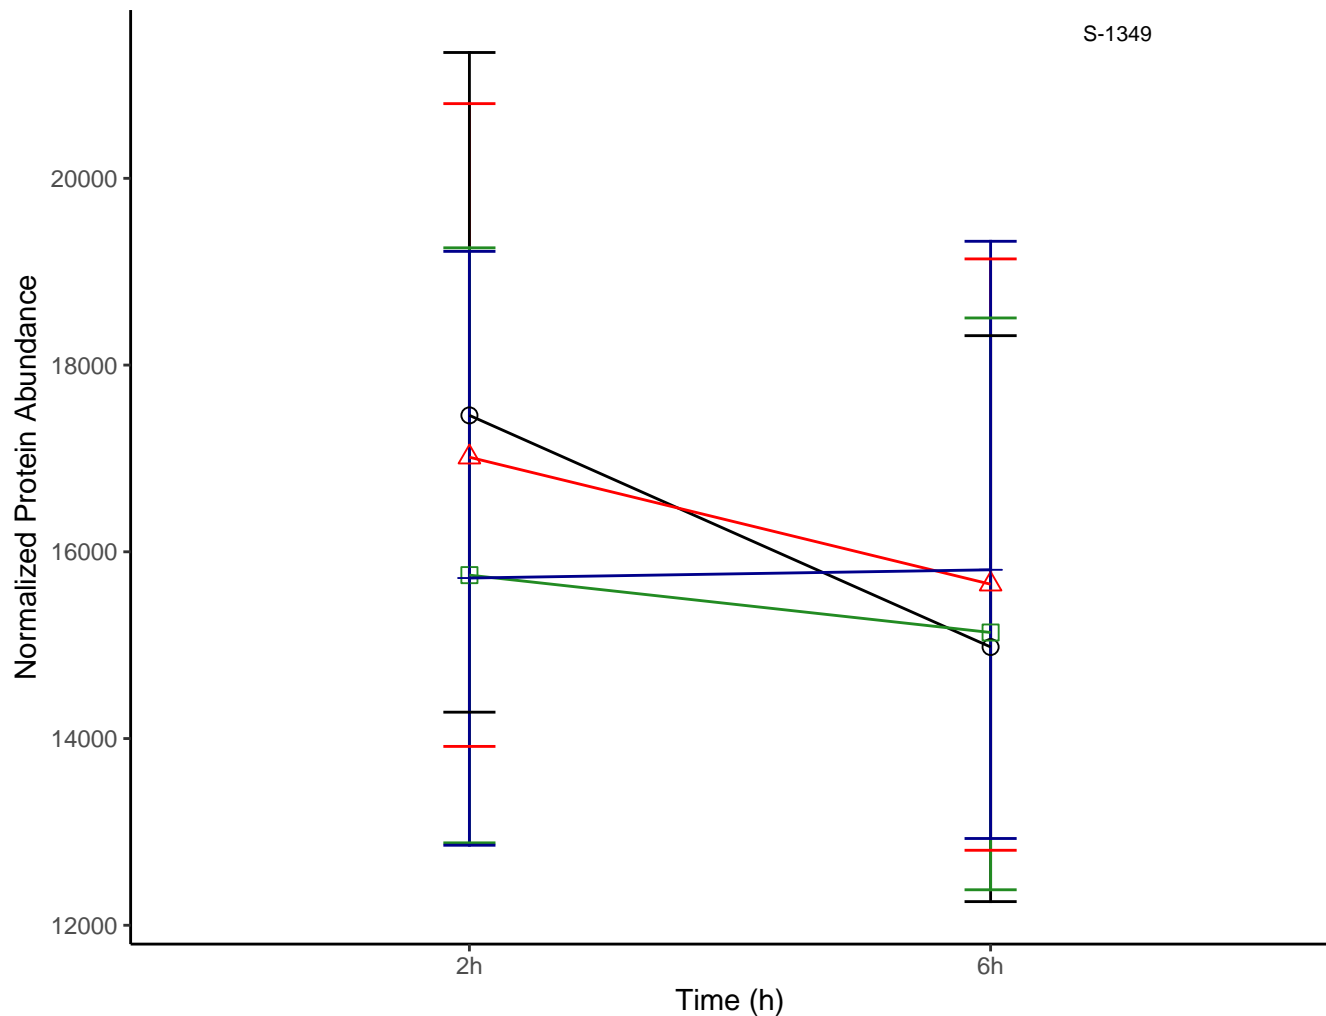

- SA564
- △ SA564- $\Delta$ *hptRS*
- SA564- $\Delta$ *ccpA*
- + SA564- $\Delta$ *hptRS/ccpA*

## RRF\_STAAM

S-1350

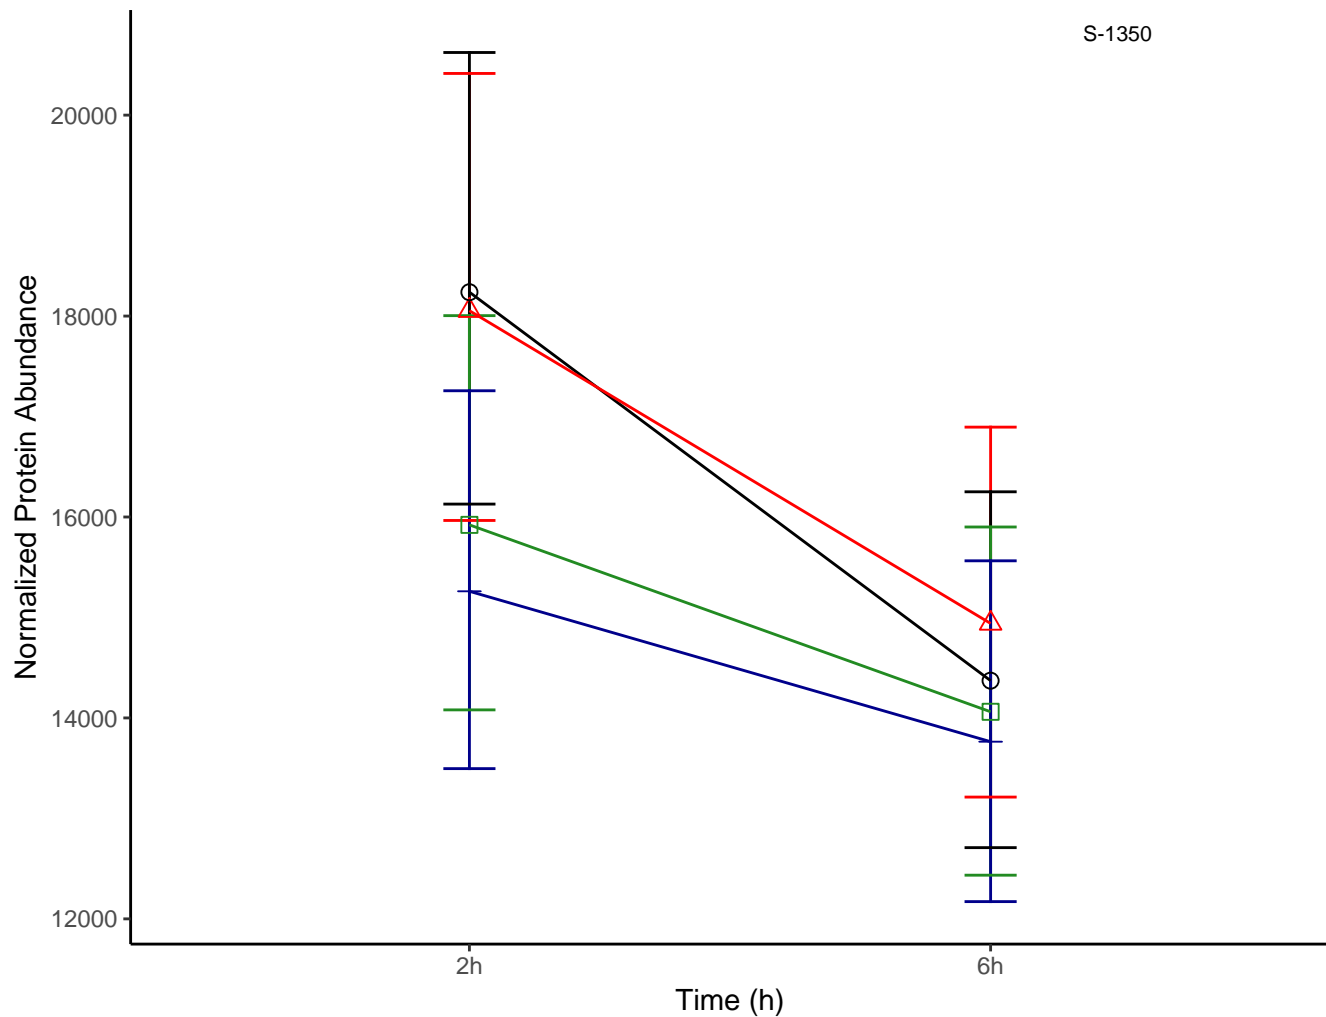

- SA564
- △ SA564- $\Delta hptRS$
- SA564- $\Delta ccpA$
- + SA564- $\Delta hptRS/ccpA$

# RS1\_STAAM

S-1351

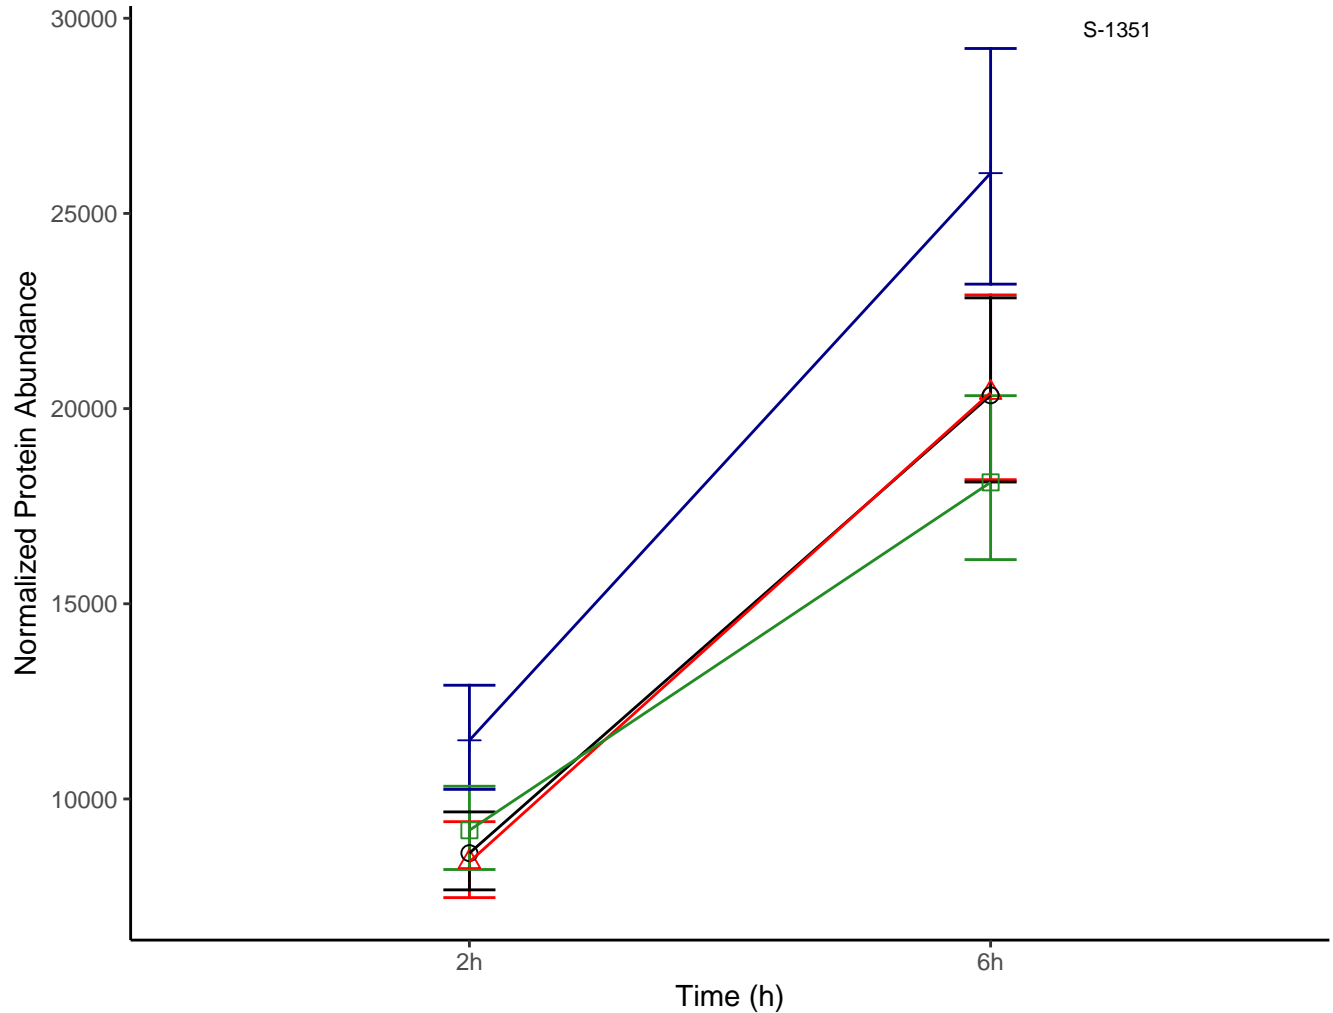

- SA564
- △ SA564- $\Delta hptRS$
- SA564- $\Delta ccpA$
- + SA564- $\Delta hptRS/ccpA$

# RS10\_STAAM

S-1352

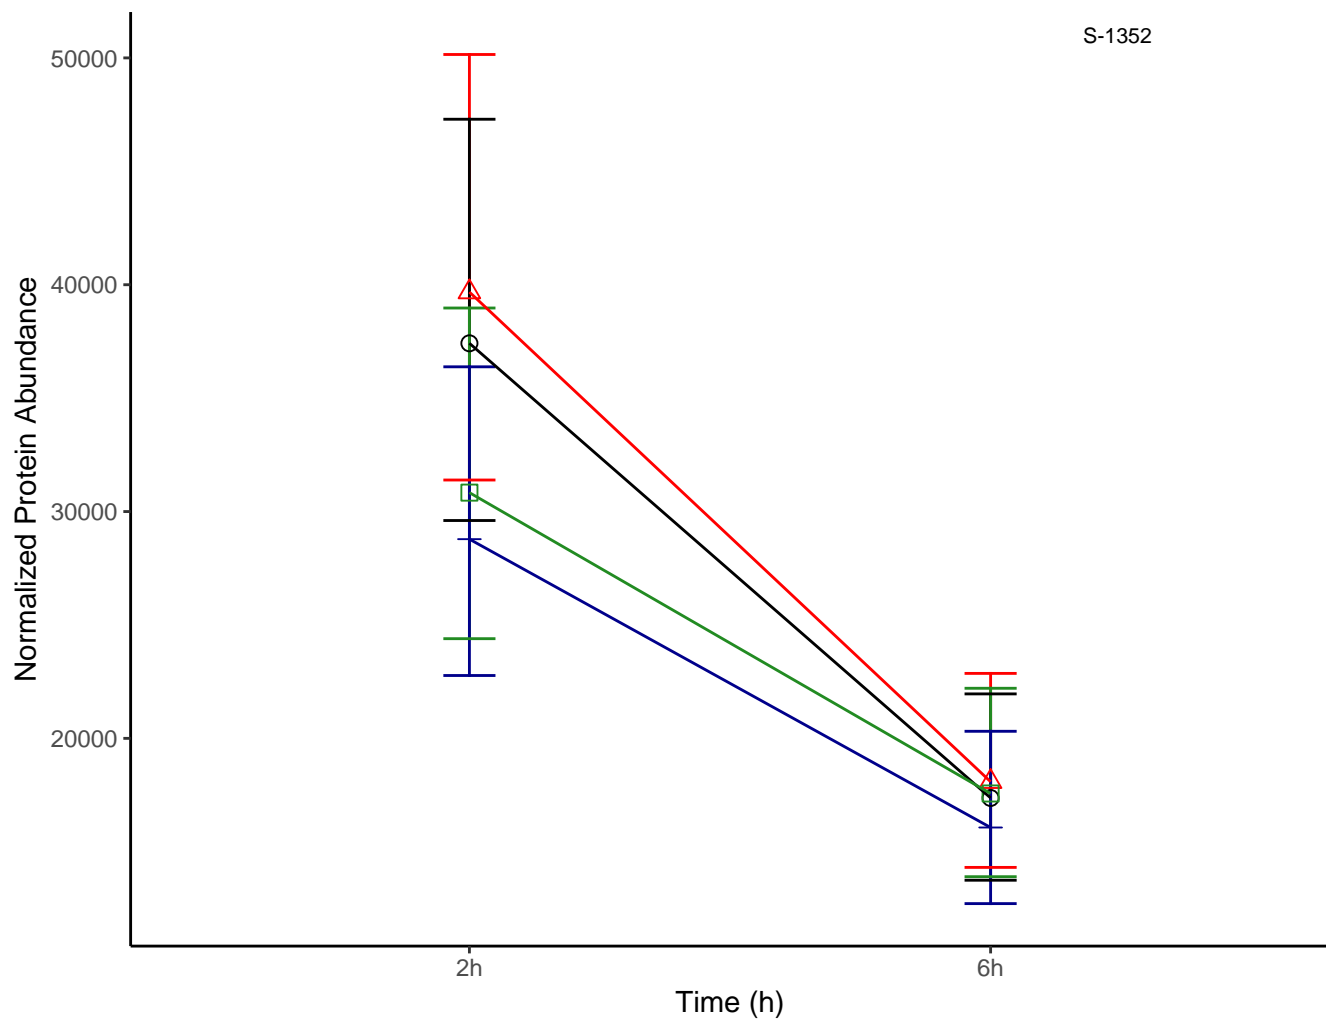

- SA564
- △ SA564- $\Delta$ *hptRS*
- SA564- $\Delta$ *ccpA*
- + SA564- $\Delta$ *hptRS/ccpA*



# RS11\_STAAM

S-1353

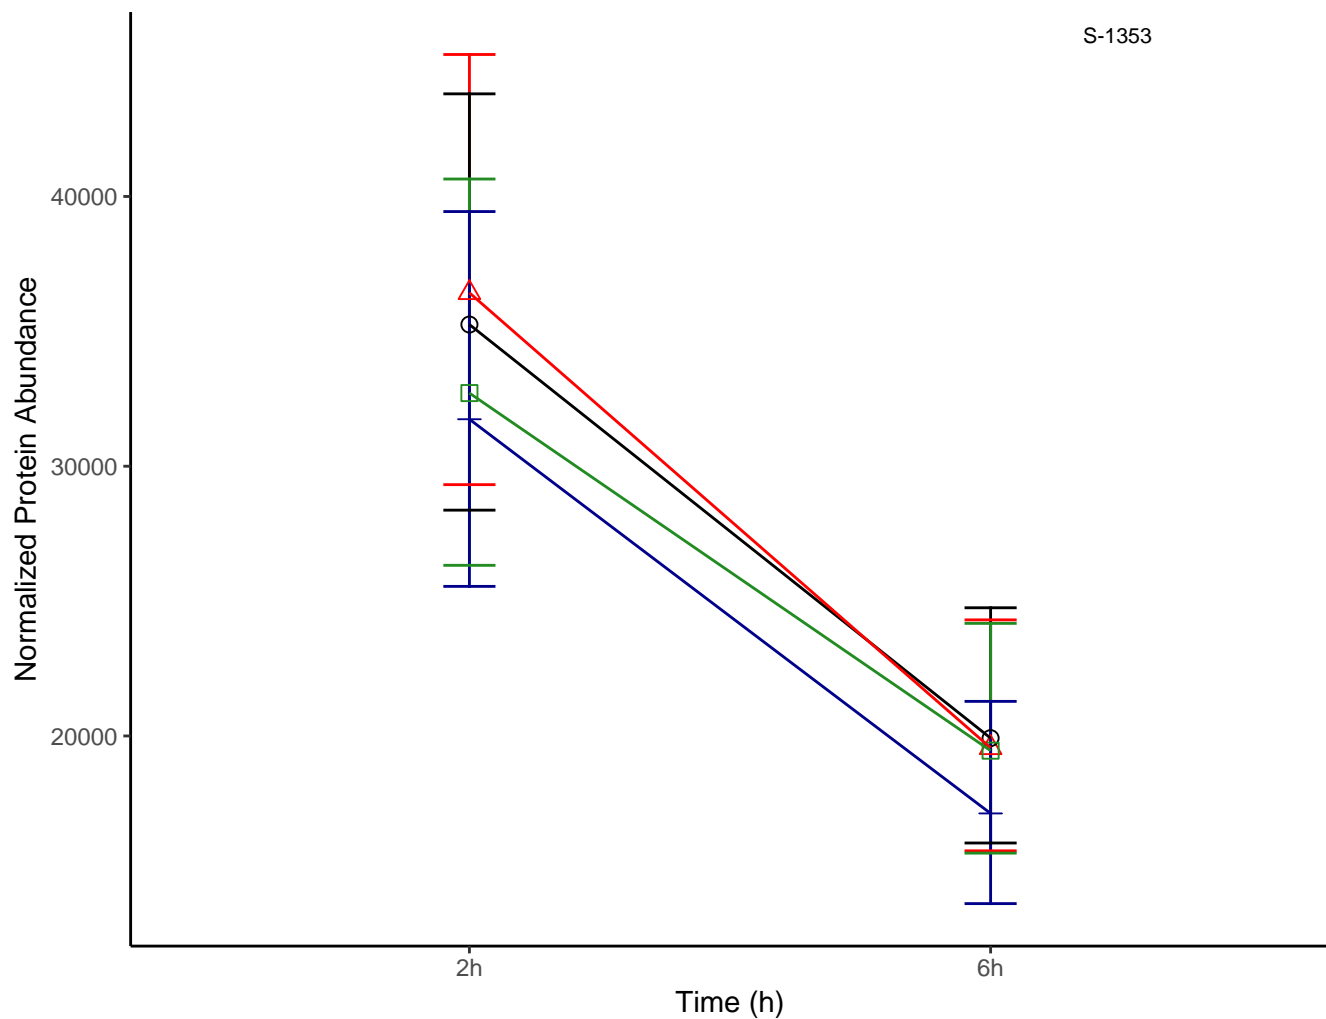

- SA564
- △ SA564- $\Delta$ *hptRS*
- SA564- $\Delta$ *ccpA*
- + SA564- $\Delta$ *hptRS/ccpA*

# RS12\_STAAM

S-1354

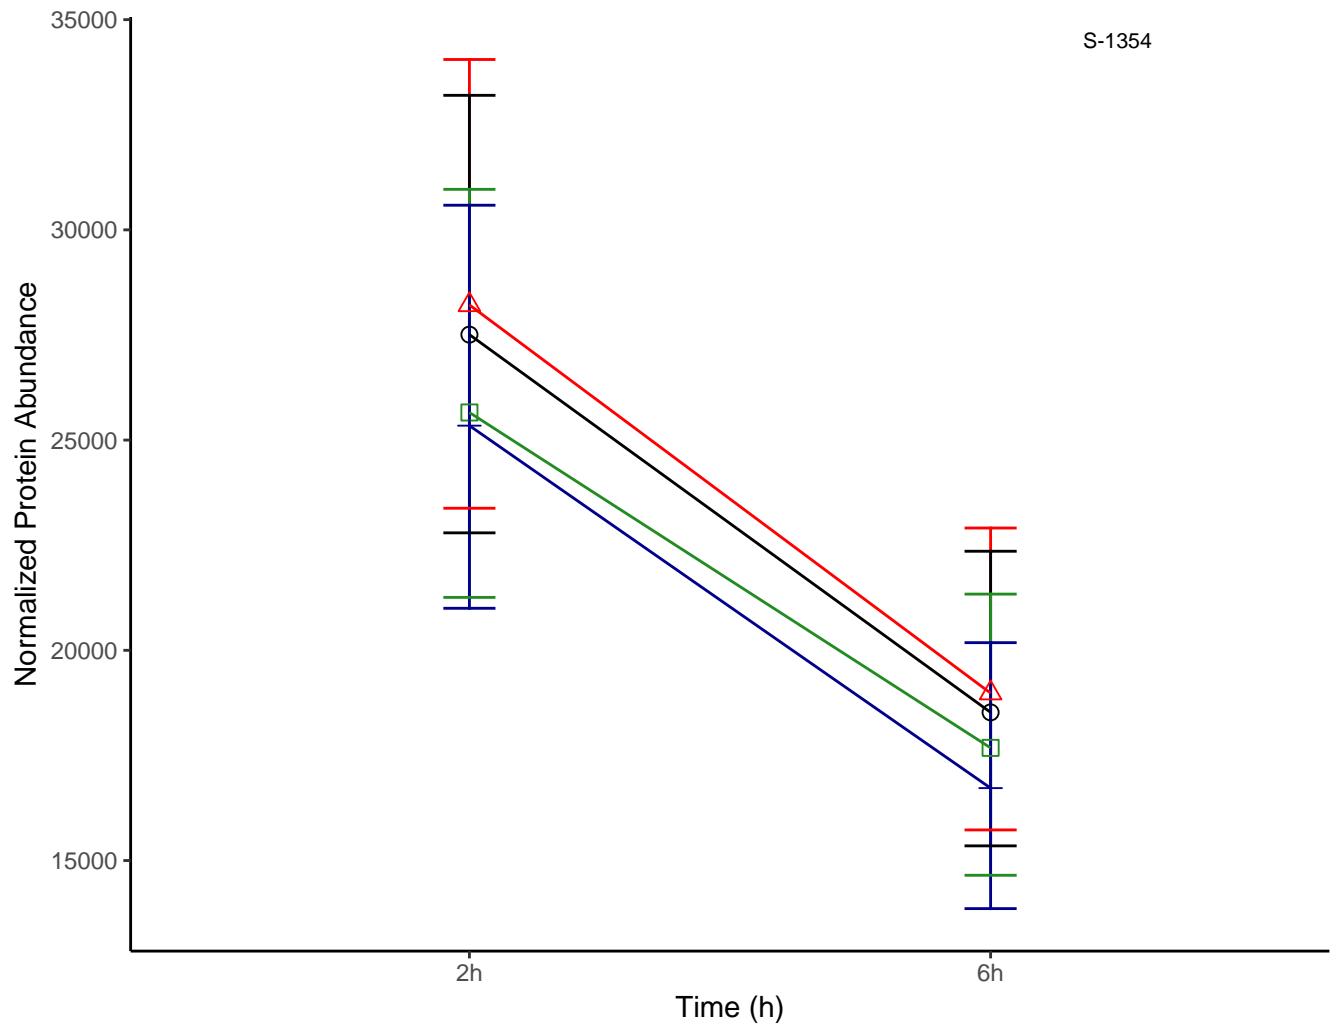

- SA564
- △ SA564-ΔhptRS
- SA564-ΔccpA
- + SA564-ΔhptRS/ccpA

# RS13\_STAAM

S-1355

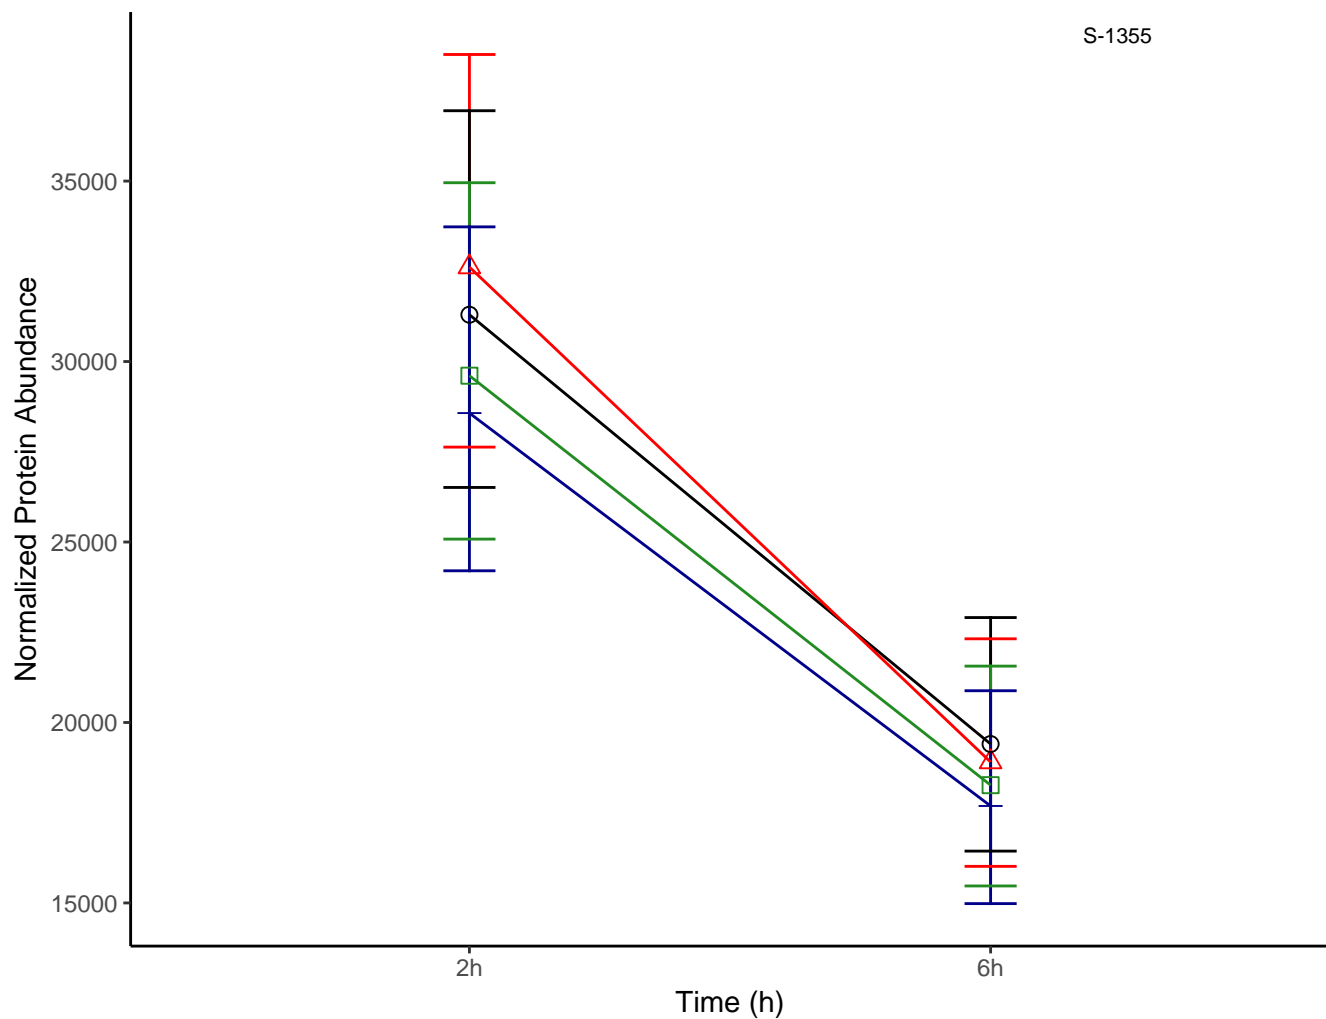

- SA564
- △ SA564- $\Delta$ *hptRS*
- SA564- $\Delta$ *ccpA*
- + SA564- $\Delta$ *hptRS/ccpA*

# RS15\_STAAM

S-1356

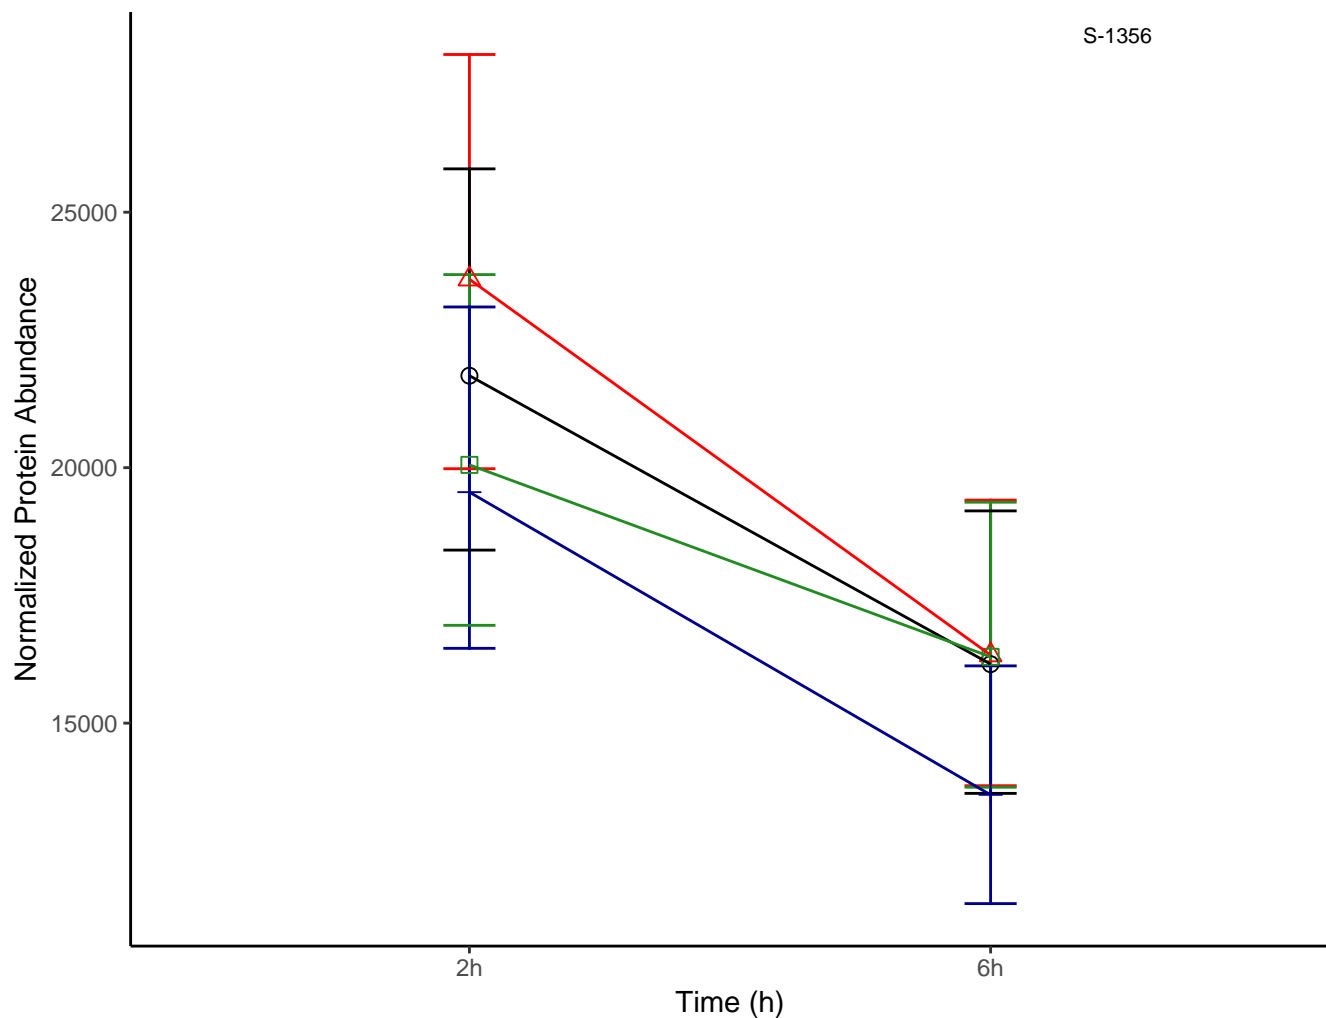

- SA564
- △ SA564- $\Delta hptRS$
- SA564- $\Delta ccpA$
- + SA564- $\Delta hptRS/ccpA$

## RS16\_STAAM

S-1357

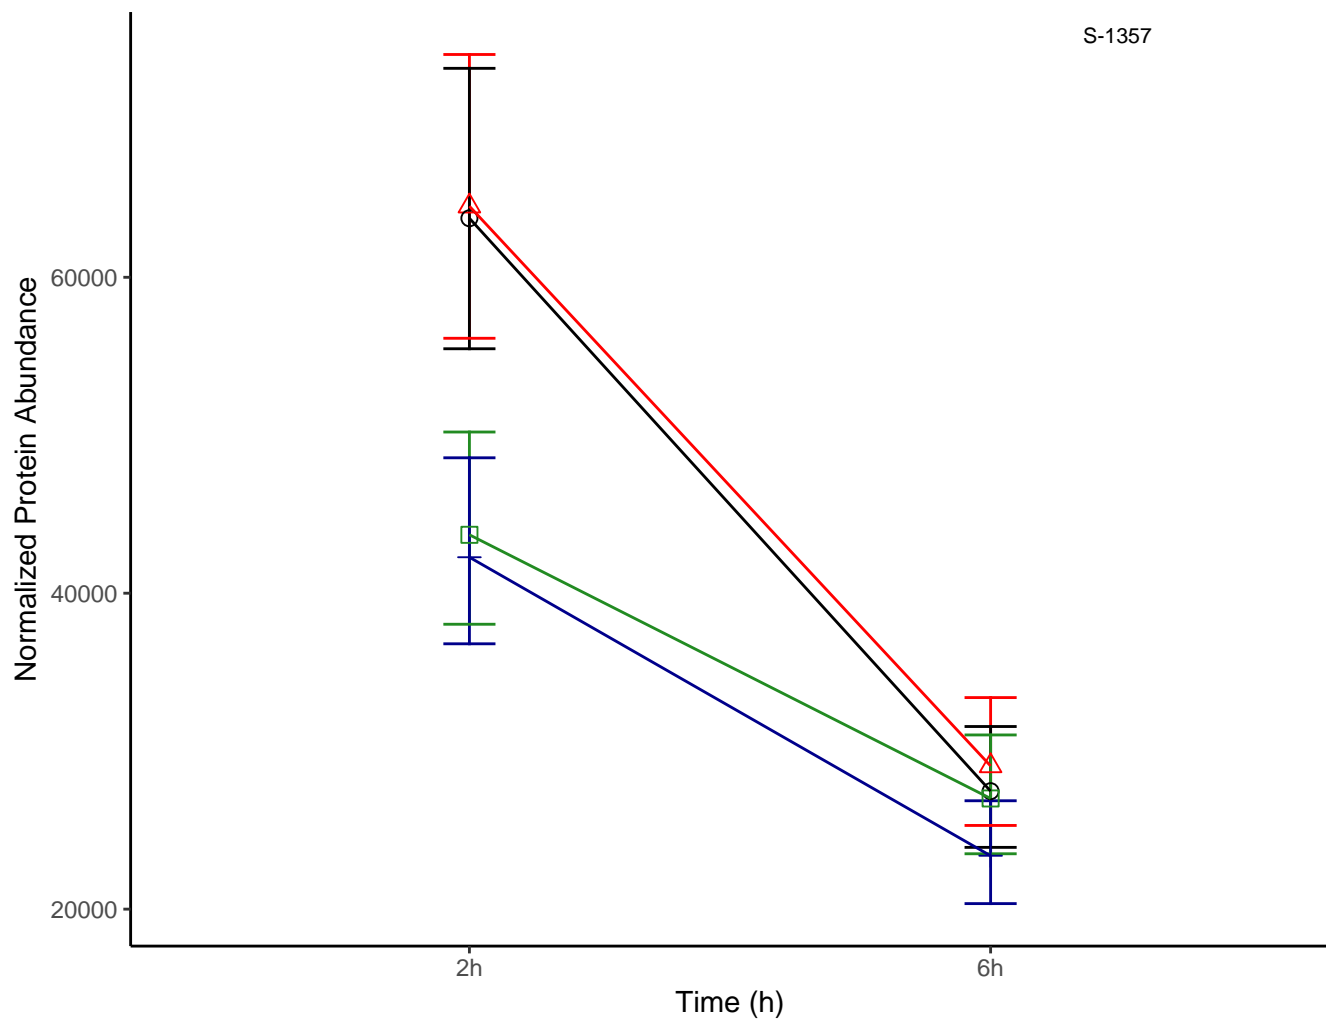

- SA564
- △ SA564- $\Delta hptRS$
- SA564- $\Delta ccbA$
- + SA564- $\Delta hptRS/ccpA$

# RS17\_STAAM

S-1358

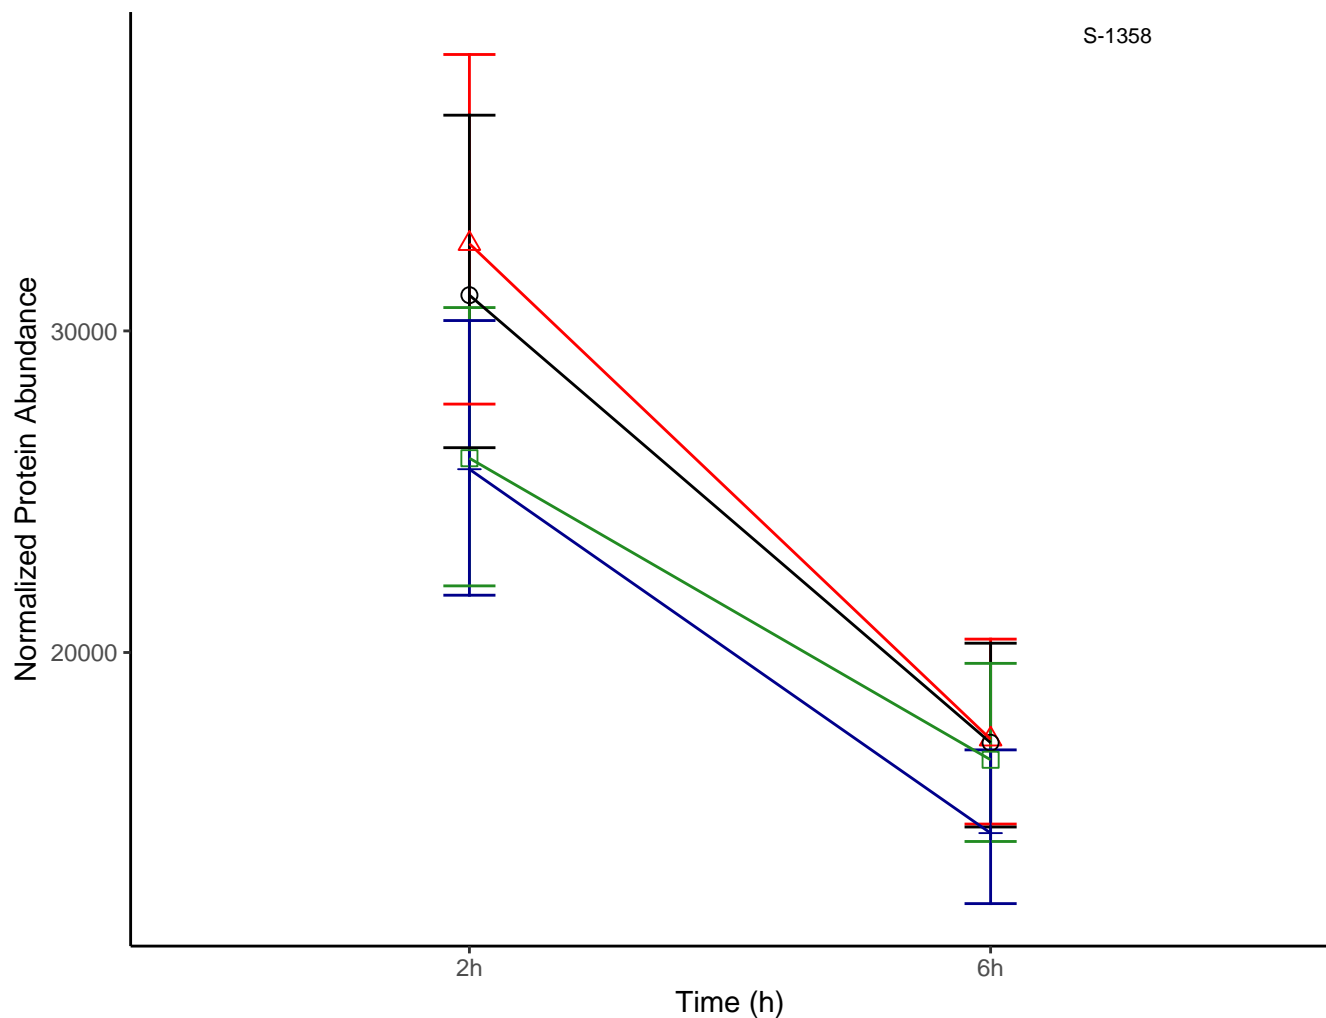

- SA564
- △ SA564- $\Delta hptRS$
- SA564- $\Delta ccpA$
- + SA564- $\Delta hptRS/ccpA$

# RS18\_STAAM

S-1359

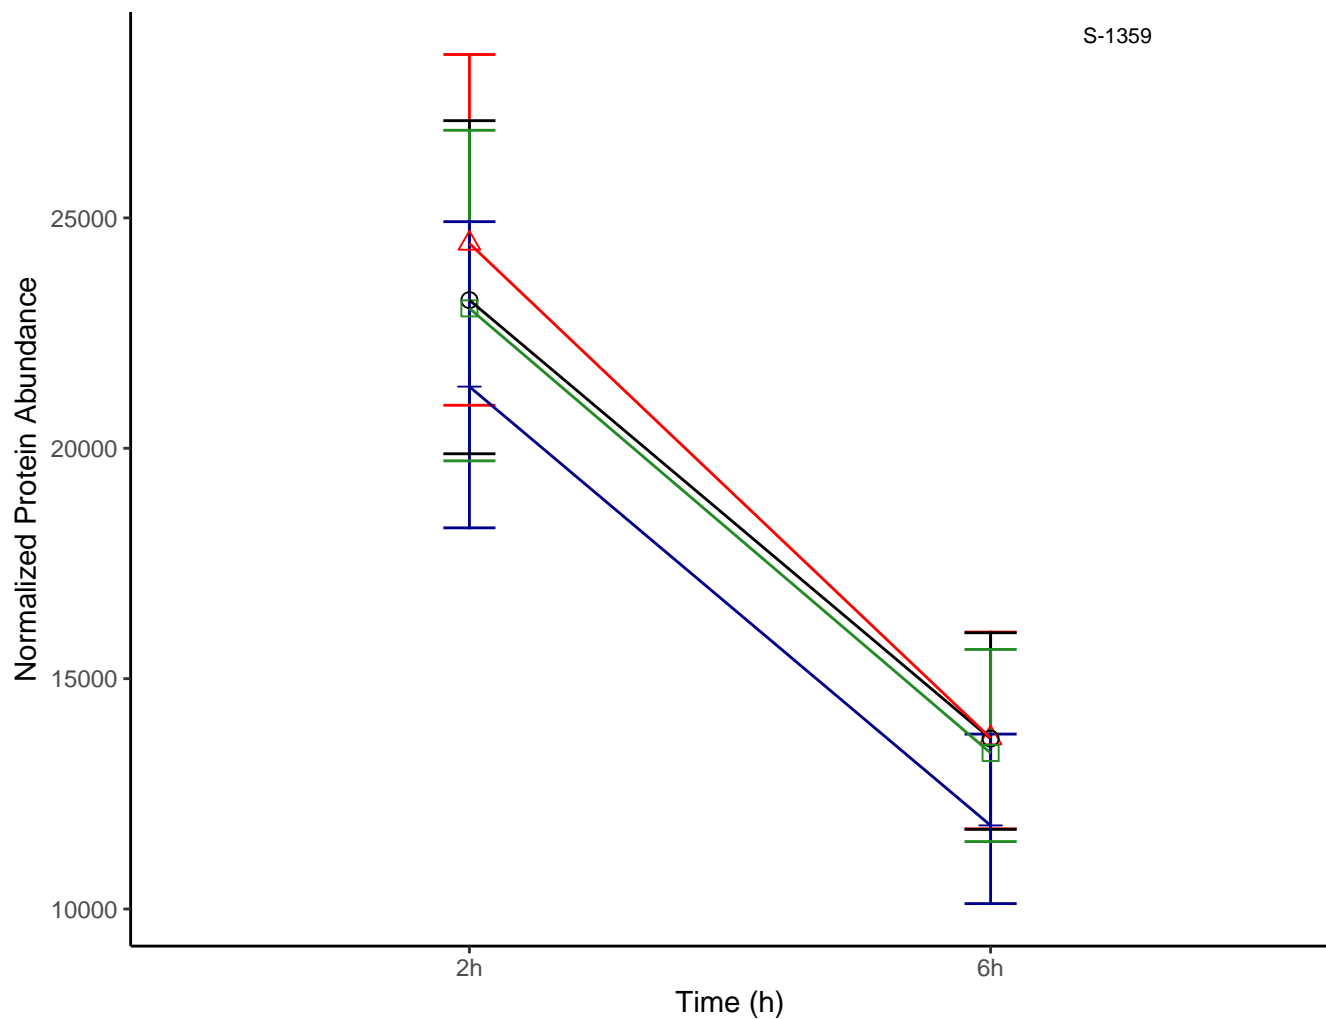

- SA564
- △ SA564- $\Delta hptRS$
- SA564- $\Delta ccpA$
- + SA564- $\Delta hptRS/ccpA$

# RS19\_STAAM

S-1360

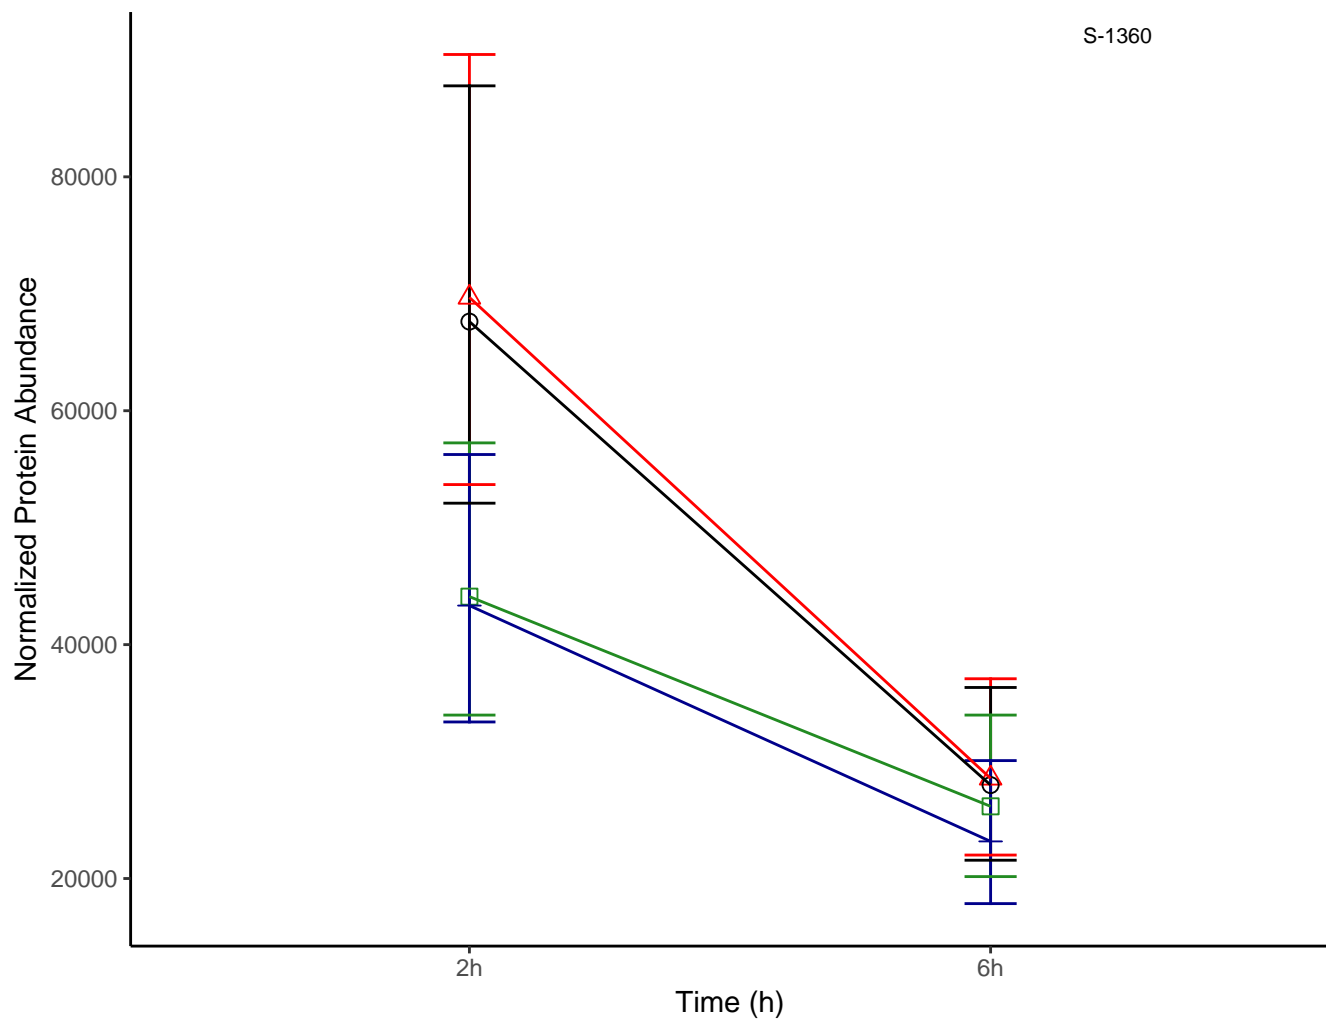

- SA564
- △ SA564- $\Delta$ hptRS
- SA564- $\Delta$ ccpA
- + SA564- $\Delta$ hptRS/ccpA



# RS2\_STAAM

S-1361

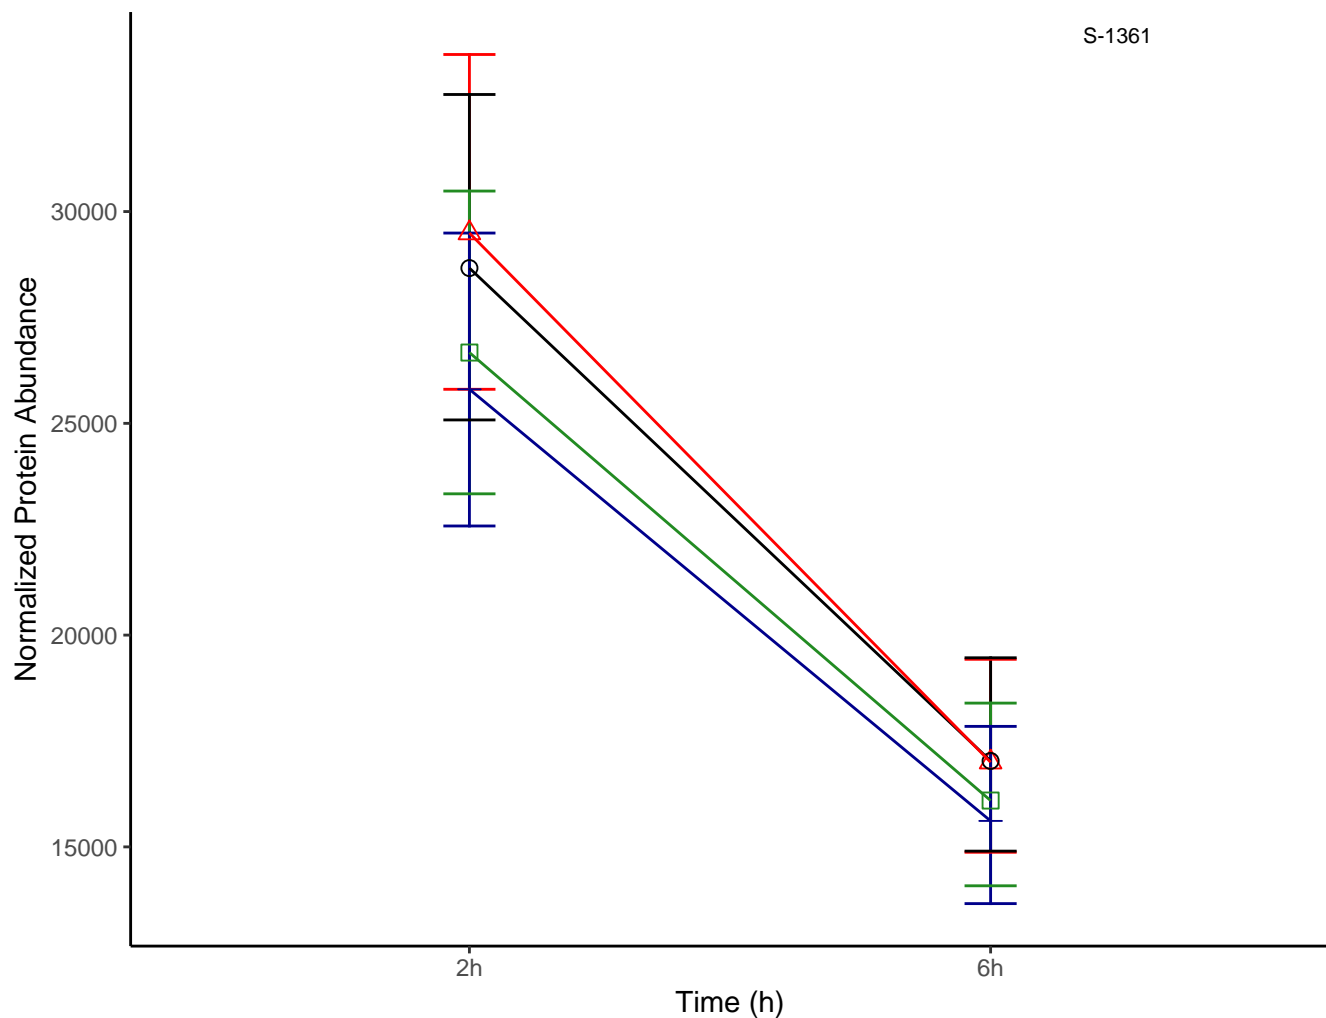

- SA564
- △ SA564- $\Delta$ *hptRS*
- SA564- $\Delta$ *ccpA*
- + SA564- $\Delta$ *hptRS/ccpA*

## RS20\_STAAM

S-1362

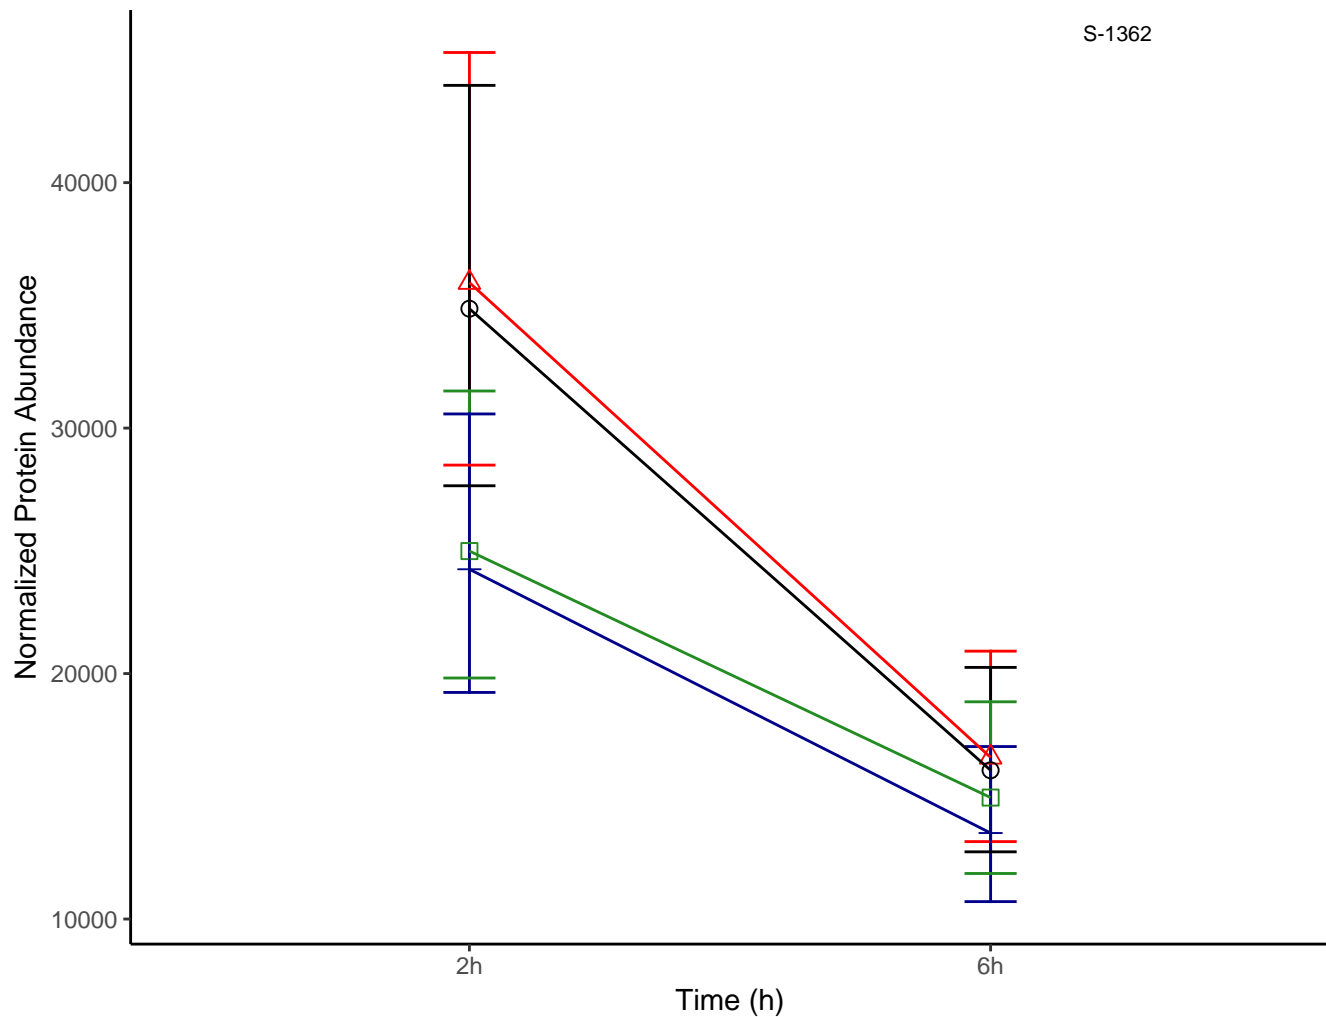

- SA564
- △ SA564-ΔhptRS
- SA564-ΔccpA
- + SA564-ΔhptRS/ccpA

## RS21\_STAAM

S-1363

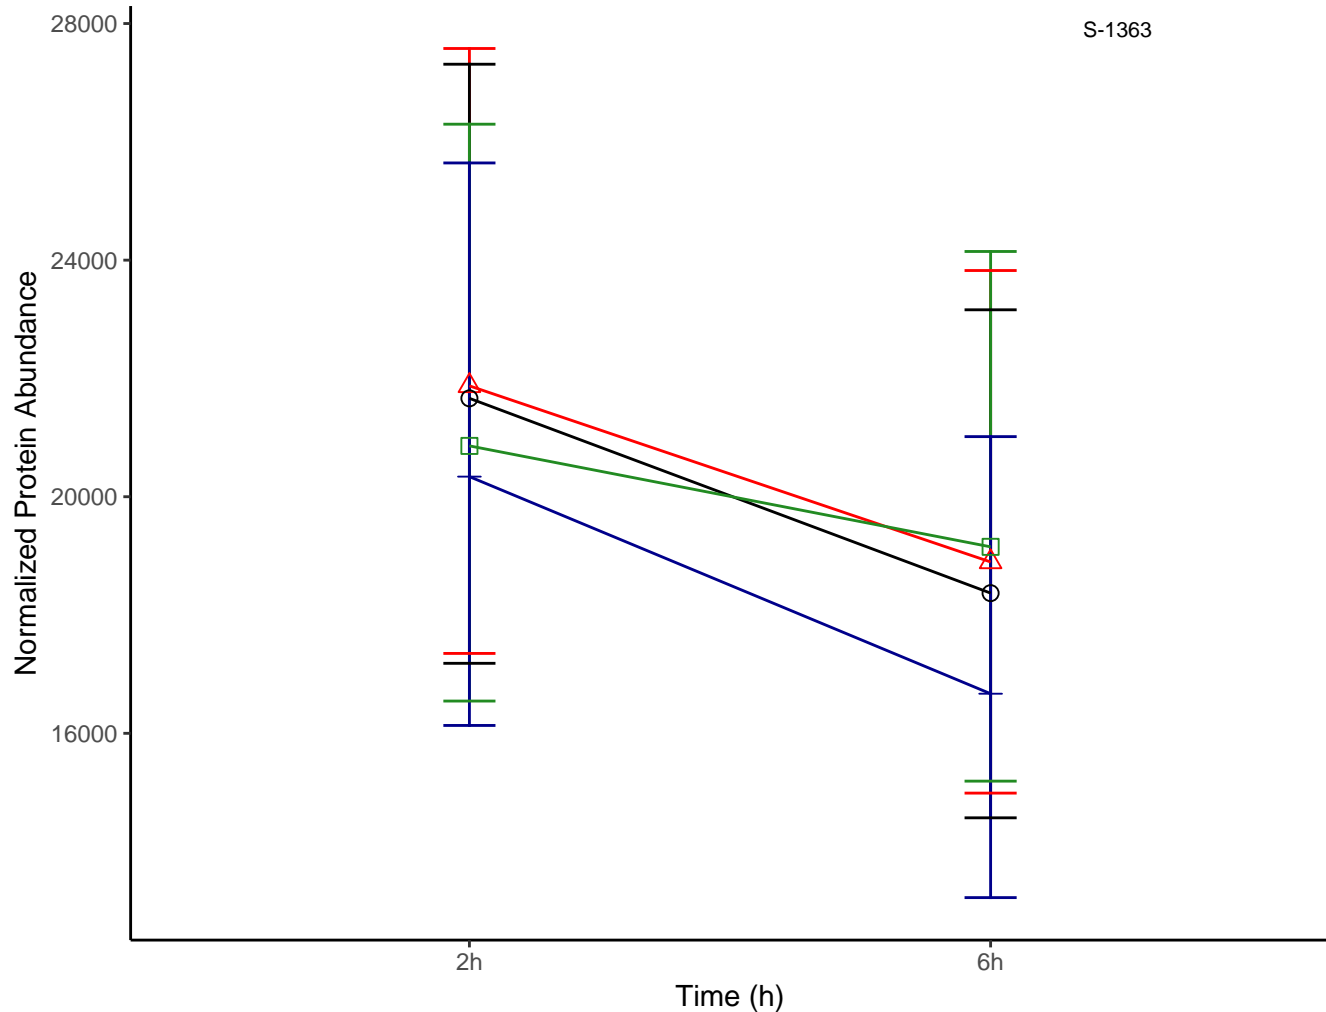

- SA564
- △ SA564- $\Delta hptRS$
- SA564- $\Delta ccpA$
- + SA564- $\Delta hptRS/ccpA$

# RS3\_STAAM

S-1364

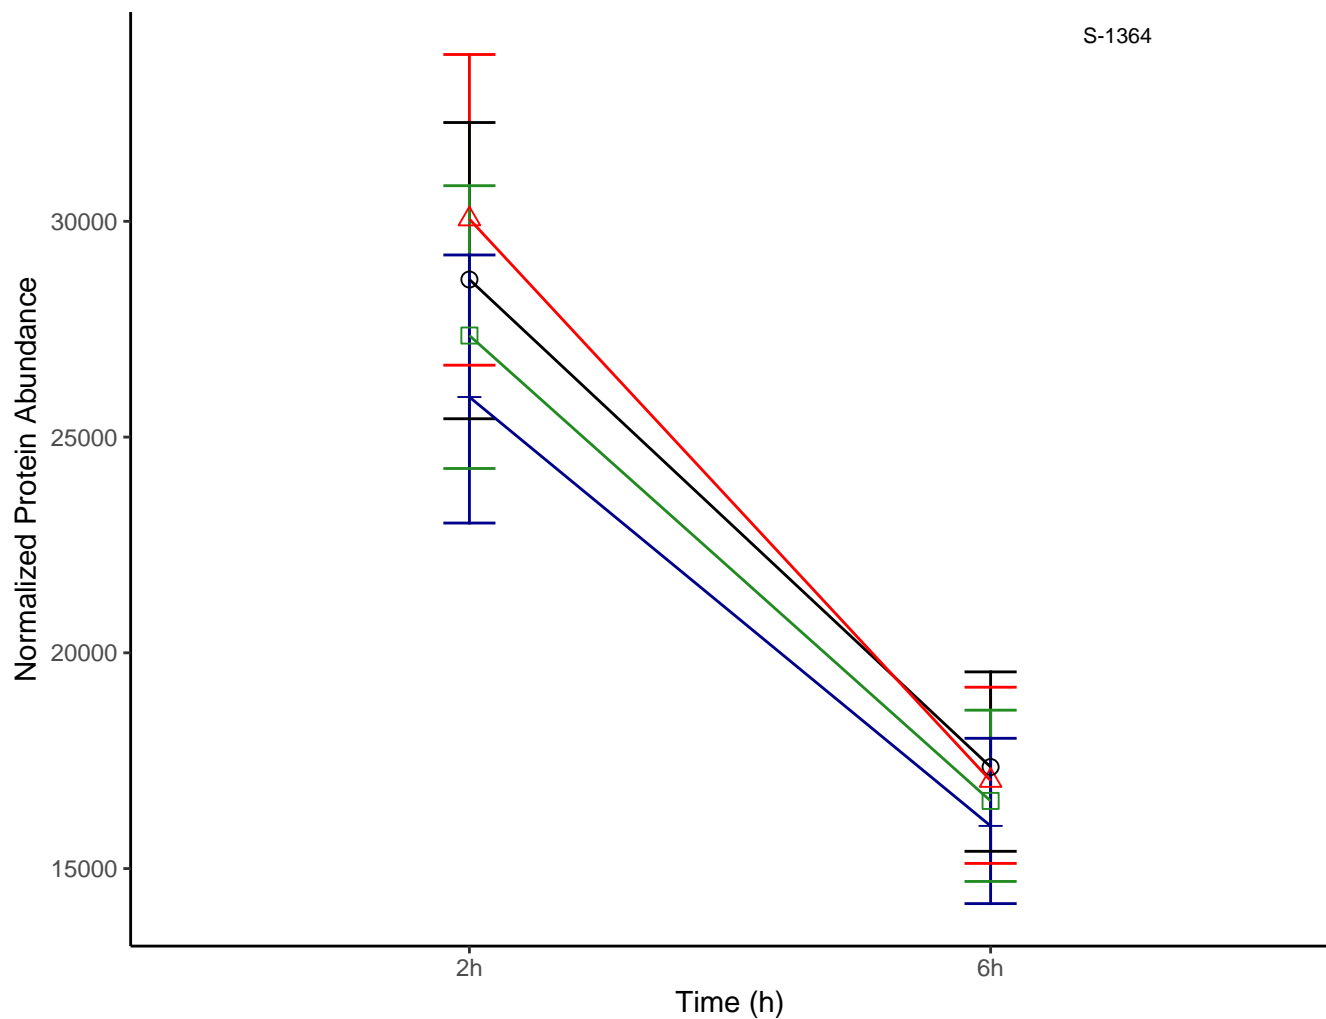

- SA564
- △ SA564- $\Delta$ *hptRS*
- SA564- $\Delta$ *ccpA*
- + SA564- $\Delta$ *hptRS/ccpA*

# RS4\_STAAM

S-1365

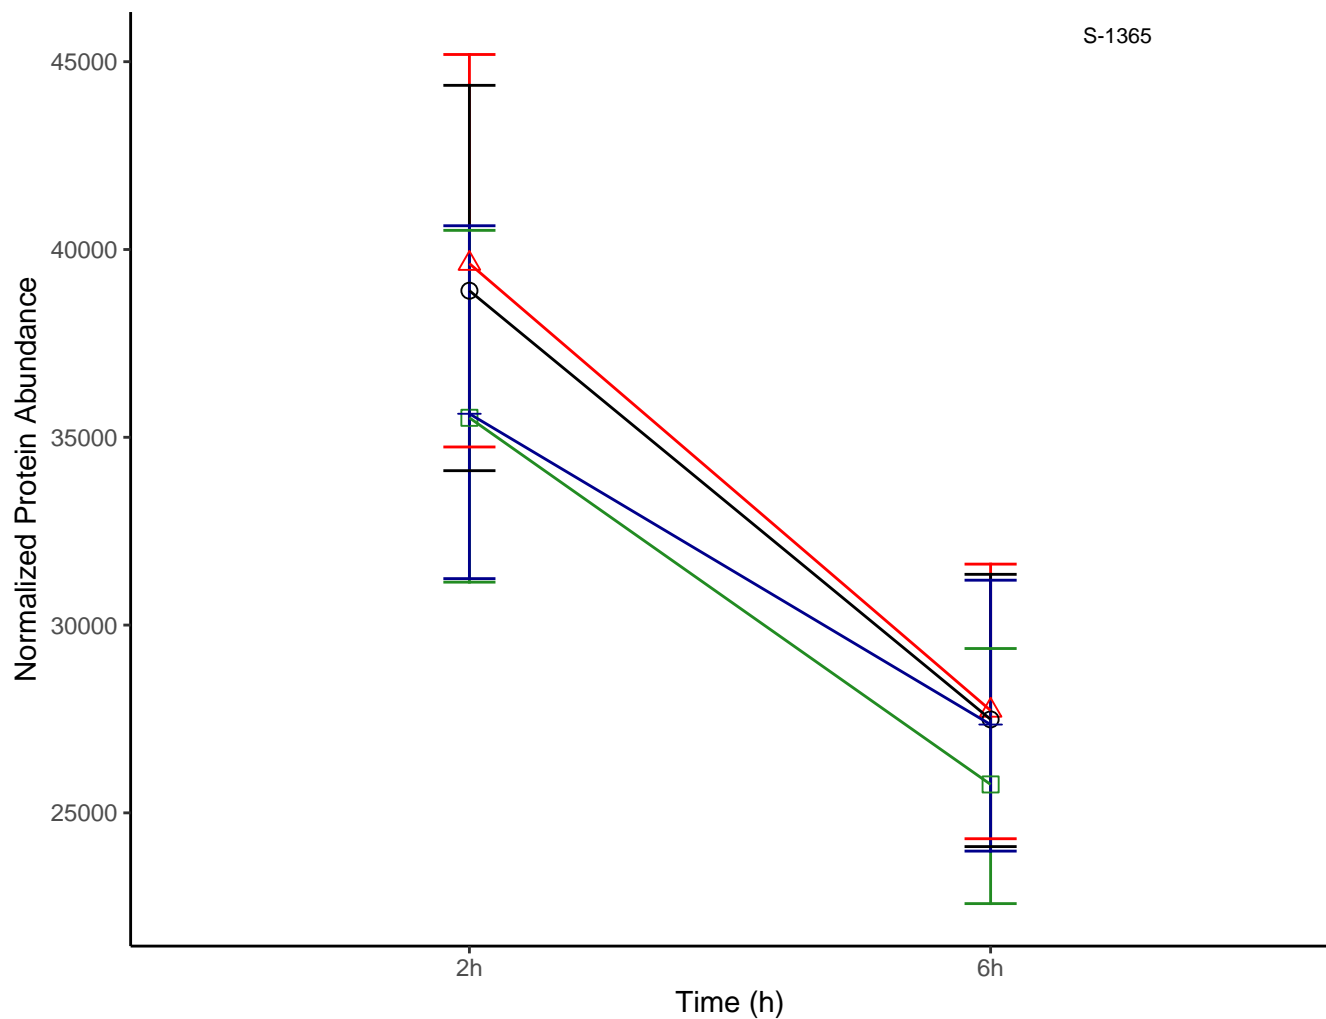

- SA564
- △ SA564- $\Delta hptRS$
- SA564- $\Delta ccpA$
- + SA564- $\Delta hptRS/ccpA$

# RS5\_STAAM

S-1366

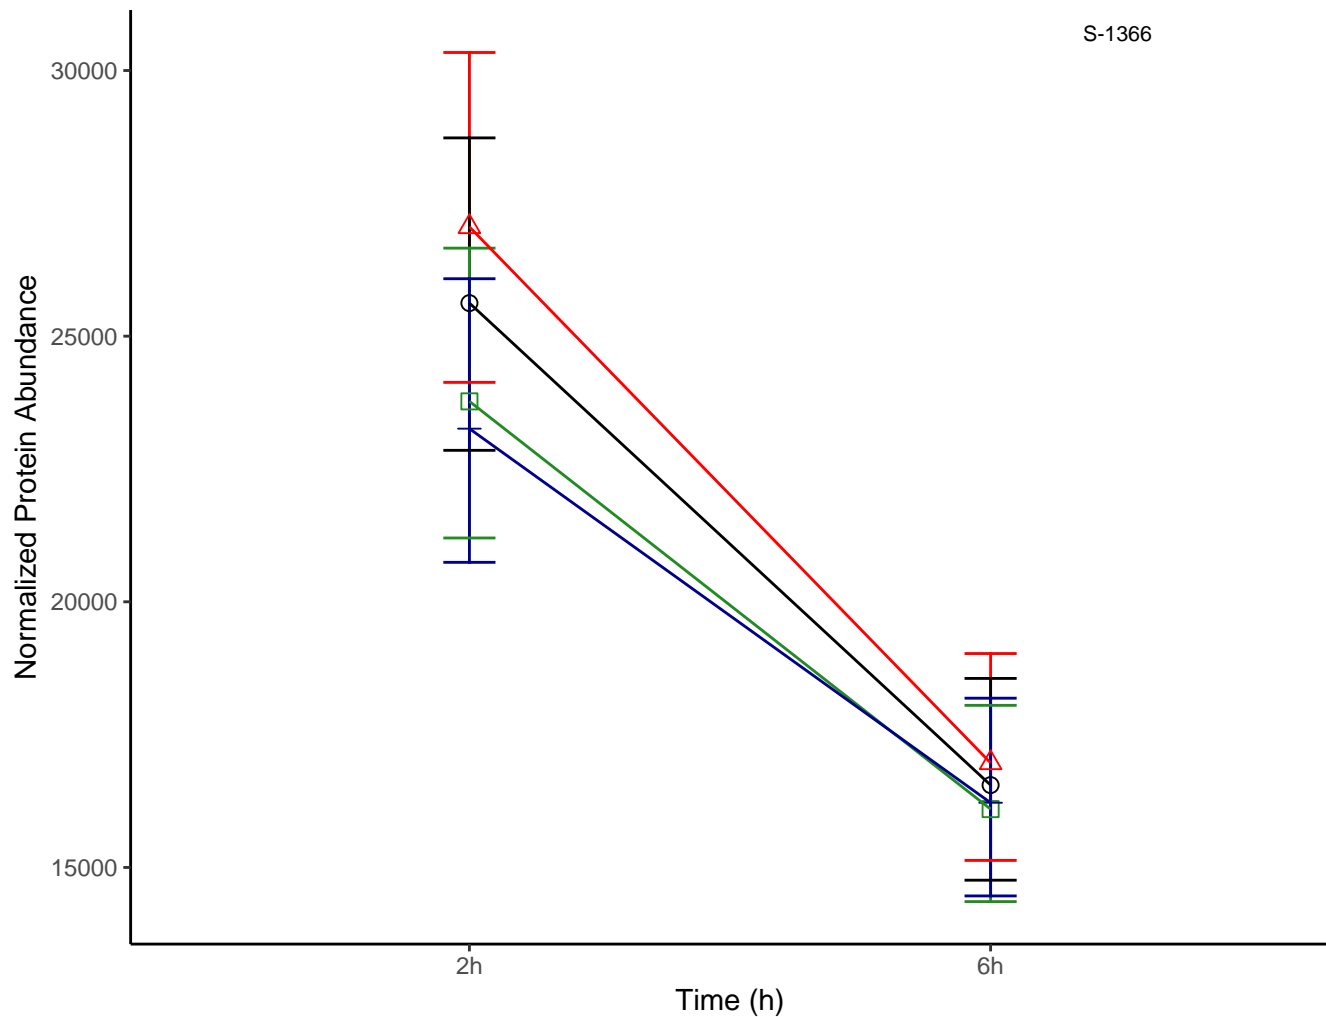

- SA564
- △ SA564- $\Delta$ *hptRS*
- SA564- $\Delta$ *ccpA*
- + SA564- $\Delta$ *hptRS/ccpA*

# RS6\_STAAM

S-1367

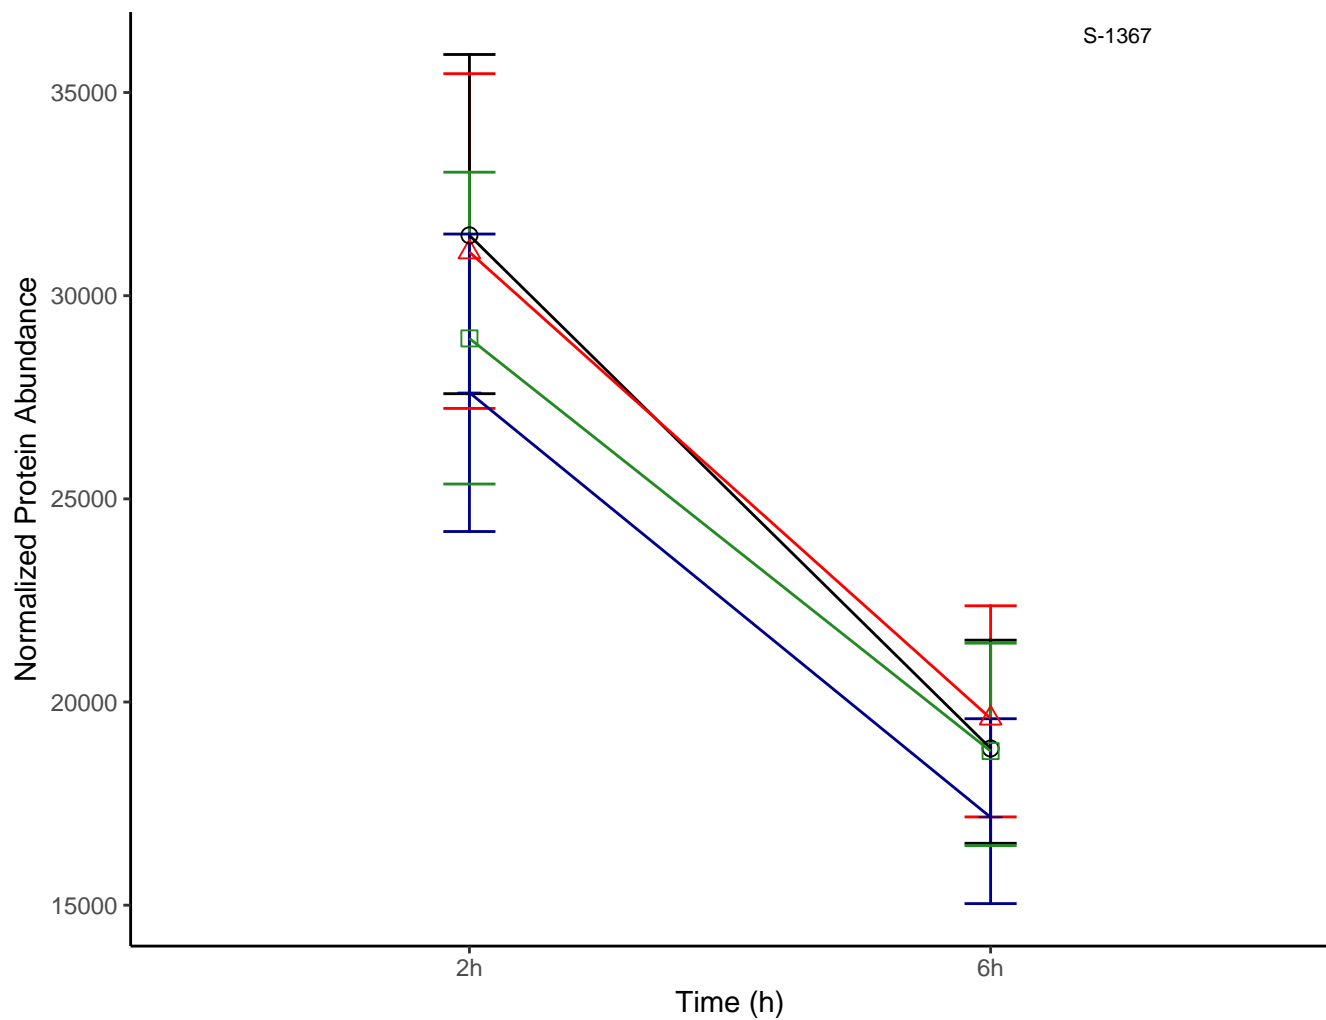

- SA564
- △ SA564- $\Delta hptRS$
- SA564- $\Delta ccpA$
- + SA564- $\Delta hptRS/ccpA$

# RS7\_STAAM

S-1368

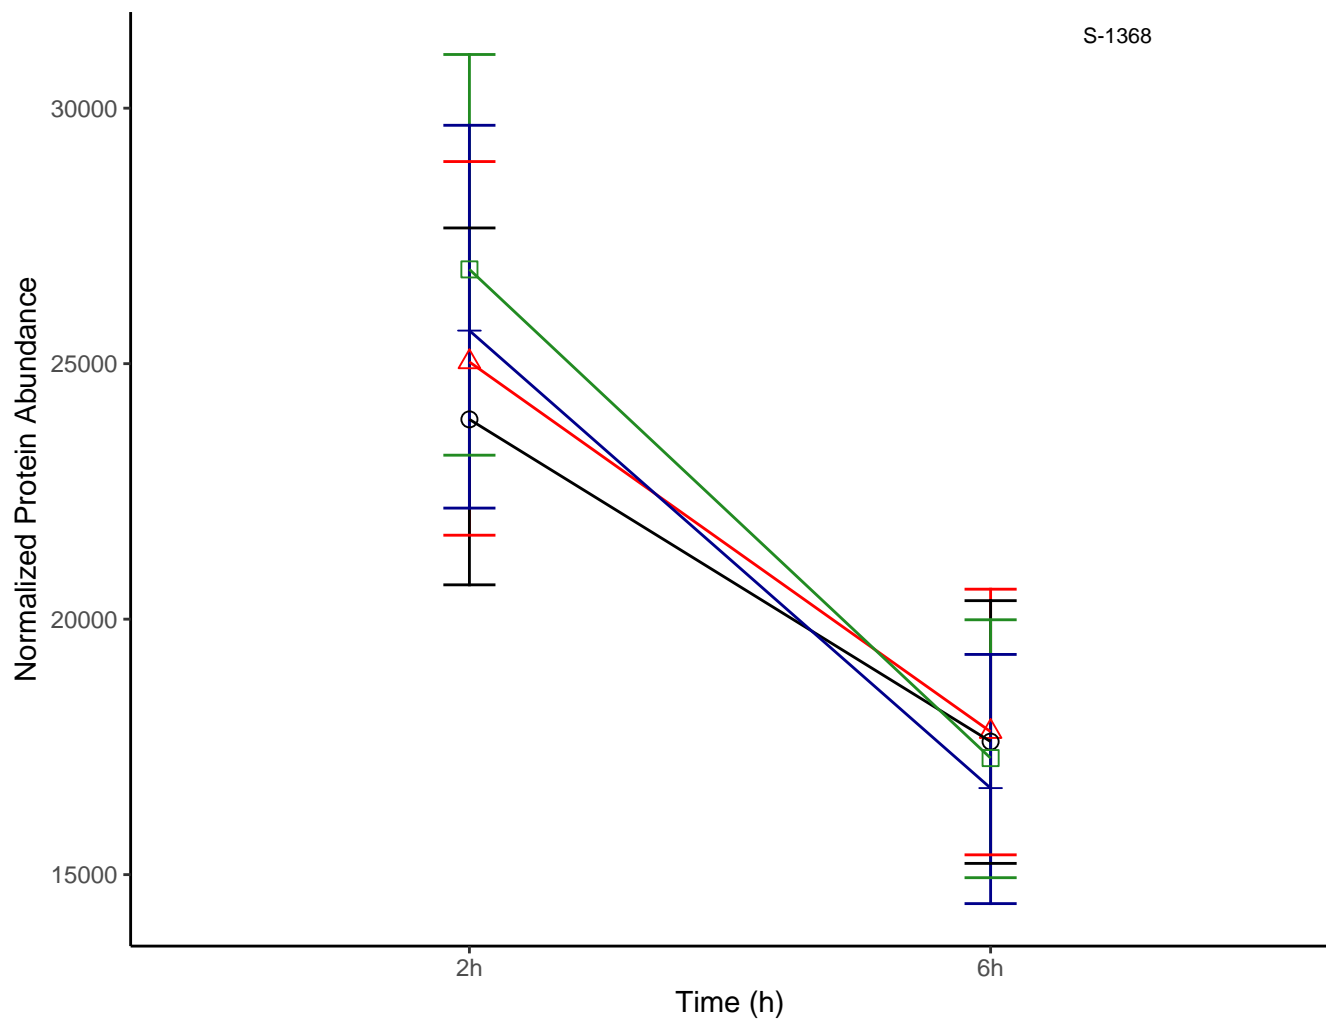

- SA564
- △ SA564- $\Delta$ *hptRS*
- SA564- $\Delta$ *ccpA*
- + SA564- $\Delta$ *hptRS/ccpA*



# RS8\_STAAM

S-1369

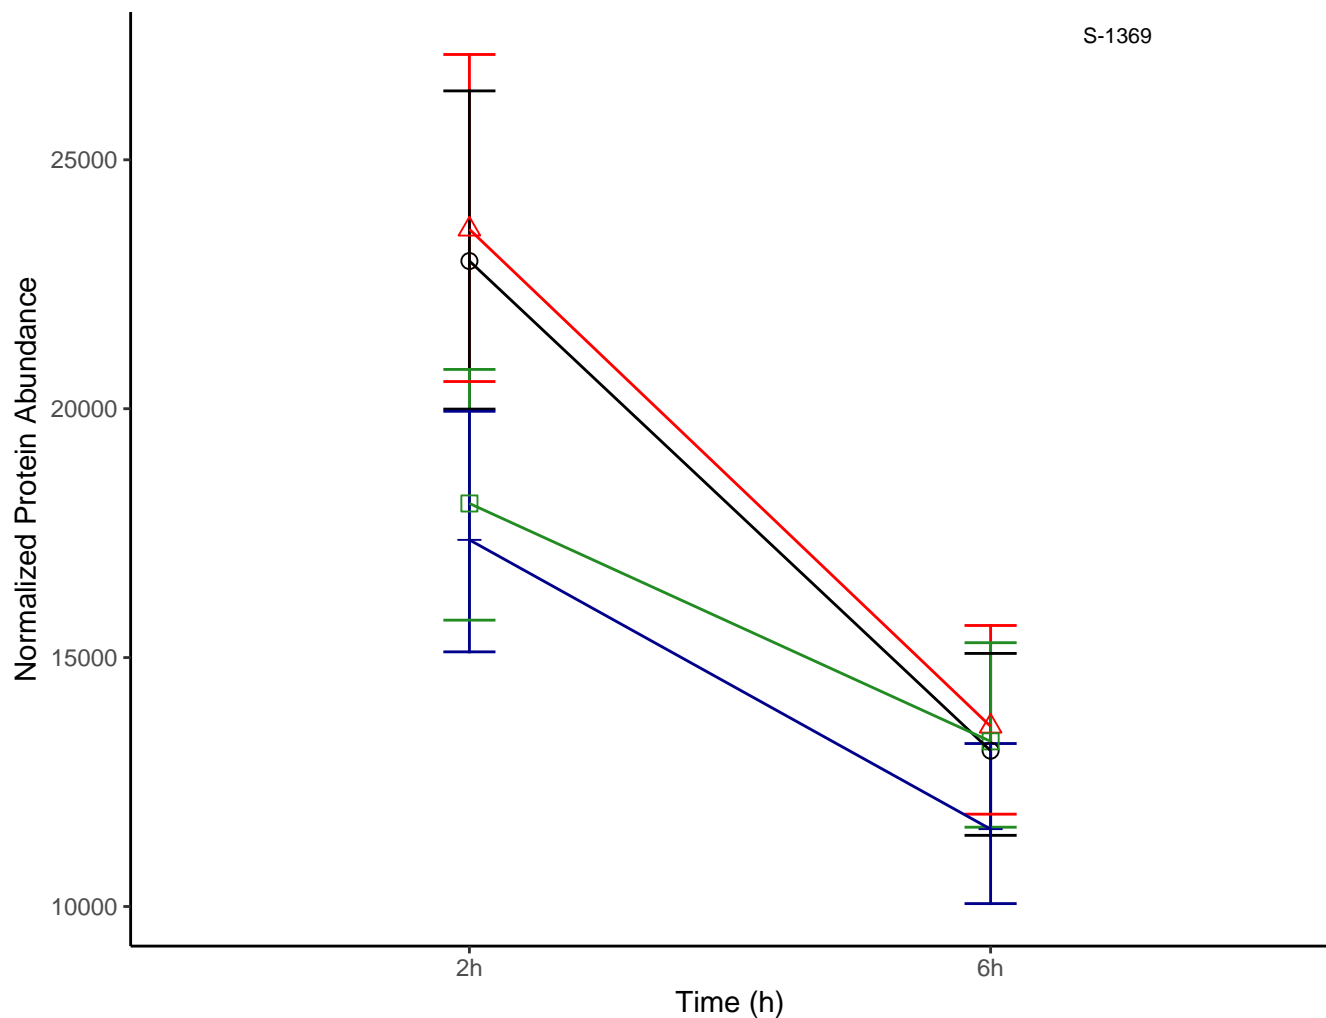

- SA564
- △ SA564- $\Delta hptRS$
- SA564- $\Delta ccpA$
- + SA564- $\Delta hptRS/ccpA$

# RS9\_STAAM

S-1370

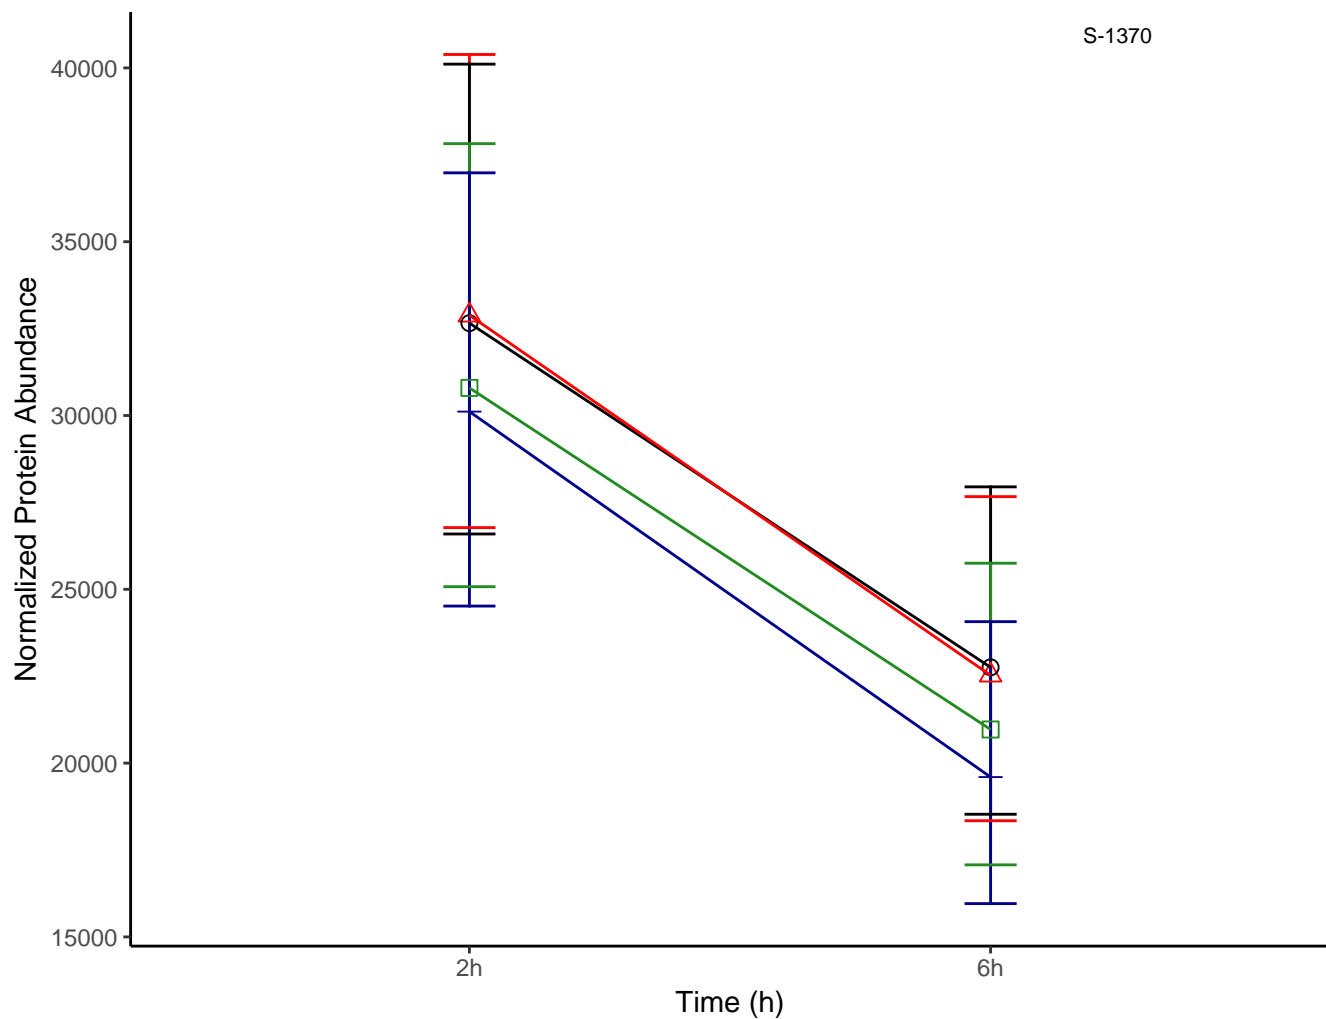

- SA564
- △ SA564- $\Delta hptRS$
- SA564- $\Delta ccpA$
- + SA564- $\Delta hptRS/ccpA$

## RSBV\_STAAM

S-1371

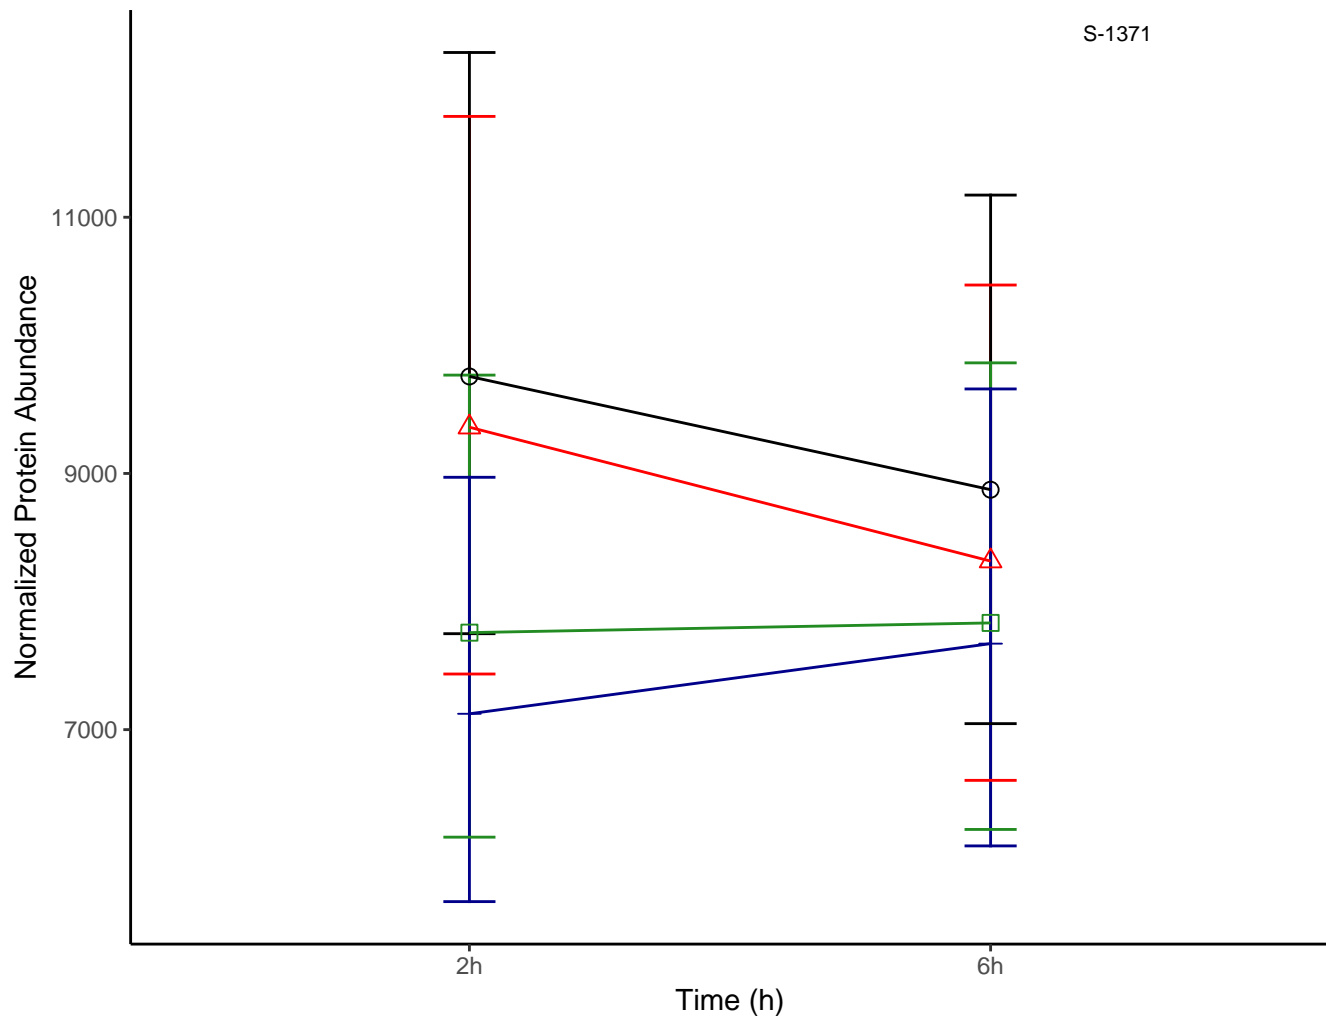

- SA564
- △ SA564- $\Delta$ *hptRS*
- SA564- $\Delta$ *ccpA*
- + SA564- $\Delta$ *hptRS/ccpA*

# RSBW\_STAAM

S-1372

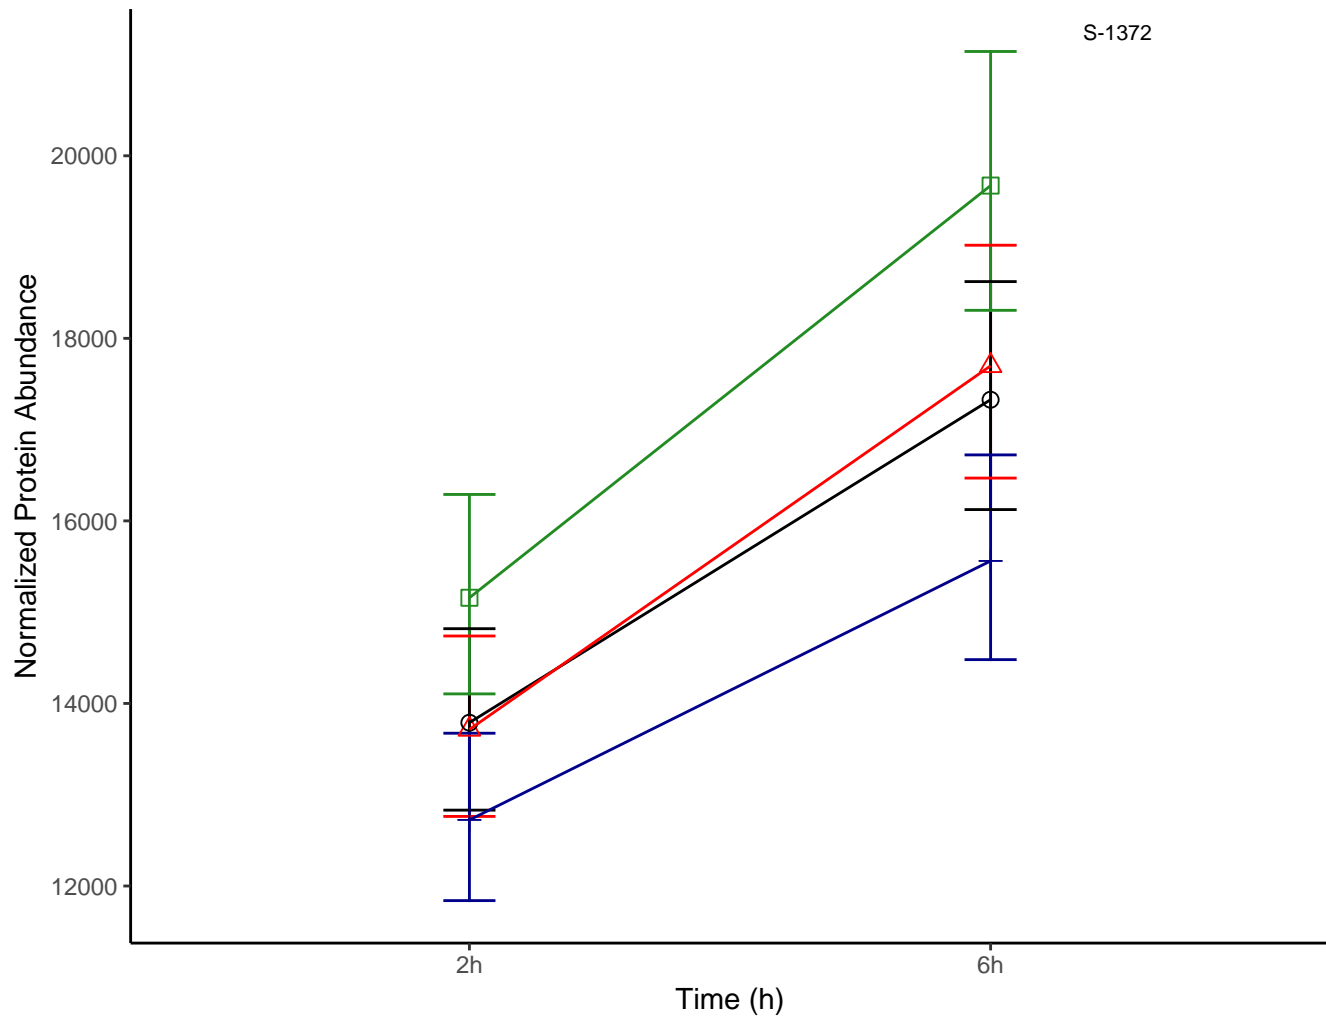

- SA564
- △ SA564- $\Delta$ hptRS
- SA564- $\Delta$ ccpA
- + SA564- $\Delta$ hptRS/ccpA

# RSMA\_STAAM

S-1373

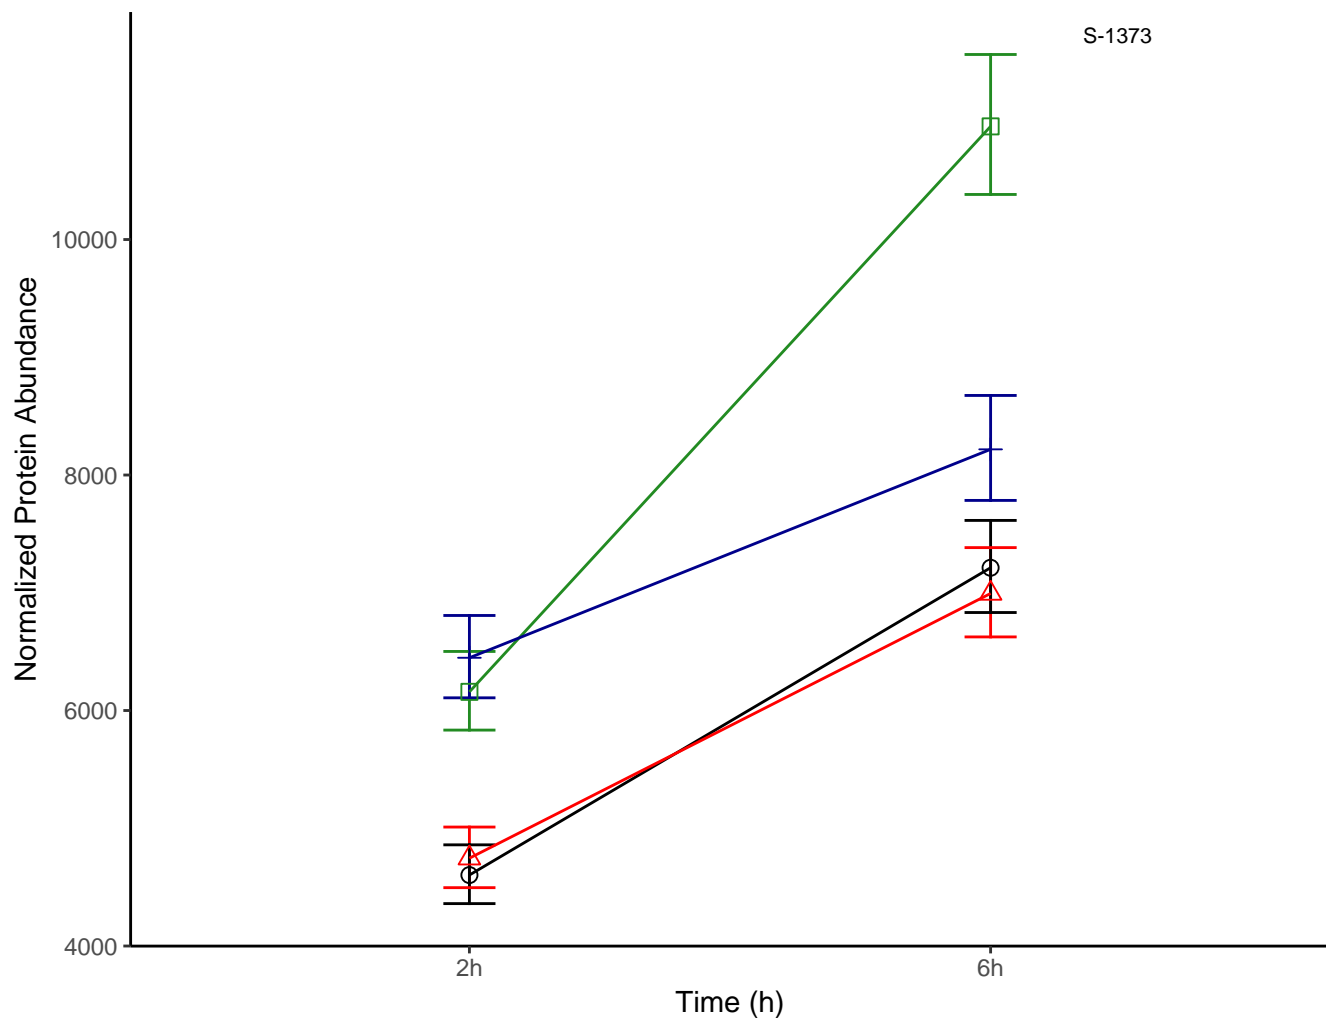

- SA564
- △ SA564- $\Delta$ *hptRS*
- SA564- $\Delta$ *ccpA*
- + SA564- $\Delta$ *hptRS/ccpA*

# RSMG\_STAAM

S-1374

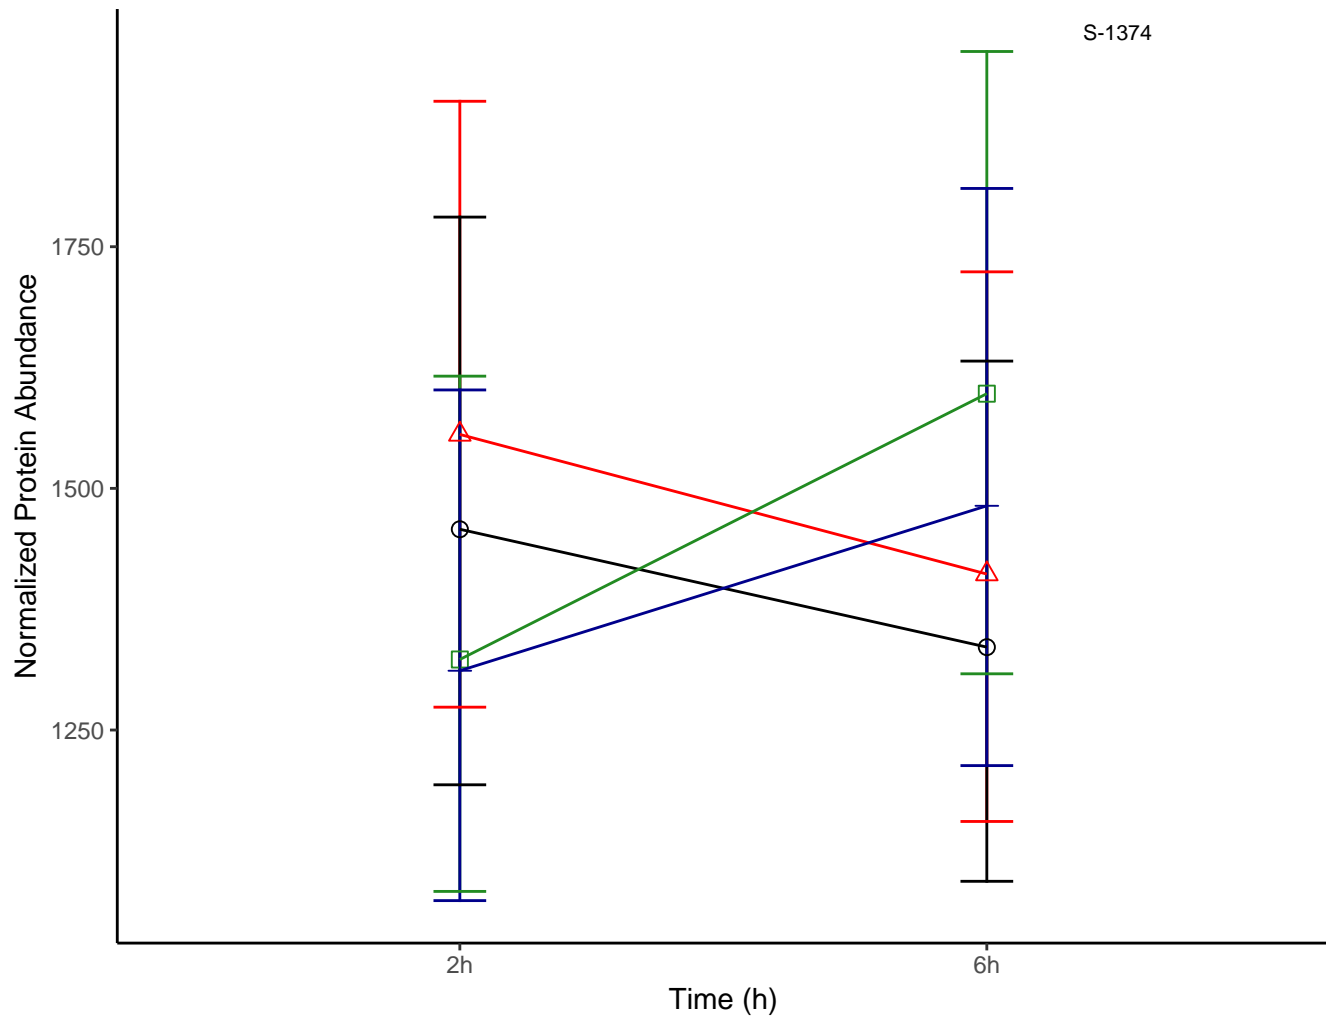

- SA564
- △ SA564- $\Delta$ *hptRS*
- SA564- $\Delta$ *ccpA*
- + SA564- $\Delta$ *hptRS/ccpA*

# RUVX\_STAAM

S-1375

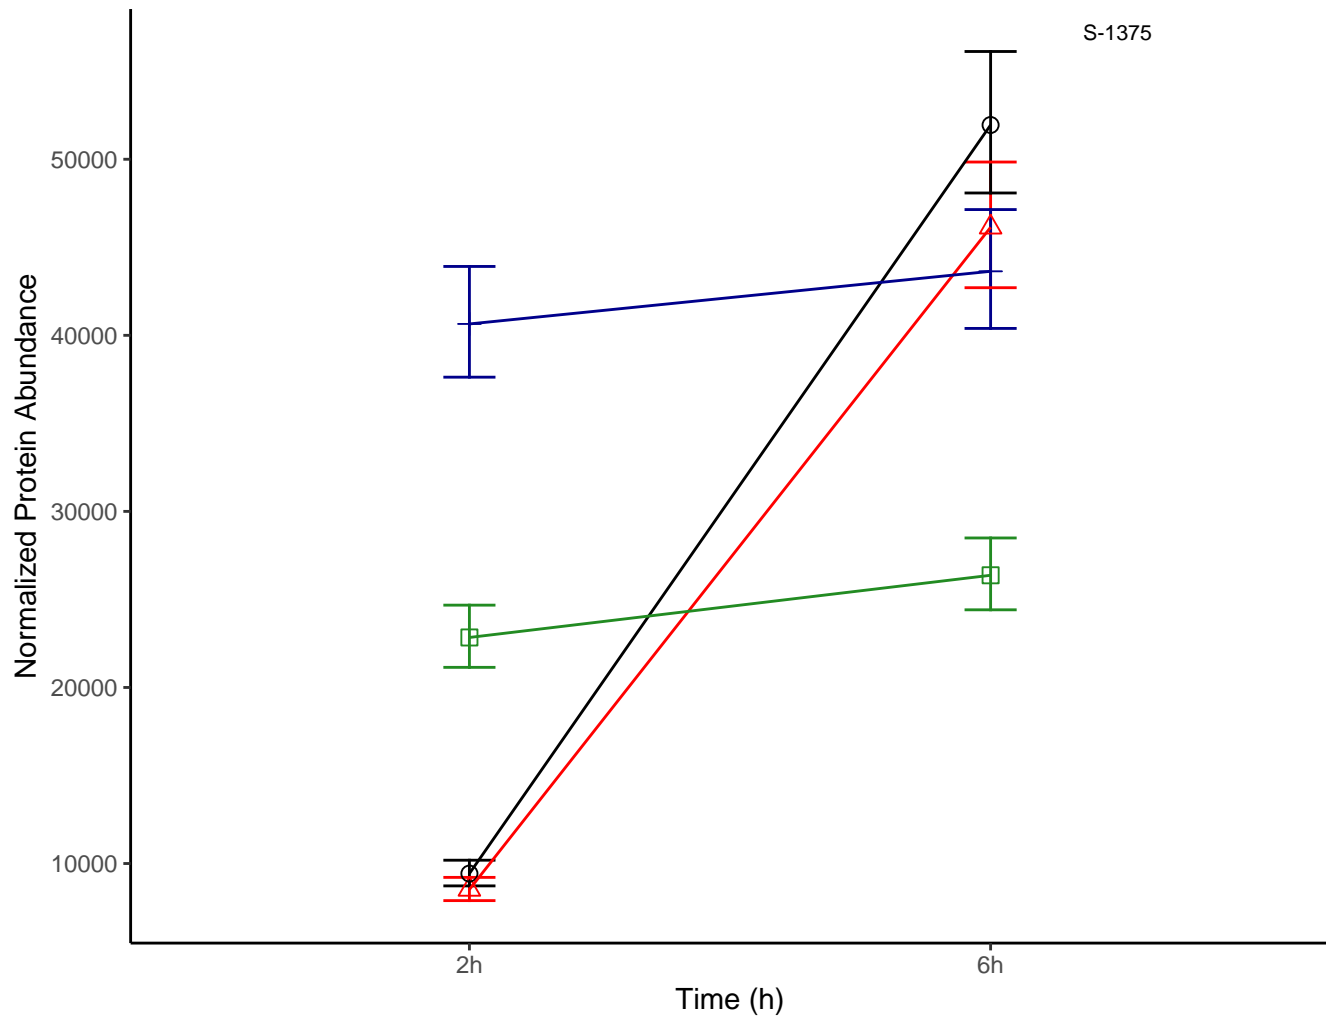

- SA564
- △ SA564- $\Delta$ *hptRS*
- SA564- $\Delta$ *ccpA*
- + SA564- $\Delta$ *hptRS/ccpA*

# S3AD\_STAAM

S-1376

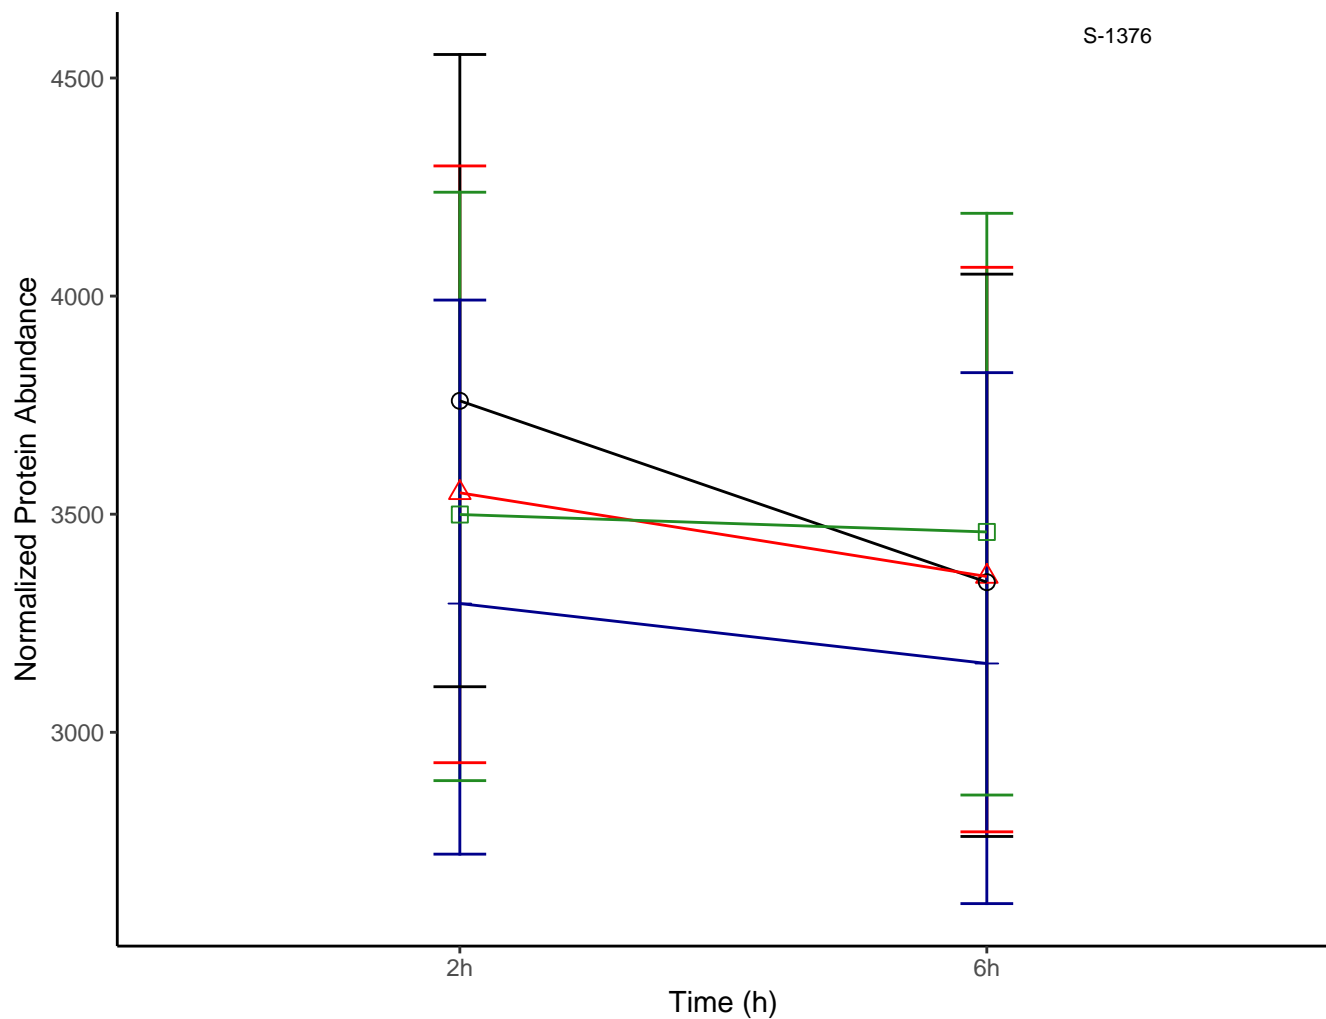

- SA564
- △ SA564- $\Delta$ *hptRS*
- SA564- $\Delta$ *ccpA*
- + SA564- $\Delta$ *hptRS/ccpA*



# SAER\_STAAM

S-1377

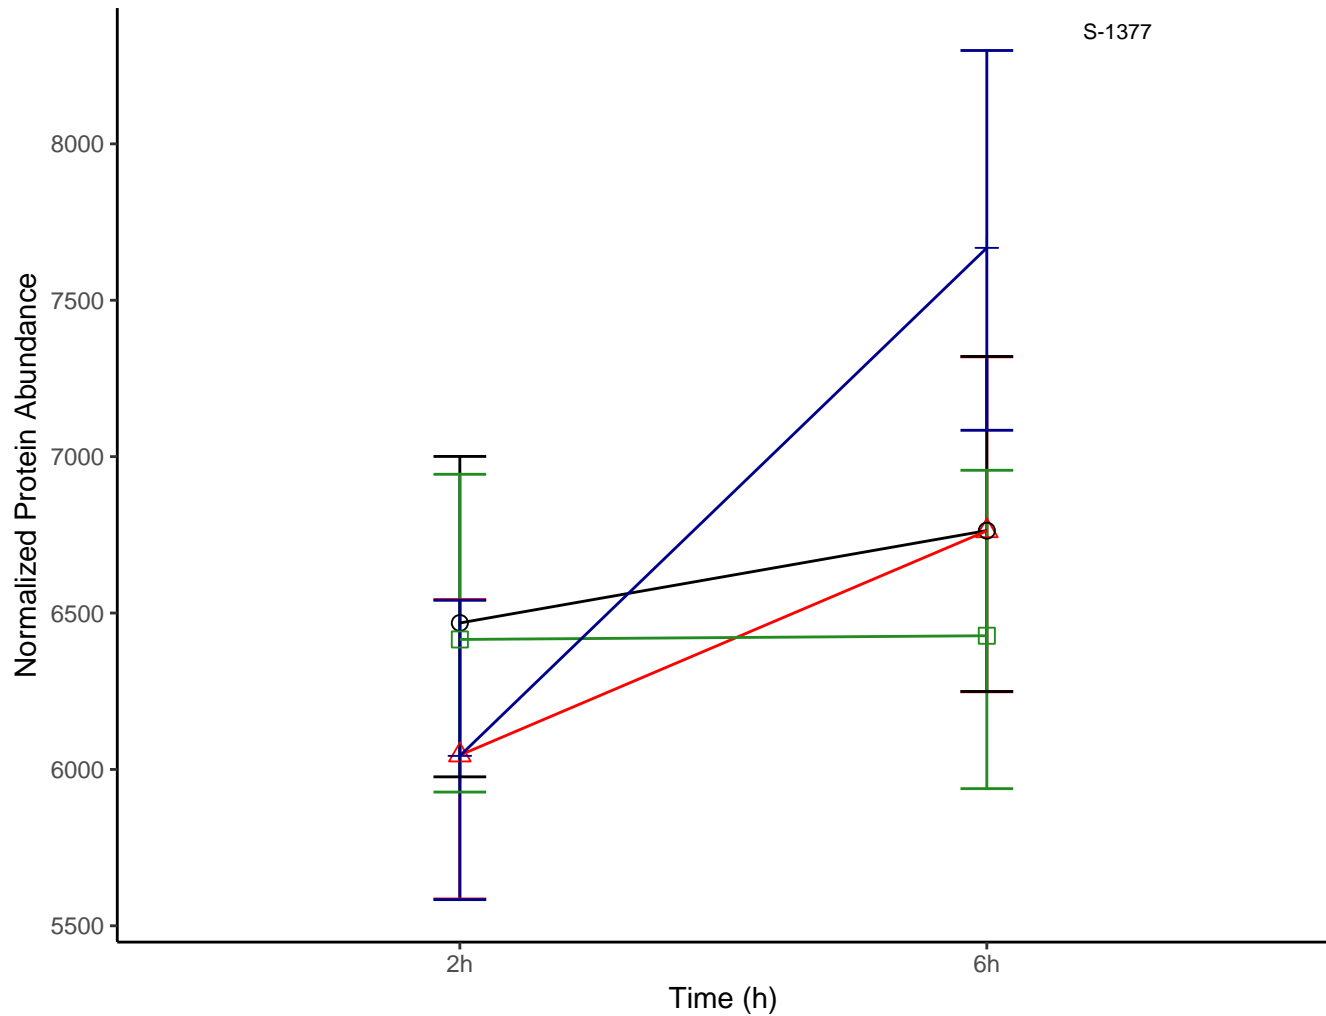

- SA564
- △ SA564- $\Delta hptRS$
- SA564- $\Delta ccpA$
- + SA564- $\Delta hptRS/ccpA$

# SARA\_STAAM

S-1378

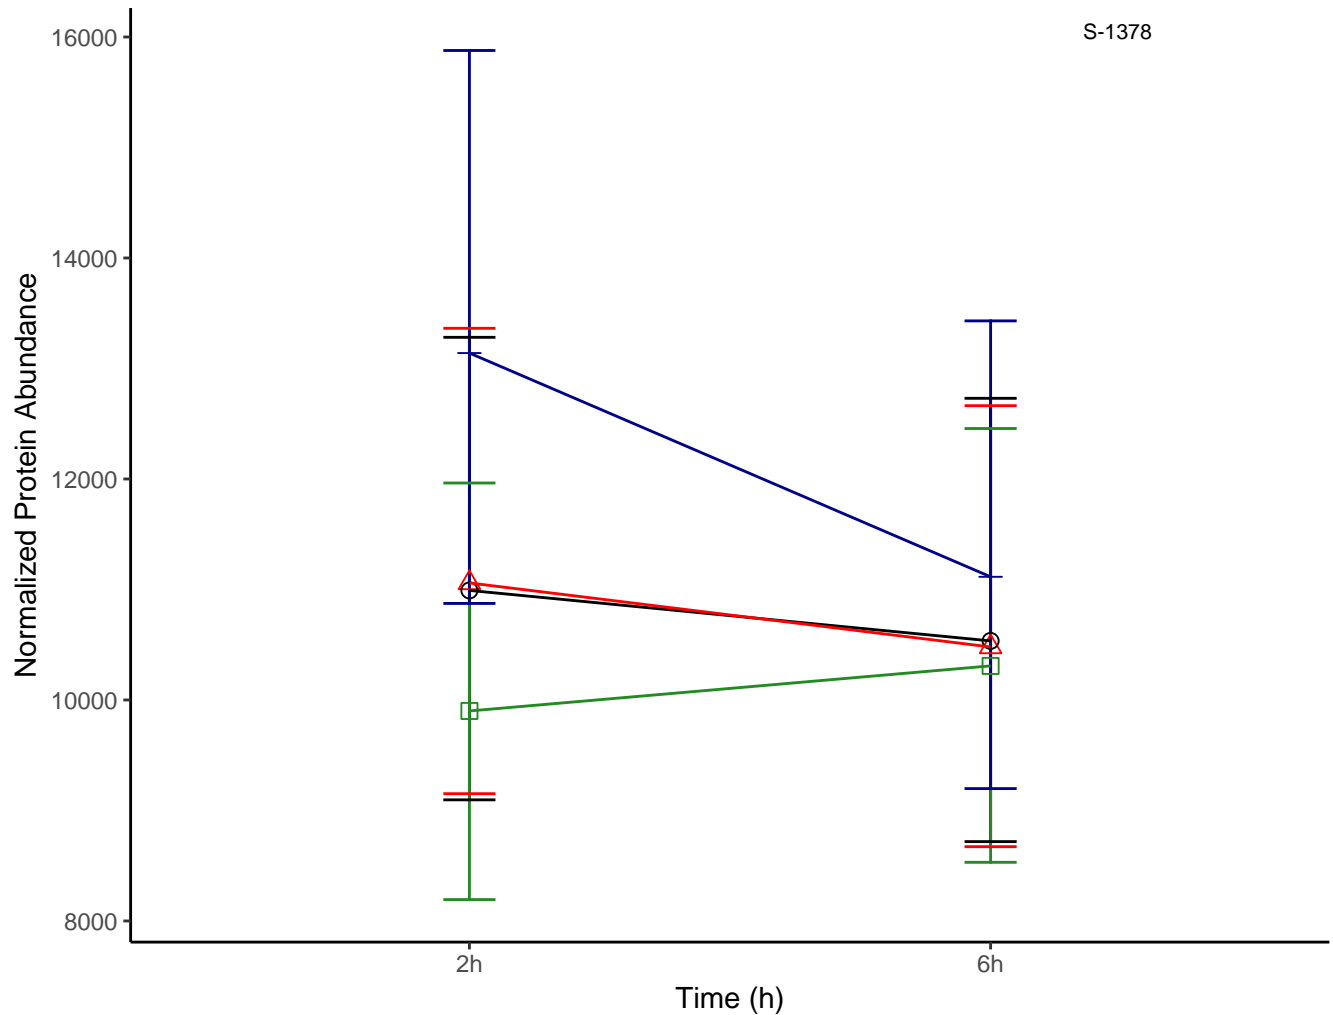

- SA564
- △ SA564- $\Delta$ *hptRS*
- SA564- $\Delta$ *ccpA*
- + SA564- $\Delta$ *hptRS/ccpA*

# SARR\_STAAM

S-1379

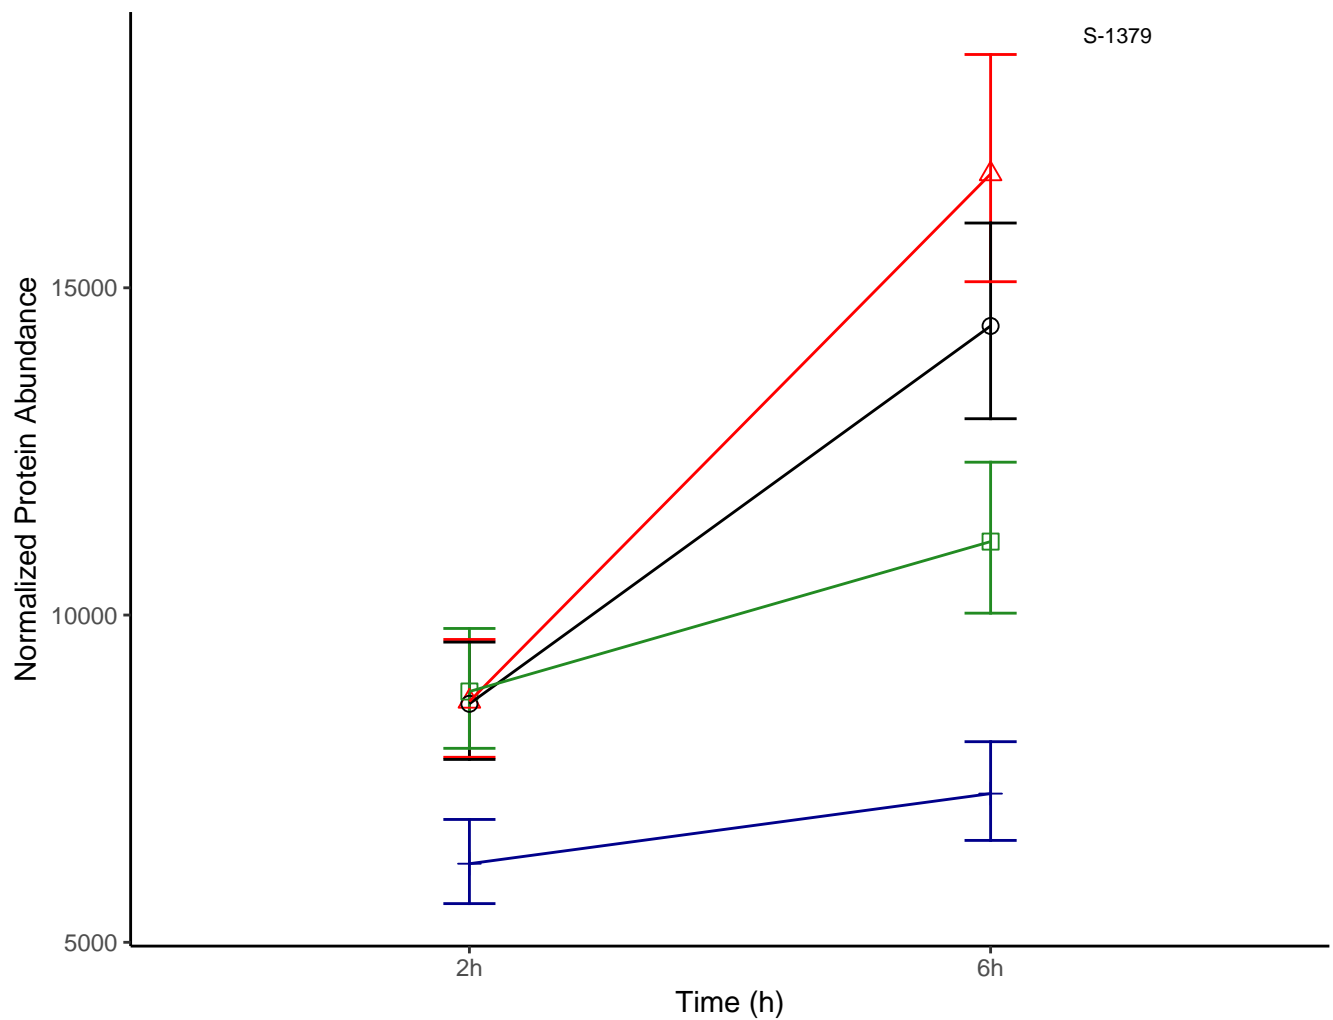

- SA564
- △ SA564- $\Delta$ *hptRS*
- SA564- $\Delta$ *ccpA*
- + SA564- $\Delta$ *hptRS/ccpA*

# SARS\_STAAM

S-1380

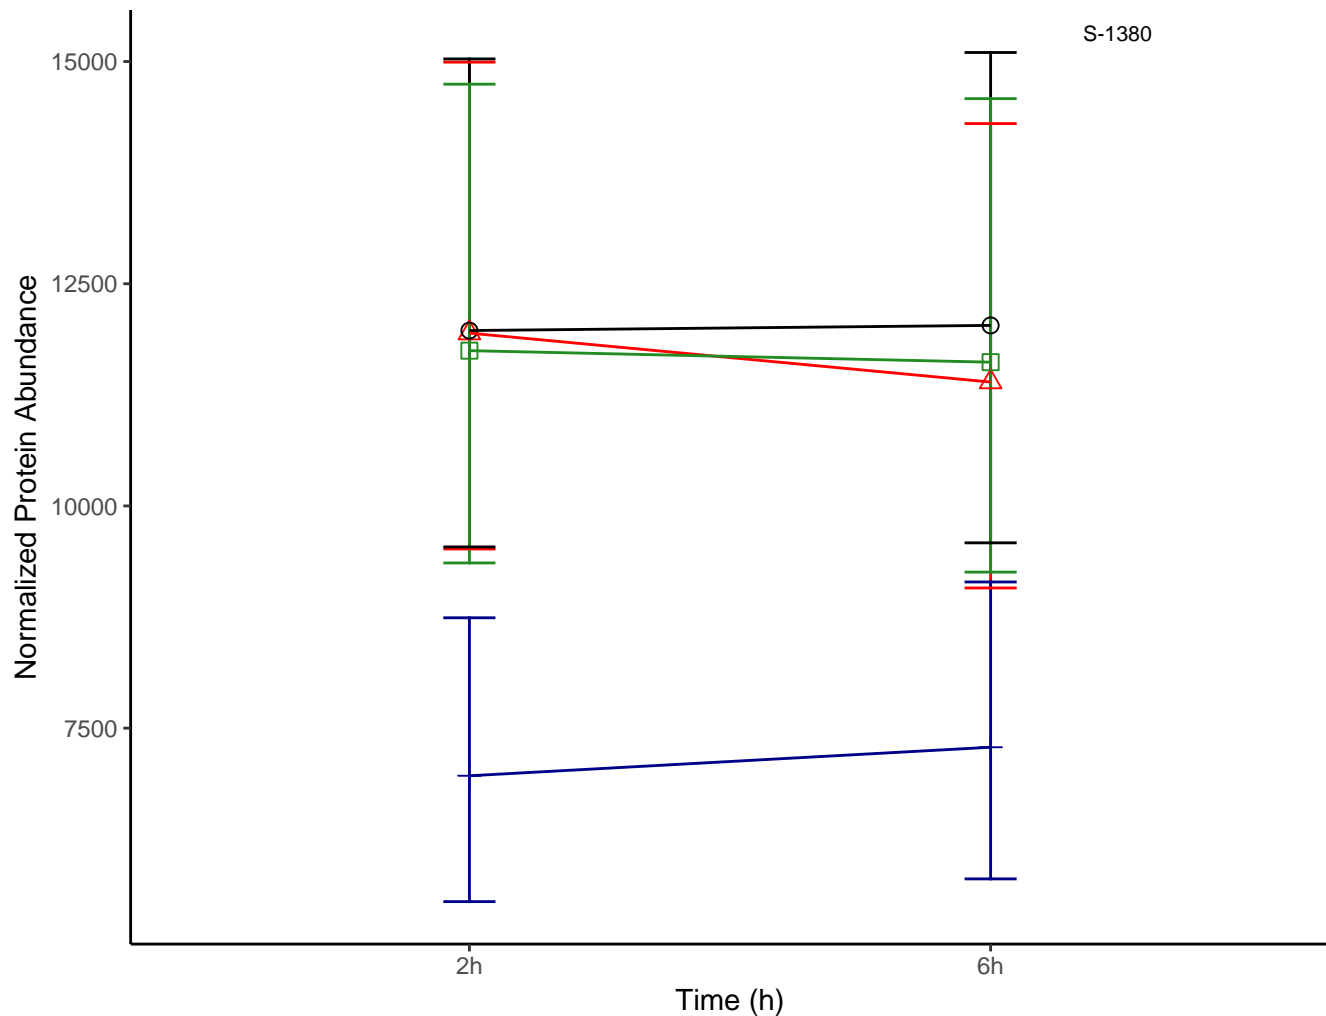

- SA564
- △ SA564- $\Delta$ hptRS
- SA564- $\Delta$ ccpA
- + SA564- $\Delta$ hptRS/ccpA

# SBCC\_STAAM

S-1381

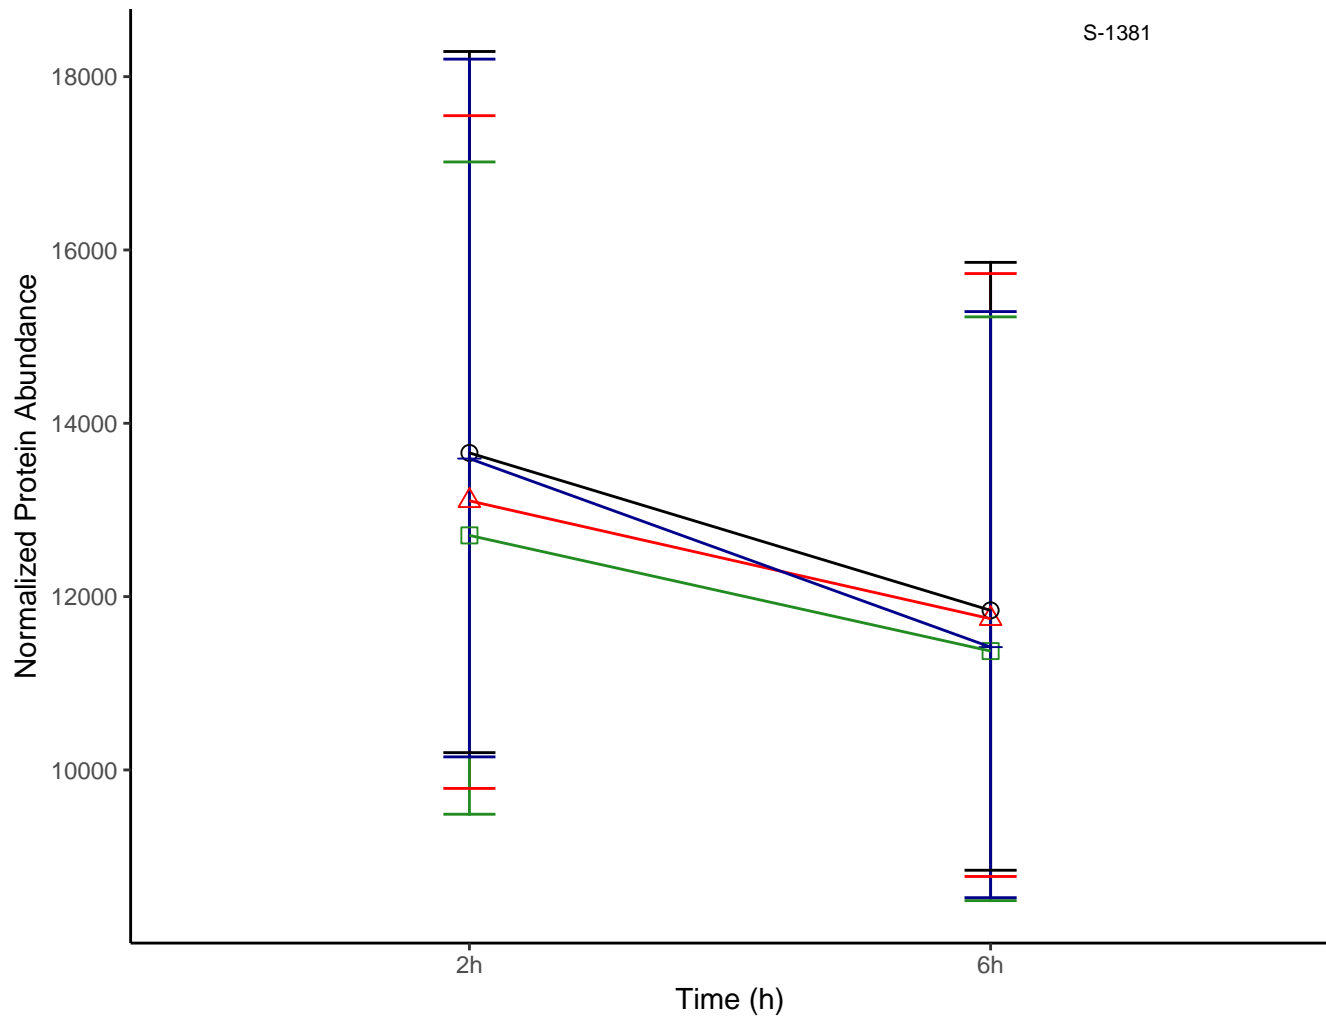

- SA564
- △ SA564- $\Delta$ *hptRS*
- SA564- $\Delta$ *ccpA*
- + SA564- $\Delta$ *hptRS/ccpA*

# SBI\_STAAM

S-1382

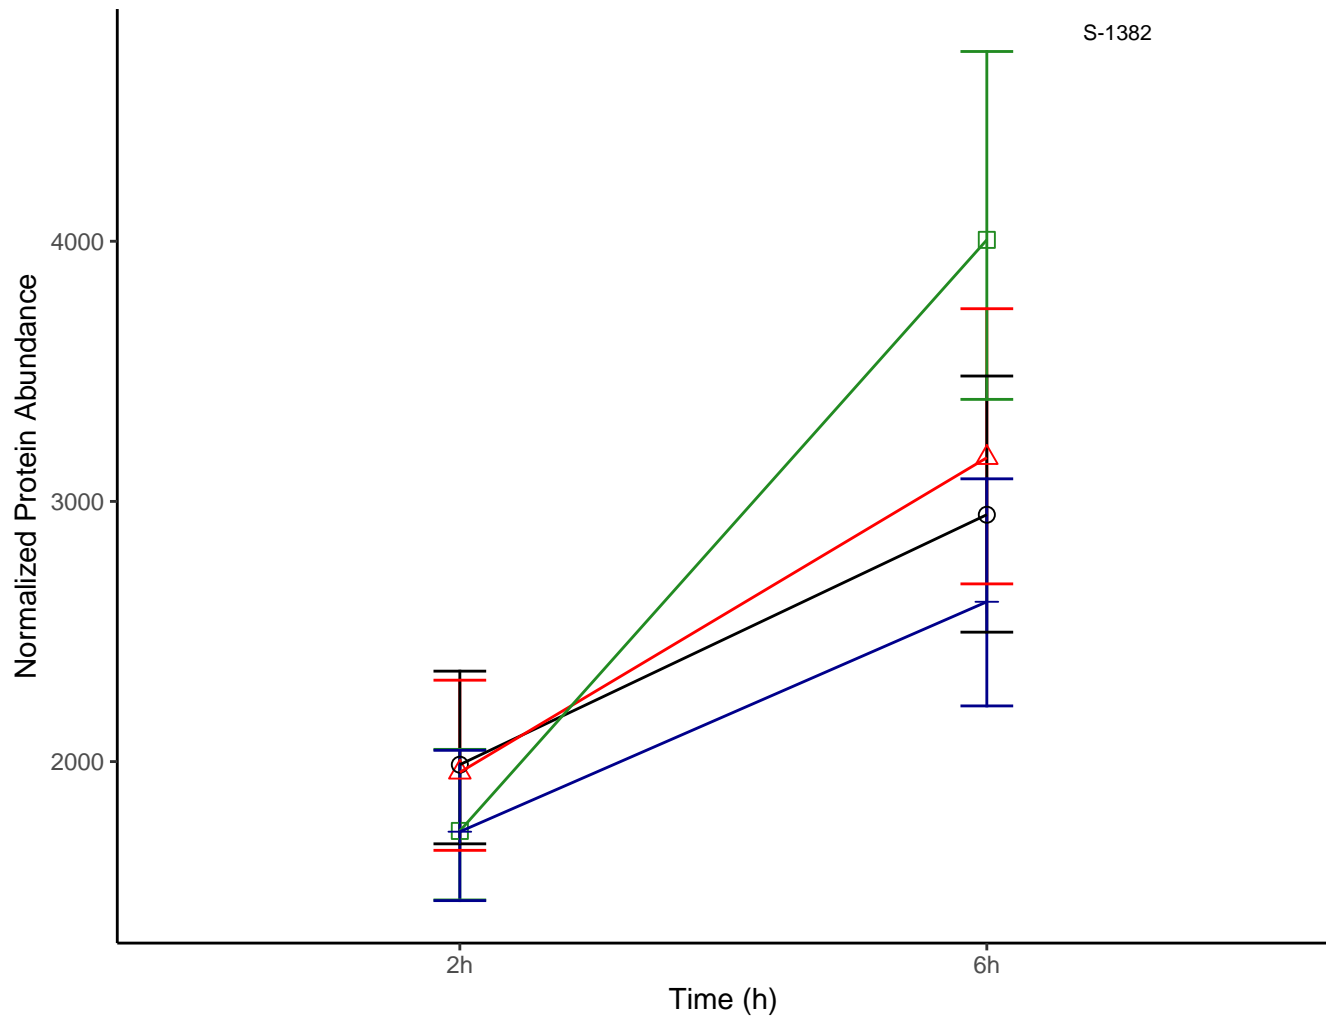

- SA564
- △ SA564- $\Delta$ *hptRS*
- SA564- $\Delta$ *ccpA*
- + SA564- $\Delta$ *hptRS/ccpA*

# SCPA\_STAAM

S-1383

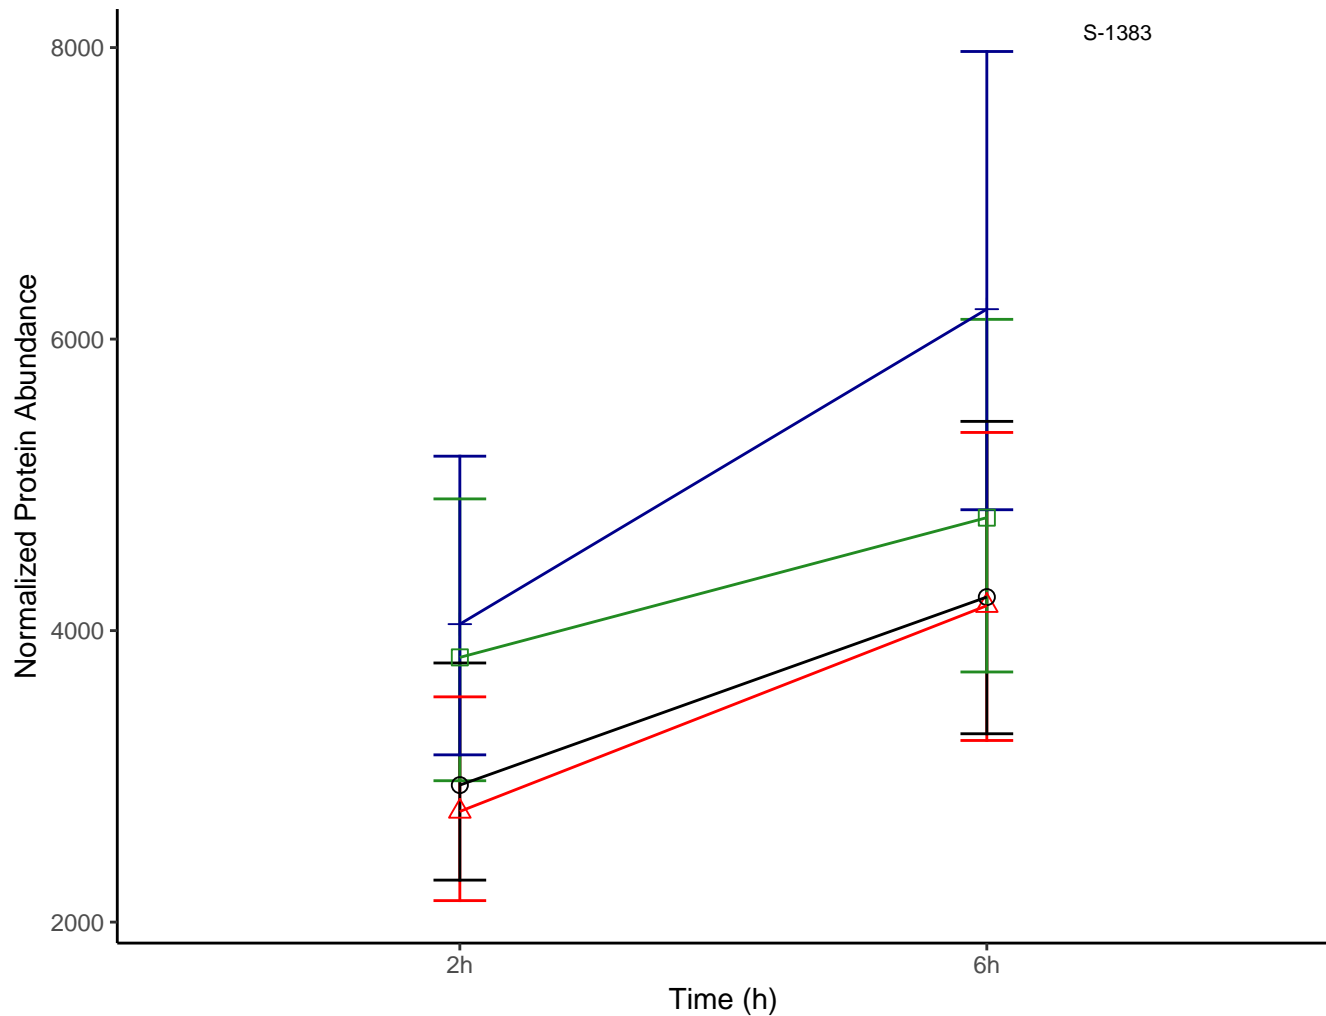

- SA564
- △ SA564-ΔhptRS
- SA564-ΔccpA
- + SA564-ΔhptRS/ccpA

# SCPB\_STAAM

S-1384

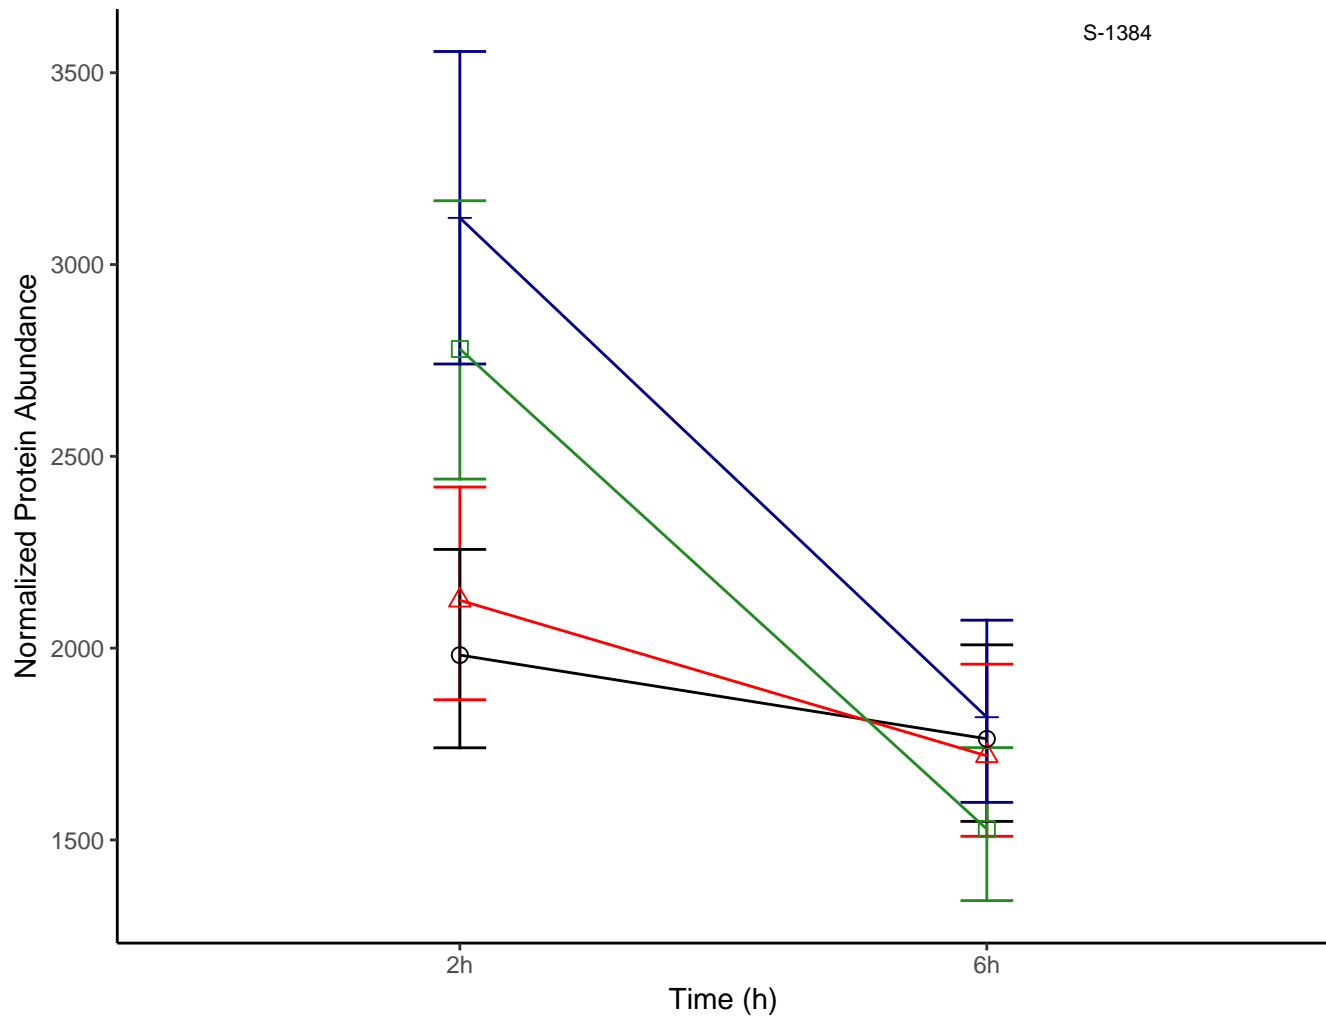

- SA564
- △ SA564- $\Delta hptRS$
- SA564- $\Delta ccpA$
- + SA564- $\Delta hptRS/ccpA$



# SECA1\_STAAM

S-1385

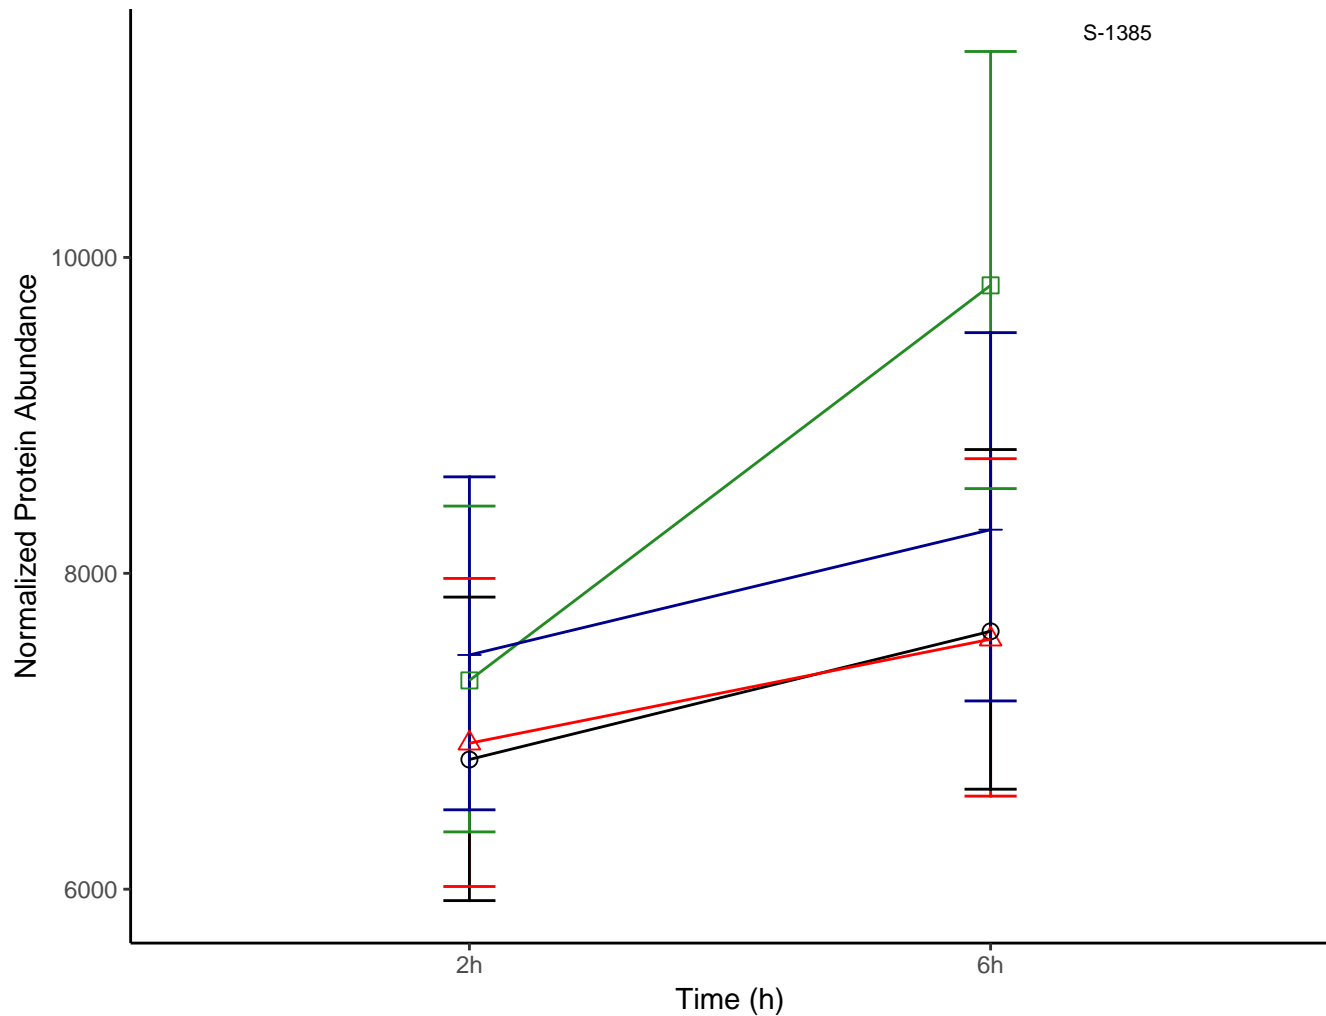

- SA564
- △ SA564- $\Delta$ *hptRS*
- SA564- $\Delta$ *ccpA*
- + SA564- $\Delta$ *hptRS/ccpA*

# SIGA\_STAAM

S-1386

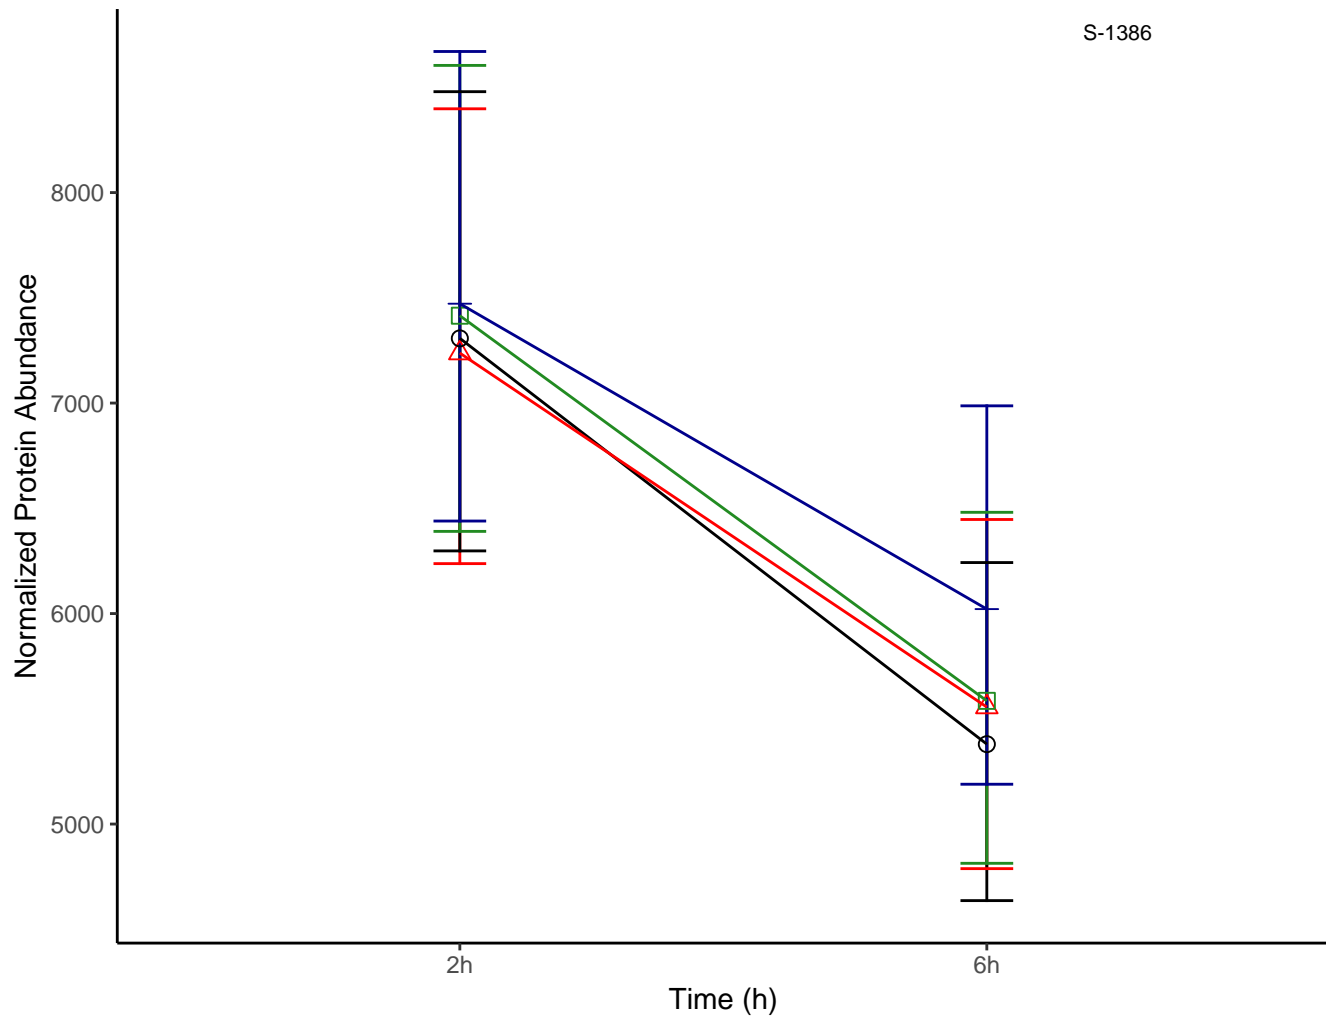

- SA564
- △ SA564- $\Delta hptRS$
- SA564- $\Delta ccpA$
- + SA564- $\Delta hptRS/ccpA$

# SODM1\_STAAM

S-1387

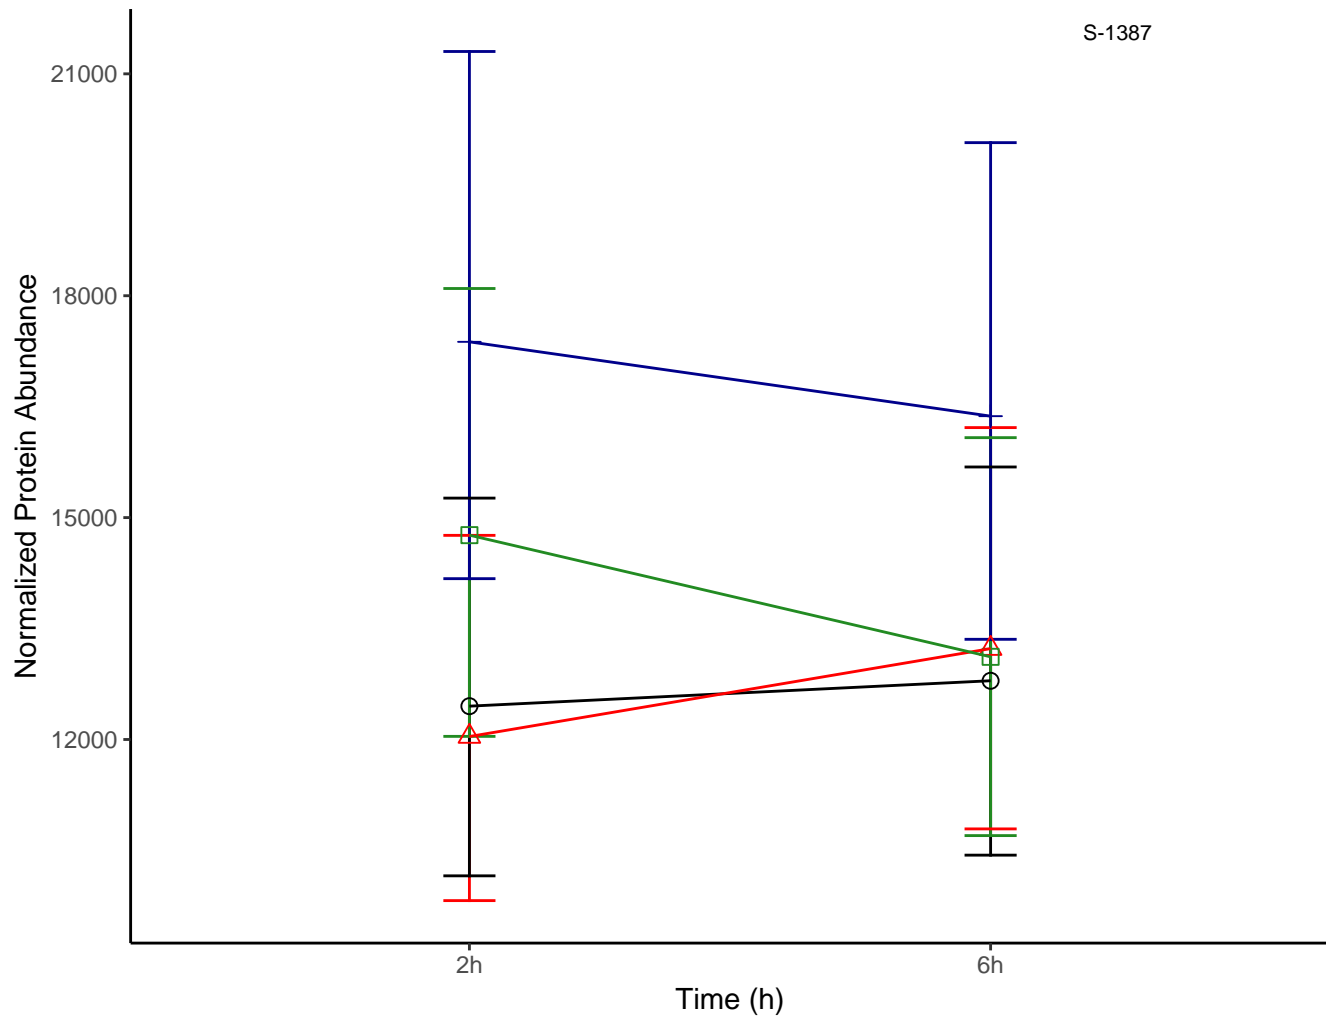

- SA564
- △ SA564- $\Delta$ *hptRS*
- SA564- $\Delta$ *ccpA*
- + SA564- $\Delta$ *hptRS/ccpA*

# SODM2\_STAAM

S-1388

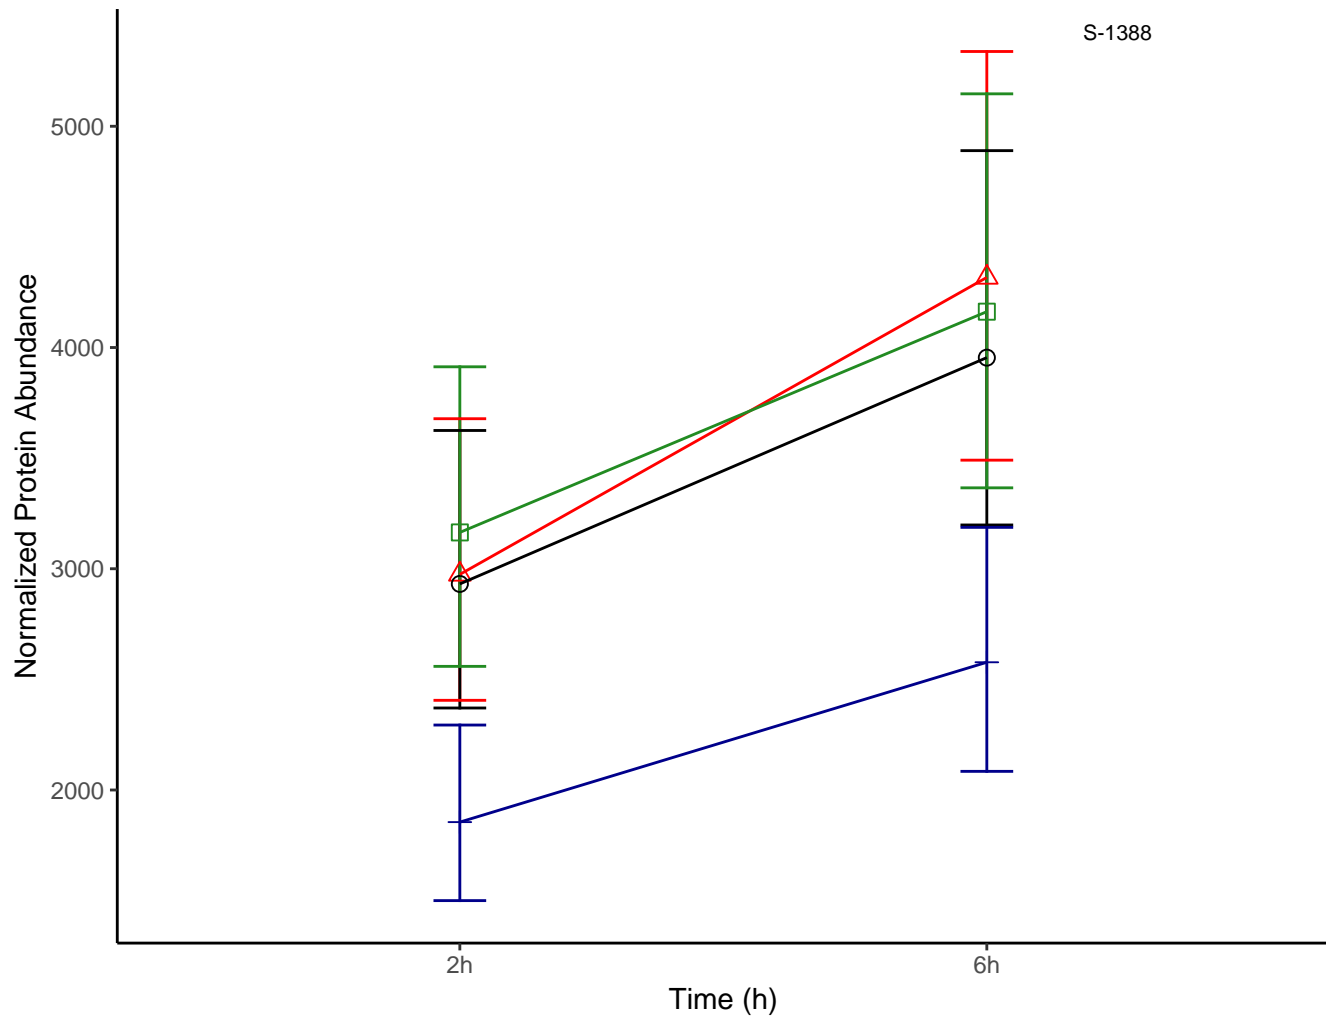

- SA564
- △ SA564- $\Delta hptRS$
- SA564- $\Delta ccpA$
- + SA564- $\Delta hptRS/ccpA$

# SP5G\_STAAM

S-1389

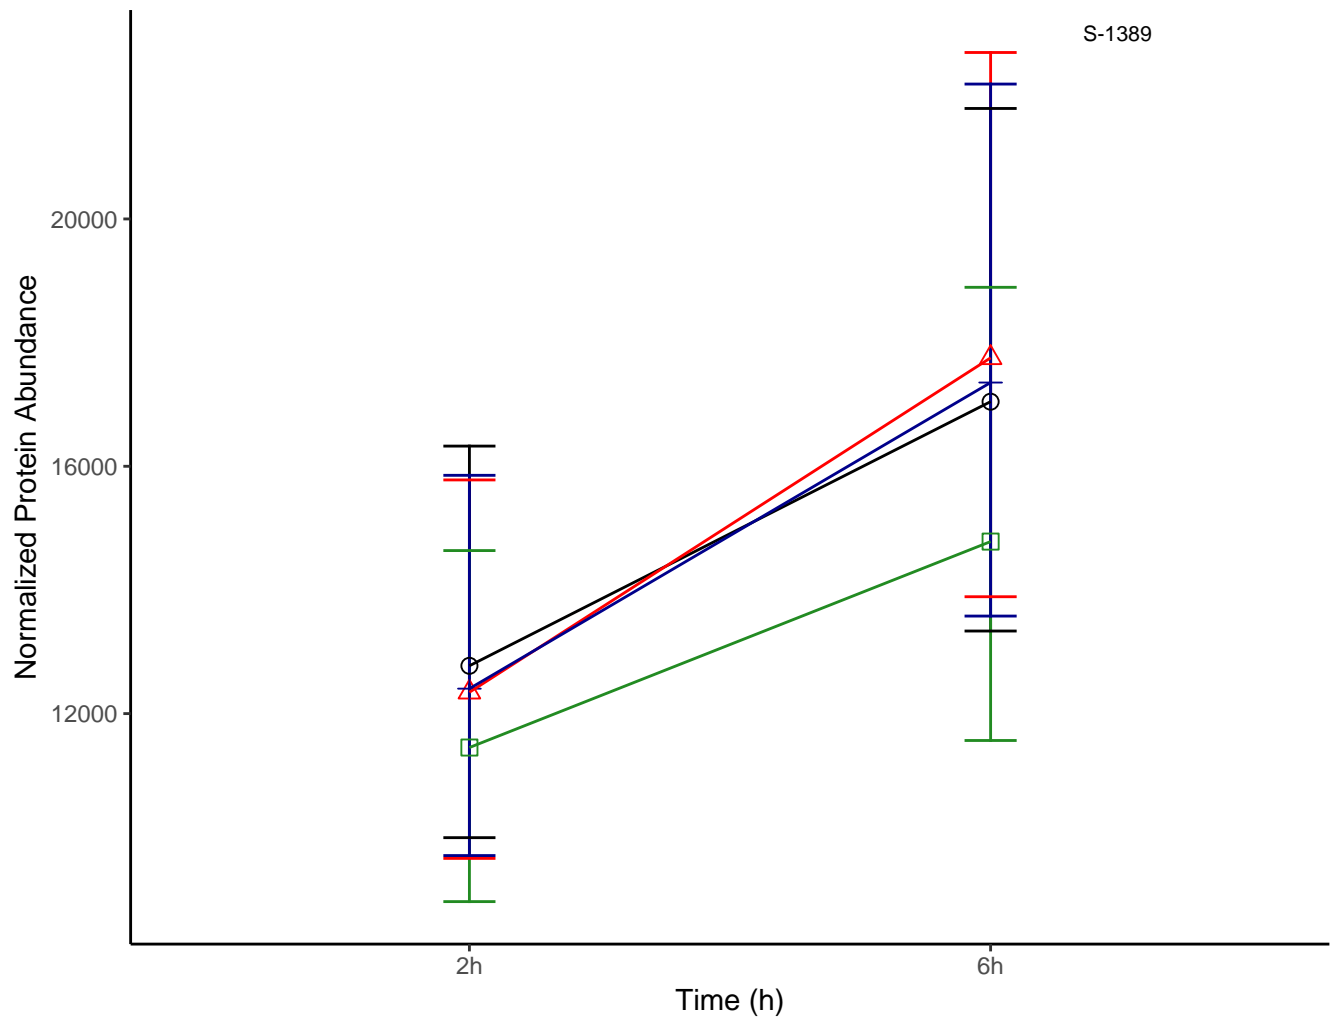

- SA564
- △ SA564- $\Delta$ *hptRS*
- SA564- $\Delta$ *ccpA*
- + SA564- $\Delta$ *hptRS/ccpA*

# SPA\_STAAM

S-1390

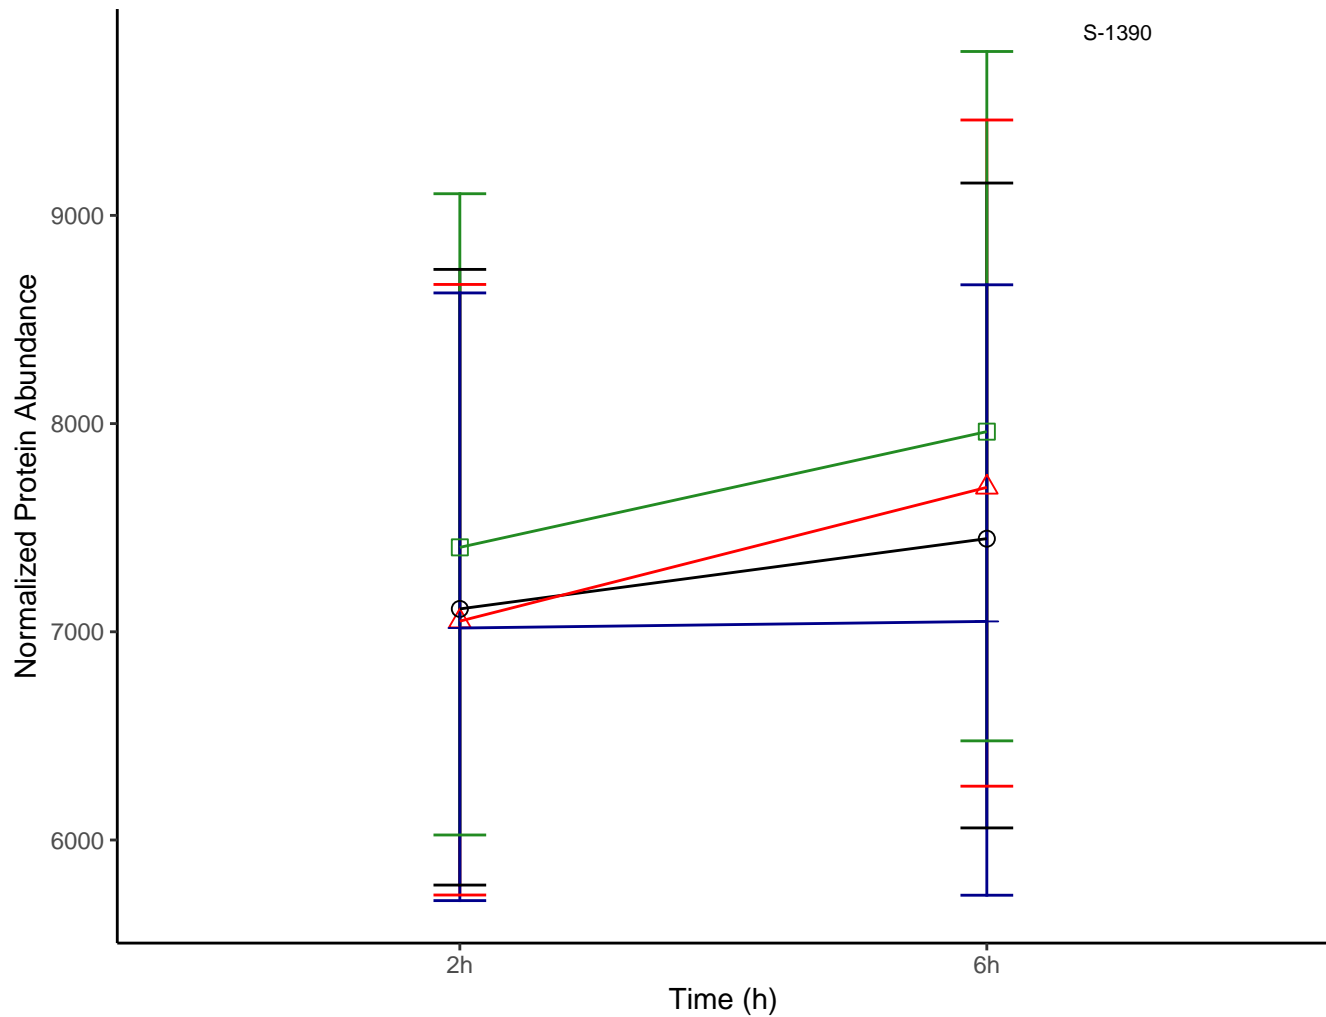

- SA564
- △ SA564- $\Delta$ *hptRS*
- SA564- $\Delta$ *ccpA*
- + SA564- $\Delta$ *hptRS/ccpA*

## SPLD\_STAAM

S-1391

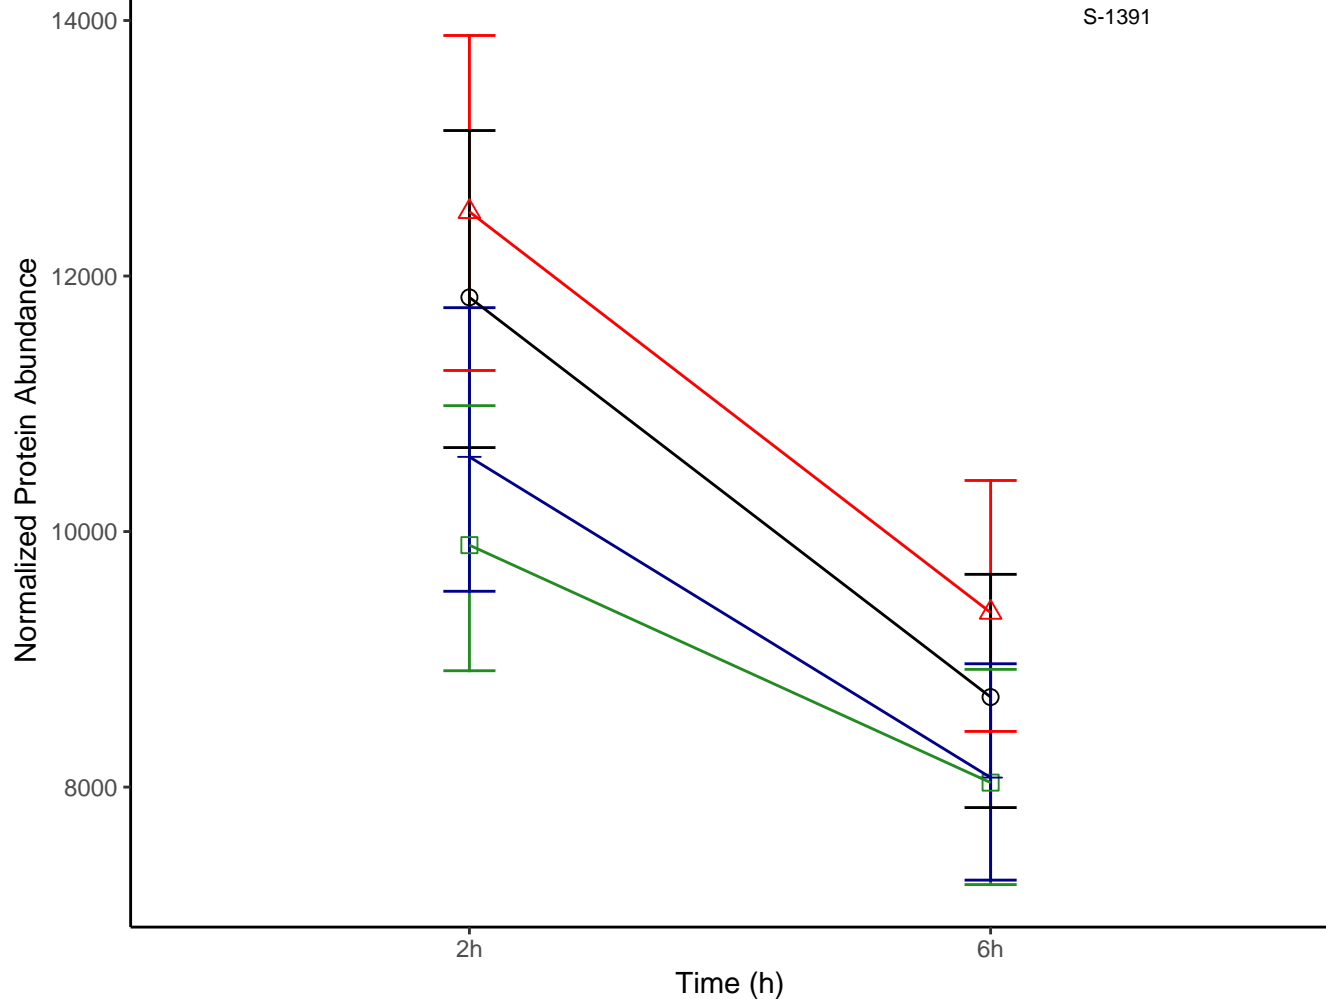

- SA564
- △ SA564- $\Delta hptRS$
- SA564- $\Delta ccpA$
- + SA564- $\Delta hptRS/ccpA$

# SPX\_STAAM

S-1392

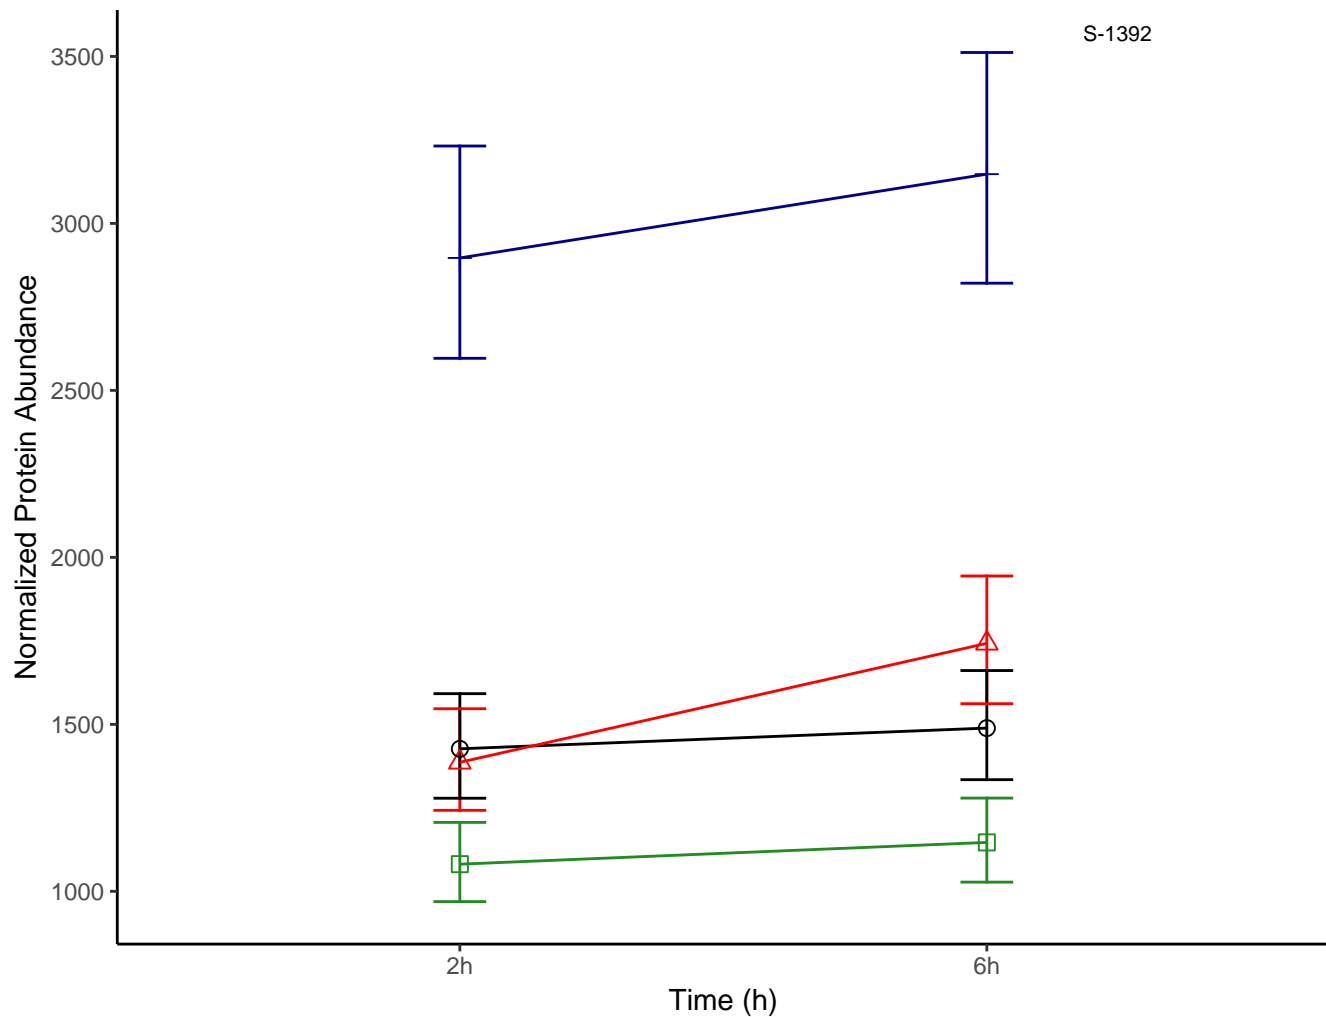

- SA564
- △ SA564- $\Delta$ *hptRS*
- SA564- $\Delta$ *ccpA*
- + SA564- $\Delta$ *hptRS/ccpA*



# SRRRA\_STAAM

S-1393

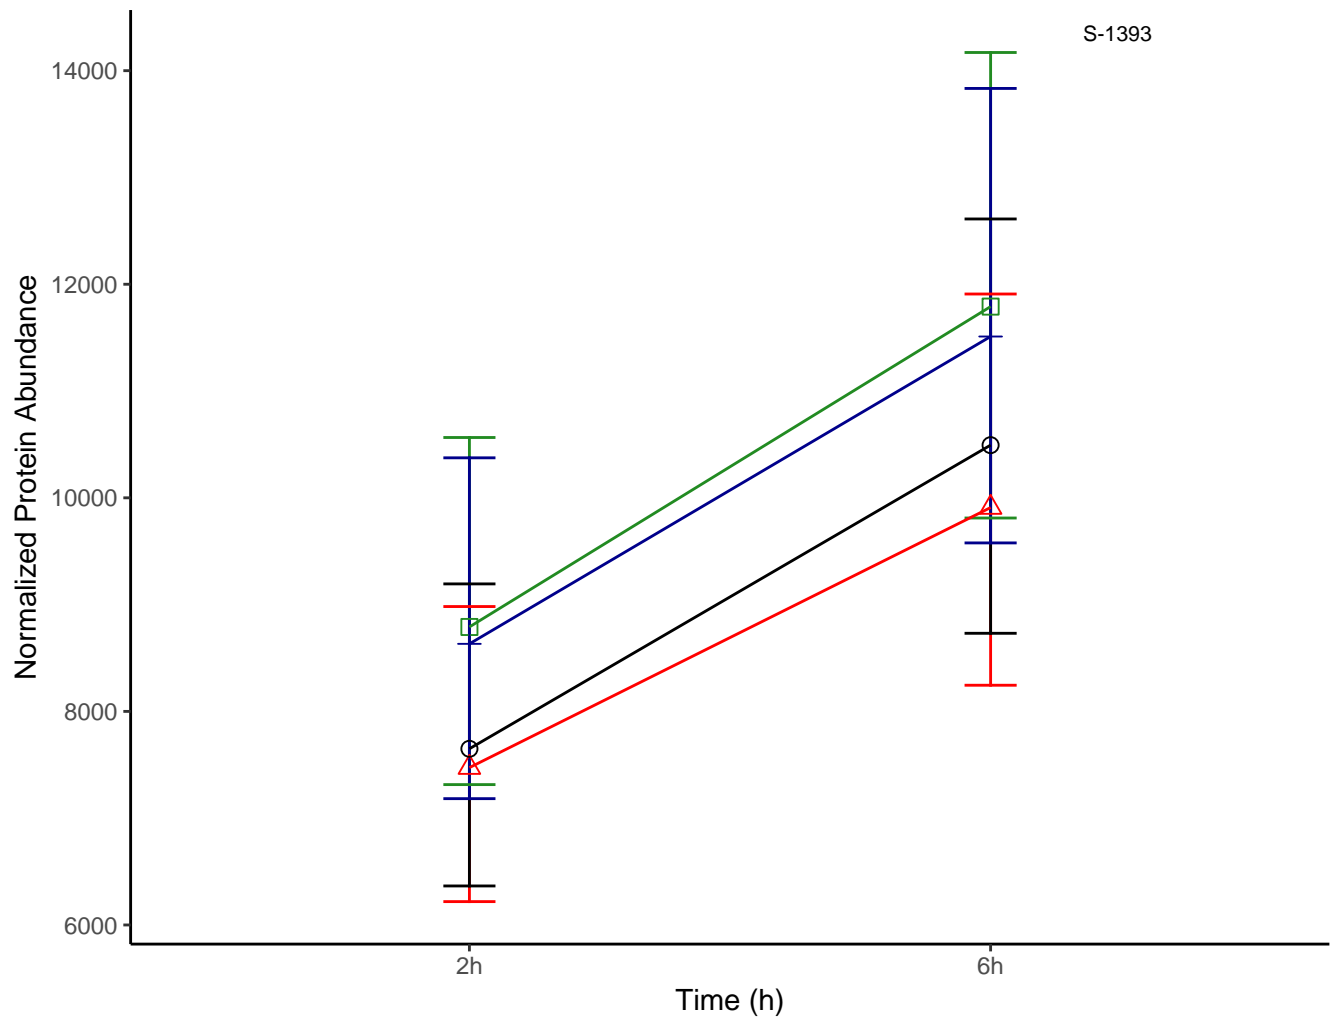

- SA564
- △ SA564- $\Delta$ hptRS
- SA564- $\Delta$ ccpA
- + SA564- $\Delta$ hptRS/ccpA

# SSAA2\_STAAM

S-1394

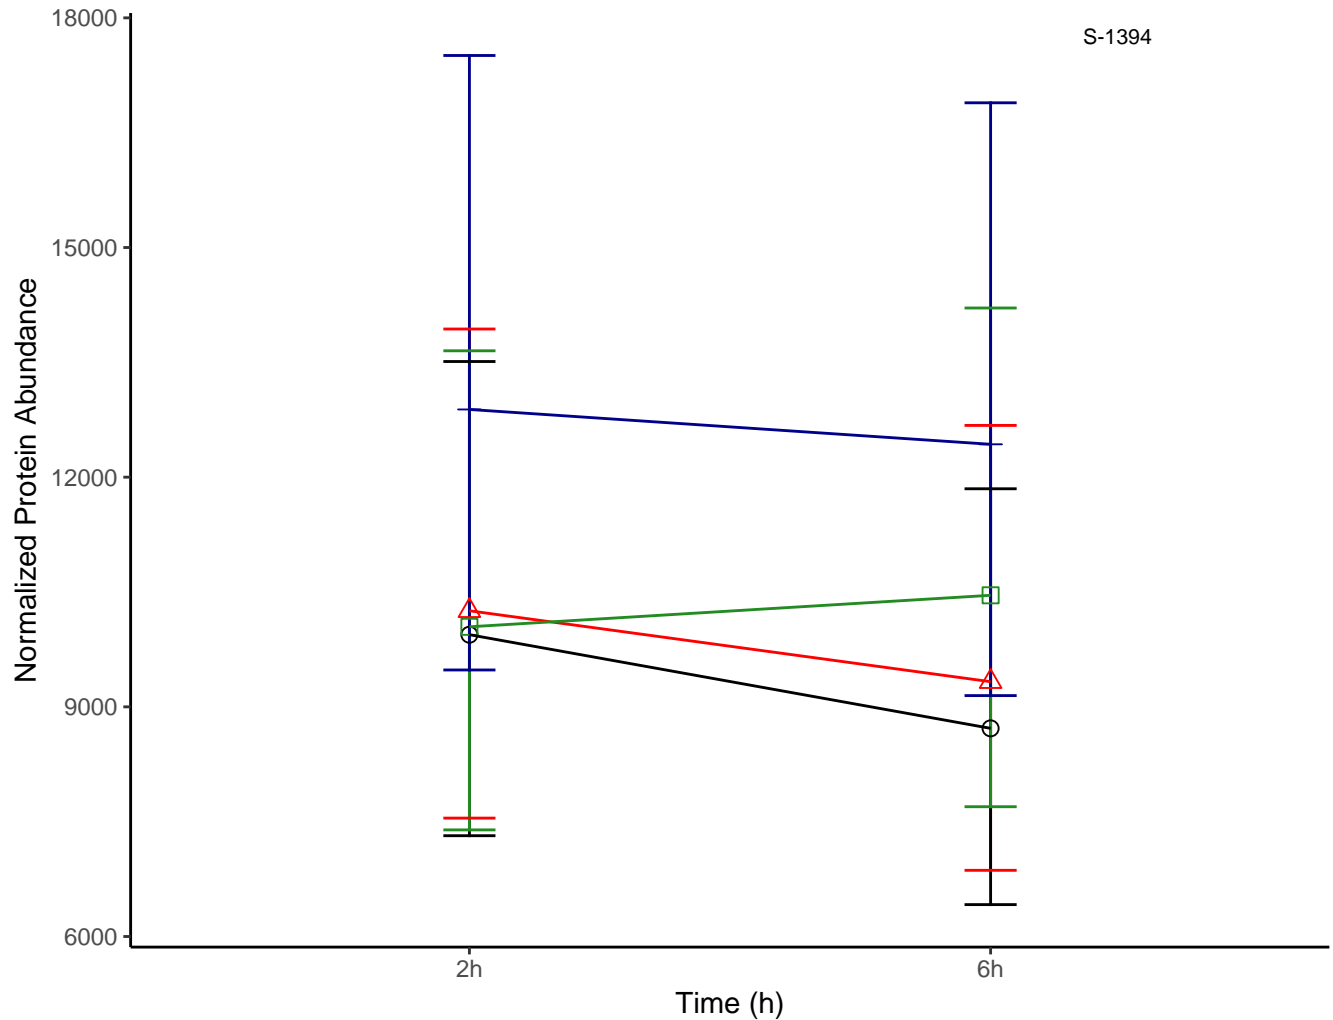

- SA564
- △ SA564- $\Delta$ *hptRS*
- SA564- $\Delta$ *ccpA*
- + SA564- $\Delta$ *hptRS/ccpA*

# SSB1\_STAAM

S-1395

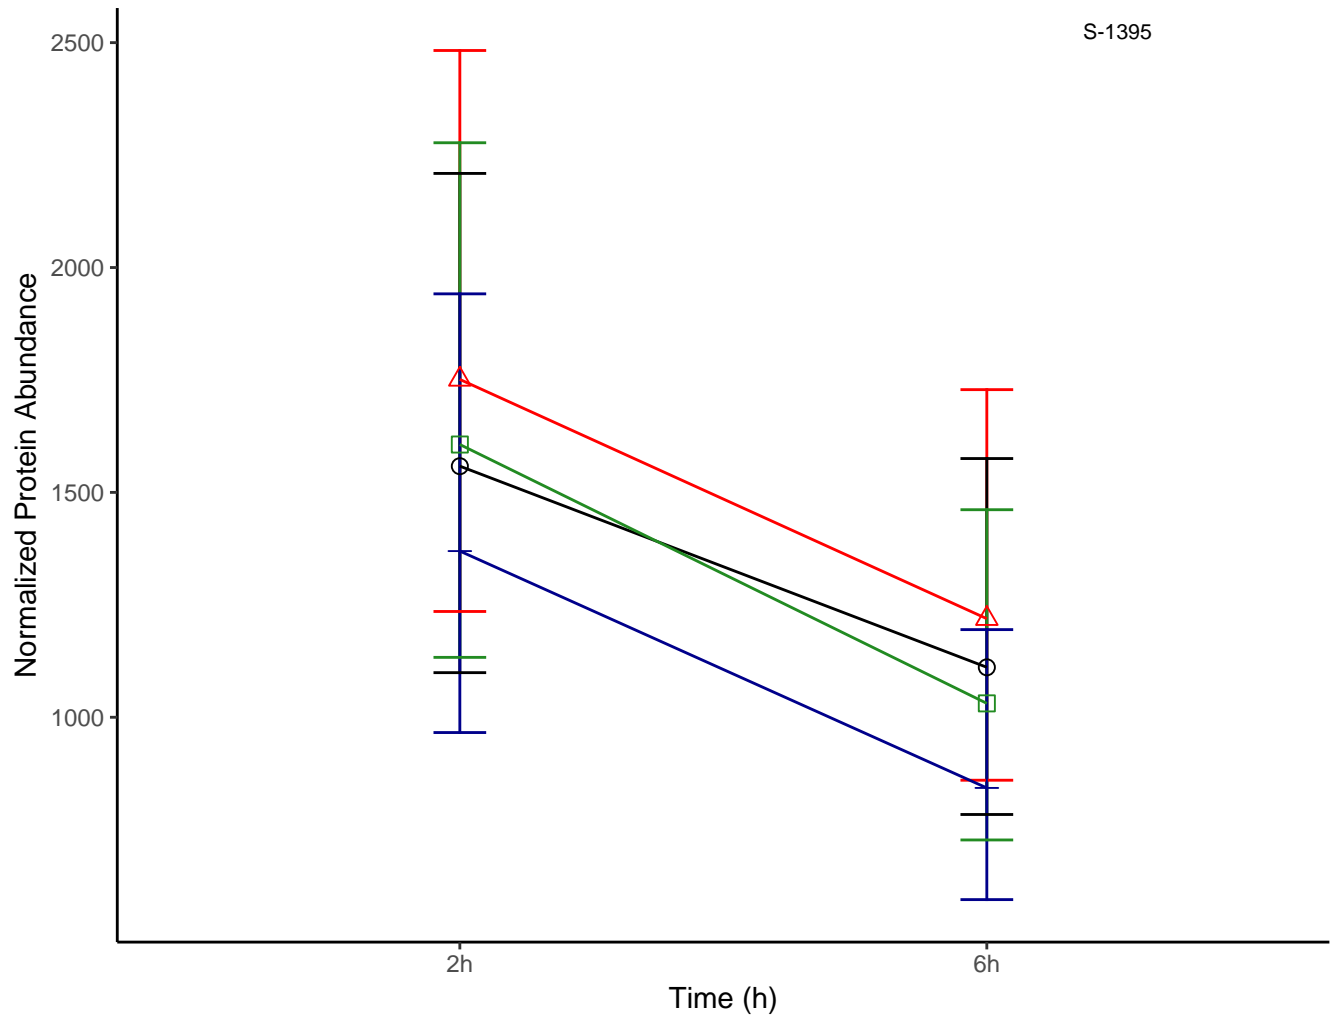

- SA564
- △ SA564- $\Delta$ *hptRS*
- SA564- $\Delta$ *ccpA*
- + SA564- $\Delta$ *hptRS/ccpA*

# SSB2\_STAAM

S-1396

Normalized Protein Abundance

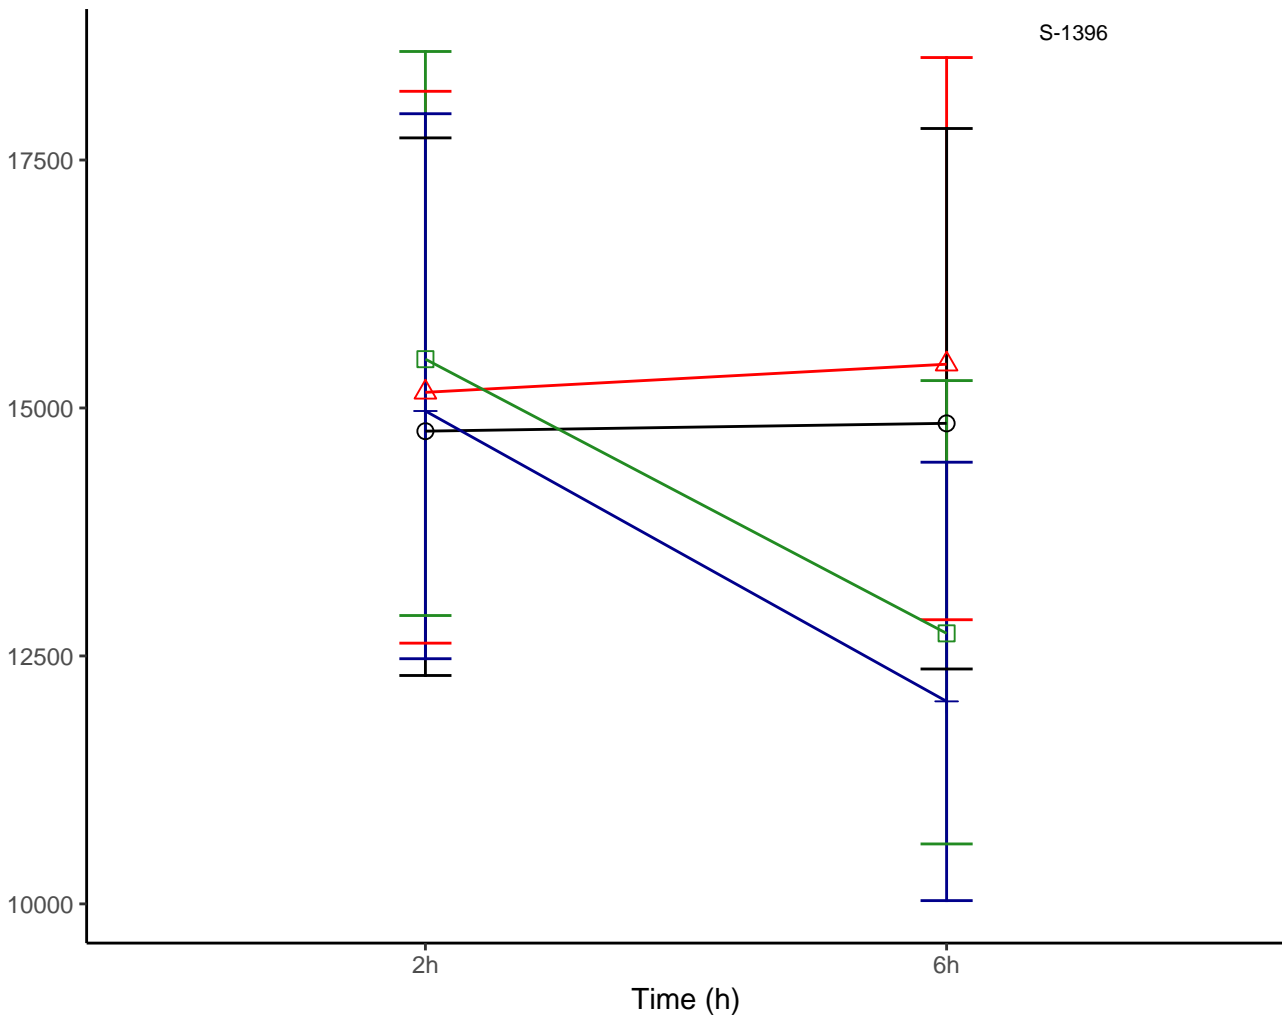

- SA564
- △ SA564- $\Delta$ *hptRS*
- SA564- $\Delta$ *ccpA*
- + SA564- $\Delta$ *hptRS/ccpA*

# SUCC\_STAAM

S-1397

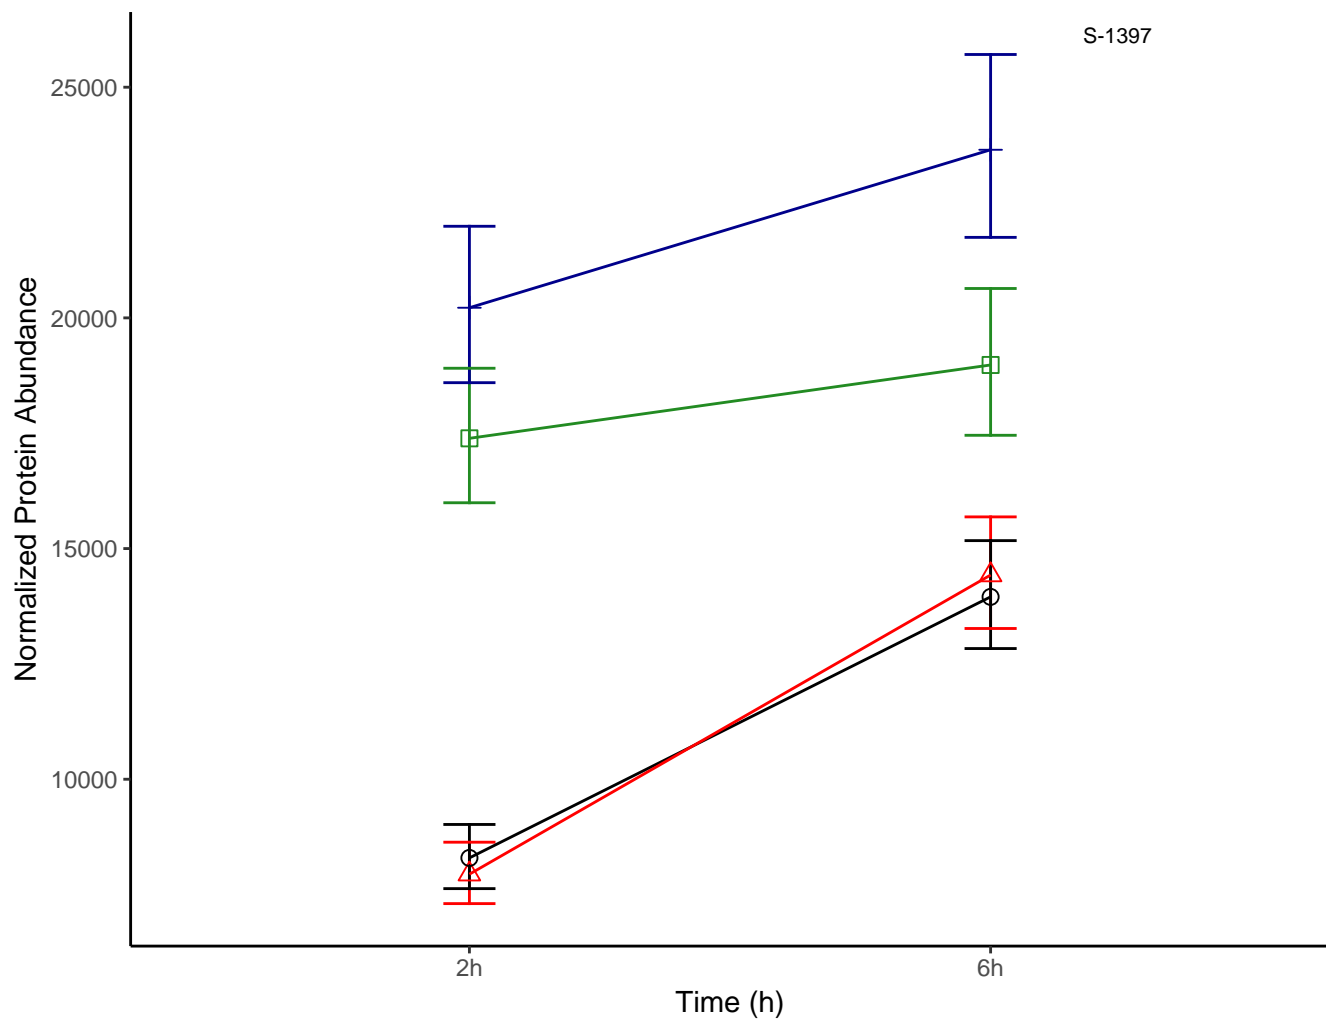

- SA564
- △ SA564- $\Delta$ hptRS
- SA564- $\Delta$ ccpA
- + SA564- $\Delta$ hptRS/ccpA

# SUCD\_STAAM

S-1398

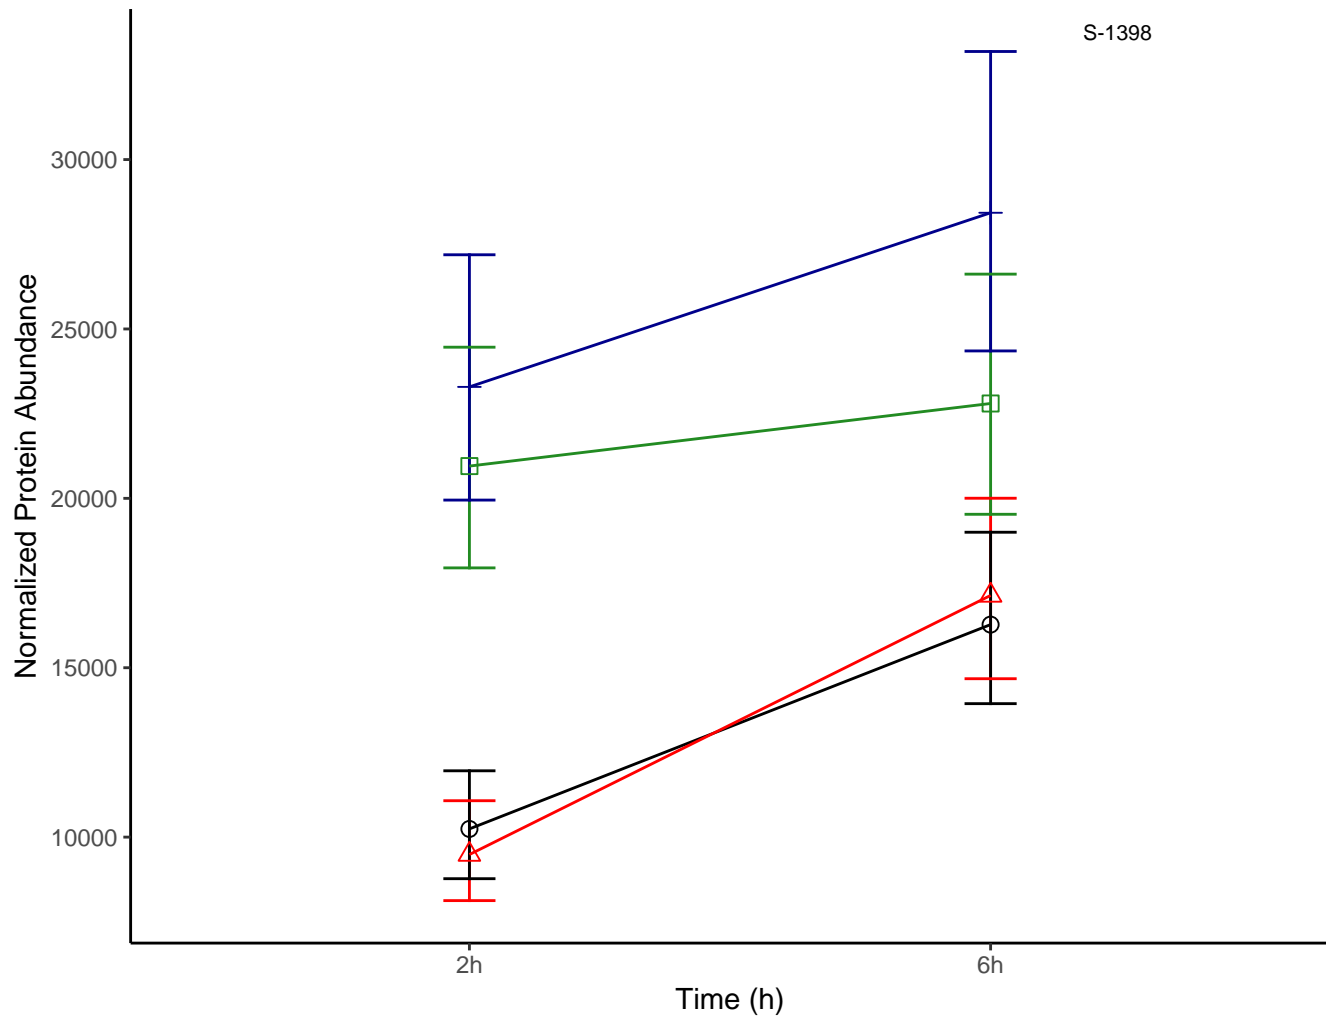

- SA564
- △ SA564- $\Delta$ *hptRS*
- SA564- $\Delta$ *ccpA*
- + SA564- $\Delta$ *hptRS/ccpA*

# SYA\_STAAM

S-1399

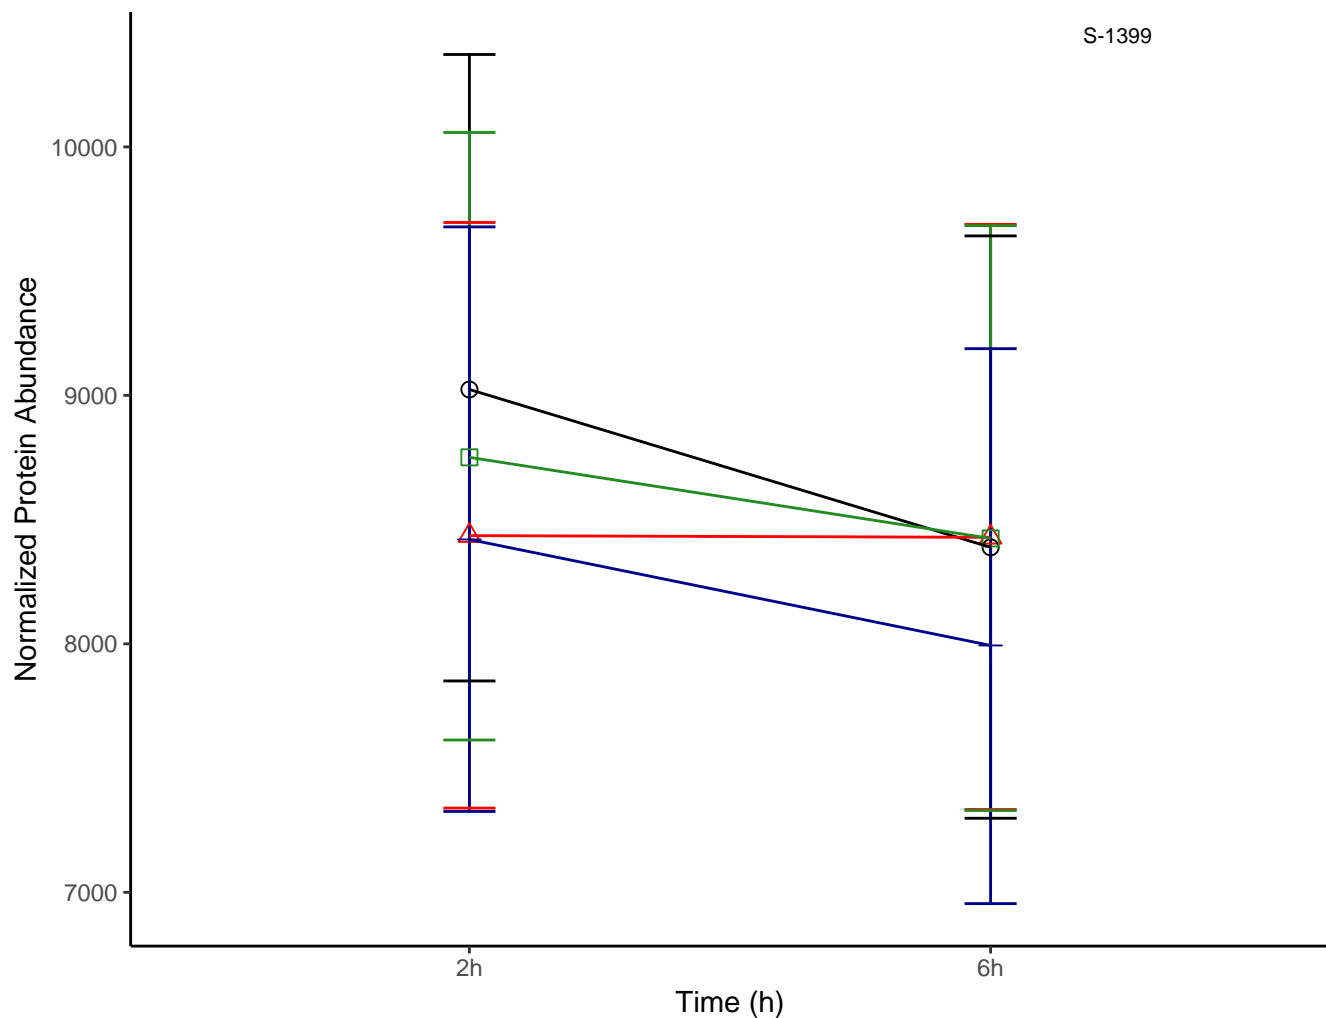

- SA564
- △ SA564- $\Delta$ *hptRS*
- SA564- $\Delta$ *ccpA*
- + SA564- $\Delta$ *hptRS/ccpA*

# SYC\_STAAM

S-1400

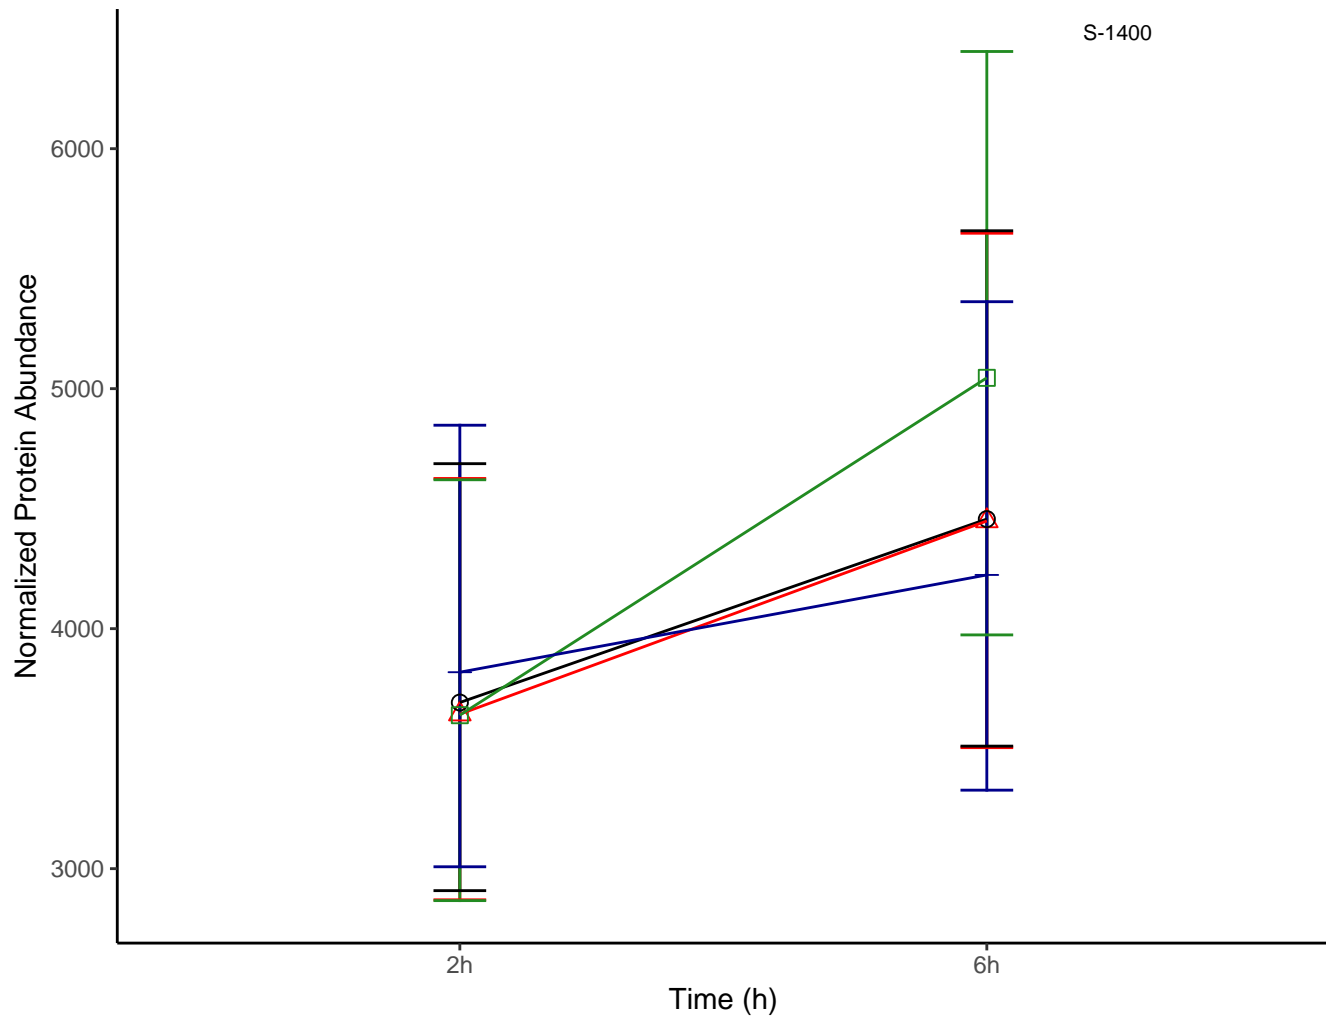

- SA564
- △ SA564- $\Delta hptRS$
- SA564- $\Delta ccpA$
- + SA564- $\Delta hptRS/ccpA$



# SYD\_STAAM

S-1401

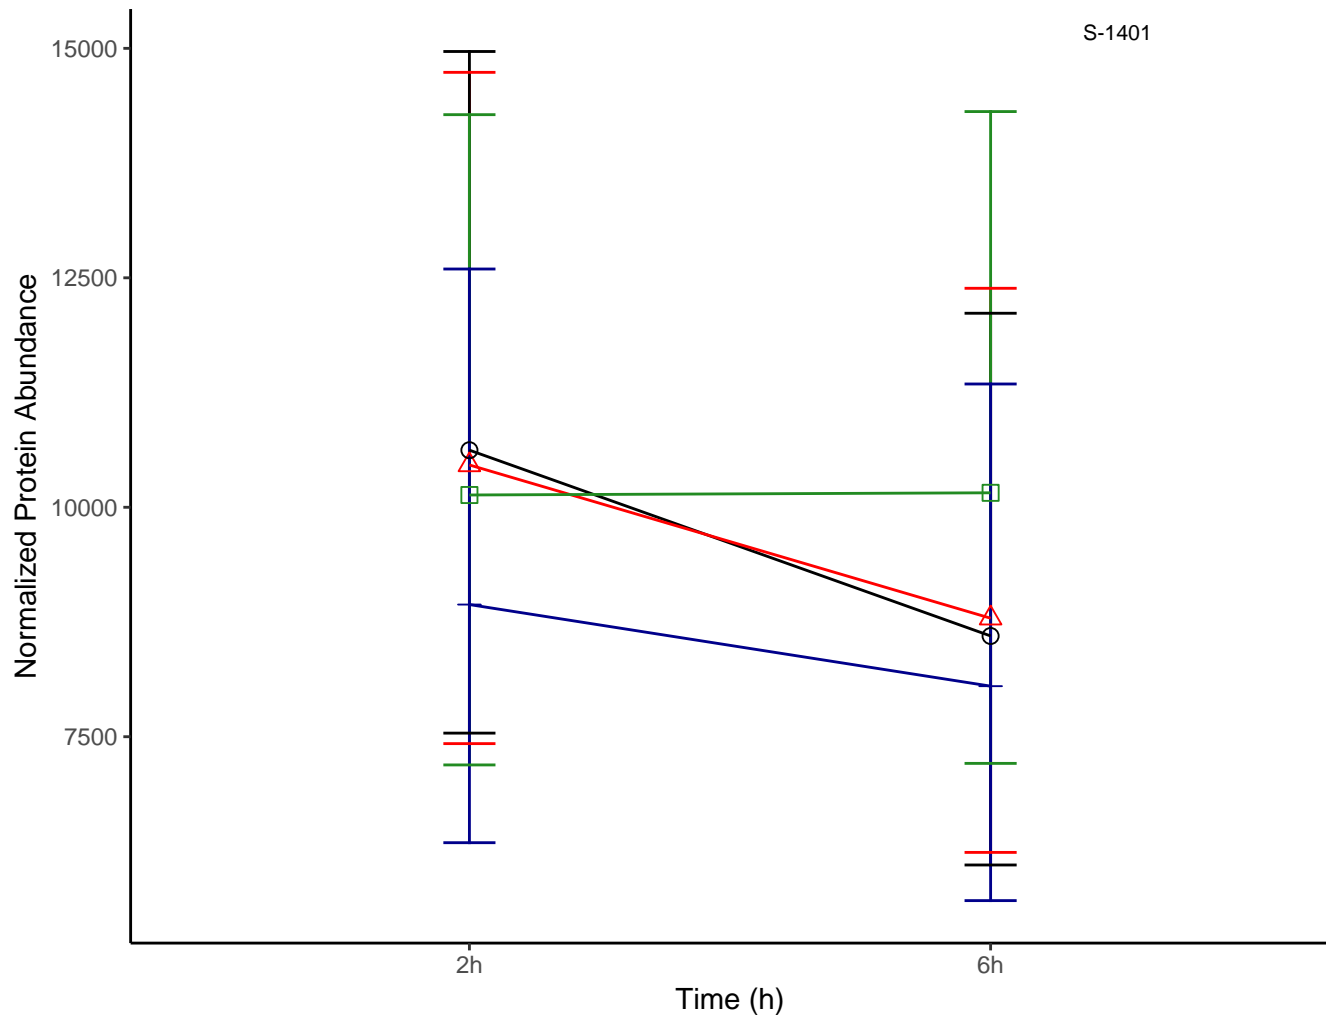

- SA564
- △ SA564- $\Delta hptRS$
- SA564- $\Delta ccpA$
- + SA564- $\Delta hptRS/ccpA$

# SYE\_STAAM

S-1402

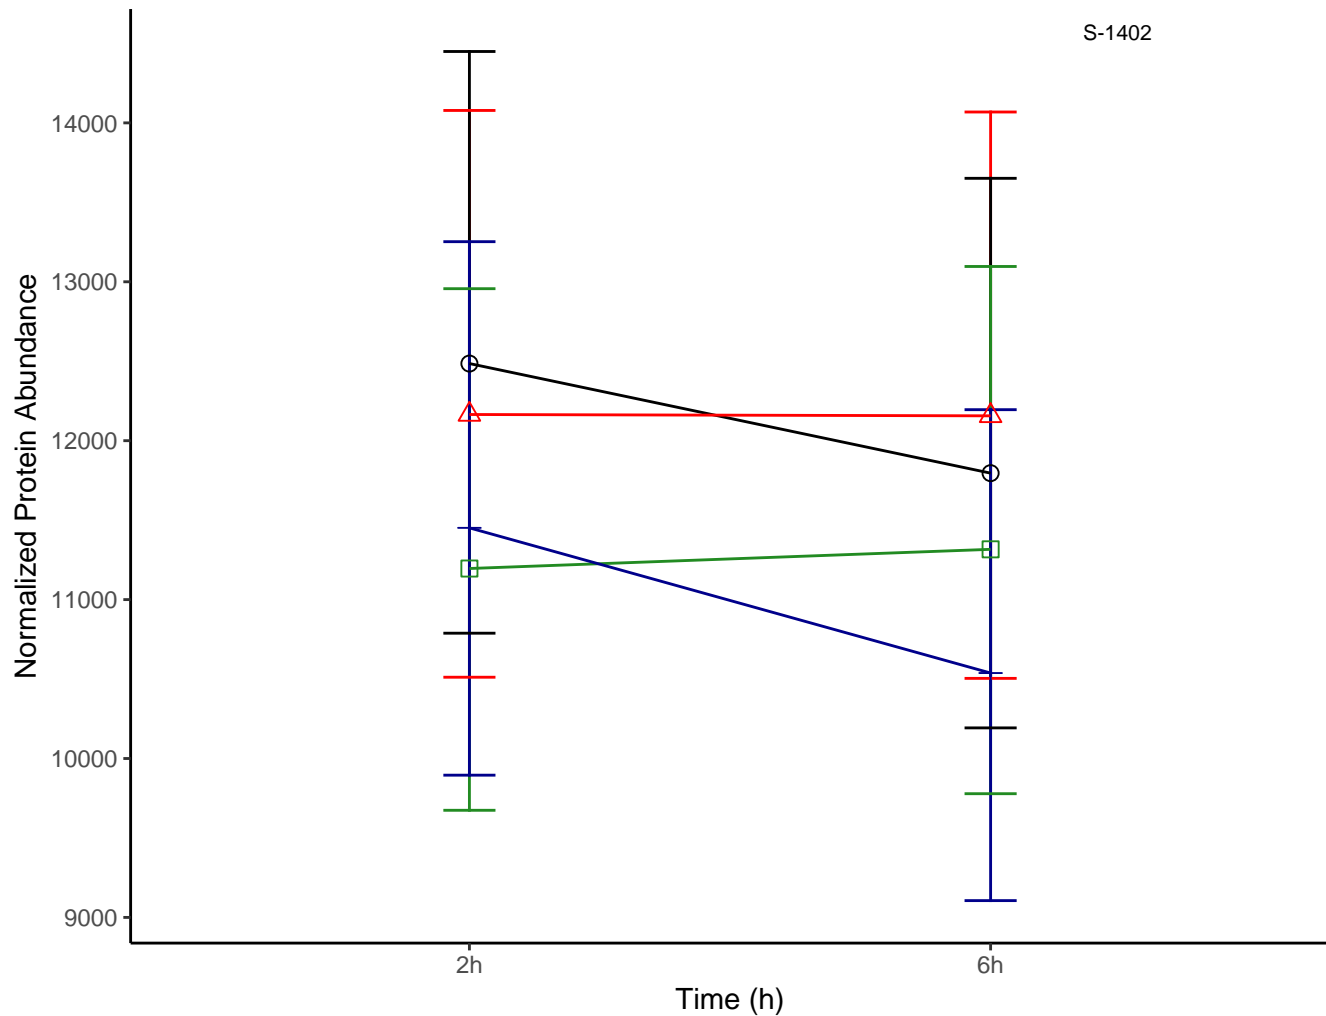

- SA564
- △ SA564- $\Delta$ *hptRS*
- SA564- $\Delta$ *ccpA*
- + SA564- $\Delta$ *hptRS/ccpA*

# SYFB\_STAAM

S-1403

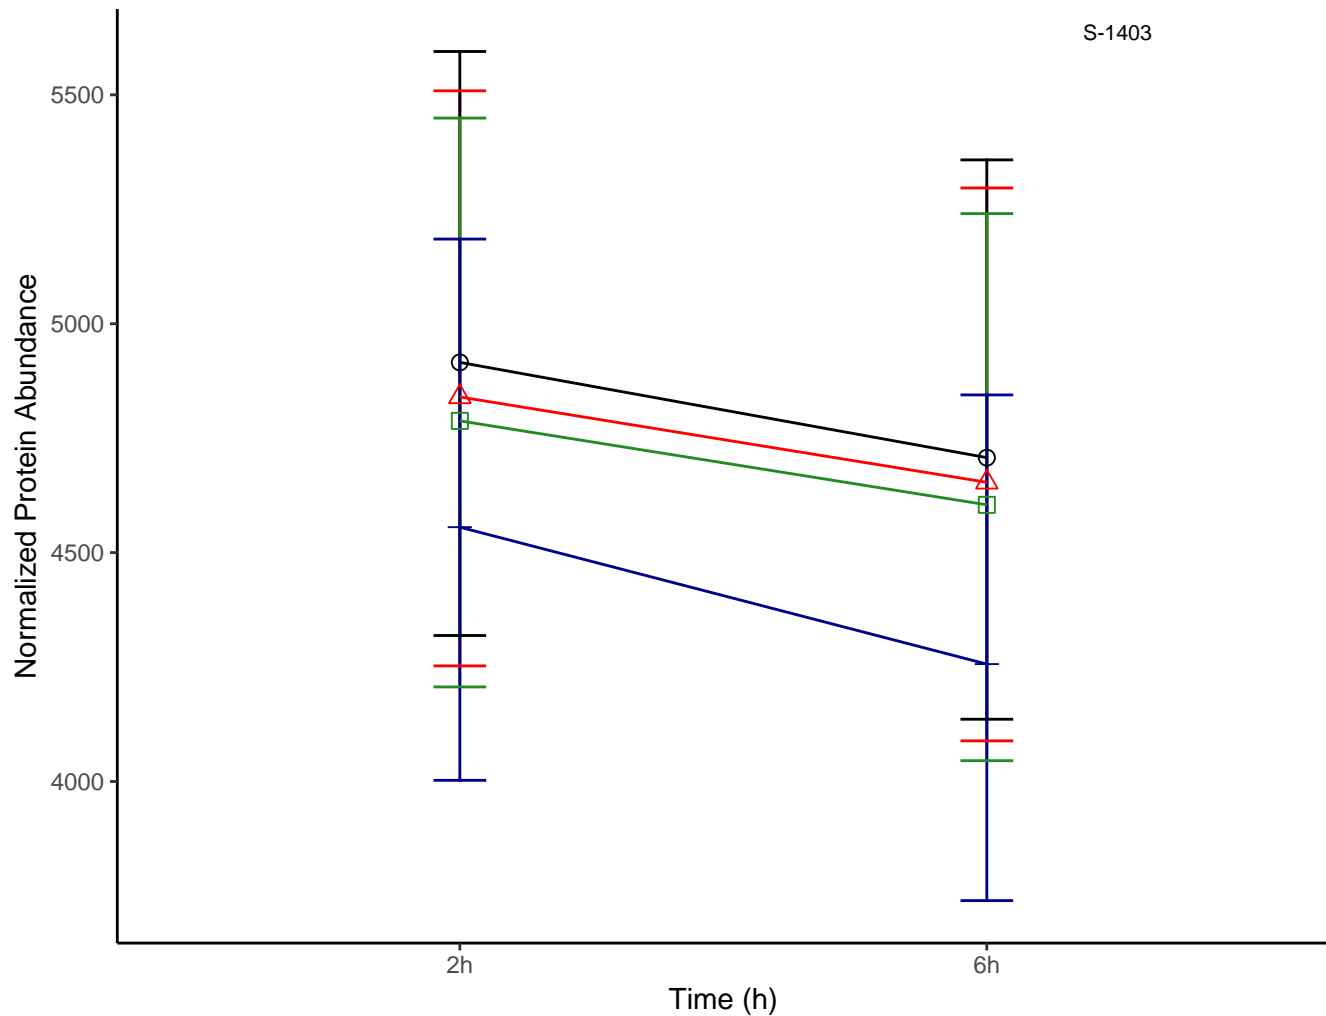

- SA564
- △ SA564- $\Delta hptRS$
- SA564- $\Delta ccpA$
- + SA564- $\Delta hptRS/ccpA$

# SYG\_STAAM

S-1404

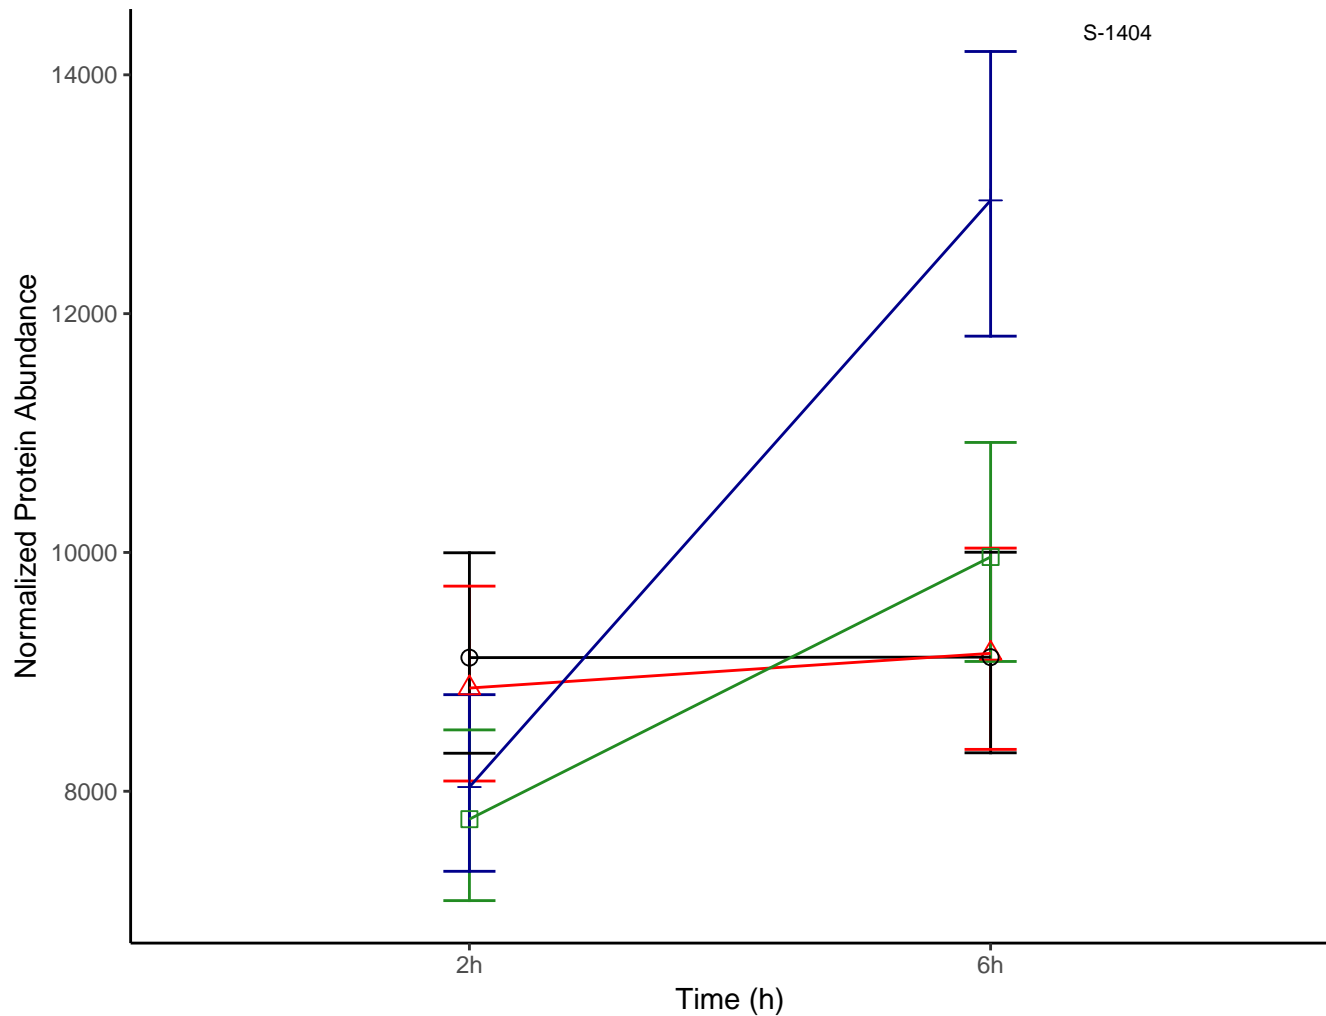

- SA564
- △ SA564- $\Delta$ *hptRS*
- SA564- $\Delta$ *ccpA*
- + SA564- $\Delta$ *hptRS/ccpA*

# SYH\_STAAM

S-1405

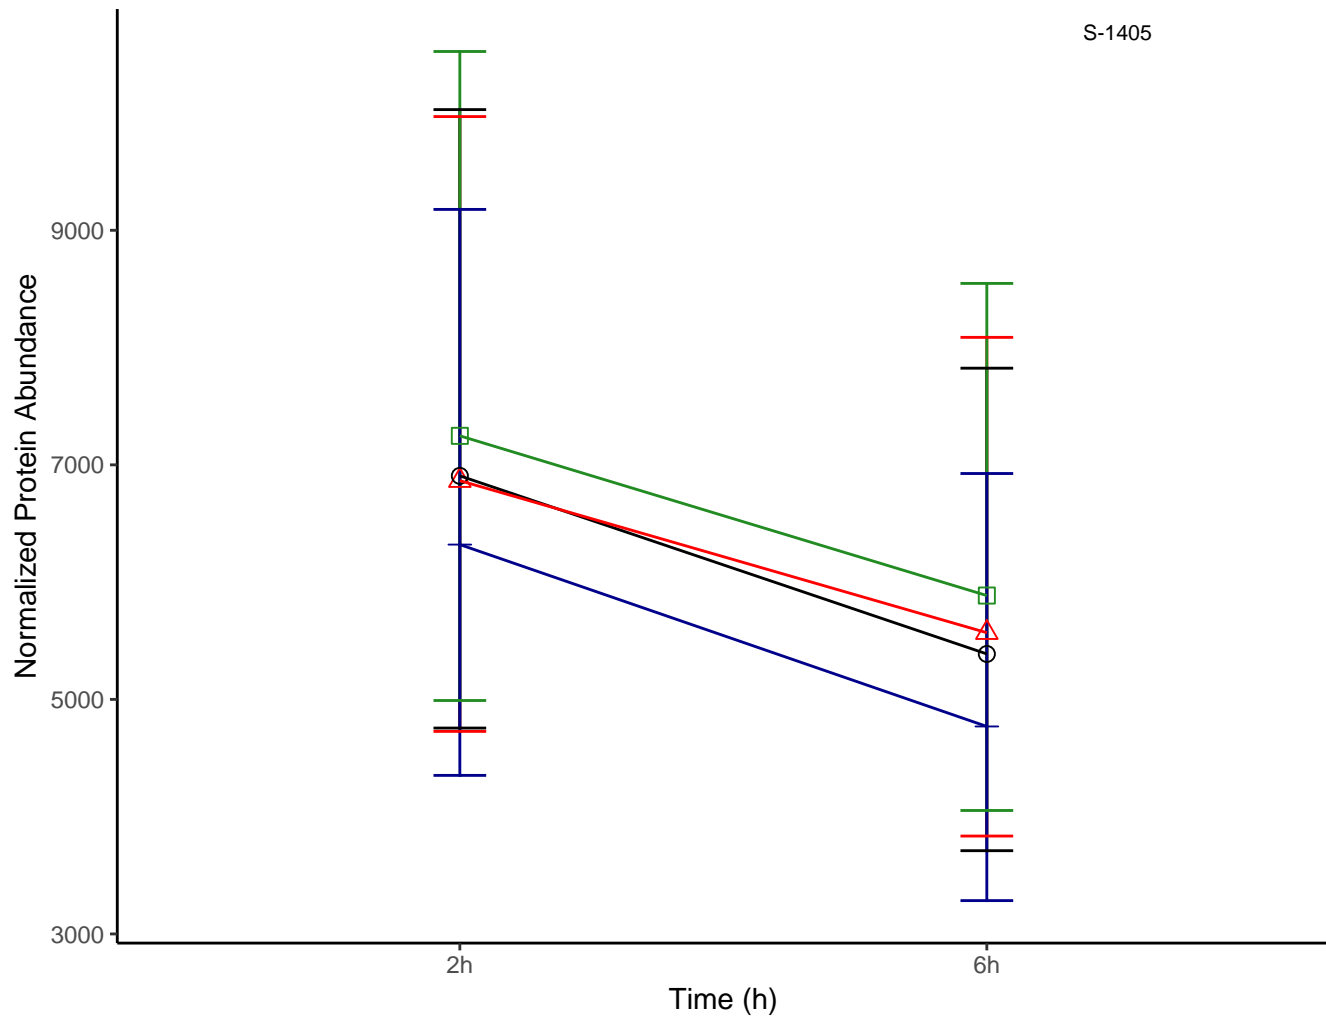

- SA564
- △ SA564- $\Delta hptRS$
- SA564- $\Delta ccpA$
- + SA564- $\Delta hptRS/ccpA$

# SYI\_STAAM

S-1406

Normalized Protein Abundance

9000

8000

7000

2h

Time (h)

6h

- SA564
- △ SA564- $\Delta$ *hptRS*
- SA564- $\Delta$ *ccpA*
- + SA564- $\Delta$ *hptRS/ccpA*

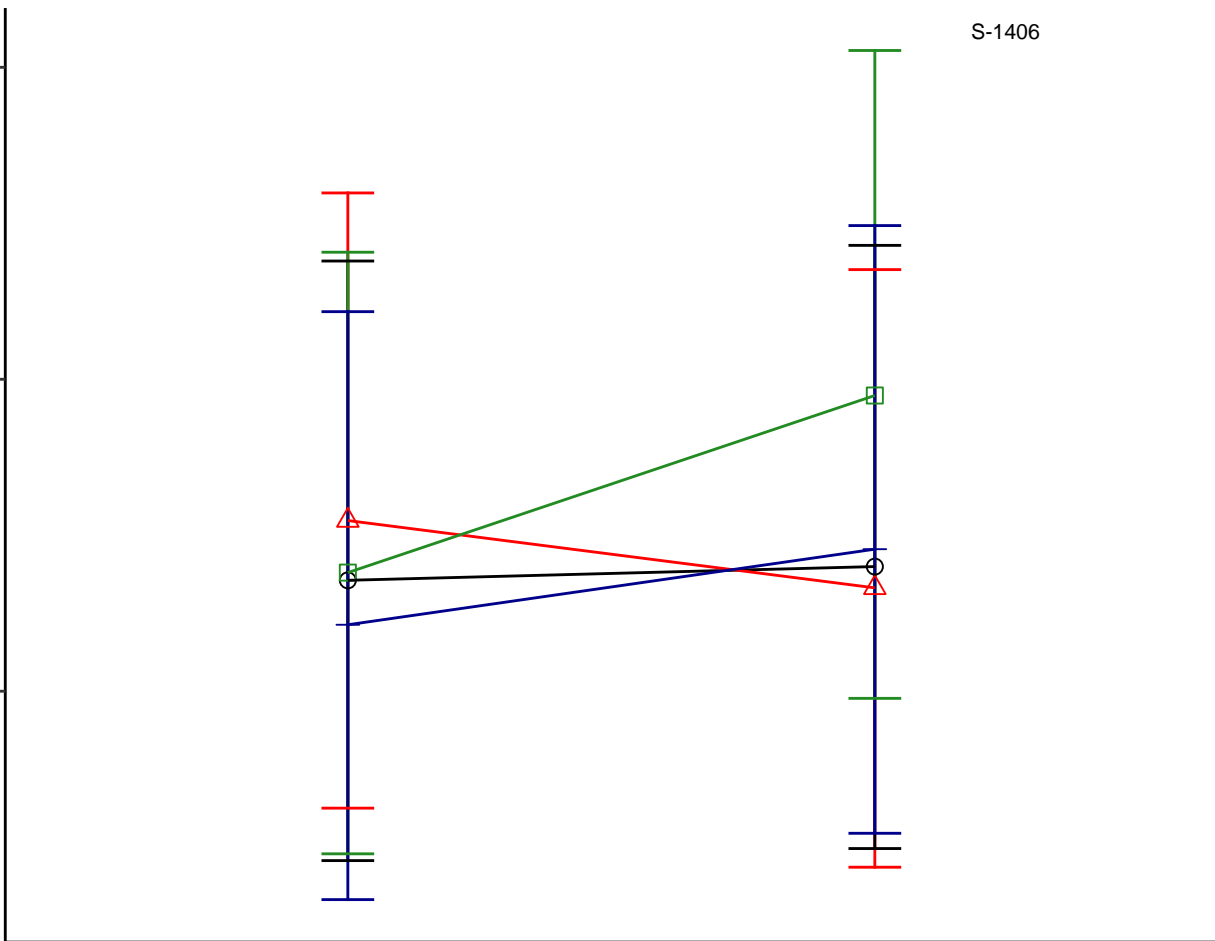

# SYK\_STAAM

S-1407

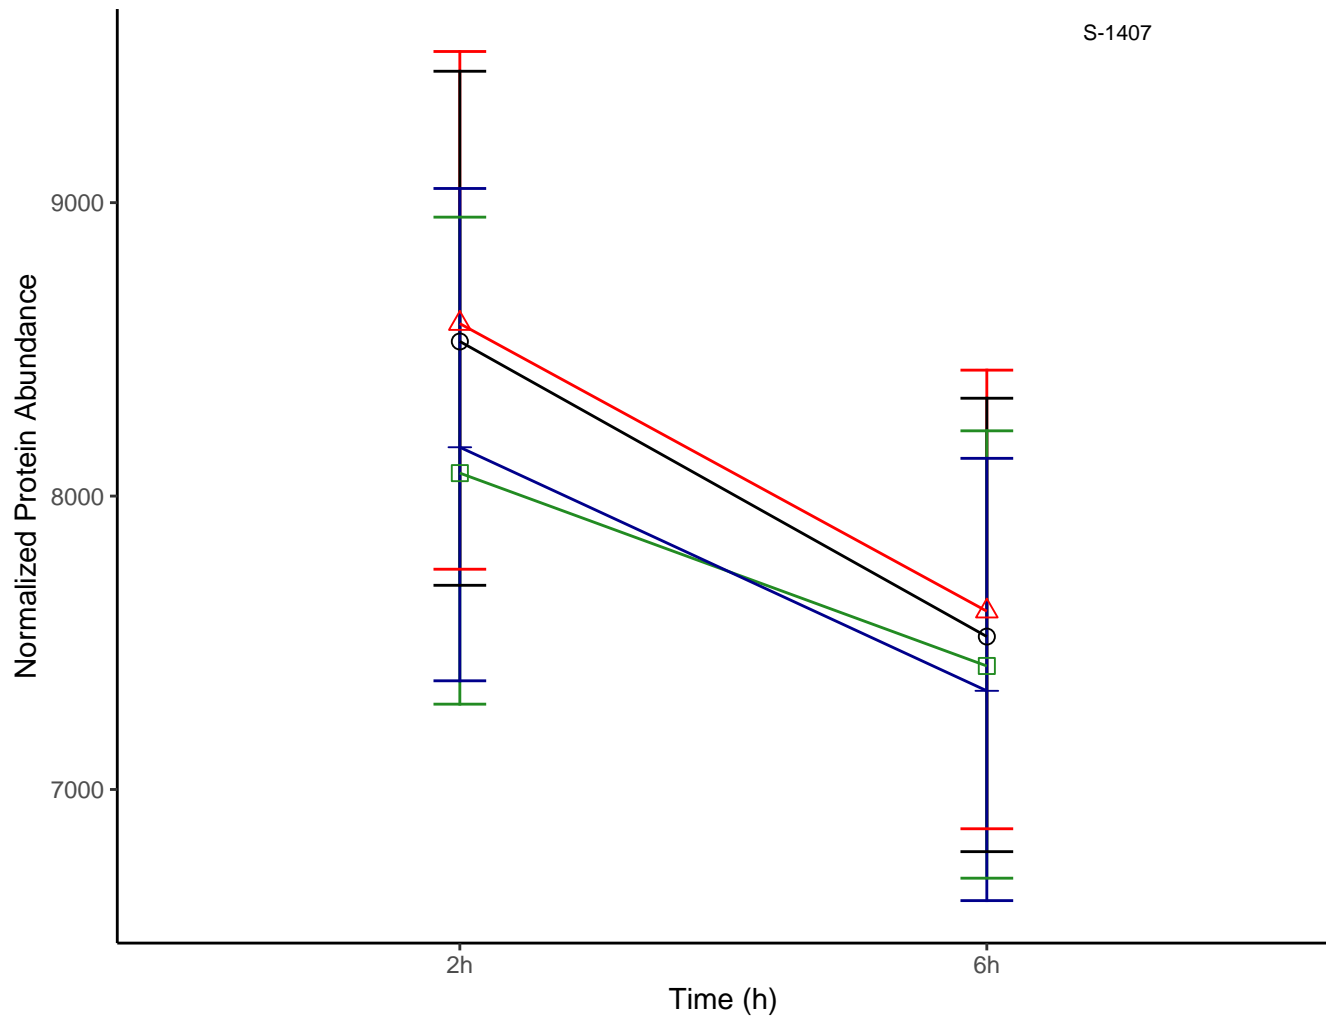

- SA564
- △ SA564- $\Delta$ *hptRS*
- SA564- $\Delta$ *ccpA*
- + SA564- $\Delta$ *hptRS/ccpA*

# SYM\_STAAM

S-1408

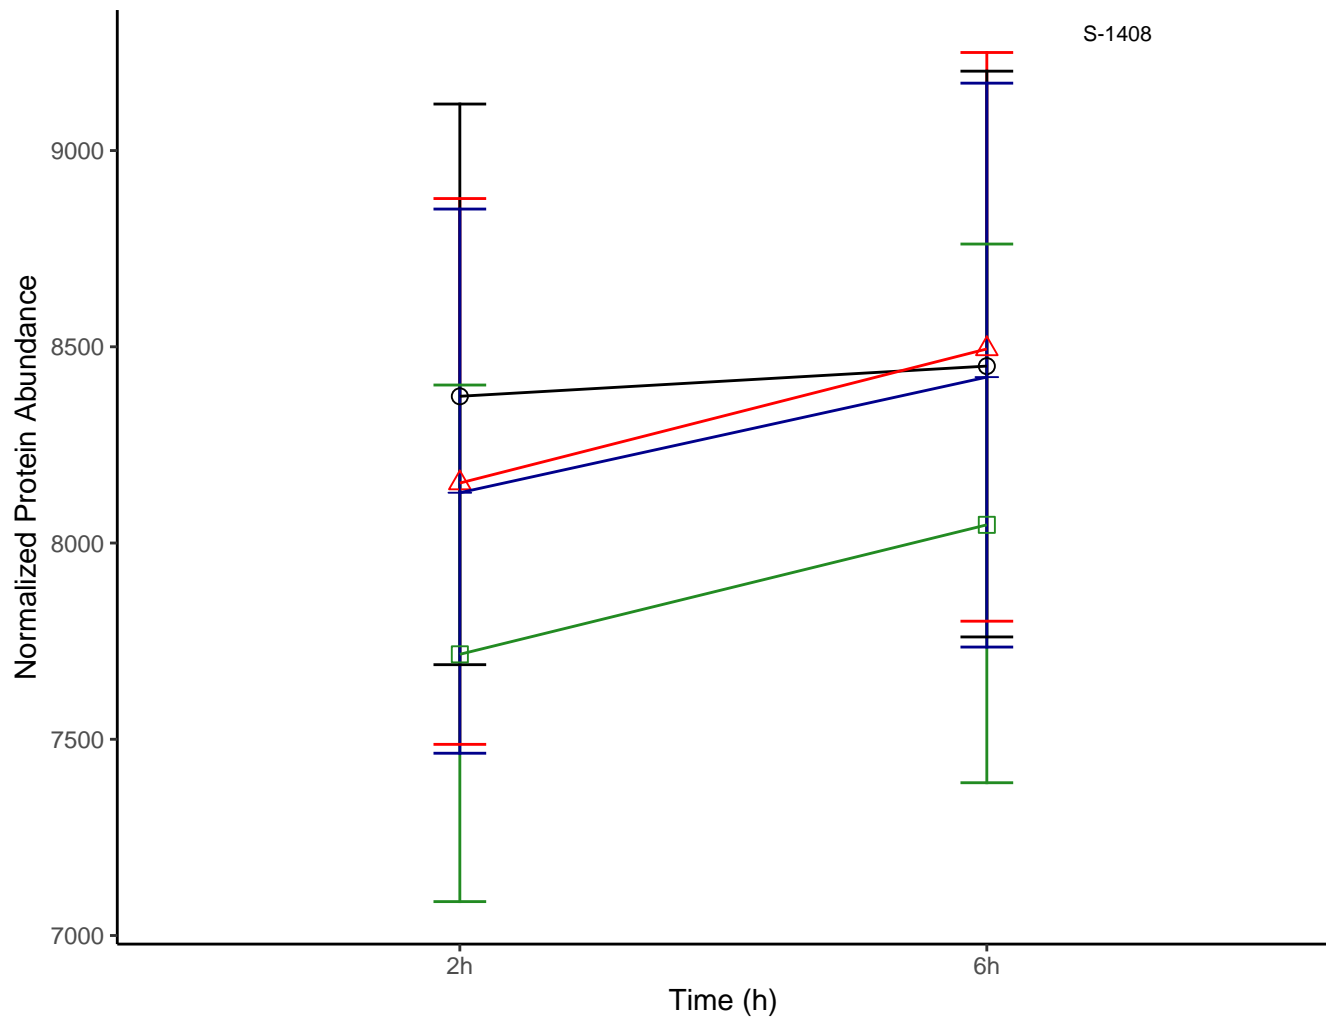

- SA564
- △ SA564- $\Delta$ *hptRS*
- SA564- $\Delta$ *ccpA*
- + SA564- $\Delta$ *hptRS/ccpA*



# SYN\_STAAM

S-1409

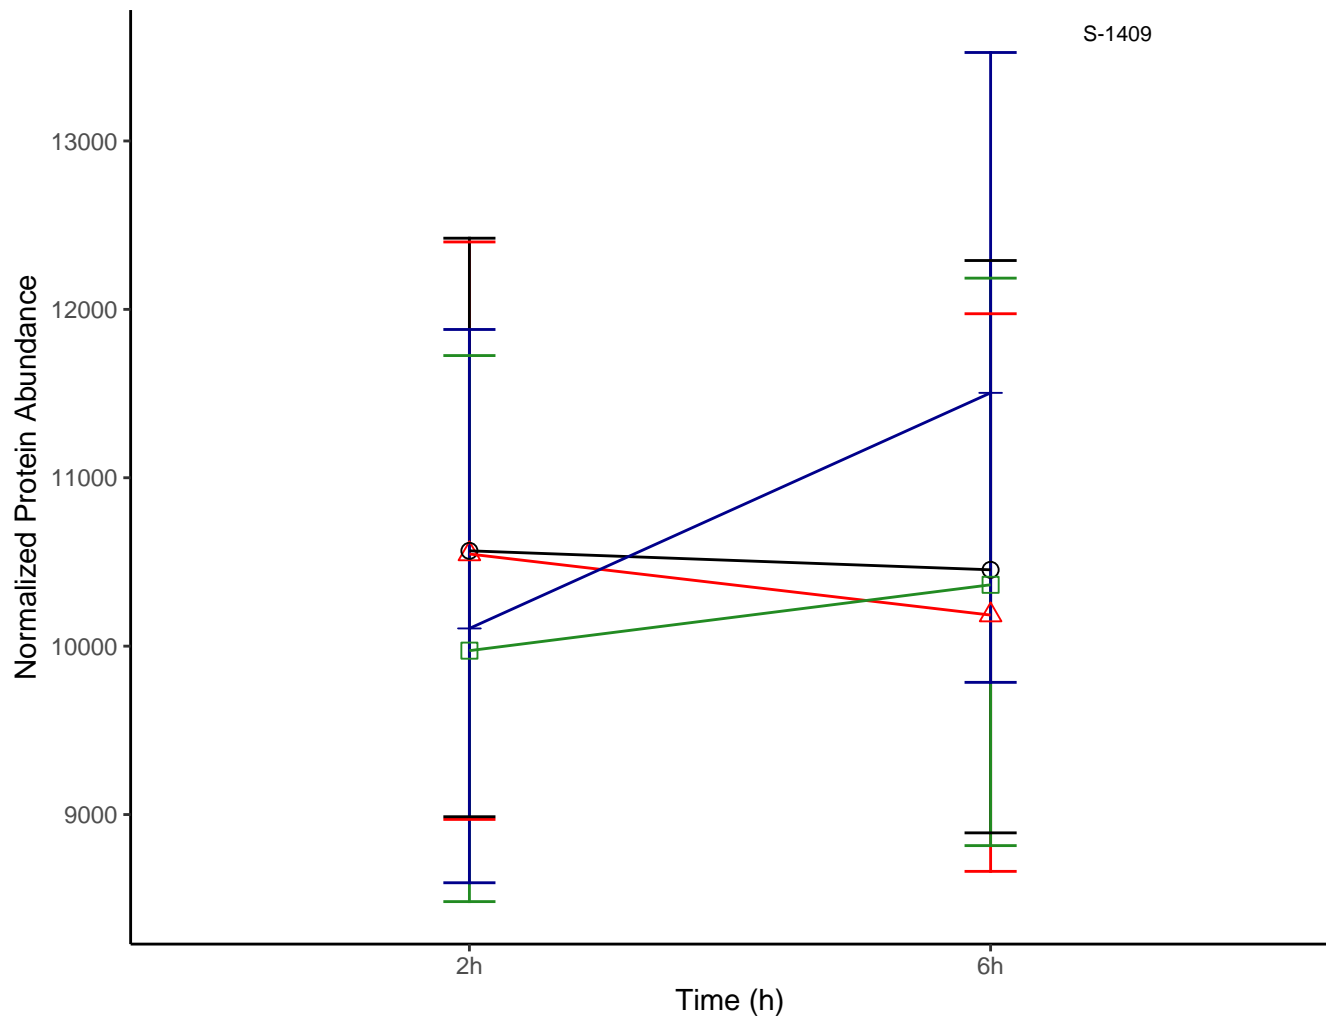

- SA564
- △ SA564- $\Delta$ *hptRS*
- SA564- $\Delta$ *ccpA*
- + SA564- $\Delta$ *hptRS/ccpA*

# SYP\_STAAM

S-1410

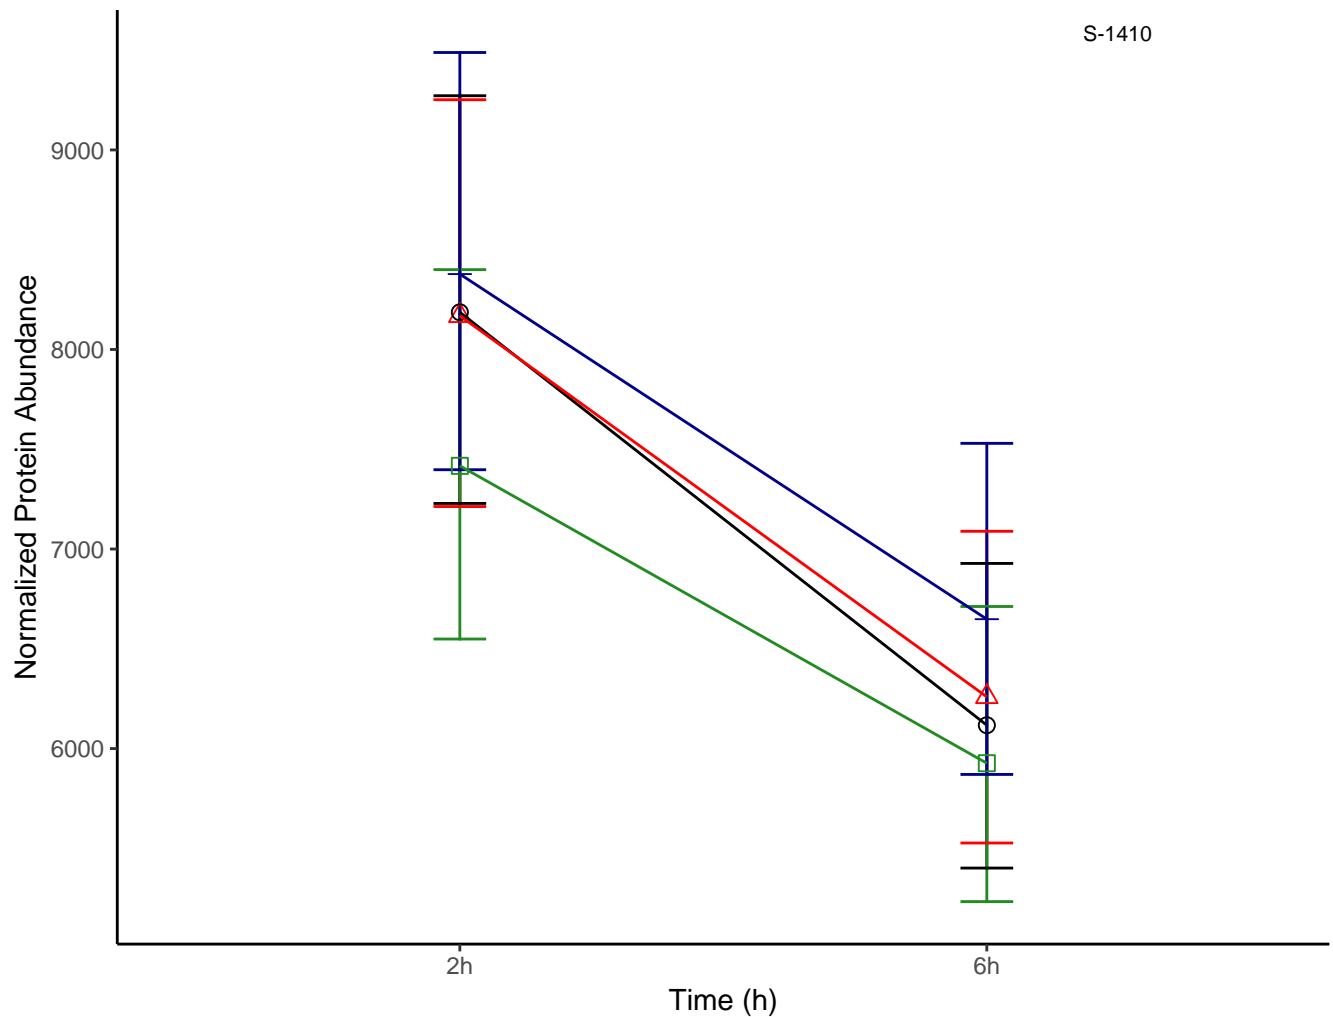

- SA564
- △ SA564- $\Delta hptRS$
- SA564- $\Delta ccpA$
- + SA564- $\Delta hptRS/ccpA$

# SYR\_STAAM

S-1411

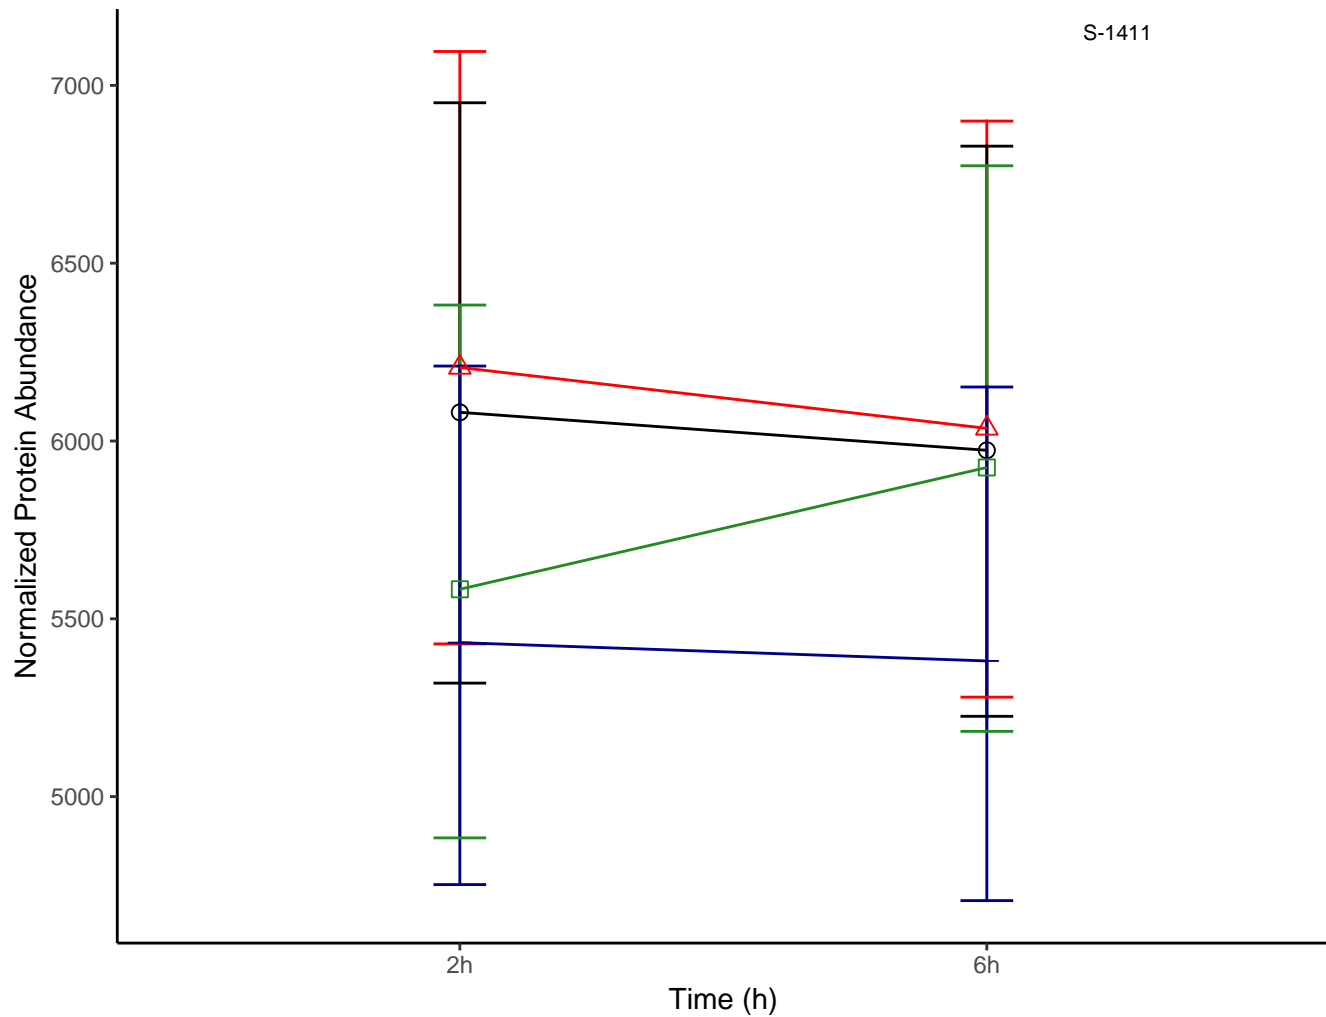

- SA564
- △ SA564- $\Delta$ *hptRS*
- SA564- $\Delta$ *ccpA*
- + SA564- $\Delta$ *hptRS/ccpA*

# SYS\_STAAM

S-1412

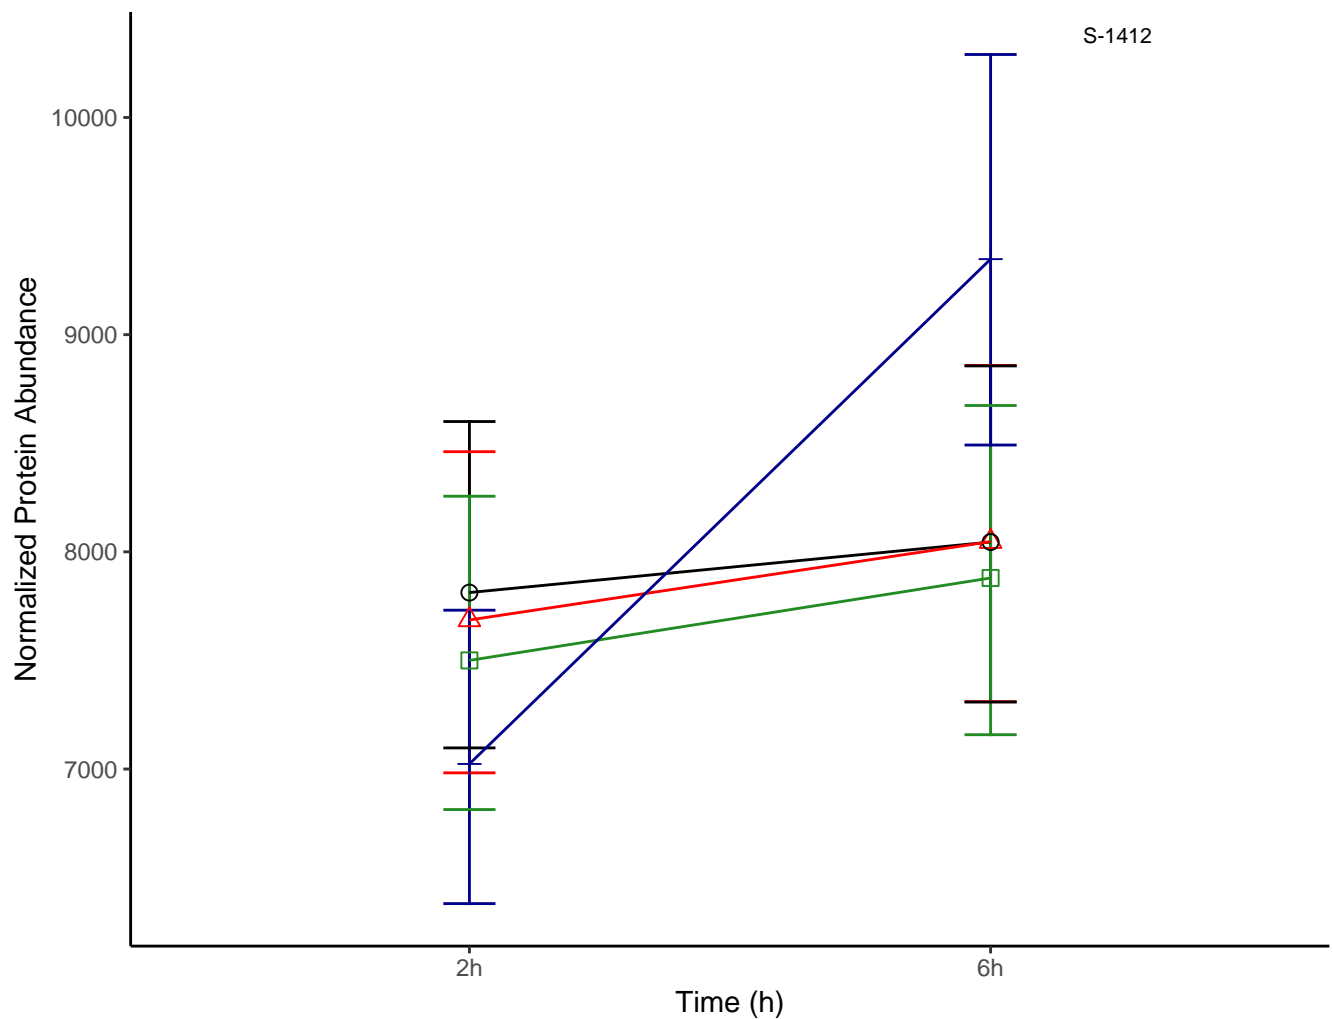

- SA564
- △ SA564- $\Delta$ hptRS
- SA564- $\Delta$ ccpA
- + SA564- $\Delta$ hptRS/ccpA

# SYT\_STAAM

S-1413

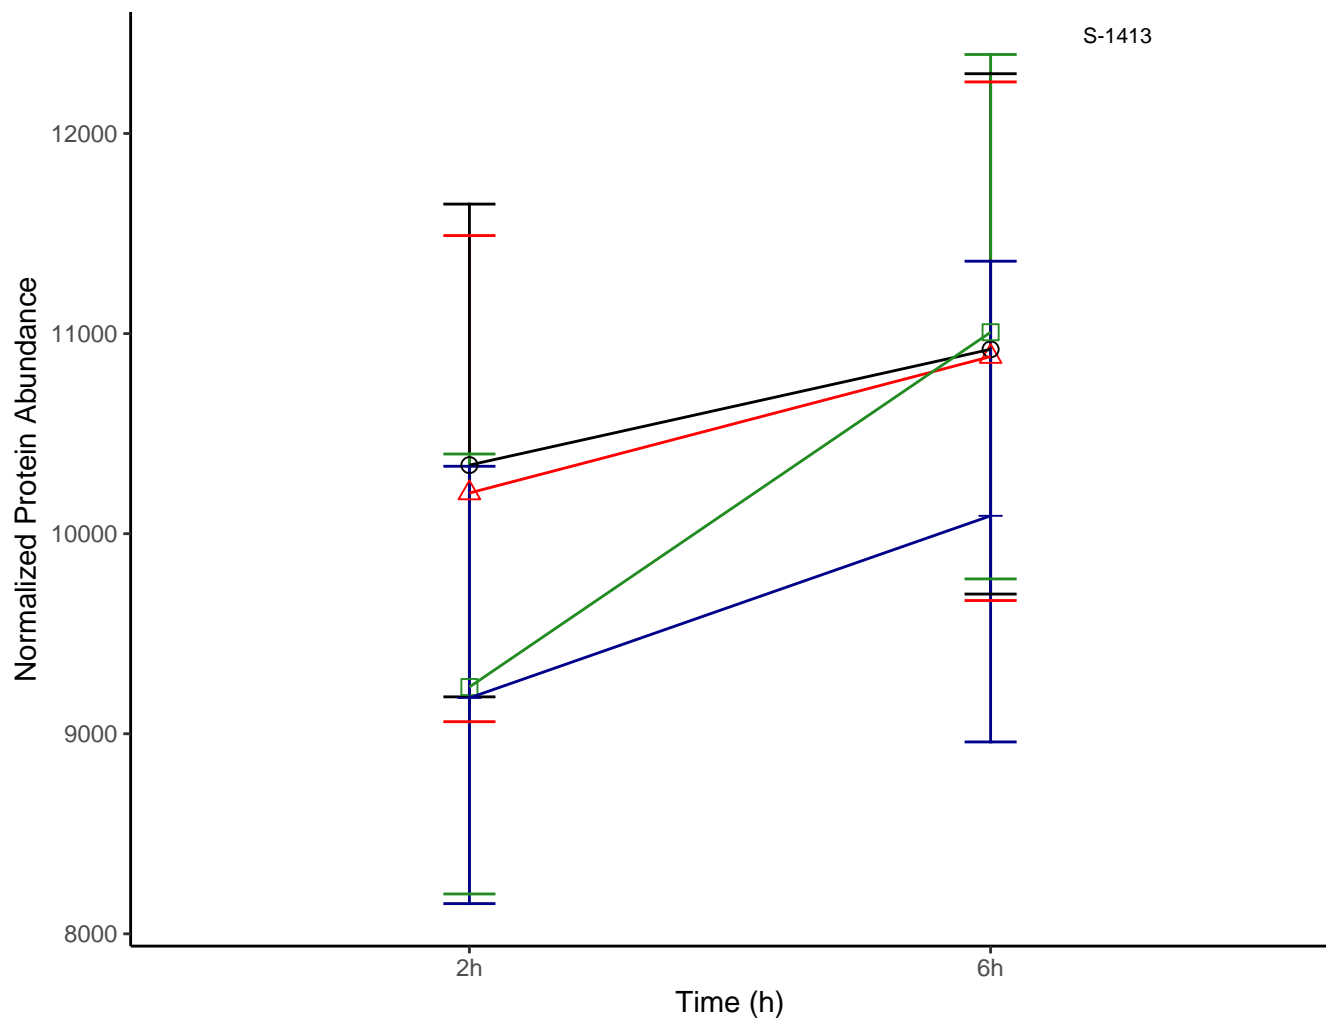

- SA564
- △ SA564-Δ*hptRS*
- SA564-Δ*ccpA*
- + SA564-Δ*hptRS/ccpA*

# SYV\_STAAM

S-1414

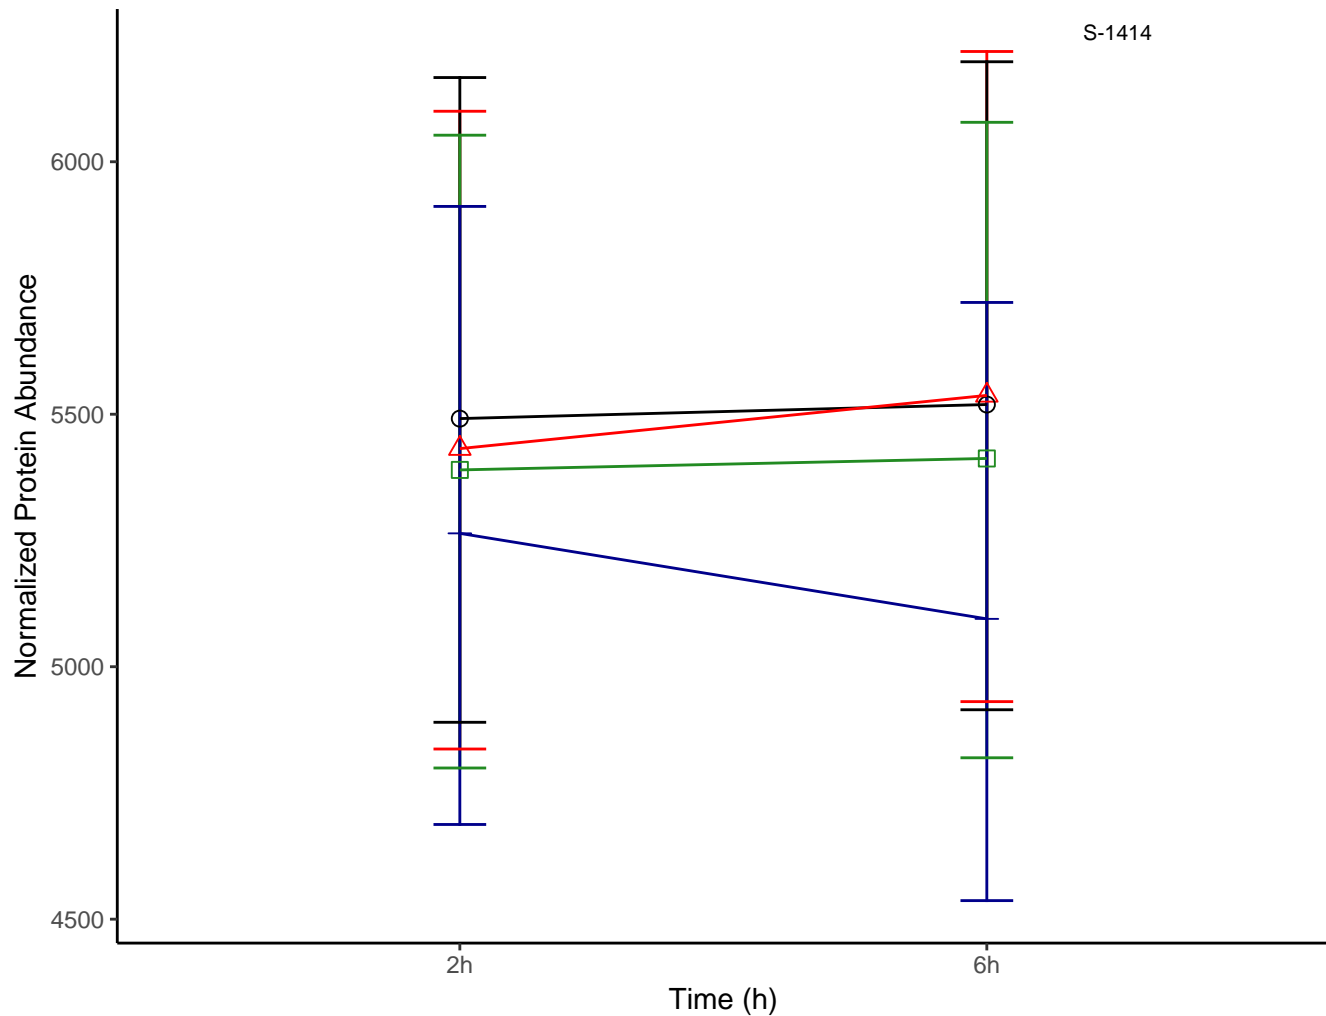

- SA564
- △ SA564- $\Delta$ *hptRS*
- SA564- $\Delta$ *ccpA*
- + SA564- $\Delta$ *hptRS/ccpA*

## SYW\_STAAM

S-1415

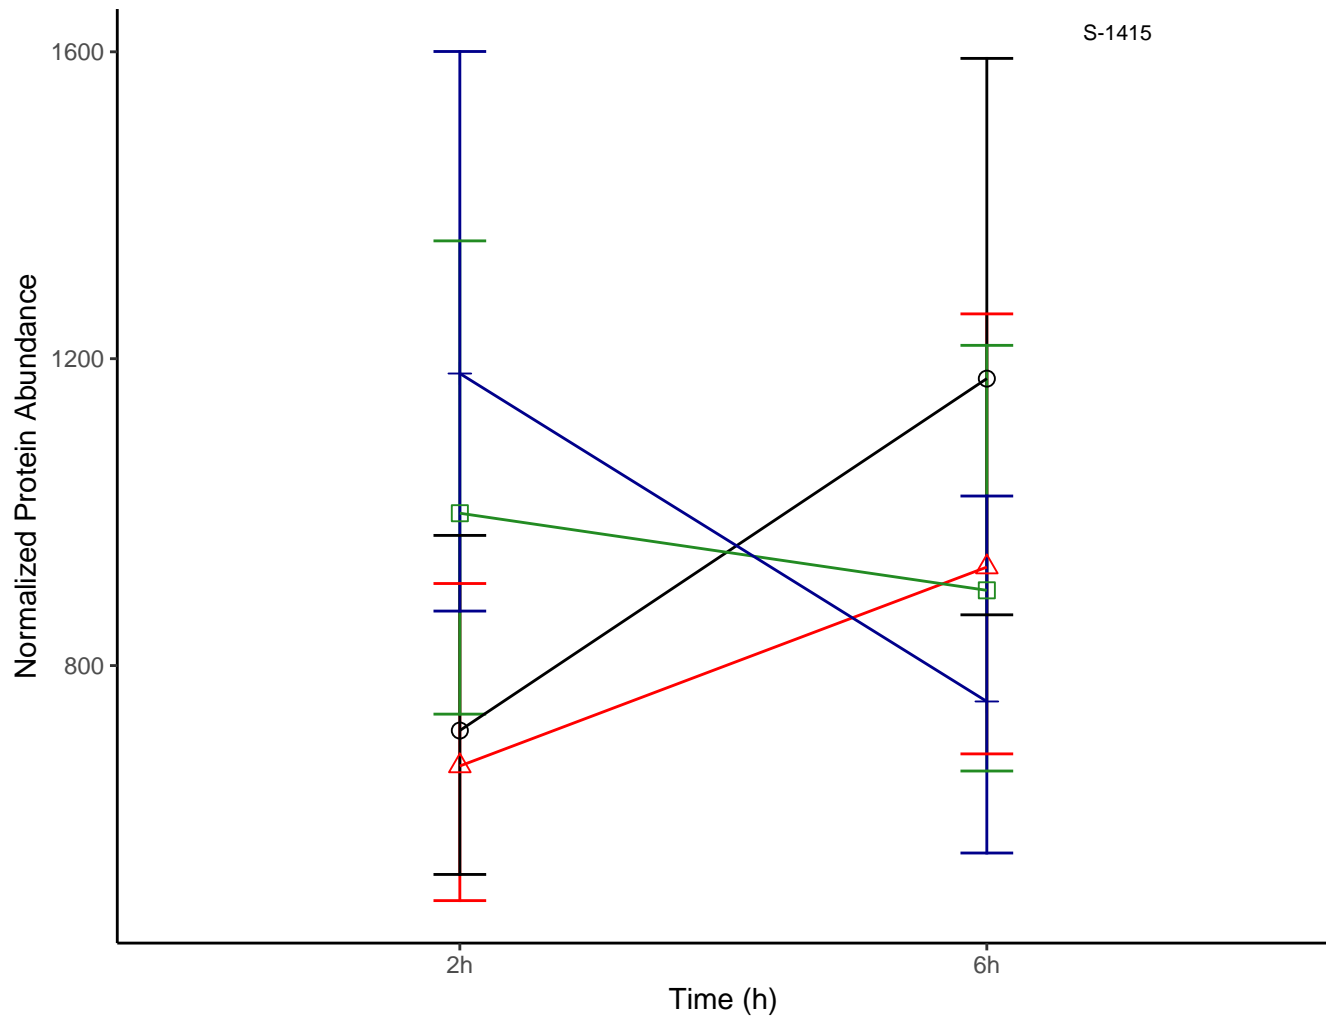

- SA564
- △ SA564- $\Delta$ *hptRS*
- SA564- $\Delta$ *ccpA*
- + SA564- $\Delta$ *hptRS/ccpA*

# SYT\_STAAM

S-1416

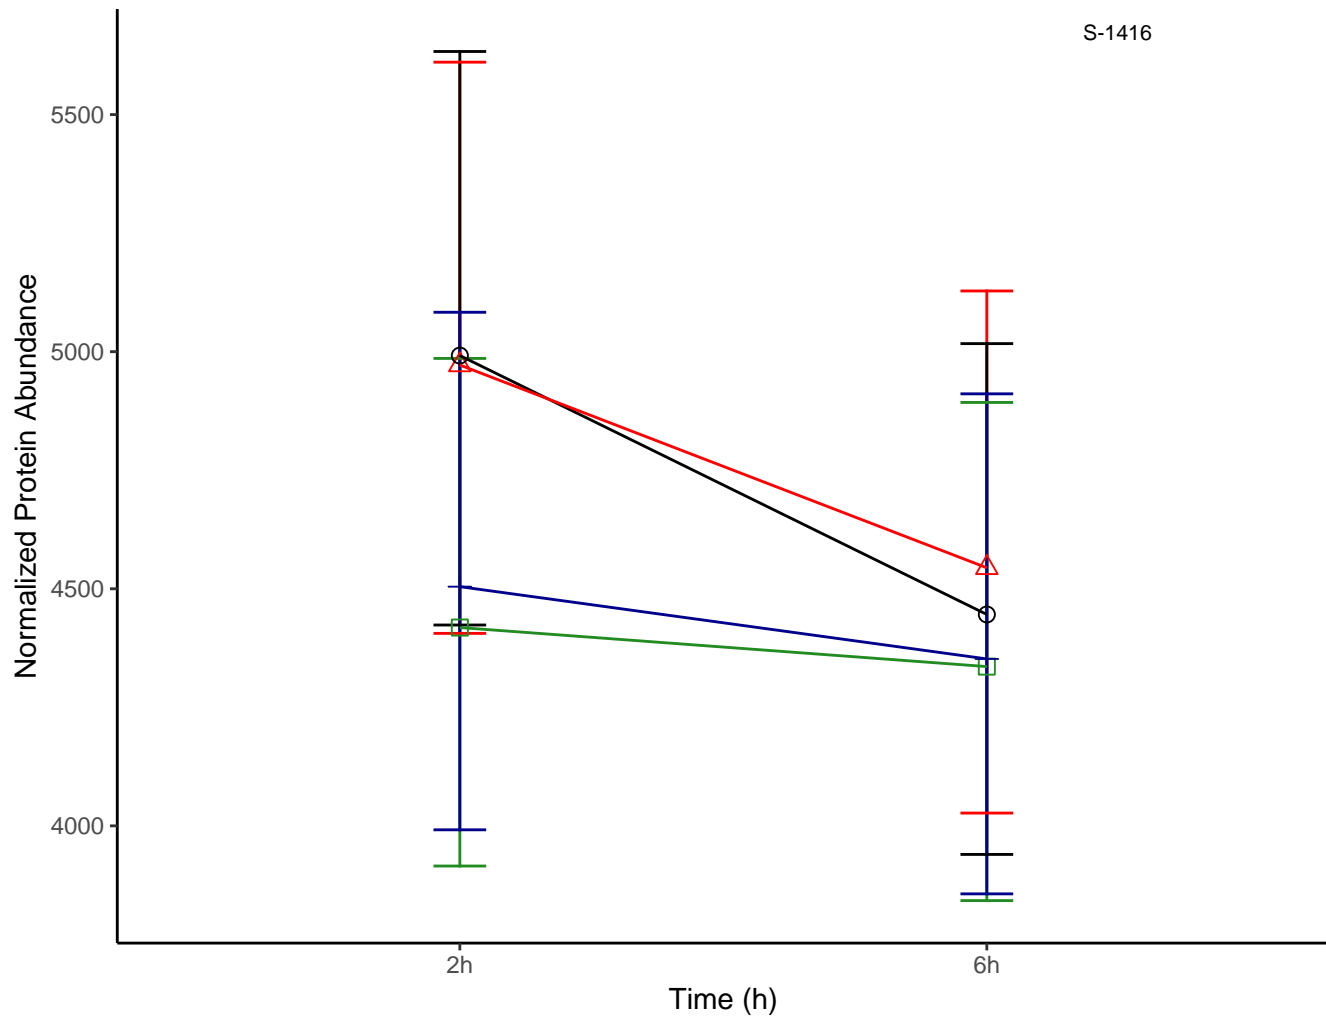

- SA564
- △ SA564- $\Delta hptRS$
- SA564- $\Delta ccpA$
- + SA564- $\Delta hptRS/ccpA$



# T431\_STAAM

S-1417

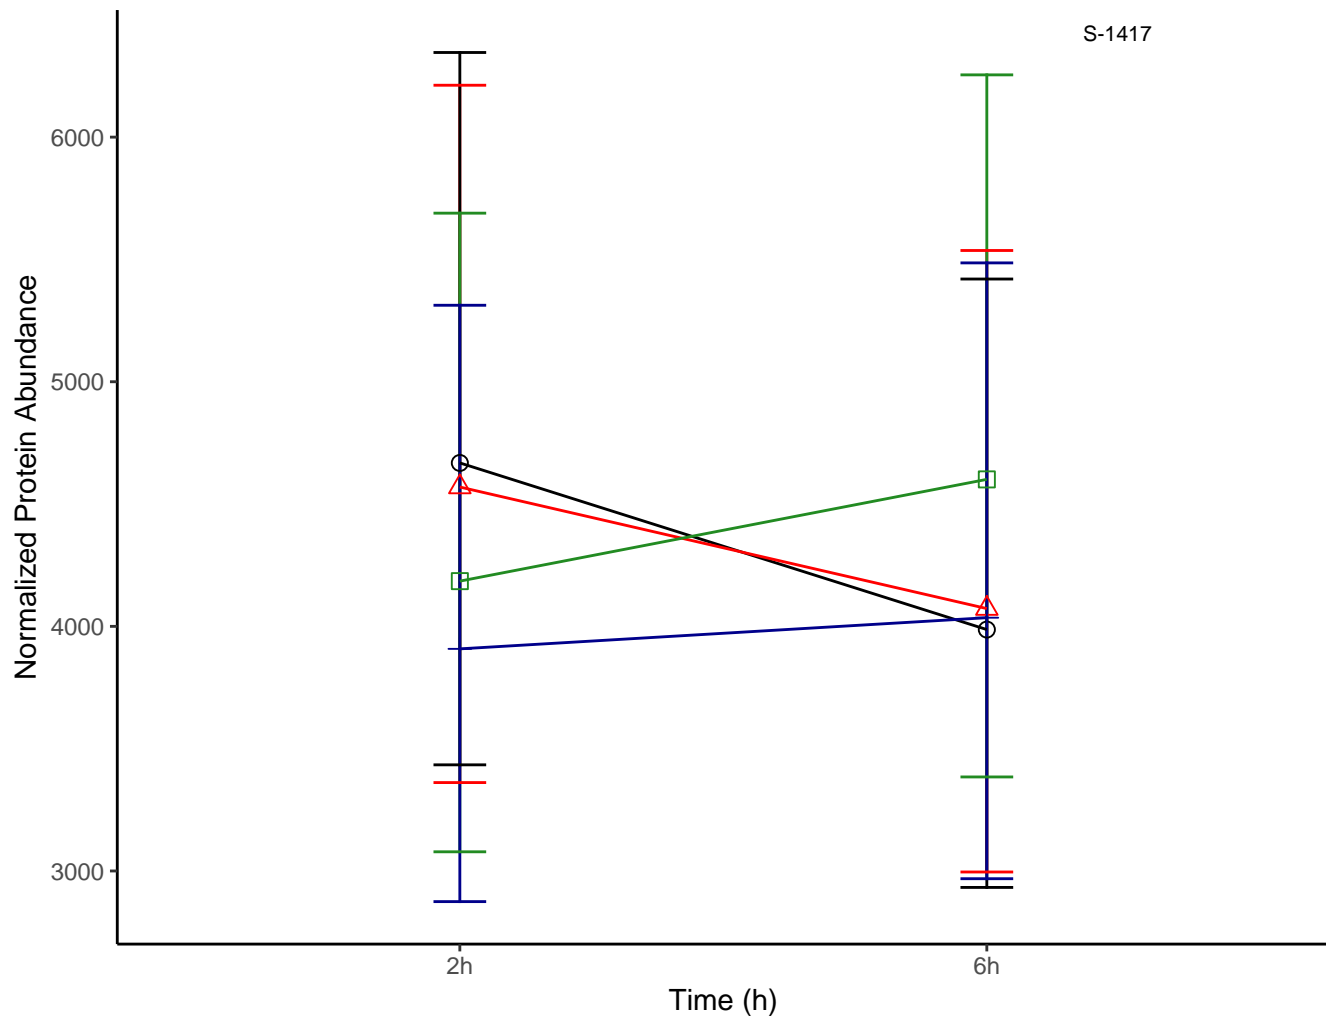

- SA564
- △ SA564- $\Delta$ *hptRS*
- SA564- $\Delta$ *ccpA*
- + SA564- $\Delta$ *hptRS/ccpA*

# TADA\_STAAM

S-1418

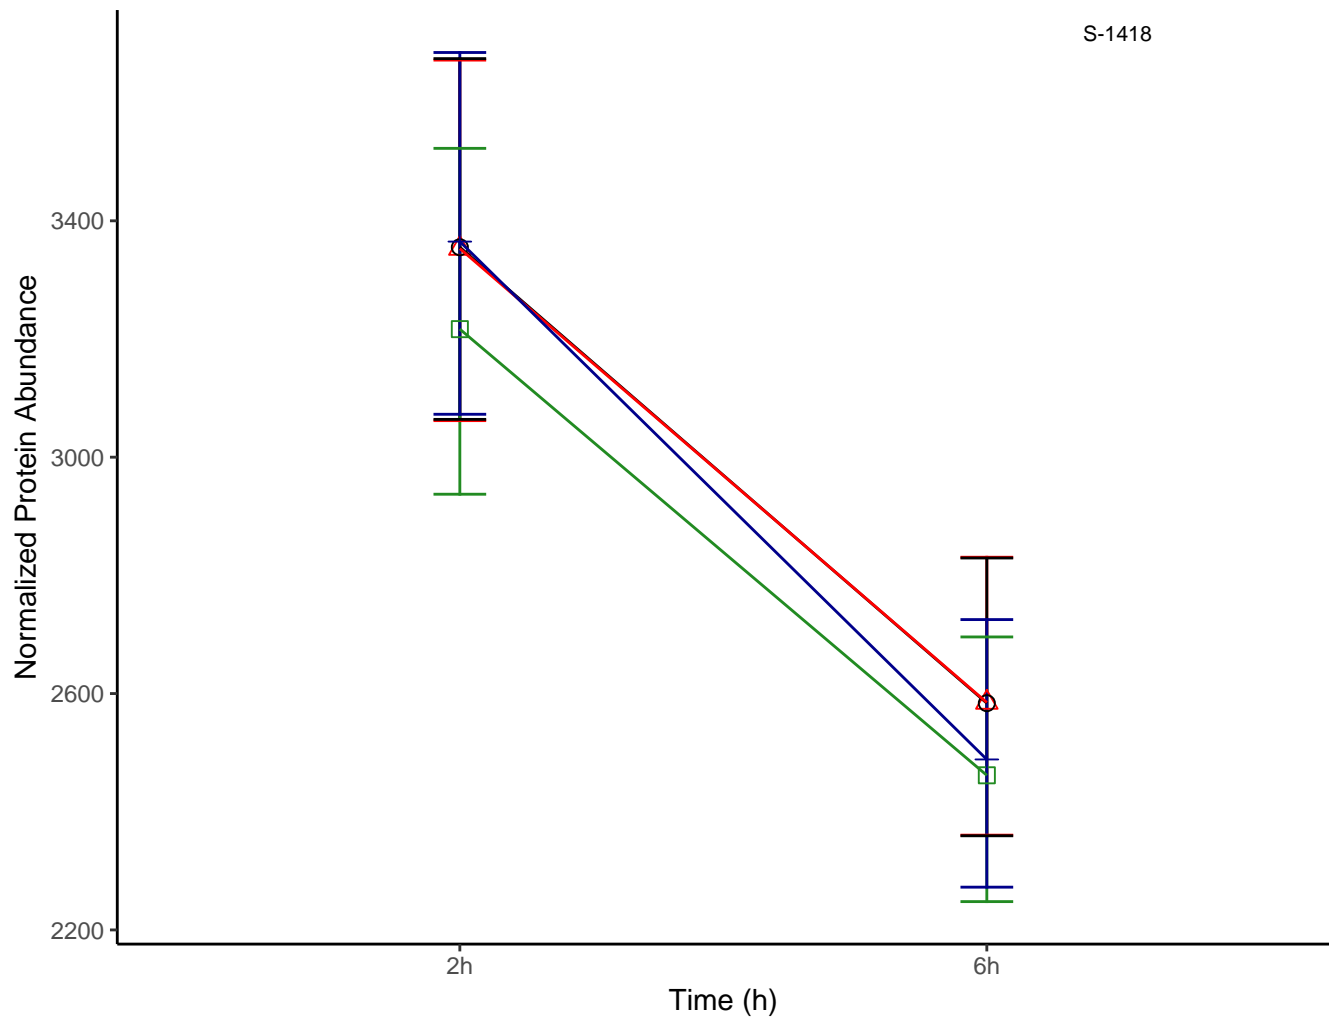

- SA564
- △ SA564- $\Delta hptRS$
- SA564- $\Delta ccpA$
- + SA564- $\Delta hptRS/ccpA$

## TAGA\_STAAM

S-1419

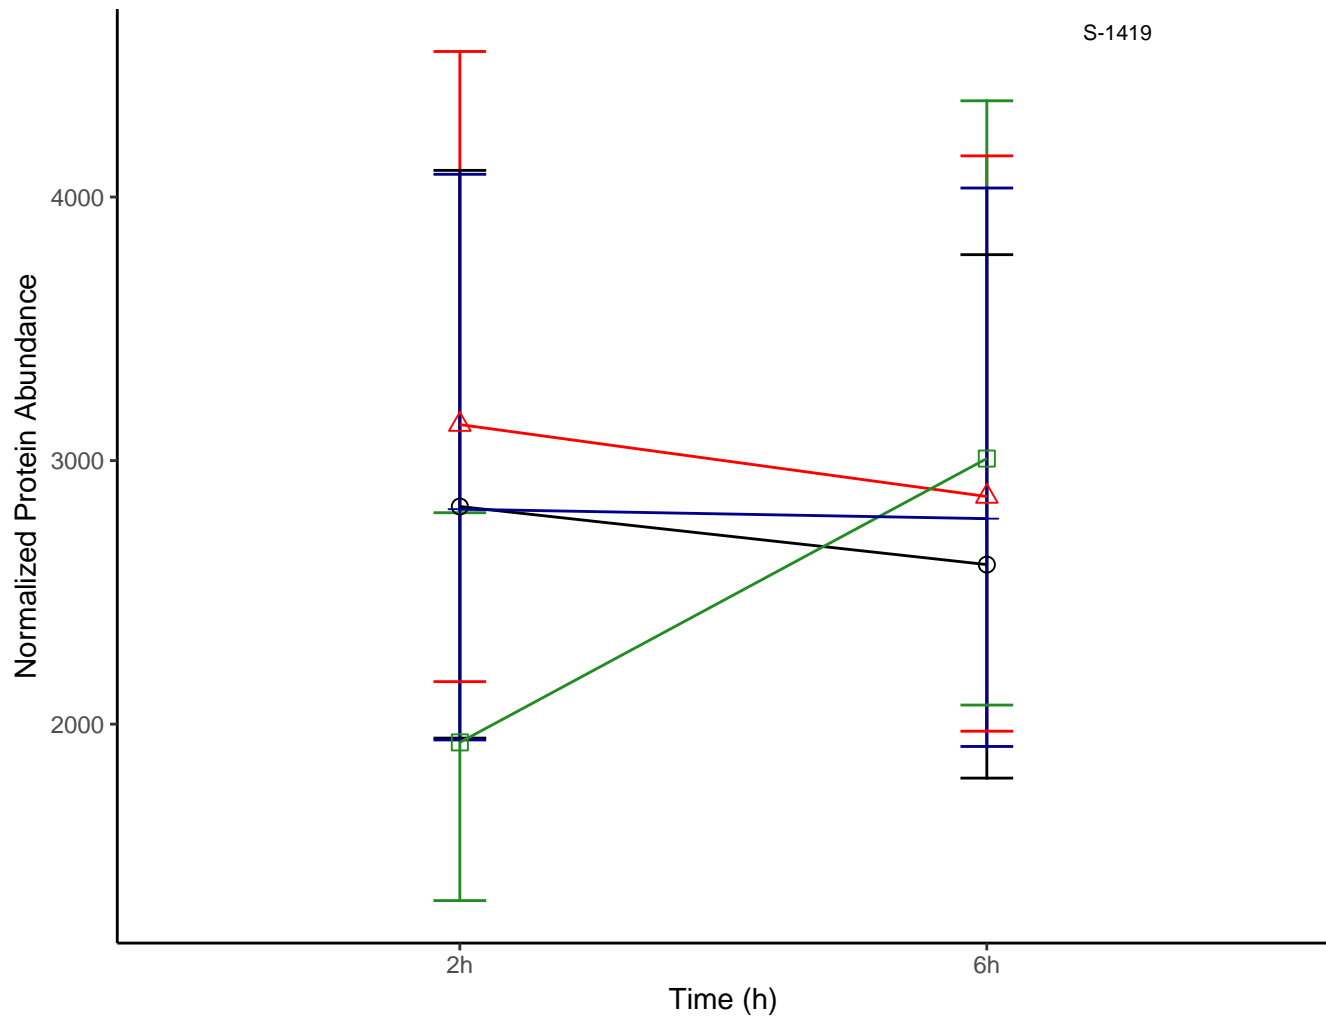

- SA564
- △ SA564- $\Delta hptRS$
- SA564- $\Delta ccpA$
- + SA564- $\Delta hptRS/ccpA$

# TDCB\_STAAM

S-1420

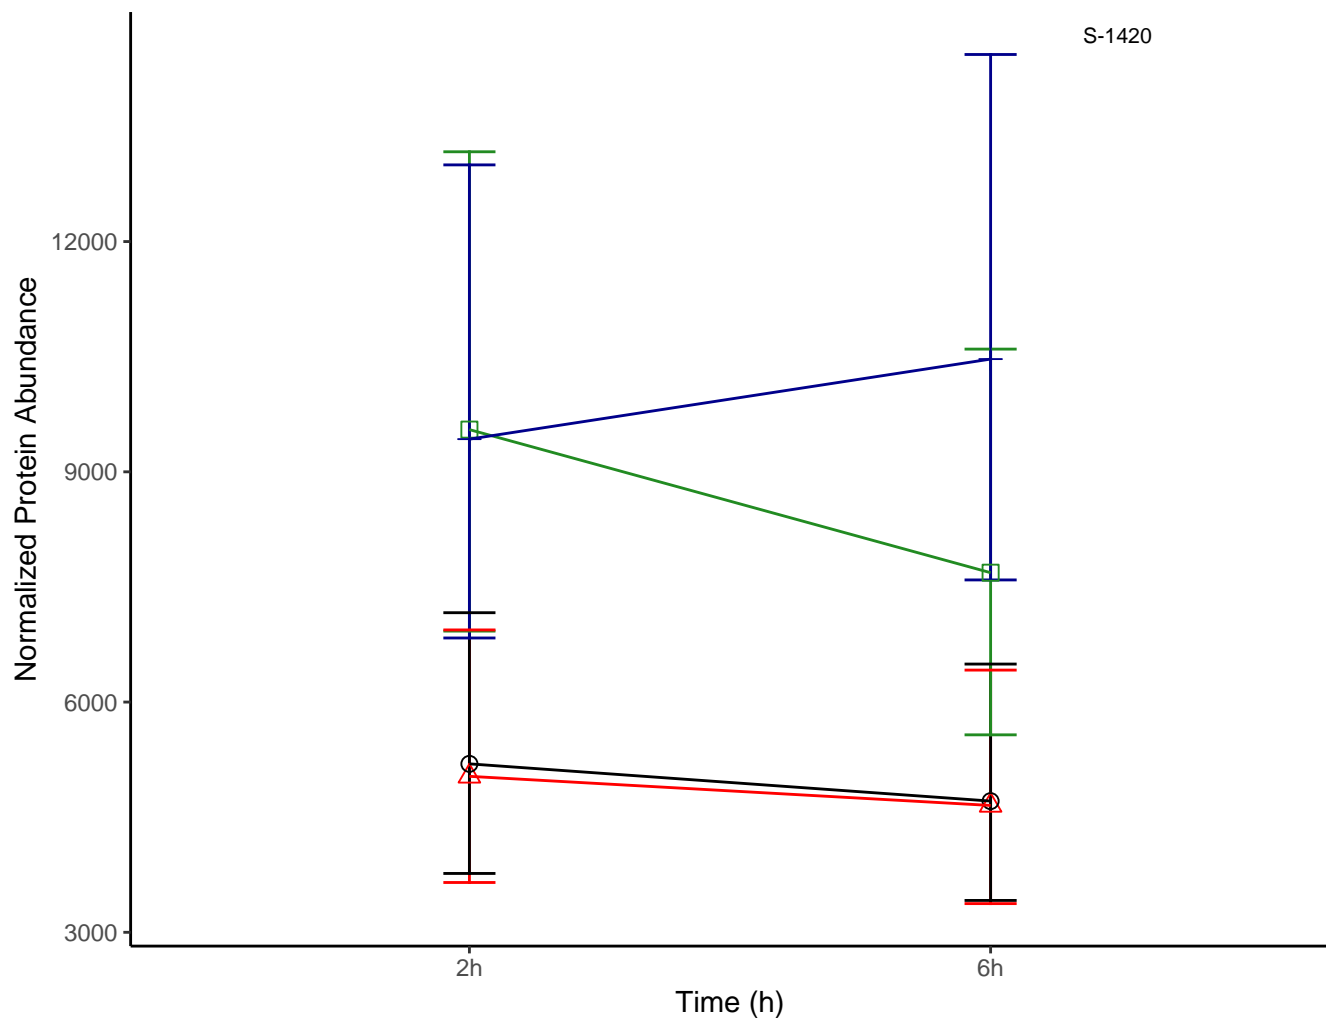

- SA564
- △ SA564- $\Delta hptRS$
- SA564- $\Delta ccpA$
- + SA564- $\Delta hptRS/ccpA$

# TELL\_STAAM

S-1421

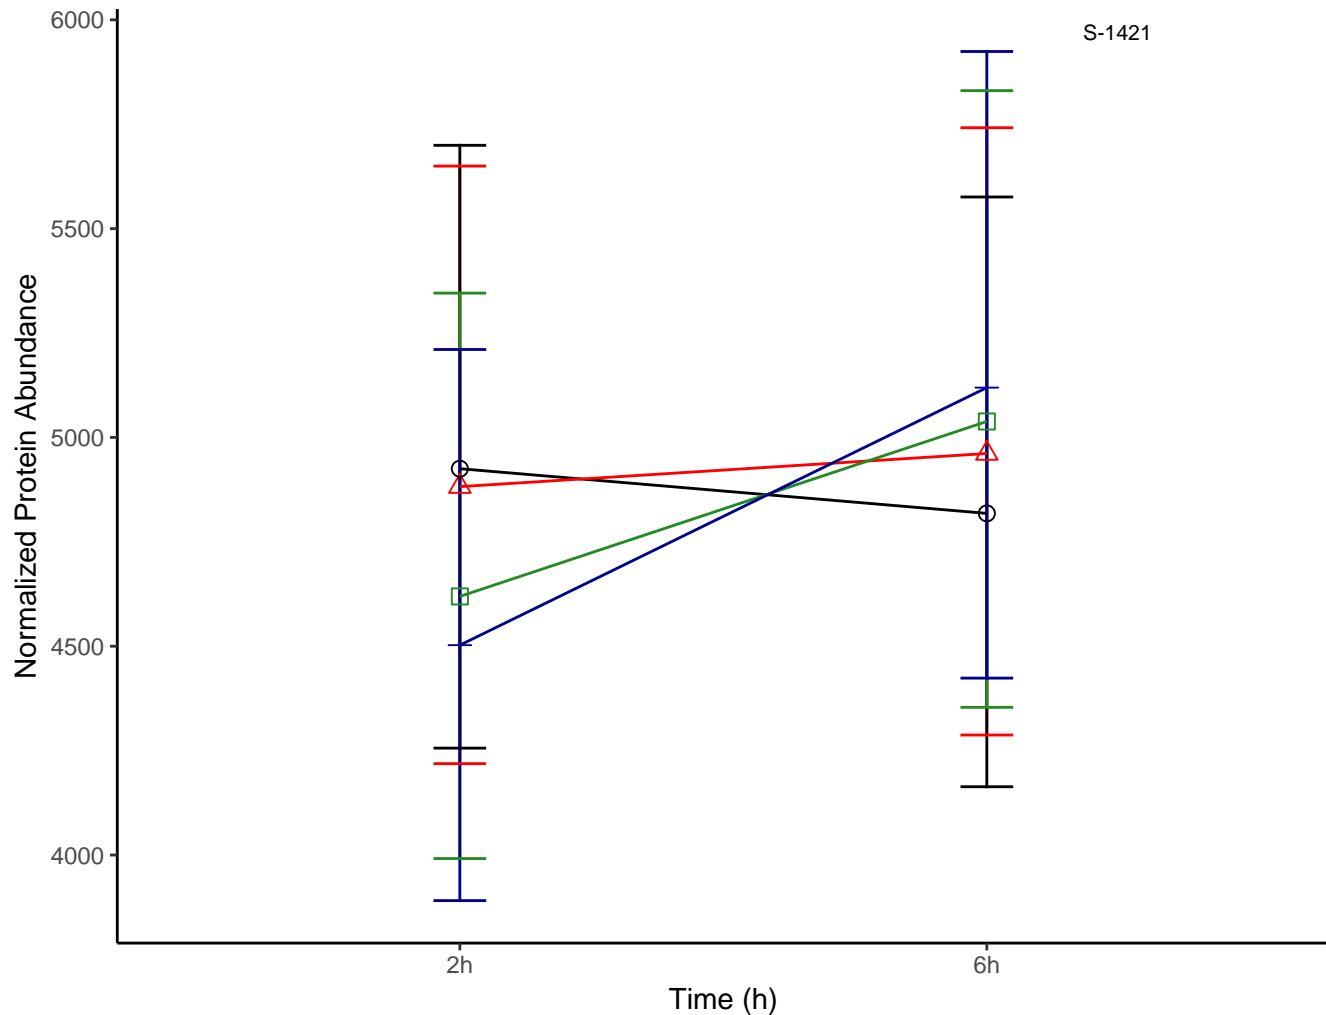

- SA564
- △ SA564- $\Delta$ *hptRS*
- SA564- $\Delta$ *ccpA*
- + SA564- $\Delta$ *hptRS/ccpA*

# THID\_STAAM

S-1422

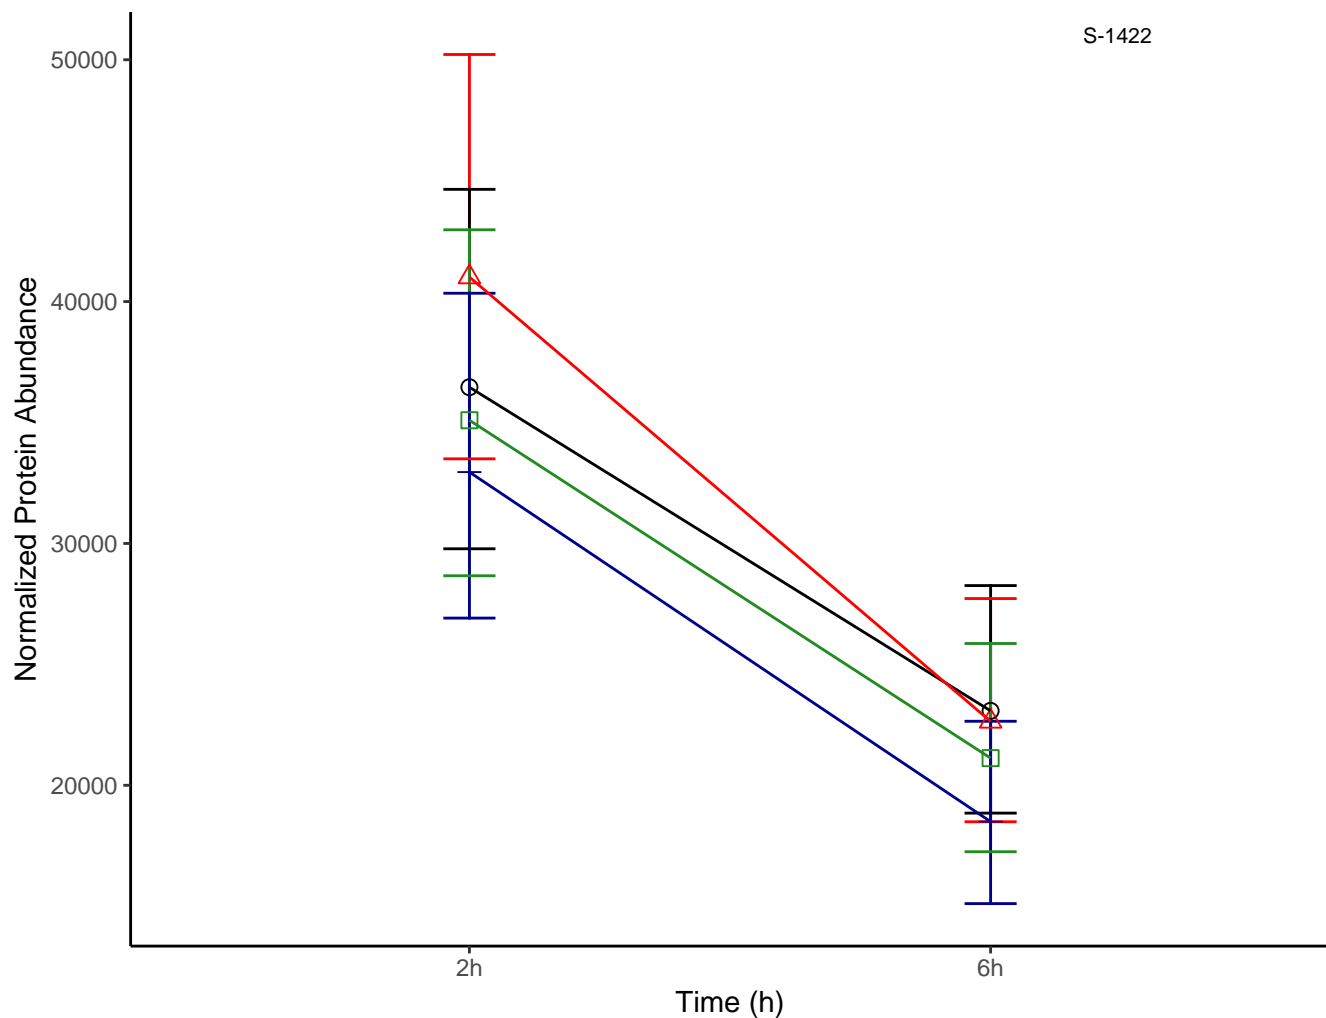

- SA564
- △ SA564- $\Delta hptRS$
- SA564- $\Delta ccpA$
- + SA564- $\Delta hptRS/ccpA$

# THIM\_STAAM

S-1423

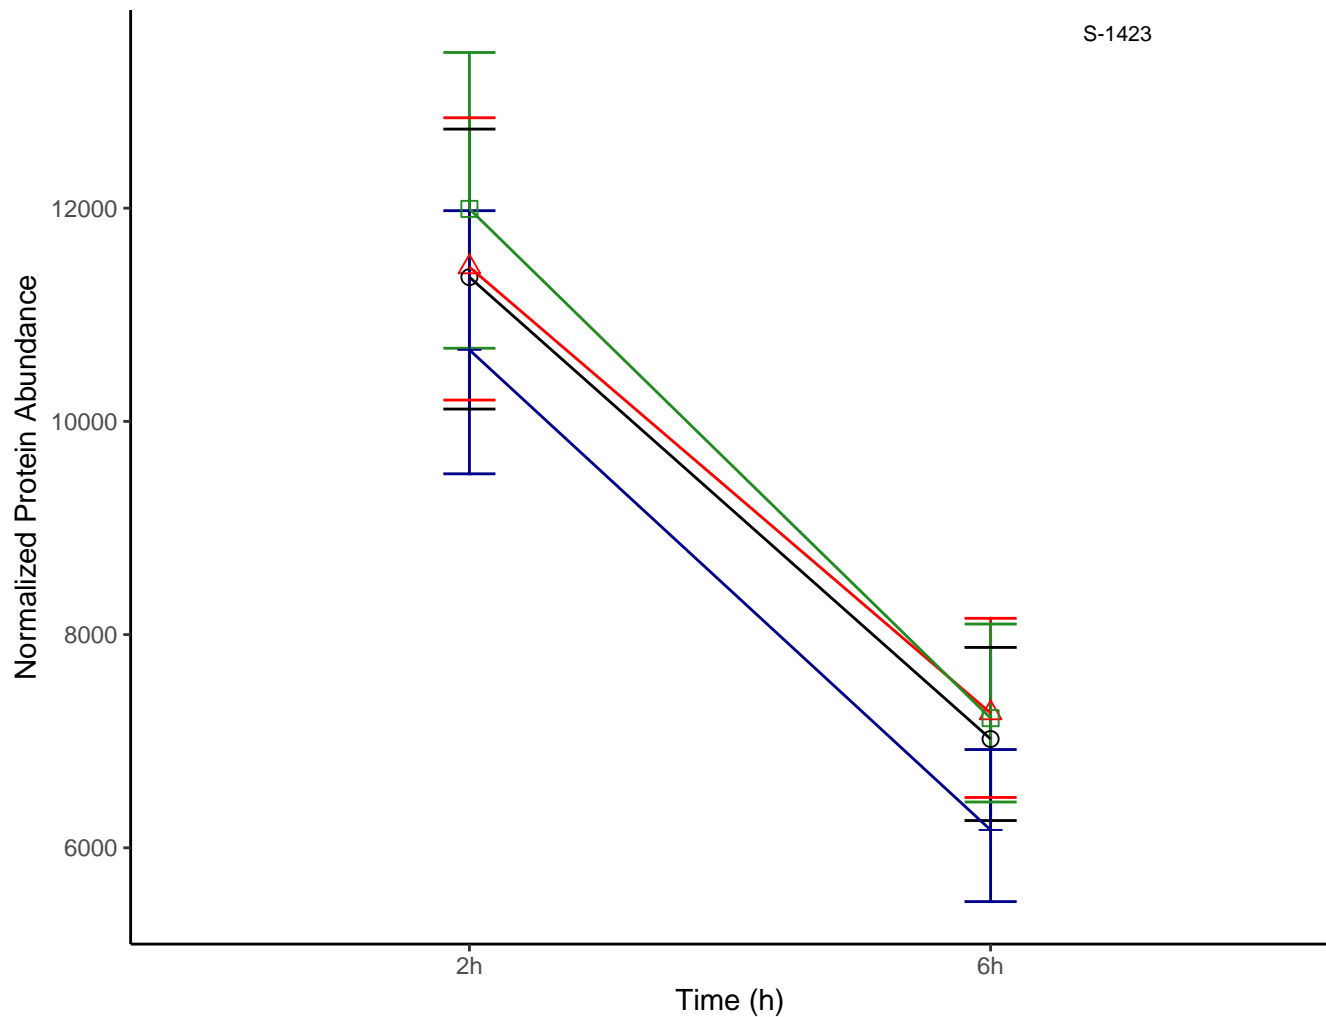

- SA564
- △ SA564- $\Delta$ *hptRS*
- SA564- $\Delta$ *ccpA*
- + SA564- $\Delta$ *hptRS/ccpA*

# THIO\_STAAM

S-1424

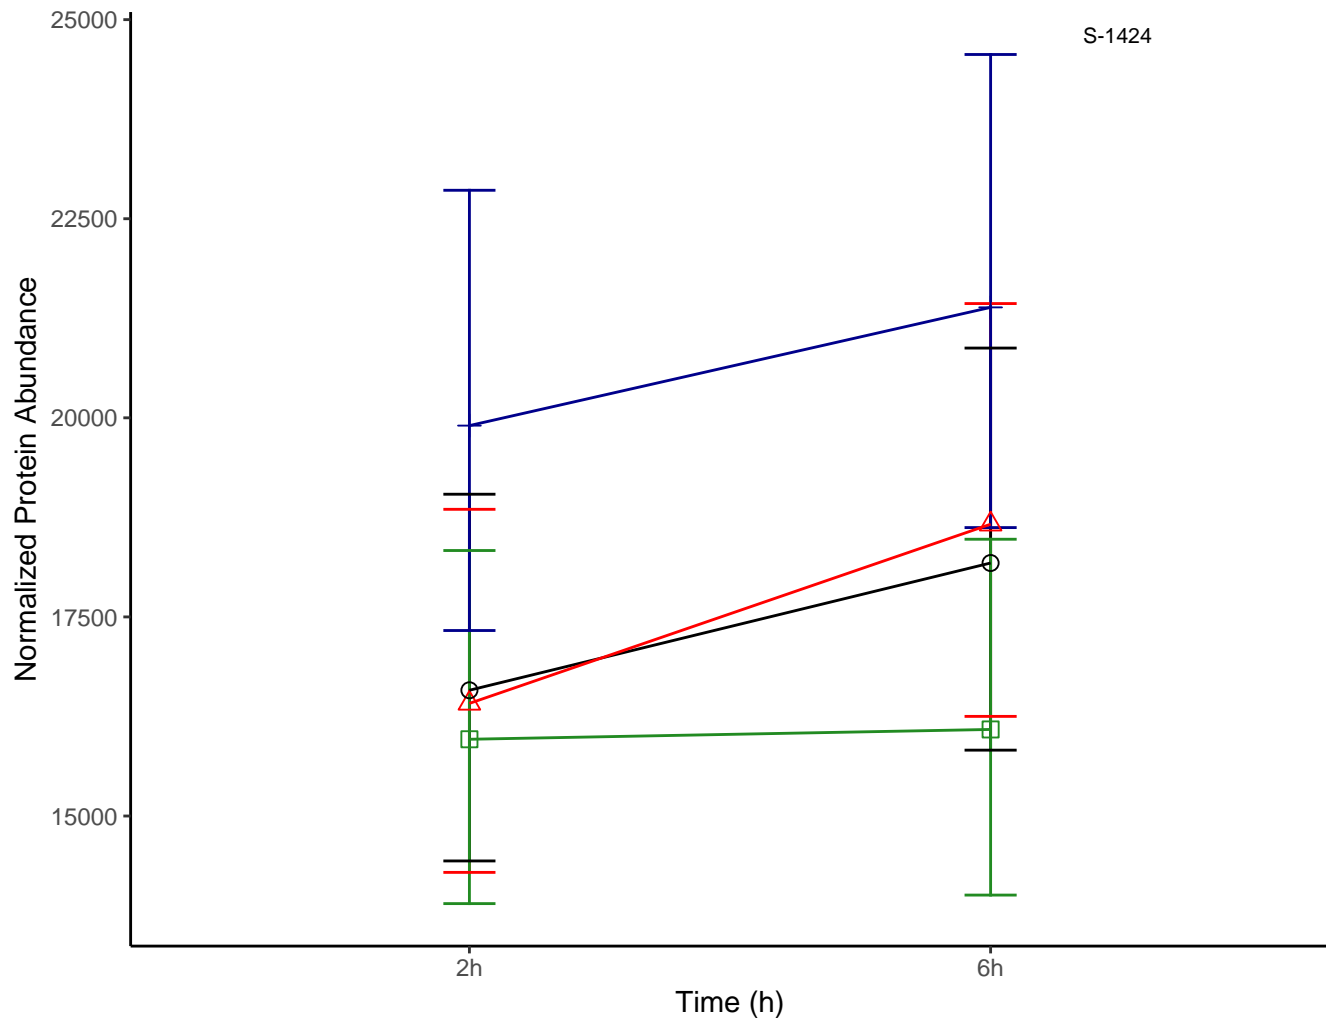

- SA564
- △ SA564- $\Delta$ *hptRS*
- SA564- $\Delta$ *ccpA*
- + SA564- $\Delta$ *hptRS/ccpA*



# THLA\_STAAM

S-1425

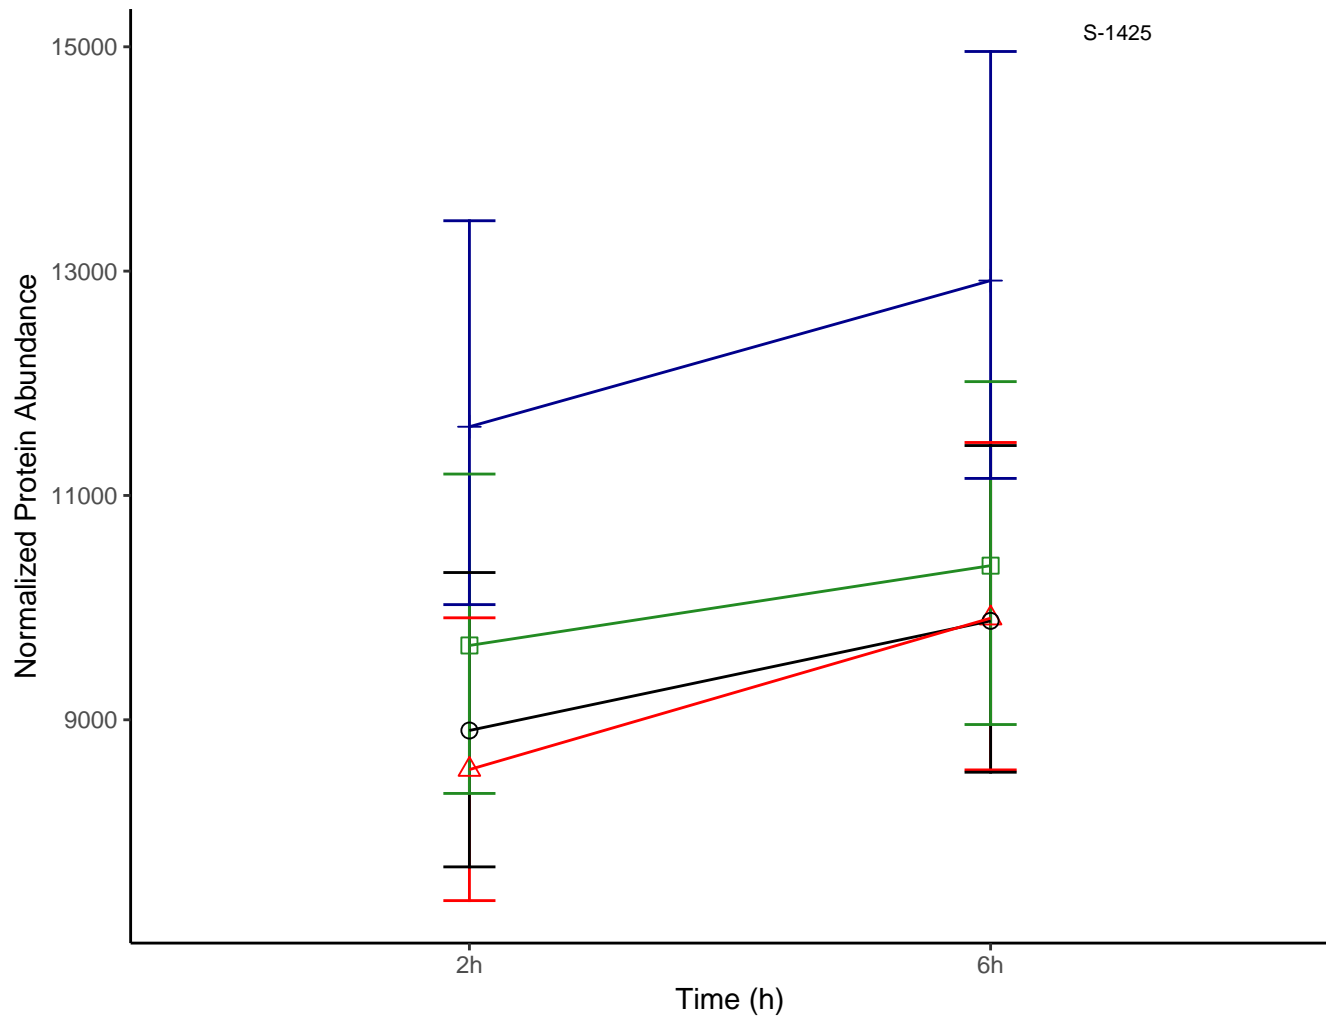

- SA564
- △ SA564- $\Delta$ hptRS
- SA564- $\Delta$ ccpA
- + SA564- $\Delta$ hptRS/ccpA

# TIG\_STAAM

S-1426

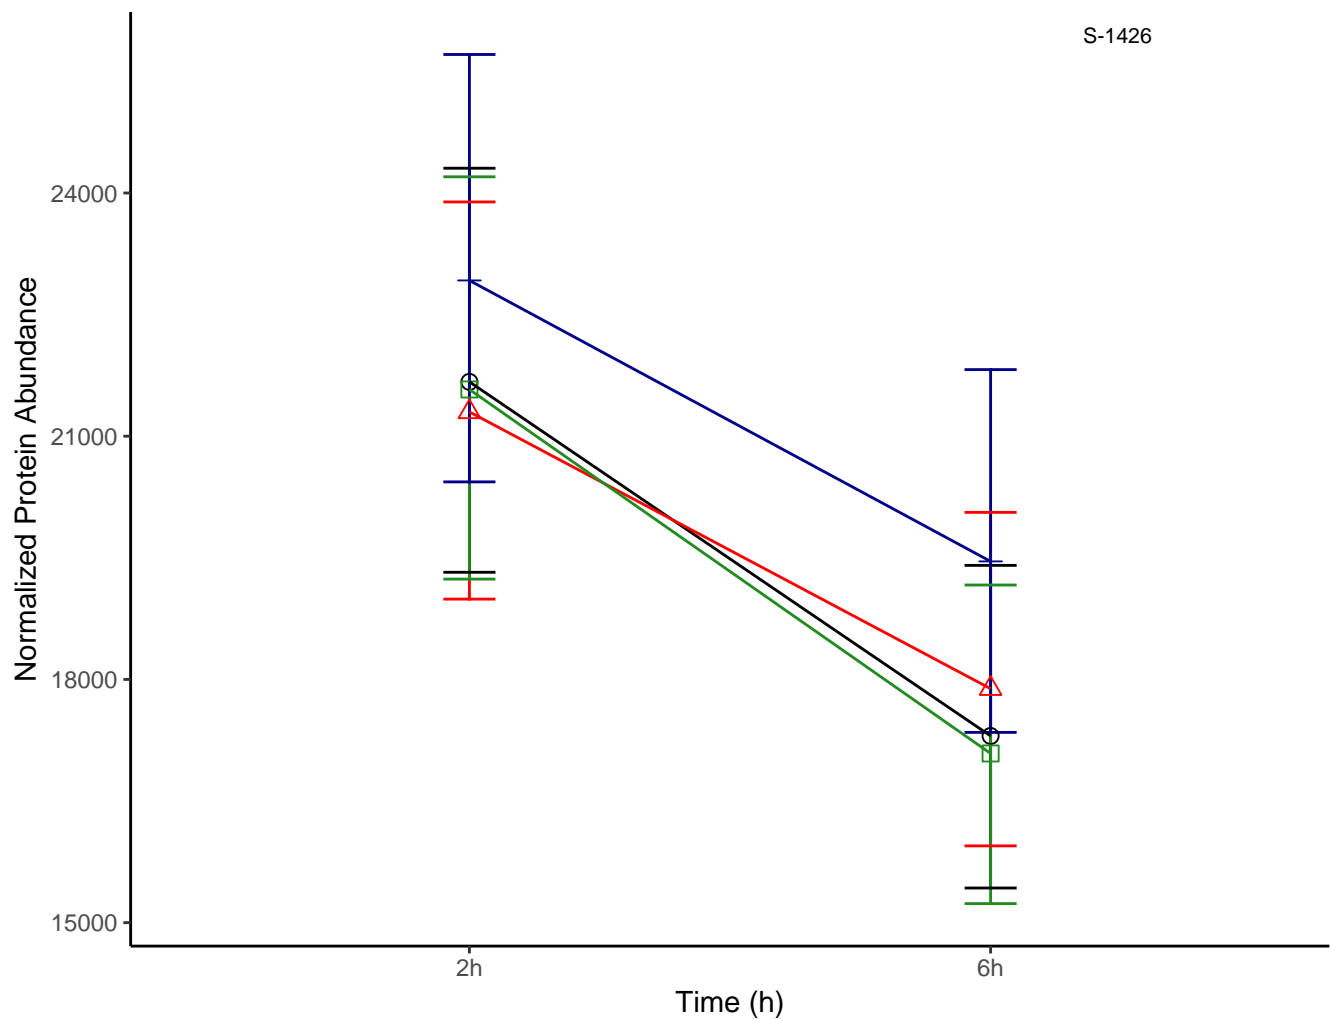

- SA564
- △ SA564- $\Delta hptRS$
- SA564- $\Delta ccpA$
- + SA564- $\Delta hptRS/ccpA$

# TKT\_STAAM

S-1427

Normalized Protein Abundance

15000

12500

10000

2h

6h

Time (h)

- SA564
- △ SA564- $\Delta$ *hptRS*
- SA564- $\Delta$ *ccpA*
- + SA564- $\Delta$ *hptRS/ccpA*

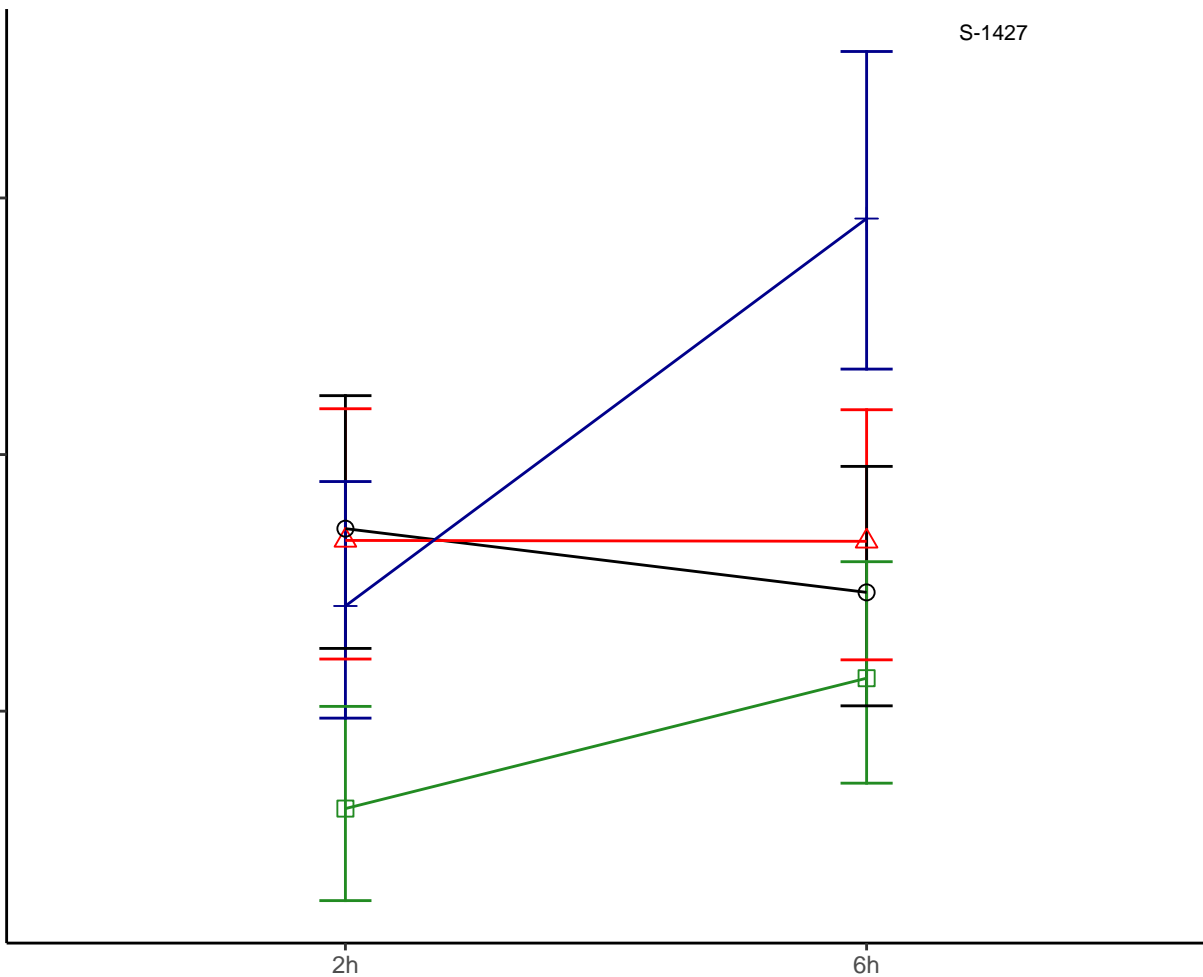

# TOP1\_STAAM

S-1428

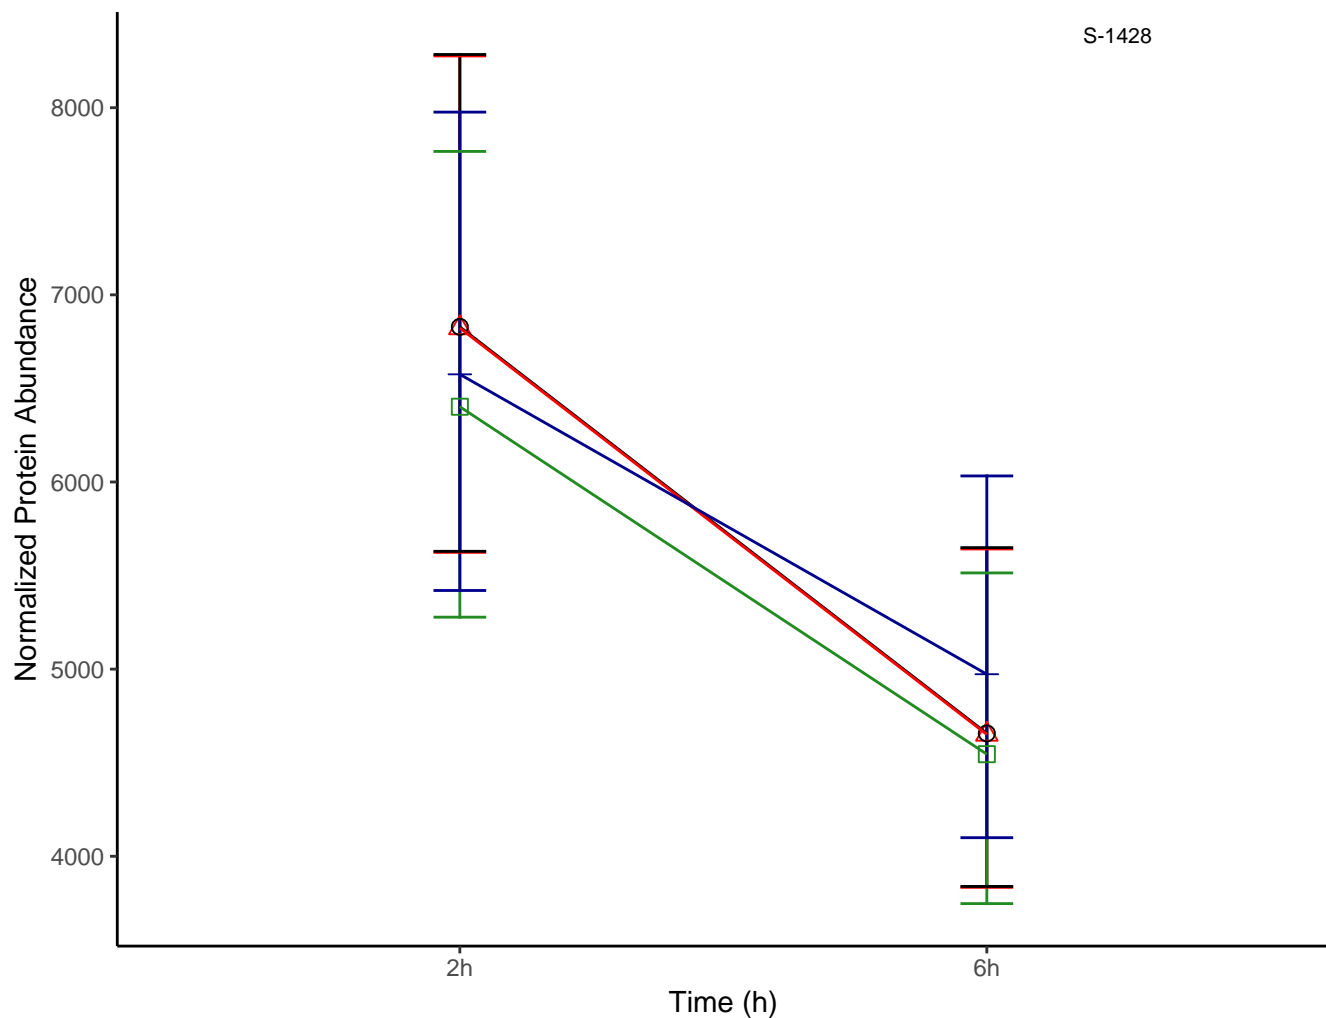

- SA564
- △ SA564- $\Delta hptRS$
- SA564- $\Delta ccpA$
- + SA564- $\Delta hptRS/ccpA$

# TOP3\_STAAM

S-1429

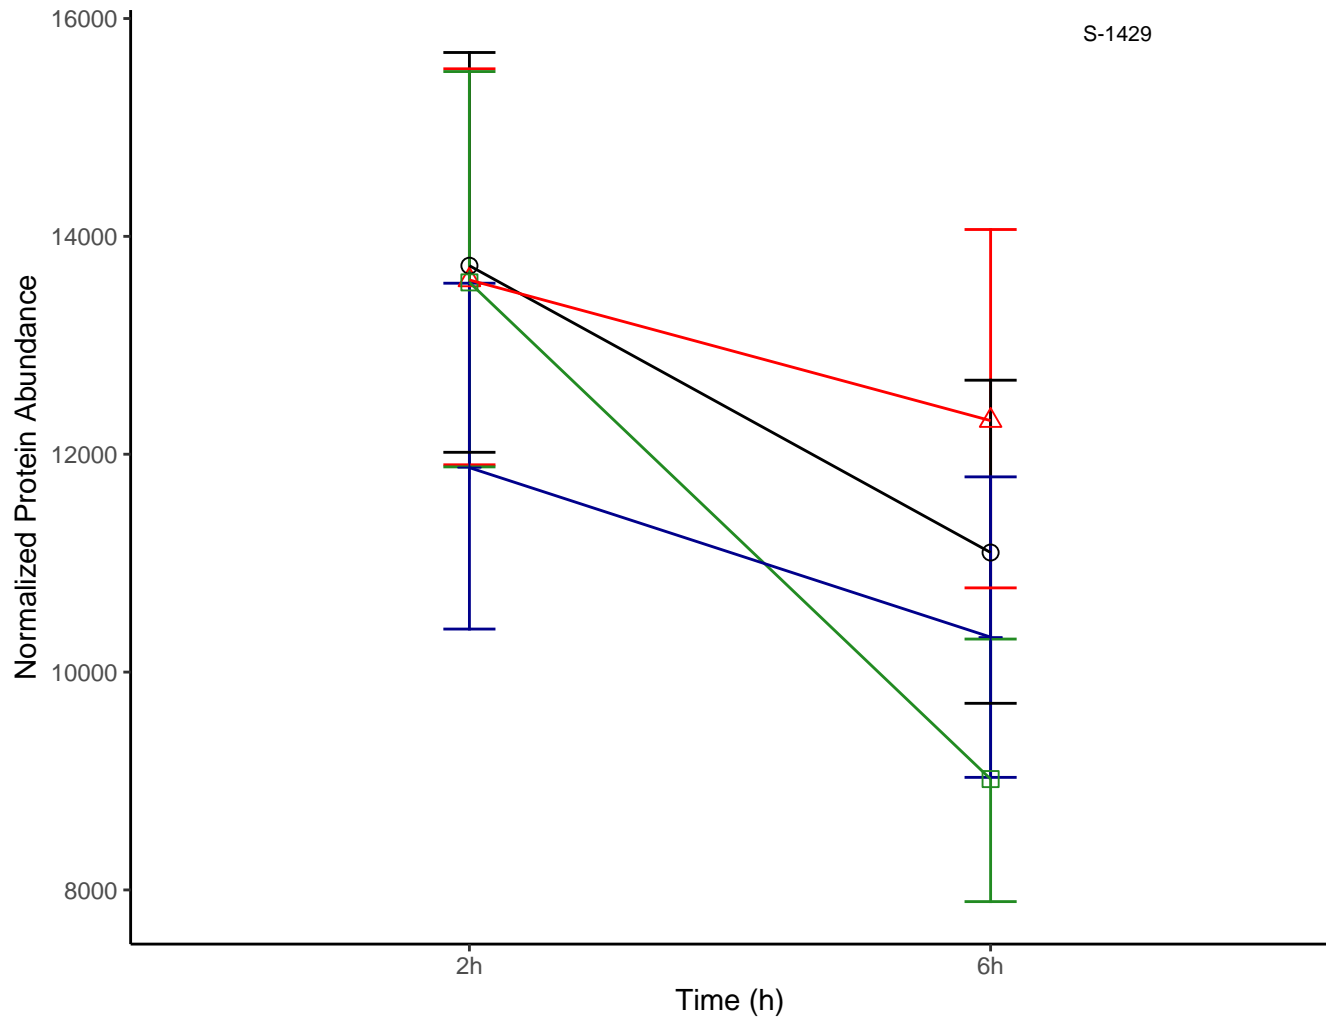

- SA564
- △ SA564- $\Delta$ *hptRS*
- SA564- $\Delta$ *ccpA*
- + SA564- $\Delta$ *hptRS/ccpA*

# TPIS\_STAAM

S-1430

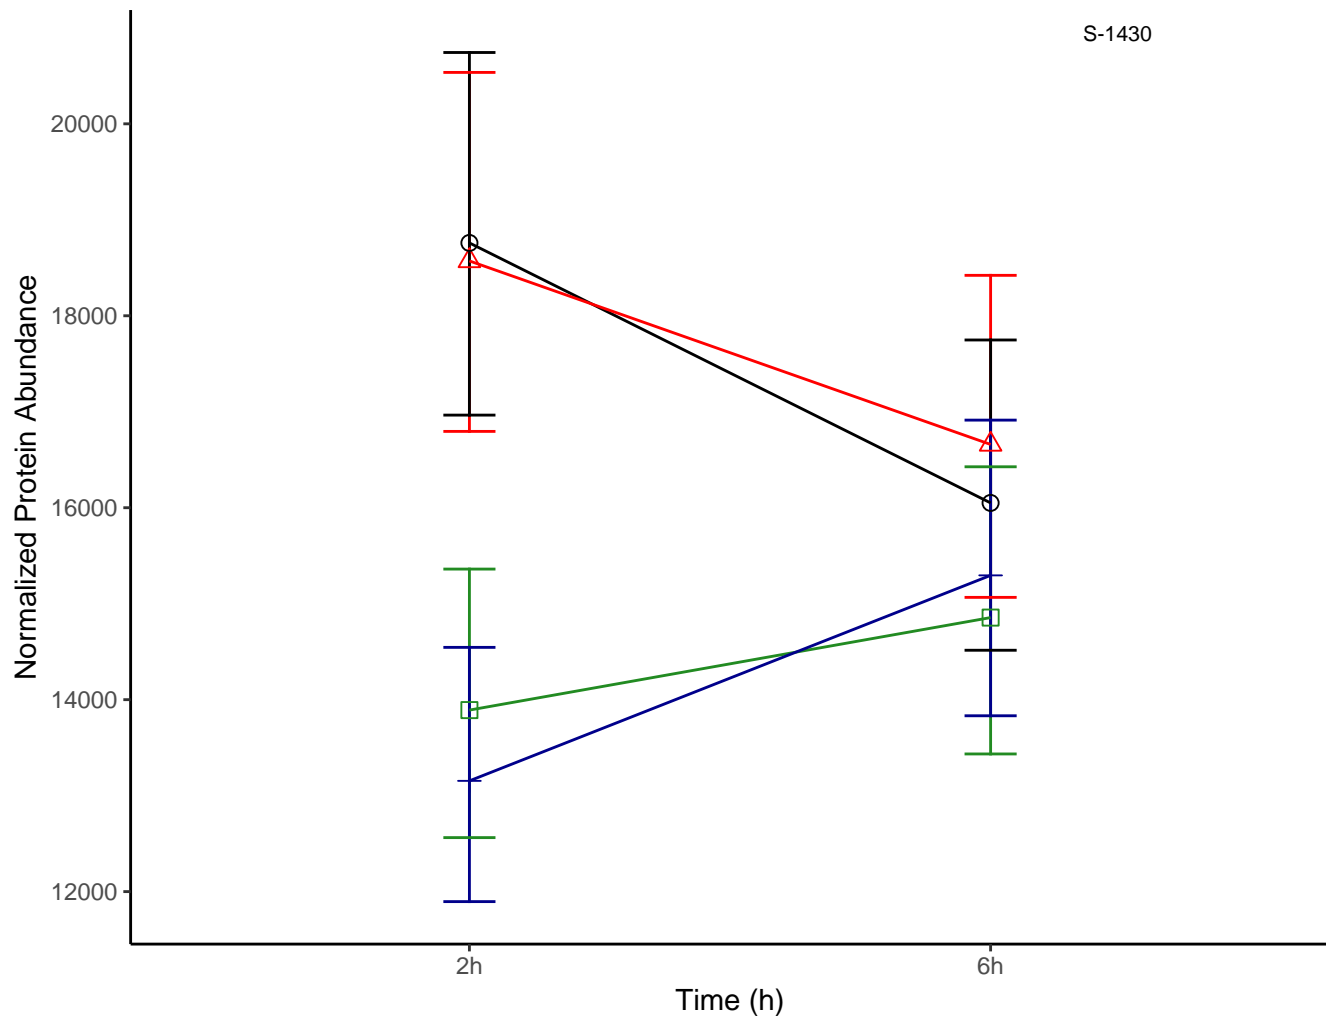

- SA564
- △ SA564- $\Delta$ *hptRS*
- SA564- $\Delta$ *ccpA*
- + SA564- $\Delta$ *hptRS/ccpA*

# TPX\_STAAM

S-1431

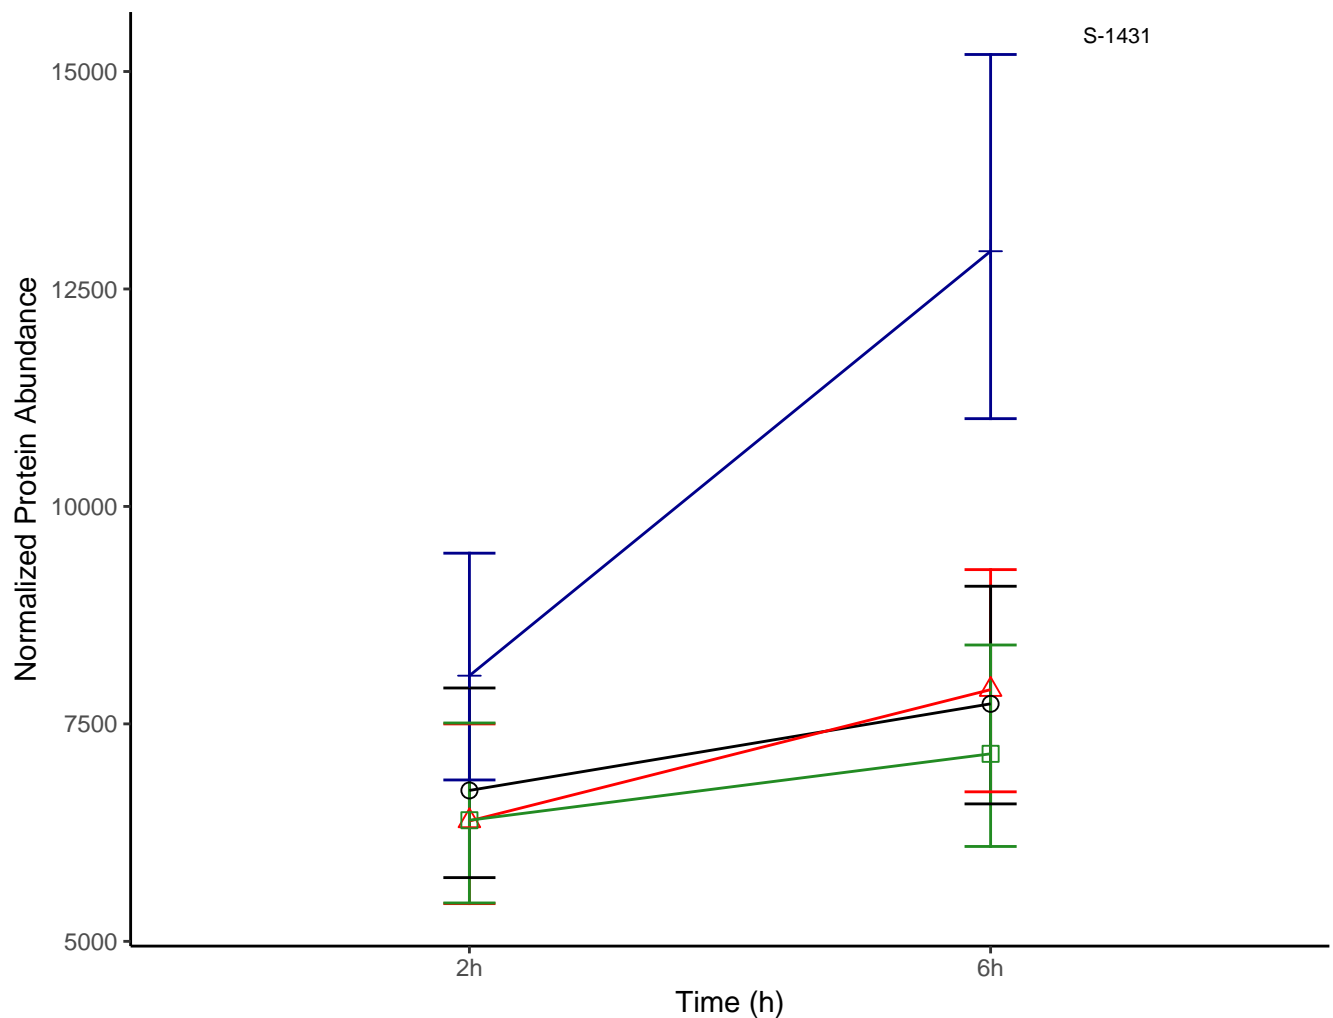

- SA564
- △ SA564- $\Delta$ *hptRS*
- SA564- $\Delta$ *ccpA*
- + SA564- $\Delta$ *hptRS/ccpA*

# TRAC\_STAAM

S-1432

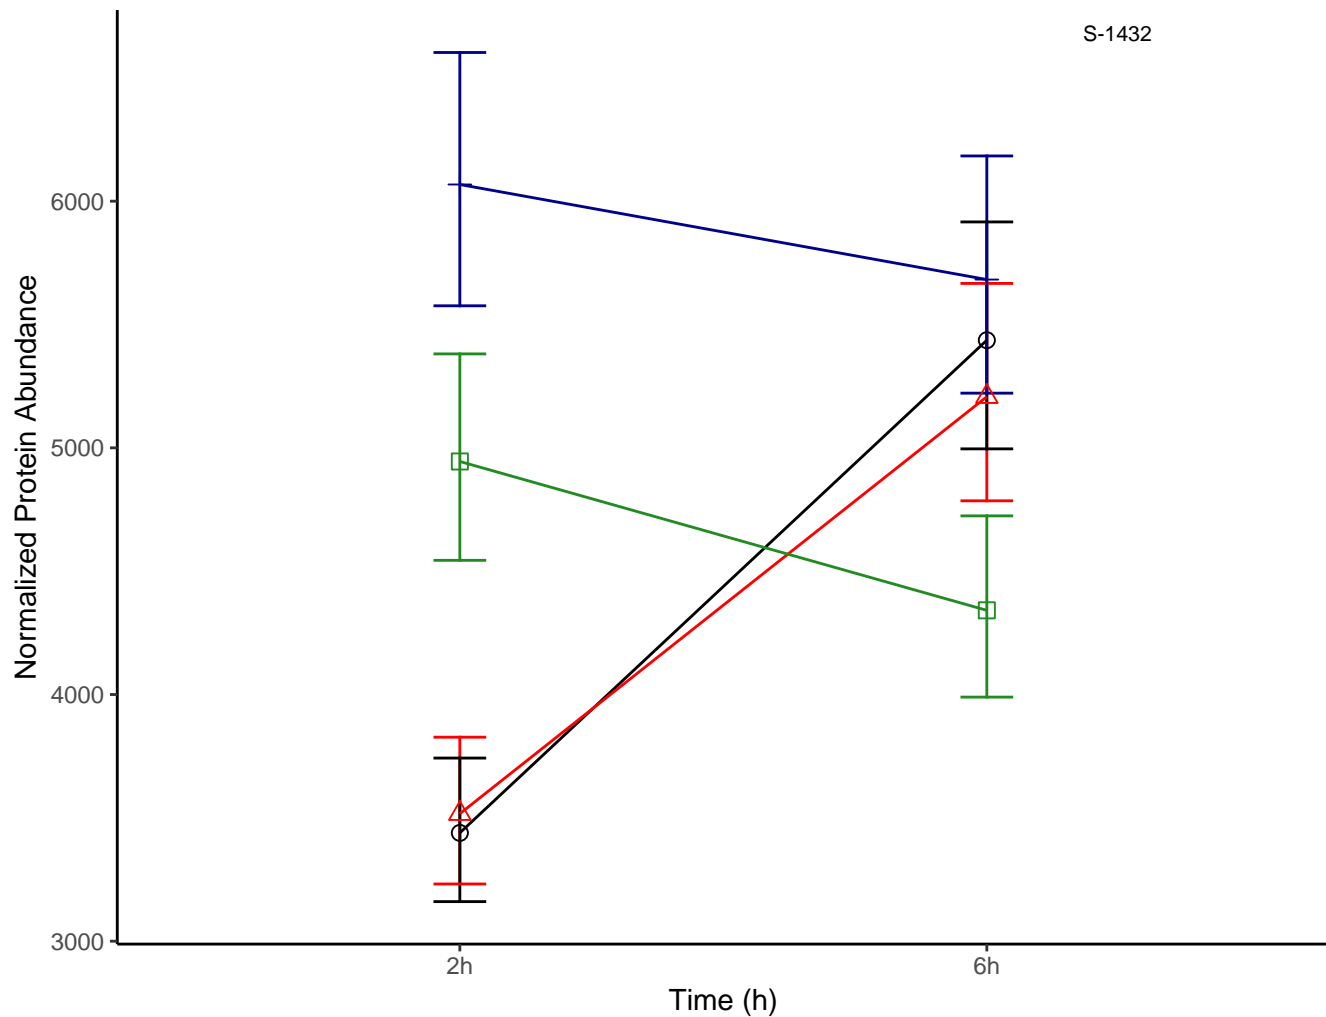

- SA564
- △ SA564- $\Delta$ *hptRS*
- SA564- $\Delta$ *ccpA*
- + SA564- $\Delta$ *hptRS/ccpA*



# TRAP\_STAAM

S-1433

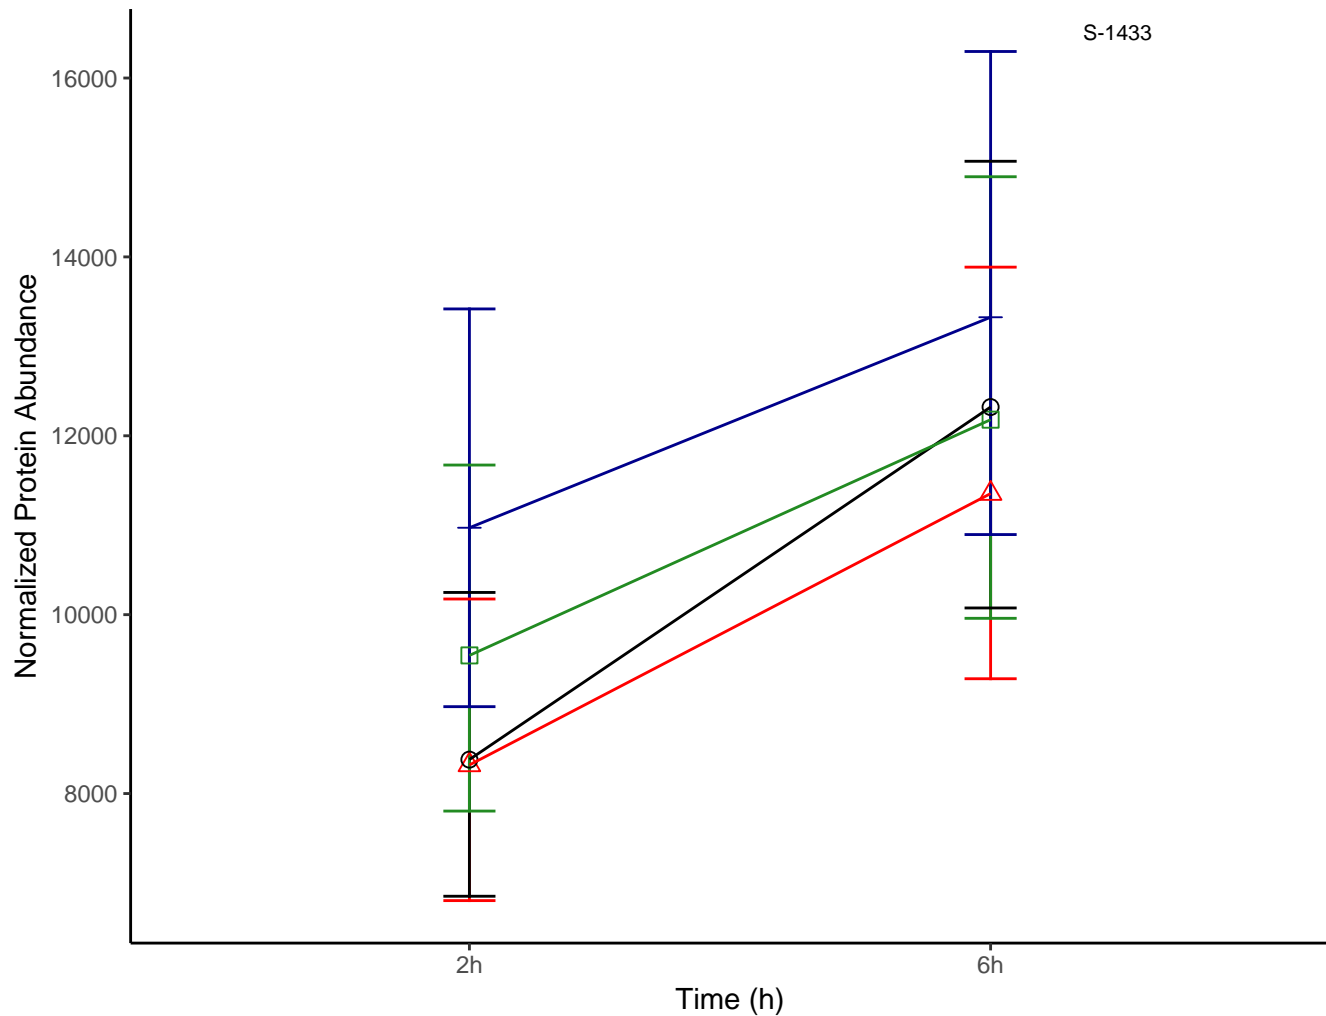

- SA564
- △ SA564- $\Delta hptRS$
- SA564- $\Delta ccpA$
- + SA564- $\Delta hptRS/ccpA$

# TRMB\_STAAM

S-1434

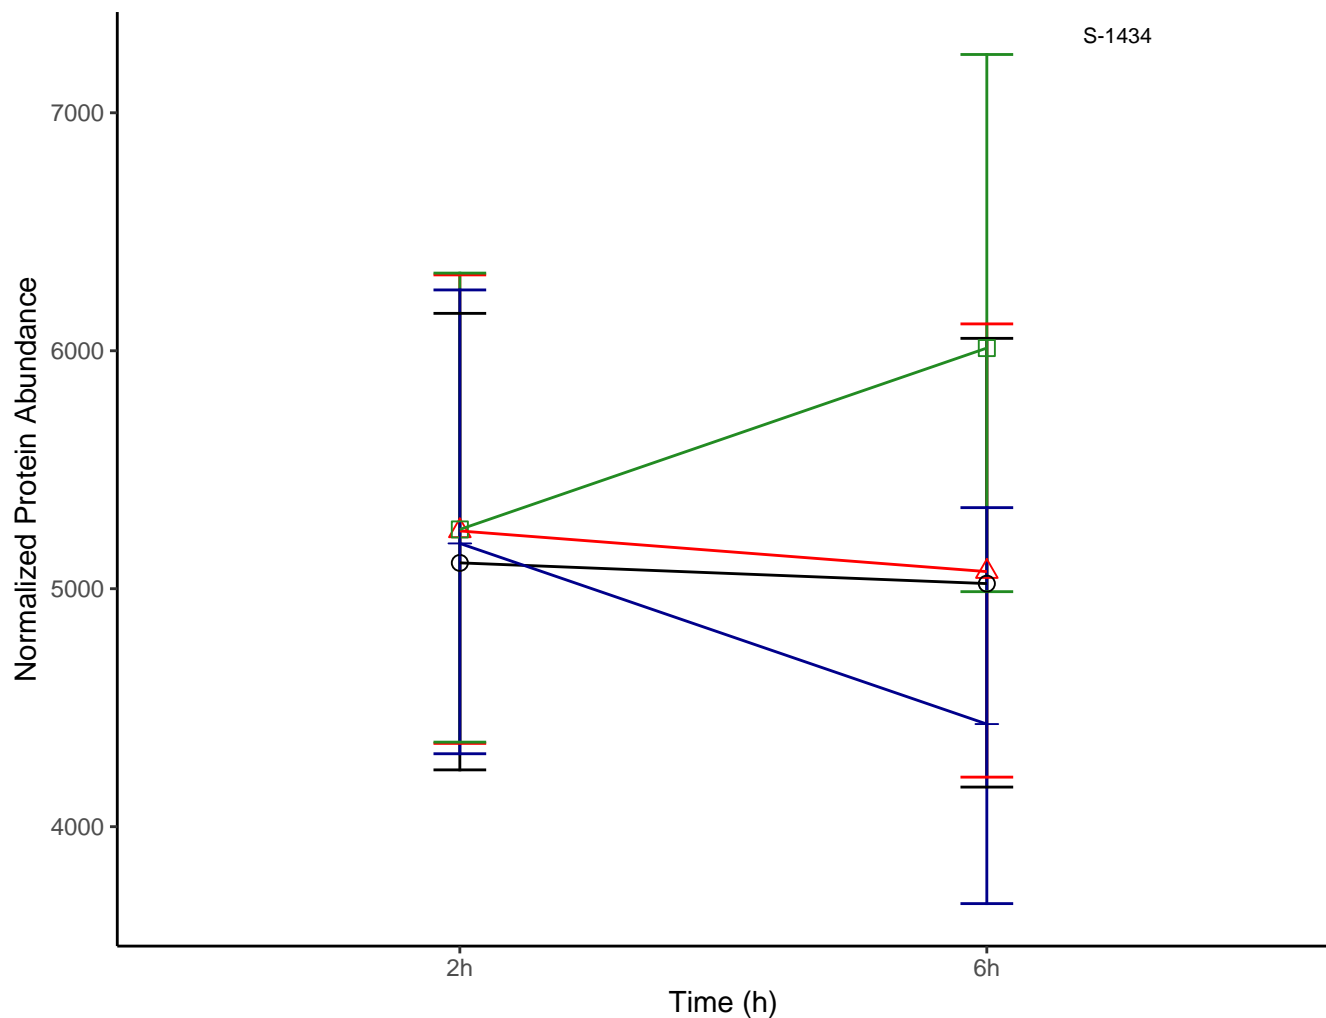

- SA564
- △ SA564- $\Delta hptRS$
- SA564- $\Delta ccpA$
- + SA564- $\Delta hptRS/ccpA$

## TRMFO\_STAAM

S-1435

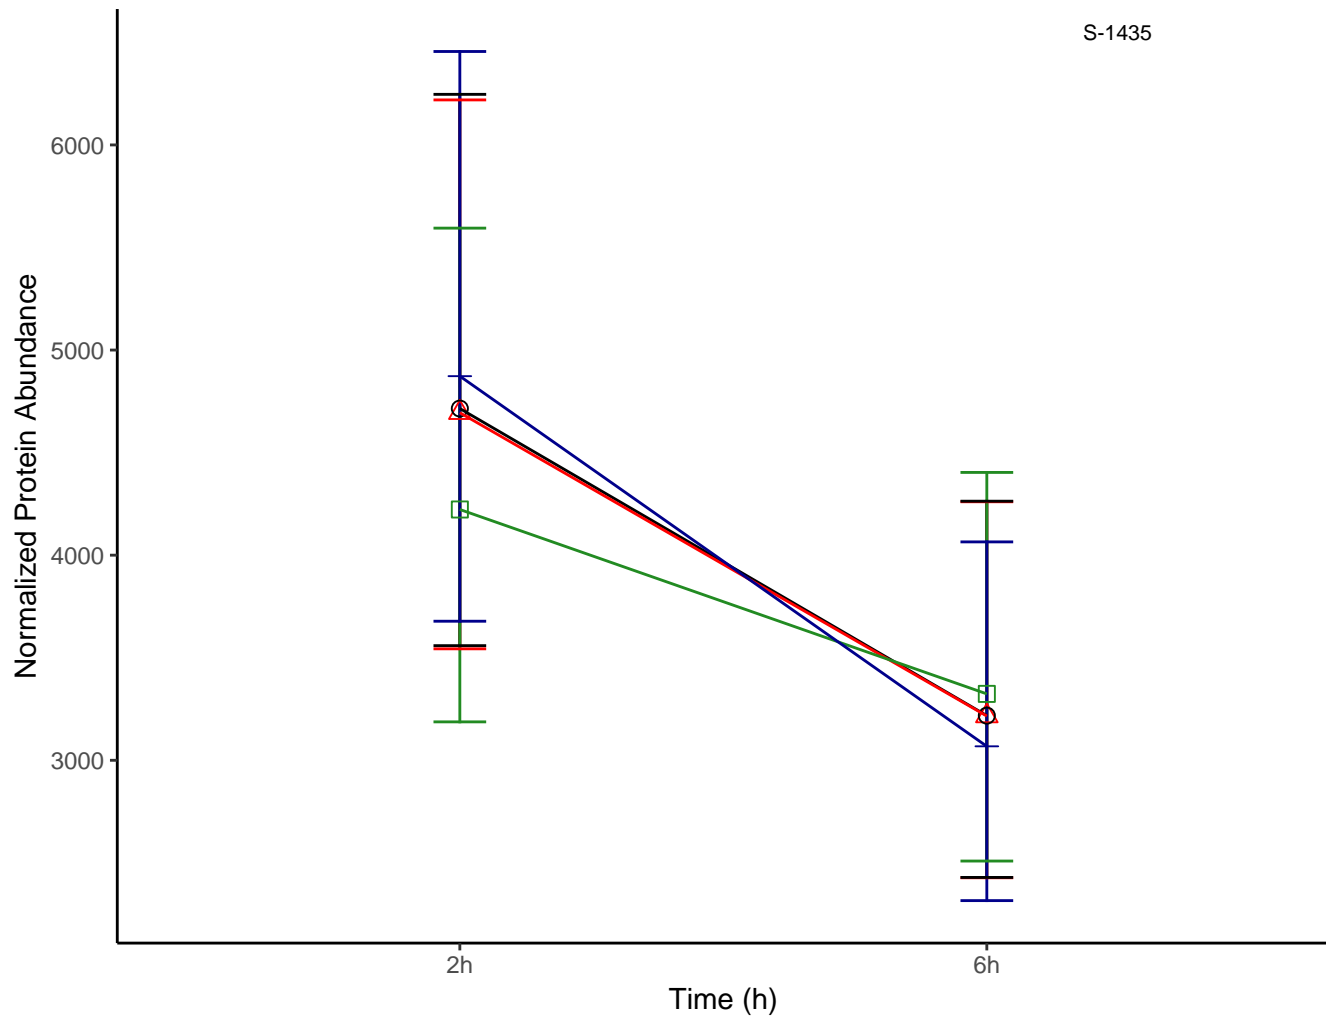

- SA564
- △ SA564- $\Delta hptRS$
- SA564- $\Delta ccpA$
- + SA564- $\Delta hptRS/ccpA$

## TRMHL\_STAAM

S-1436

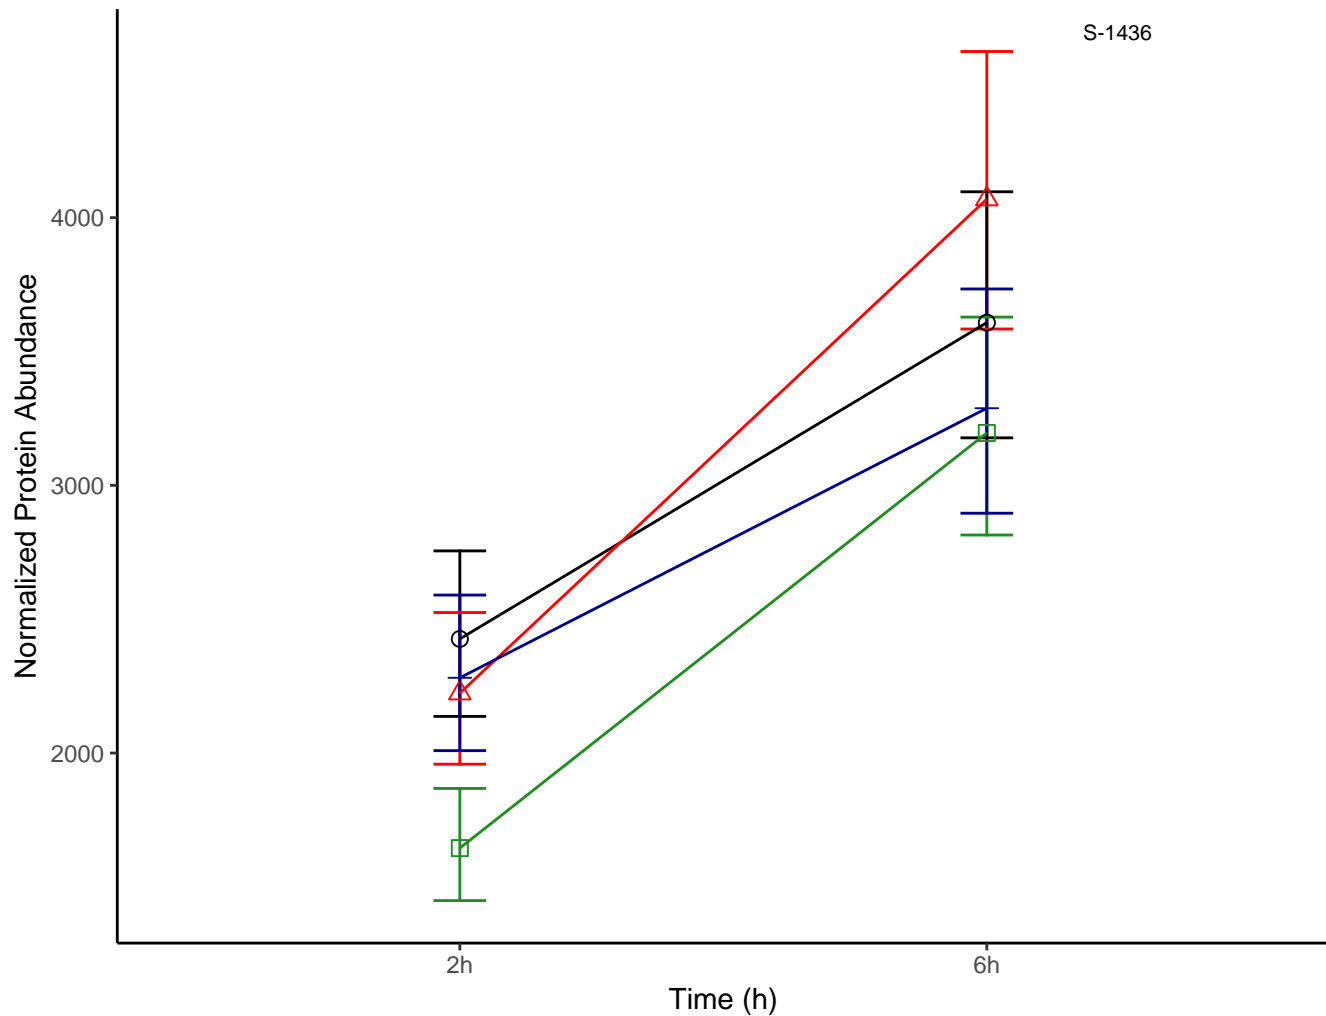

- SA564
- △ SA564- $\Delta$ *hptRS*
- SA564- $\Delta$ *ccpA*
- + SA564- $\Delta$ *hptRS/ccpA*

# TRPA\_STAAM

S-1437

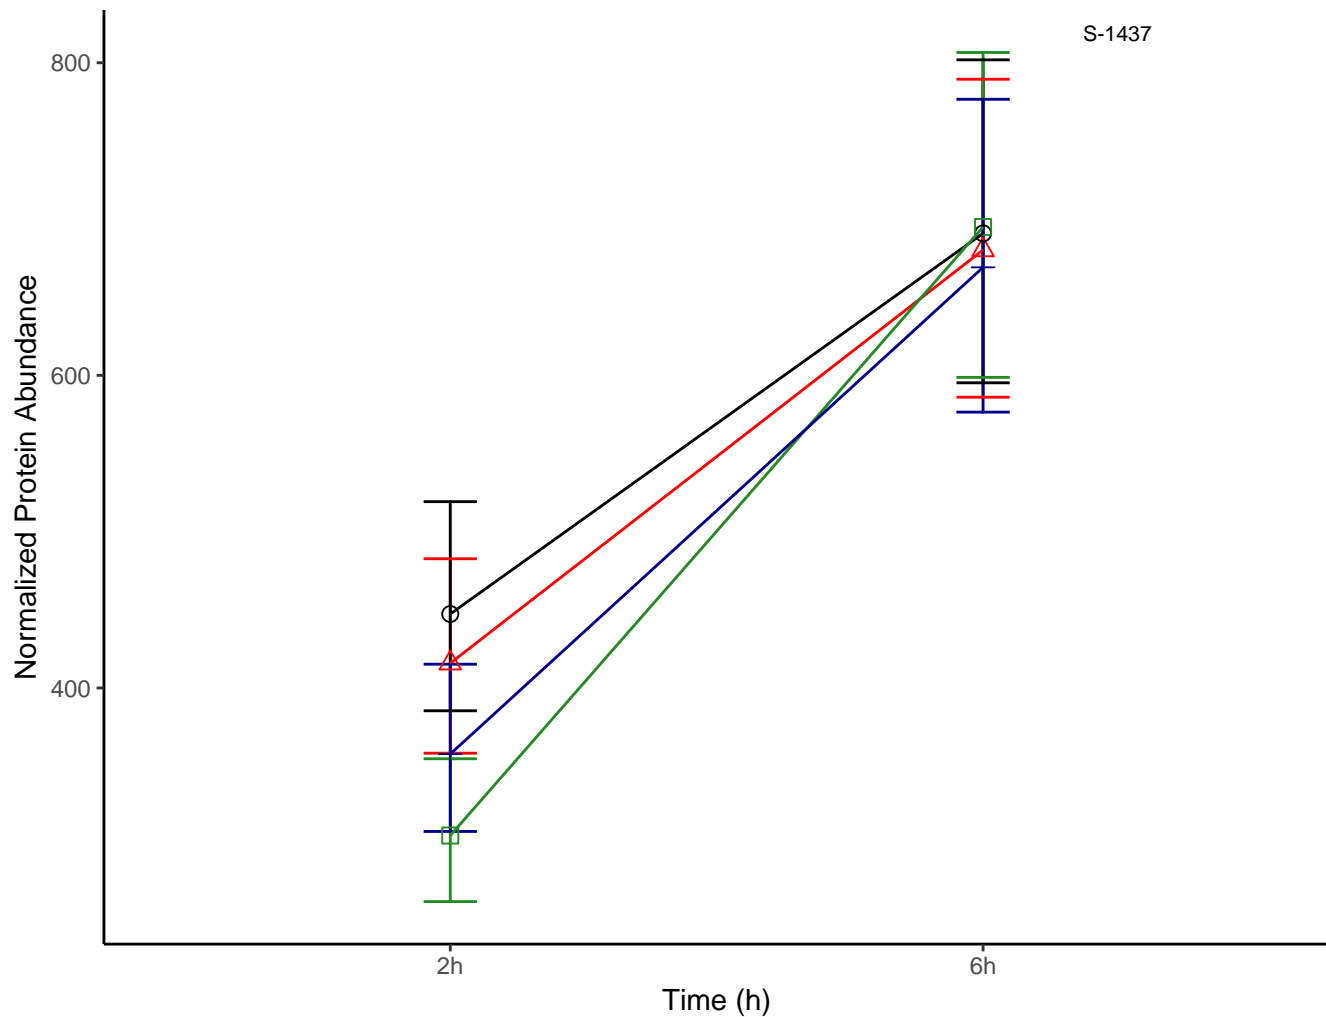

- SA564
- △ SA564- $\Delta hptRS$
- SA564- $\Delta ccpA$
- + SA564- $\Delta hptRS/ccpA$

# TRPF\_STAAM

S-1438

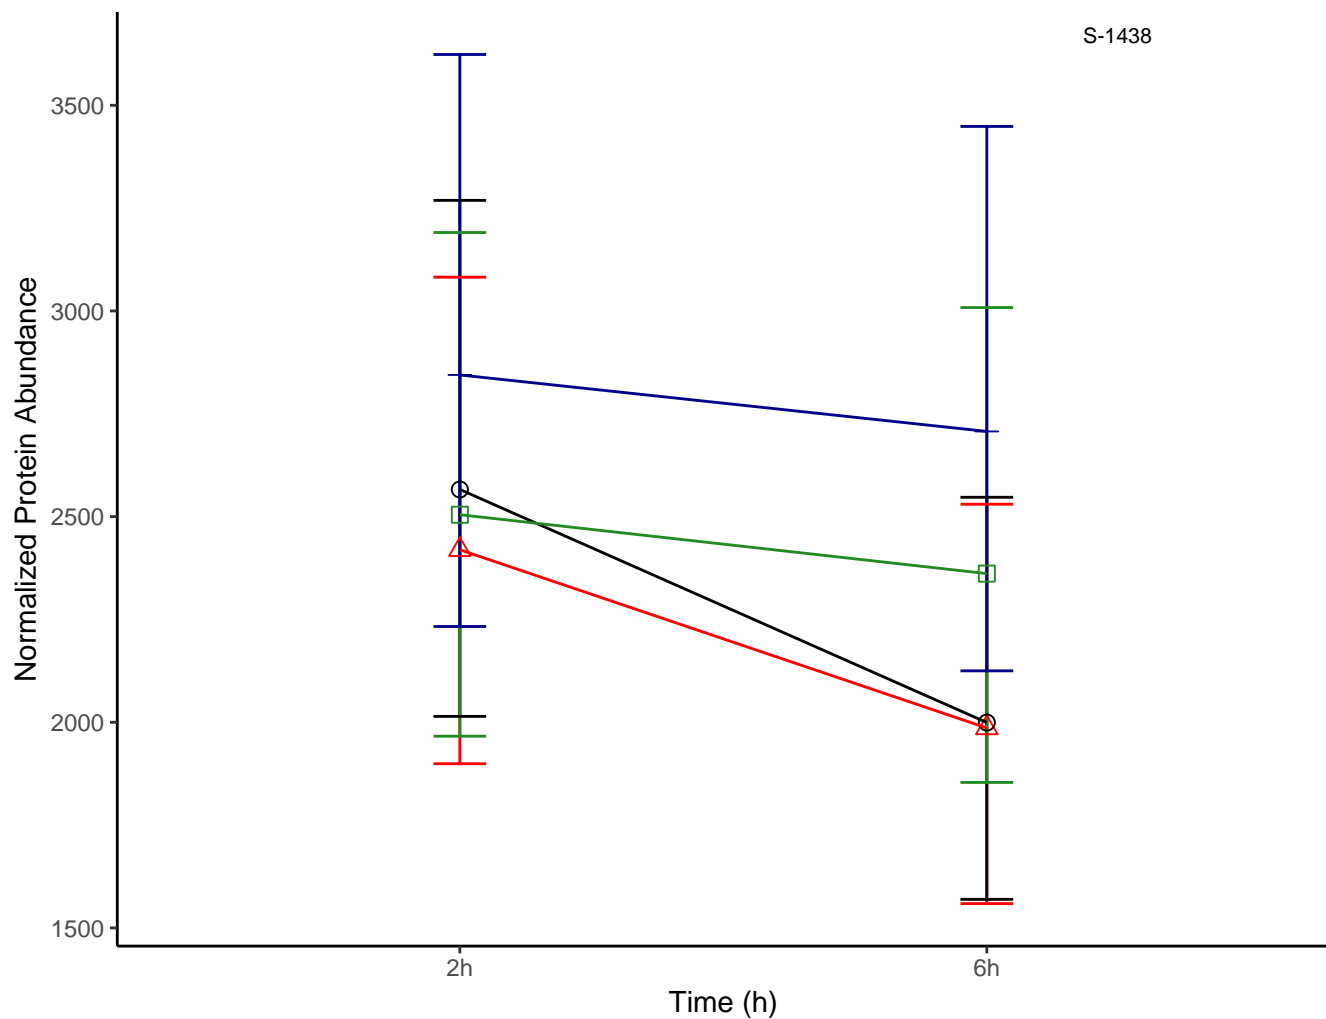

- SA564
- △ SA564- $\Delta$ *hptRS*
- SA564- $\Delta$ *ccpA*
- + SA564- $\Delta$ *hptRS/ccpA*

# TRUB\_STAAM

S-1439

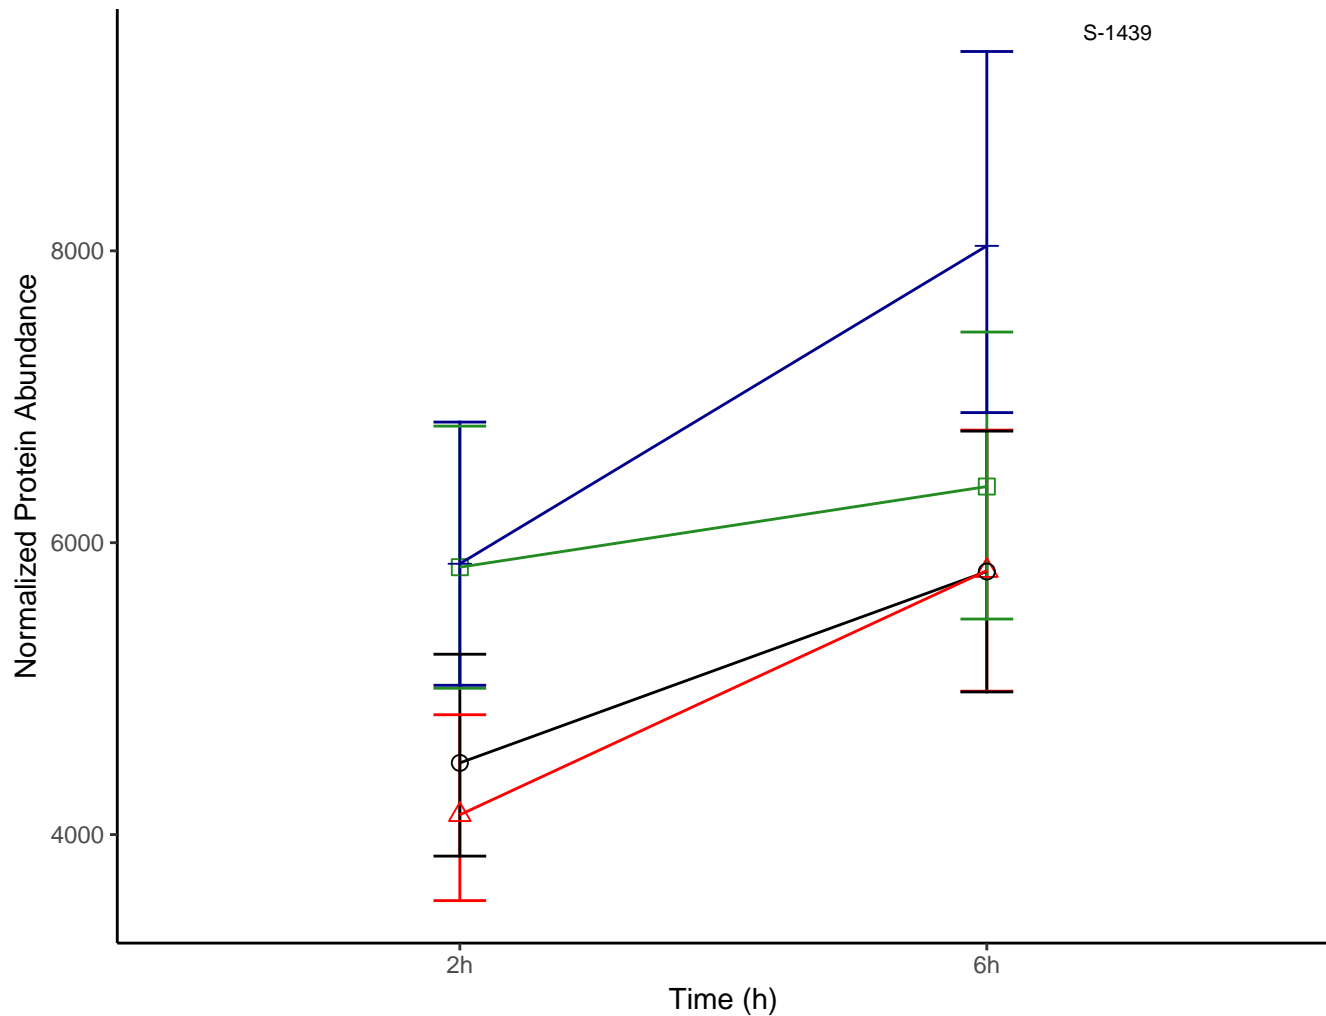

- SA564
- △ SA564- $\Delta hptRS$
- SA564- $\Delta ccpA$
- + SA564- $\Delta hptRS/ccpA$

# TRXB\_STAAM

S-1440

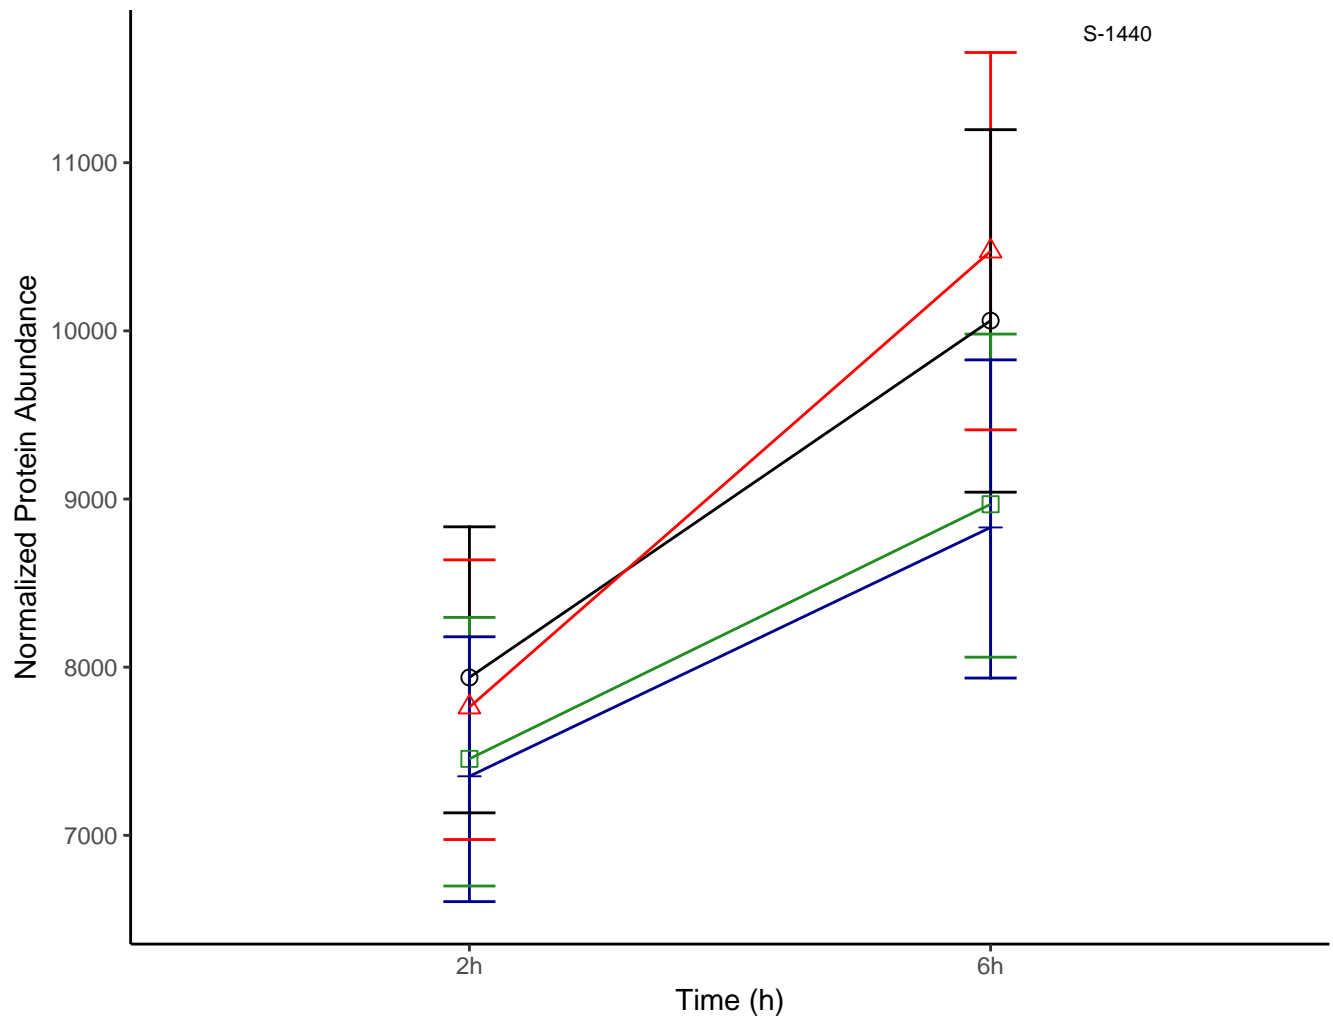

- SA564
- △ SA564-ΔhptRS
- SA564-ΔccpA
- + SA564-ΔhptRS/ccpA



# TSAD\_STAAM

S-1441

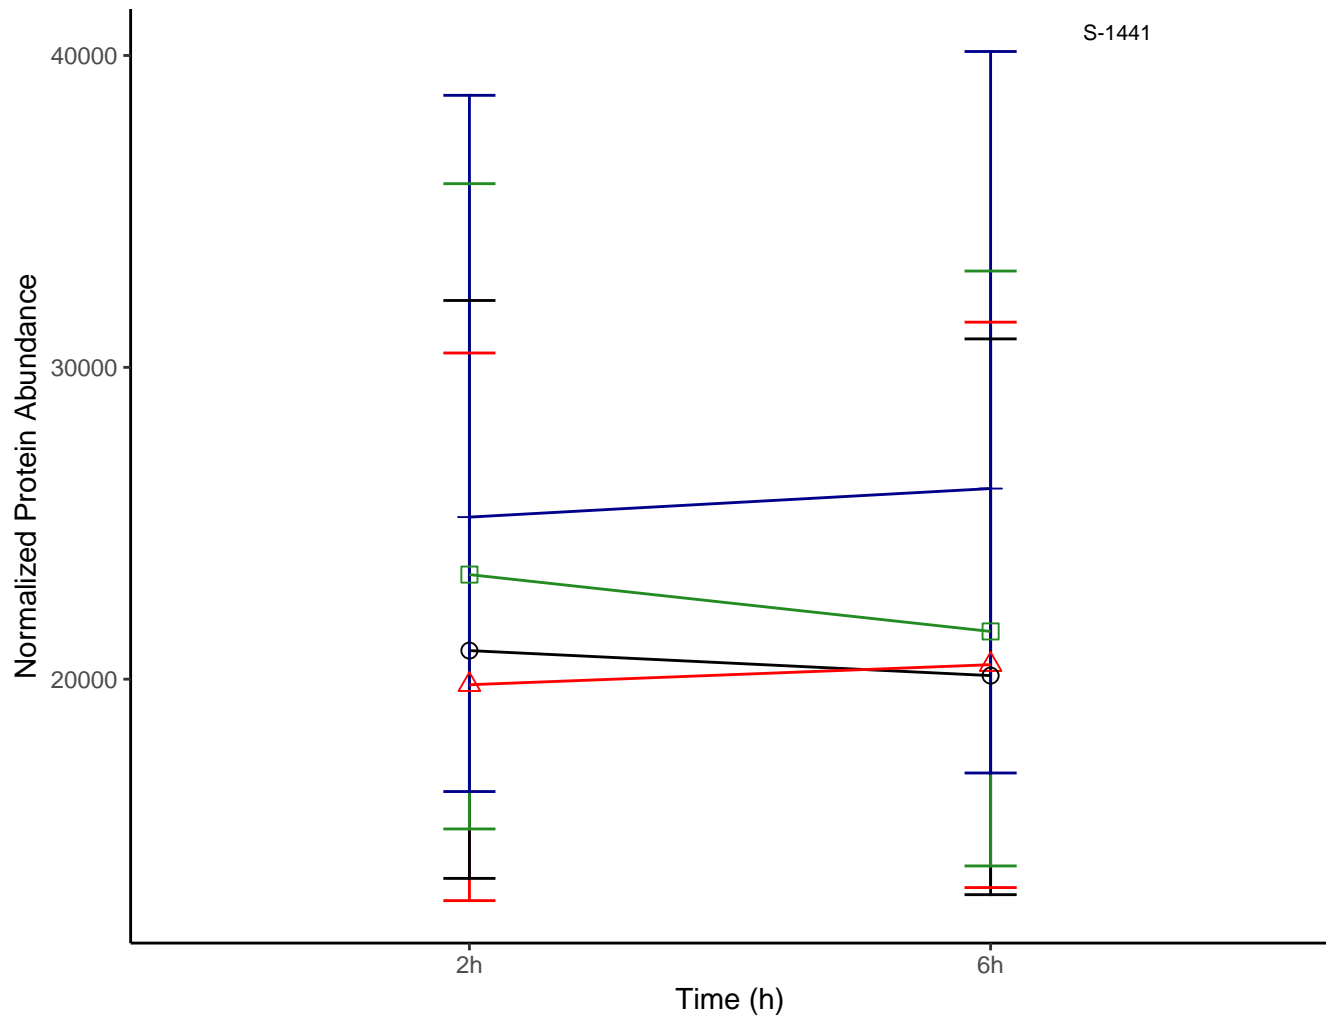

- SA564
- △ SA564- $\Delta$ *hptRS*
- SA564- $\Delta$ *ccpA*
- + SA564- $\Delta$ *hptRS/ccpA*

# TYRA\_STAAM

S-1442

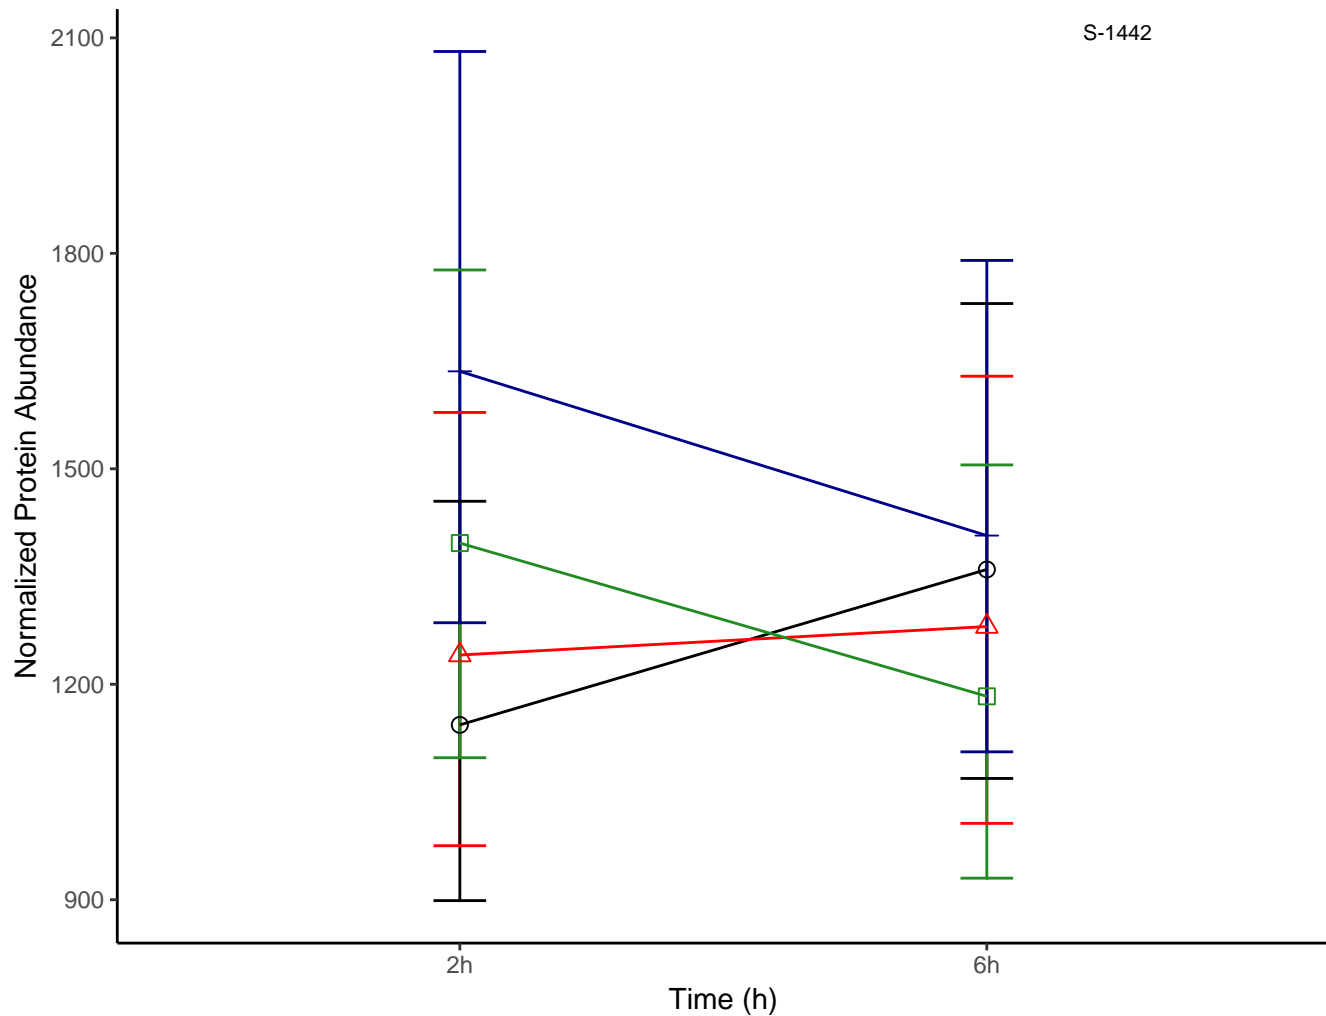

- SA564
- △ SA564- $\Delta$ hptRS
- SA564- $\Delta$ ccpA
- + SA564- $\Delta$ hptRS/ccpA

# TYSY\_STAAM

S-1443

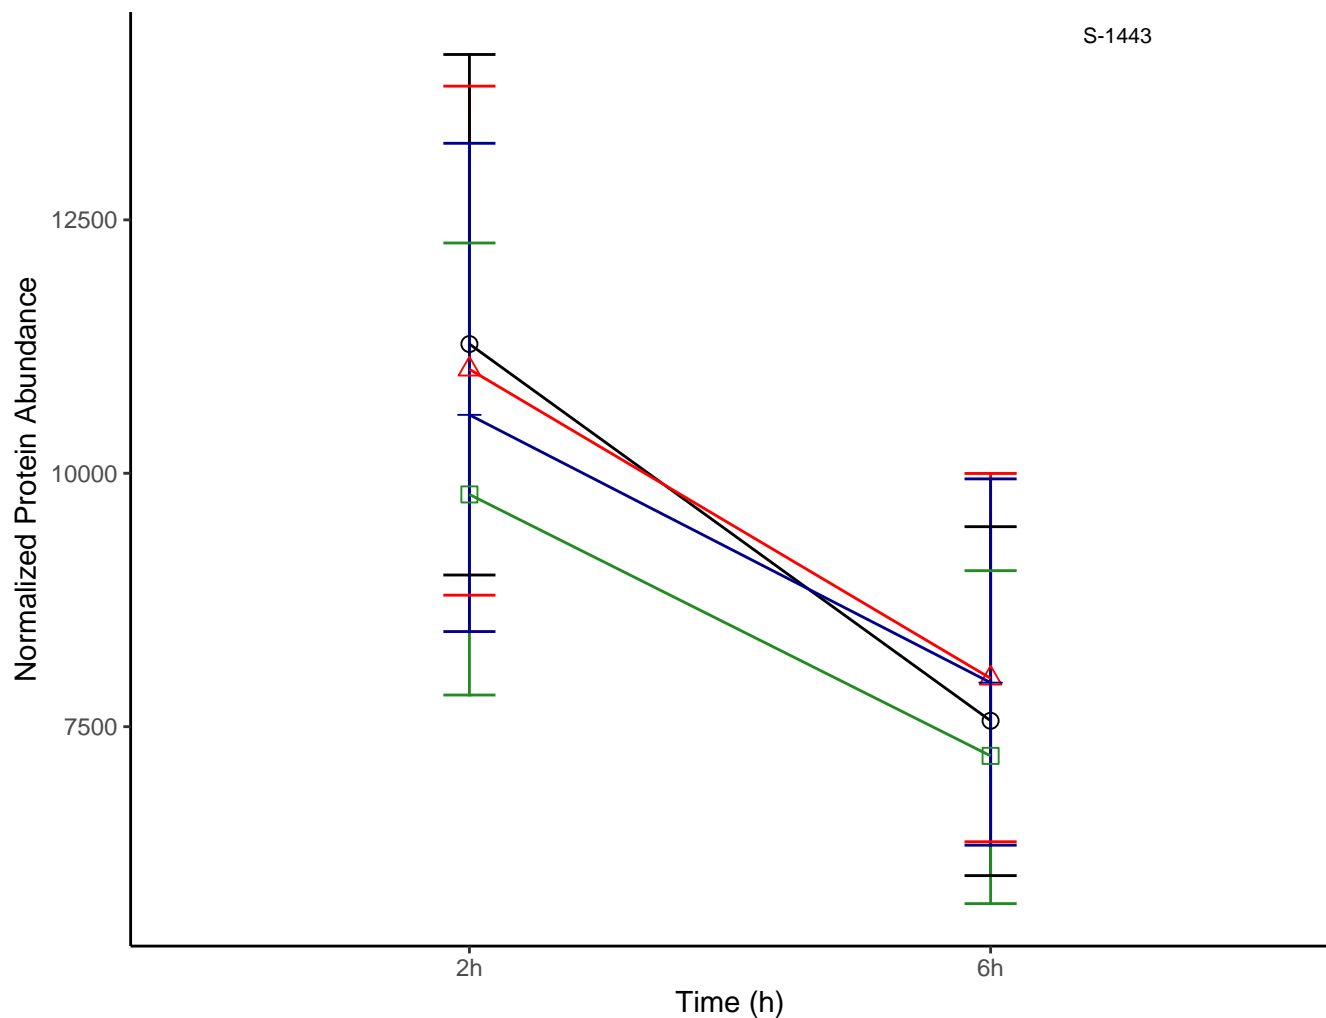

- SA564
- △ SA564- $\Delta$ *hptRS*
- SA564- $\Delta$ *ccpA*
- + SA564- $\Delta$ *hptRS/ccpA*

# UNG\_STAAM

S-1444

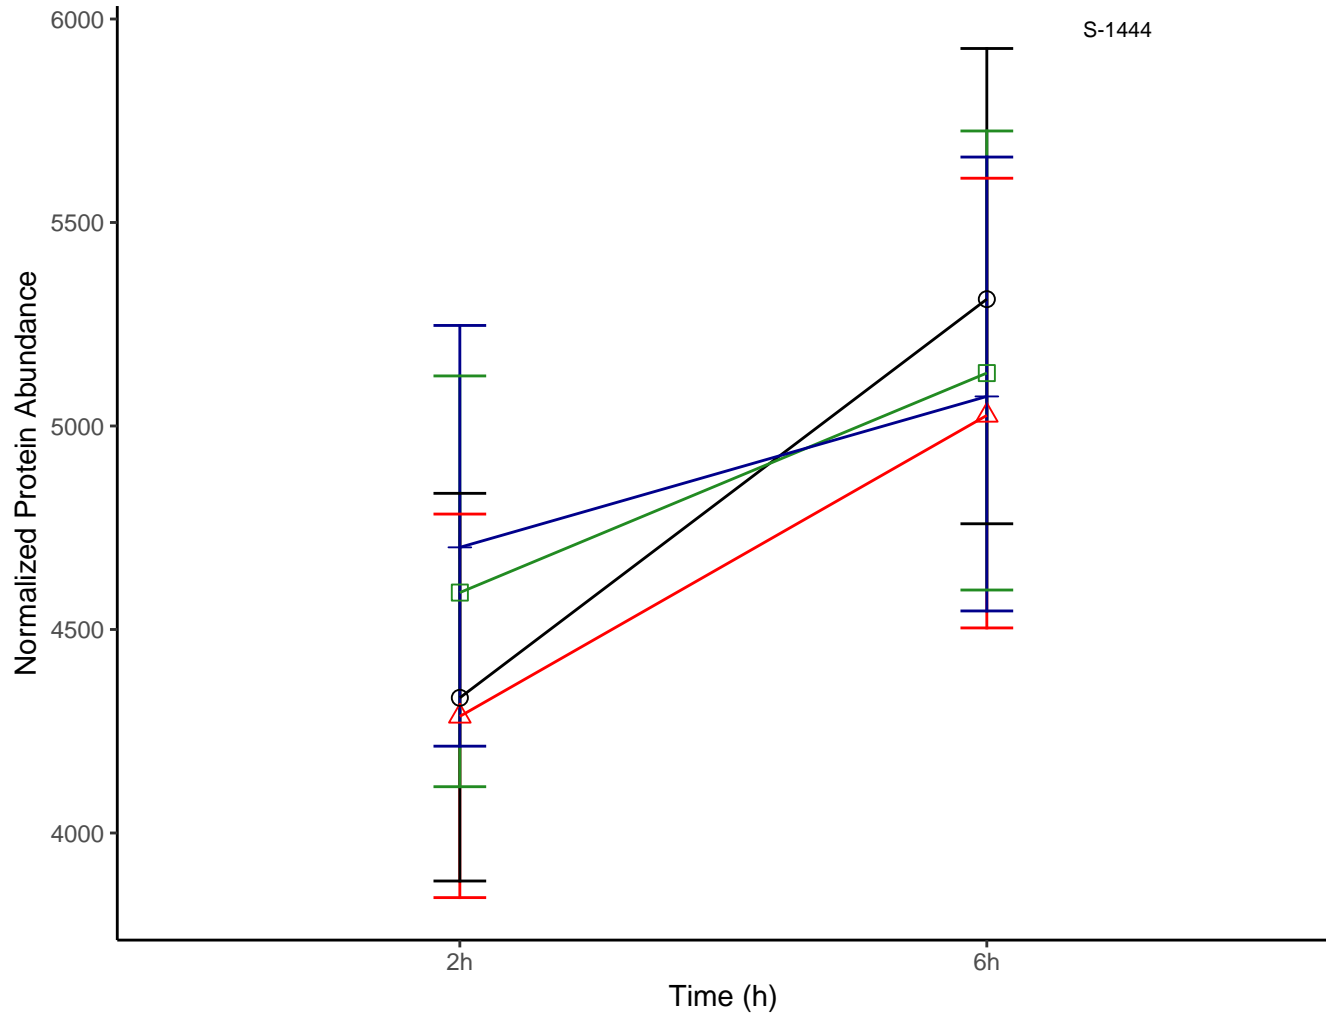

- SA564
- △ SA564- $\Delta$ *hptRS*
- SA564- $\Delta$ *ccpA*
- + SA564- $\Delta$ *hptRS/ccpA*

# UP355\_STAAM

S-1445

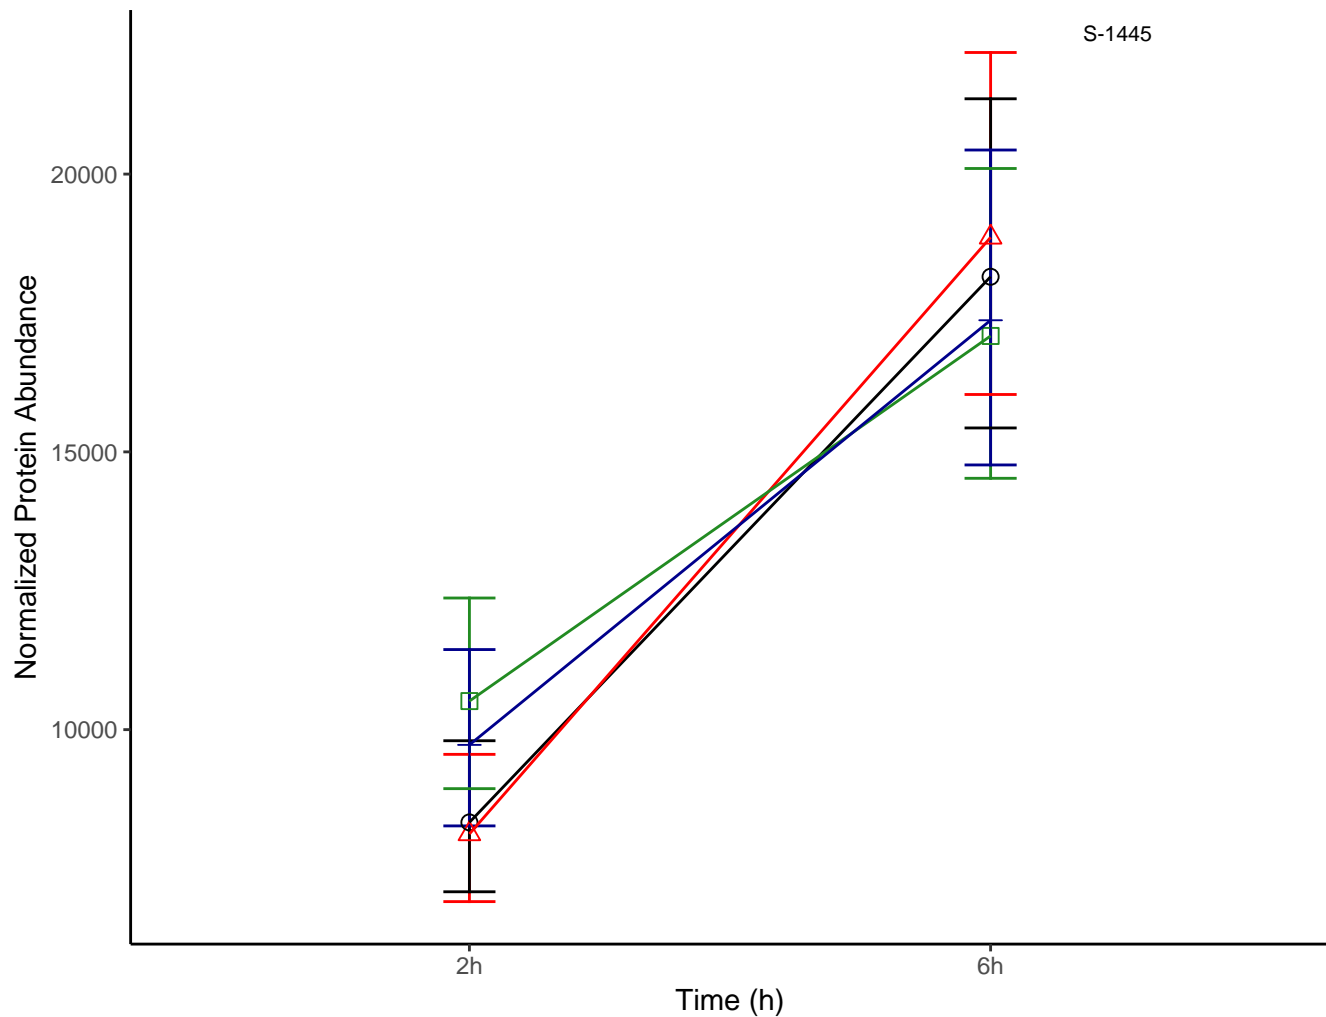

- SA564
- △ SA564- $\Delta hptRS$
- SA564- $\Delta ccpA$
- + SA564- $\Delta hptRS/ccpA$

# UPP\_STAAM

S-1446

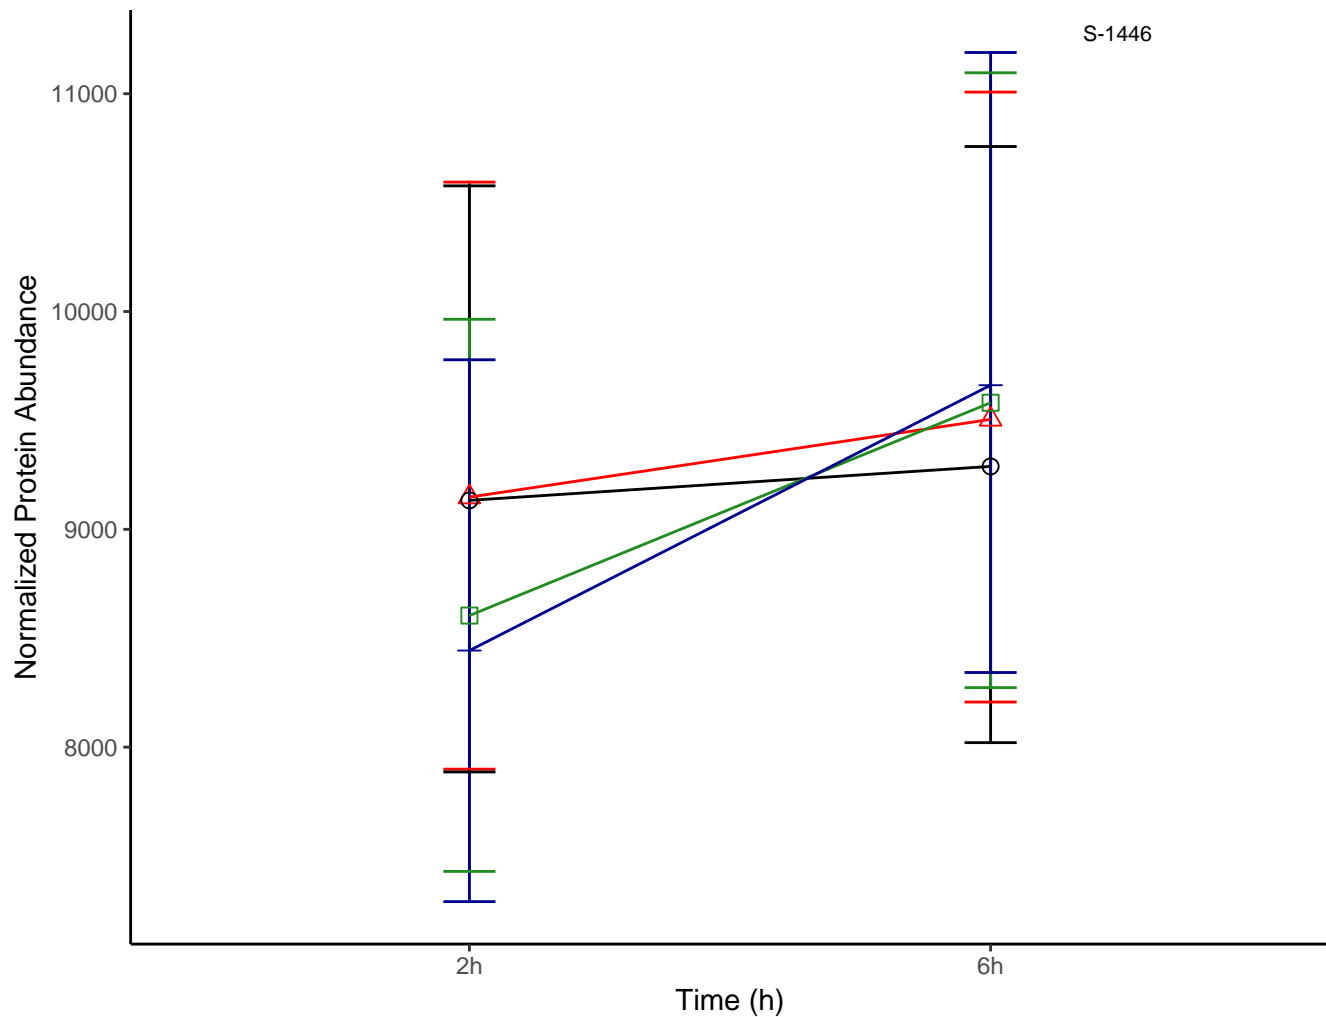

- SA564
- △ SA564- $\Delta$ hptRS
- SA564- $\Delta$ ccpA
- + SA564- $\Delta$ hptRS/ccpA

# UREE\_STAAM

S-1447

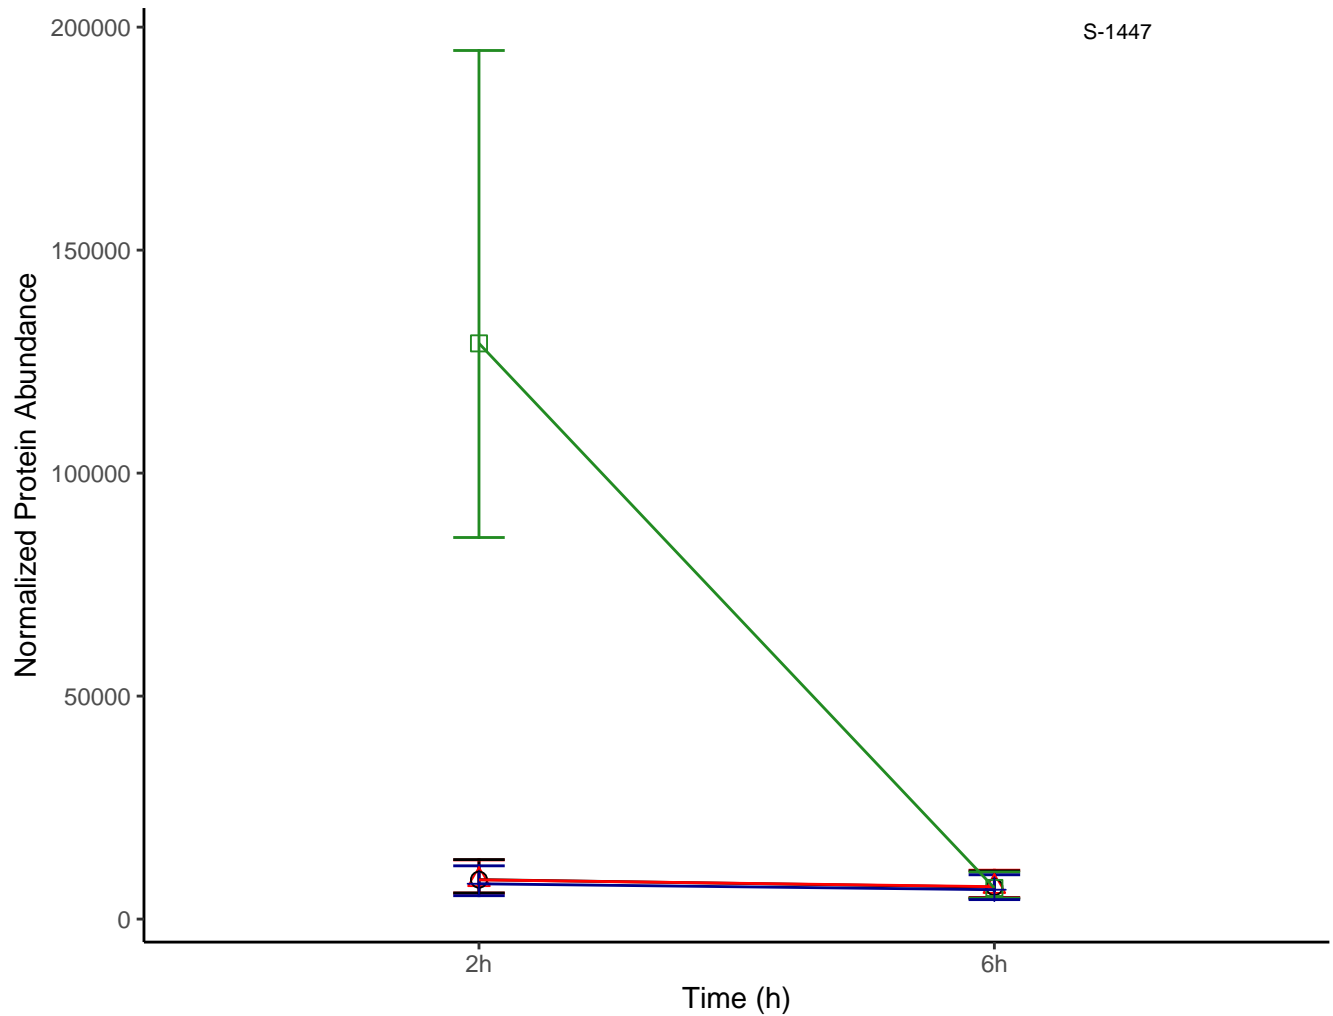

- SA564
- △ SA564- $\Delta hptRS$
- SA564- $\Delta ccpA$
- + SA564- $\Delta hptRS/ccpA$

# UREG\_STAAM

S-1448

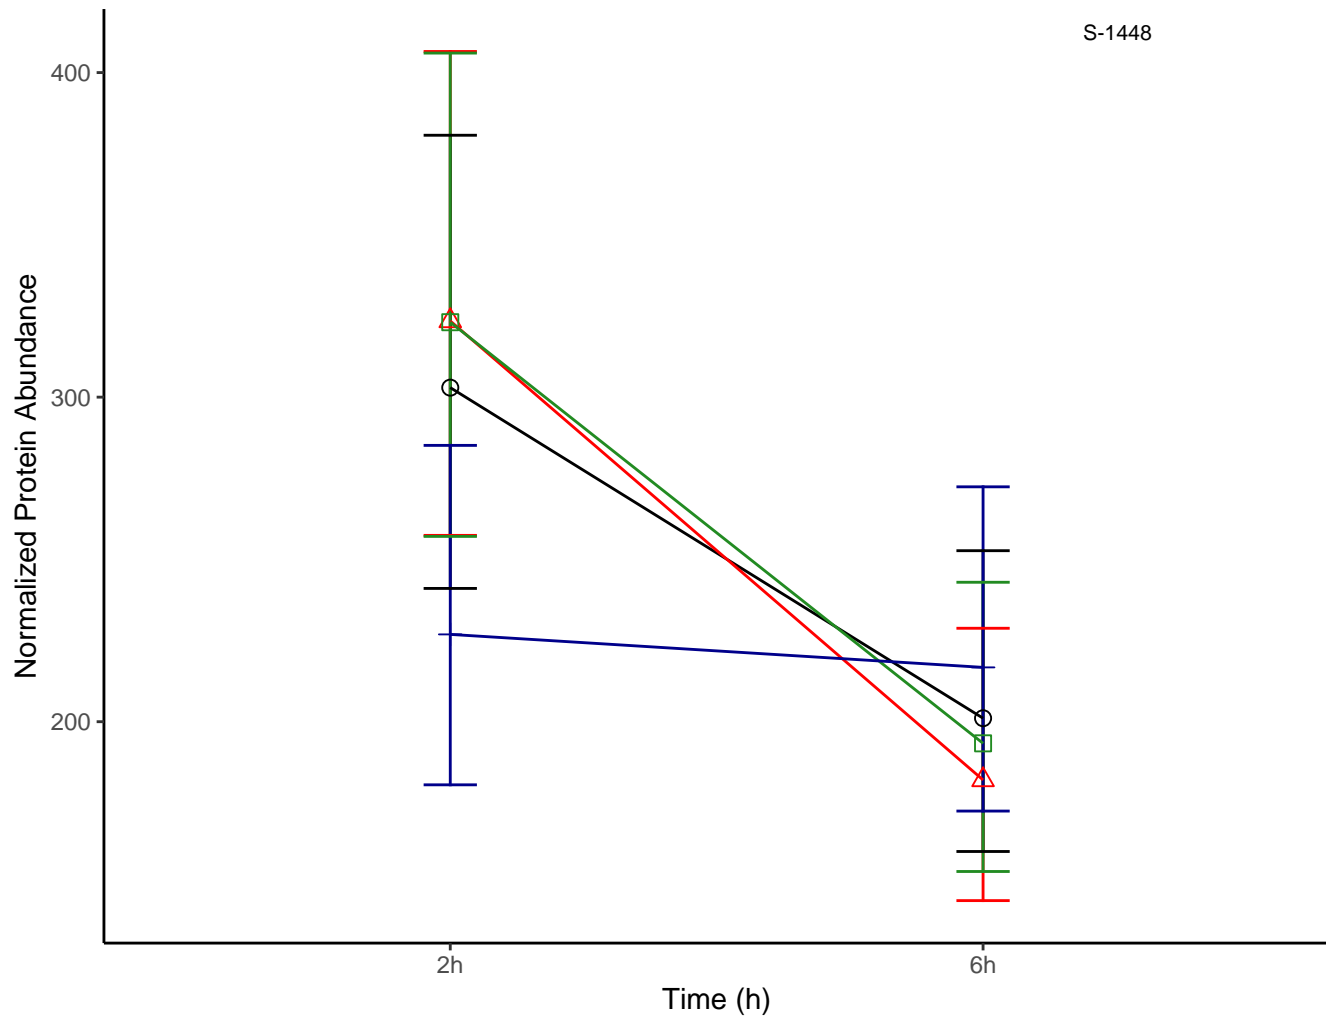

- SA564
- △ SA564- $\Delta$ *hptRS*
- SA564- $\Delta$ *ccpA*
- + SA564- $\Delta$ *hptRS/ccpA*



# URK\_STAAM

S-1449

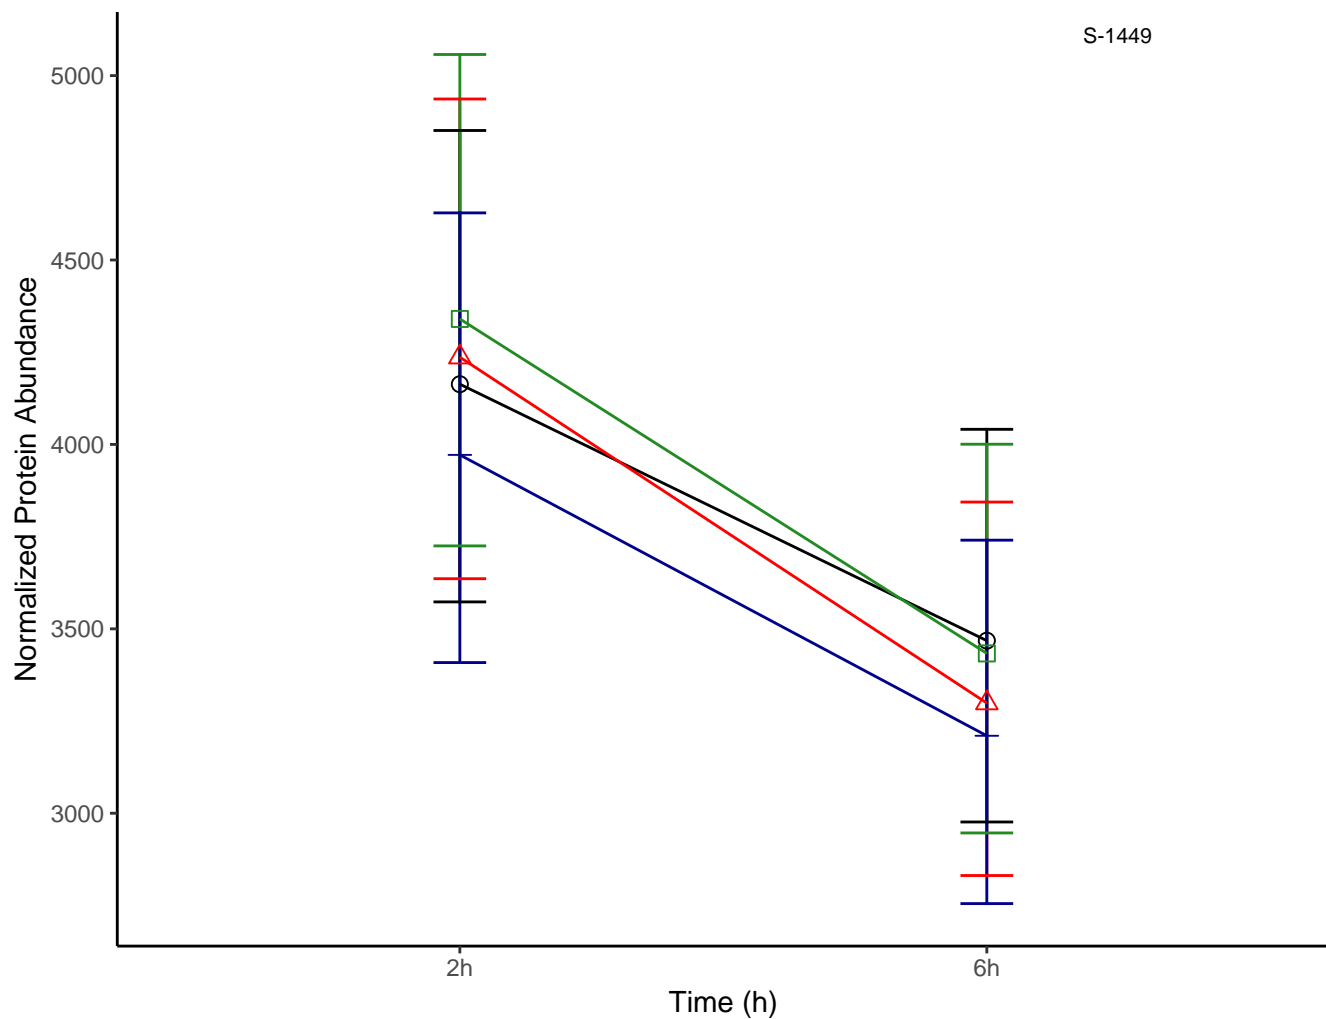

- SA564
- △ SA564- $\Delta hptRS$
- SA564- $\Delta ccpA$
- + SA564- $\Delta hptRS/ccpA$

# URTF\_STAAM

S-1450

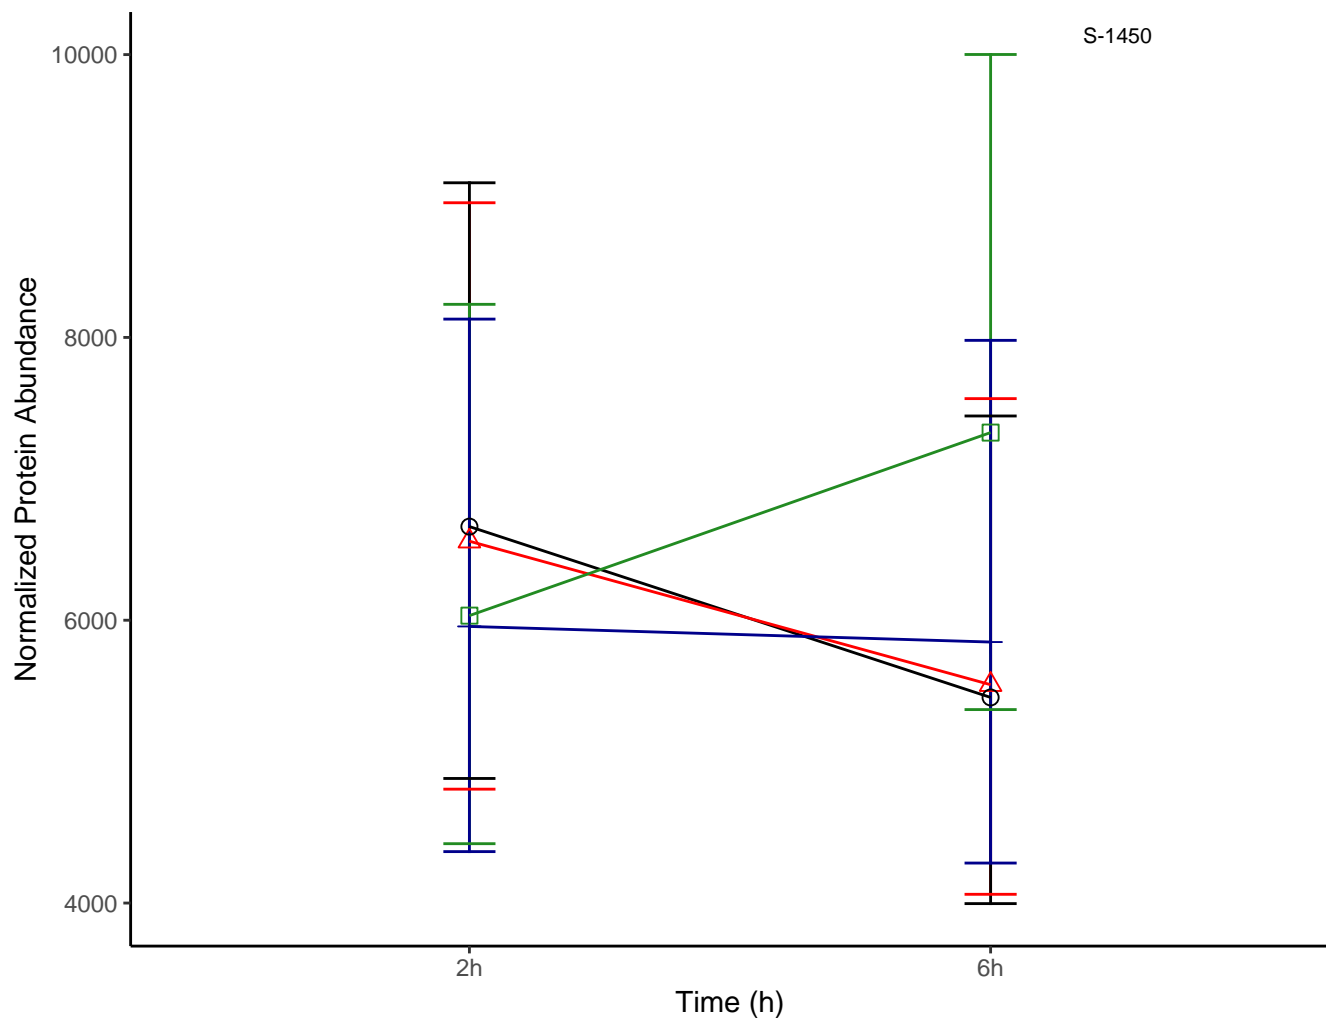

- SA564
- △ SA564- $\Delta$ *hptRS*
- SA564- $\Delta$ *ccpA*
- + SA564- $\Delta$ *hptRS/ccpA*

# UVRA\_STAAM

S-1451

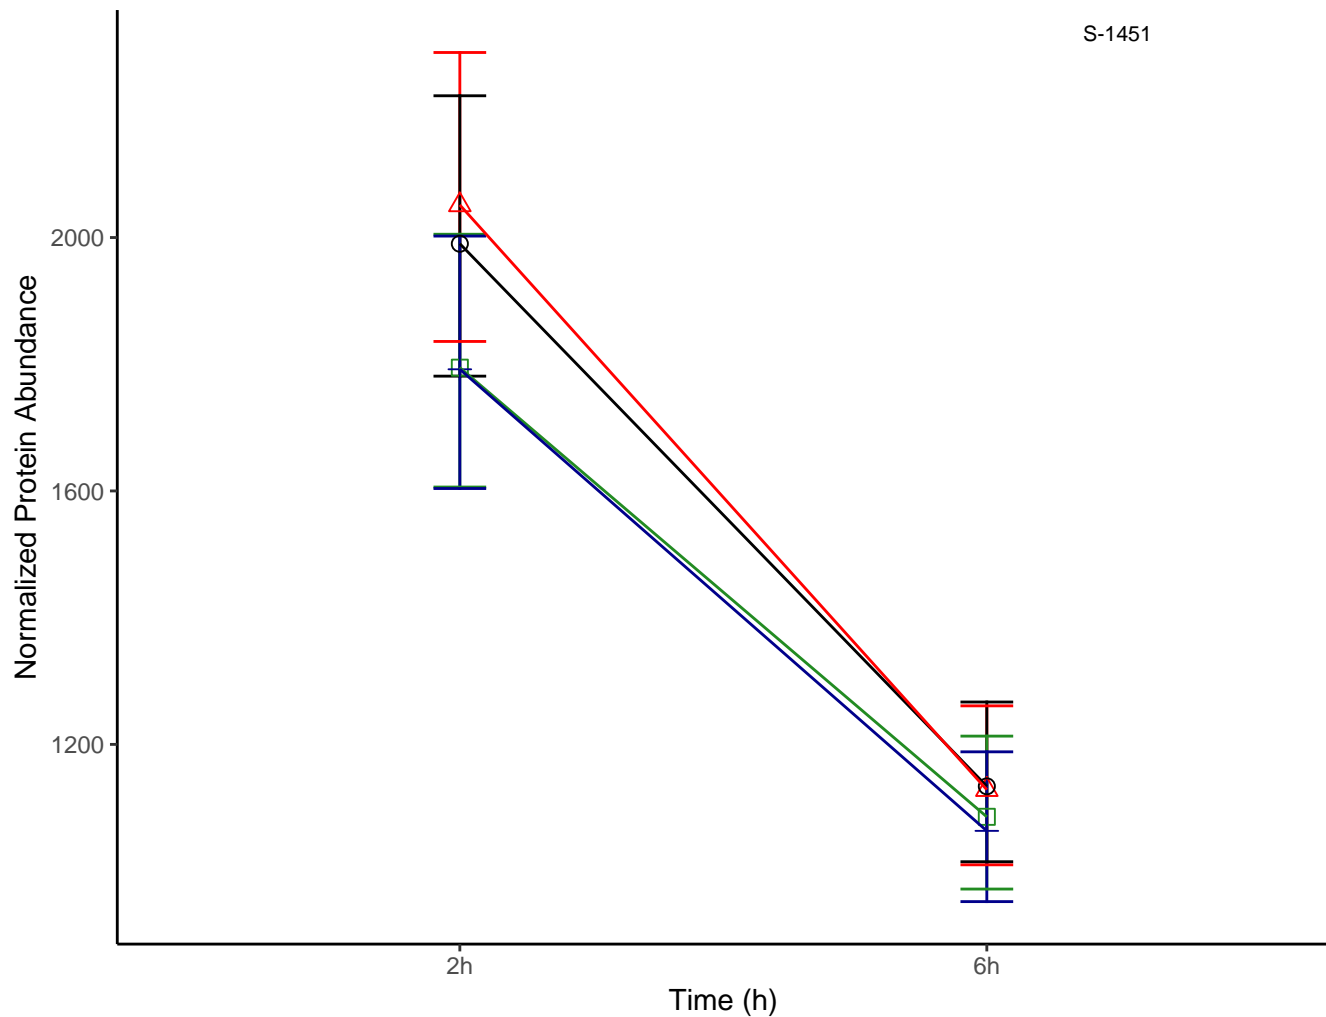

- SA564
- △ SA564- $\Delta hptRS$
- SA564- $\Delta ccpA$
- + SA564- $\Delta hptRS/ccpA$

# VRAC\_STAAM

S-1452

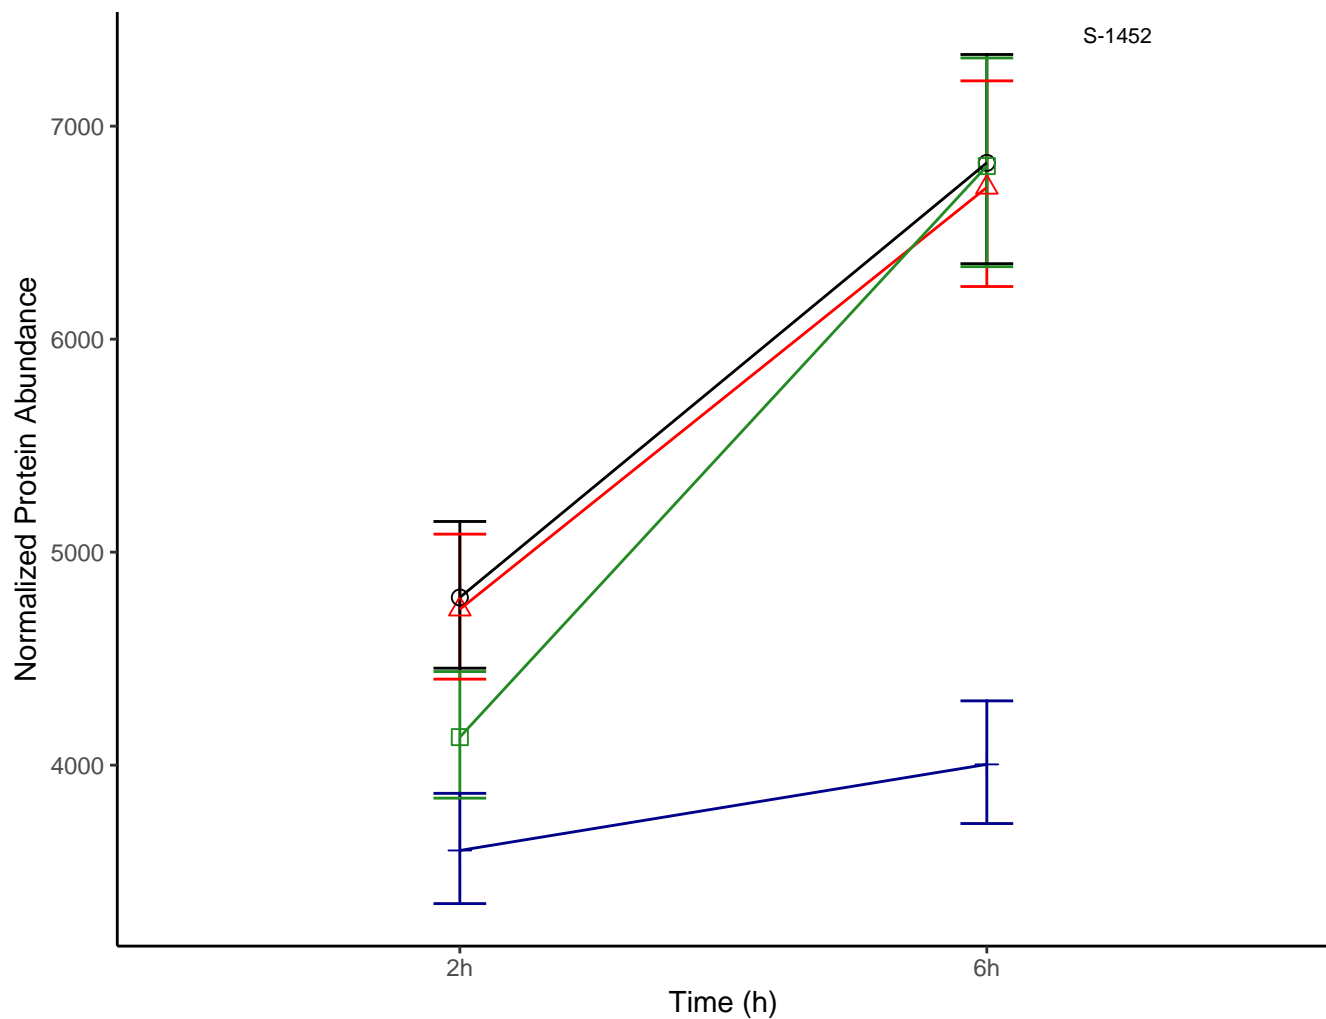

- SA564
- △ SA564- $\Delta hptRS$
- SA564- $\Delta ccpA$
- + SA564- $\Delta hptRS/ccpA$

# VRAR\_STAAM

S-1453

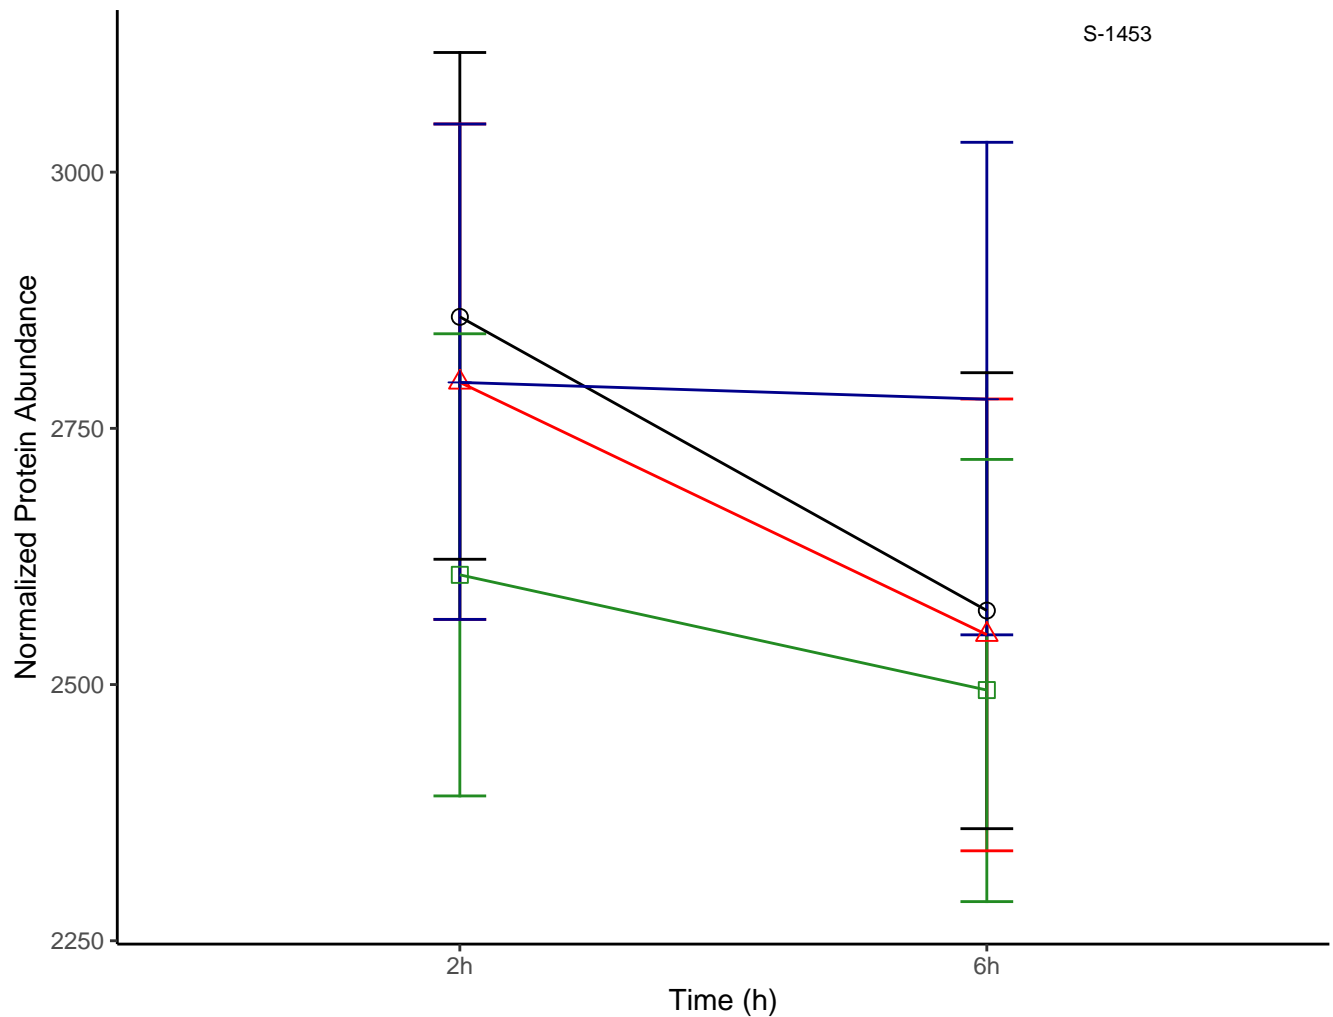

- SA564
- △ SA564- $\Delta$ *hptRS*
- SA564- $\Delta$ *ccpA*
- + SA564- $\Delta$ *hptRS/ccpA*

# WALK\_STAAM

S-1454

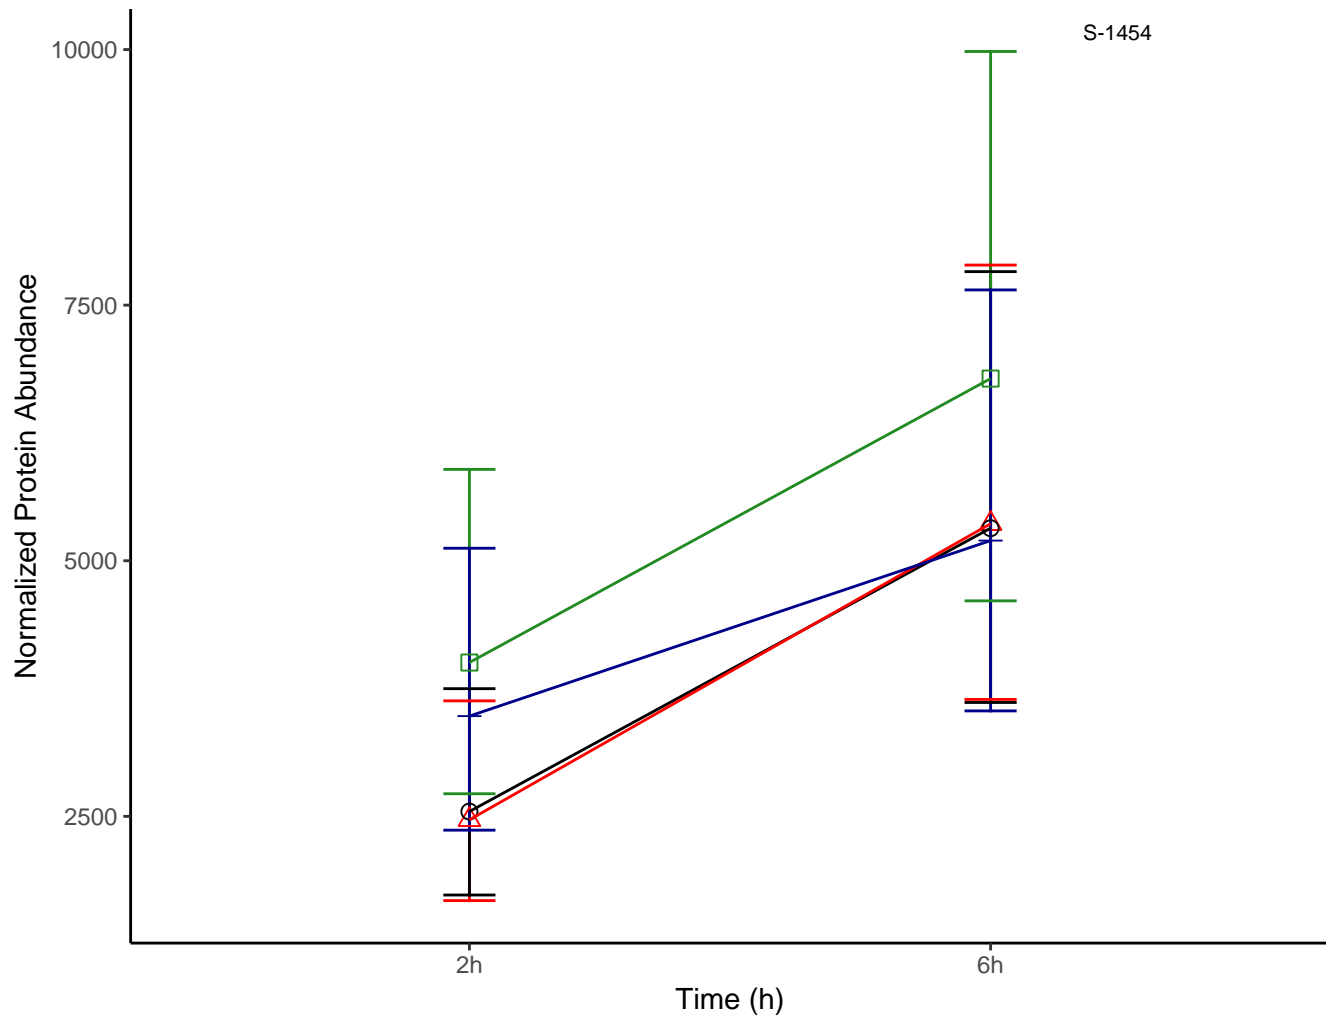

- SA564
- △ SA564- $\Delta$ *hptRS*
- SA564- $\Delta$ *ccpA*
- + SA564- $\Delta$ *hptRS/ccpA*

# WALR\_STAAM

S-1455

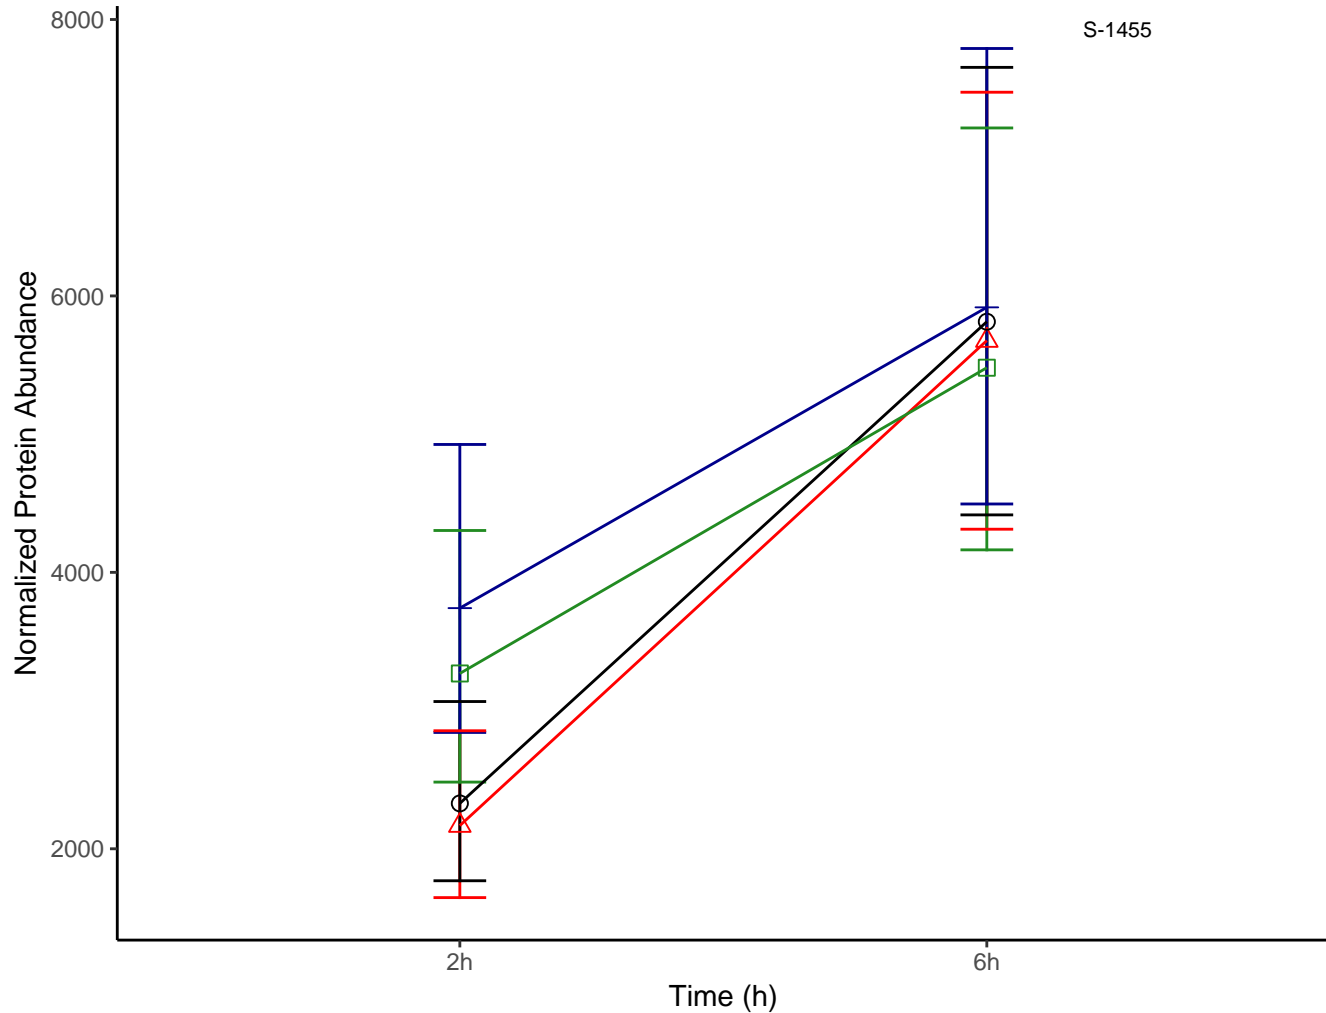

- SA564
- △ SA564- $\Delta$ *hptRS*
- SA564- $\Delta$ *ccpA*
- + SA564- $\Delta$ *hptRS/ccpA*

# XERD\_STAAM

S-1456

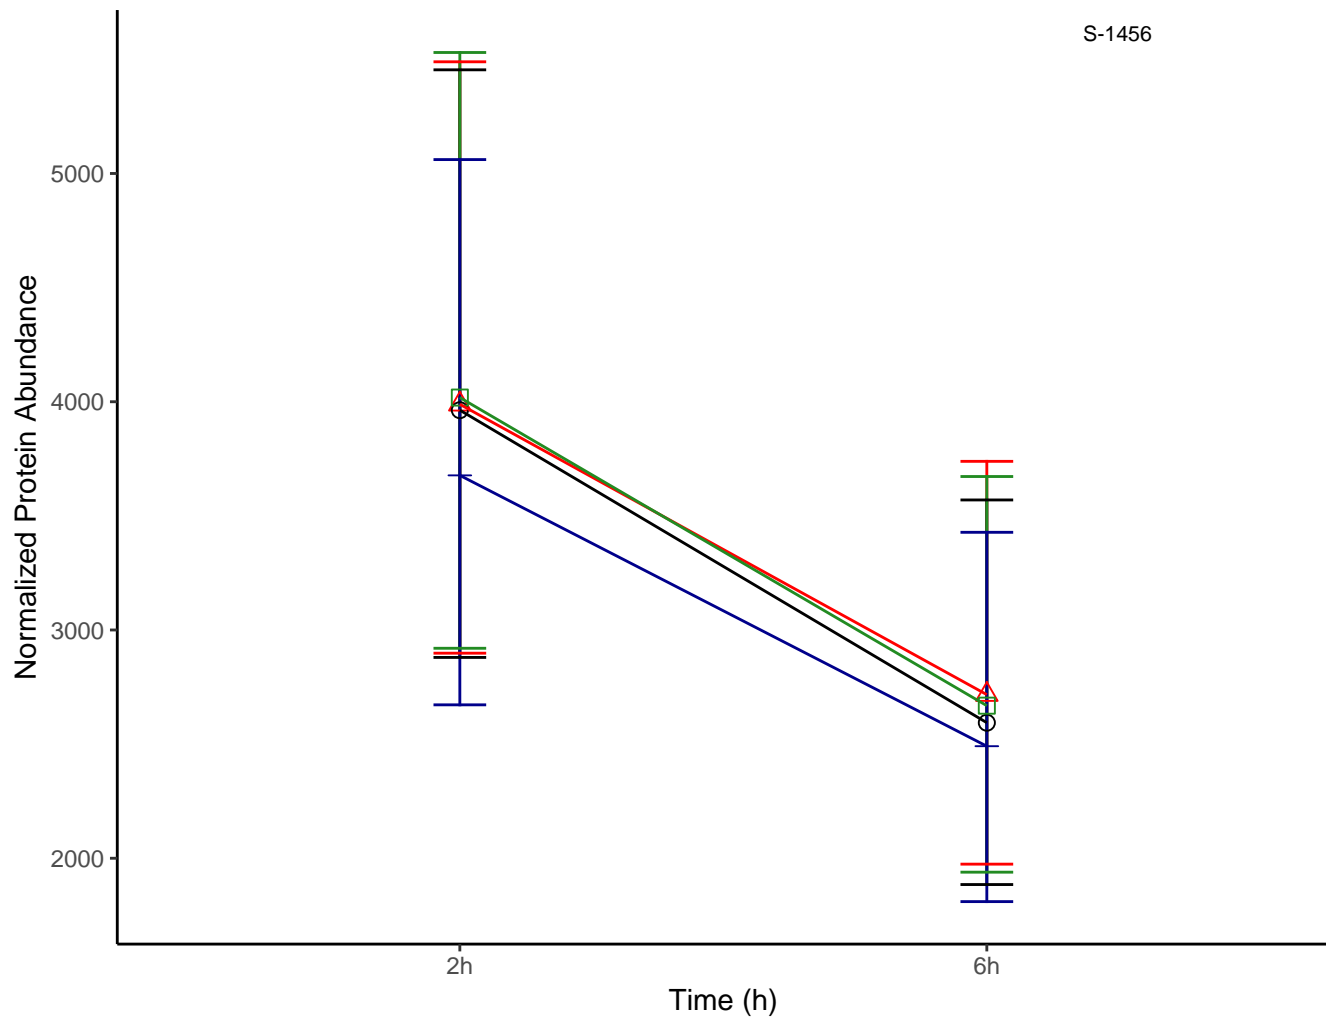

- SA564
- △ SA564- $\Delta$ *hptRS*
- SA564- $\Delta$ *ccpA*
- + SA564- $\Delta$ *hptRS/ccpA*



# XPT\_STAAM

S-1457

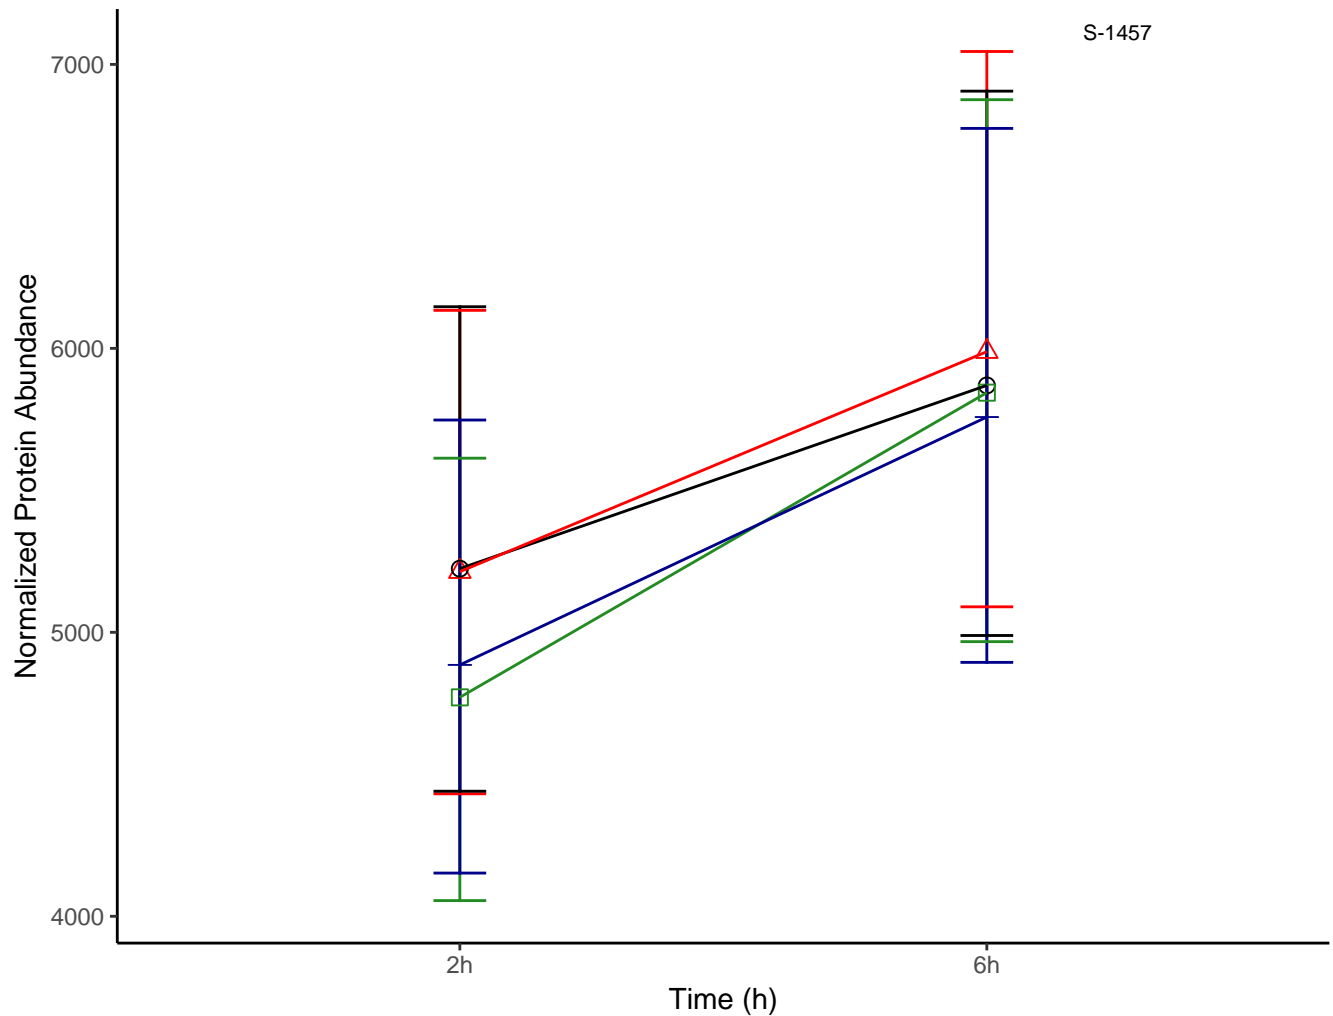

- SA564
- △ SA564- $\Delta$ *hptRS*
- SA564- $\Delta$ *ccpA*
- + SA564- $\Delta$ *hptRS/ccpA*

## Y098\_STAAM

S-1458

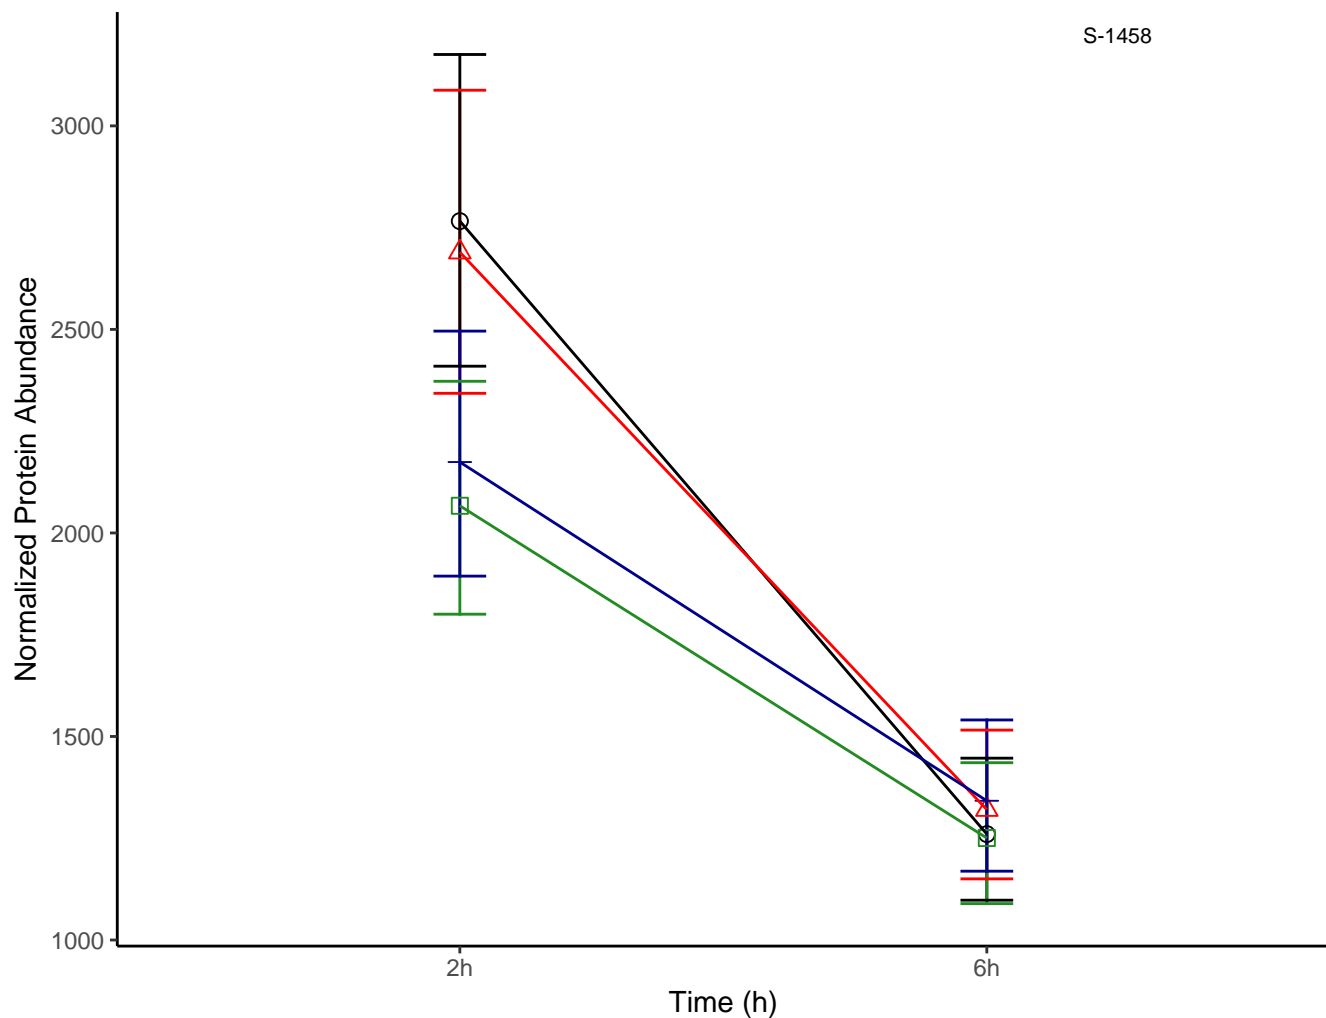

- SA564
- △ SA564- $\Delta$ *hptRS*
- SA564- $\Delta$ *ccpA*
- + SA564- $\Delta$ *hptRS/ccpA*

# Y099\_STAAM

S-1459

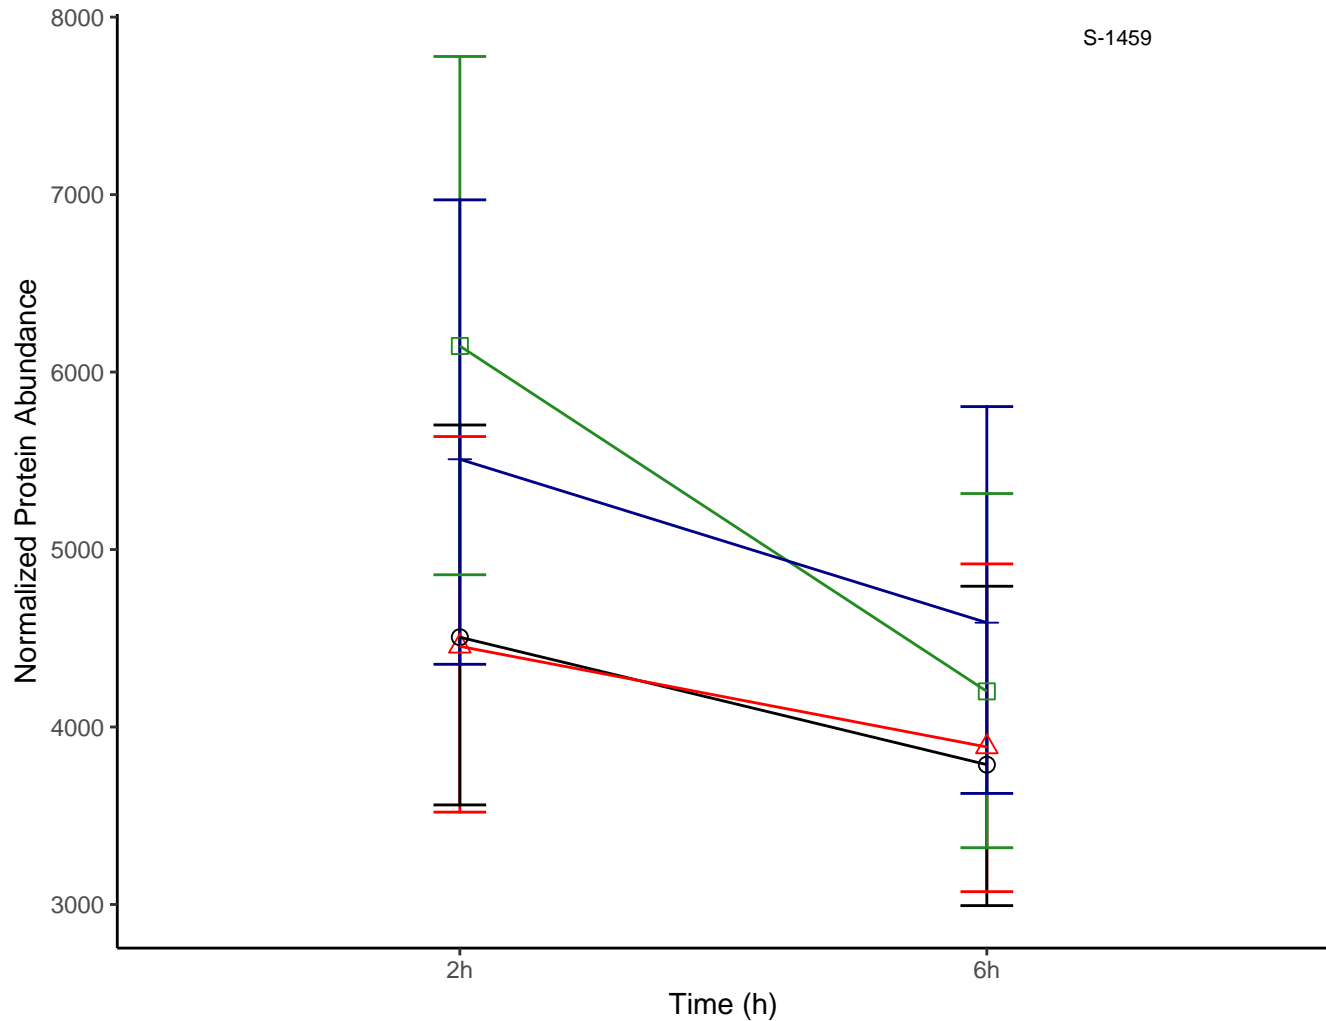

- SA564
- △ SA564-ΔhptRS
- SA564-ΔccpA
- + SA564-ΔhptRS/ccpA

# Y1015\_STAAM

S-1460

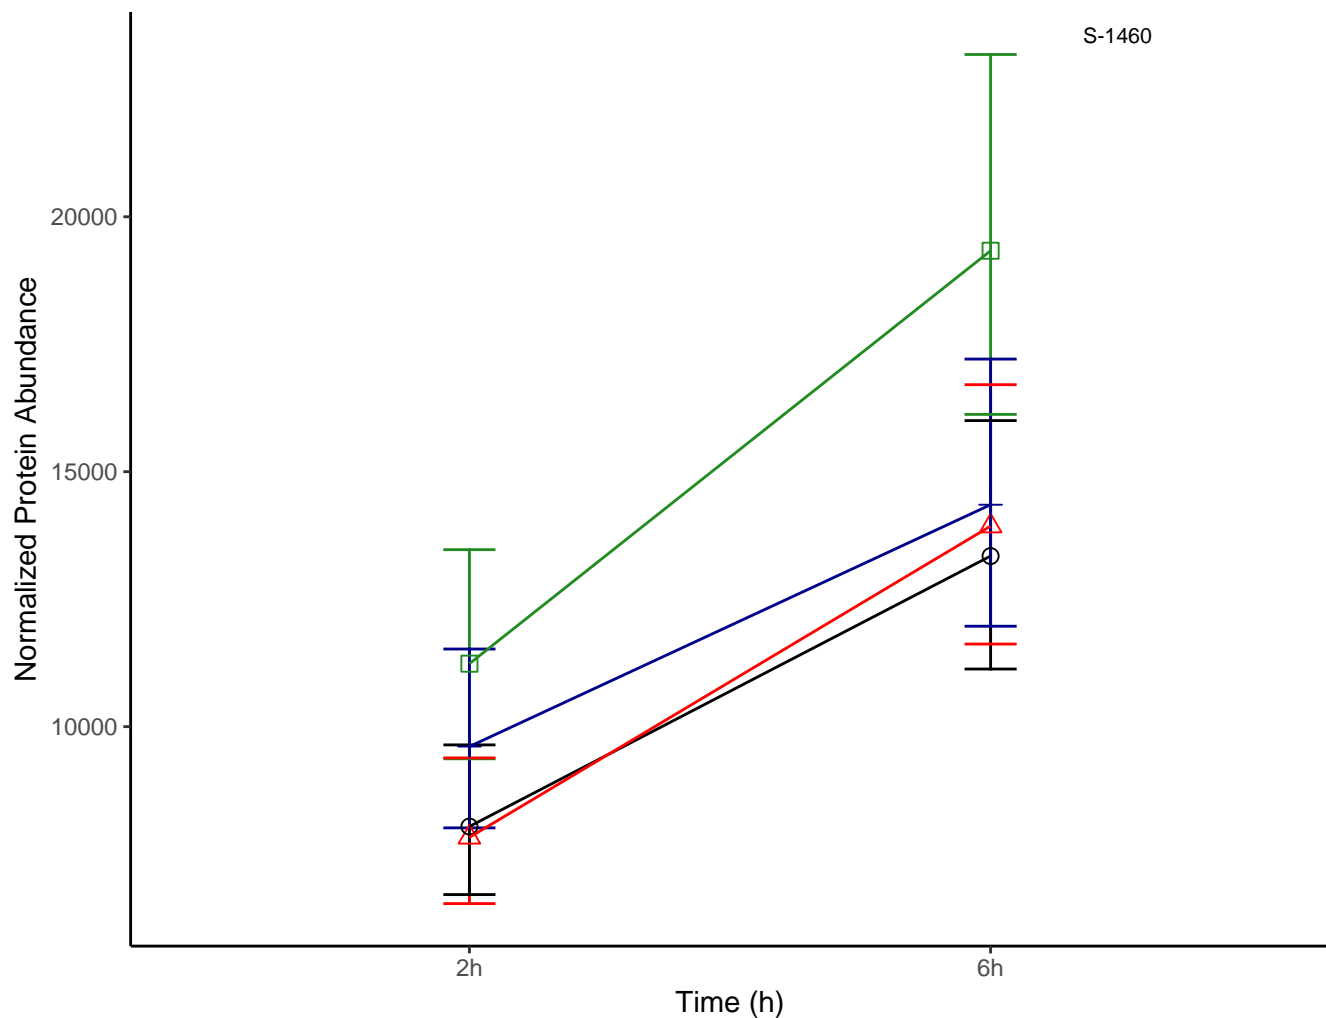

- SA564
- △ SA564- $\Delta$ *hptRS*
- SA564- $\Delta$ *ccpA*
- + SA564- $\Delta$ *hptRS/ccpA*

## Y1090\_STAAM

S-1461

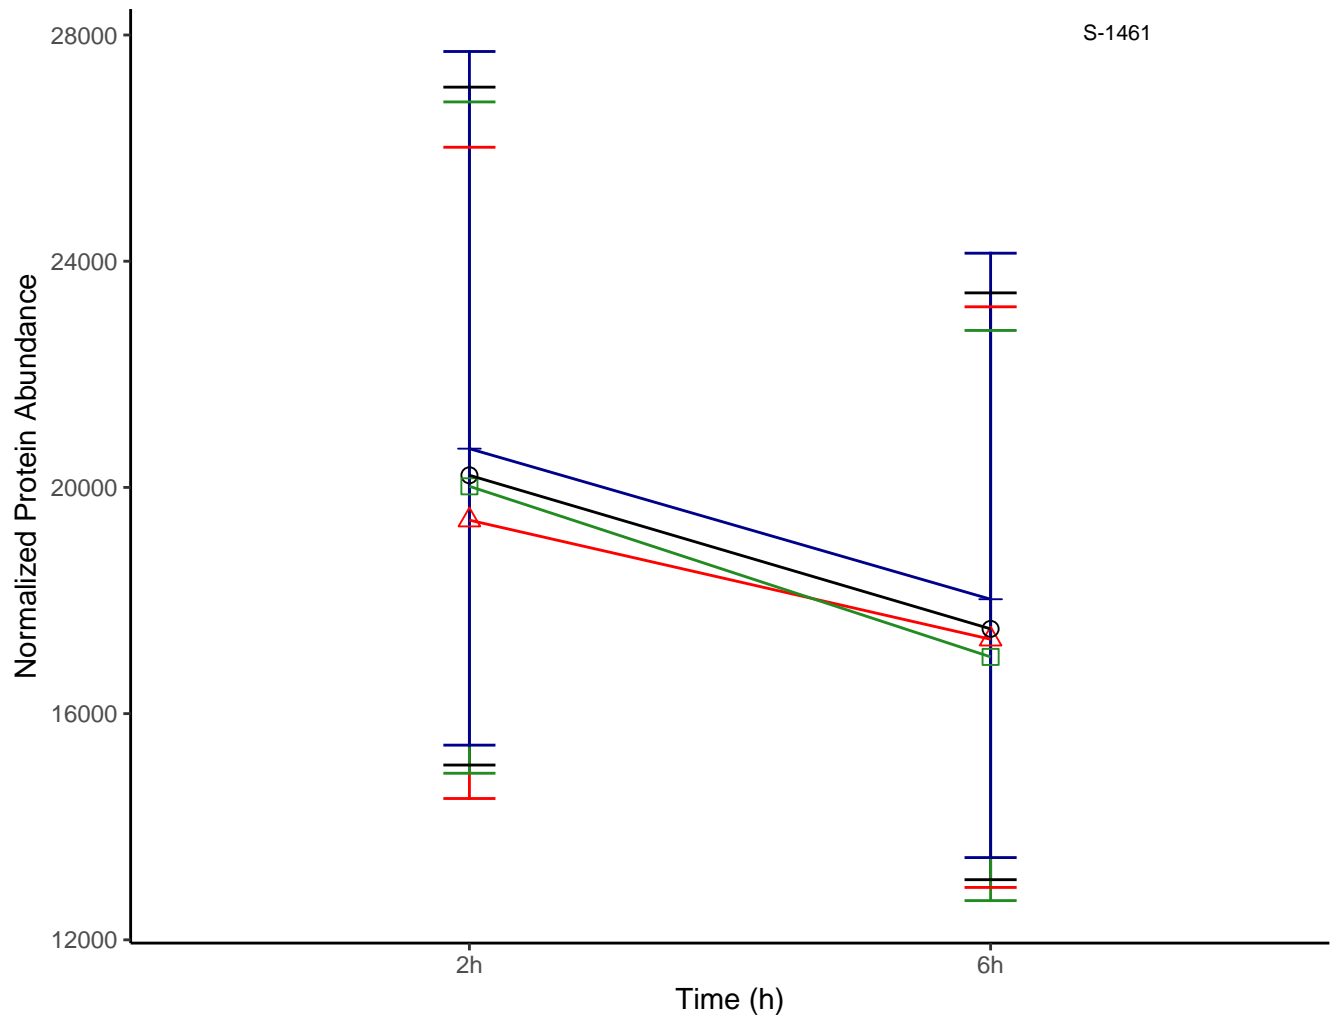

- SA564
- △ SA564- $\Delta hptRS$
- SA564- $\Delta ccpA$
- + SA564- $\Delta hptRS/ccpA$

# Y1176\_STAAM

S-1462

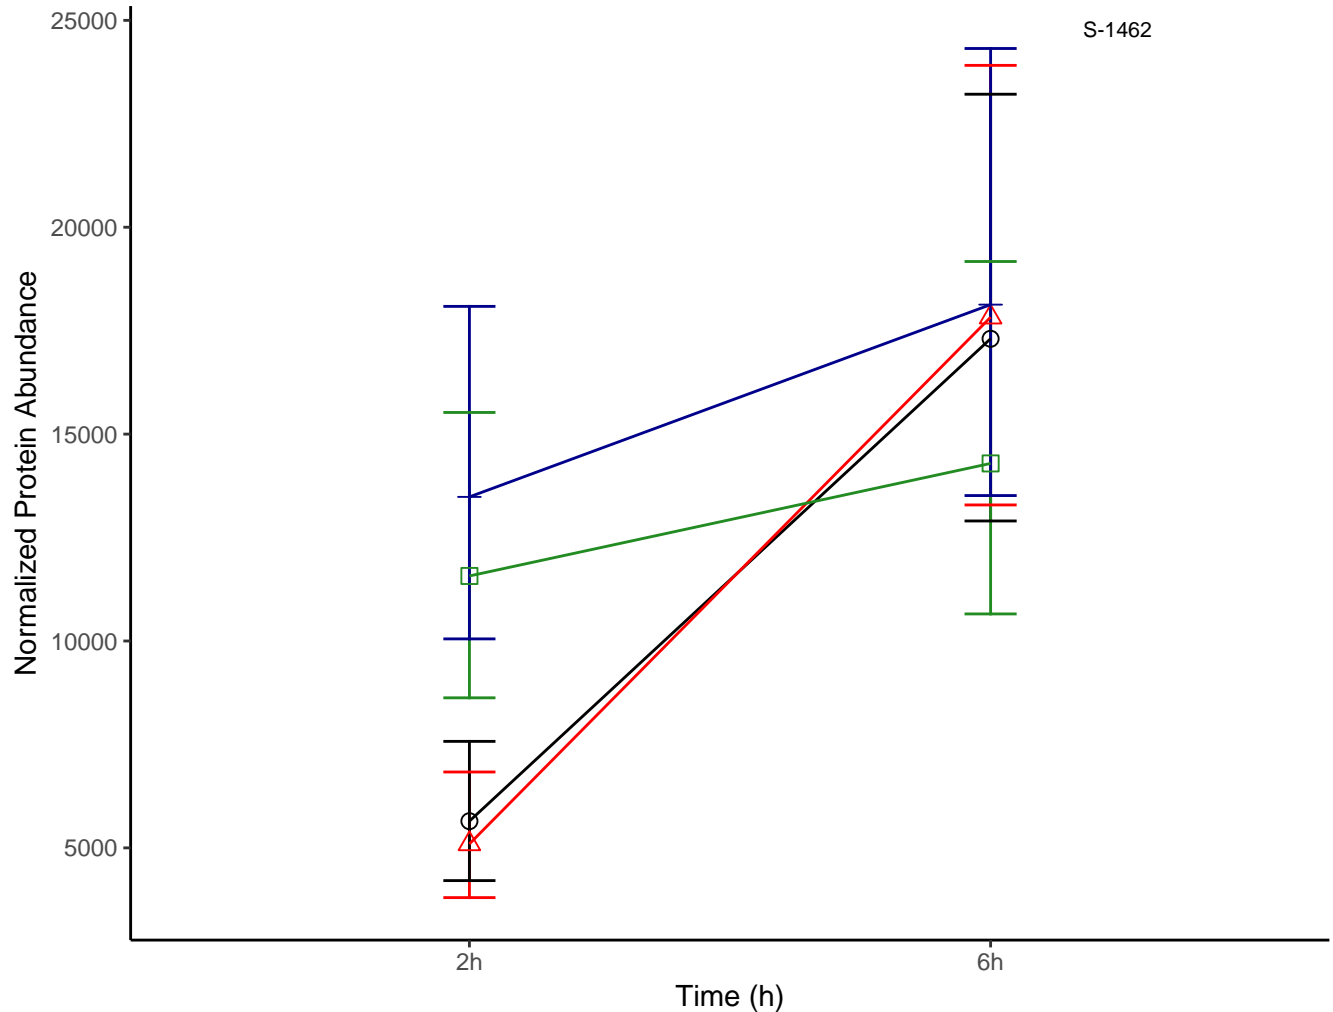

- SA564
- △ SA564- $\Delta$ *hptRS*
- SA564- $\Delta$ *ccpA*
- + SA564- $\Delta$ *hptRS/ccpA*

## Y1177\_STAAM

S-1463

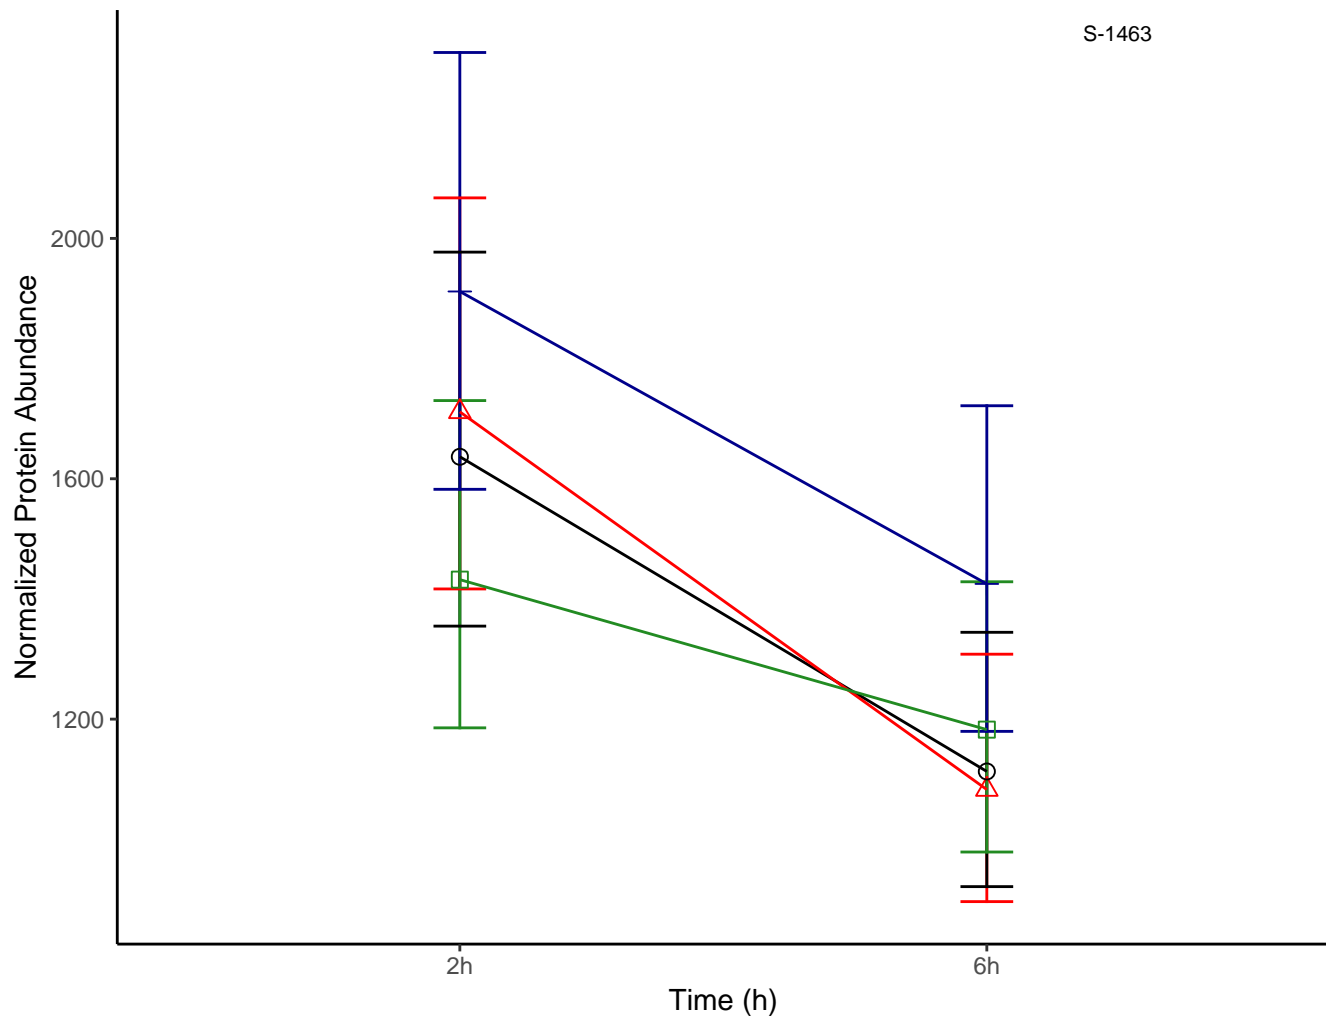

- SA564
- △ SA564- $\Delta hptRS$
- SA564- $\Delta ccpA$
- + SA564- $\Delta hptRS/ccpA$

## Y1187\_STAAM

S-1464

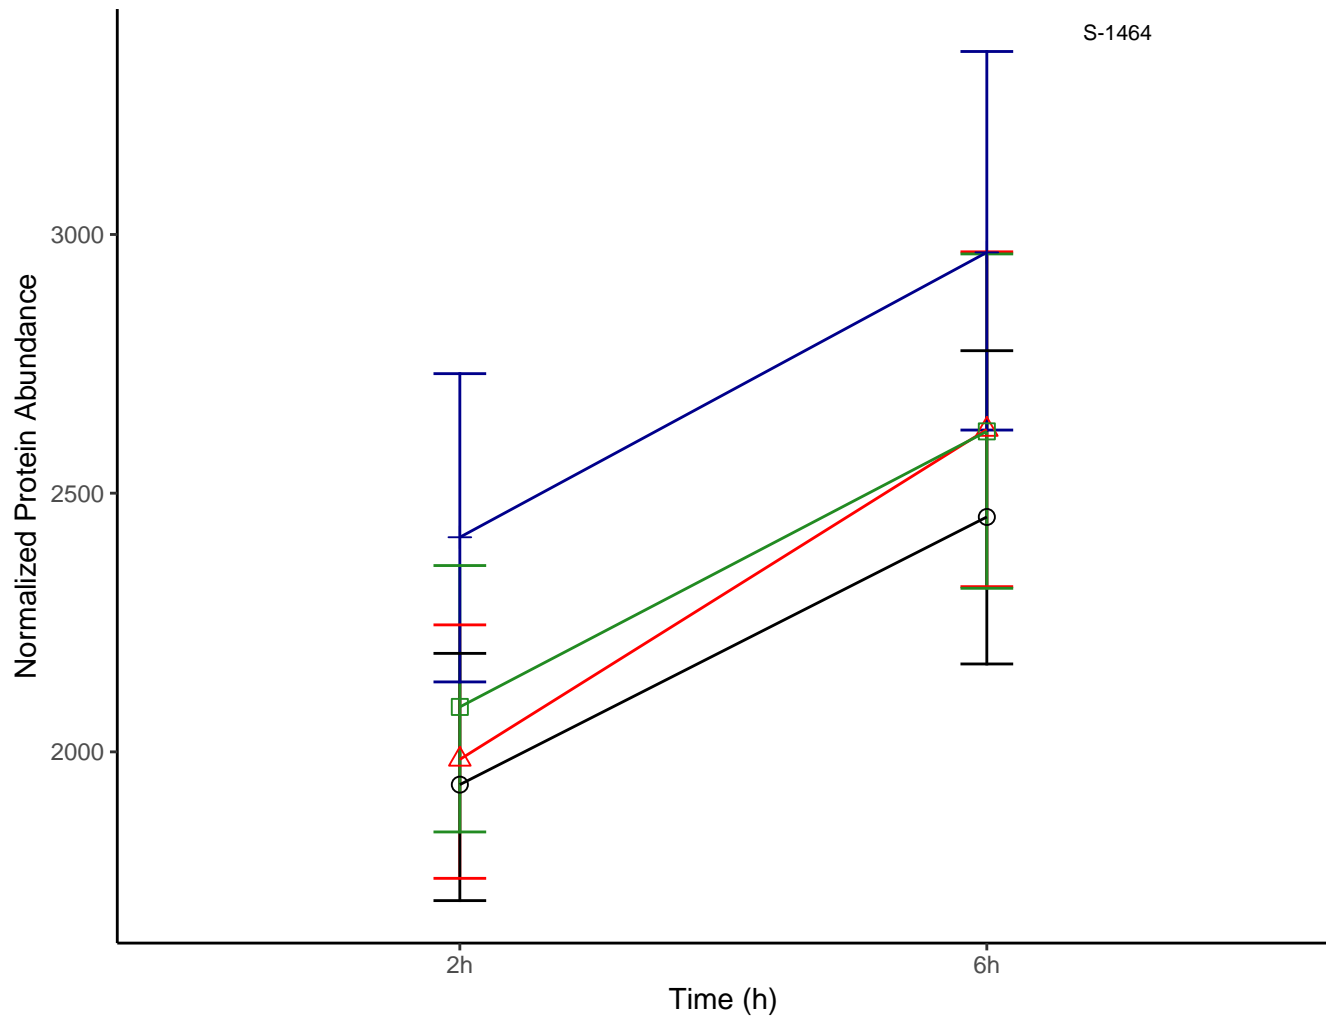

- SA564
- △ SA564- $\Delta$ *hptRS*
- SA564- $\Delta$ *ccpA*
- + SA564- $\Delta$ *hptRS/ccpA*



## Y1226\_STAAM

S-1465

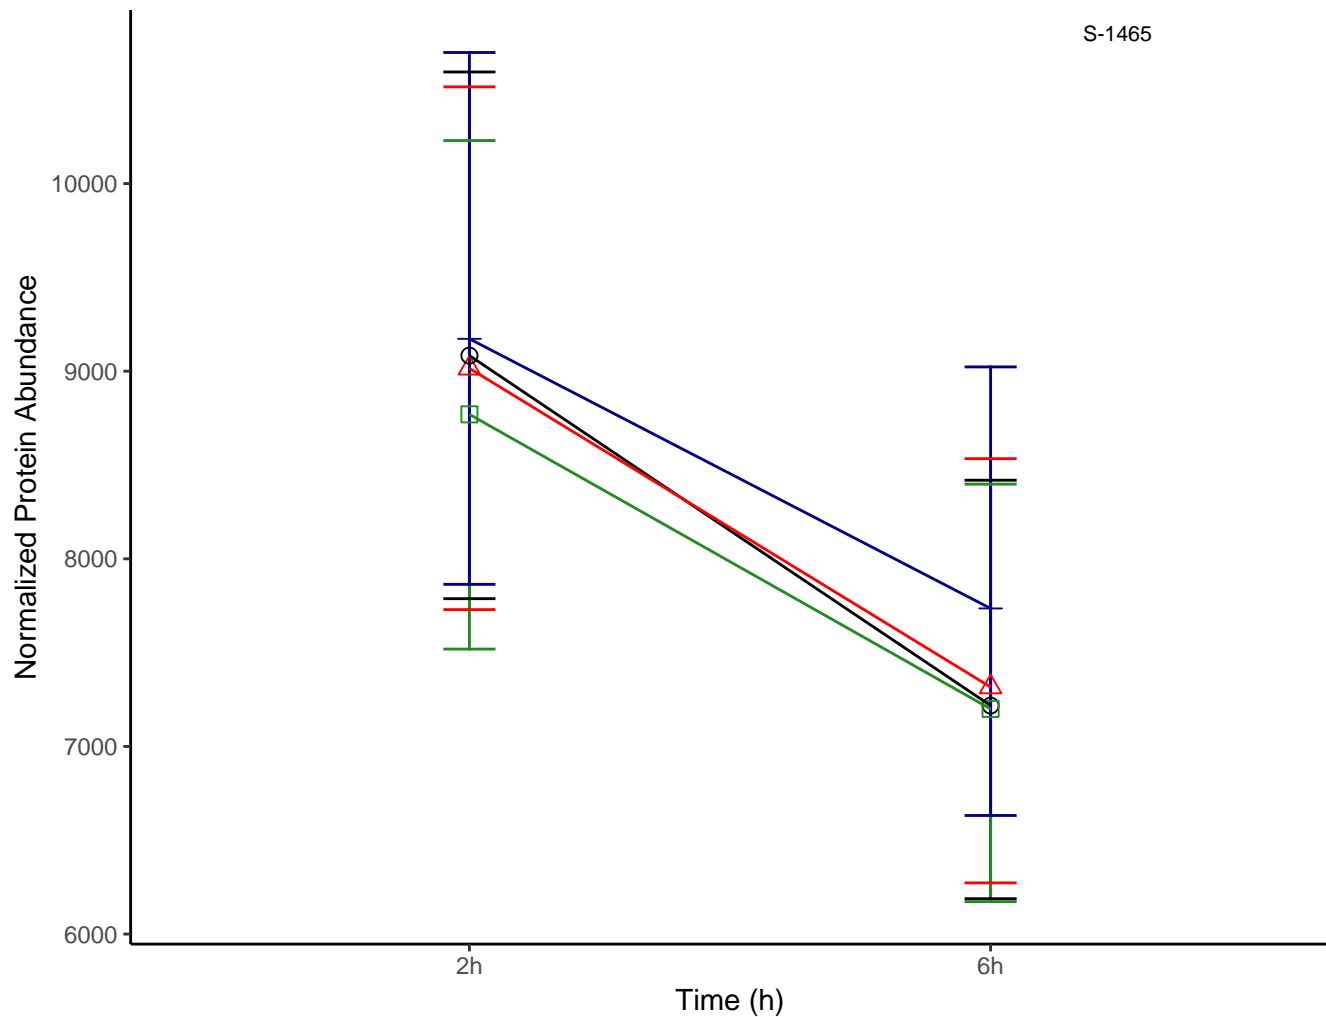

- SA564
- △ SA564- $\Delta hptRS$
- SA564- $\Delta ccpA$
- + SA564- $\Delta hptRS/ccpA$

# Y1341\_STAAM

S-1466

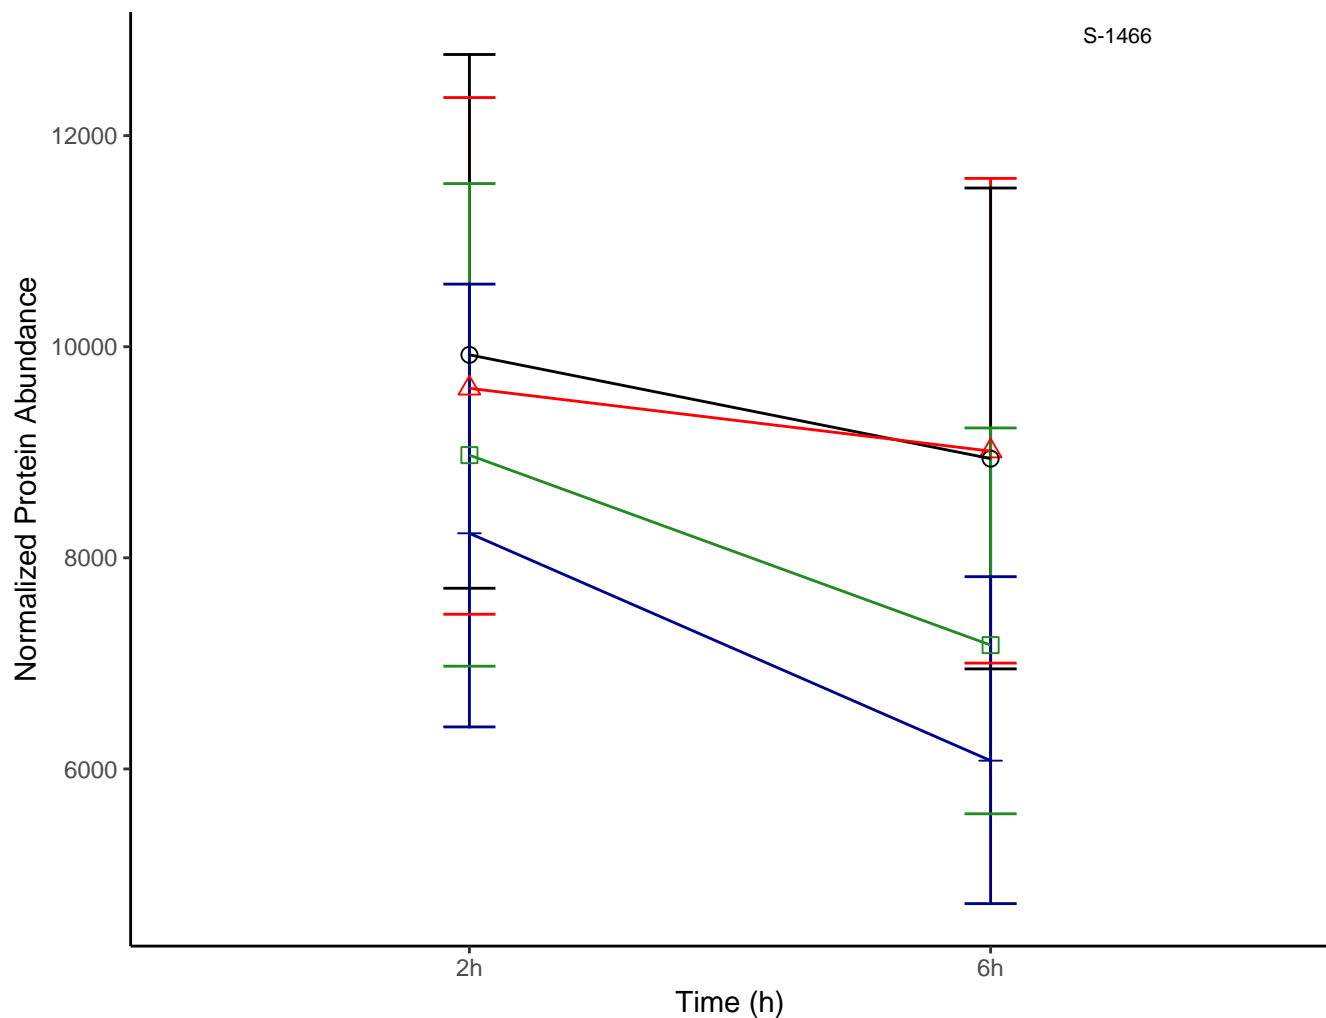

- SA564
- △ SA564- $\Delta hptRS$
- SA564- $\Delta ccpA$
- + SA564- $\Delta hptRS/ccpA$

## Y1343\_STAAM

S-1467

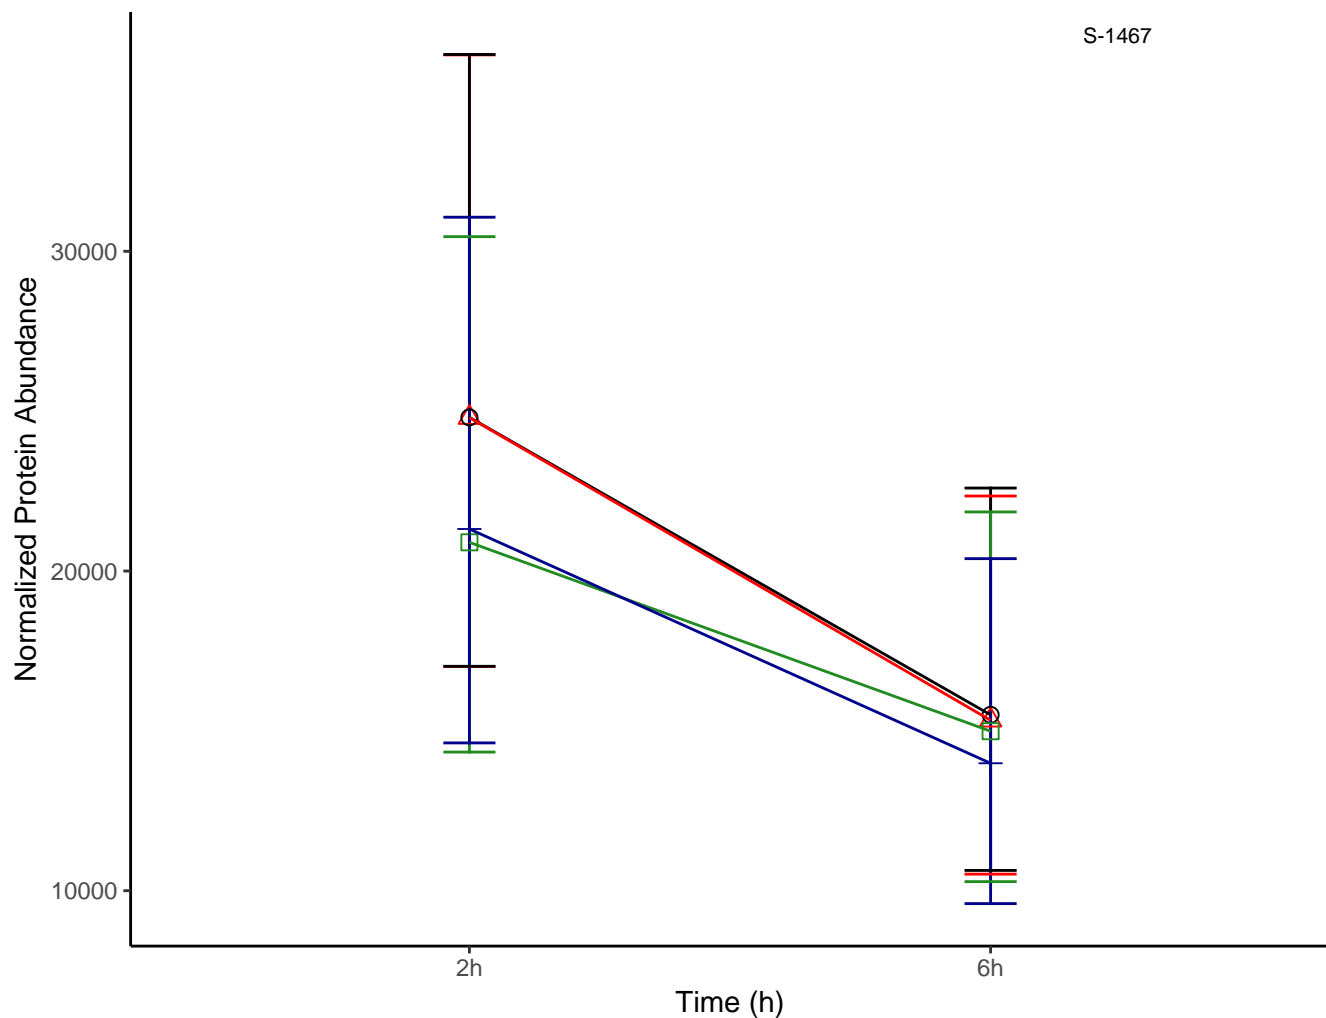

- SA564
- △ SA564-ΔhptRS
- SA564-ΔccpA
- + SA564-ΔhptRS/ccpA

# Y1352\_STAAM

S-1468

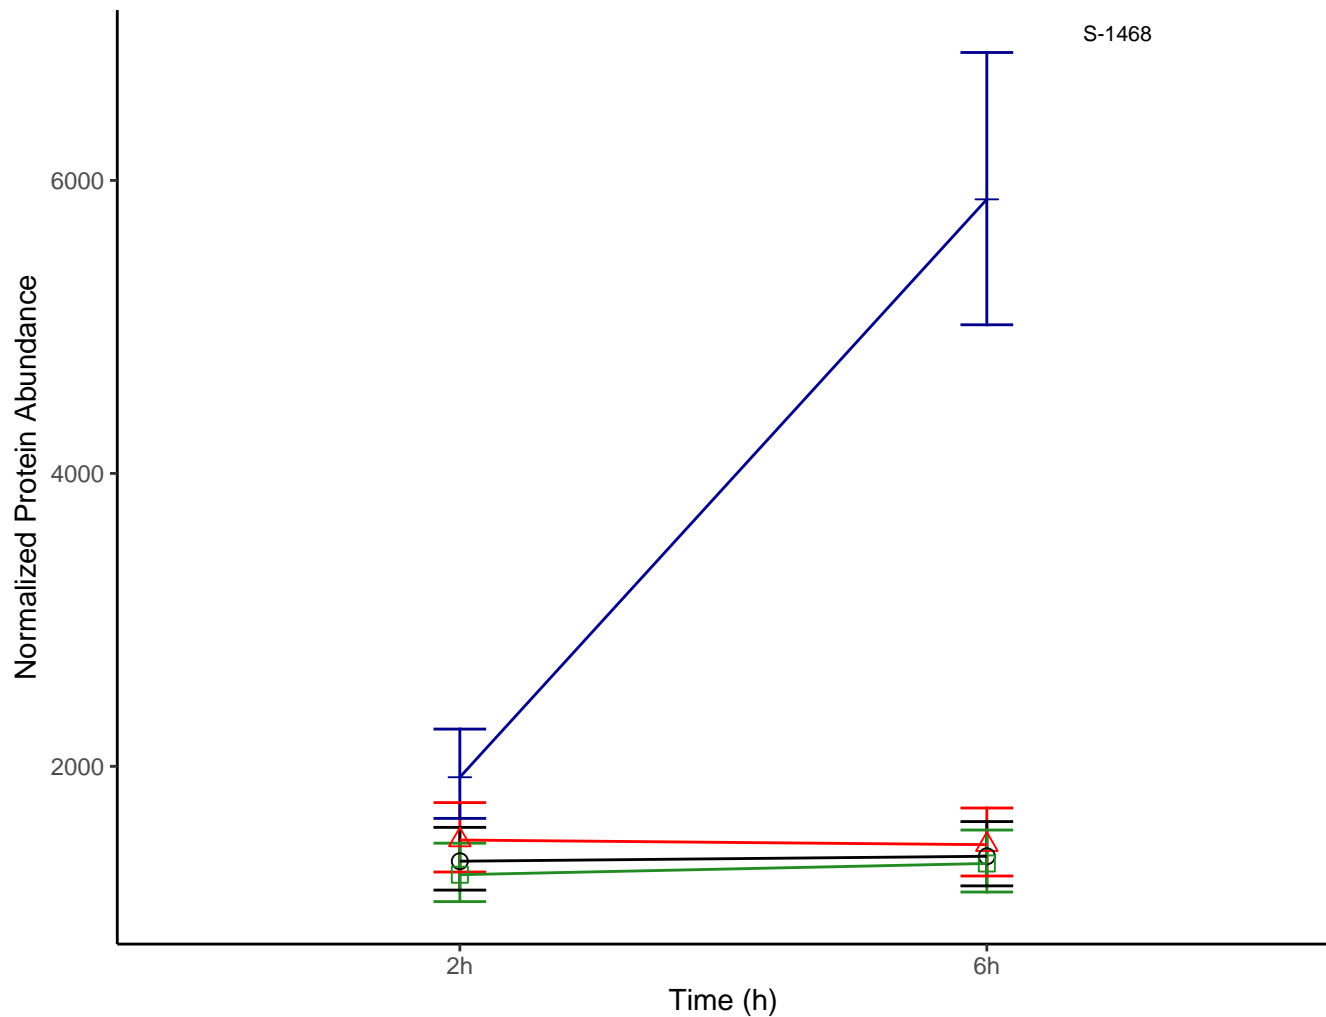

- SA564
- △ SA564- $\Delta hptRS$
- SA564- $\Delta ccpA$
- + SA564- $\Delta hptRS/ccpA$

# Y1363\_STAAM

S-1469

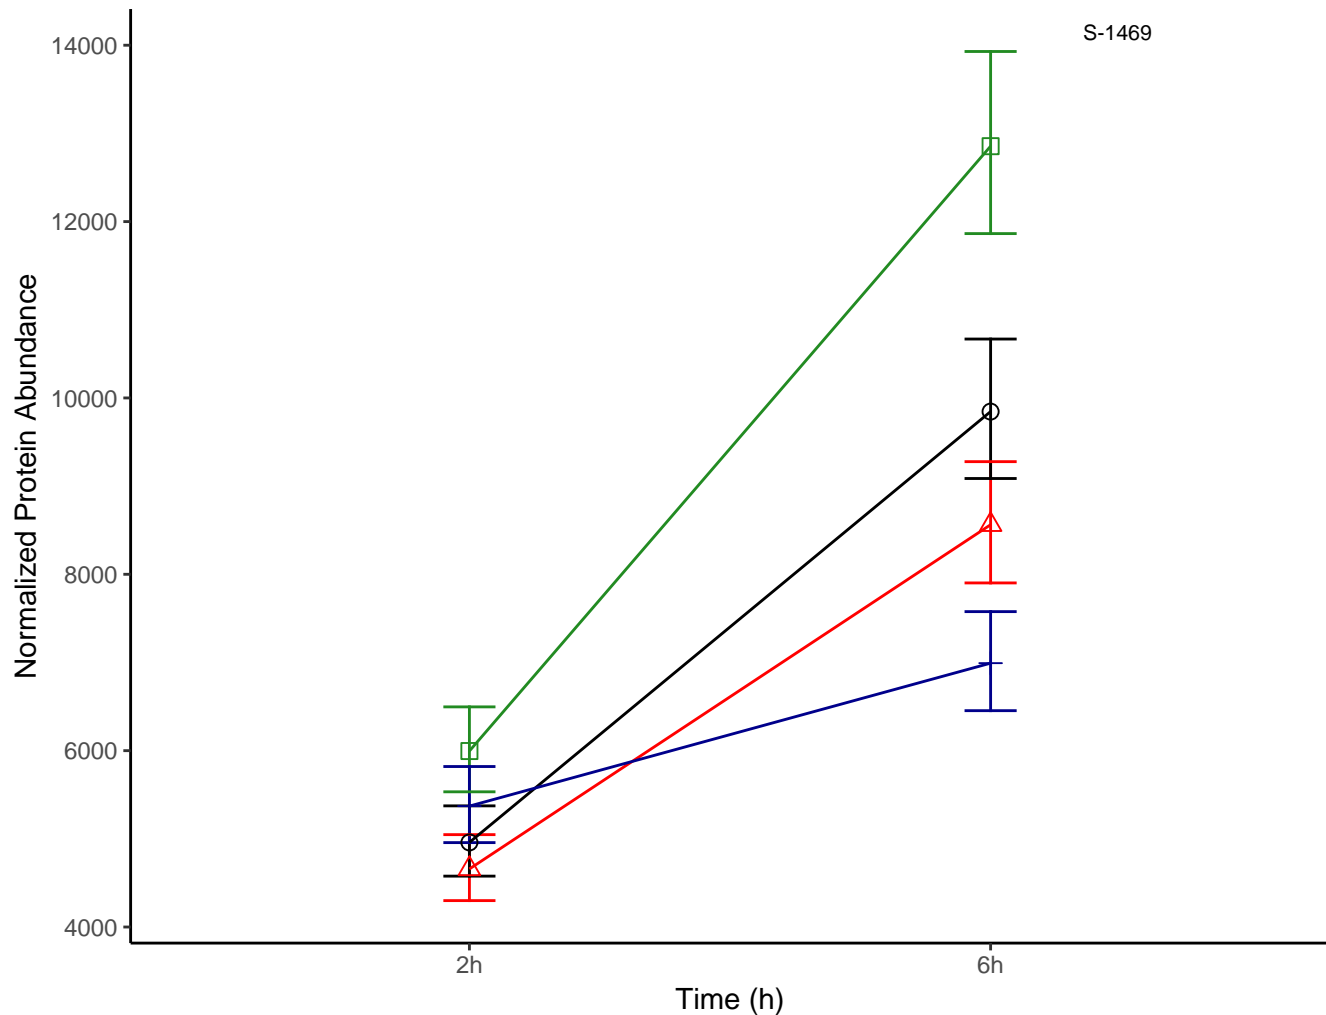

- SA564
- △ SA564- $\Delta$ *hptRS*
- SA564- $\Delta$ *ccpA*
- + SA564- $\Delta$ *hptRS/ccpA*

## Y1409\_STAAM

S-1470

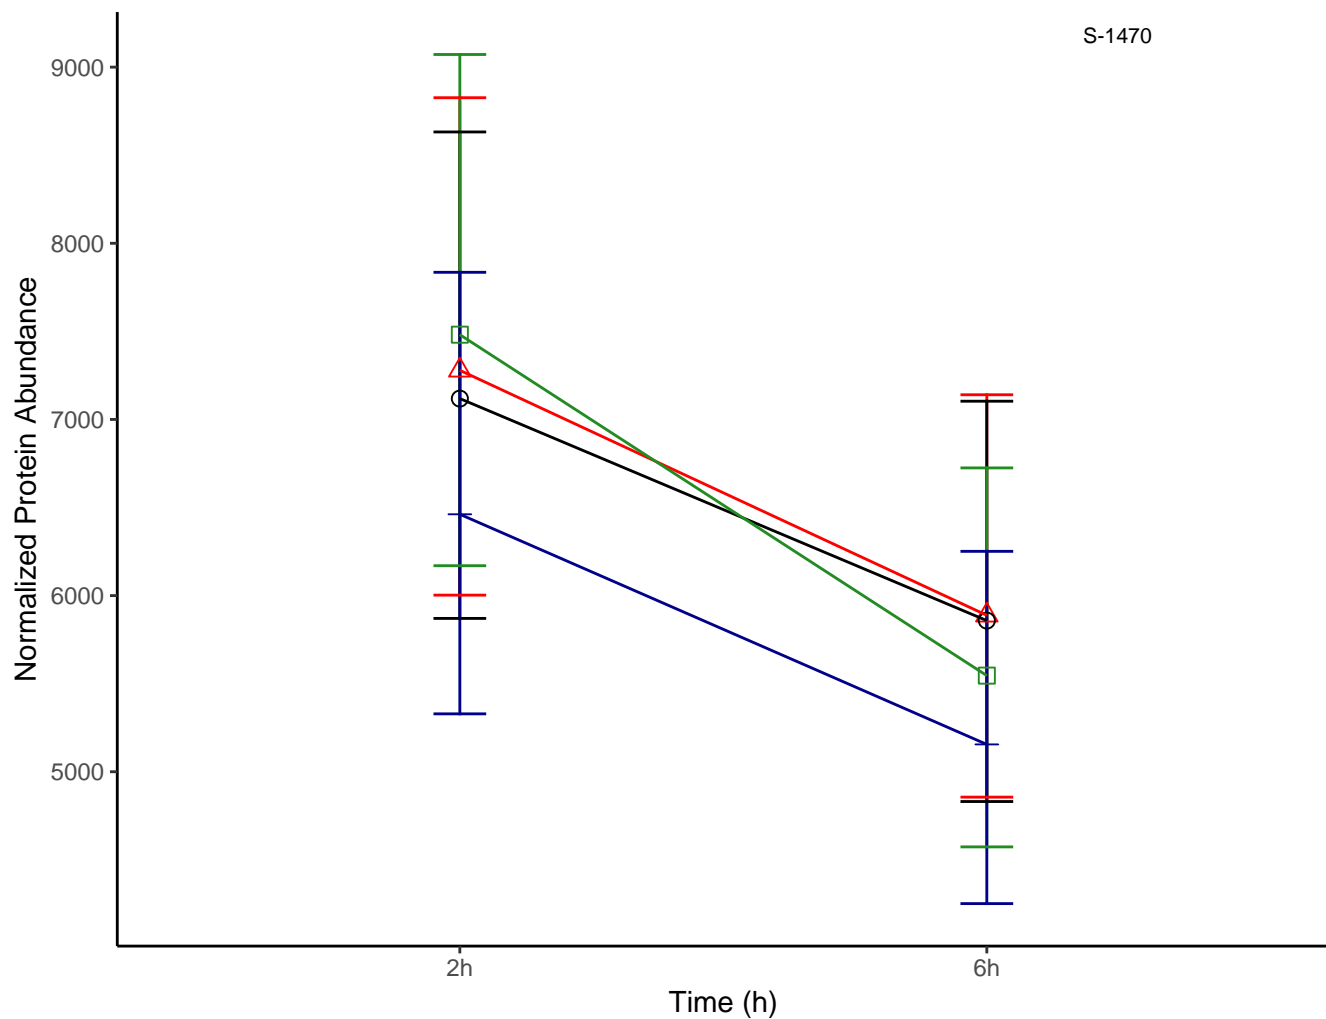

- SA564
- △ SA564- $\Delta hptRS$
- SA564- $\Delta ccpA$
- + SA564- $\Delta hptRS/ccpA$

## Y1425\_STAAM

S-1471

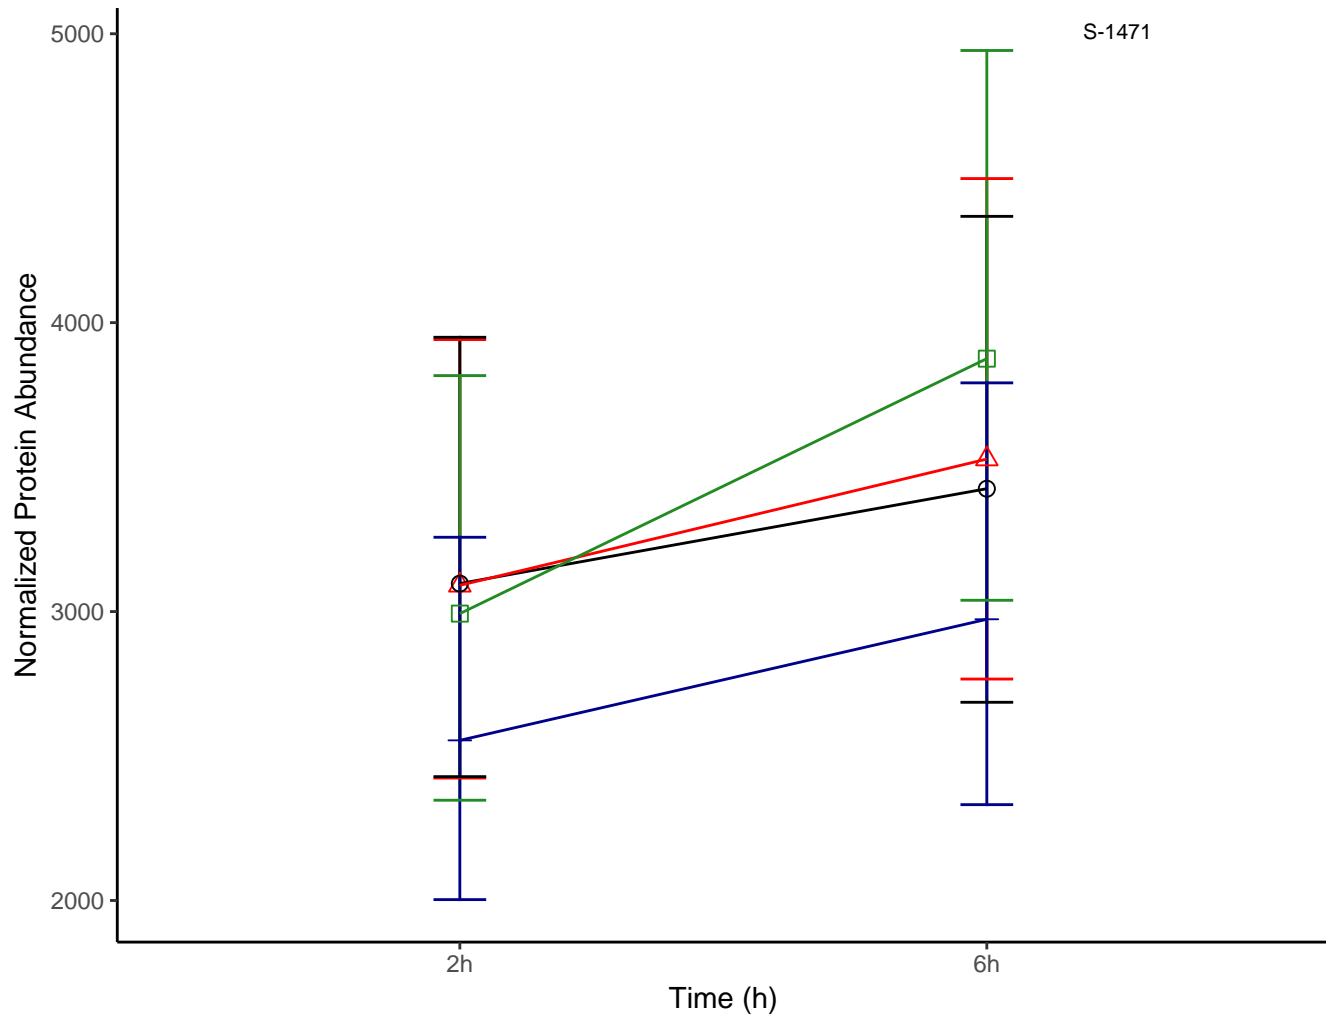

- SA564
- △ SA564-ΔhptRS
- SA564-ΔccpA
- + SA564-ΔhptRS/ccpA

## Y1462\_STAAM

S-1472

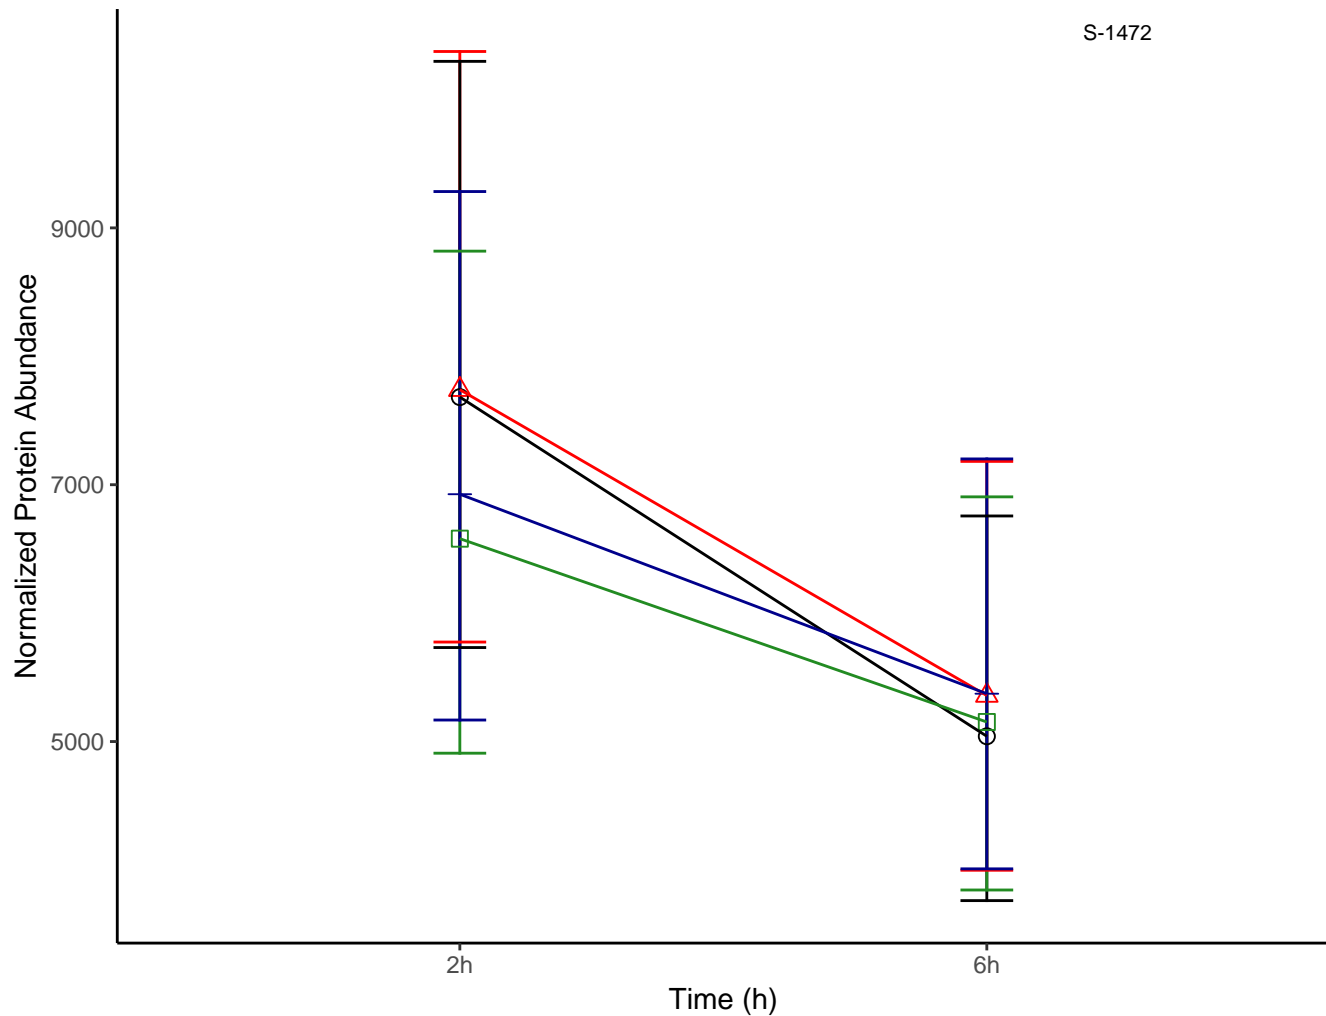

- SA564
- △ SA564- $\Delta hptRS$
- SA564- $\Delta ccpA$
- + SA564- $\Delta hptRS/ccpA$



# Y1514\_STAAM

S-1473

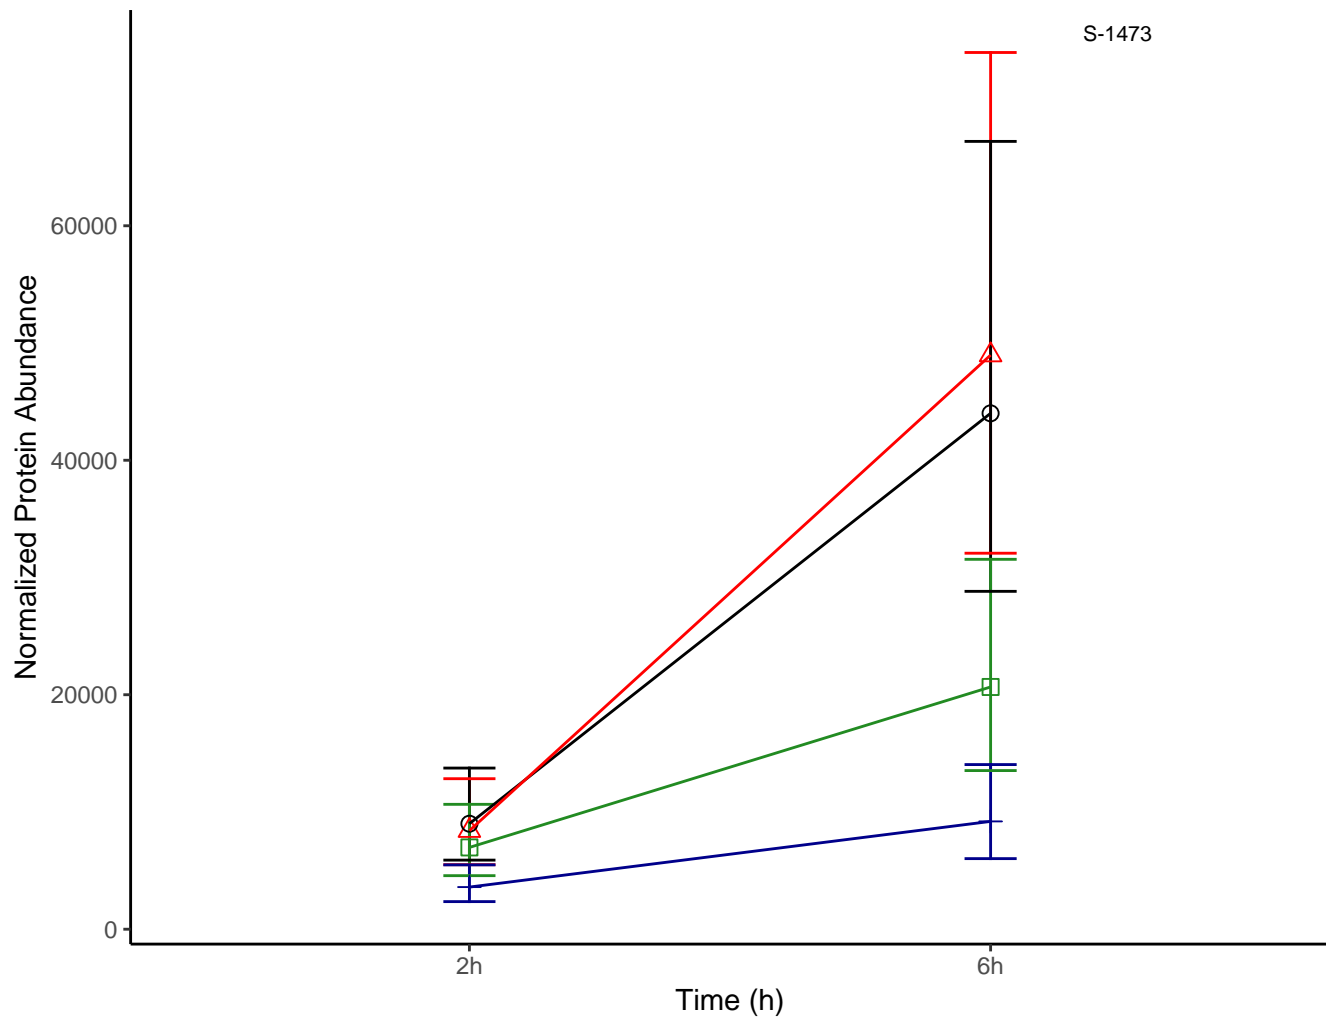

- SA564
- △ SA564- $\Delta$ *hptRS*
- SA564- $\Delta$ *ccpA*
- + SA564- $\Delta$ *hptRS/ccpA*

# Y1573\_STAAM

S-1474

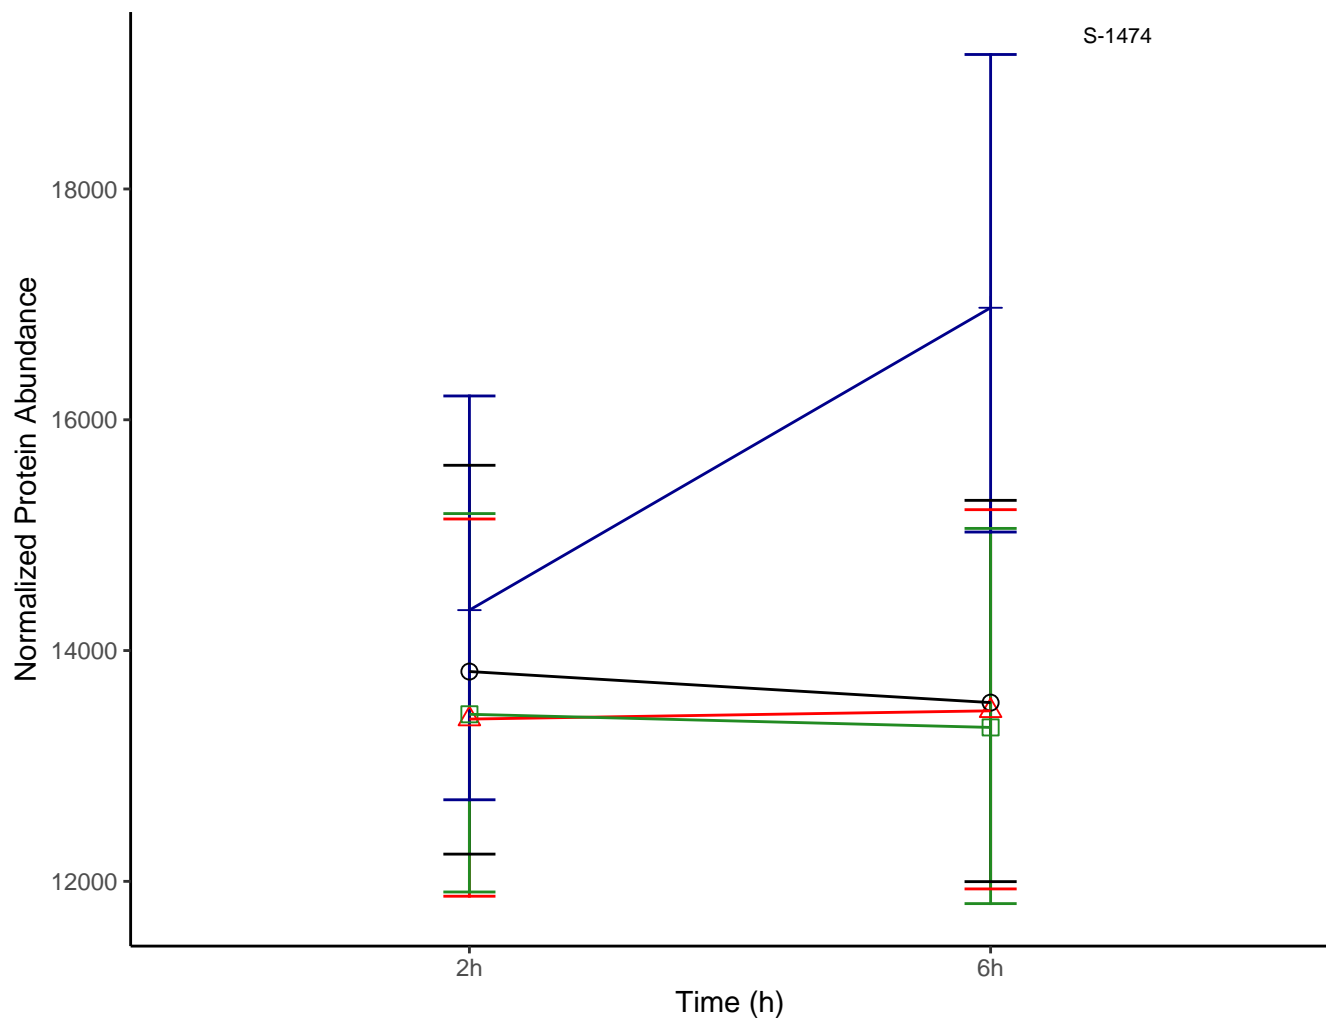

- SA564
- △ SA564- $\Delta hptRS$
- SA564- $\Delta ccpA$
- + SA564- $\Delta hptRS/ccpA$

## Y1605\_STAAM

S-1475

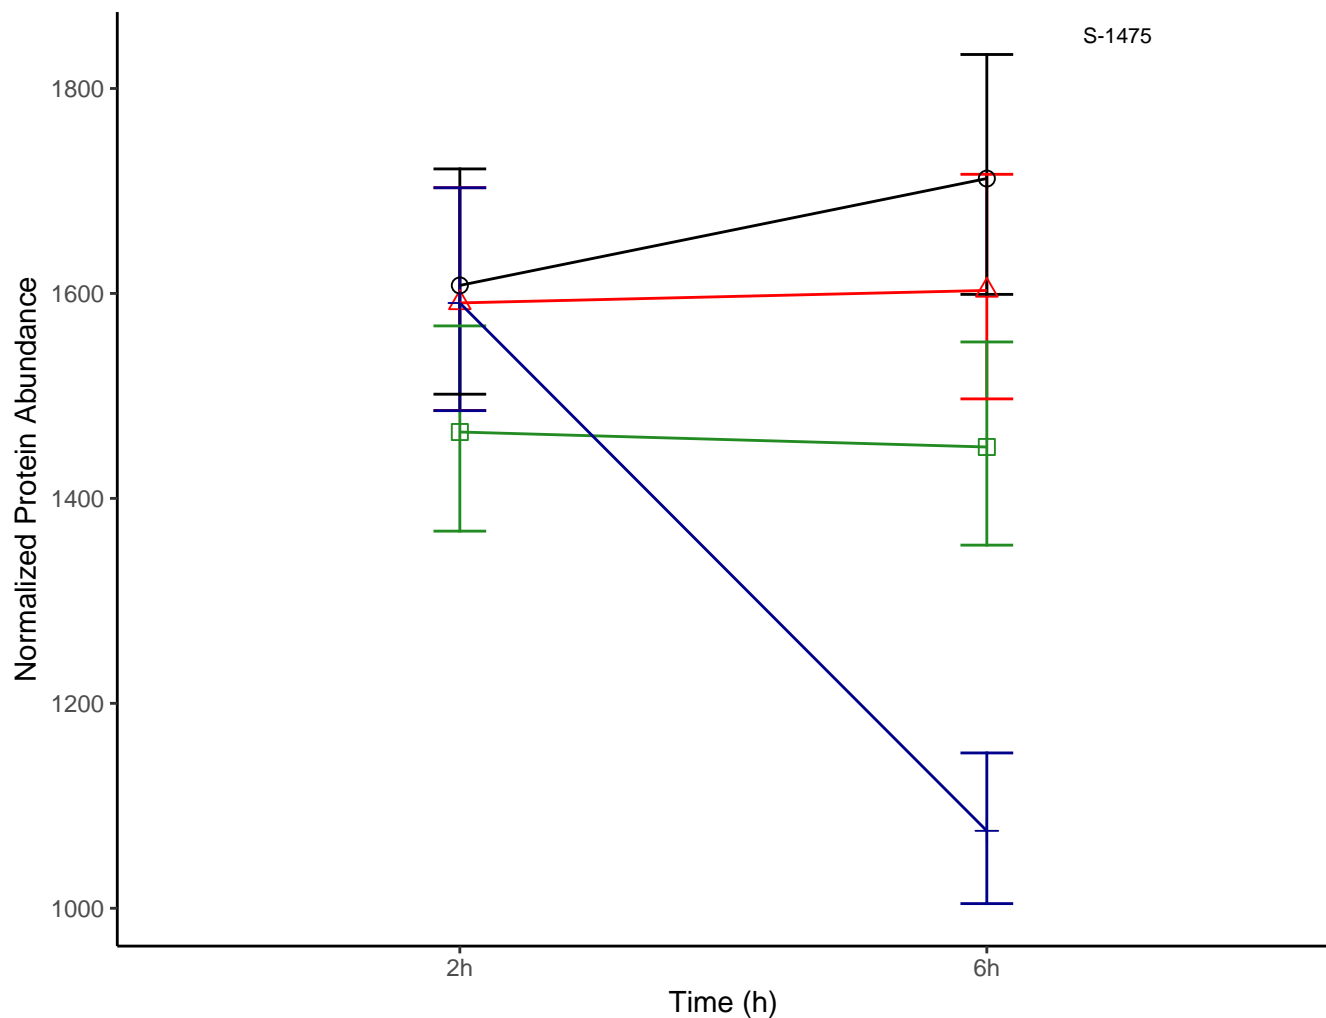

- SA564
- △ SA564- $\Delta hptRS$
- SA564- $\Delta ccpA$
- + SA564- $\Delta hptRS/ccpA$

## Y1617\_STAAM

S-1476

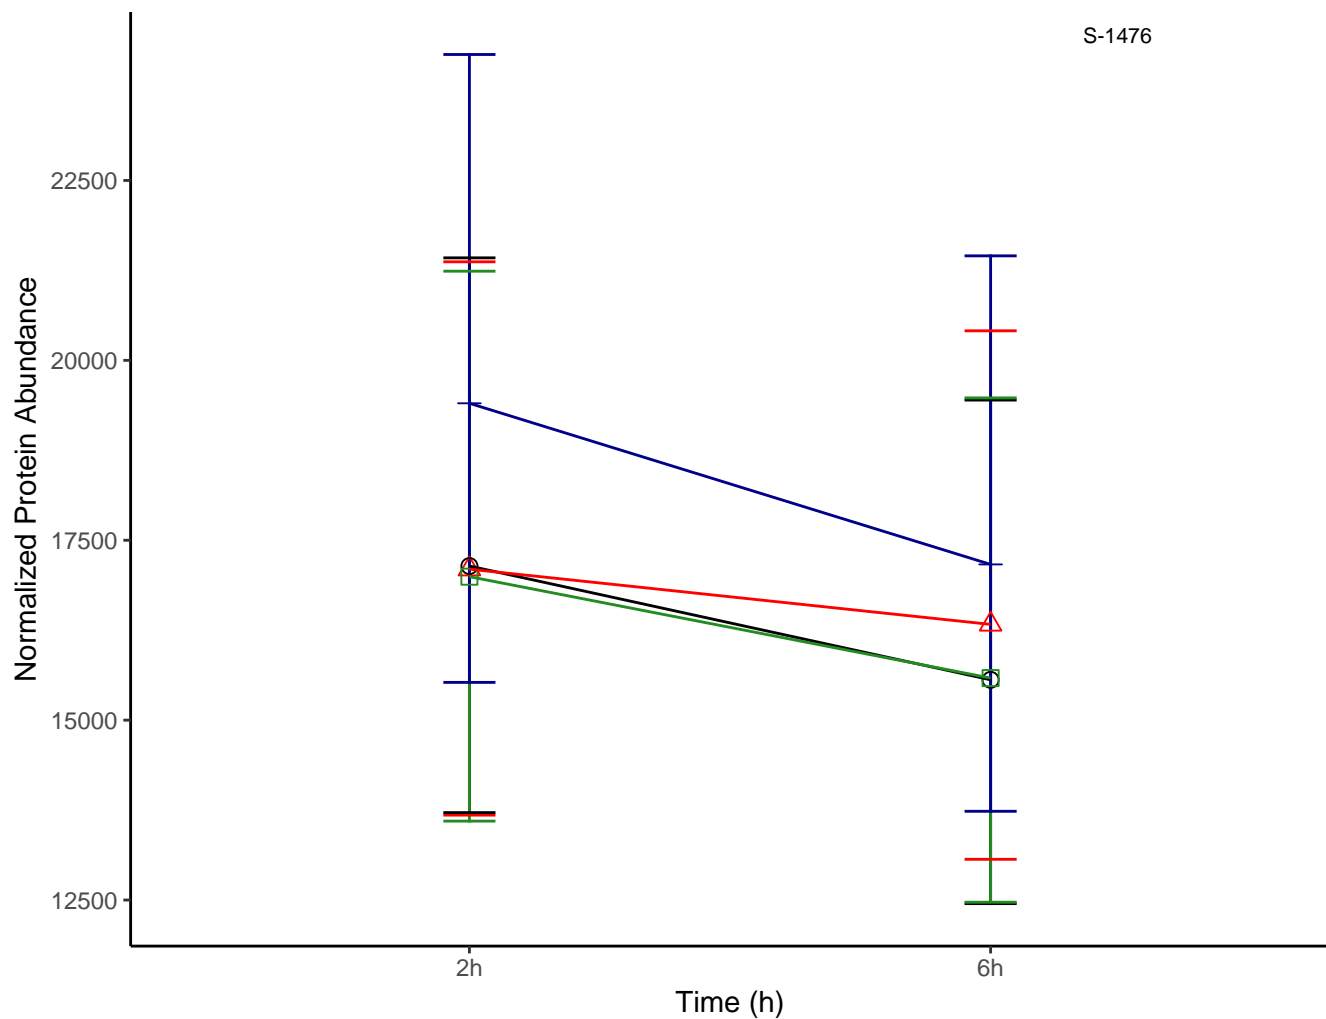

- SA564
- △ SA564- $\Delta$ *hptRS*
- SA564- $\Delta$ *ccpA*
- + SA564- $\Delta$ *hptRS/ccpA*

# Y1625\_STAAM

S-1477

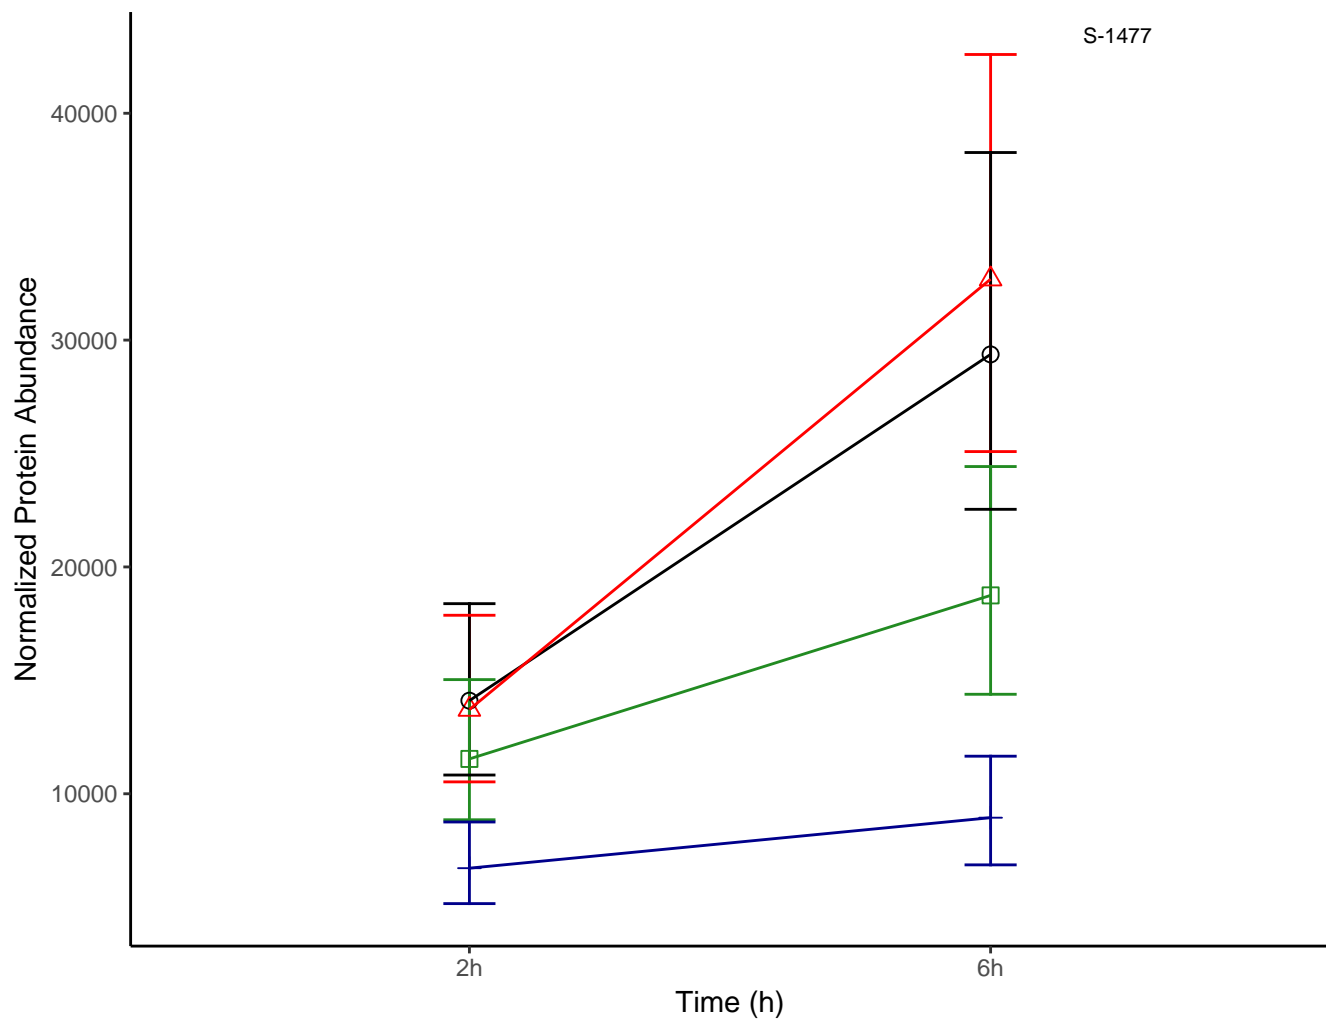

- SA564
- △ SA564- $\Delta$ *hptRS*
- SA564- $\Delta$ *ccpA*
- + SA564- $\Delta$ *hptRS/ccpA*

# Y1710\_STAAM

S-1478

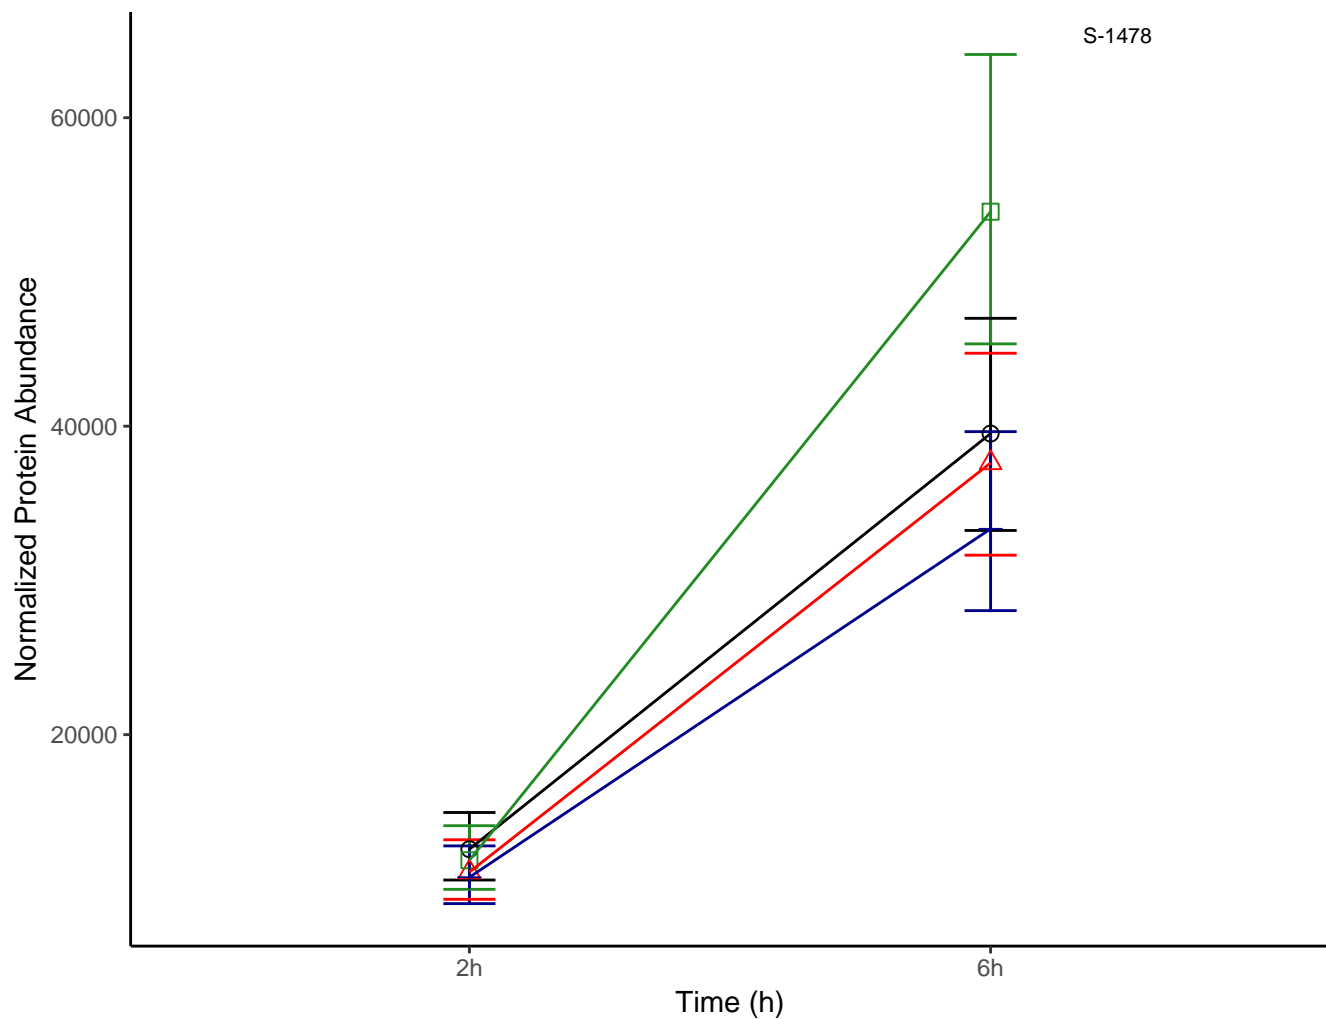

- SA564
- △ SA564-ΔhptRS
- SA564-ΔccpA
- + SA564-ΔhptRS/ccpA

# Y1739\_STAAM

S-1479

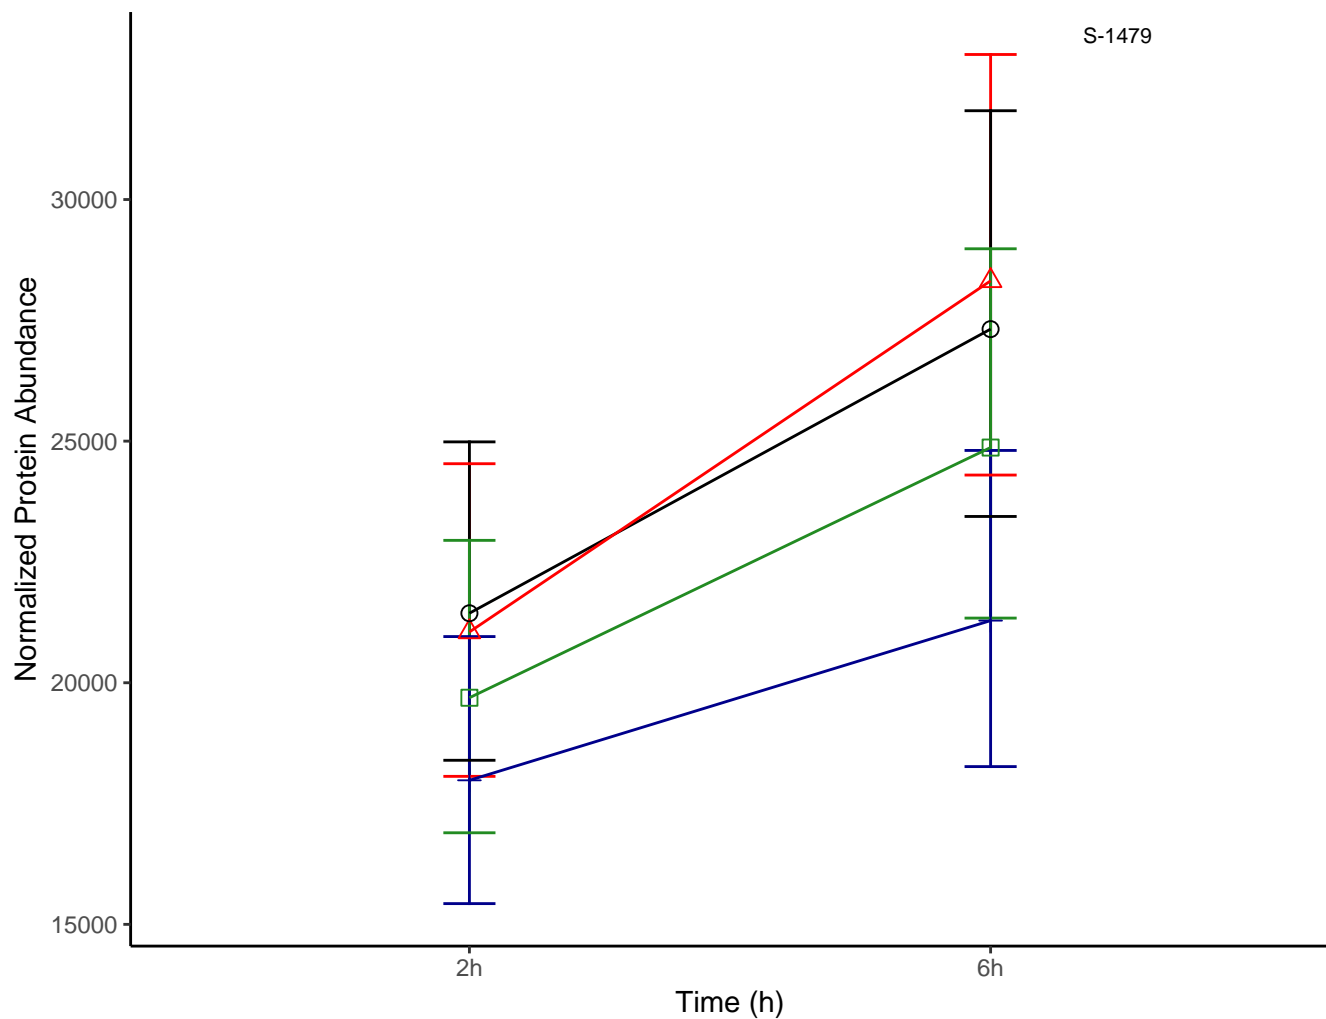

- SA564
- △ SA564- $\Delta$ *hptRS*
- SA564- $\Delta$ *ccpA*
- + SA564- $\Delta$ *hptRS/ccpA*

# Y1845\_STAAM

S-1480

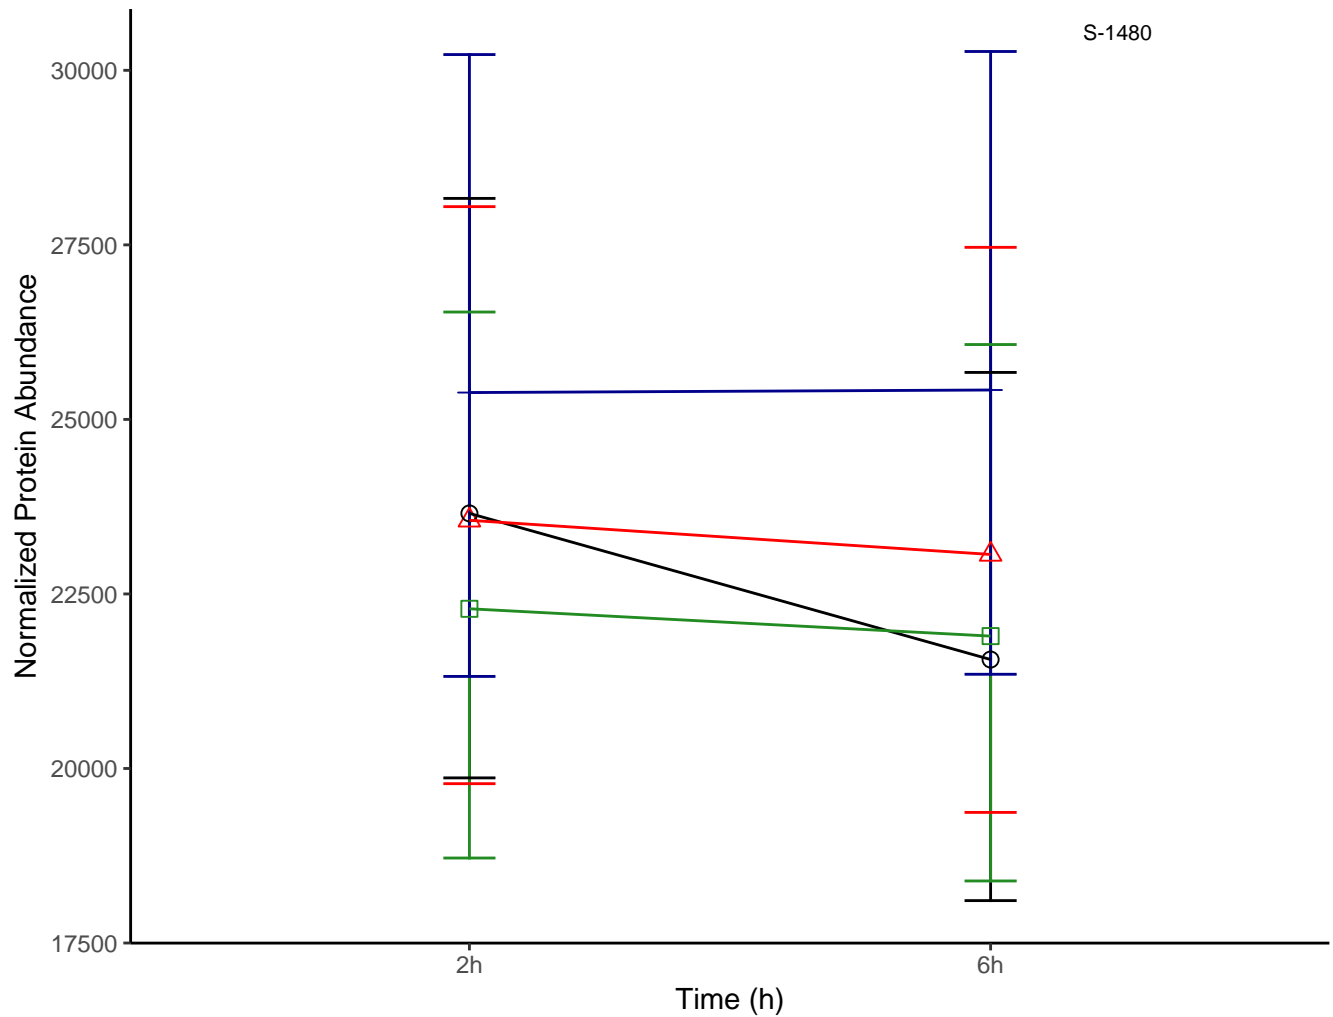

- SA564
- △ SA564- $\Delta hptRS$
- SA564- $\Delta ccpA$
- + SA564- $\Delta hptRS/ccpA$



# Y1866\_STAAM

S-1481

Normalized Protein Abundance

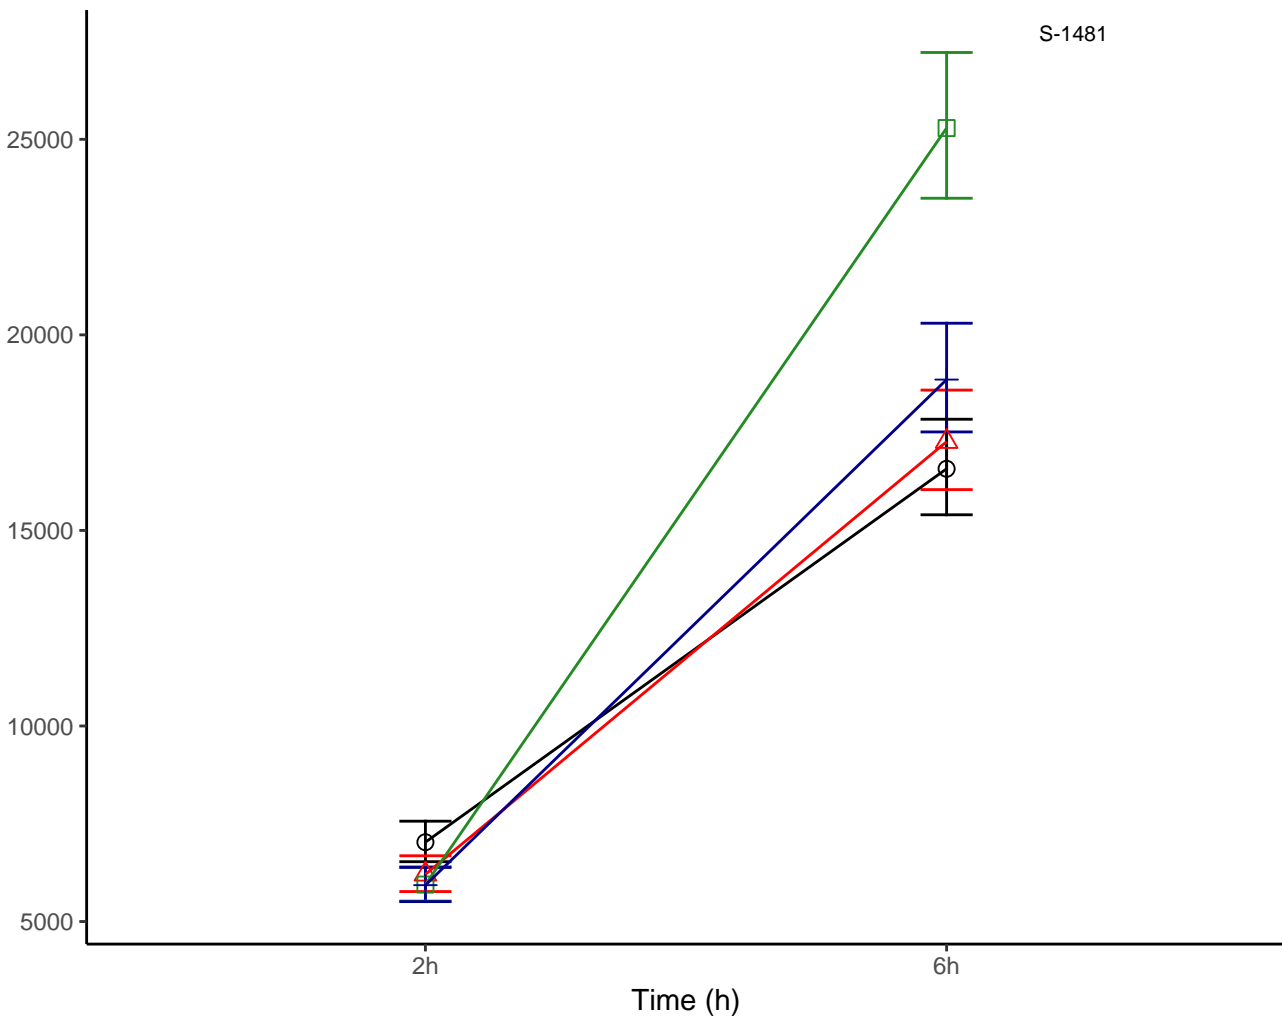

- SA564
- △ SA564- $\Delta$ *hptRS*
- SA564- $\Delta$ *ccpA*
- + SA564- $\Delta$ *hptRS/ccpA*

# Y1880\_STAAM

S-1482

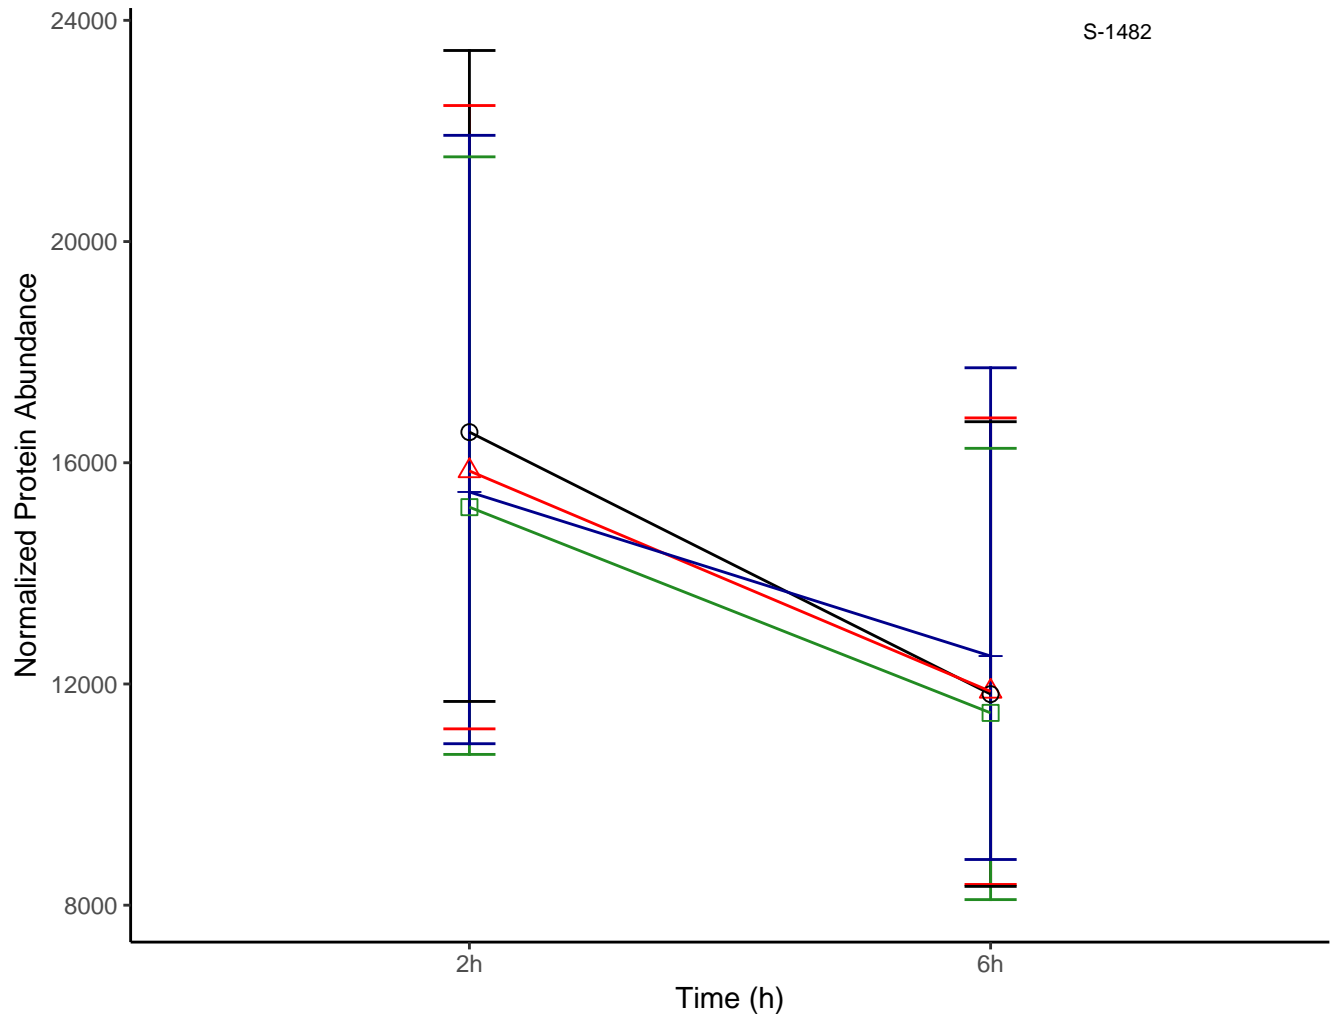

- SA564
- △ SA564- $\Delta$ *hptRS*
- SA564- $\Delta$ *ccpA*
- + SA564- $\Delta$ *hptRS/ccpA*

## Y1921\_STAAM

S-1483

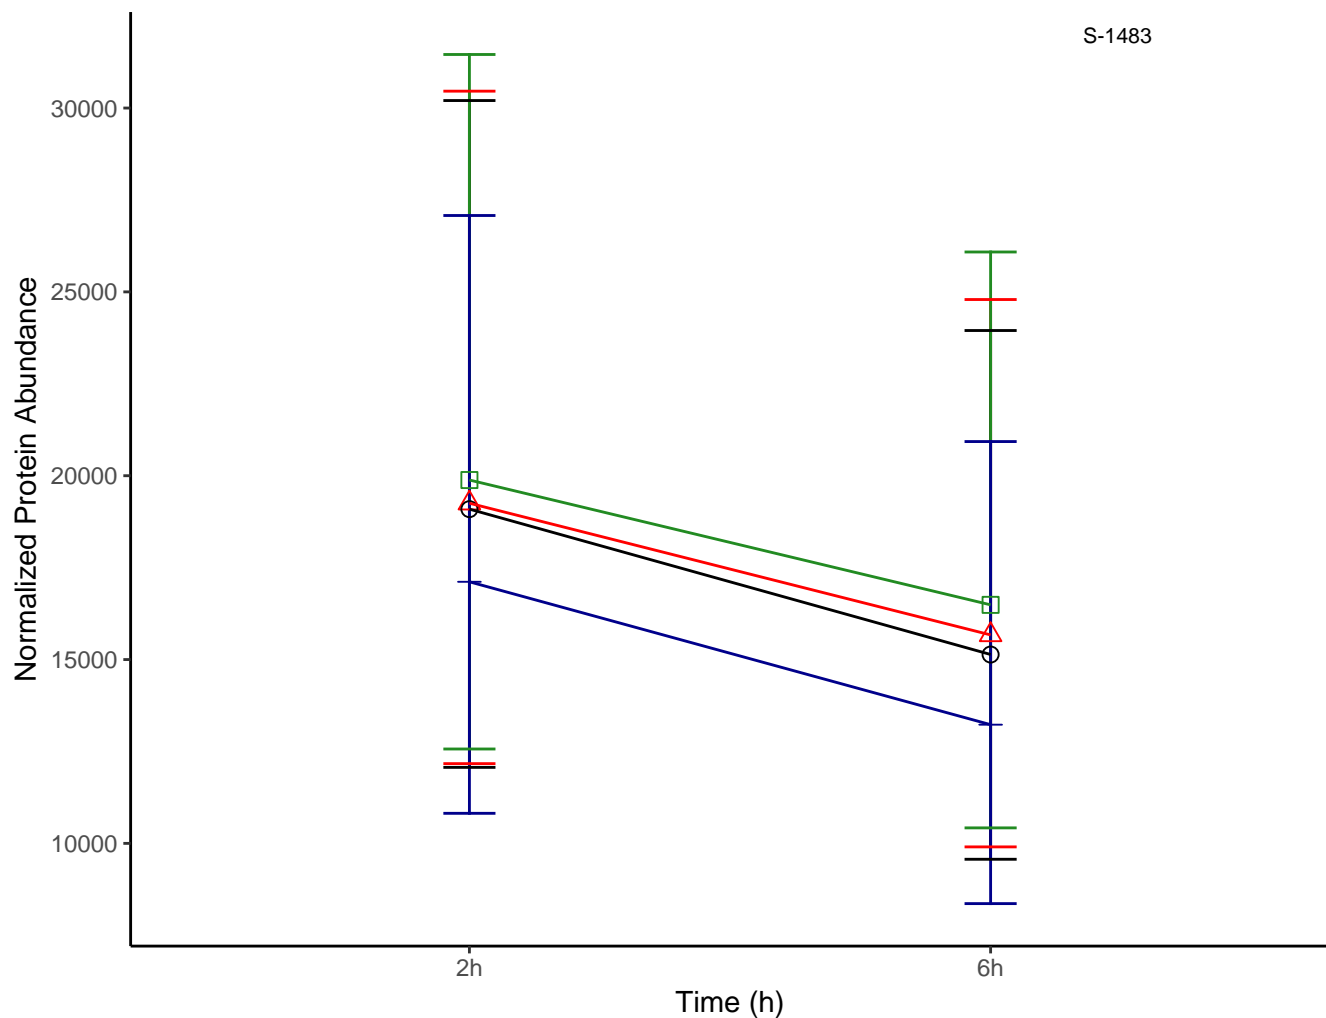

- SA564
- △ SA564-ΔhptRS
- SA564-ΔccpA
- + SA564-ΔhptRS/ccpA

# Y2173\_STAAM

S-1484

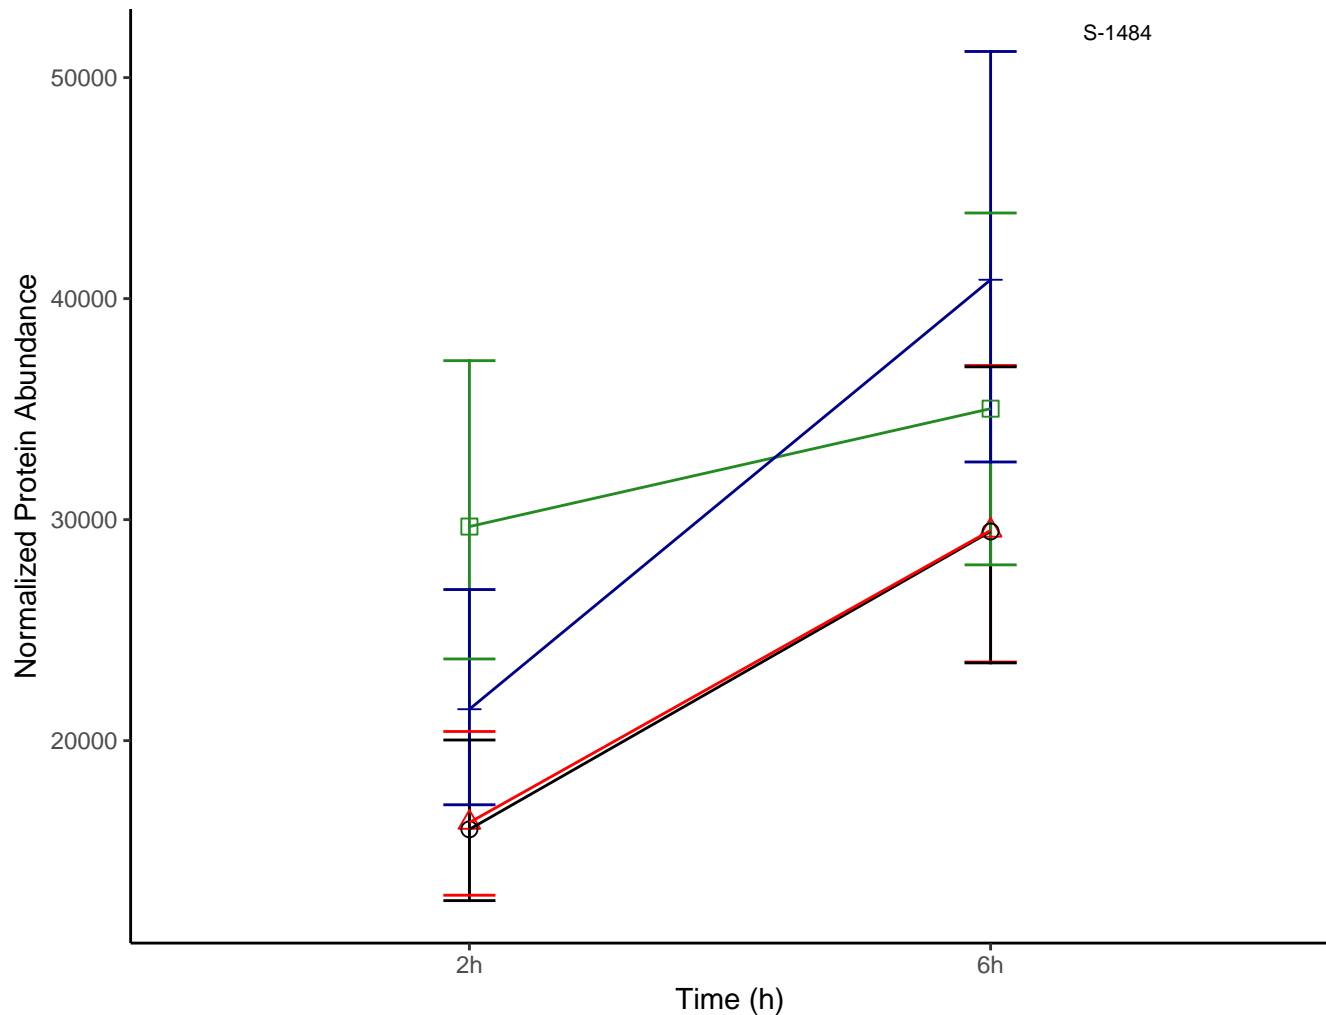

- SA564
- △ SA564-ΔhptRS
- SA564-ΔccpA
- + SA564-ΔhptRS/ccpA

## Y2204\_STAAM

S-1485

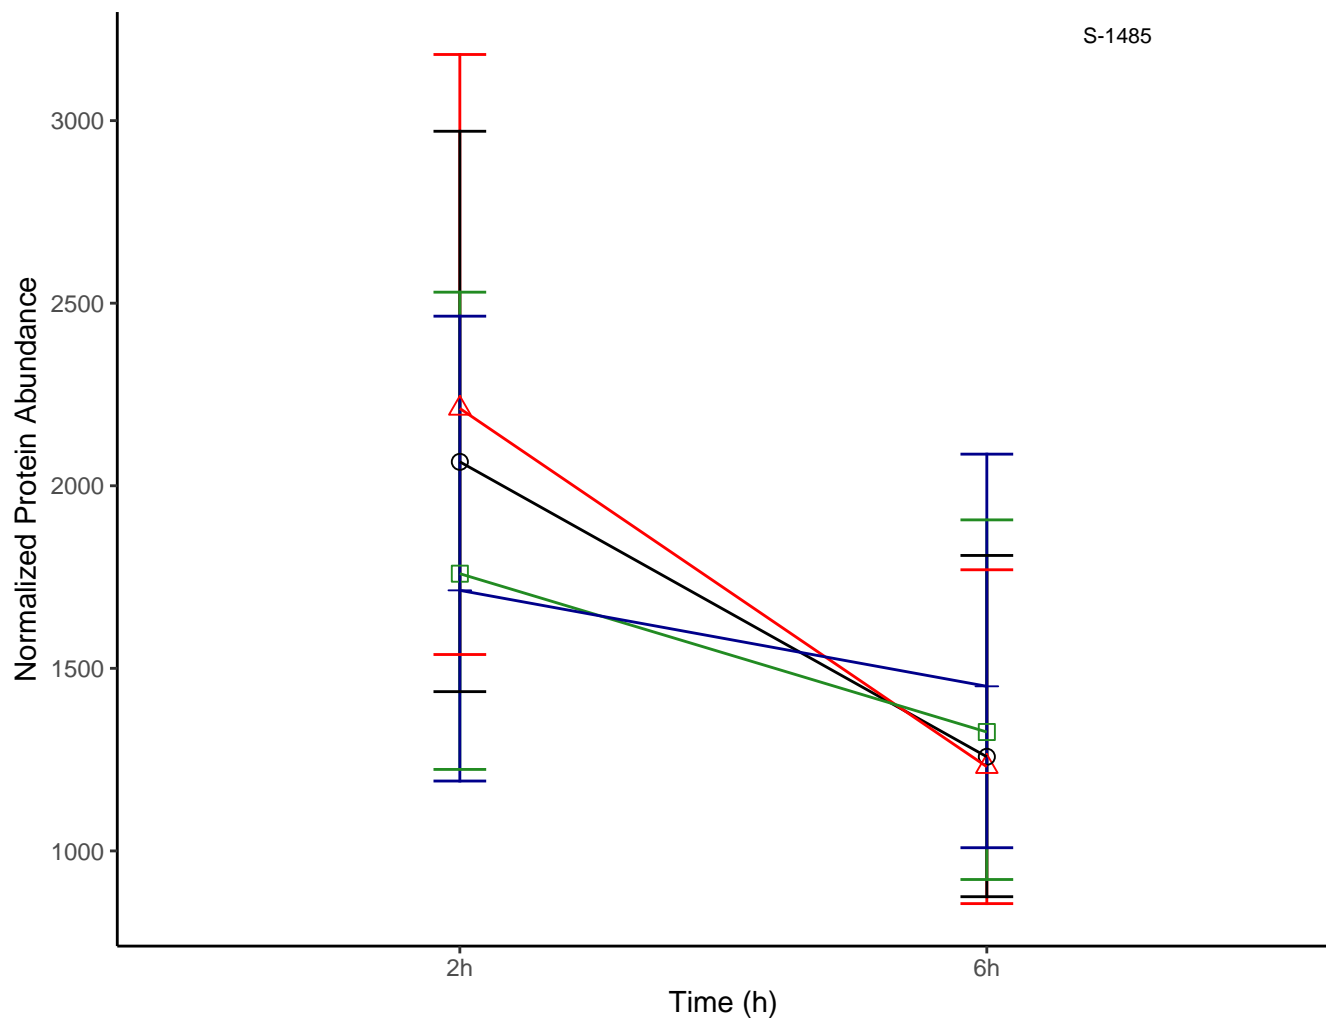

- SA564
- △ SA564- $\Delta$ *hptRS*
- SA564- $\Delta$ *ccpA*
- + SA564- $\Delta$ *hptRS/ccpA*

# Y2265\_STAAM

S-1486

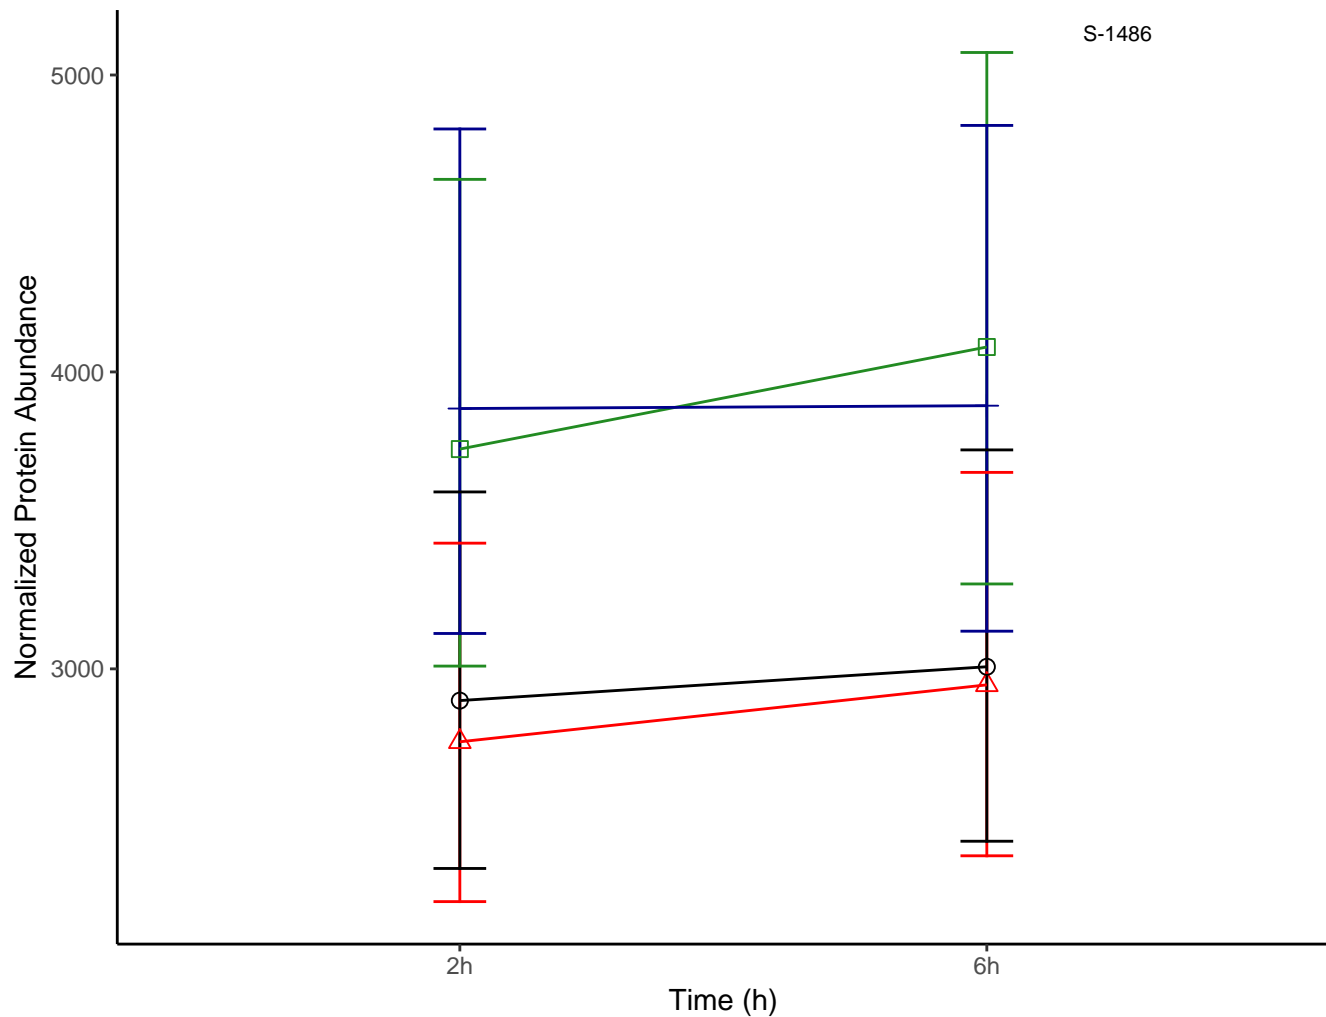

- SA564
- △ SA564- $\Delta$ *hptRS*
- SA564- $\Delta$ *ccpA*
- + SA564- $\Delta$ *hptRS/ccpA*

## Y2305\_STAAM

S-1487

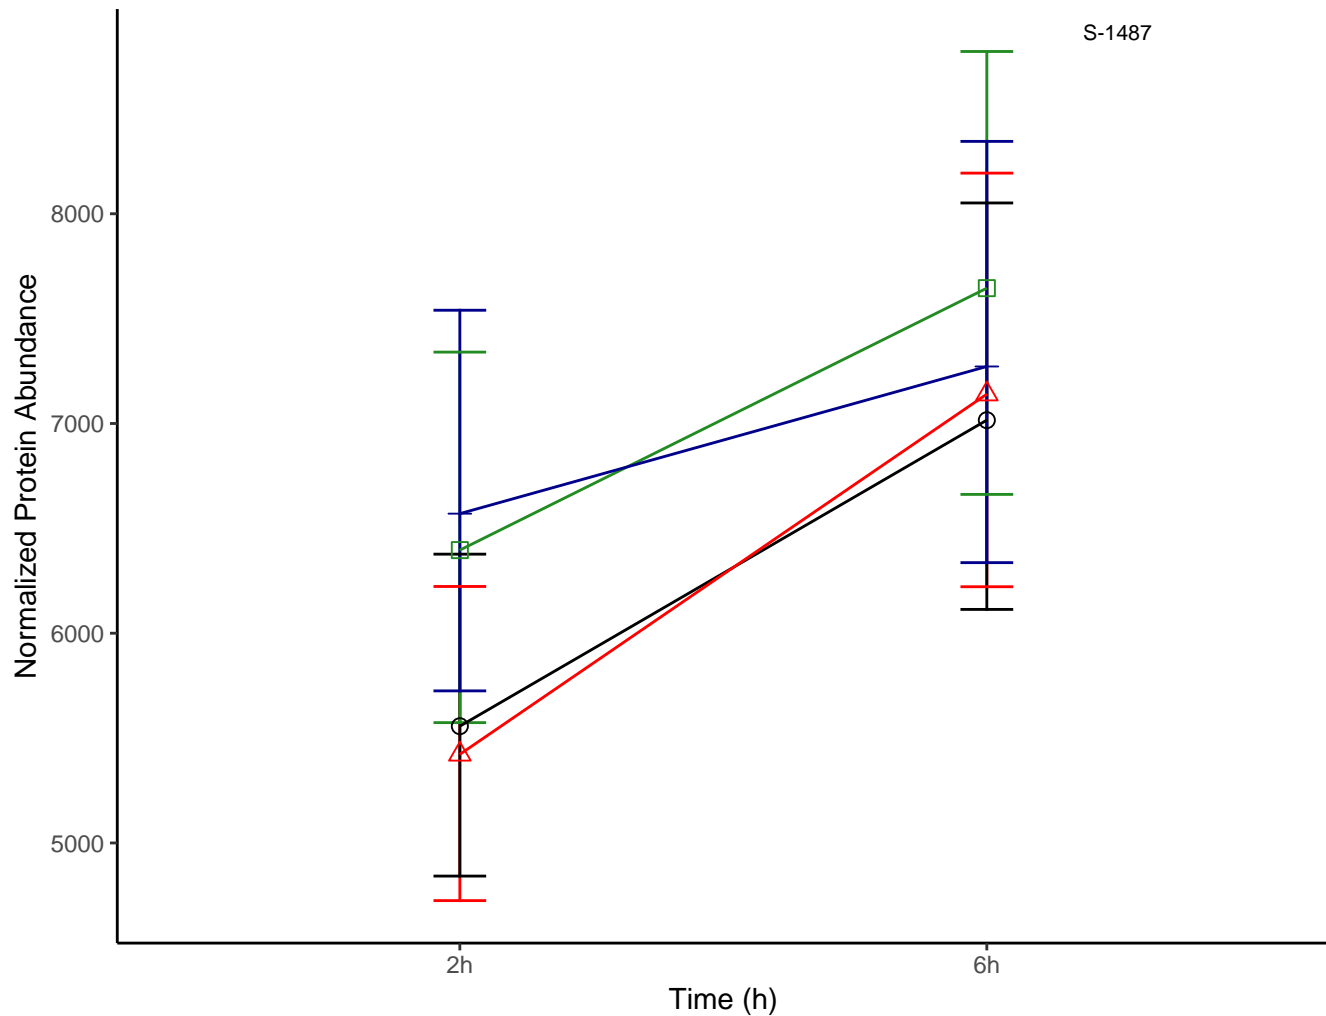

- SA564
- △ SA564- $\Delta$ *hptRS*
- SA564- $\Delta$ *ccpA*
- + SA564- $\Delta$ *hptRS/ccpA*

## Y2363\_STAAM

S-1488

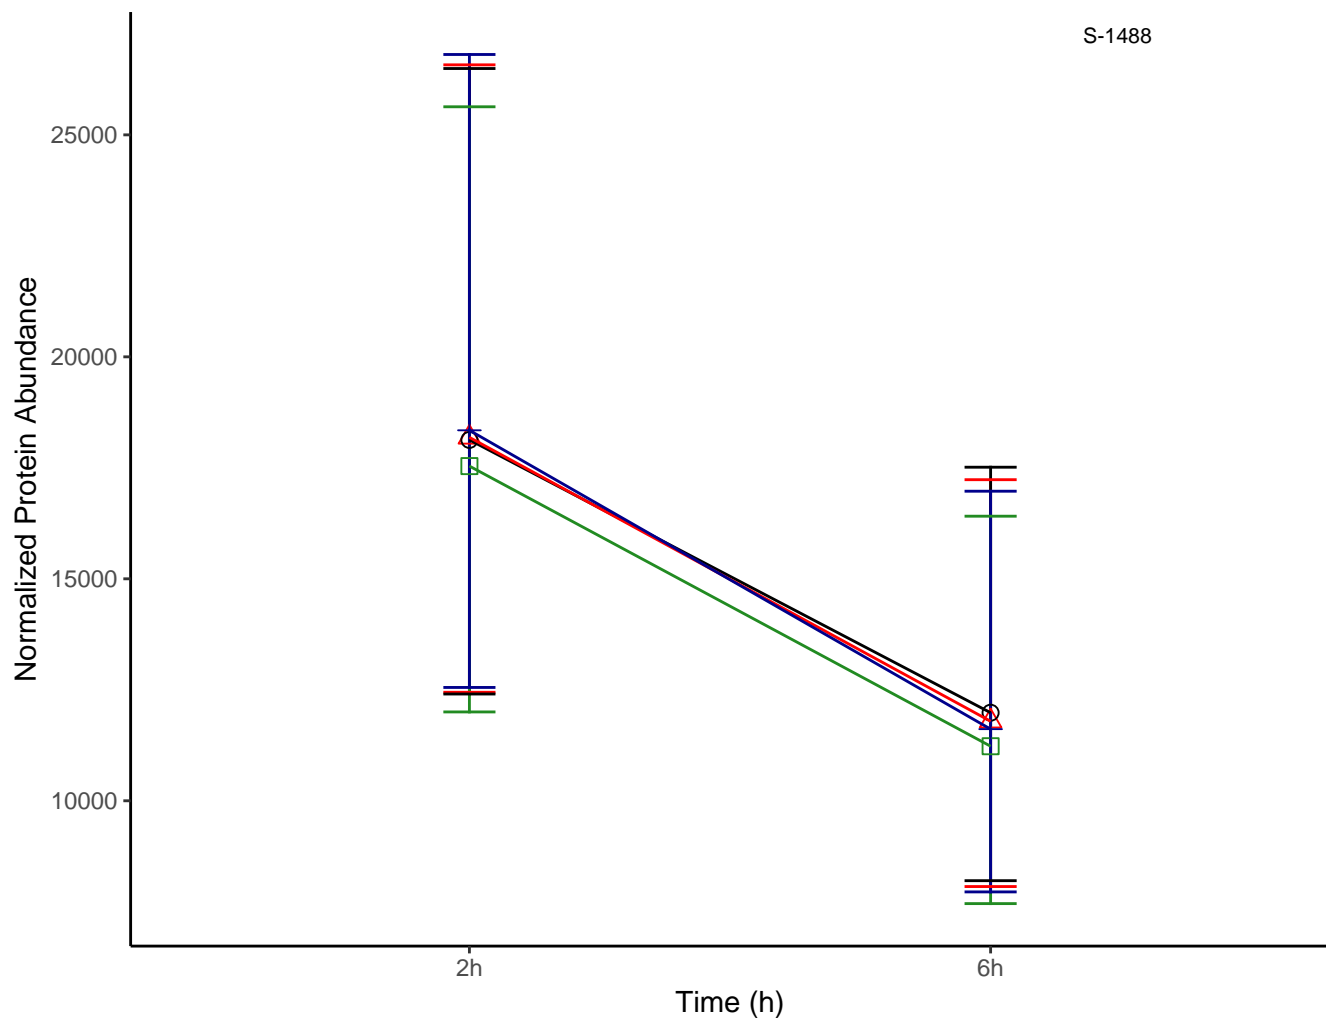

- SA564
- △ SA564- $\Delta hptRS$
- SA564- $\Delta ccpA$
- + SA564- $\Delta hptRS/ccpA$



# Y2368\_STAAM

S-1489

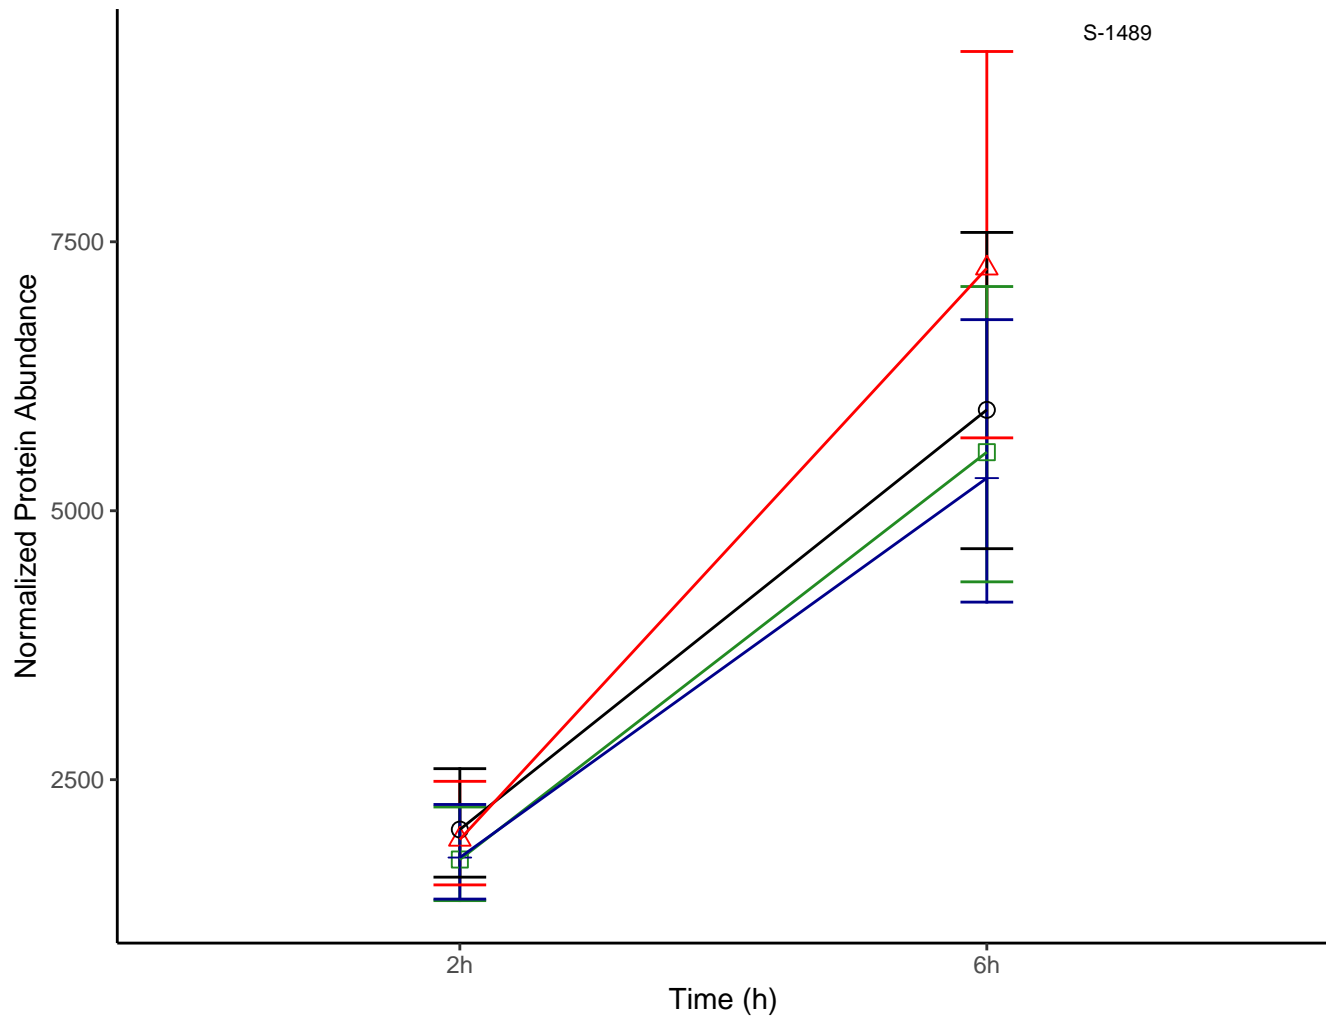

- SA564
- △ SA564- $\Delta hptRS$
- SA564- $\Delta ccpA$
- + SA564- $\Delta hptRS/ccpA$

## Y2478\_STAAM

S-1490

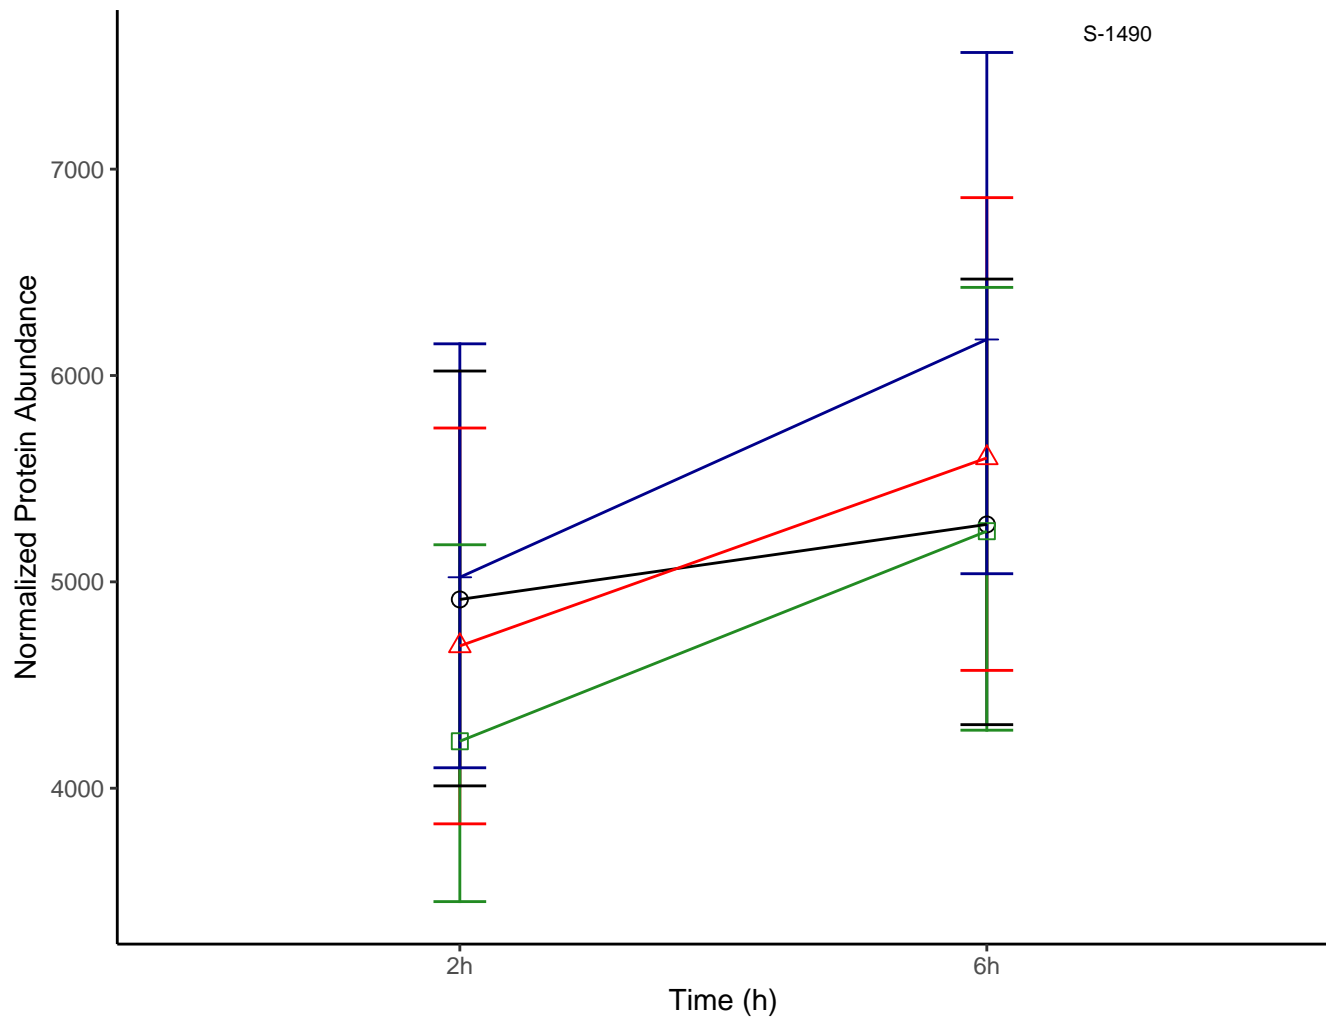

- SA564
- △ SA564- $\Delta hptRS$
- SA564- $\Delta ccpA$
- + SA564- $\Delta hptRS/ccpA$

## Y2523\_STAAM

S-1491

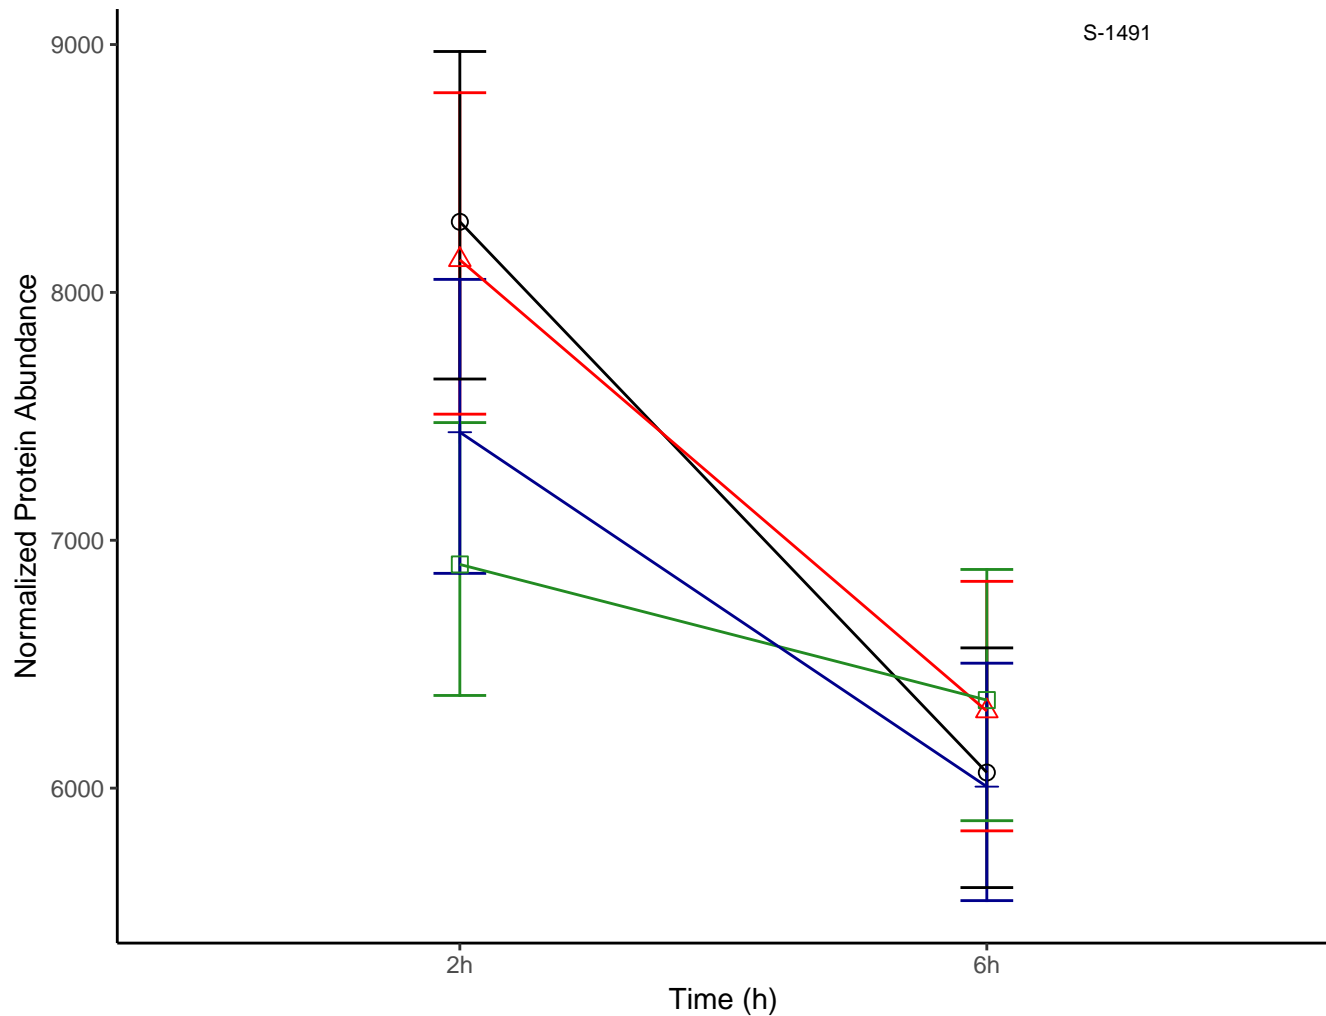

- SA564
- △ SA564- $\Delta hptRS$
- SA564- $\Delta ccpA$
- + SA564- $\Delta hptRS/ccpA$

# Y2573\_STAAM

S-1492

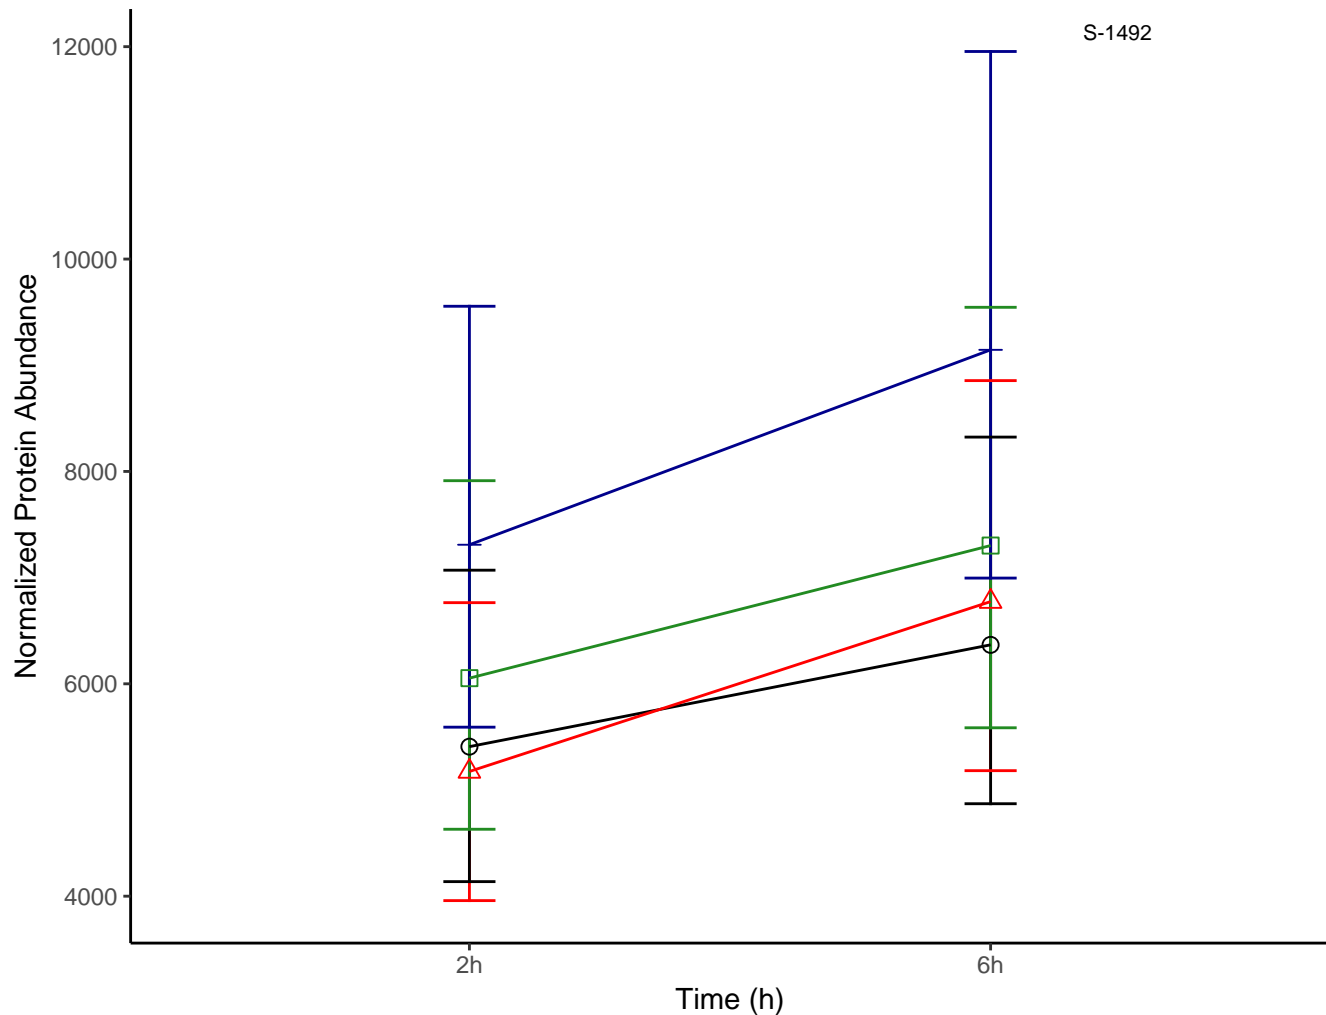

- SA564
- △ SA564- $\Delta$ hptRS
- SA564- $\Delta$ ccpA
- + SA564- $\Delta$ hptRS/ccpA

## Y2578\_STAAM

S-1493

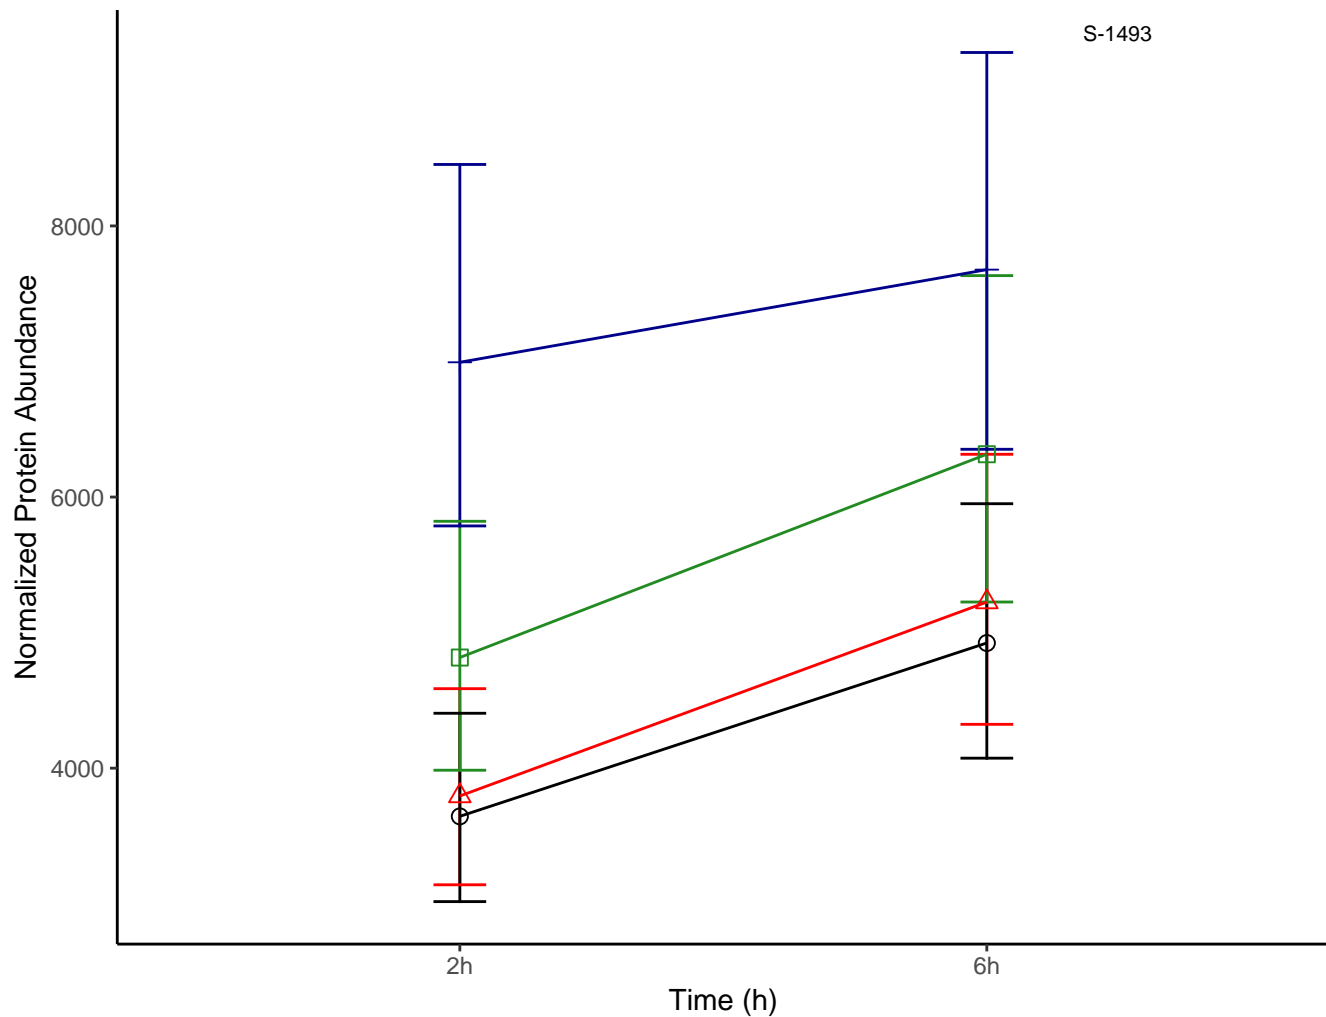

- SA564
- △ SA564- $\Delta$ *hptRS*
- SA564- $\Delta$ *ccpA*
- + SA564- $\Delta$ *hptRS/ccpA*

## Y2581\_STAAM

S-1494

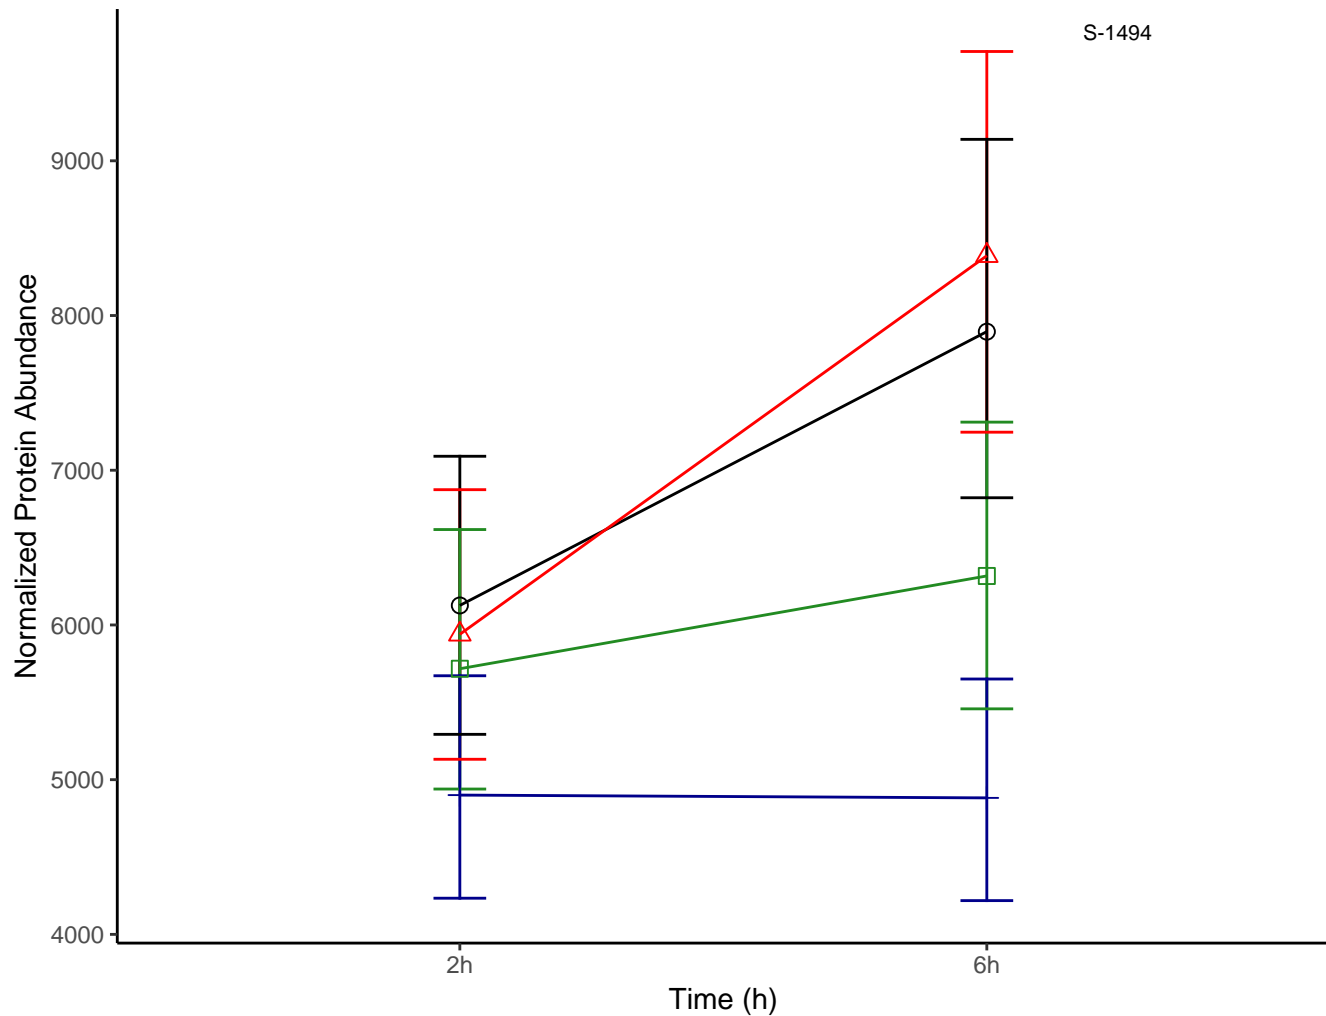

- SA564
- △ SA564- $\Delta hptRS$
- SA564- $\Delta ccpA$
- + SA564- $\Delta hptRS/ccpA$

# Y2627\_STAAM

S-1495

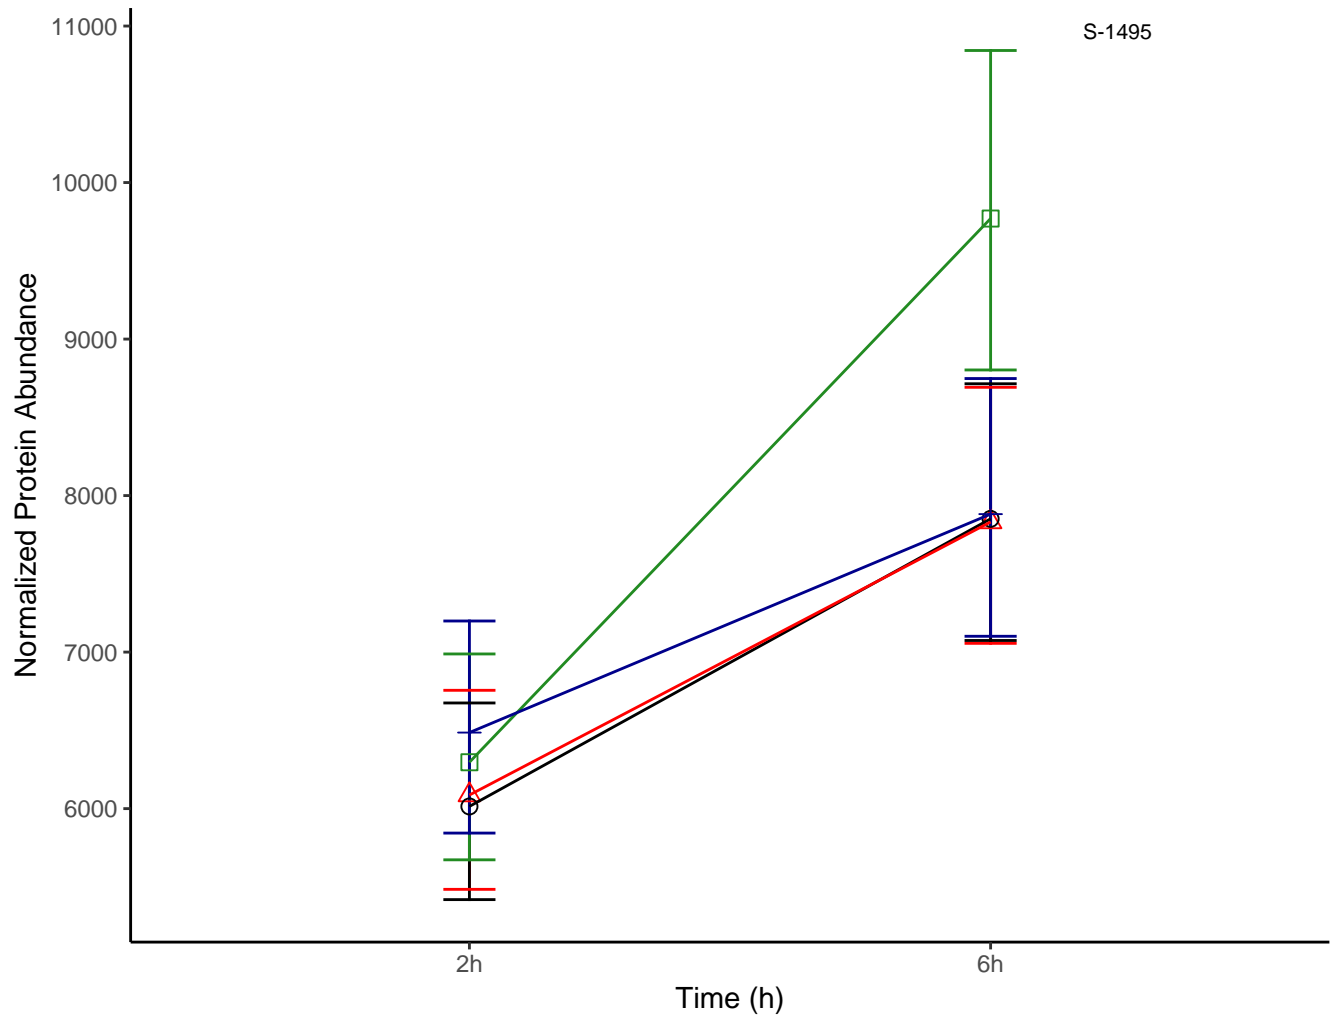

- SA564
- △ SA564- $\Delta hptRS$
- SA564- $\Delta ccpA$
- + SA564- $\Delta hptRS/ccpA$

# Y2687\_STAAM

S-1496

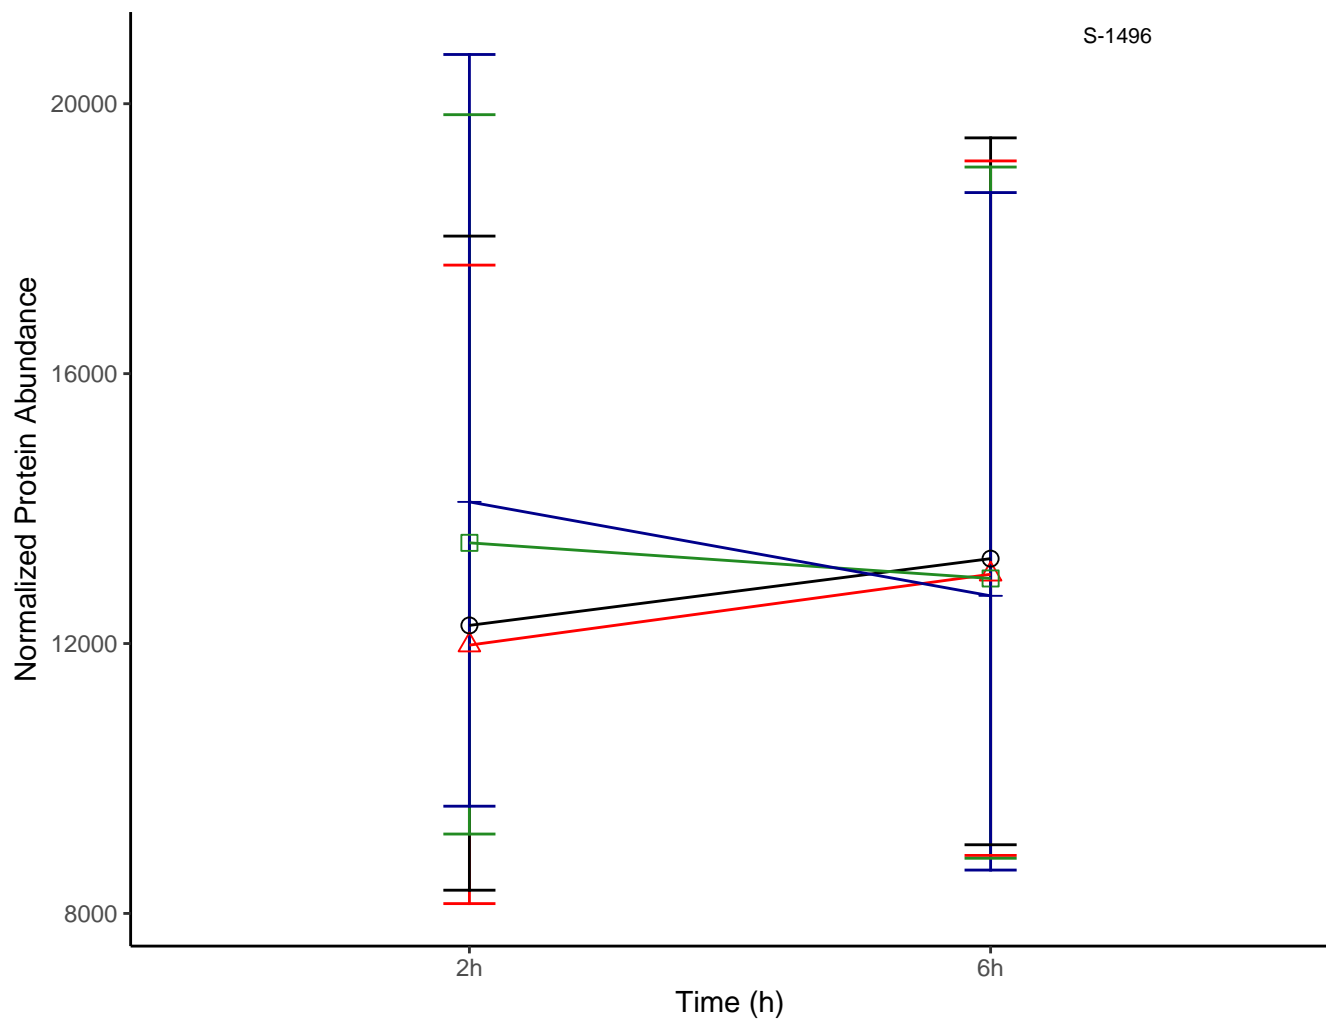

- SA564
- △ SA564- $\Delta$ *hptRS*
- SA564- $\Delta$ *ccpA*
- + SA564- $\Delta$ *hptRS/ccpA*



# Y2689\_STAAM

S-1497

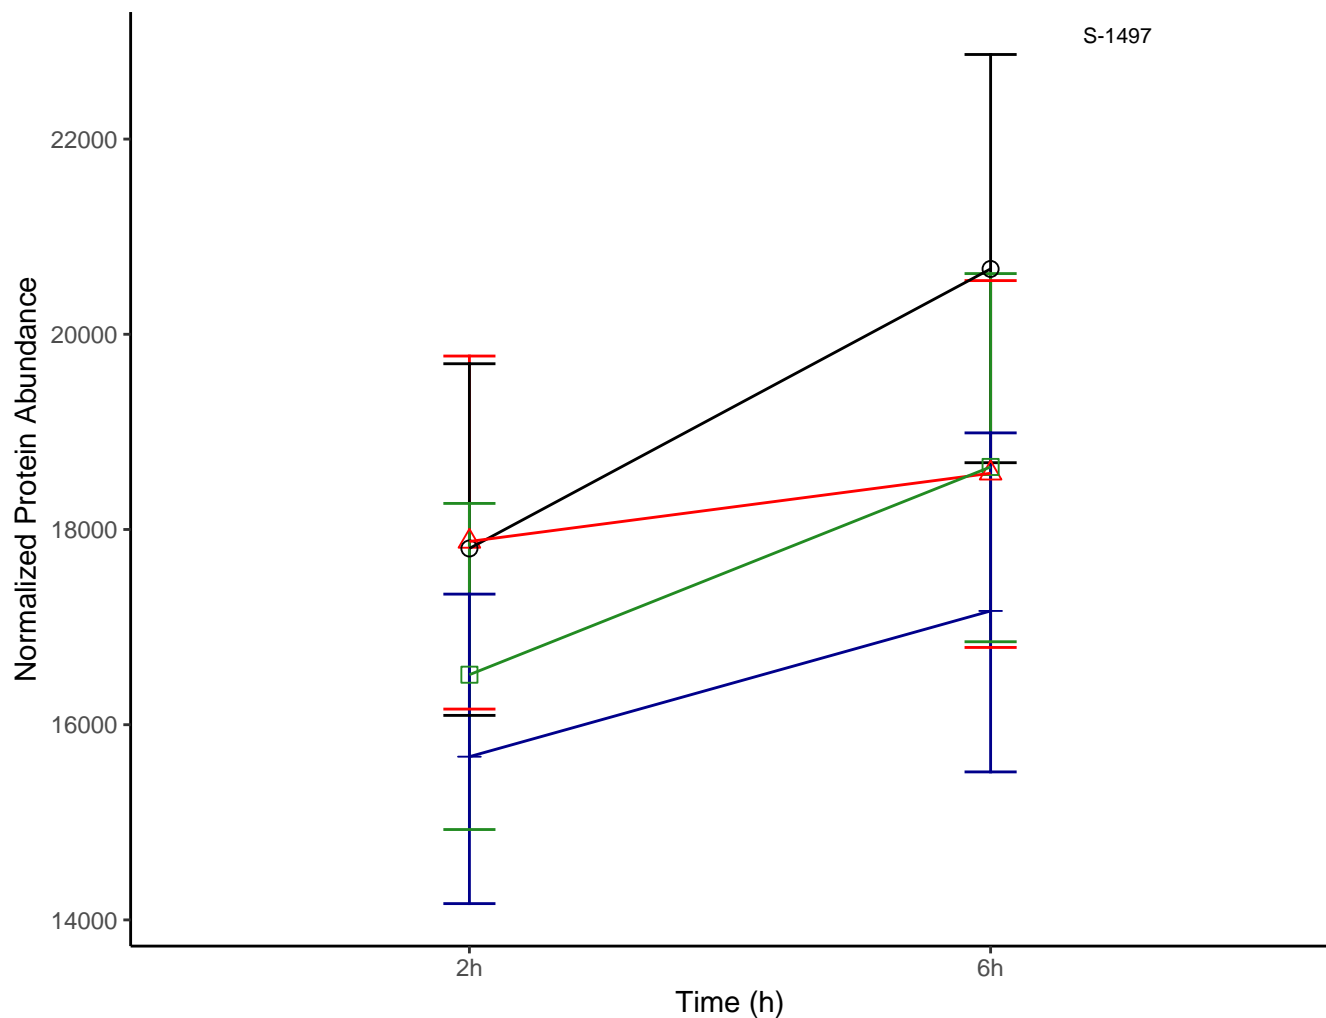

- SA564
- △ SA564- $\Delta$ hptRS
- SA564- $\Delta$ ccpA
- + SA564- $\Delta$ hptRS/ccpA

# Y385\_STAAM

S-1498

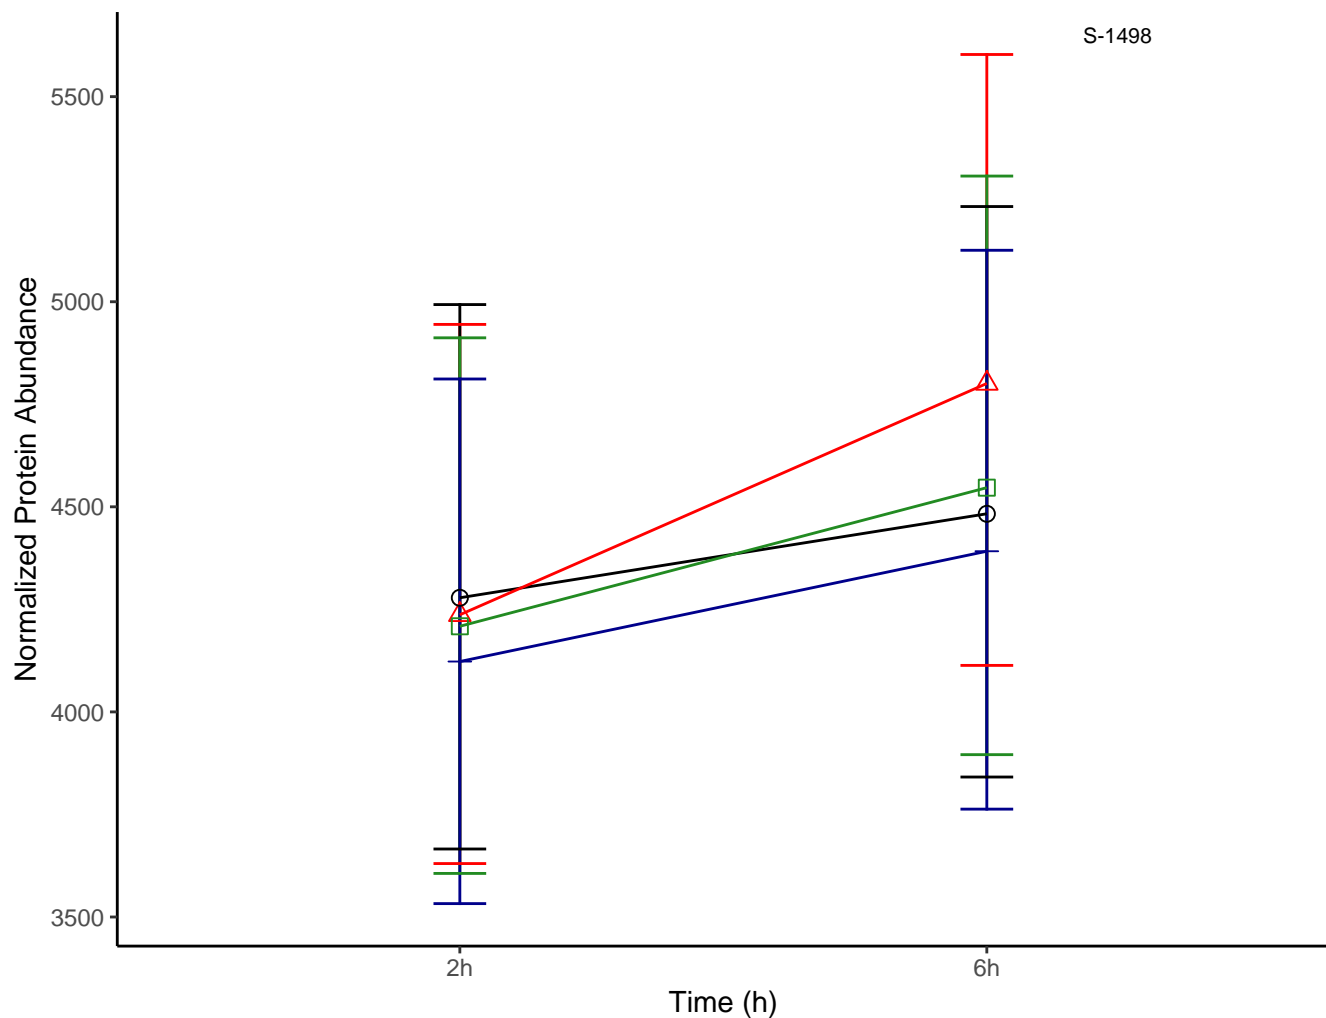

- SA564
- △ SA564- $\Delta$ *hptRS*
- SA564- $\Delta$ *ccpA*
- + SA564- $\Delta$ *hptRS/ccpA*

## Y437\_STAAM

S-1499

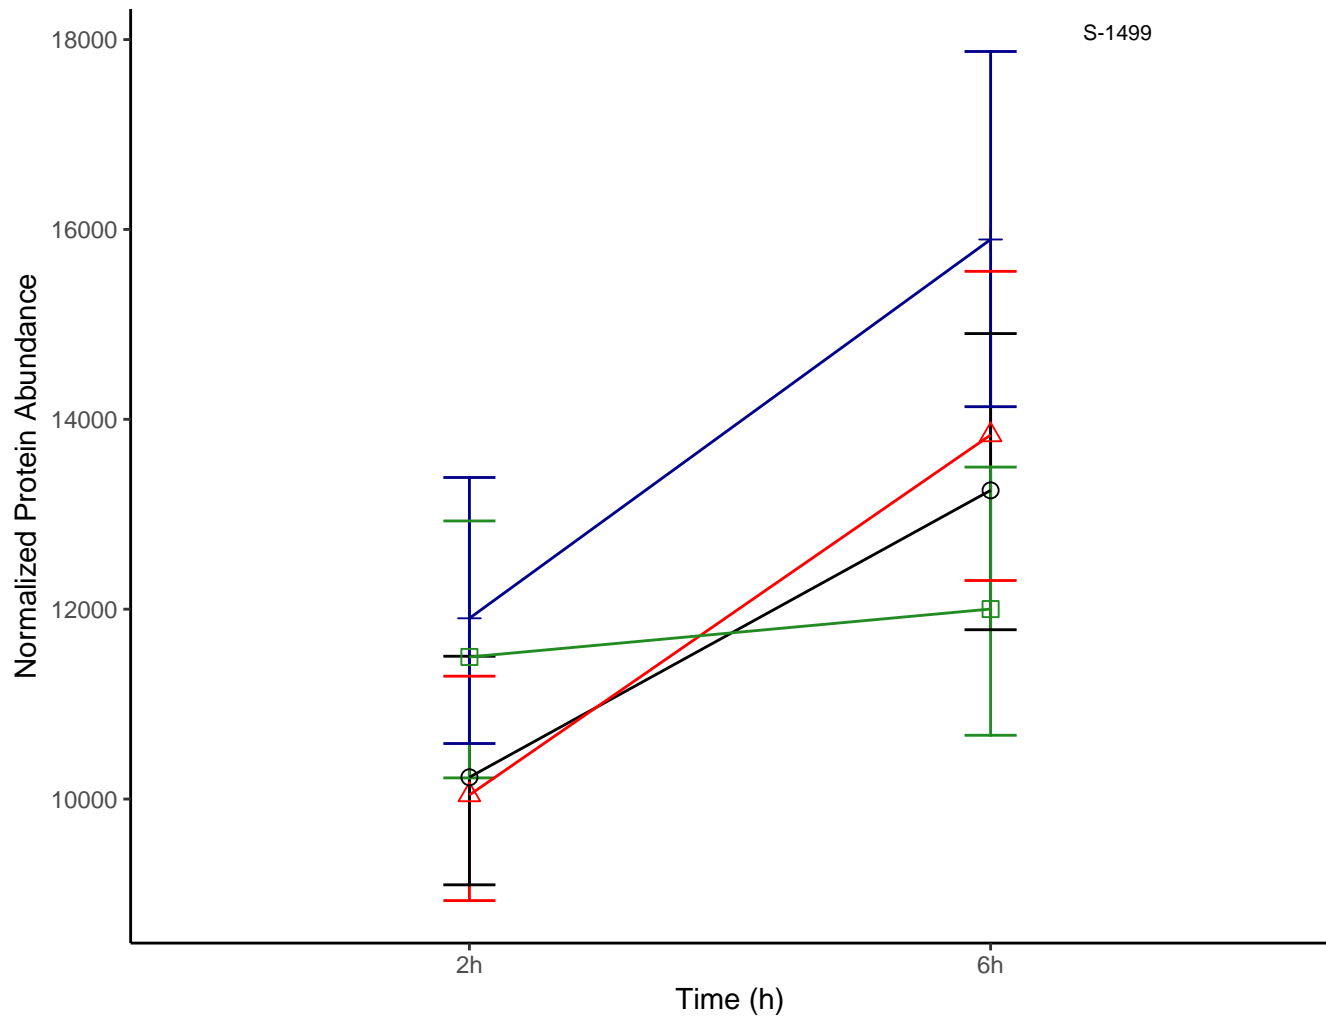

- SA564
- △ SA564- $\Delta hptRS$
- SA564- $\Delta ccpA$
- + SA564- $\Delta hptRS/ccpA$

# Y479\_STAAM

S-1500

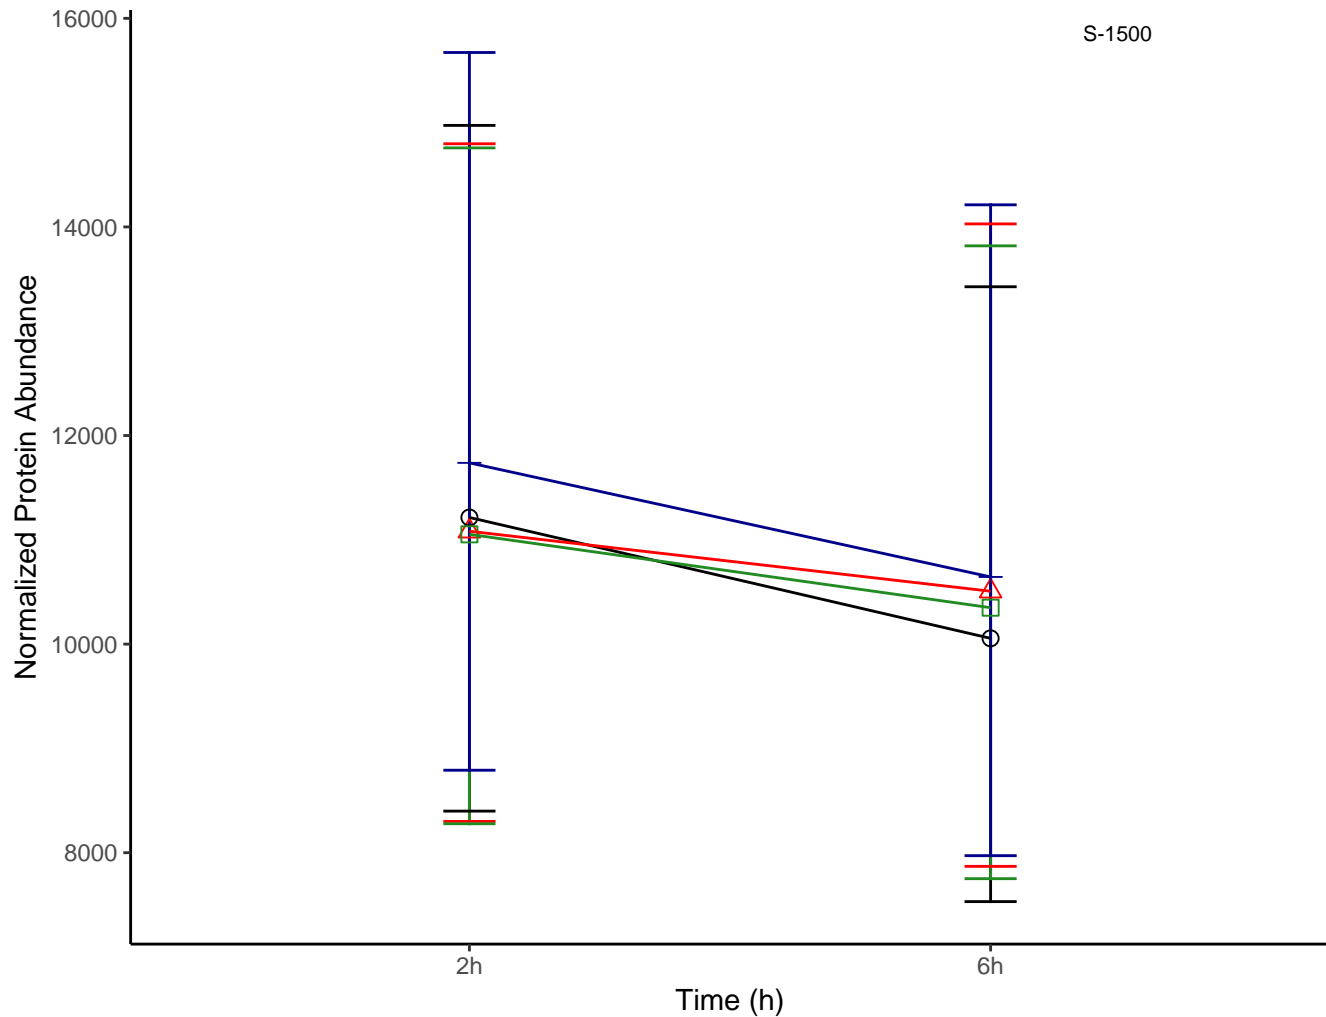

- SA564
- △ SA564- $\Delta hptRS$
- SA564- $\Delta ccpA$
- + SA564- $\Delta hptRS/ccpA$

## Y553\_STAAM

S-1501

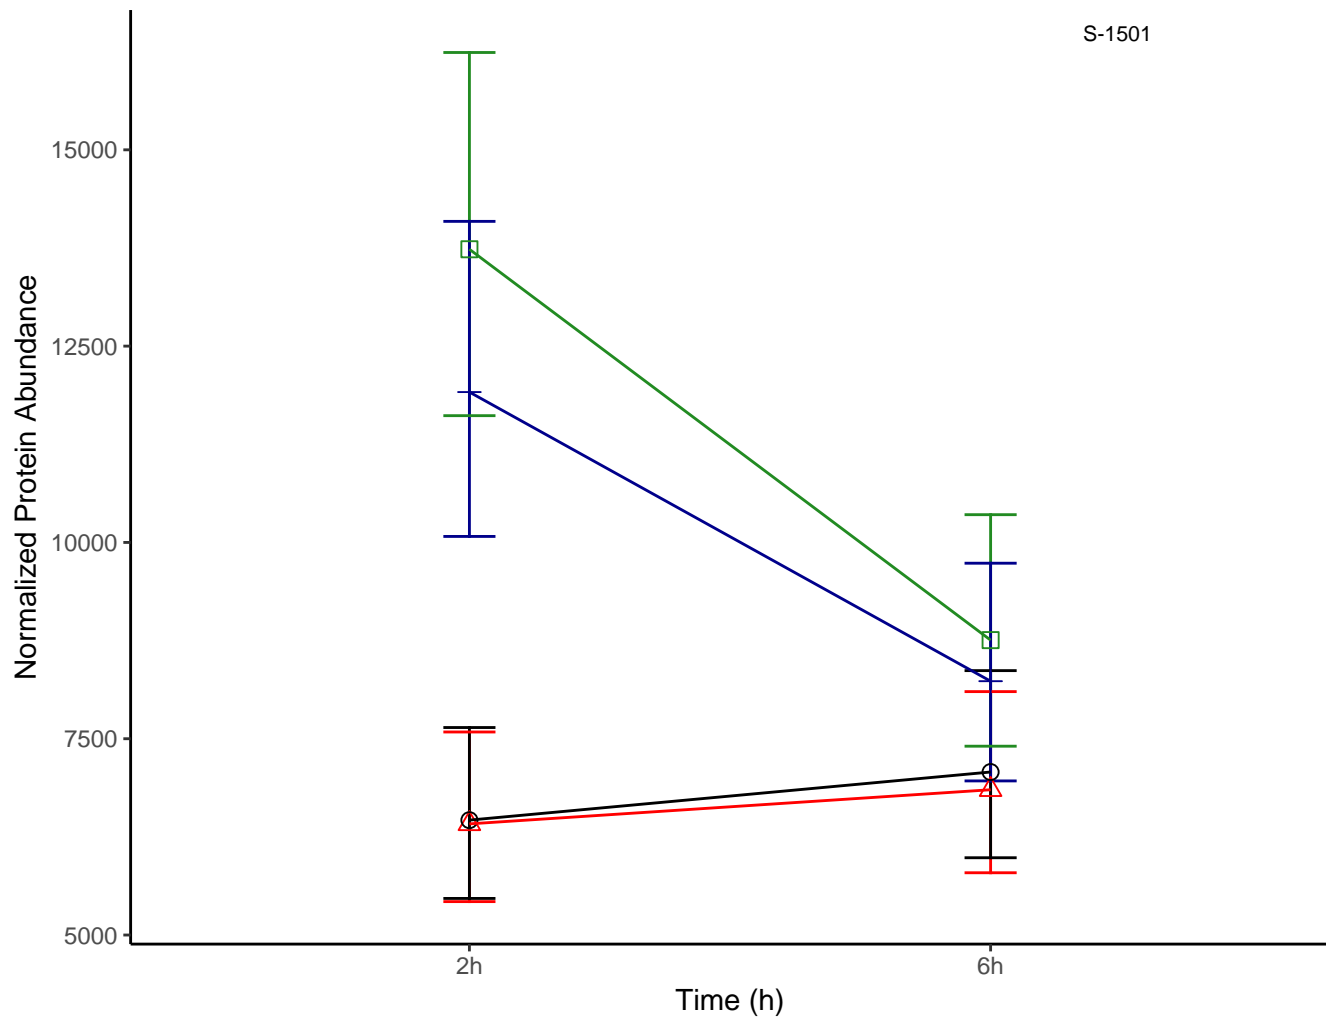

- SA564
- △ SA564- $\Delta$ hptRS
- SA564- $\Delta$ ccpA
- + SA564- $\Delta$ hptRS/ccpA

# Y587\_STAAM

S-1502

Normalized Protein Abundance

15000

10000

2h

6h

Time (h)

- SA564
- △ SA564- $\Delta$ *hptRS*
- SA564- $\Delta$ *ccpA*
- + SA564- $\Delta$ *hptRS/ccpA*

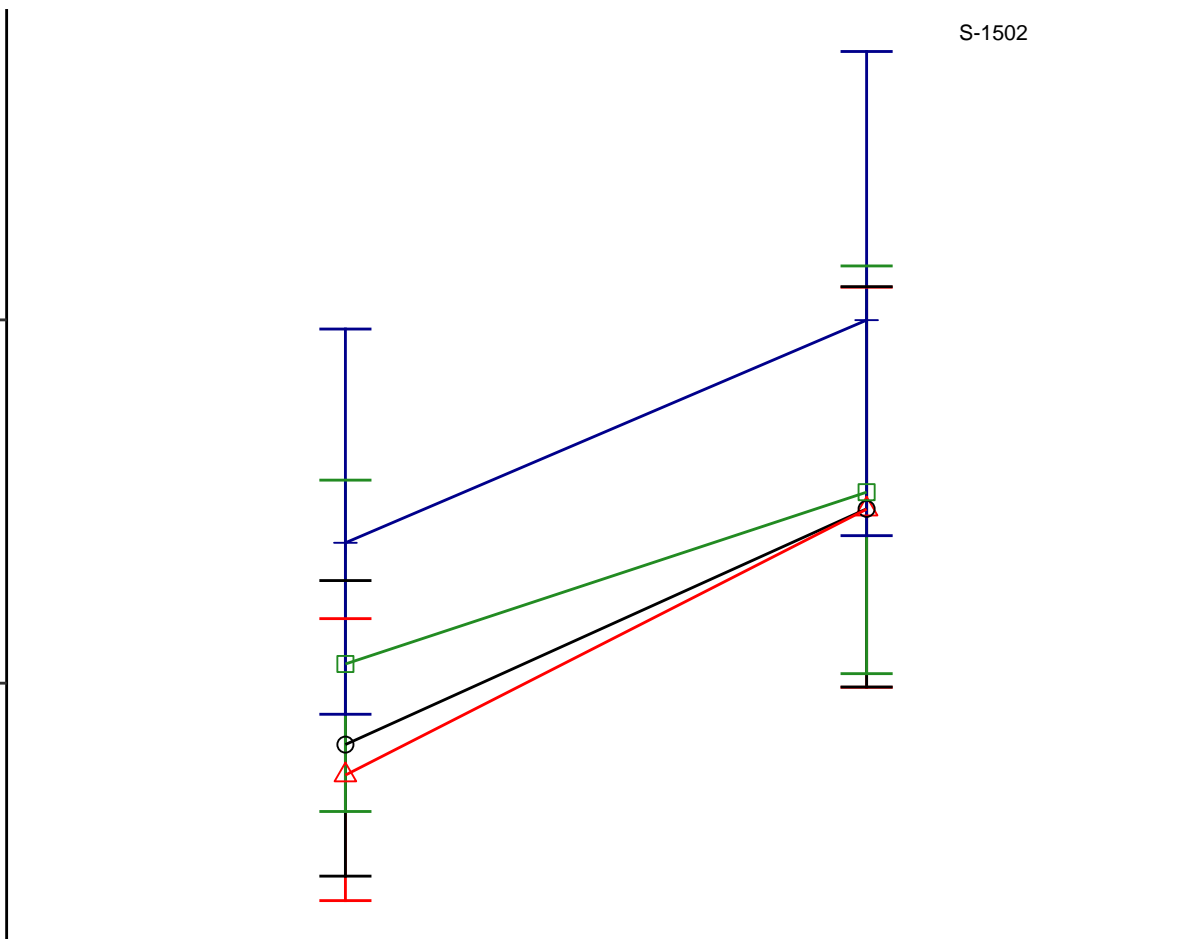

# Y669\_STAAM

S-1503

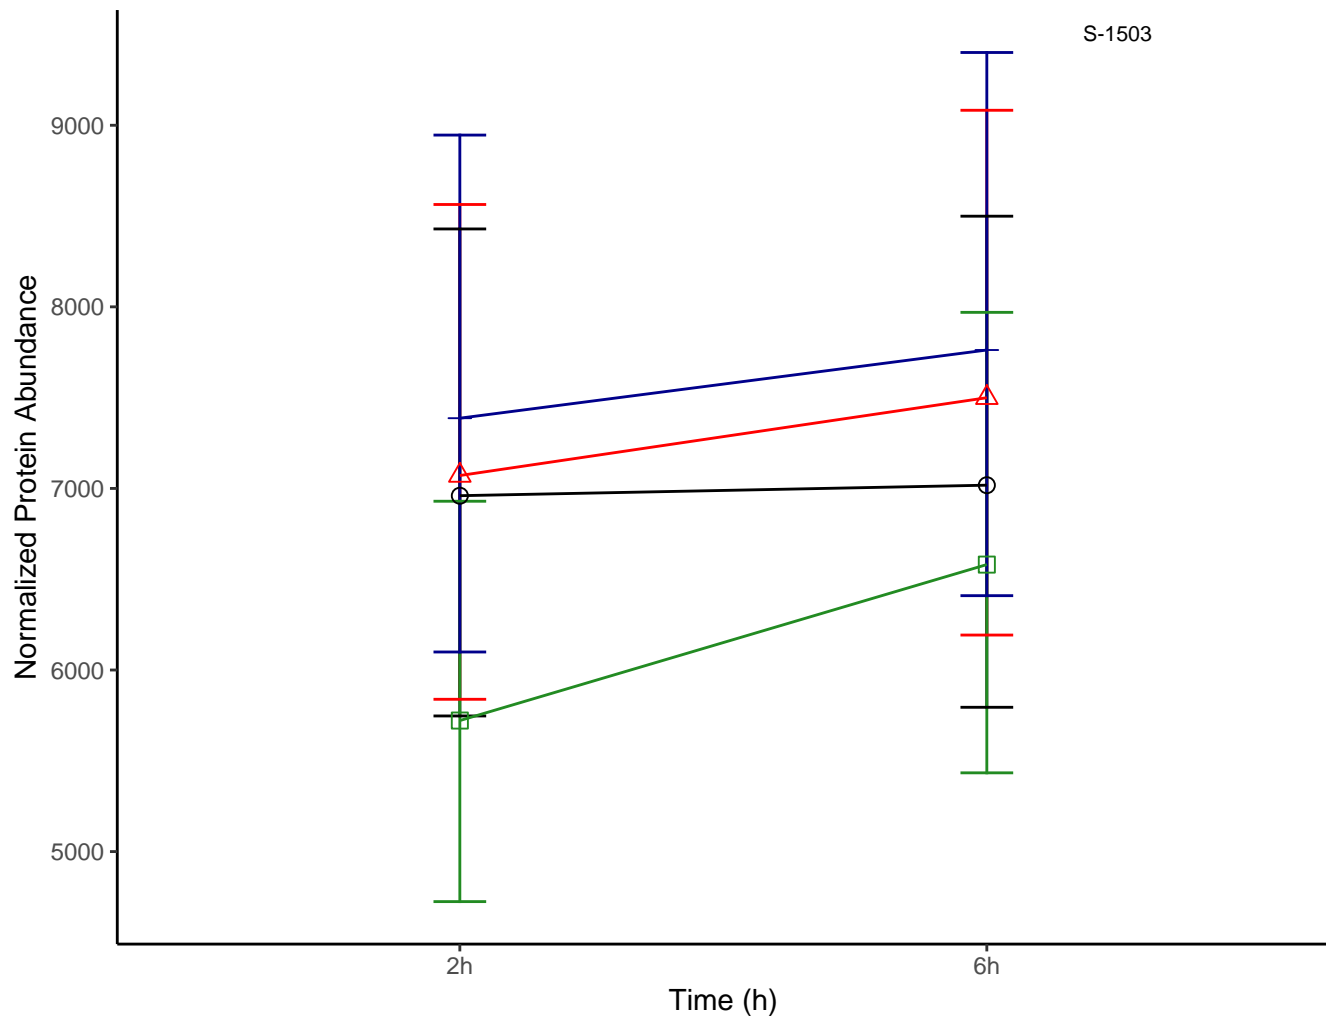

- SA564
- △ SA564- $\Delta hptRS$
- SA564- $\Delta ccpA$
- + SA564- $\Delta hptRS/ccpA$

# Y752\_STAAM

S-1504

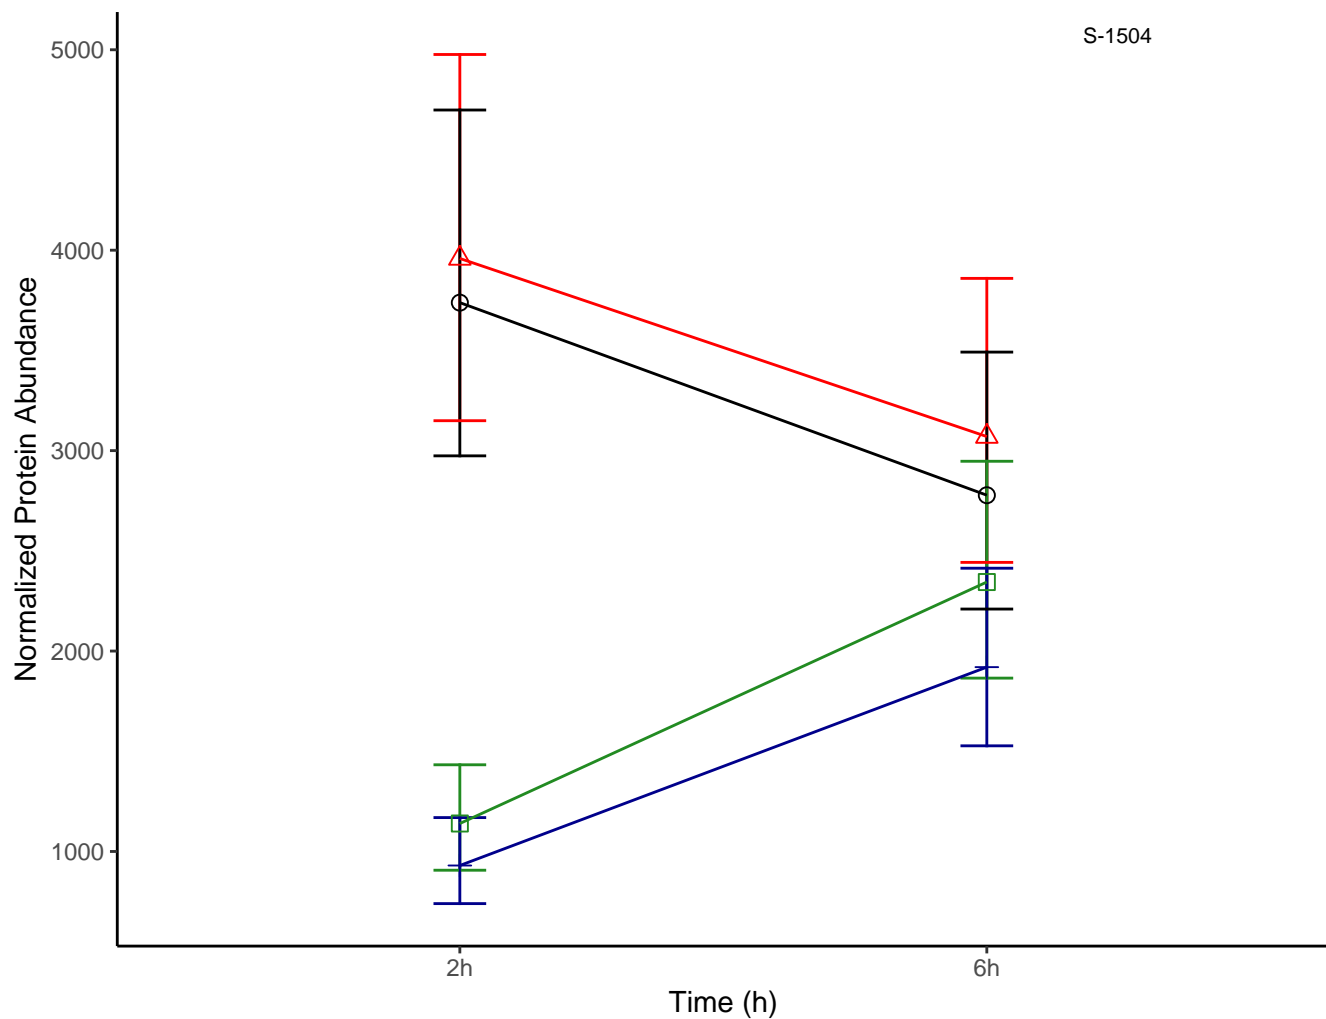

- SA564
- △ SA564- $\Delta$ *hptRS*
- SA564- $\Delta$ *ccpA*
- + SA564- $\Delta$ *hptRS/ccpA*



# Y765\_STAAM

S-1505

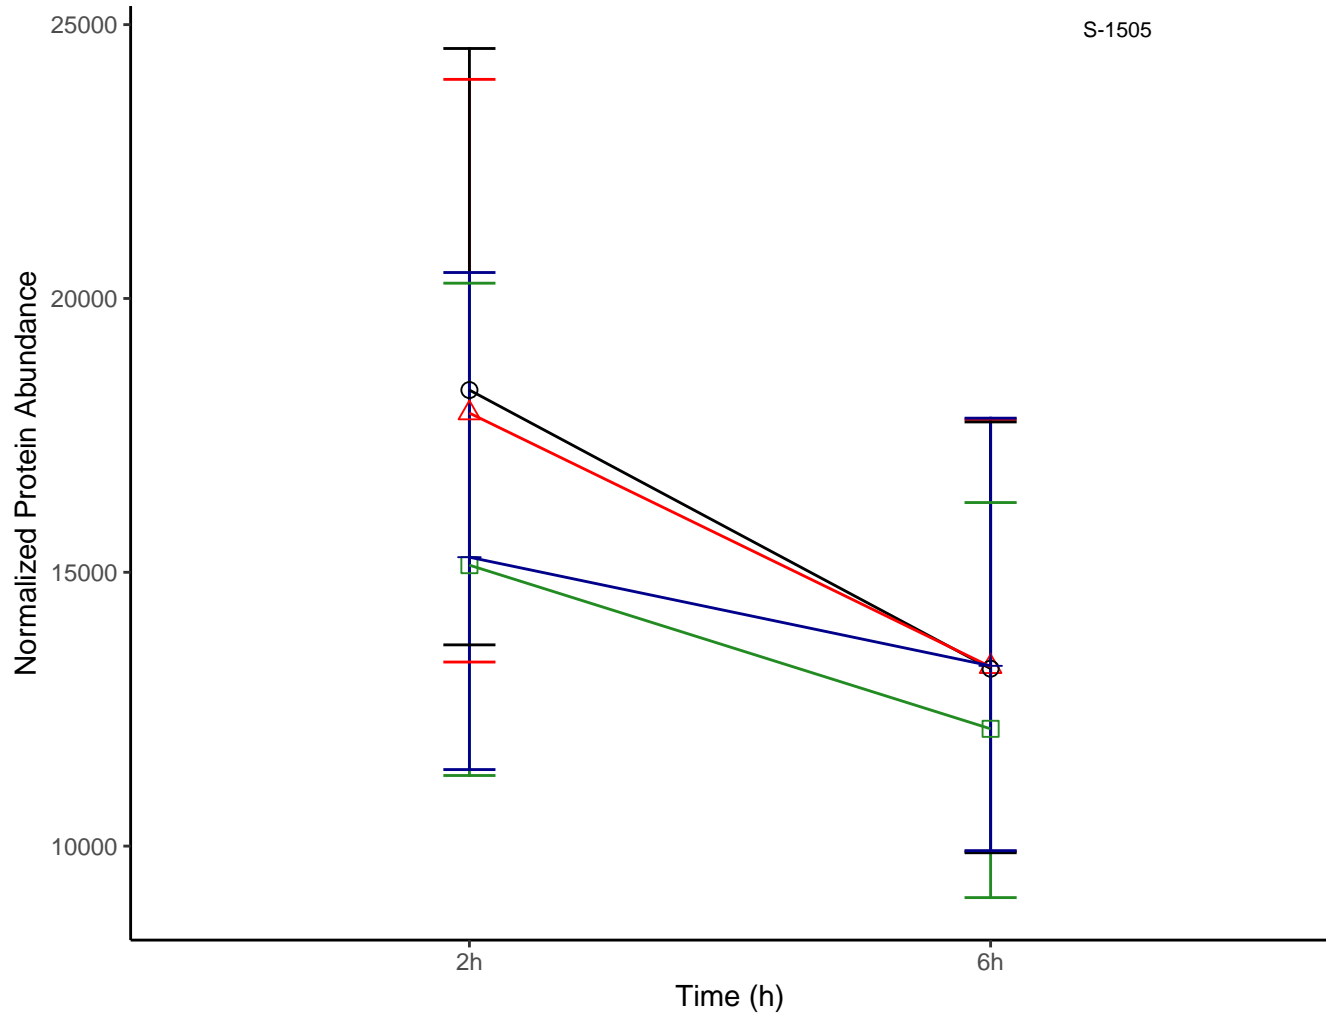

- SA564
- △ SA564- $\Delta hptRS$
- SA564- $\Delta ccpA$
- ⊕ SA564- $\Delta hptRS/ccpA$

# Y769\_STAAM

S-1506

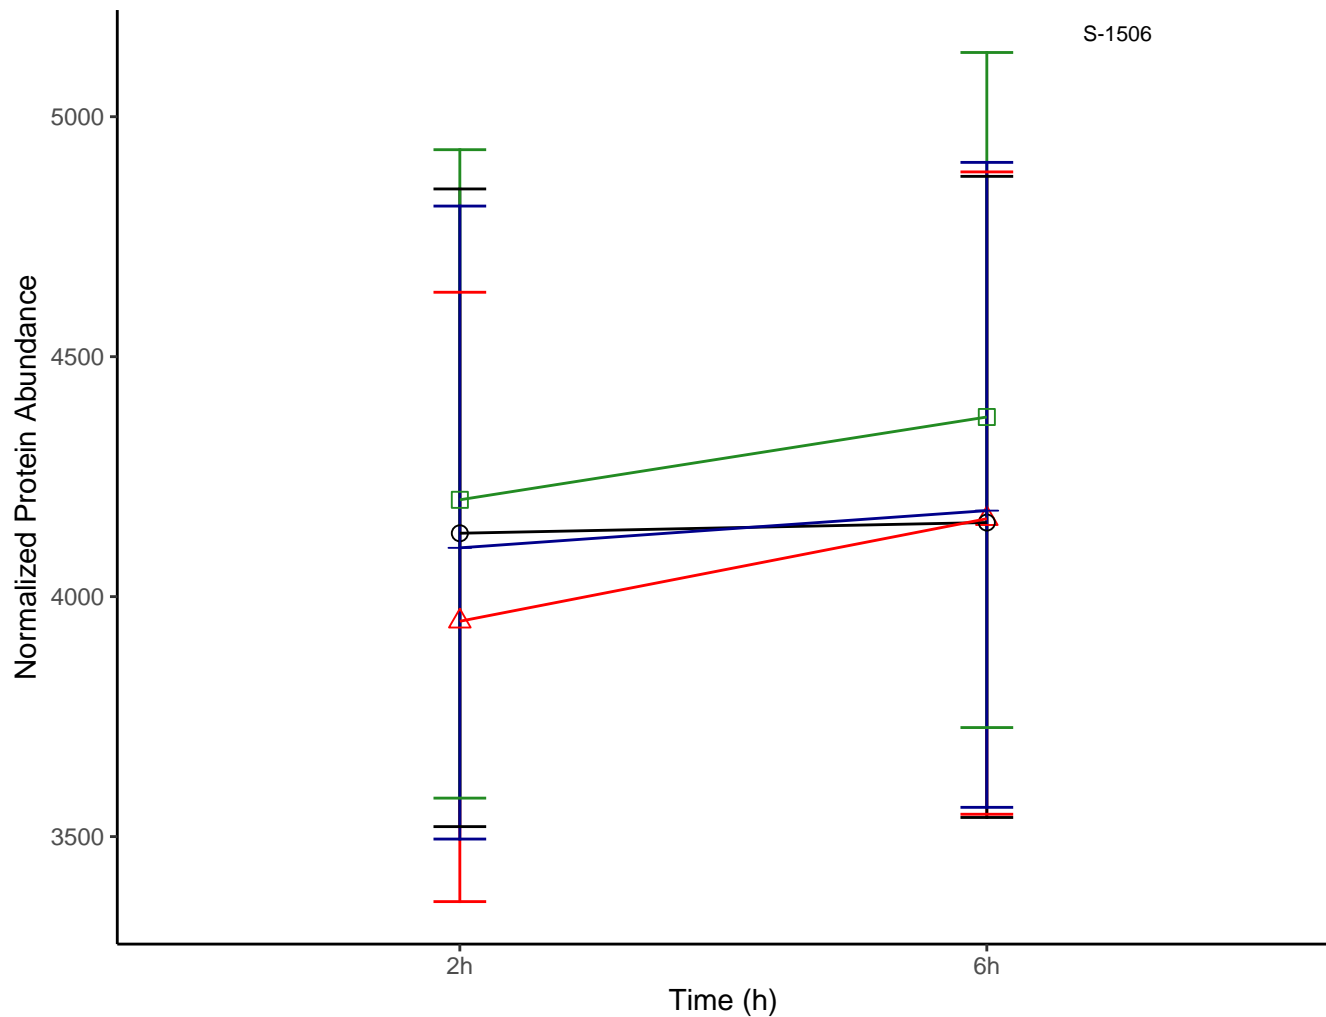

- SA564
- △ SA564- $\Delta$ *hptRS*
- SA564- $\Delta$ *ccpA*
- + SA564- $\Delta$ *hptRS/ccpA*

# Y840\_STAAM

S-1507

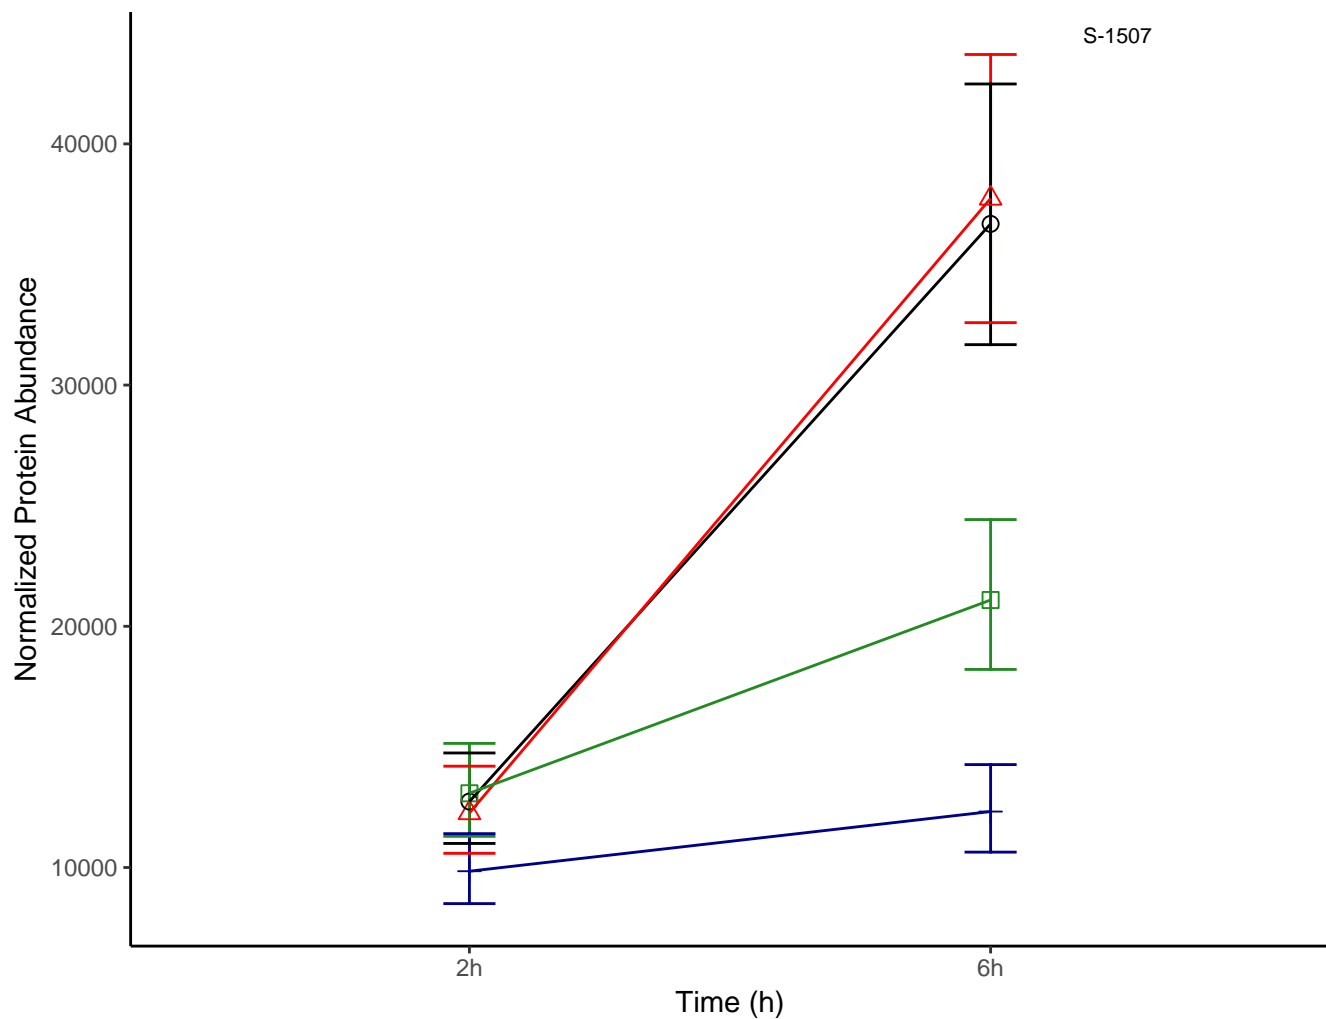

- SA564
- △ SA564- $\Delta hptRS$
- SA564- $\Delta ccpA$
- + SA564- $\Delta hptRS/ccpA$

## Y846\_STAAM

S-1508

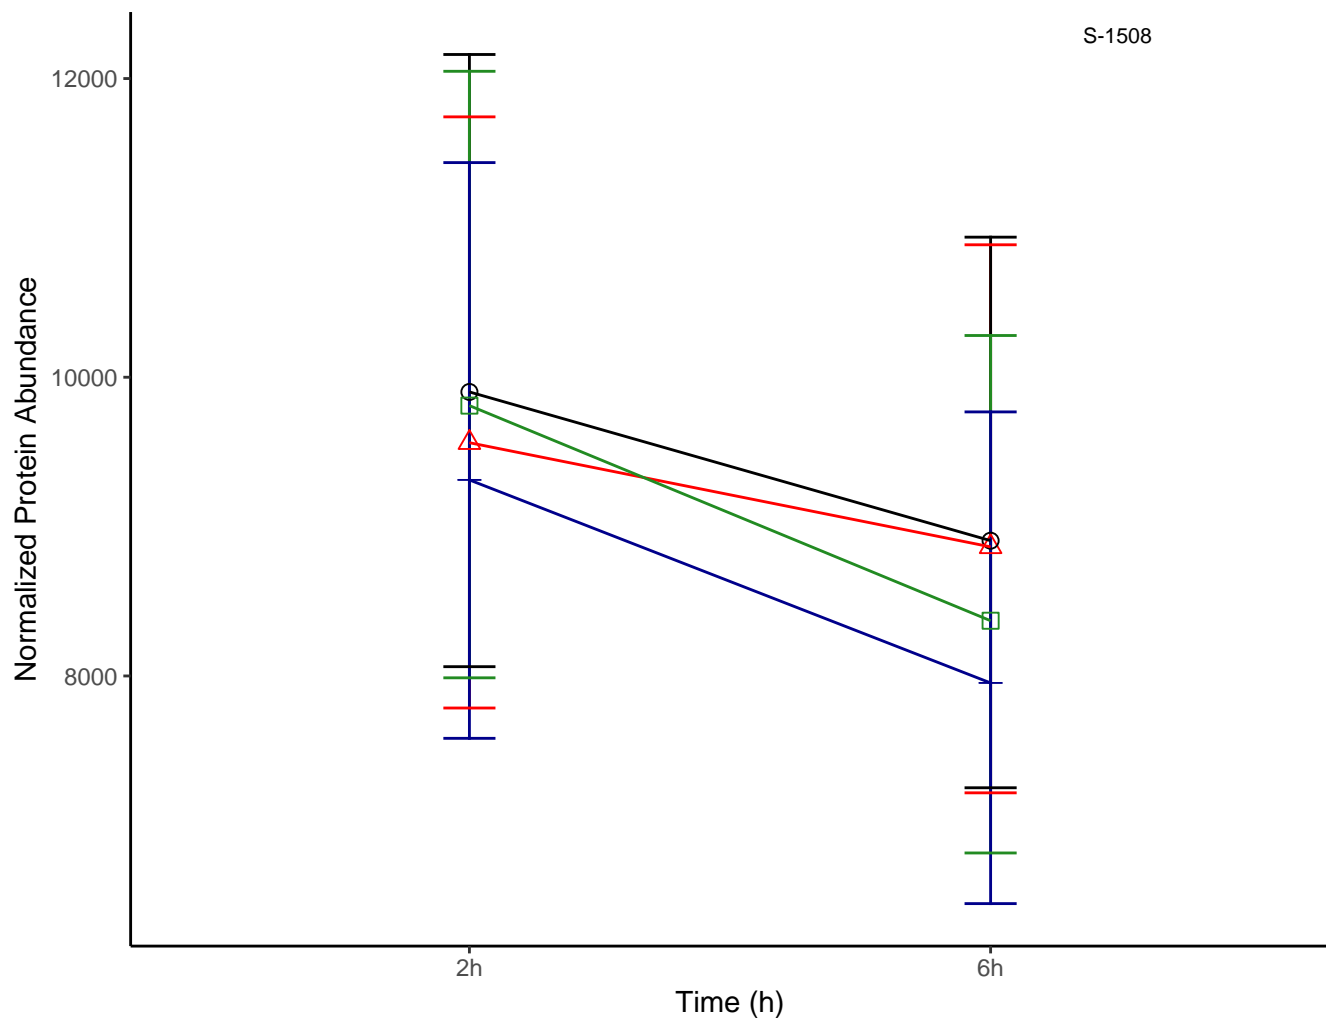

- SA564
- △ SA564- $\Delta hptRS$
- SA564- $\Delta ccpA$
- + SA564- $\Delta hptRS/ccpA$

## Y941\_STAAM

S-1509

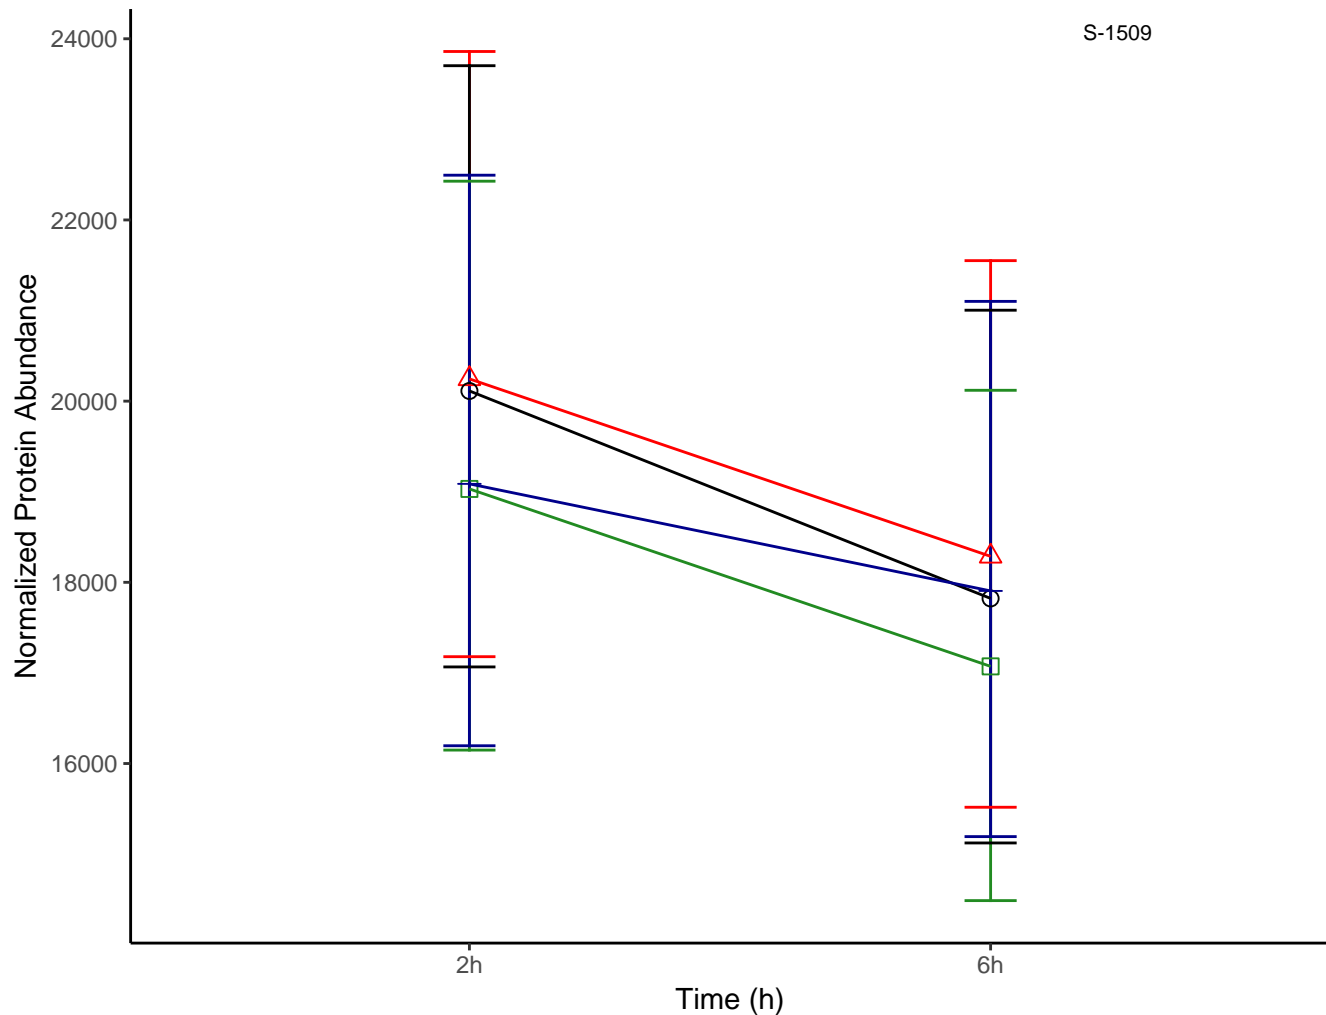

- SA564
- △ SA564- $\Delta hptRS$
- SA564- $\Delta ccpA$
- + SA564- $\Delta hptRS/ccpA$

# Y968\_STAAM

S-1510

Normalized Protein Abundance

17500  
15000  
12500  
10000

2h

6h

Time (h)

- SA564
- △ SA564- $\Delta hptRS$
- SA564- $\Delta ccpA$
- + SA564- $\Delta hptRS/ccpA$

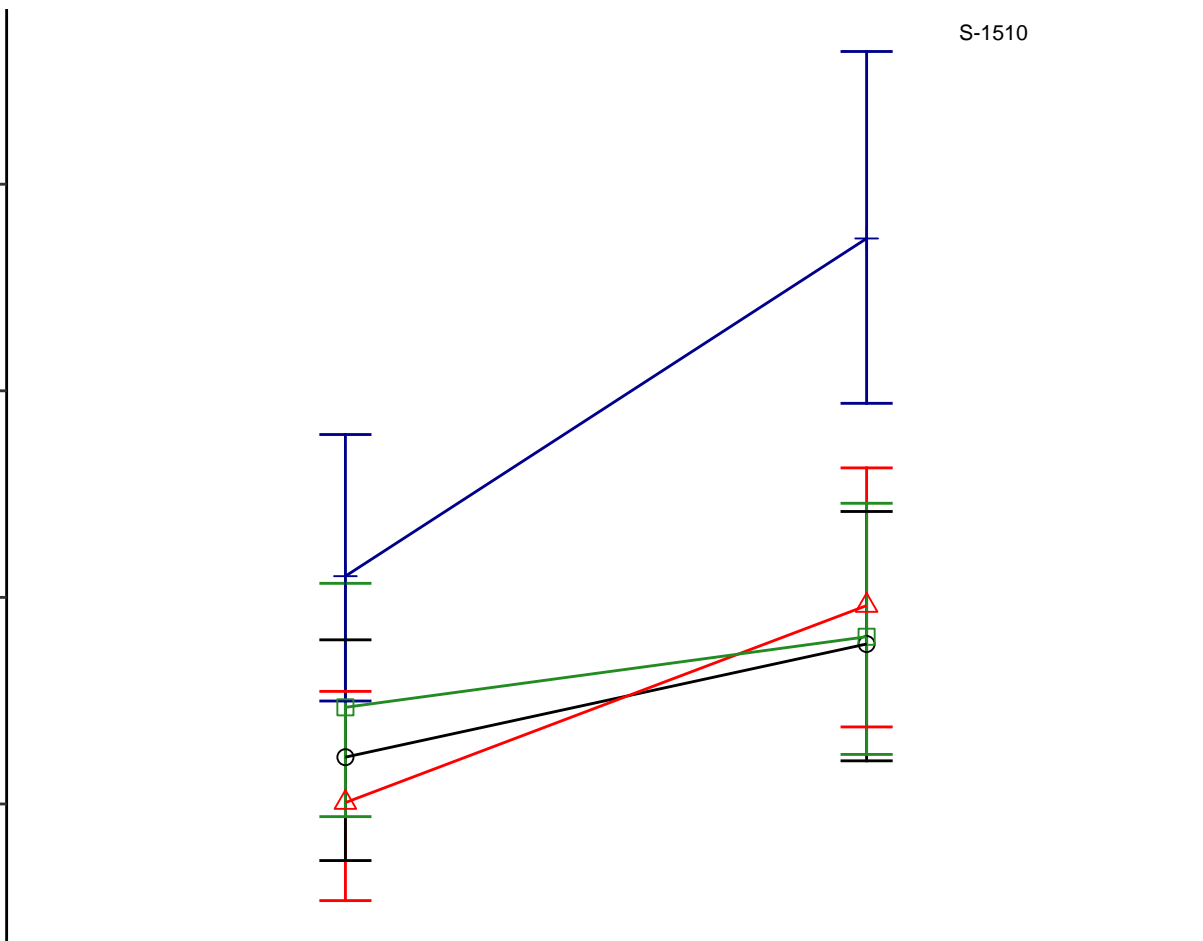

# YABA\_STAAM

S-1511

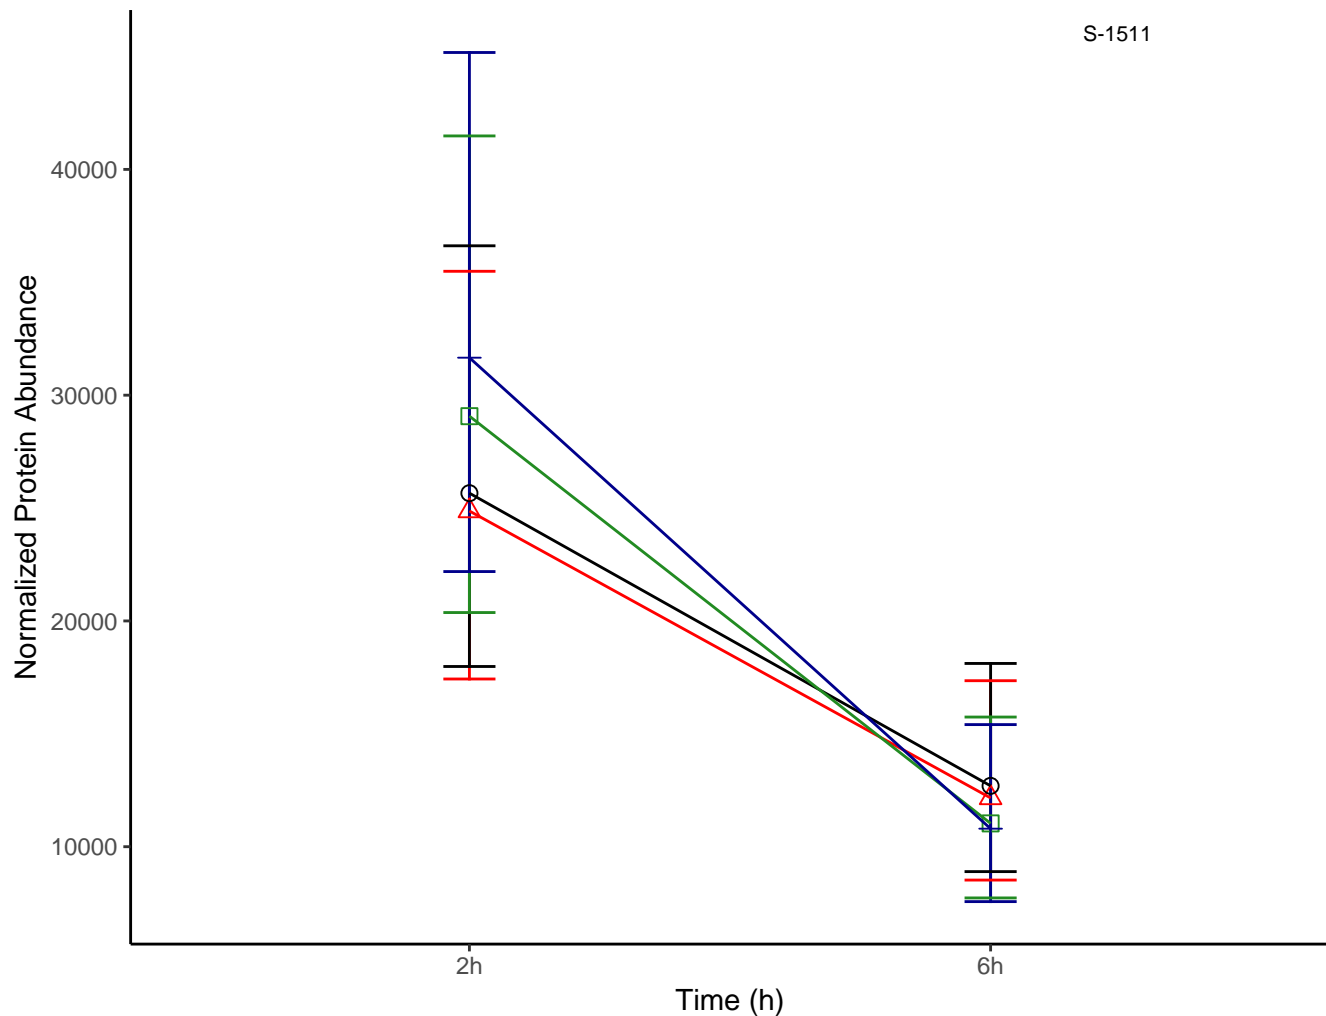

- SA564
- △ SA564- $\Delta hptRS$
- SA564- $\Delta ccpA$
- + SA564- $\Delta hptRS/ccpA$

# YBEY\_STAAM

S-1512

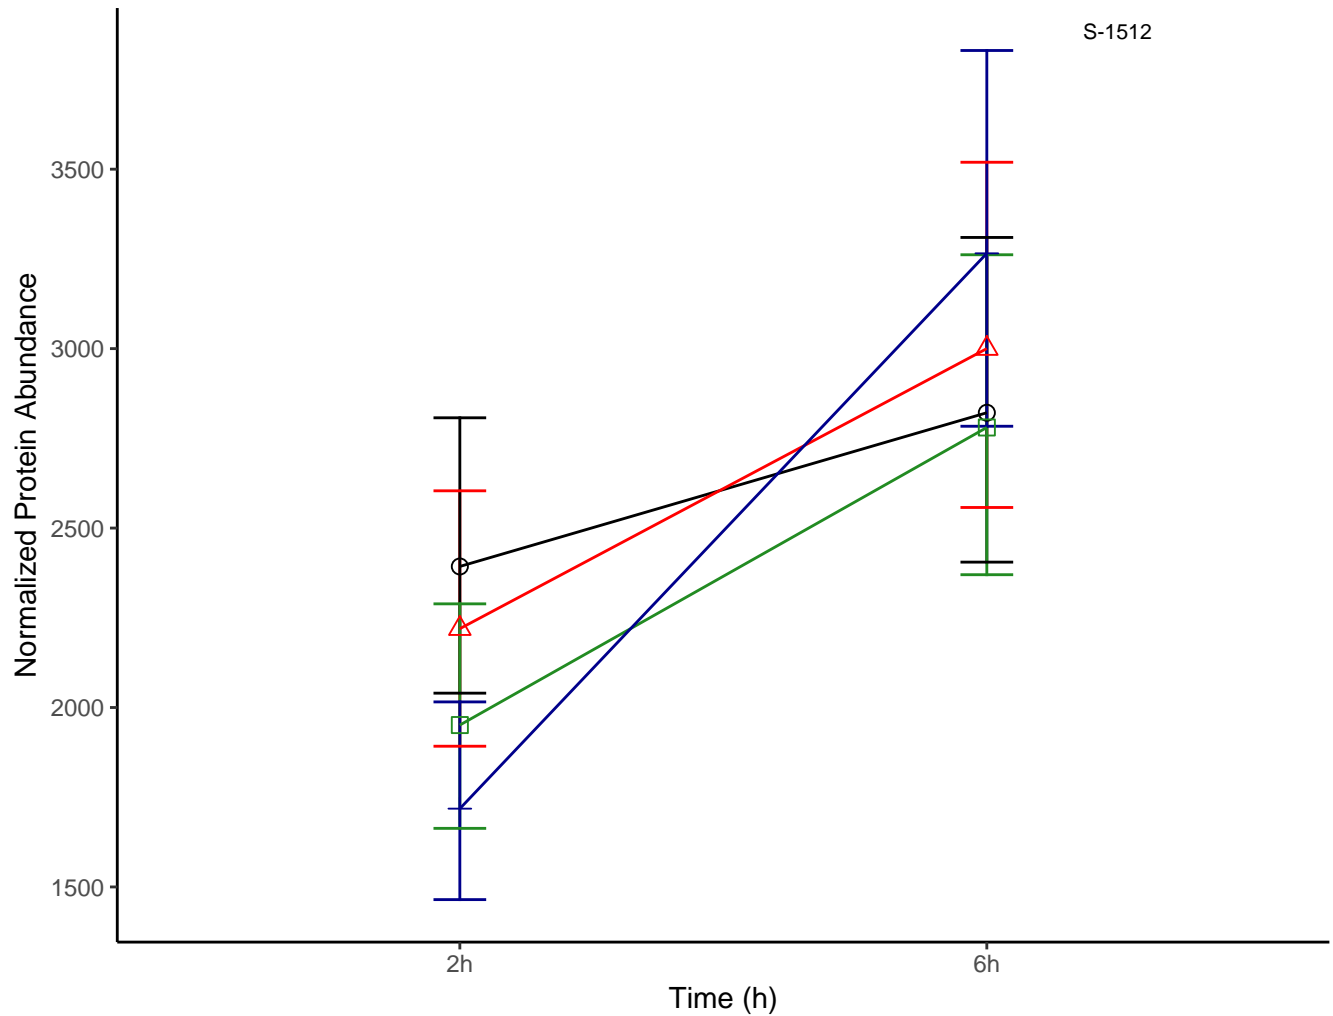

- SA564
- △ SA564- $\Delta$ *hptRS*
- SA564- $\Delta$ *ccpA*
- + SA564- $\Delta$ *hptRS/ccpA*



**Figure I.**

2-way analysis: m x h | s

Pages: S1513-S2014

The normalized protein abundance, lower 95% confidence interval, and upper 95% confidence interval were plotted for each protein. These plots were analyzed if a 3-way interaction was rejected and 2-way interaction was identified between media and hour.

# 6PGD\_STAAM

S-1514

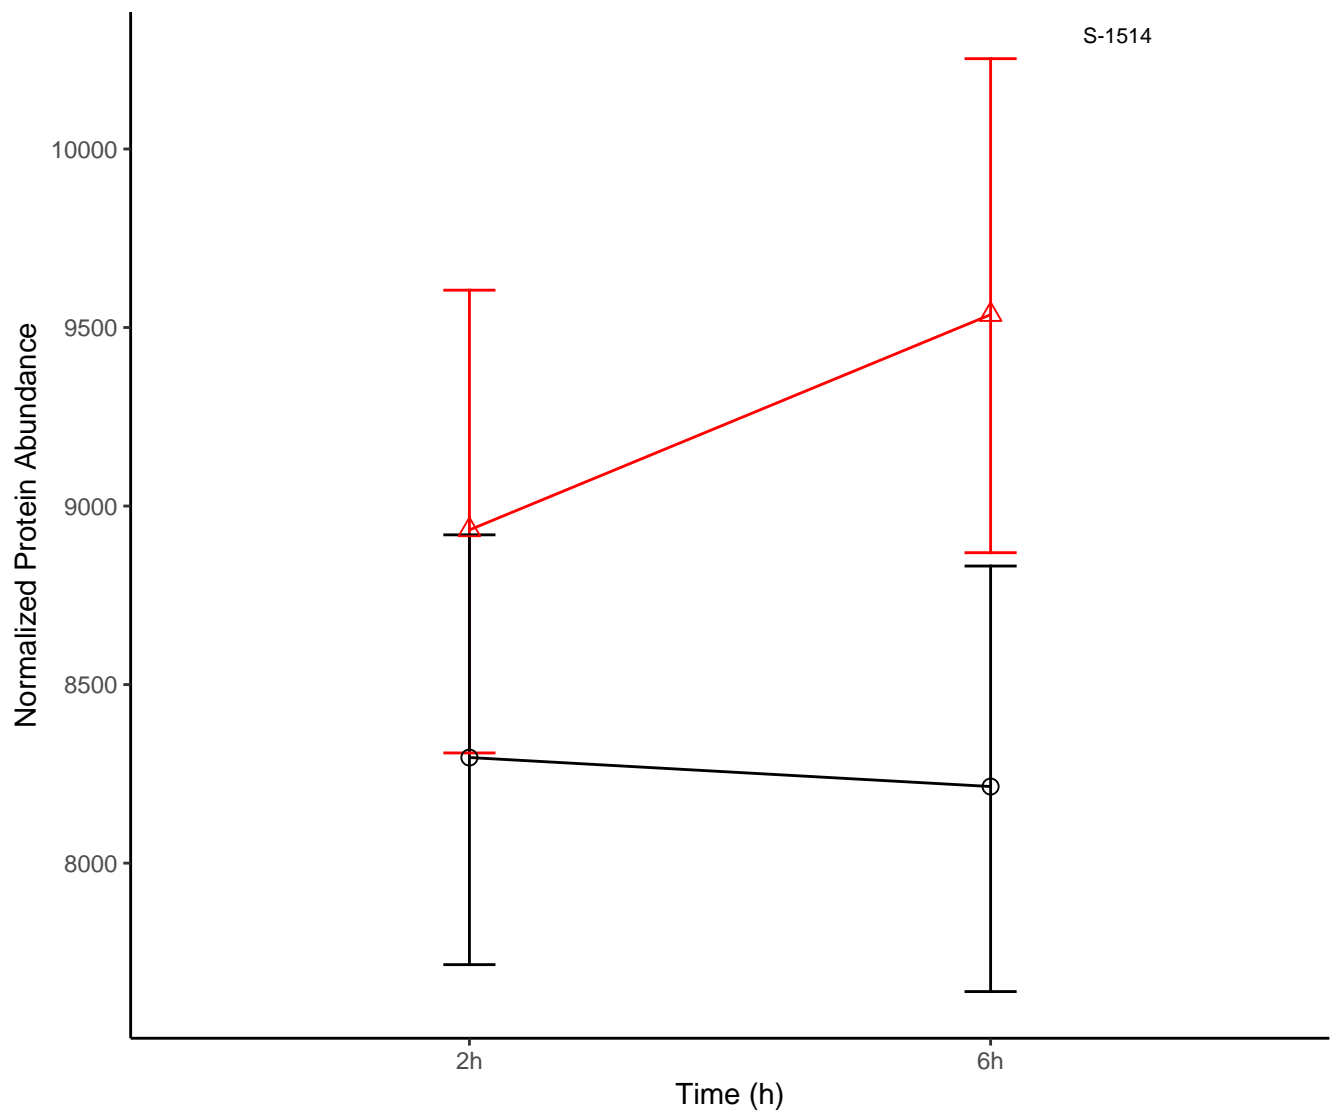

○ TSB-dex

△ TSB

# ACCA\_STAAM

S-1515

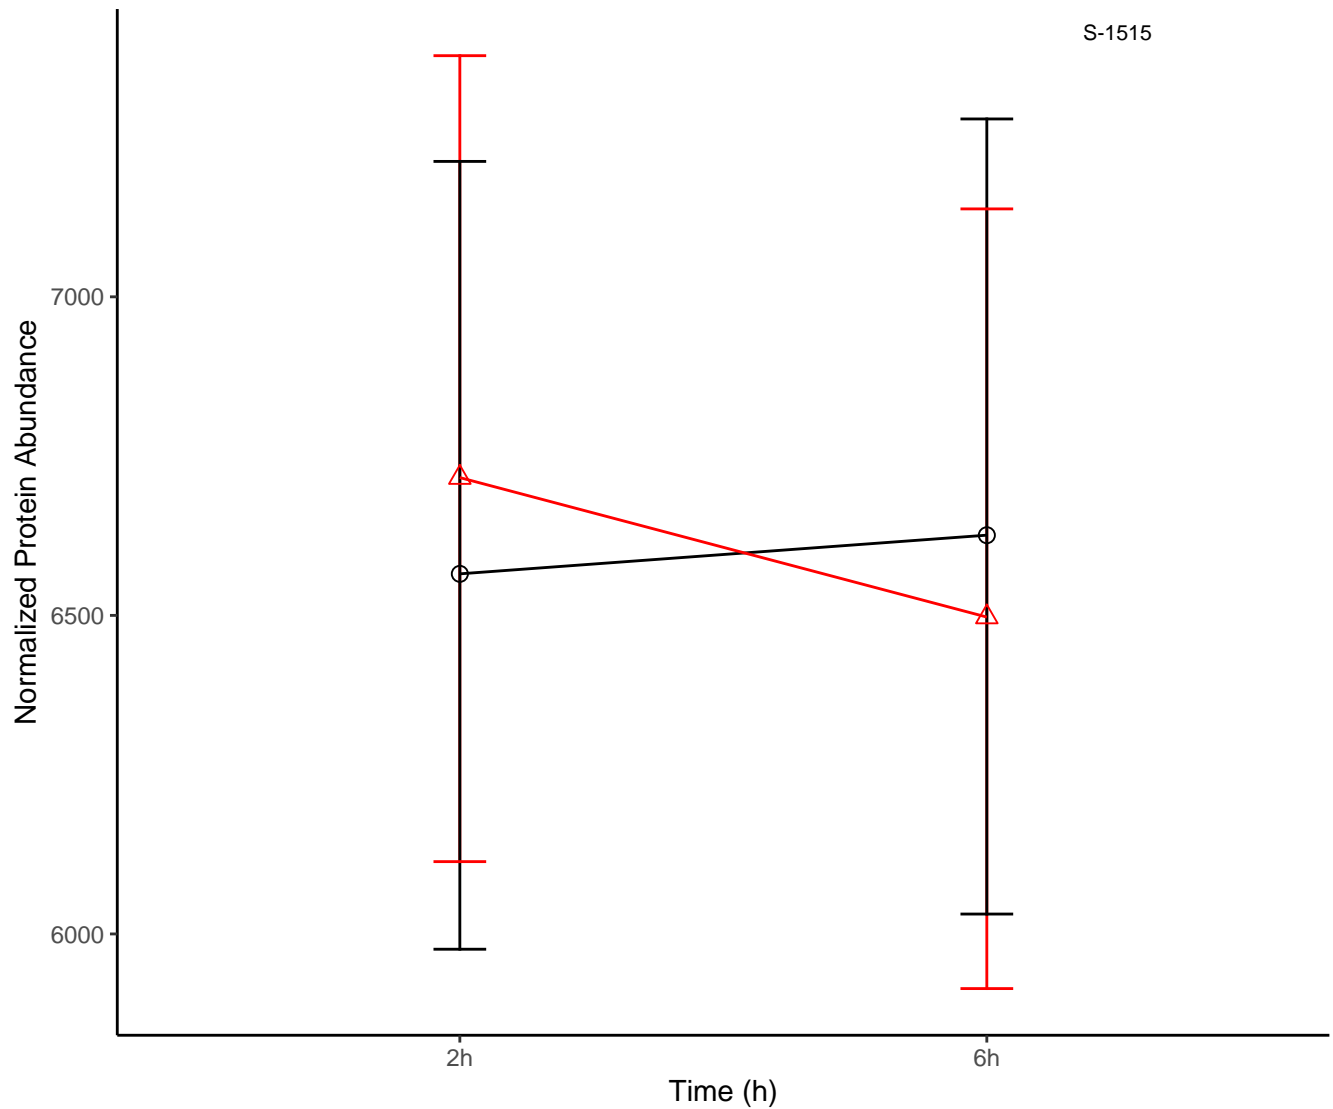

○ TSB-dex

△ TSB

# ACKA\_STAAM

S-1516

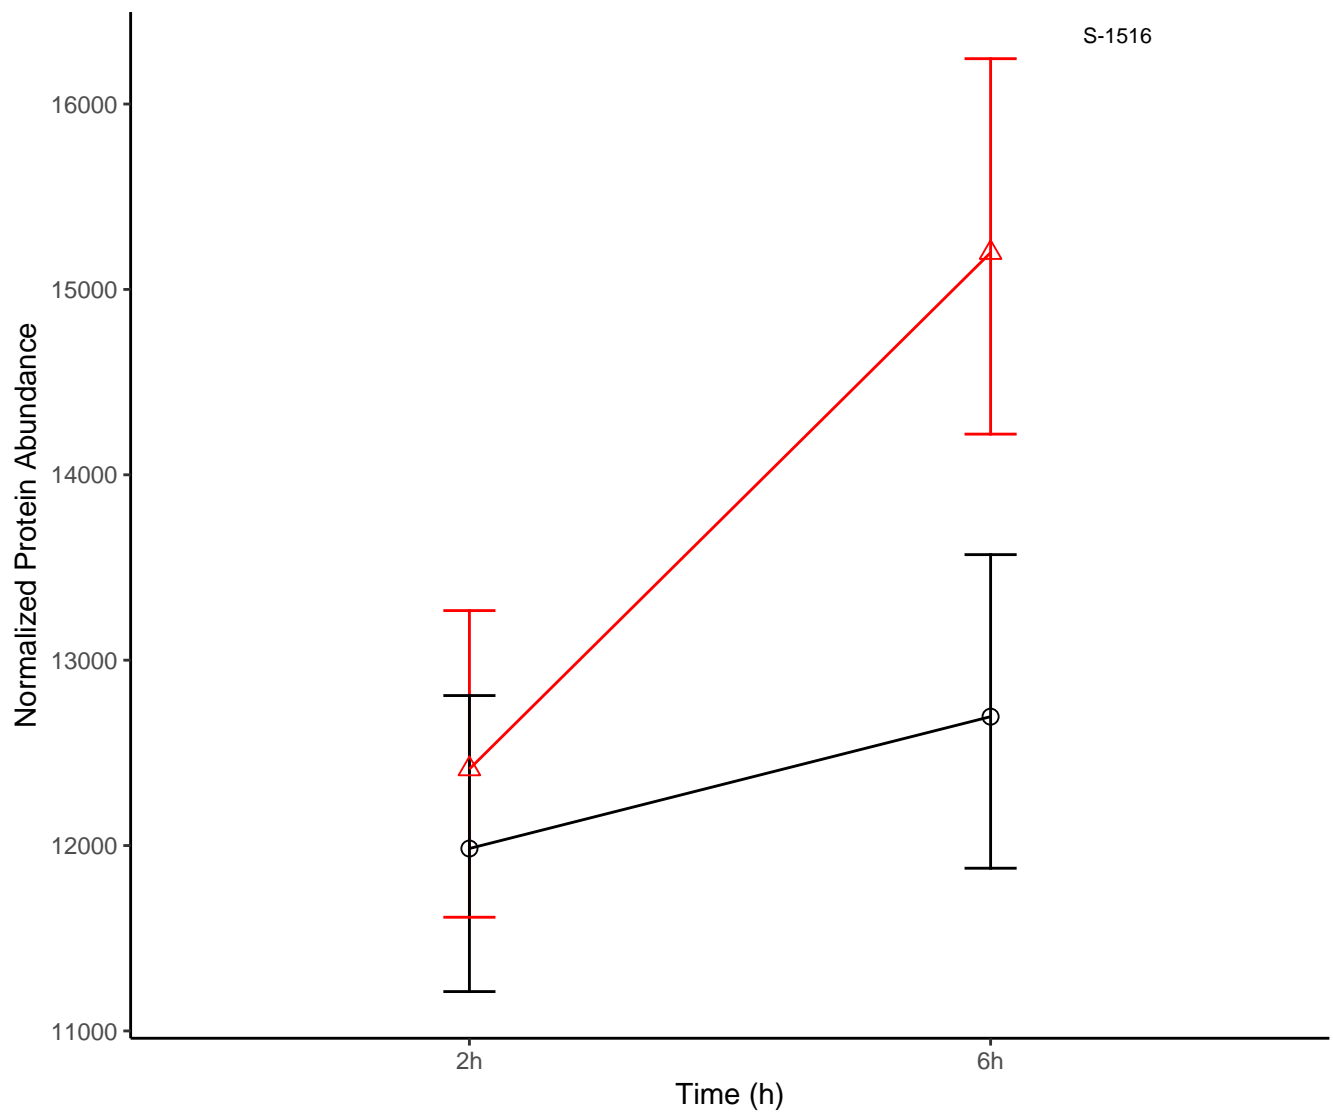

○ TSB-dex

△ TSB

# ACON\_STAAM

S-1517

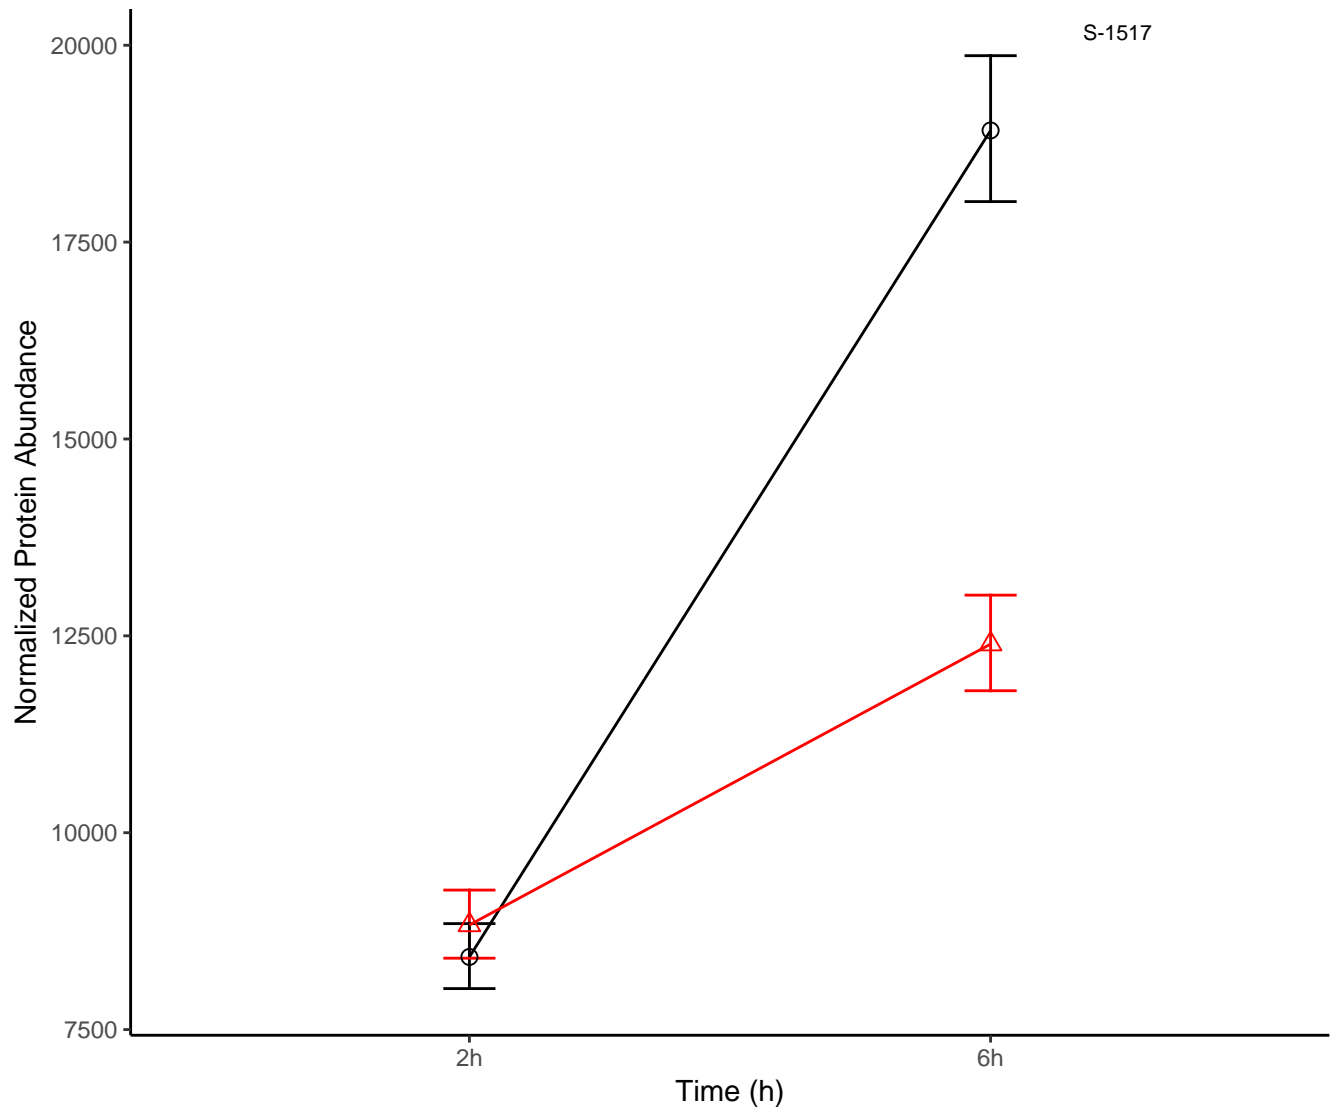

○ TSB-dex

△ TSB

# ACP\_STAAM

S-1518

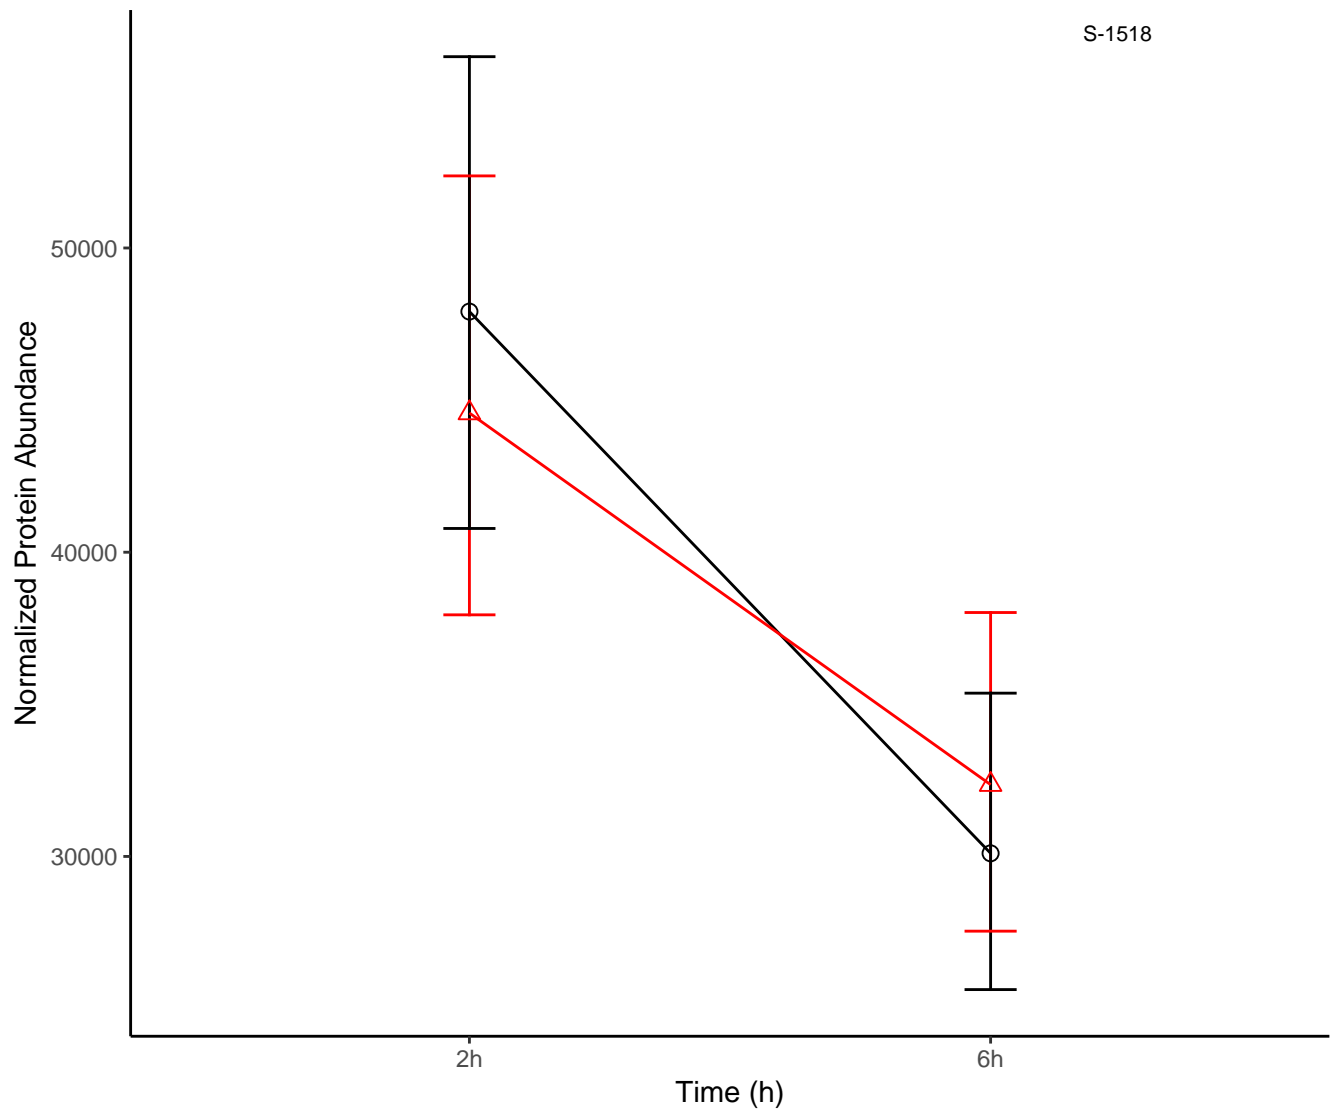

○ TSB-dex

△ TSB

# ADH\_STAAM

S-1519

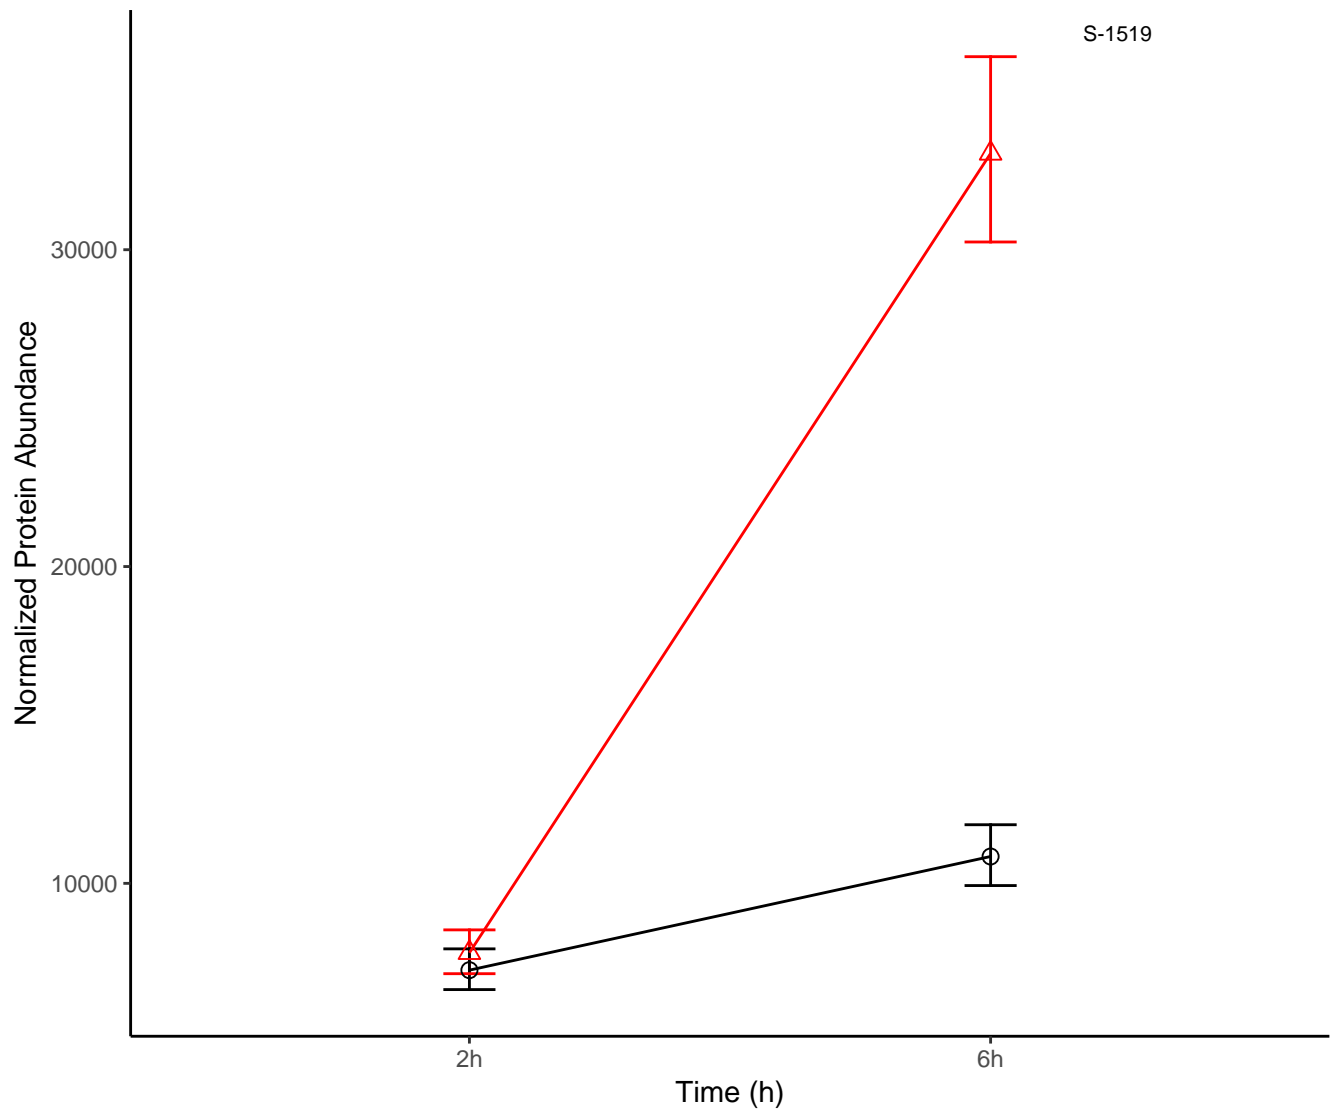

○ TSB-dex

△ TSB

# AHPC\_STAAM

S-1520

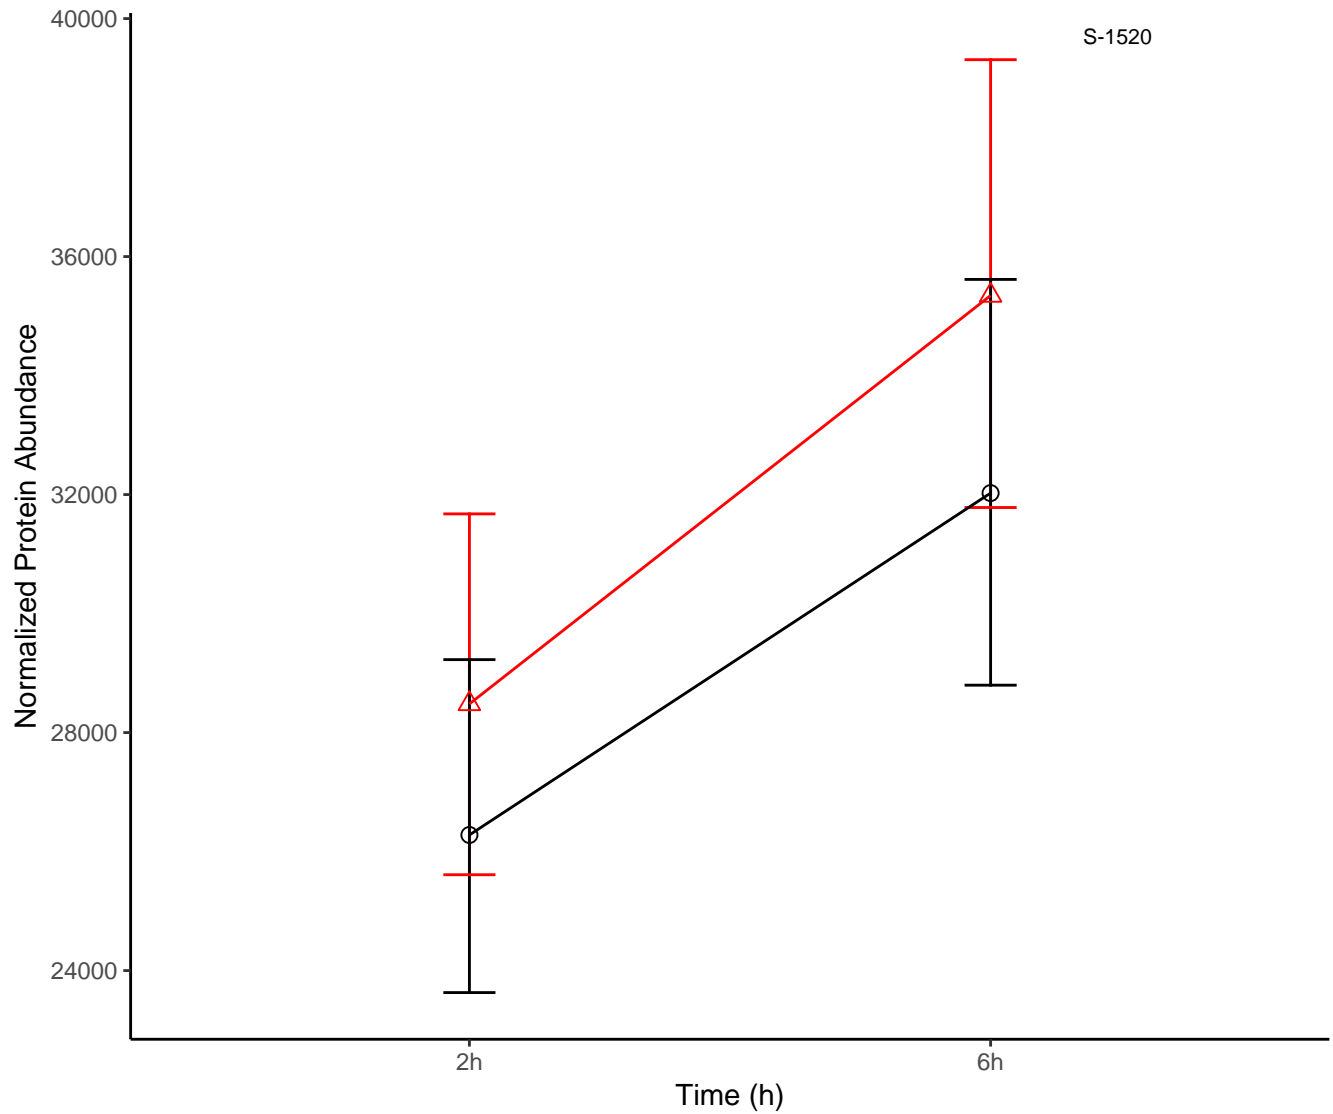

○ TSB-dex

△ TSB



# AHPF\_STAAM

S-1521

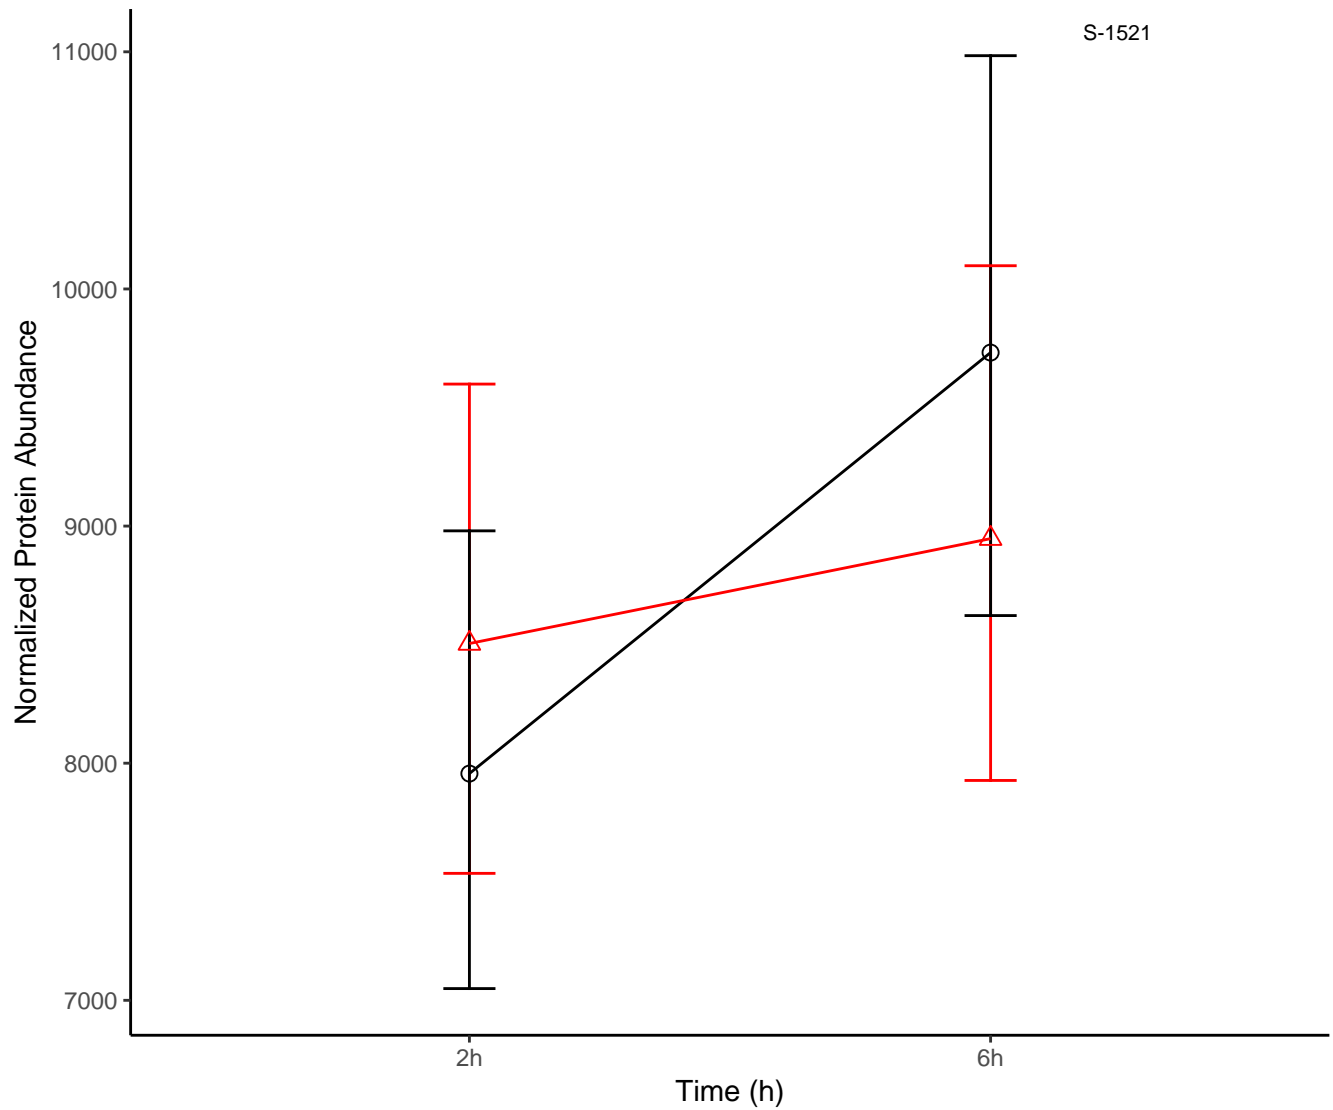

○ TSB-dex

△ TSB

# ALD1\_STAAM

S-1522

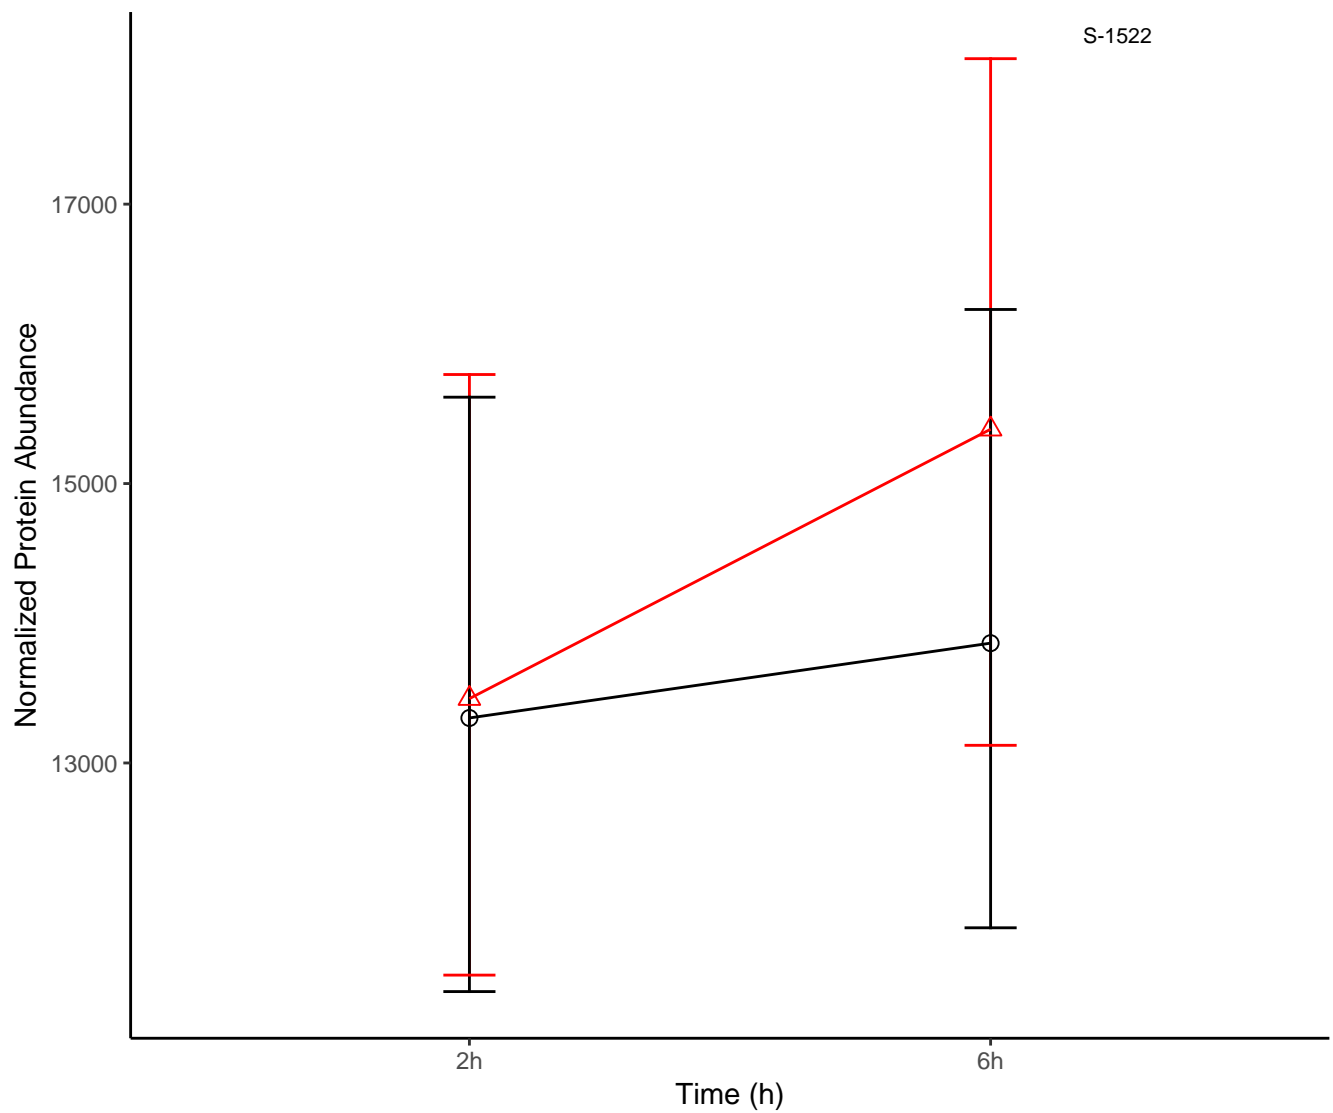

○ TSB-dex

△ TSB

# ALDA\_STAAM

S-1523

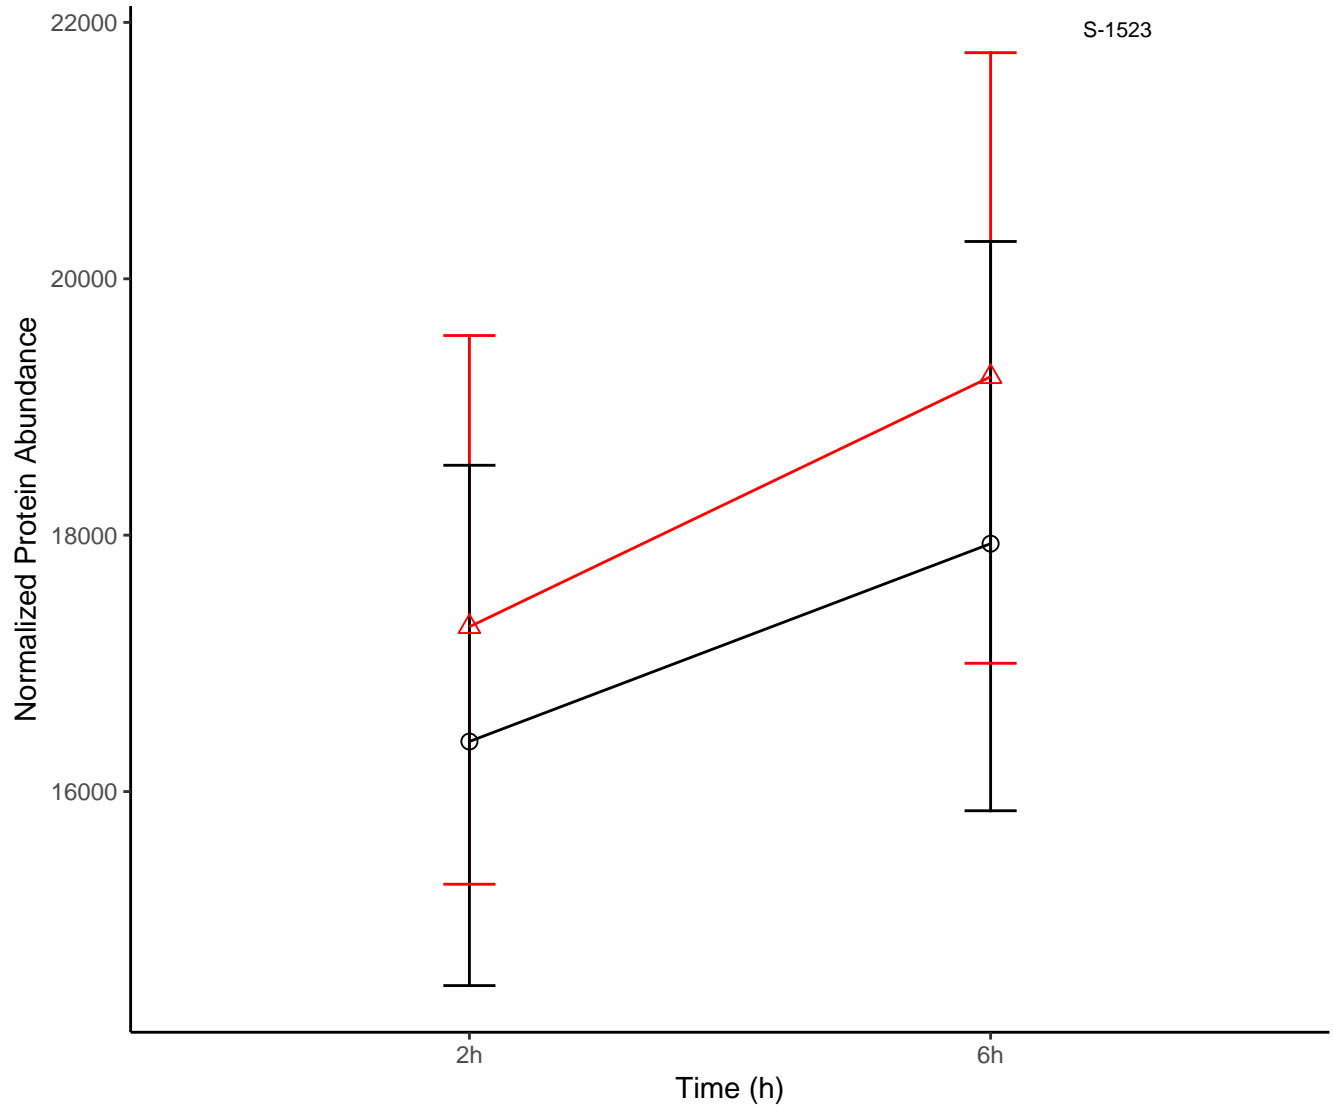

○ TSB-dex

△ TSB

# ALF1\_STAAM

S-1524

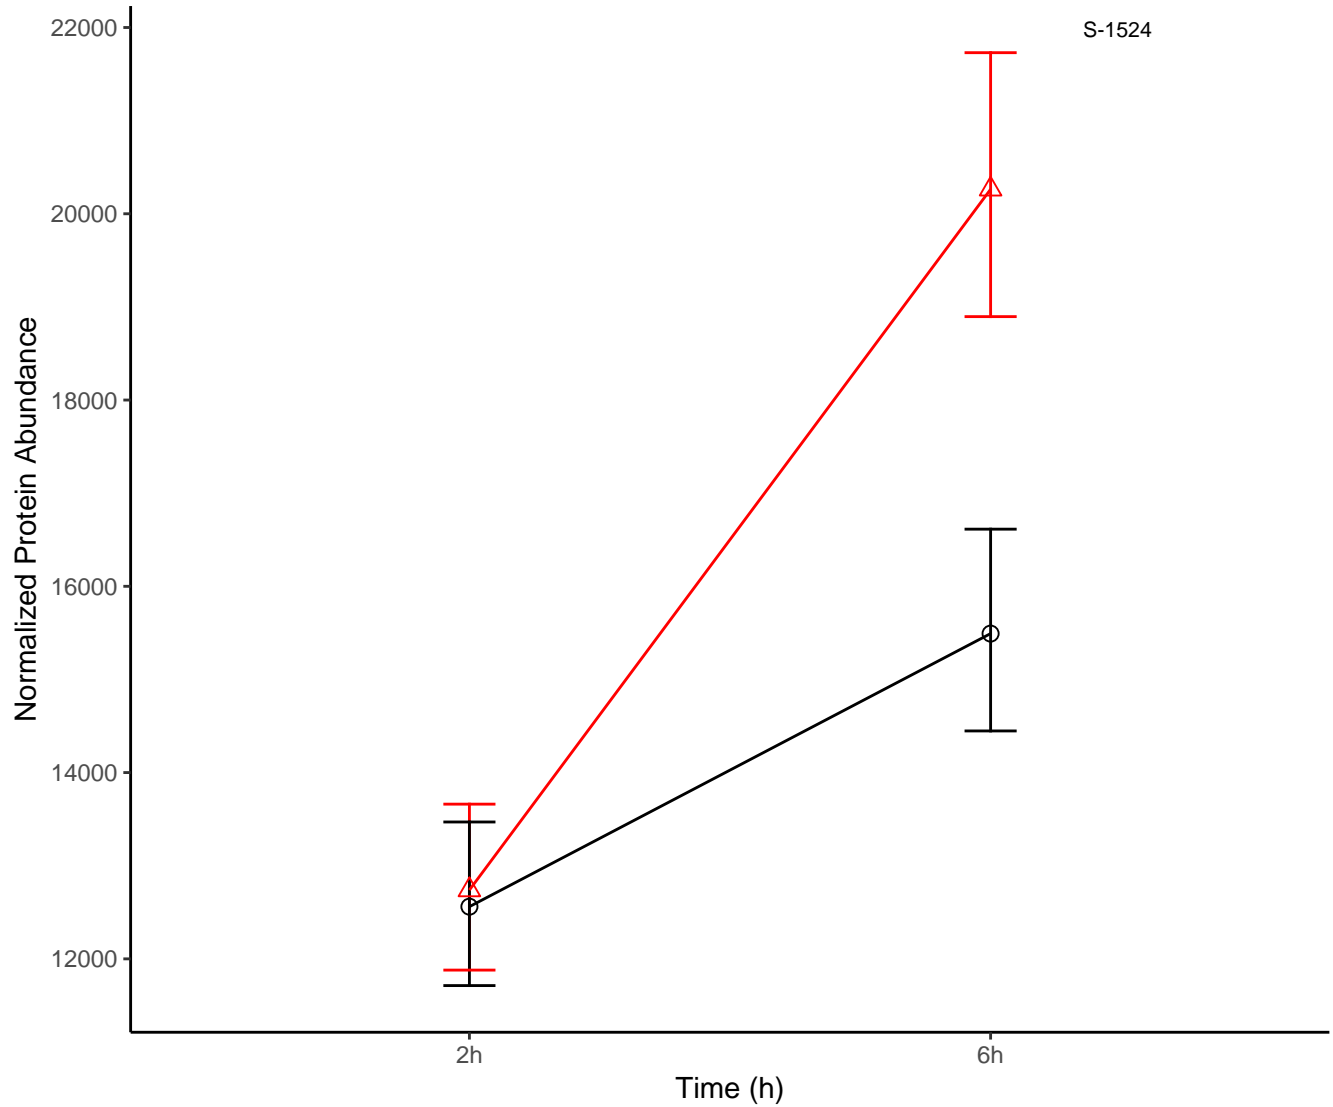

○ TSB-dex

△ TSB

# ALF2\_STAAM

S-1525

Normalized Protein Abundance

25000

22500

20000

2h

6h

Time (h)

○ TSB-dex

△ TSB

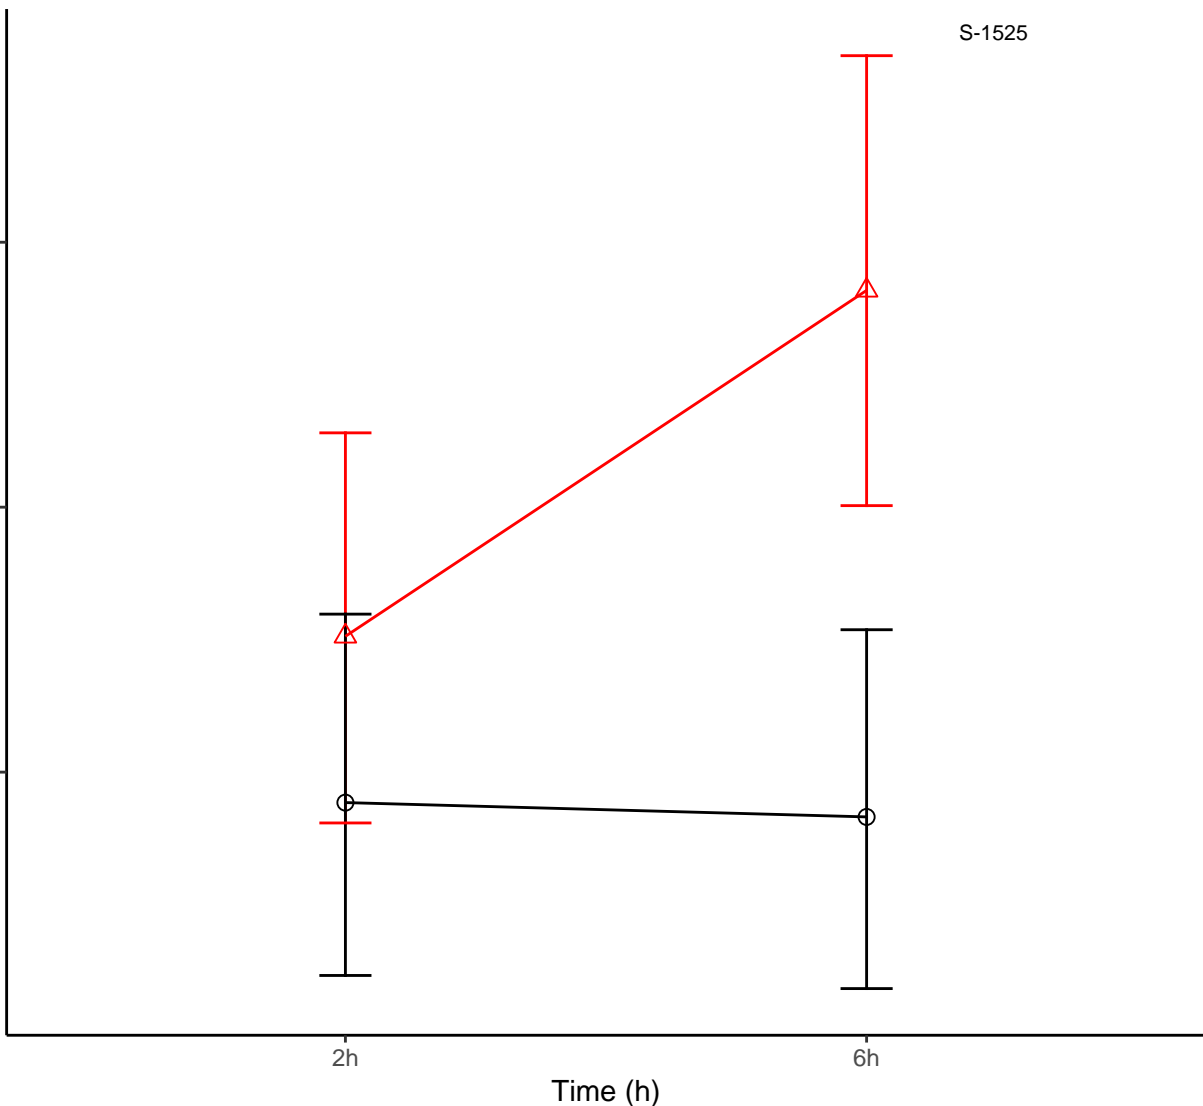

# APT\_STAAM

S-1526

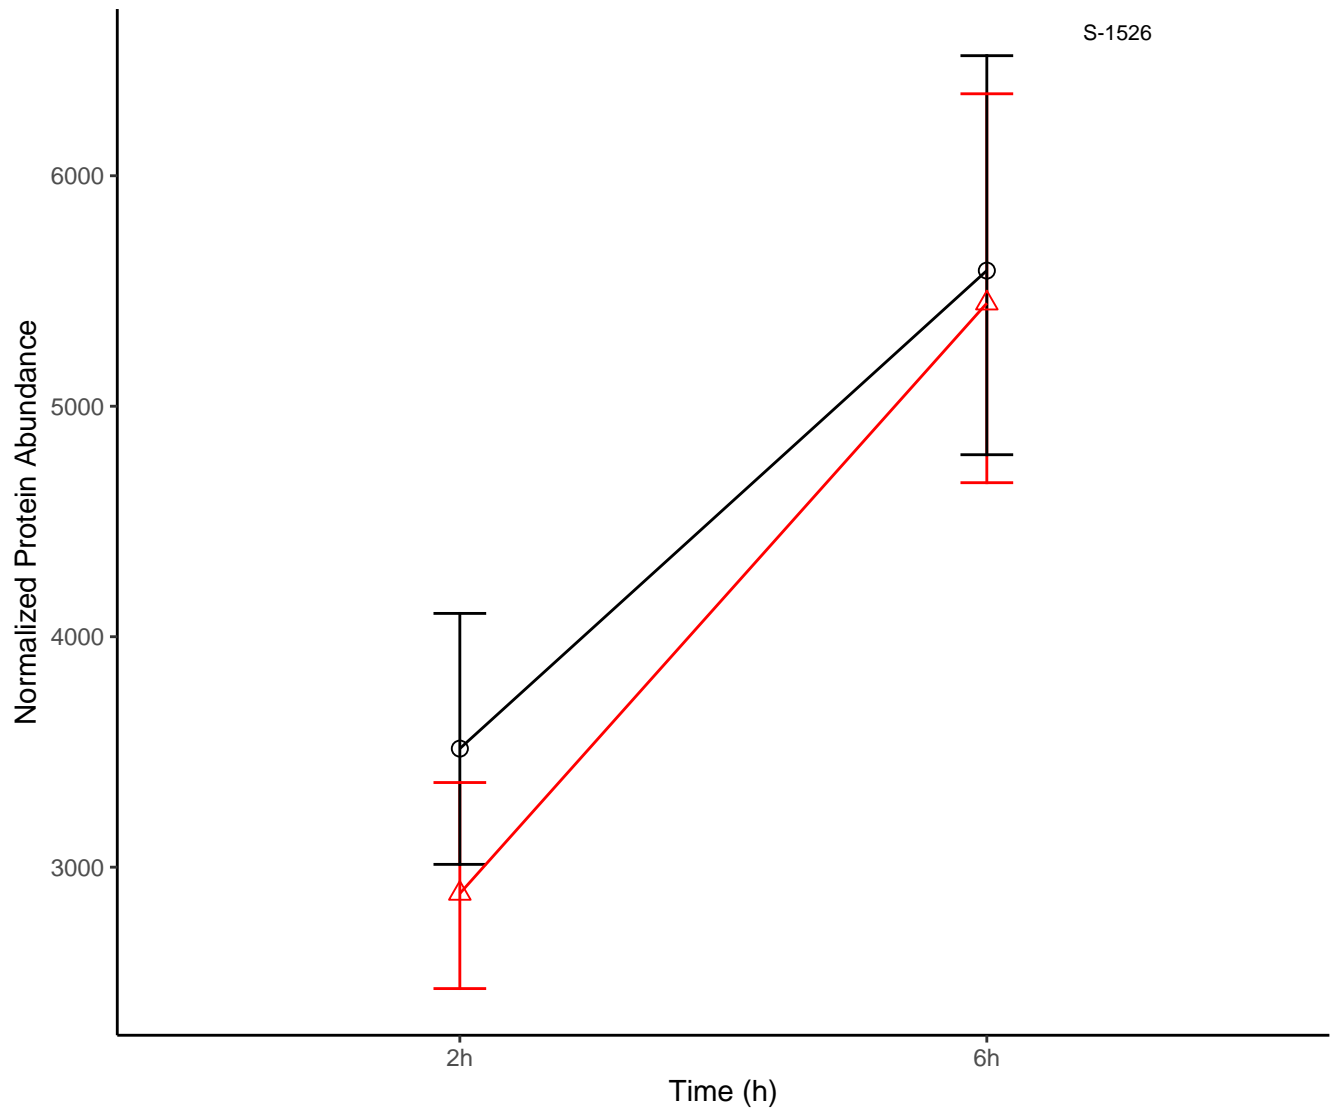

○ TSB-dex

△ TSB

# ARCA\_STAAM

S-1527

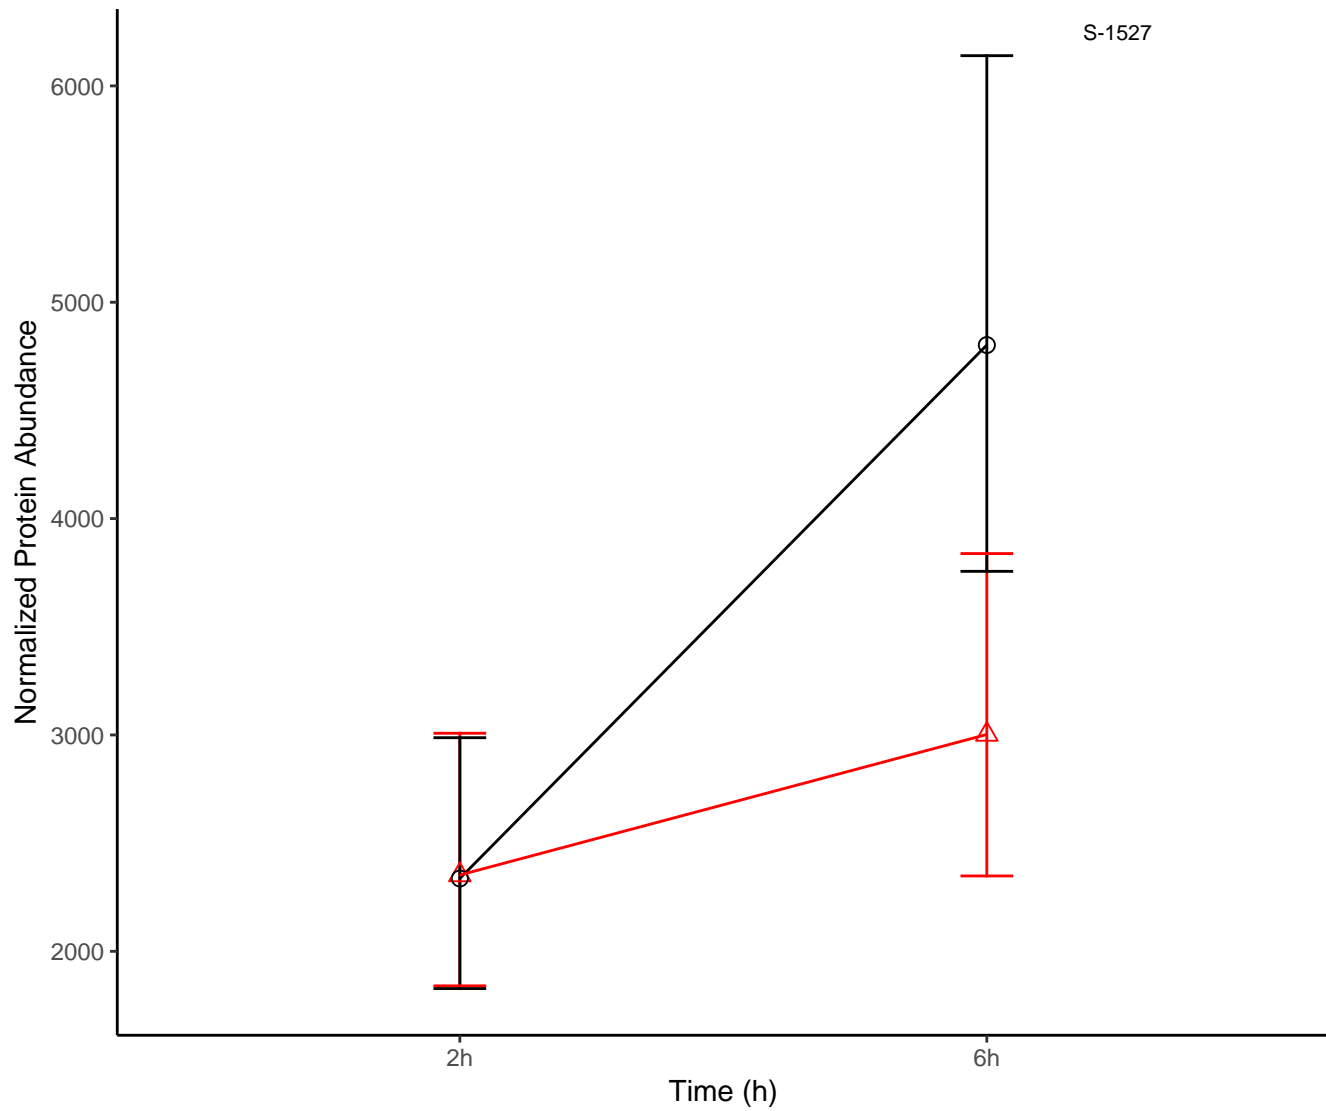

○ TSB-dex

△ TSB

# ARCC1\_STAAM

S-1528

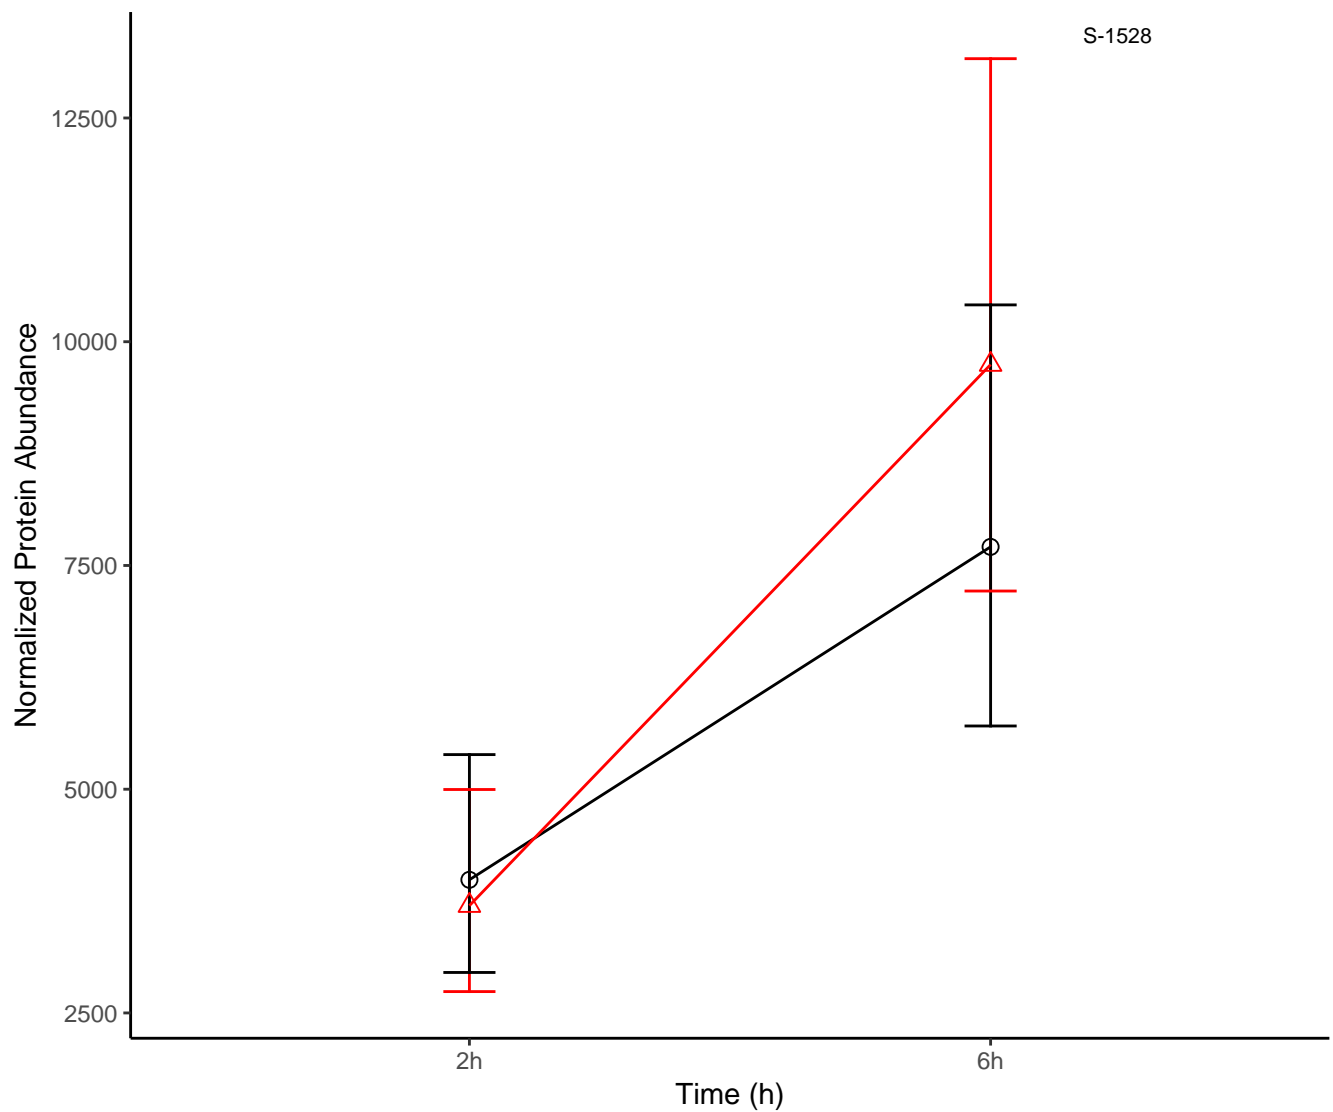

○ TSB-dex

△ TSB



# ARGI\_STAAM

S-1529

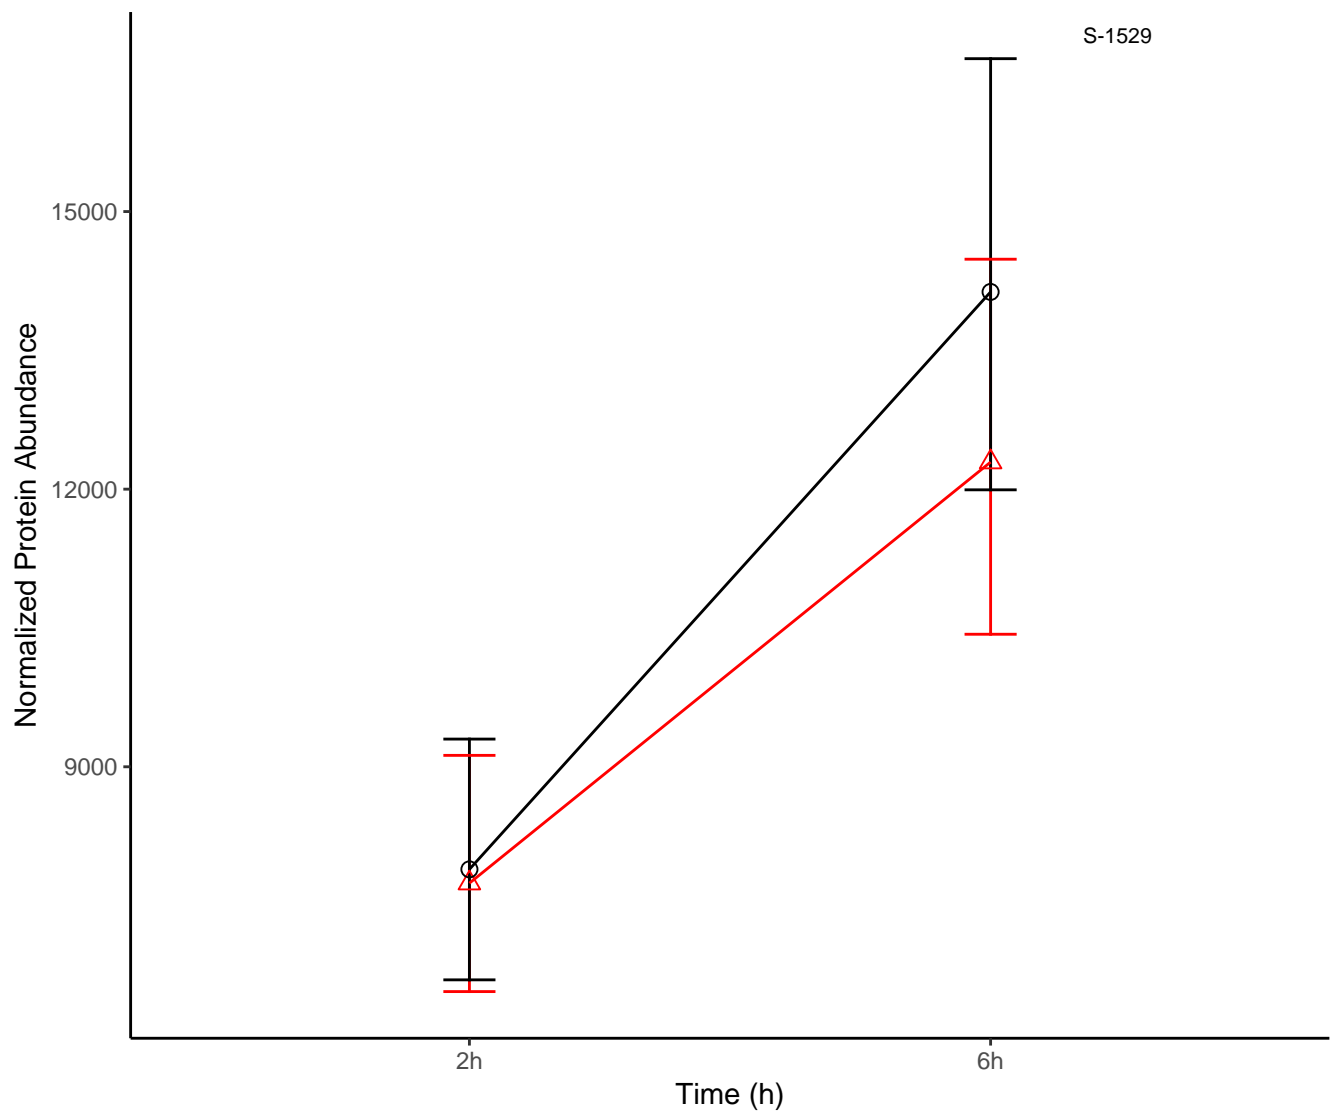

○ TSB-dex

△ TSB

# ARGR\_STAAM

S-1530

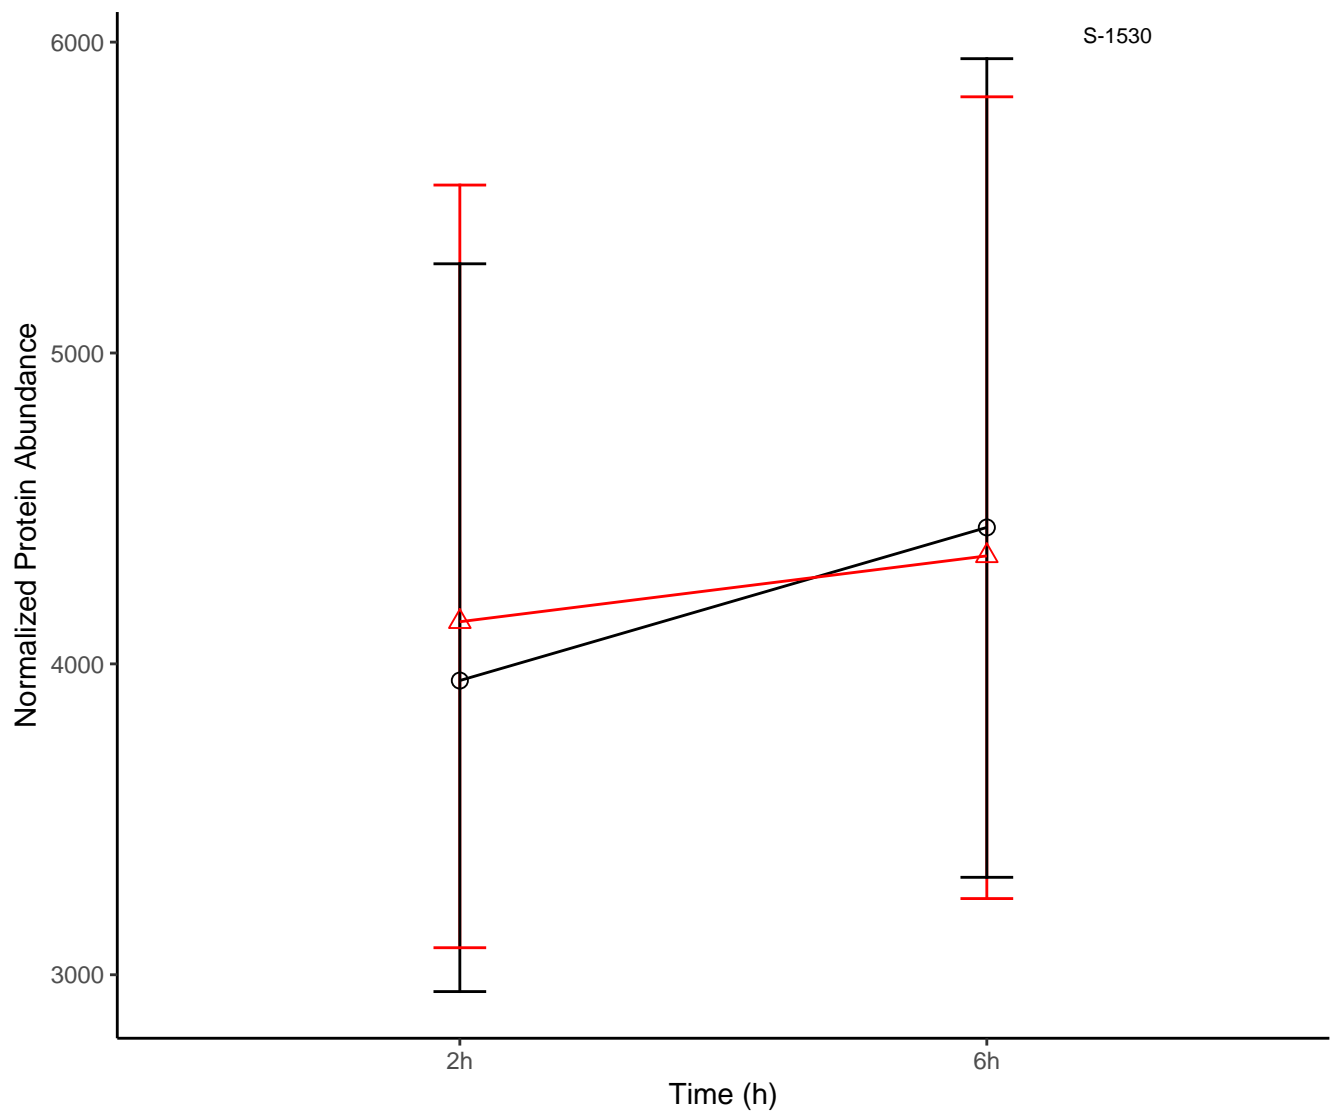

○ TSB-dex

△ TSB

# ARLR\_STAAM

S-1531

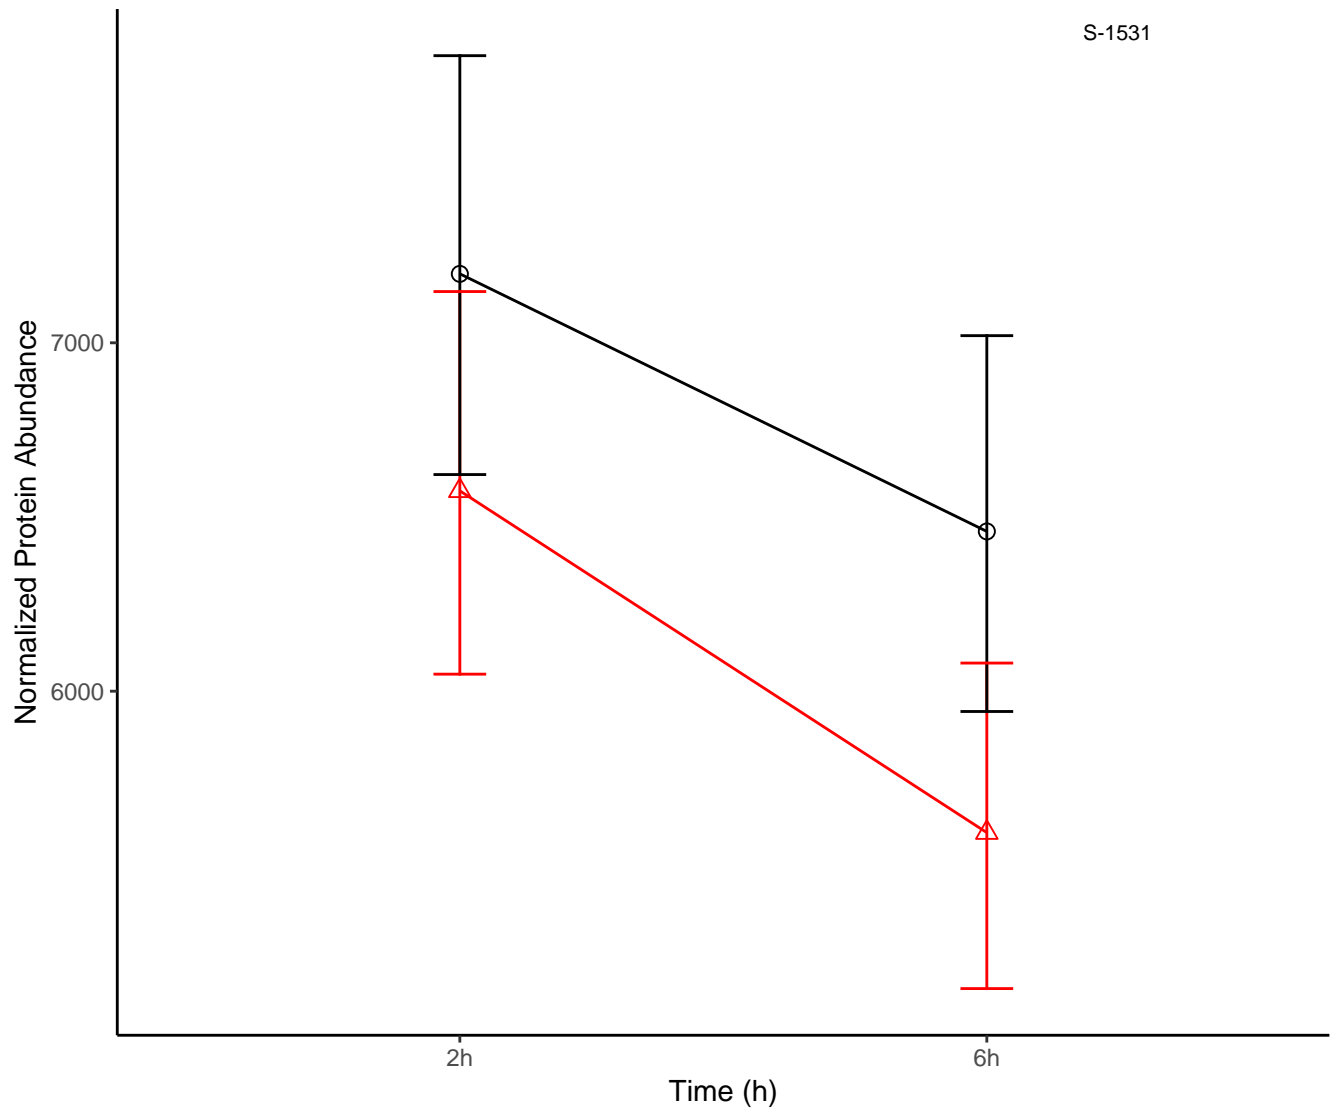

○ TSB-dex

△ TSB

# ARLY\_STAAM

S-1532

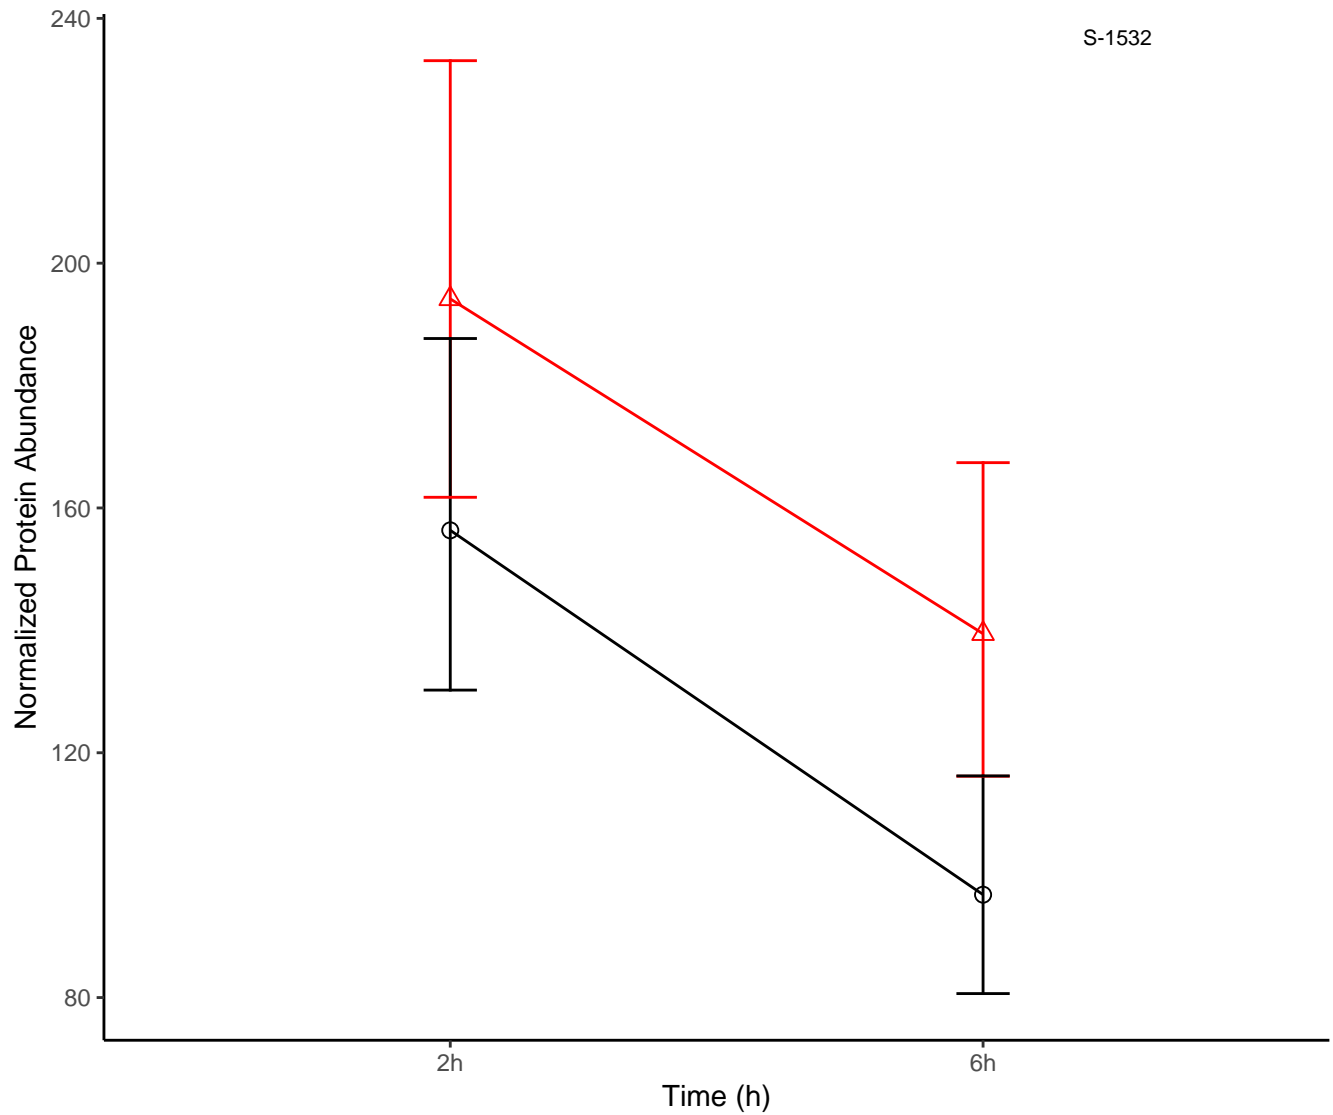

○ TSB-dex

△ TSB

# AROA\_STAAM

S-1533

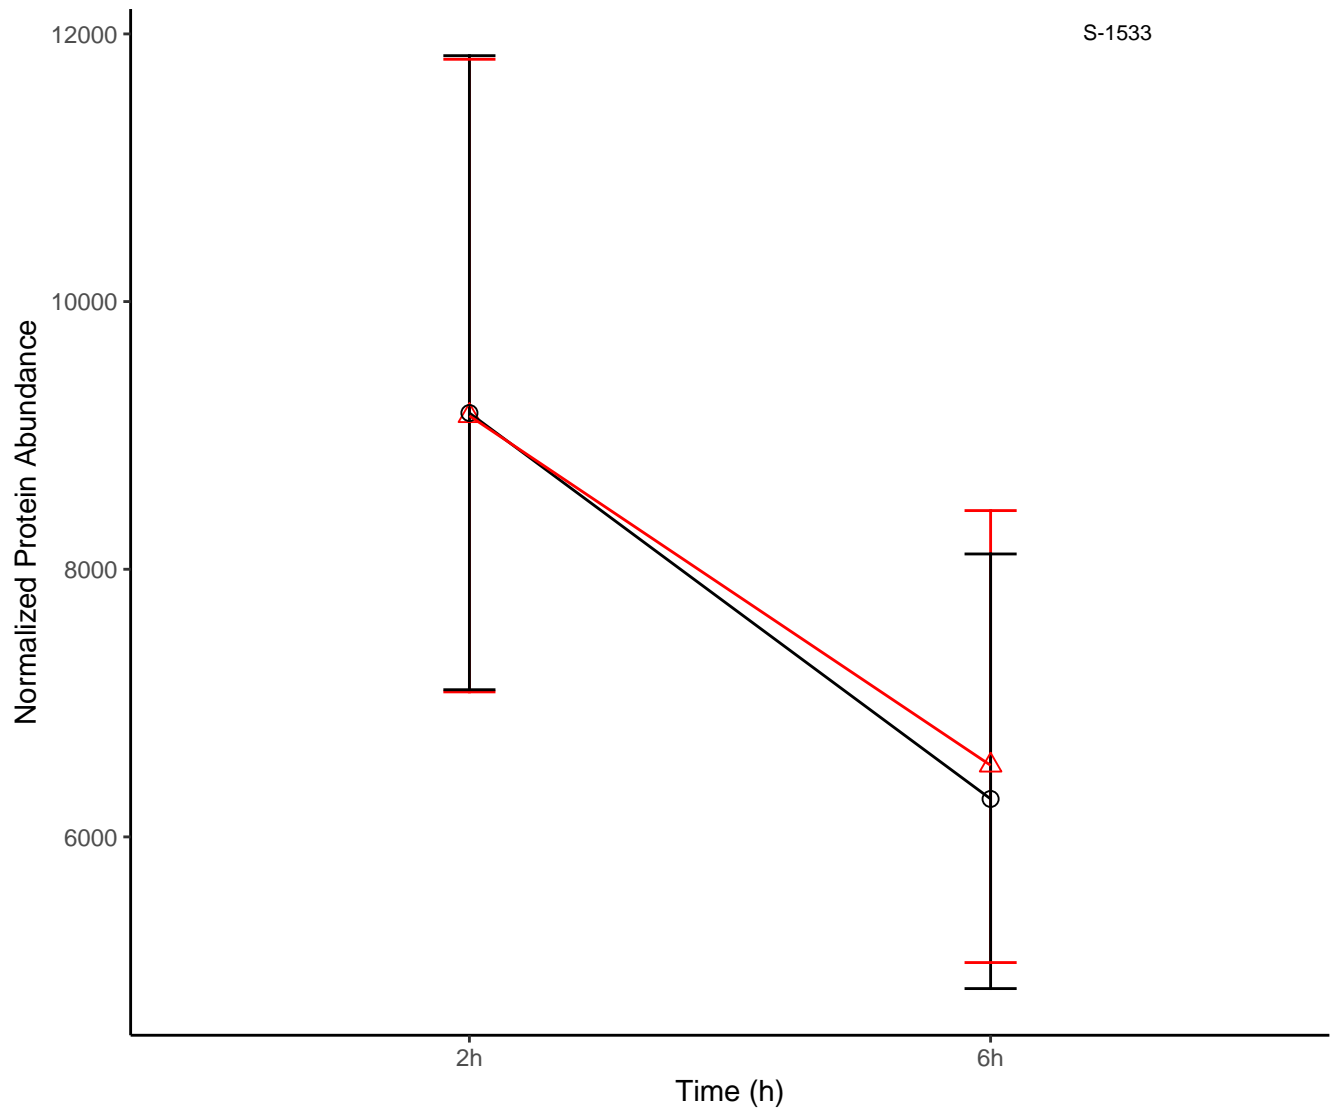

○ TSB-dex

△ TSB

# AROB\_STAAM

S-1534

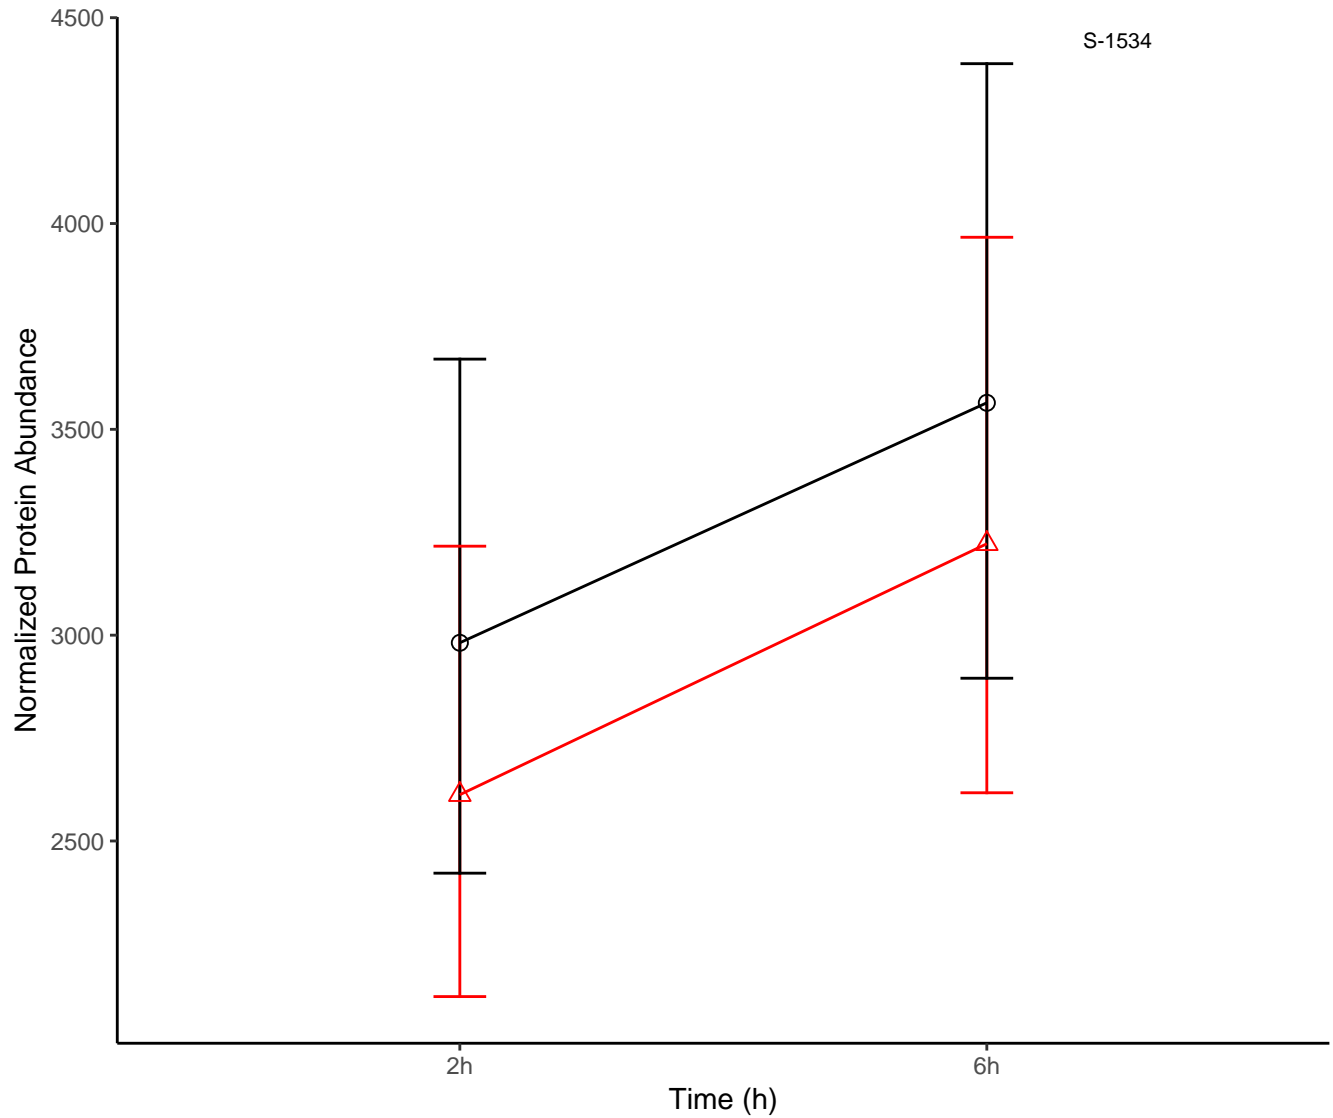

○ TSB-dex

△ TSB

# AROE\_STAAM

S-1535

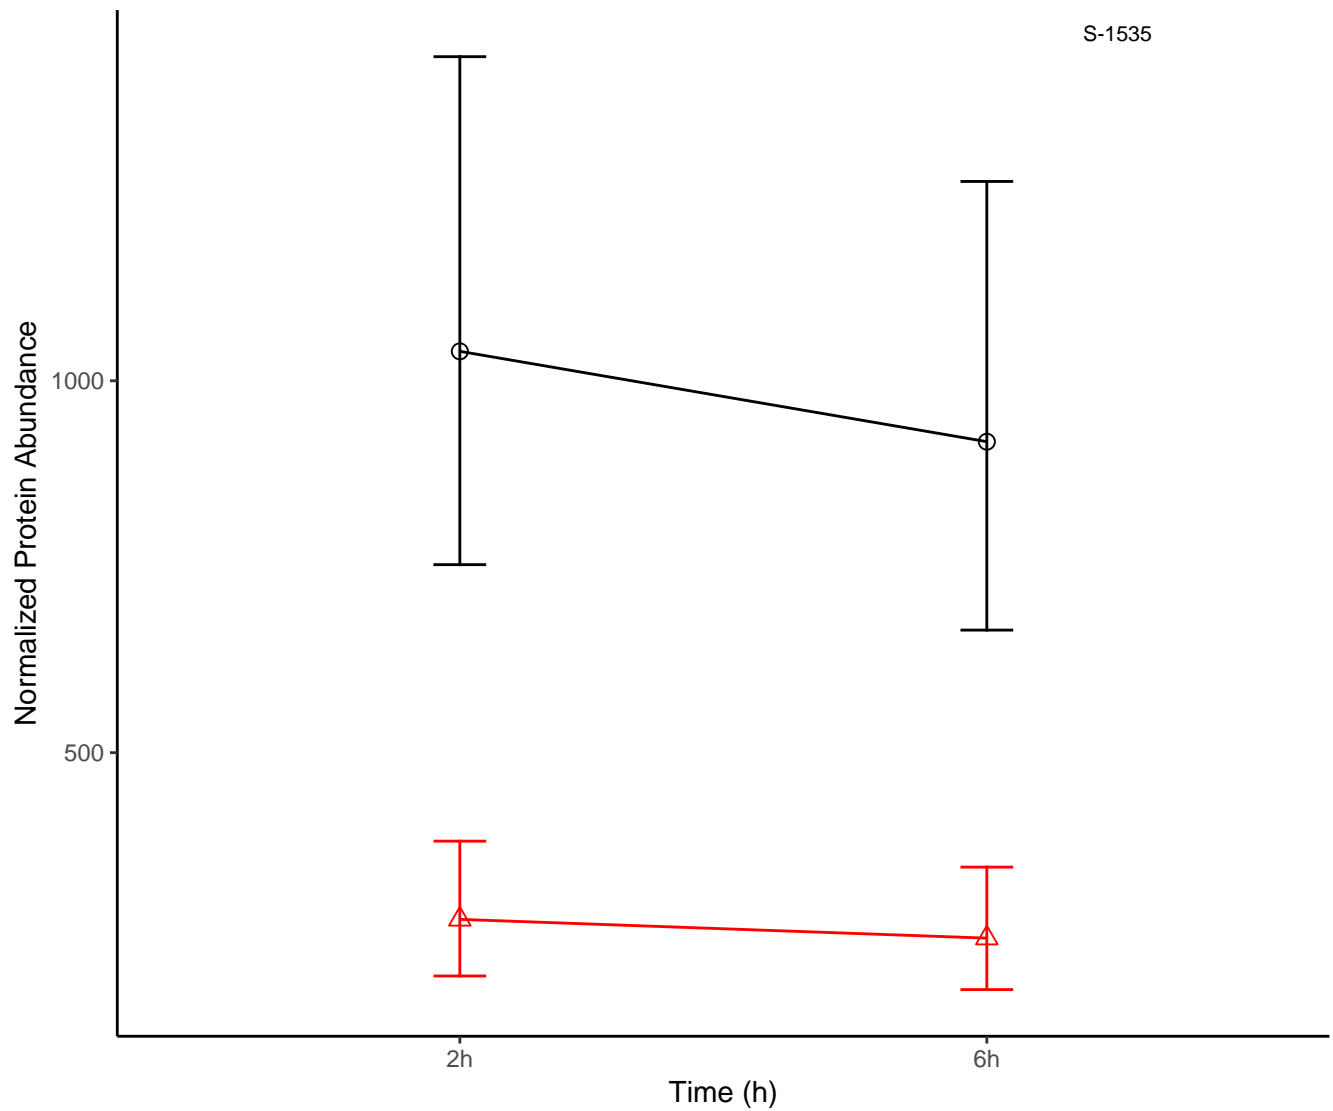

○ TSB-dex

△ TSB

# ASP23\_STAAM

S-1536

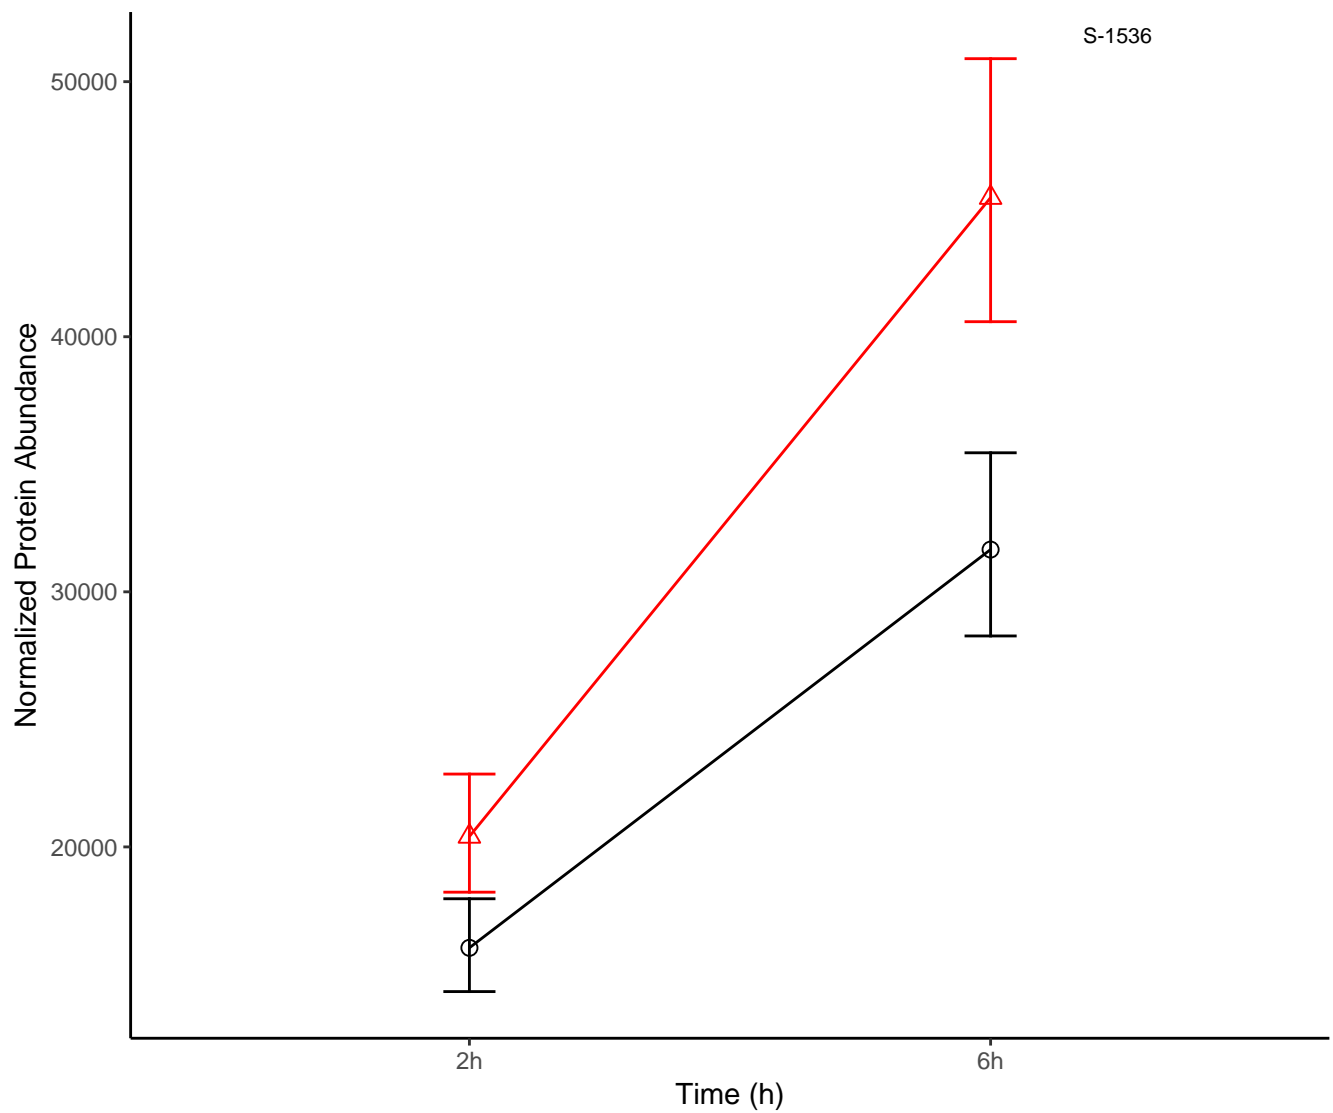

○ TSB-dex

△ TSB



# ATL\_STAAM

S-1537

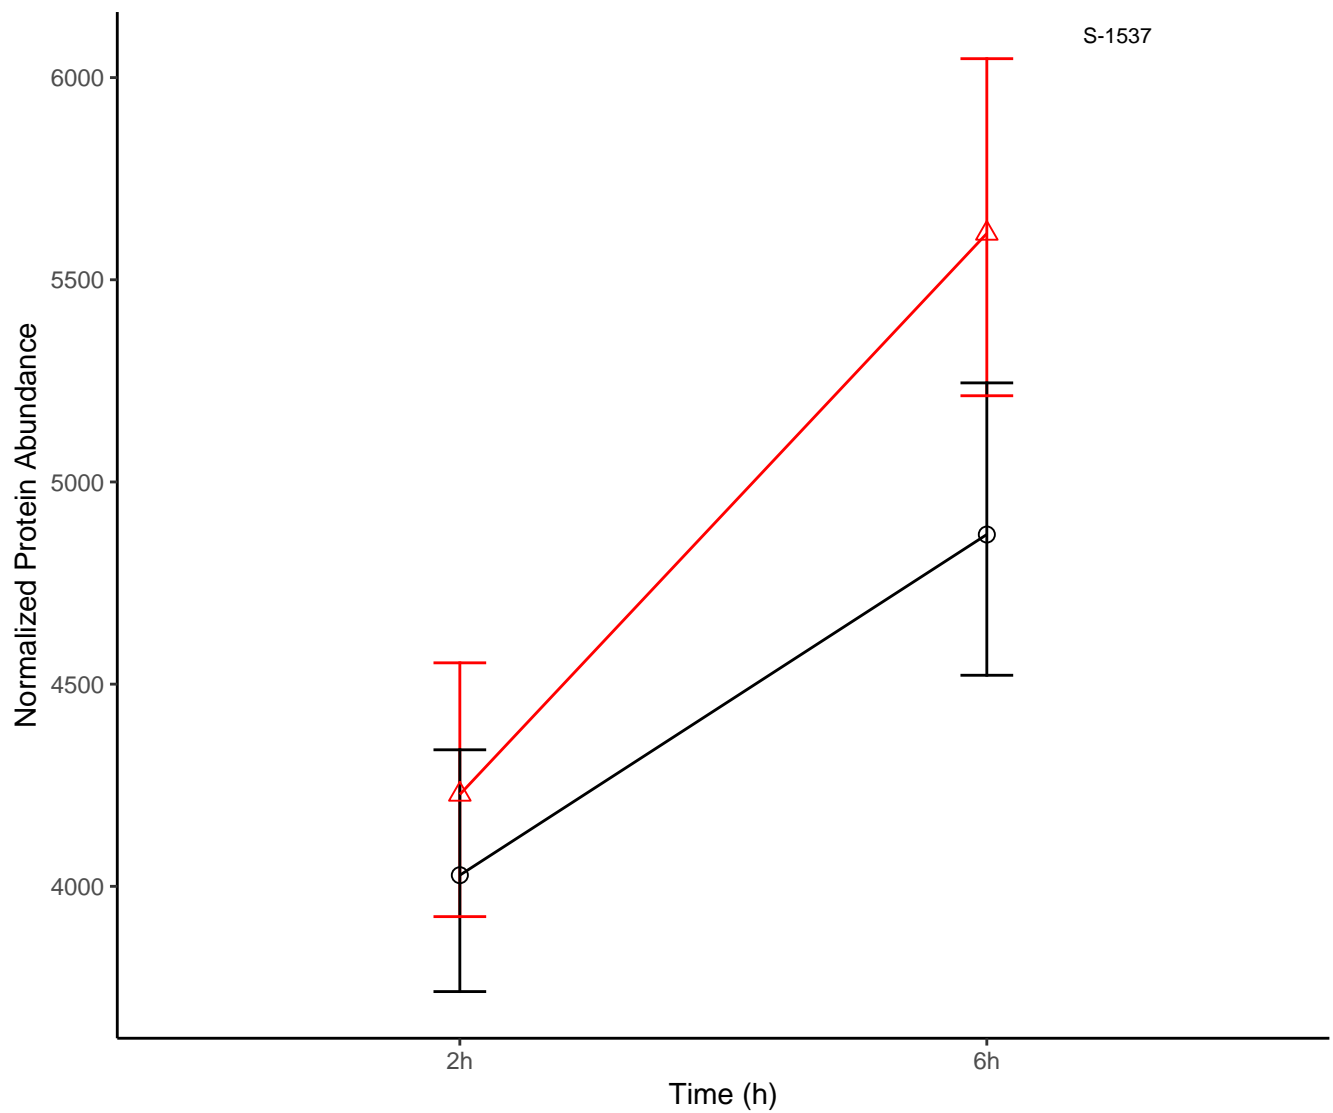

○ TSB-dex

△ TSB

# ATPA\_STAAM

S-1538

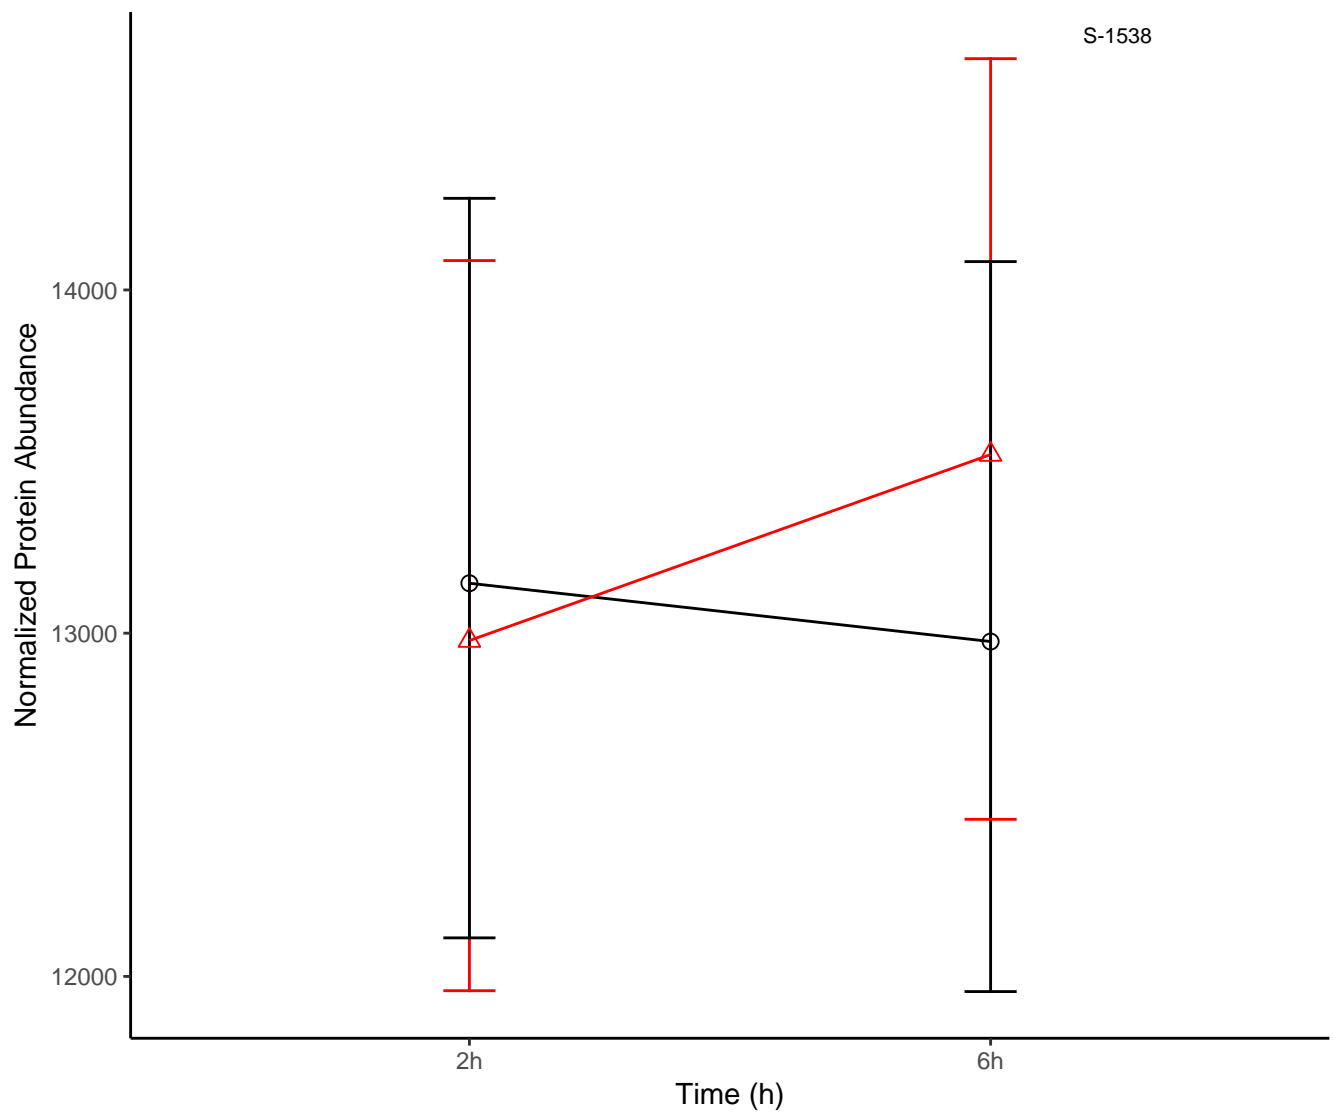

○ TSB-dex

△ TSB

# ATPB\_STAAM

S-1539

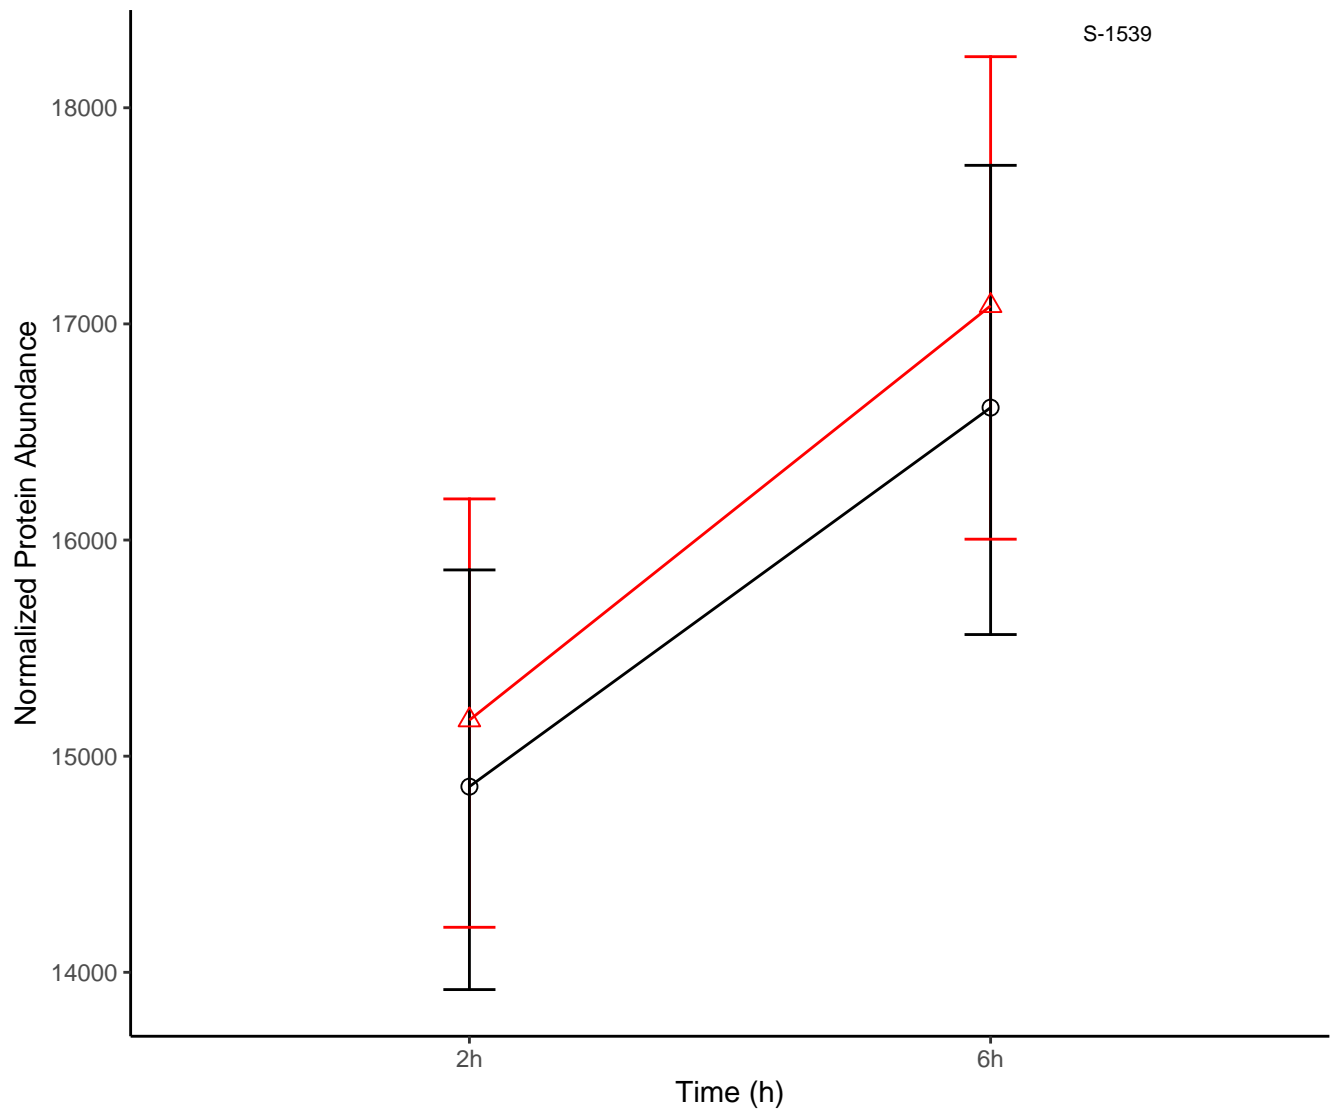

○ TSB-dex

△ TSB

# ATPD\_STAAM

S-1540

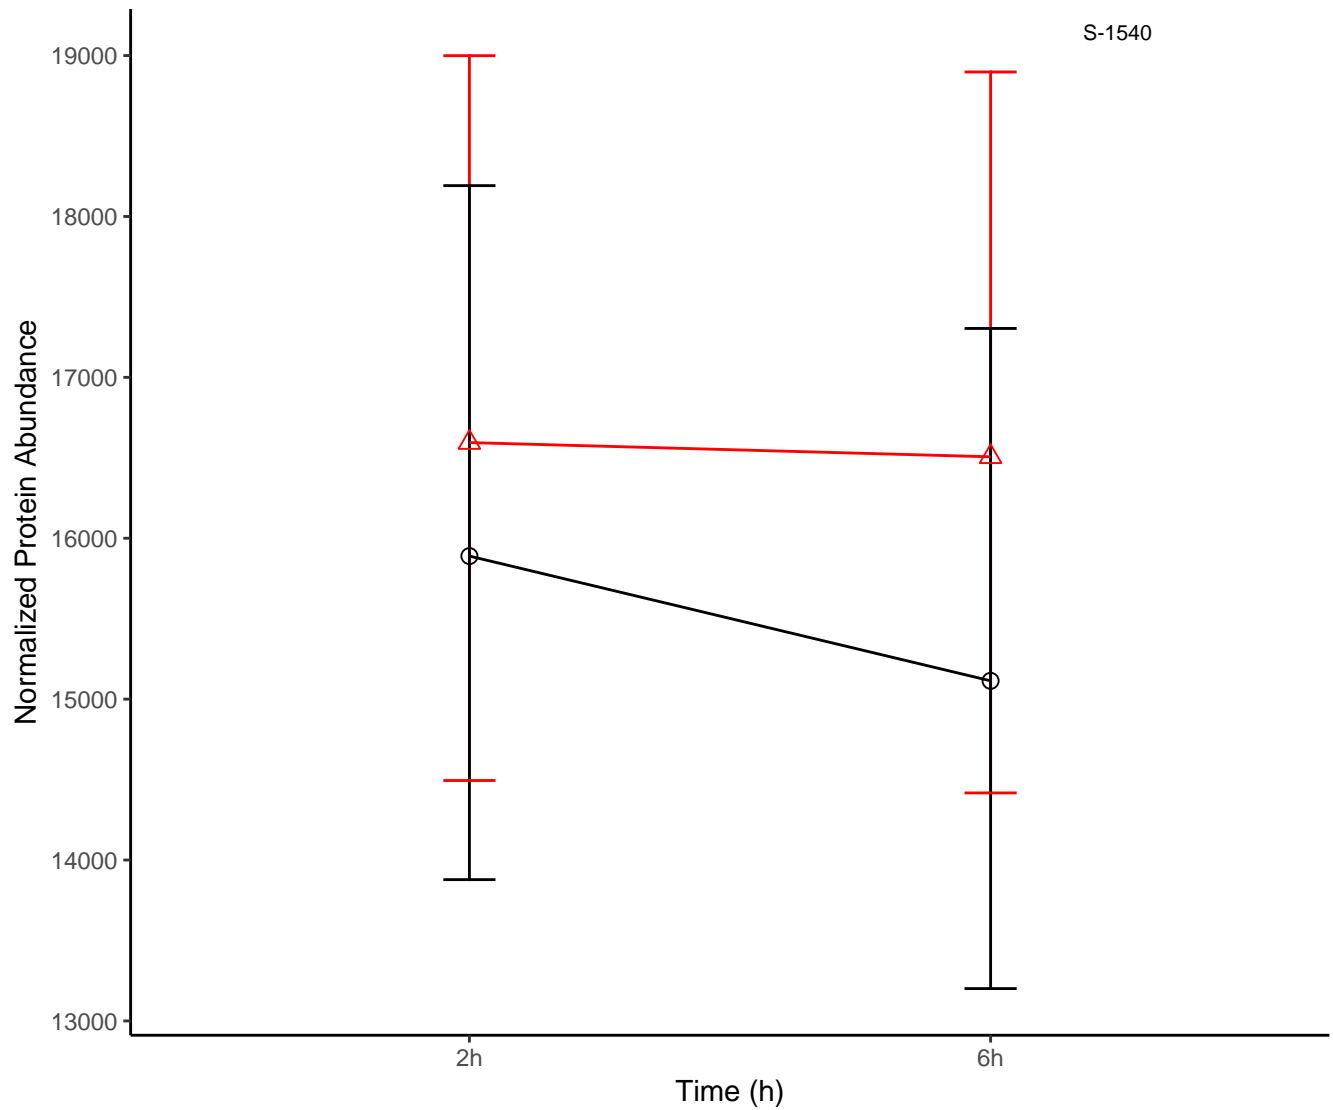

○ TSB-dex

△ TSB

# ATPE\_STAAM

S-1541

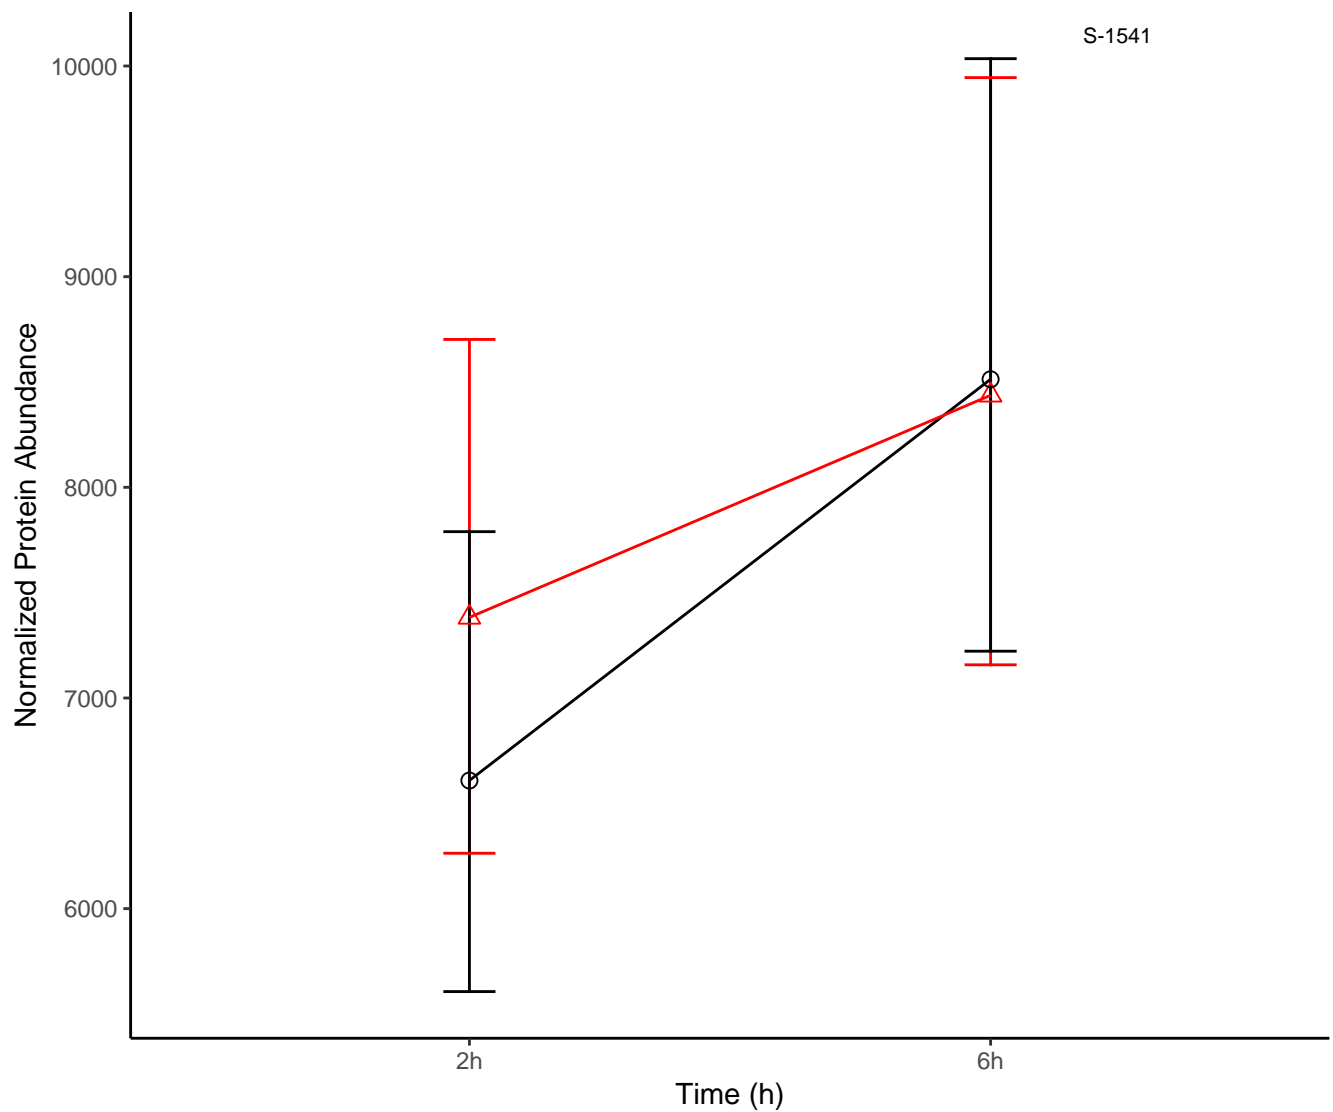

○ TSB-dex

△ TSB

# ATPF\_STAAM

S-1542

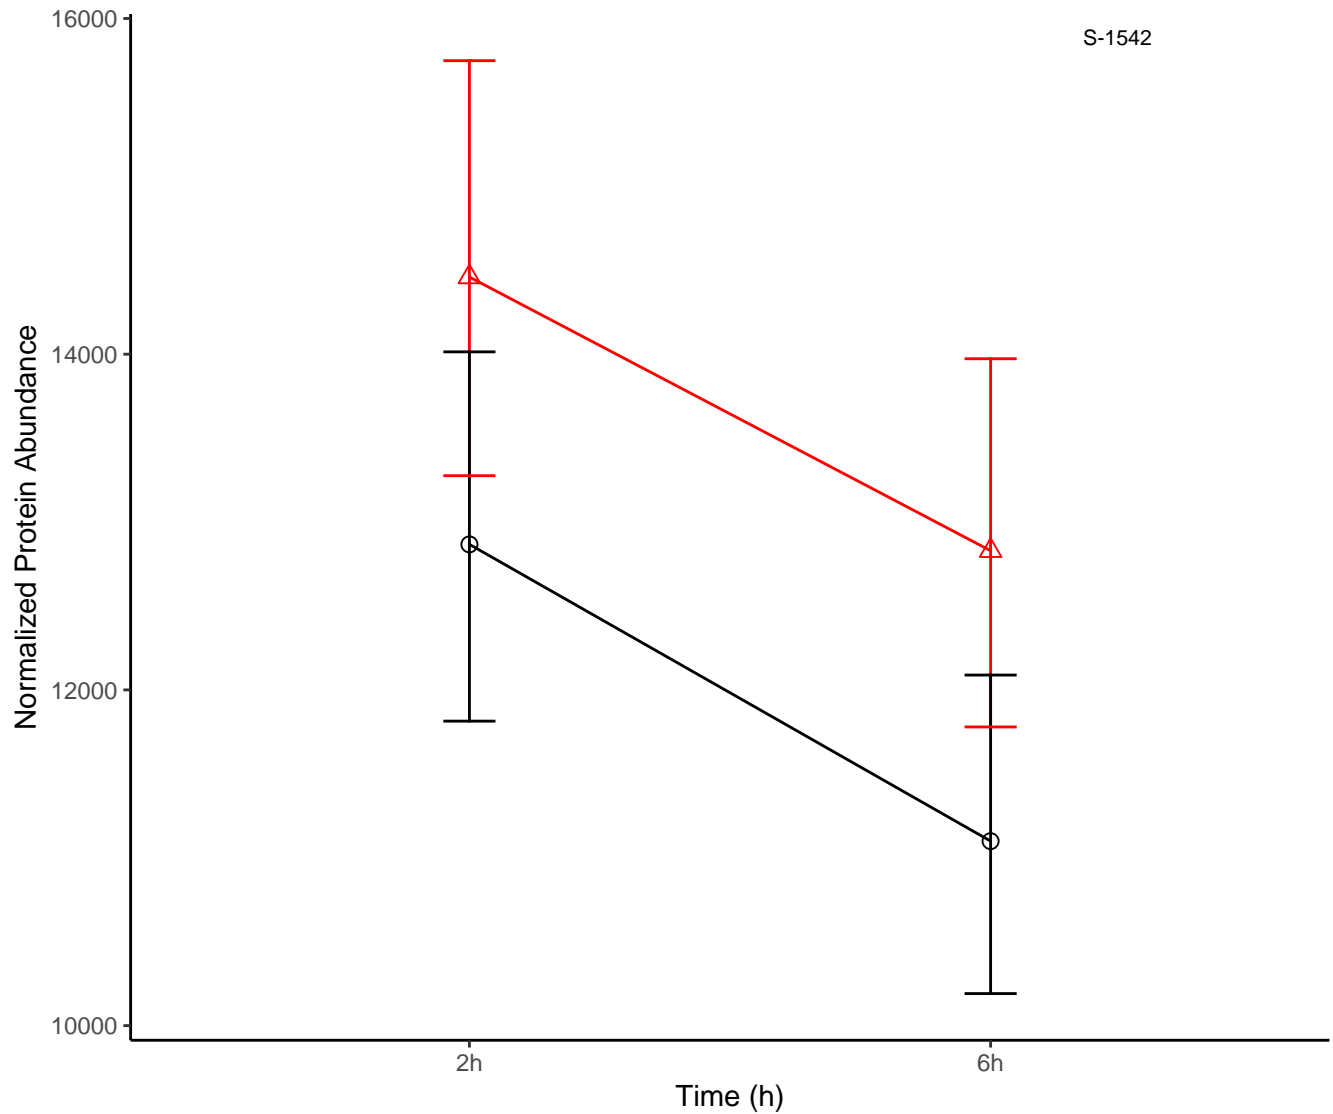

○ TSB-dex

△ TSB

# ATPG\_STAAM

S-1543

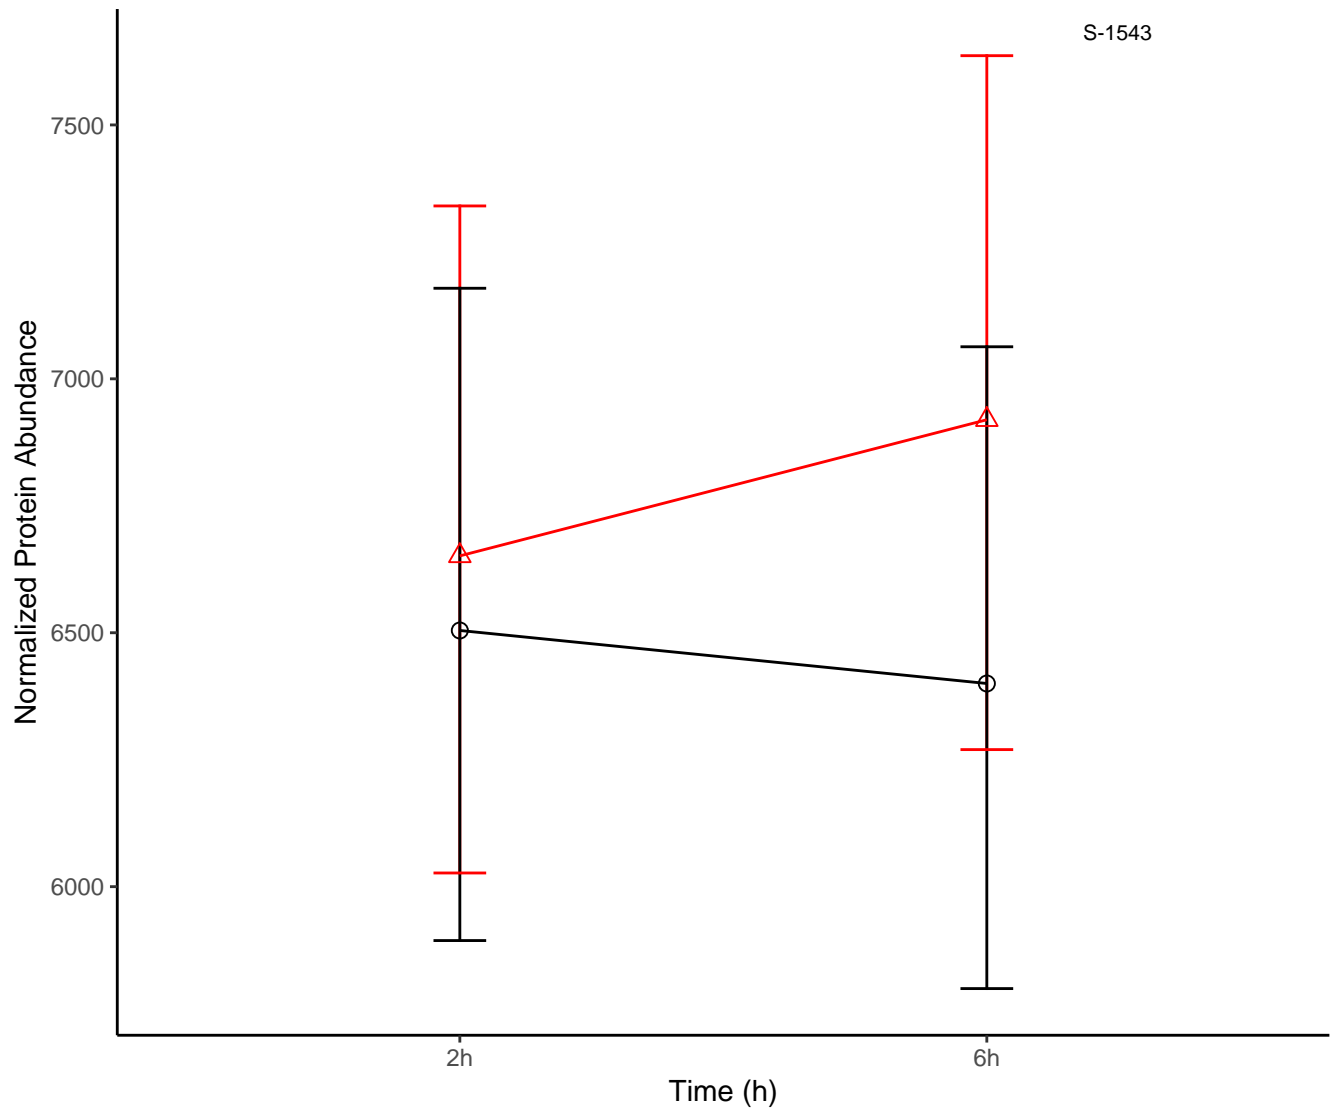

○ TSB-dex

△ TSB

# AZO1\_STAAM

S-1544

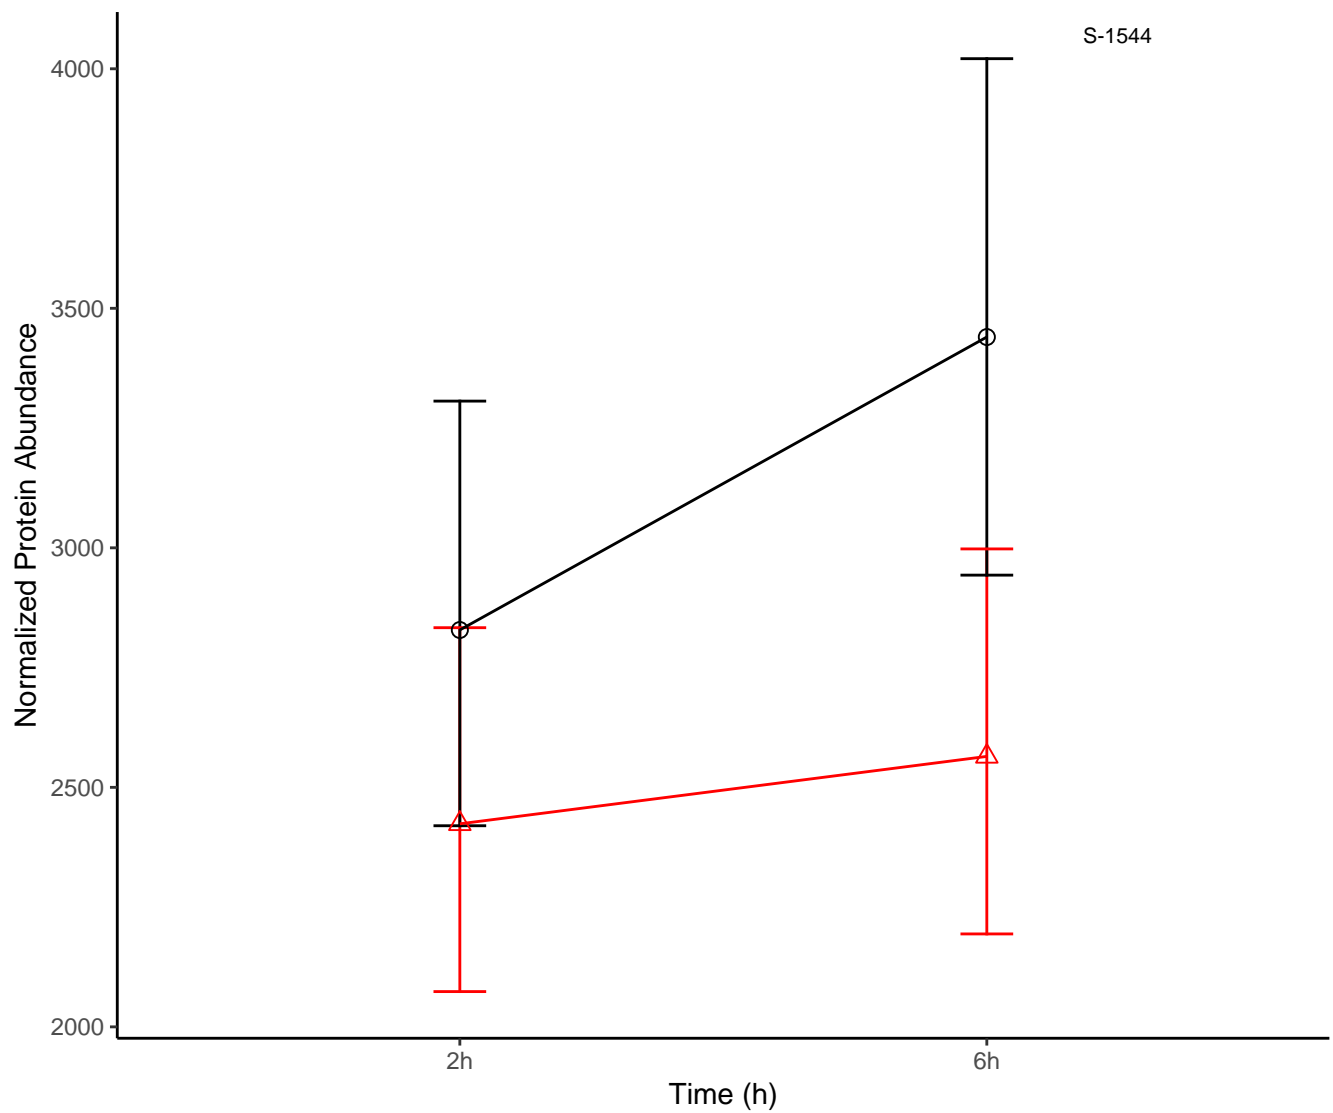

○ TSB-dex

△ TSB



# AZOR\_STAAM

S-1545

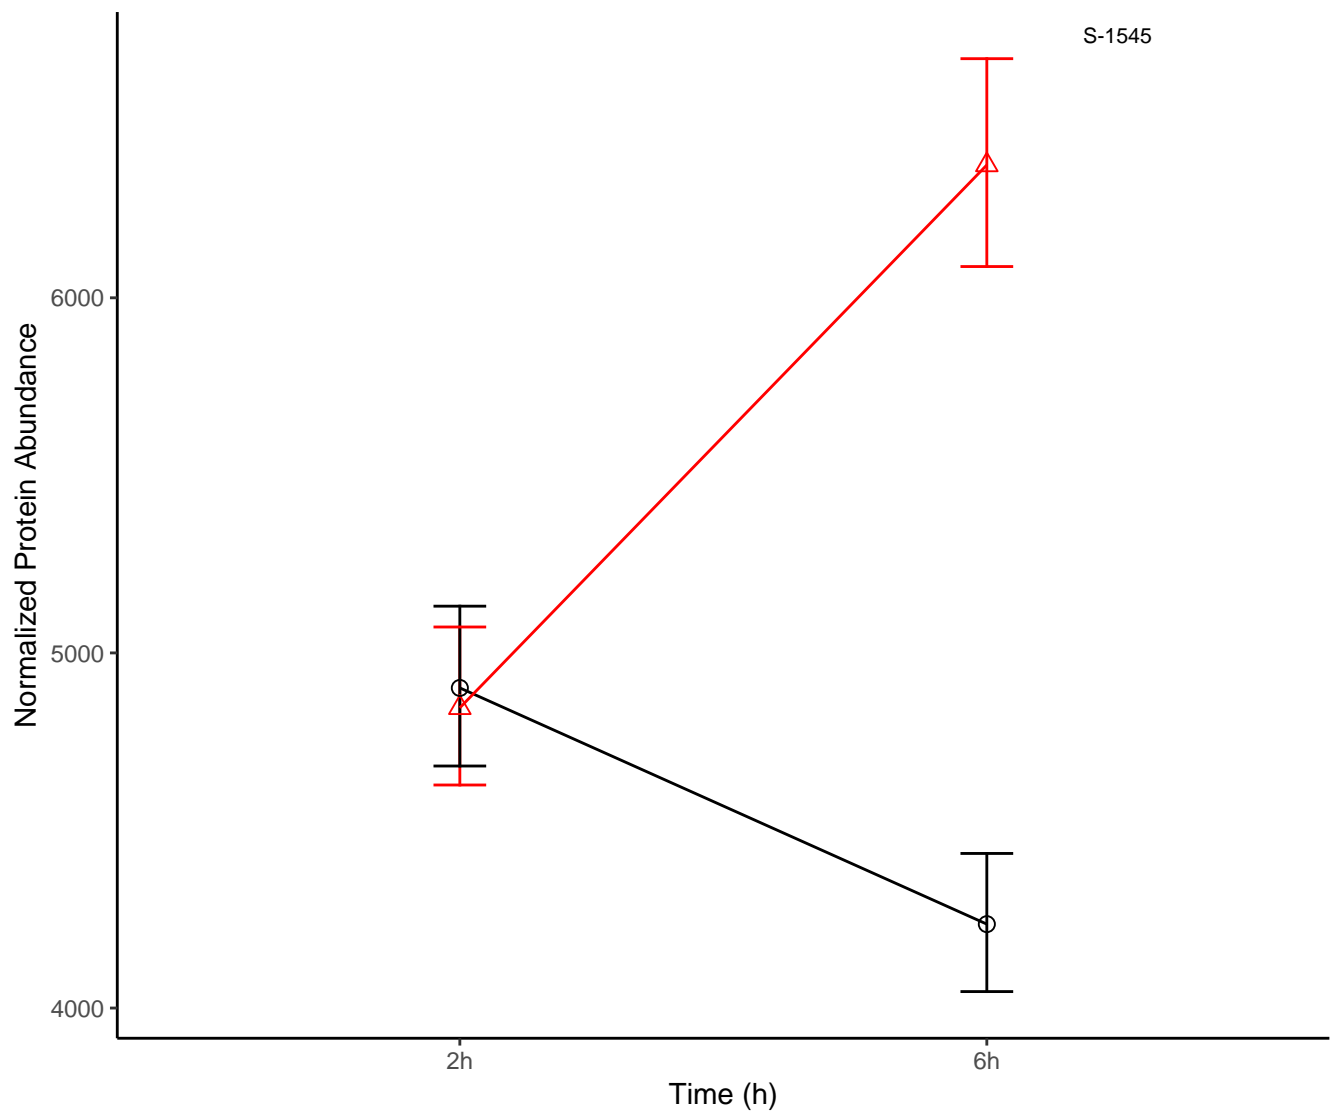

○ TSB-dex

△ TSB

# BSAA\_STAAM

S-1546

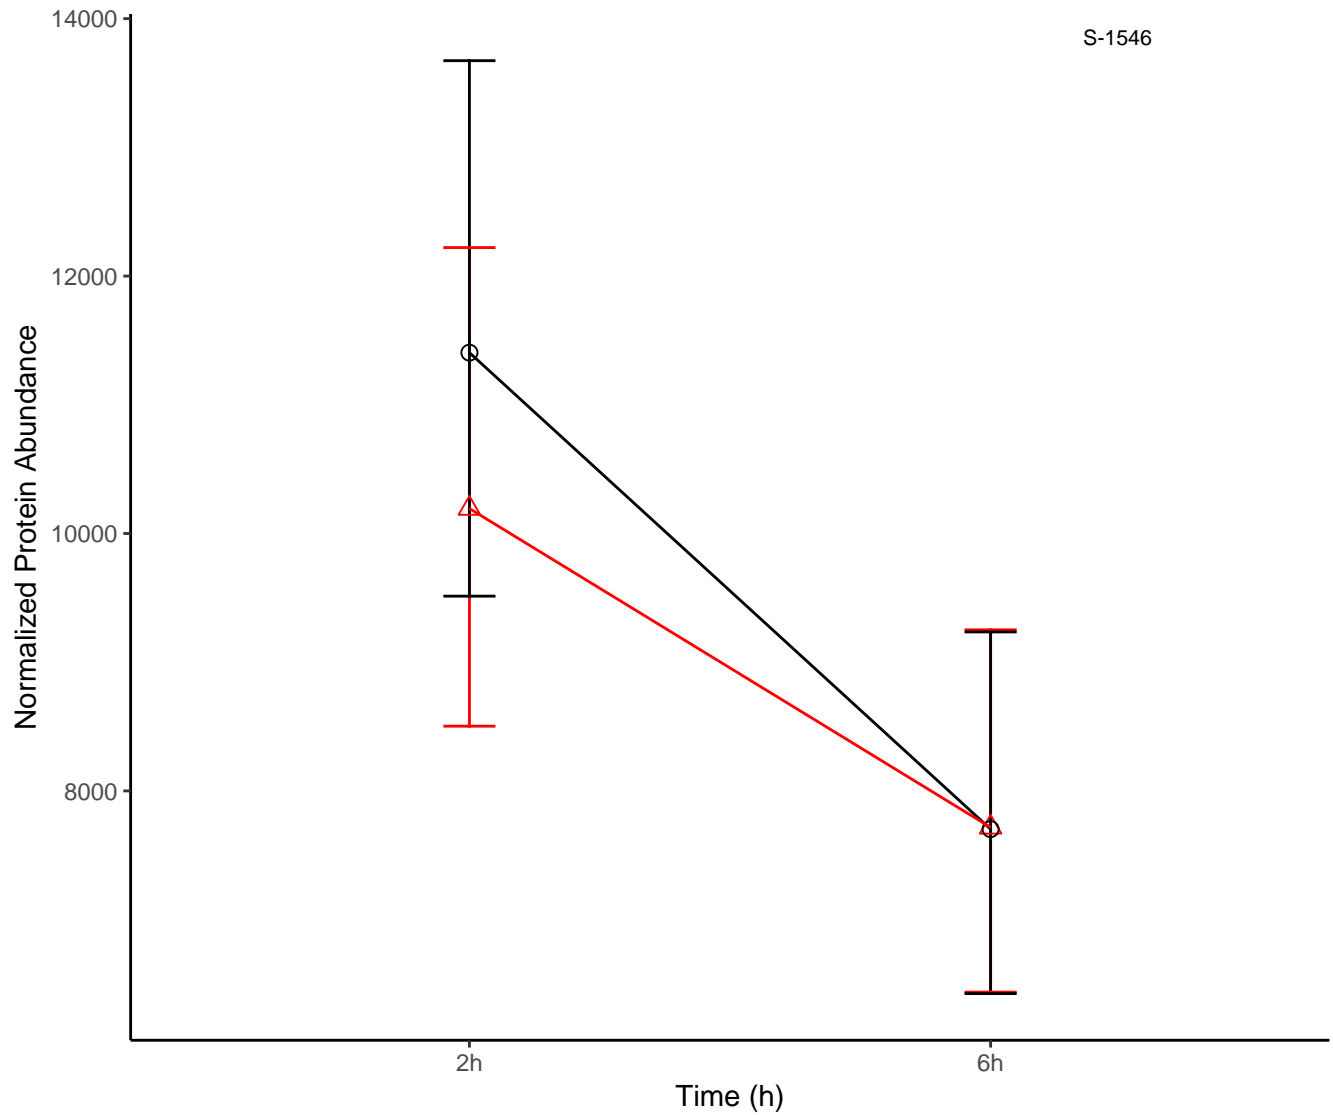

○ TSB-dex

△ TSB

# BUTA\_STAAM

S-1547

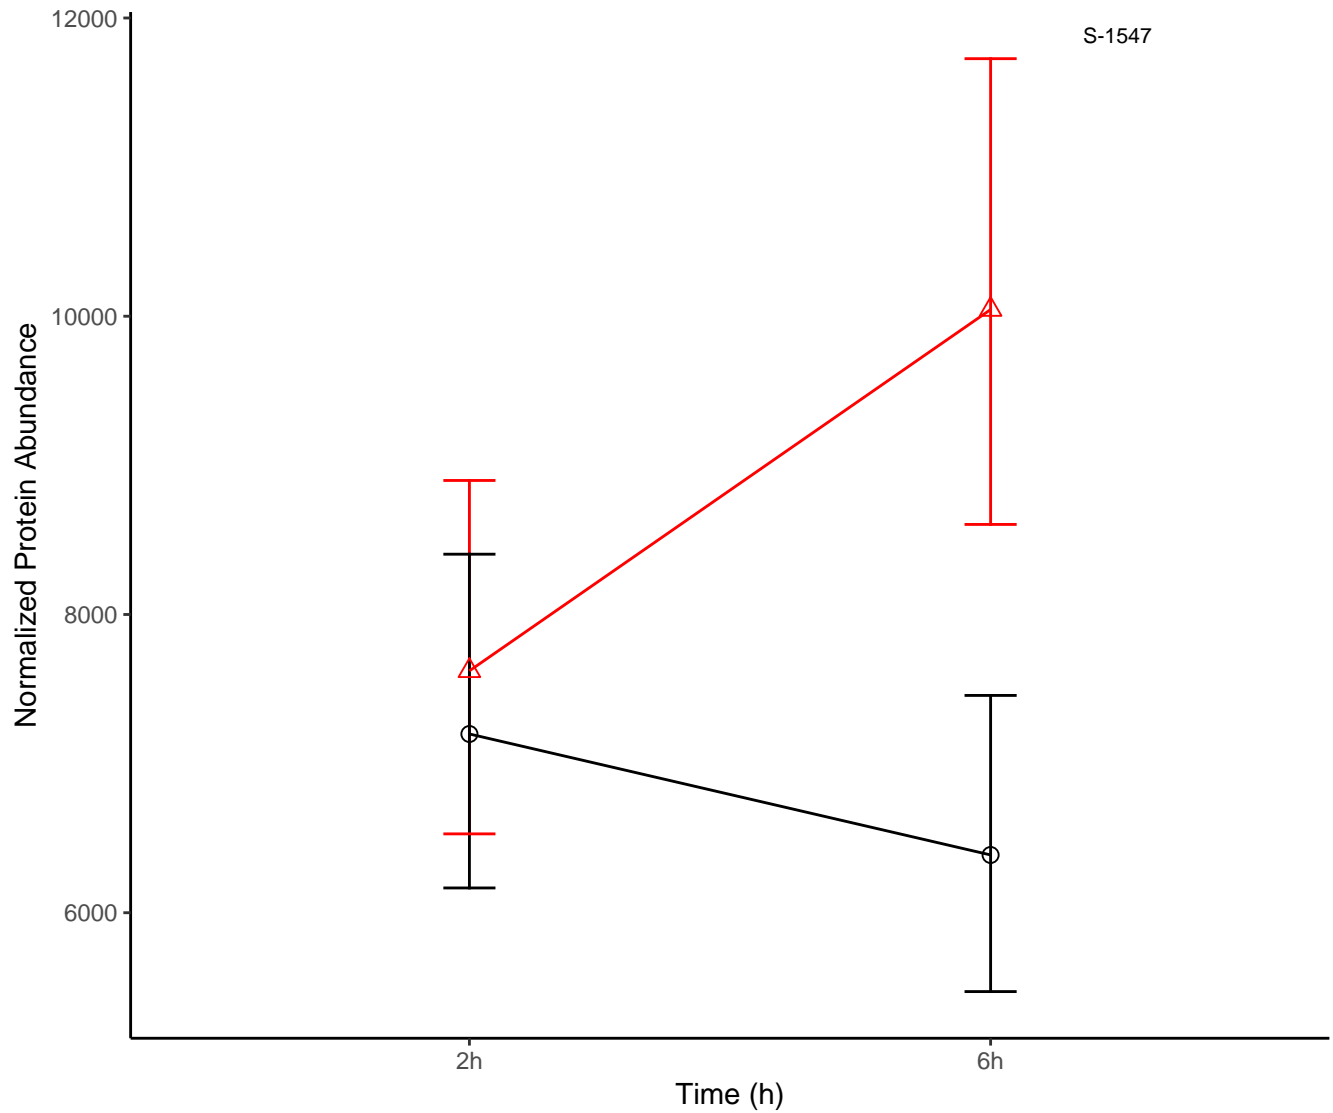

○ TSB-dex

△ TSB

# CARA\_STAAM

S-1548

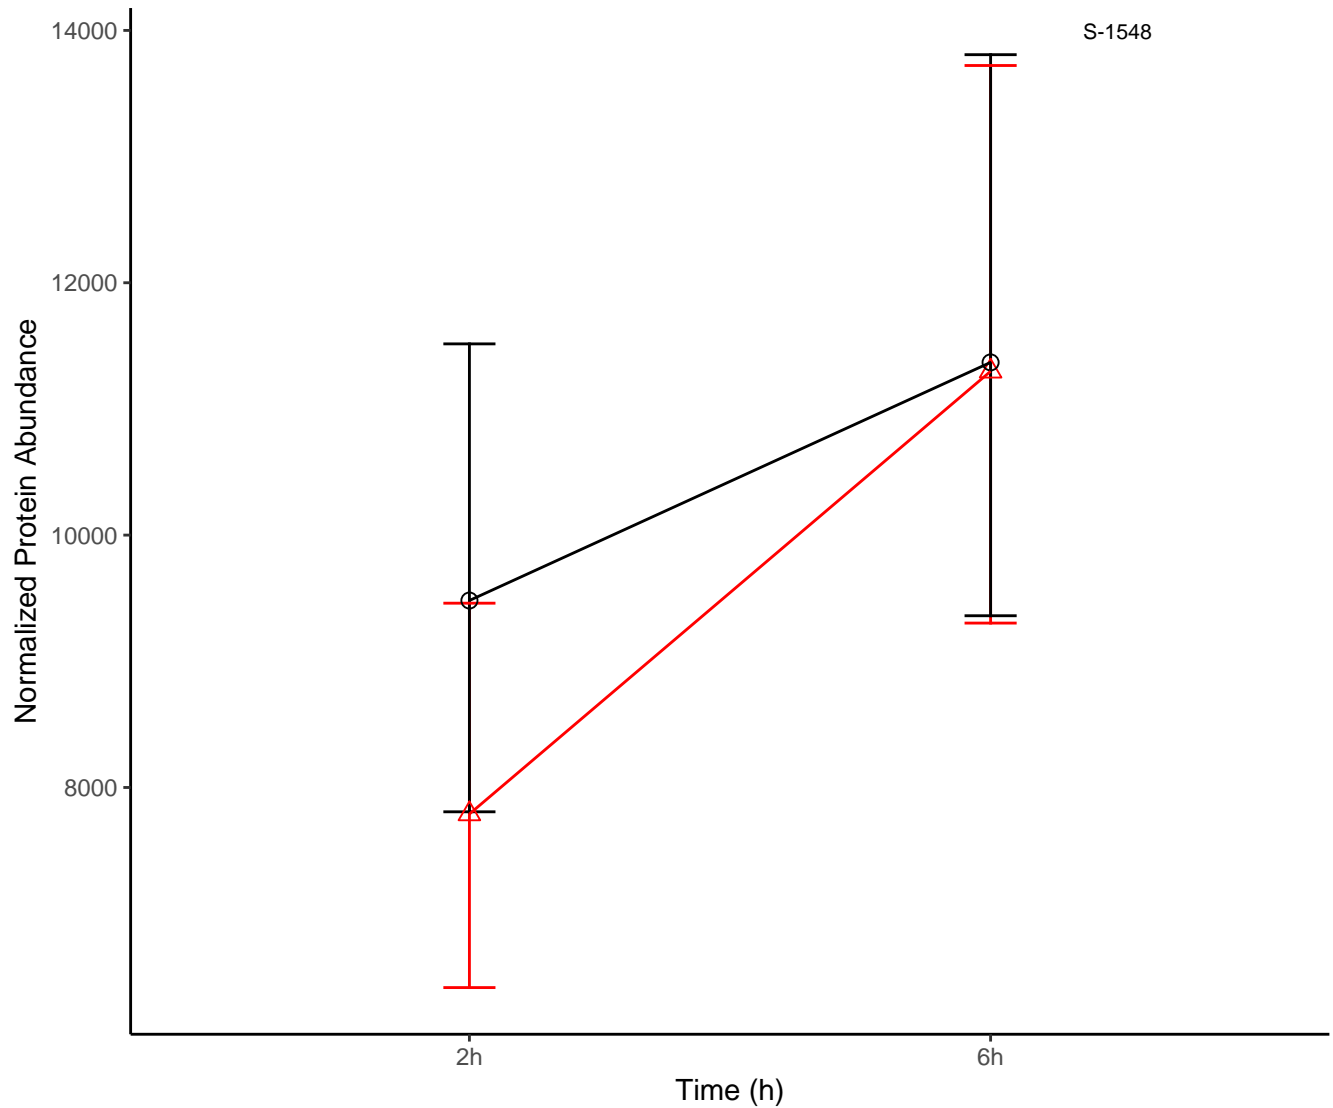

○ TSB-dex

△ TSB

# CARB\_STAAM

S-1549

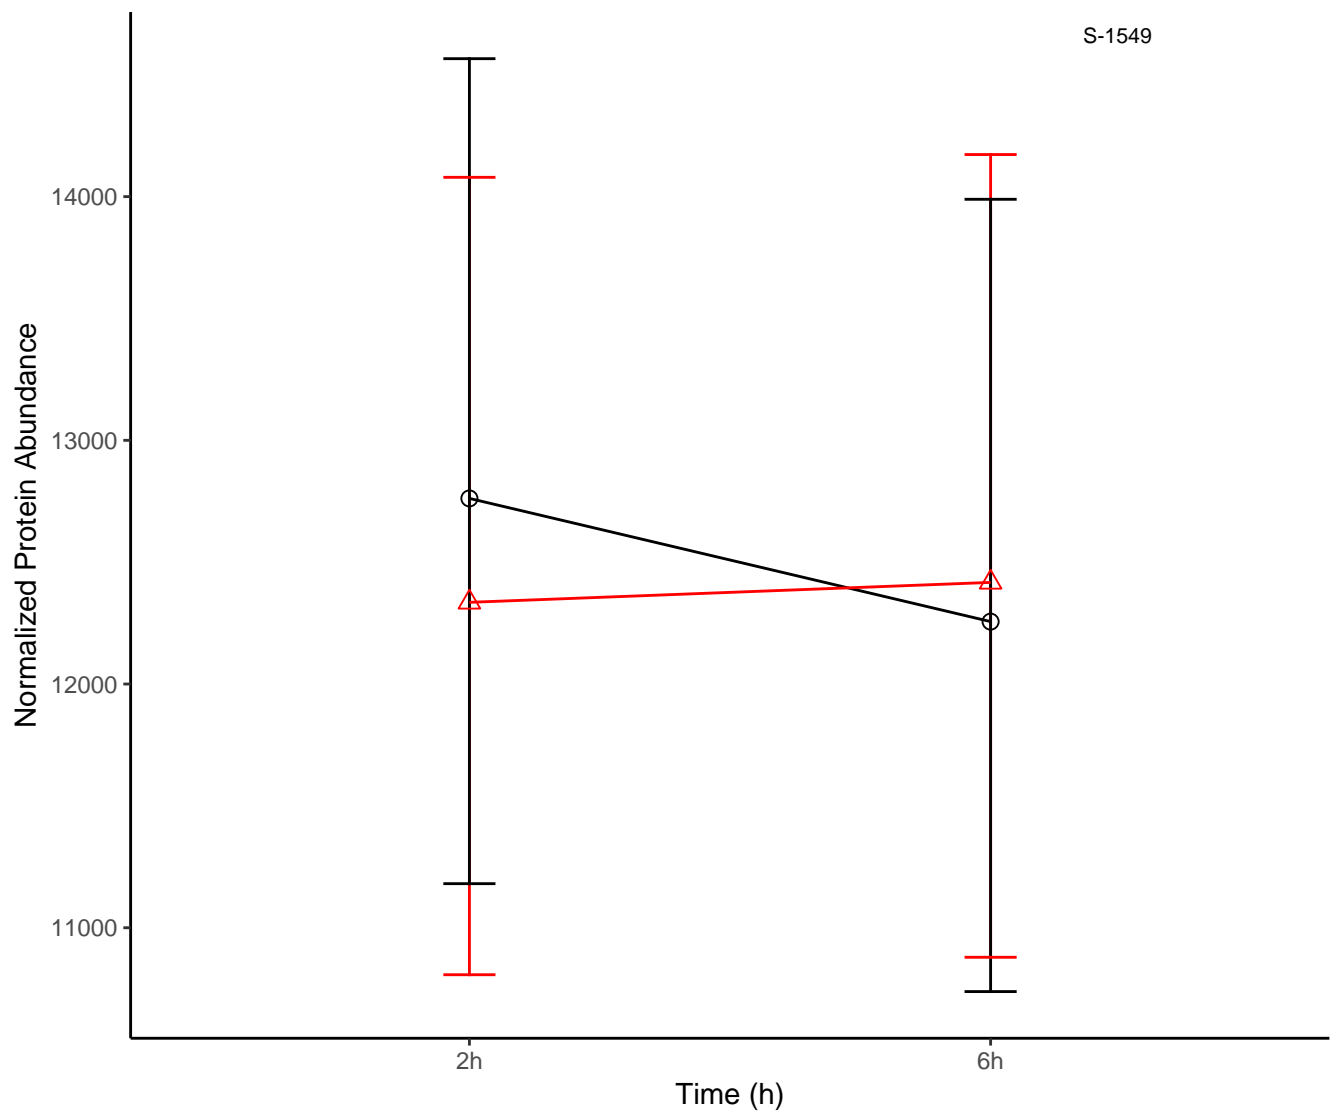

○ TSB-dex

△ TSB

# CATA\_STAAM

S-1550

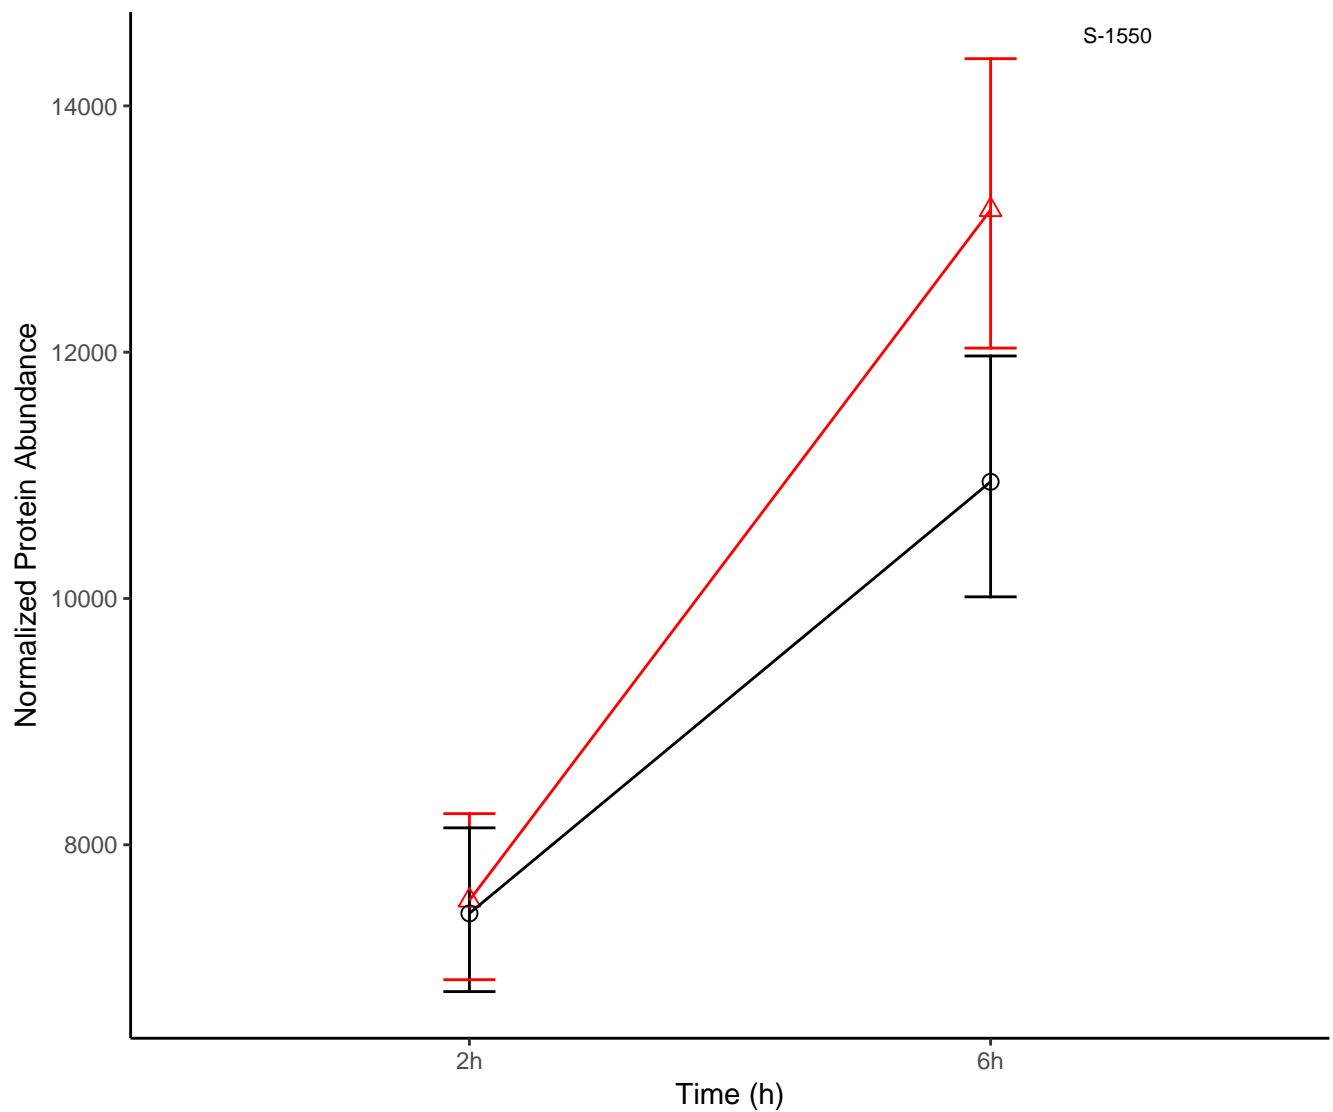

○ TSB-dex

△ TSB

# CCPA\_STAAM

S-1551

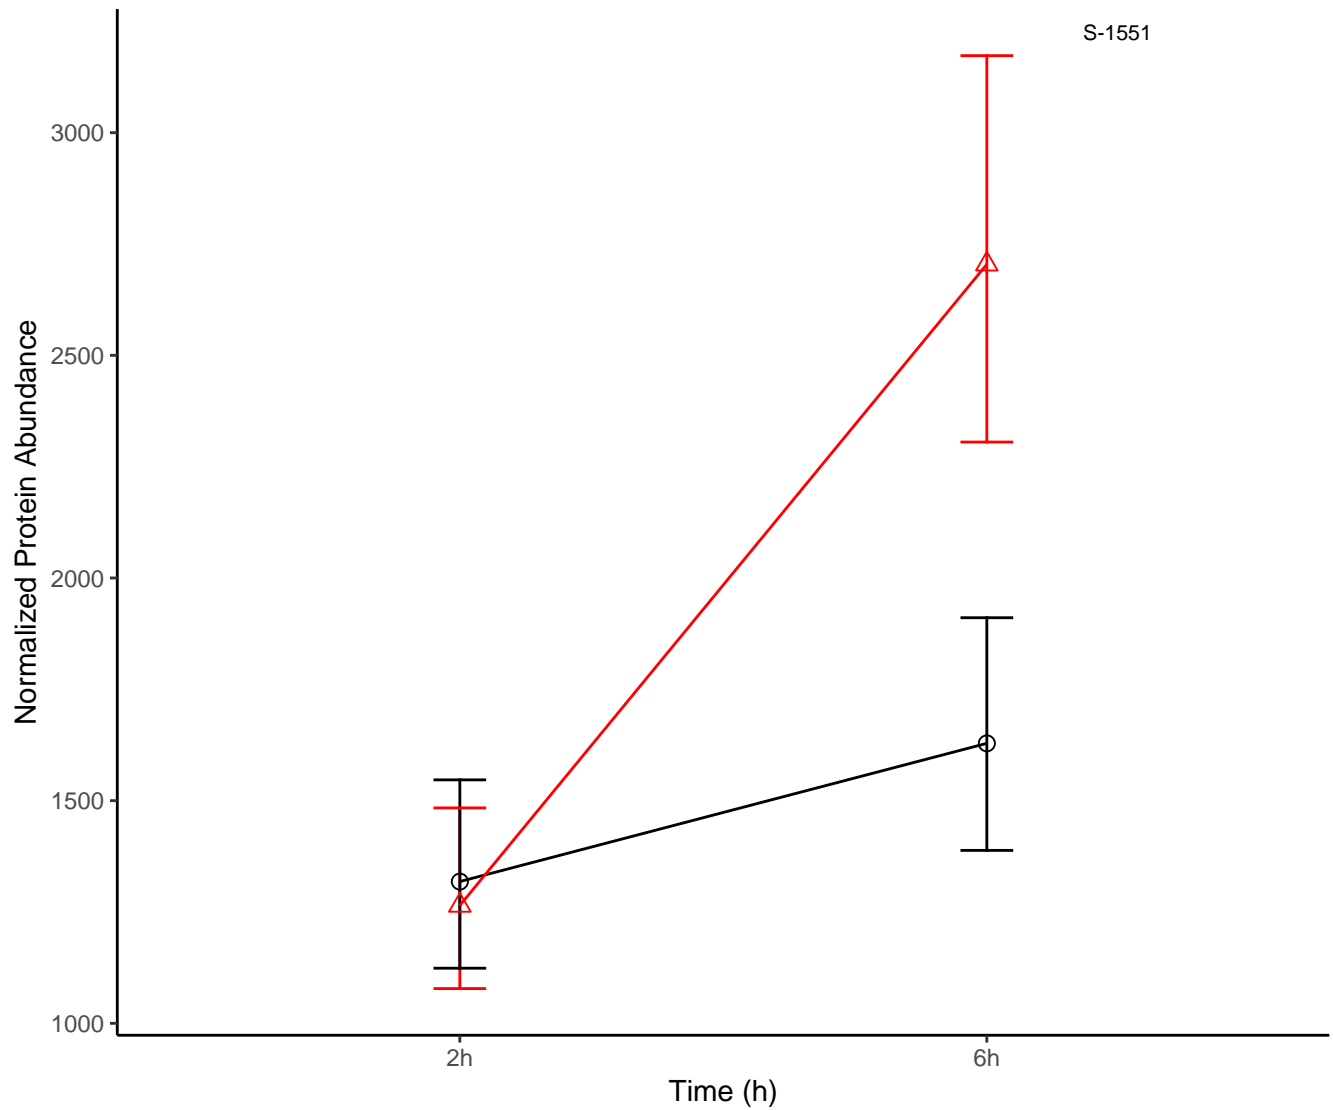

○ TSB-dex

△ TSB

# CDR\_STAAM

S-1552

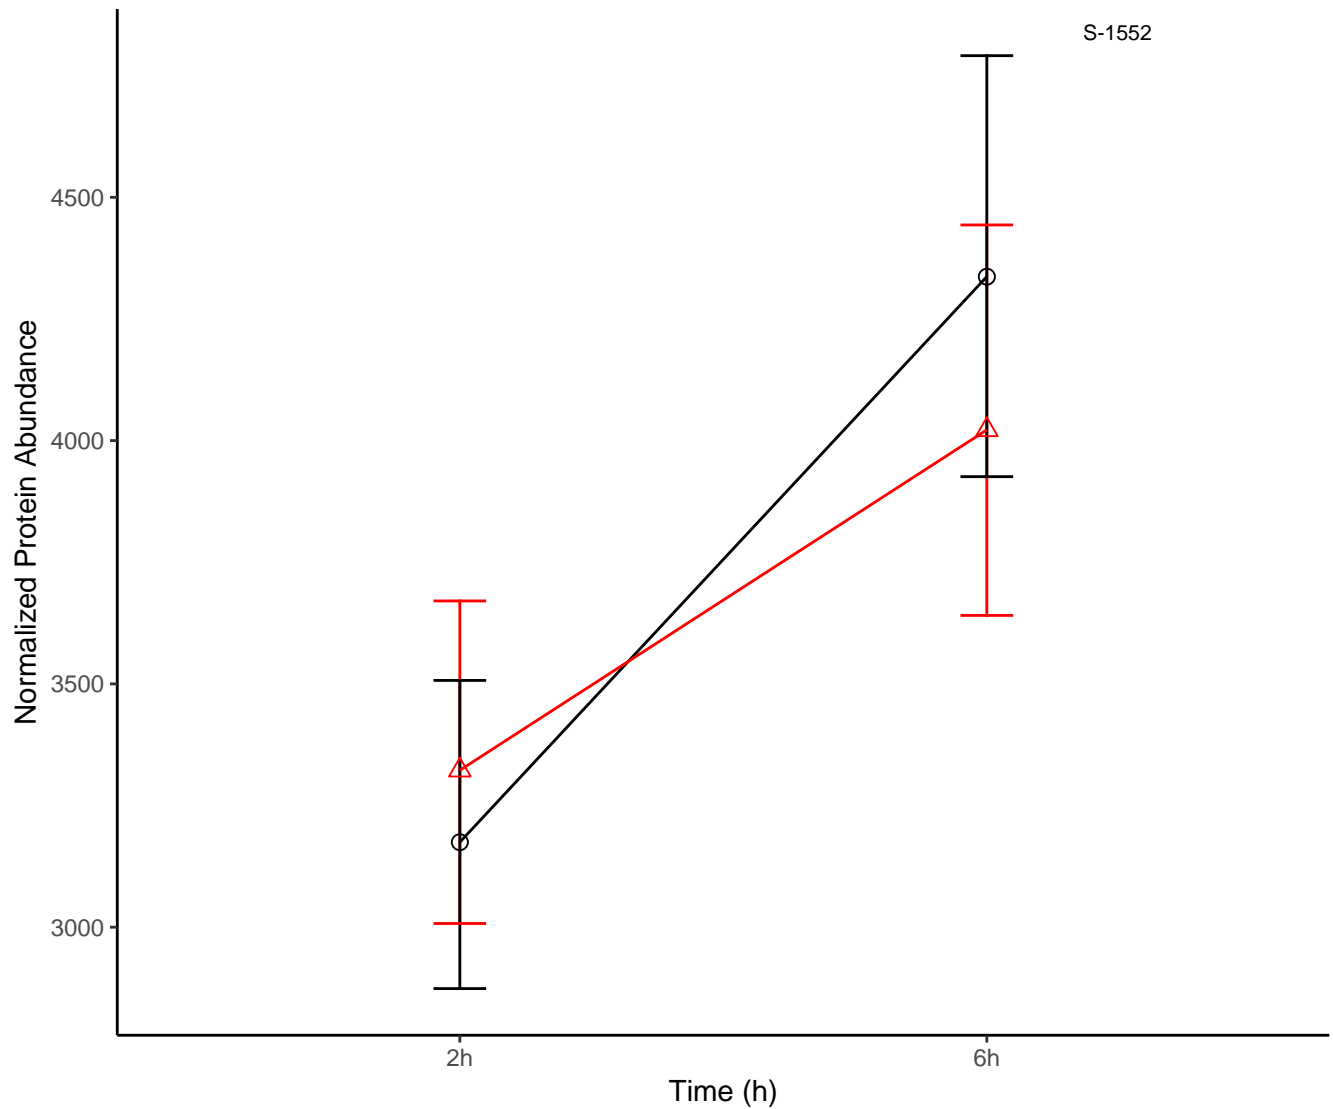

○ TSB-dex

△ TSB



# CH10\_STAAM

S-1553

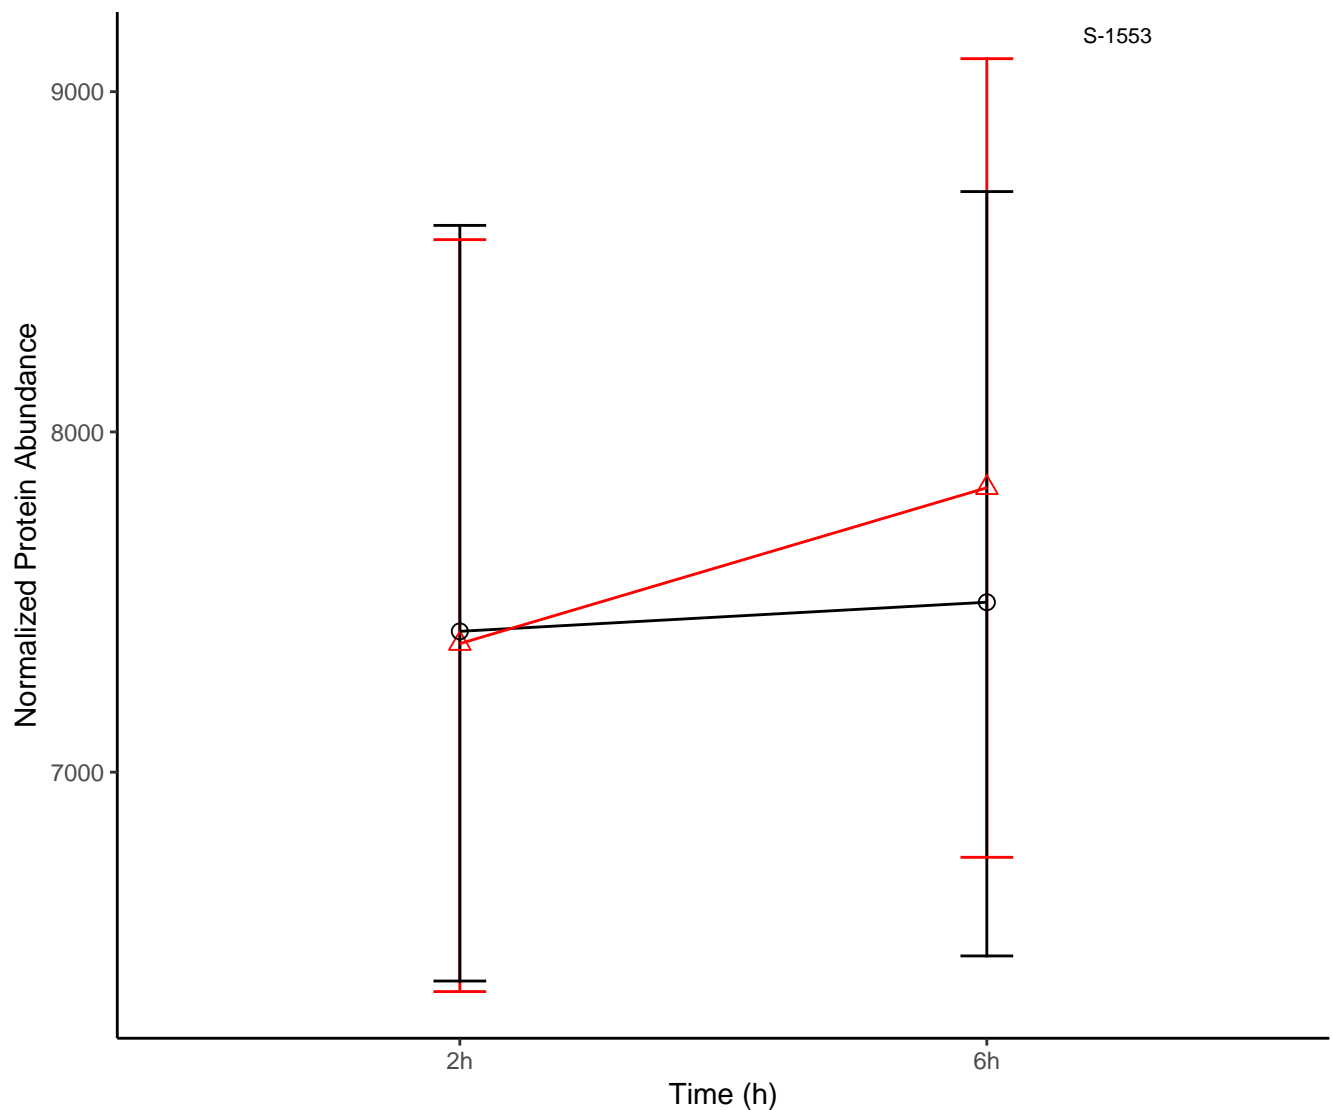

○ TSB-dex

△ TSB

# CH60\_STAAM

S-1554

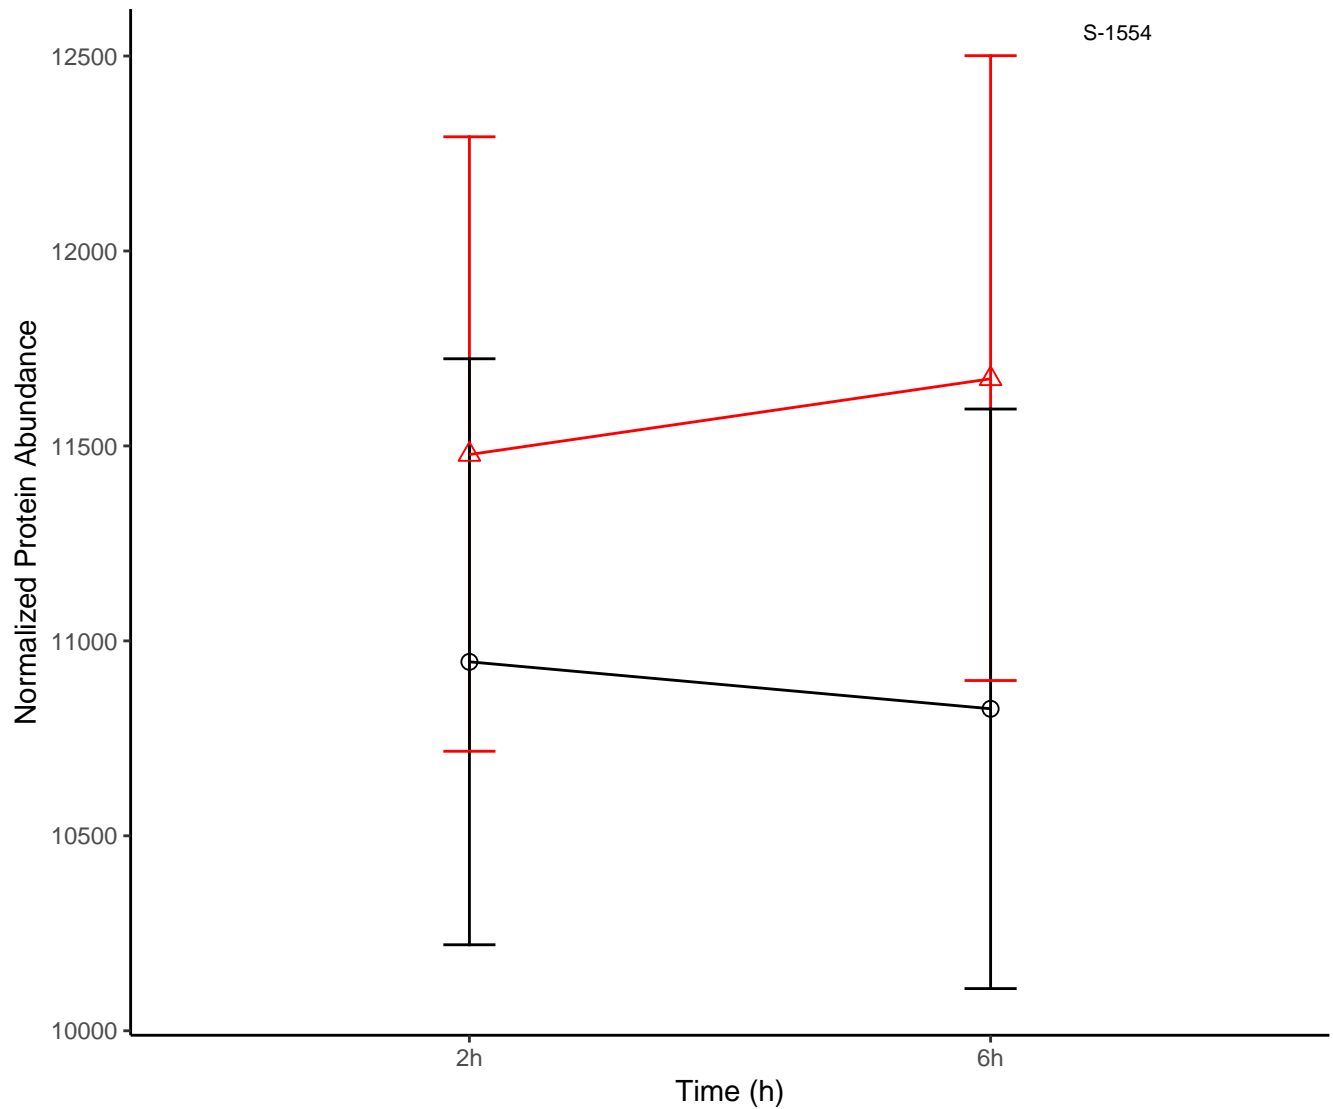

○ TSB-dex

△ TSB

# CLPB\_STAAM

S-1555

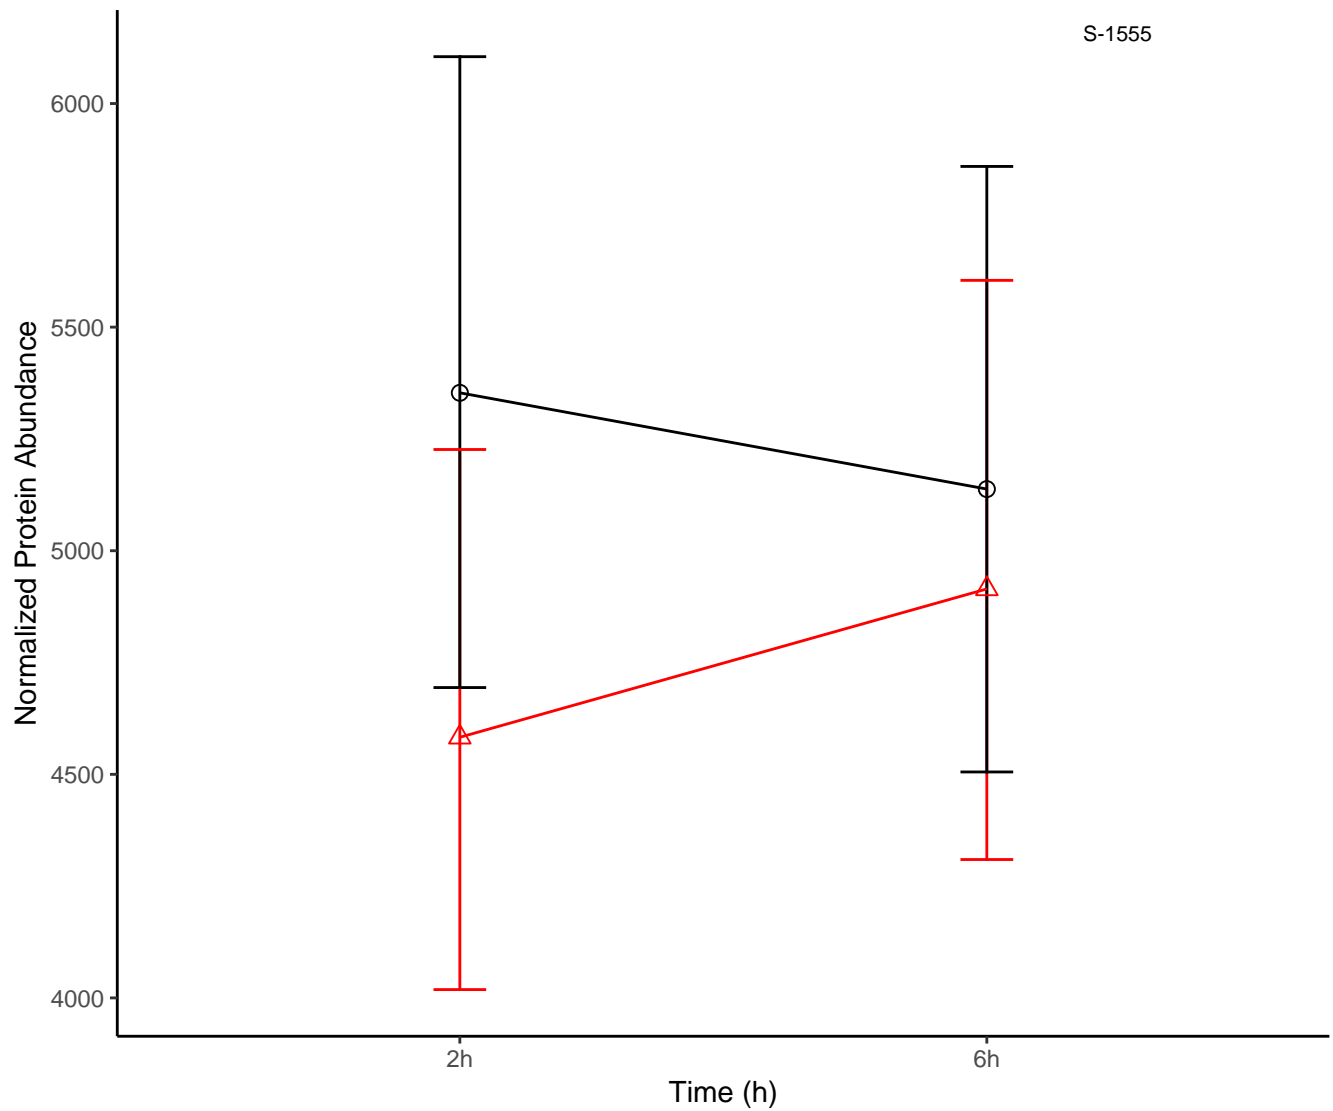

○ TSB-dex

△ TSB

# CLPC\_STAAM

S-1556

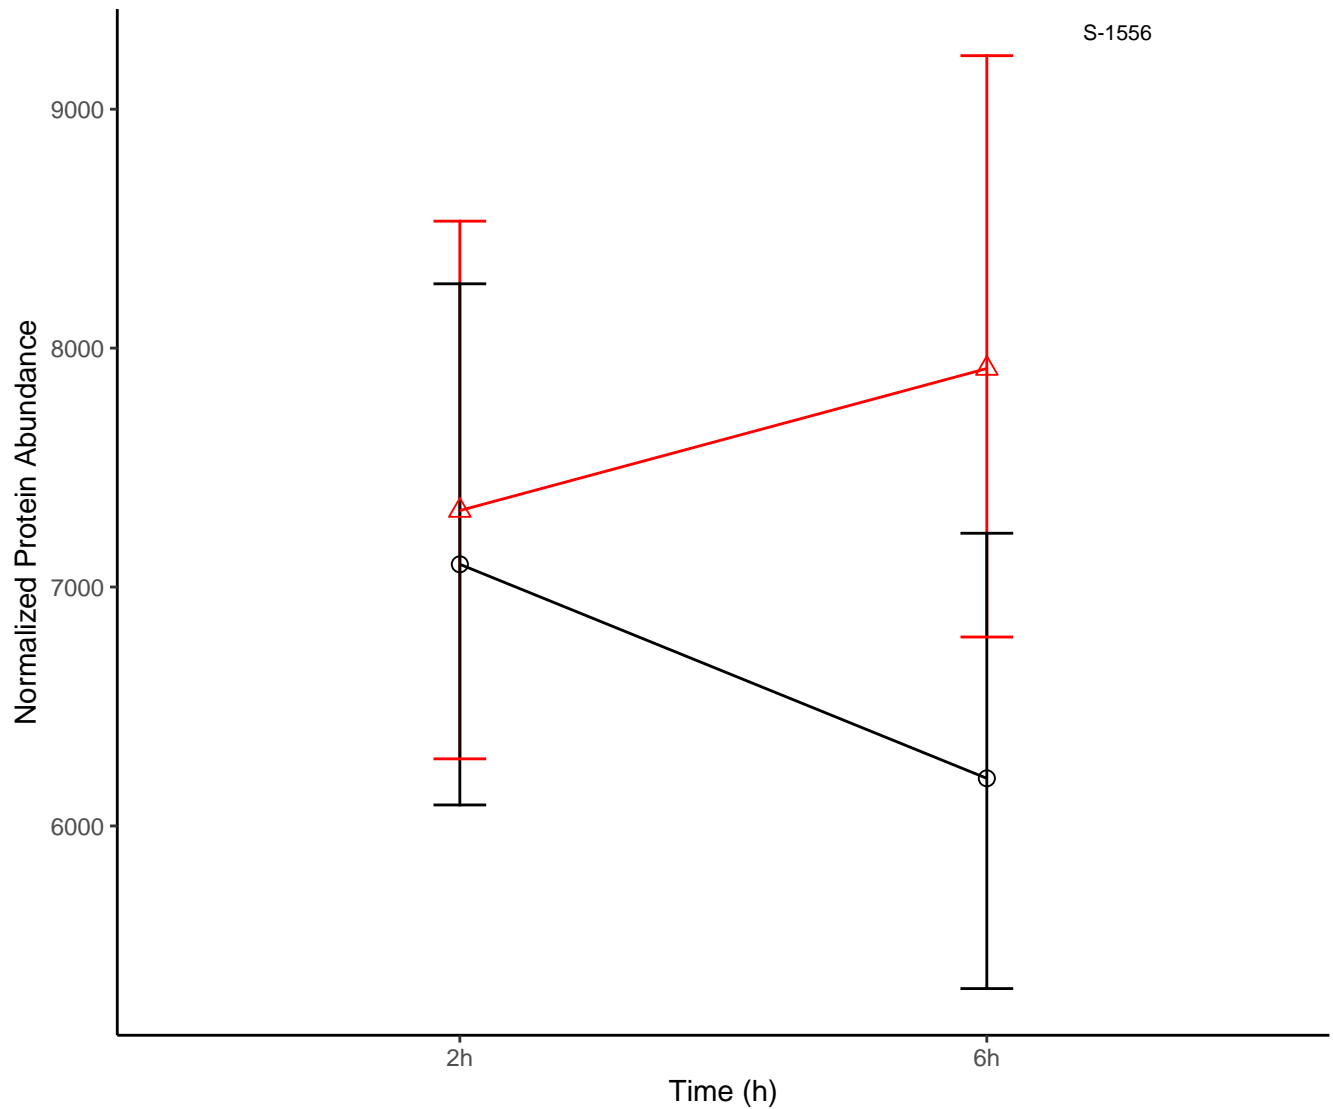

○ TSB-dex

△ TSB

# CLPL\_STAAM

S-1557

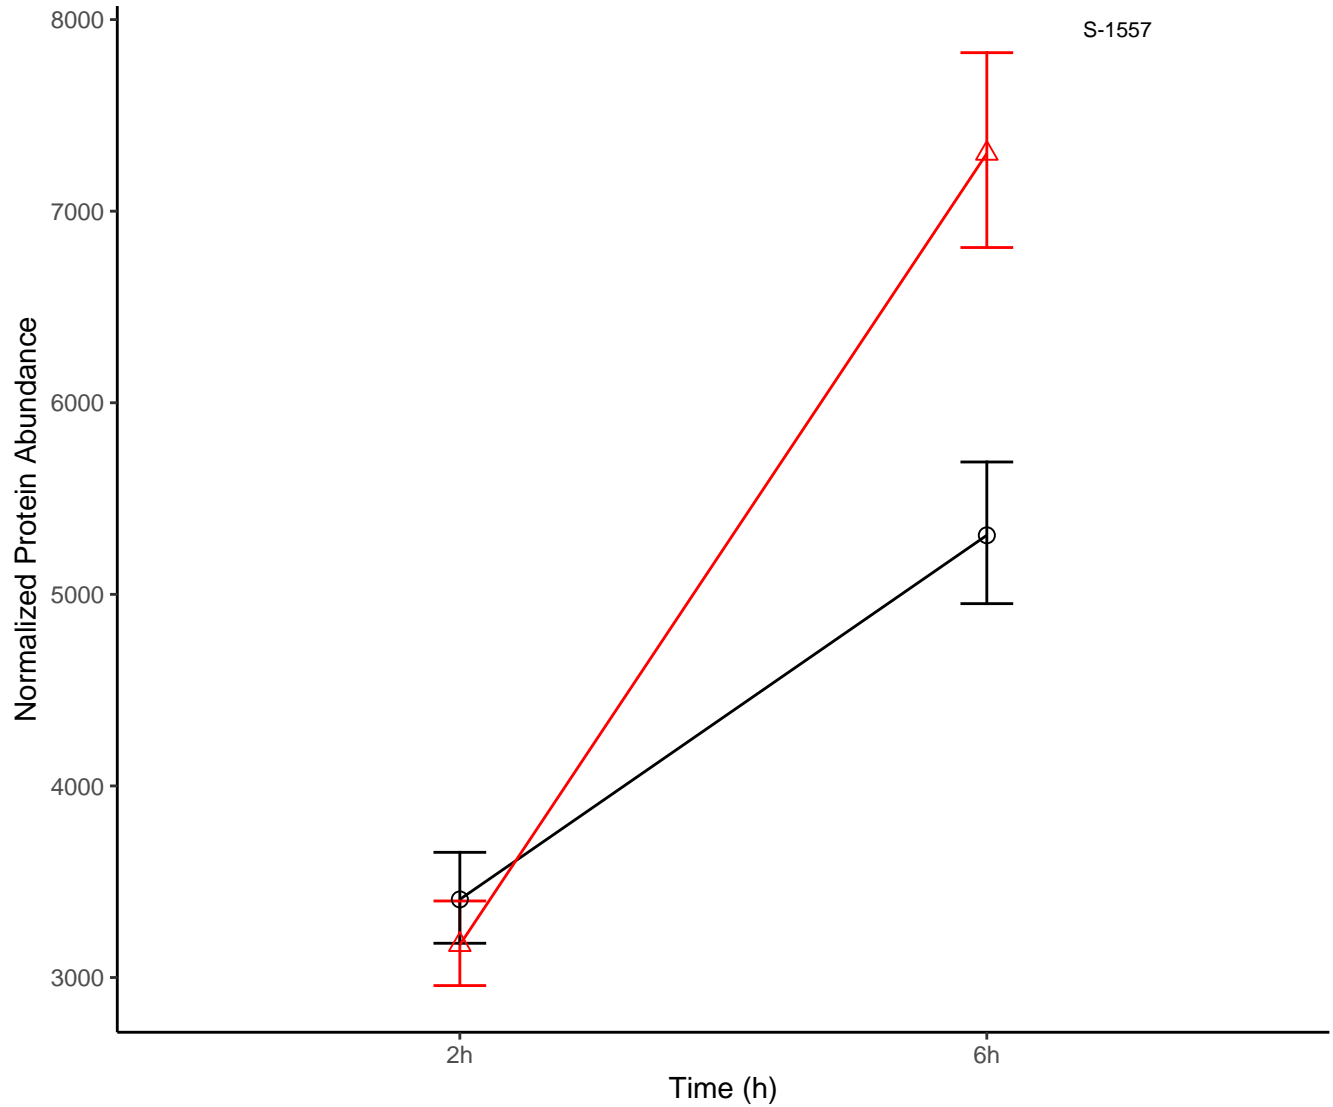

○ TSB-dex

△ TSB

# CLPP\_STAAM

S-1558

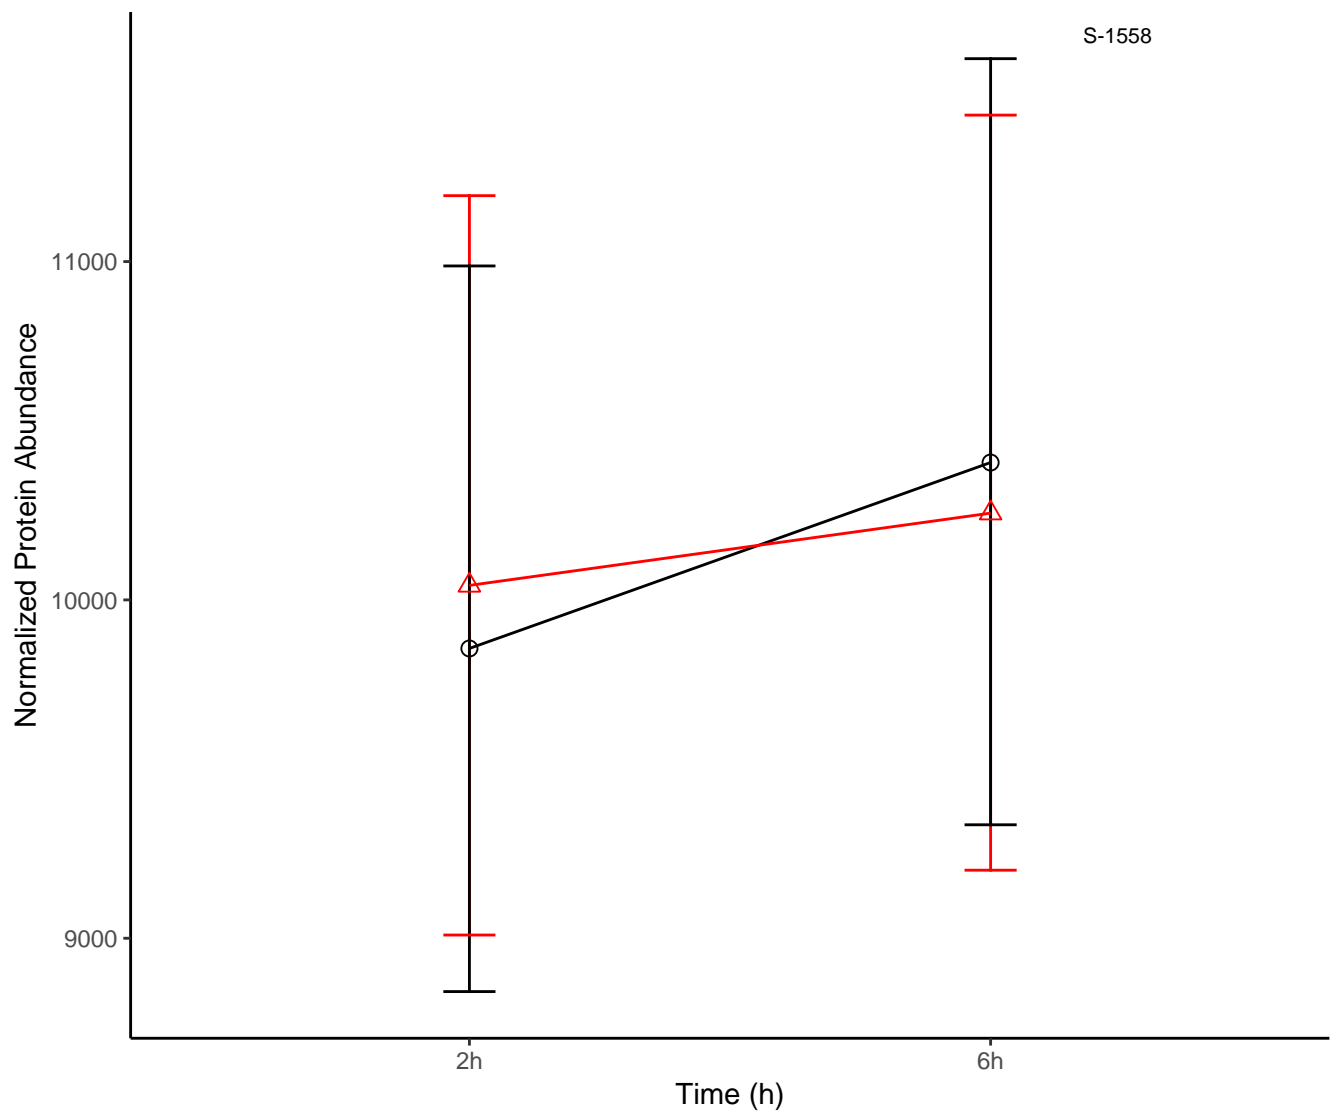

○ TSB-dex

△ TSB

# CLPX\_STAAM

S-1559

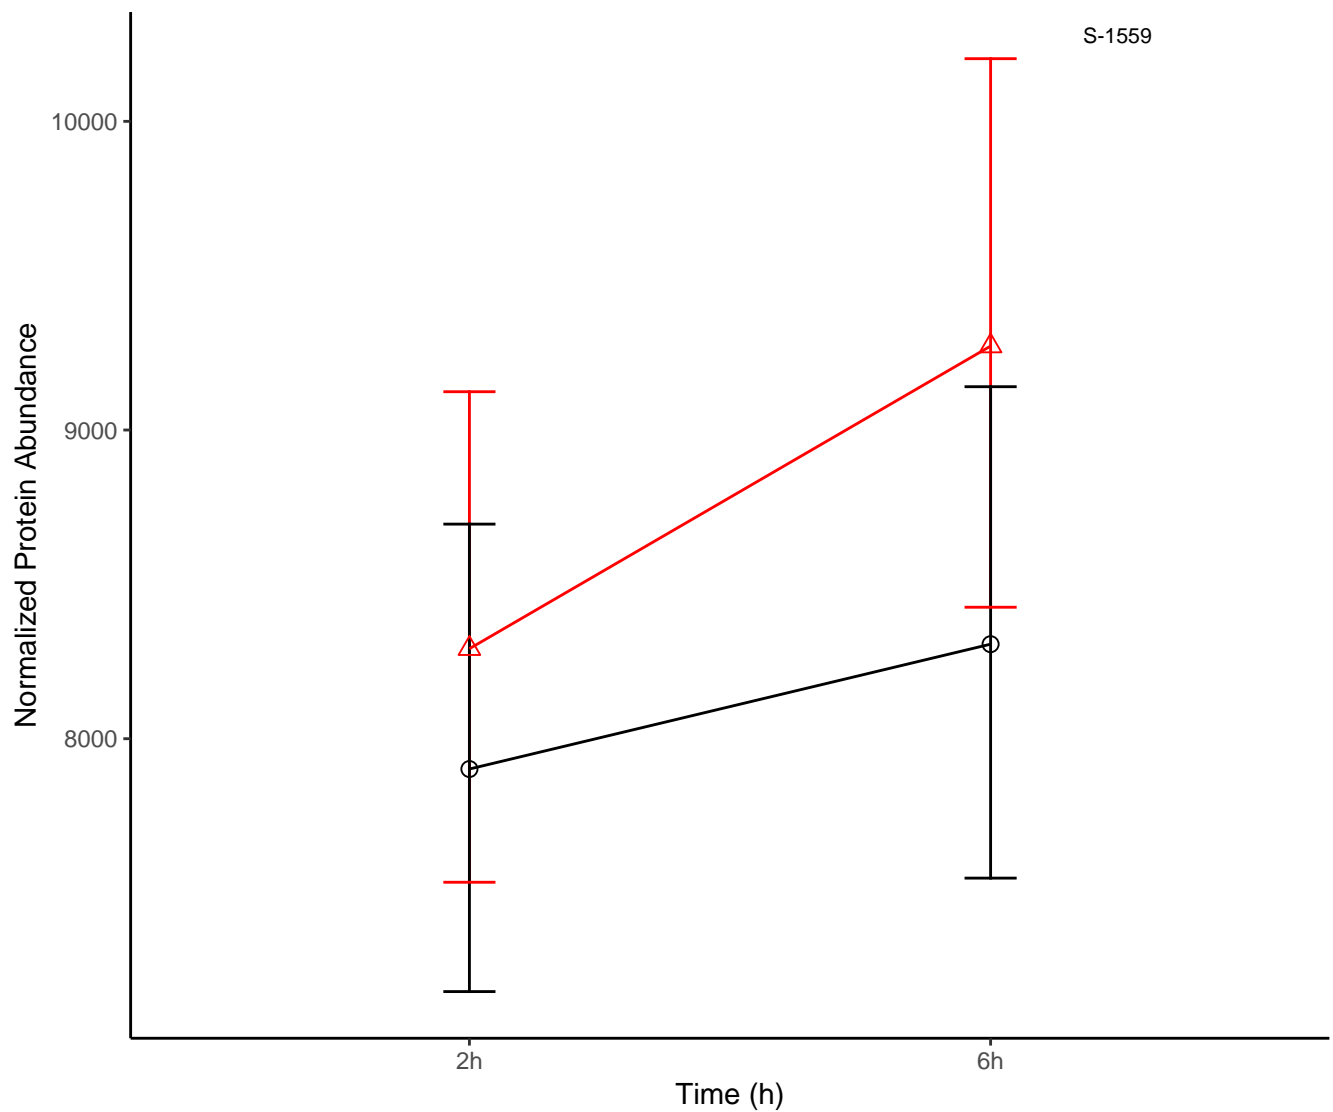

○ TSB-dex

△ TSB

# CODY\_STAAM

S-1560

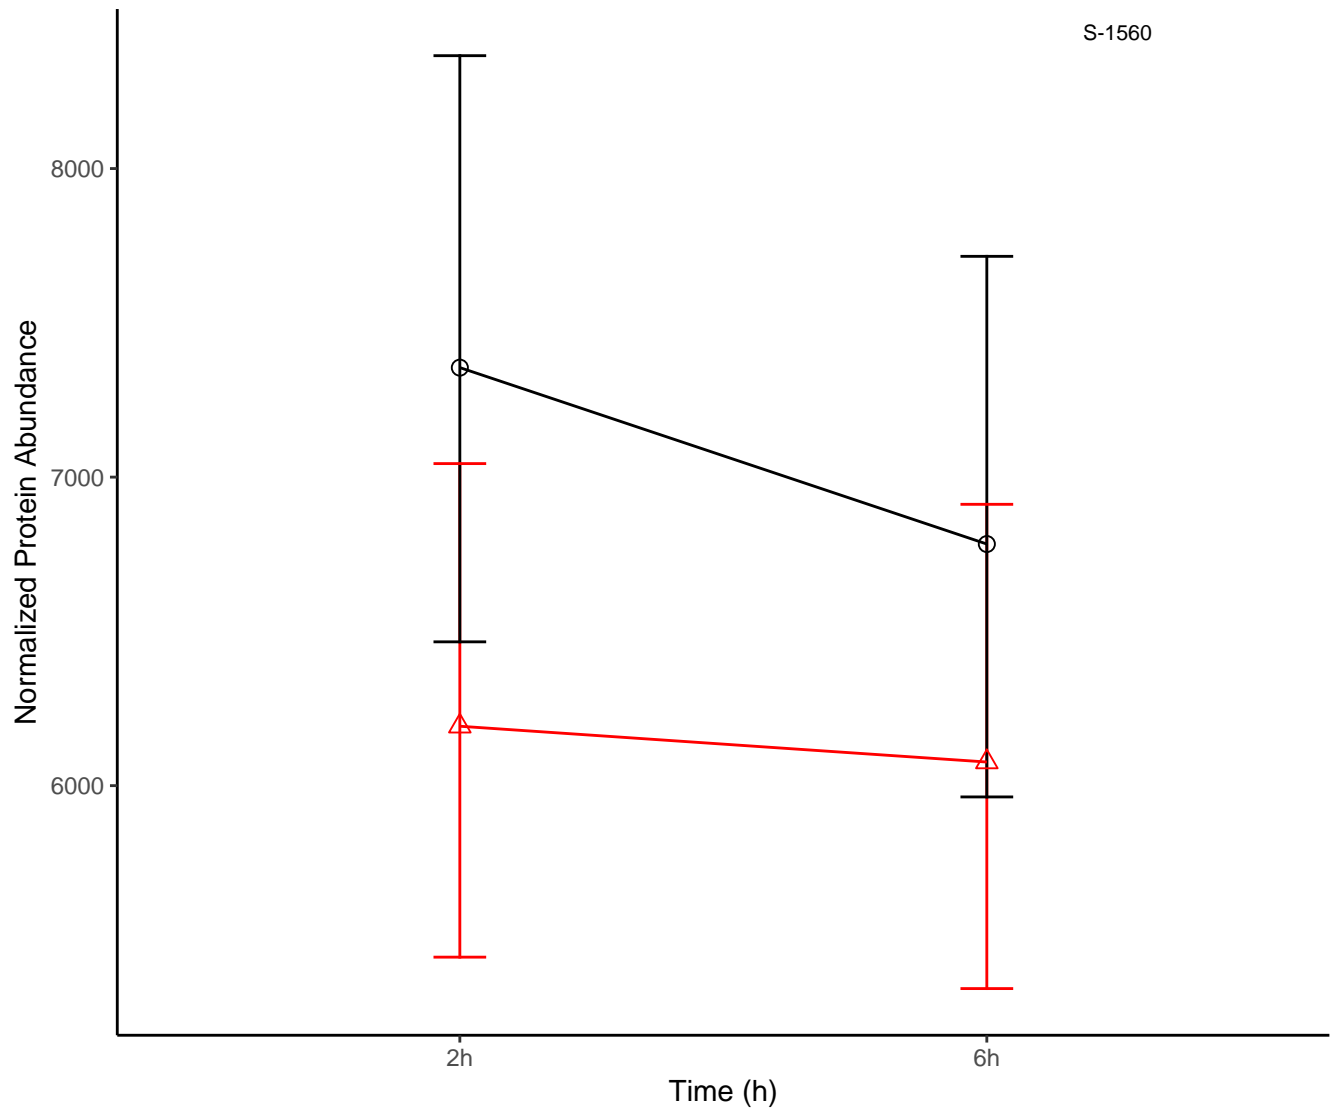

○ TSB-dex

△ TSB



# COPZ\_STAAM

S-1561

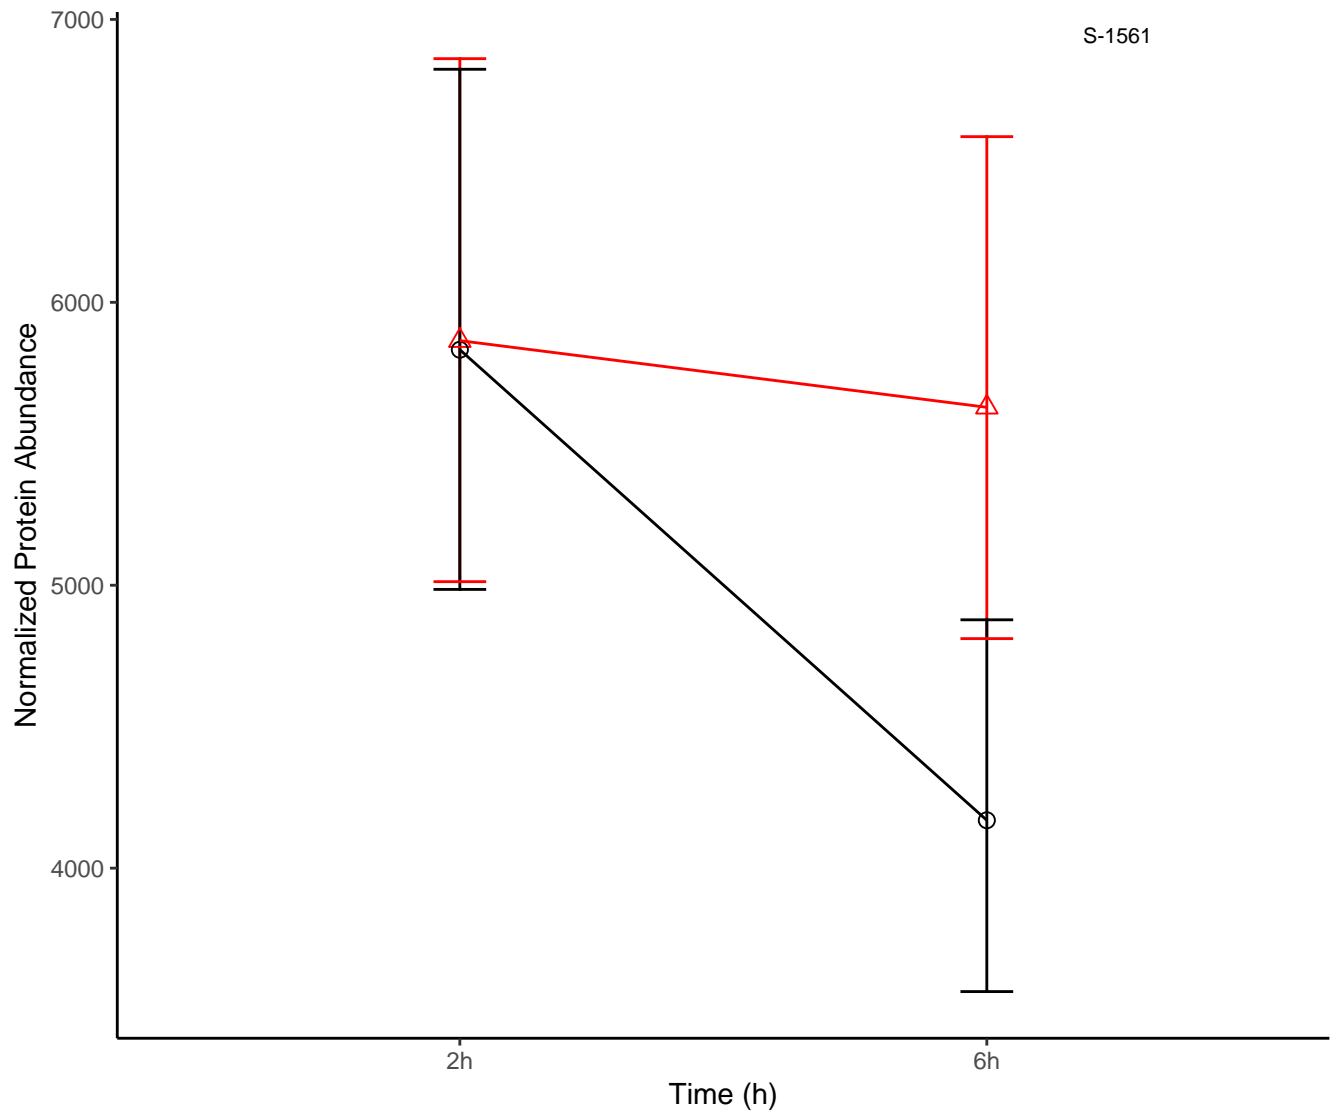

○ TSB-dex

△ TSB

# CRTN\_STAAM

S-1562

Normalized Protein Abundance

2000

1500

2h

6h

Time (h)

○ TSB-dex

△ TSB

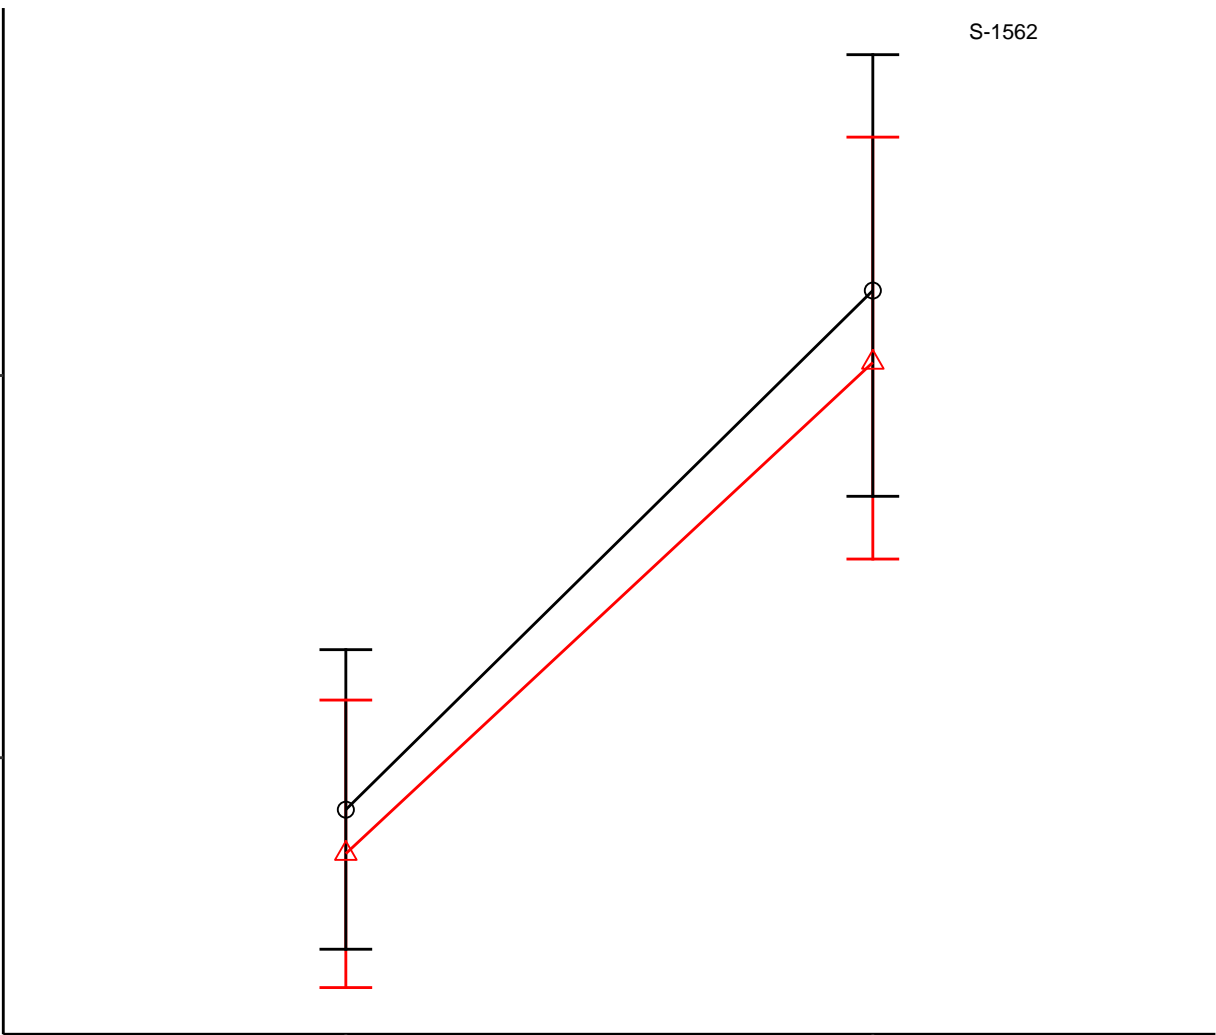

# CSD\_STAAM

S-1563

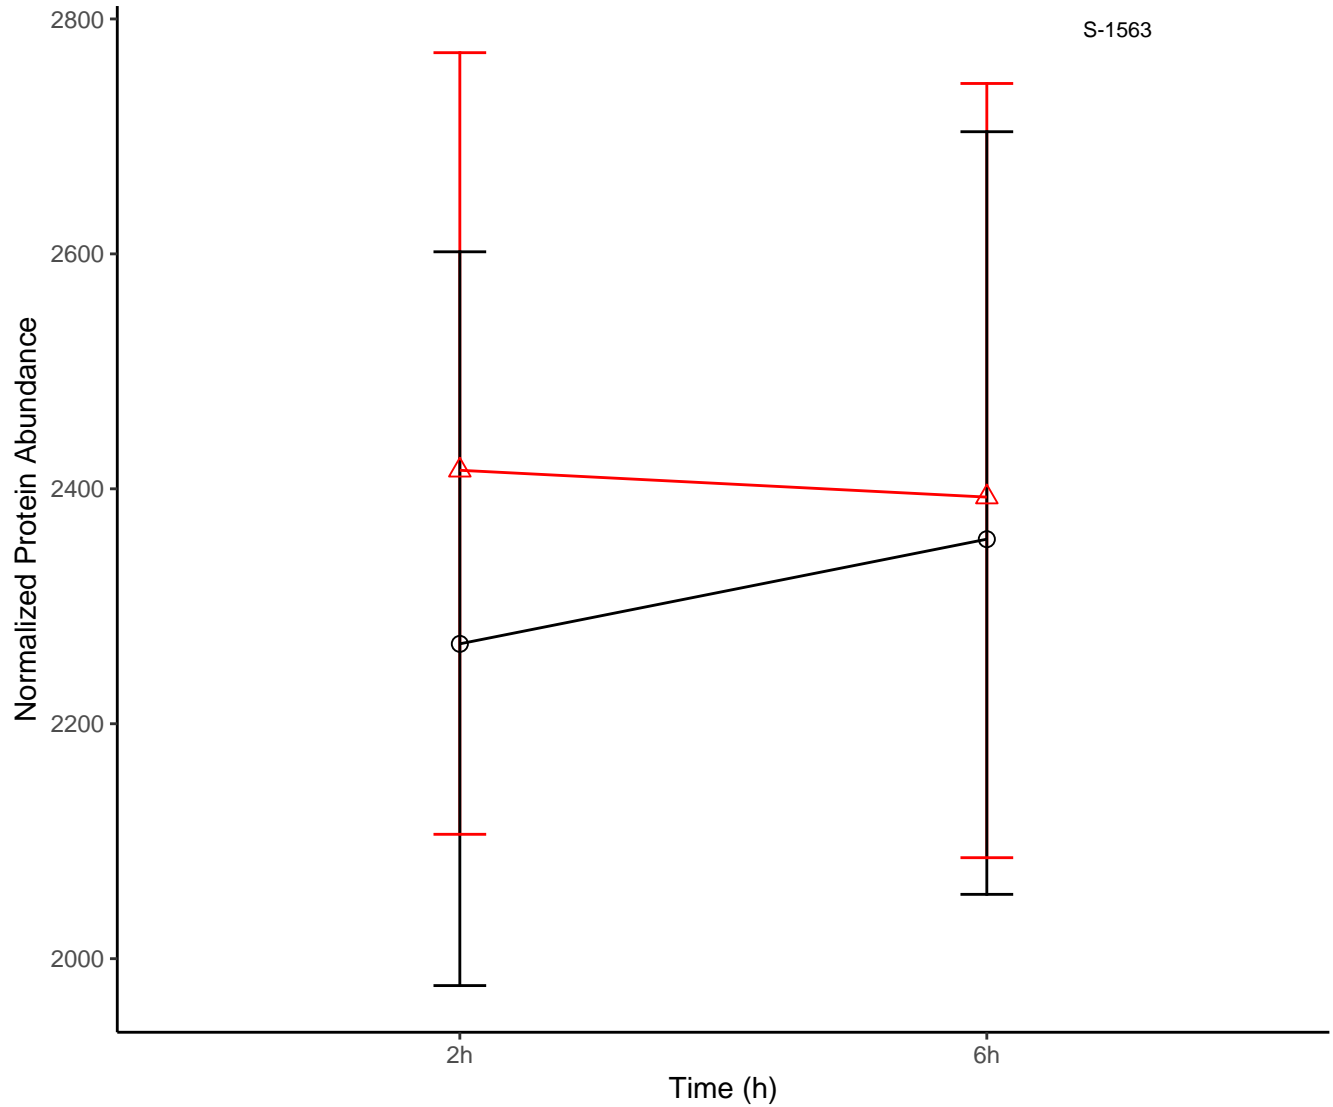

○ TSB-dex

△ TSB

# CSHA\_STAAM

S-1564

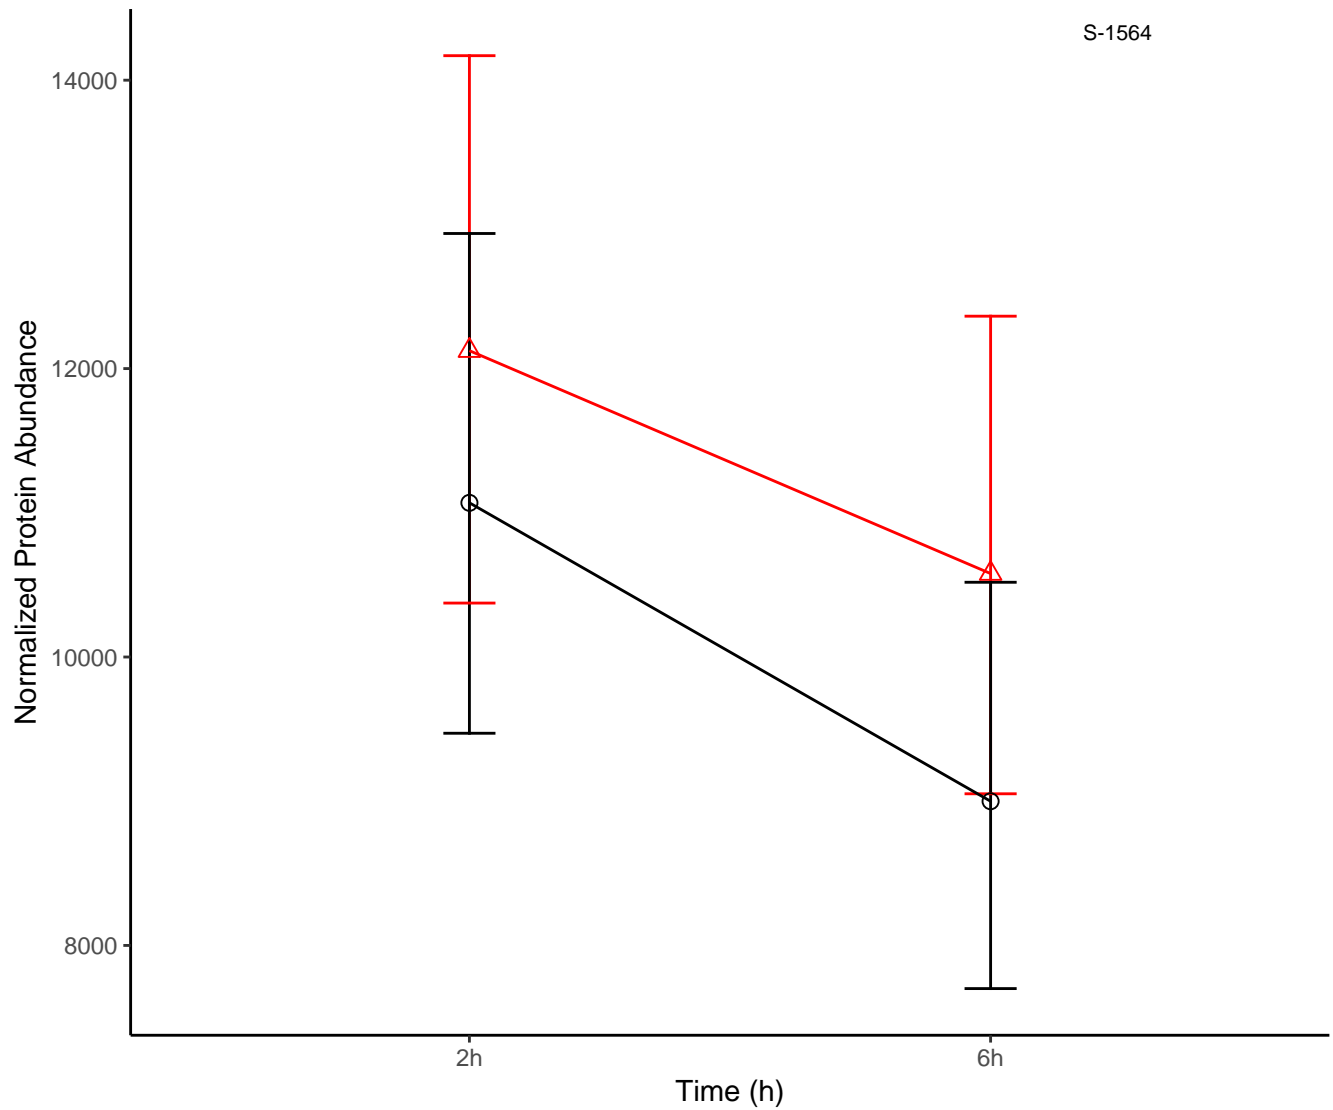

○ TSB-dex

△ TSB

# CSPA\_STAAM

S-1565

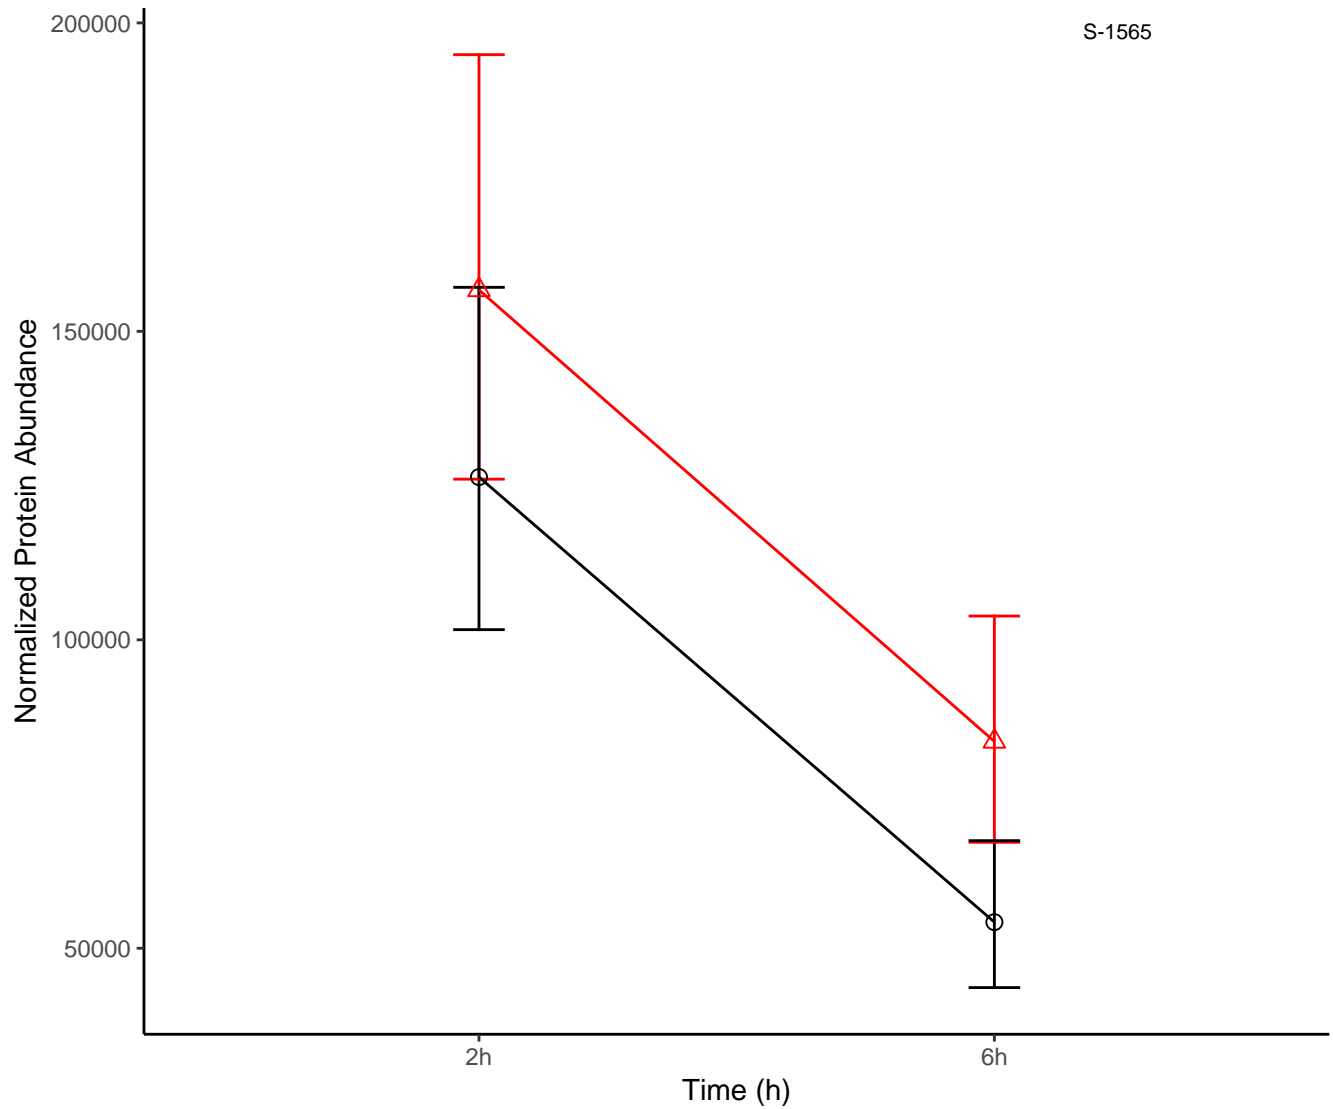

○ TSB-dex

△ TSB

# CTPAL\_STAAM

S-1566

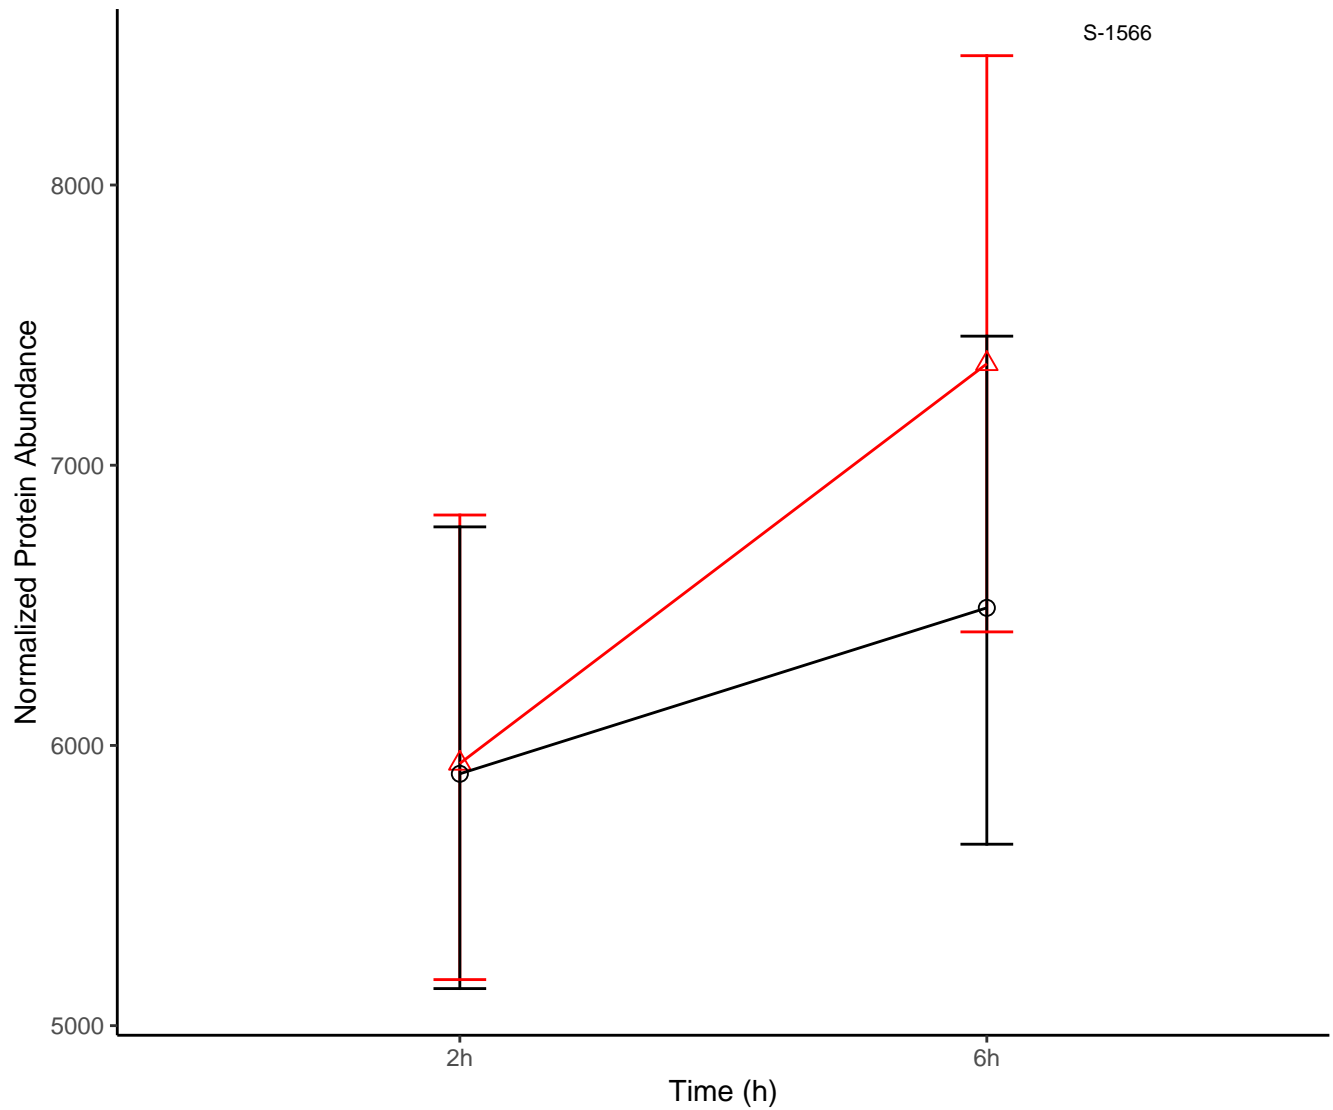

○ TSB-dex

△ TSB

# CVFB\_STAAM

S-1567

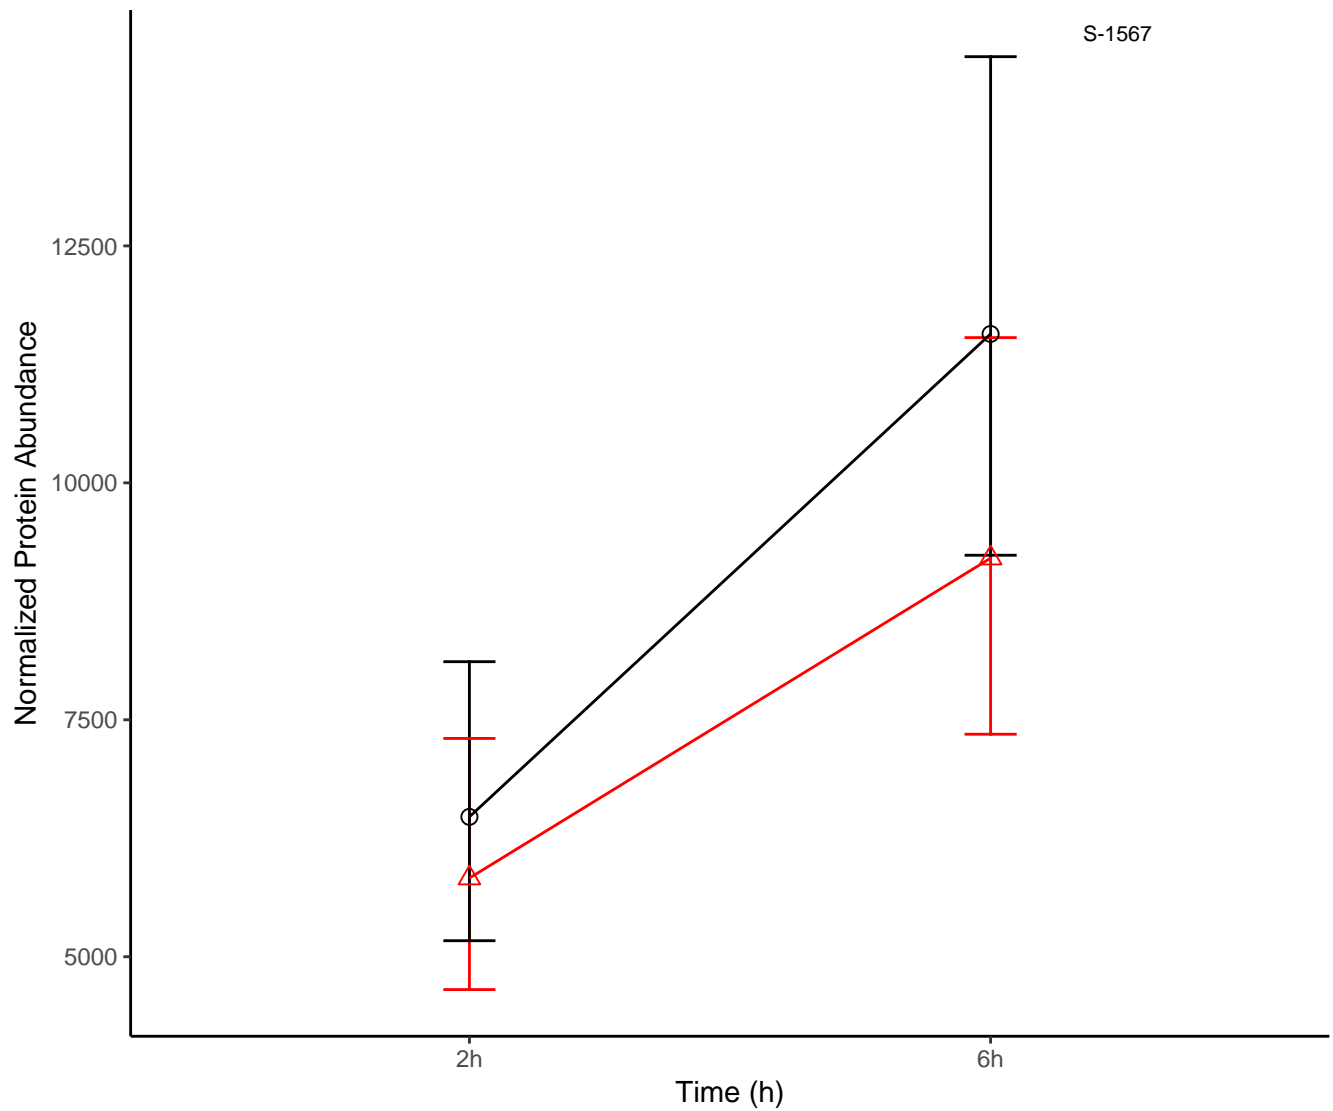

○ TSB-dex

△ TSB

# CYSE\_STAAM

S-1568

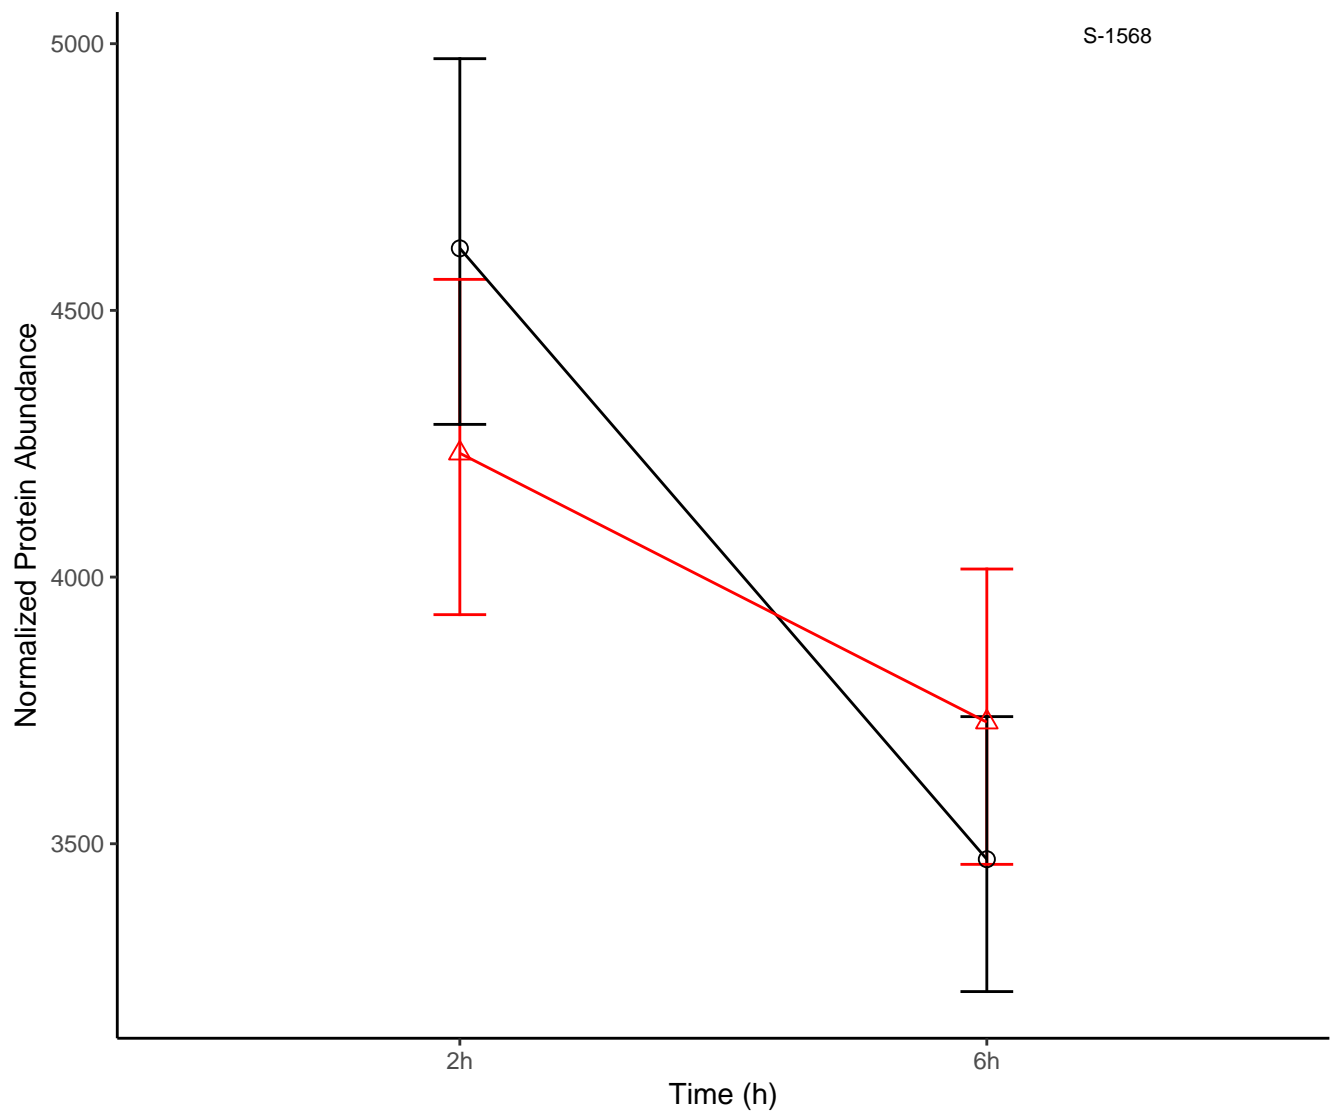

○ TSB-dex

△ TSB



# CYSK\_STAAM

S-1569

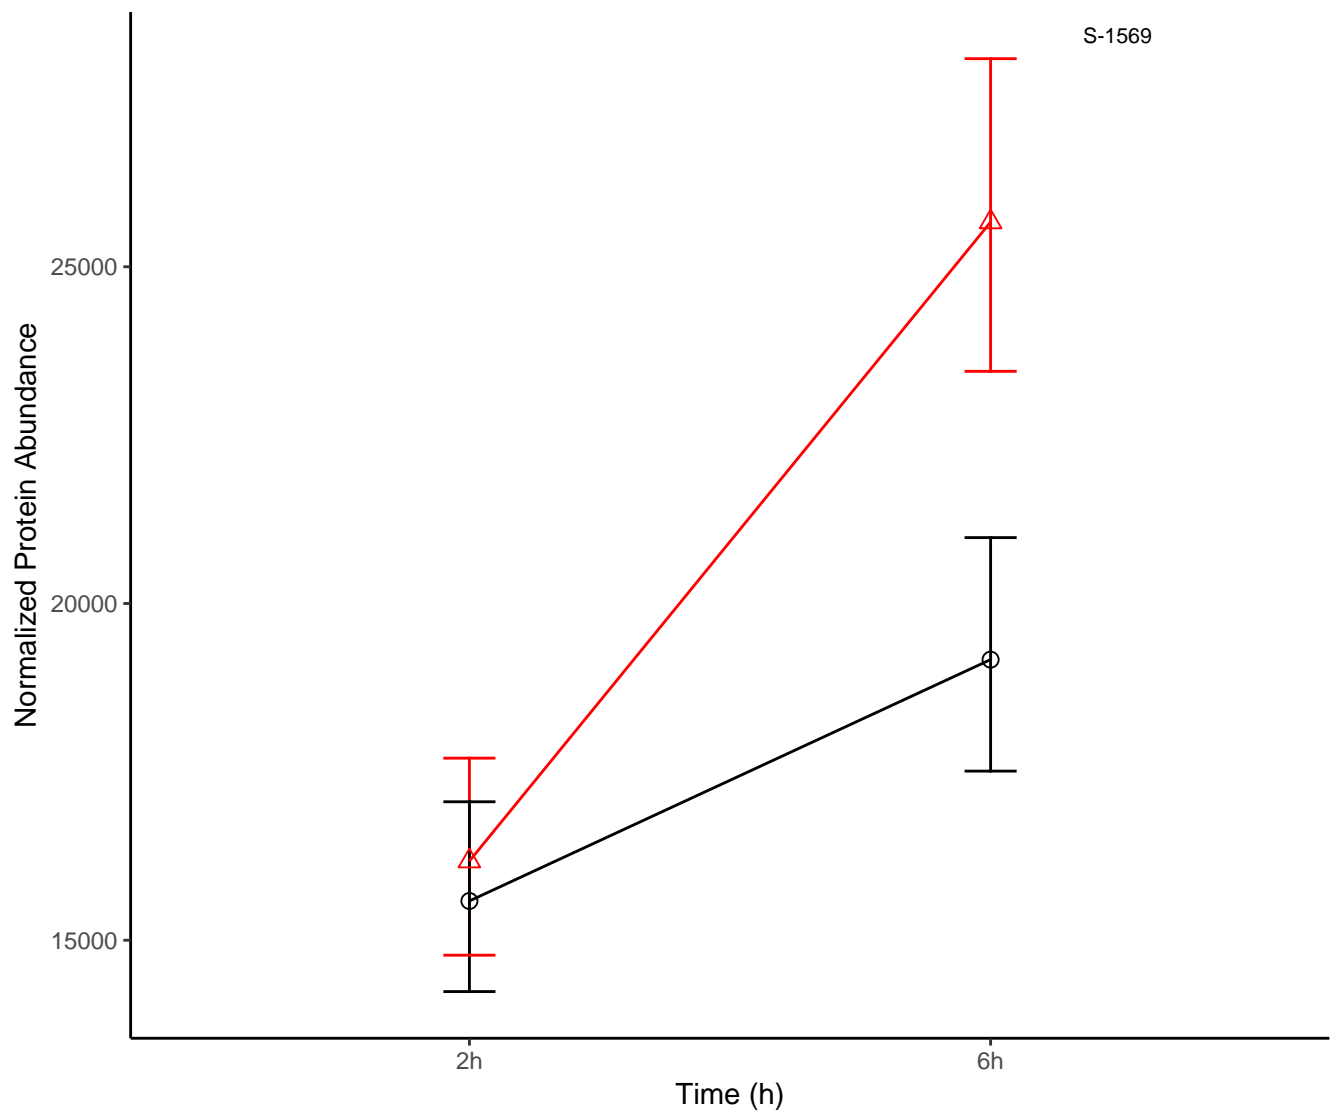

○ TSB-dex

△ TSB

# DAAA\_STAAM

S-1570

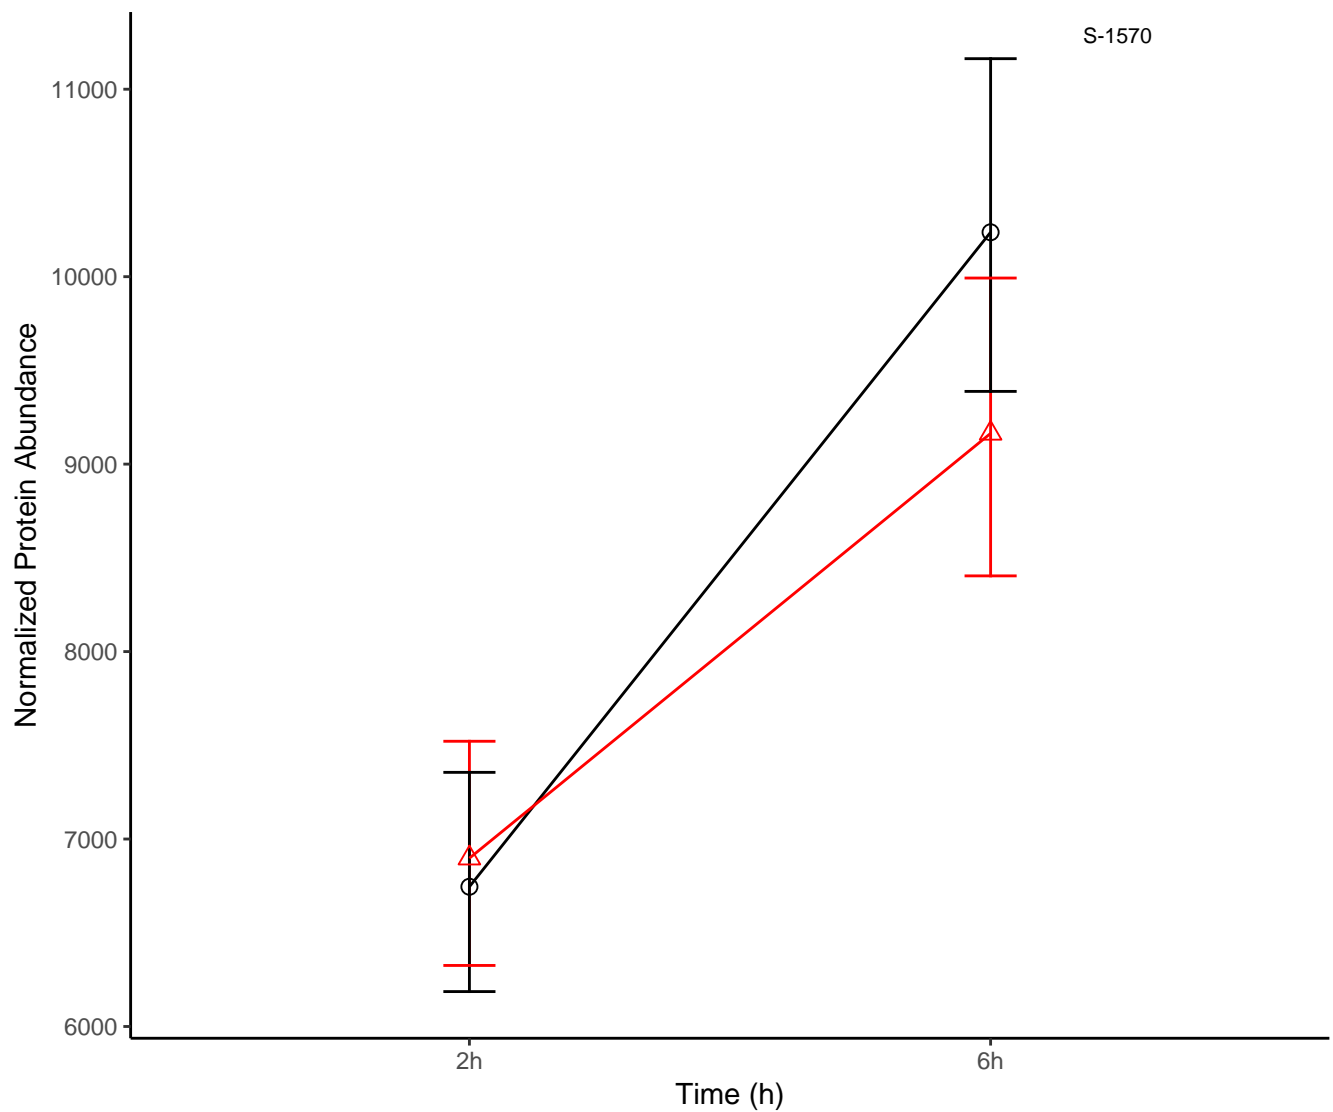

○ TSB-dex

△ TSB

# DAPB\_STAAM

S-1571

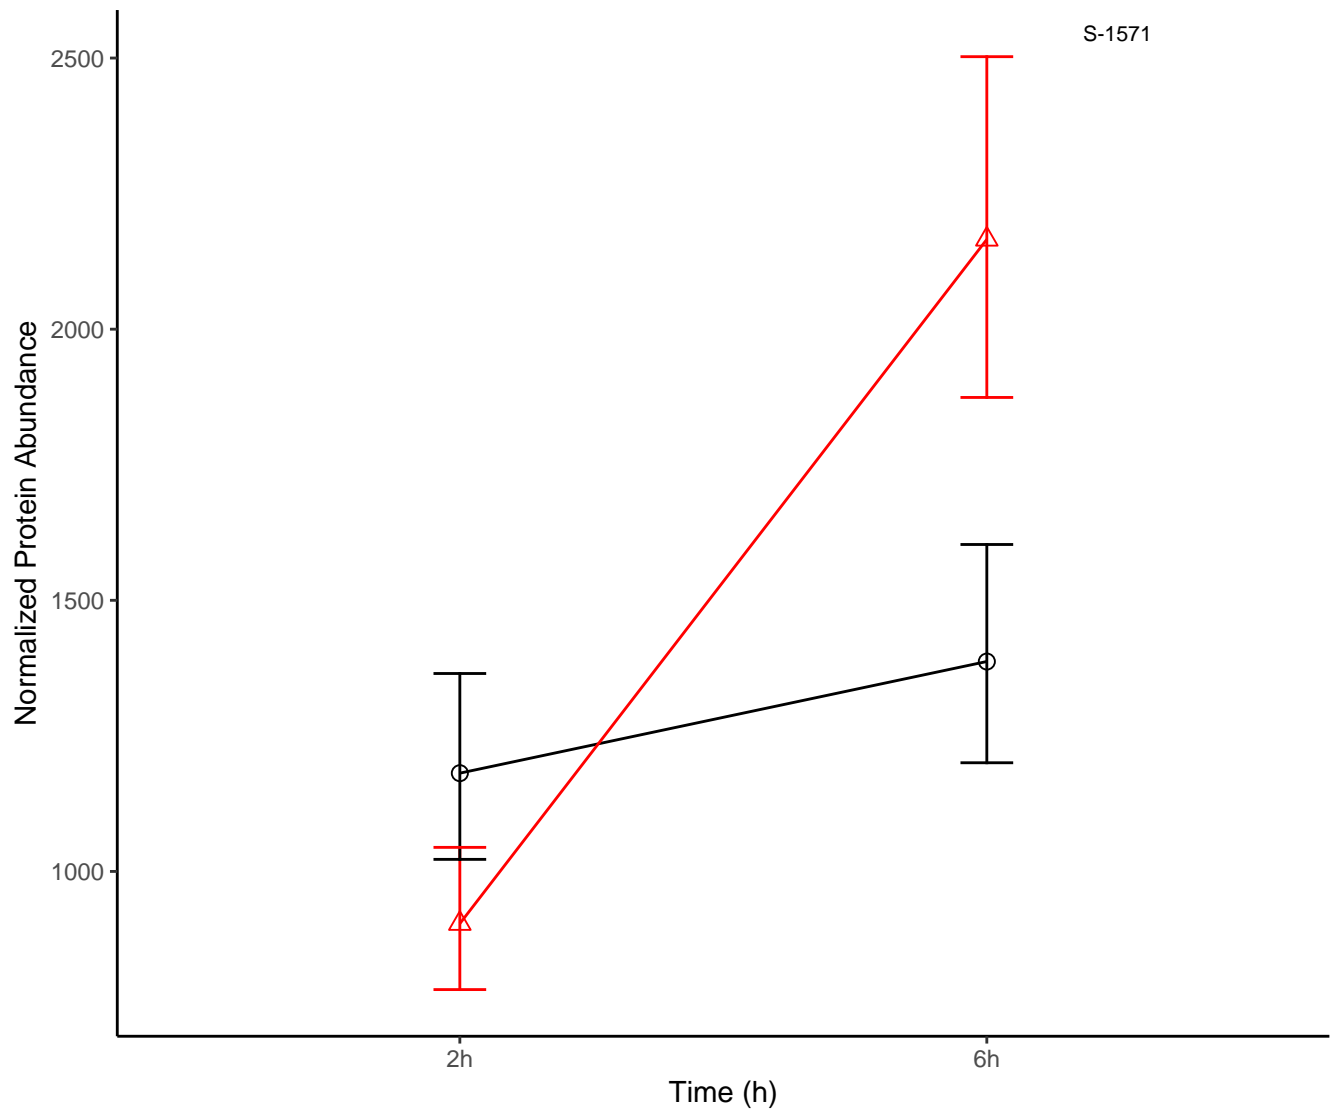

○ TSB-dex

△ TSB

# DAPH\_STAAM

S-1572

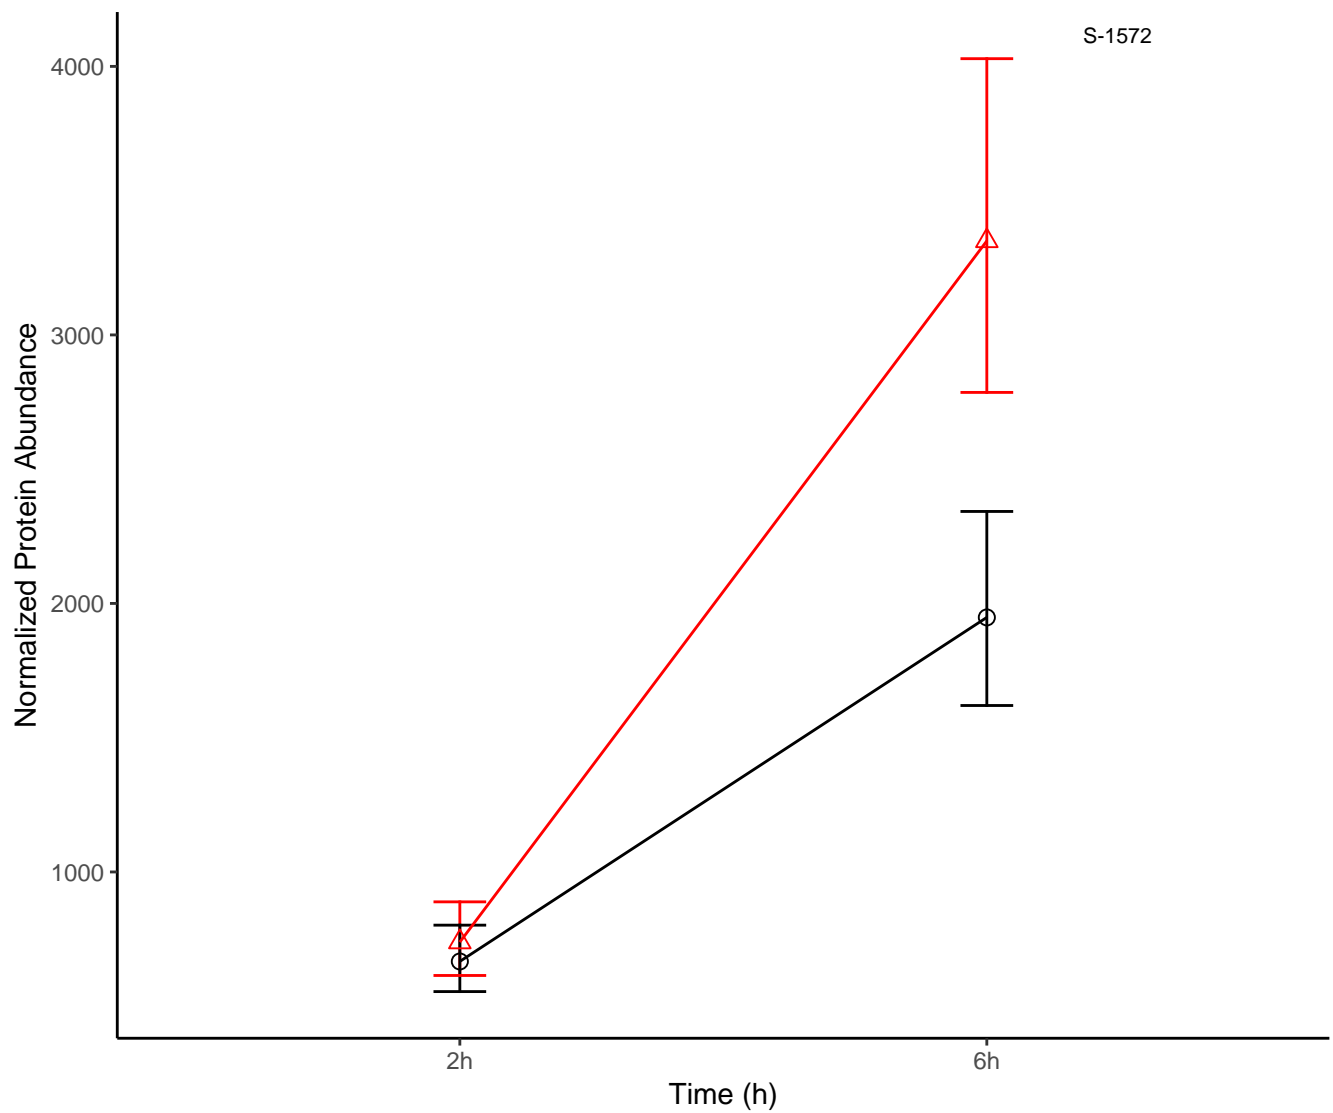

○ TSB-dex

△ TSB

# DBH\_STAAM

S-1573

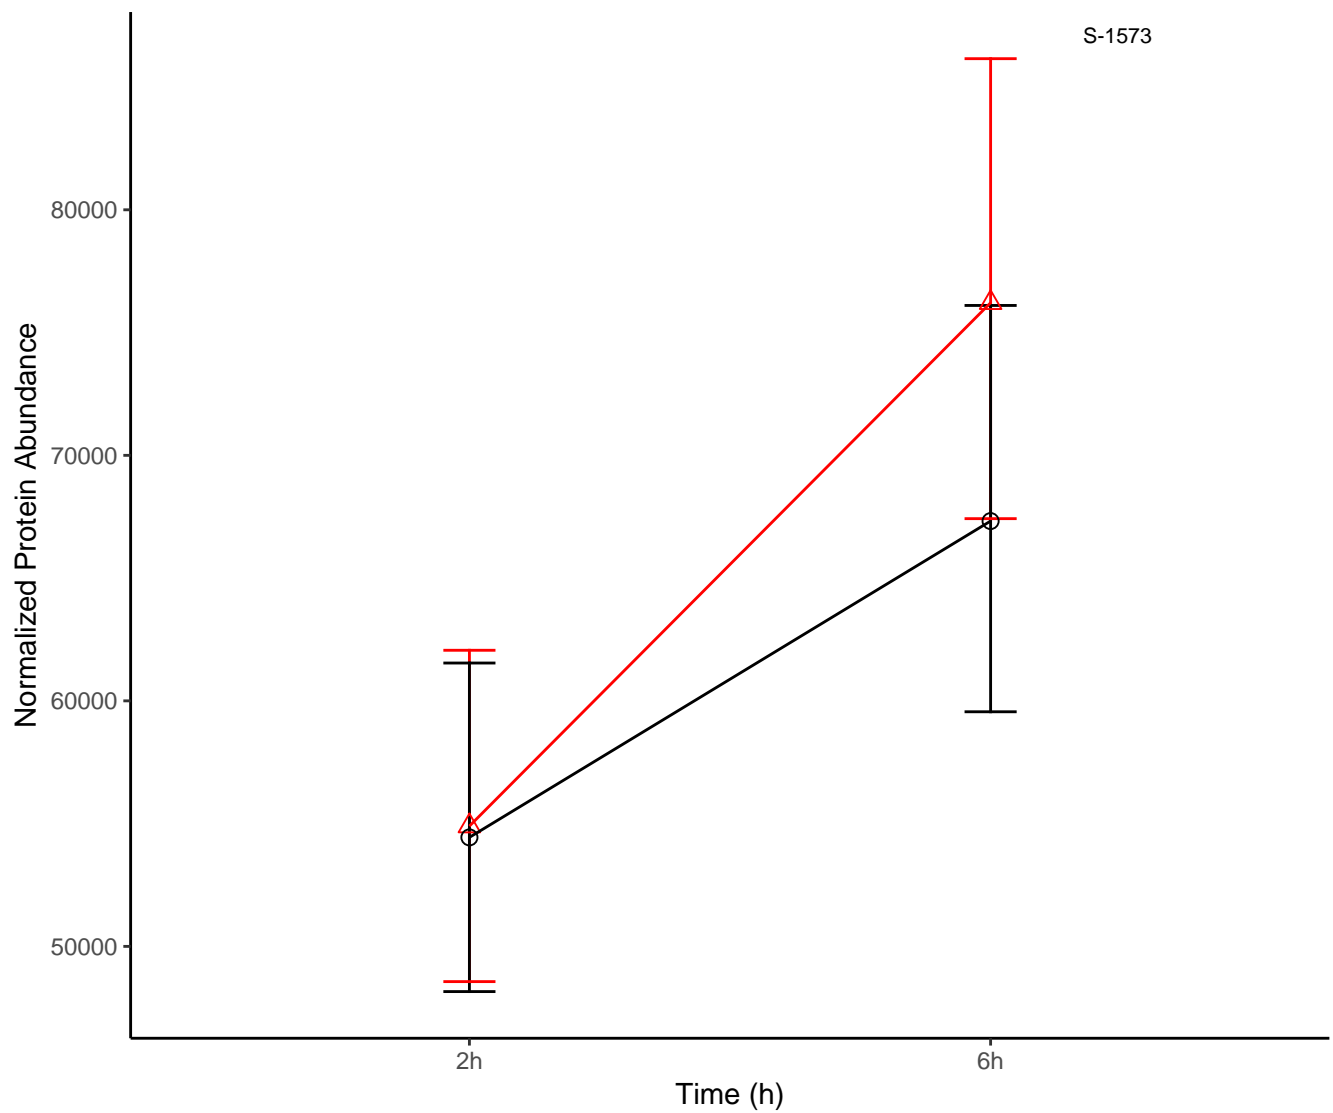

○ TSB-dex

△ TSB

# DCUP\_STAAM

S-1574

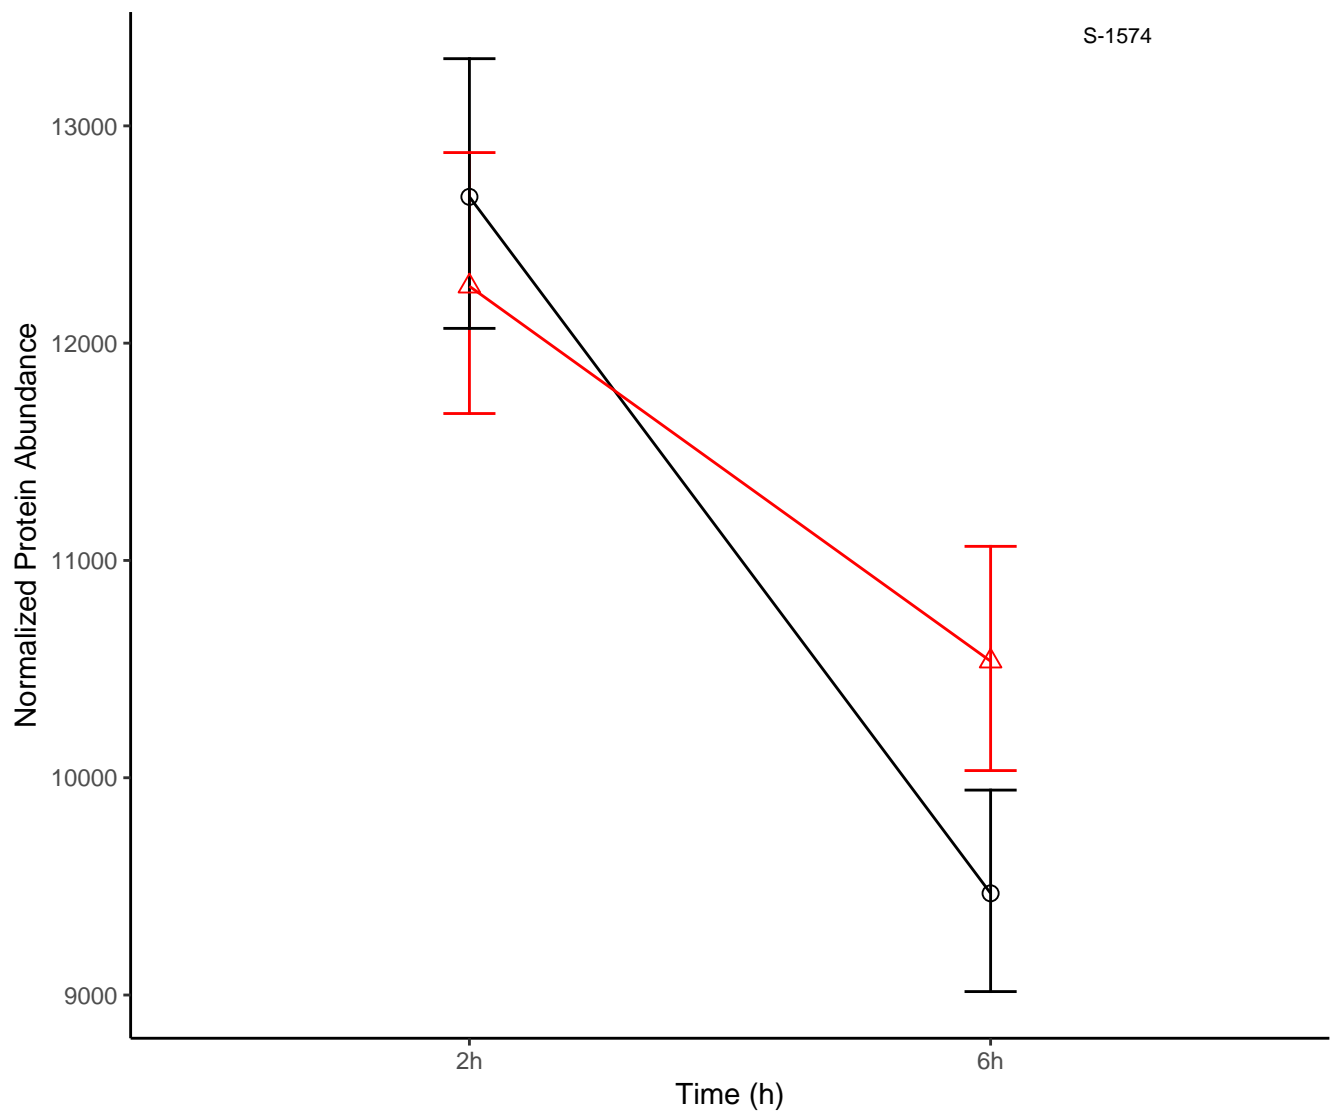

○ TSB-dex

△ TSB

# DDL\_STAAM

S-1575

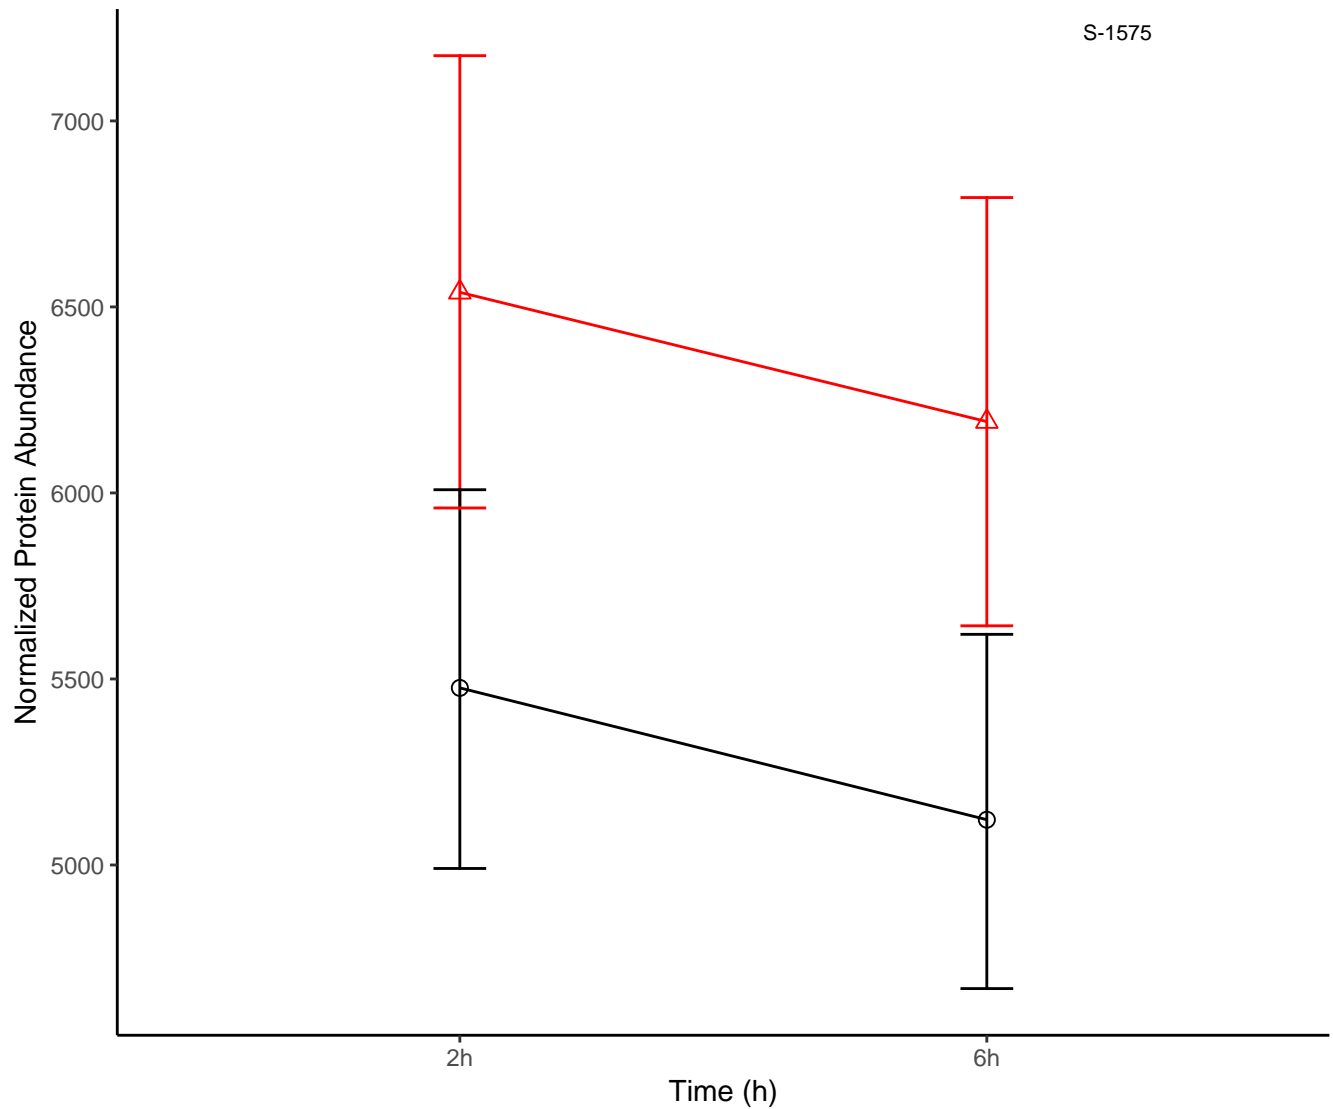

○ TSB-dex

△ TSB

# DEF\_STAAM

S-1576

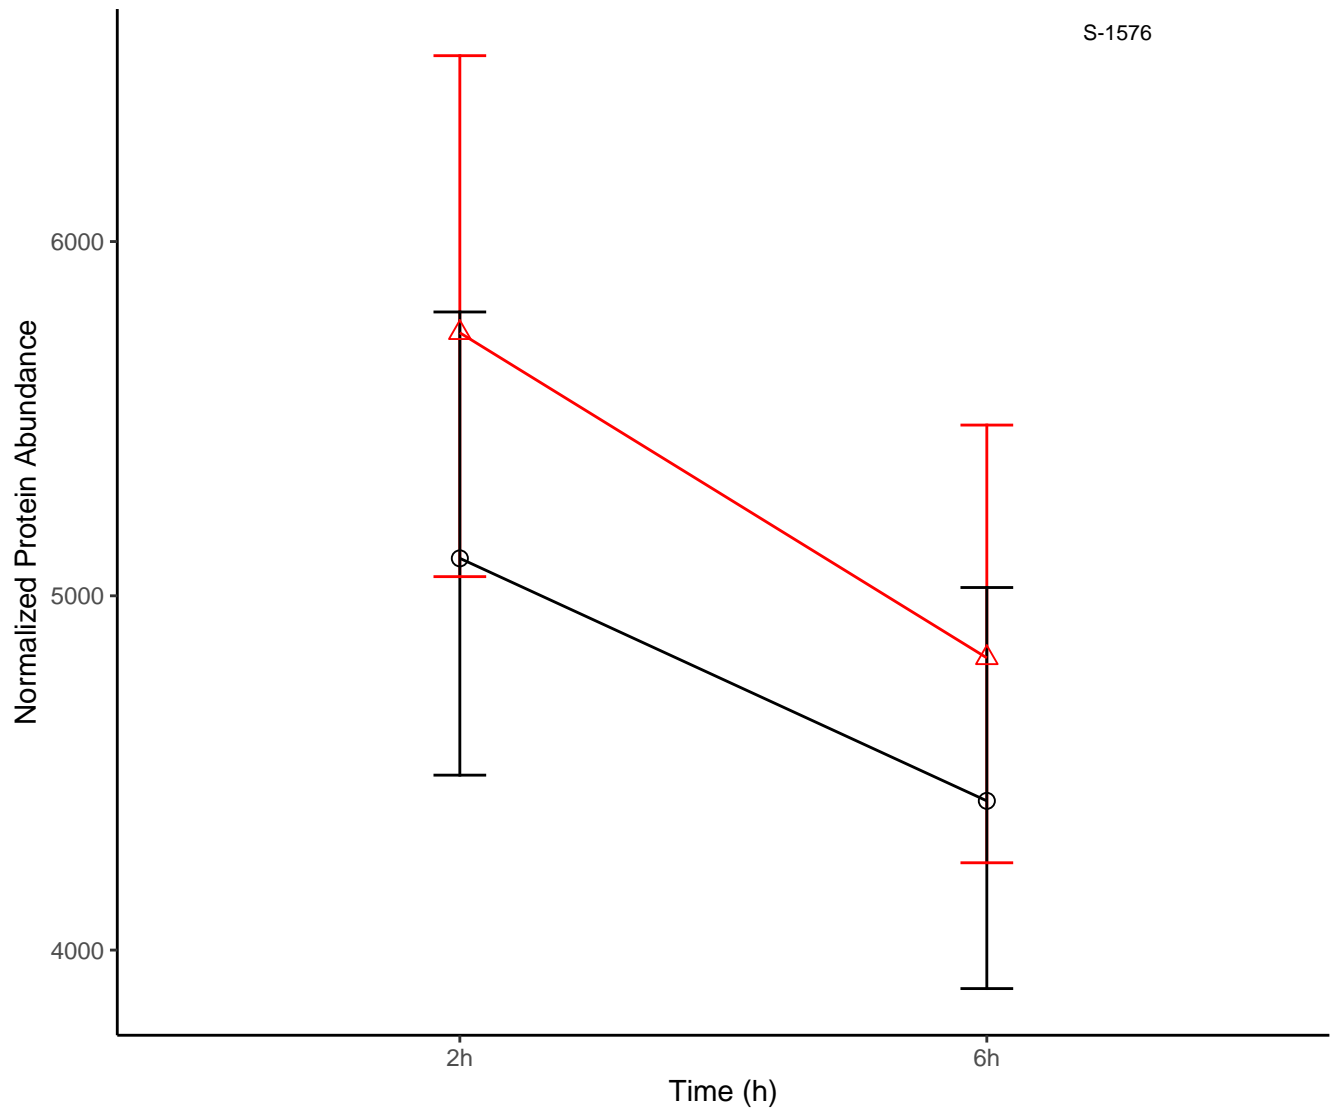

○ TSB-dex

△ TSB



# DEOB\_STAAM

S-1577

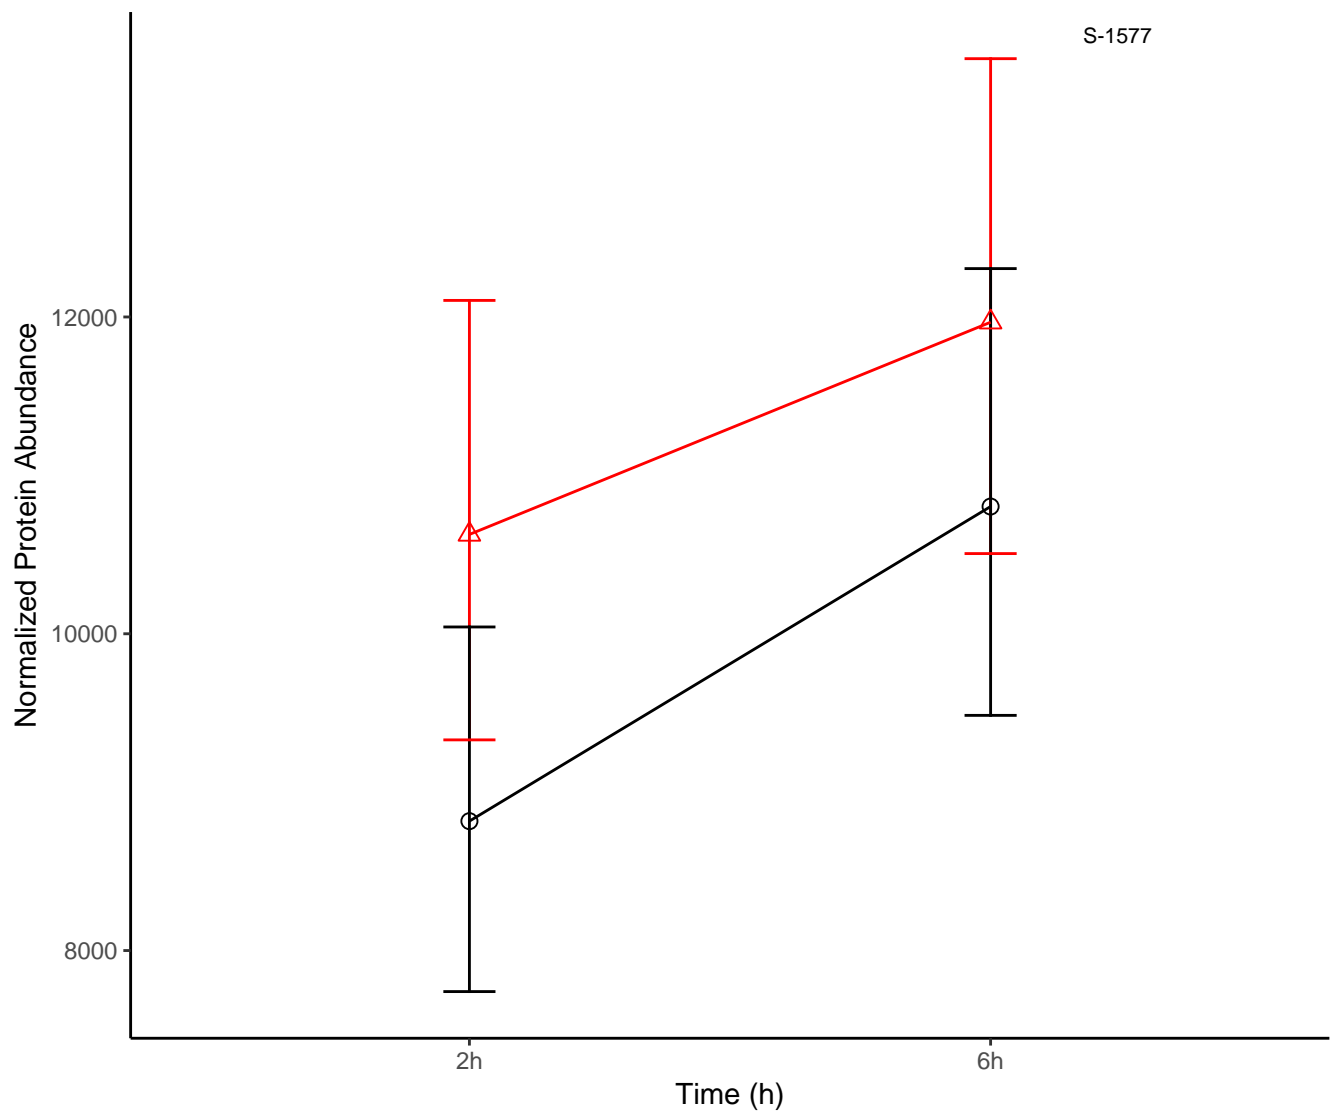

○ TSB-dex

△ TSB

# DEOC1\_STAAM

S-1578

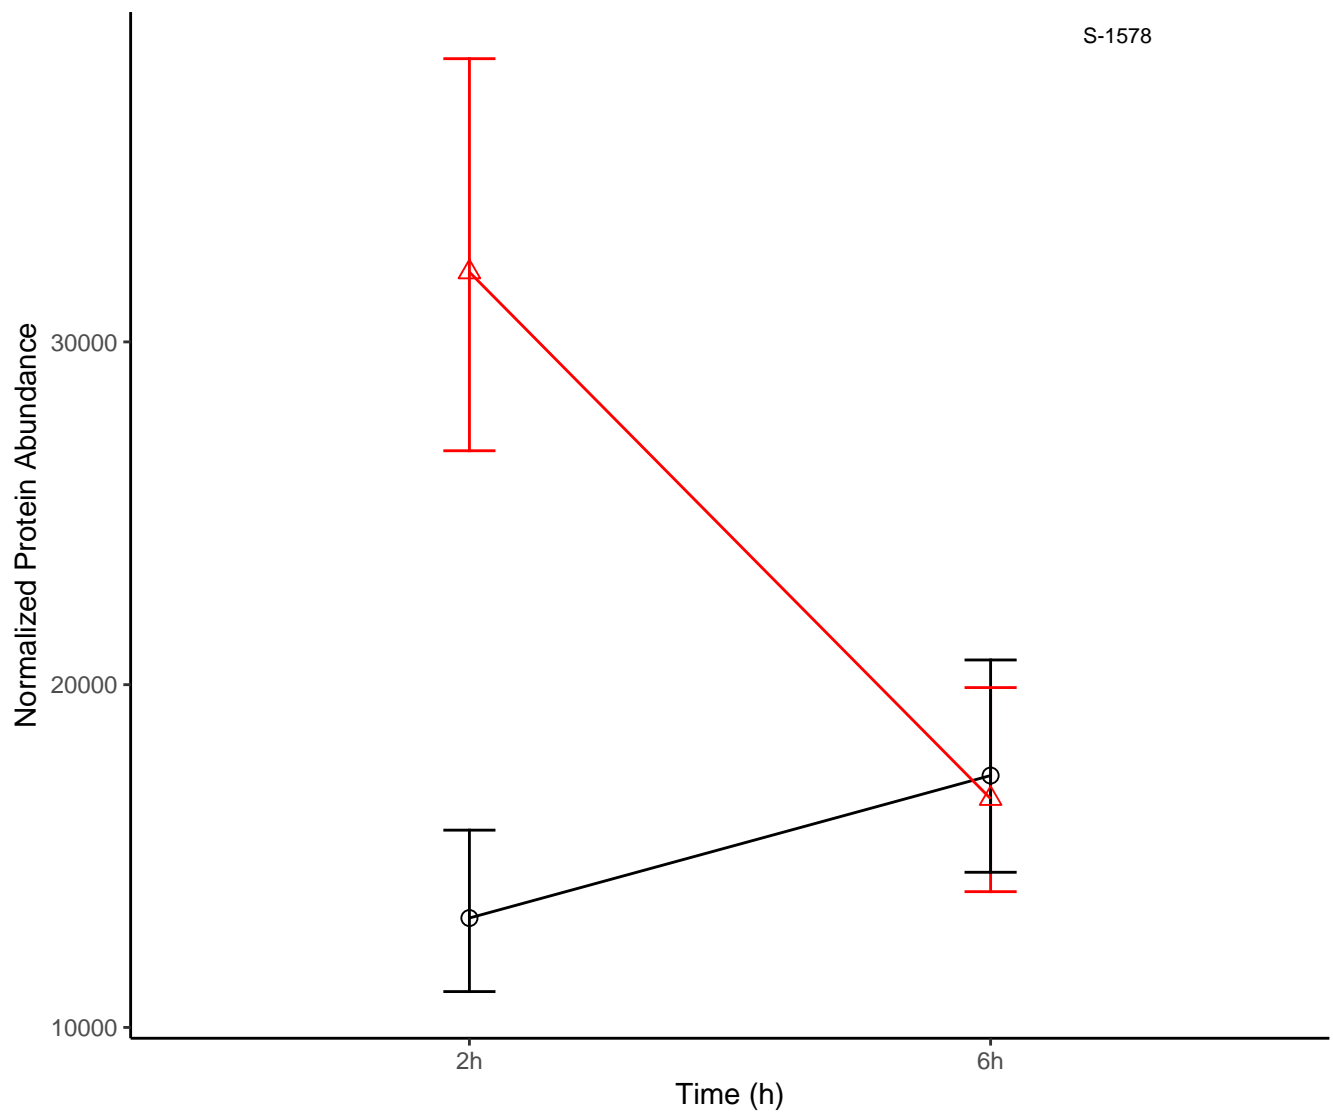

○ TSB-dex

△ TSB

# DEOC2\_STAAM

S-1579

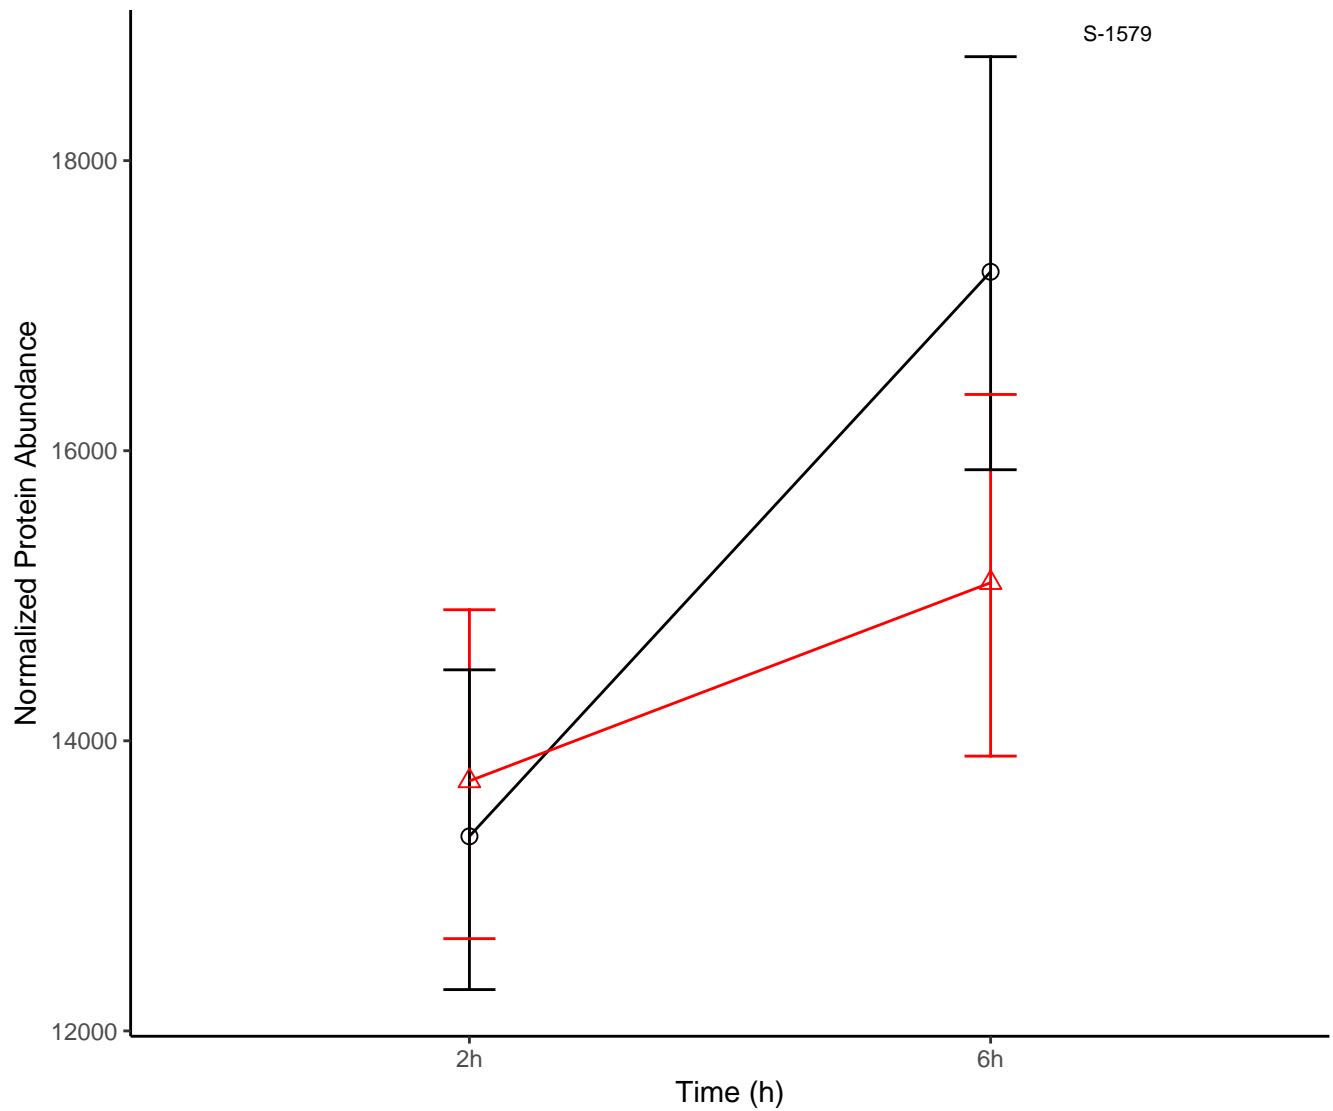

○ TSB-dex

△ TSB

# DER\_STAAM

S-1580

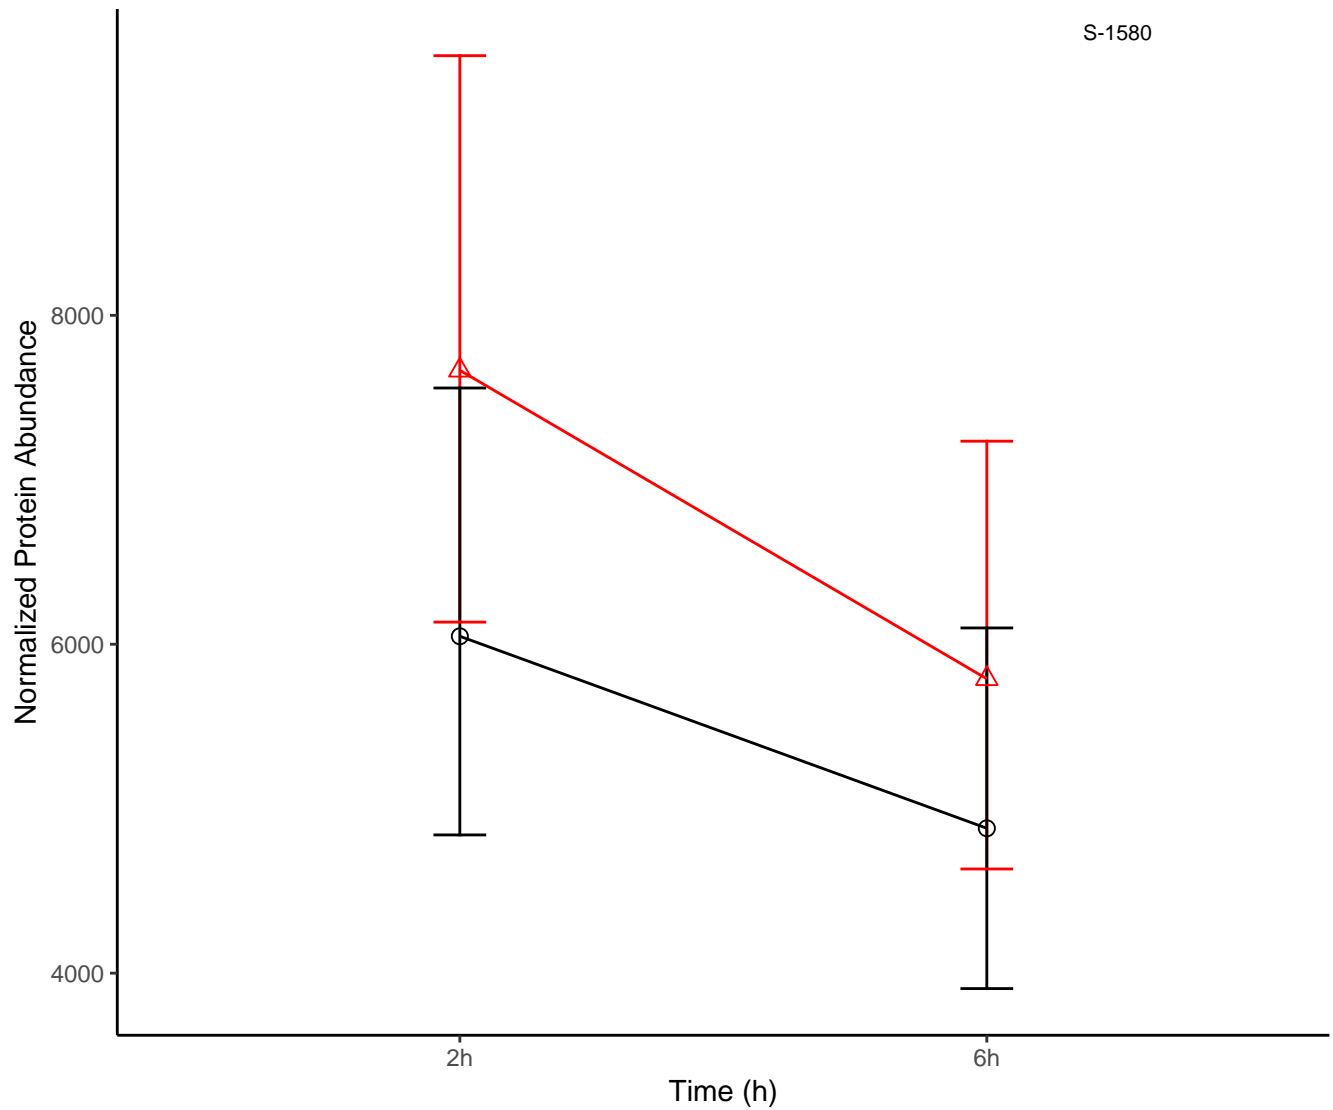

○ TSB-dex

△ TSB

# DHA1\_STAAM

S-1581

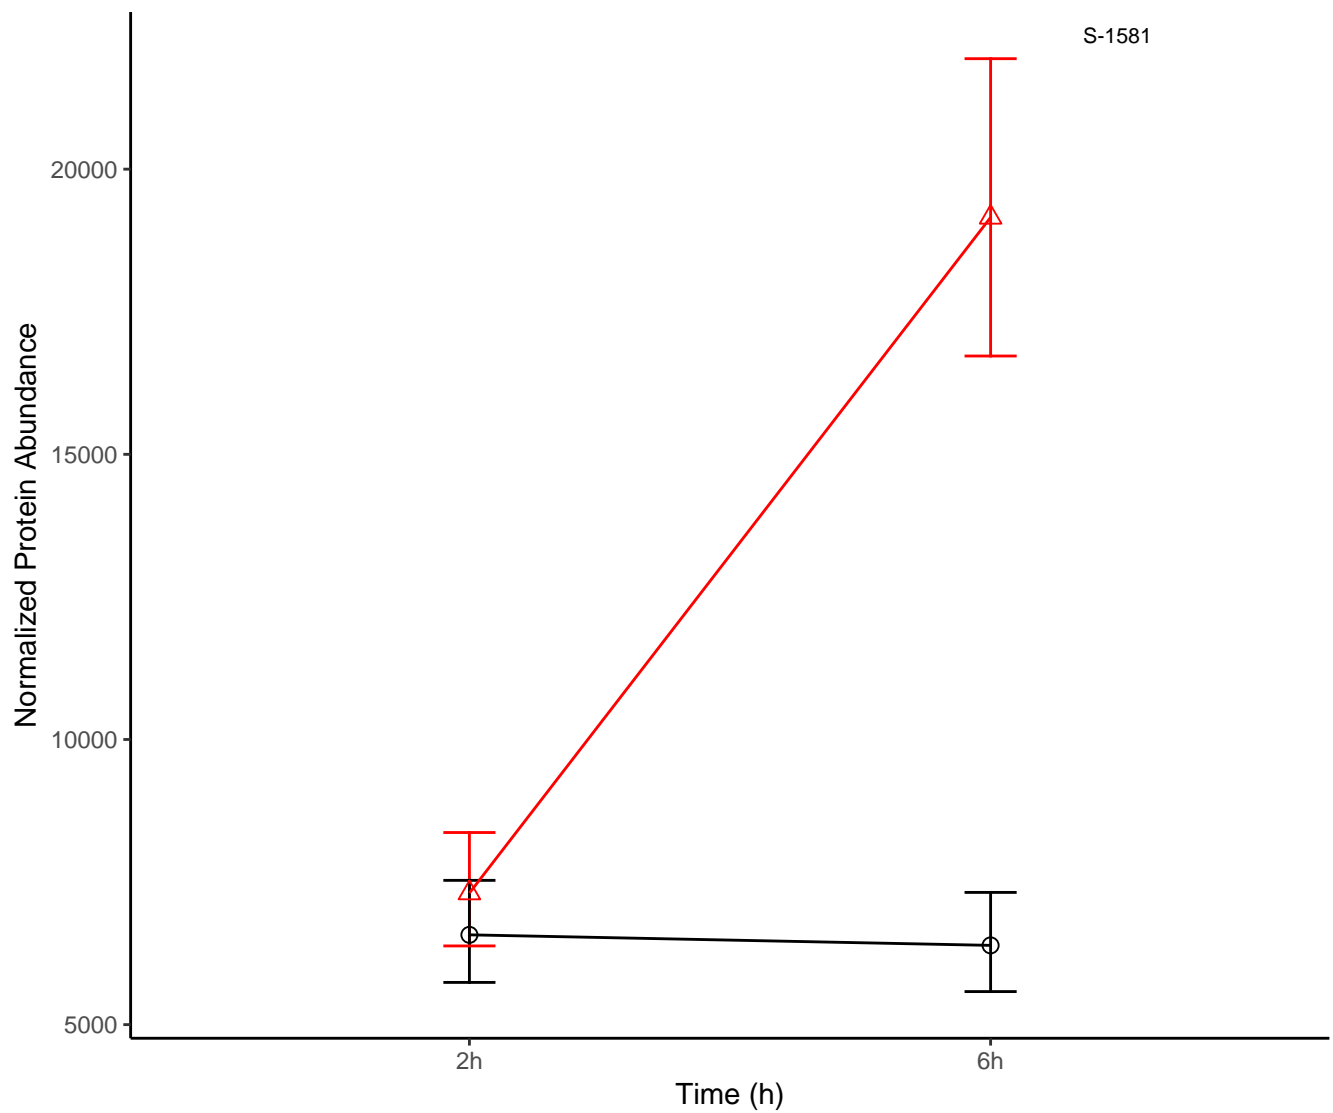

○ TSB-dex

△ TSB

# DHA2\_STAAM

S-1582

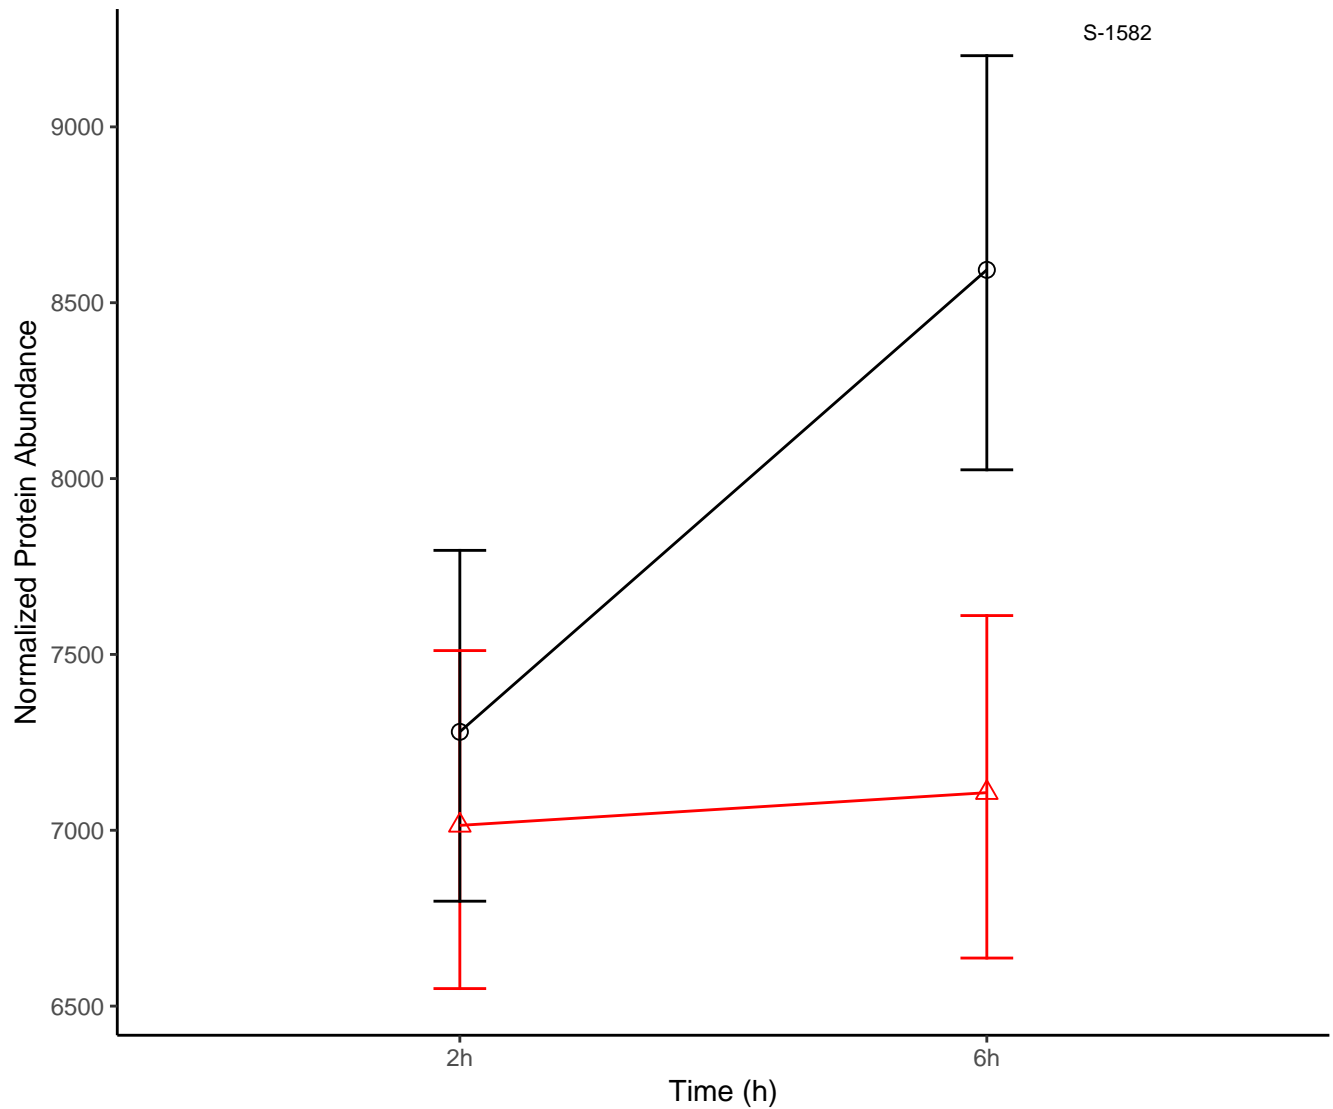

○ TSB-dex

△ TSB

# DHE2\_STAAM

S-1583

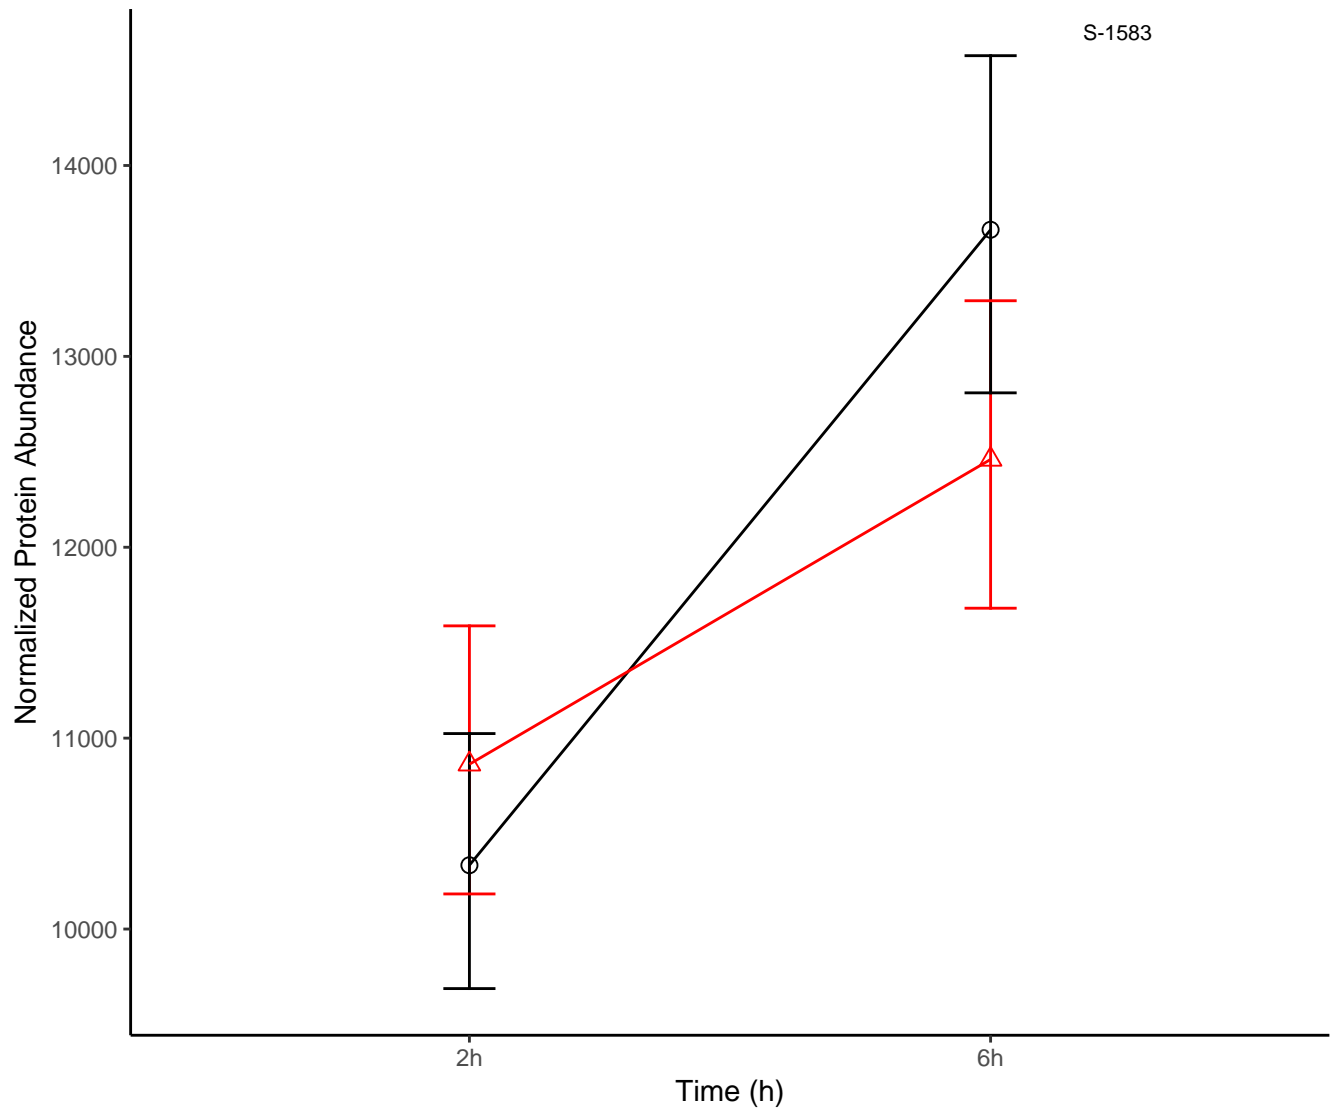

○ TSB-dex

△ TSB

# DHPS\_STAAM

S-1584

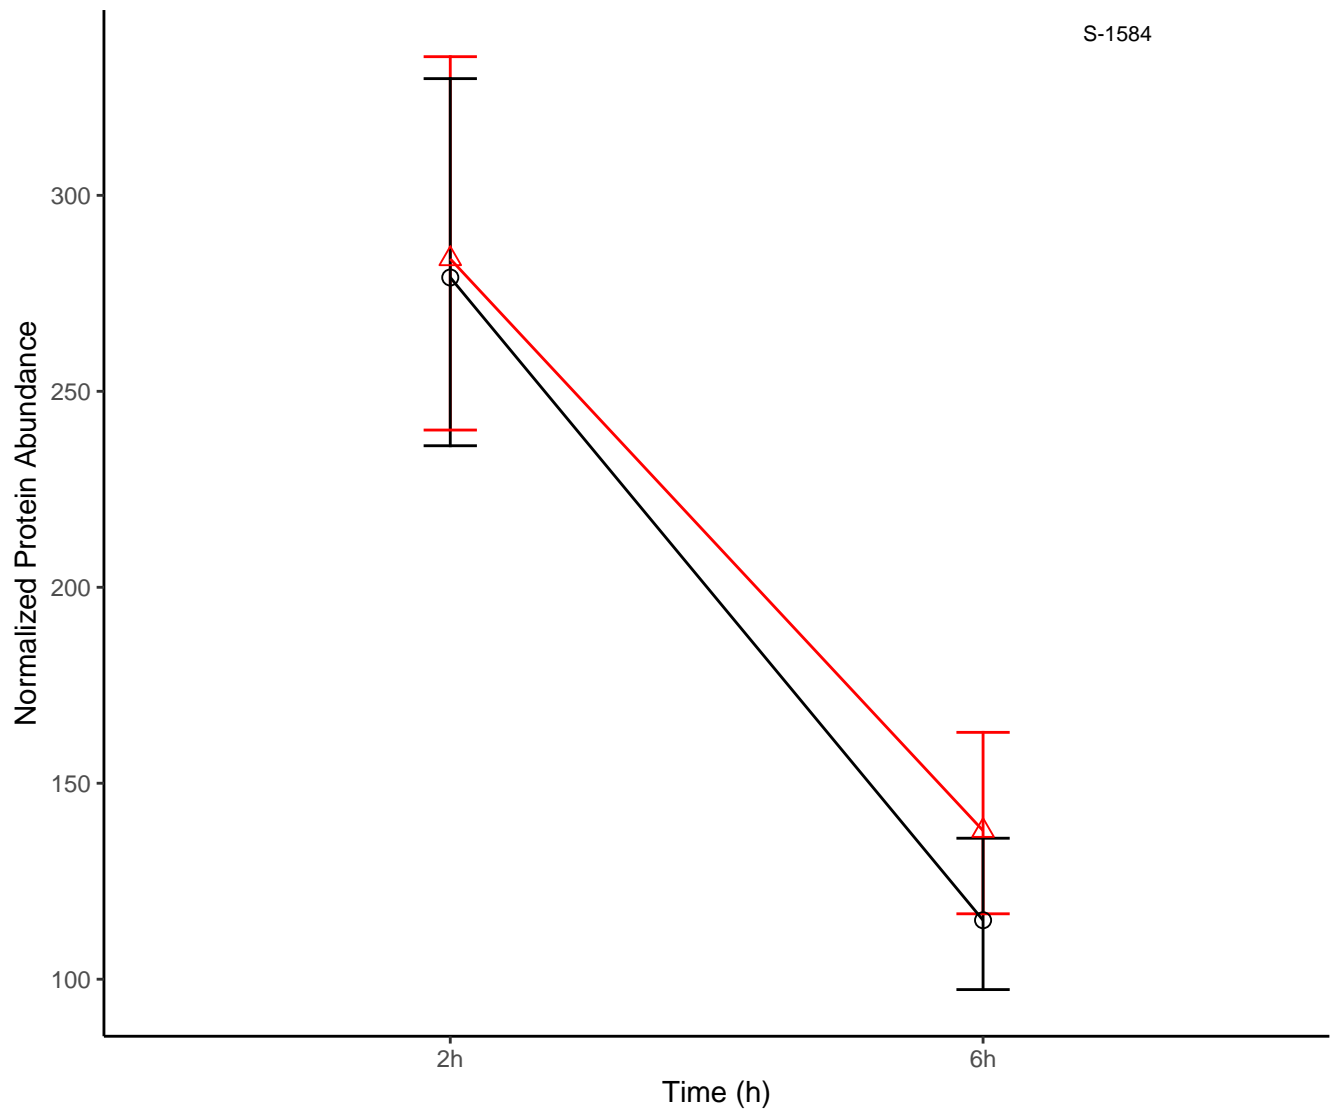

○ TSB-dex

△ TSB



# DLDH\_STAAM

S-1585

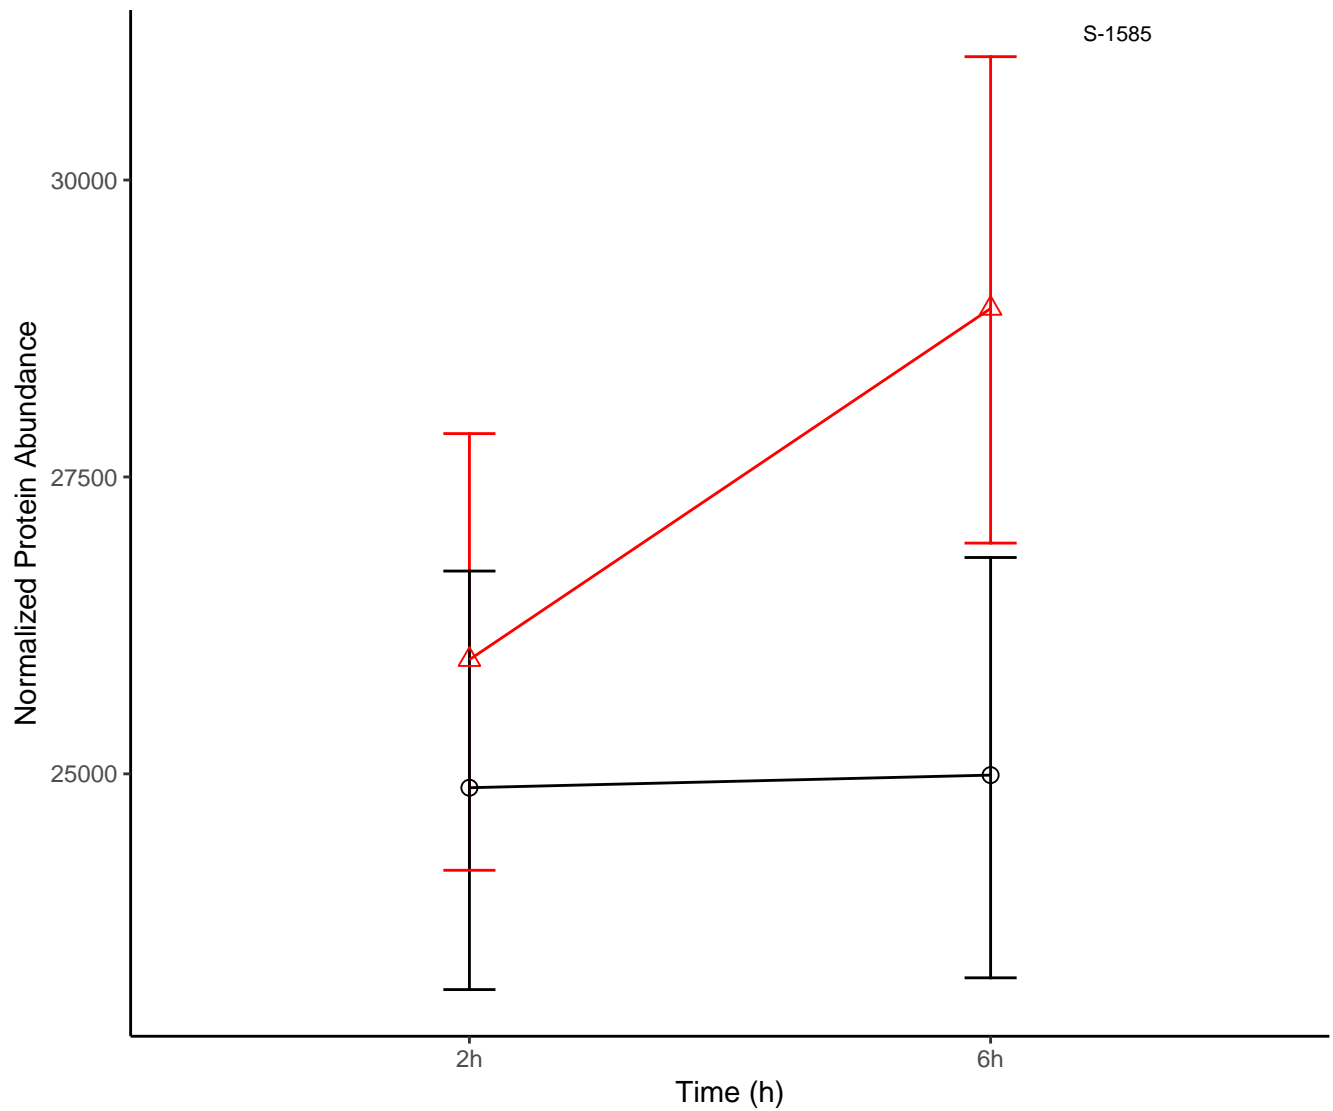

○ TSB-dex

△ TSB

# DLTA\_STAAM

S-1586

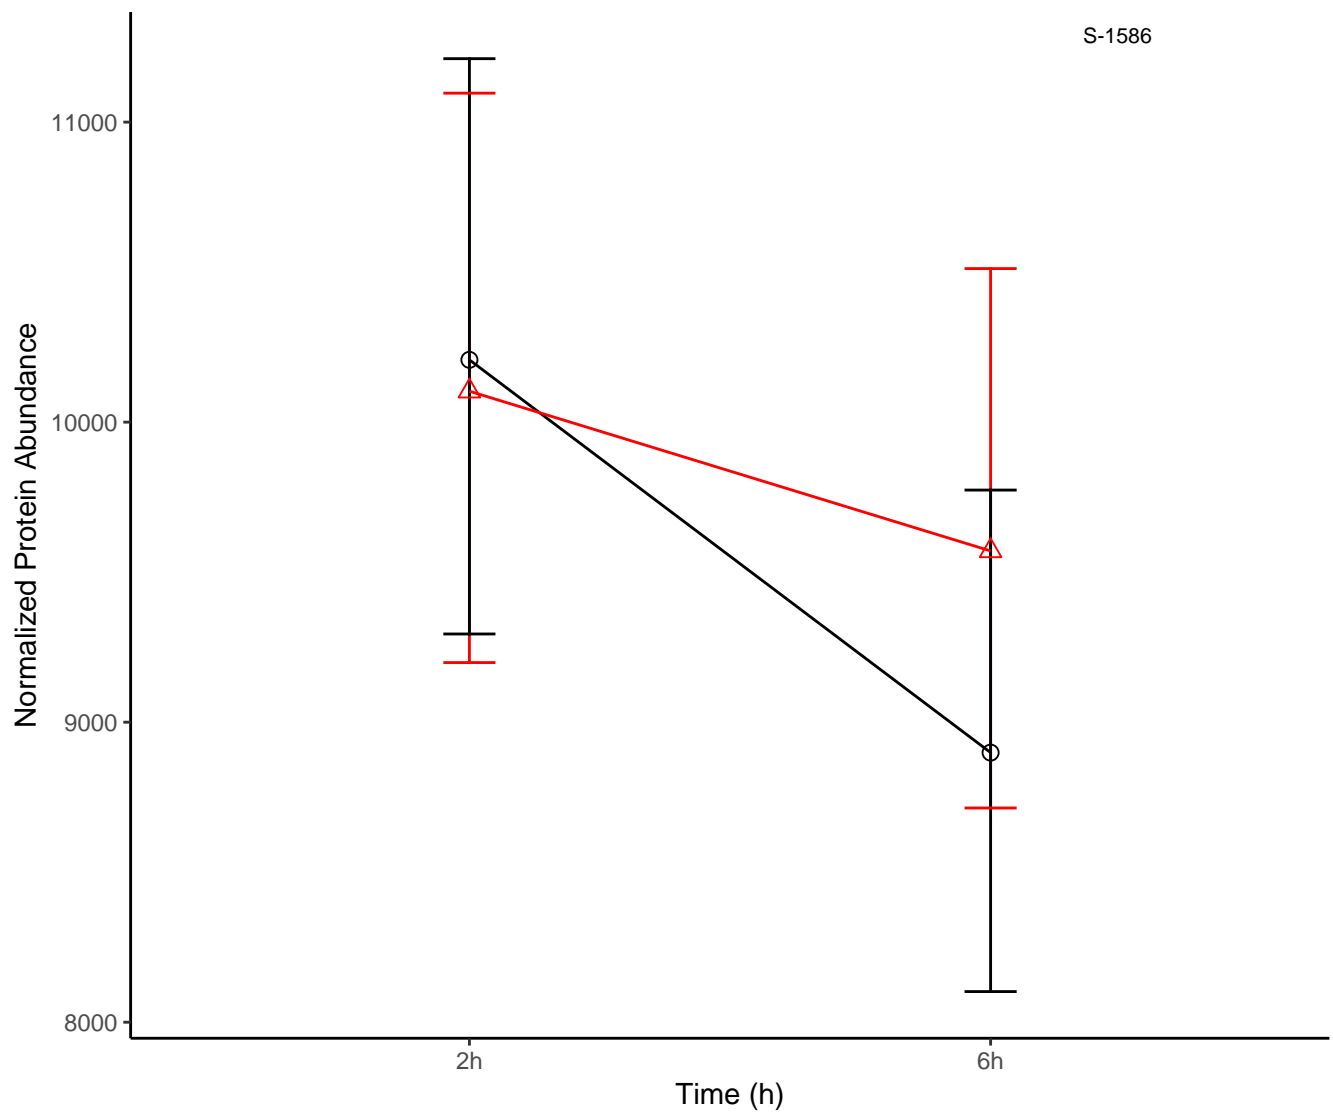

○ TSB-dex

△ TSB

# DLTC\_STAAM

S-1587

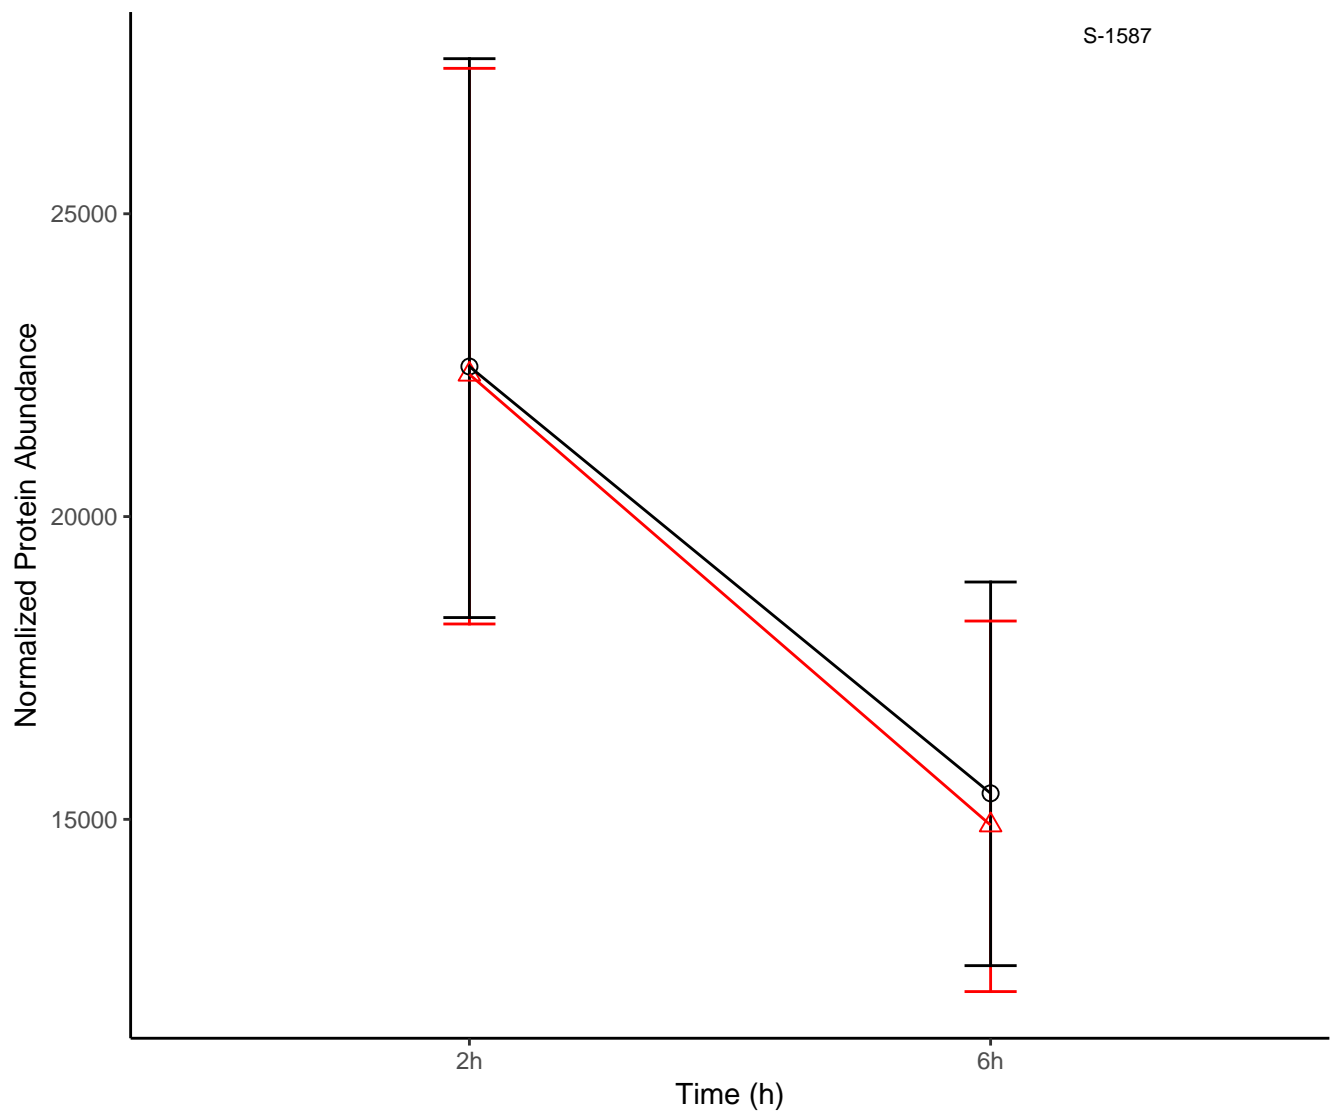

○ TSB-dex

△ TSB

# DNAA\_STAAM

S-1588

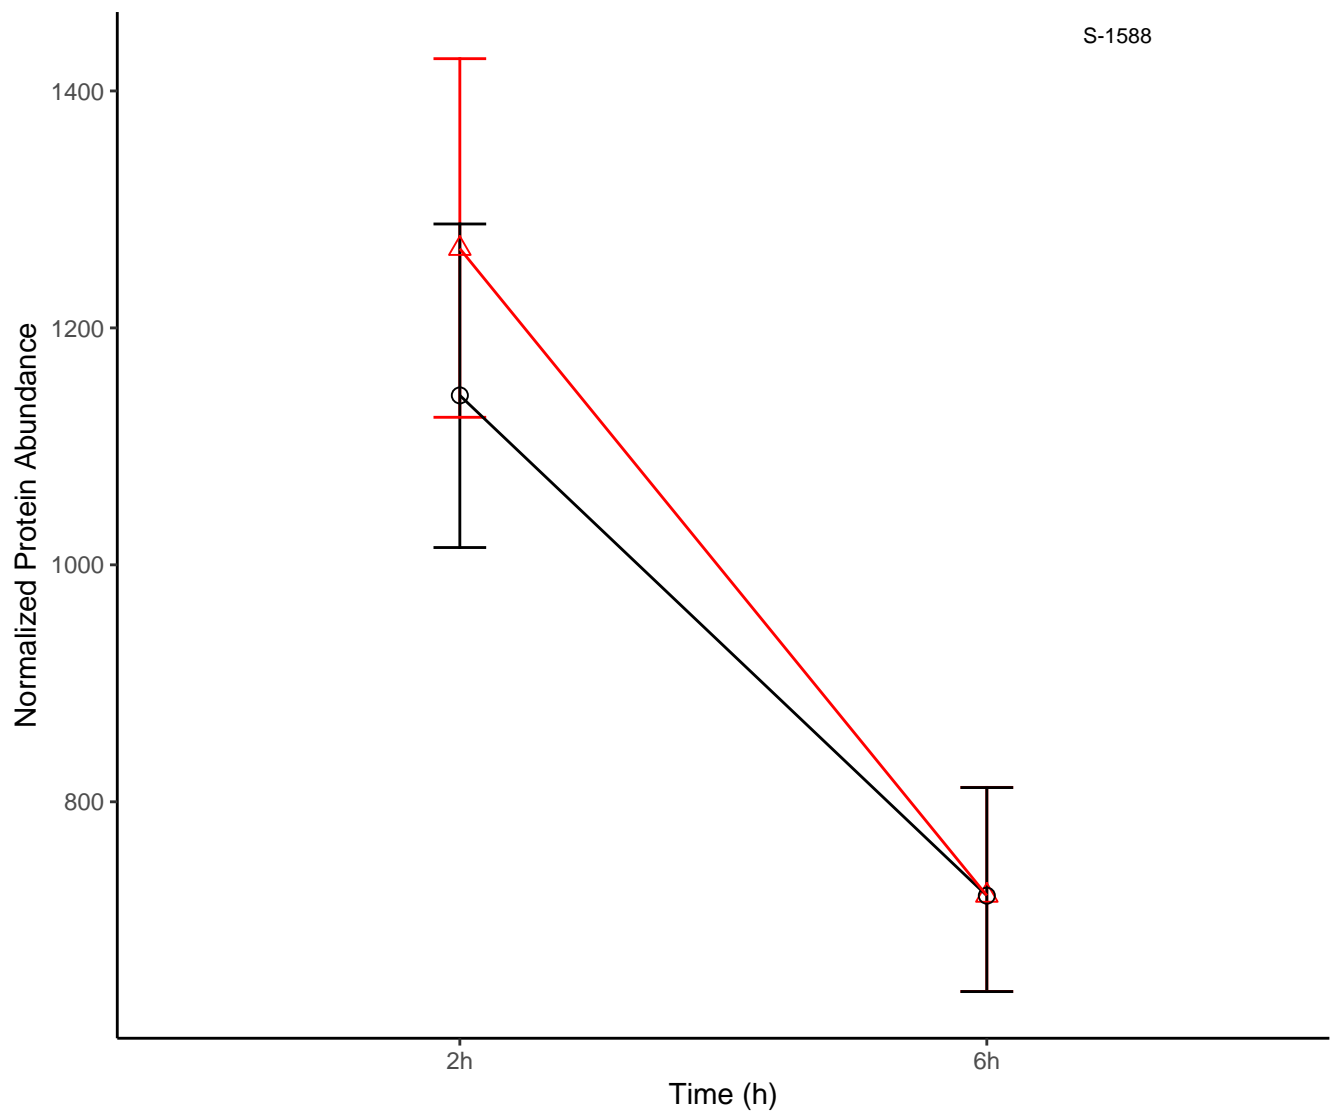

○ TSB-dex

△ TSB

# DNAG\_STAAM

S-1589

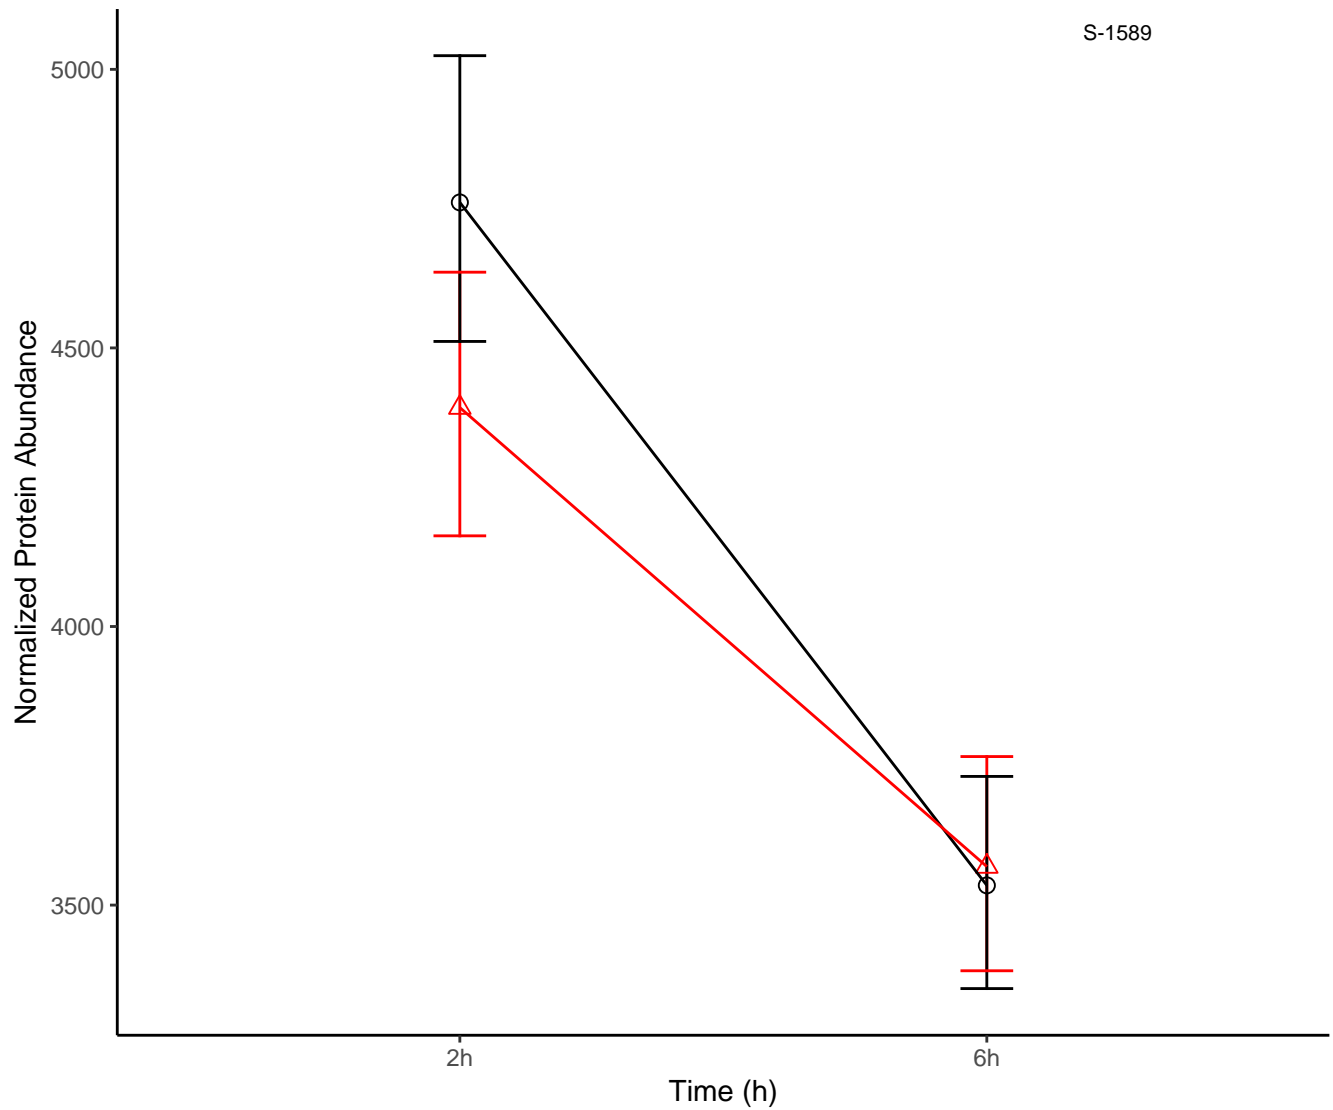

○ TSB-dex

△ TSB

# DNAJ\_STAAM

S-1590

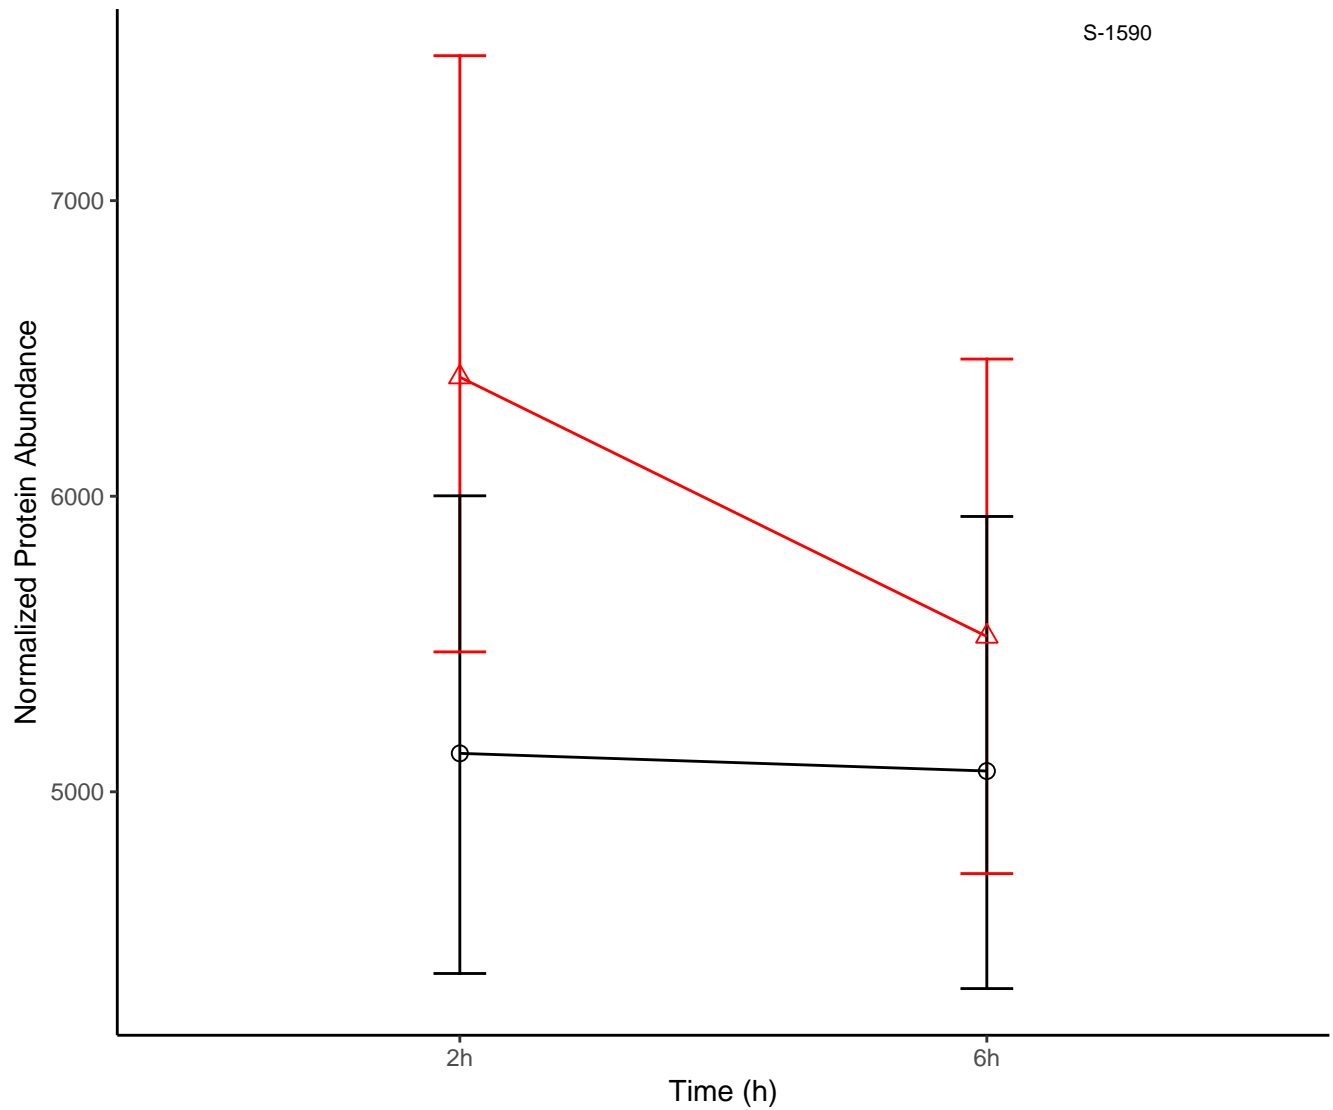

○ TSB-dex

△ TSB

# DNAK\_STAAM

S-1591

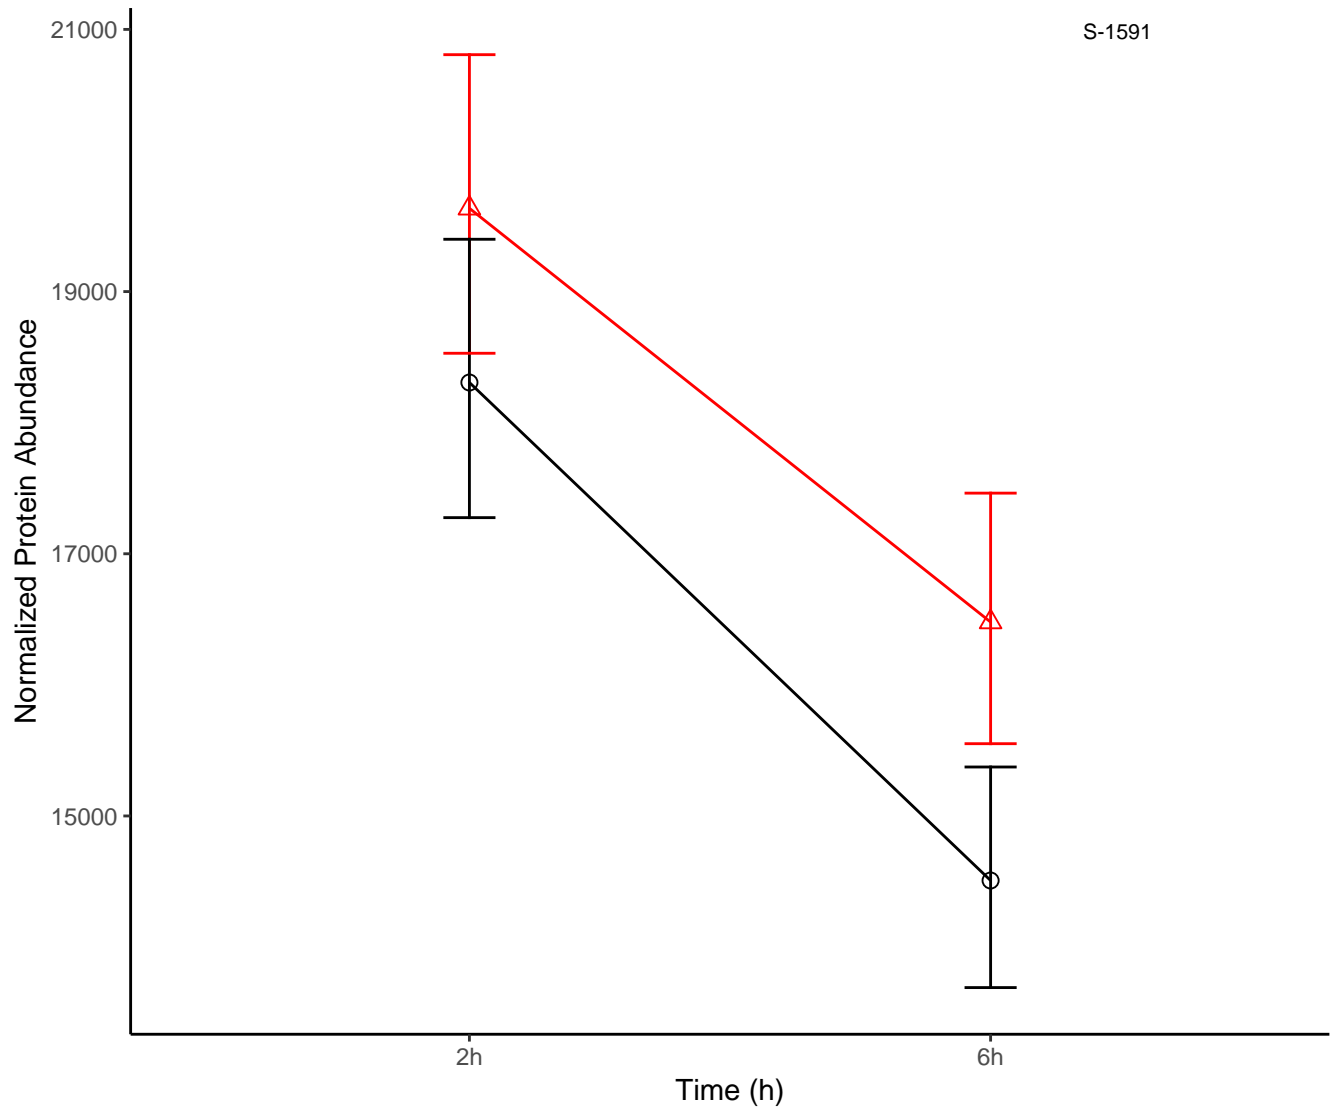

○ TSB-dex

△ TSB

# DNLJ\_STAAM

S-1592

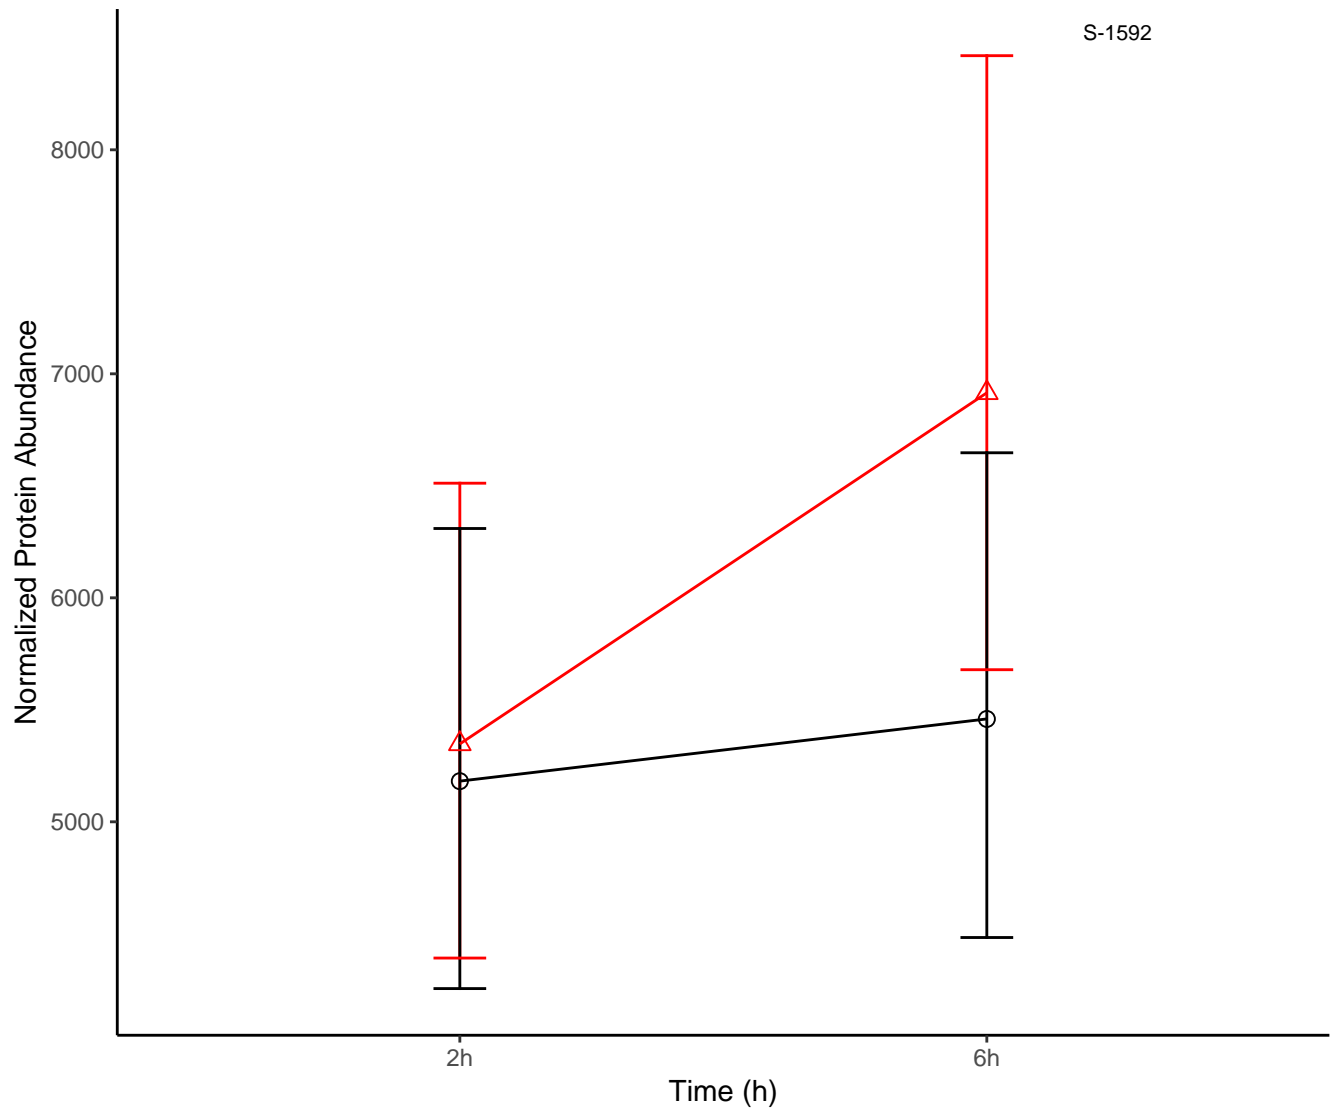

○ TSB-dex

△ TSB



# DPO3B\_STAAM

S-1593

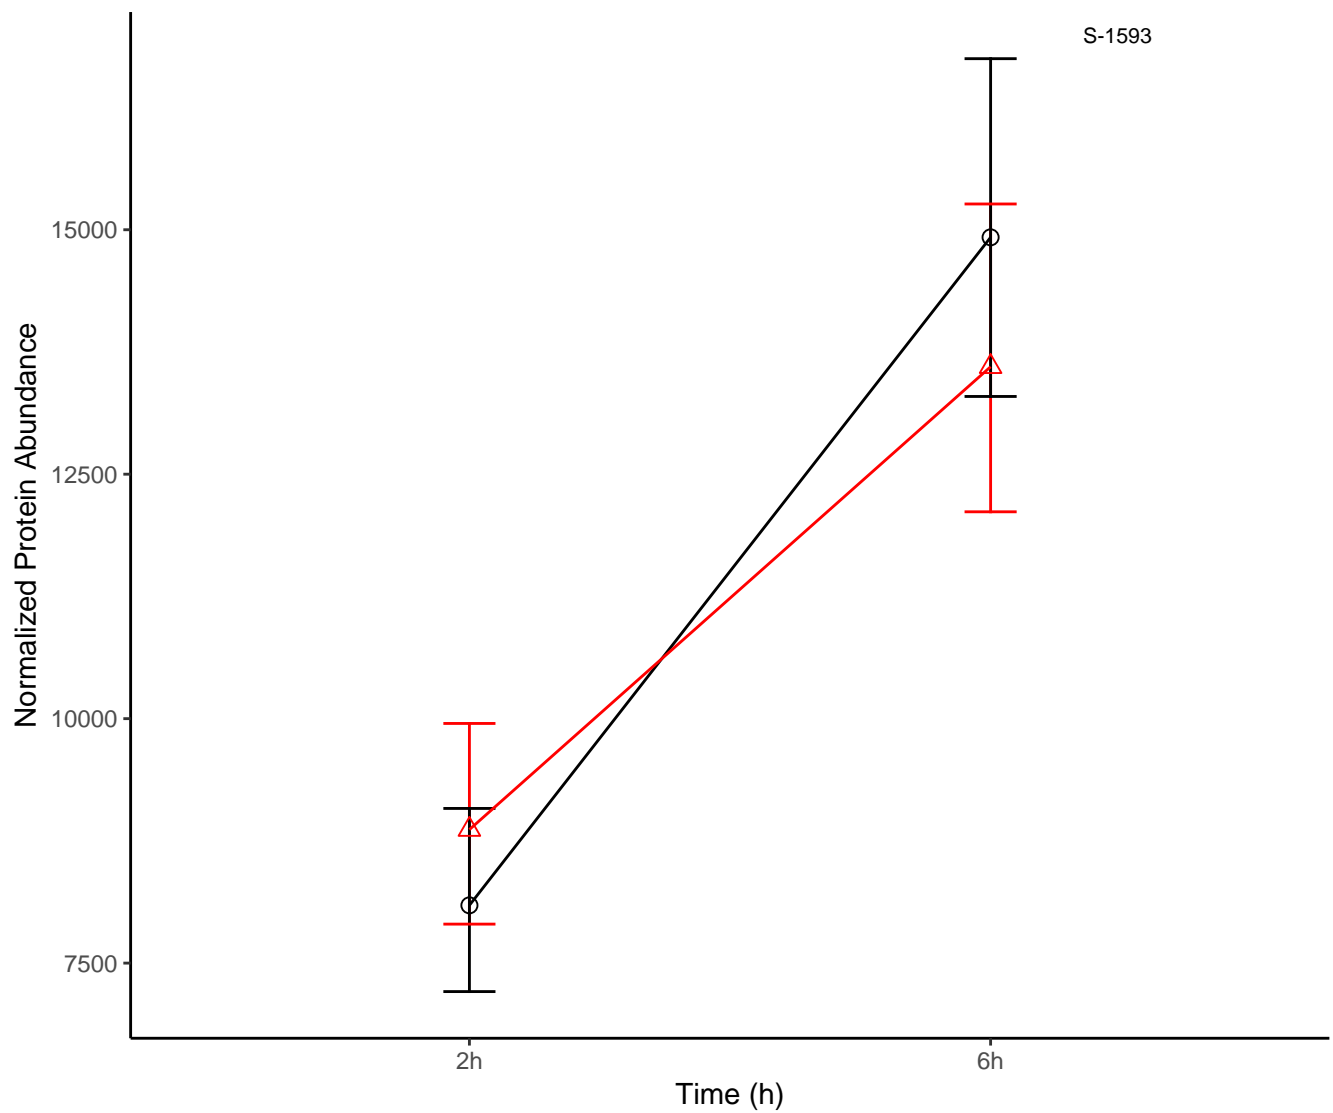

○ TSB-dex

△ TSB

# DPO4\_STAAM

S-1594

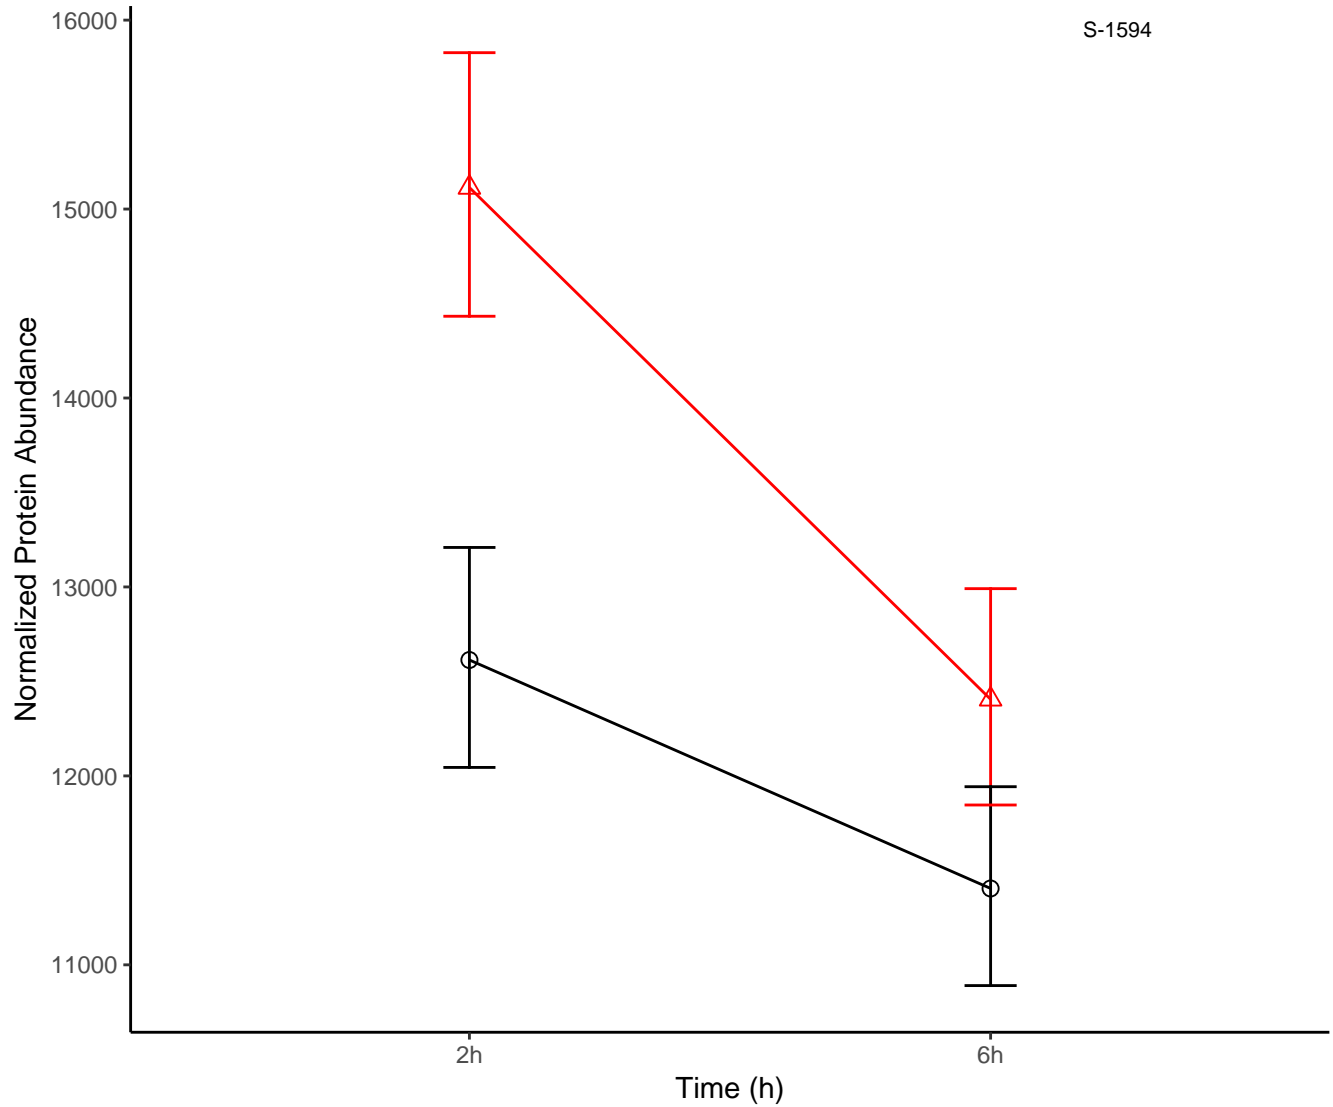

○ TSB-dex

△ TSB

# DTD\_STAAM

S-1595

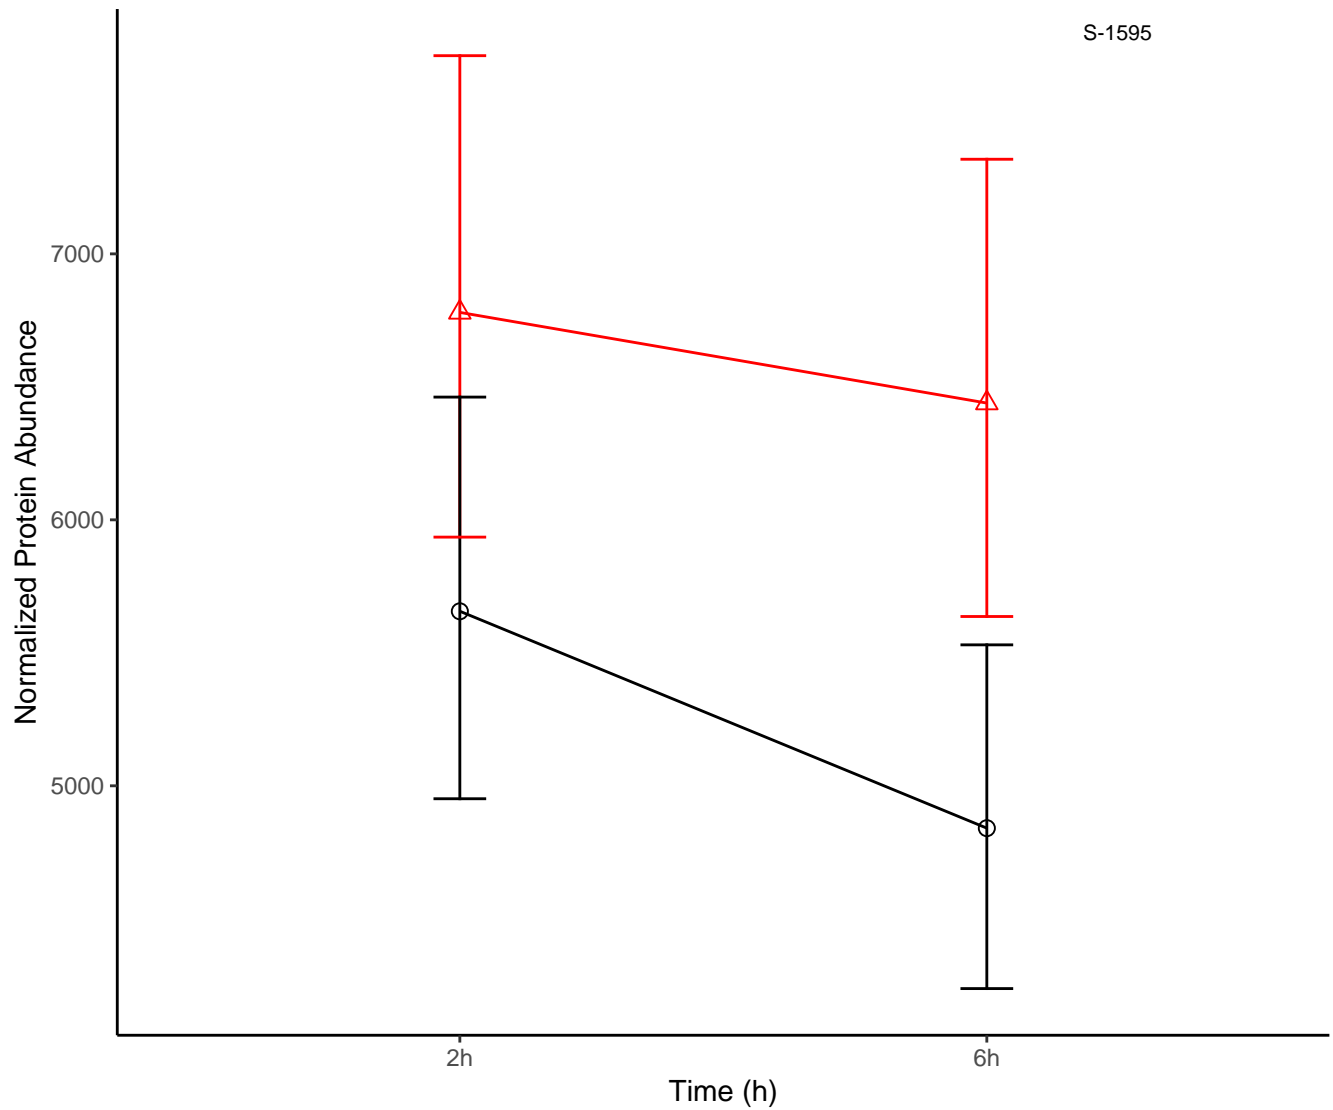

○ TSB-dex

△ TSB

# DYR\_STAAM

S-1596

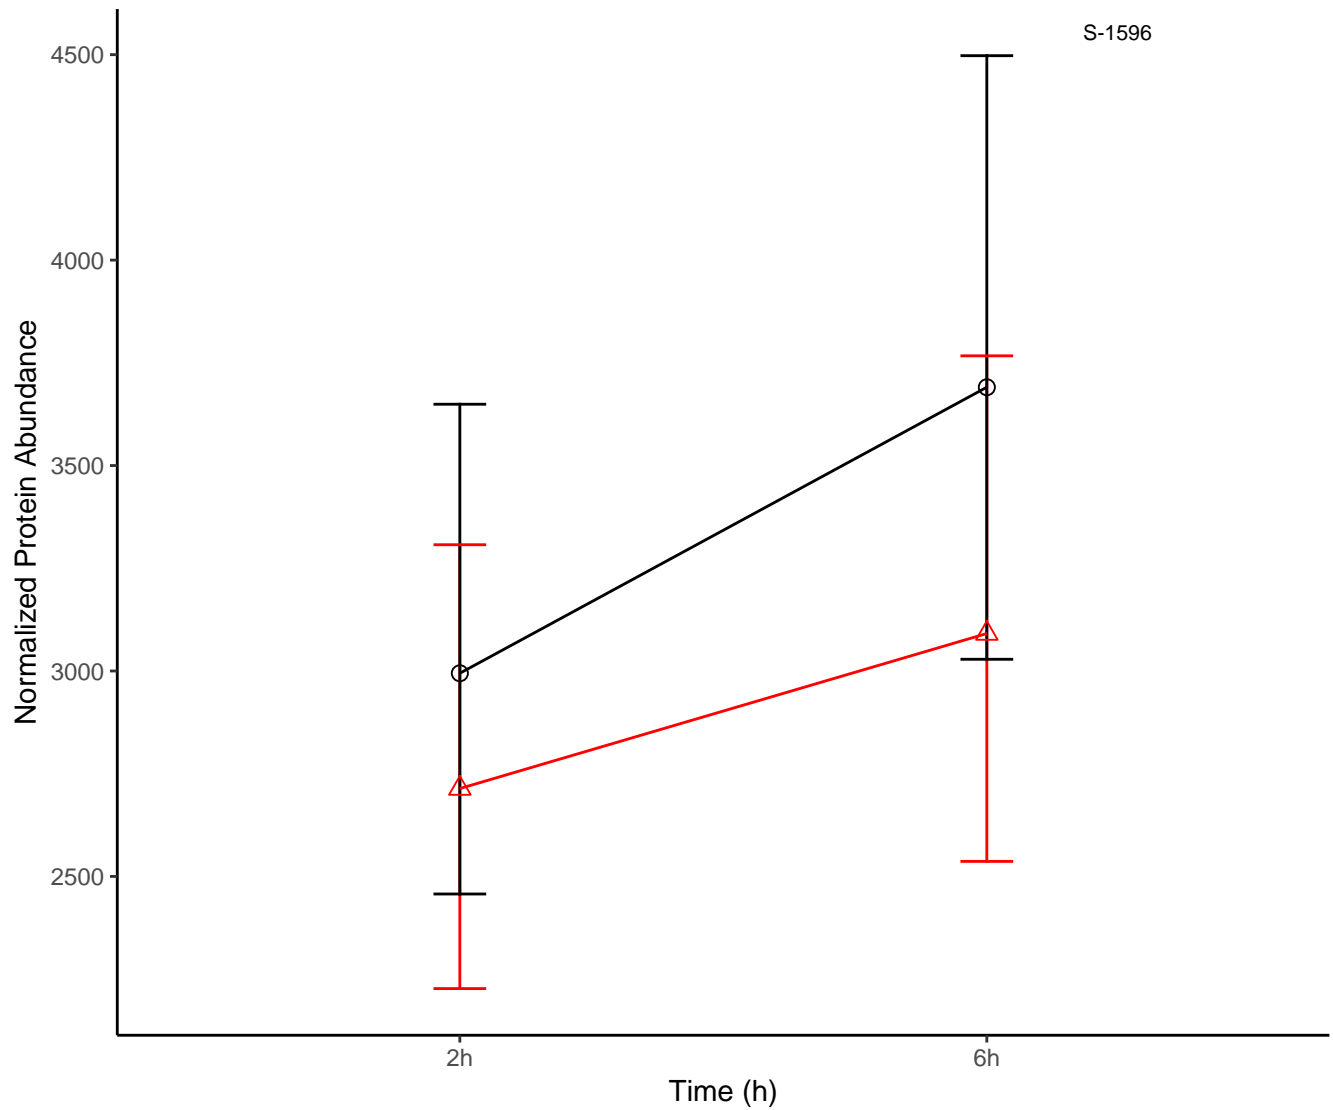

○ TSB-dex

△ TSB

# EBPS\_STAAM

S-1597

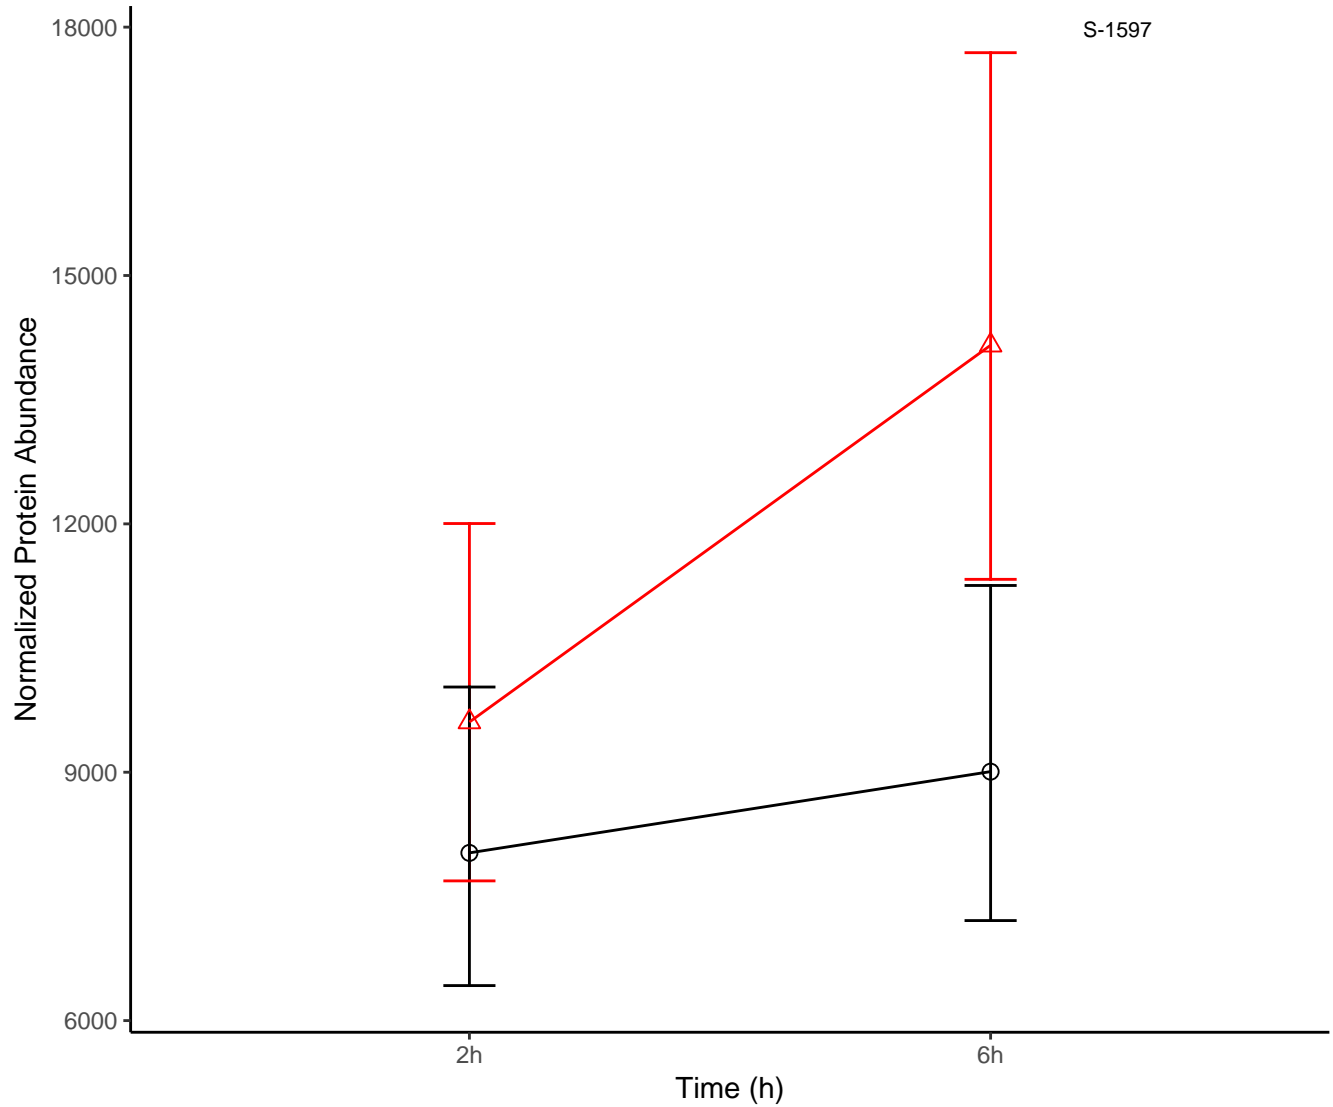

○ TSB-dex

△ TSB

# ECFA1\_STAAM

S-1598

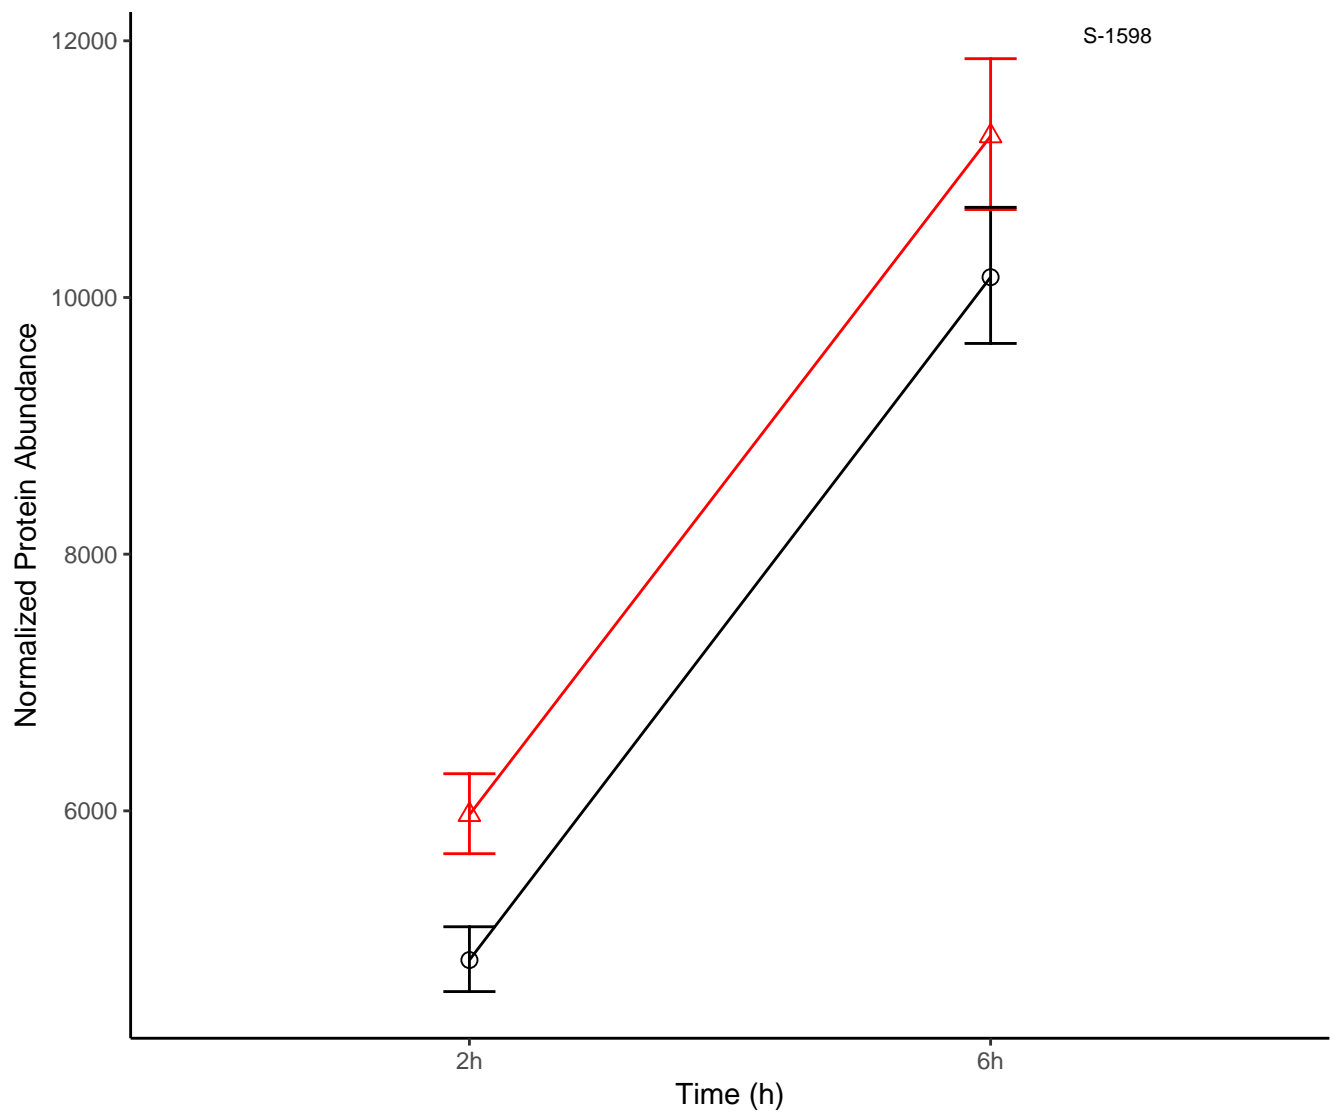

○ TSB-dex

△ TSB

# EFG\_STAAM

S-1599

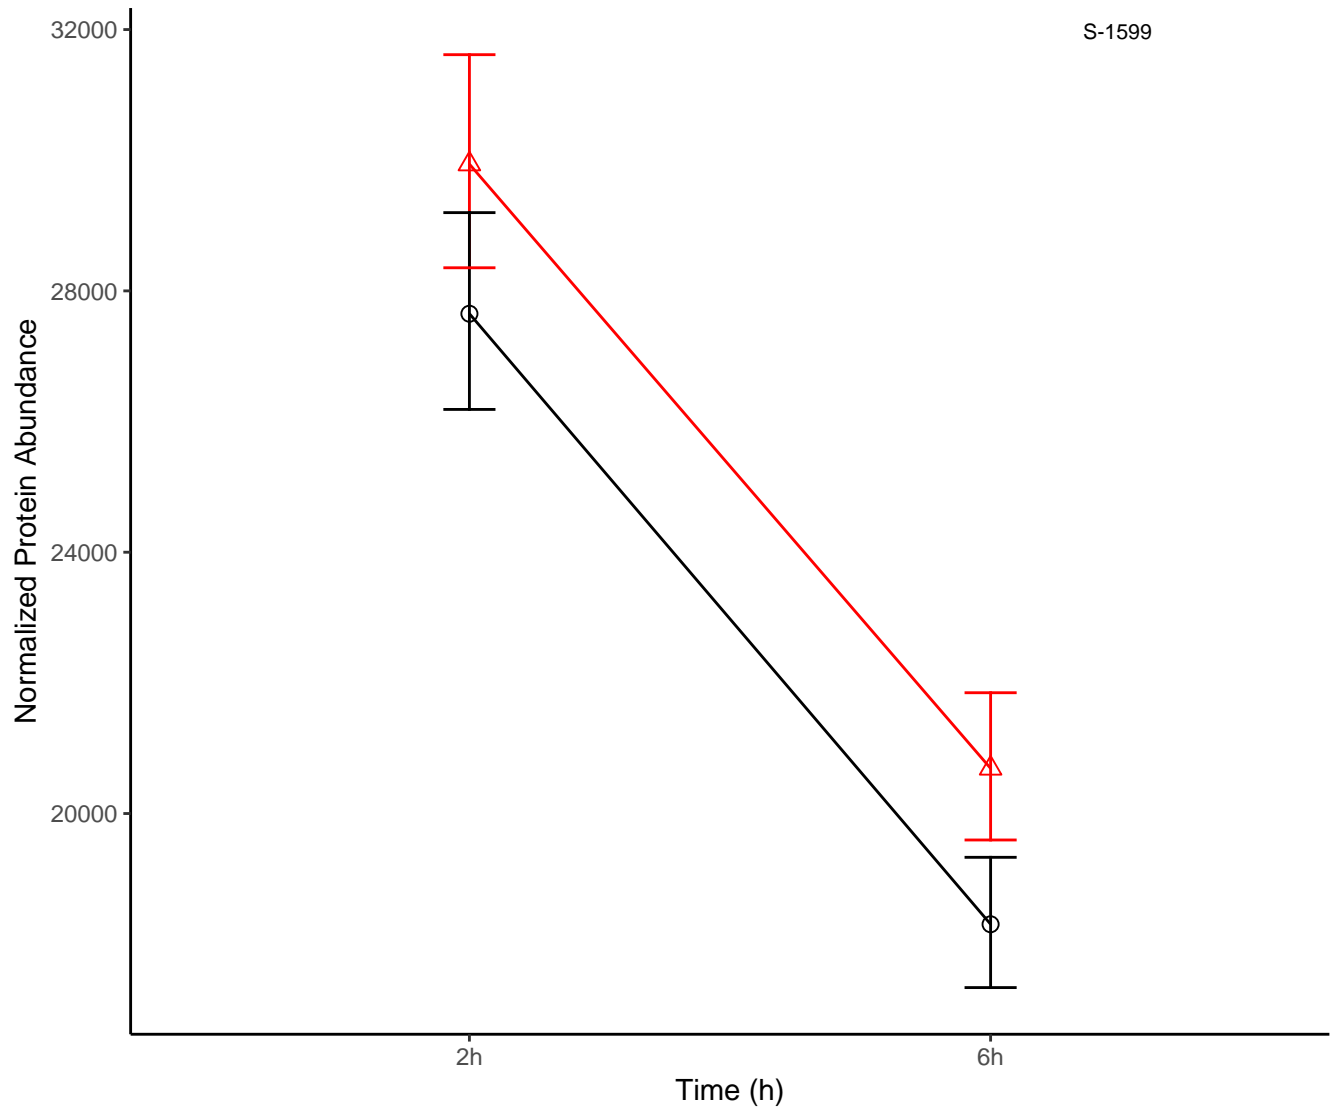

○ TSB-dex

△ TSB

# EFP\_STAAM

S-1600

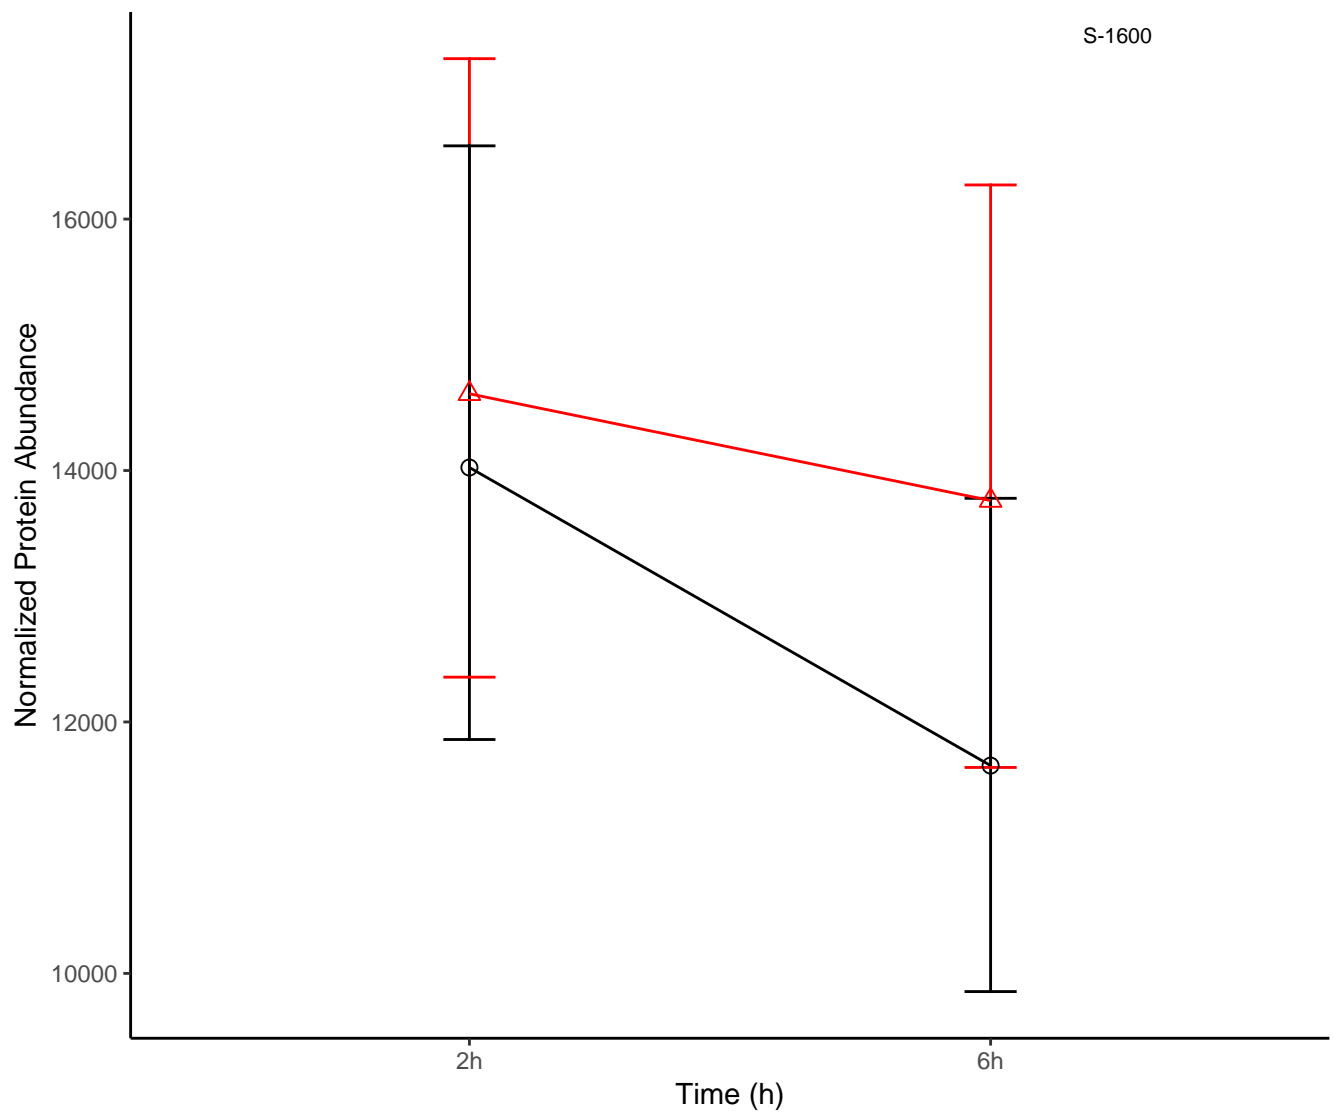

○ TSB-dex

△ TSB



# EFTS\_STAAM

S-1601

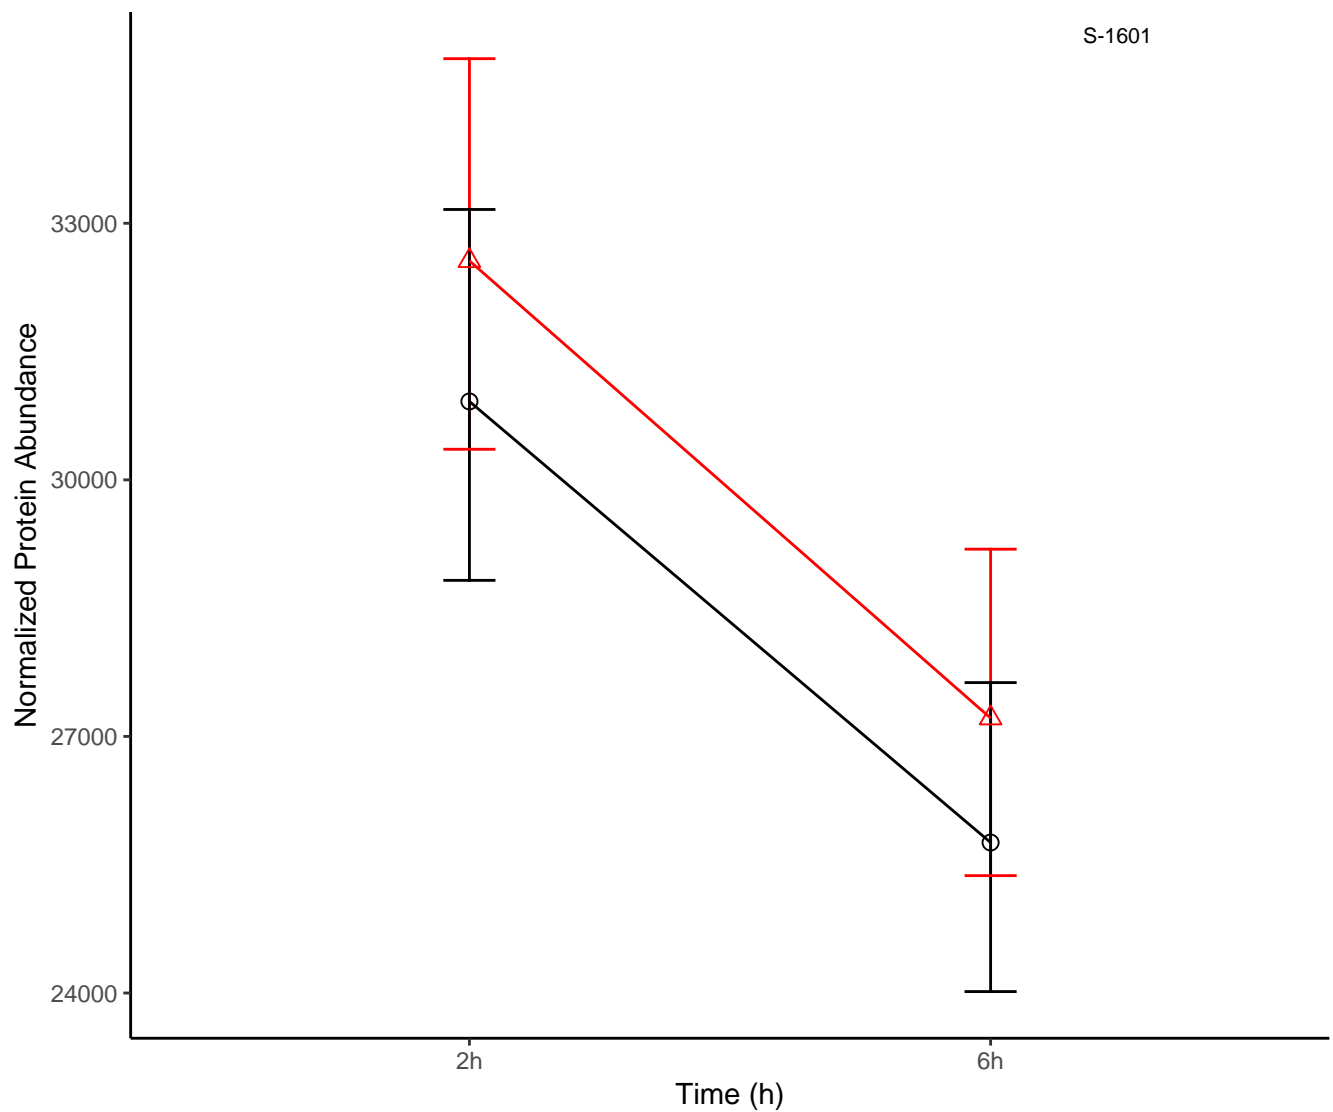

○ TSB-dex

△ TSB

# EFTU\_STAAM

S-1602

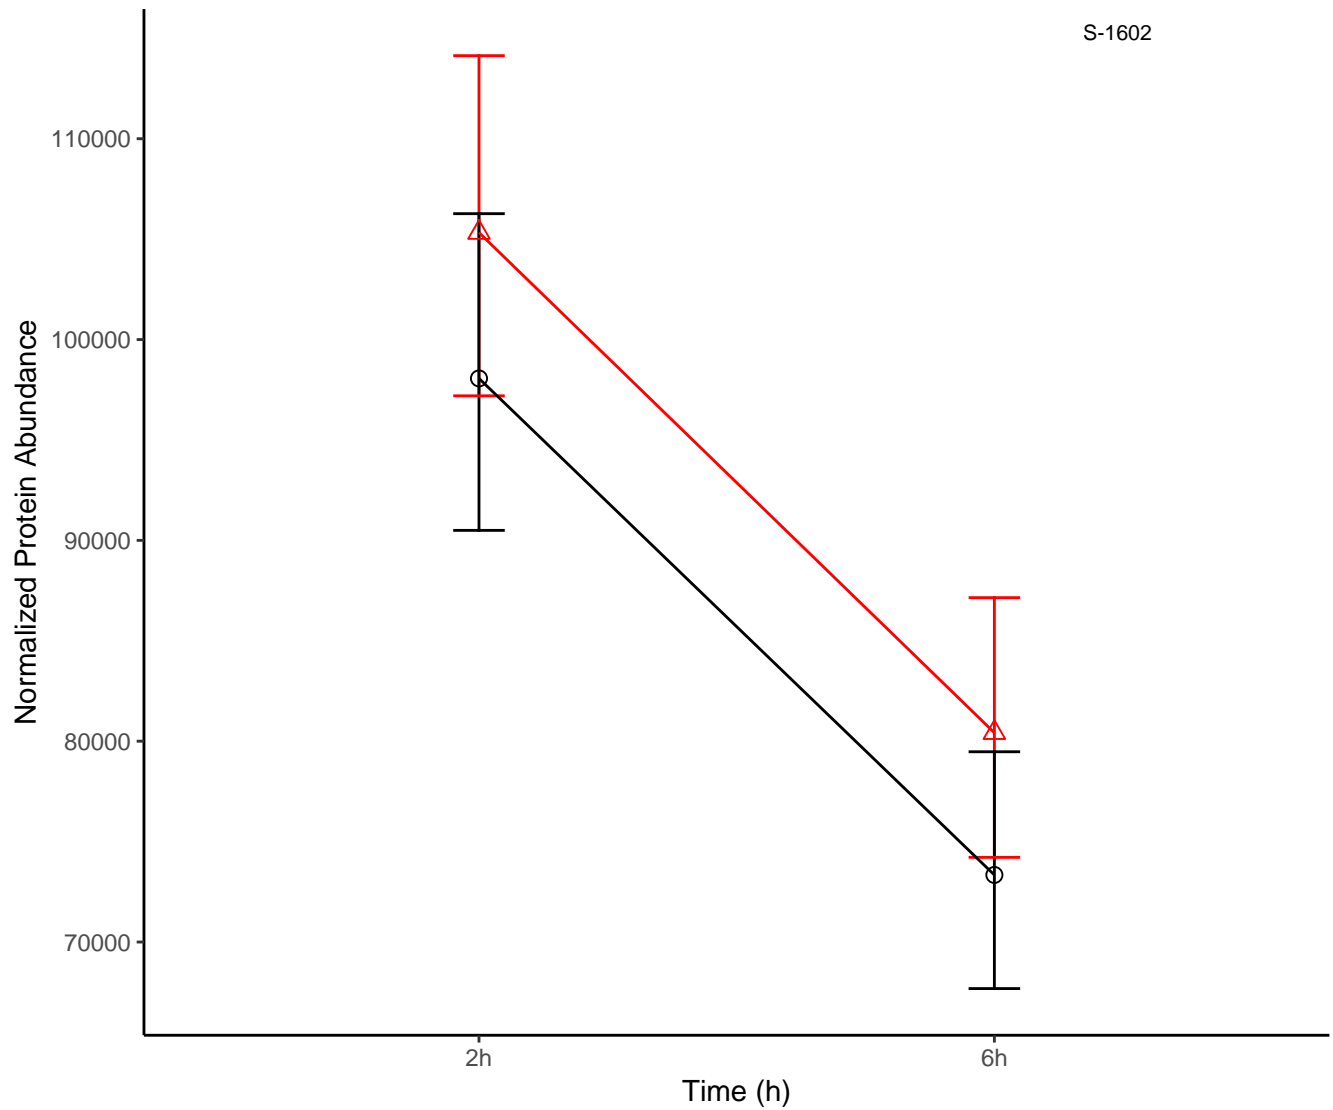

○ TSB-dex

△ TSB

# ENO\_STAAM

S-1603

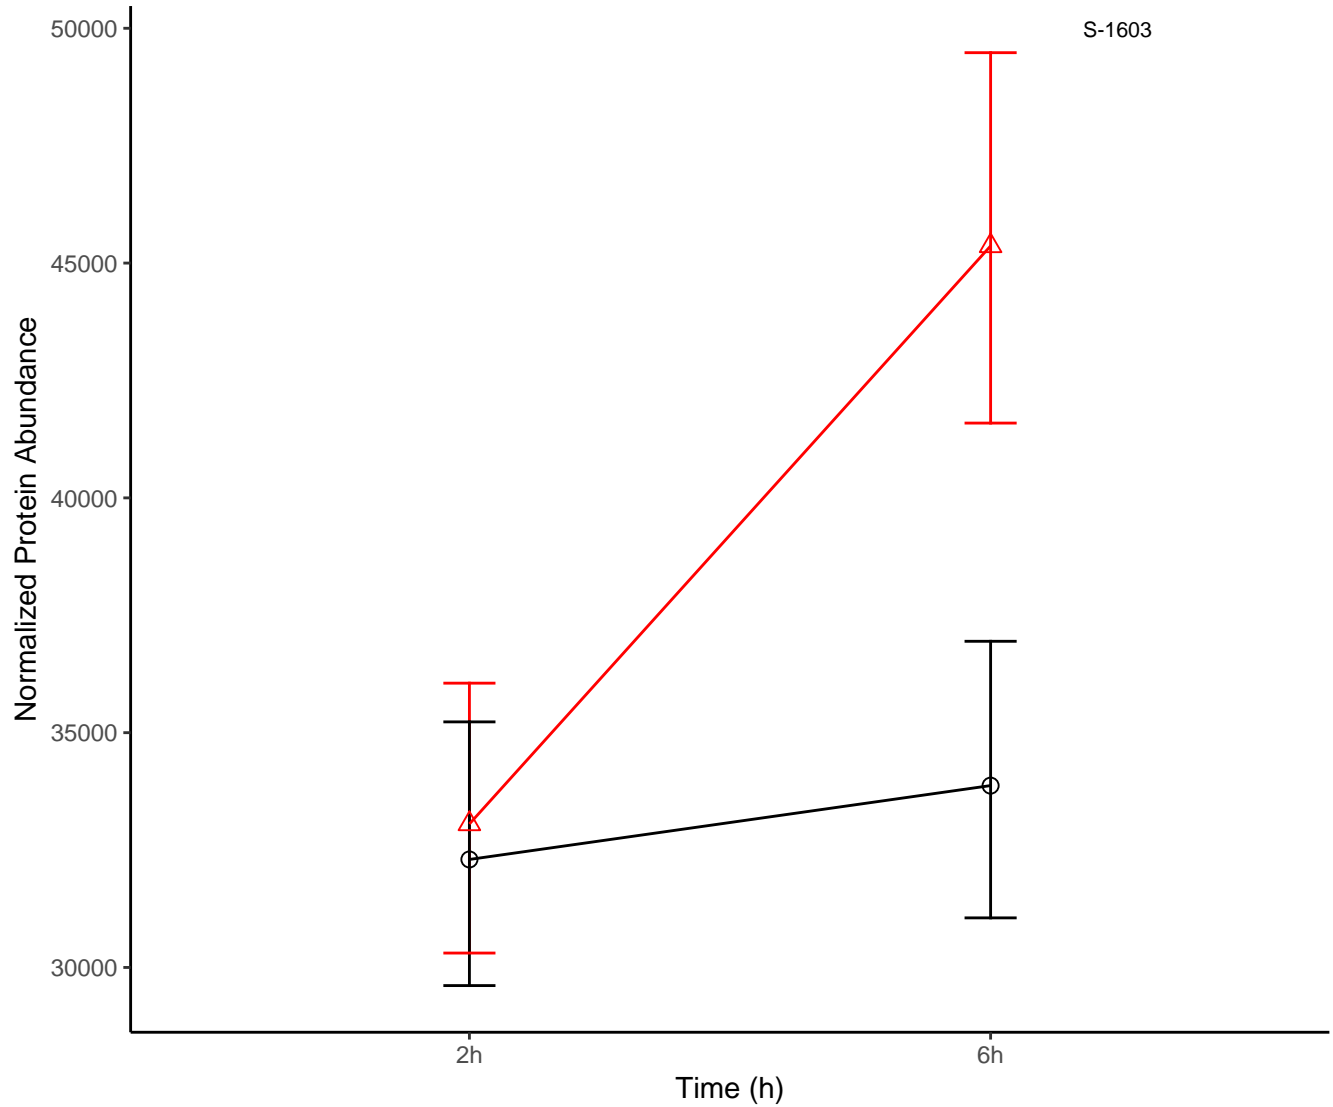

○ TSB-dex

△ TSB

# ERA\_STAAM

S-1604

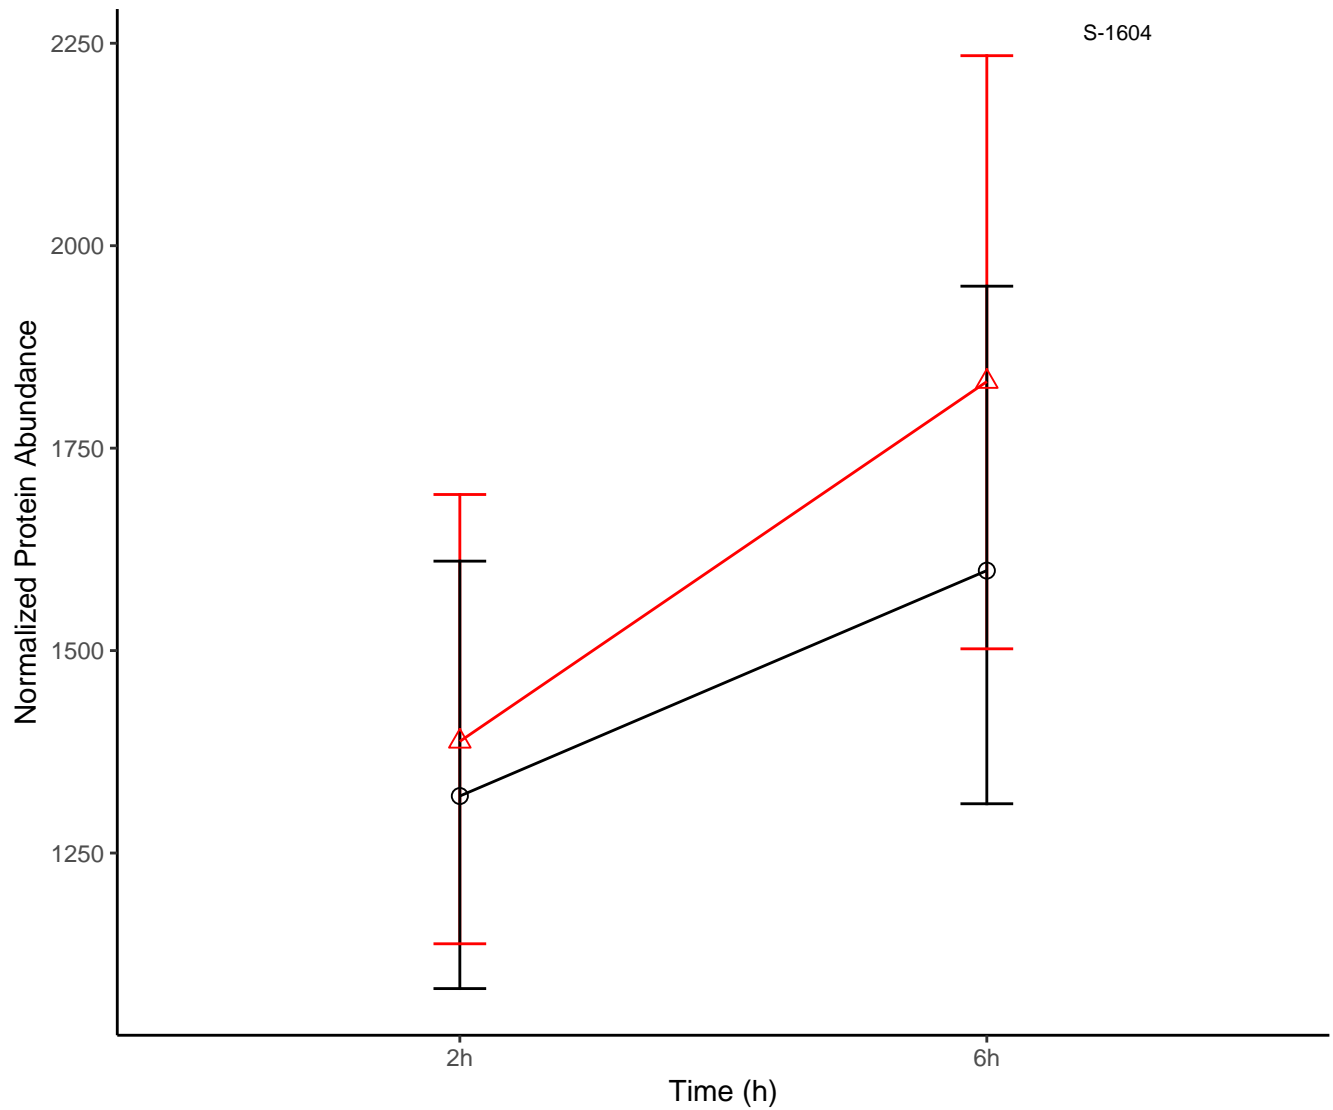

○ TSB-dex

△ TSB

# ERMA\_STAAM

S-1605

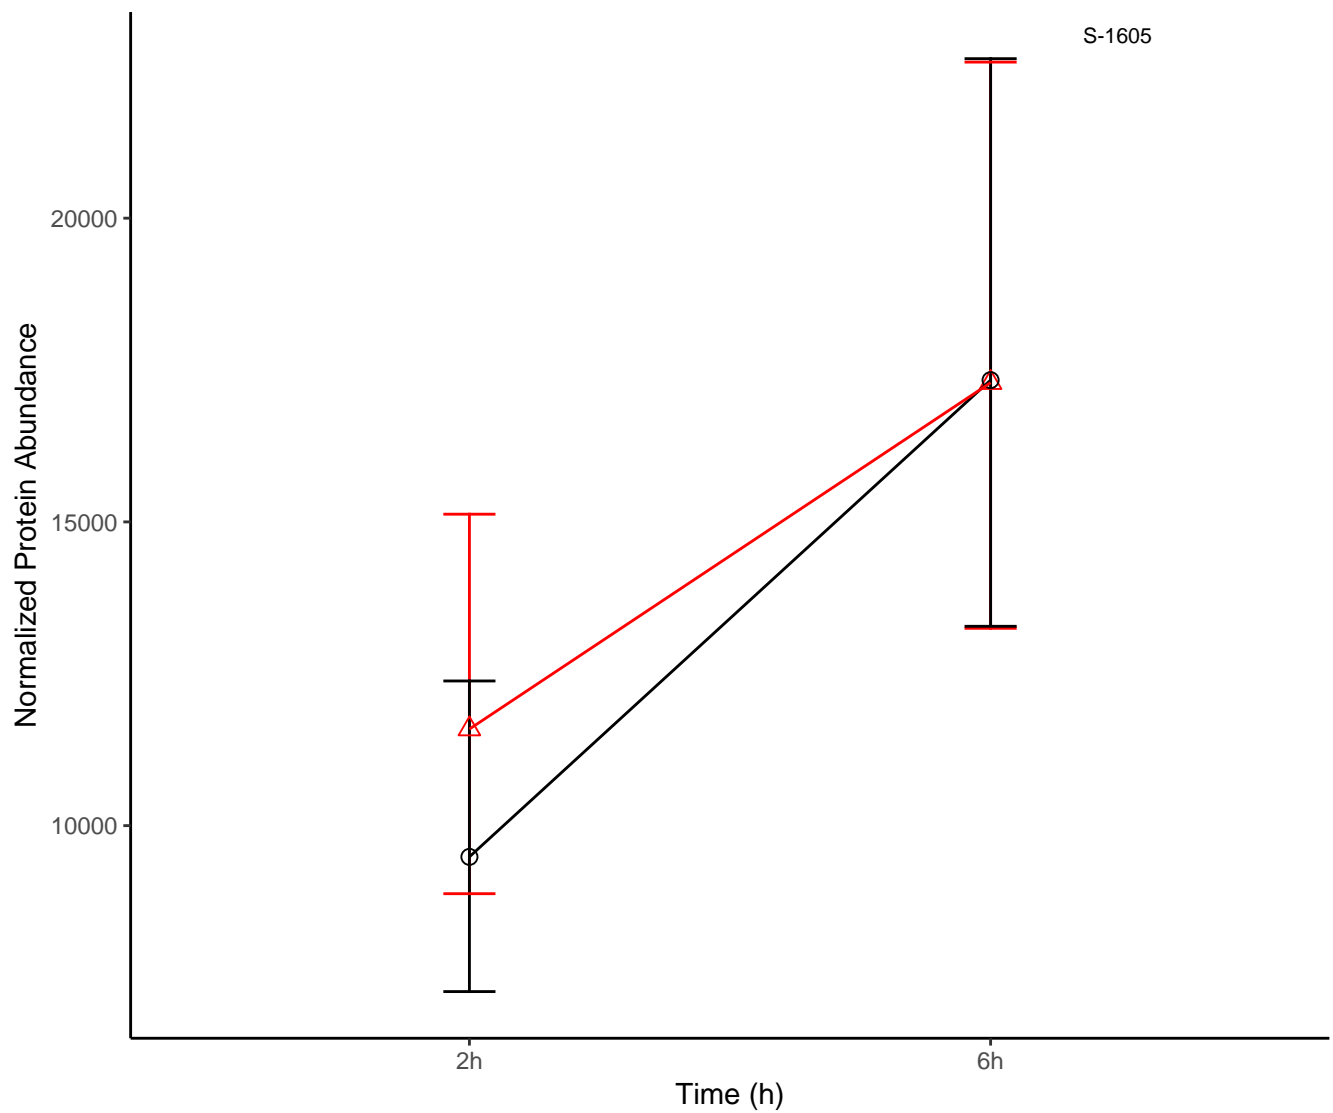

○ TSB-dex

△ TSB

# ESSA\_STAAM

S-1606

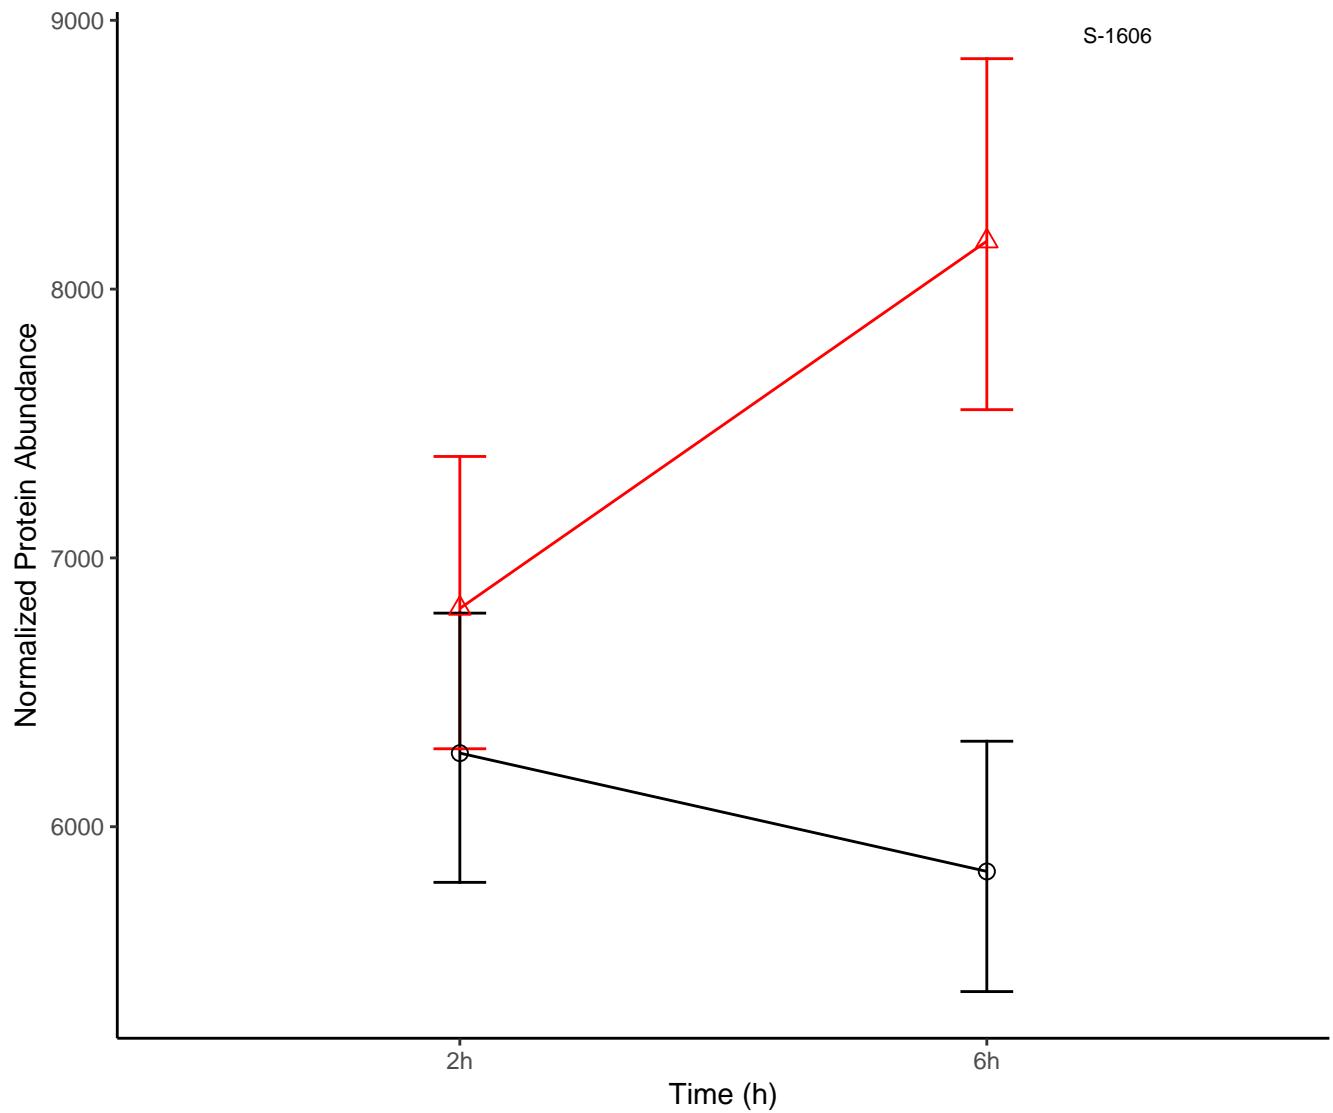

○ TSB-dex

△ TSB

# ESXA\_STAAM

S-1607

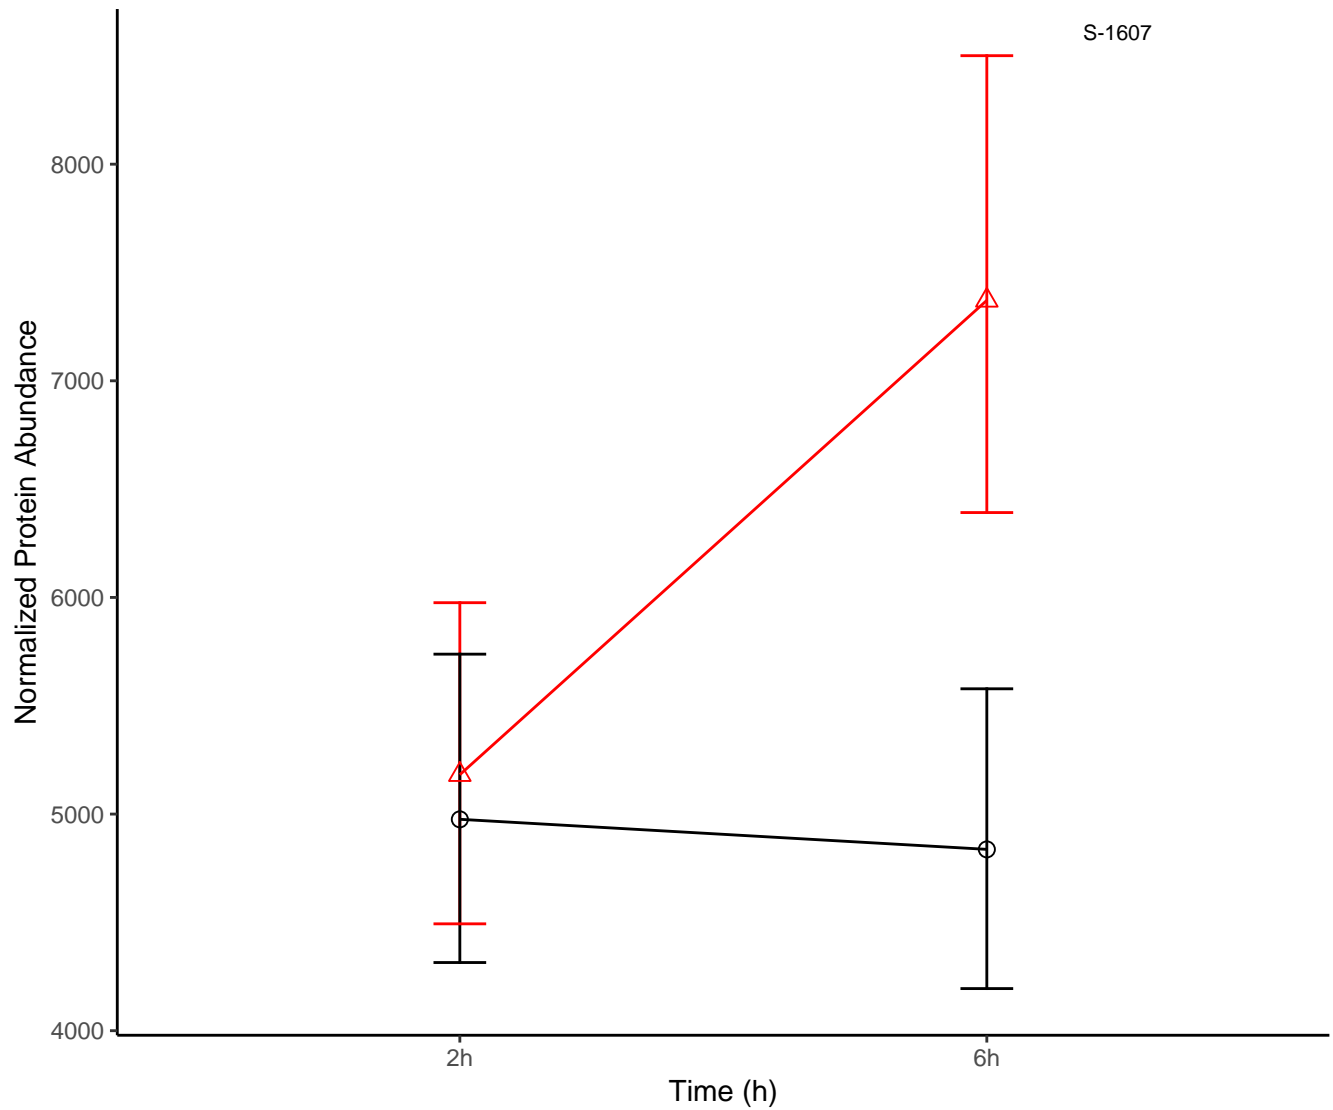

○ TSB-dex

△ TSB

# EX7L\_STAAM

S-1608

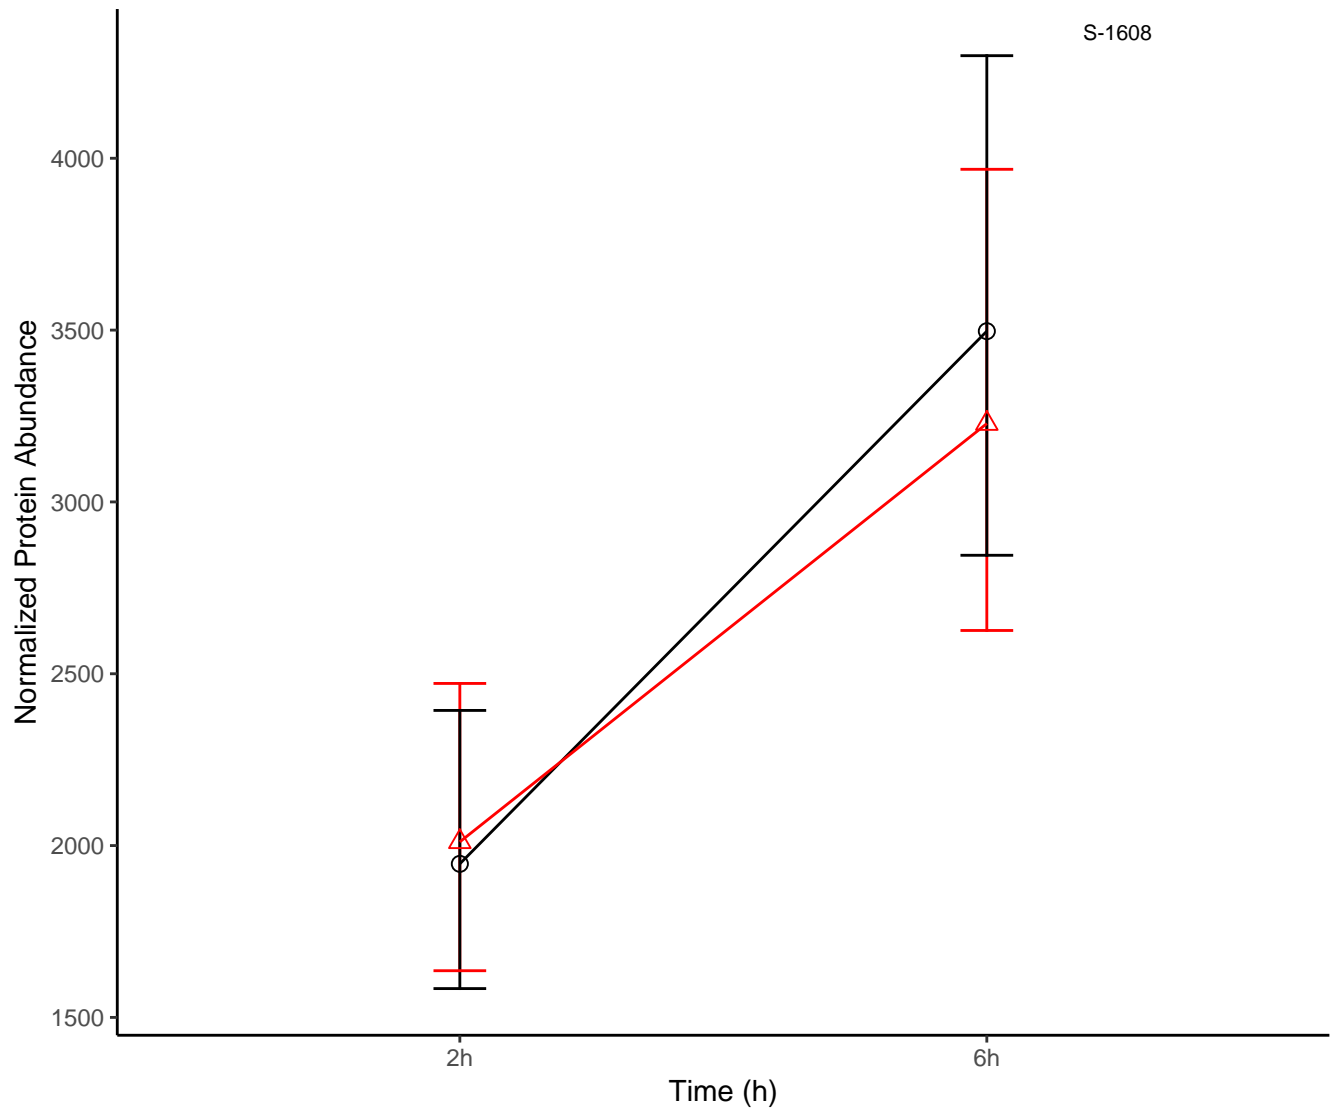

○ TSB-dex

△ TSB



# EZRA\_STAAM

S-1609

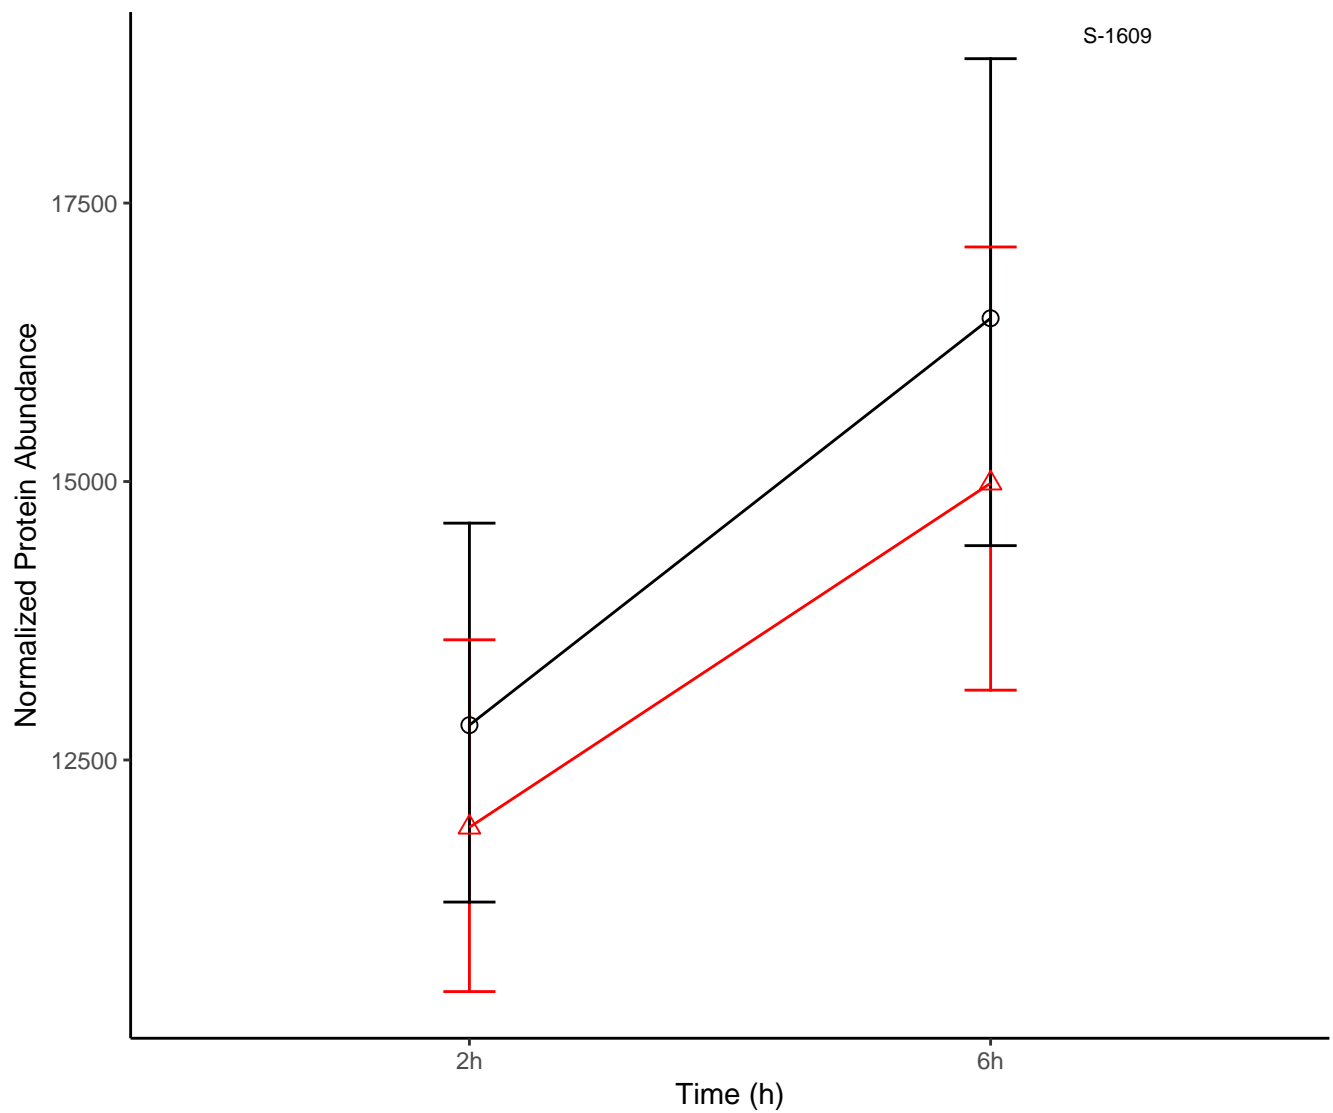

○ TSB-dex

△ TSB

# FABD\_STAAM

S-1610

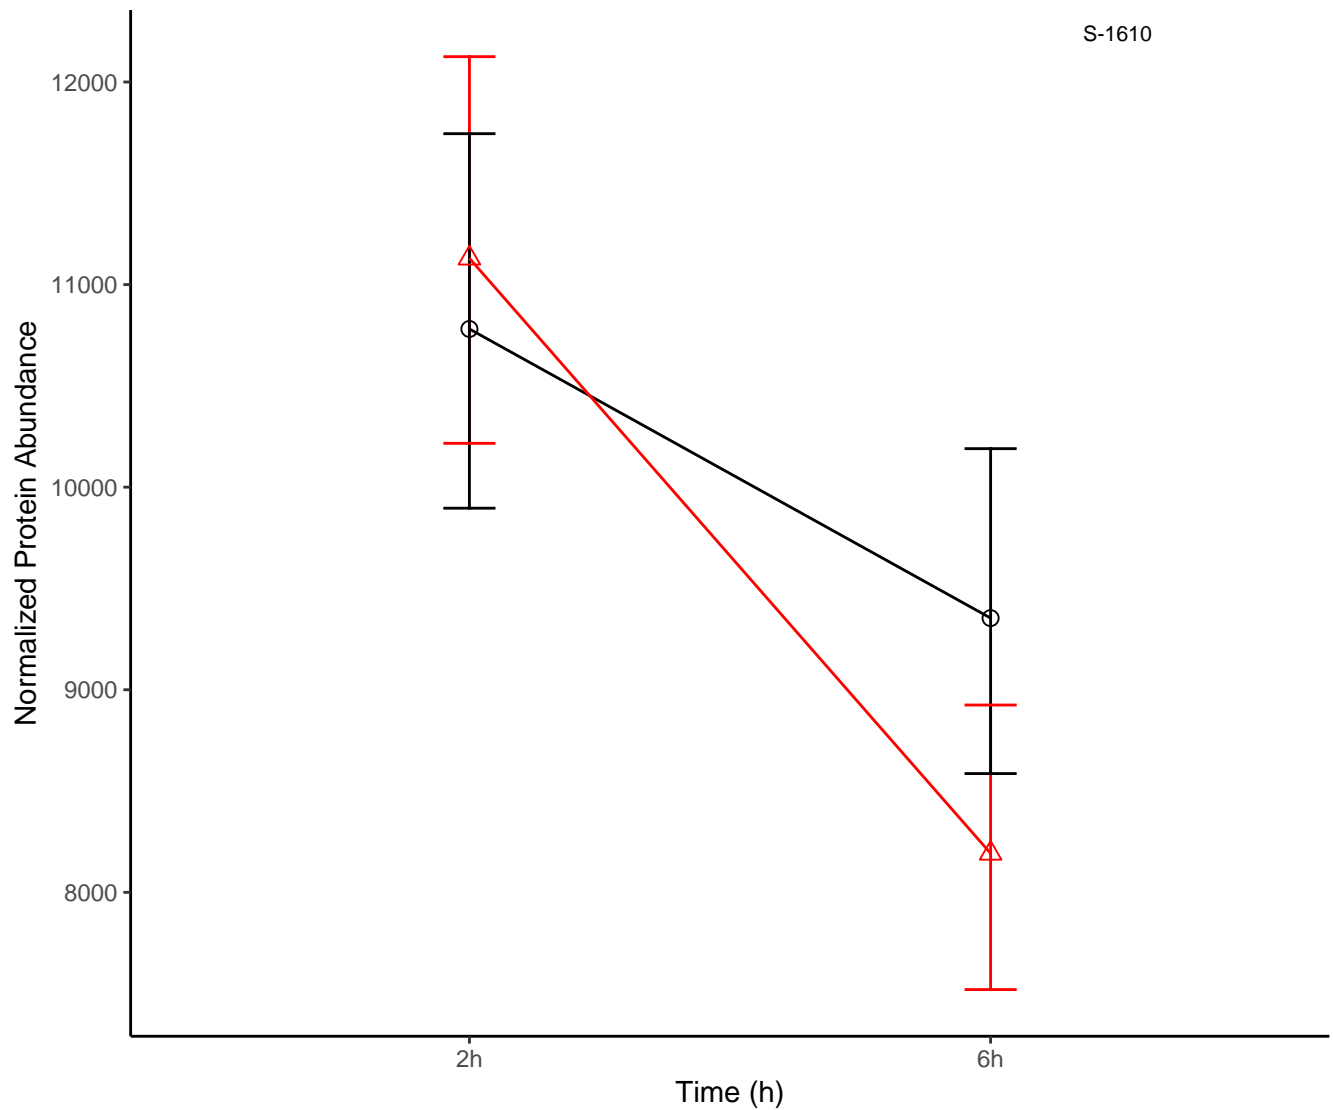

○ TSB-dex

△ TSB

# FABF\_STAAM

S-1611

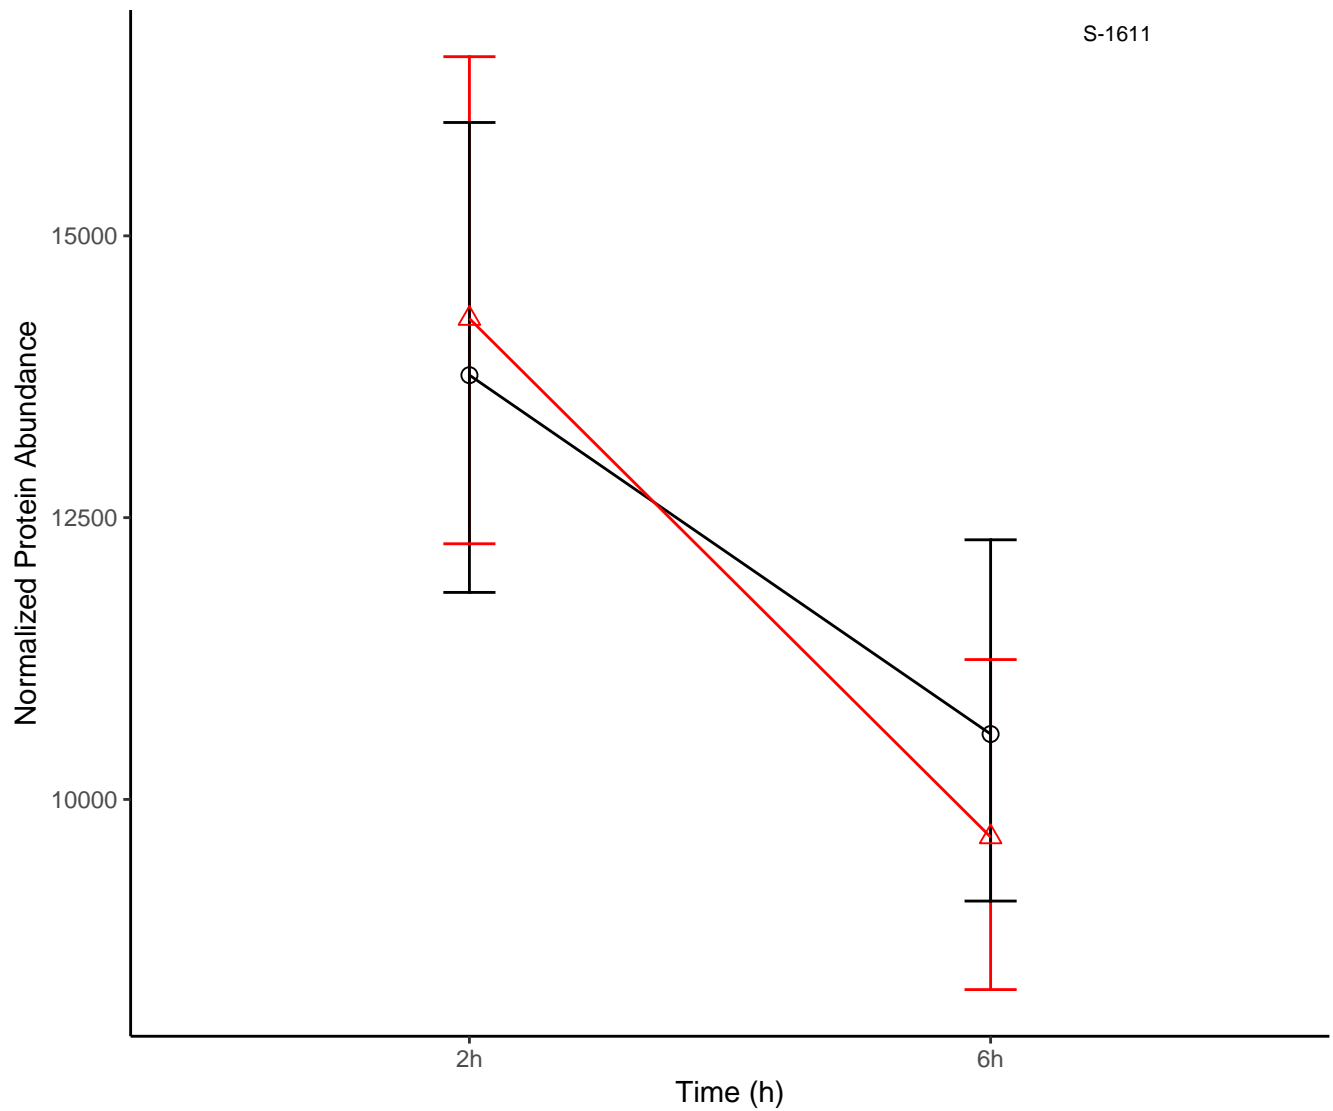

○ TSB-dex

△ TSB

# FABG\_STAAM

S-1612

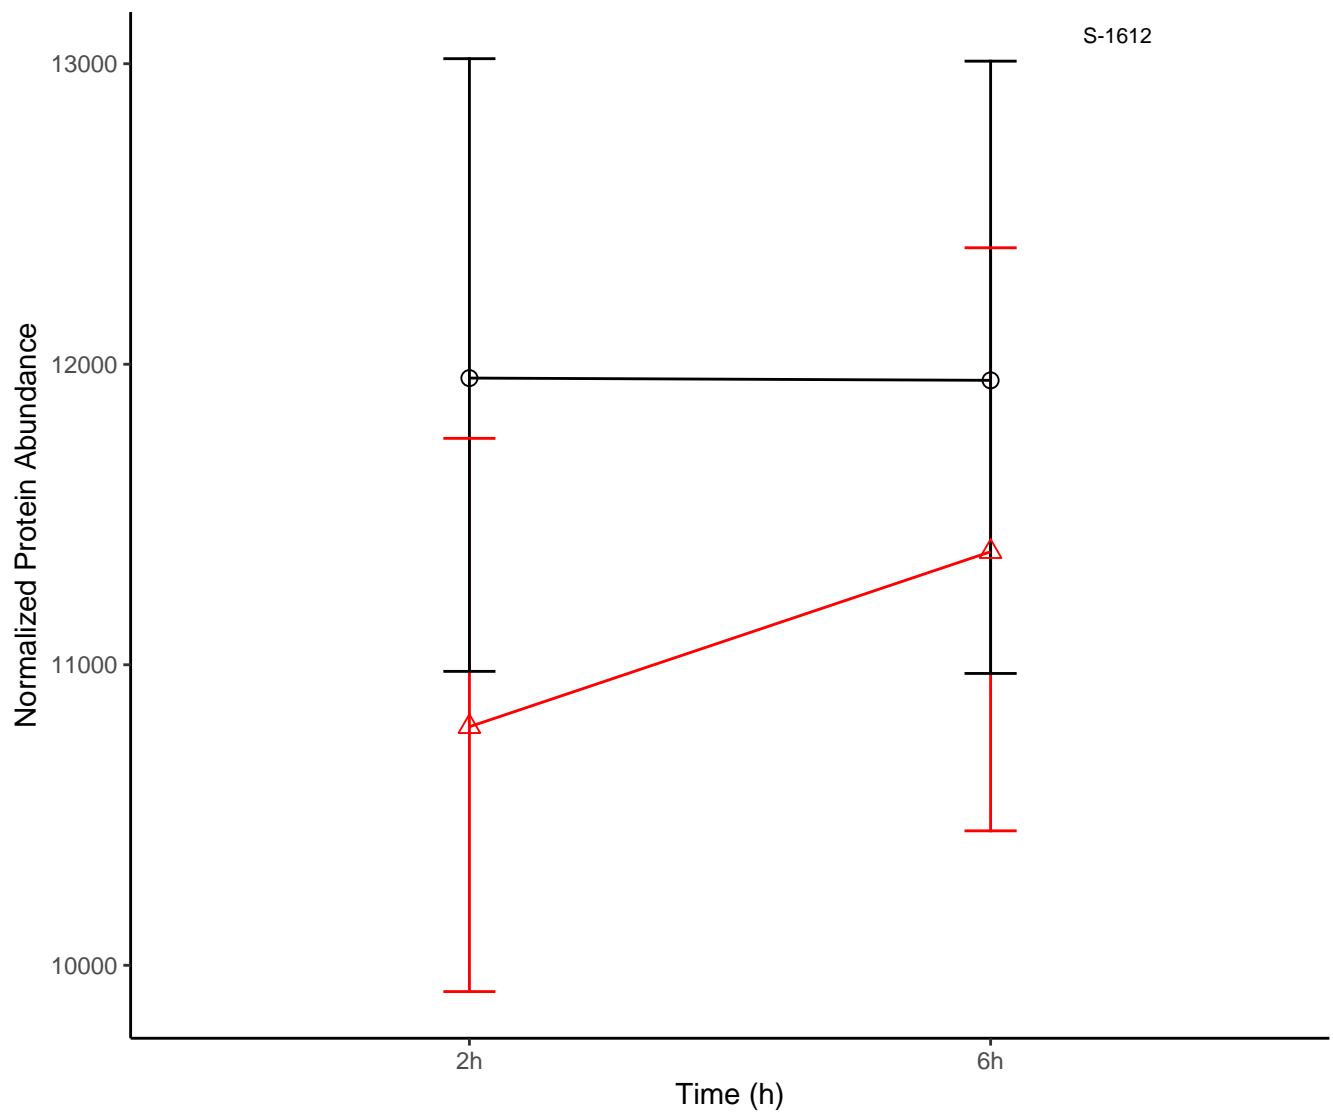

○ TSB-dex

△ TSB

# FABH\_STAAM

S-1613

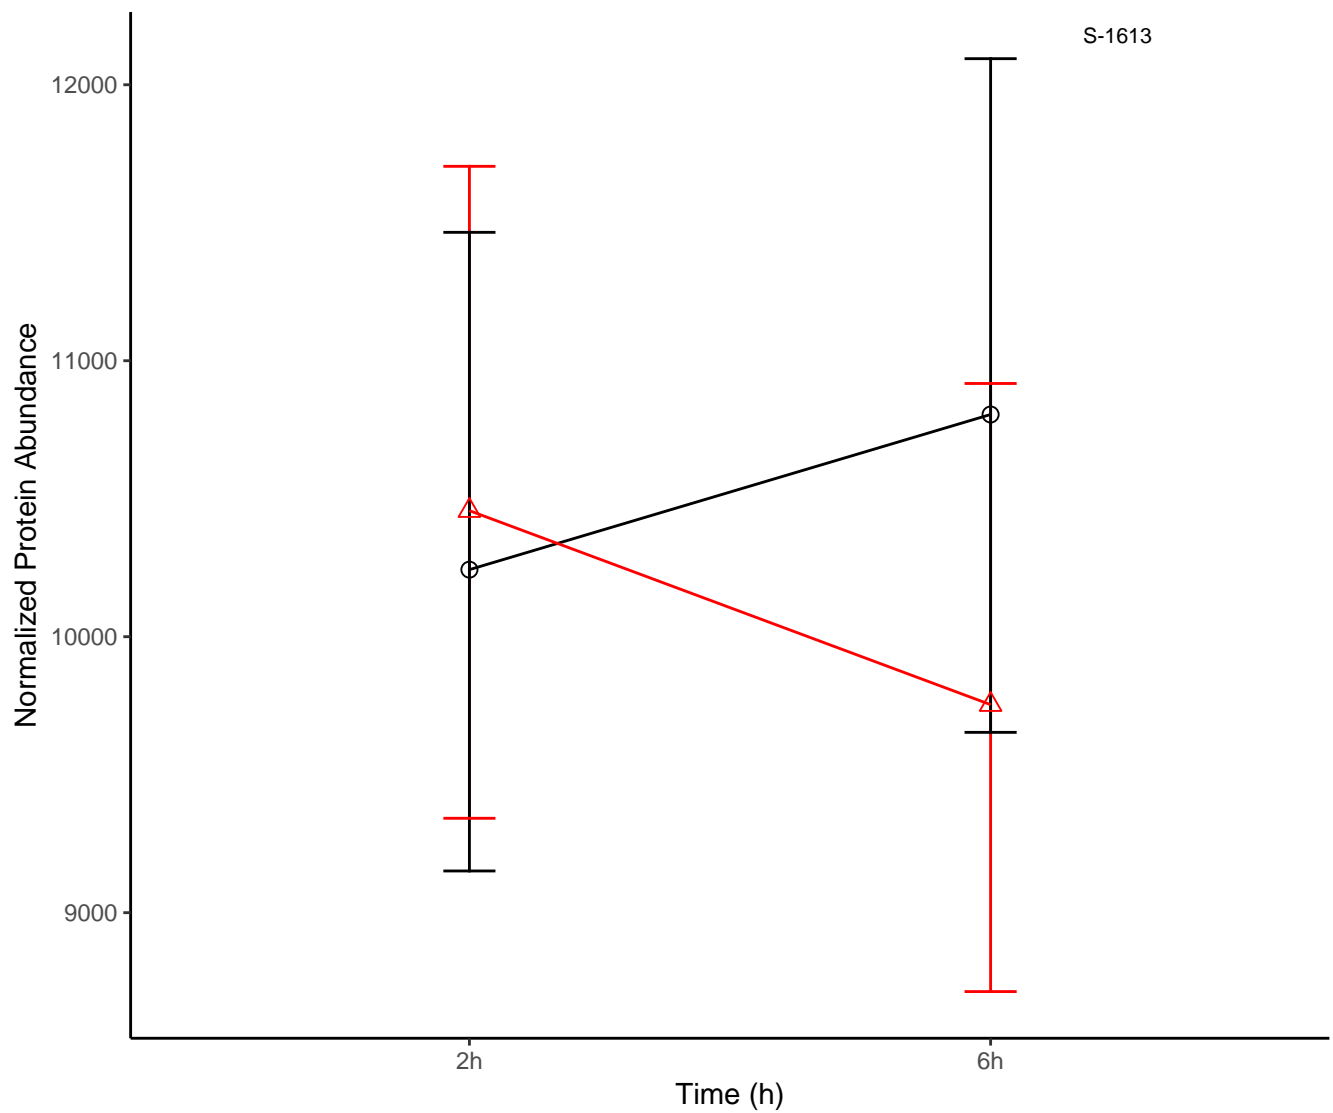

○ TSB-dex

△ TSB

# FABZ\_STAAM

S-1614

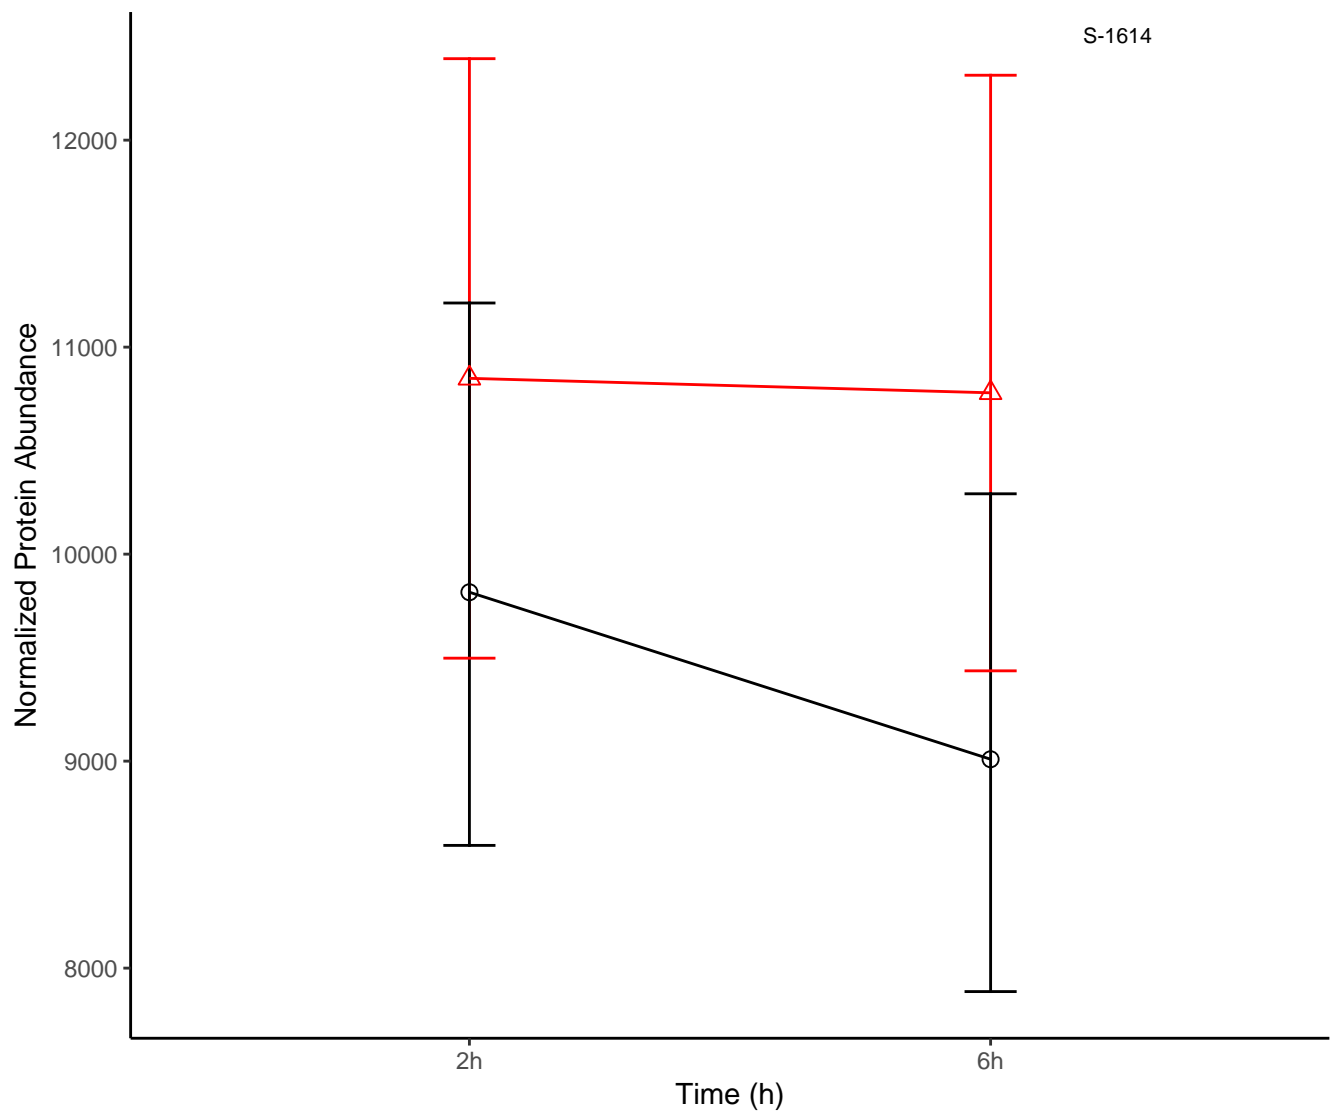

○ TSB-dex

△ TSB

# FEMA\_STAAM

S-1615

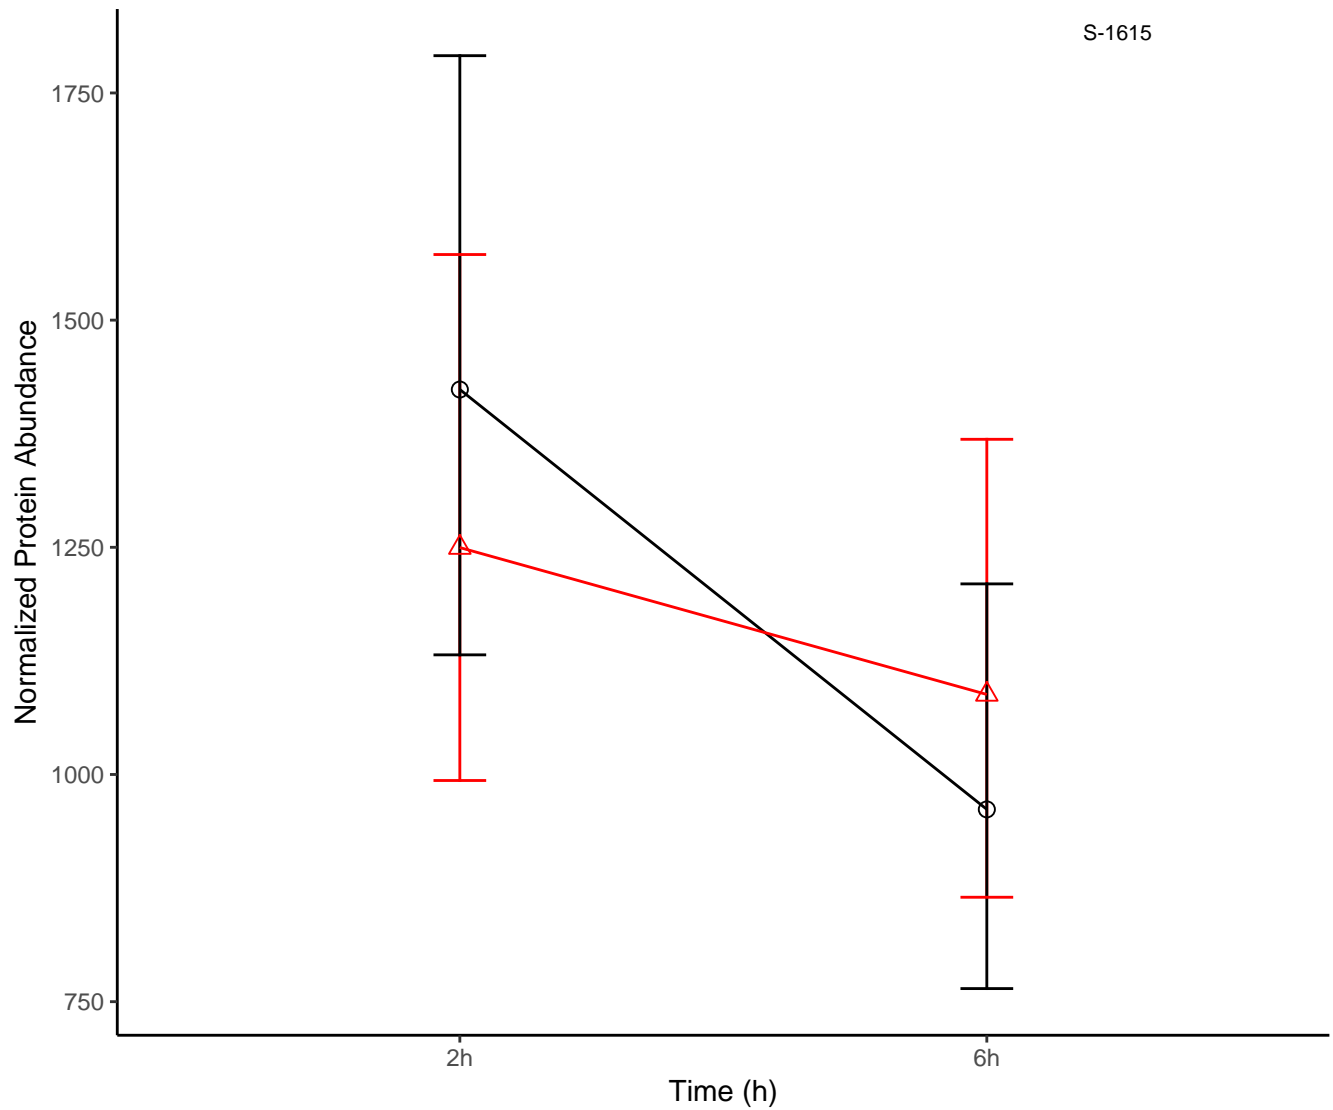

○ TSB-dex

△ TSB

# FEMB\_STAAM

S-1616

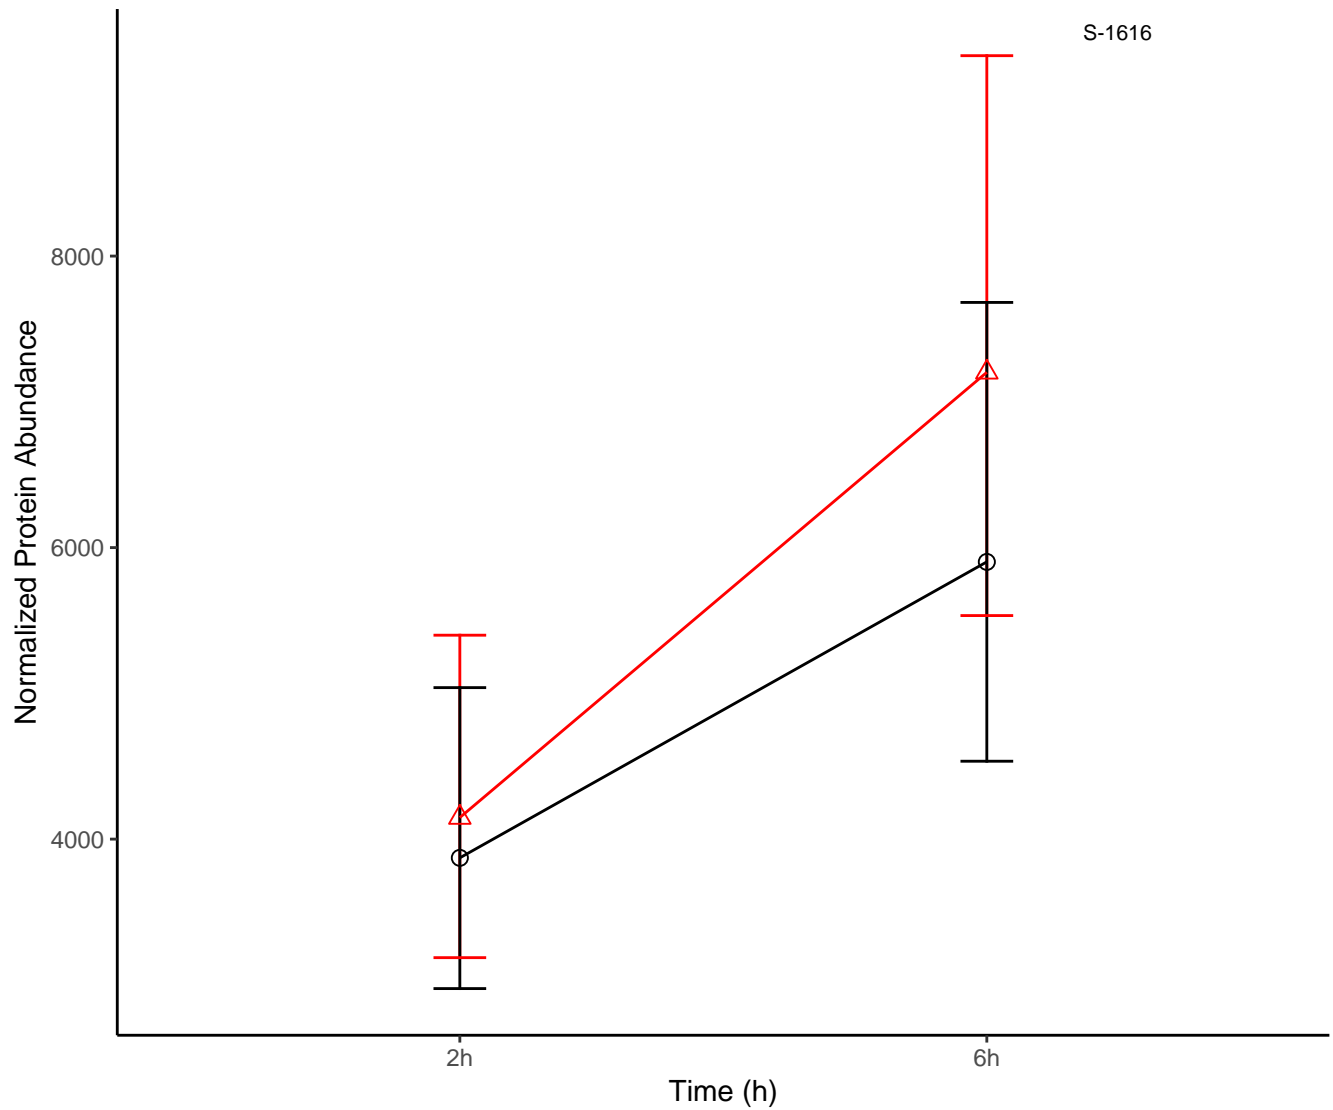

○ TSB-dex

△ TSB



# FEMX\_STAAM

S-1617

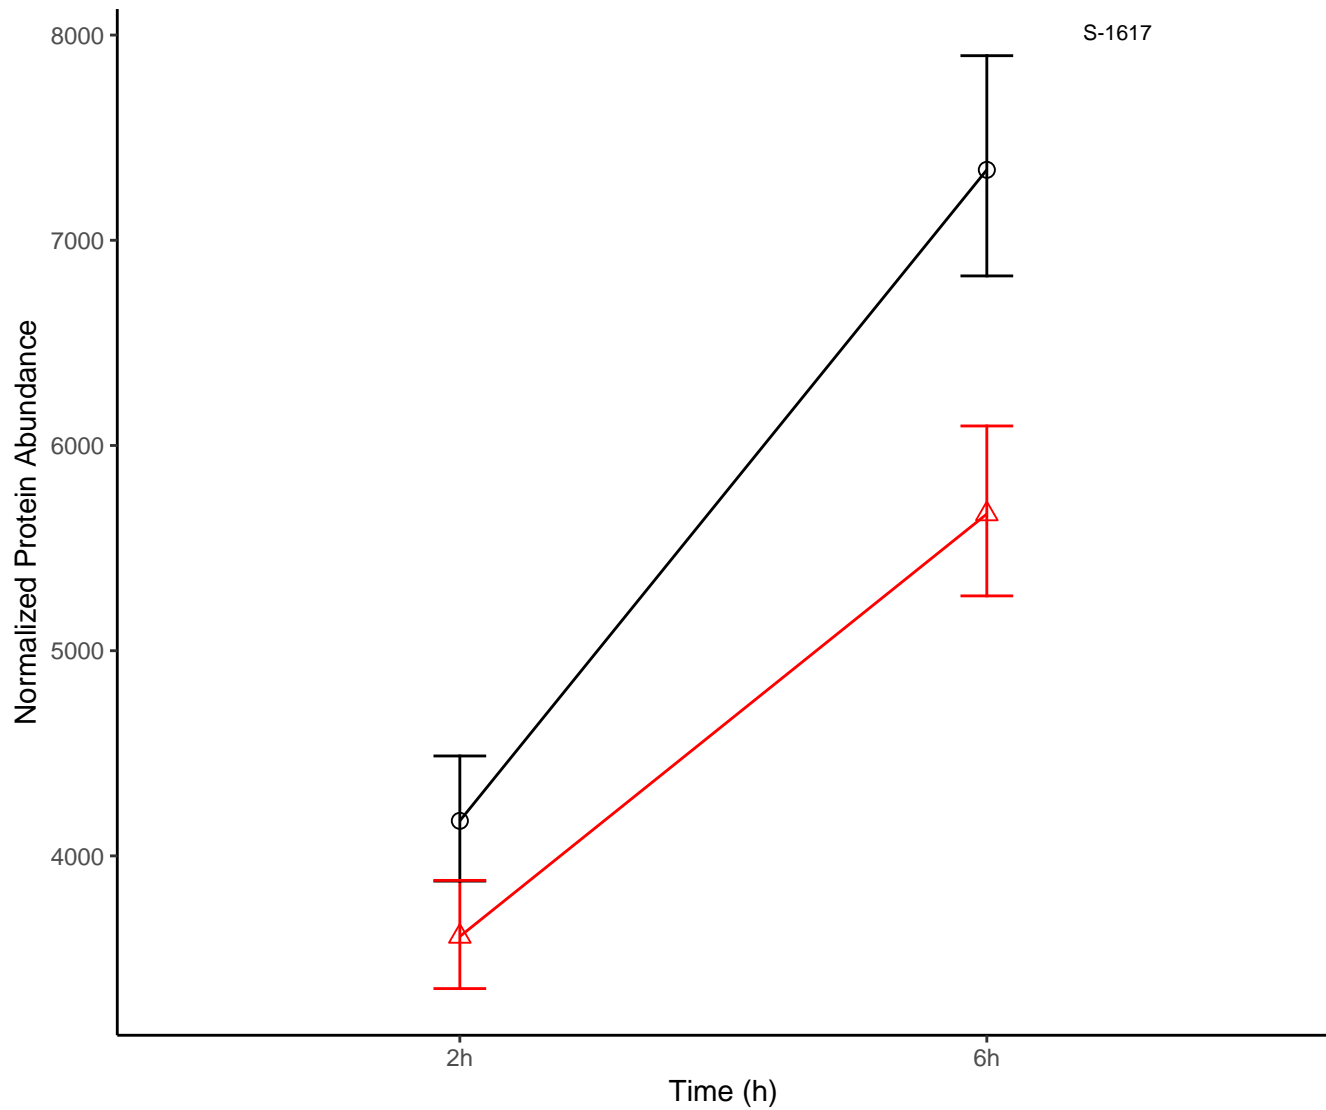

○ TSB-dex

△ TSB

# FENR\_STAAM

S-1618

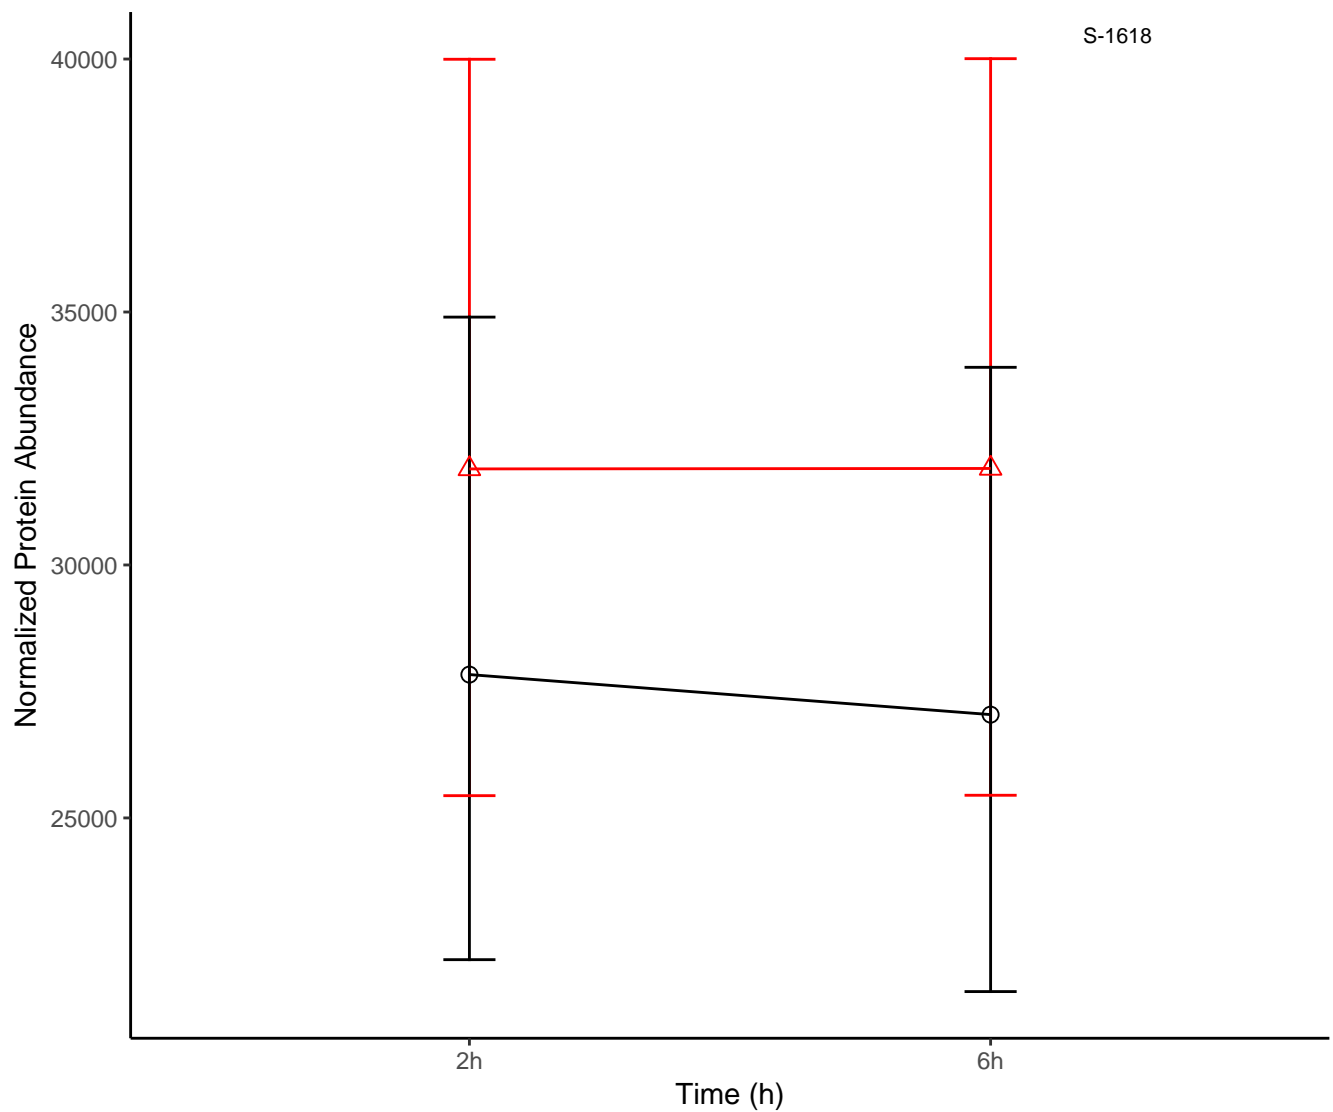

○ TSB-dex

△ TSB

# FLIPR\_STAAM

S-1619

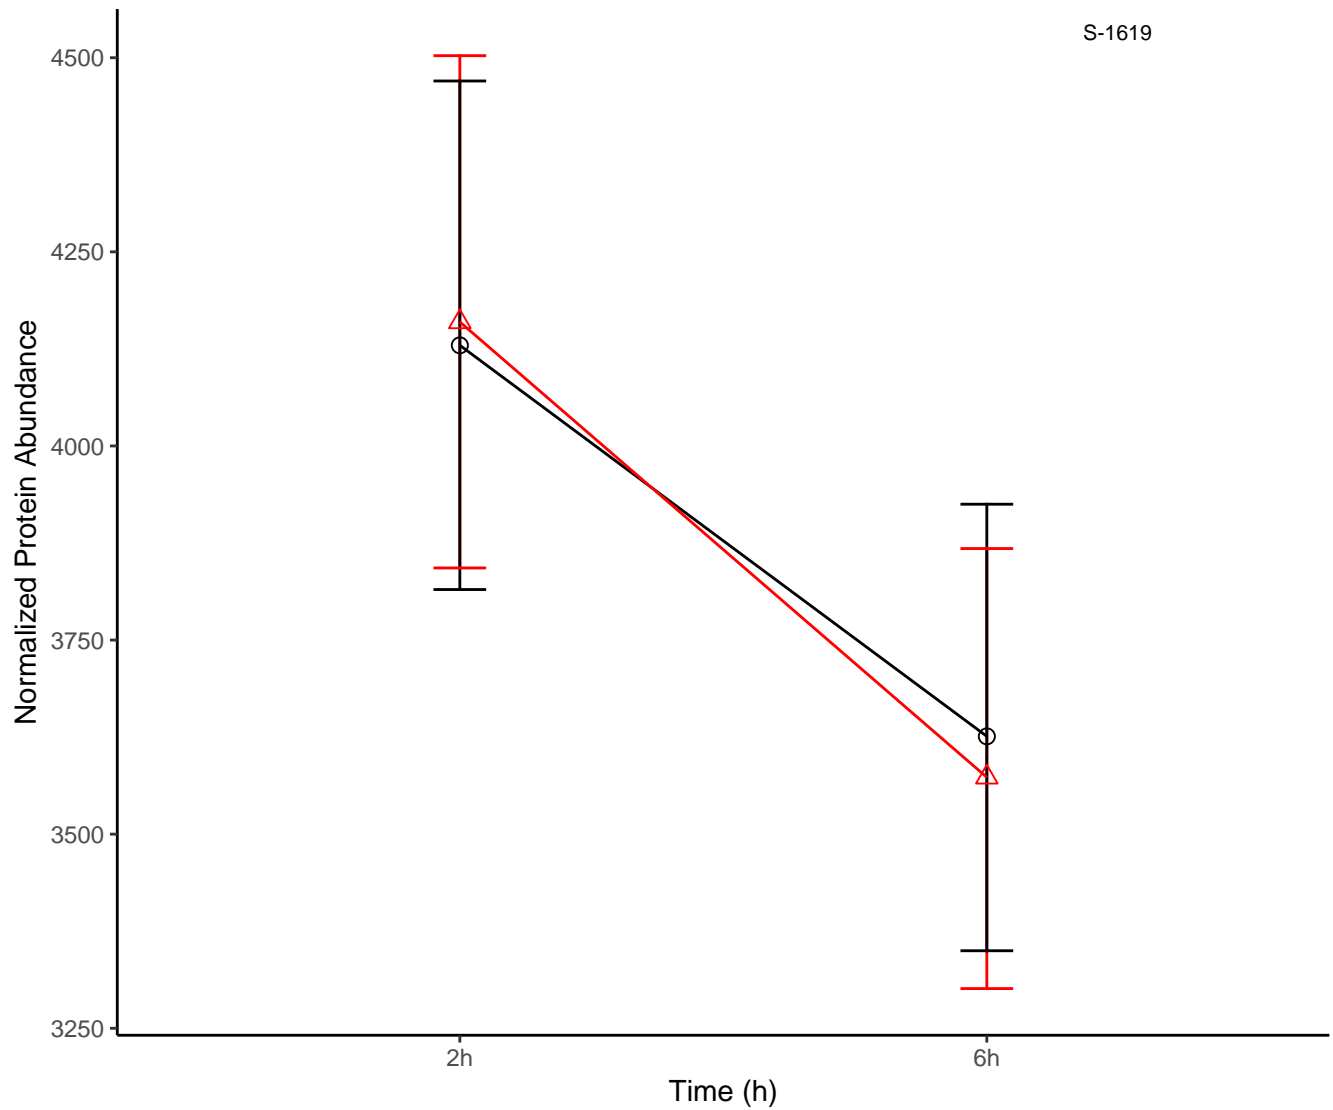

○ TSB-dex

△ TSB

# FMT\_STAAM

S-1620

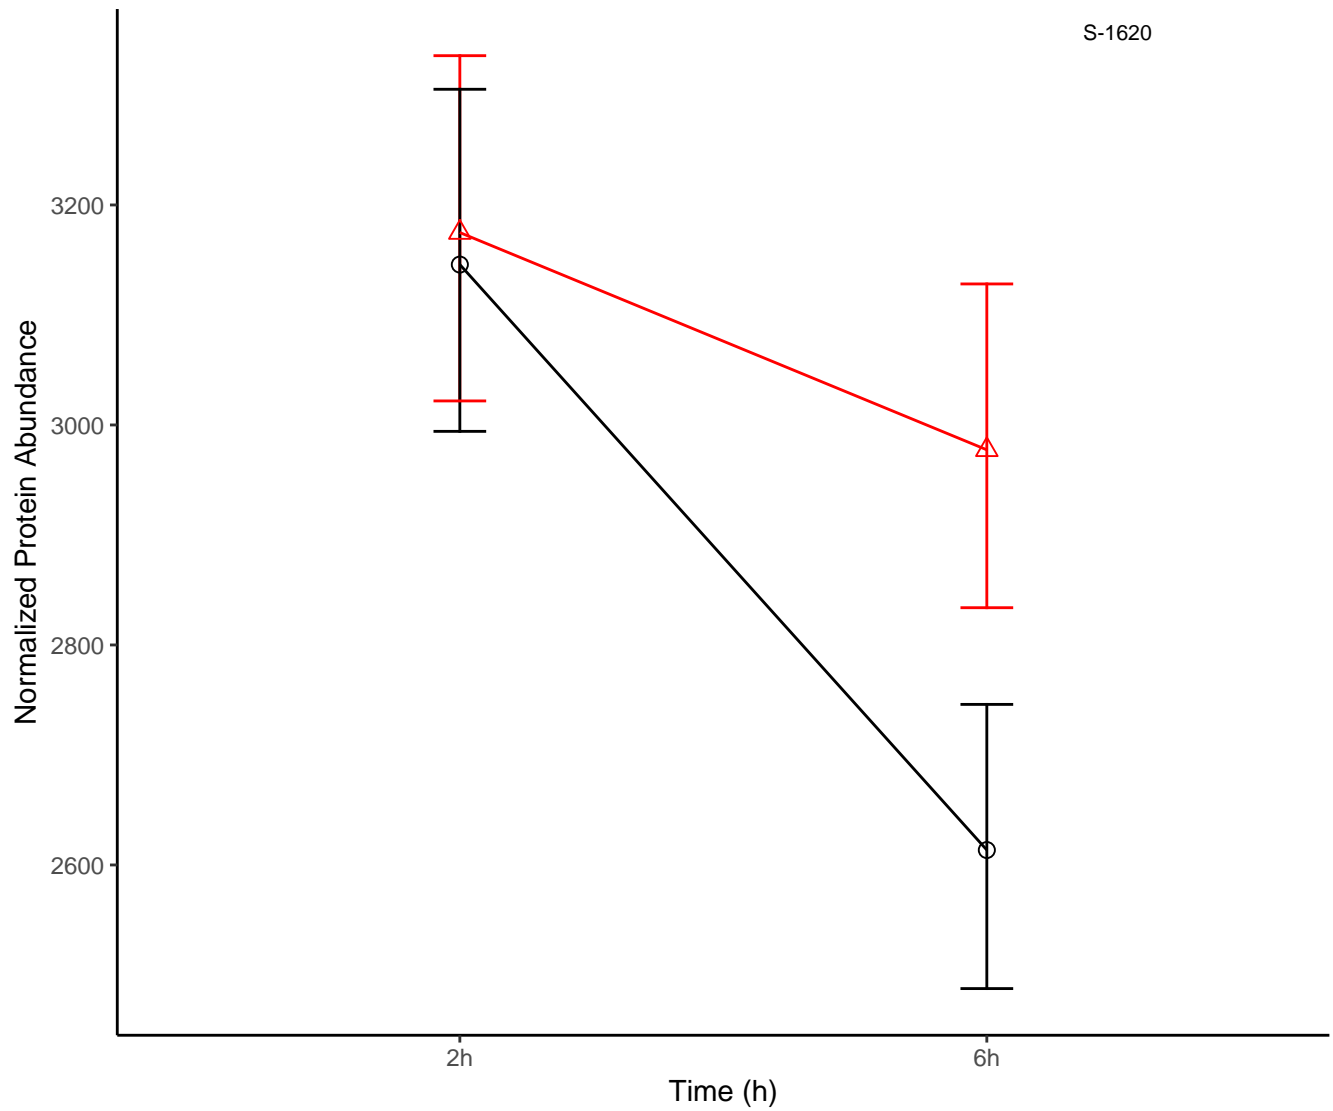

○ TSB-dex

△ TSB

# FMTA\_STAAM

S-1621

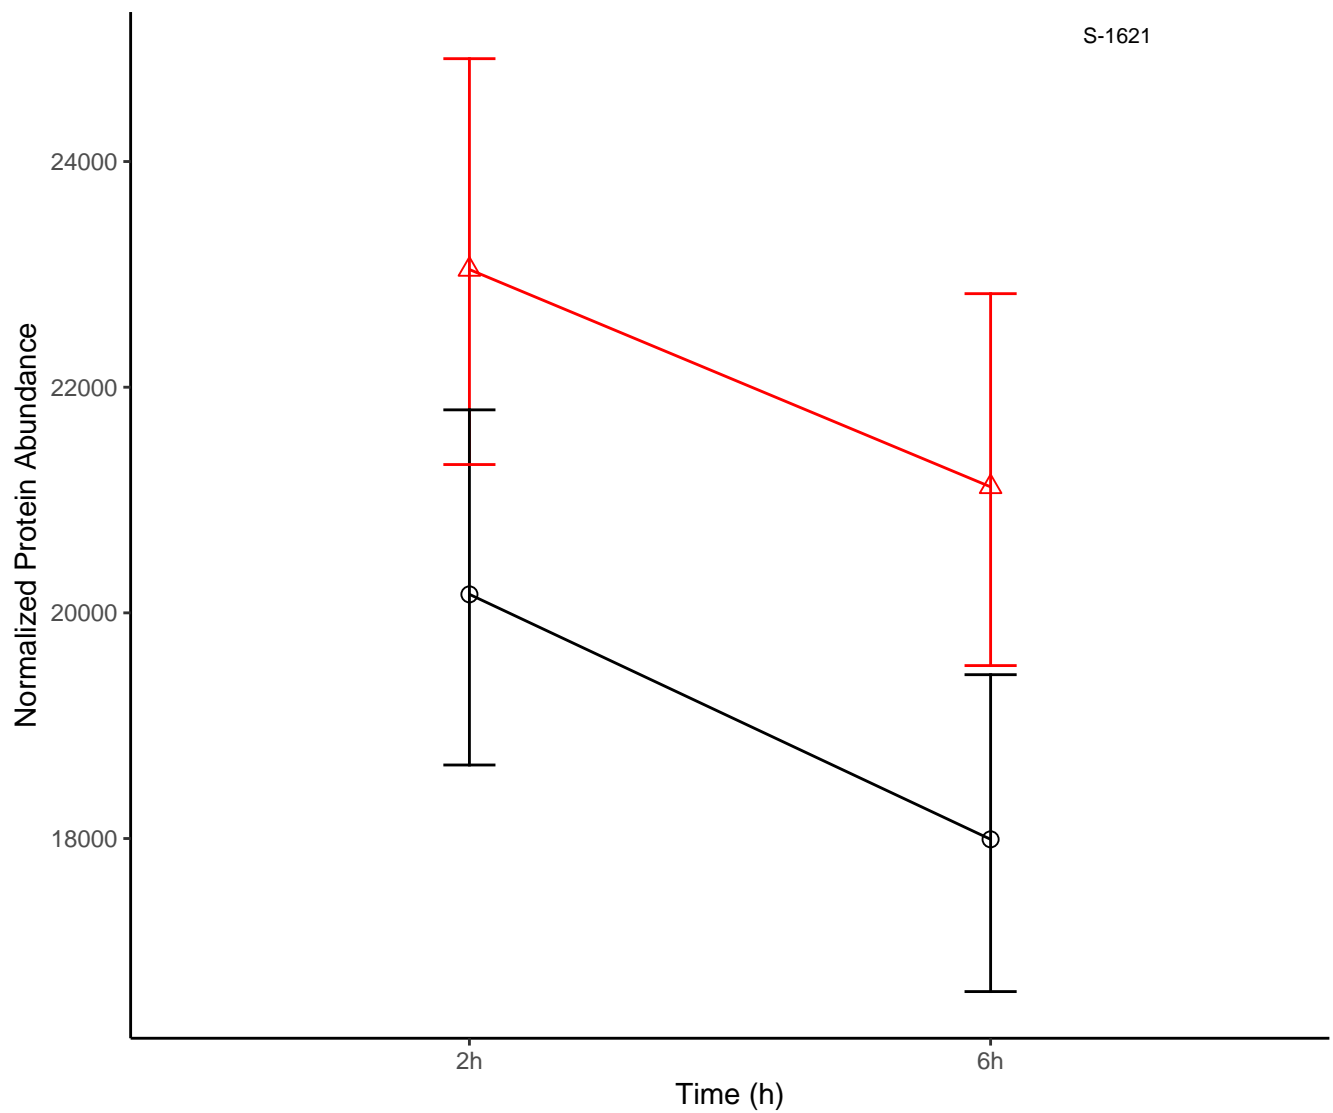

○ TSB-dex

△ TSB

# FOLB\_STAAM

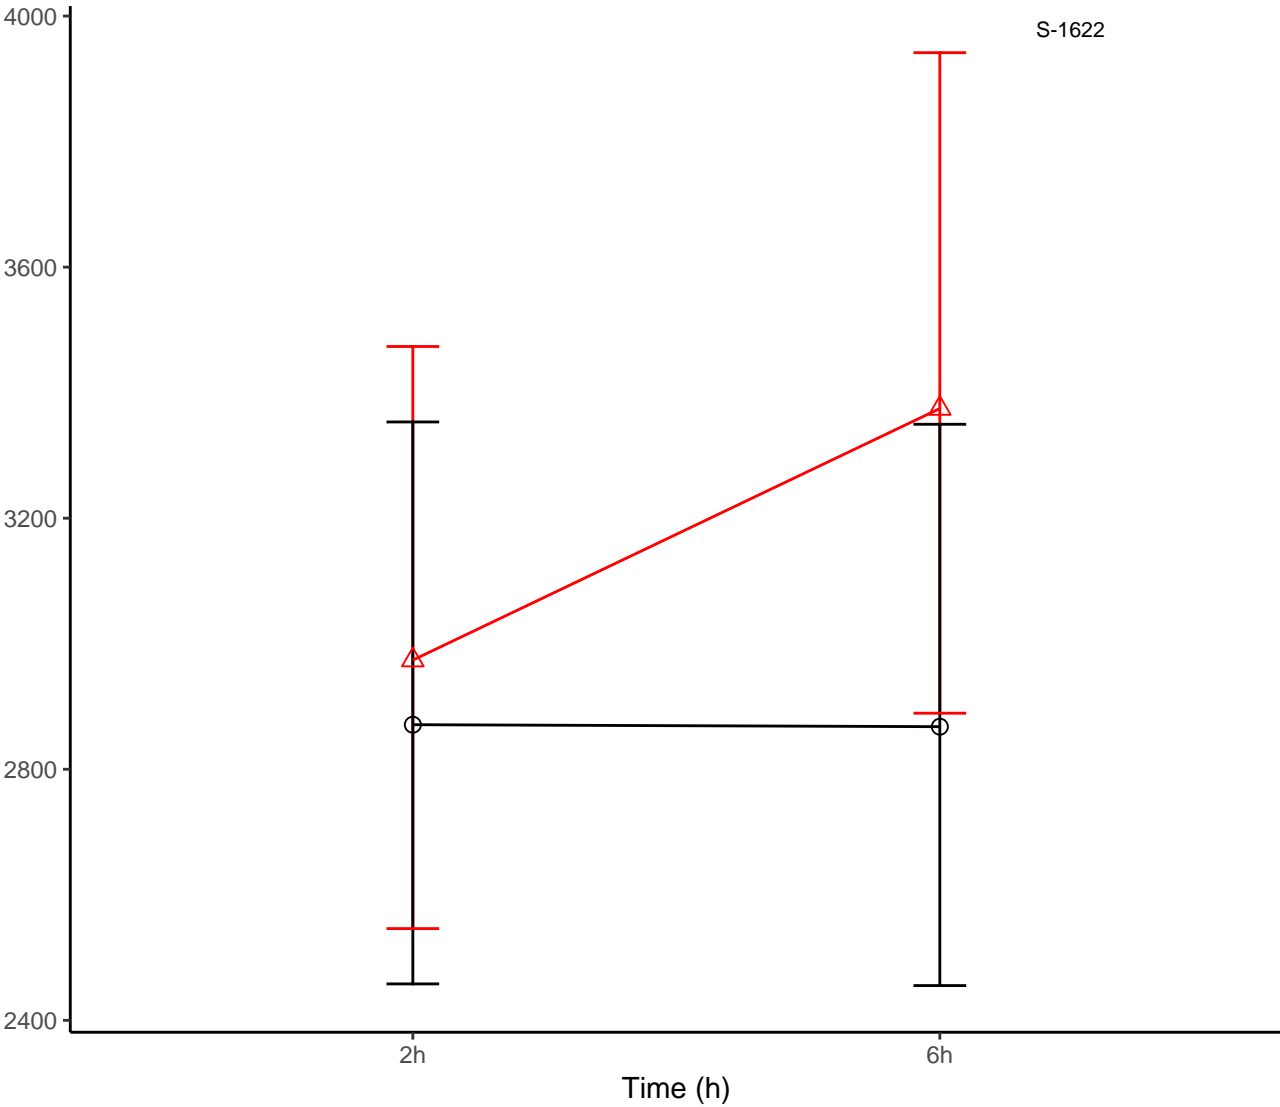

○ TSB-dex

△ TSB

# FOLD\_STAAM

S-1623

Normalized Protein Abundance

17500

15000

12500

10000

2h

6h

Time (h)

○ TSB-dex

△ TSB

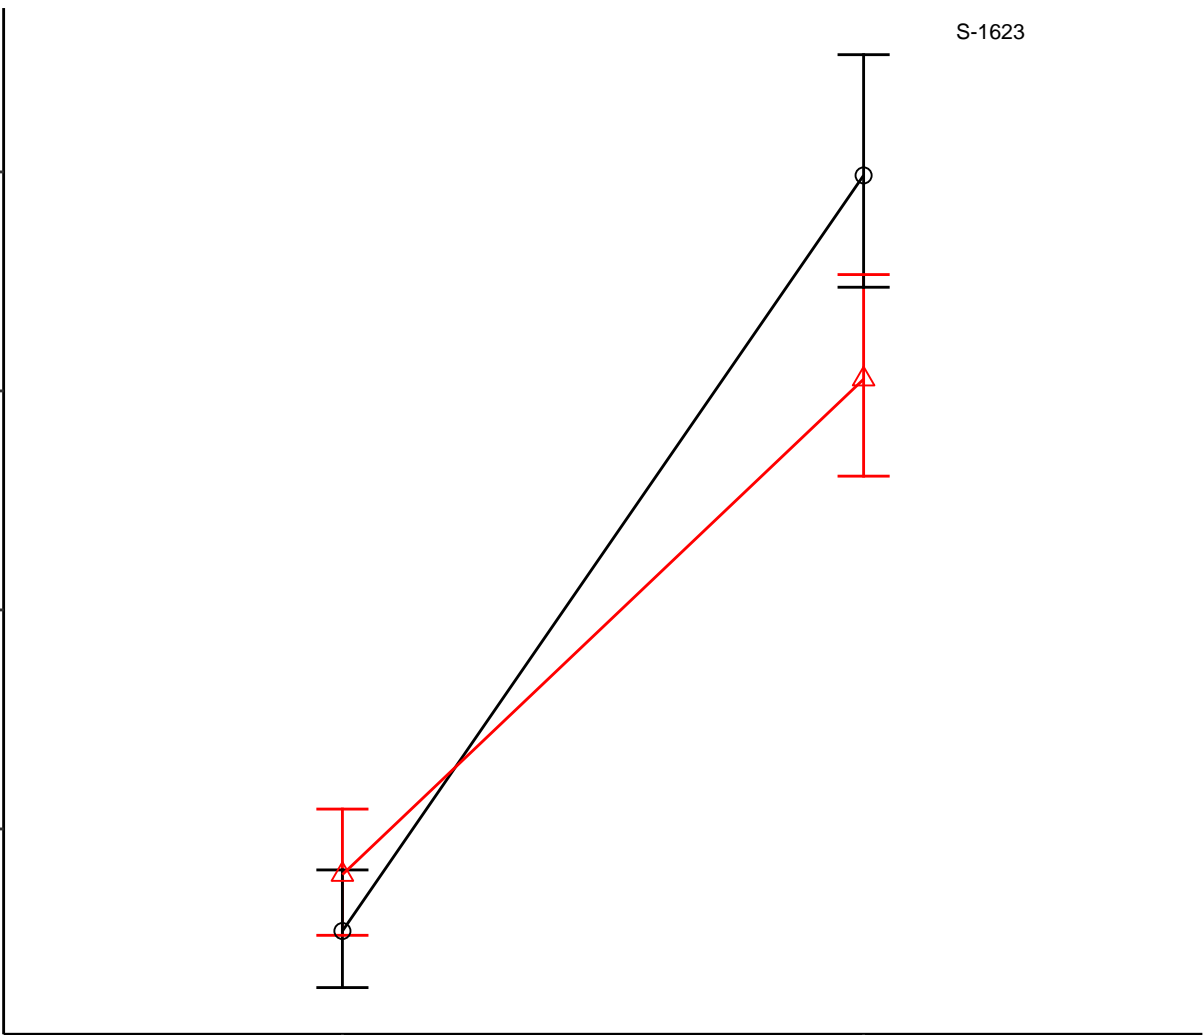

# FTHS\_STAAM

S-1624

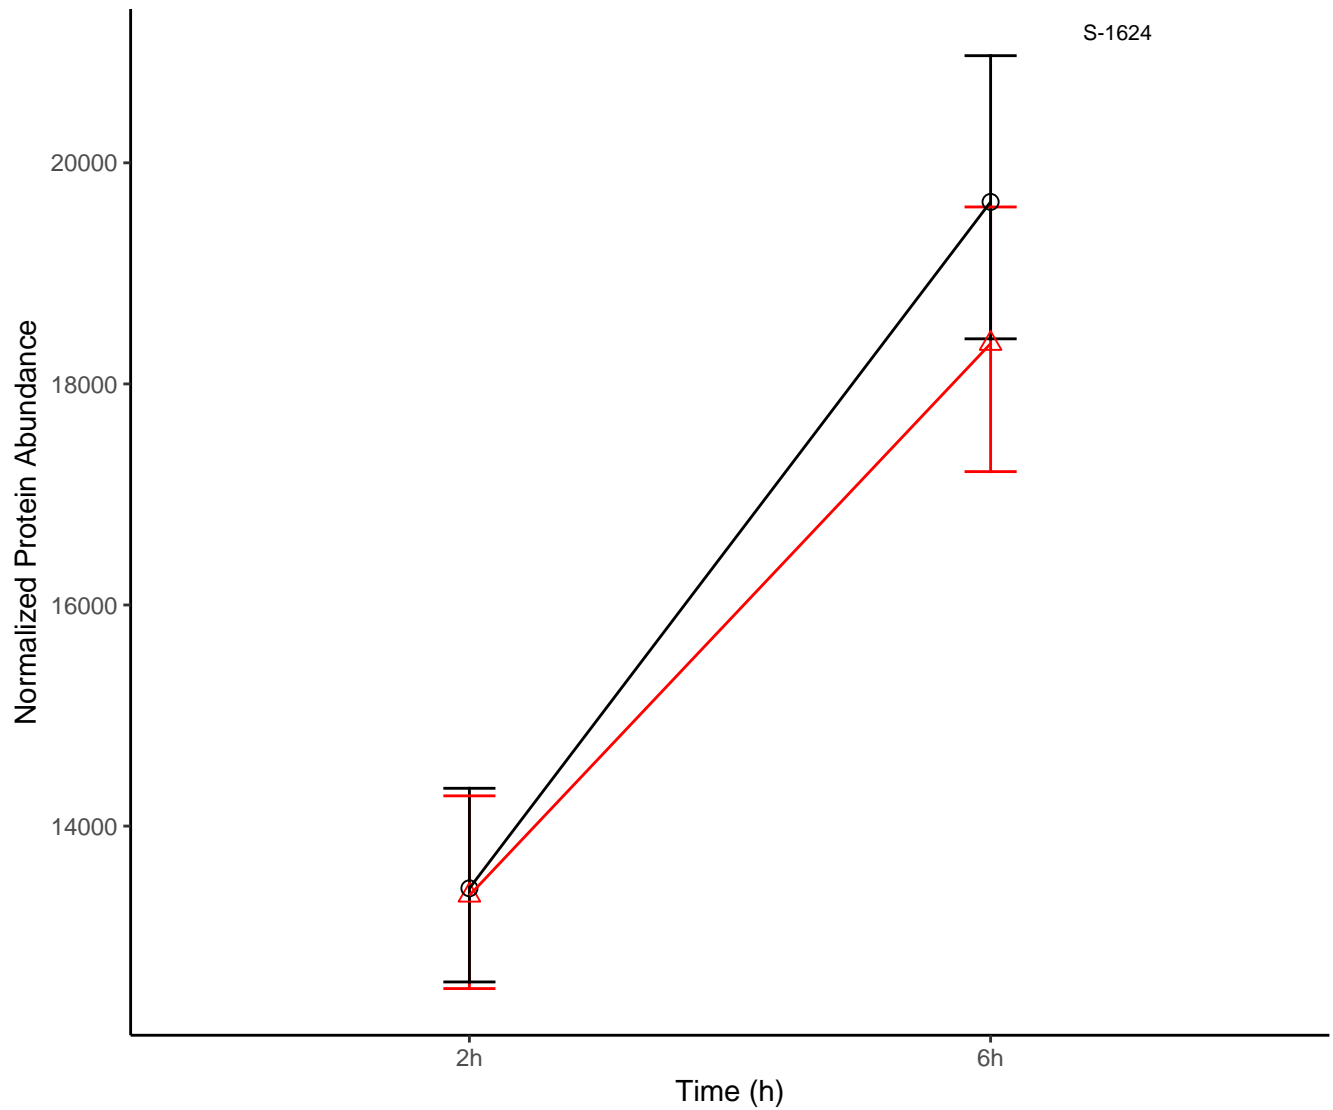

○ TSB-dex

△ TSB



# FTN\_STAAM

S-1625

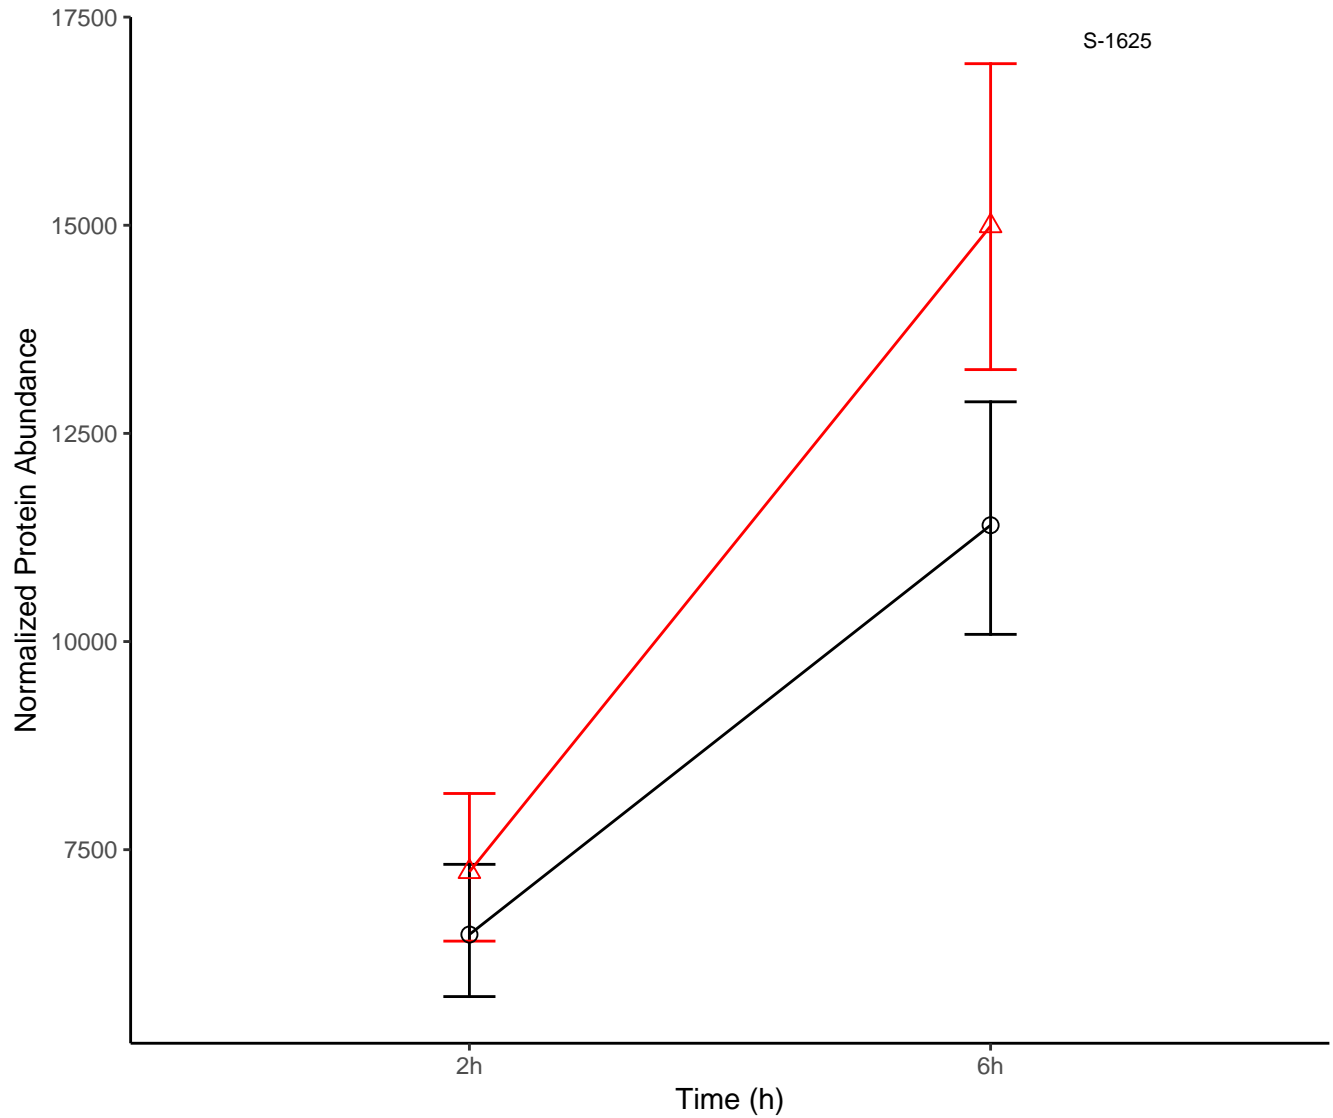

○ TSB-dex

△ TSB

# FTSA\_STAAM

S-1626

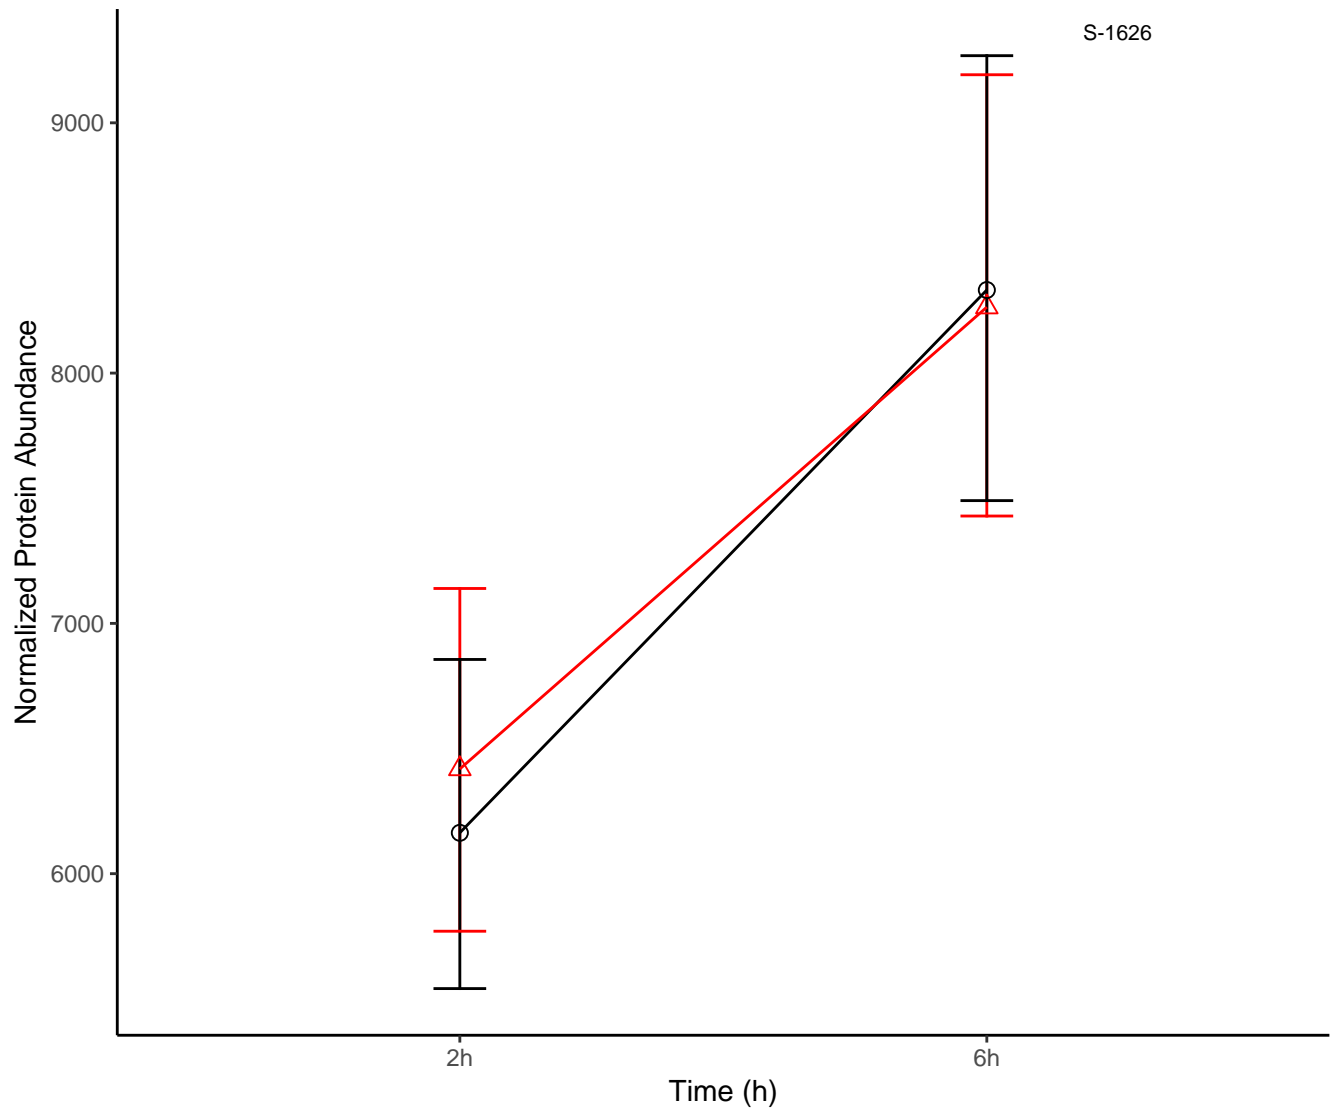

○ TSB-dex

△ TSB

# FTSZ\_STAAM

S-1627

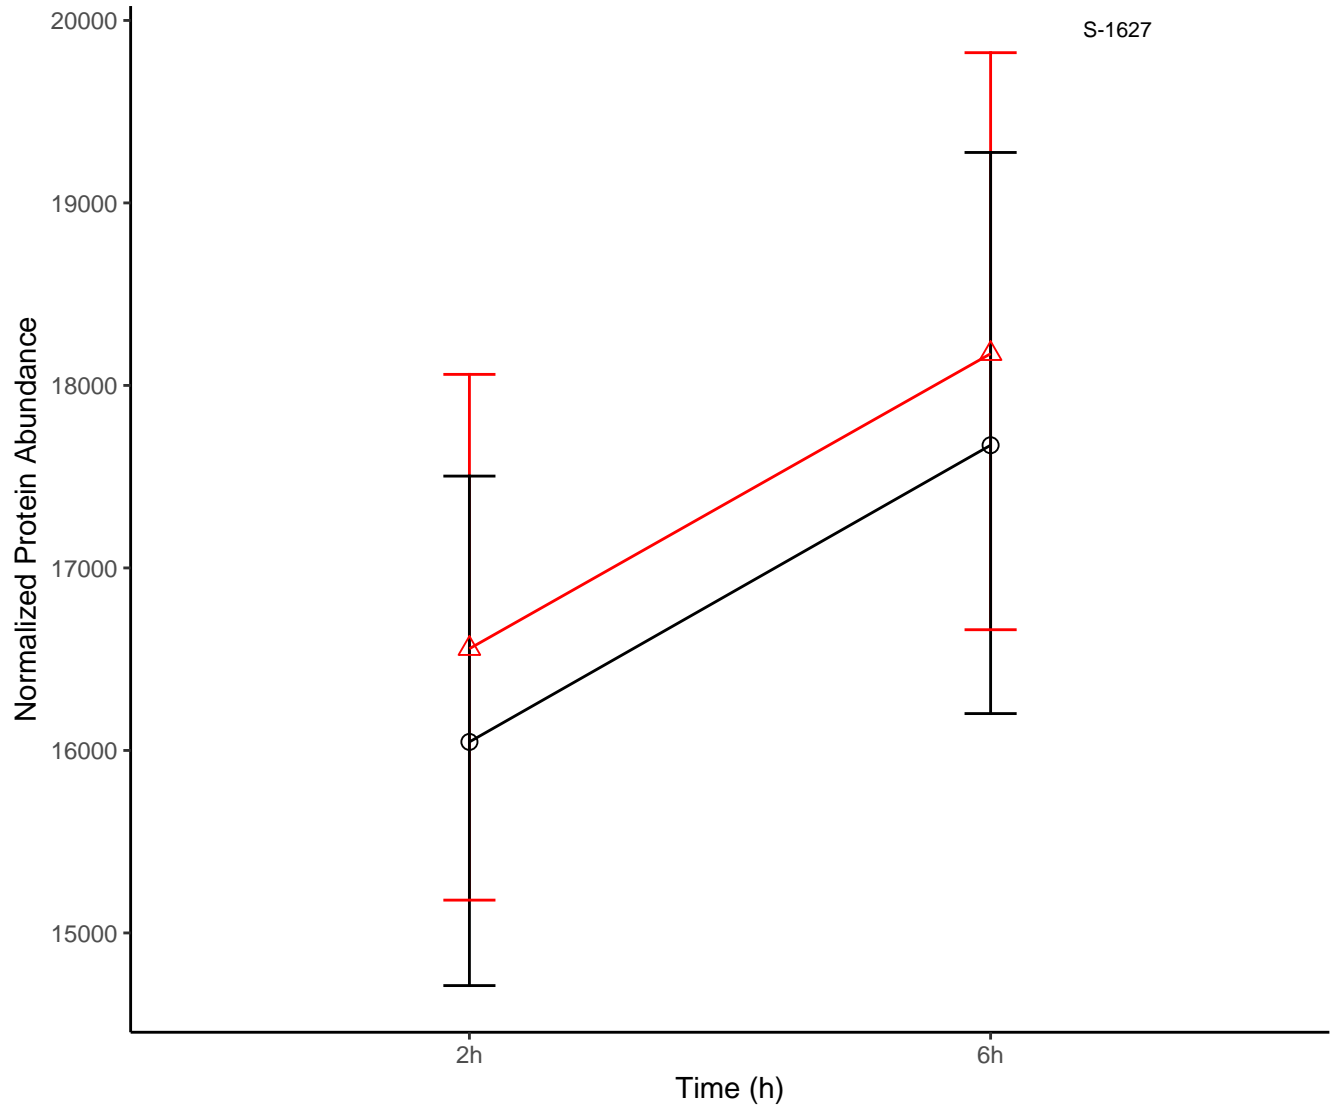

○ TSB-dex

△ TSB

# FUMC\_STAAM

S-1628

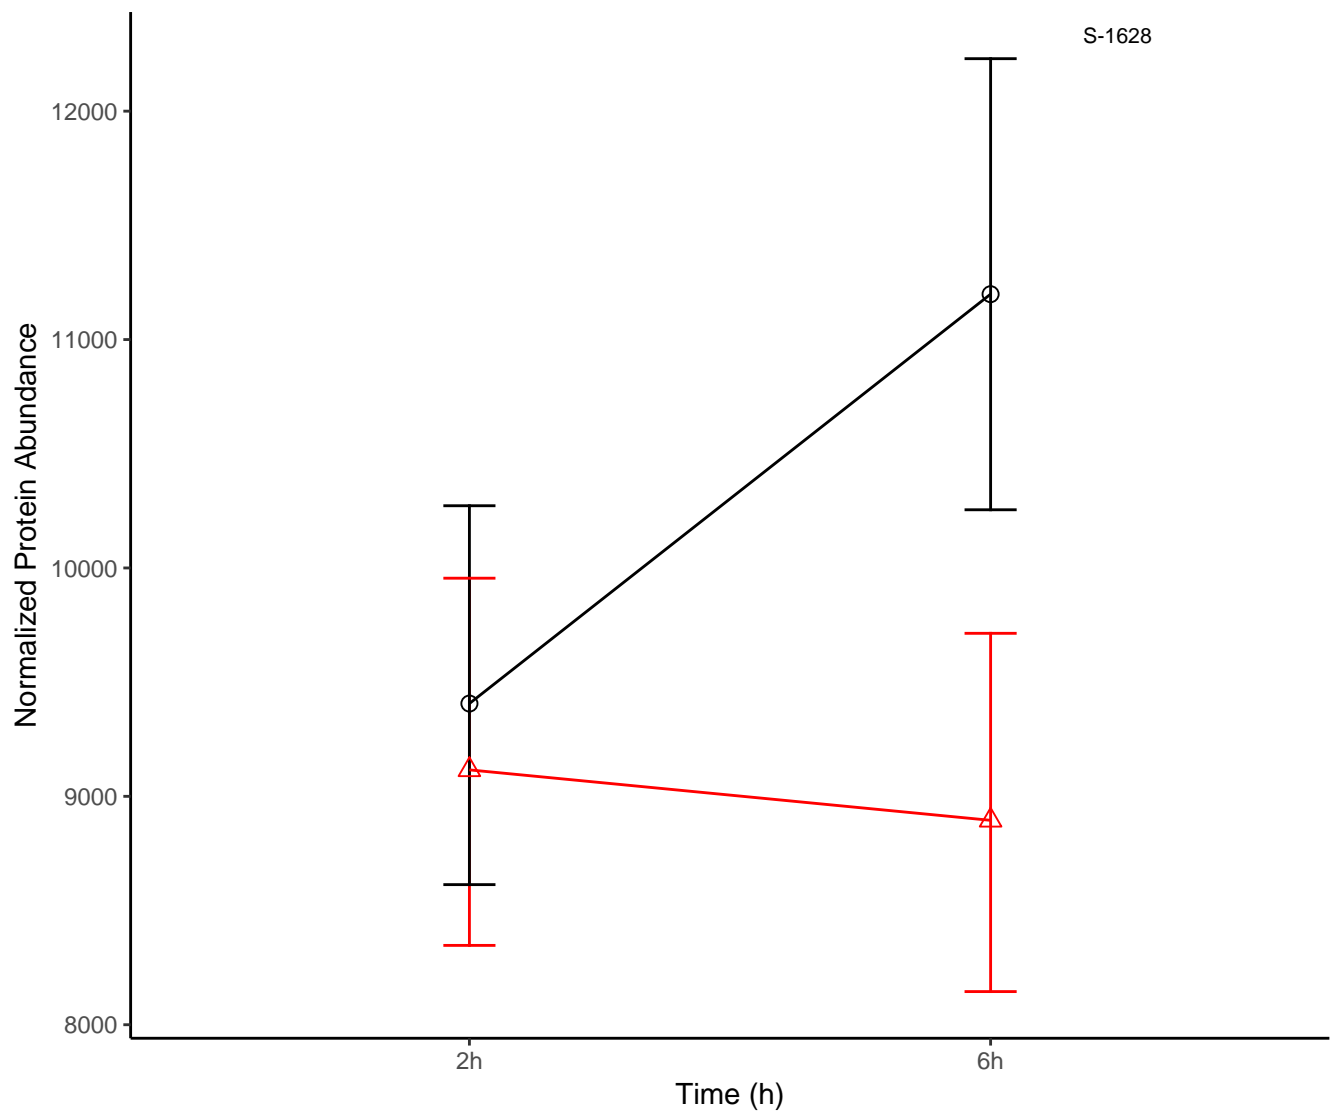

○ TSB-dex

△ TSB

# G3P1\_STAAM

S-1629

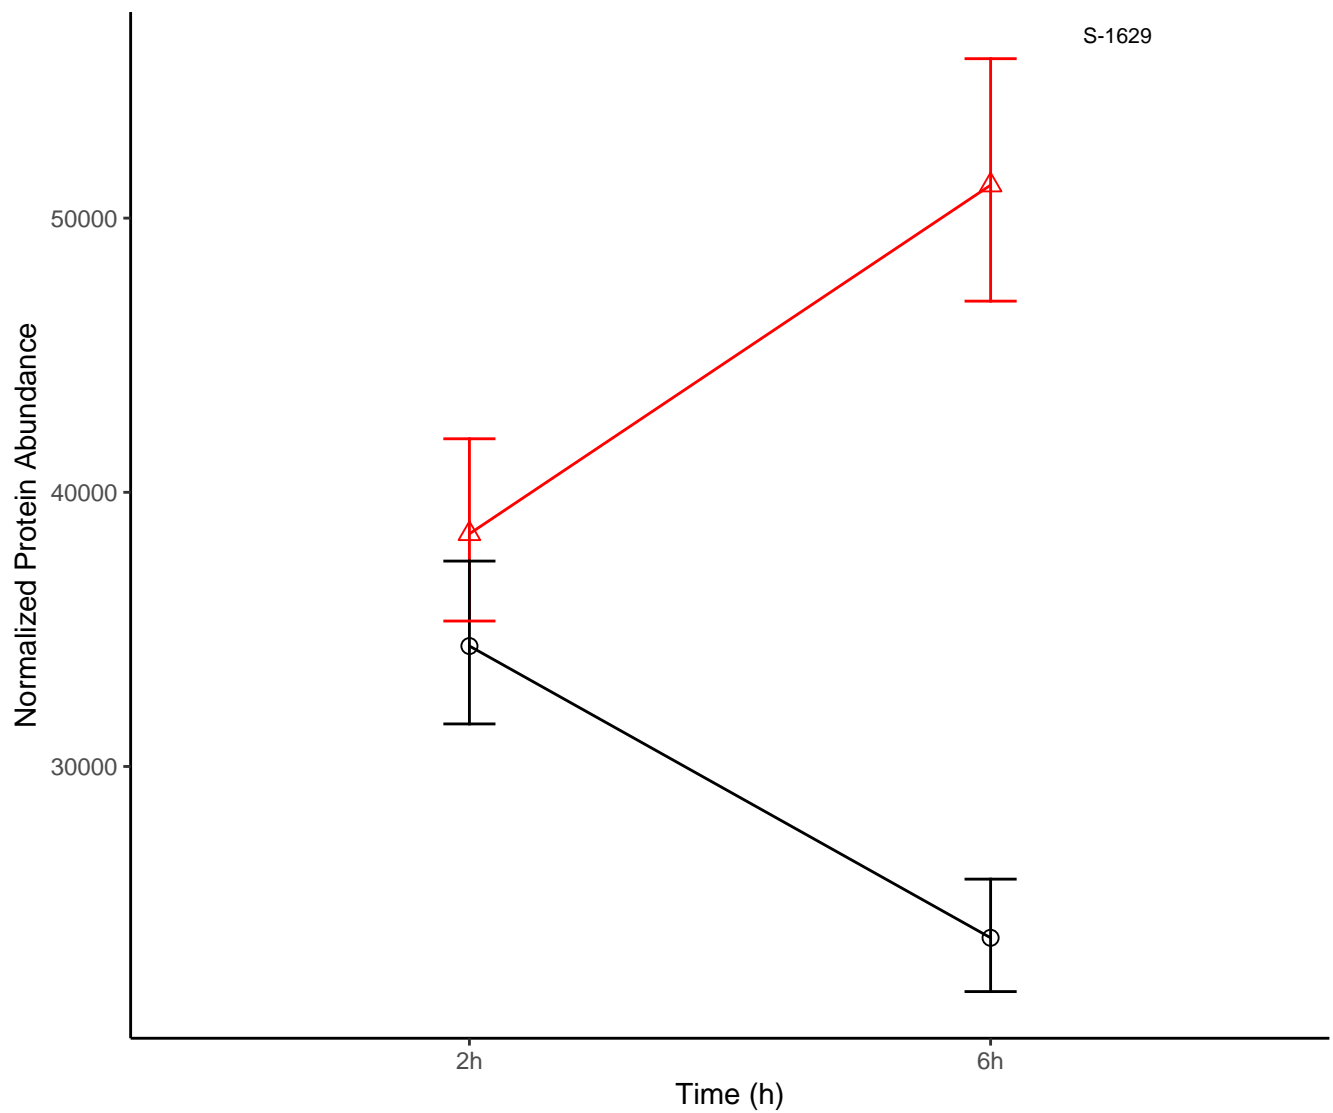

○ TSB-dex

△ TSB

# G3P2\_STAAM

S-1630

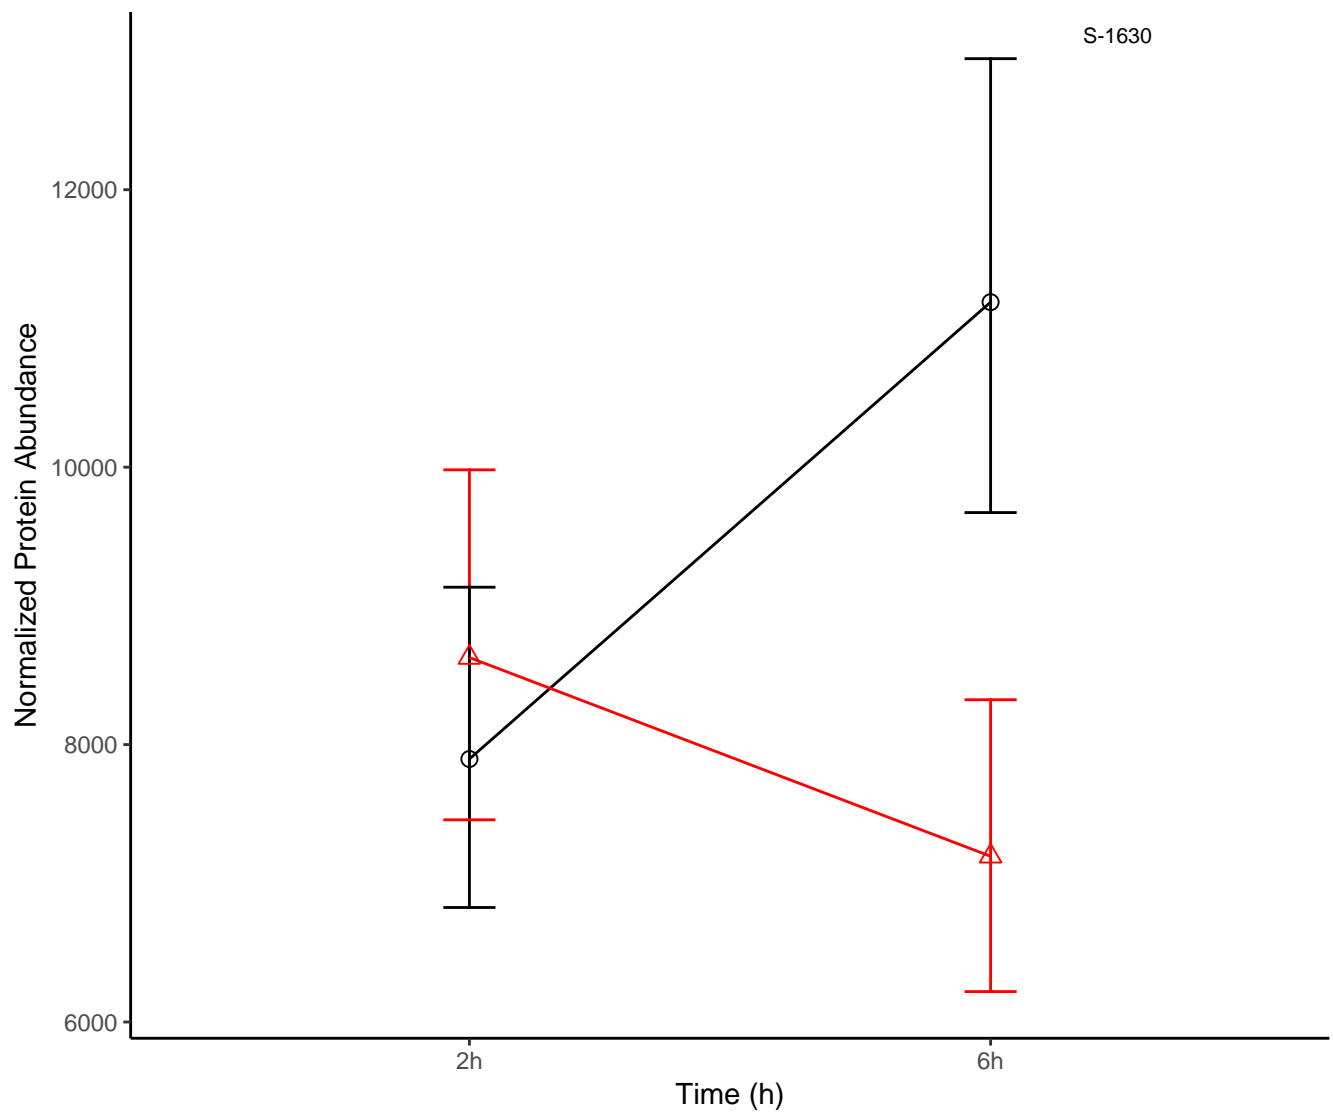

○ TSB-dex

△ TSB

# G6PI\_STAAM

S-1631

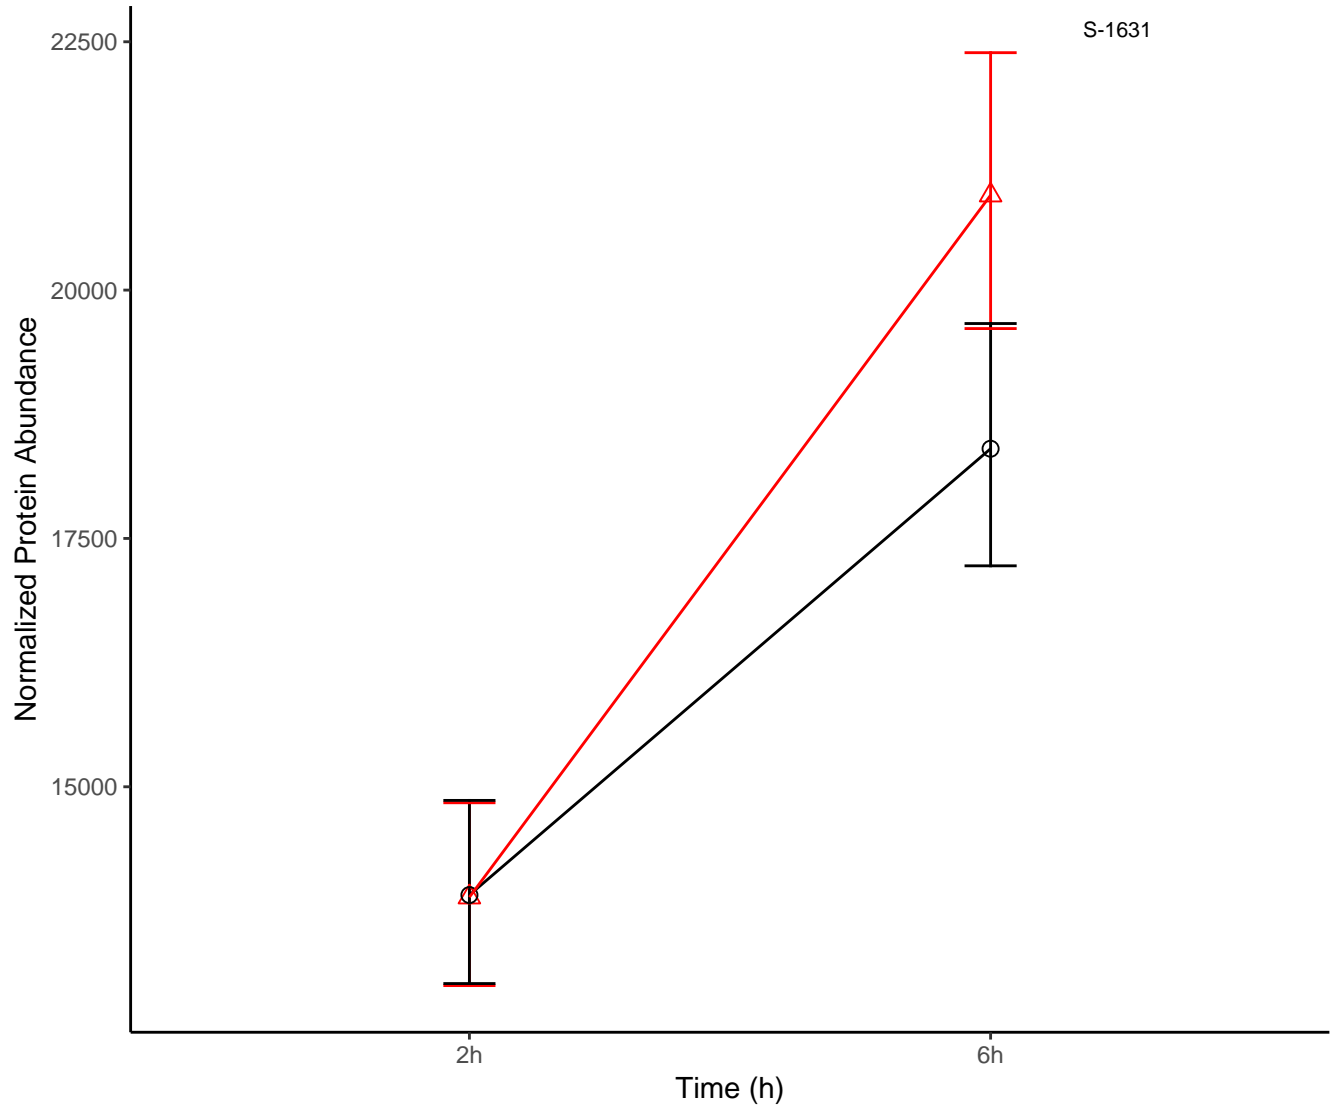

○ TSB-dex

△ TSB

# GATA\_STAAM

S-1632

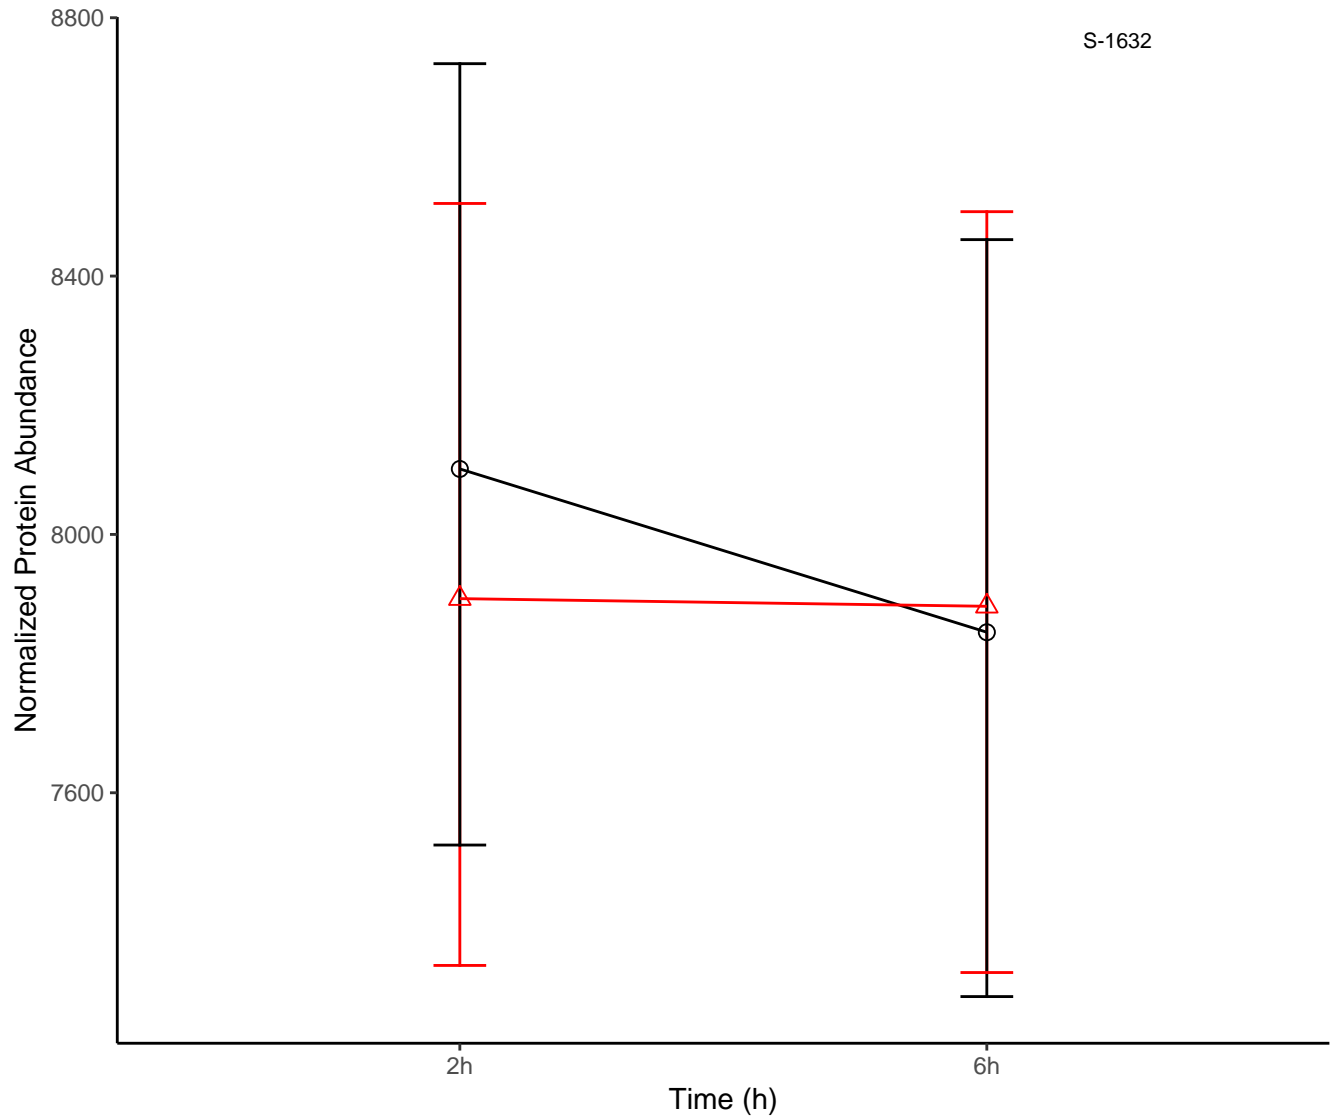

○ TSB-dex

△ TSB



# GATB\_STAAM

S-1633

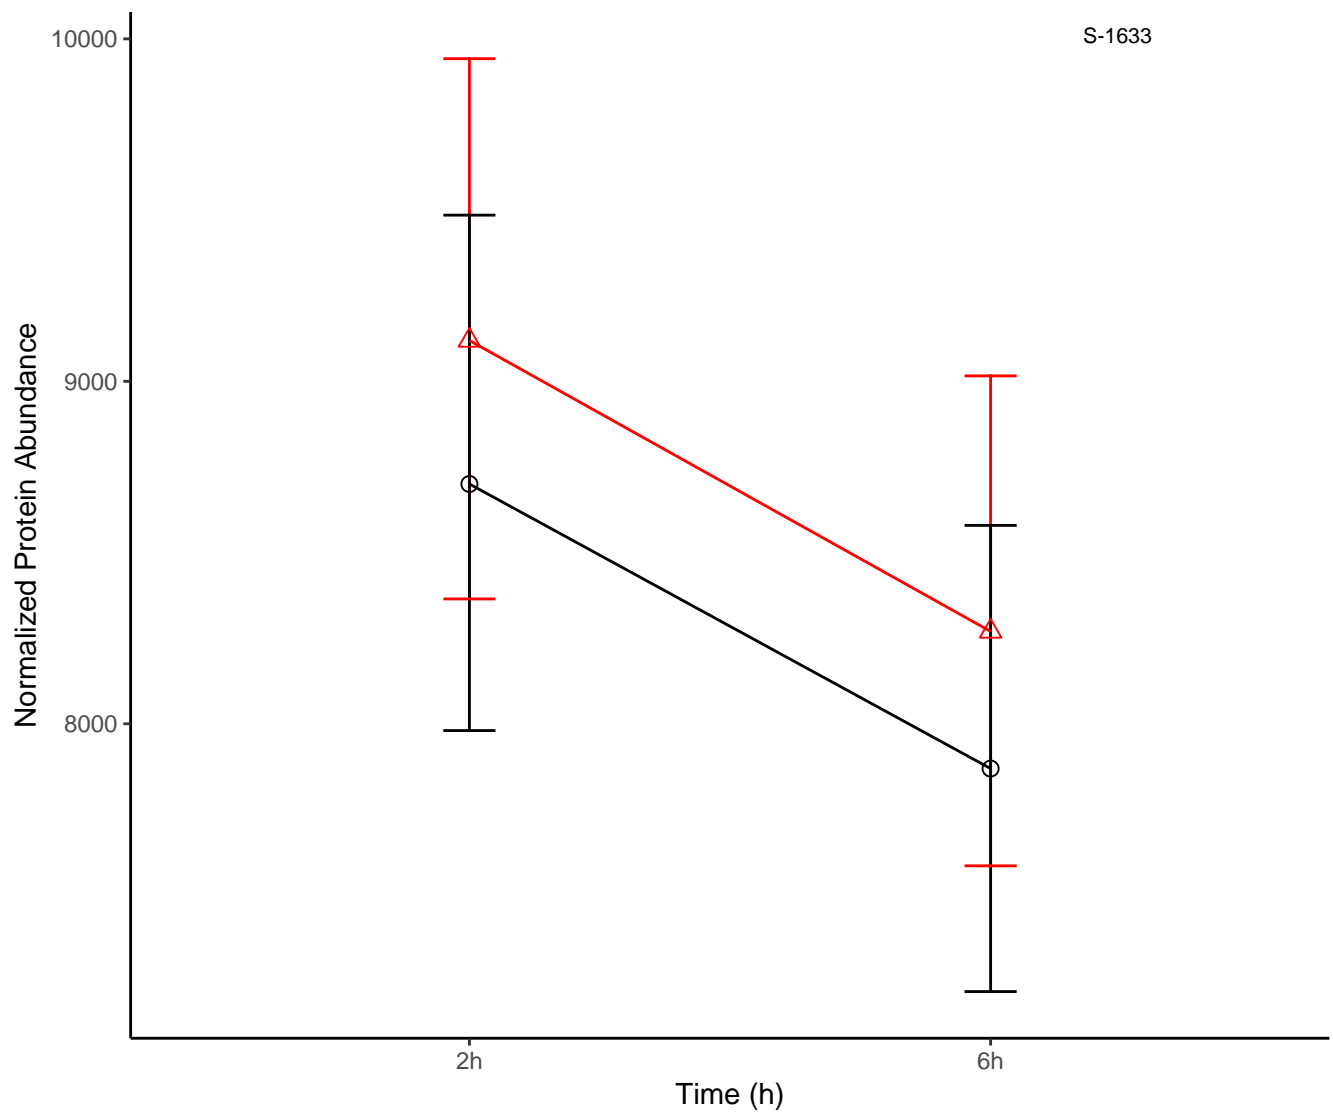

○ TSB-dex

△ TSB

# GATC\_STAAM

S-1634

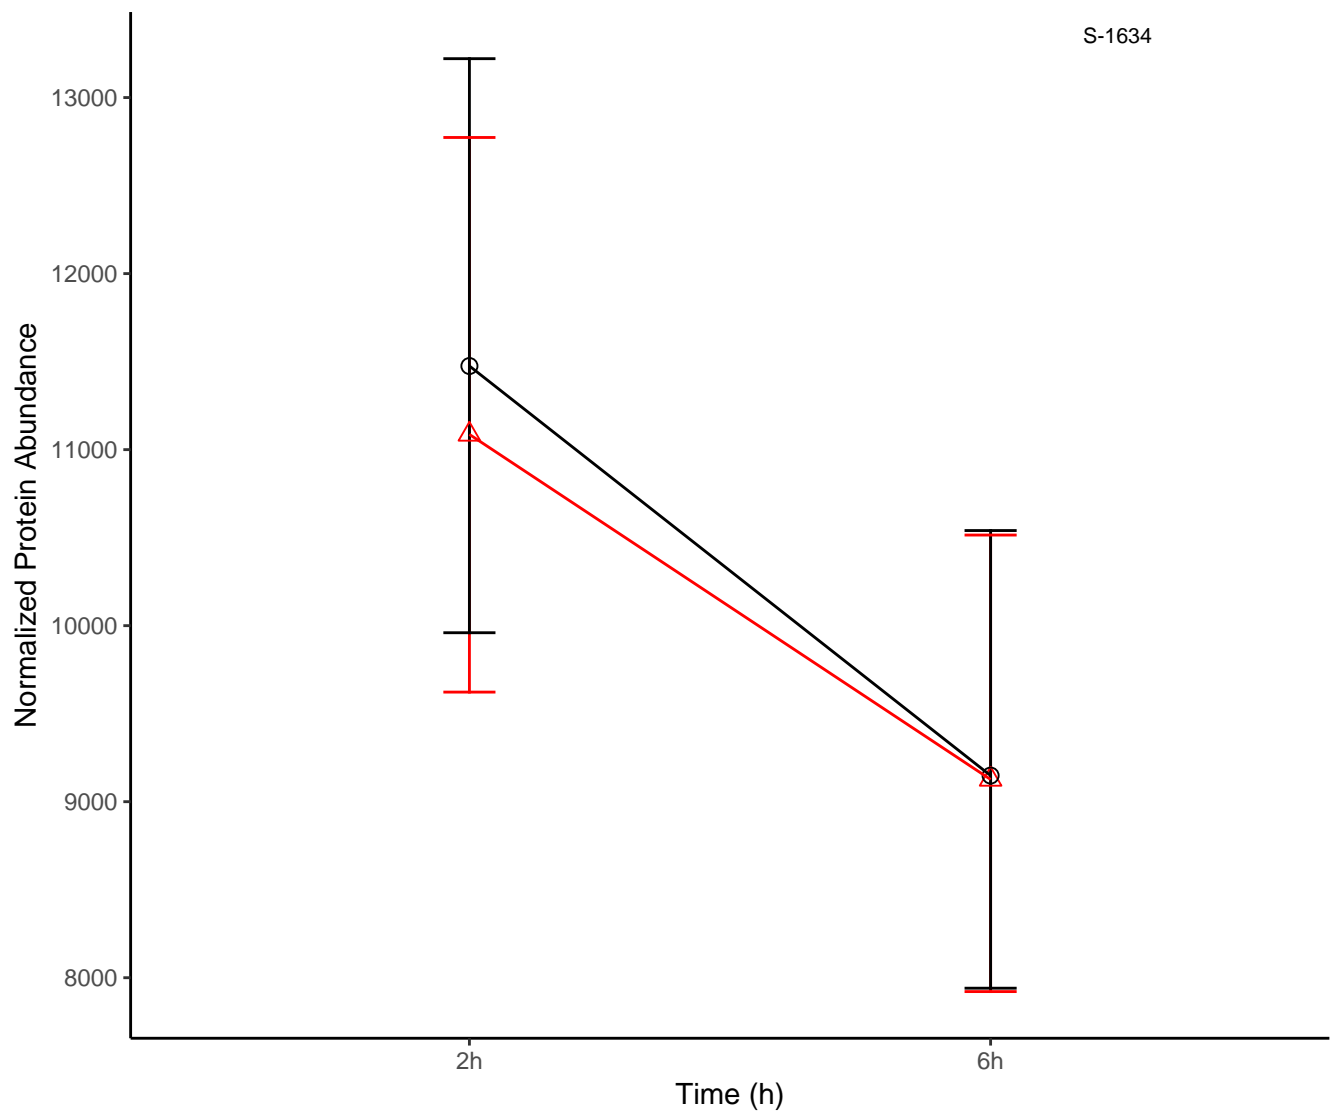

○ TSB-dex

△ TSB

# GCH4\_STAAM

S-1635

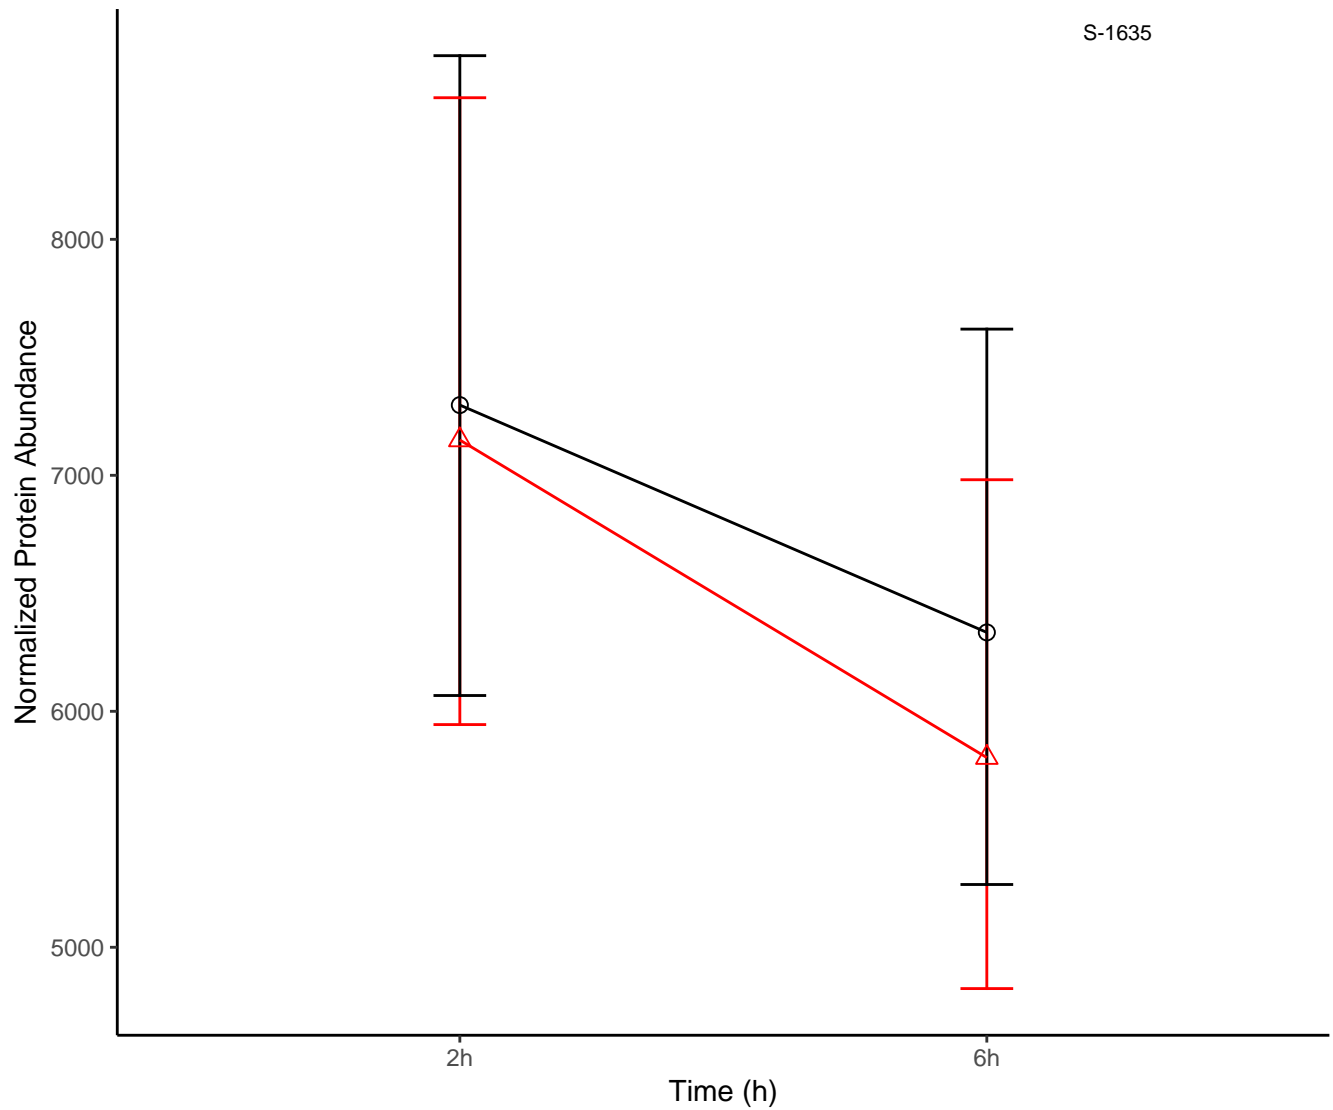

○ TSB-dex

△ TSB

# GCSH\_STAAM

S-1636

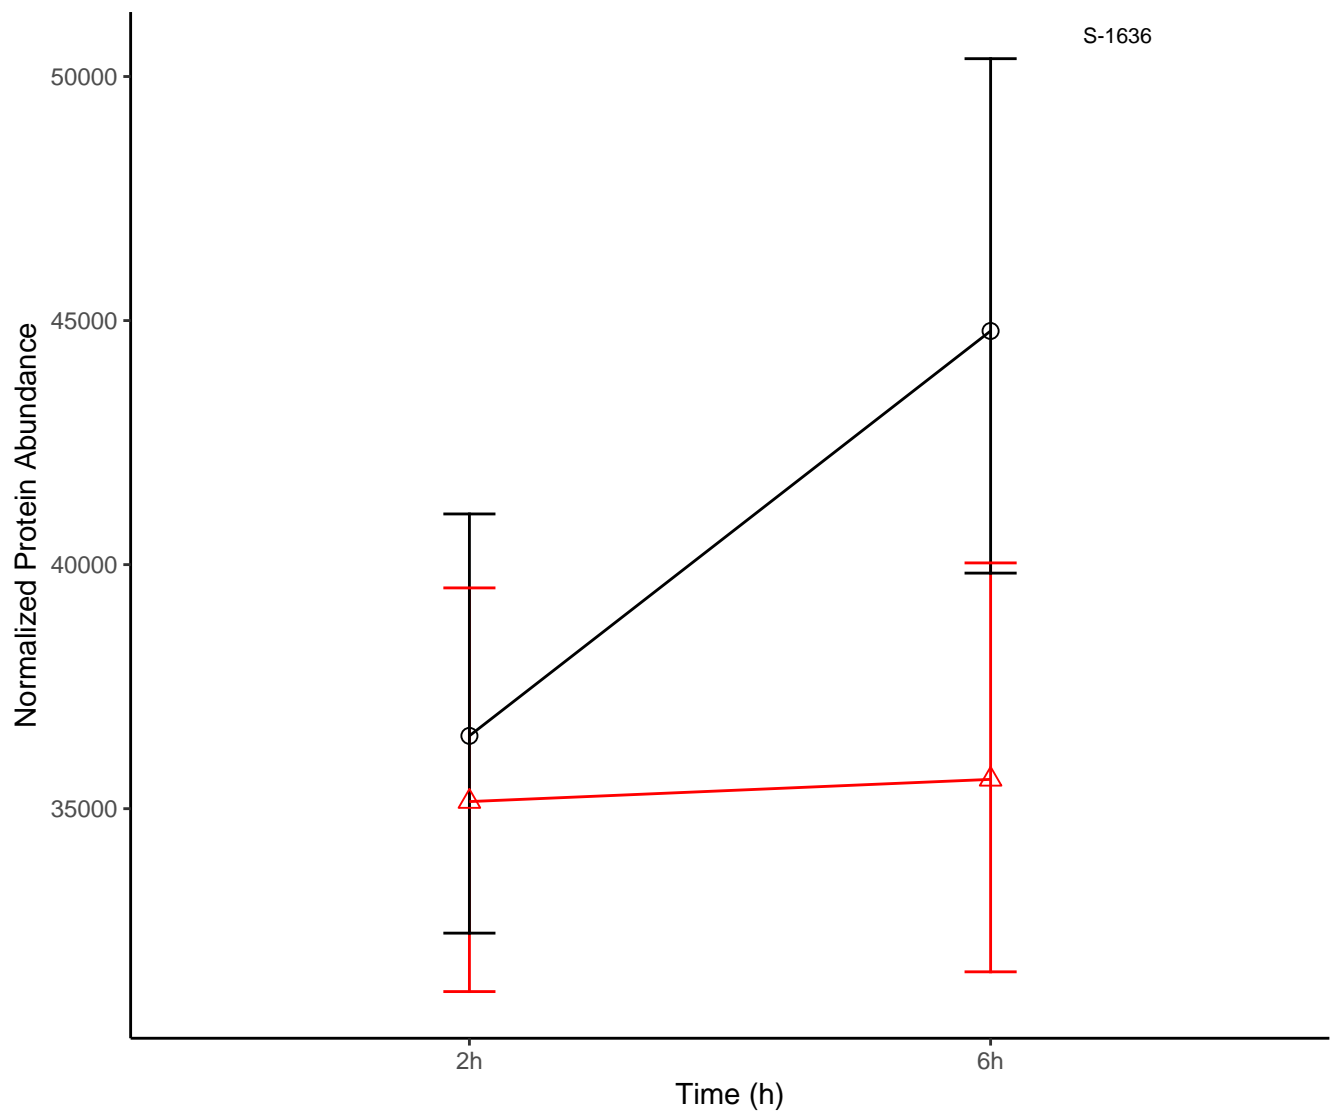

○ TSB-dex

△ TSB

# GCSPA\_STAAM

S-1637

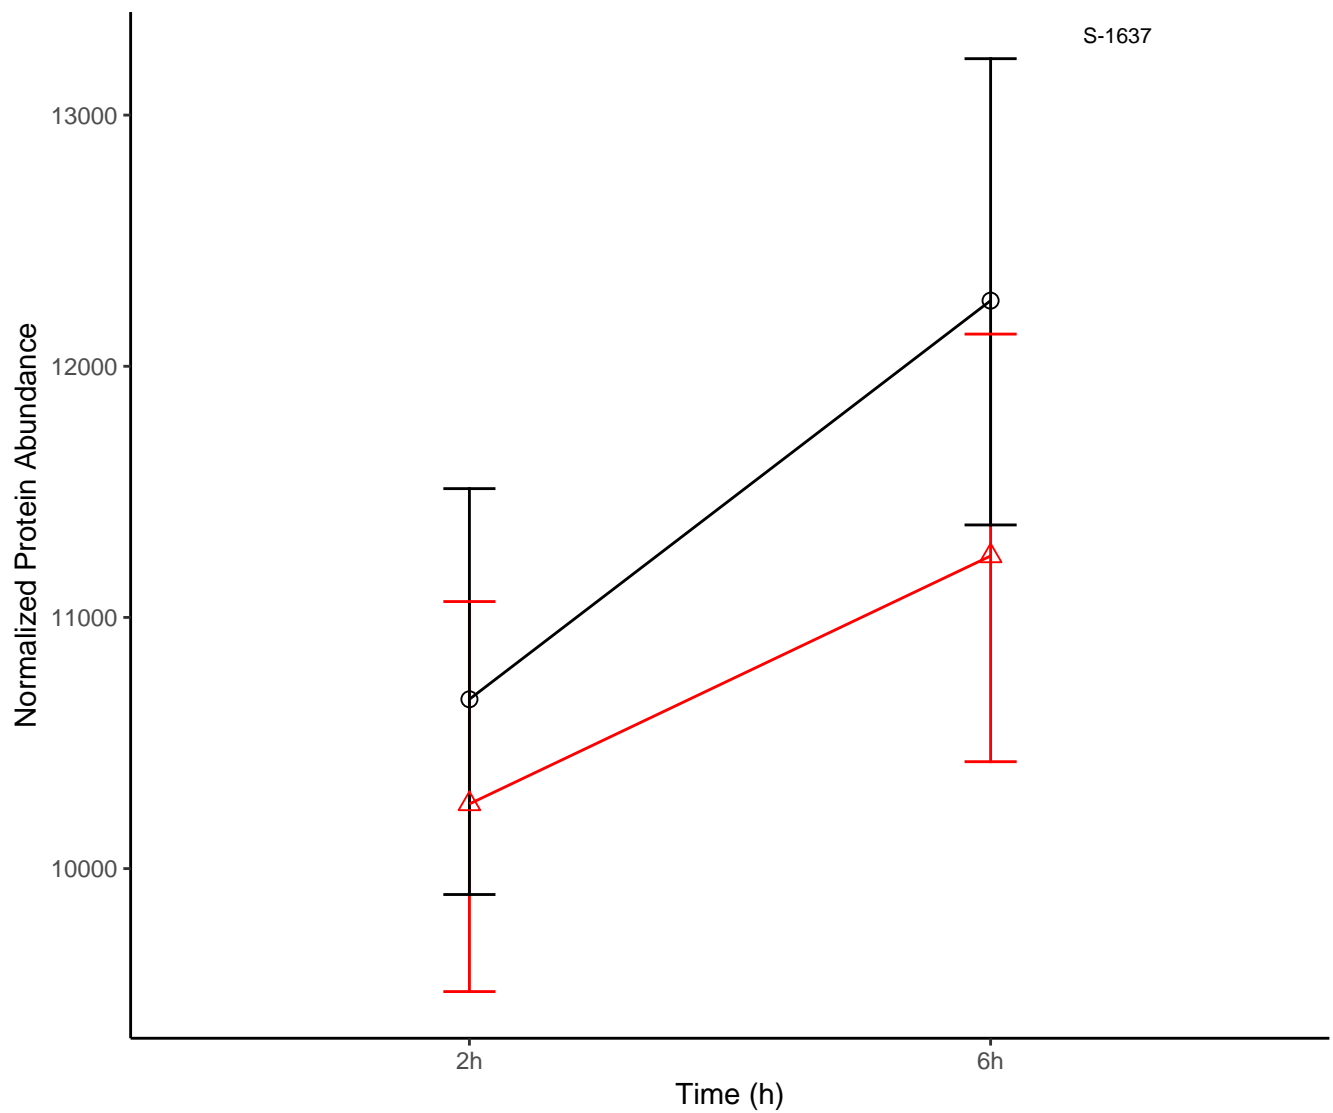

○ TSB-dex

△ TSB

# GCSPB\_STAAM

S-1638

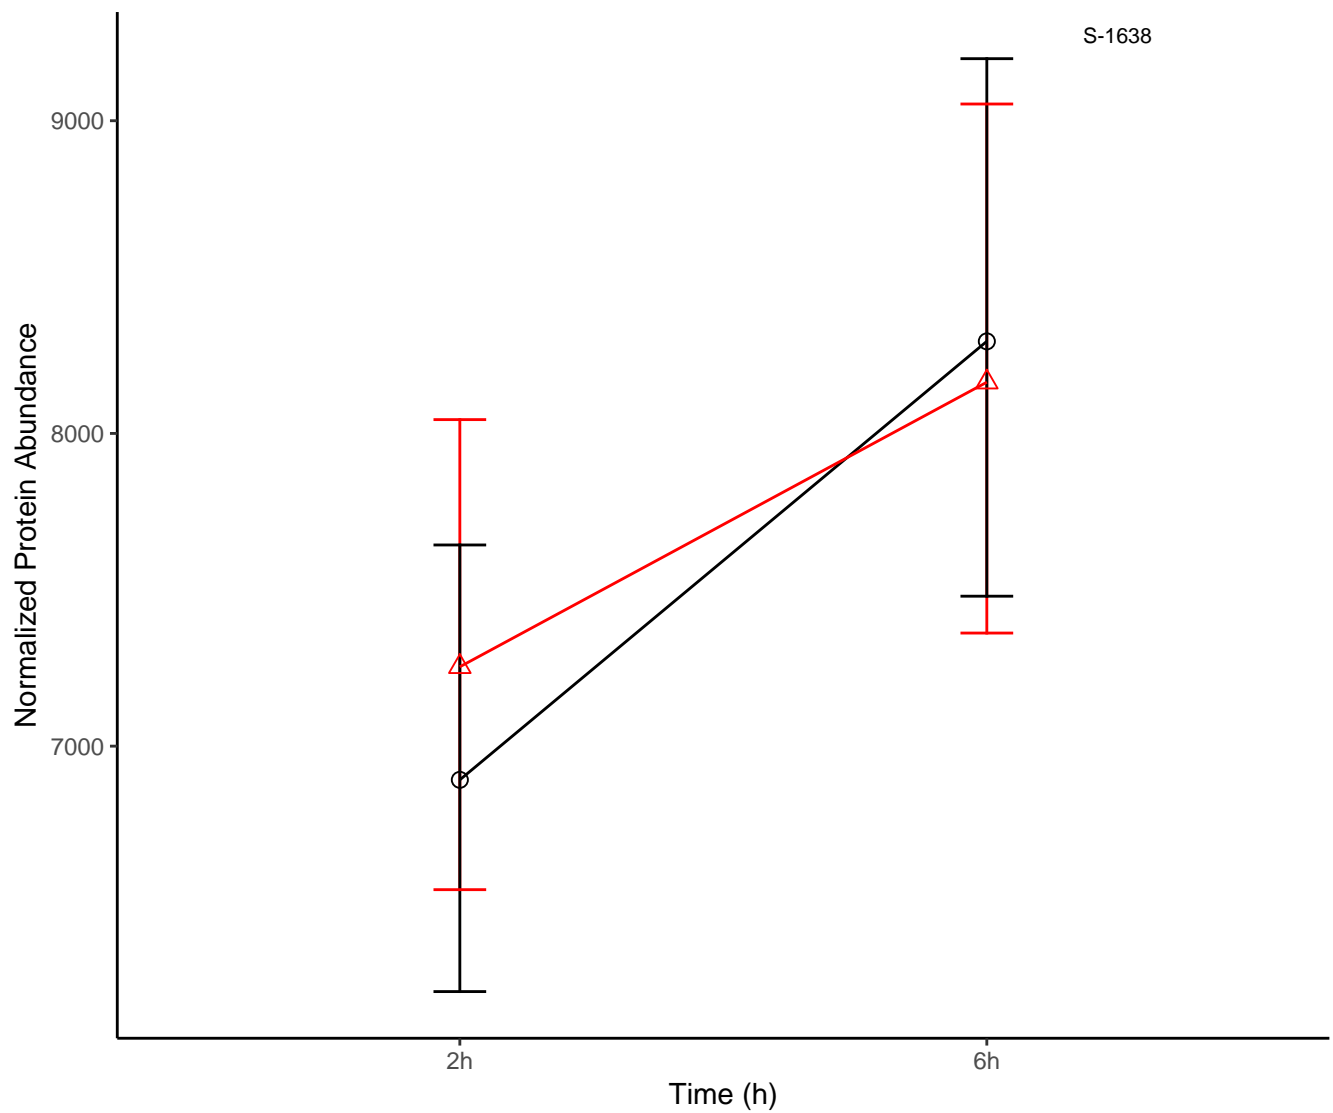

○ TSB-dex

△ TSB

# GCST\_STAAM

S-1639

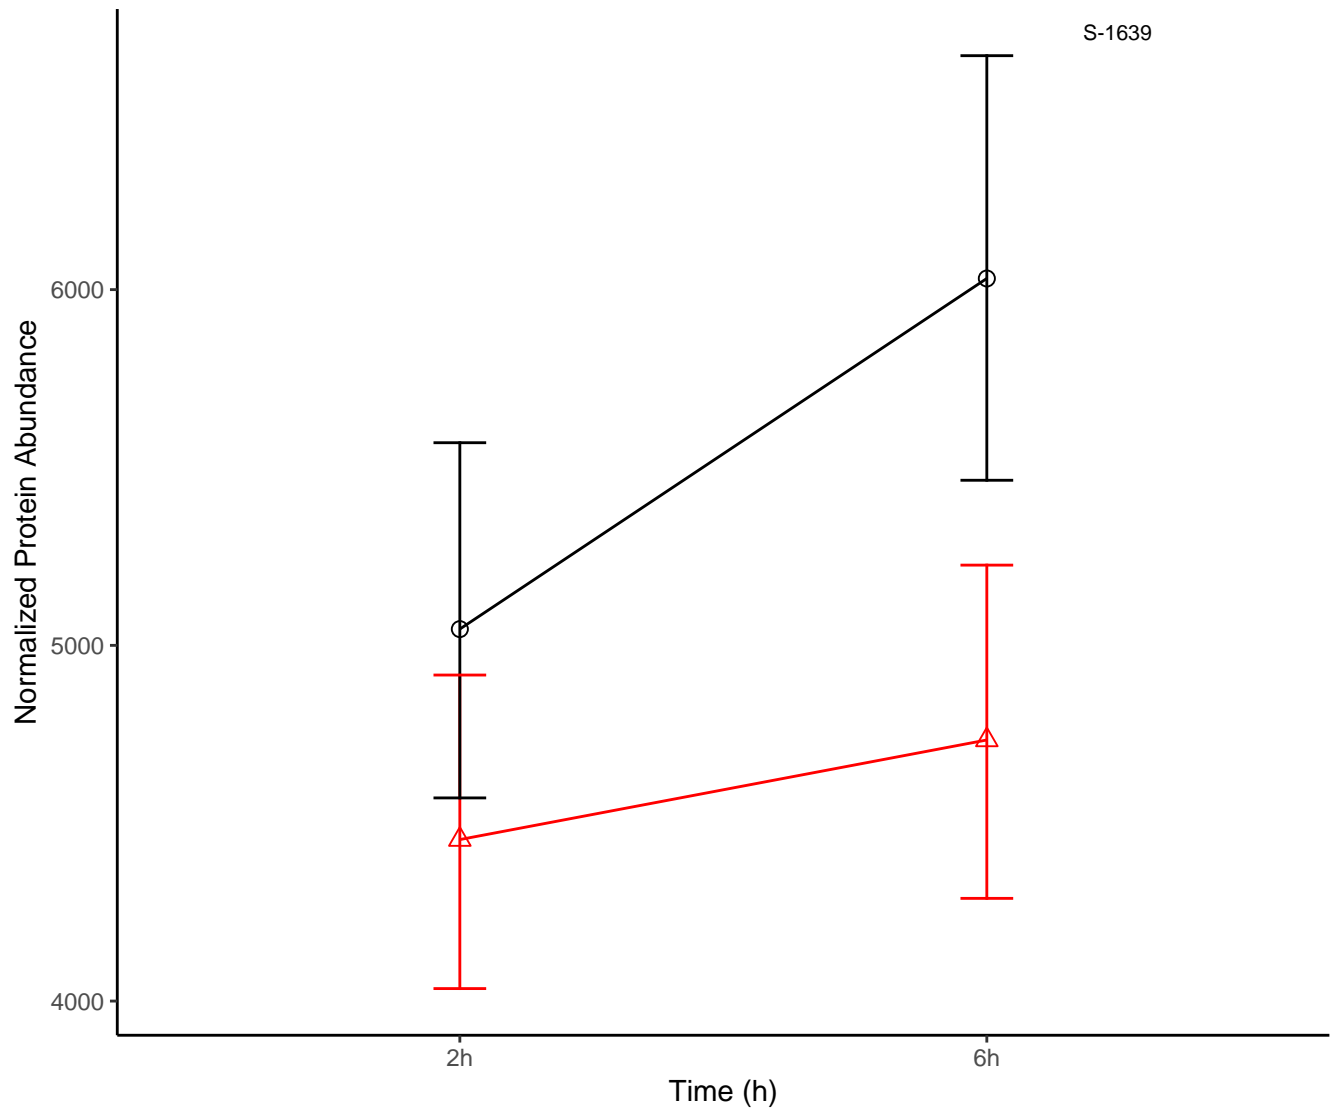

○ TSB-dex

△ TSB

# GLMM\_STAAM

S-1640

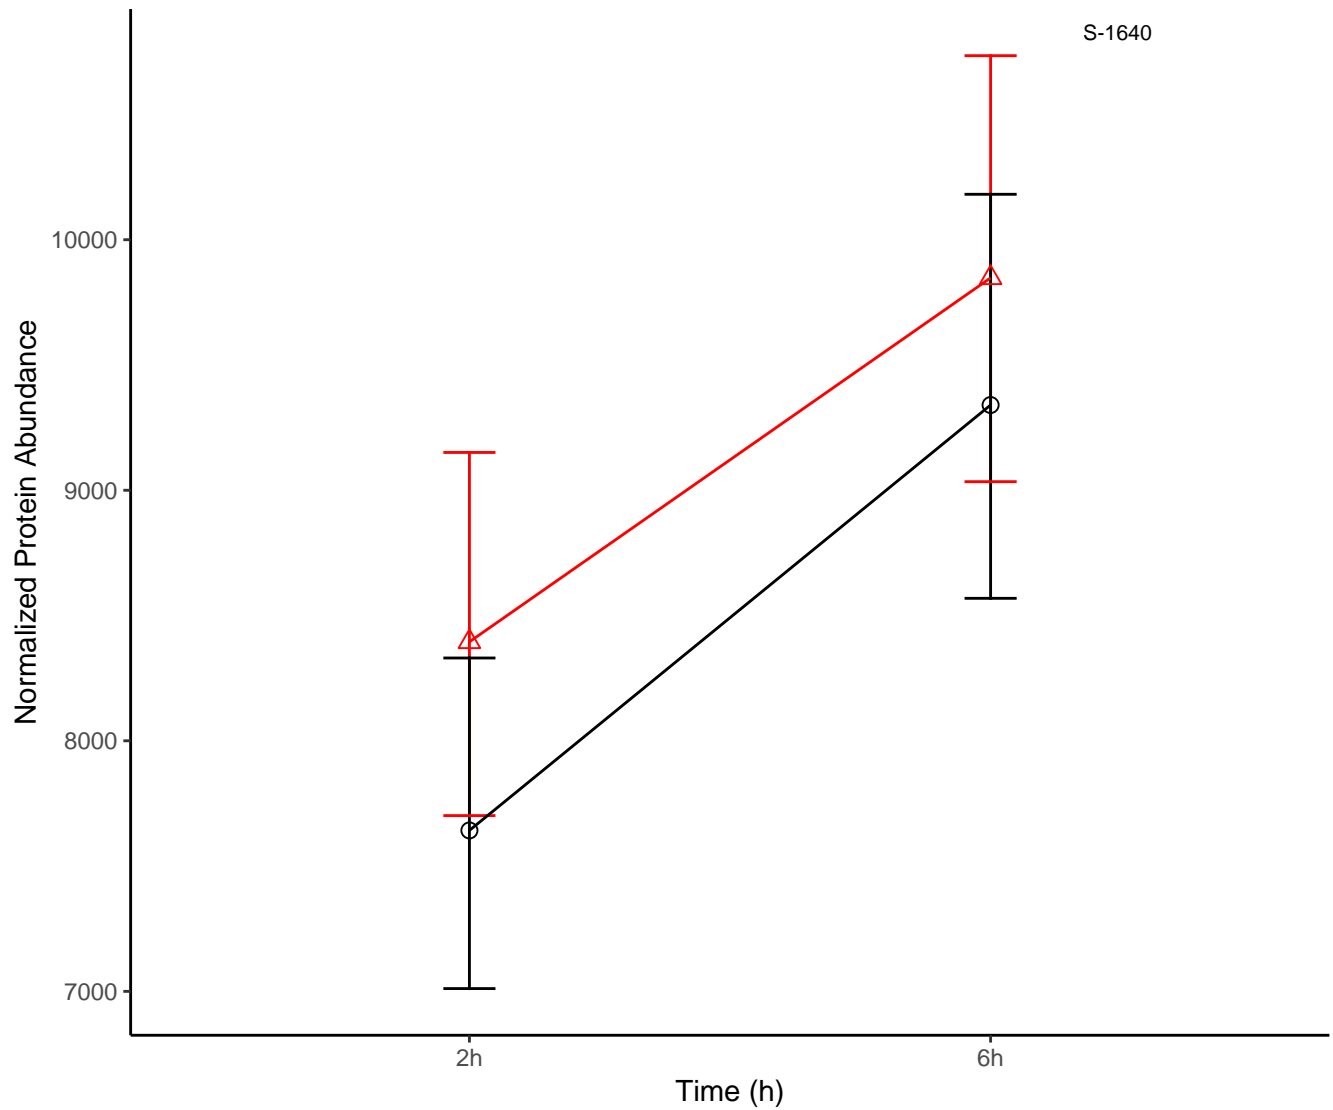

○ TSB-dex

△ TSB



# GLMS\_STAAM

S-1641

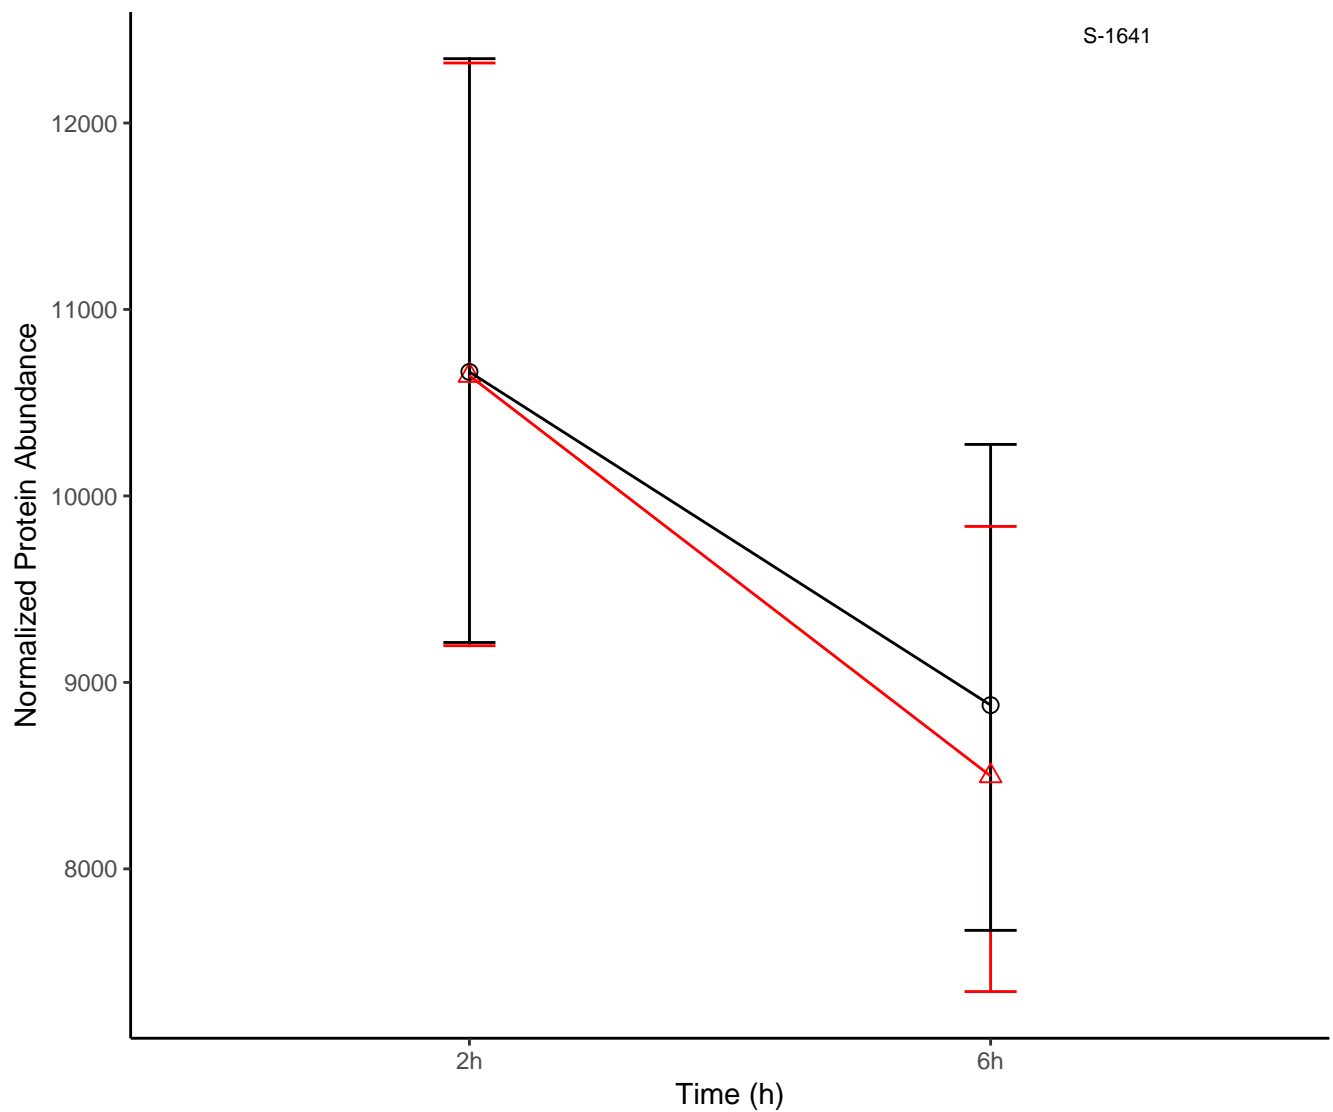

○ TSB-dex

△ TSB

# GLMU\_STAAM

S-1642

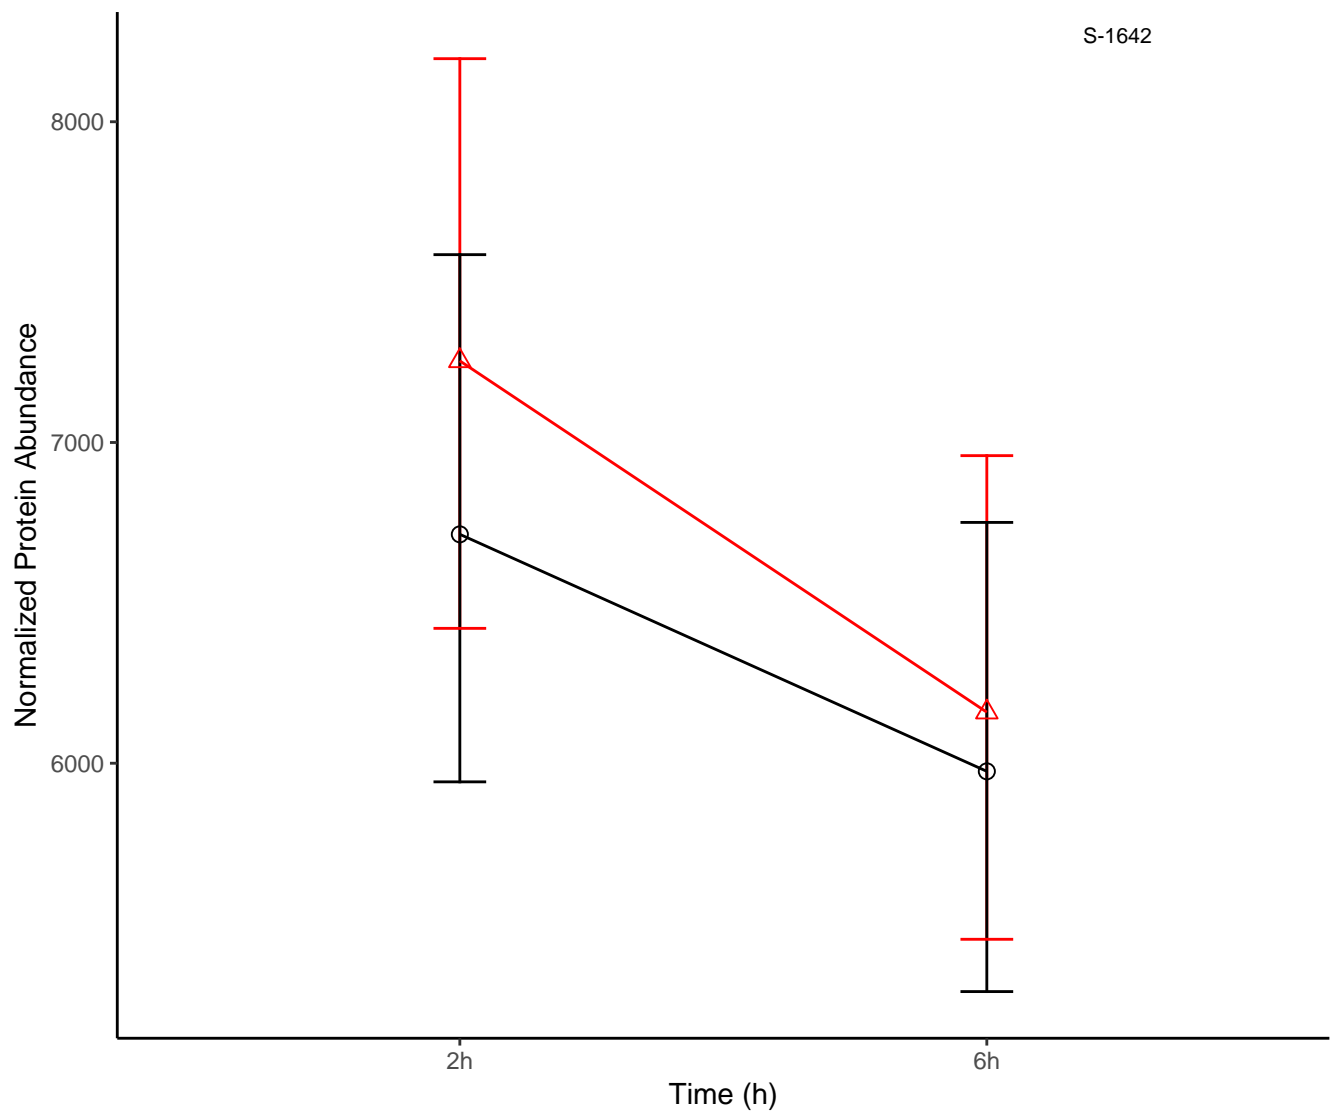

○ TSB-dex

△ TSB

# GLNA\_STAAM

S-1643

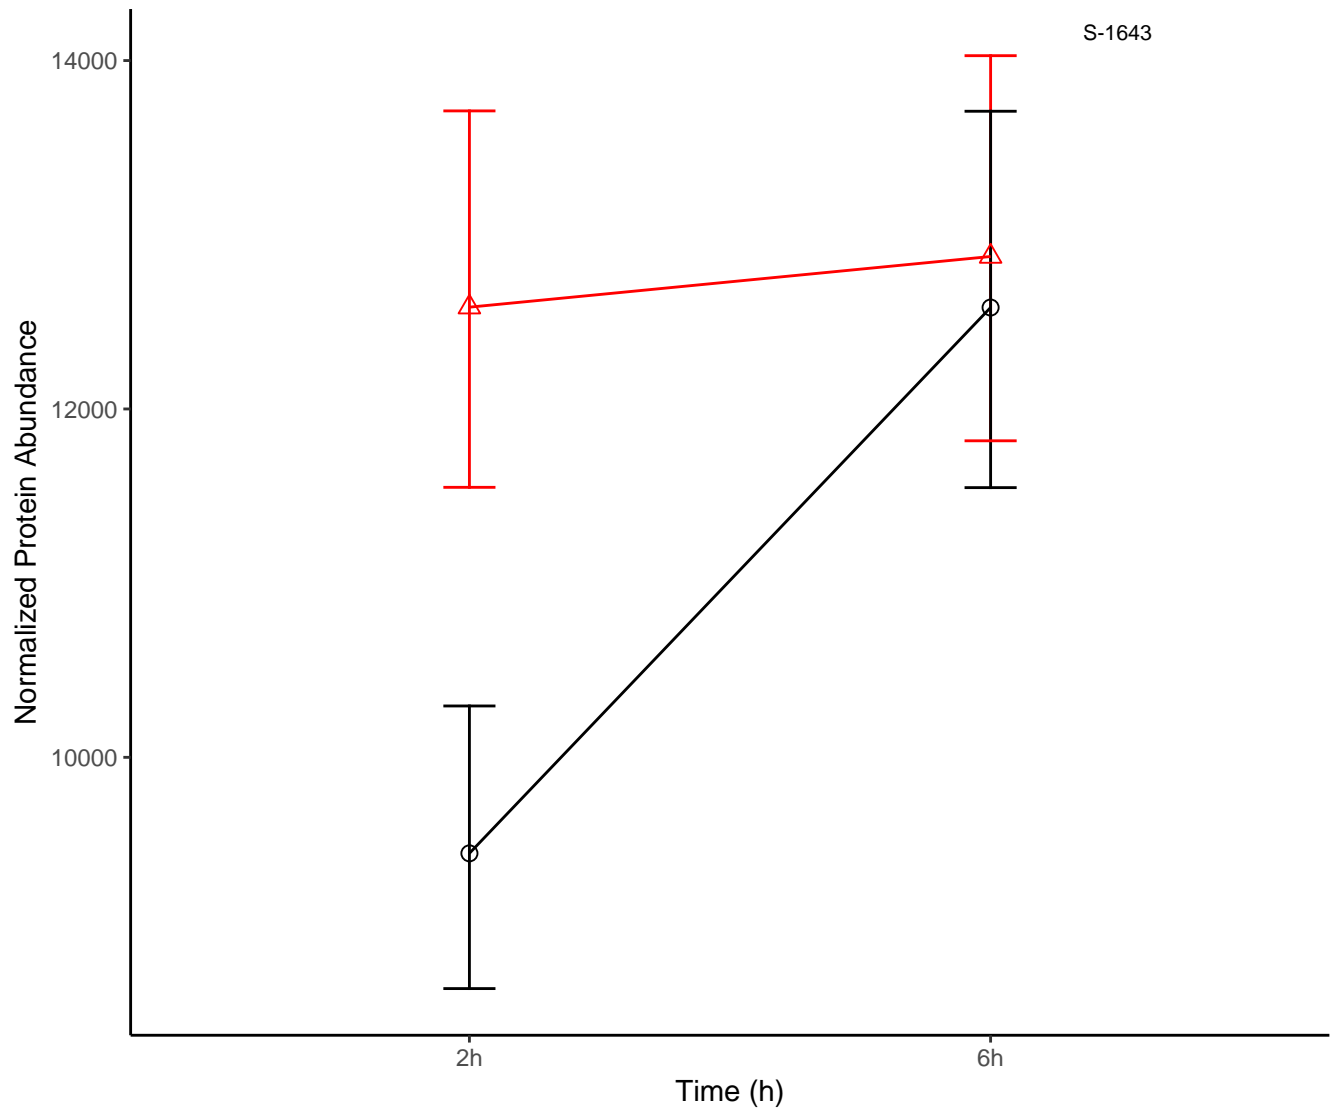

○ TSB-dex

△ TSB

# GLPD\_STAAM

S-1644

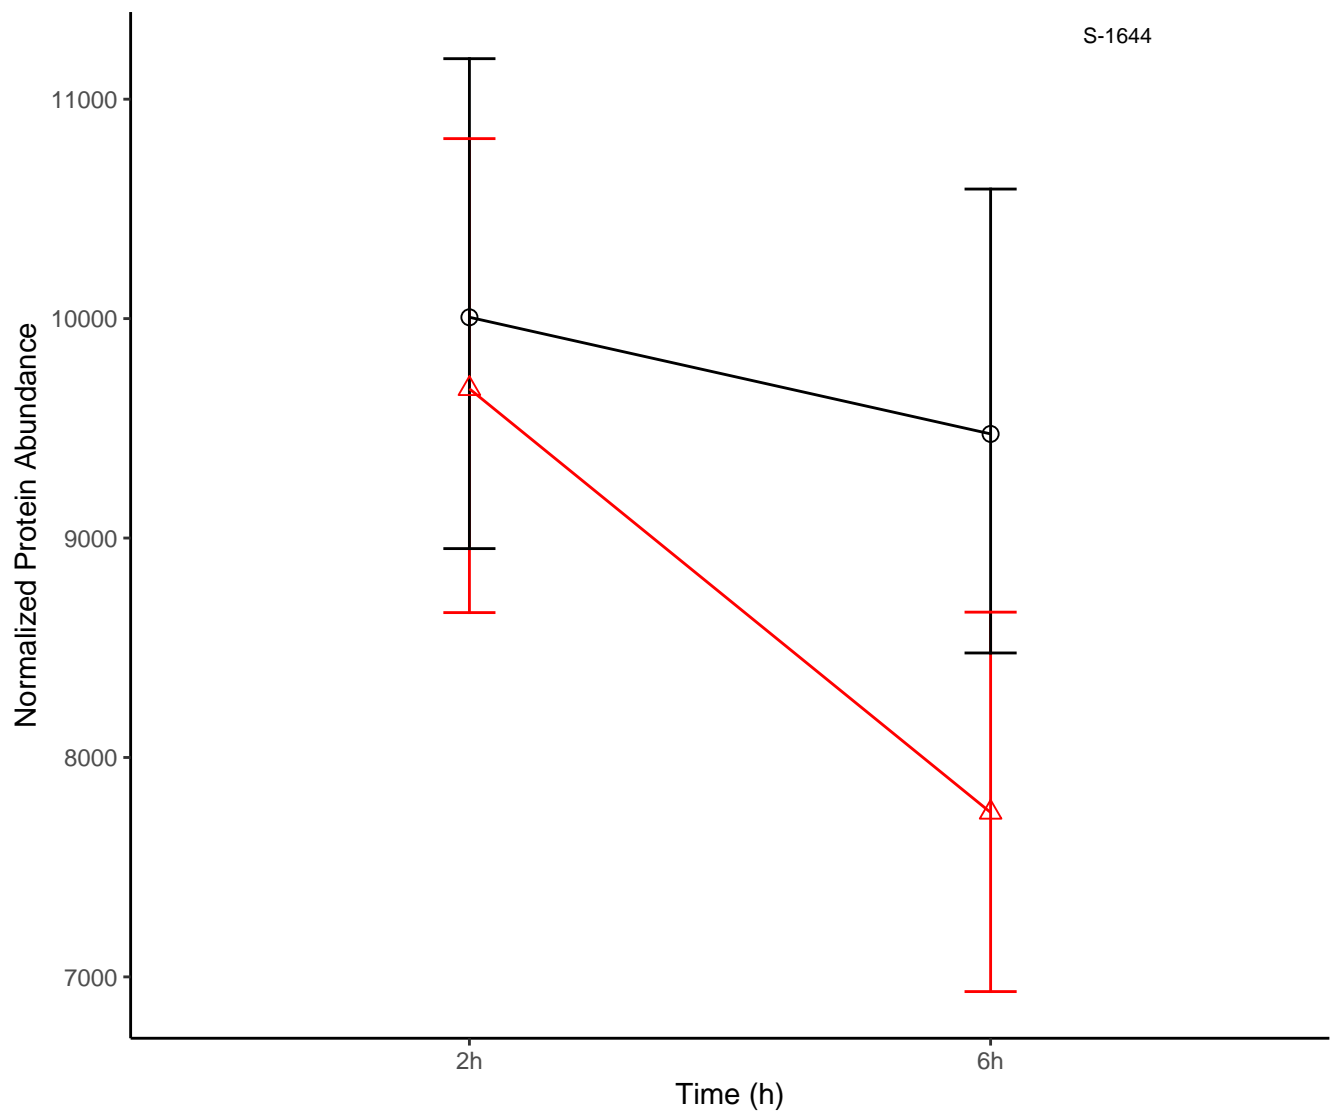

○ TSB-dex

△ TSB

# GLPK\_STAAM

S-1645

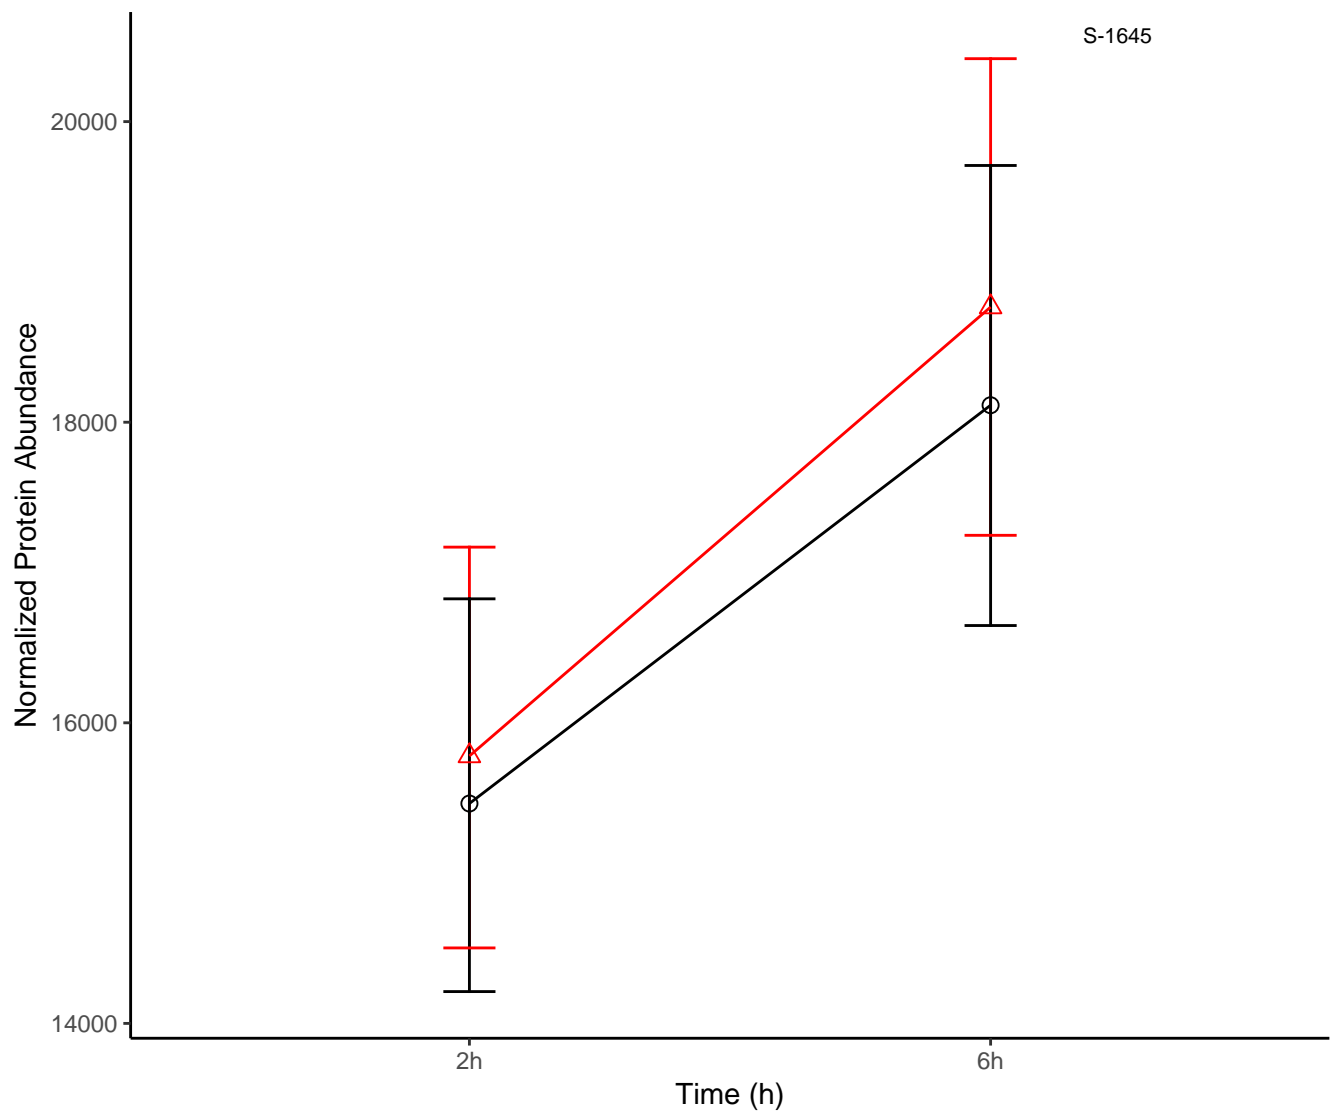

○ TSB-dex

△ TSB

# GLYA\_STAAM

S-1646

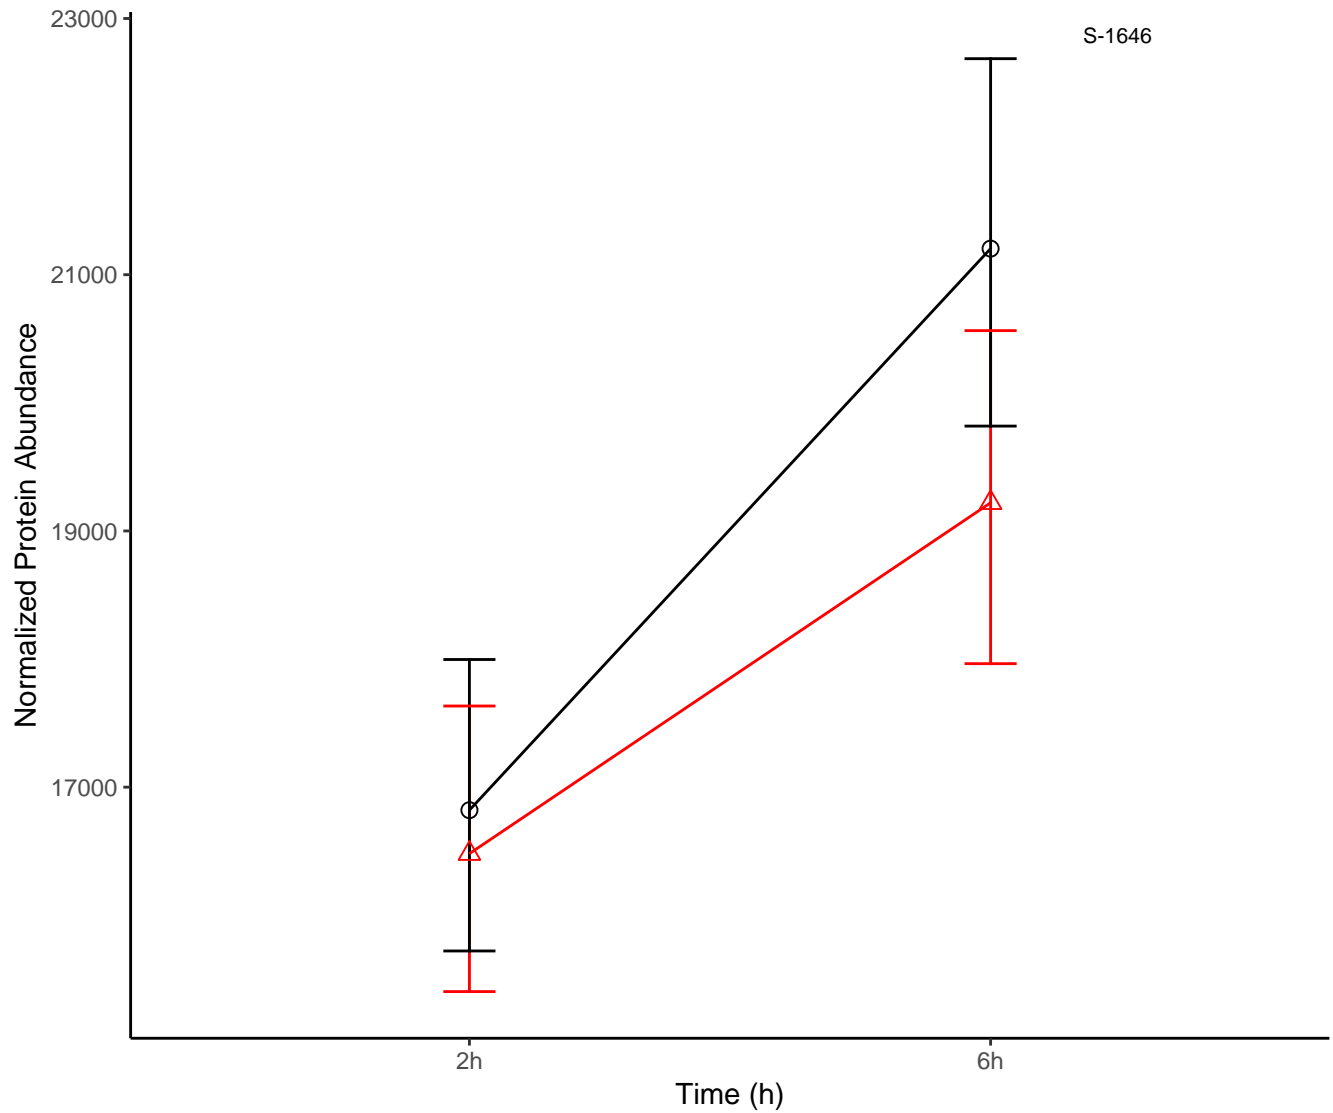

○ TSB-dex

△ TSB

# GPDA\_STAAM

S-1647

Normalized Protein Abundance

3000

2000

2h

6h

Time (h)

○ TSB-dex

△ TSB

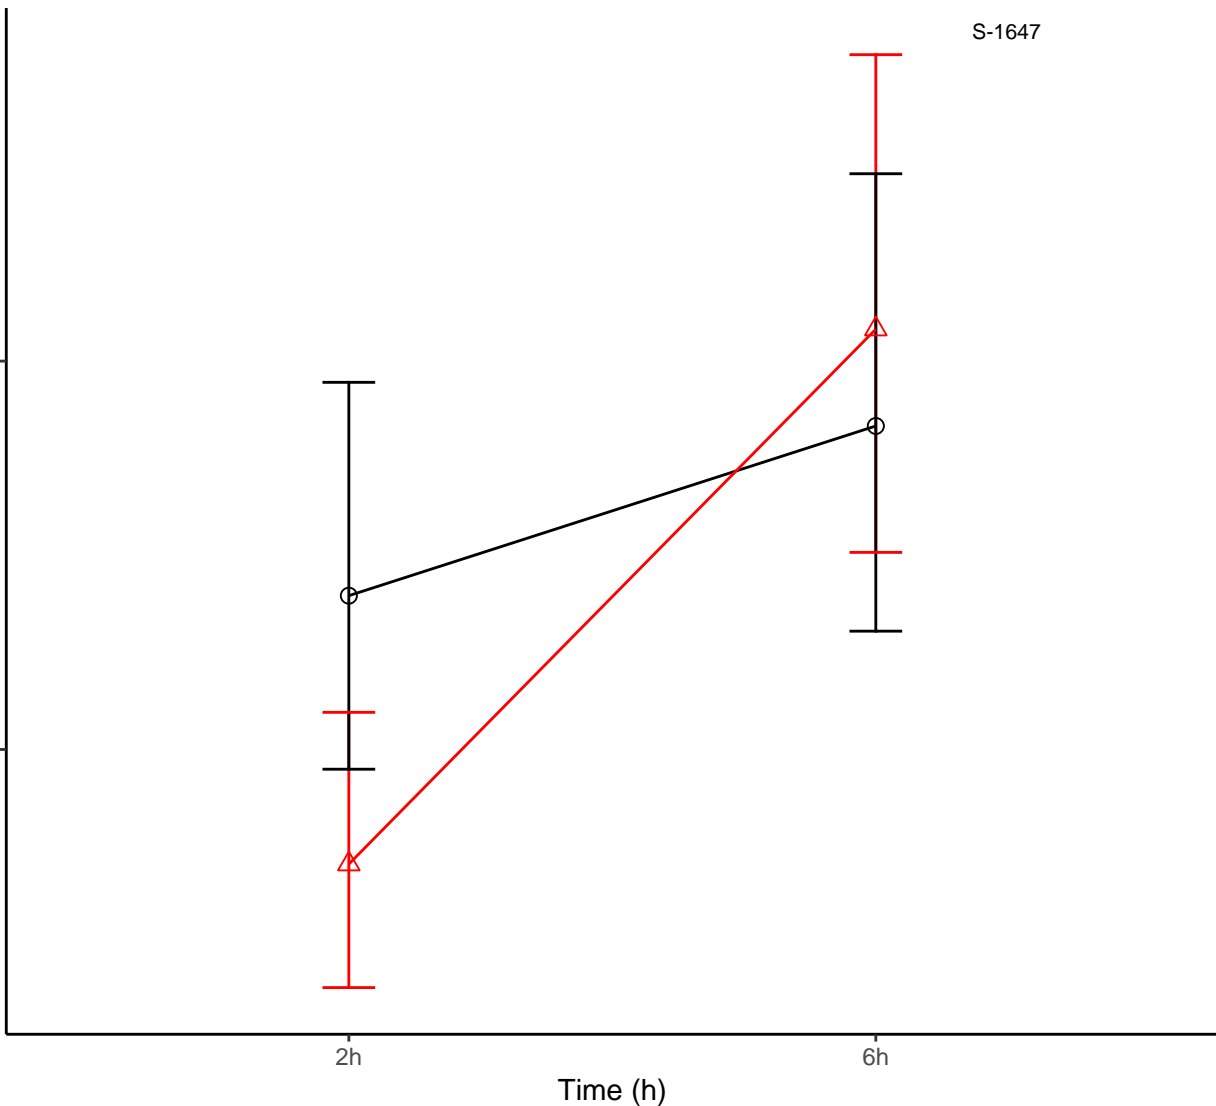

# GPMA\_STAAM

S-1648

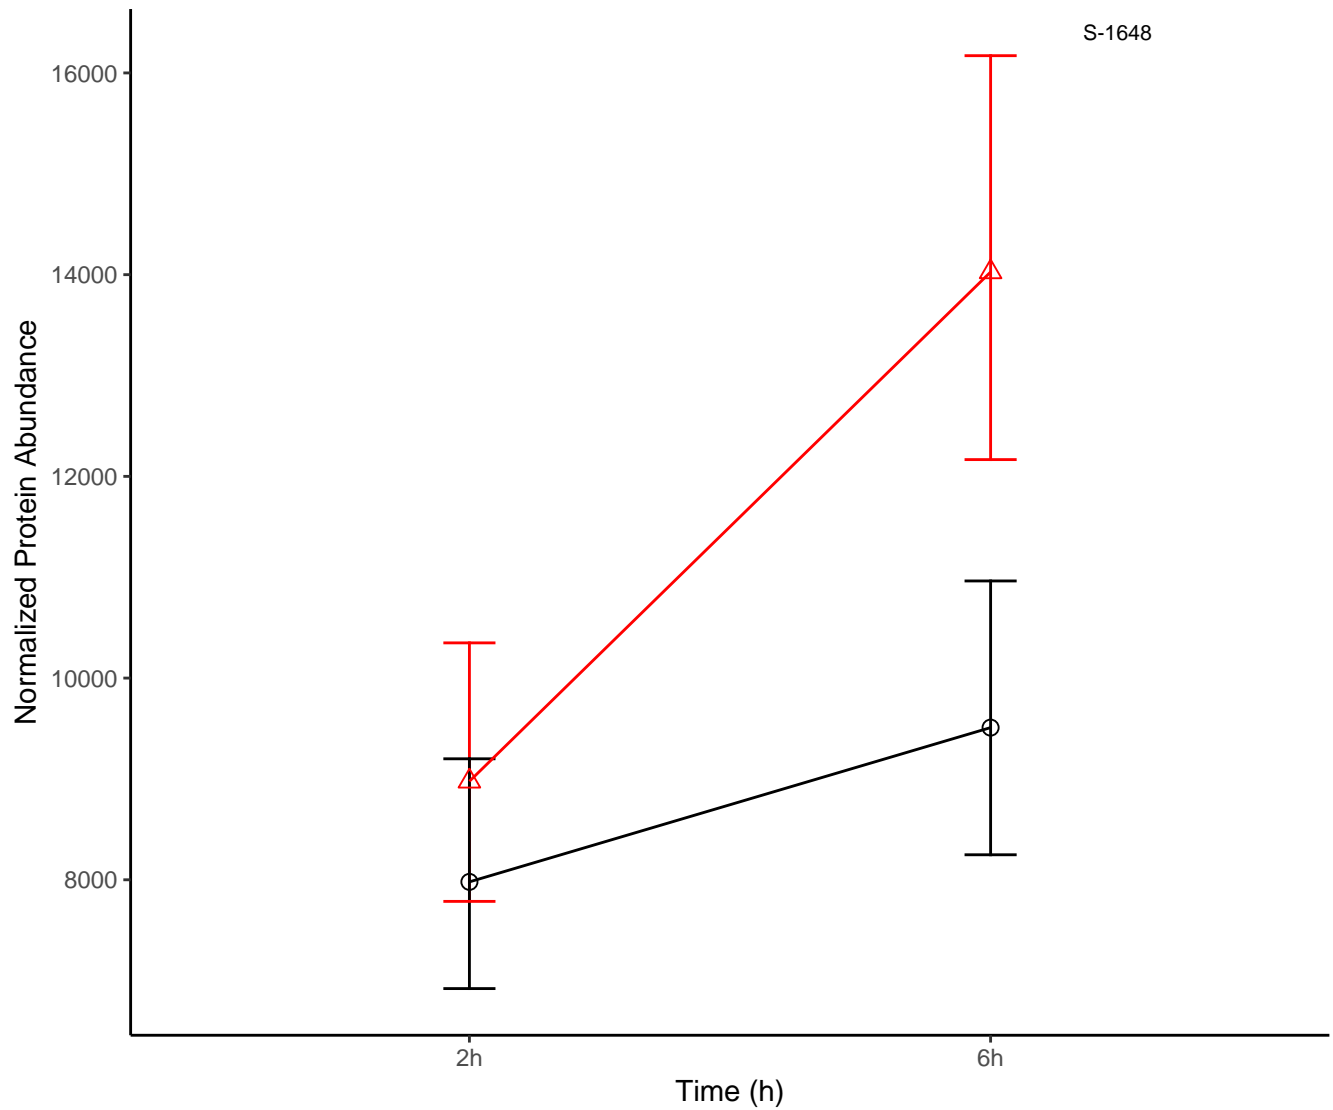

○ TSB-dex

△ TSB



# GPMI\_STAAM

S-1649

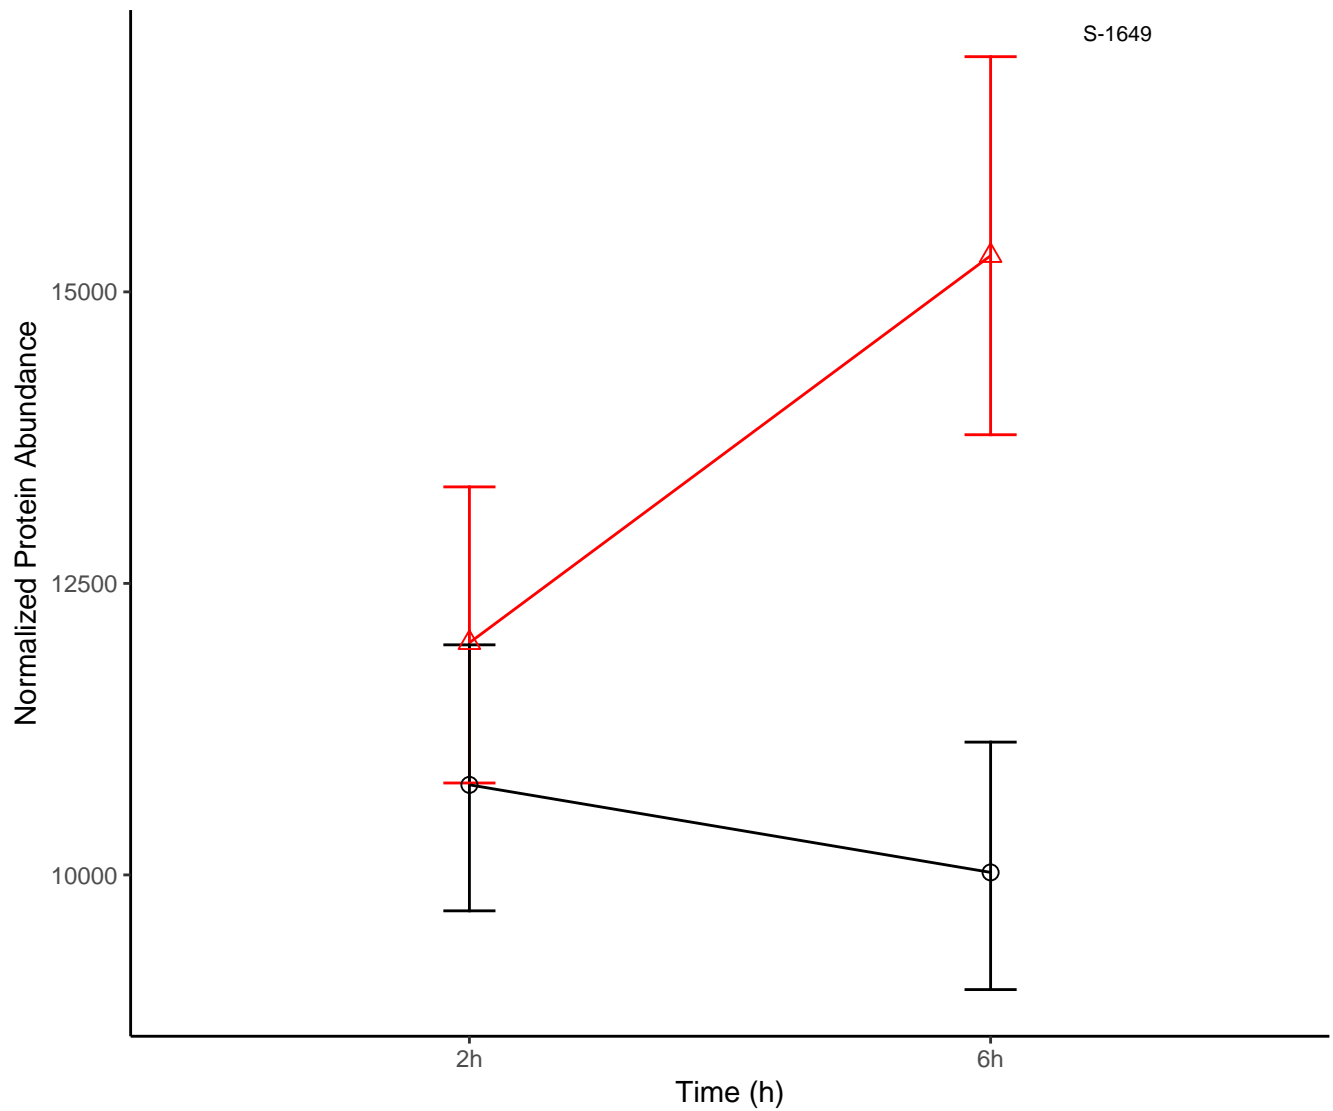

○ TSB-dex

△ TSB

# GPSB\_STAAM

S-1650

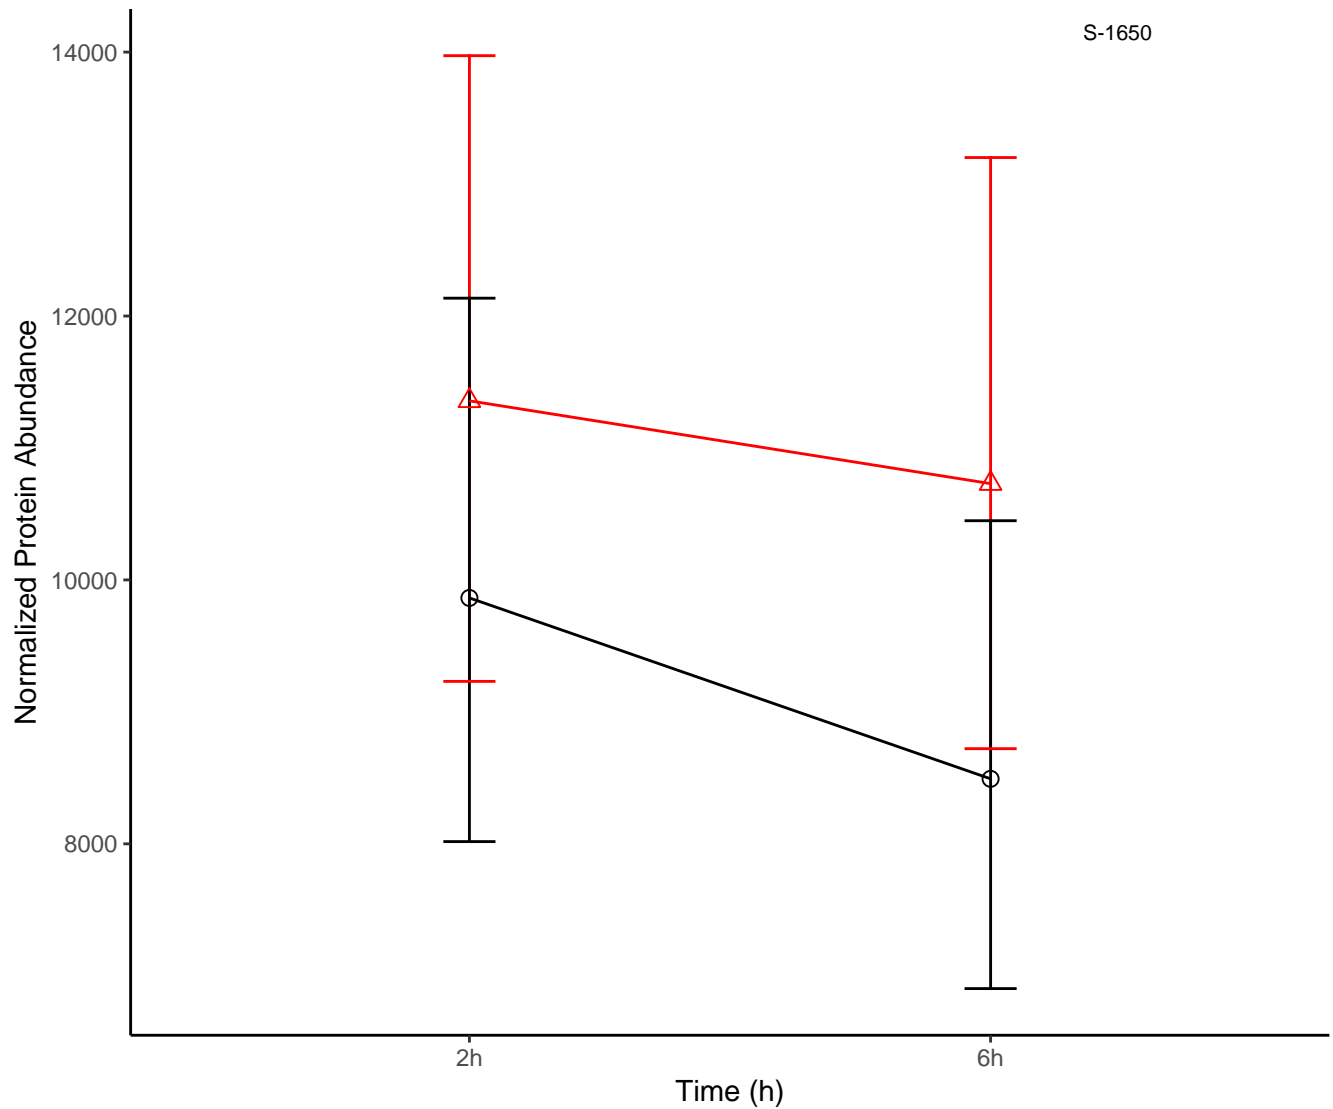

○ TSB-dex

△ TSB

# GRAR\_STAAM

S-1651

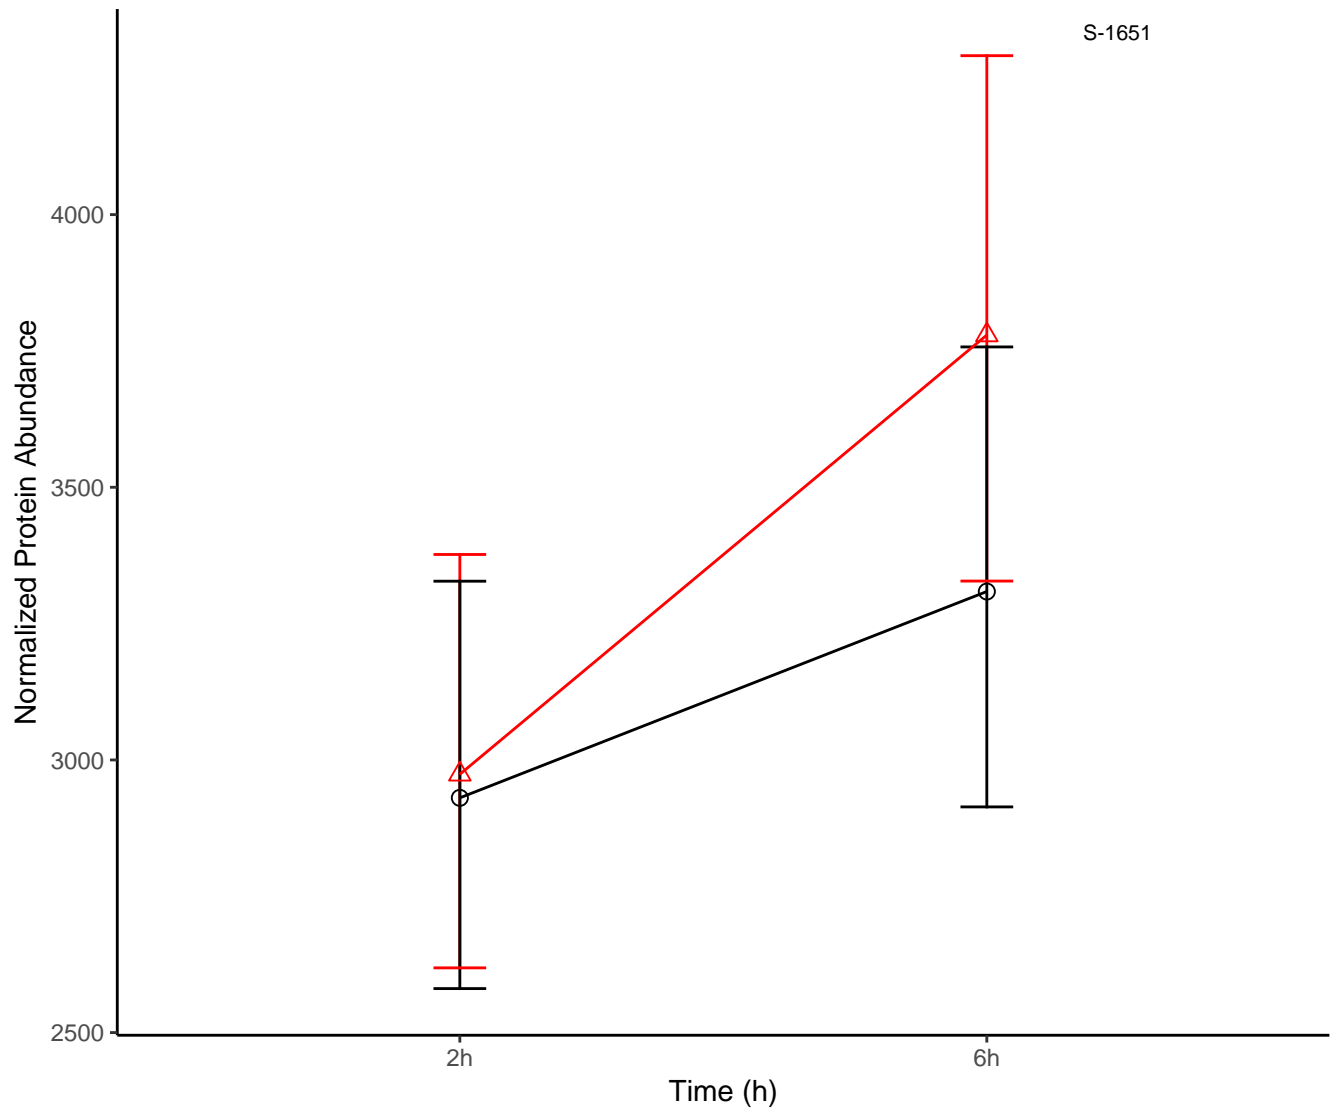

○ TSB-dex

△ TSB

# GREASTAAM

S-1652

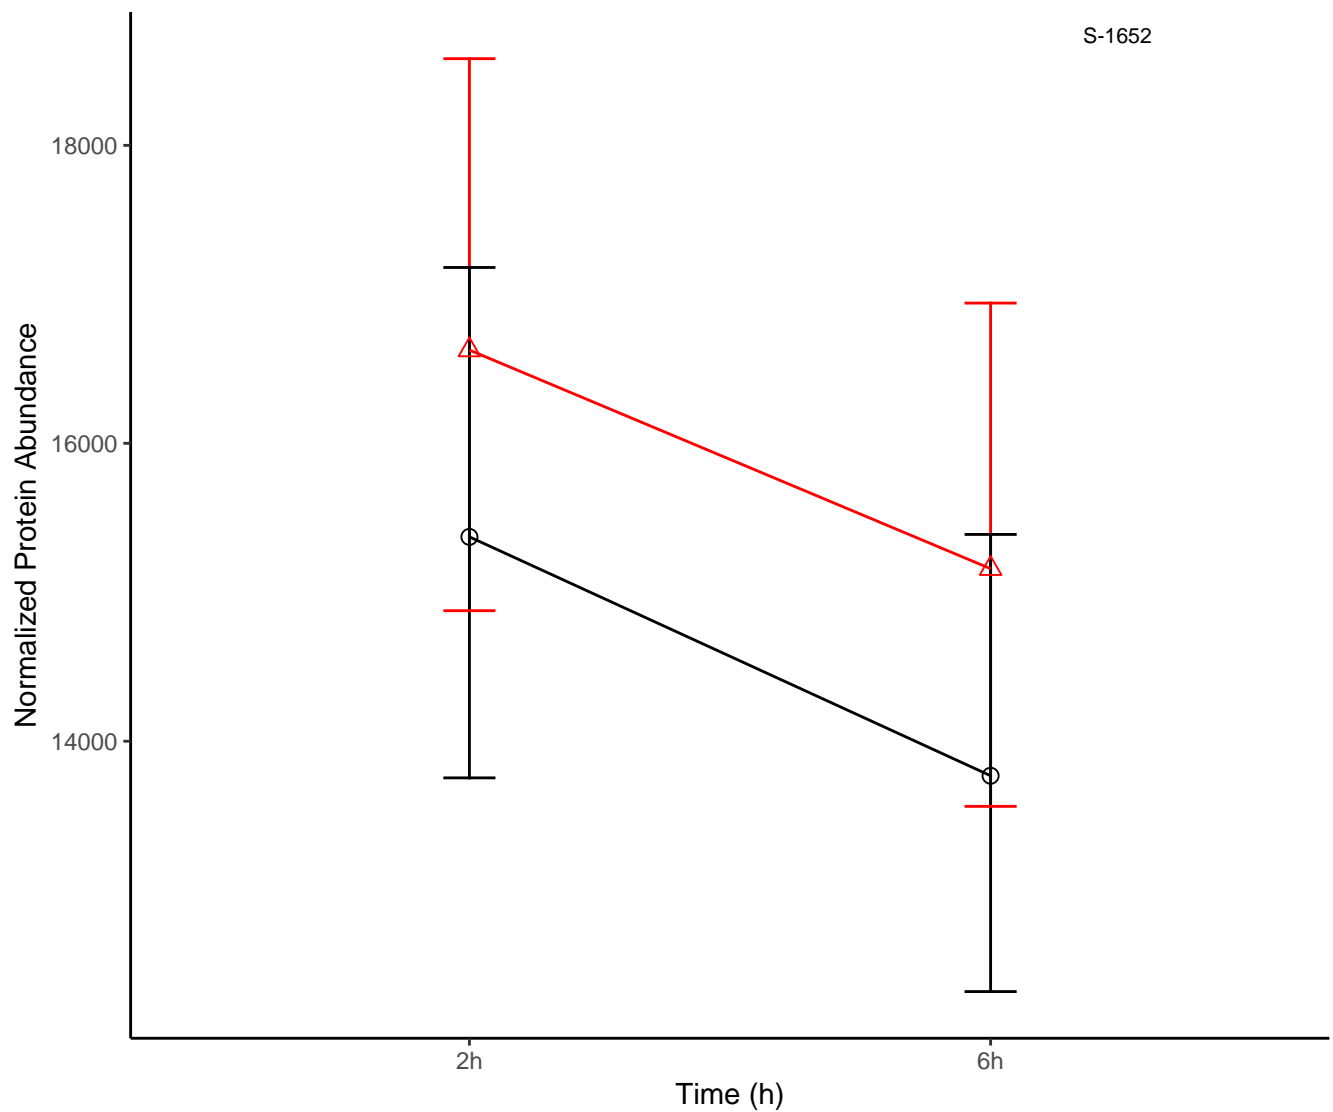

○ TSB-dex

△ TSB

# GRPE\_STAAM

S-1653

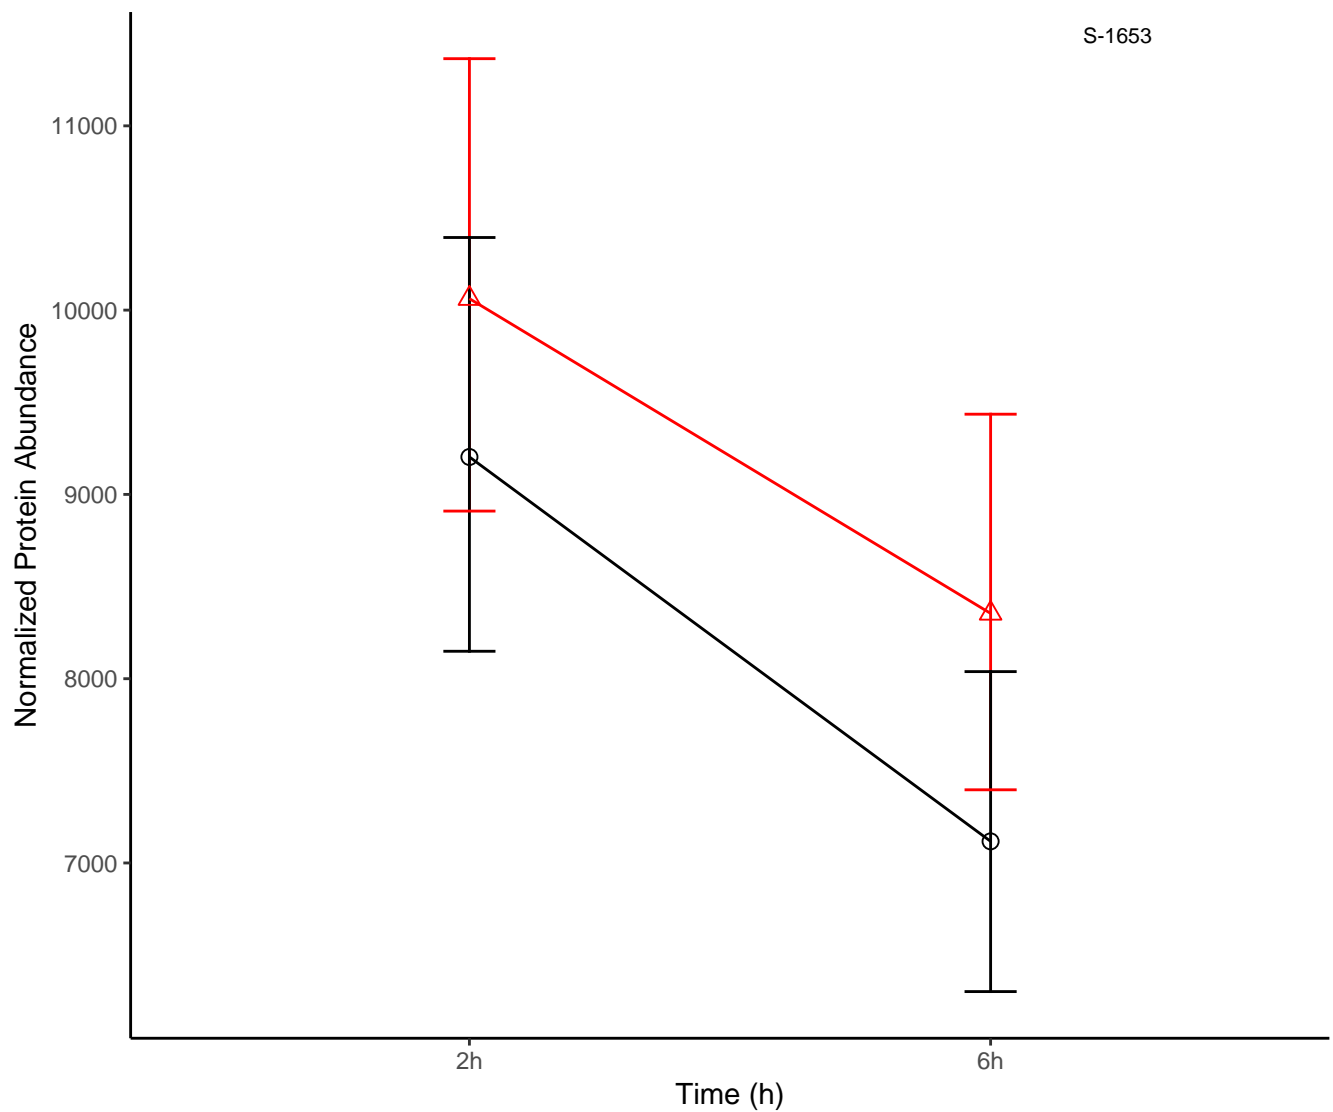

○ TSB-dex

△ TSB

# GSA1\_STAAM

S-1654

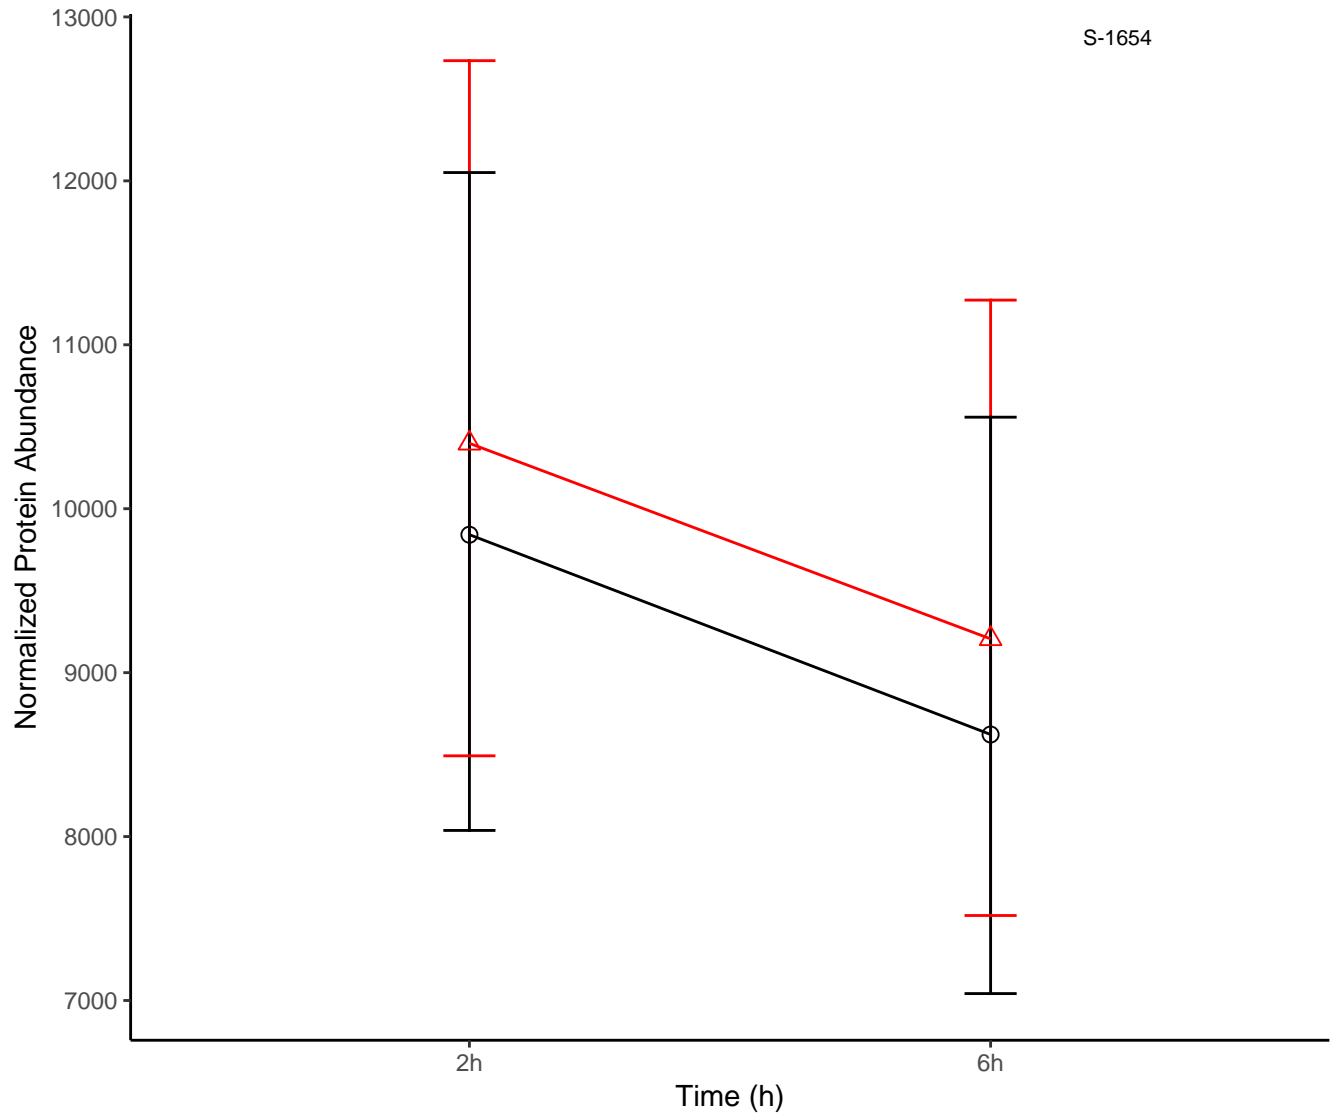

○ TSB-dex

△ TSB

# GSA2\_STAAM

S-1655

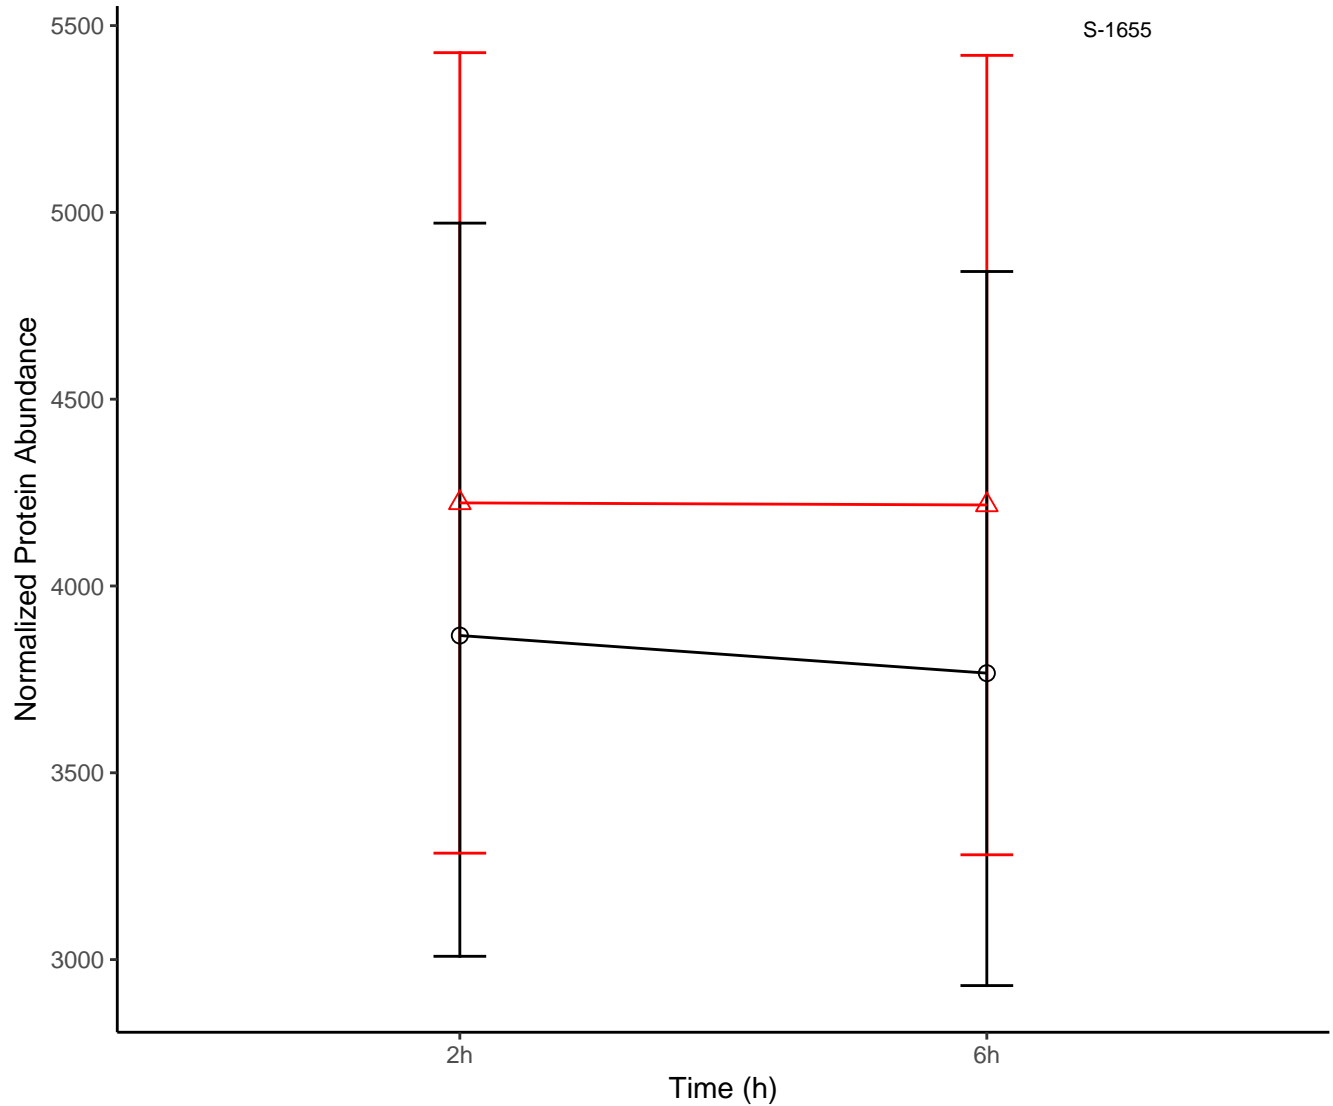

○ TSB-dex

△ TSB

# GTAB\_STAAM

S-1656

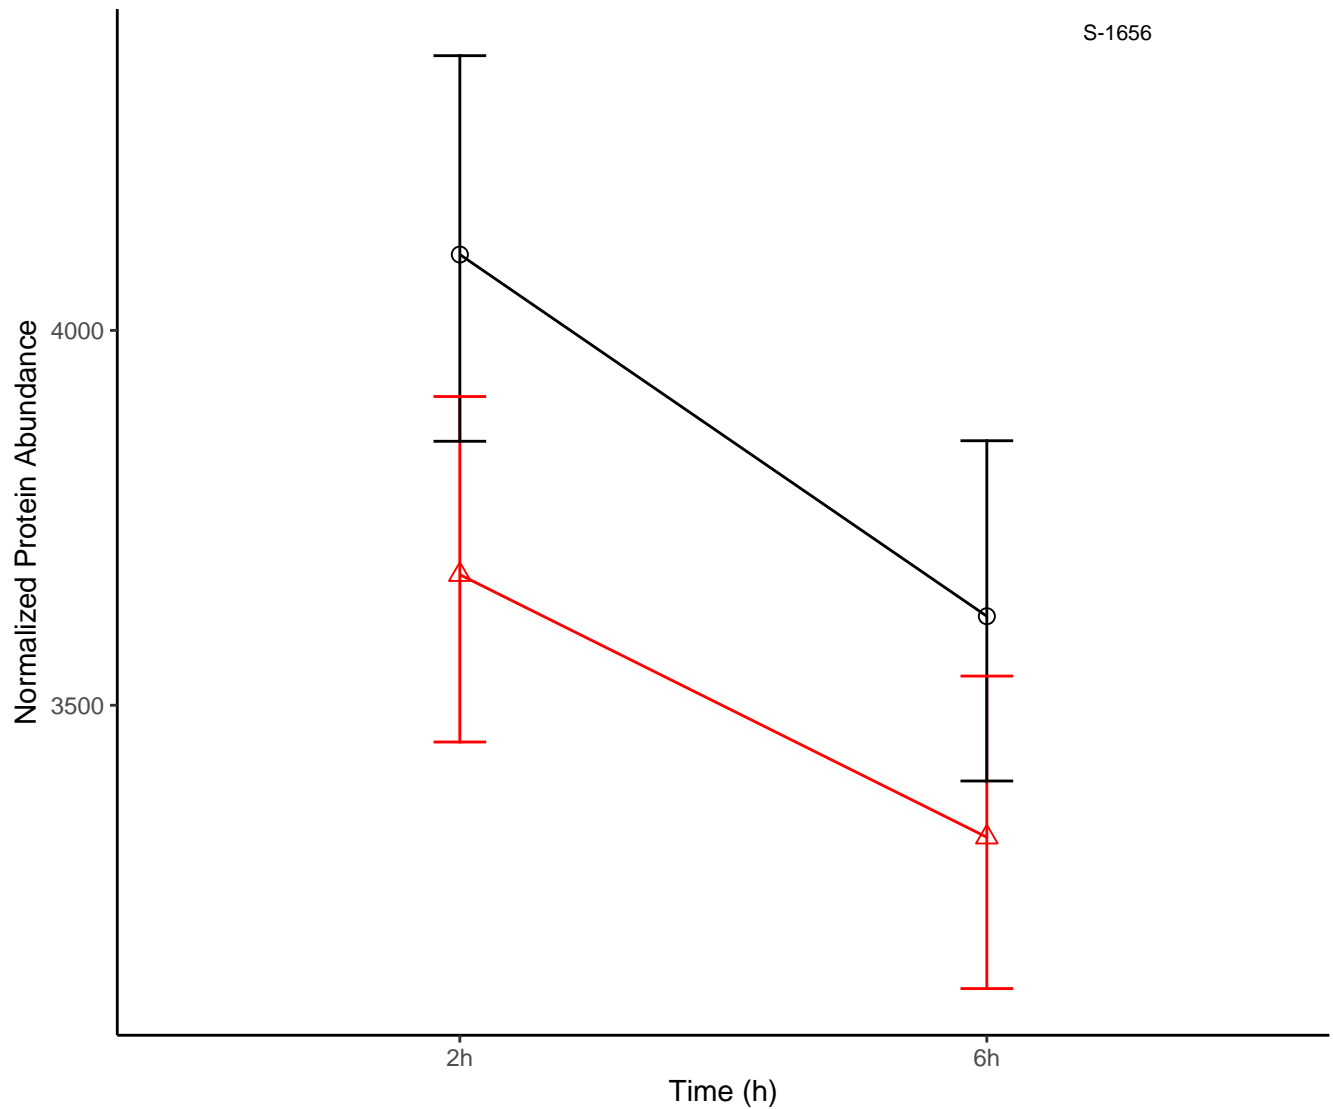

○ TSB-dex

△ TSB



# GUAA\_STAAM

S-1657

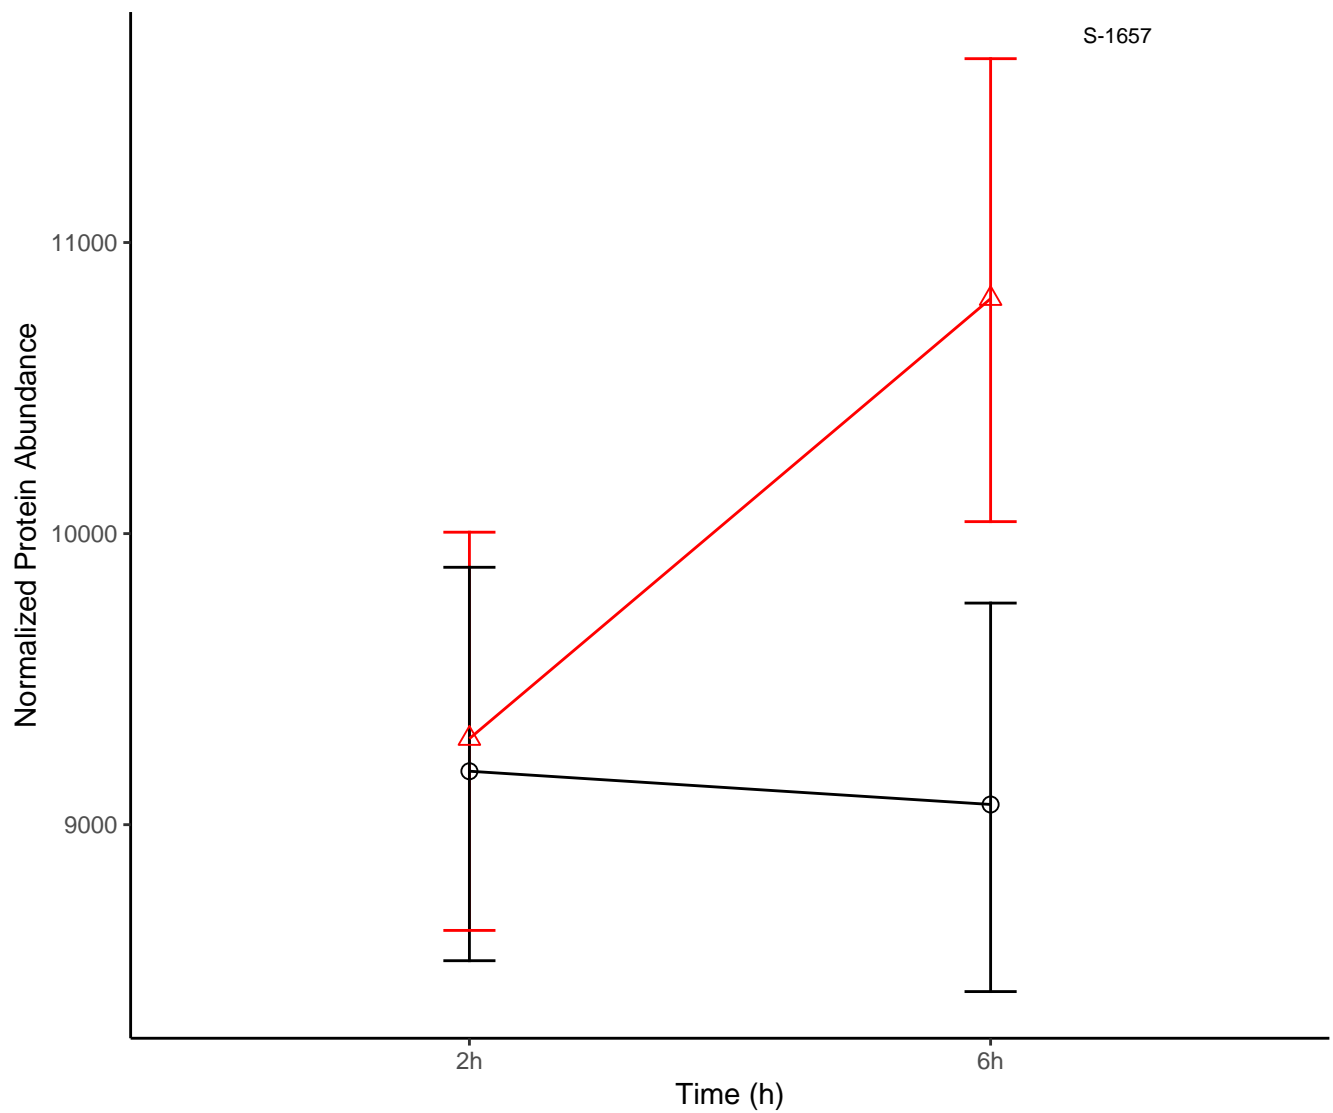

○ TSB-dex

△ TSB

# GUAC\_STAAM

S-1658

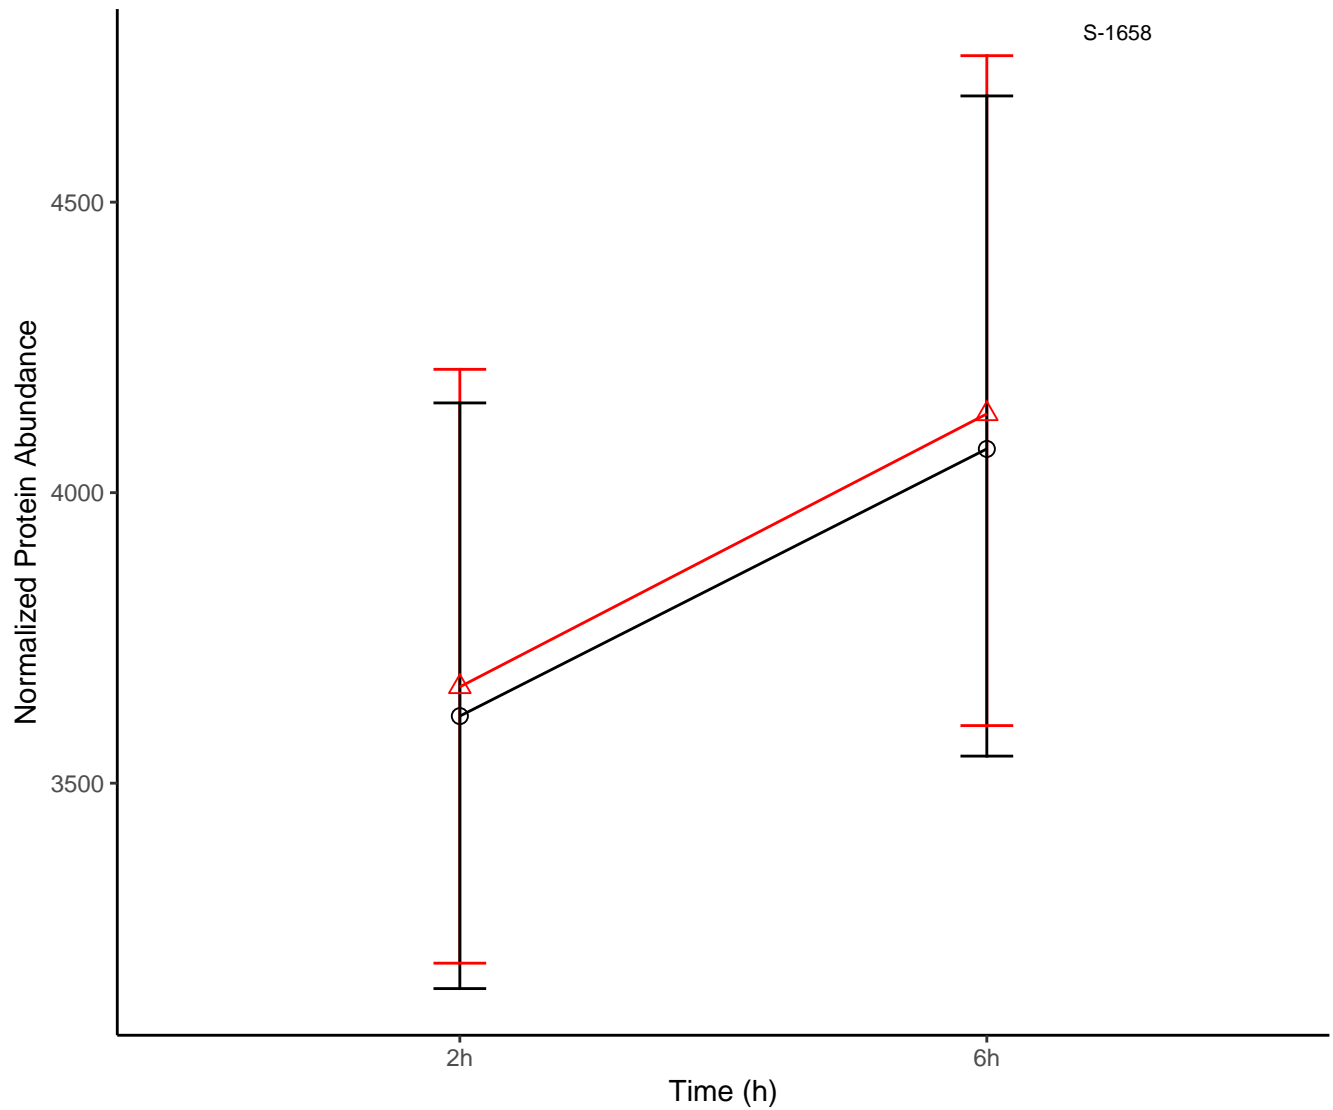

○ TSB-dex

△ TSB

# GYRB\_STAAM

S-1659

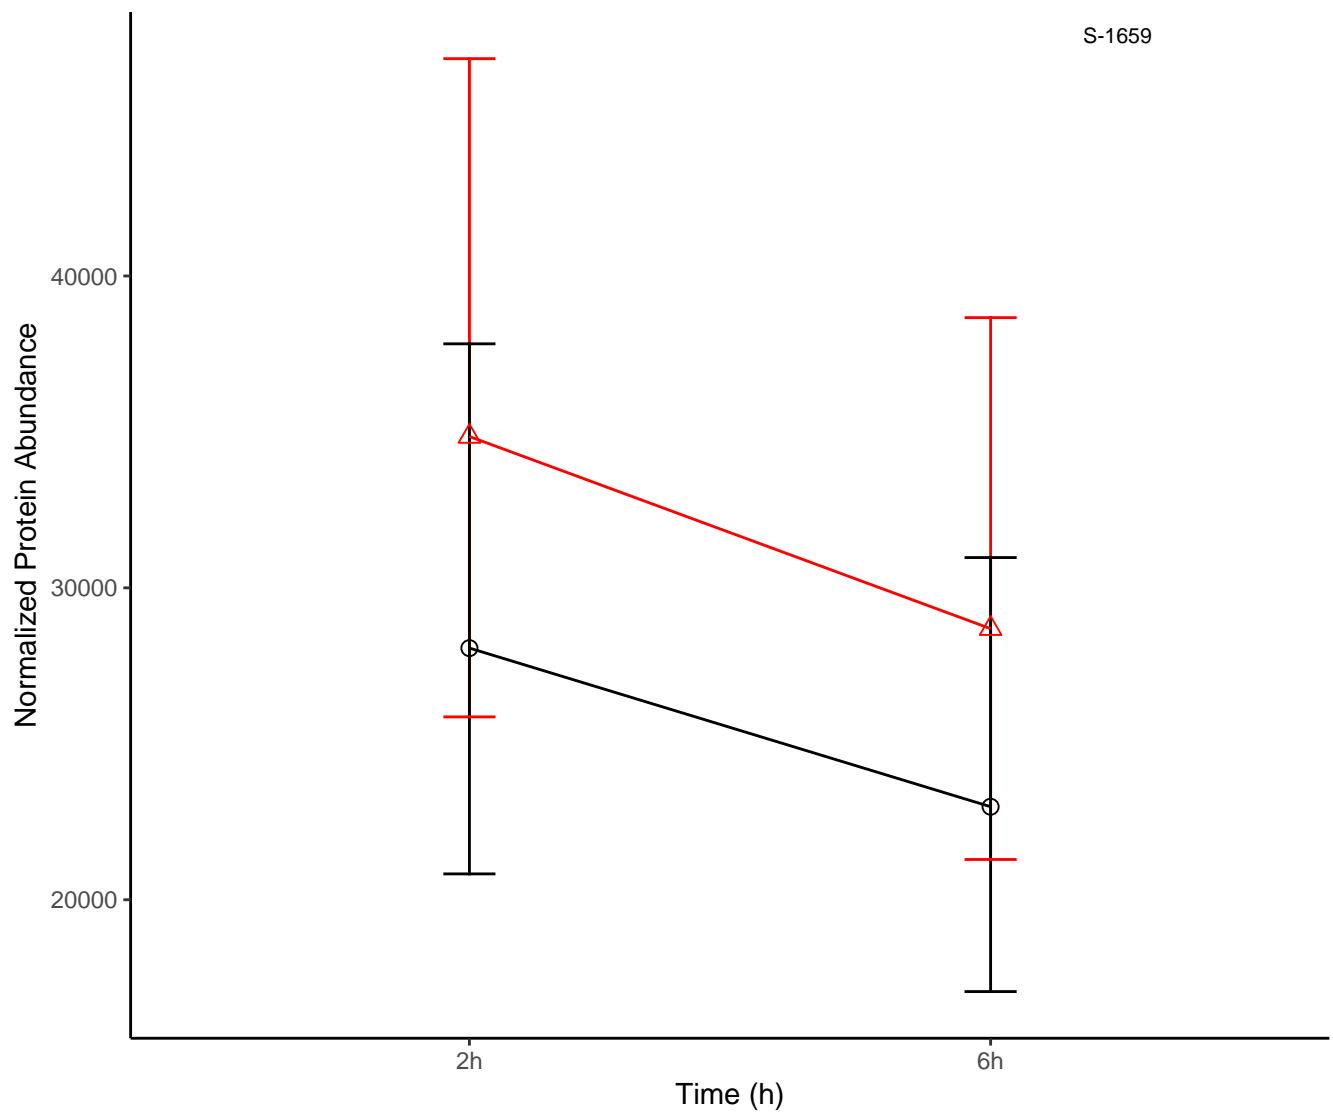

○ TSB-dex

△ TSB

# HCHA\_STAAM

S-1660

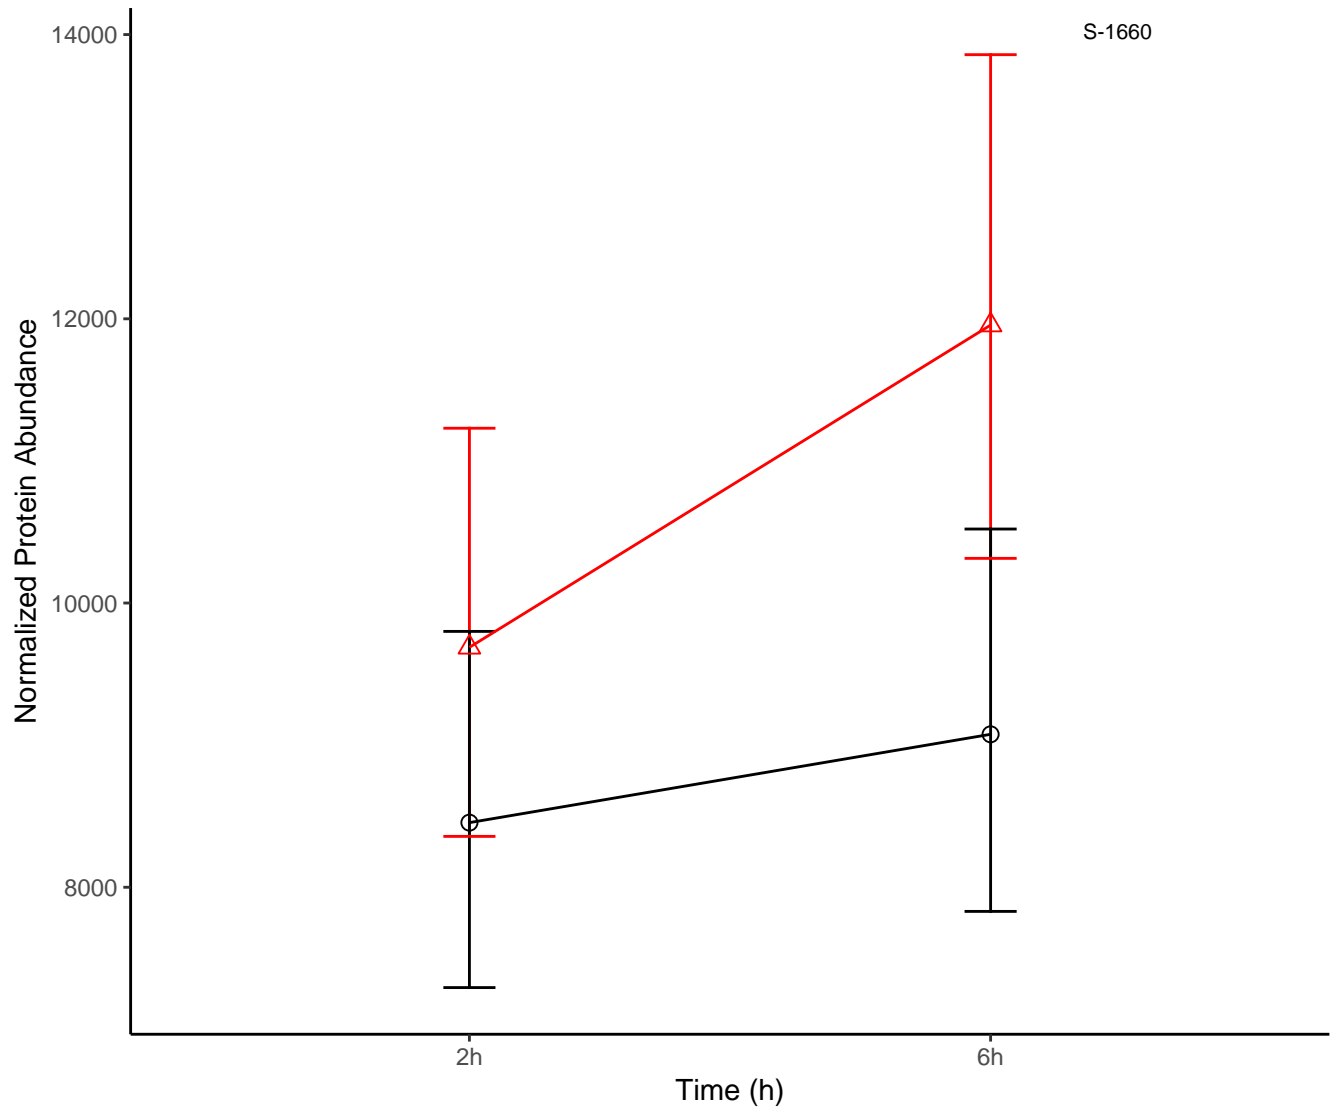

○ TSB-dex

△ TSB

# HEM2\_STAAM

S-1661

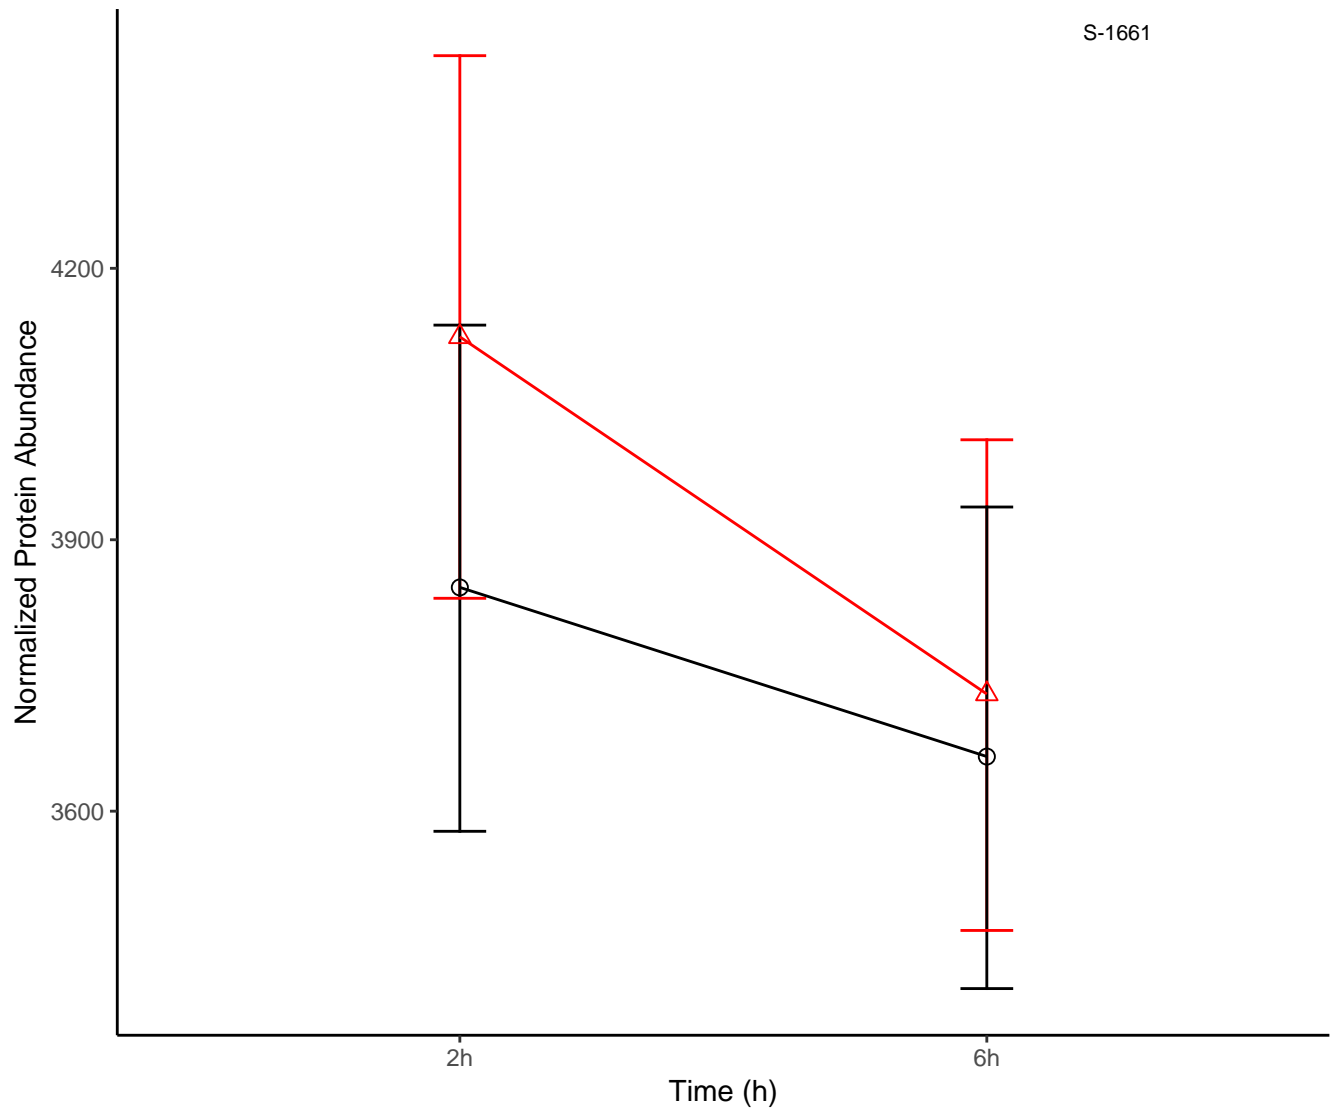

○ TSB-dex

△ TSB

# HEM3\_STAAM

S-1662

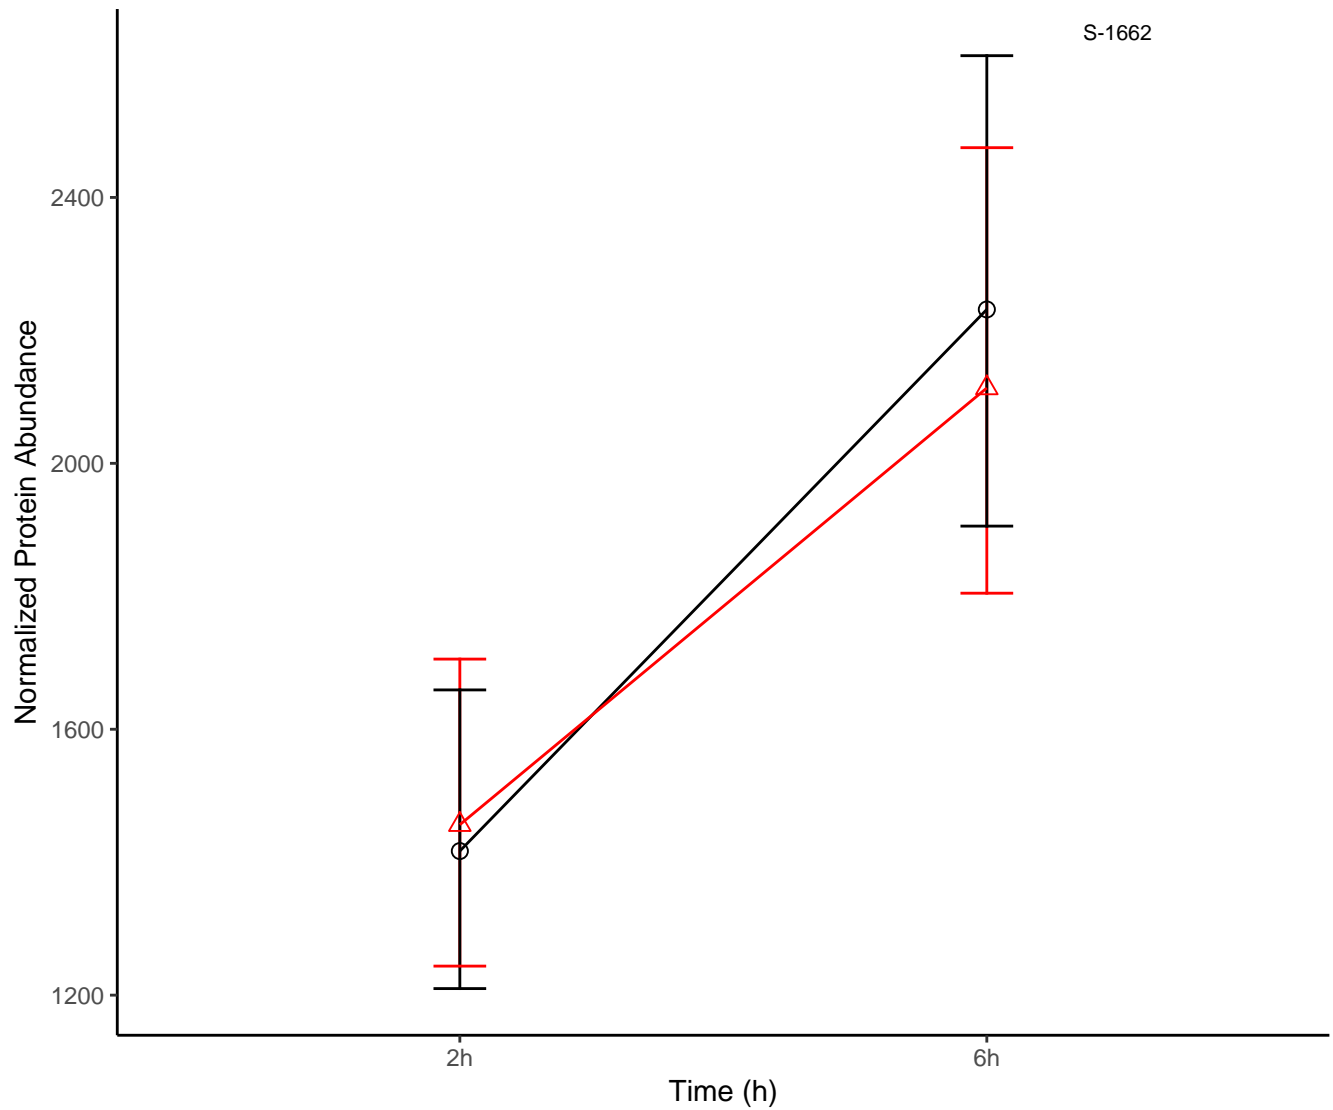

○ TSB-dex

△ TSB

# HLD\_STAAM

S-1663

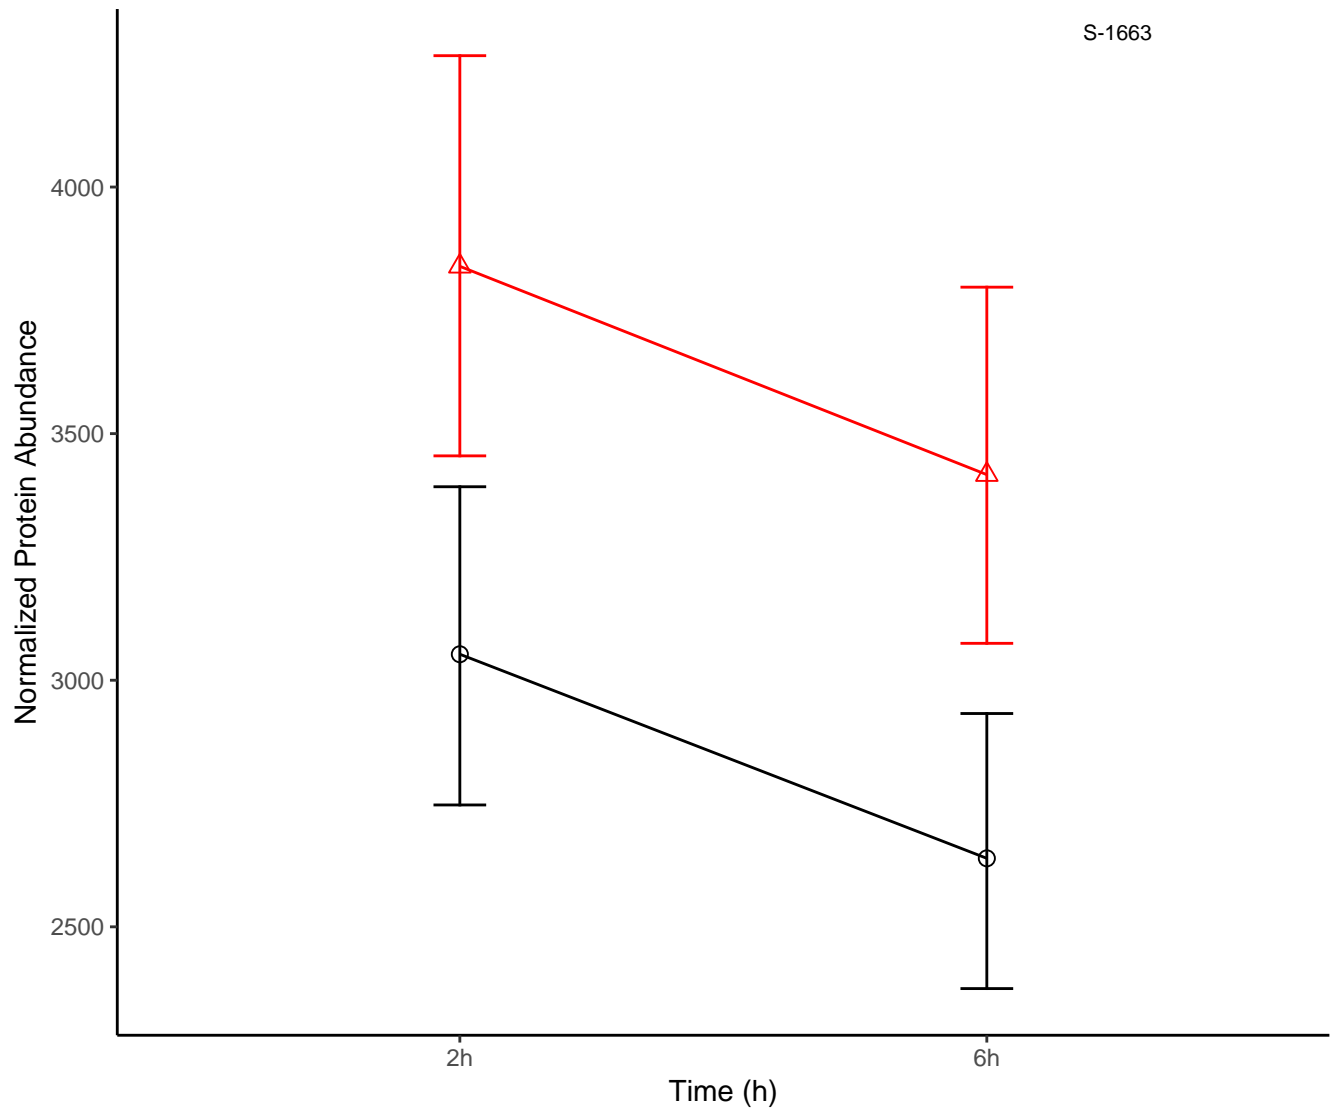

○ TSB-dex

△ TSB

# HPRK\_STAAM

S-1664

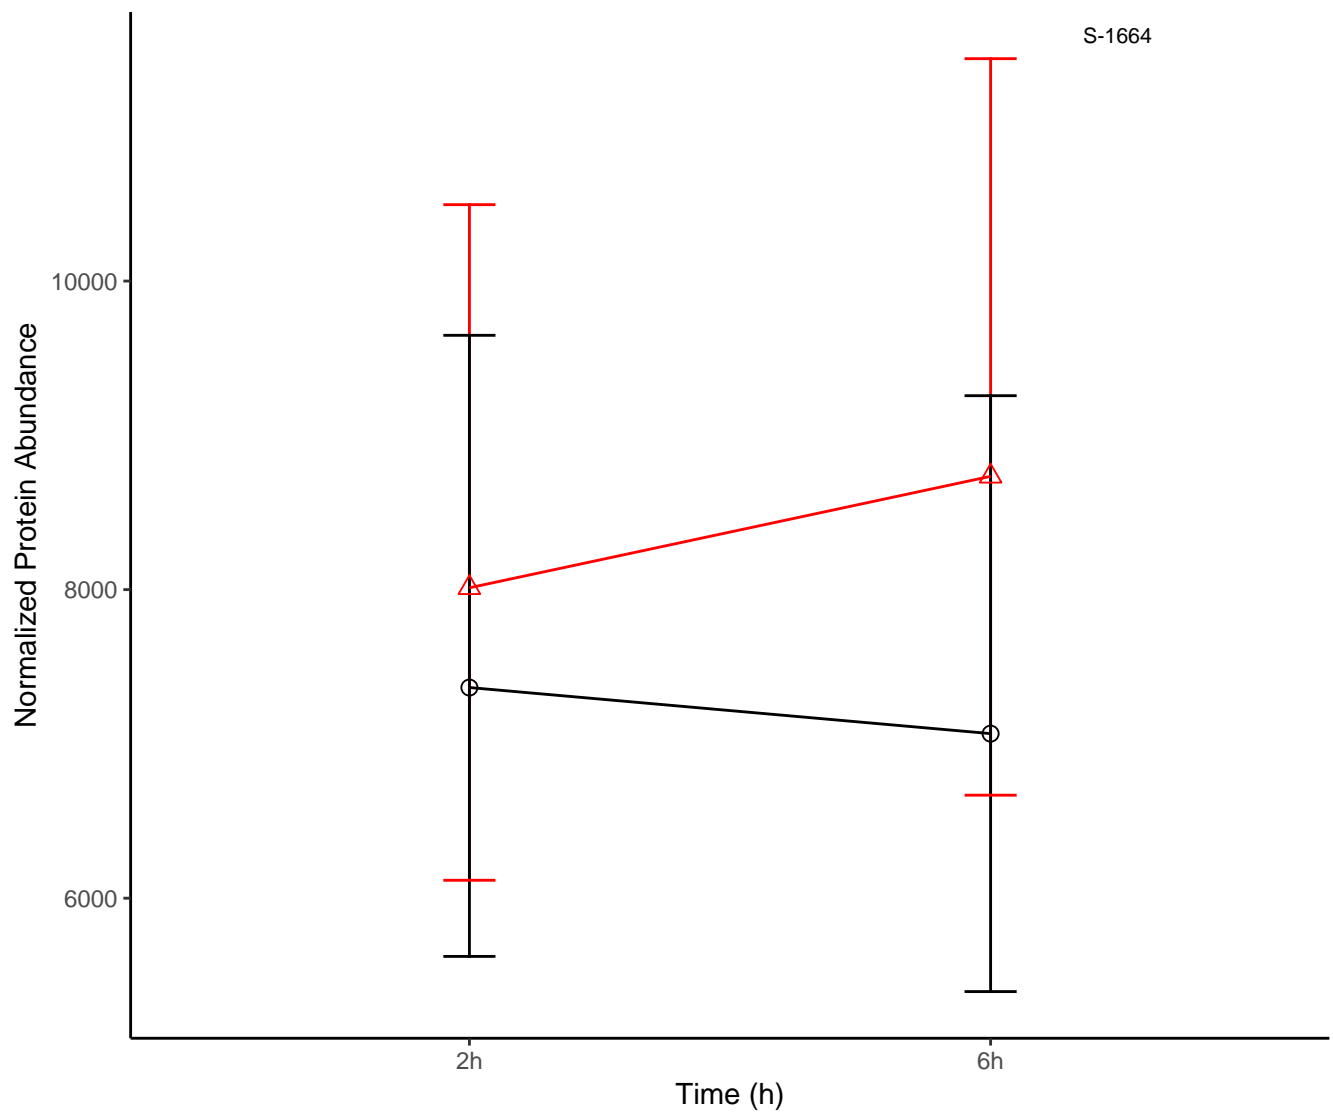

○ TSB-dex

△ TSB



# HPRT\_STAAM

S-1665

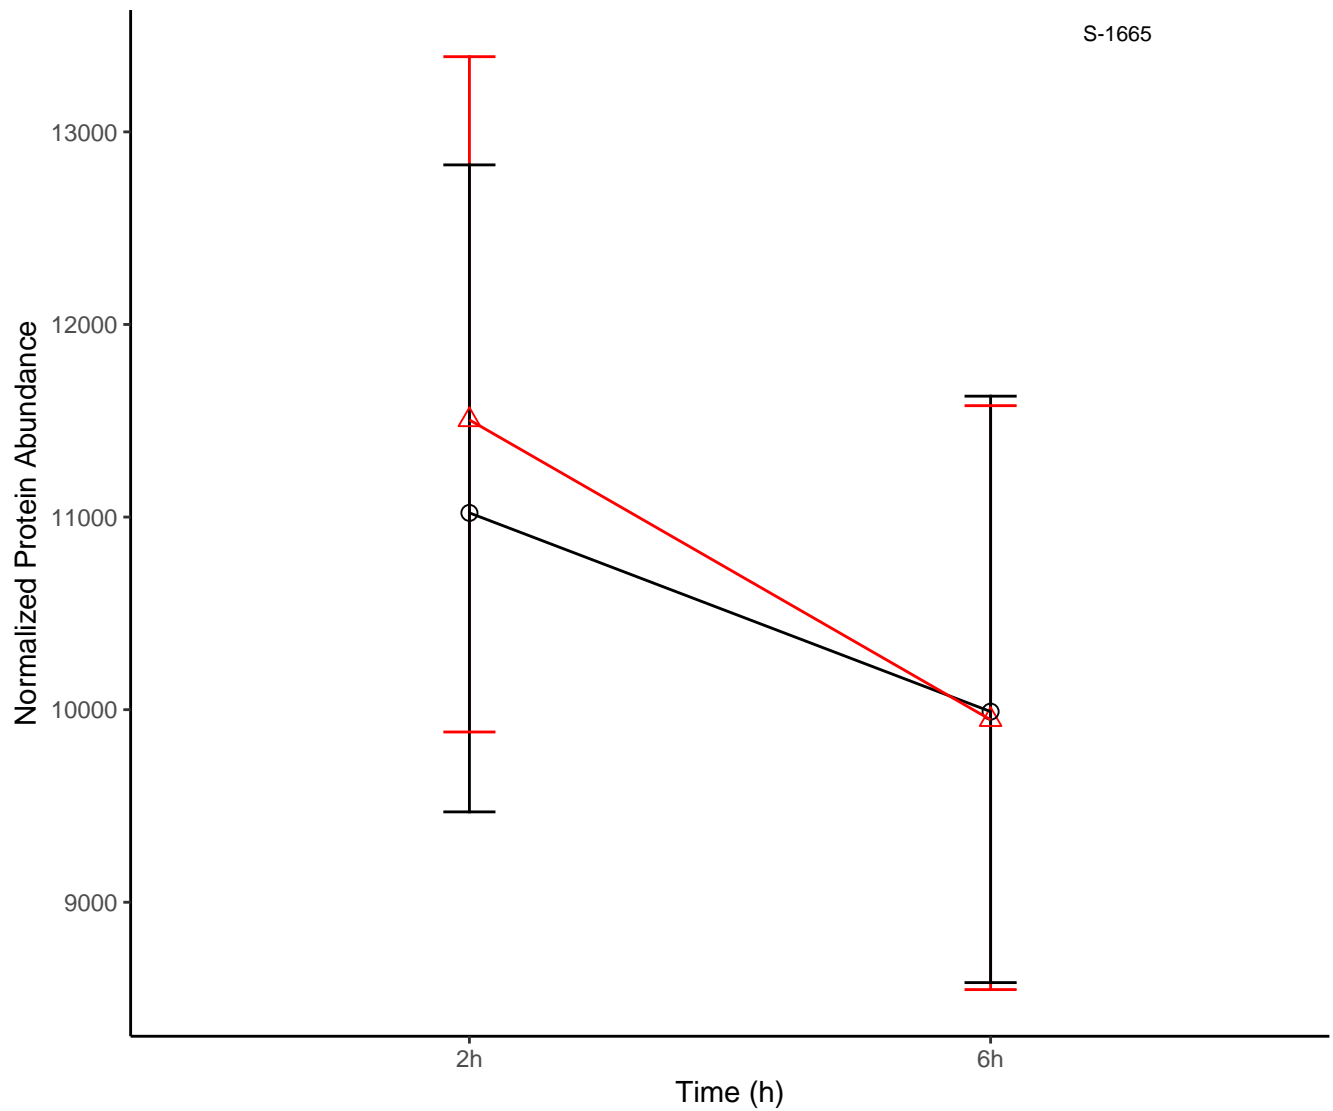

○ TSB-dex

△ TSB

# HPS\_STAAM

S-1666

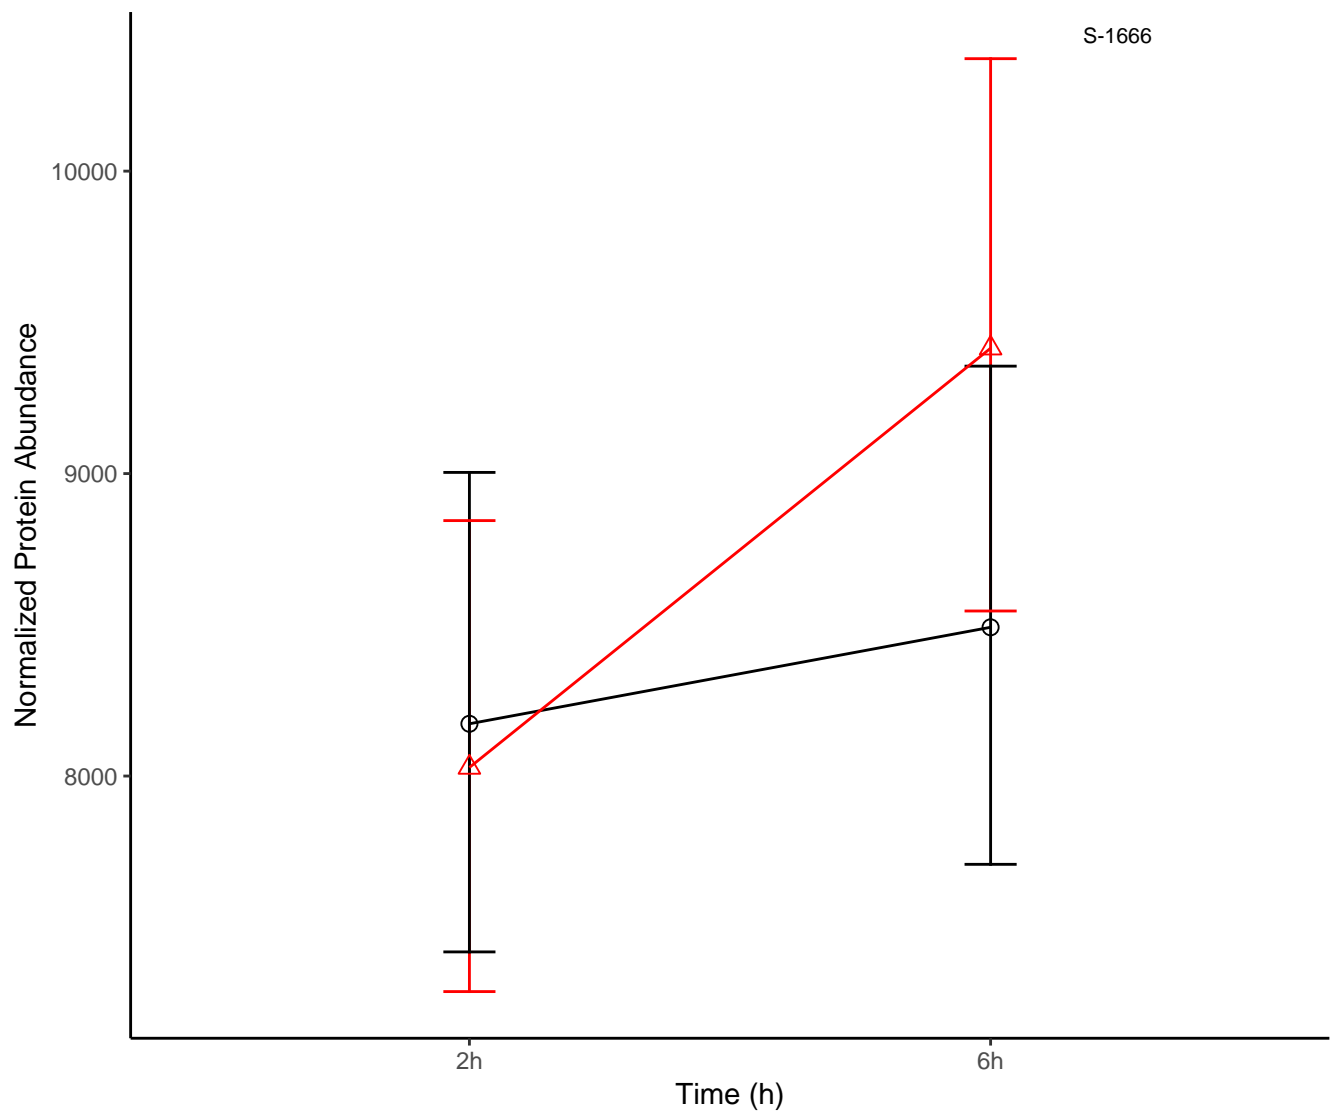

○ TSB-dex

△ TSB

# HRTA\_STAAM

S-1667

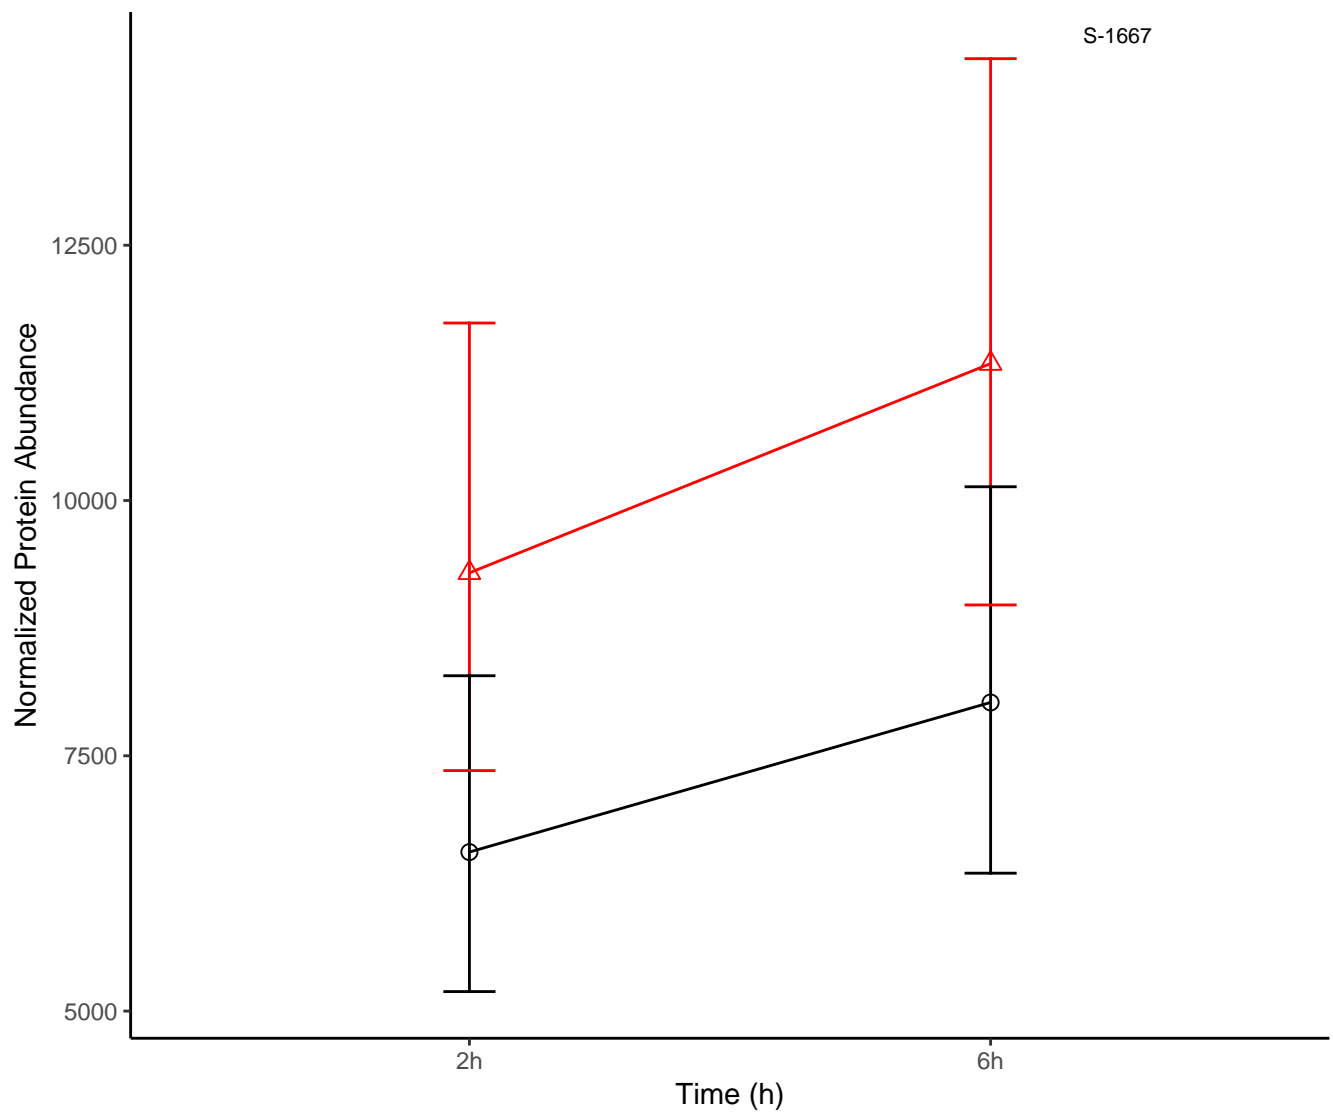

○ TSB-dex

△ TSB

# HSLO\_STAAM

S-1668

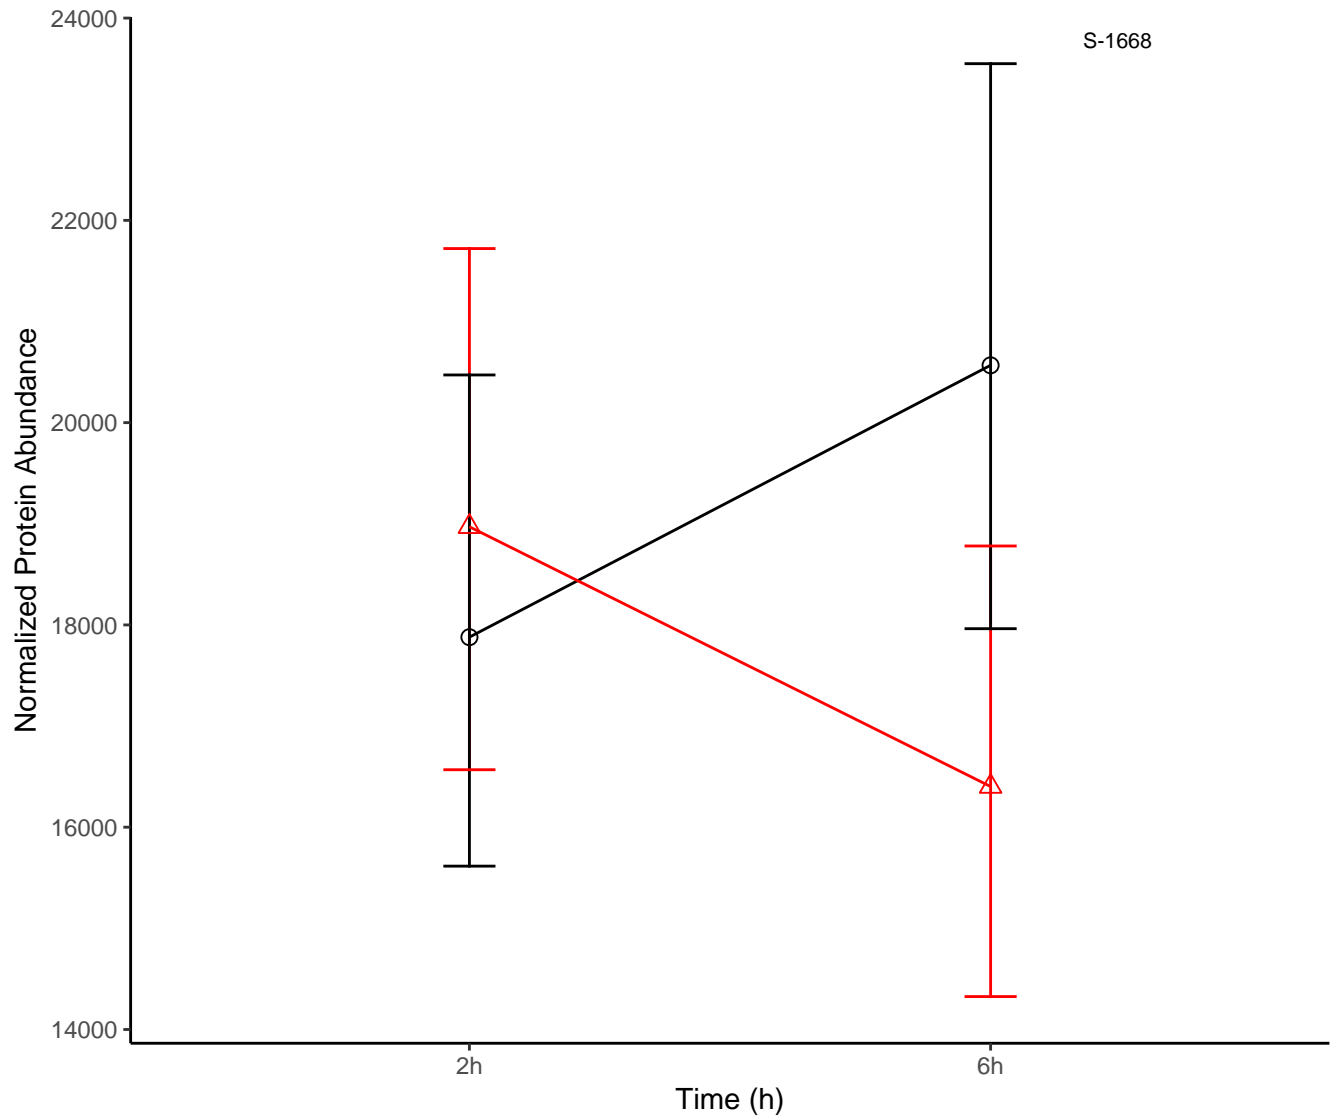

○ TSB-dex

△ TSB

# HSLU\_STAAM

S-1669

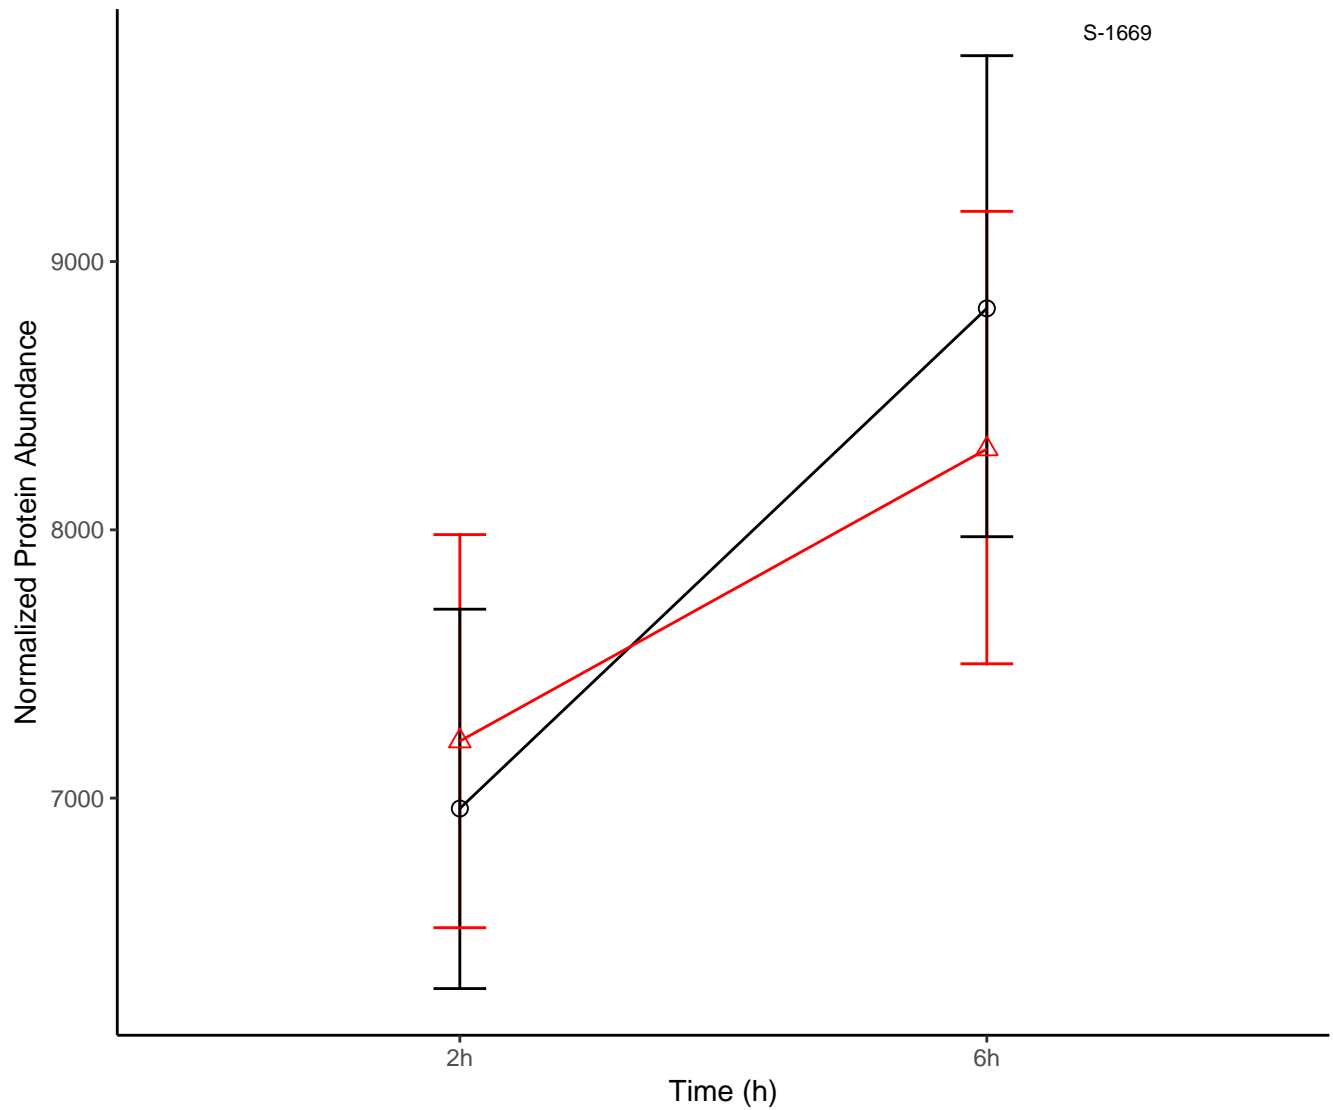

○ TSB-dex

△ TSB

# HSLV\_STAAM

S-1670

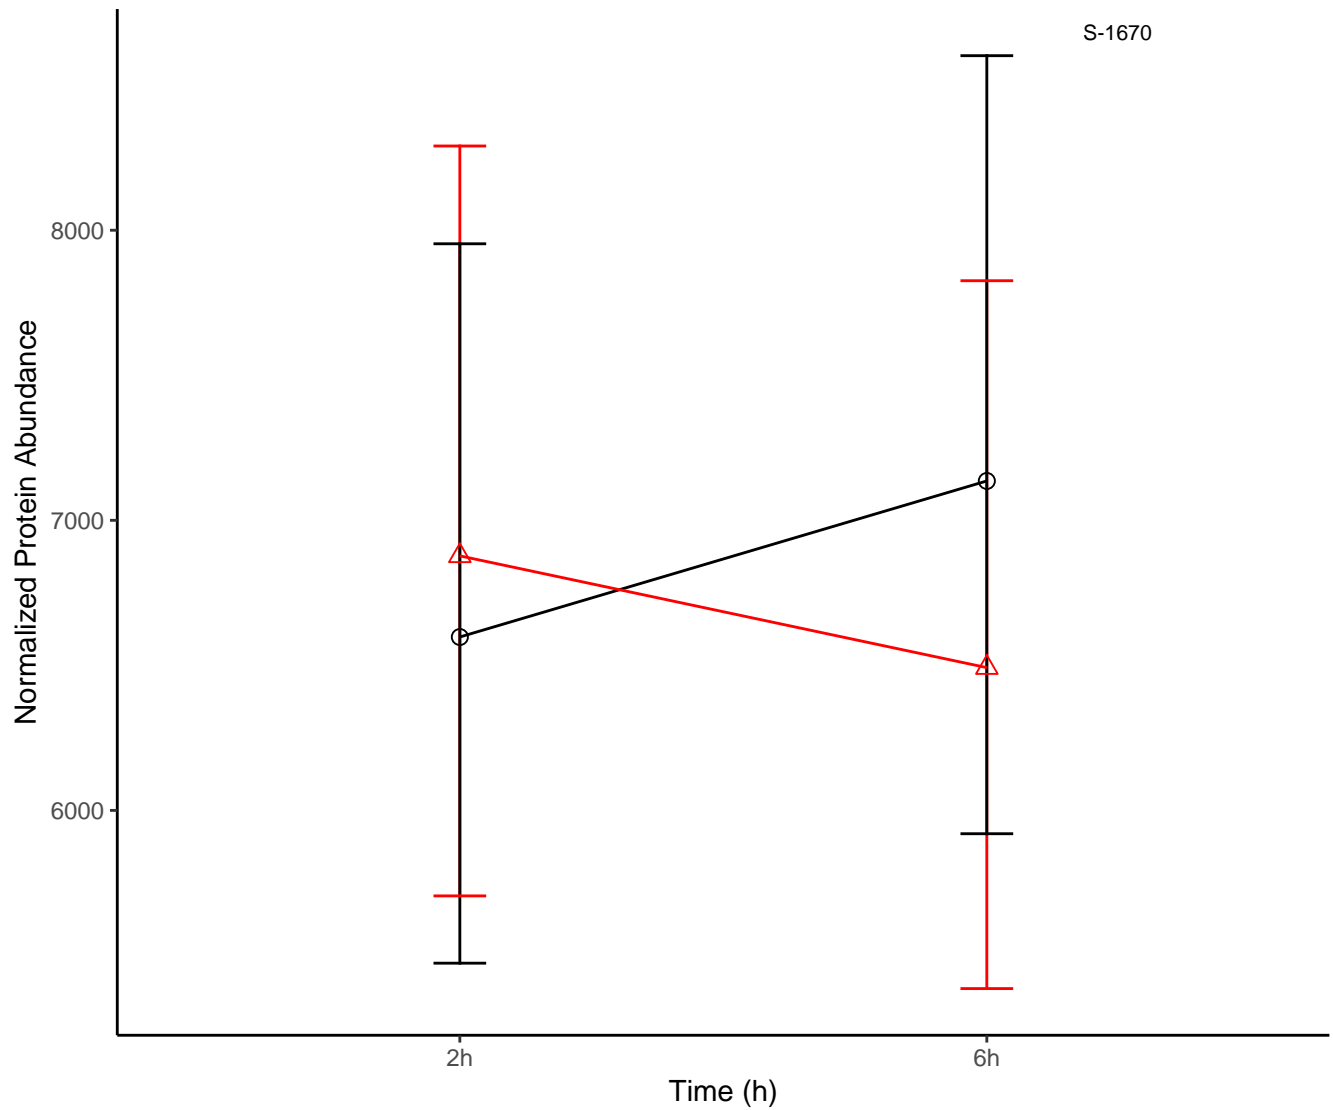

○ TSB-dex

△ TSB

# HUTH\_STAAM

S-1671

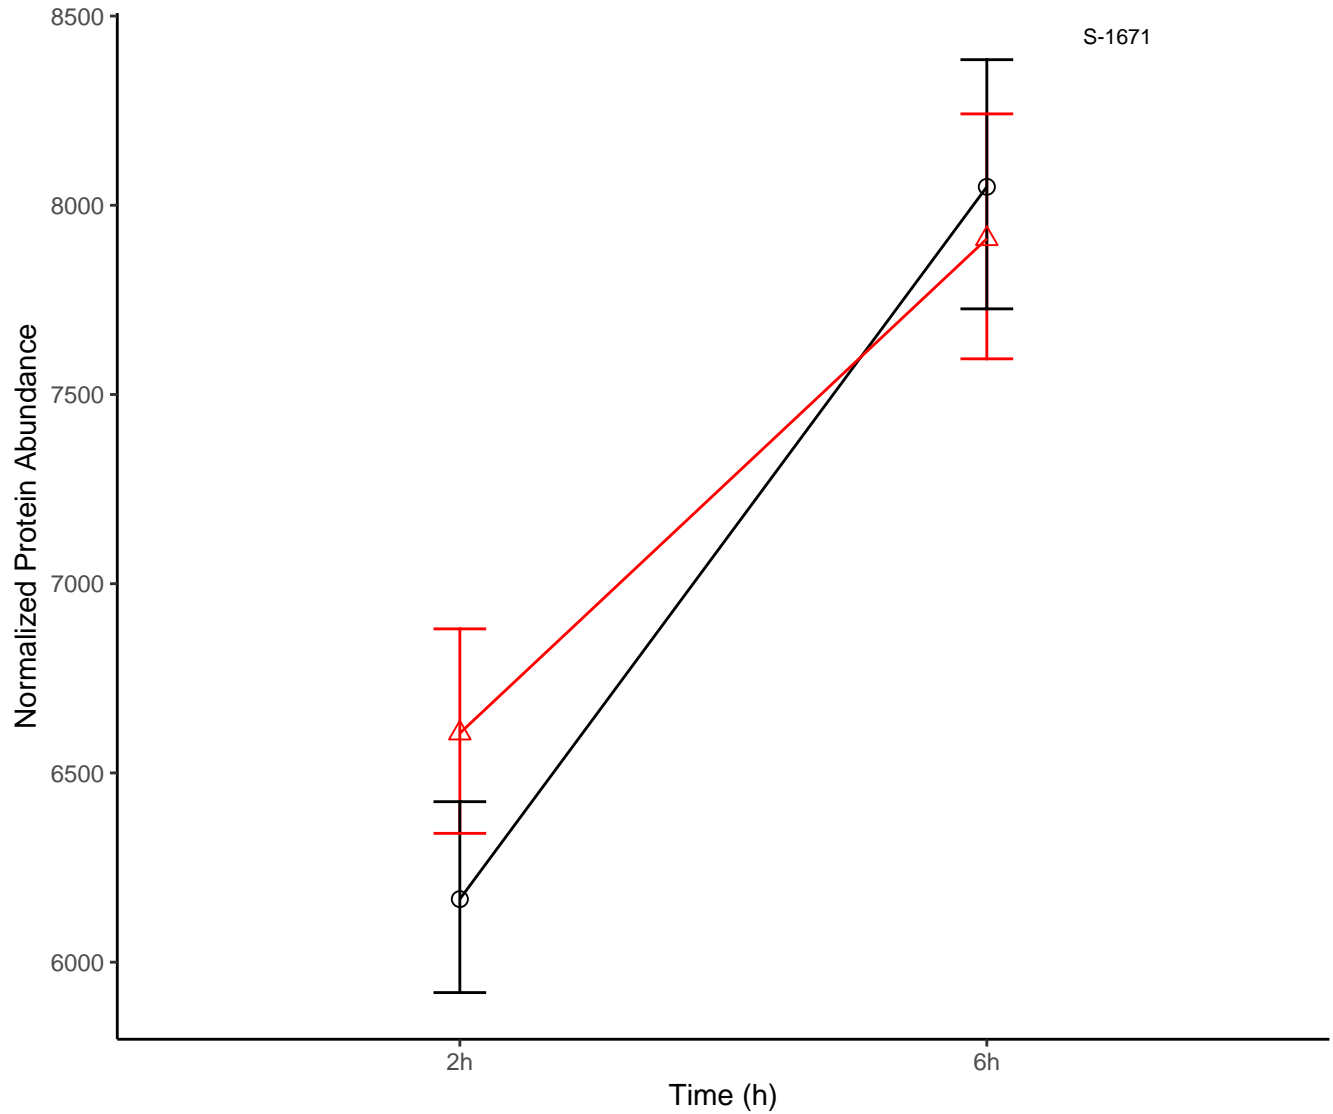

○ TSB-dex

△ TSB

# HUTI\_STAAM

S-1672

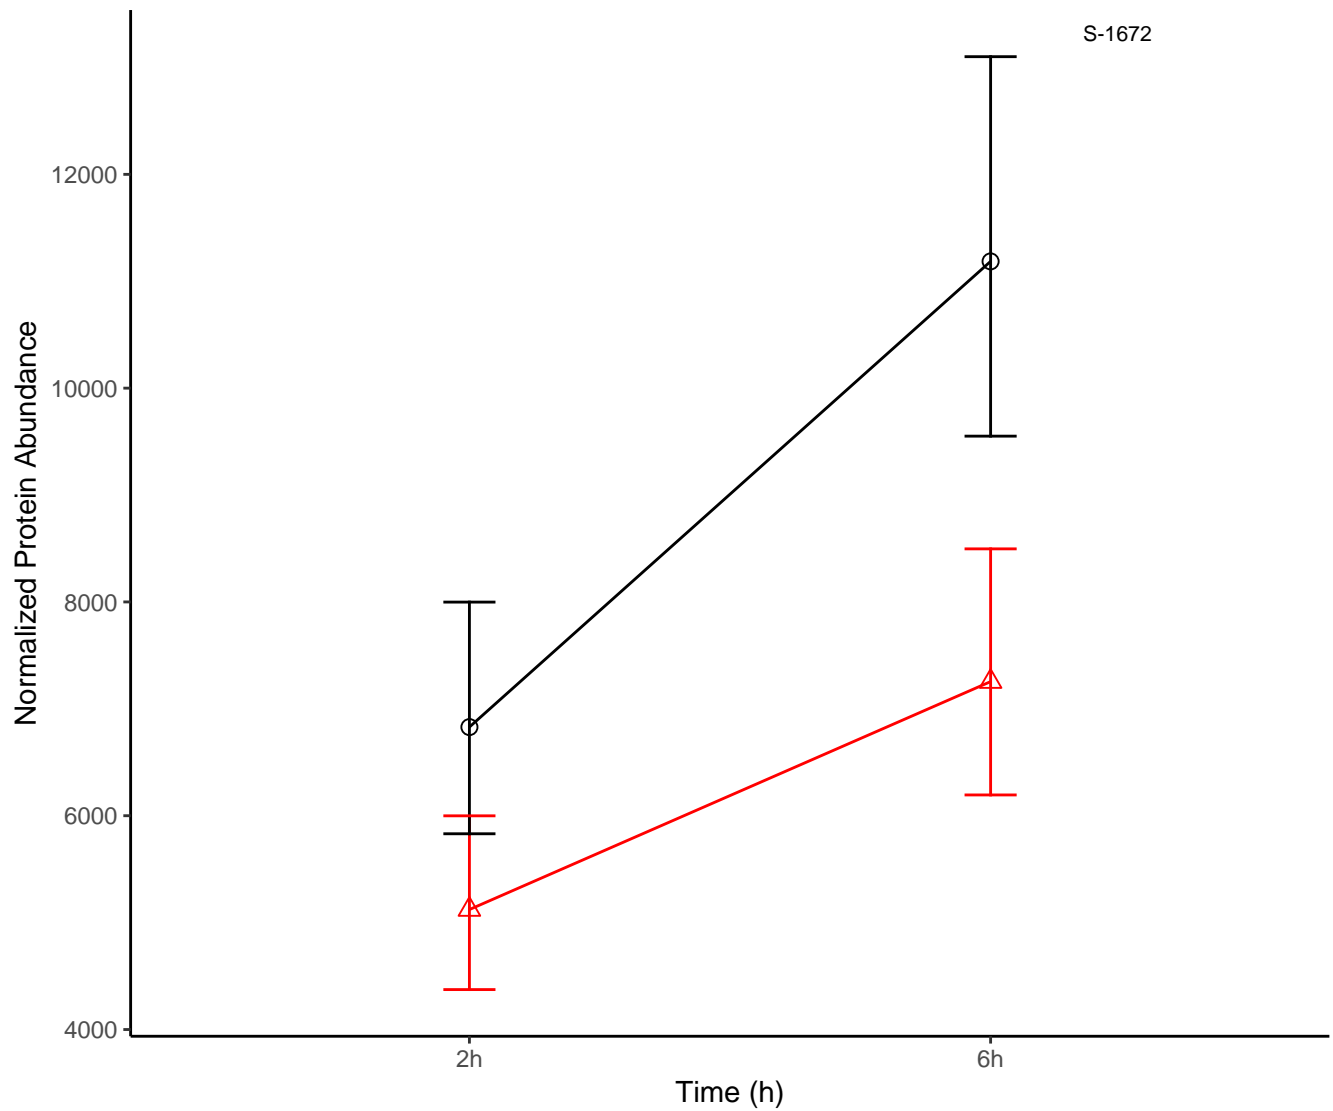

○ TSB-dex

△ TSB



# HUTU\_STAAM

S-1673

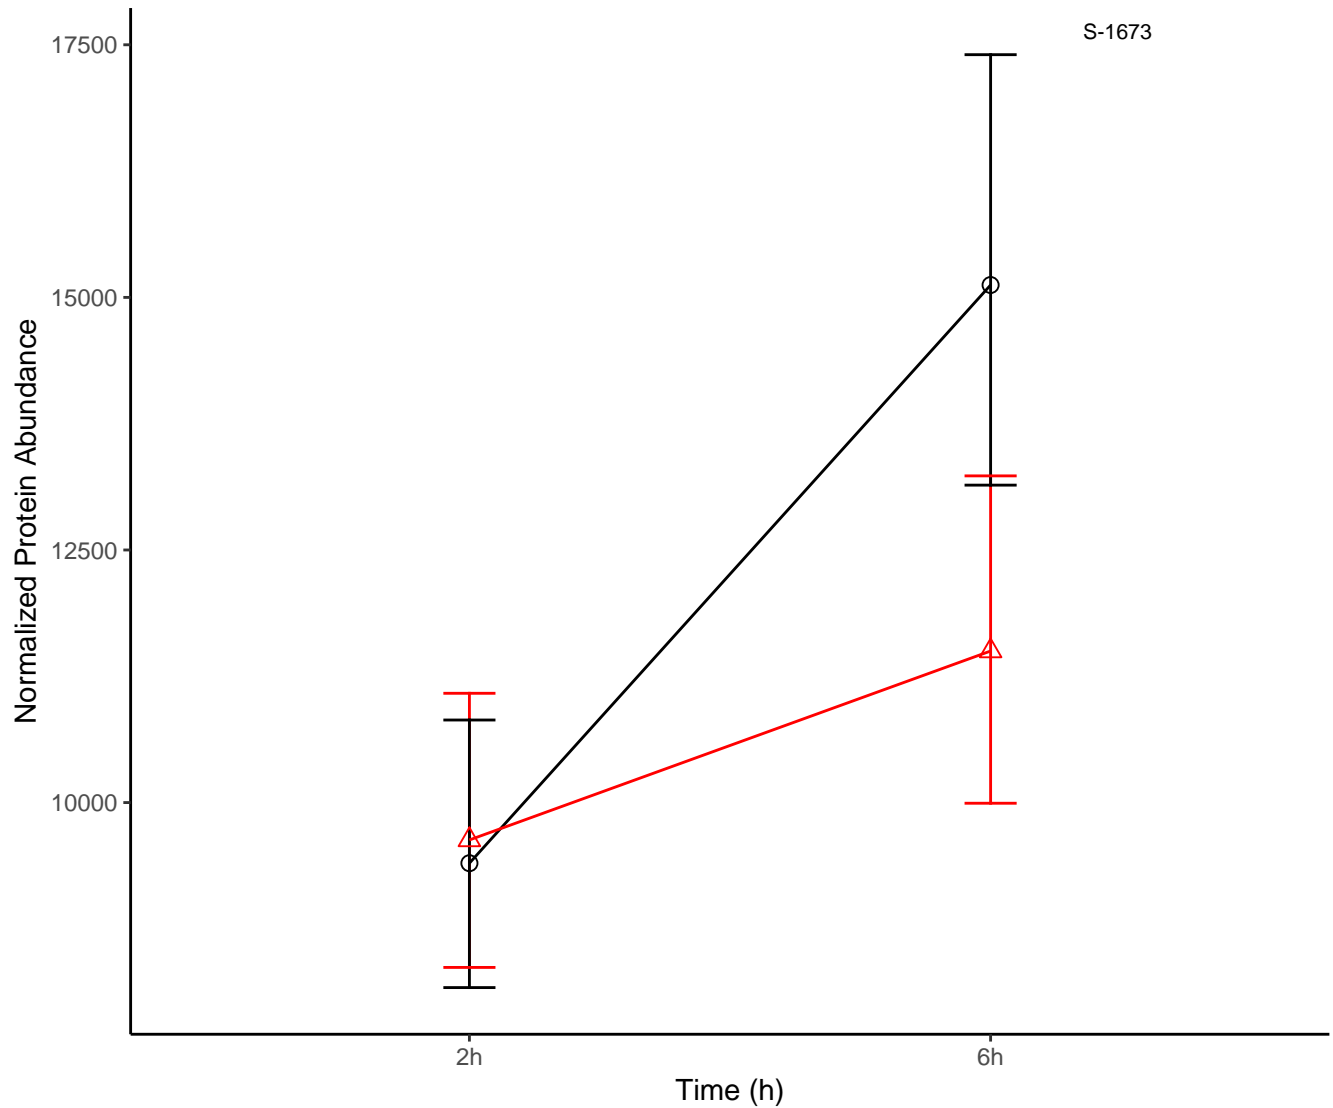

○ TSB-dex

△ TSB

# ICAB\_STAAM

S-1674

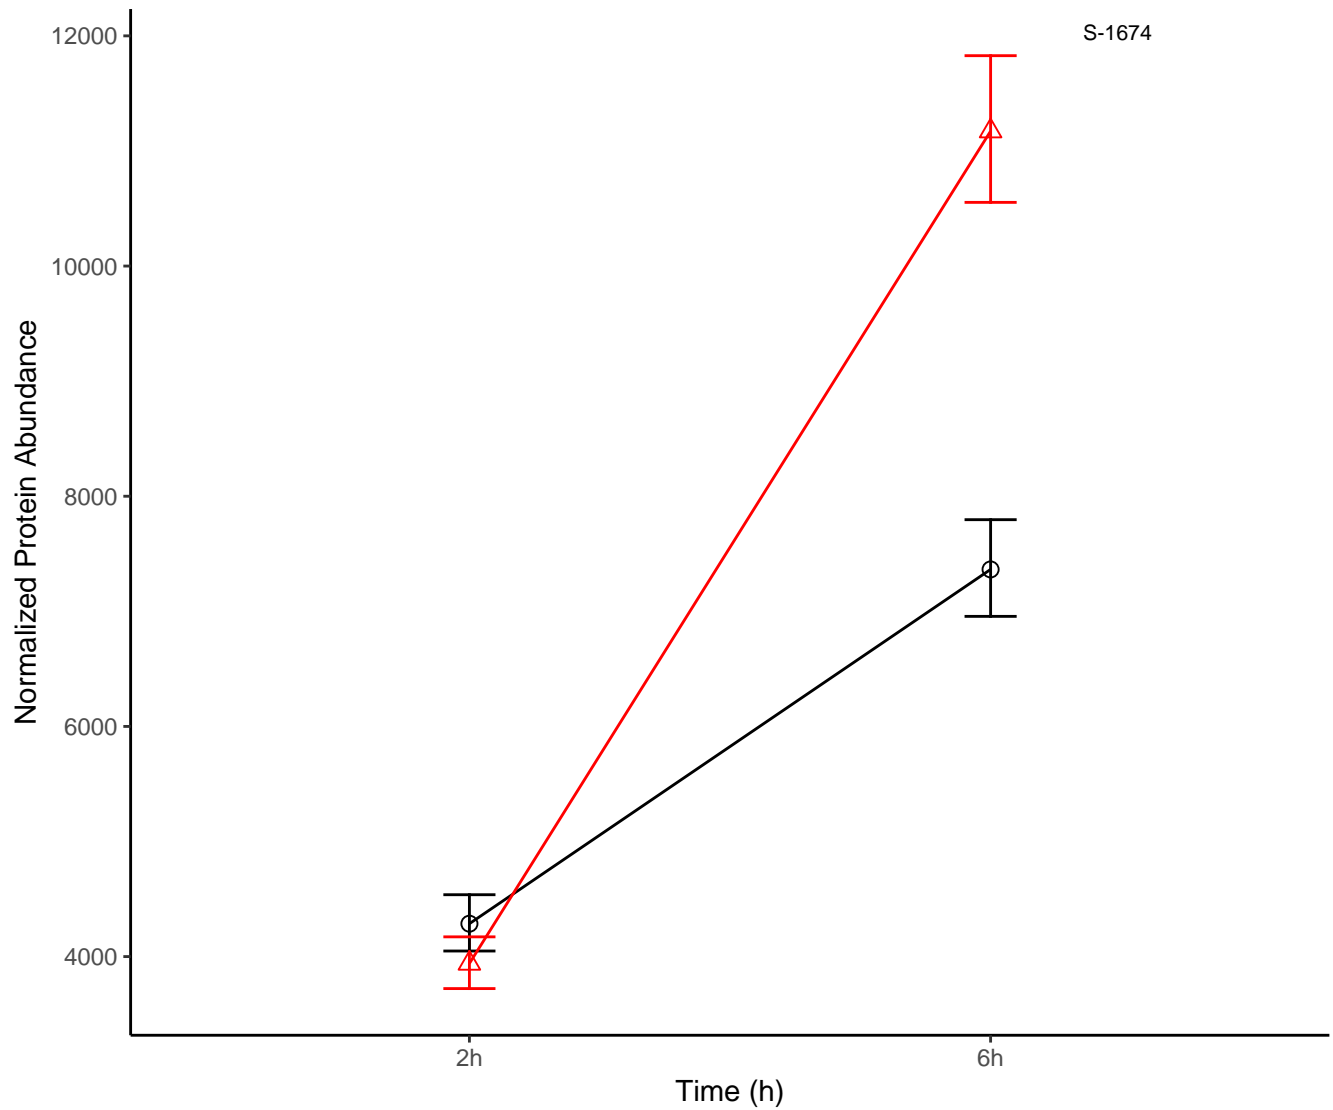

○ TSB-dex

△ TSB

# IDH\_STAAM

S-1675

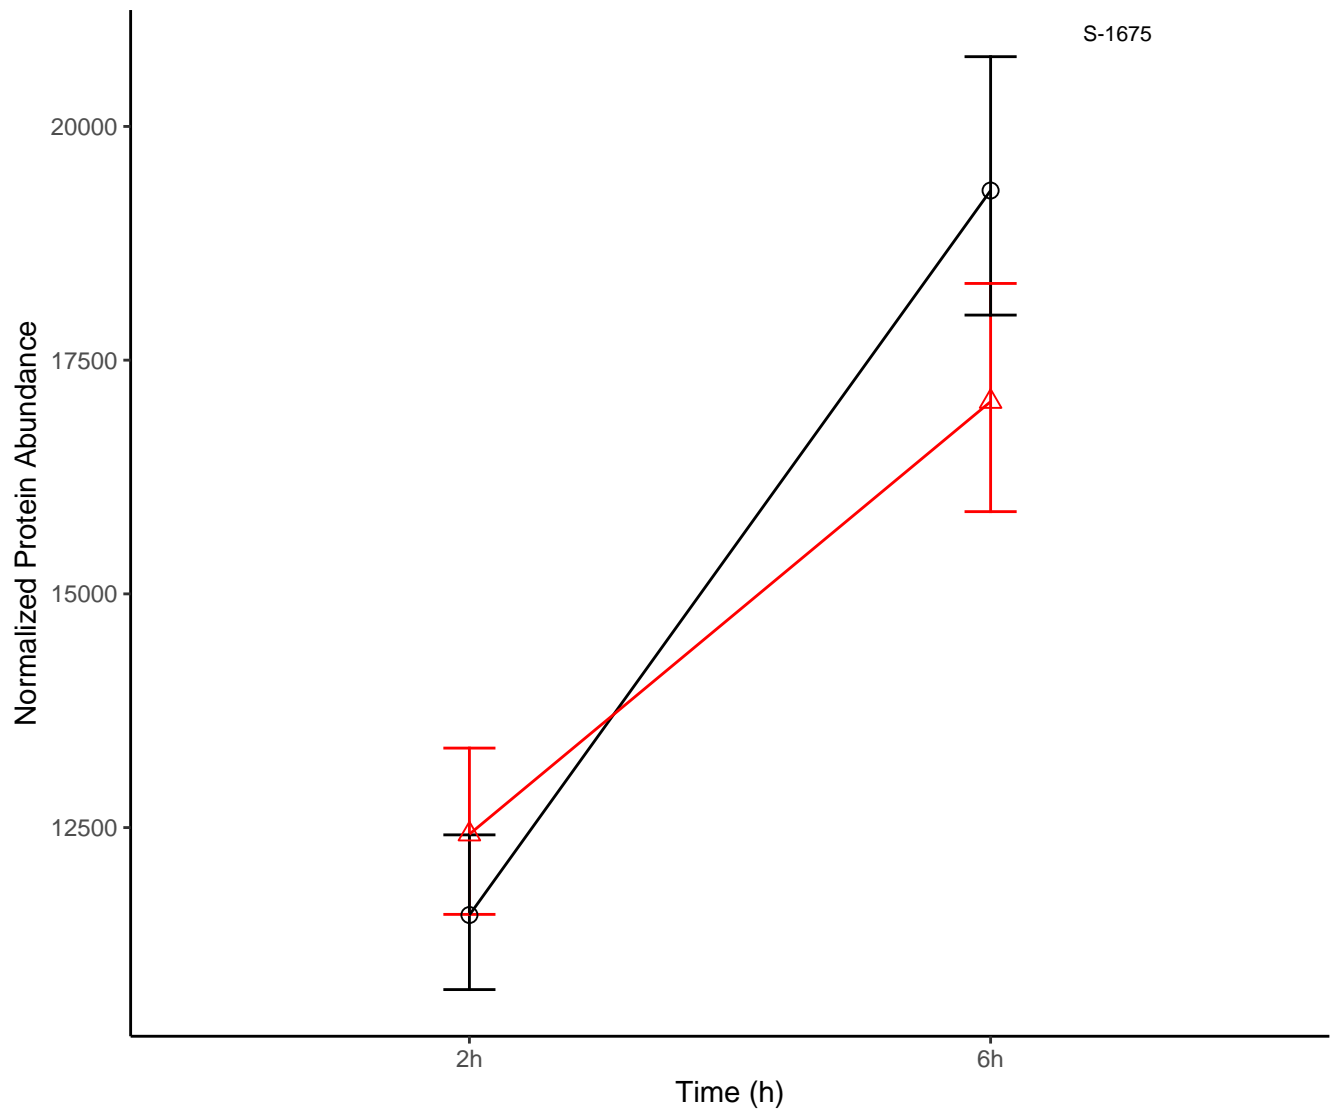

○ TSB-dex

△ TSB

# IF1\_STAAM

S-1676

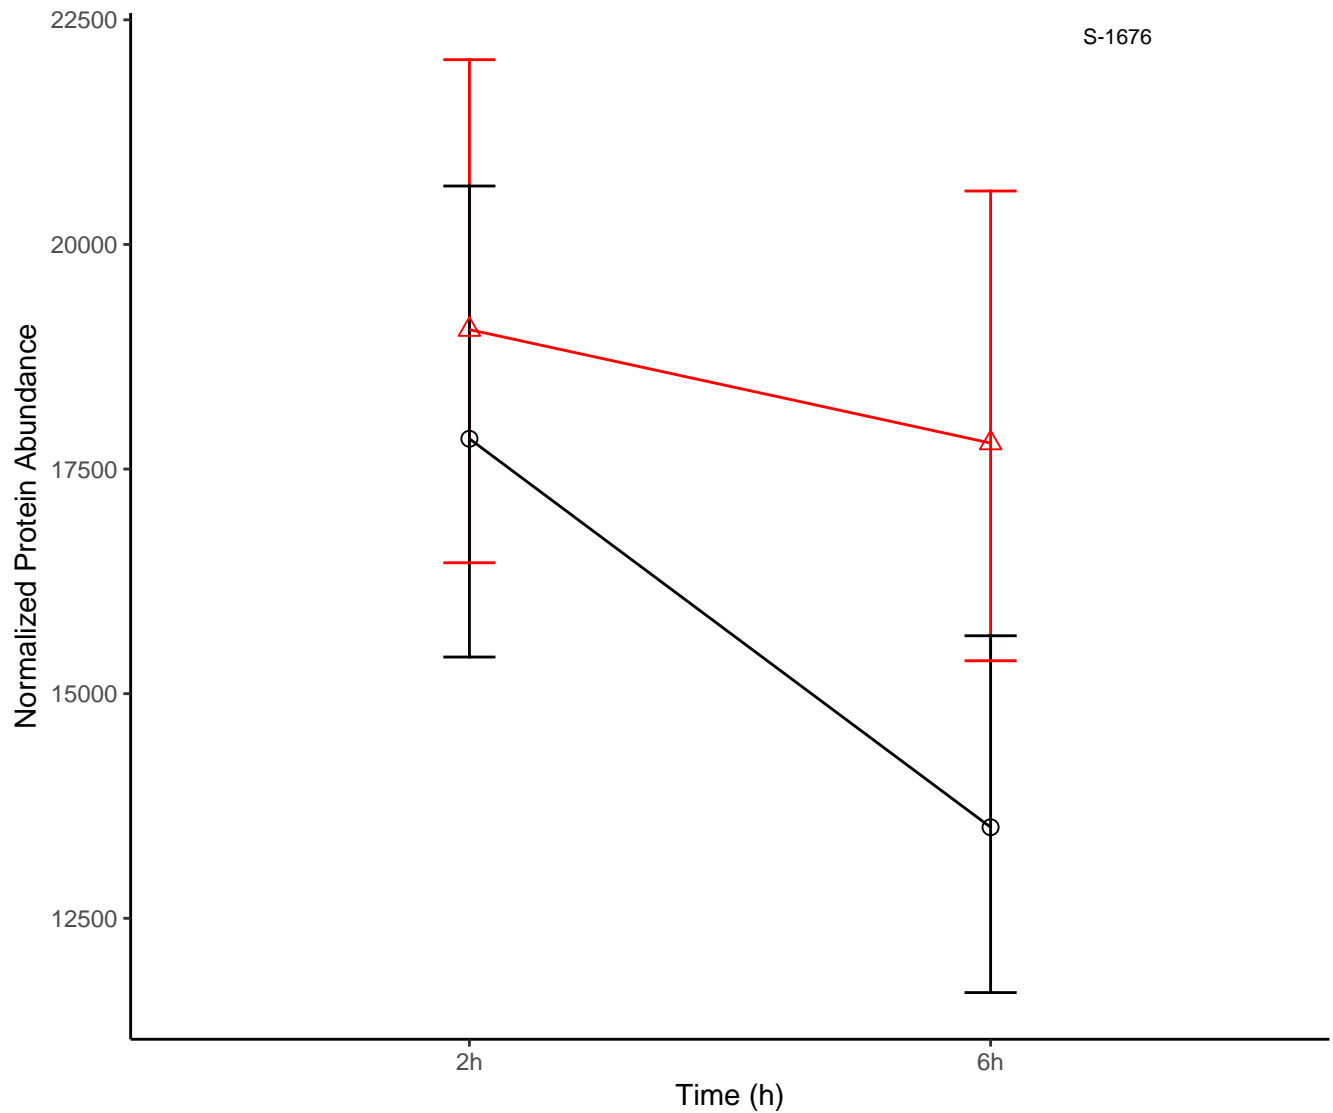

○ TSB-dex

△ TSB

# IF2\_STAAM

S-1677

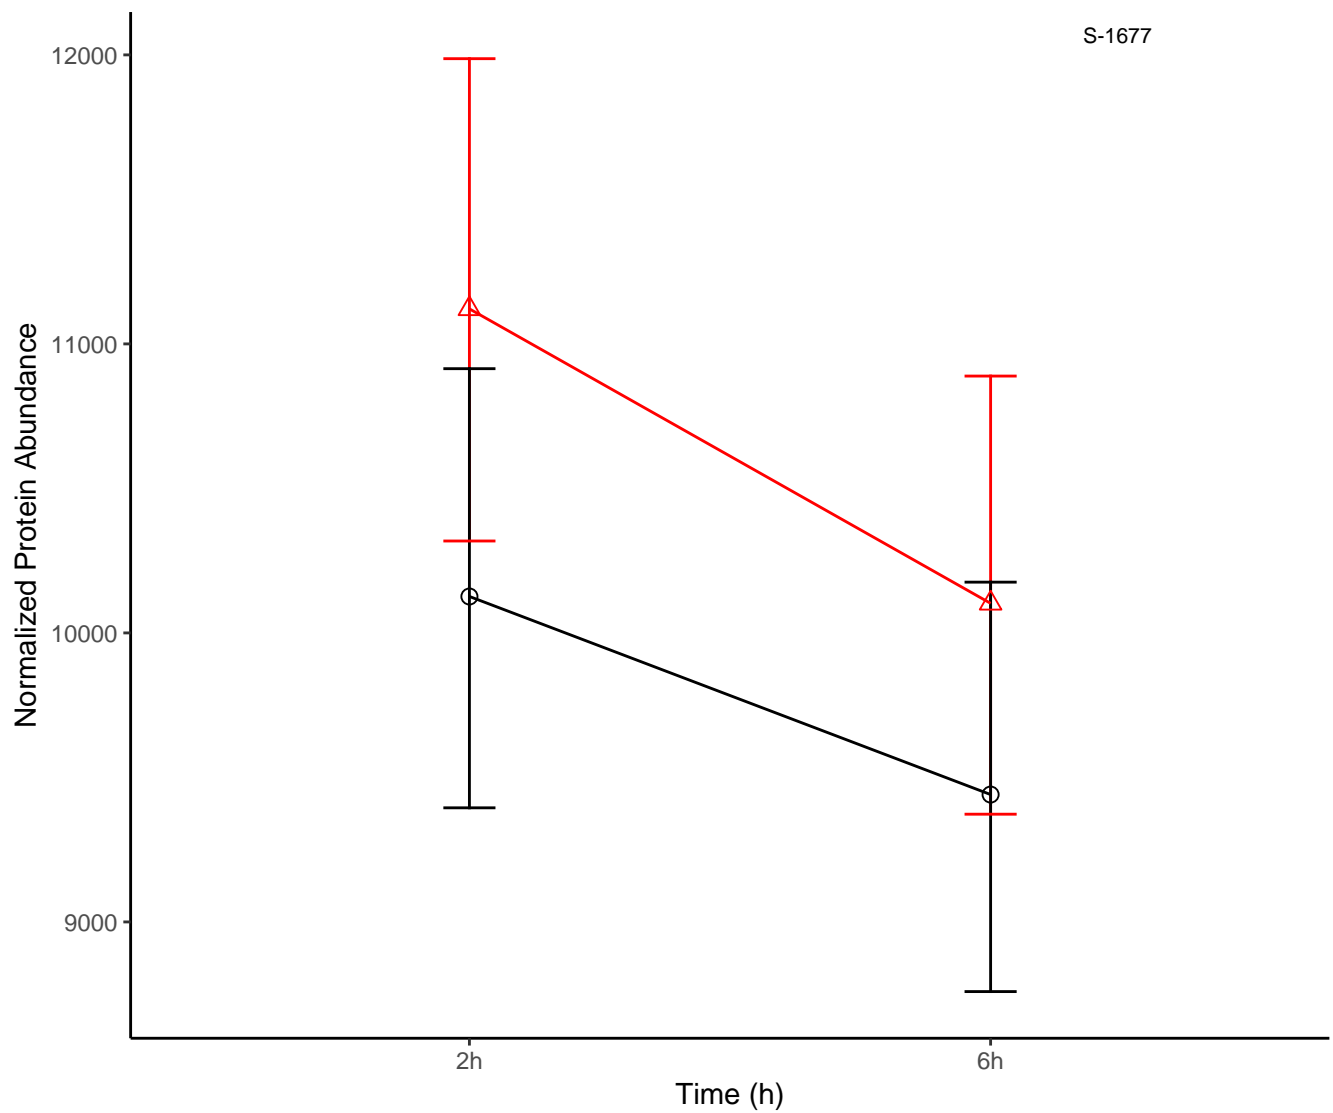

○ TSB-dex

△ TSB

# IF3\_STAAM

S-1678

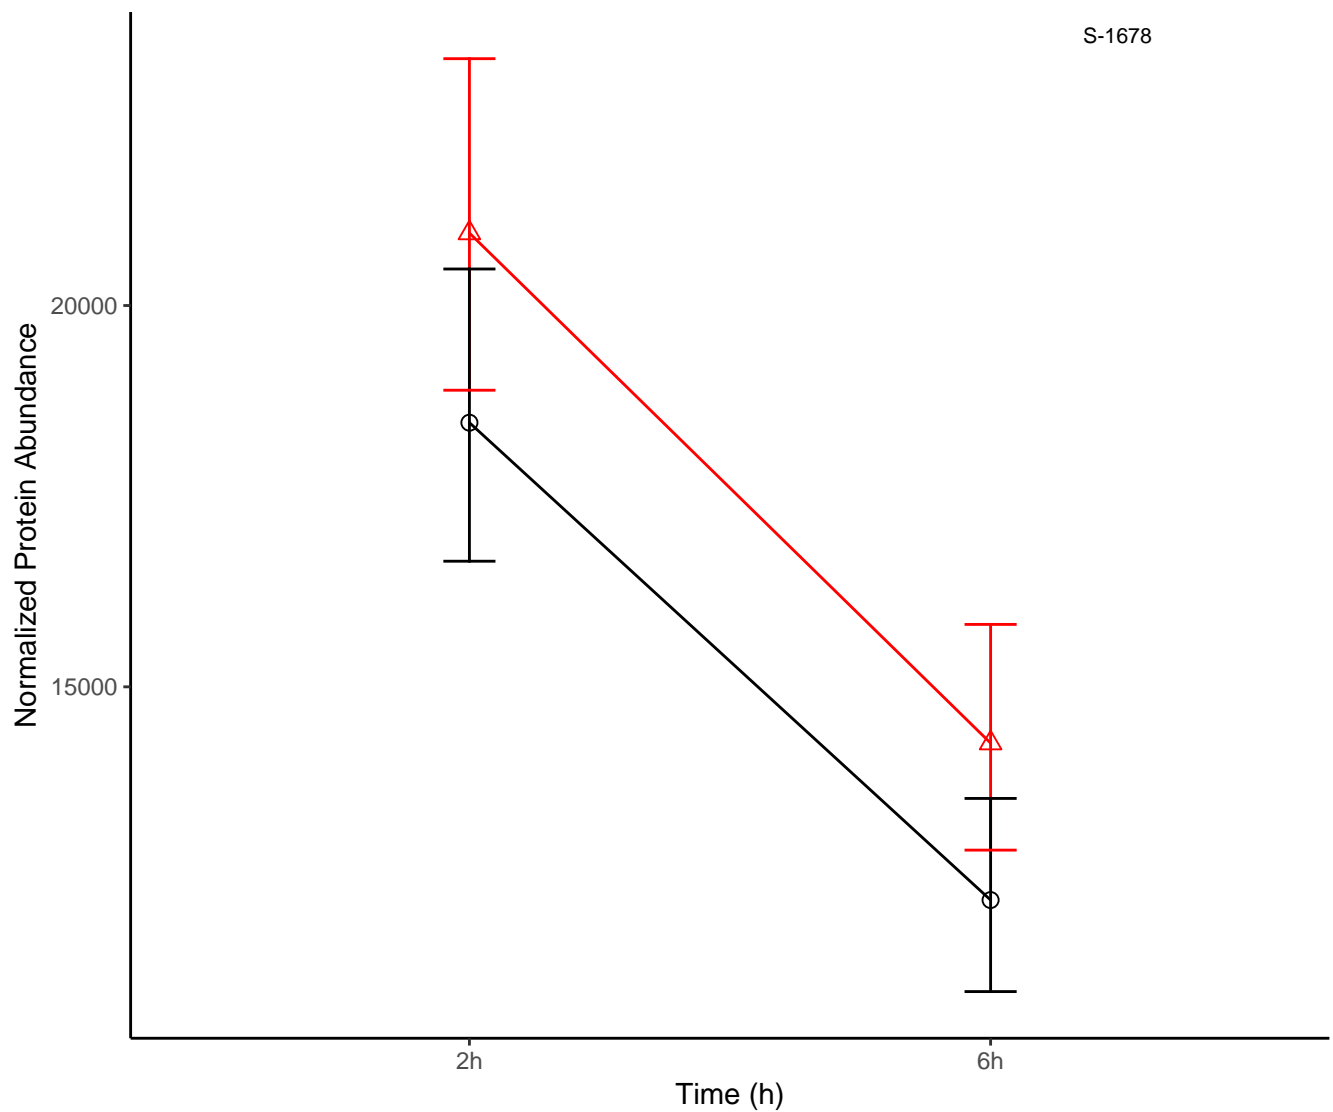

○ TSB-dex

△ TSB

# ILVC\_STAAM

S-1679

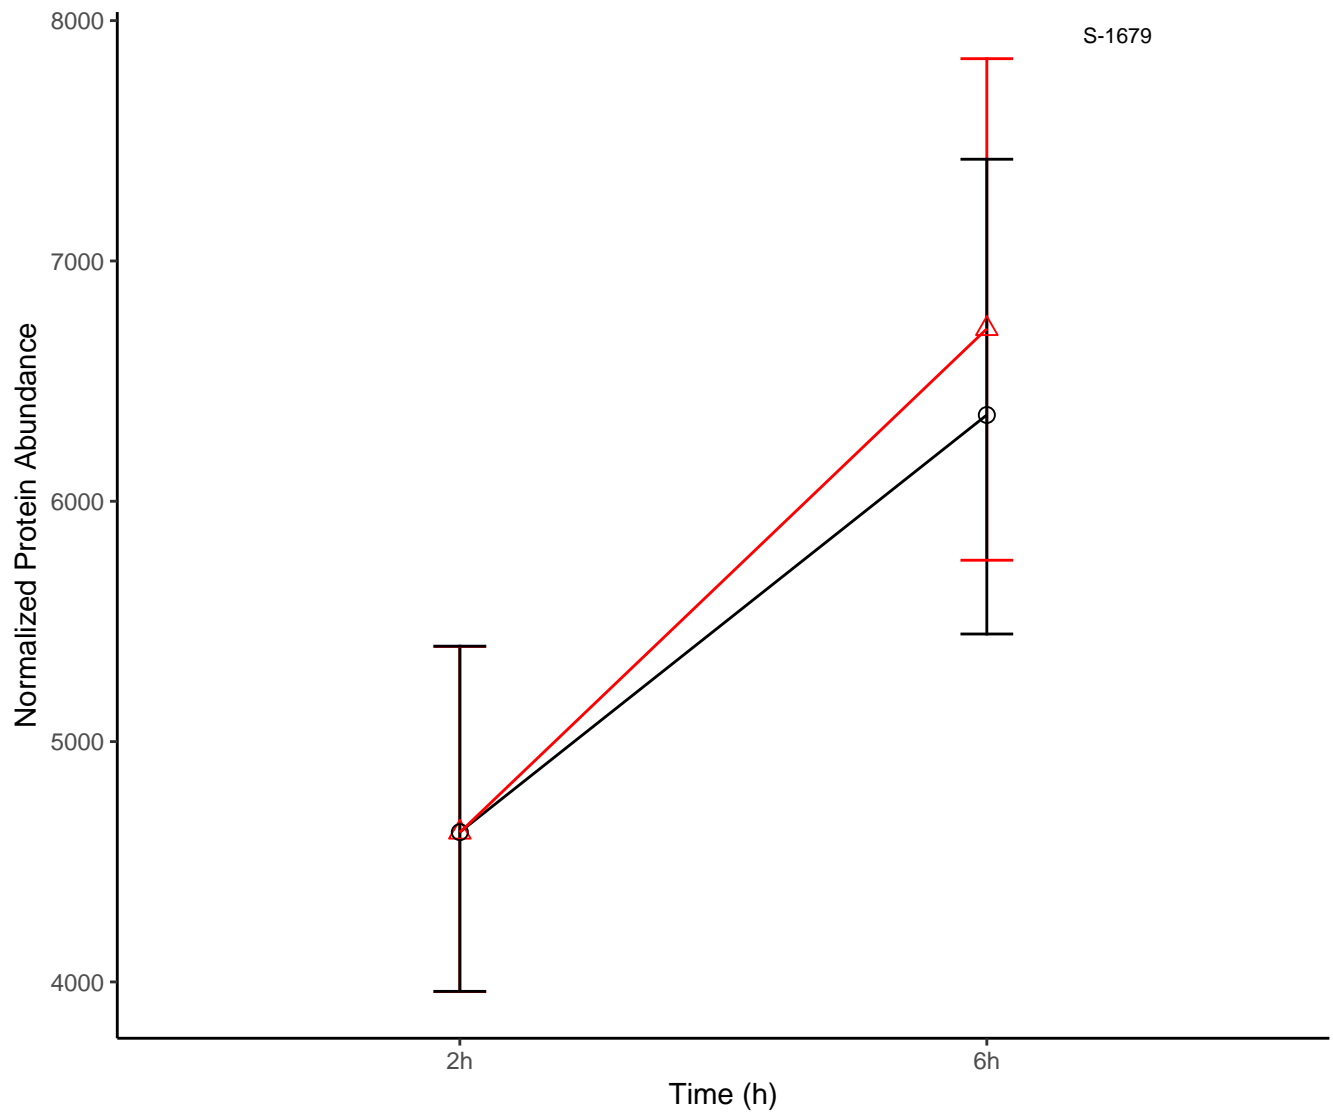

○ TSB-dex

△ TSB

# ILVE\_STAAM

S-1680

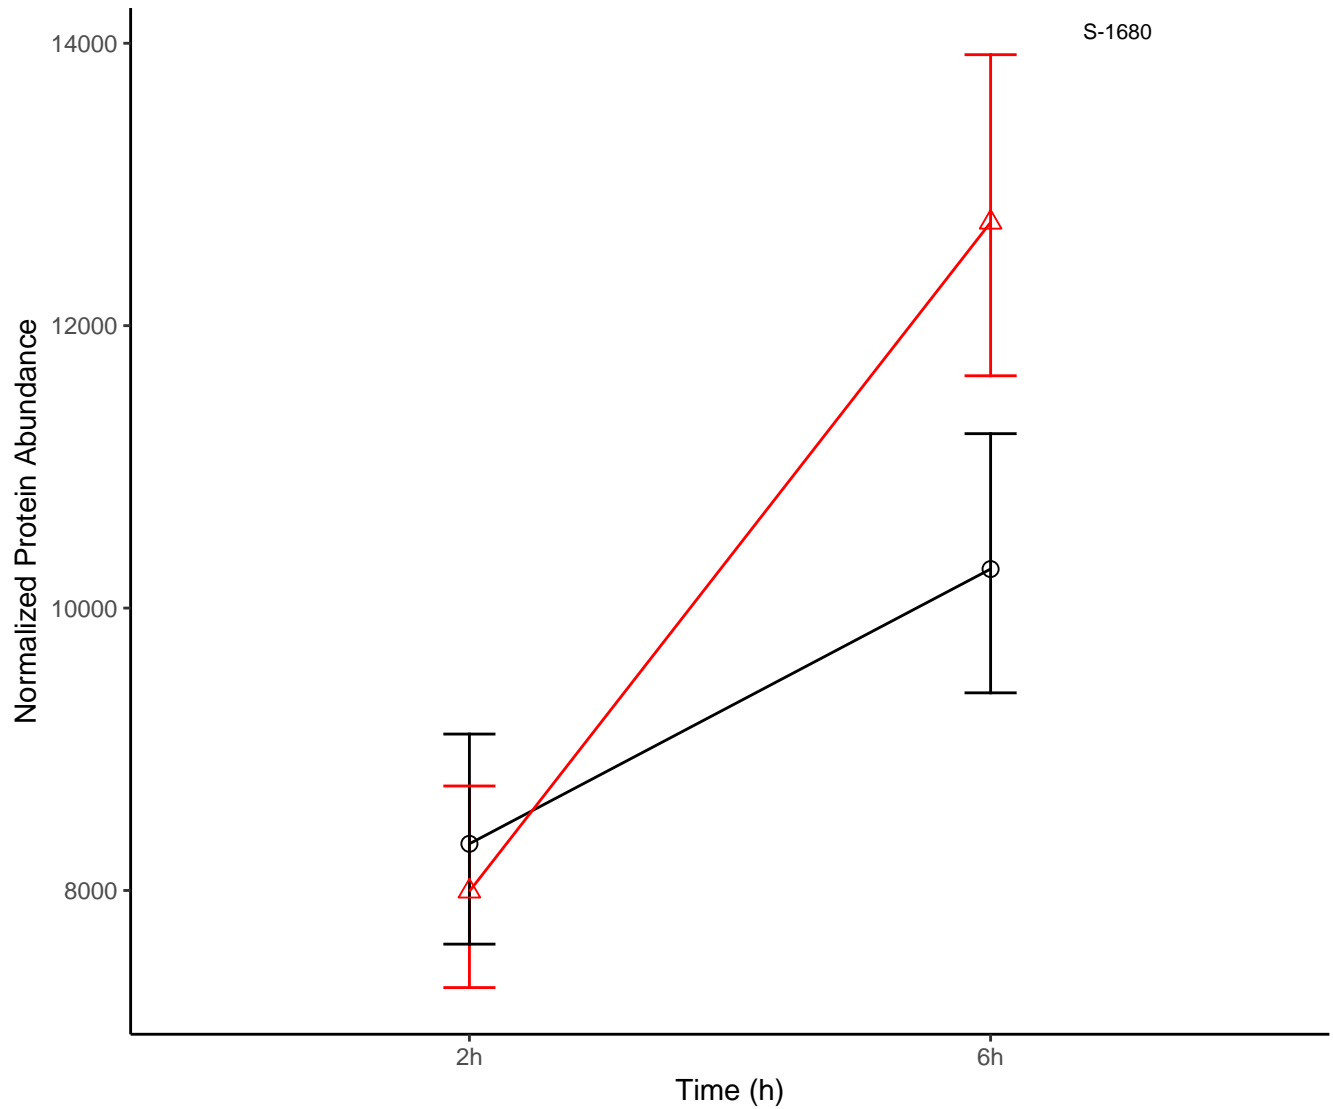

○ TSB-dex

△ TSB



# IMDH\_STAAM

S-1681

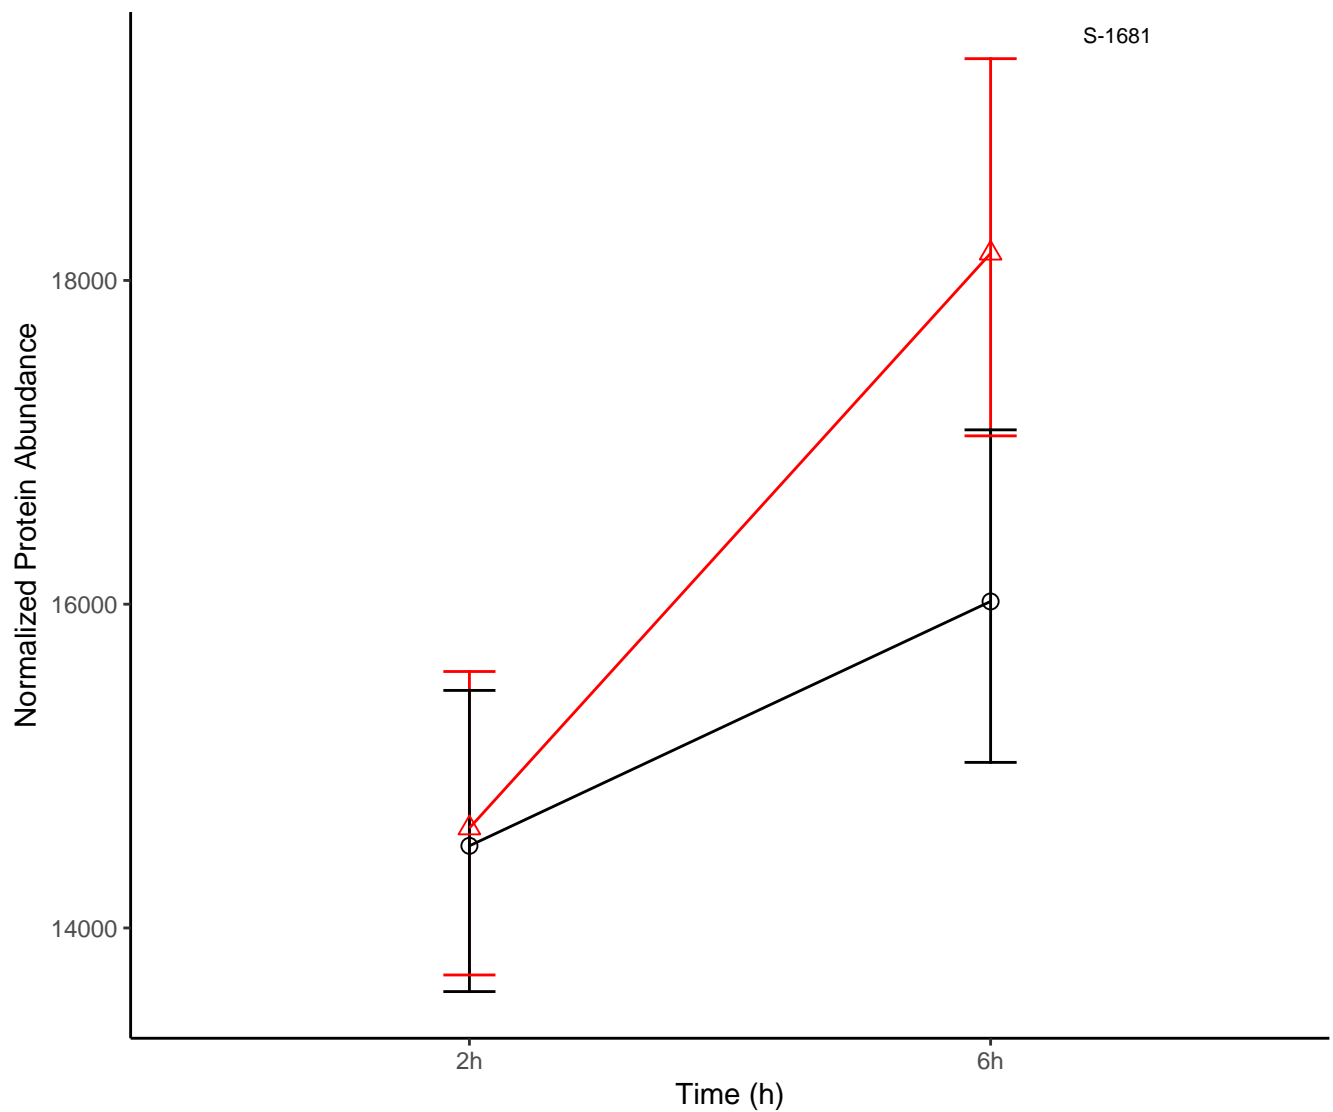

○ TSB-dex

△ TSB

# ISAA\_STAAM

S-1682

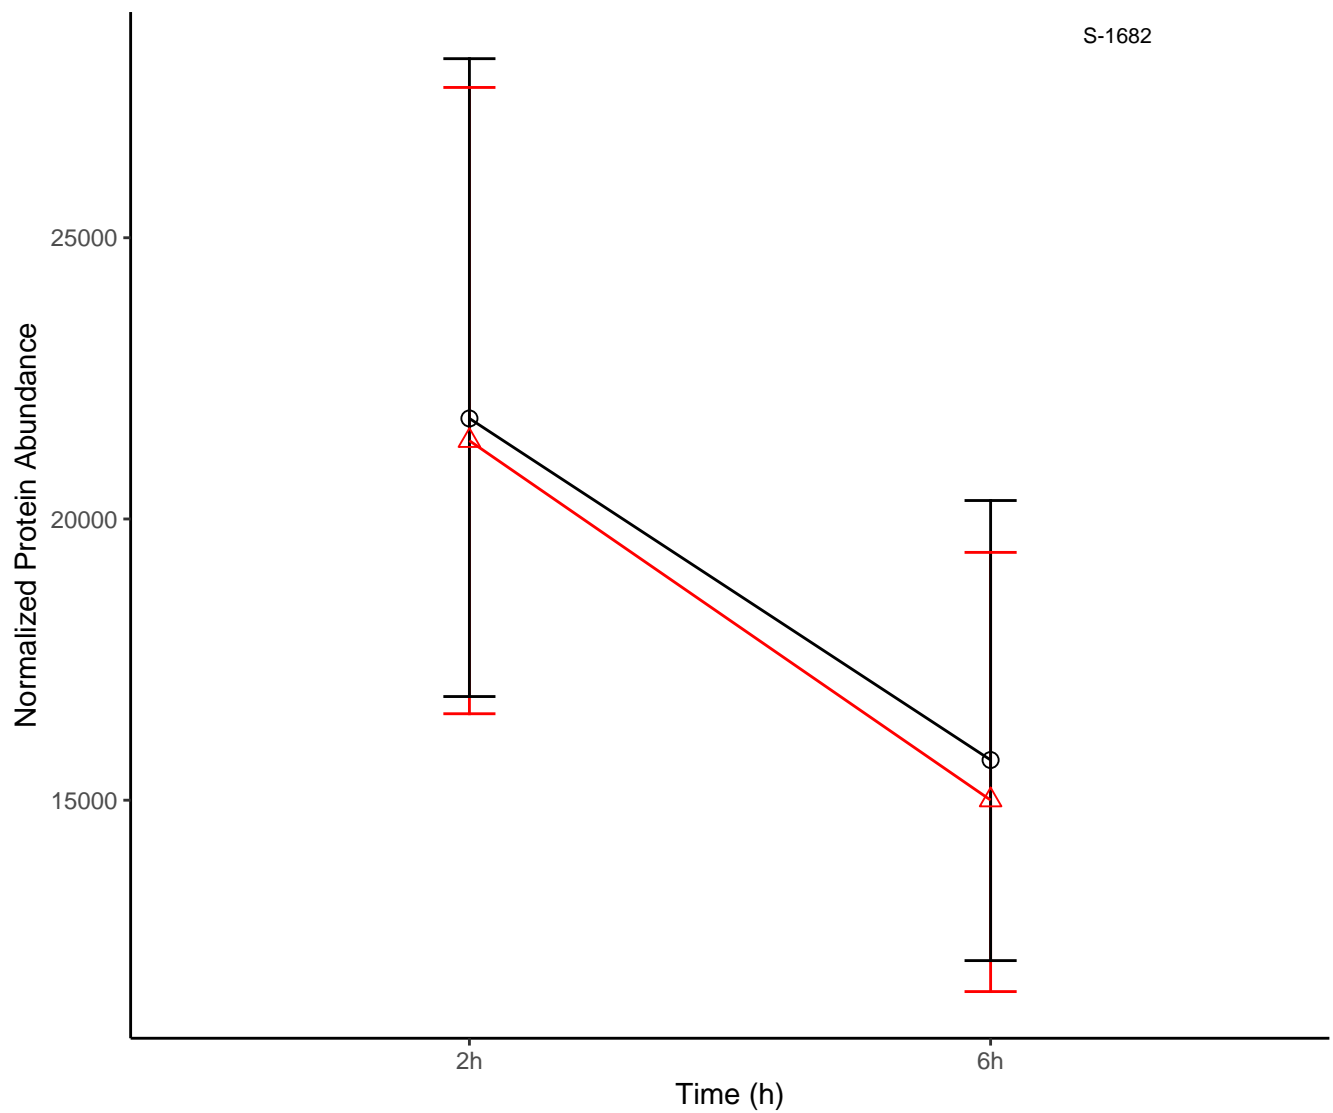

○ TSB-dex

△ TSB

# ISPD1\_STAAM

S-1683

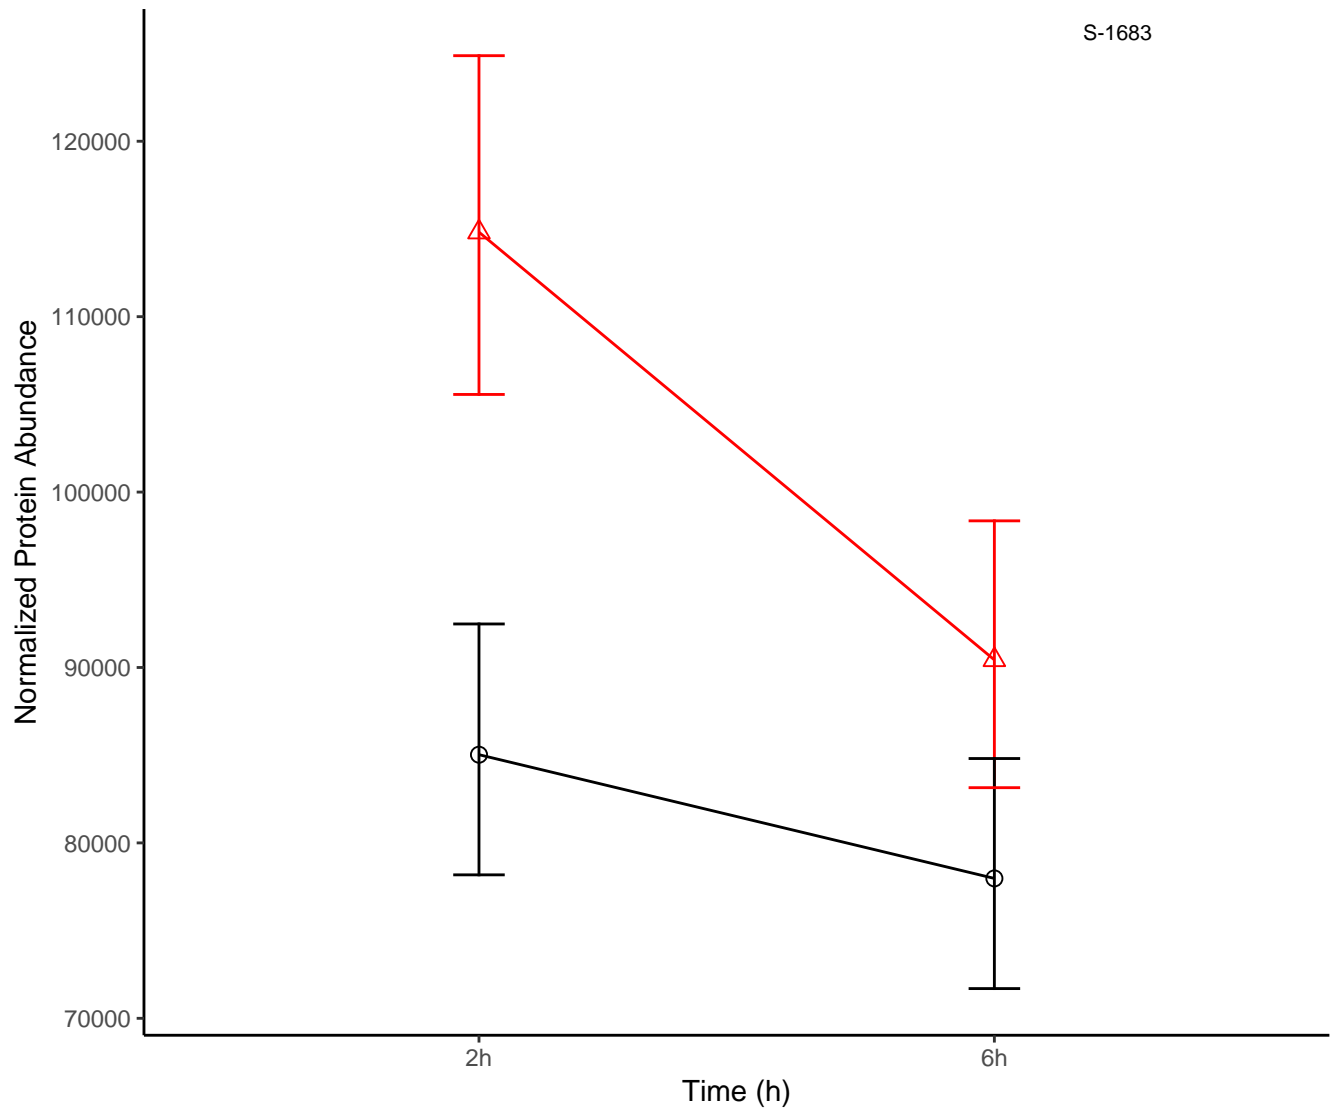

○ TSB-dex

△ TSB

# ISPD2\_STAAM

S-1684

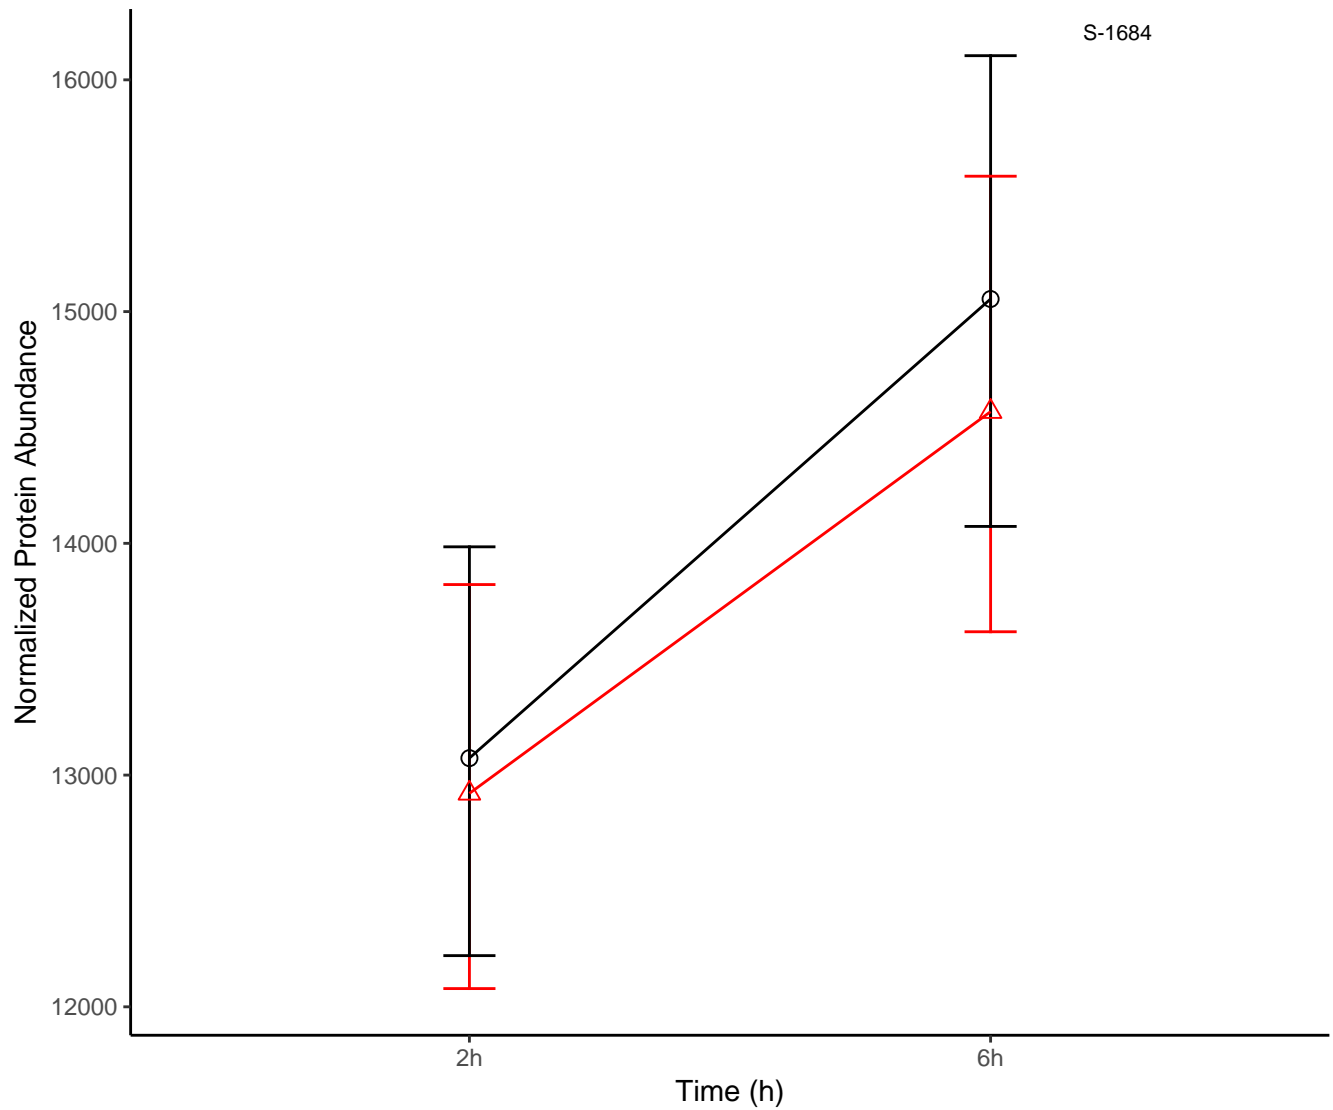

○ TSB-dex

△ TSB

# ISPE\_STAAM

S-1685

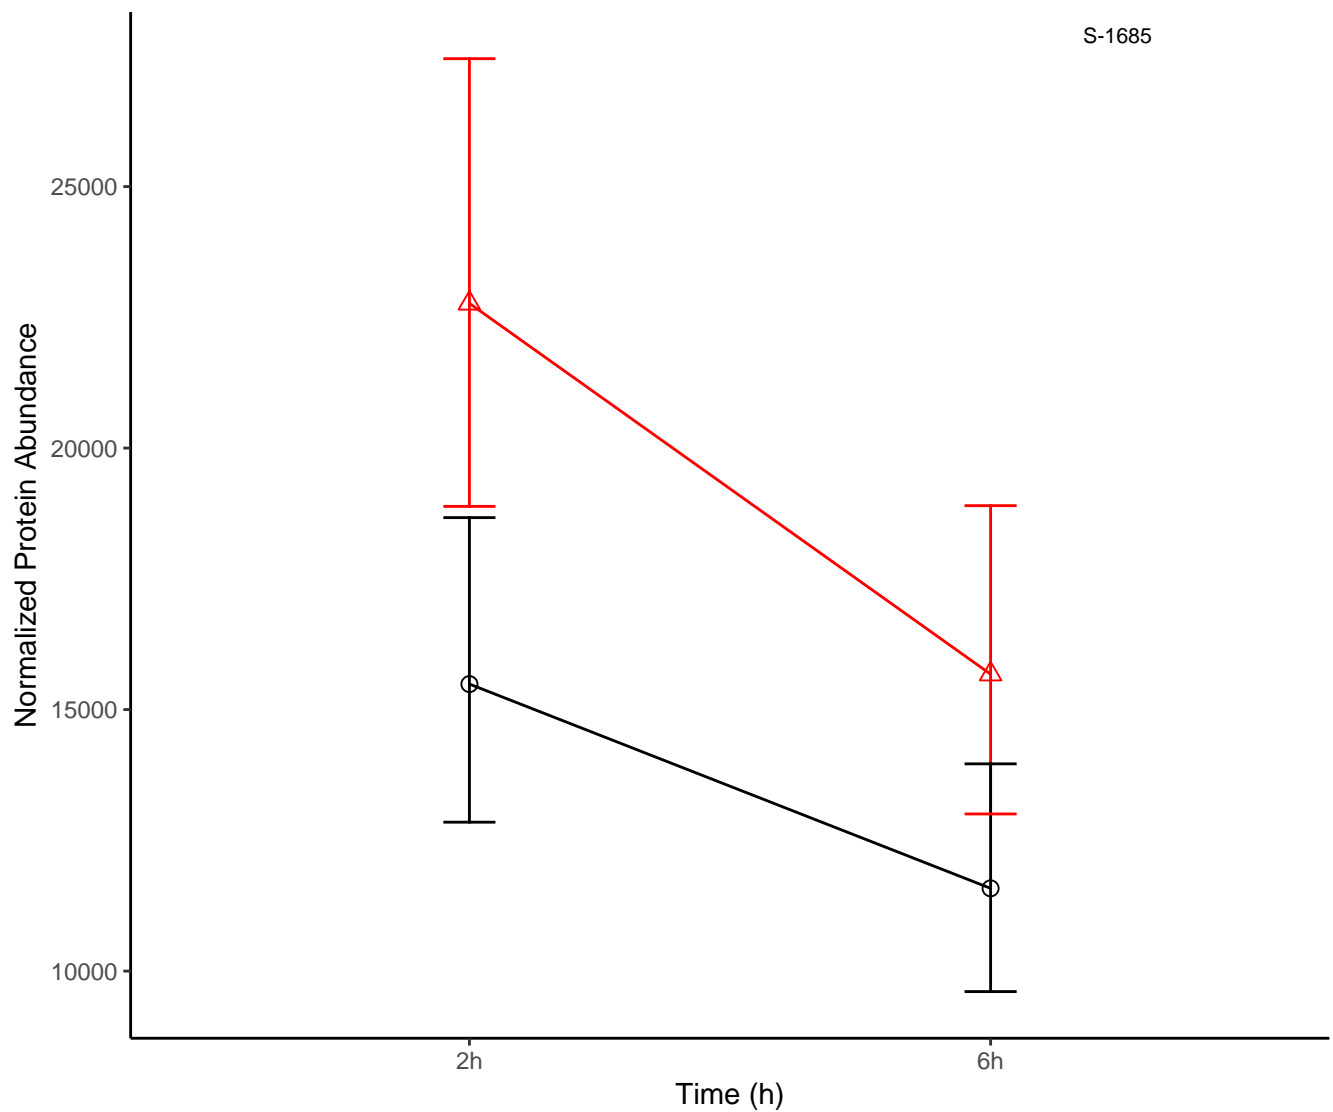

○ TSB-dex

△ TSB

# KAD\_STAAM

S-1686

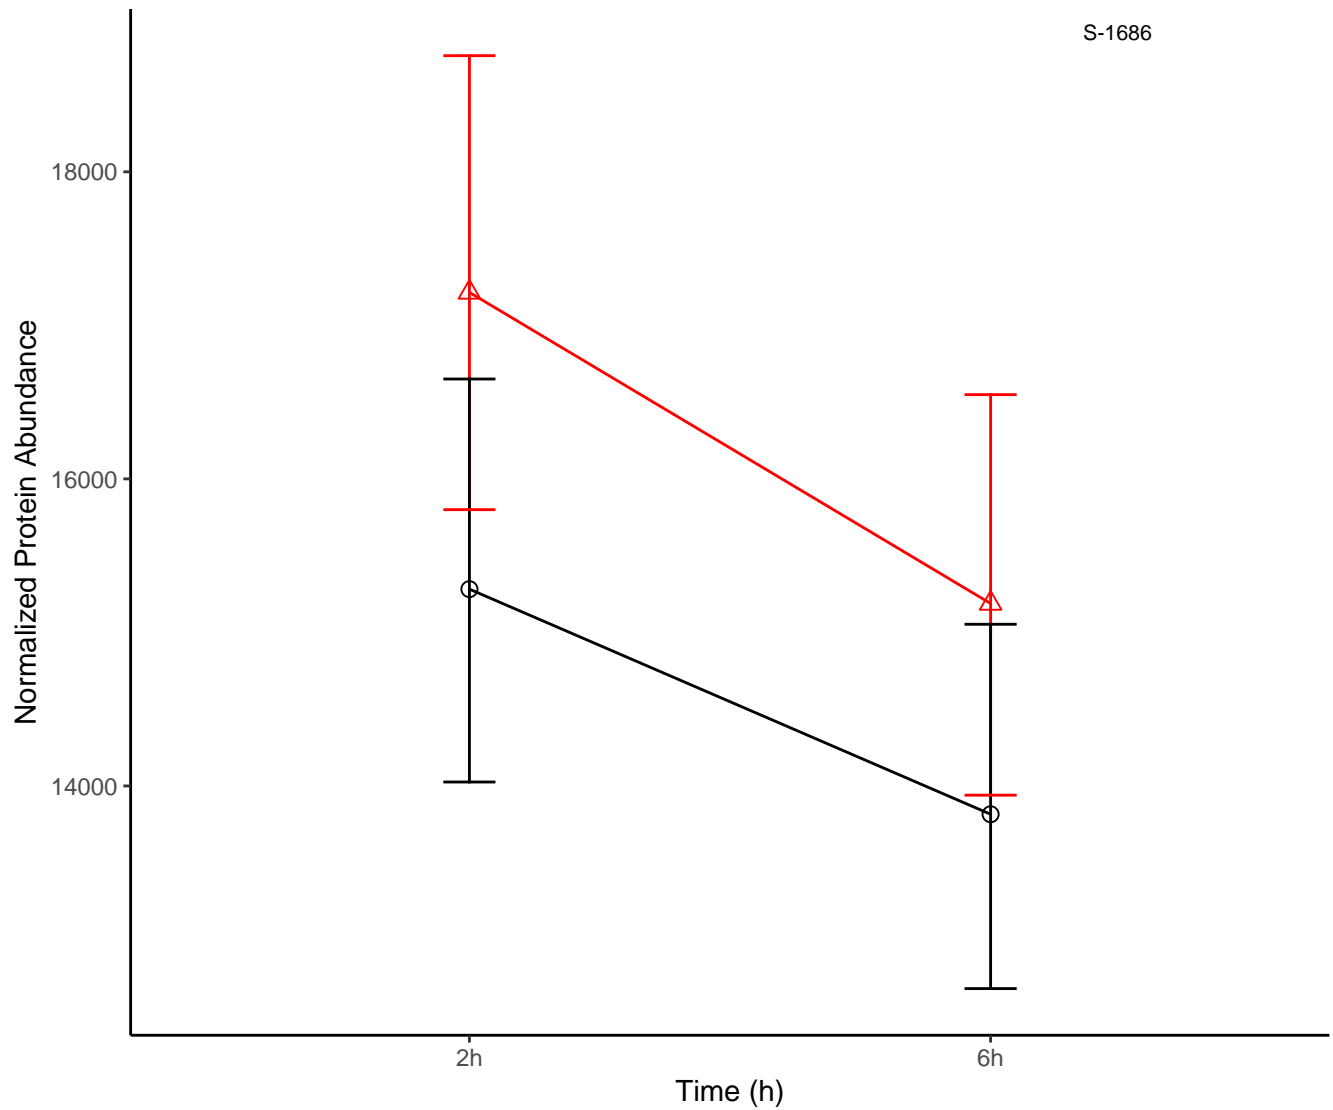

○ TSB-dex

△ TSB

# KCY\_STAAM

S-1687

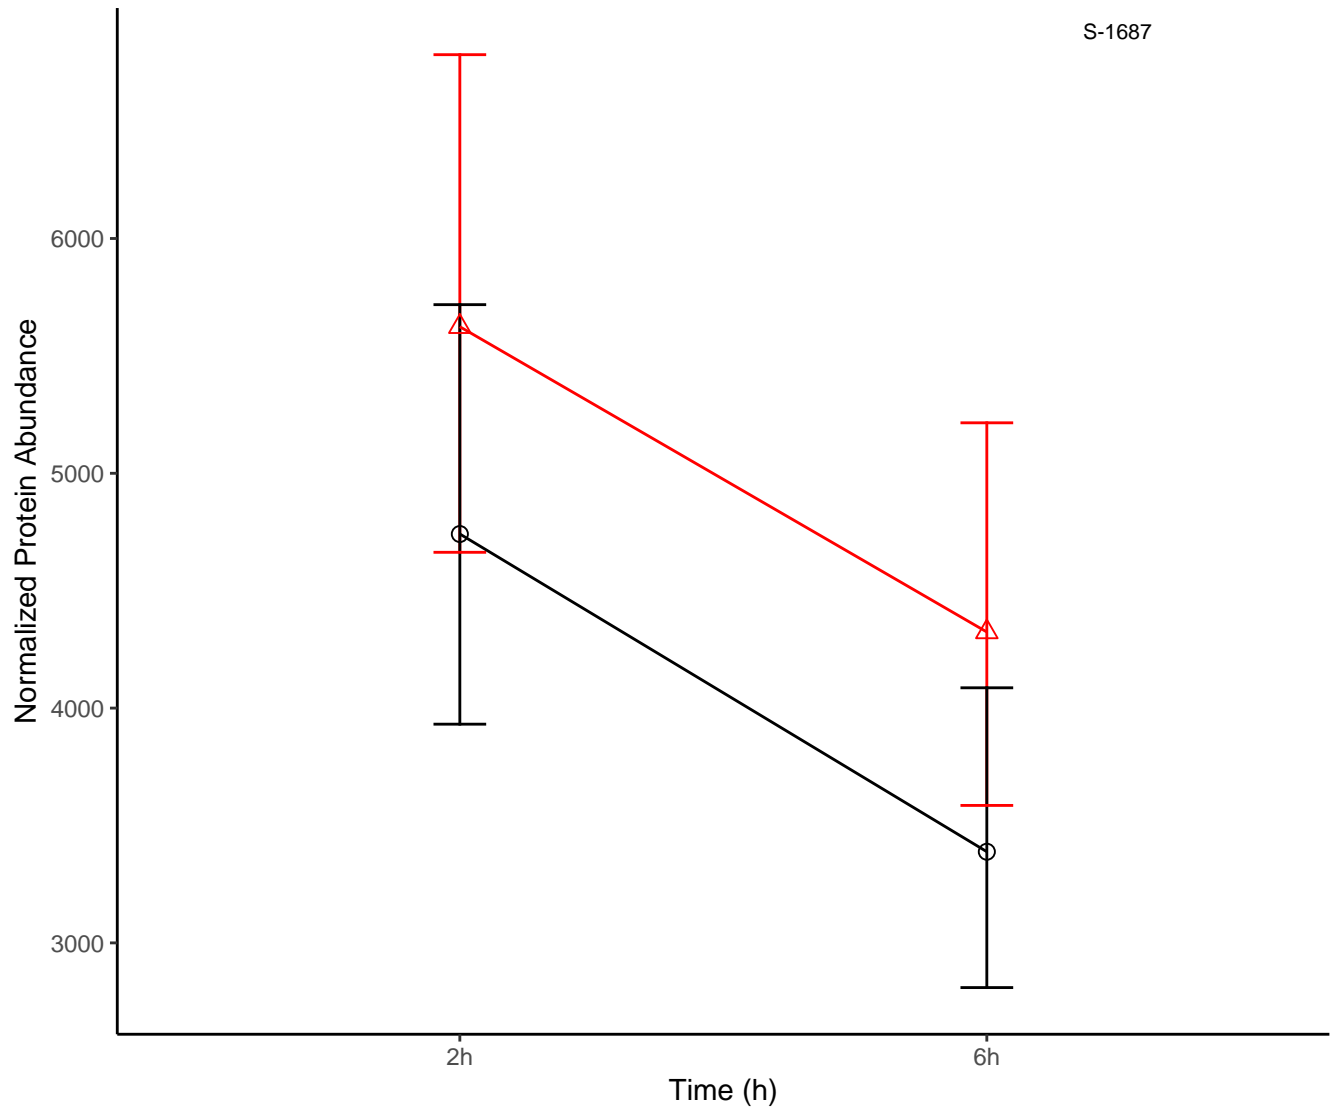

○ TSB-dex

△ TSB

# KITH\_STAAM

S-1688

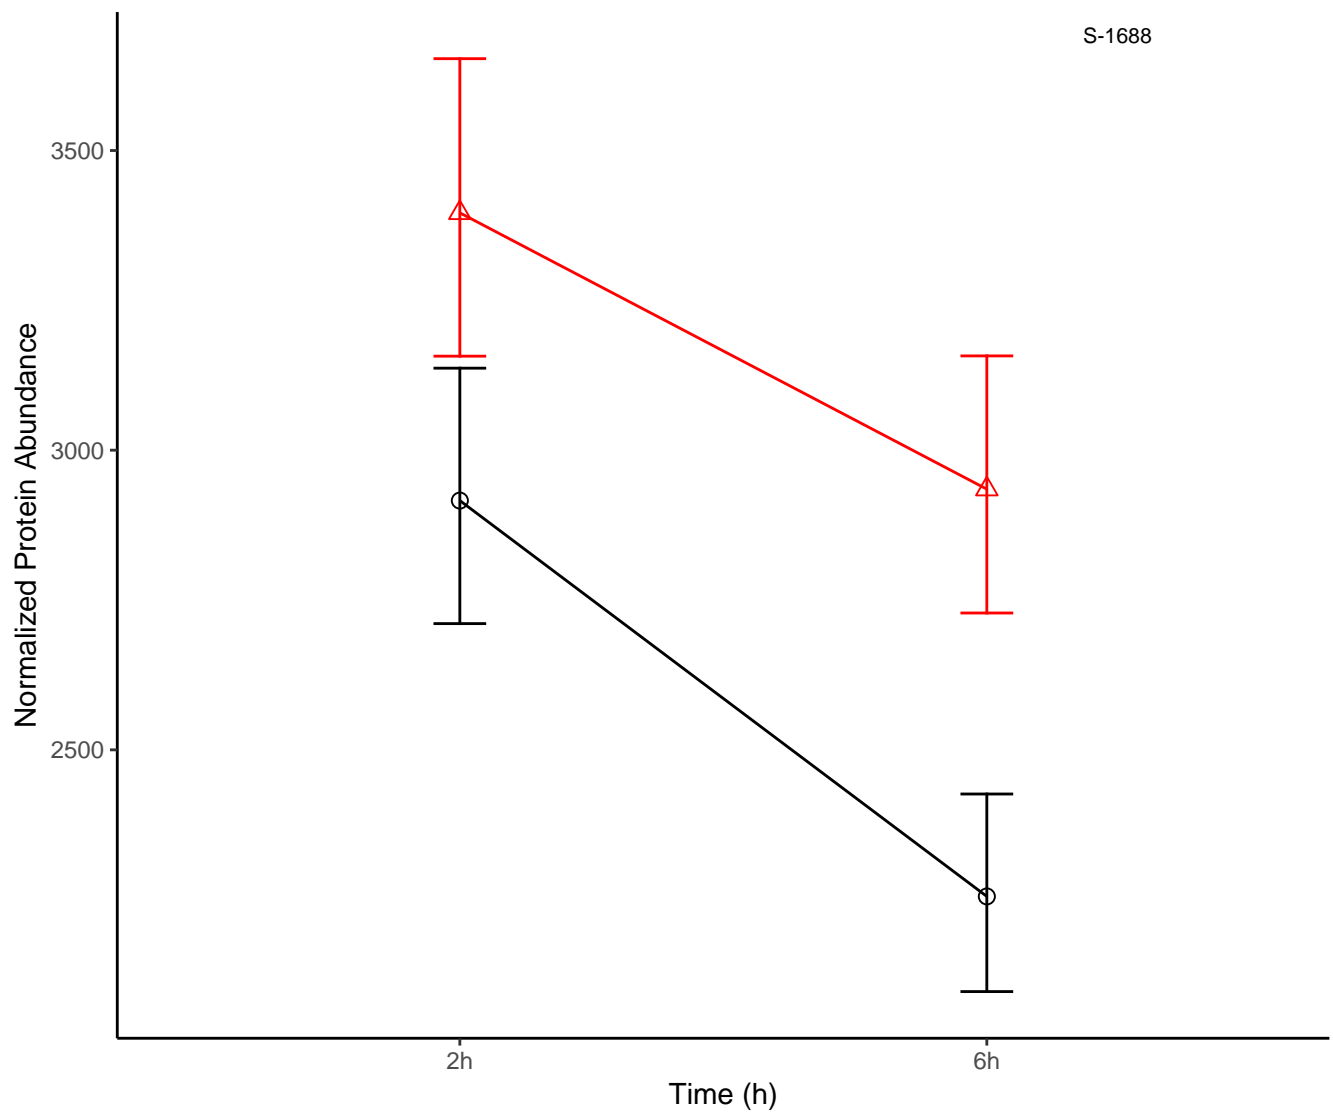

○ TSB-dex

△ TSB



# KPRS\_STAAM

S-1689

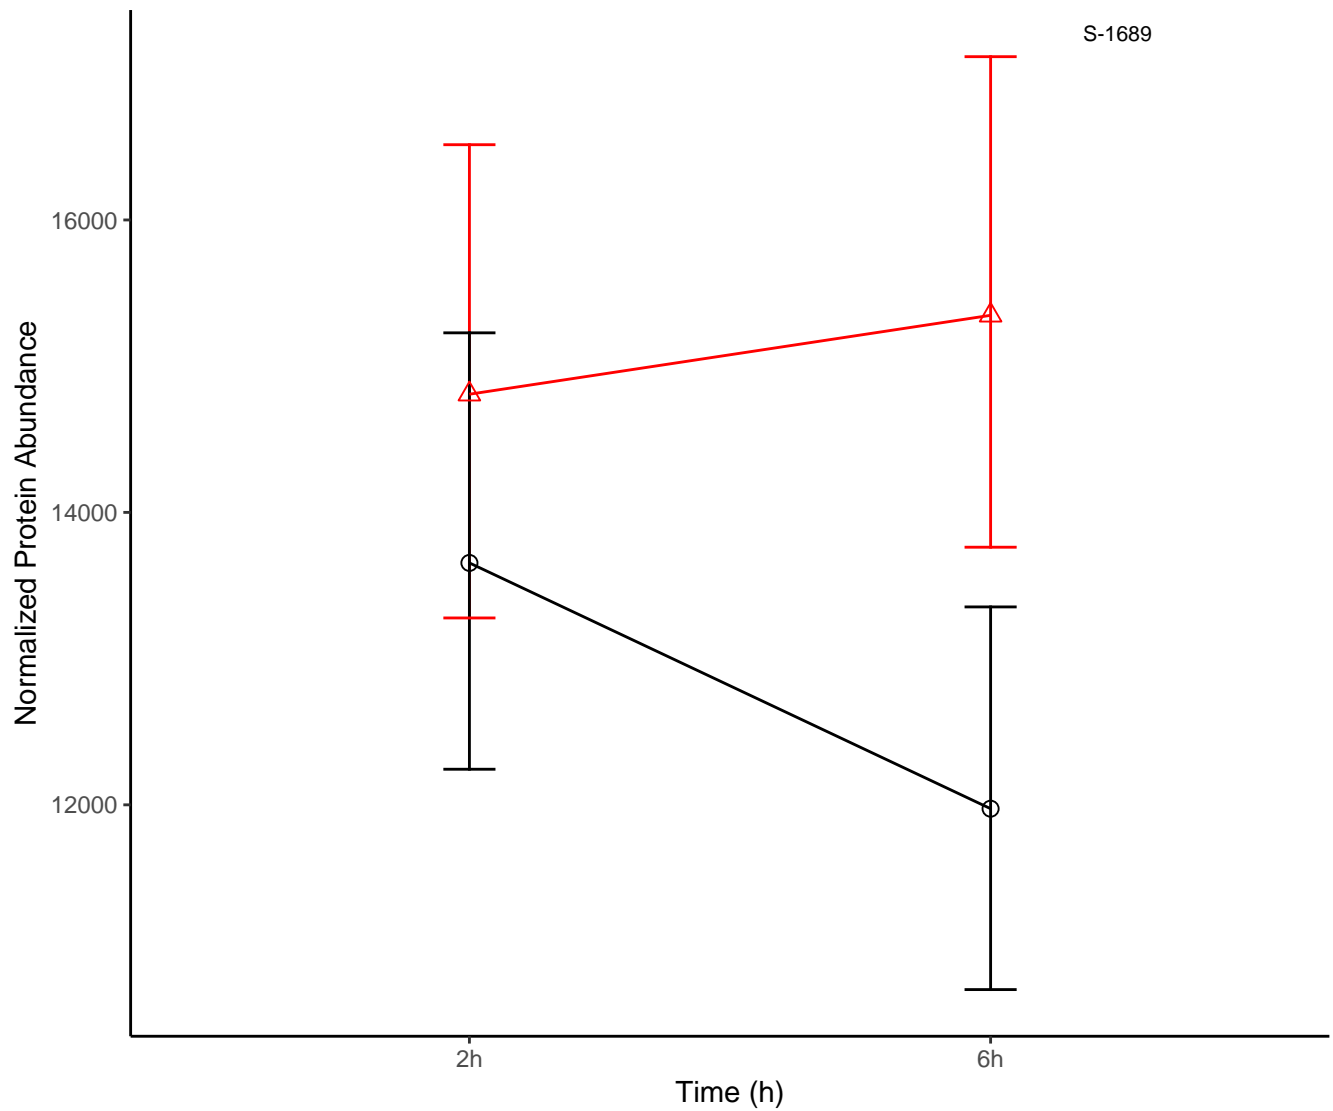

○ TSB-dex

△ TSB

# KPYK\_STAAM

S-1690

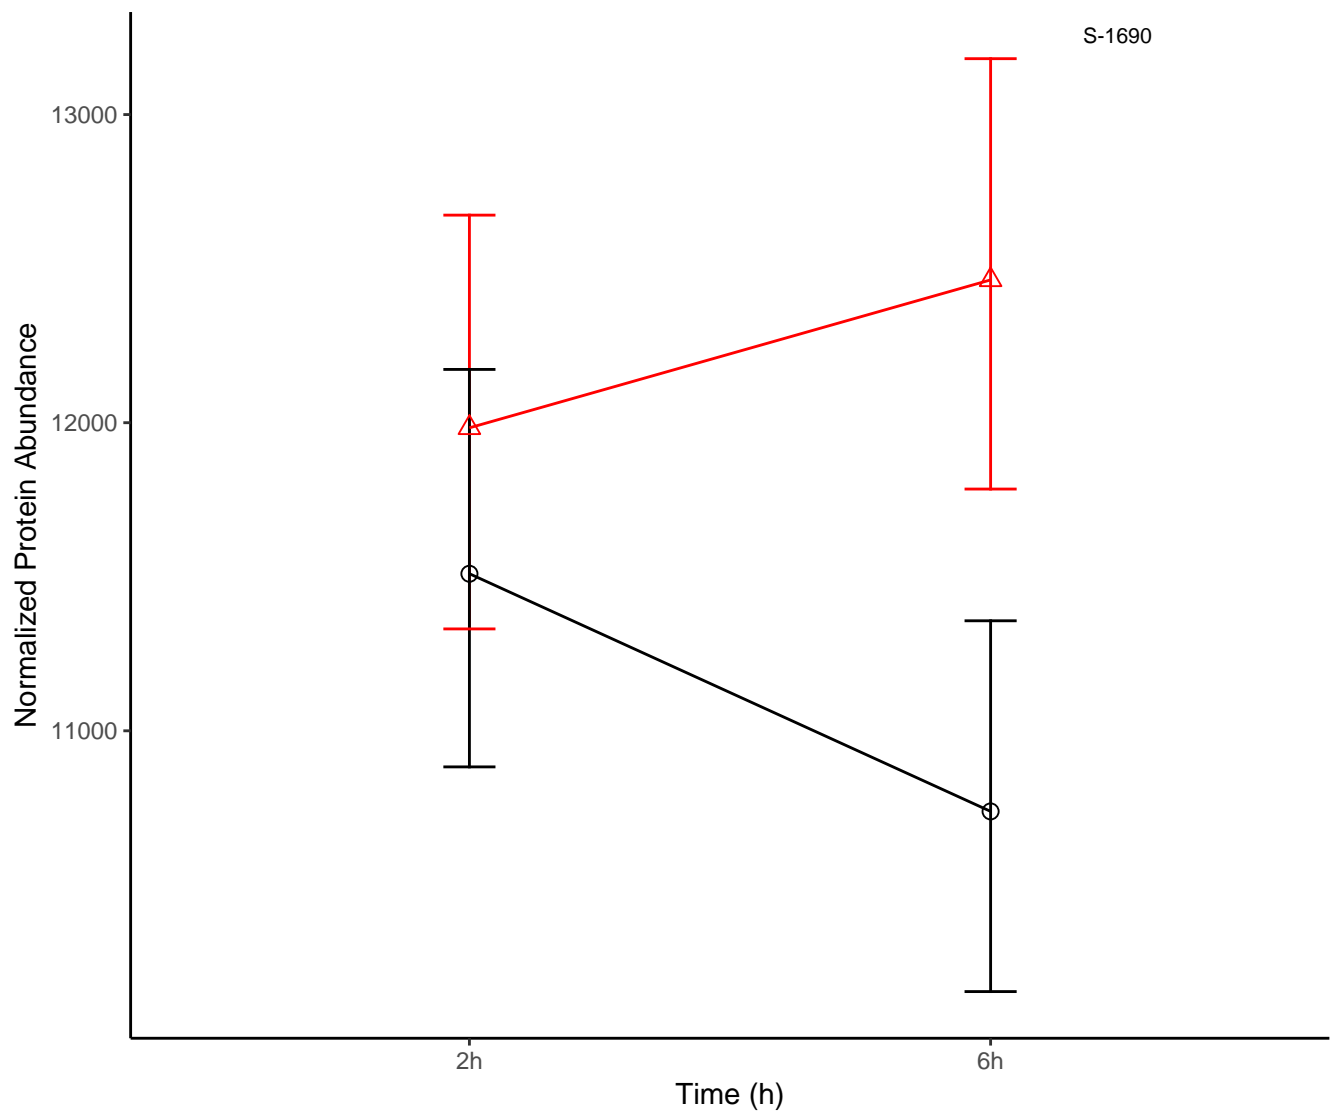

○ TSB-dex

△ TSB

# KTHY\_STAAM

S-1691

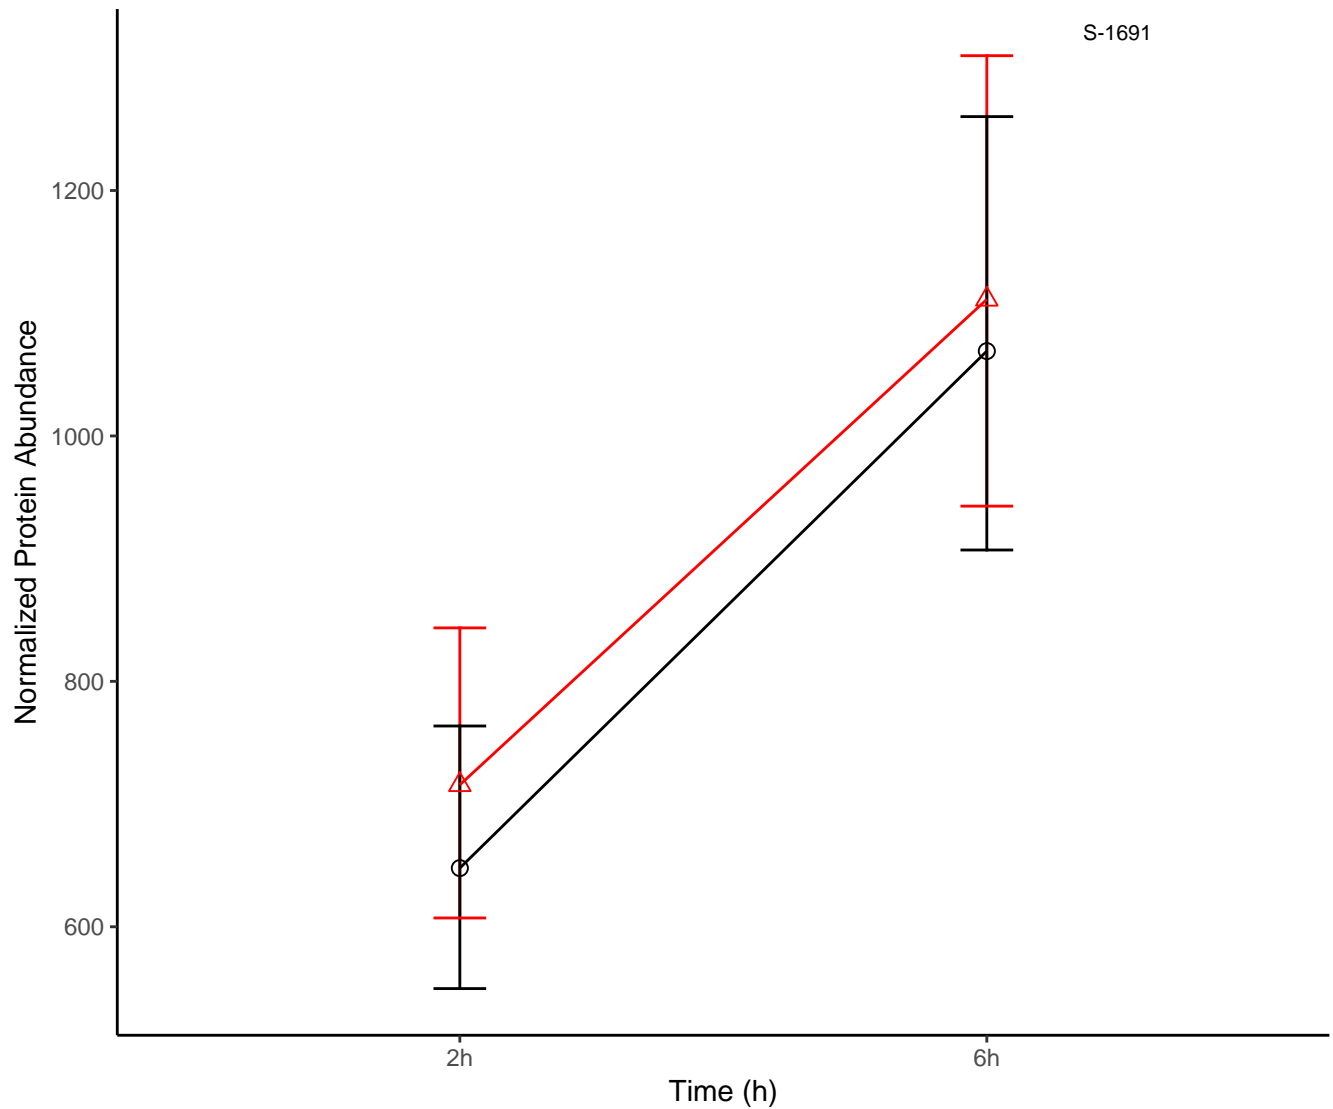

○ TSB-dex

△ TSB

# LACA\_STAAM

S-1692

Normalized Protein Abundance

25000

20000

2h

6h

Time (h)

○ TSB-dex

△ TSB

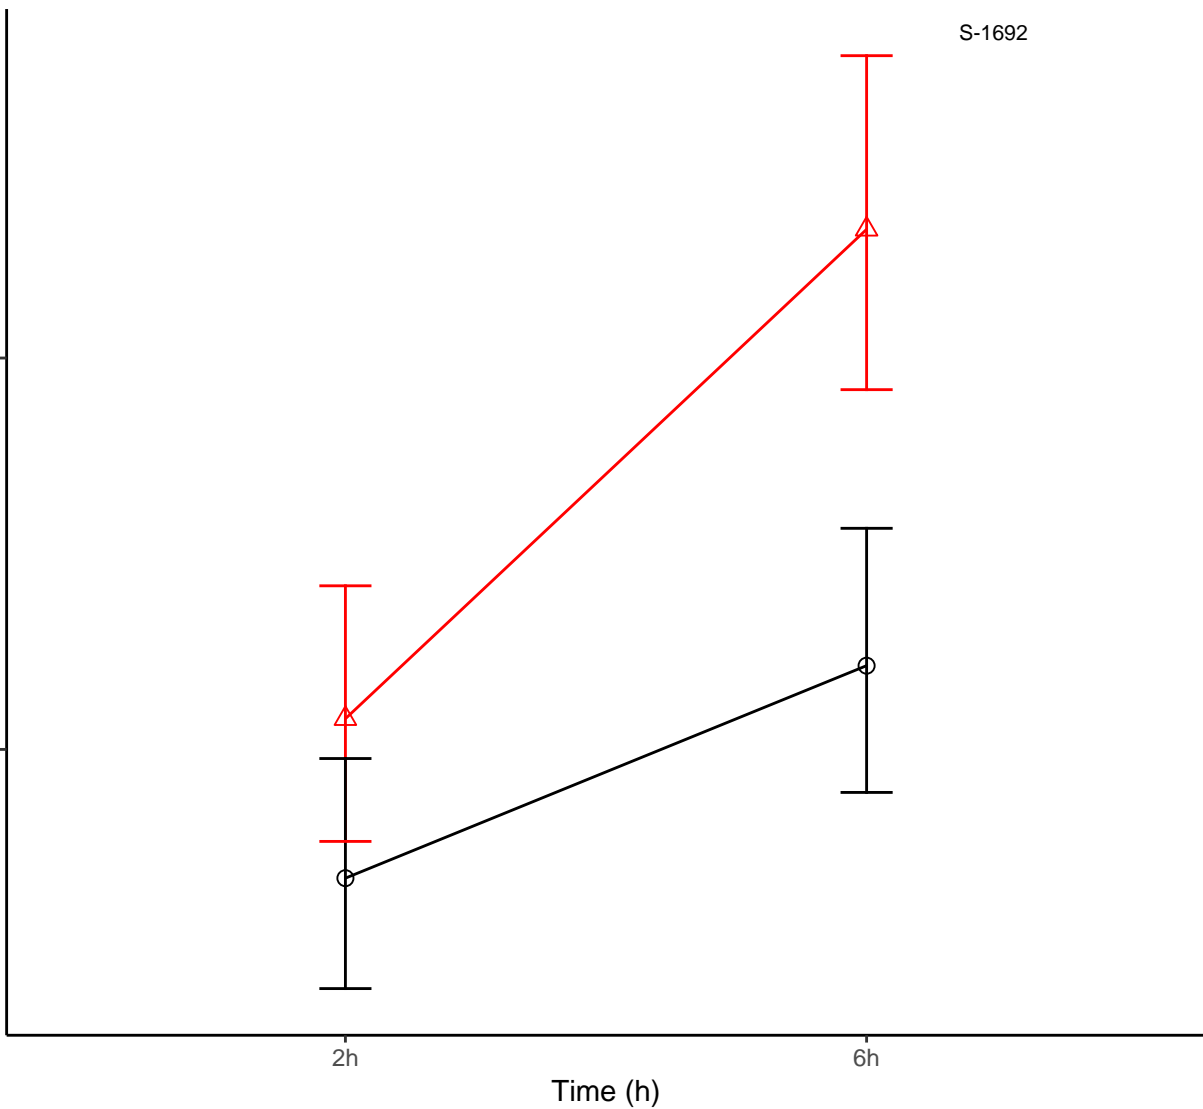

# LDH1\_STAAM

S-1693

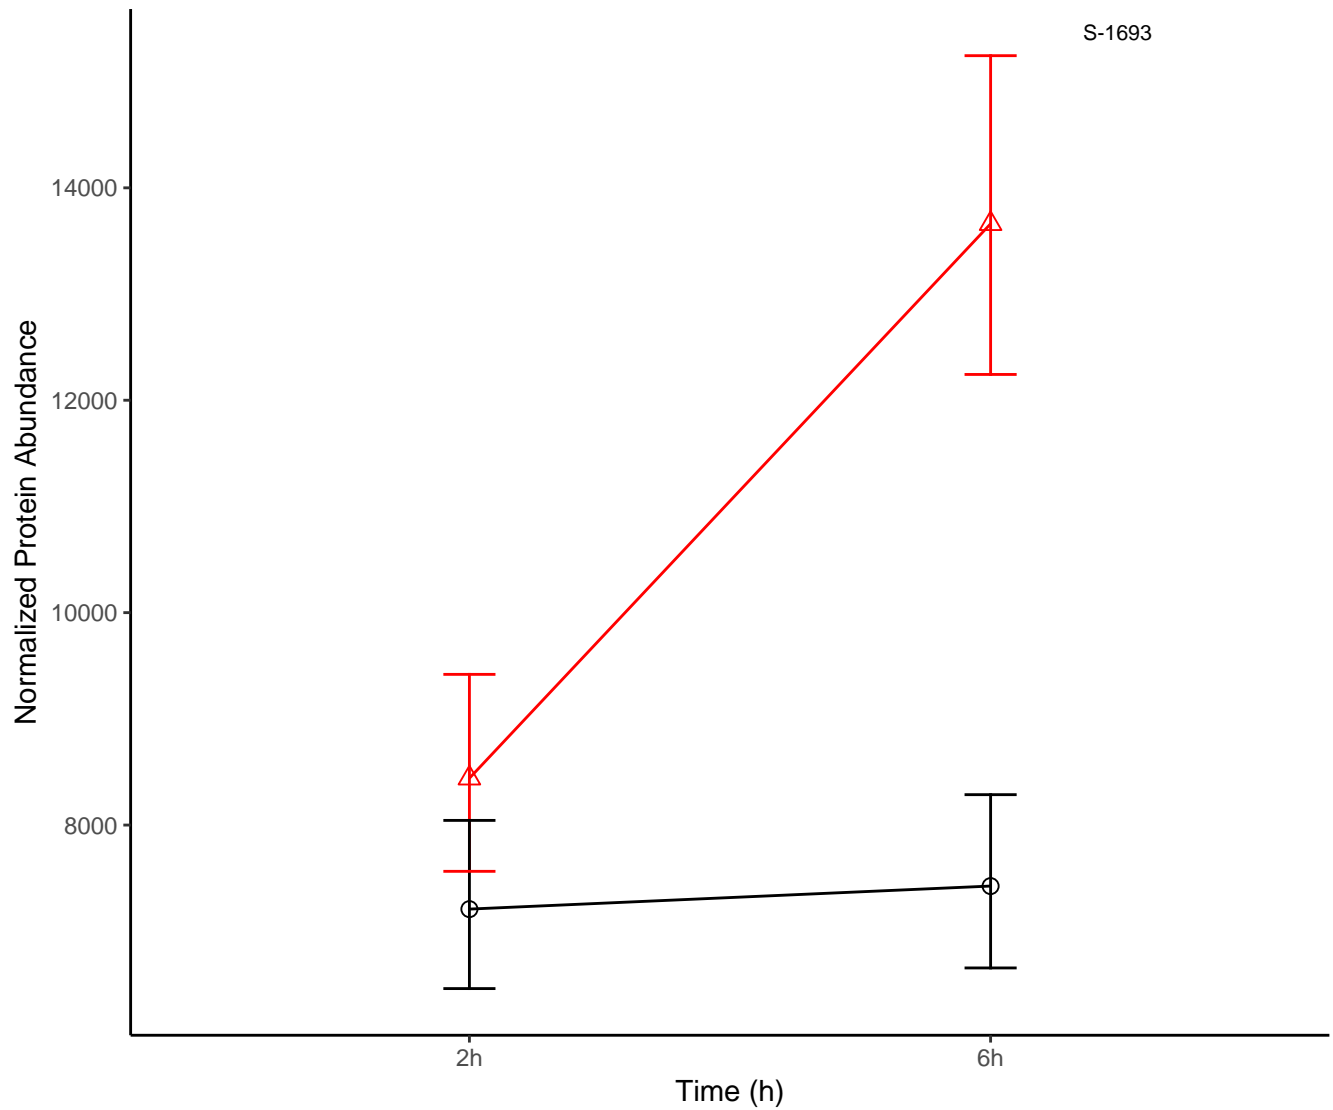

○ TSB-dex

△ TSB

# LDH2\_STAAM

S-1694

Normalized Protein Abundance

30000

20000

2h

6h

Time (h)

○ TSB-dex

△ TSB

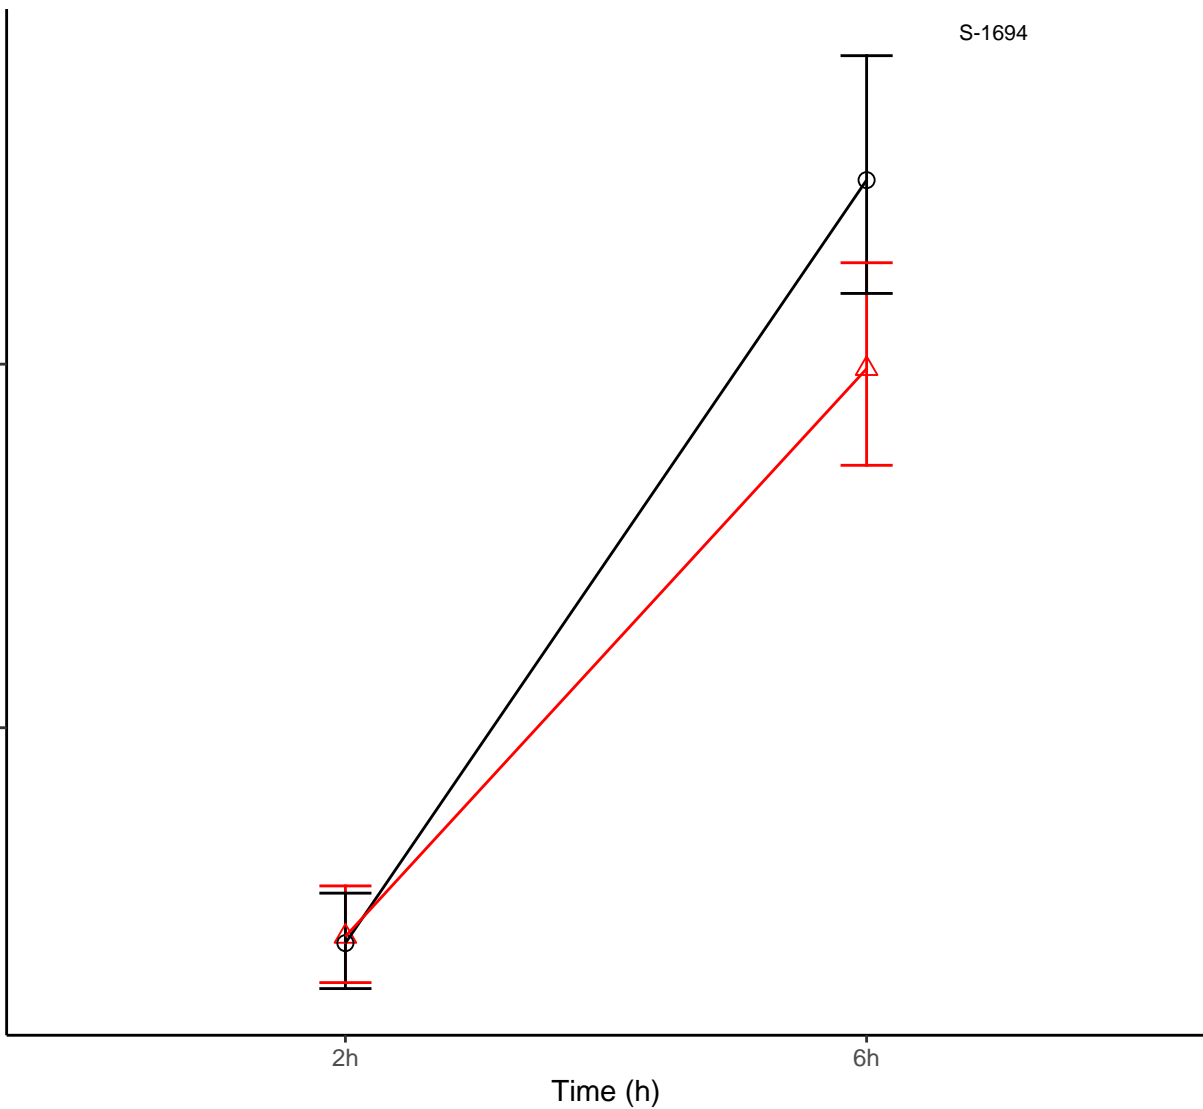

# LDHD\_STAAM

S-1695

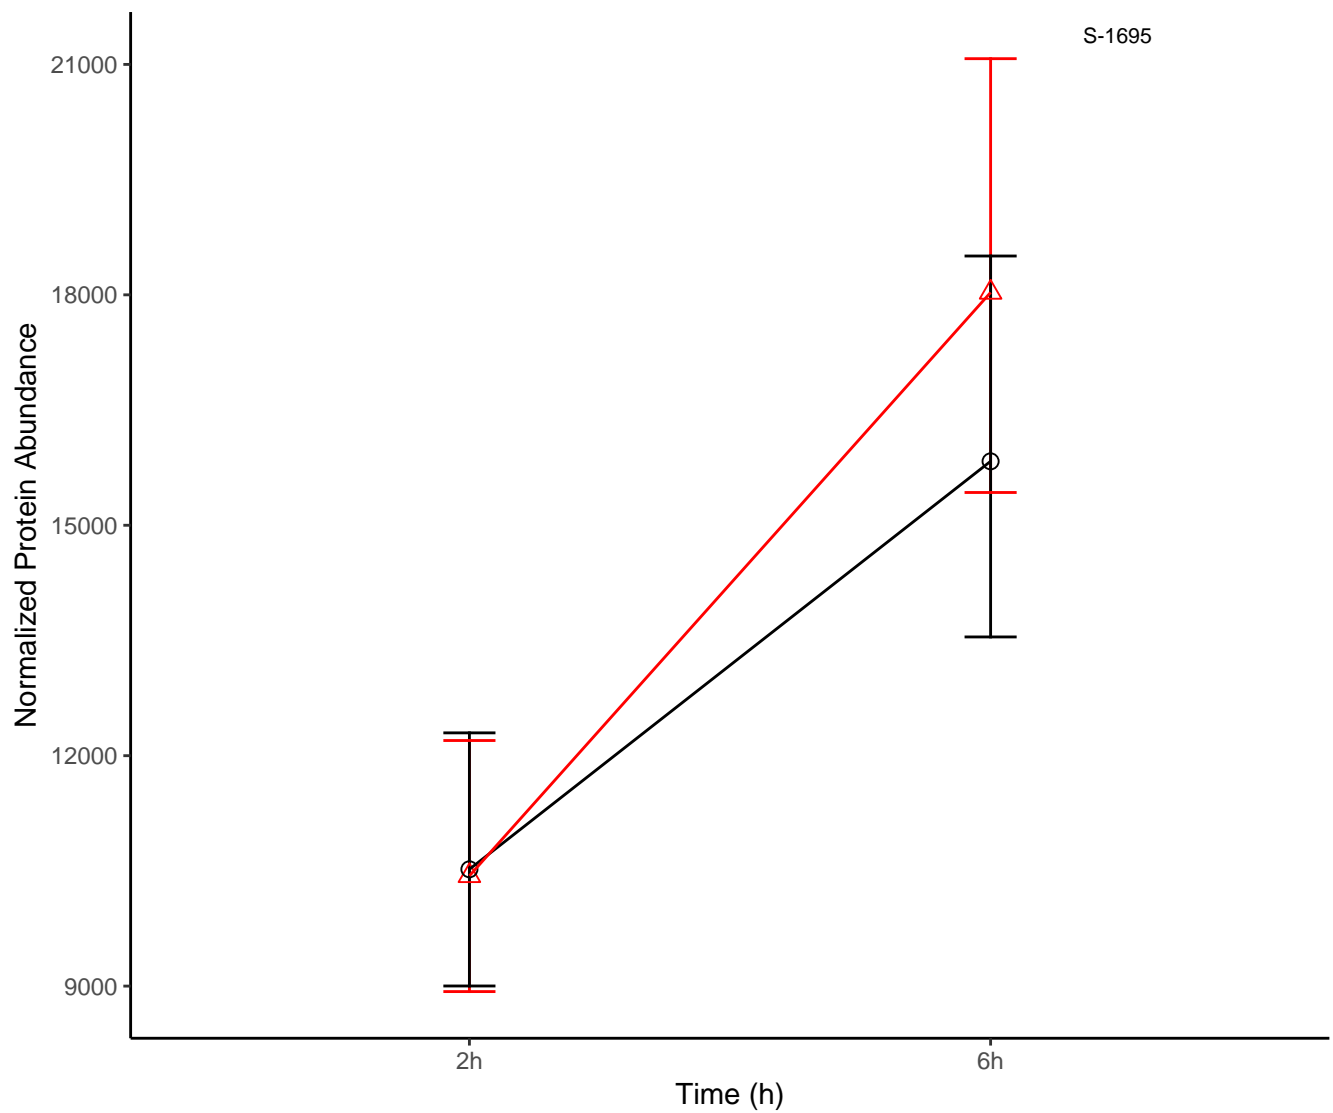

○ TSB-dex

△ TSB

# LEP\_STAAM

S-1696

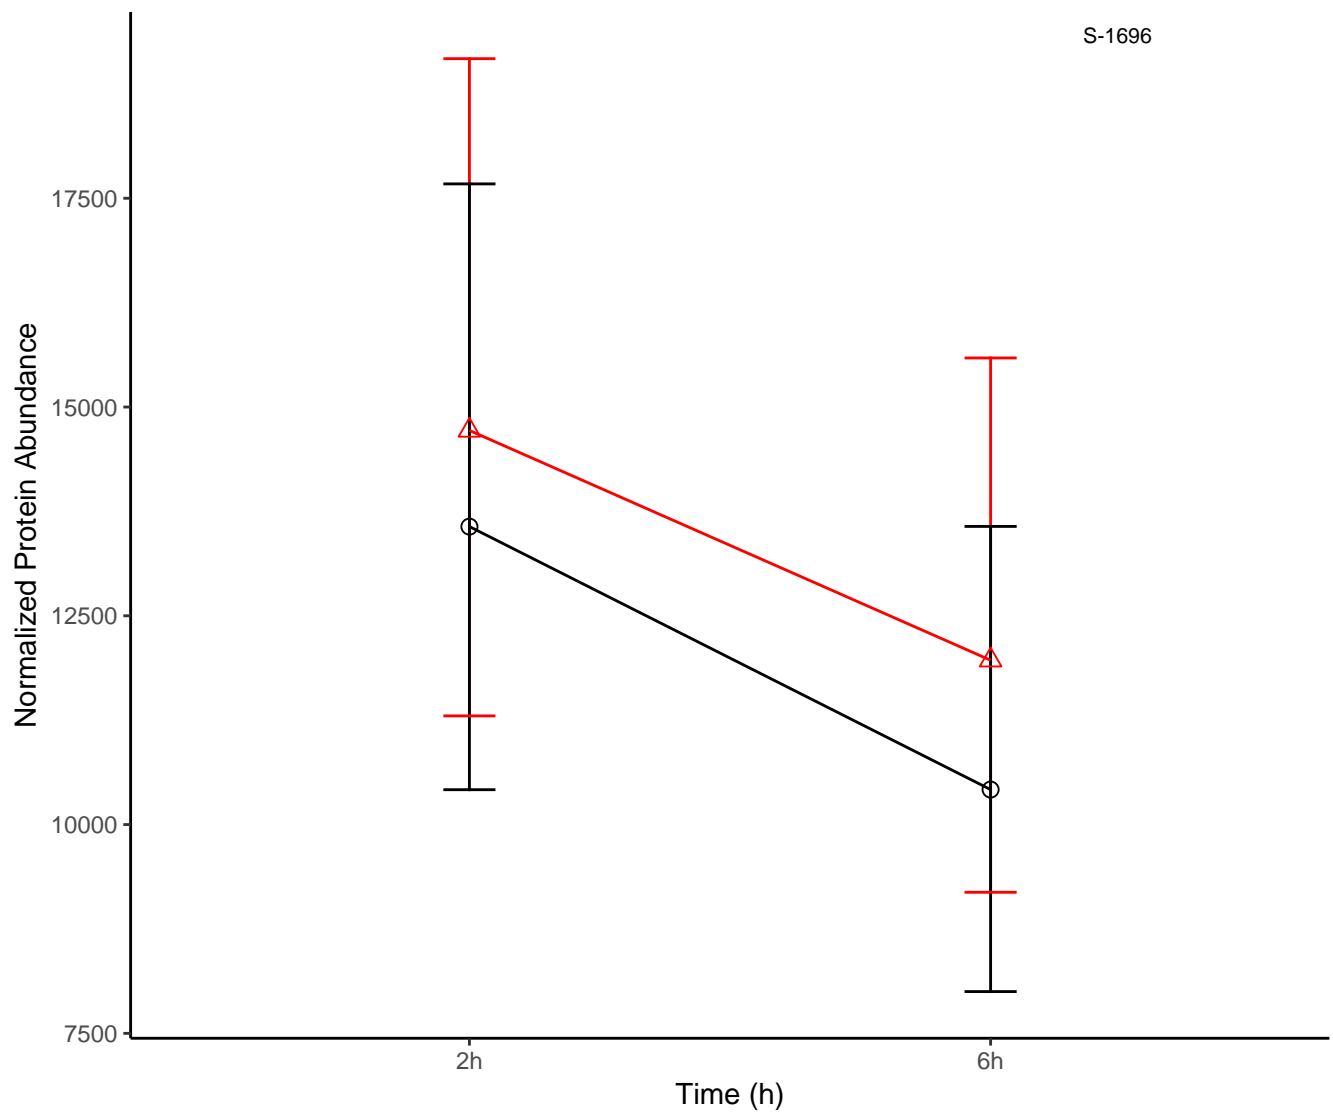

○ TSB-dex

△ TSB



# LEPA\_STAAM

S-1697

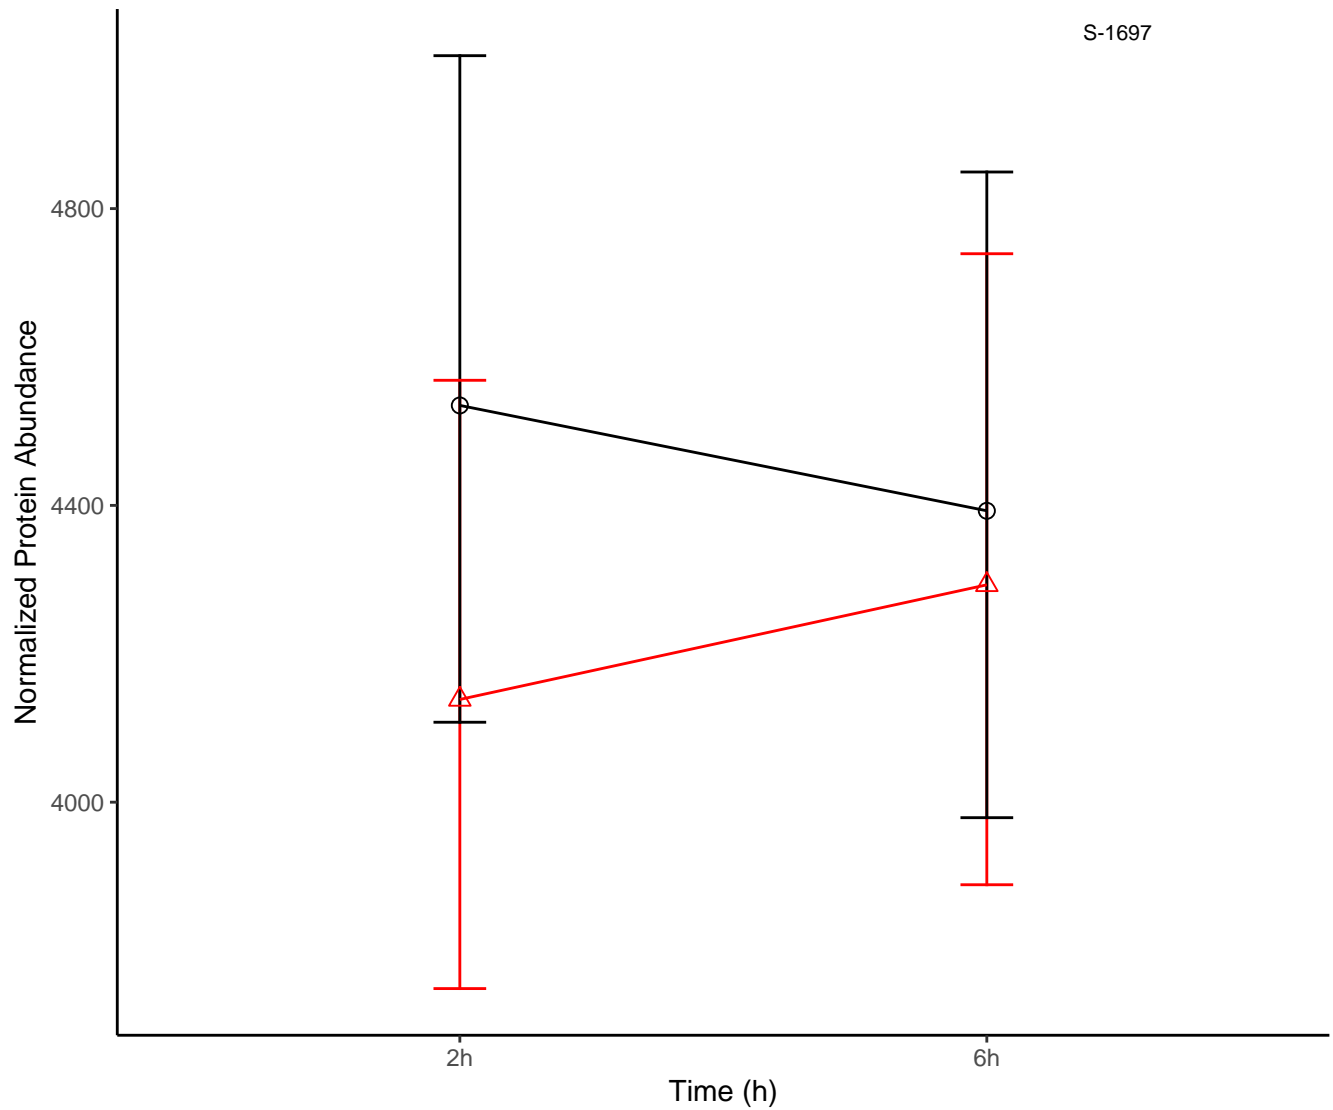

○ TSB-dex

△ TSB

# LEU1\_STAAM

S-1698

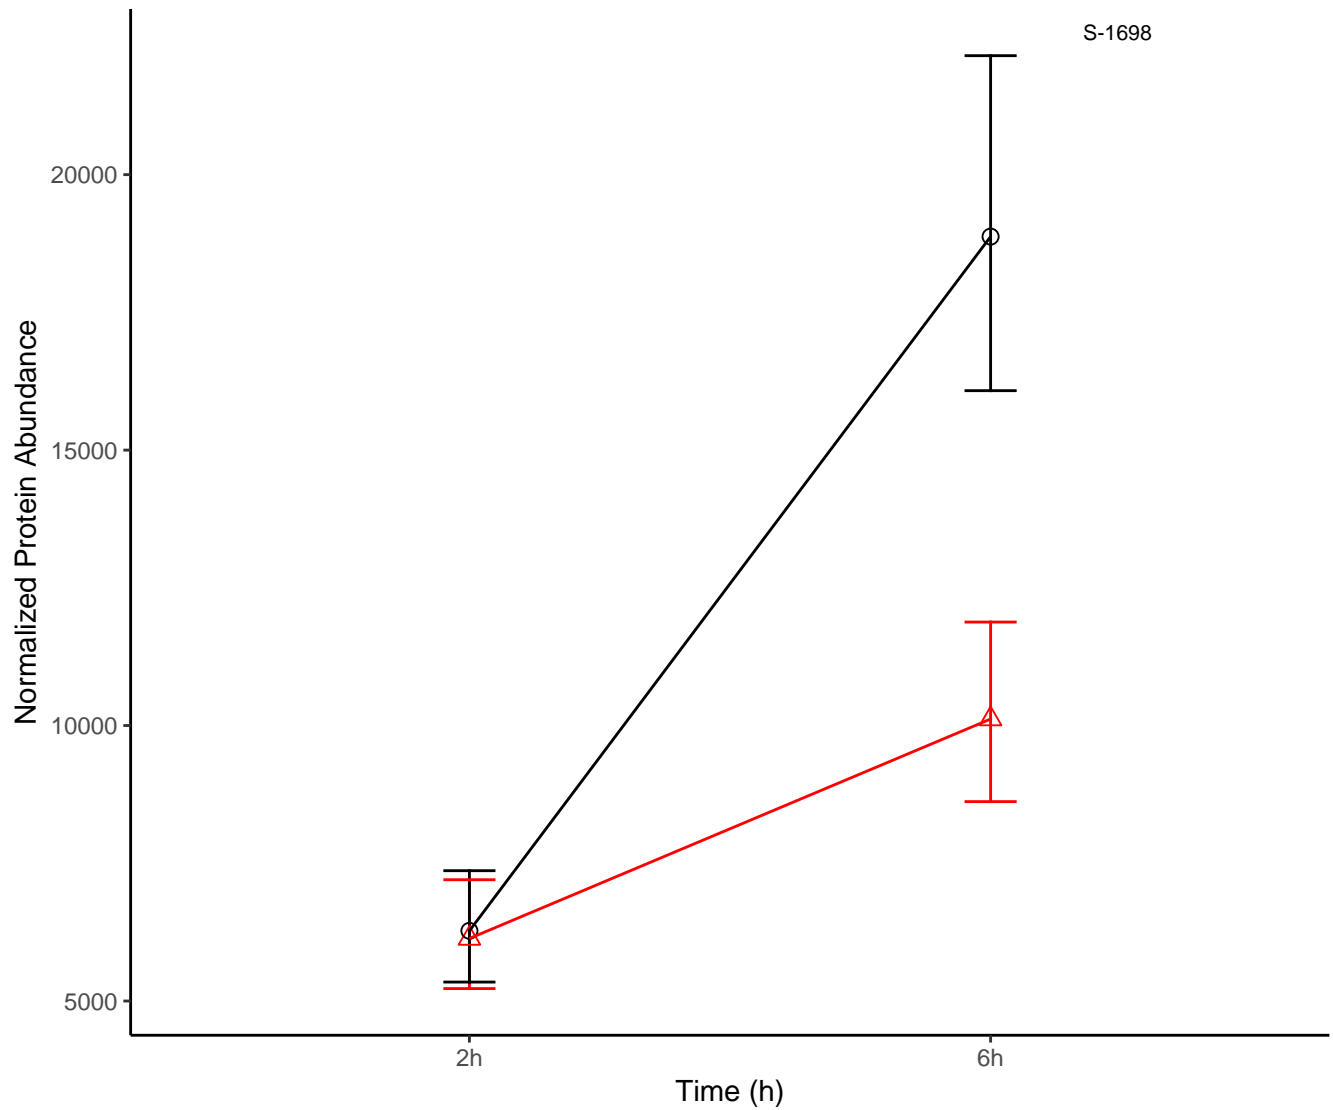

○ TSB-dex

△ TSB

# LIPA\_STAAM

S-1699

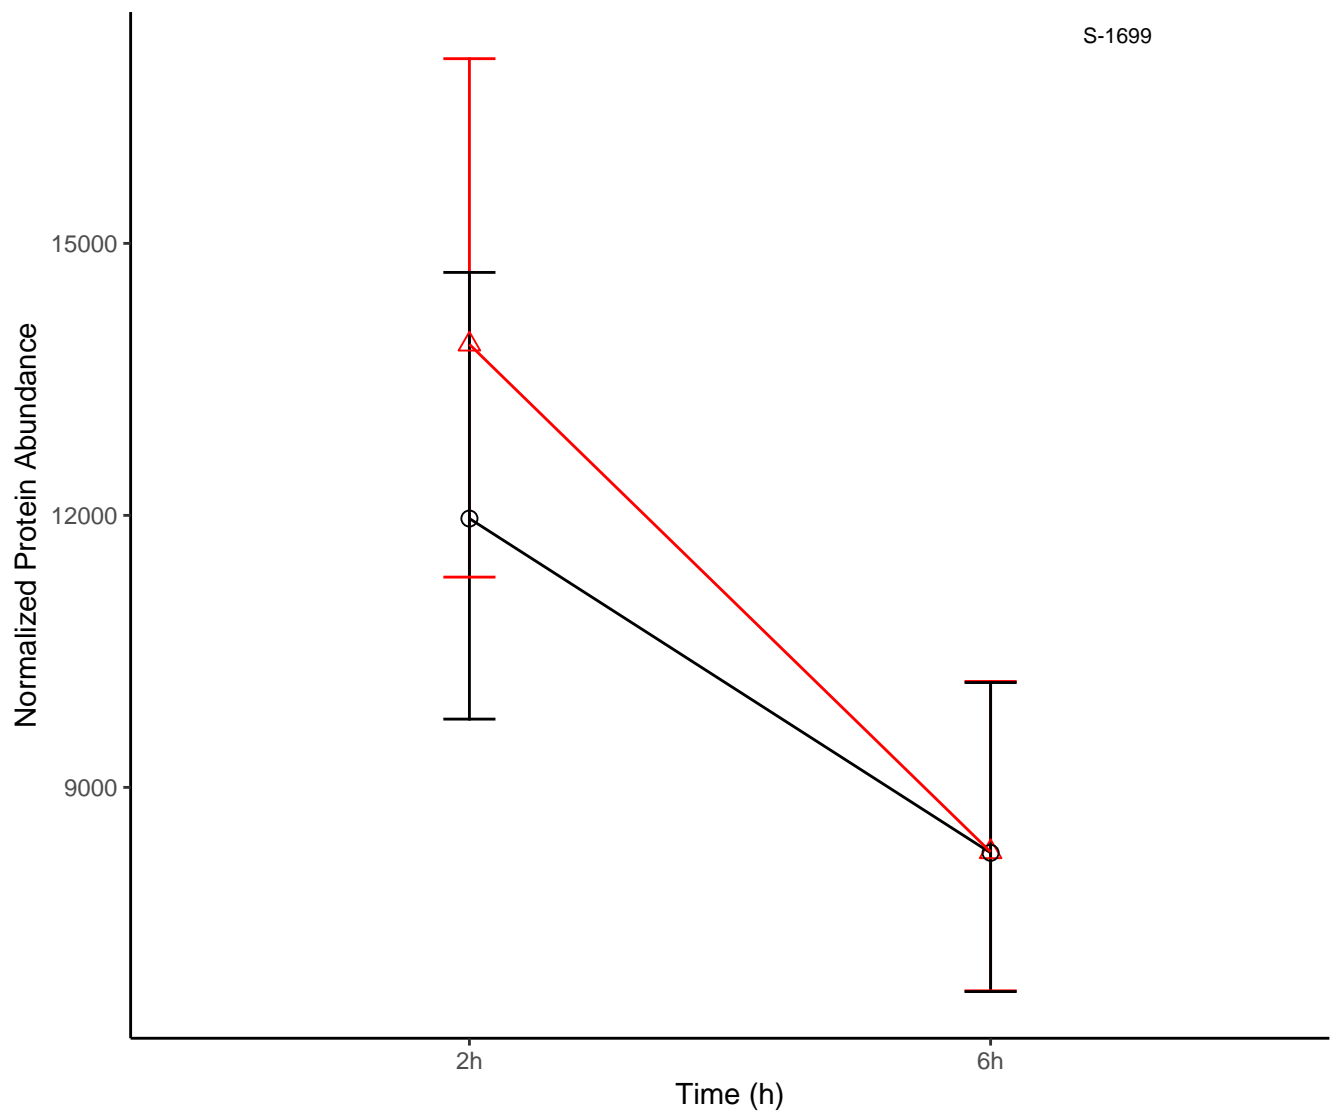

○ TSB-dex

△ TSB

# LUXS\_STAAM

S-1700

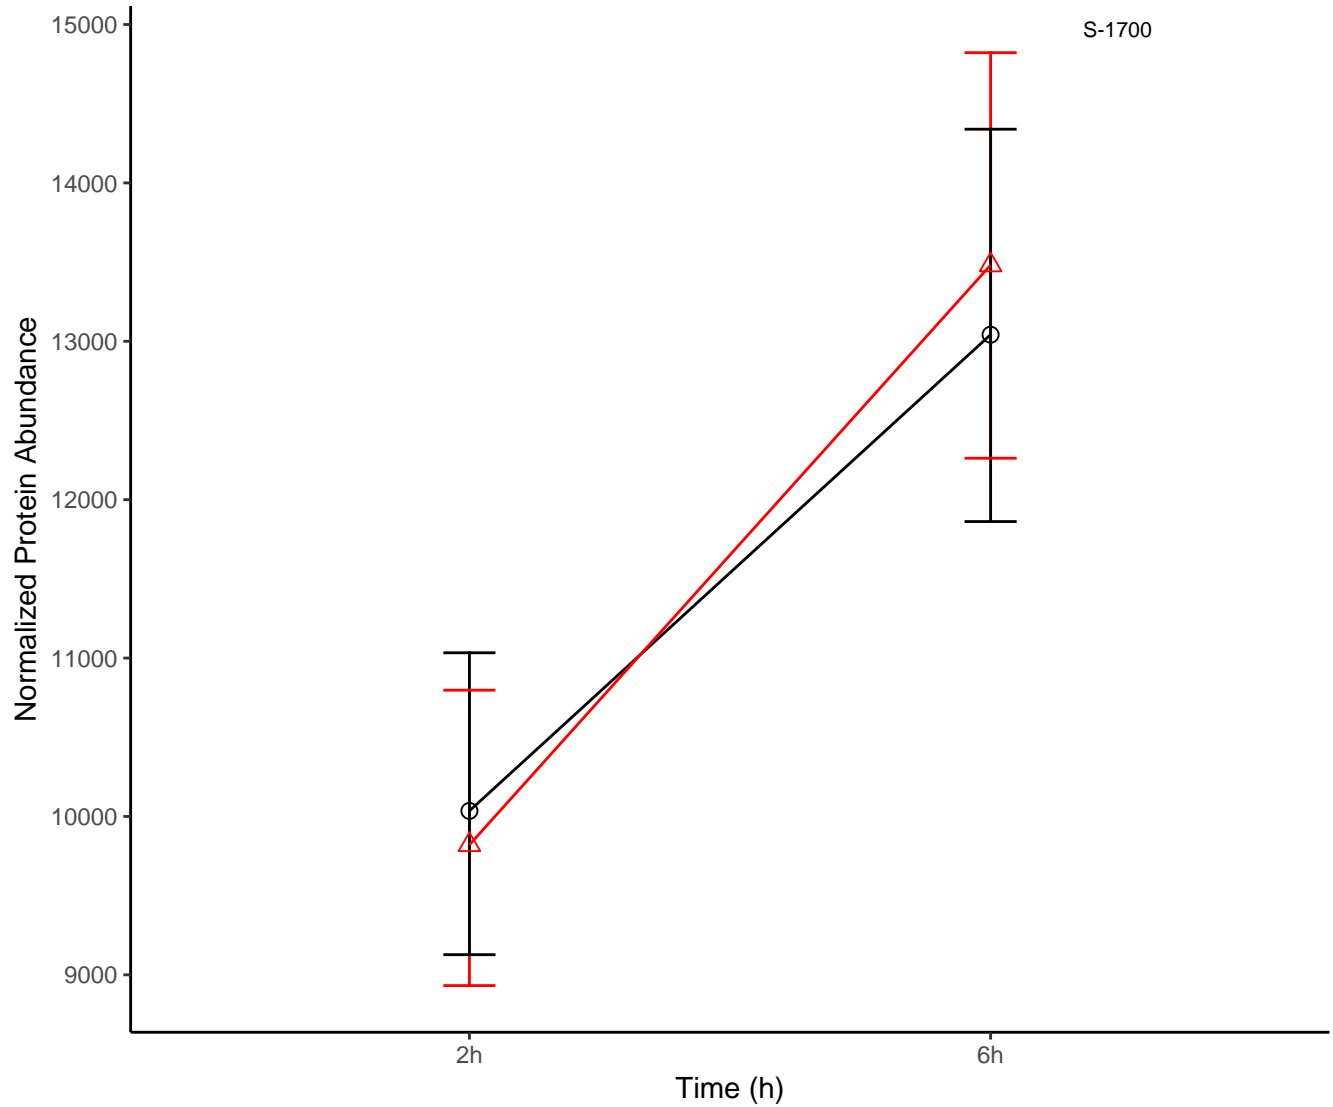

○ TSB-dex

△ TSB

# LYTH\_STAAM

S-1701

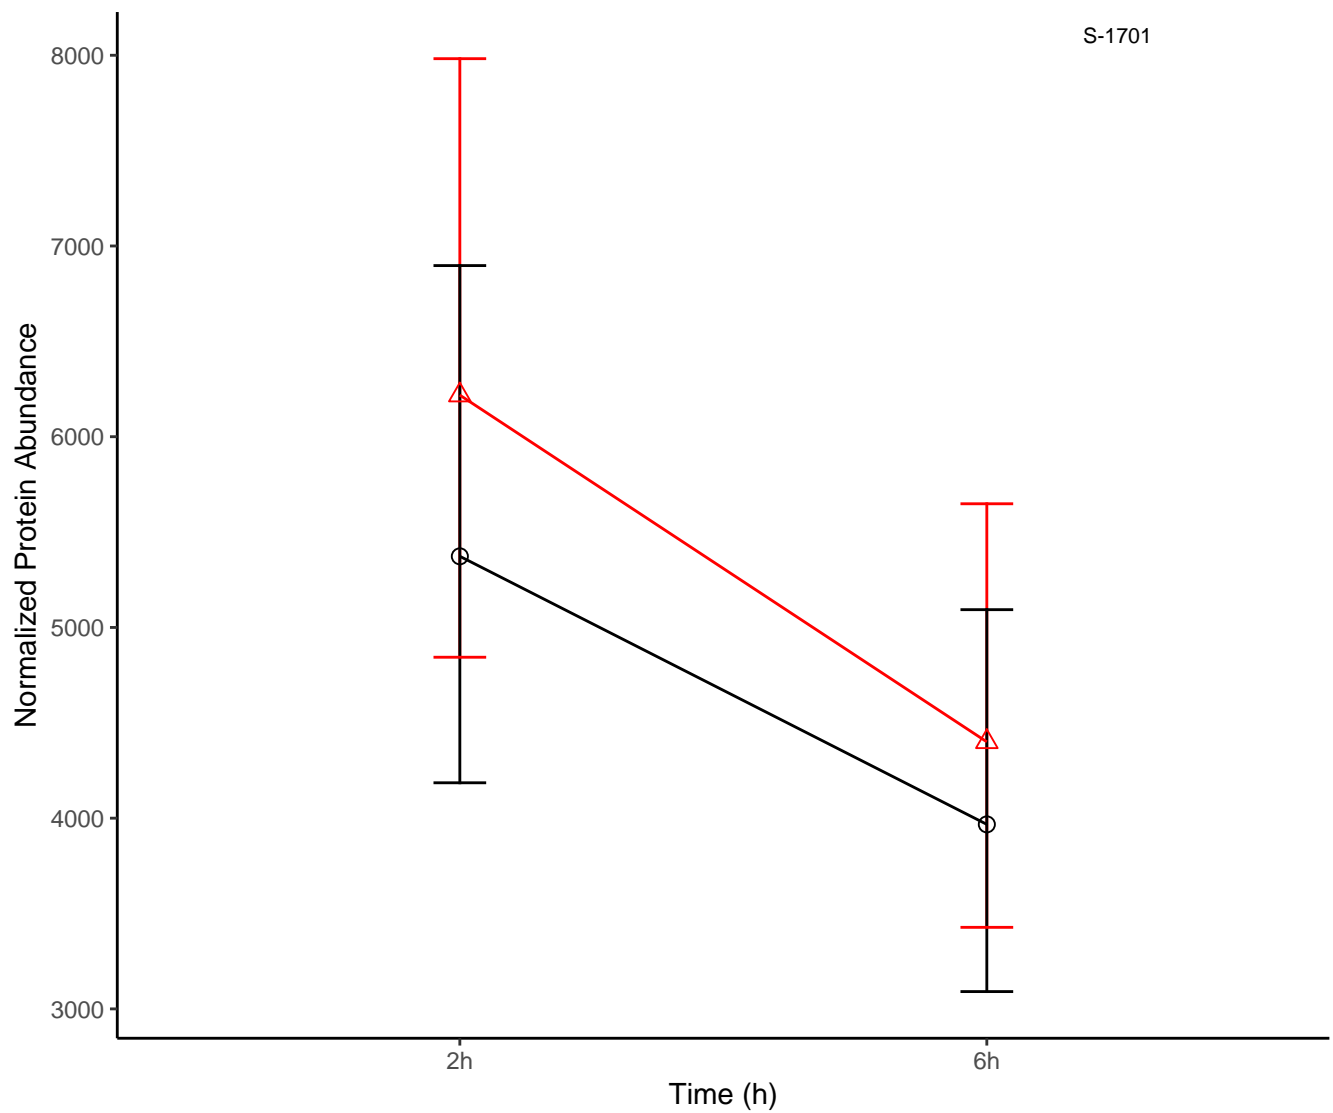

○ TSB-dex

△ TSB

# LYTN\_STAAM

S-1702

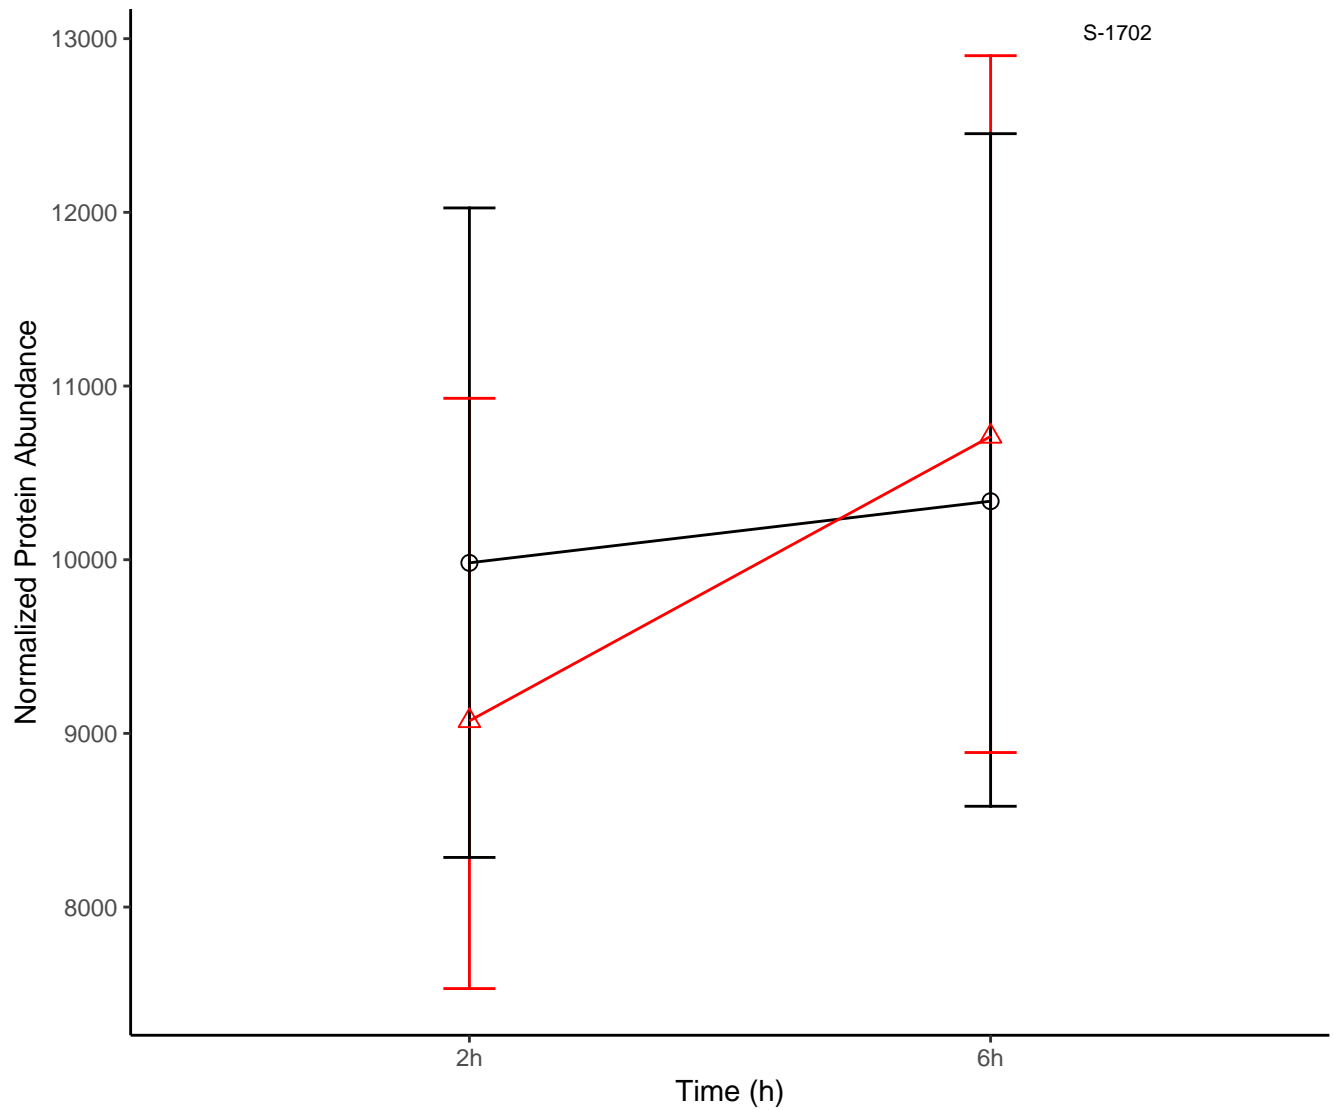

○ TSB-dex

△ TSB

# MAP\_STAAM

S-1703

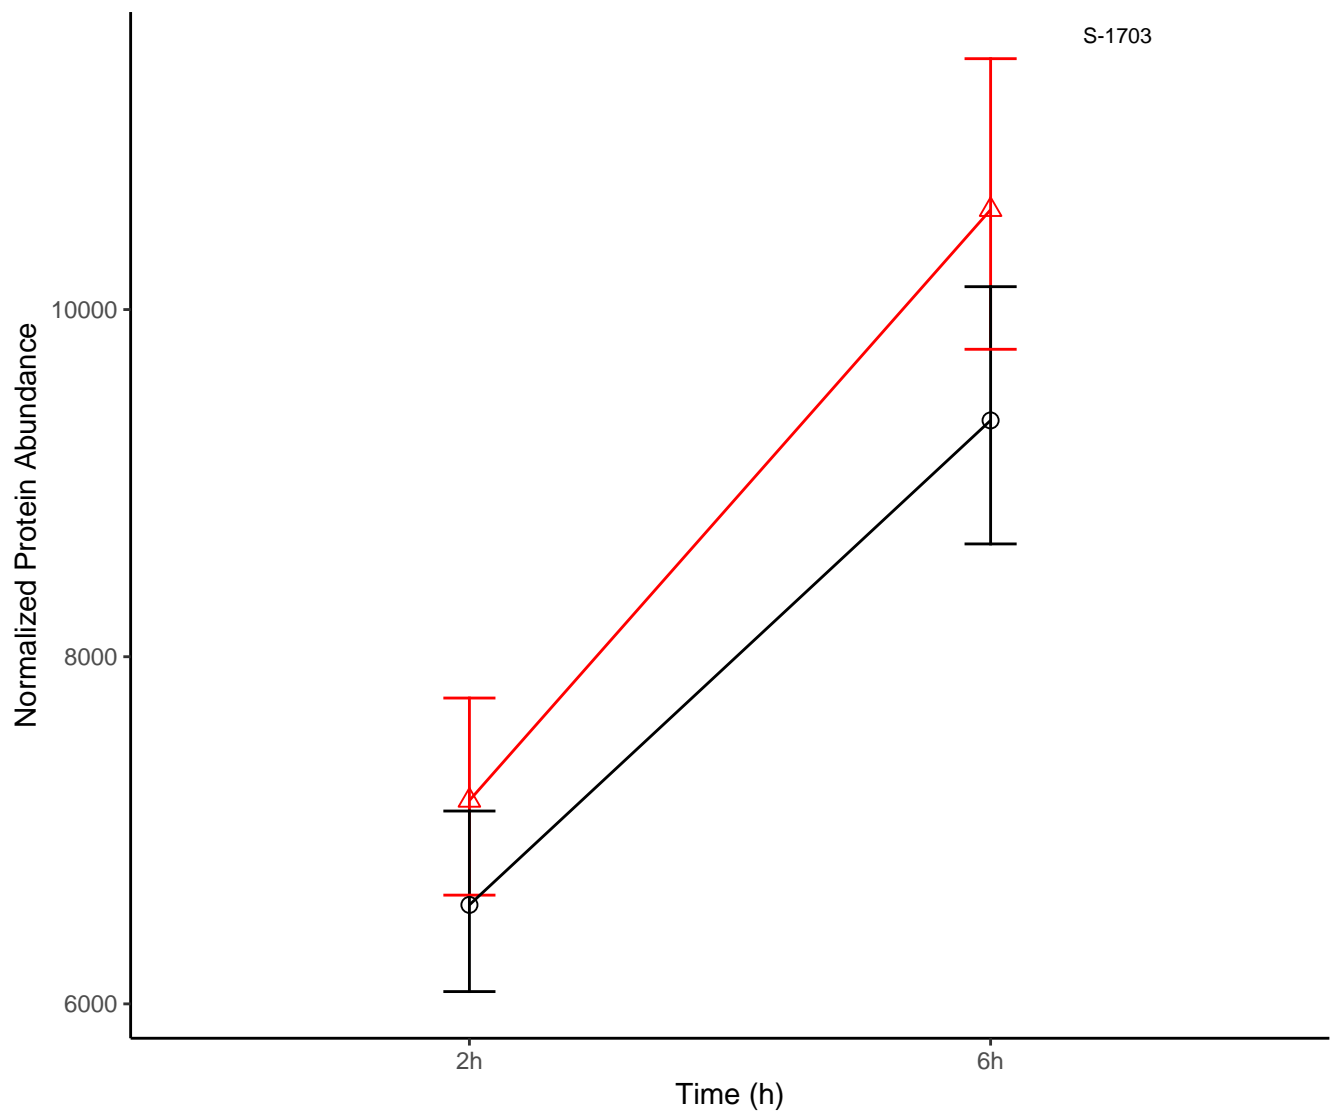

○ TSB-dex

△ TSB

# MAP1\_STAAM

S-1704

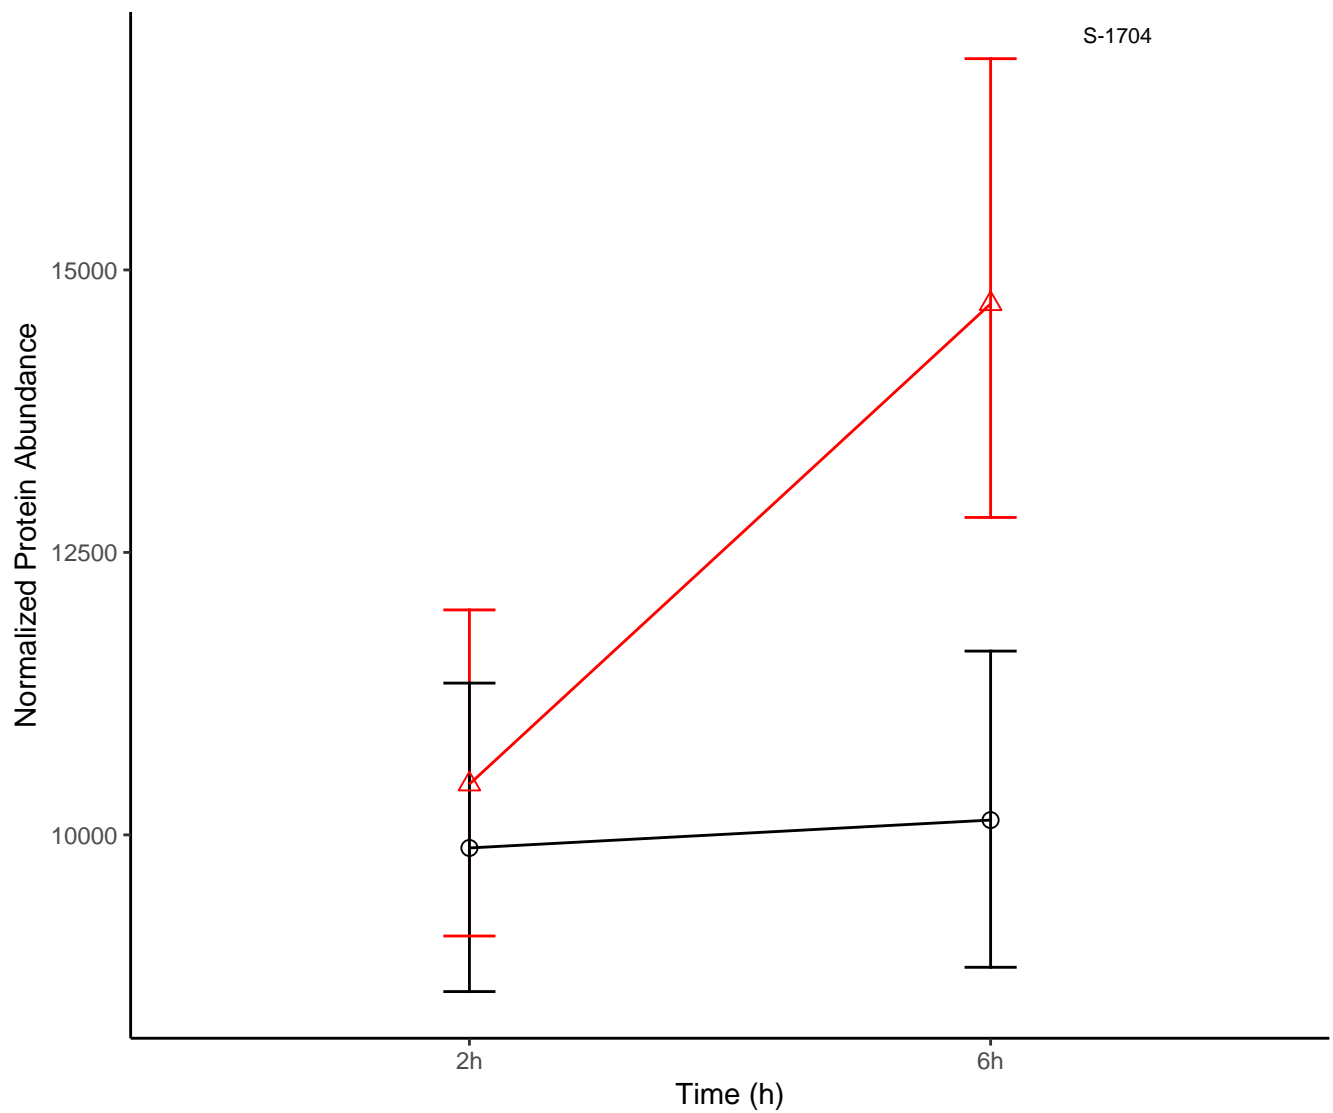

○ TSB-dex

△ TSB



# MAZF\_STAAM

S-1705

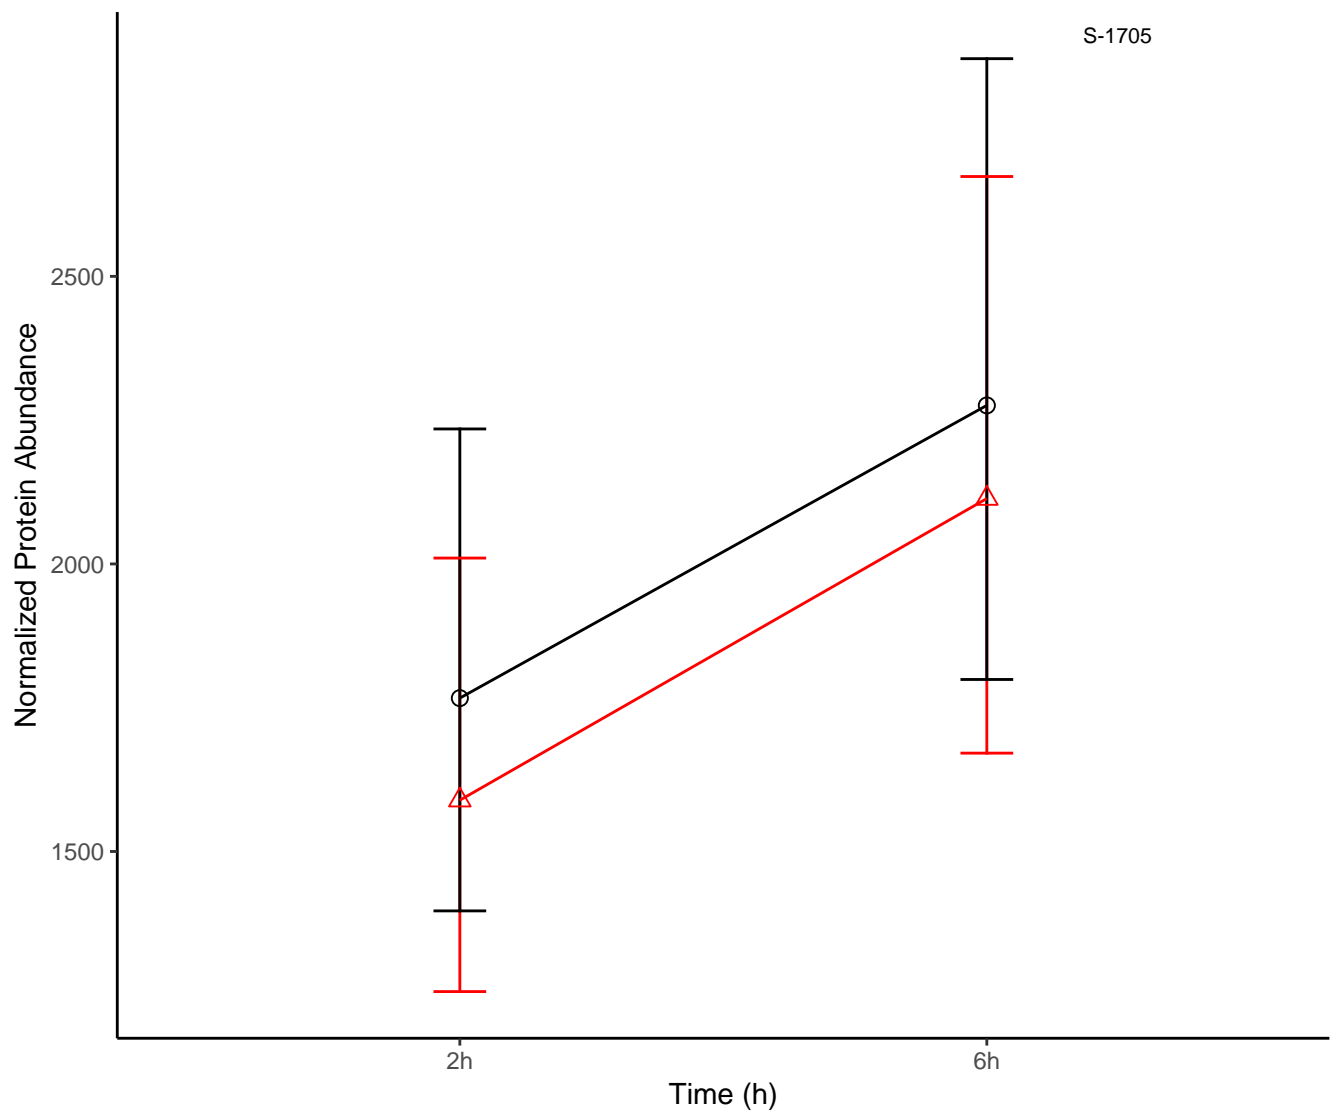

○ TSB-dex

△ TSB

# MENB\_STAAM

S-1706

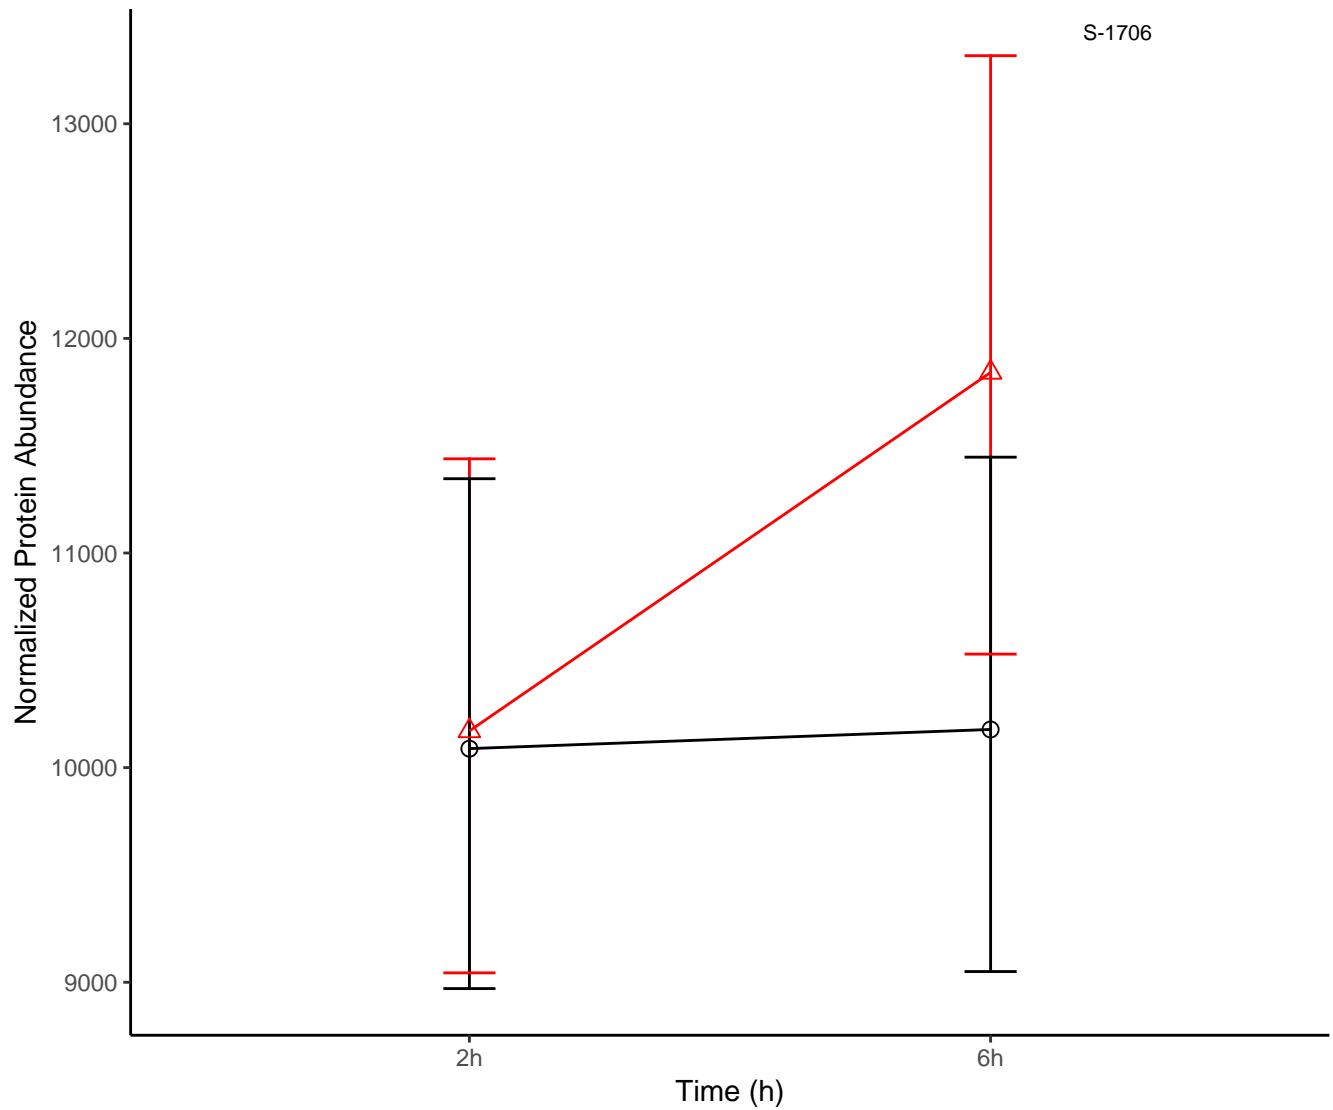

○ TSB-dex

△ TSB

# MENG\_STAAM

S-1707

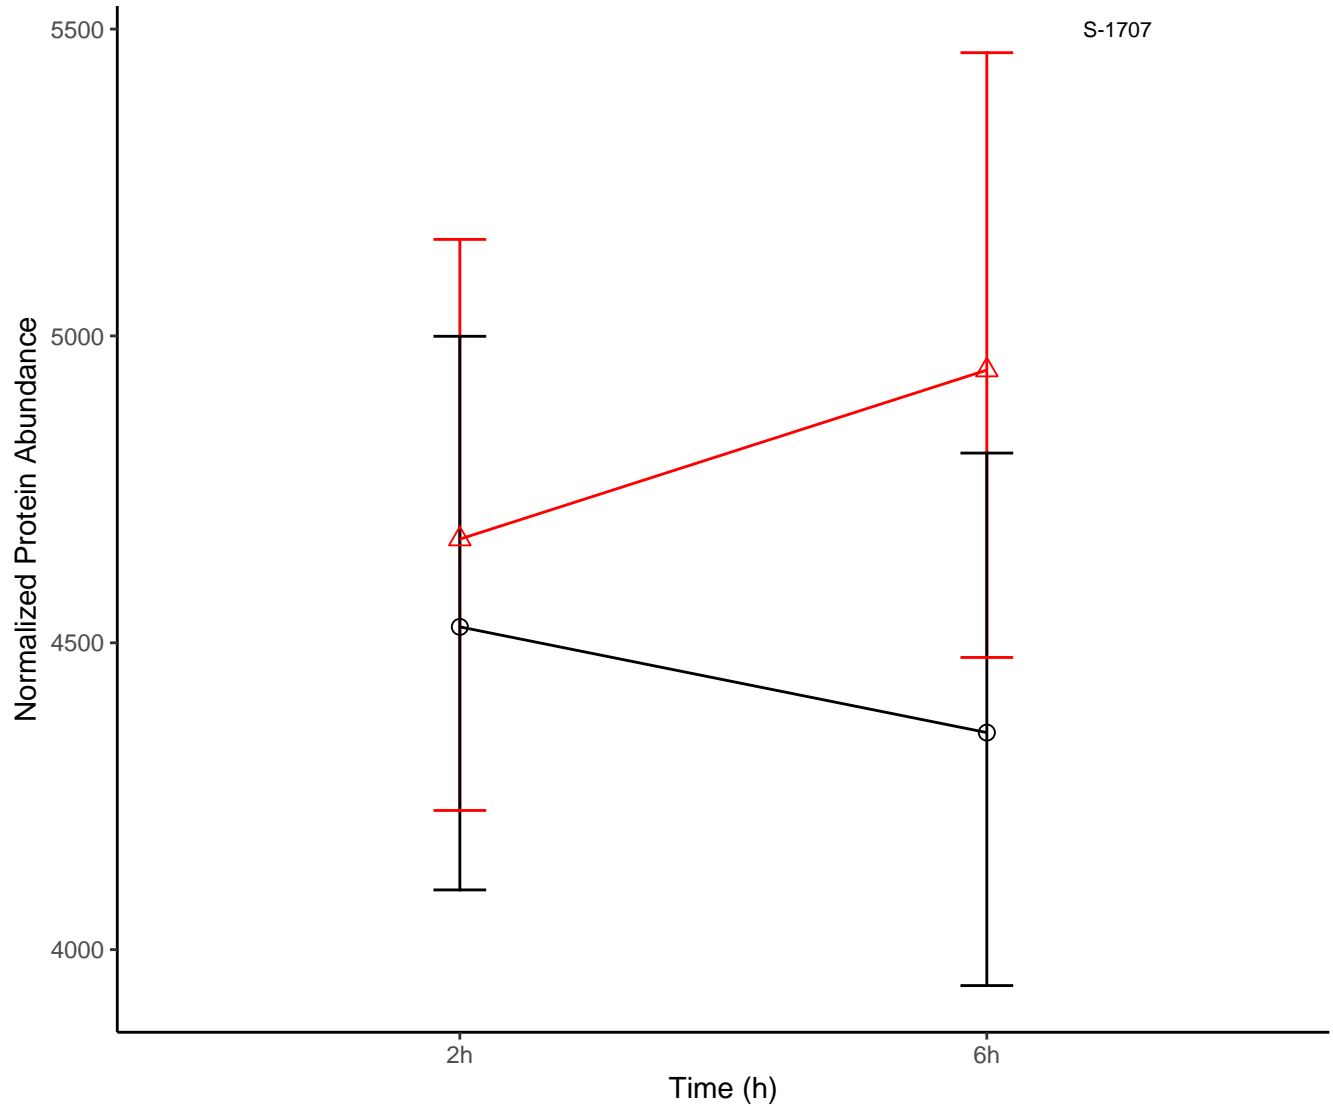

○ TSB-dex

△ TSB

# METK\_STAAM

S-1708

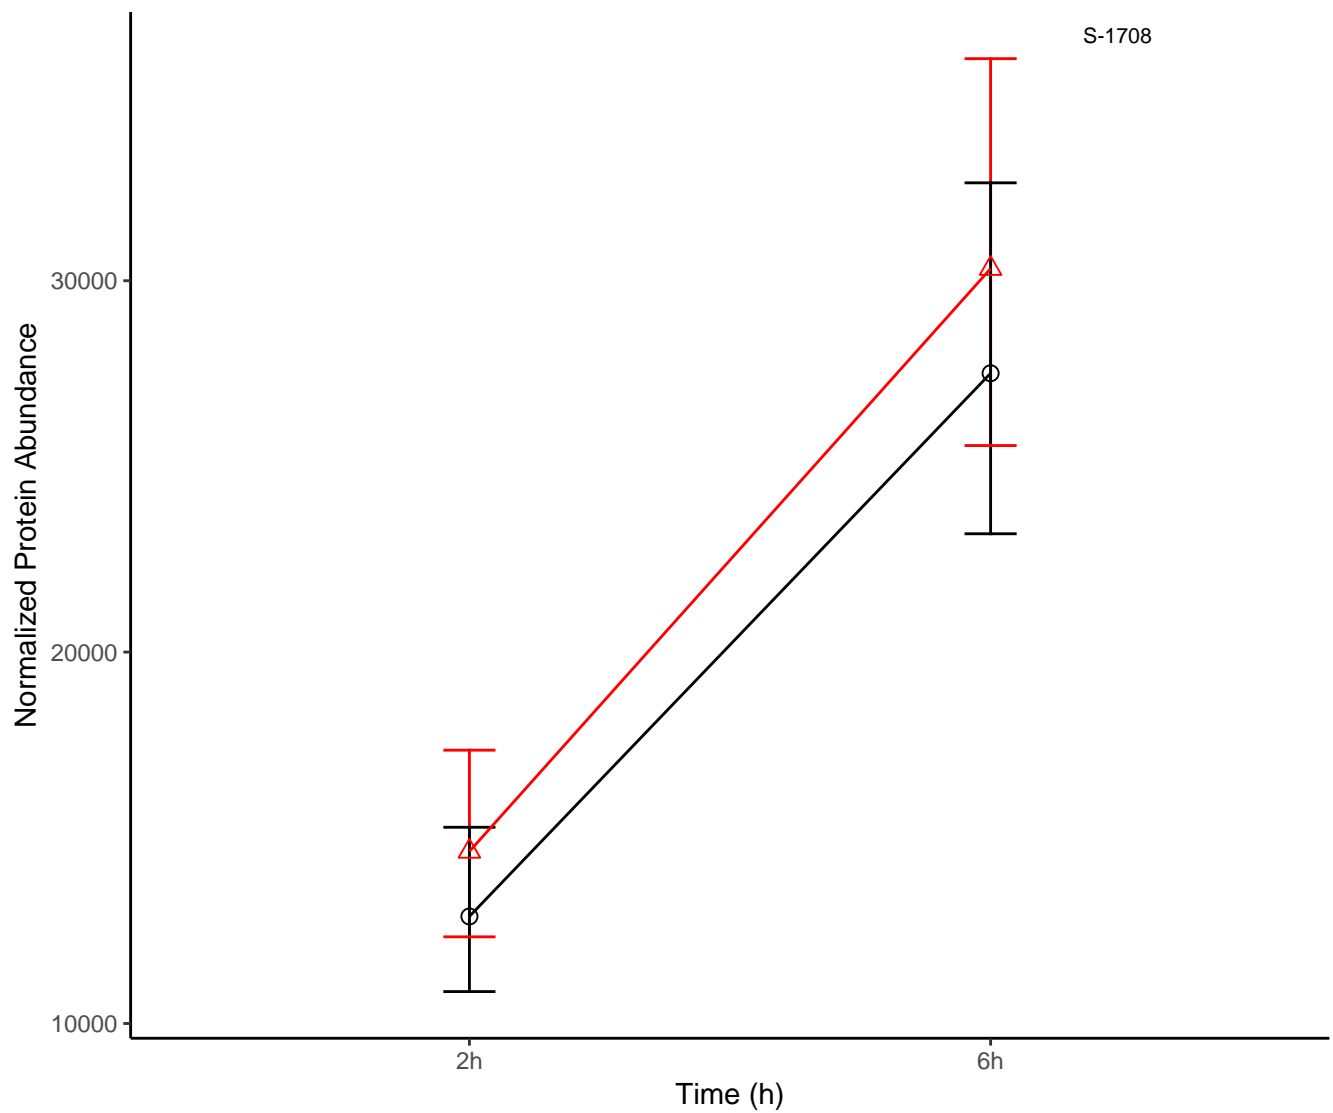

○ TSB-dex

△ TSB

# METN2\_STAAM

S-1709

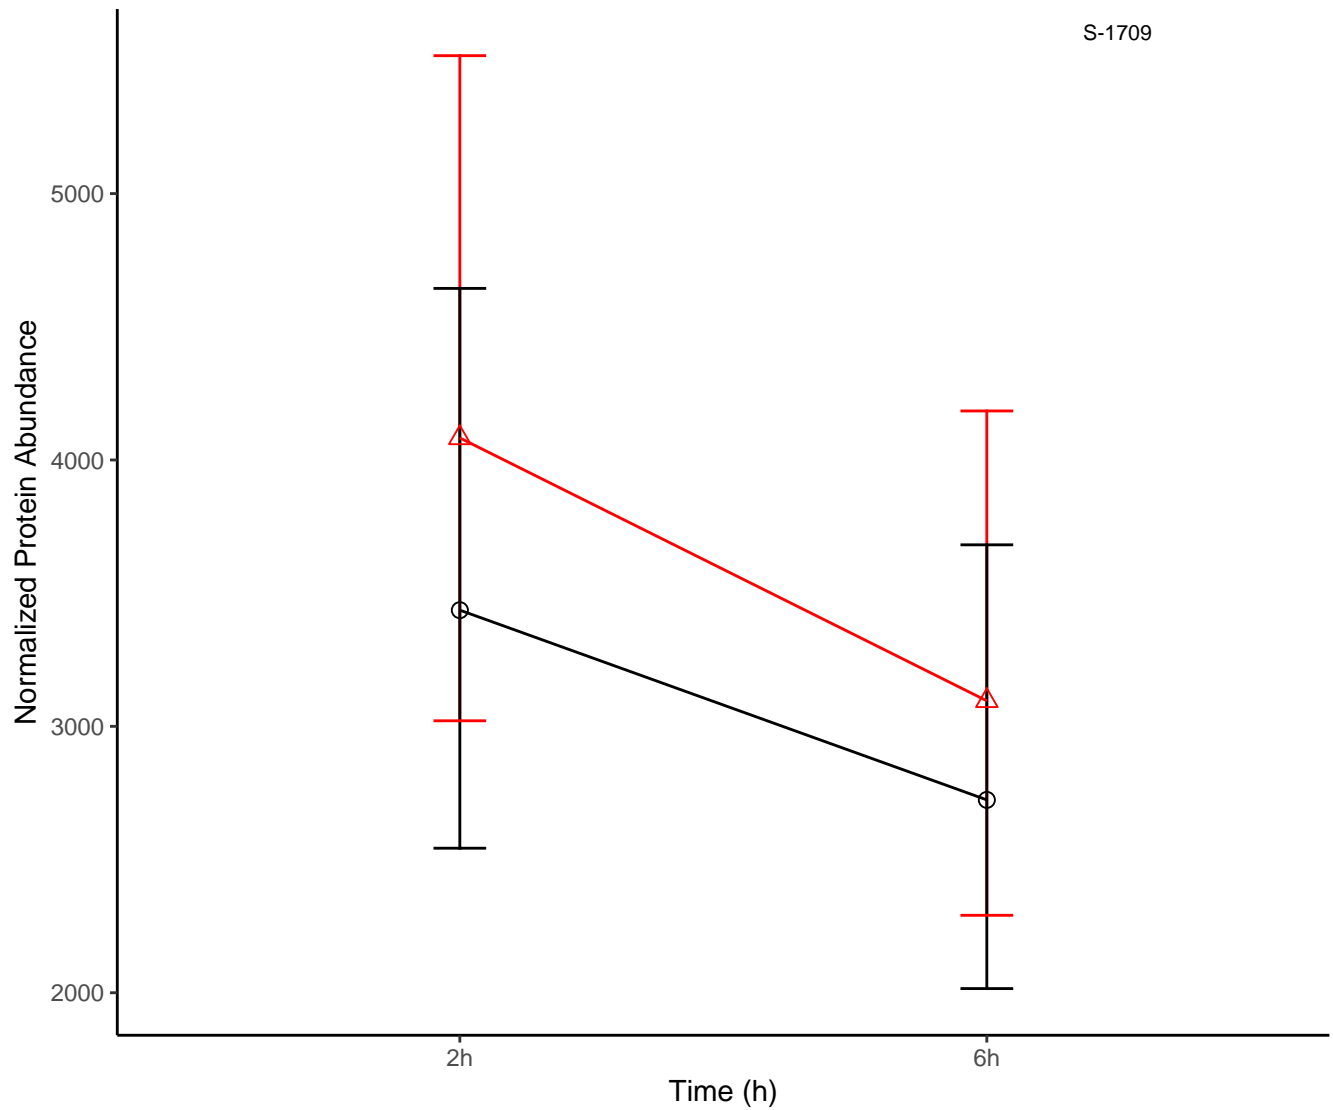

○ TSB-dex

△ TSB

# MGRA\_STAAM

S-1710

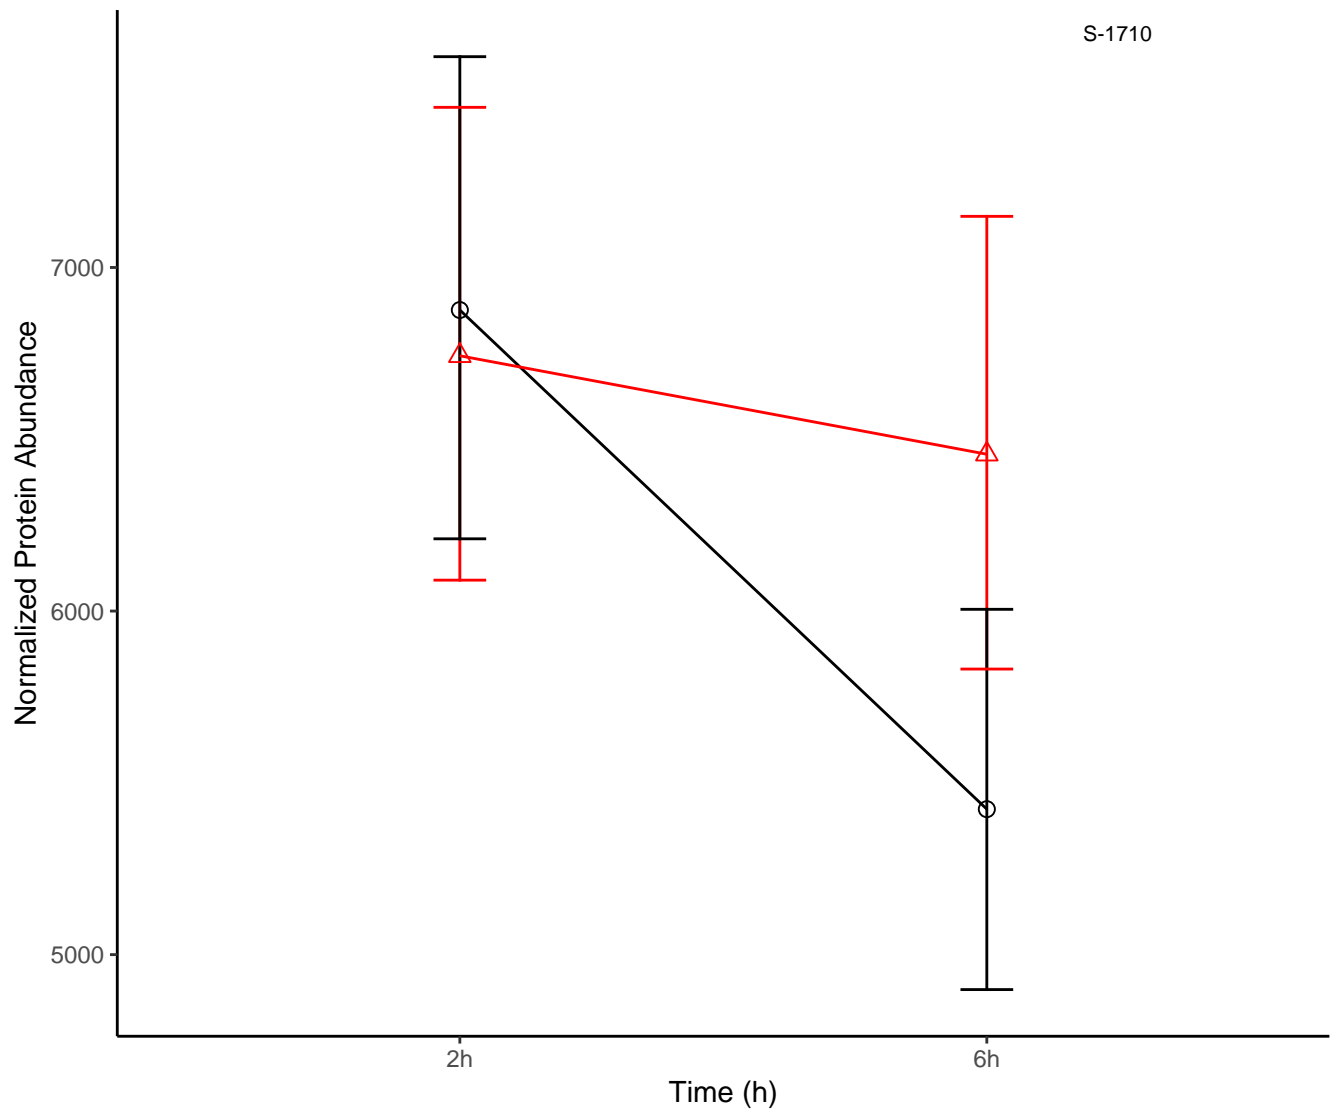

○ TSB-dex

△ TSB

# MIAB\_STAAM

S-1711

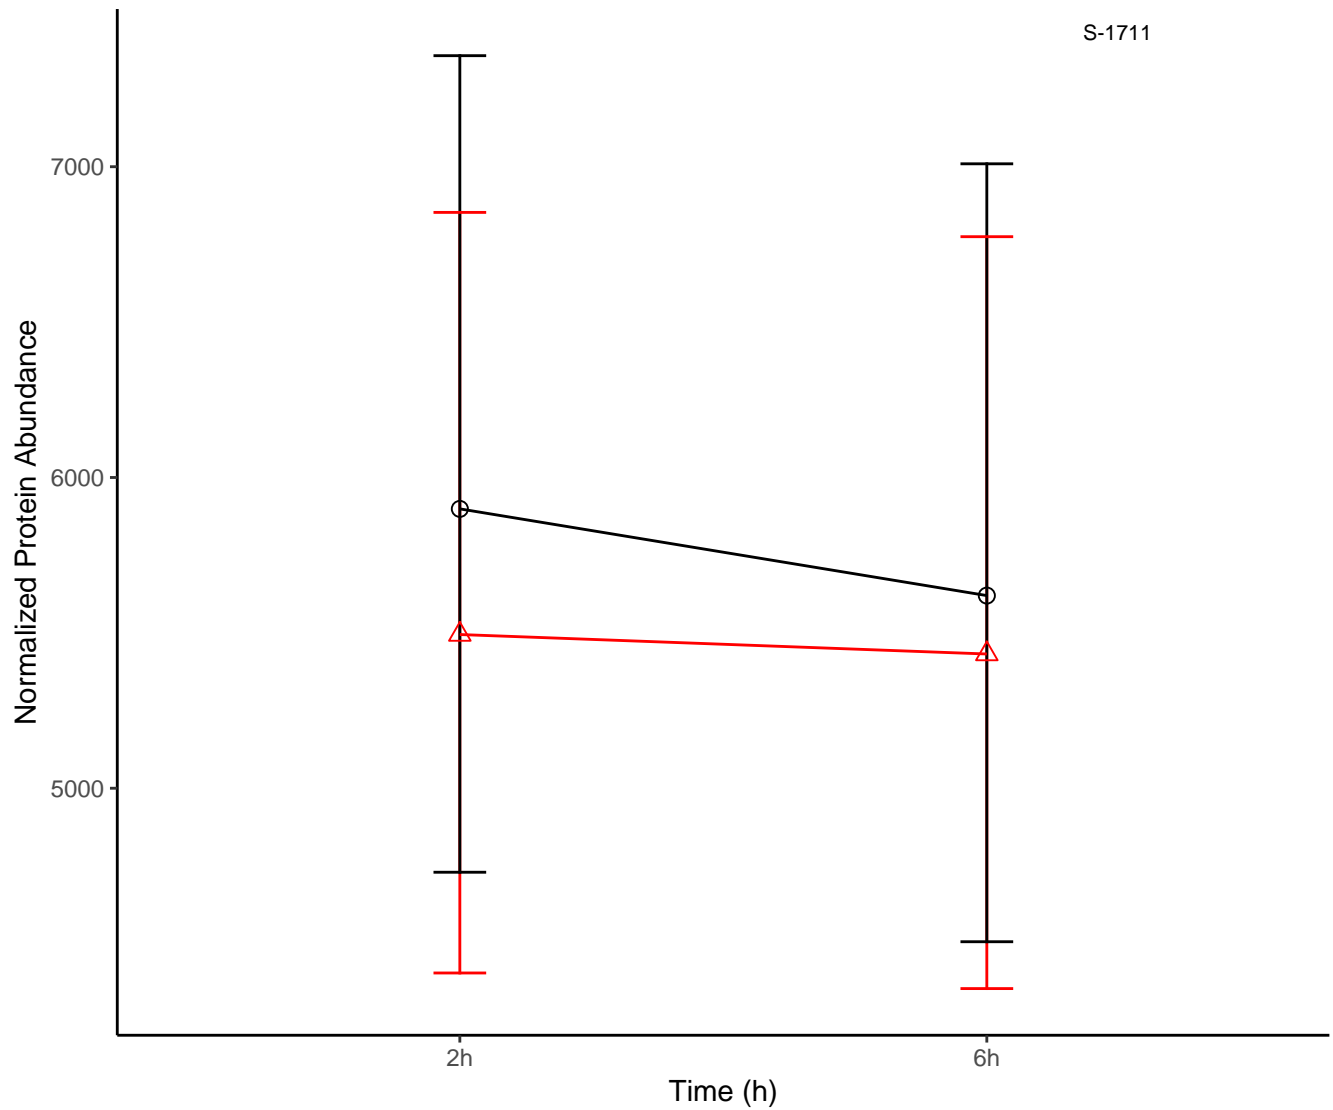

○ TSB-dex

△ TSB

# MNME\_STAAM

S-1712

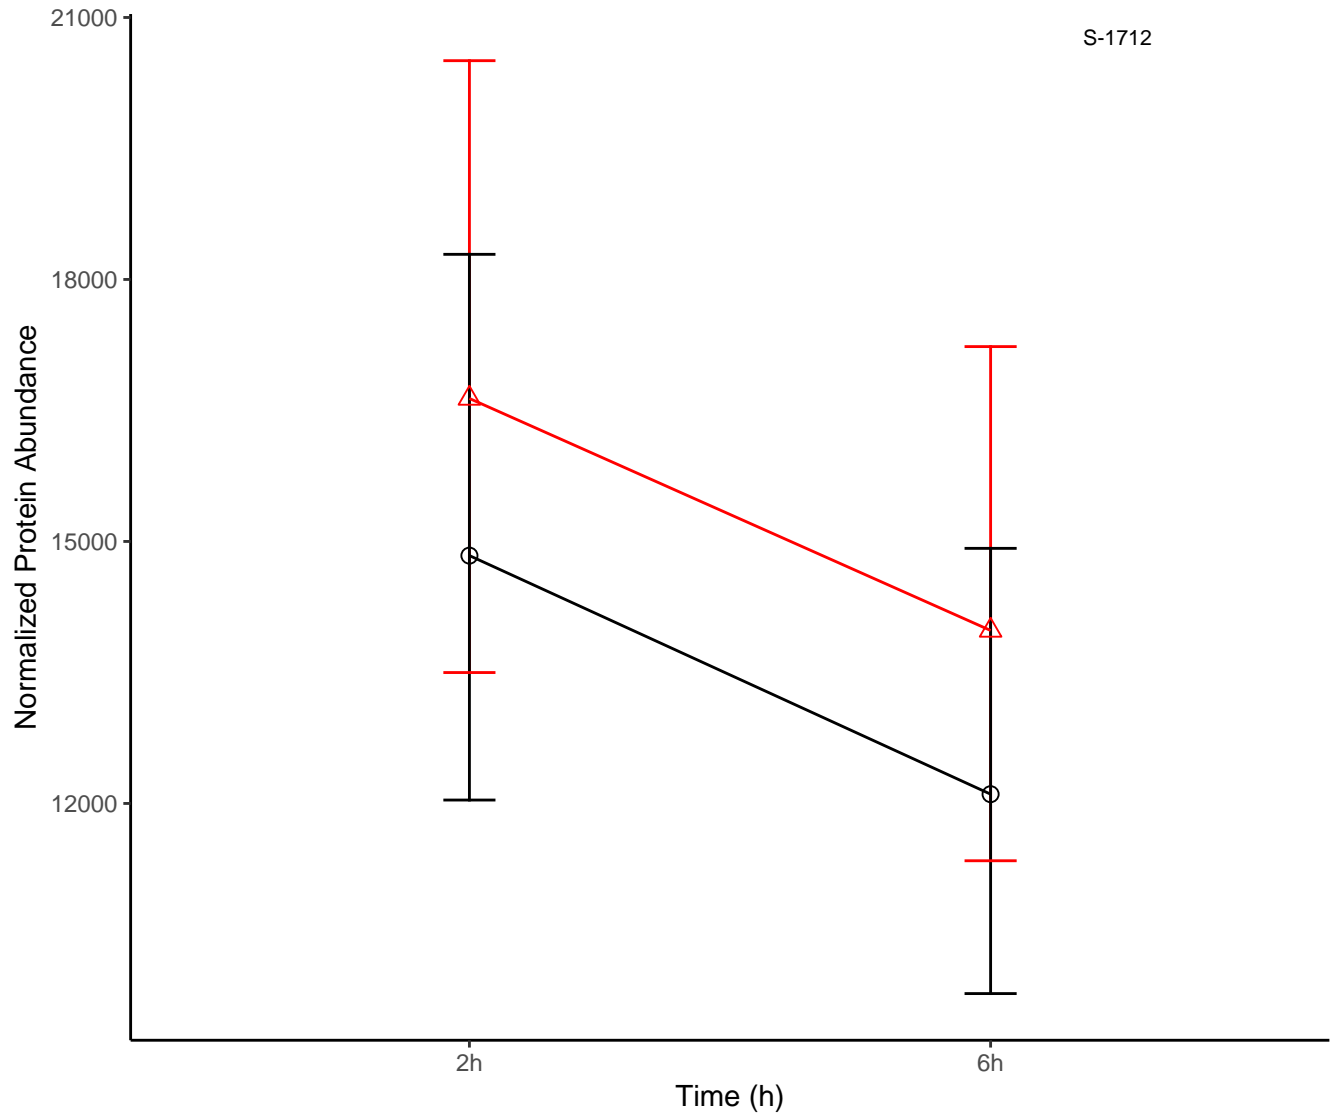

○ TSB-dex

△ TSB



# MNMG\_STAAM

S-1713

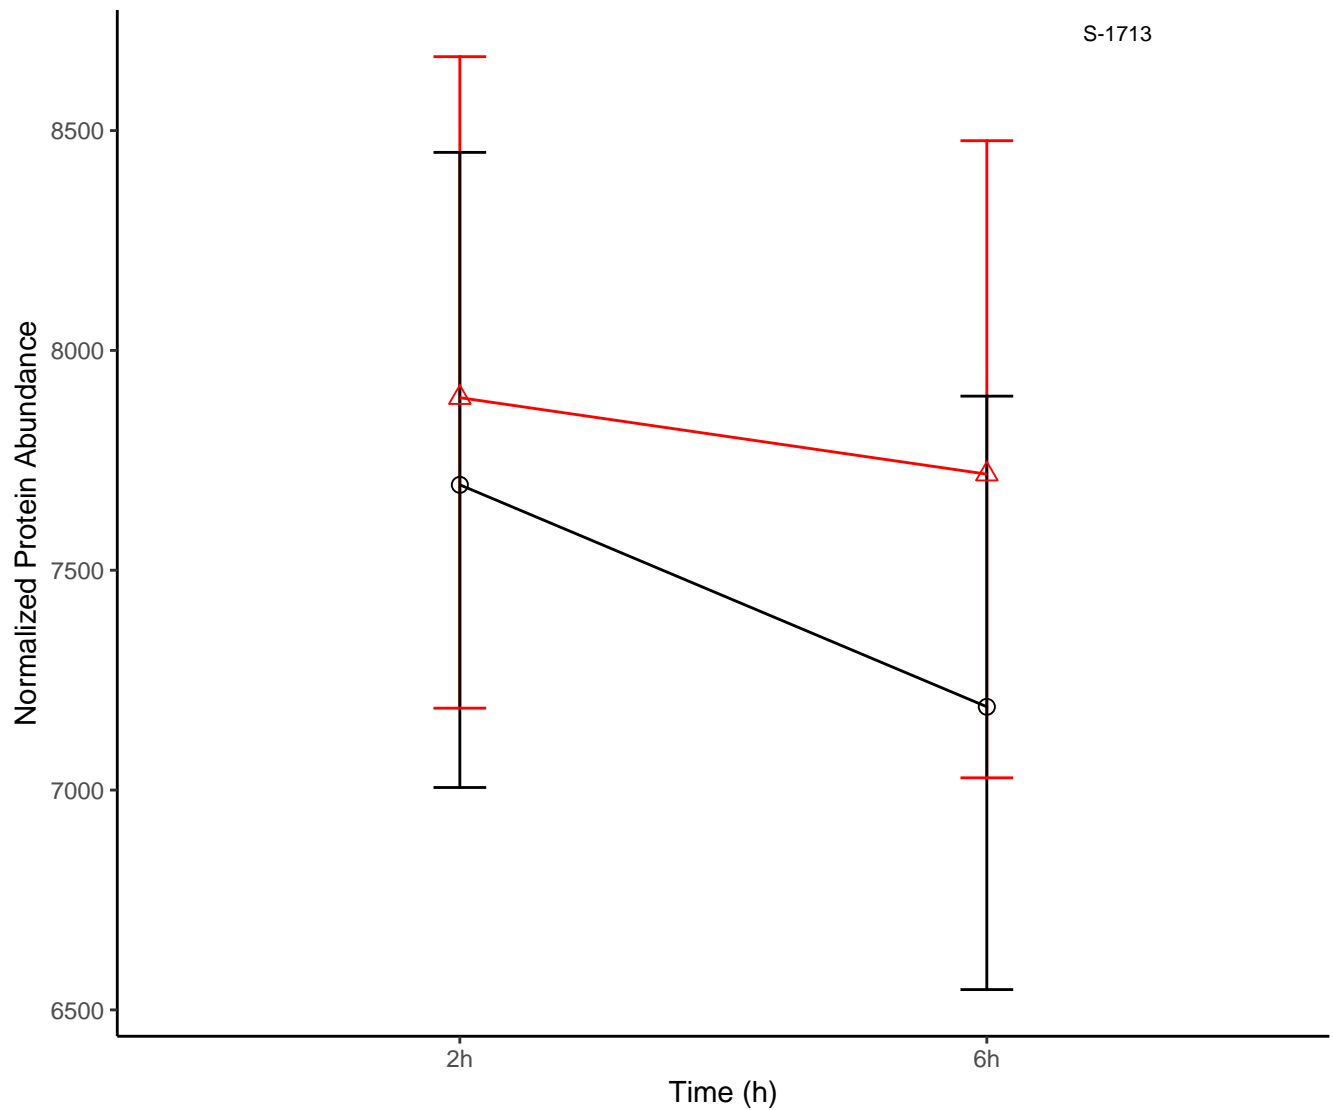

○ TSB-dex

△ TSB

# MOAC\_STAAM

S-1714

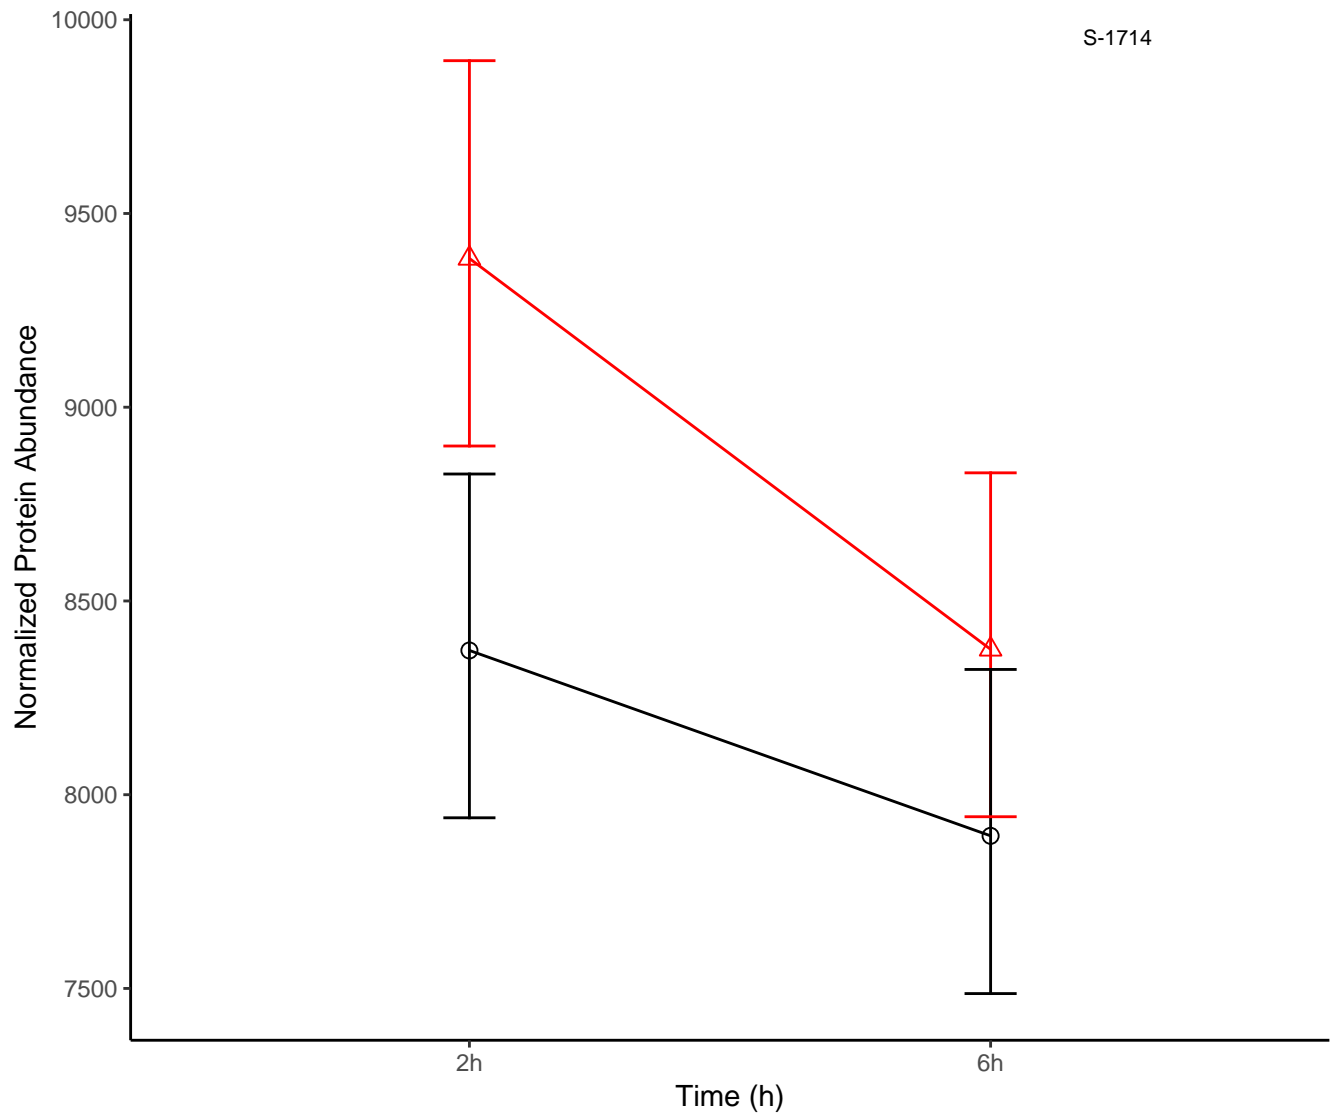

○ TSB-dex

△ TSB

# MOEA\_STAAM

S-1715

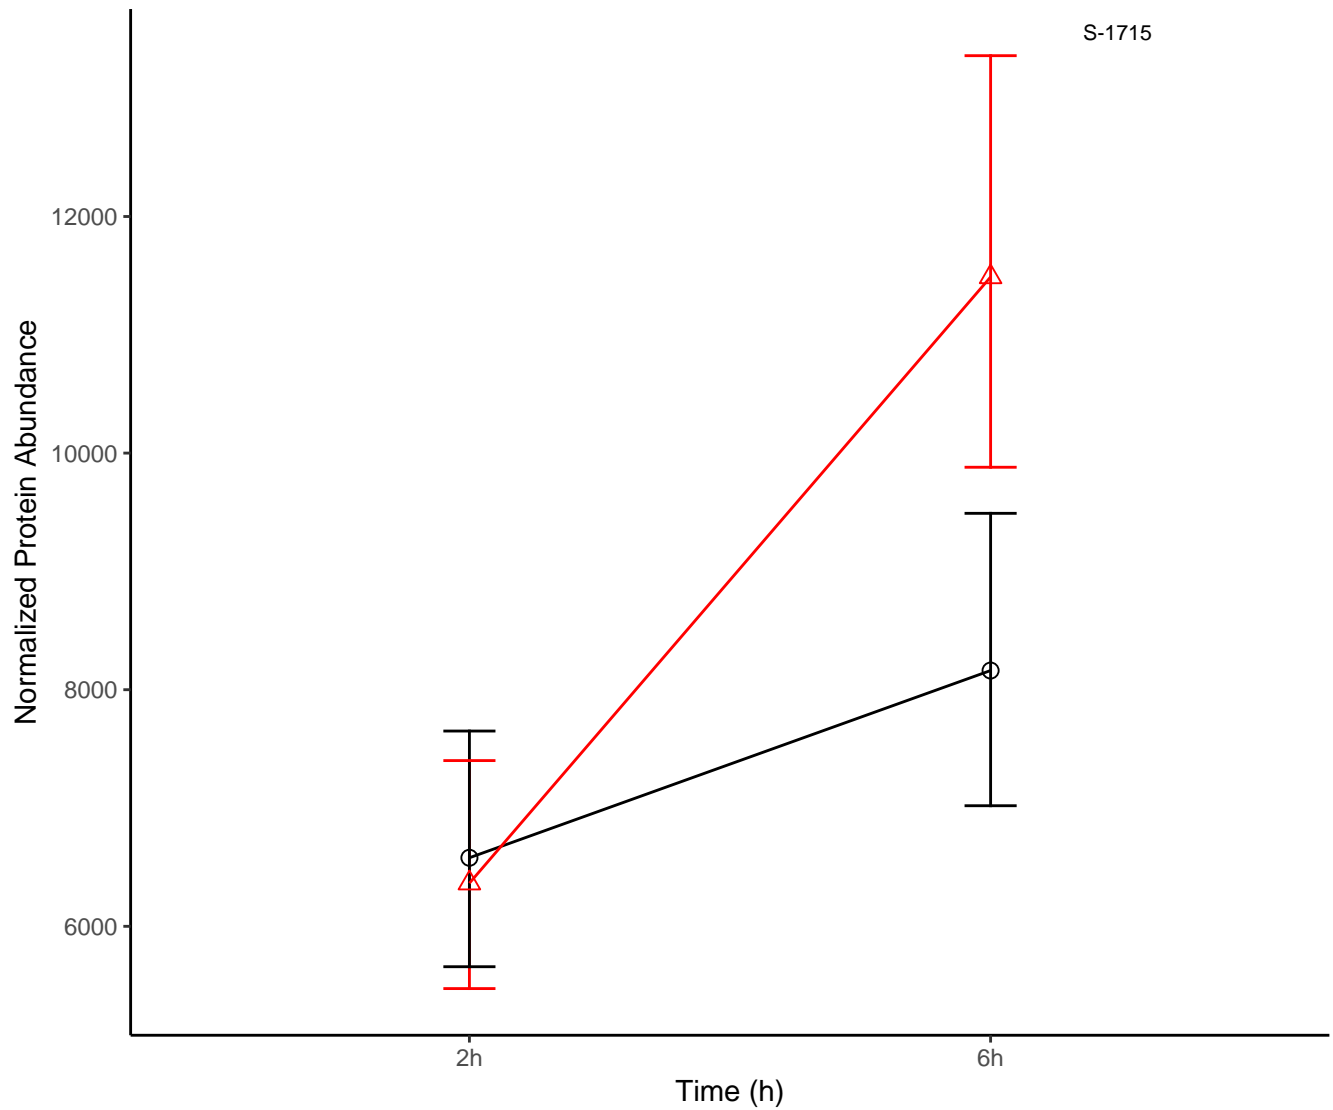

○ TSB-dex

△ TSB

# MQO2\_STAAM

S-1716

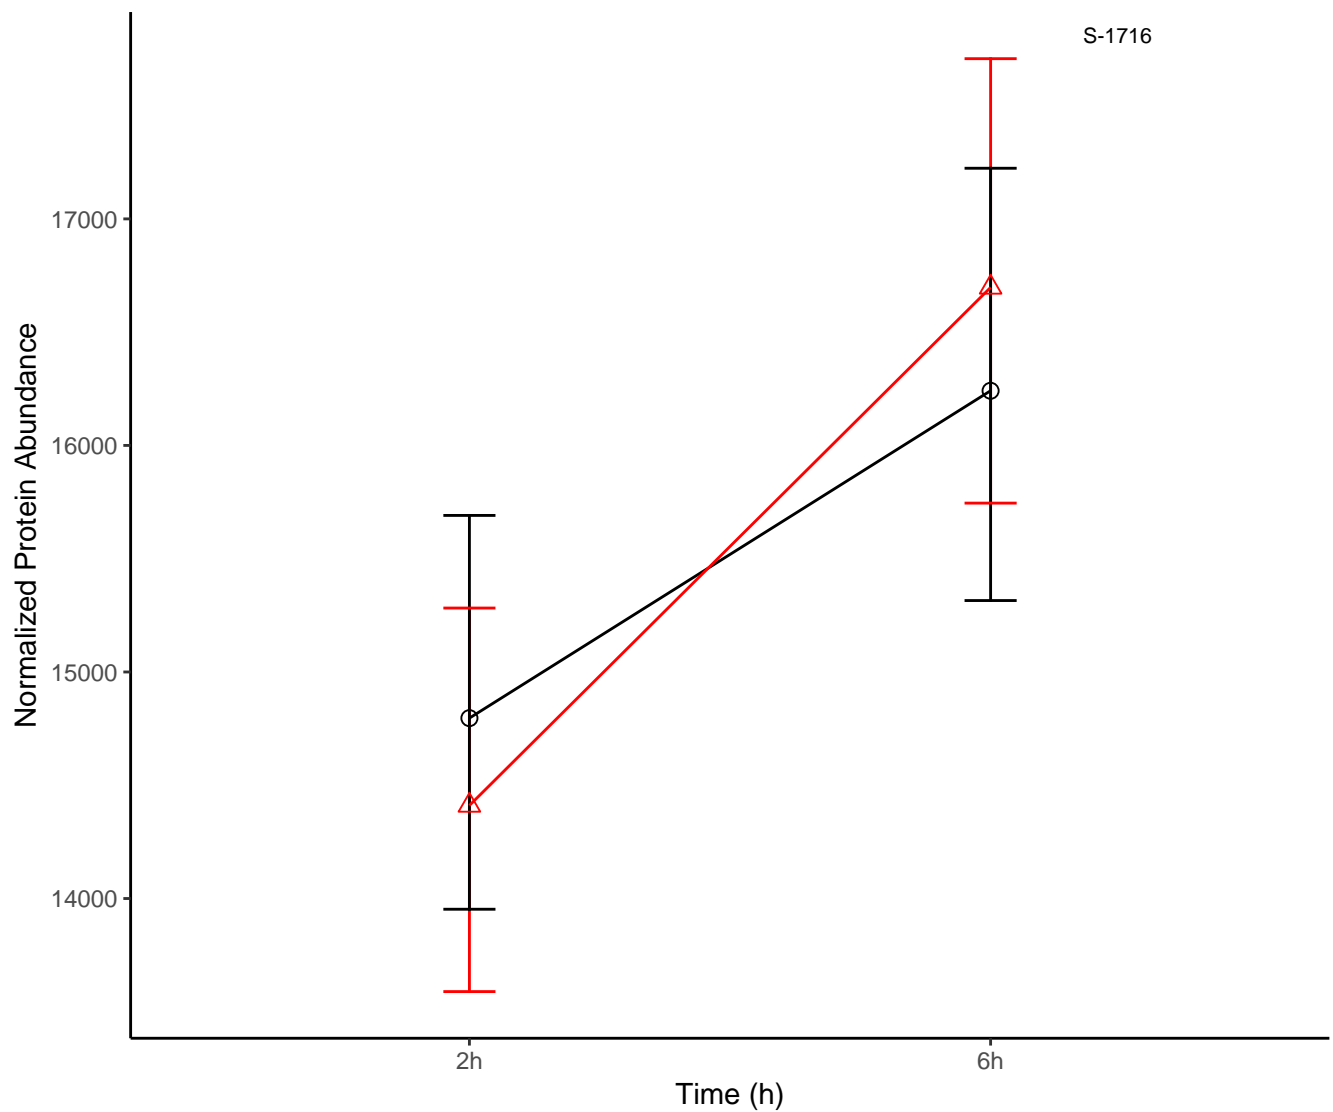

○ TSB-dex

△ TSB

# MSRA1\_STAAM

S-1717

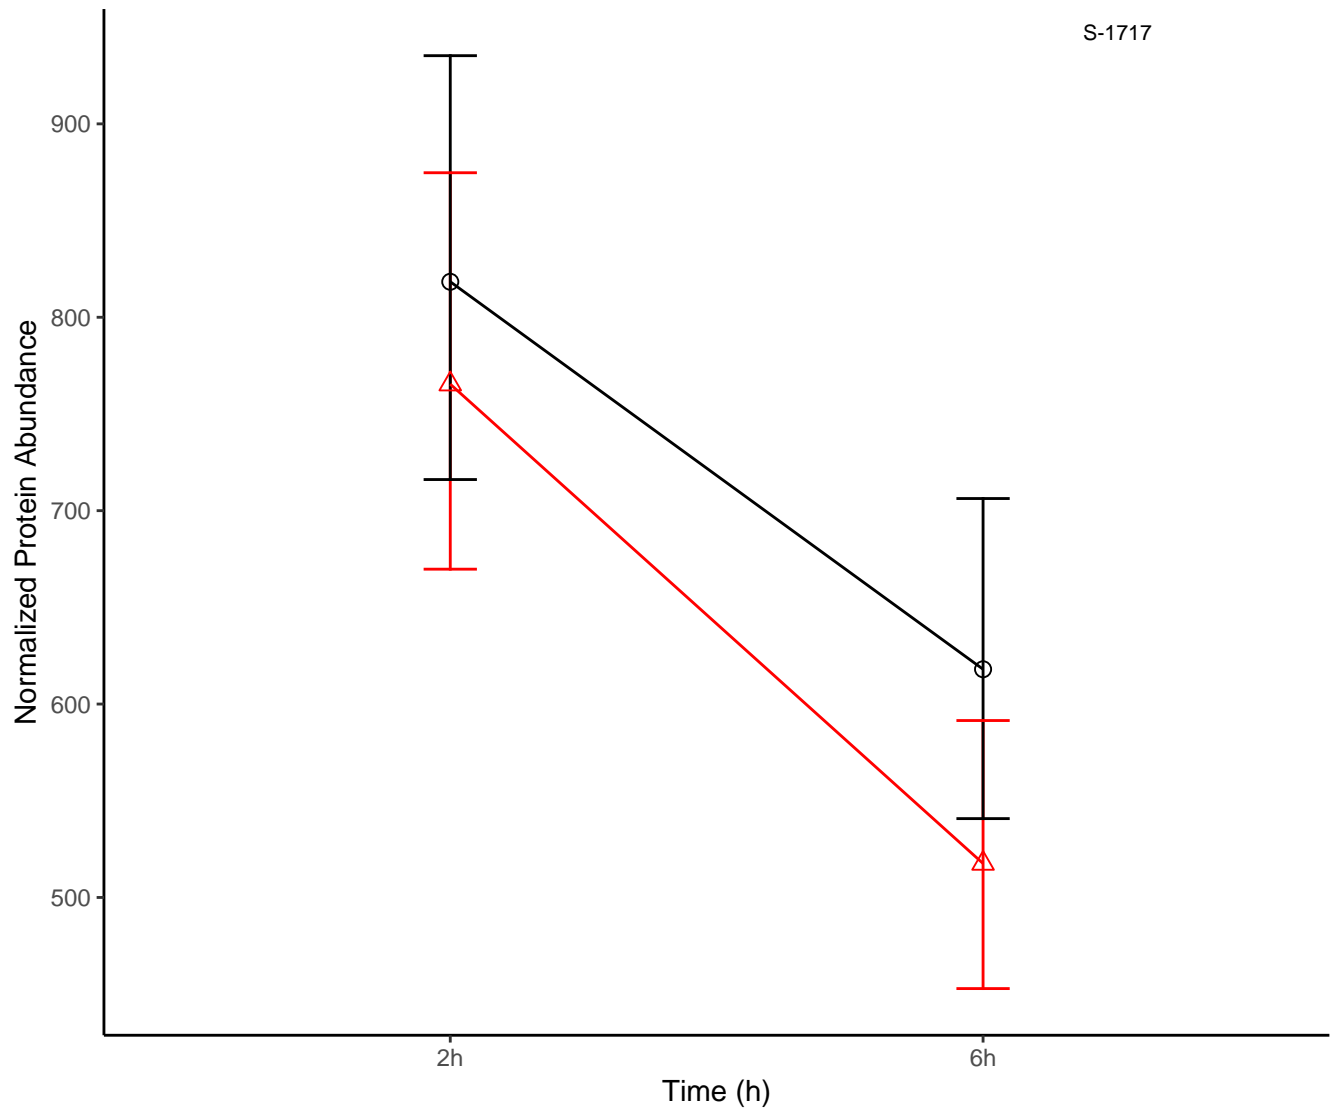

○ TSB-dex

△ TSB

# MSRA2\_STAAM

S-1718

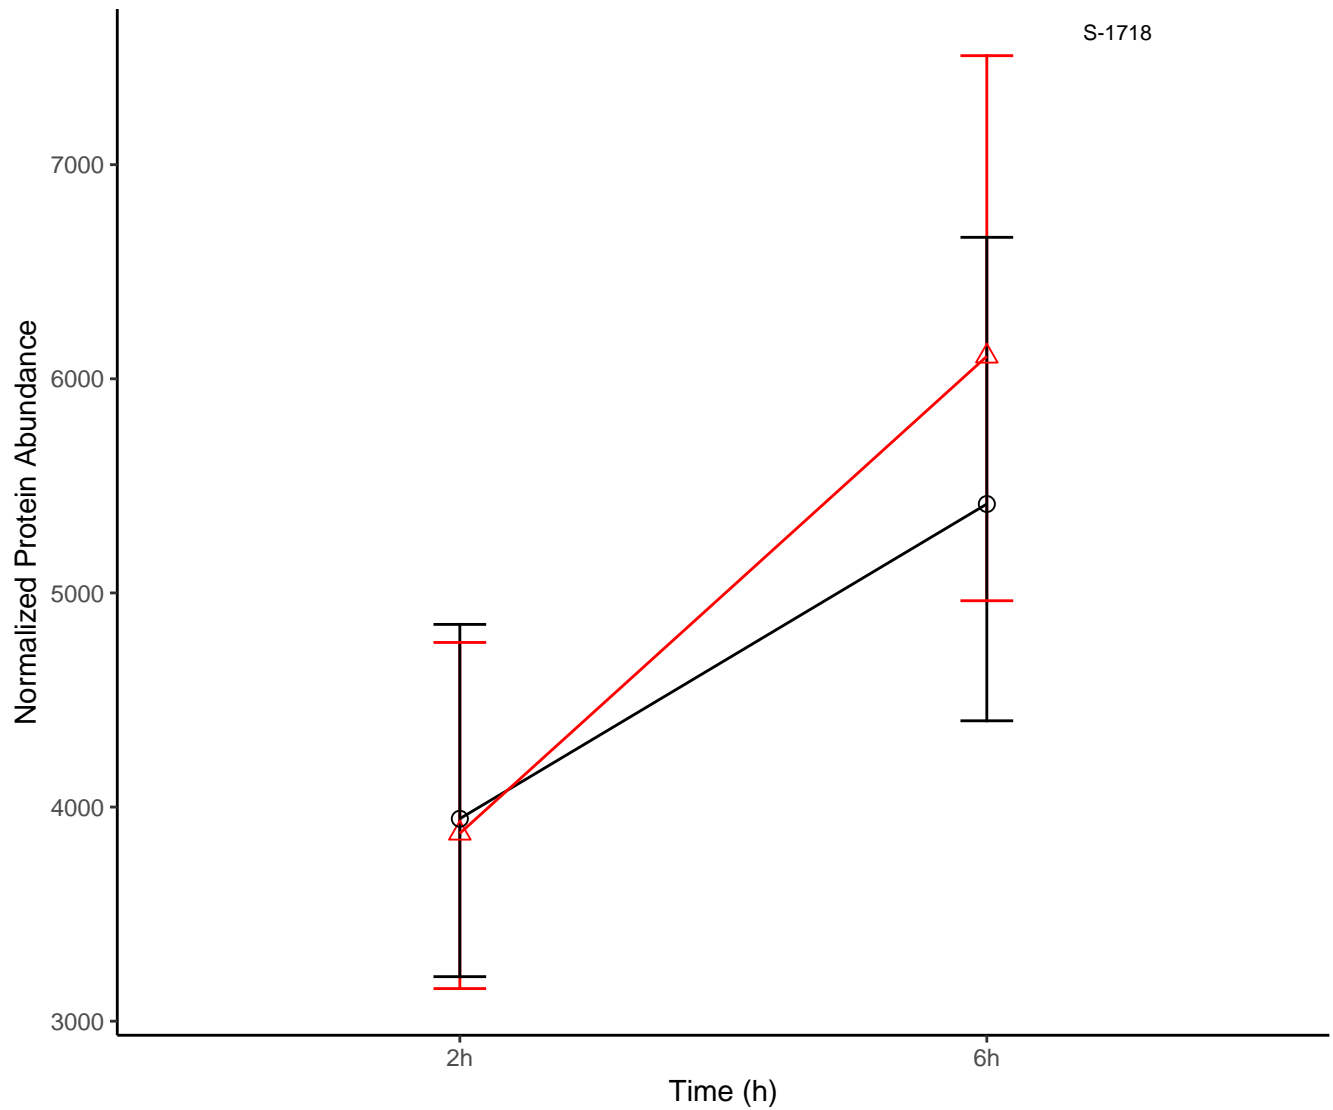

○ TSB-dex

△ TSB

# MSRB\_STAAM

S-1719

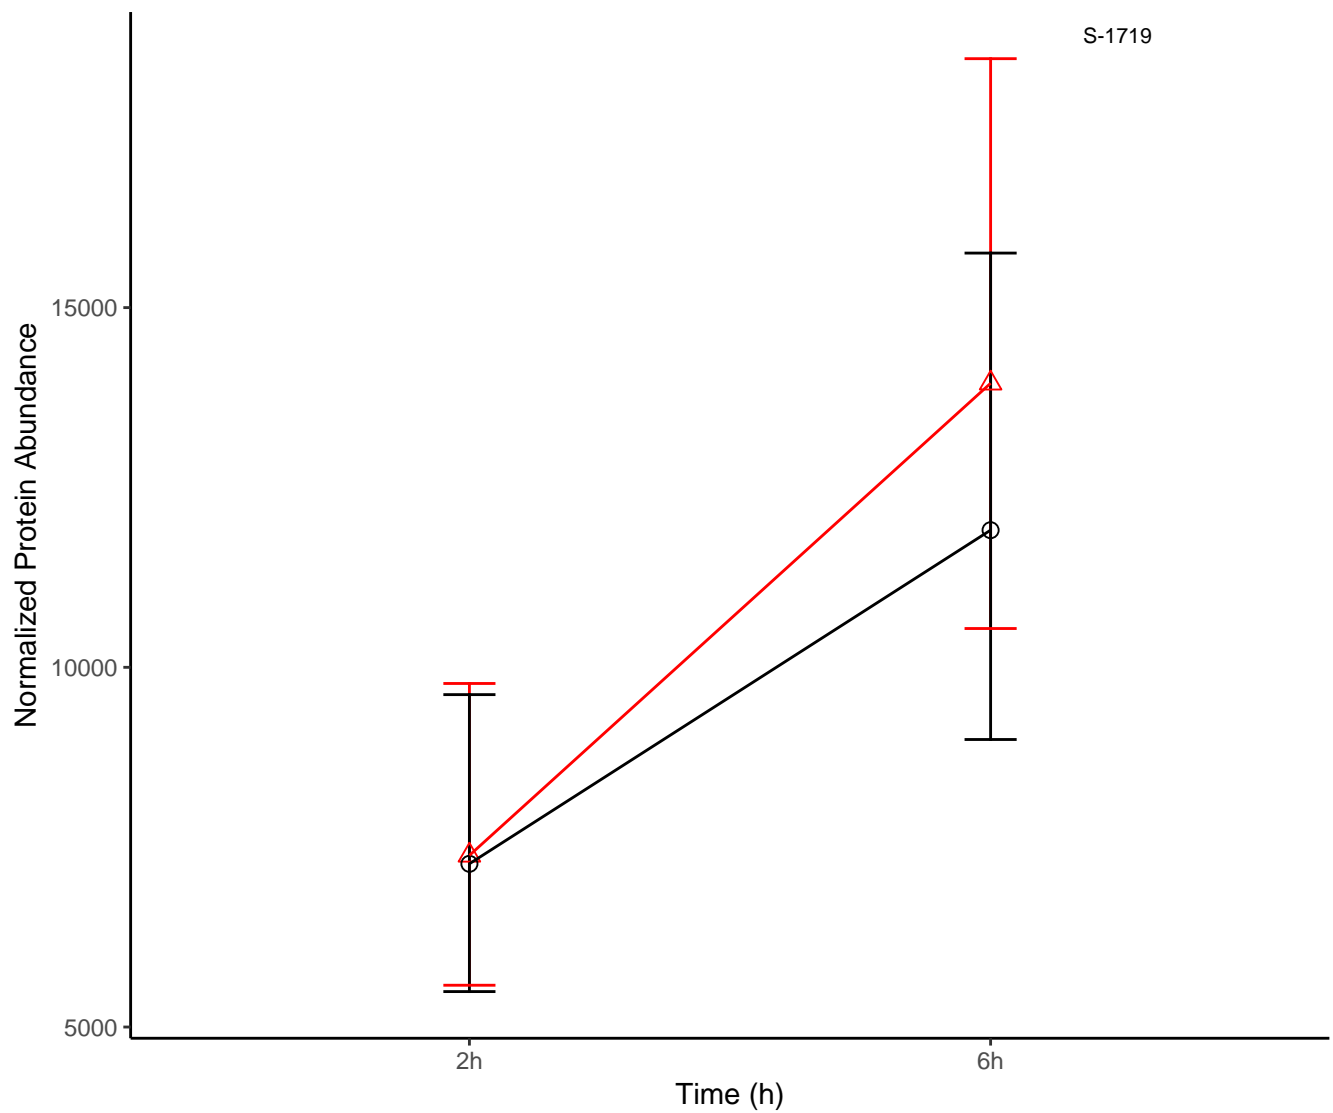

○ TSB-dex

△ TSB

# MTLD\_STAAM

S-1720

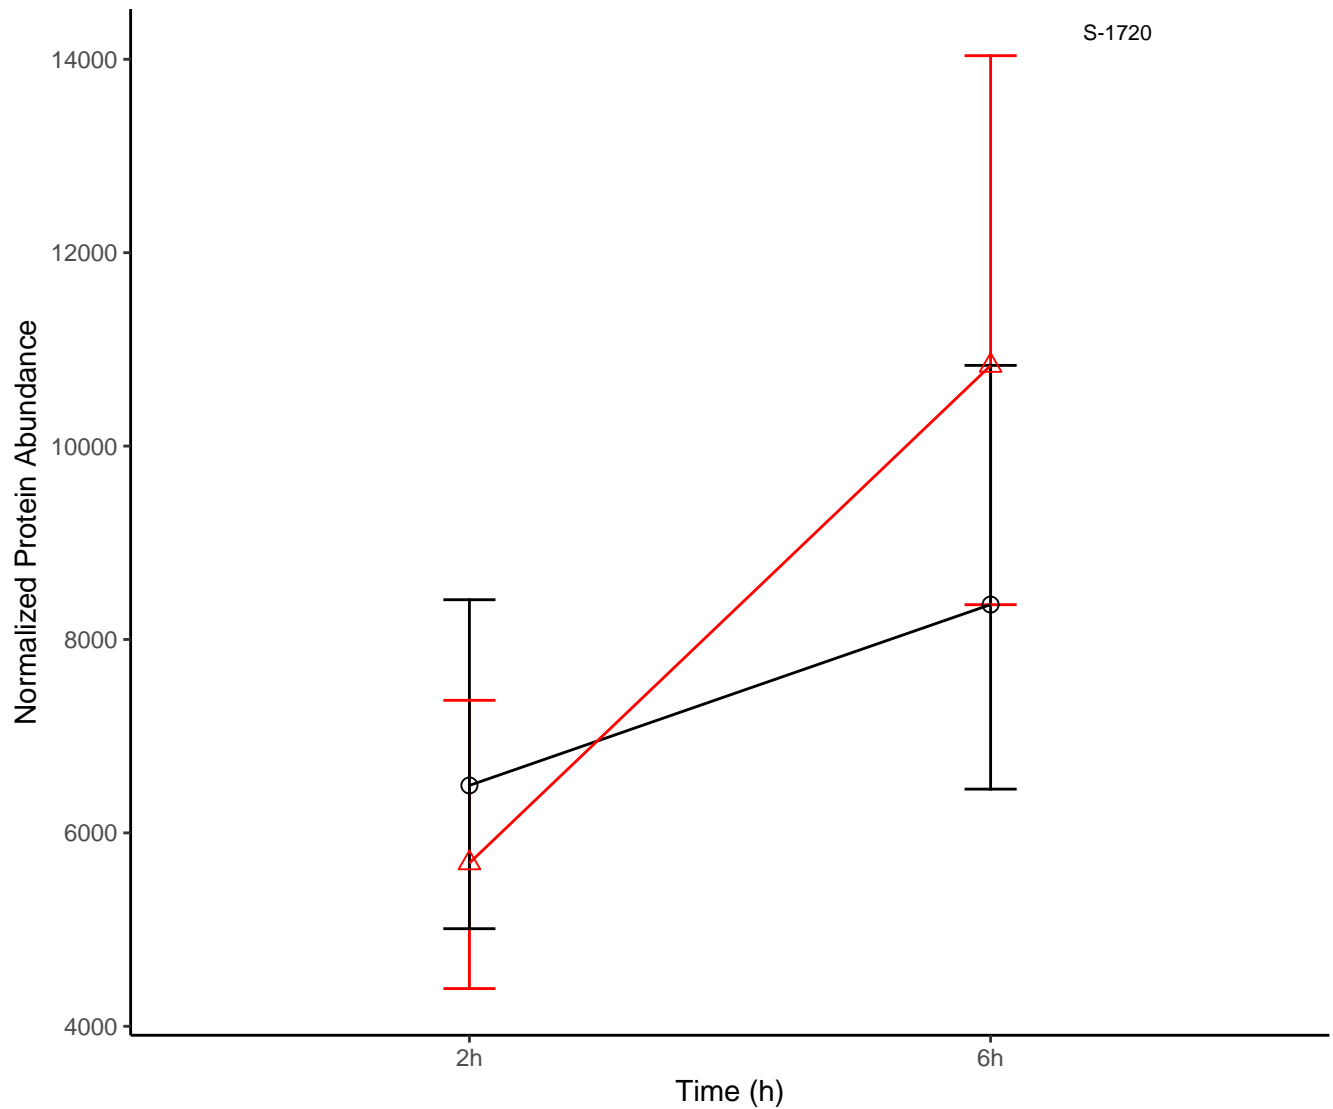

○ TSB-dex

△ TSB



# MTNN\_STAAM

S-1721

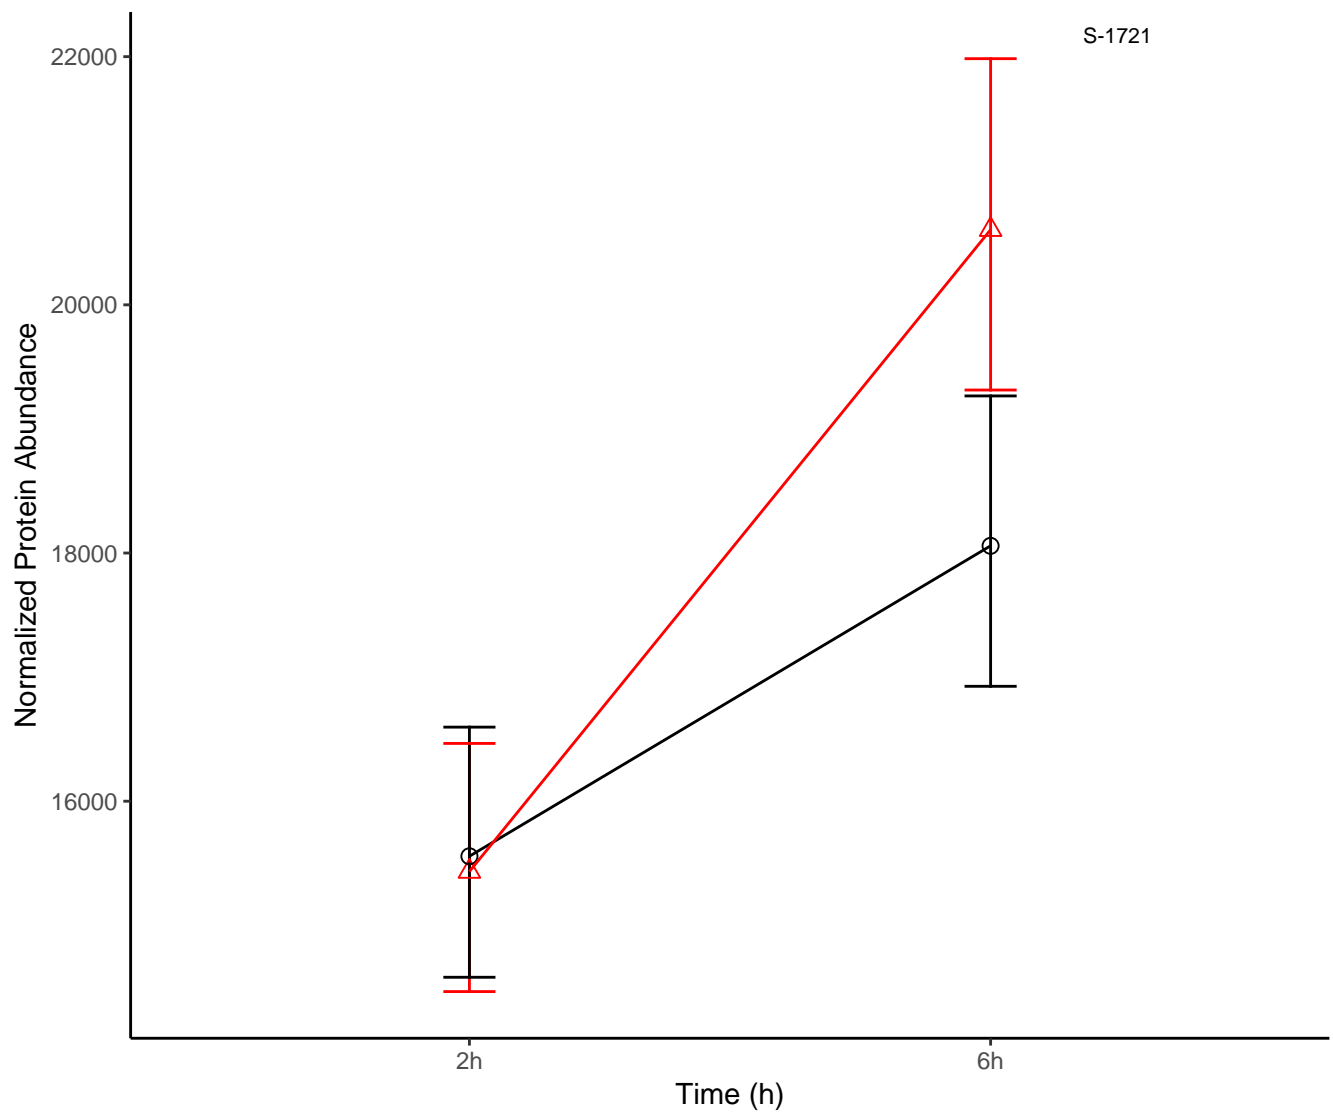

○ TSB-dex

△ TSB

# MURA1\_STAAM

S-1722

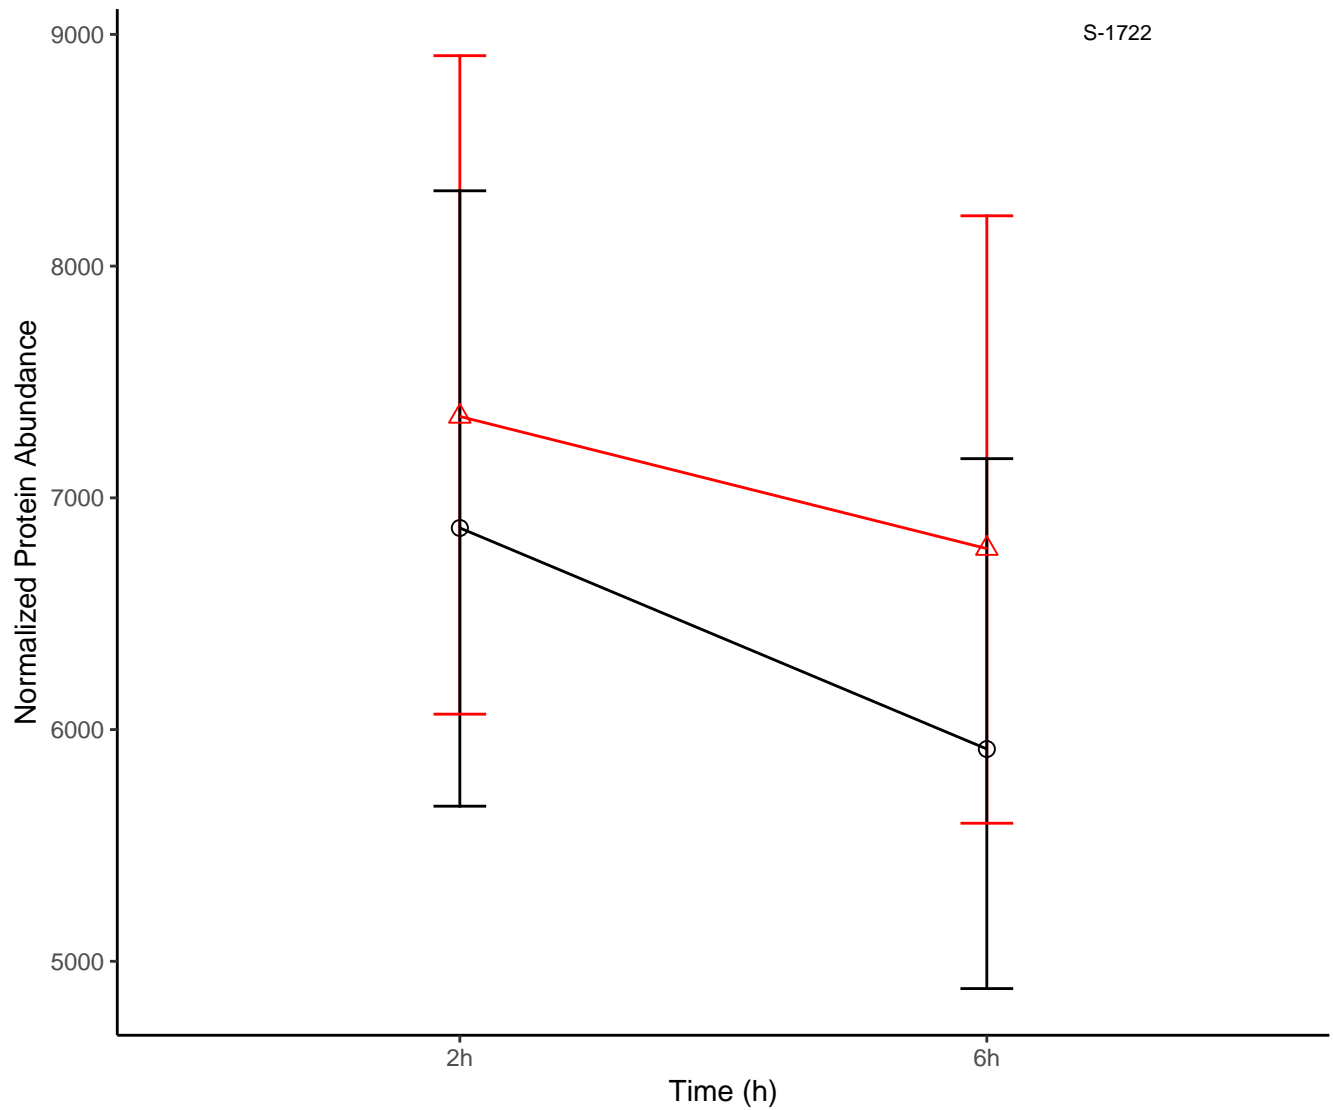

○ TSB-dex

△ TSB

# MURA2\_STAAM

S-1723

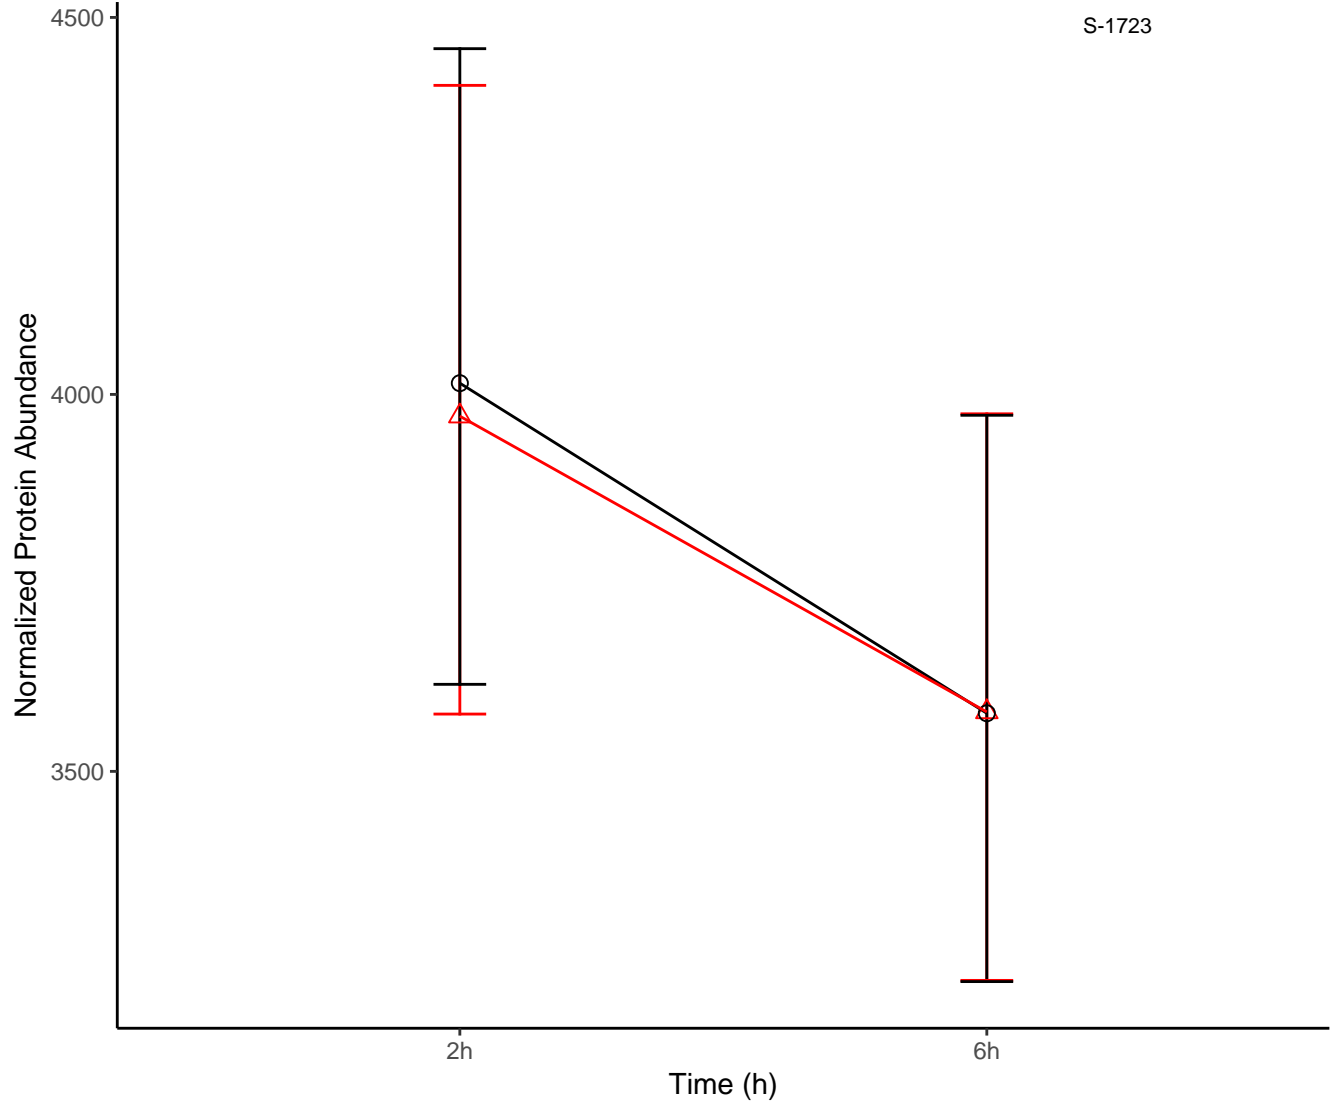

○ TSB-dex

△ TSB

# MURC\_STAAM

S-1724

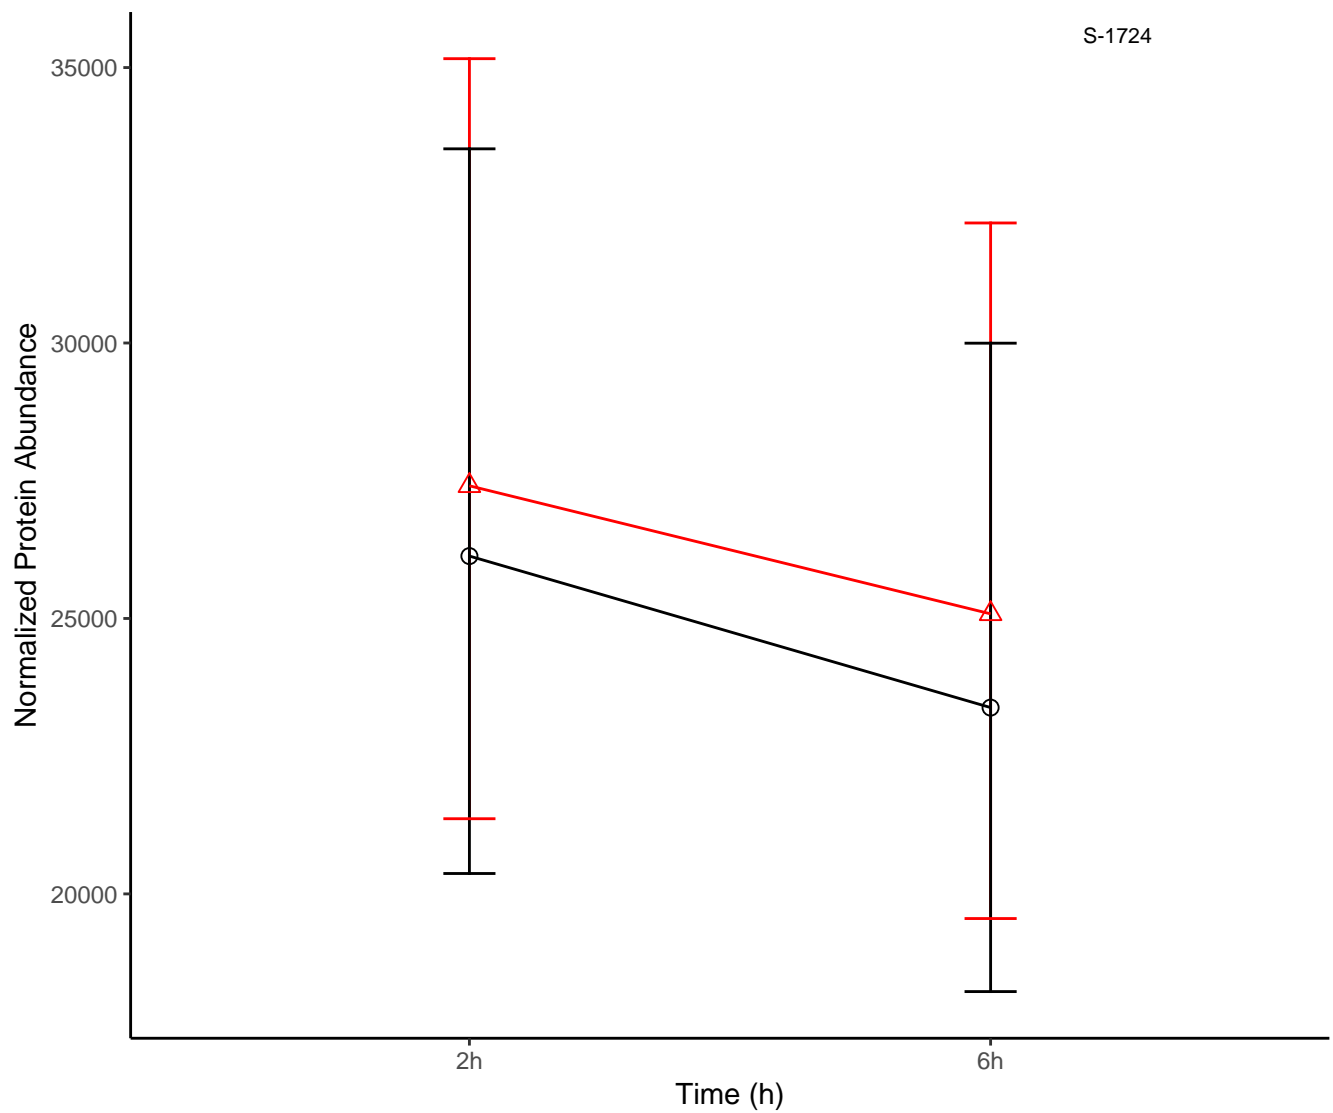

○ TSB-dex

△ TSB

# MURD\_STAAM

S-1725

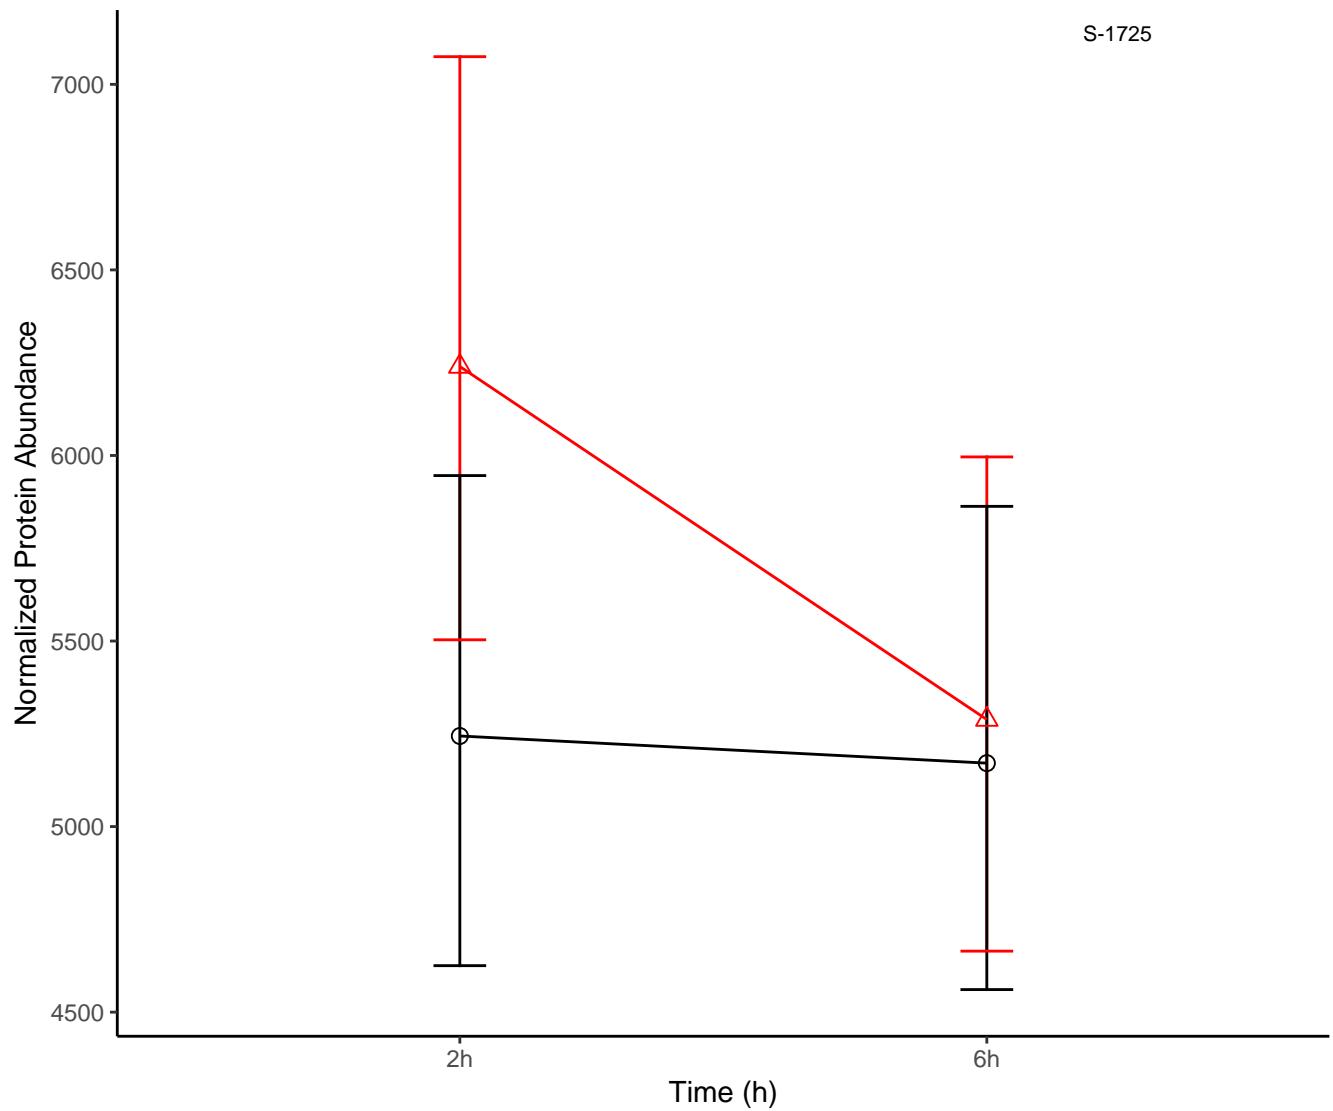

○ TSB-dex

△ TSB

# MURE\_STAAM

S-1726

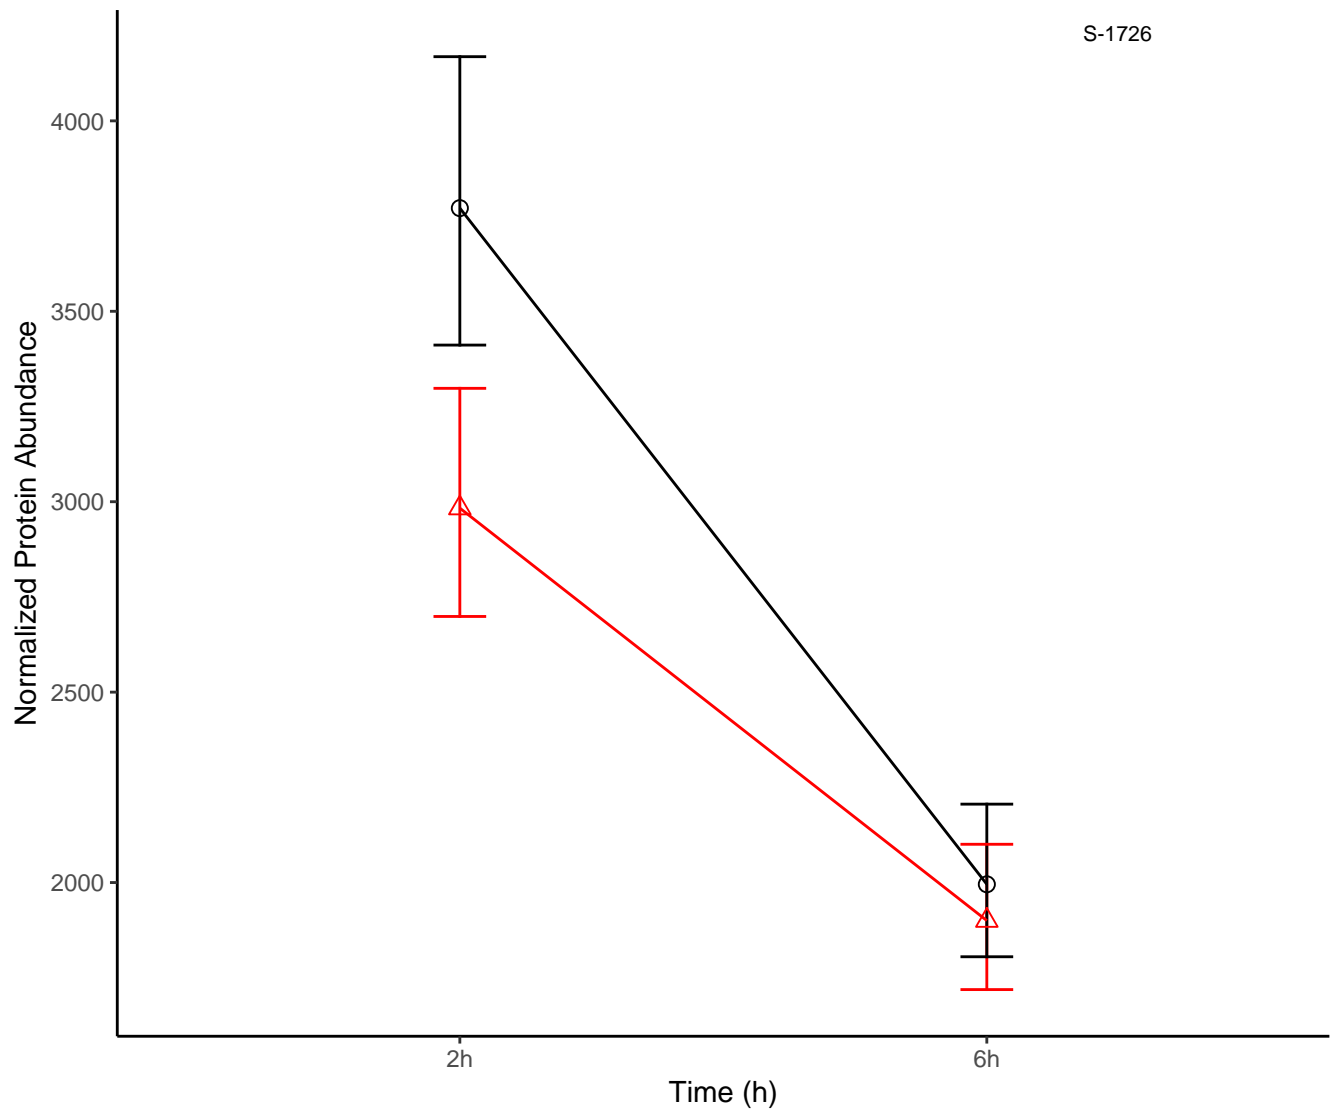

○ TSB-dex

△ TSB

# MURG\_STAAM

S-1727

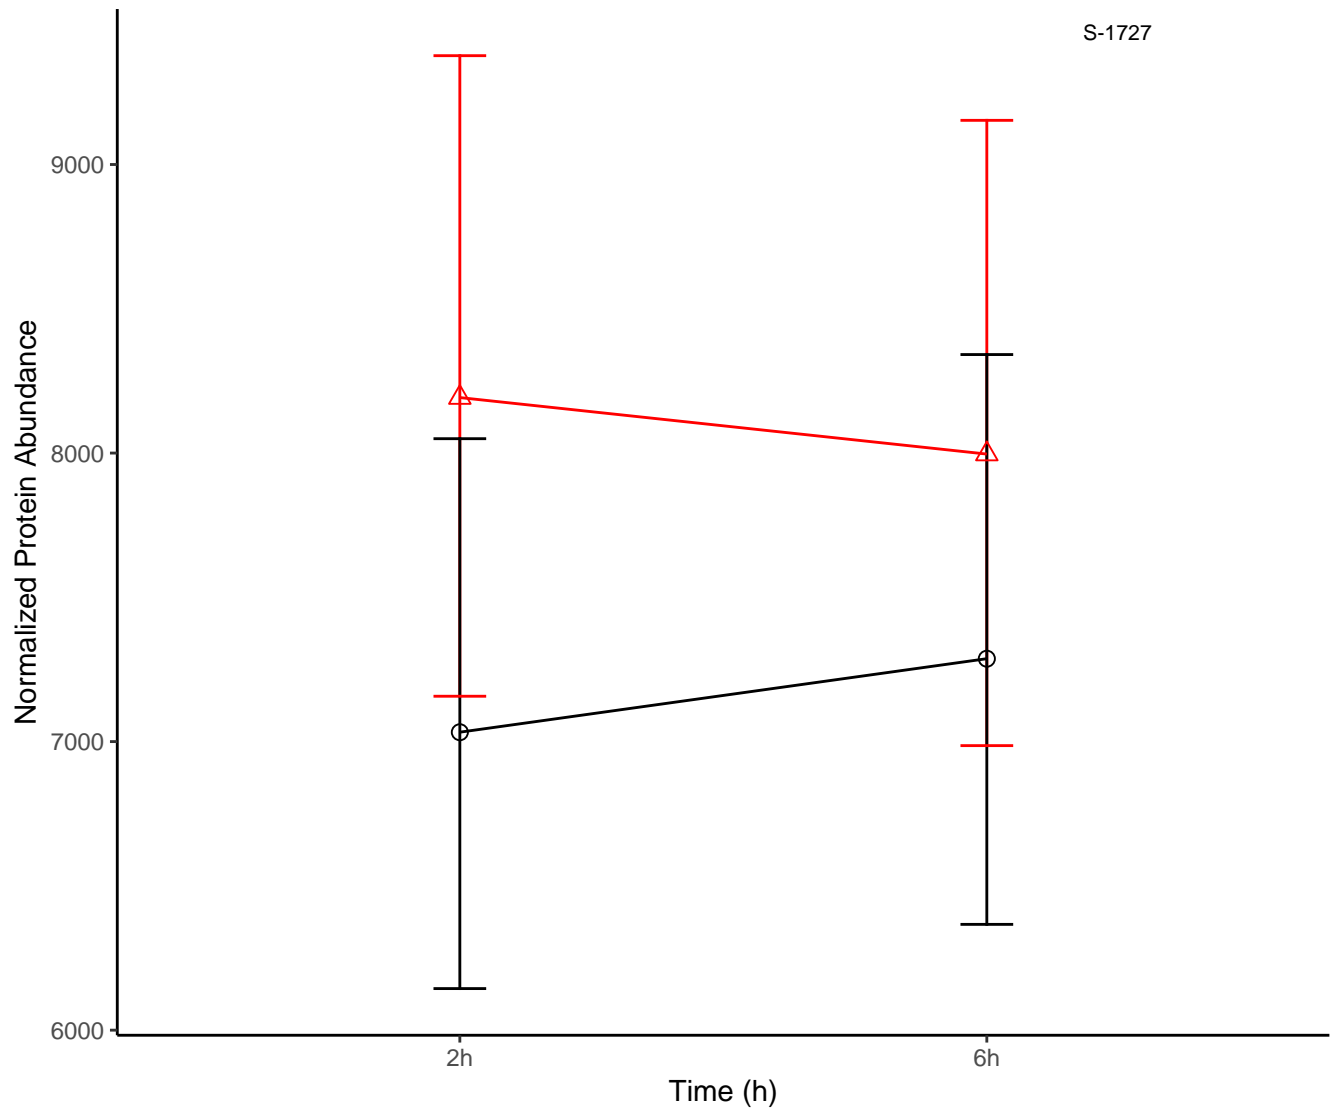

○ TSB-dex

△ TSB

# MURI\_STAAM

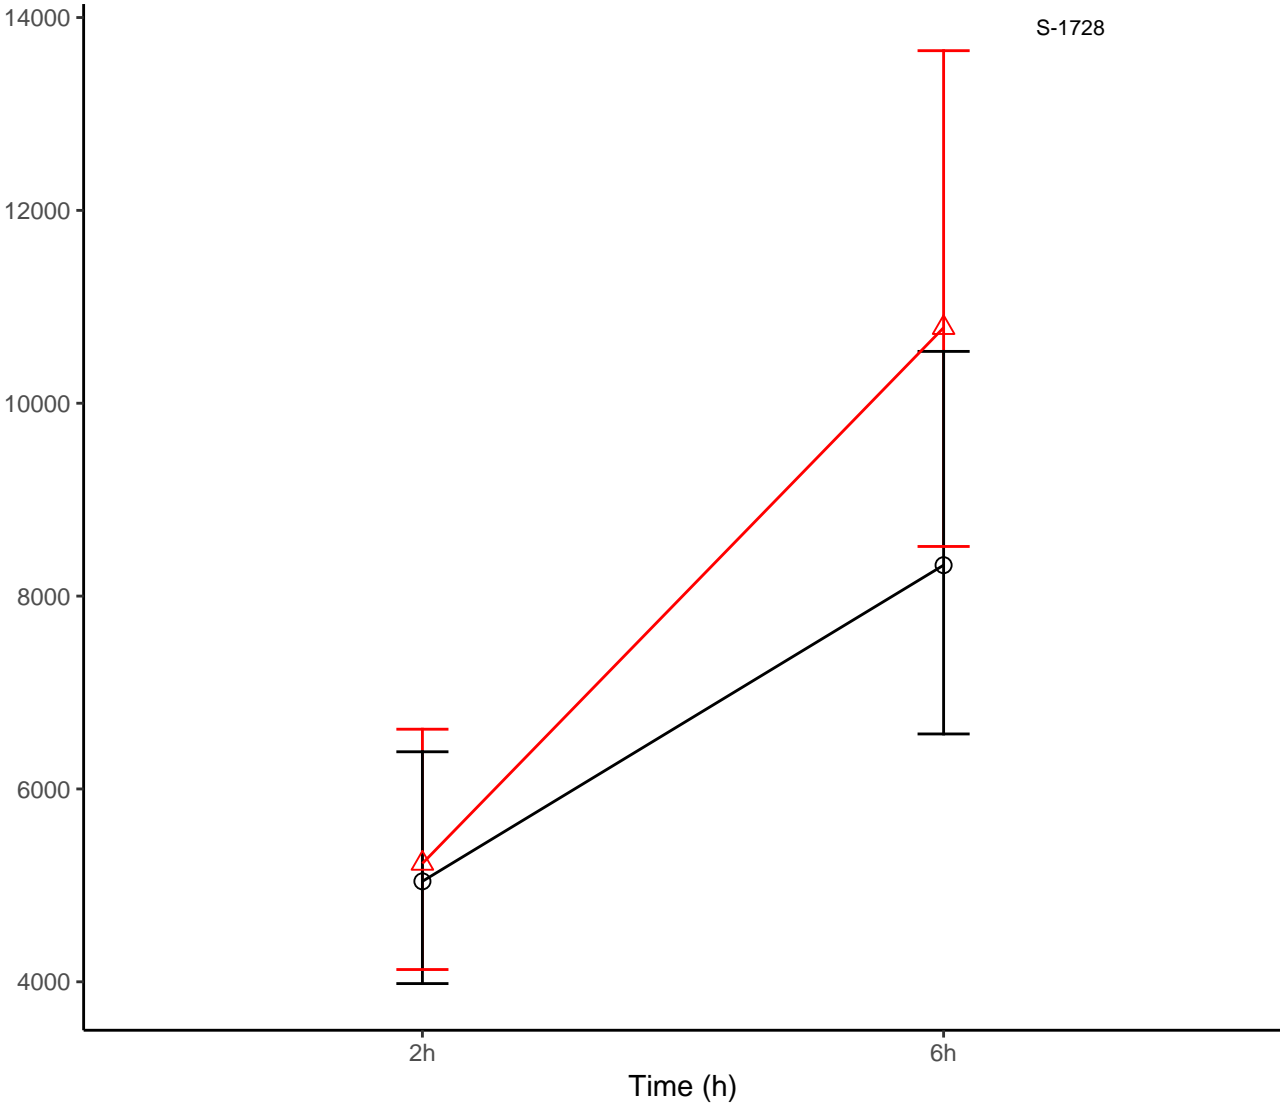

S-1728

○ TSB-dex

△ TSB



# MUTS\_STAAM

S-1729

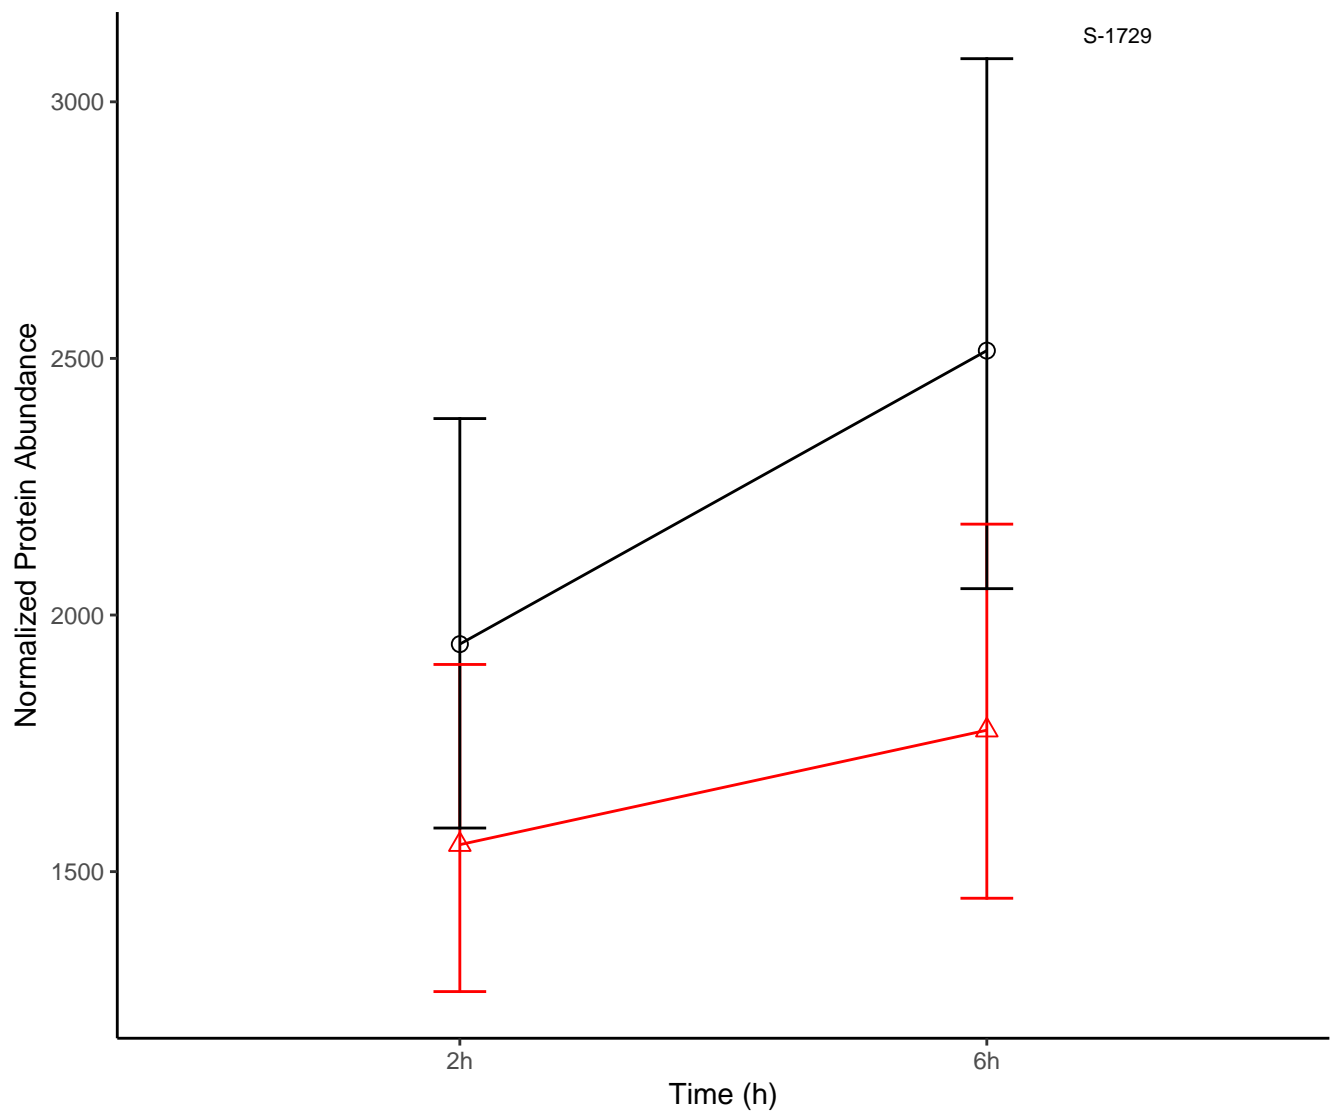

○ TSB-dex

△ TSB

# NADD\_STAAM

S-1730

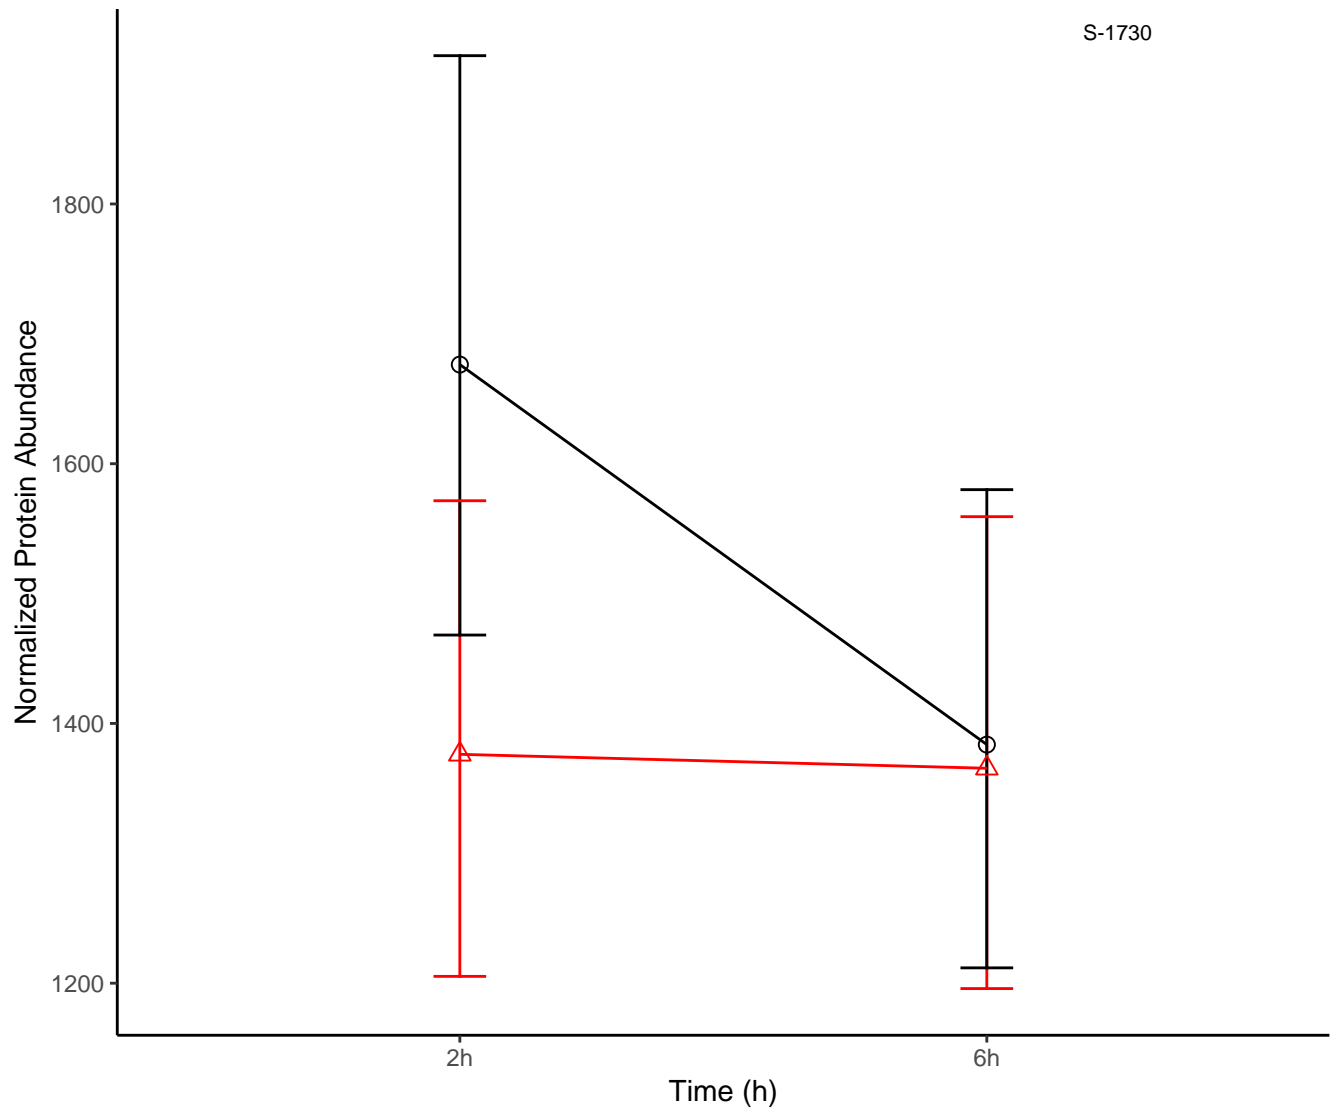

○ TSB-dex

△ TSB

# NADE\_STAAM

S-1731

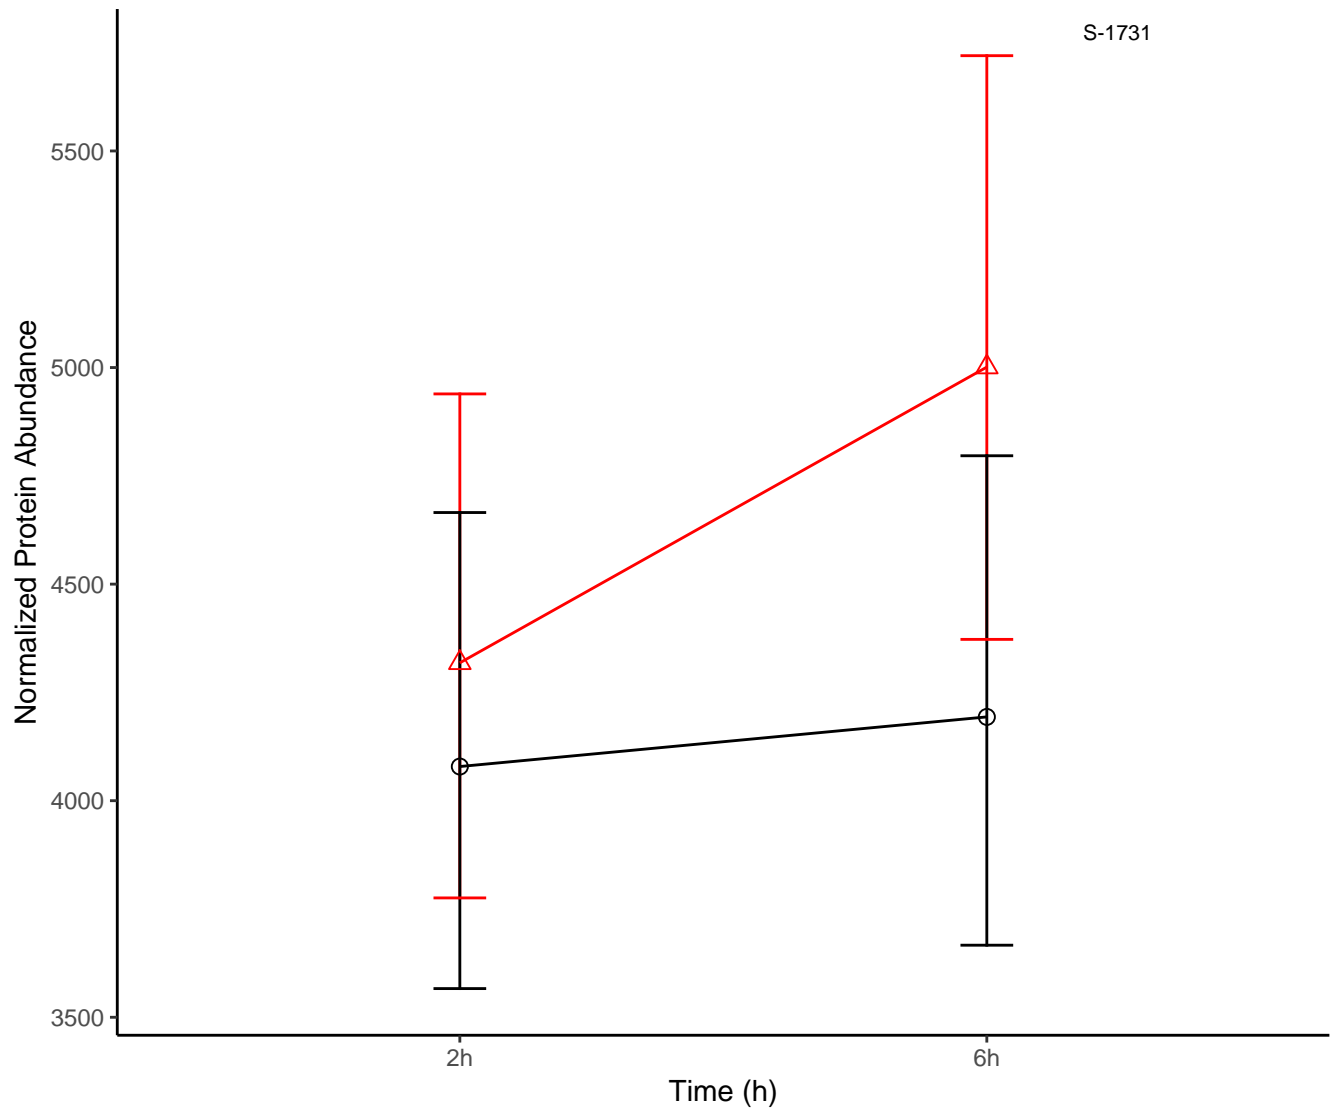

○ TSB-dex

△ TSB

# NAGD\_STAAM

S-1732

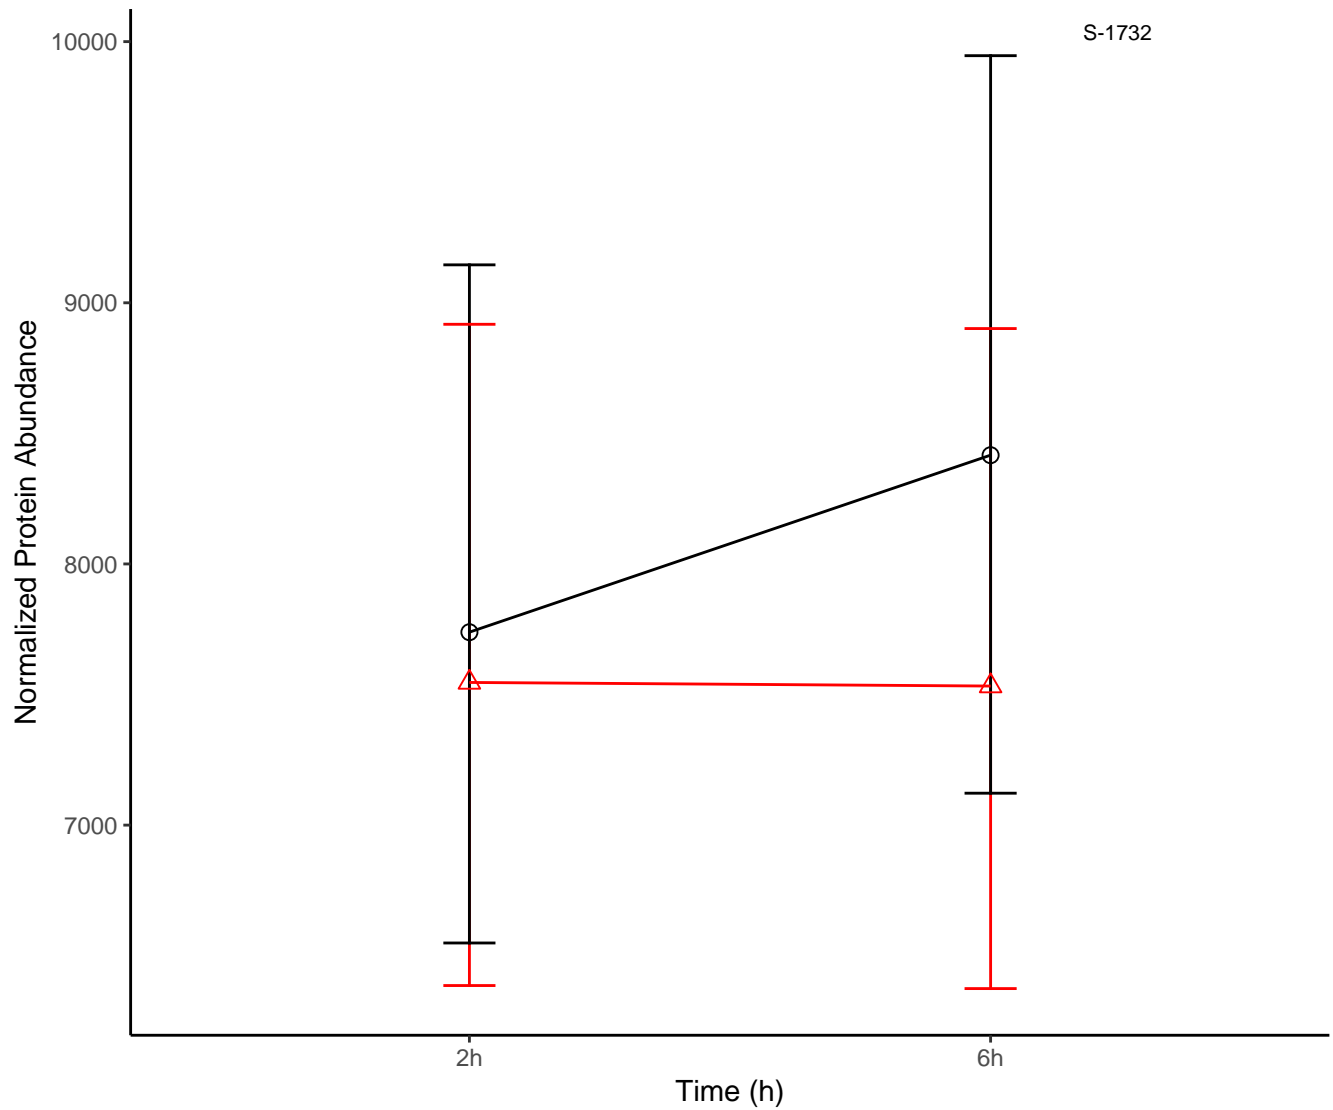

○ TSB-dex

△ TSB

# NDK\_STAAM

S-1733

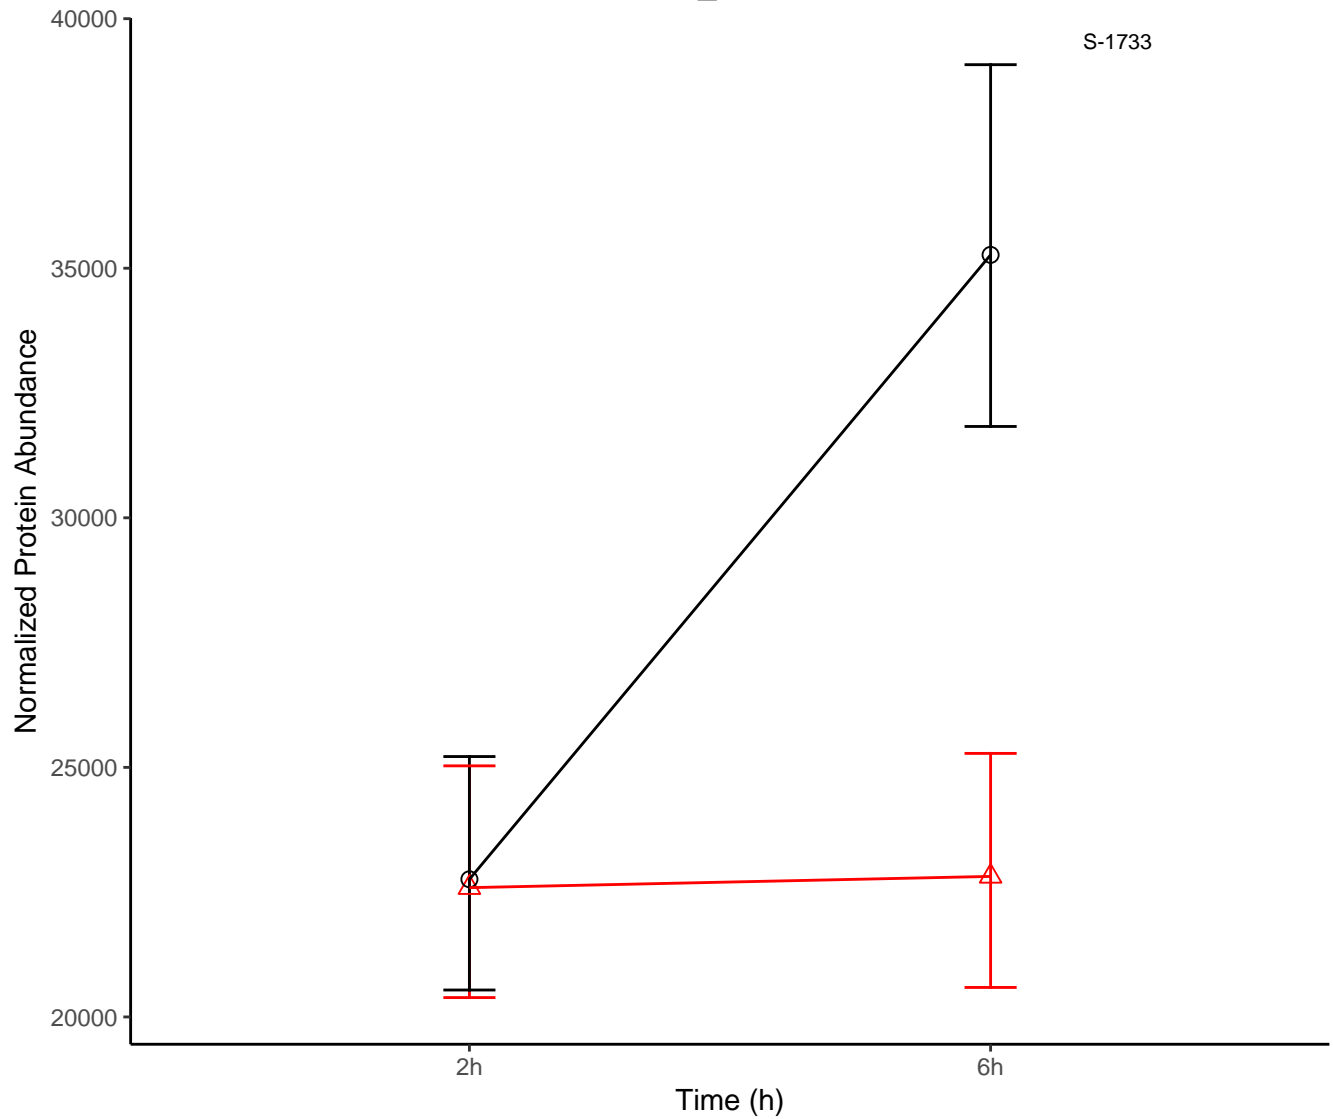

○ TSB-dex

△ TSB

# NRDR\_STAAM

S-1734

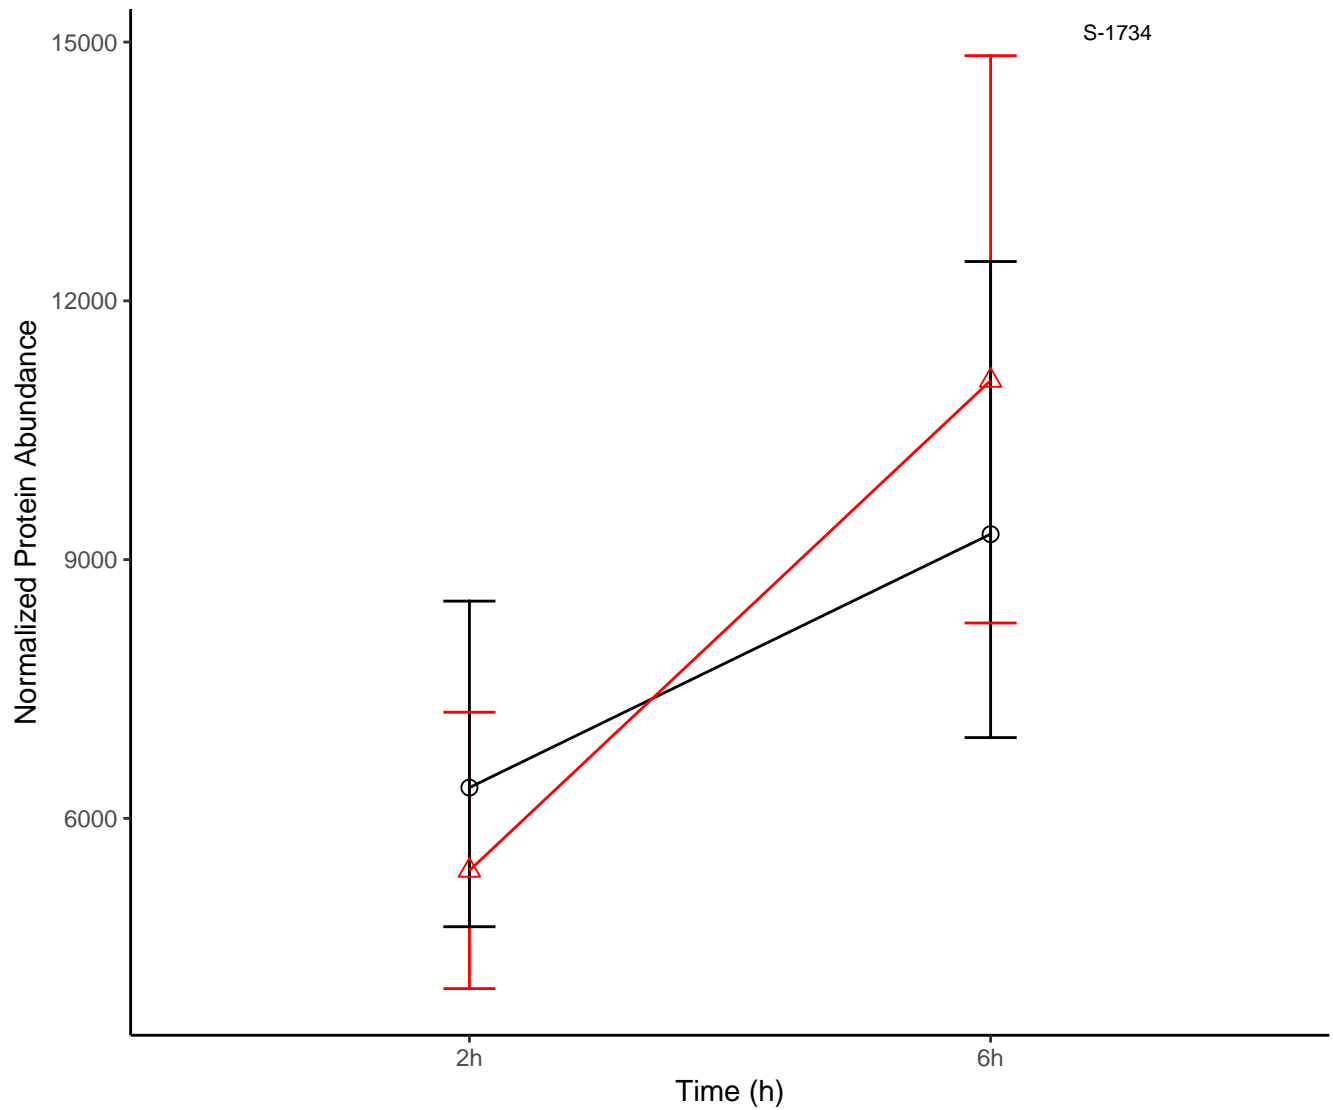

○ TSB-dex

△ TSB

# NREB\_STAAM

S-1735

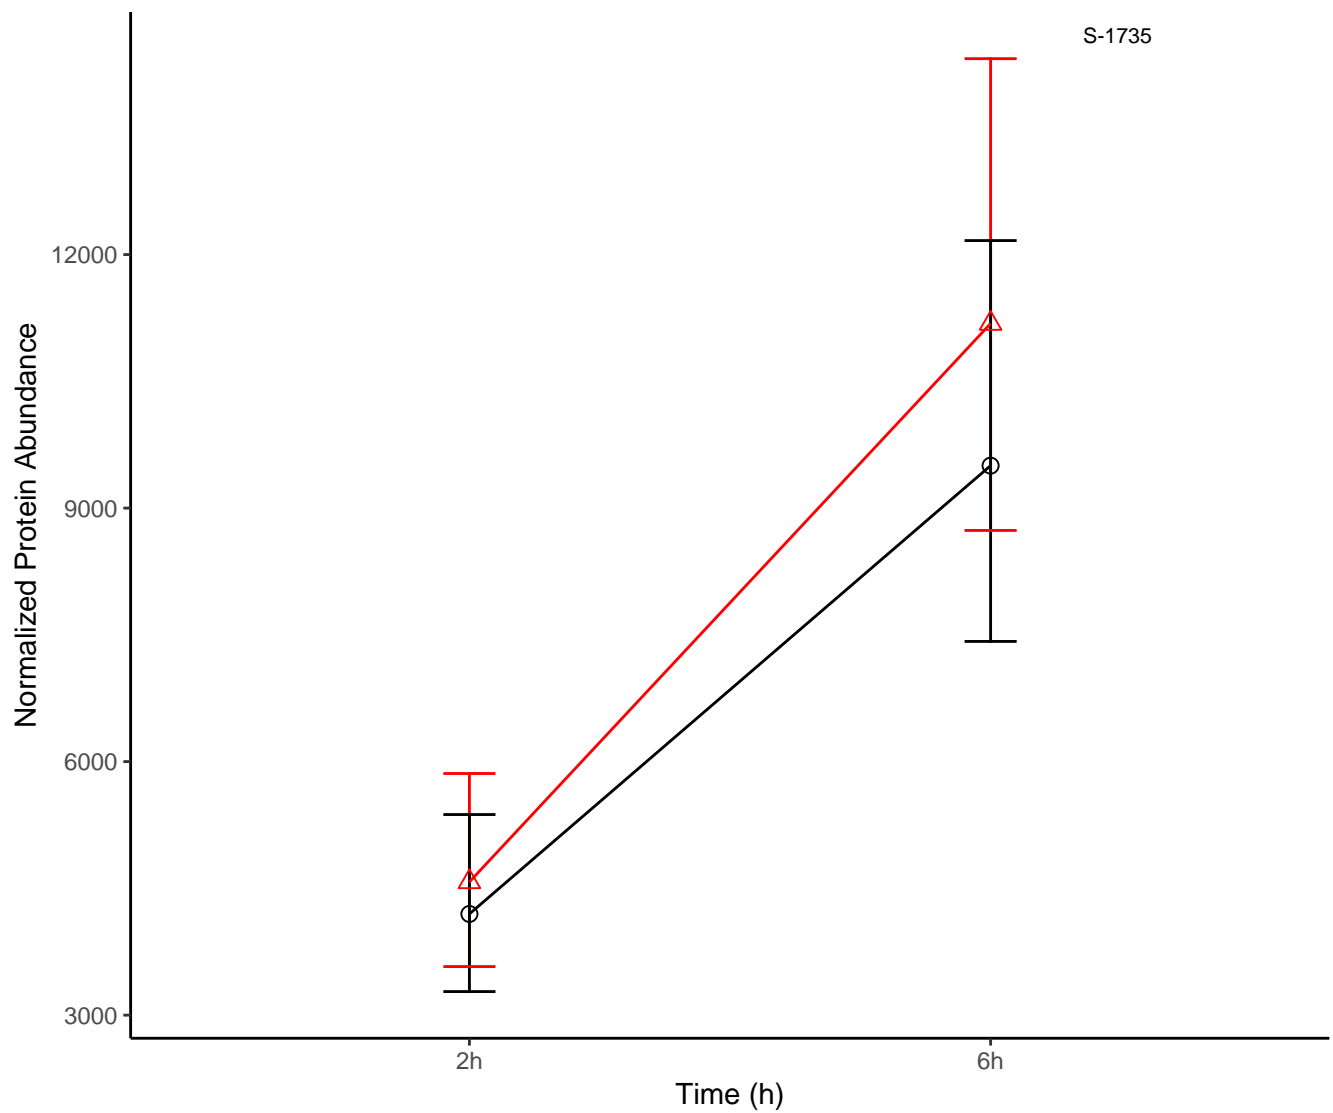

○ TSB-dex

△ TSB

# NUSG\_STAAM

S-1736

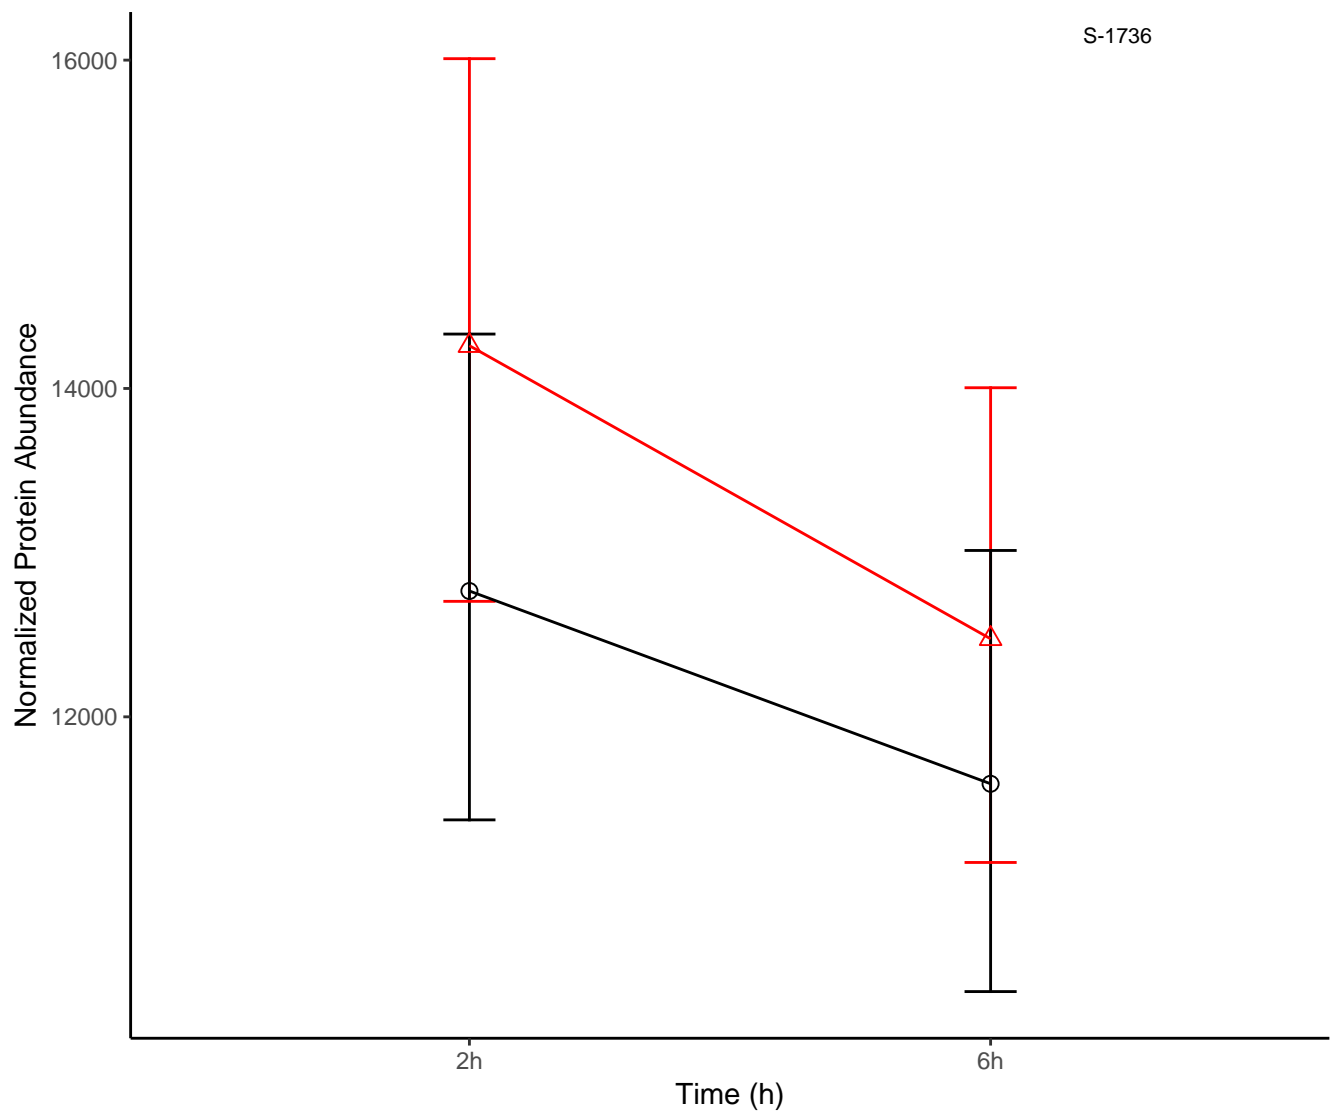

○ TSB-dex

△ TSB



# OAT2\_STAAM

S-1737

Normalized Protein Abundance

20000

15000

2h

6h

Time (h)

○ TSB-dex

△ TSB

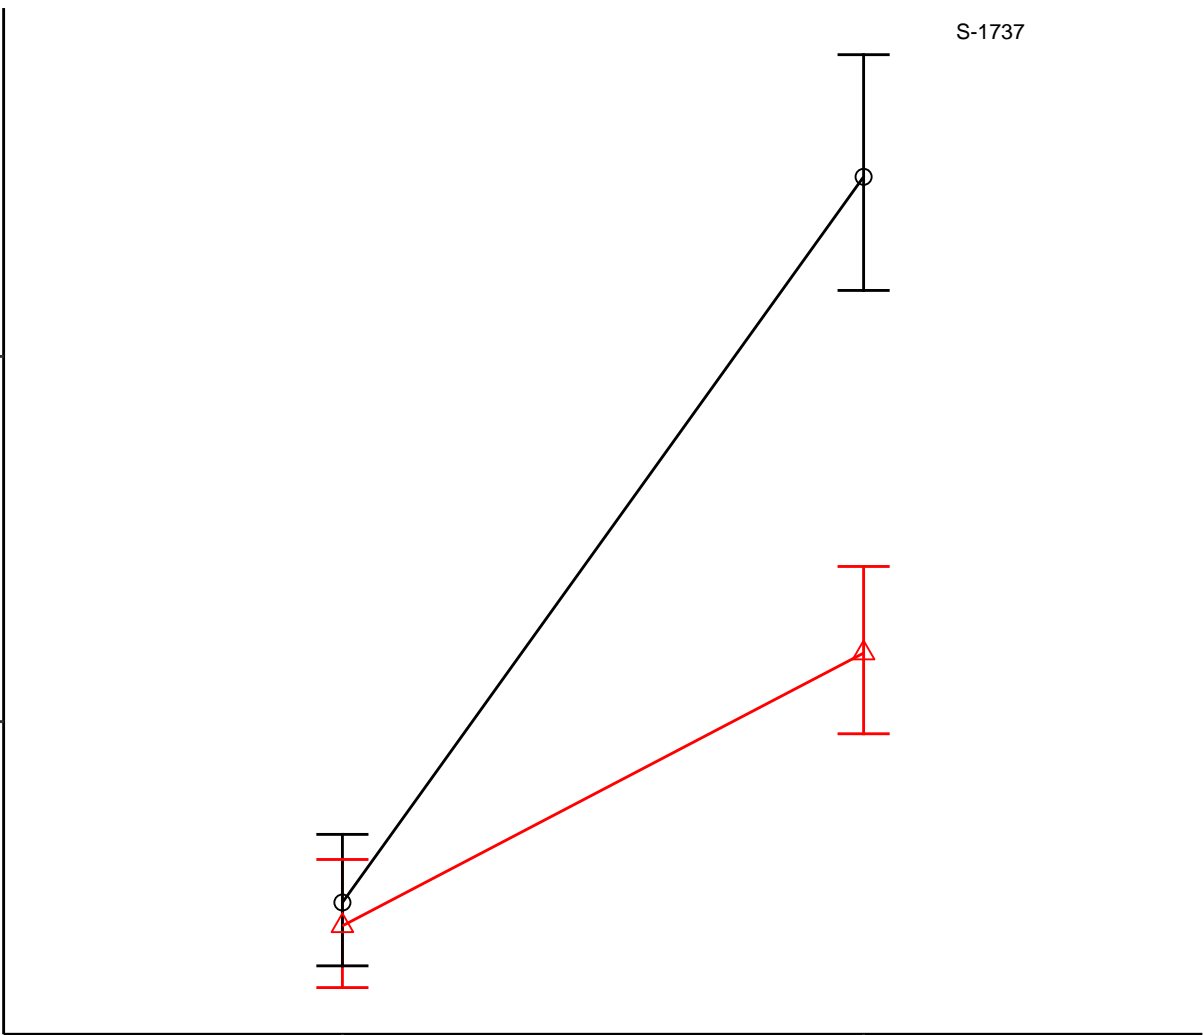

# OBG\_STAAM

S-1738

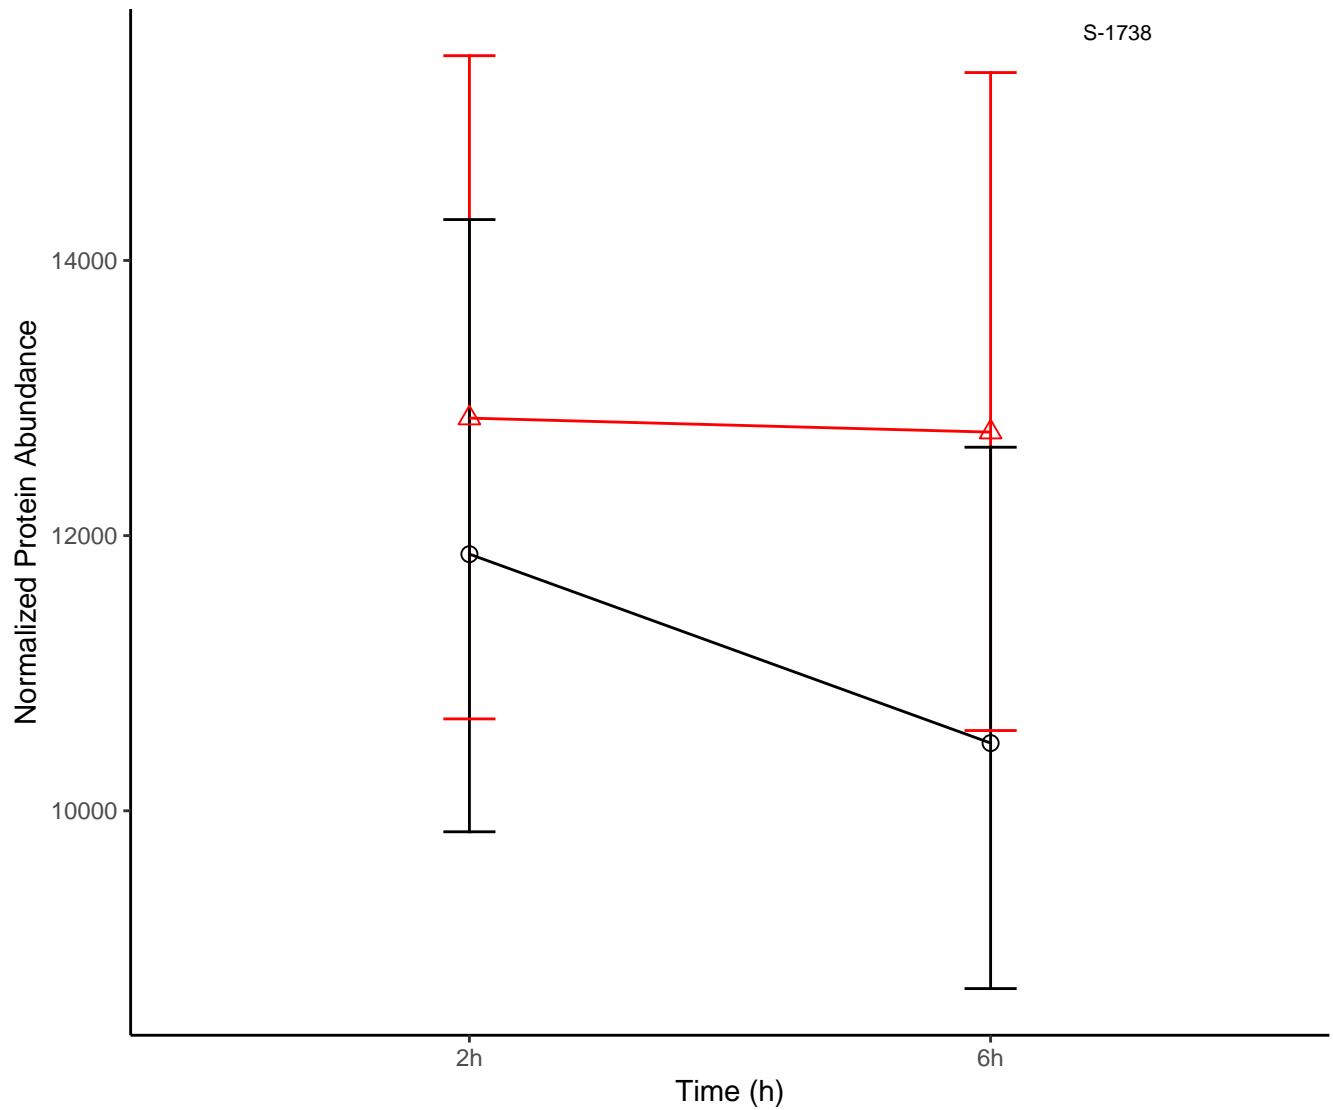

○ TSB-dex

△ TSB

# ODO1\_STAAM

S-1739

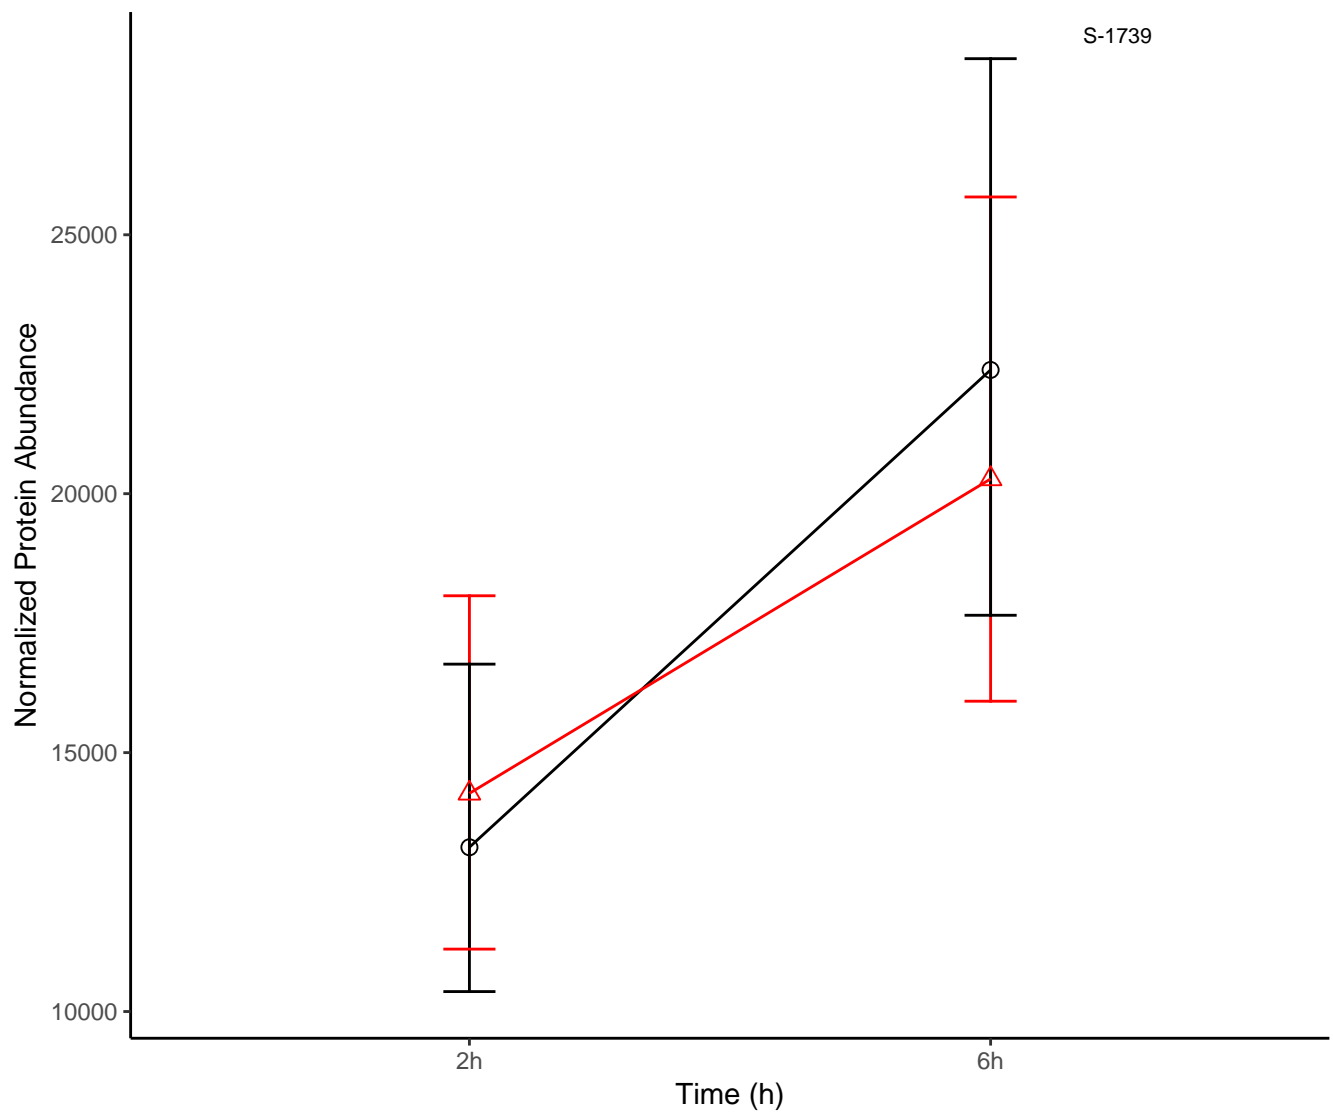

○ TSB-dex

△ TSB

# ODO2\_STAAM

S-1740

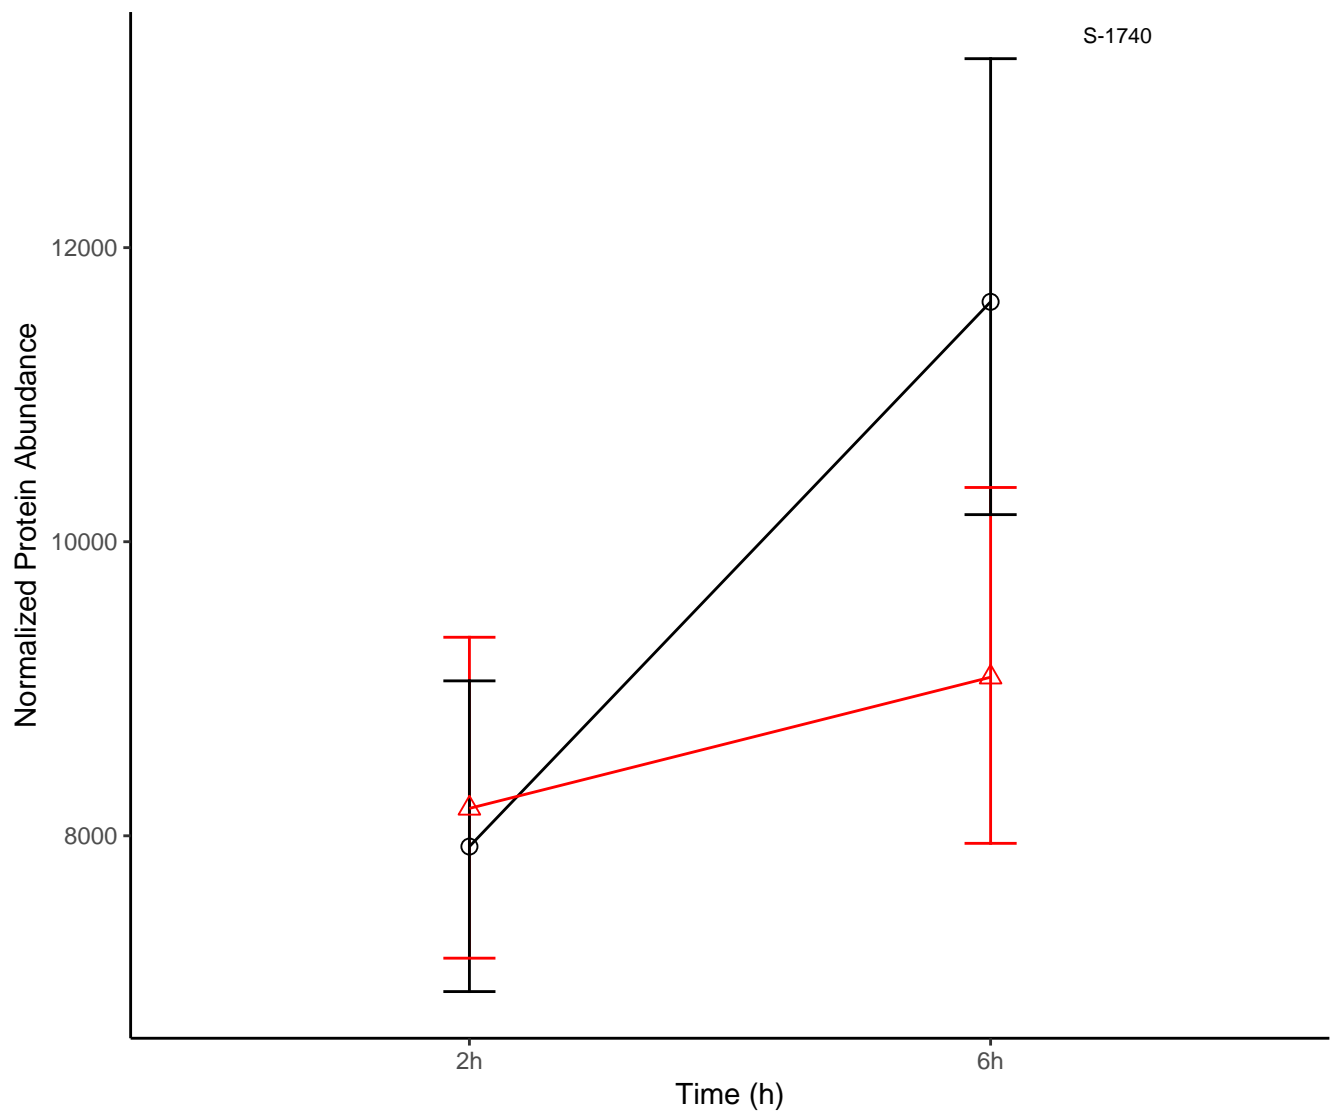

○ TSB-dex

△ TSB

# ODP2\_STAAM

S-1741

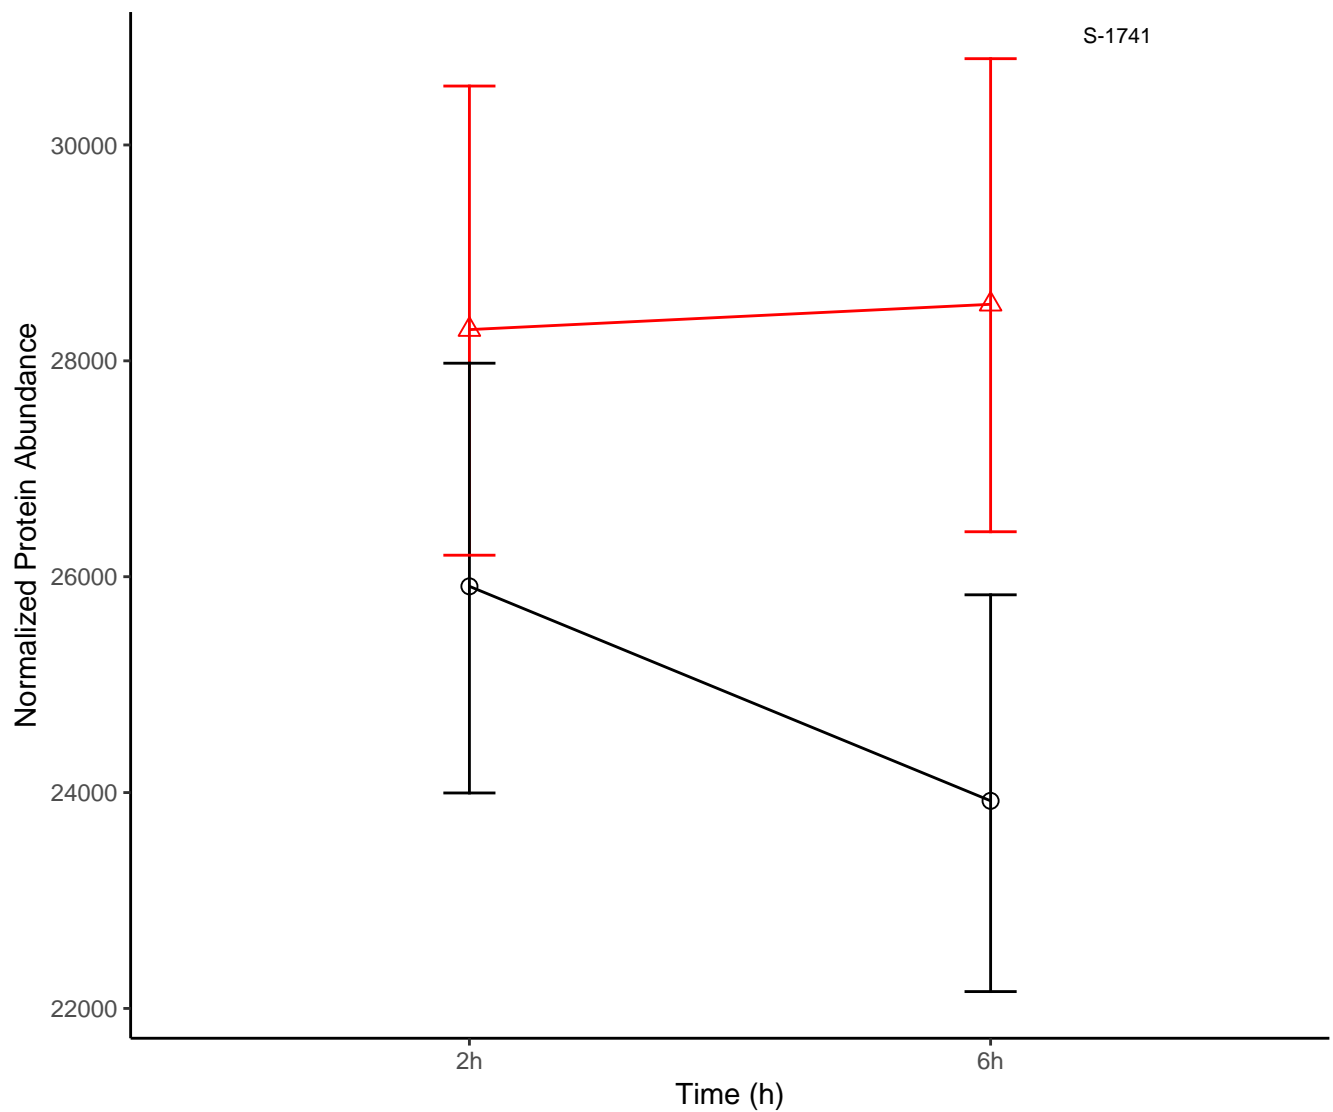

○ TSB-dex

△ TSB

# ODPA\_STAAM

S-1742

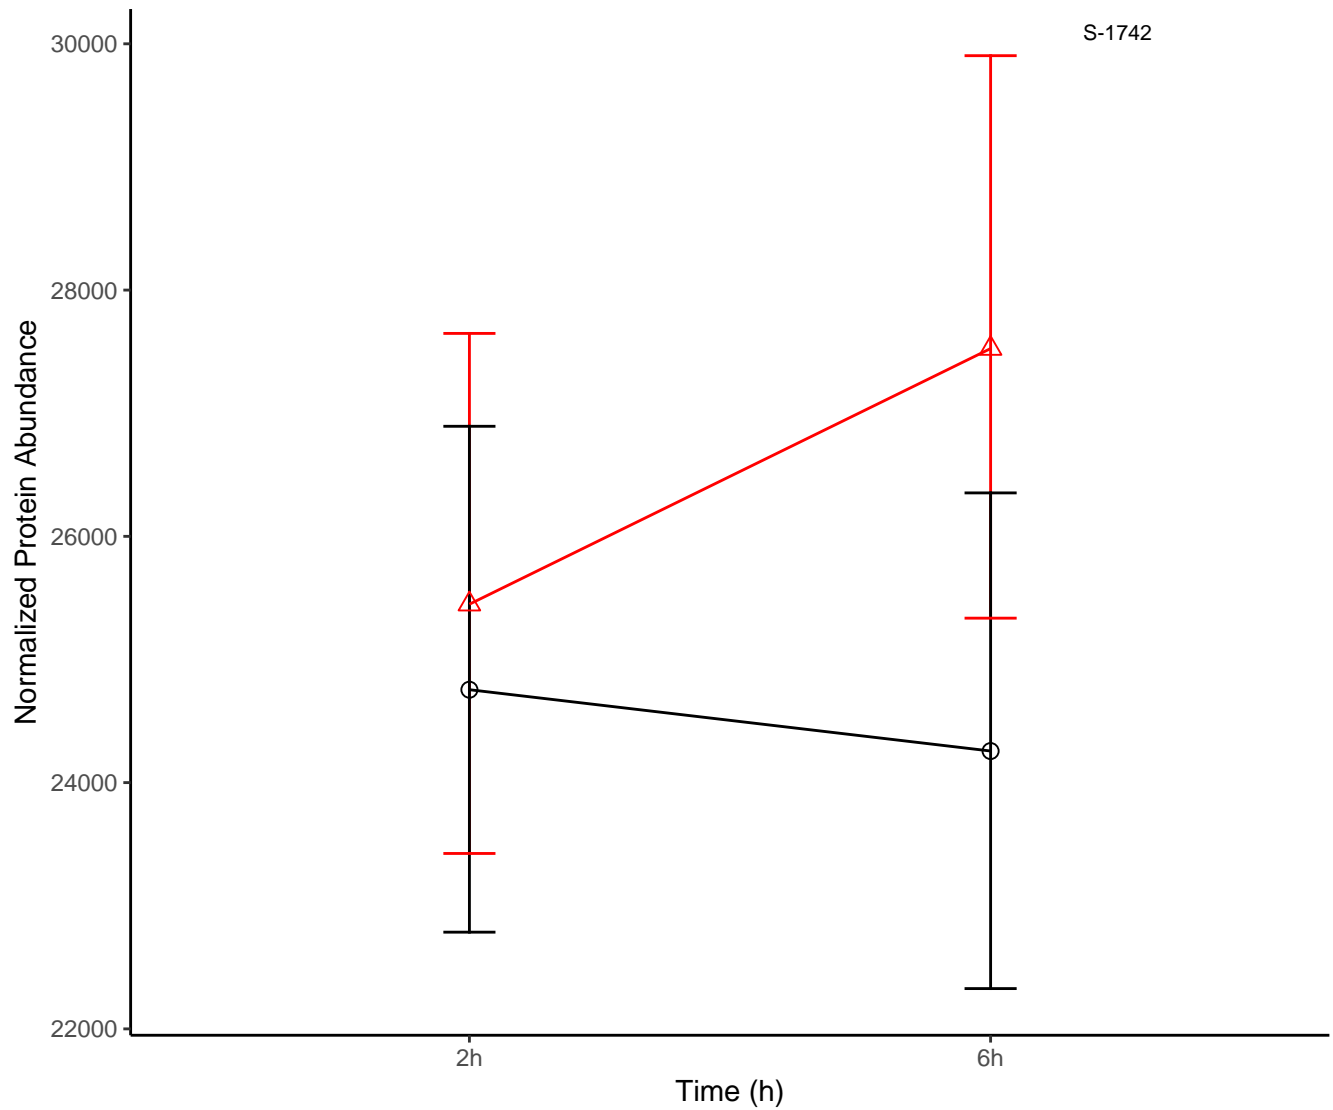

○ TSB-dex

△ TSB

# ODPB\_STAAM

S-1743

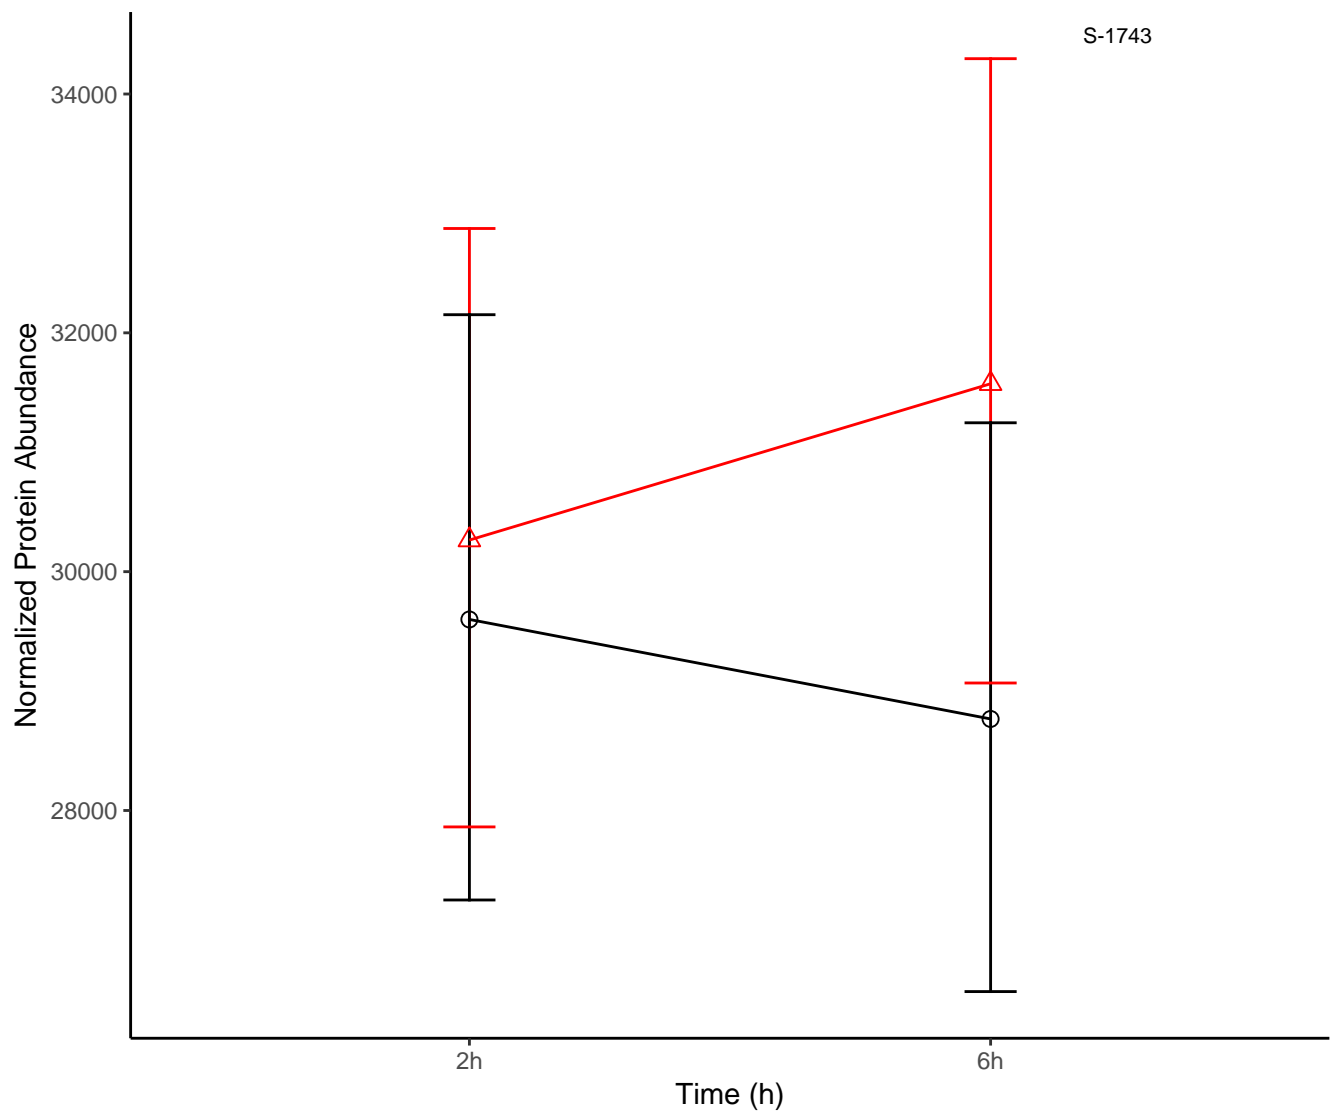

○ TSB-dex

△ TSB

# OHRL\_STAAM

S-1744

Normalized Protein Abundance

10000

5000

2h

6h

Time (h)

○ TSB-dex

△ TSB

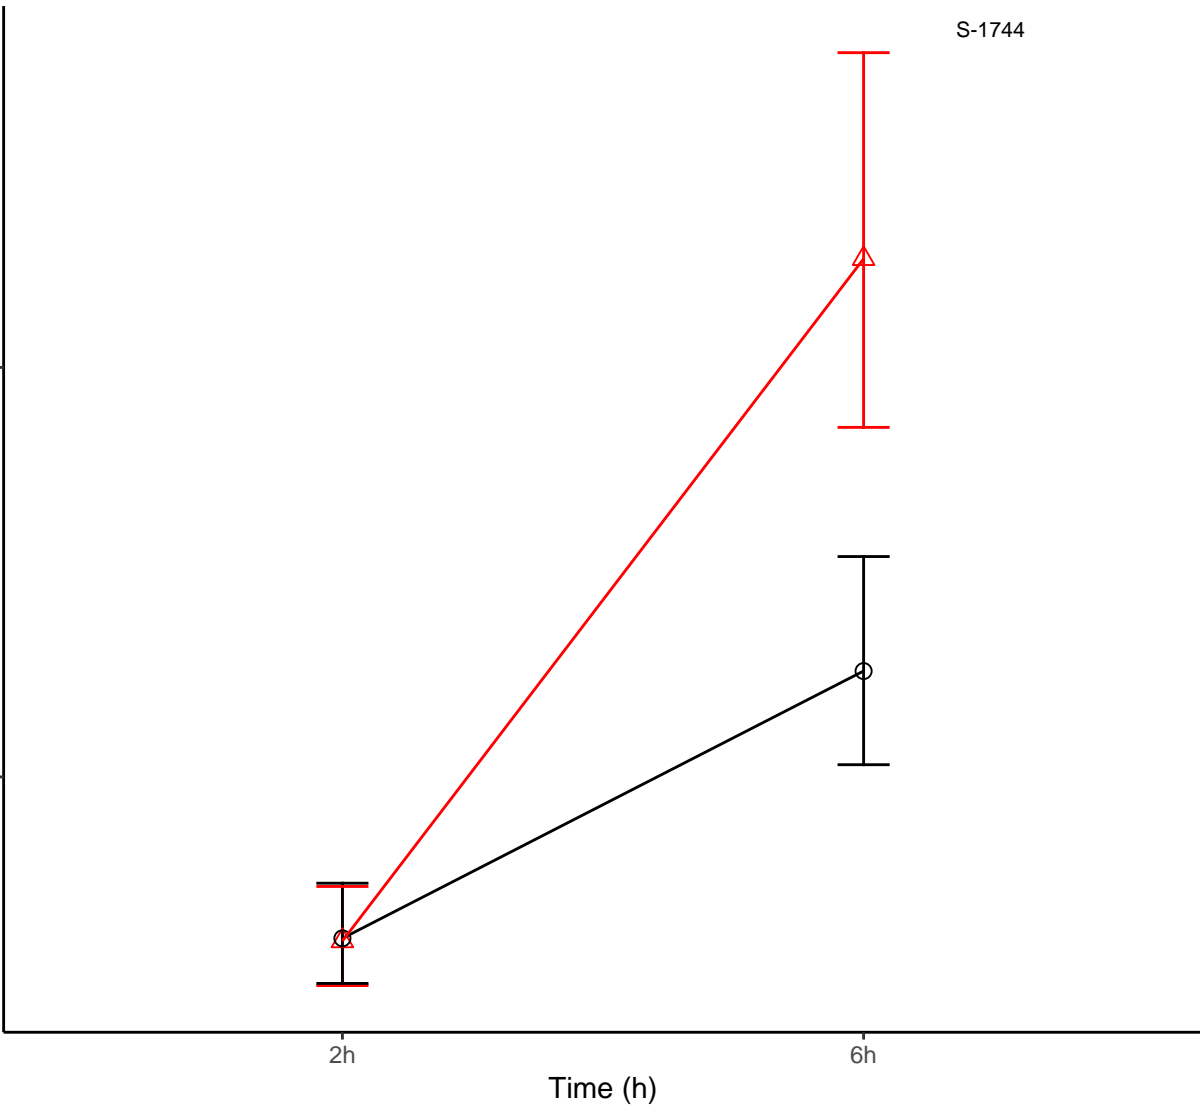



# OTC\_STAAM

S-1745

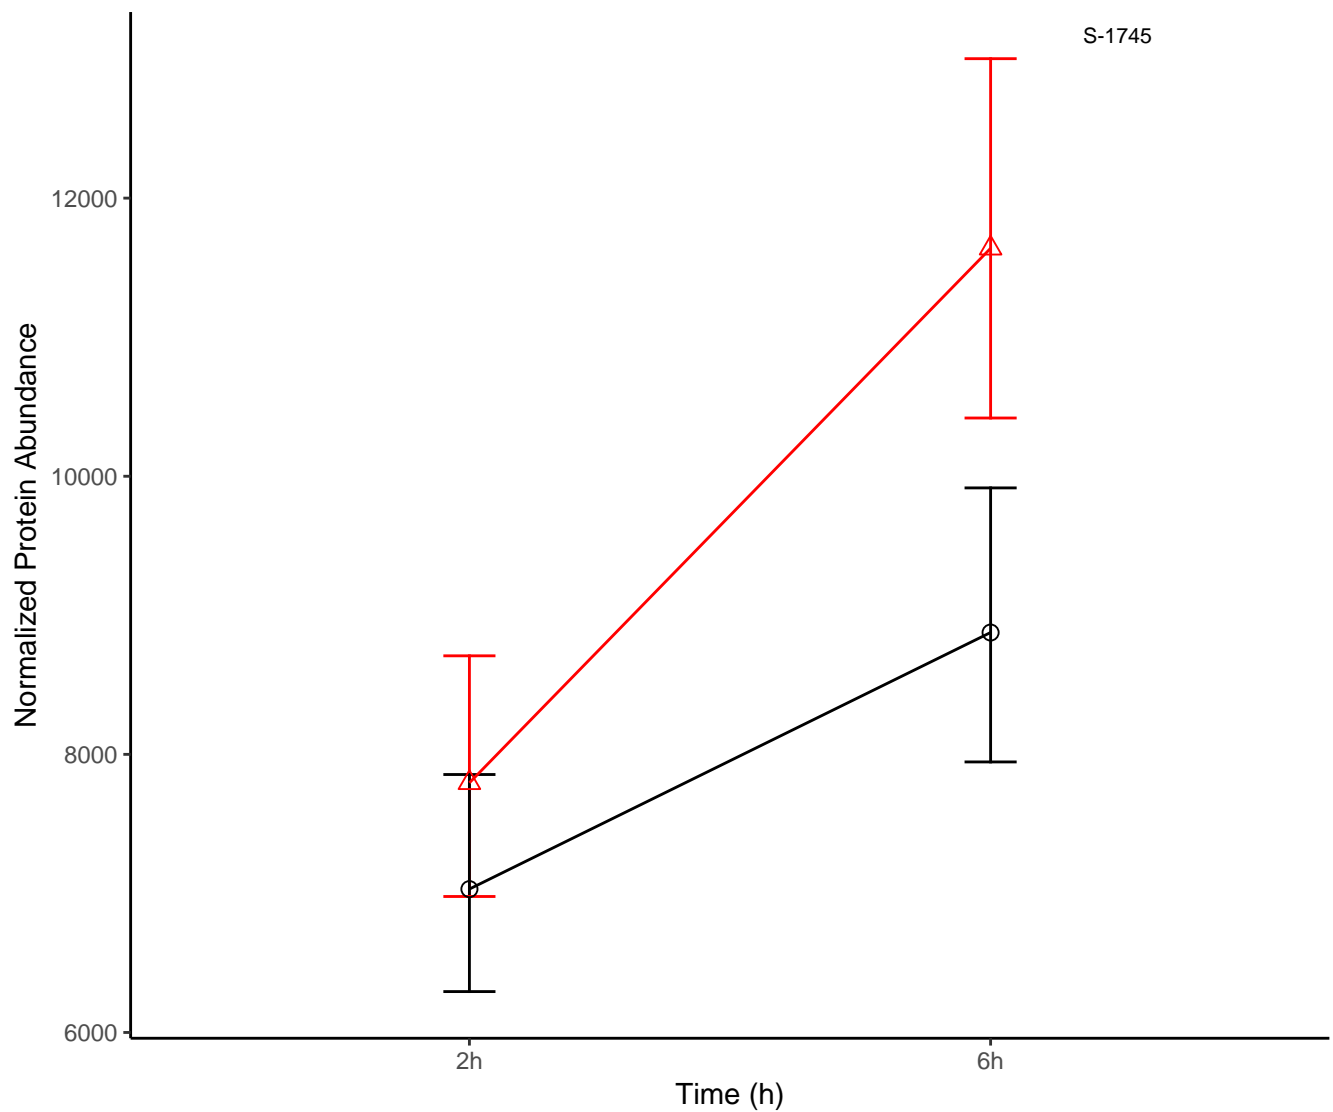

○ TSB-dex

△ TSB

# OTCC\_STAAM

S-1746

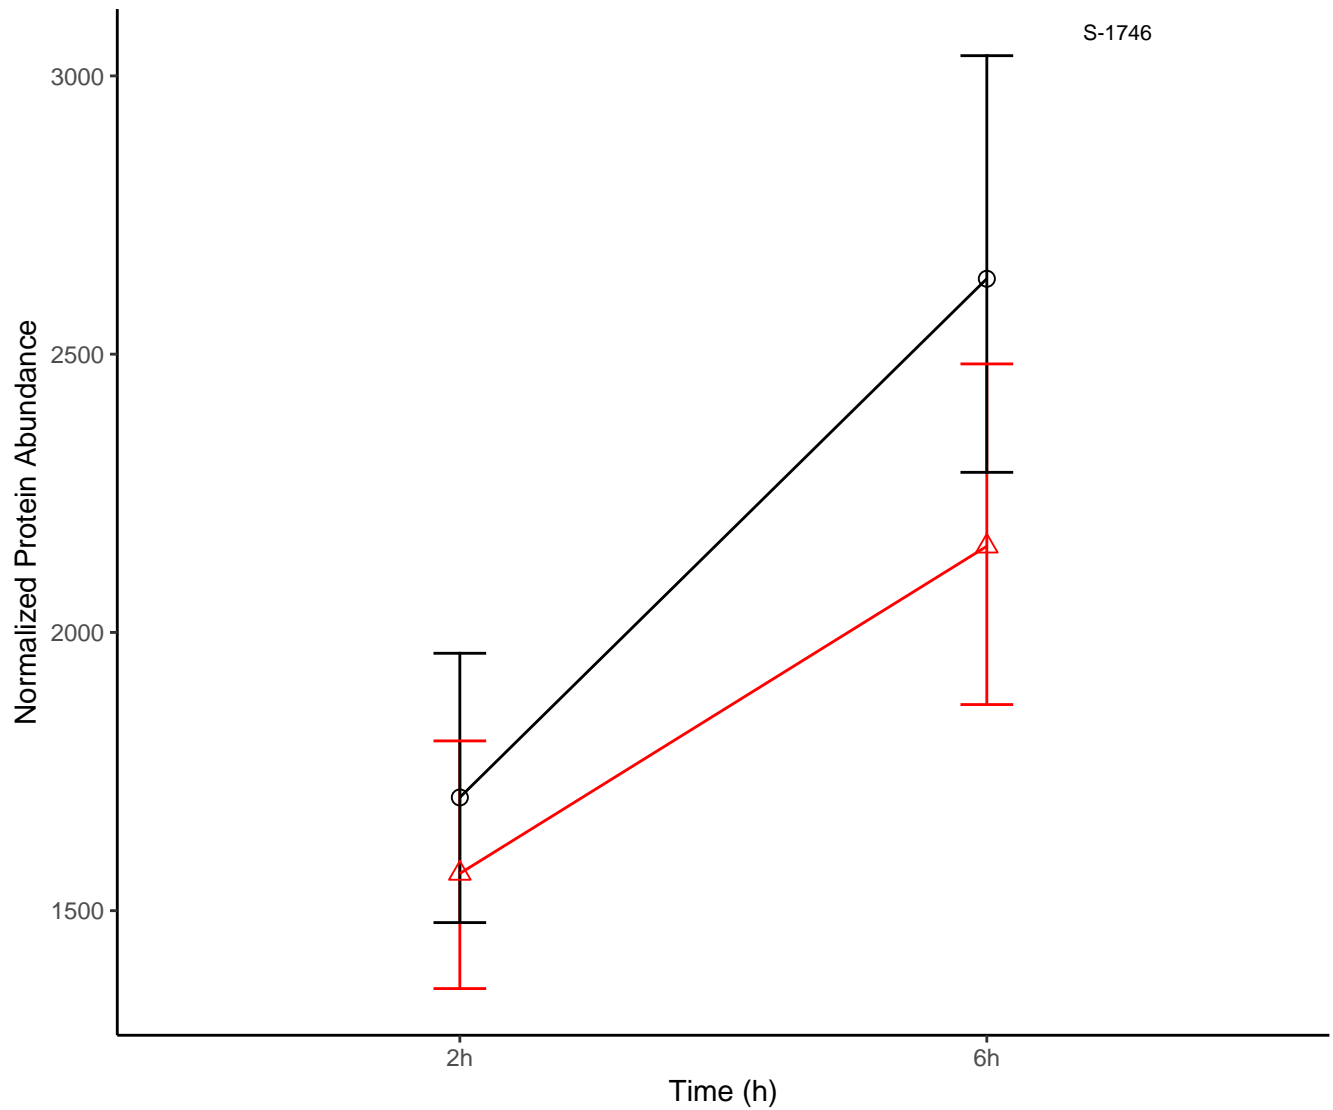

○ TSB-dex

△ TSB

# P5CR\_STAAM

S-1747

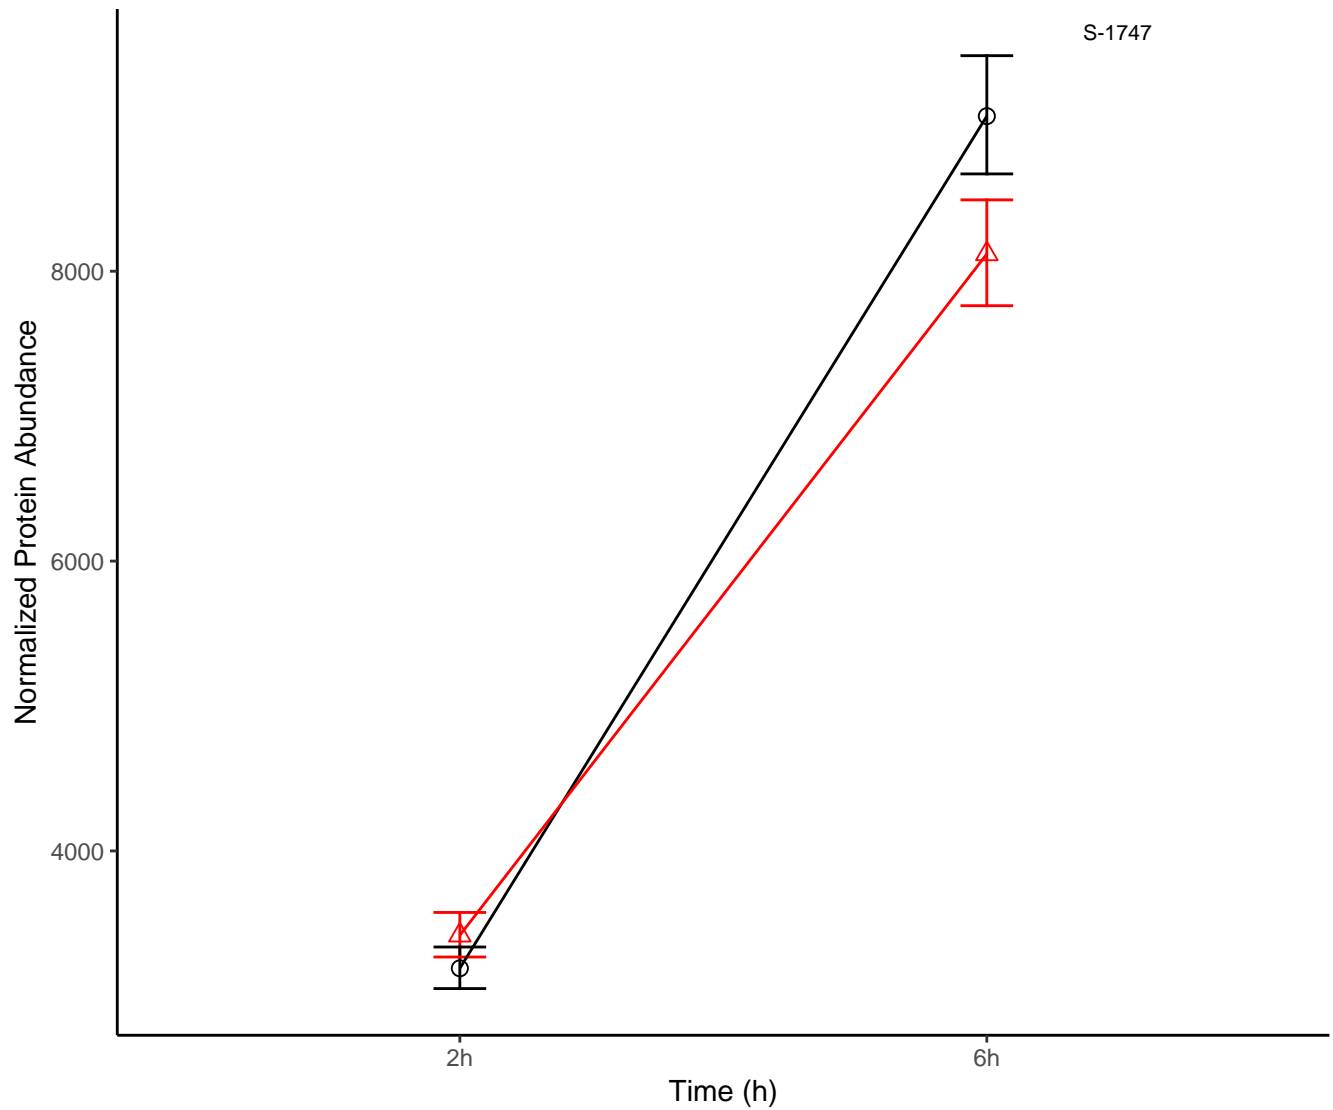

○ TSB-dex

△ TSB

# PANB\_STAAM

S-1748

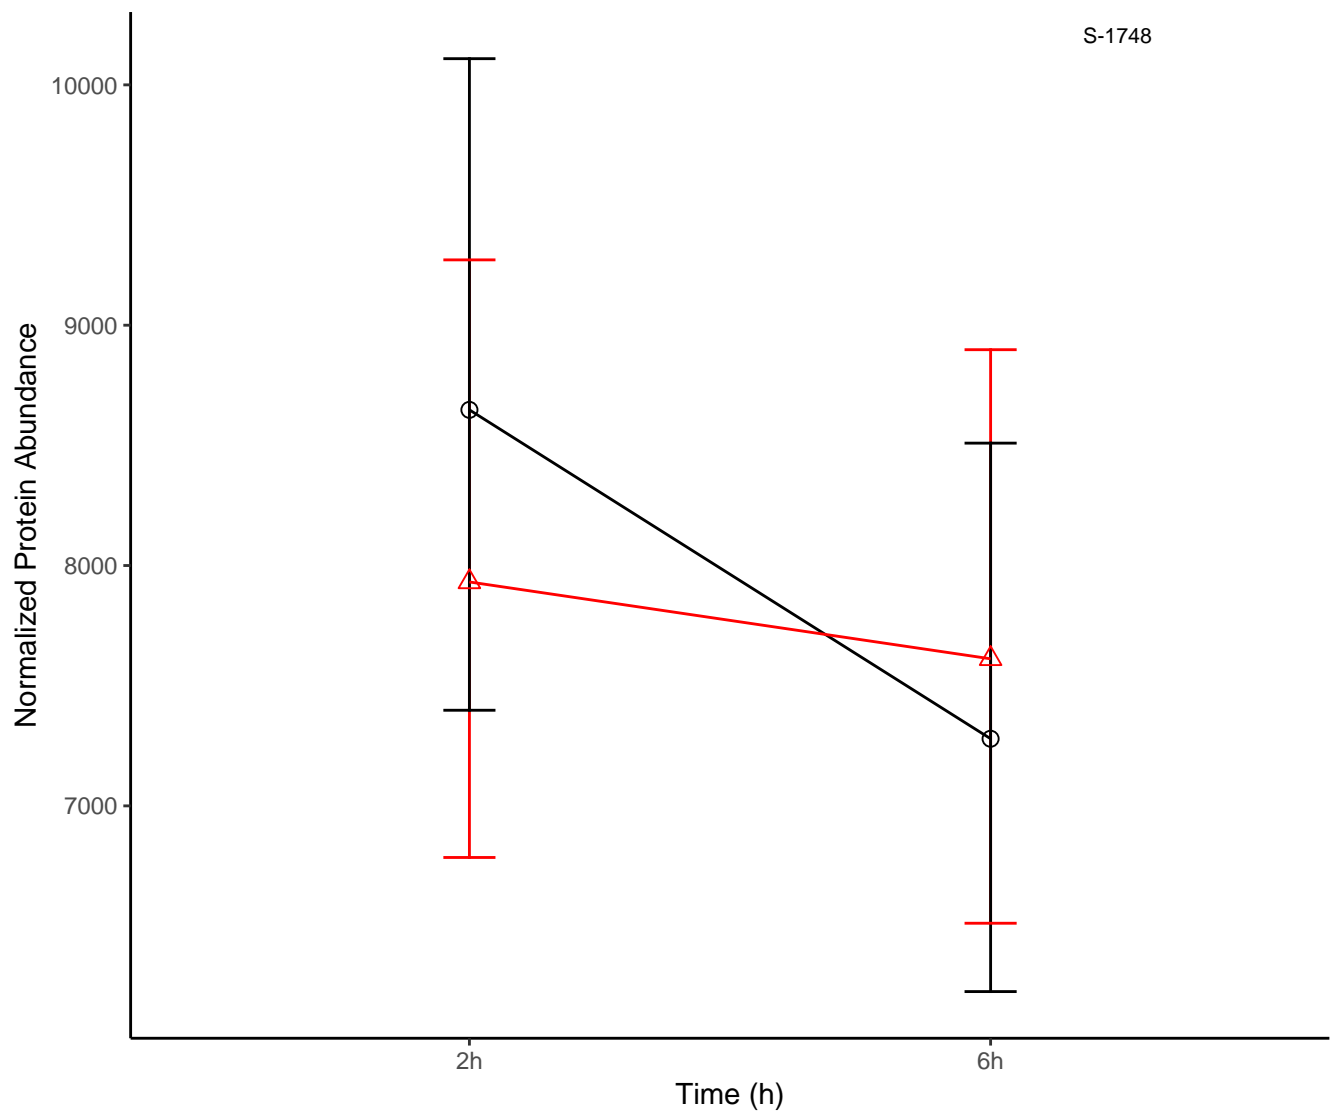

○ TSB-dex

△ TSB

# PAND\_STAAM

S-1749

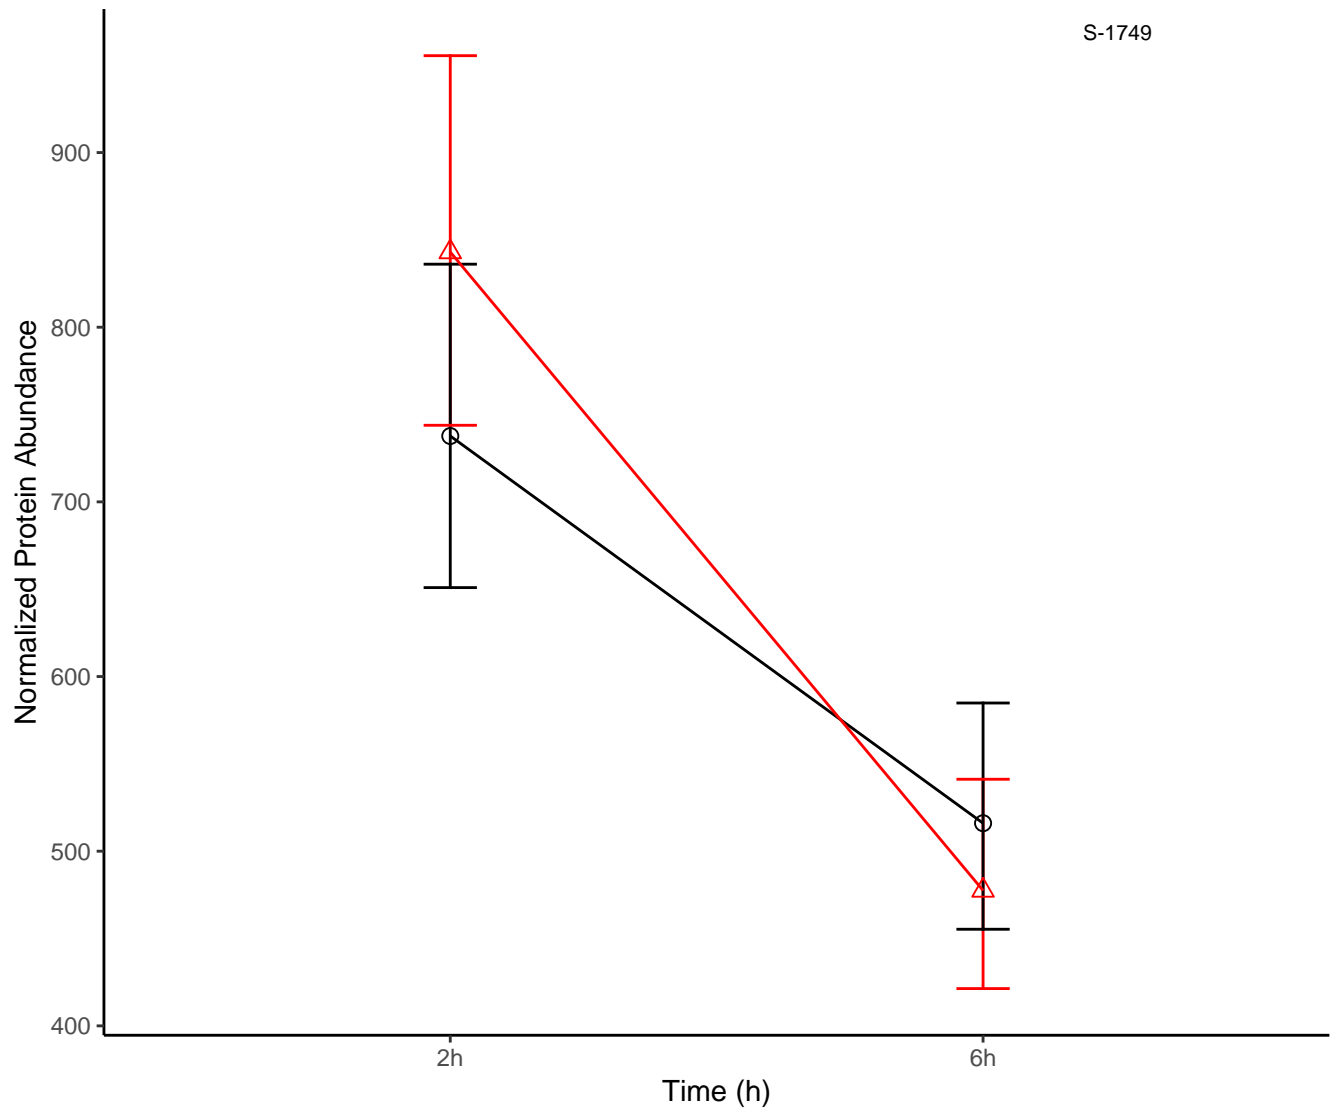

○ TSB-dex

△ TSB

# PARC\_STAAM

S-1750

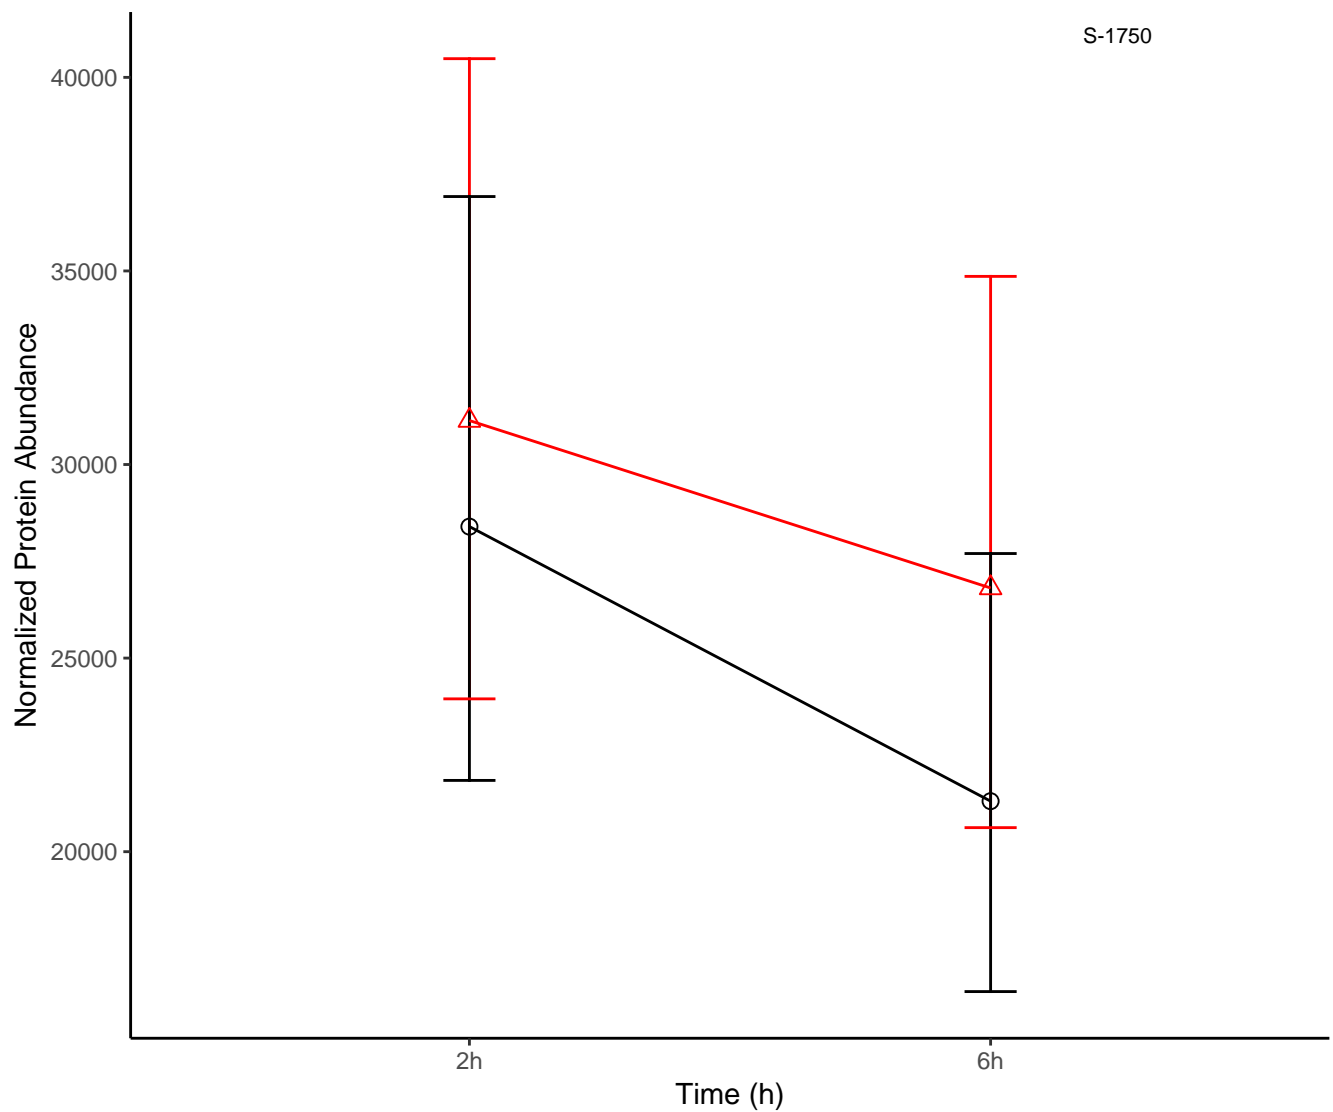

○ TSB-dex

△ TSB

# PCKA\_STAAM

S-1751

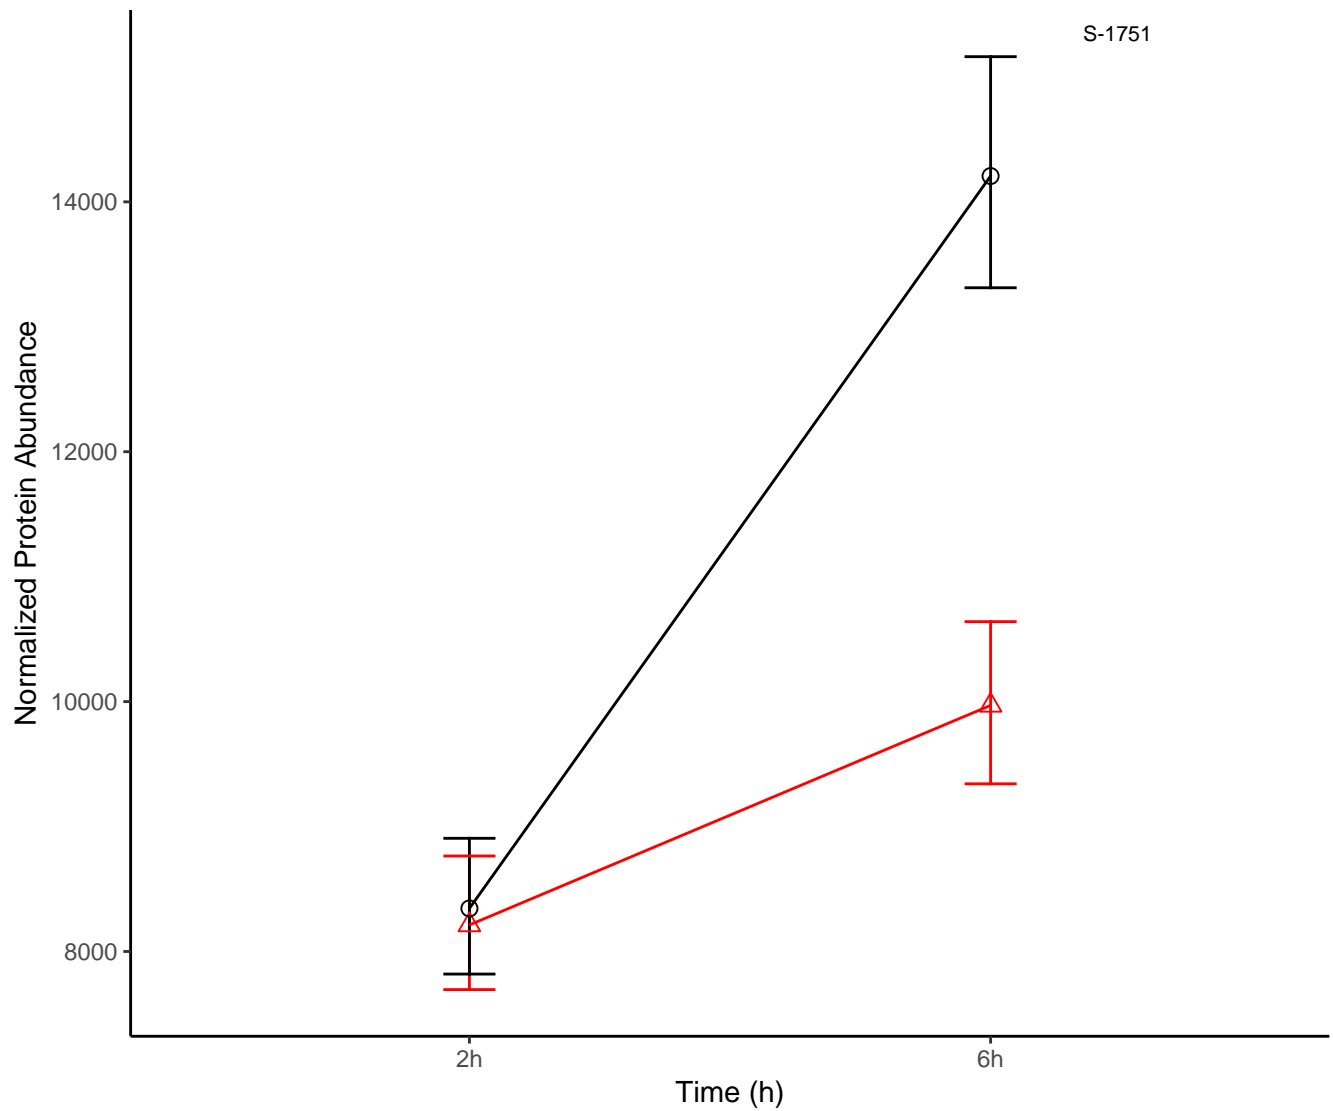

○ TSB-dex

△ TSB

# PCRA\_STAAM

S-1752

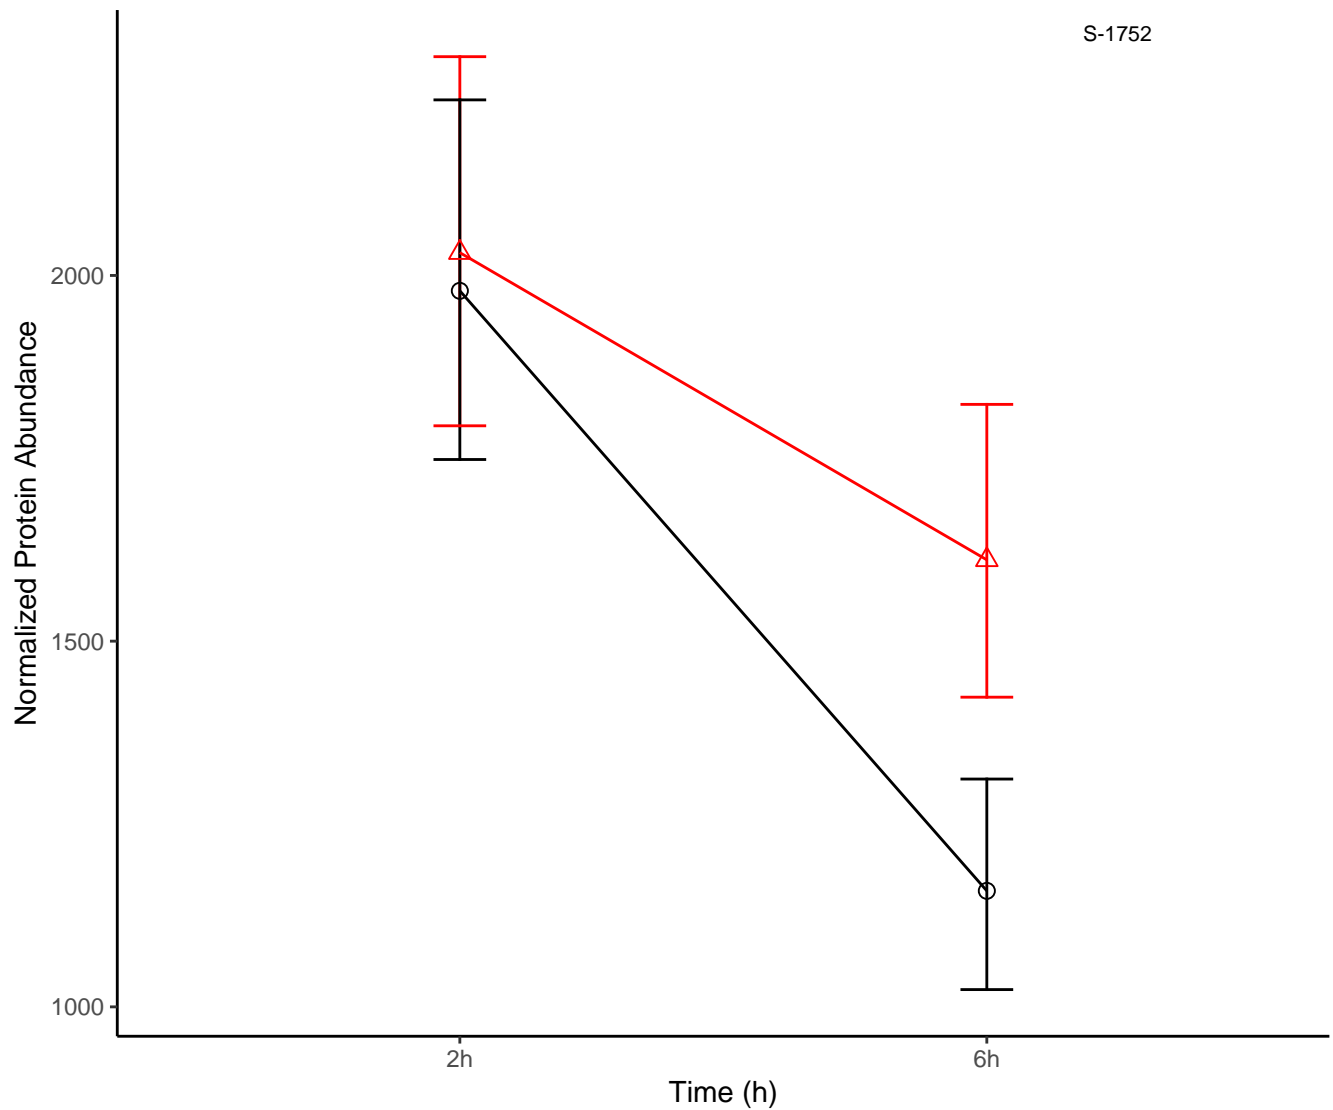

○ TSB-dex

△ TSB



# PDP\_STAAM

S-1753

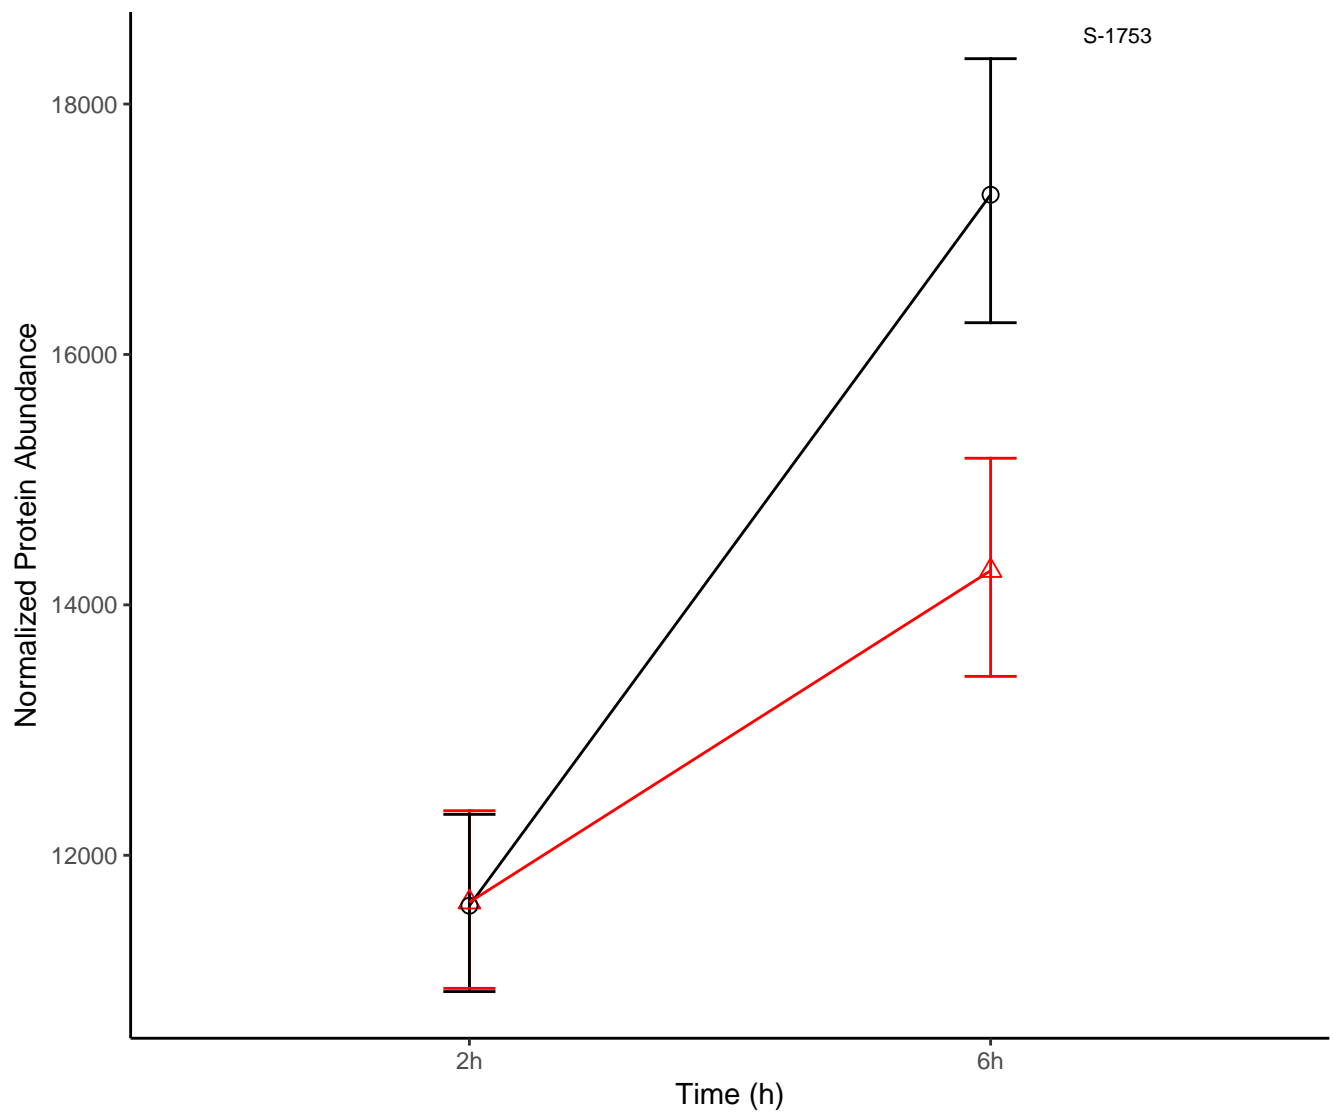

○ TSB-dex

△ TSB

# PDRP\_STAAM

S-1754

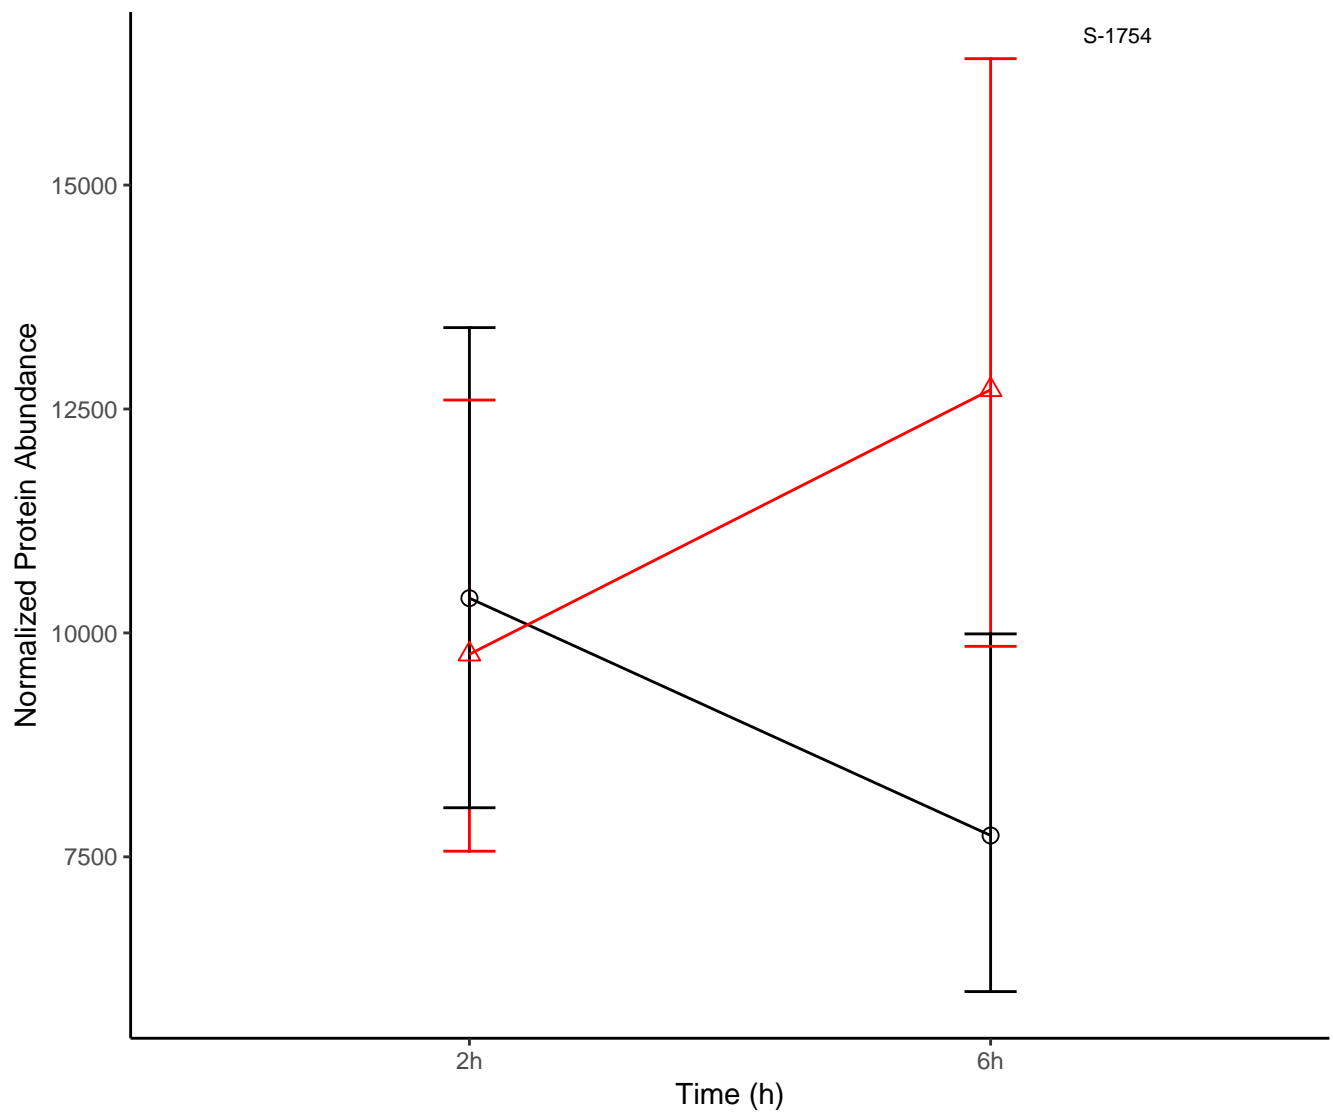

○ TSB-dex

△ TSB

# PDXS\_STAAM

S-1755

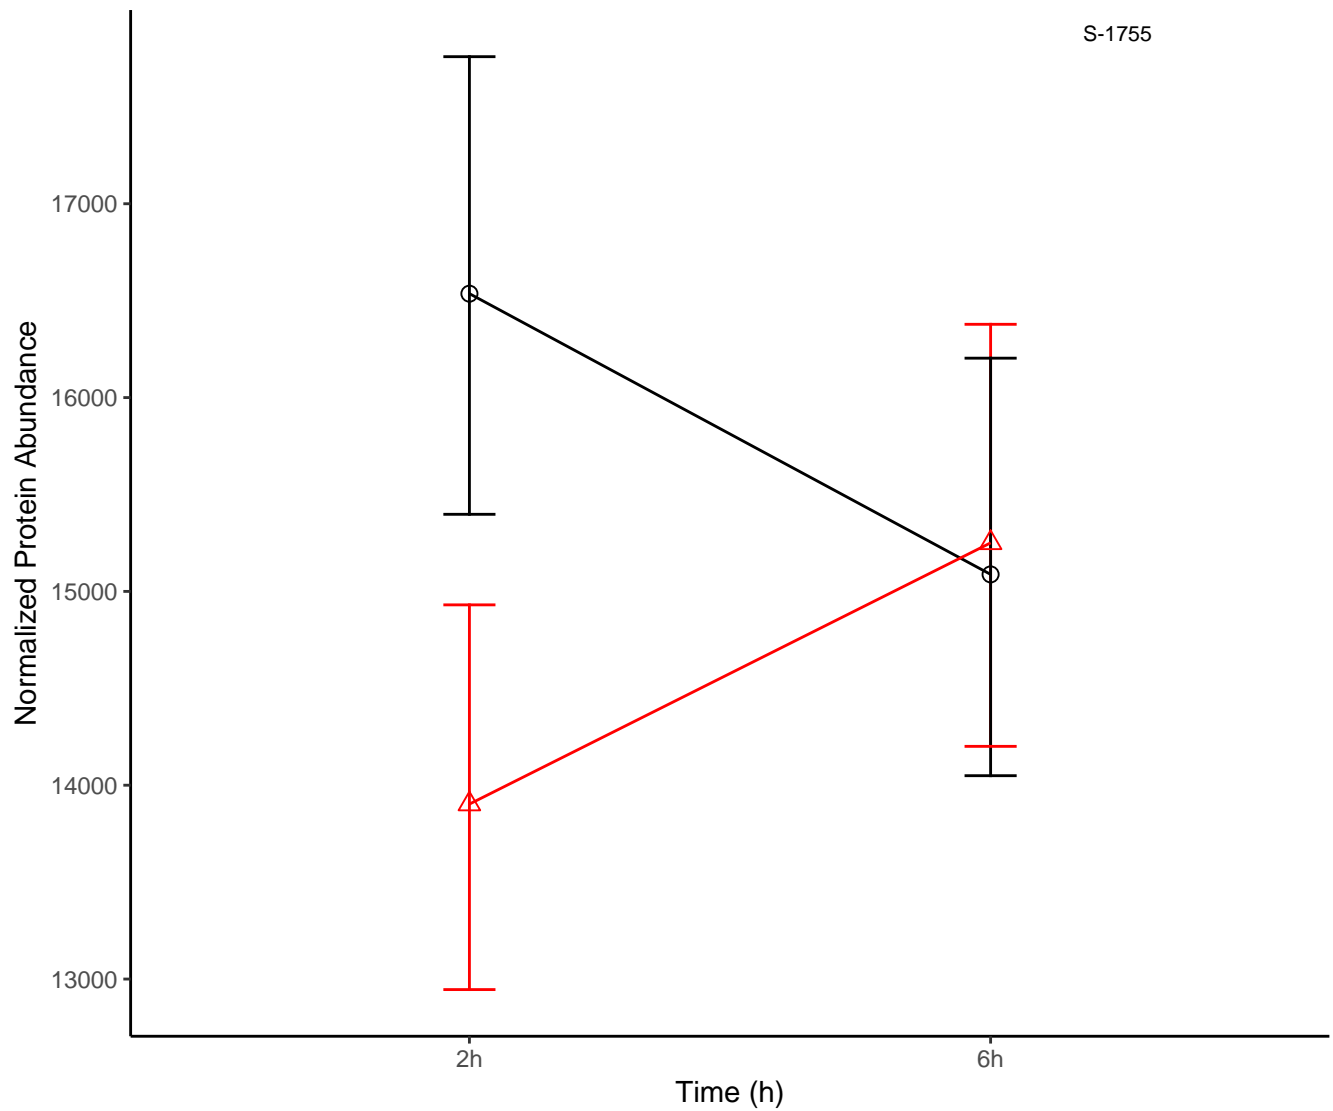

○ TSB-dex

△ TSB

# PDXT\_STAAM

S-1756

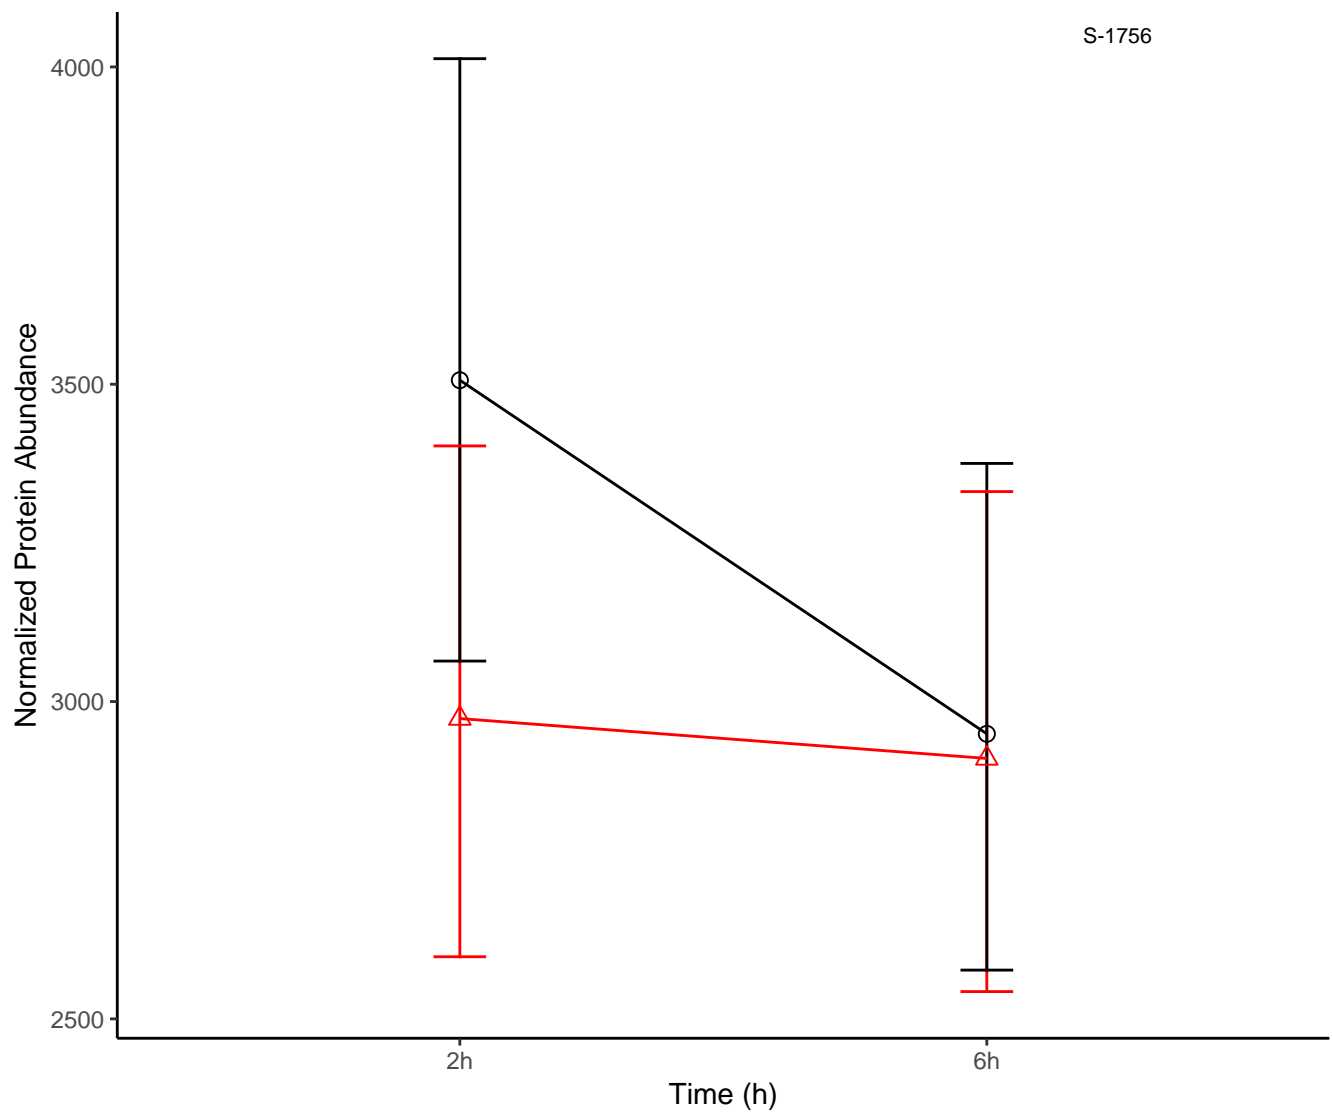

○ TSB-dex

△ TSB

# PEPVL\_STAAM

S-1757

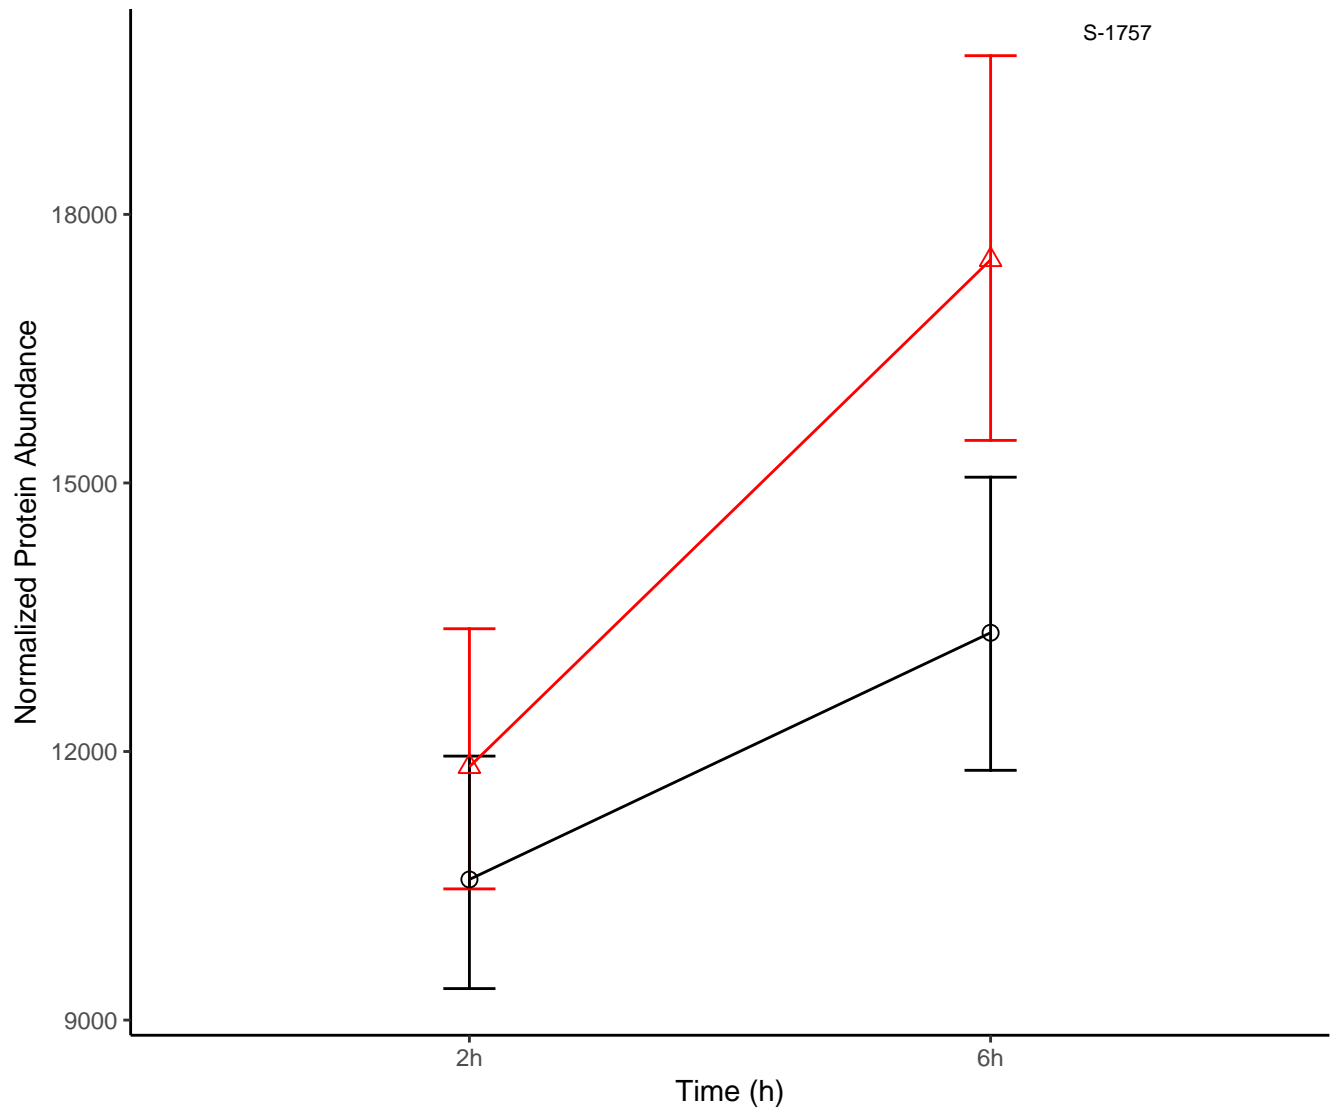

○ TSB-dex

△ TSB

# PERR\_STAAM

S-1758

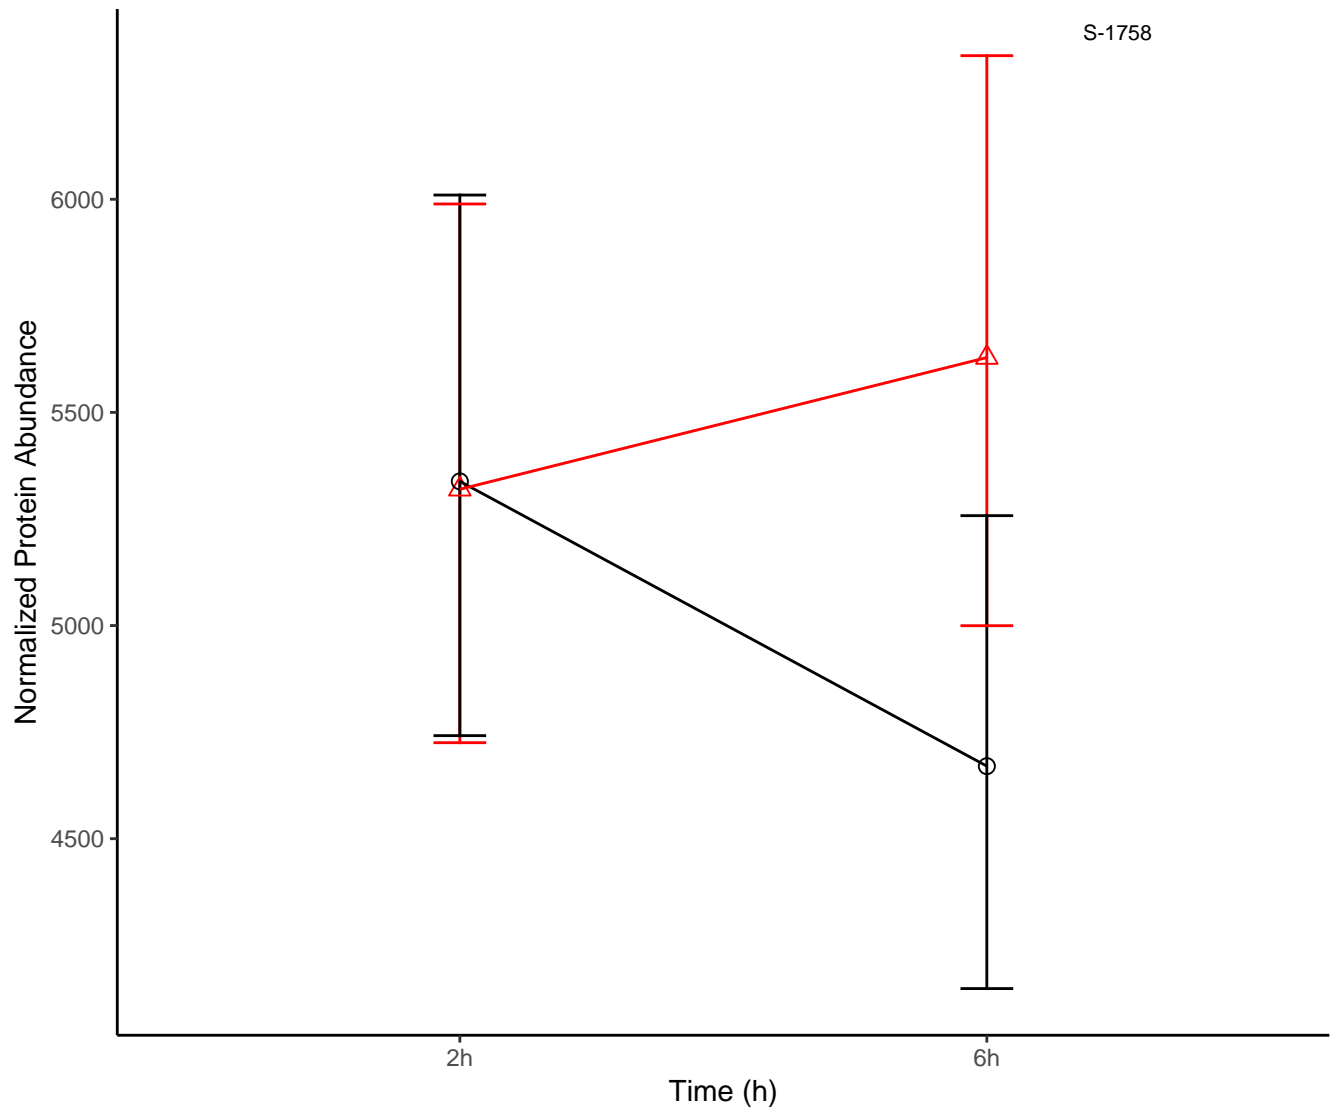

○ TSB-dex

△ TSB

# PFKA\_STAAM

S-1759

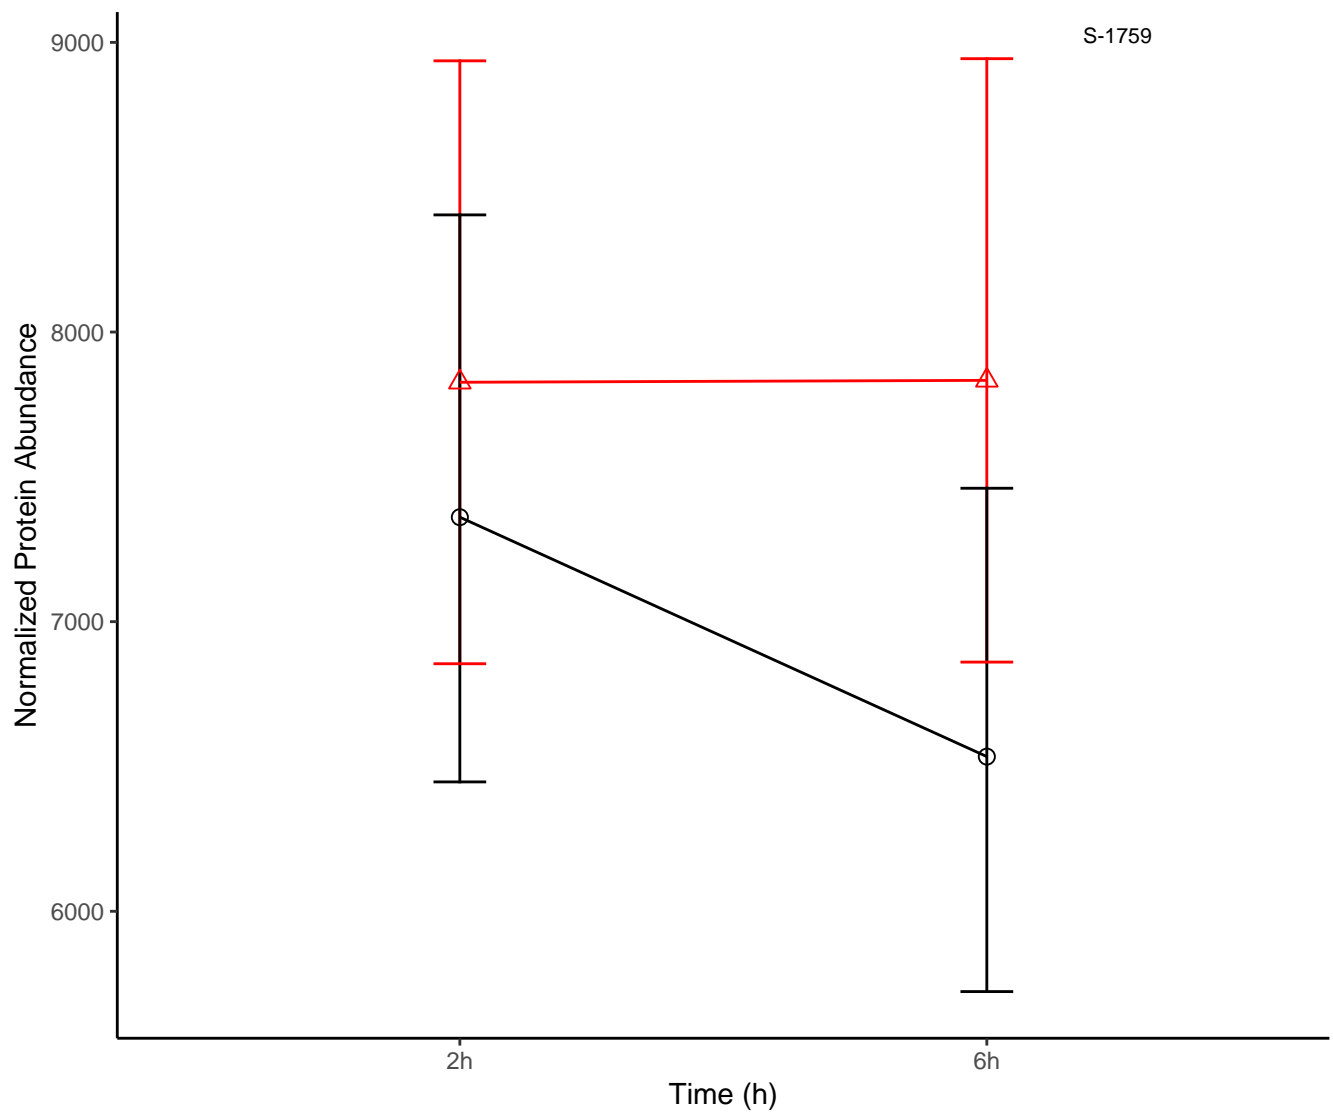

○ TSB-dex

△ TSB

# PFLA\_STAAM

S-1760

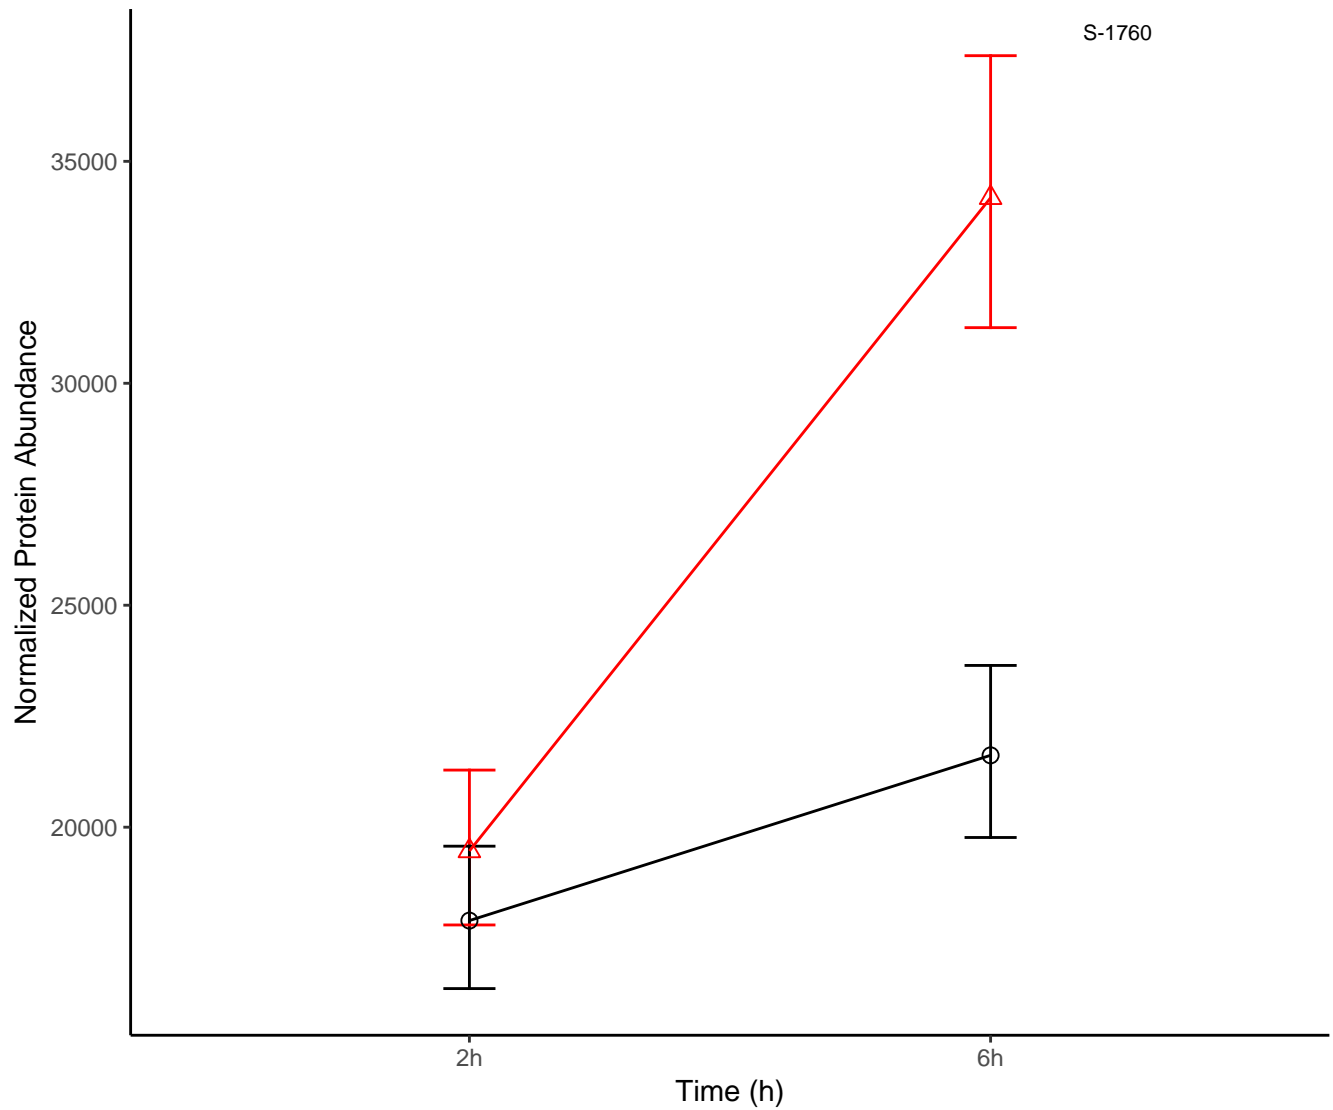

○ TSB-dex

△ TSB



# PFLB\_STAAM

S-1761

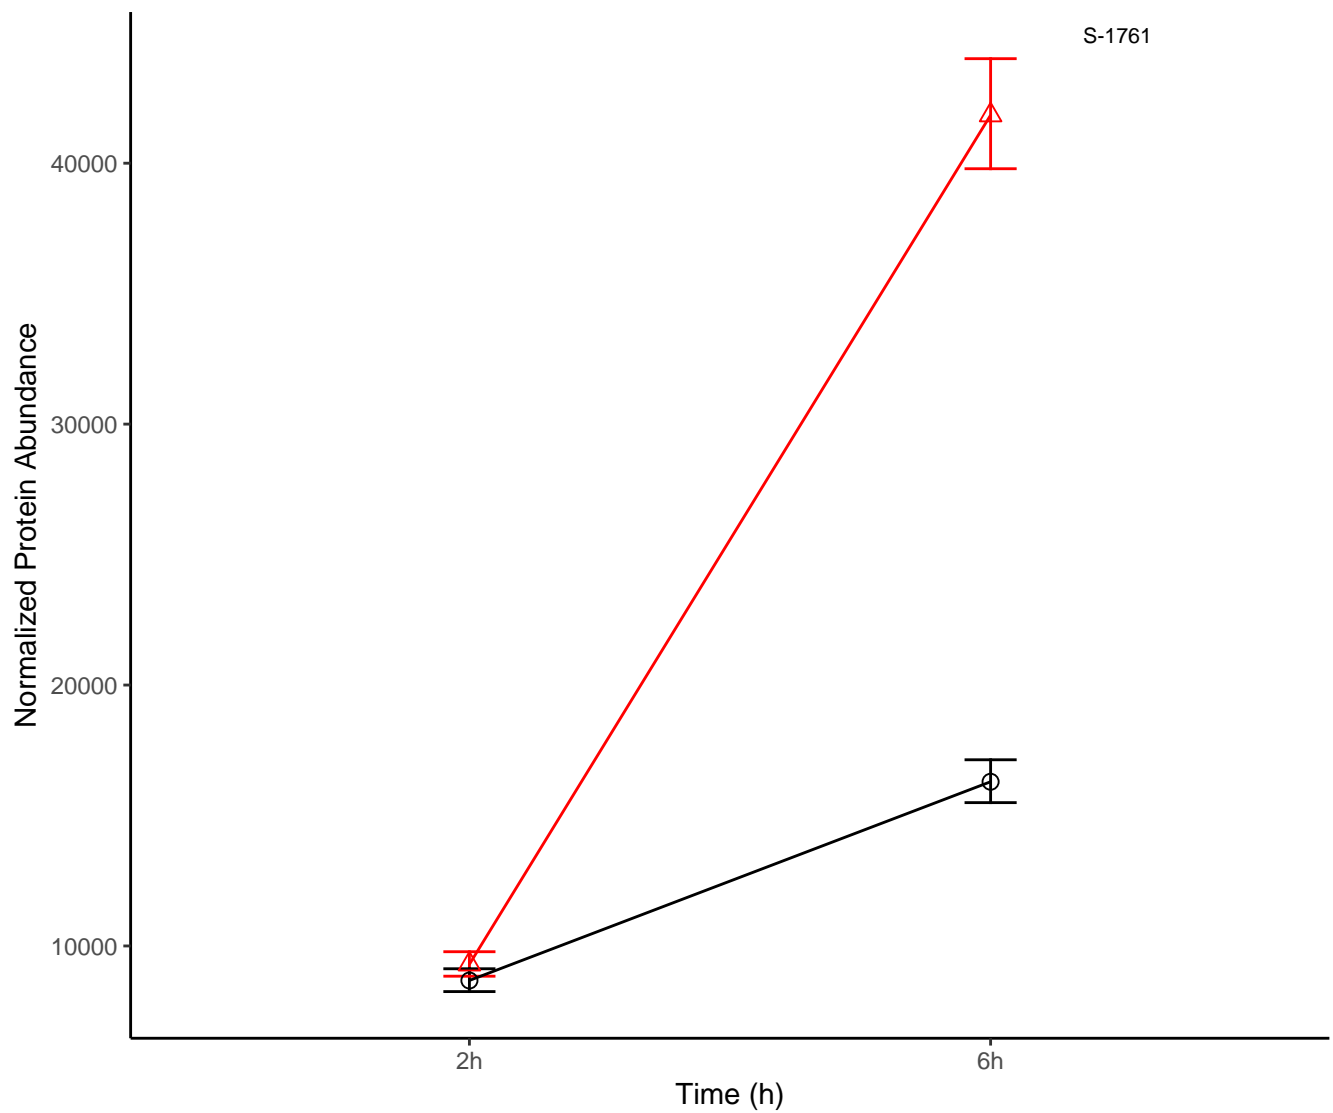

○ TSB-dex

△ TSB

# PGCA\_STAAM

S-1762

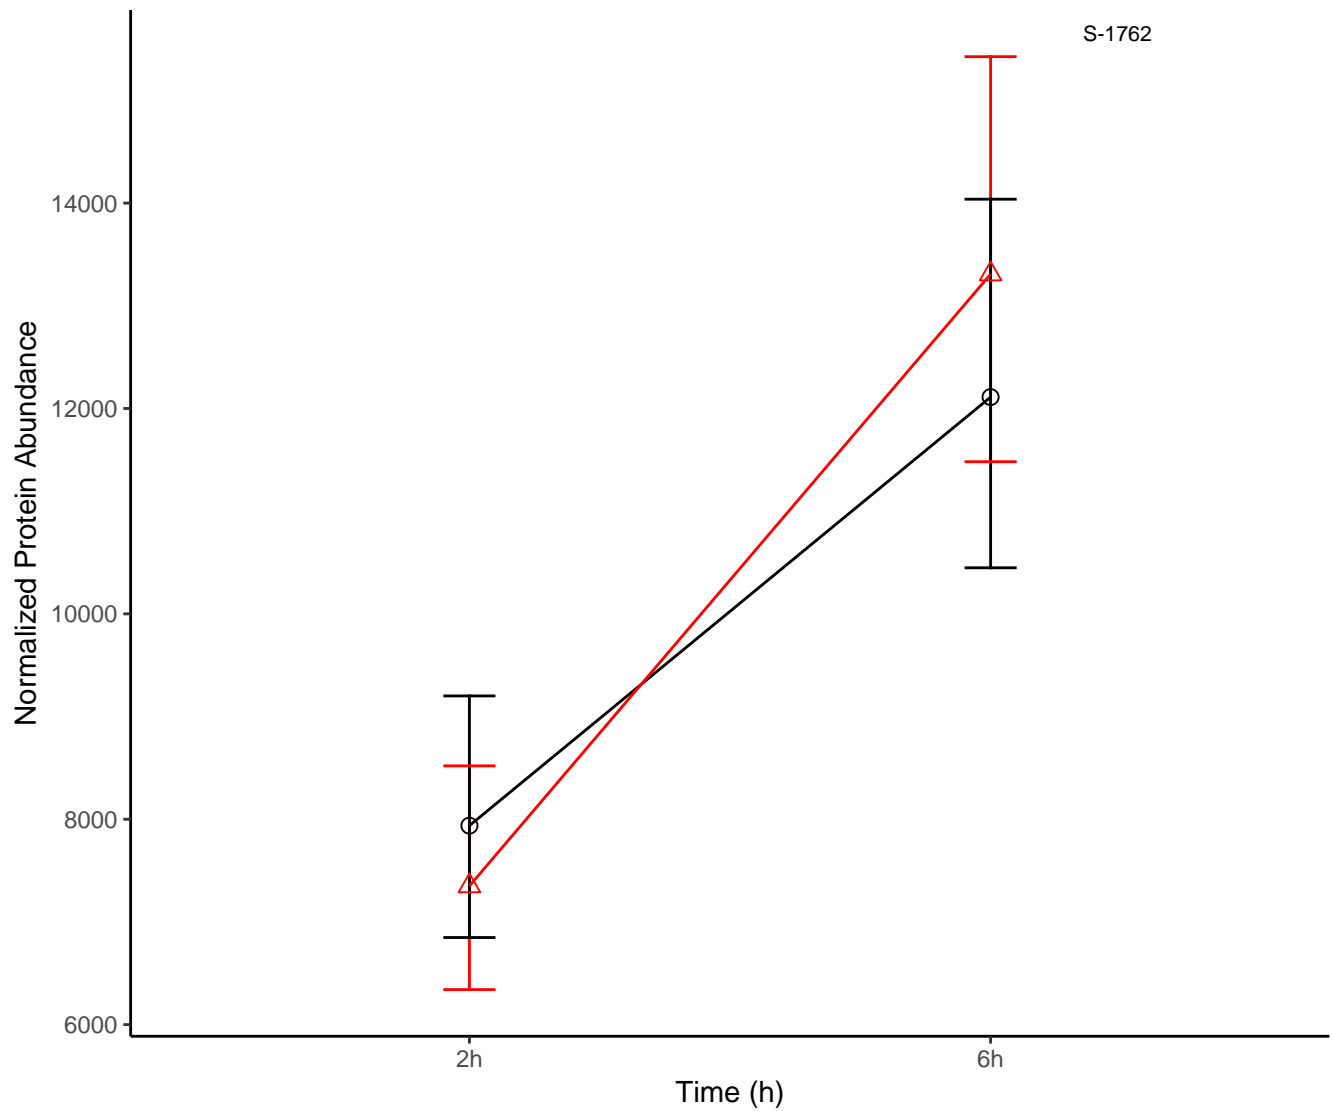

○ TSB-dex

△ TSB

# PGK\_STAAM

S-1763

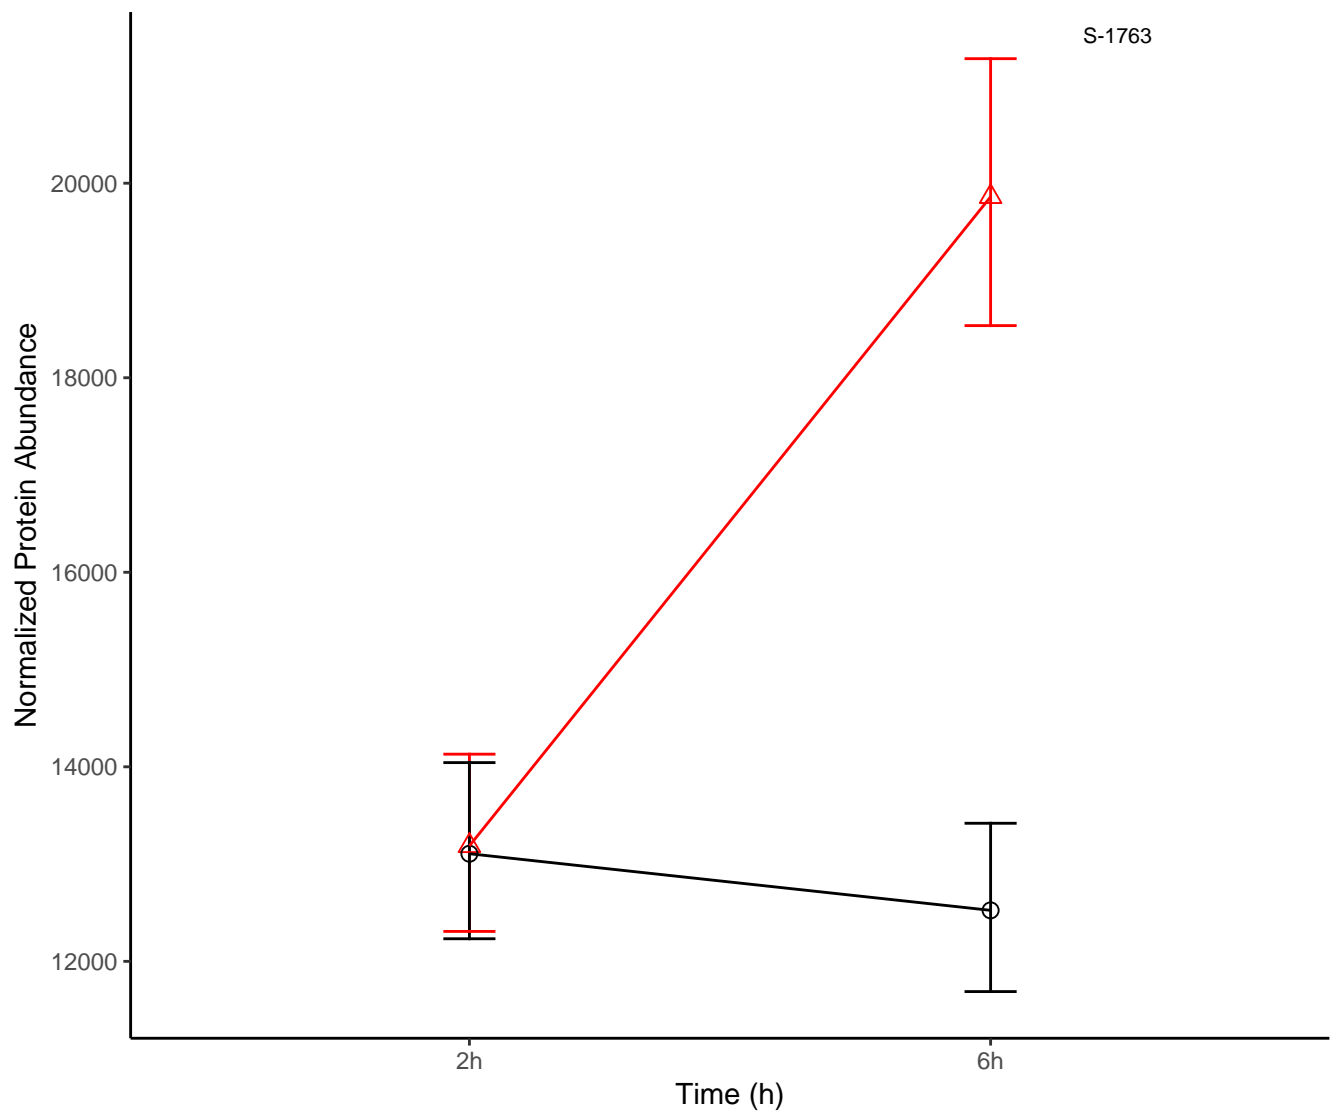

○ TSB-dex

△ TSB

# PHNC\_STAAM

S-1764

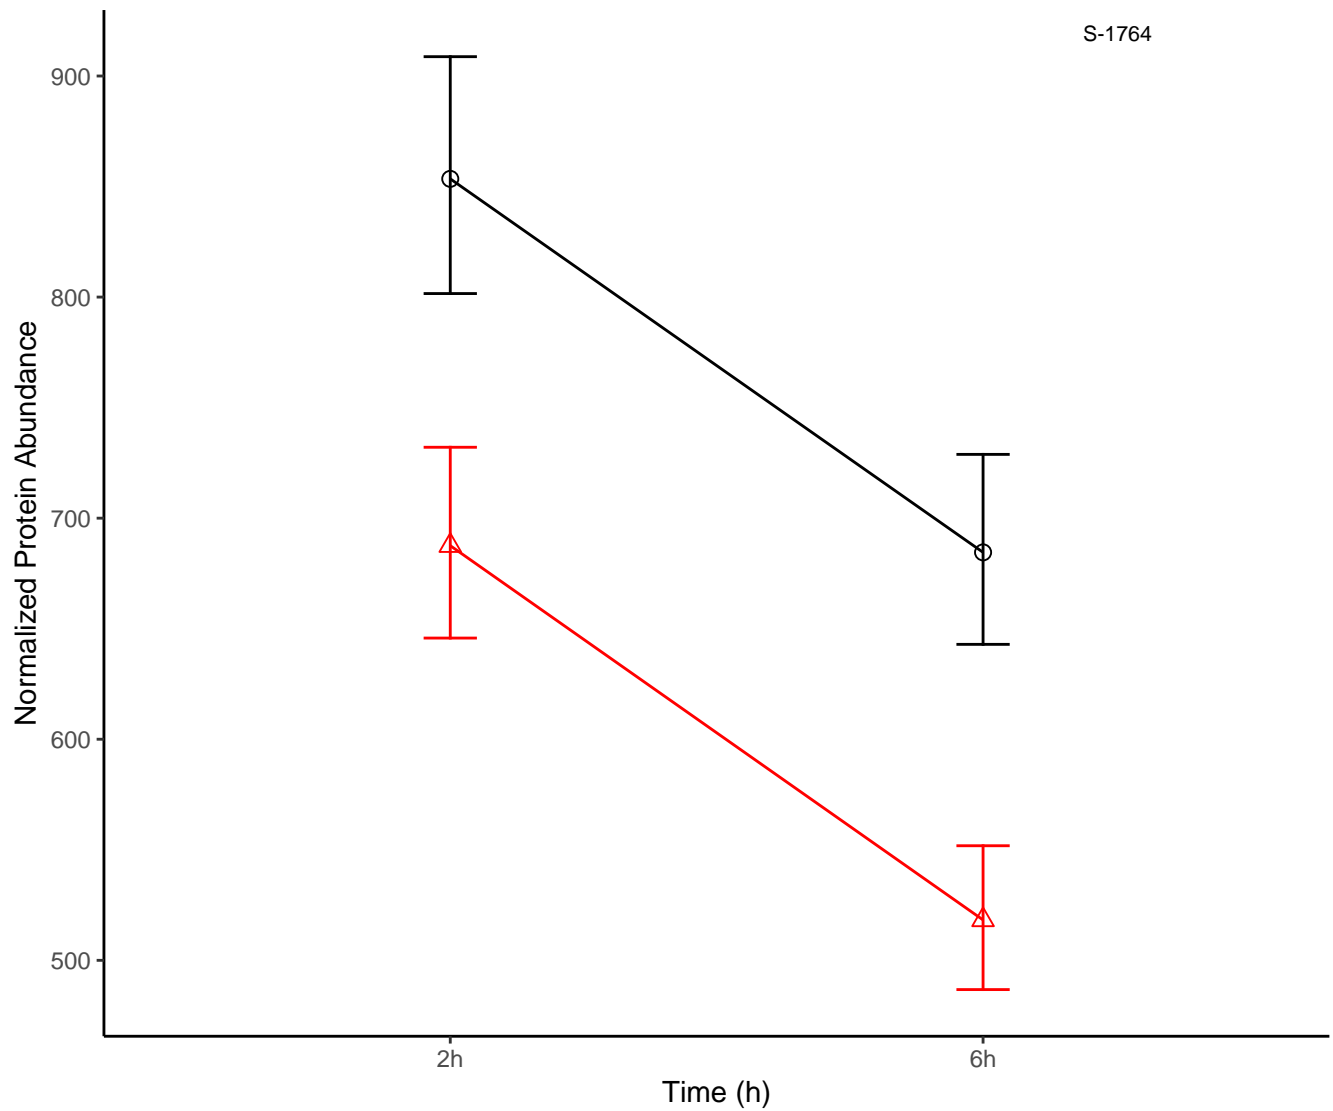

○ TSB-dex

△ TSB

# PLSX\_STAAM

S-1765

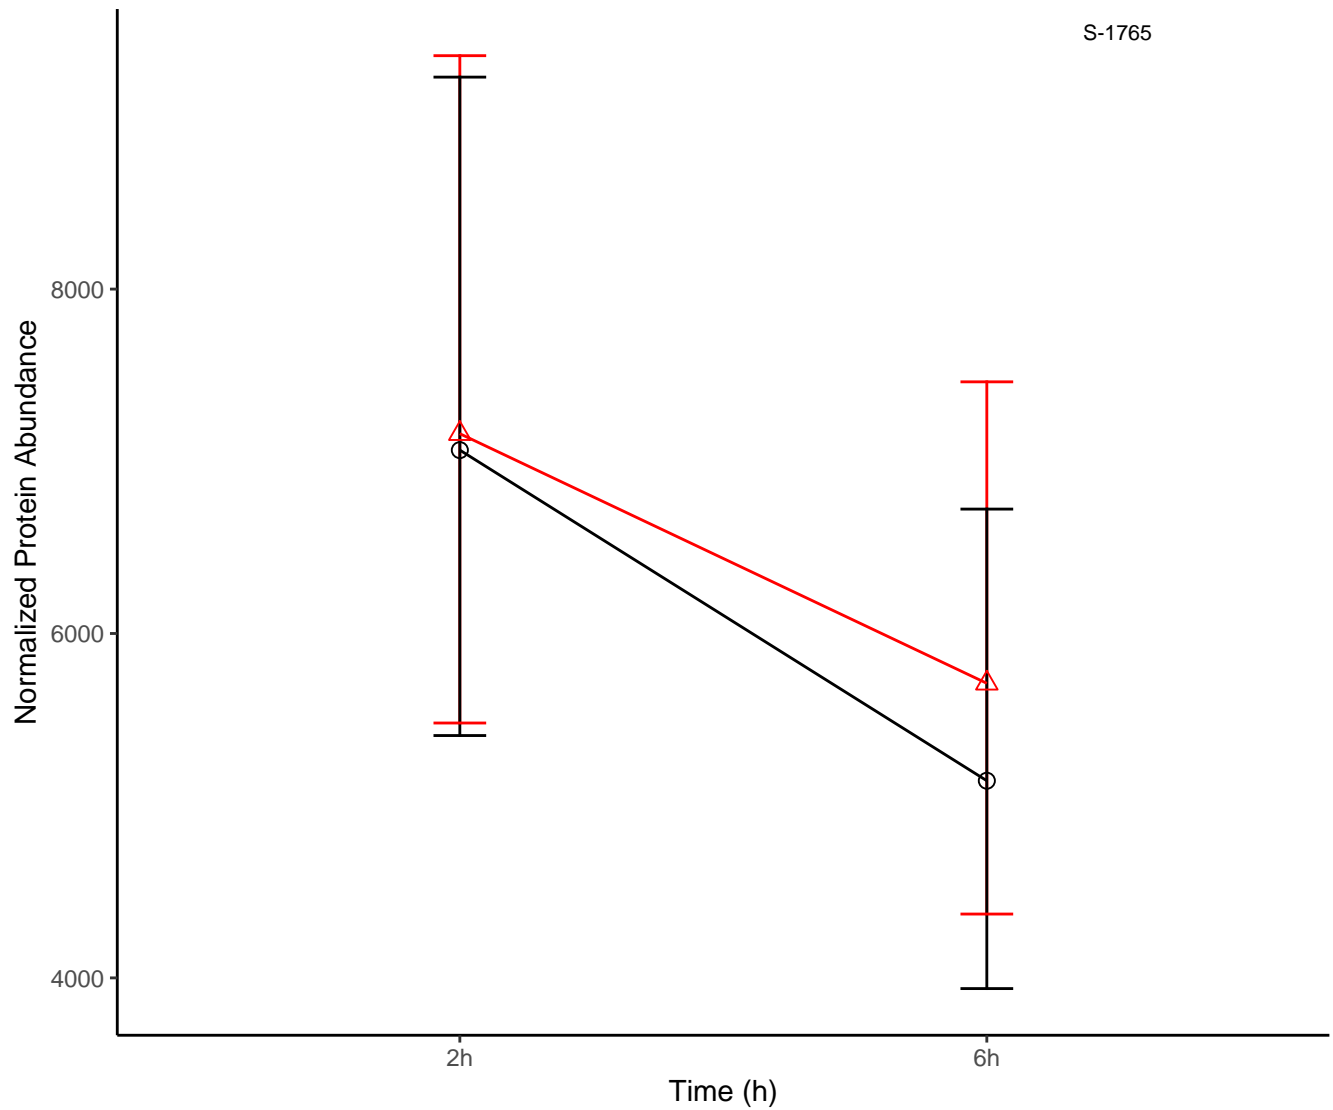

○ TSB-dex

△ TSB

# PNP\_STAAM

S-1766

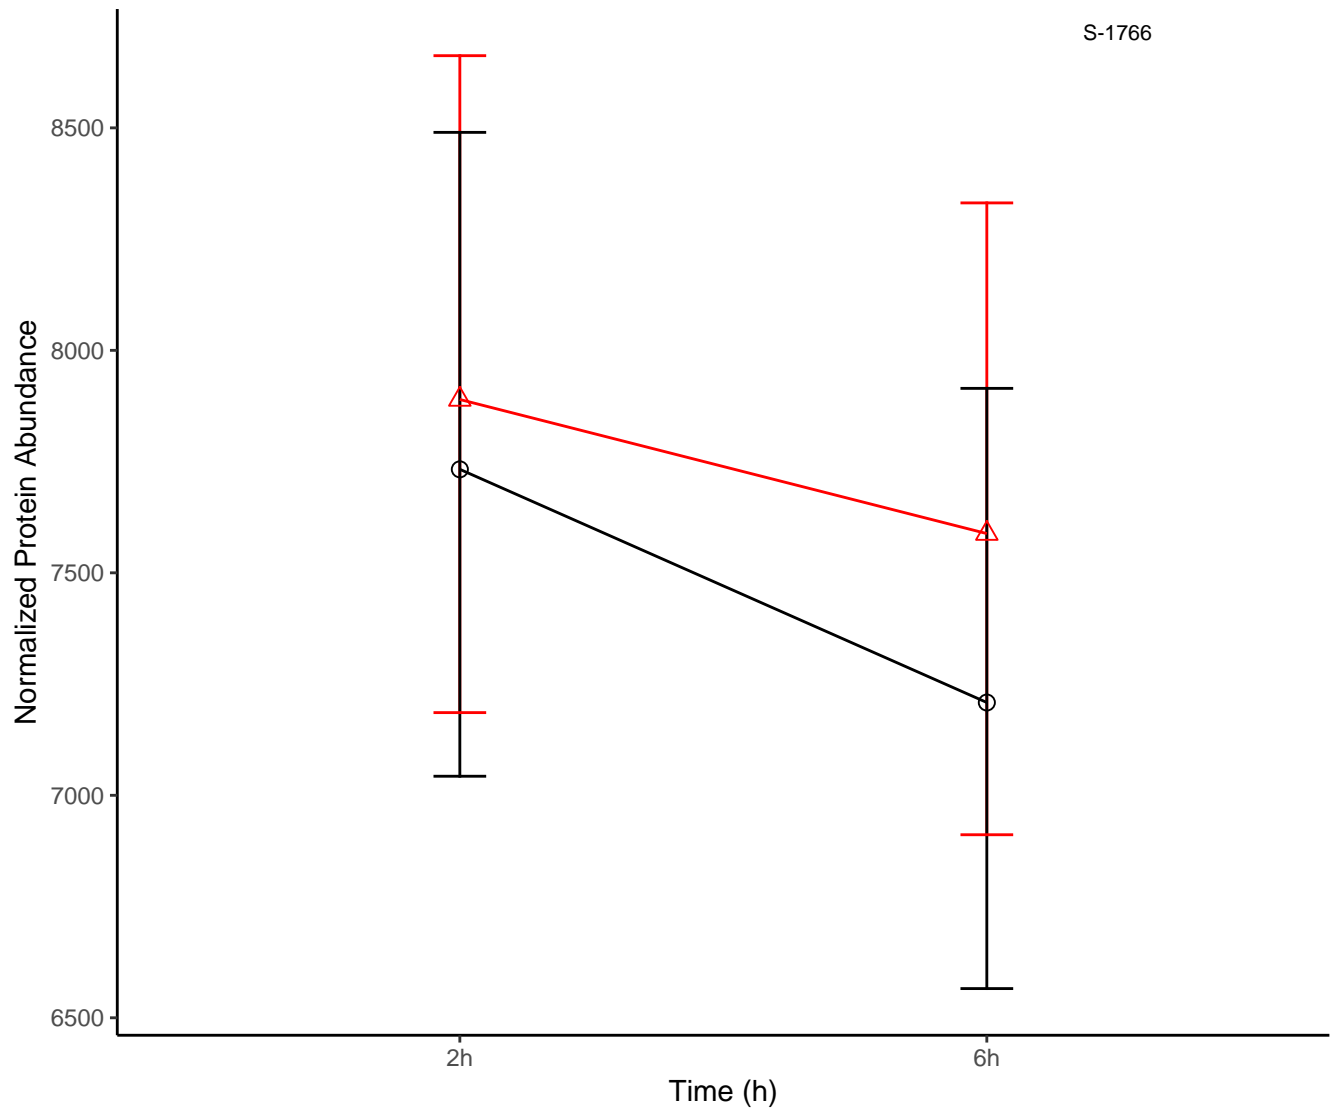

○ TSB-dex

△ TSB

# PPAC\_STAAM

S-1767

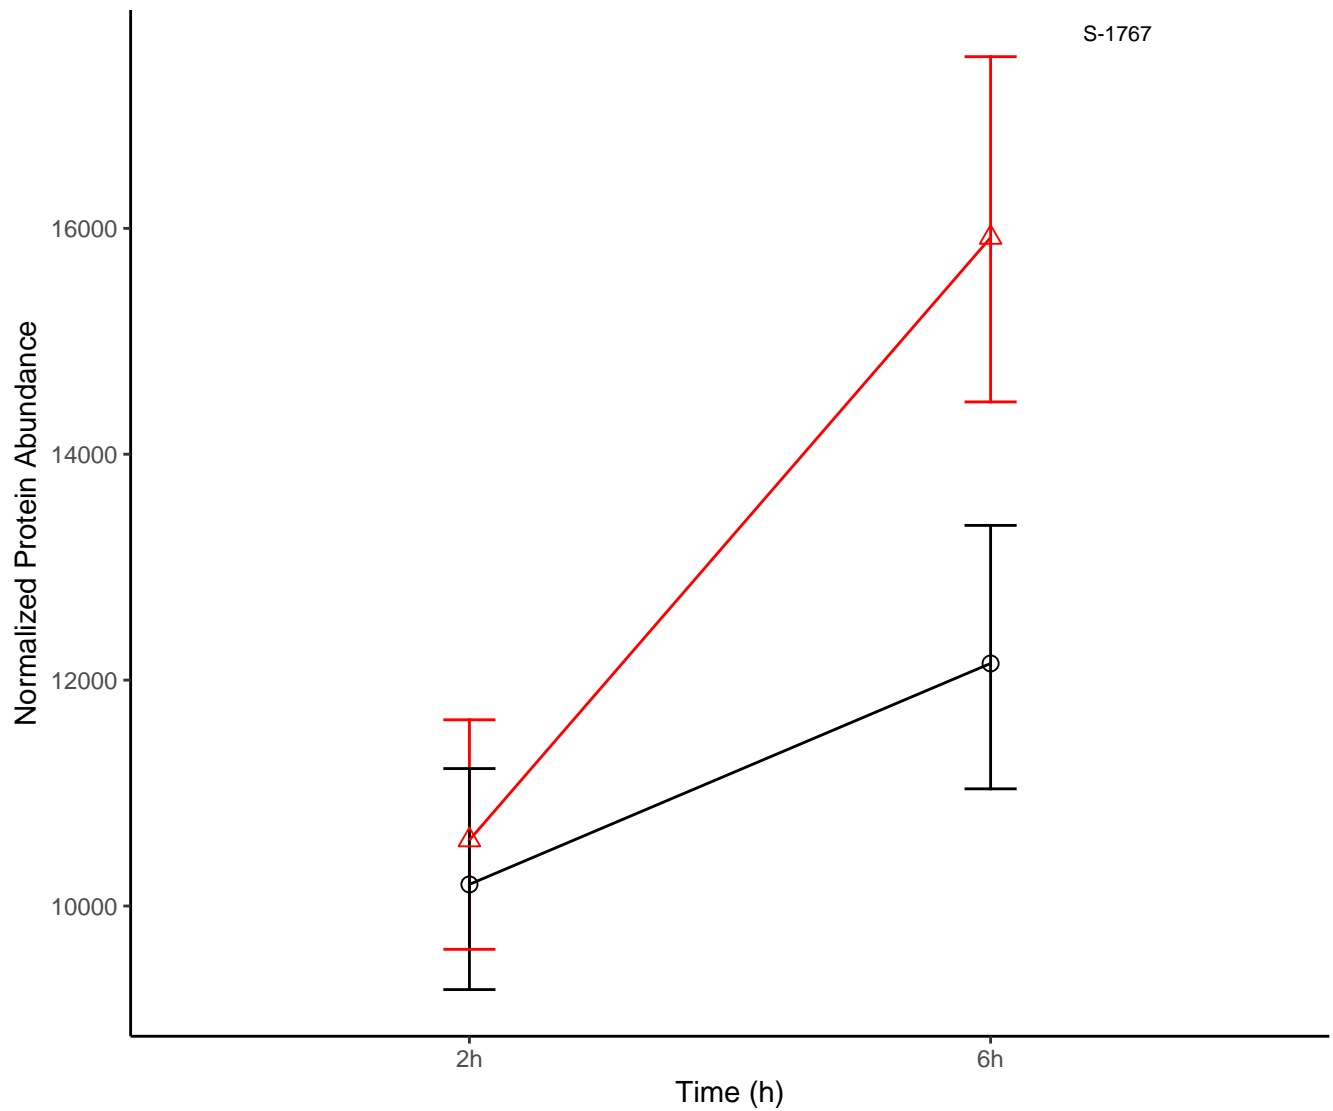

○ TSB-dex

△ TSB

# PPAT\_STAAM

S-1768

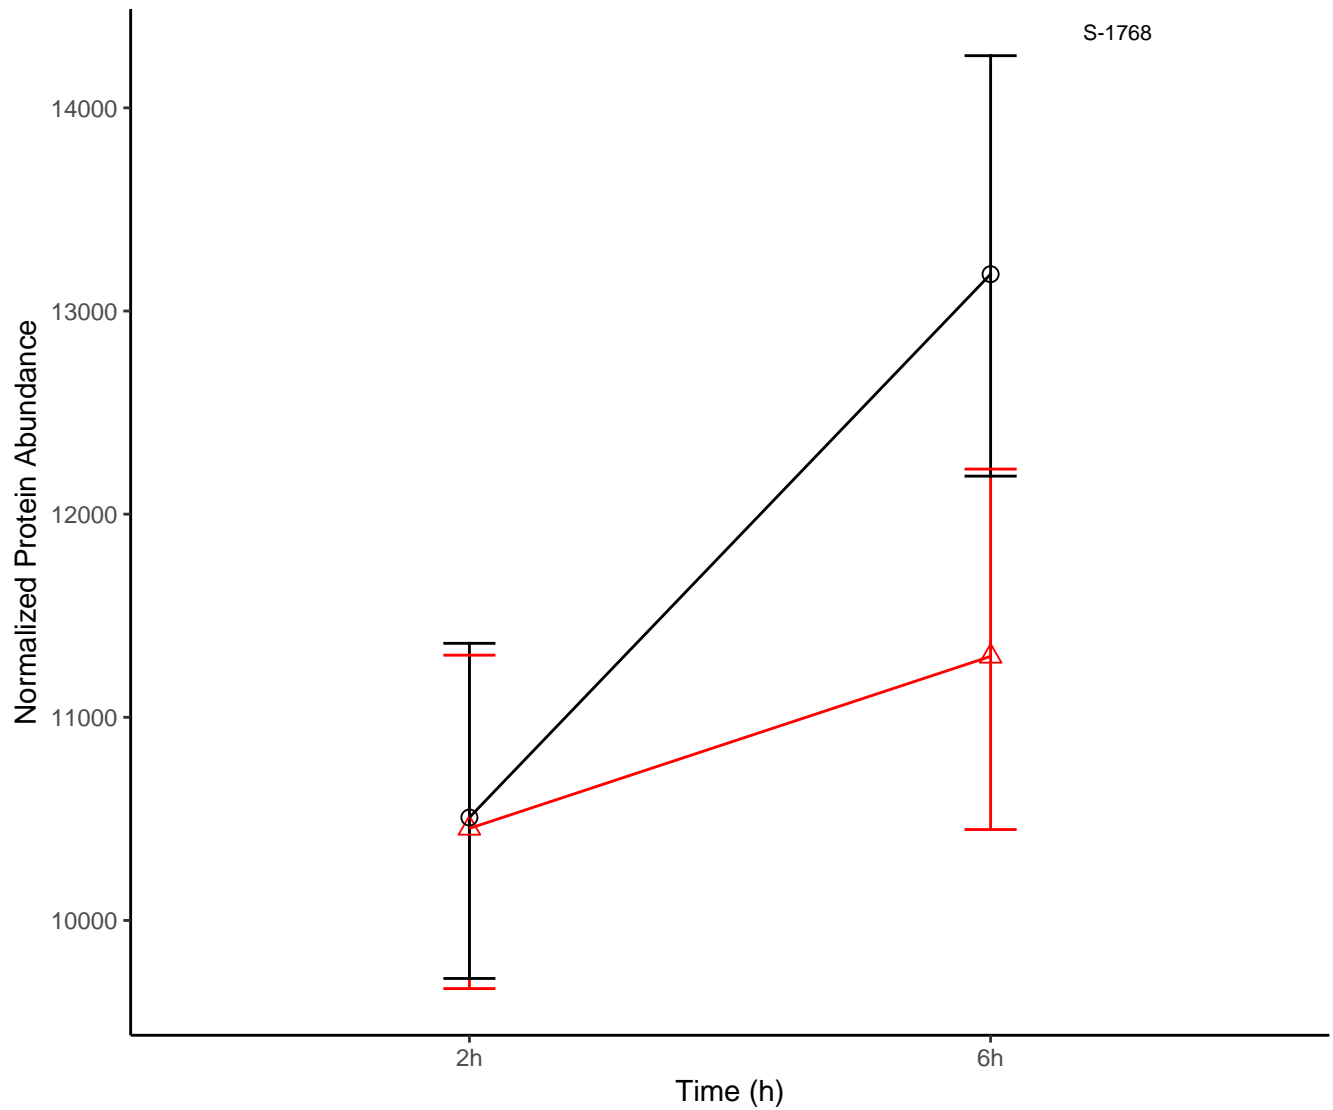

○ TSB-dex

△ TSB



# PPI1\_STAAM

S-1769

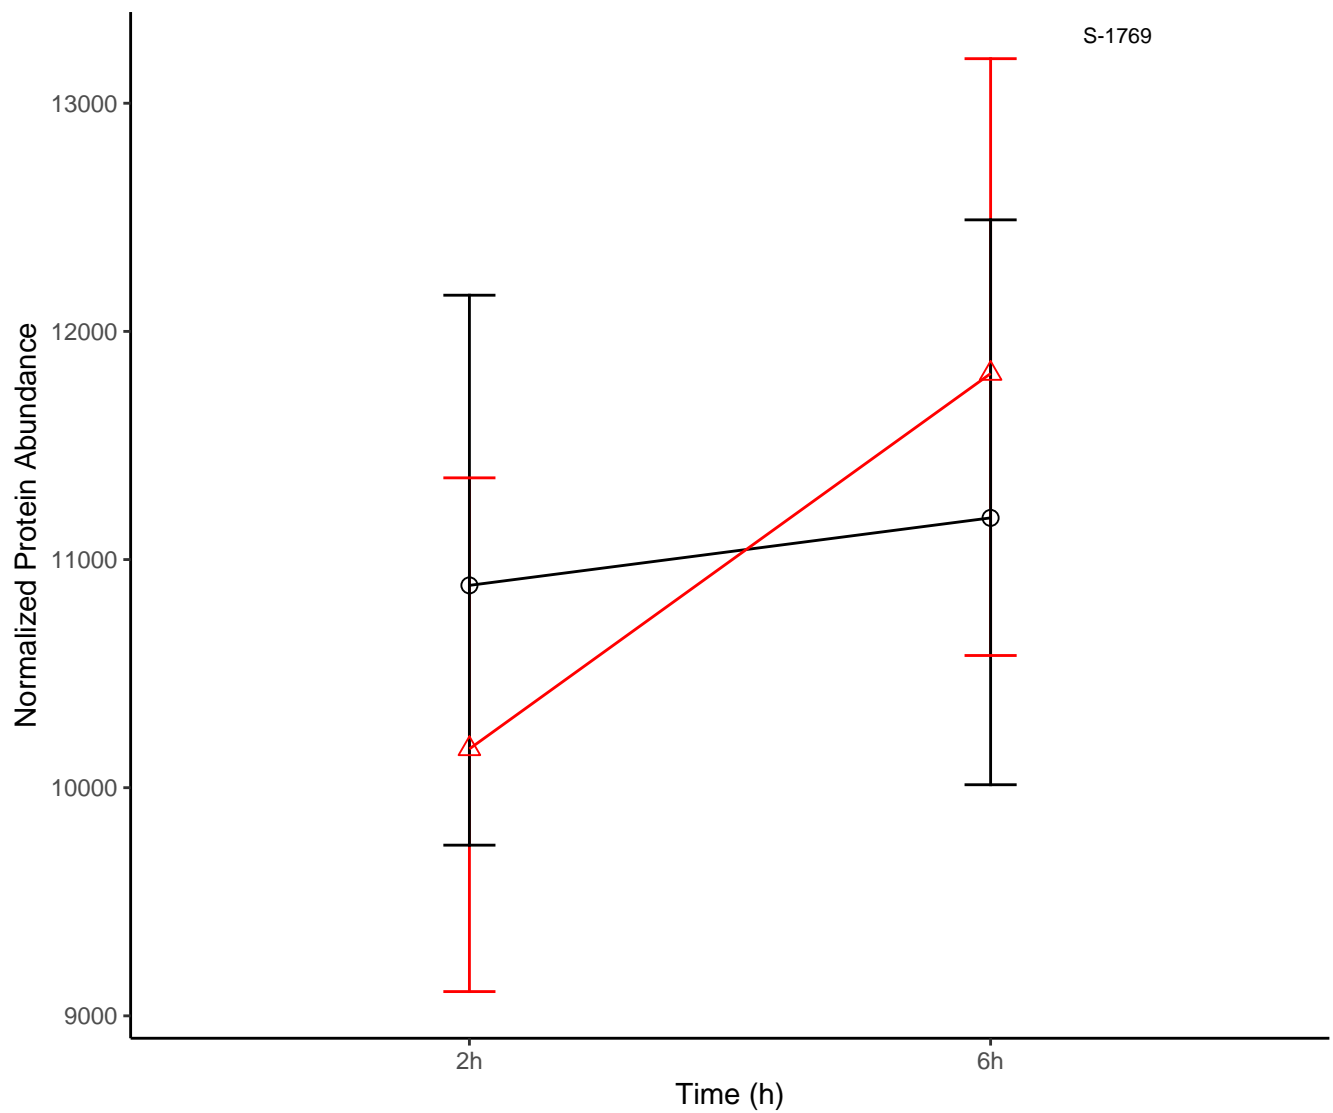

○ TSB-dex

△ TSB

# PRSA\_STAAM

S-1770

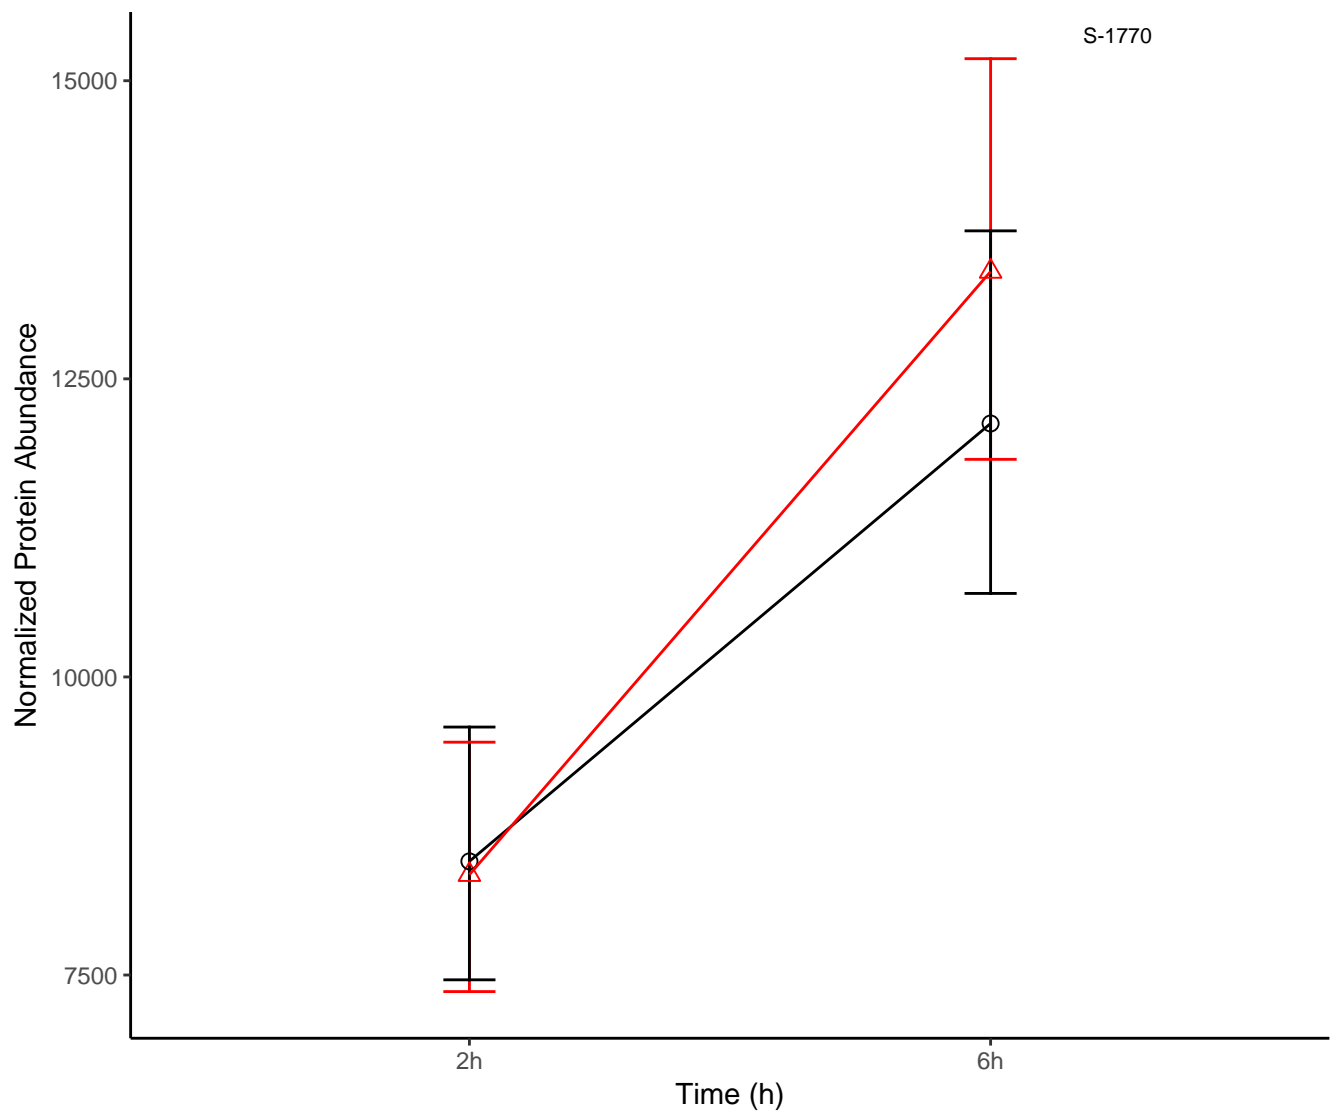

○ TSB-dex

△ TSB

# PSTB\_STAAM

S-1771

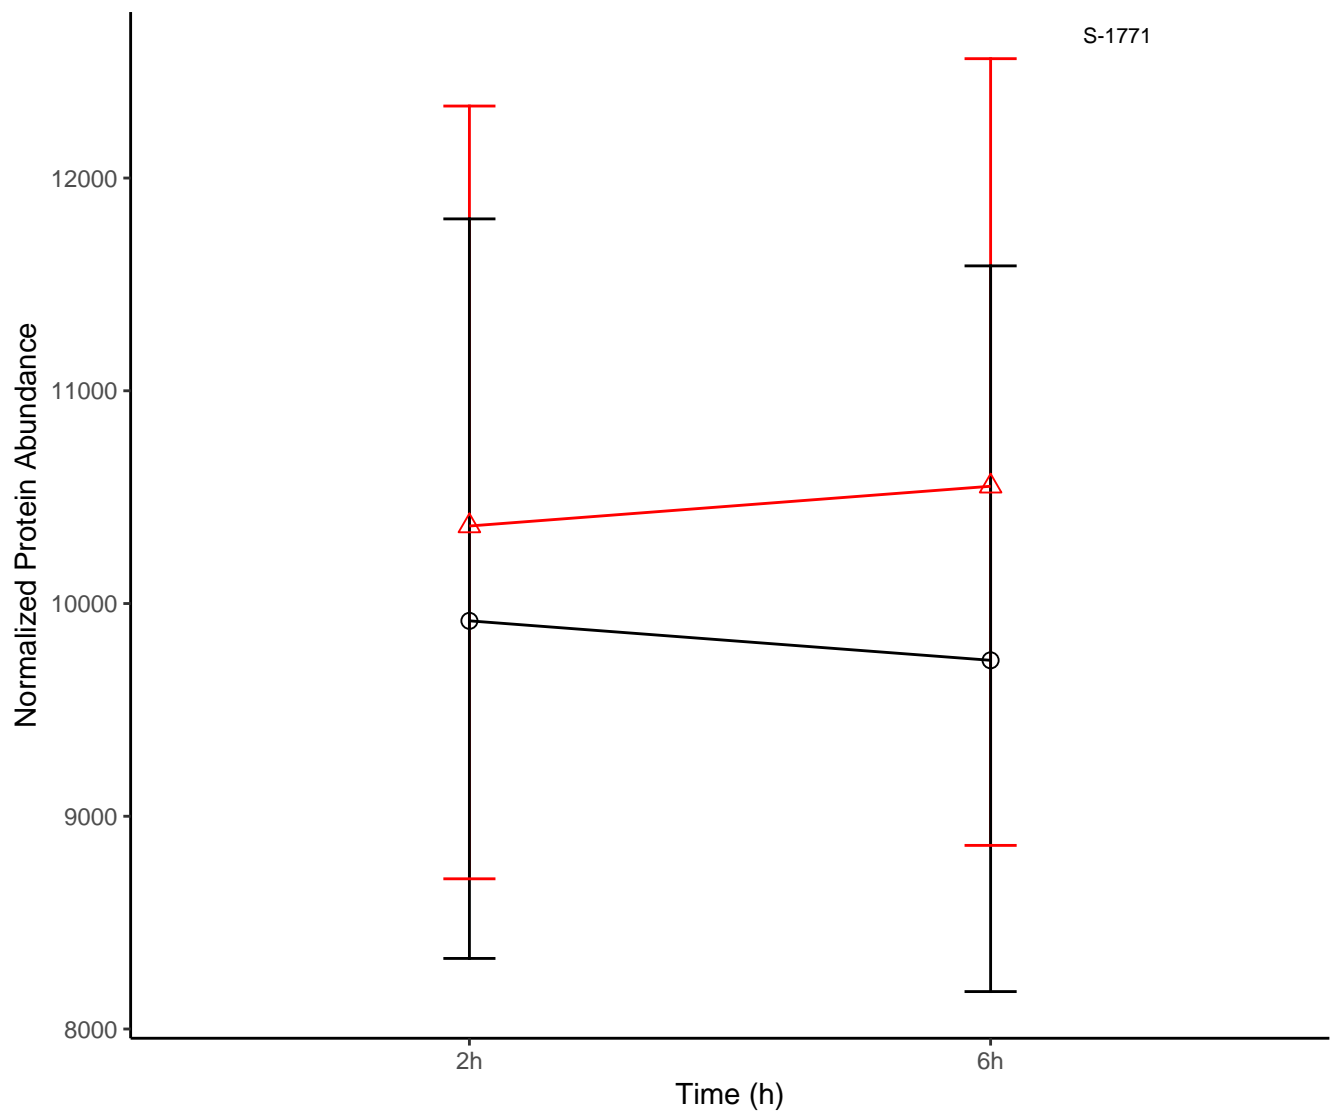

○ TSB-dex

△ TSB

# PSTS\_STAAM

S-1772

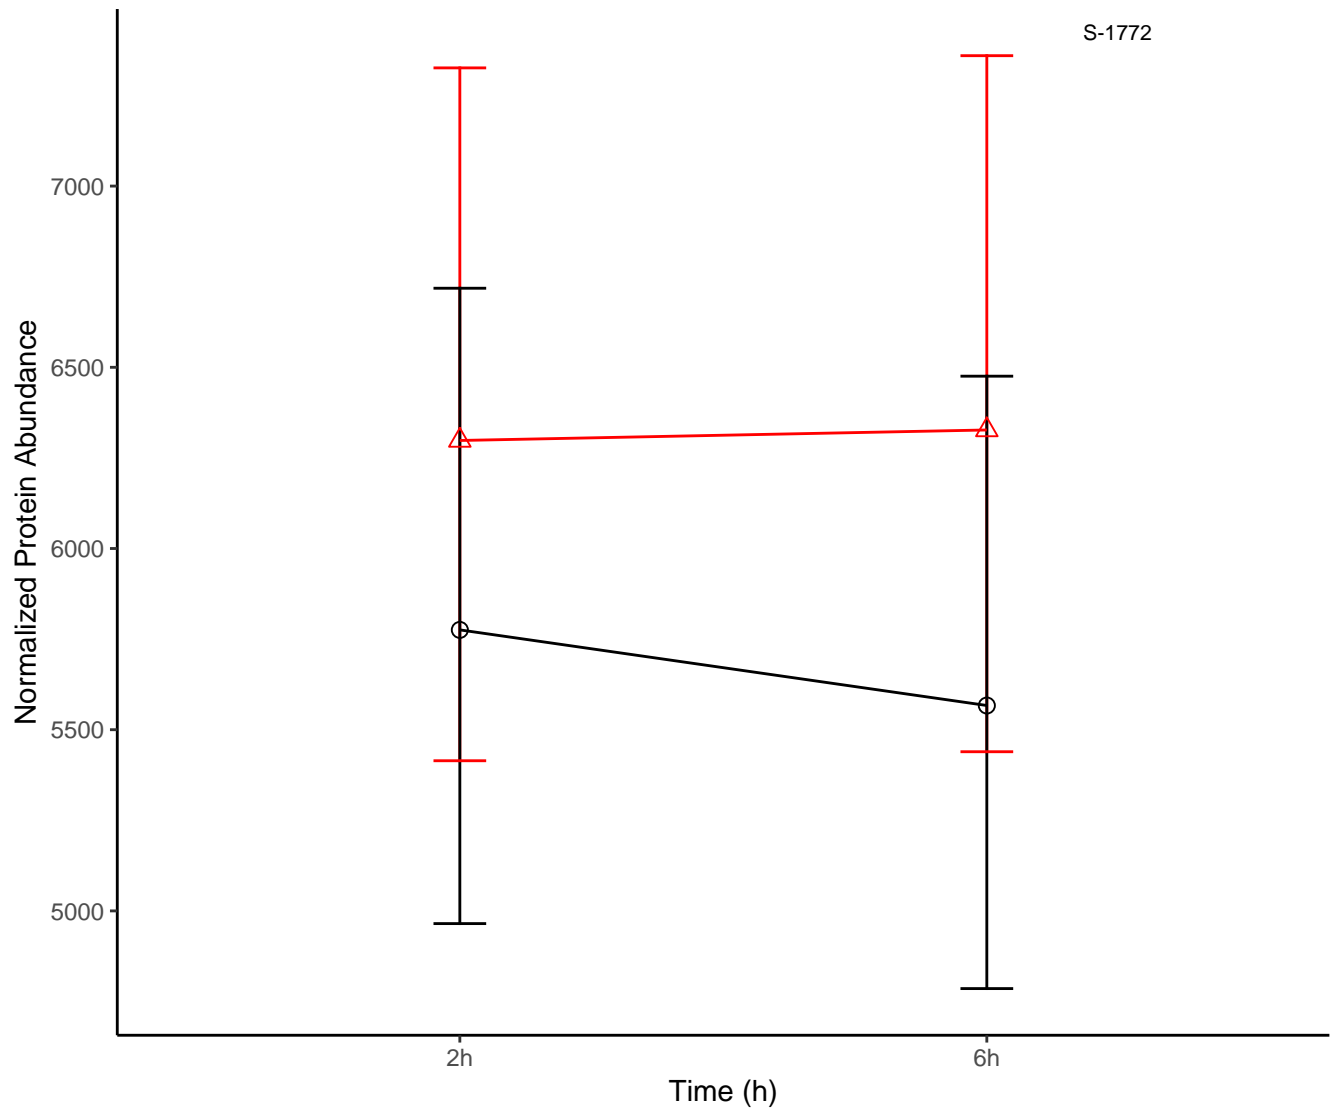

○ TSB-dex

△ TSB

# PT1\_STAAM

S-1773

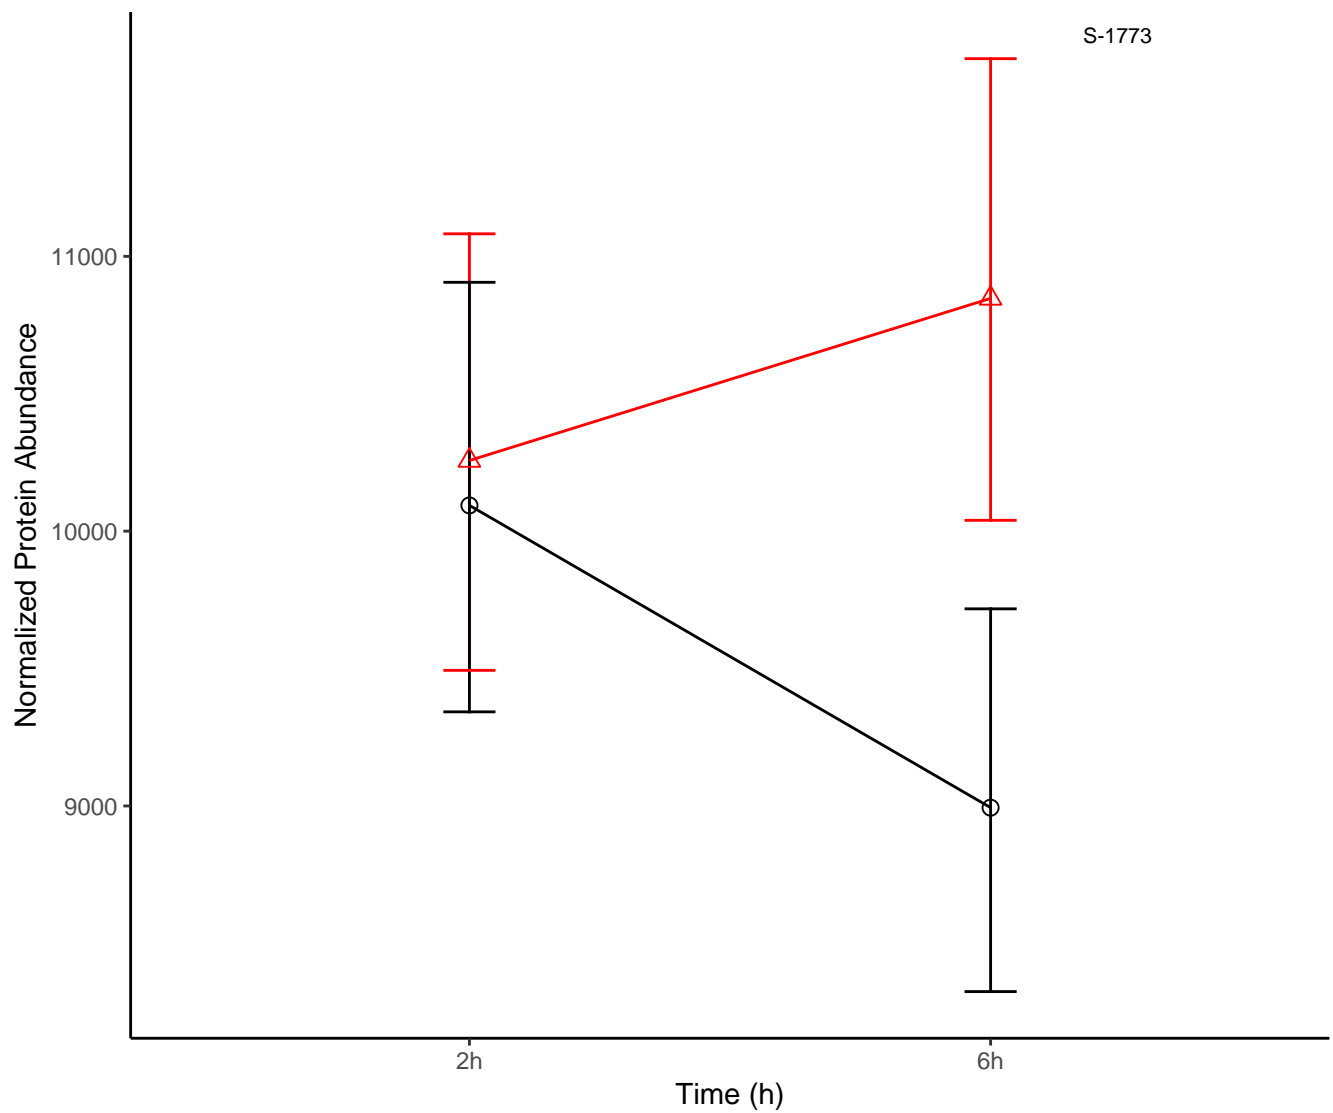

○ TSB-dex

△ TSB

# PTAS\_STAAM

S-1774

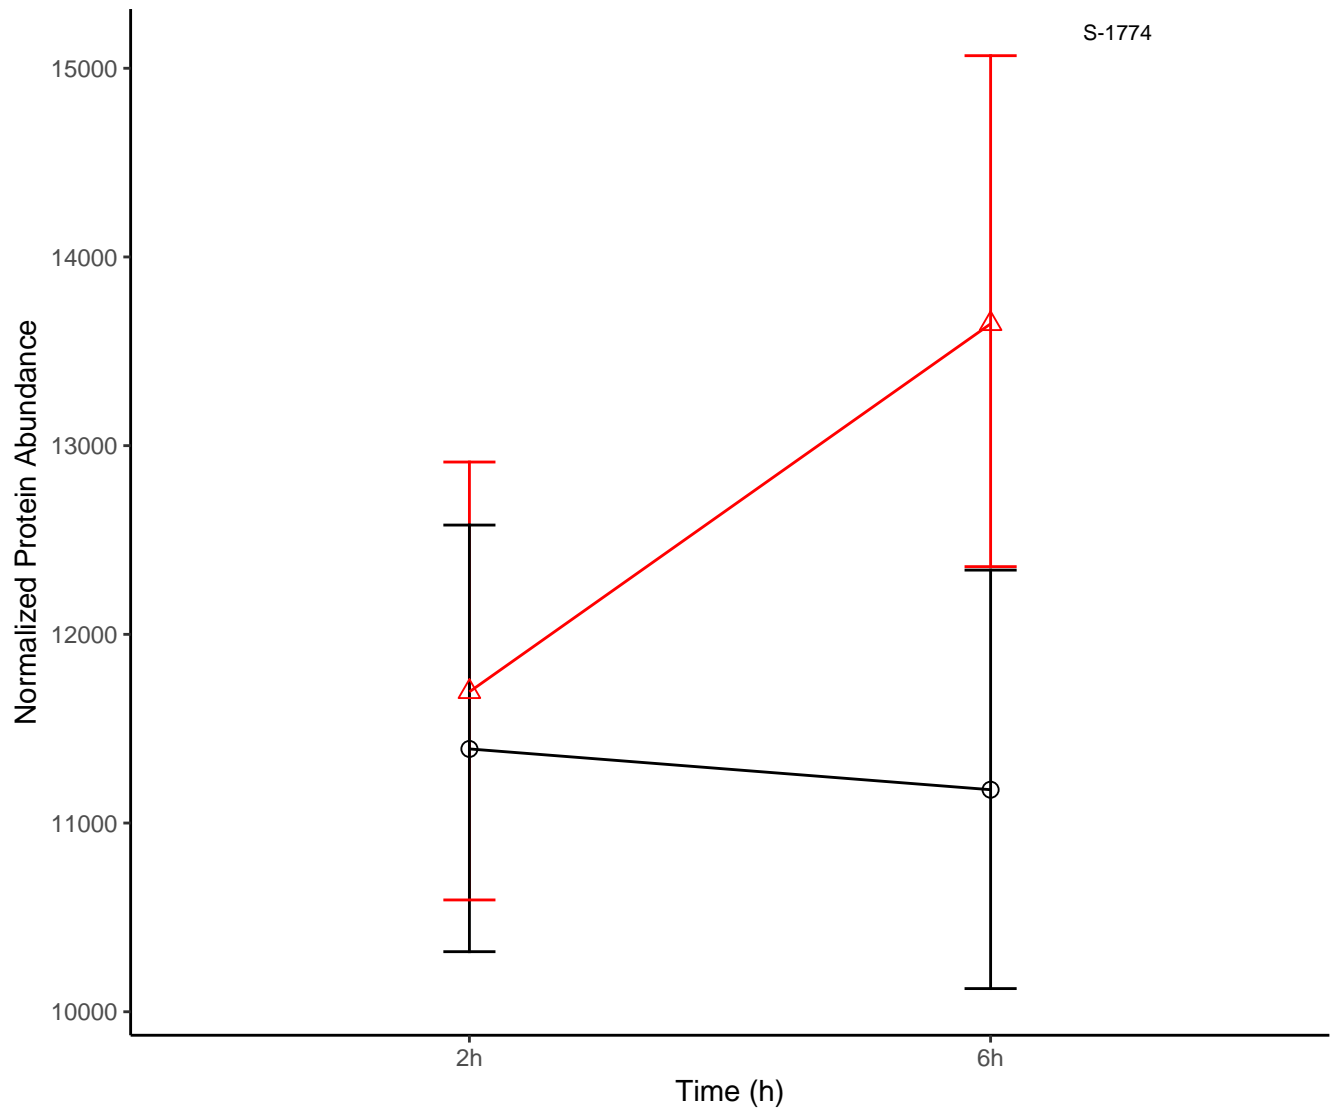

○ TSB-dex

△ TSB

# PTG3C\_STAAM

S-1775

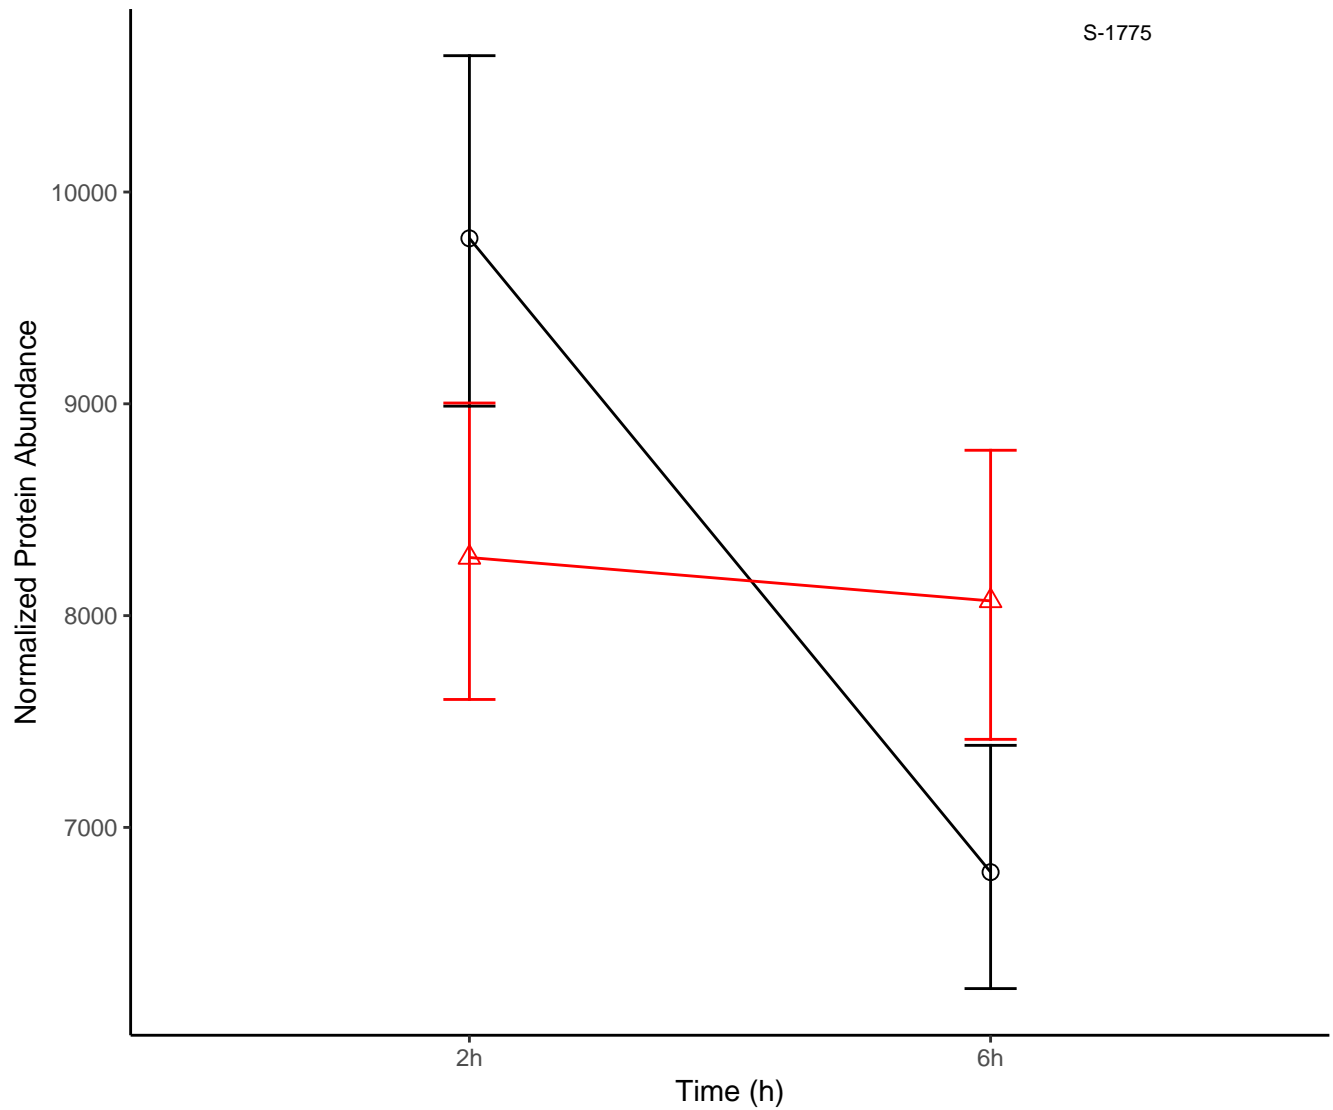

○ TSB-dex

△ TSB

# PTGA\_STAAM

S-1776

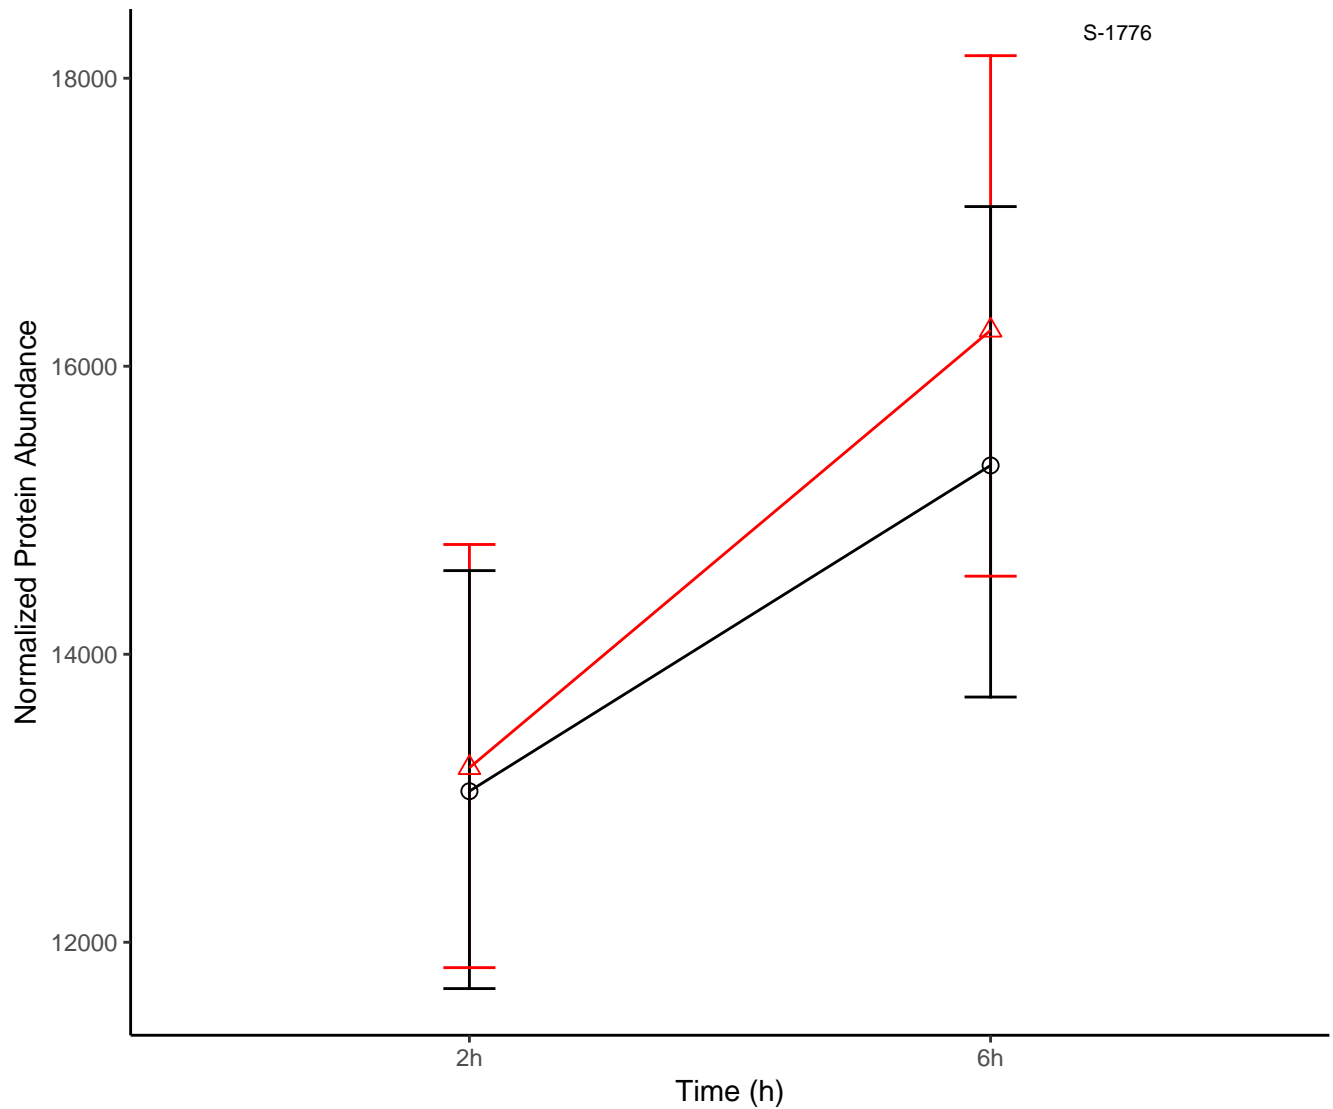

○ TSB-dex

△ TSB



# PTH\_STAAM

S-1777

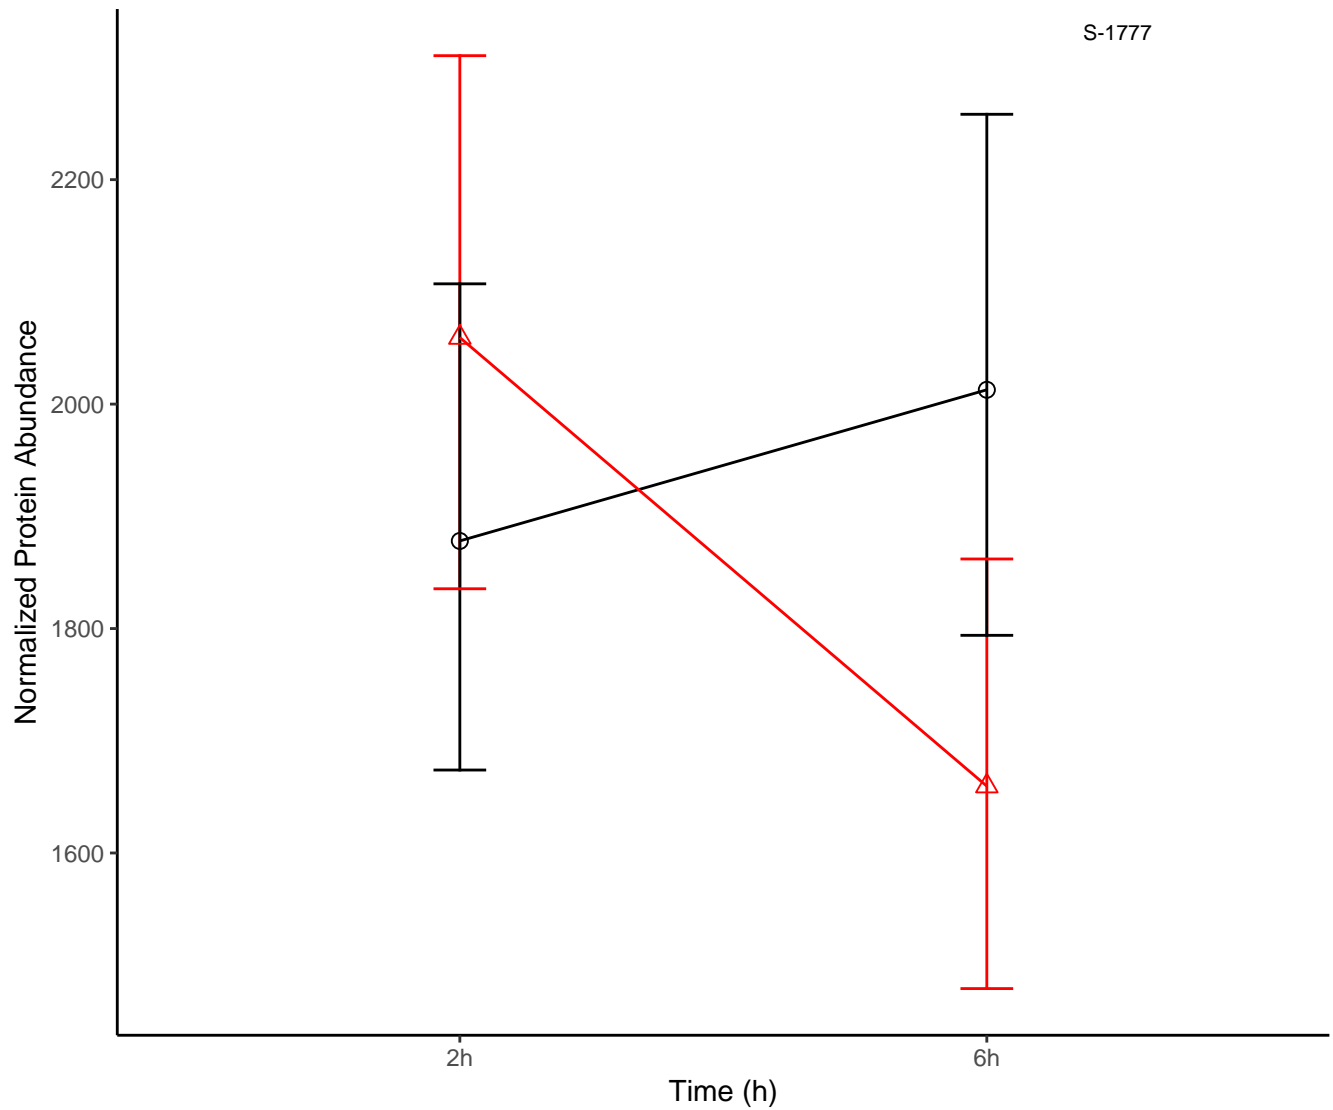

○ TSB-dex

△ TSB

# PTHP\_STAAM

S-1778

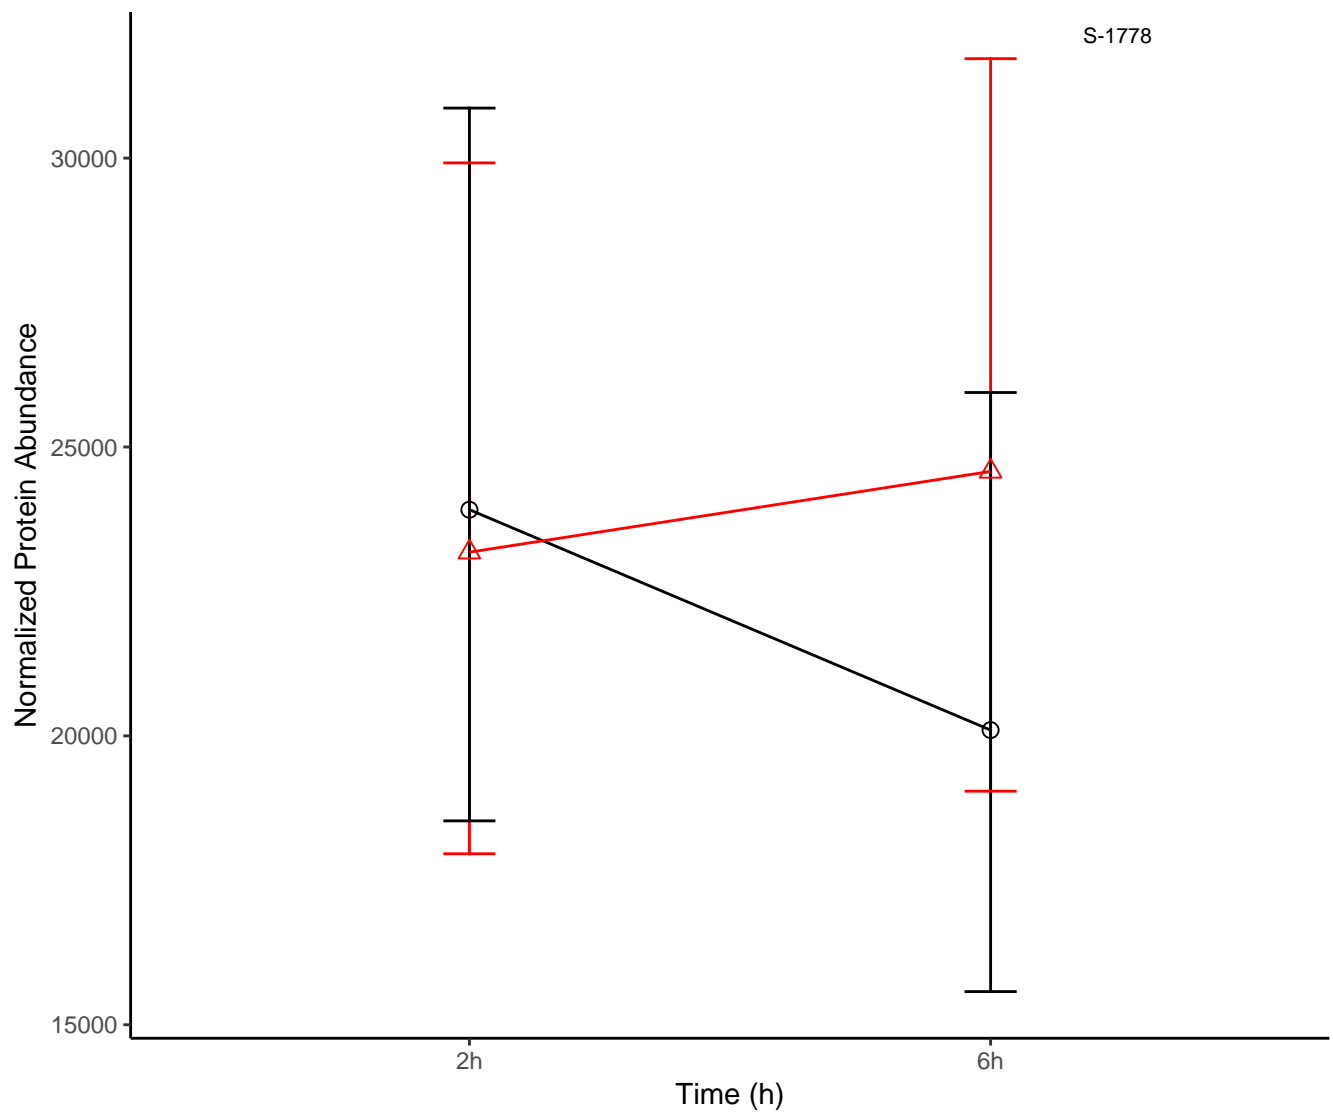

○ TSB-dex

△ TSB

# PTMA\_STAAM

S-1779

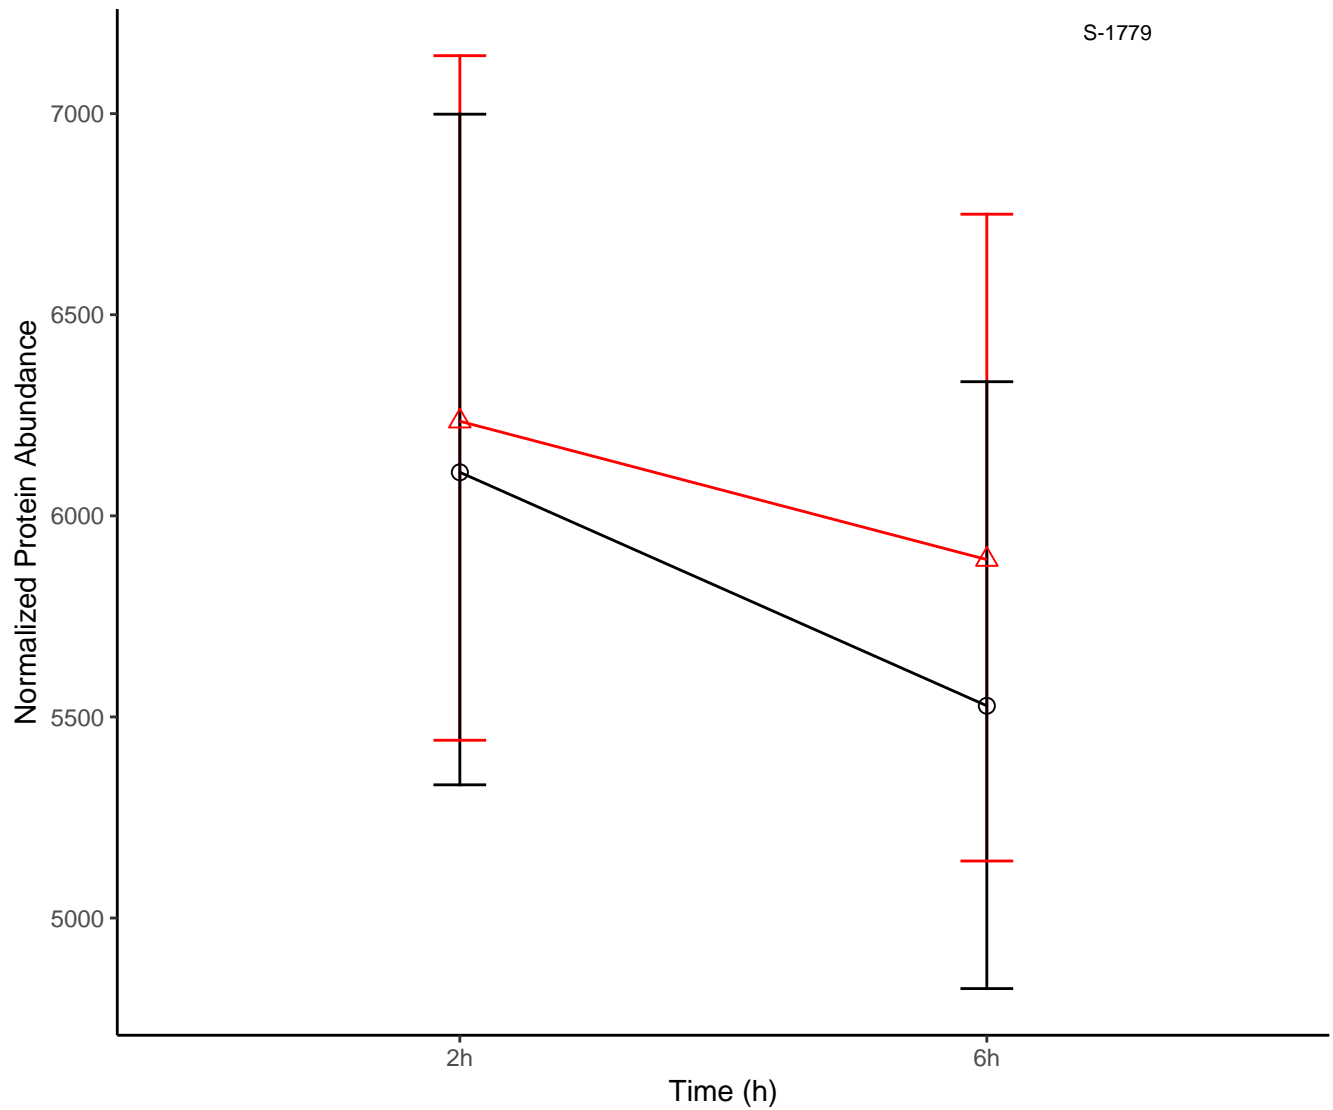

○ TSB-dex

△ TSB

# PUR1\_STAAM

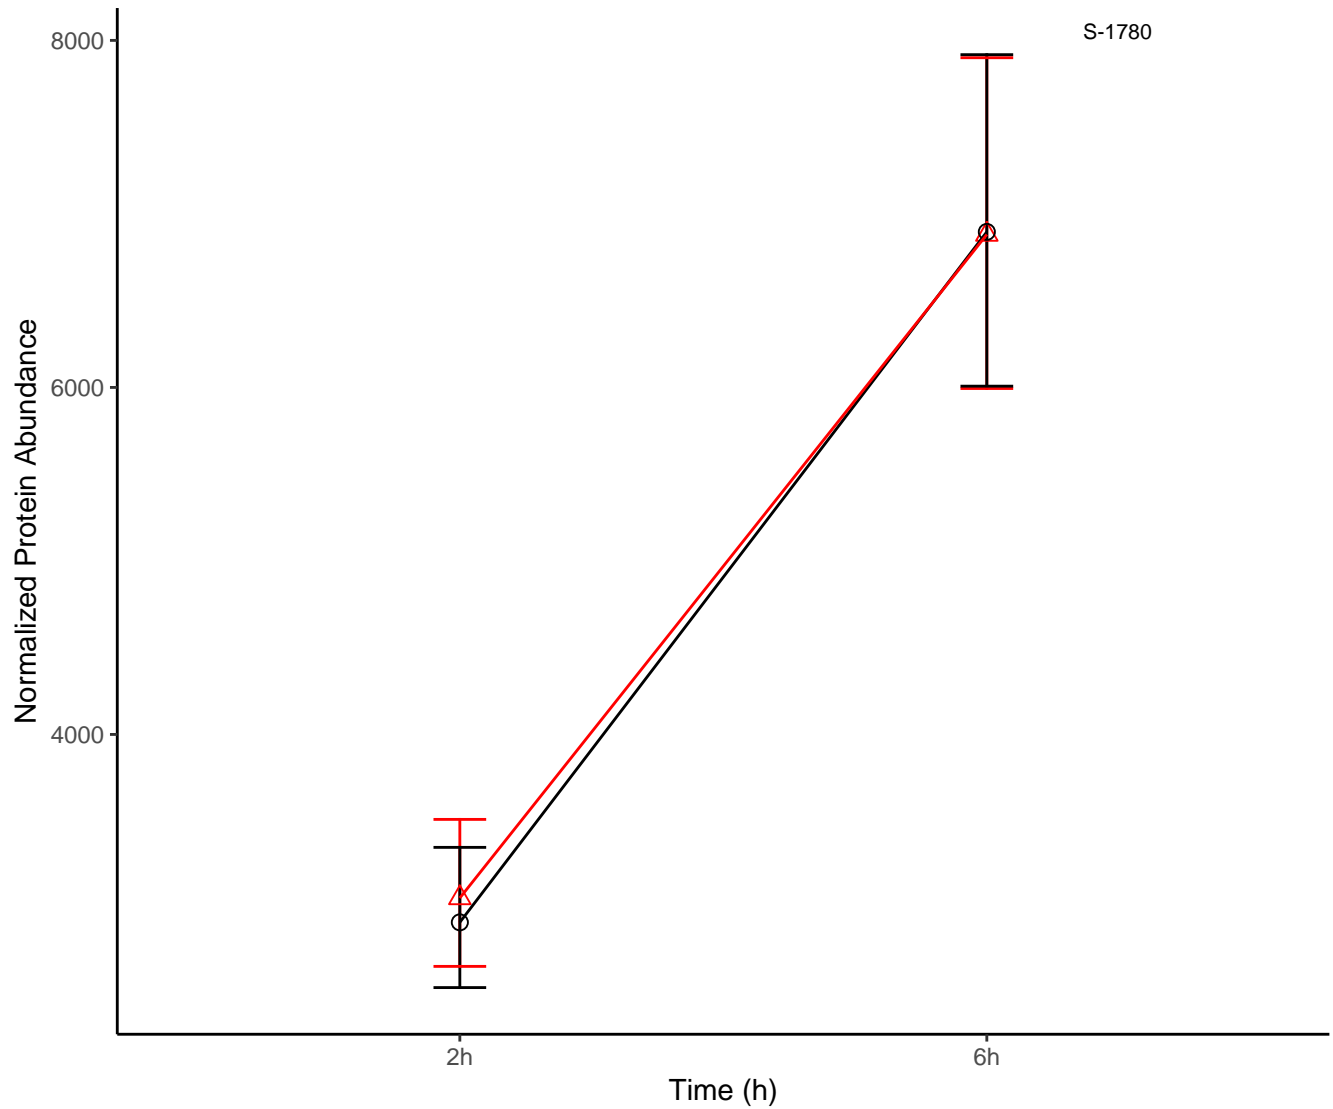

○ TSB-dex

△ TSB

# PUR2\_STAAM

S-1781

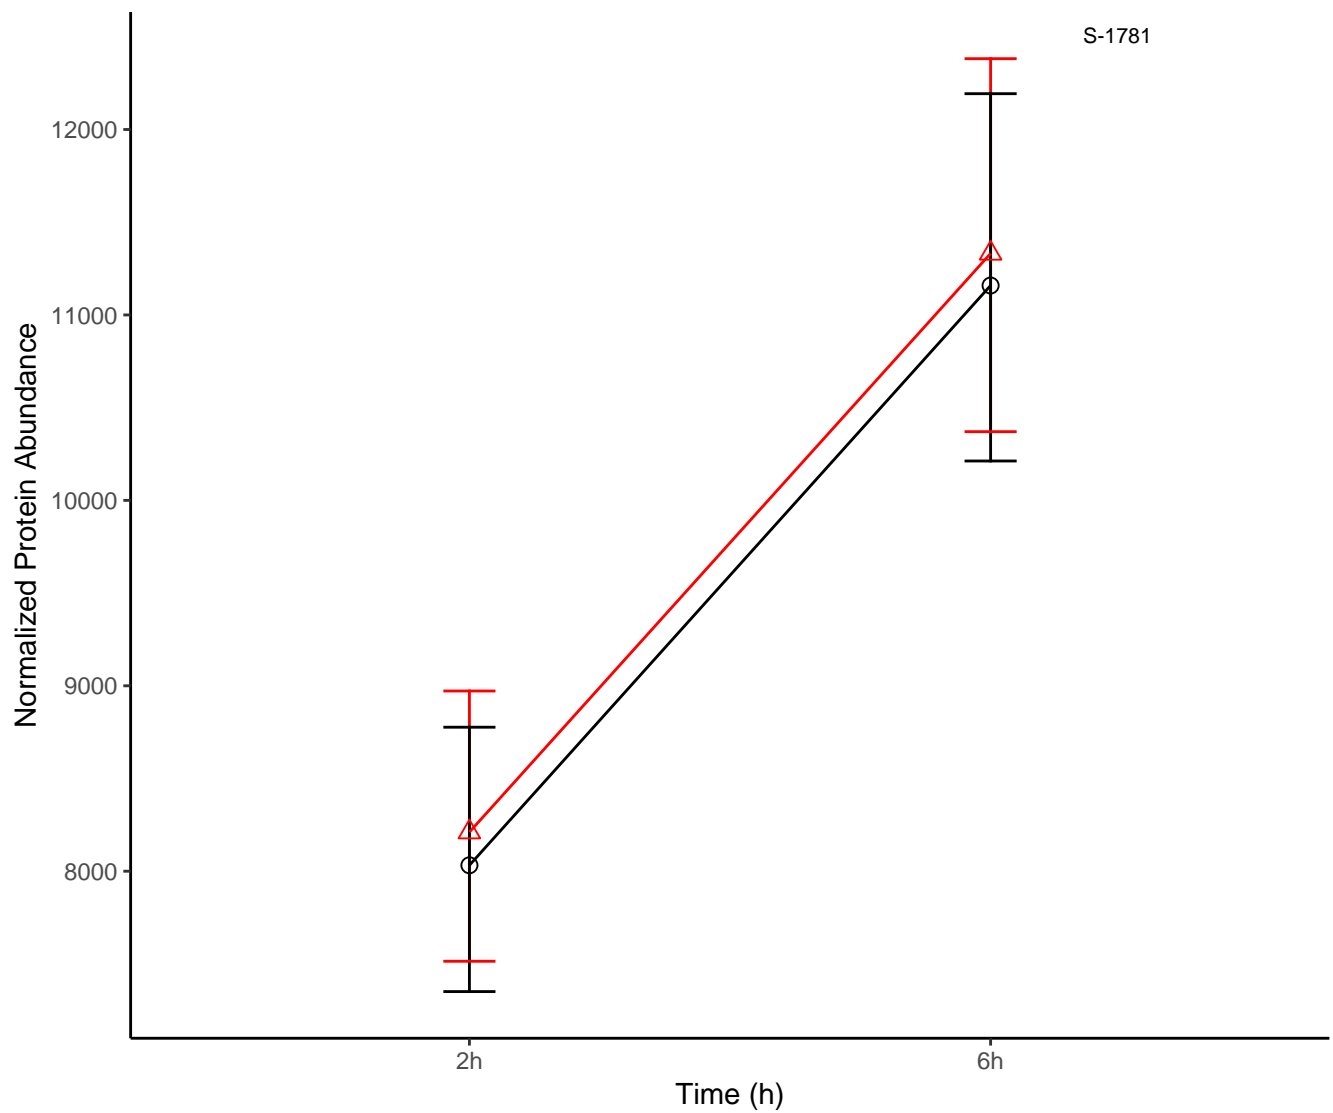

○ TSB-dex

△ TSB

# PUR3\_STAAM

S-1782

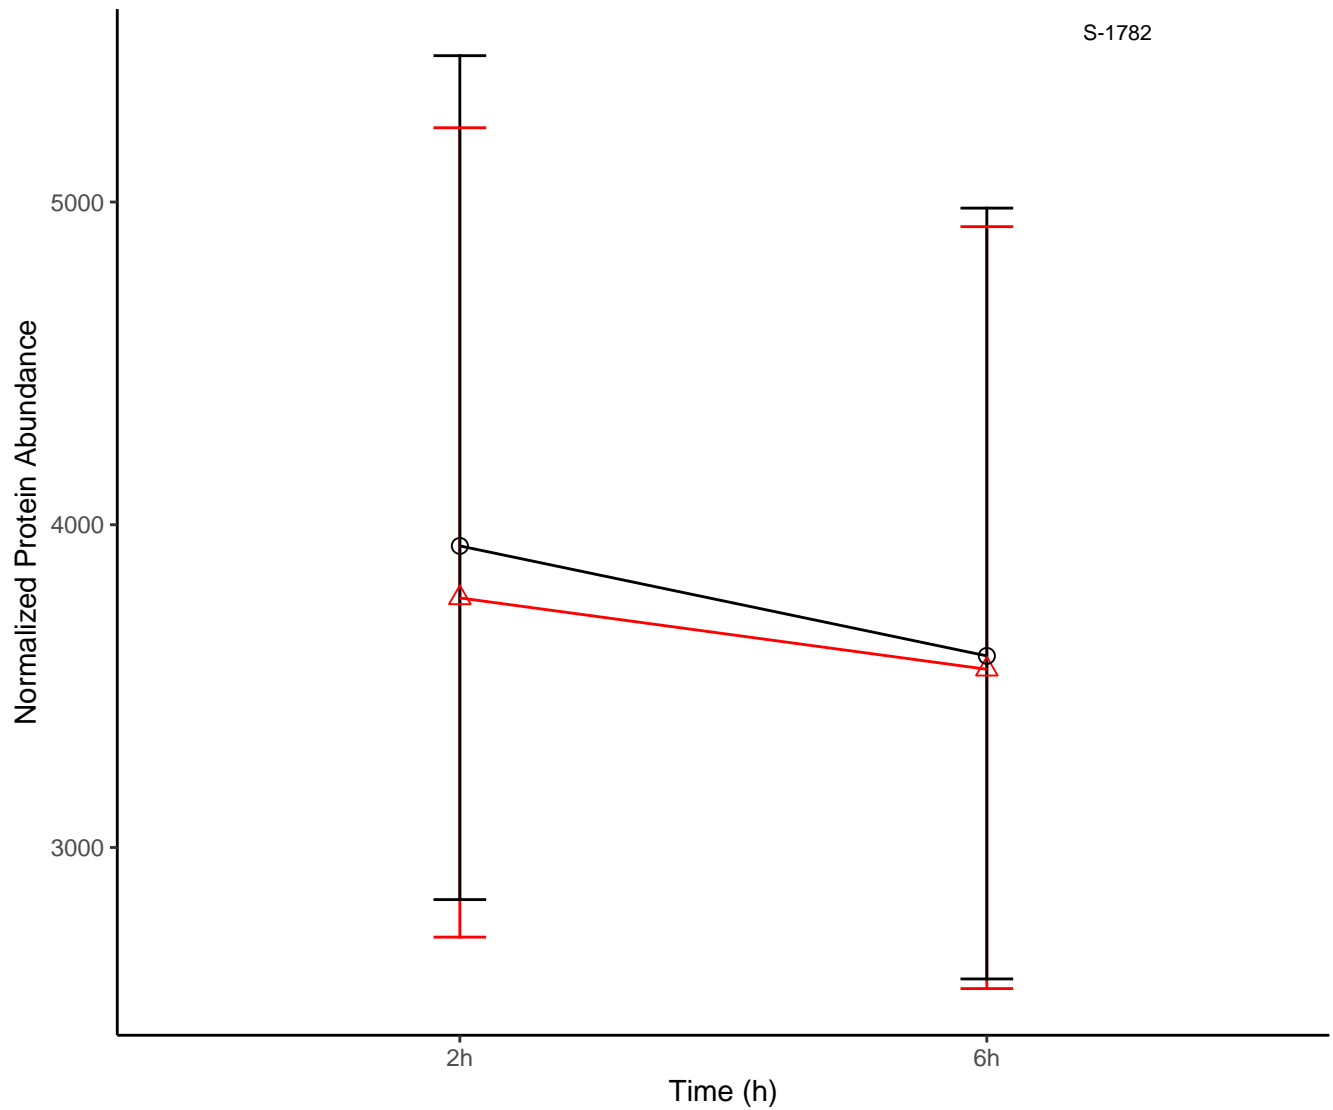

○ TSB-dex

△ TSB

# PUR5\_STAAM

S-1783

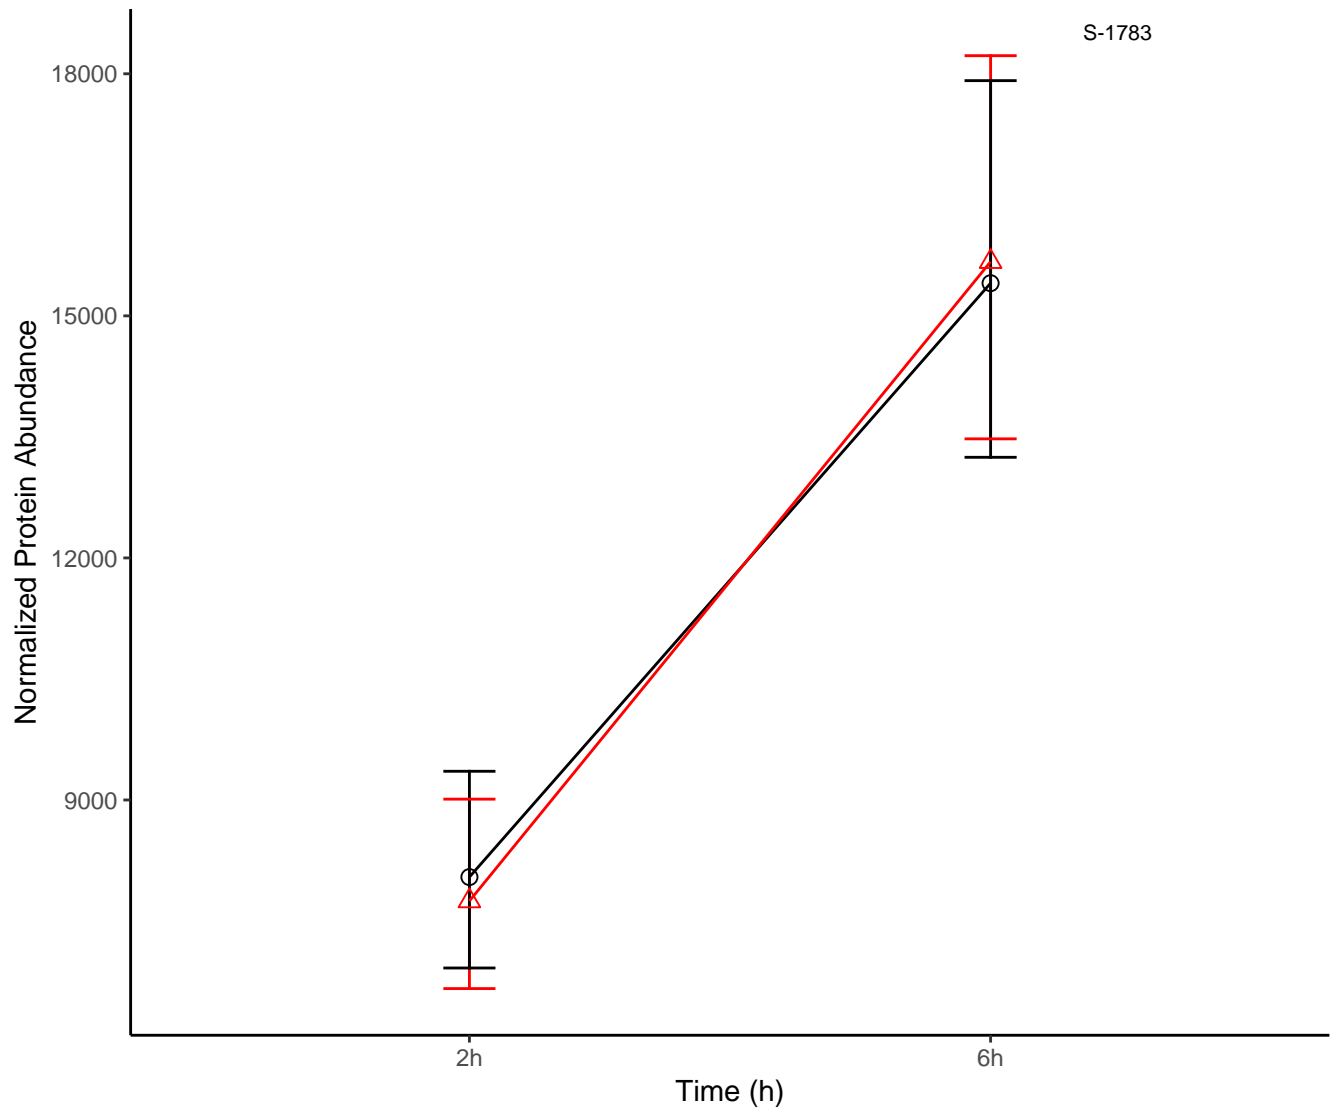

○ TSB-dex

△ TSB

# PUR7\_STAAM

S-1784

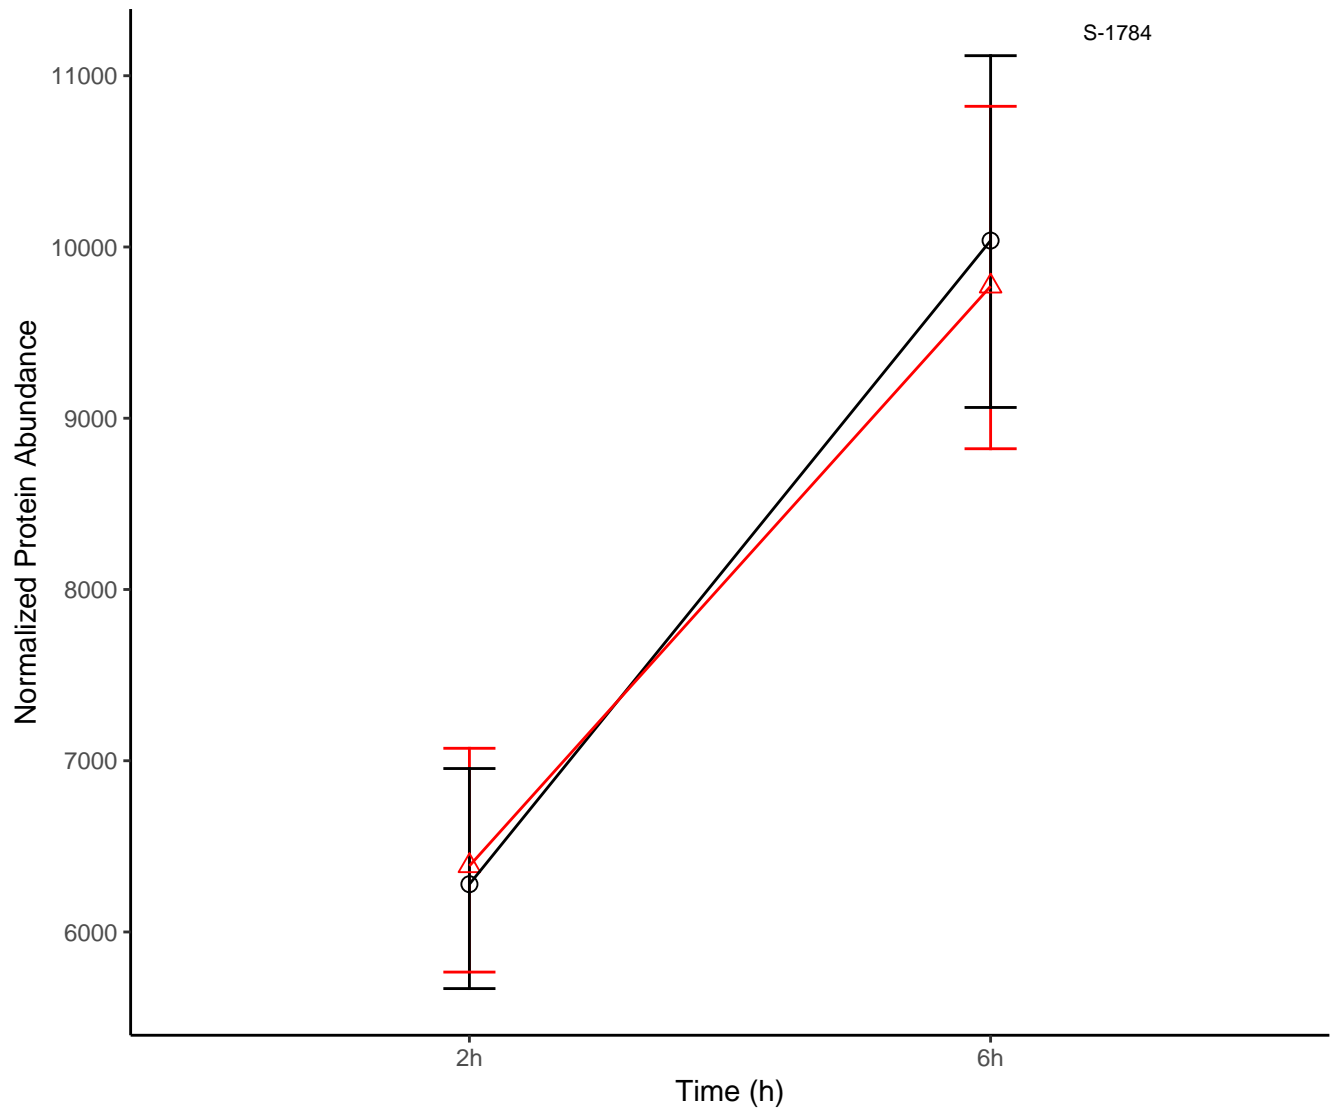

○ TSB-dex

△ TSB



# PUR8\_STAAM

S-1785

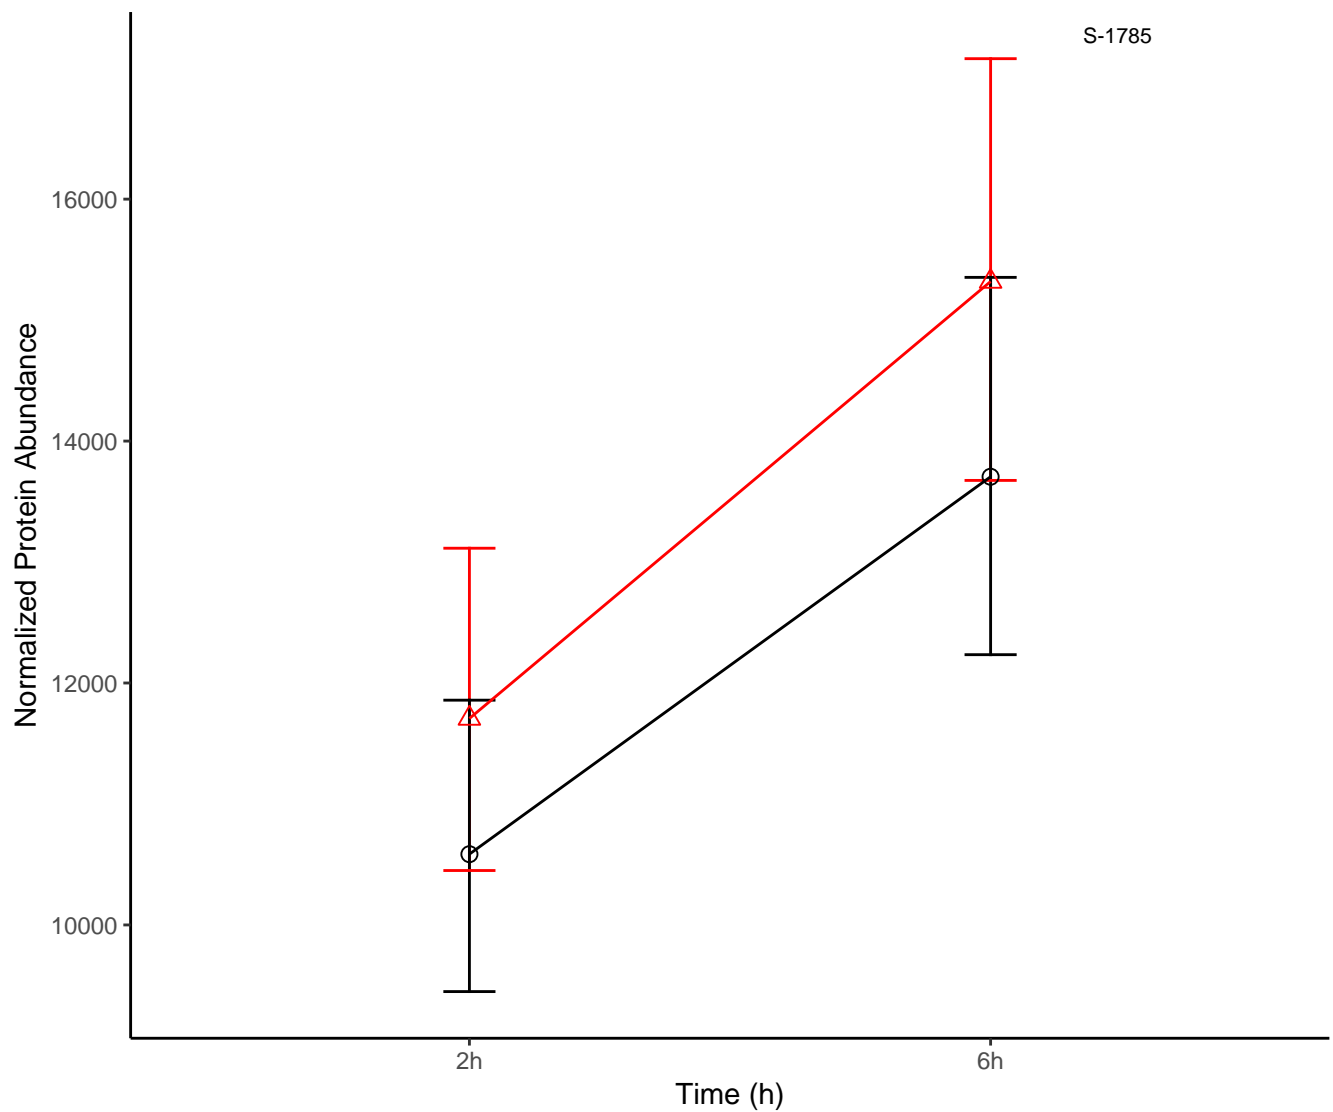

○ TSB-dex

△ TSB

# PUR9\_STAAM

S-1786

Normalized Protein Abundance

15000  
12000  
9000

2h

6h

Time (h)

○ TSB-dex

△ TSB

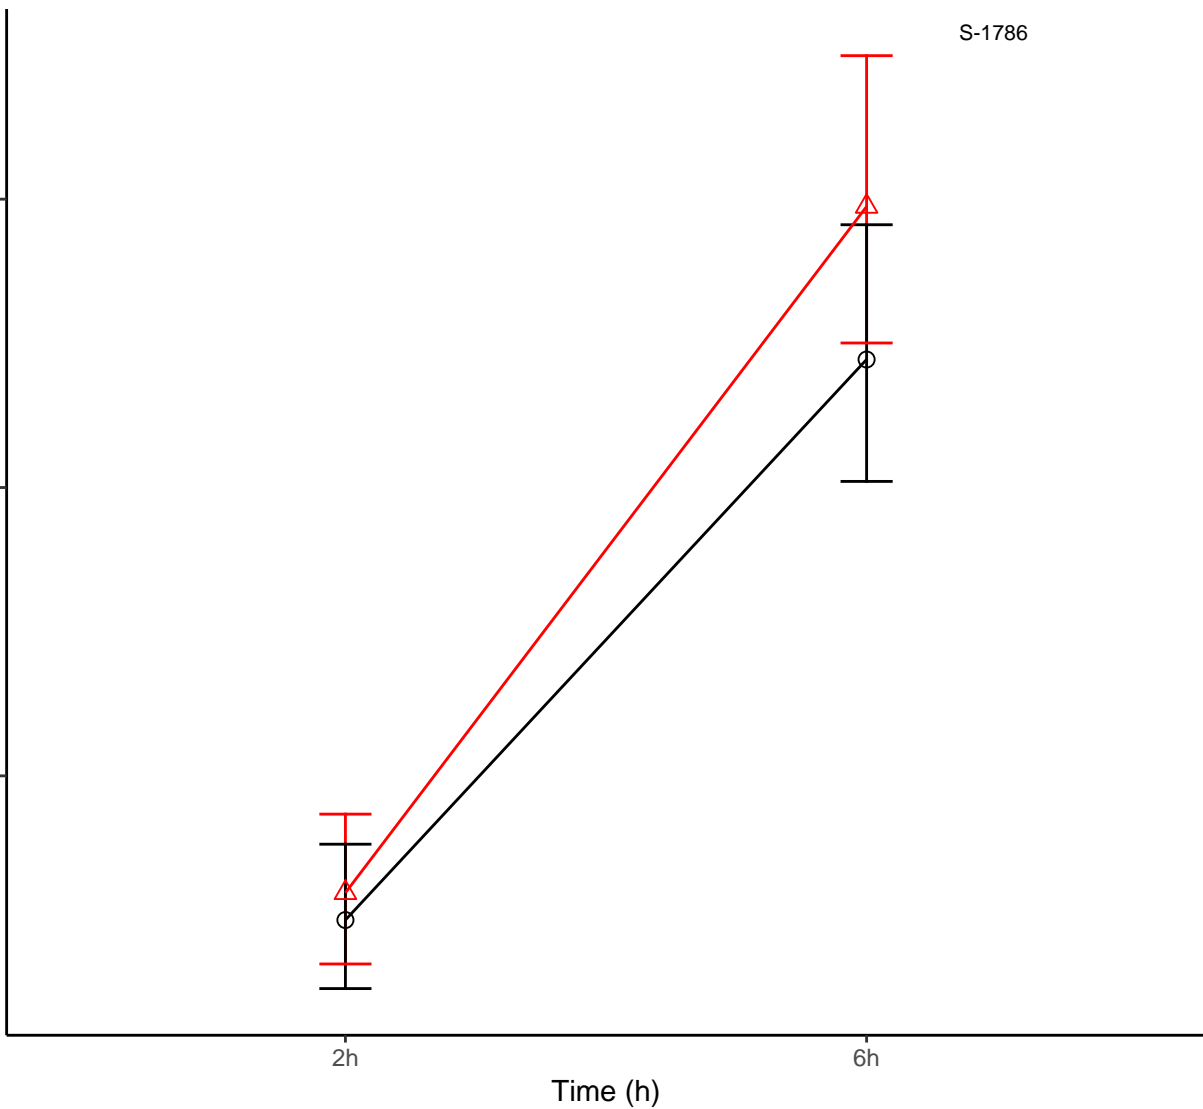

# PURA\_STAAM

S-1787

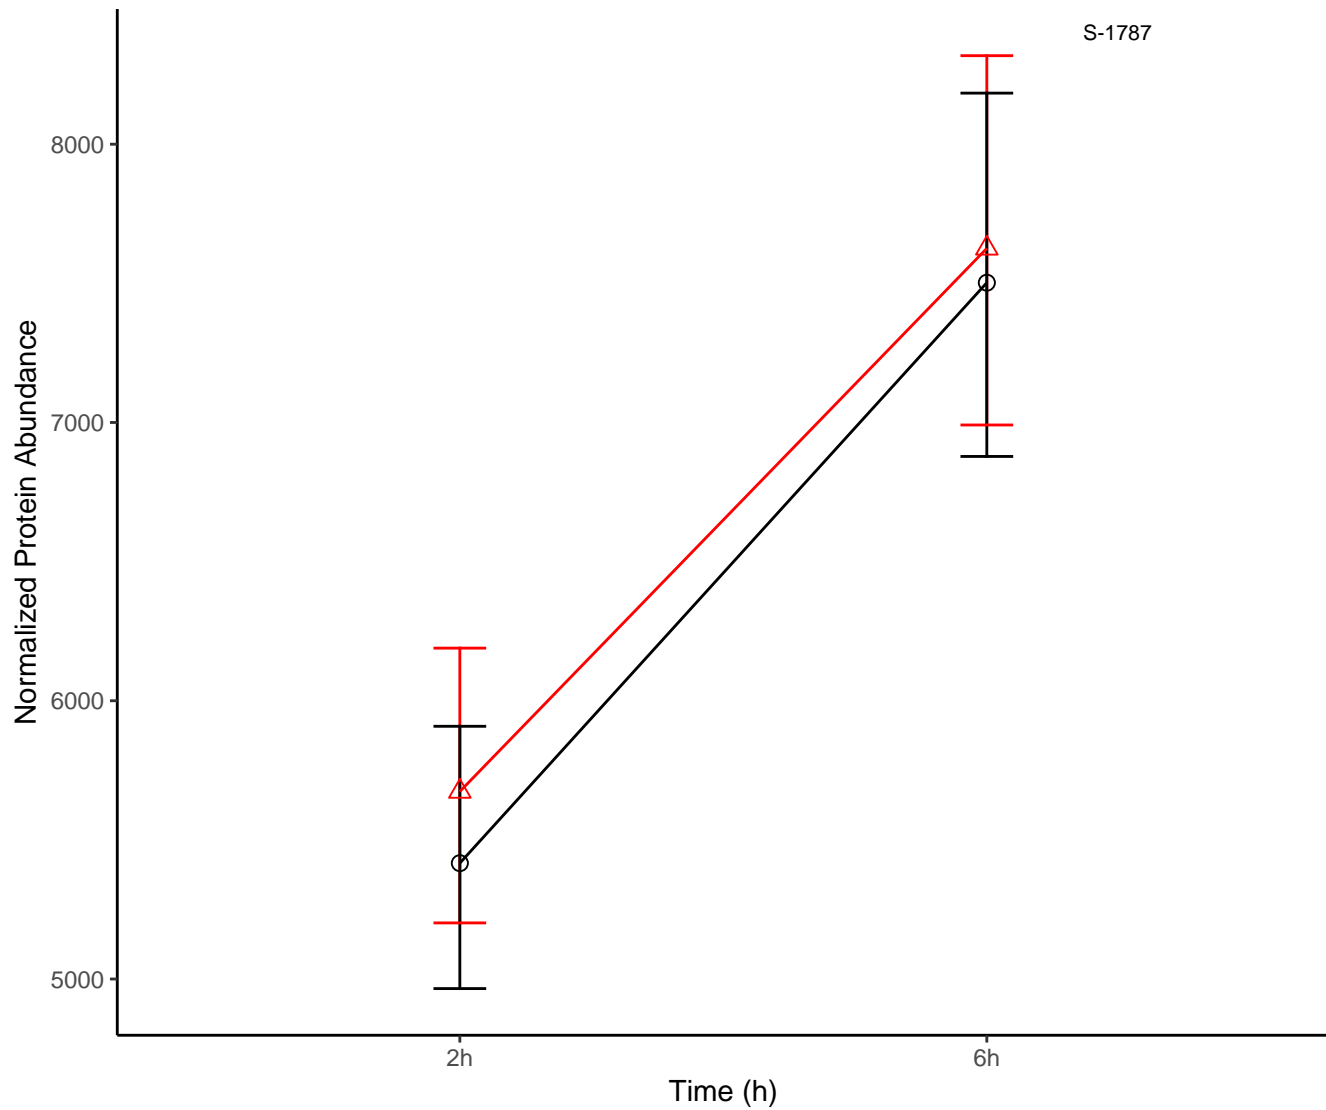

○ TSB-dex

△ TSB

# PURK\_STAAM

S-1788

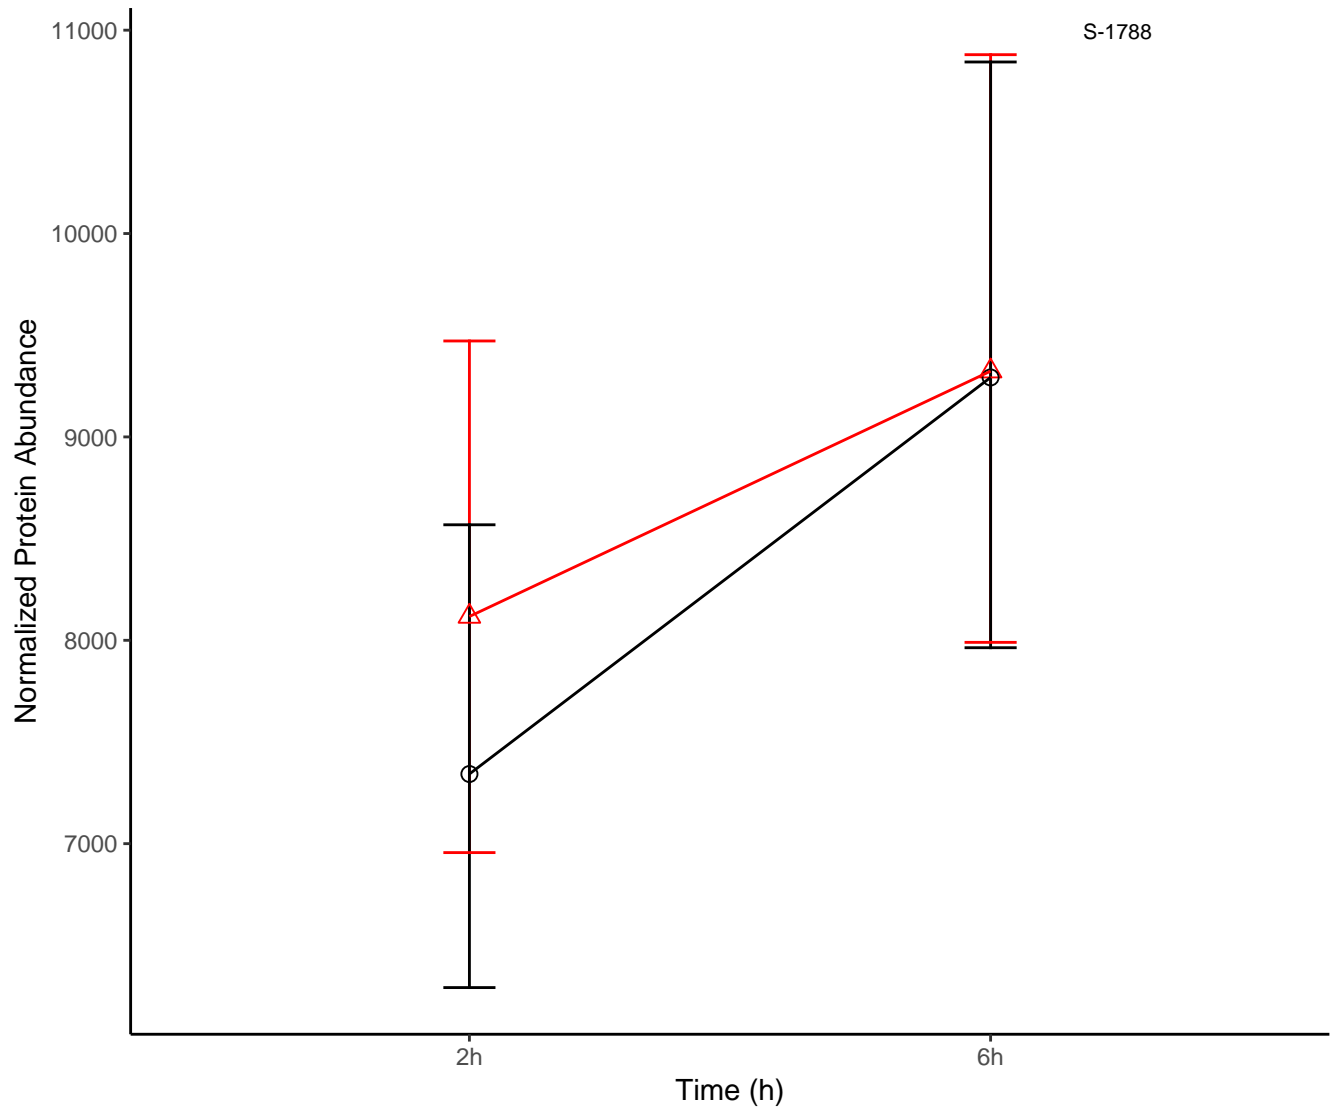

○ TSB-dex

△ TSB

# PURL\_STAAM

S-1789

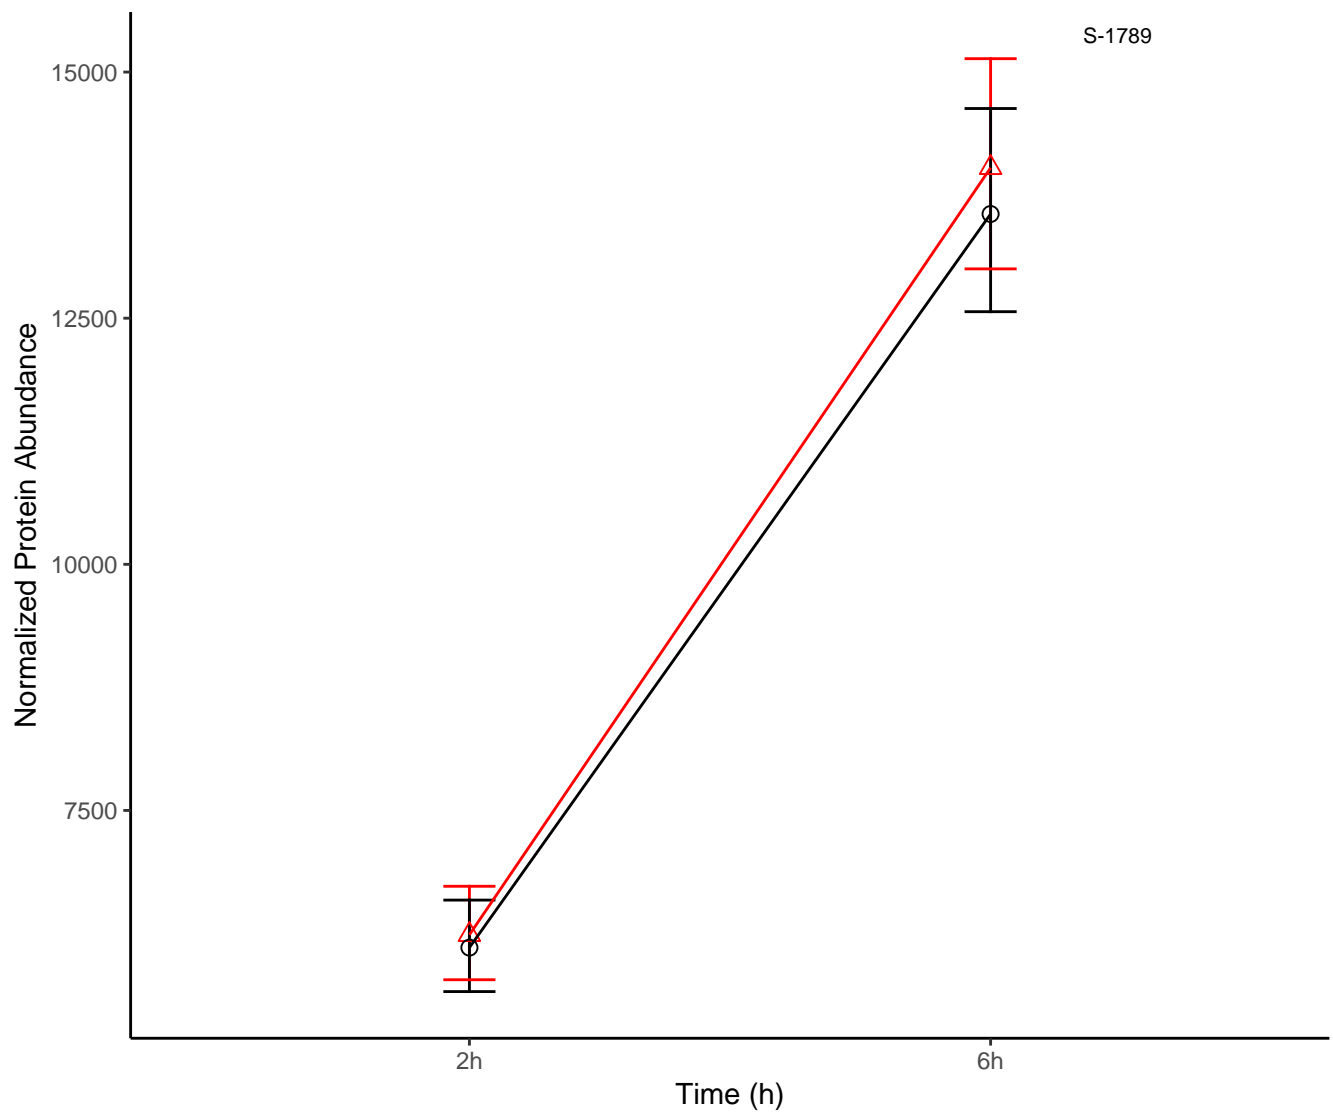

○ TSB-dex

△ TSB

# PURQ\_STAAM

S-1790

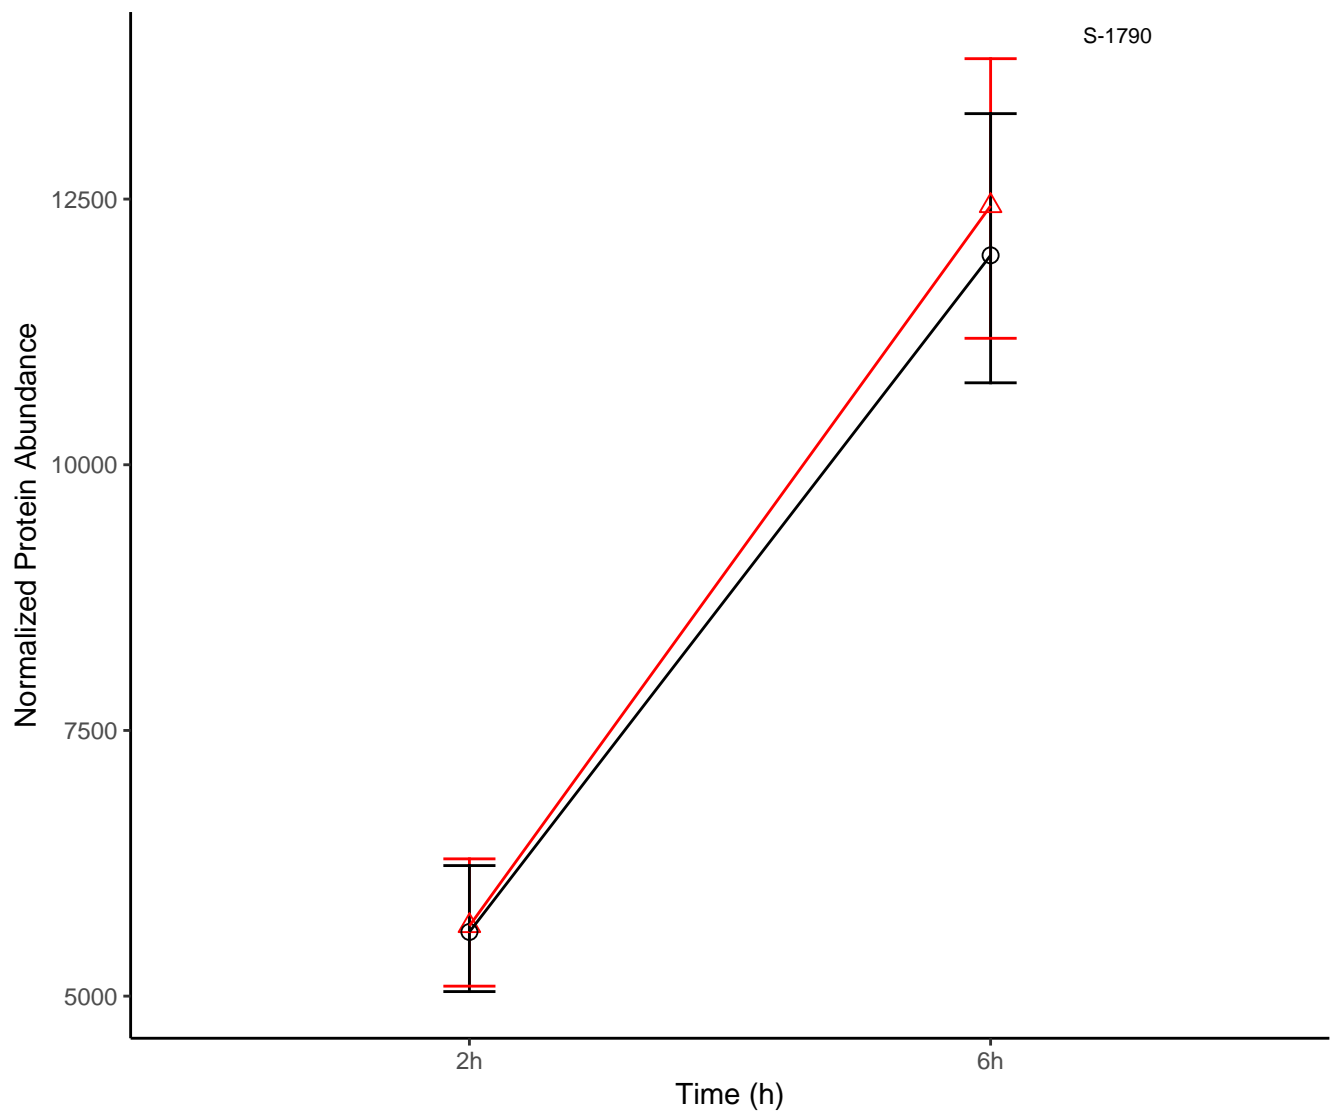

○ TSB-dex

△ TSB

# PYRB\_STAAM

S-1791

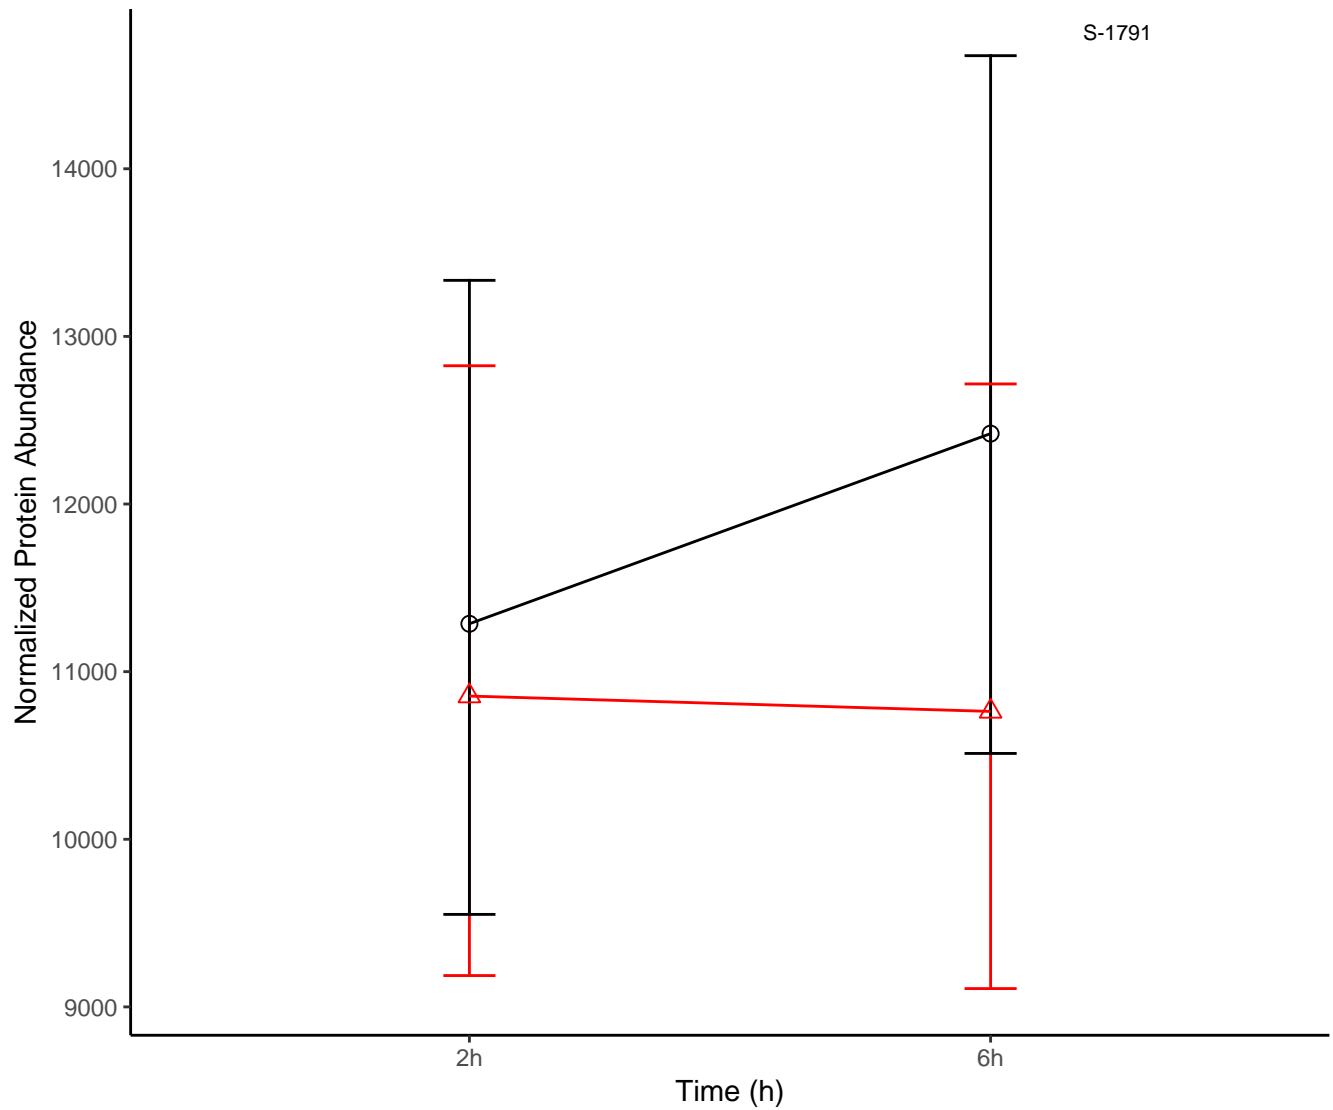

○ TSB-dex

△ TSB

# PYRC\_STAAM

S-1792

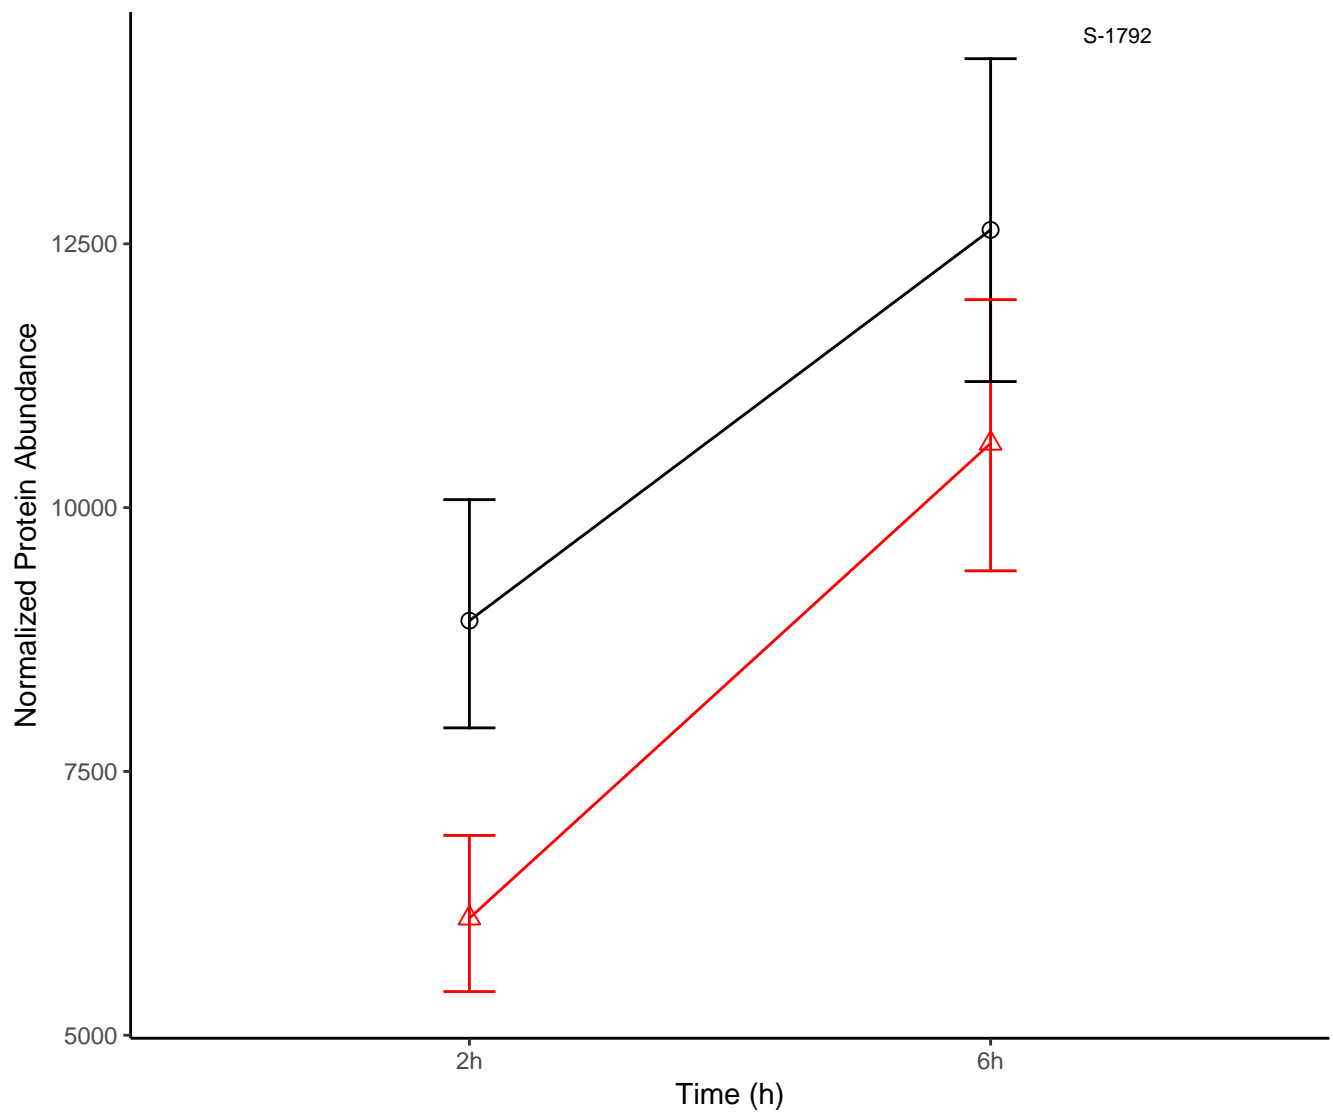

○ TSB-dex

△ TSB



# PYRE\_STAAM

S-1793

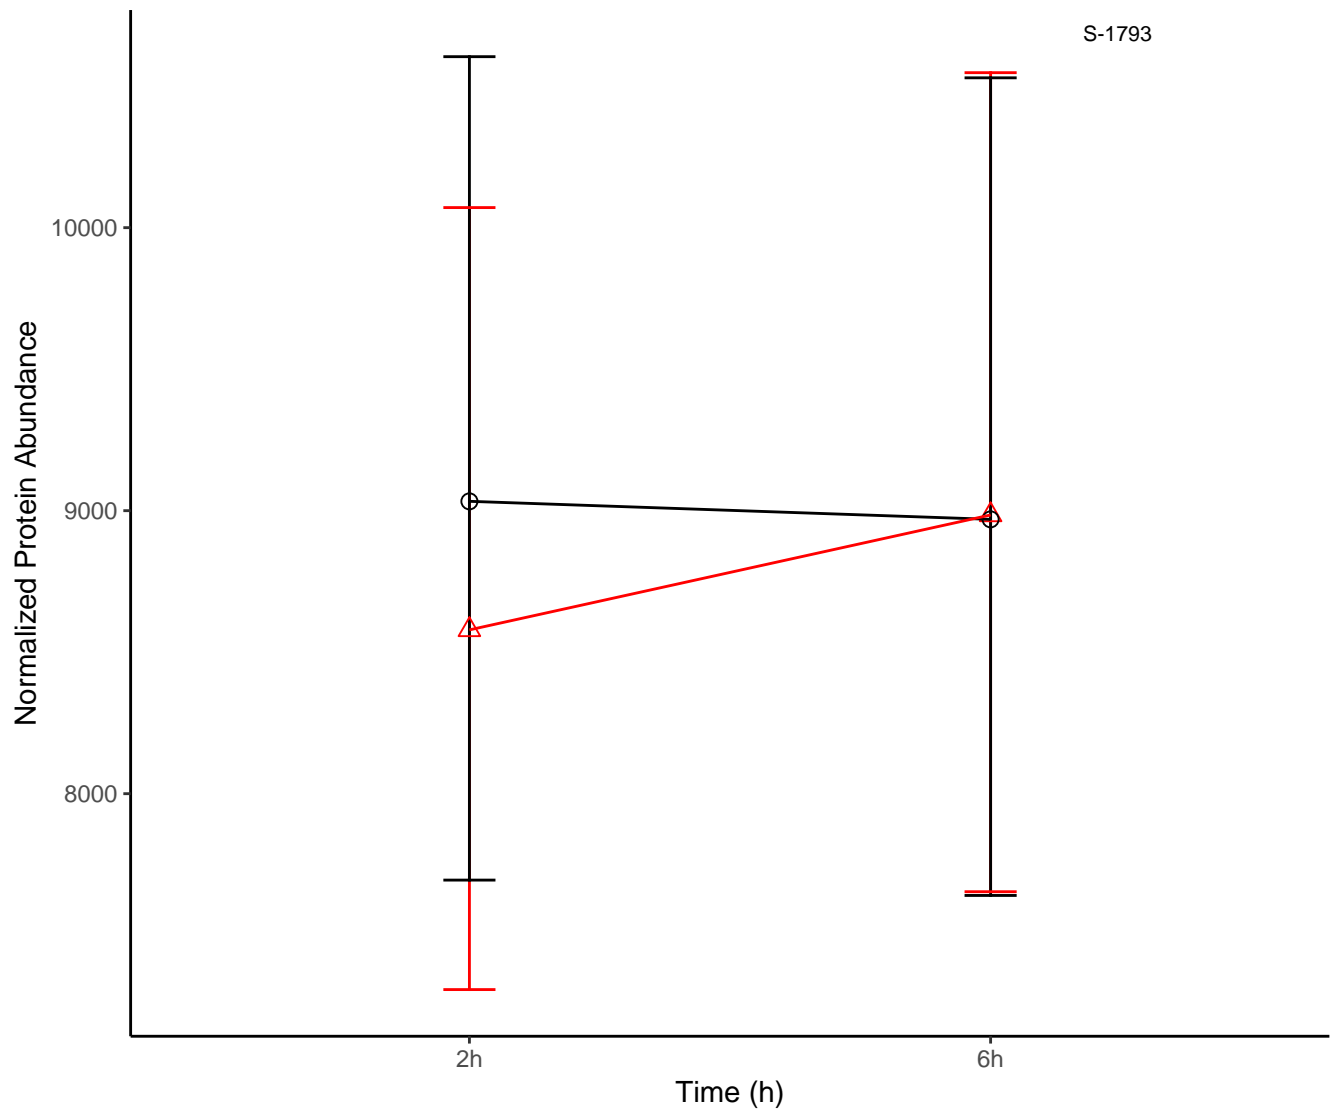

○ TSB-dex

△ TSB

# PYRF\_STAAM

S-1794

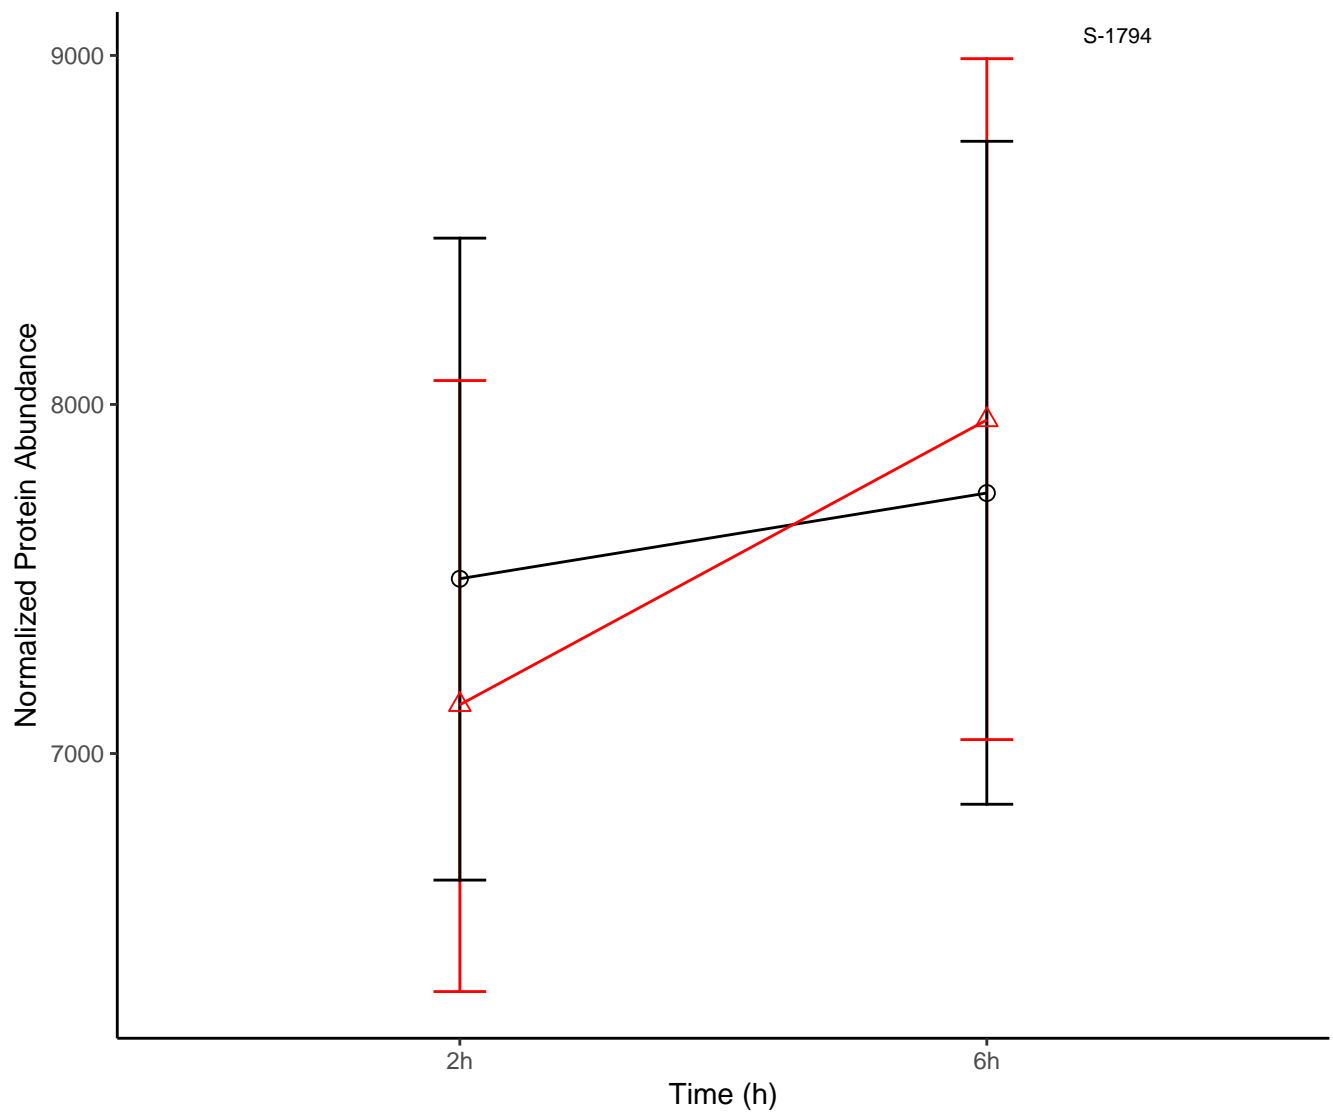

○ TSB-dex

△ TSB

# PYRG\_STAAM

S-1795

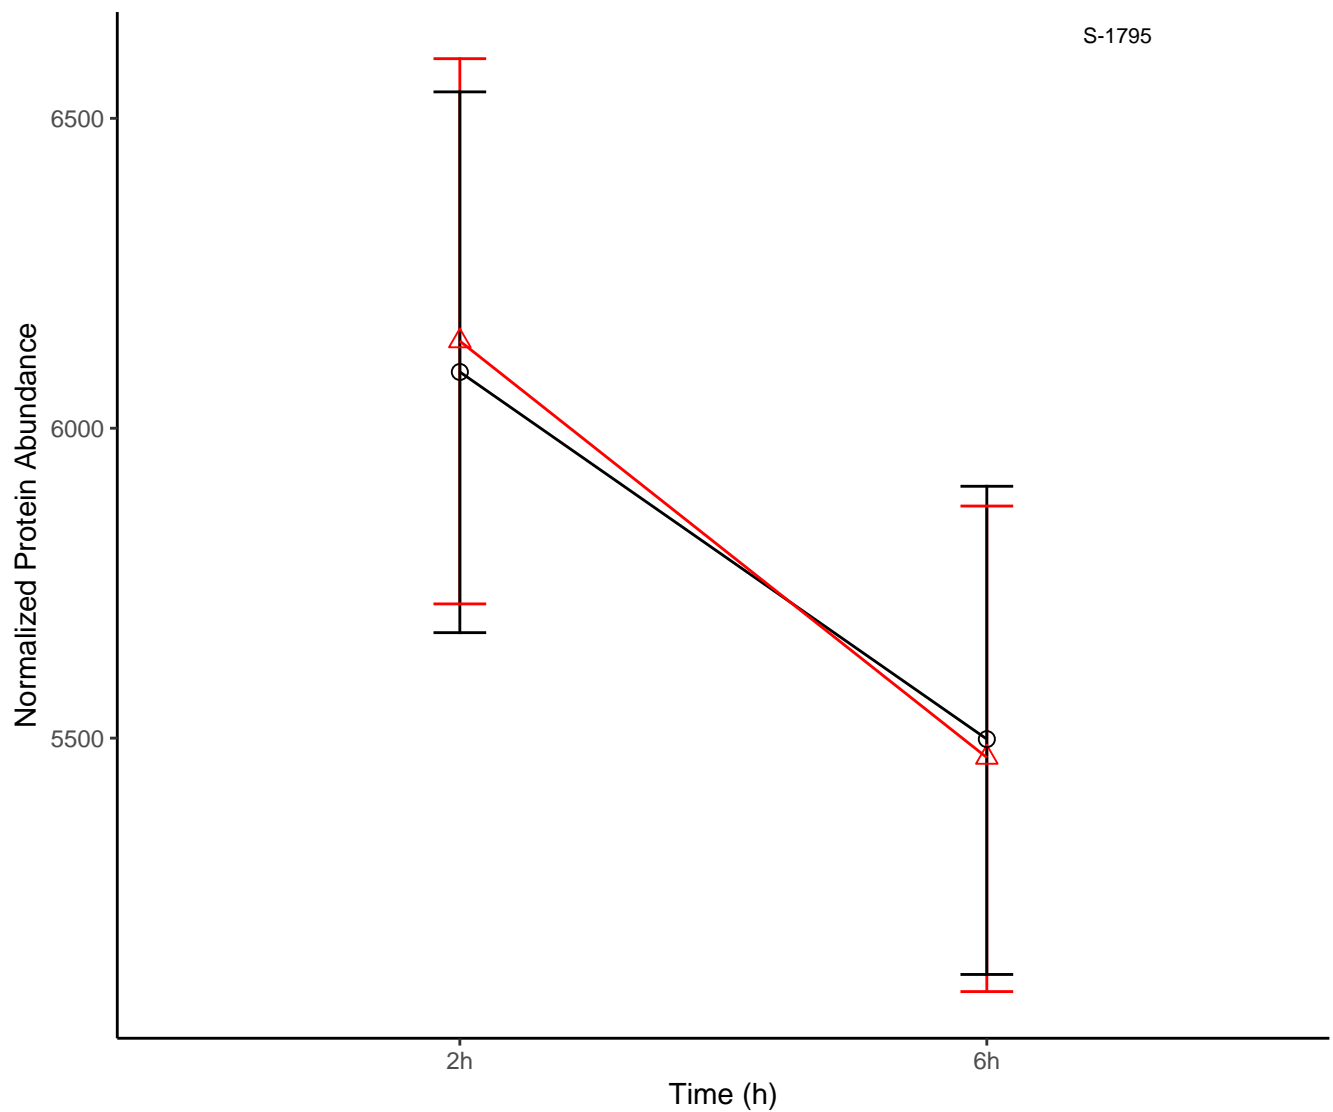

○ TSB-dex

△ TSB

# PYRH\_STAAM

S-1796

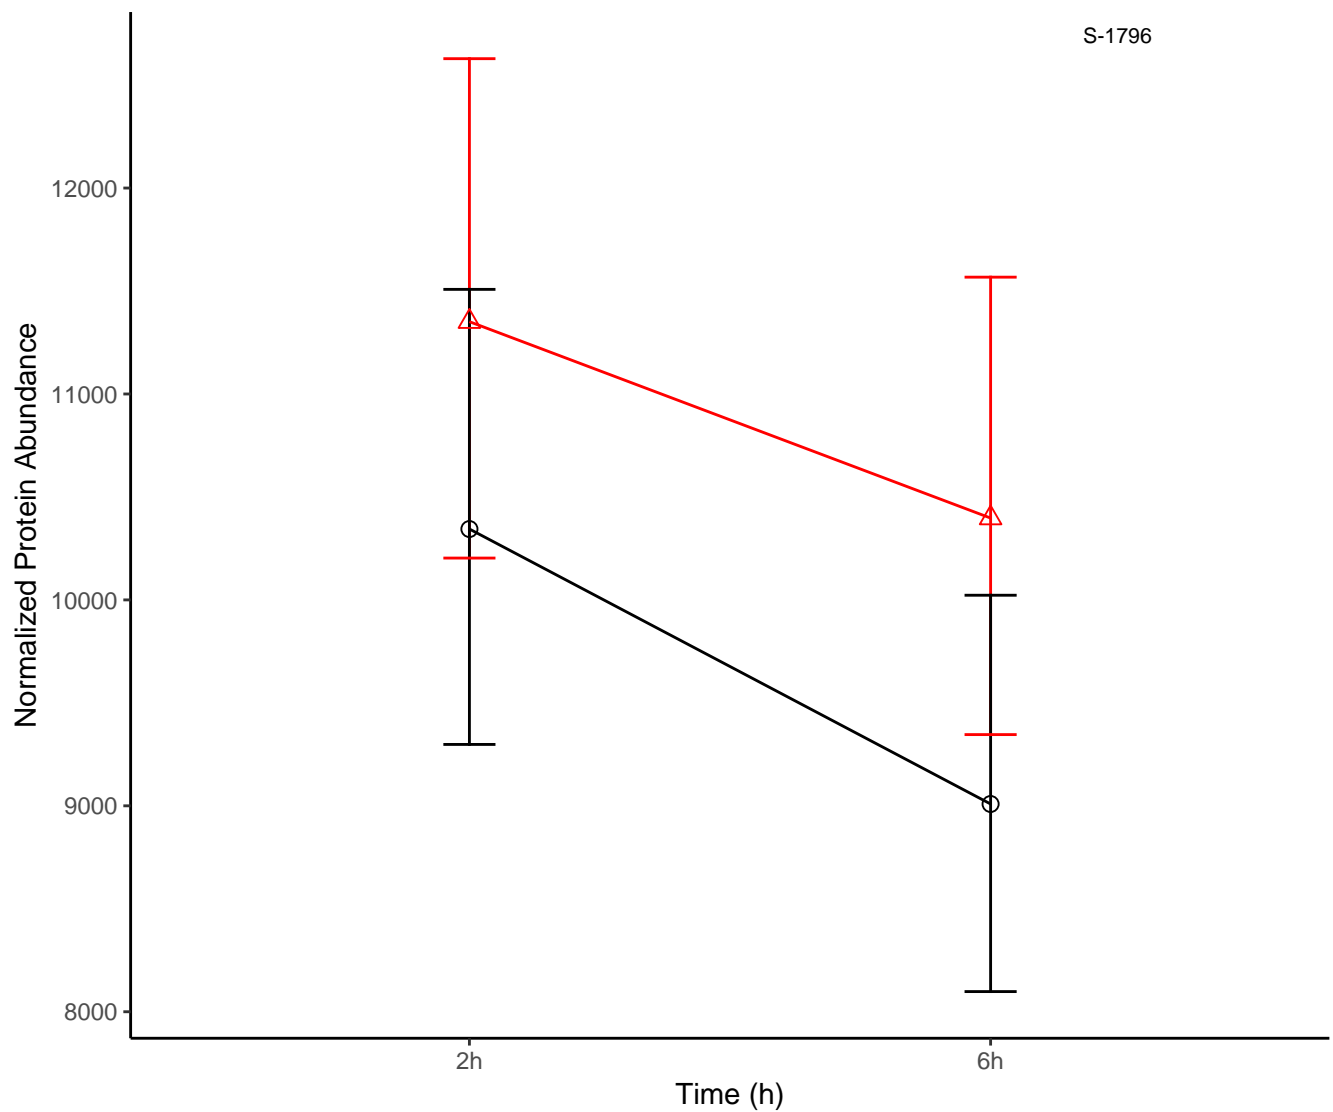

○ TSB-dex

△ TSB

# PYRR\_STAAM

S-1797

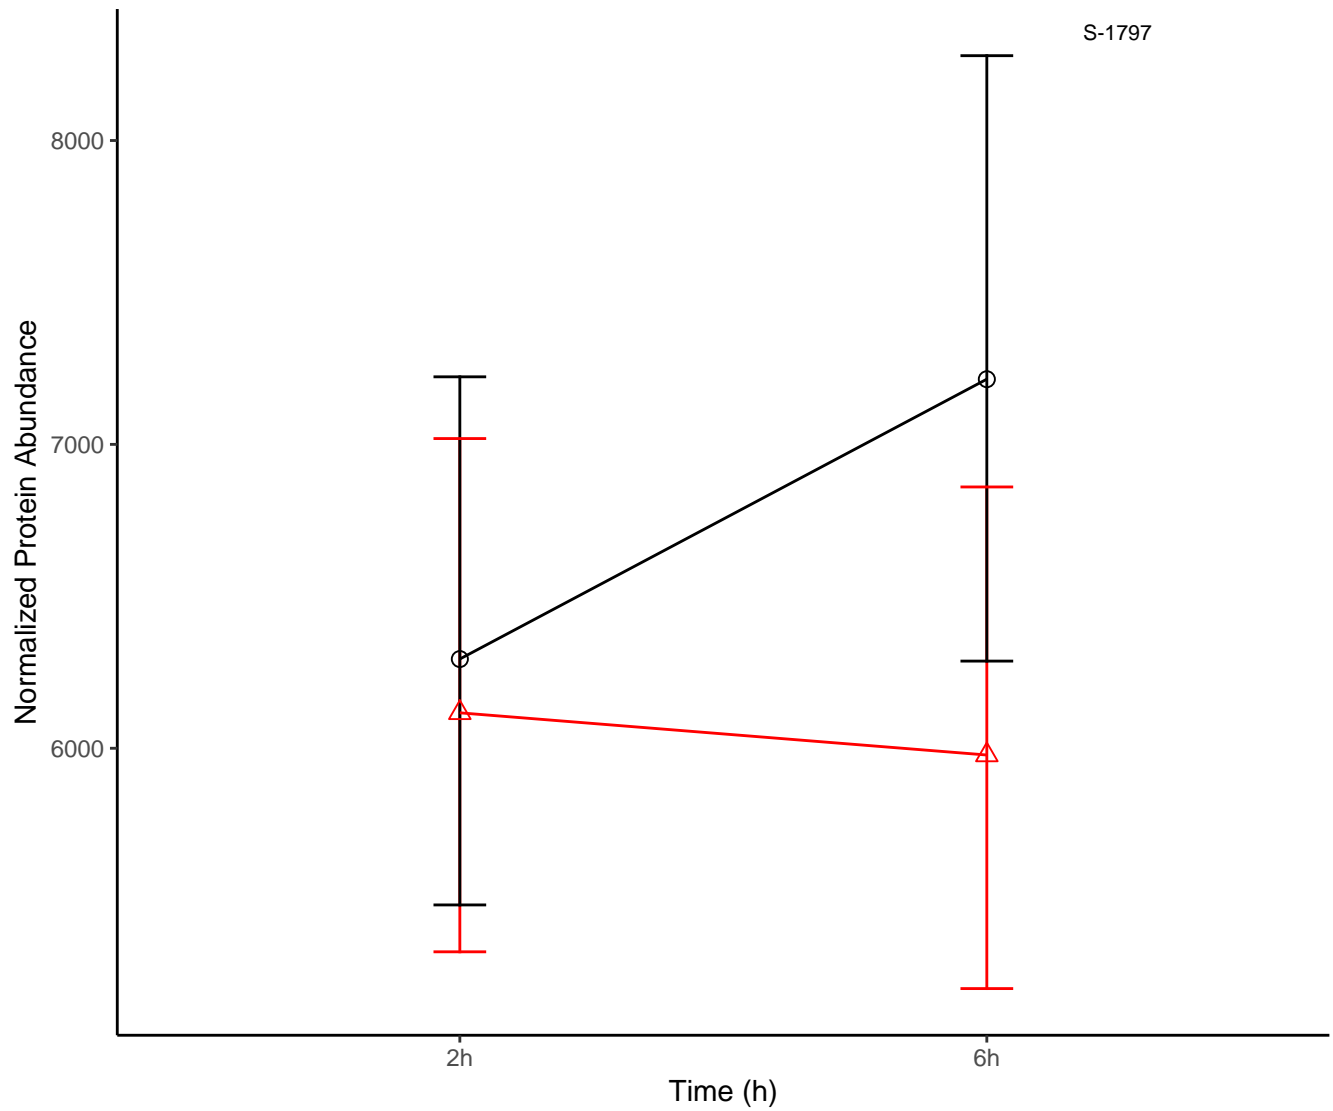

○ TSB-dex

△ TSB

# QOX2\_STAAM

S-1798

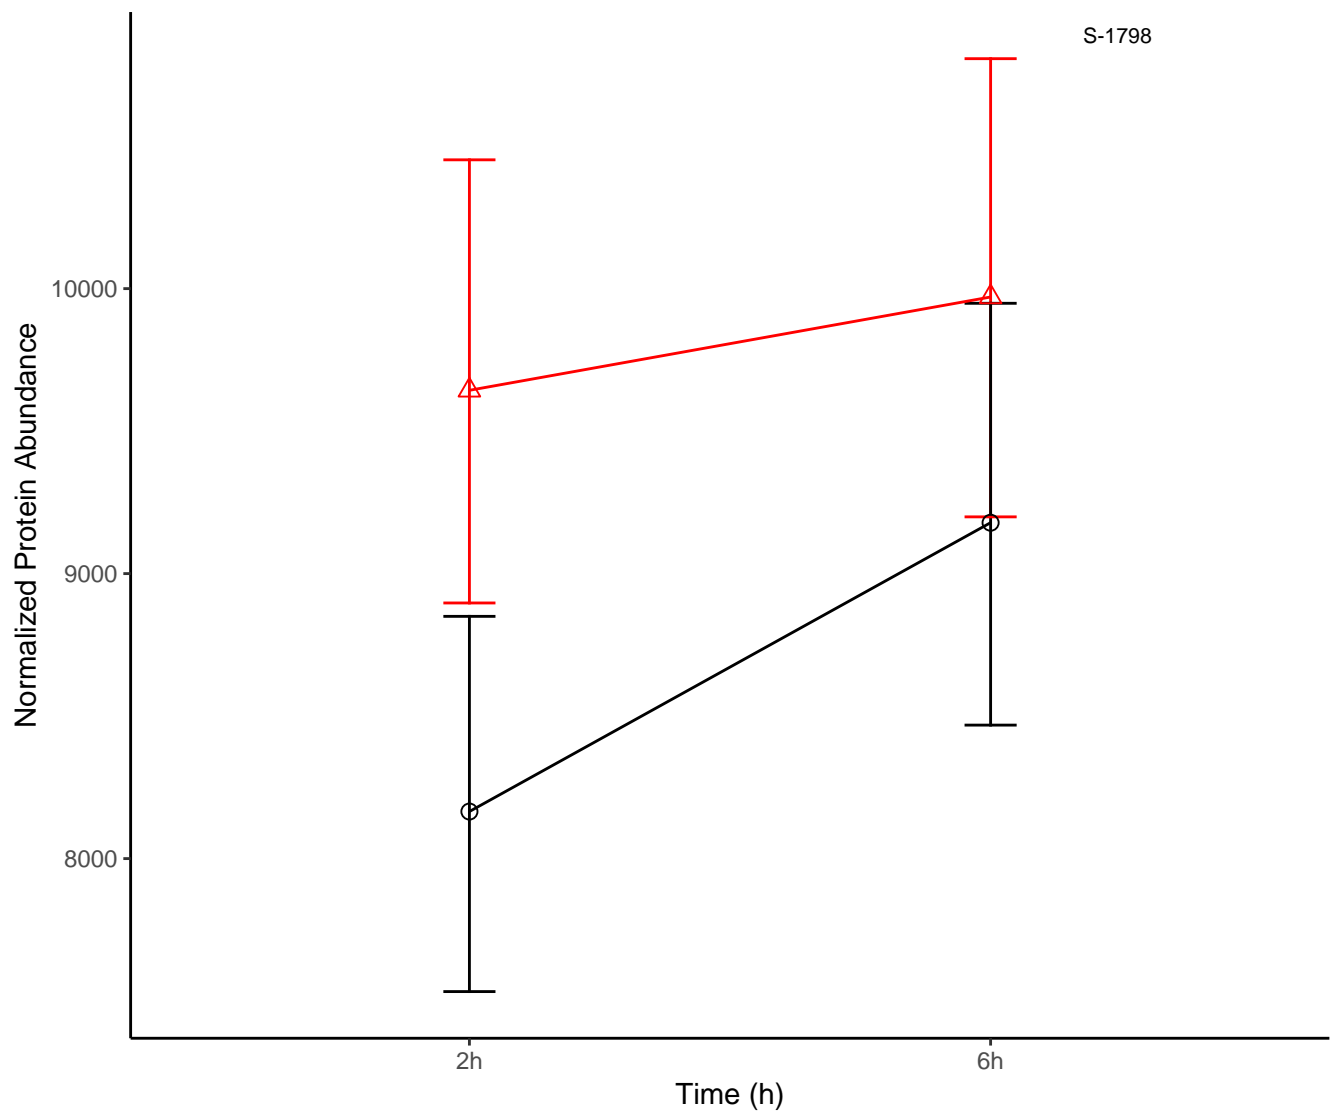

○ TSB-dex

△ TSB

# QUEA\_STAAM

S-1799

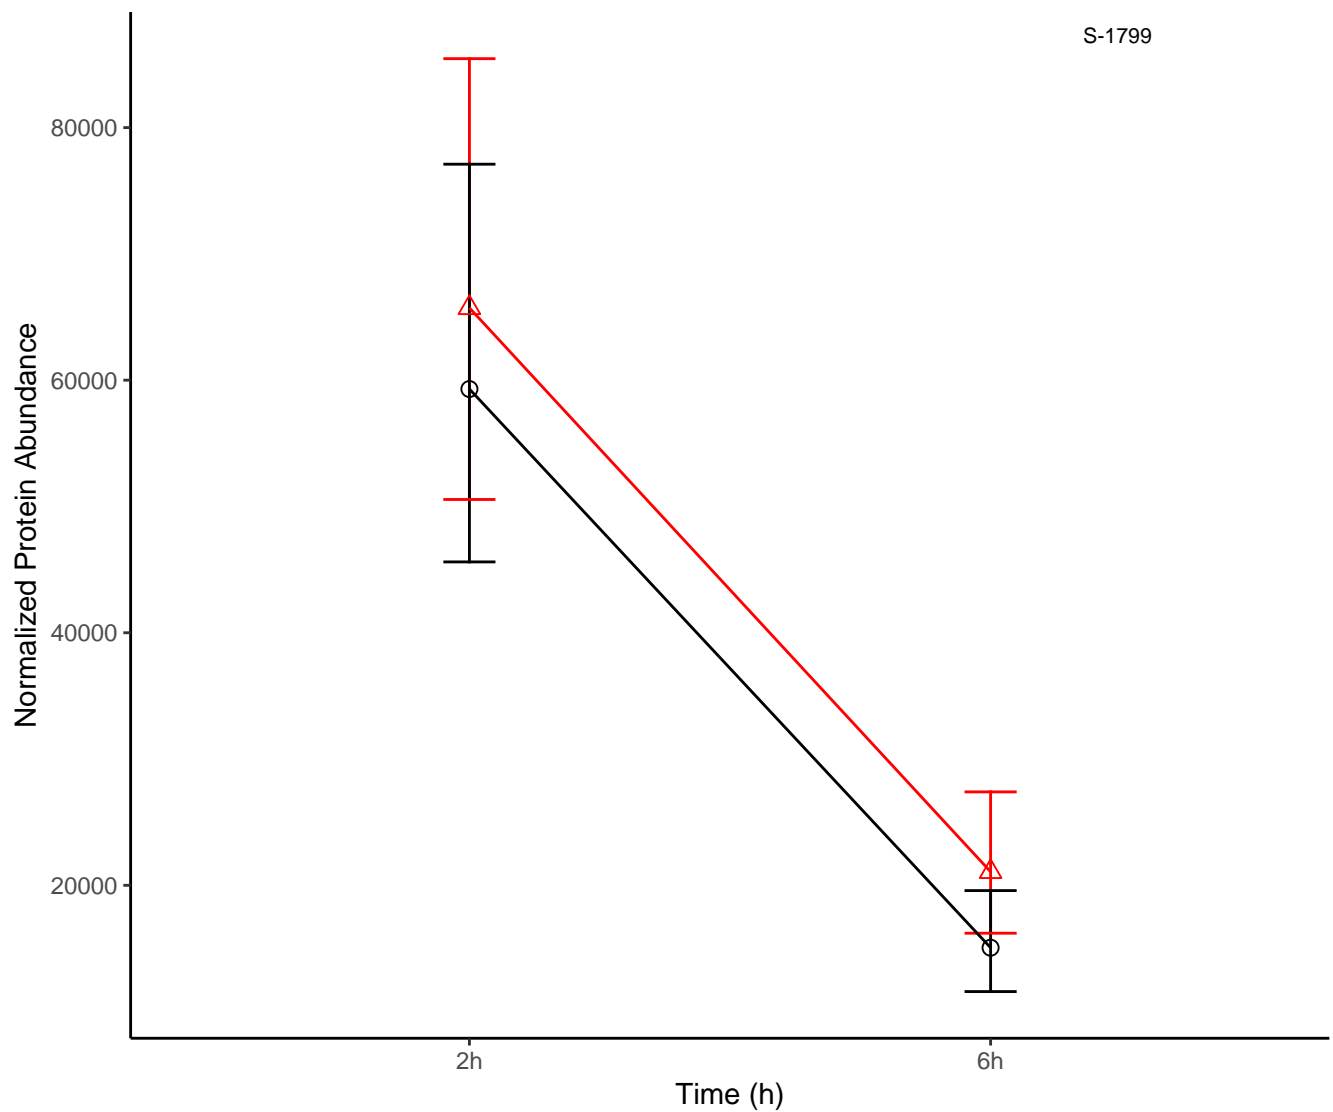

○ TSB-dex

△ TSB

# QUEC\_STAAM

S-1800

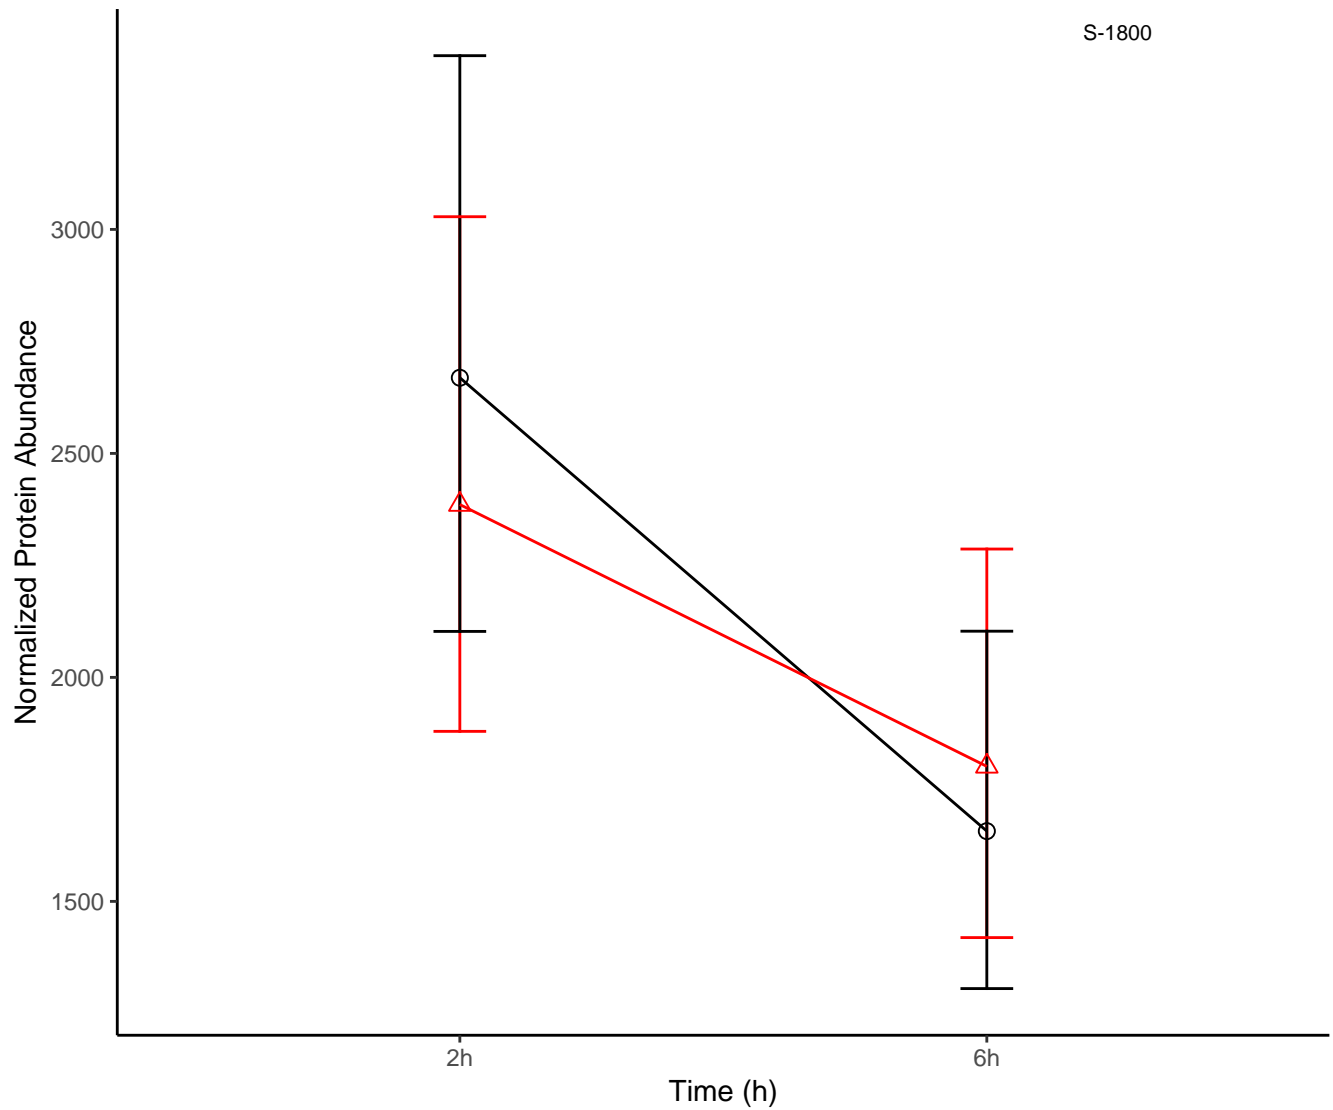

○ TSB-dex

△ TSB



# RBFA\_STAAM

S-1801

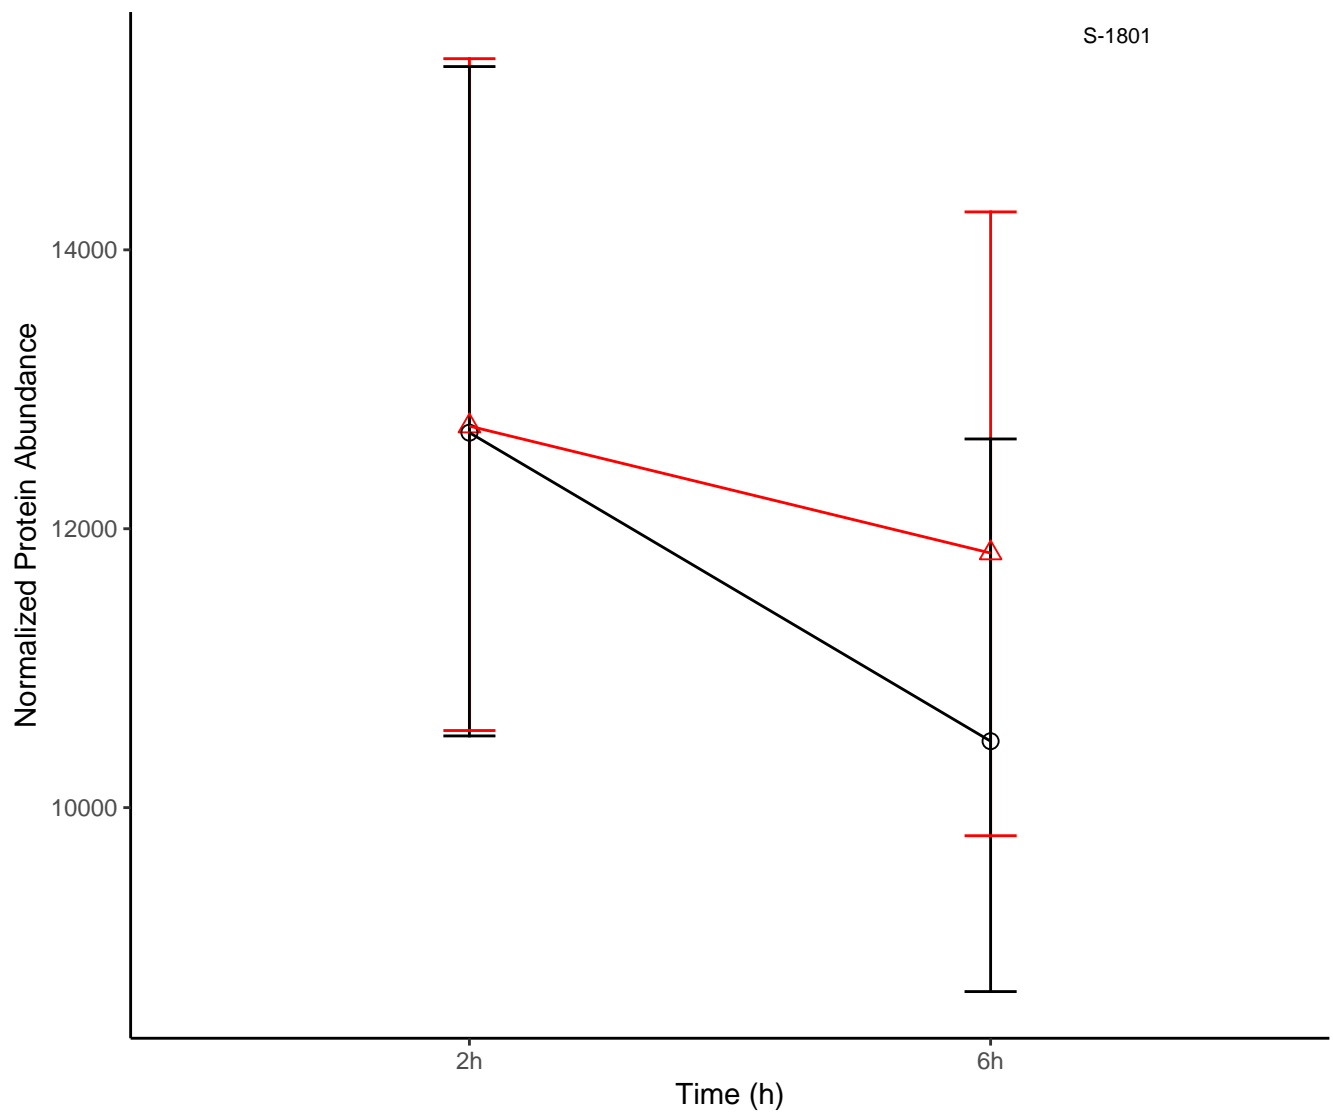

○ TSB-dex

△ TSB

# RECA\_STAAM

S-1802

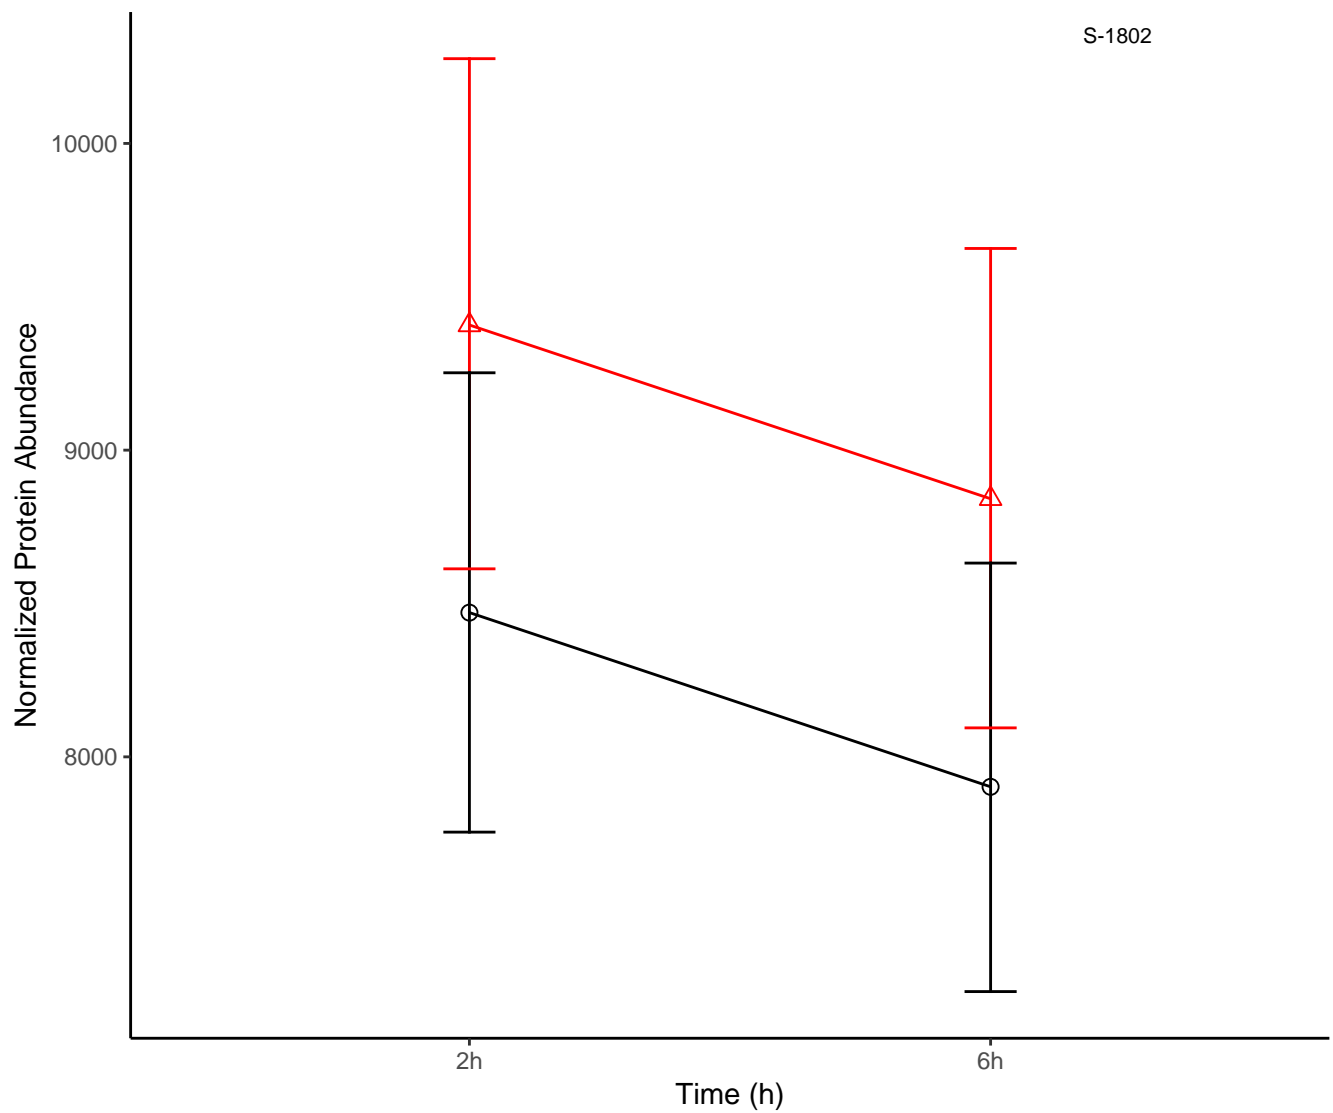

○ TSB-dex

△ TSB

# RELA\_STAAM

S-1803

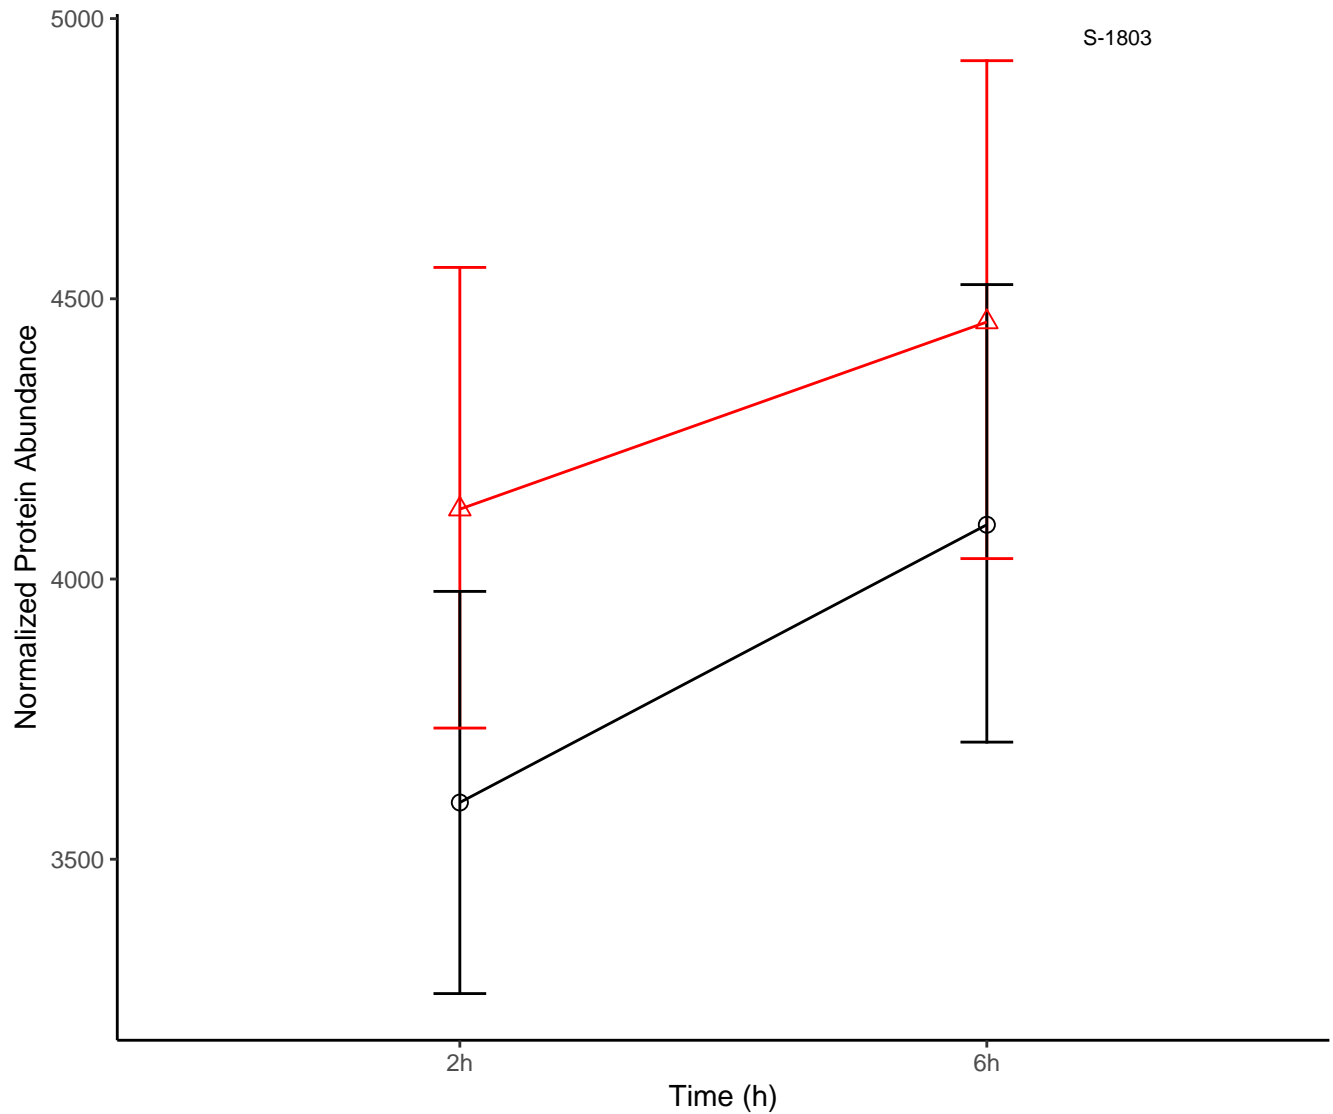

○ TSB-dex

△ TSB

# REX\_STAAM

S-1804

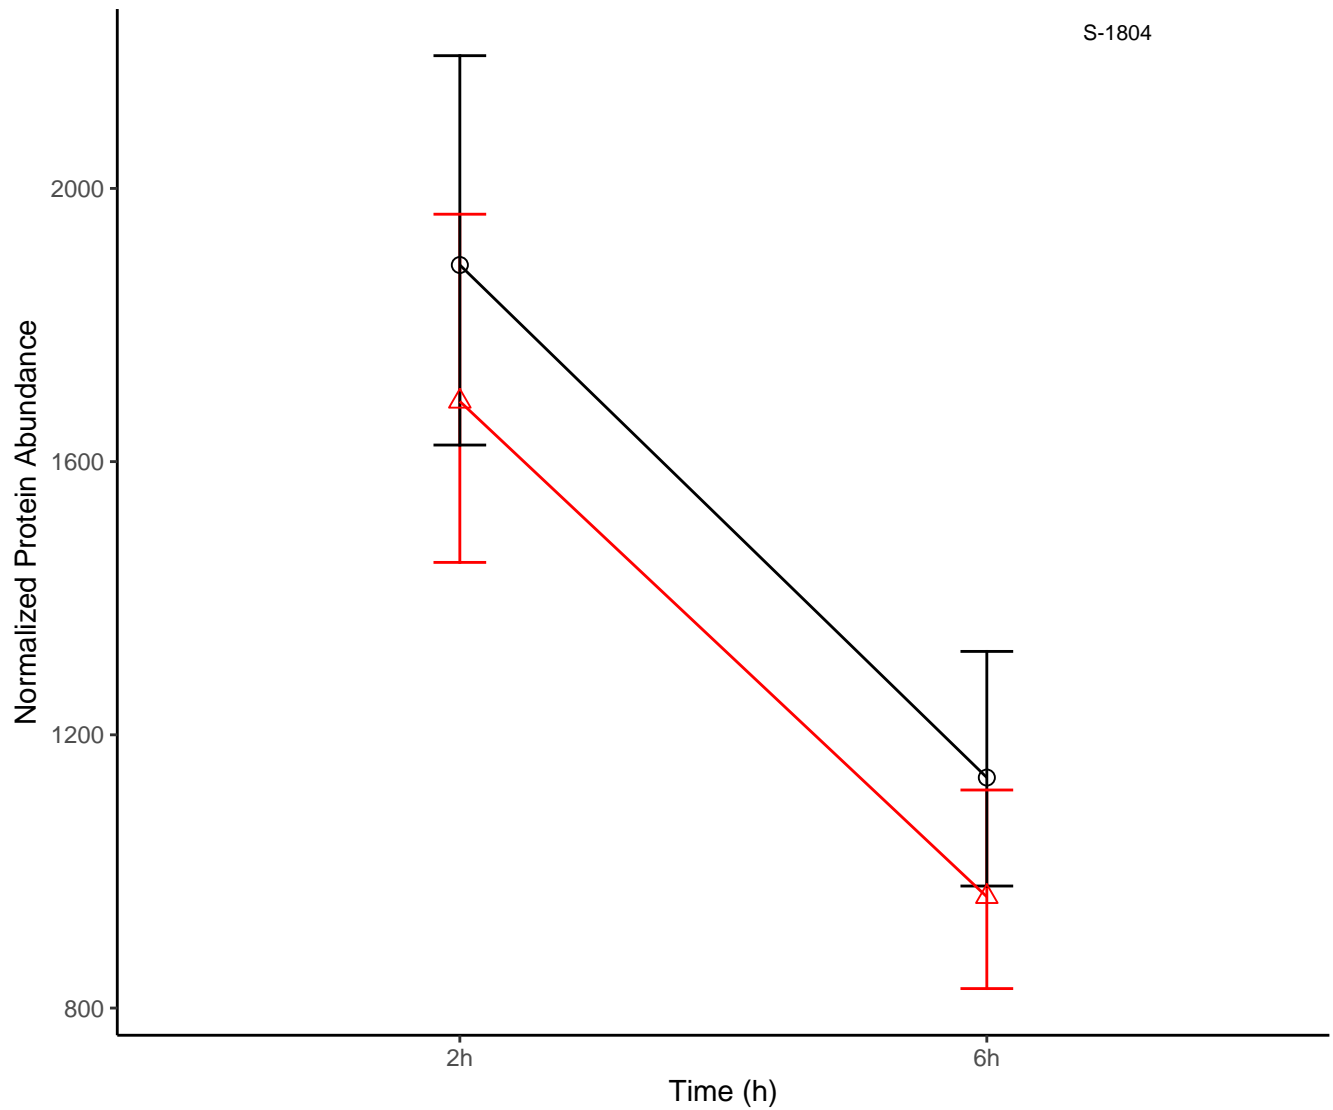

○ TSB-dex

△ TSB

# RF1\_STAAM

S-1805

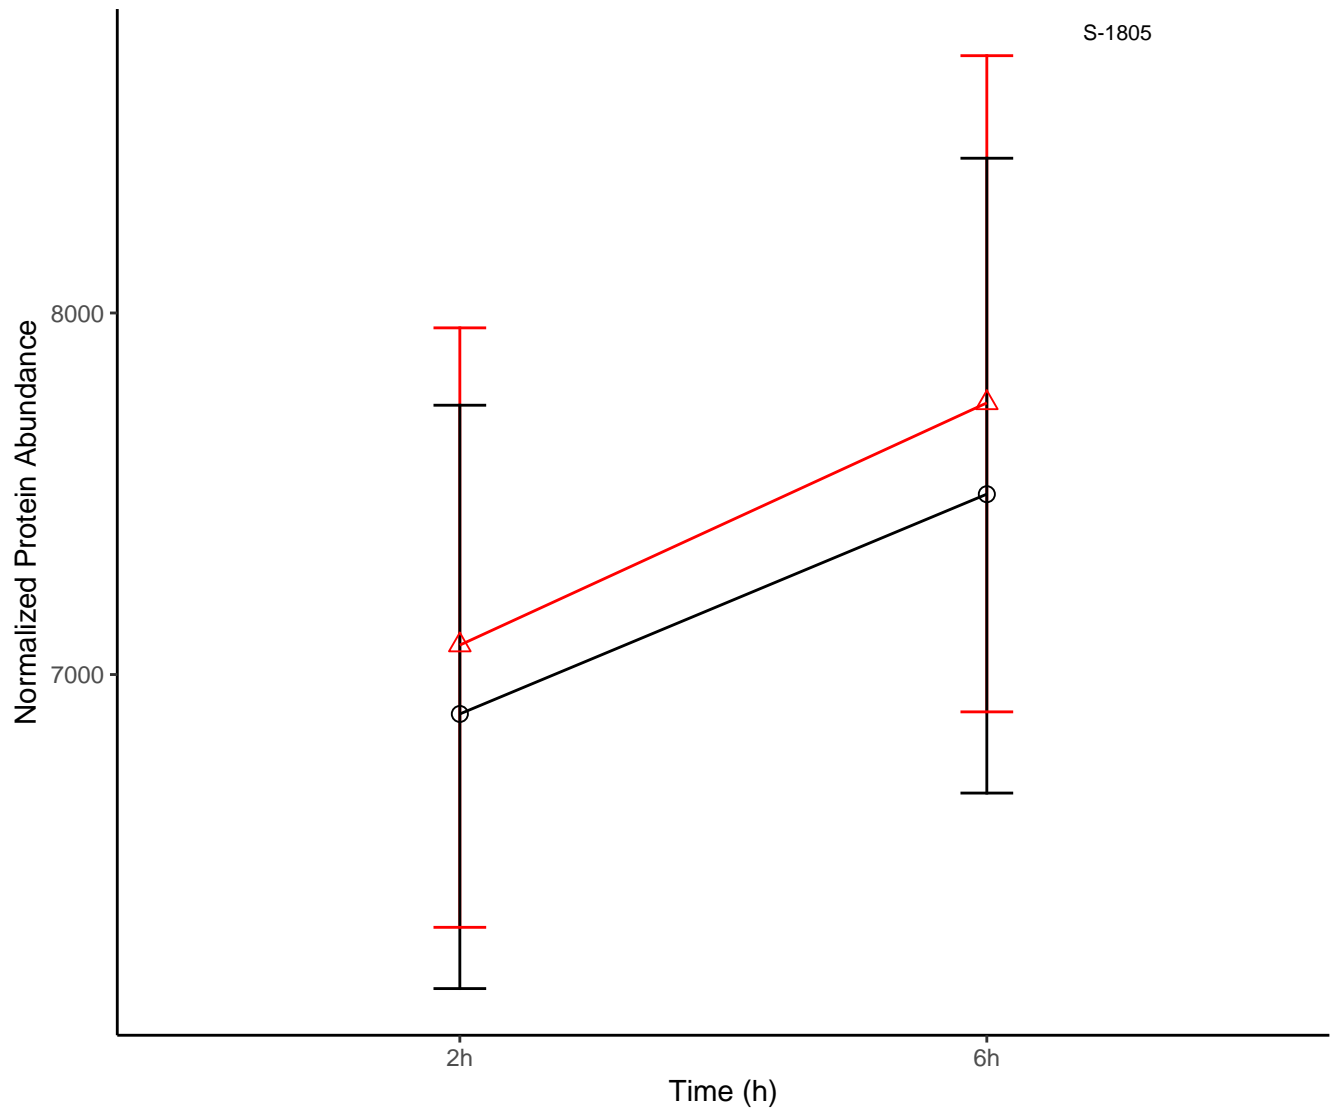

○ TSB-dex

△ TSB

# RIBBA\_STAAM

S-1806

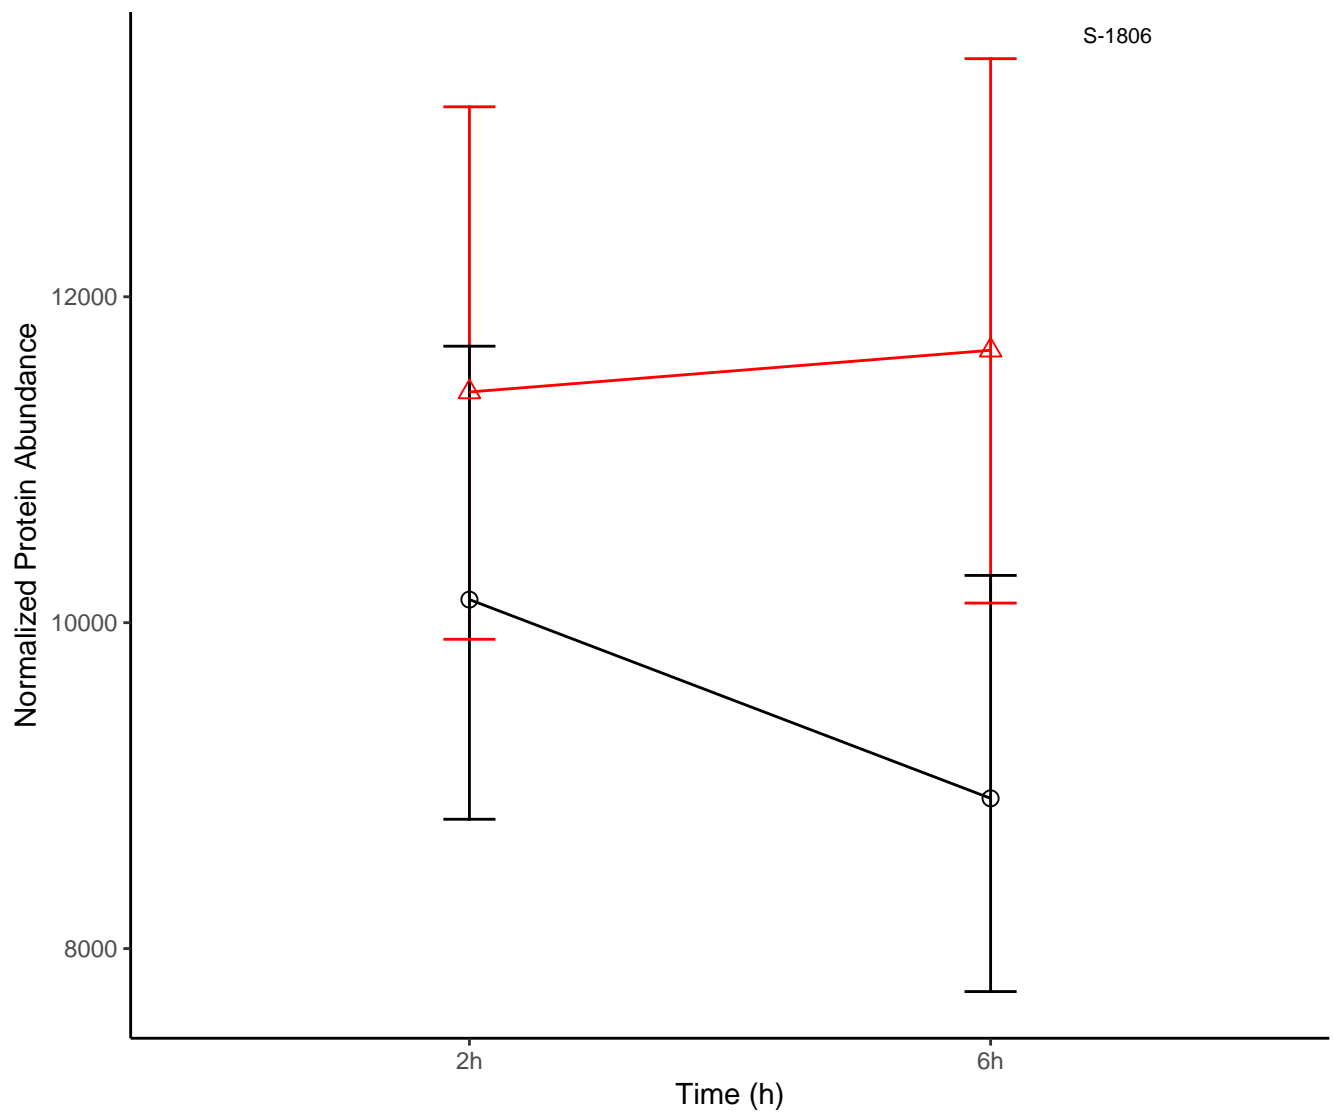

○ TSB-dex

△ TSB

# RIMM\_STAAM

S-1807

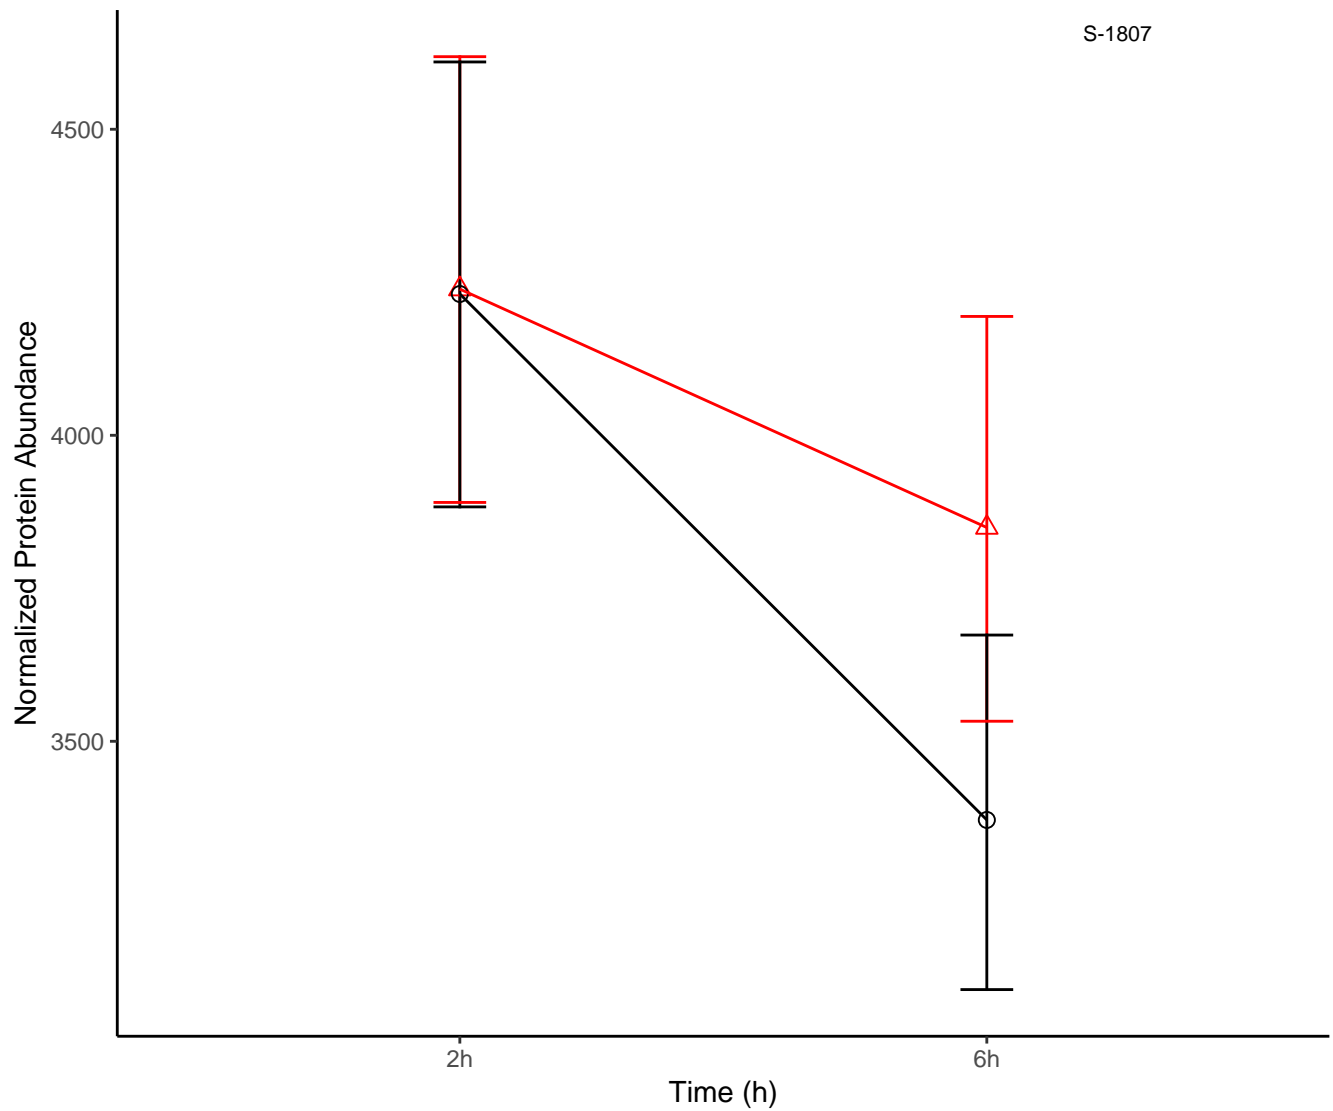

○ TSB-dex

△ TSB

# RISB\_STAAM

S-1808

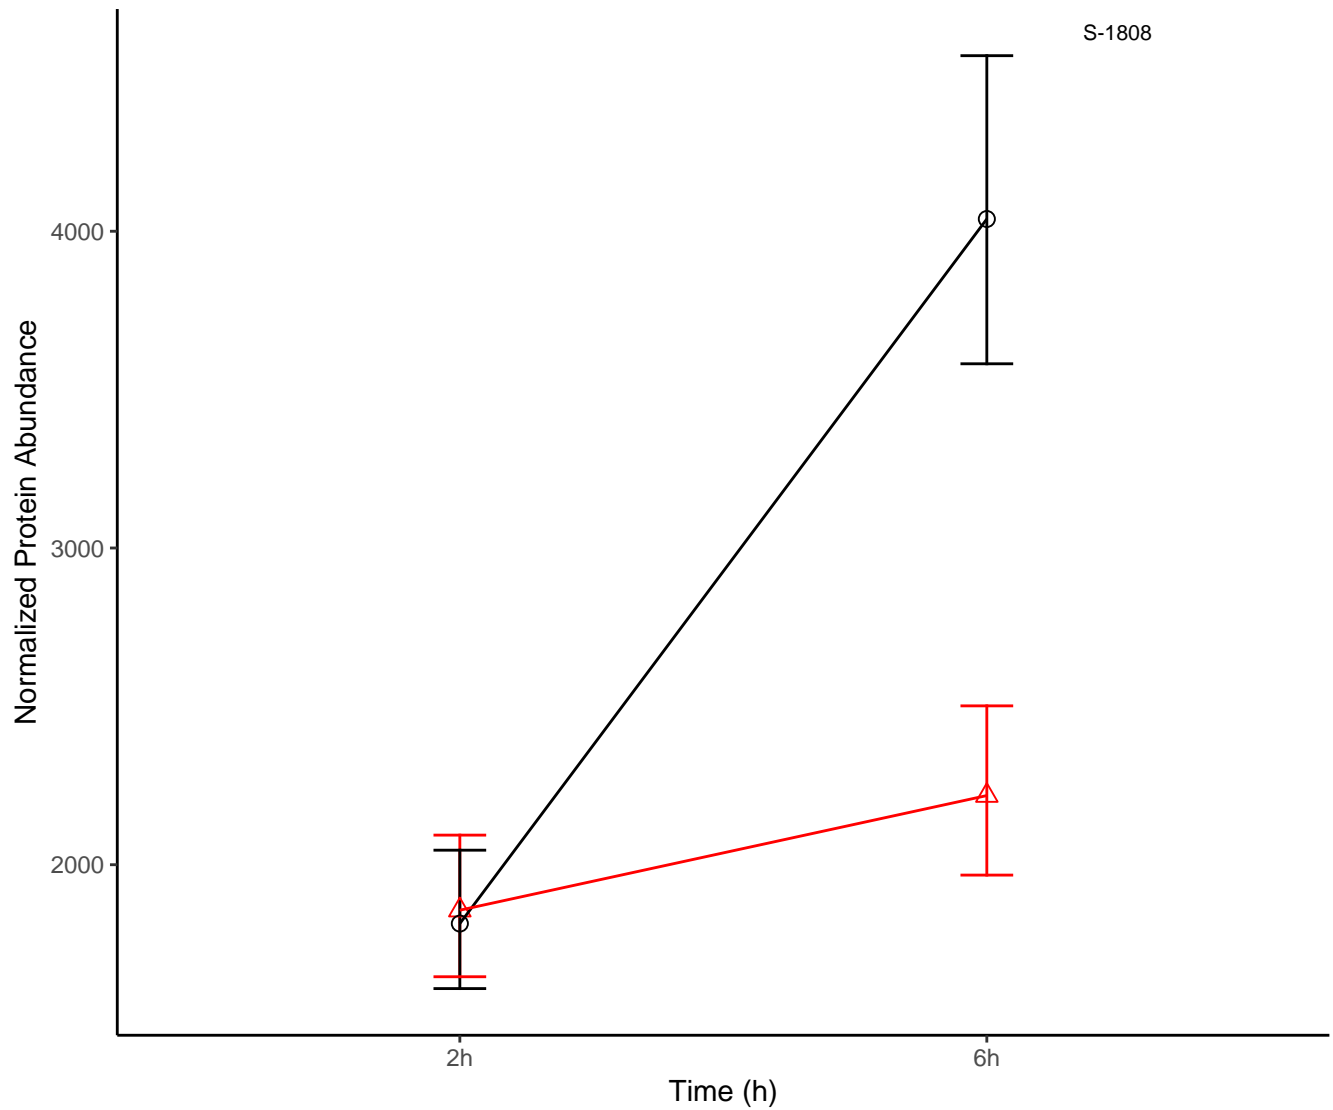

○ TSB-dex

△ TSB



# RL1\_STAAM

S-1809

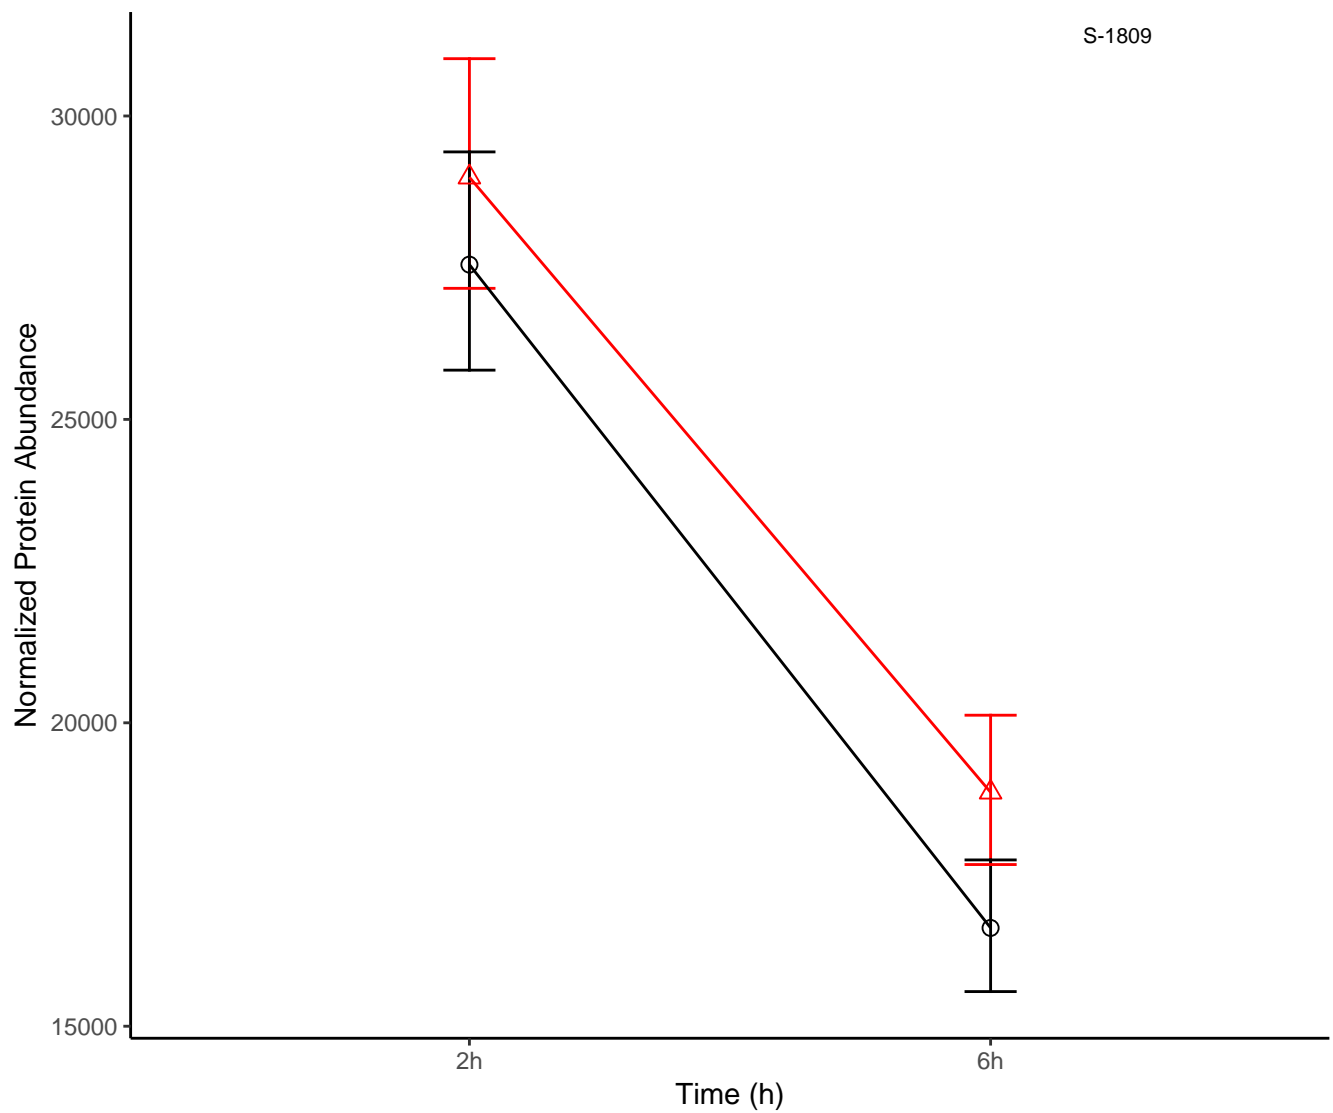

○ TSB-dex

△ TSB

# RL10\_STAAM

S-1810

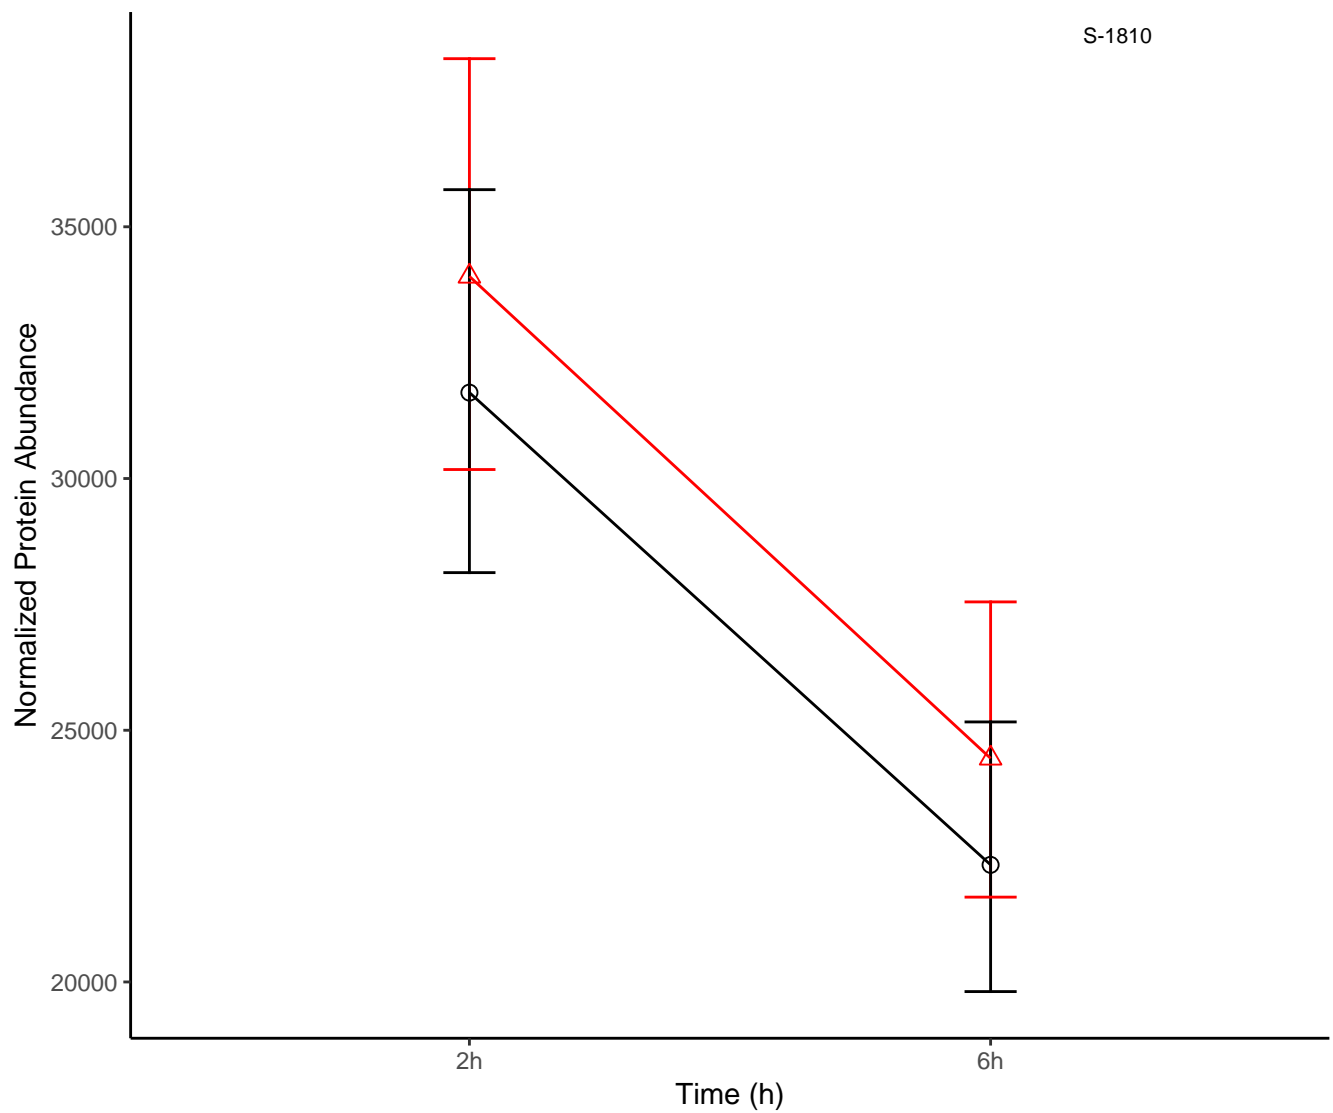

○ TSB-dex

△ TSB

# RL11\_STAAM

S-1811

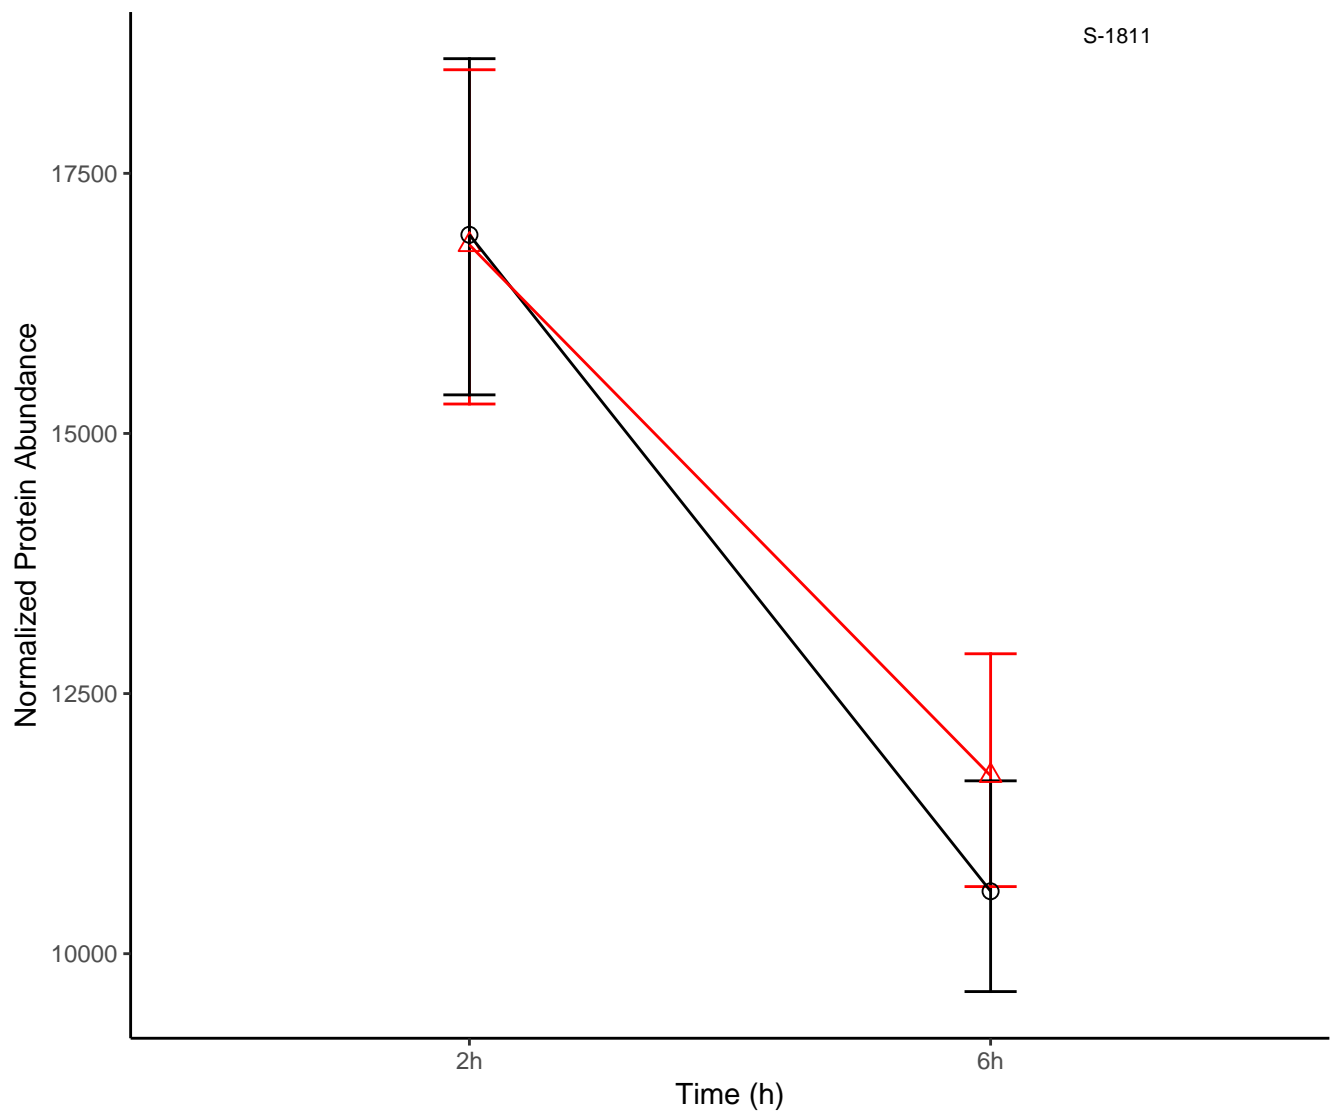

○ TSB-dex

△ TSB

# RL13\_STAAM

S-1812

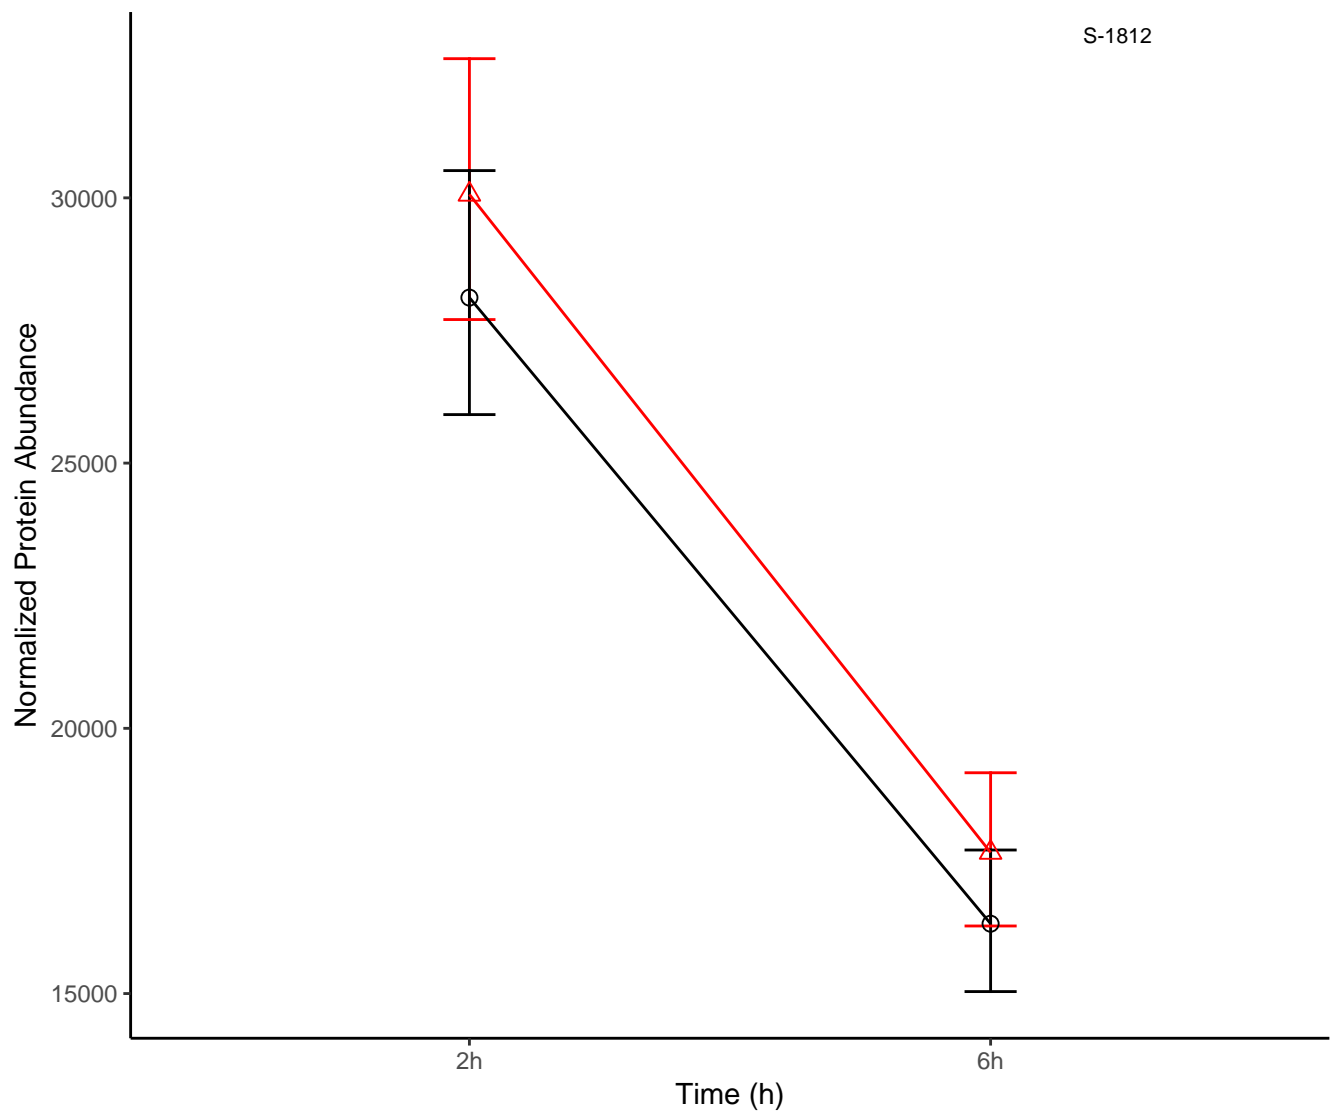

○ TSB-dex

△ TSB

# RL14\_STAAM

S-1813

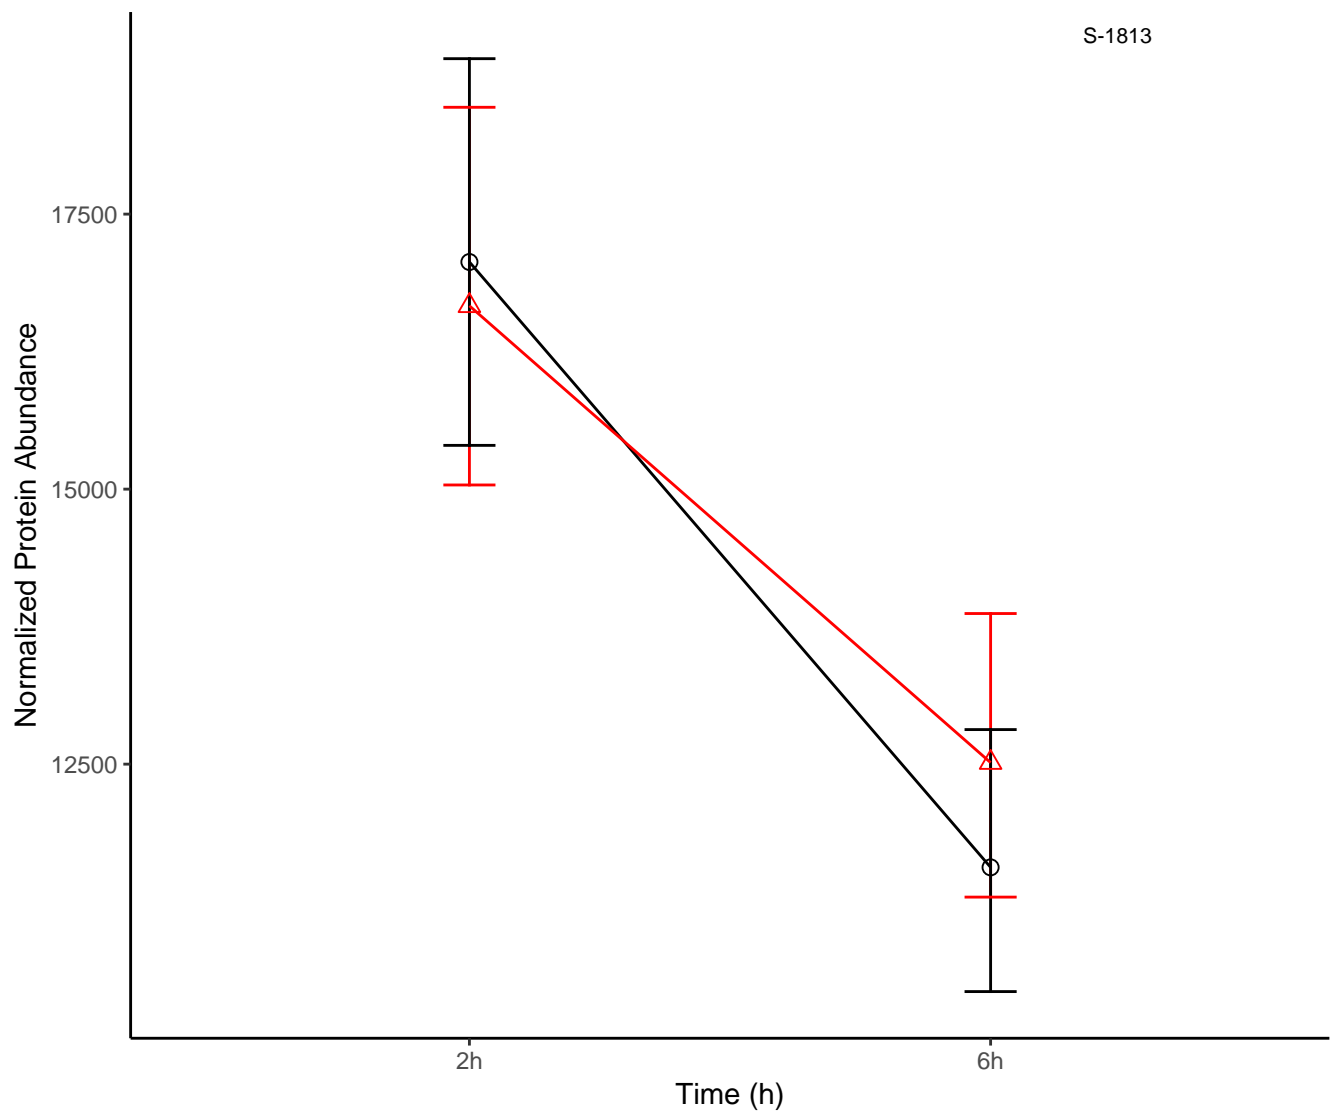

○ TSB-dex

△ TSB

# RL15\_STAAM

S-1814

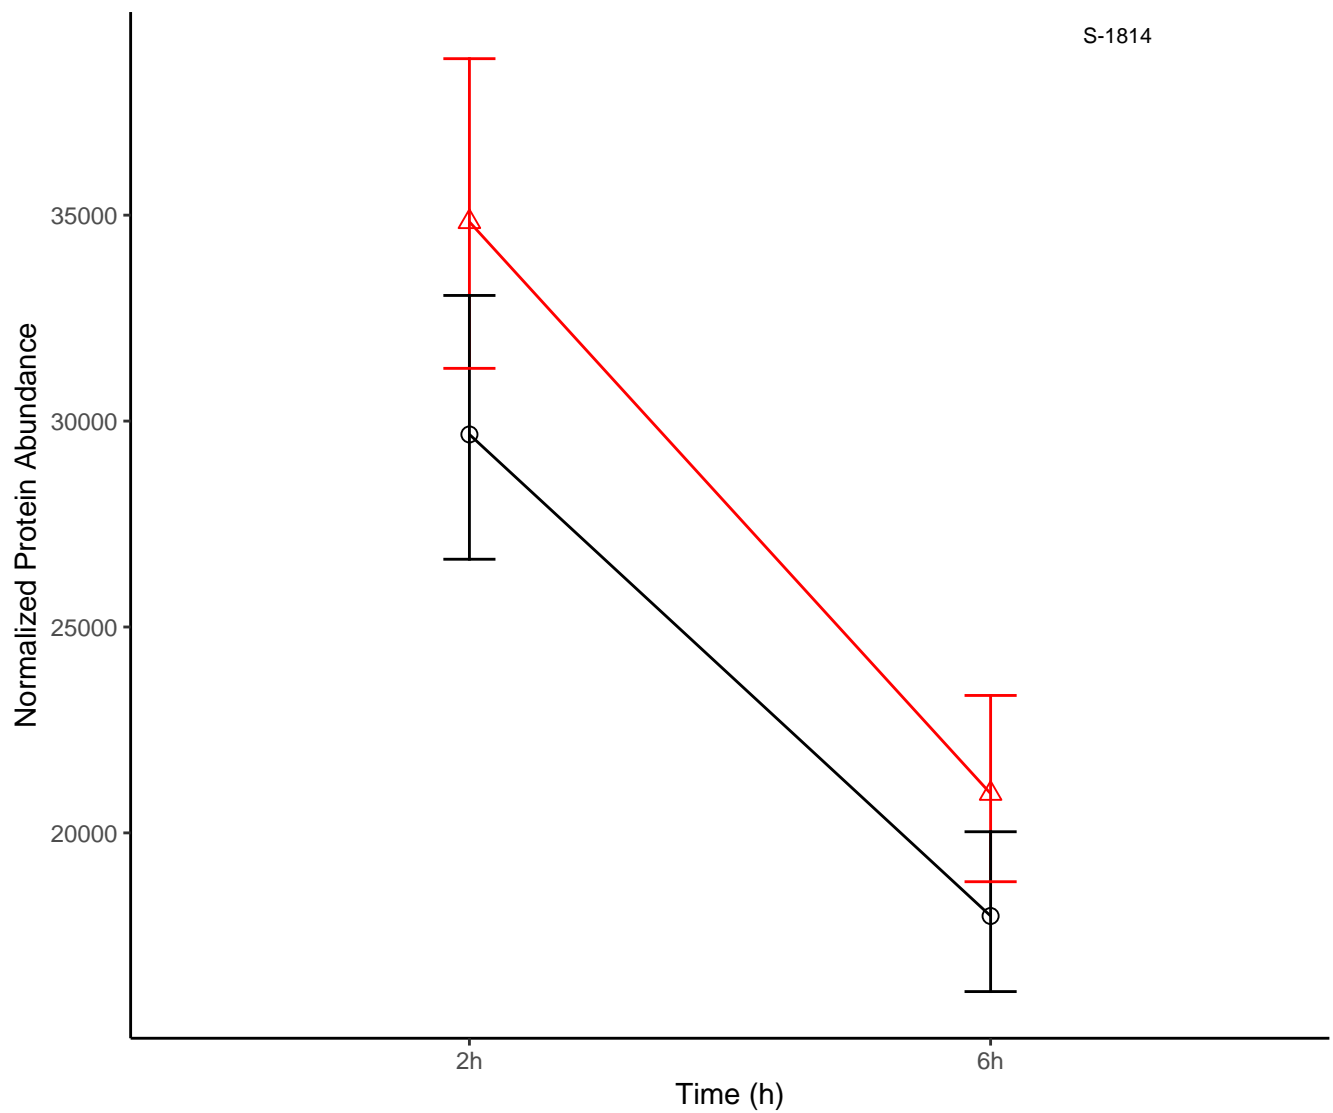

○ TSB-dex

△ TSB

# RL16\_STAAM

S-1815

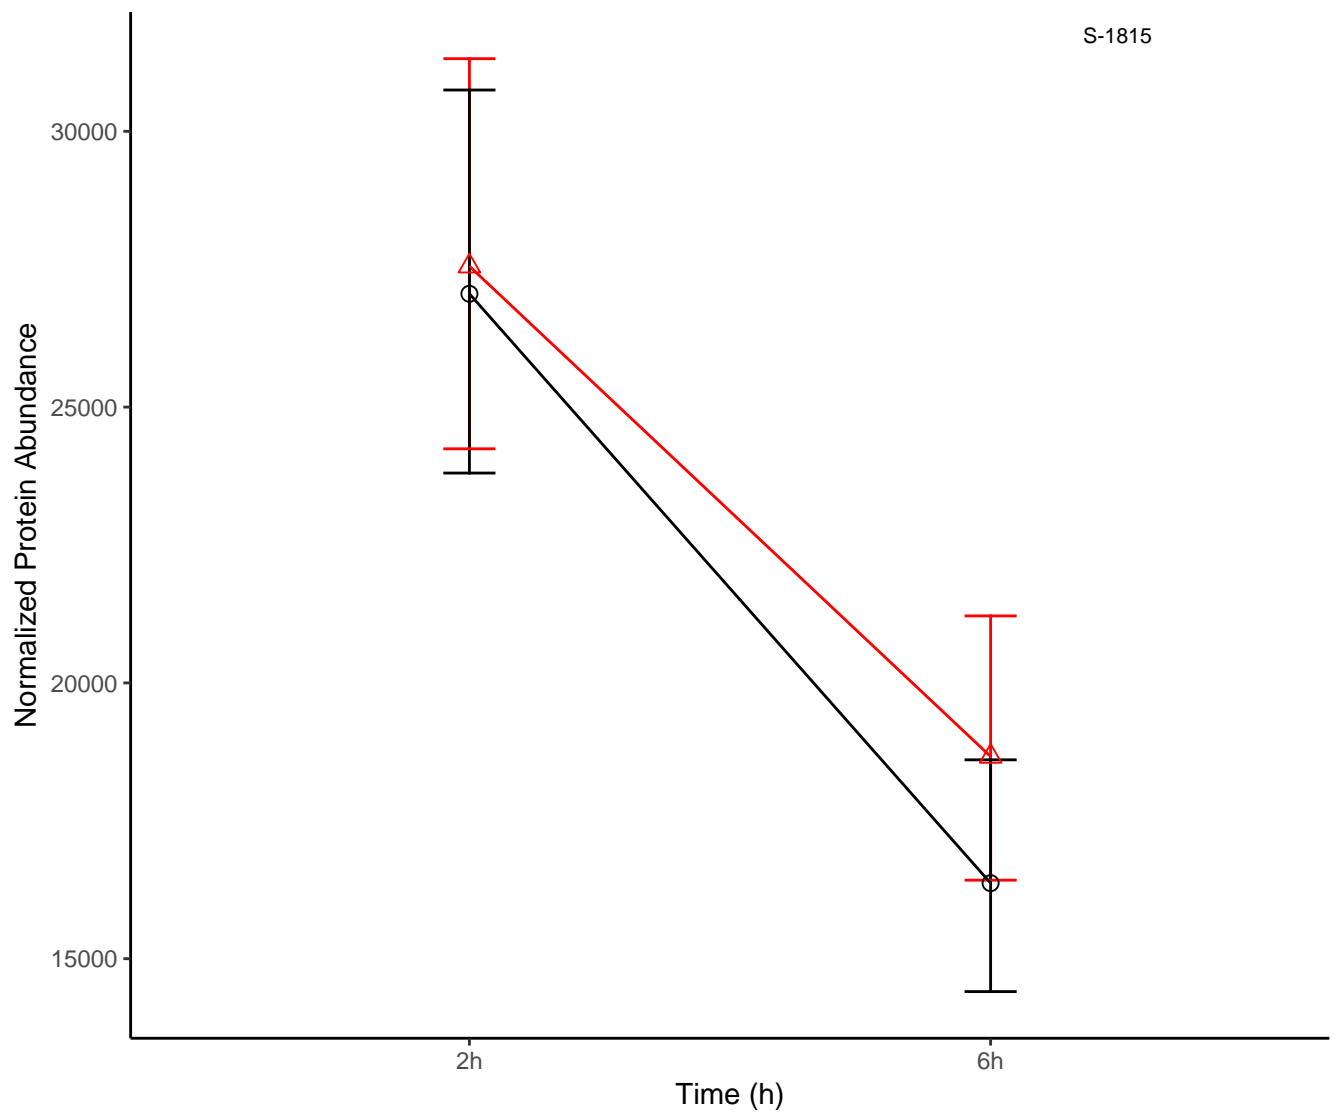

○ TSB-dex

△ TSB

# RL17\_STAAM

S-1816

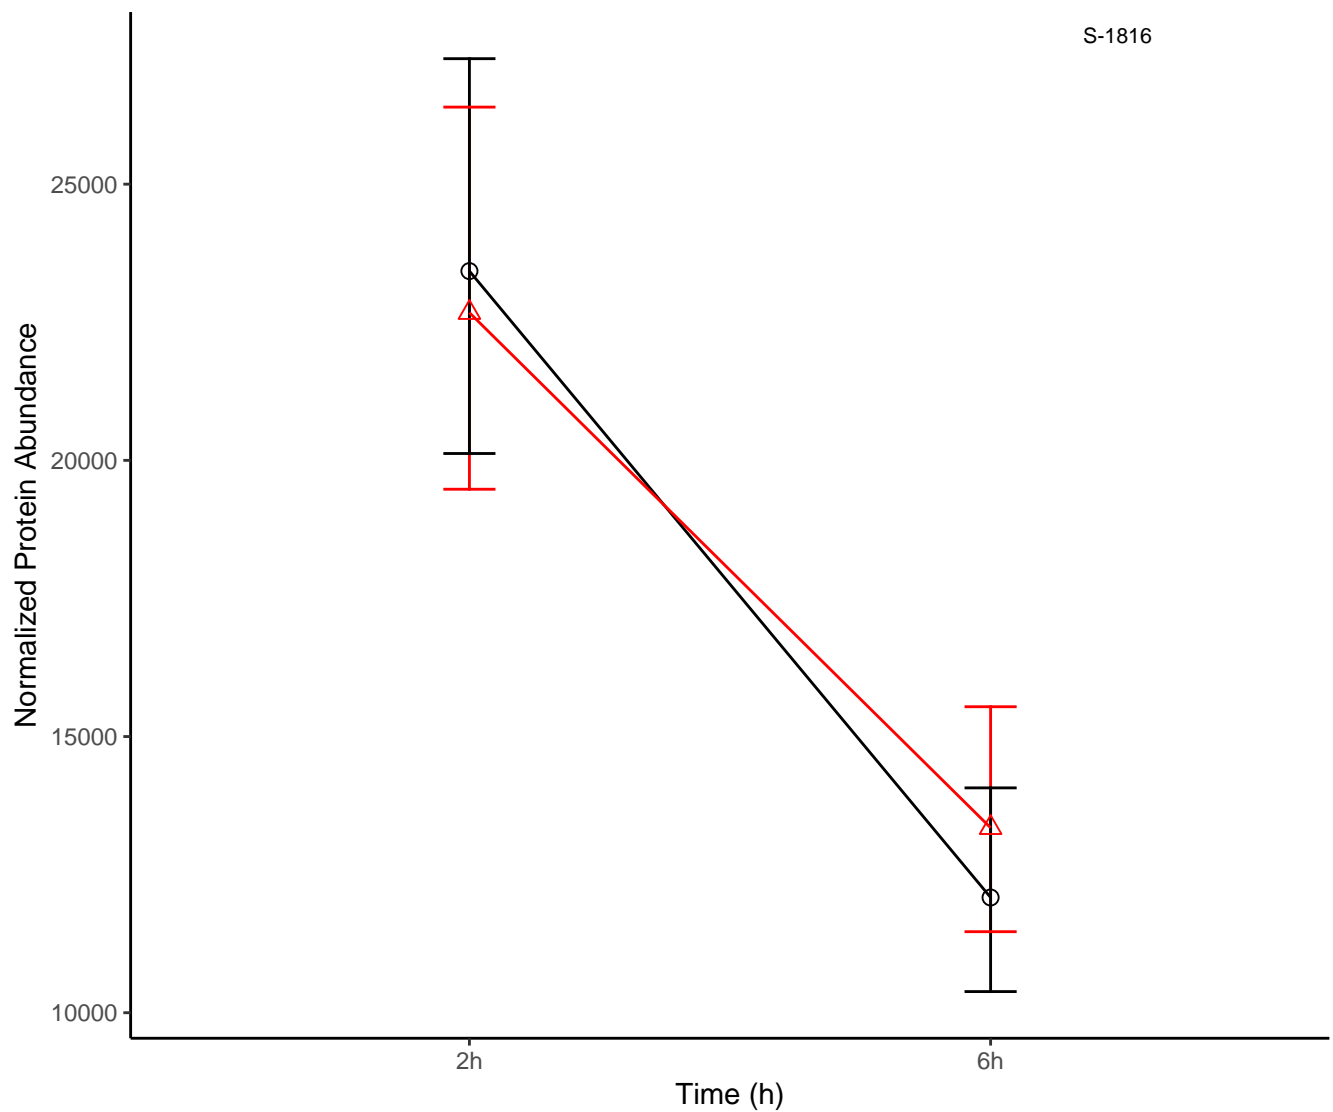

○ TSB-dex

△ TSB



# RL18\_STAAM

S-1817

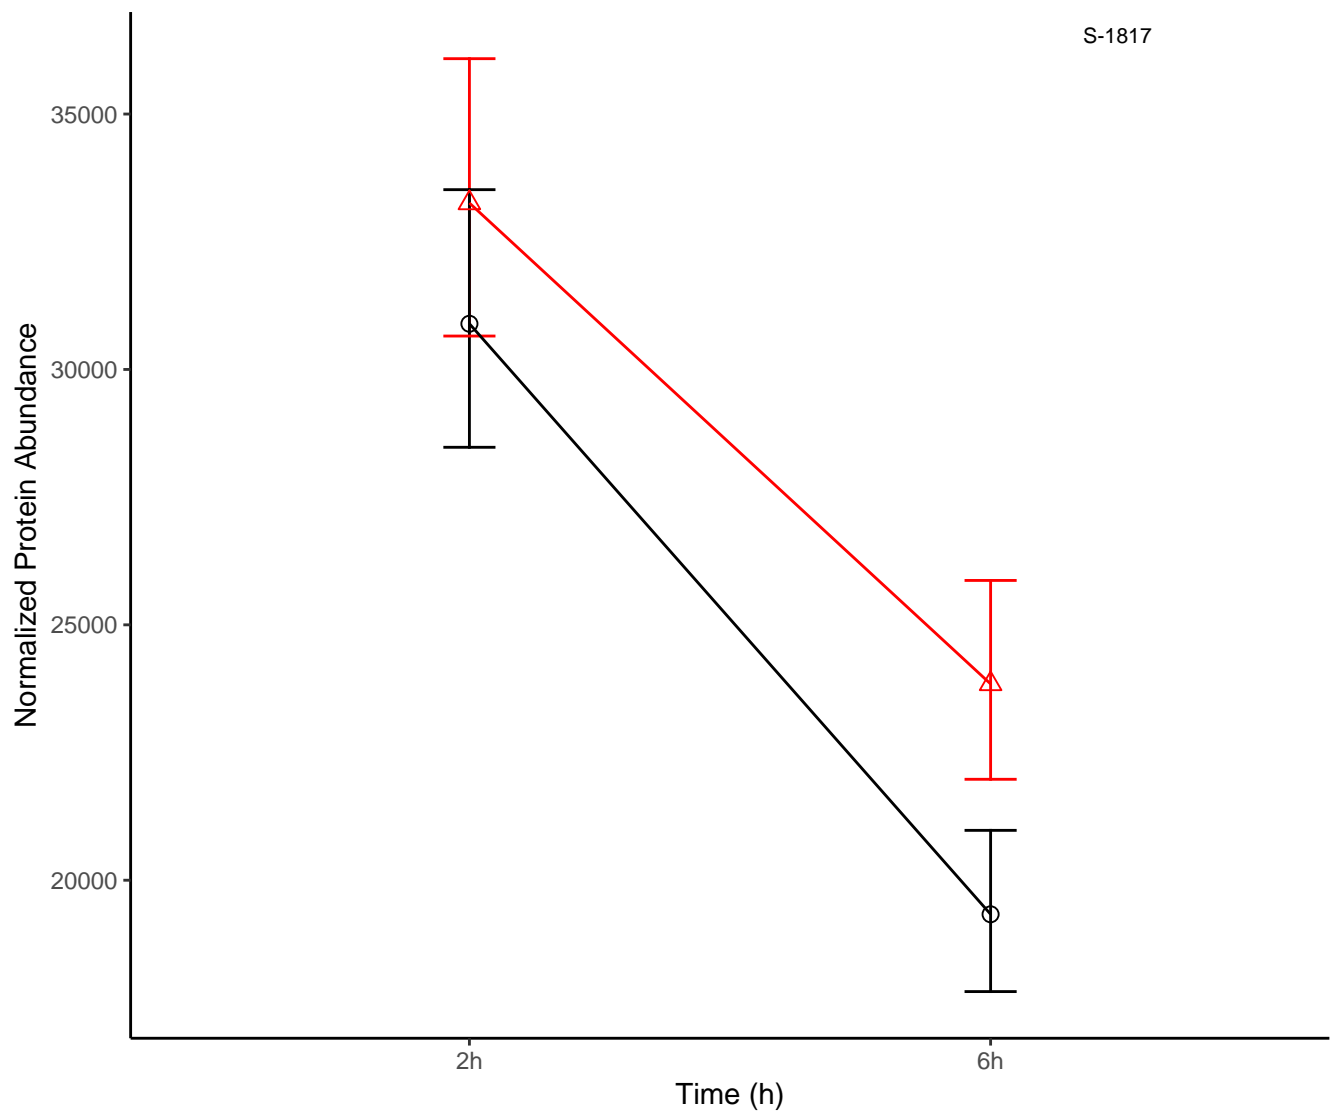

○ TSB-dex

△ TSB

# RL19\_STAAM

S-1818

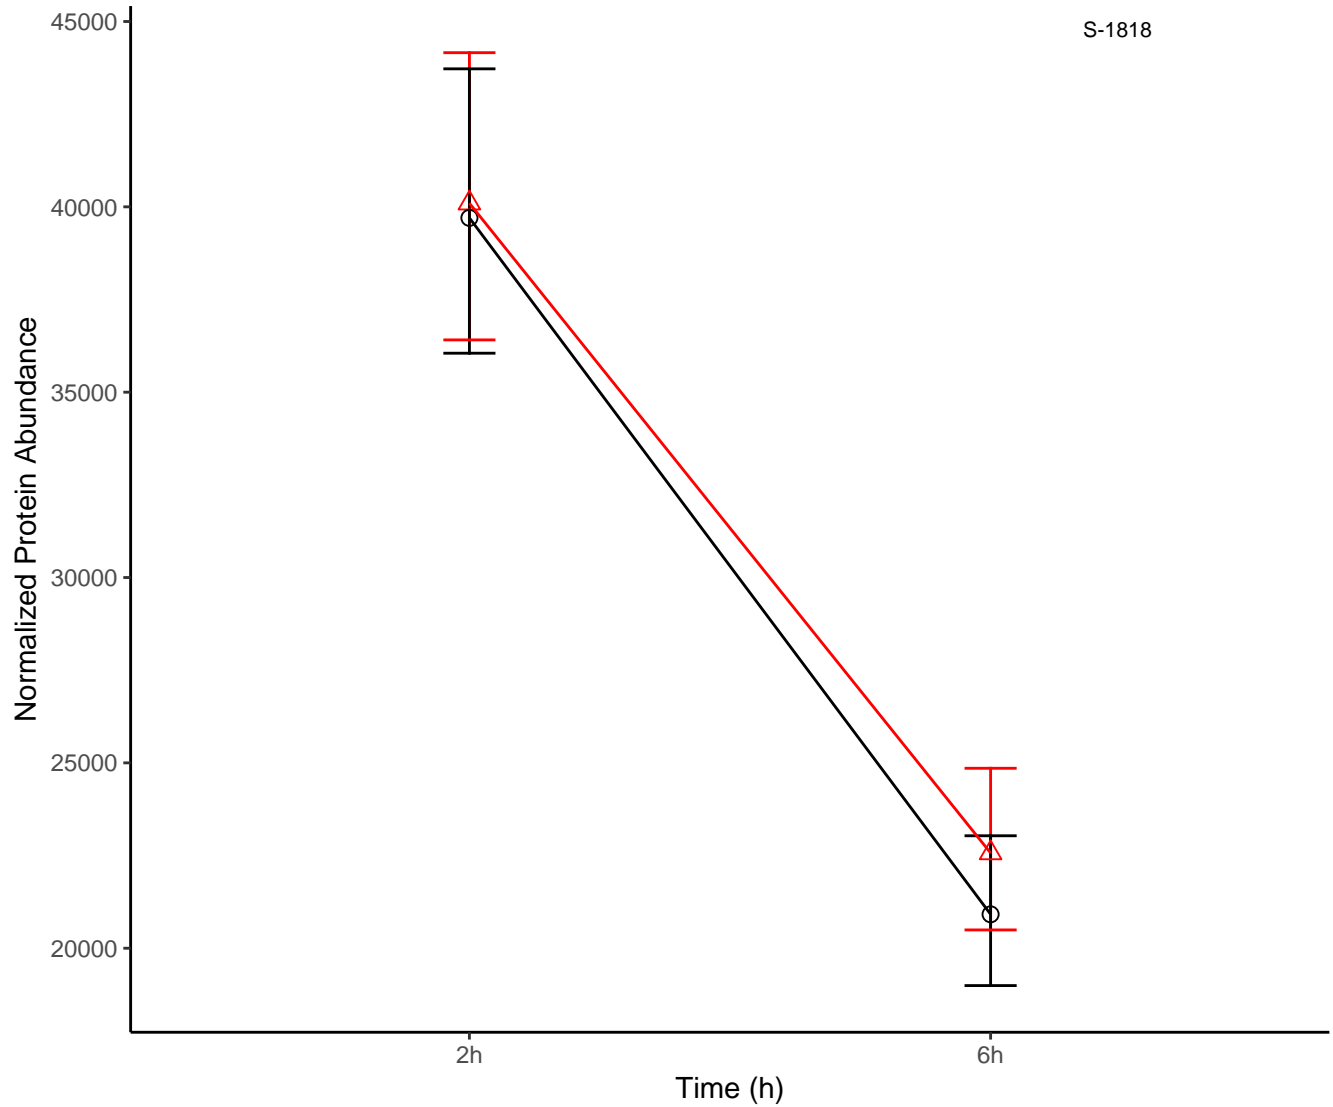

○ TSB-dex

△ TSB

# RL2\_STAAM

S-1819

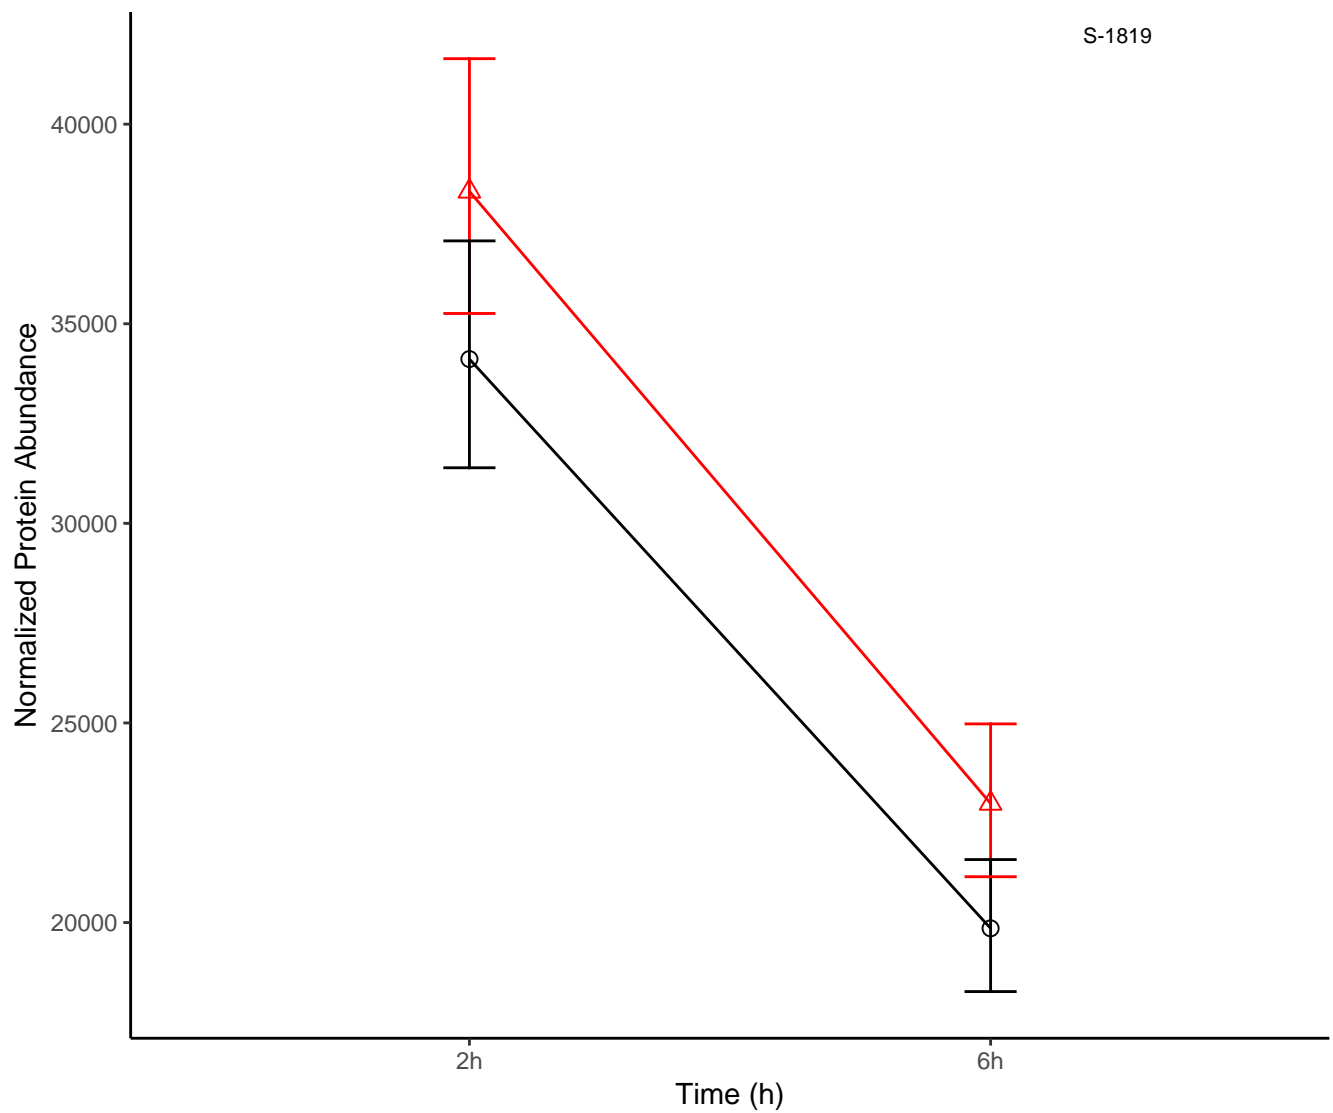

○ TSB-dex

△ TSB

# RL20\_STAAM

S-1820

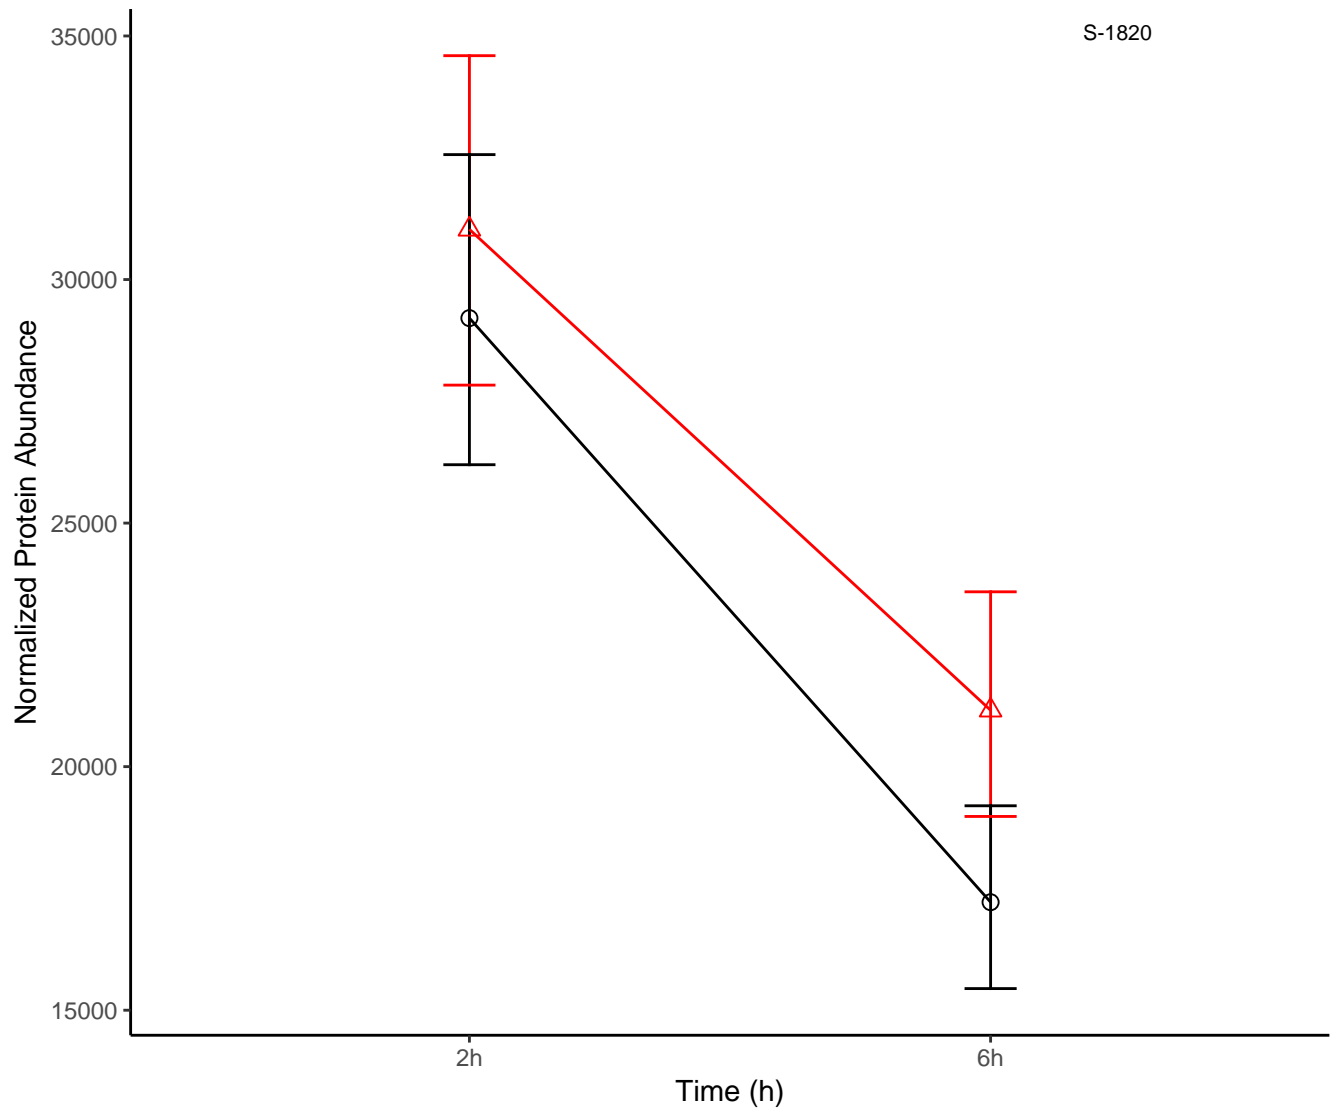

○ TSB-dex

△ TSB

# RL21\_STAAM

S-1821

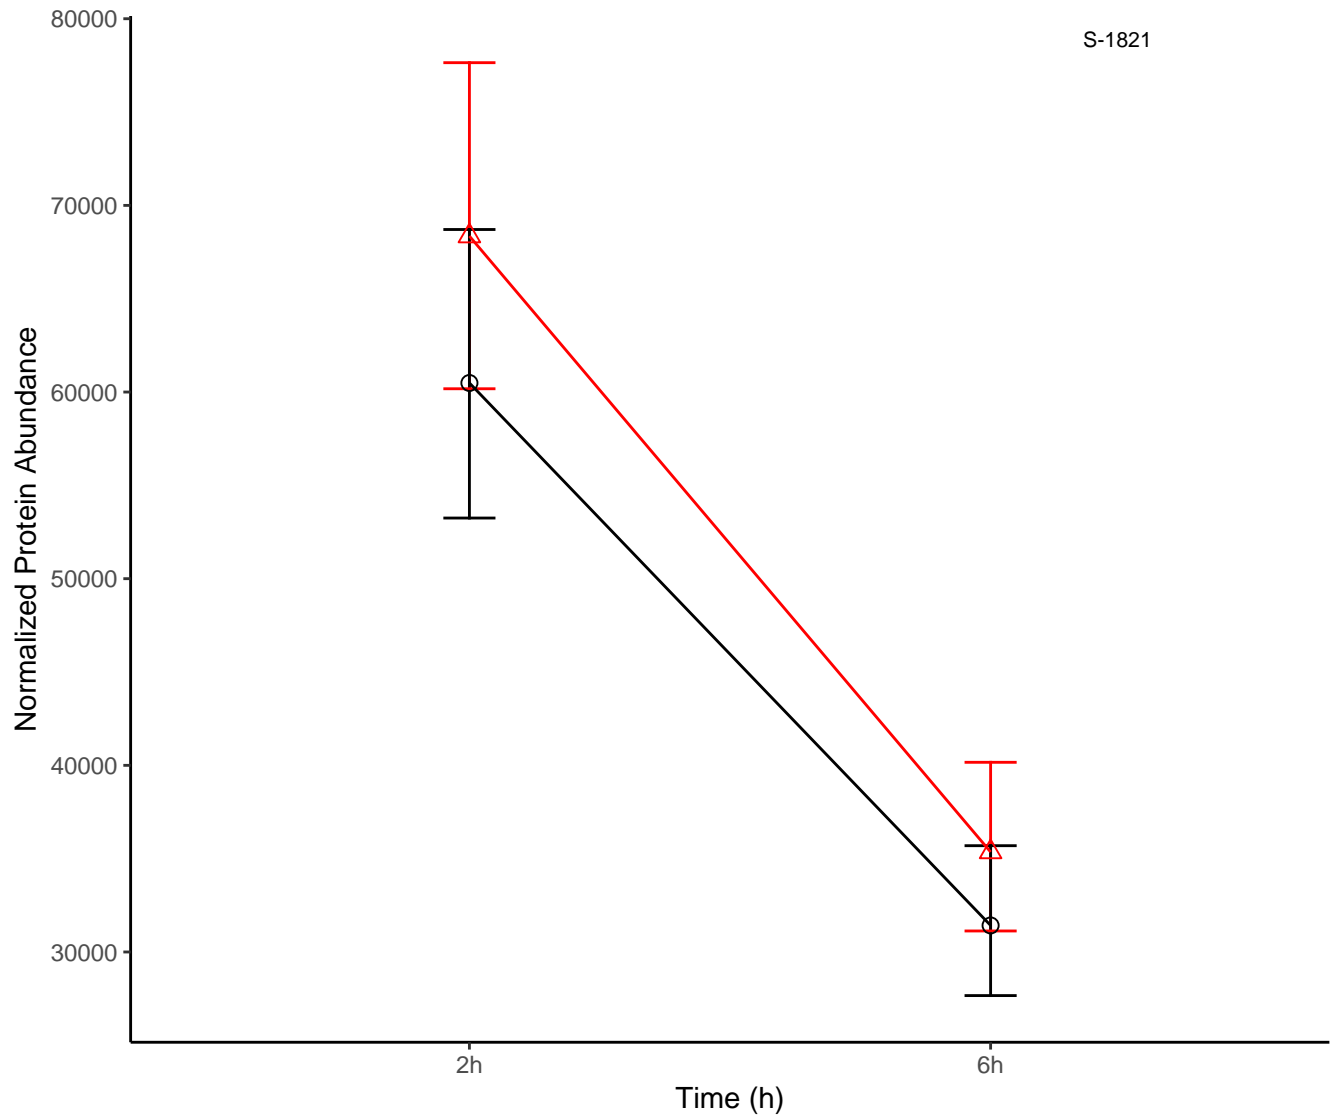

○ TSB-dex

△ TSB

# RL22\_STAAM

S-1822

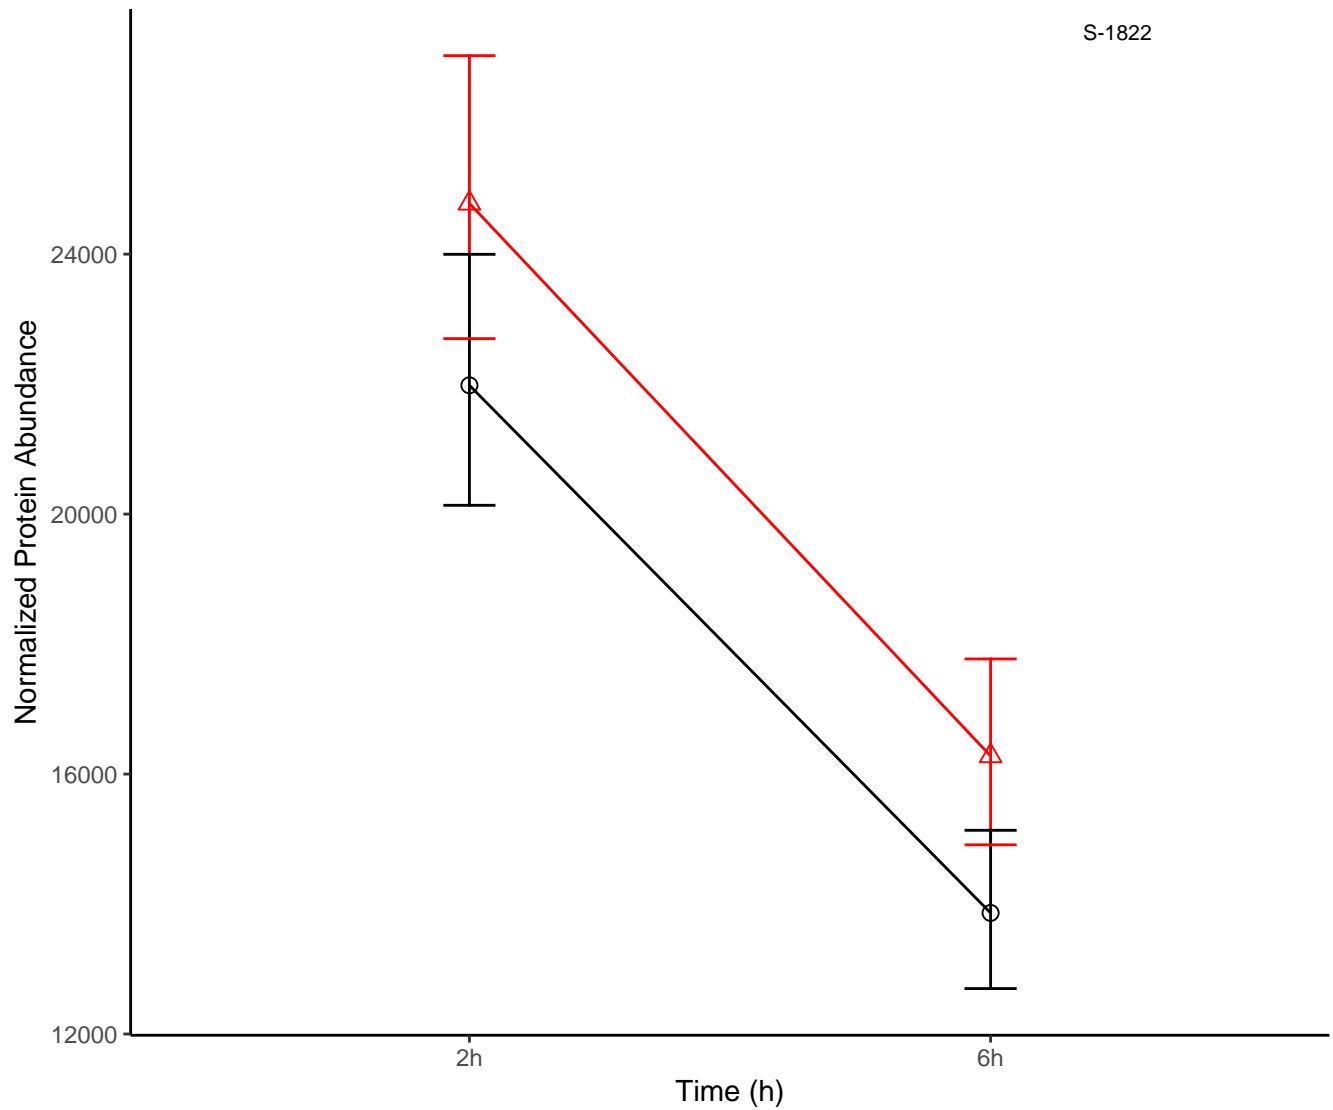

○ TSB-dex

△ TSB

# RL23\_STAAM

S-1823

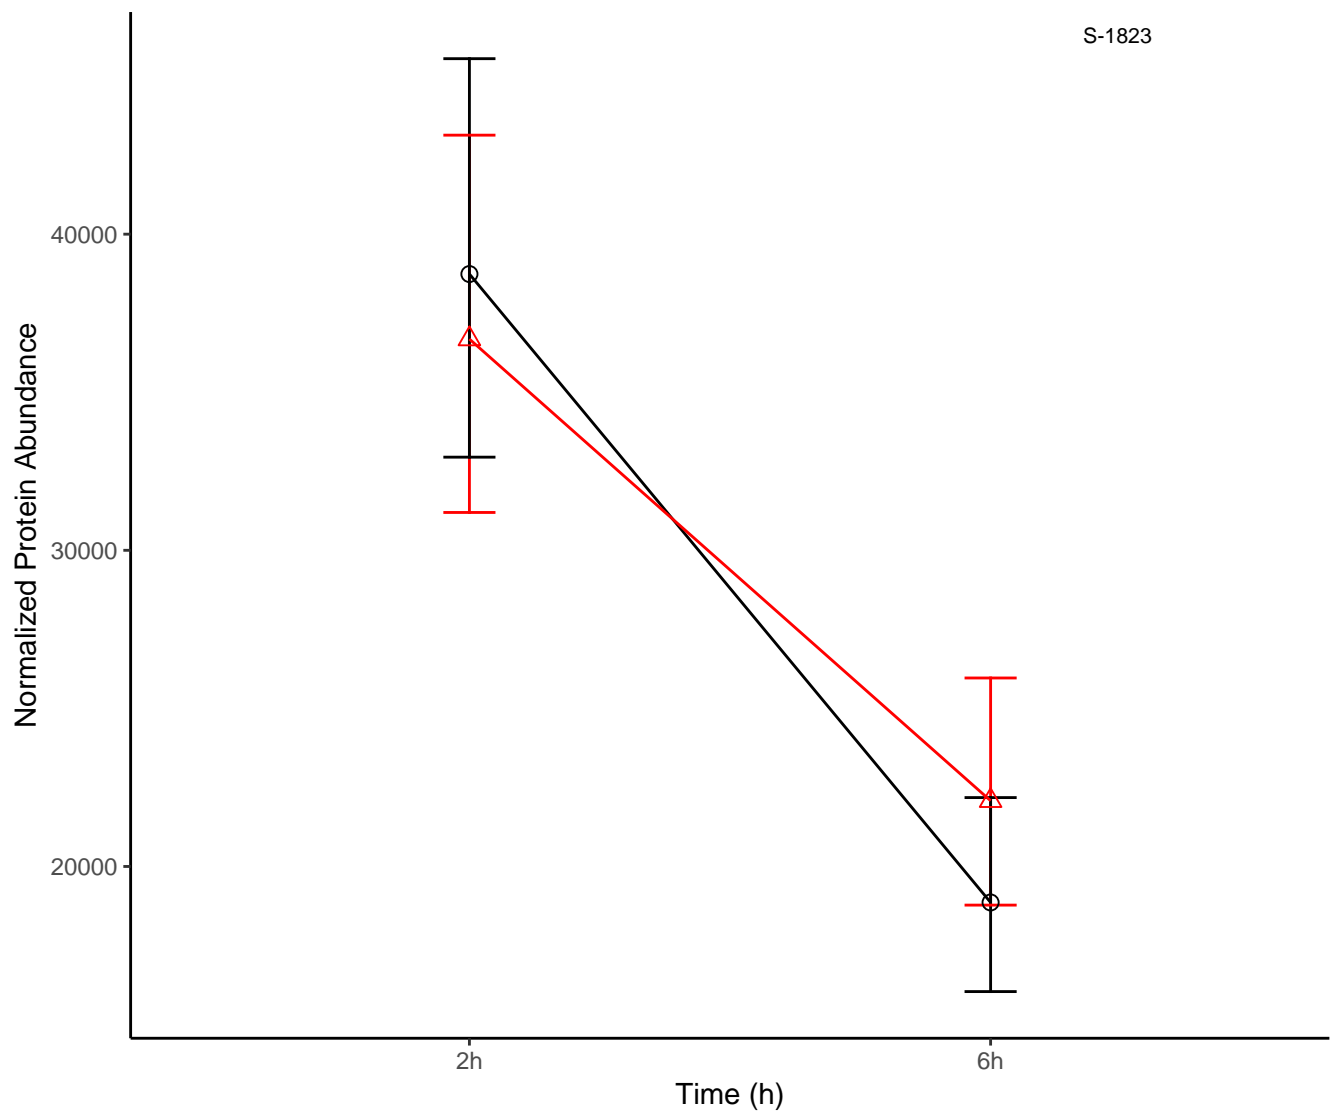

○ TSB-dex

△ TSB

# RL24\_STAAM

S-1824

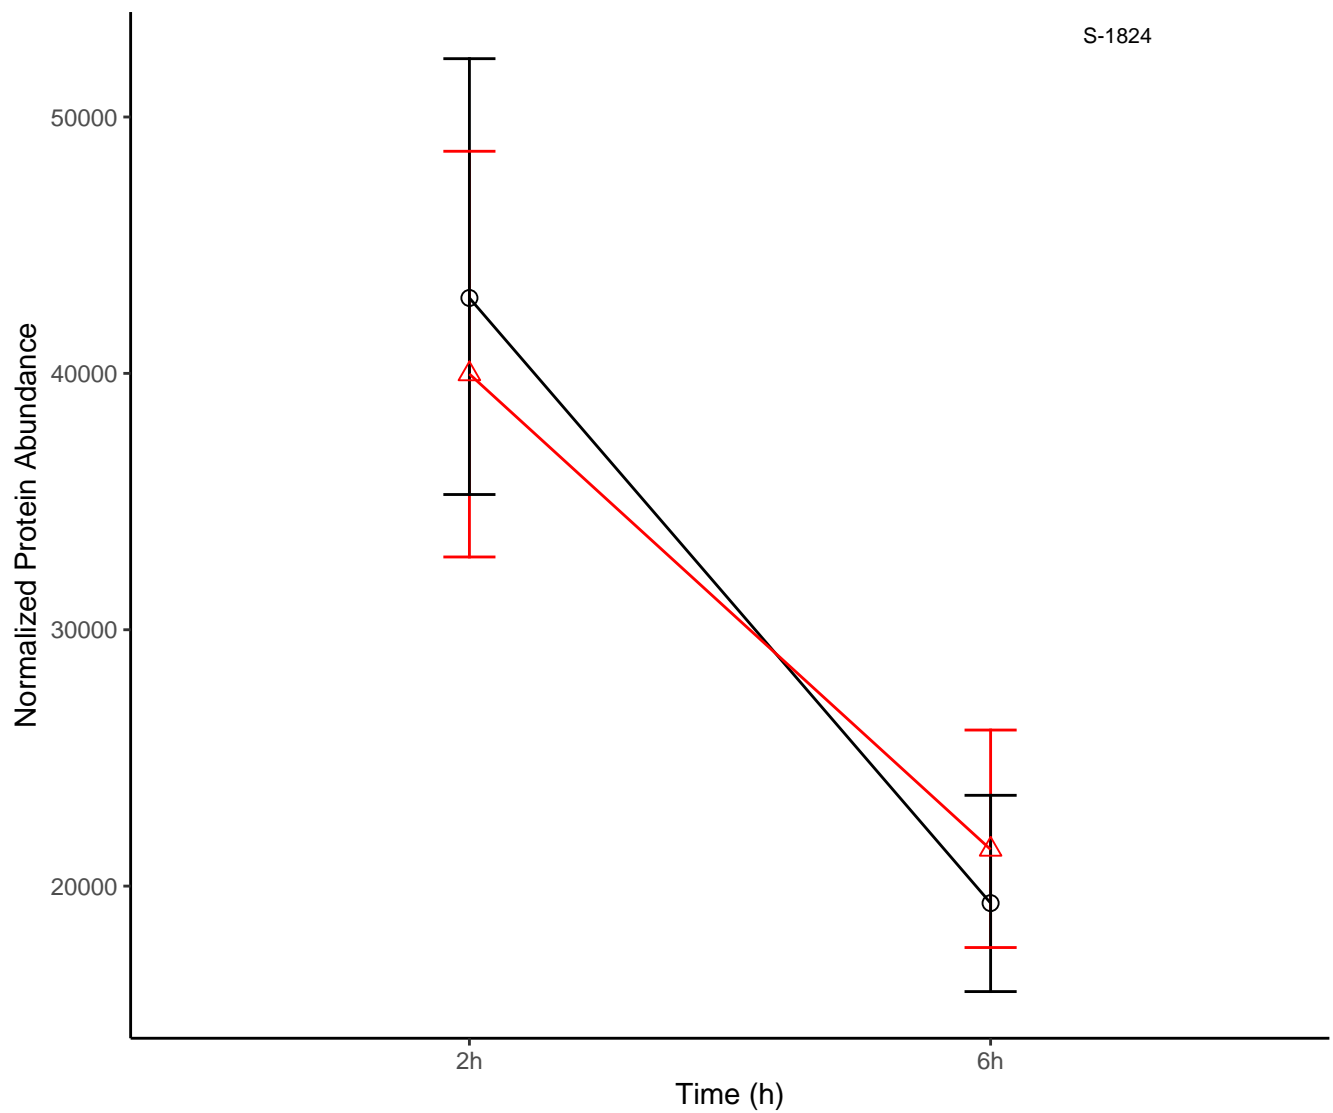

○ TSB-dex

△ TSB



# RL25\_STAAM

S-1825

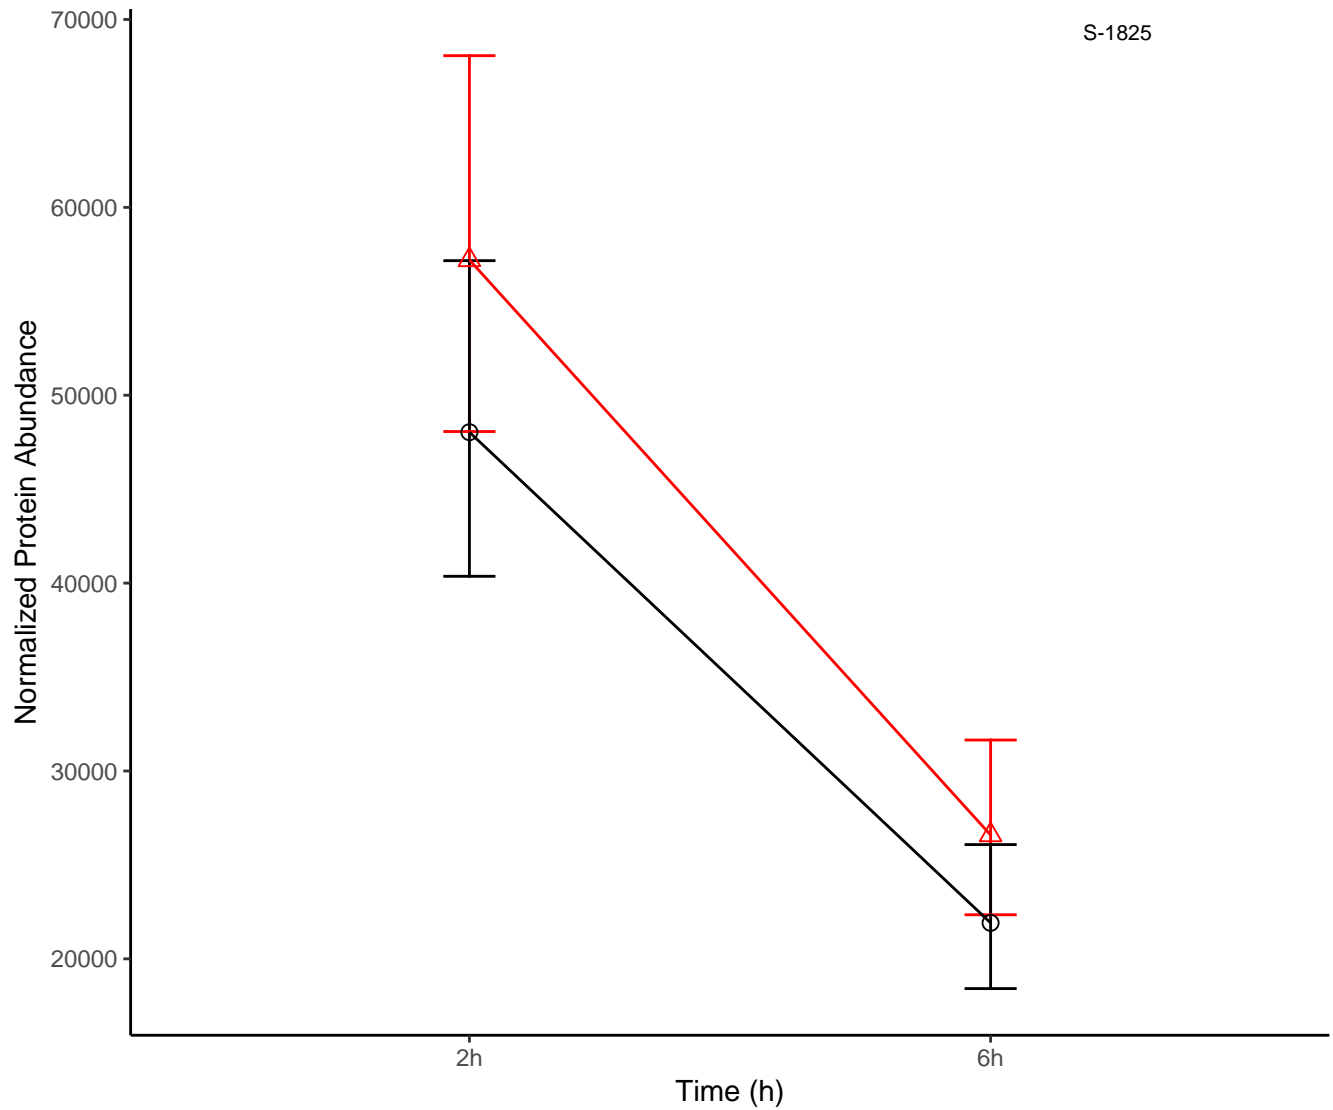

○ TSB-dex

△ TSB

# RL27\_STAAM

S-1826

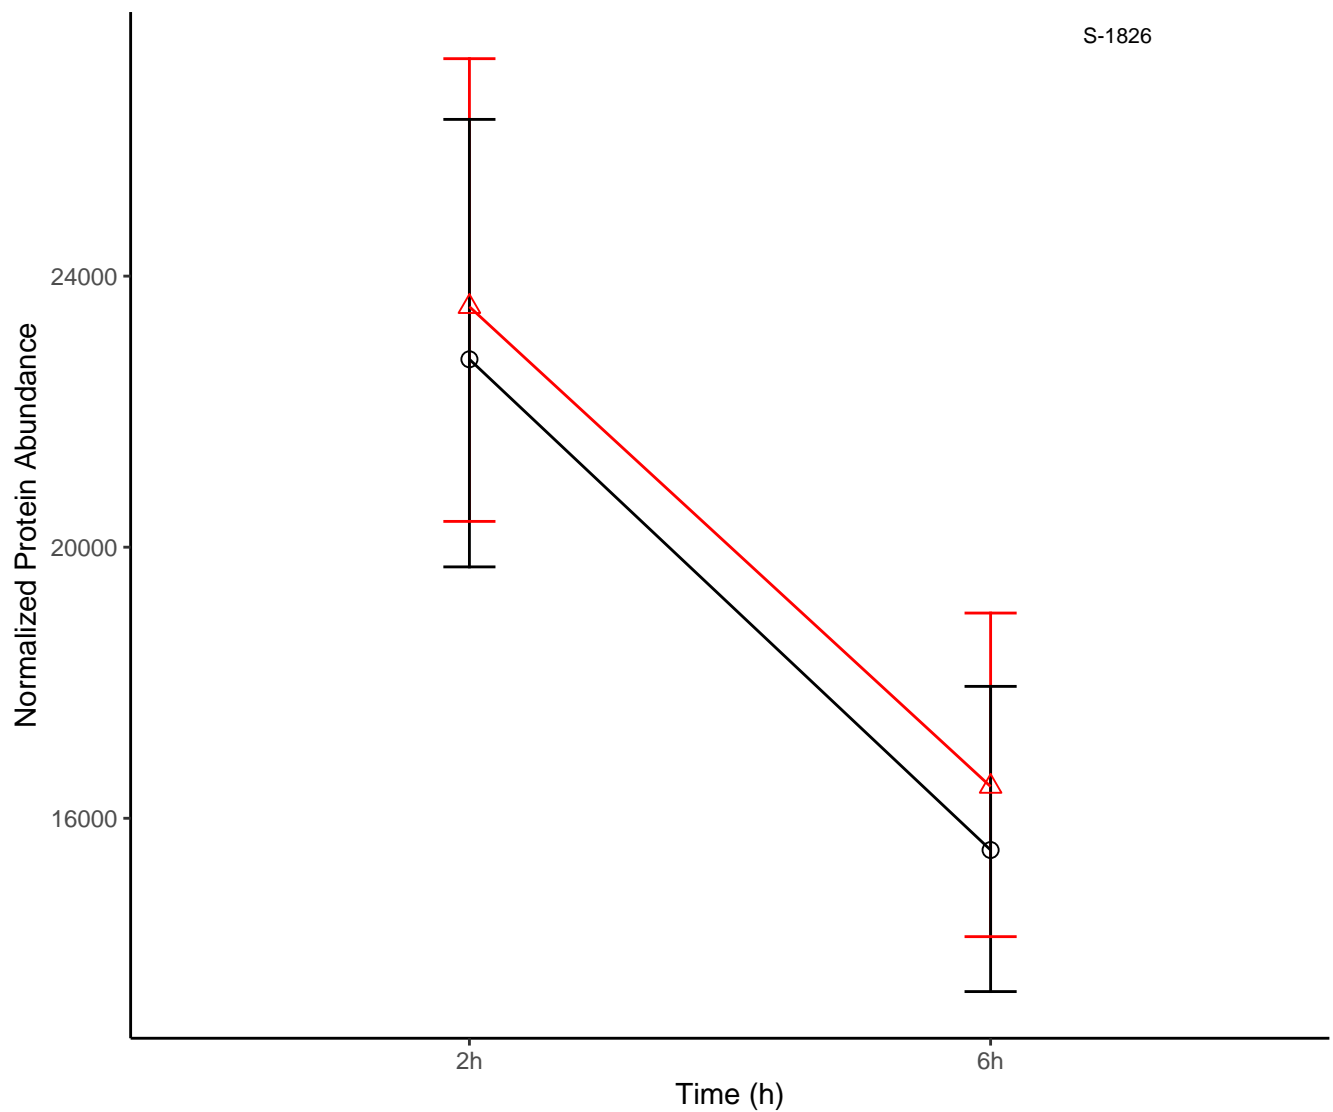

○ TSB-dex

△ TSB

# RL28\_STAAM

S-1827

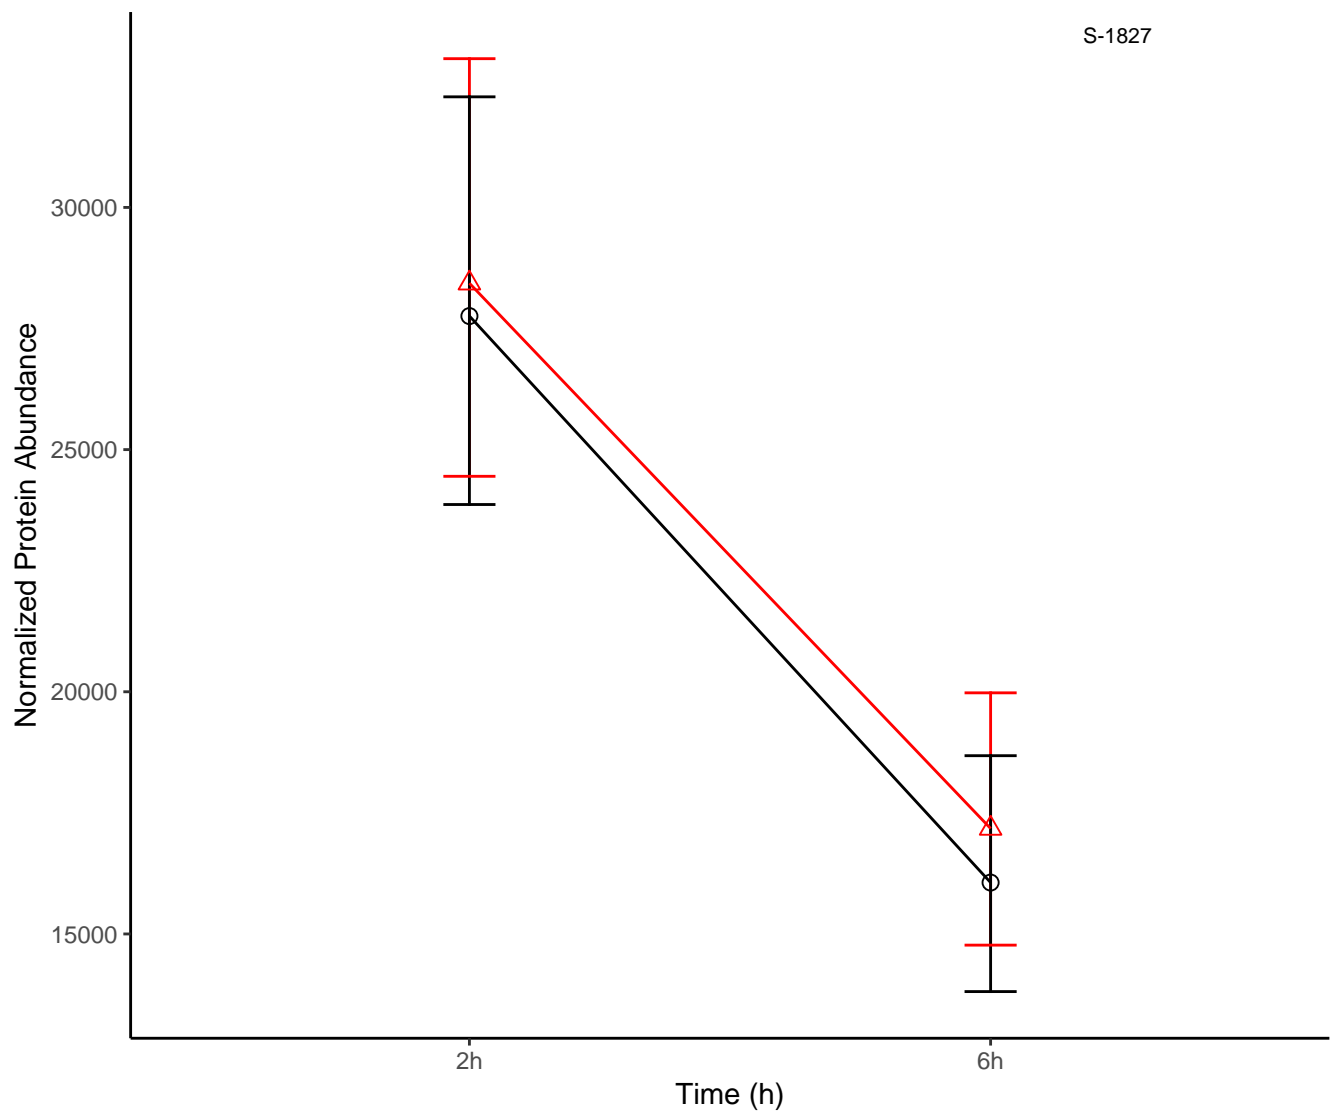

○ TSB-dex

△ TSB

# RL29\_STAAM

S-1828

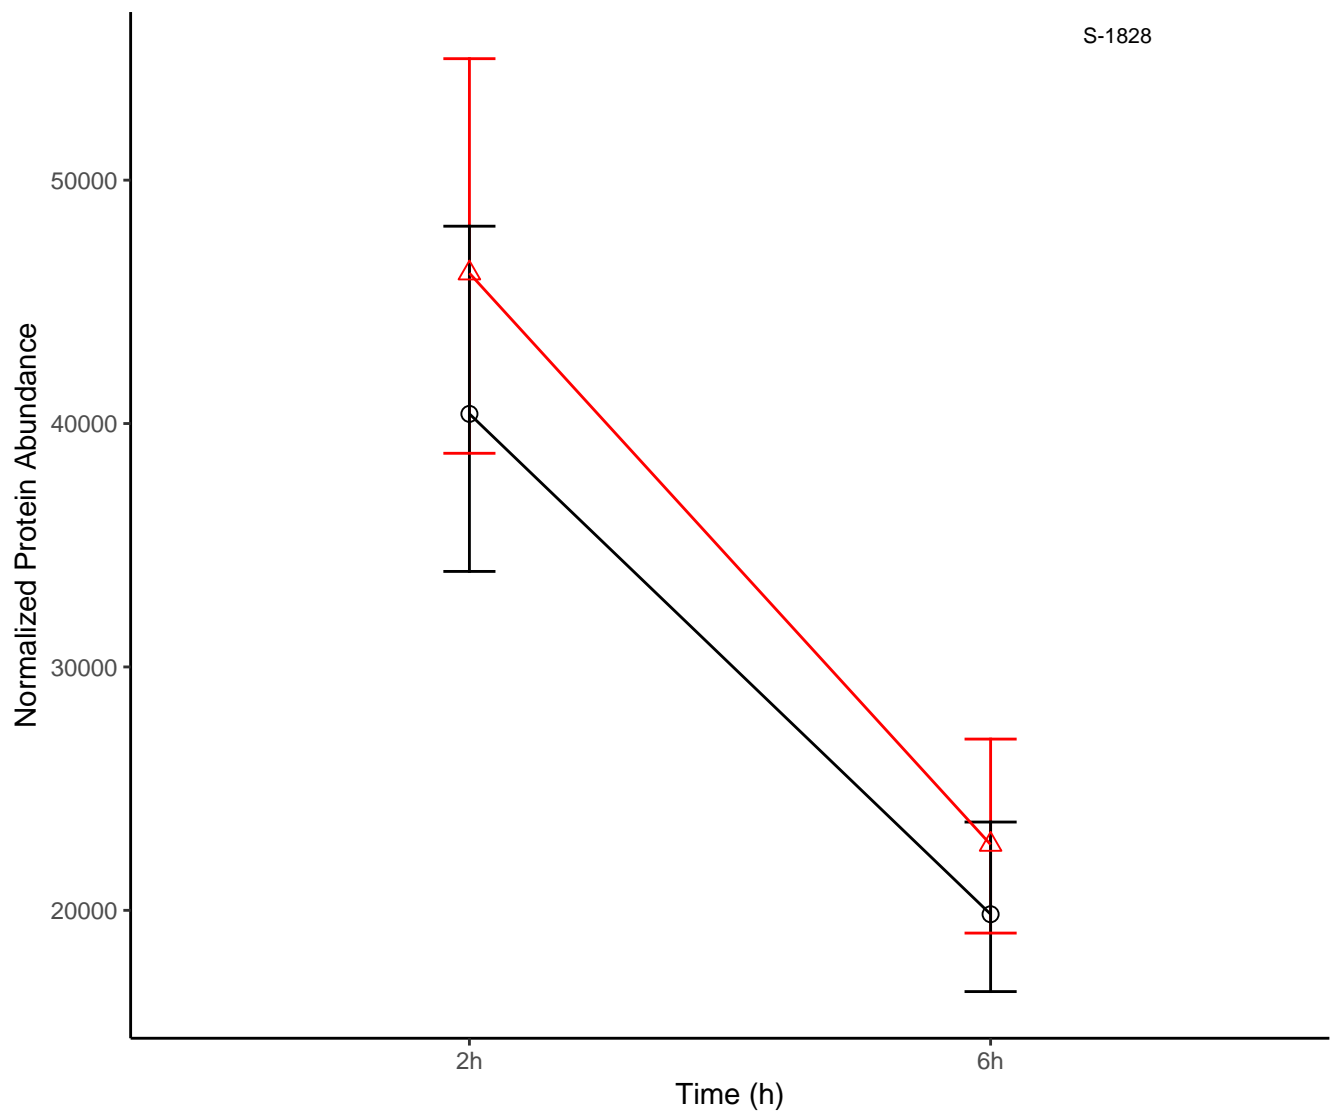

○ TSB-dex

△ TSB

# RL3\_STAAM

S-1829

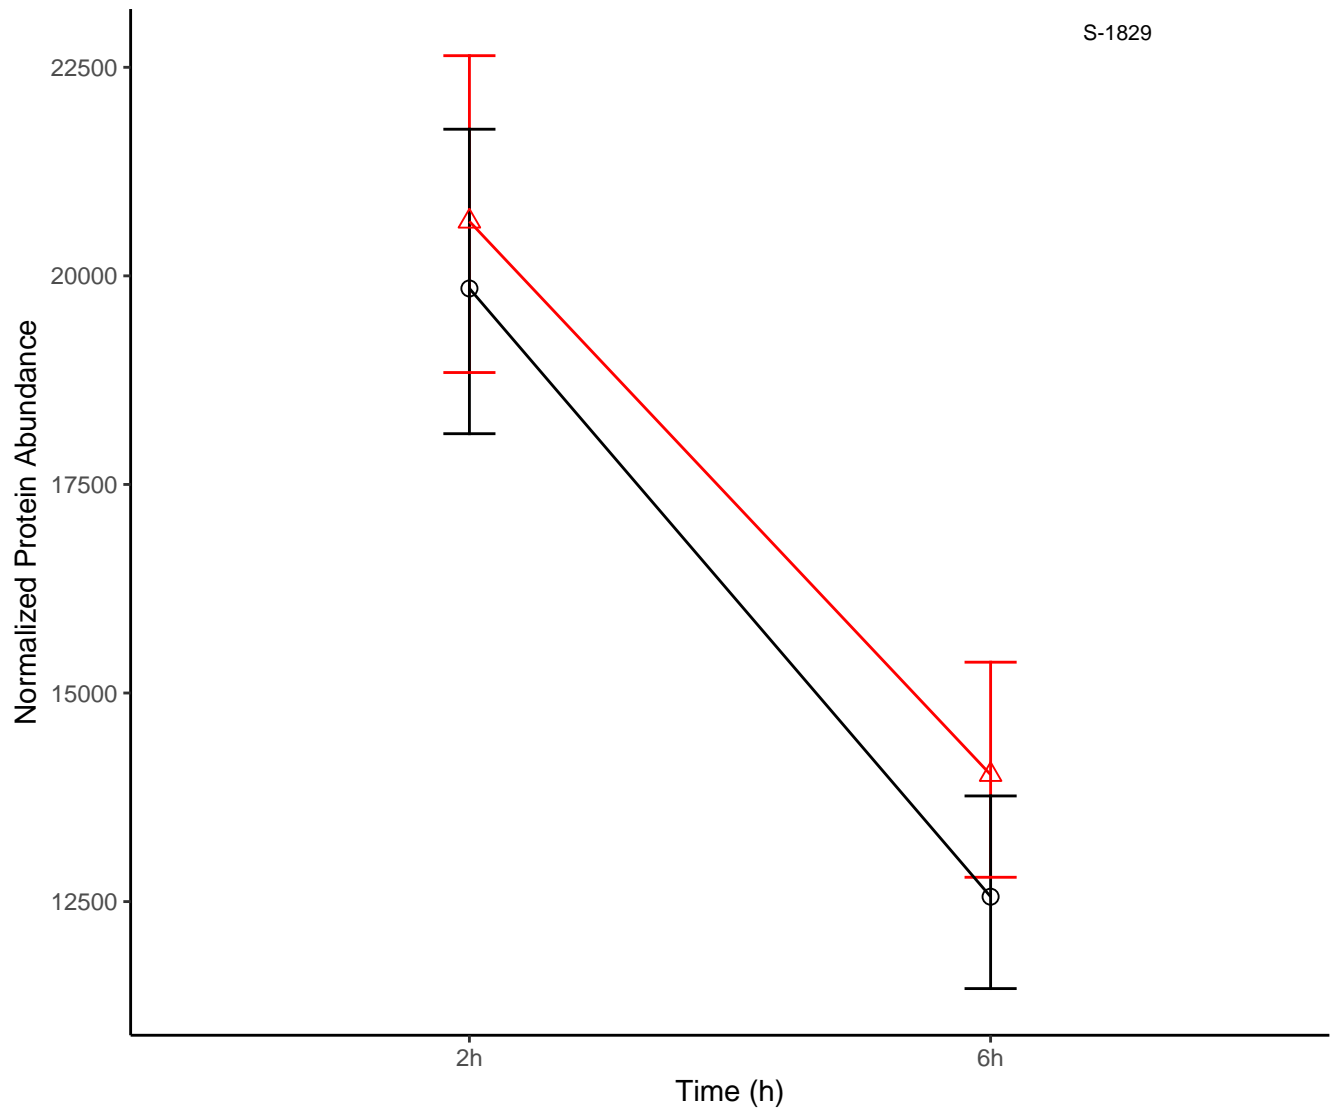

○ TSB-dex

△ TSB

# RL30\_STAAM

S-1830

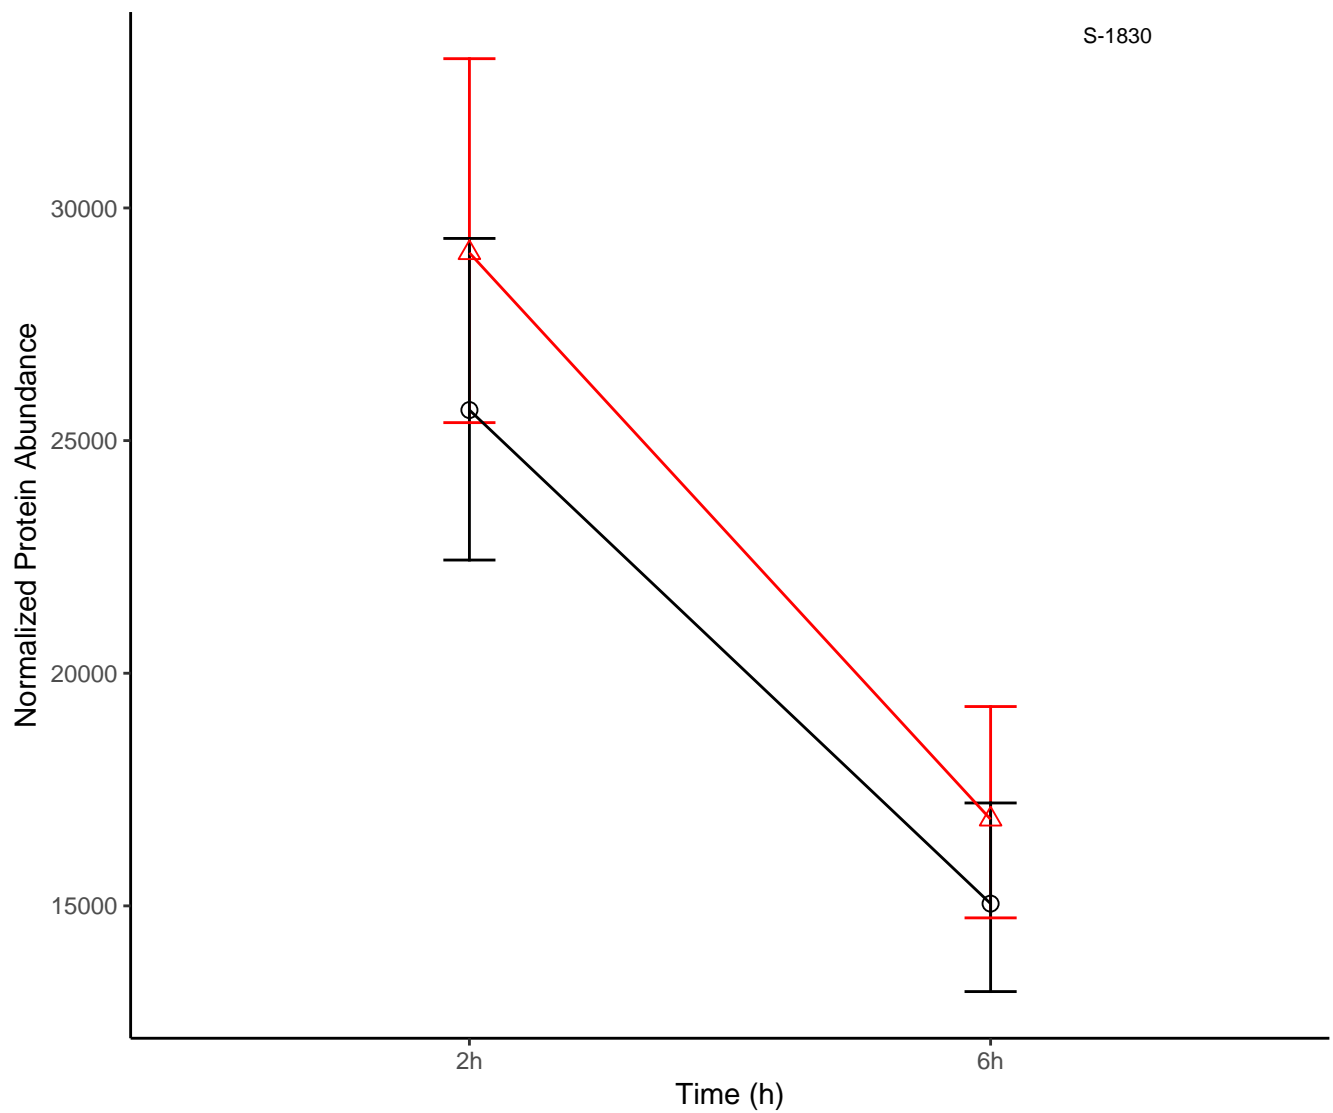

○ TSB-dex

△ TSB

# RL31B\_STAAM

S-1831

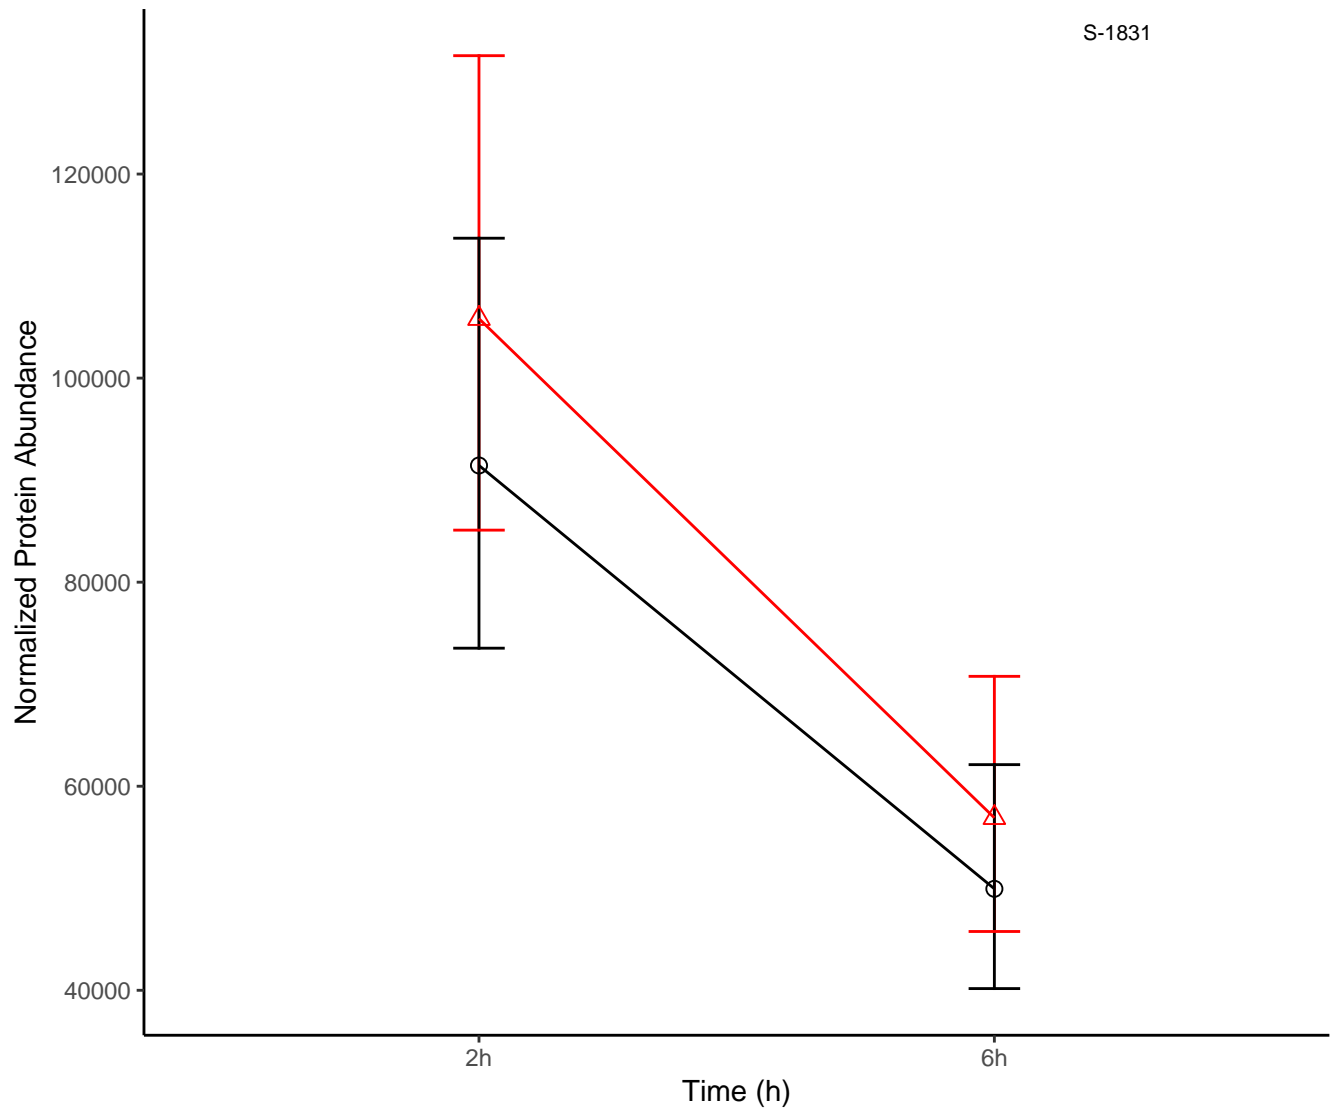

○ TSB-dex

△ TSB

# RL32\_STAAM

S-1832

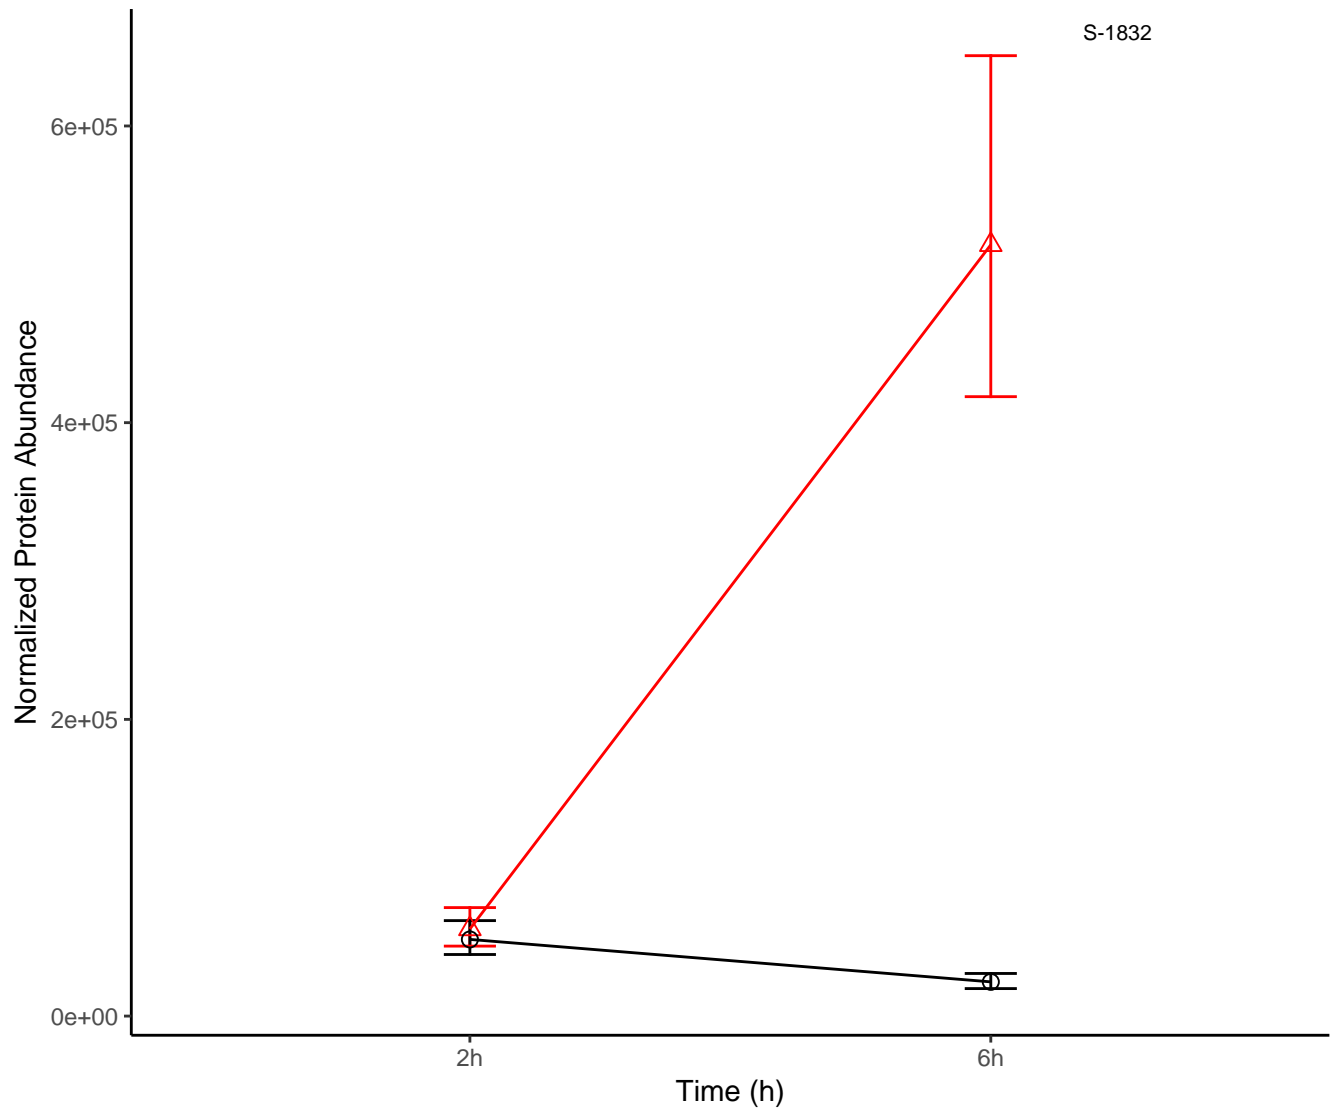

○ TSB-dex

△ TSB



# RL331\_STAAM

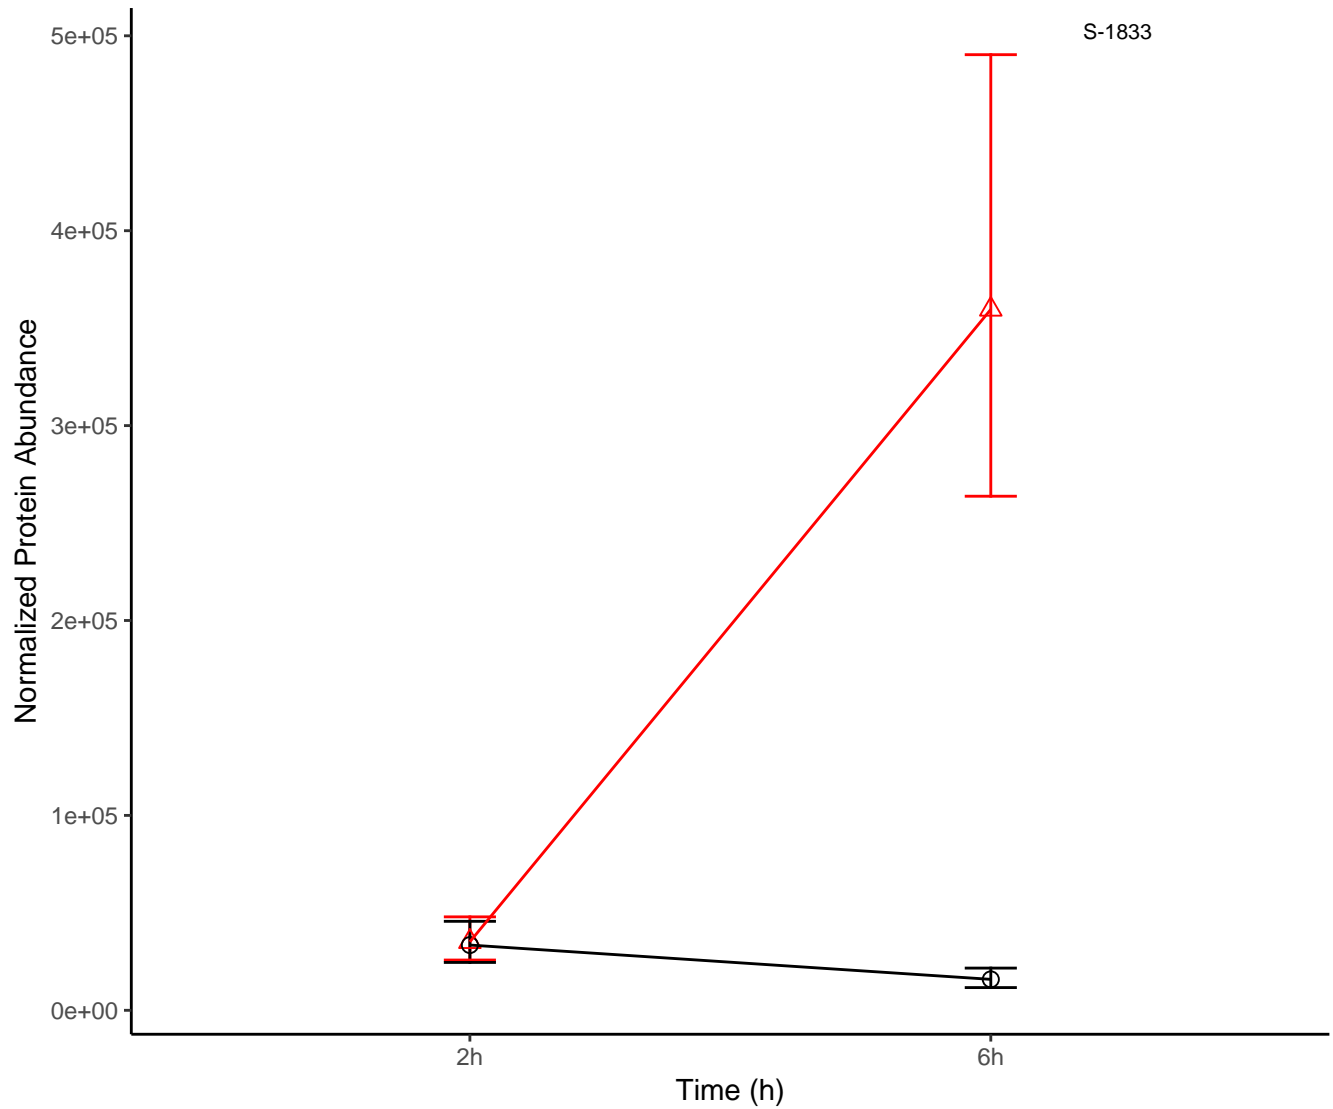

○ TSB-dex

△ TSB

# RL332\_STAAM

S-1834

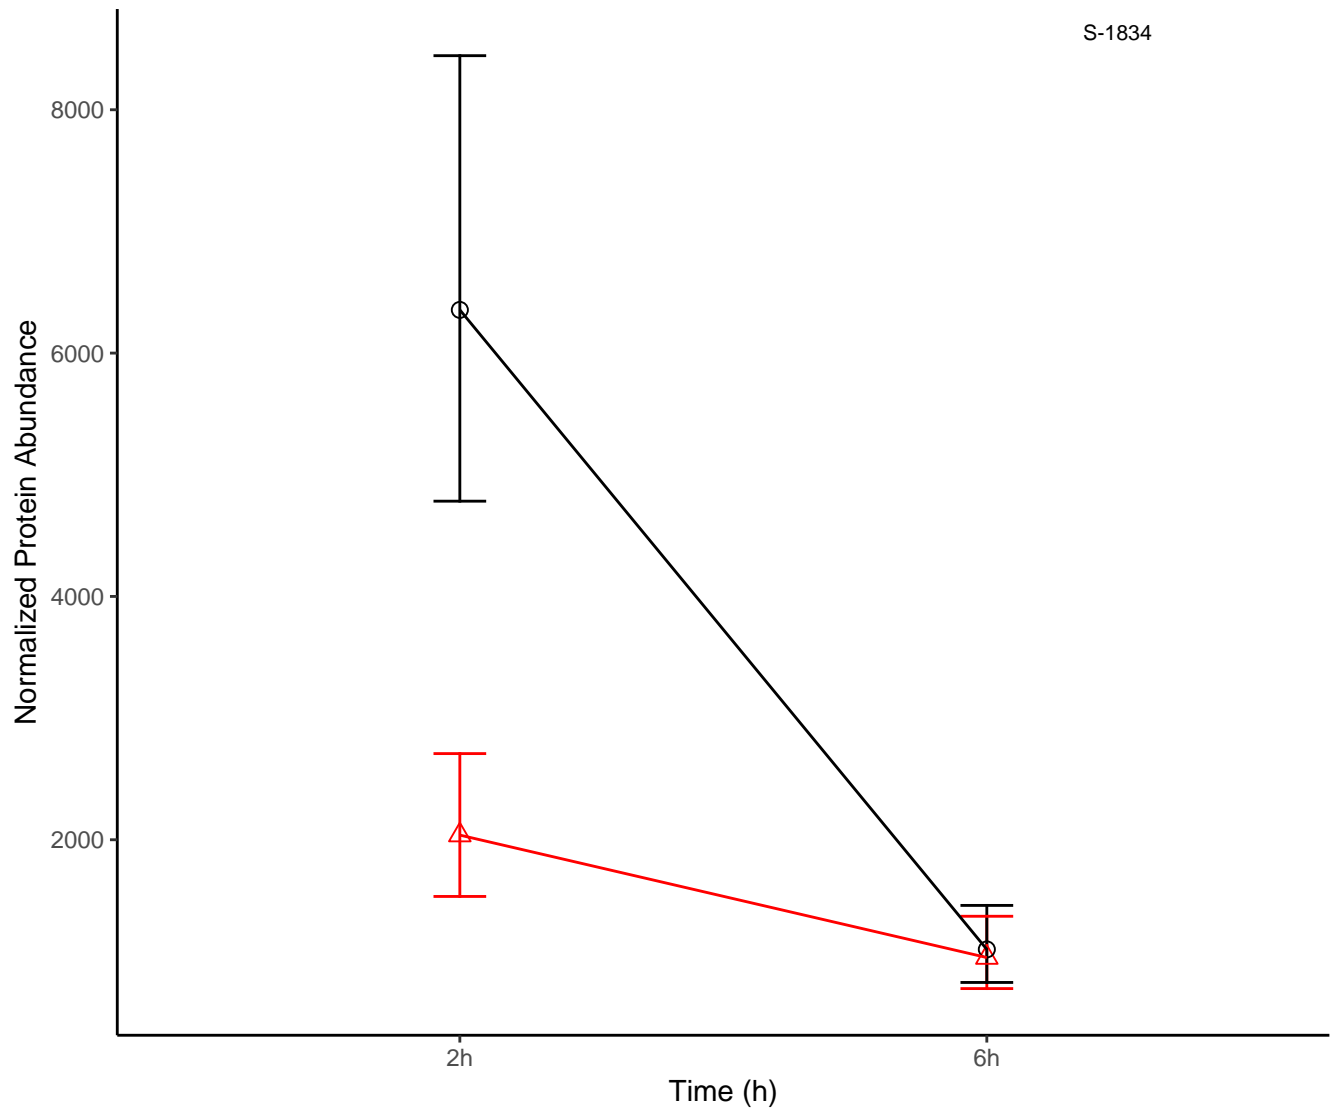

○ TSB-dex

△ TSB

# RL35\_STAAM

S-1835

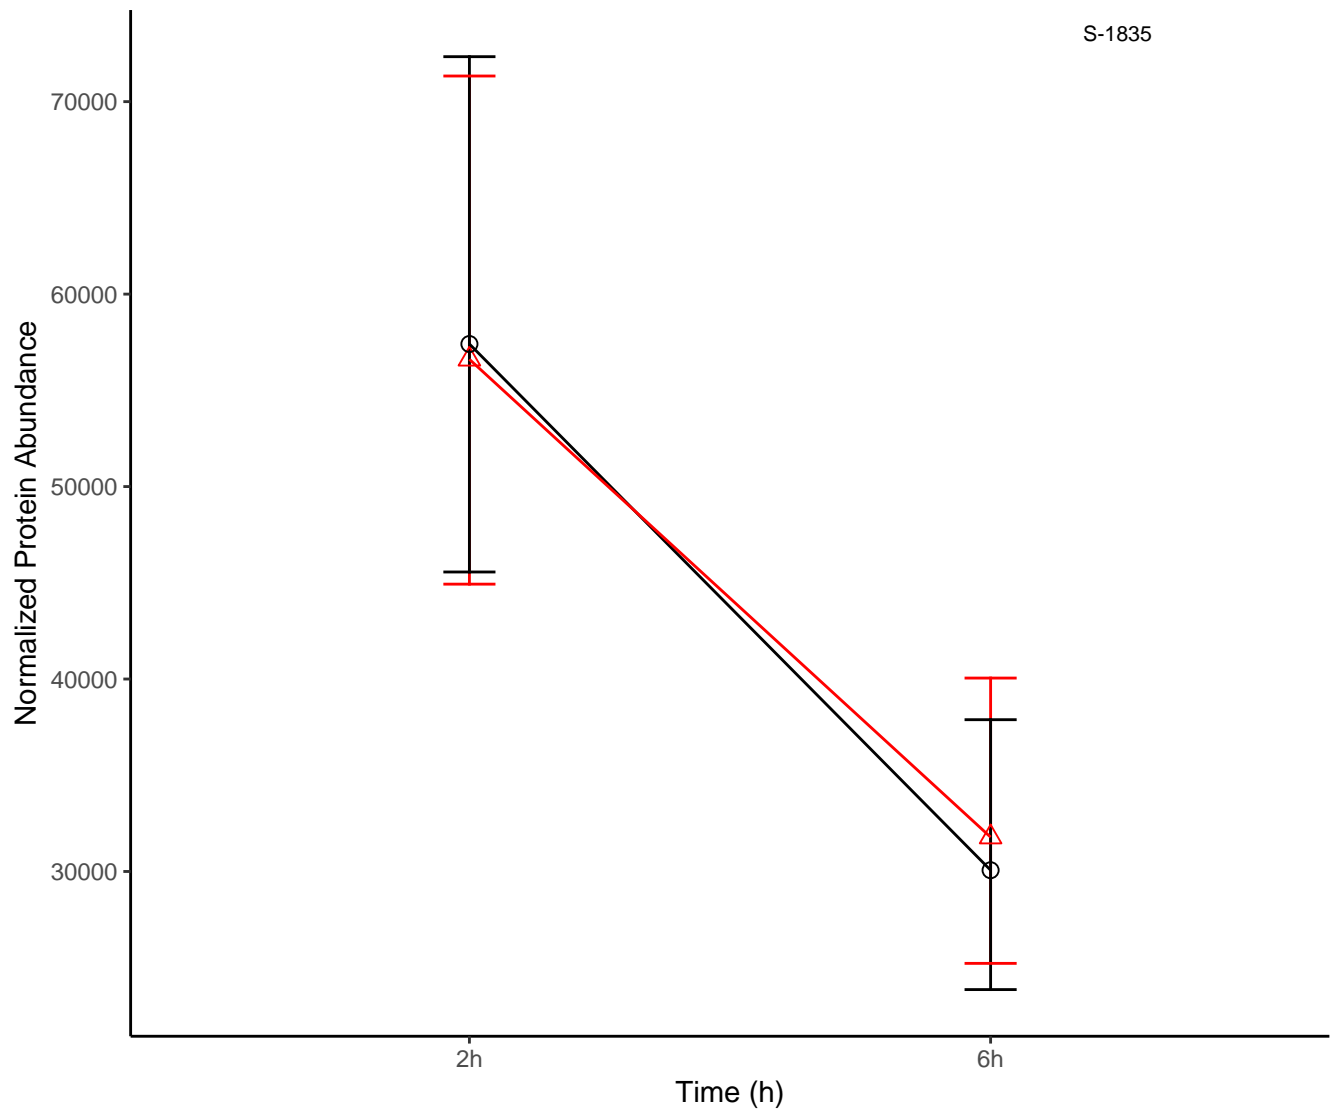

○ TSB-dex

△ TSB

# RL36\_STAAM

S-1836

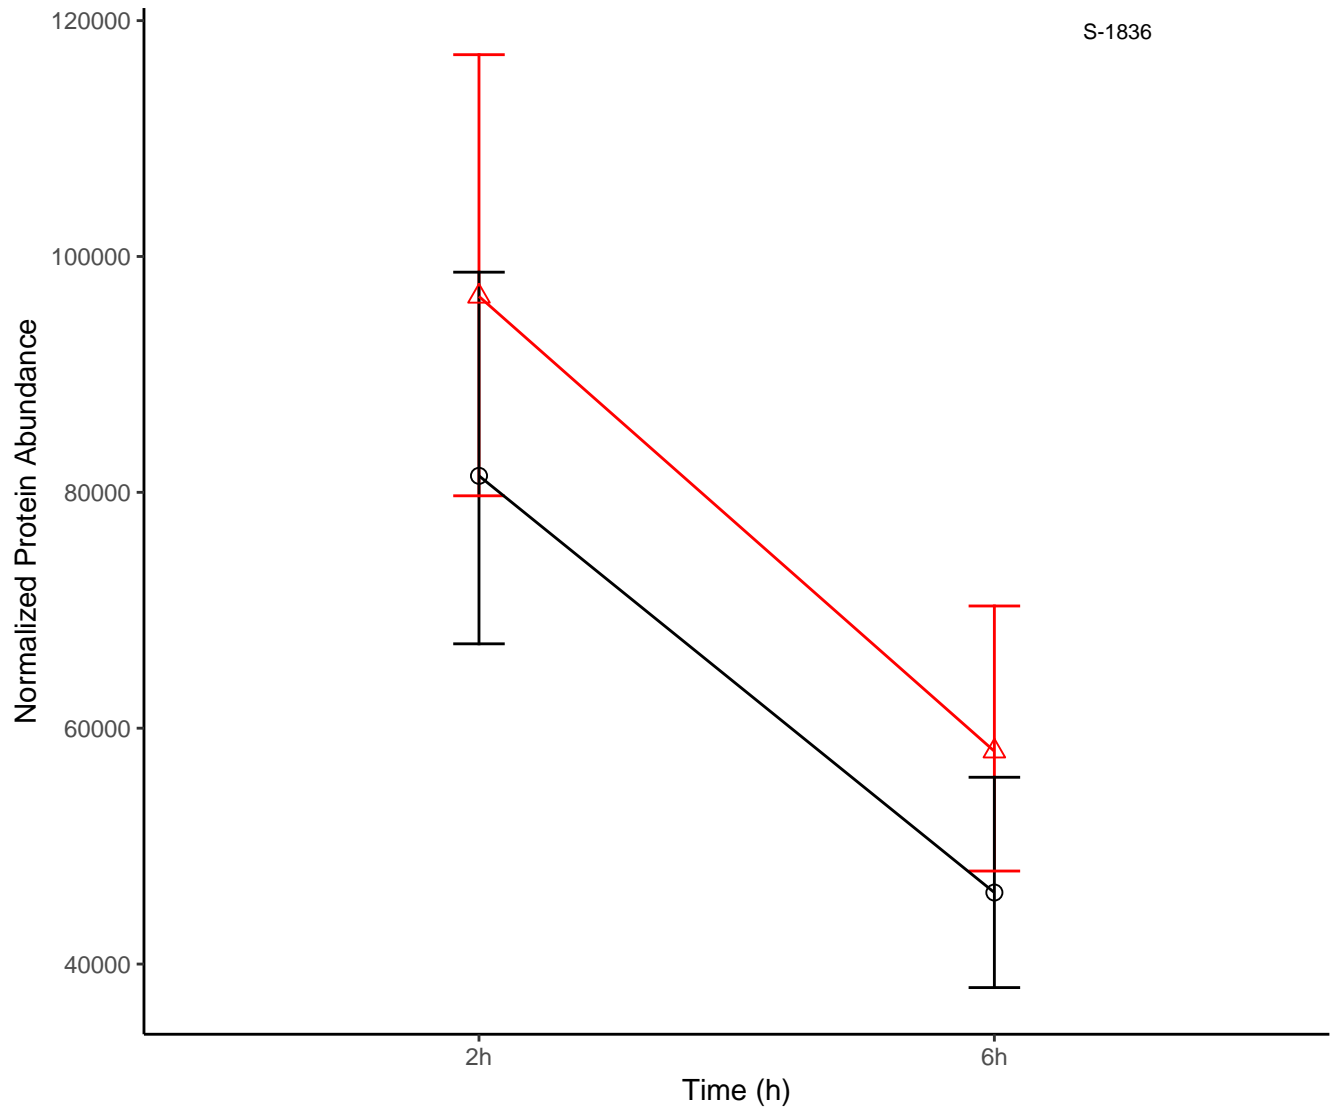

○ TSB-dex

△ TSB

# RL4\_STAAM

S-1837

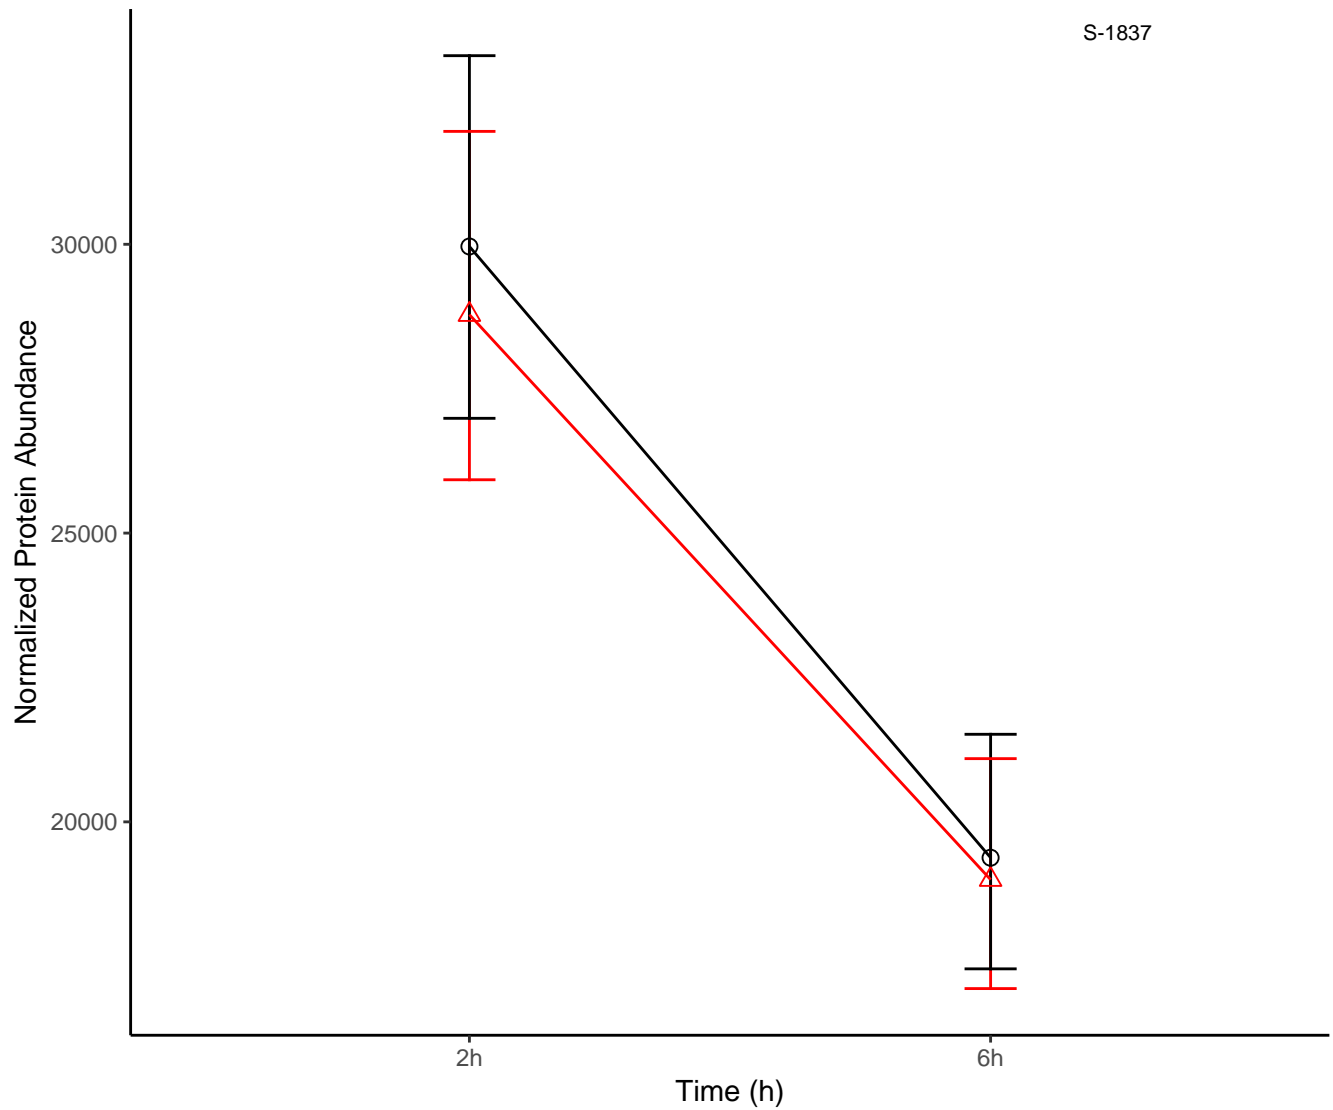

○ TSB-dex

△ TSB

# RL5\_STAAM

S-1838

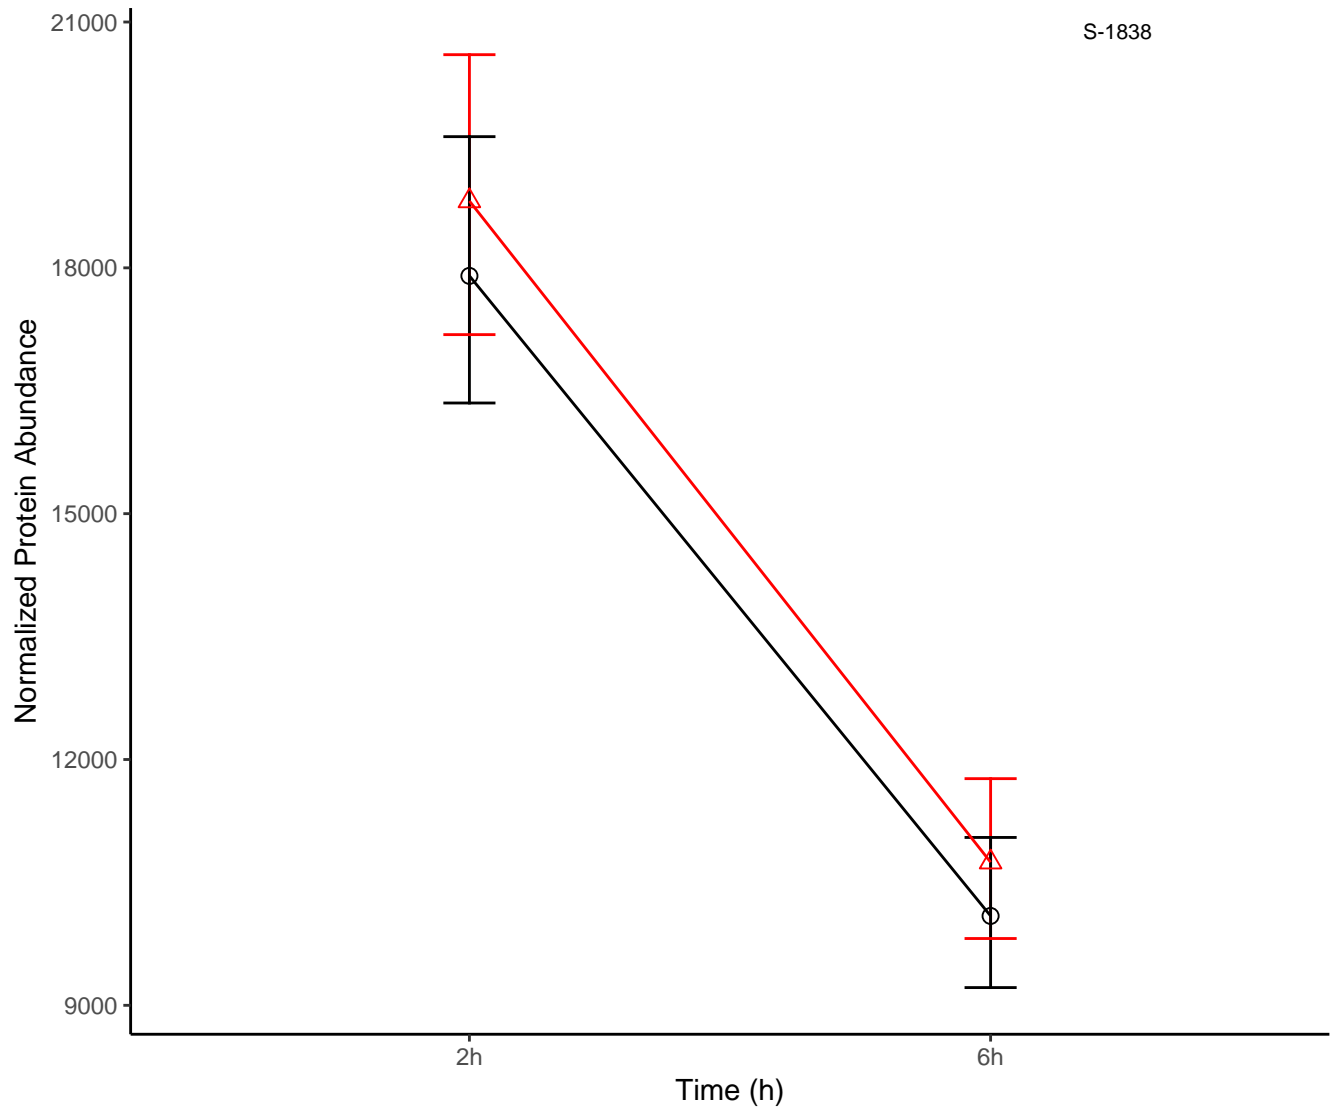

○ TSB-dex

△ TSB

# RL6\_STAAM

S-1839

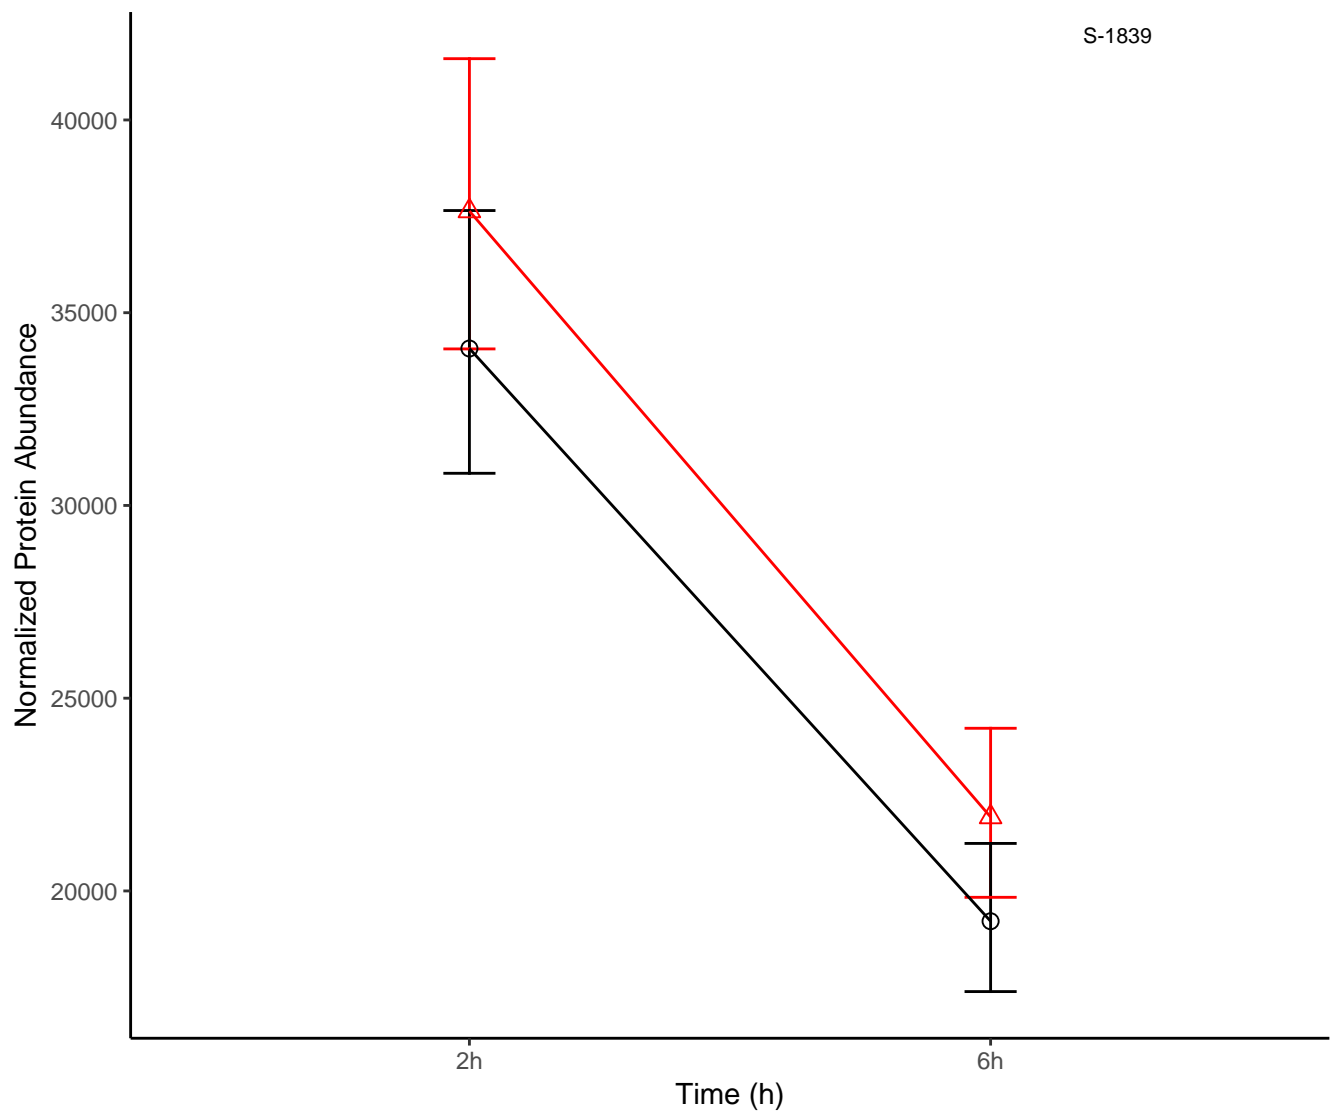

○ TSB-dex

△ TSB

# RL7\_STAAM

S-1840

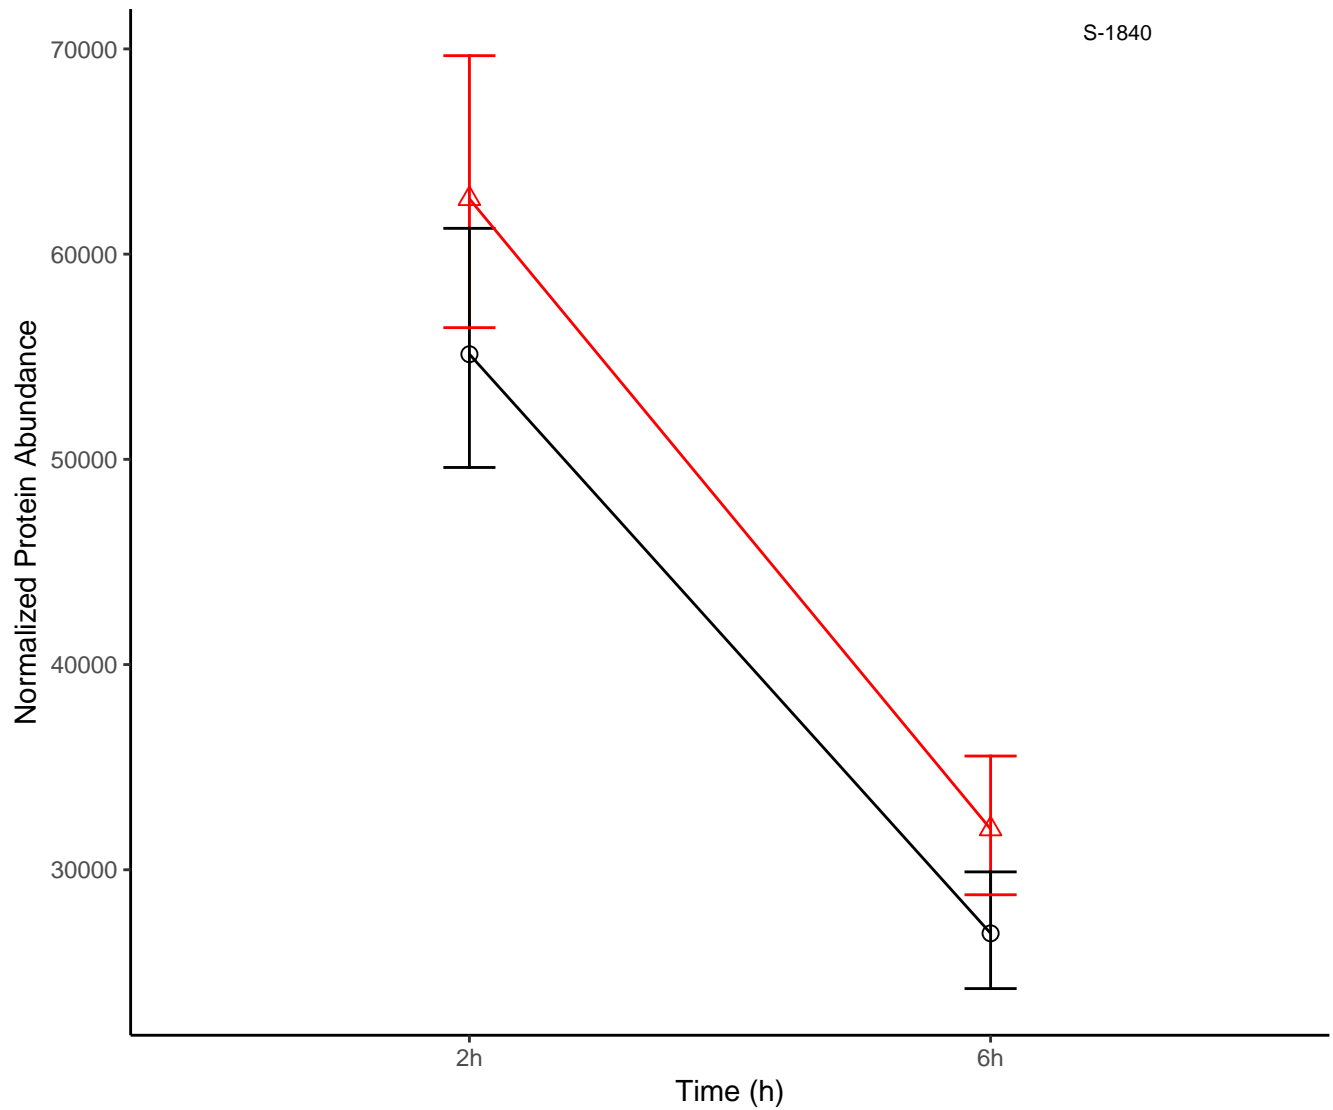

○ TSB-dex

△ TSB



# RL9\_STAAM

S-1841

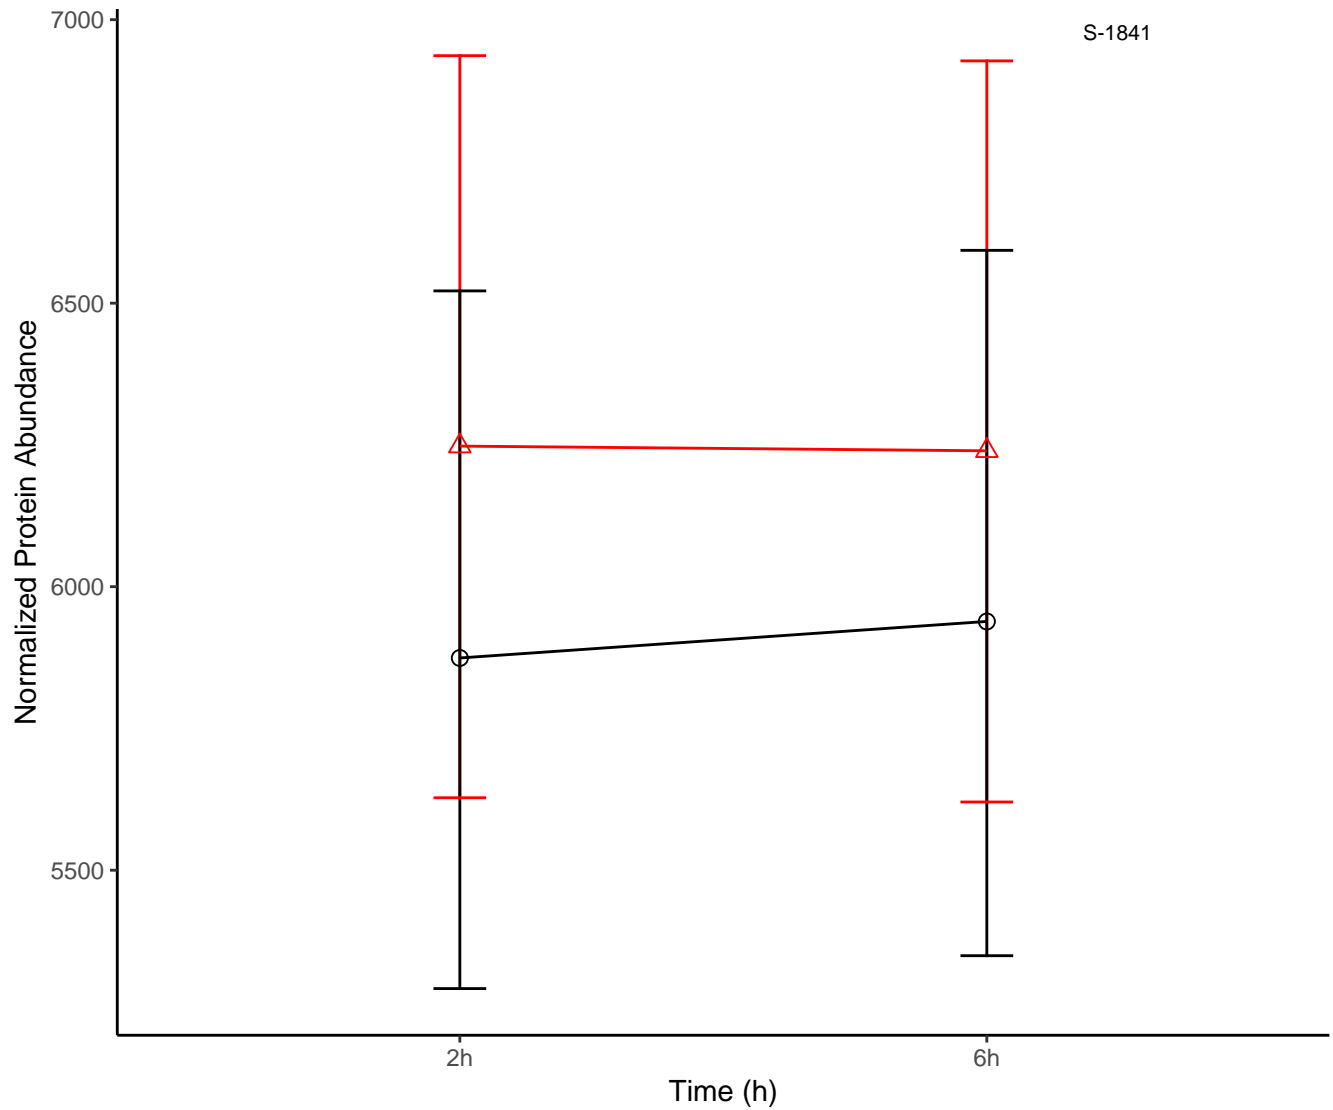

○ TSB-dex

△ TSB

# RNJ1\_STAAM

S-1842

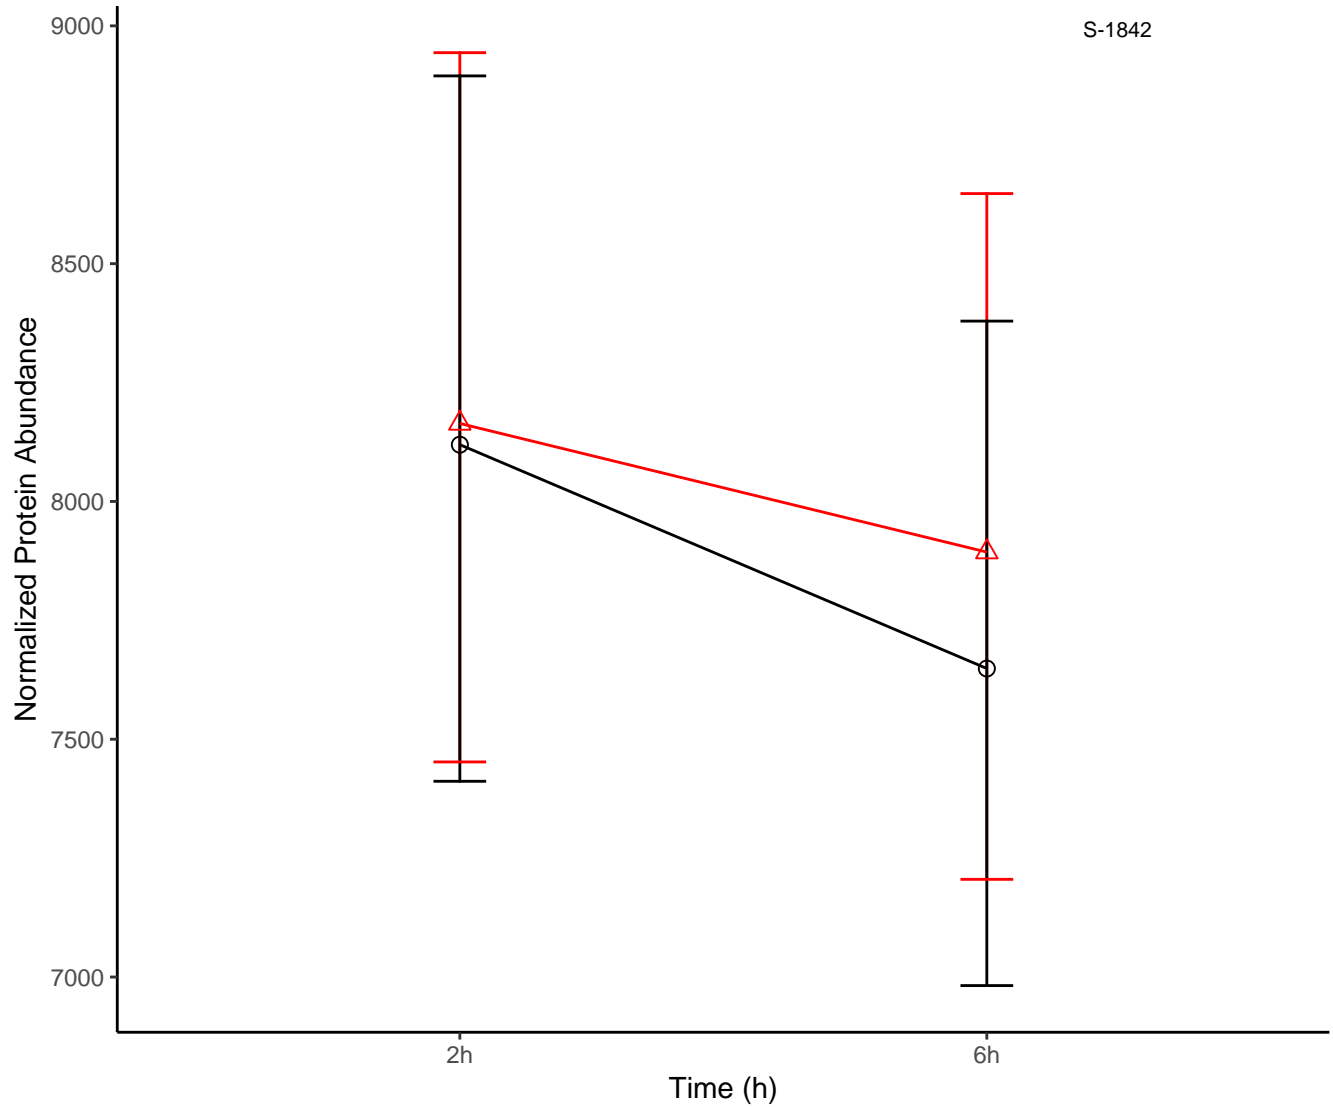

○ TSB-dex

△ TSB

# RNJ2\_STAAM

S-1843

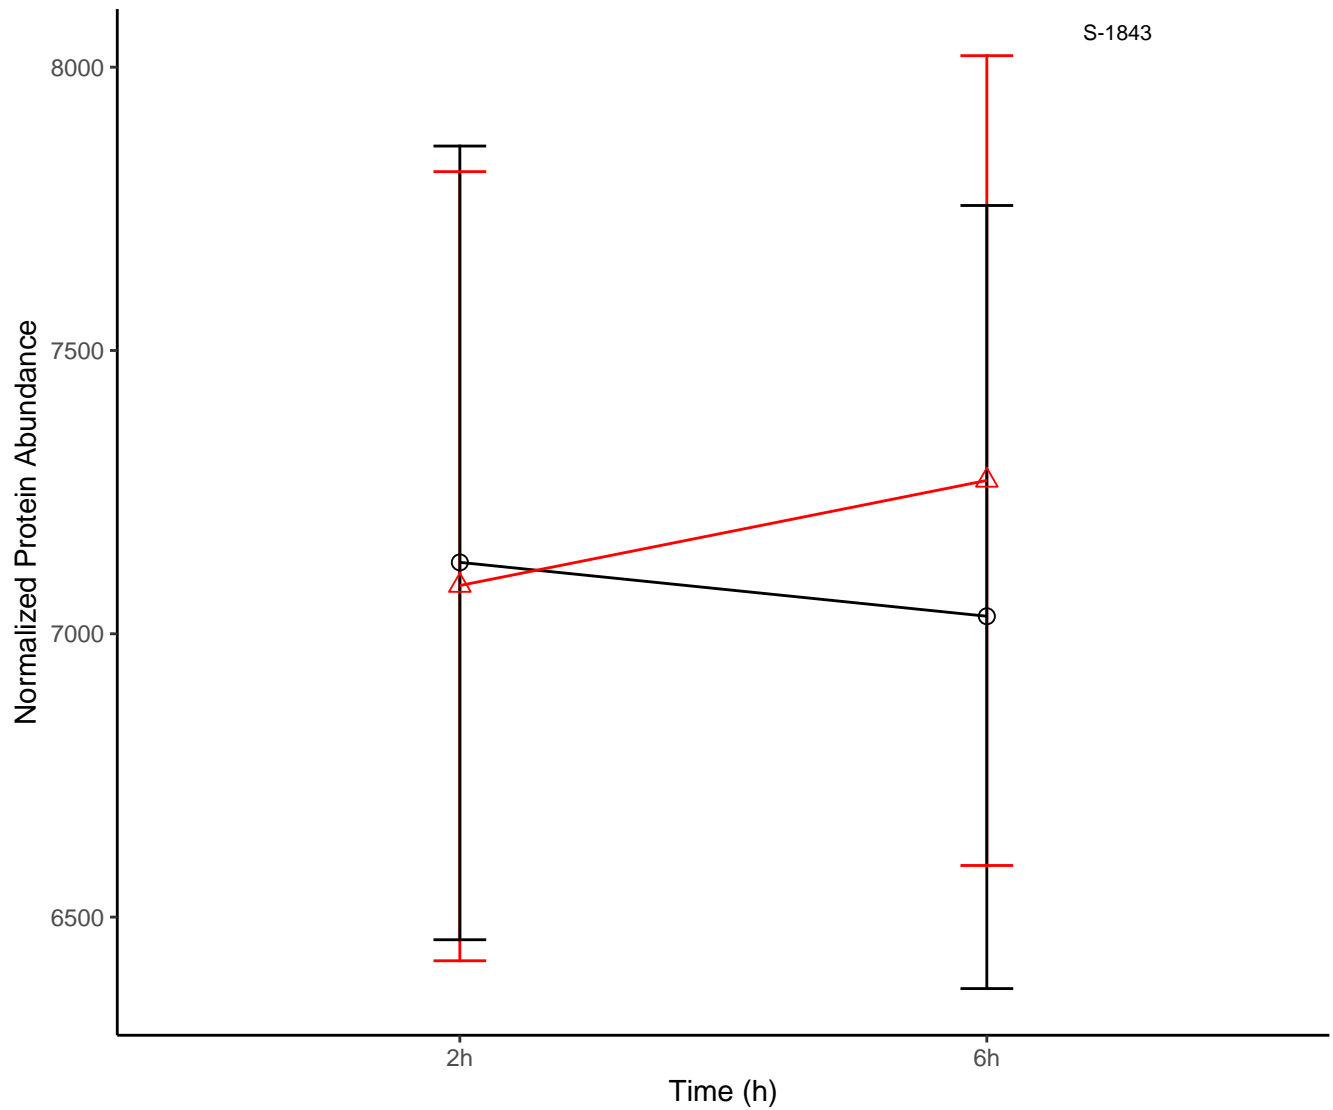

○ TSB-dex

△ TSB

# RNY\_STAAM

S-1844

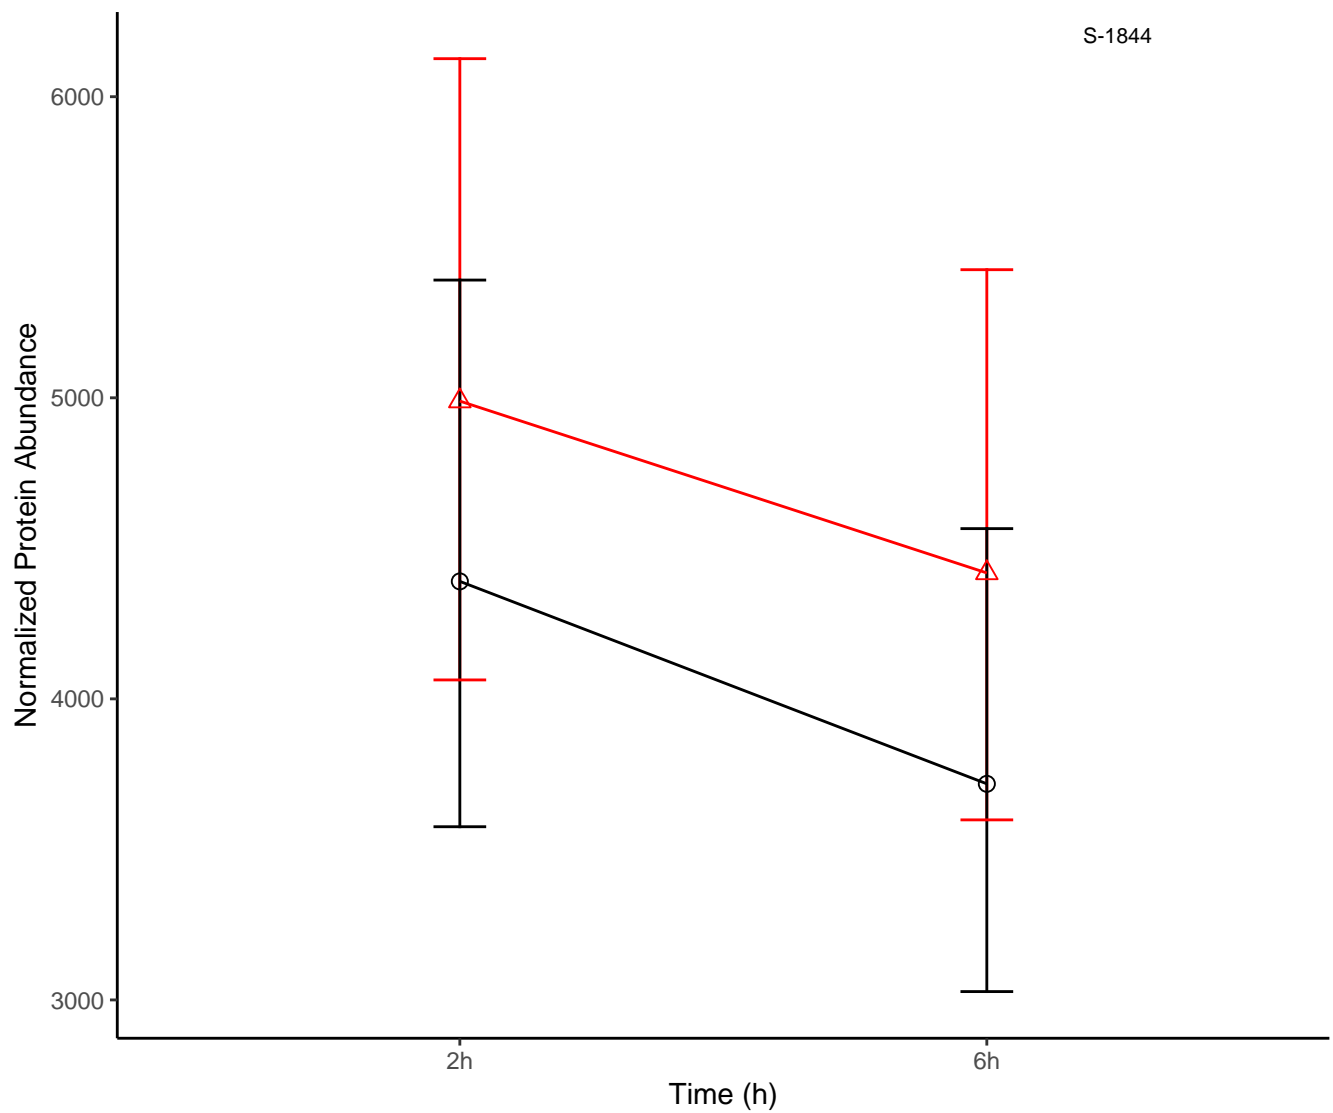

○ TSB-dex

△ TSB

# ROCA\_STAAM

S-1845

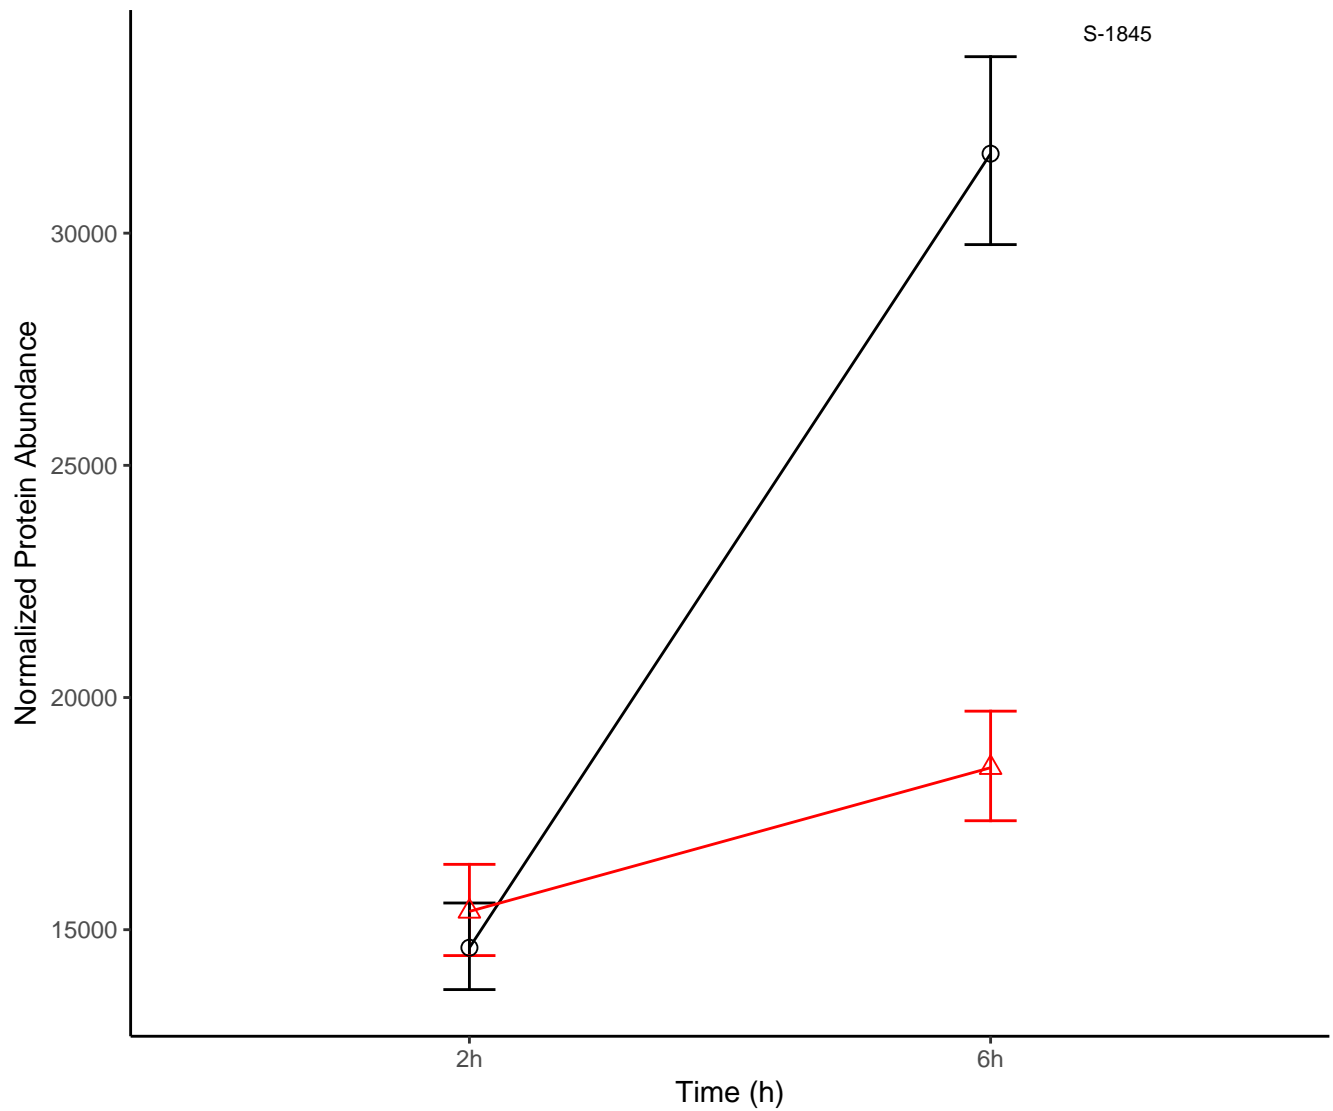

○ TSB-dex

△ TSB

# ROT\_STAAM

S-1846

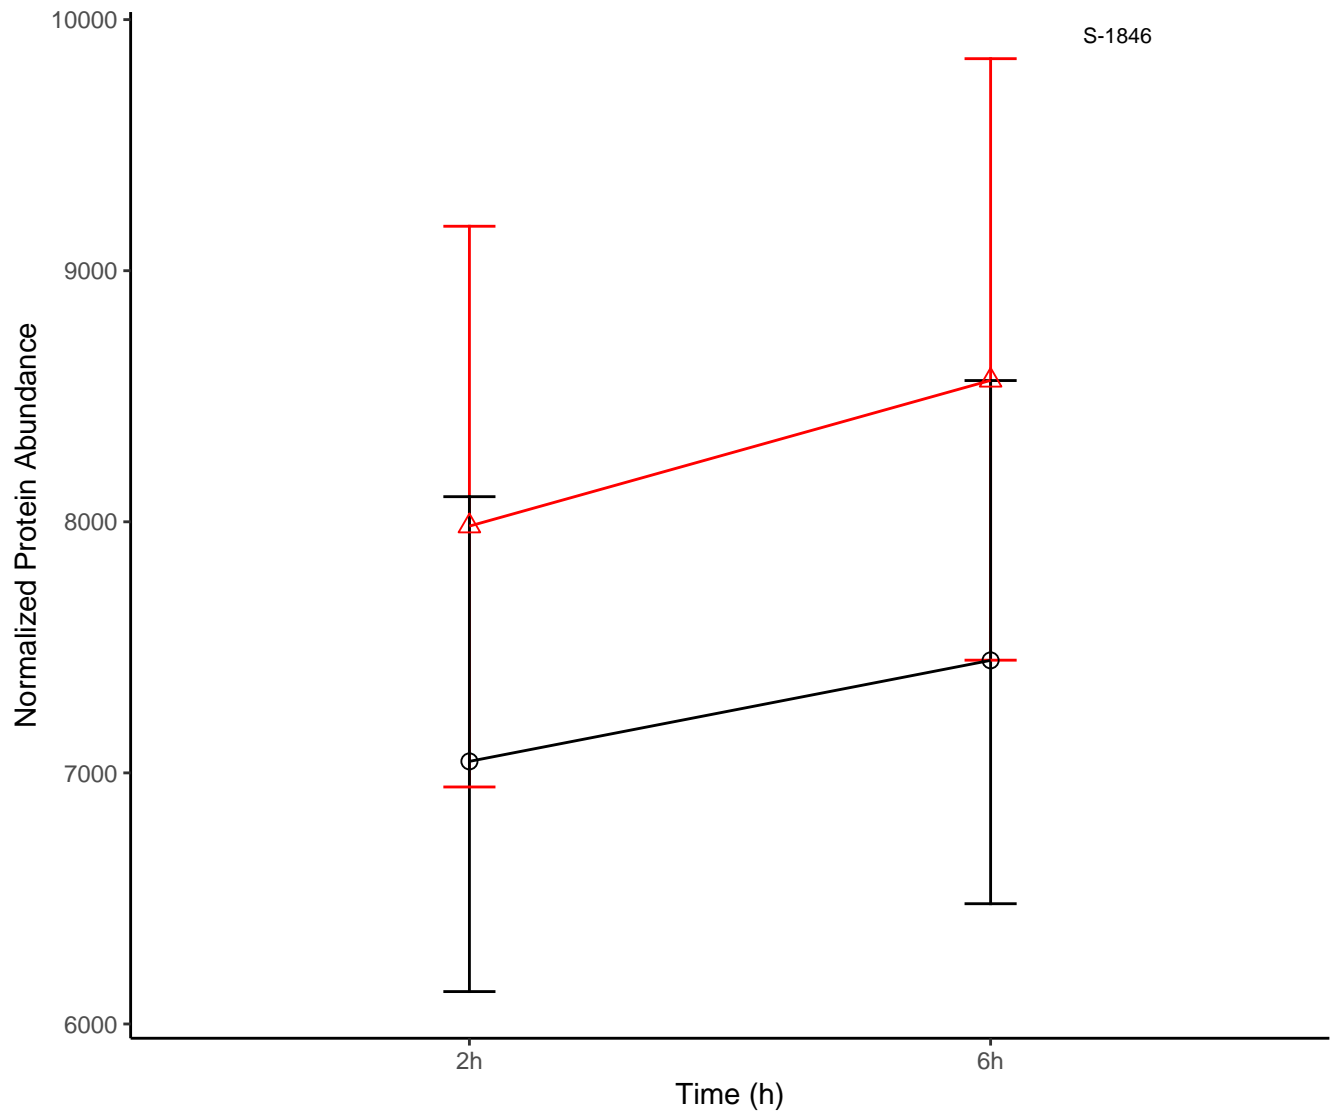

○ TSB-dex

△ TSB

# RPOA\_STAAM

S-1847

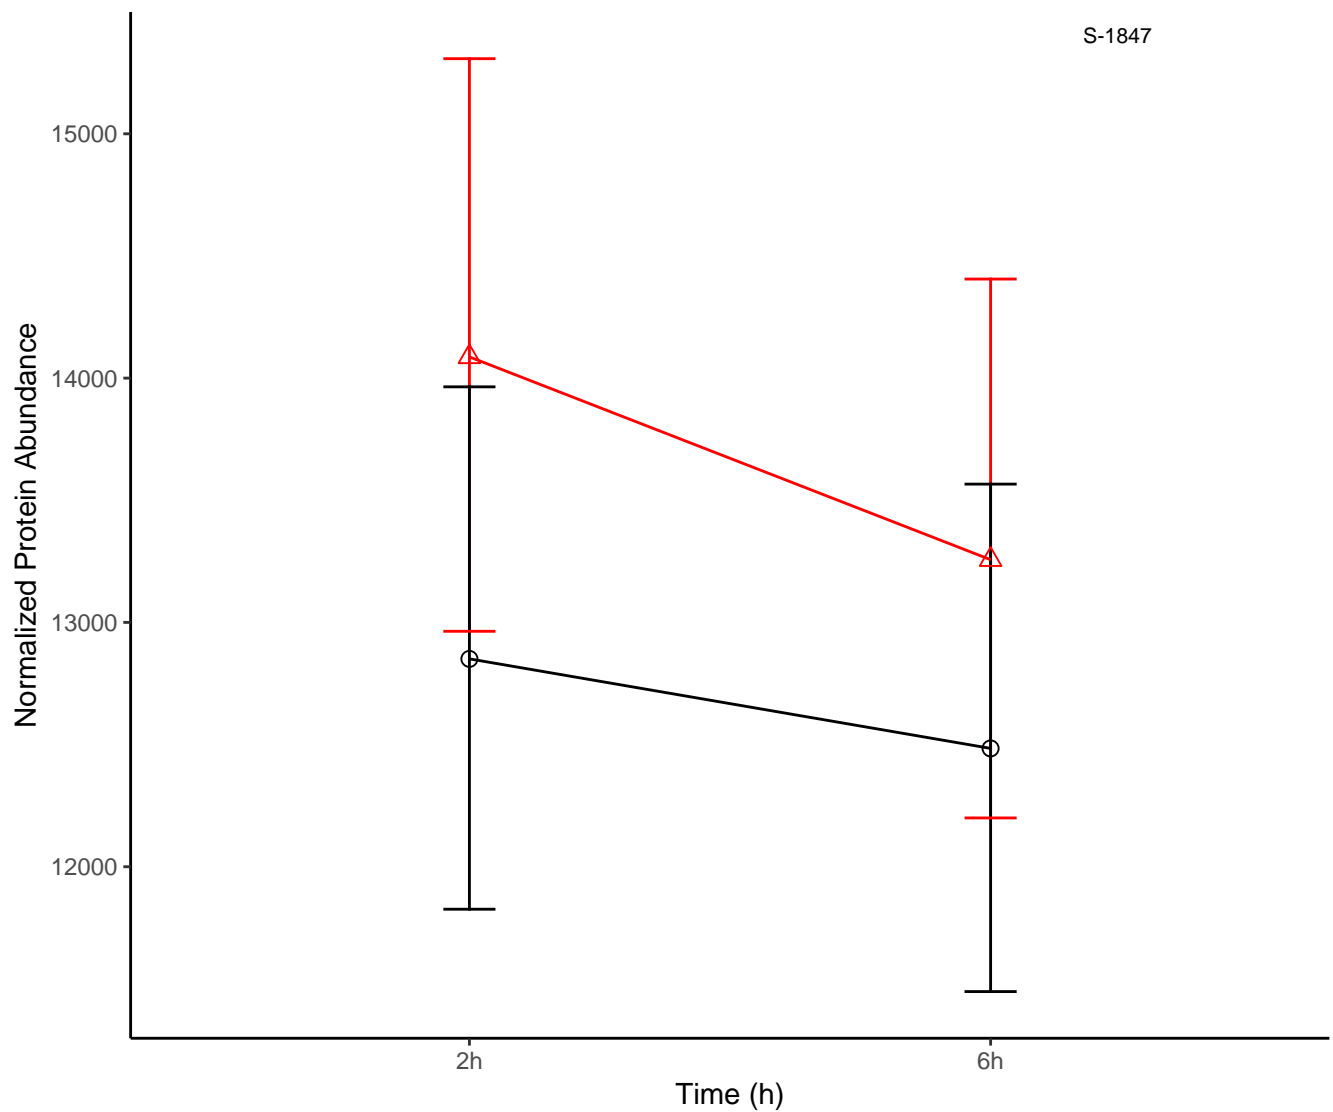

○ TSB-dex

△ TSB

# RPOB\_STAAM

S-1848

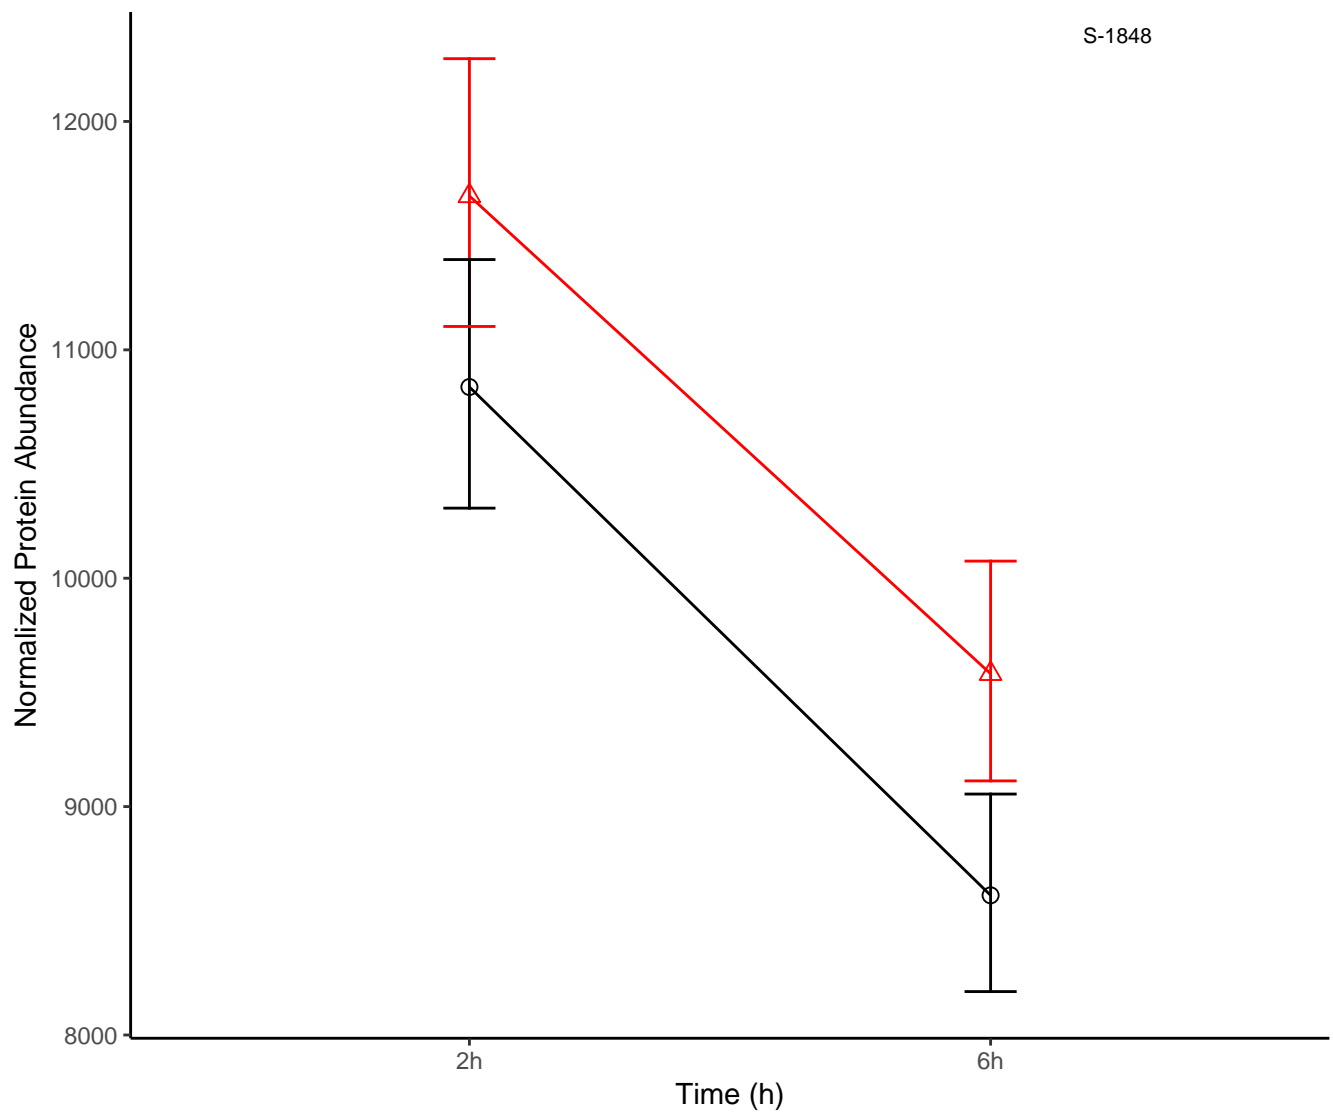

○ TSB-dex

△ TSB



# RPOC\_STAAM

S-1849

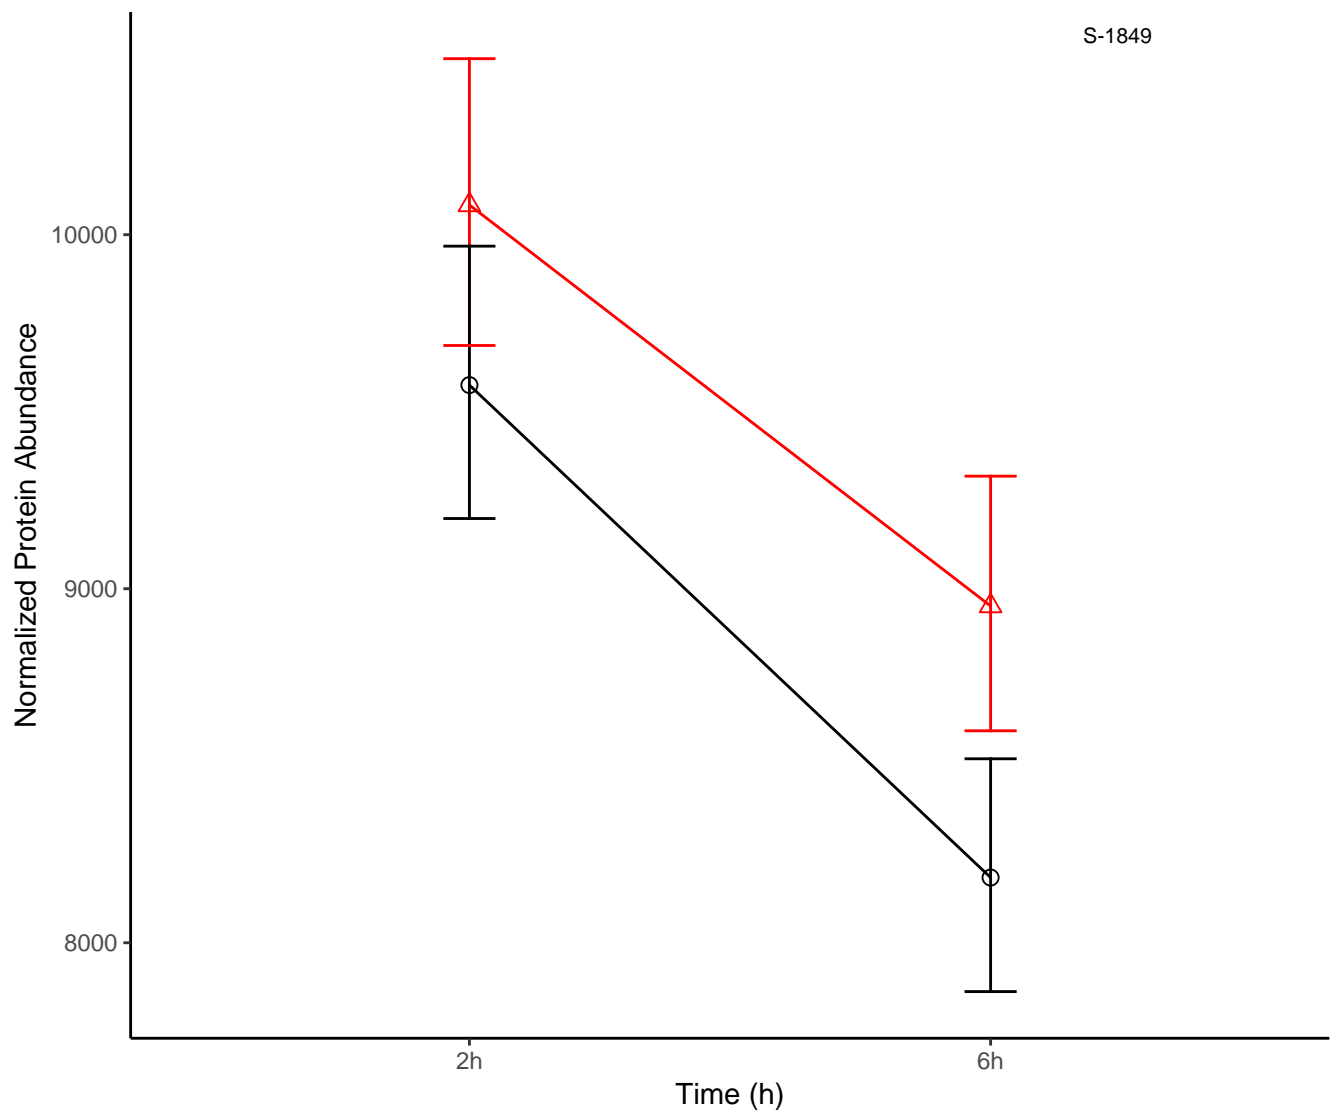

○ TSB-dex

△ TSB

# RPOE\_STAAM

S-1850

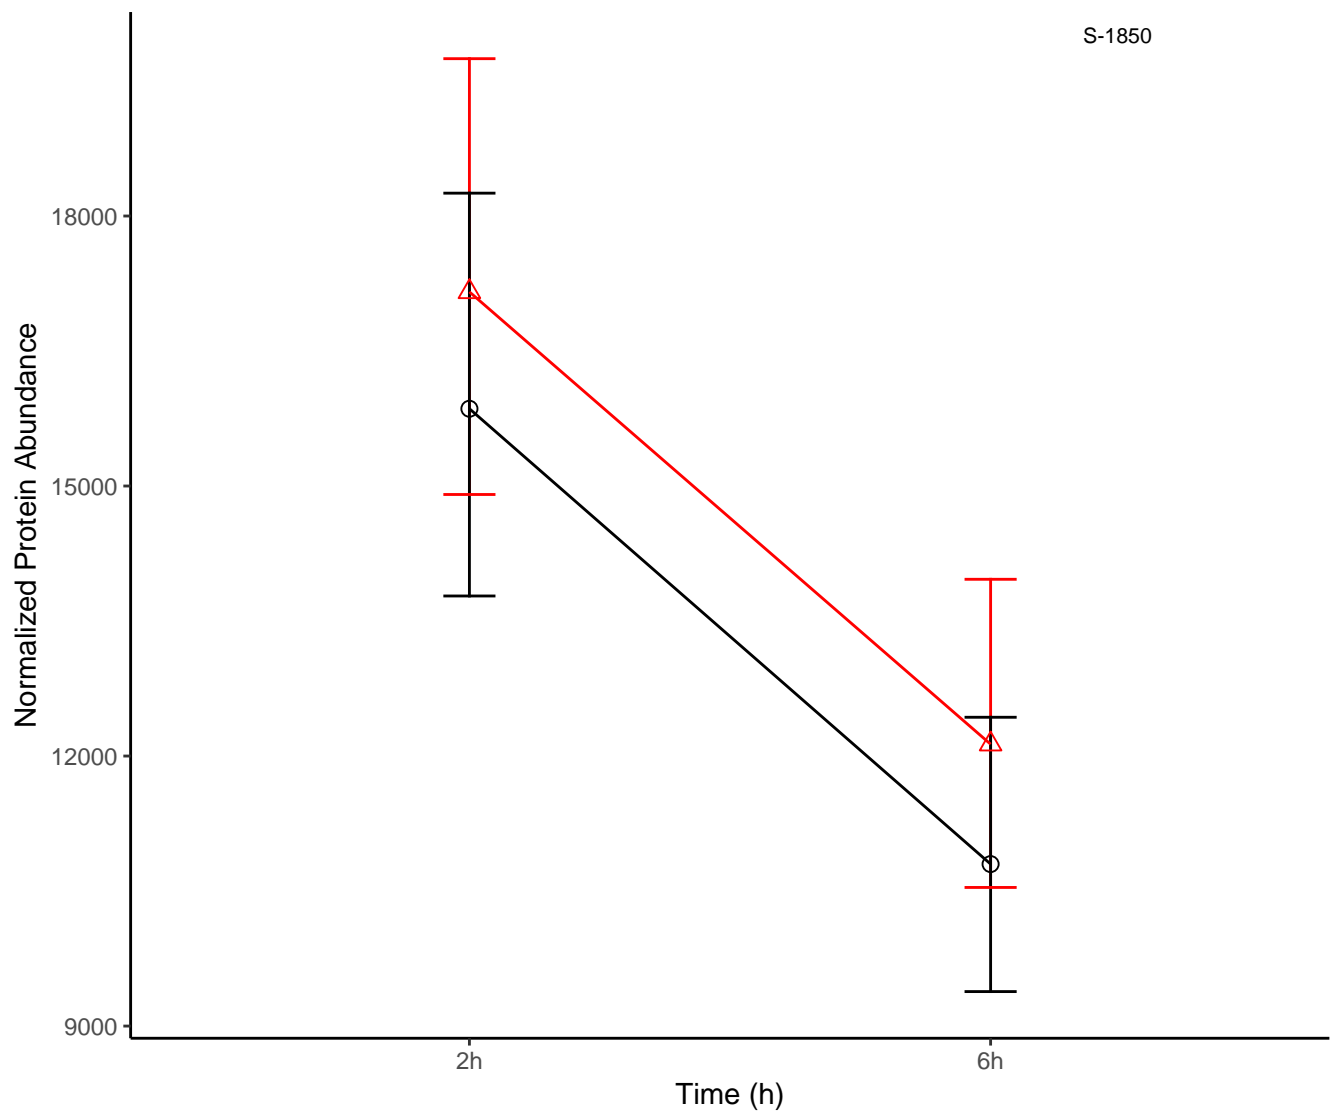

○ TSB-dex

△ TSB

# RPOZ\_STAAM

S-1851

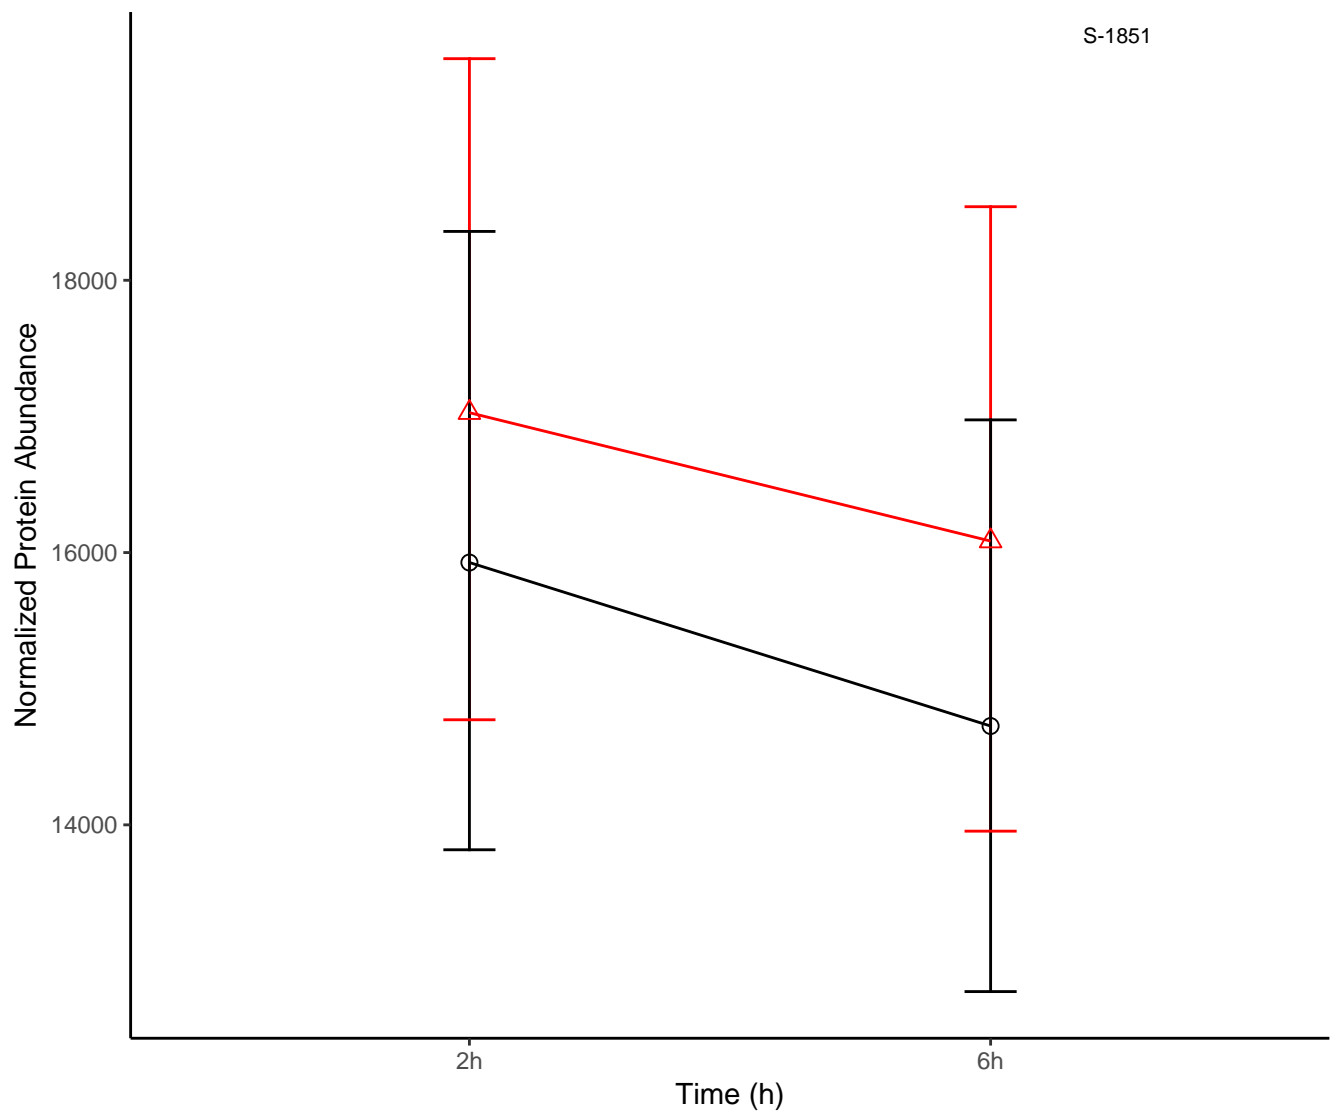

○ TSB-dex

△ TSB

# RRF\_STAAM

S-1852

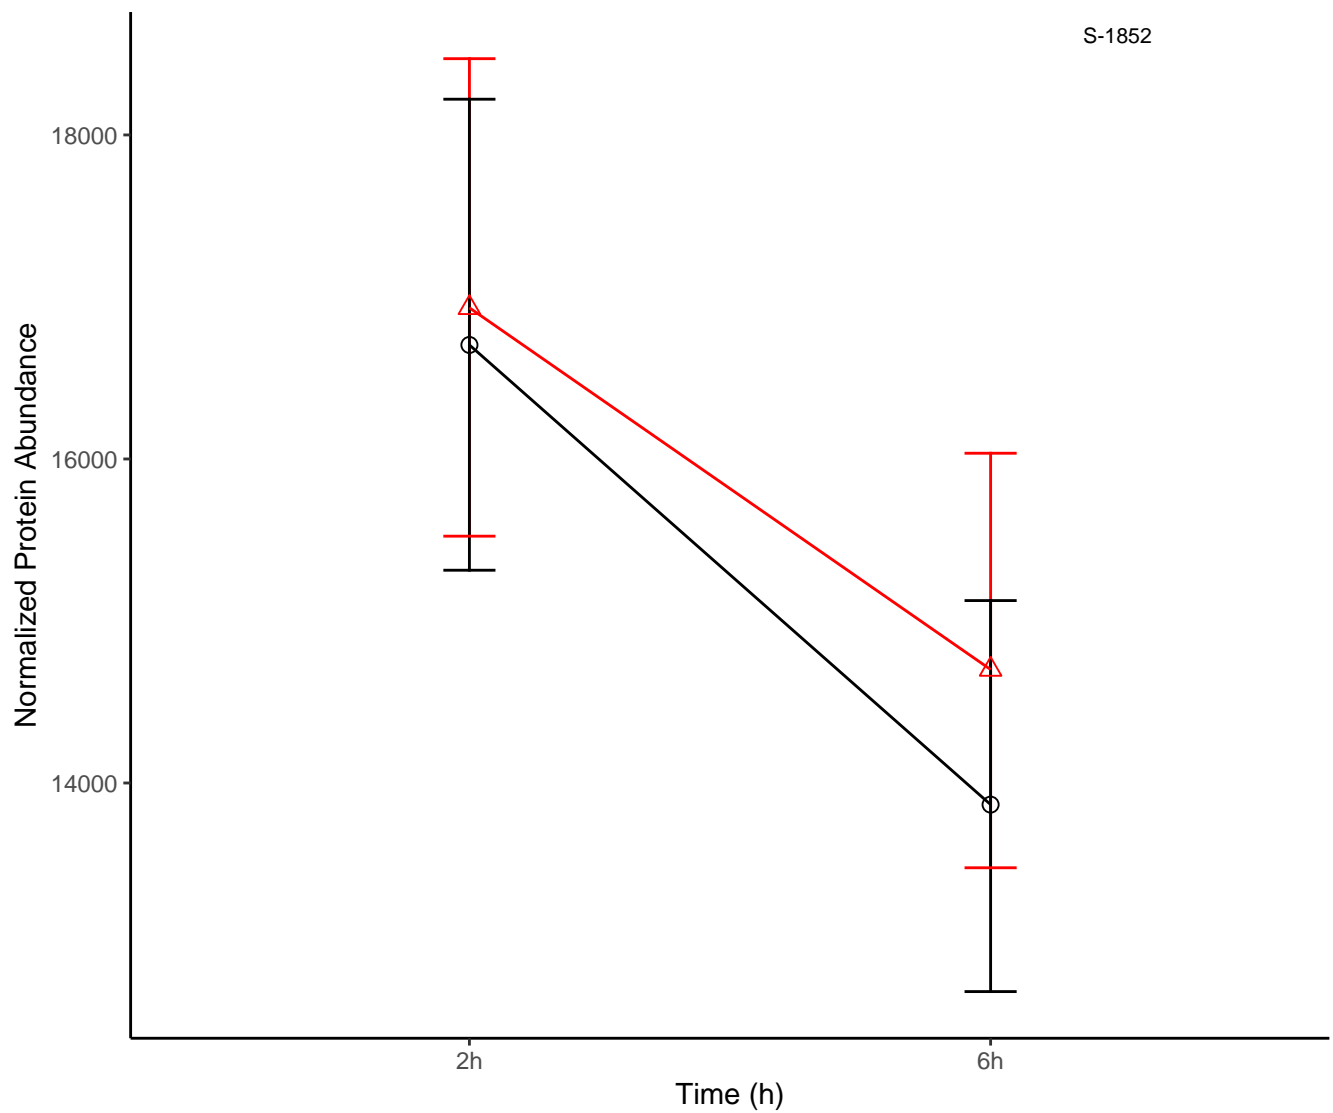

○ TSB-dex

△ TSB

# RS1\_STAAM

S-1853

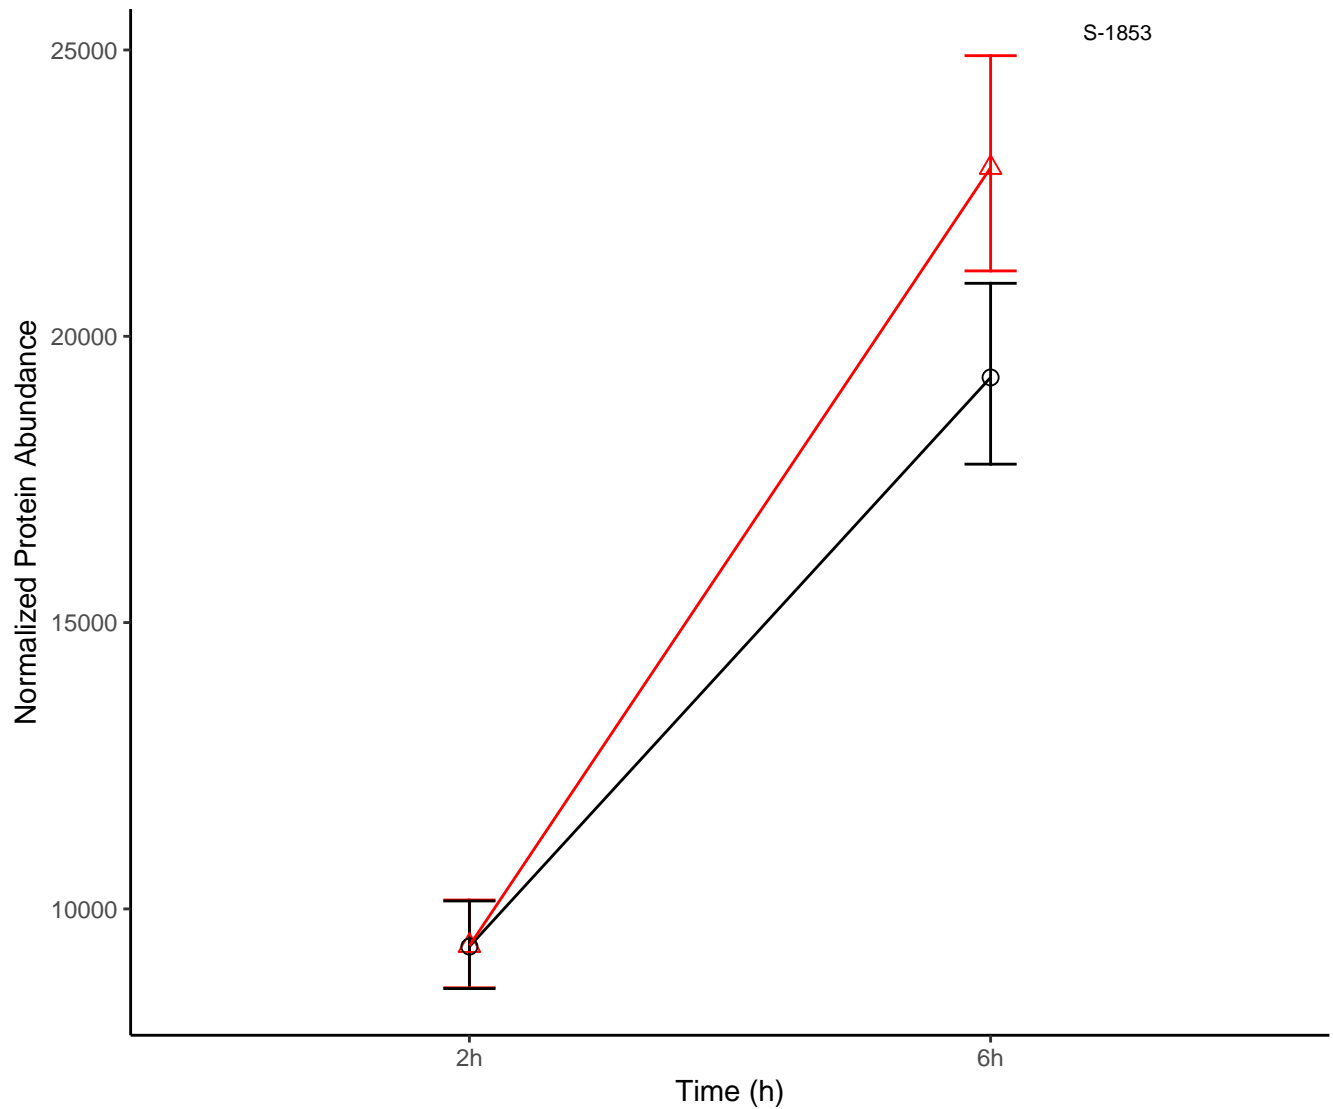

○ TSB-dex

△ TSB

# RS10\_STAAM

S-1854

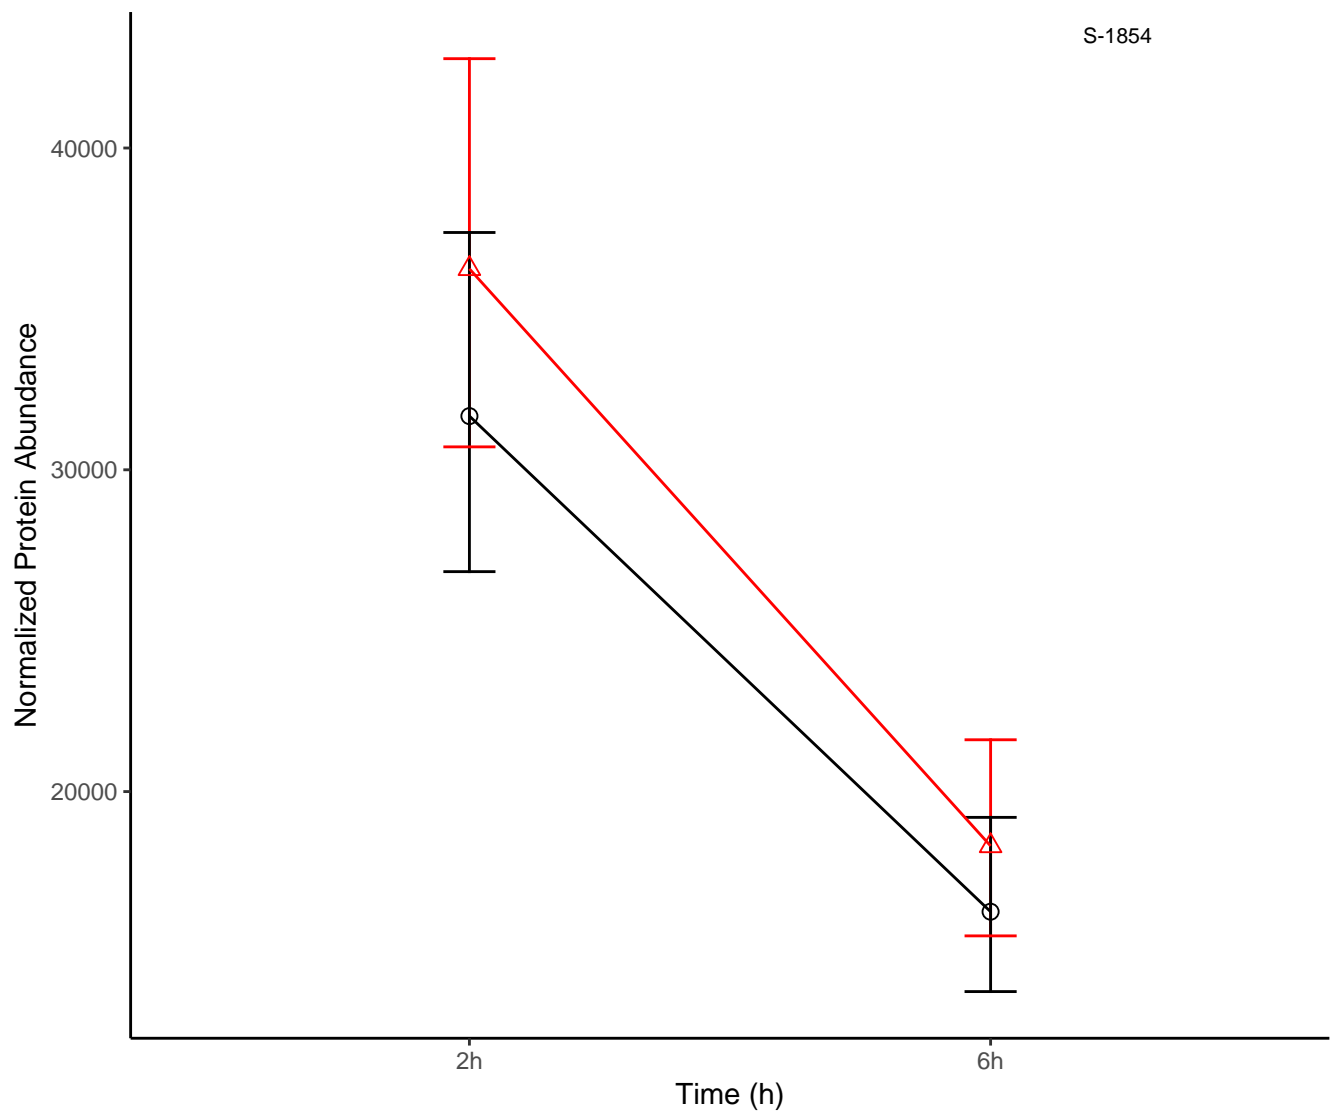

○ TSB-dex

△ TSB

# RS11\_STAAM

S-1855

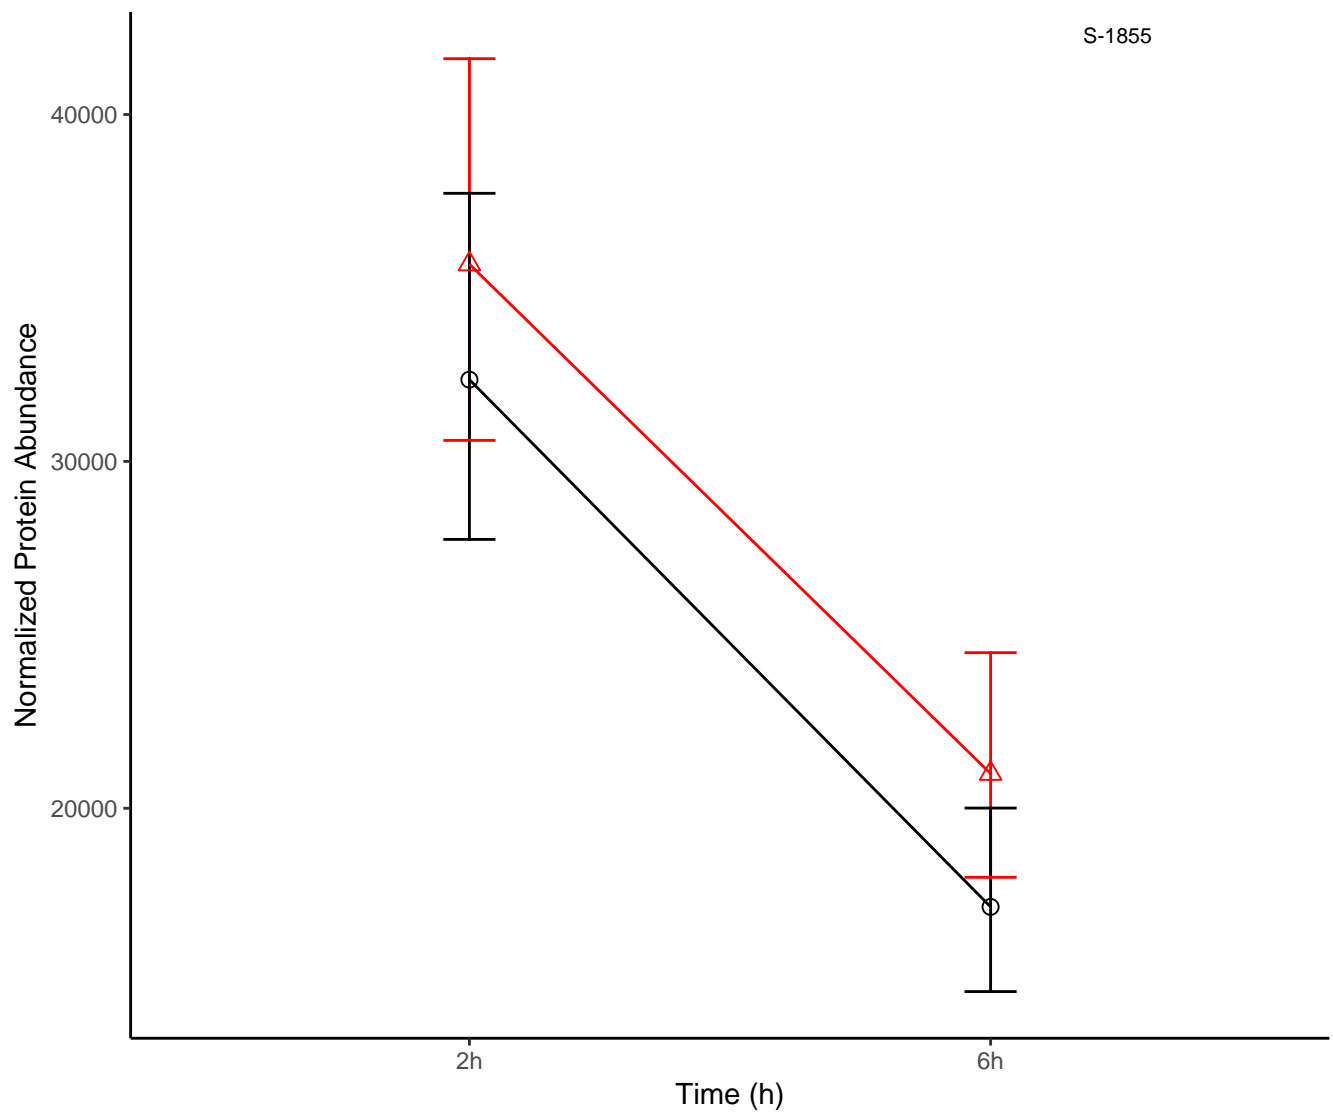

○ TSB-dex

△ TSB

# RS12\_STAAM

S-1856

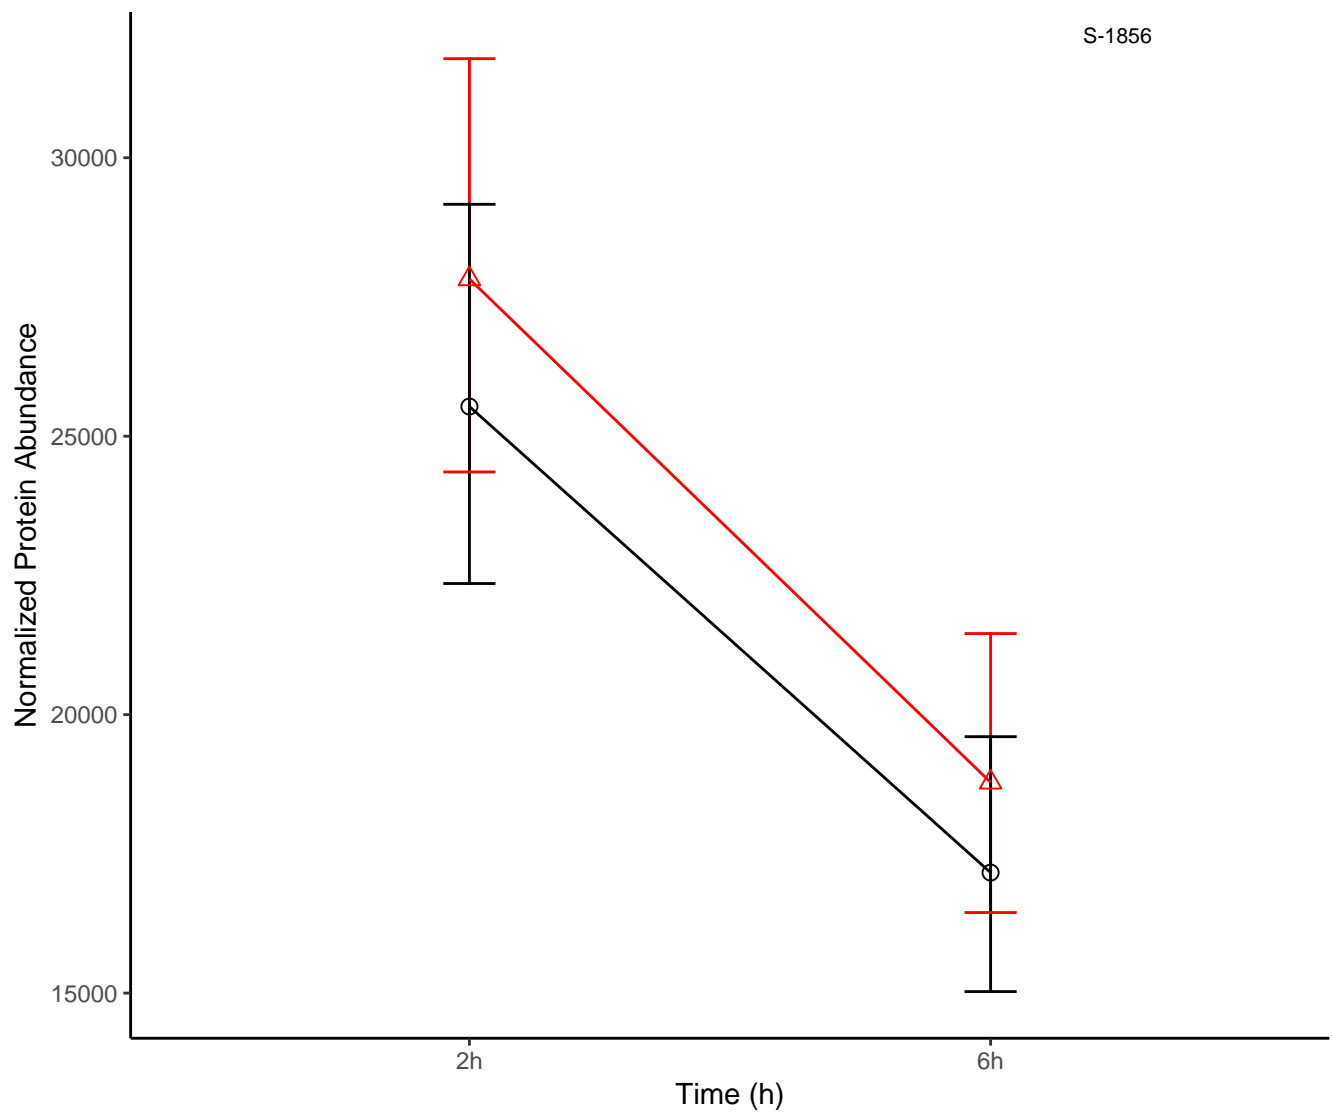

○ TSB-dex

△ TSB



# RS13\_STAAM

S-1857

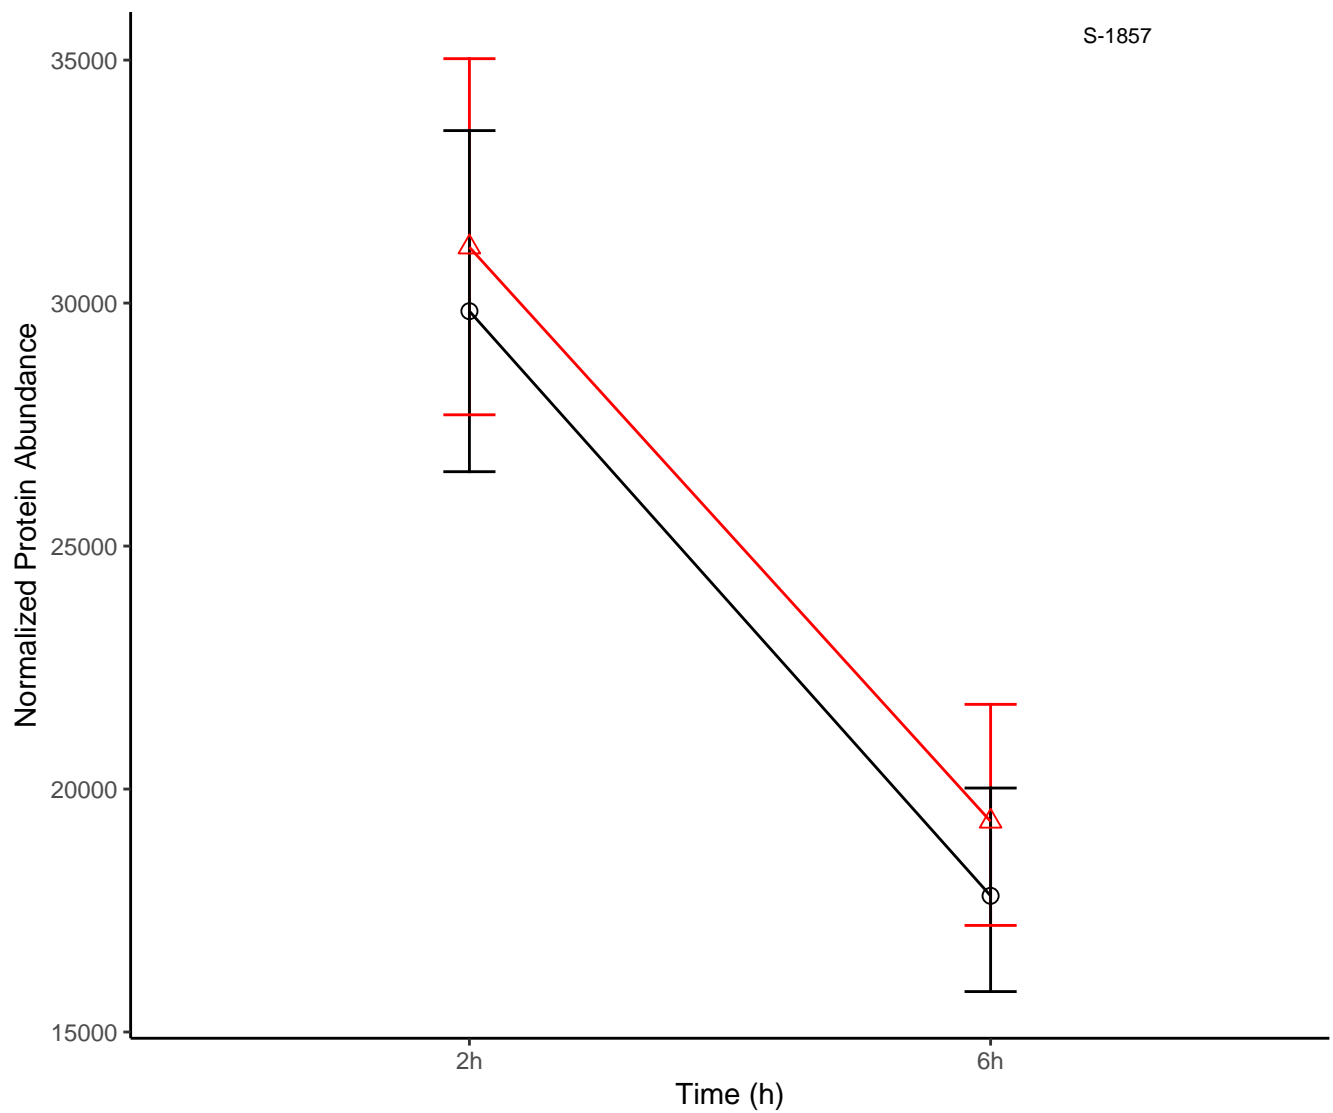

○ TSB-dex

△ TSB

# RS15\_STAAM

S-1858

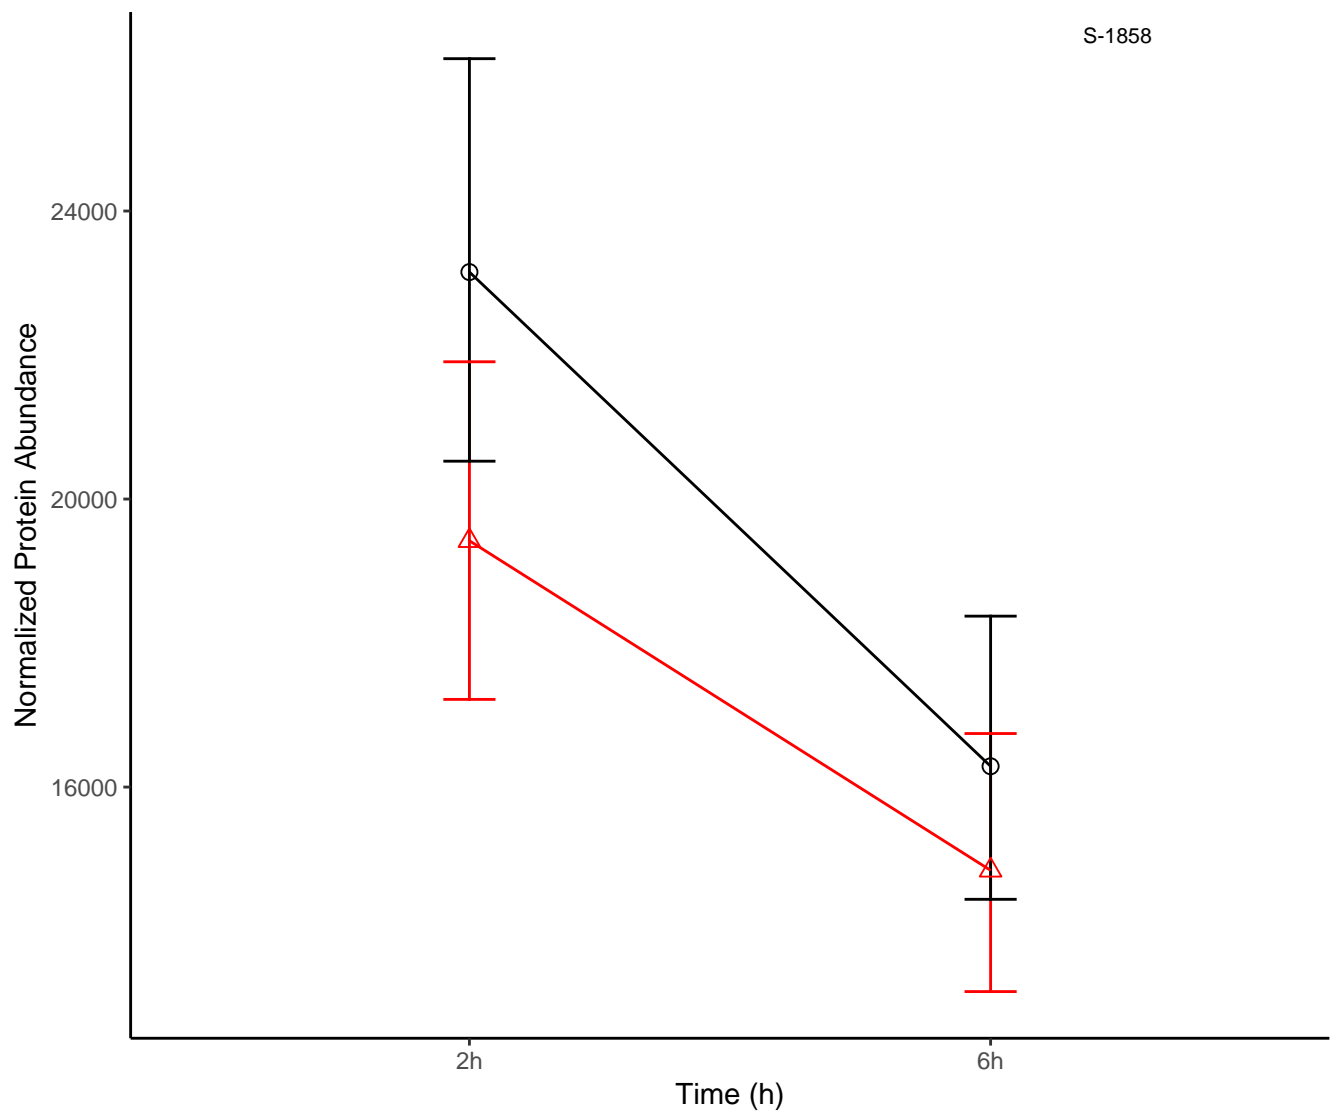

○ TSB-dex

△ TSB

# RS16\_STAAM

S-1859

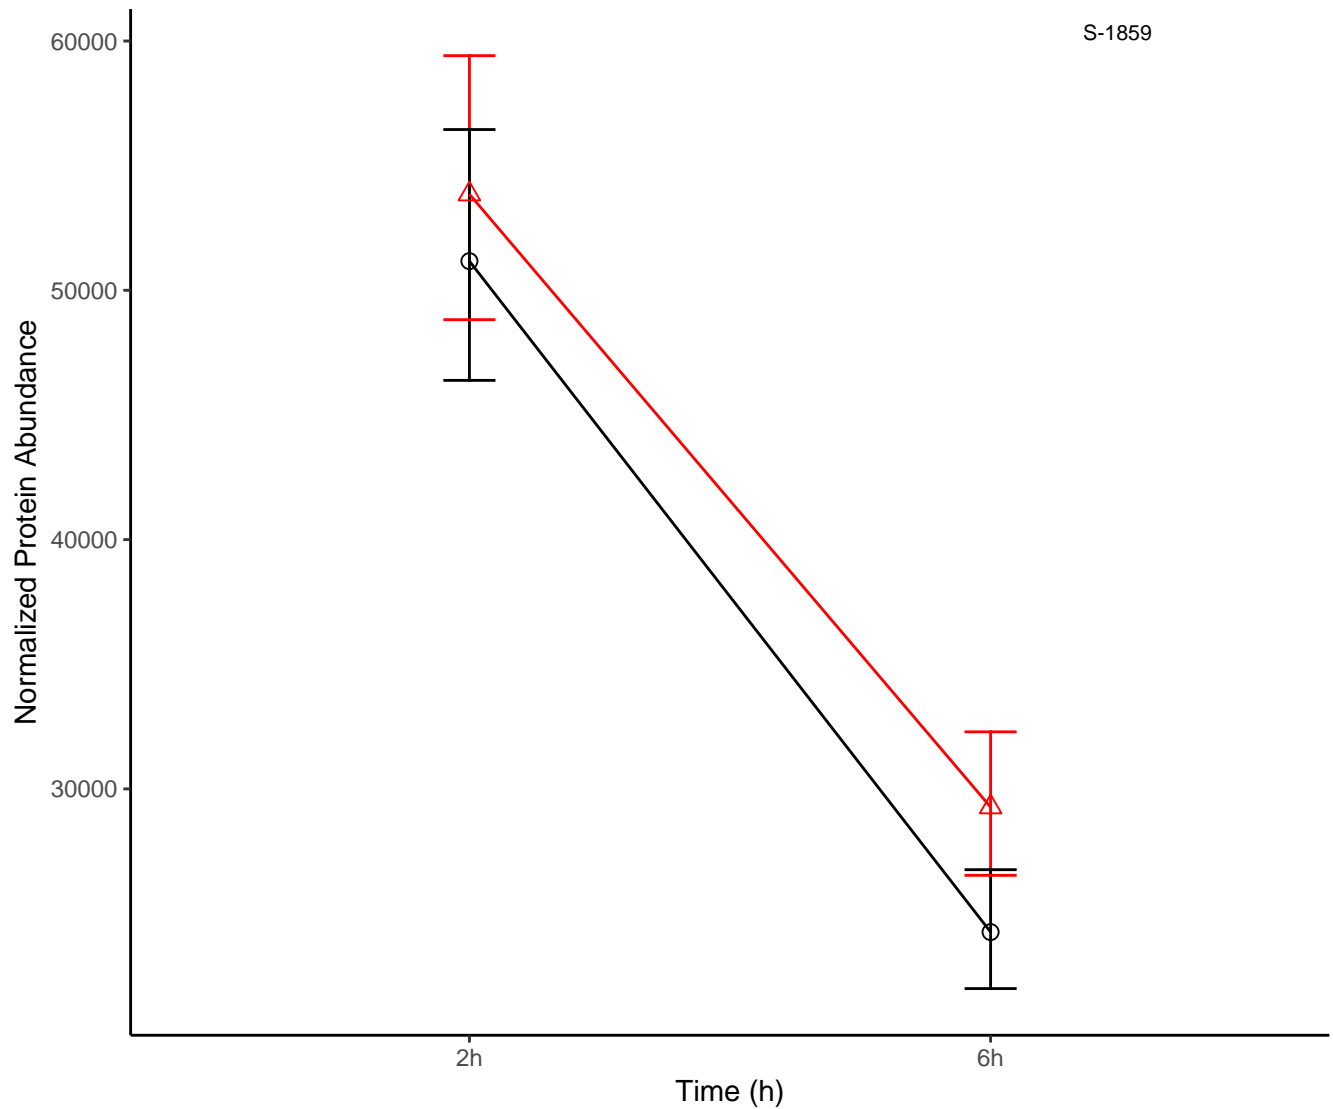

○ TSB-dex

△ TSB

# RS17\_STAAM

S-1860

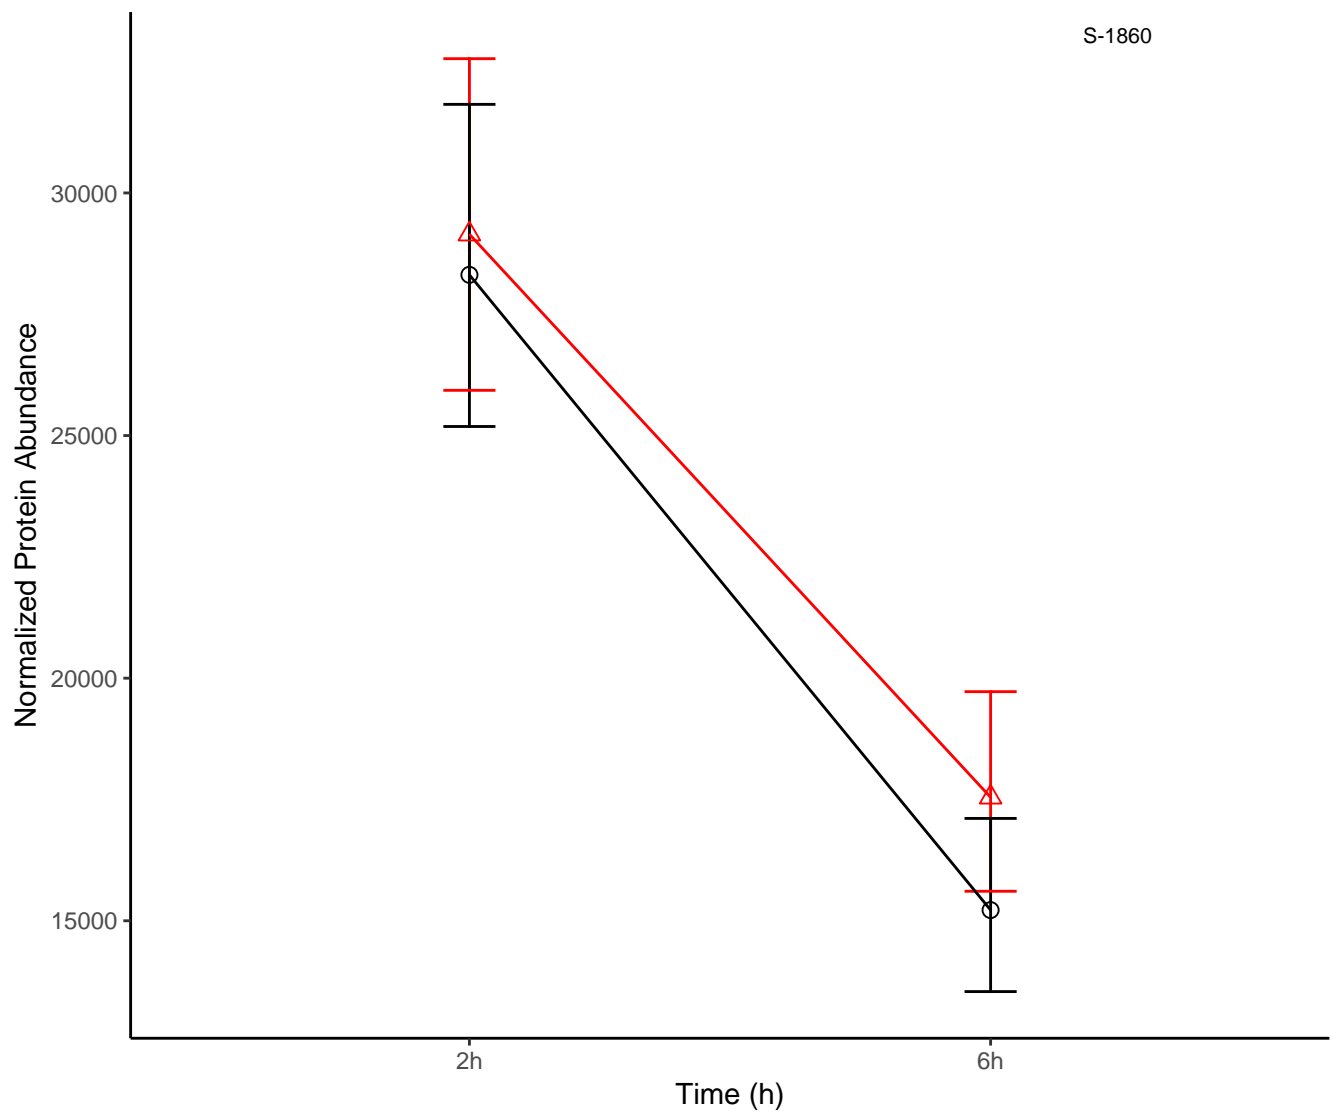

○ TSB-dex

△ TSB

# RS18\_STAAM

S-1861

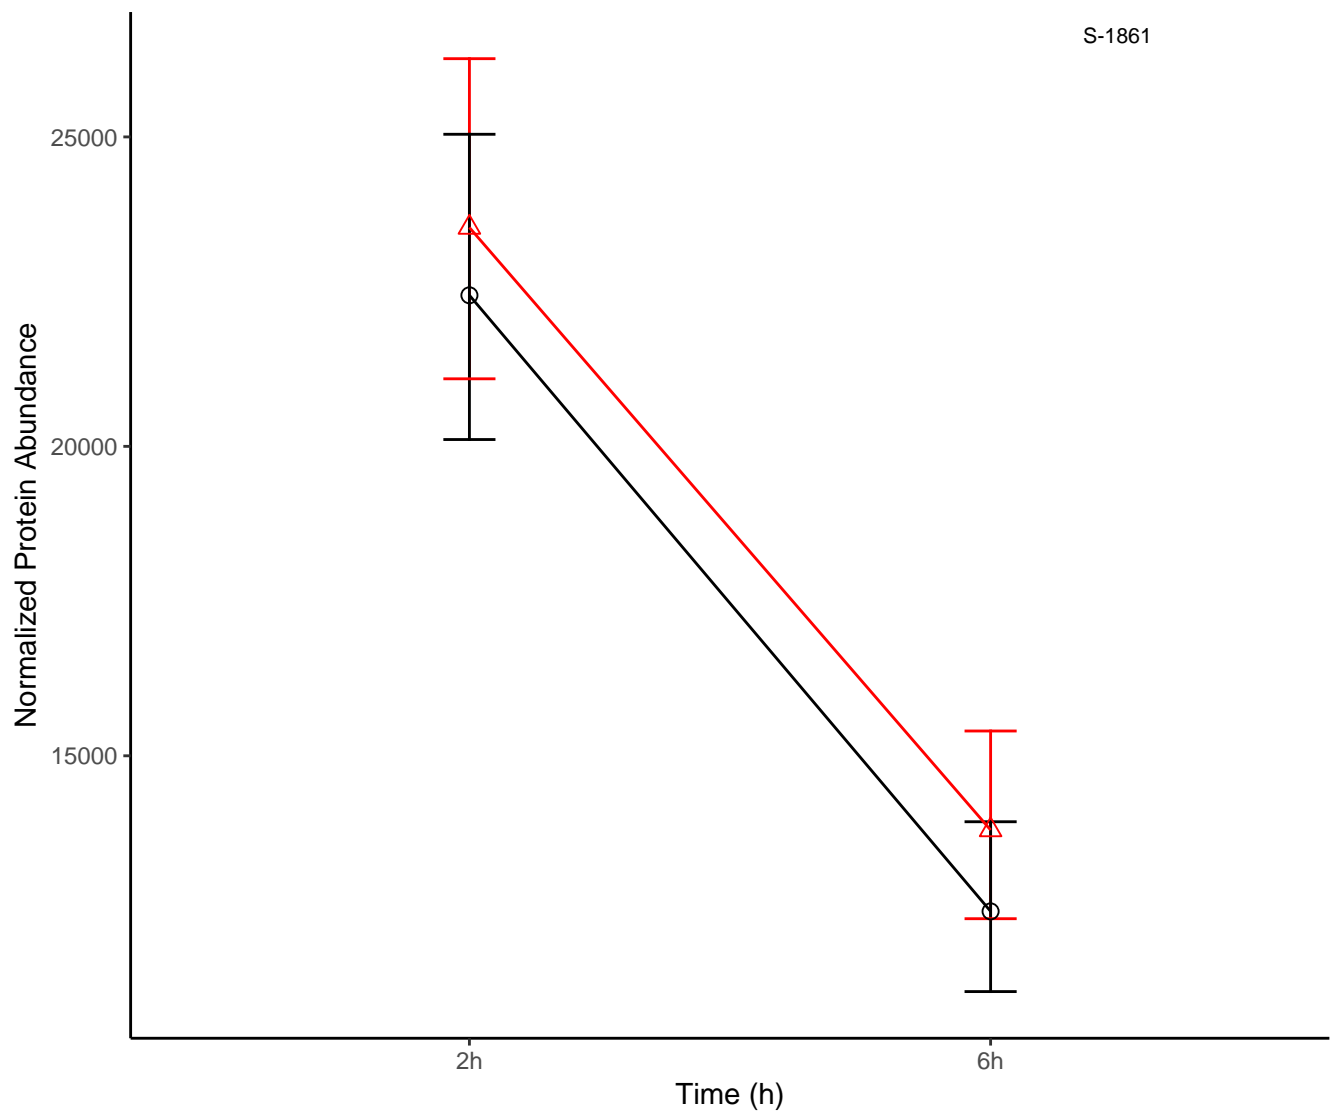

○ TSB-dex

△ TSB

# RS19\_STAAM

S-1862

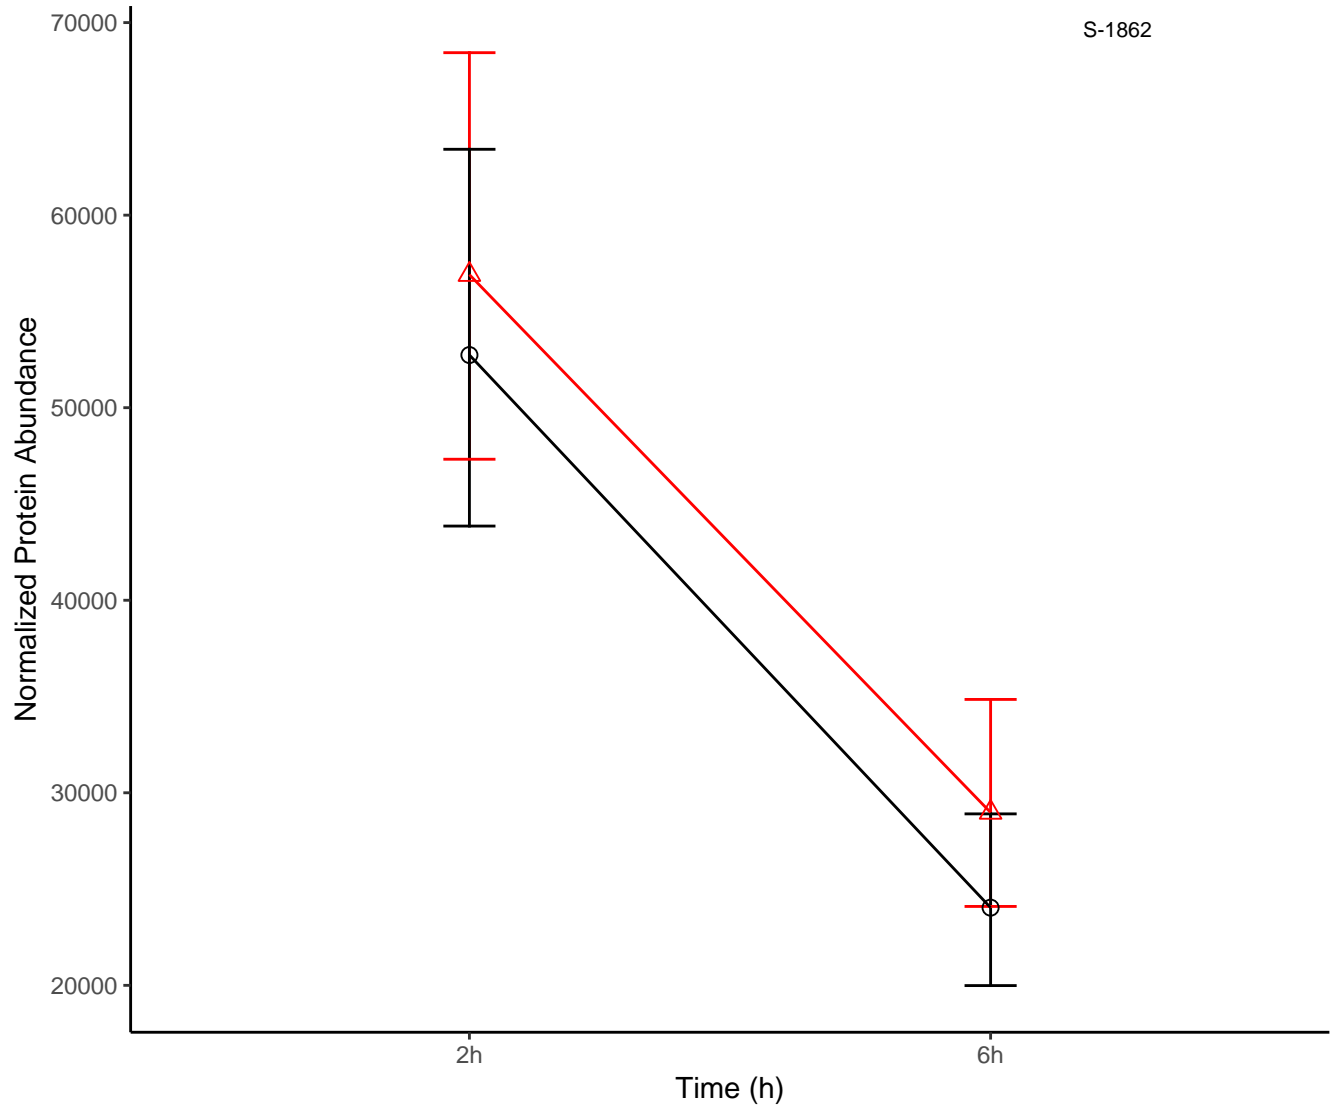

○ TSB-dex

△ TSB

# RS2\_STAAM

S-1863

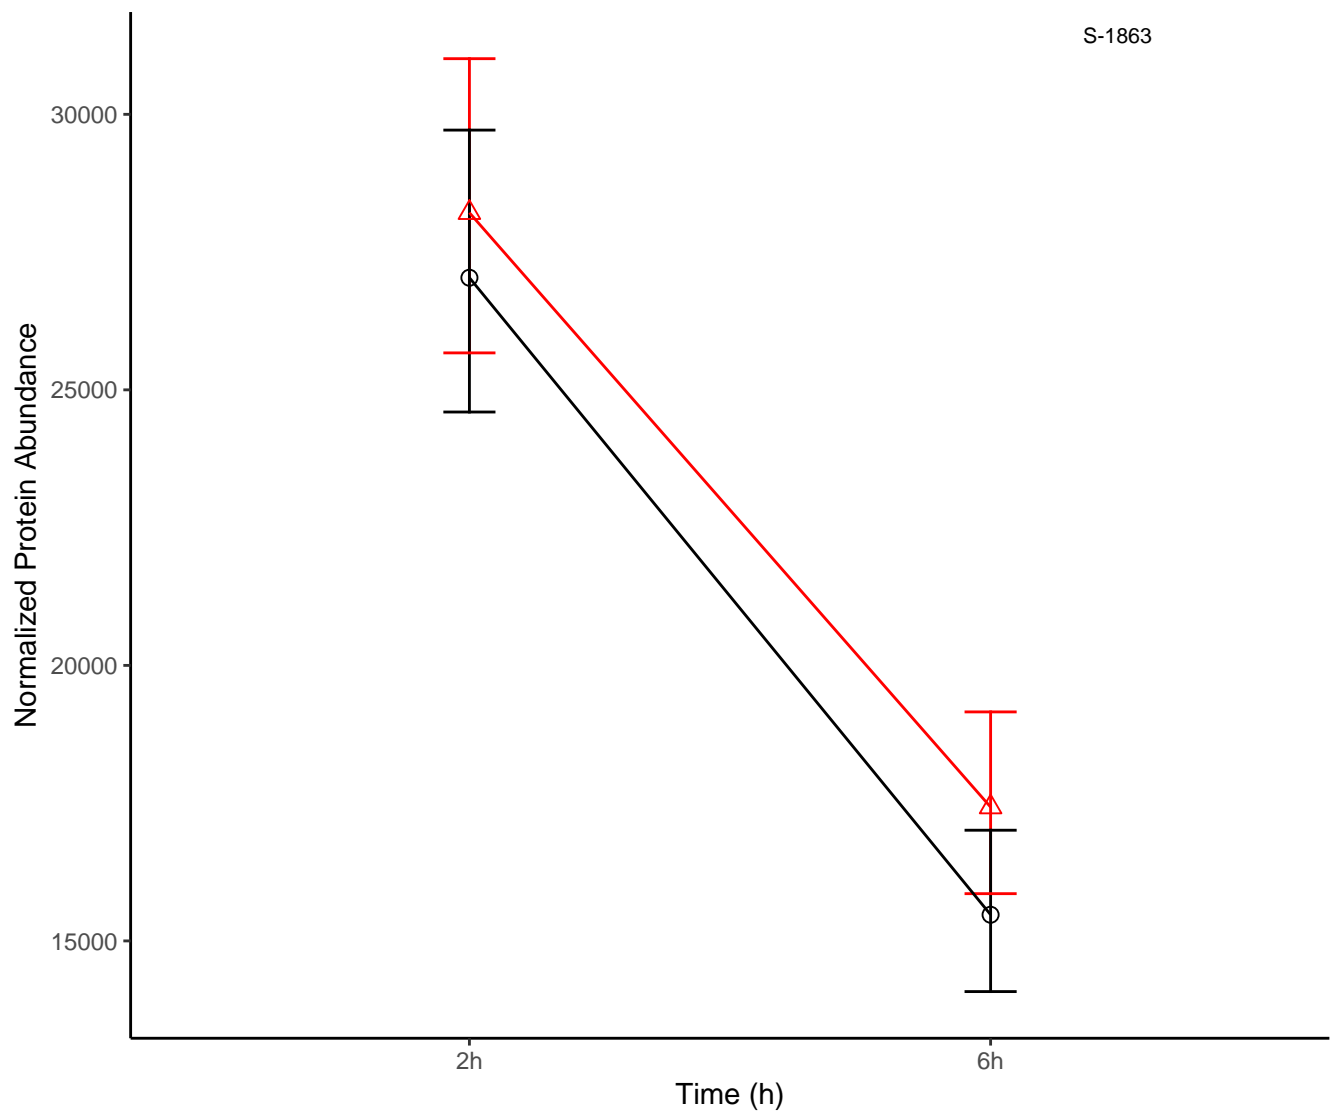

○ TSB-dex

△ TSB

# RS20\_STAAM

S-1864

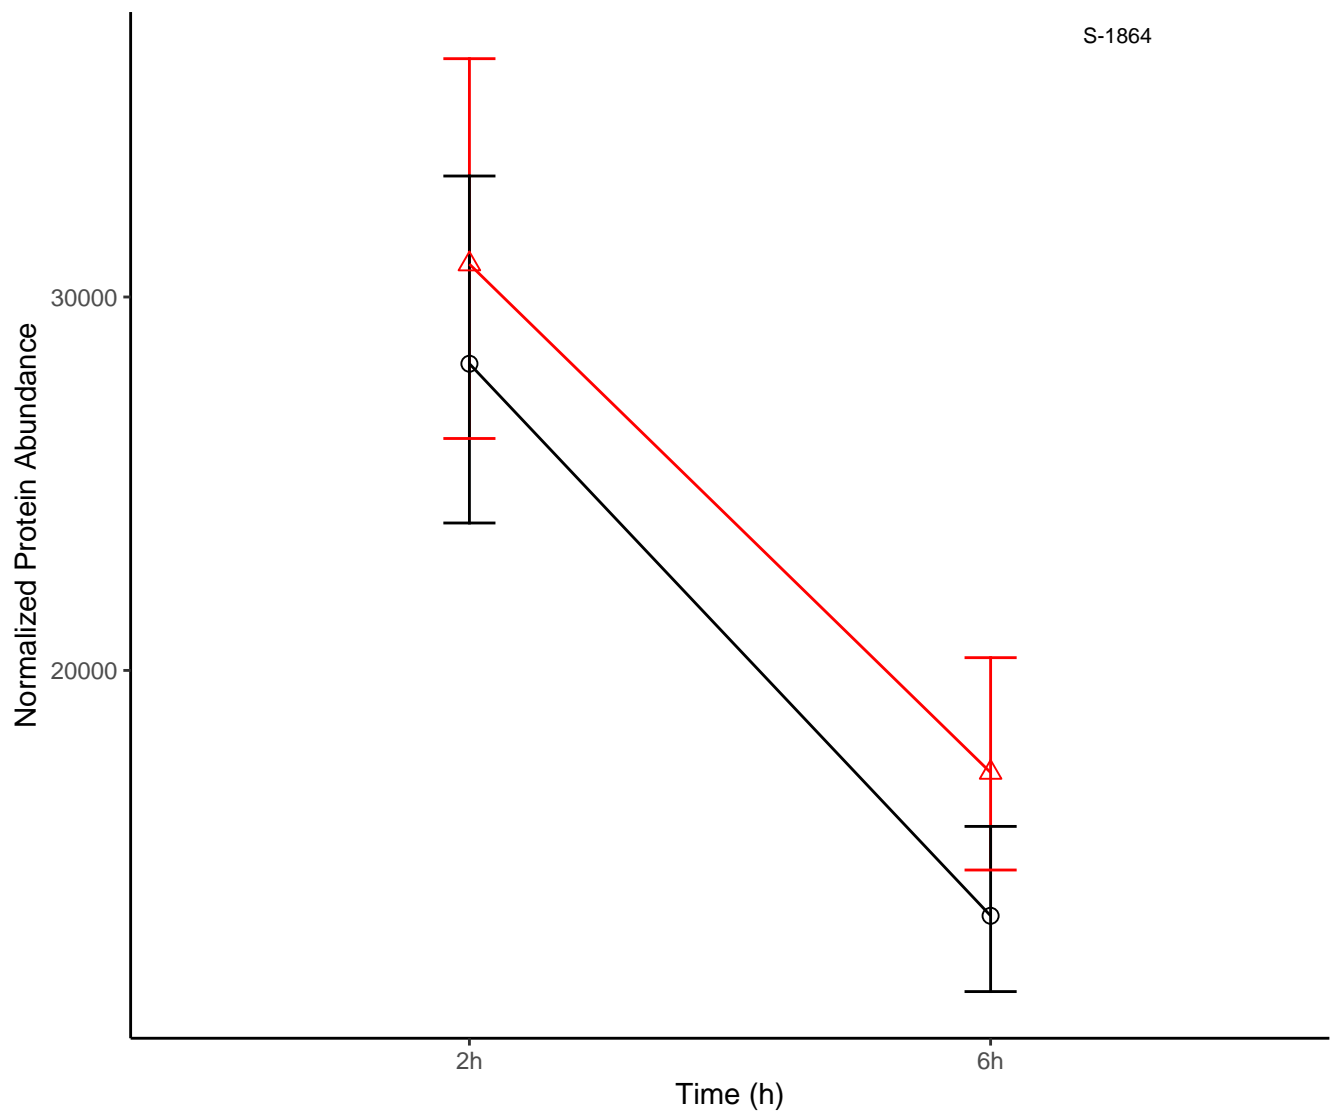

○ TSB-dex

△ TSB



# RS21\_STAAM

S-1865

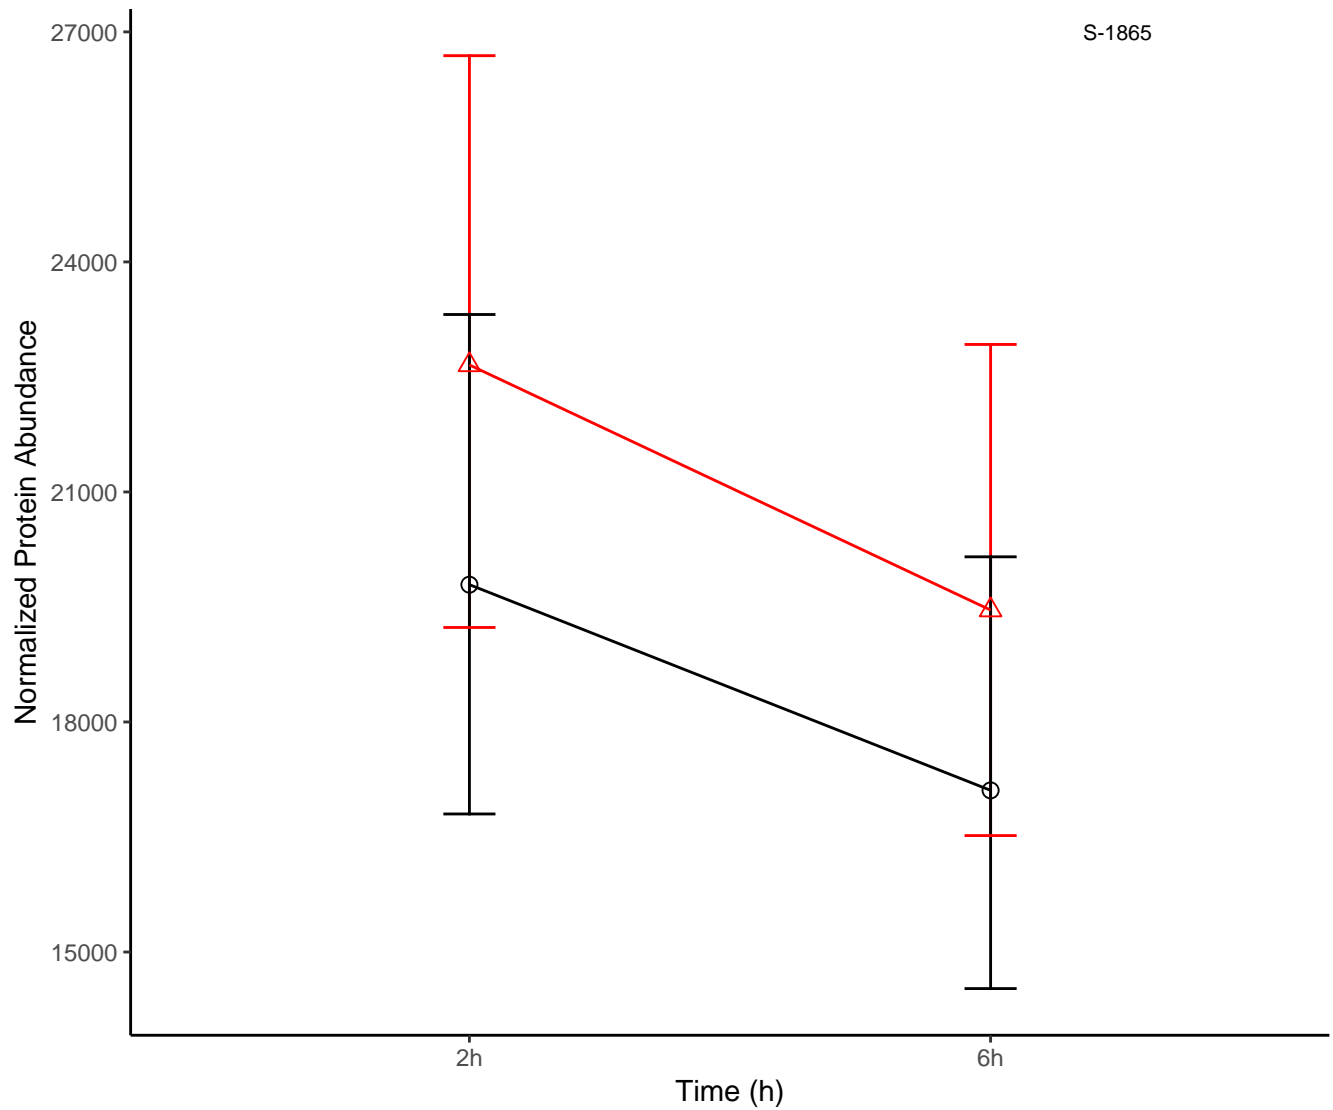

○ TSB-dex

△ TSB

# RS3\_STAAM

S-1866

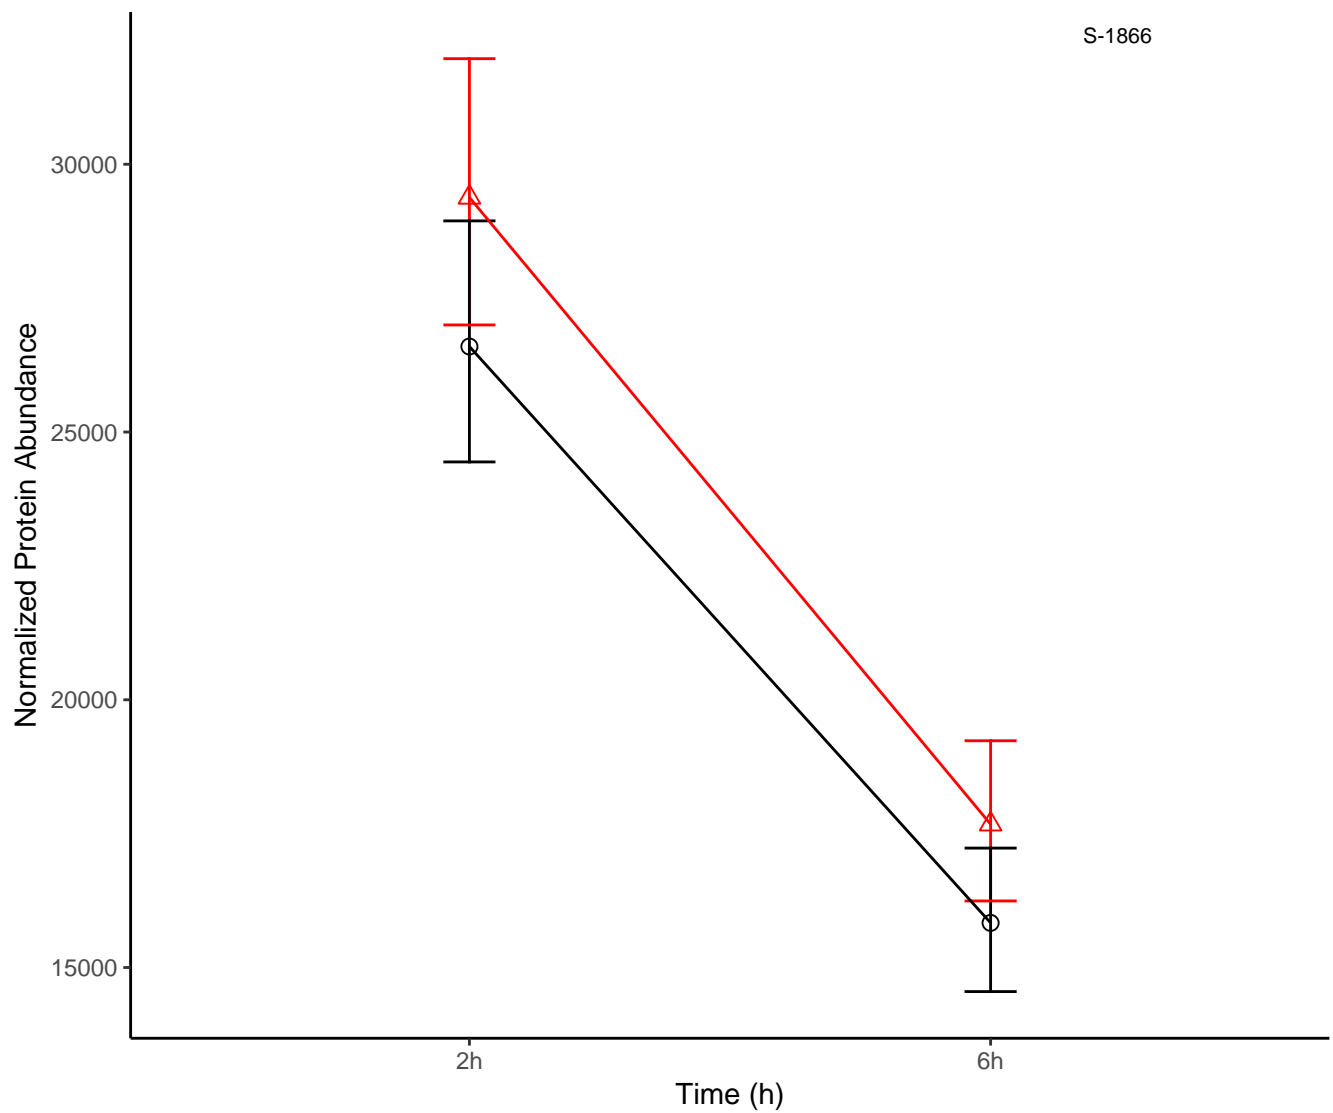

○ TSB-dex

△ TSB

# RS4\_STAAM

S-1867

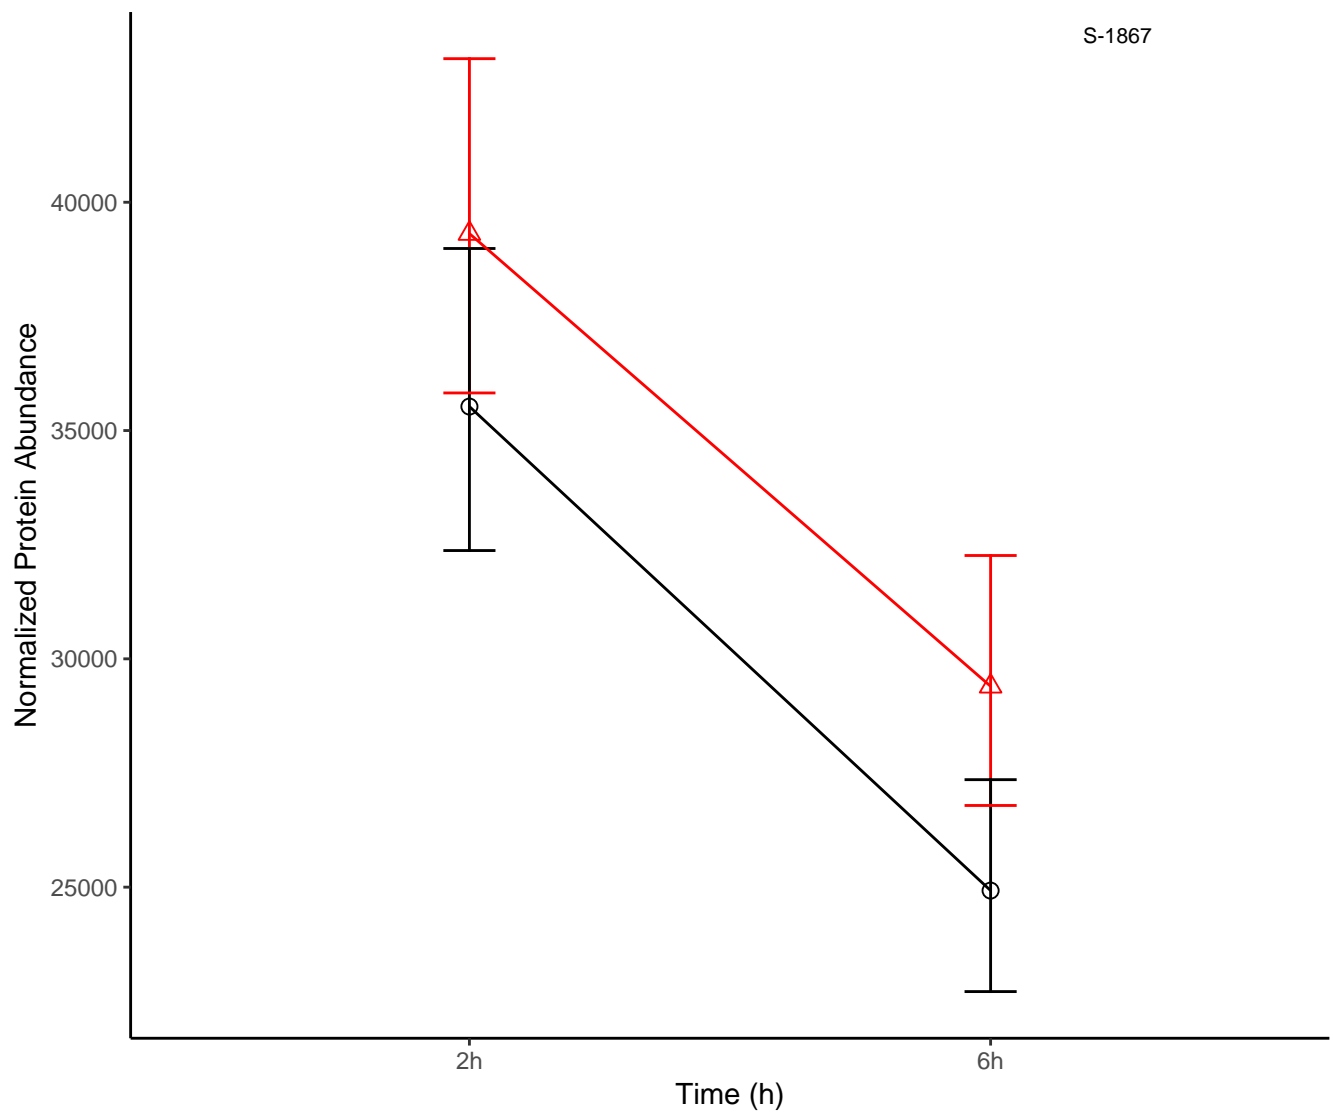

○ TSB-dex

△ TSB

# RS5\_STAAM

S-1868

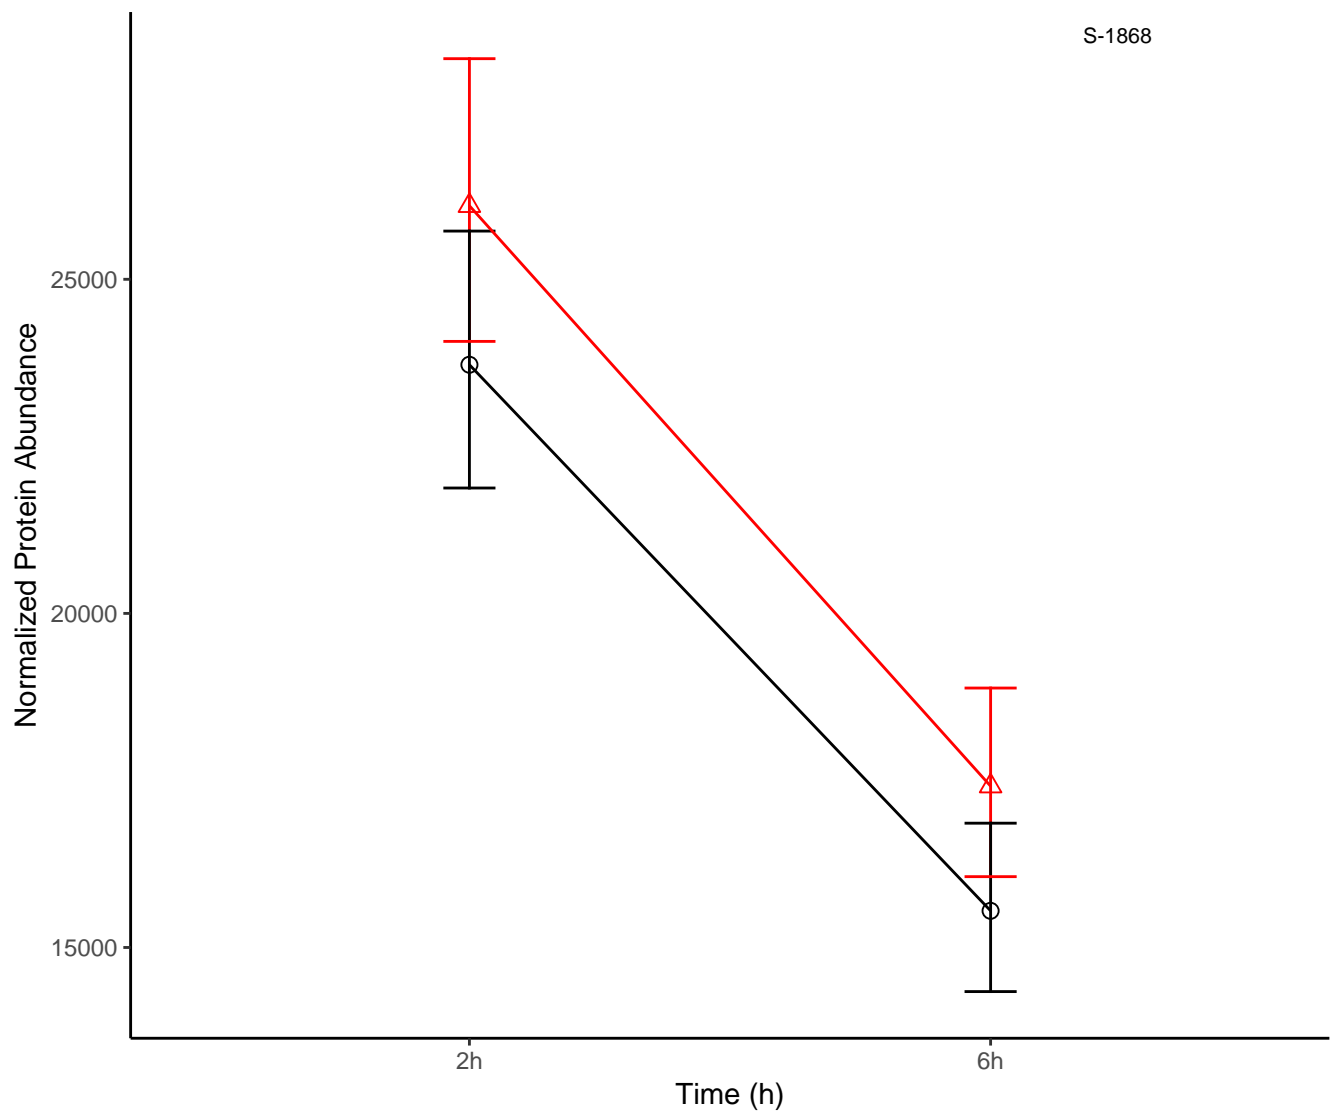

○ TSB-dex

△ TSB

# RS6\_STAAM

S-1869

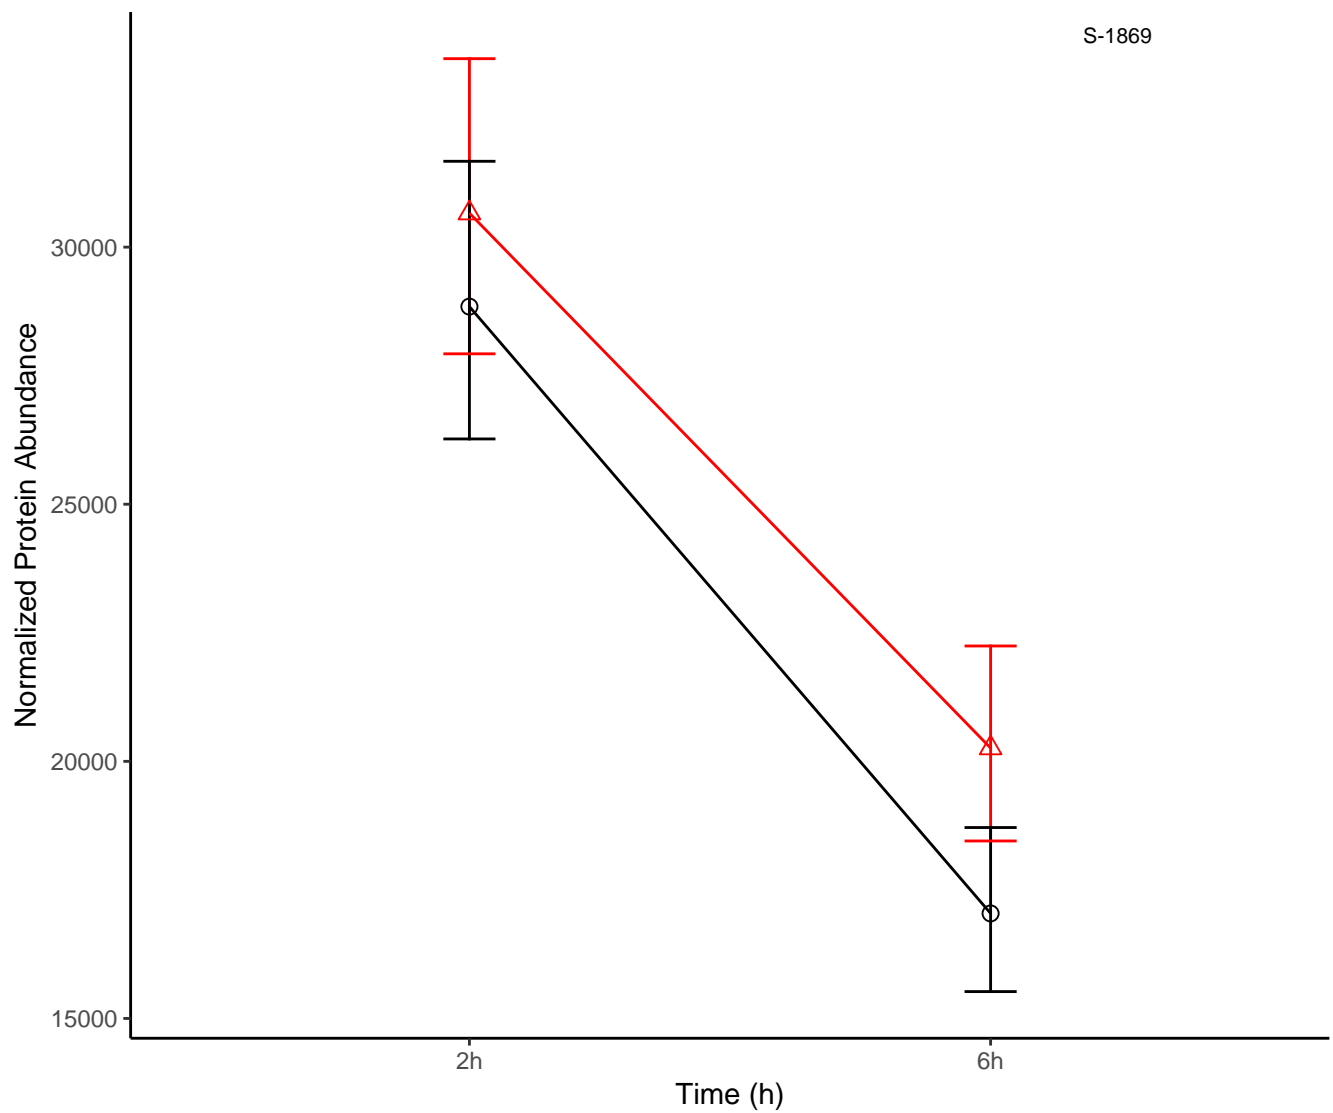

○ TSB-dex

△ TSB

# RS7\_STAAM

S-1870

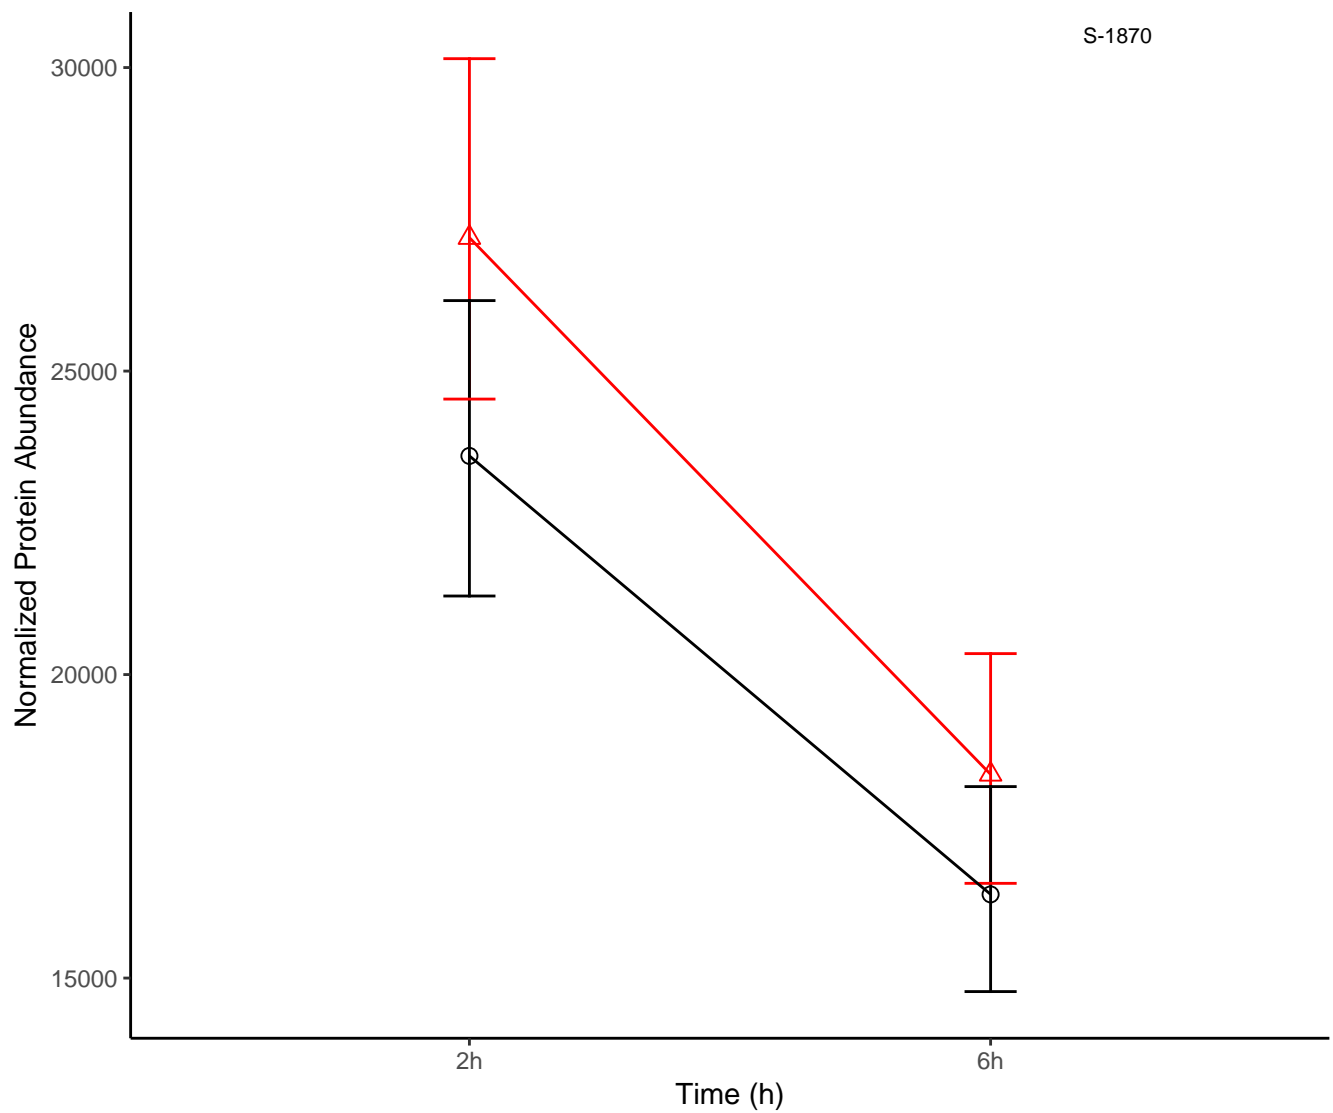

○ TSB-dex

△ TSB

# RS8\_STAAM

S-1871

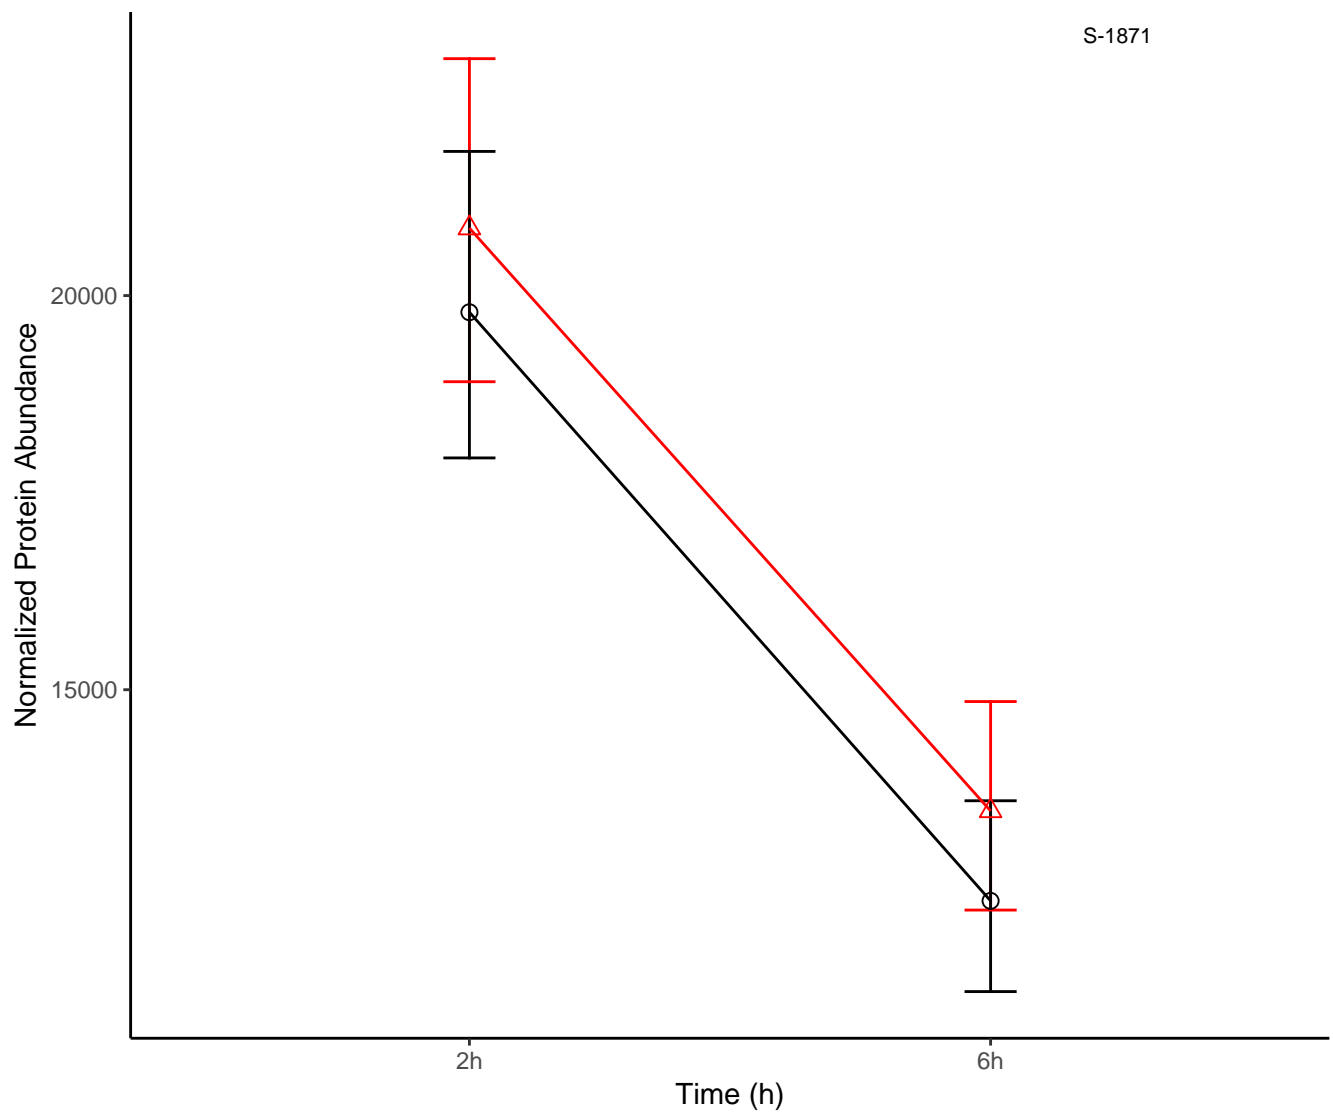

○ TSB-dex

△ TSB

# RS9\_STAAM

S-1872

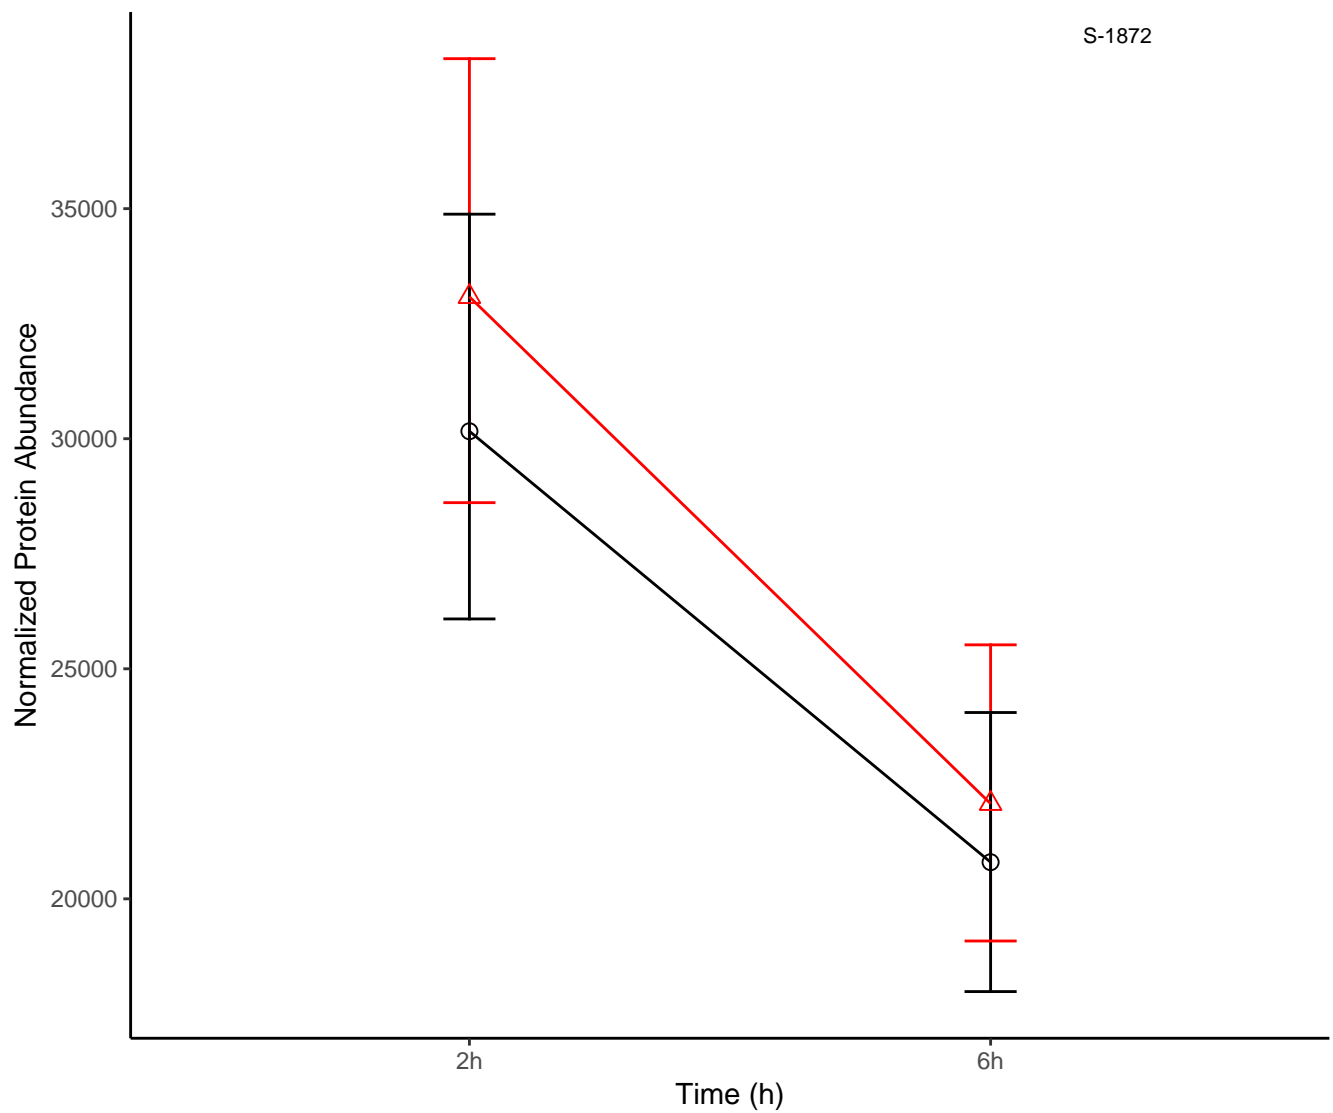

○ TSB-dex

△ TSB



# RSBV\_STAAM

S-1873

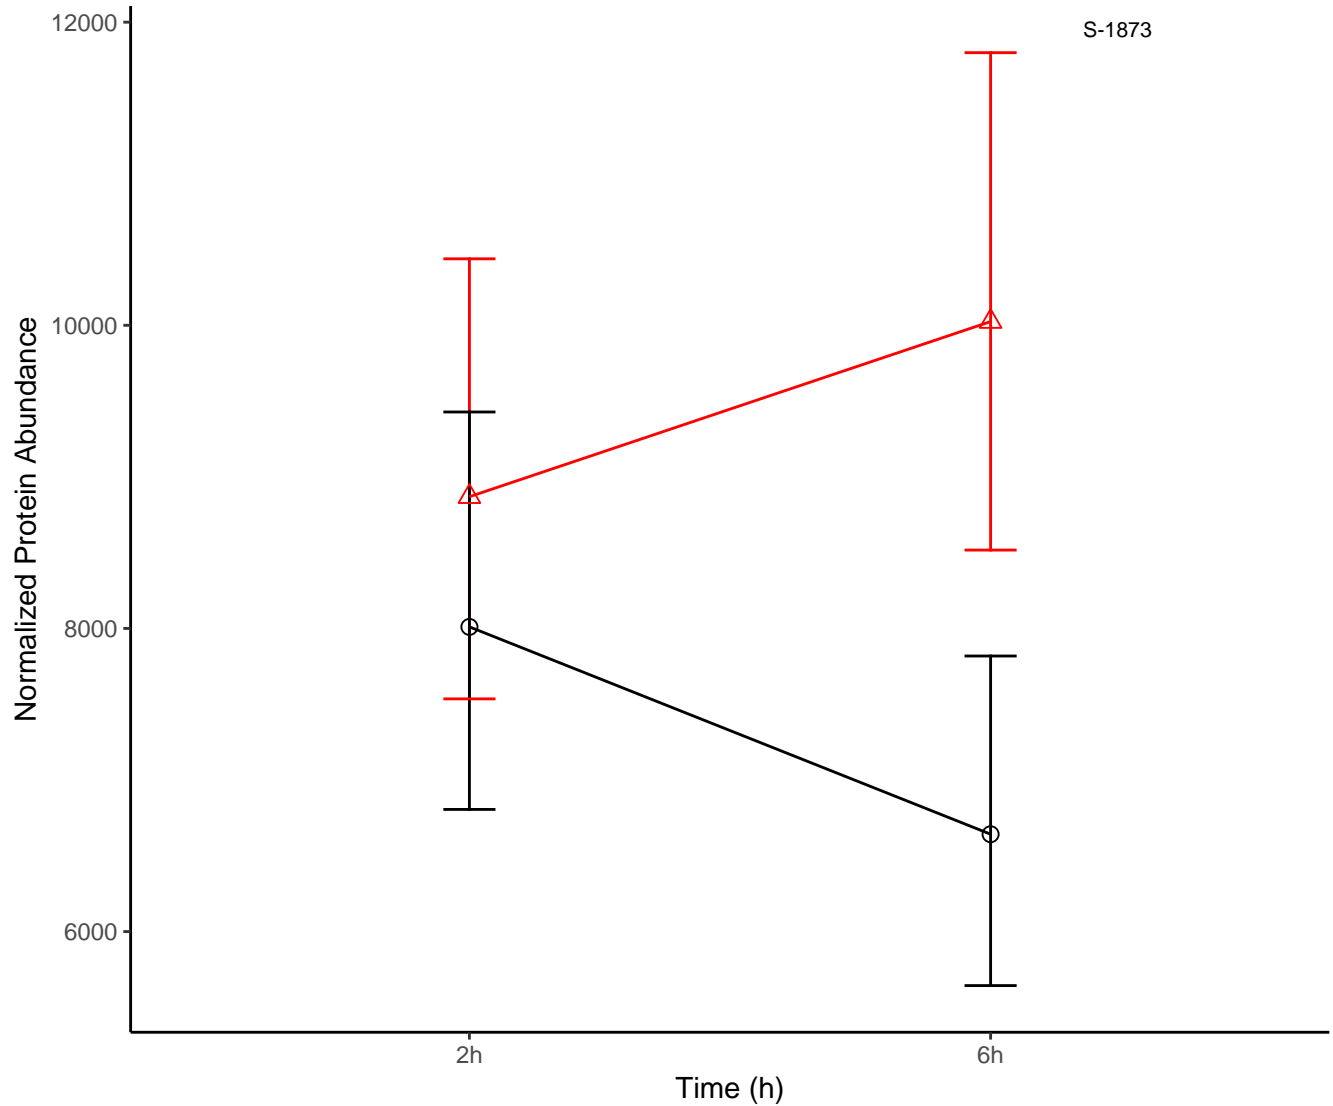

○ TSB-dex

△ TSB

# RSBW\_STAAM

S-1874

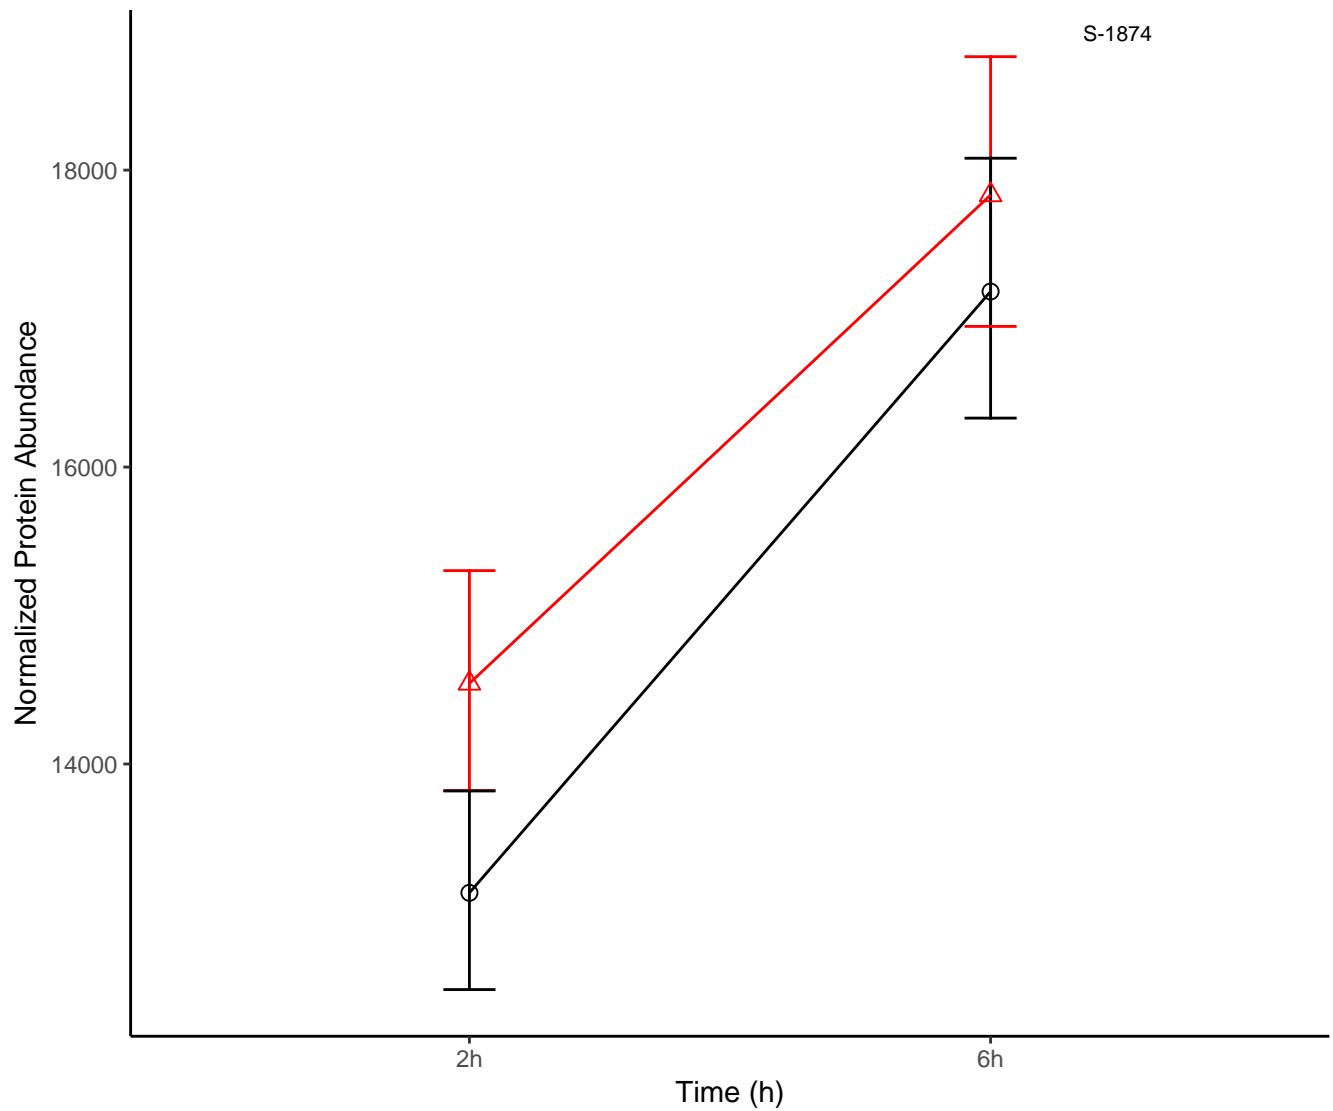

○ TSB-dex

△ TSB

# RSMA\_STAAM

S-1875

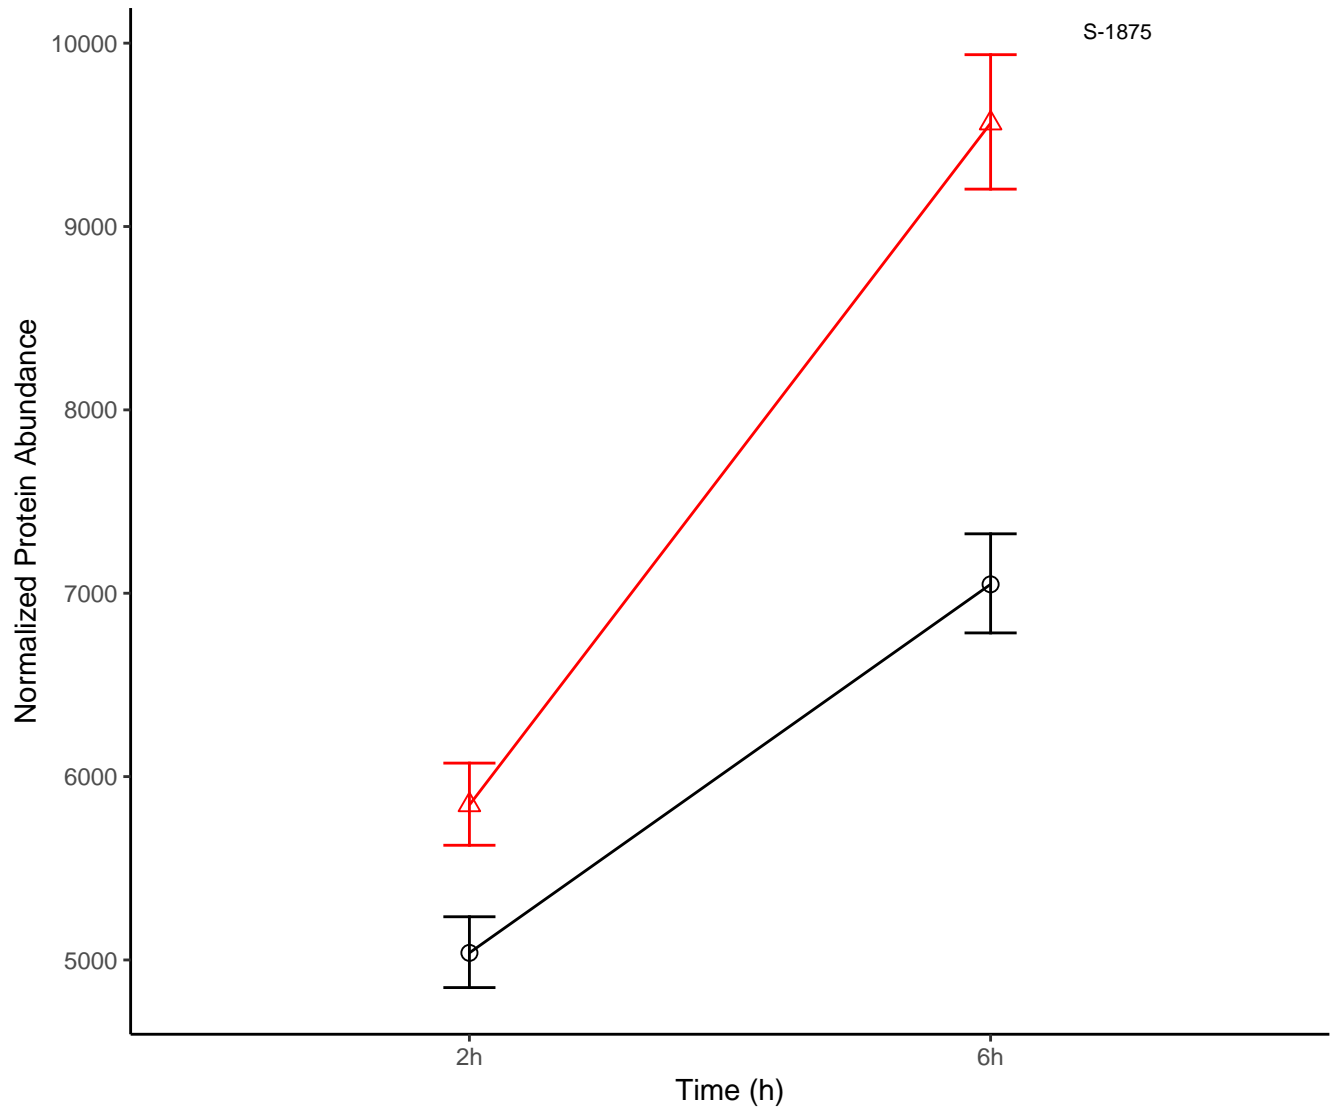

○ TSB-dex

△ TSB

# RSMG\_STAAM

S-1876

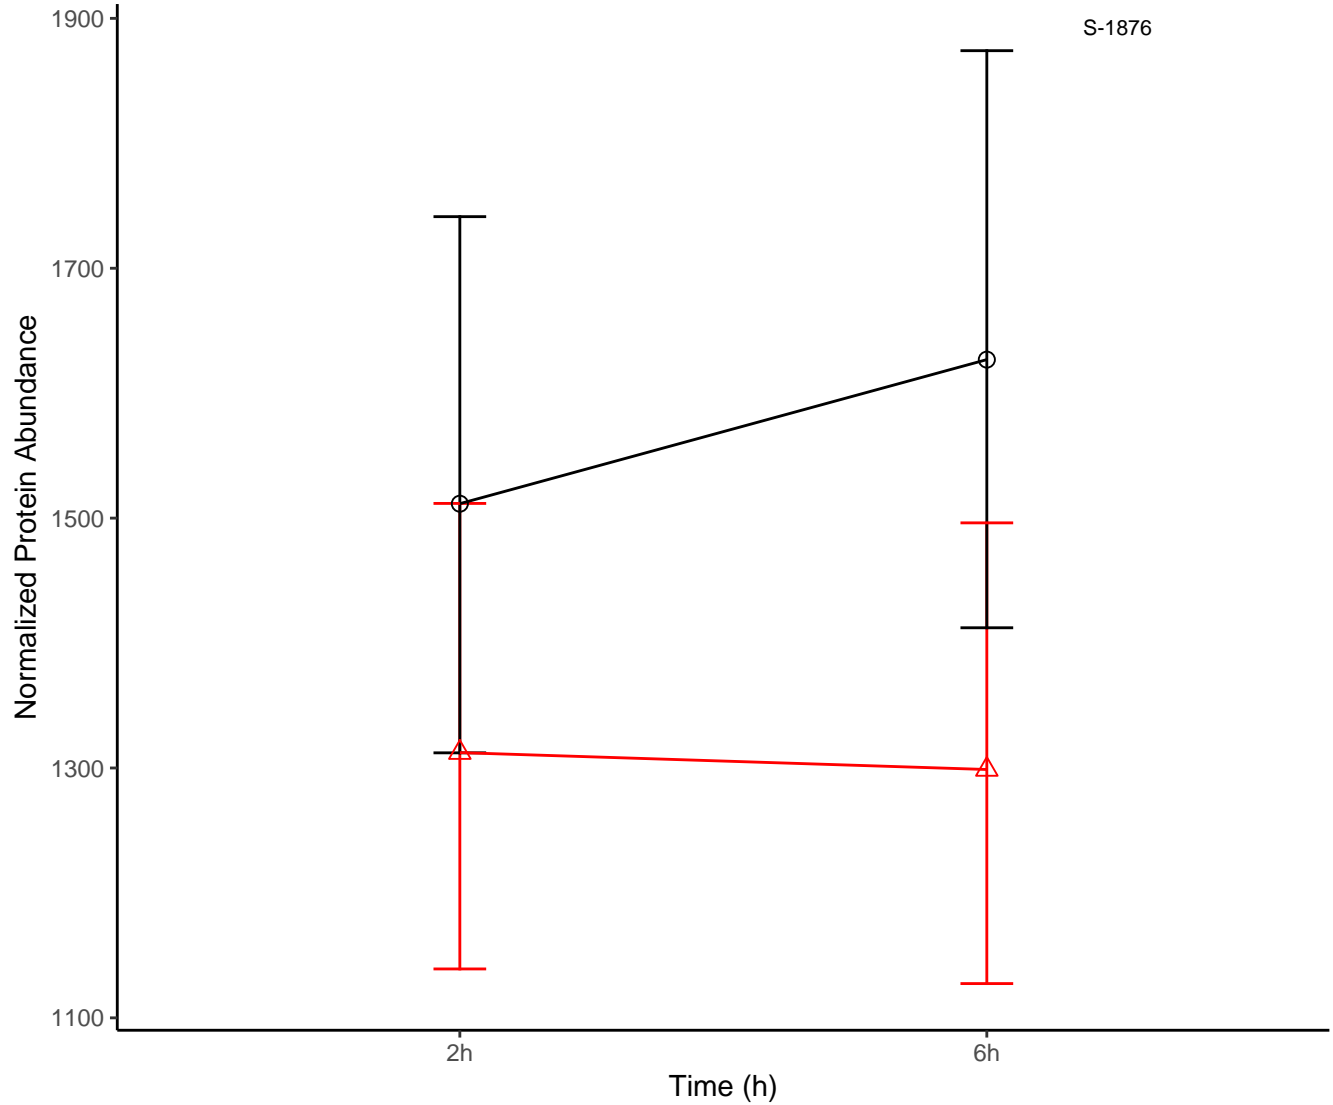

○ TSB-dex

△ TSB

# RUVX\_STAAM

S-1877

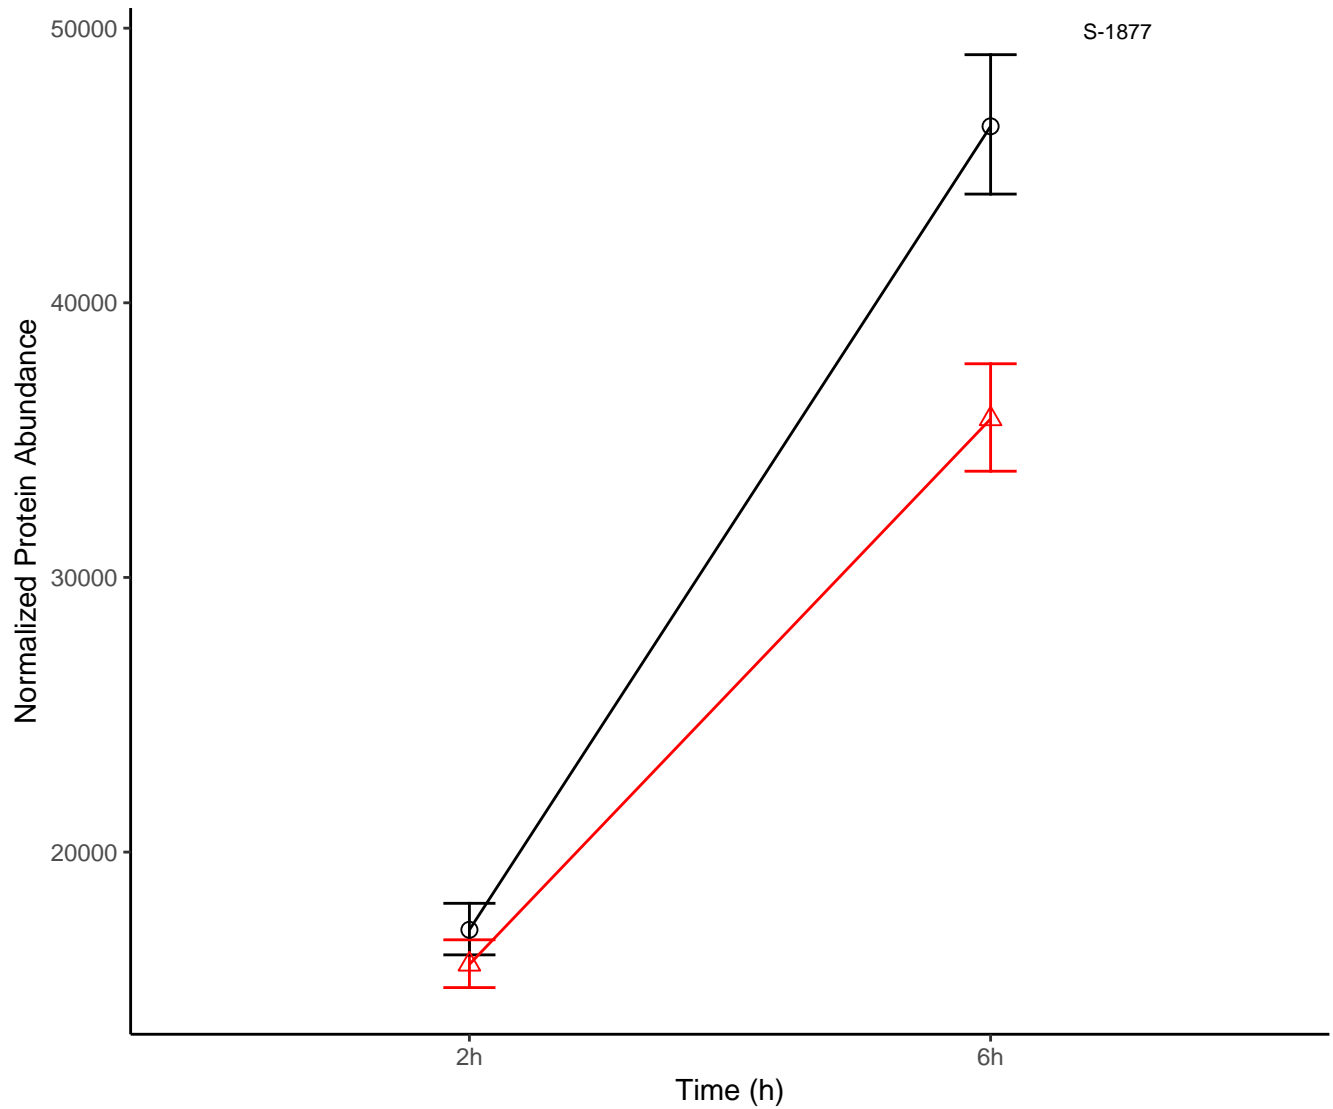

○ TSB-dex

△ TSB

# S3AD\_STAAM

S-1878

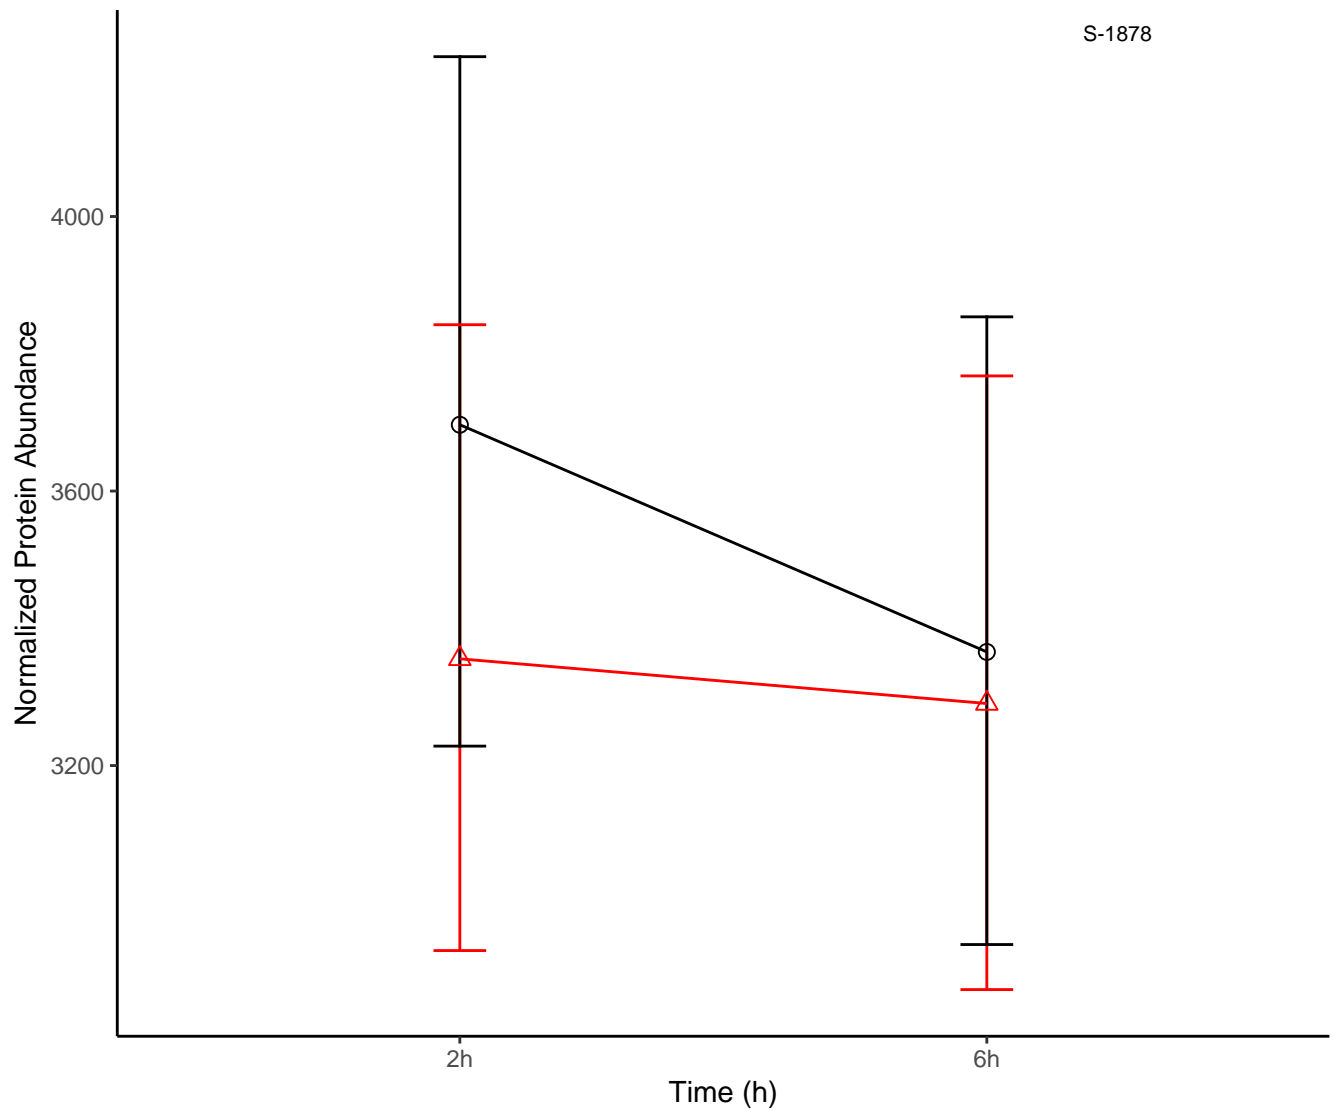

○ TSB-dex

△ TSB

# SAER\_STAAM

S-1879

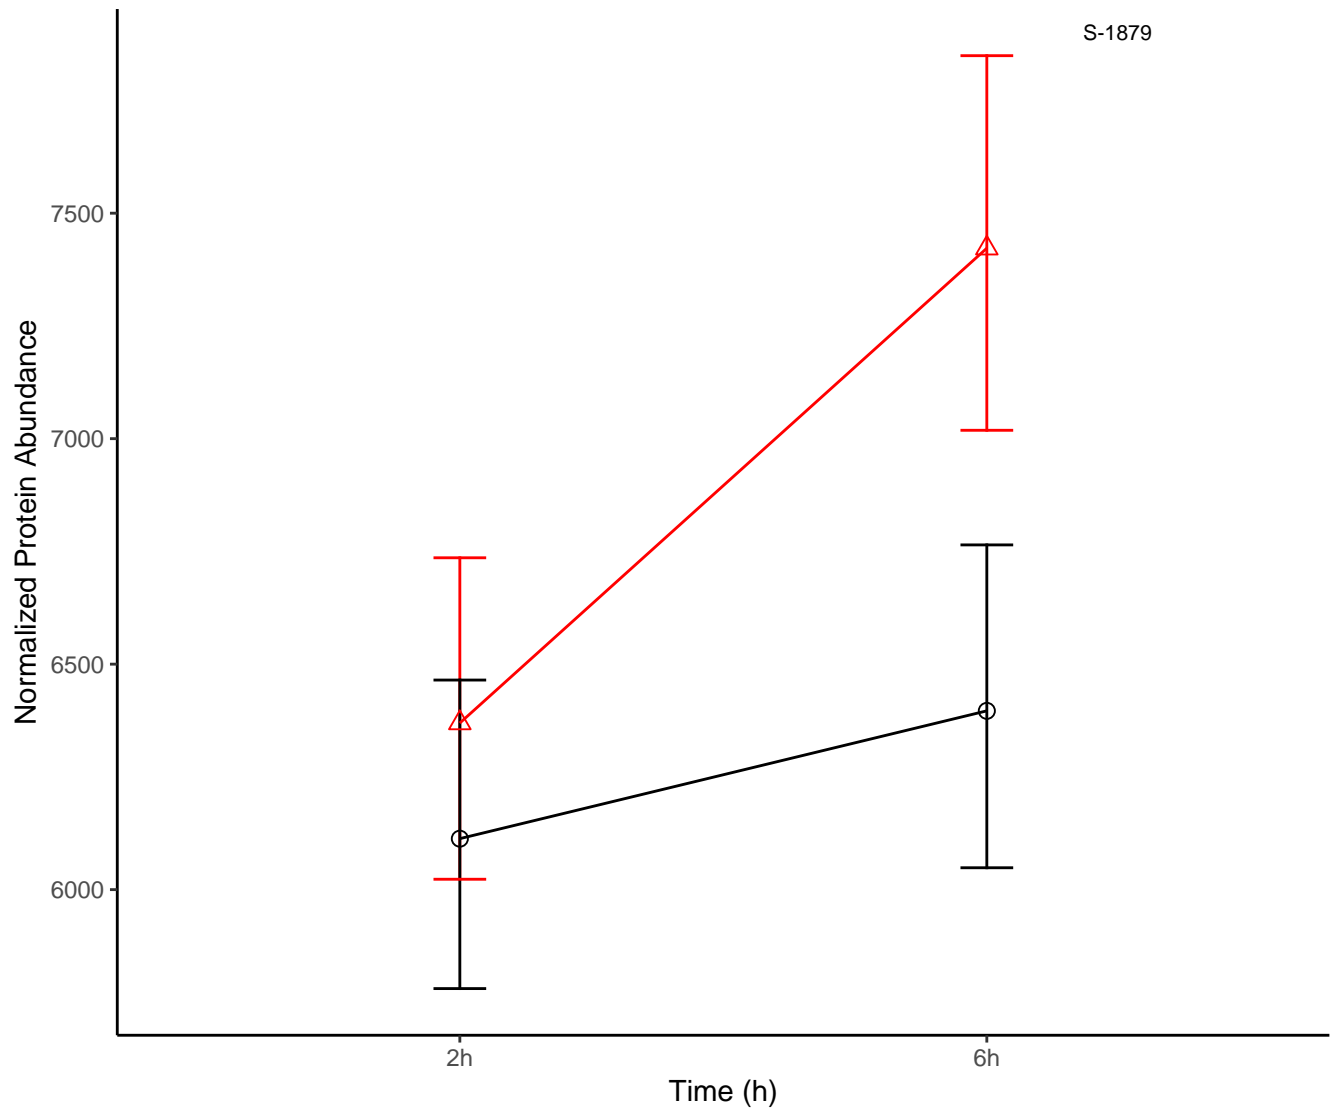

○ TSB-dex

△ TSB

# SARA\_STAAM

S-1880

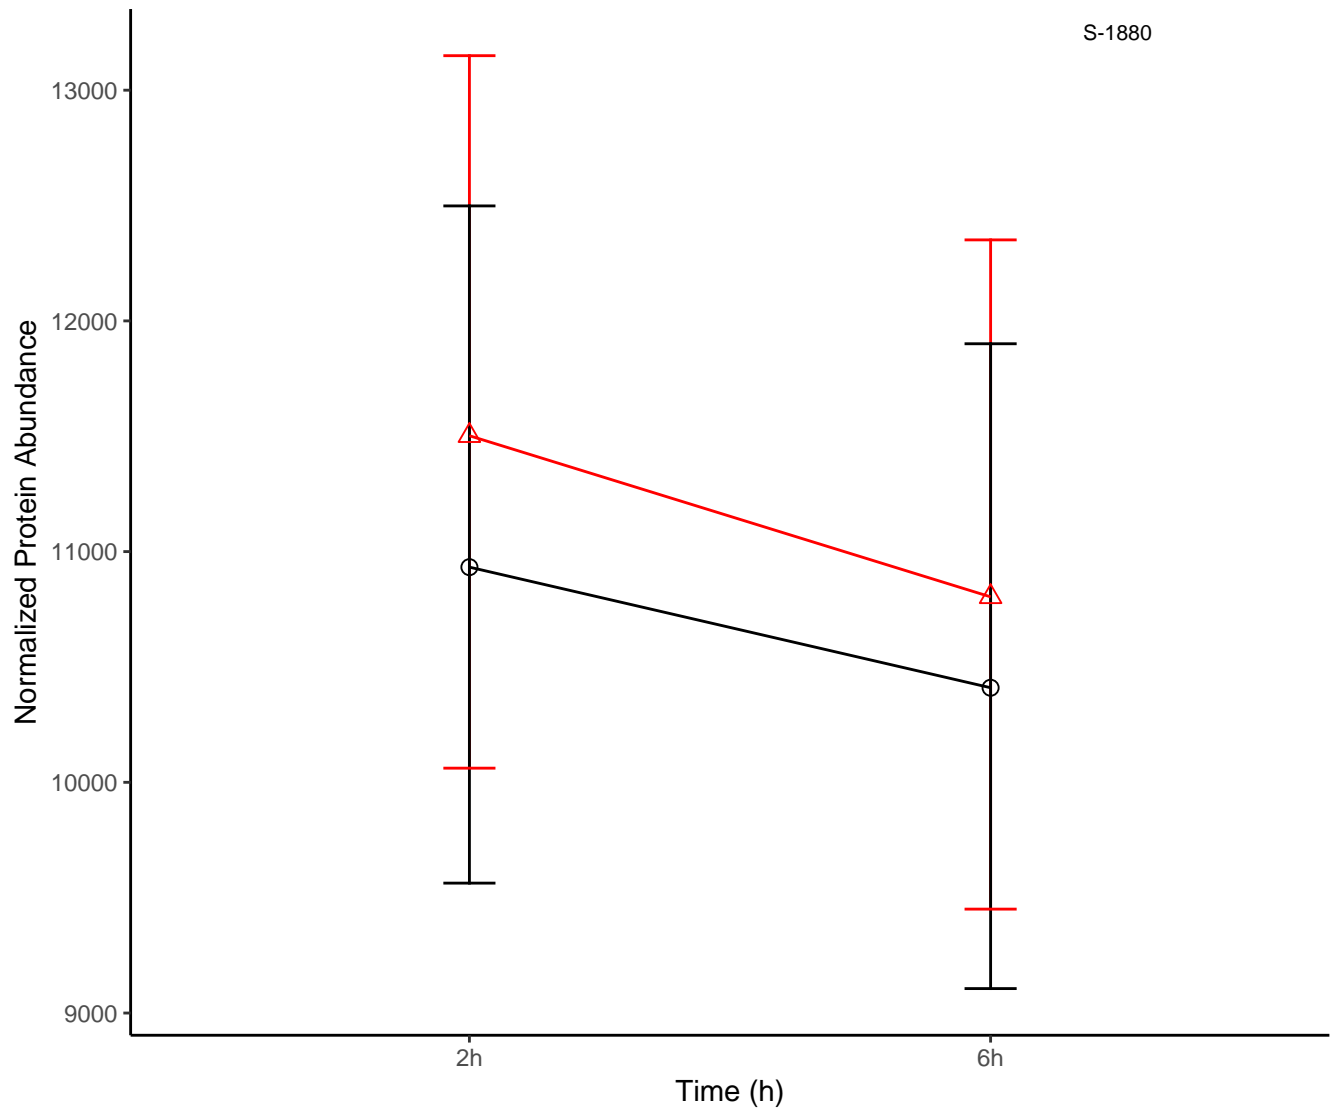

○ TSB-dex

△ TSB



# SARR\_STAAM

S-1881

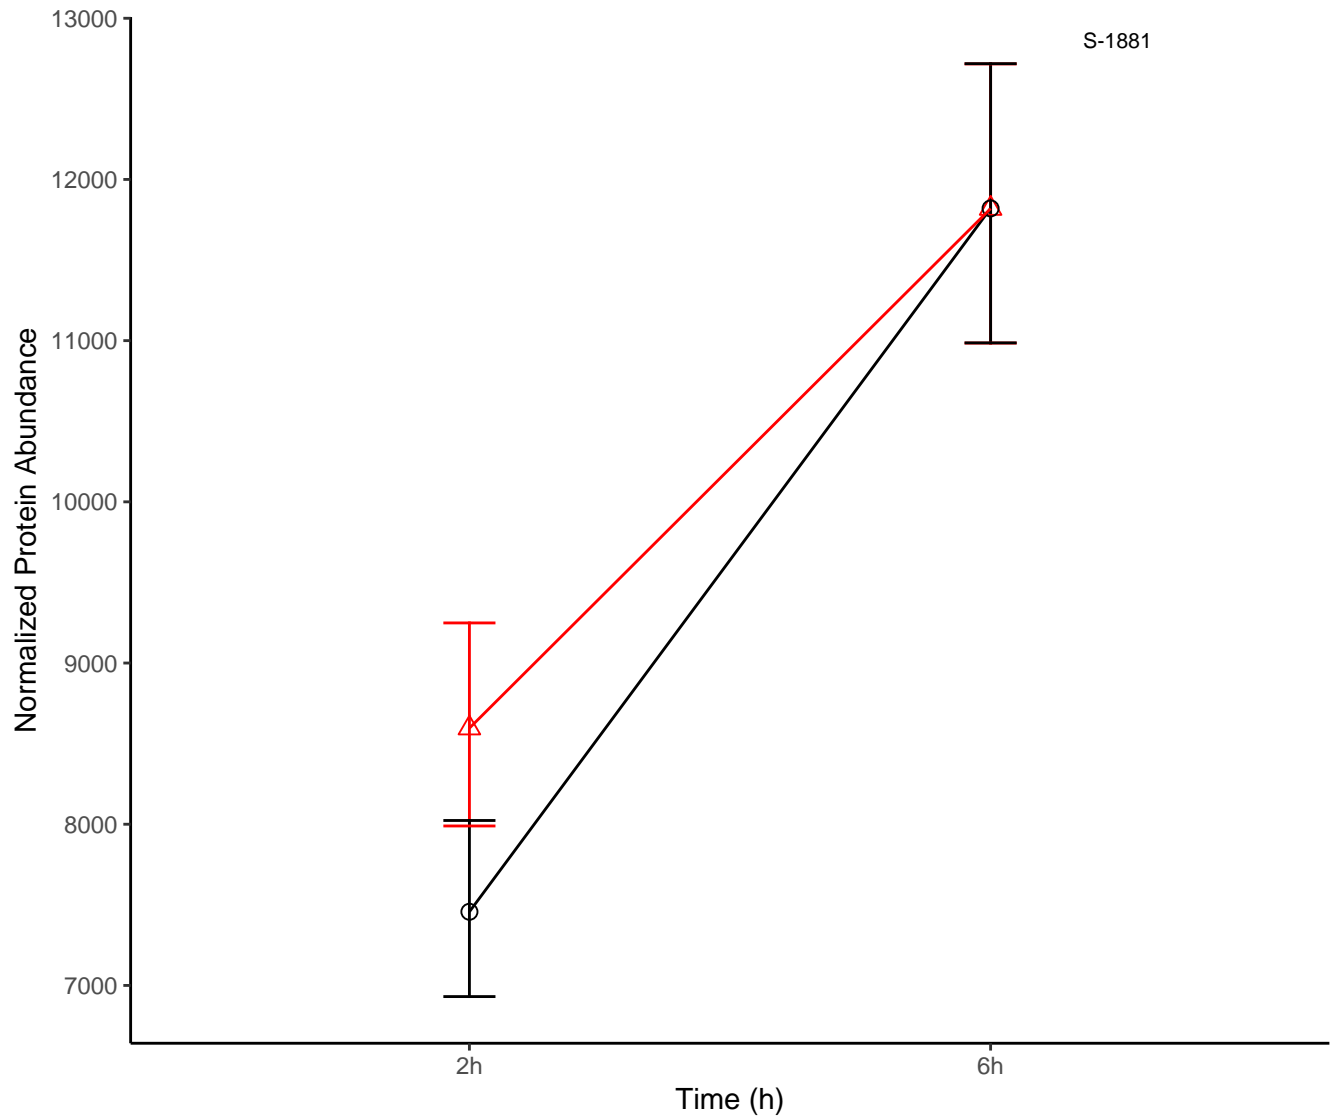

○ TSB-dex

△ TSB

# SARS\_STAAM

S-1882

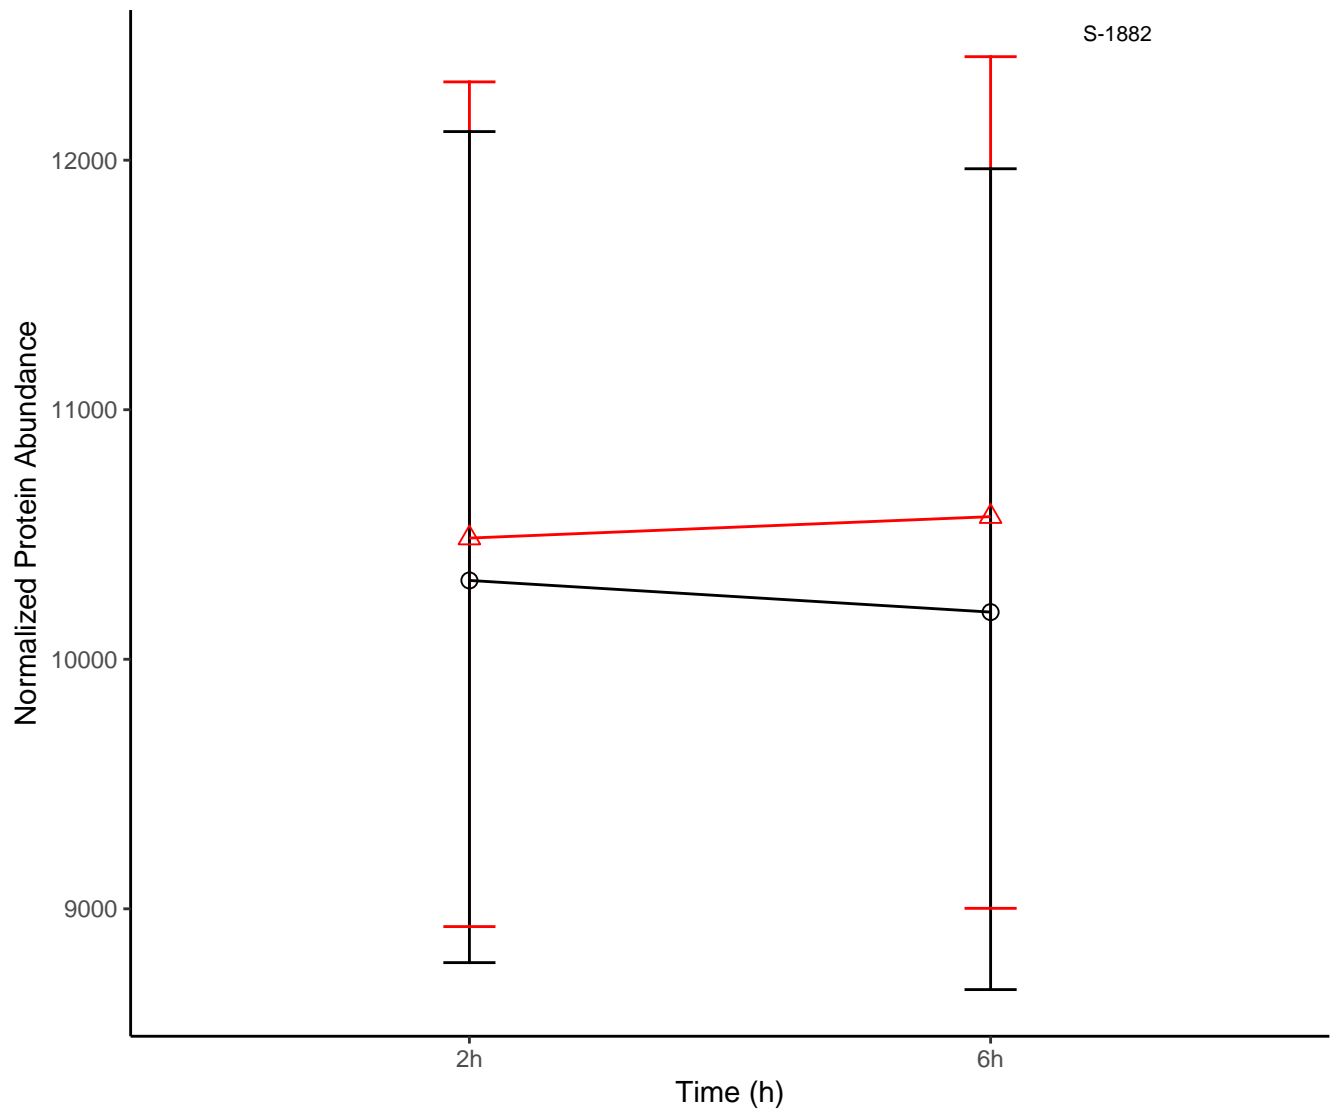

○ TSB-dex

△ TSB

# SBCC\_STAAM

S-1883

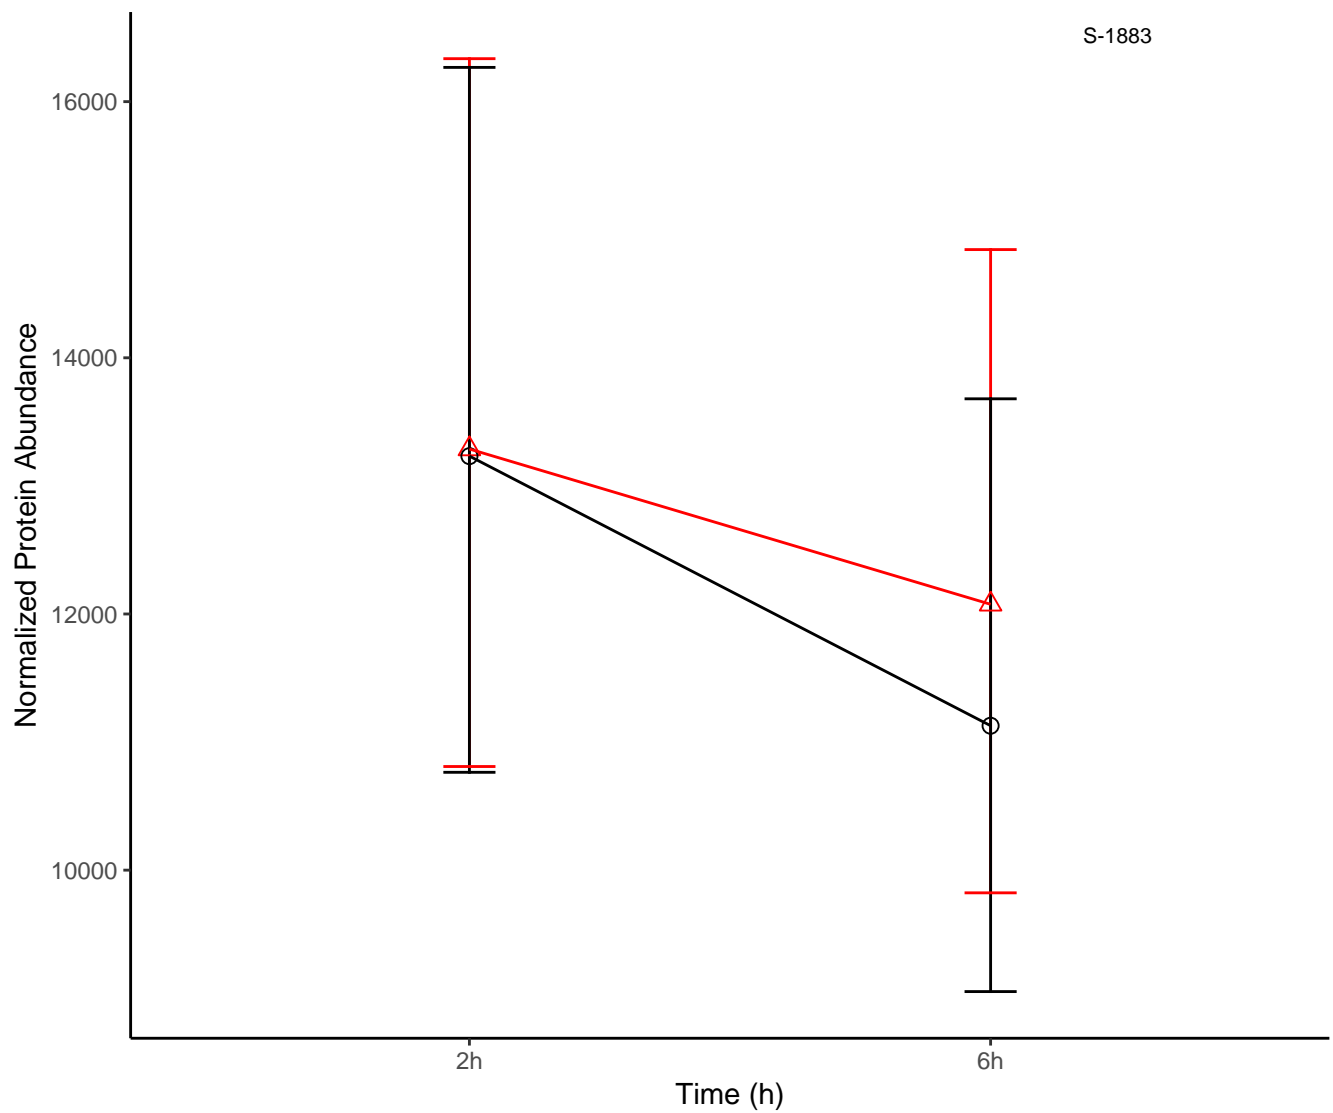

○ TSB-dex

△ TSB

# SBI\_STAAM

S-1884

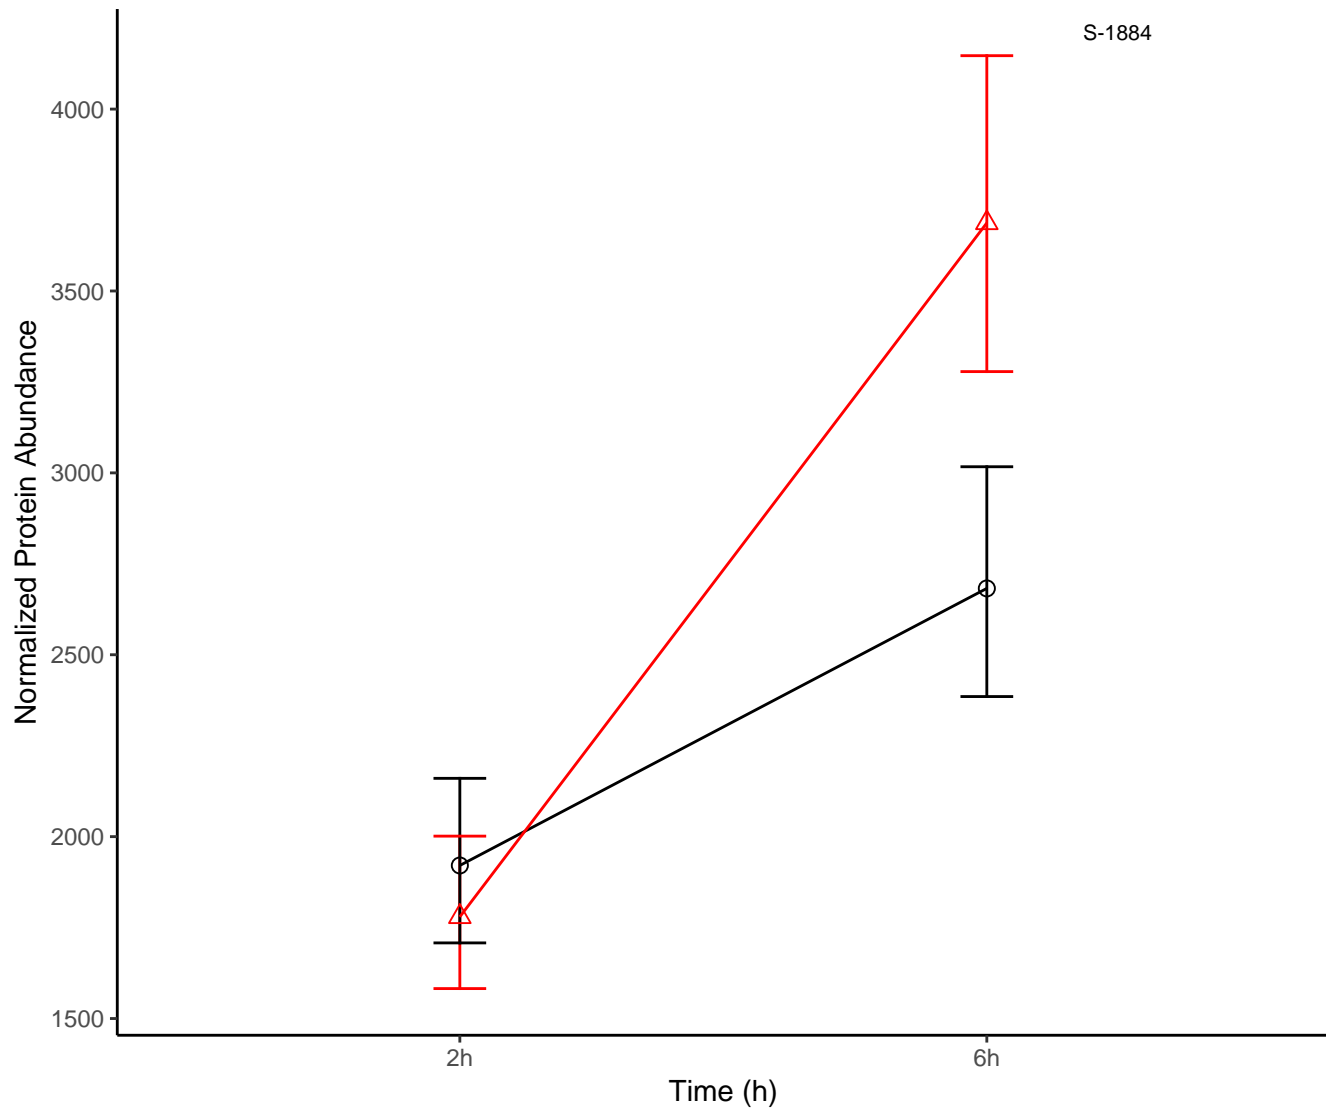

○ TSB-dex

△ TSB

# SCPA\_STAAM

S-1885

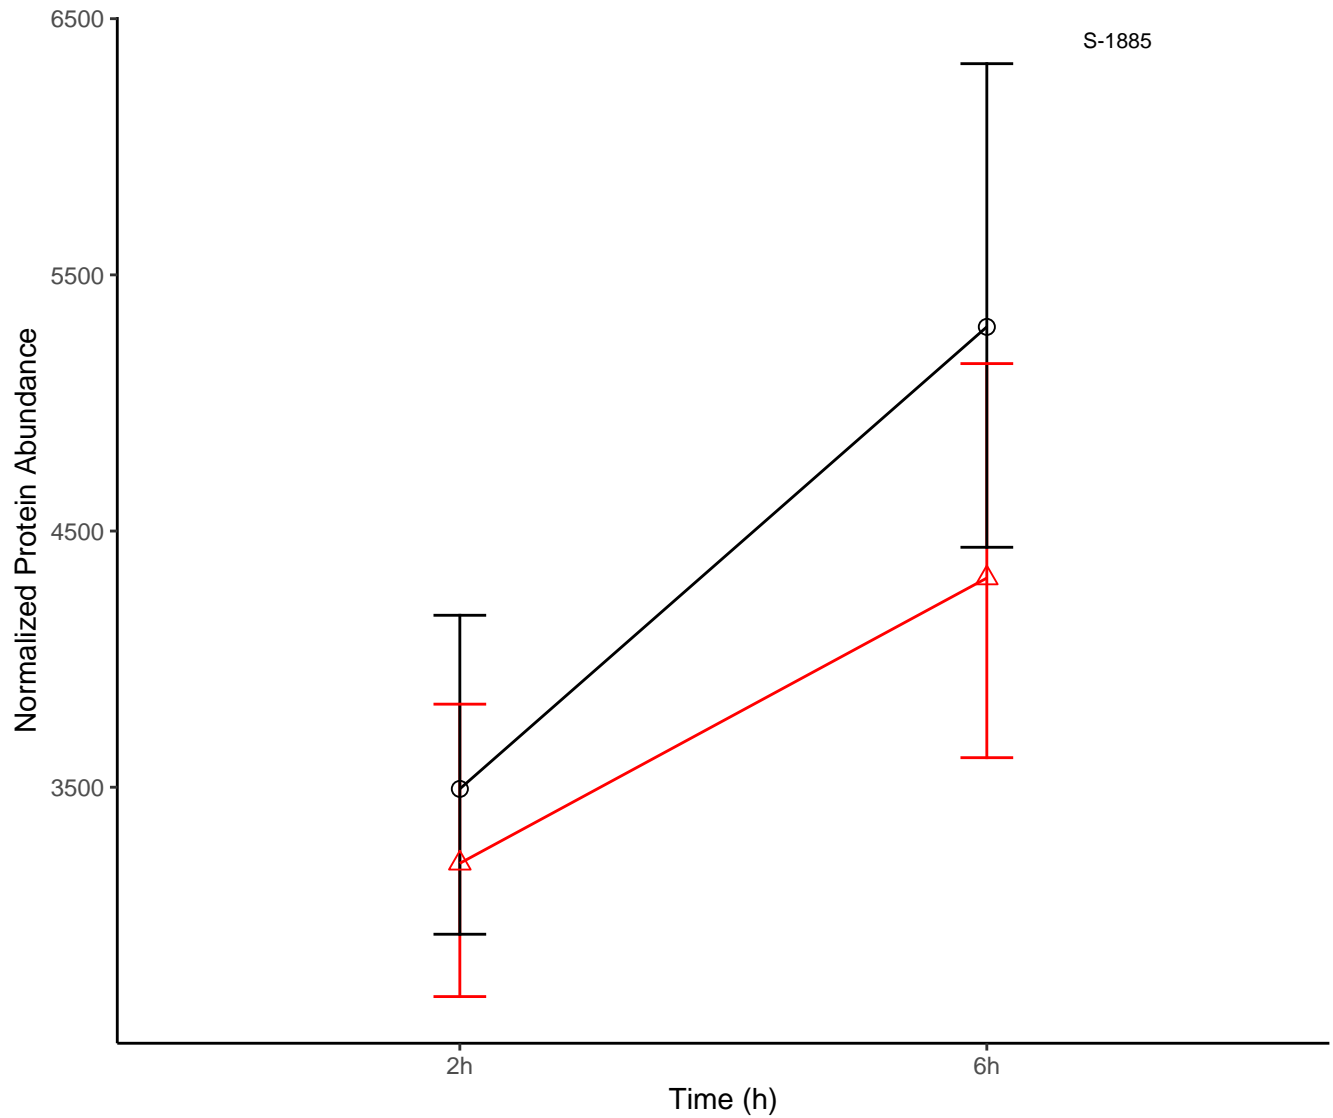

○ TSB-dex

△ TSB

# SCPB\_STAAM

S-1886

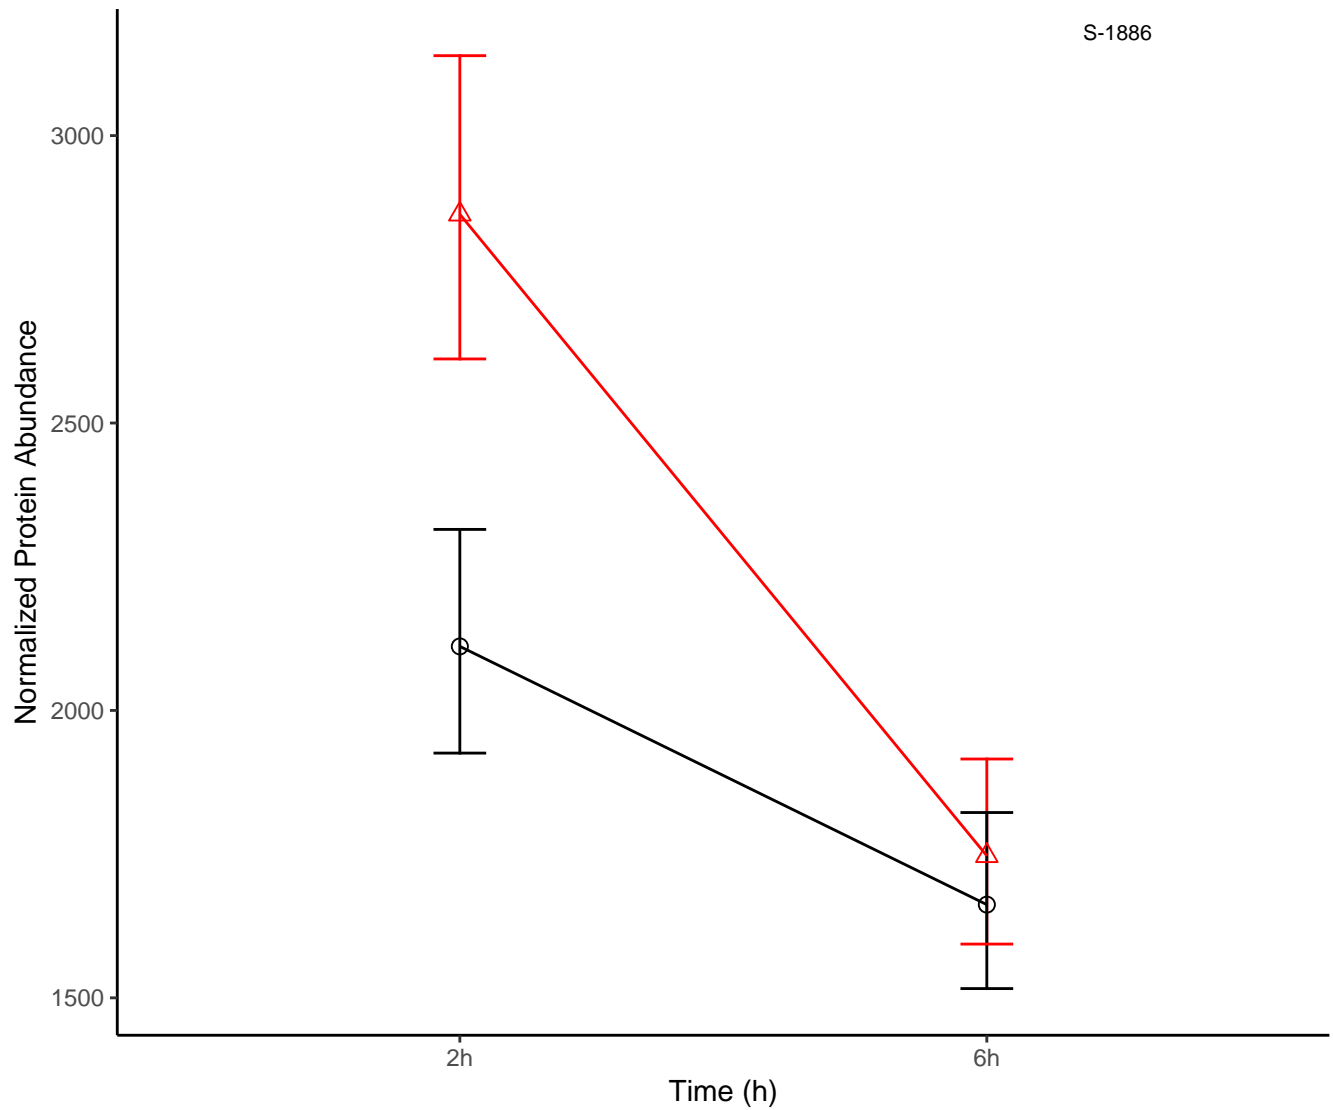

○ TSB-dex

△ TSB

# SECA1\_STAAM

S-1887

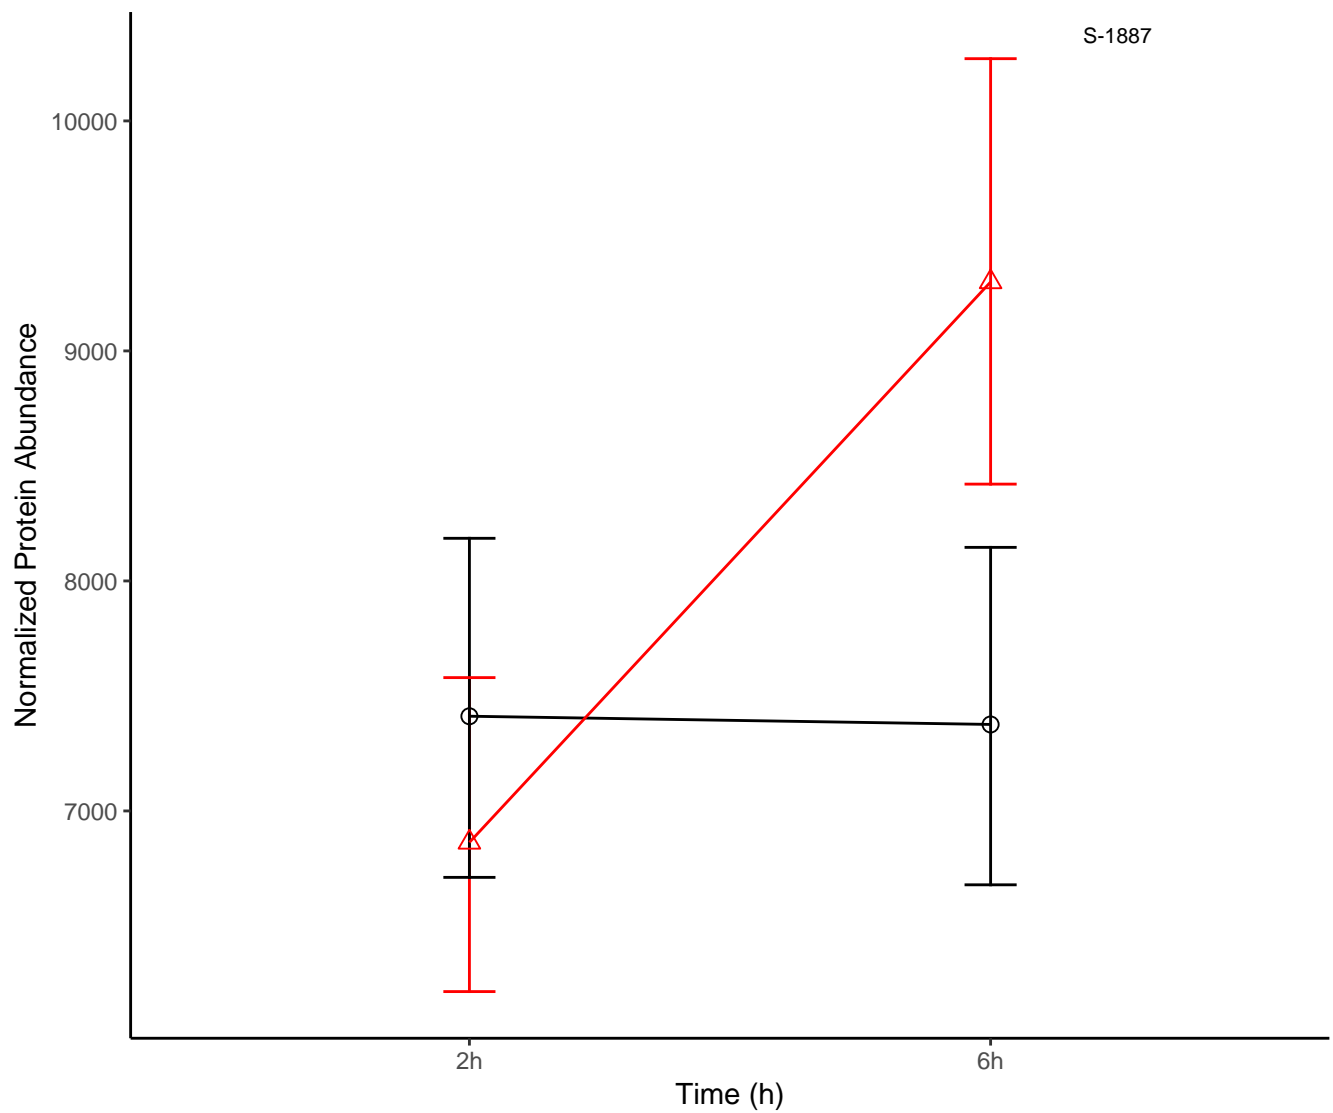

○ TSB-dex

△ TSB

# SIGA\_STAAM

S-1888

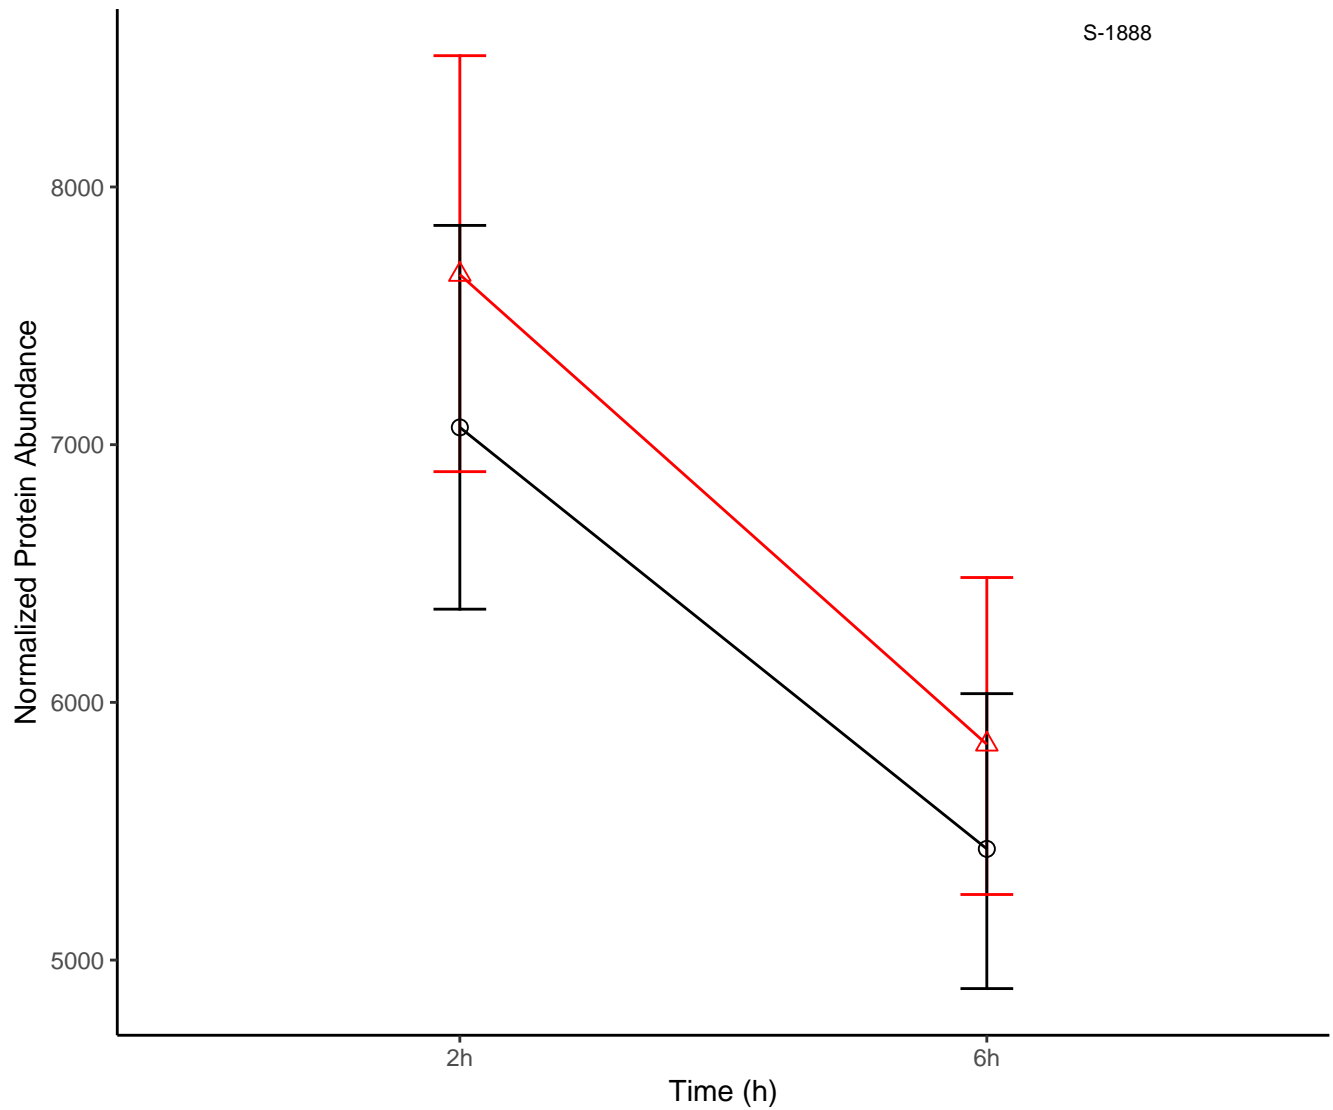

○ TSB-dex

△ TSB



# SODM1\_STAAM

S-1889

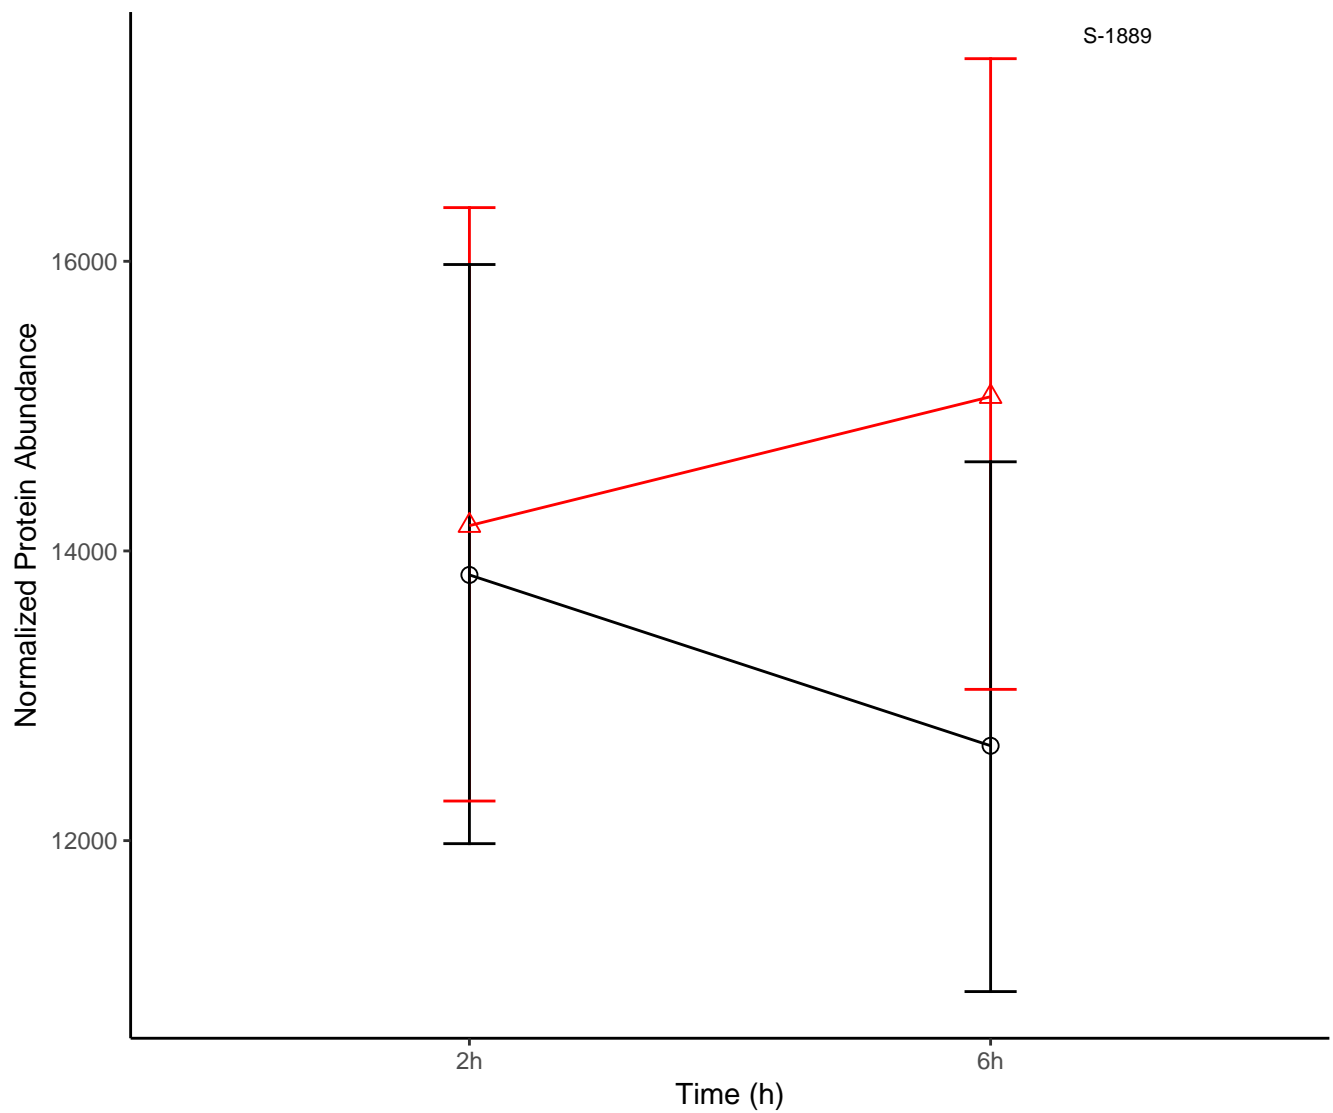

○ TSB-dex

△ TSB

# SODM2\_STAAM

S-1890

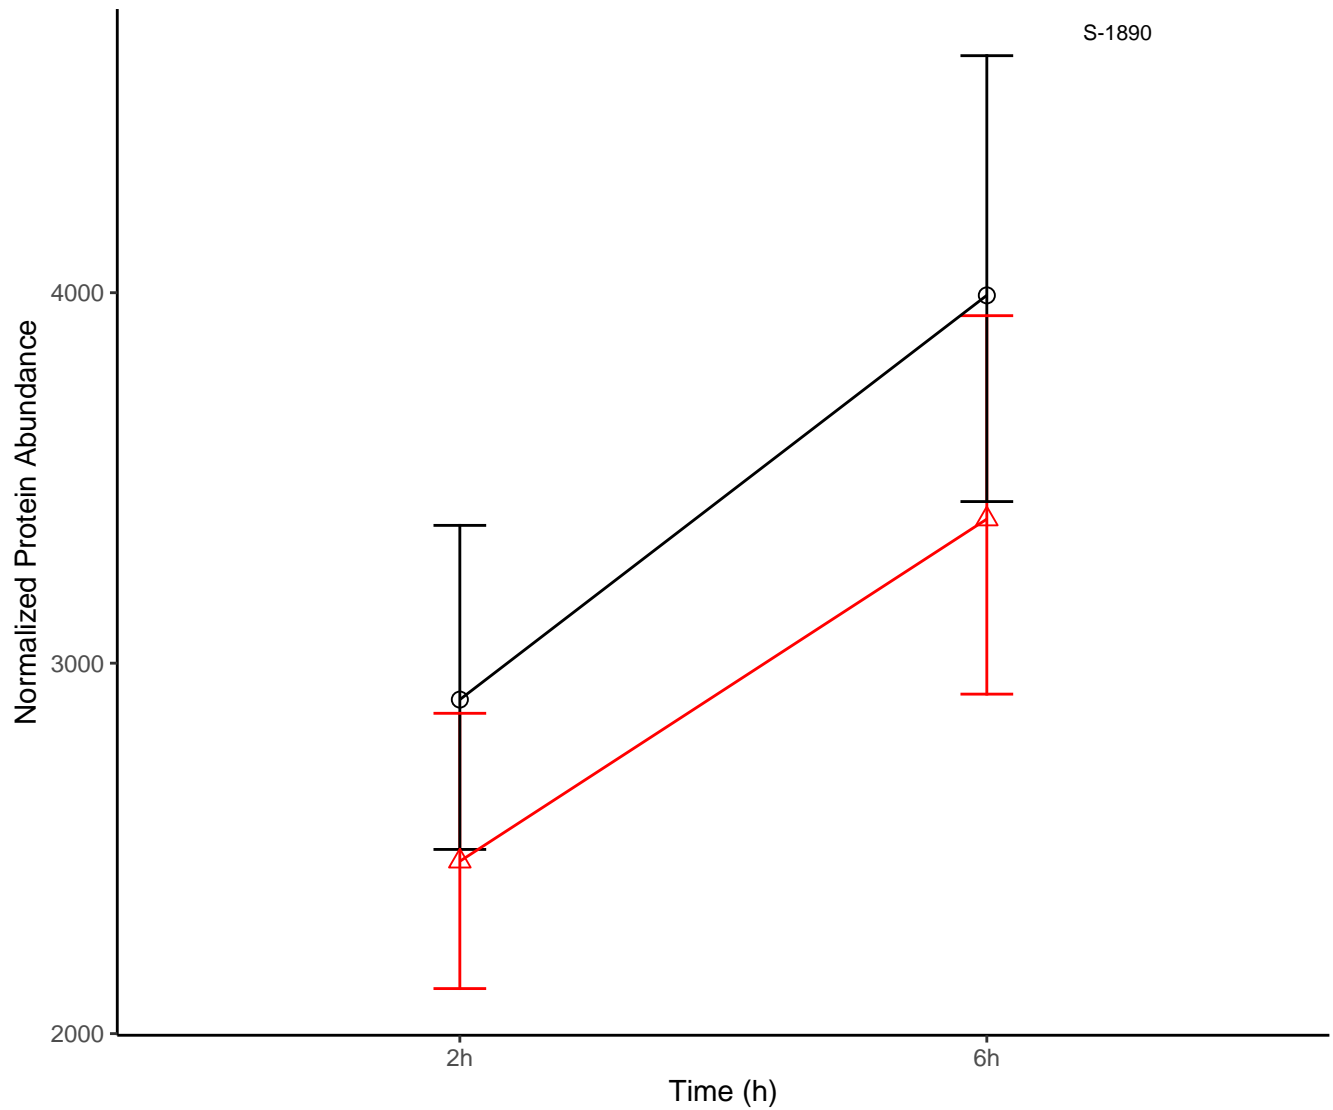

○ TSB-dex

△ TSB

# SP5G\_STAAM

S-1891

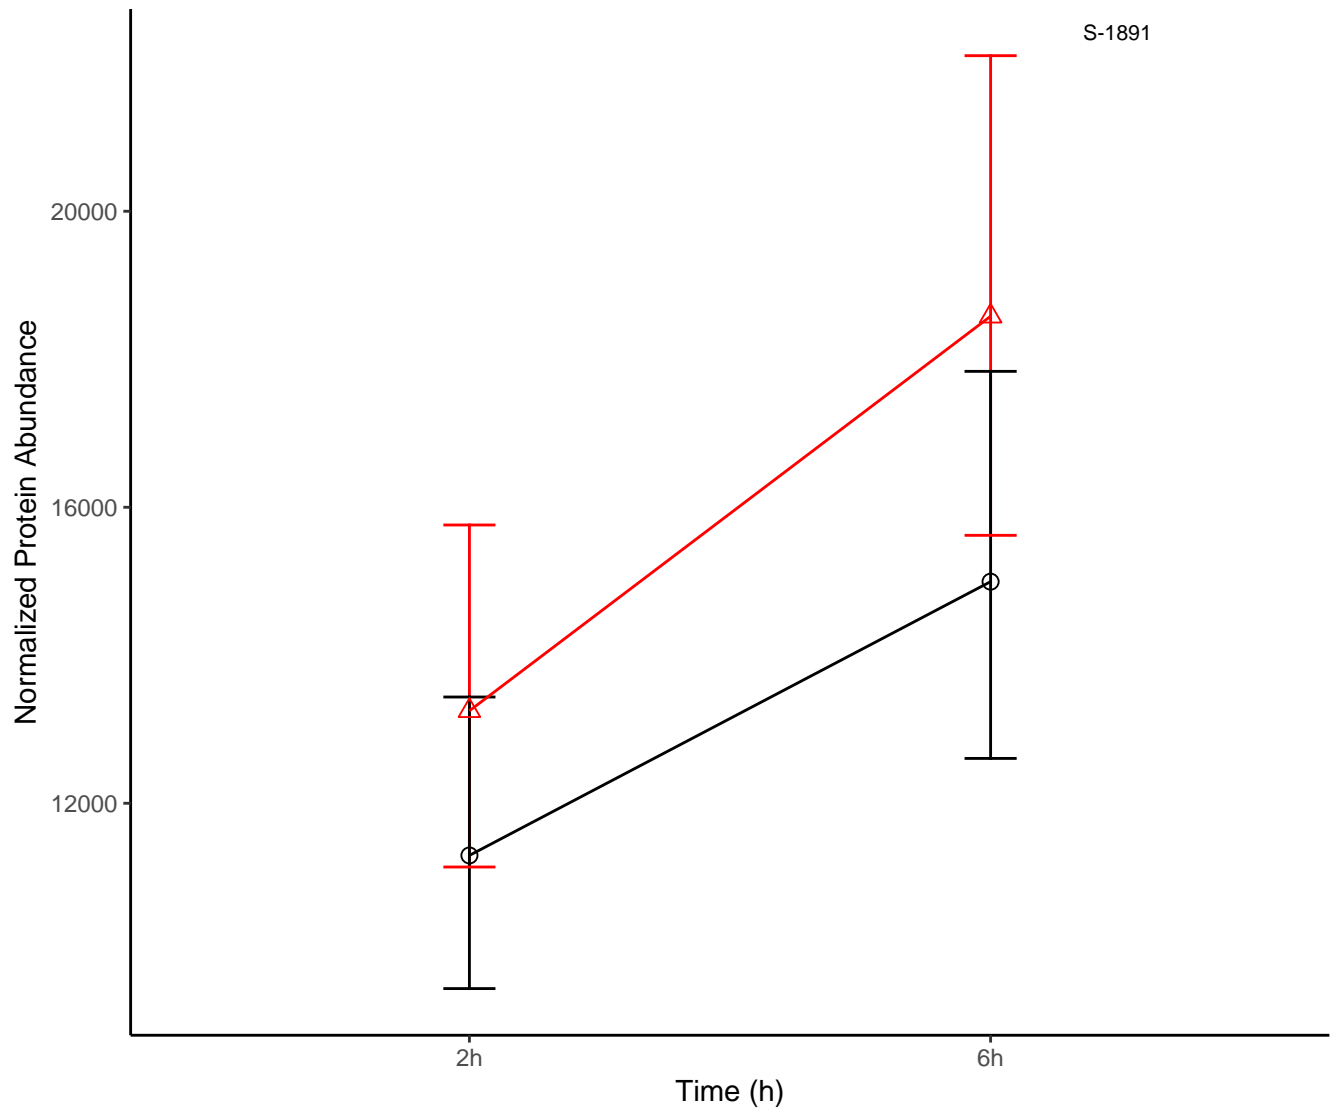

○ TSB-dex

△ TSB

# SPA\_STAAM

S-1892

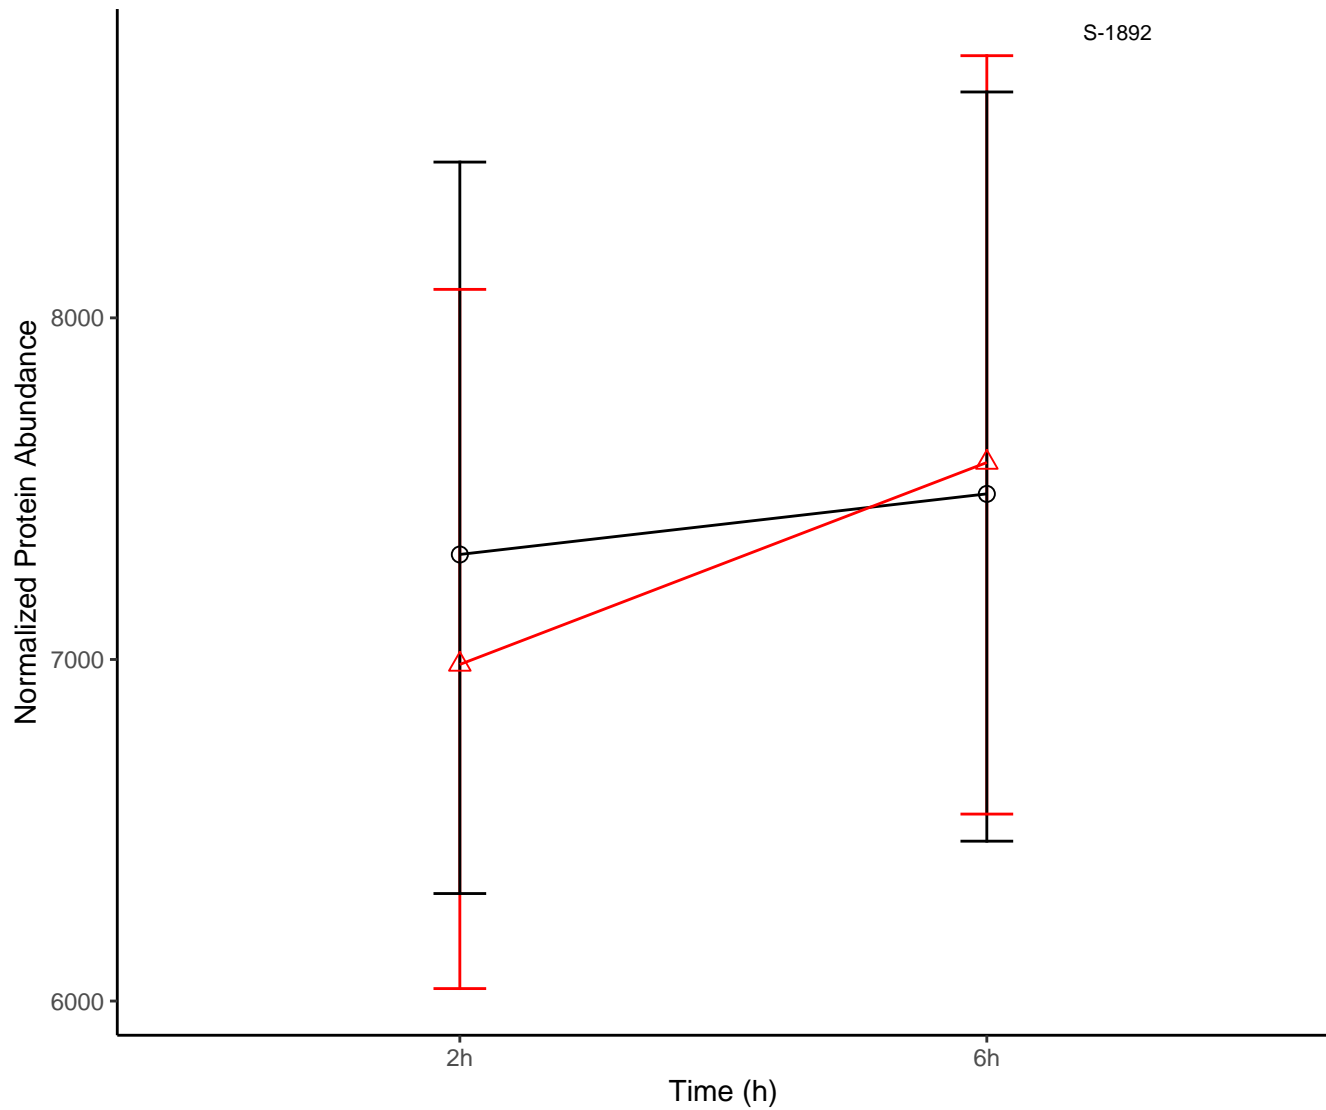

○ TSB-dex

△ TSB

# SPLD\_STAAM

S-1893

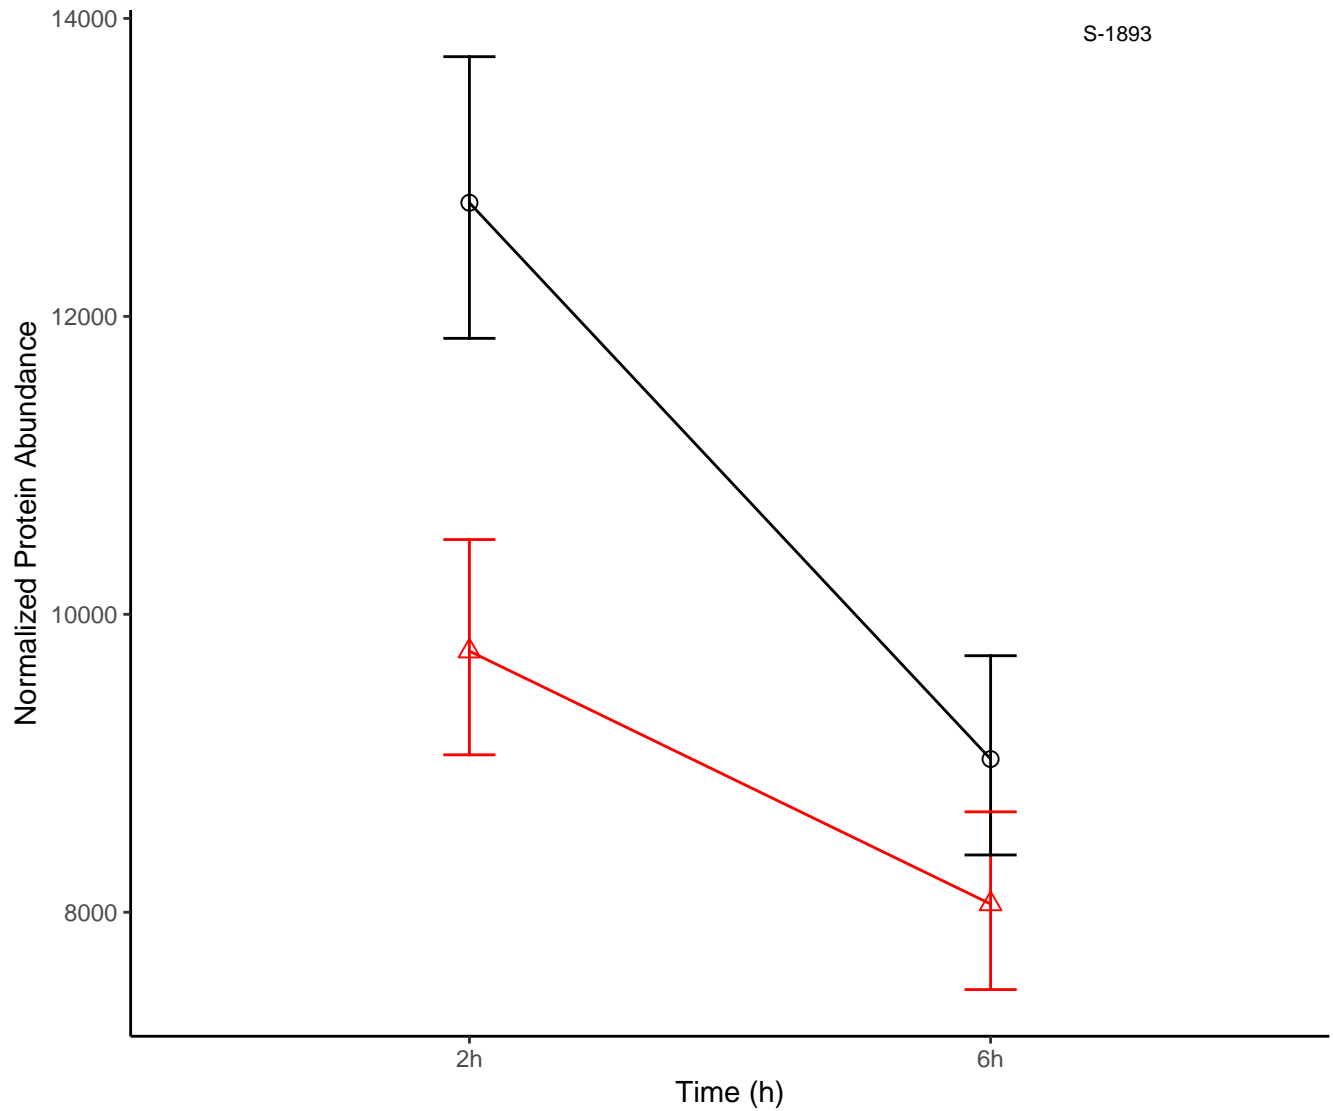

○ TSB-dex

△ TSB

# SPX\_STAAM

S-1894

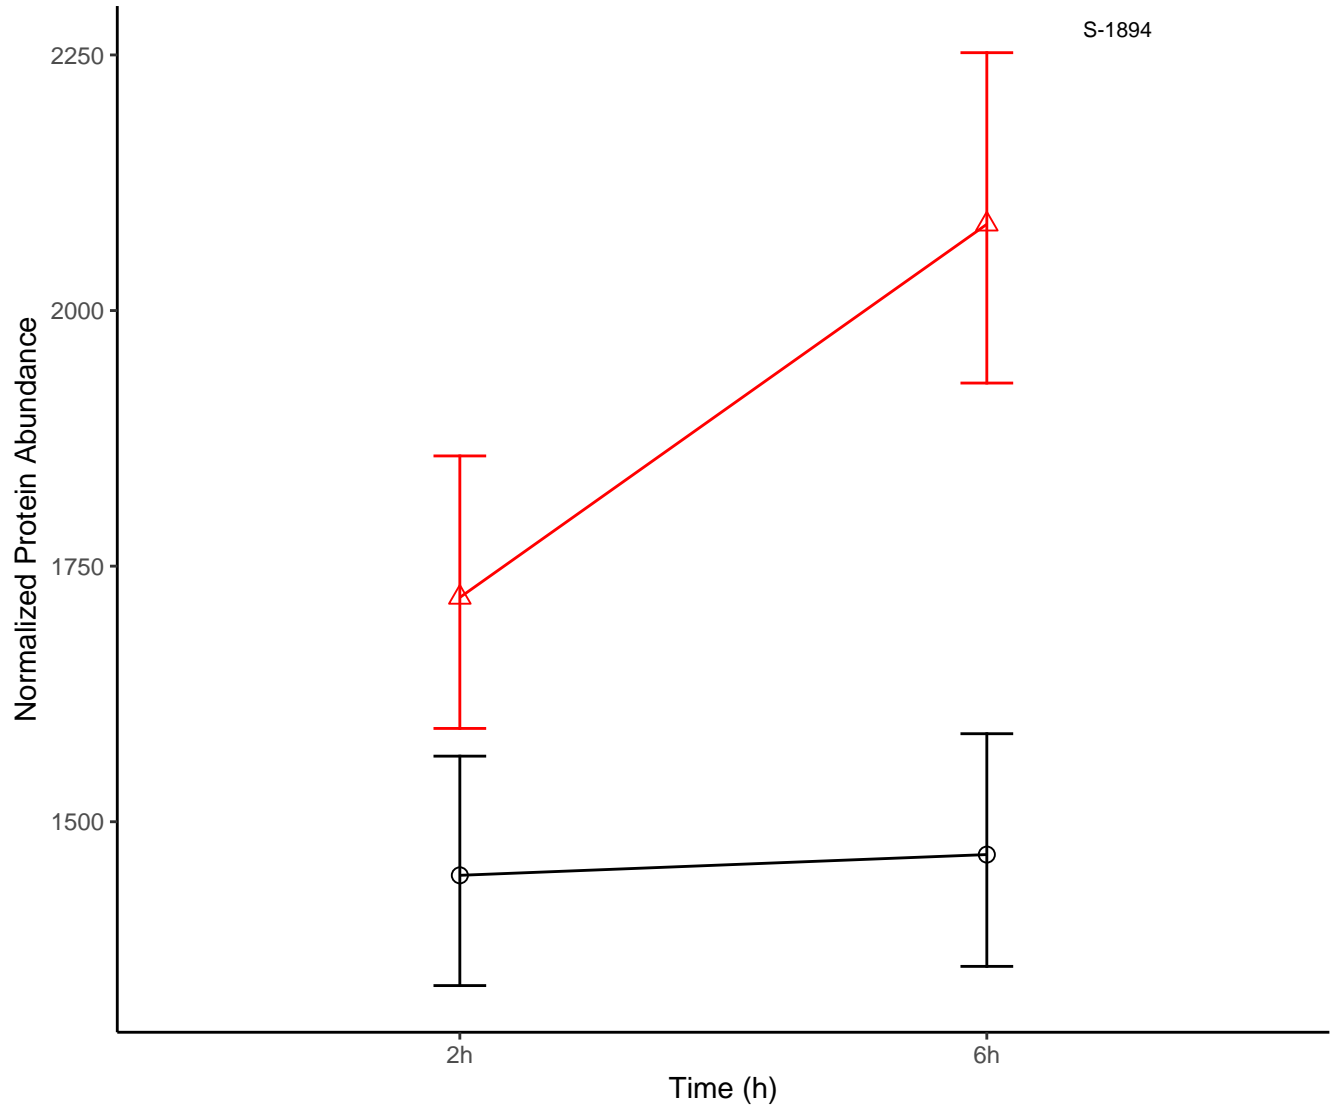

○ TSB-dex

△ TSB

# SRRRA\_STAAM

S-1895

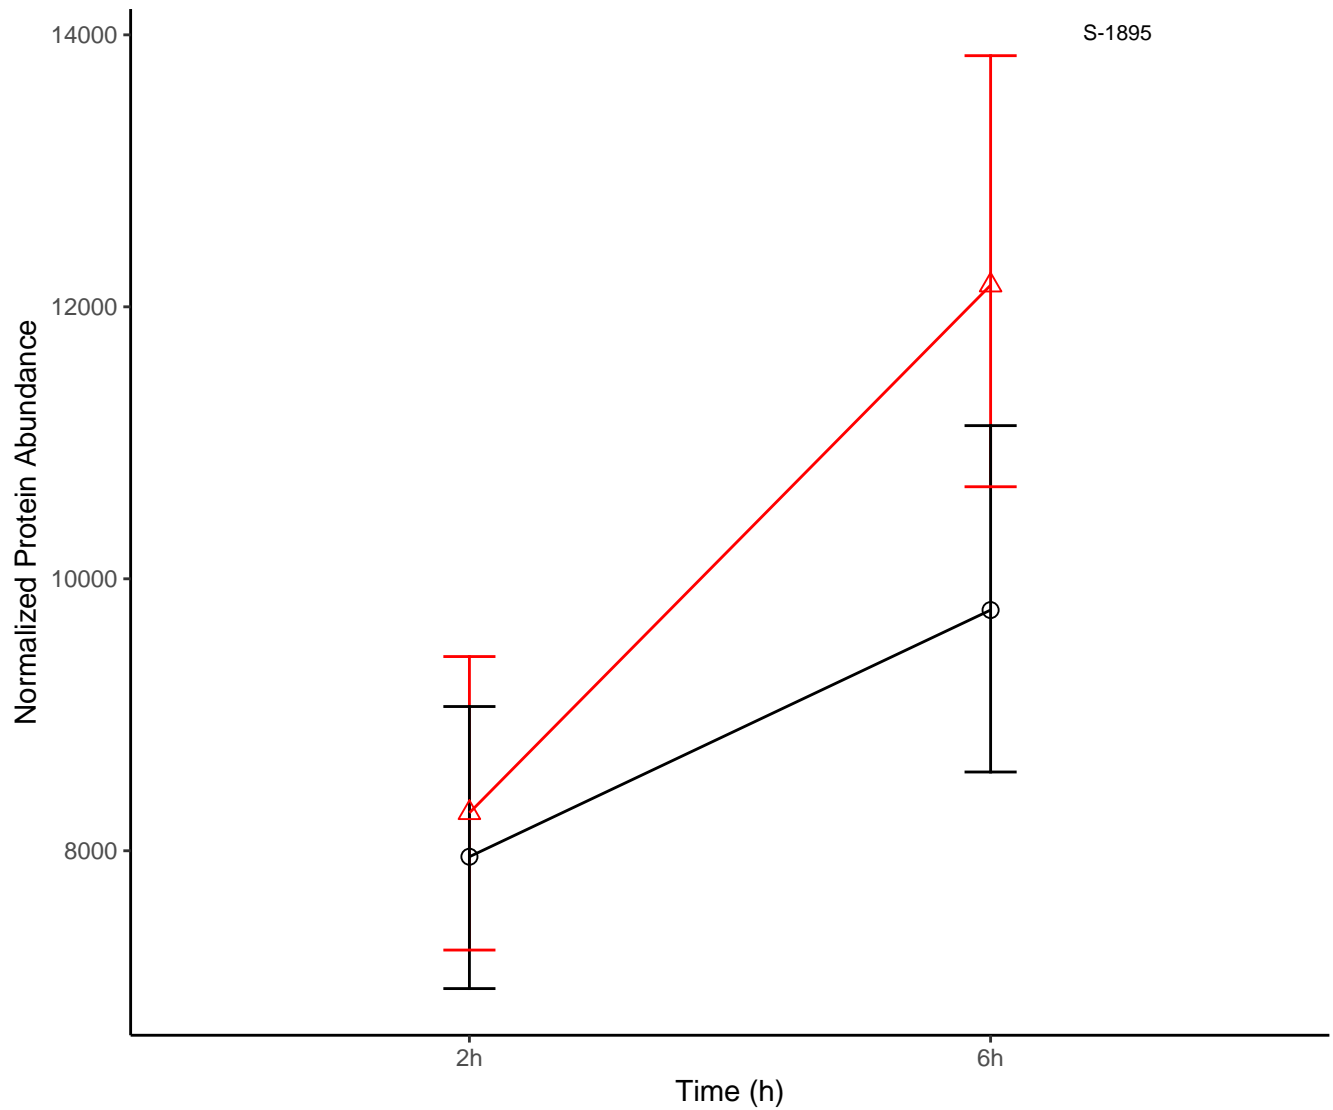

○ TSB-dex

△ TSB

# SSAA2\_STAAM

S-1896

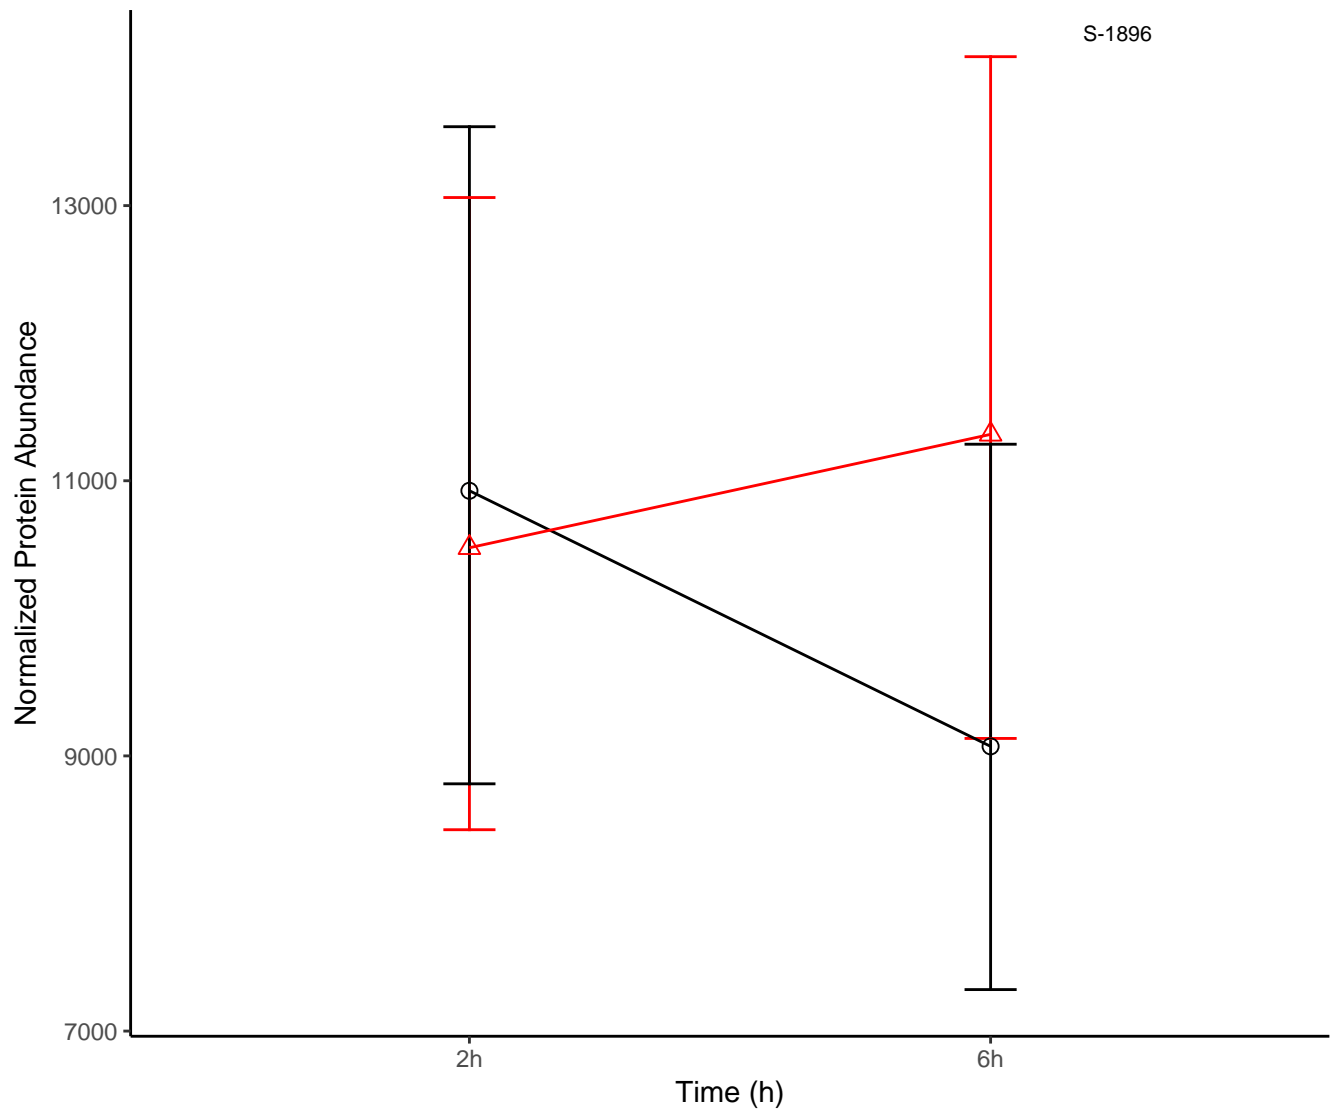

○ TSB-dex

△ TSB



# SSB1\_STAAM

S-1897

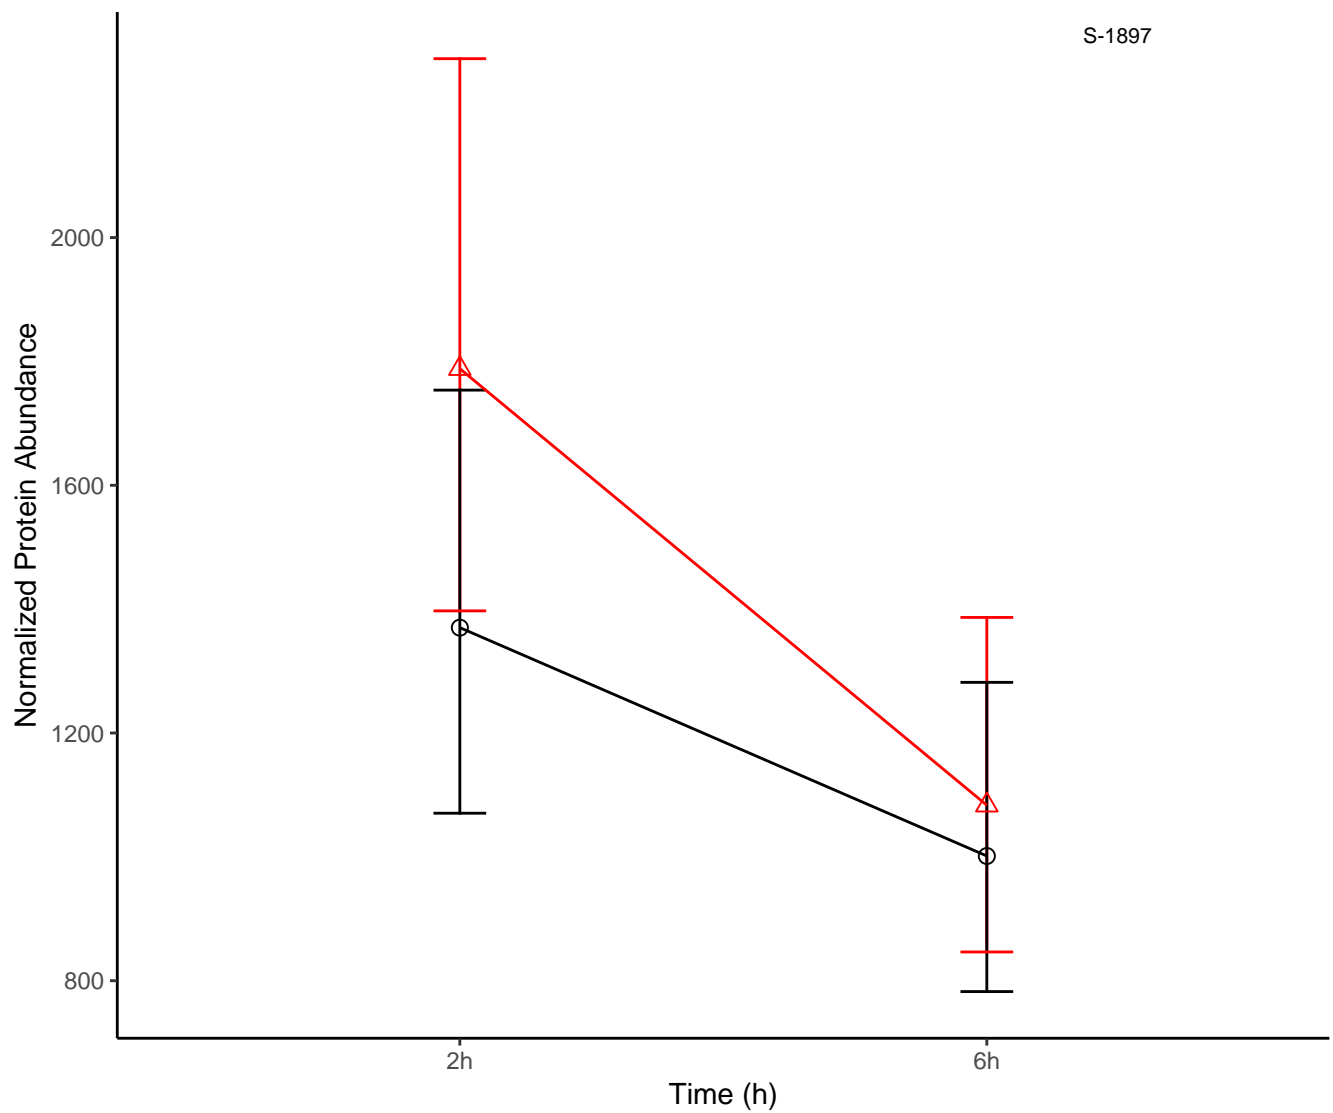

○ TSB-dex

△ TSB

# SSB2\_STAAM

S-1898

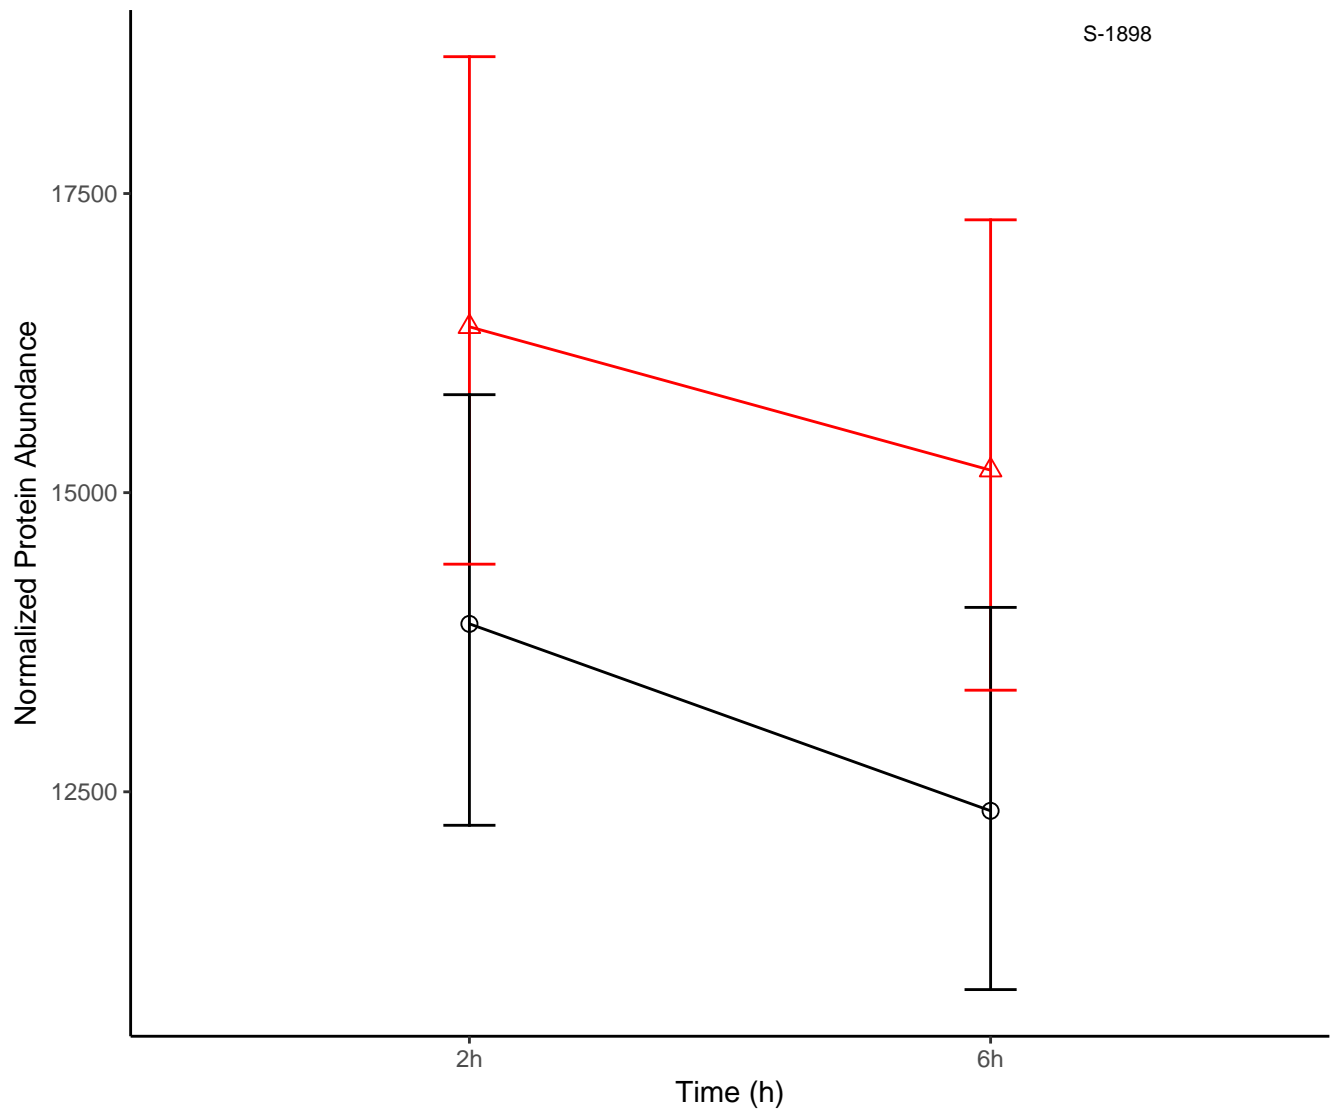

○ TSB-dex

△ TSB

# SUCC\_STAAM

S-1899

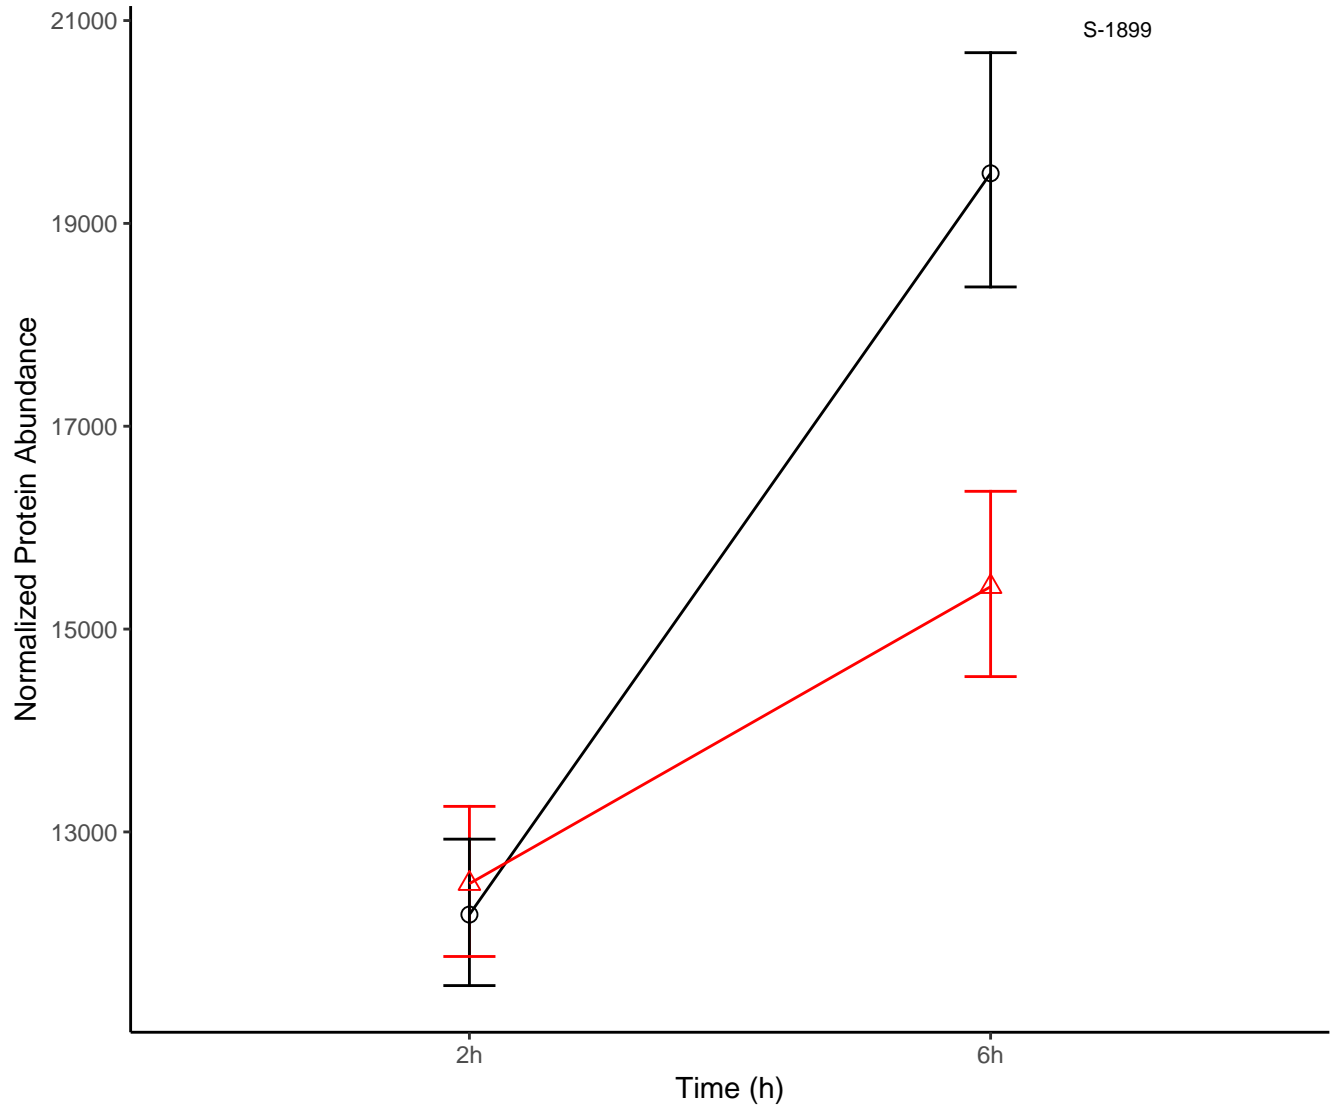

○ TSB-dex

△ TSB

# SUCD\_STAAM

S-1900

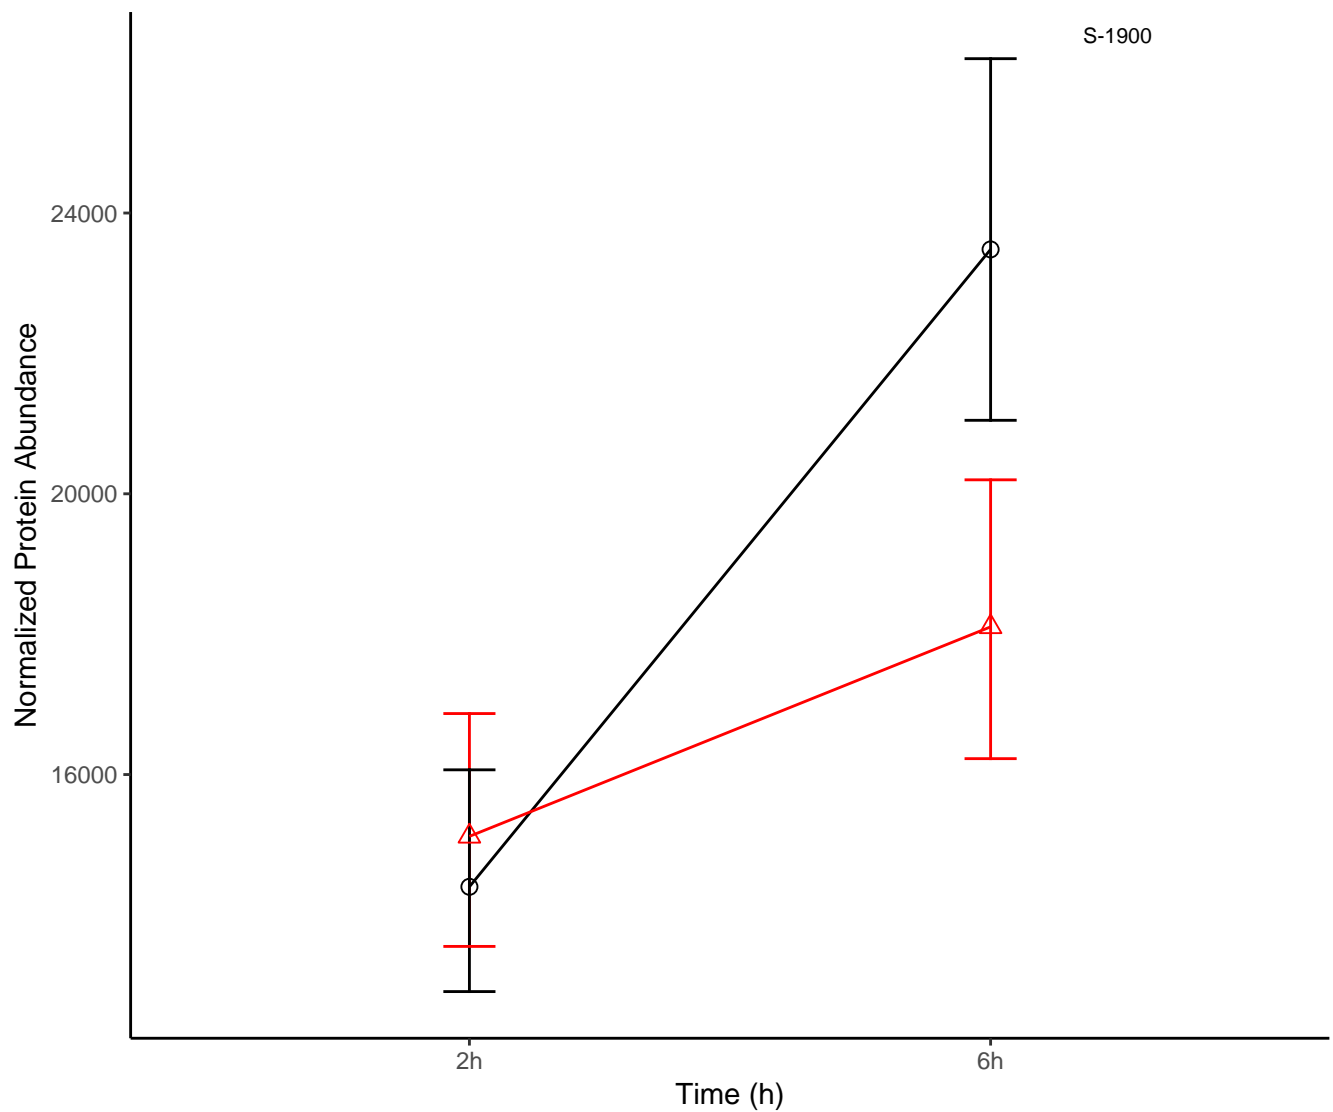

○ TSB-dex

△ TSB

# SYA\_STAAM

S-1901

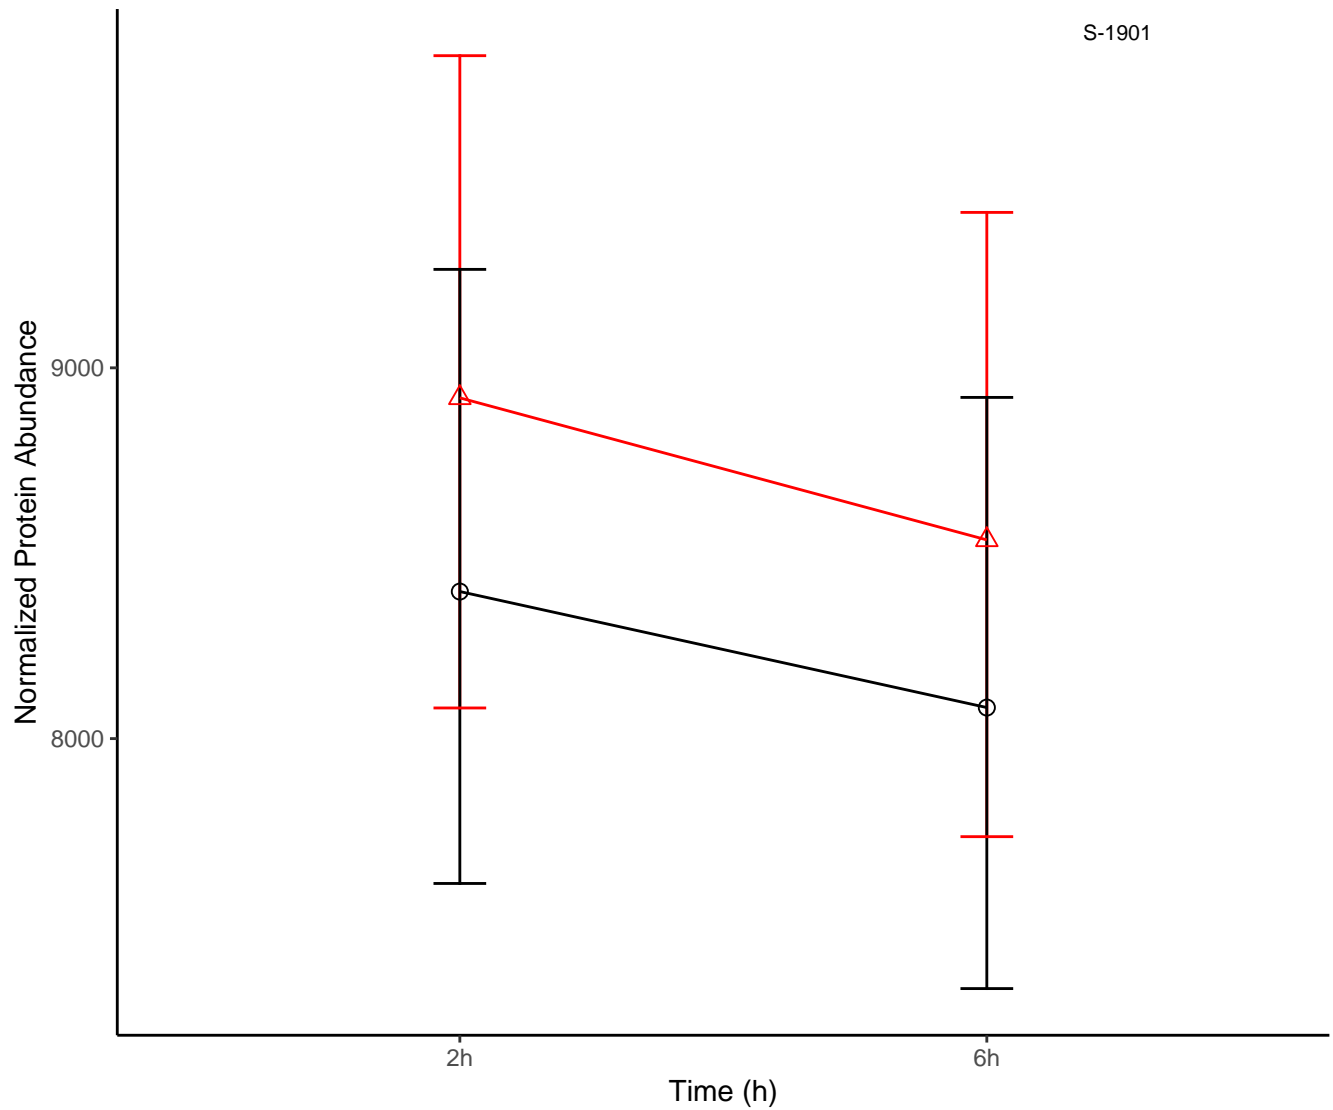

○ TSB-dex

△ TSB

# SYC\_STAAM

S-1902

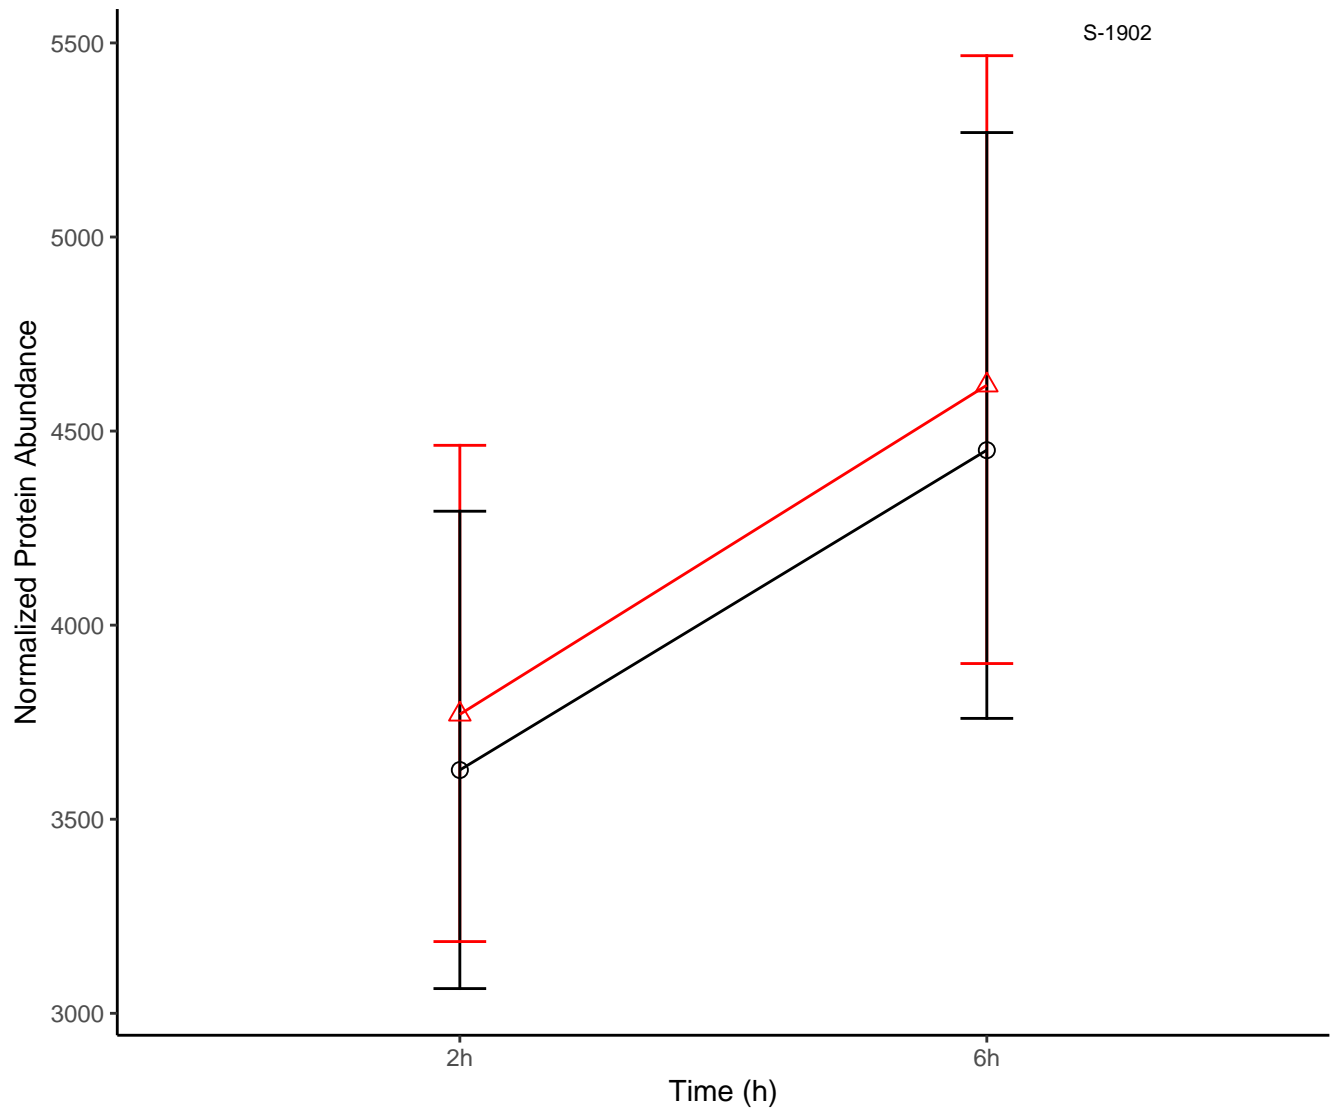

○ TSB-dex

△ TSB

# SYD\_STAAM

S-1903

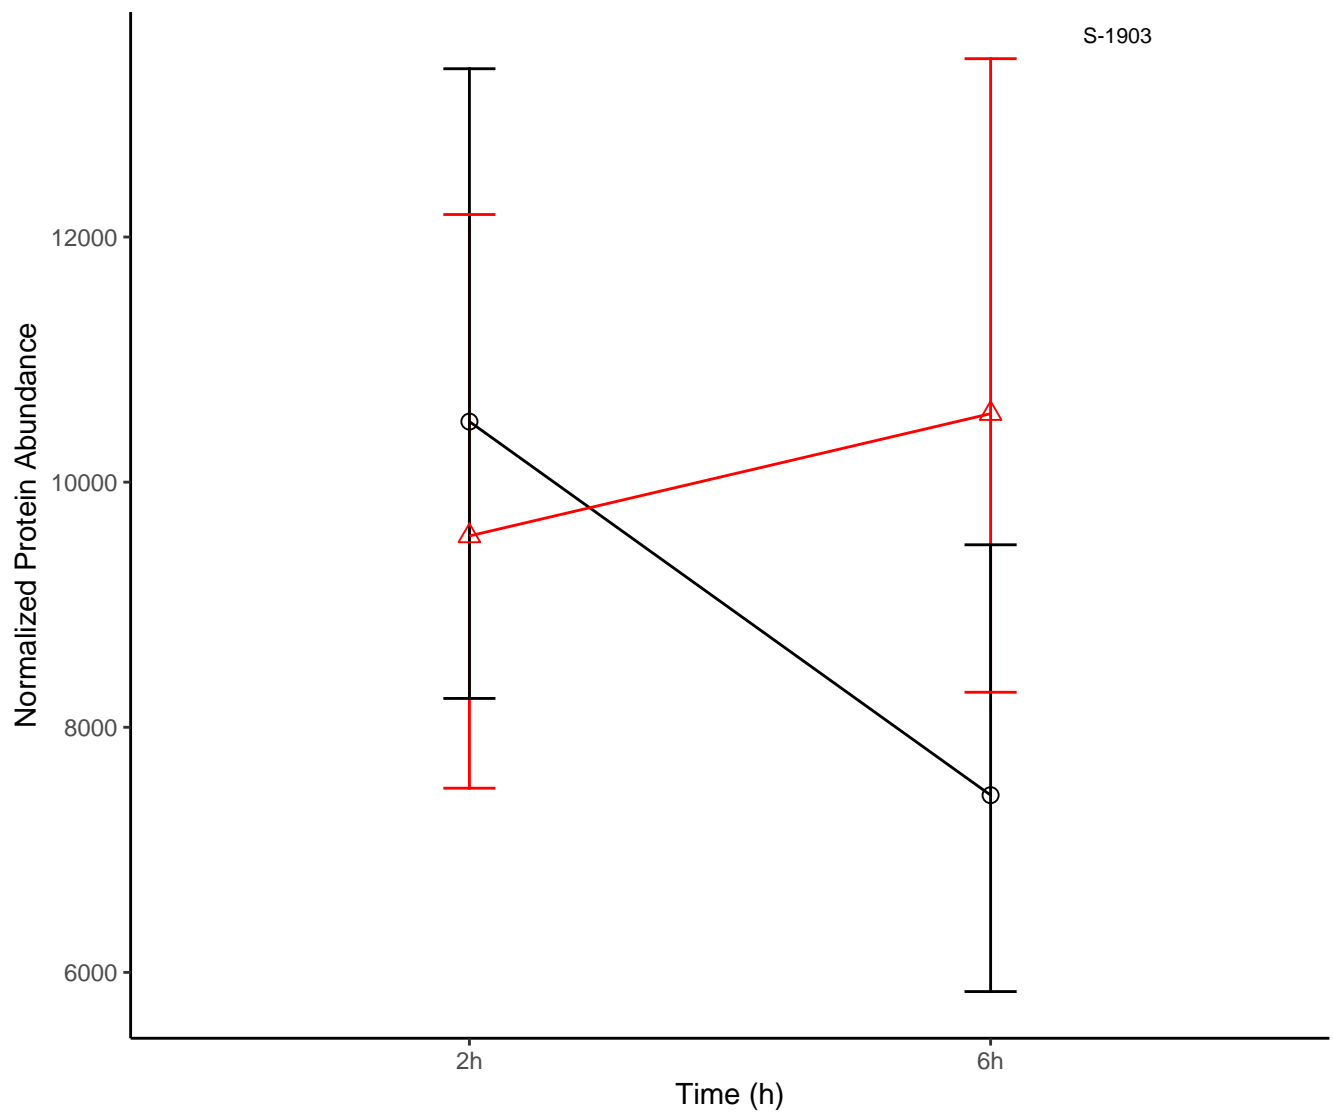

○ TSB-dex

△ TSB

# SYE\_STAAM

S-1904

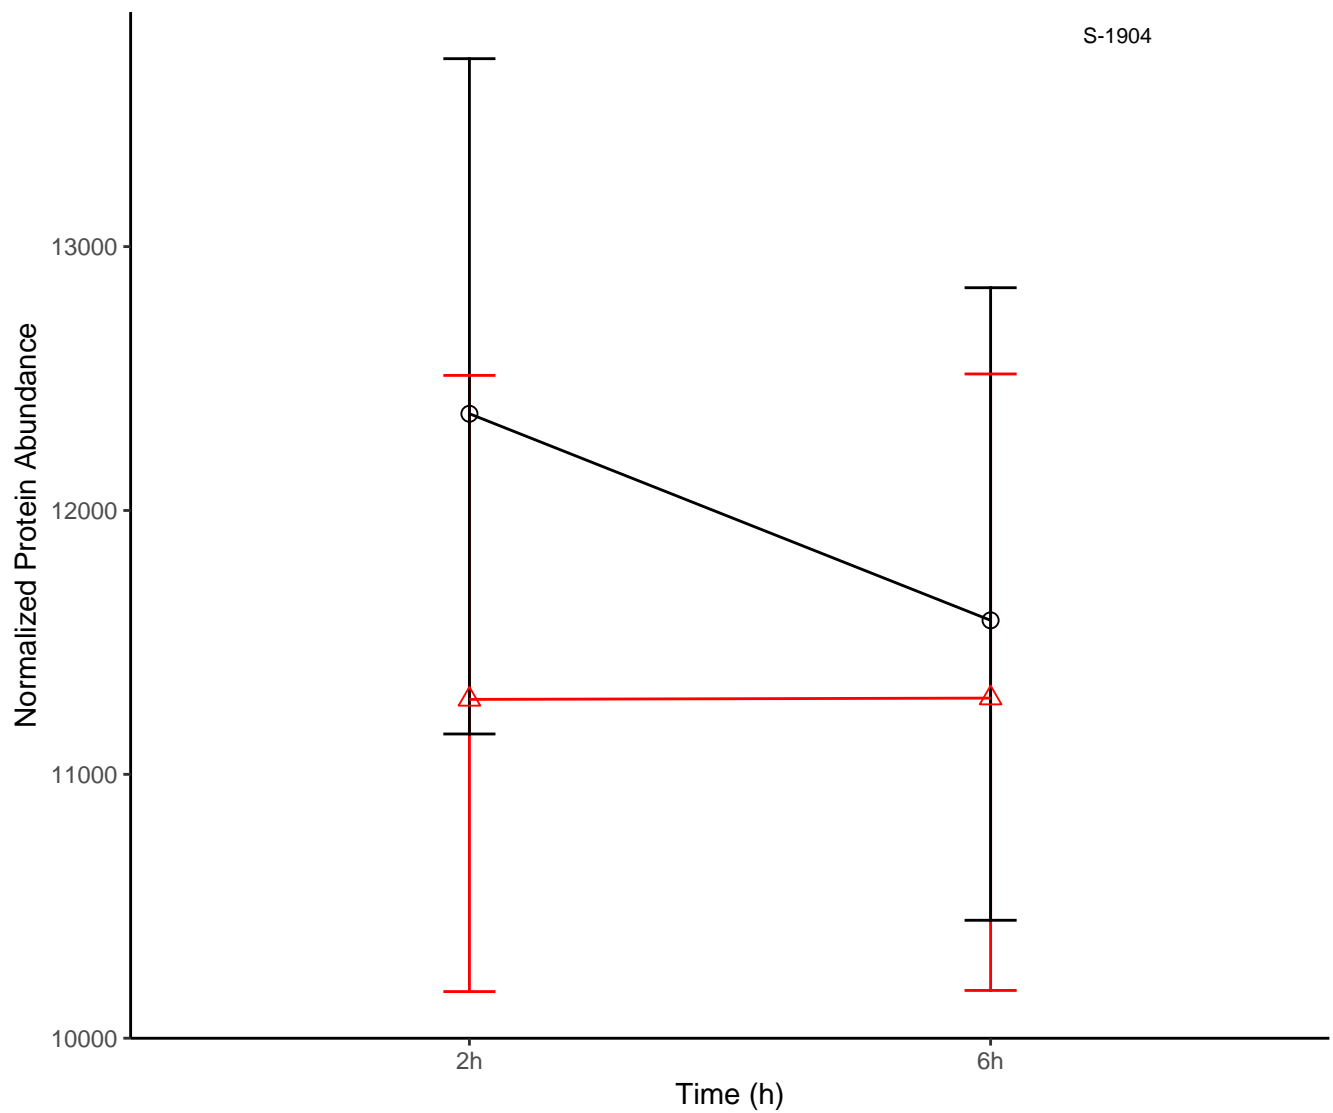

○ TSB-dex

△ TSB



# SYFB\_STAAM

S-1905

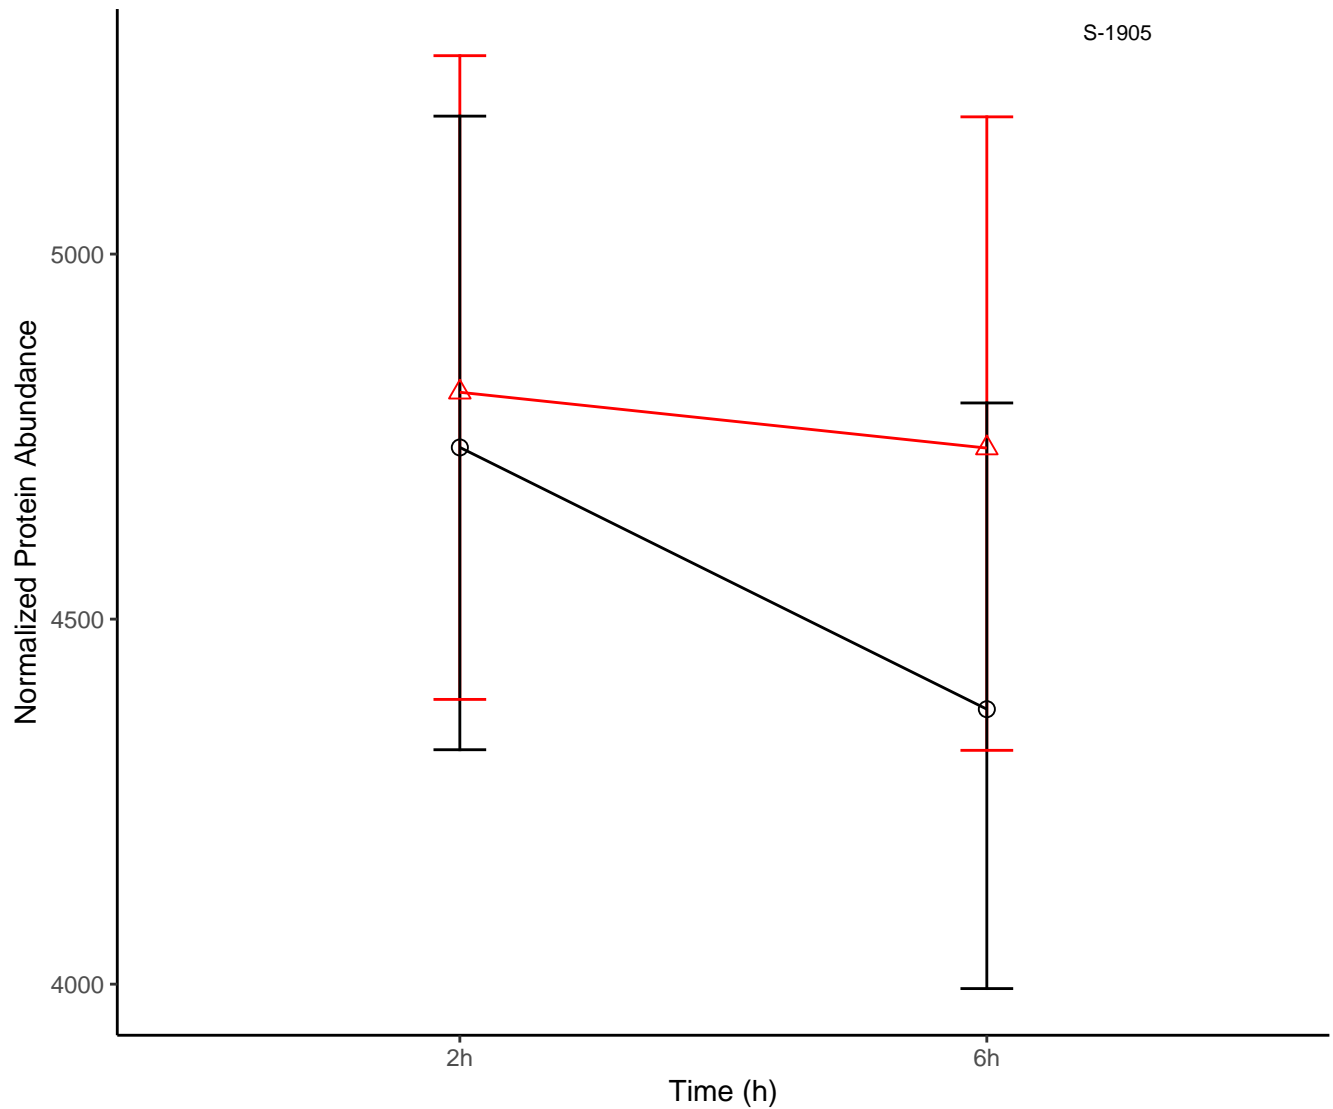

○ TSB-dex

△ TSB

# SYG\_STAAM

S-1906

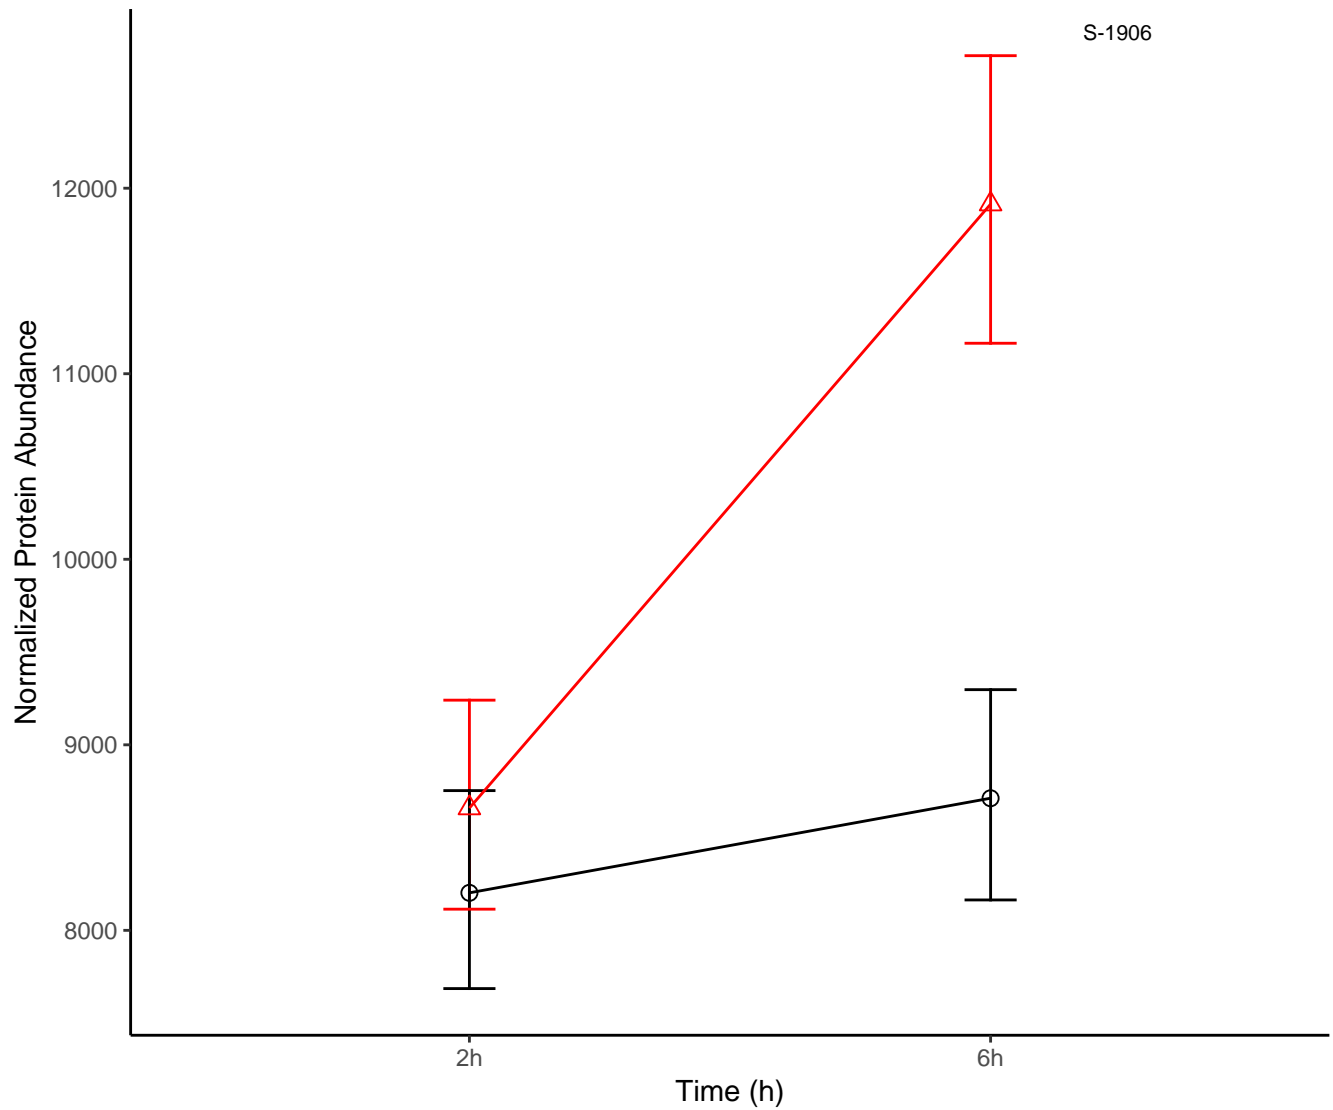

○ TSB-dex

△ TSB

# SYH\_STAAM

S-1907

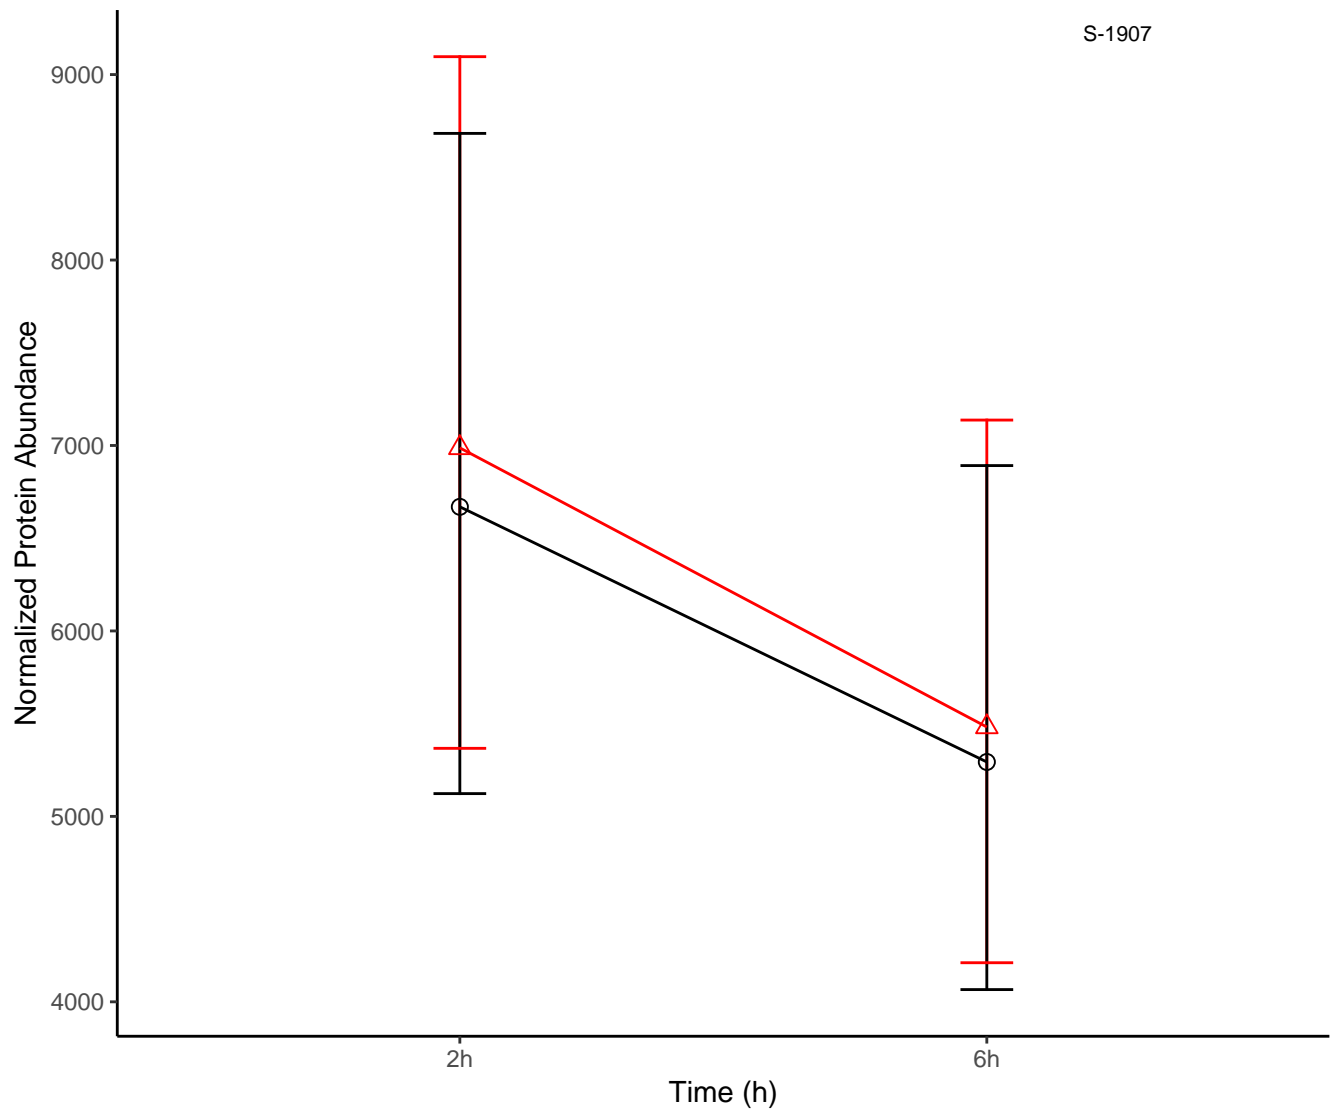

○ TSB-dex

△ TSB

# SYI\_STAAM

S-1908

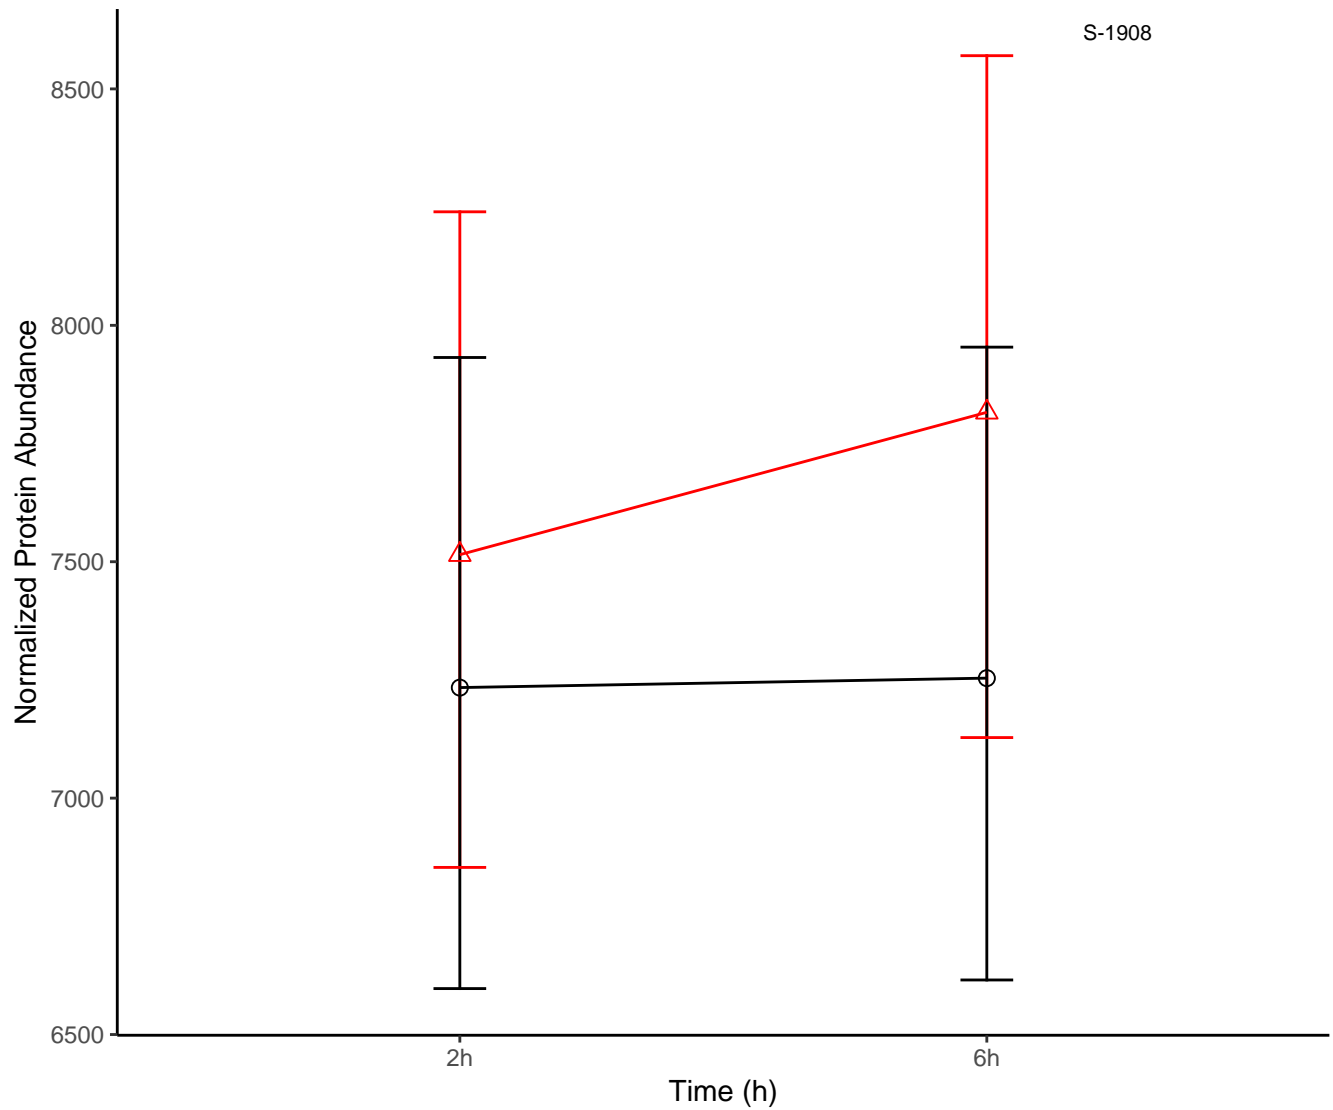

○ TSB-dex

△ TSB

# SYK\_STAAM

S-1909

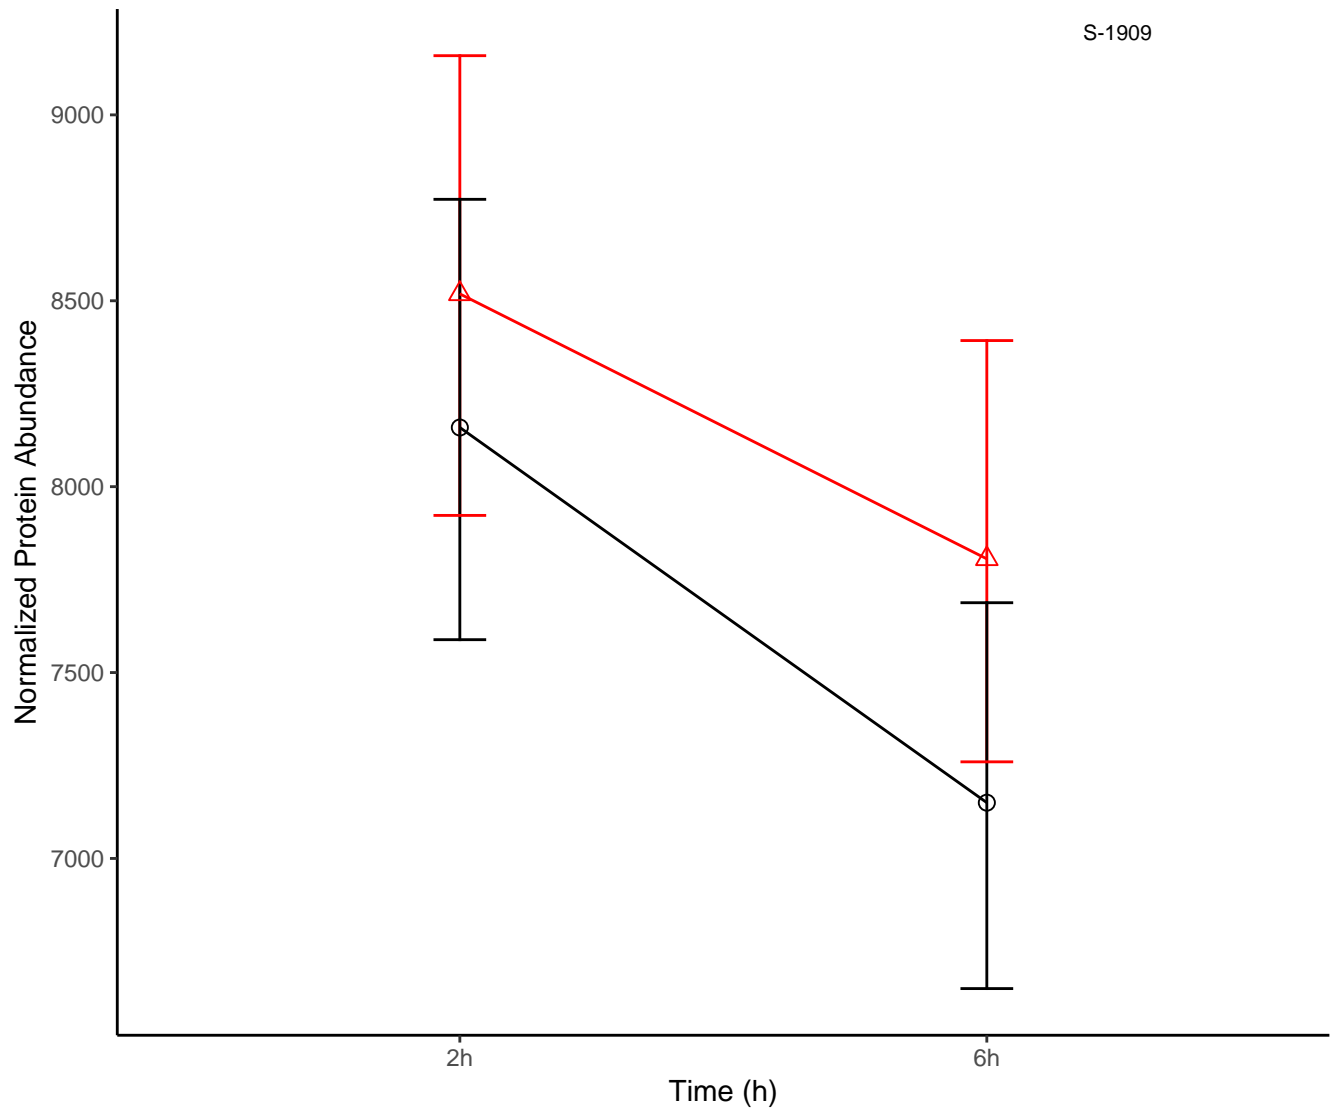

○ TSB-dex

△ TSB

# SYM\_STAAM

S-1910

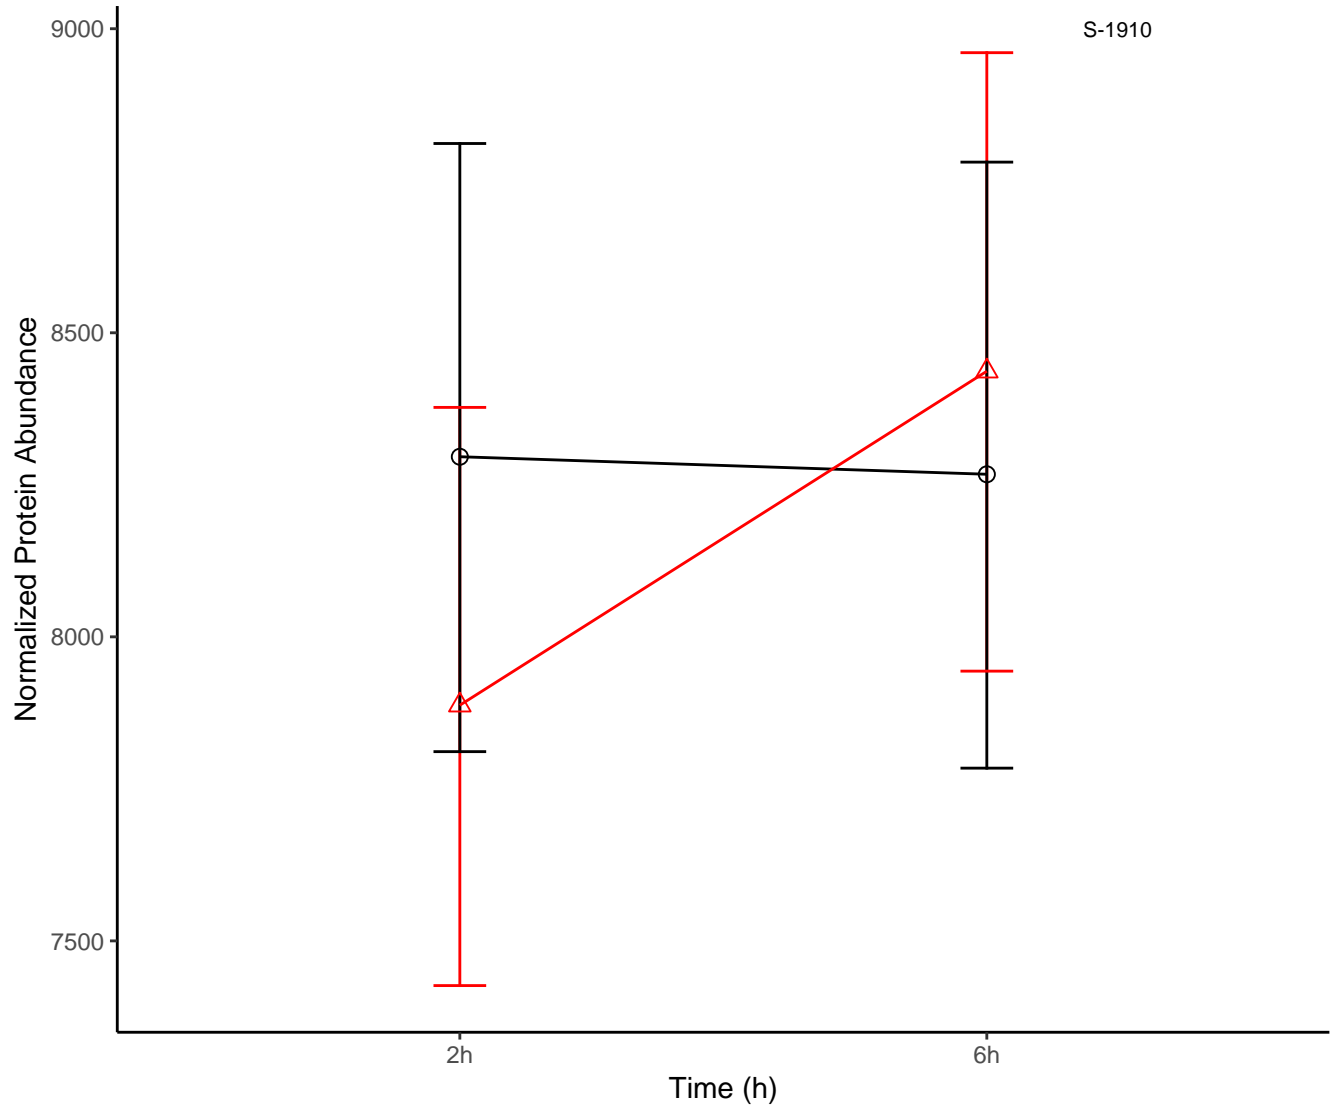

○ TSB-dex

△ TSB

# SYN\_STAAM

S-1911

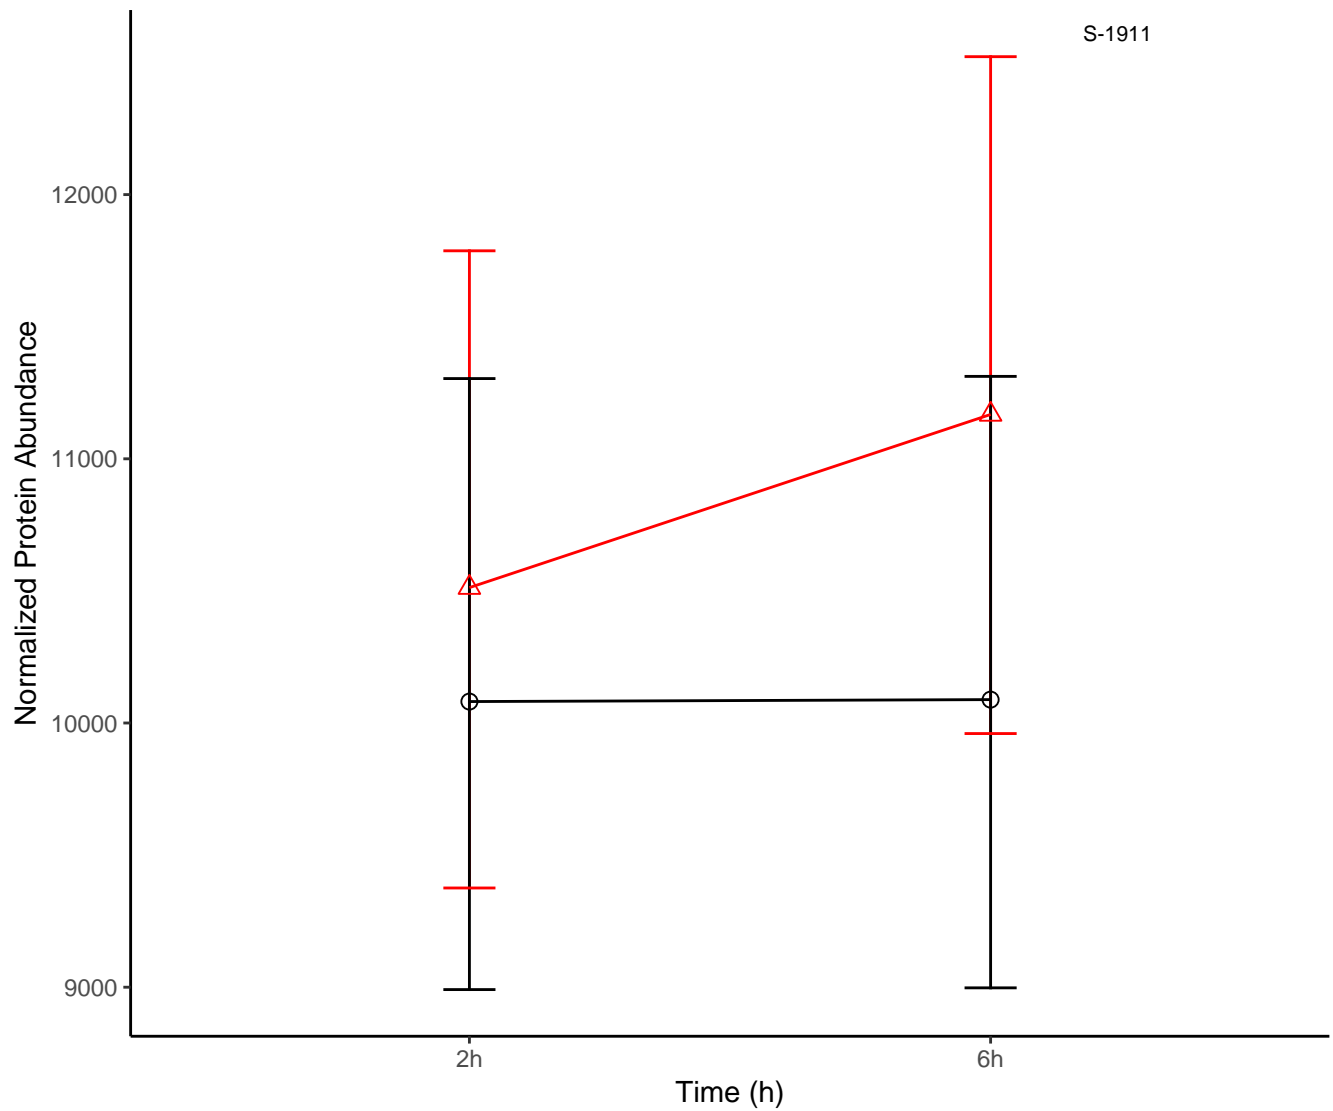

○ TSB-dex

△ TSB

# SYP\_STAAM

S-1912

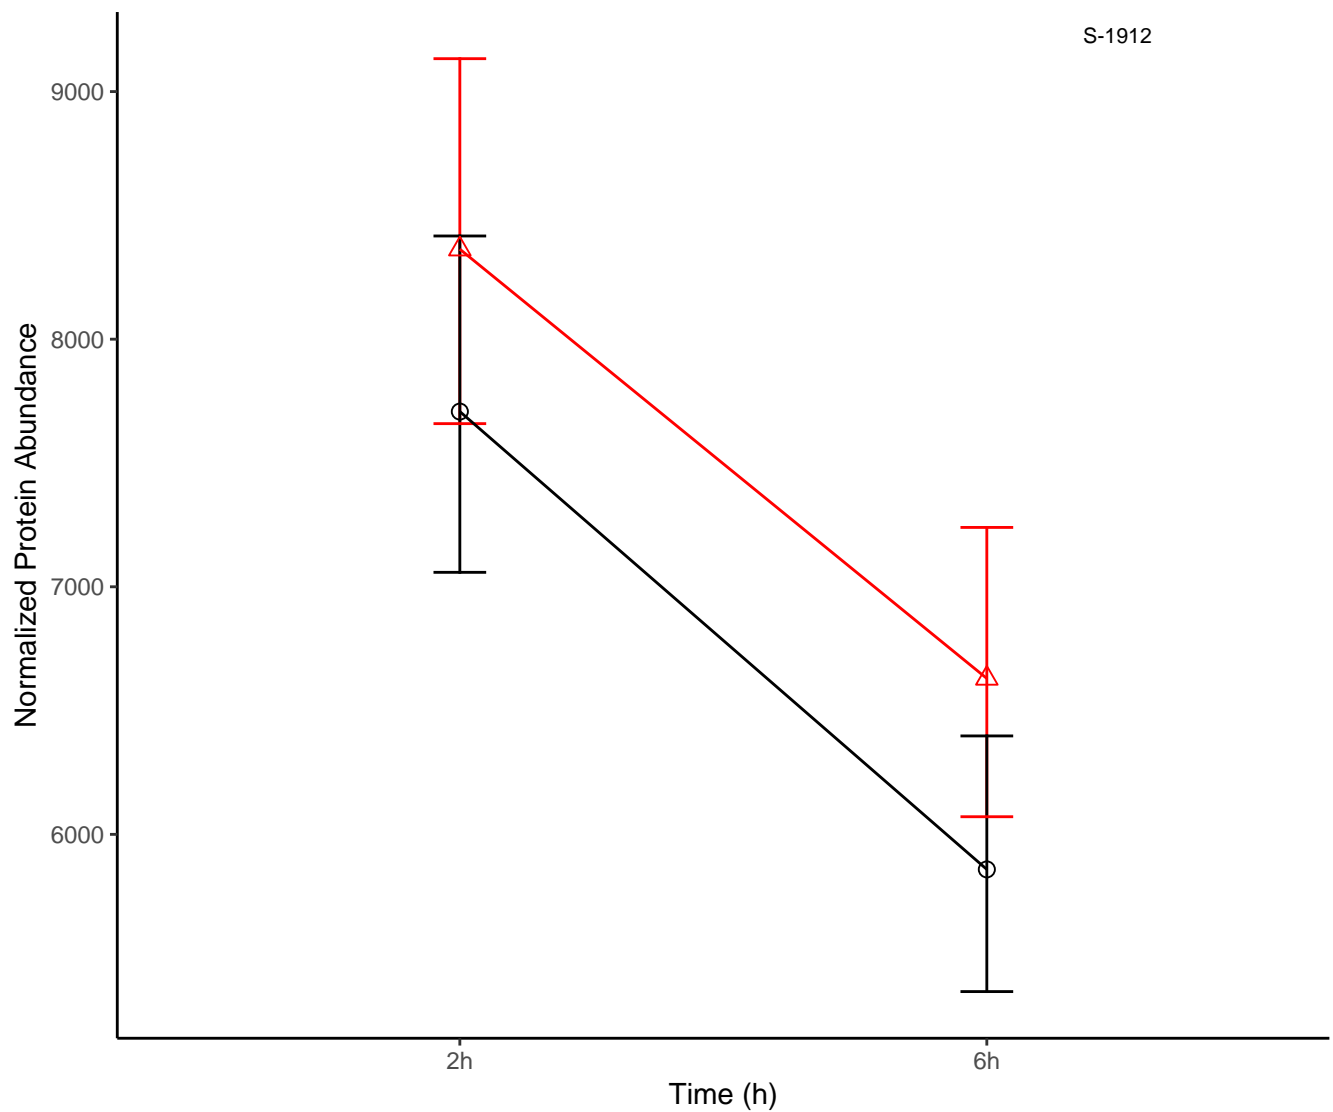

○ TSB-dex

△ TSB



# SYR\_STAAM

S-1913

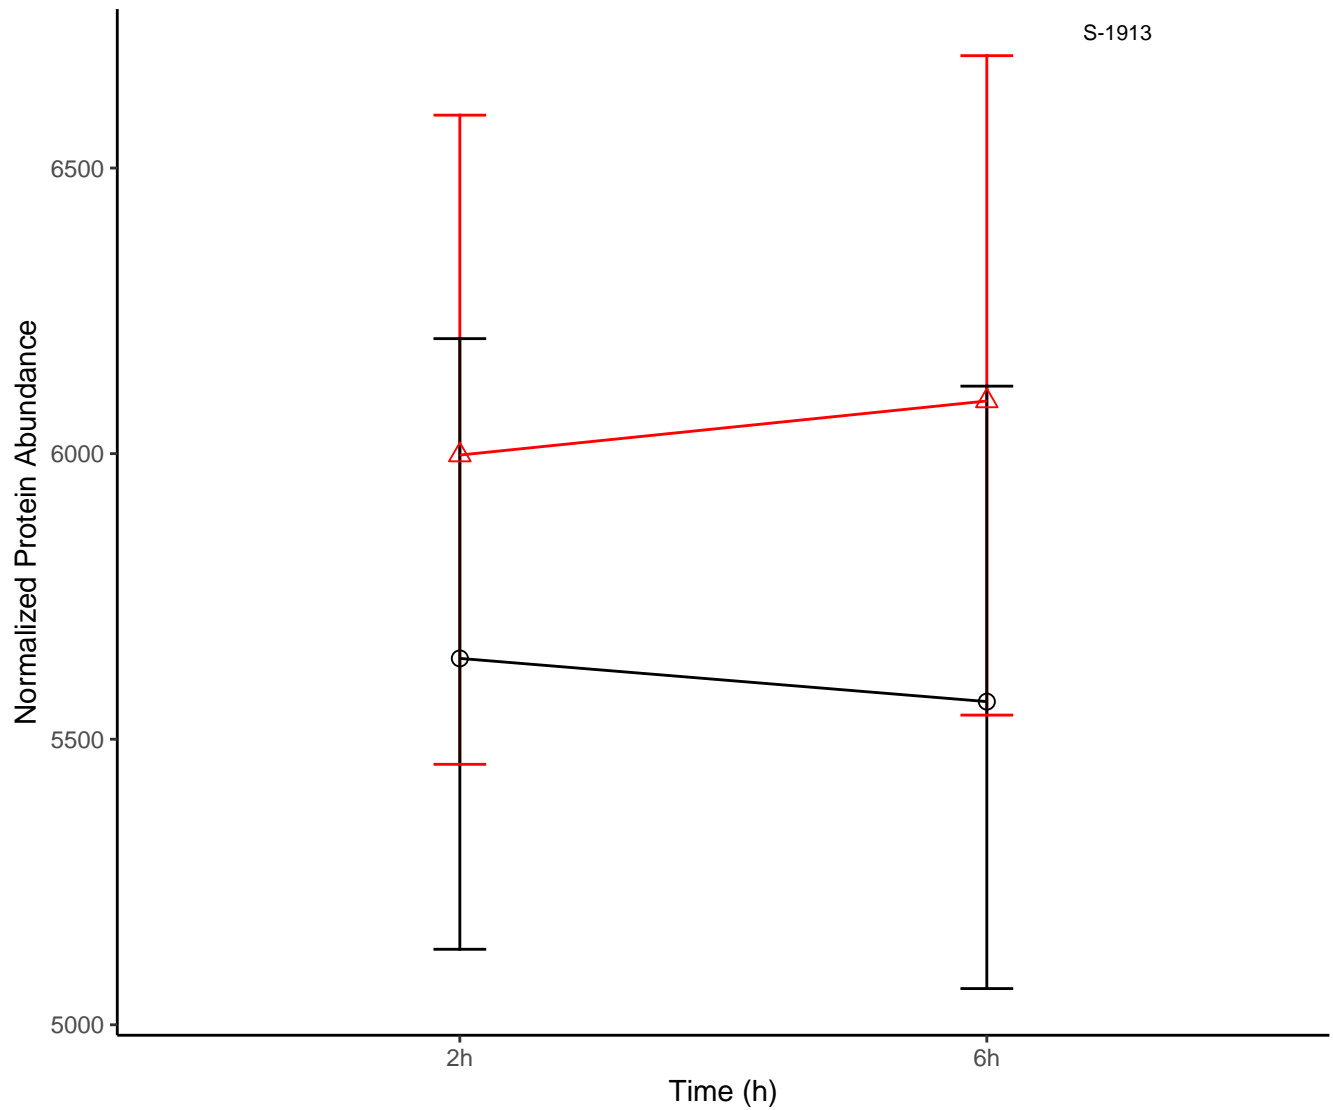

○ TSB-dex

△ TSB

# SYS\_STAAM

S-1914

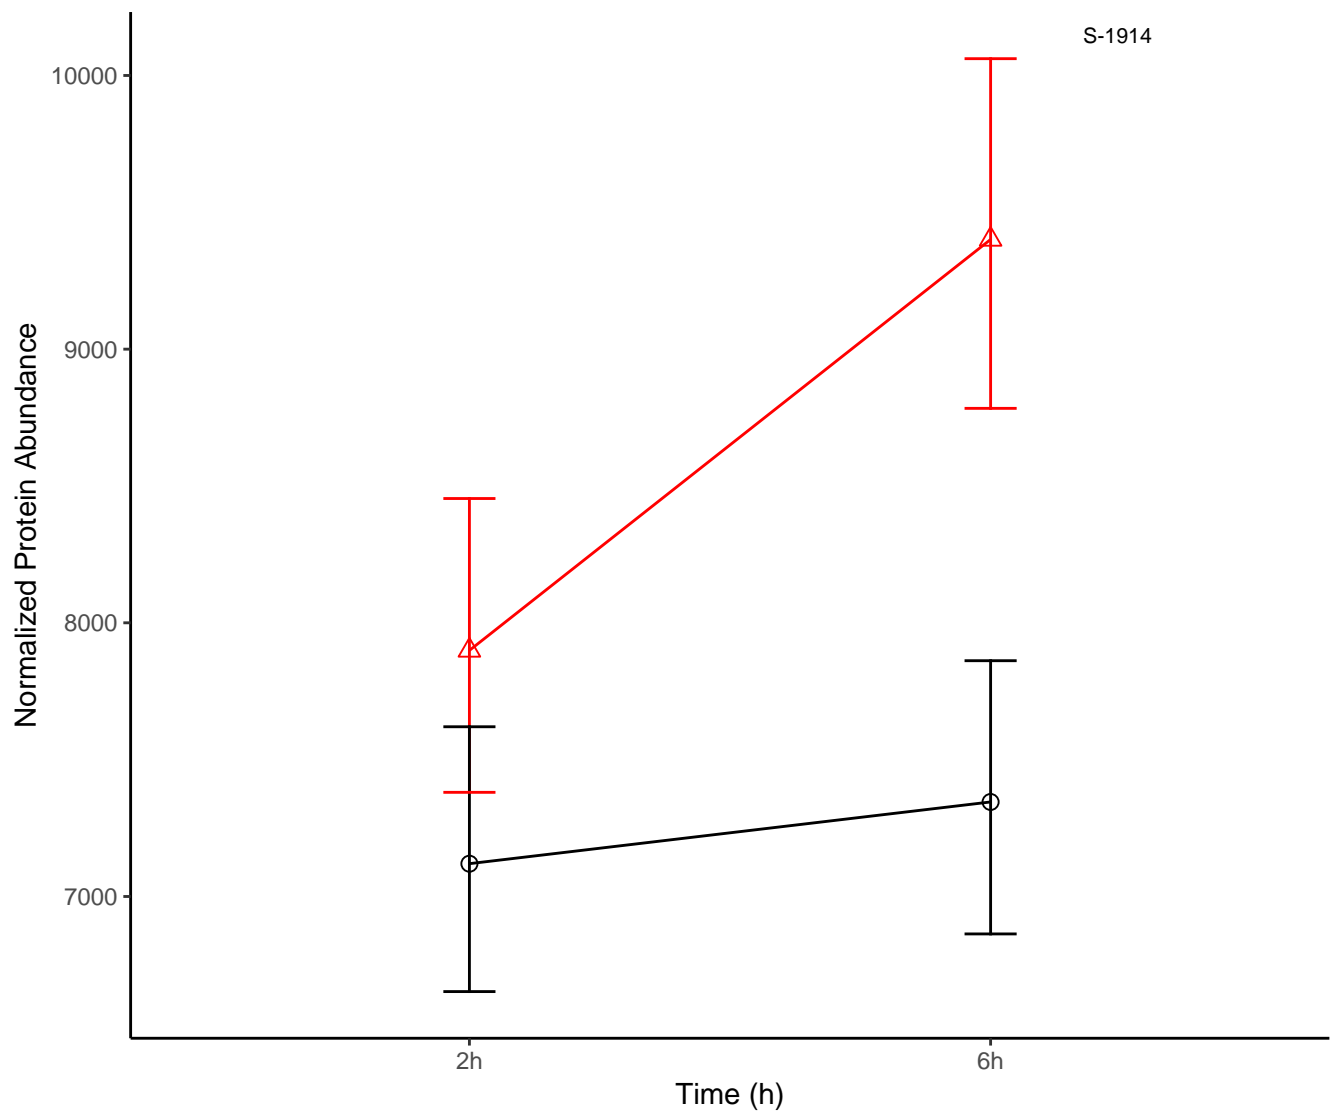

○ TSB-dex

△ TSB

# SYT\_STAAM

S-1915

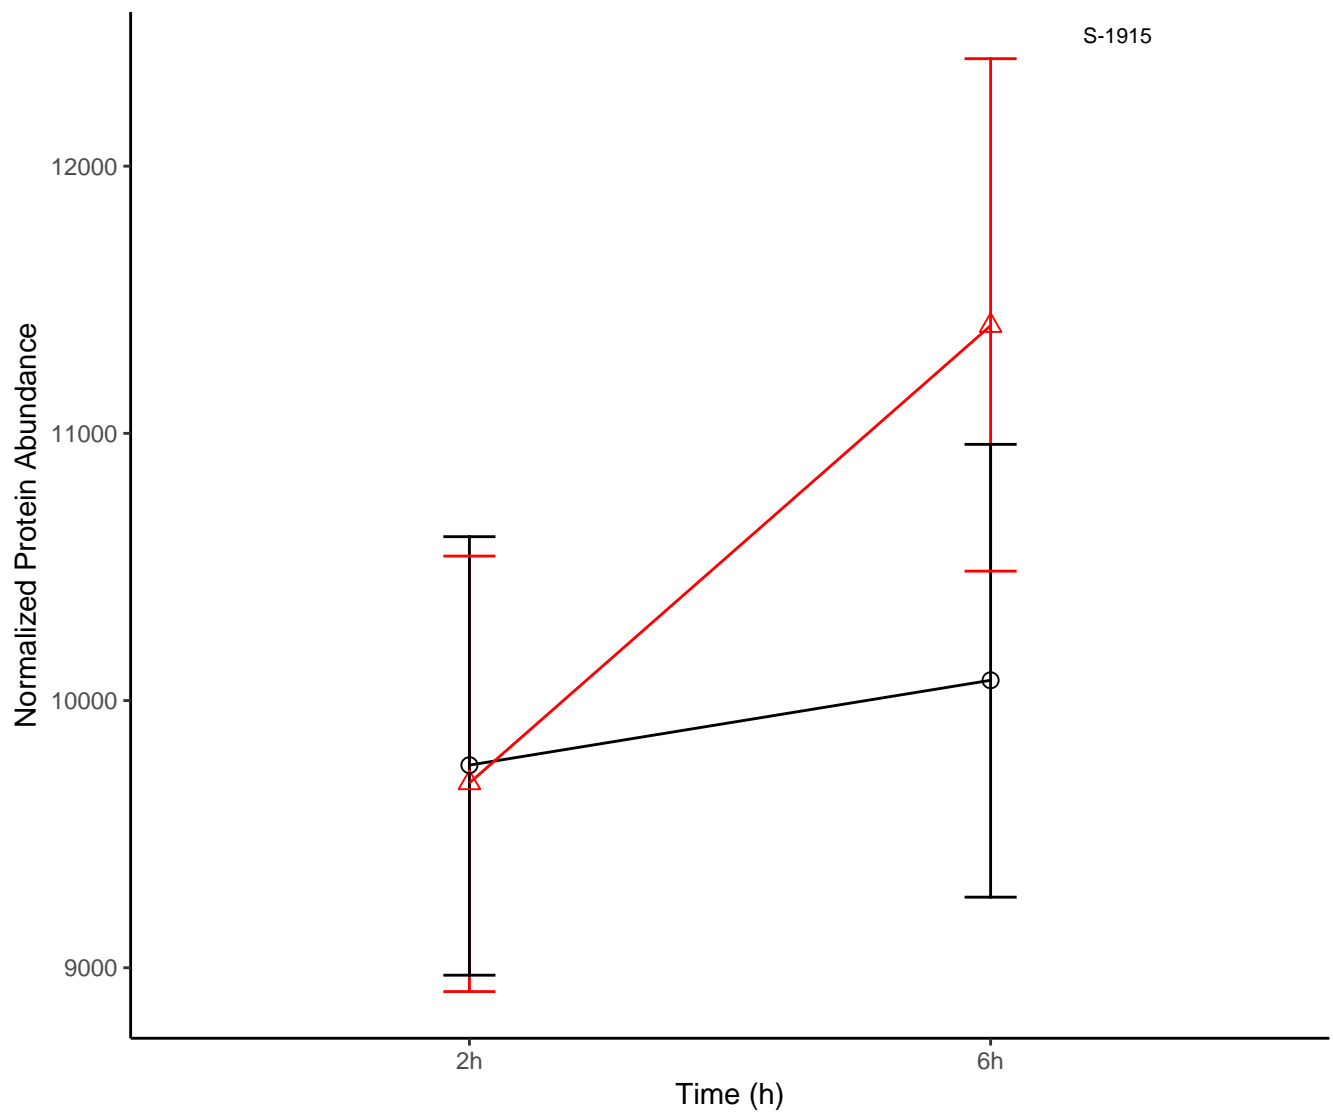

○ TSB-dex

△ TSB

# SYV\_STAAM

S-1916

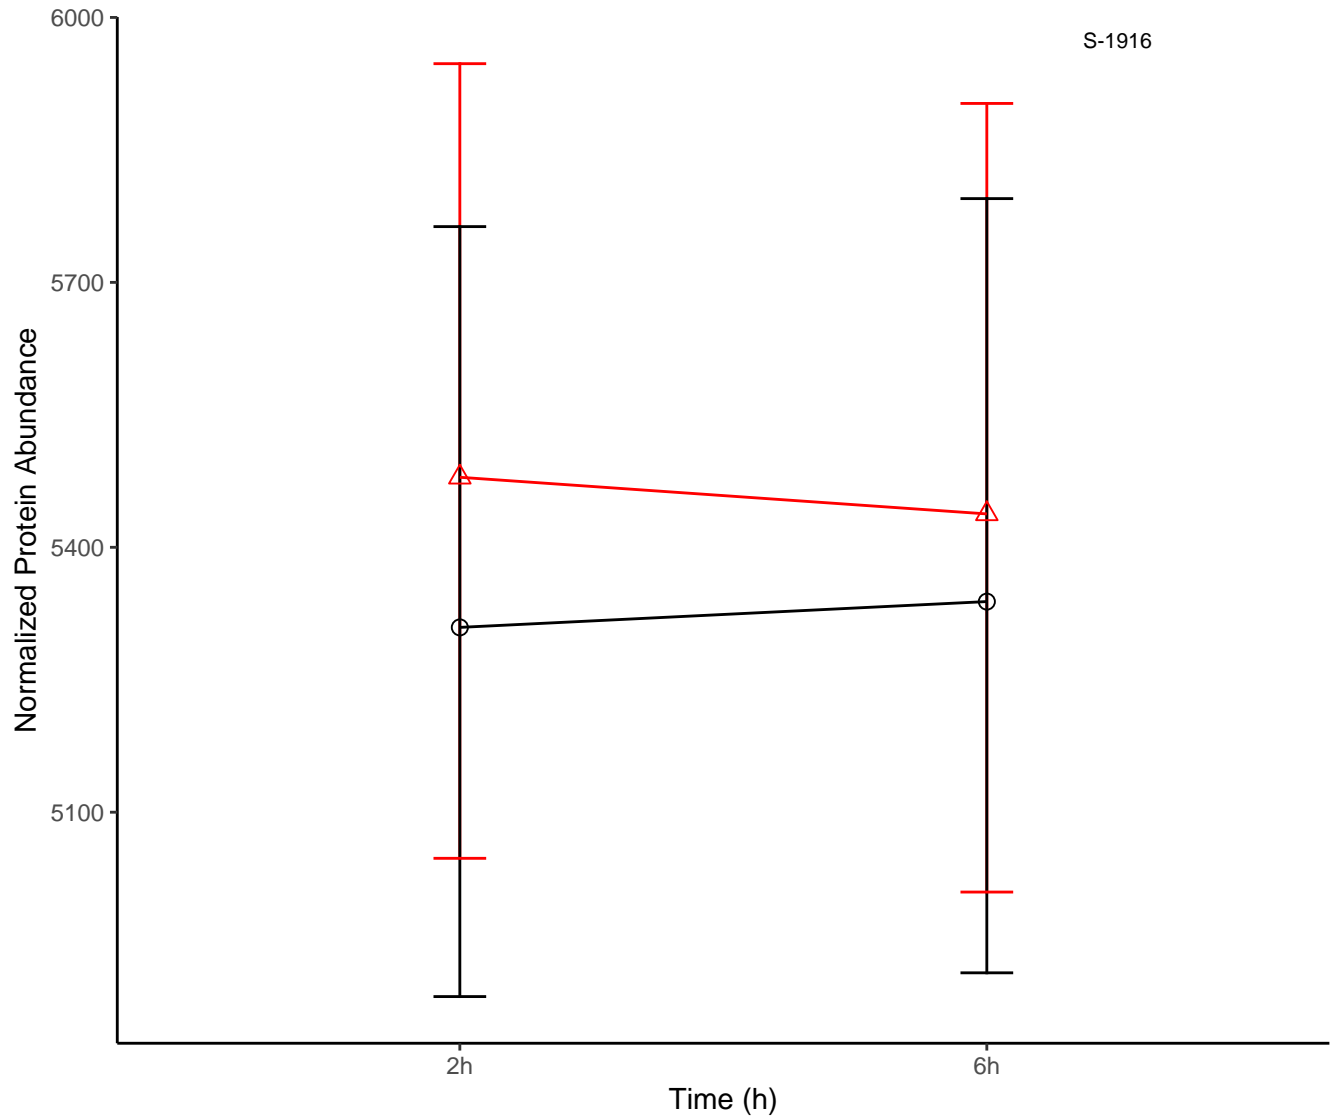

○ TSB-dex

△ TSB

# SYW\_STAAM

S-1917

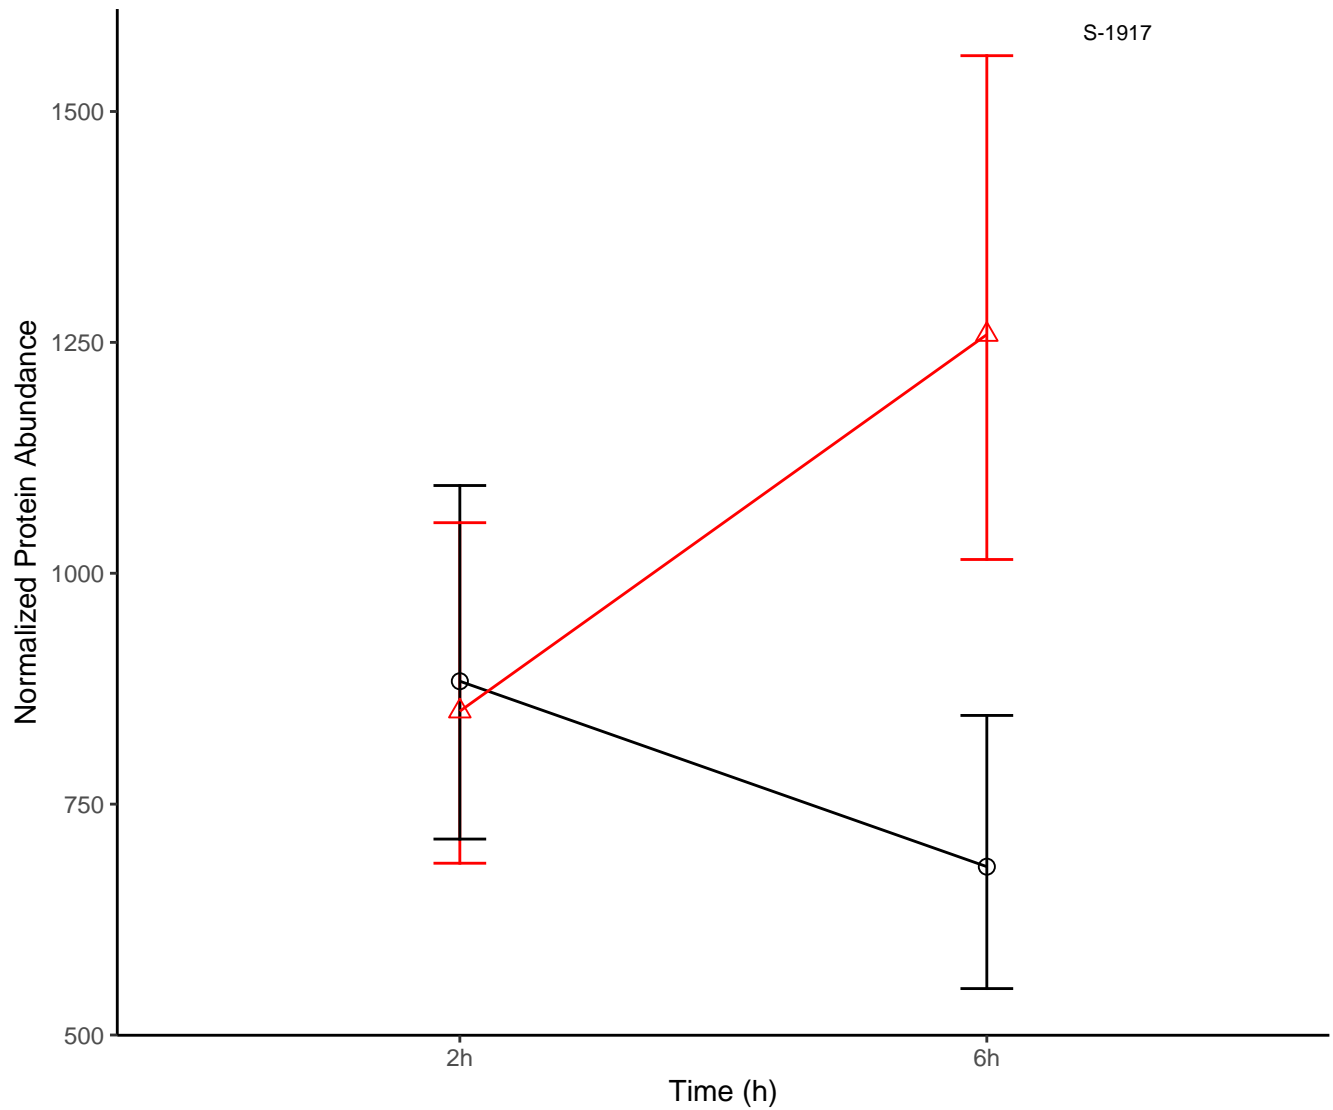

○ TSB-dex

△ TSB

# SYT\_STAAM

S-1918

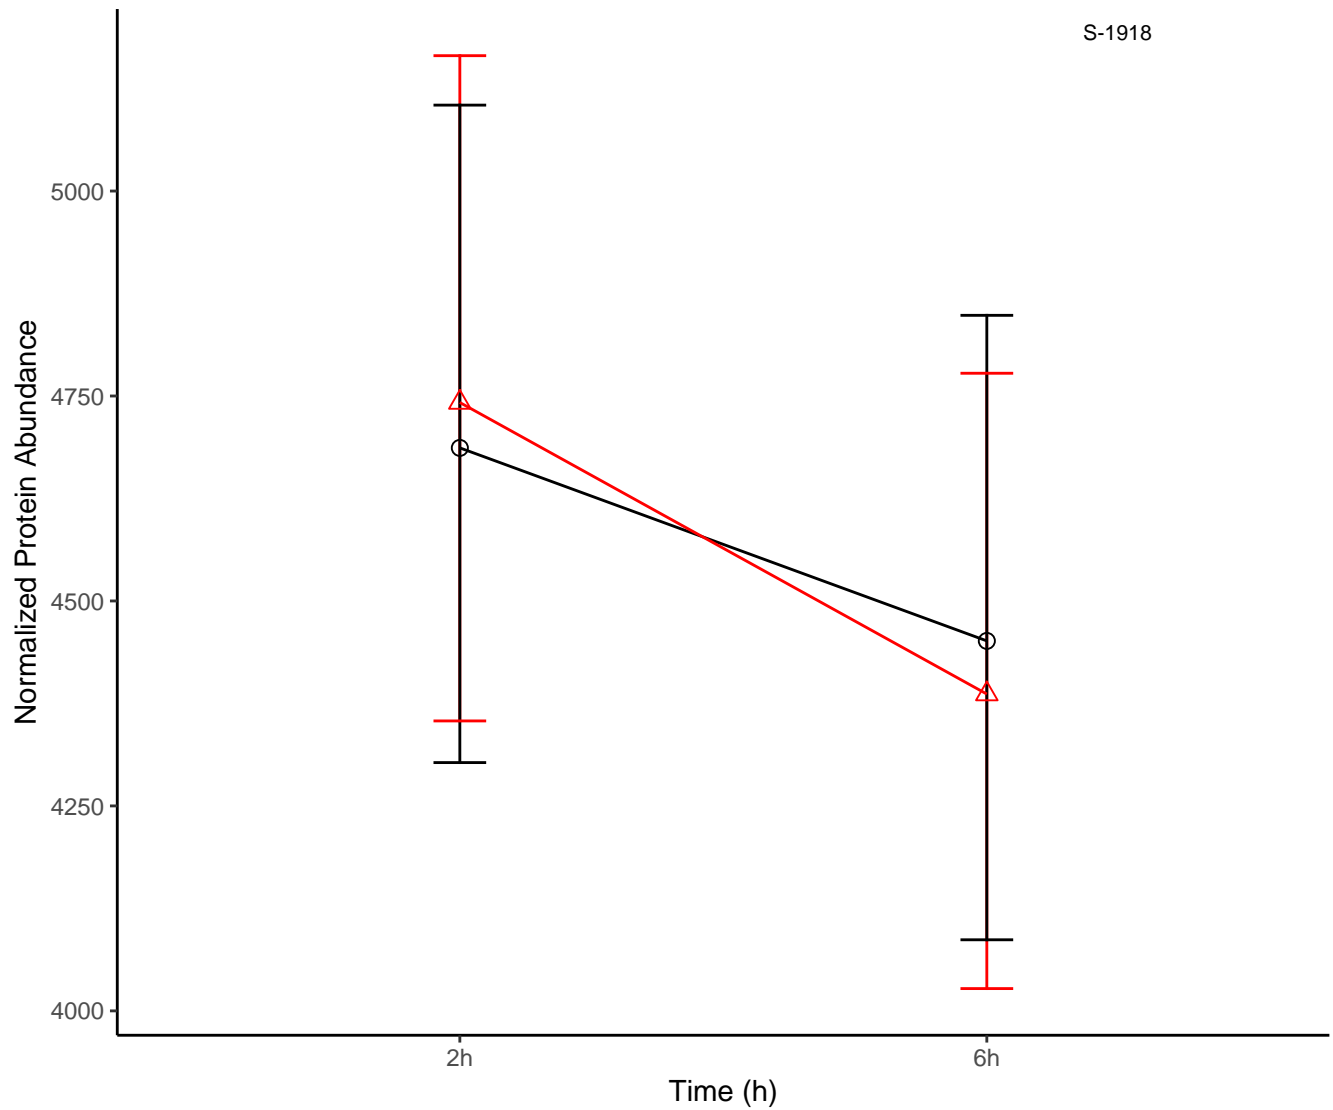

○ TSB-dex

△ TSB

# T431\_STAAM

S-1919

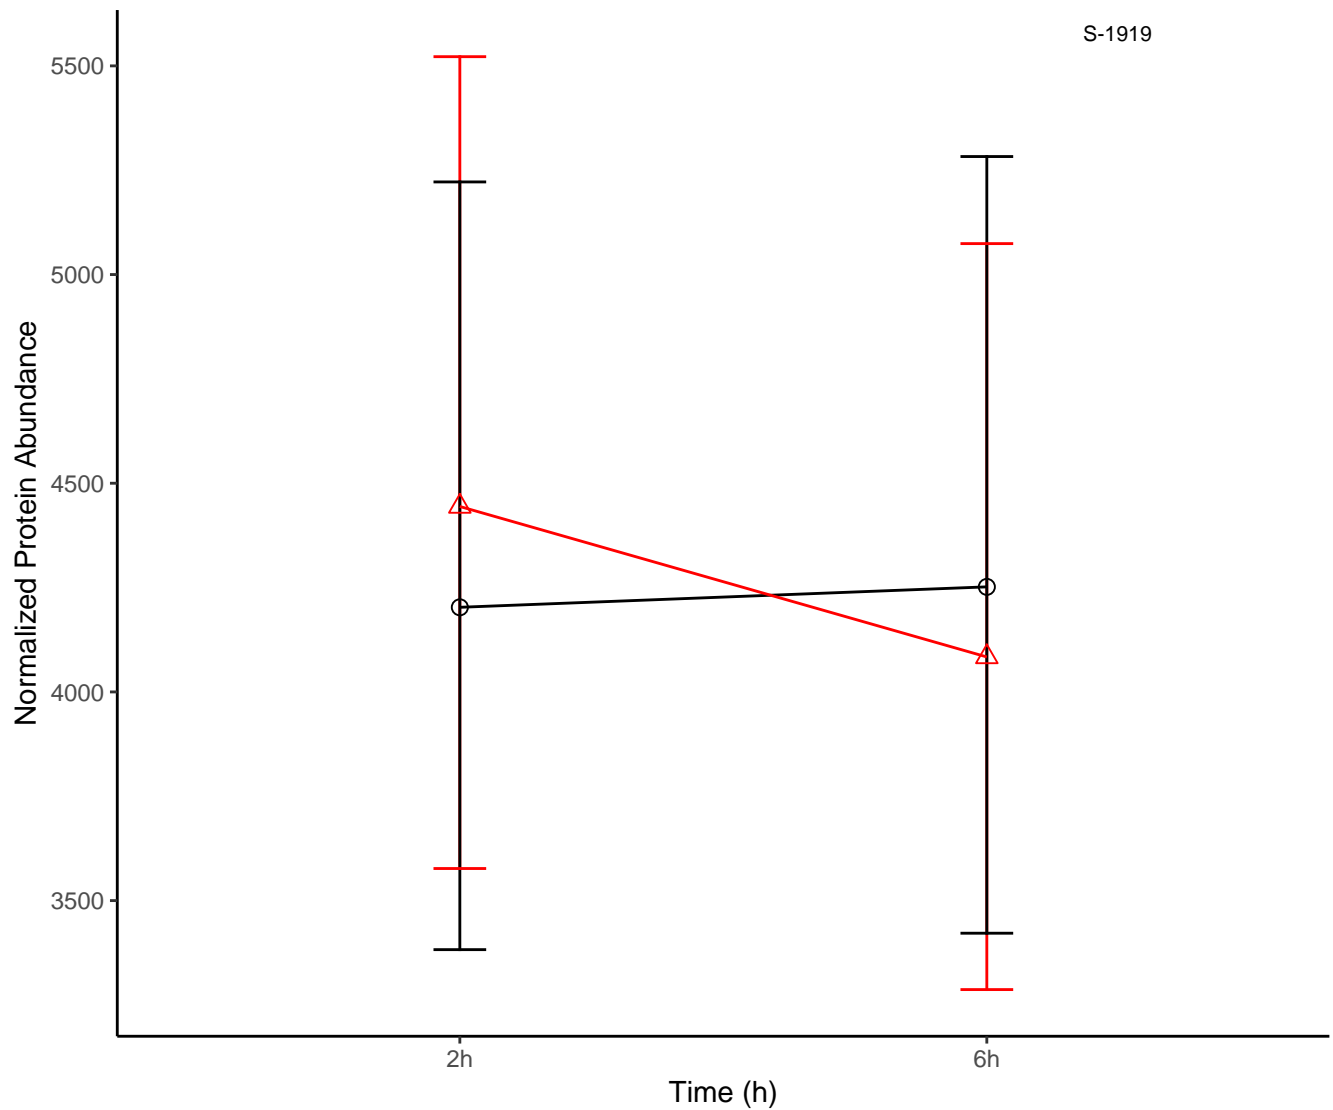

○ TSB-dex

△ TSB

# TADA\_STAAM

S-1920

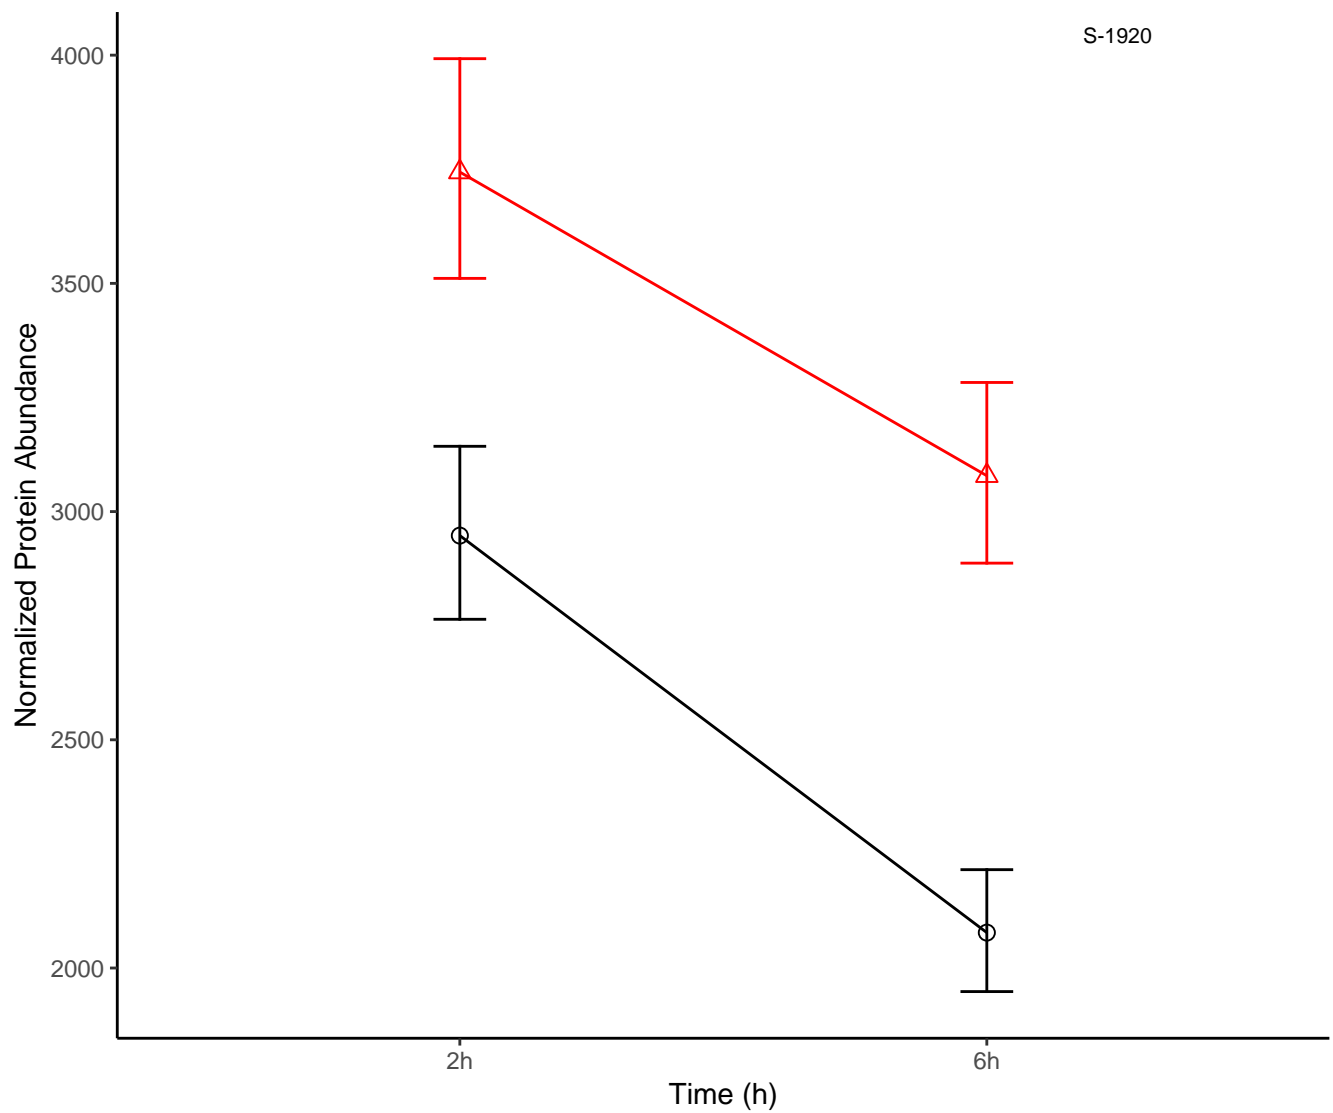

○ TSB-dex

△ TSB



# TAGA\_STAAM

S-1921

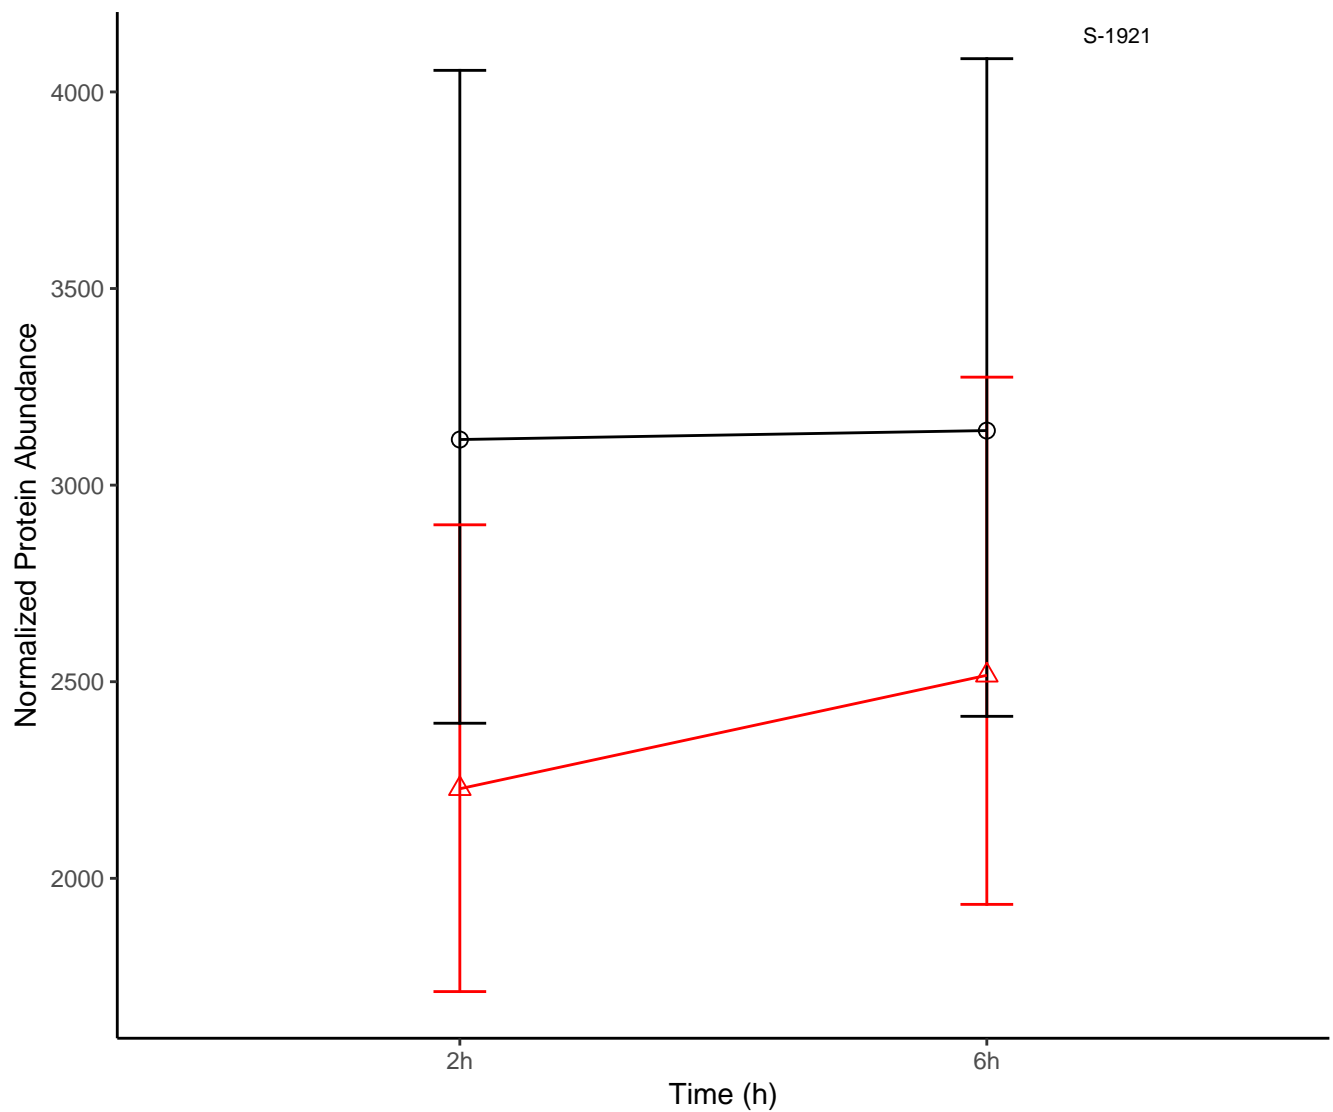

○ TSB-dex

△ TSB

# TDCB\_STAAM

S-1922

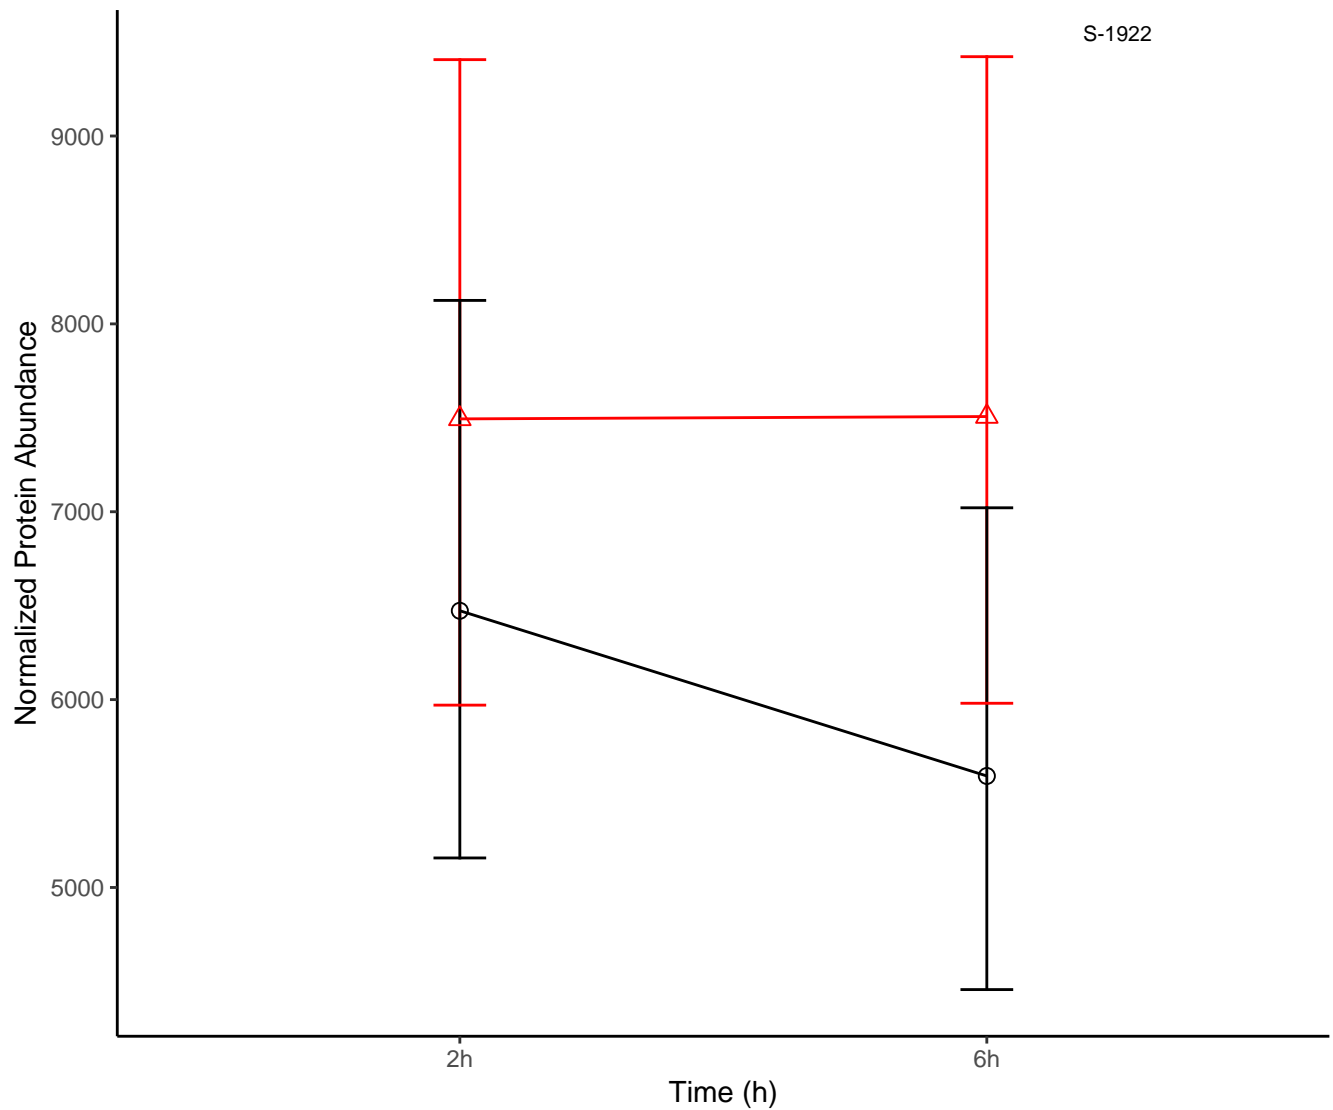

○ TSB-dex

△ TSB

# TELL\_STAAM

S-1923

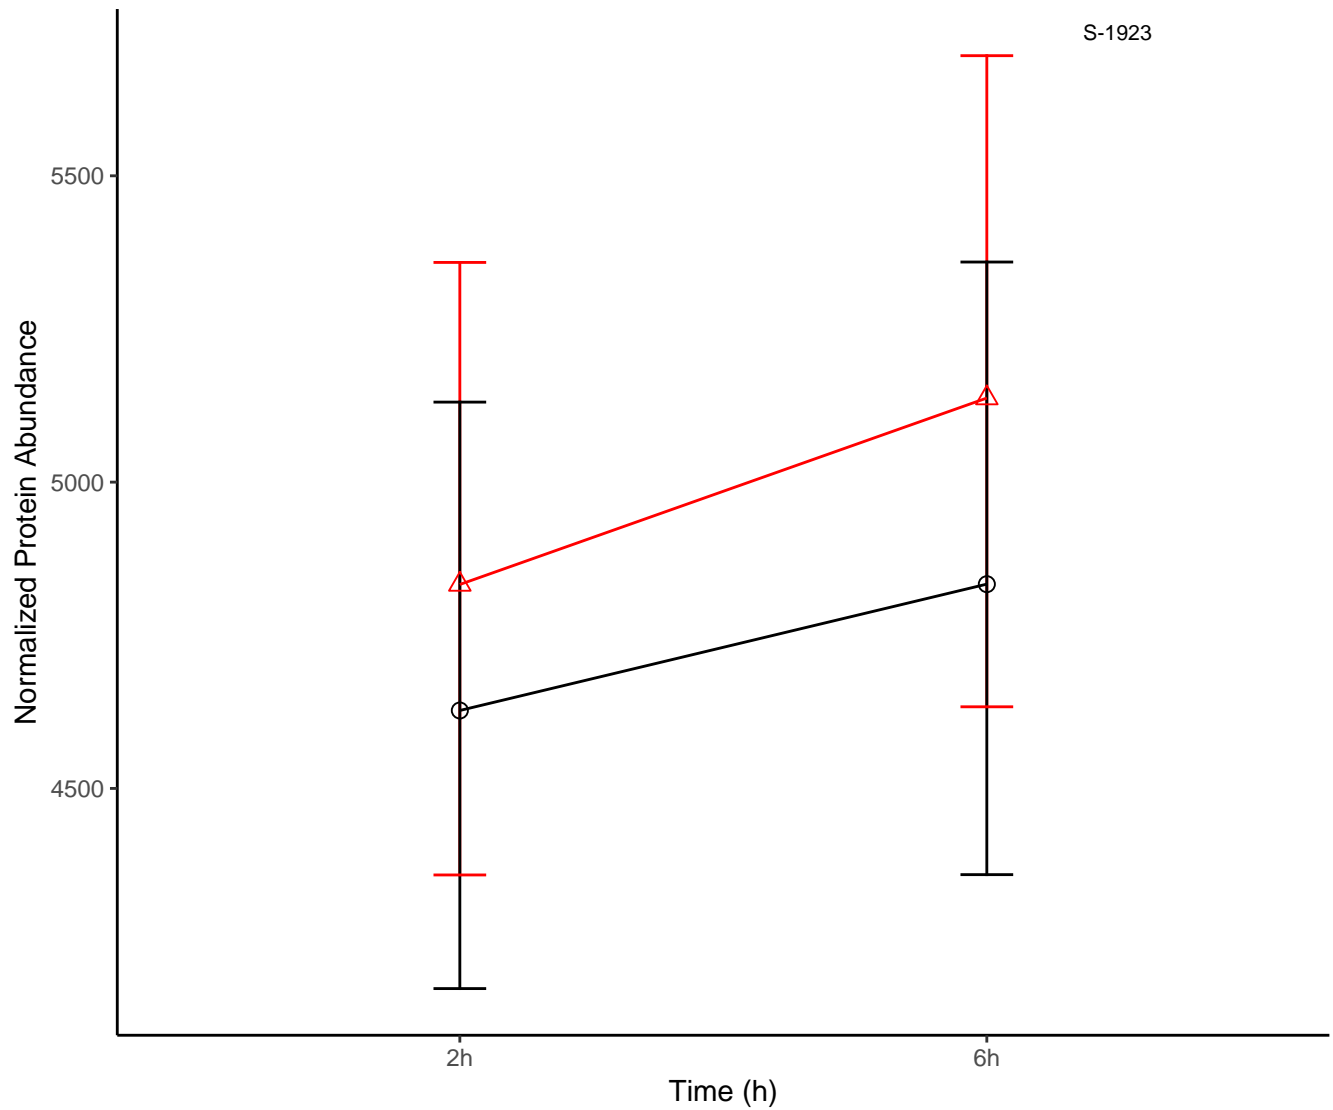

○ TSB-dex

△ TSB

# THID\_STAAM

S-1924

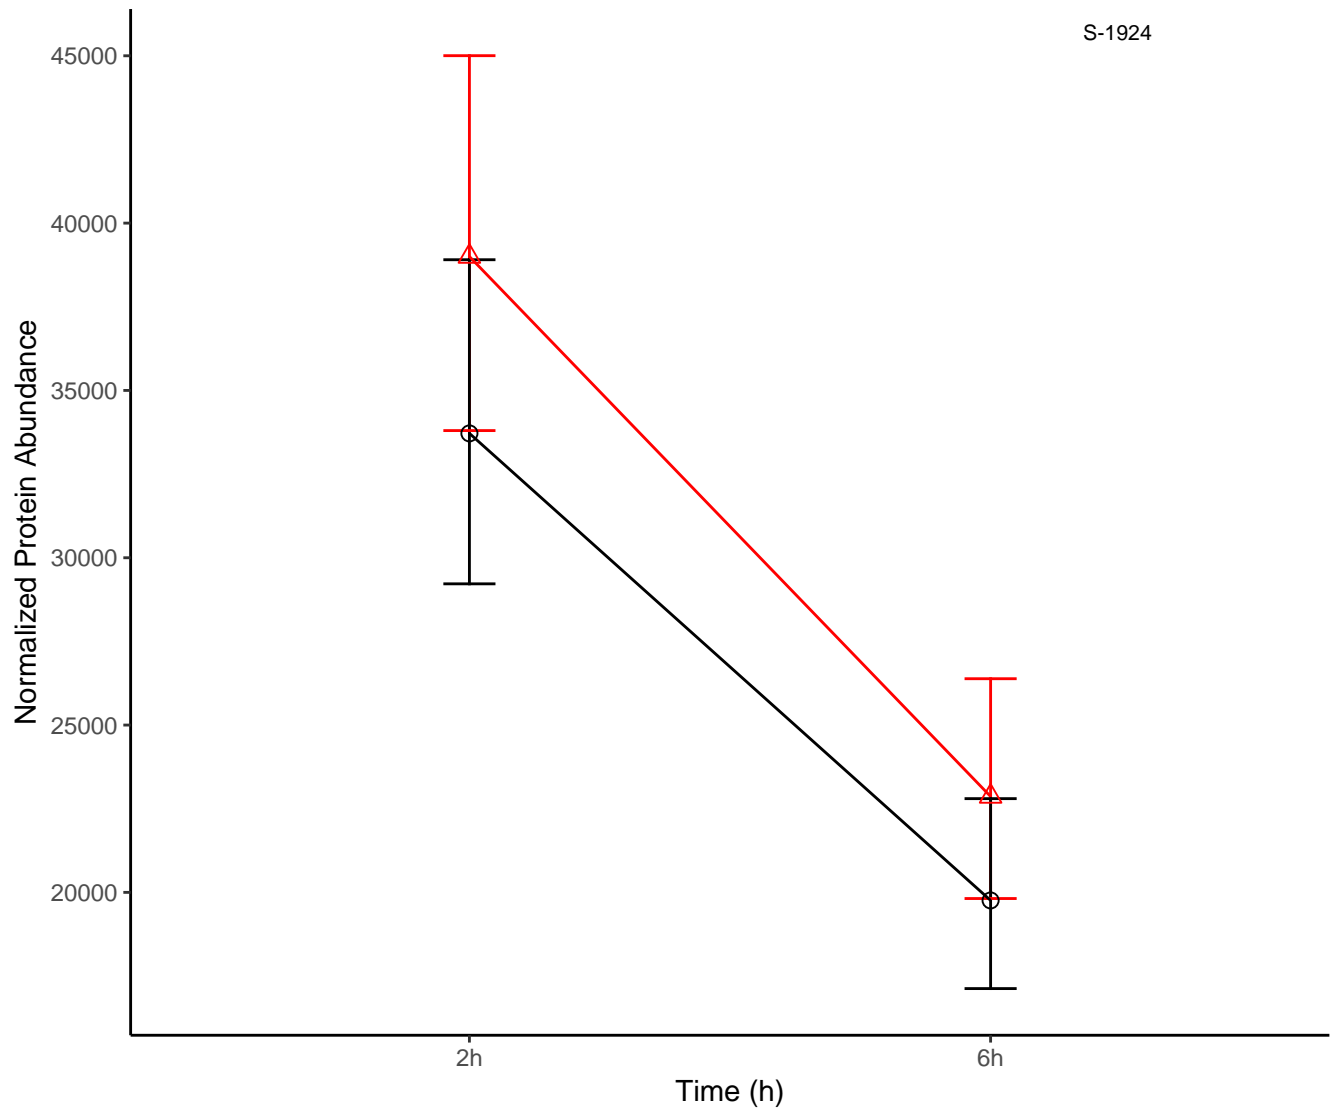

○ TSB-dex

△ TSB

# THIM\_STAAM

S-1925

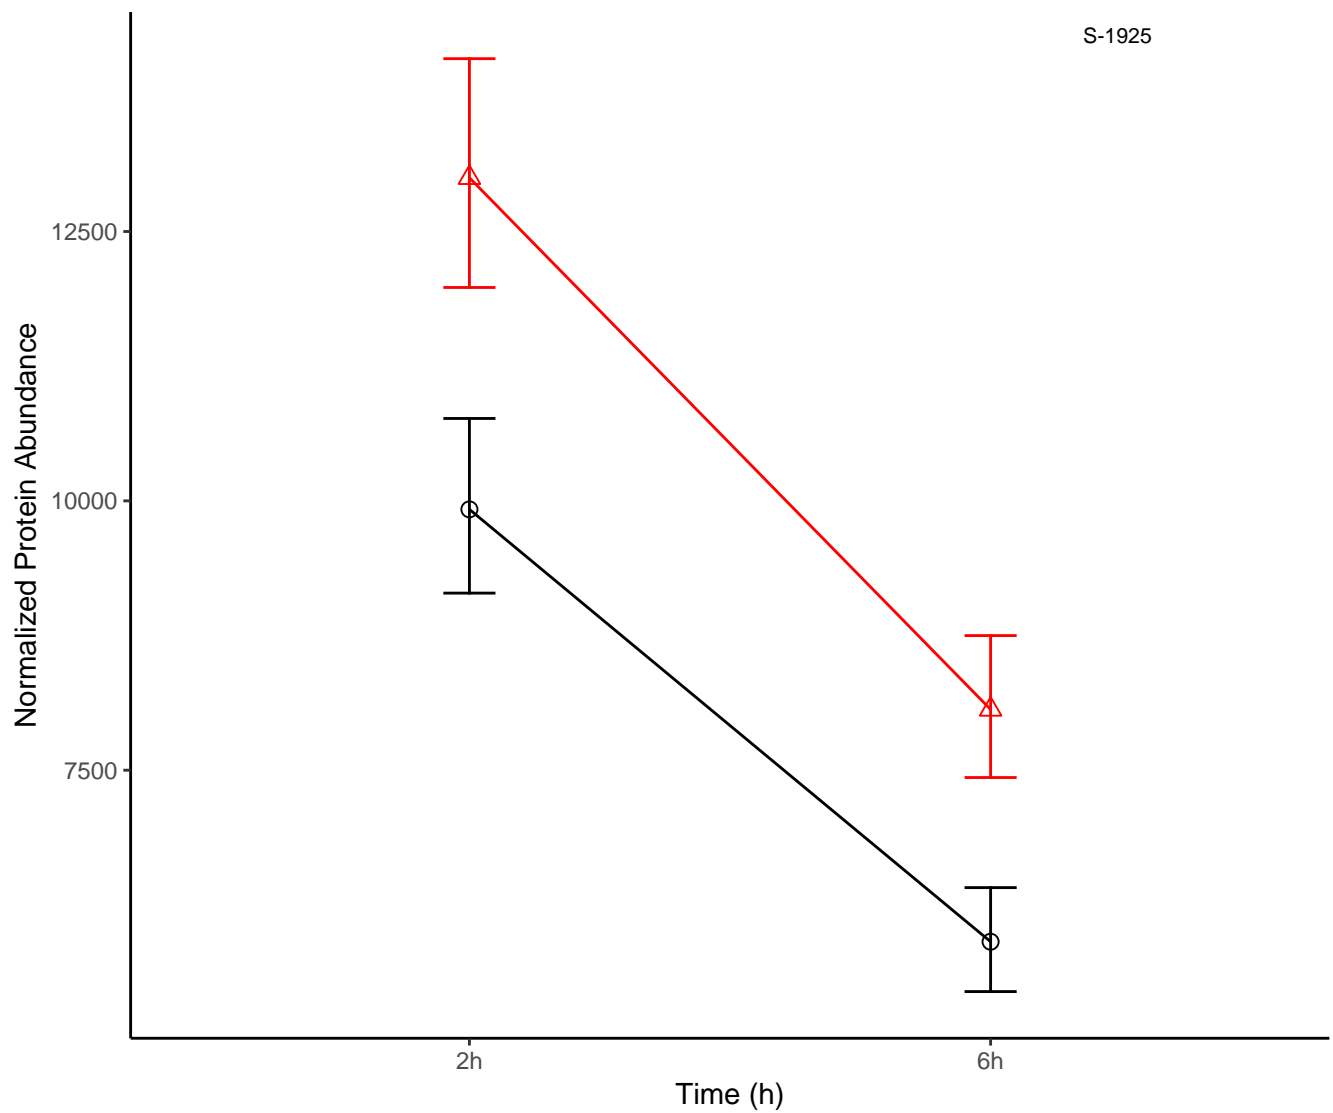

○ TSB-dex

△ TSB

# THIO\_STAAM

S-1926

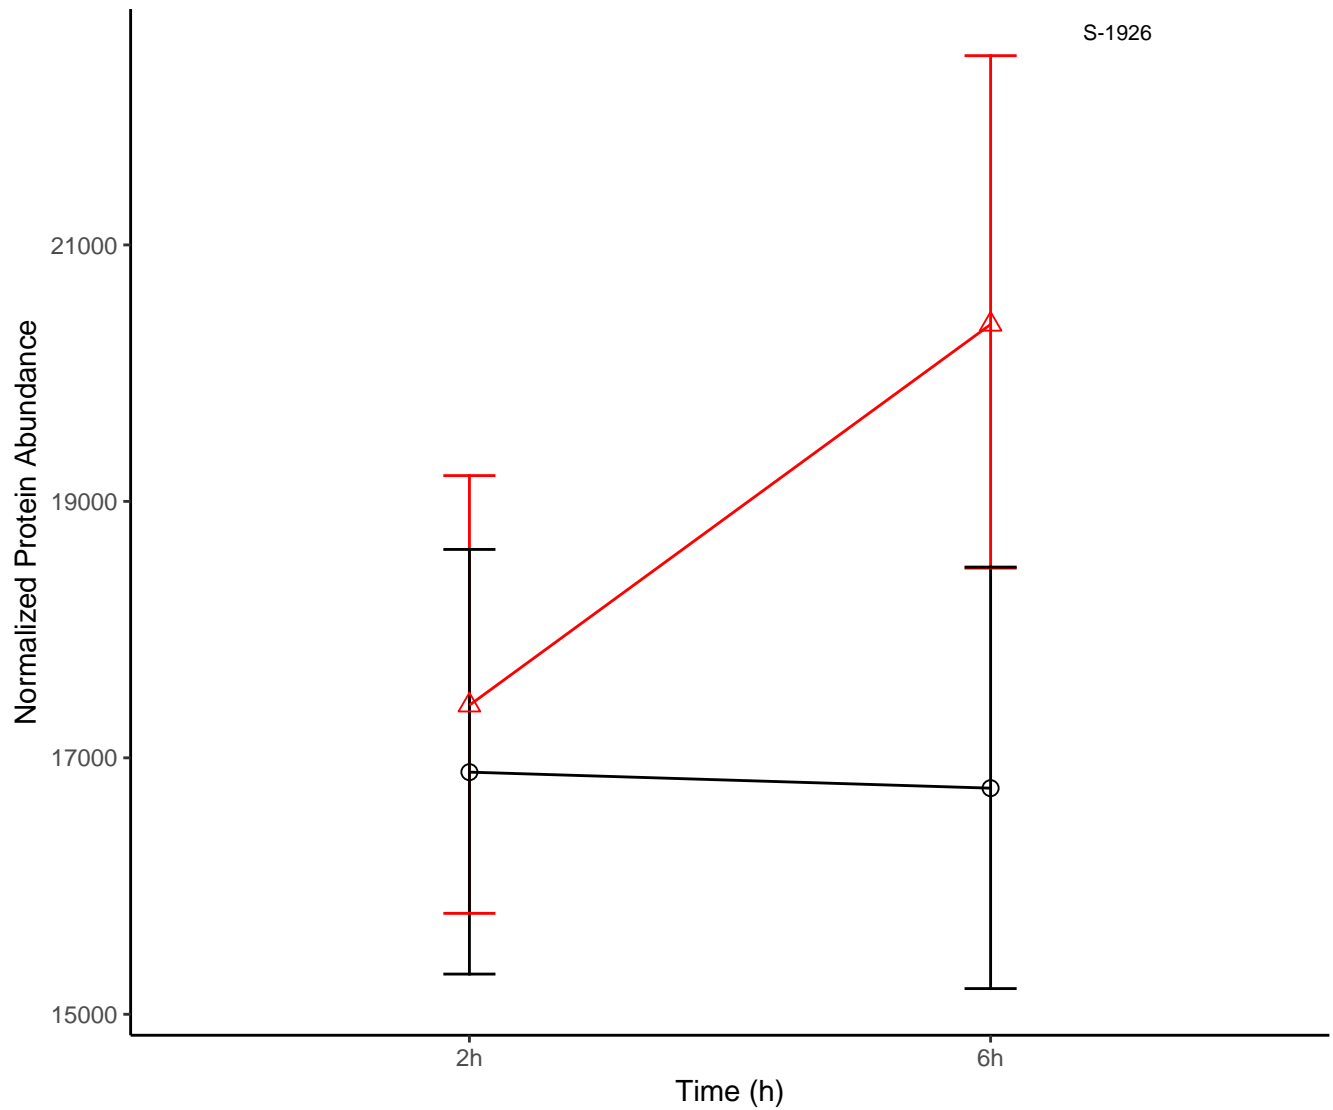

○ TSB-dex

△ TSB

# THLA\_STAAM

S-1927

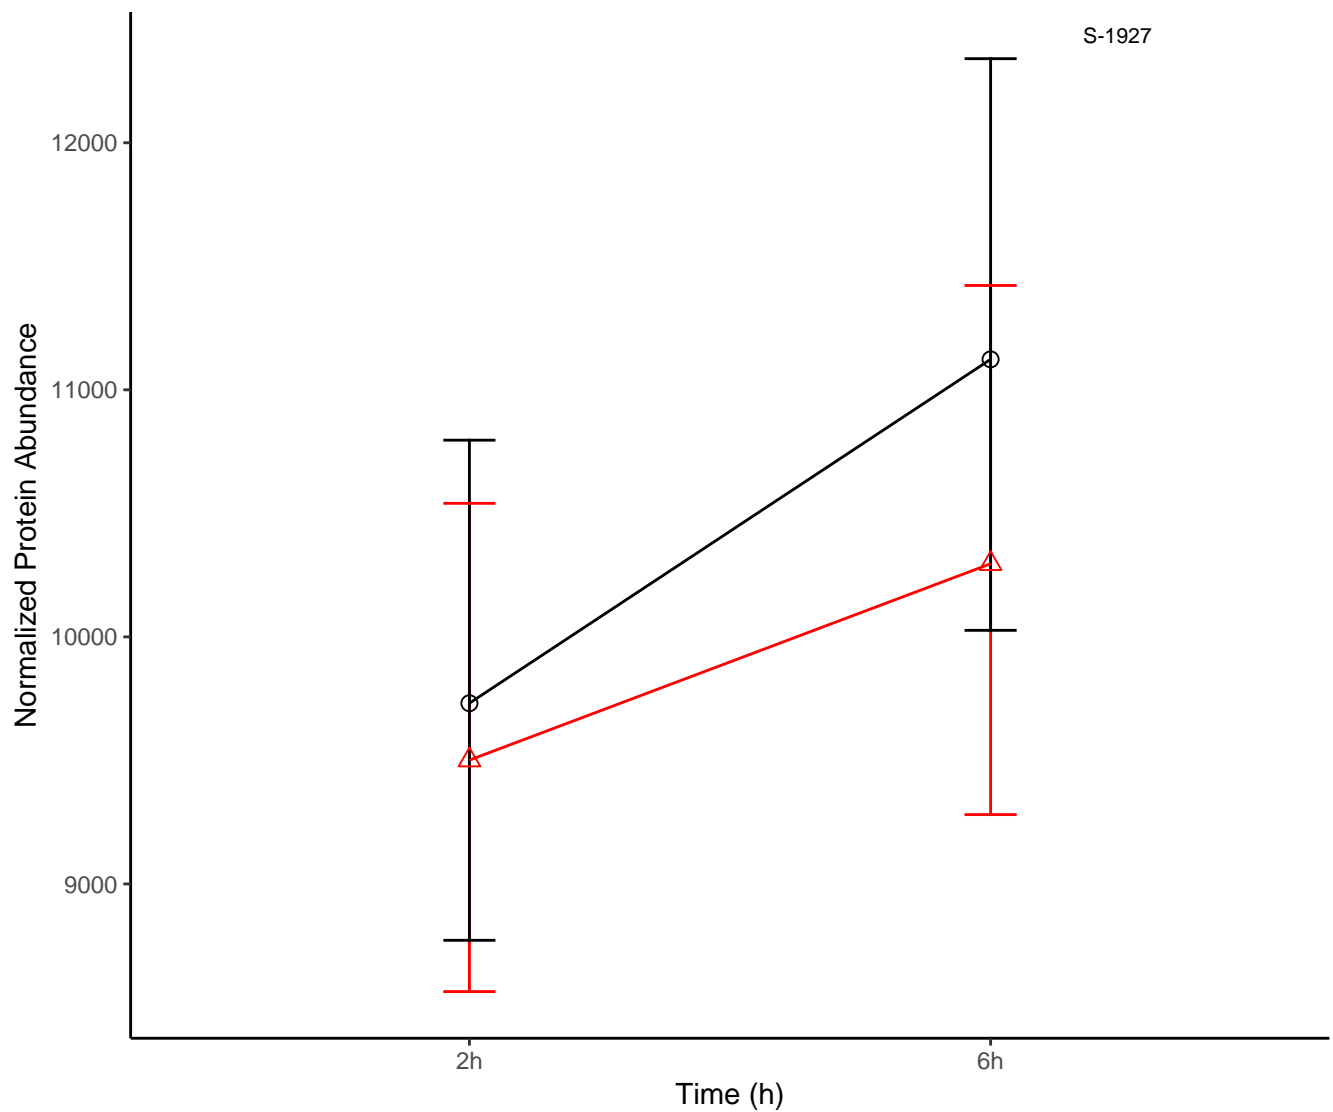

○ TSB-dex

△ TSB

# TIG\_STAAM

S-1928

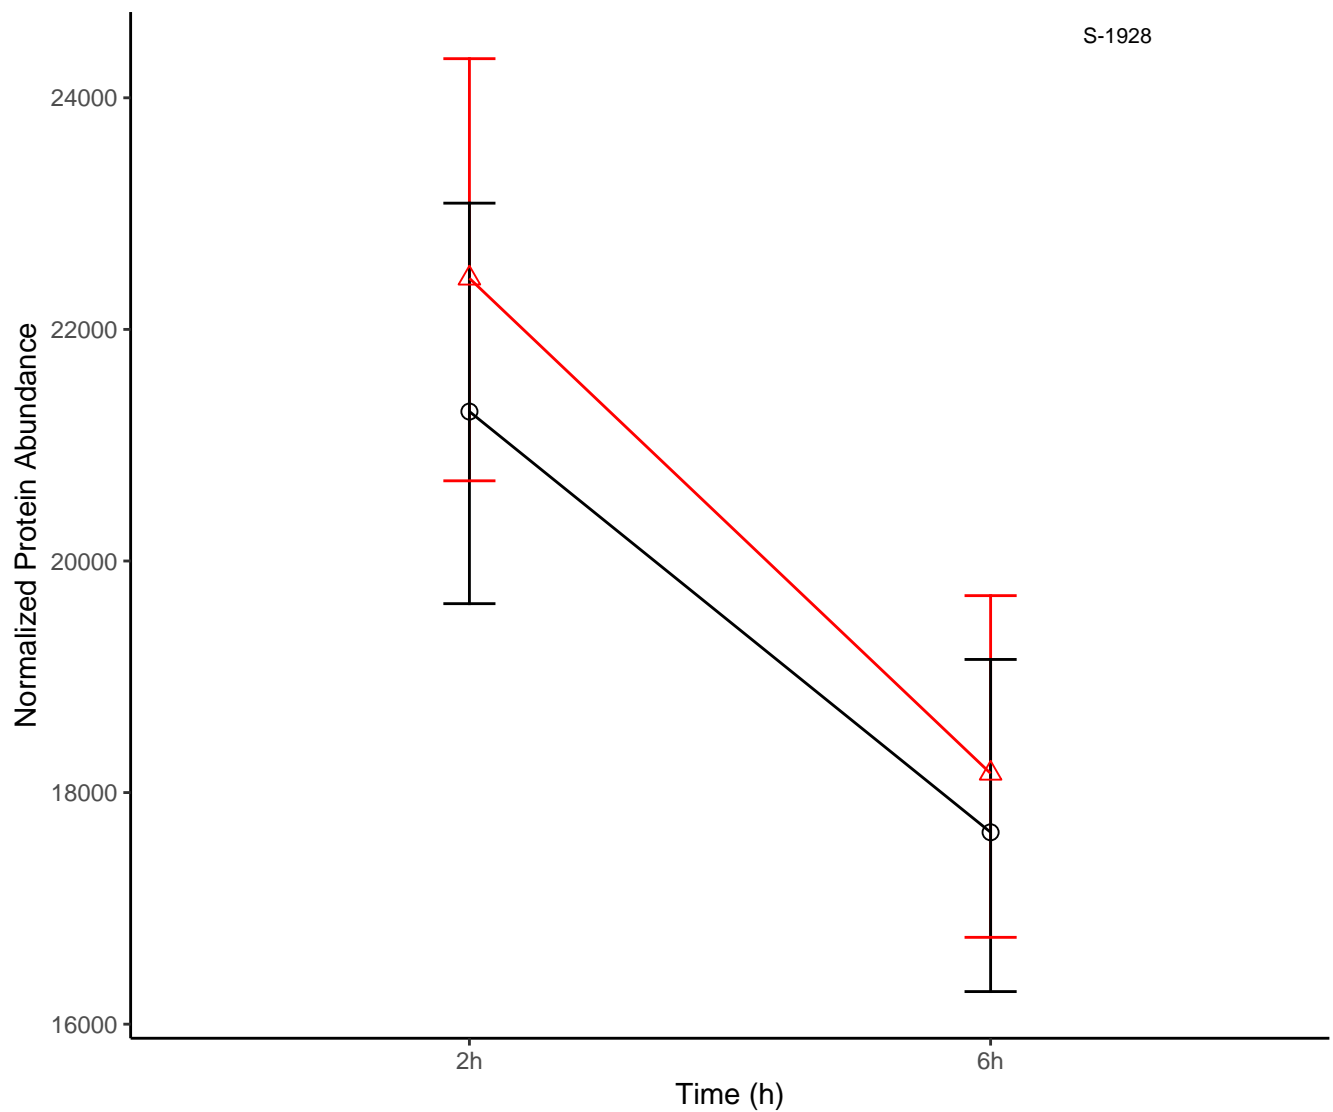

○ TSB-dex

△ TSB



# TKT\_STAAM

S-1929

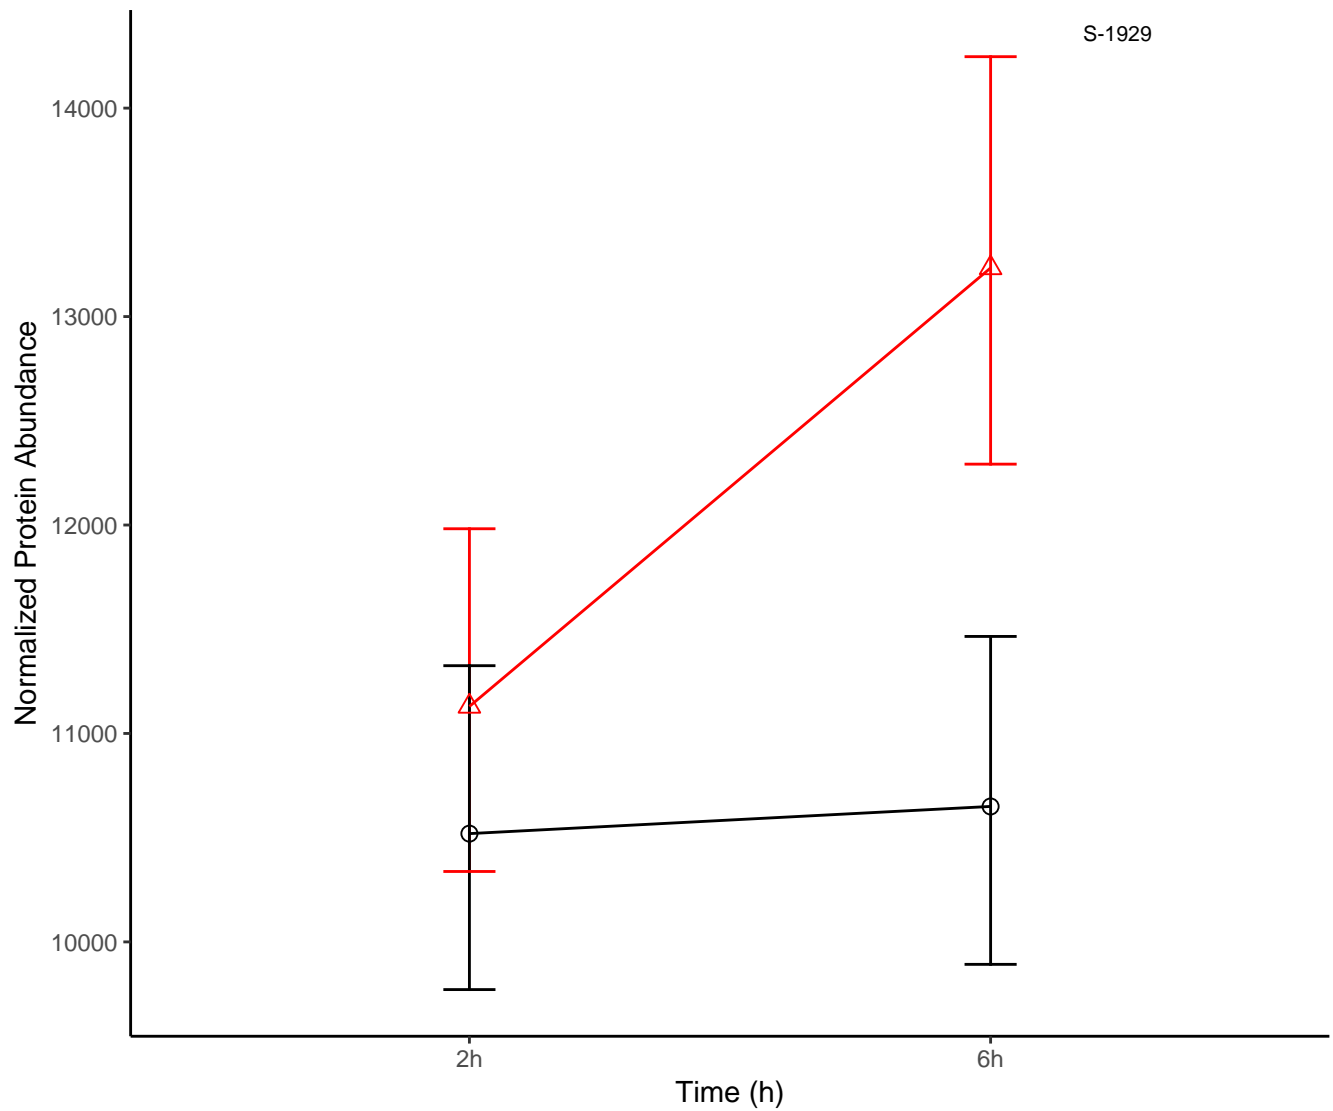

○ TSB-dex

△ TSB

# TOP1\_STAAM

S-1930

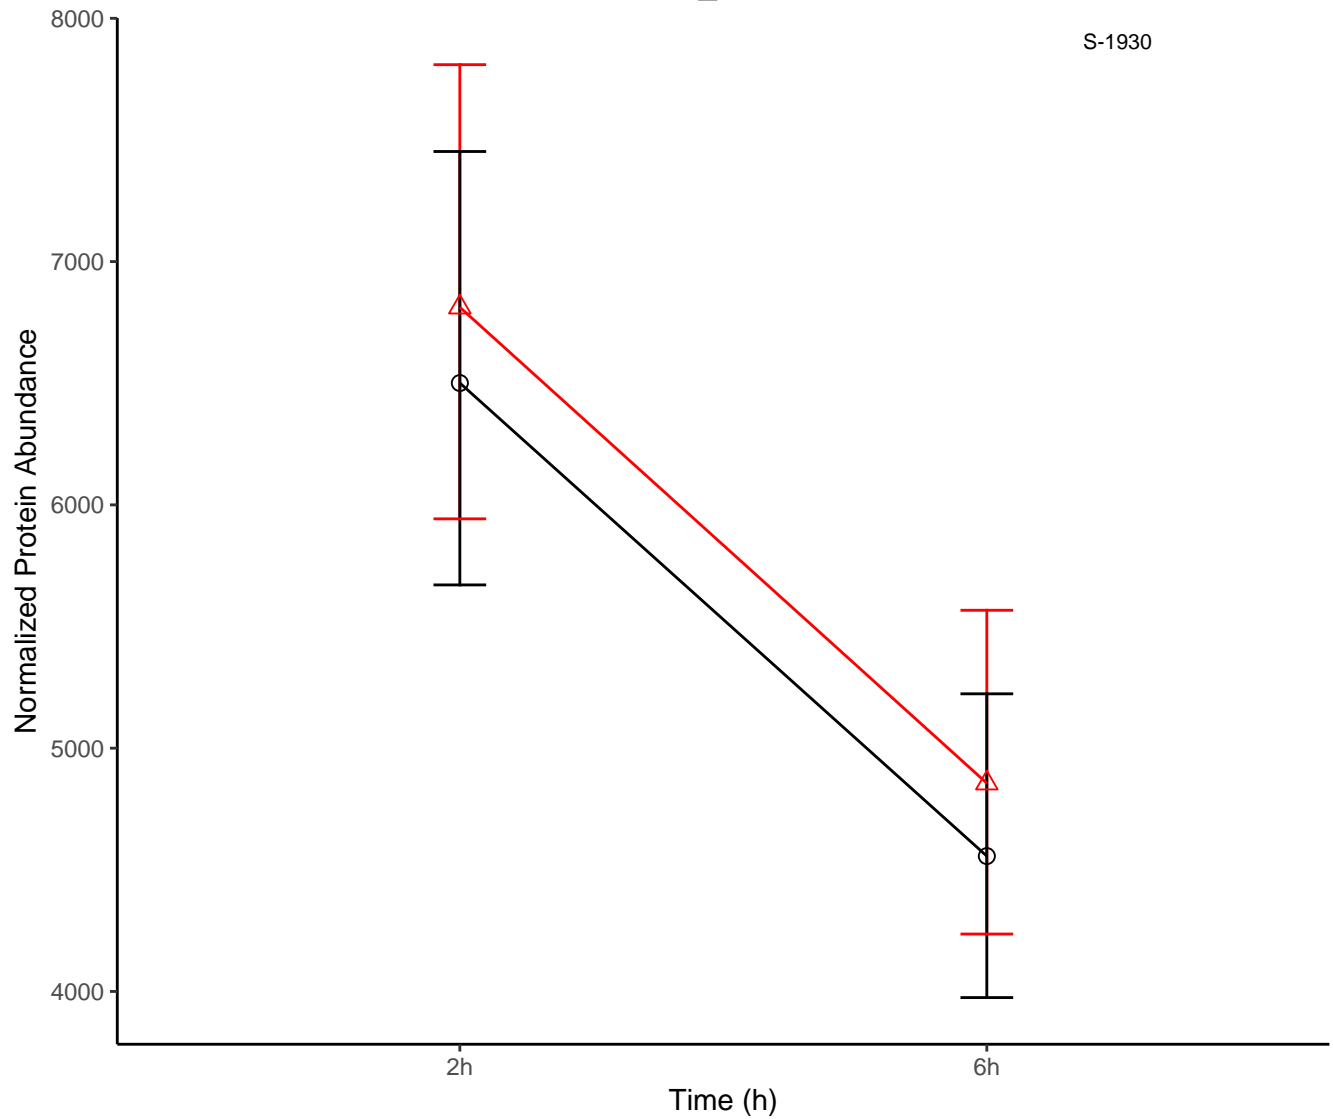

○ TSB-dex

△ TSB

# TOP3\_STAAM

S-1931

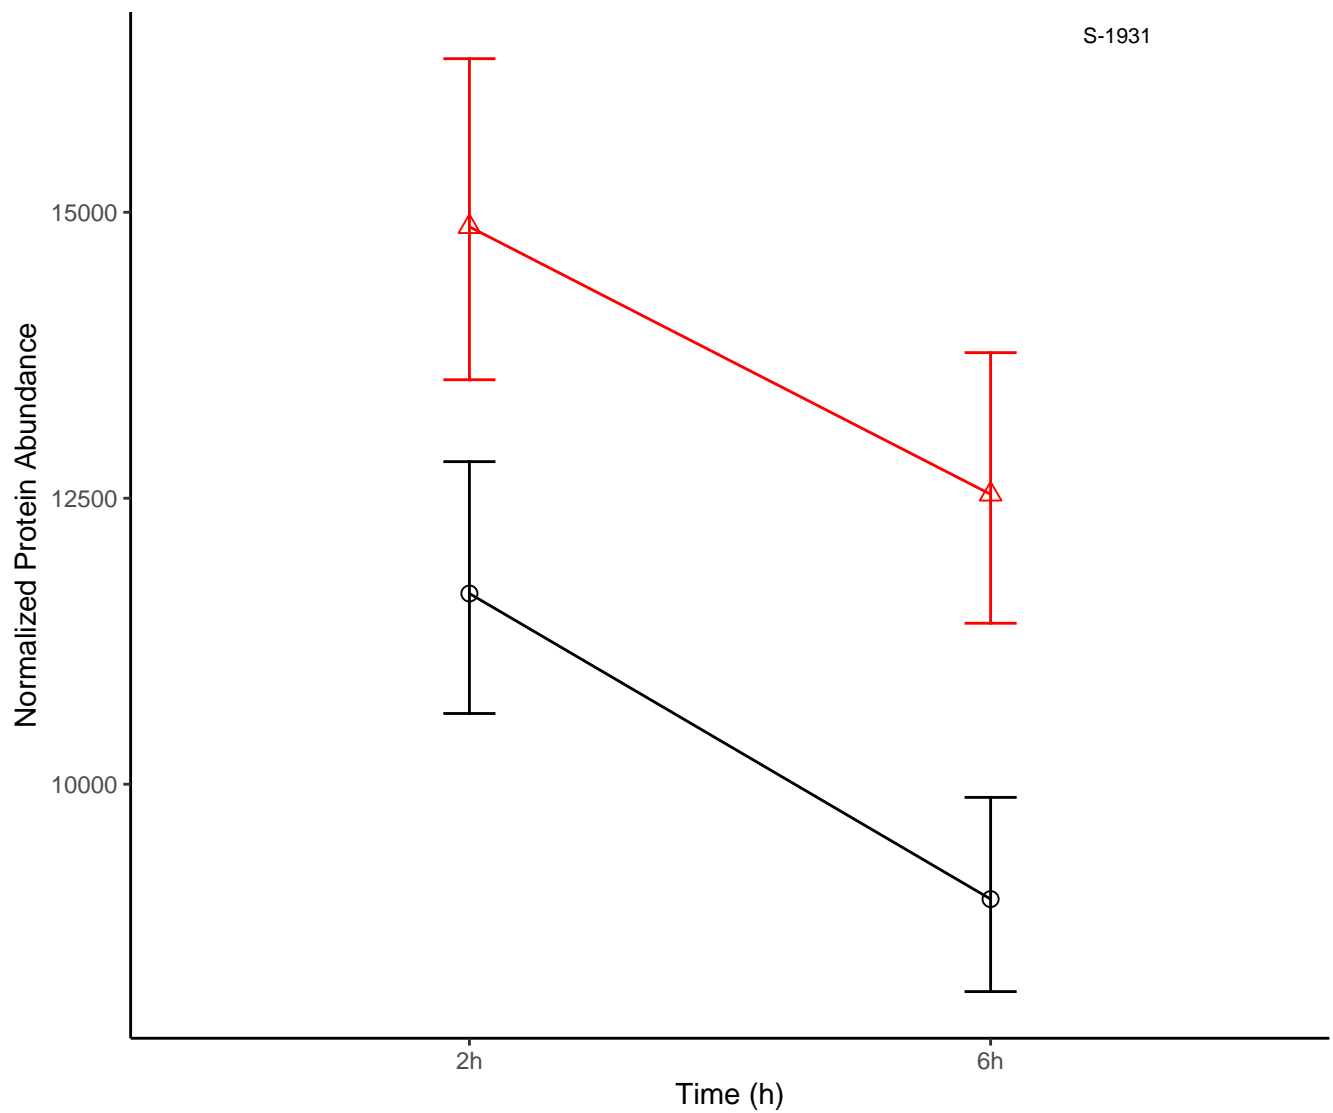

○ TSB-dex

△ TSB

# TPIS\_STAAM

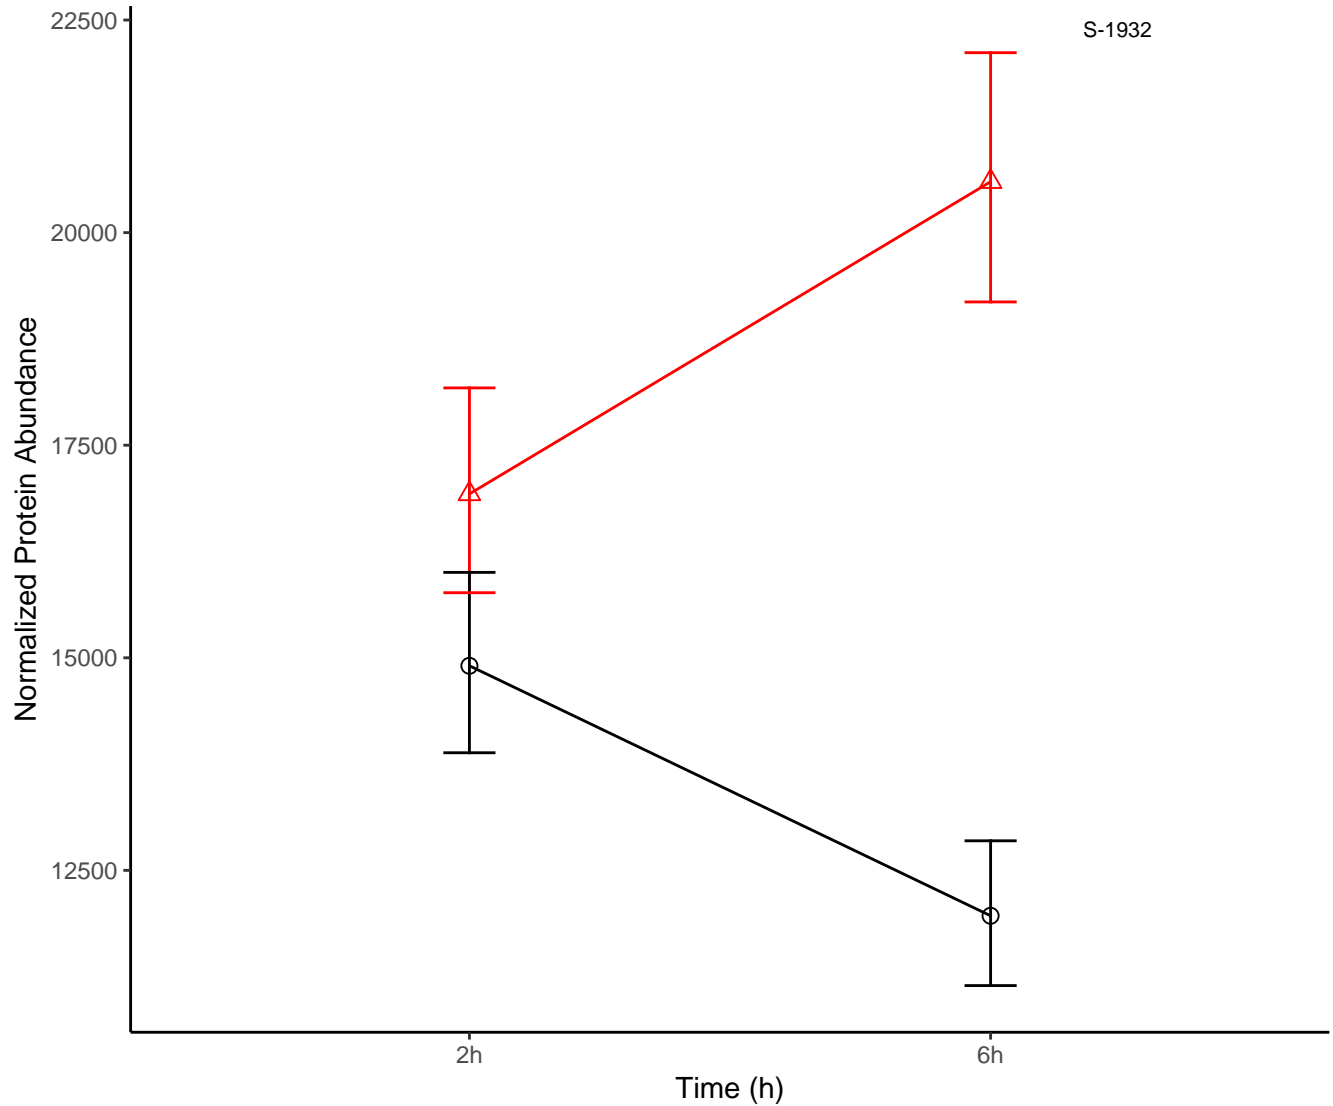

○ TSB-dex

△ TSB

# TPX\_STAAM

S-1933

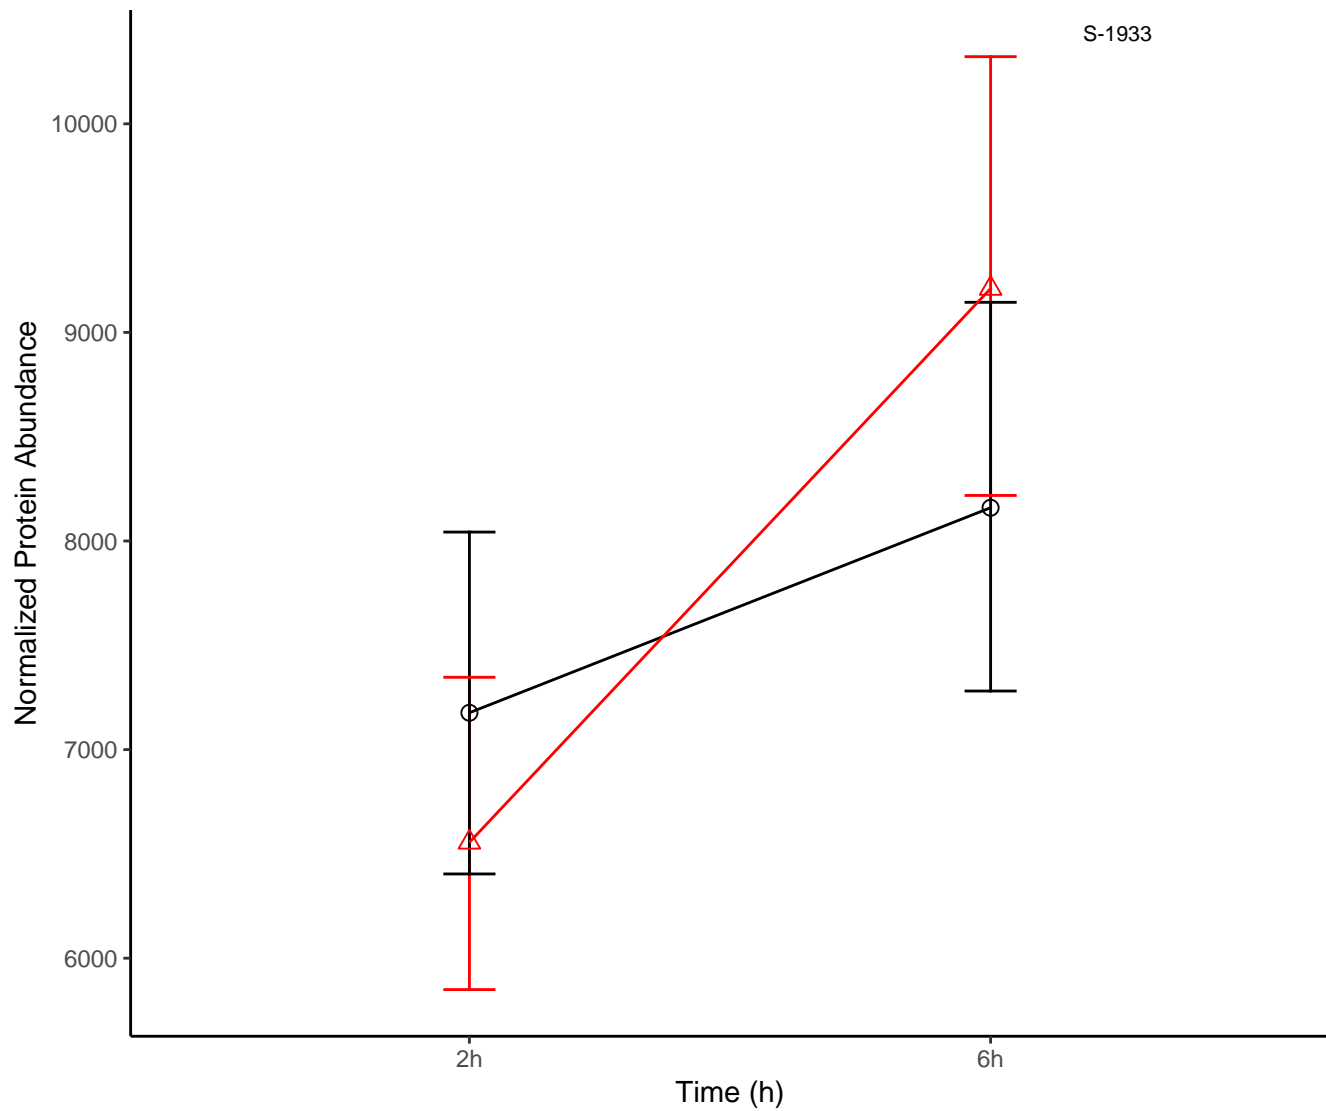

○ TSB-dex

△ TSB

# TRAC\_STAAM

S-1934

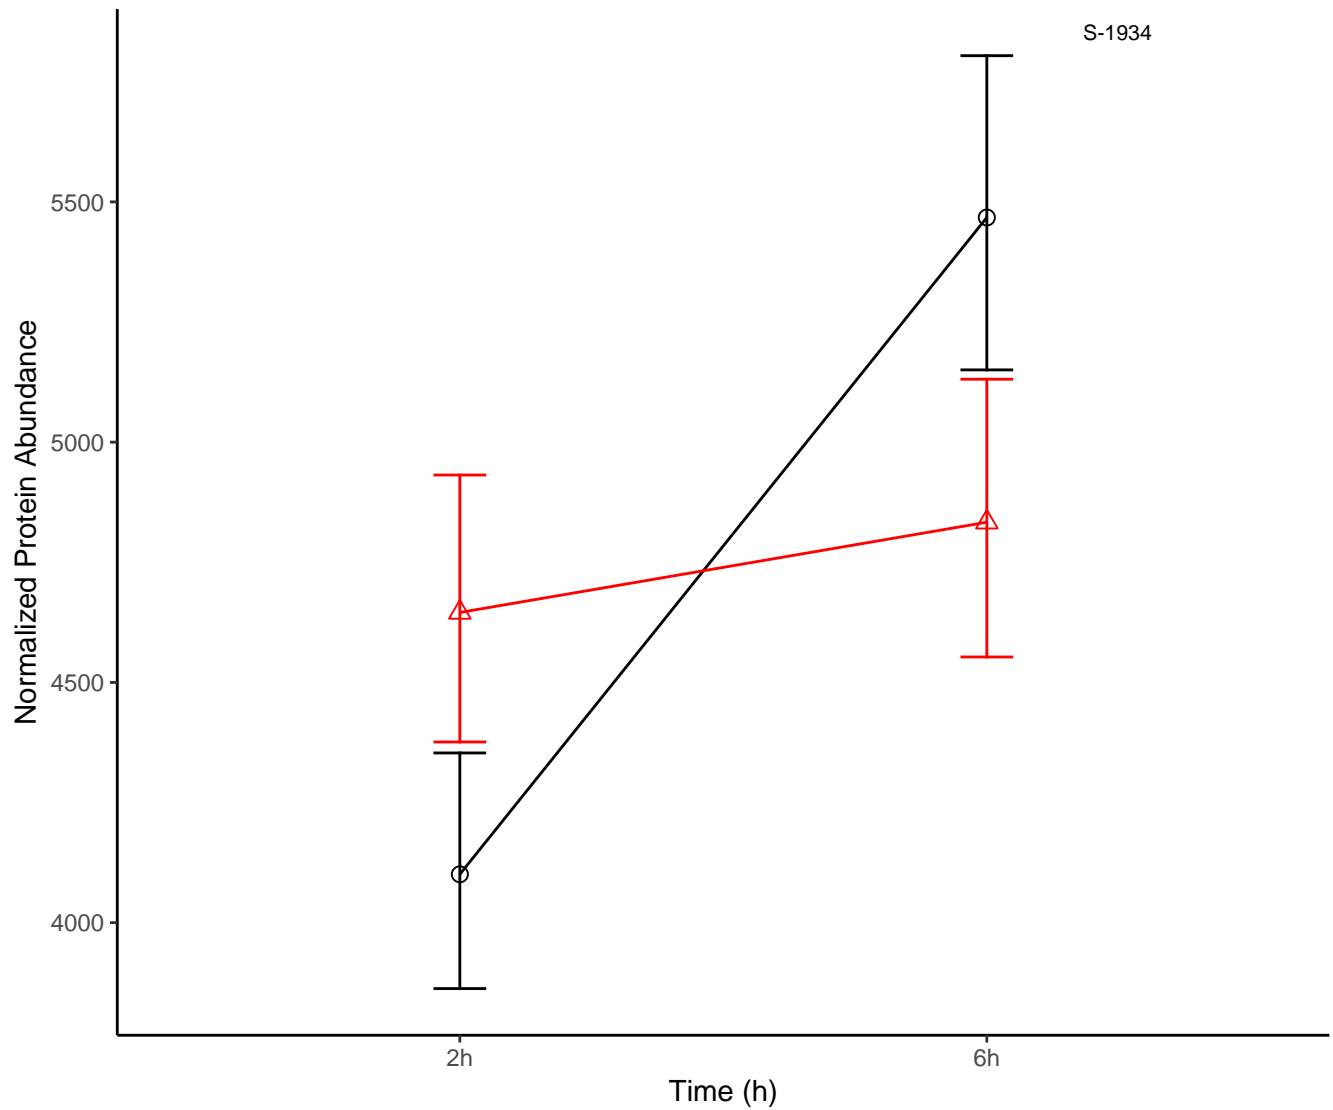

○ TSB-dex

△ TSB

# TRAP\_STAAM

S-1935

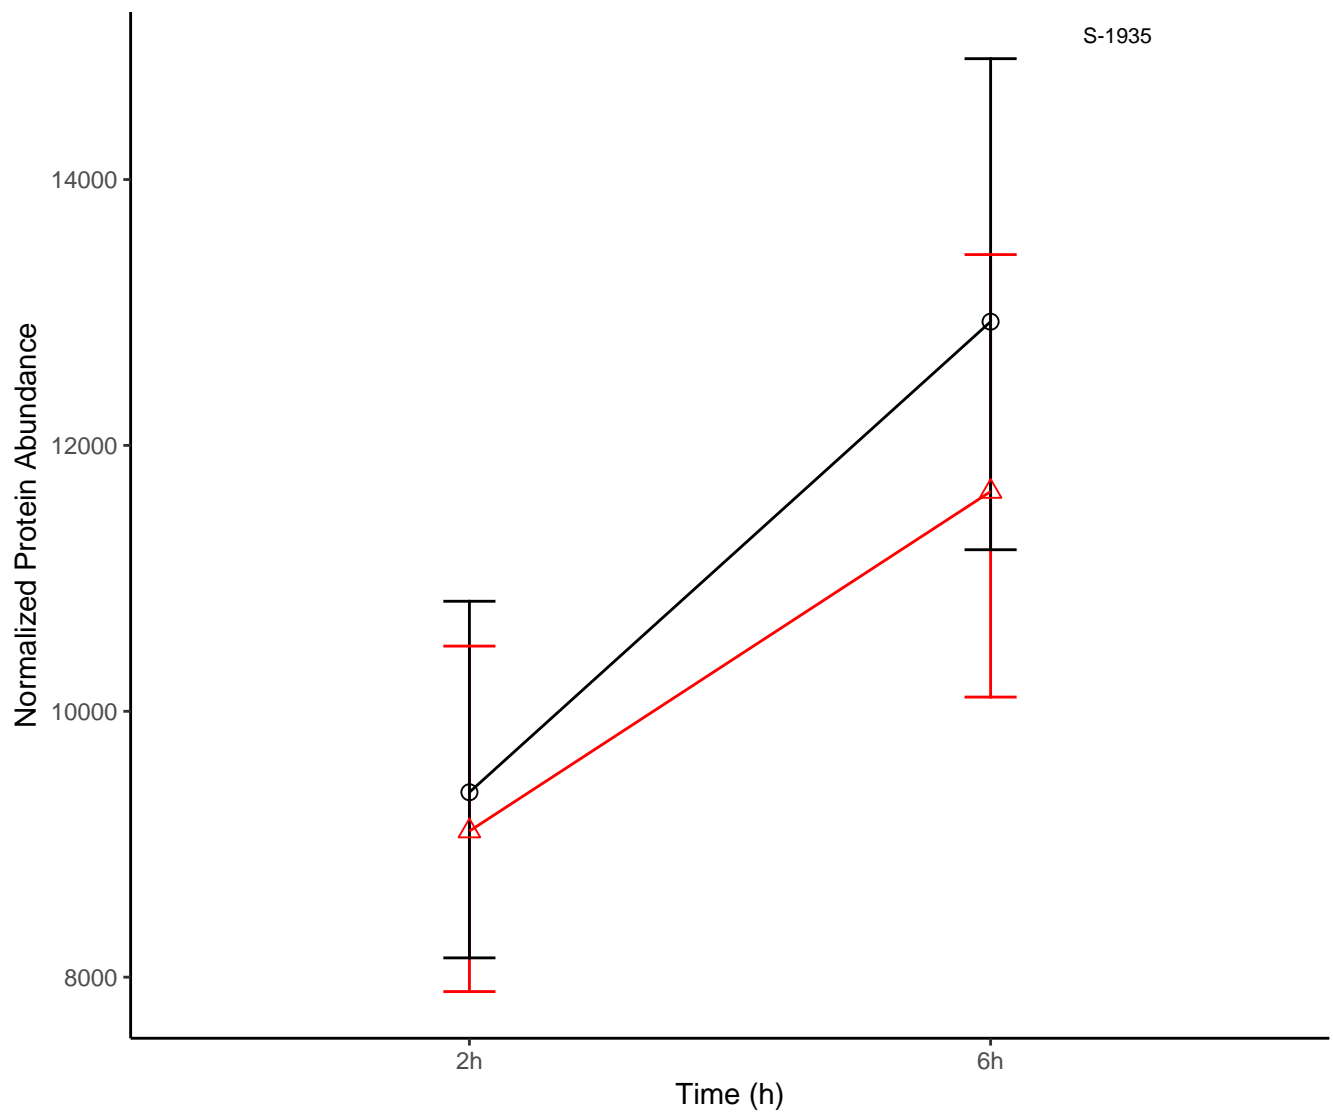

○ TSB-dex

△ TSB

# TRMB\_STAAM

S-1936

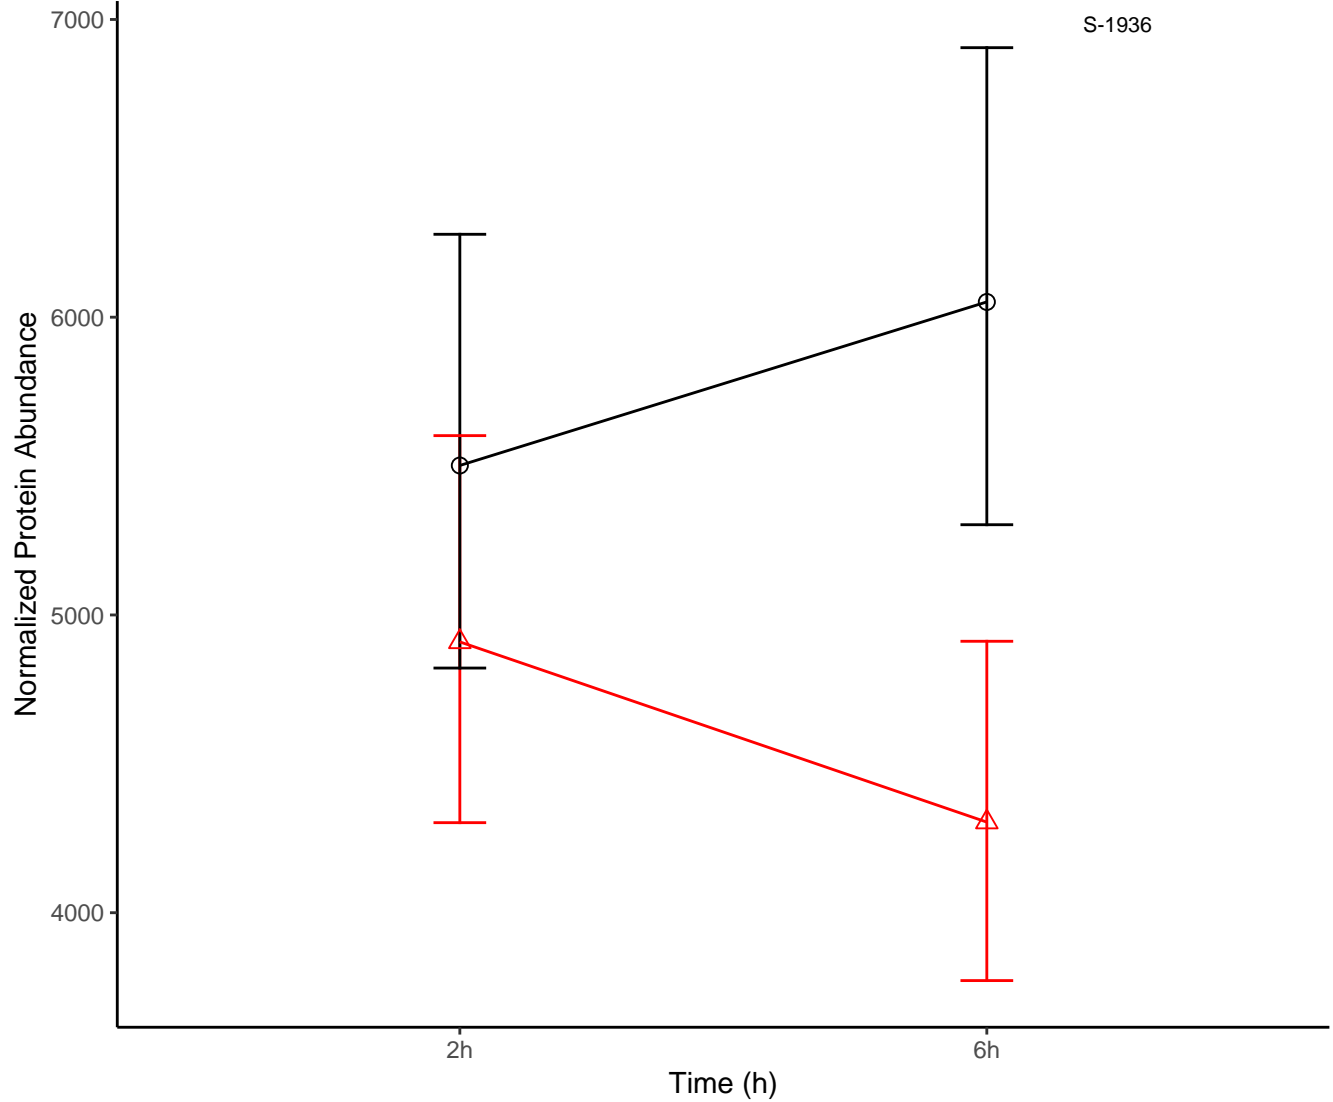

○ TSB-dex

△ TSB



# TRMFO\_STAAM

S-1937

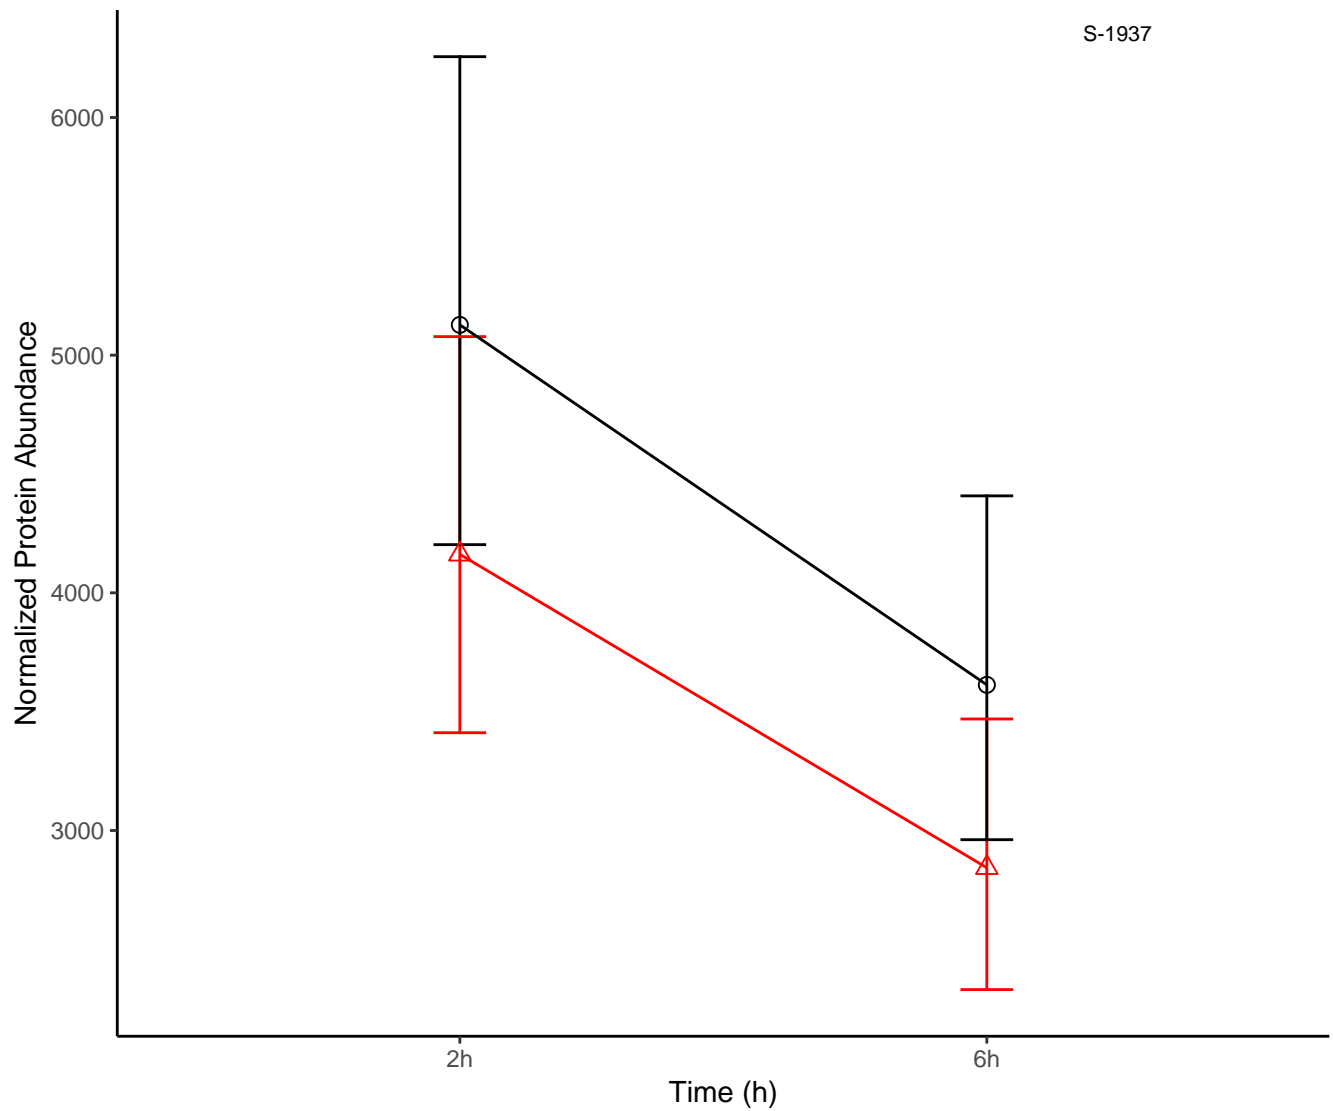

○ TSB-dex

△ TSB

# TRMHL\_STAAM

S-1938

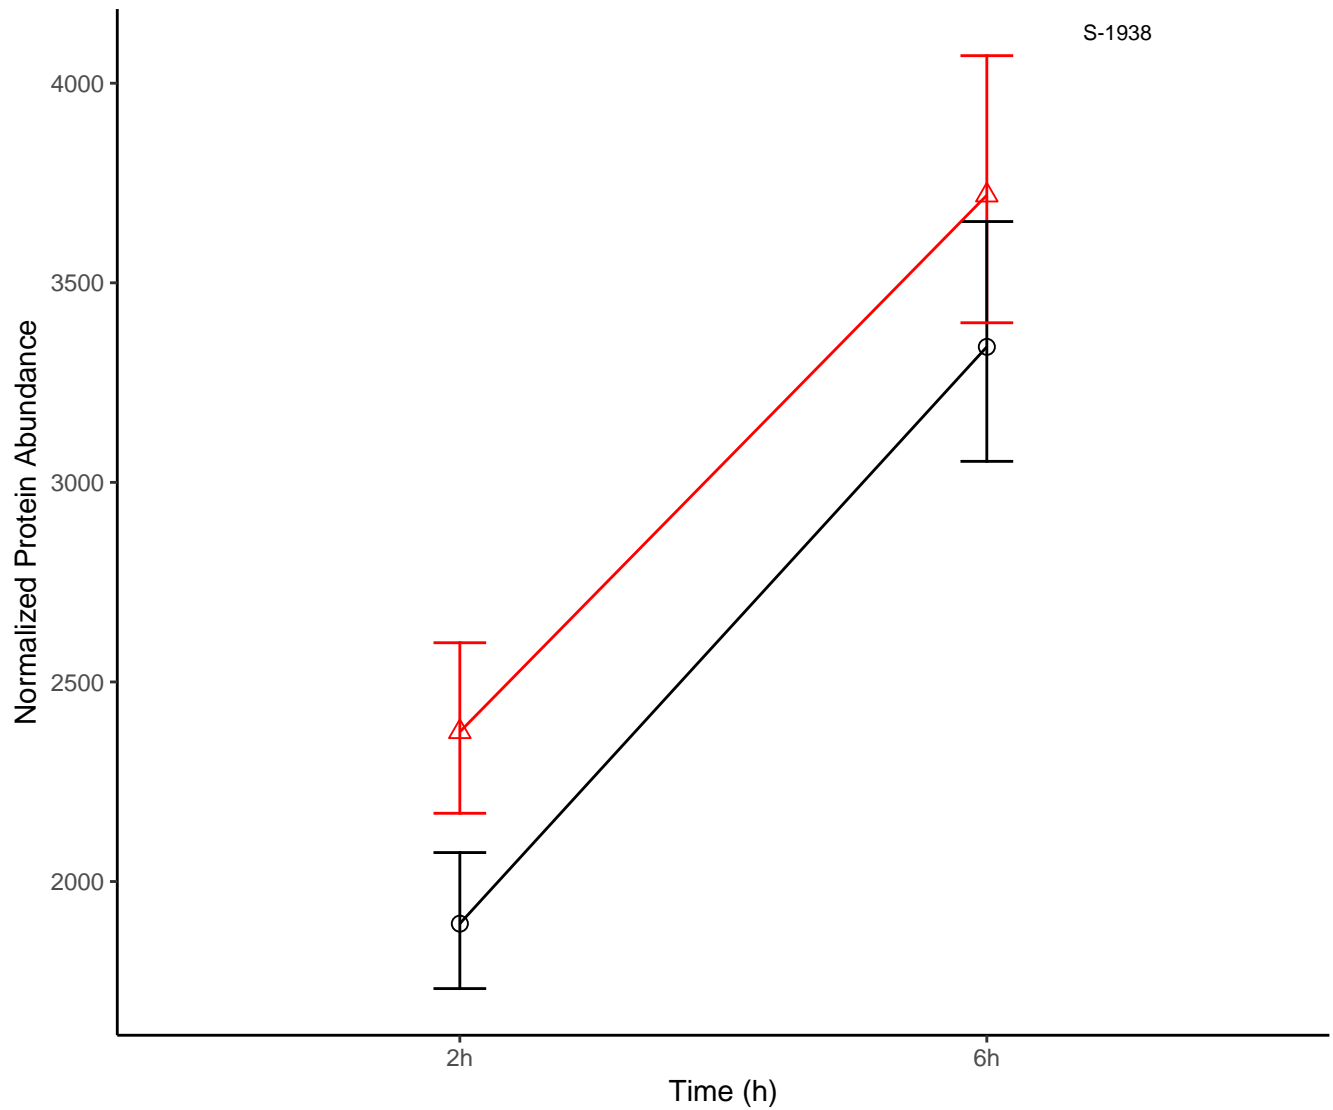

○ TSB-dex

△ TSB

# TRPA\_STAAM

S-1939

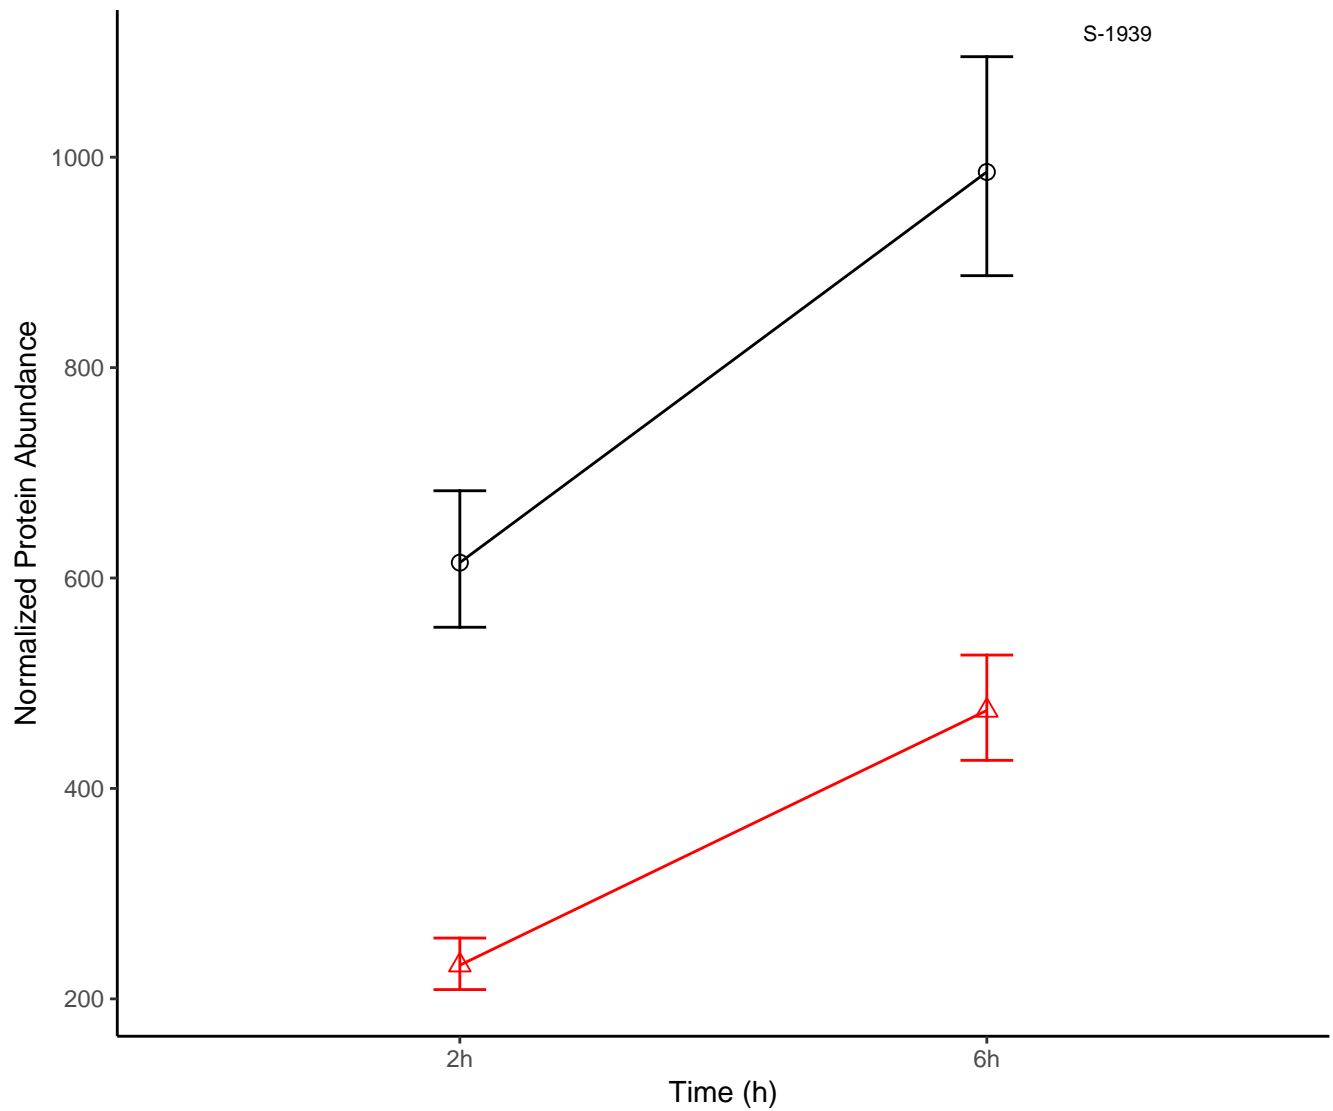

○ TSB-dex

△ TSB

# TRPF\_STAAM

S-1940

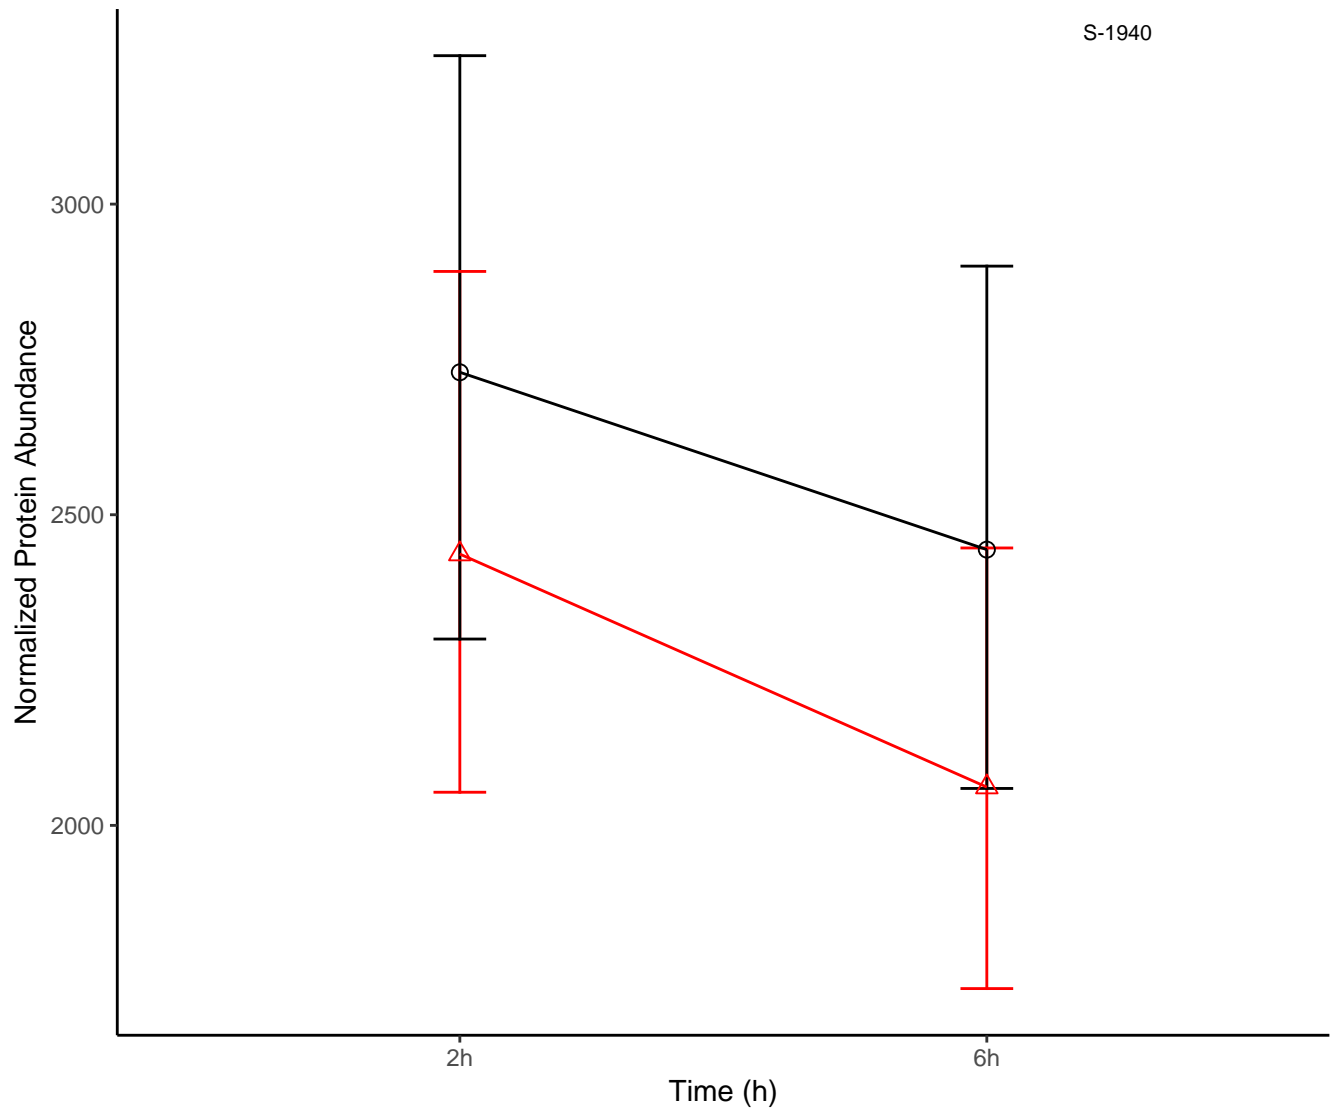

○ TSB-dex

△ TSB

# TRUB\_STAAM

S-1941

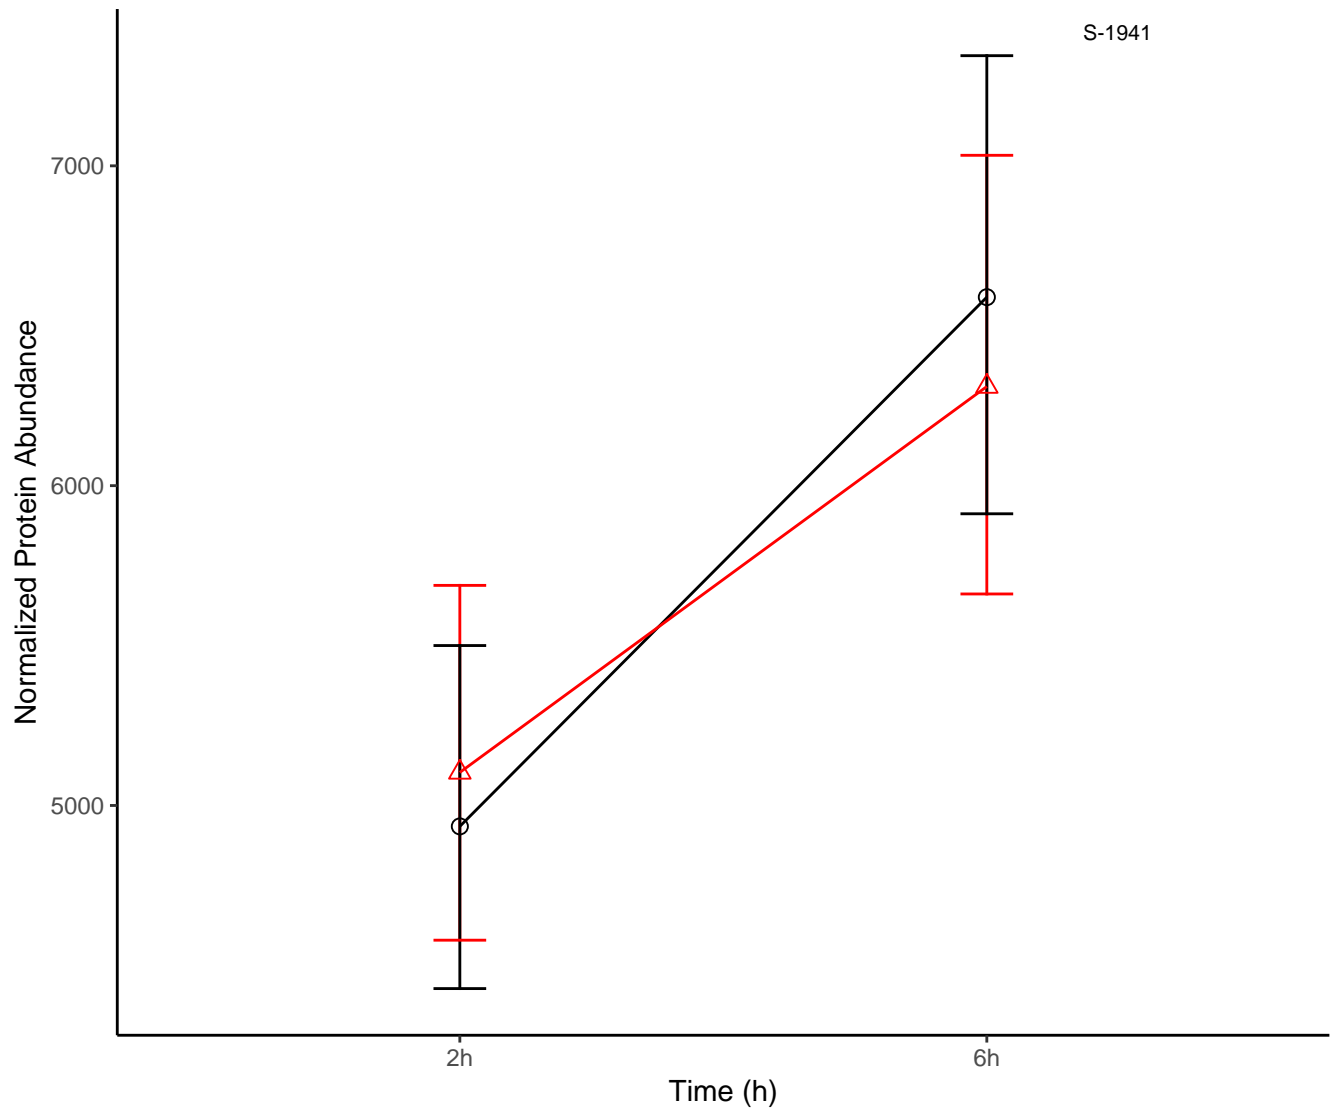

○ TSB-dex

△ TSB

# TRXB\_STAAM

S-1942

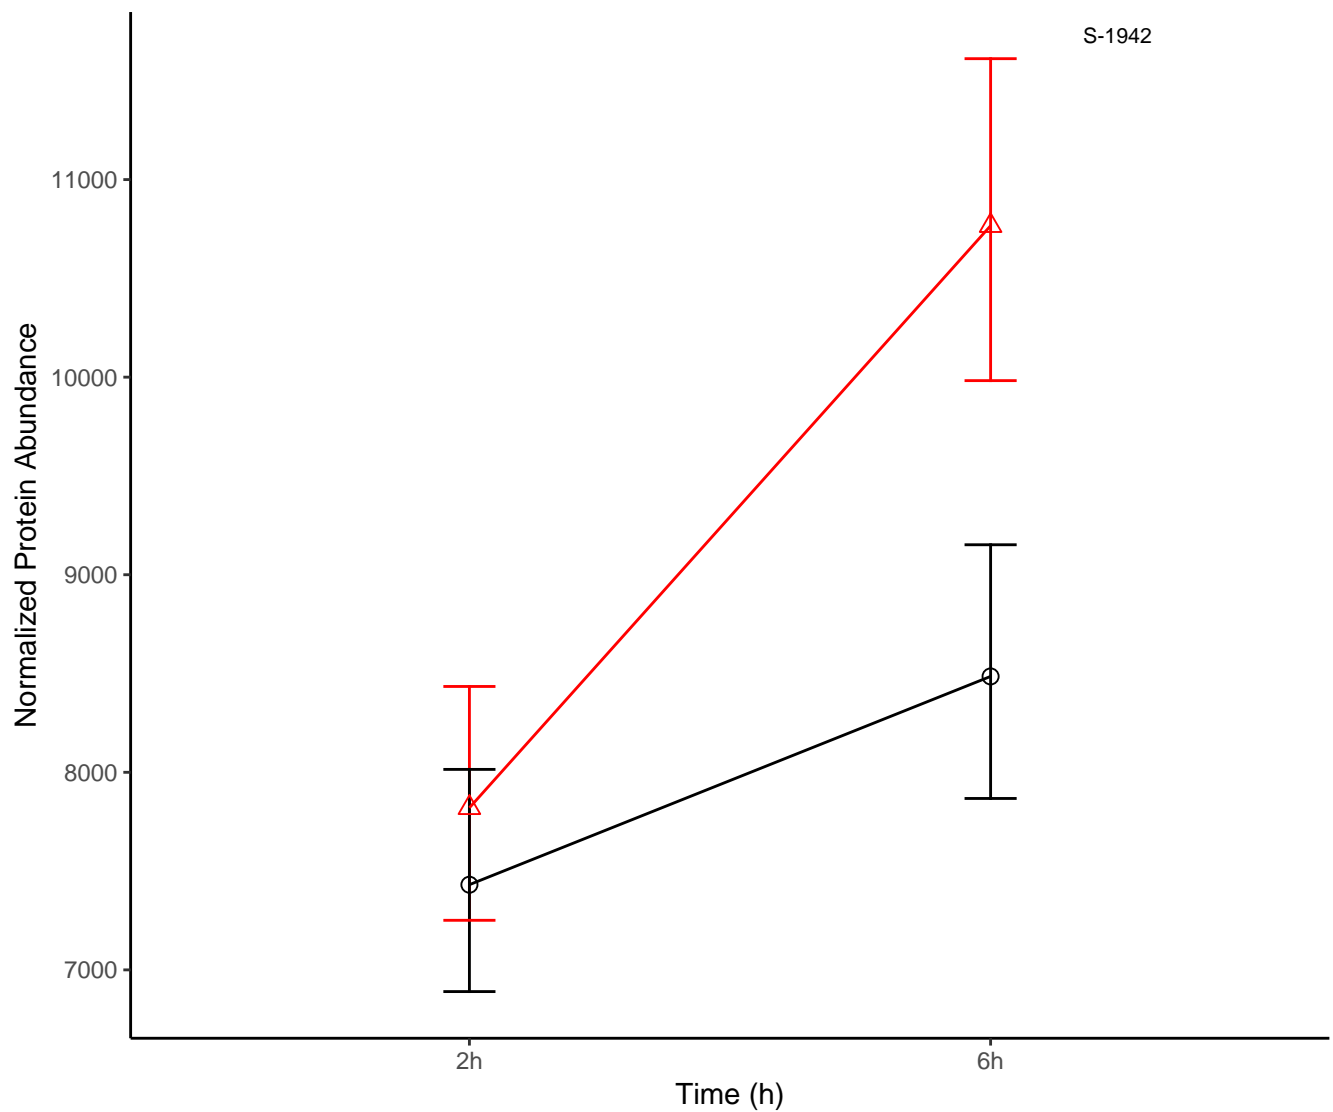

○ TSB-dex

△ TSB

# TSAD\_STAAM

S-1943

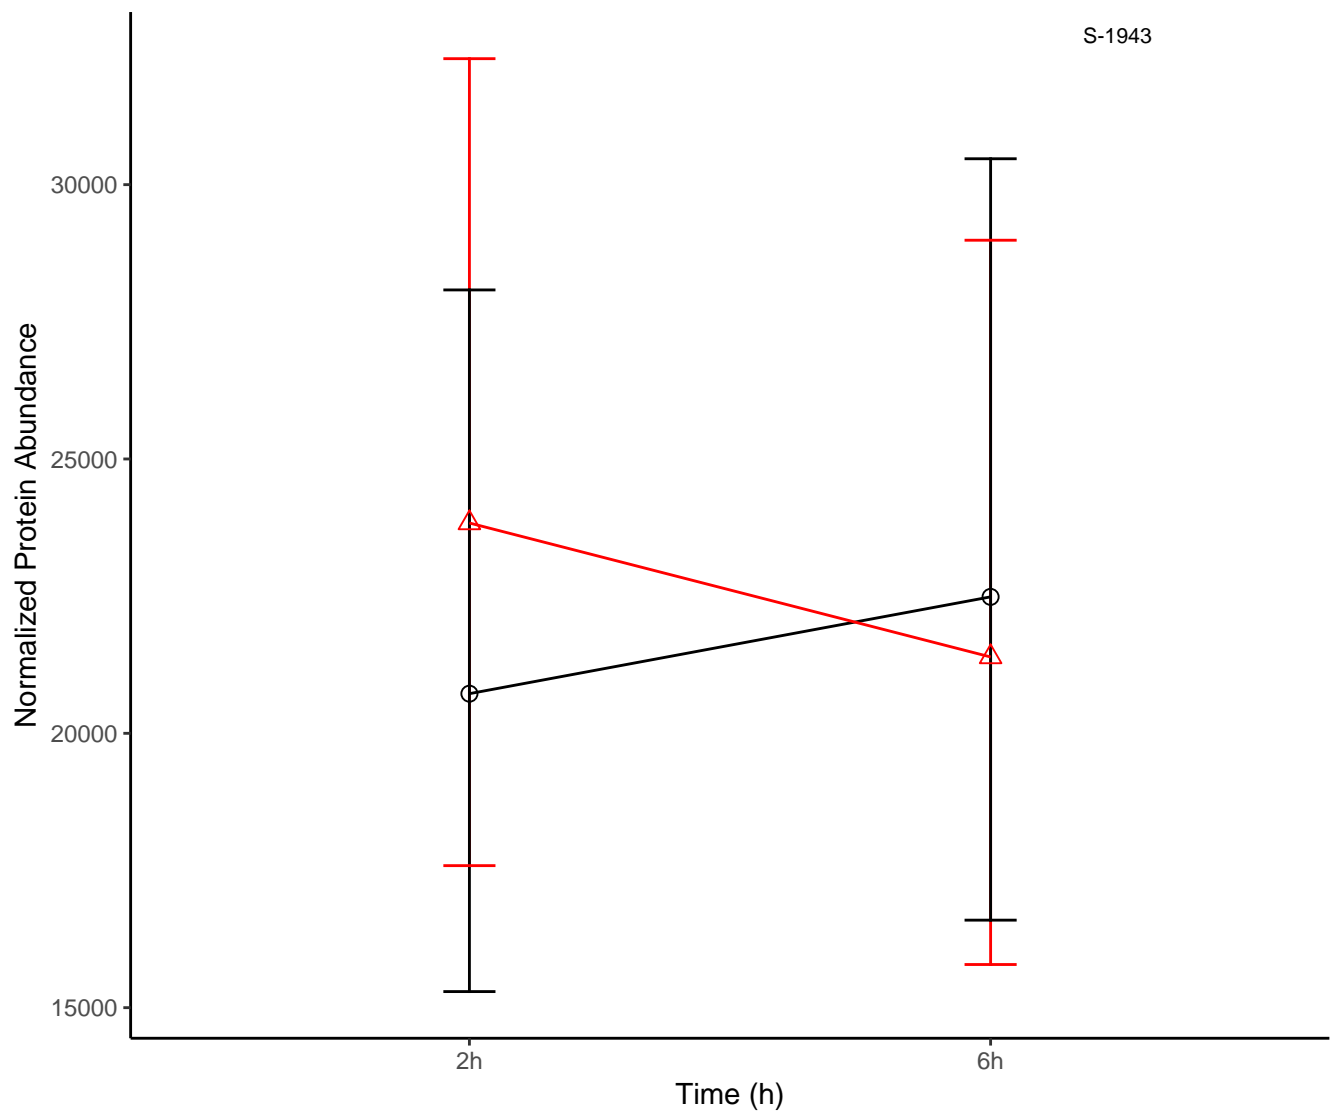

○ TSB-dex

△ TSB

# TYRA\_STAAM

S-1944

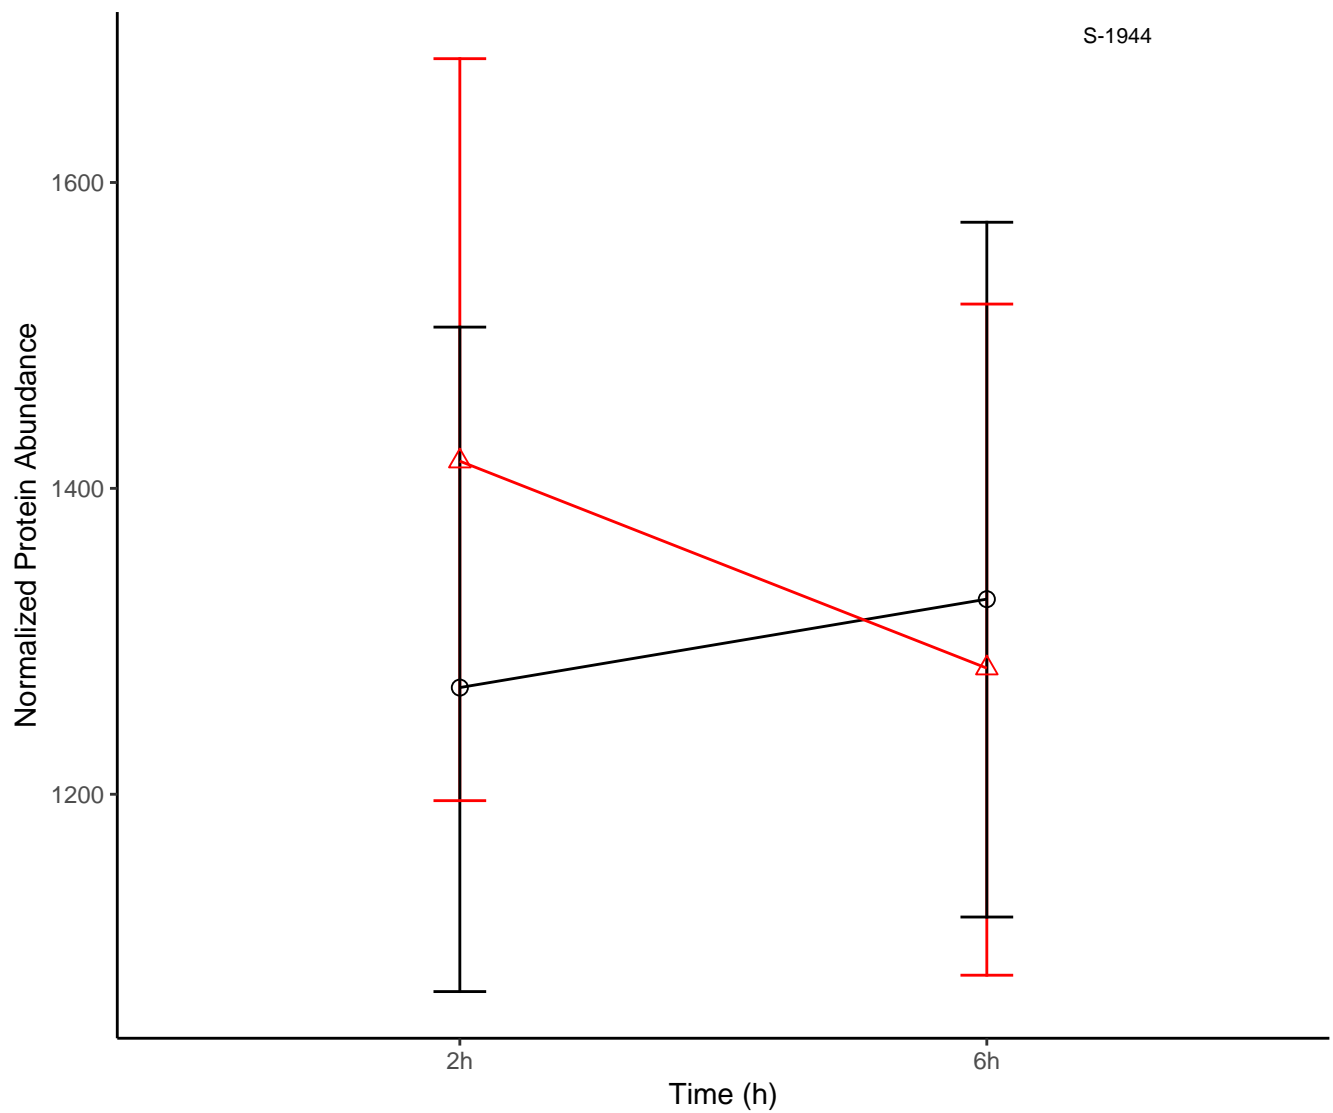

○ TSB-dex

△ TSB



# TYSY\_STAAM

S-1945

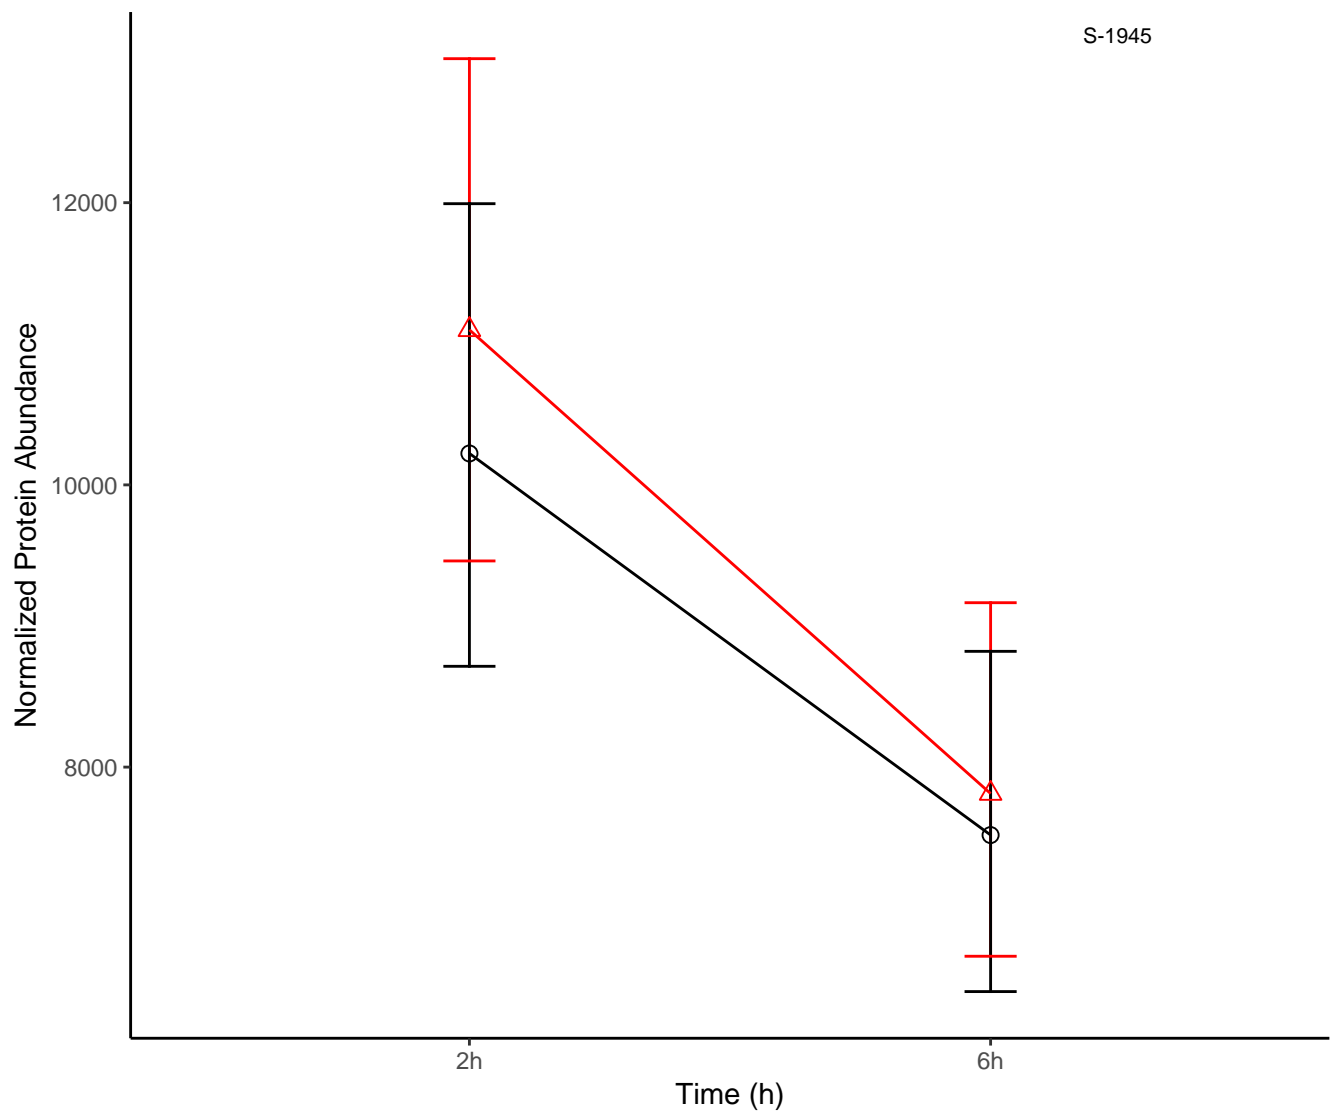

○ TSB-dex

△ TSB

# UNG\_STAAM

S-1946

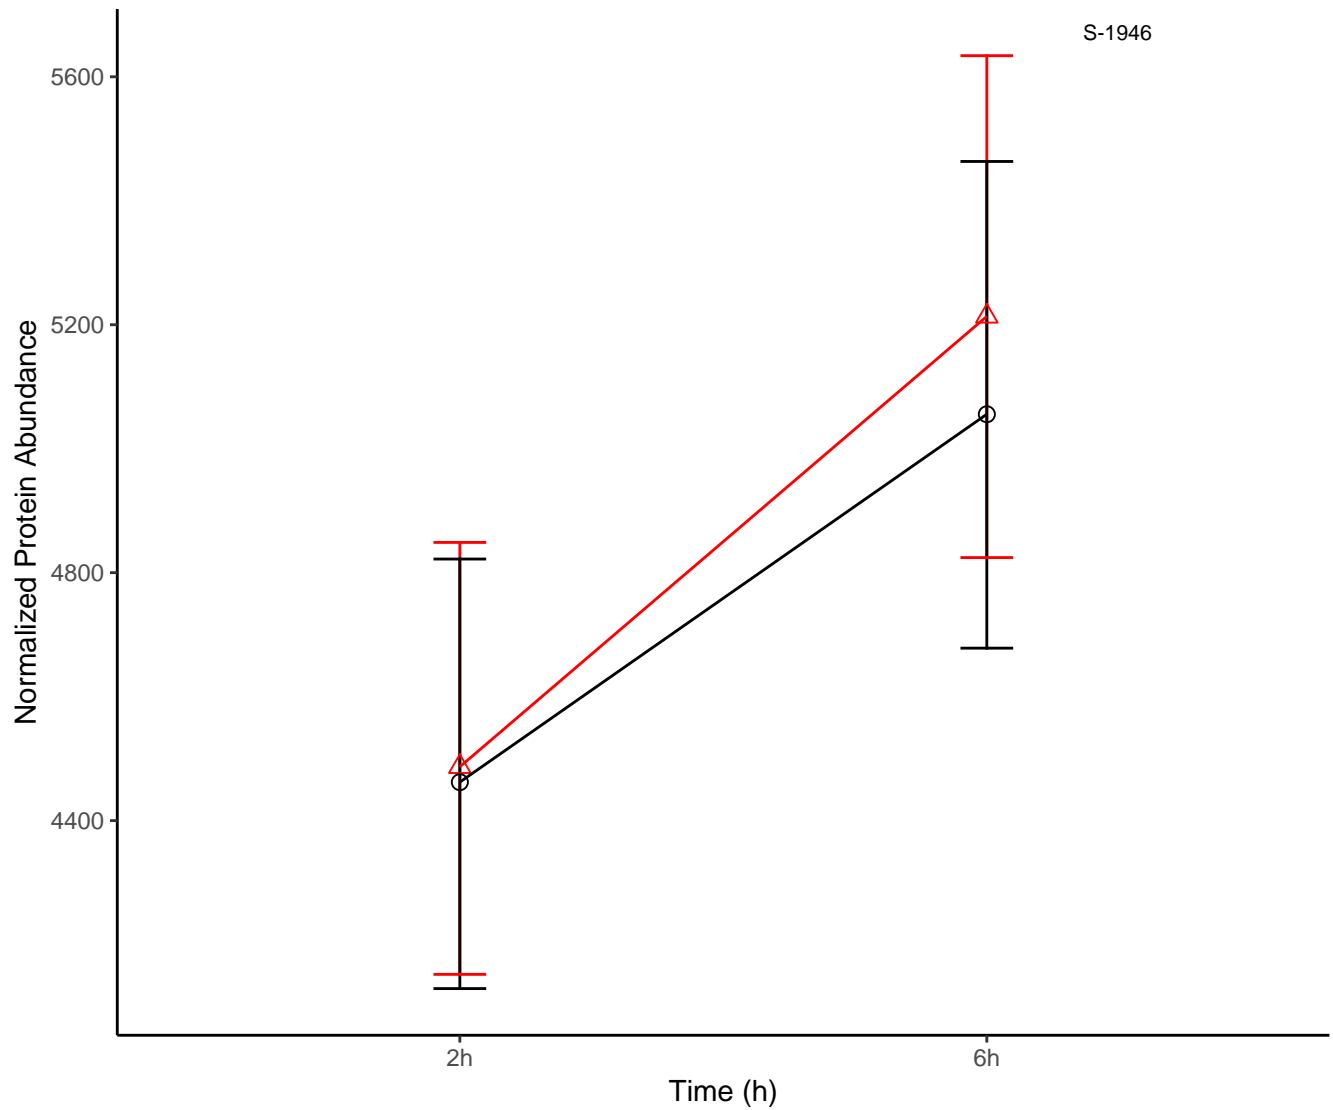

○ TSB-dex

△ TSB

# UP355\_STAAM

S-1947

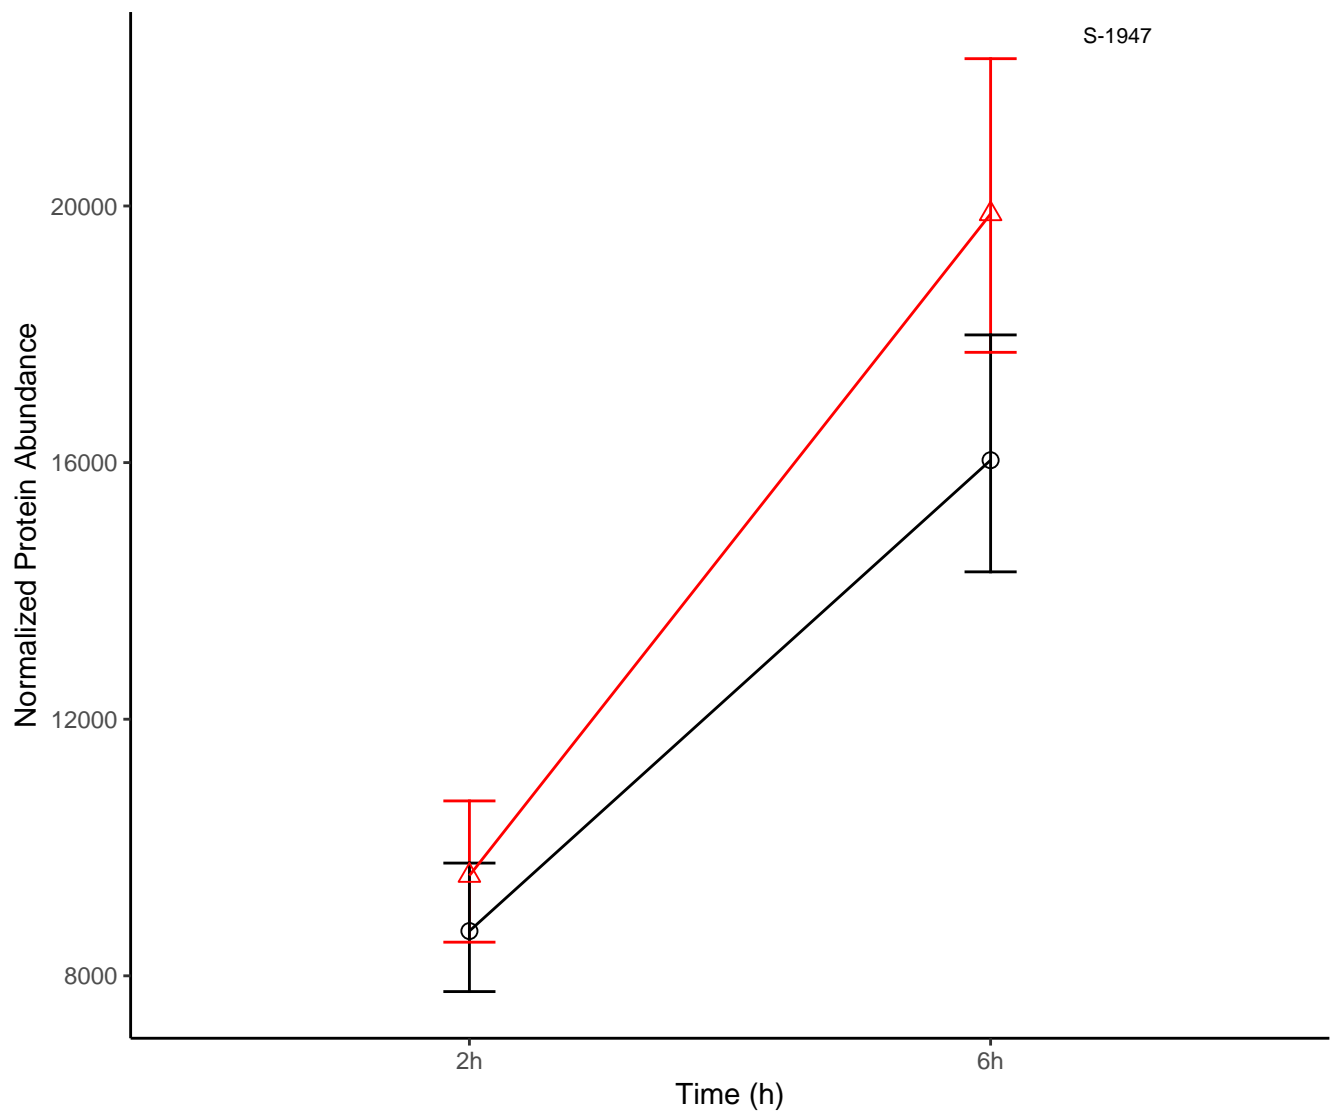

○ TSB-dex

△ TSB

# UPP\_STAAM

S-1948

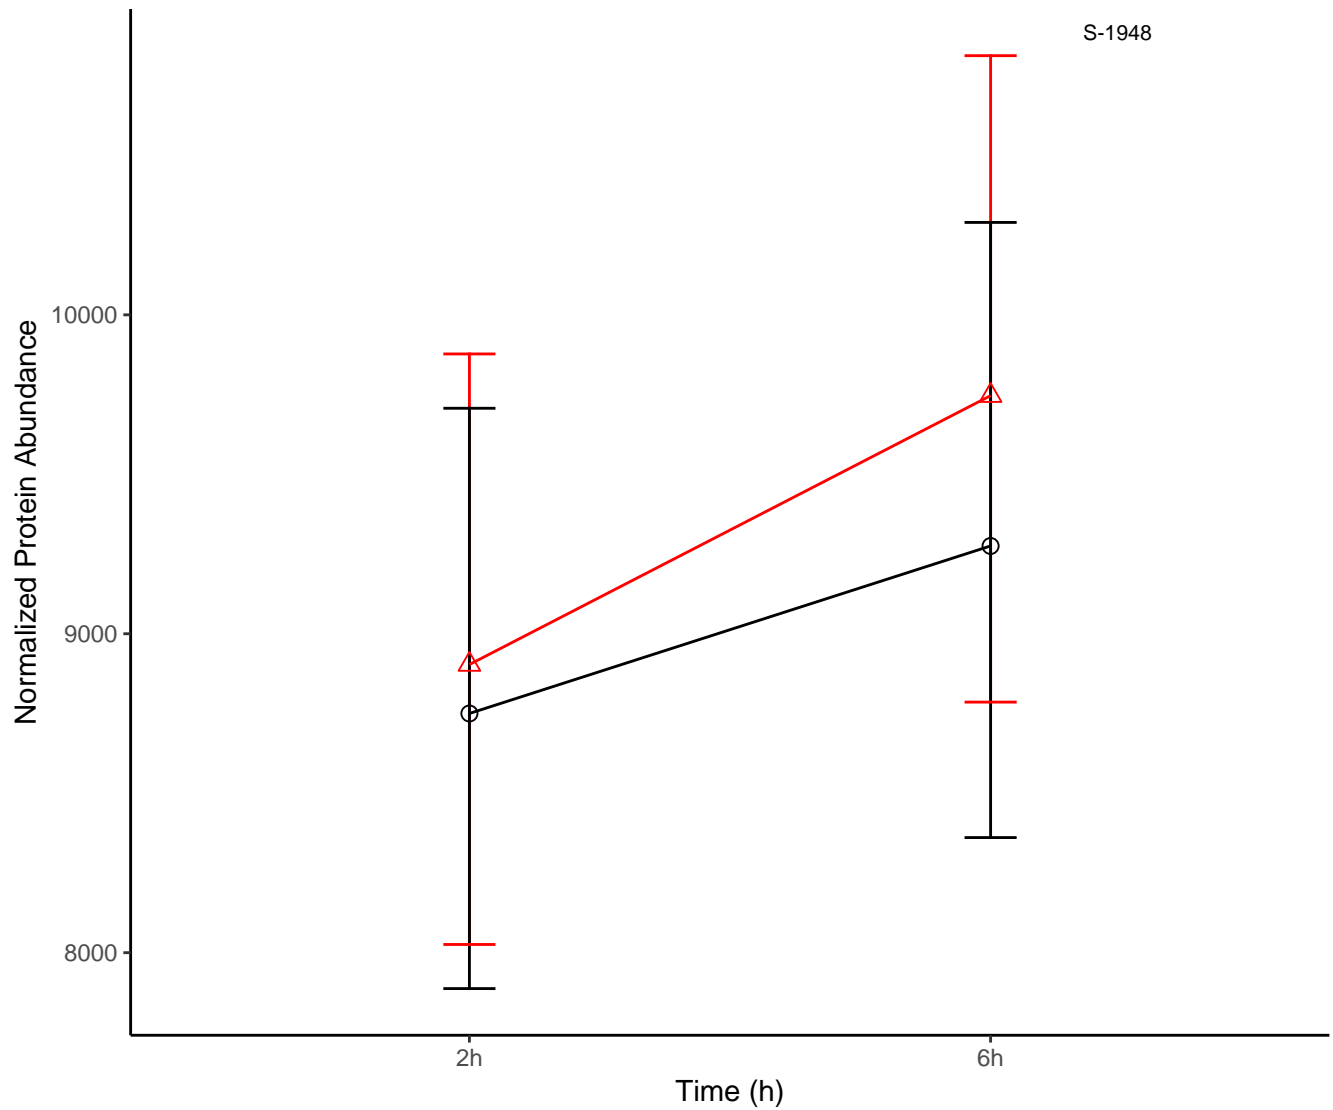

○ TSB-dex

△ TSB

# UREE\_STAAM

S-1949

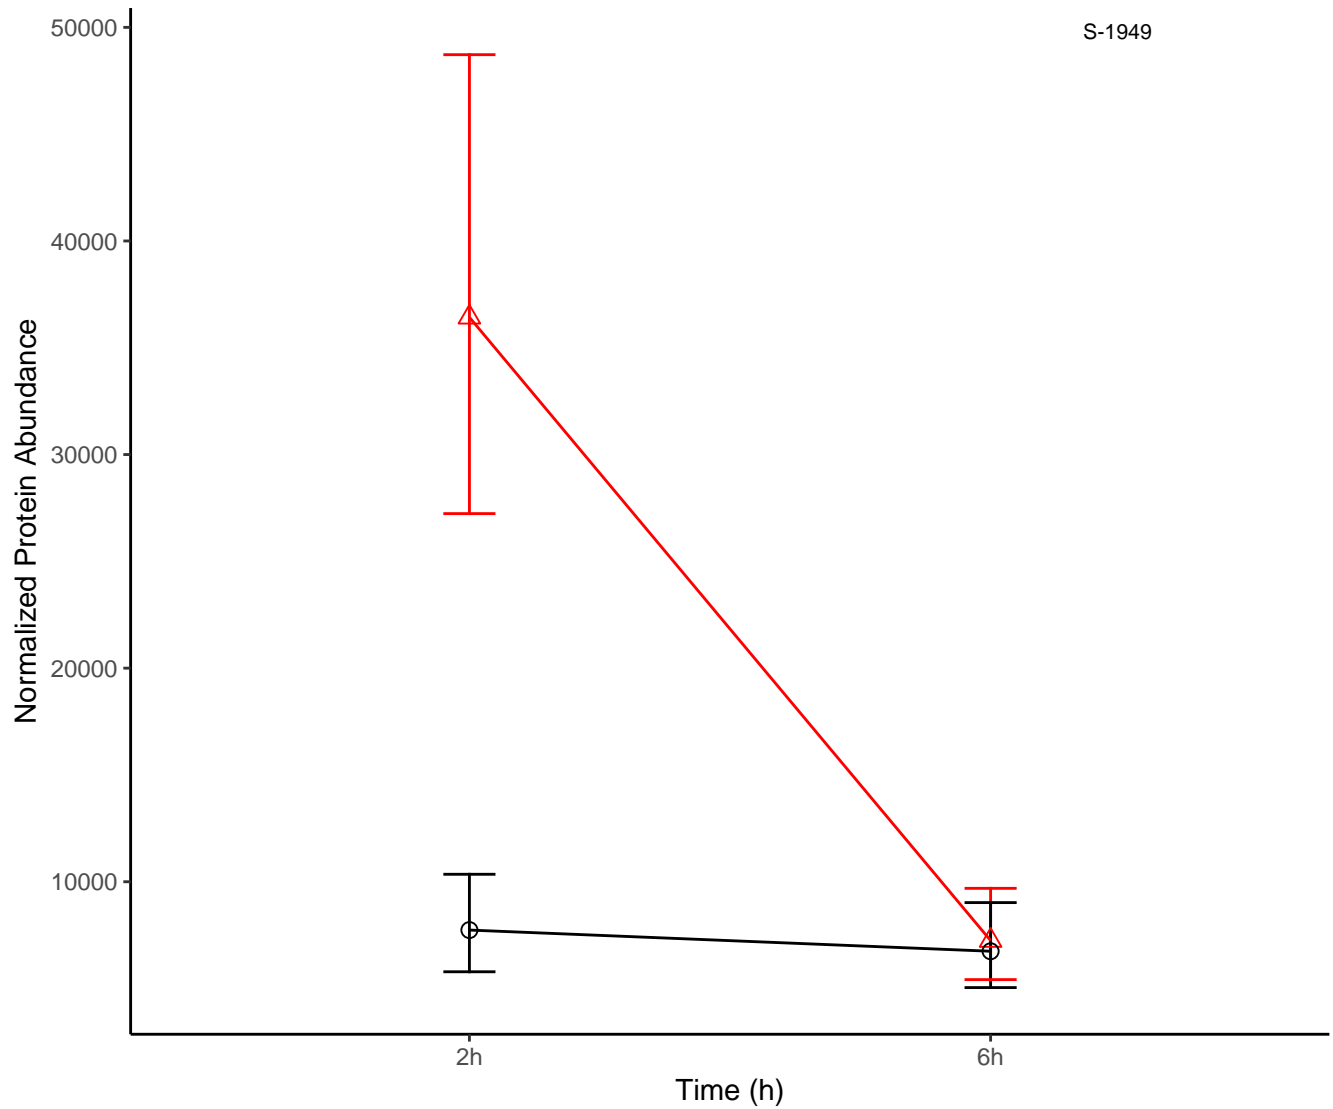

○ TSB-dex

△ TSB

# UREG\_STAAM

S-1950

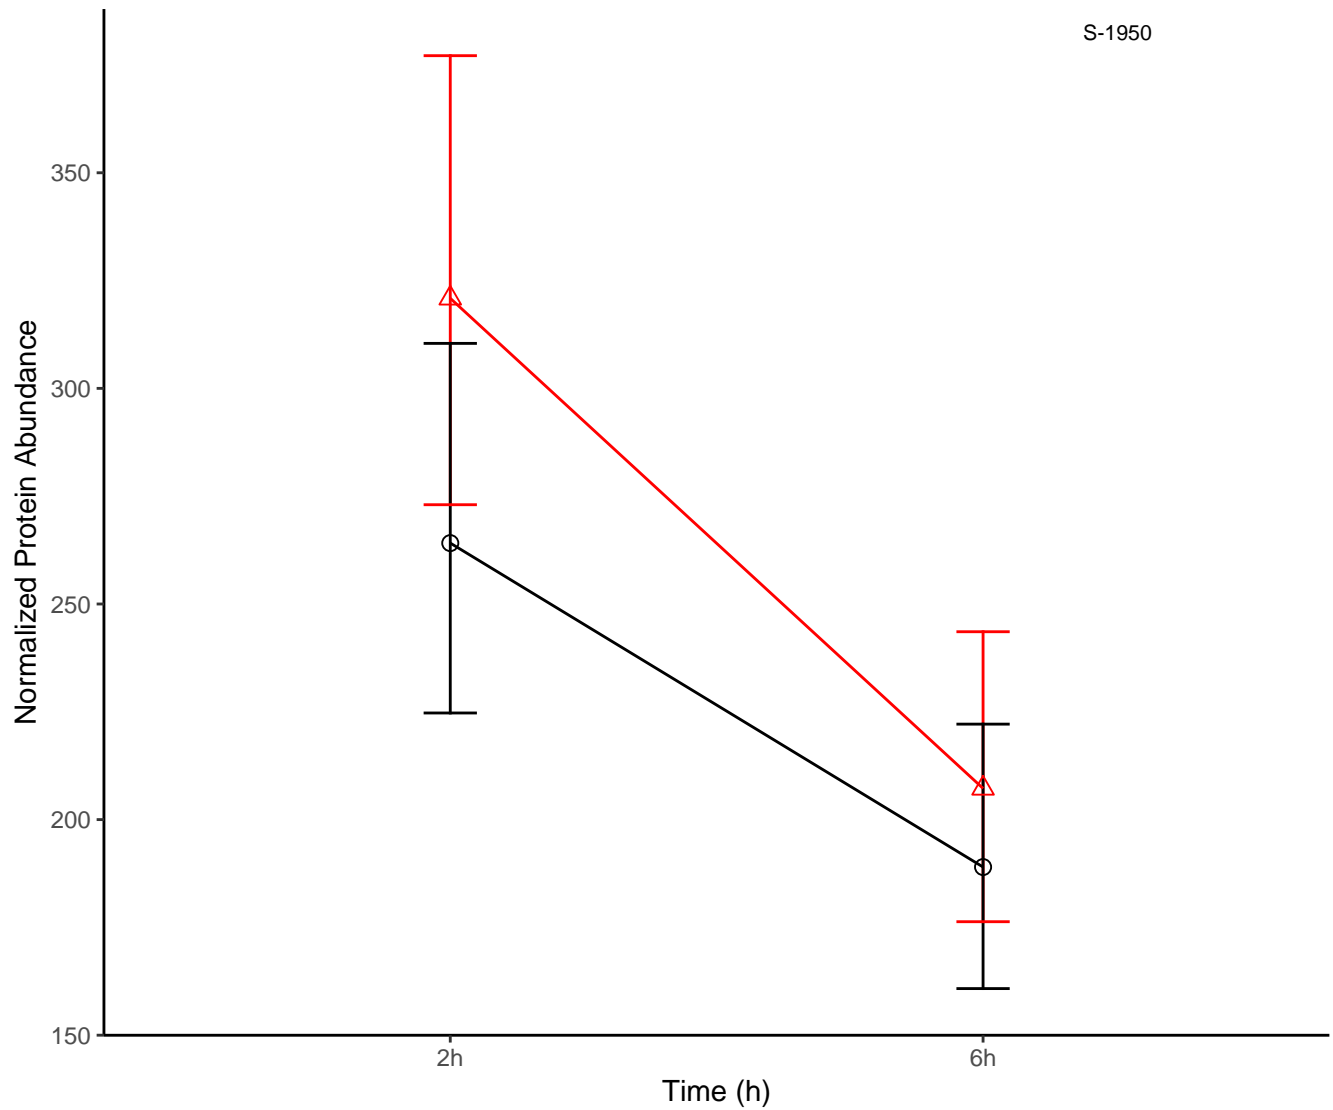

○ TSB-dex

△ TSB

# URK\_STAAM

S-1951

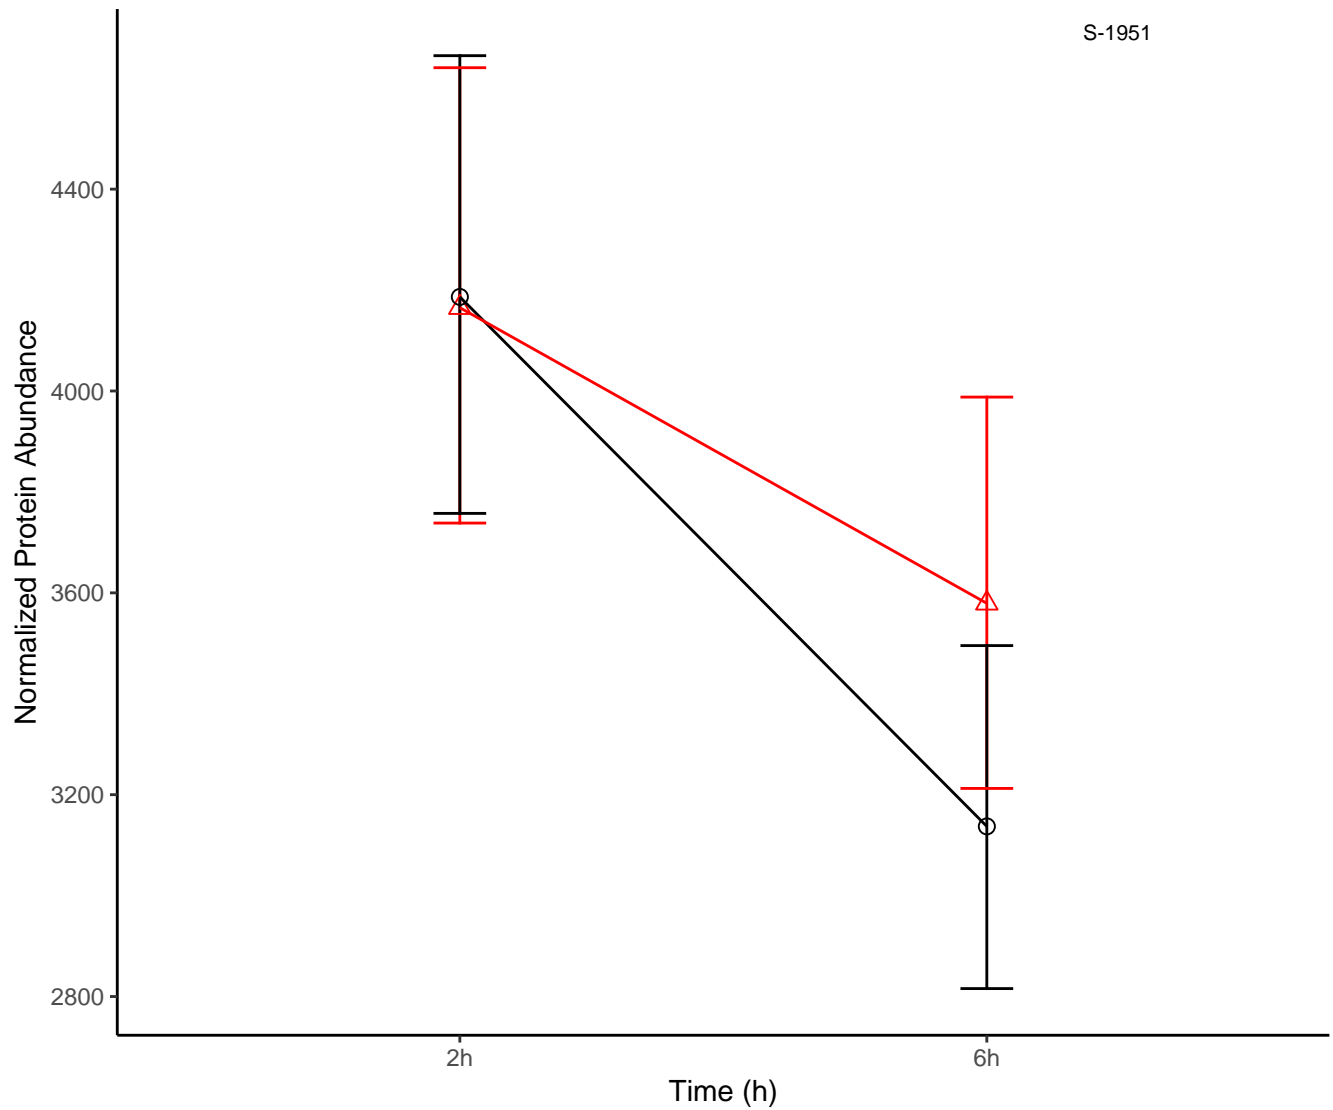

○ TSB-dex

△ TSB

# URTF\_STAAM

S-1952

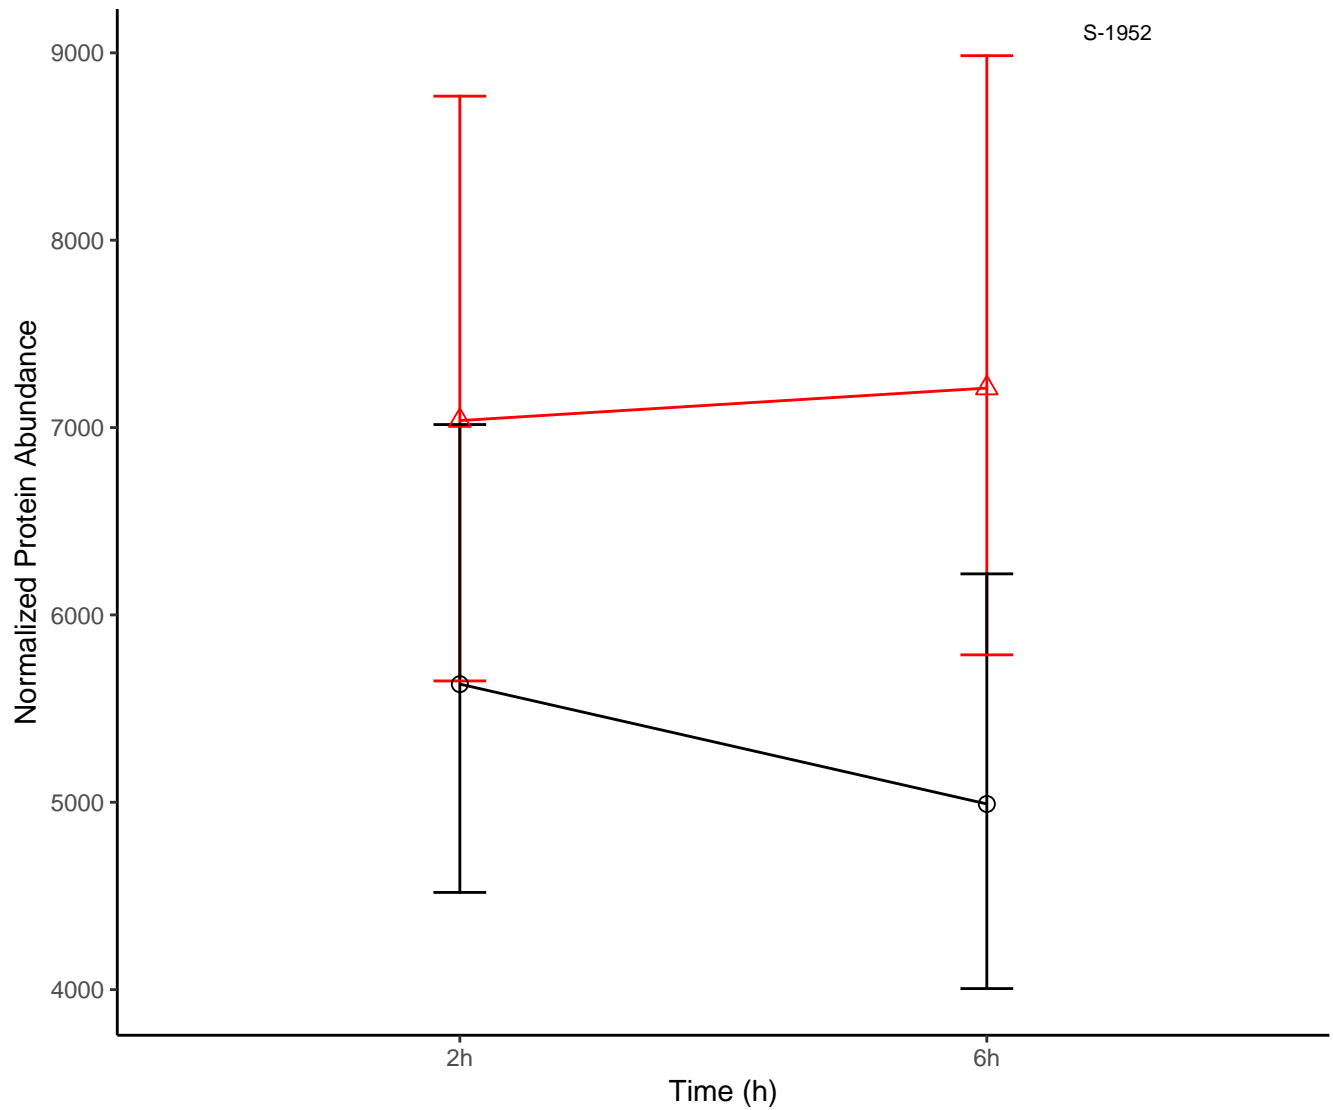

○ TSB-dex

△ TSB



# UVRA\_STAAM

S-1953

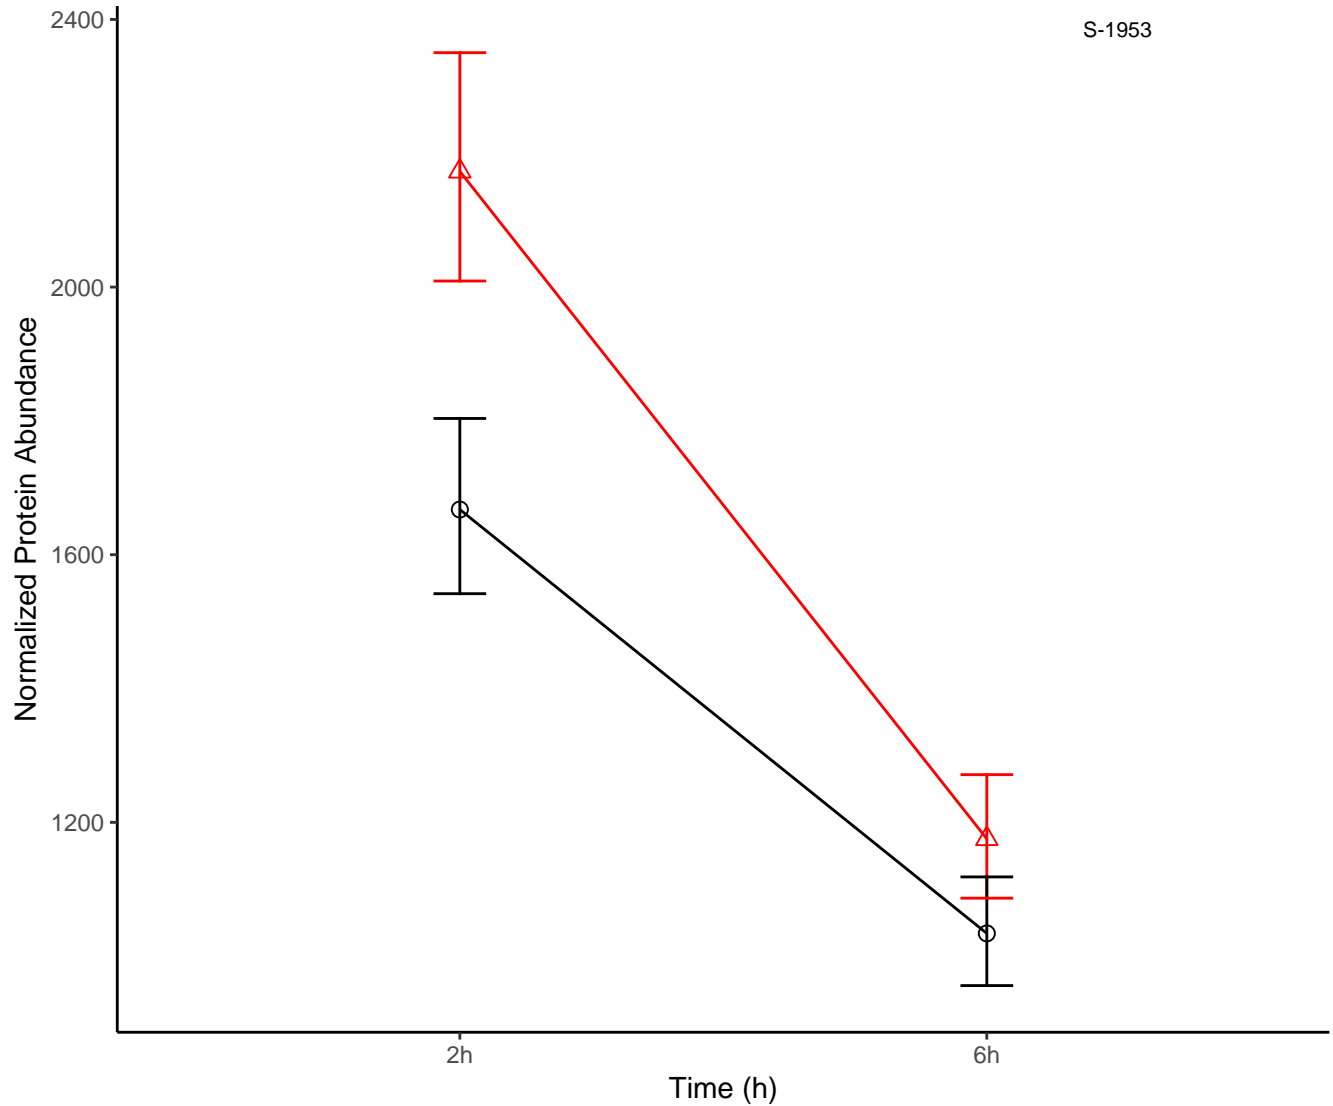

○ TSB-dex

△ TSB

# VRAC\_STAAM

S-1954

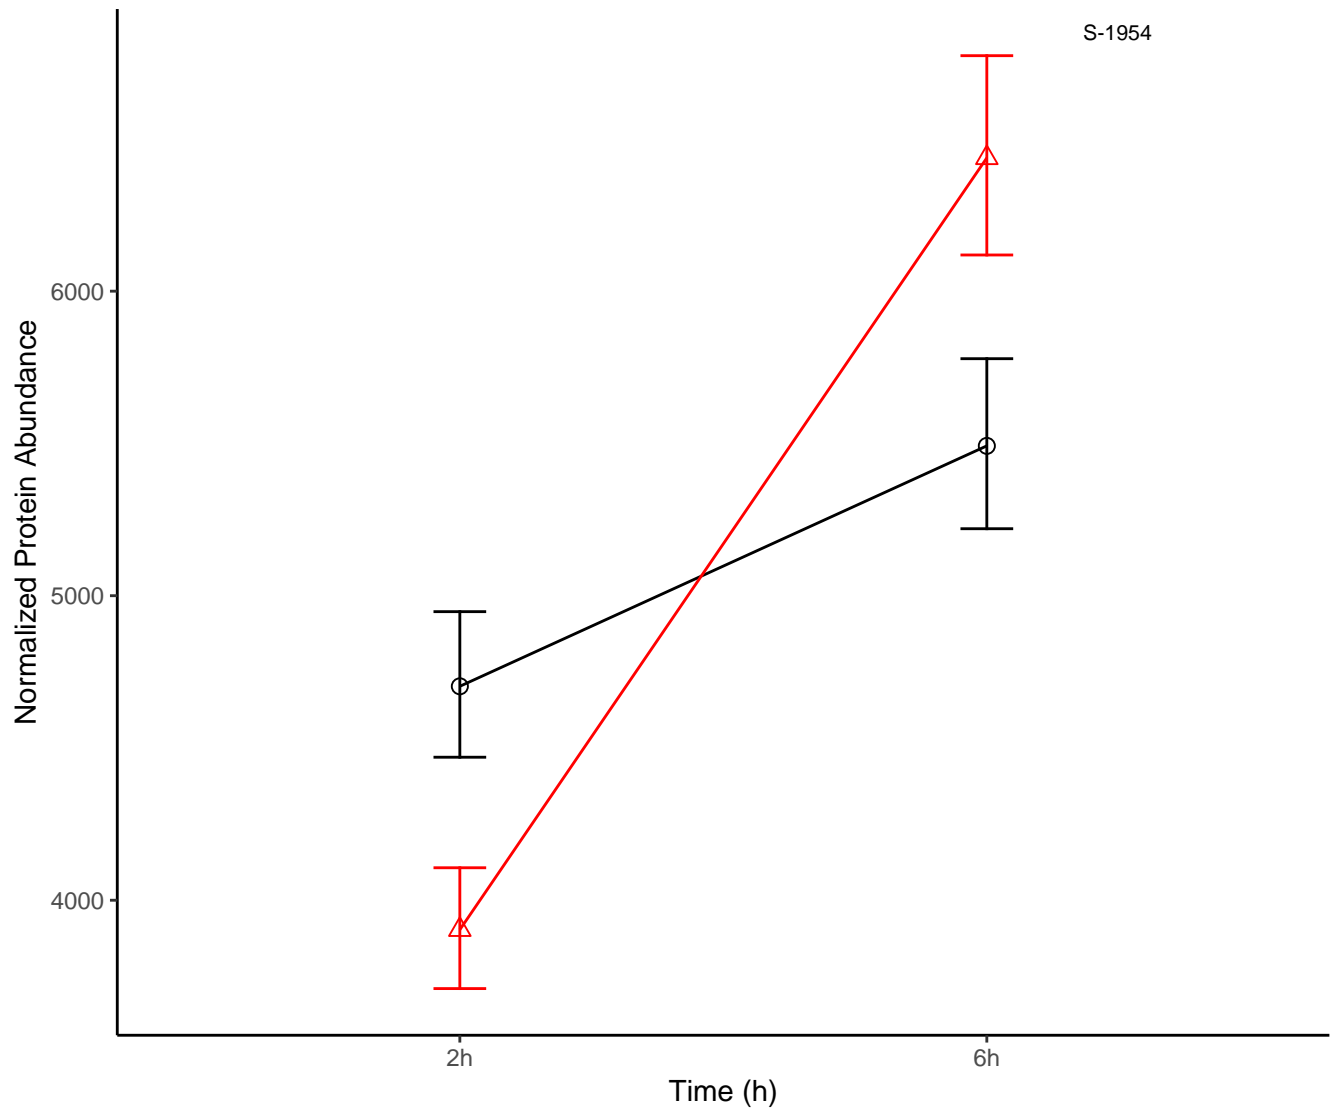

○ TSB-dex

△ TSB

# VRAR\_STAAM

S-1955

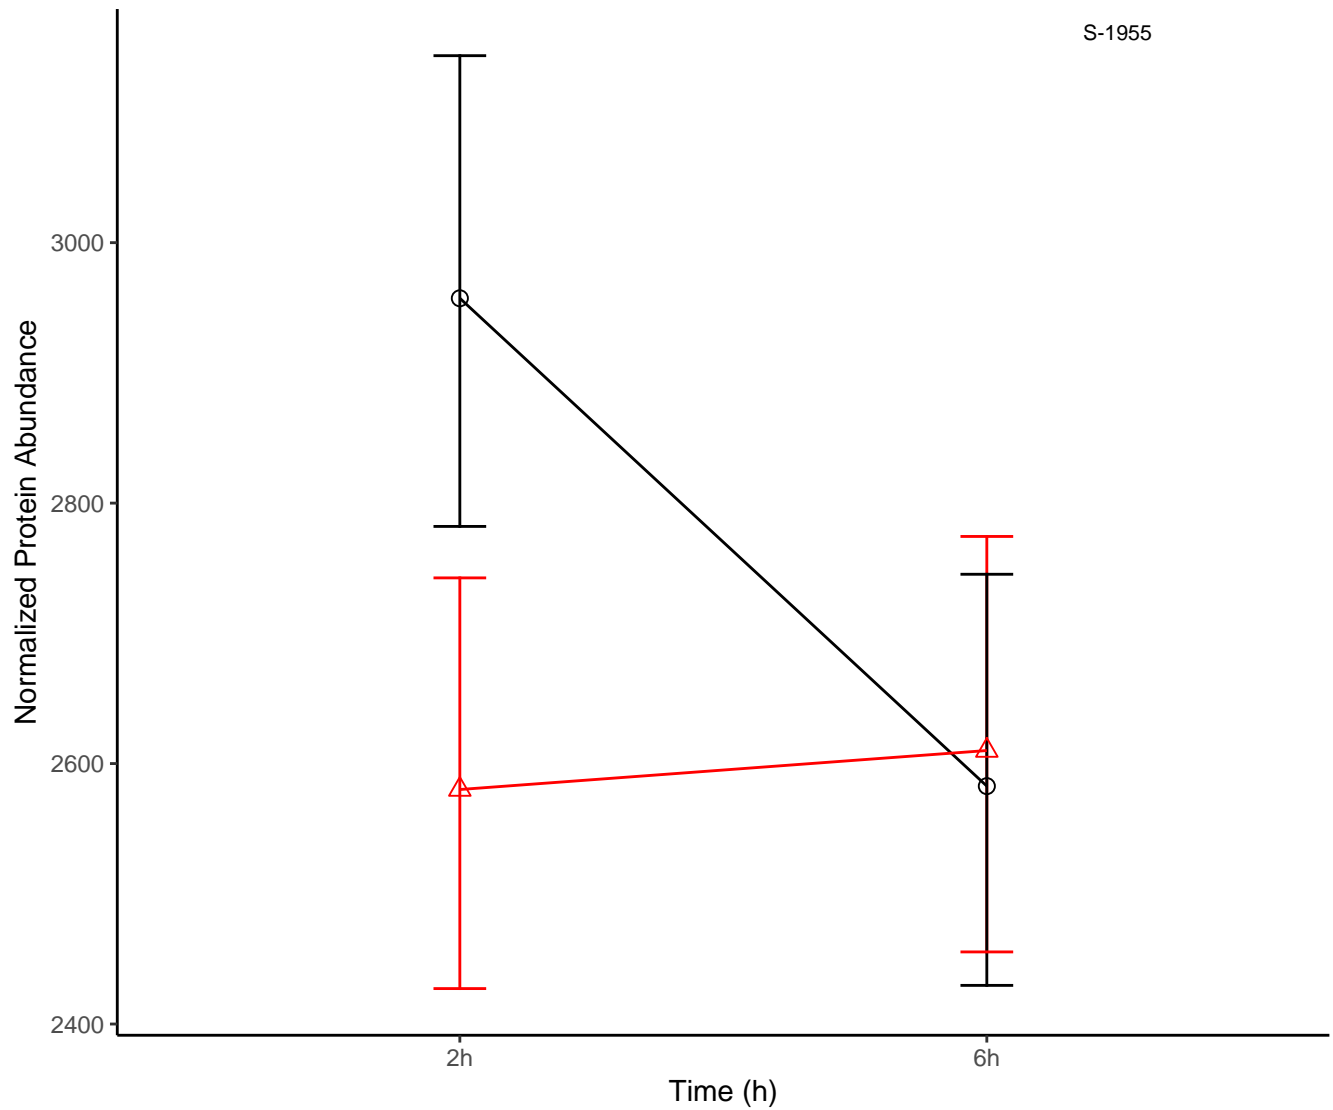

○ TSB-dex

△ TSB

# WALK\_STAAM

S-1956

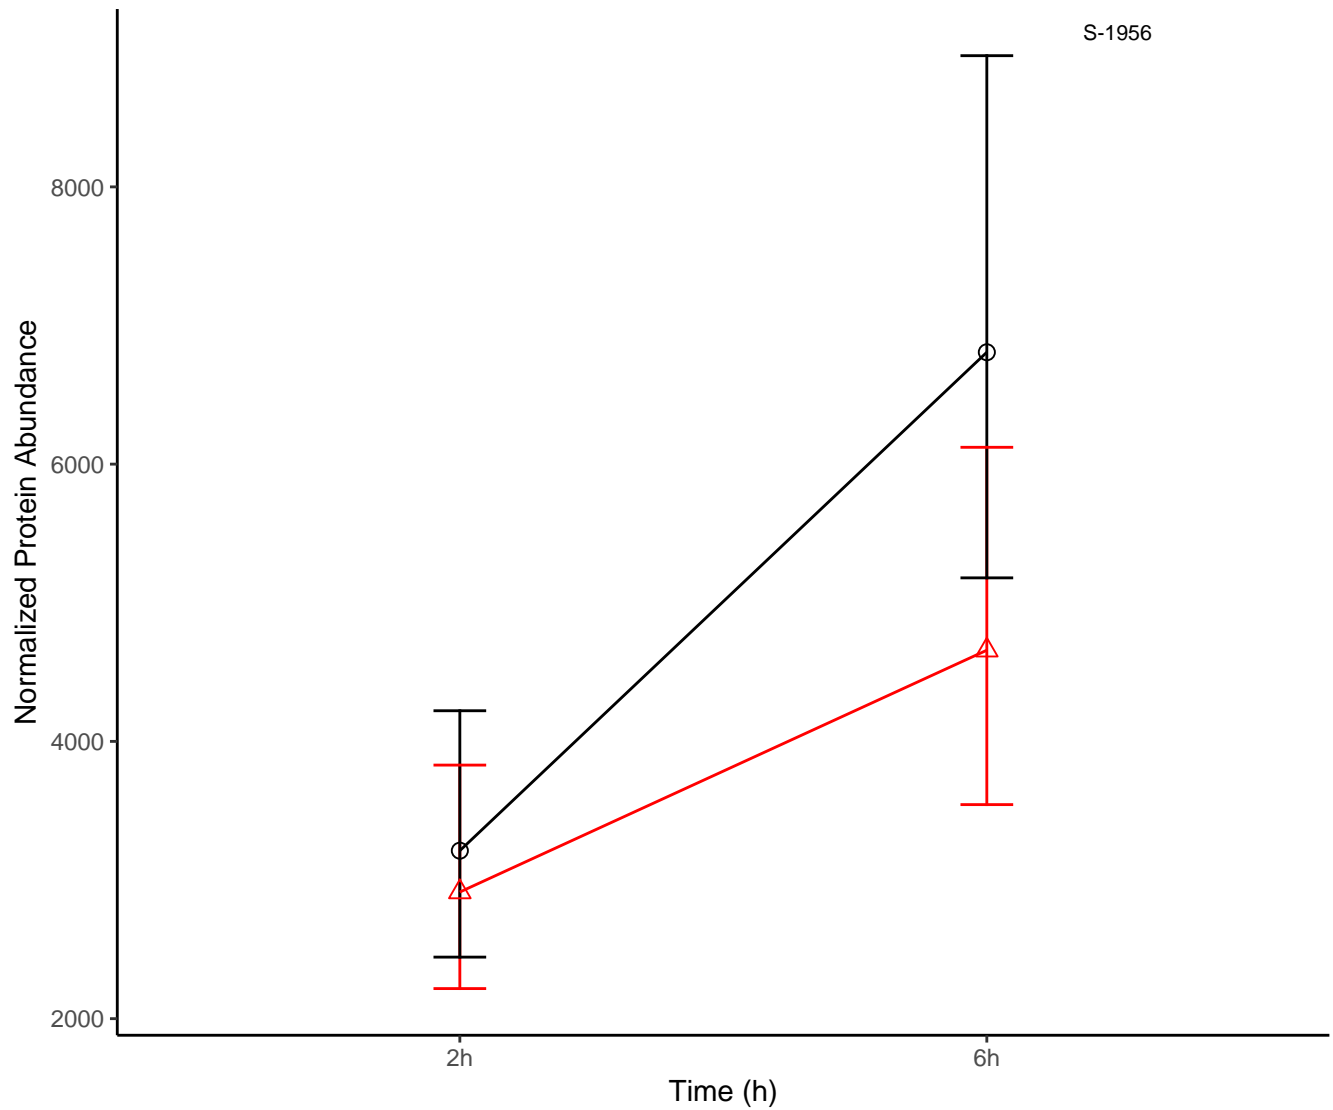

○ TSB-dex

△ TSB

# WALR\_STAAM

S-1957

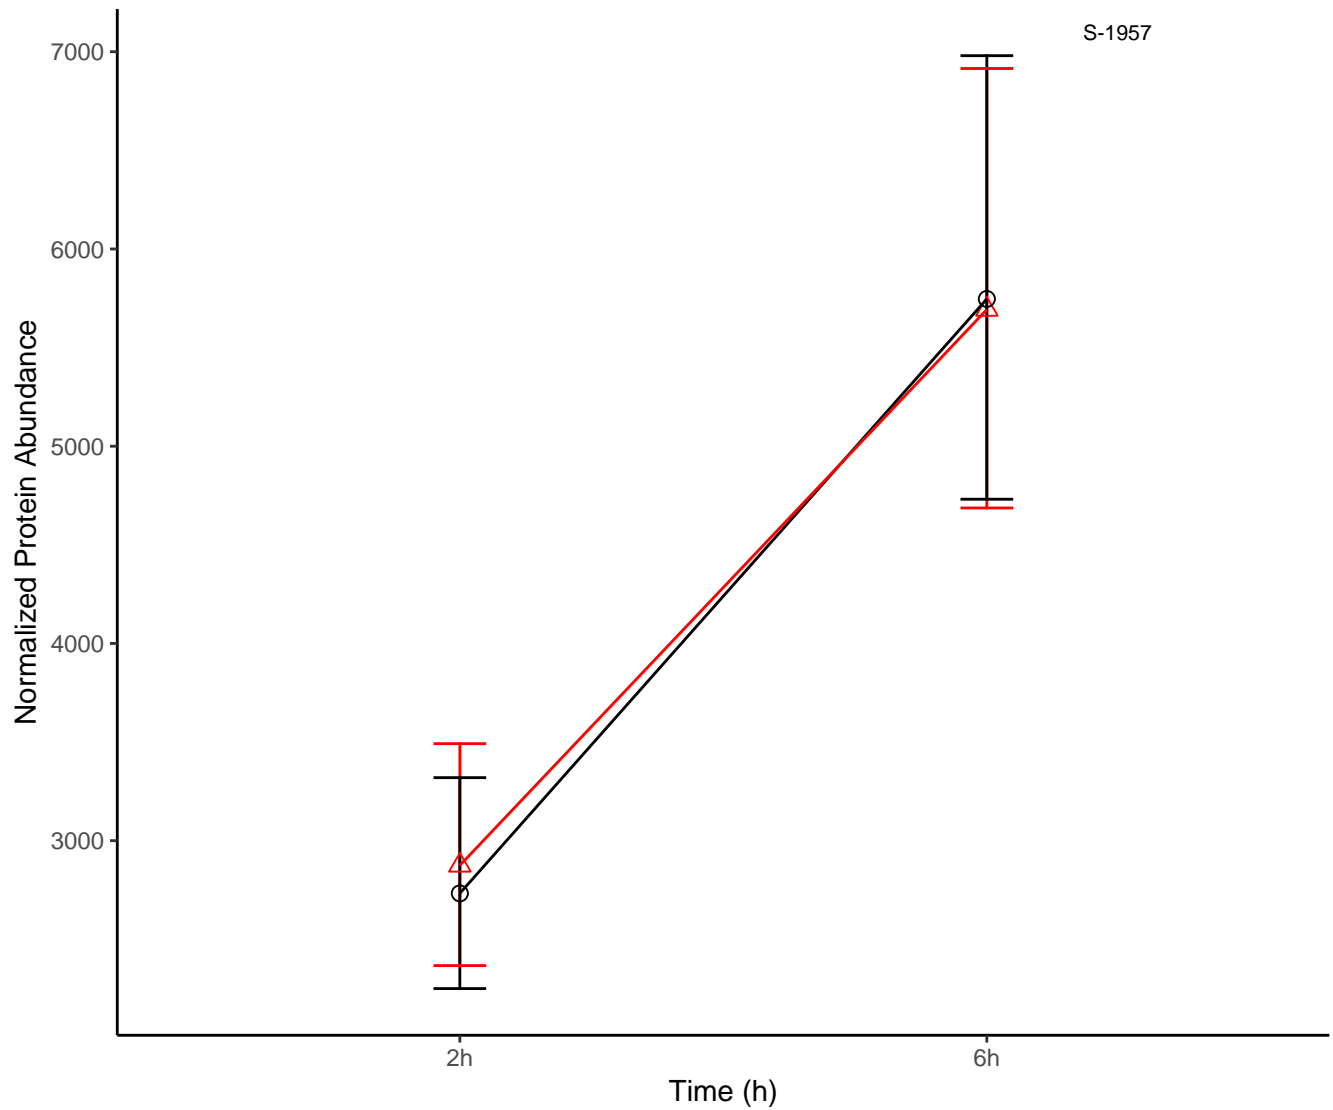

○ TSB-dex

△ TSB

# XERD\_STAAM

S-1958

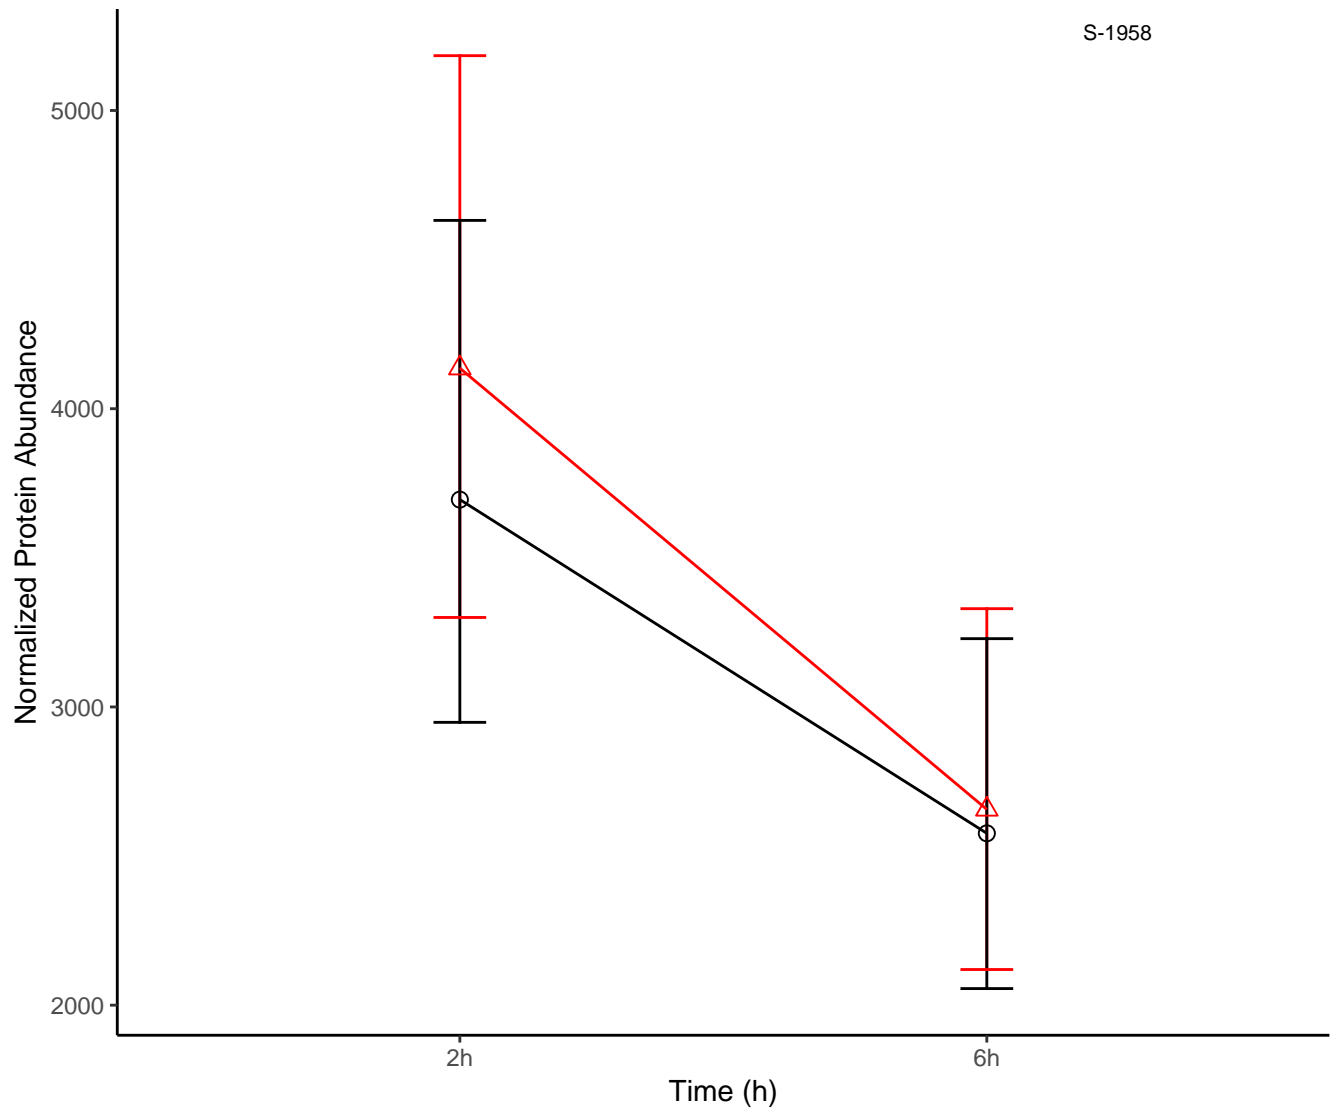

○ TSB-dex

△ TSB

# XPT\_STAAM

S-1959

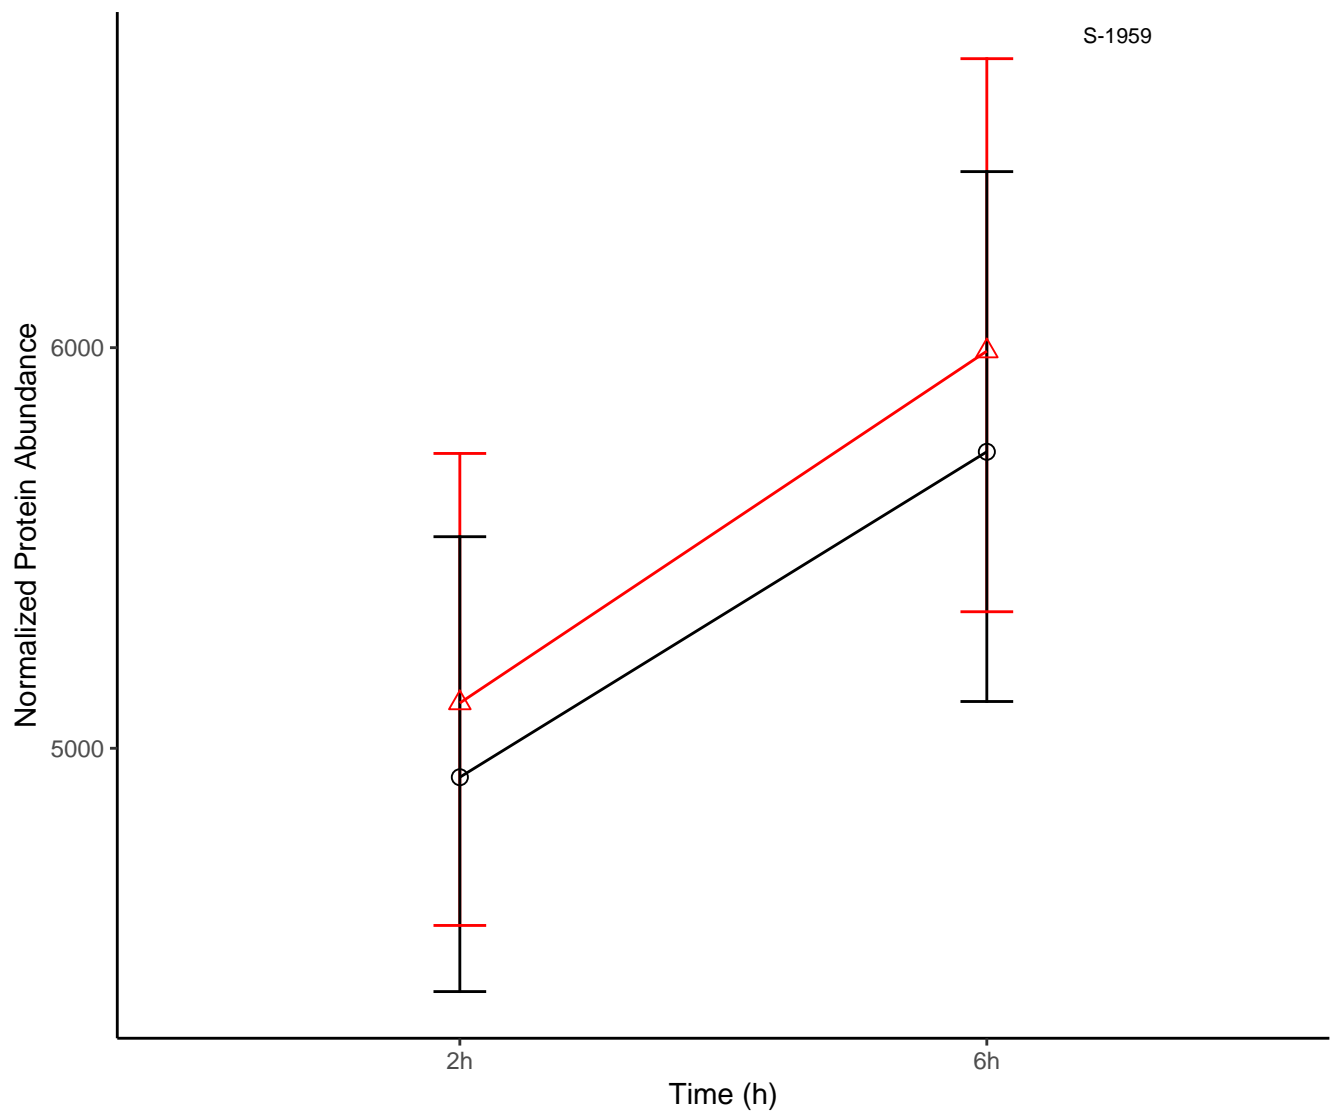

○ TSB-dex

△ TSB

# Y098\_STAAM

S-1960

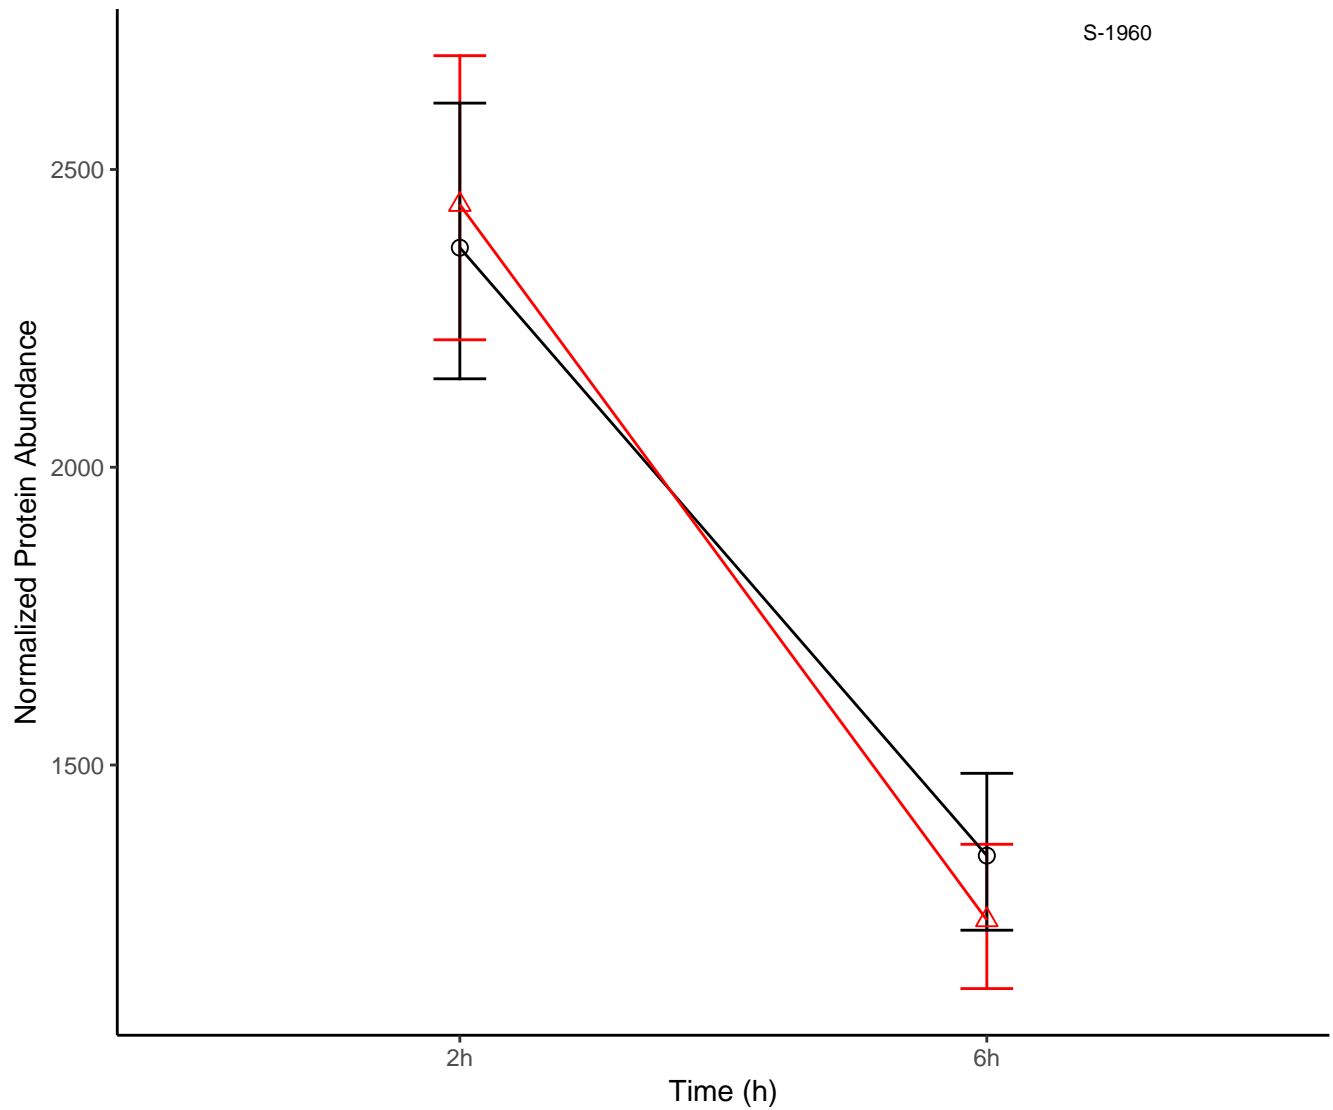

○ TSB-dex

△ TSB



# Y099\_STAAM

S-1961

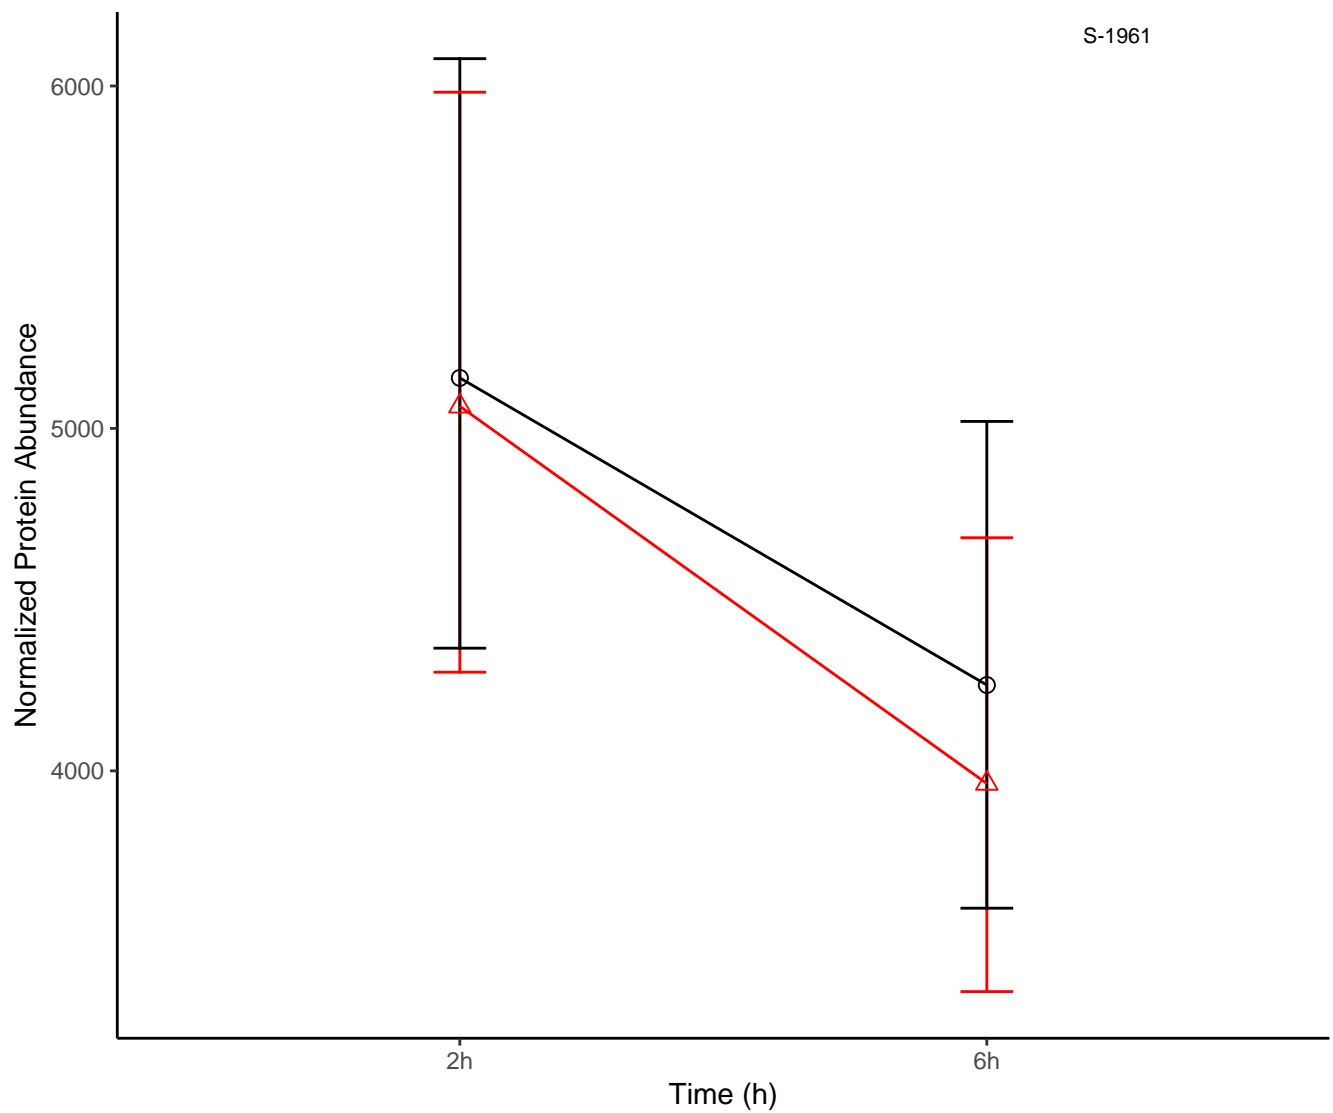

○ TSB-dex

△ TSB

# Y1015\_STAAM

S-1962

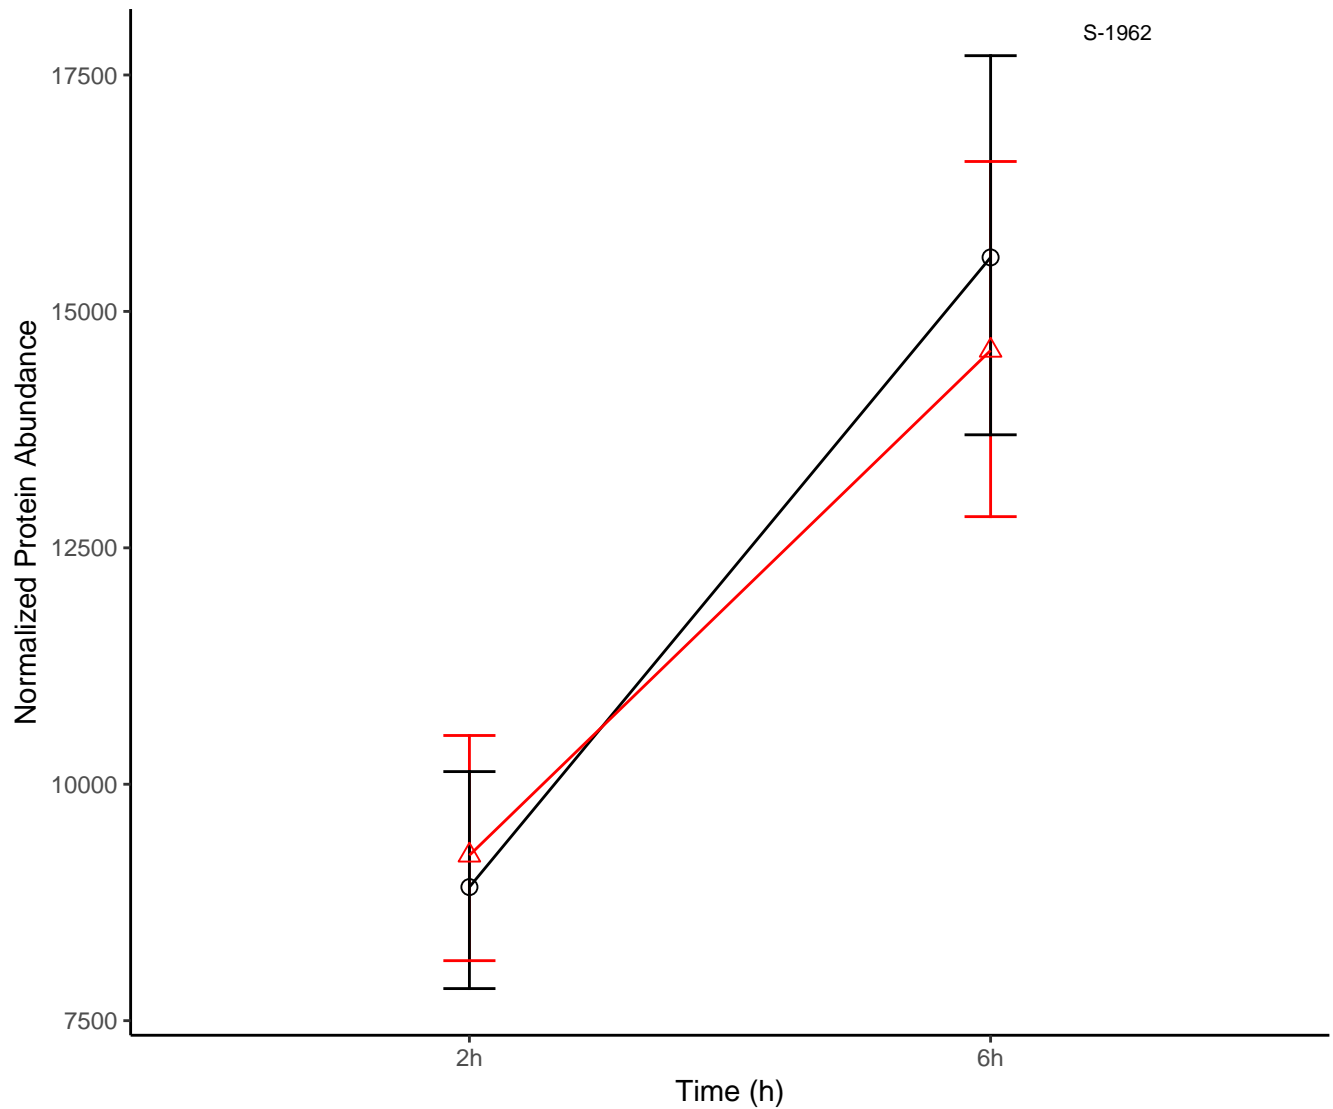

○ TSB-dex

△ TSB

# Y1090\_STAAM

S-1963

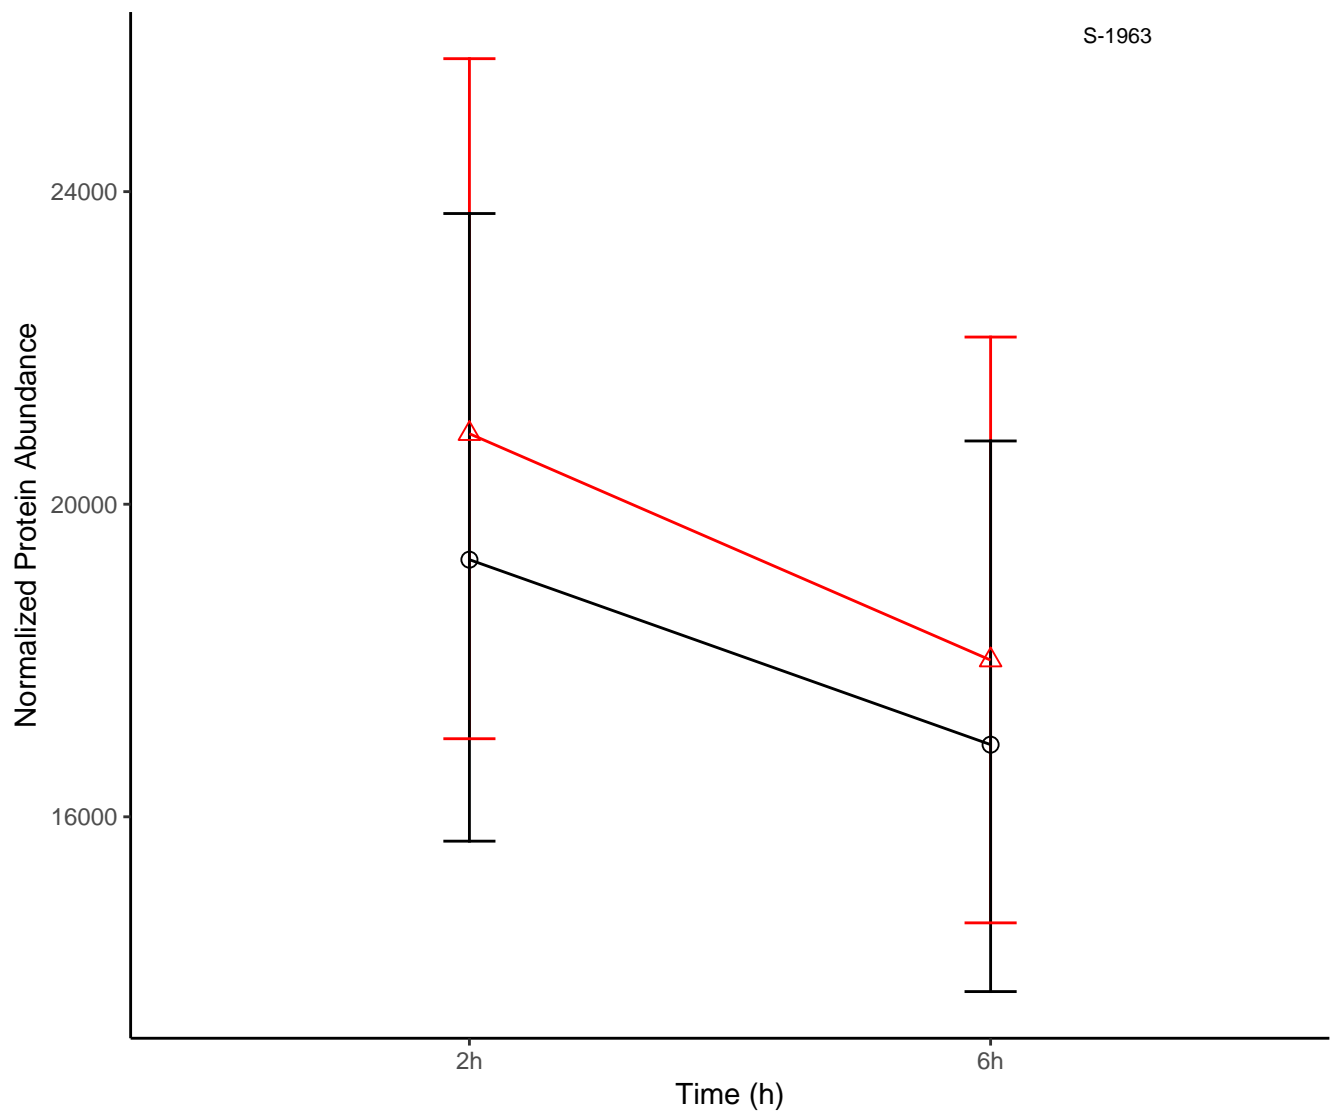

○ TSB-dex

△ TSB

# Y1176\_STAAM

S-1964

Normalized Protein Abundance

20000

15000

10000

2h

6h

Time (h)

○ TSB-dex

△ TSB

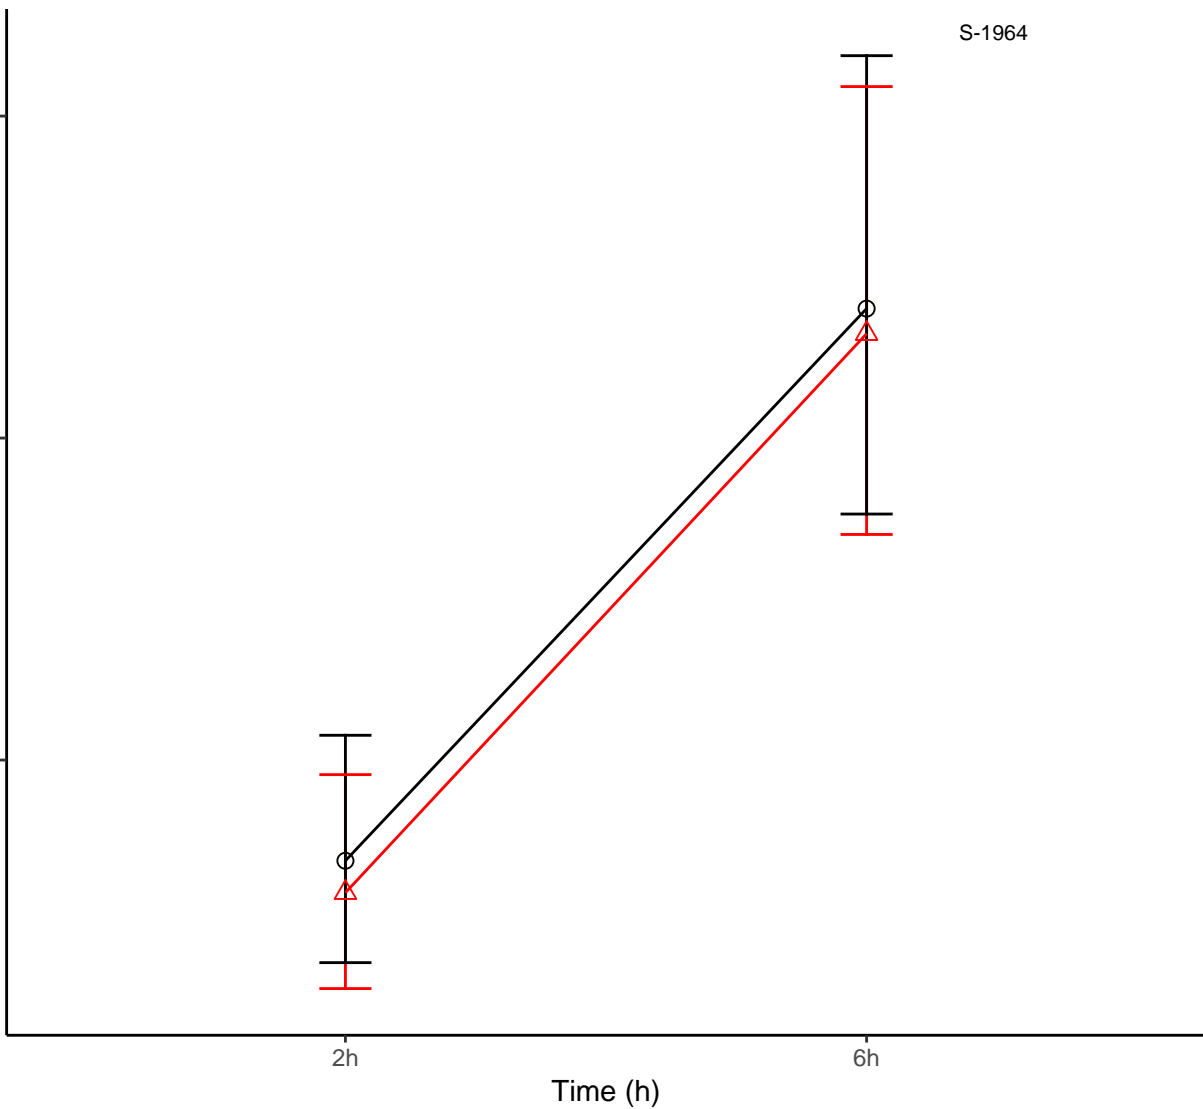

# Y1177\_STAAM

S-1965

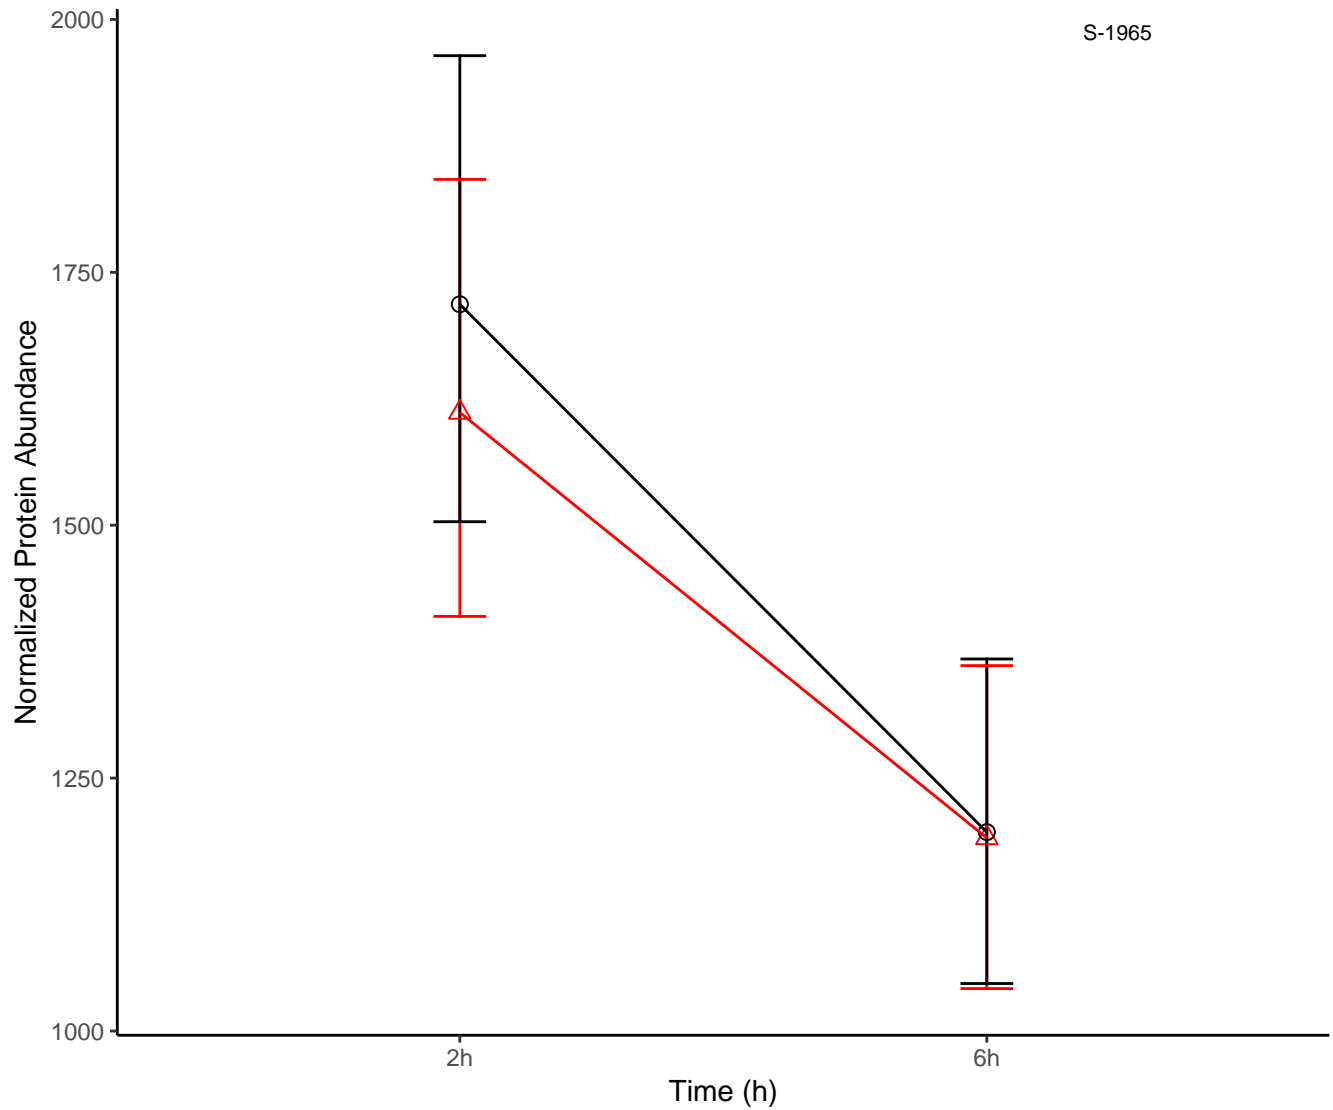

○ TSB-dex

△ TSB

# Y1187\_STAAM

S-1966

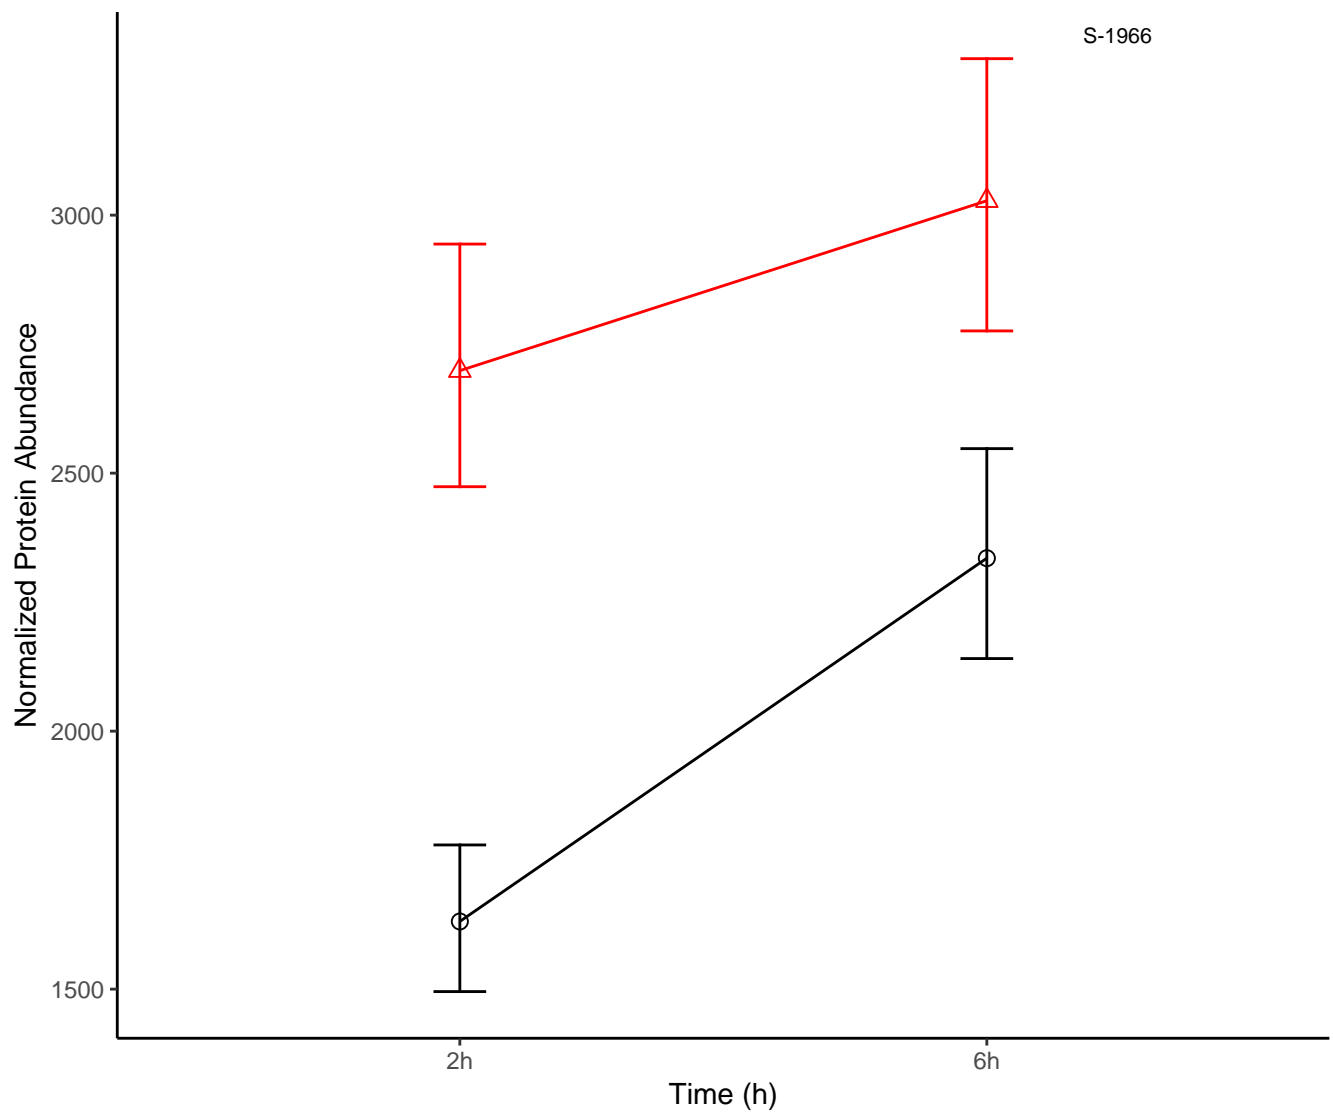

○ TSB-dex

△ TSB

# Y1226\_STAAM

S-1967

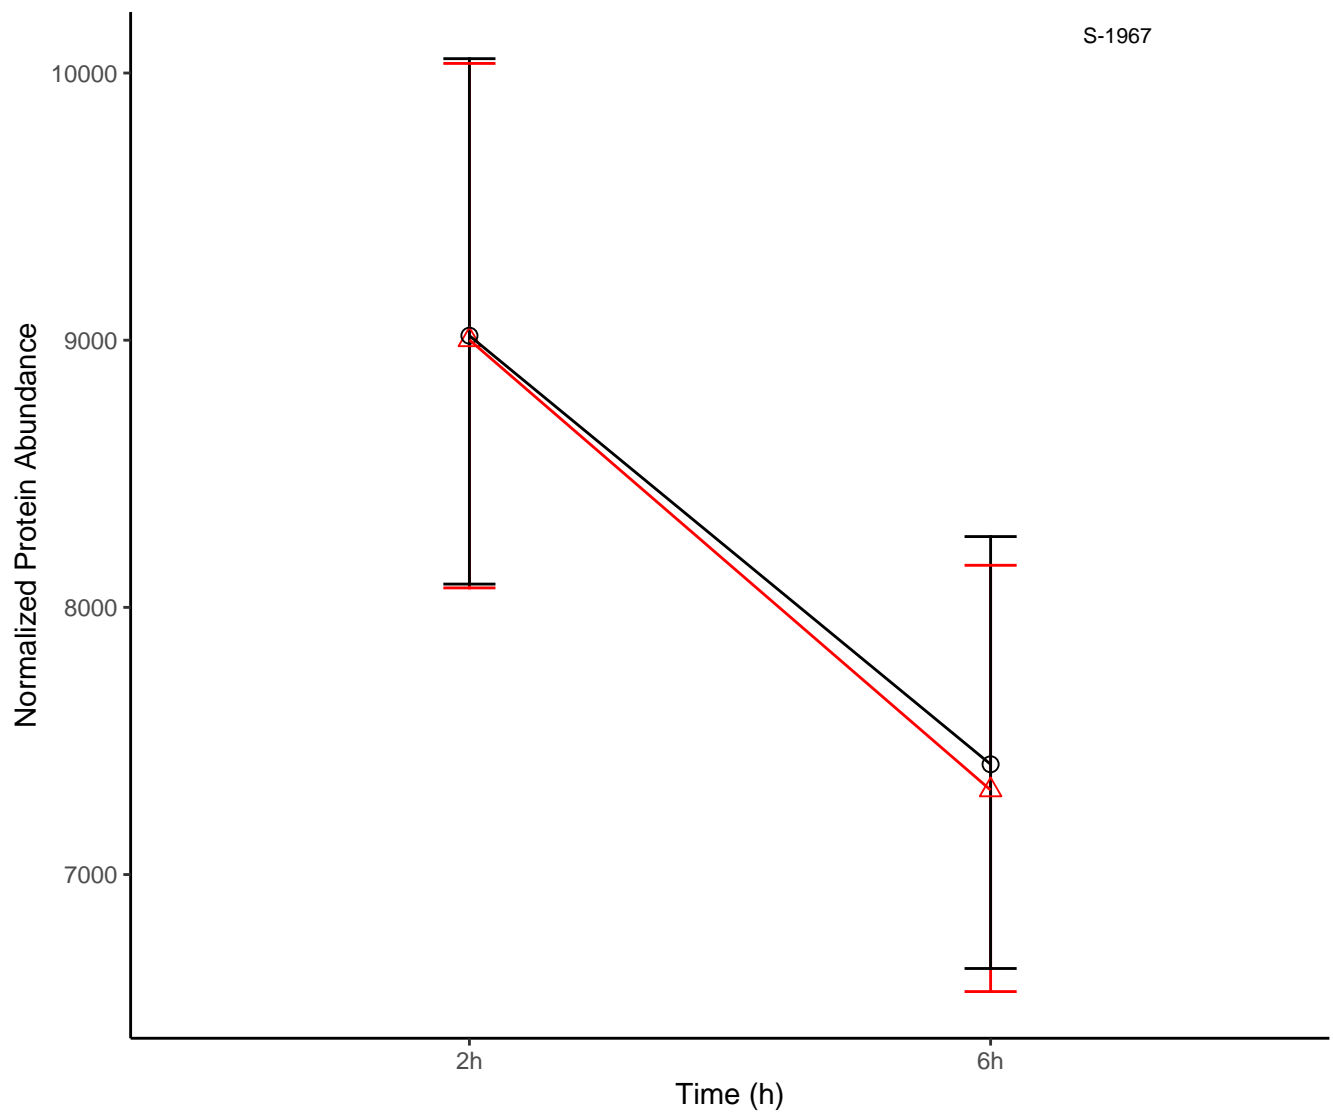

○ TSB-dex

△ TSB

# Y1341\_STAAM

S-1968

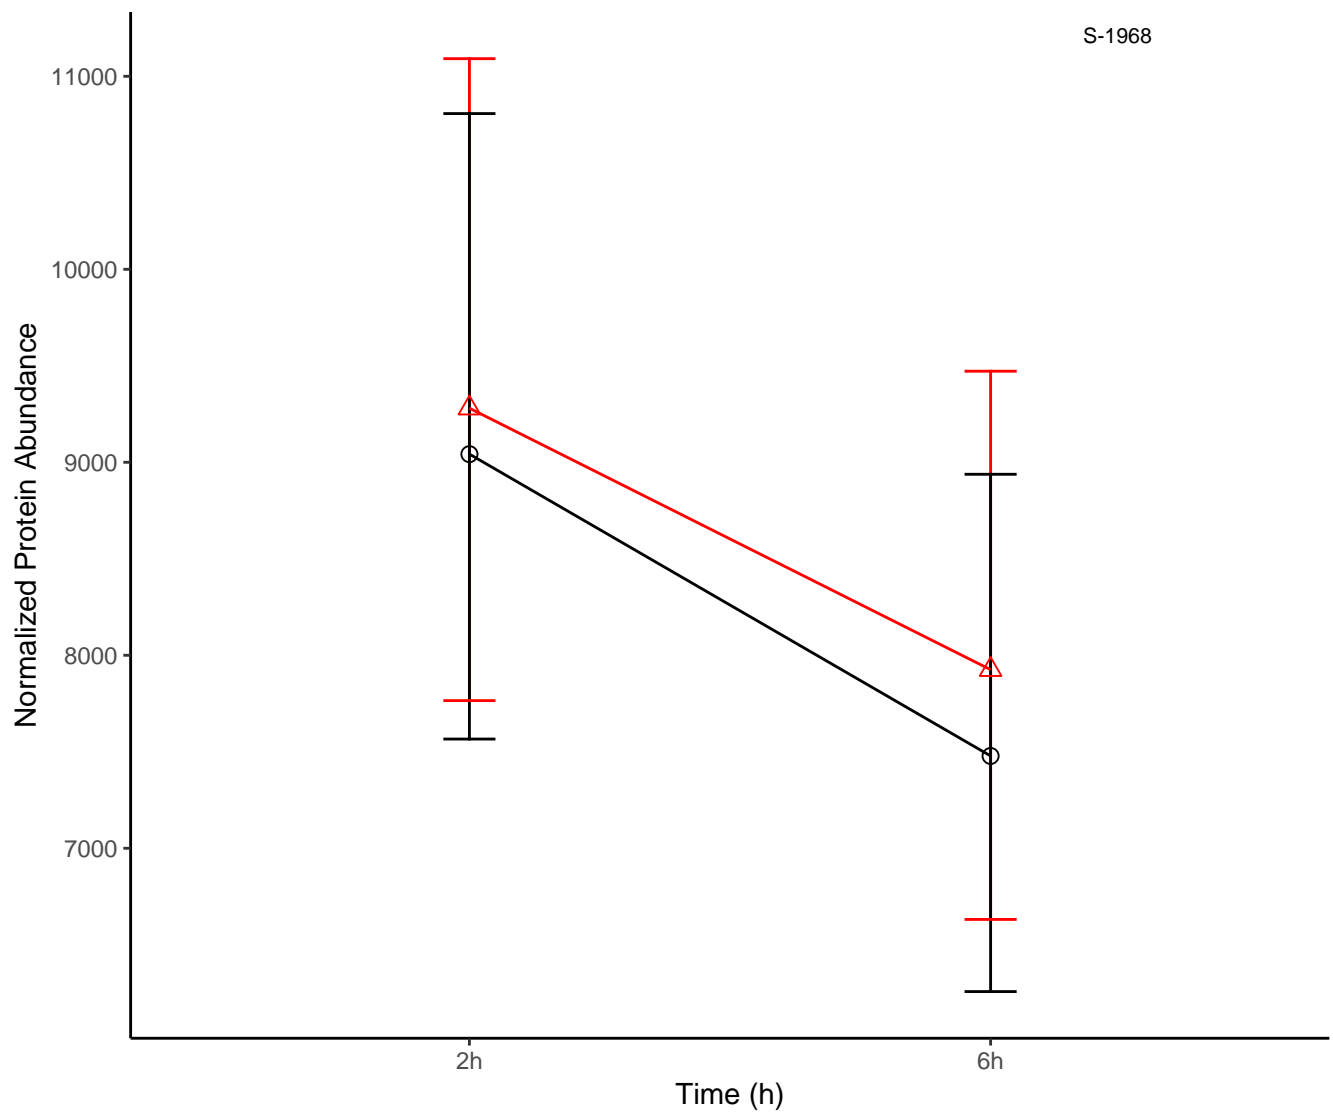

○ TSB-dex

△ TSB



# Y1343\_STAAM

S-1969

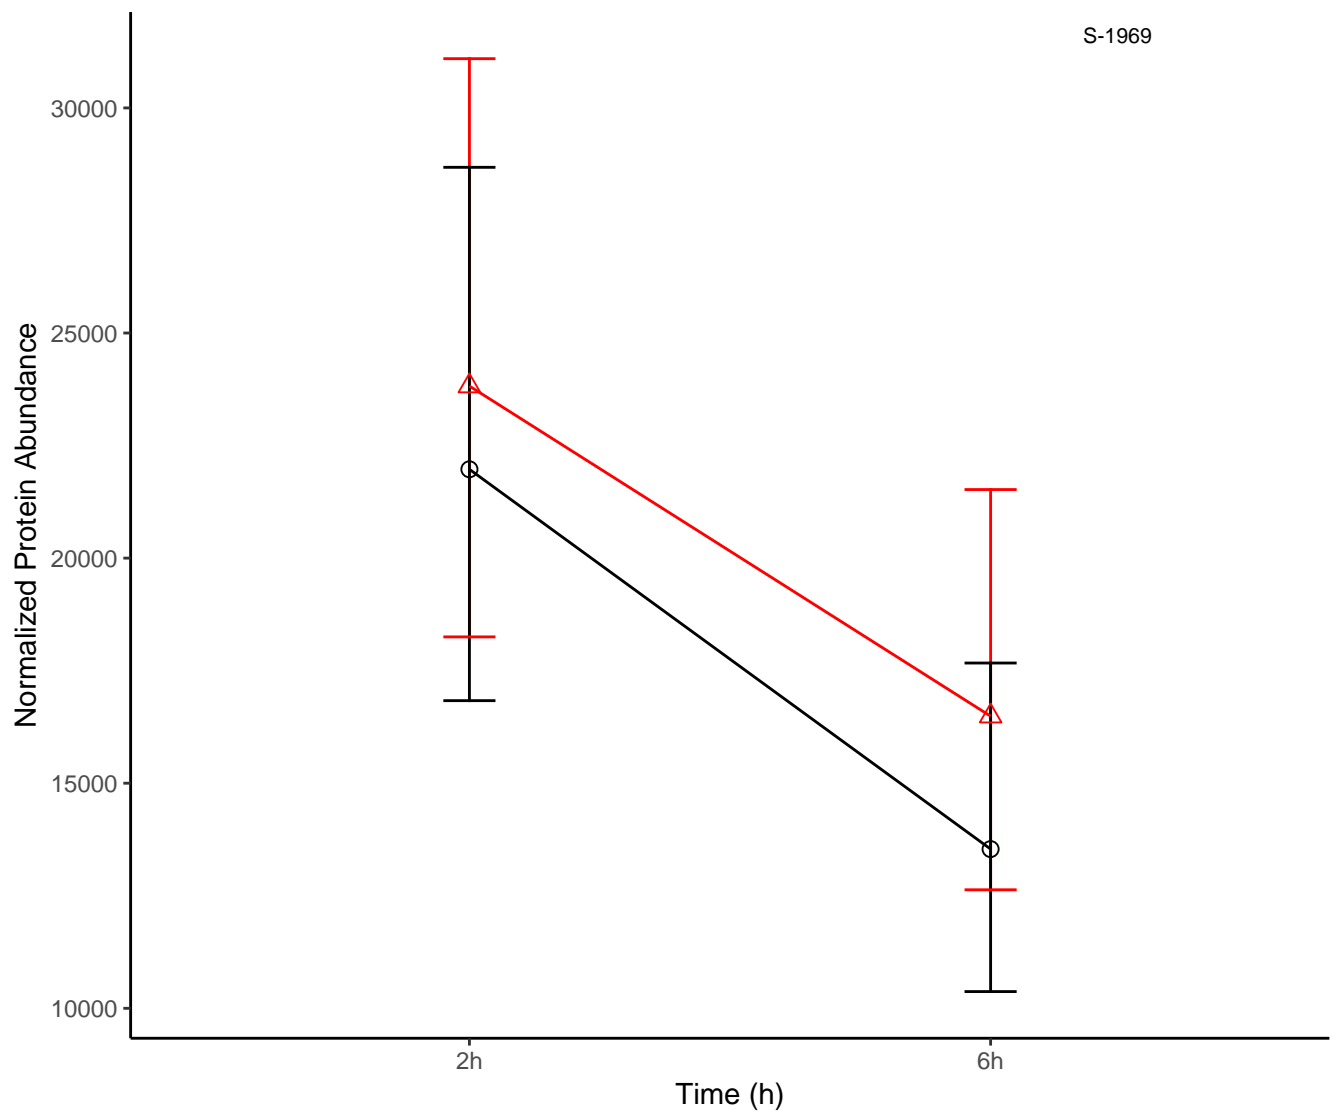

○ TSB-dex

△ TSB

# Y1352\_STAAM

S-1970

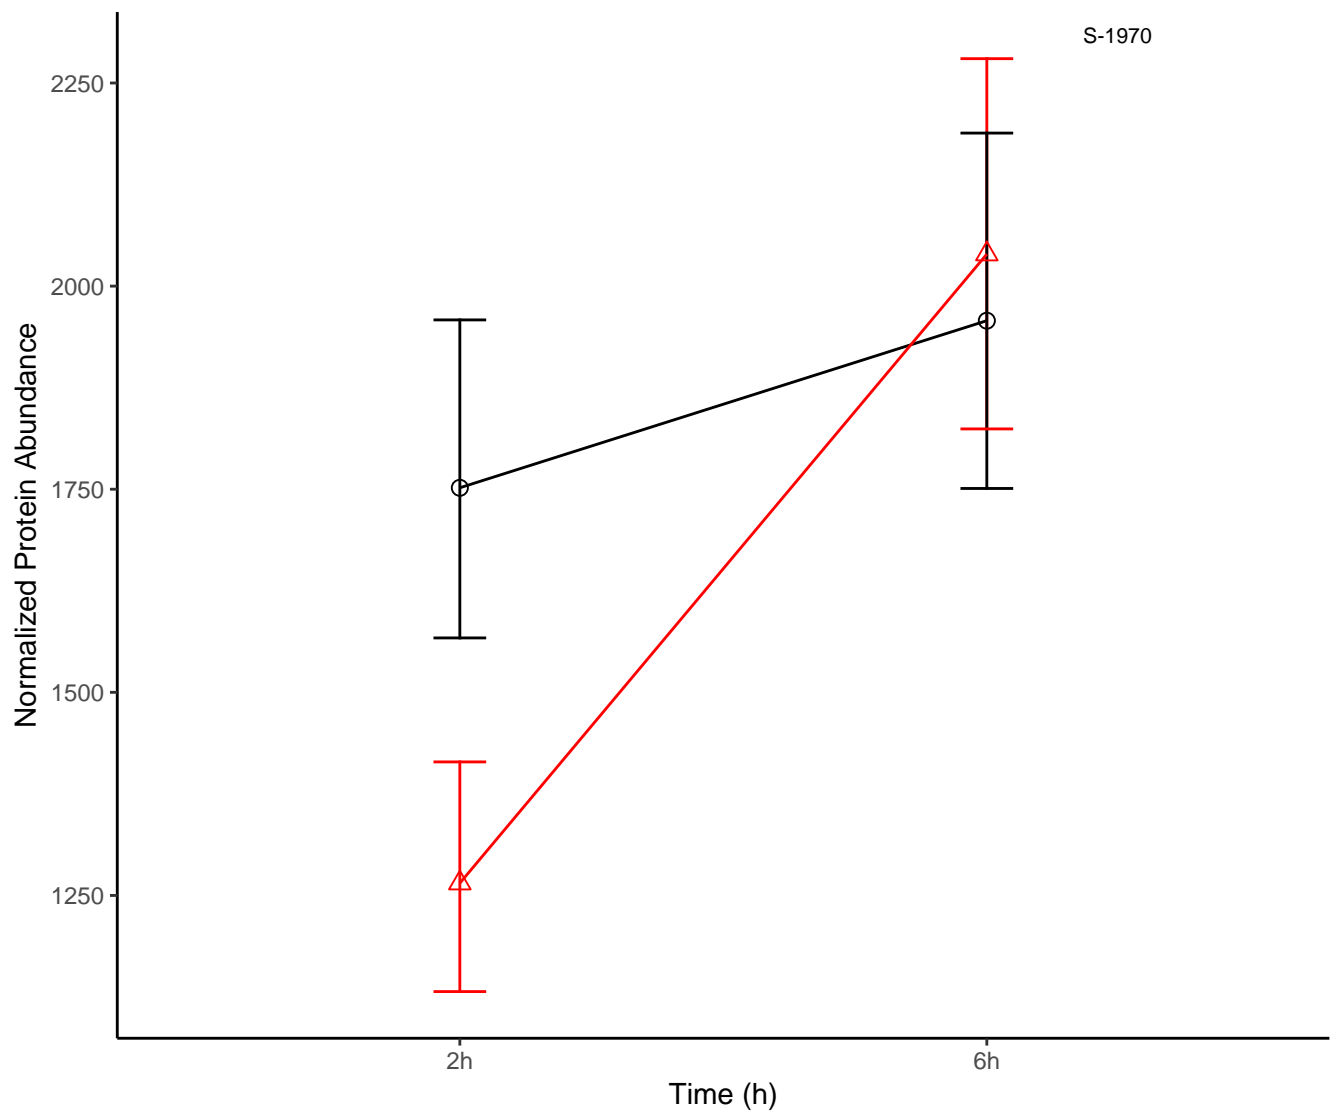

○ TSB-dex

△ TSB

# Y1363\_STAAM

S-1971

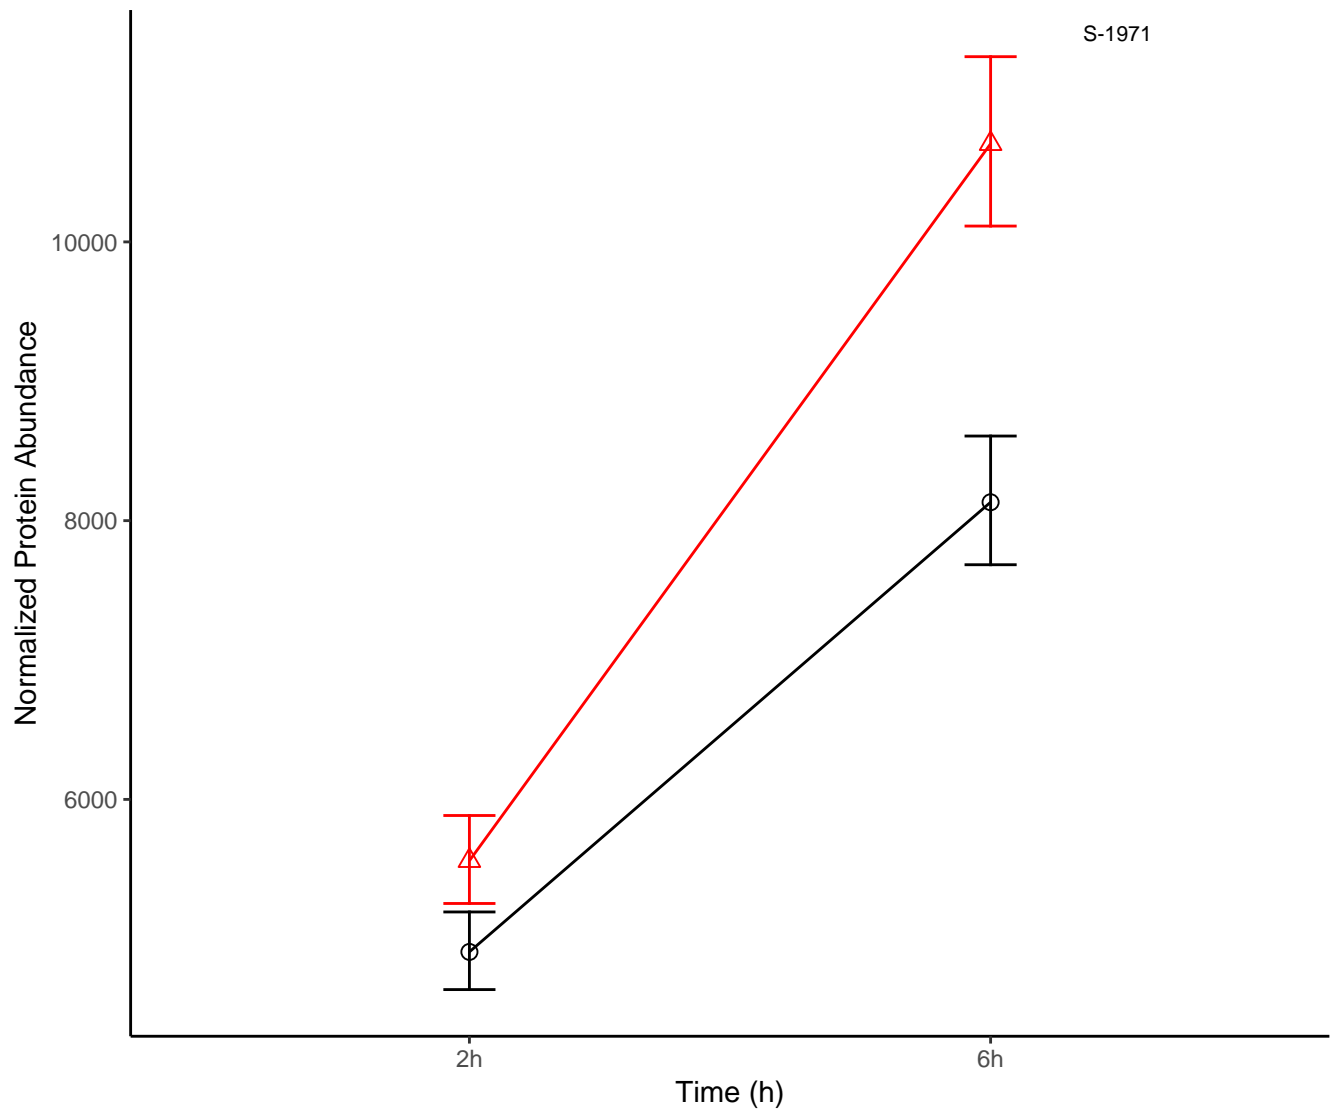

○ TSB-dex

△ TSB

# Y1409\_STAAM

S-1972

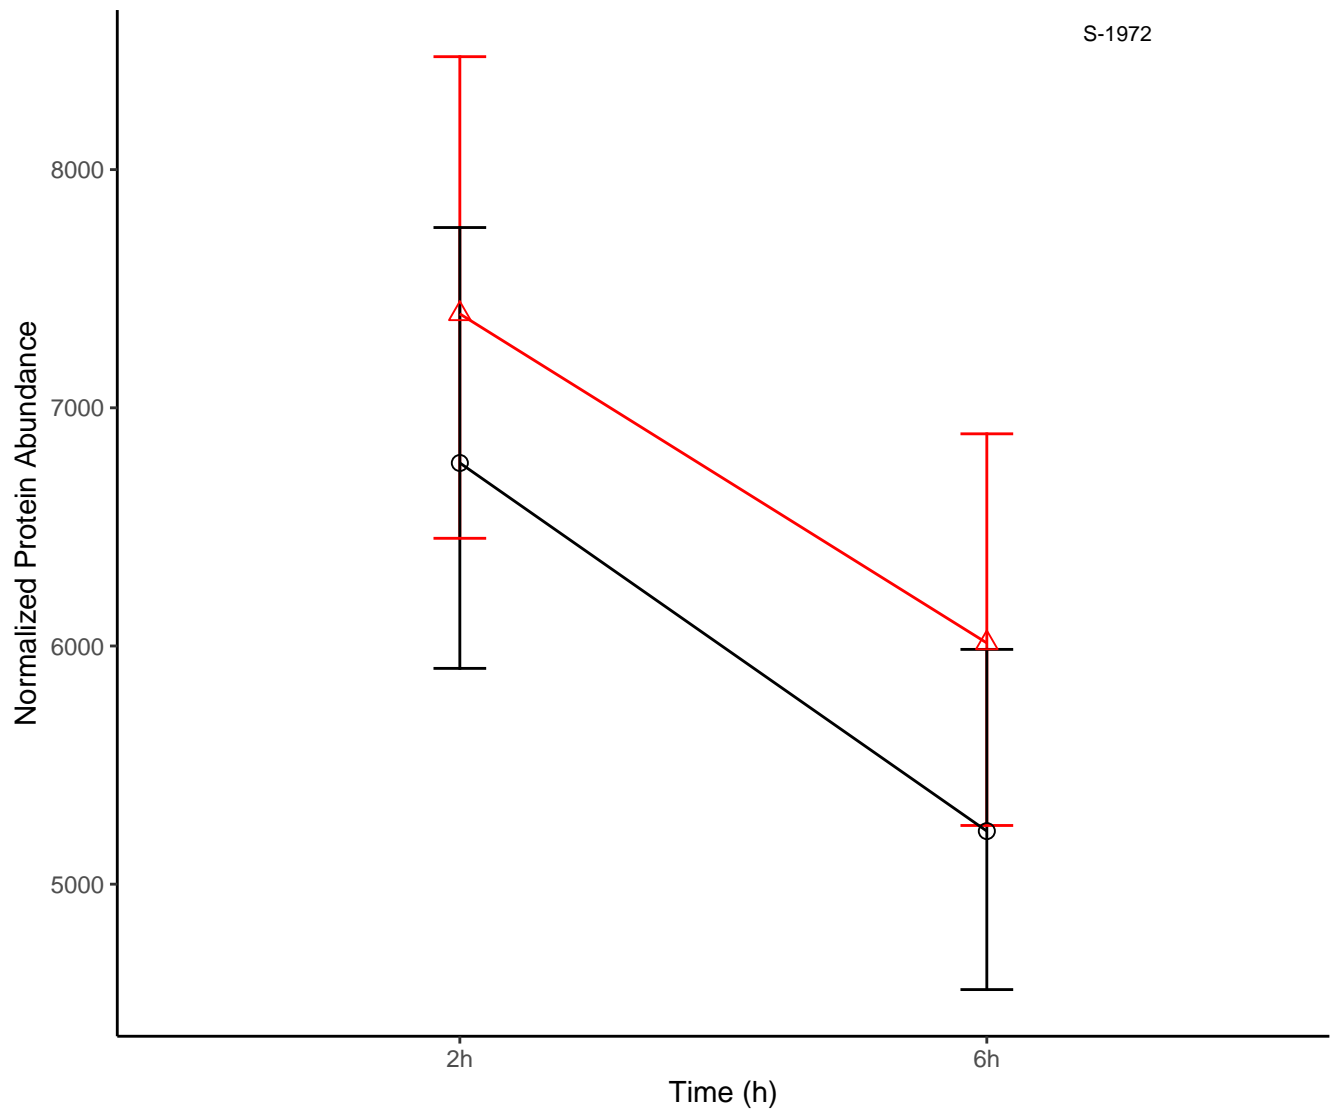

○ TSB-dex

△ TSB

# Y1425\_STAAM

S-1973

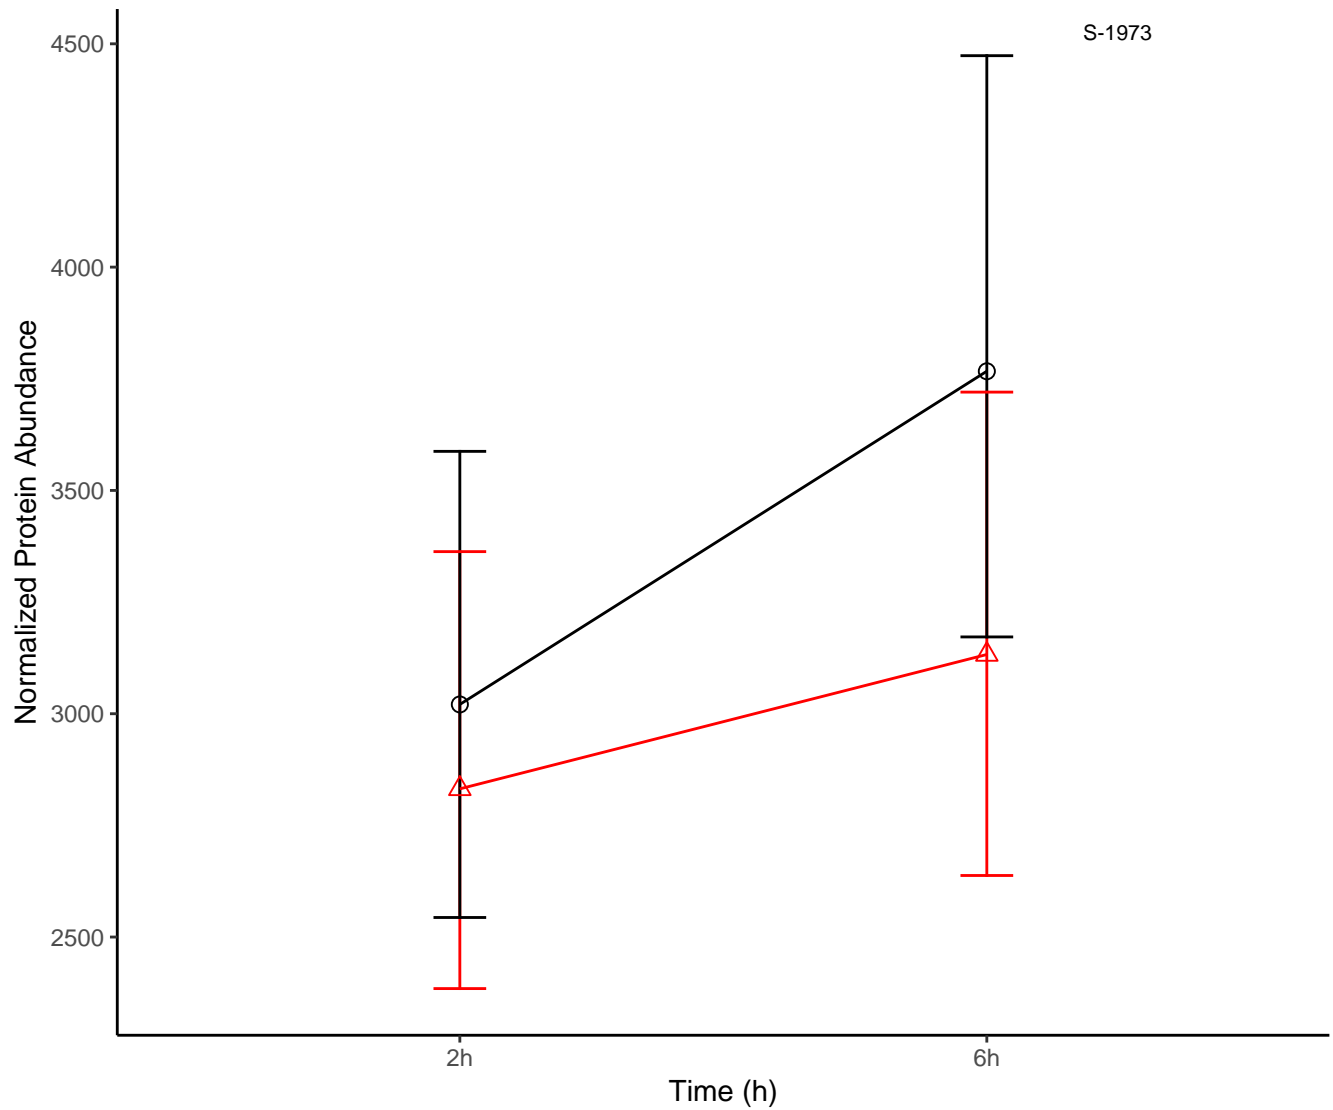

○ TSB-dex

△ TSB

# Y1462\_STAAM

S-1974

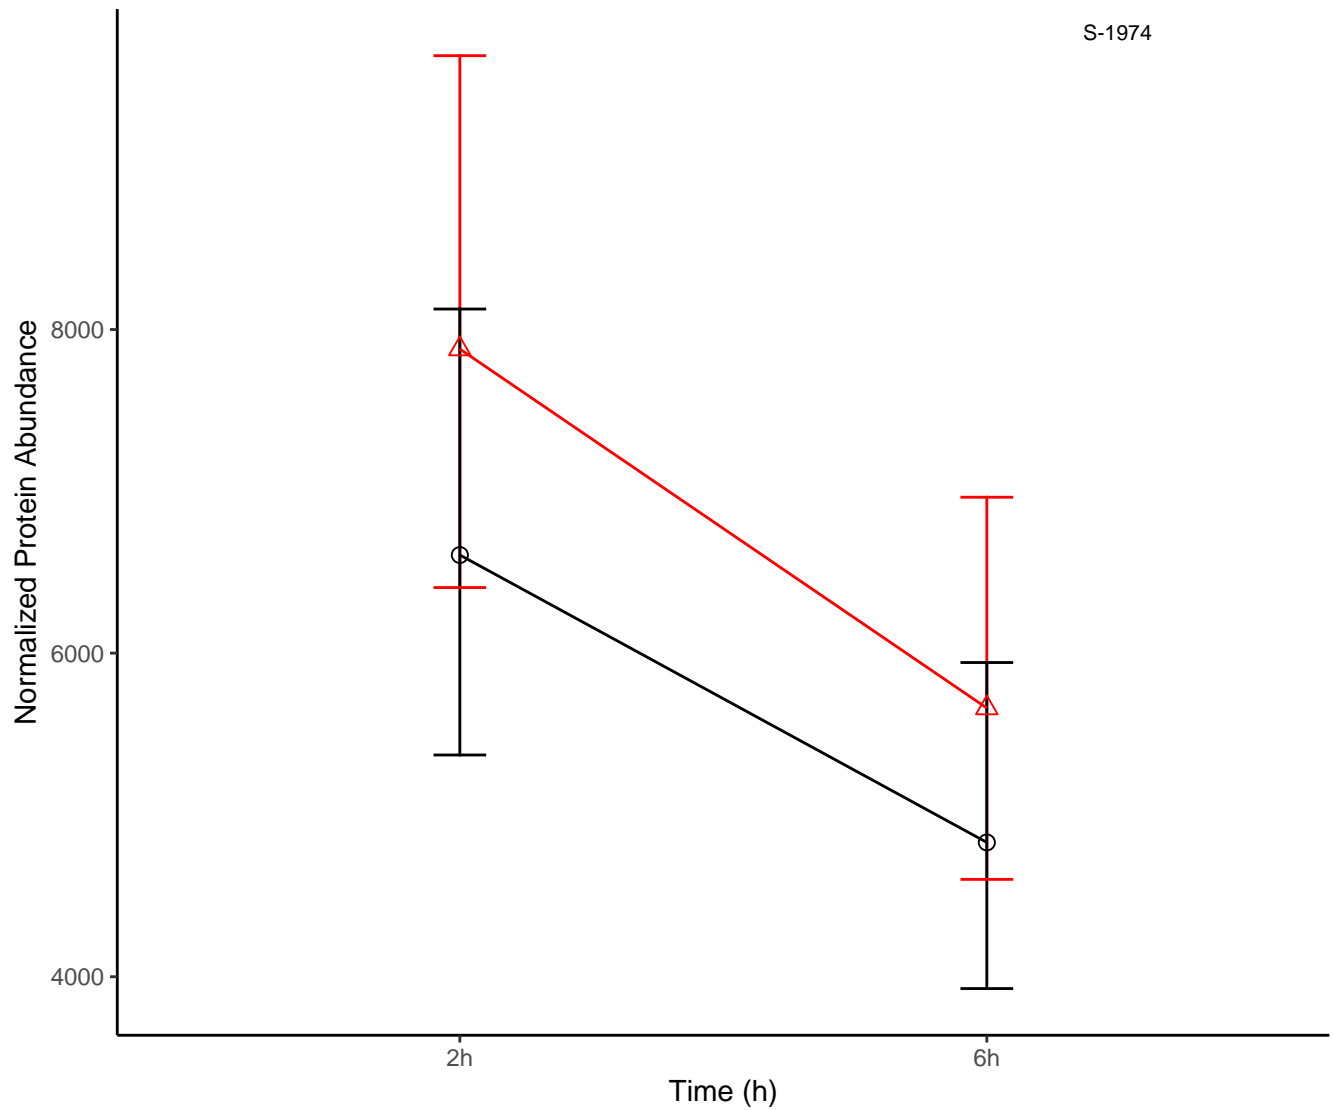

○ TSB-dex

△ TSB

# Y1514\_STAAM

S-1975

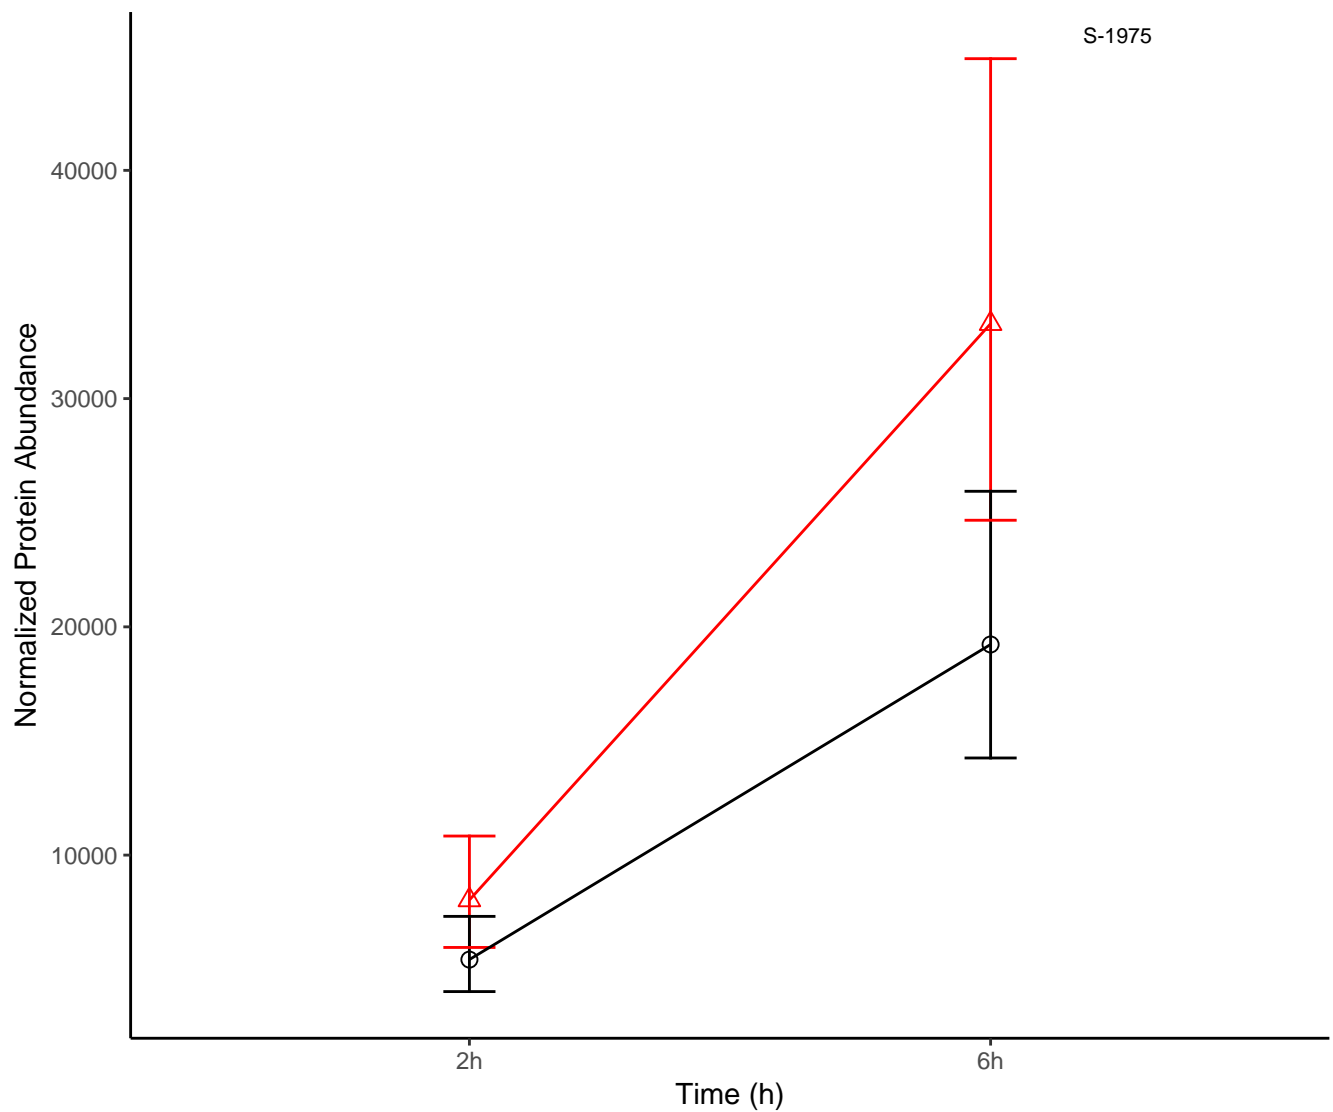

○ TSB-dex

△ TSB

# Y1573\_STAAM

S-1976

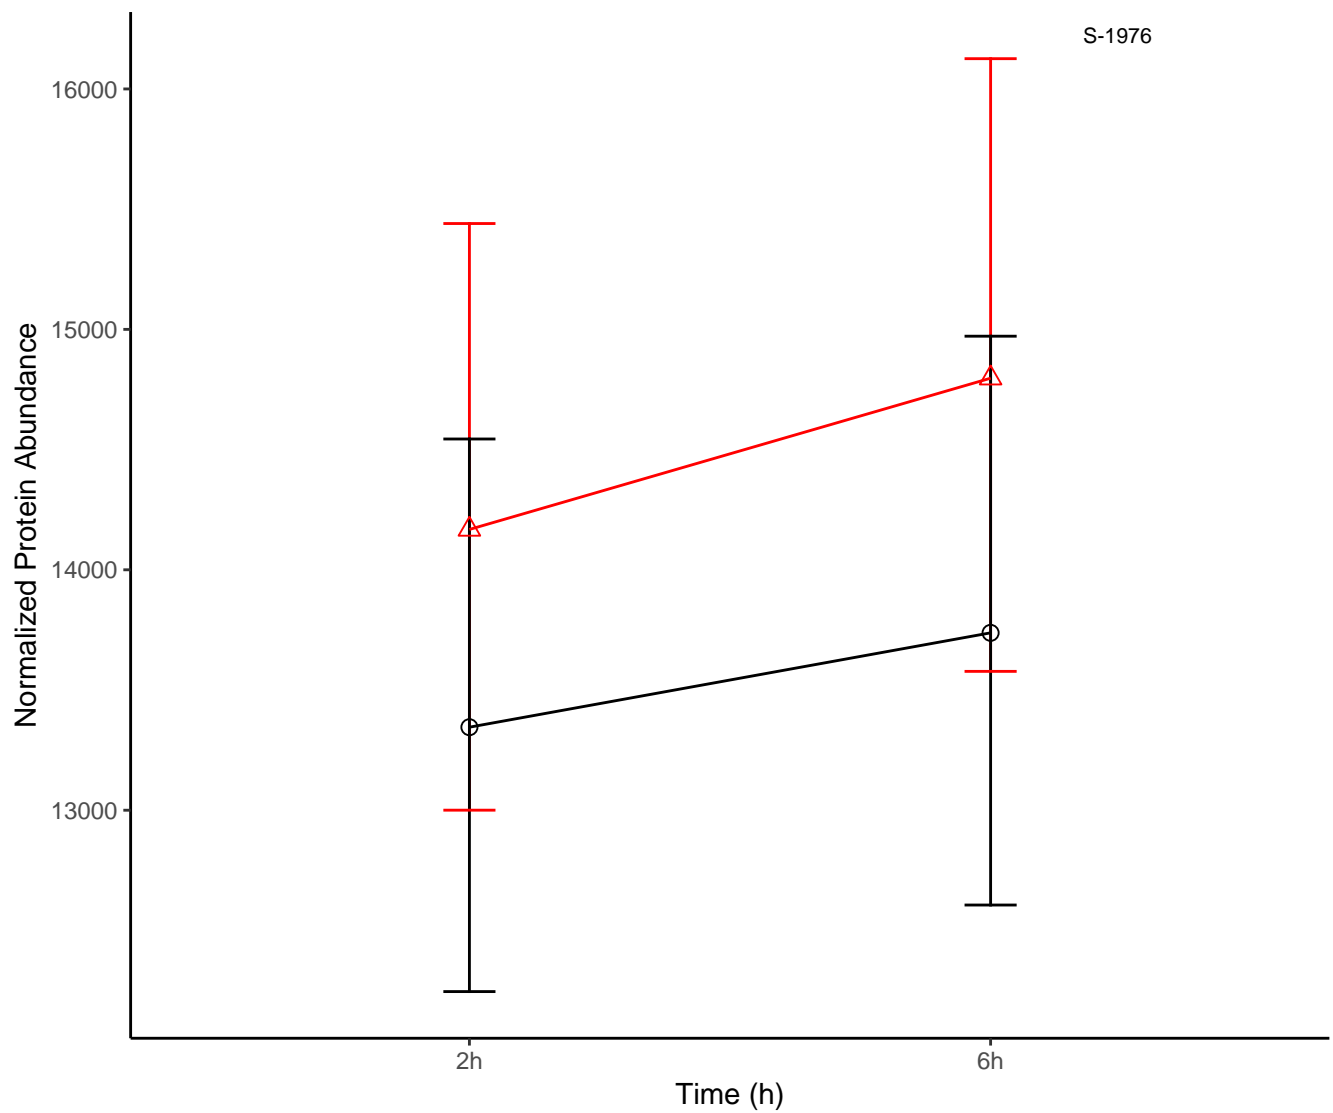

○ TSB-dex

△ TSB



# Y1605\_STAAM

S-1977

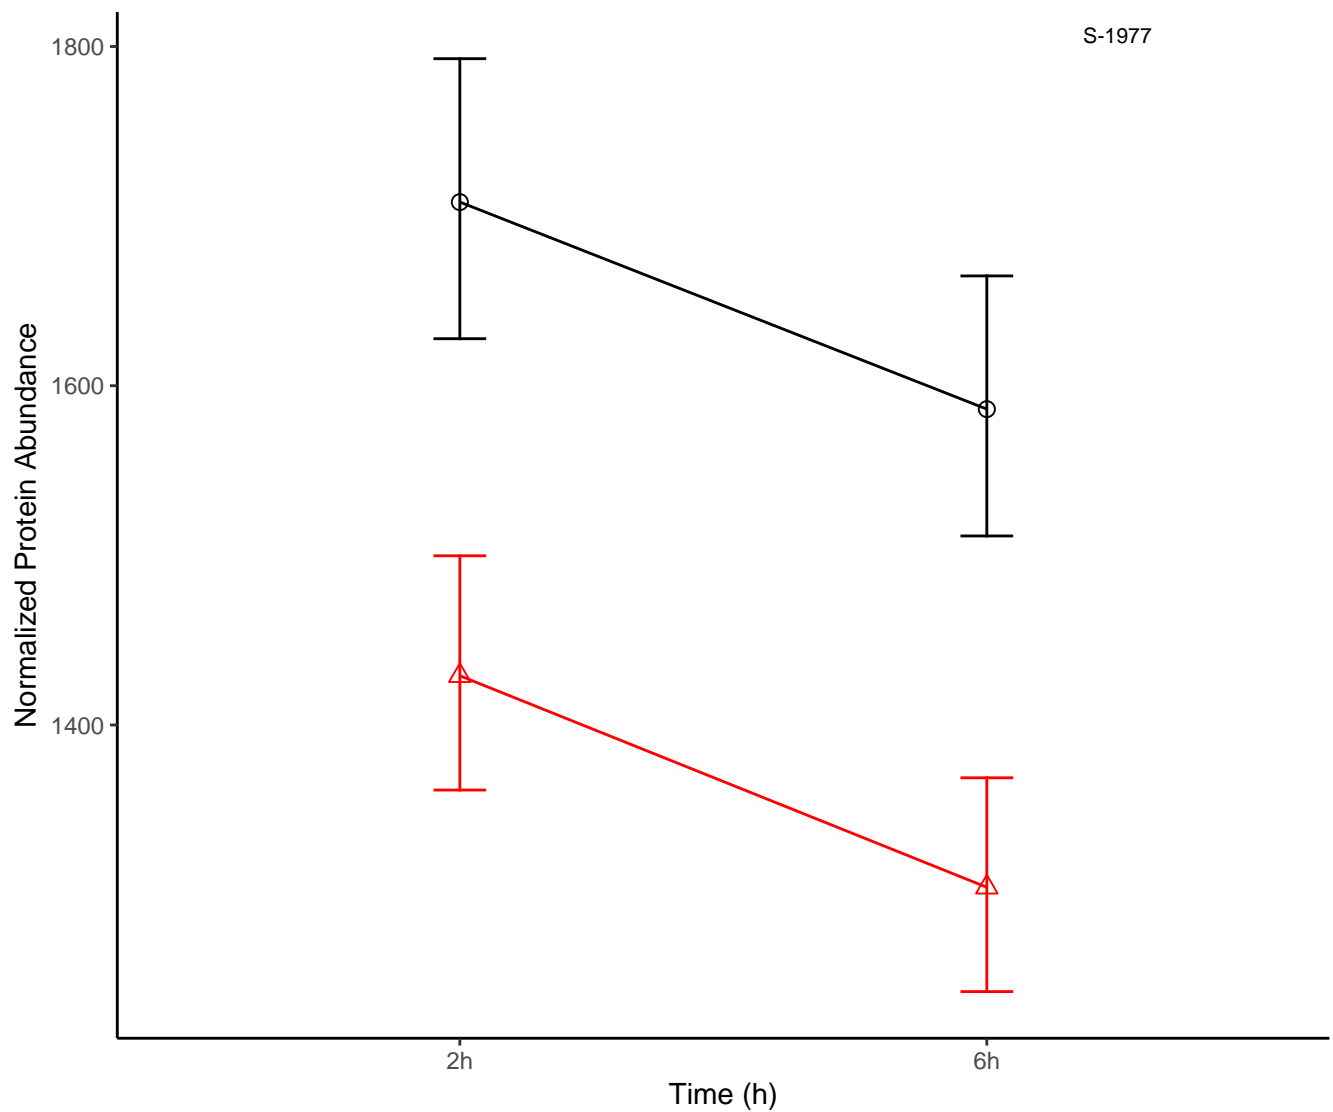

○ TSB-dex

△ TSB

# Y1617\_STAAM

S-1978

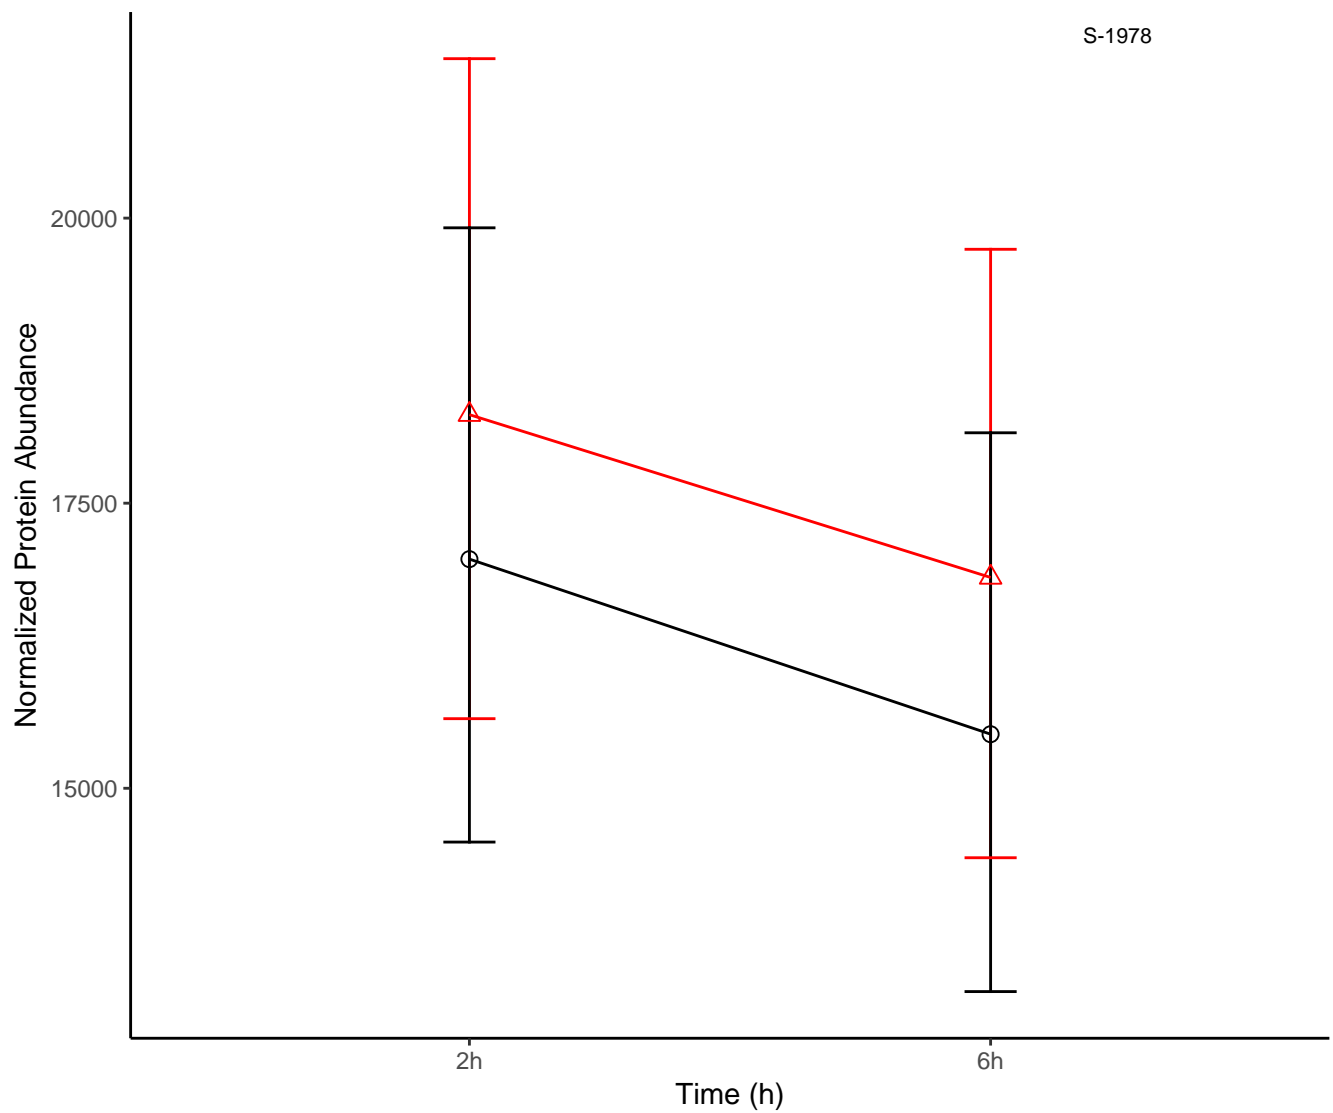

○ TSB-dex

△ TSB

# Y1625\_STAAM

S-1979

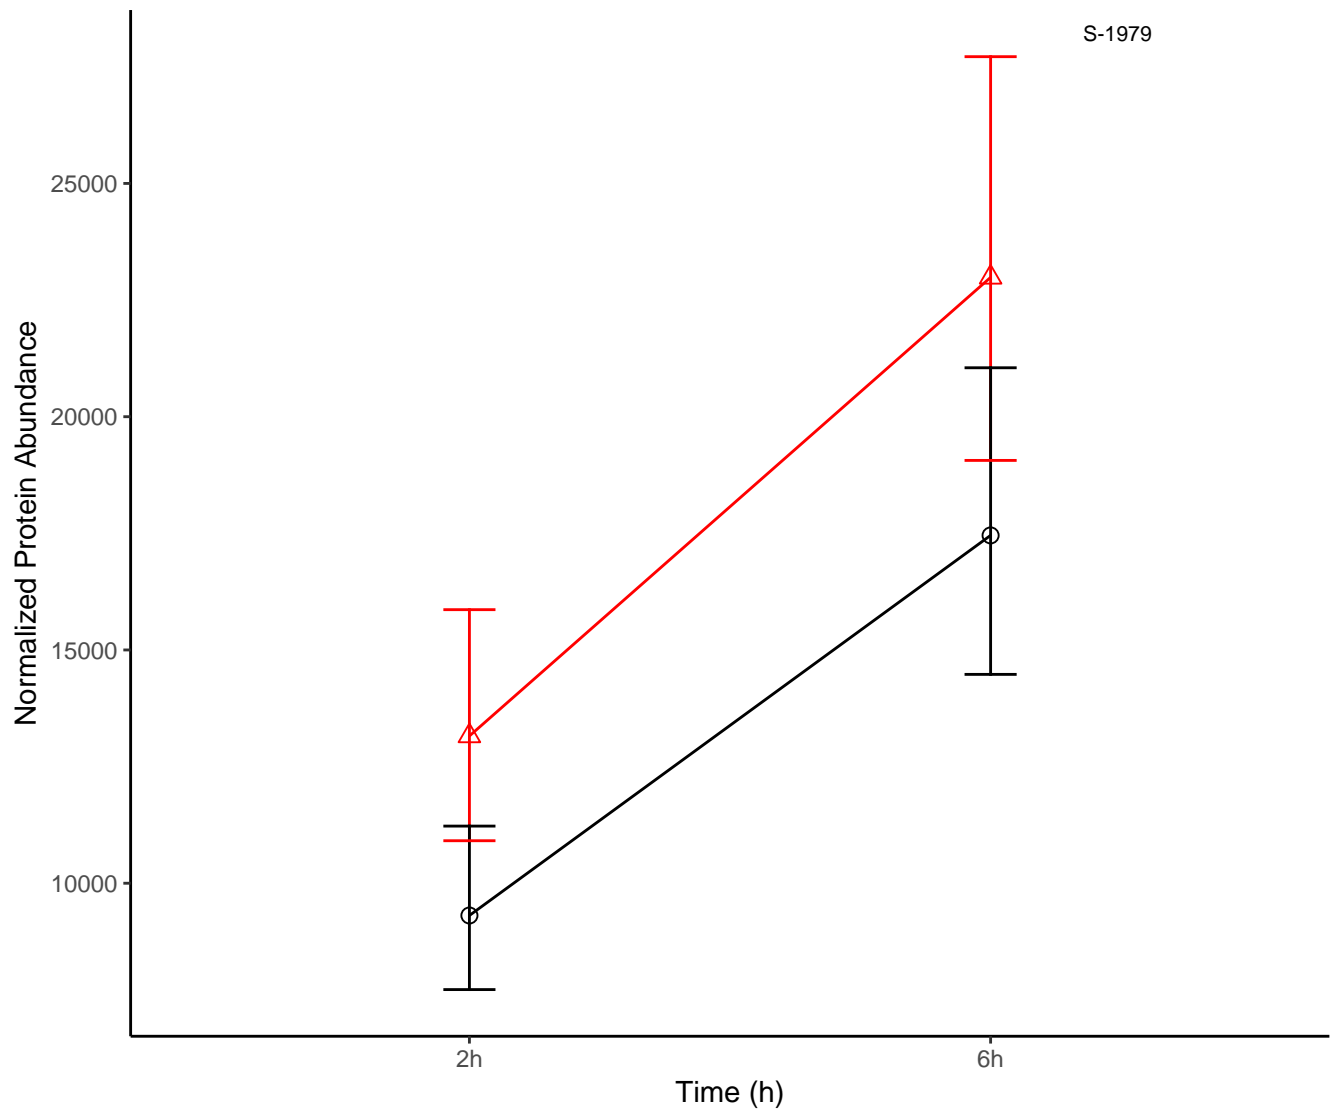

○ TSB-dex

△ TSB

# Y1710\_STAAM

S-1980

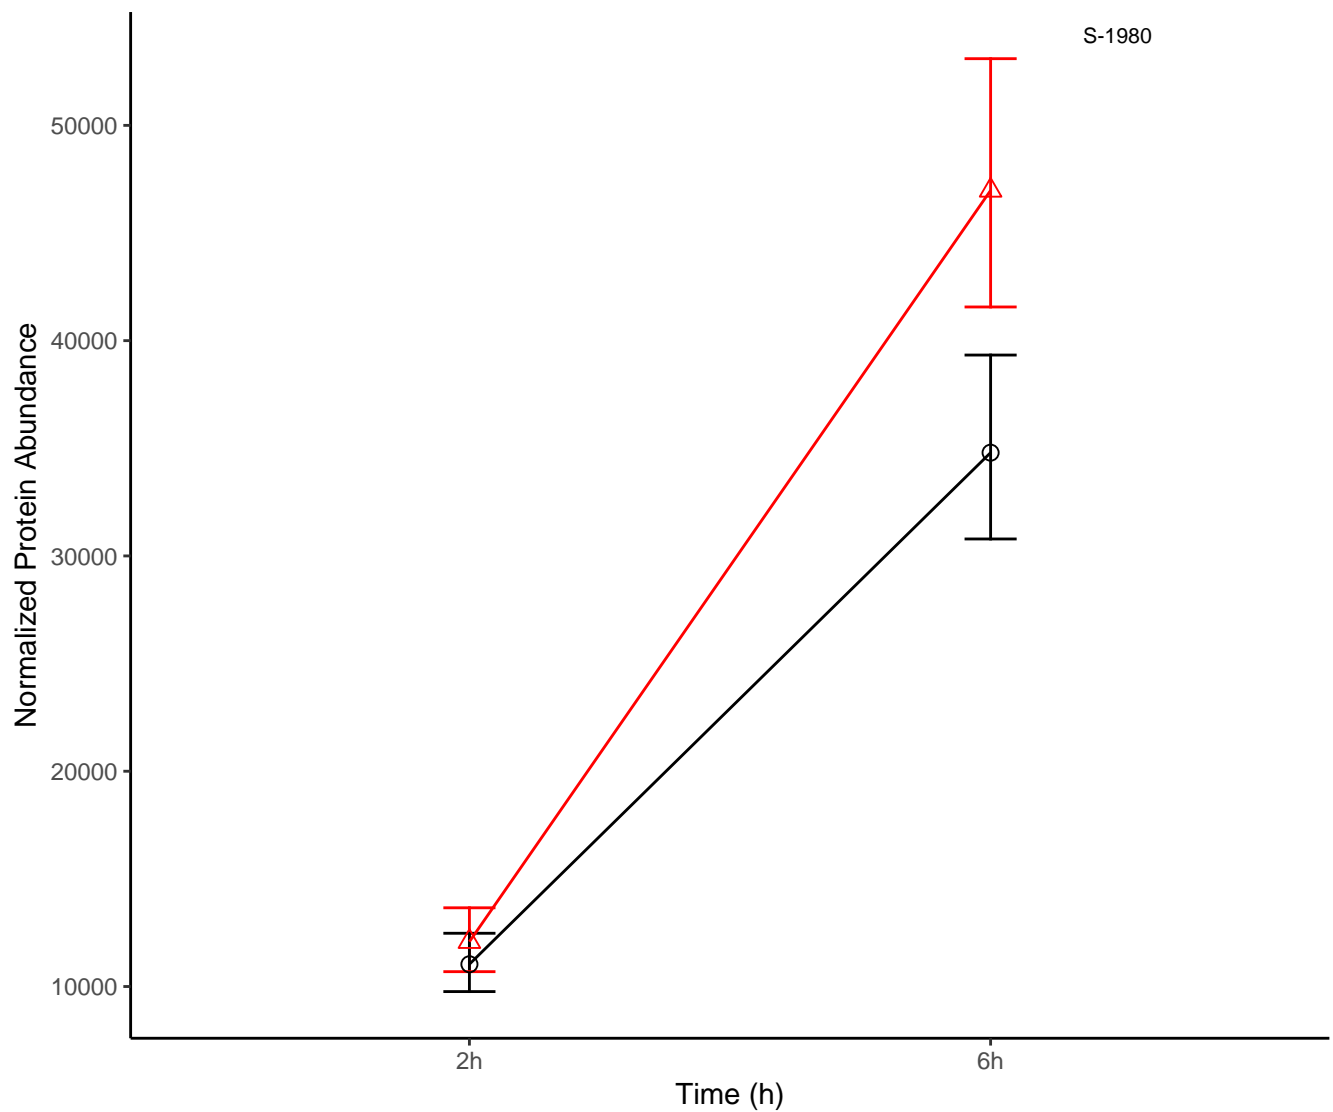

○ TSB-dex

△ TSB

# Y1739\_STAAM

S-1981

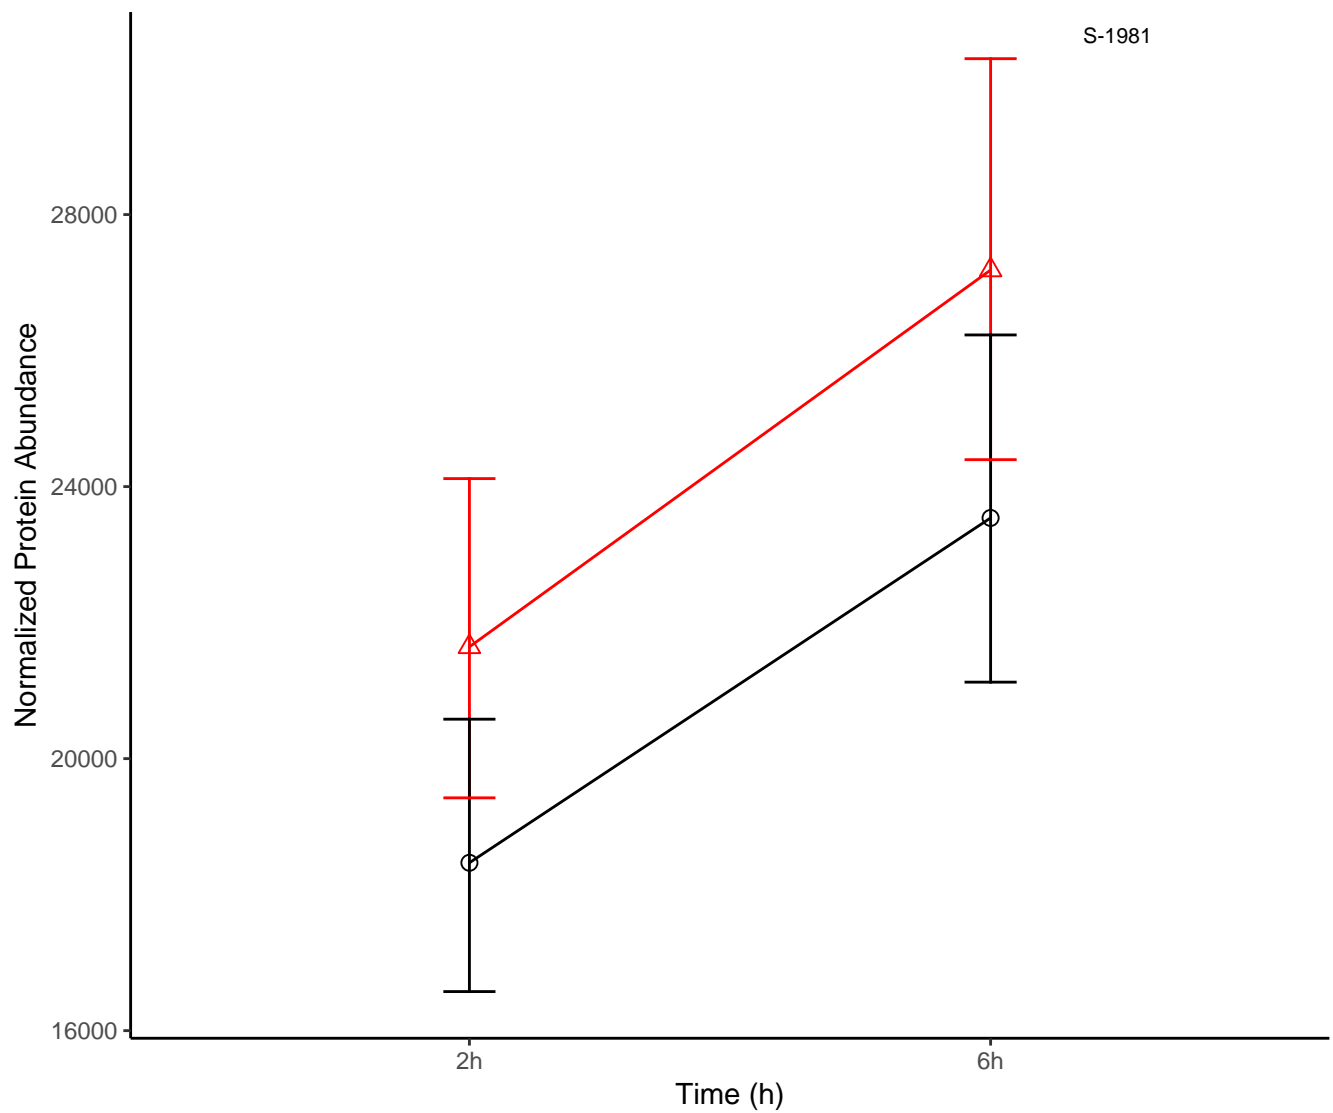

○ TSB-dex

△ TSB

# Y1845\_STAAM

S-1982

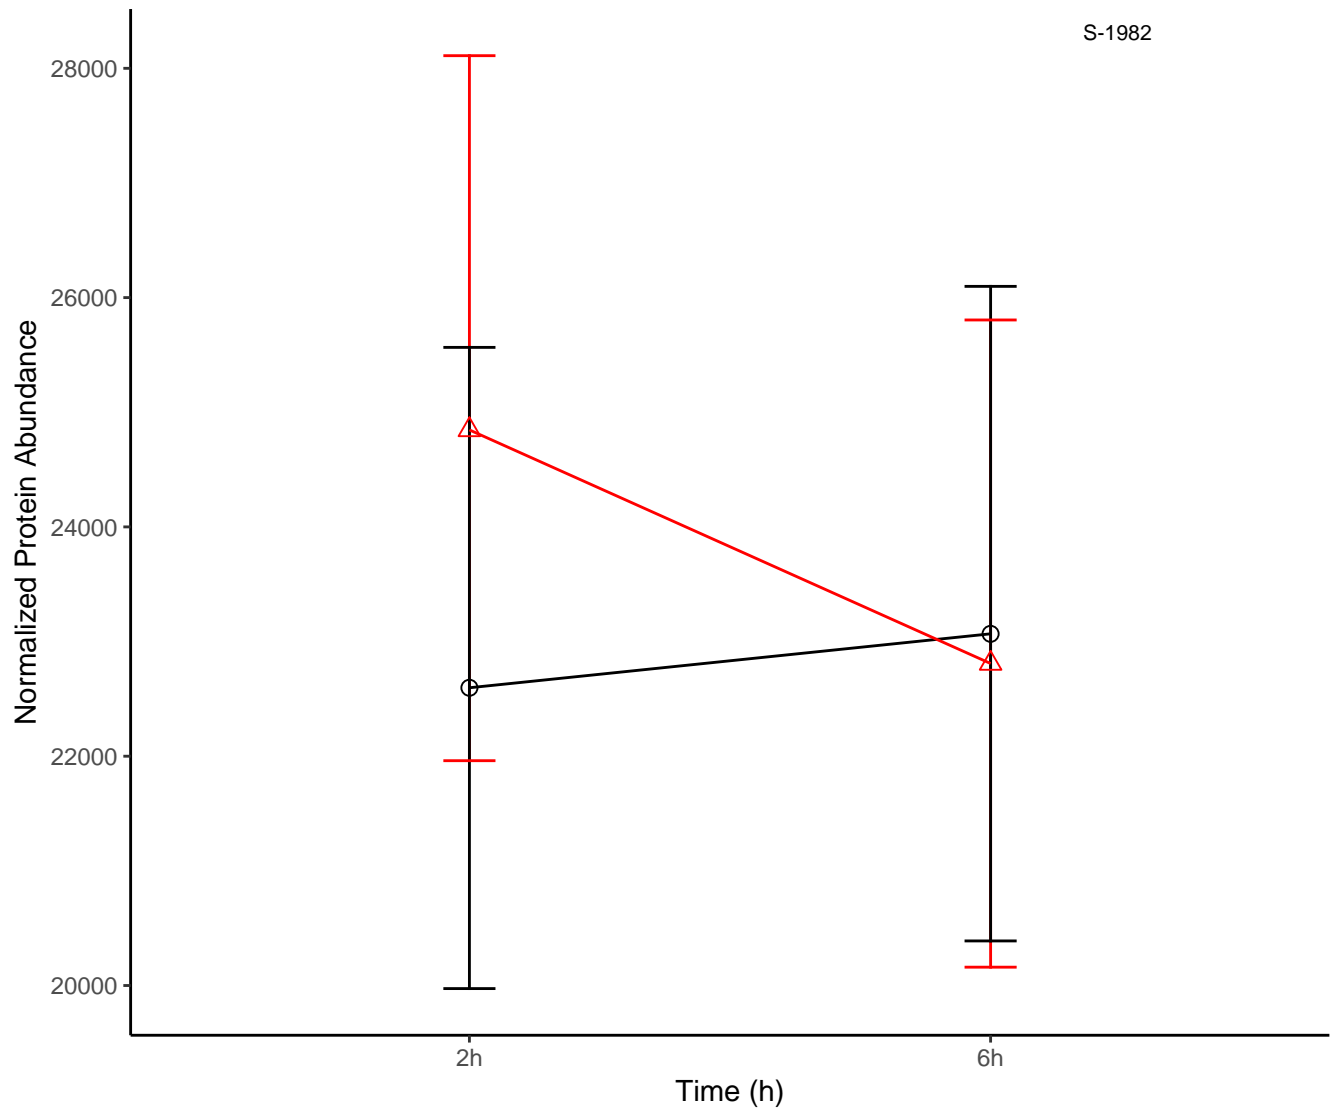

○ TSB-dex

△ TSB

# Y1866\_STAAM

S-1983

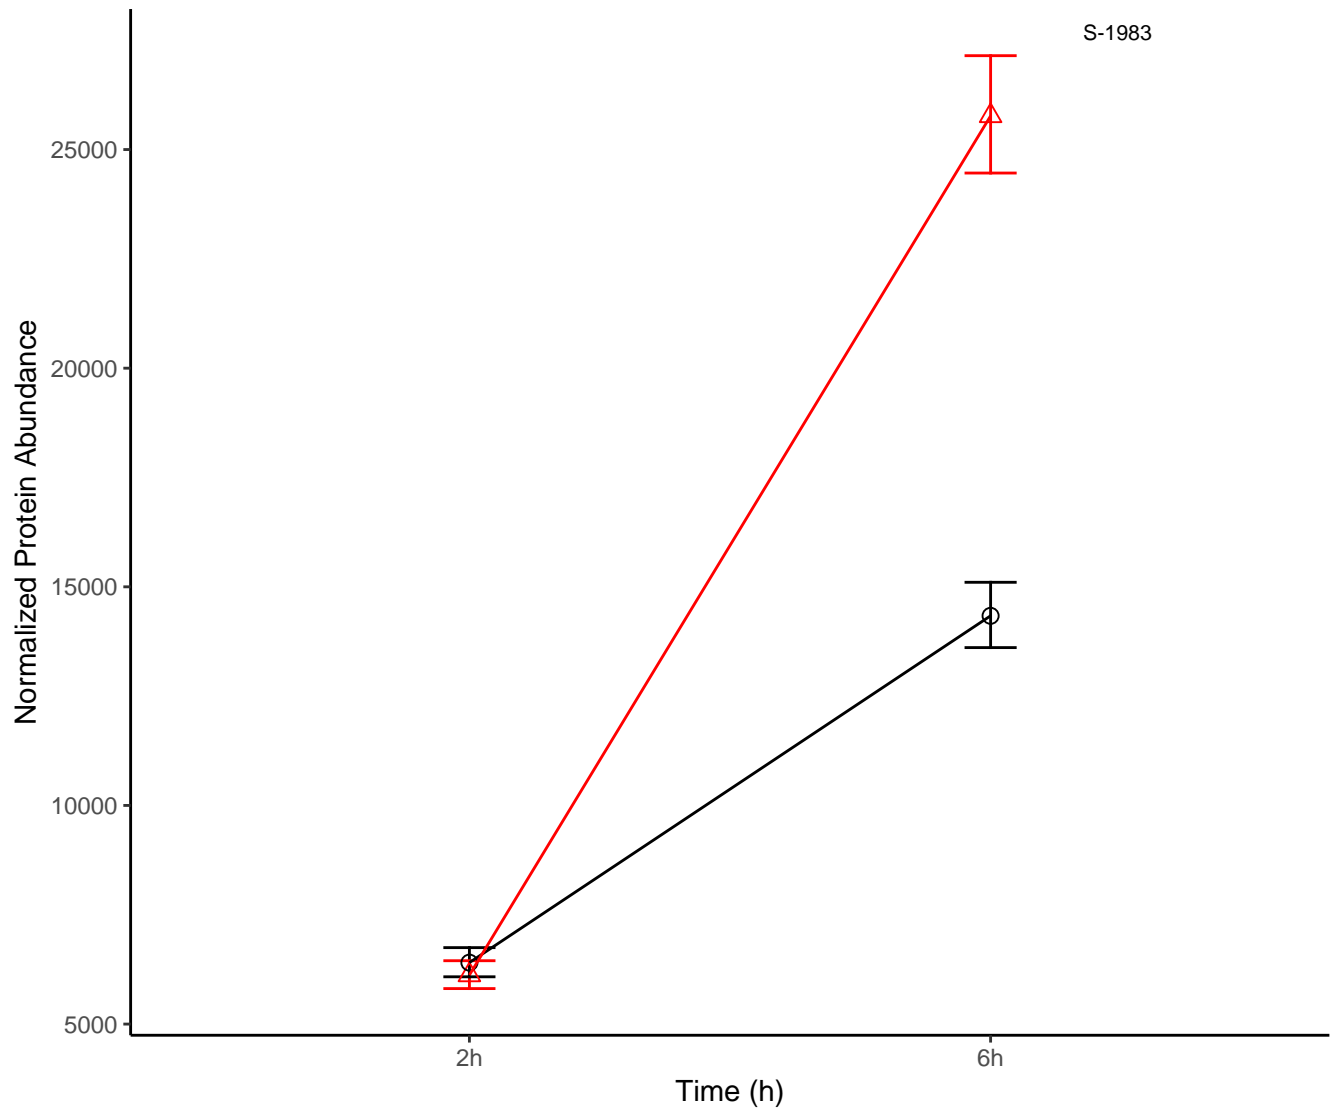

○ TSB-dex

△ TSB

# Y1880\_STAAM

S-1984

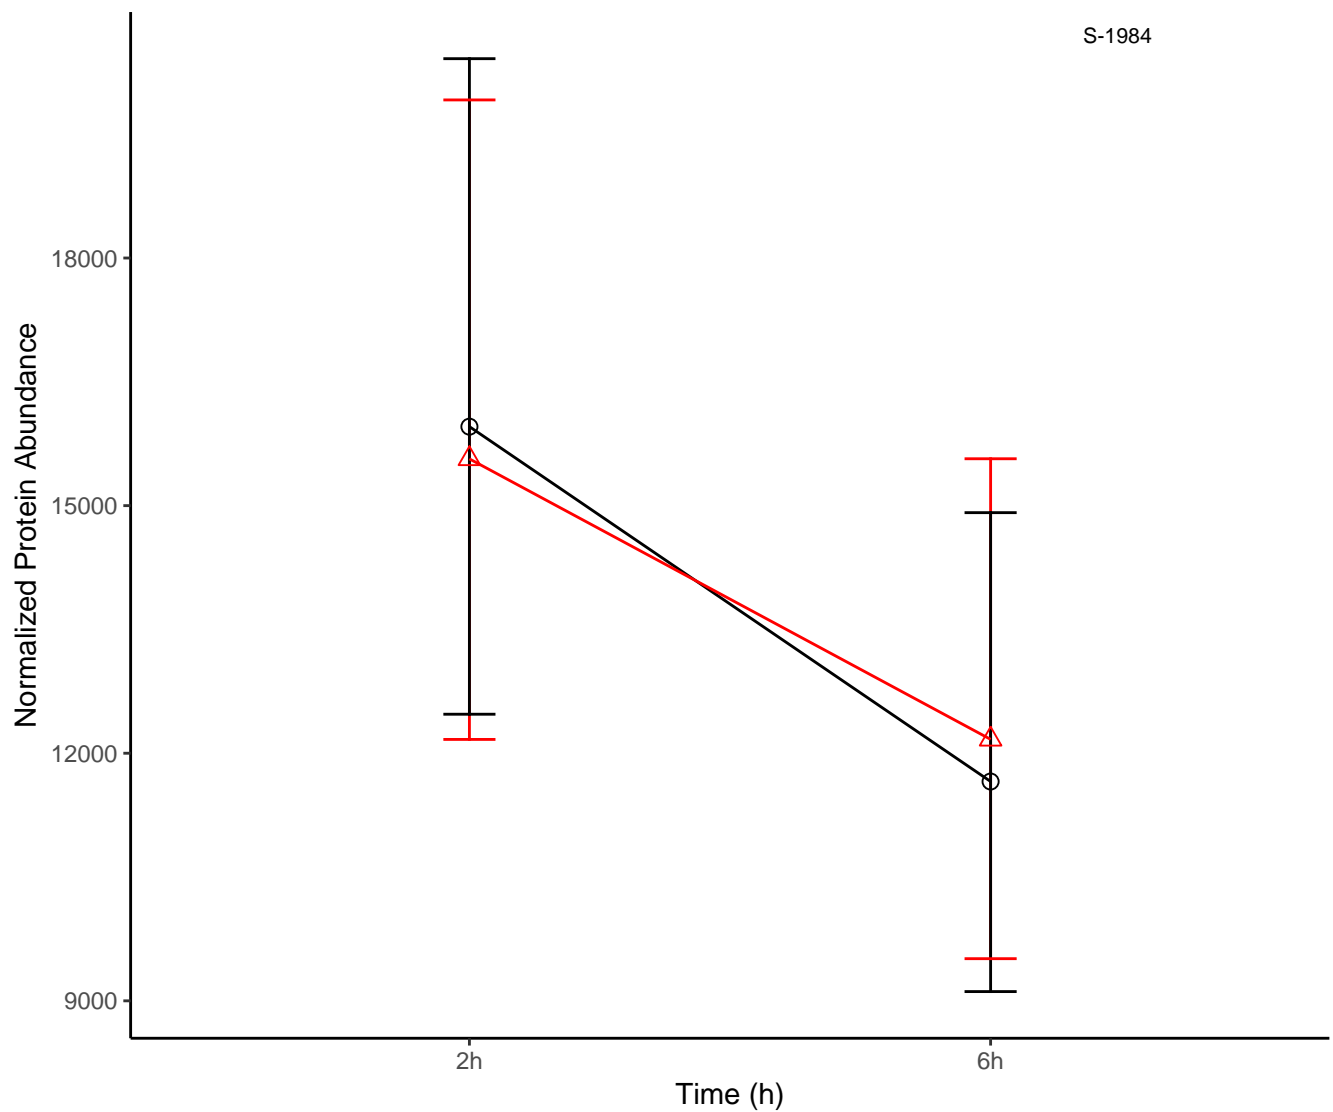

○ TSB-dex

△ TSB



# Y1921\_STAAM

S-1985

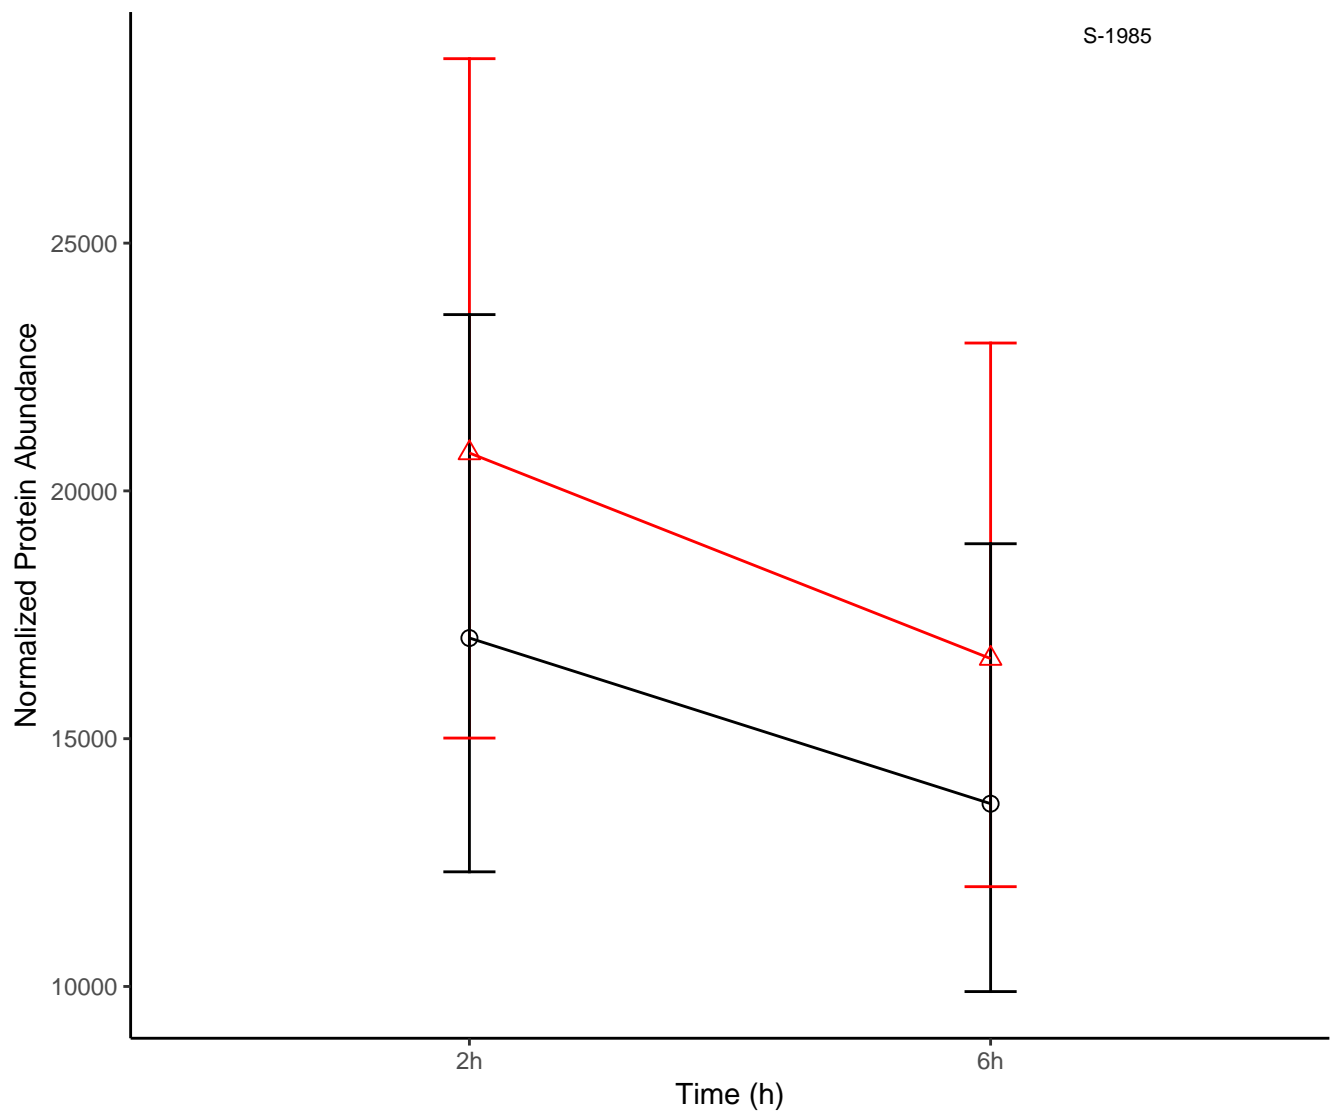

○ TSB-dex

△ TSB

# Y2173\_STAAM

S-1986

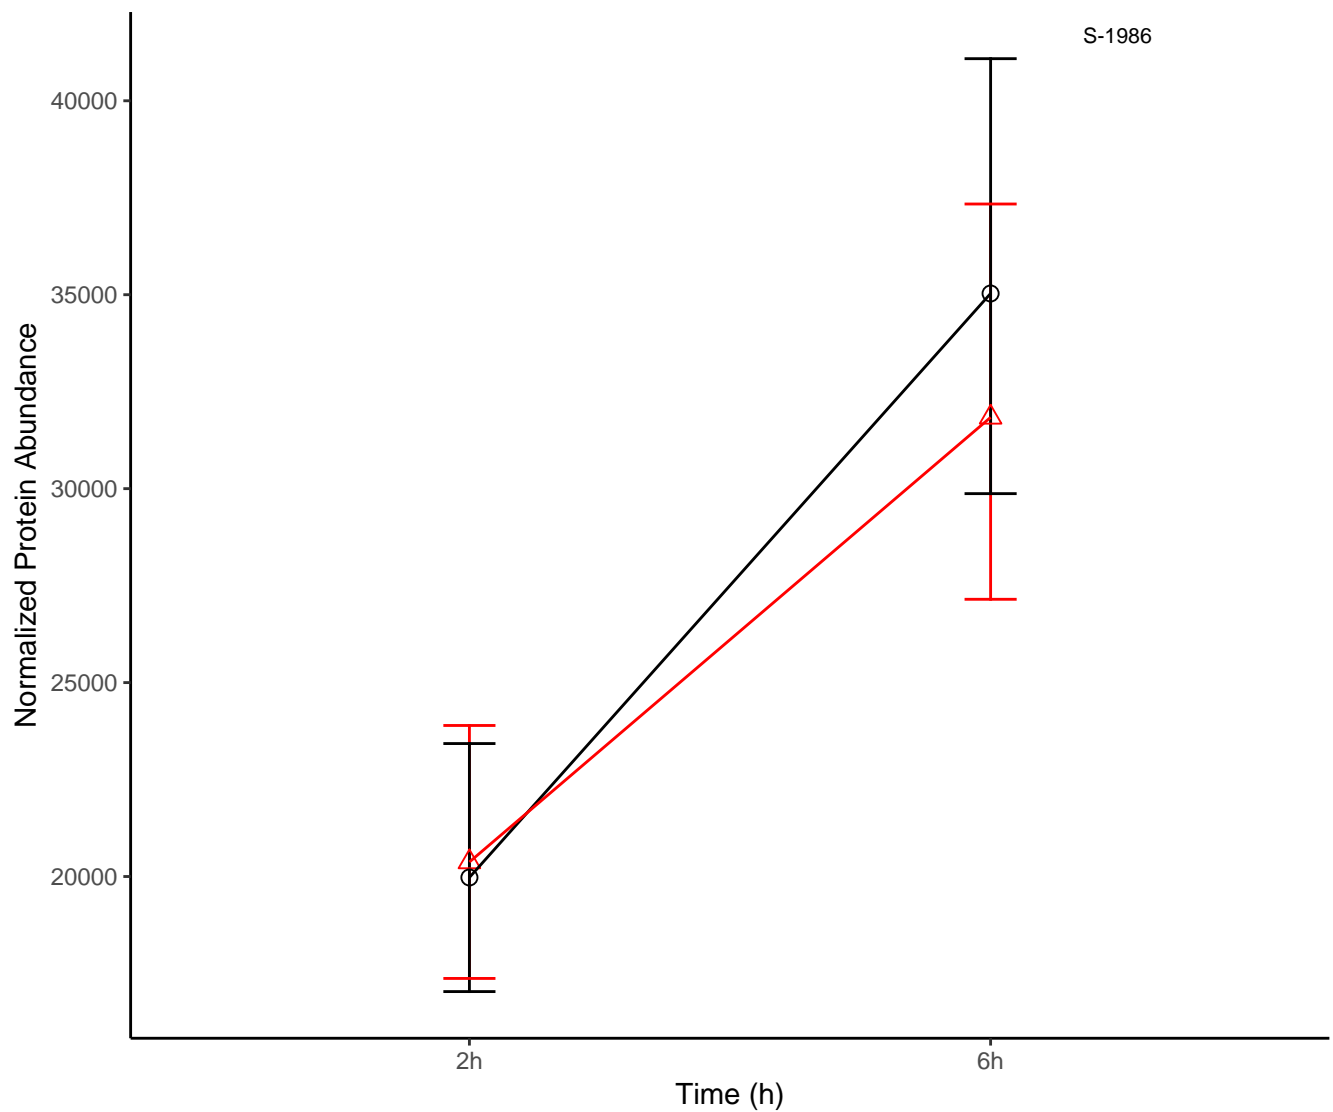

○ TSB-dex

△ TSB

# Y2204\_STAAM

S-1987

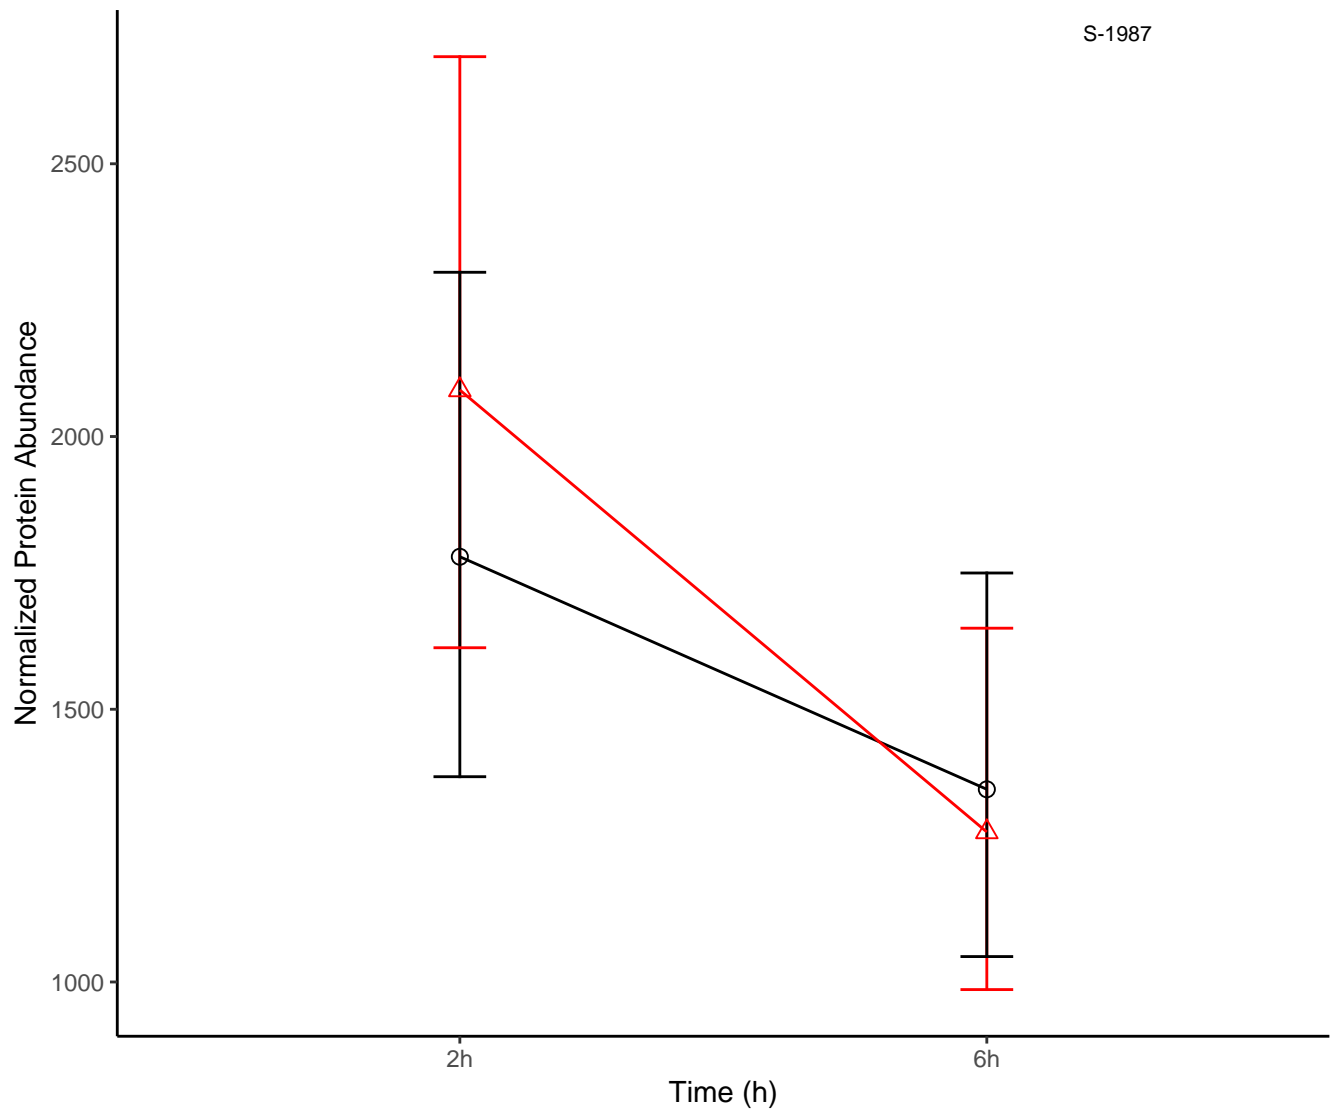

○ TSB-dex

△ TSB

# Y2265\_STAAM

S-1988

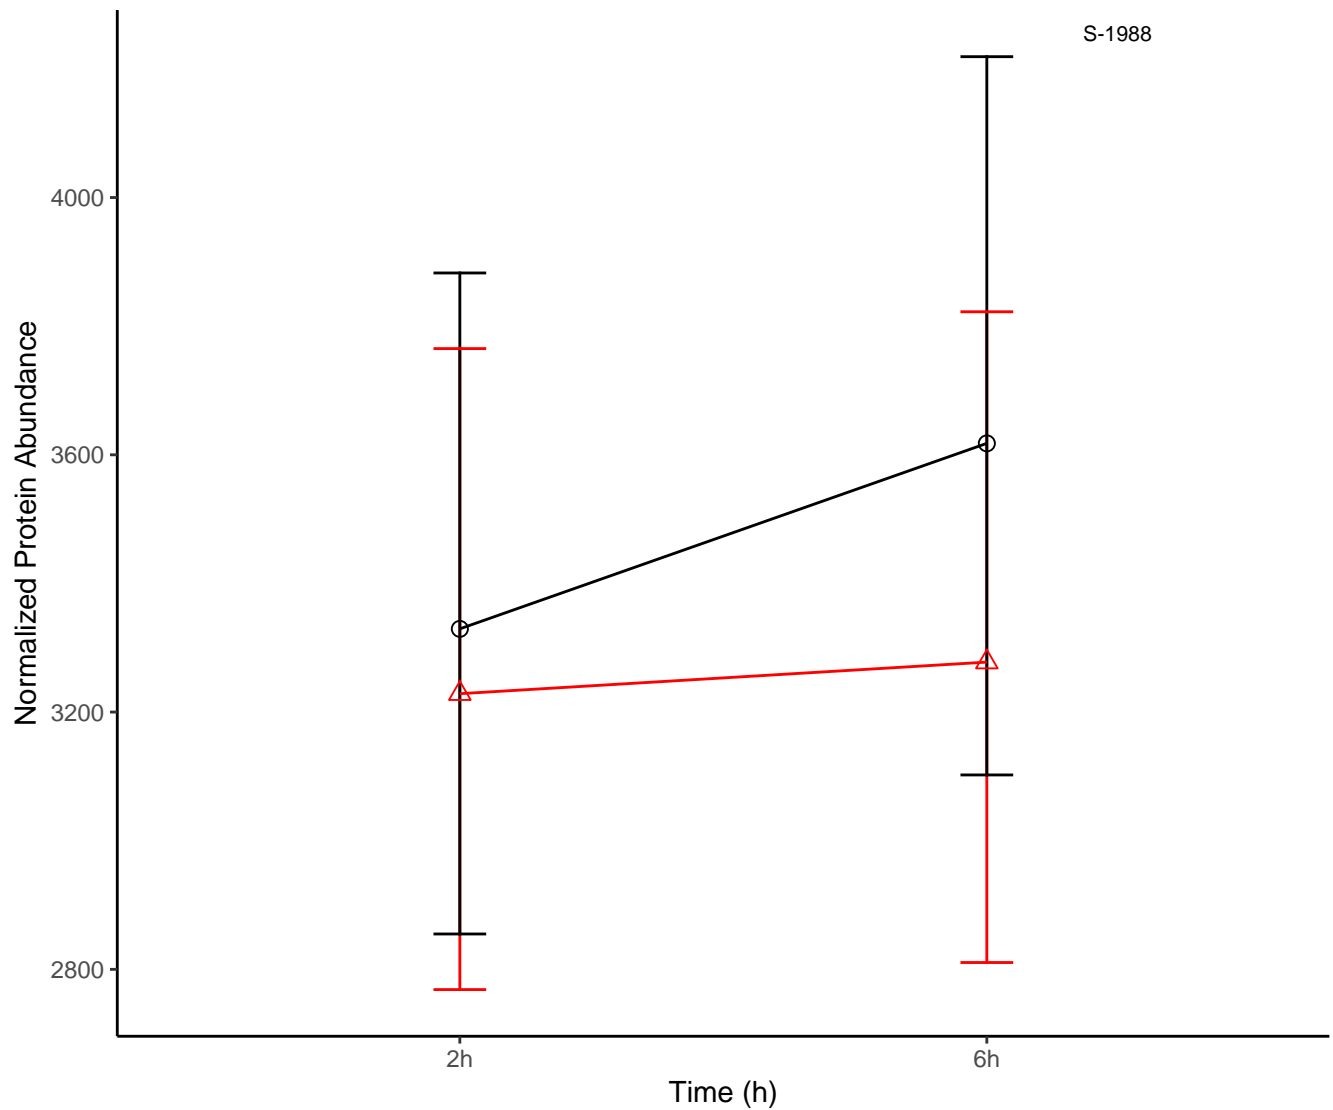

○ TSB-dex

△ TSB

# Y2305\_STAAM

S-1989

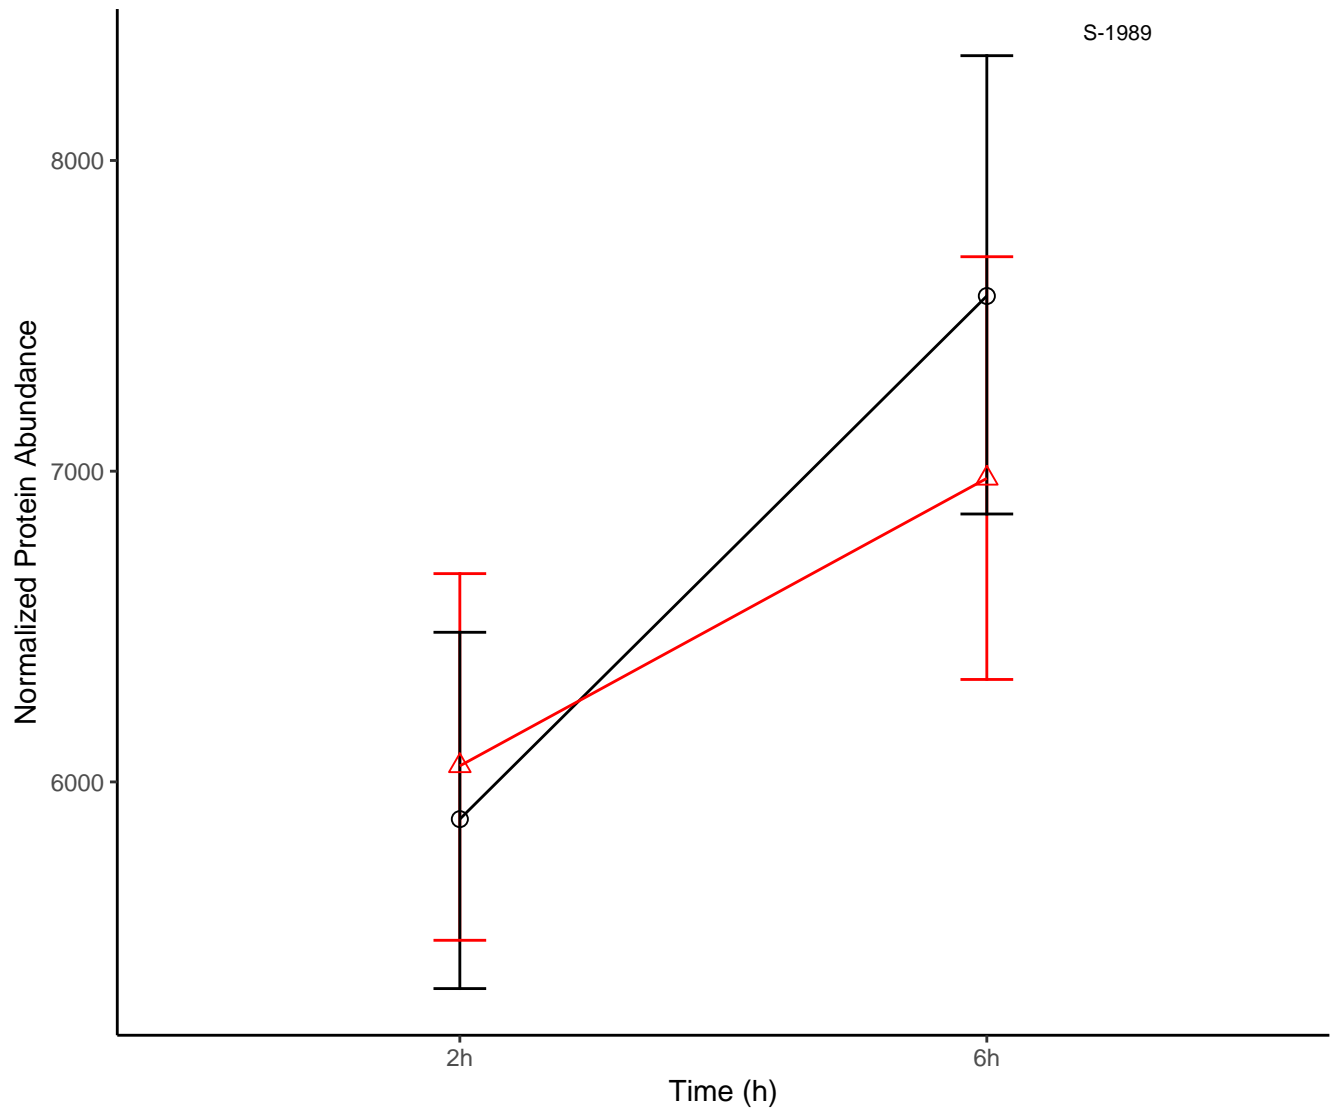

○ TSB-dex

△ TSB

# Y2363\_STAAM

S-1990

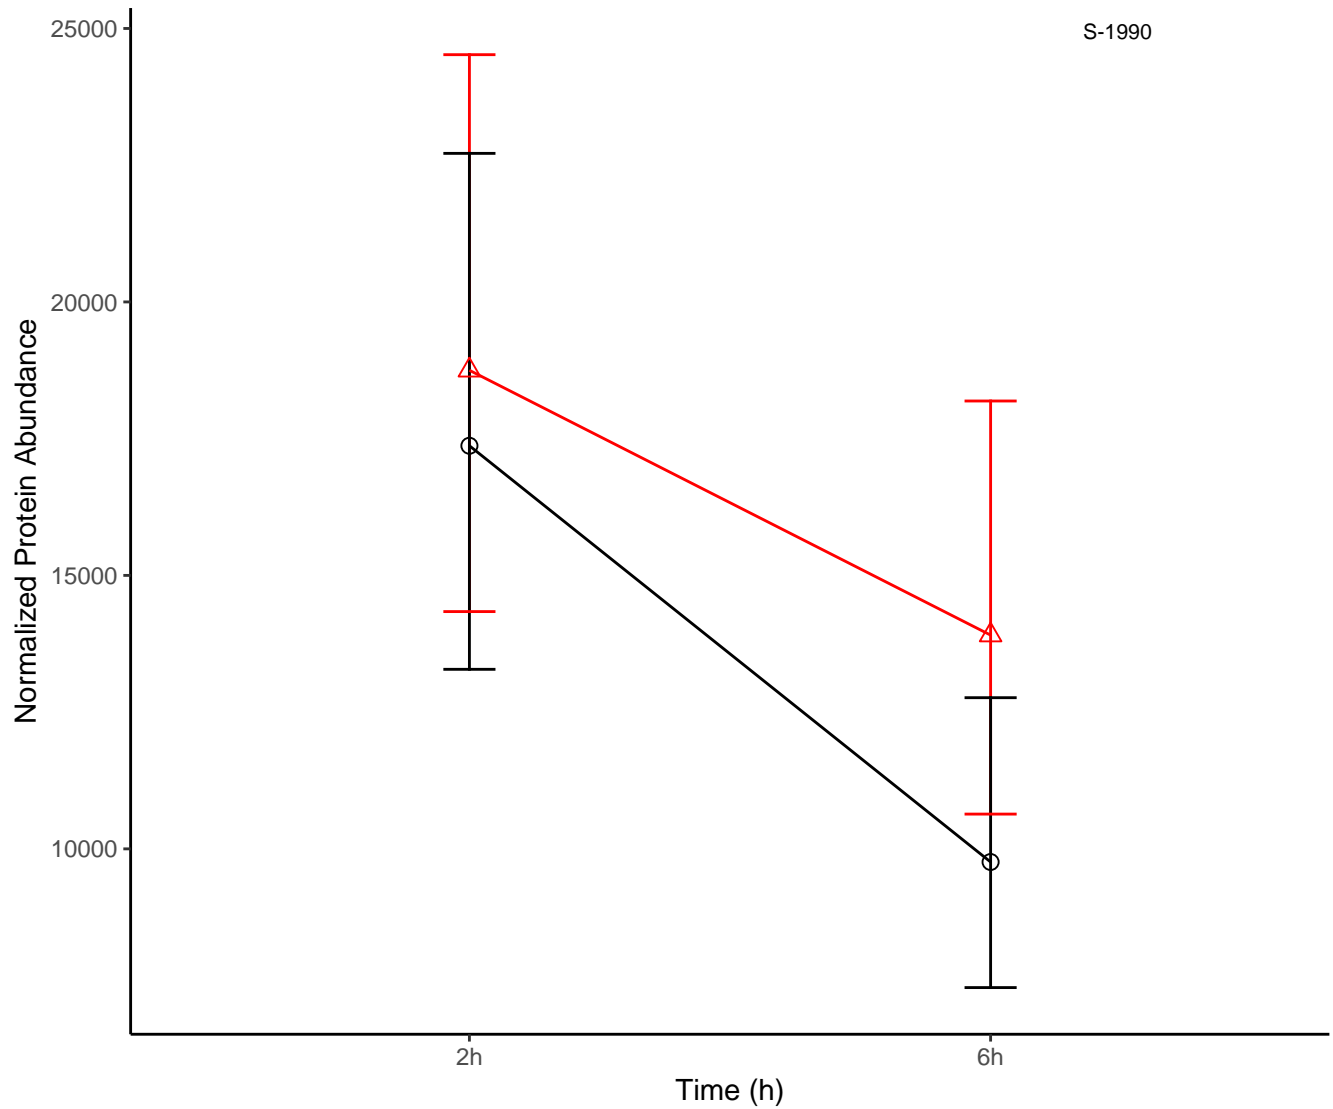

○ TSB-dex

△ TSB

# Y2368\_STAAM

S-1991

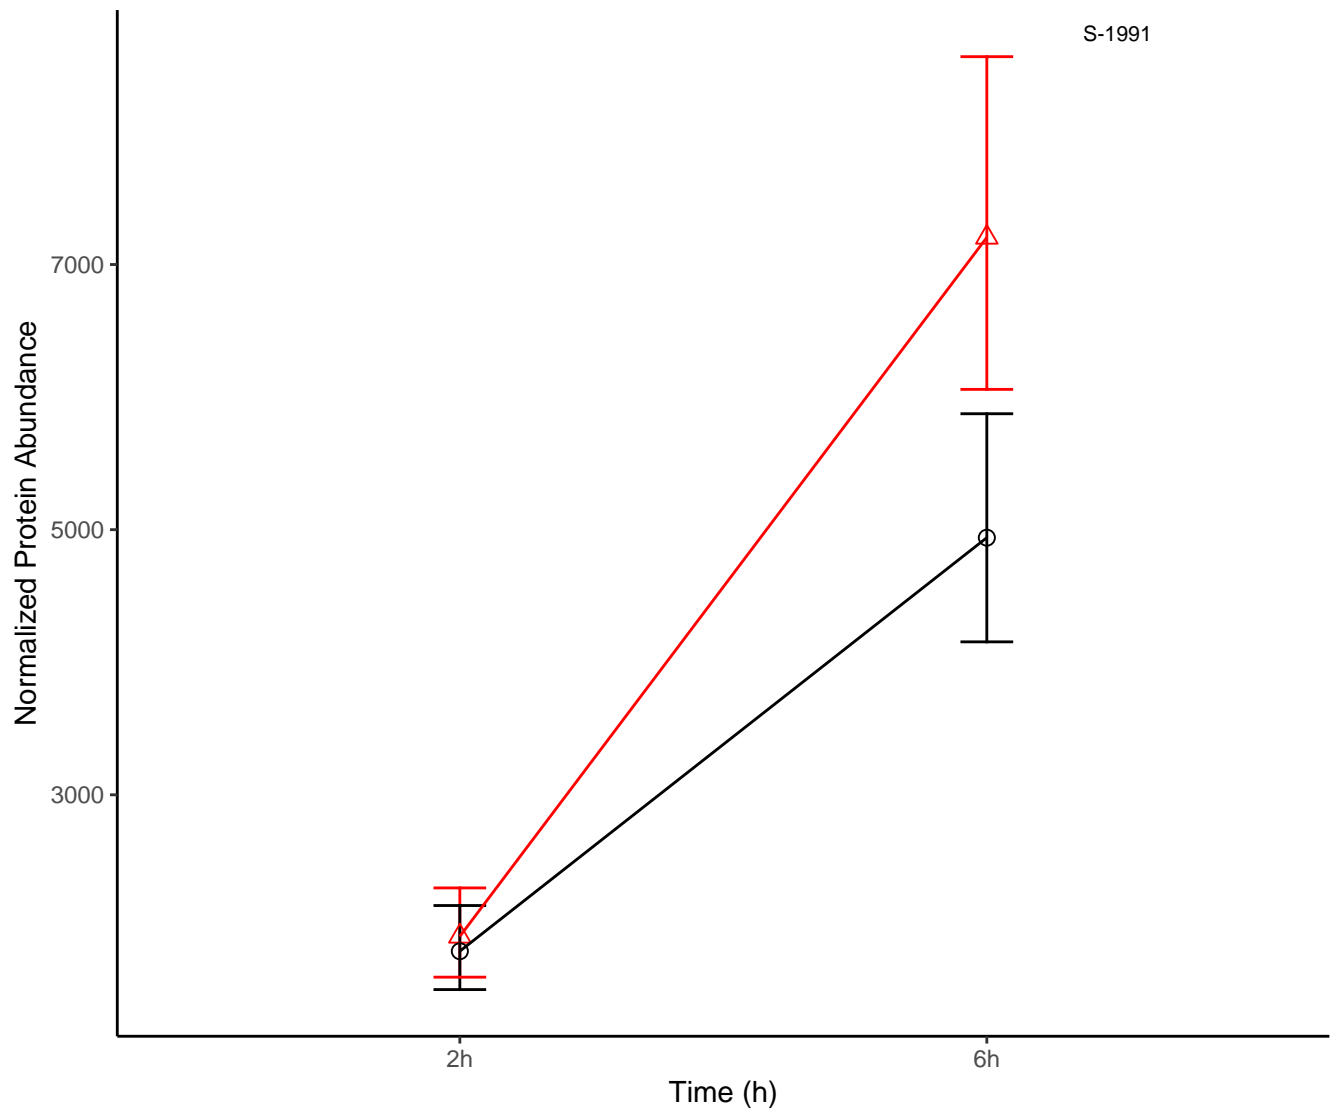

○ TSB-dex

△ TSB

# Y2478\_STAAM

S-1992

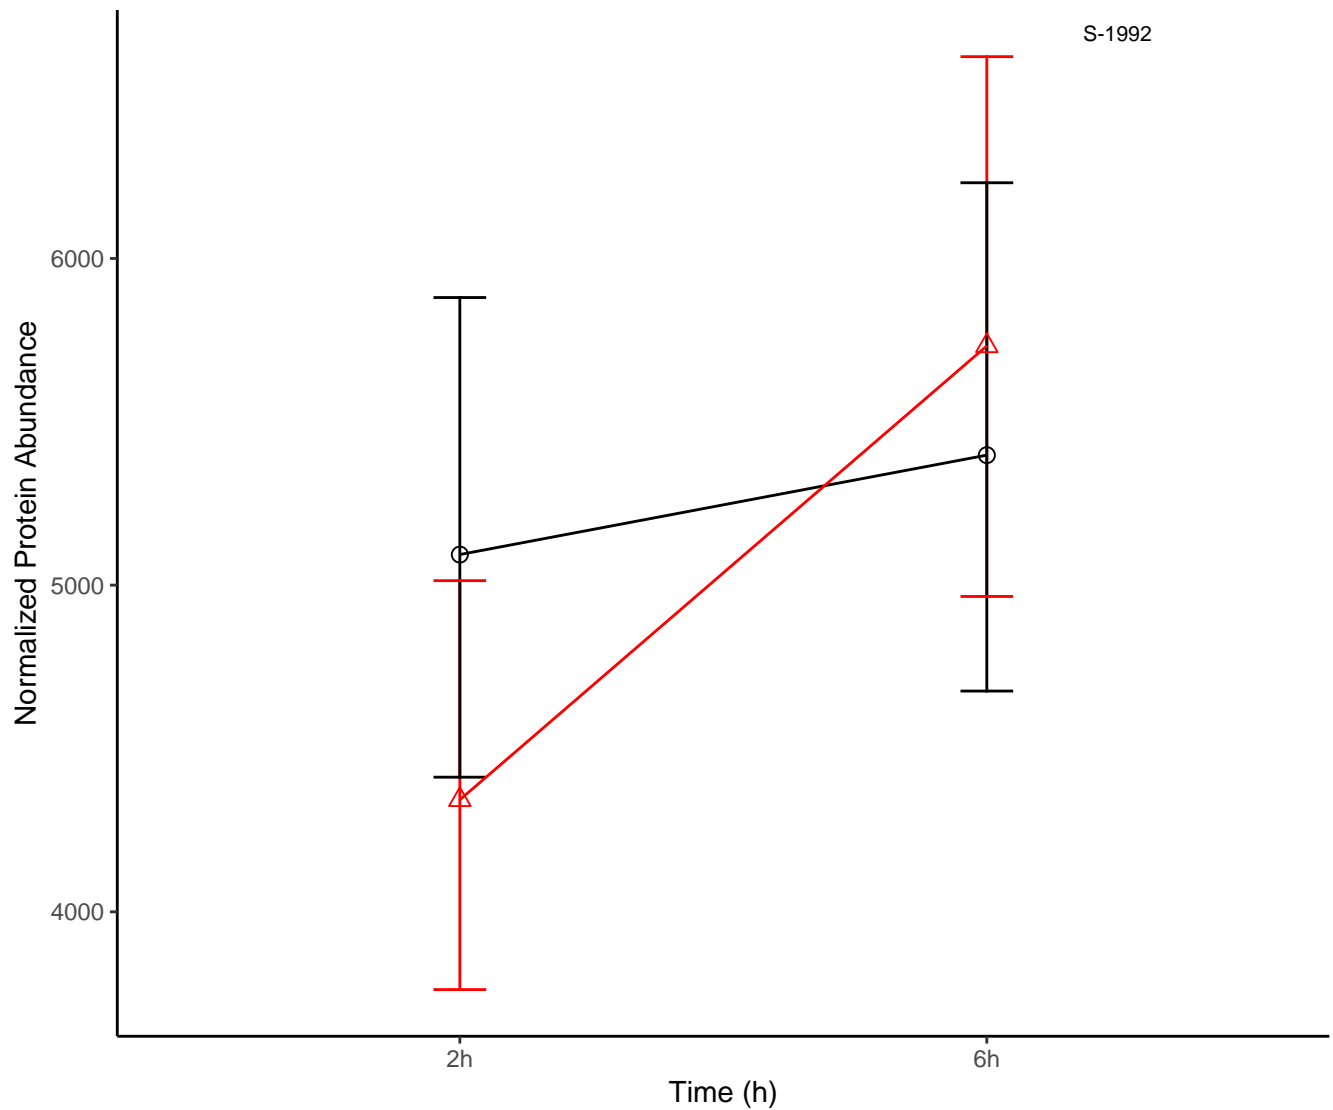

○ TSB-dex

△ TSB



# Y2523\_STAAM

S-1993

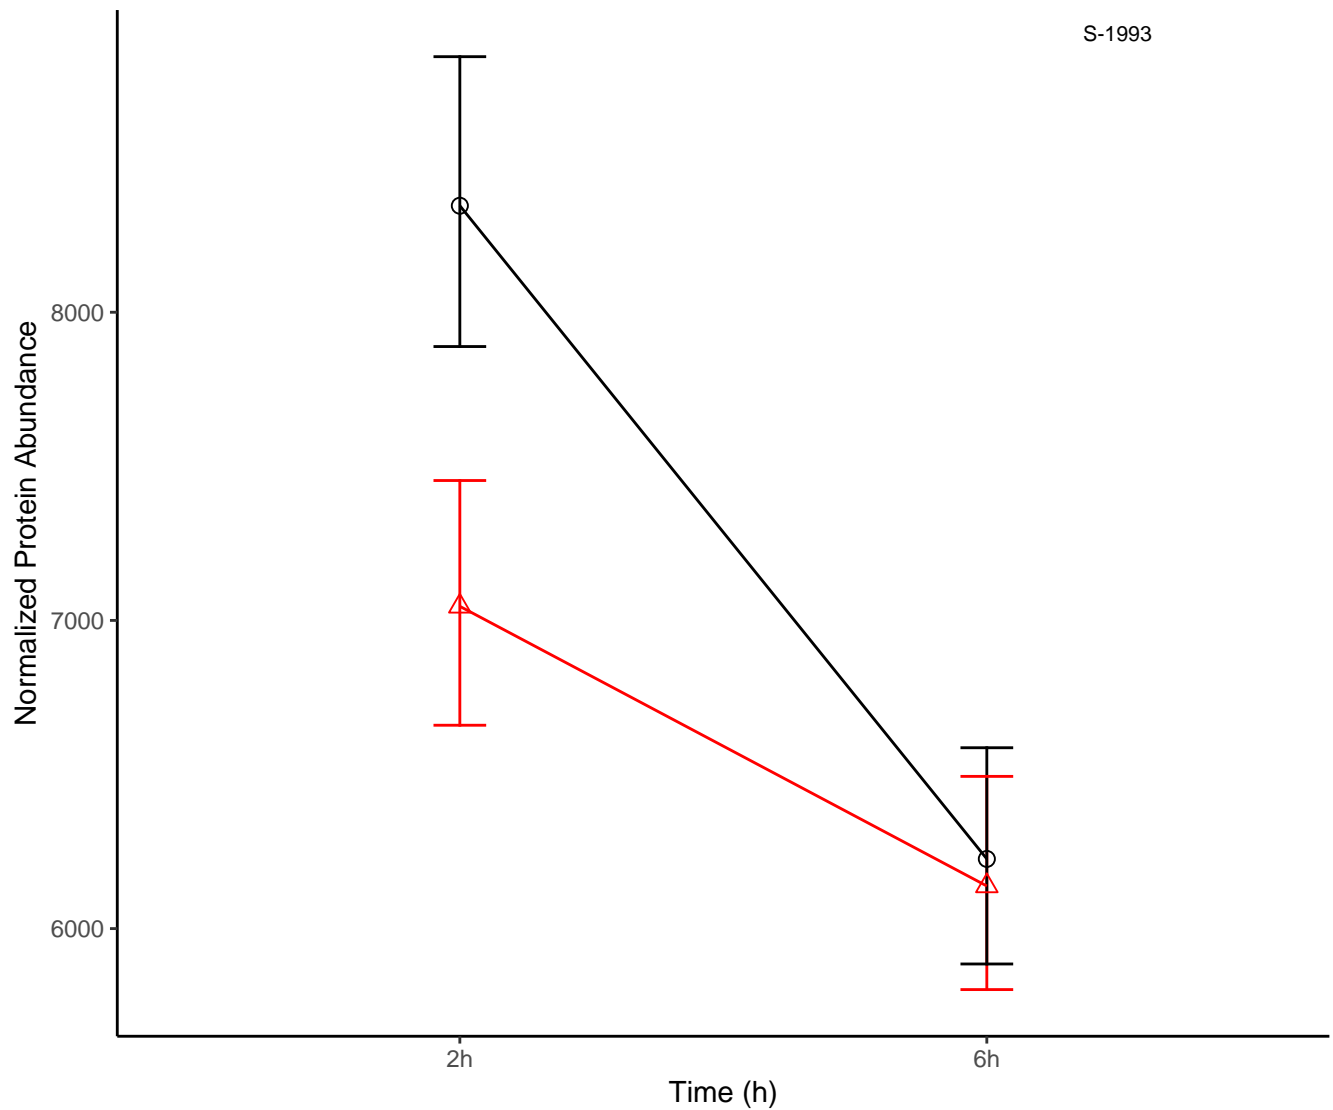

○ TSB-dex

△ TSB

# Y2573\_STAAM

S-1994

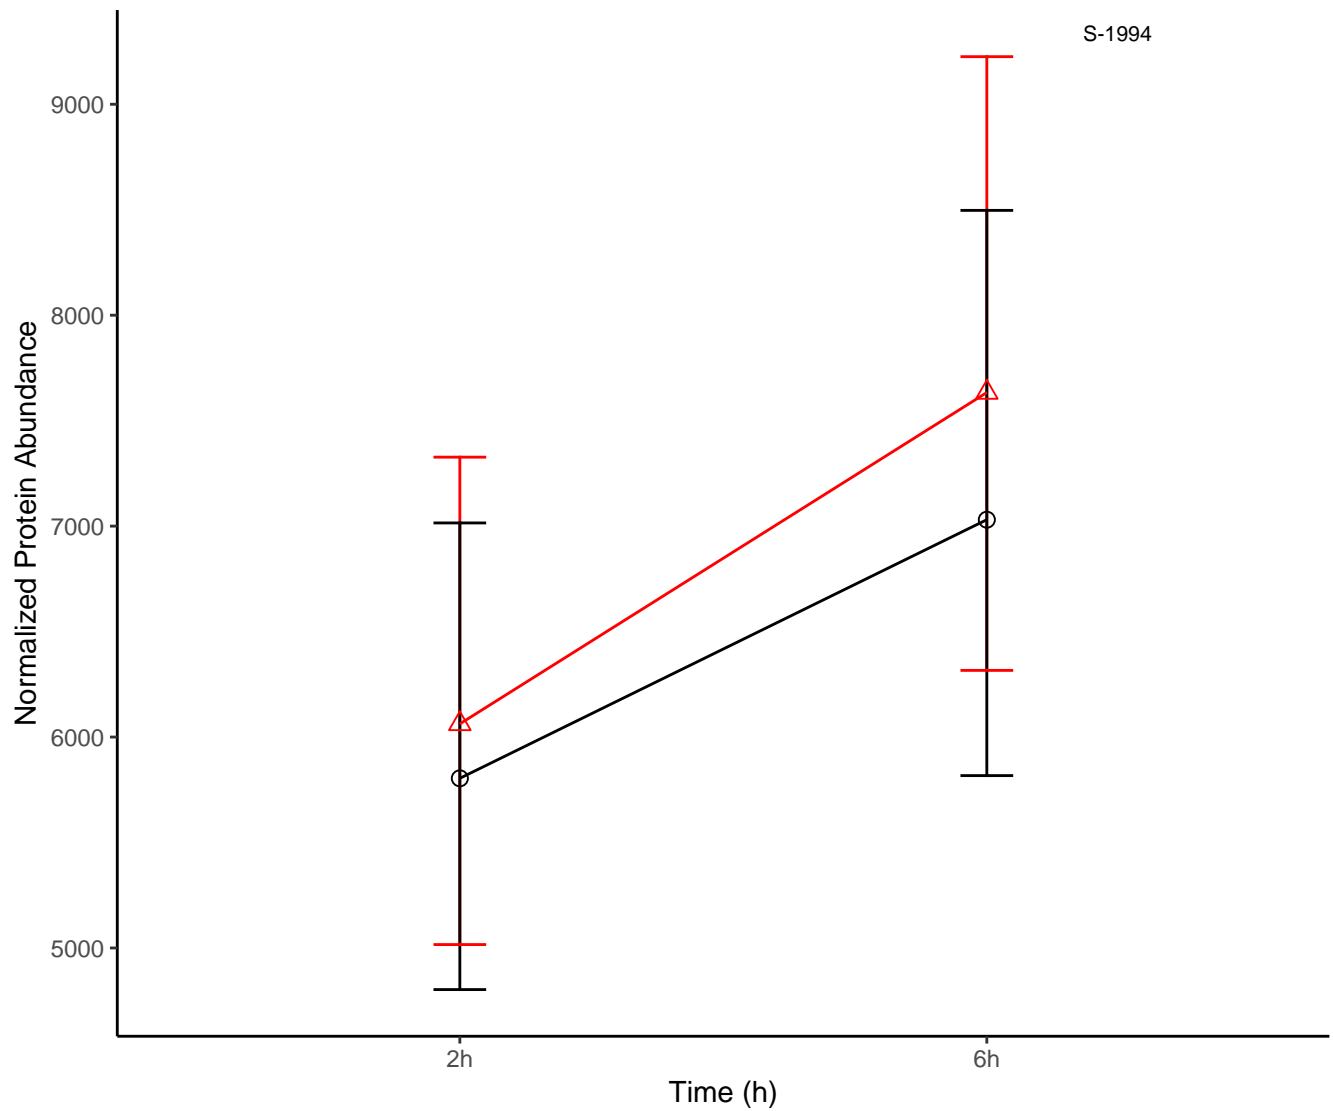

○ TSB-dex

△ TSB

# Y2578\_STAAM

S-1995

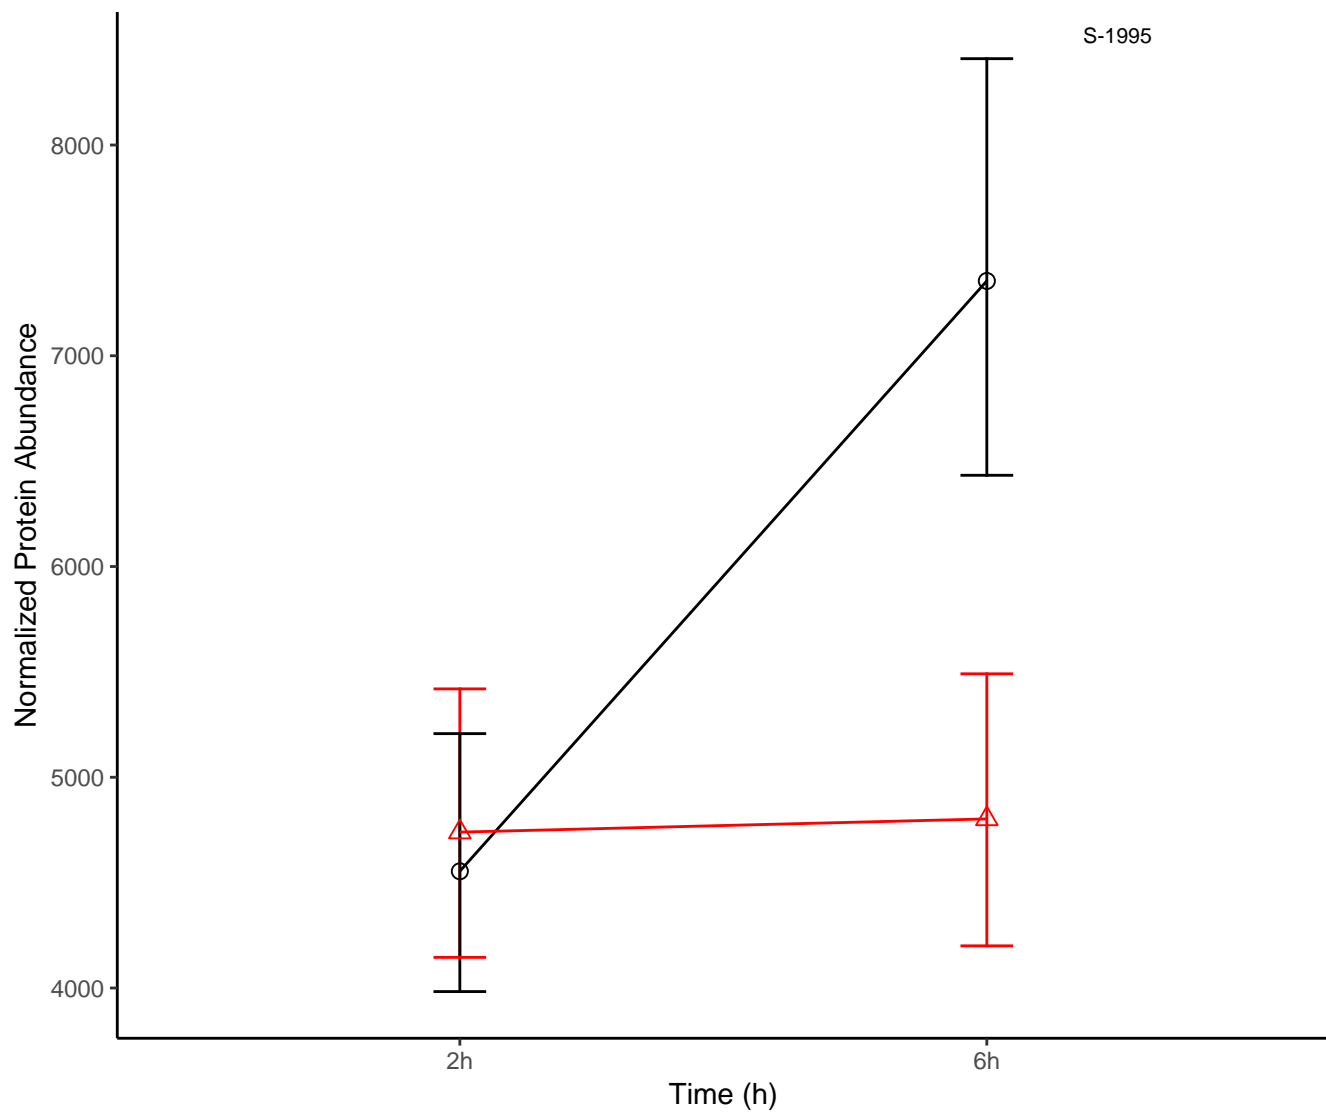

○ TSB-dex

△ TSB

# Y2581\_STAAM

S-1996

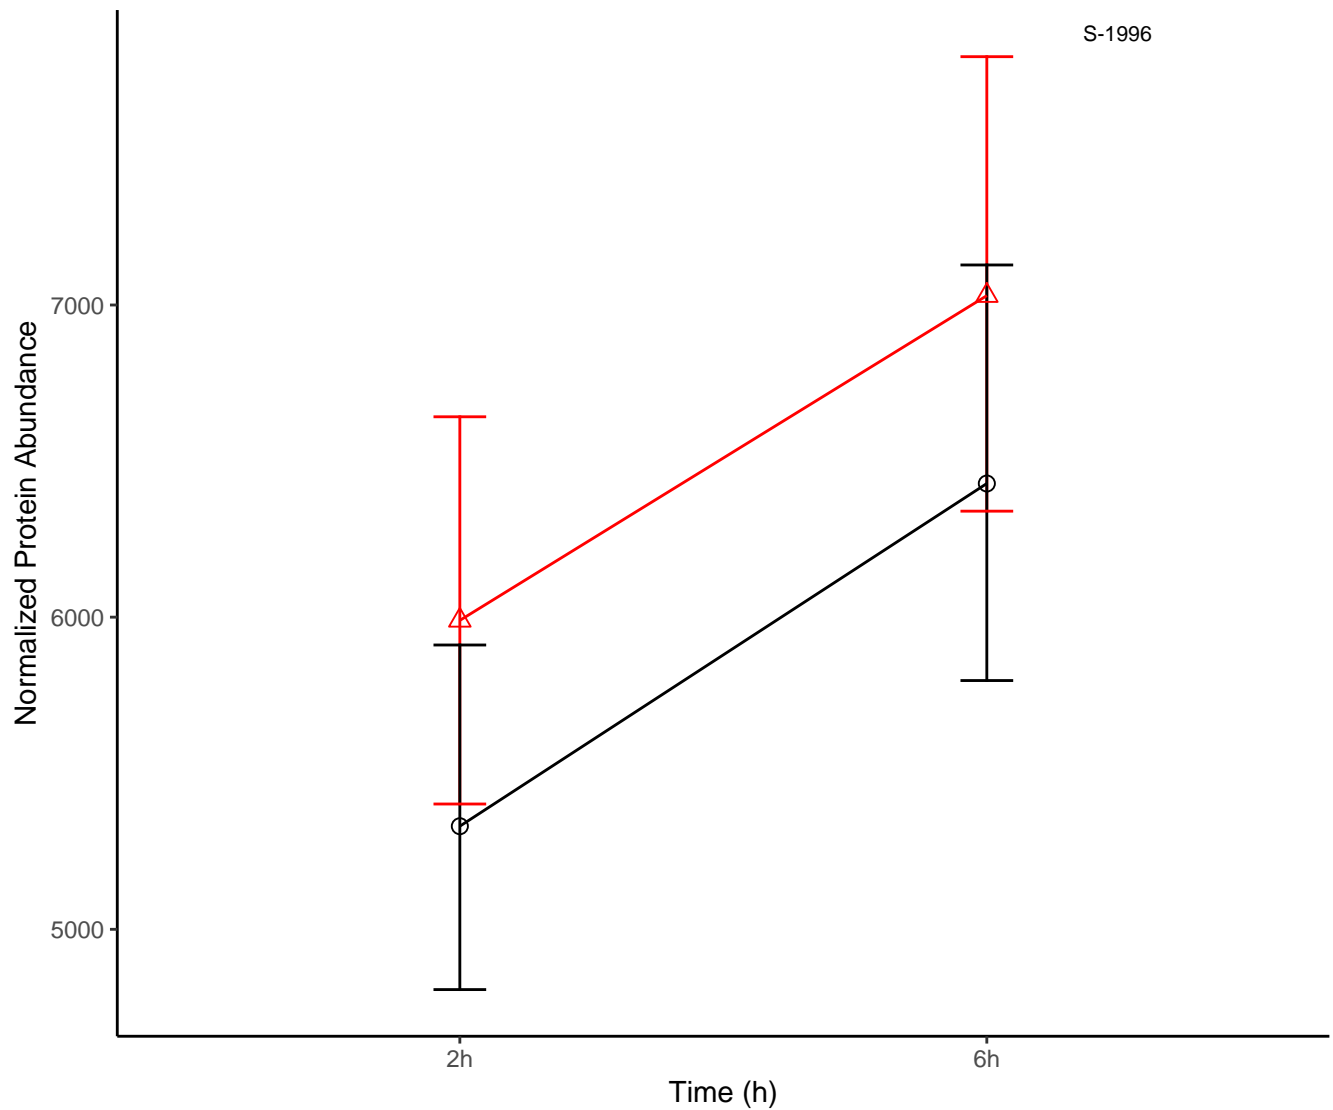

○ TSB-dex

△ TSB

# Y2627\_STAAM

S-1997

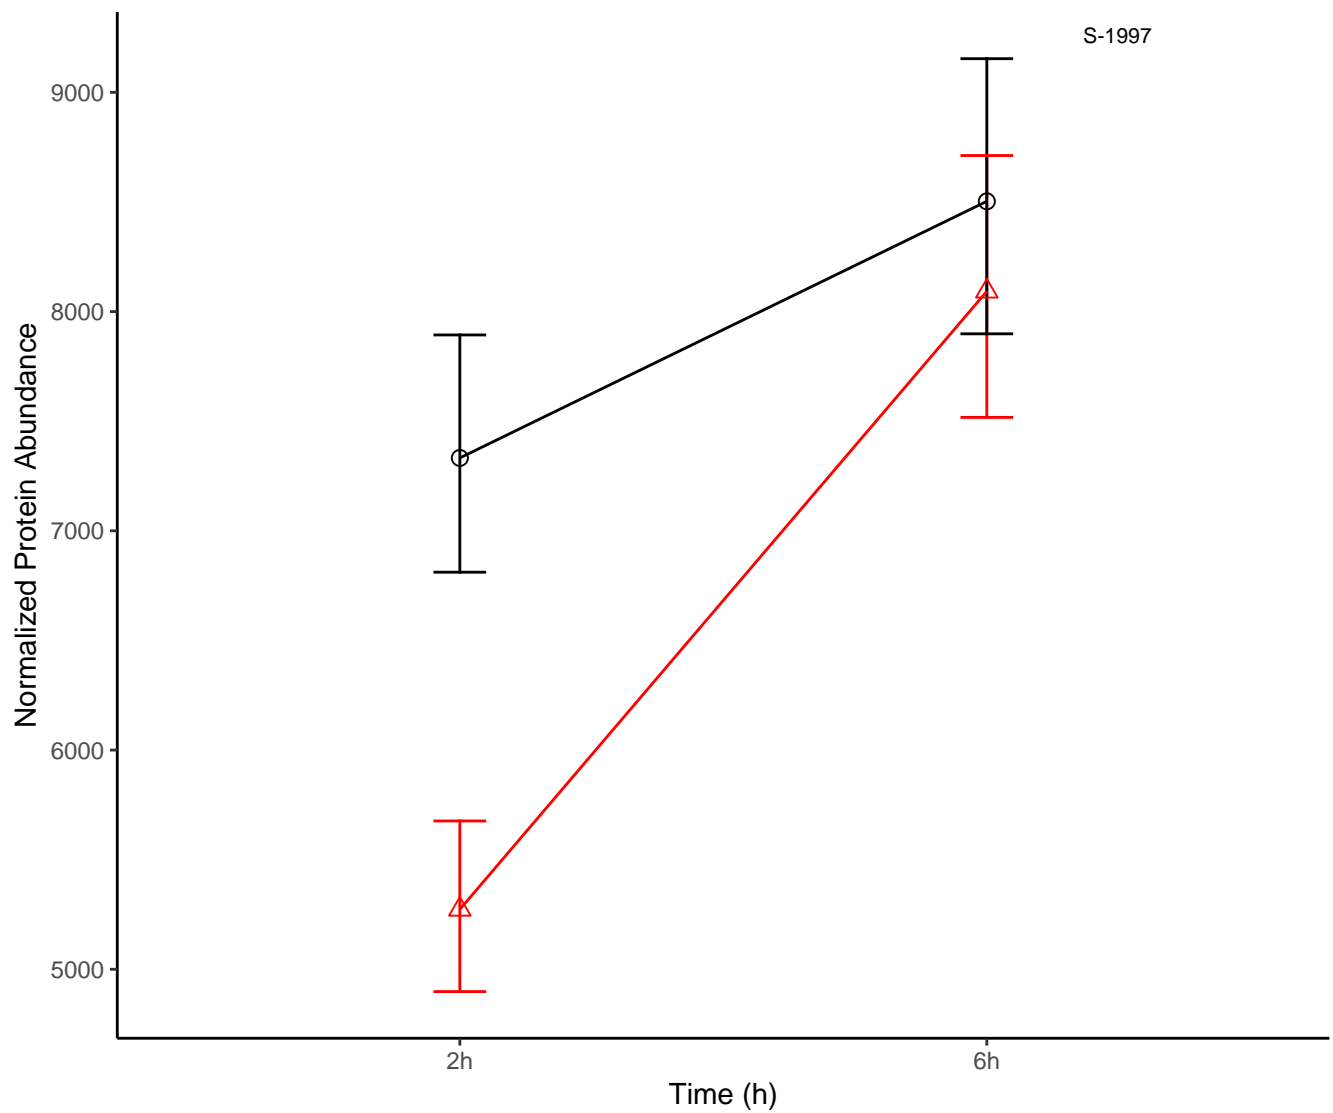

○ TSB-dex

△ TSB

# Y2687\_STAAM

S-1998

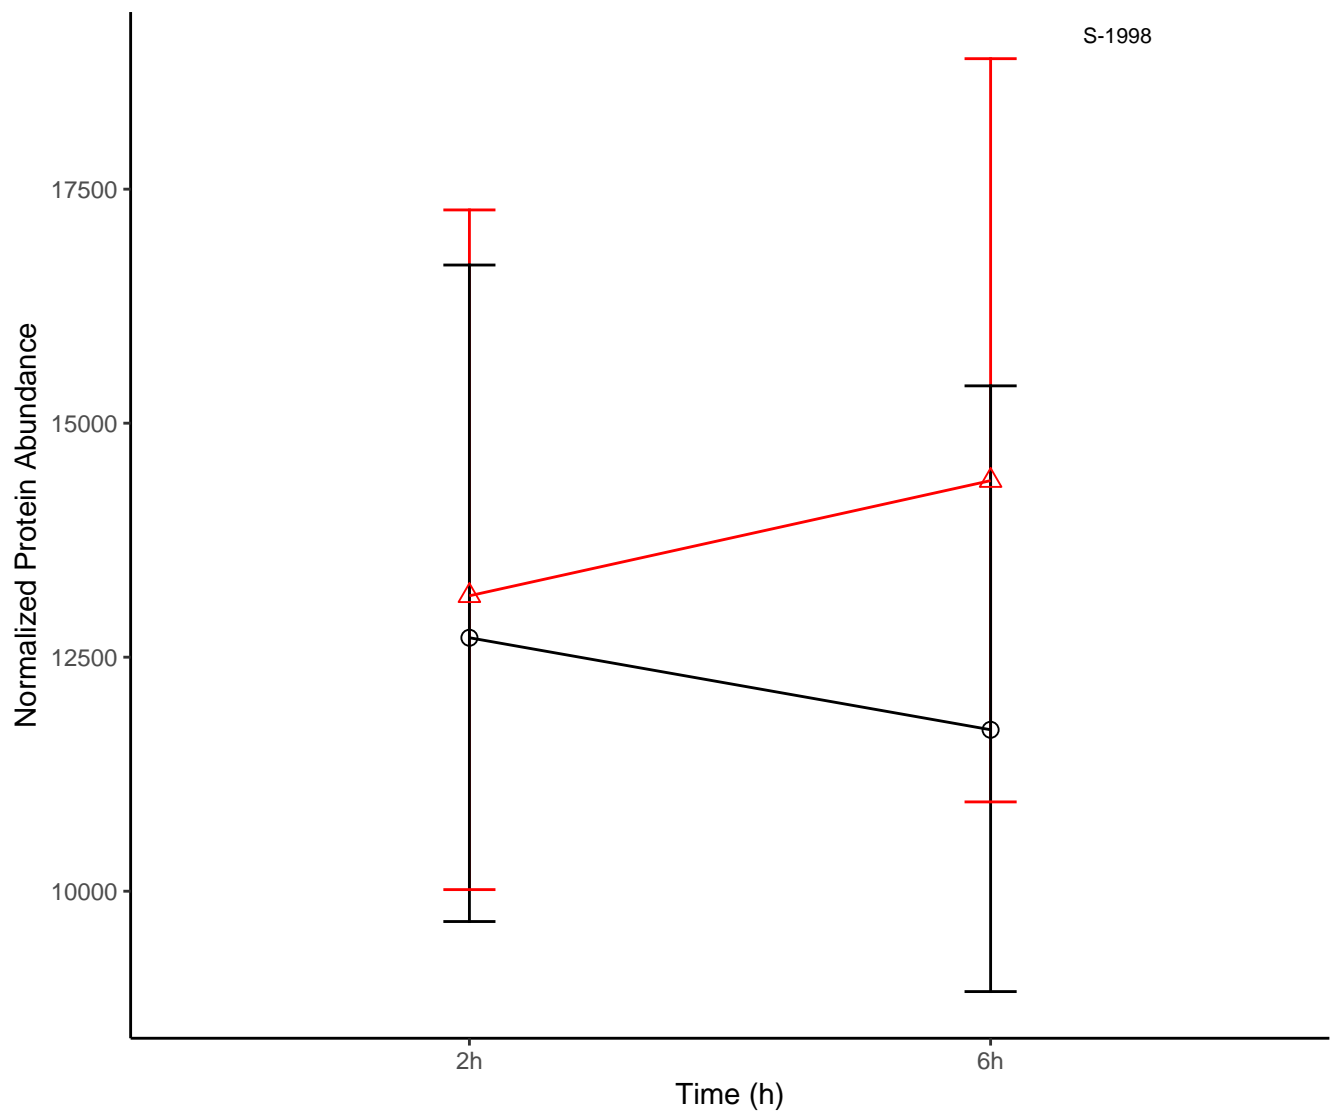

○ TSB-dex

△ TSB

# Y2689\_STAAM

S-1999

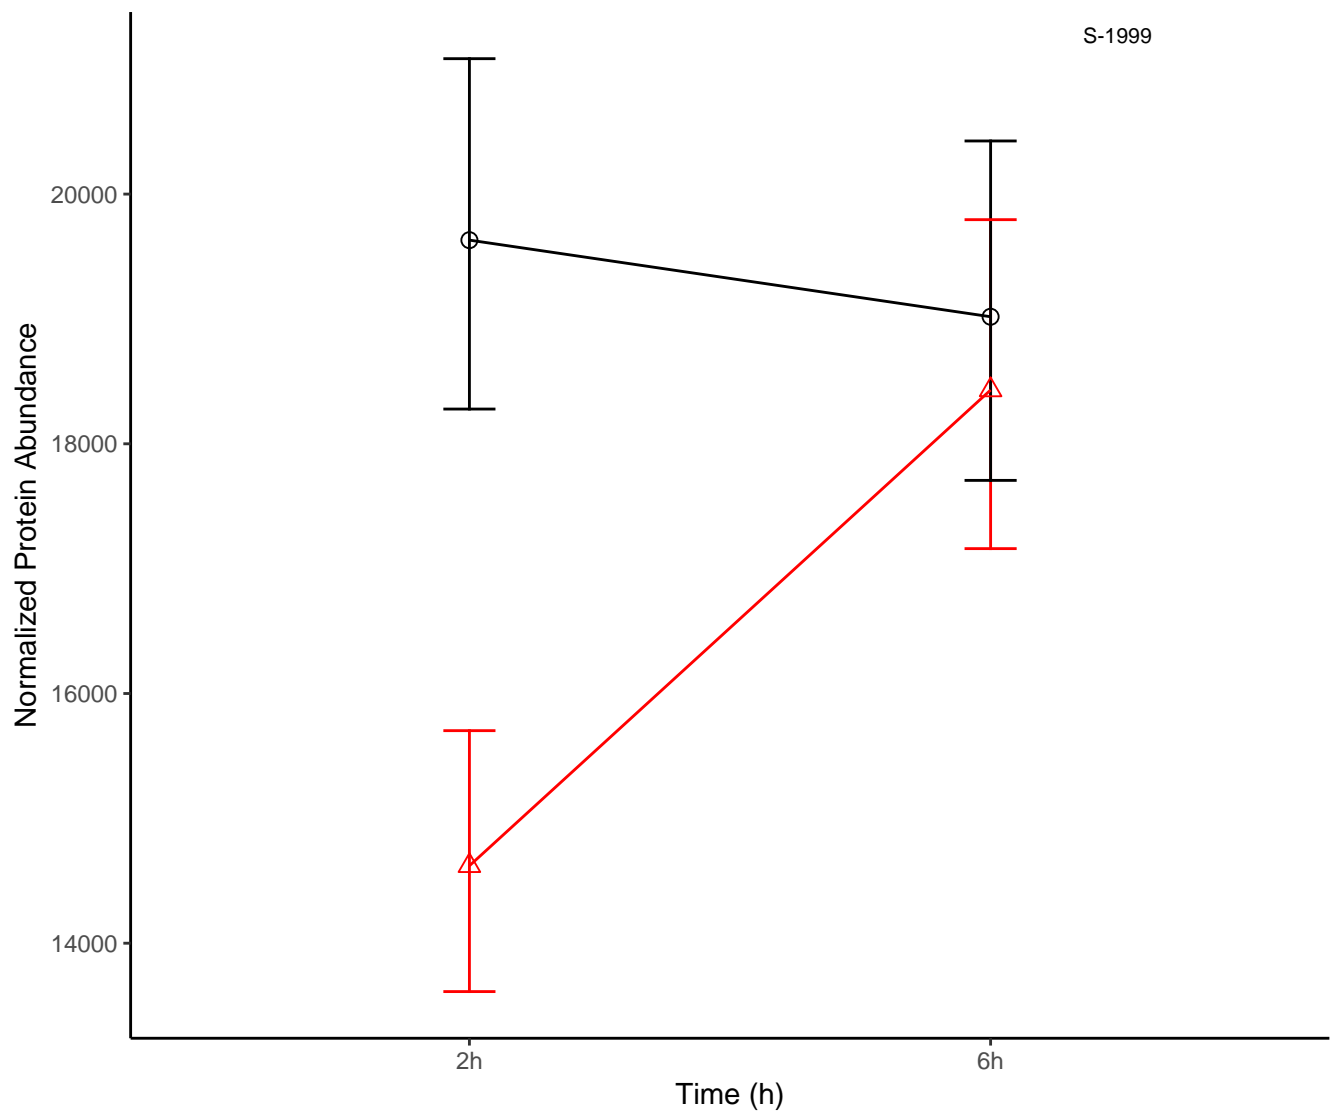

○ TSB-dex

△ TSB

# Y385\_STAAM

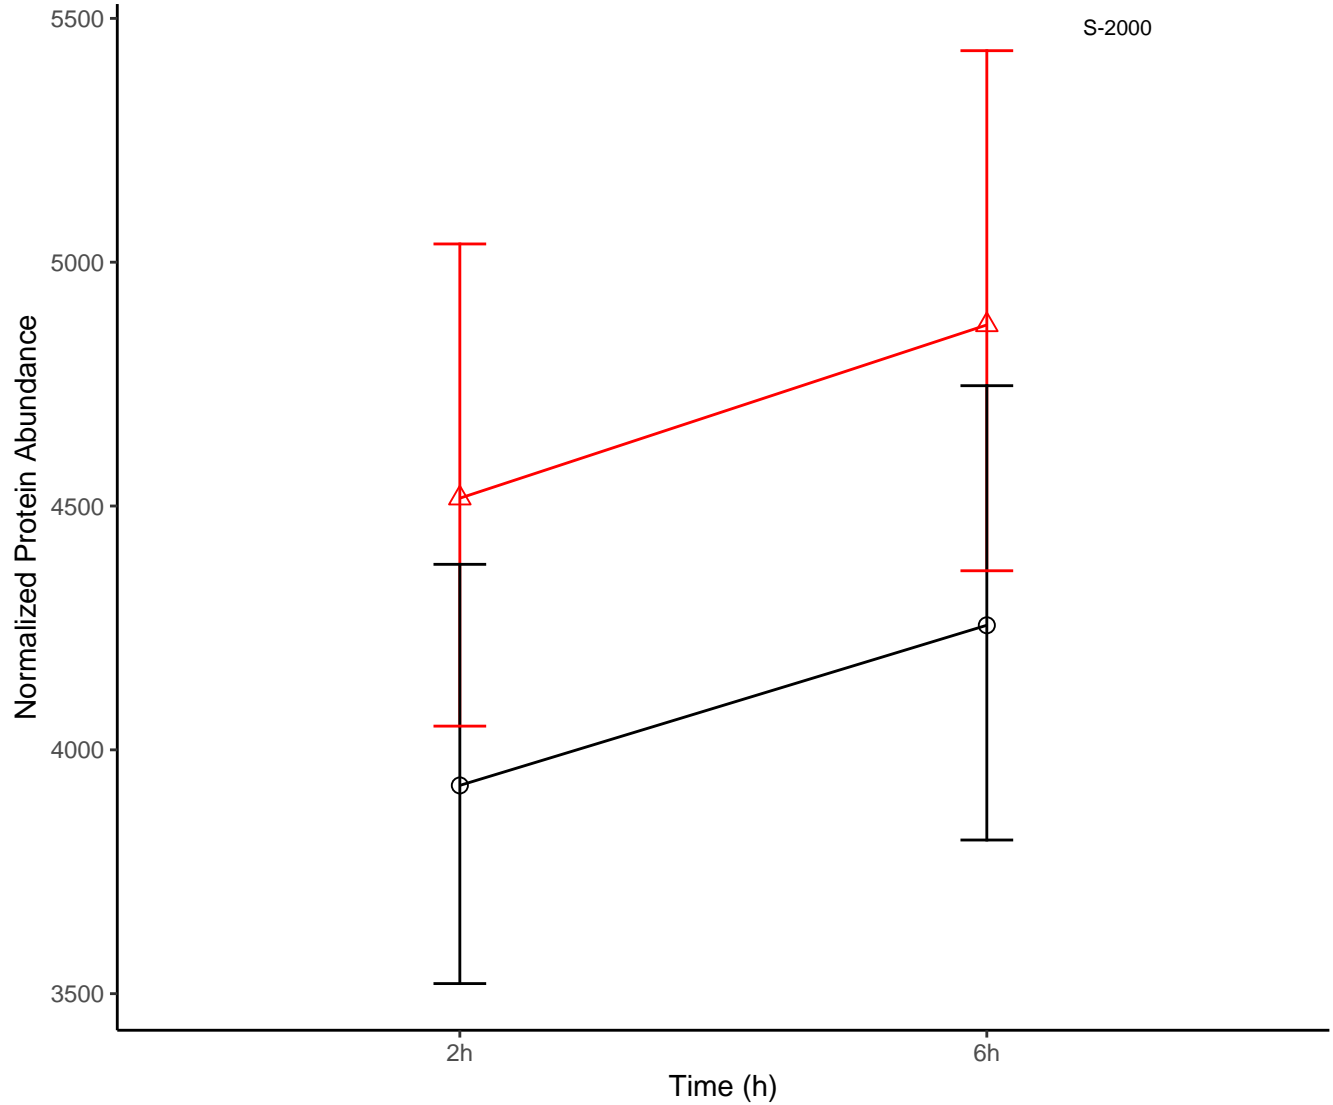

S-2000

○ TSB-dex

△ TSB



# Y437\_STAAM

S-2001

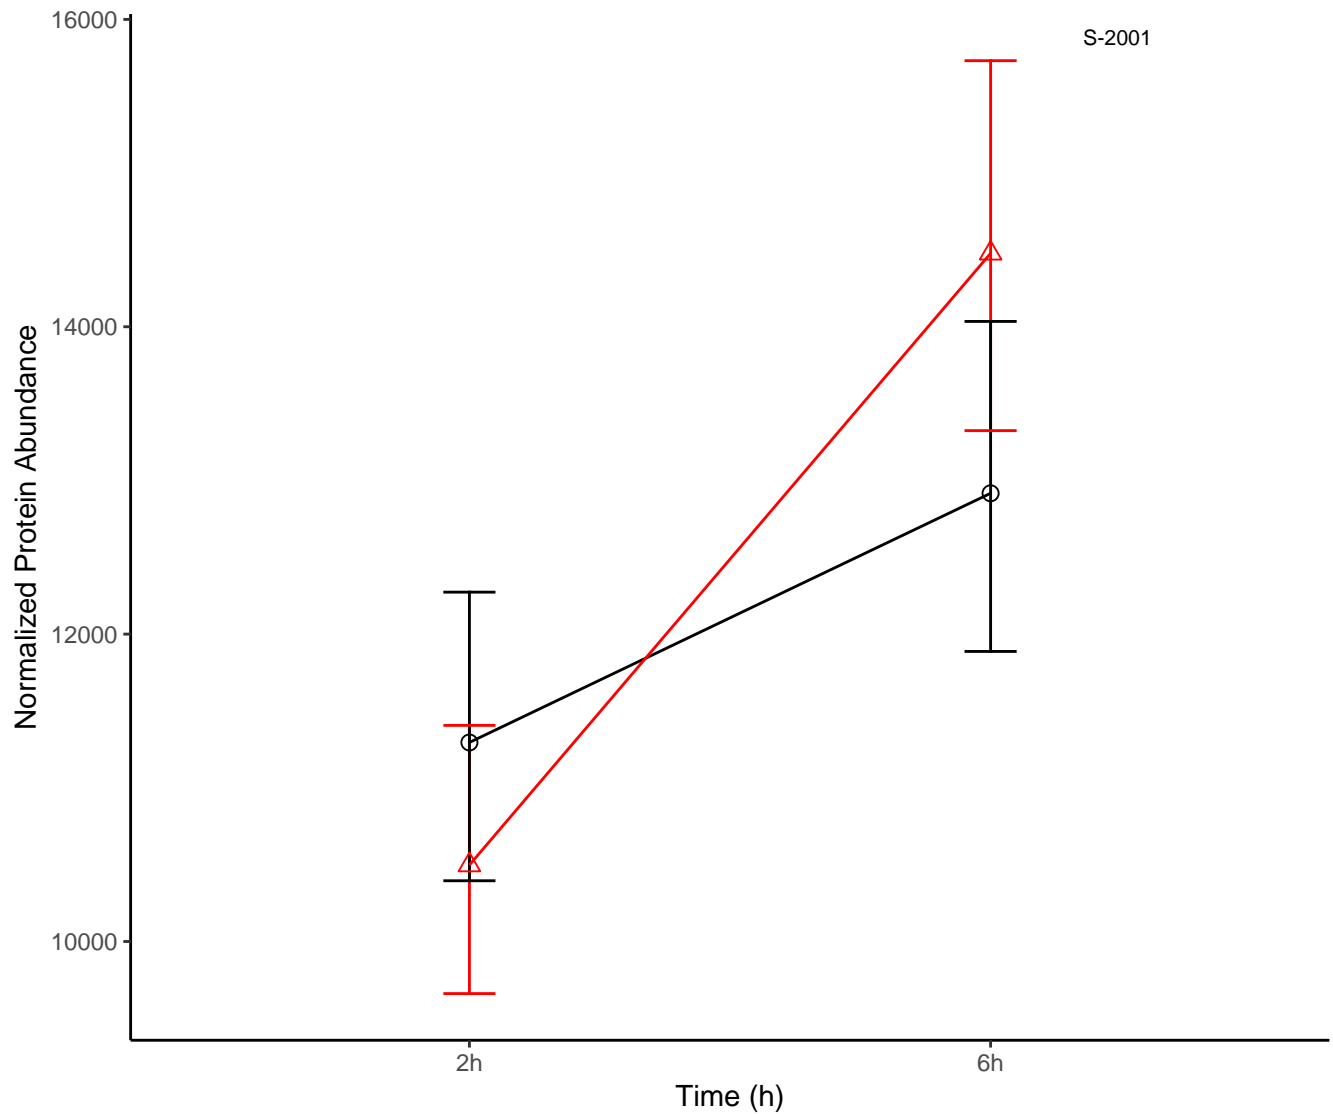

○ TSB-dex

△ TSB

# Y479\_STAAM

S-2002

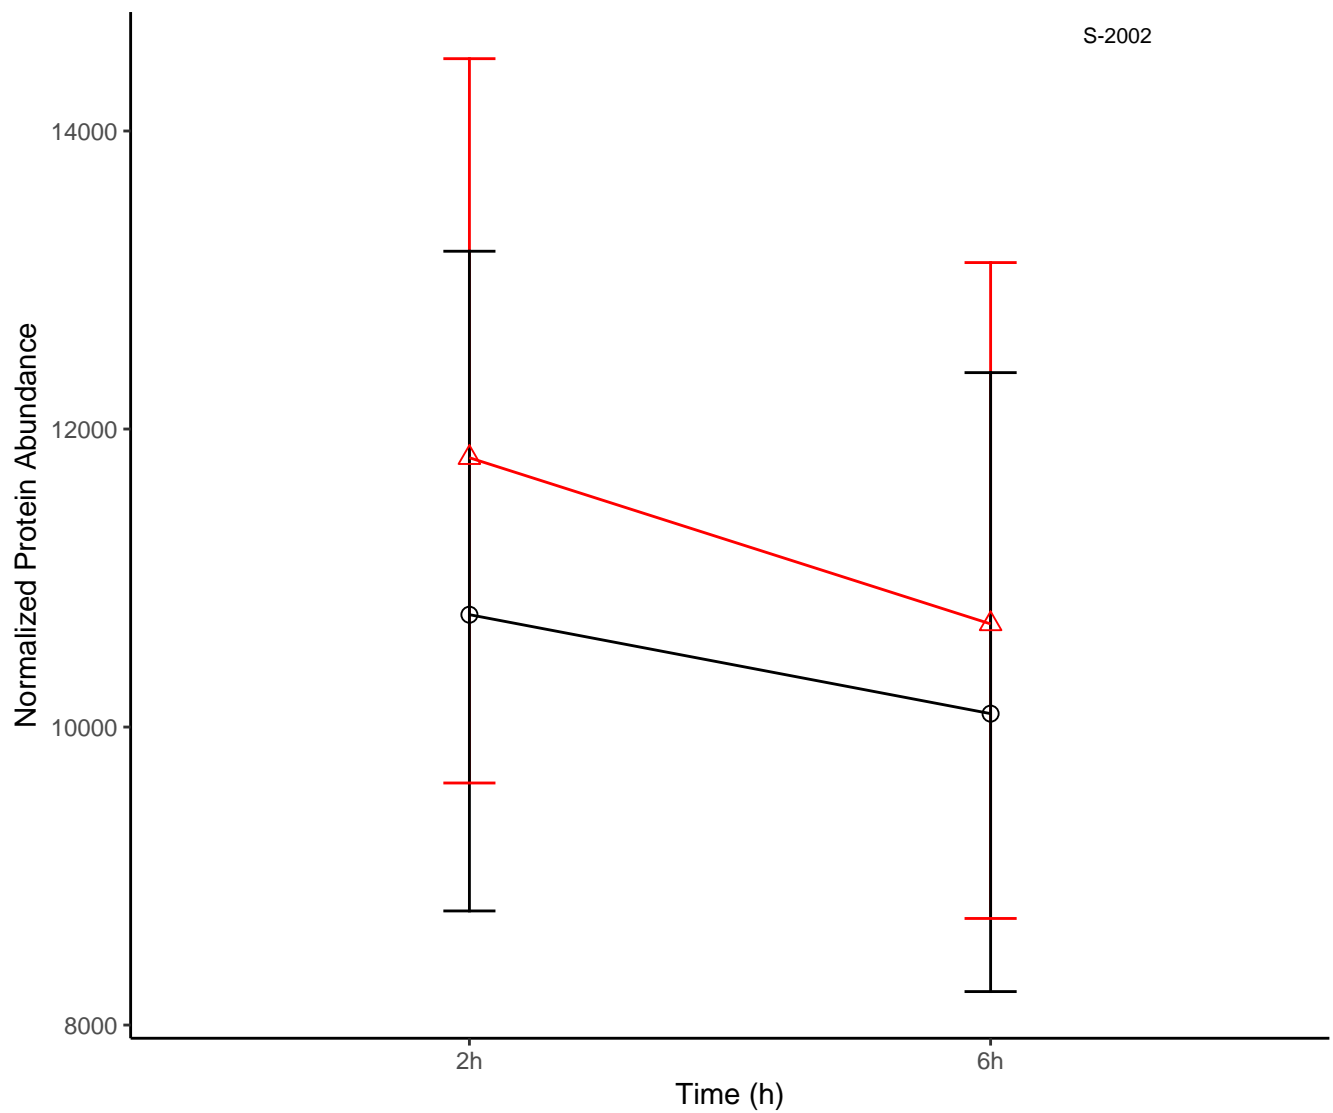

○ TSB-dex

△ TSB

# Y553\_STAAM

S-2003

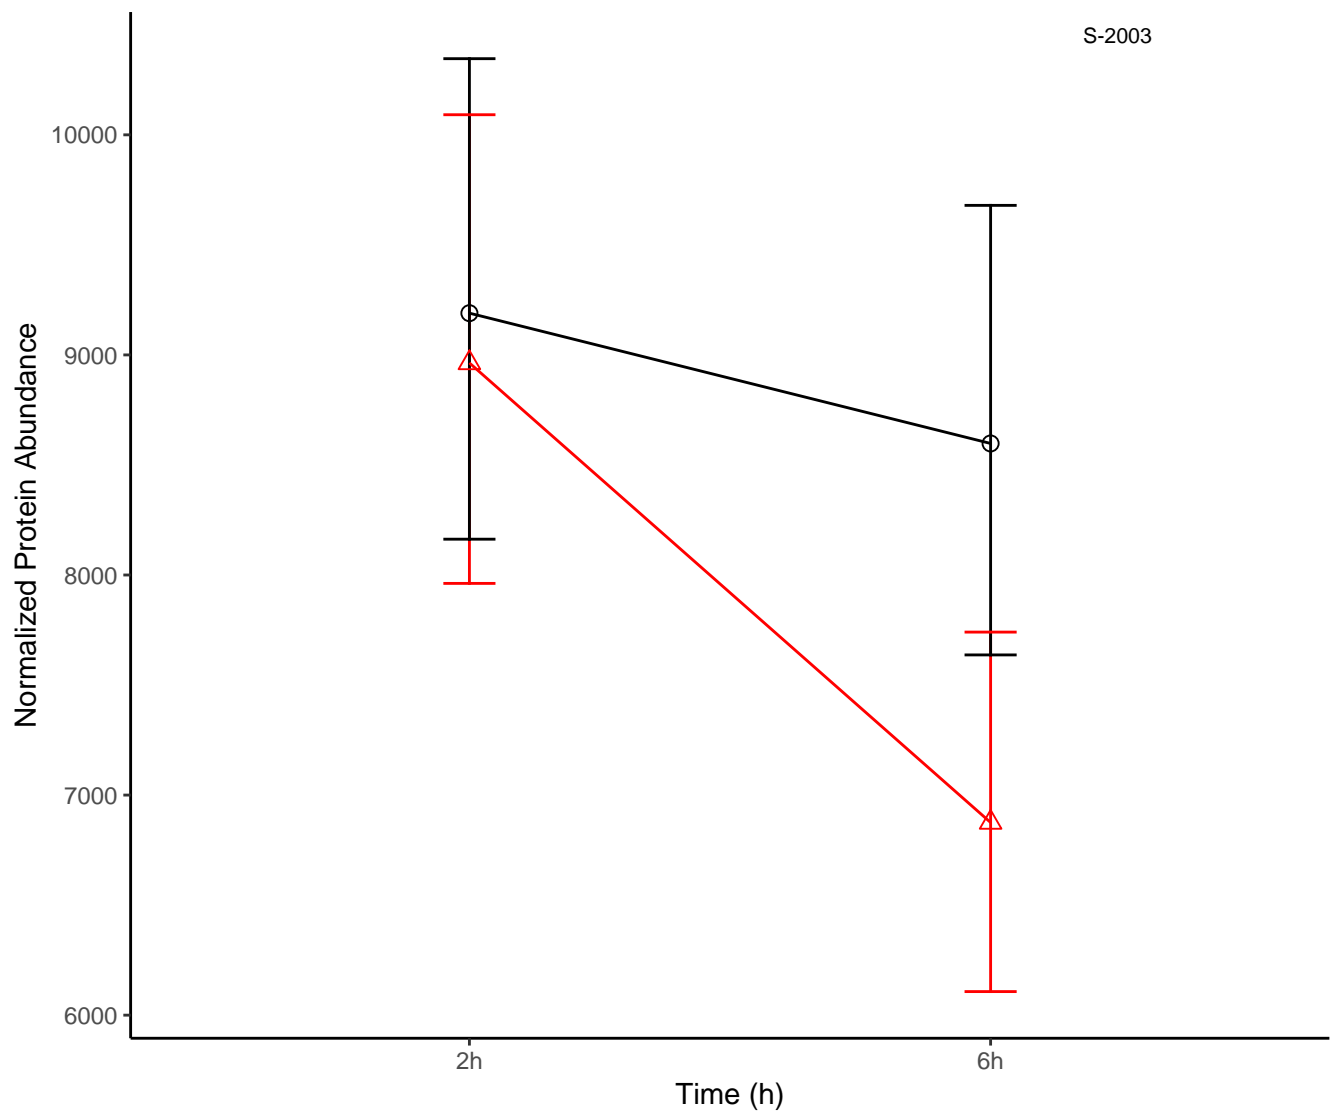

○ TSB-dex

△ TSB

# Y587\_STAAM

S-2004

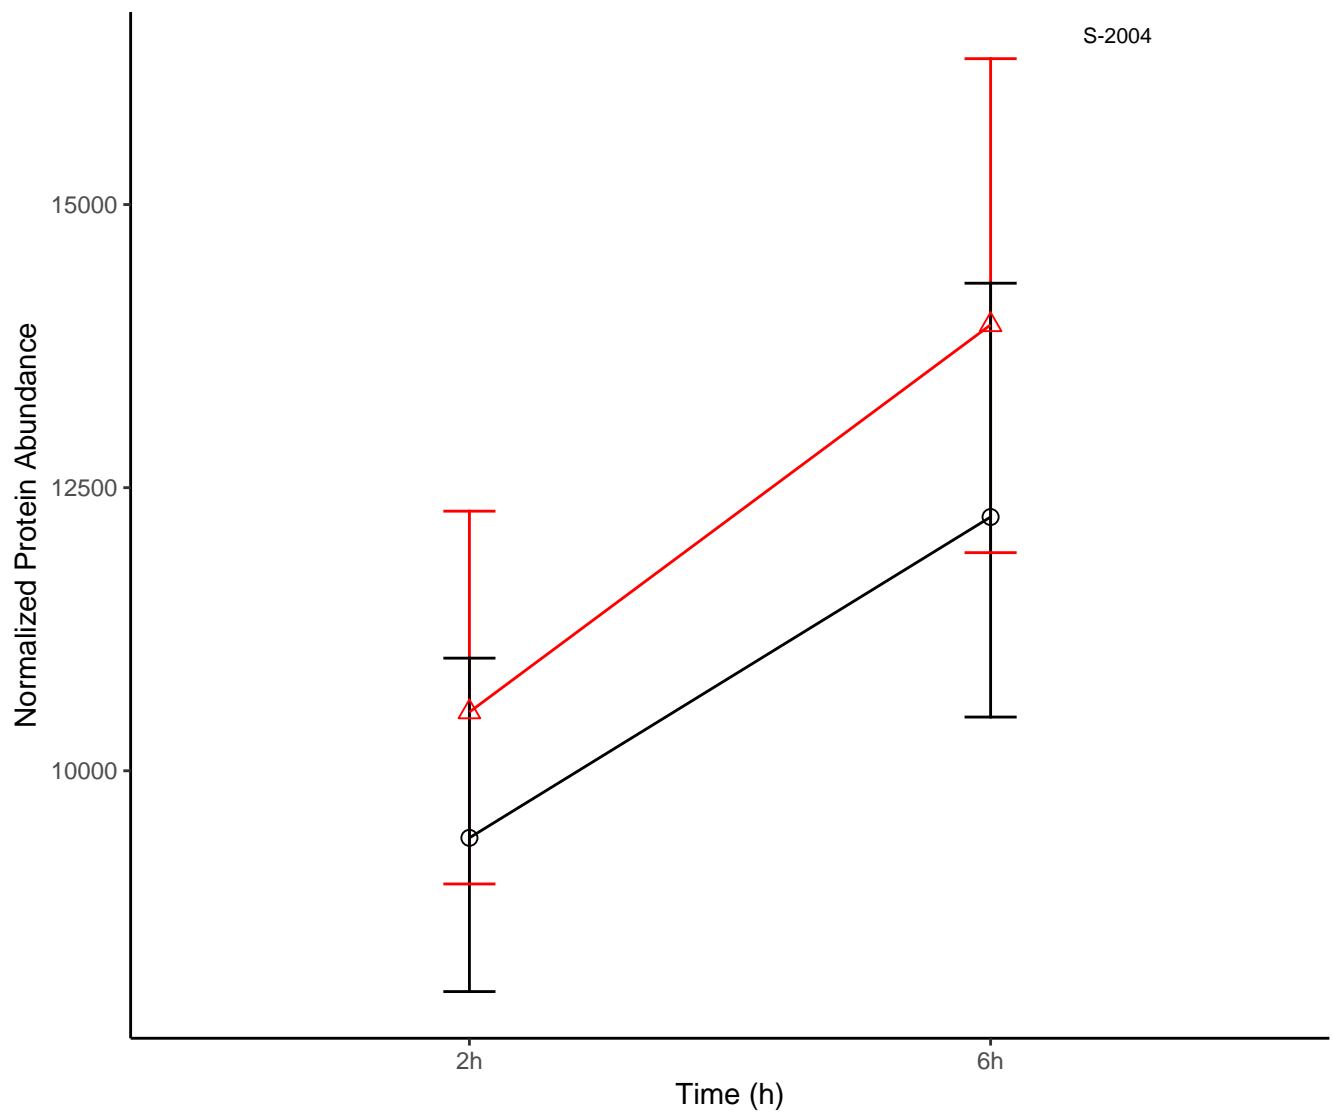

○ TSB-dex

△ TSB

# Y669\_STAAM

S-2005

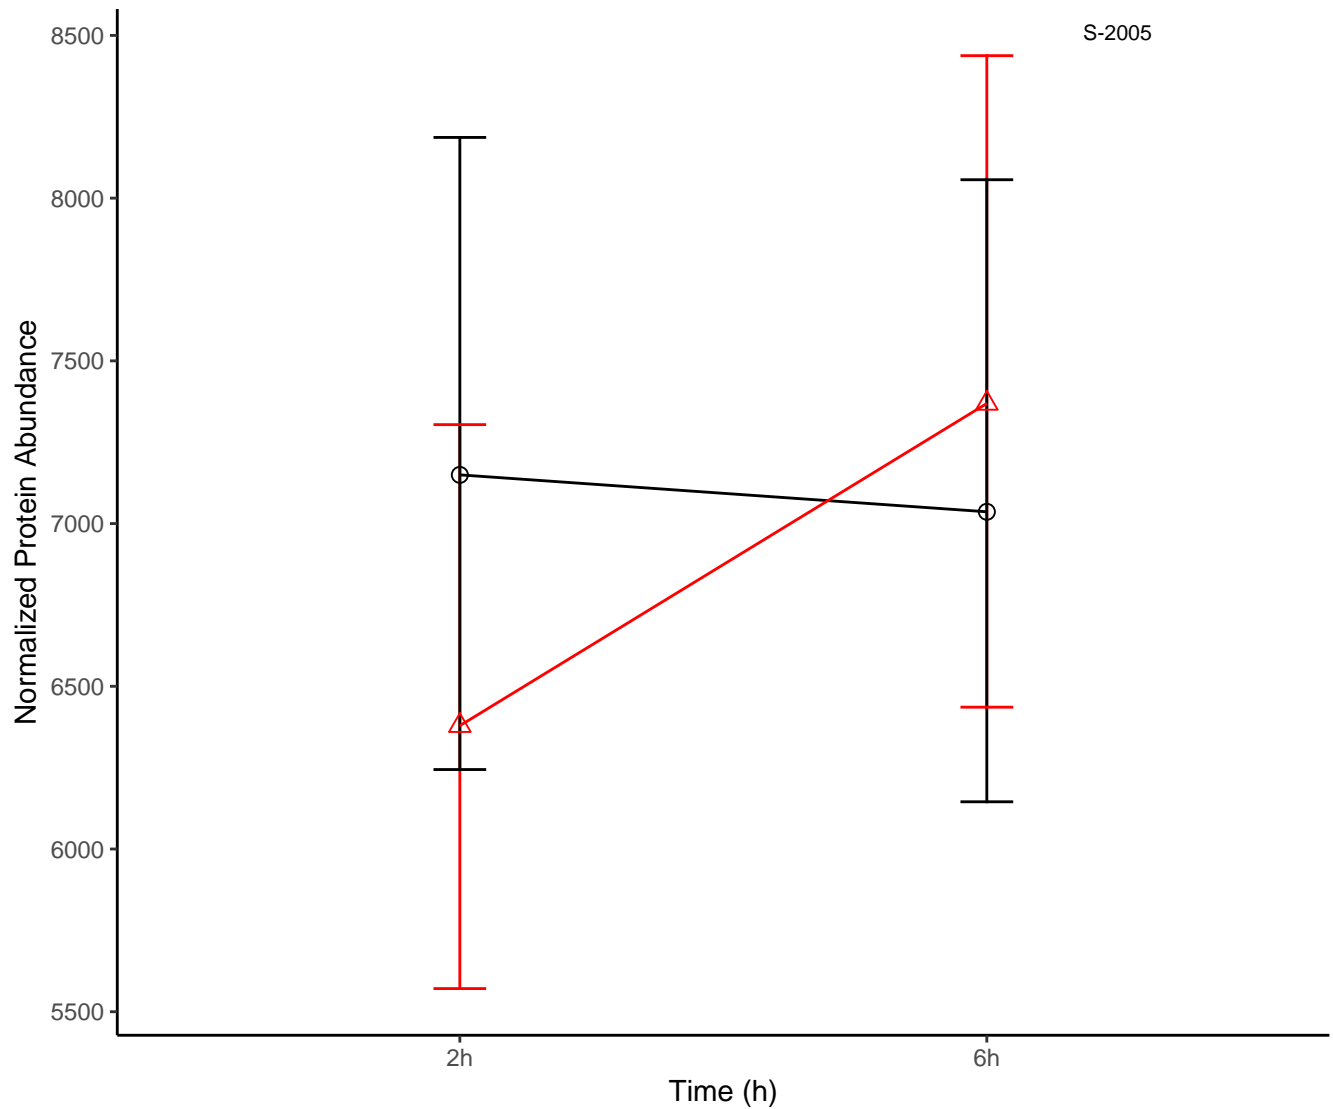

○ TSB-dex

△ TSB

# Y752\_STAAM

S-2006

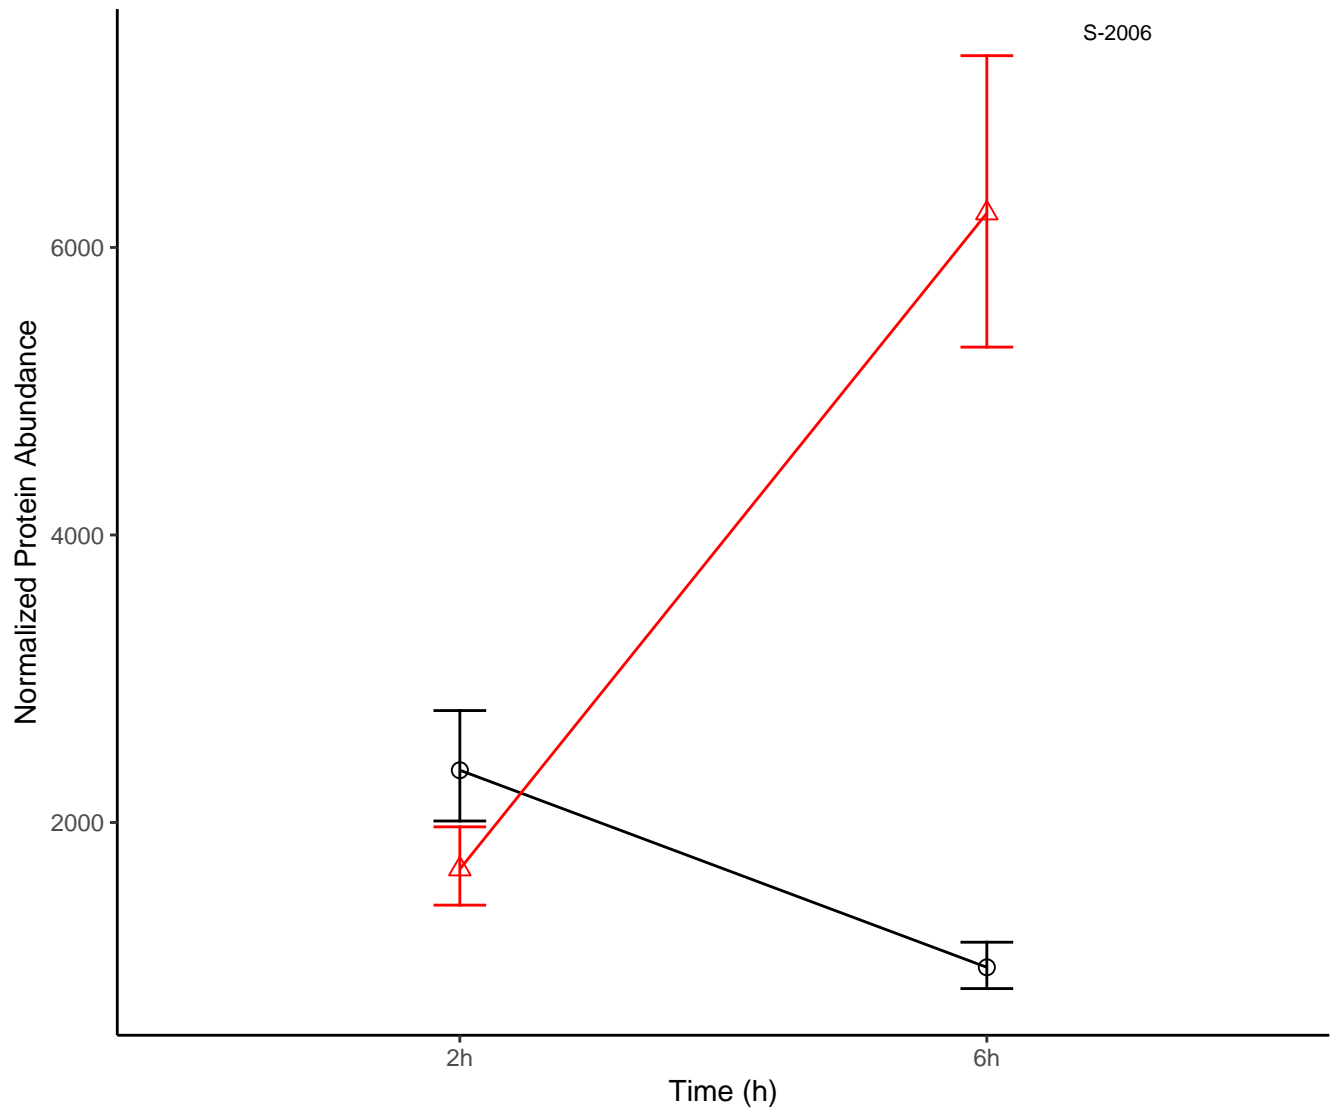

○ TSB-dex

△ TSB

# Y765\_STAAM

S-2007

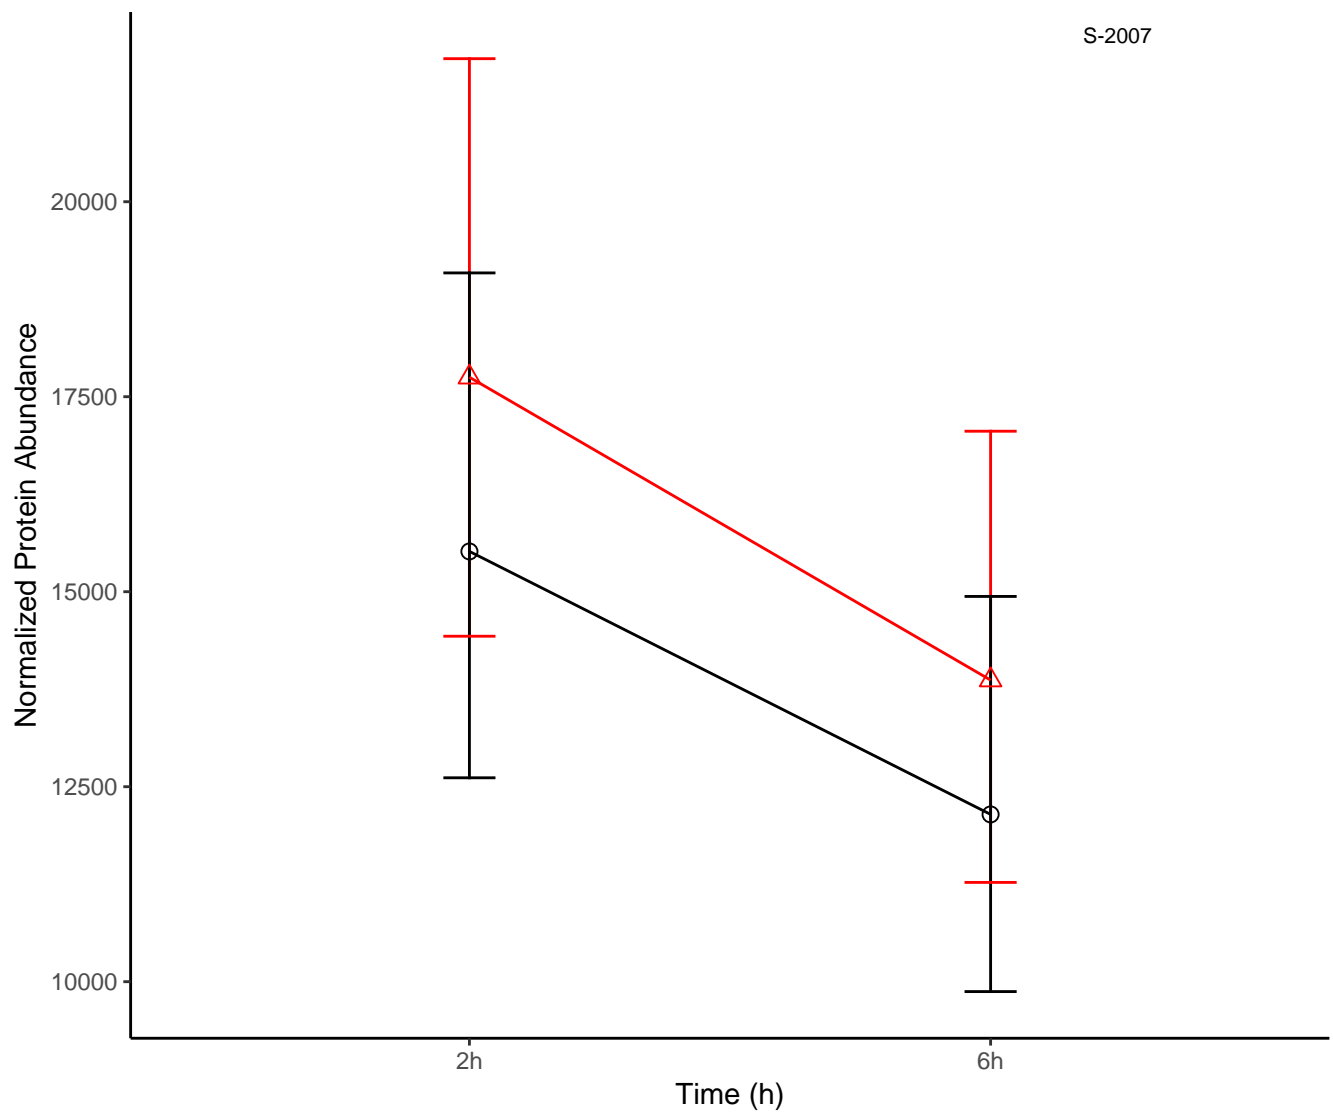

○ TSB-dex

△ TSB

# Y769\_STAAM

S-2008

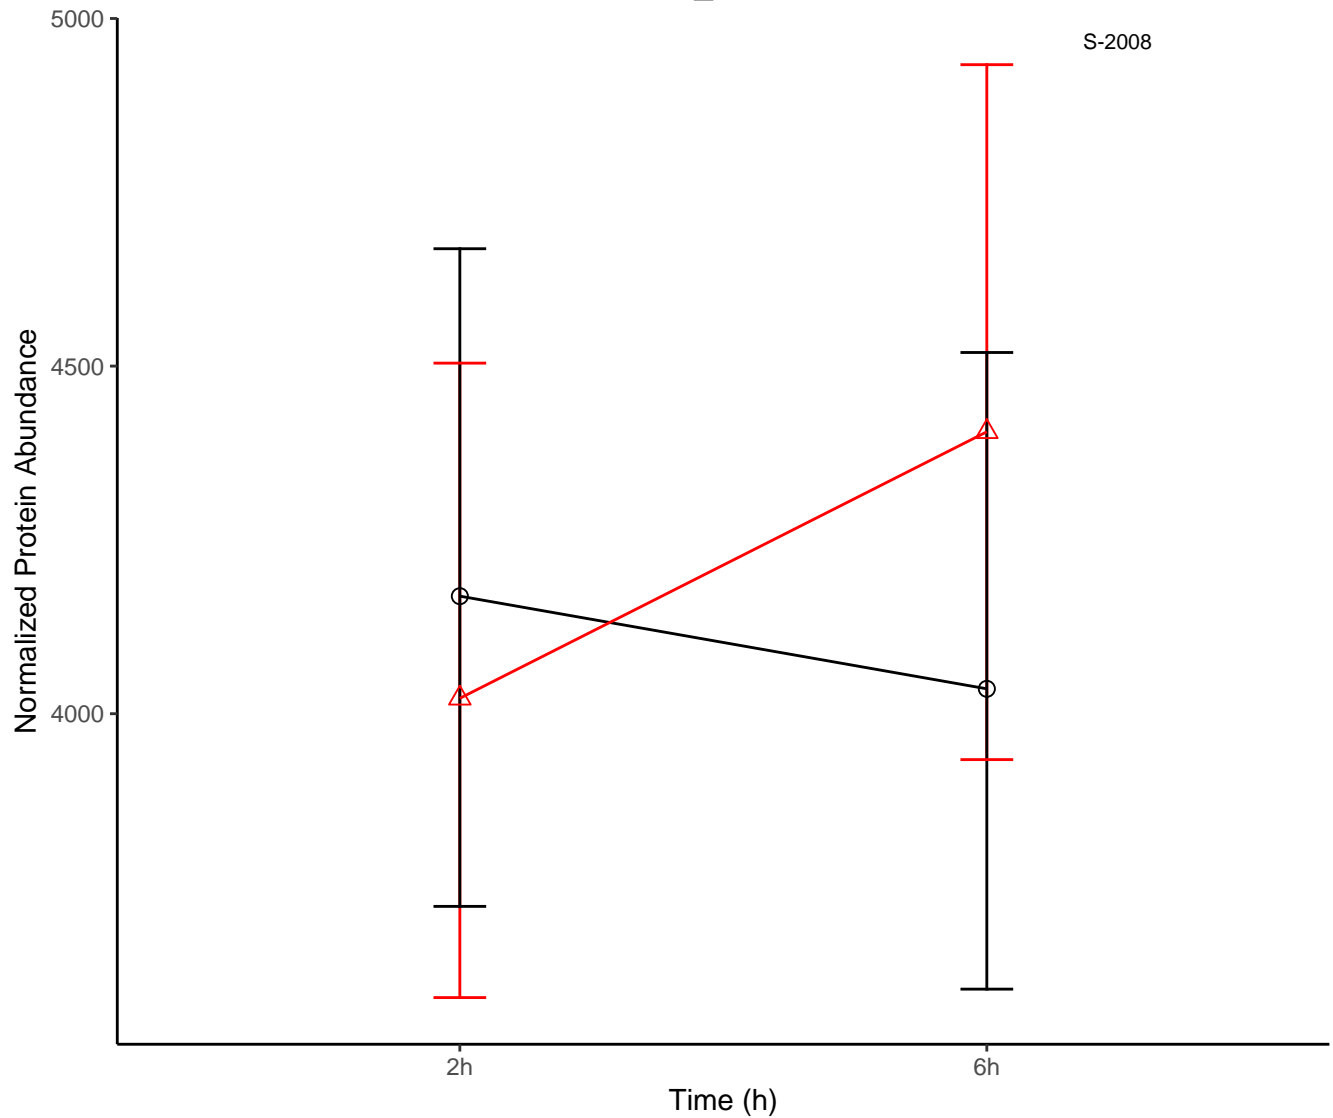

○ TSB-dex

△ TSB



# Y840\_STAAM

S-2009

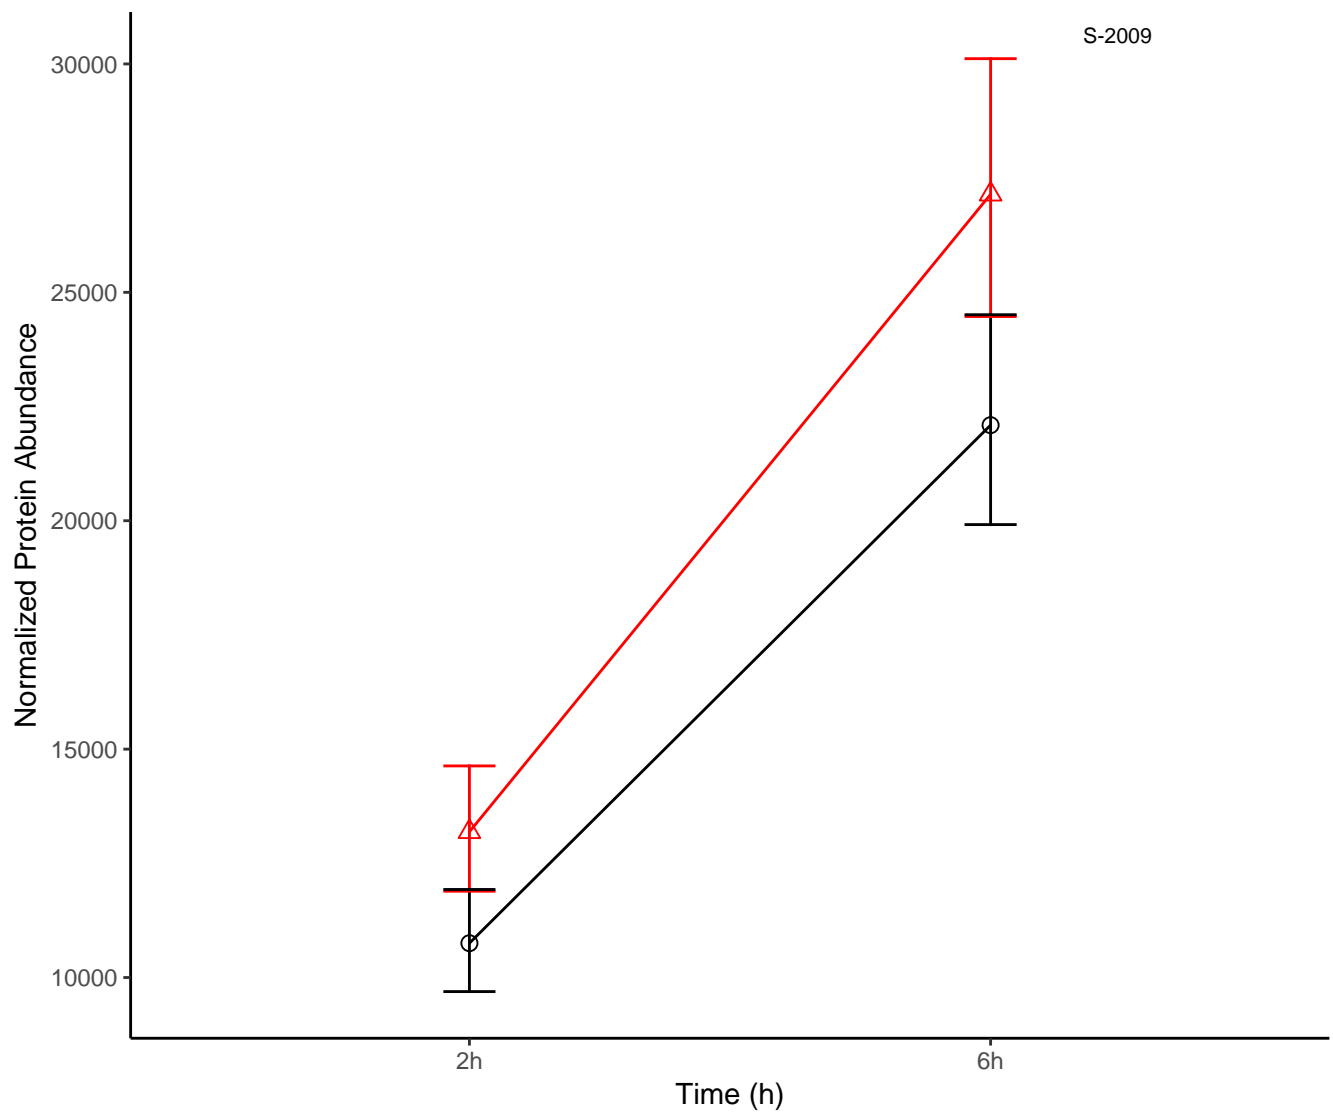

○ TSB-dex

△ TSB

# Y846\_STAAM

S-2010

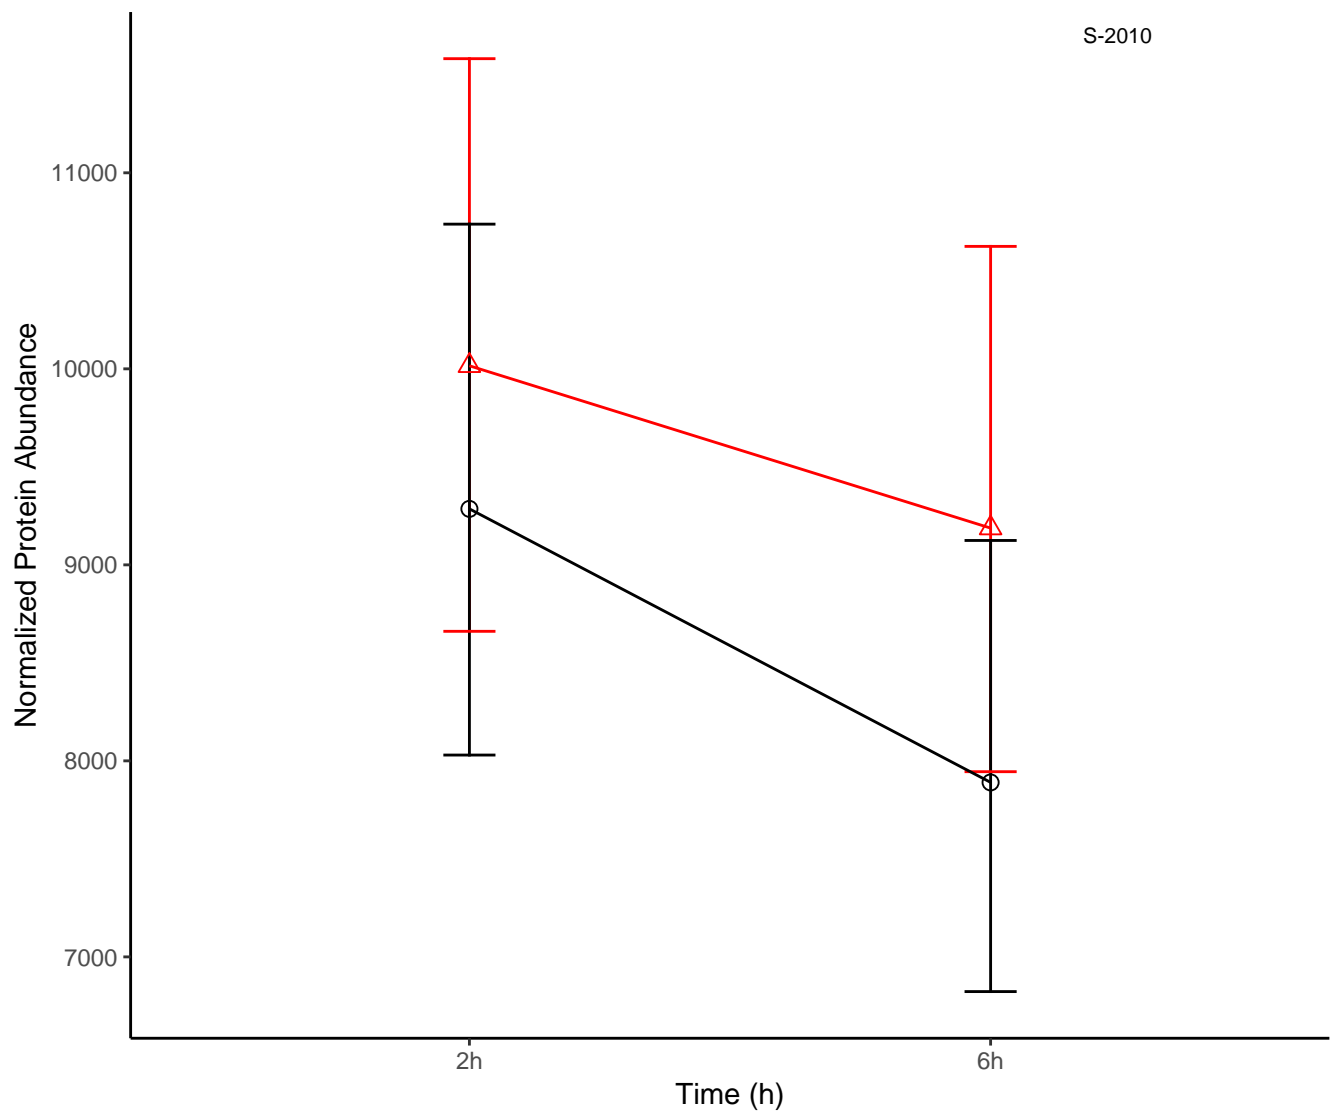

○ TSB-dex

△ TSB

# Y941\_STAAM

S-2011

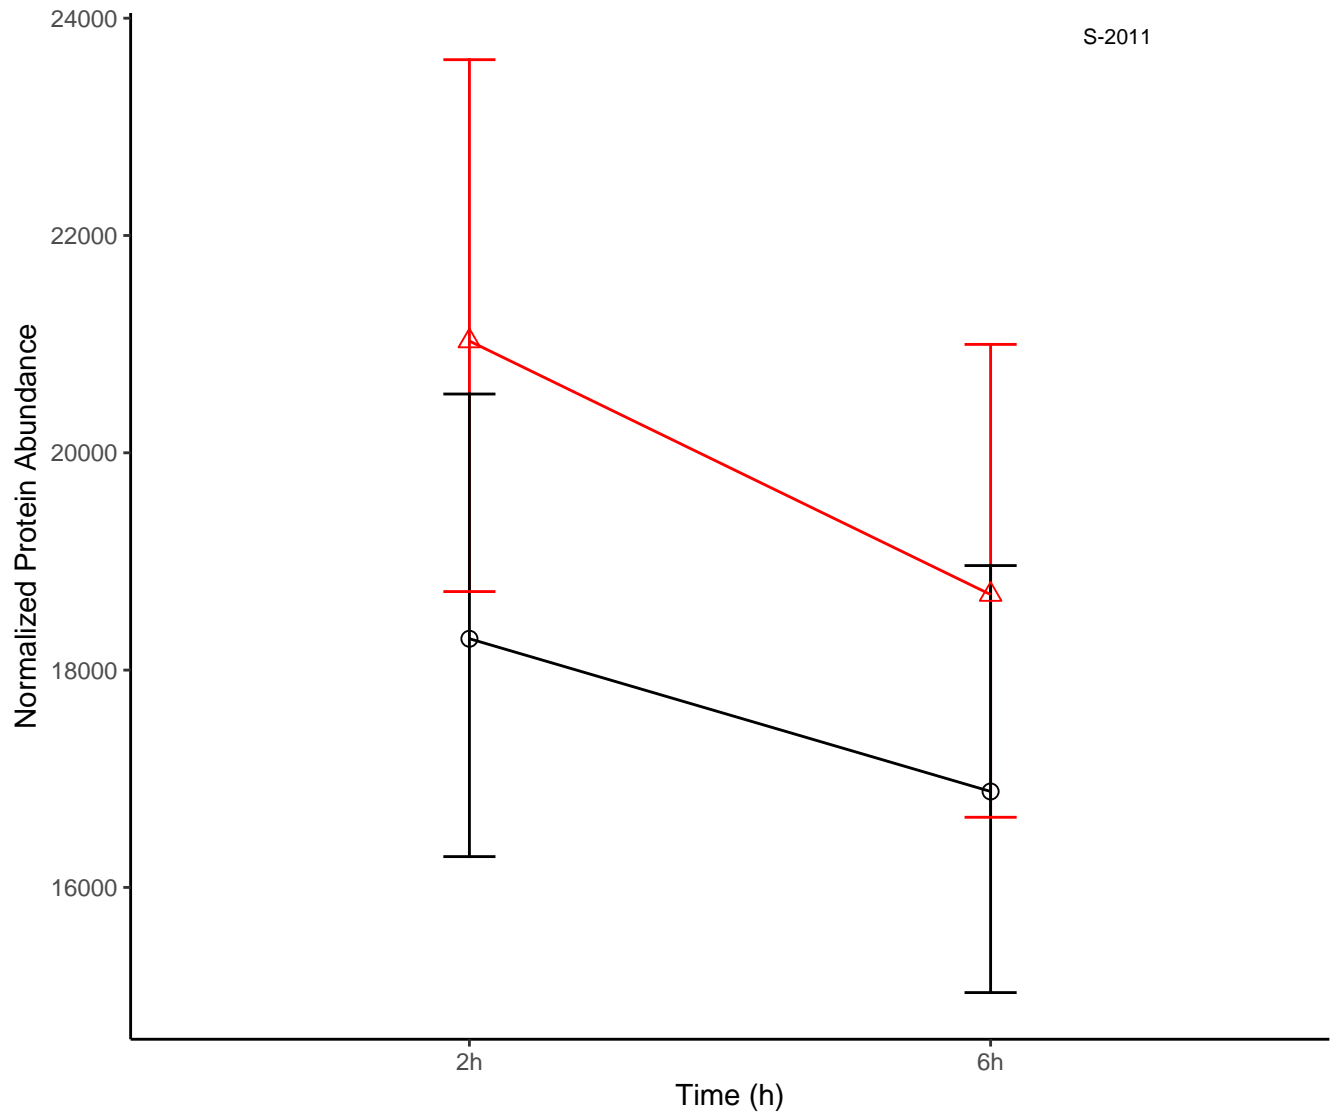

○ TSB-dex

△ TSB

# Y968\_STAAM

S-2012

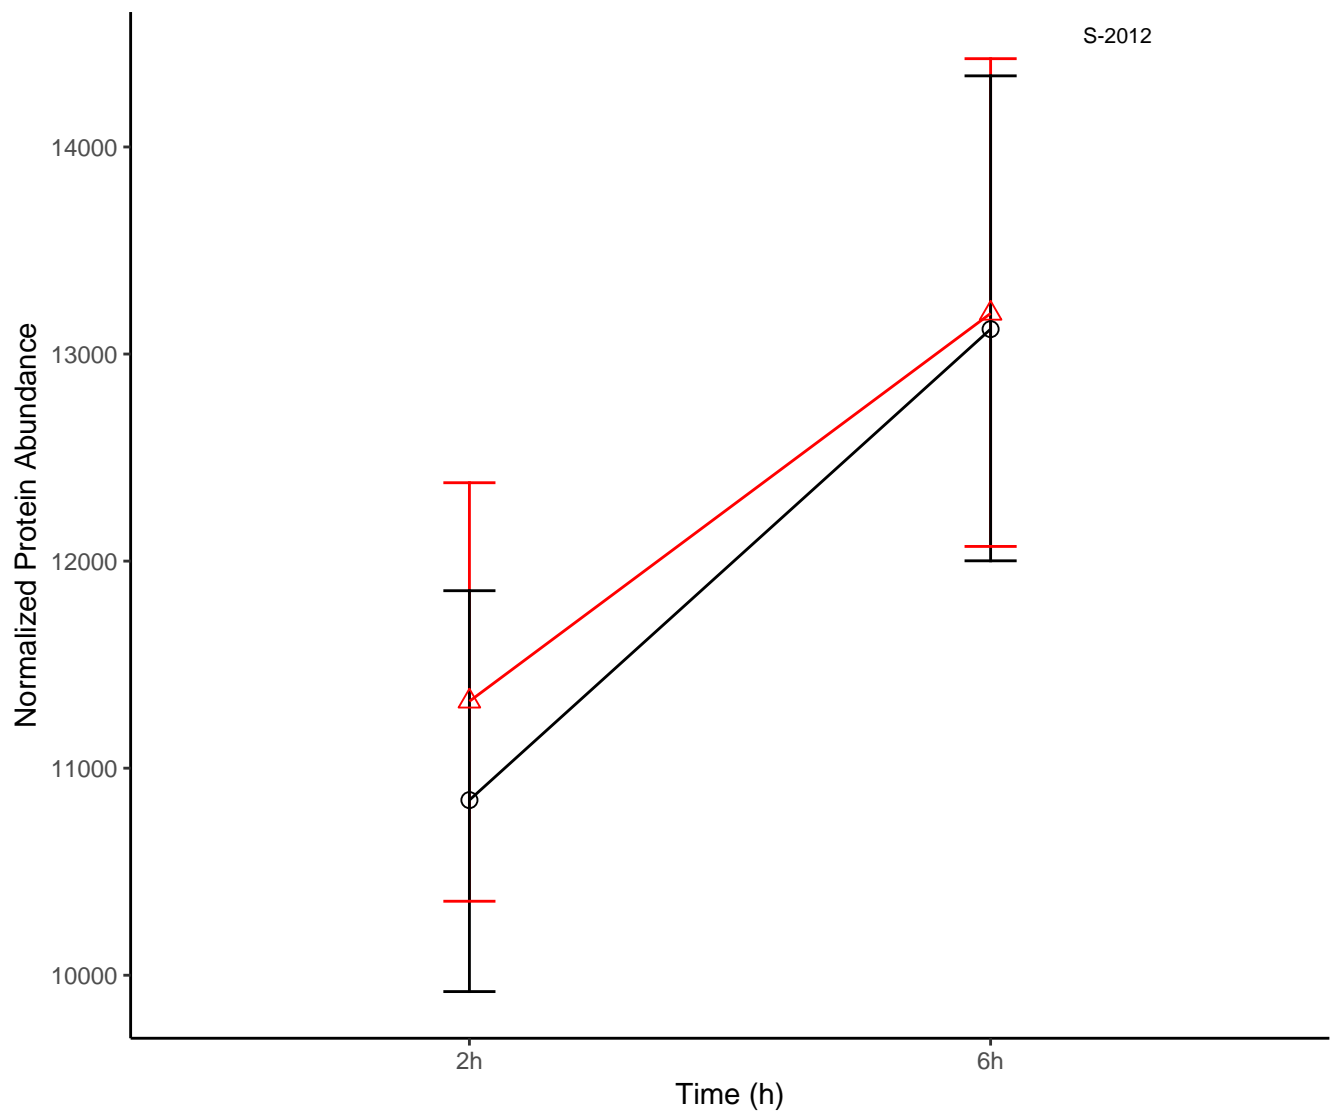

○ TSB-dex

△ TSB

# YABA\_STAAM

S-2013

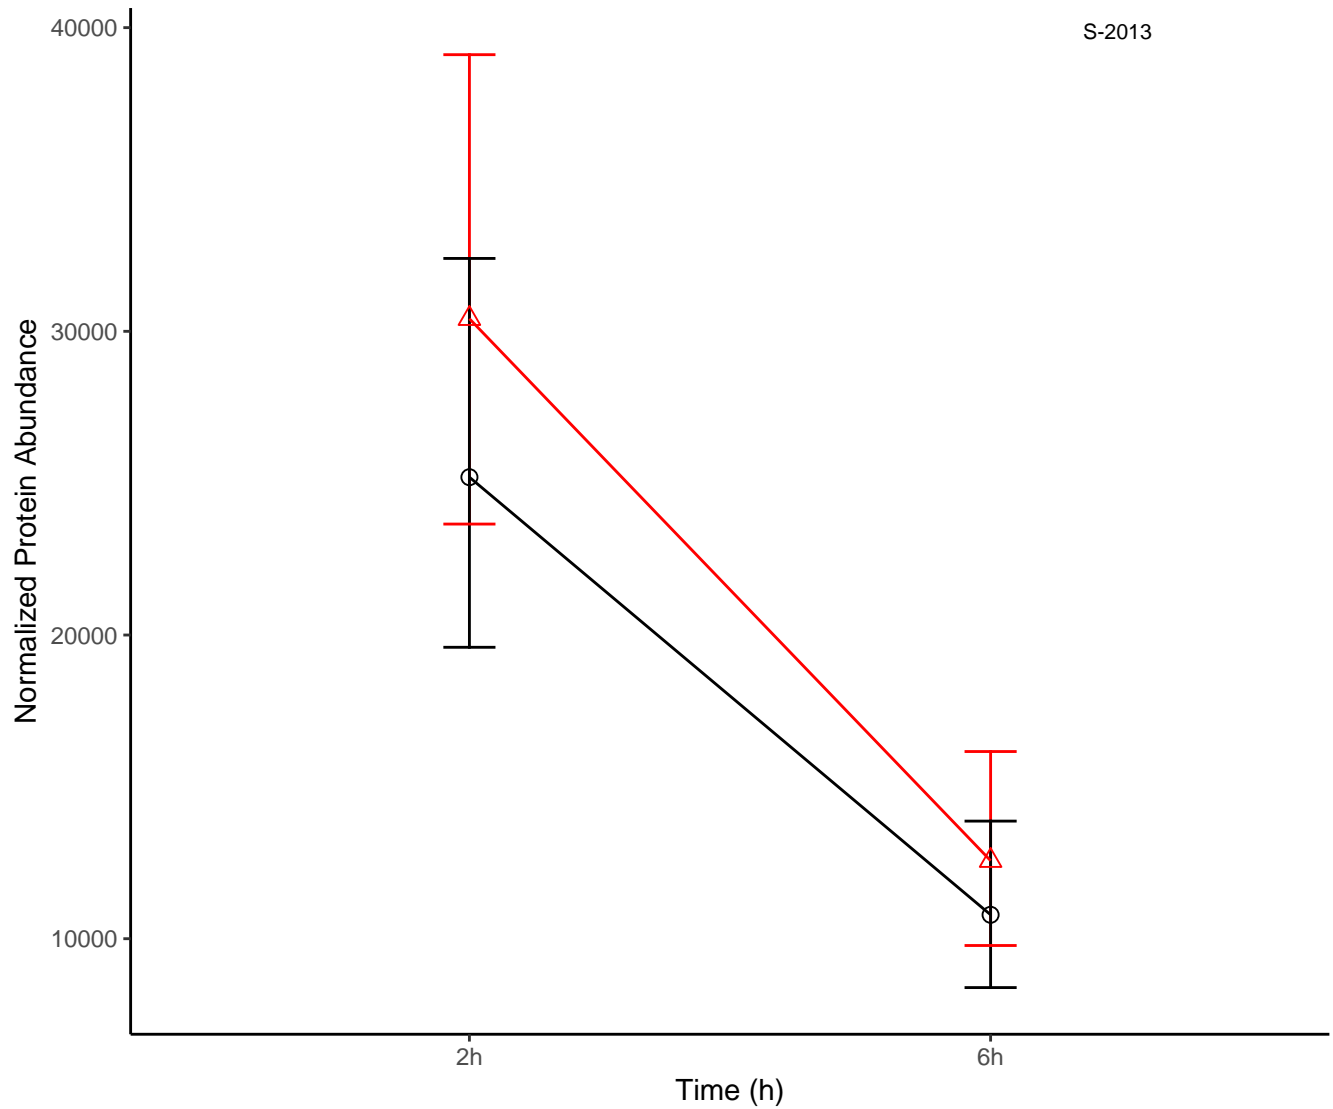

○ TSB-dex

△ TSB

# YBEY\_STAAM

S-2014

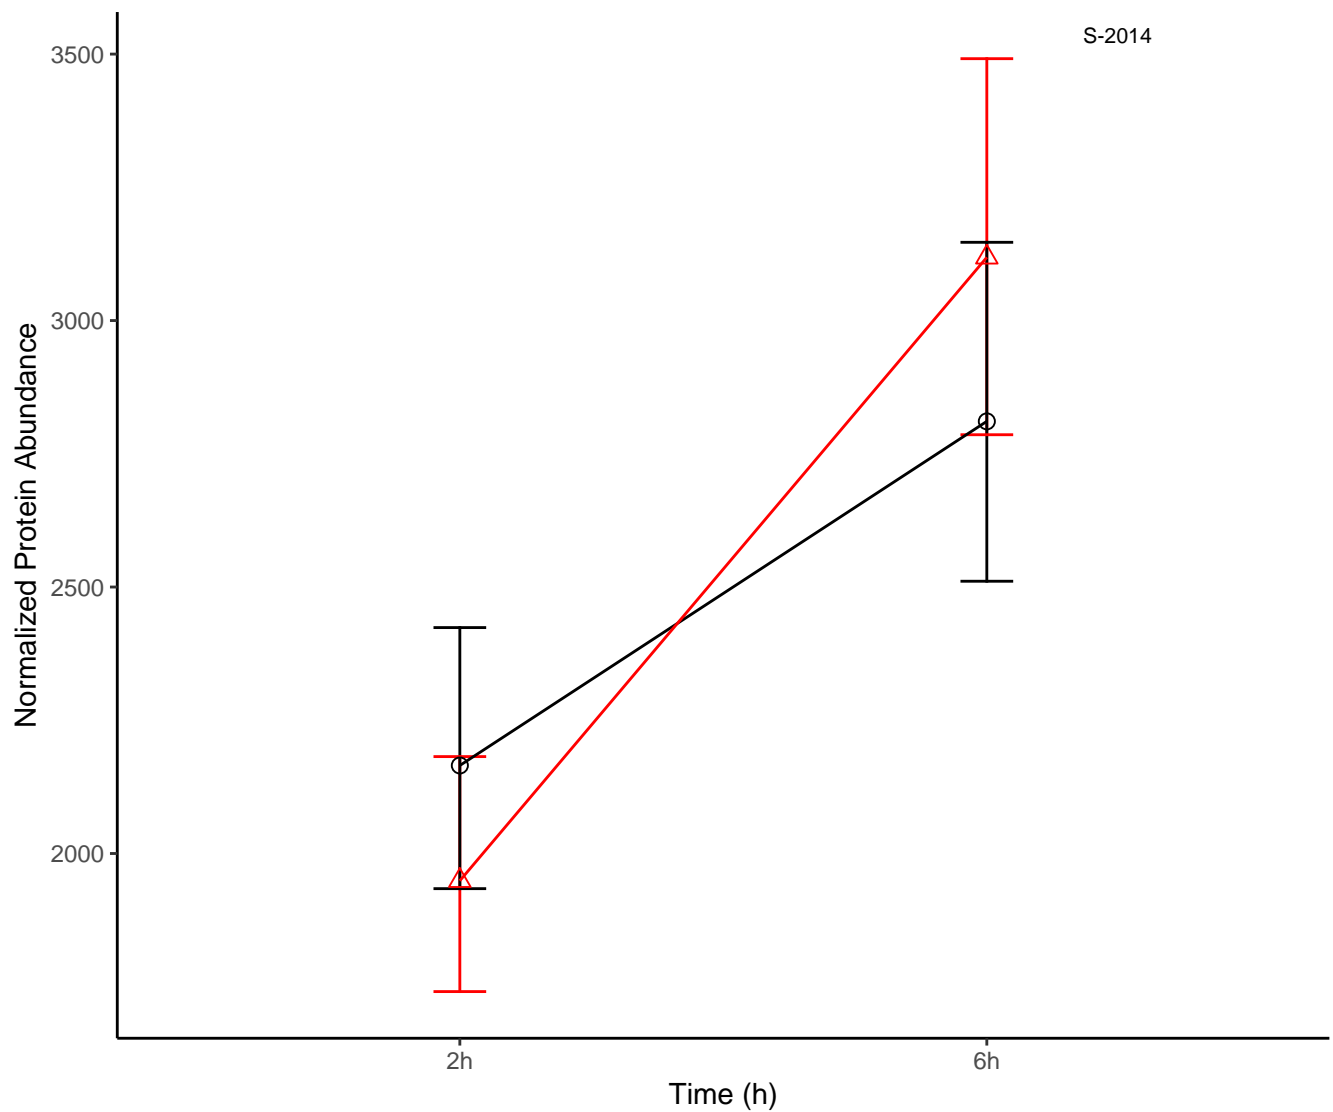

○ TSB-dex

△ TSB

**Figure J.**

1-way analysis: h

Pages: S2015-S2516

The normalized protein abundance, lower 95% confidence interval, and upper 95% confidence interval were plotted for each protein. These plots were analyzed if the 3-way and 2-way interactions were rejected and a significant main effect (1-way) was identified for hour.

# 6PGD\_STAAM

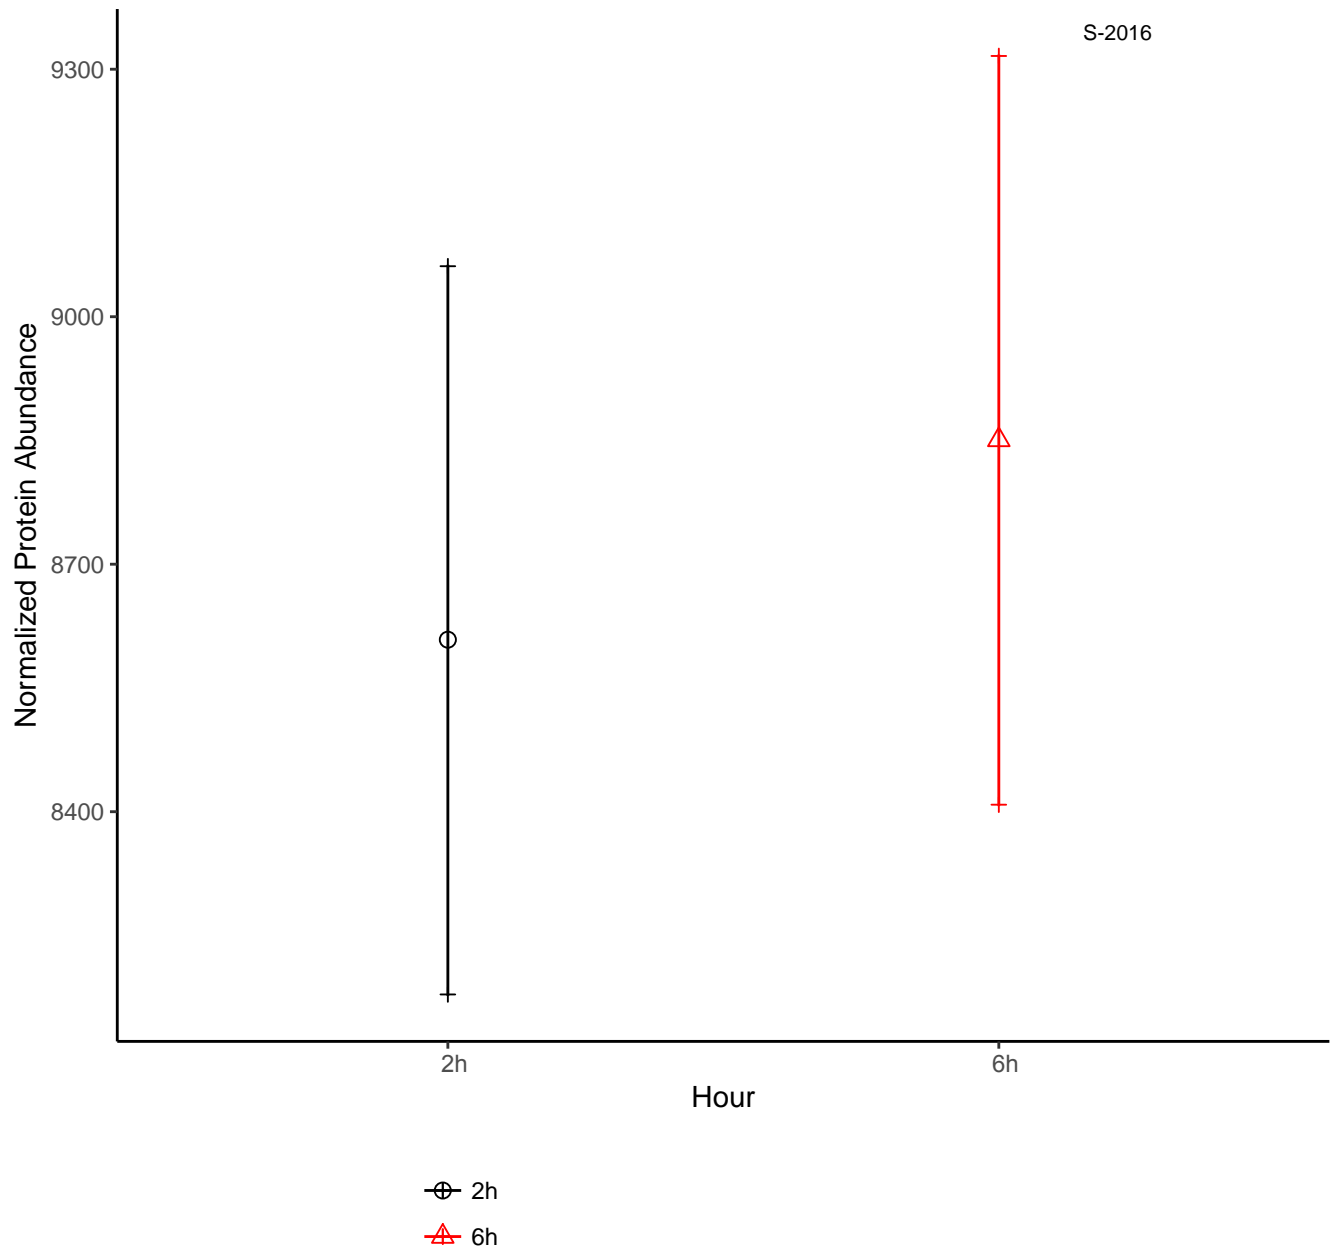



# ACCA\_STAAM

S-2017

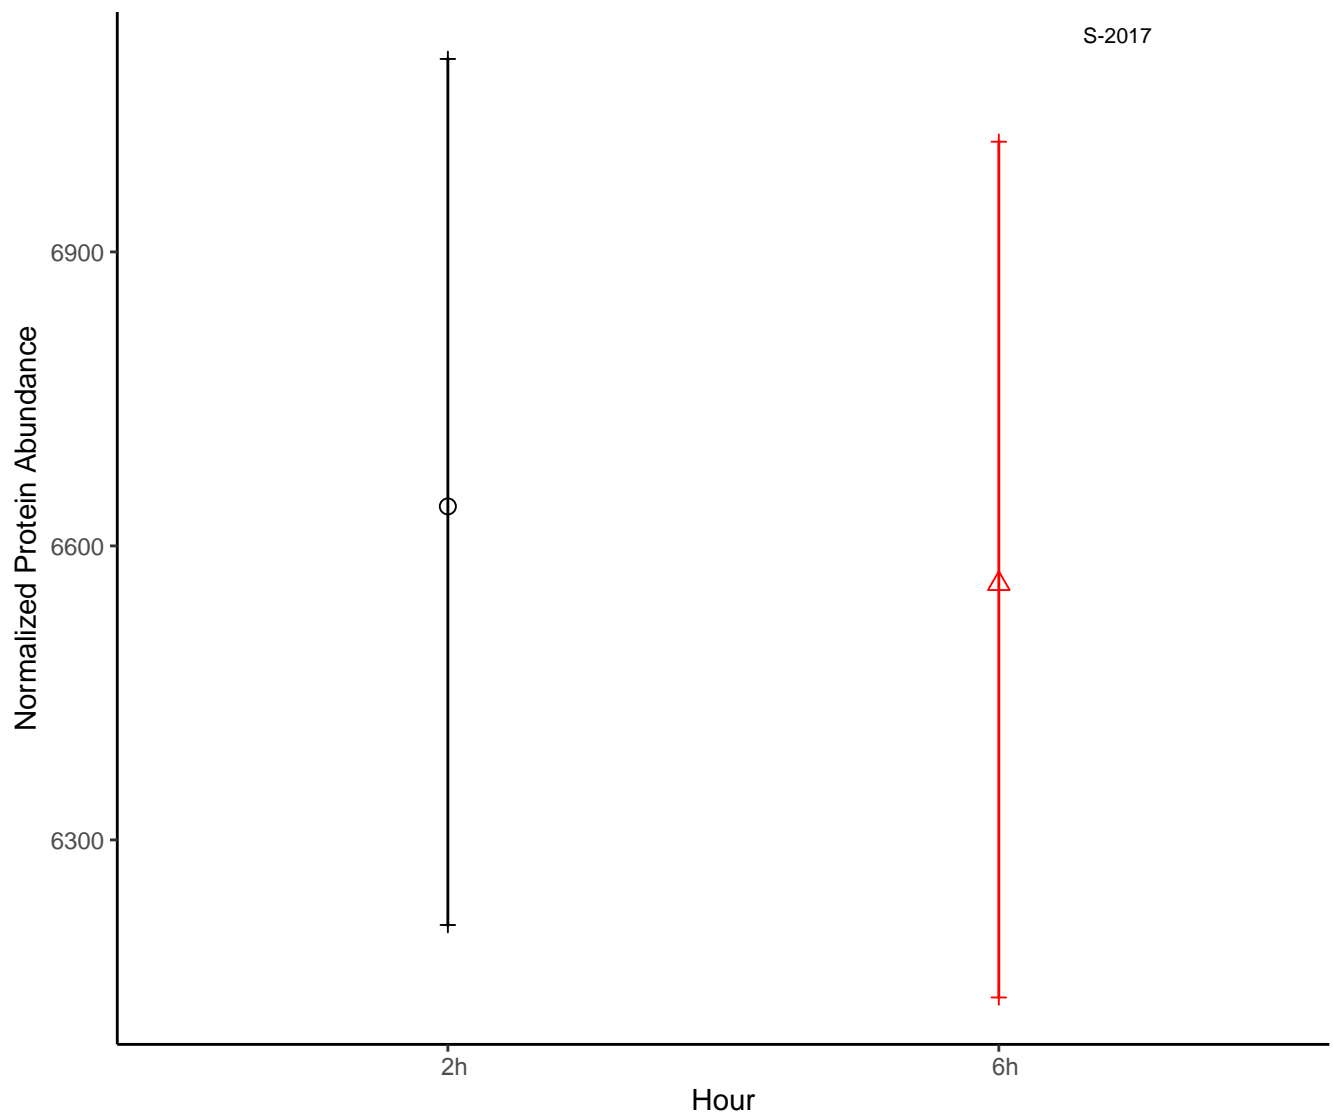

⊕ 2h

△ 6h

# ACKA\_STAAM

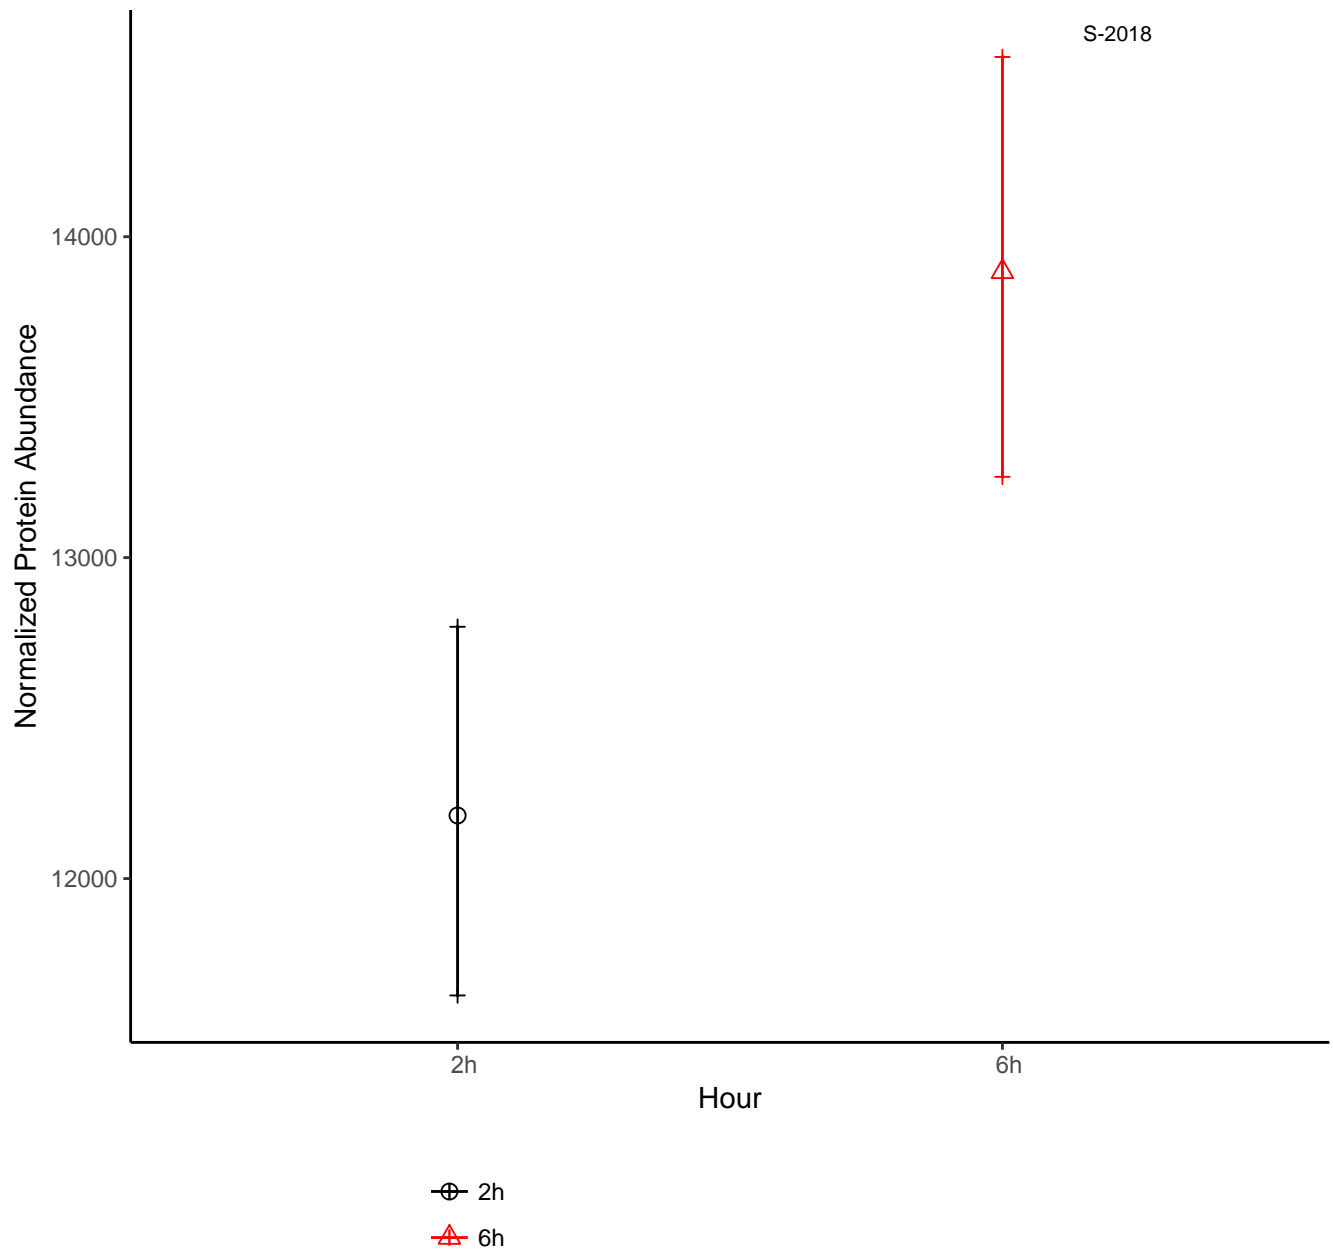

# ACON\_STAAM

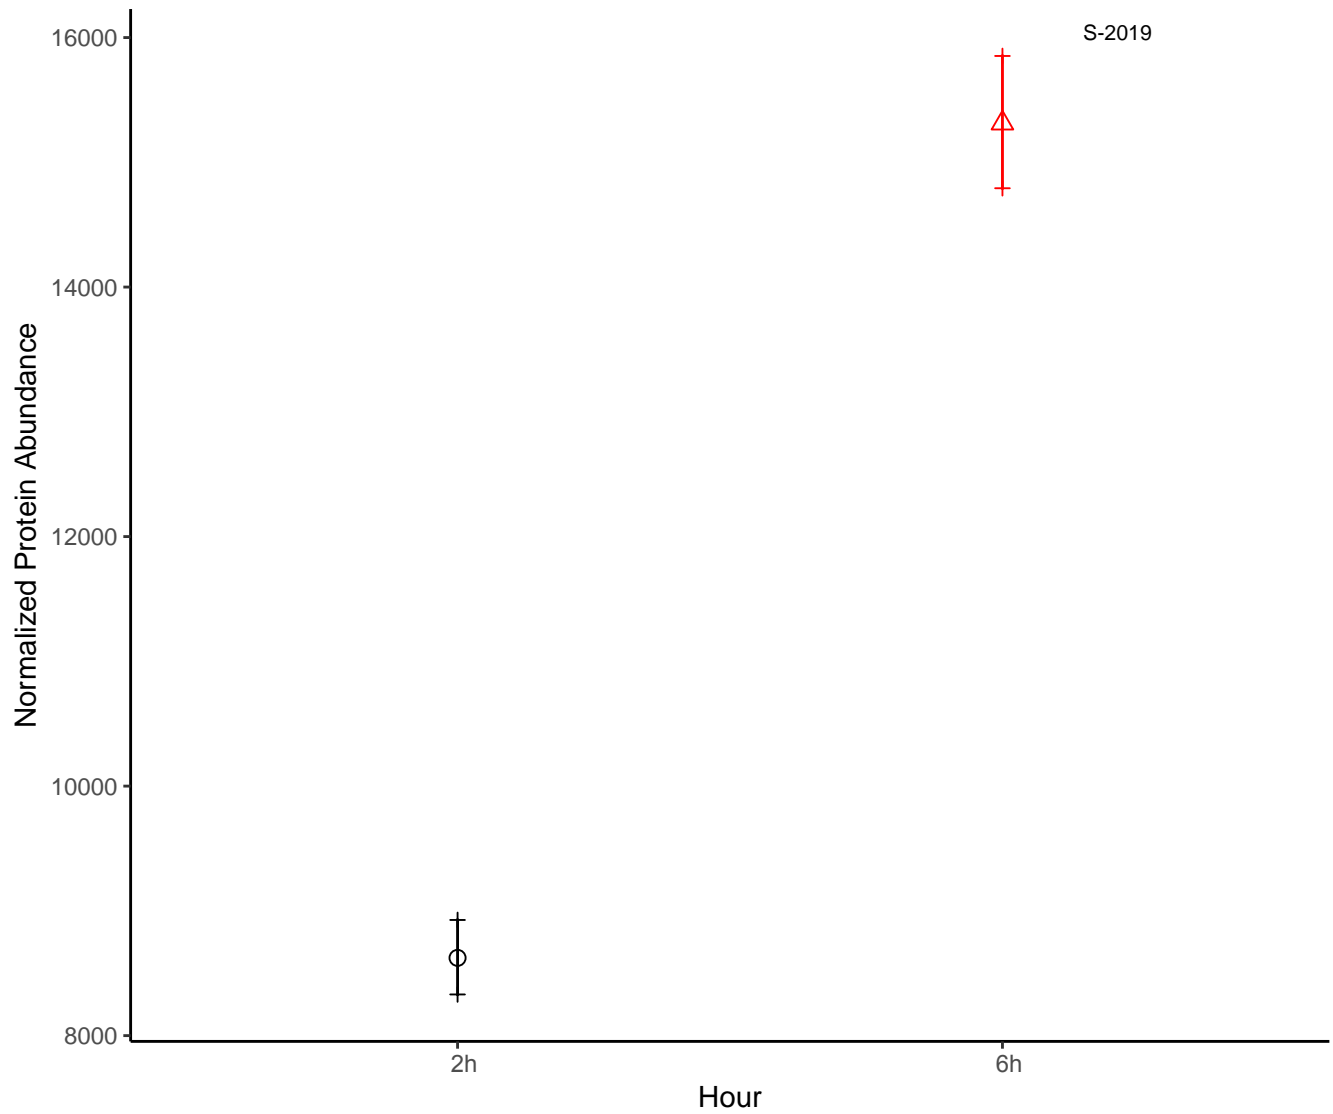

⊕ 2h

△ 6h

# ACP\_STAAM

S-2020

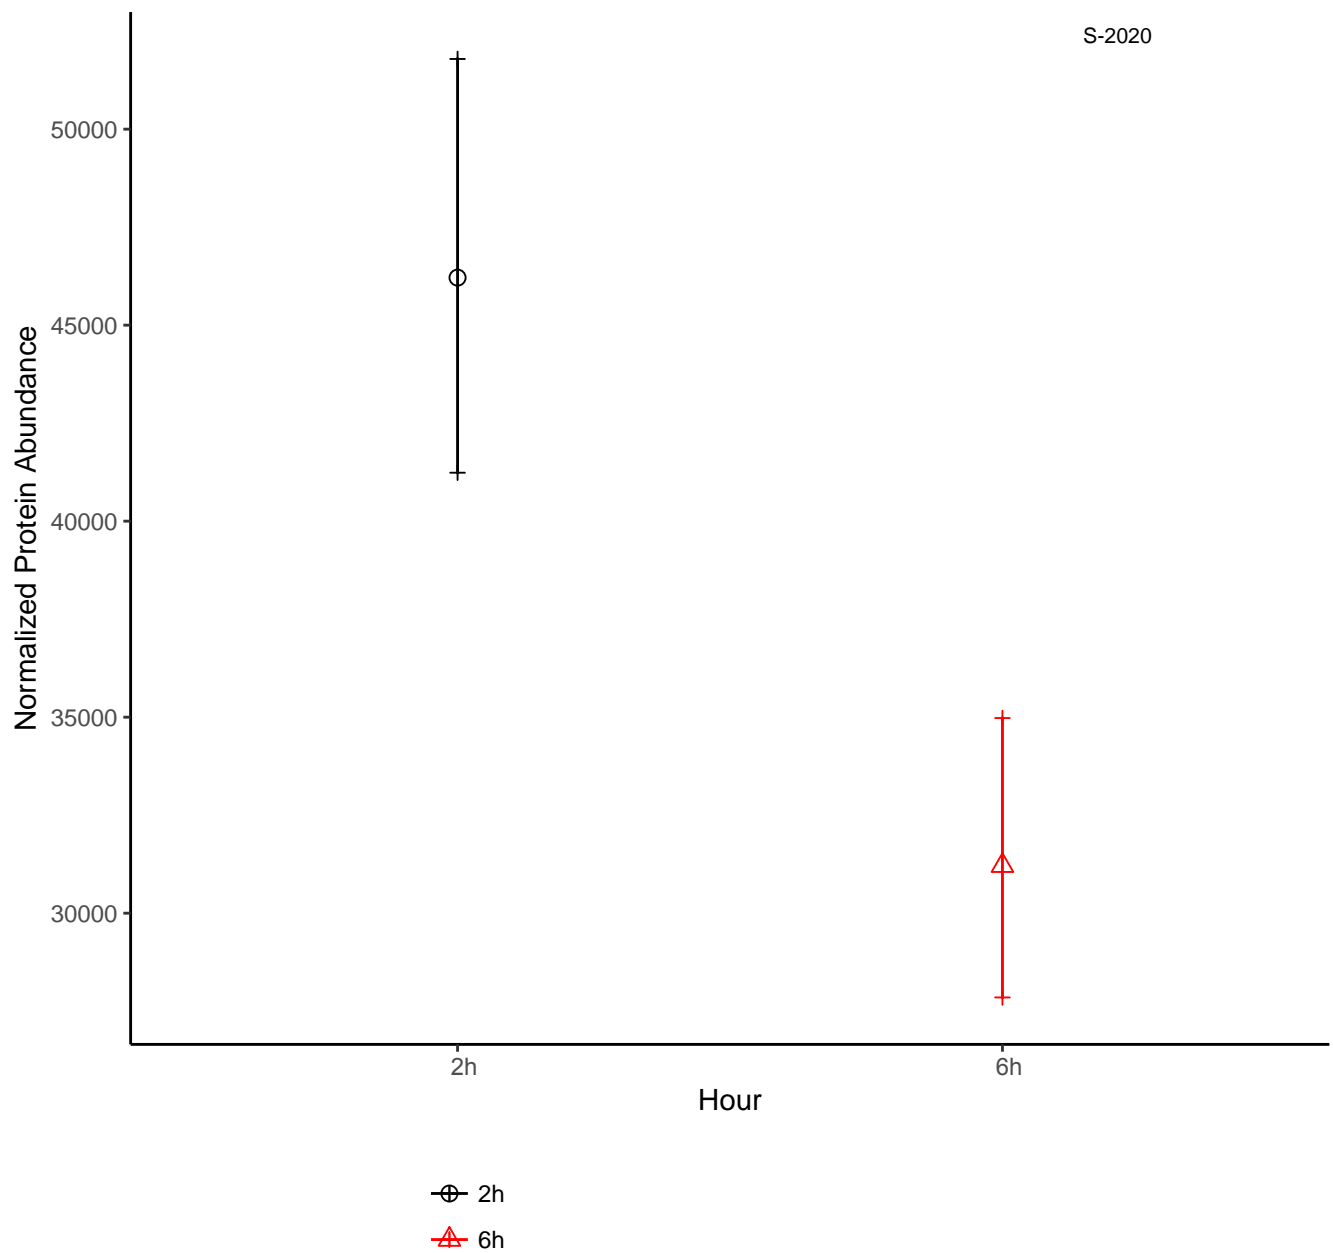

# ADH\_STAAM

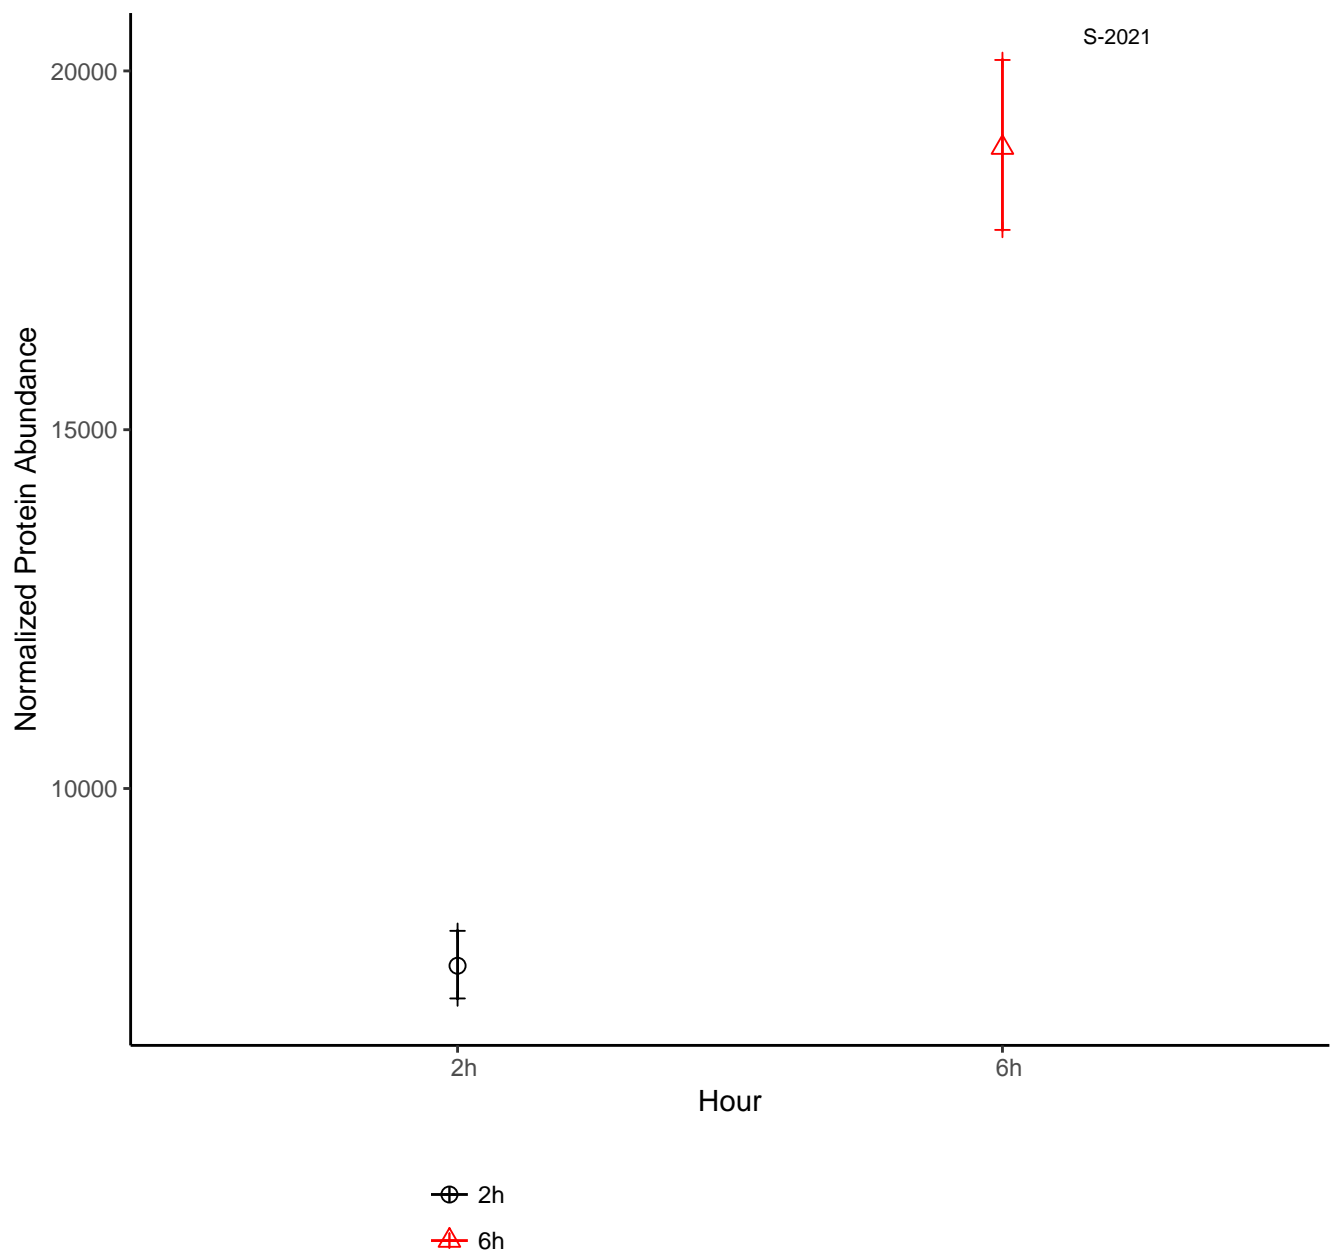

# AHPC\_STAAM

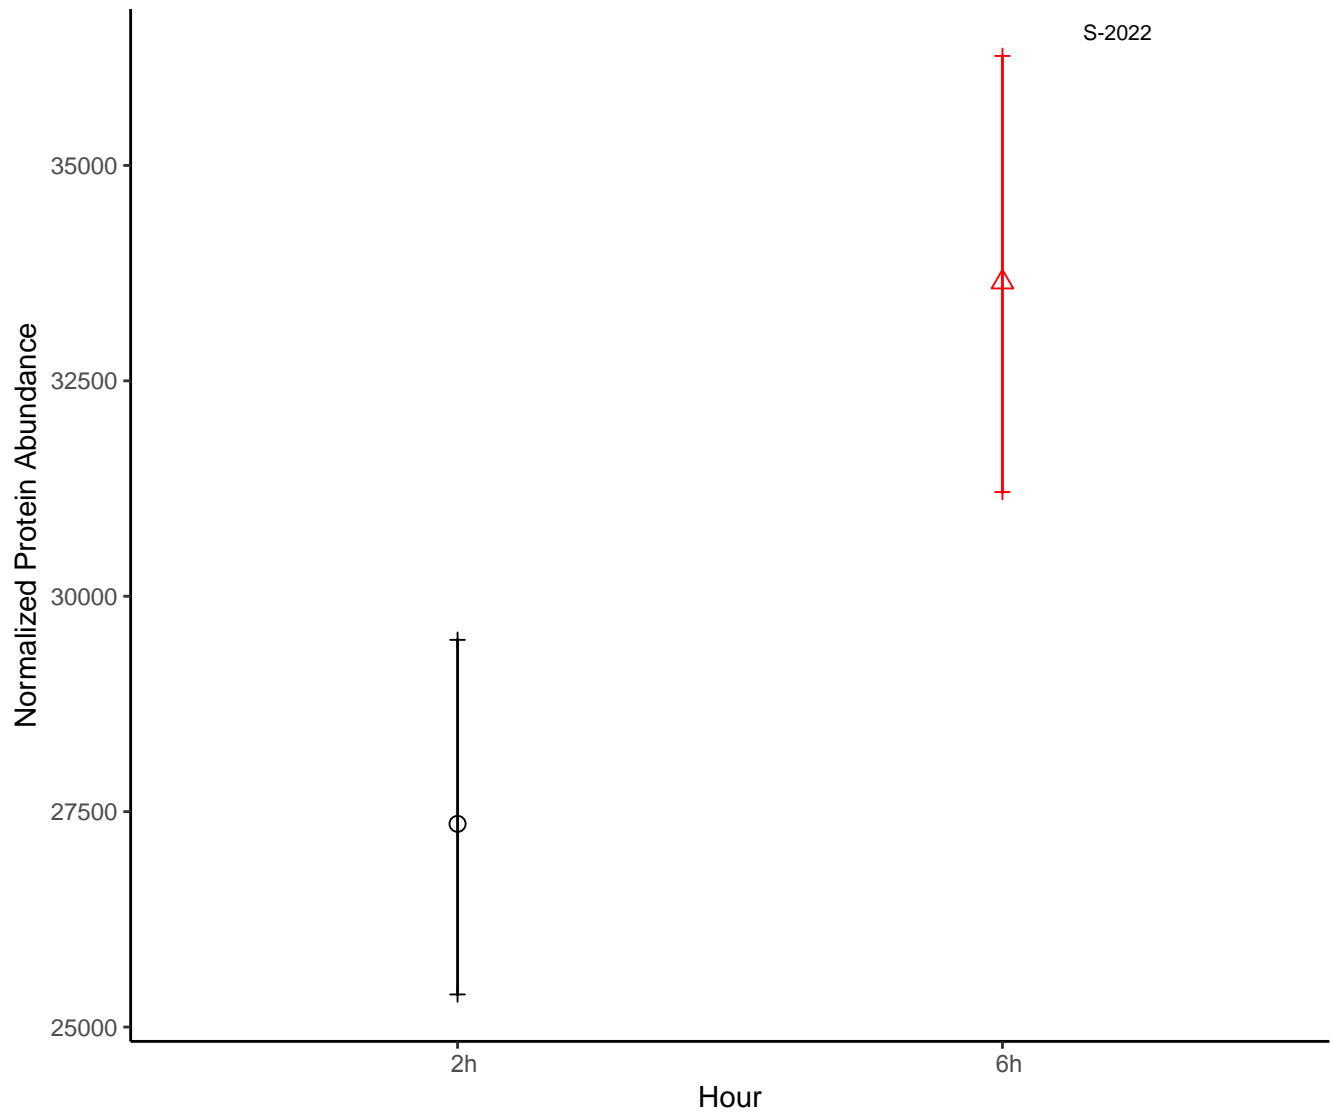

⊕ 2h

△ 6h

# AHPF\_STAAM

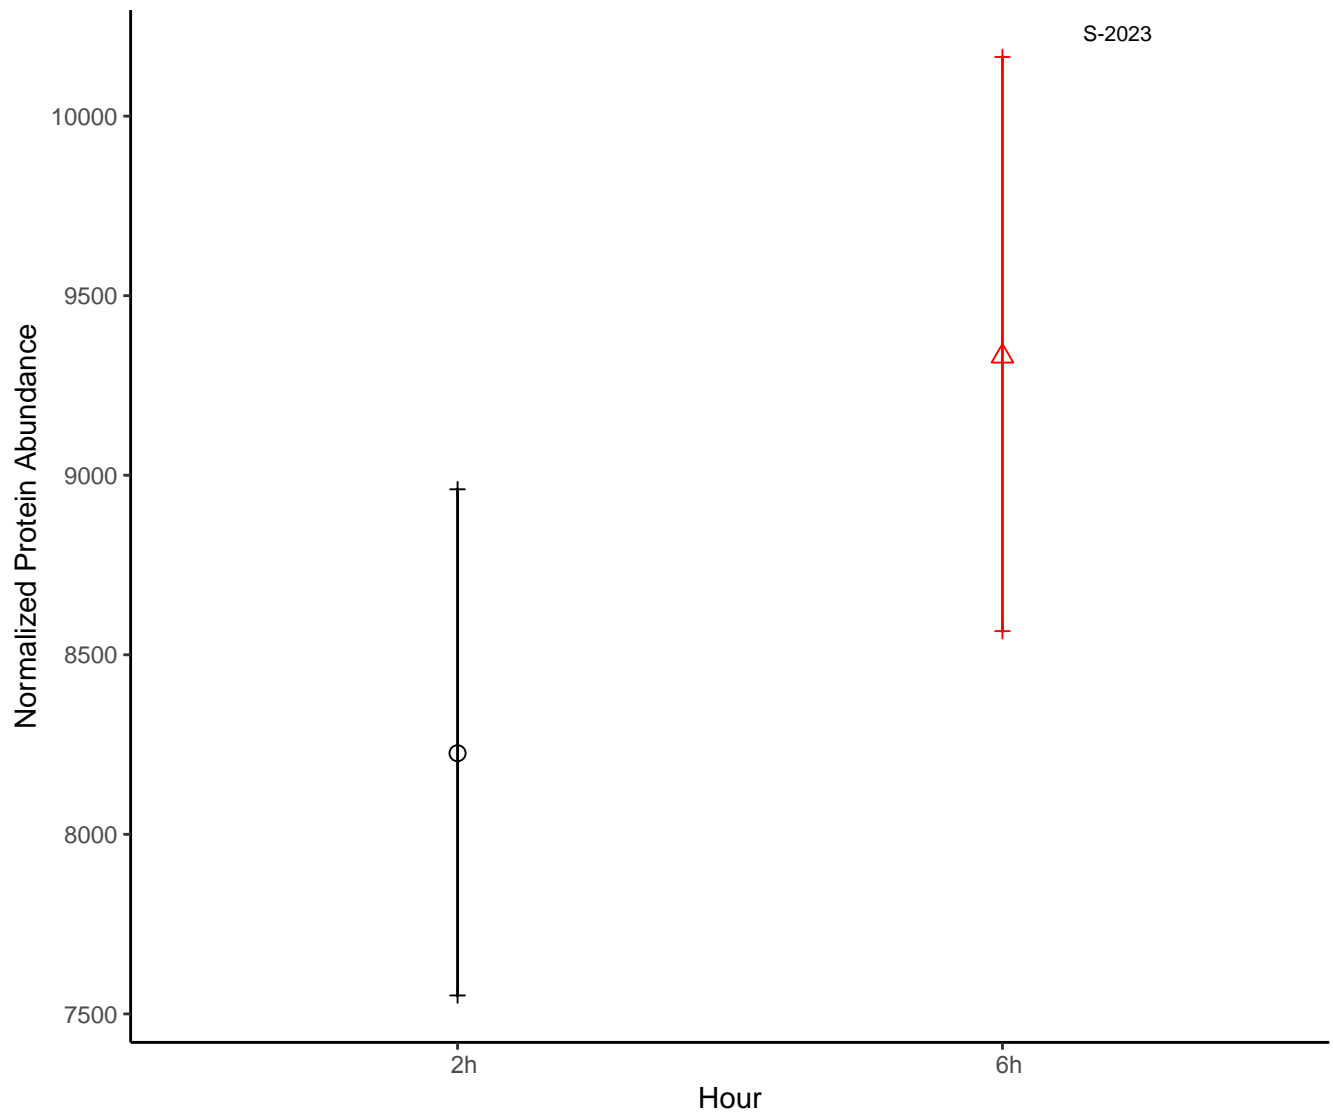

⊕ 2h

△ 6h

# ALD1\_STAAM

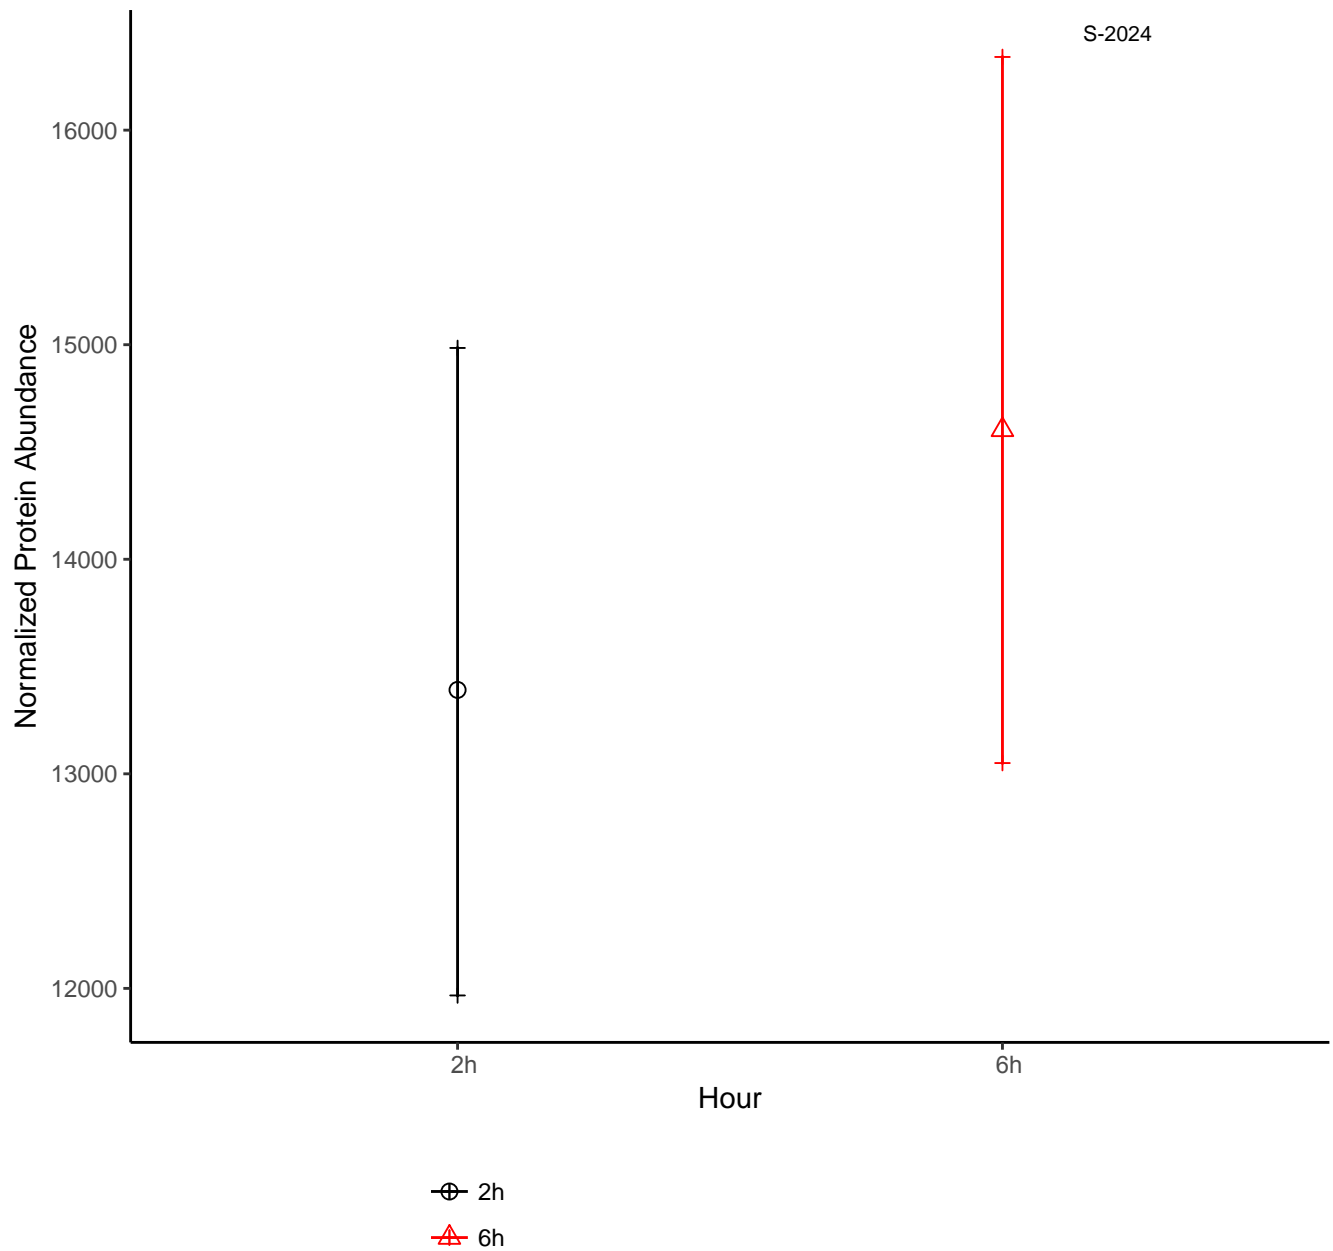



# ALDA\_STAAM

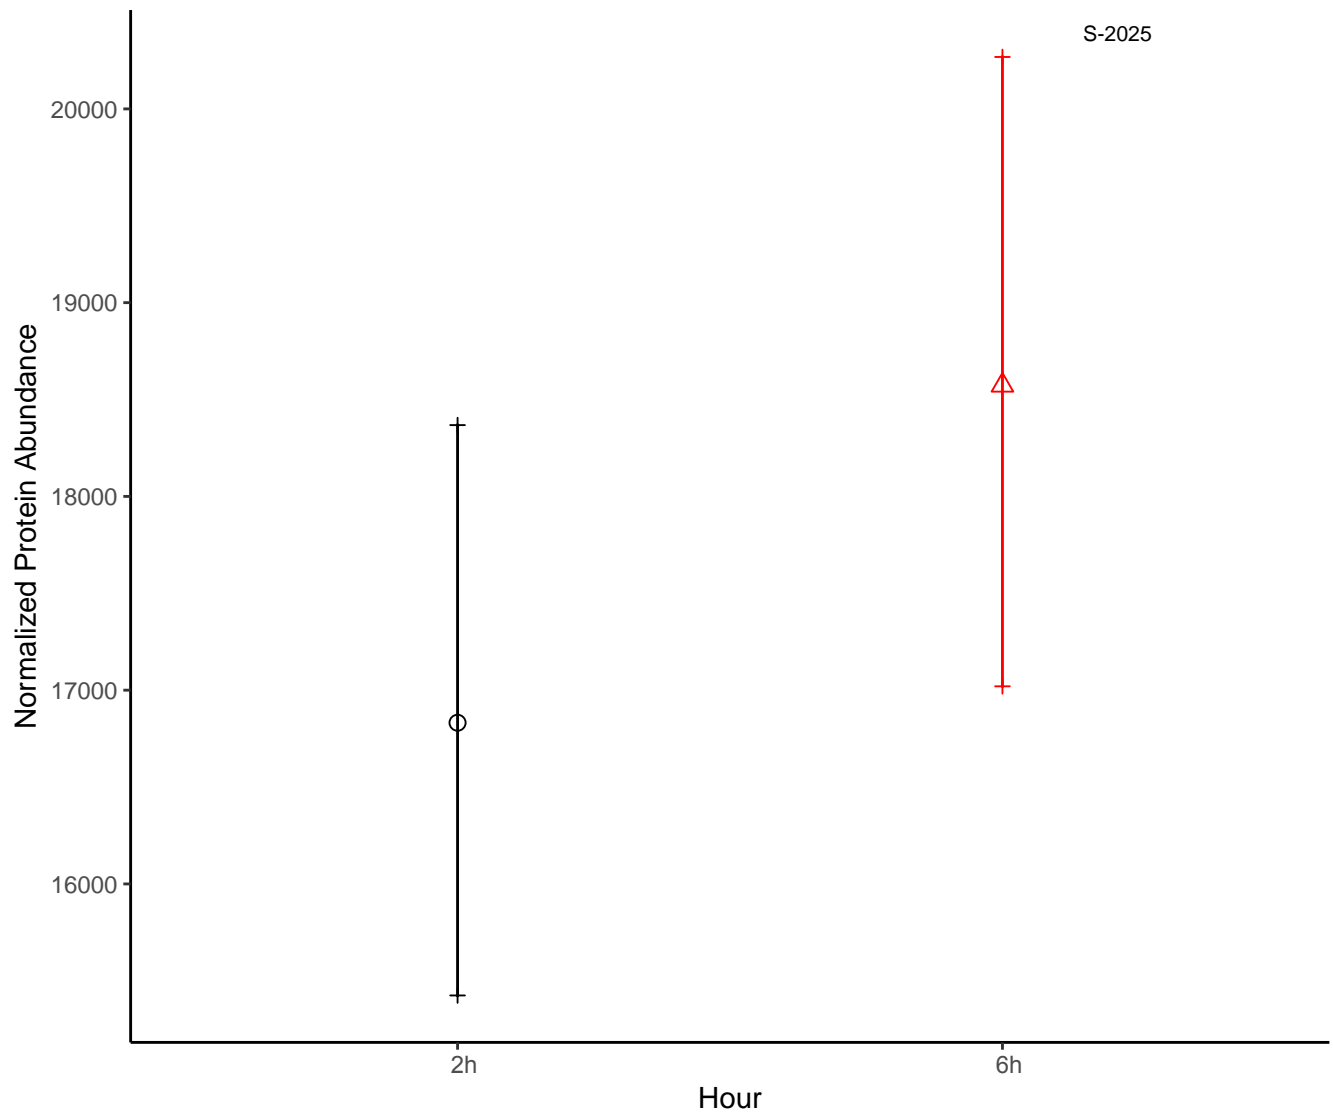

⊕ 2h

△ 6h

# ALF1\_STAAM

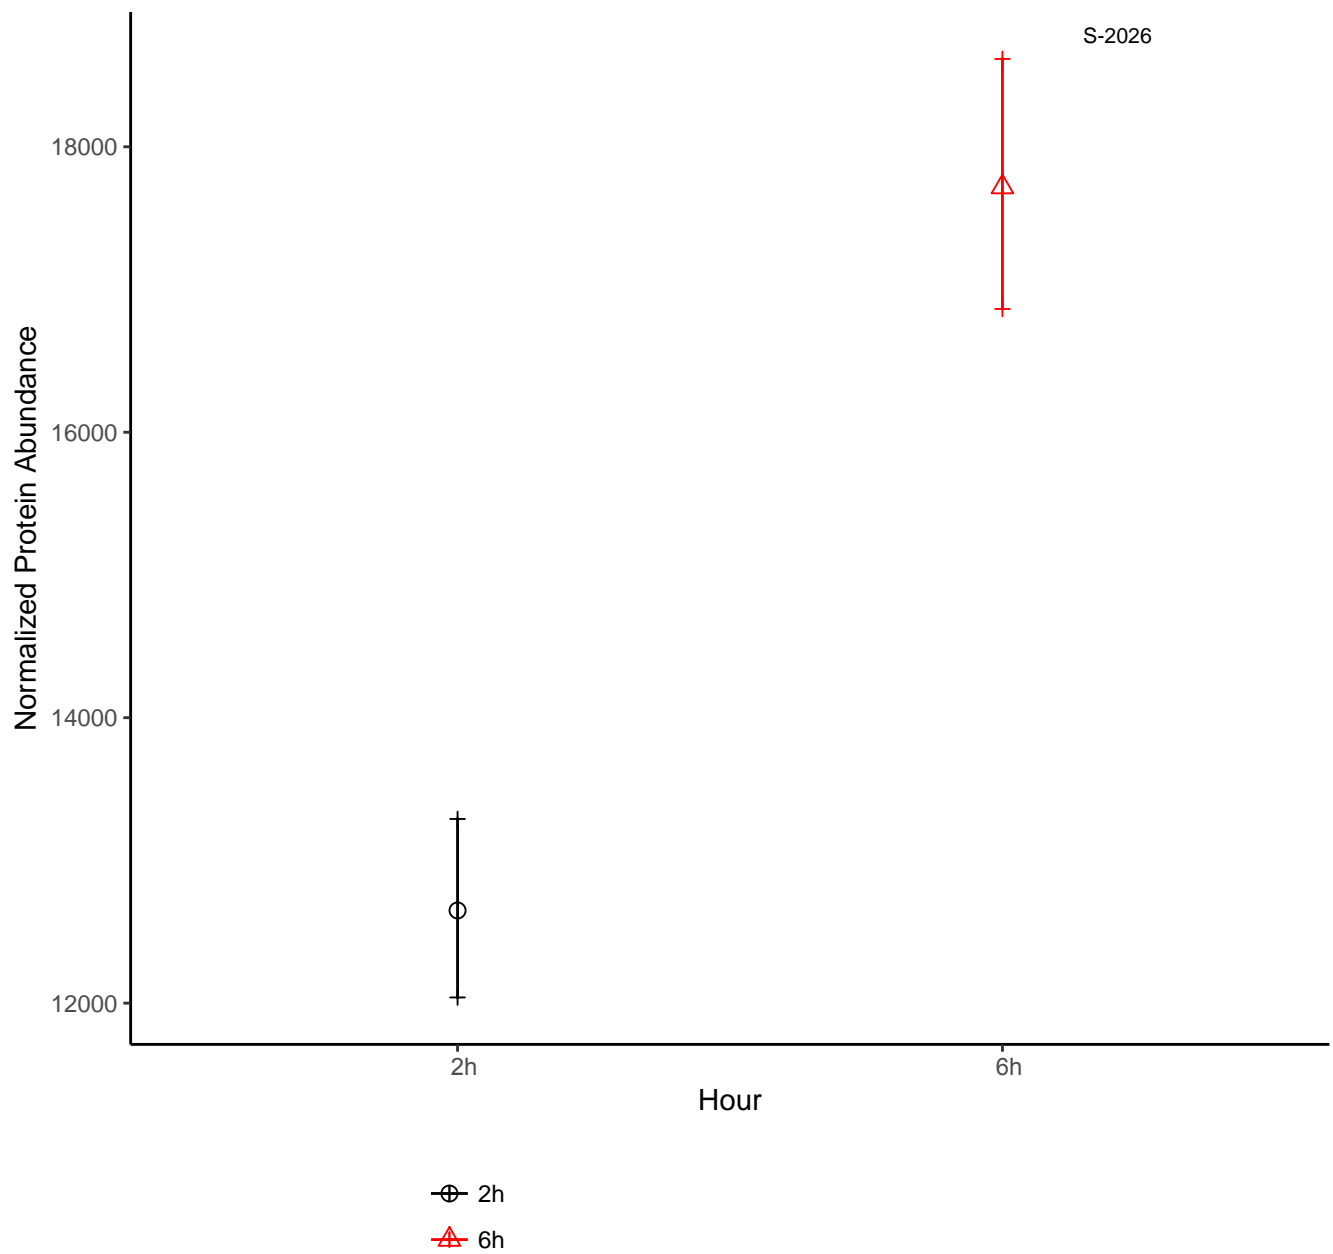

# ALF2\_STAAM

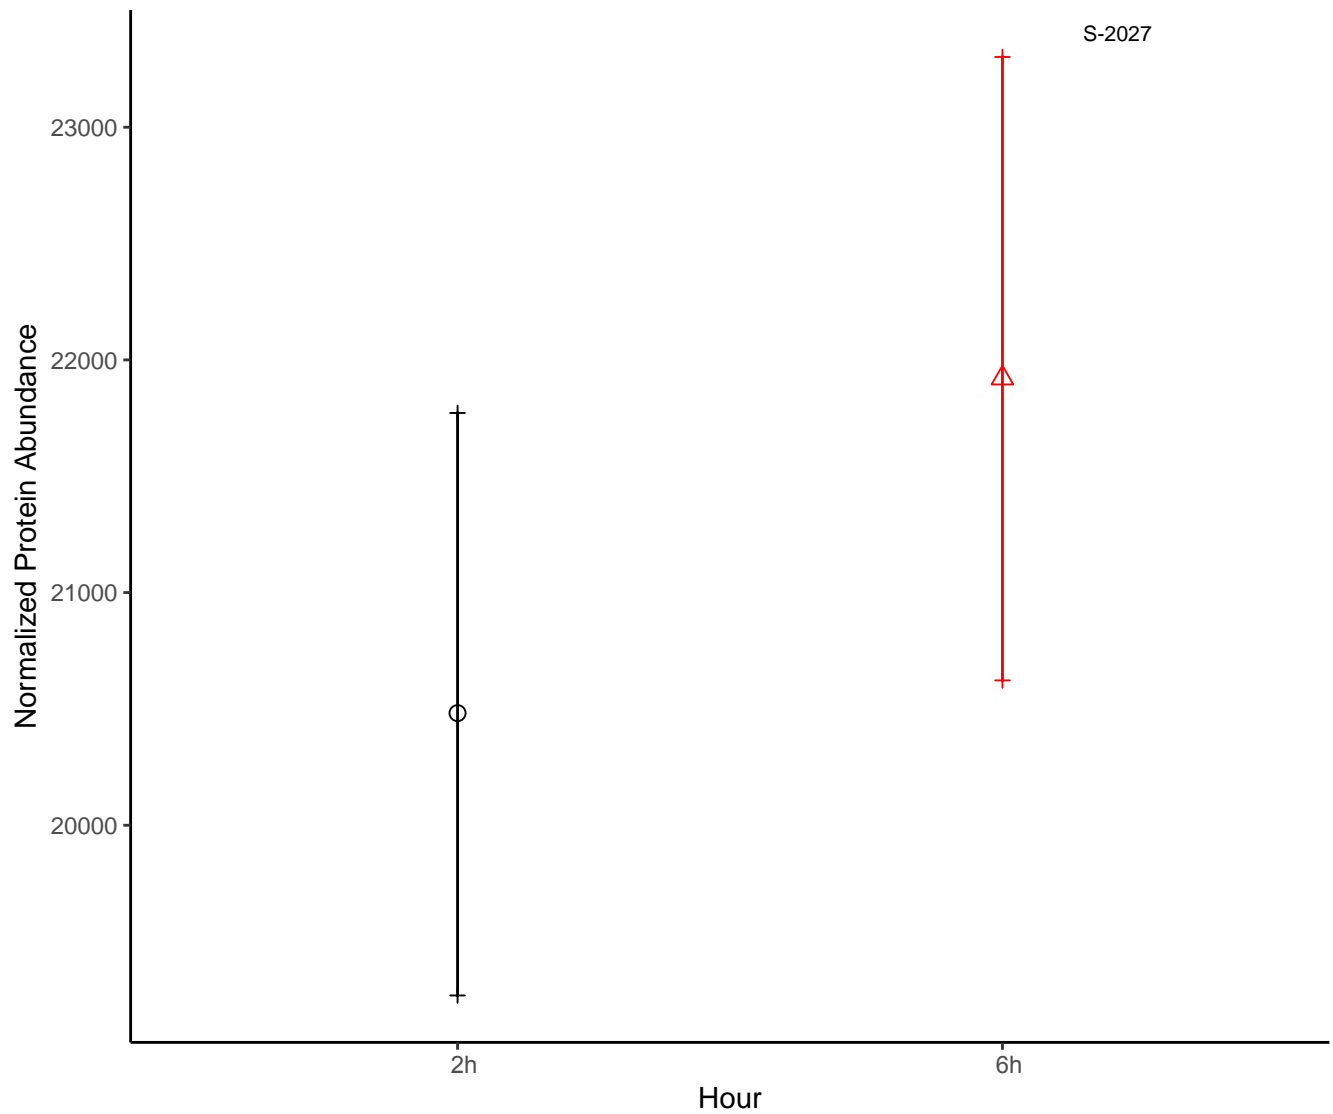

⊕ 2h

△ 6h

# APT\_STAAM

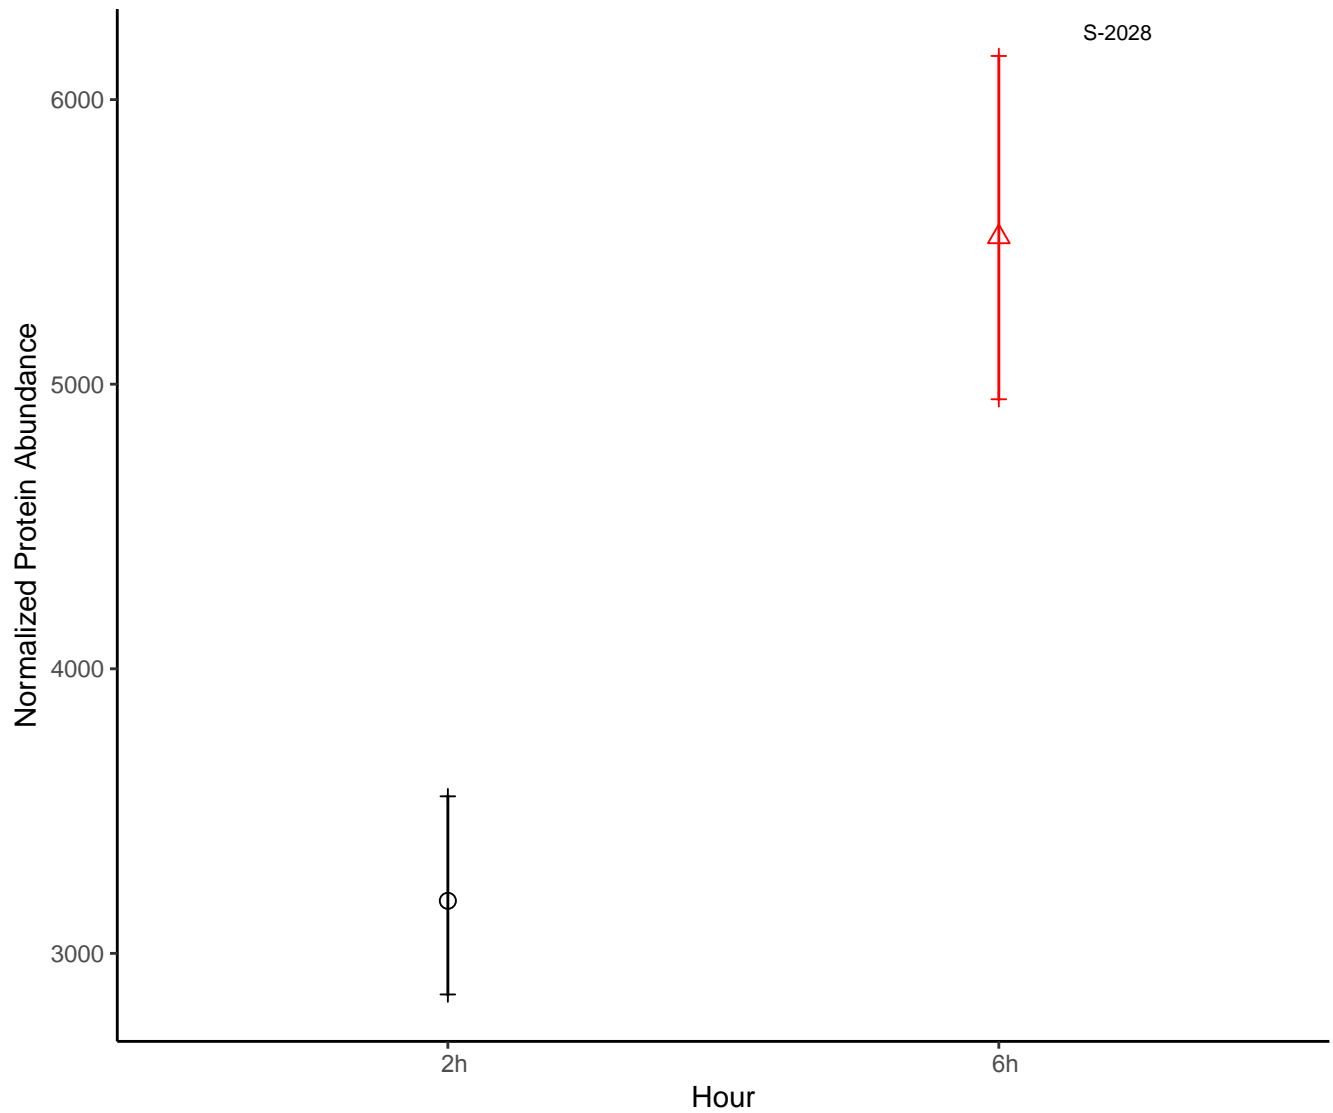

⊕ 2h

△ 6h

# ARCA\_STAAM

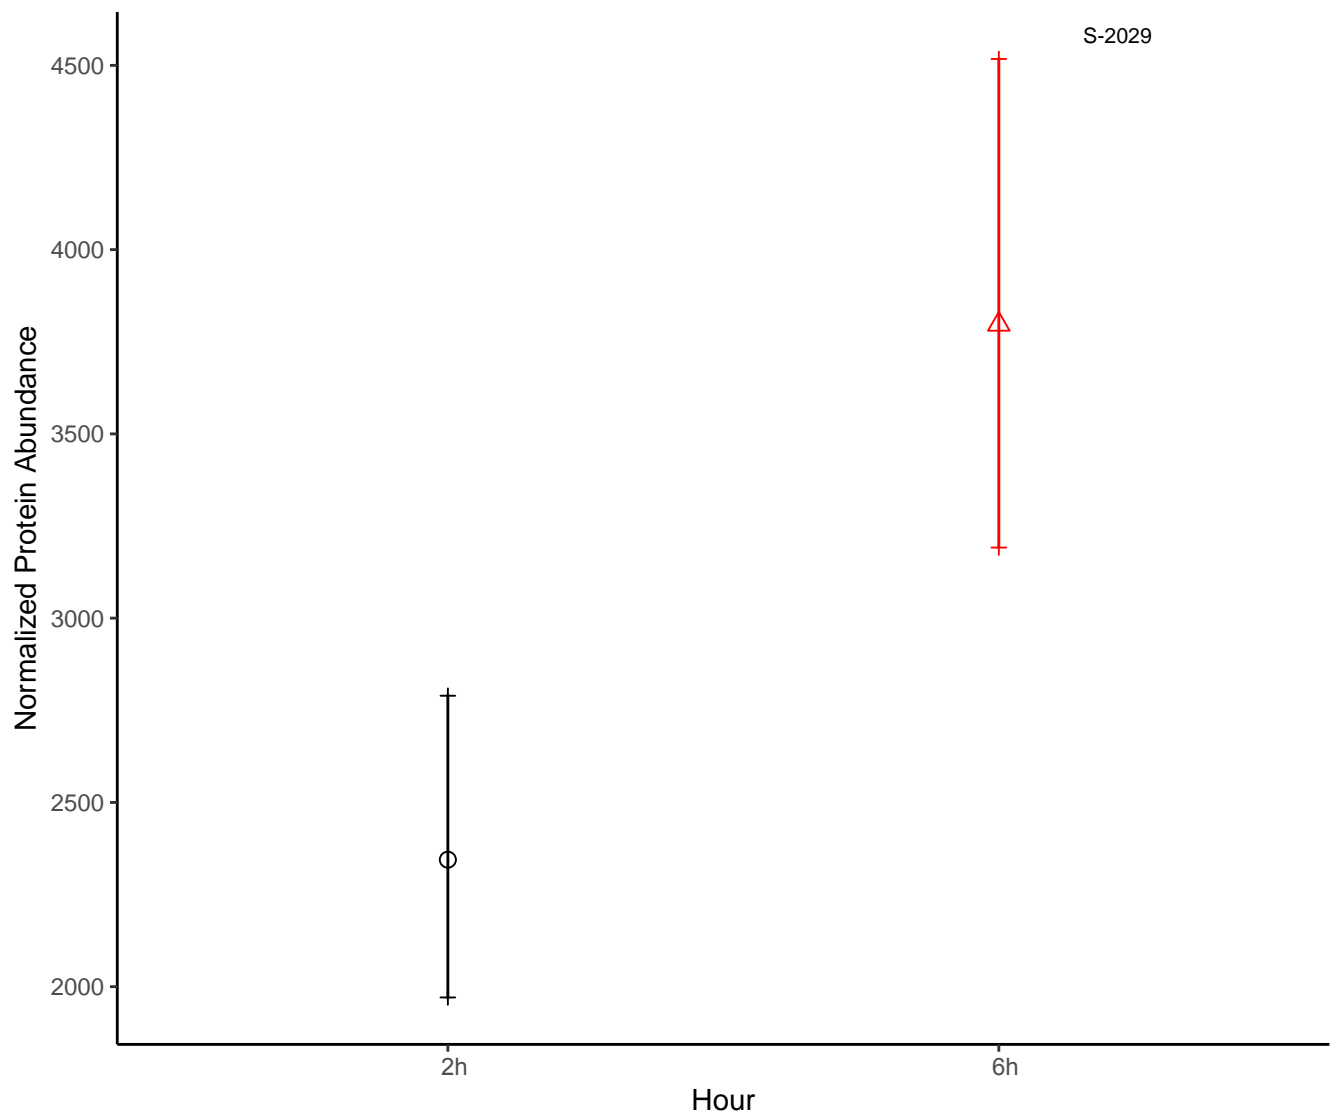

⊕ 2h

△ 6h

# ARCC1\_STAAM

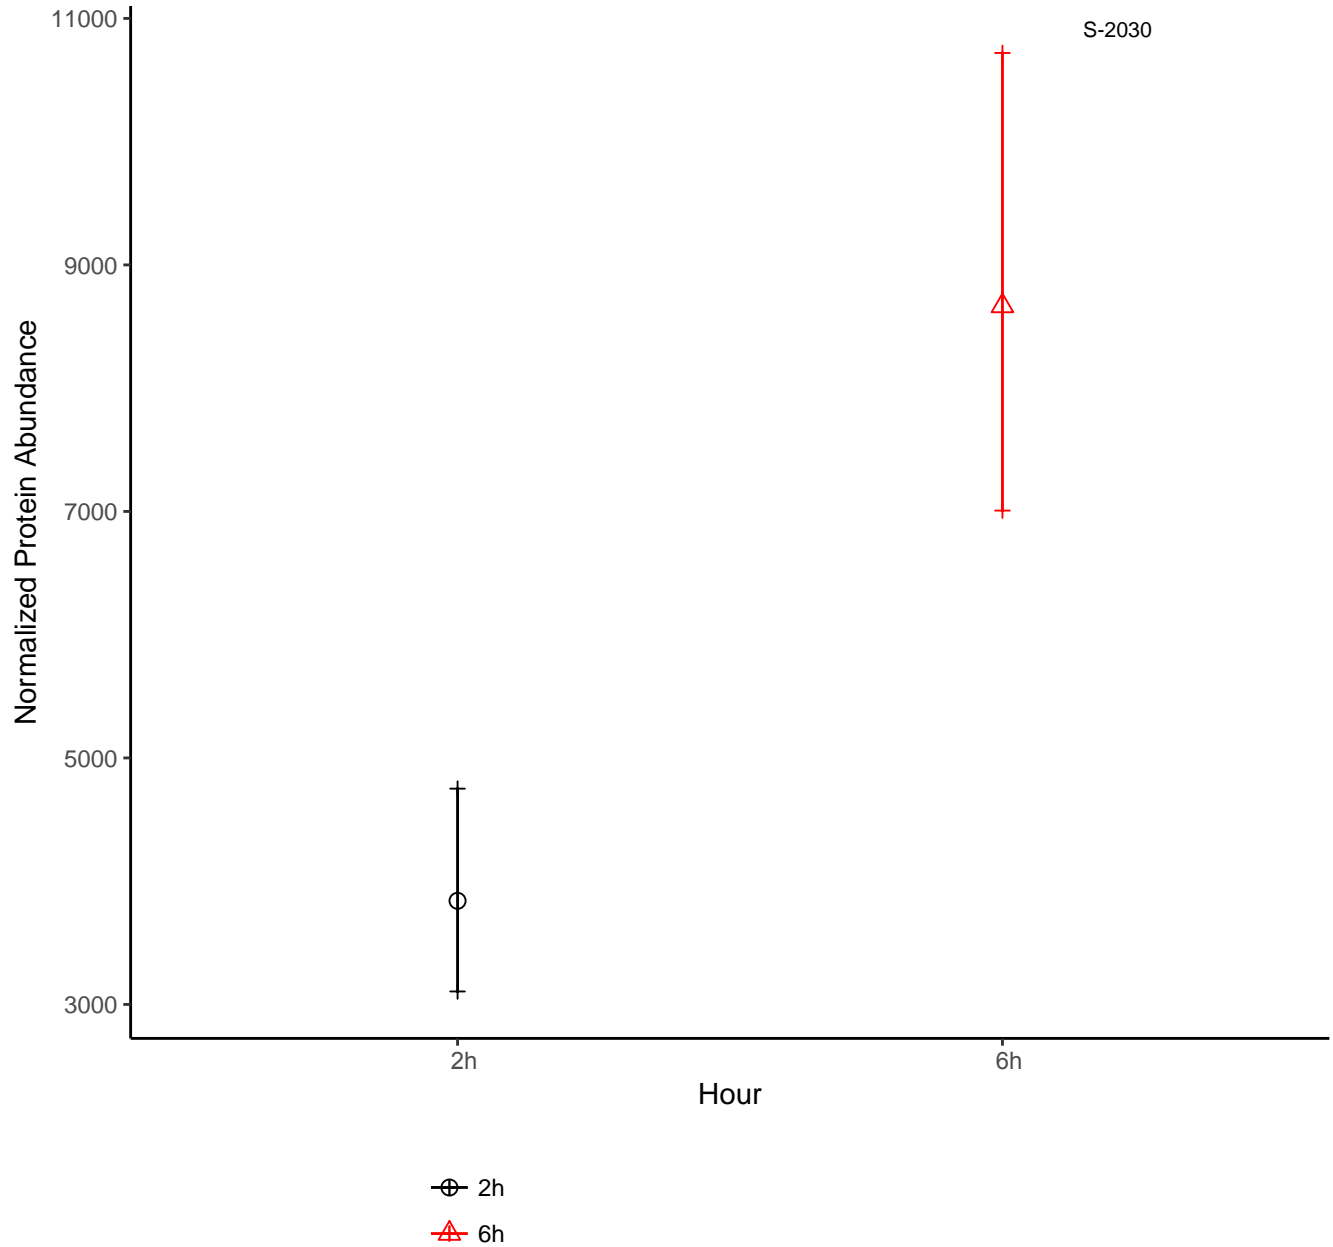

# ARGI\_STAAM

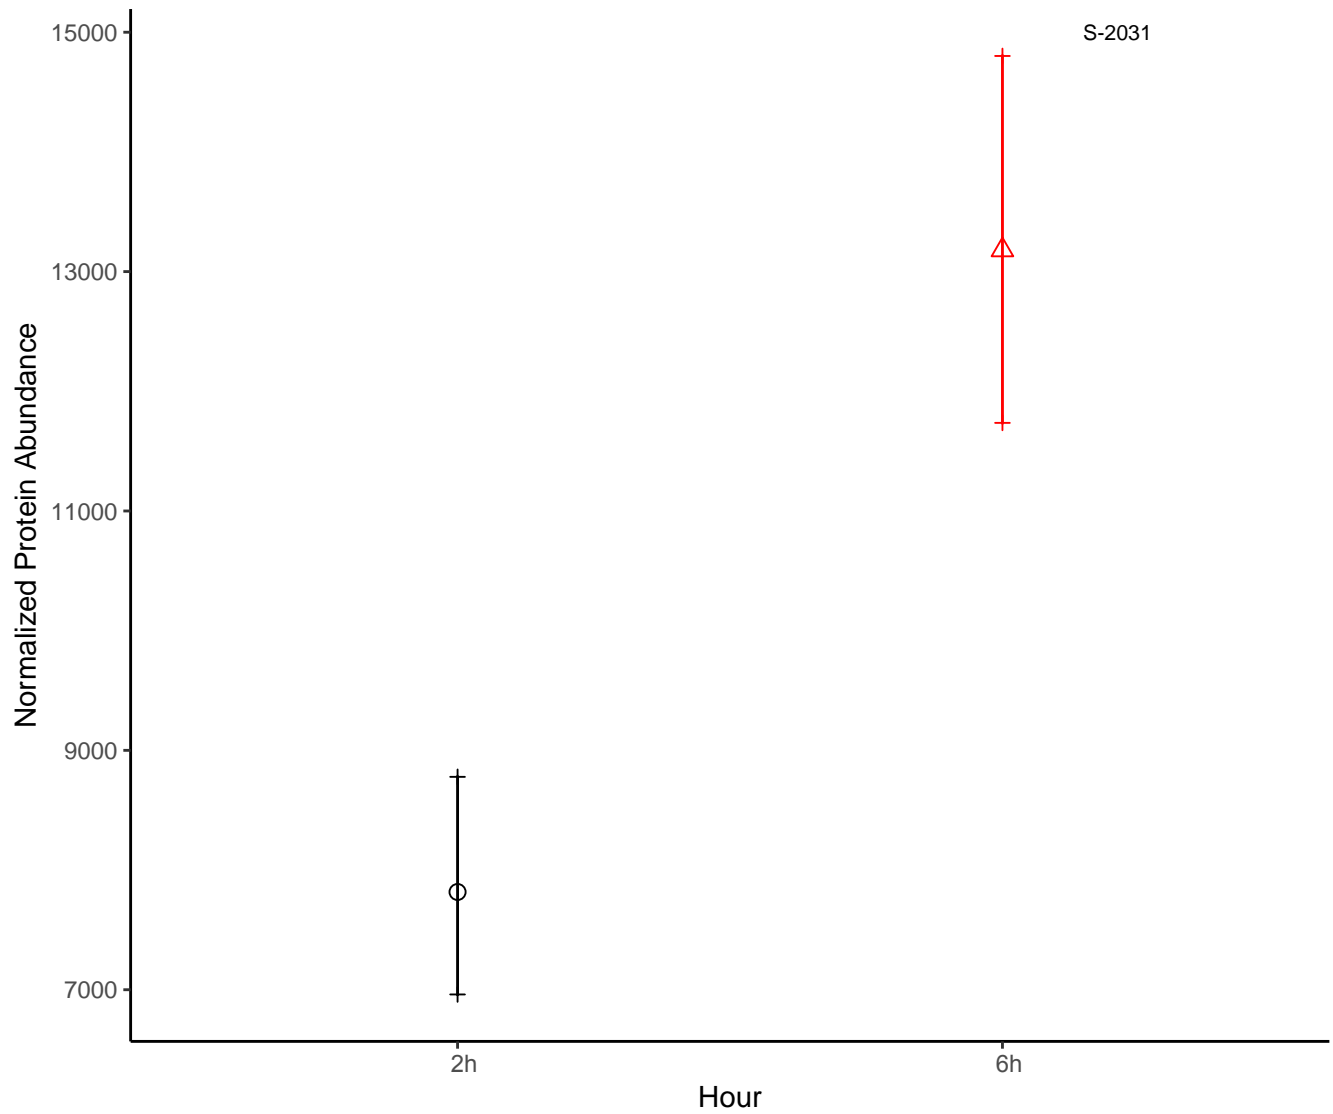

⊕ 2h

△ 6h

# ARGR\_STAAM

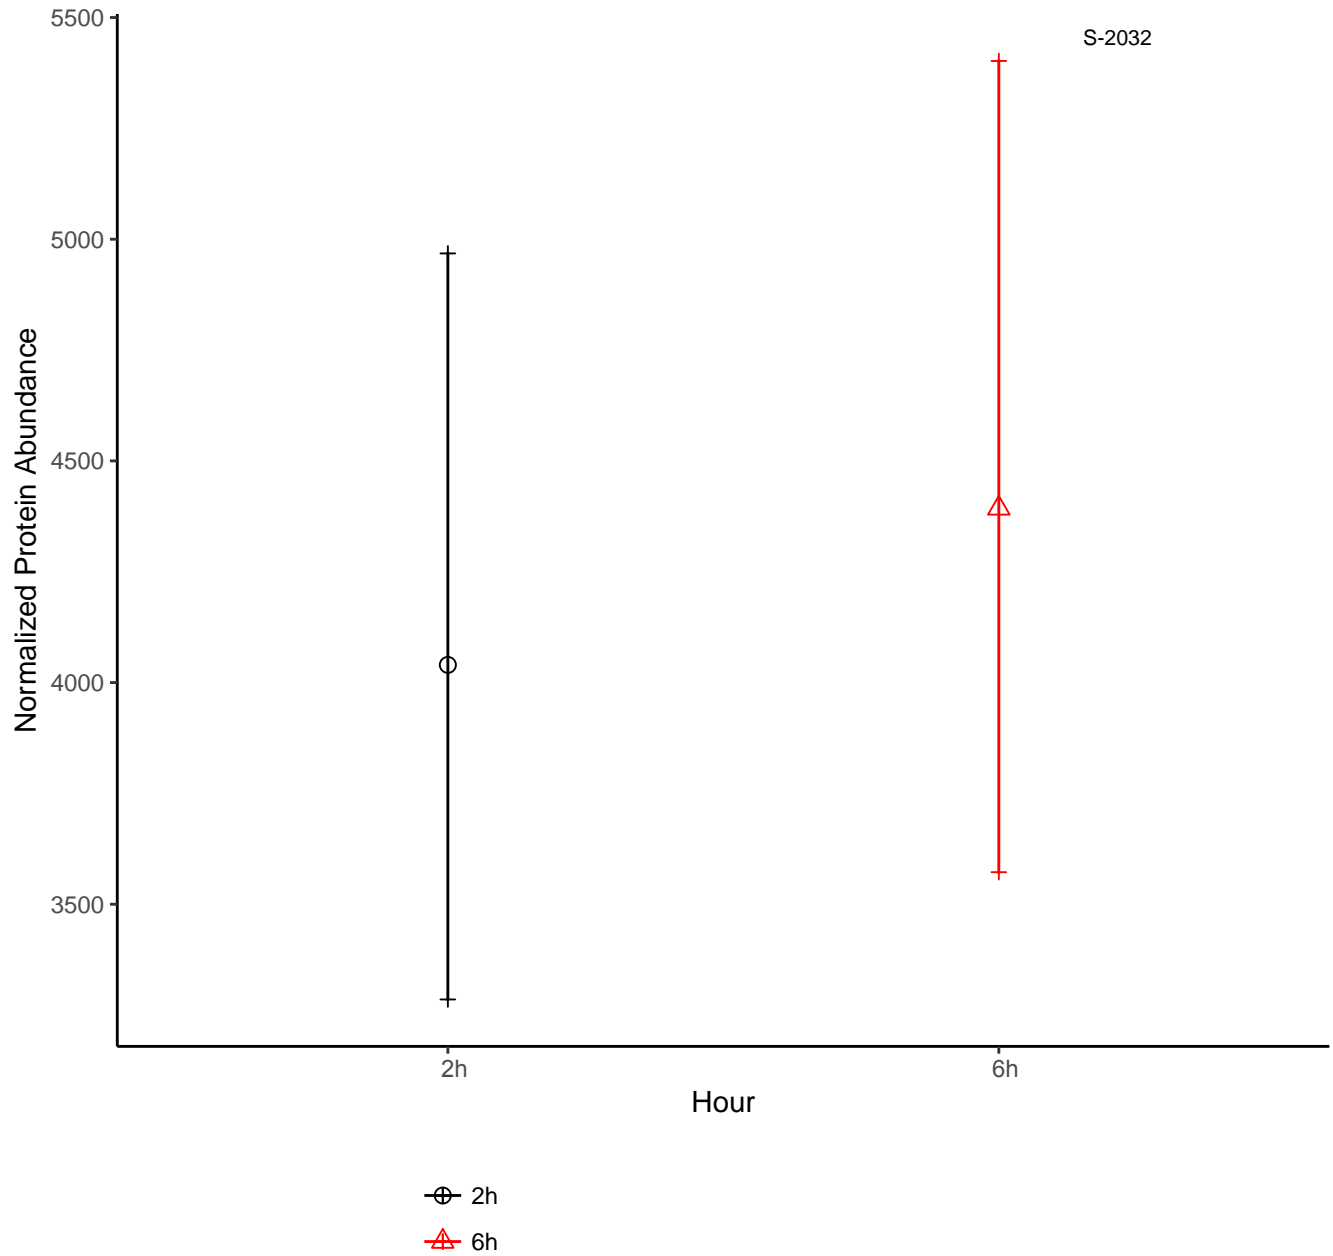



# ARLR\_STAAM

S-2033

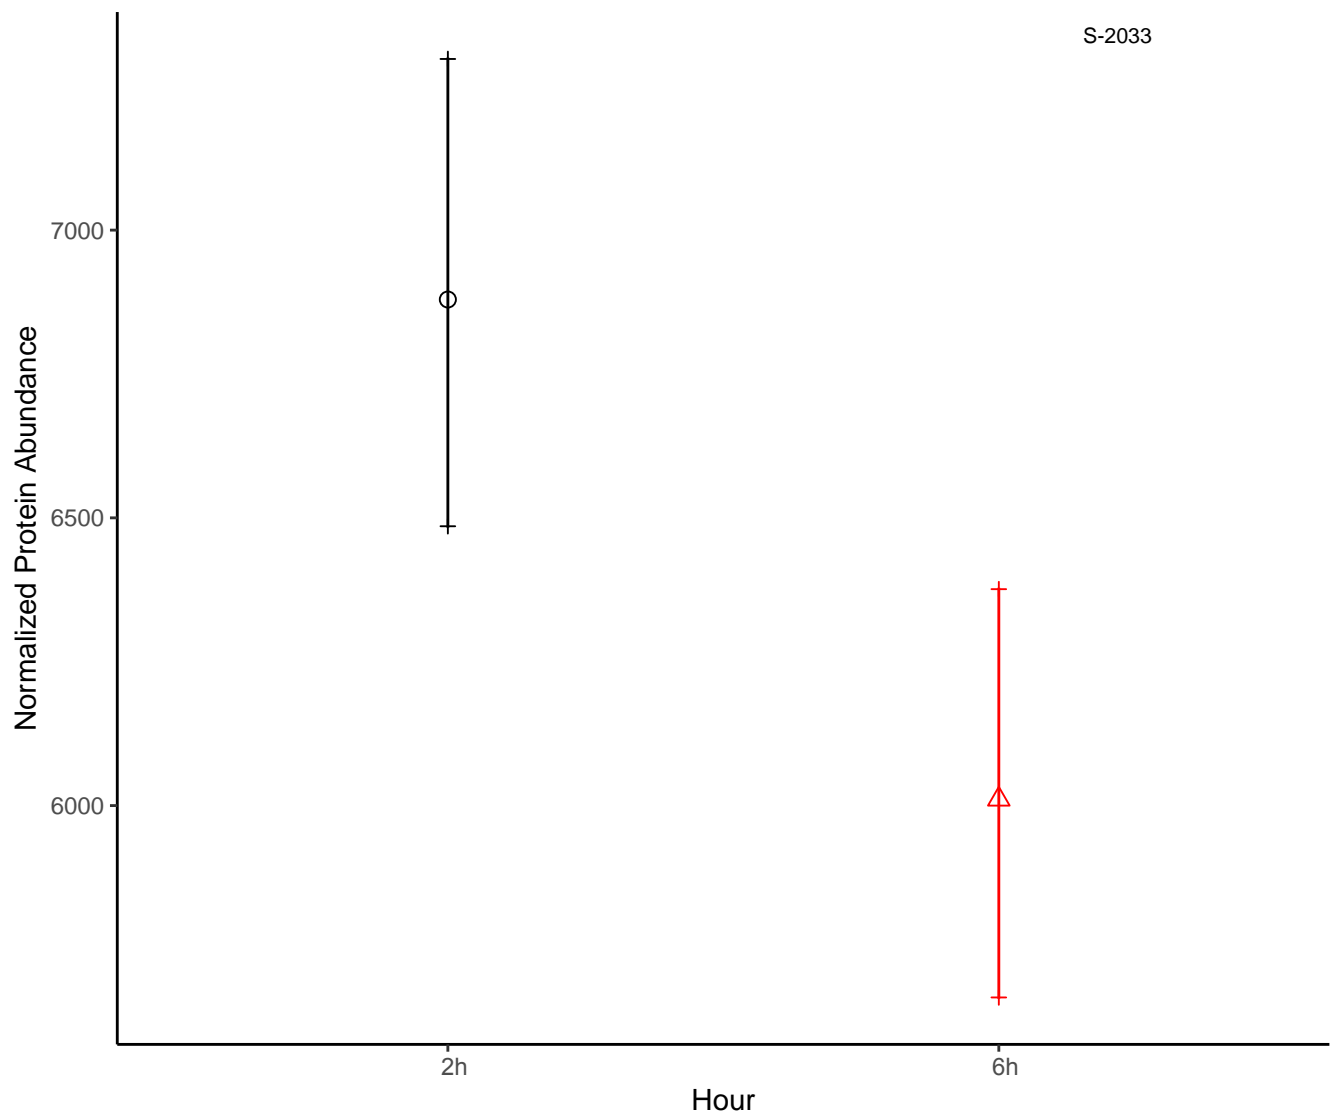

⊕ 2h

△ 6h

# ARLY\_STAAM

S-2034

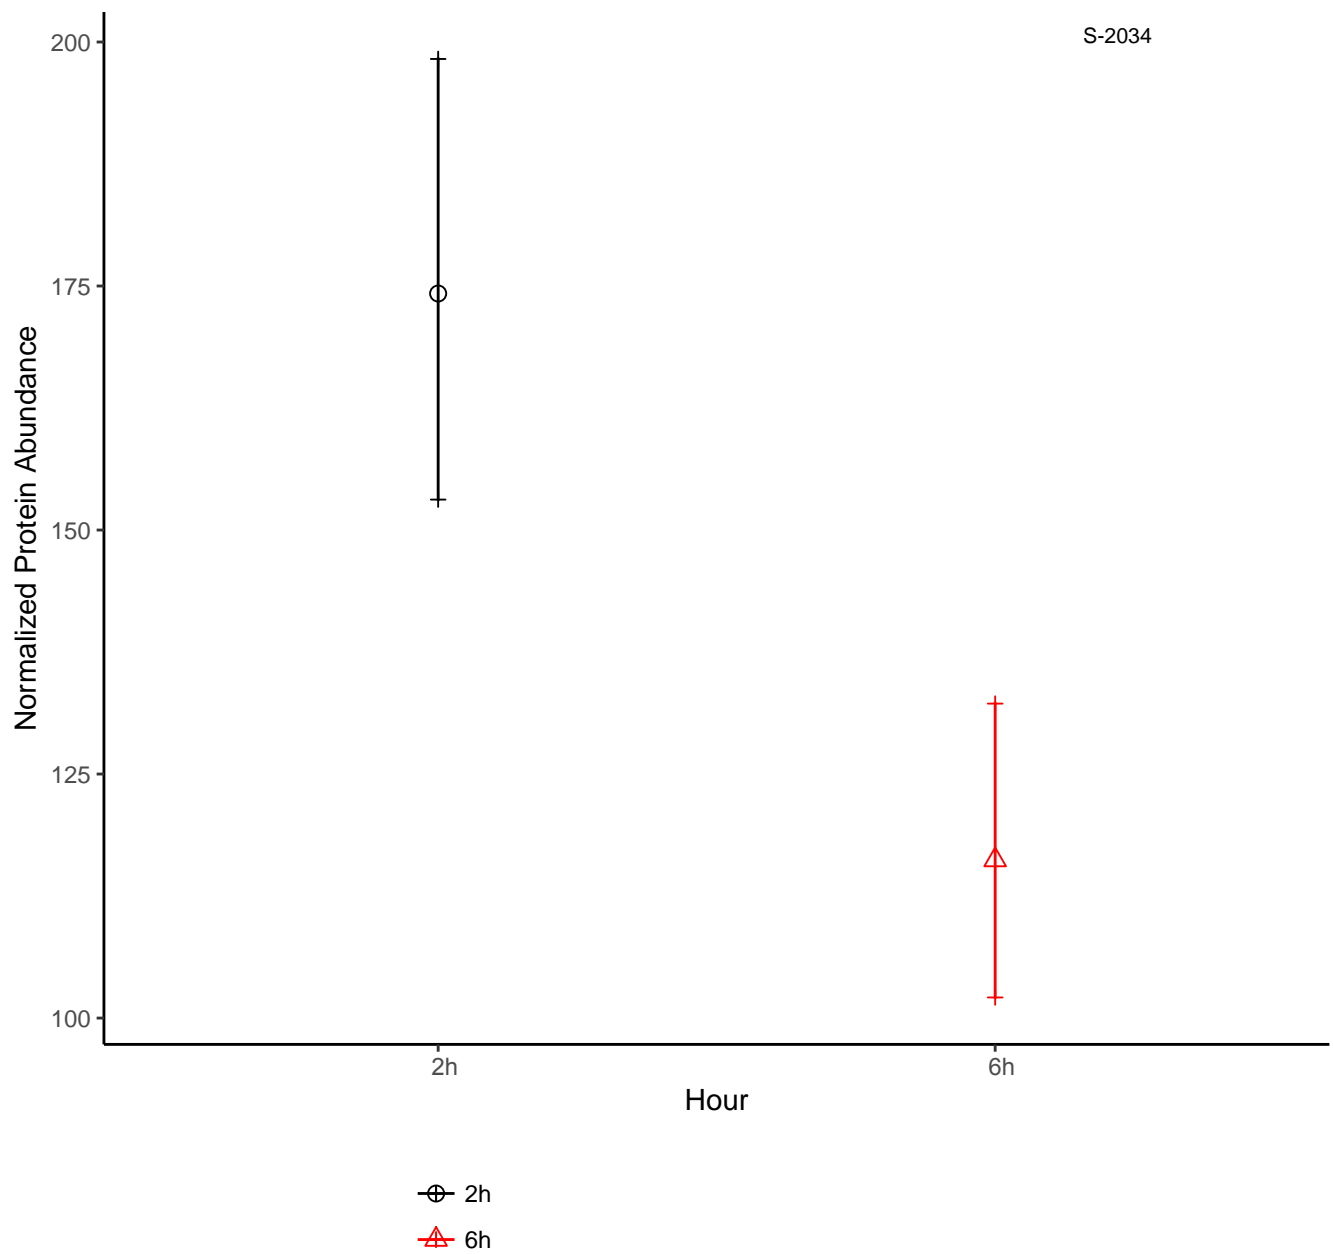

# AROA\_STAAM

S-2035

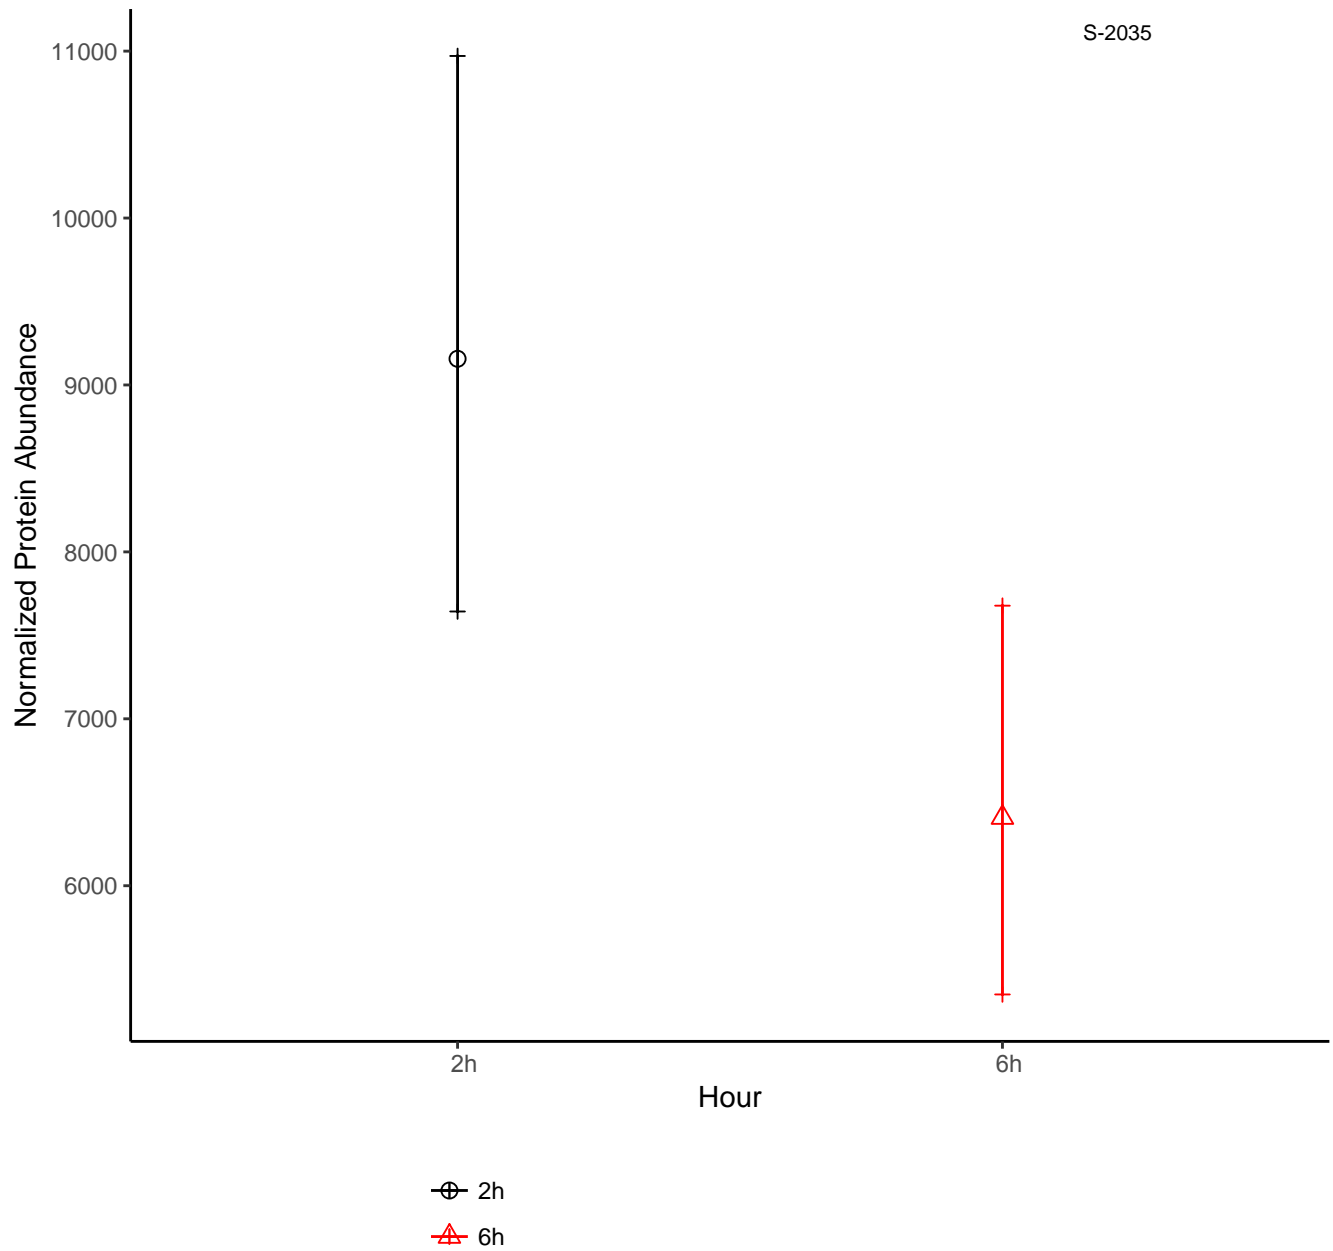

# AROB\_STAAM

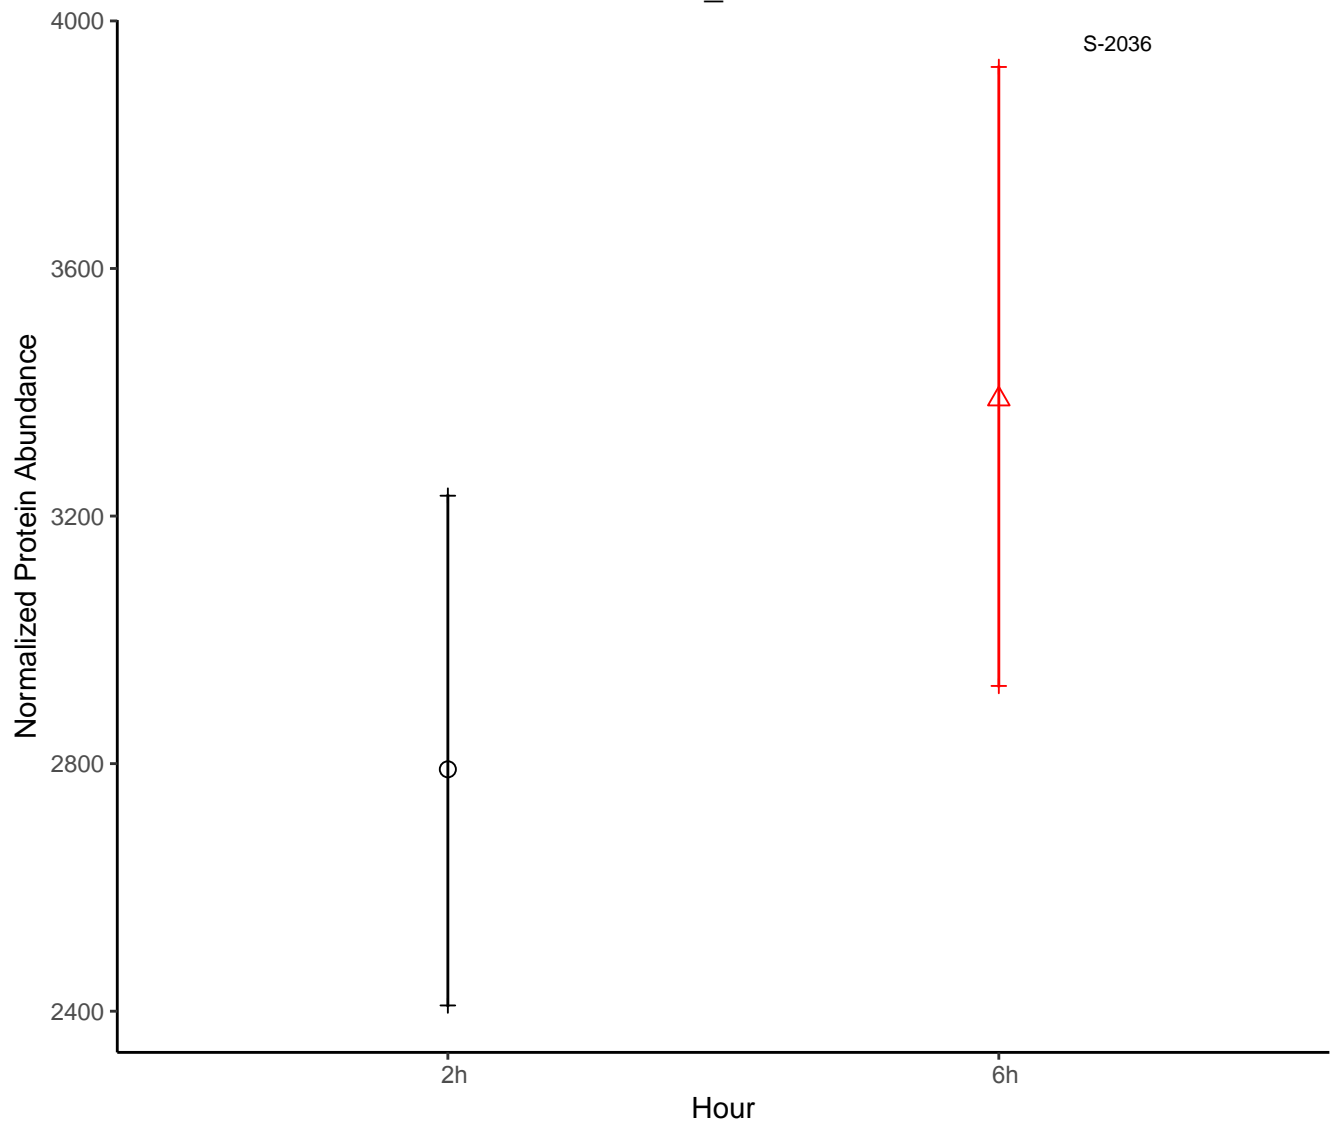

⊕ 2h

△ 6h

# AROE\_STAAM

S-2037

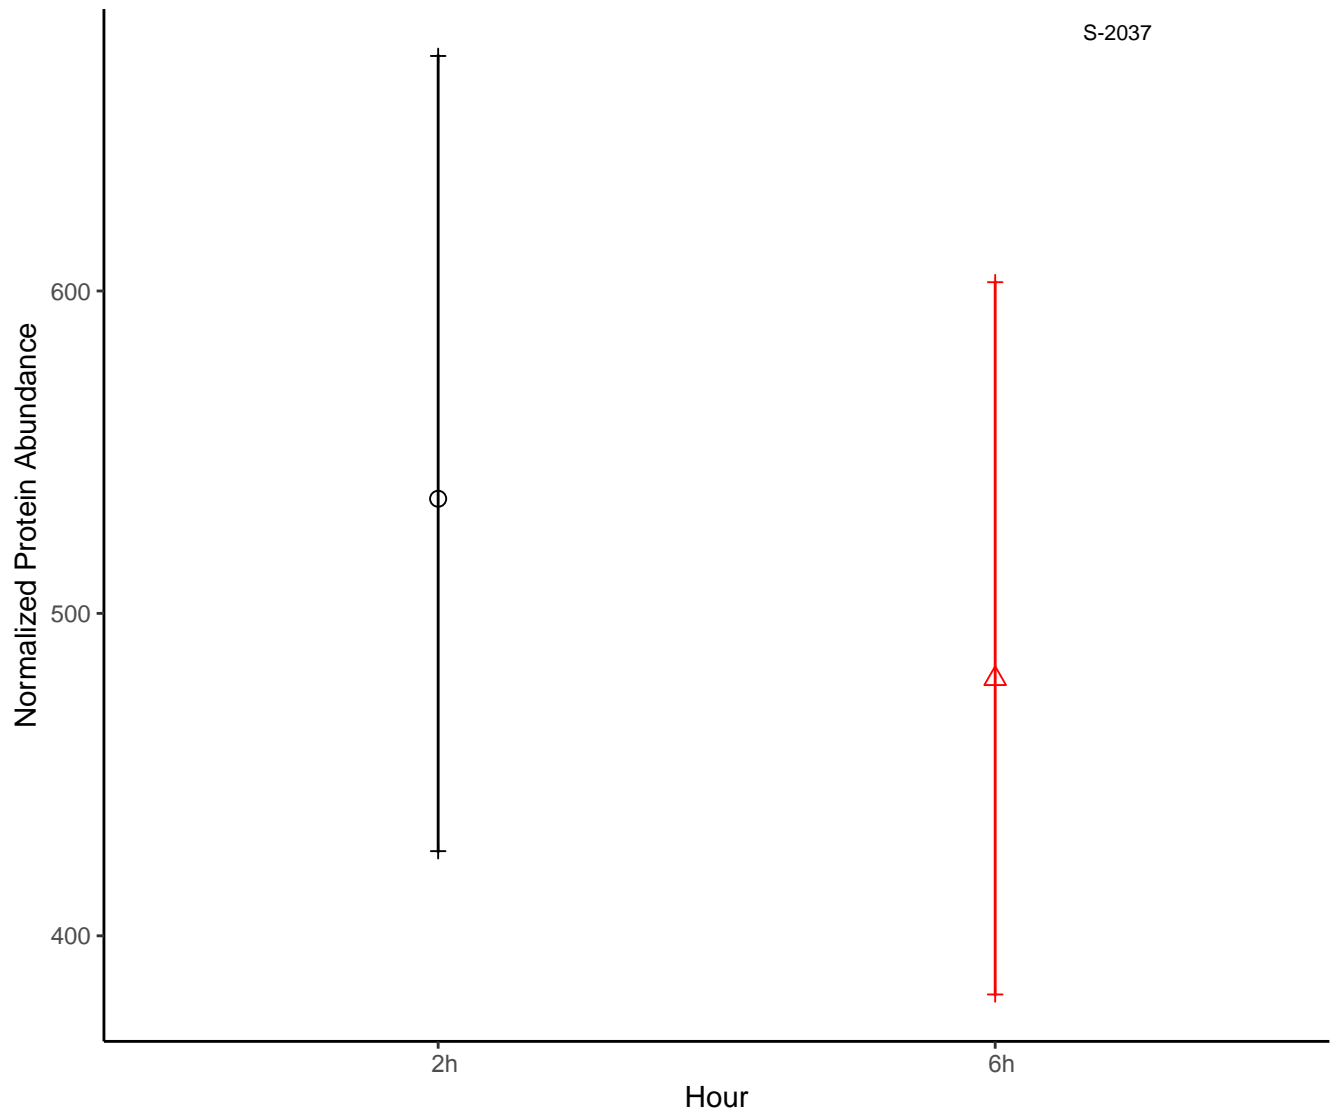

⊕ 2h

△ 6h

# ASP23\_STAAM

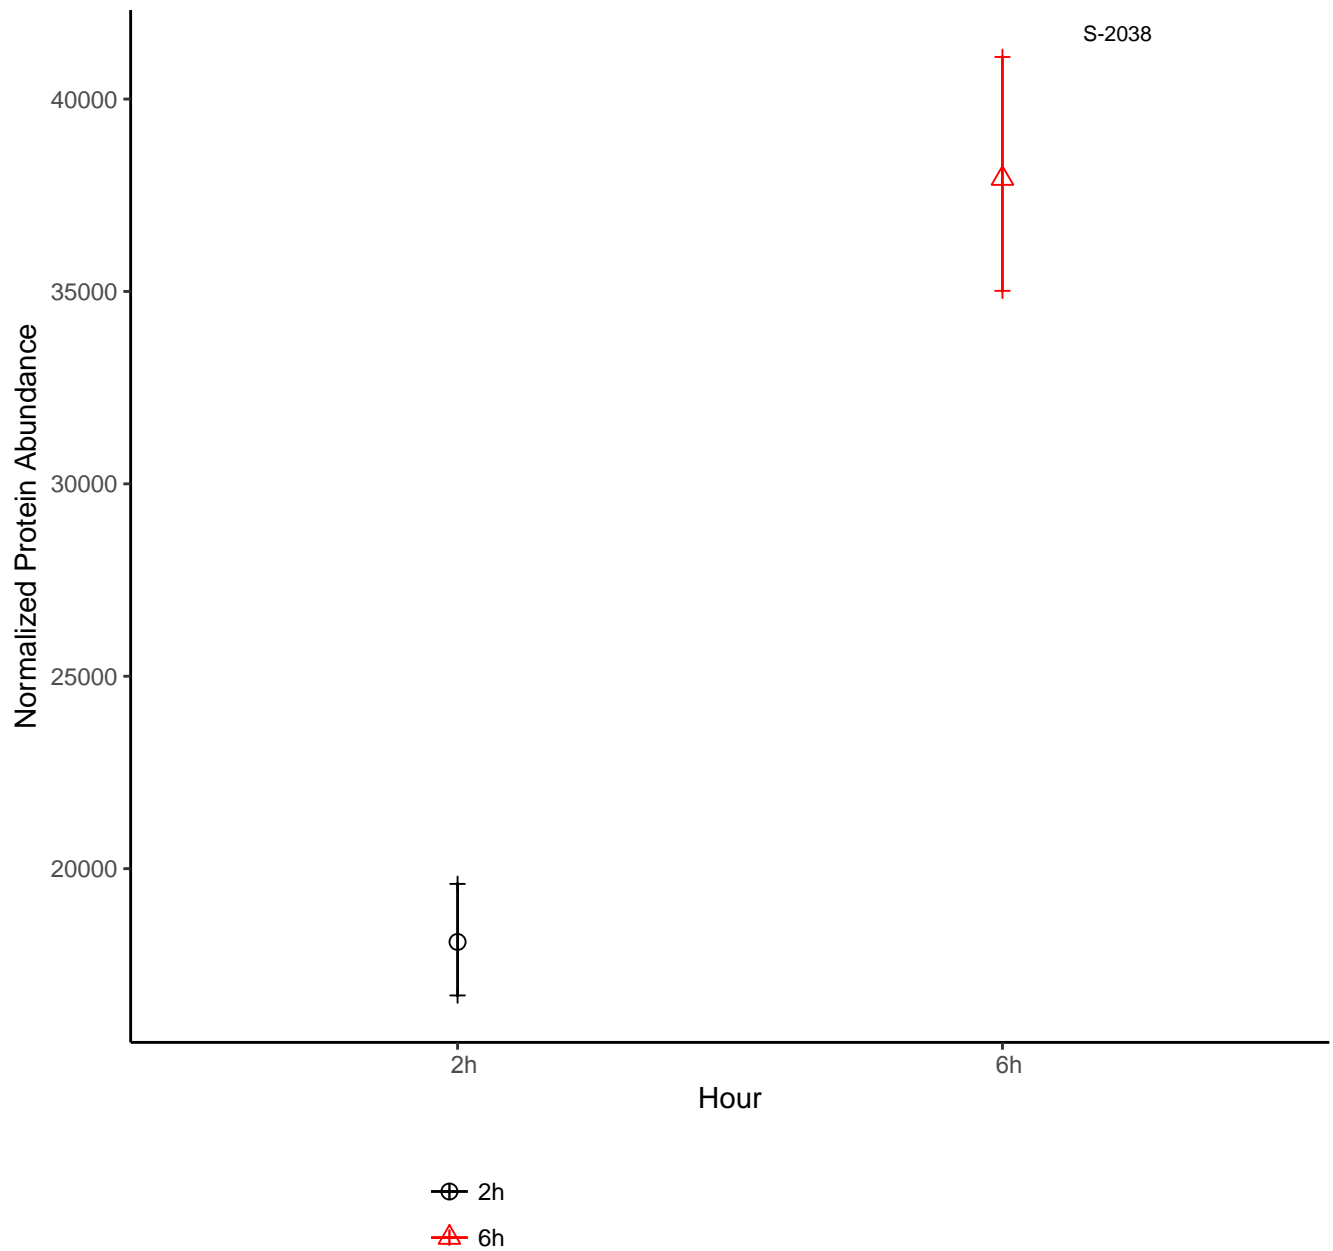

# ATL\_STAAM

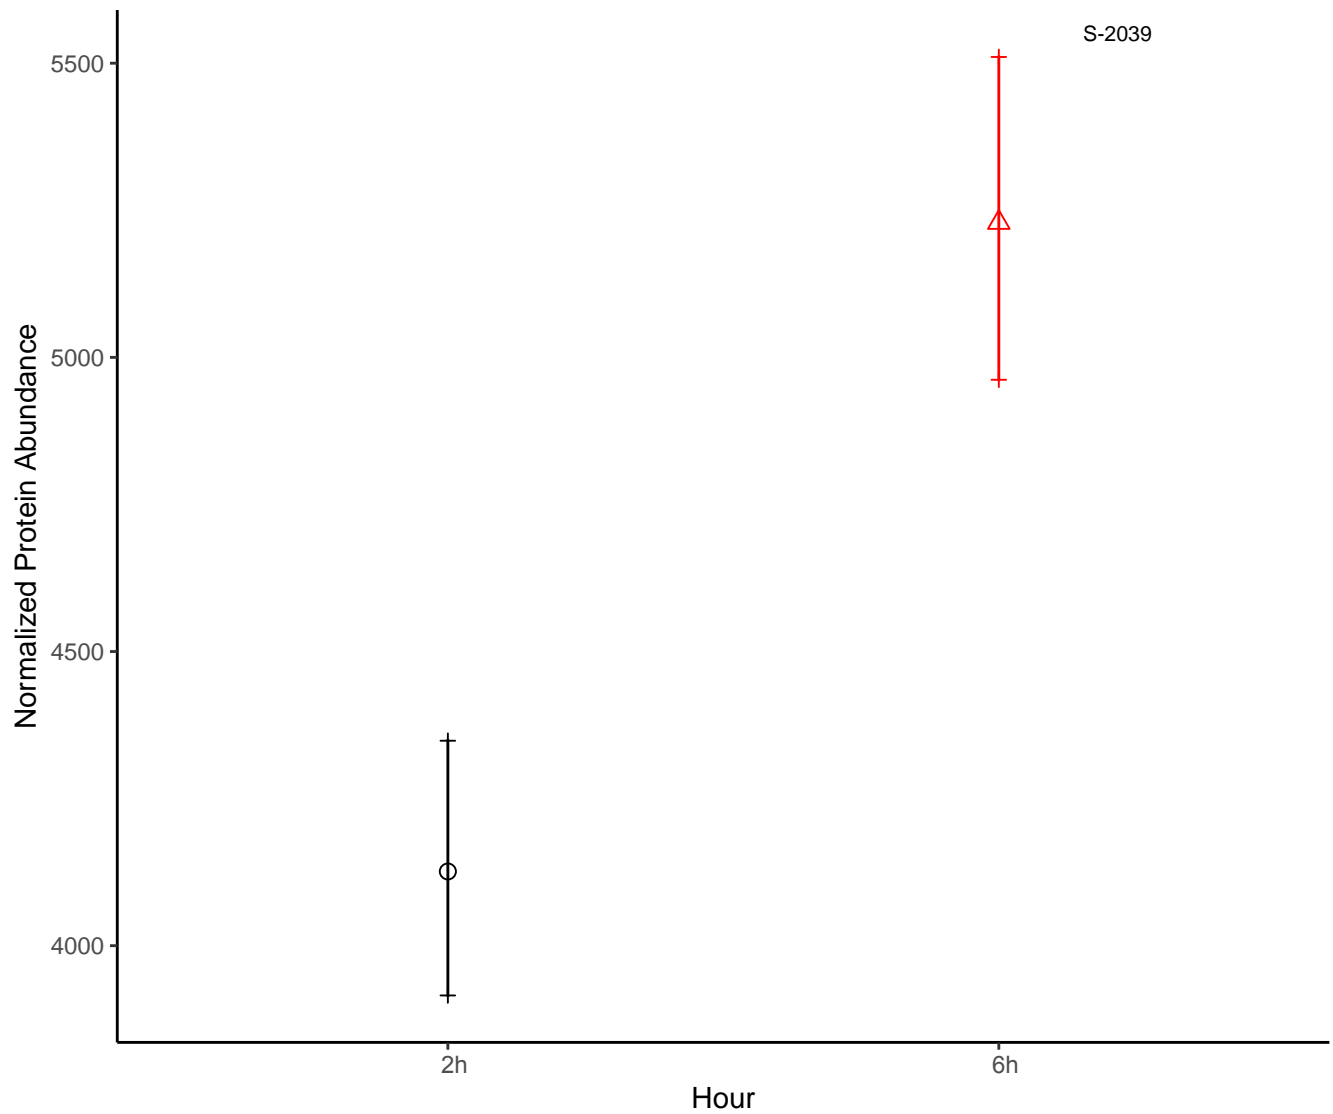

⊕ 2h

△ 6h

# ATPA\_STAAM

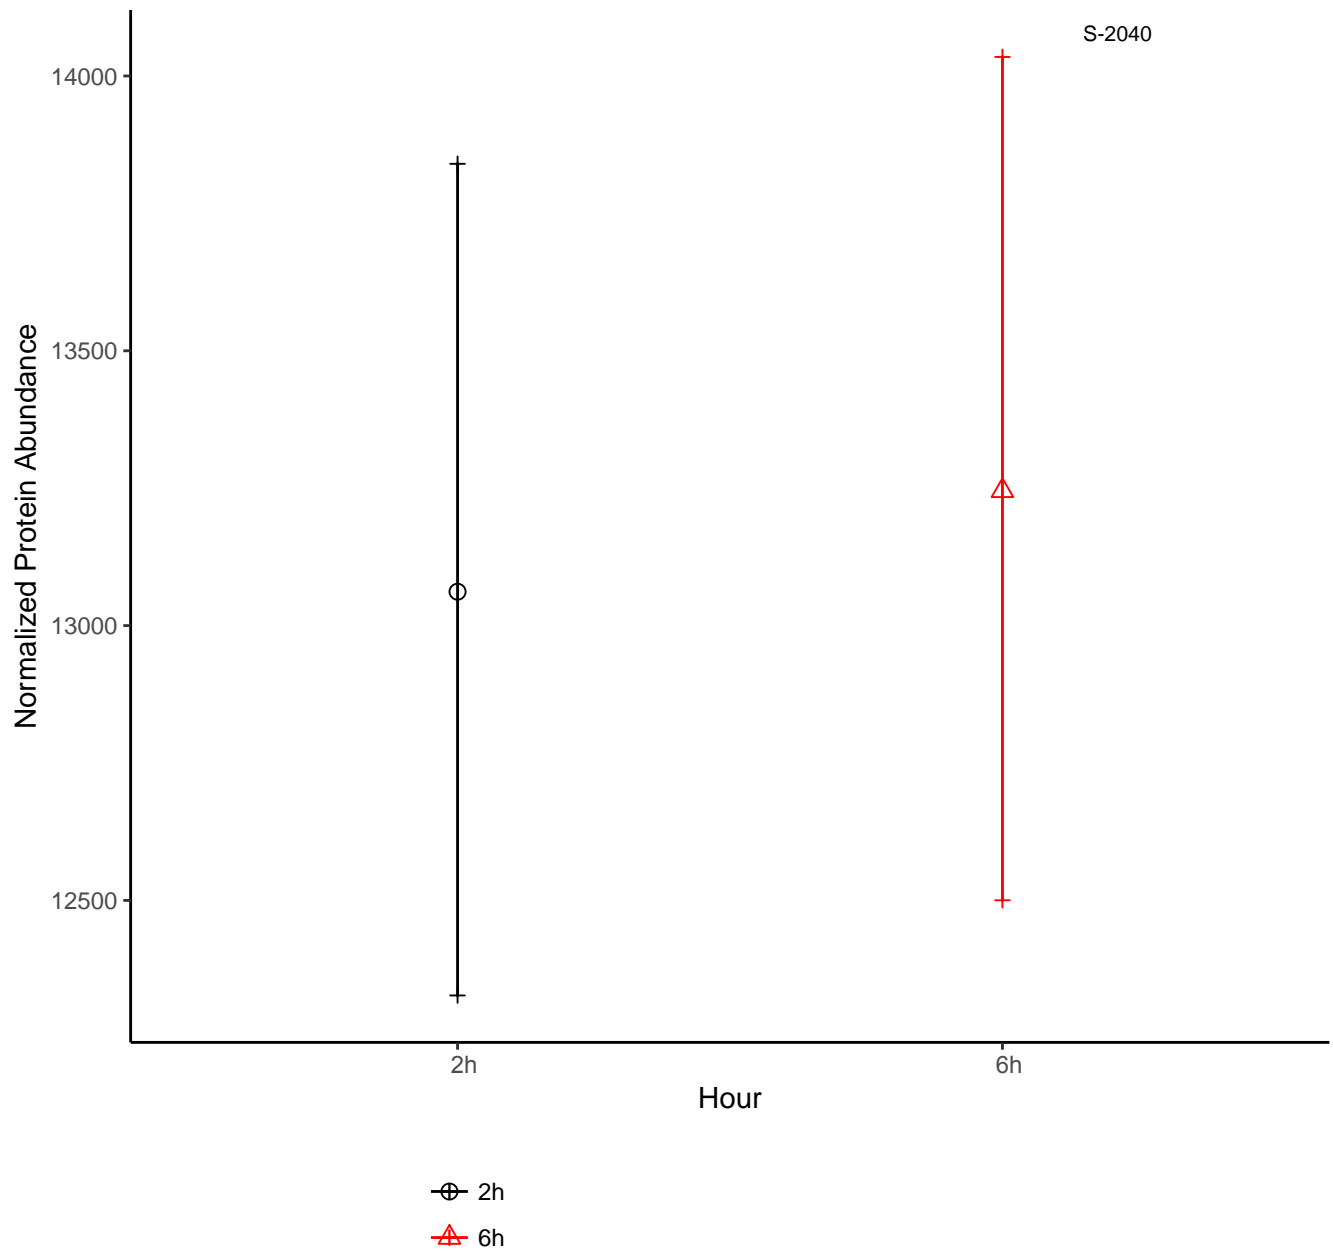



# ATPB\_STAAM

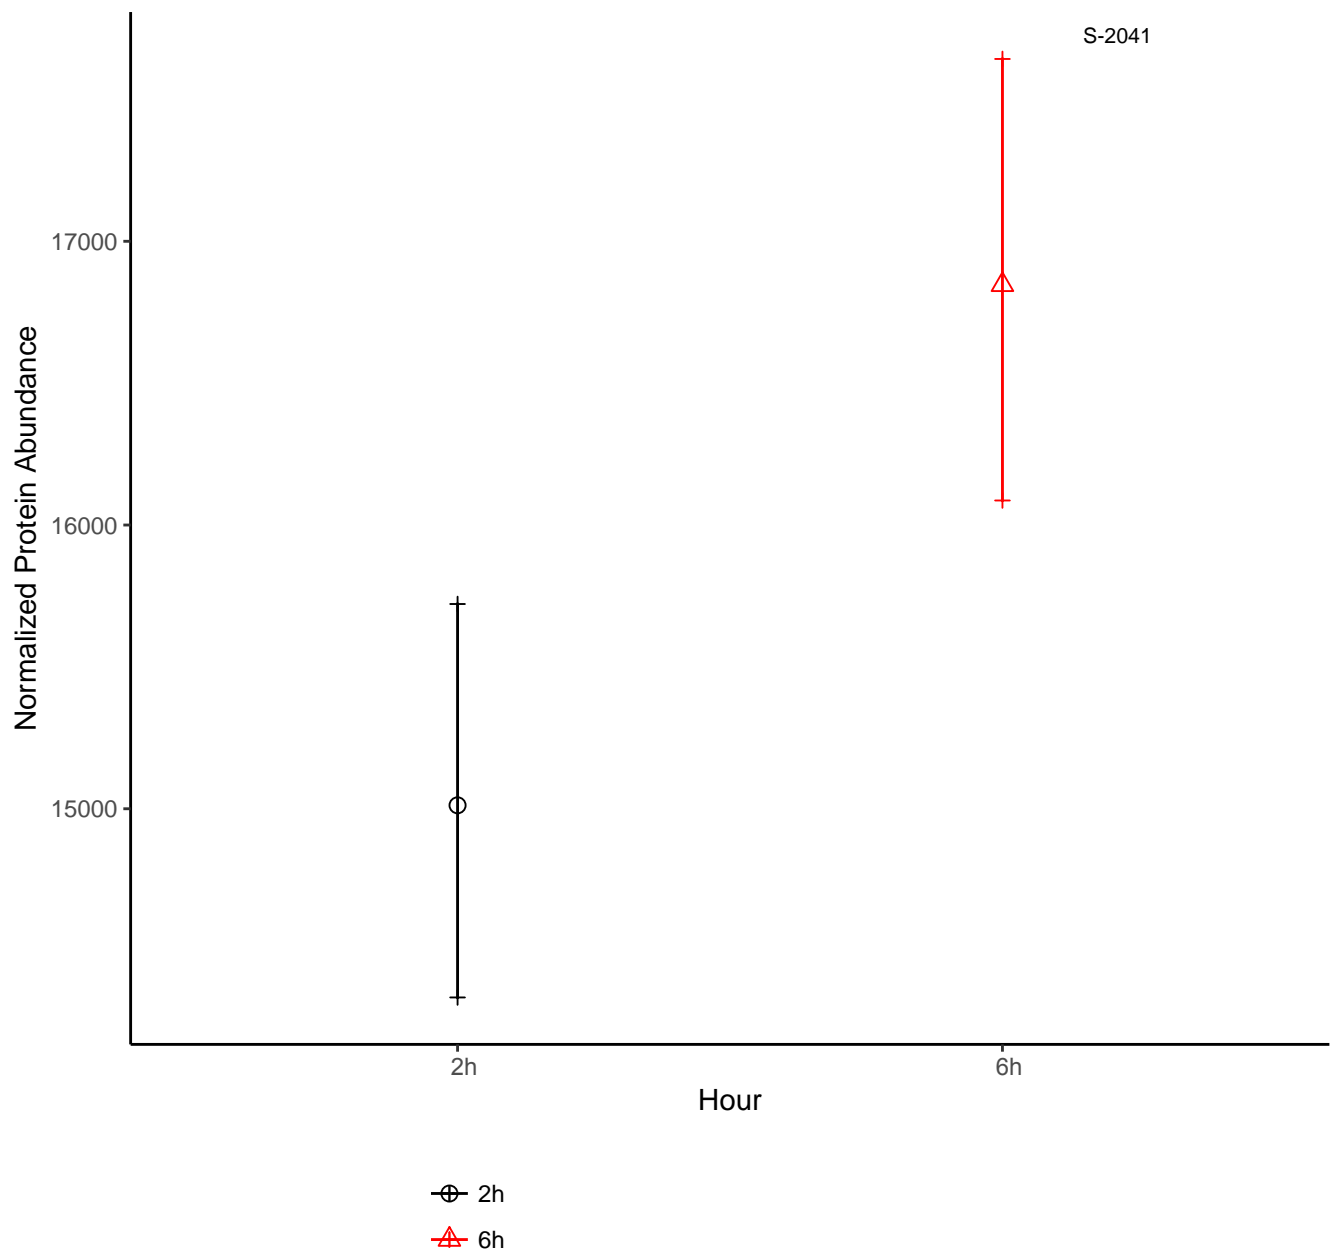

# ATPD\_STAAM

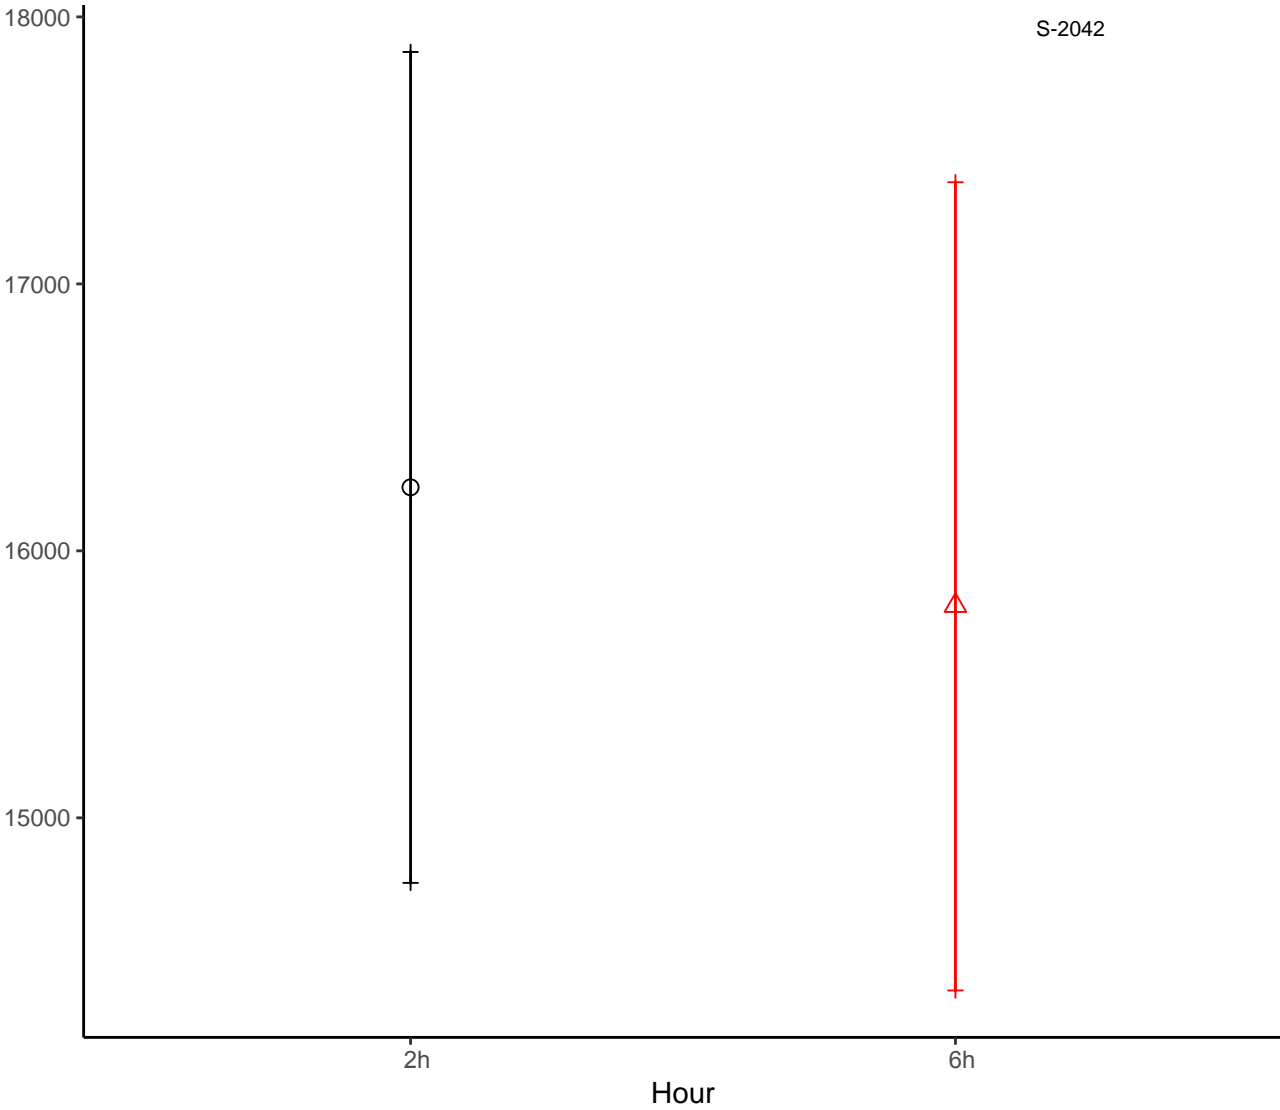

⊕ 2h

△ 6h

# ATPE\_STAAM

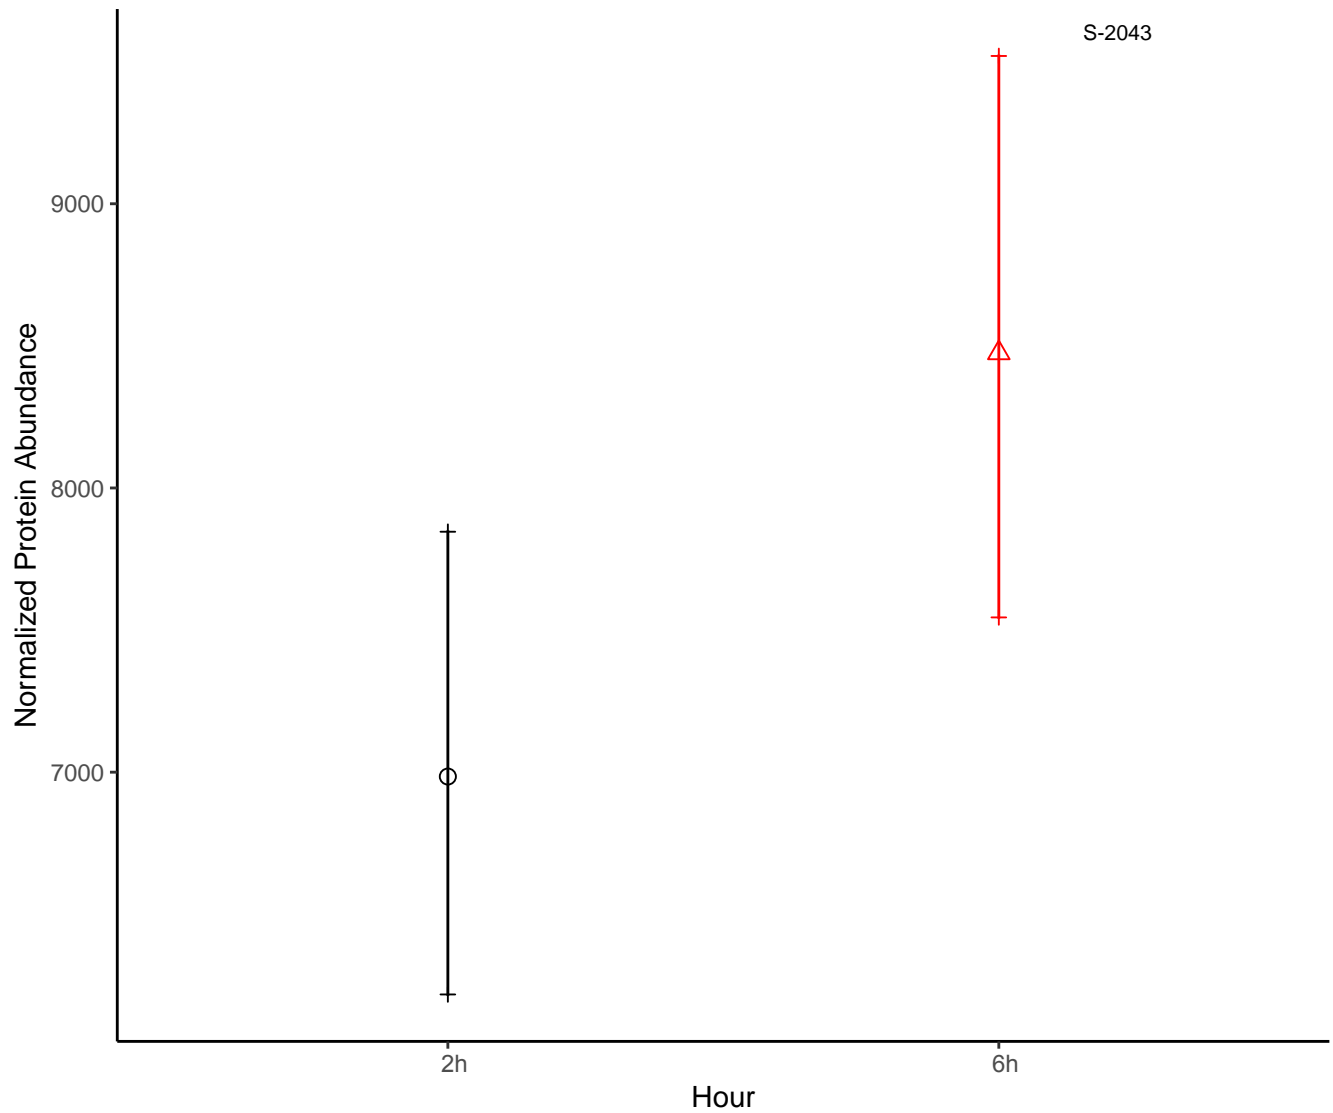

⊕ 2h

△ 6h

# ATPF\_STAAM

S-2044

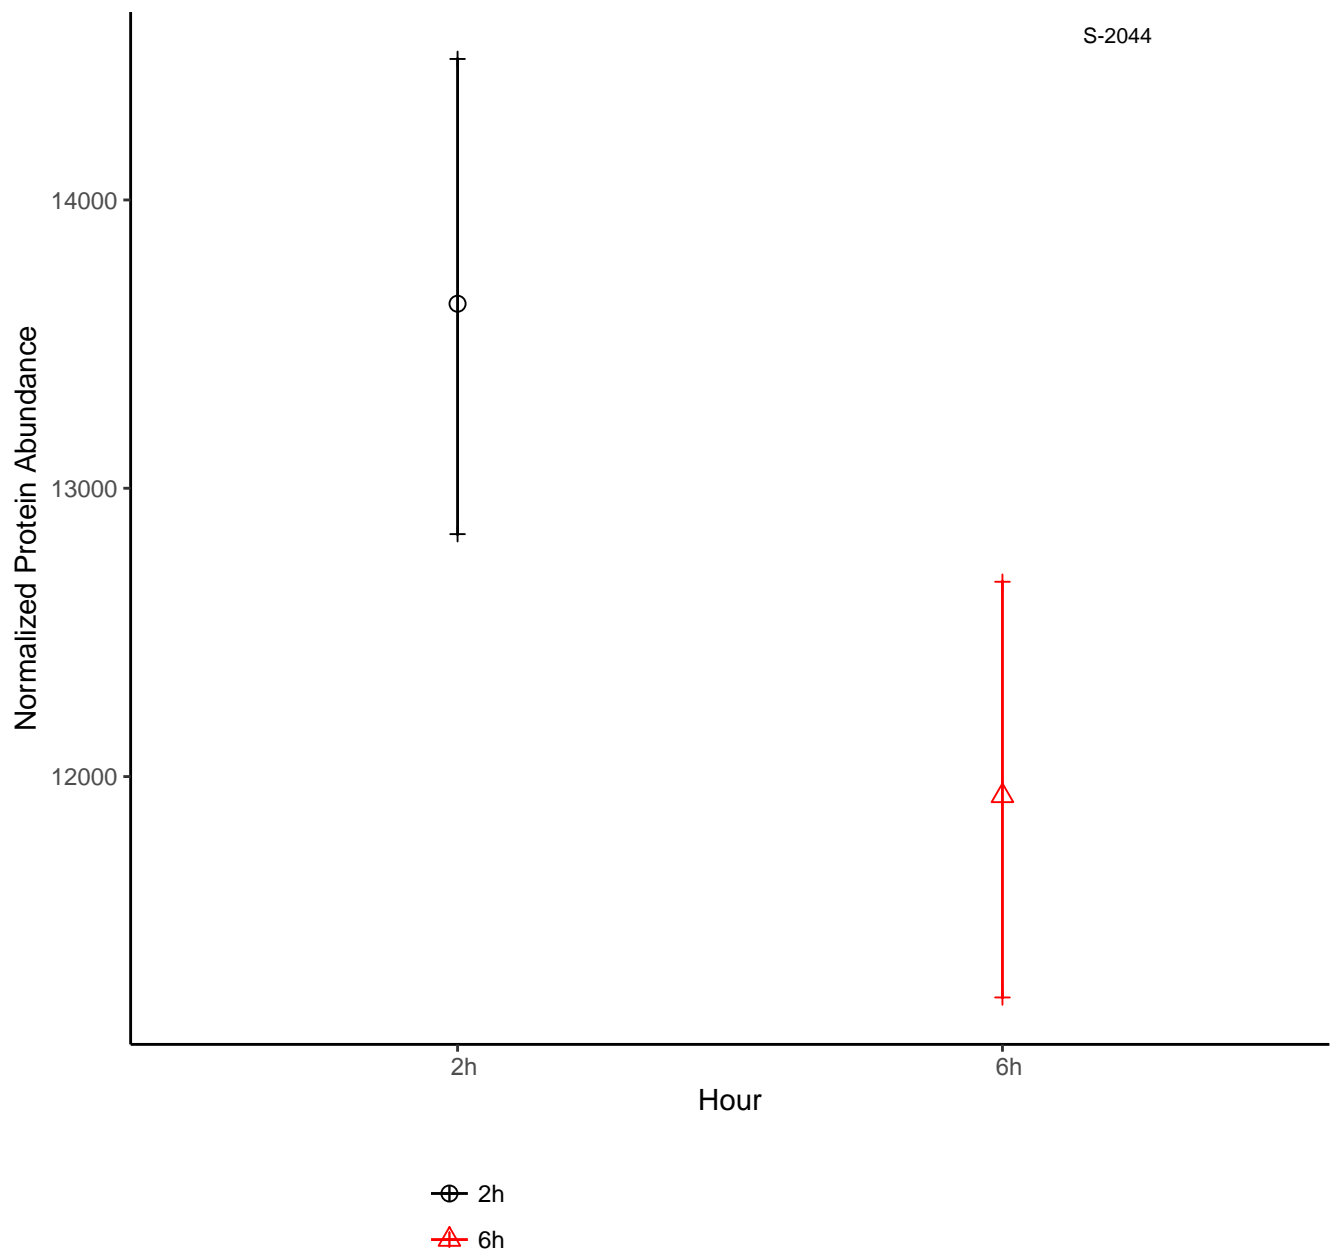

# ATPG\_STAAM

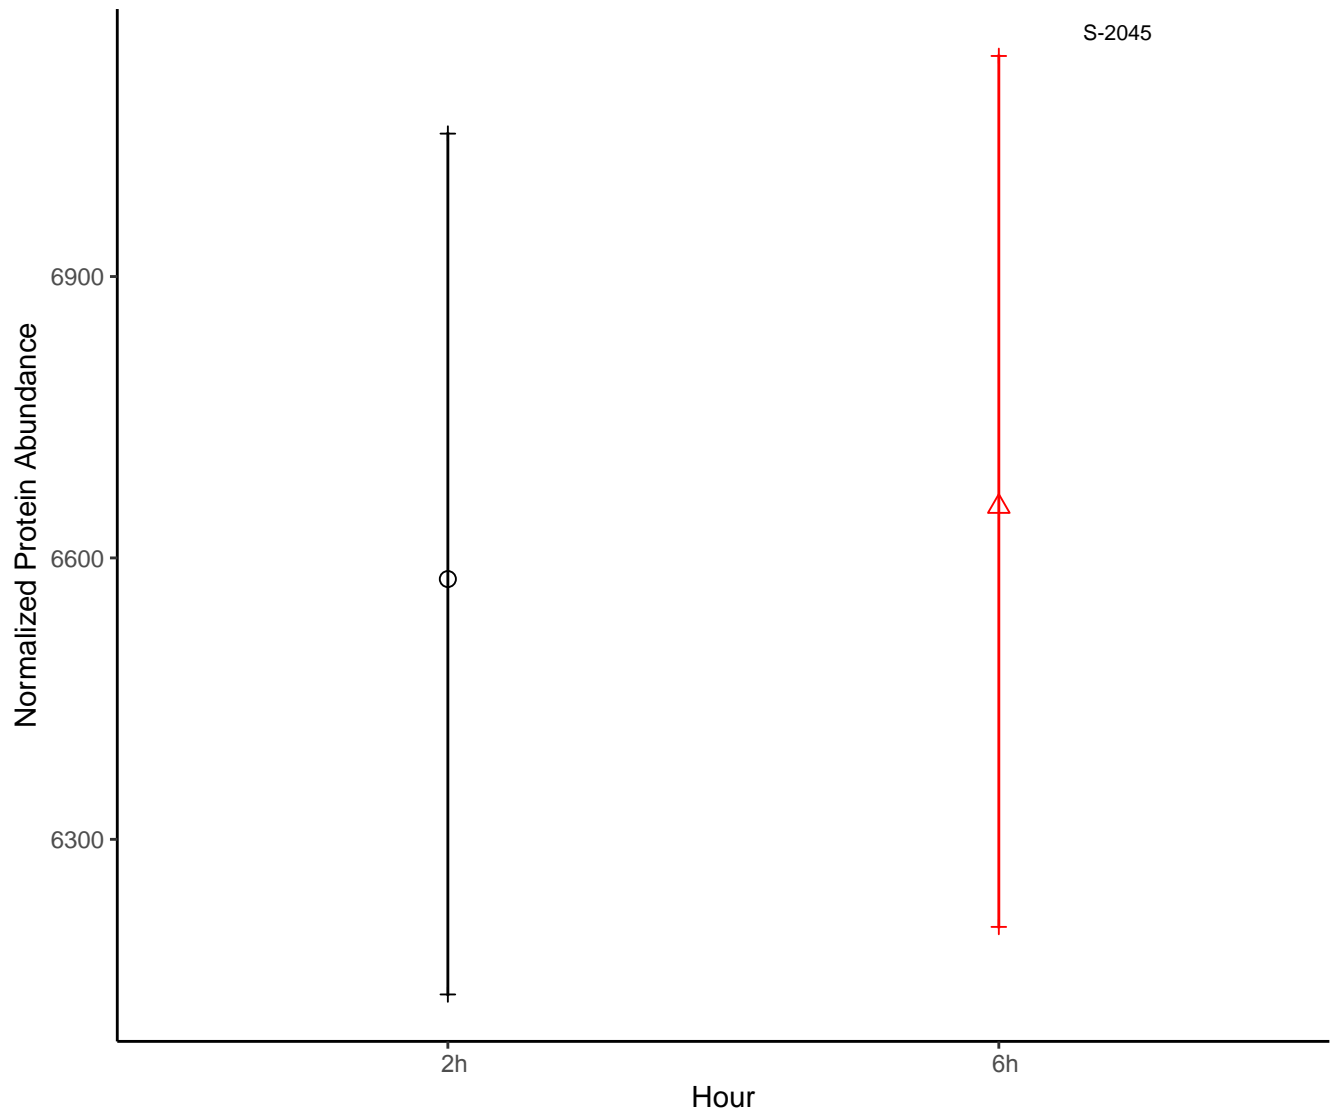

⊕ 2h

△ 6h

# AZO1\_STAAM

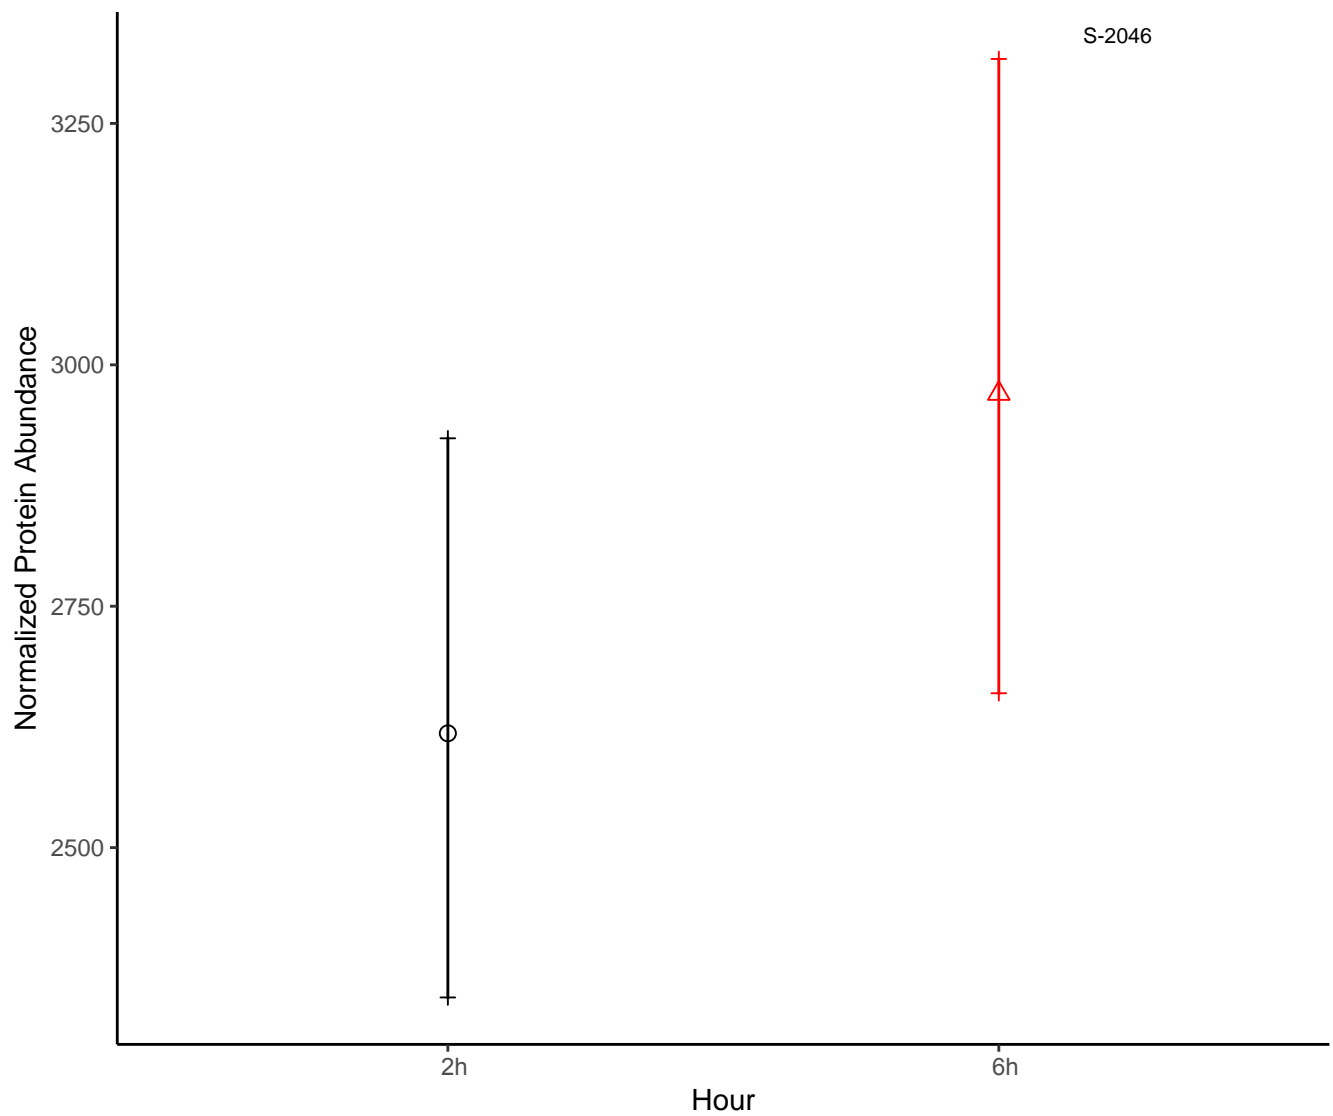

⊕ 2h

△ 6h

# AZOR\_STAAM

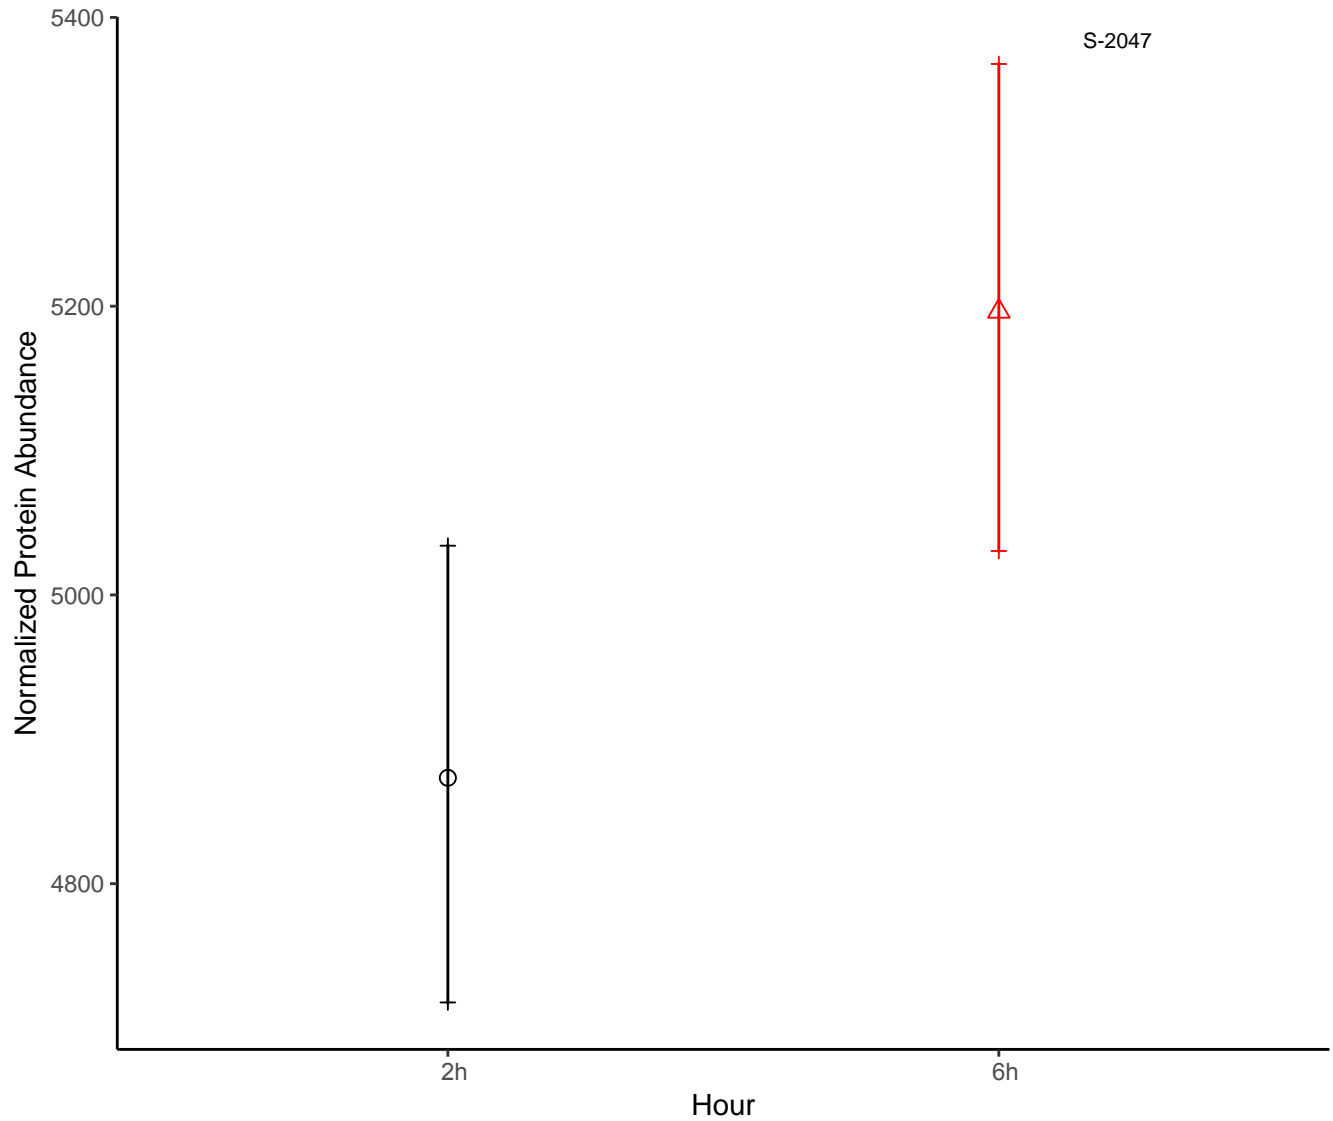

⊕ 2h

△ 6h

# BSAA\_STAAM

S-2048

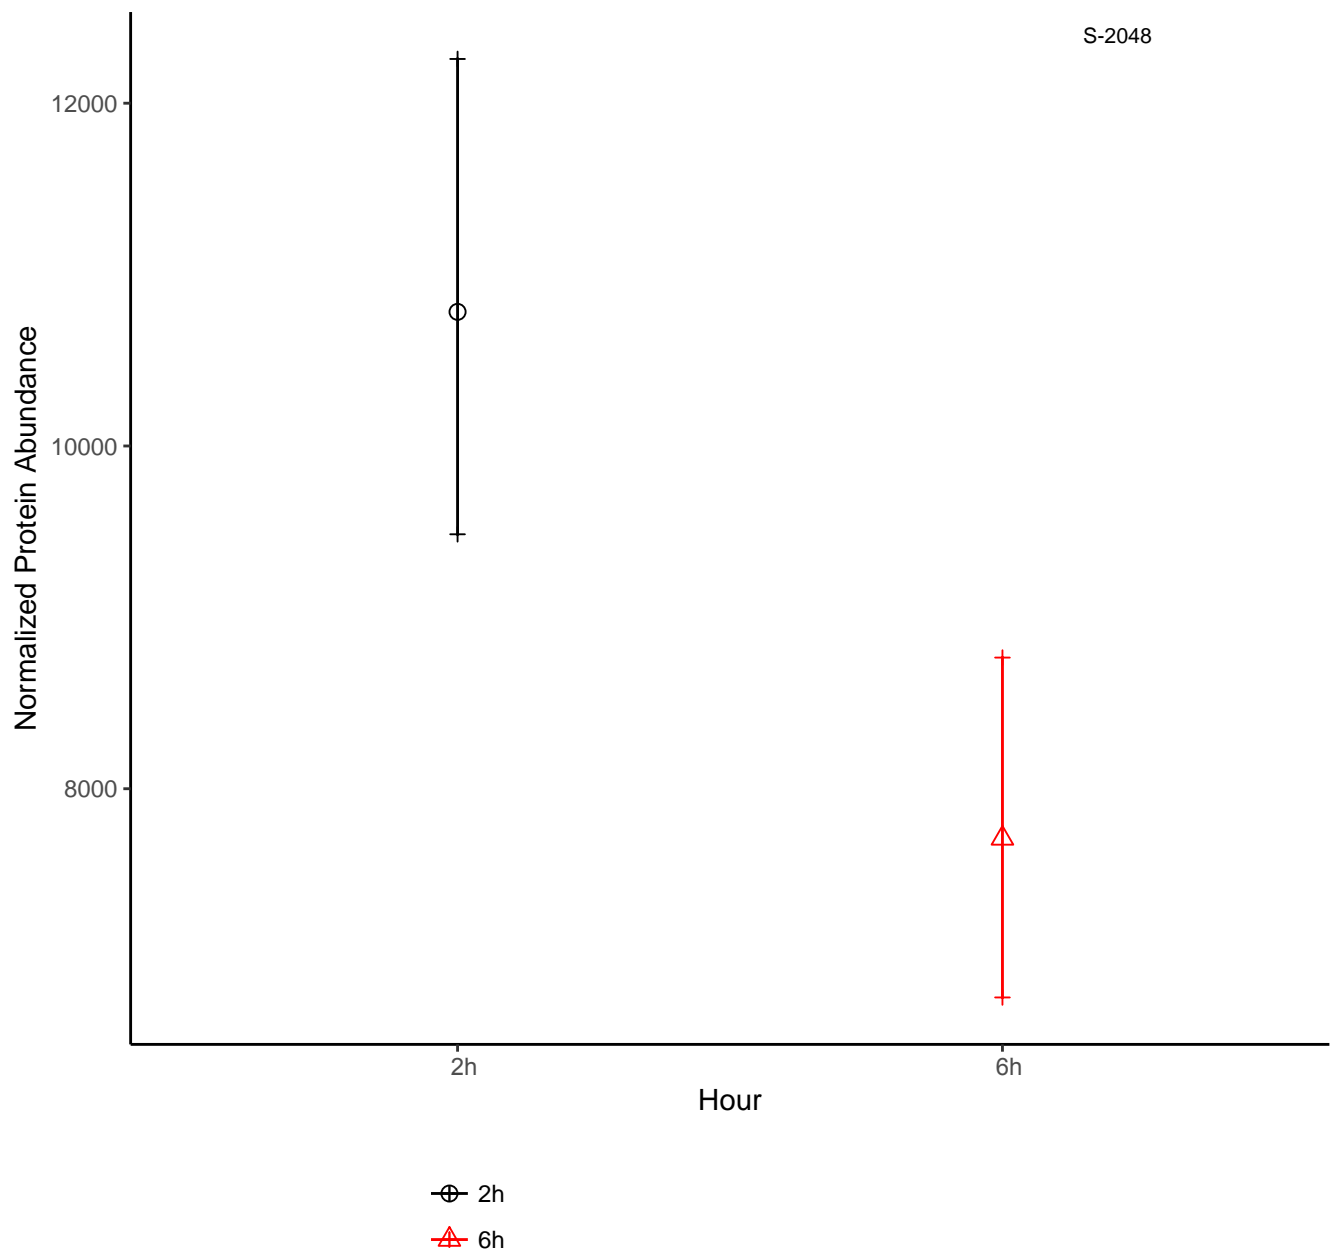



# BUTA\_STAAM

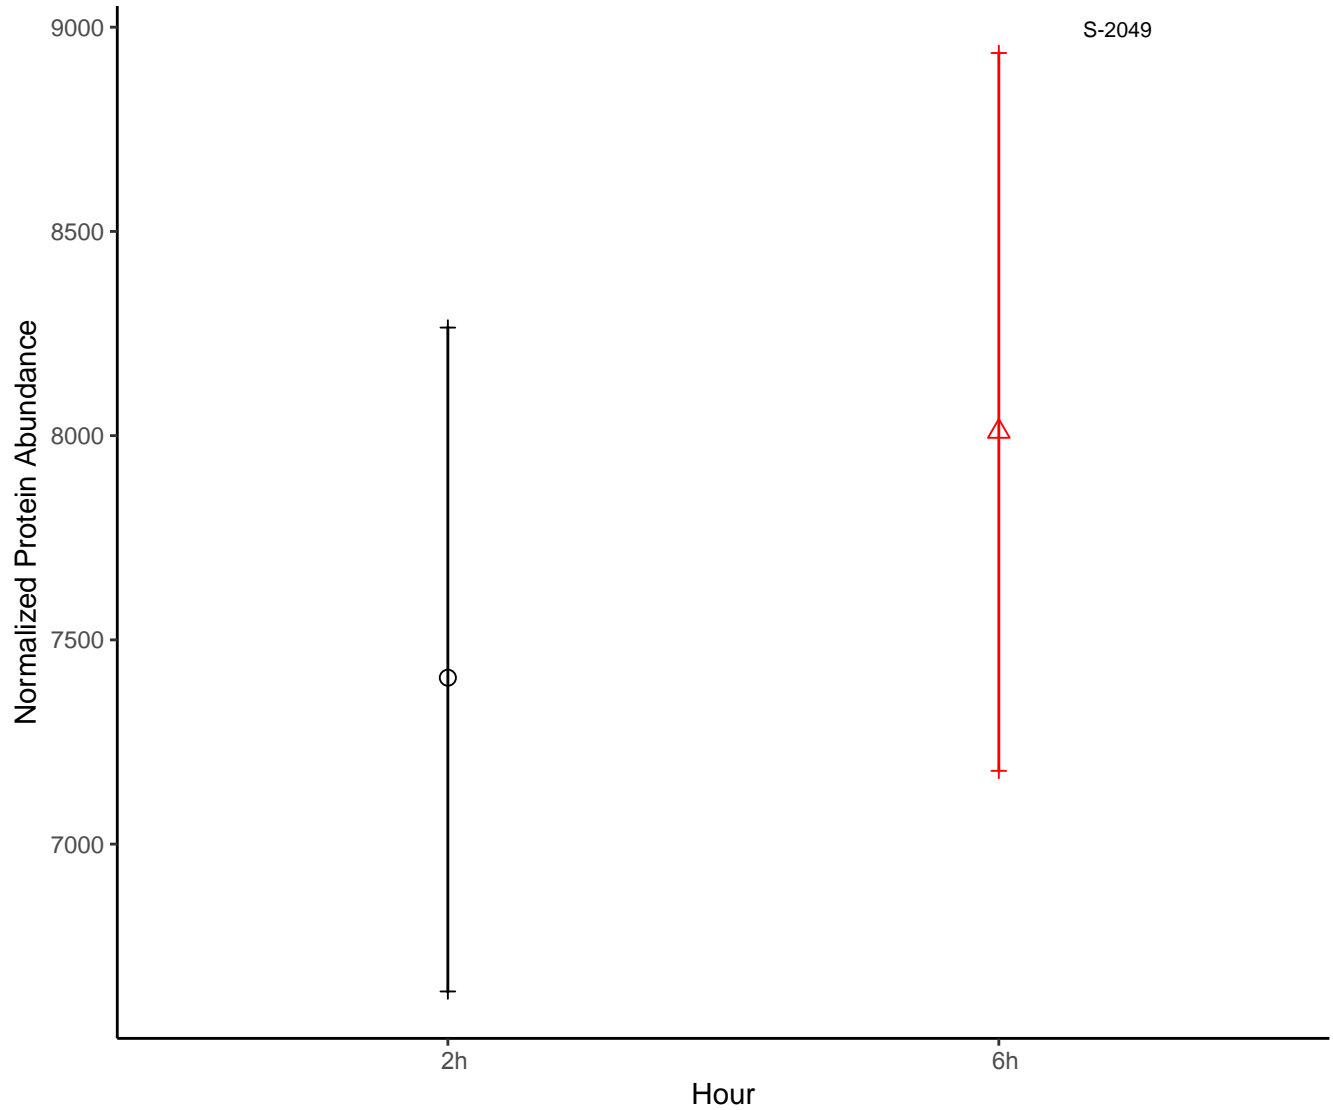

⊕ 2h

△ 6h

# CARA\_STAAM

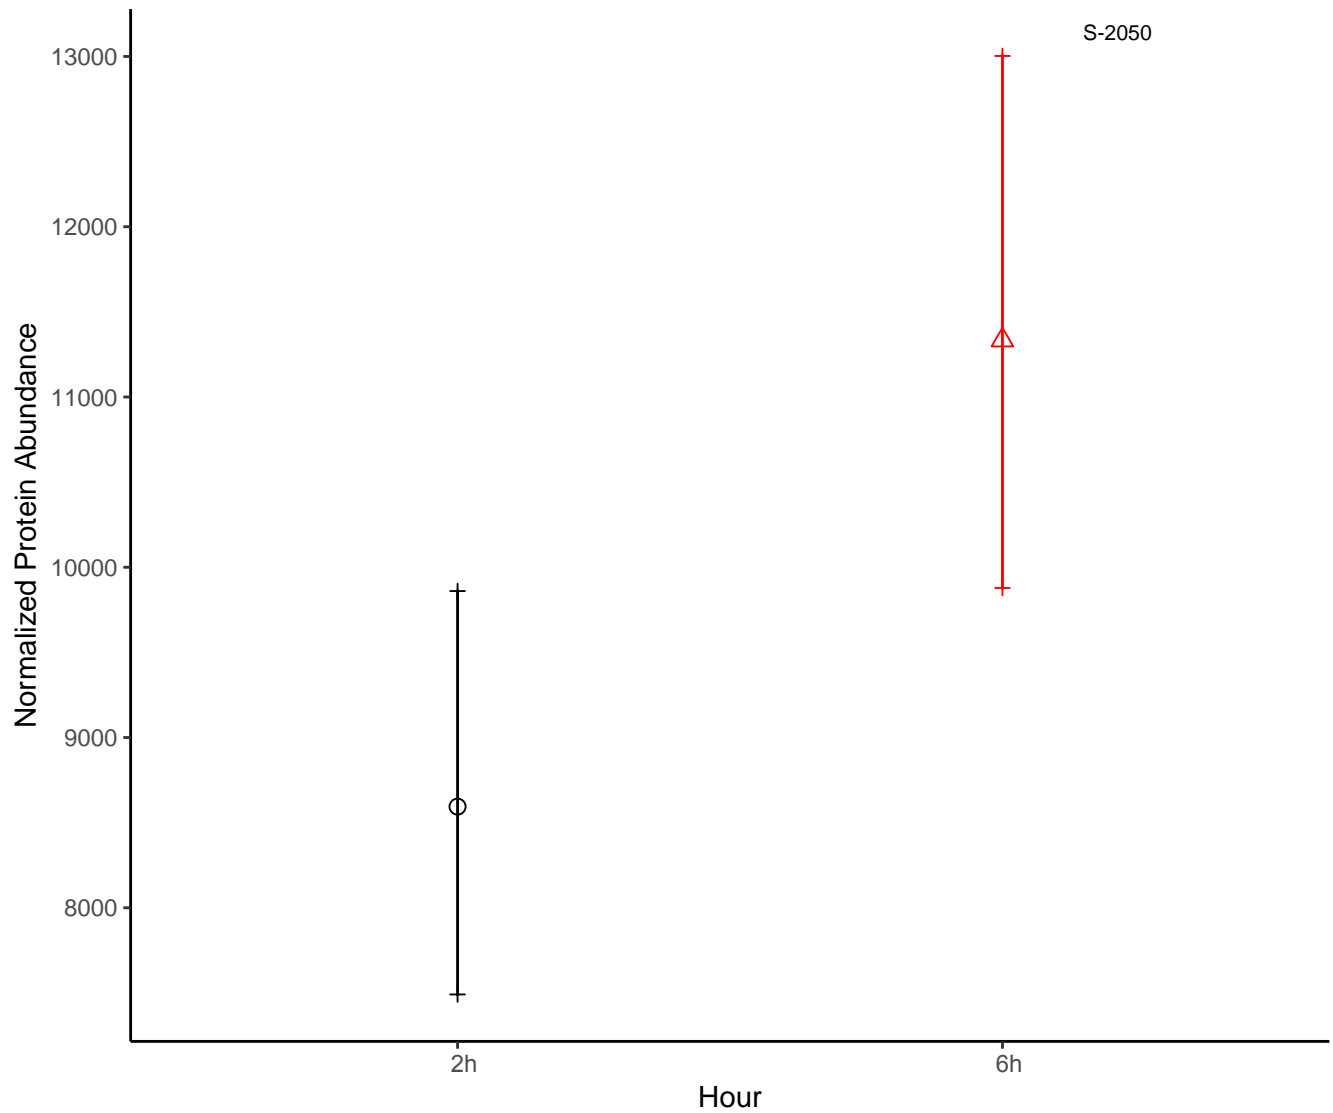

⊕ 2h

△ 6h

# CARB\_STAAM

S-2051

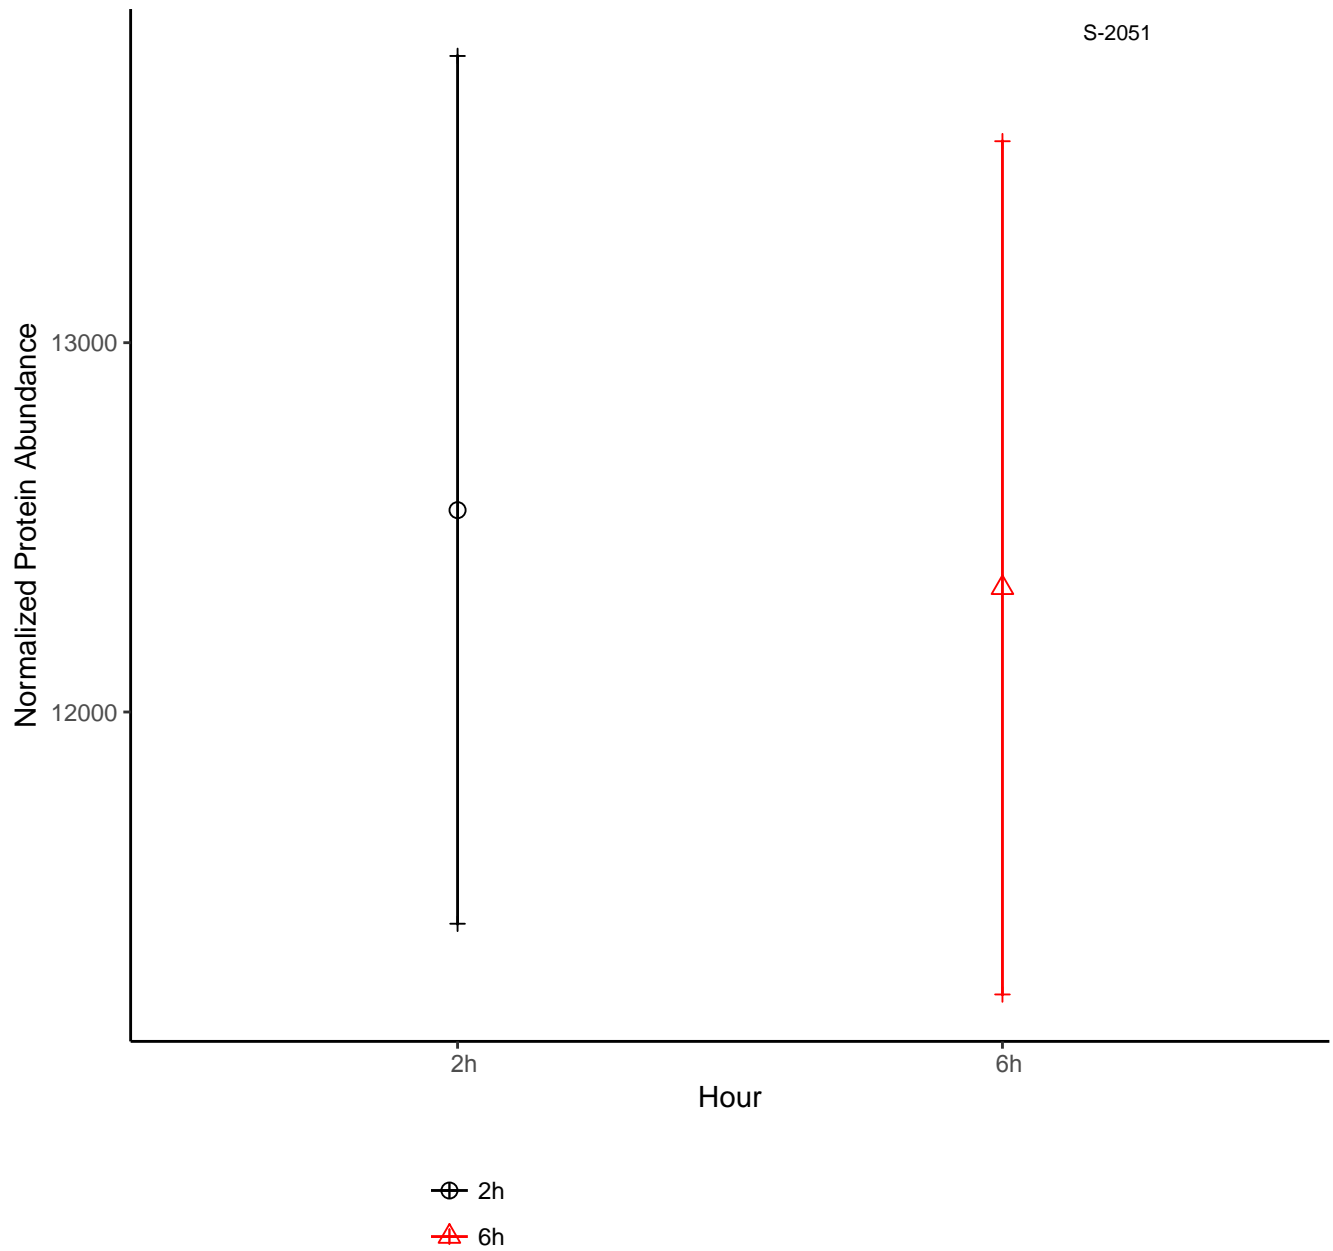

# CATA\_STAAM

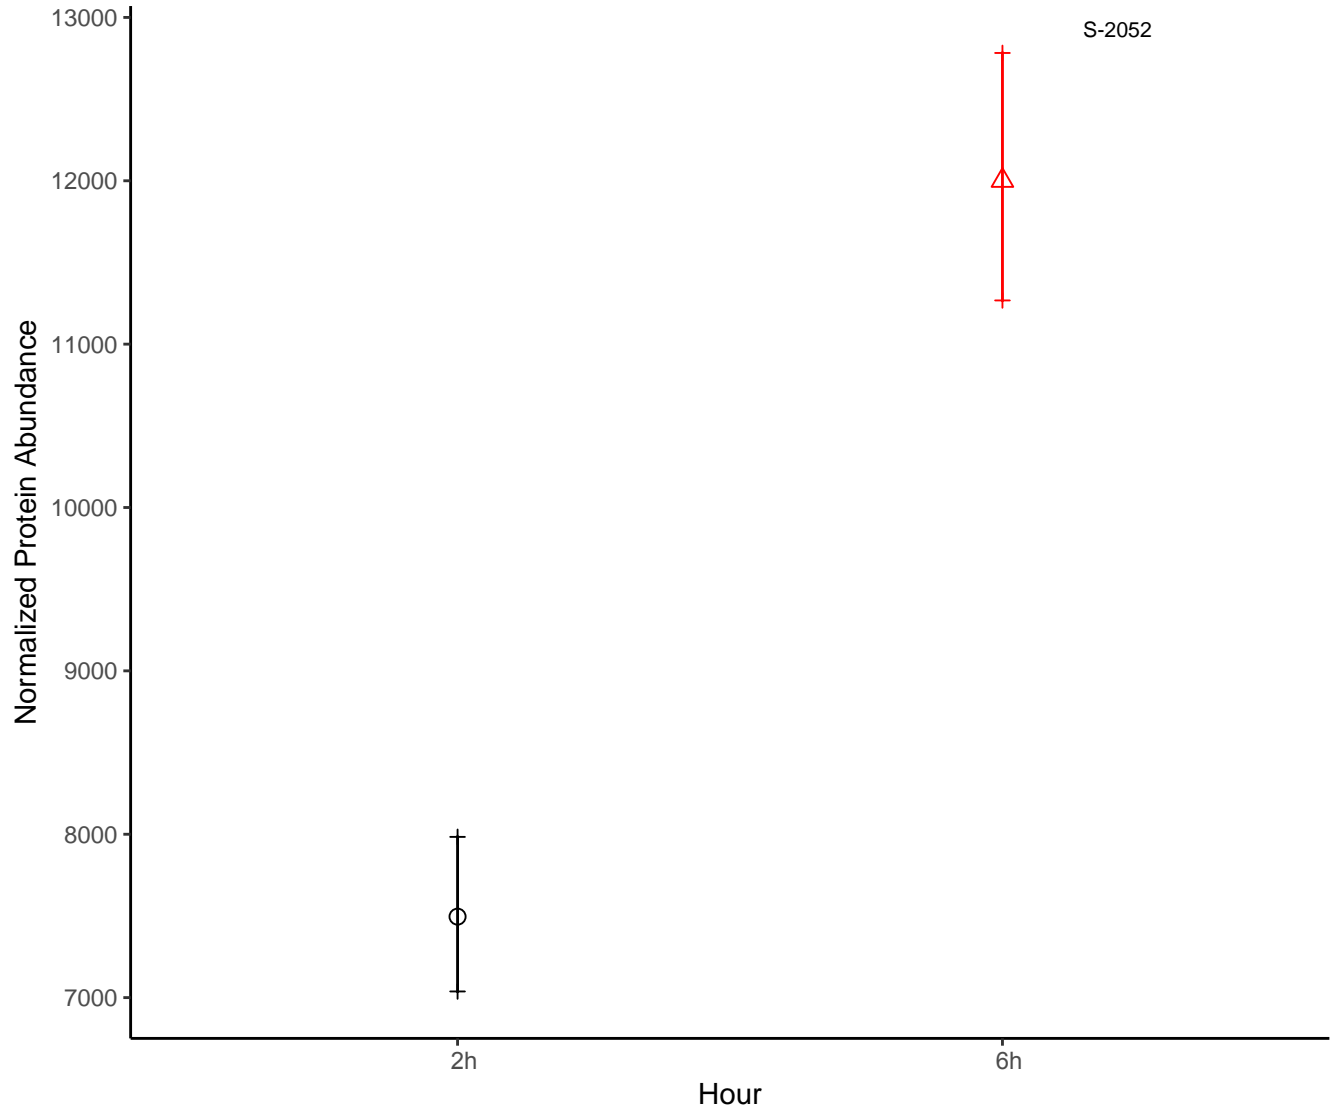

⊕ 2h

△ 6h

# CCPA\_STAAM

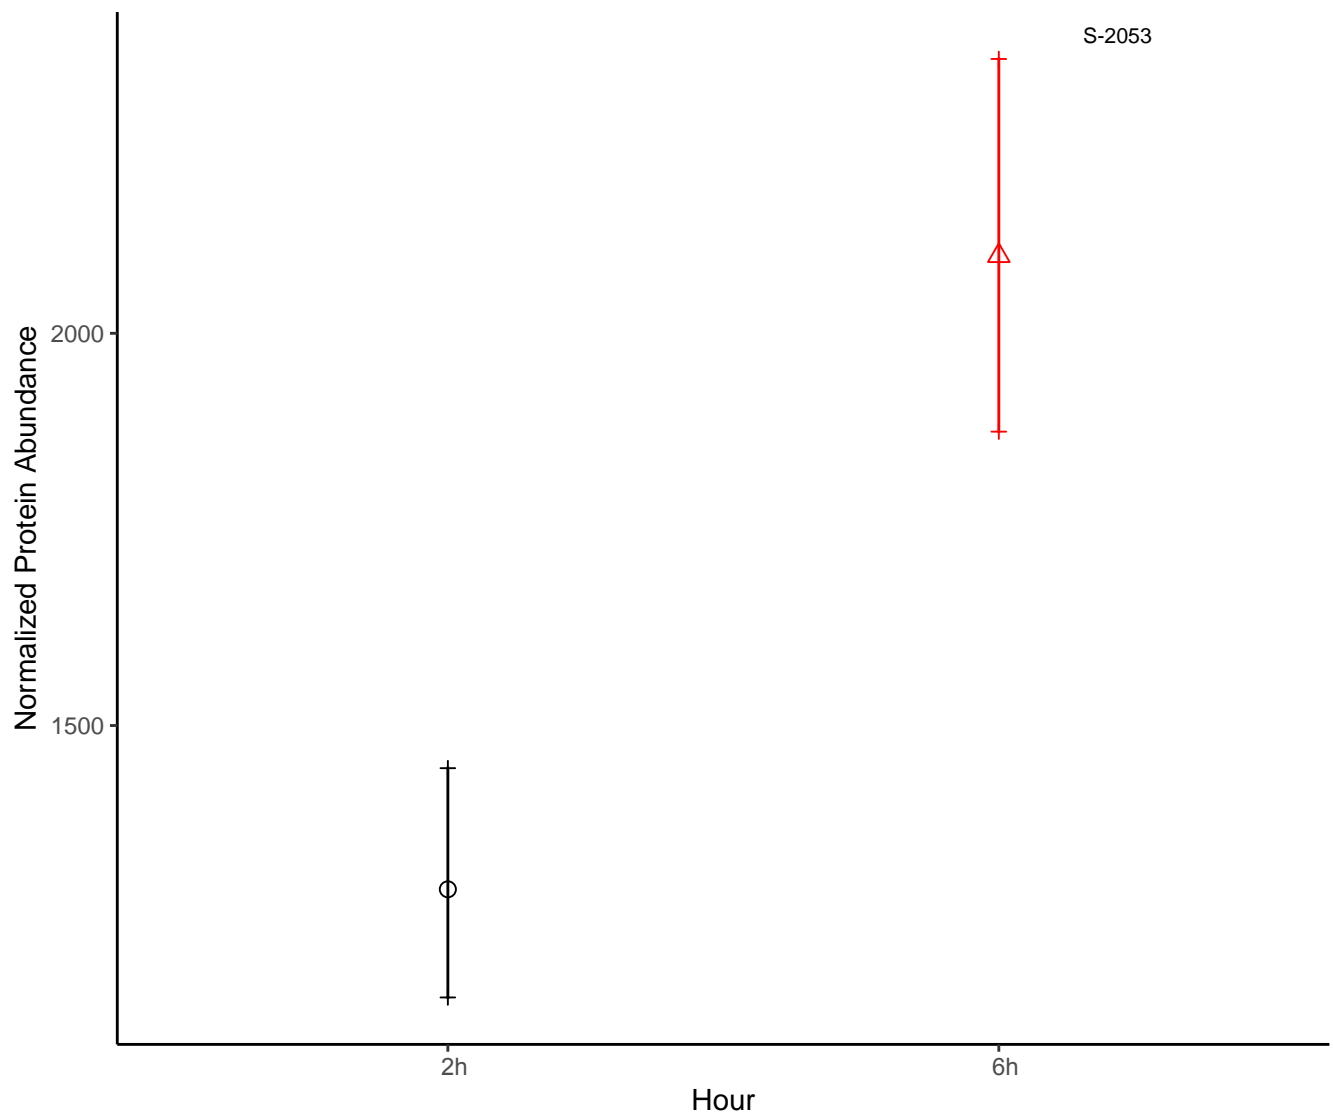

⊕ 2h

△ 6h

# CDR\_STAAM

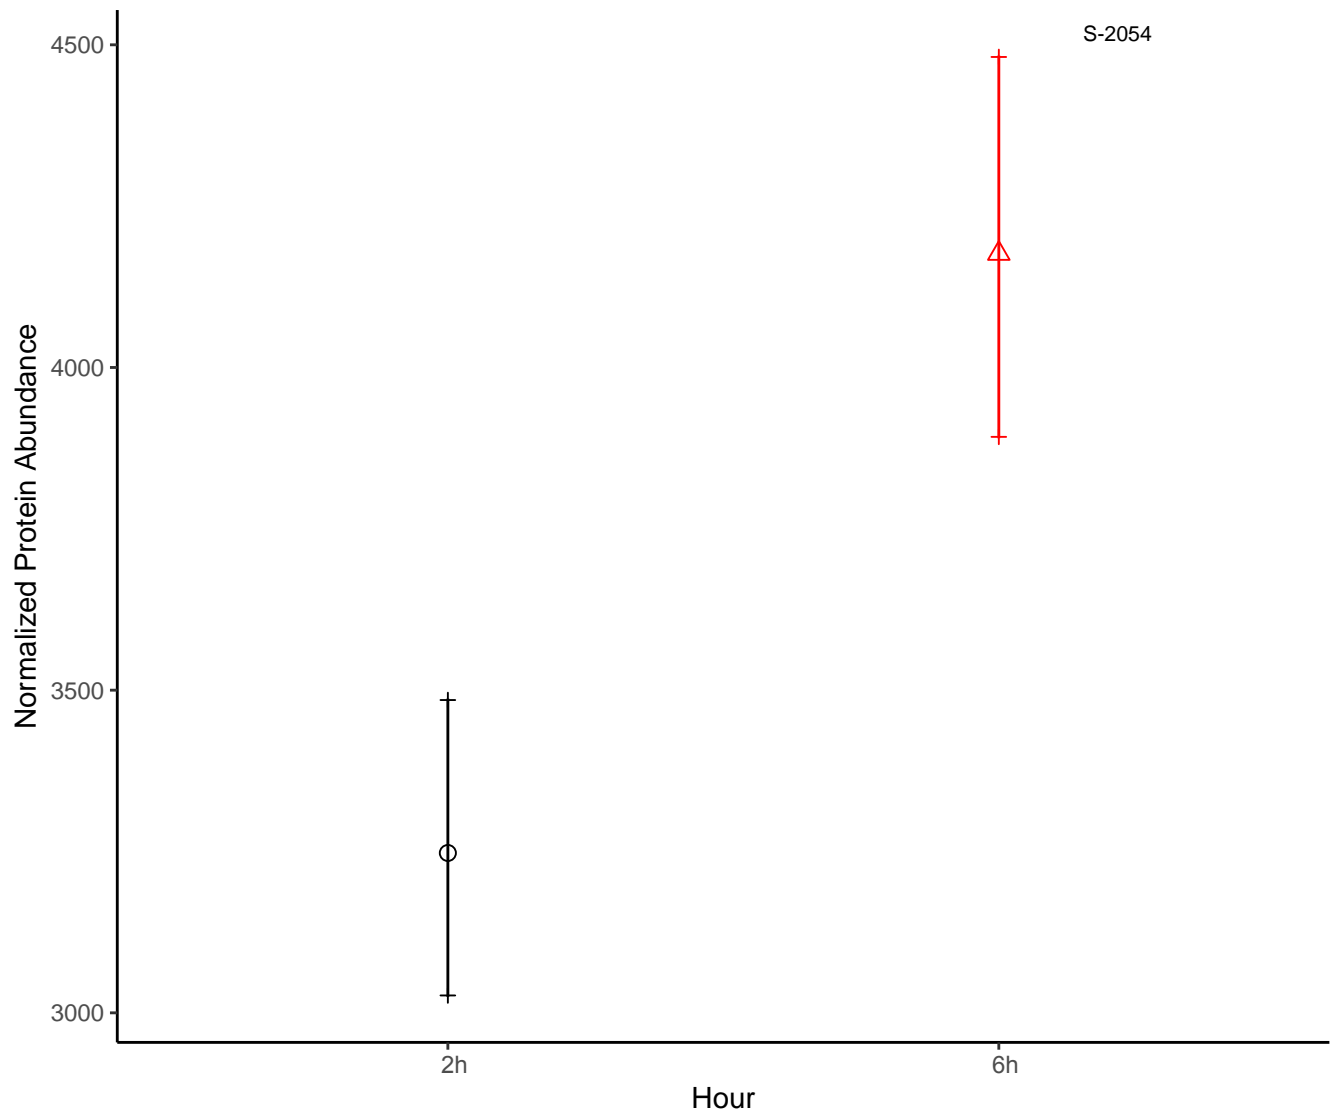

⊕ 2h

△ 6h

# CH10\_STAAM

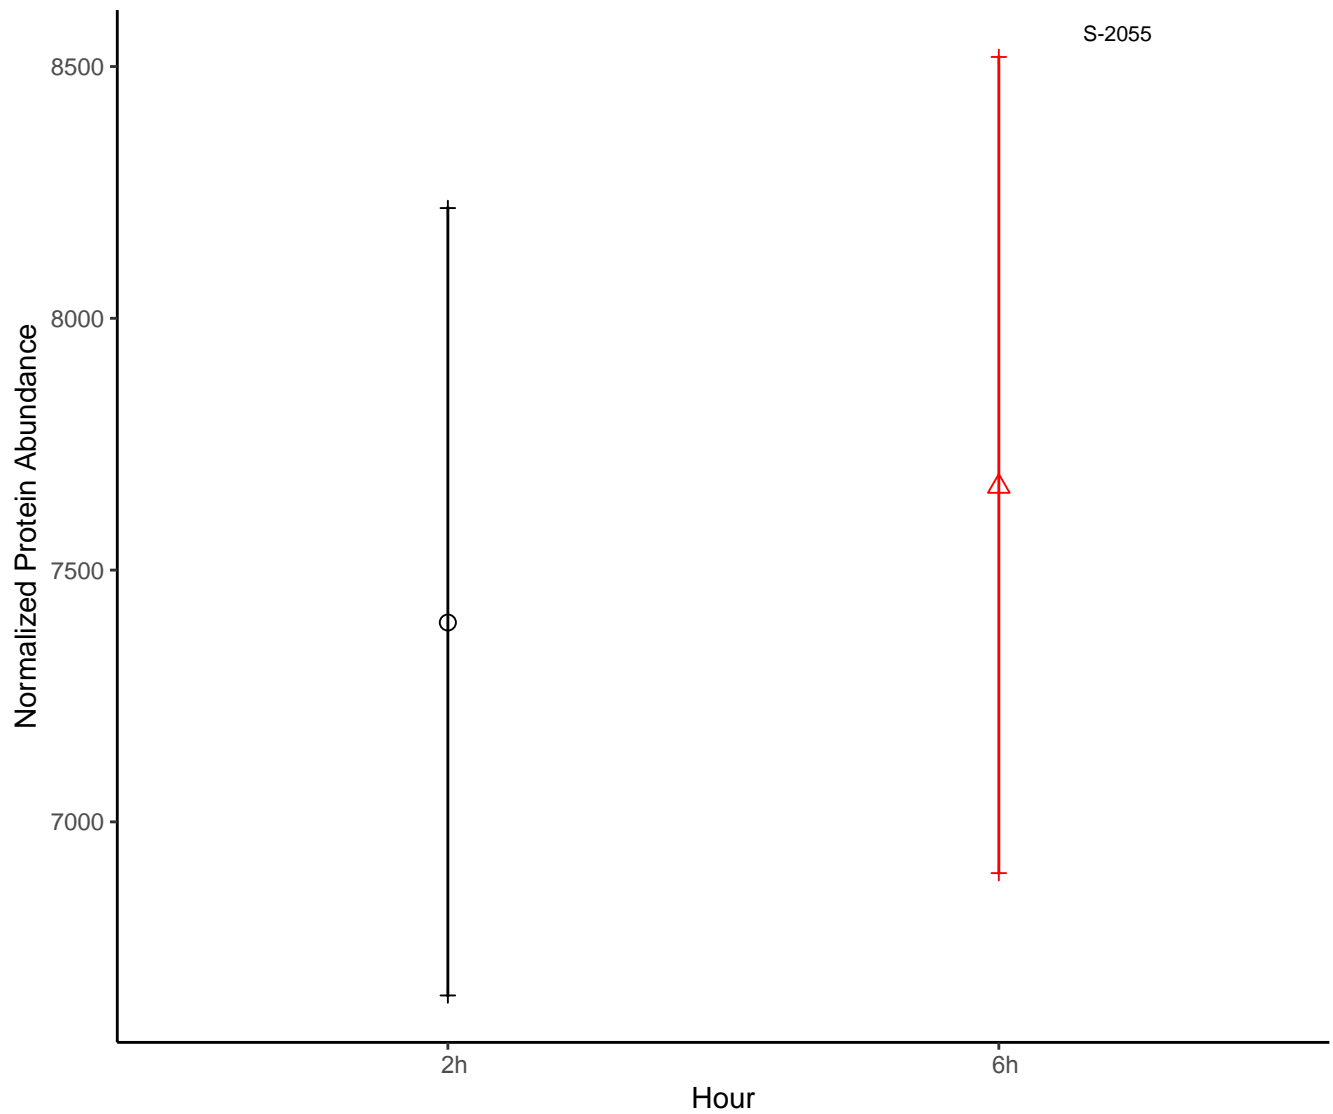

⊕ 2h

△ 6h

# CH60\_STAAM

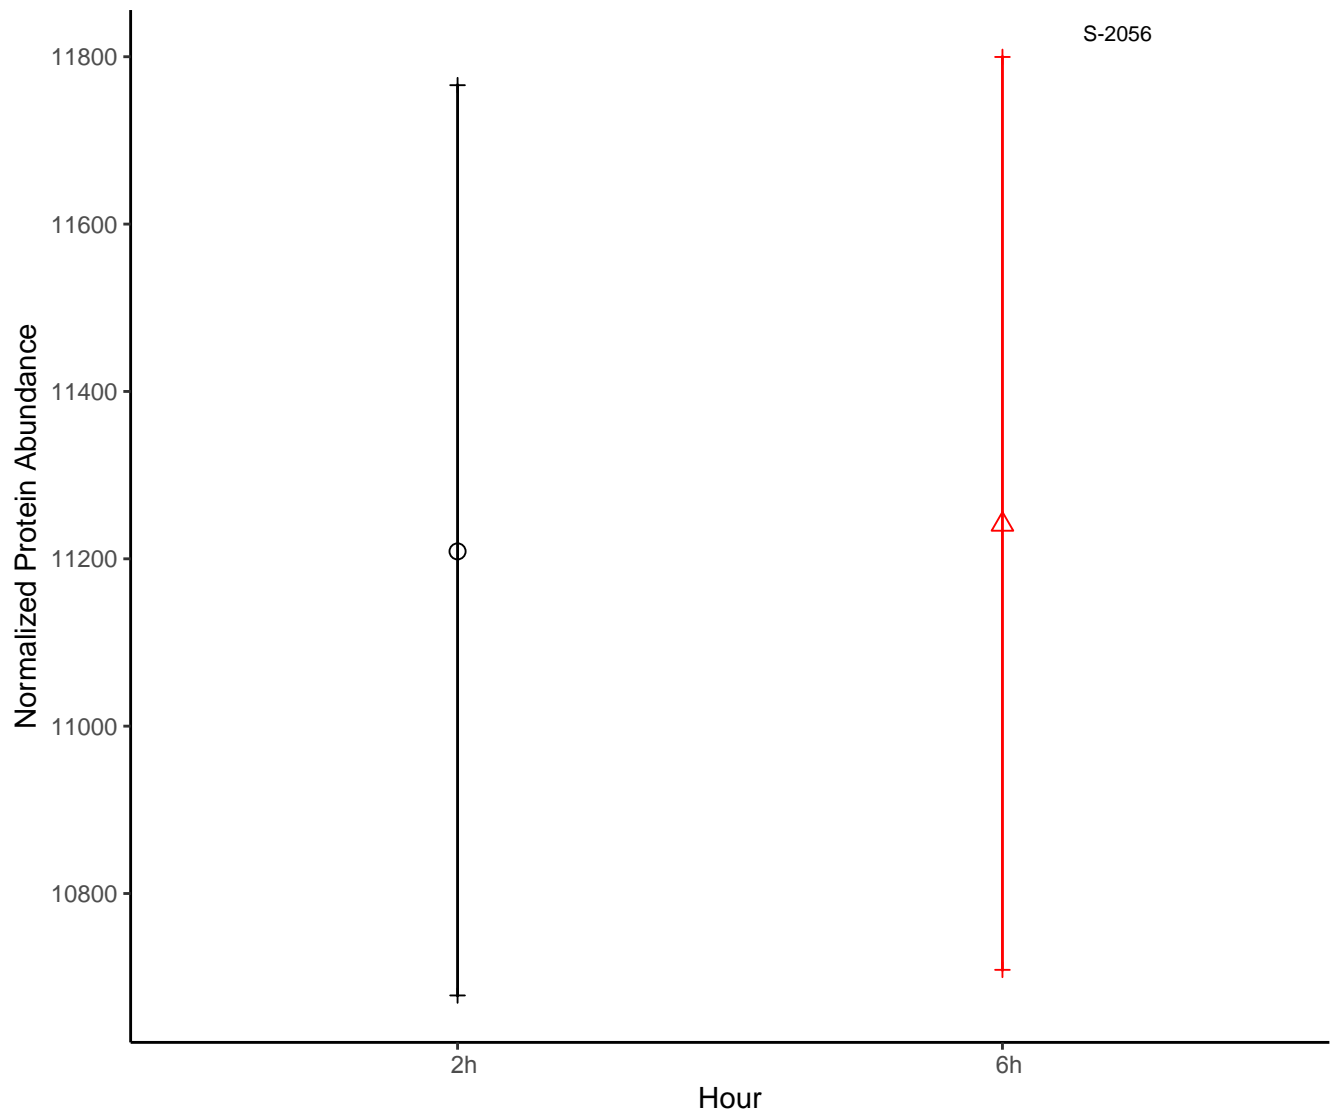

S-2056

⊕ 2h

△ 6h



# CLPB\_STAAM

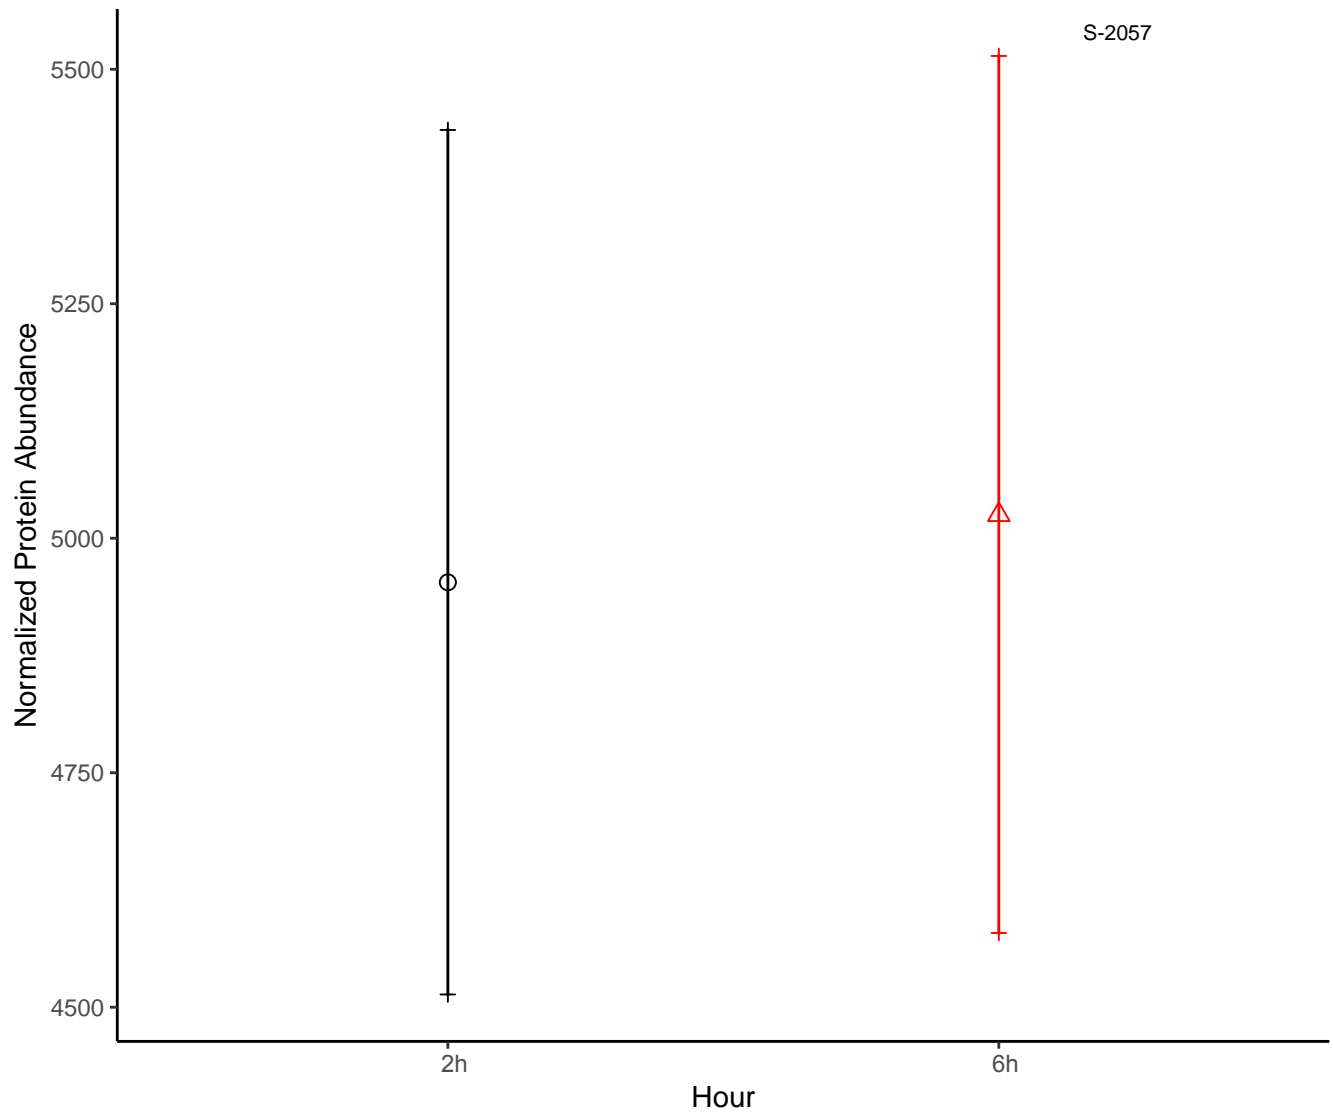

⊕ 2h

△ 6h

# CLPC\_STAAM

S-2058

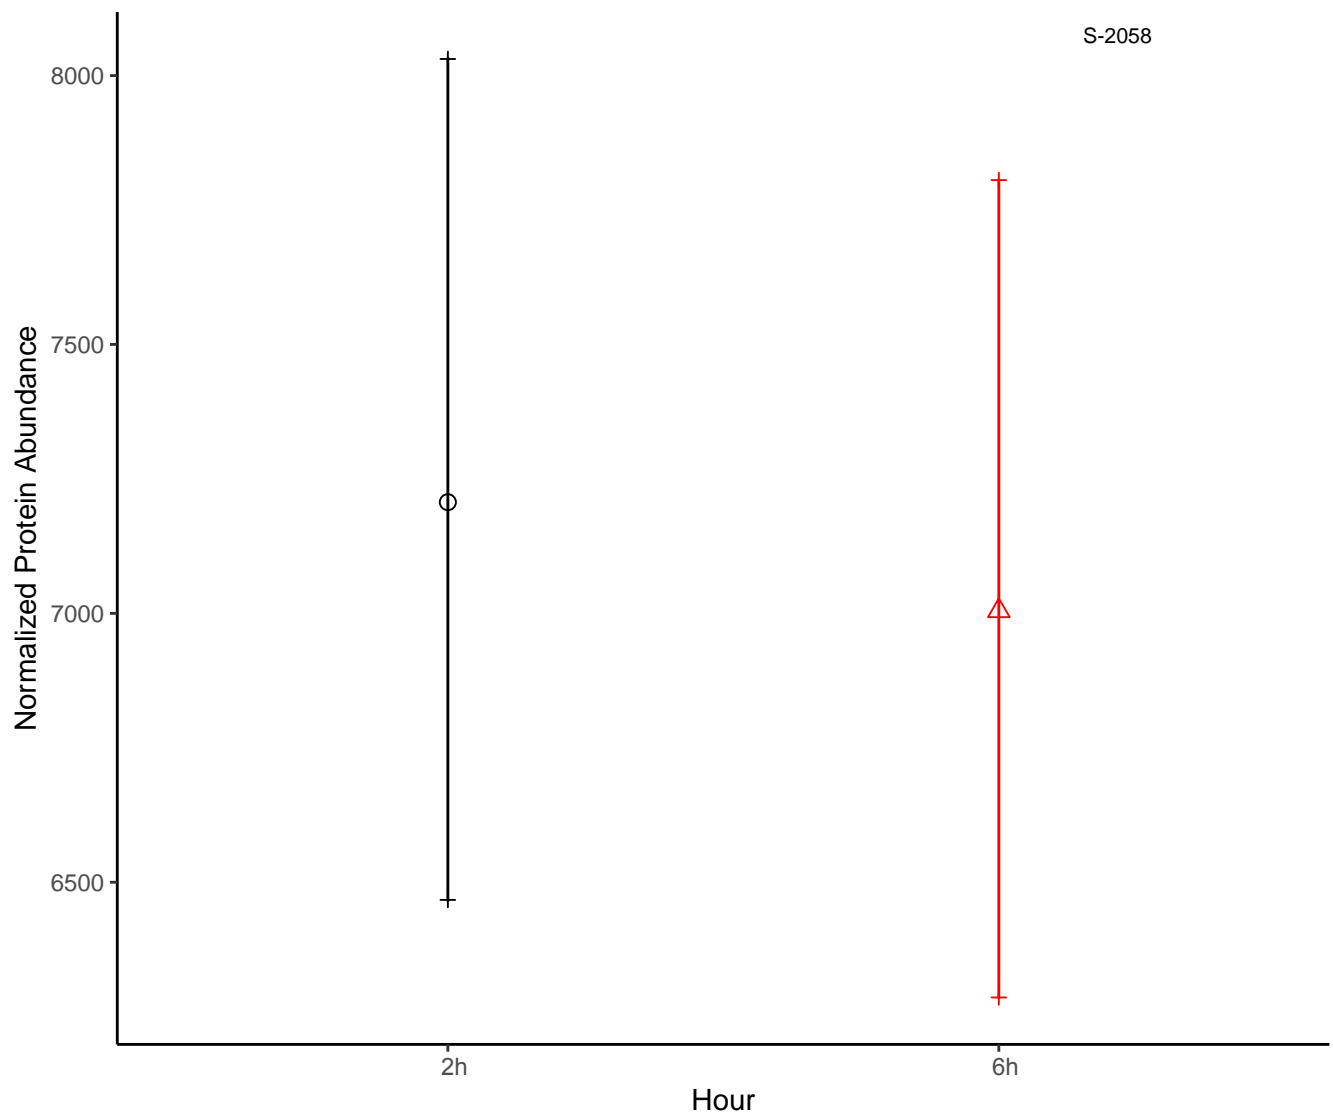

⊕ 2h

△ 6h

# CLPL\_STAAM

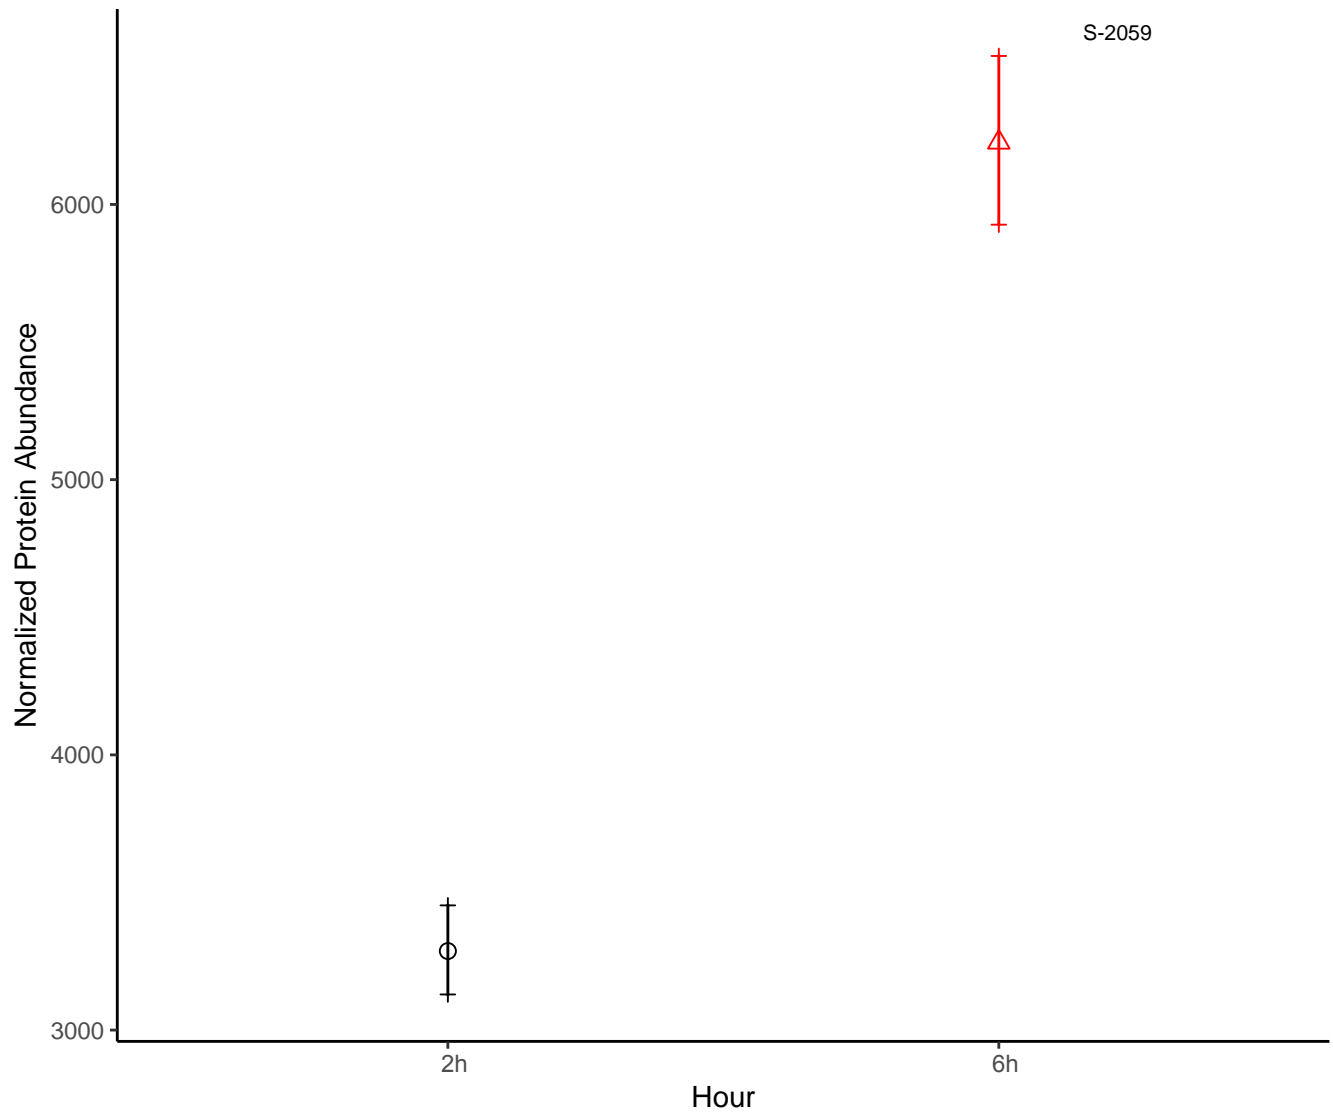

⊕ 2h

⊕ 6h

# CLPP\_STAAM

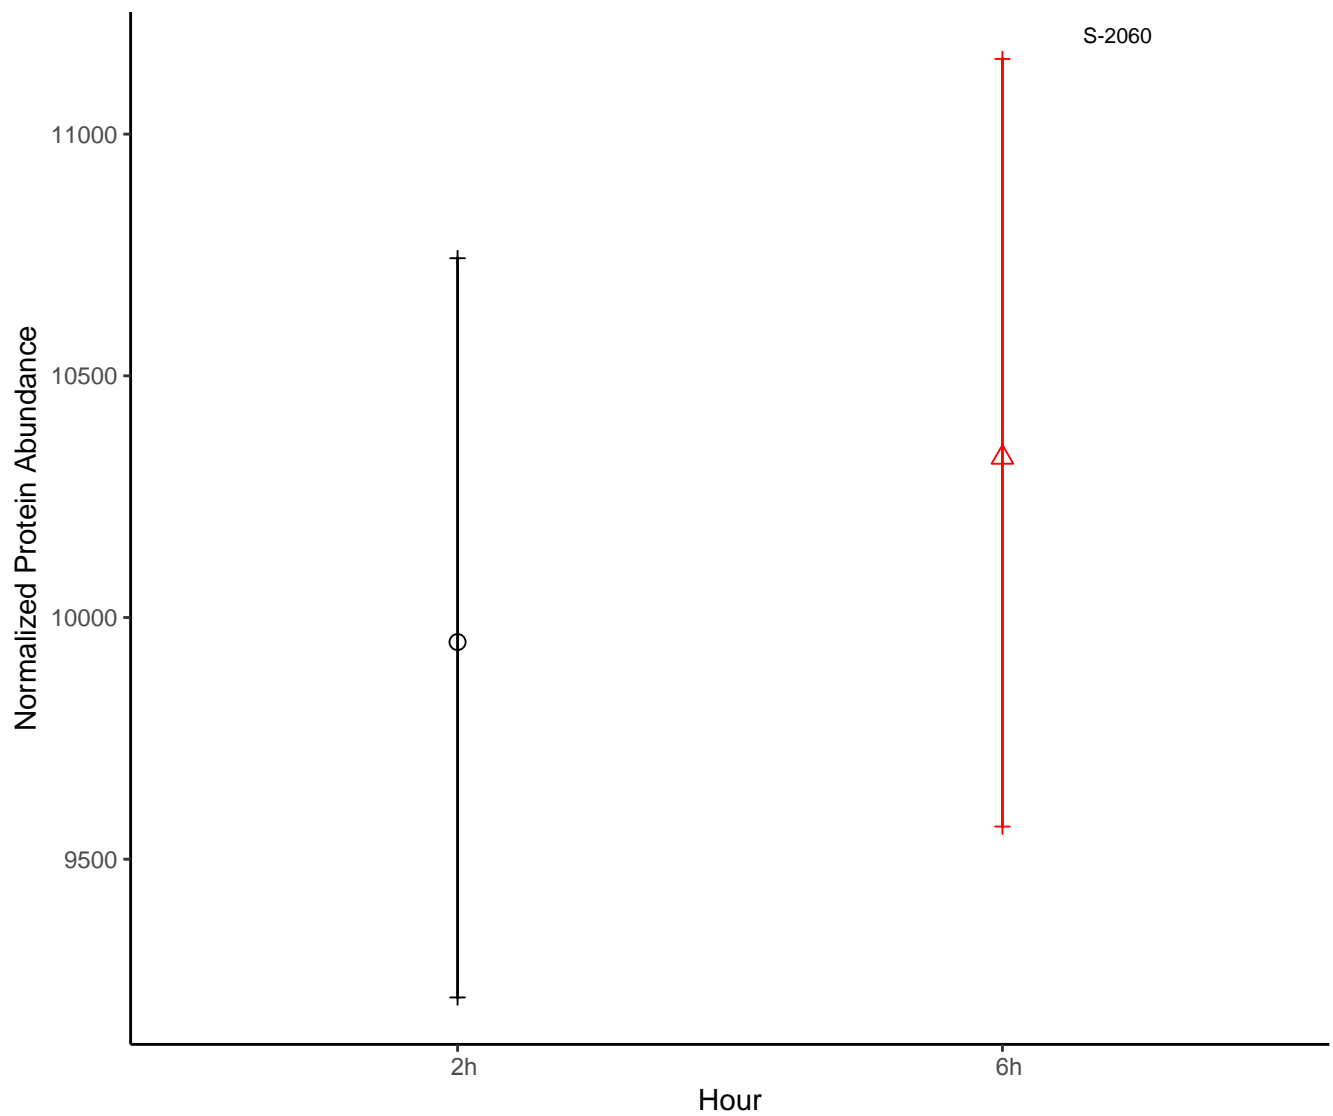

⊕ 2h

△ 6h

# CLPX\_STAAM

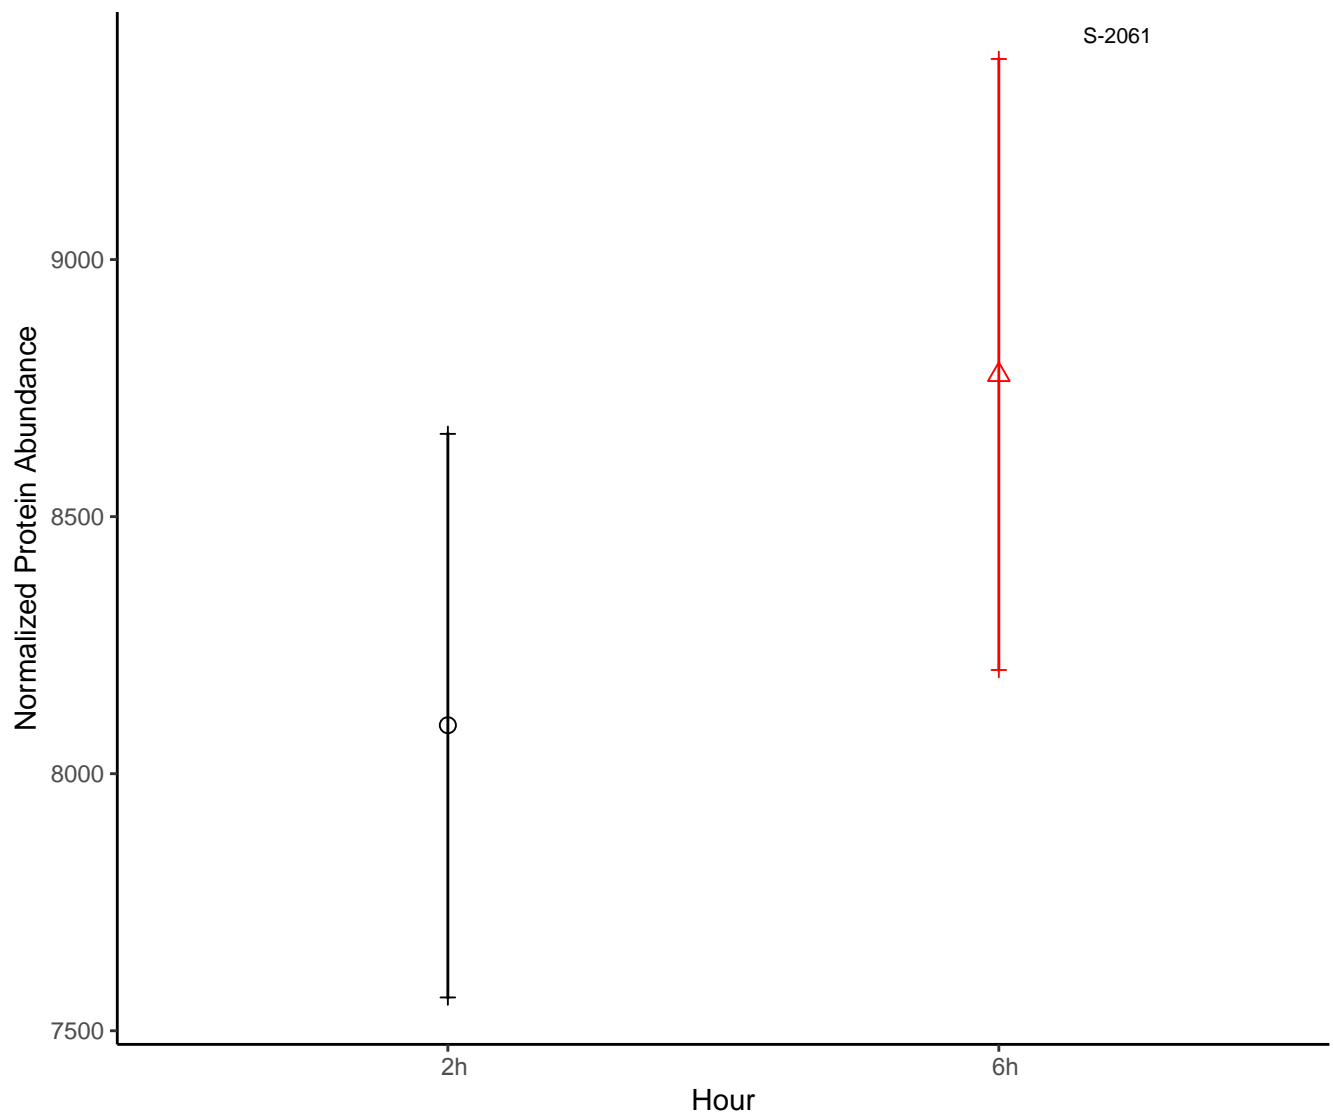

⊕ 2h

△ 6h

# CODY\_STAAM

S-2062

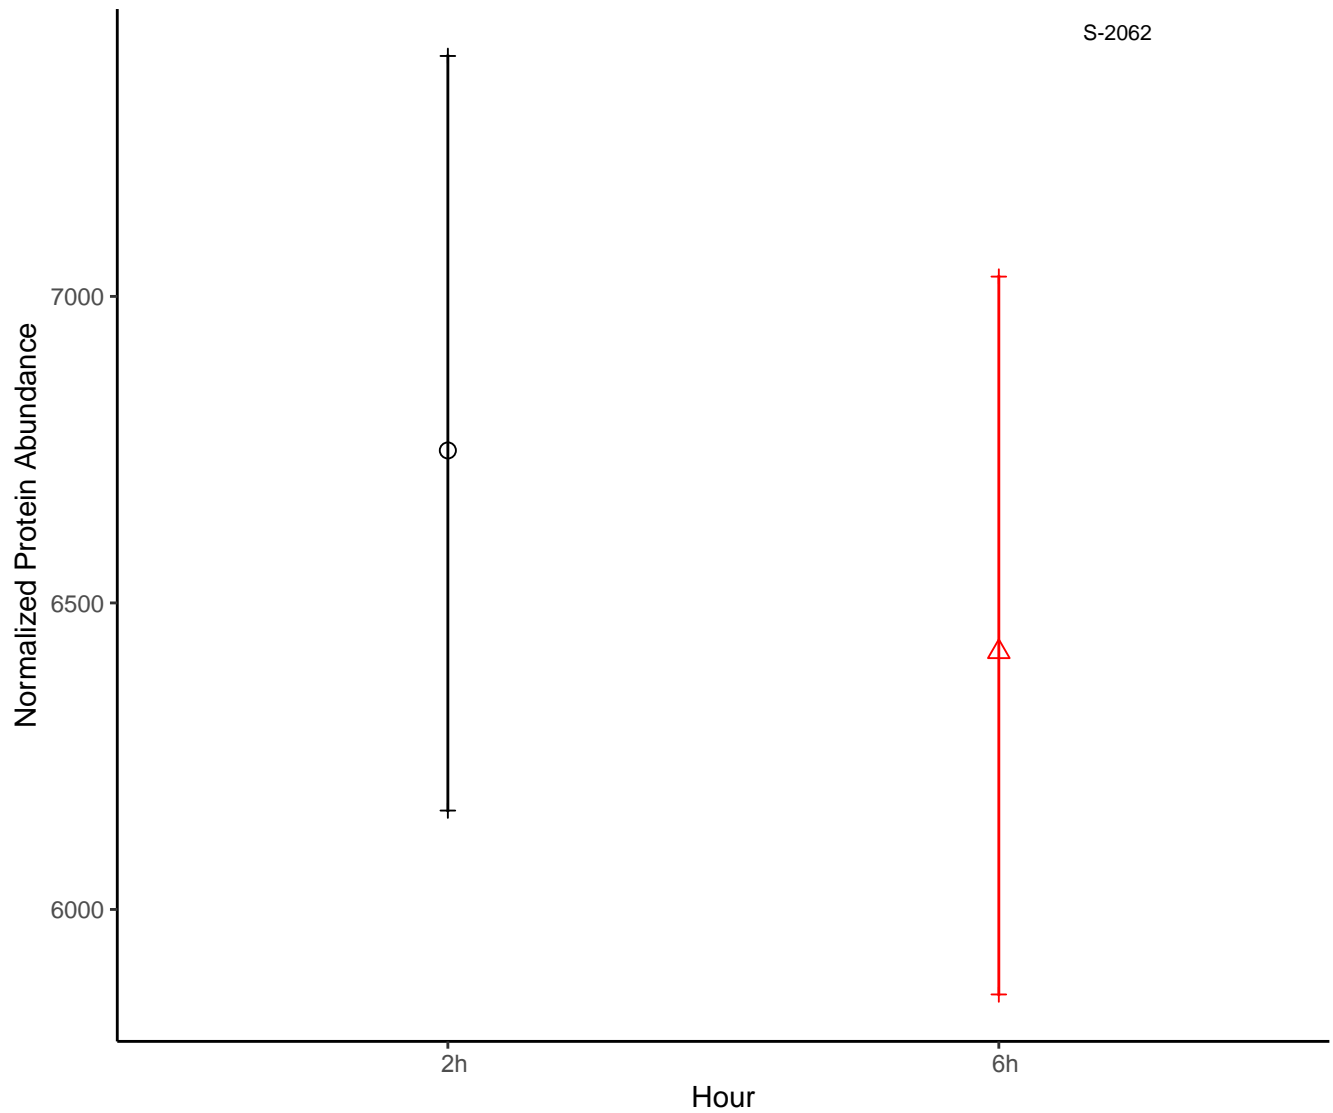

⊕ 2h

△ 6h

# COPZ\_STAAM

S-2063

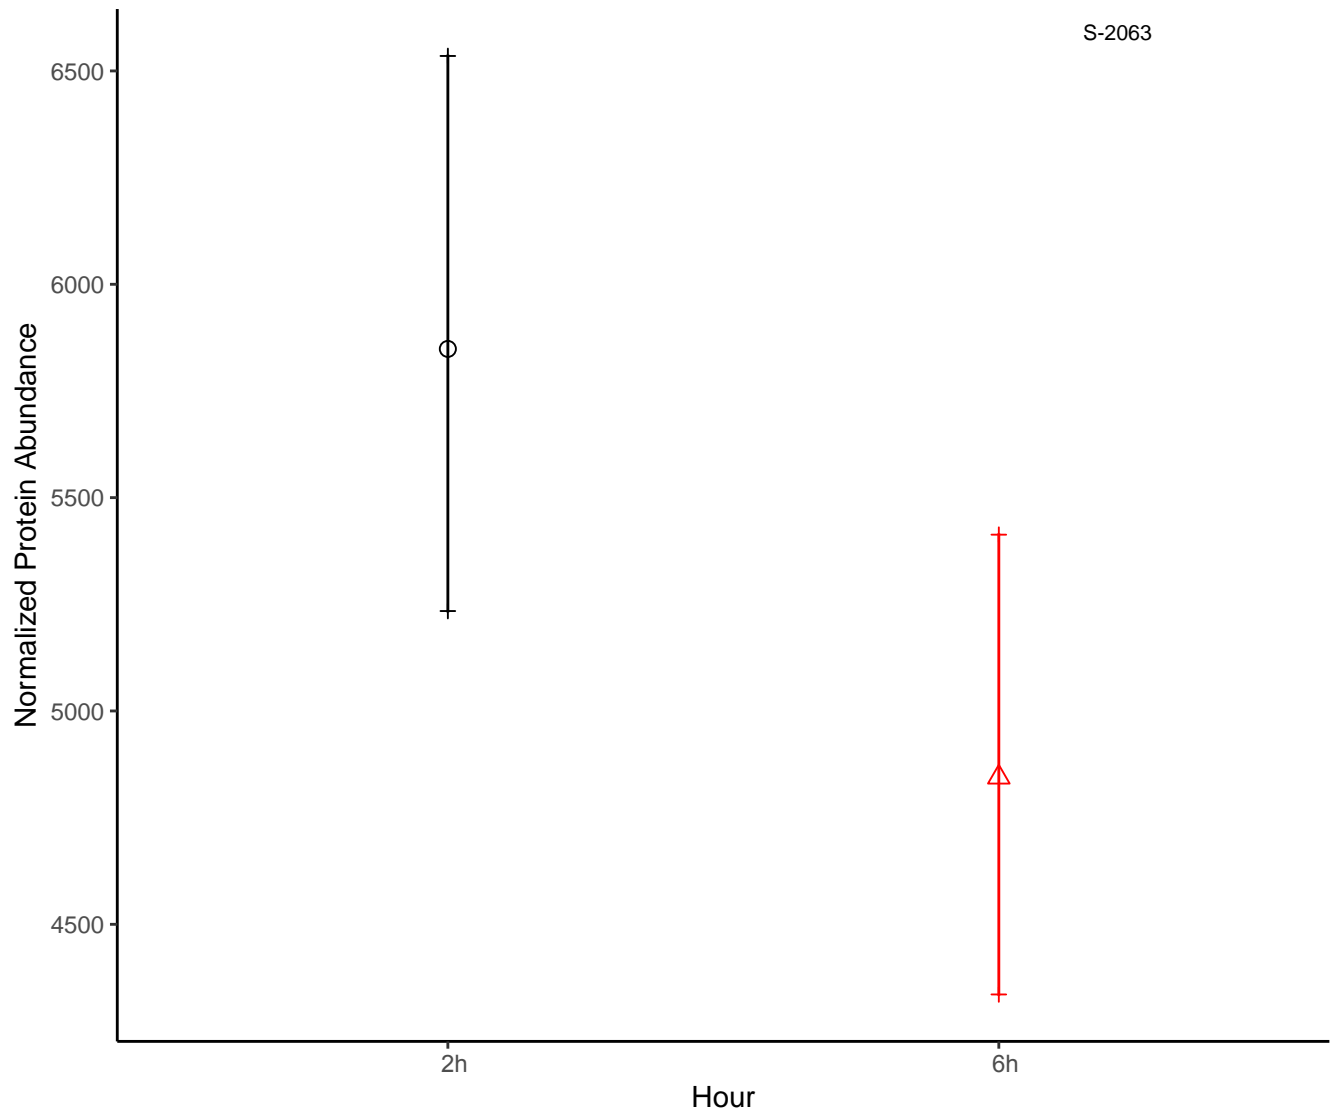

⊕ 2h

△ 6h

# CRTN\_STAAM

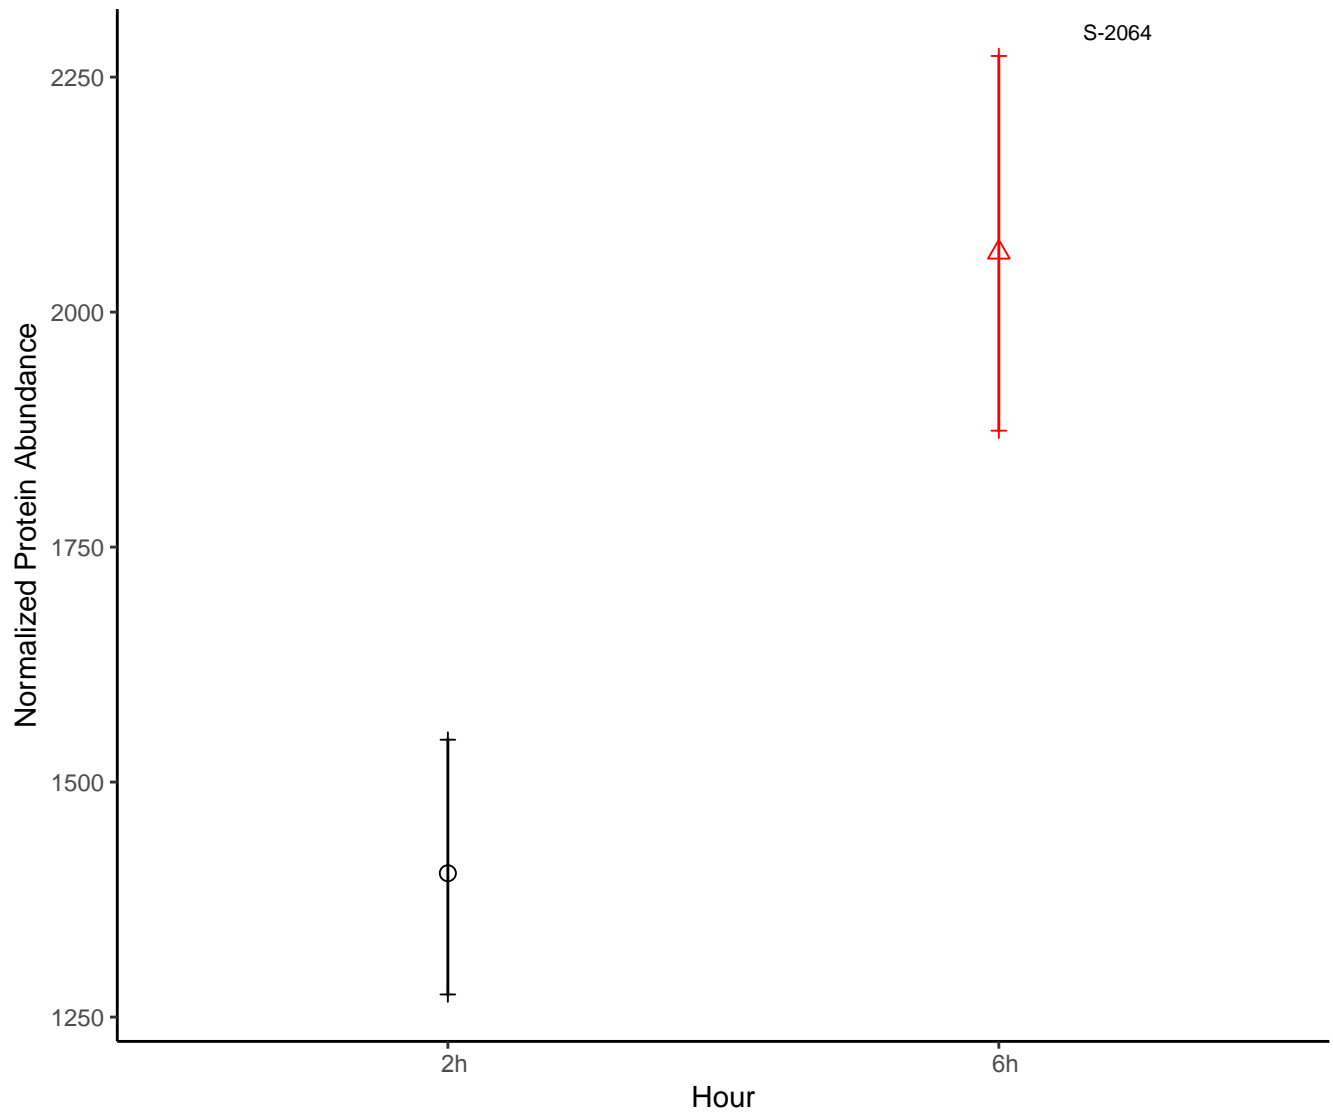

⊕ 2h

△ 6h



# CSD\_STAAM

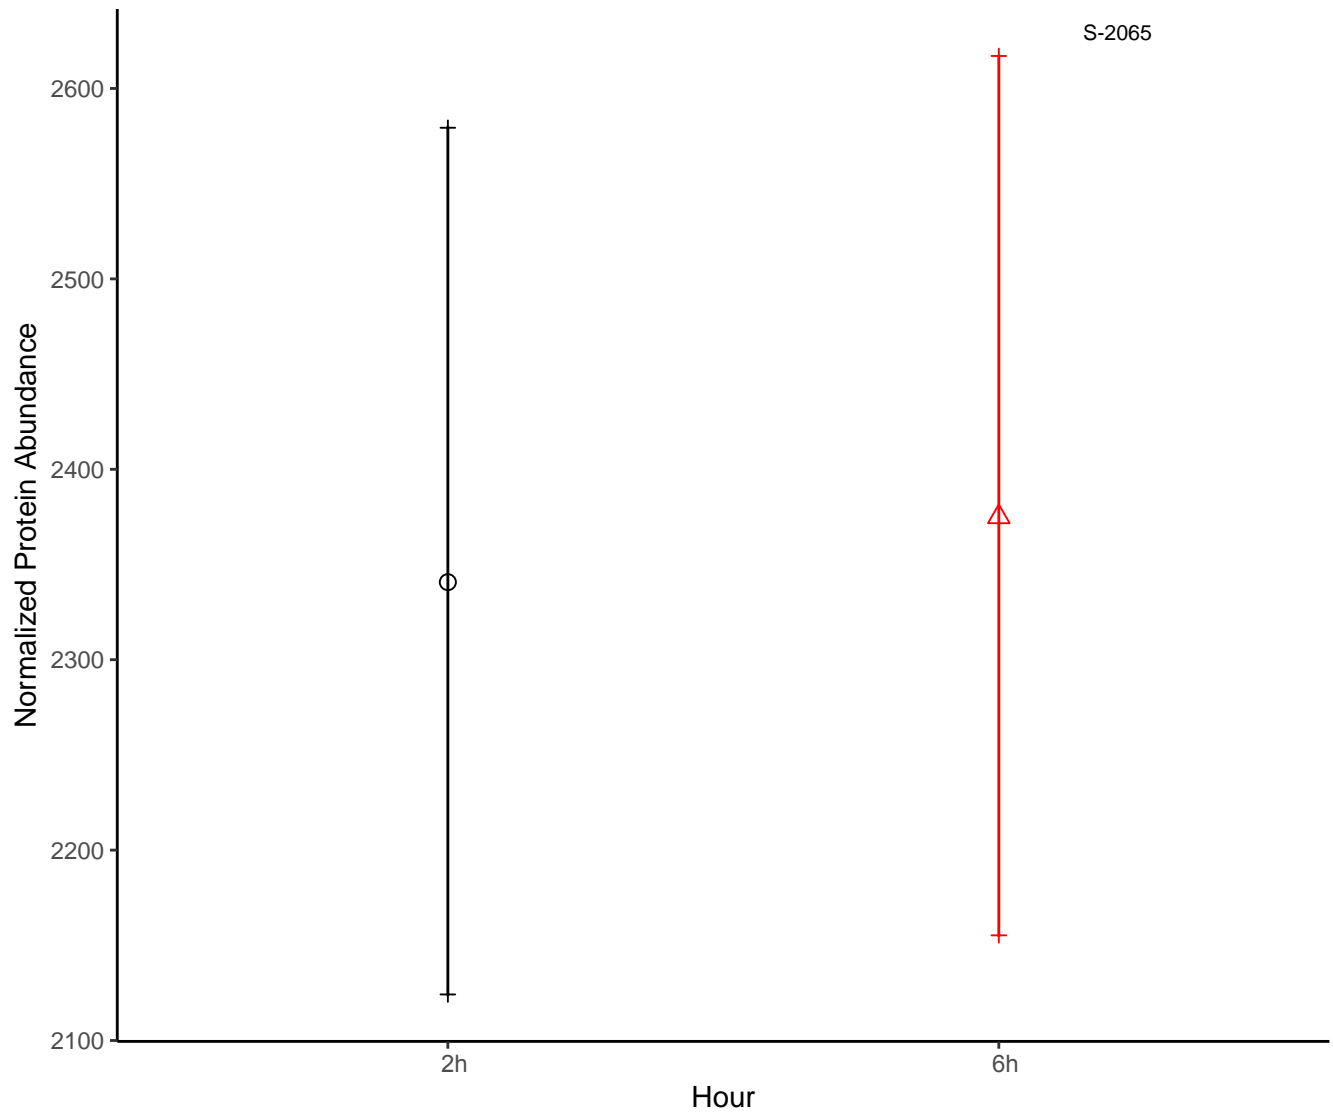

⊕ 2h

△ 6h

# CSHA\_STAAM

S-2066

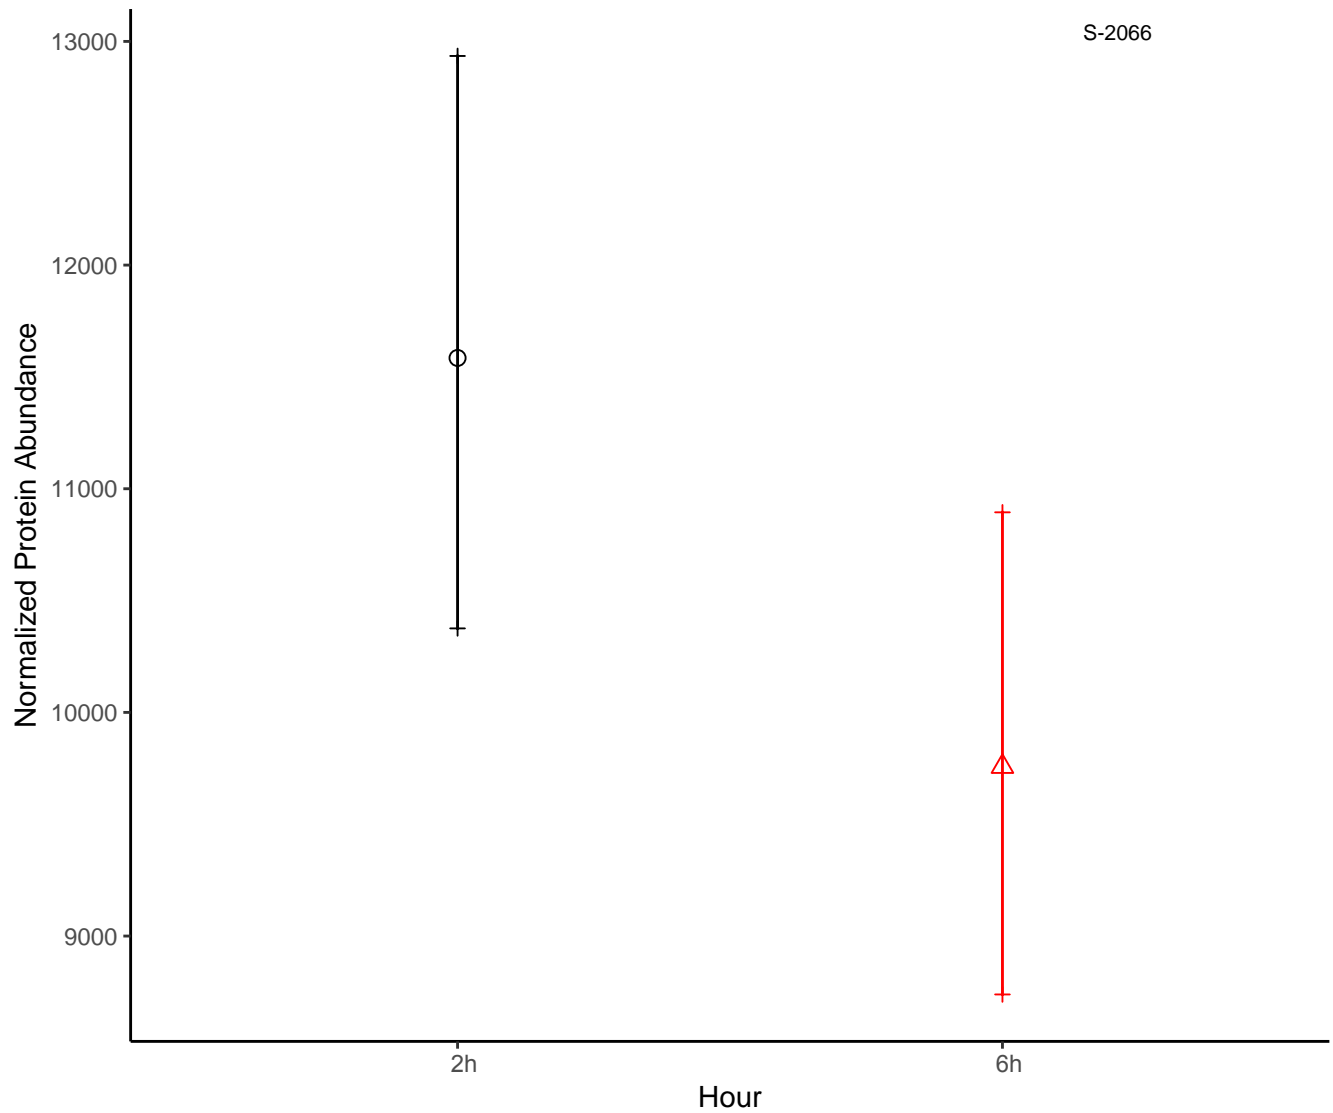

⊕ 2h

△ 6h

# CSPA\_STAAM

S-2067

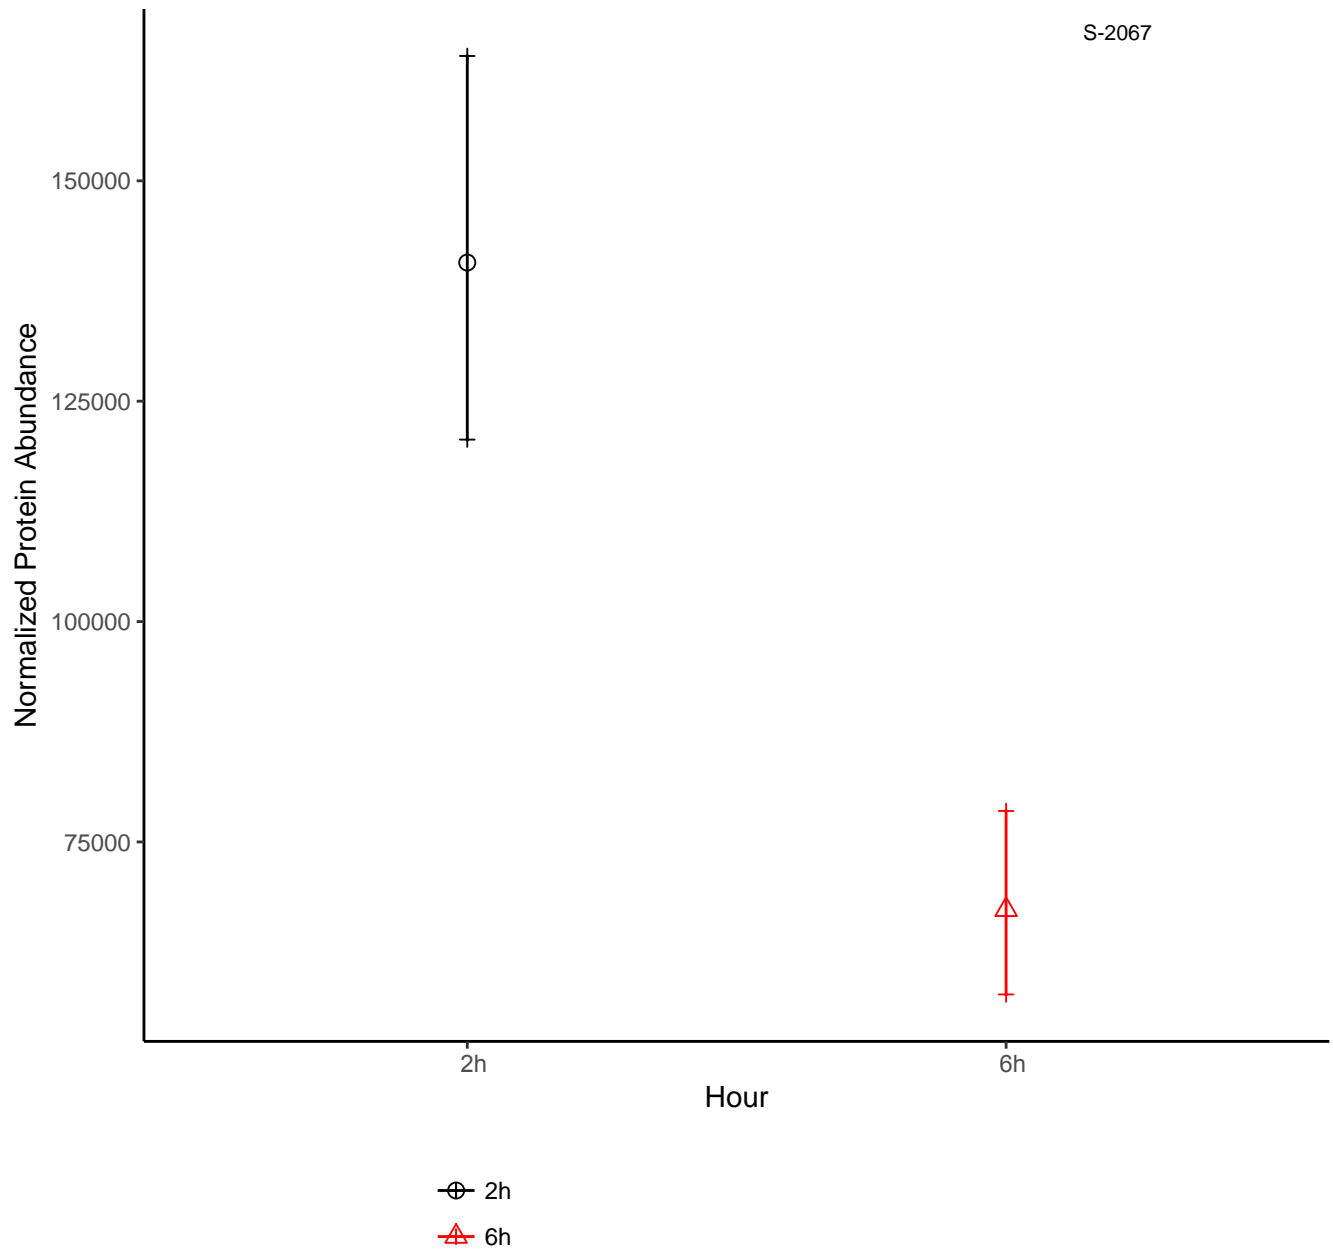

# CTPAL\_STAAM

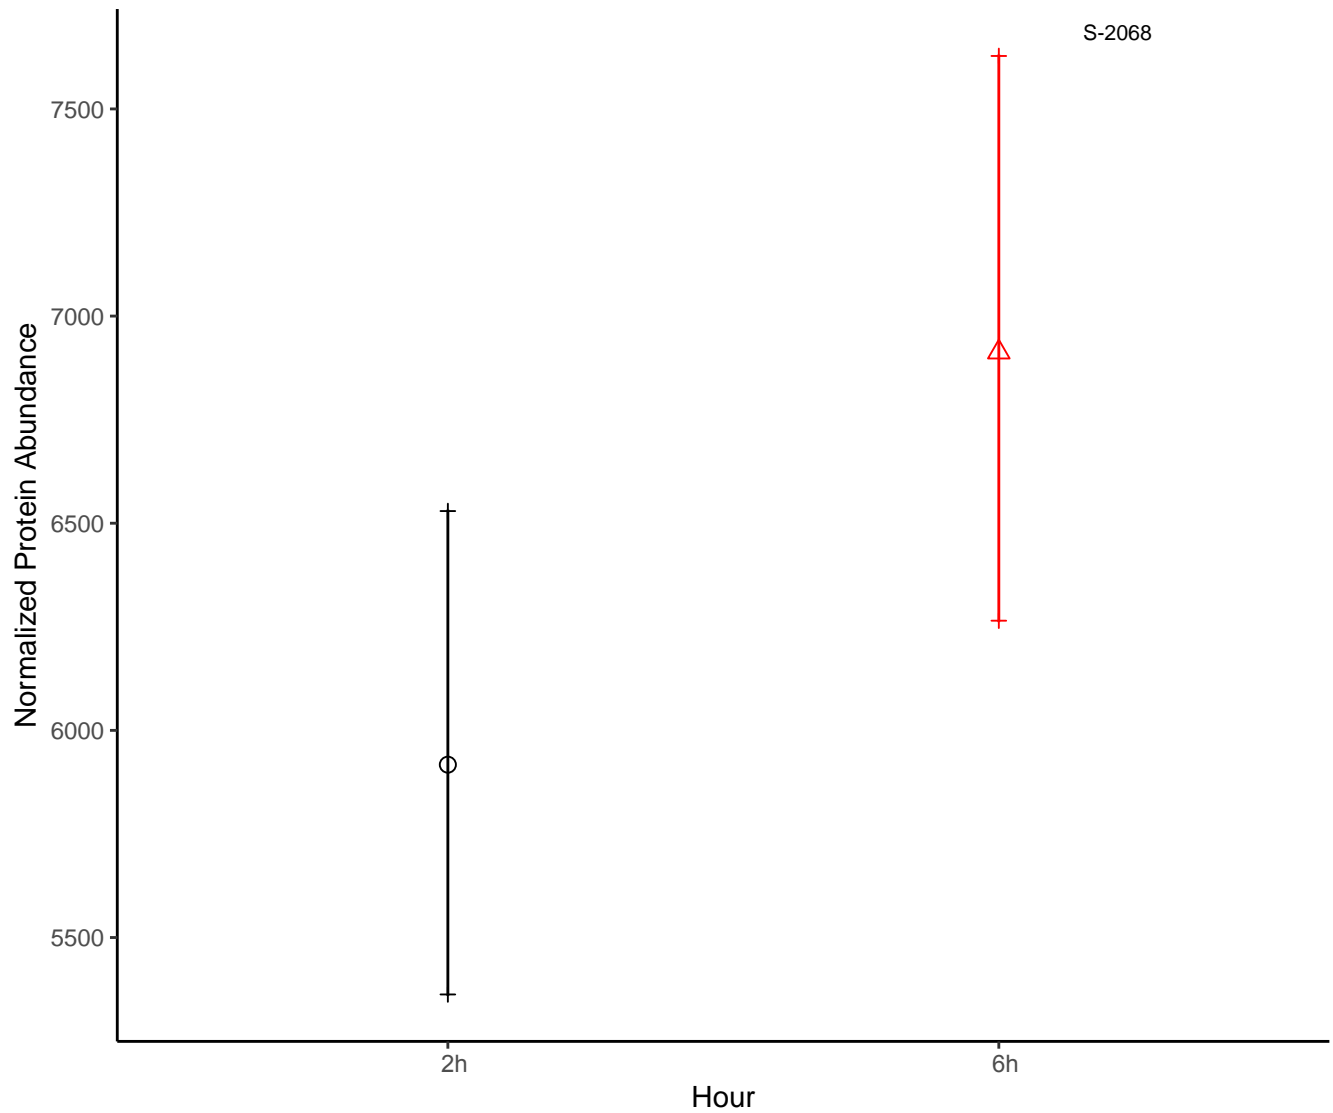

⊕ 2h

△ 6h

# CVFB\_STAAM

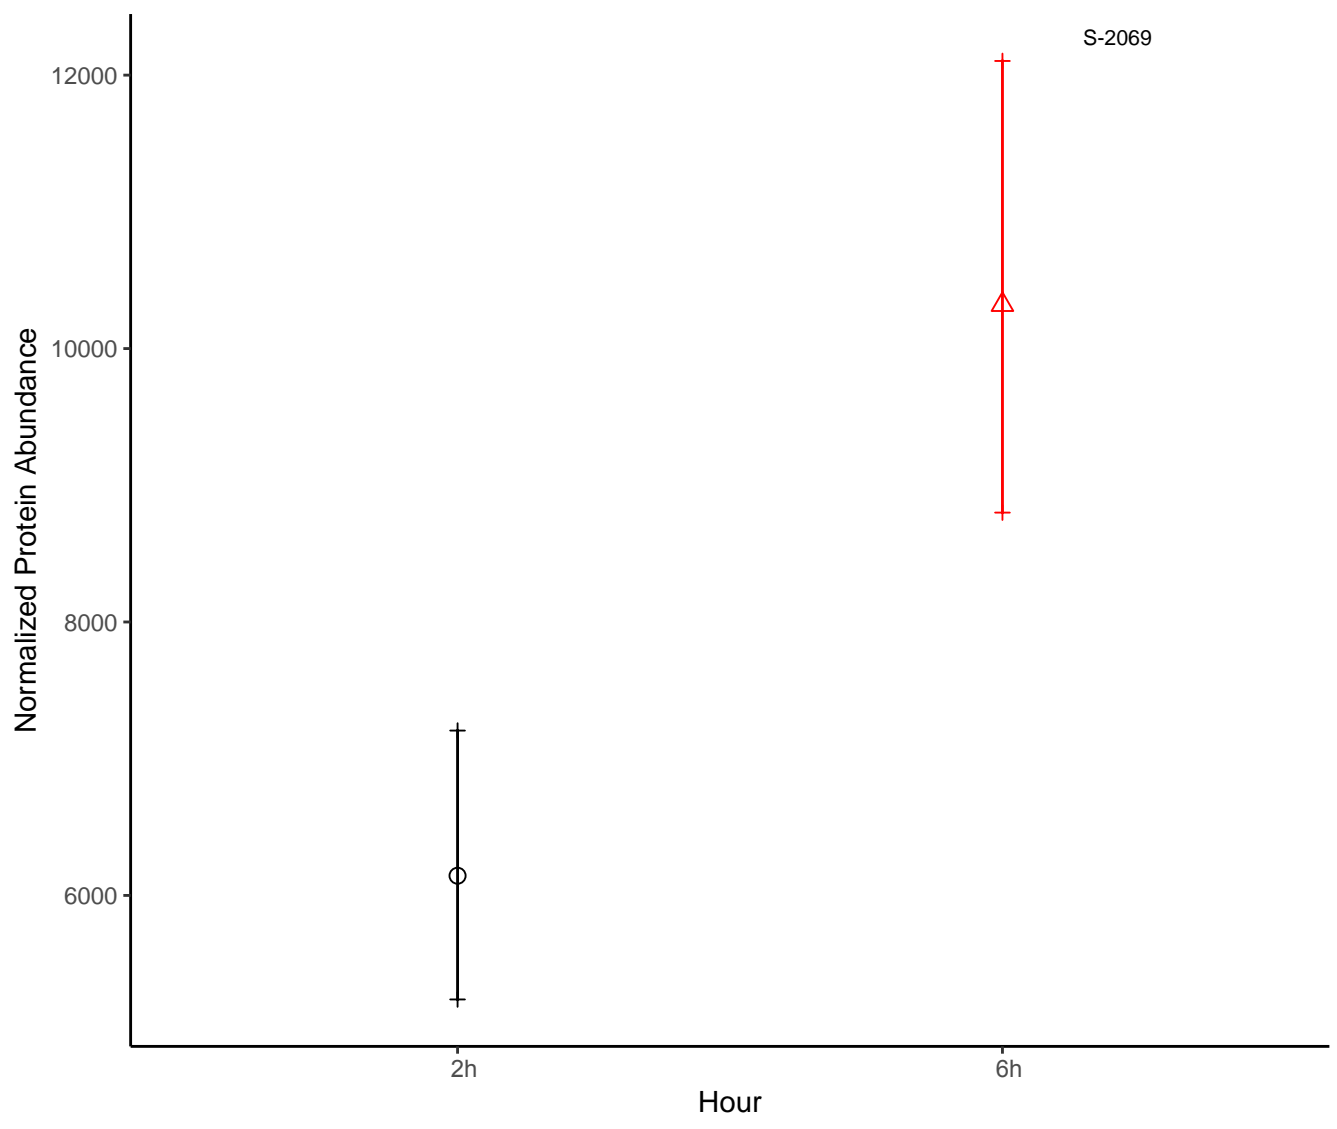

S-2069

⊕ 2h

△ 6h

# CYSE\_STAAM

S-2070

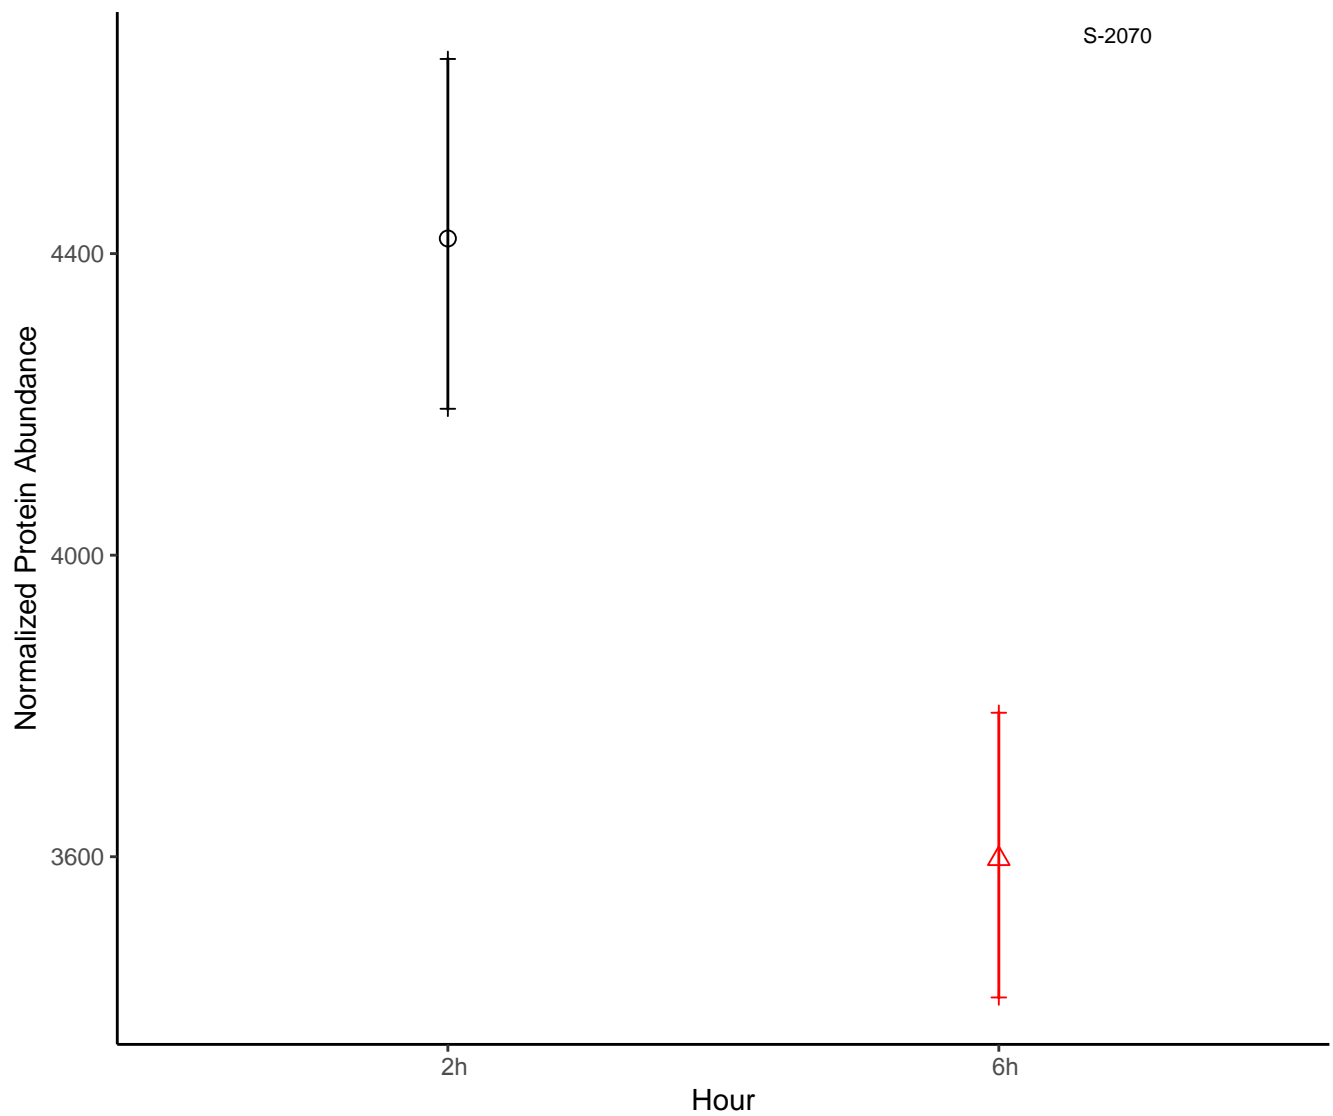

⊕ 2h

△ 6h

# CYSK\_STAAM

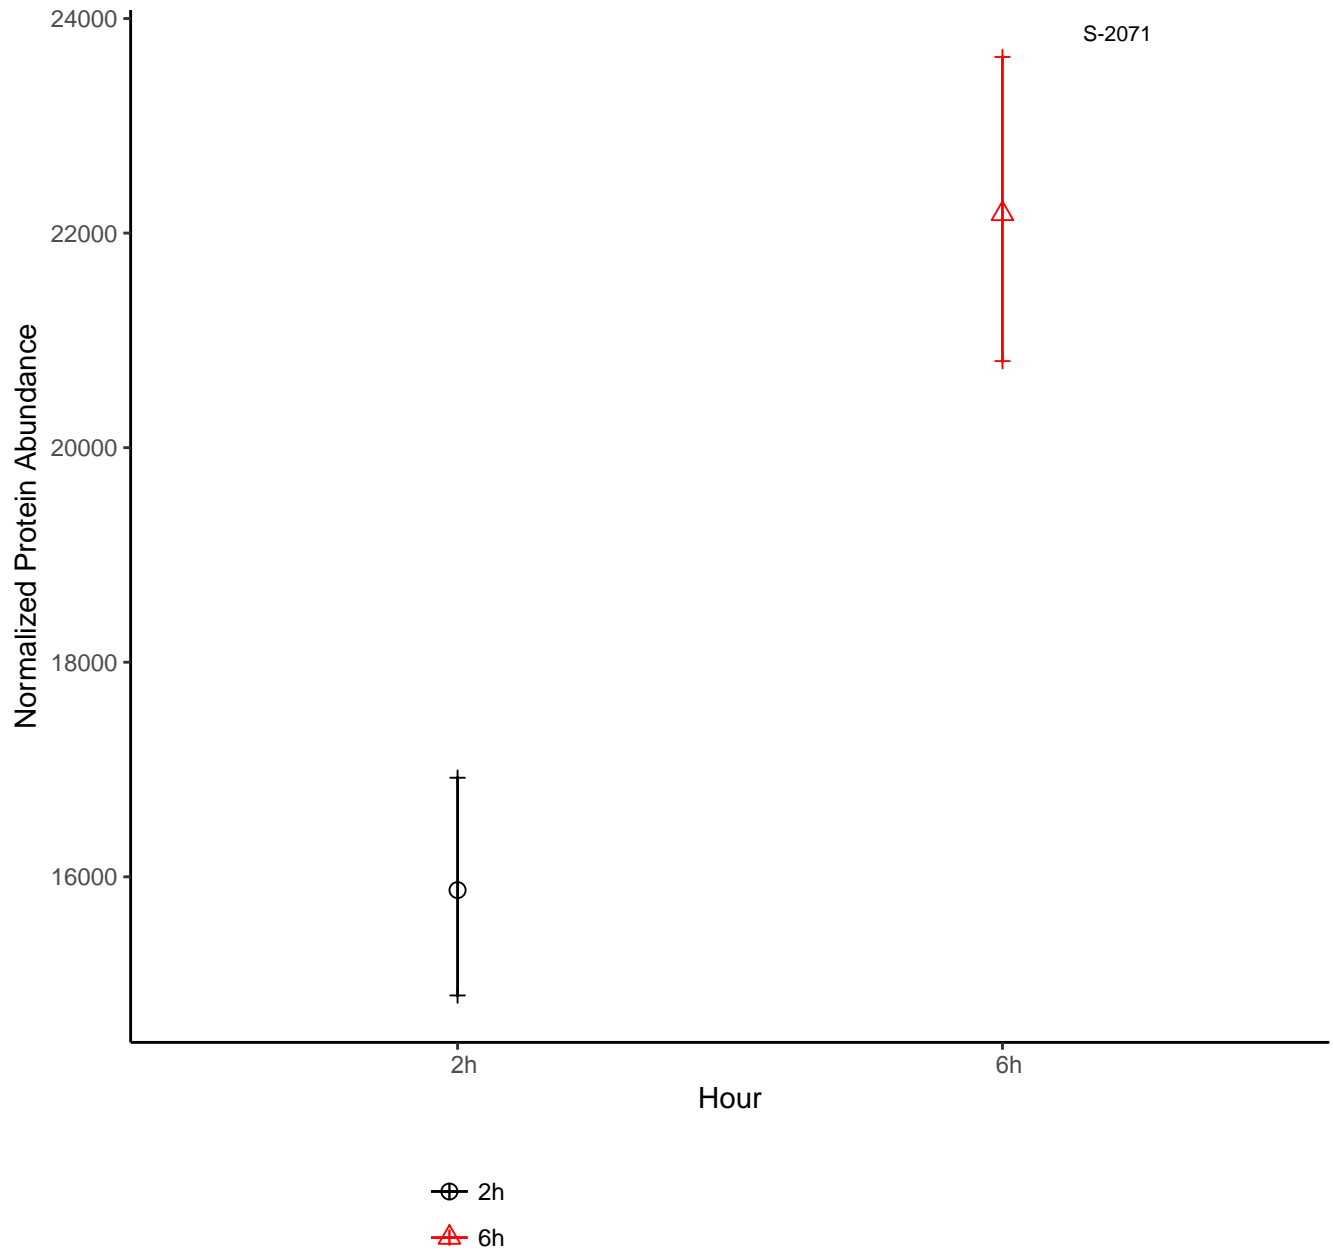

# DAAA\_STAAM

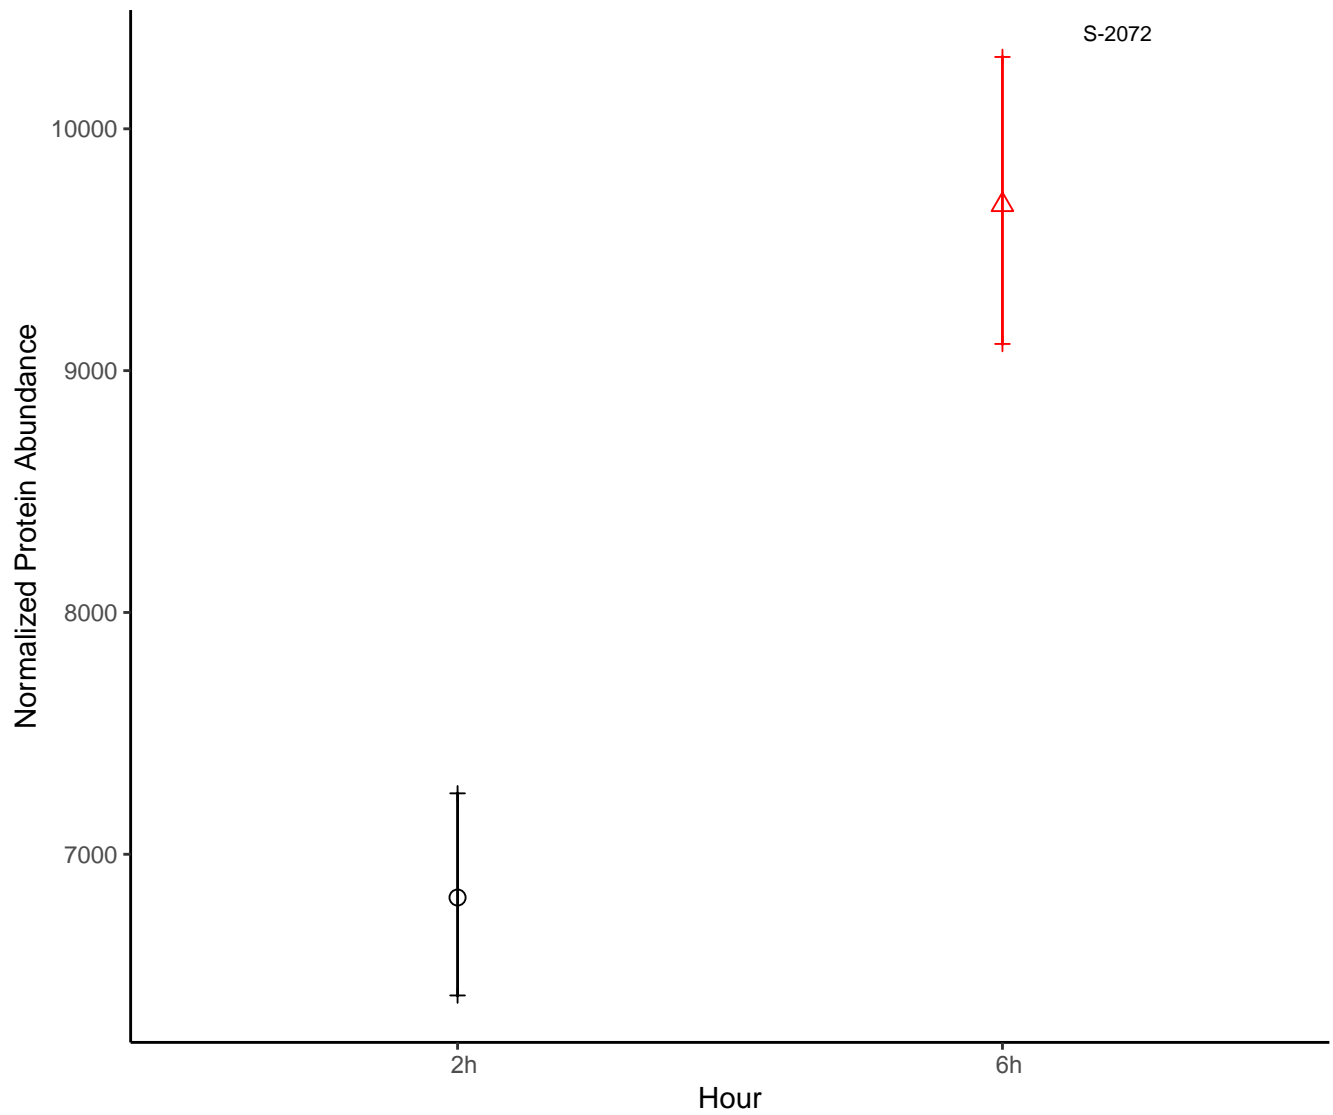

⊕ 2h

△ 6h



# DAPB\_STAAM

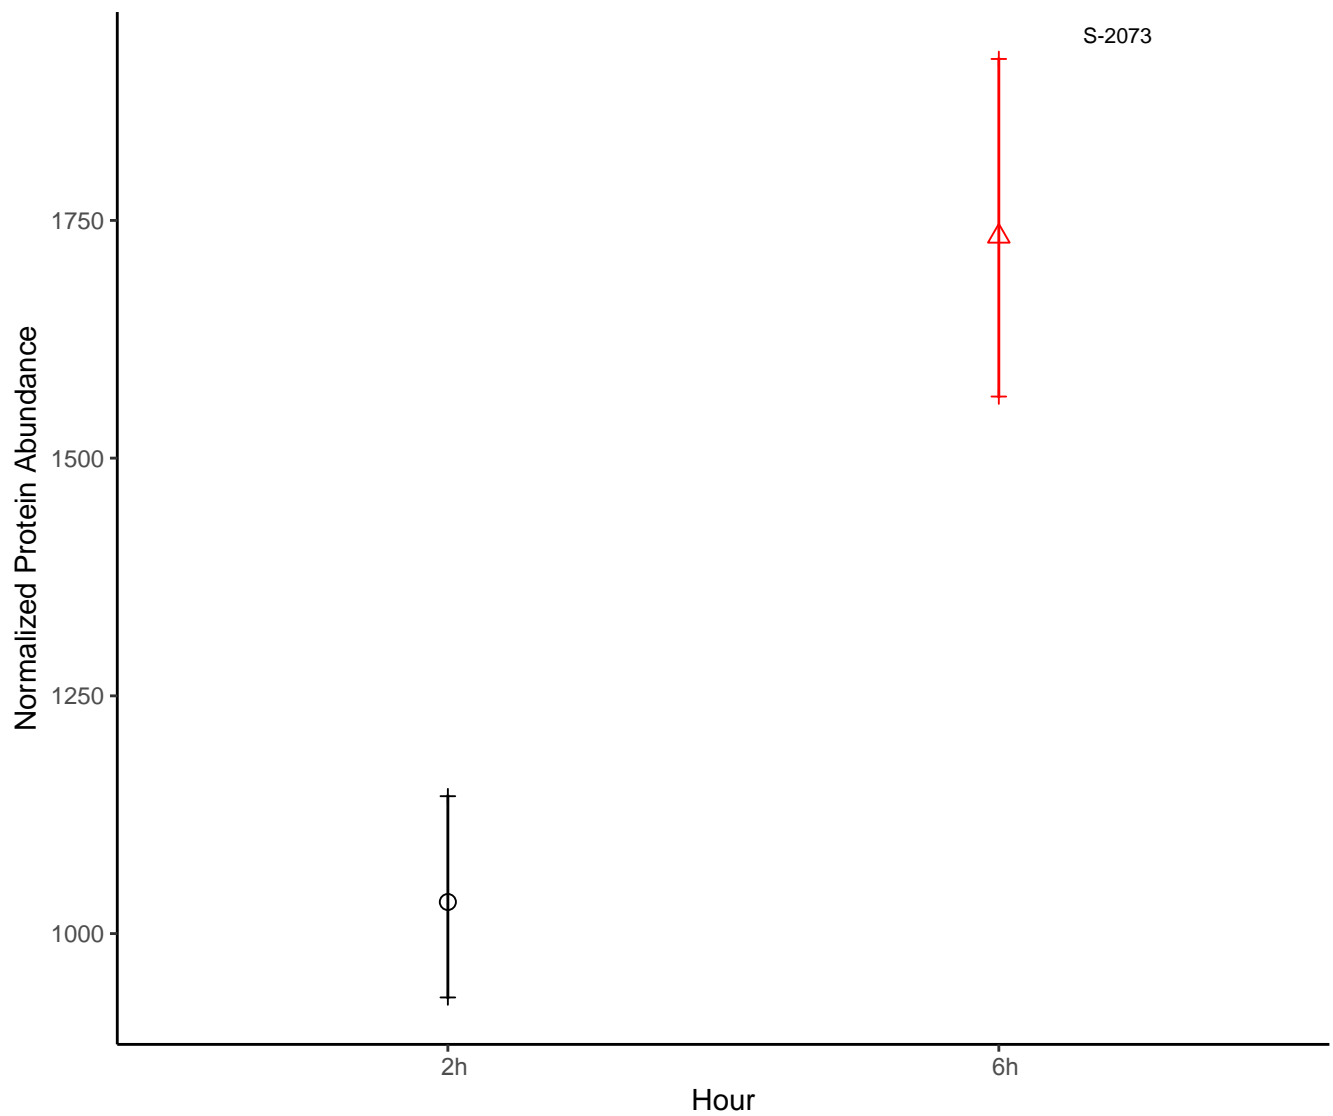

⊕ 2h

△ 6h

# DAPH\_STAAM

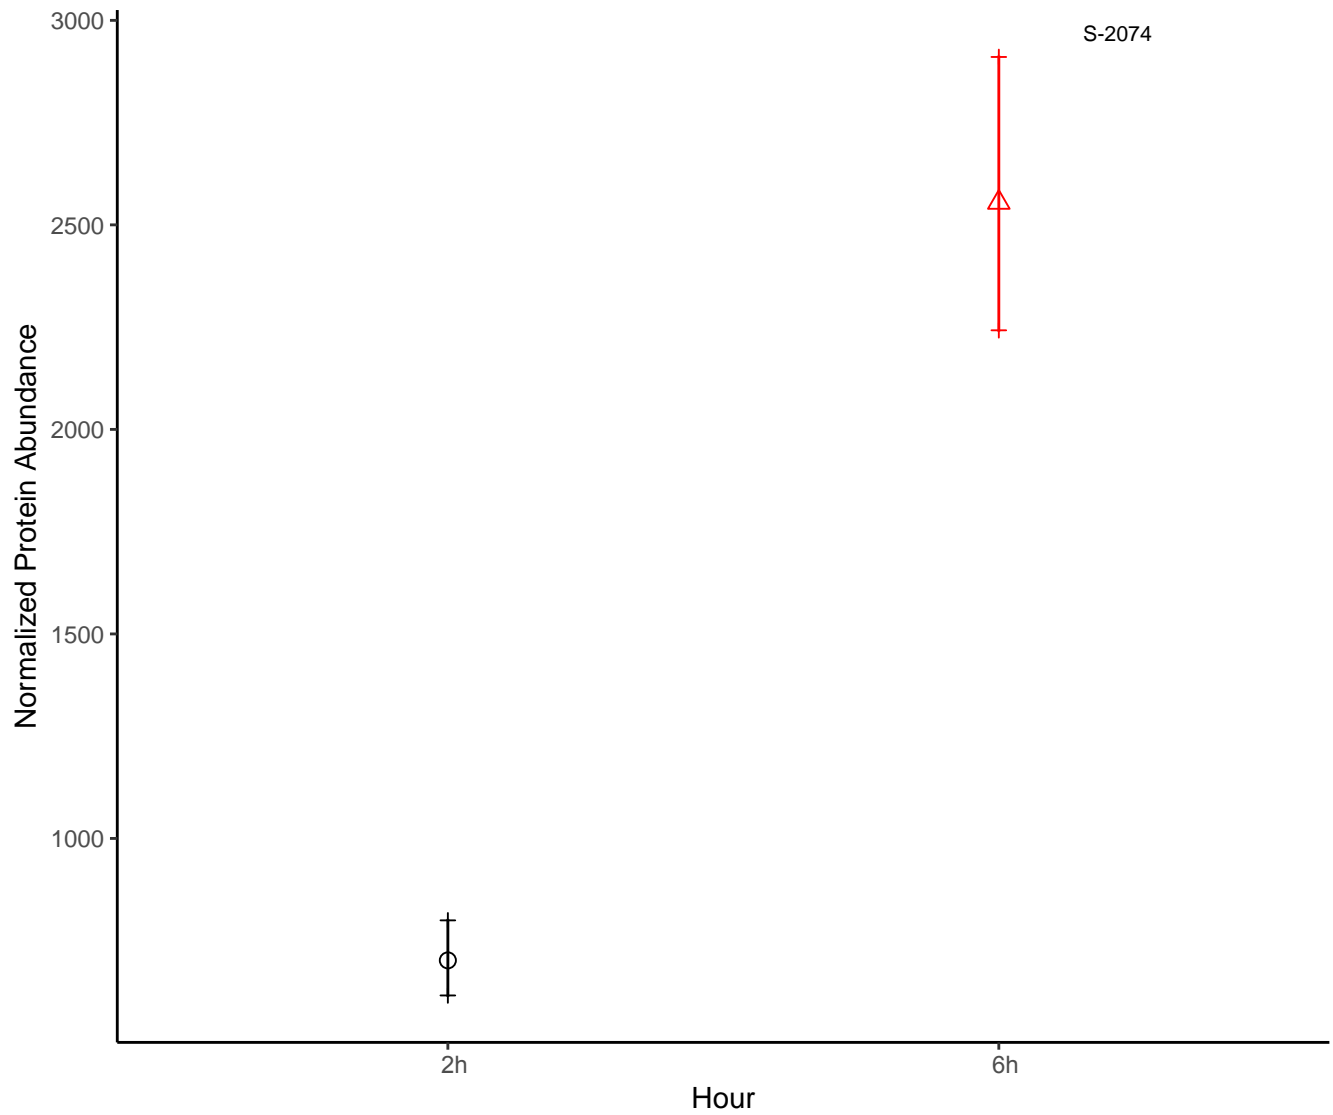

⊕ 2h

△ 6h

# DBH\_STAAM

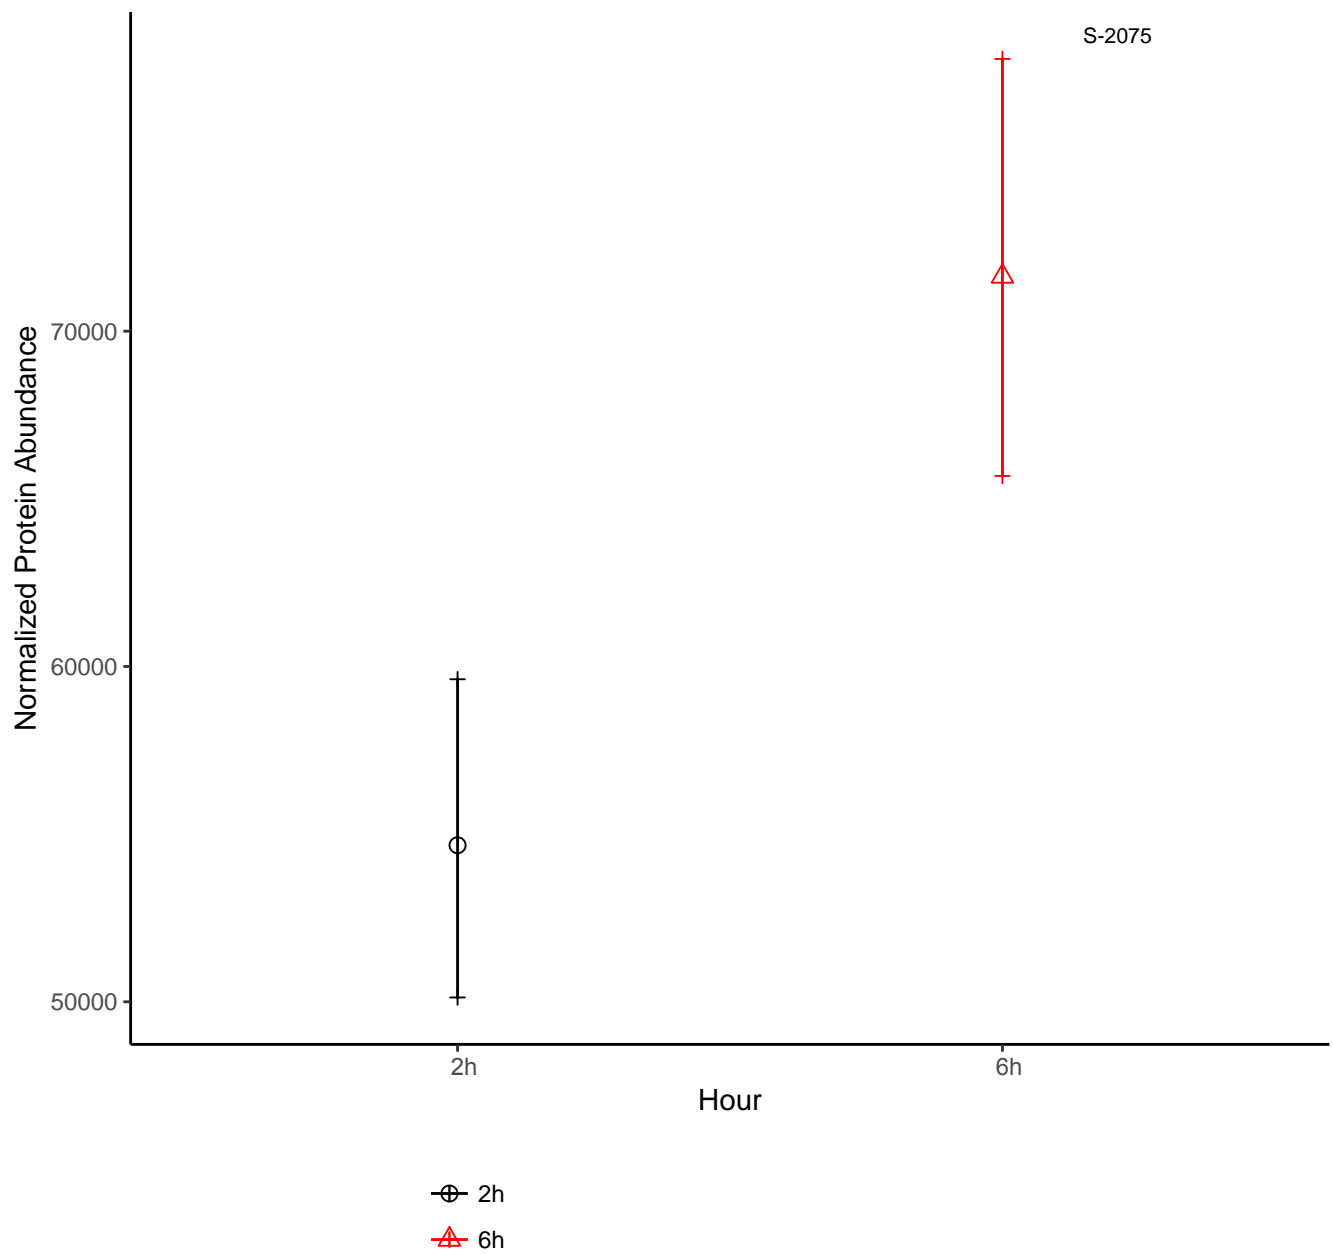

# DCUP\_STAAM

S-2076

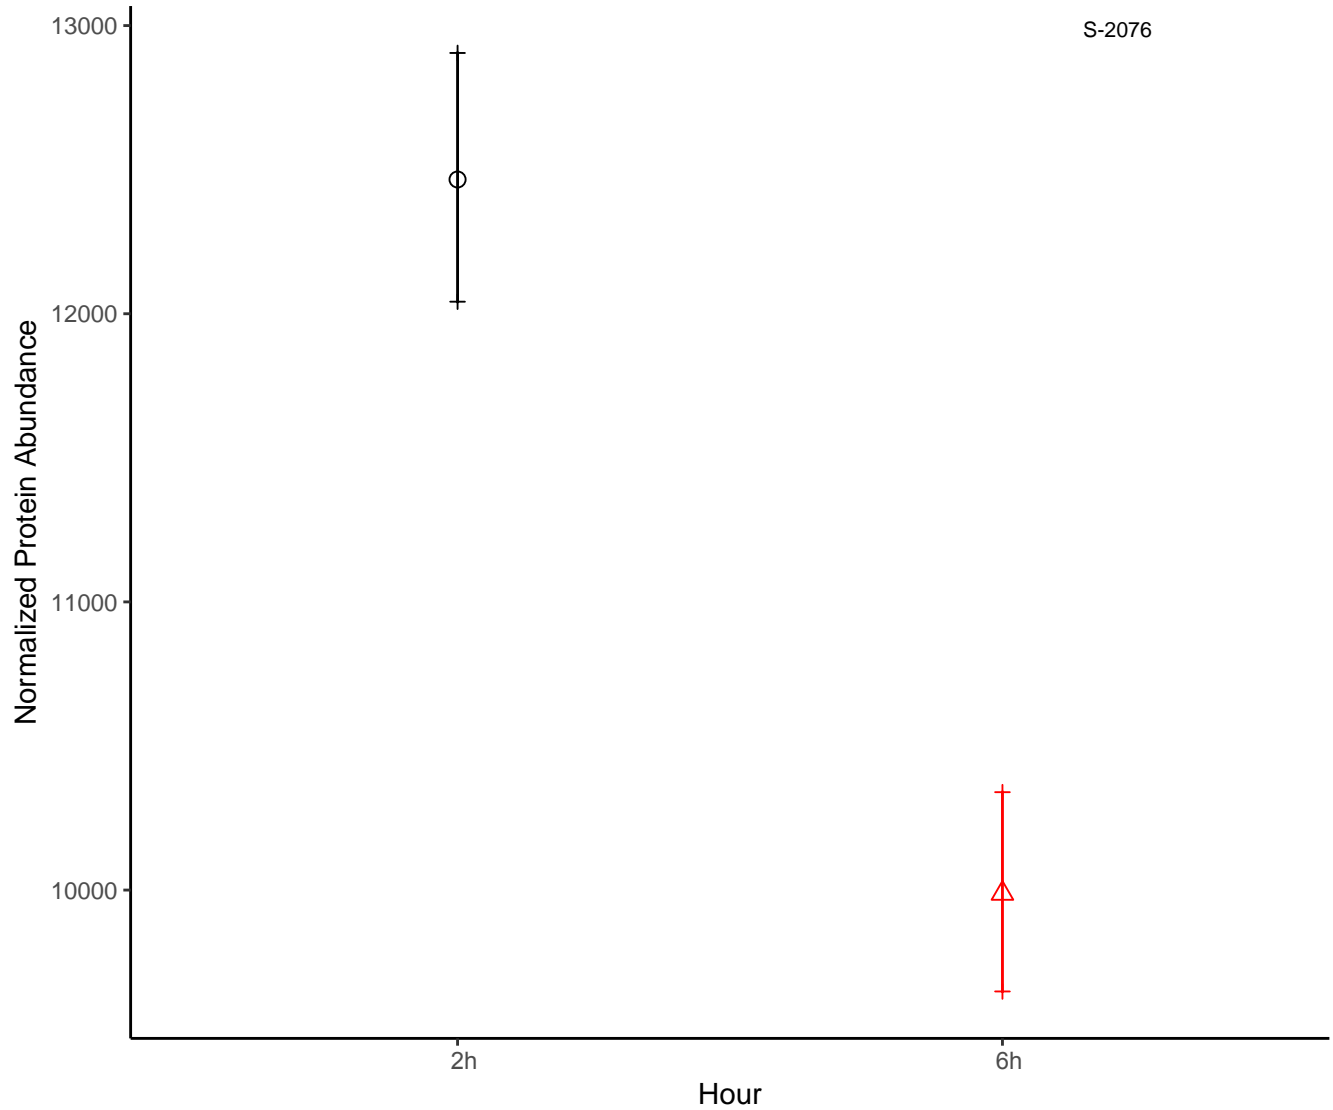

⊕ 2h

△ 6h

# DDL\_STAAM

S-2077

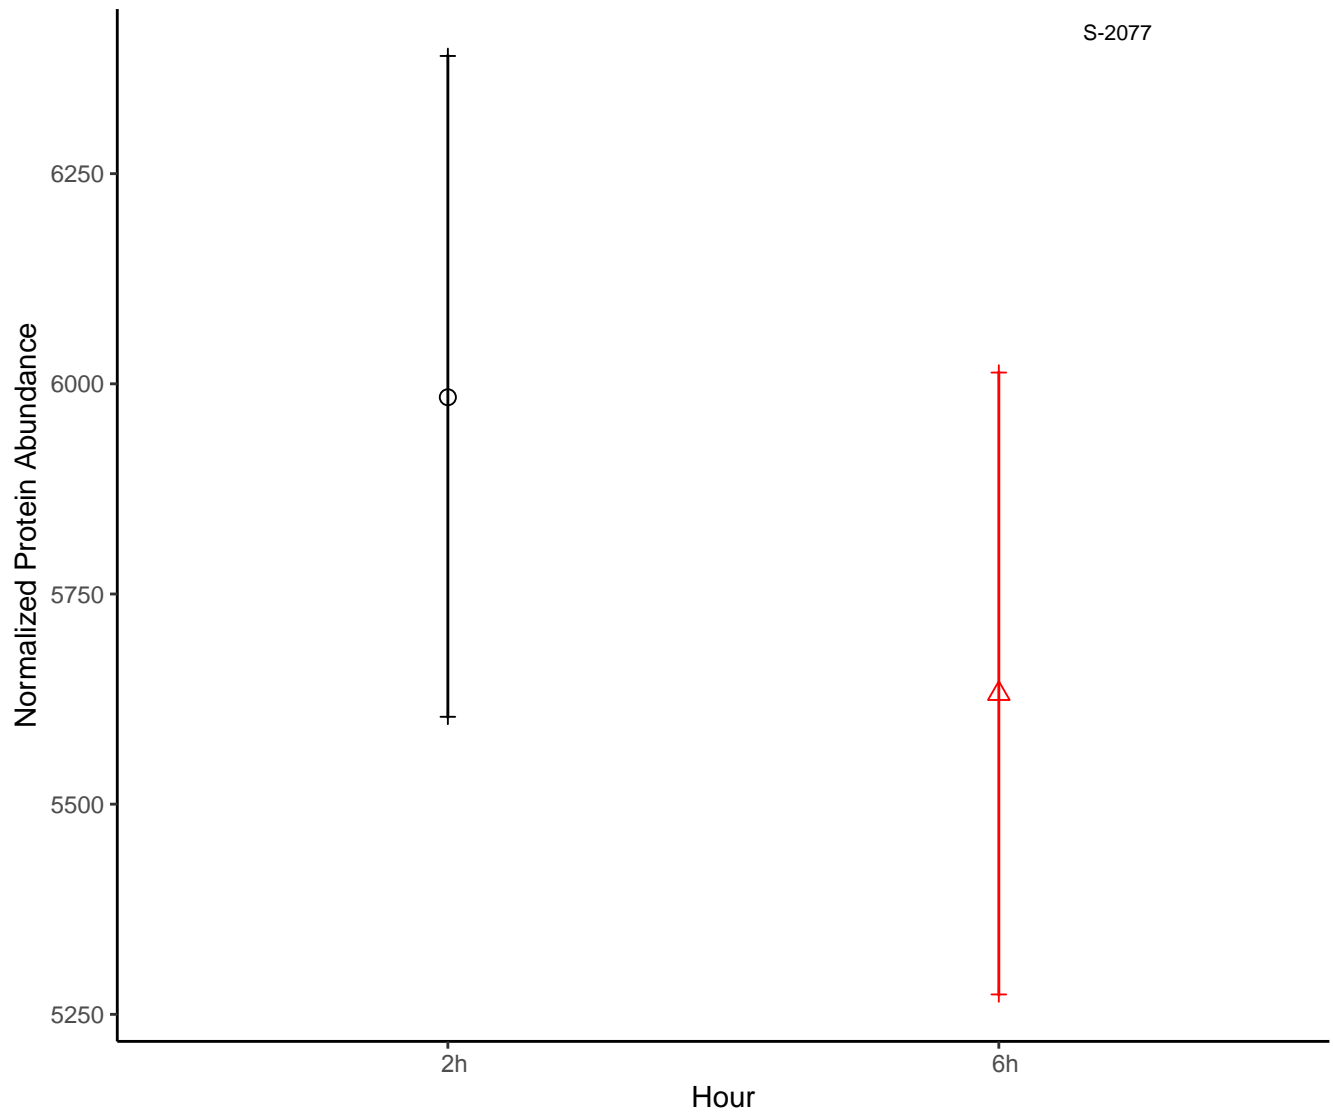

⊕ 2h

△ 6h

# DEF\_STAAM

S-2078

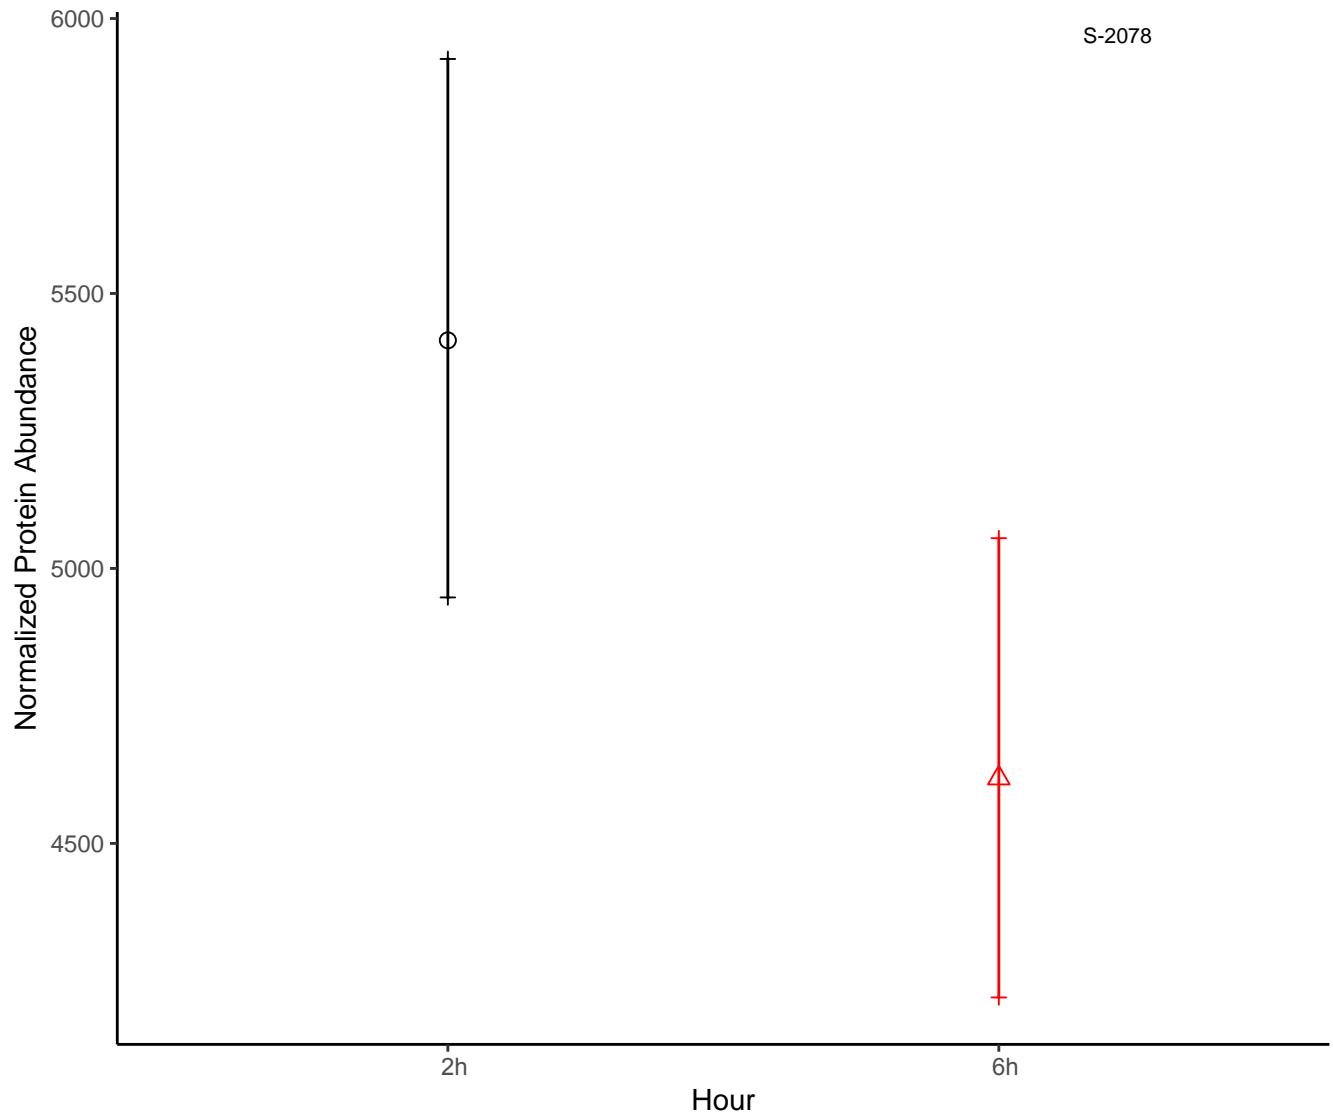

⊕ 2h

△ 6h

# DEOB\_STAAM

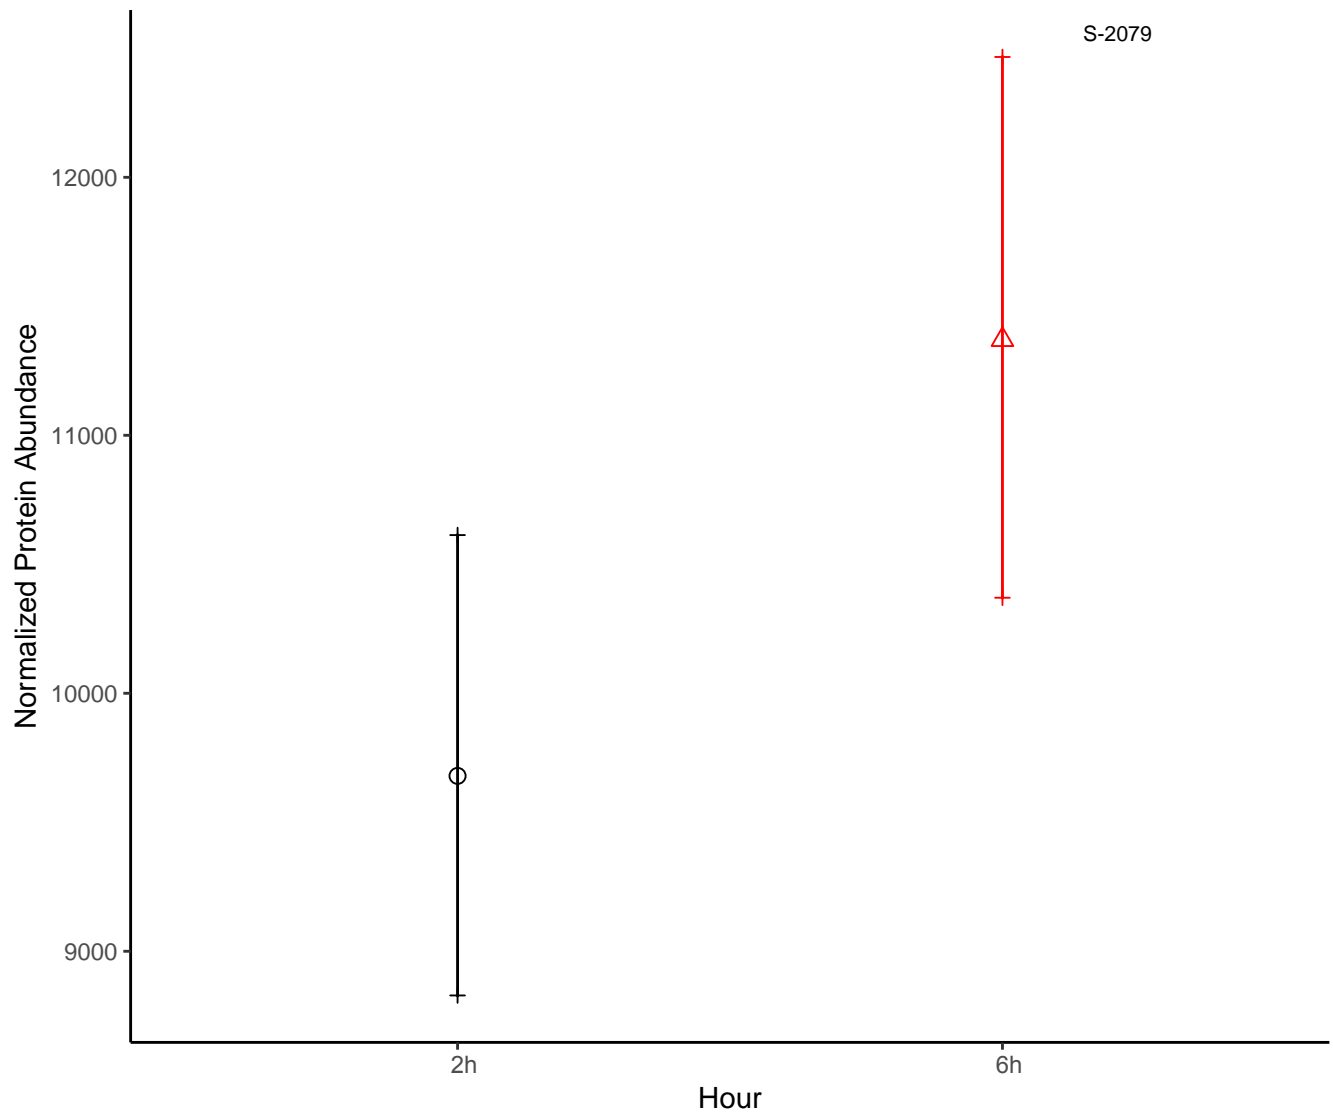

S-2079

⊕ 2h

△ 6h

# DEOC1\_STAAM

S-2080

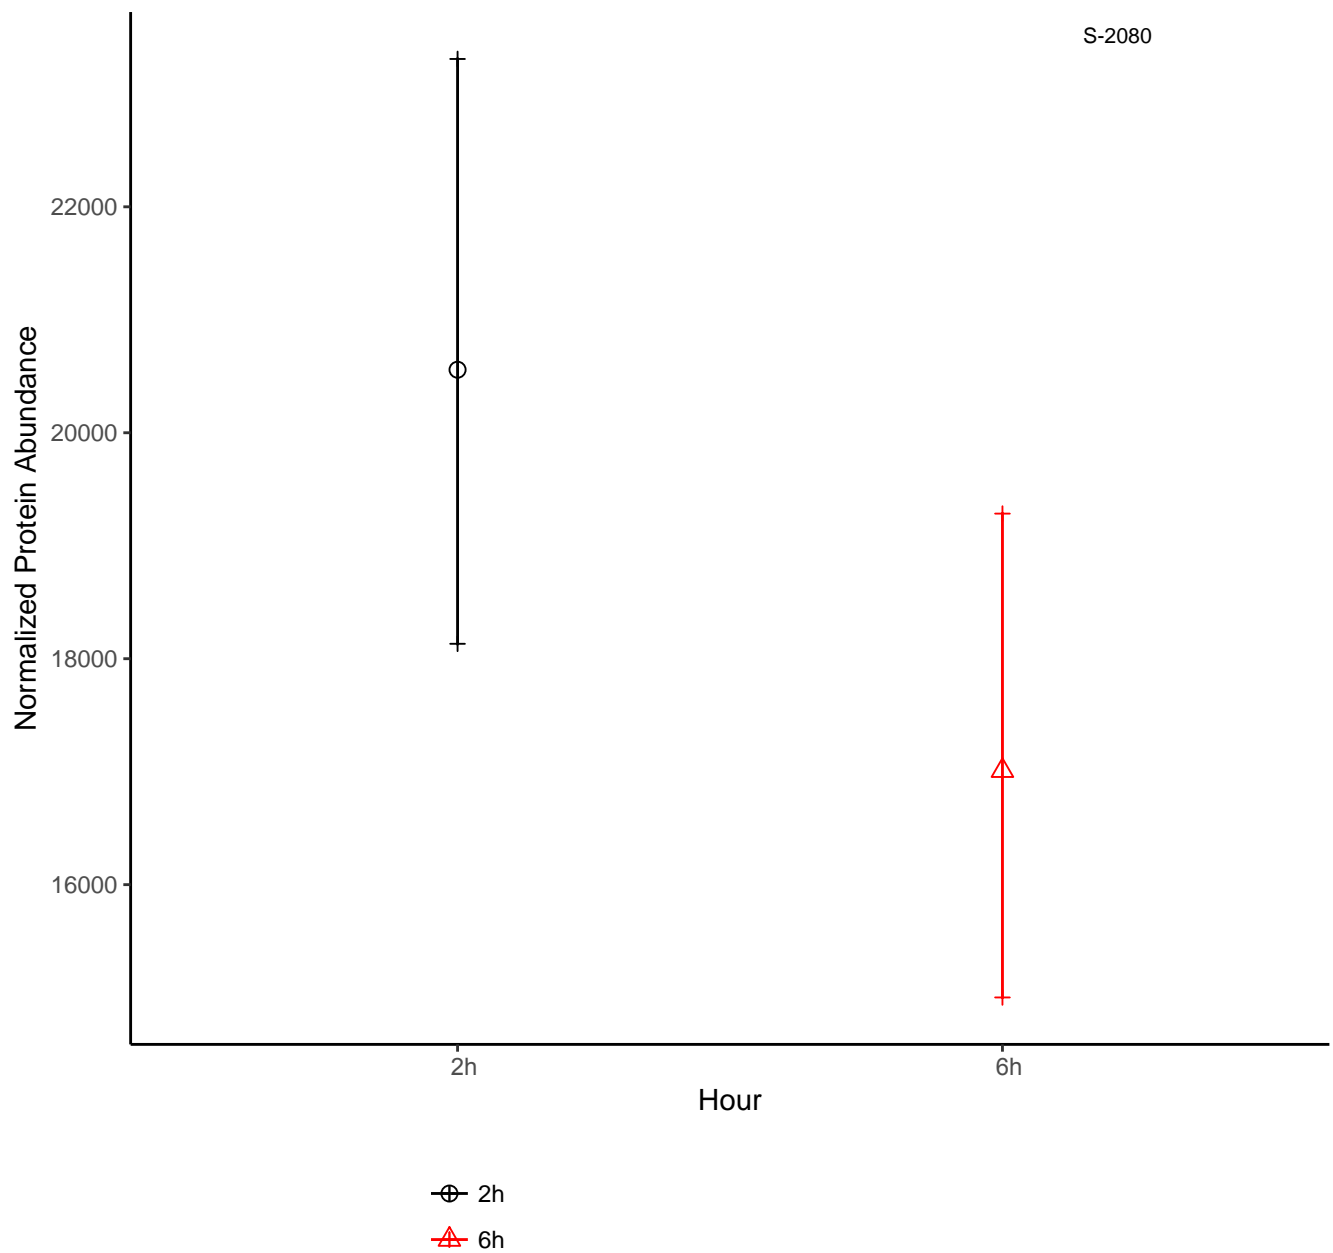



# DEOC2\_STAAM

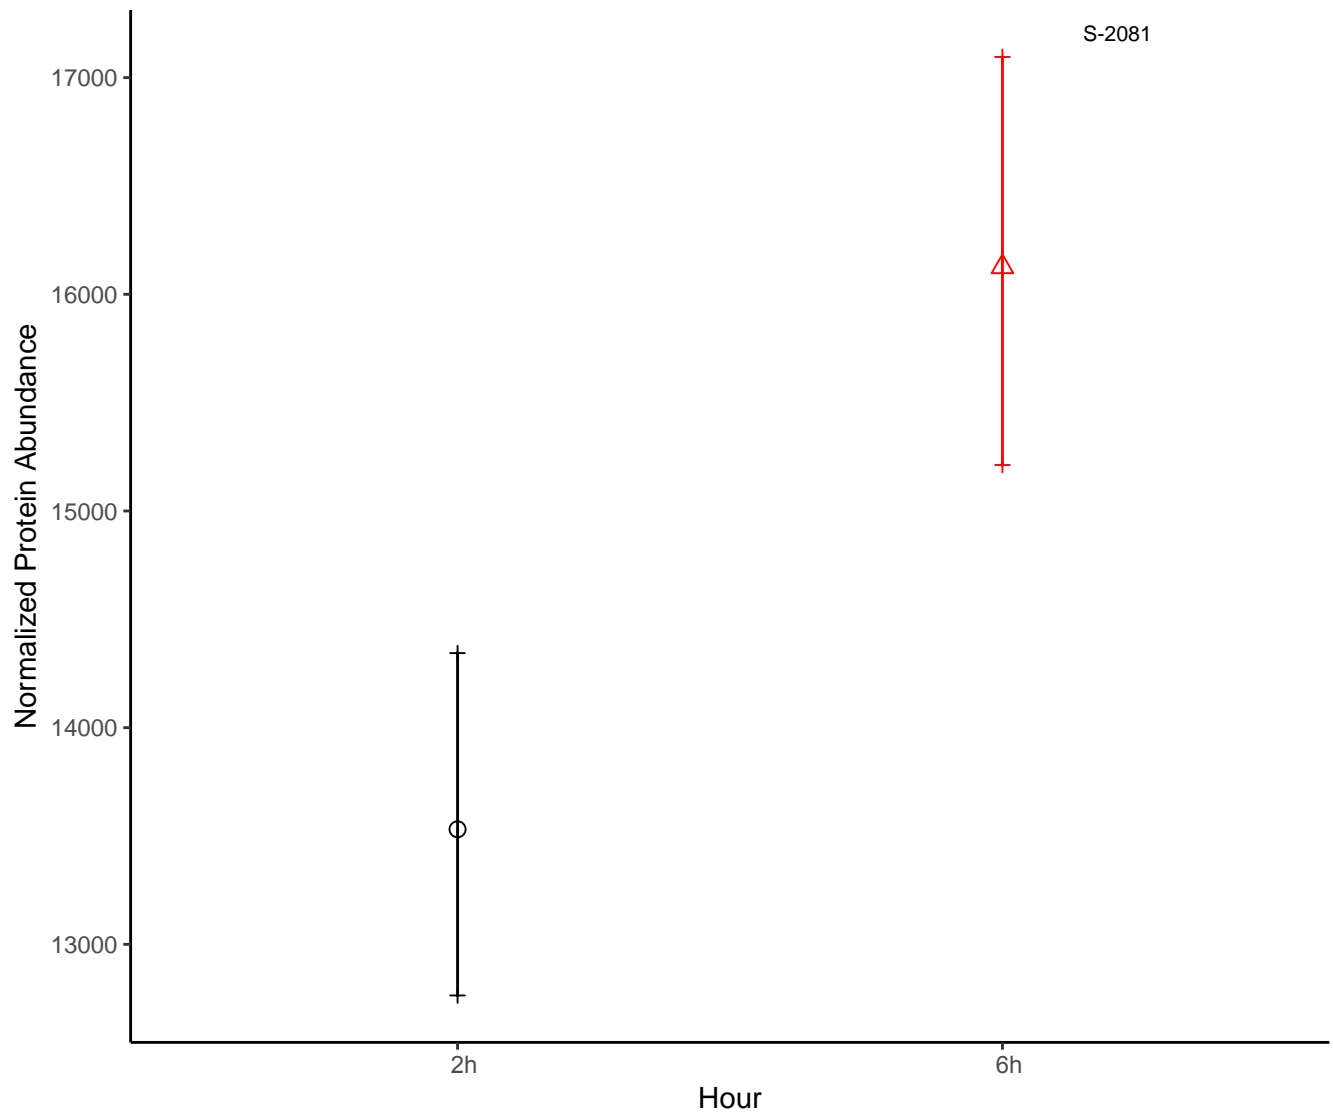

⊕ 2h

△ 6h

# DER\_STAAM

S-2082

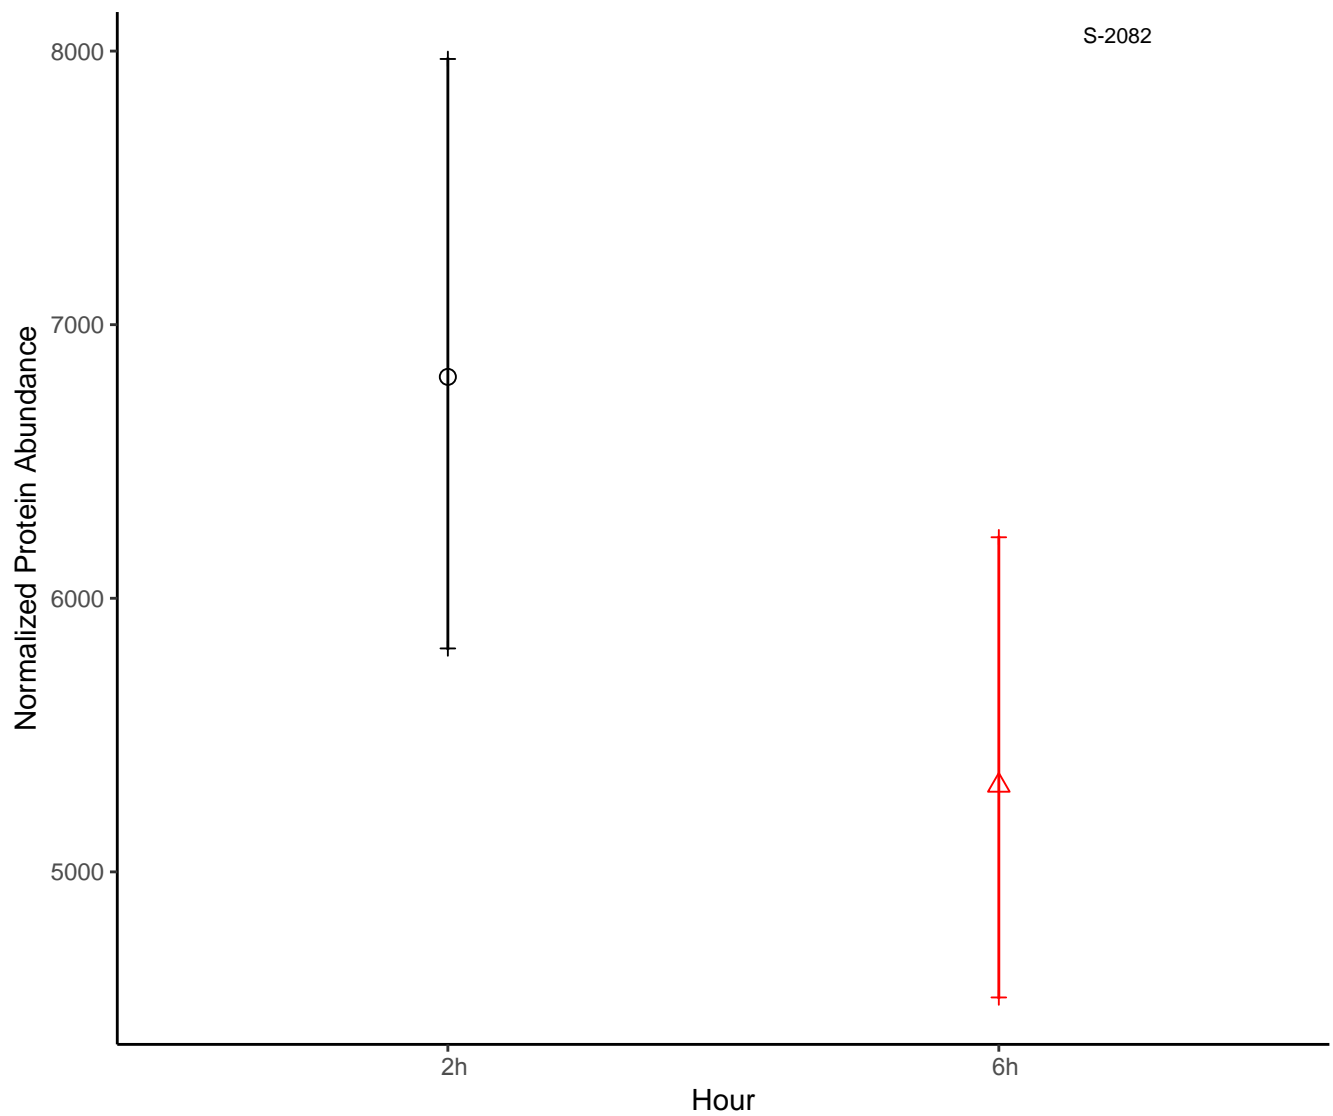

⊕ 2h

△ 6h

# DHA1\_STAAM

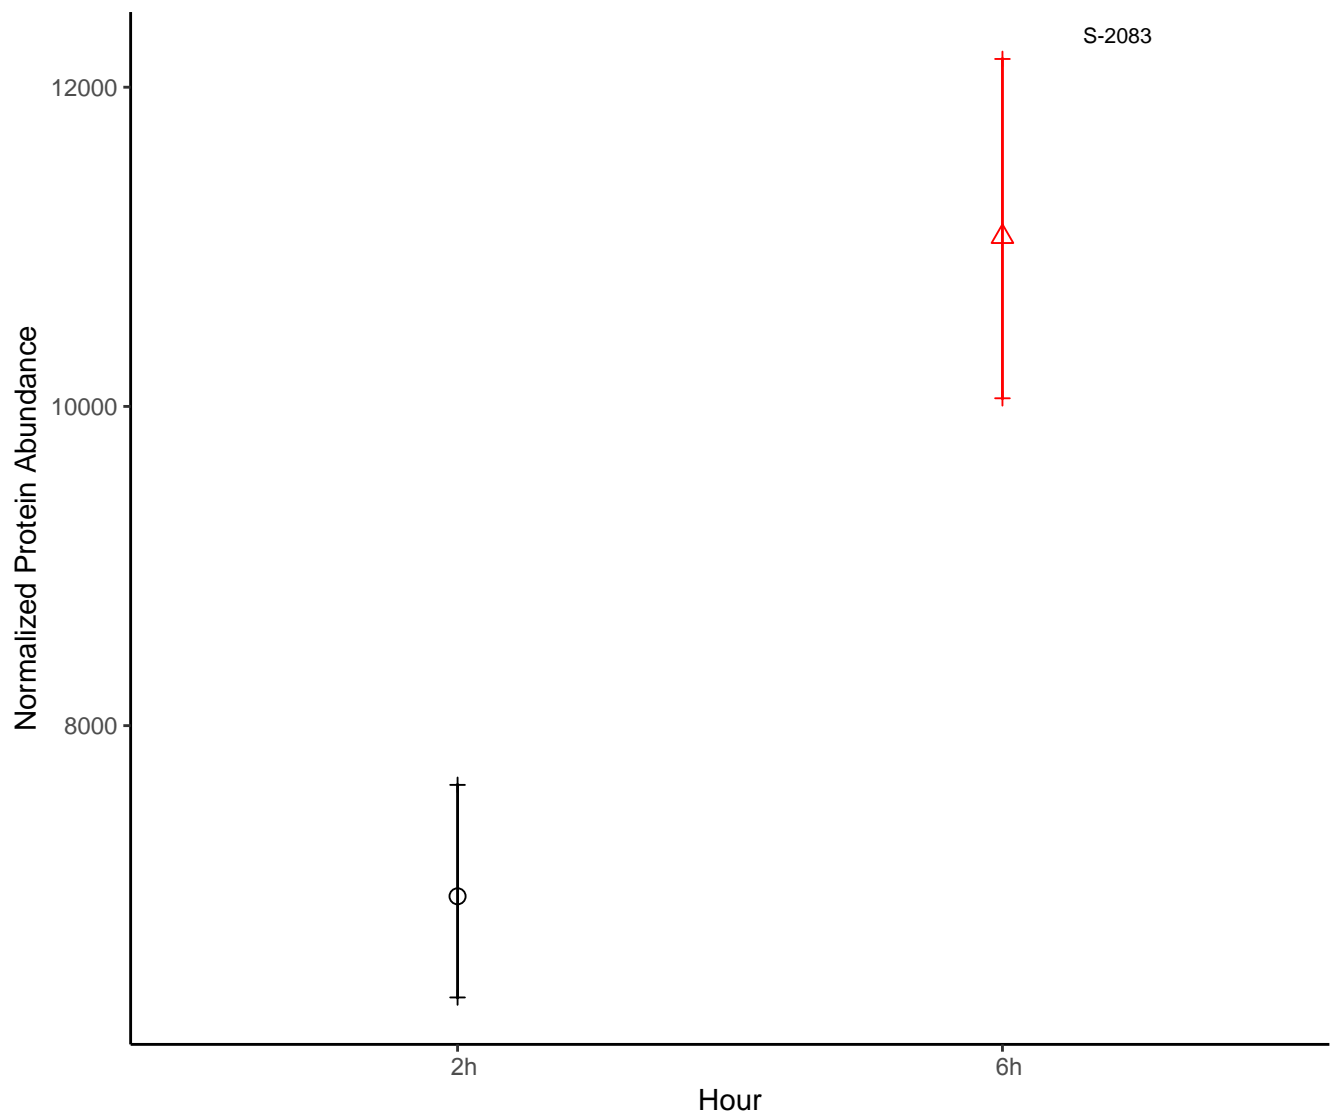

⊕ 2h

△ 6h

# DHA2\_STAAM

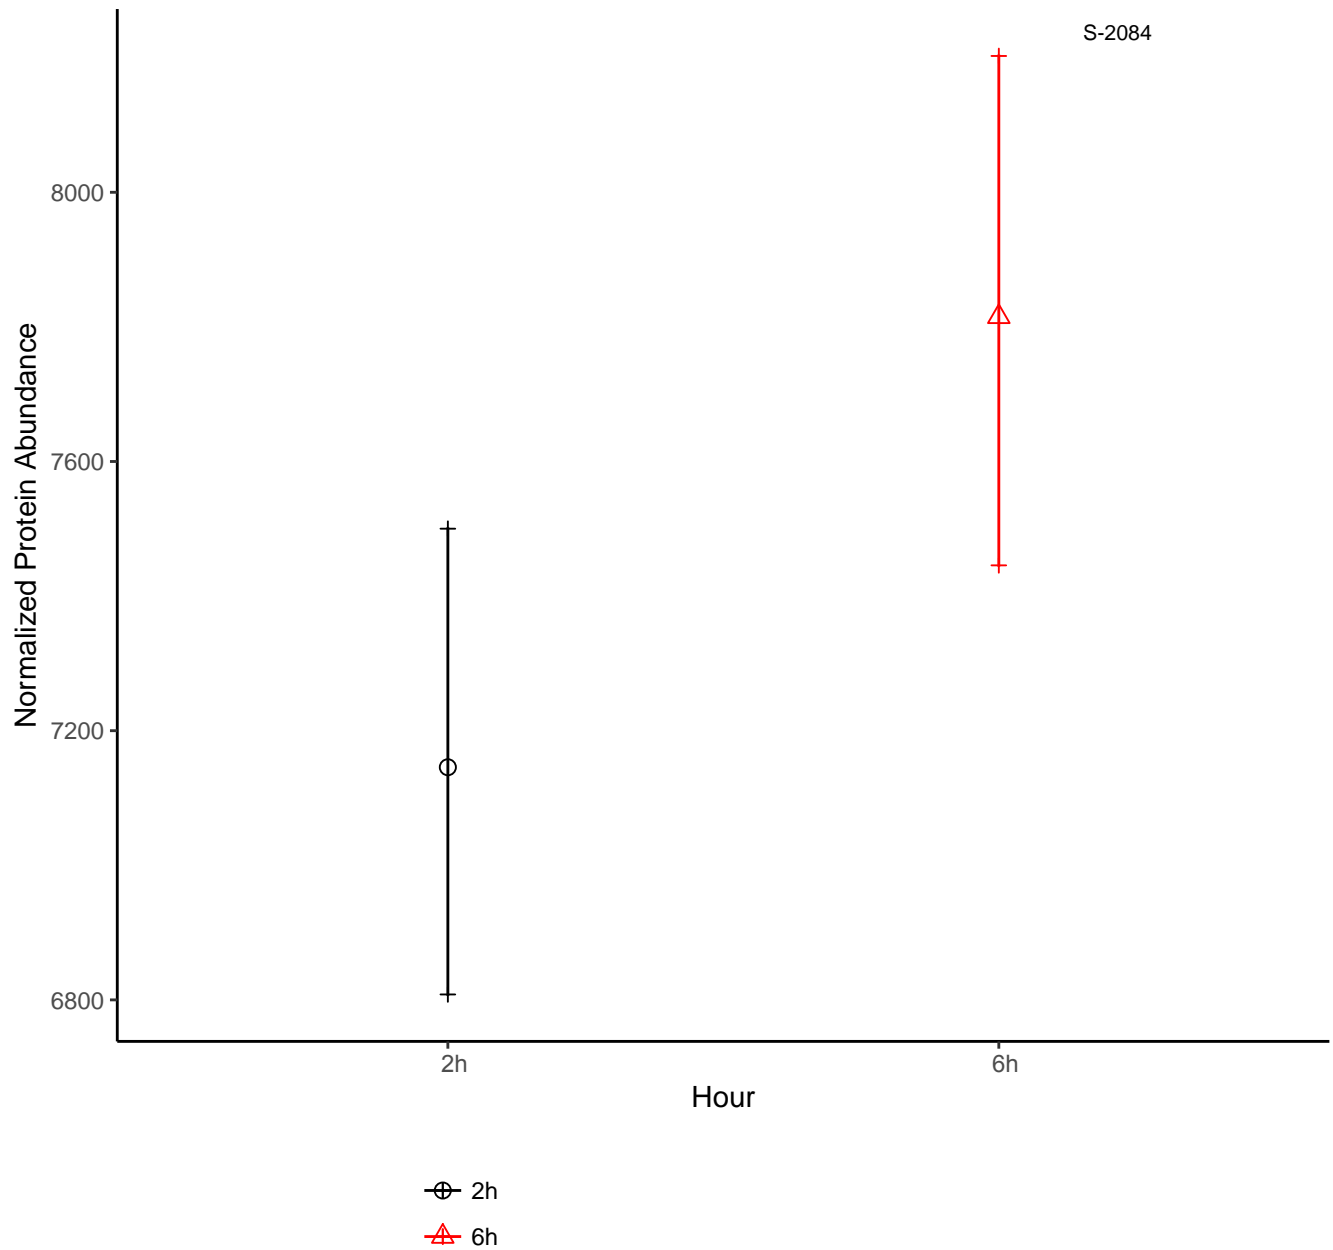

# DHE2\_STAAM

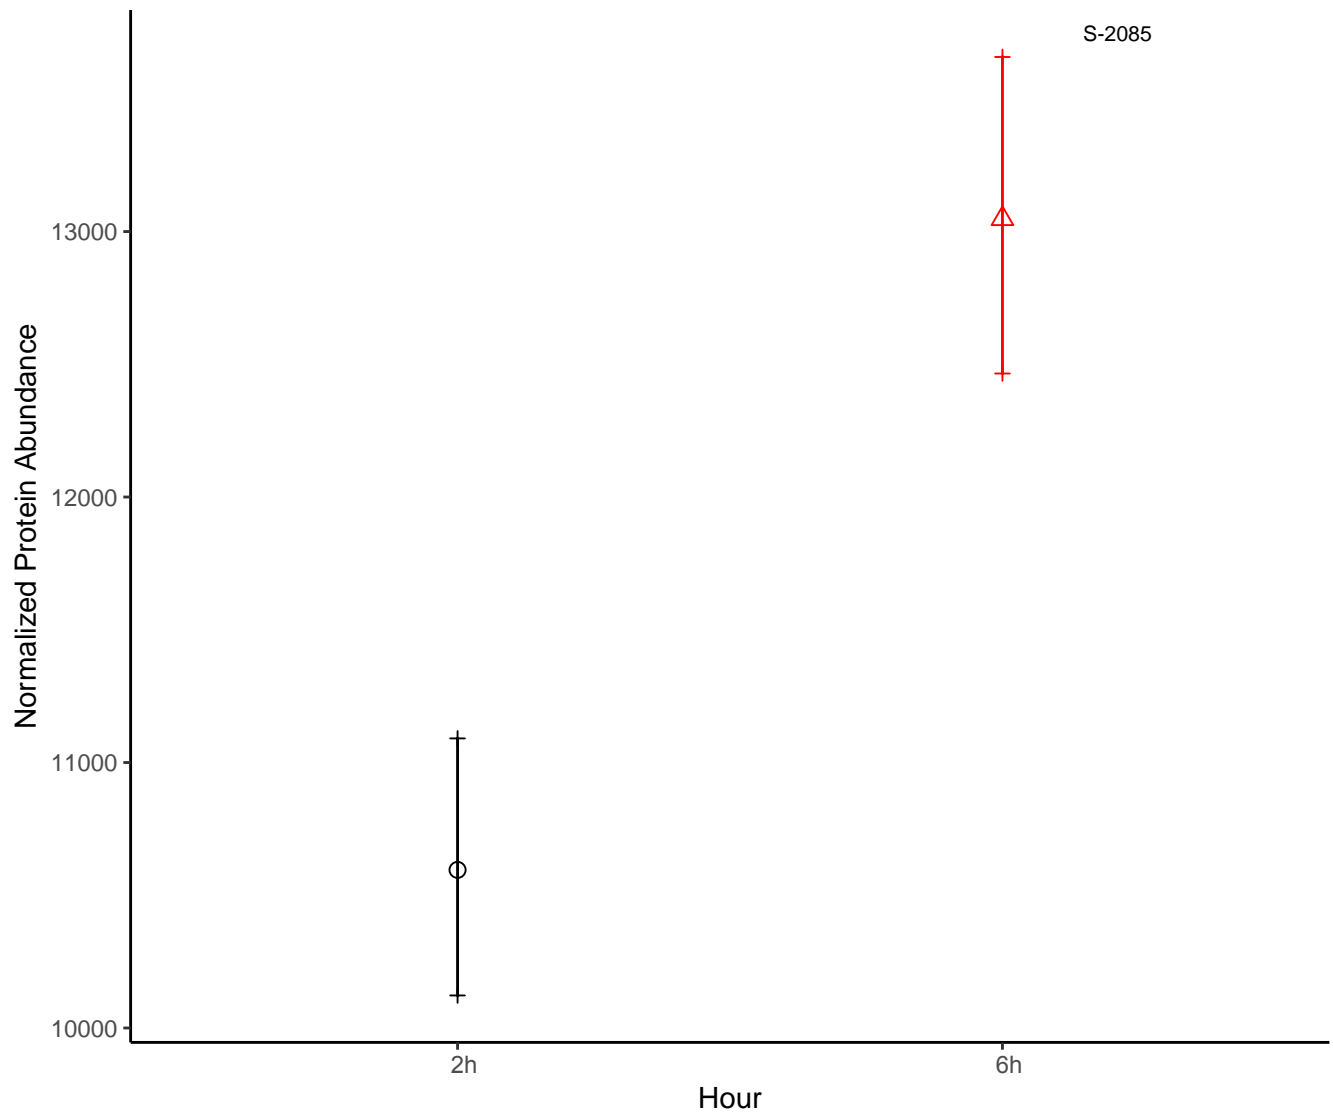

⊕ 2h

△ 6h

# DHPS\_STAAM

S-2086

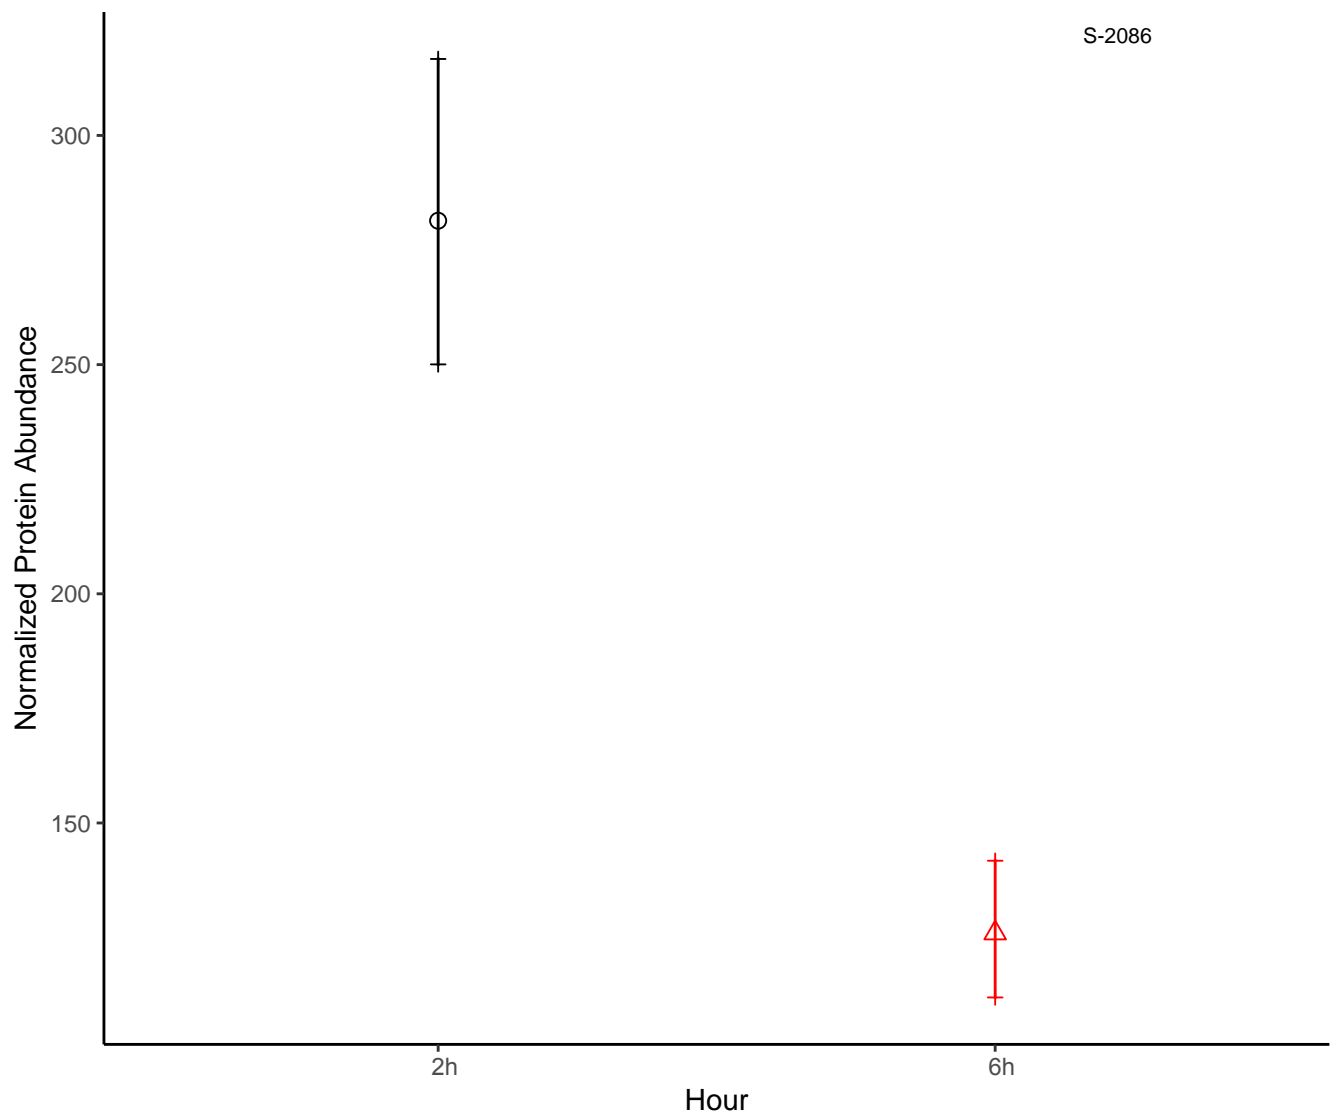

⊕ 2h

△ 6h

# DLDH\_STAAM

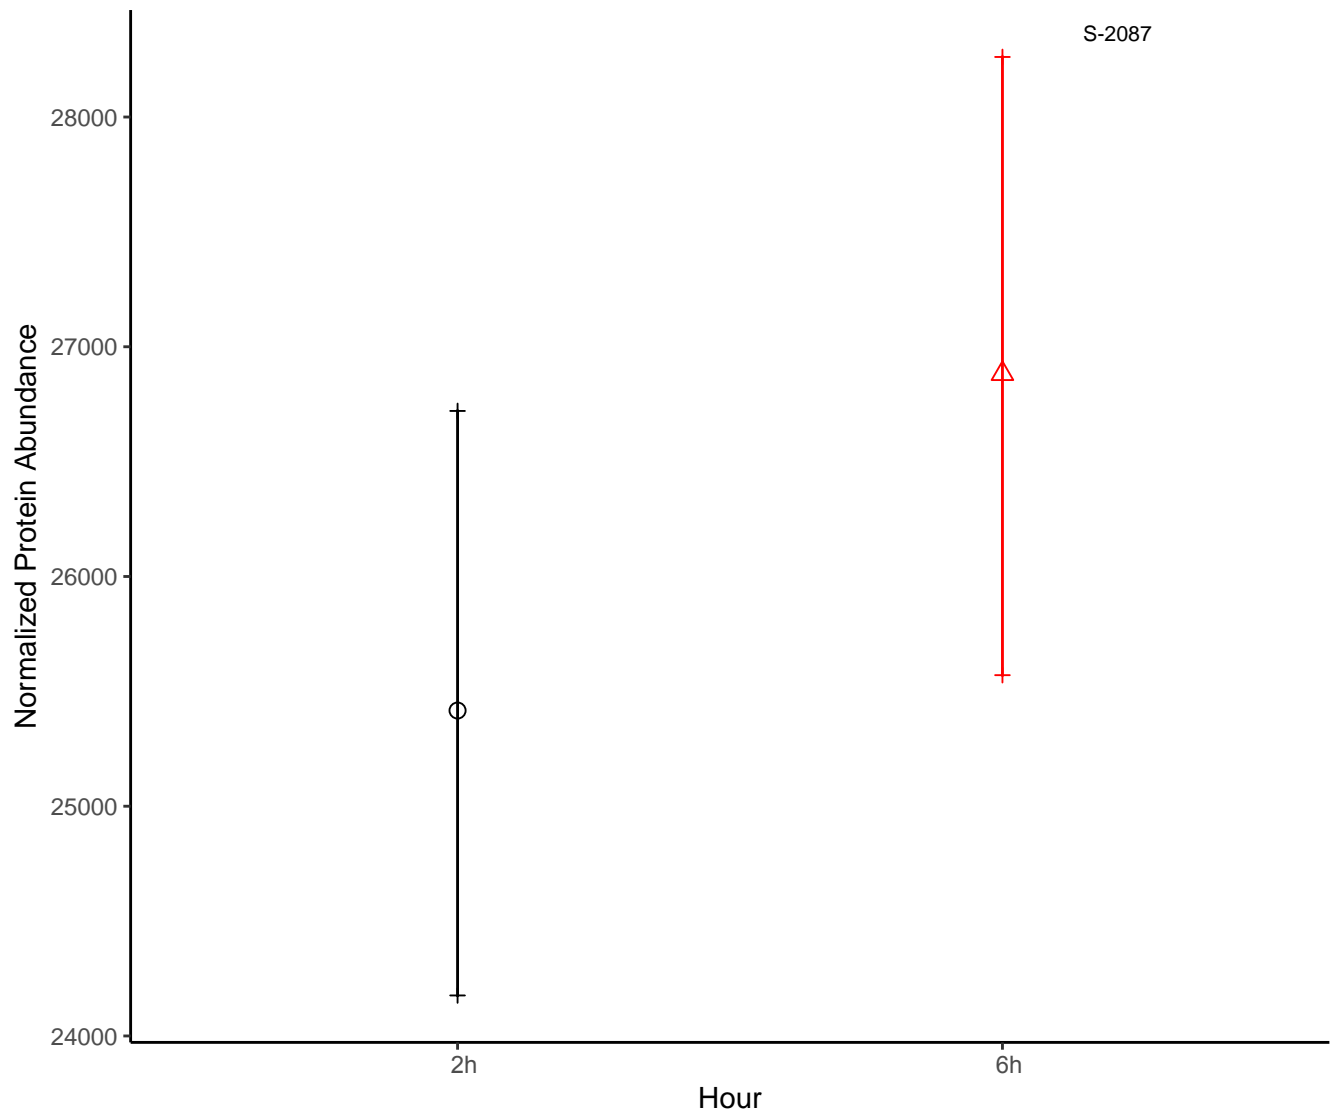

⊕ 2h

△ 6h

# DLTA\_STAAM

S-2088

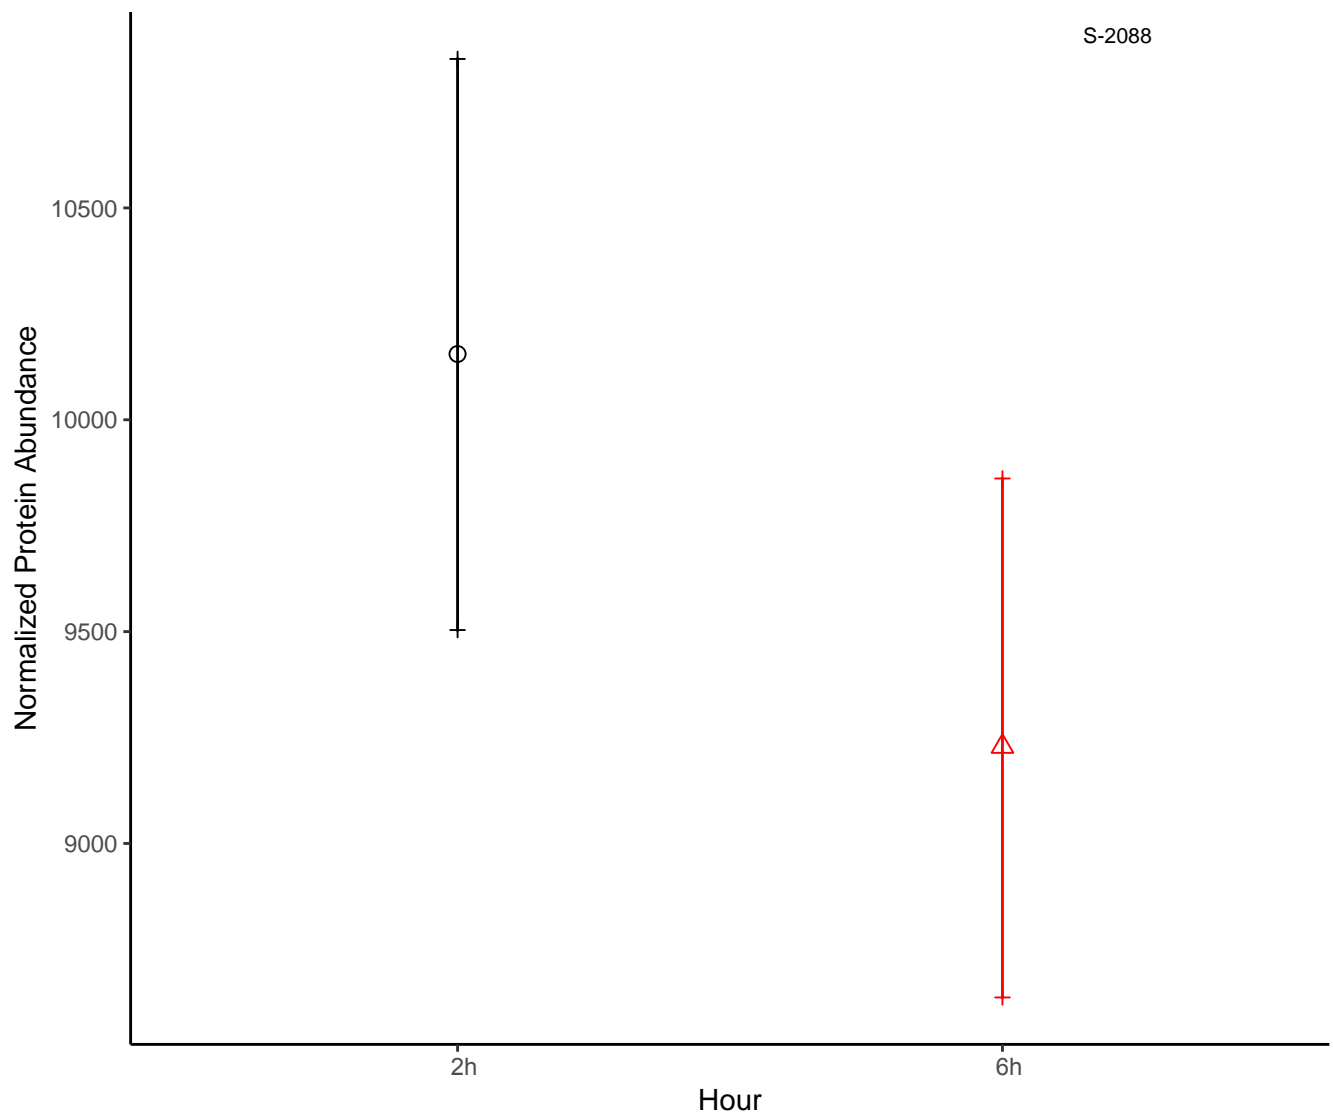

⊕ 2h

△ 6h



# DLTC\_STAAM

S-2089

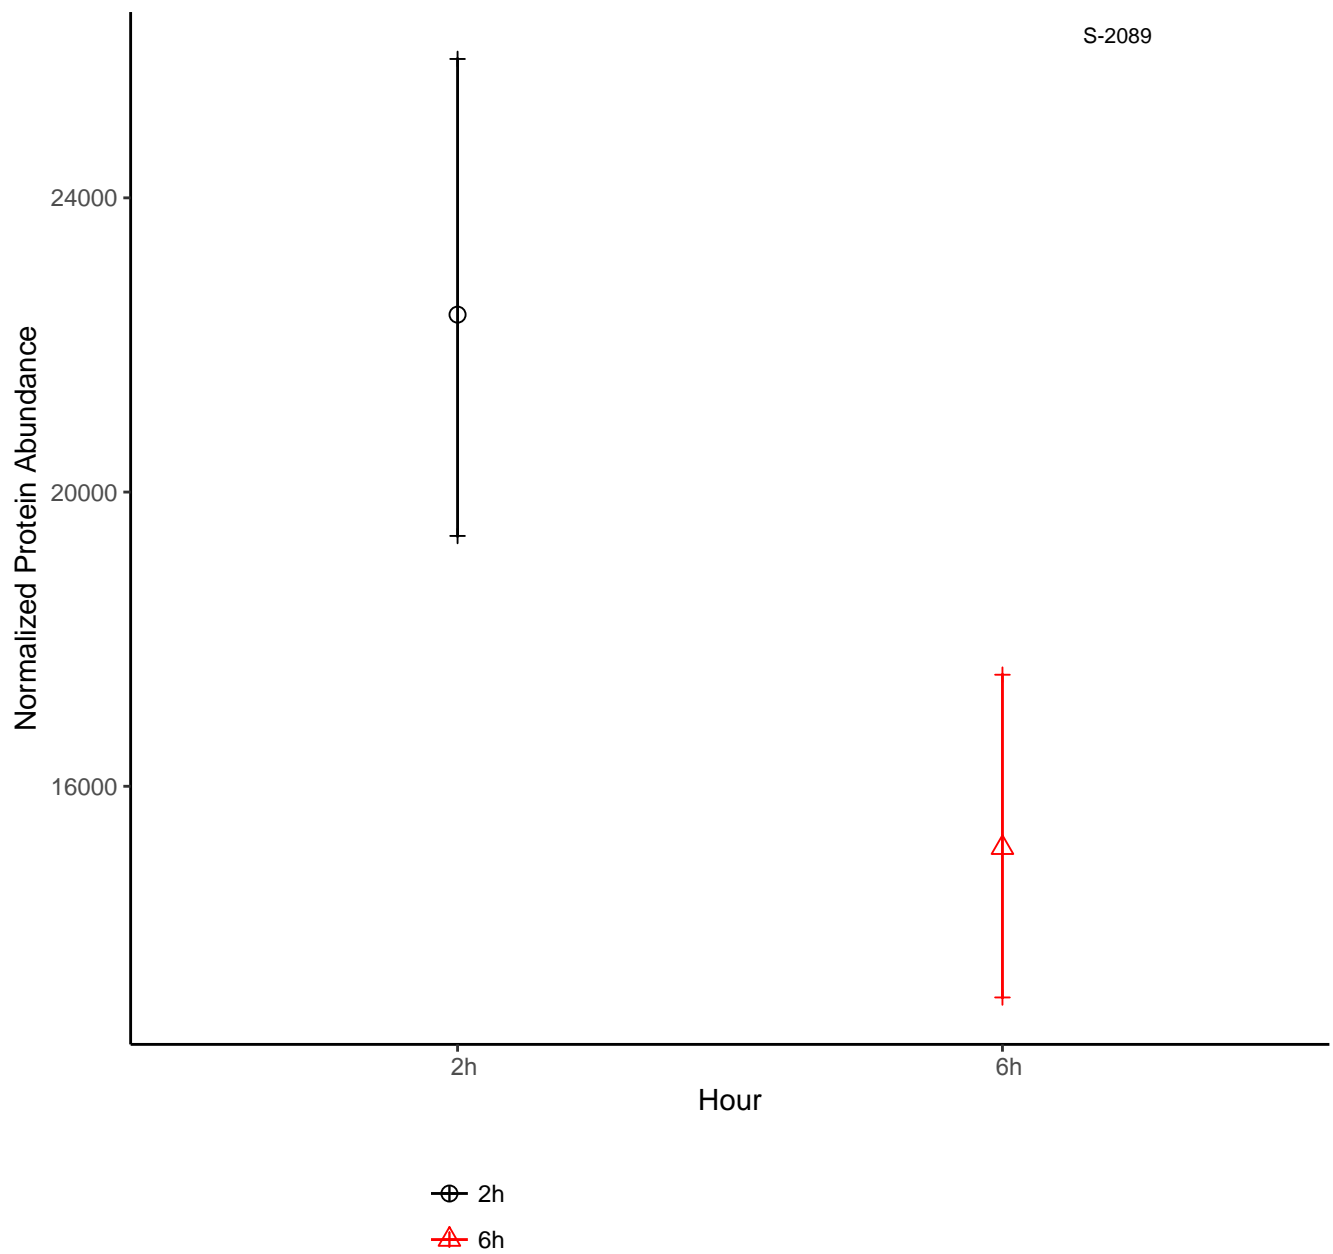

# DNAA\_STAAM

S-2090

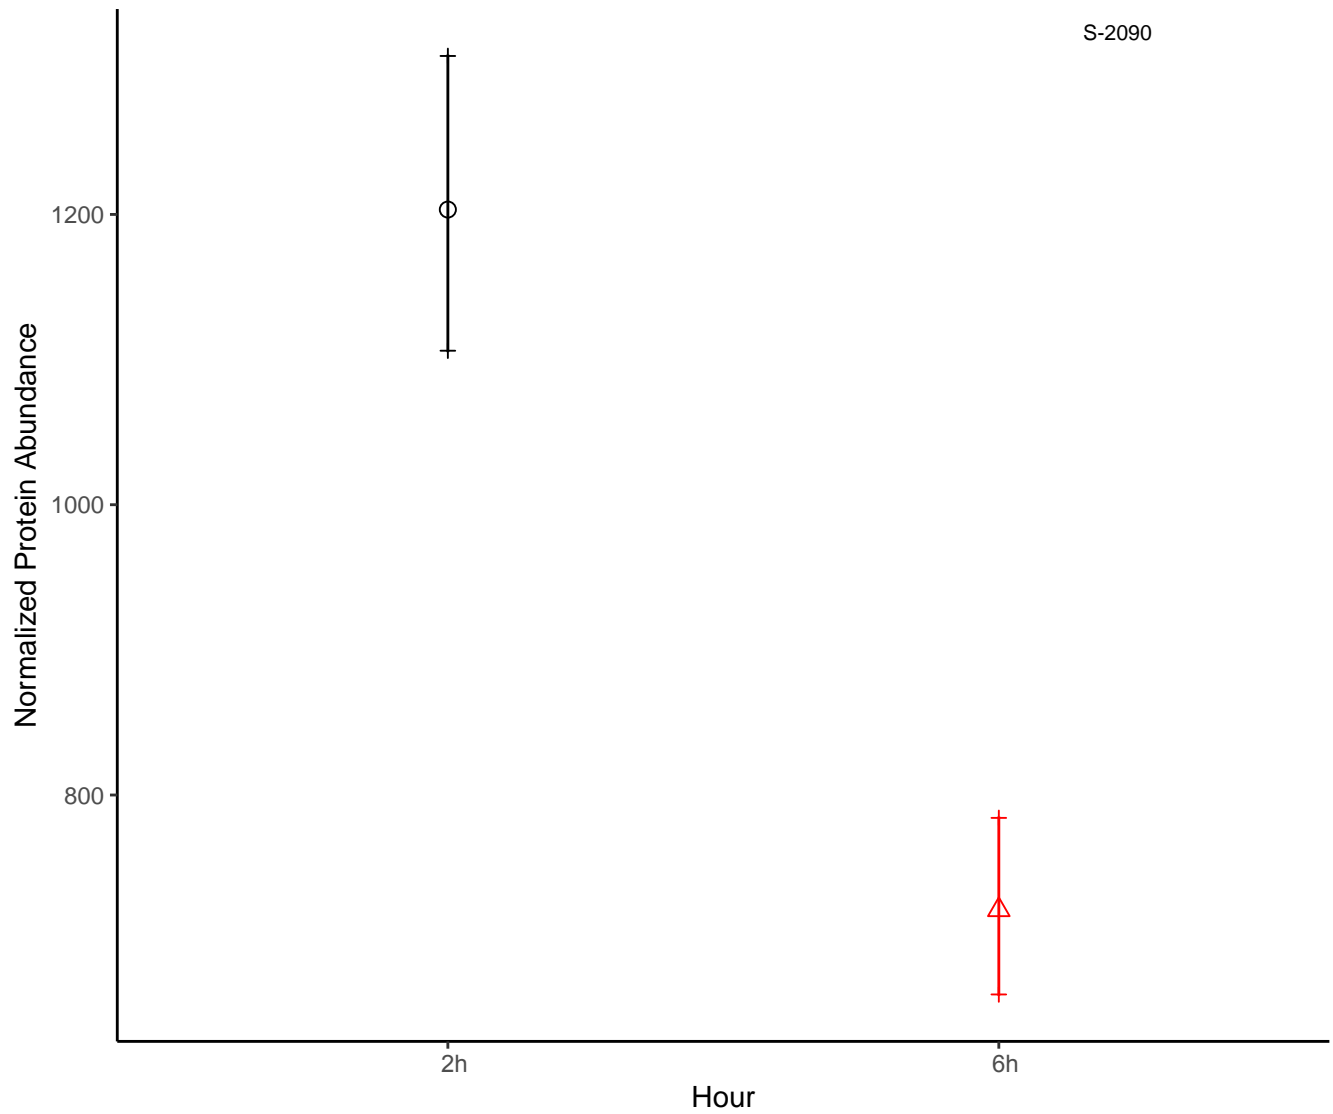

⊕ 2h

△ 6h

# DNAG\_STAAM

S-2091

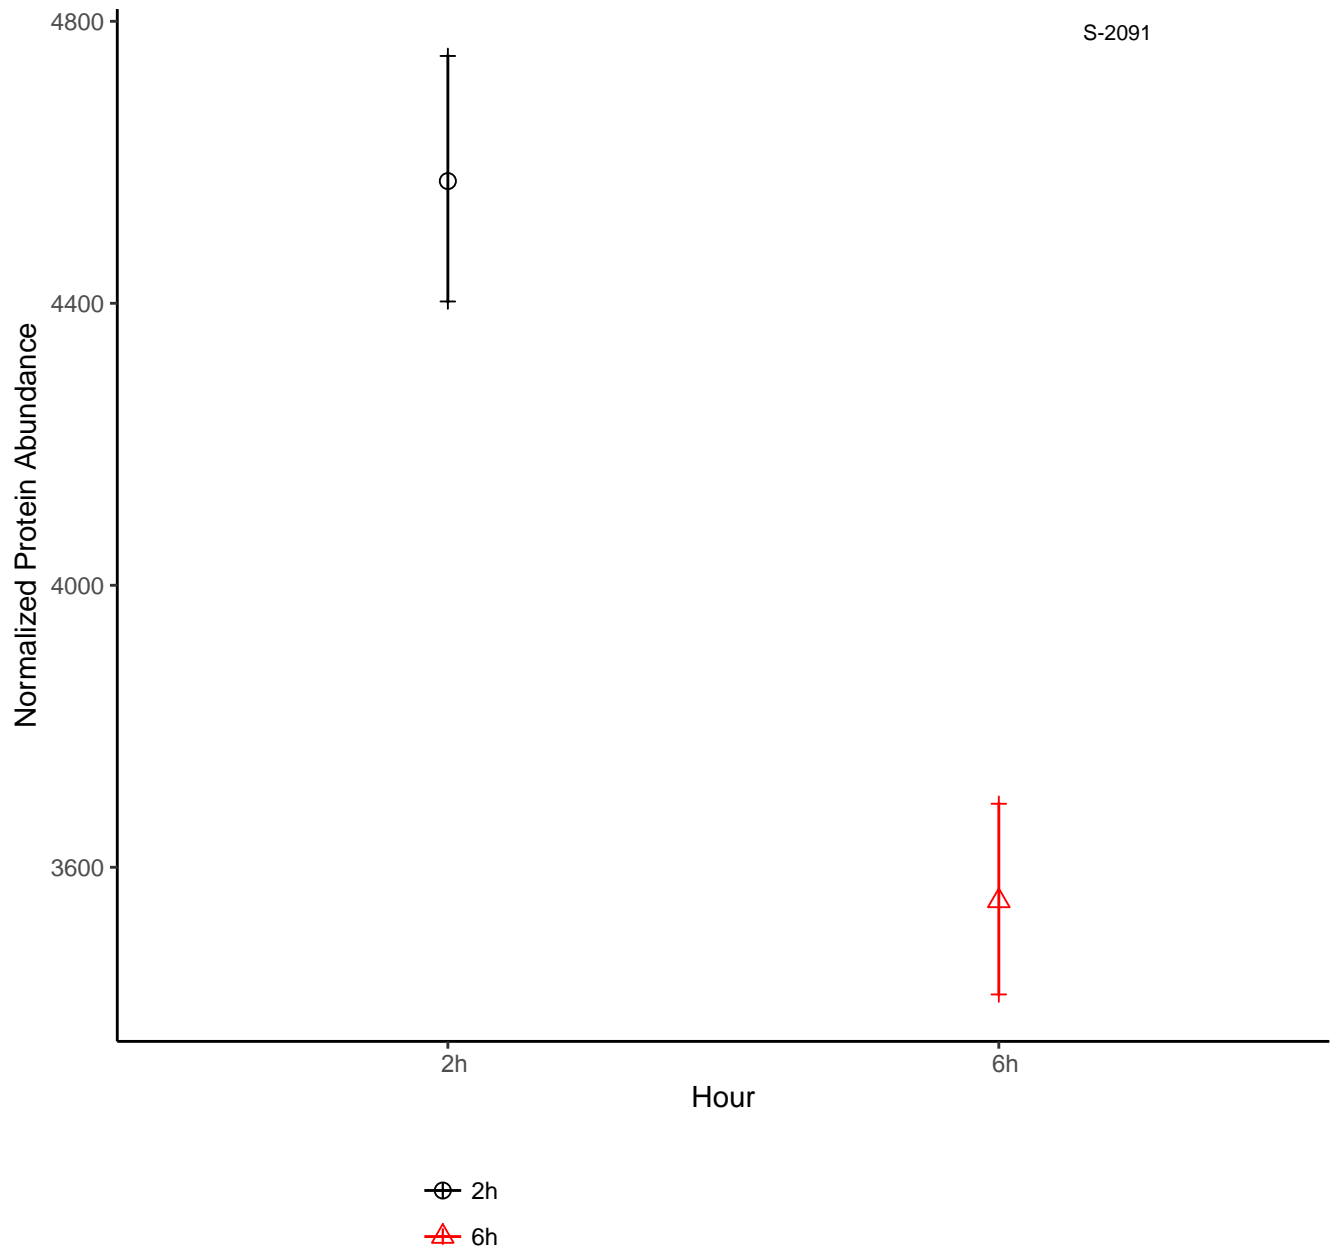

# DNAJ\_STAAM

S-2092

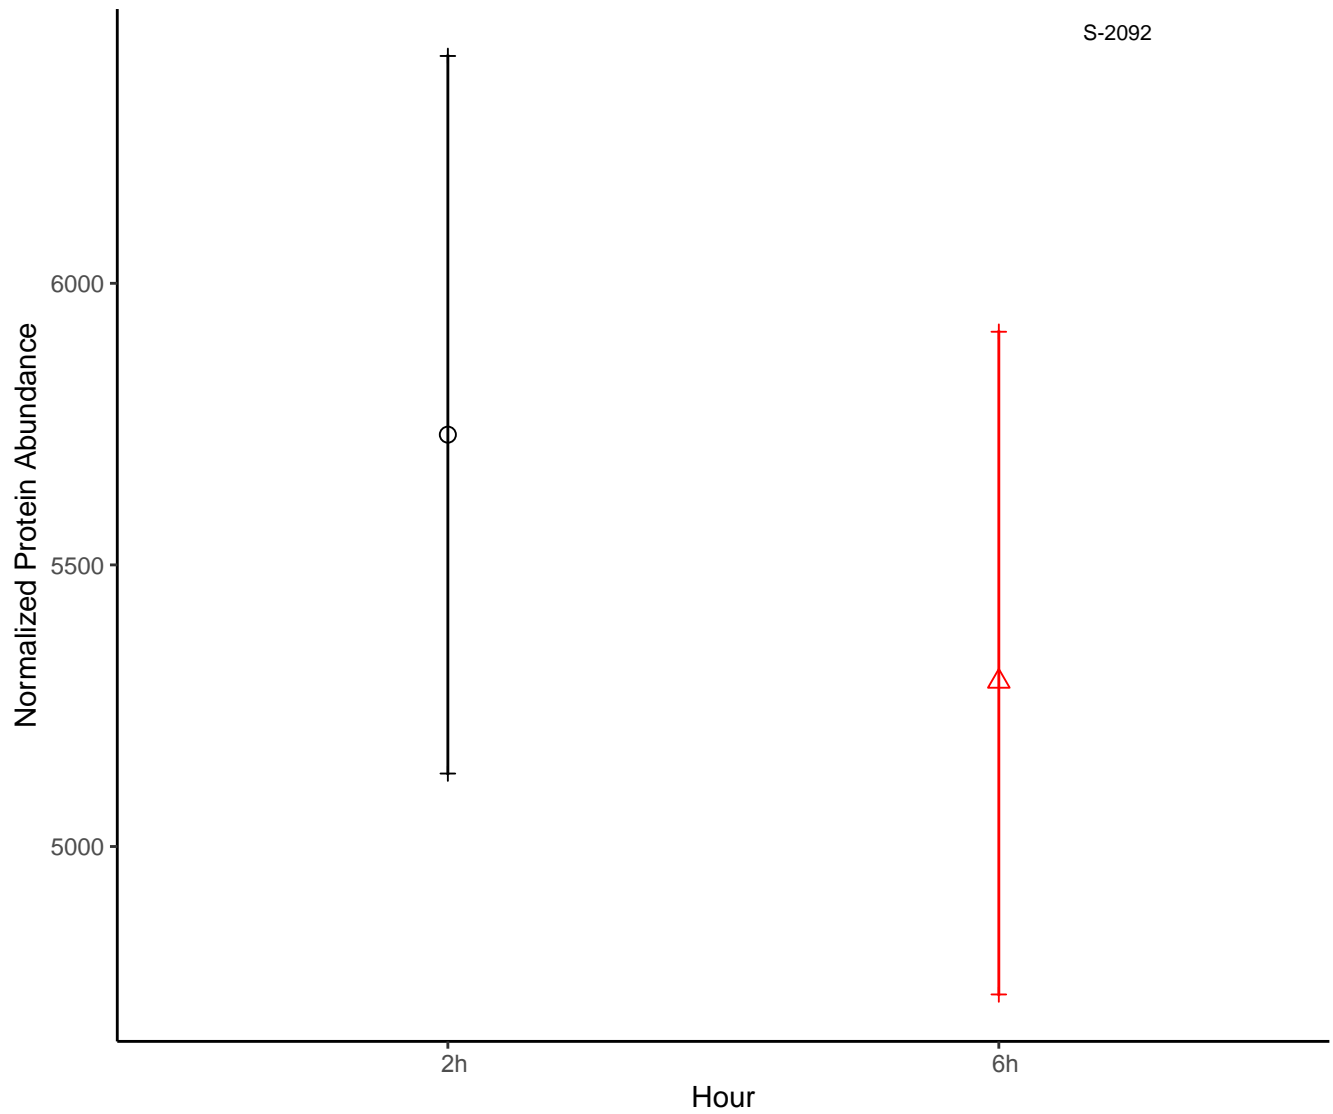

⊕ 2h

△ 6h

# DNAK\_STAAM

S-2093

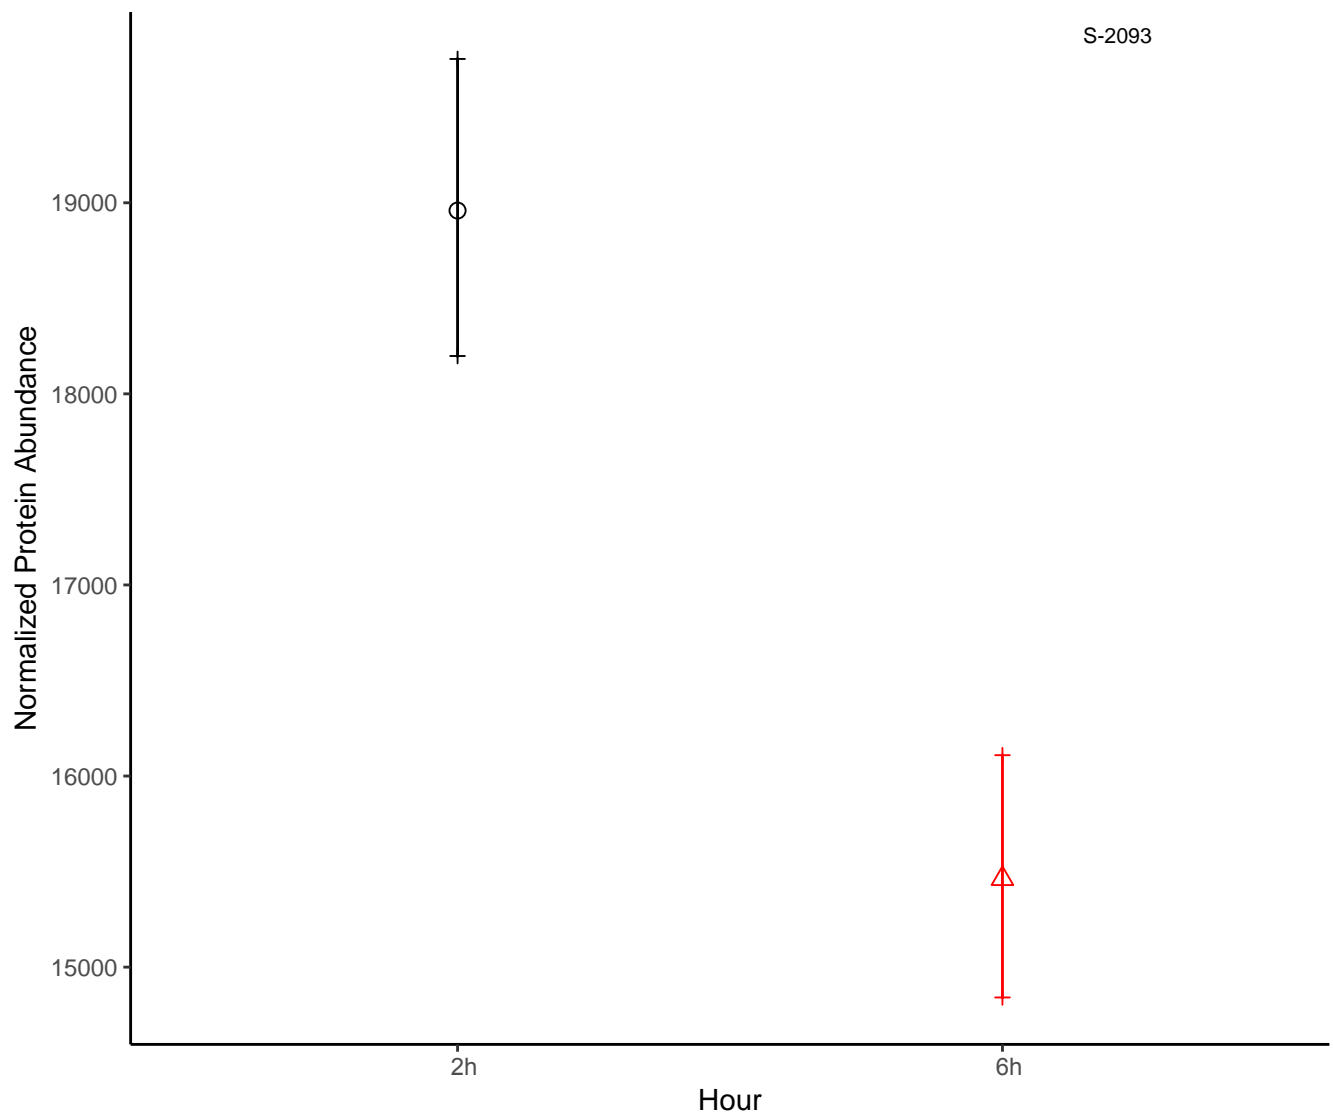

⊕ 2h

△ 6h

# DNLJ\_STAAM

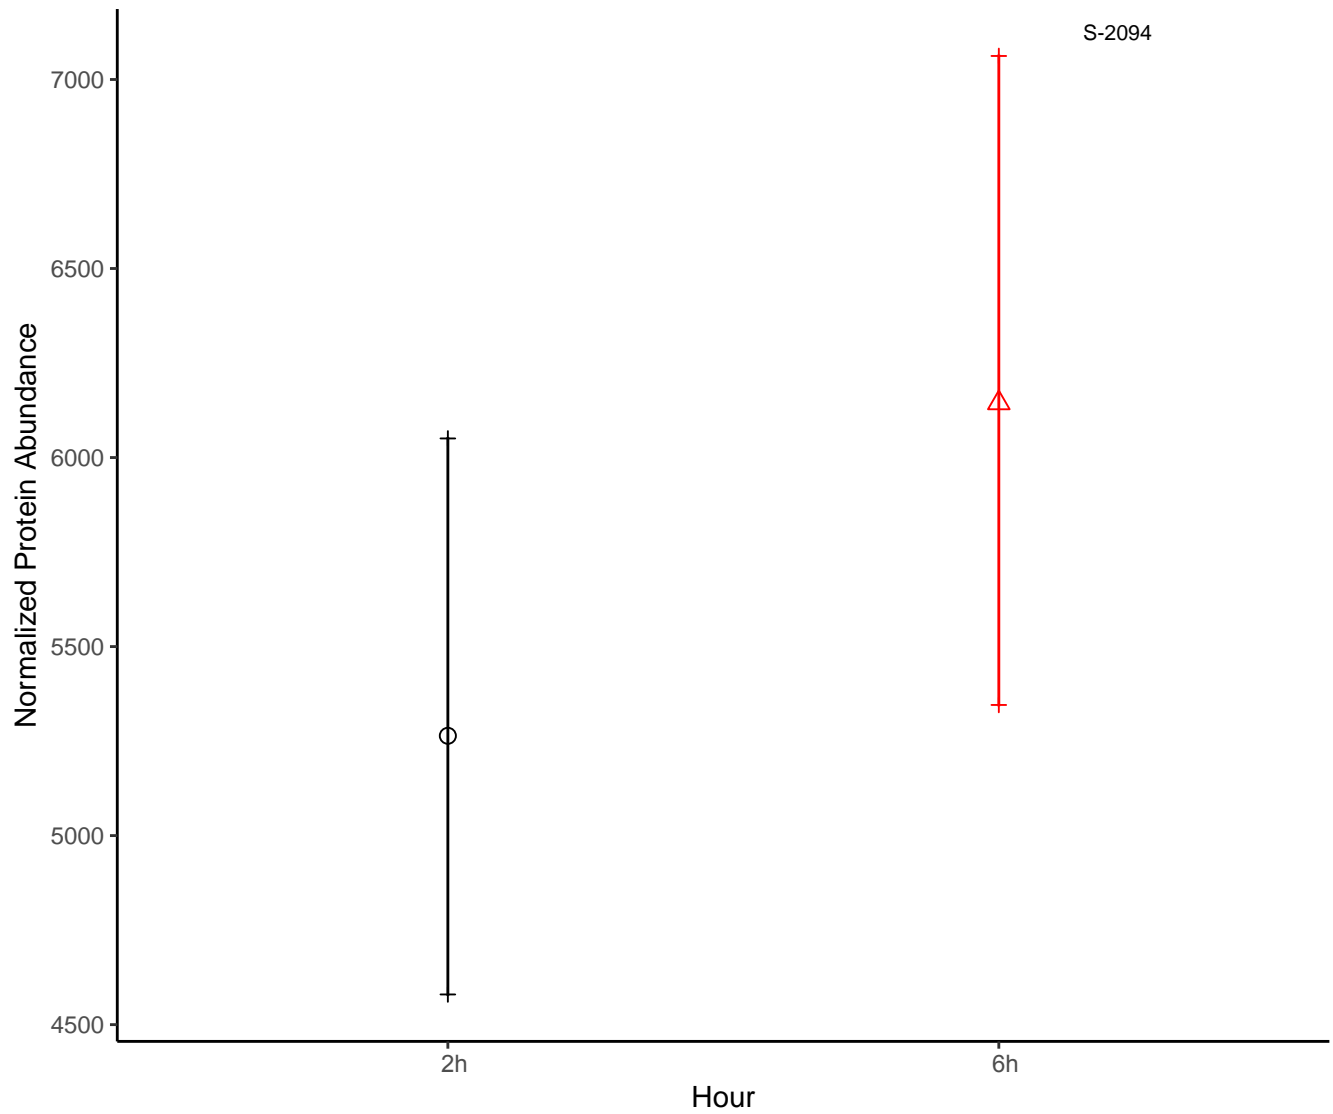

⊕ 2h

△ 6h

# DPO3B\_STAAM

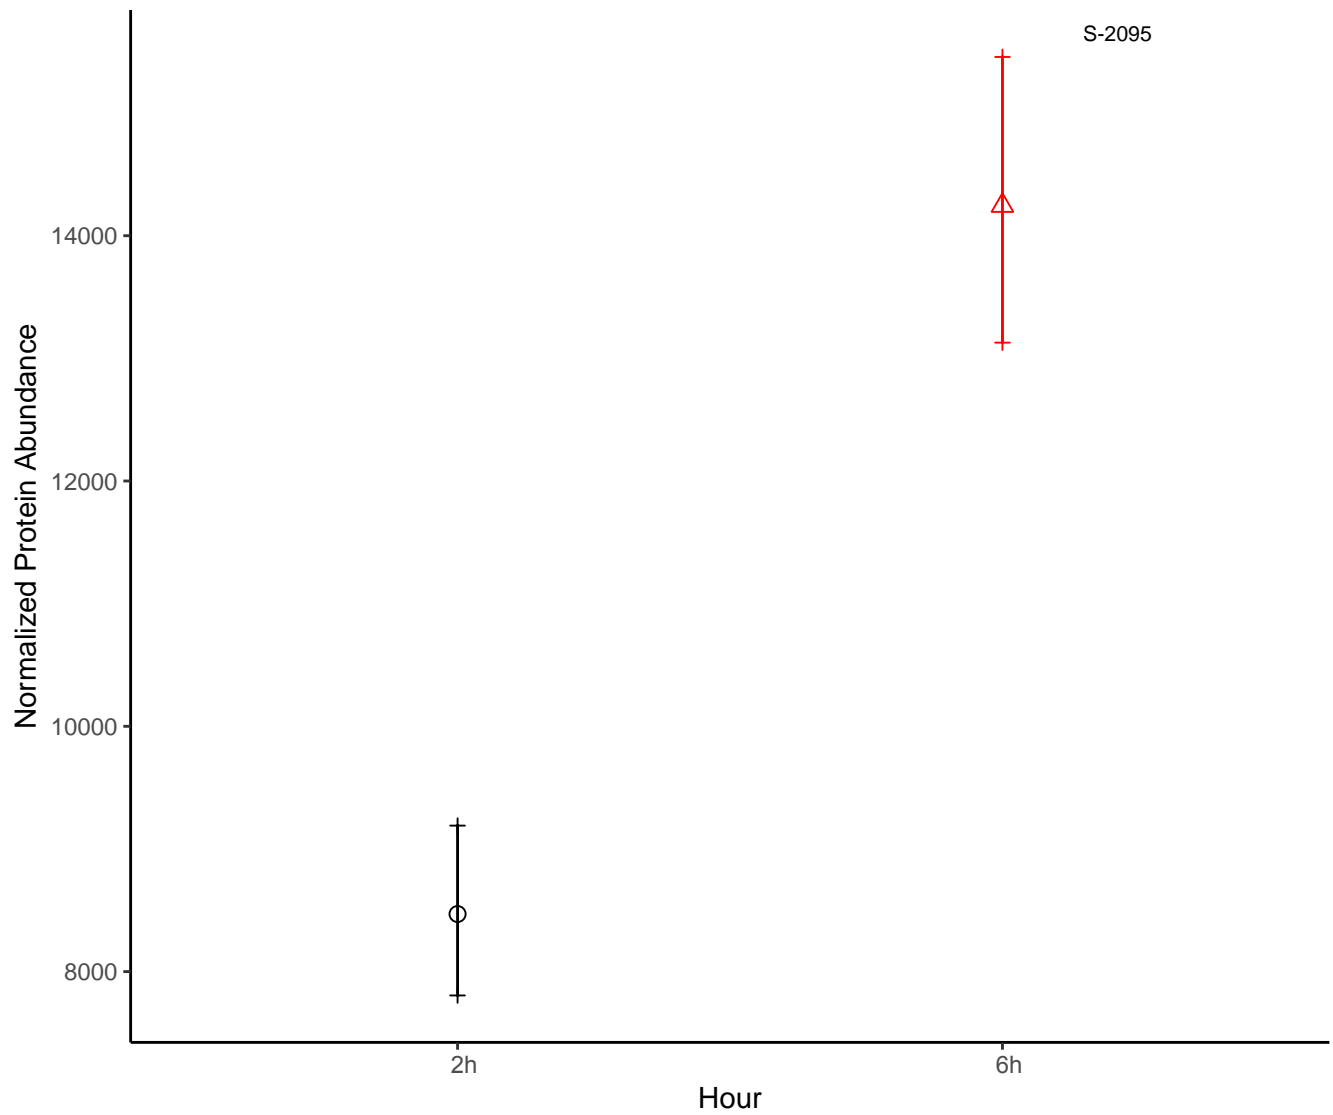

⊕ 2h

△ 6h

# DPO4\_STAAM

S-2096

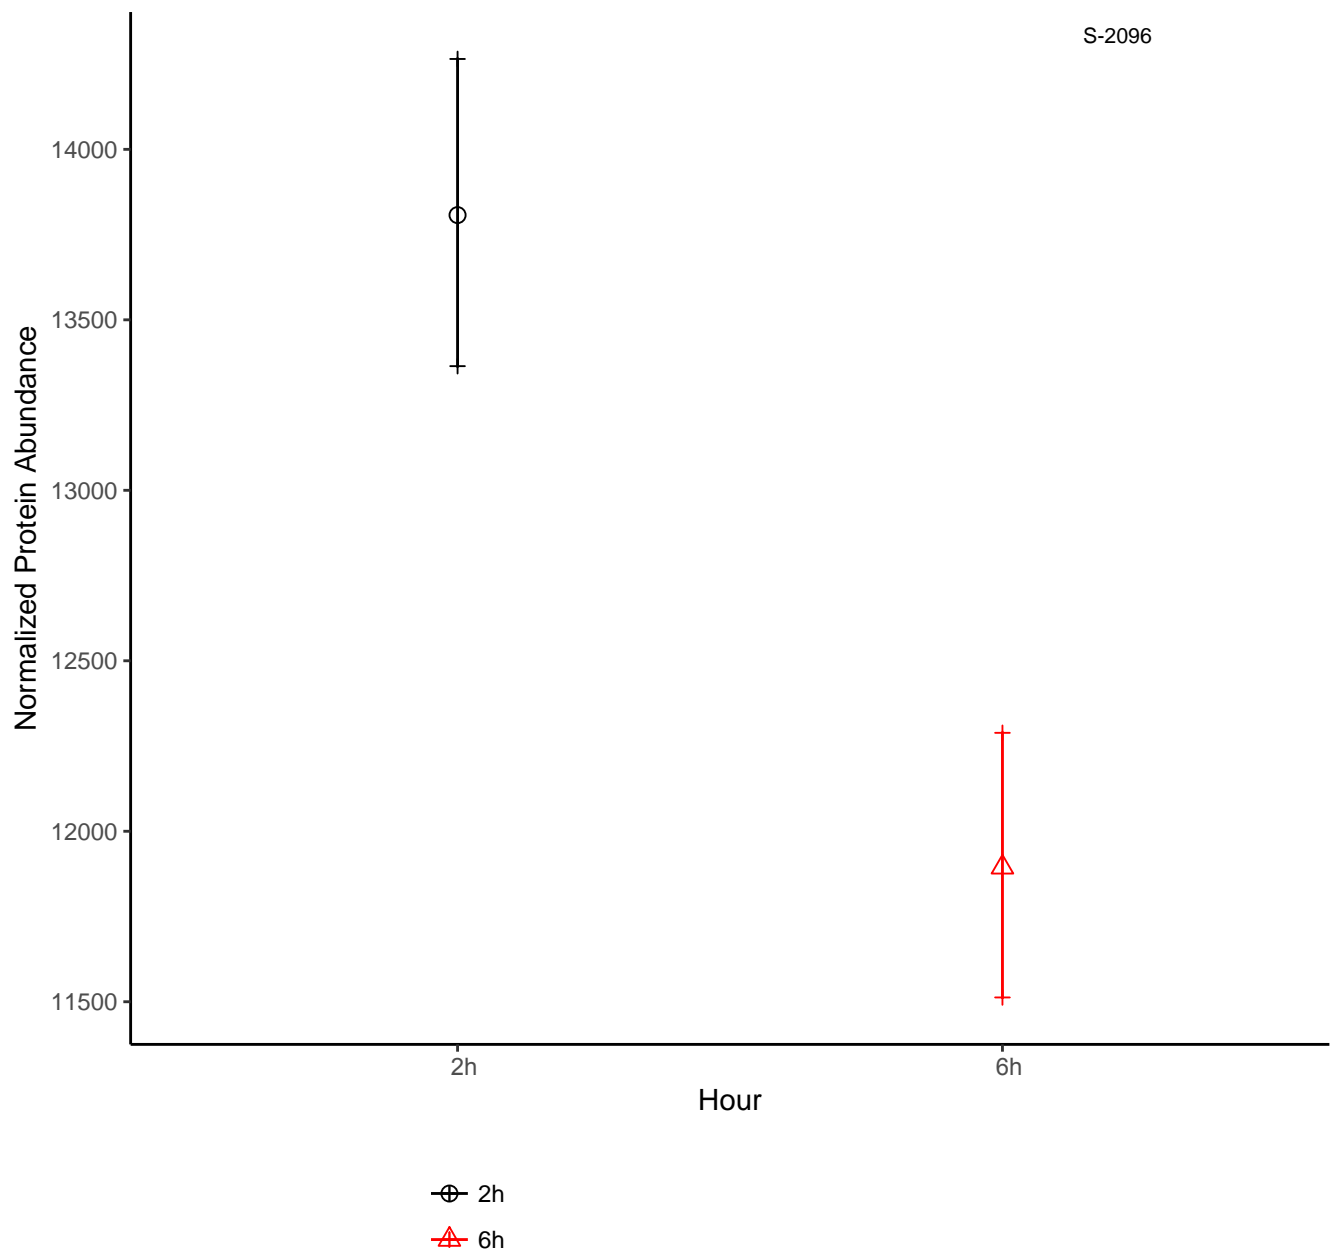



# DTD\_STAAM

S-2097

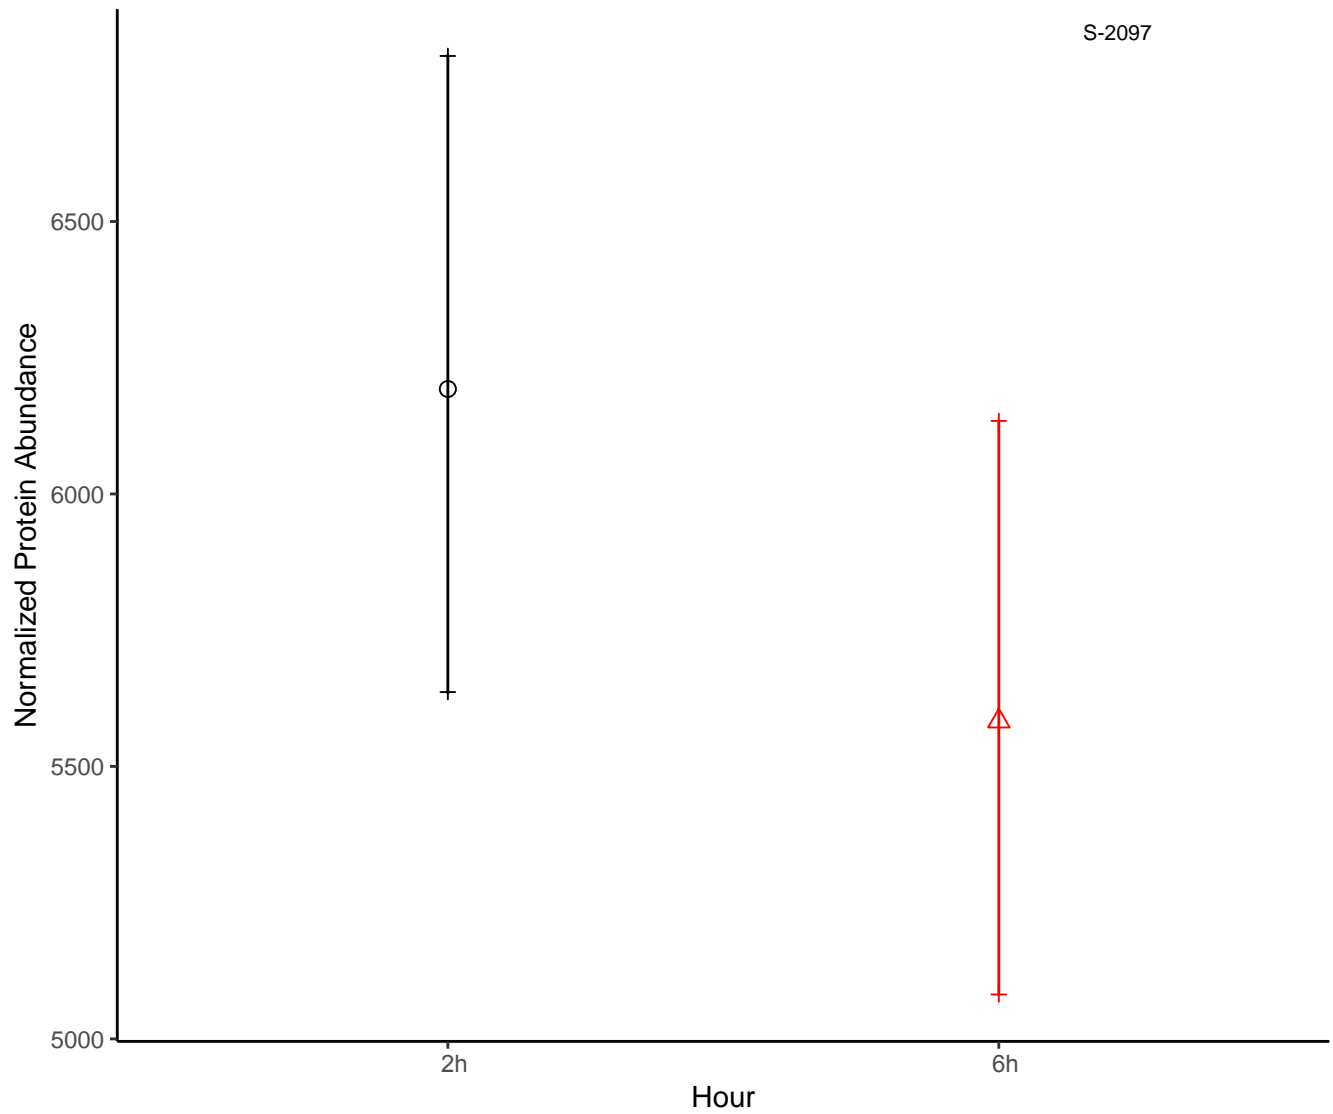

⊕ 2h

△ 6h

# DYR\_STAAM

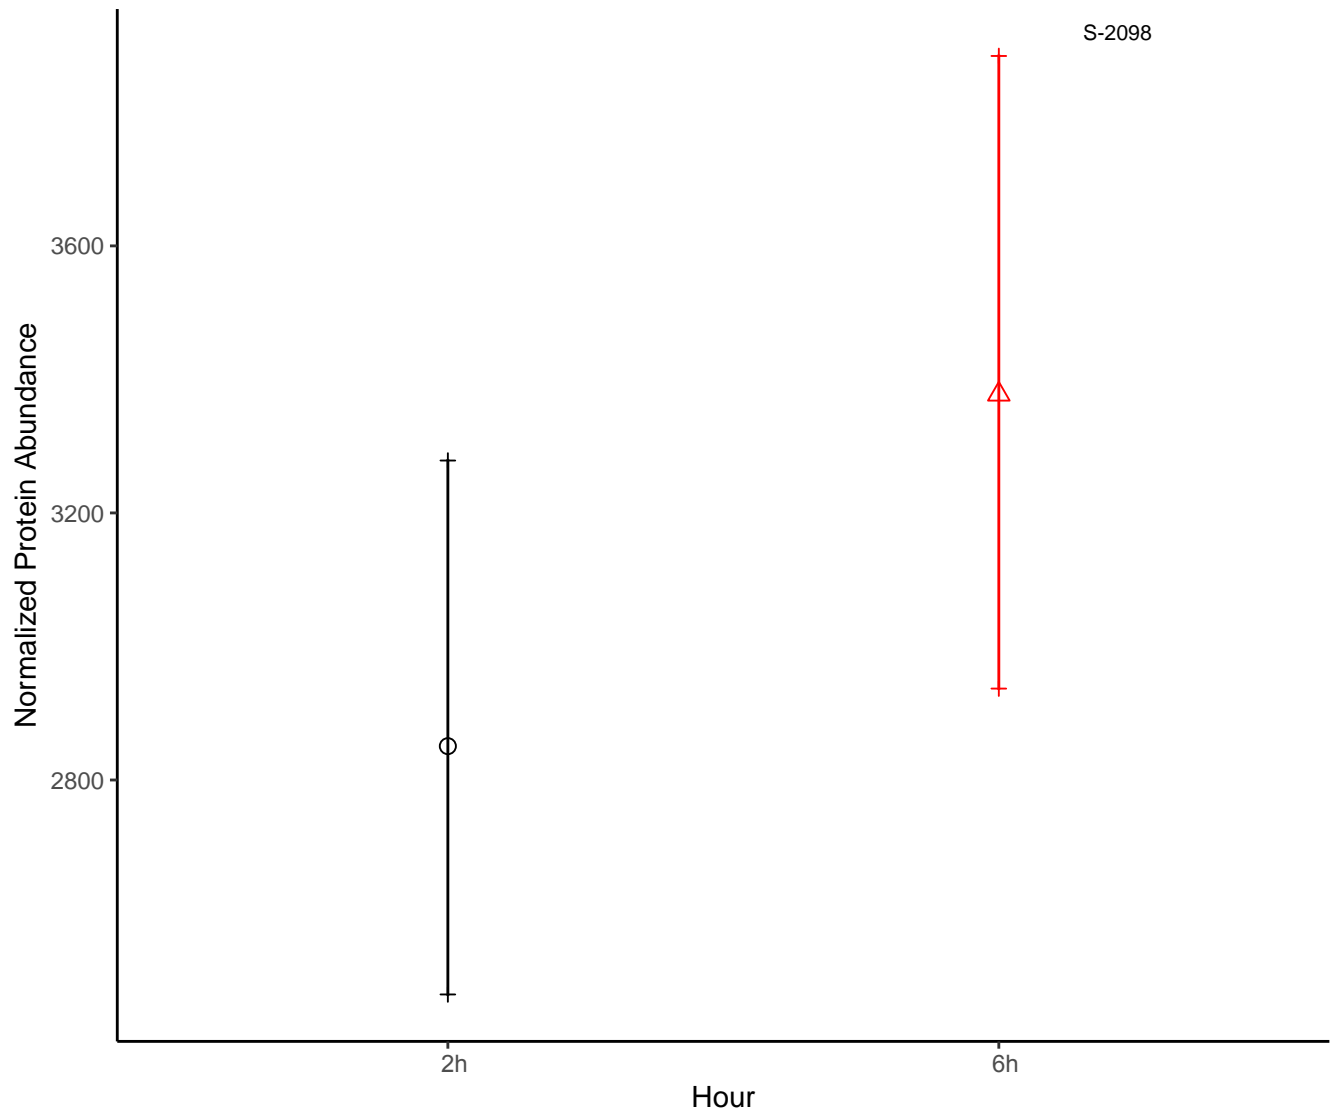

⊕ 2h

△ 6h

# EBPS\_STAAM

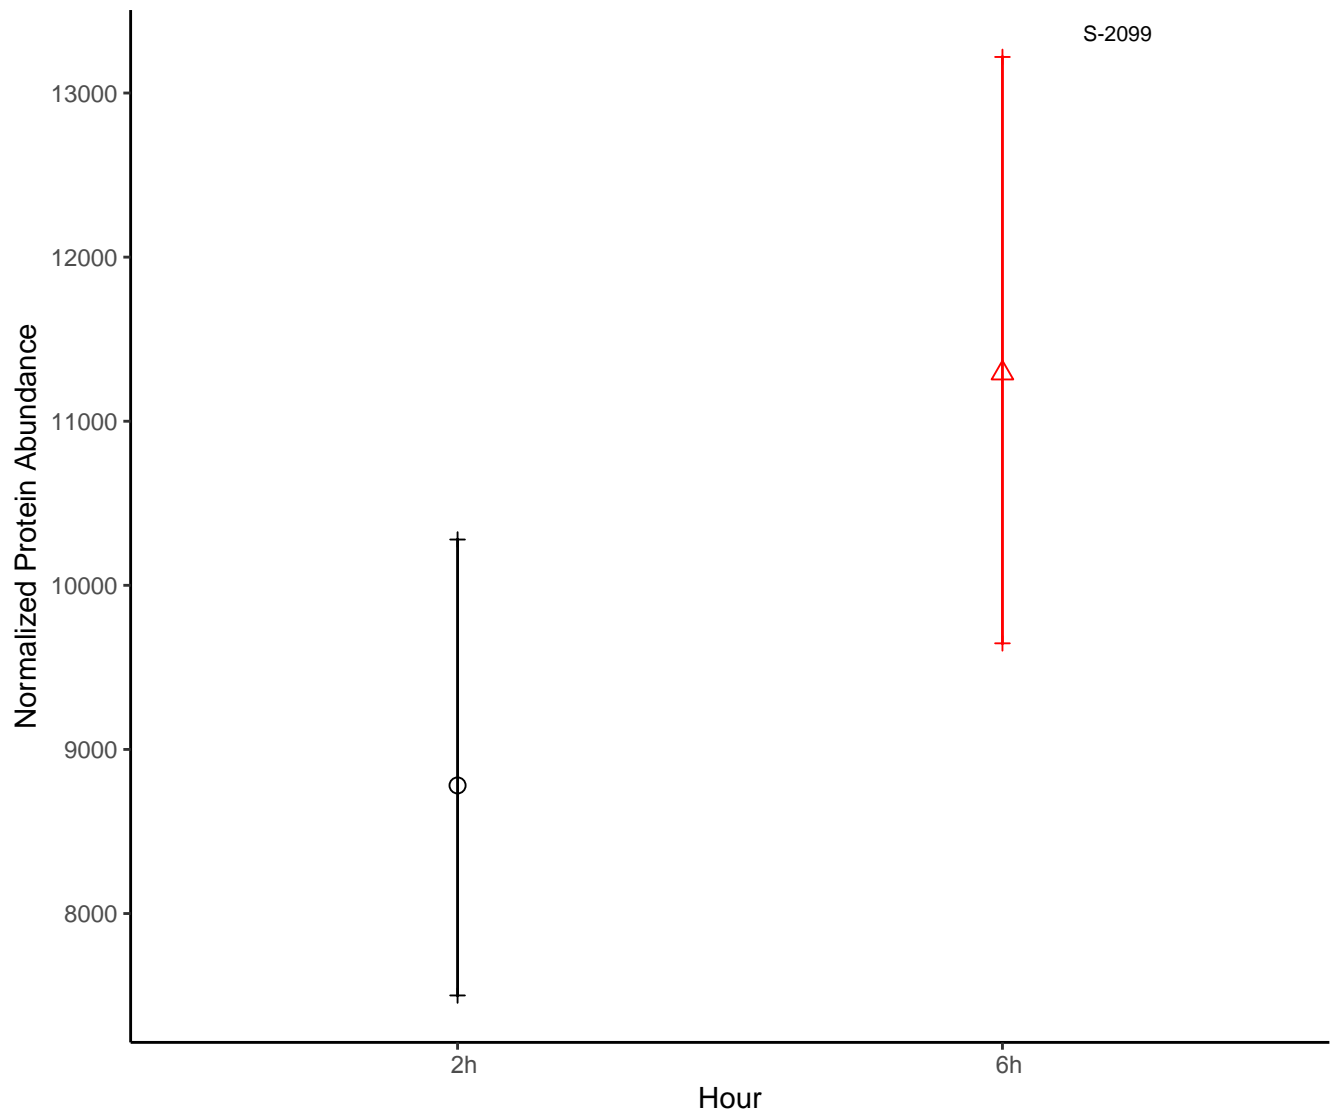

S-2099

⊕ 2h

△ 6h

# ECFA1\_STAAM

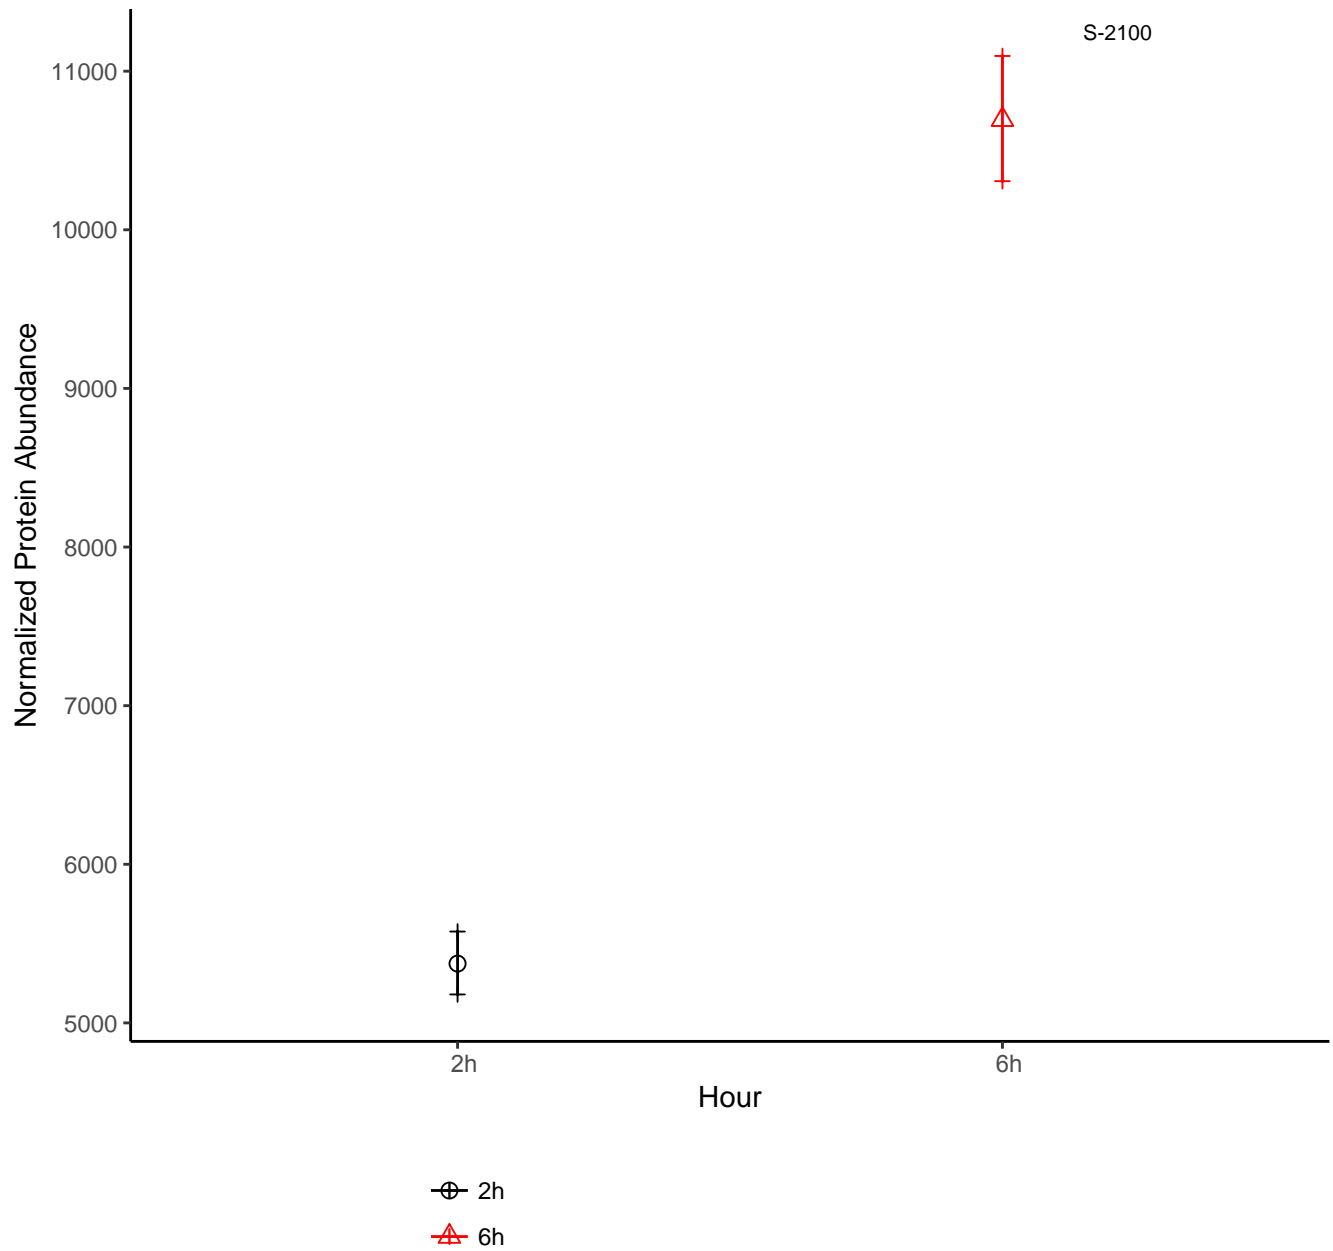

# EFG\_STAAM

S-2101

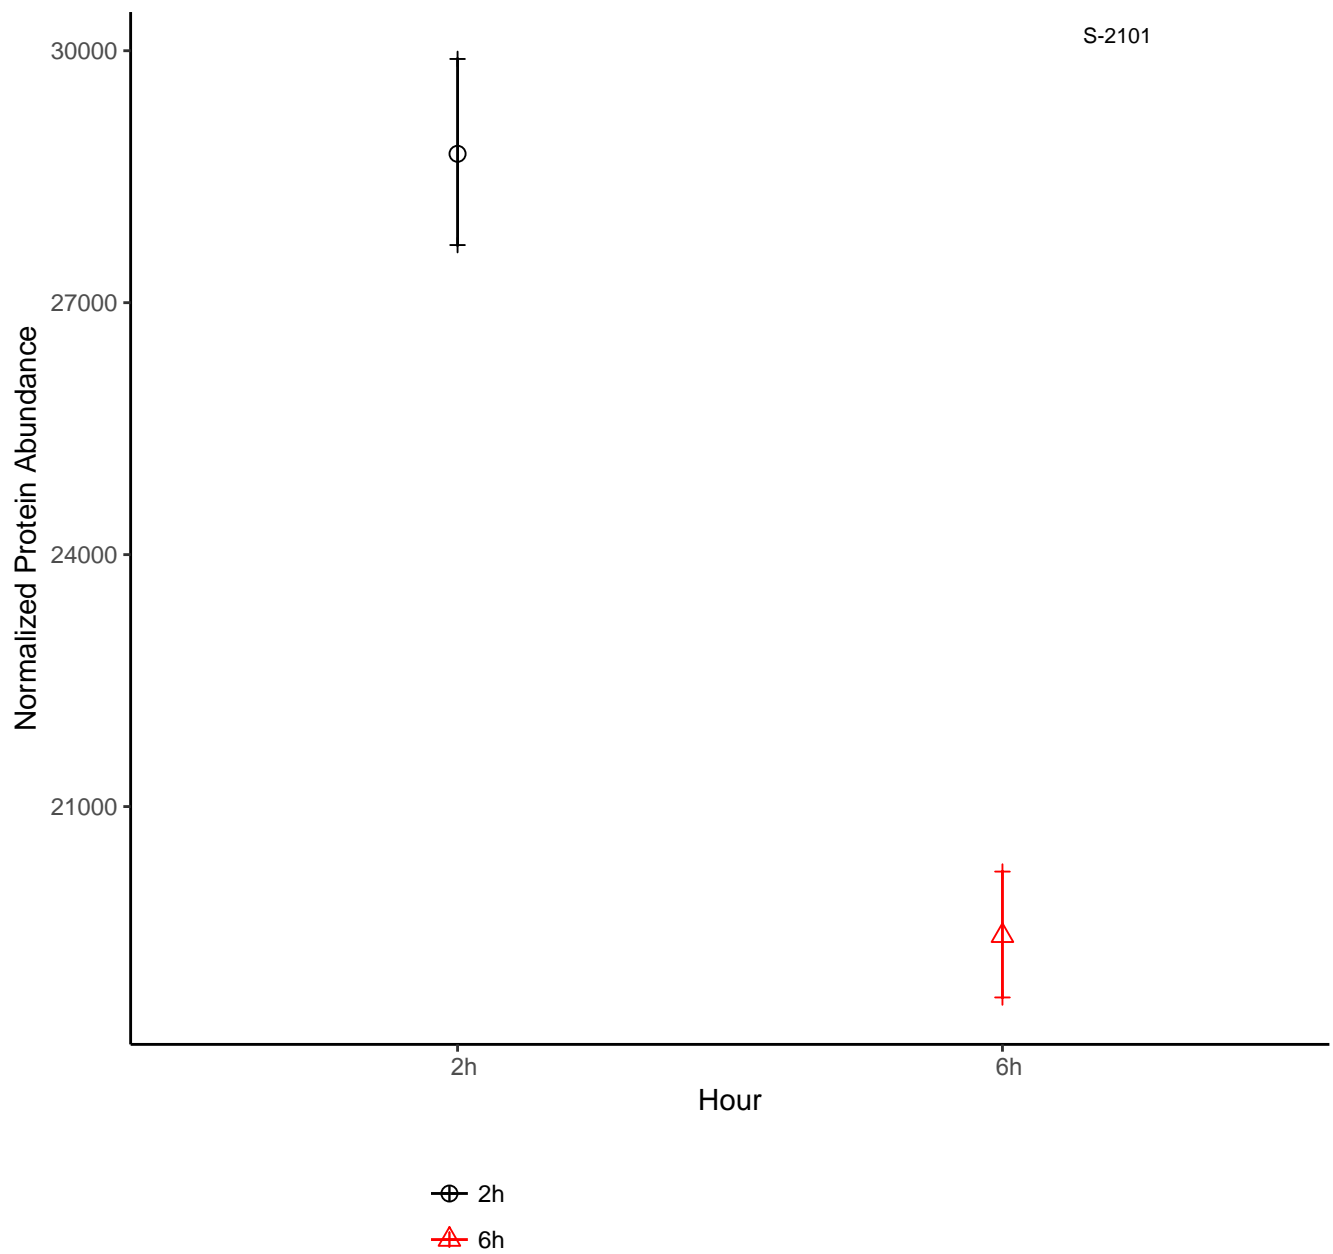

# EFP\_STAAM

S-2102

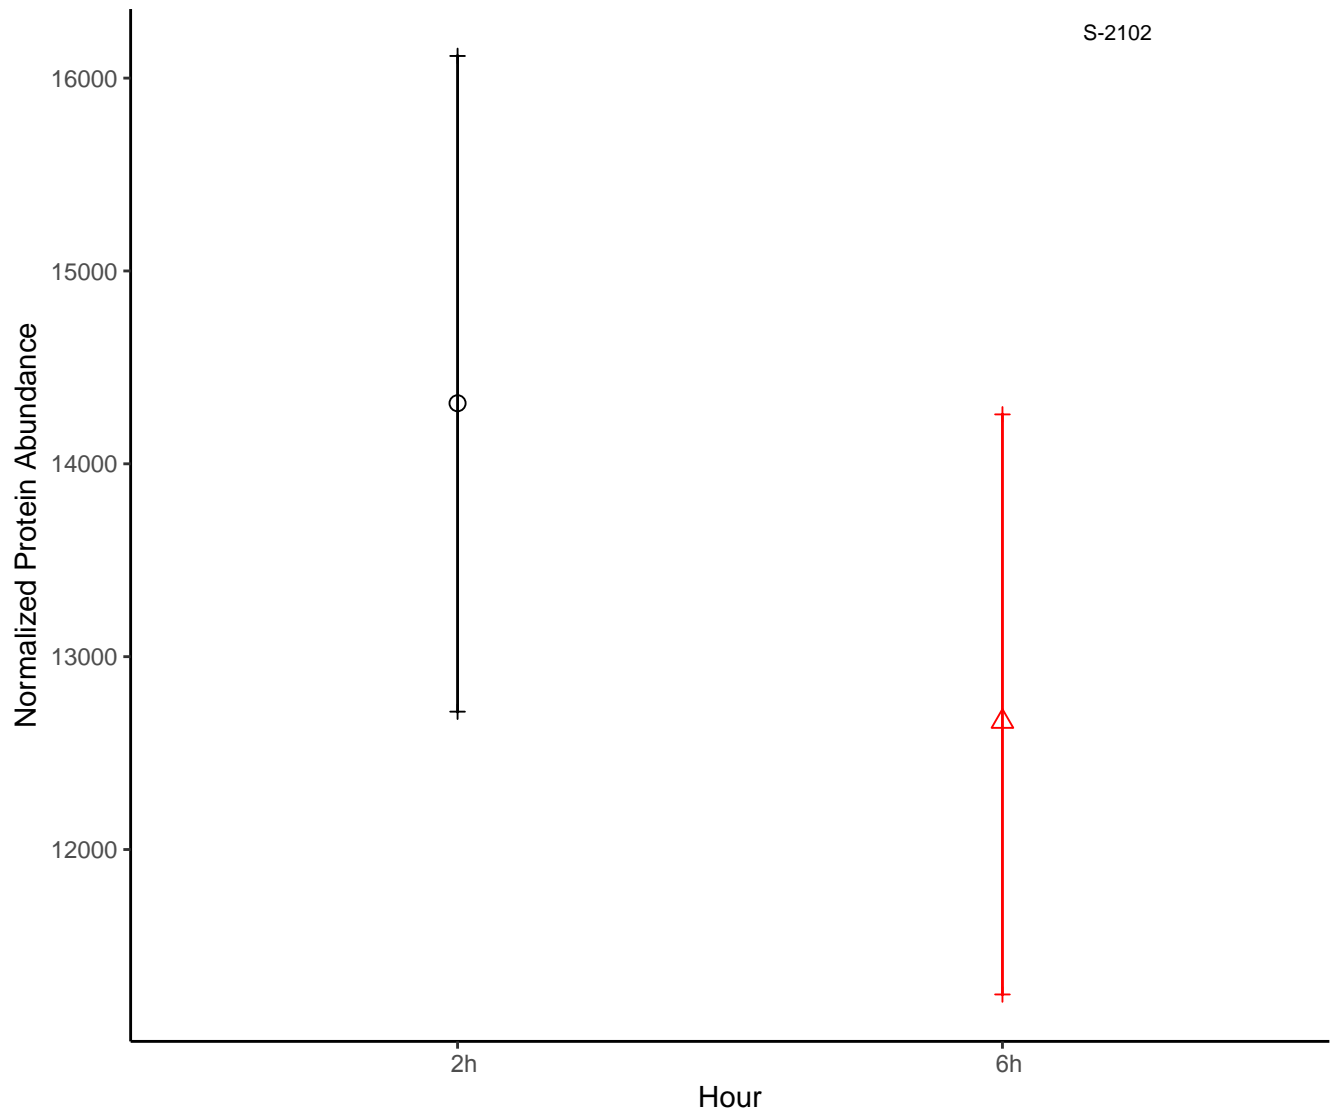

⊕ 2h

△ 6h

# EFTS\_STAAM

S-2103

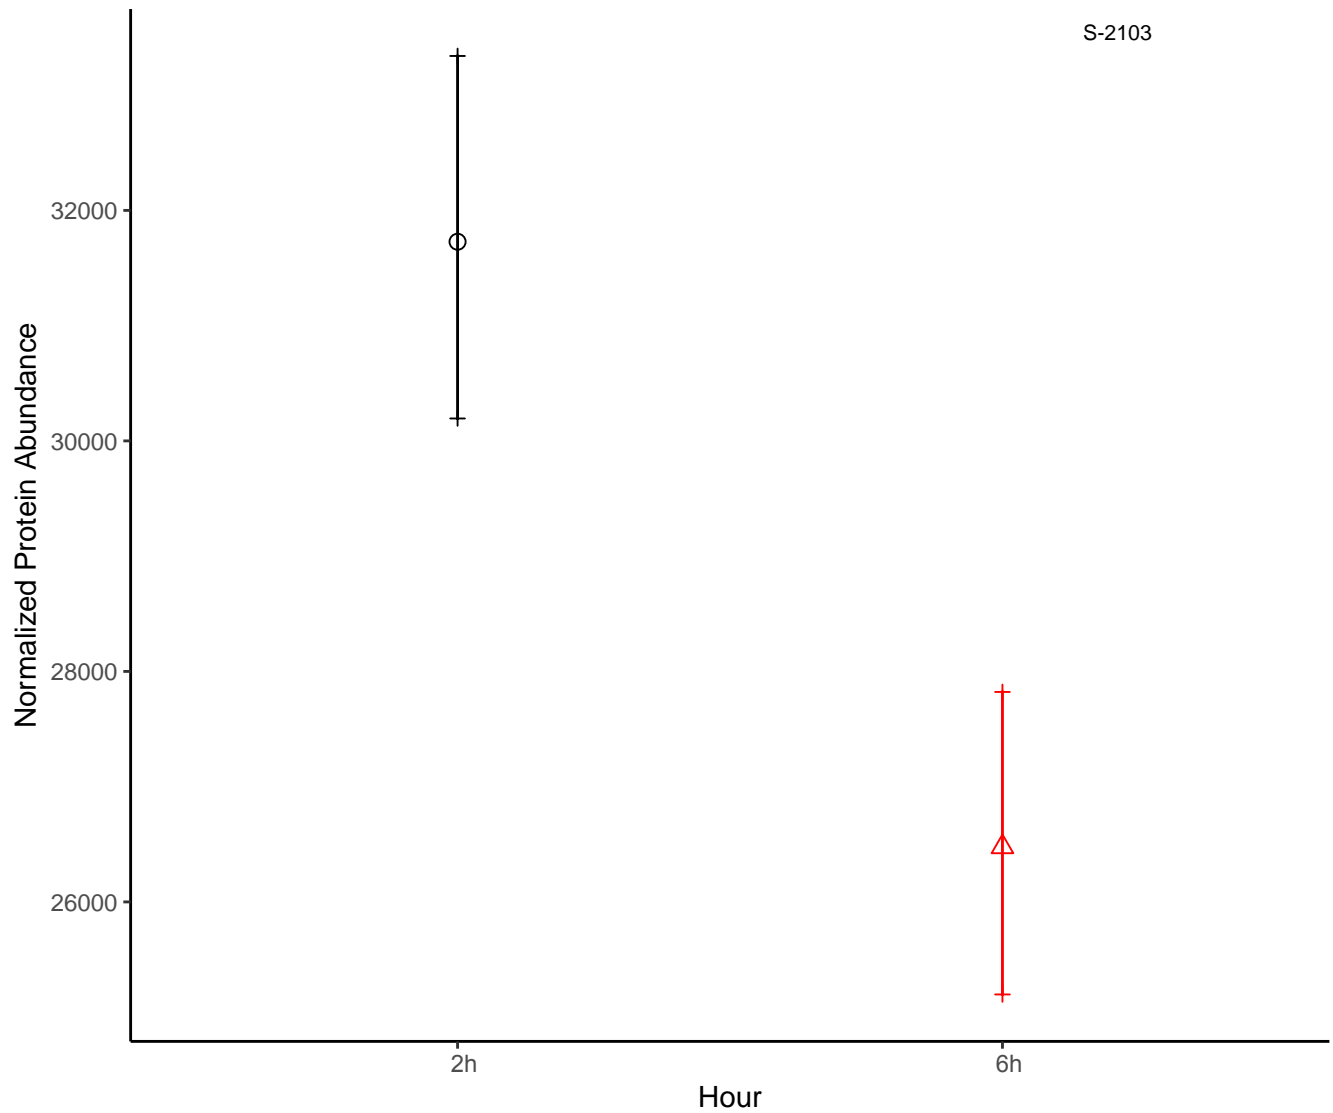

⊕ 2h

△ 6h

# EFTU\_STAAM

S-2104

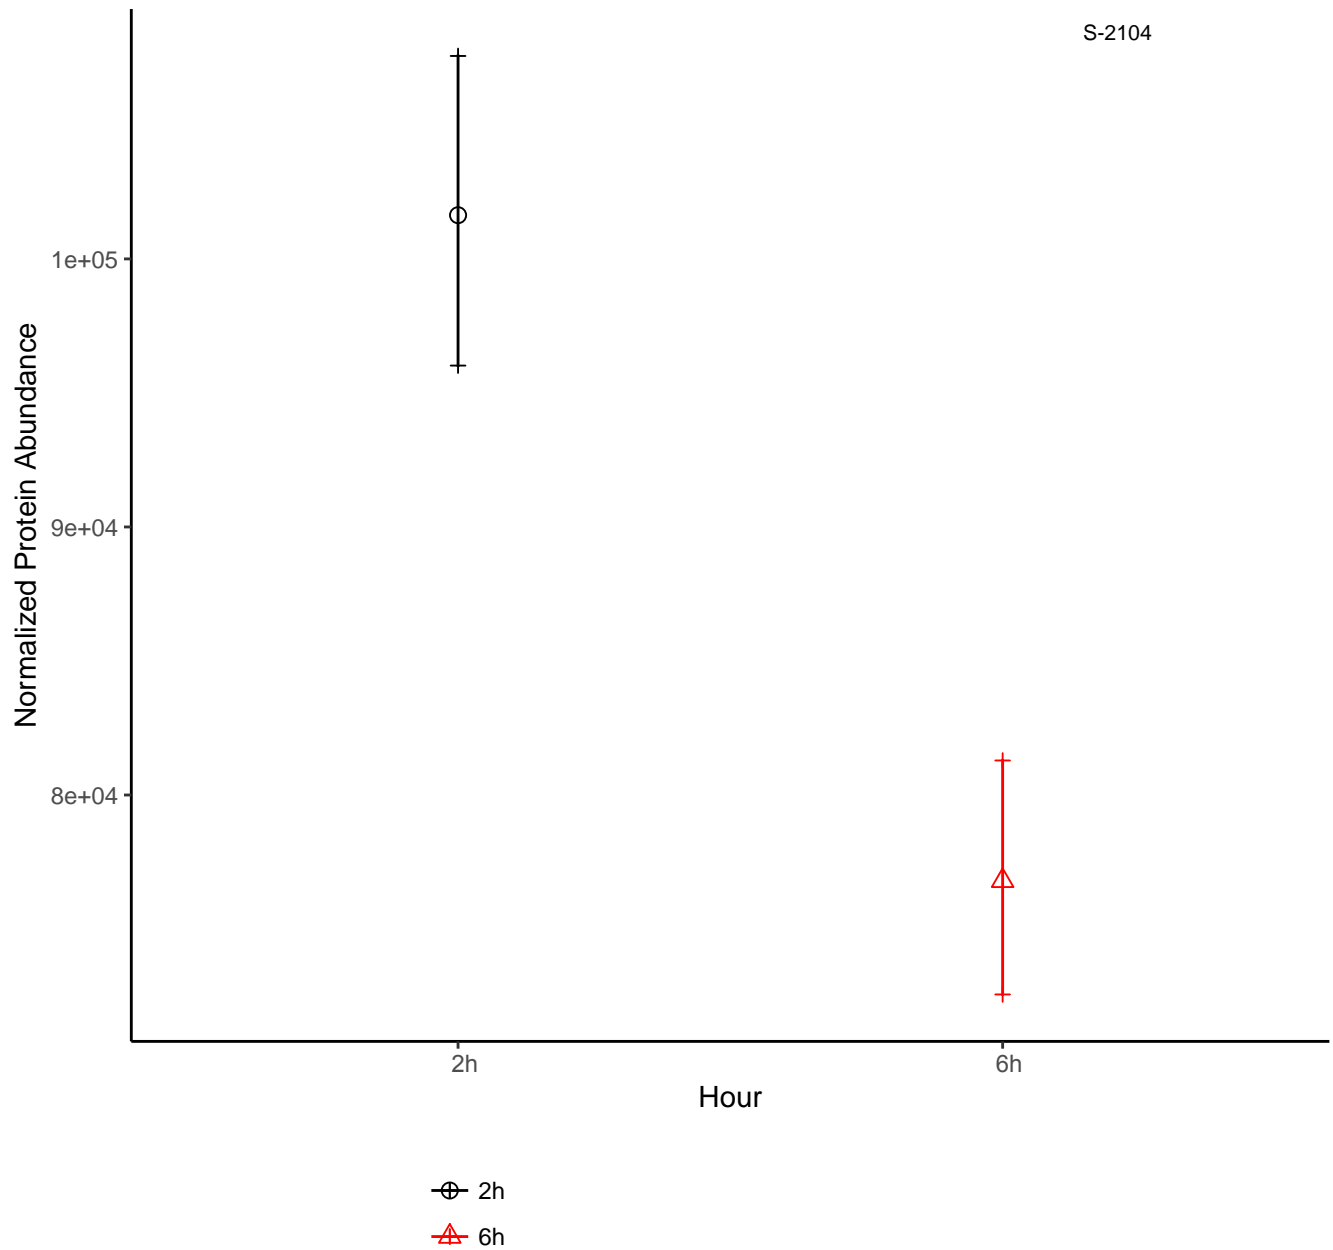



# ENO\_STAAM

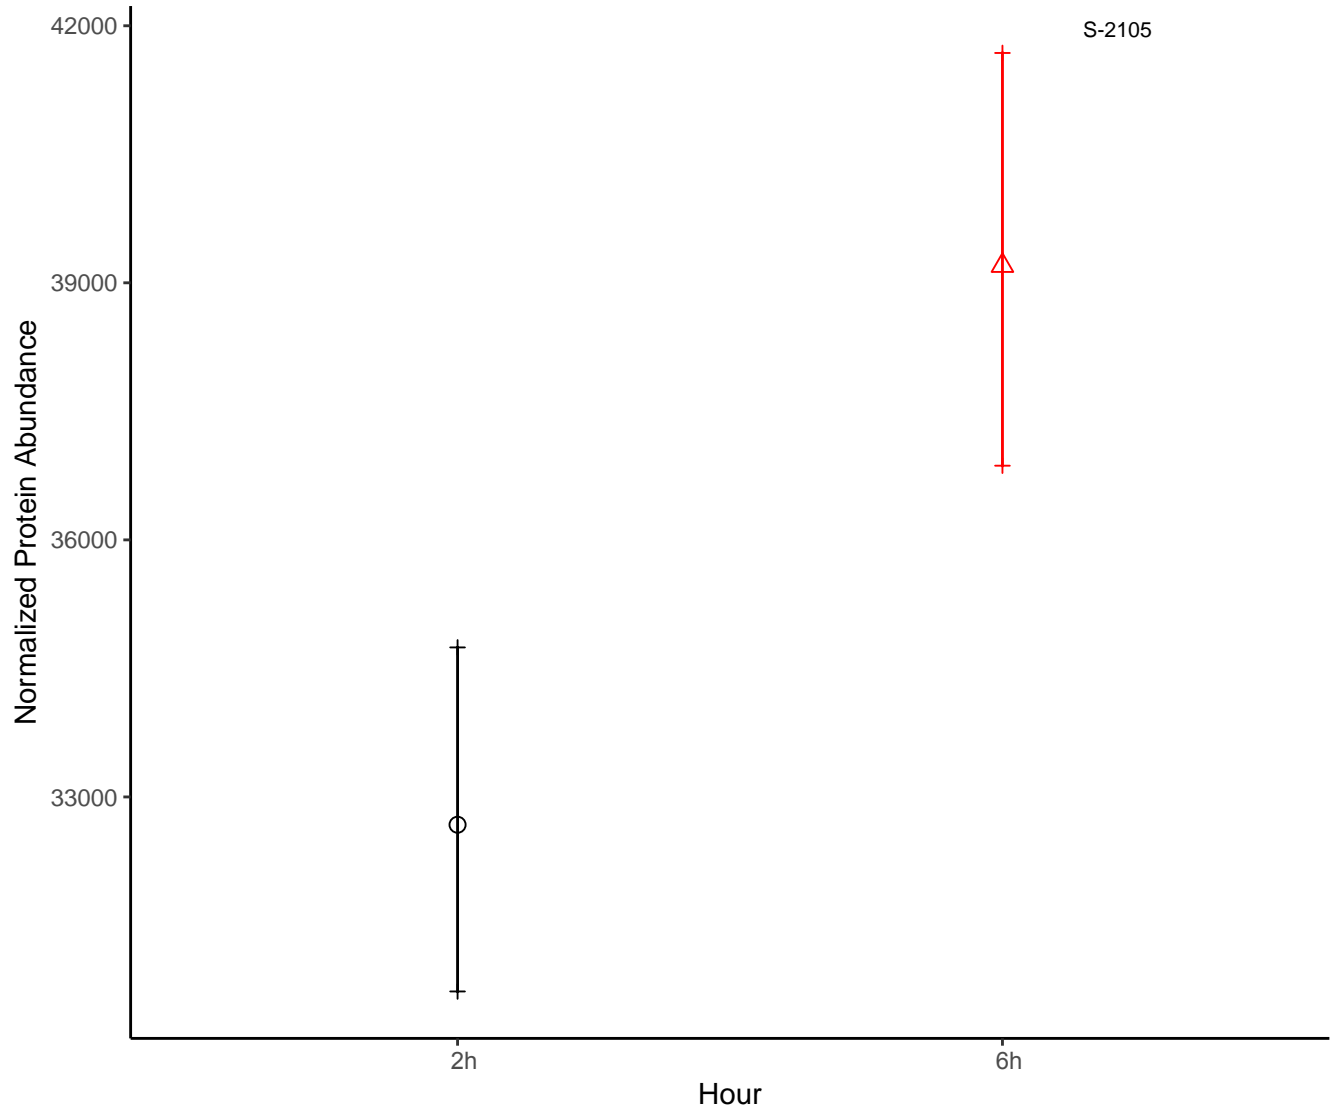

⊕ 2h

△ 6h

# ERA\_STAAM

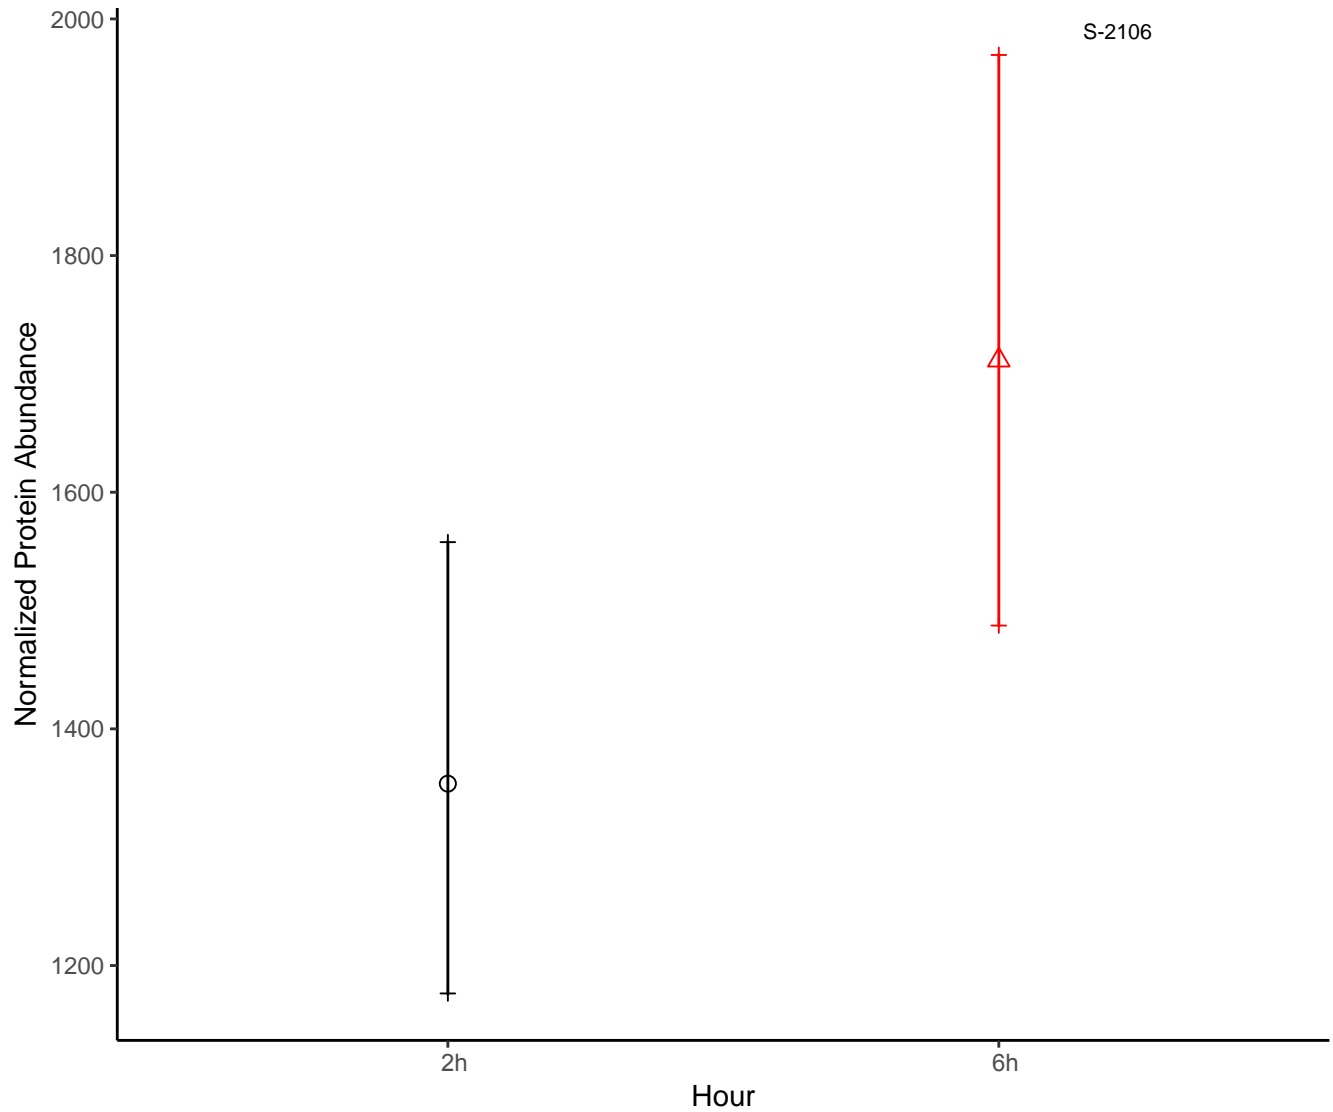

⊕ 2h

△ 6h

# ERMA\_STAAM

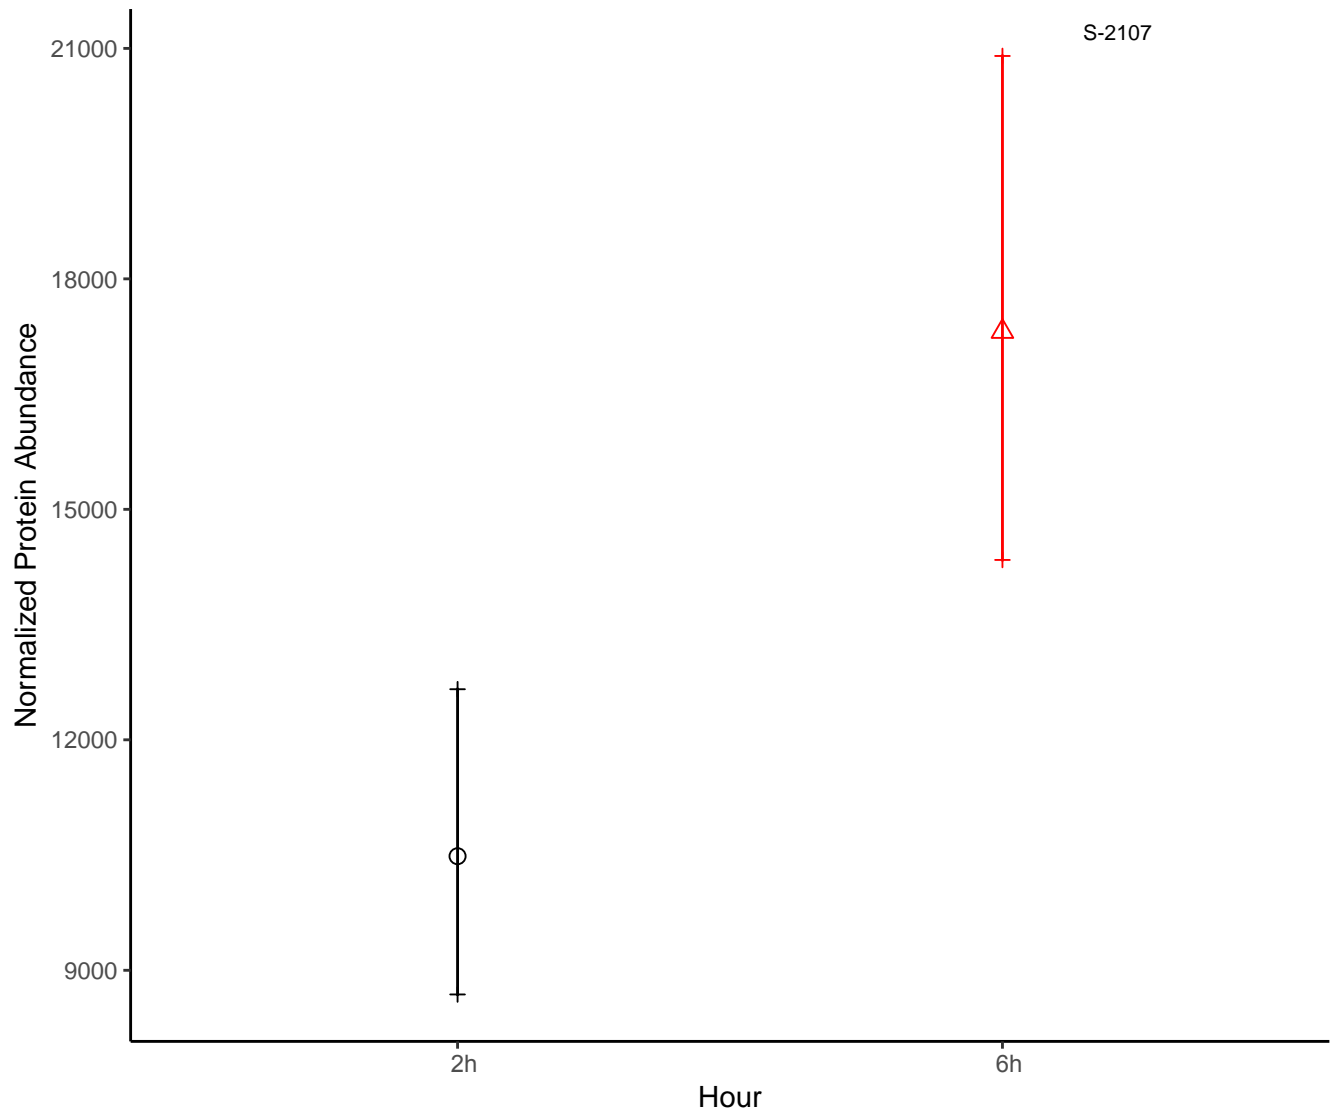

⊕ 2h

△ 6h

# ESSA\_STAAM

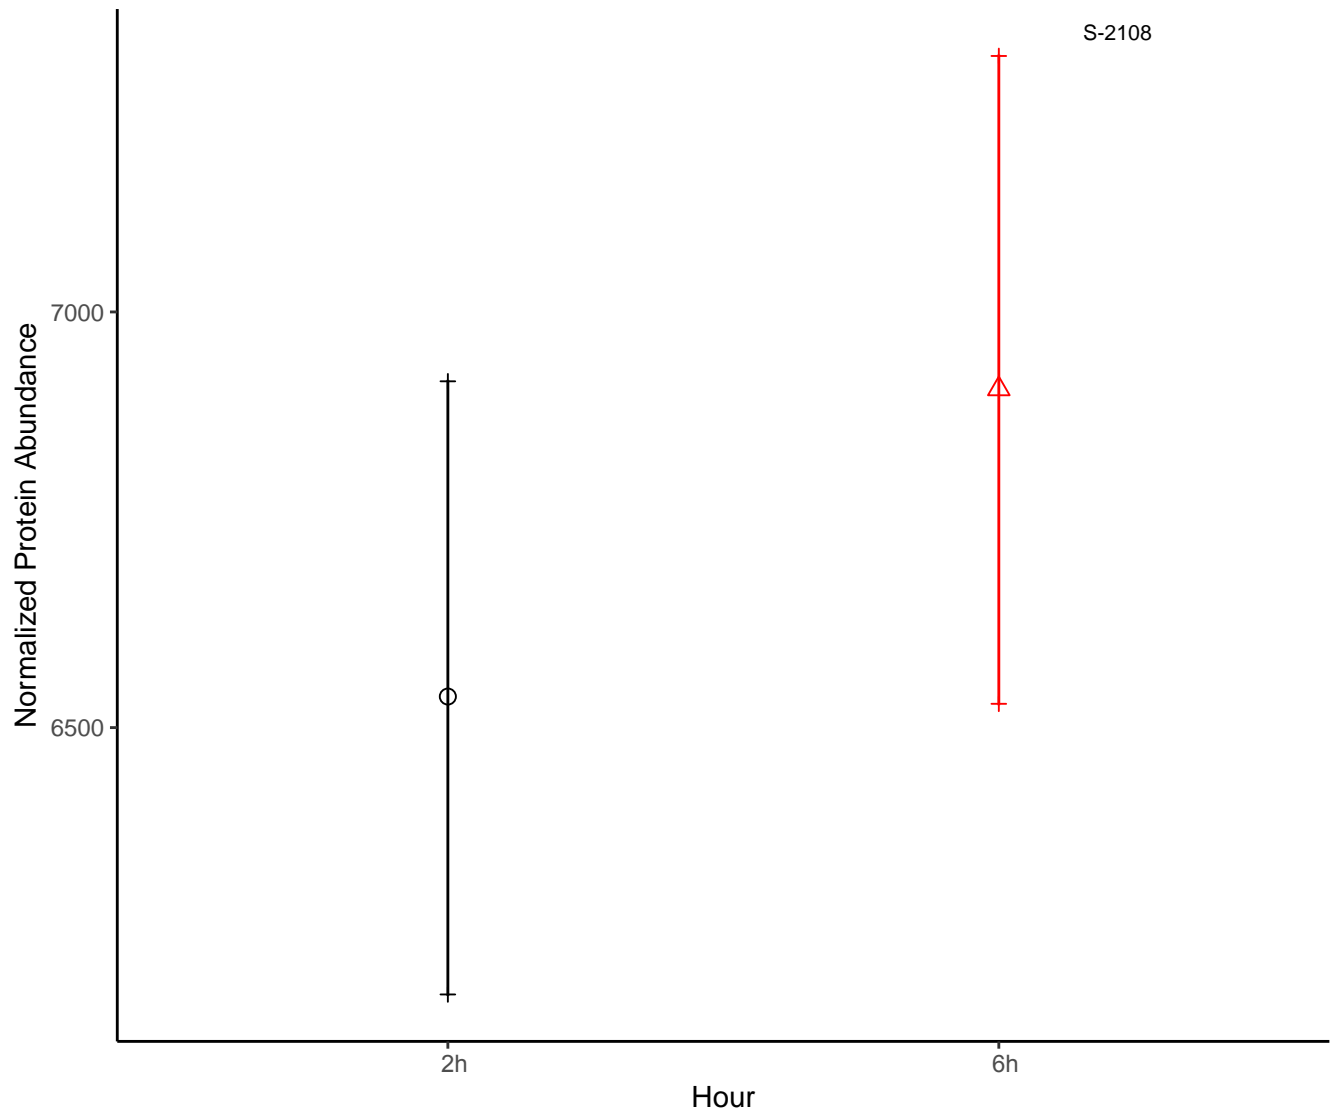

⊕ 2h

△ 6h

# ESXA\_STAAM

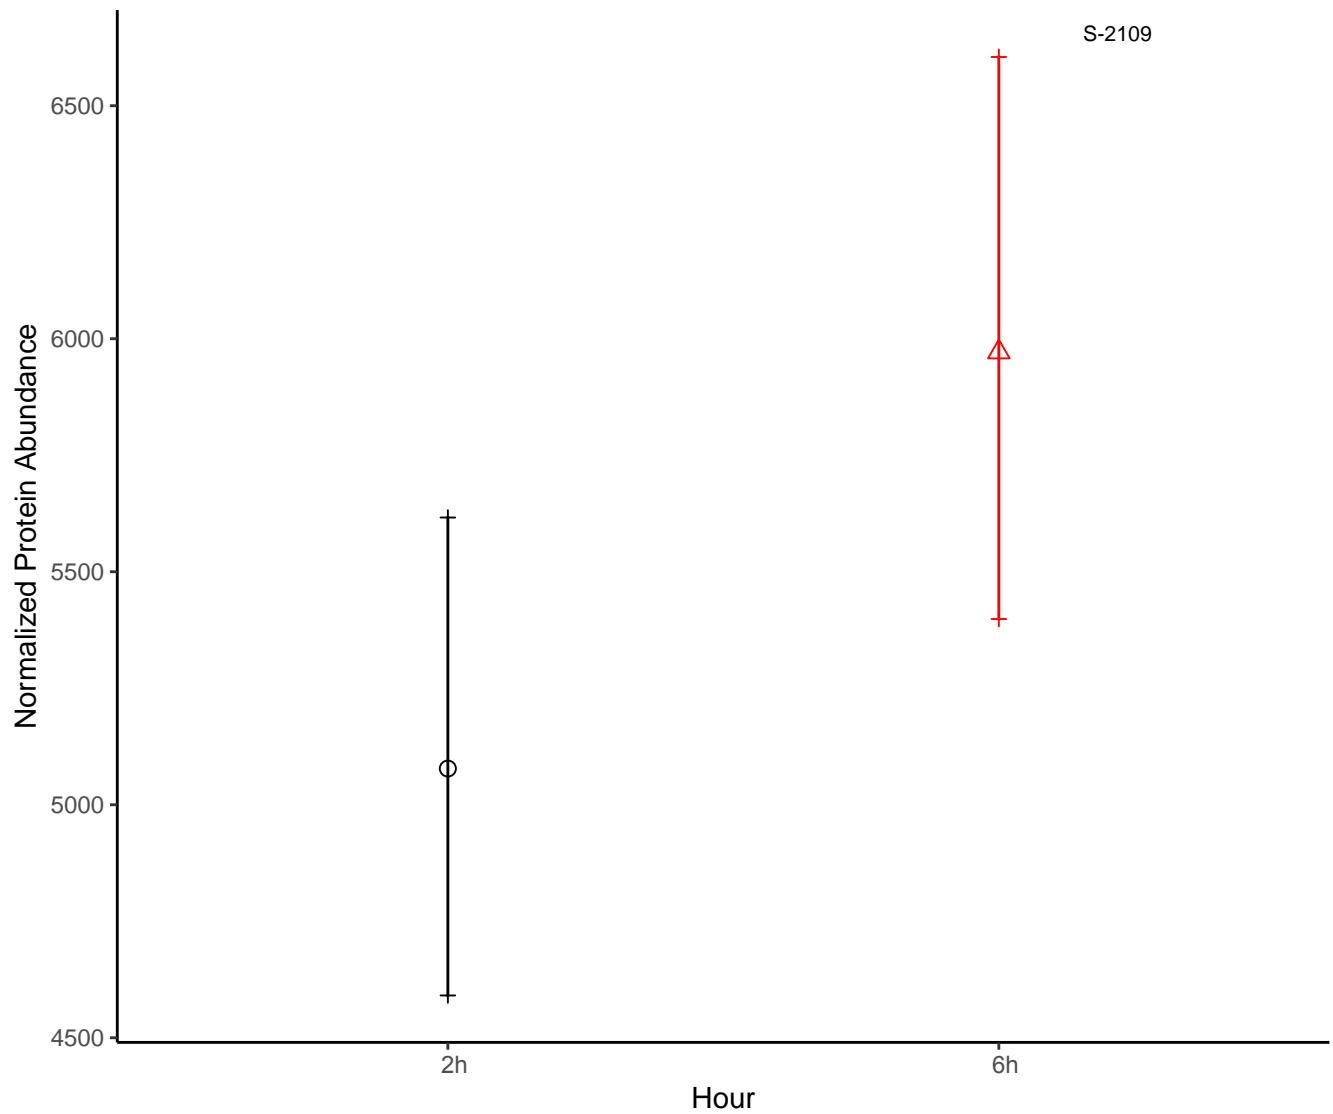

⊕ 2h

△ 6h

# EX7L\_STAAM

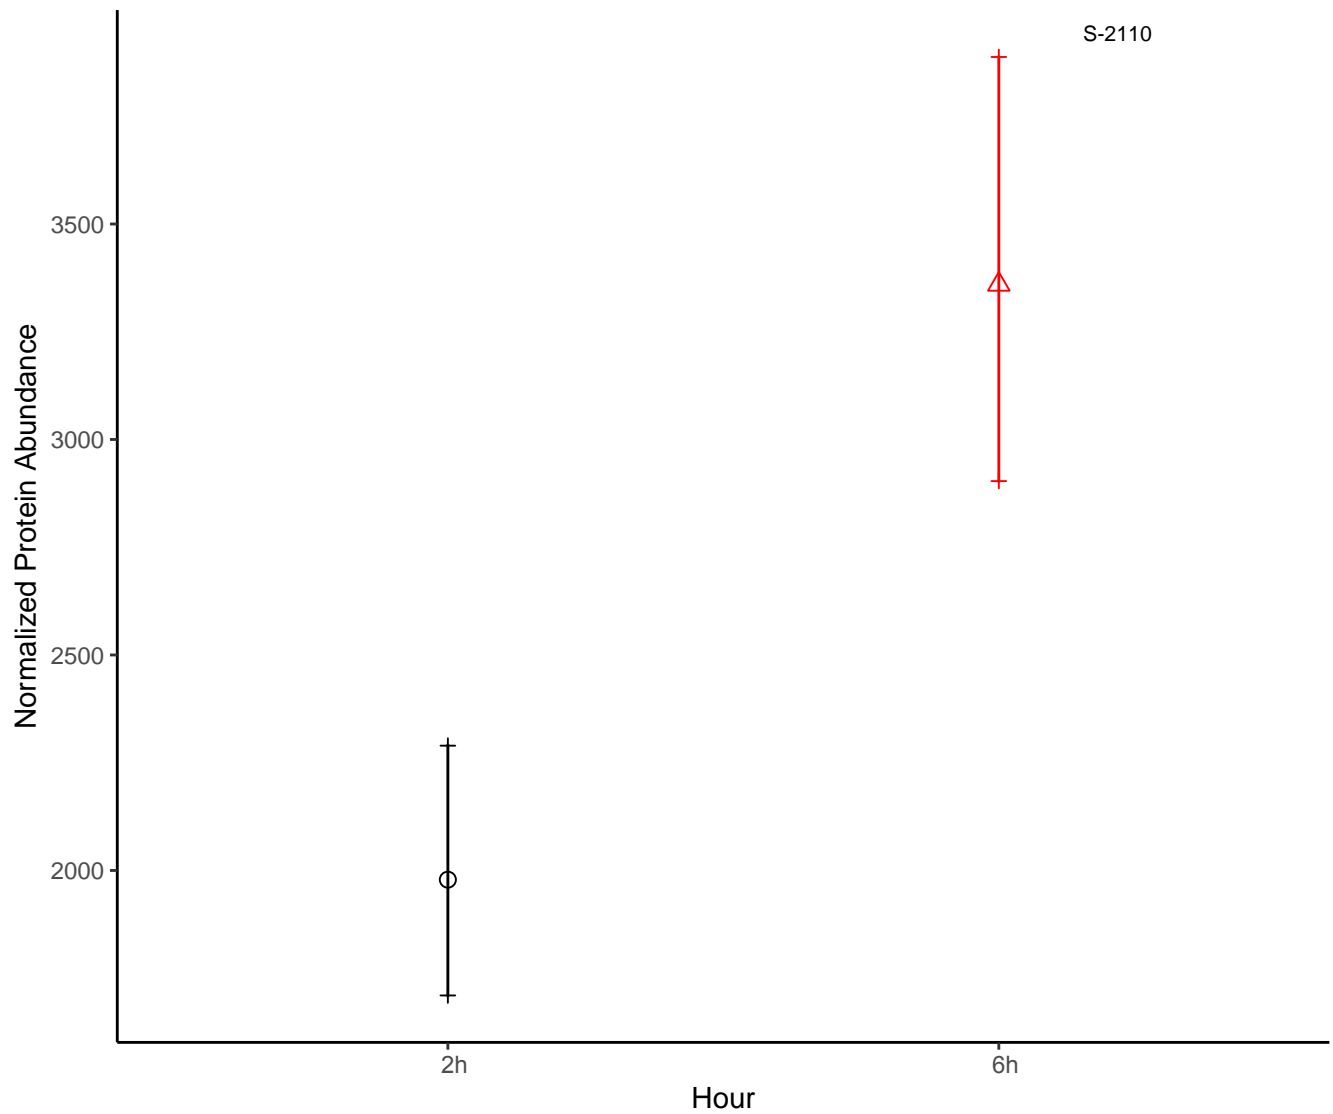

⊕ 2h

△ 6h

# EZRA\_STAAM

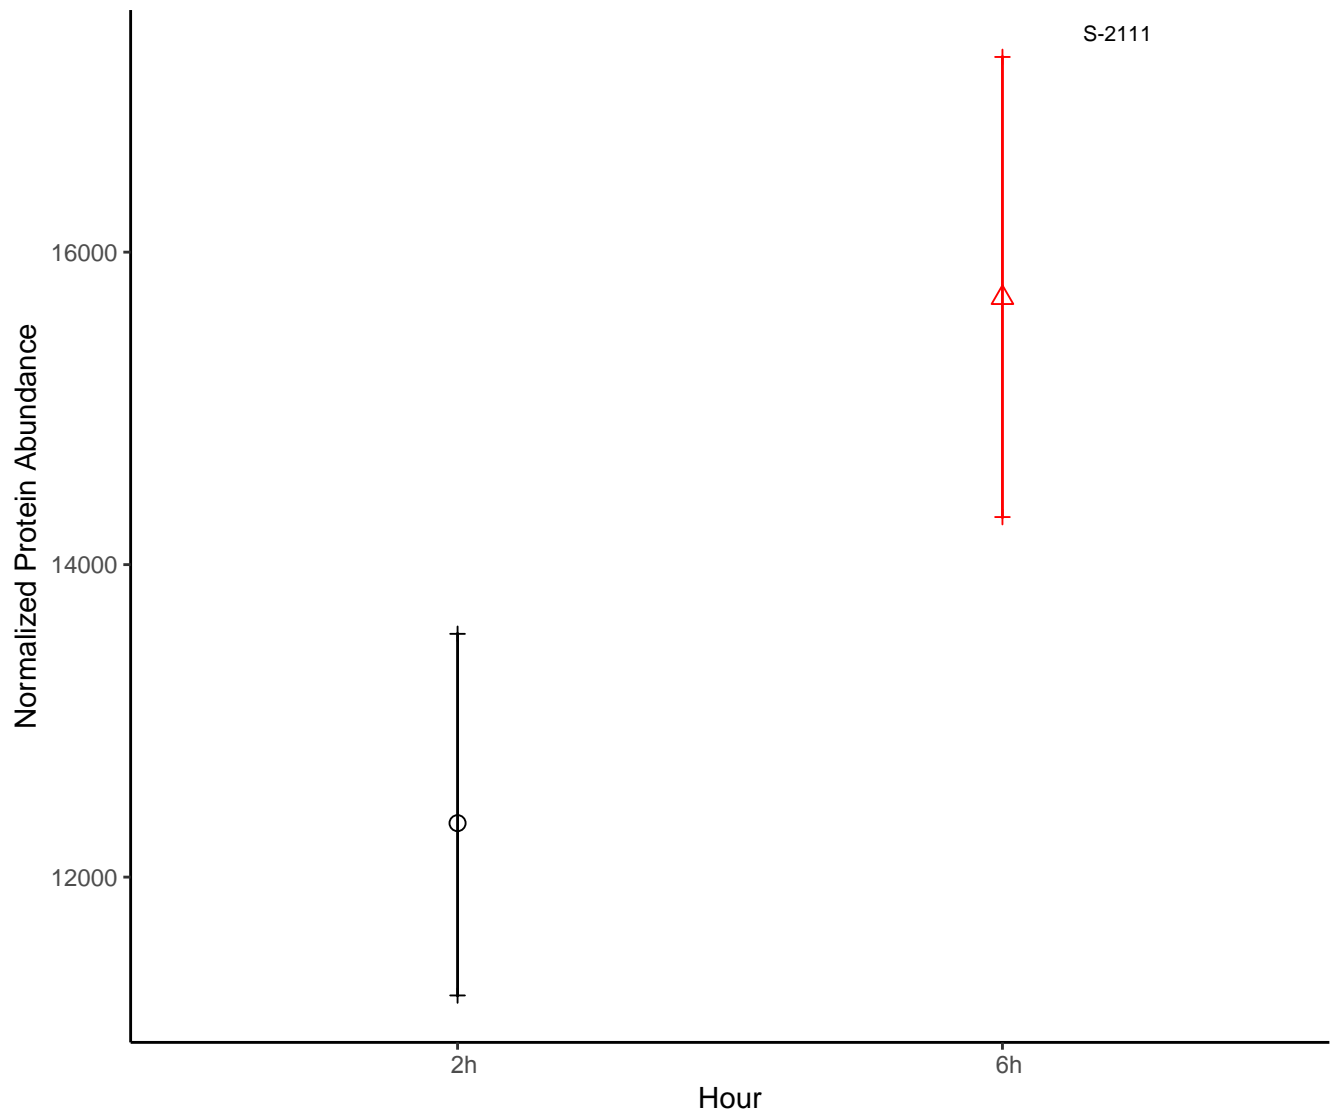

⊕ 2h

△ 6h

# FABD\_STAAM

S-2112

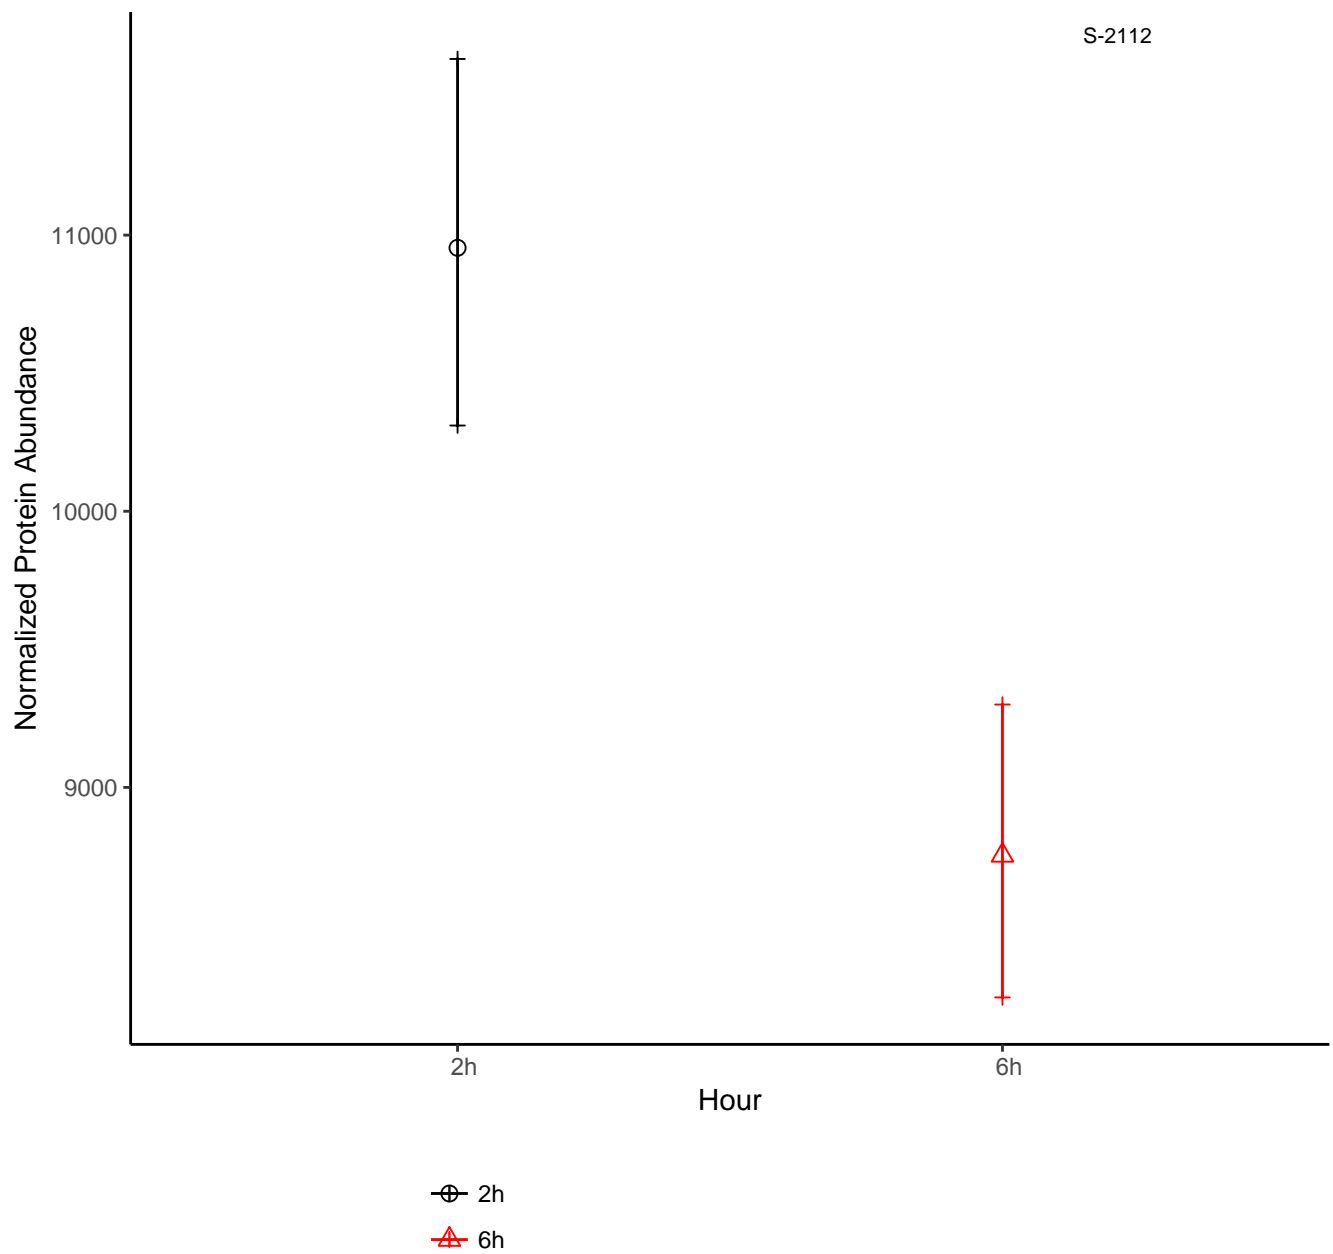



# FABF\_STAAM

S-2113

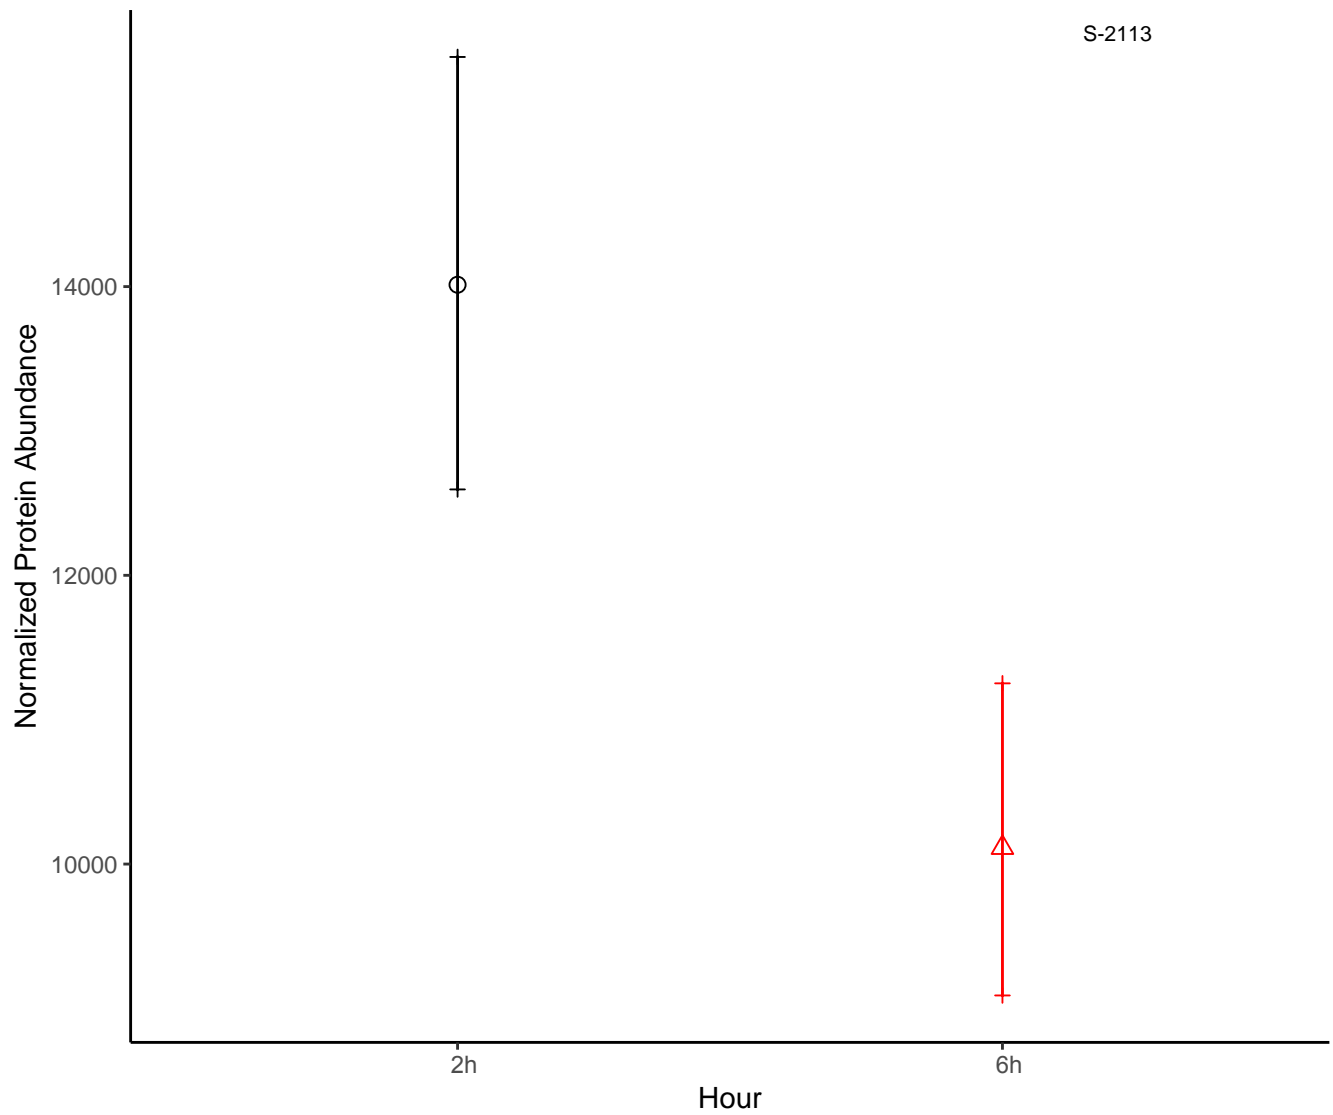

⊕ 2h

△ 6h

# FABG\_STAAM

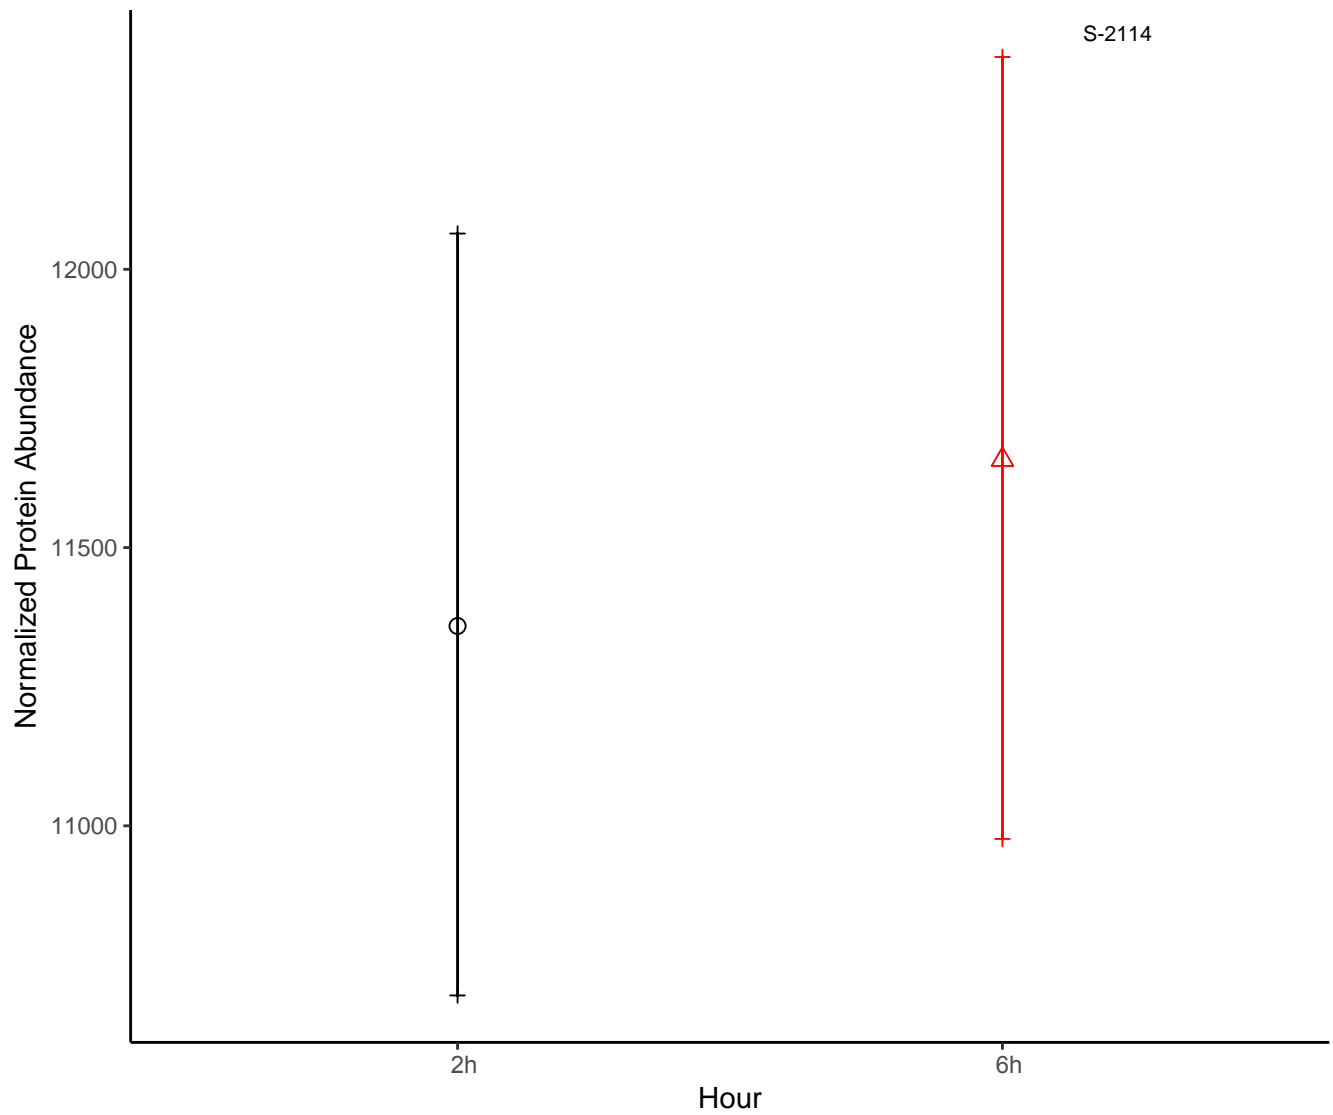

⊕ 2h

△ 6h

# FABH\_STAAM

S-2115

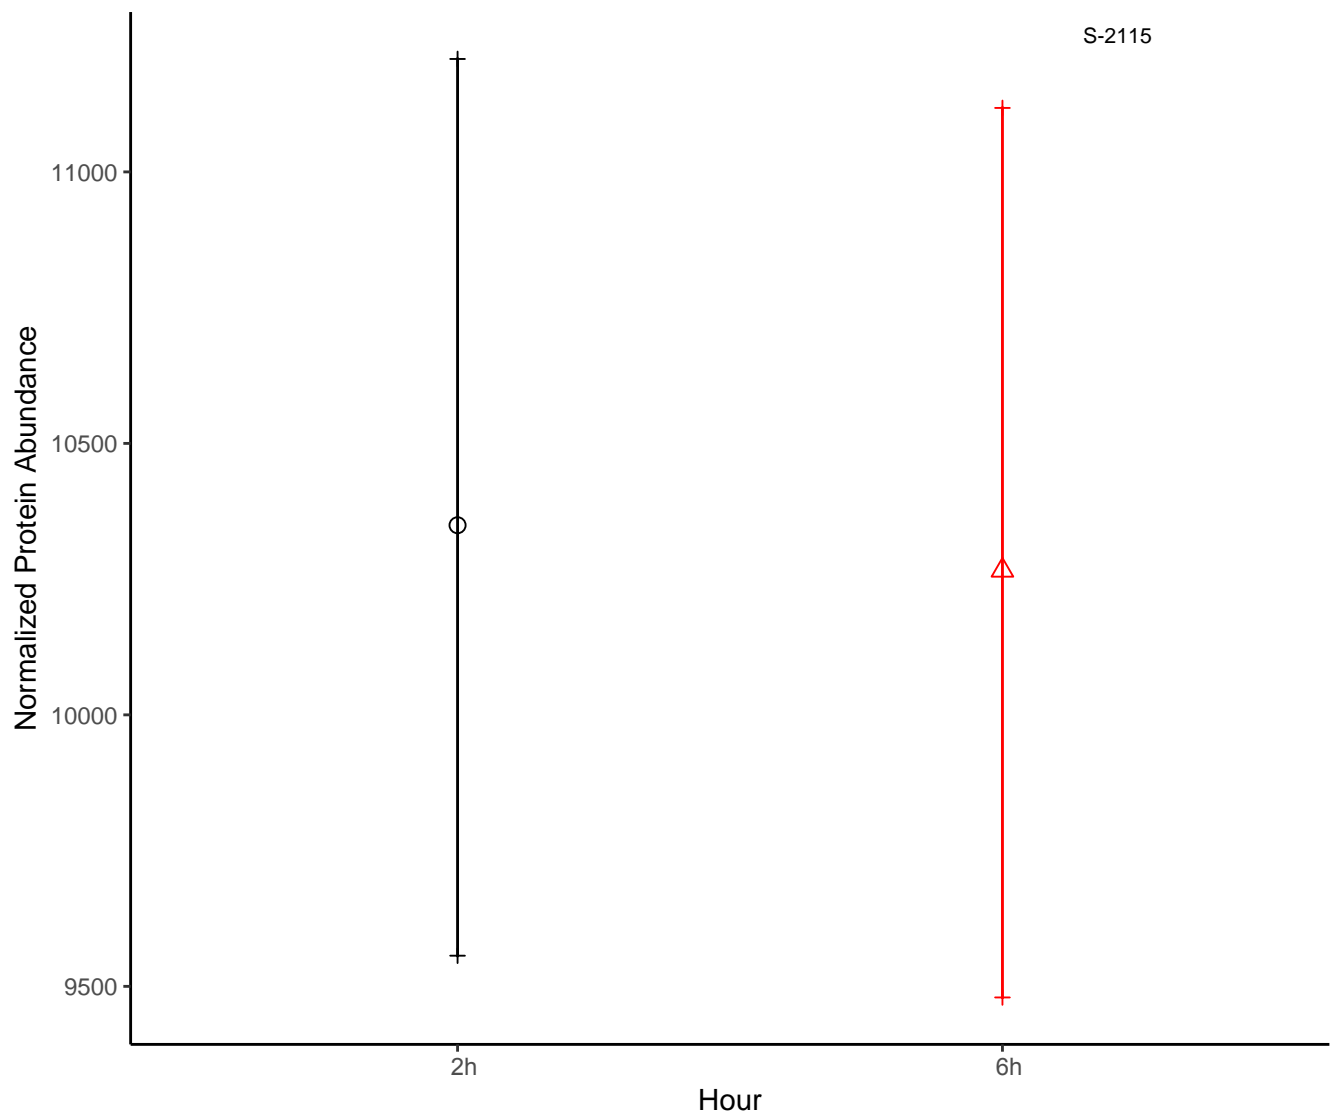

⊕ 2h

△ 6h

# FABZ\_STAAM

S-2116

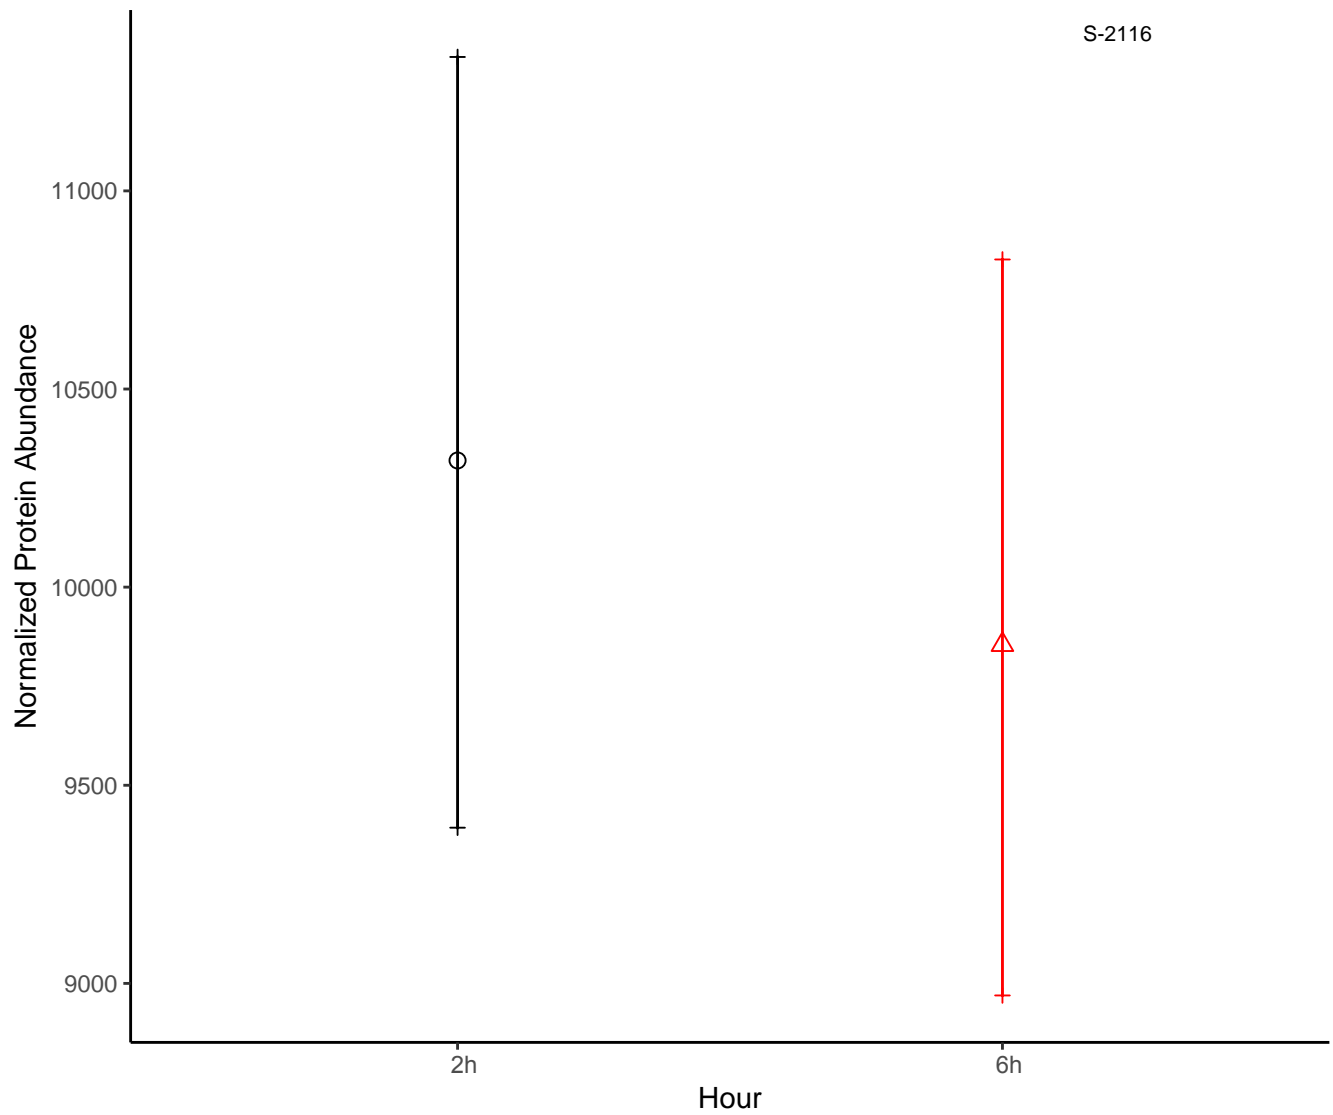

⊕ 2h

△ 6h

# FEMA\_STAAM

S-2117

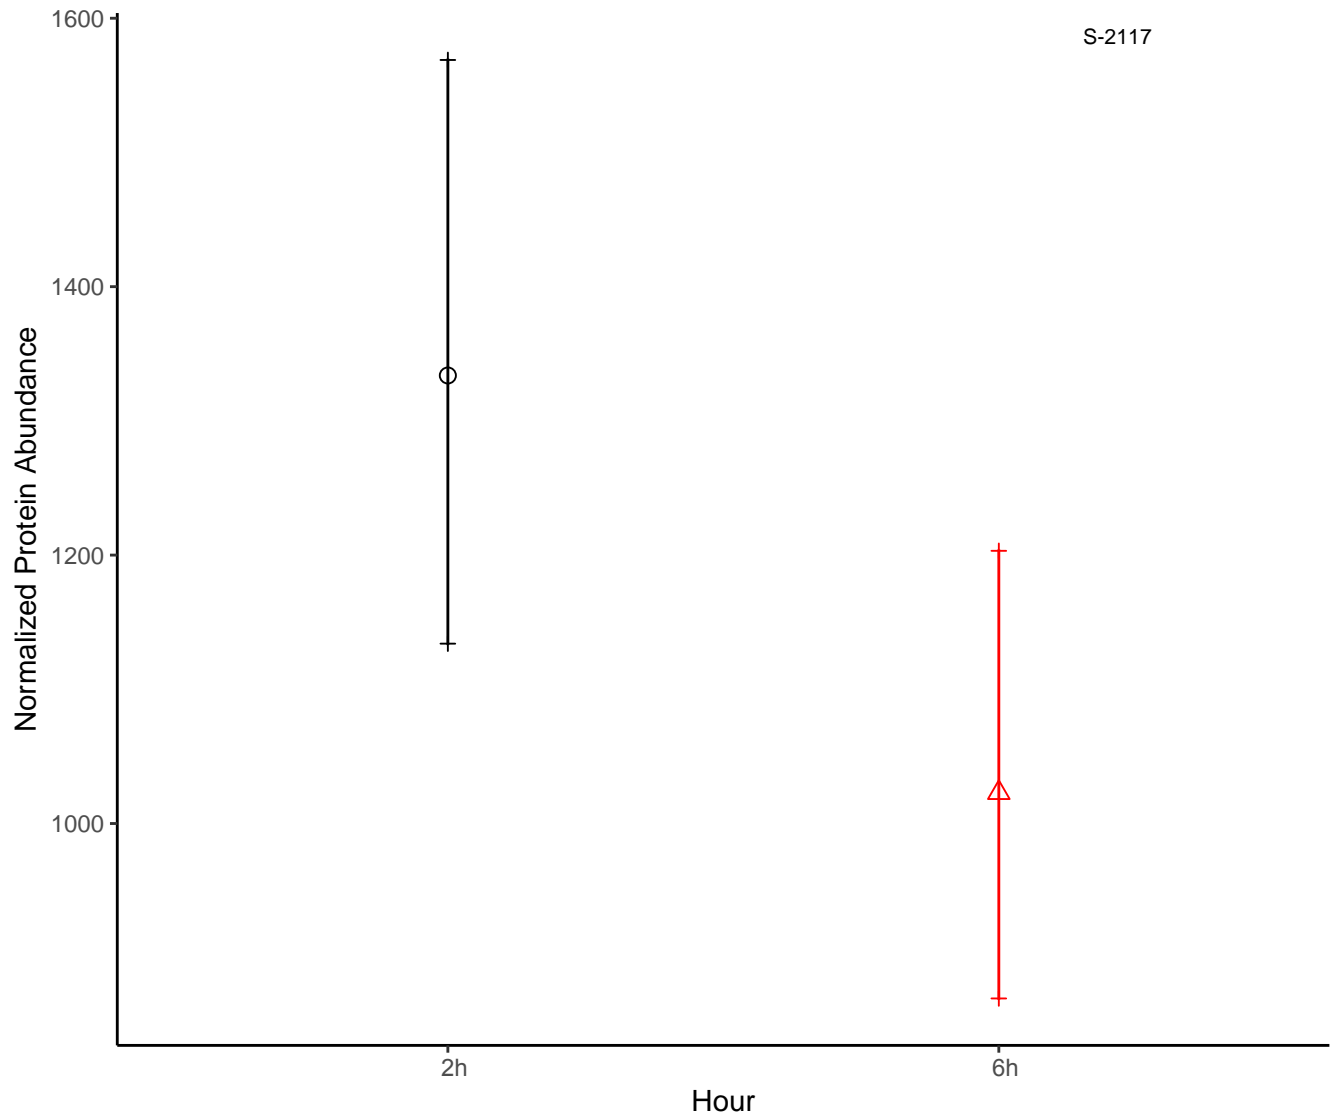

⊕ 2h

△ 6h

# FEMB\_STAAM

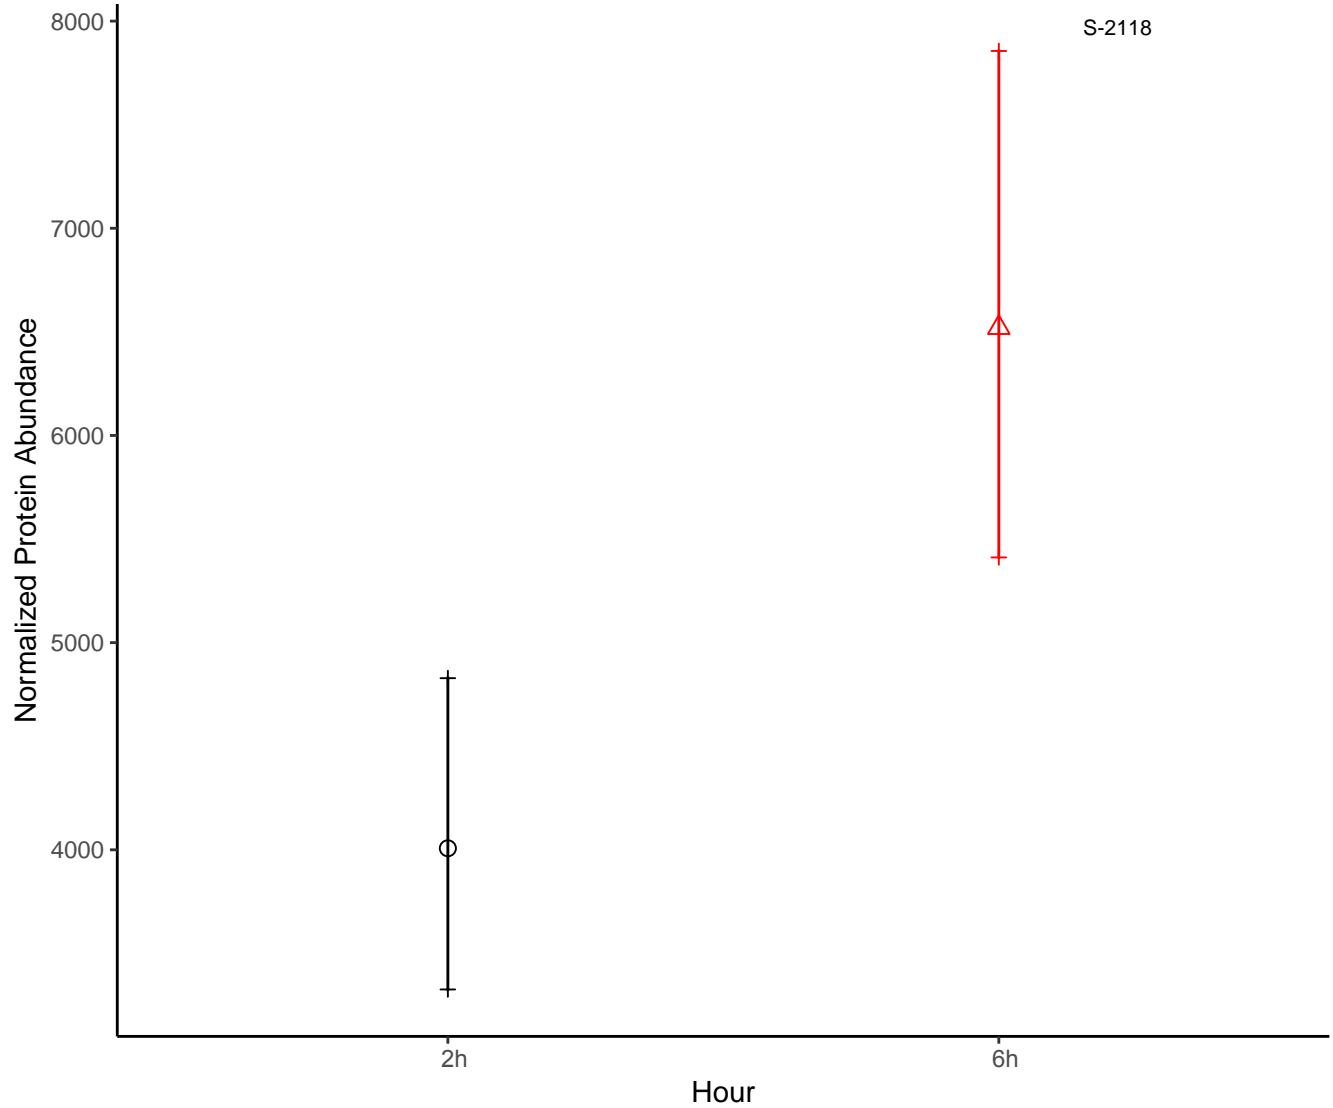

⊕ 2h

△ 6h

# FEMX\_STAAM

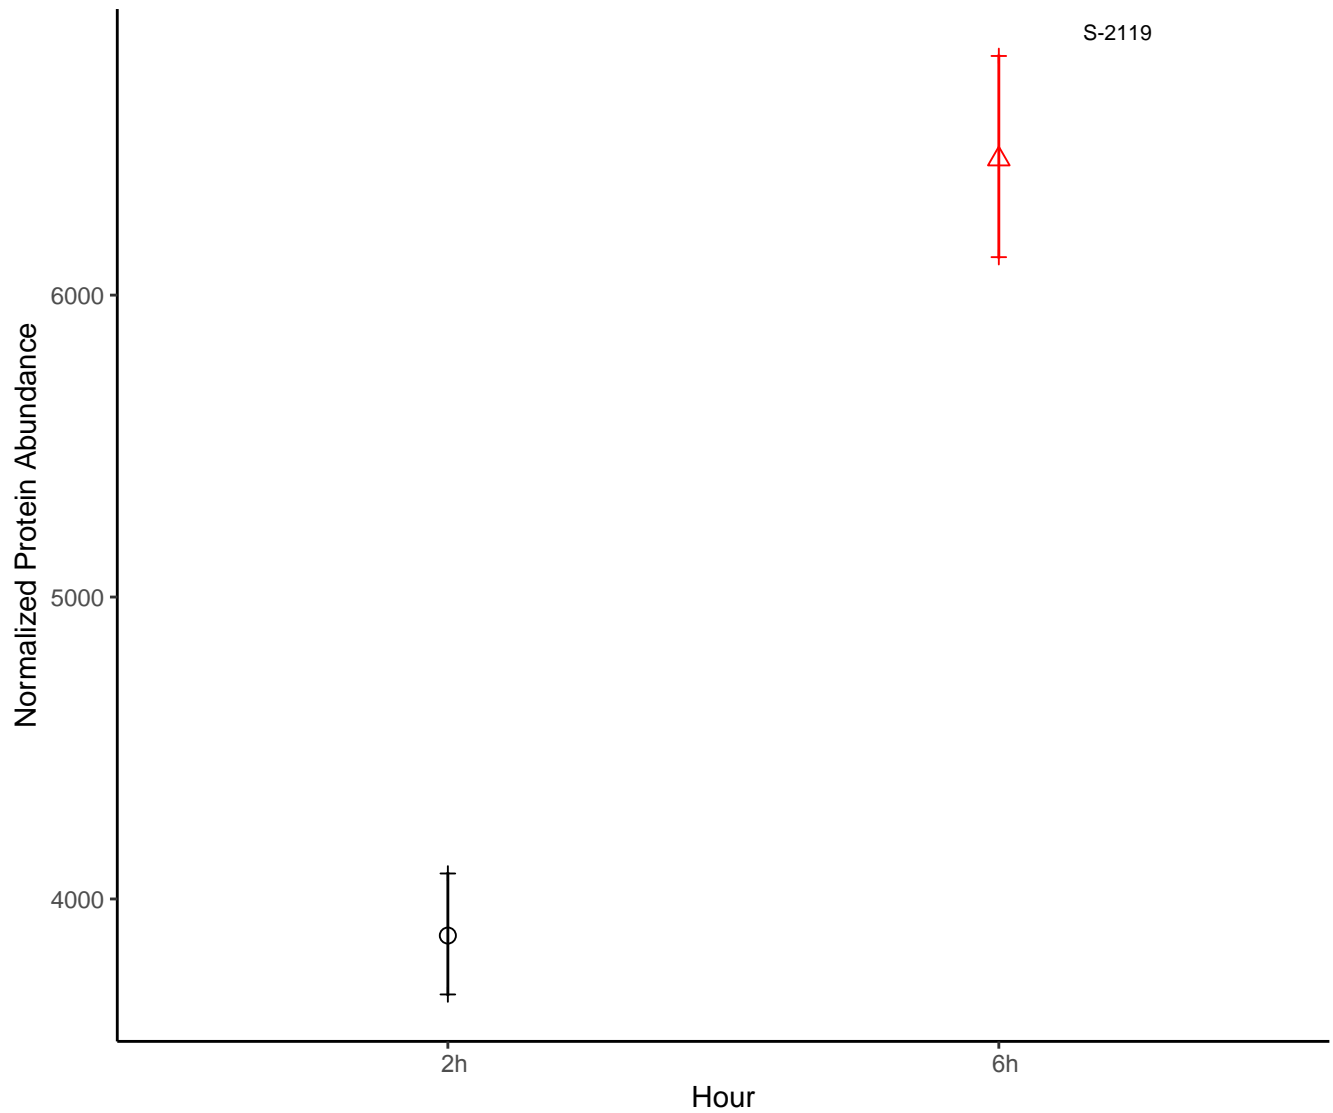

⊕ 2h

△ 6h

# FENR\_STAAM

S-2120

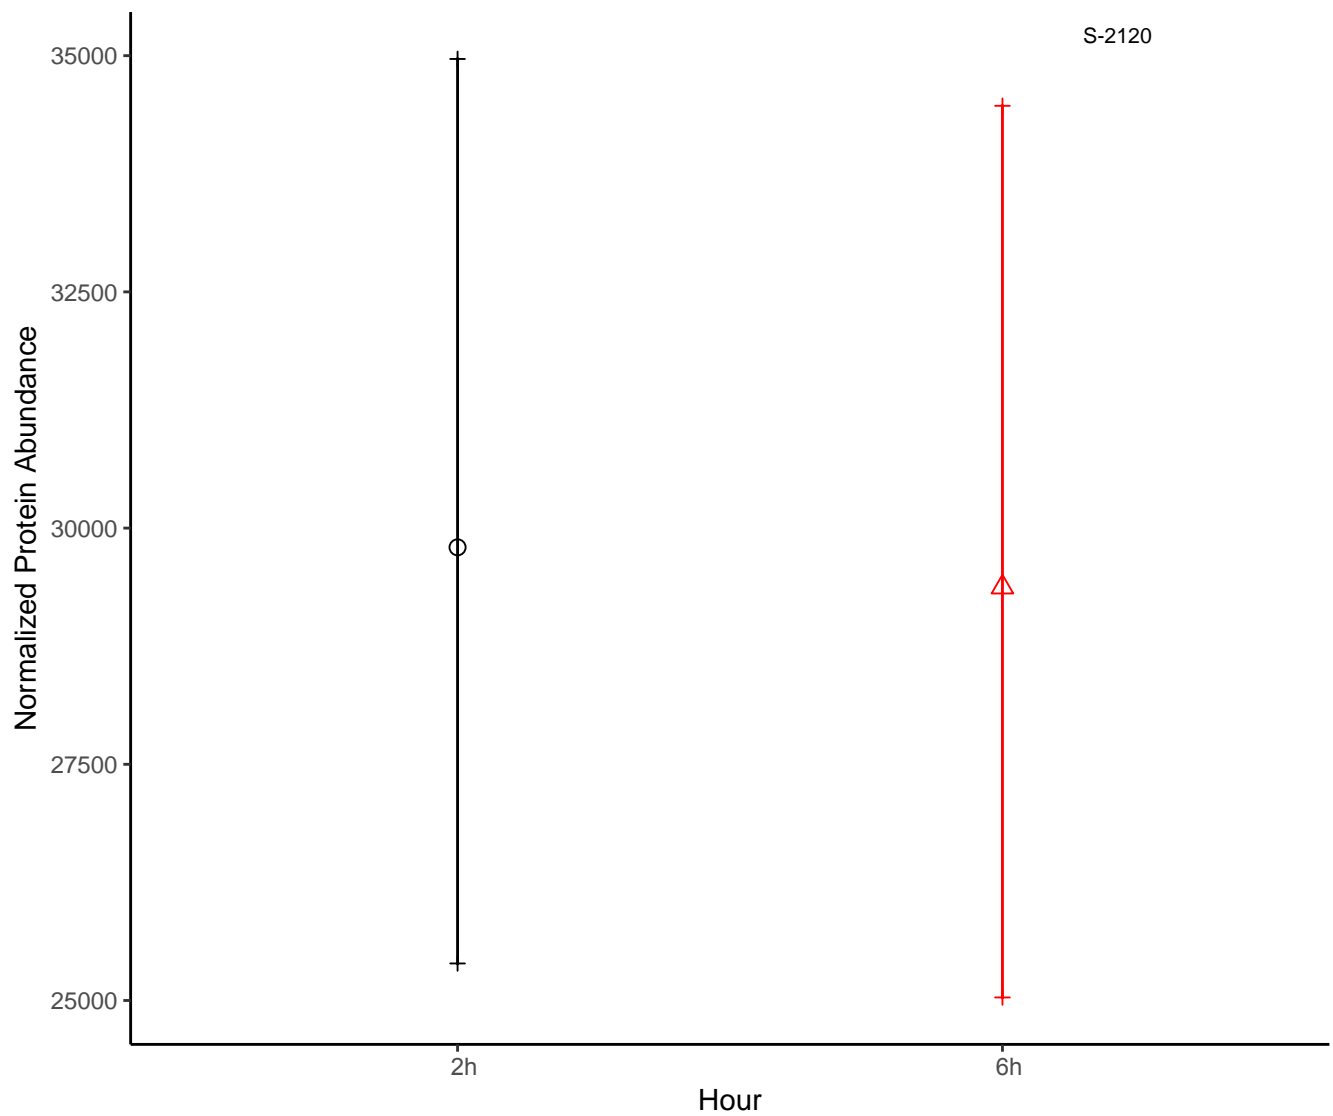

⊕ 2h

△ 6h



# FLIPR\_STAAM

S-2121

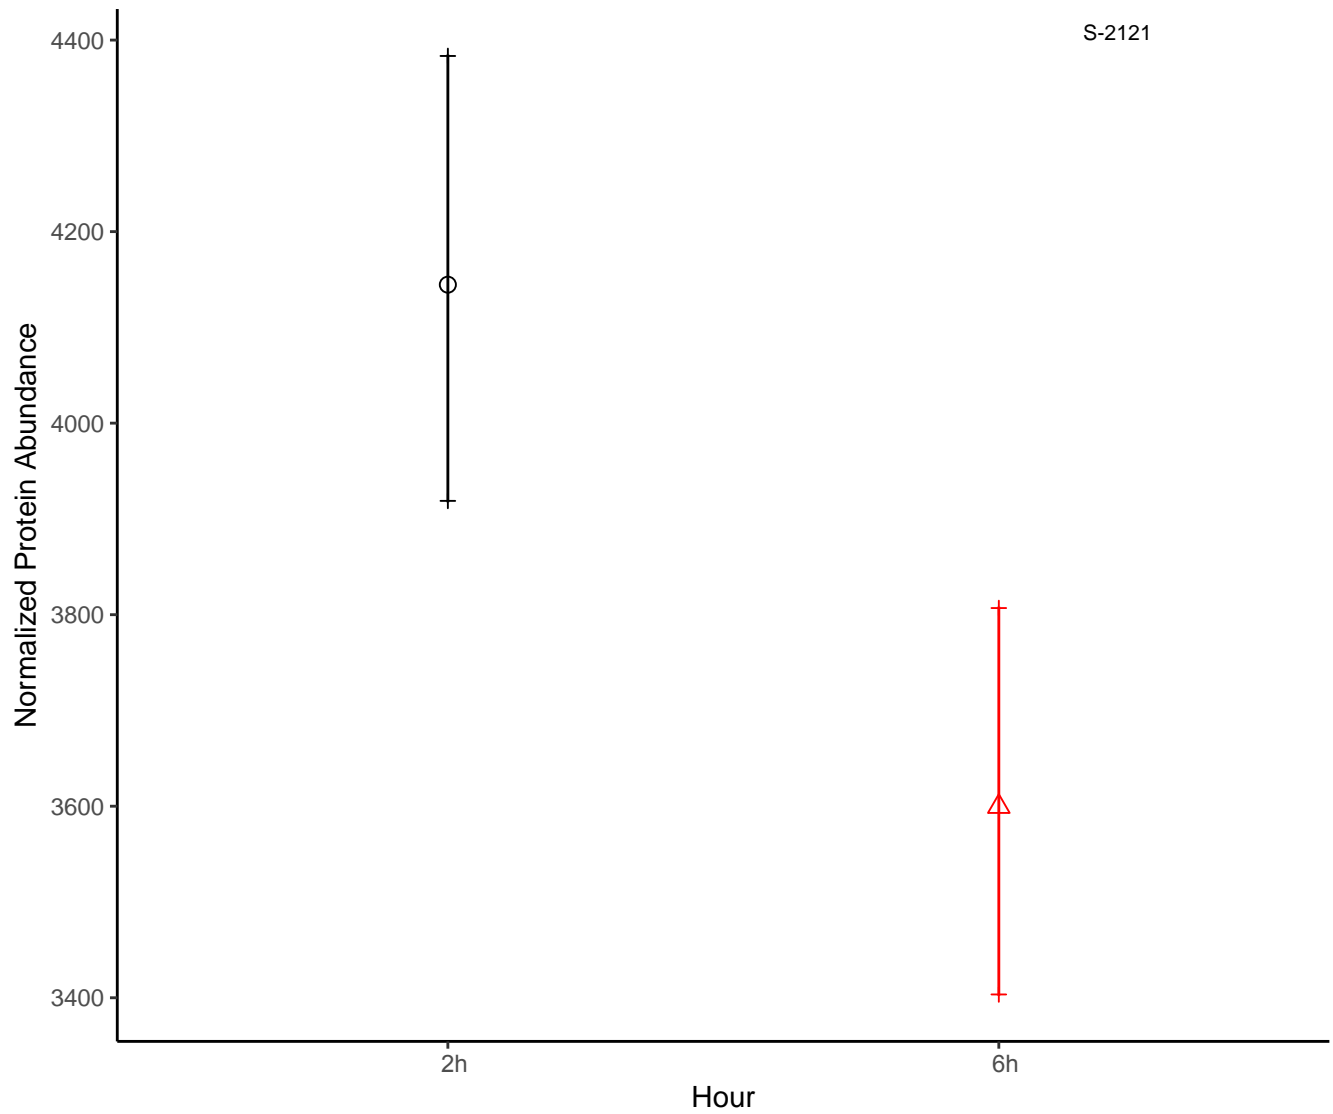

⊕ 2h

△ 6h

# FMT\_STAAM

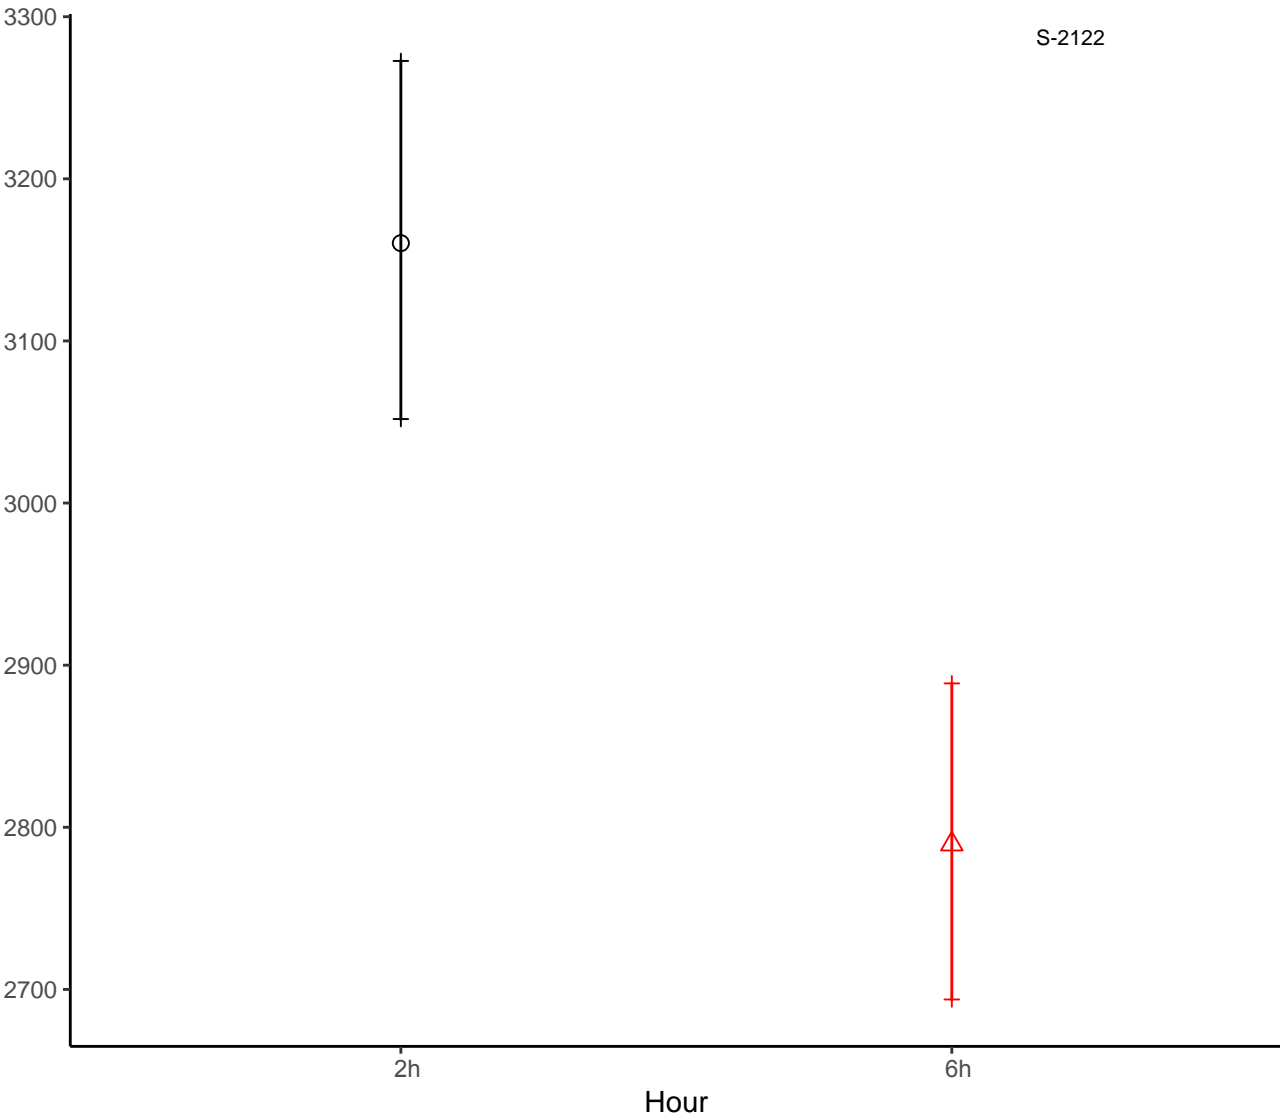

⊕ 2h

△ 6h

# FMTA\_STAAM

S-2123

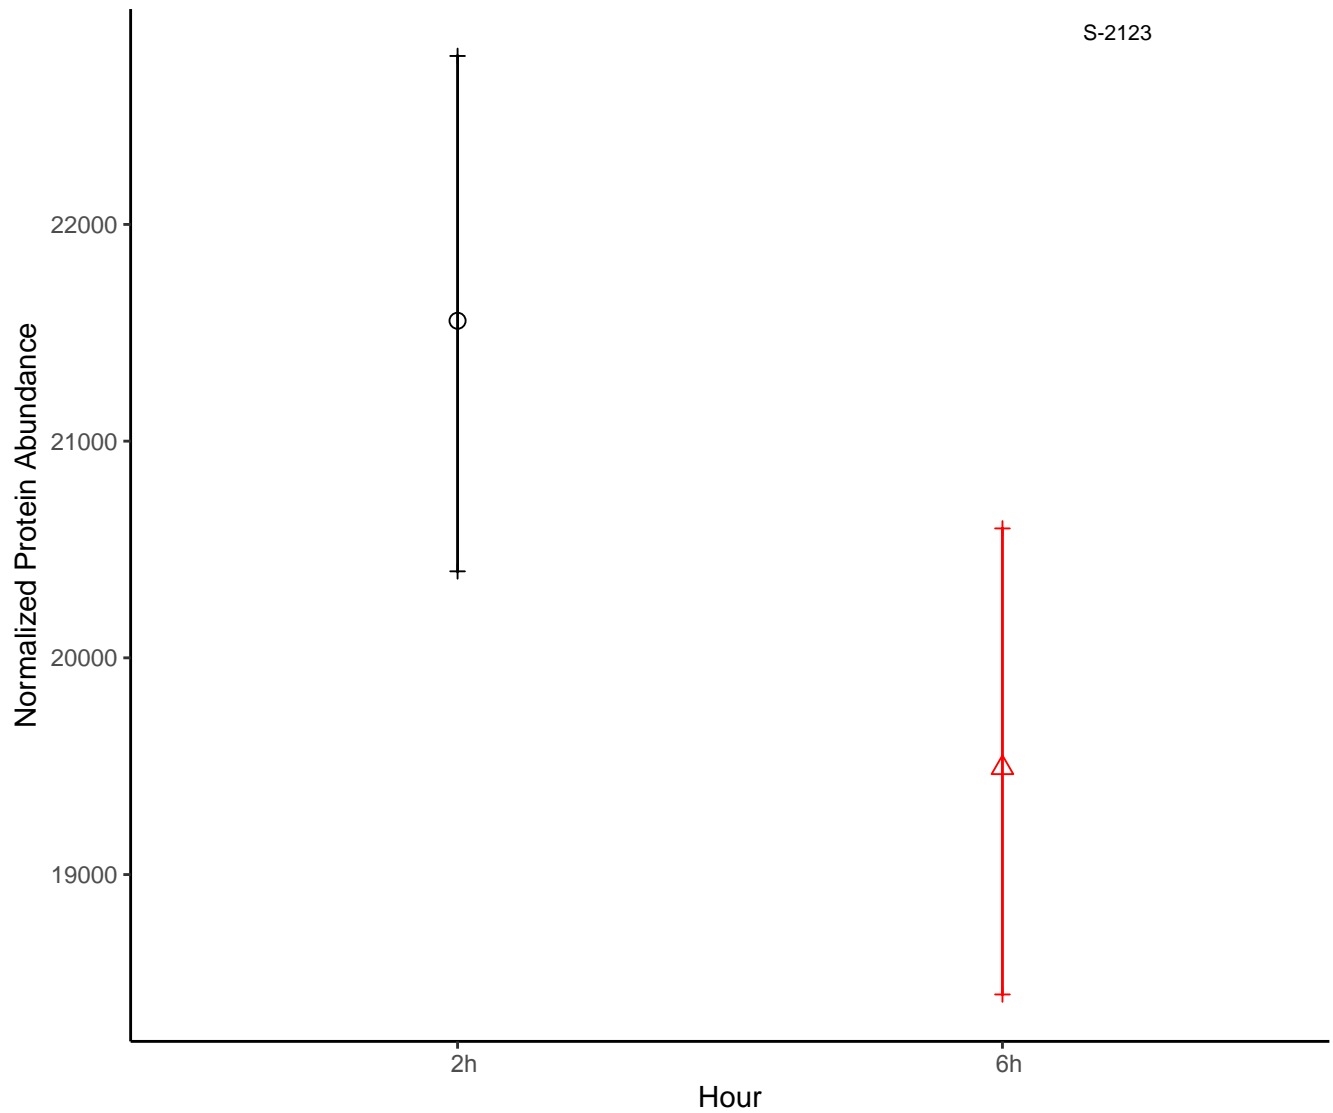

⊕ 2h

△ 6h

# FOLB\_STAAM

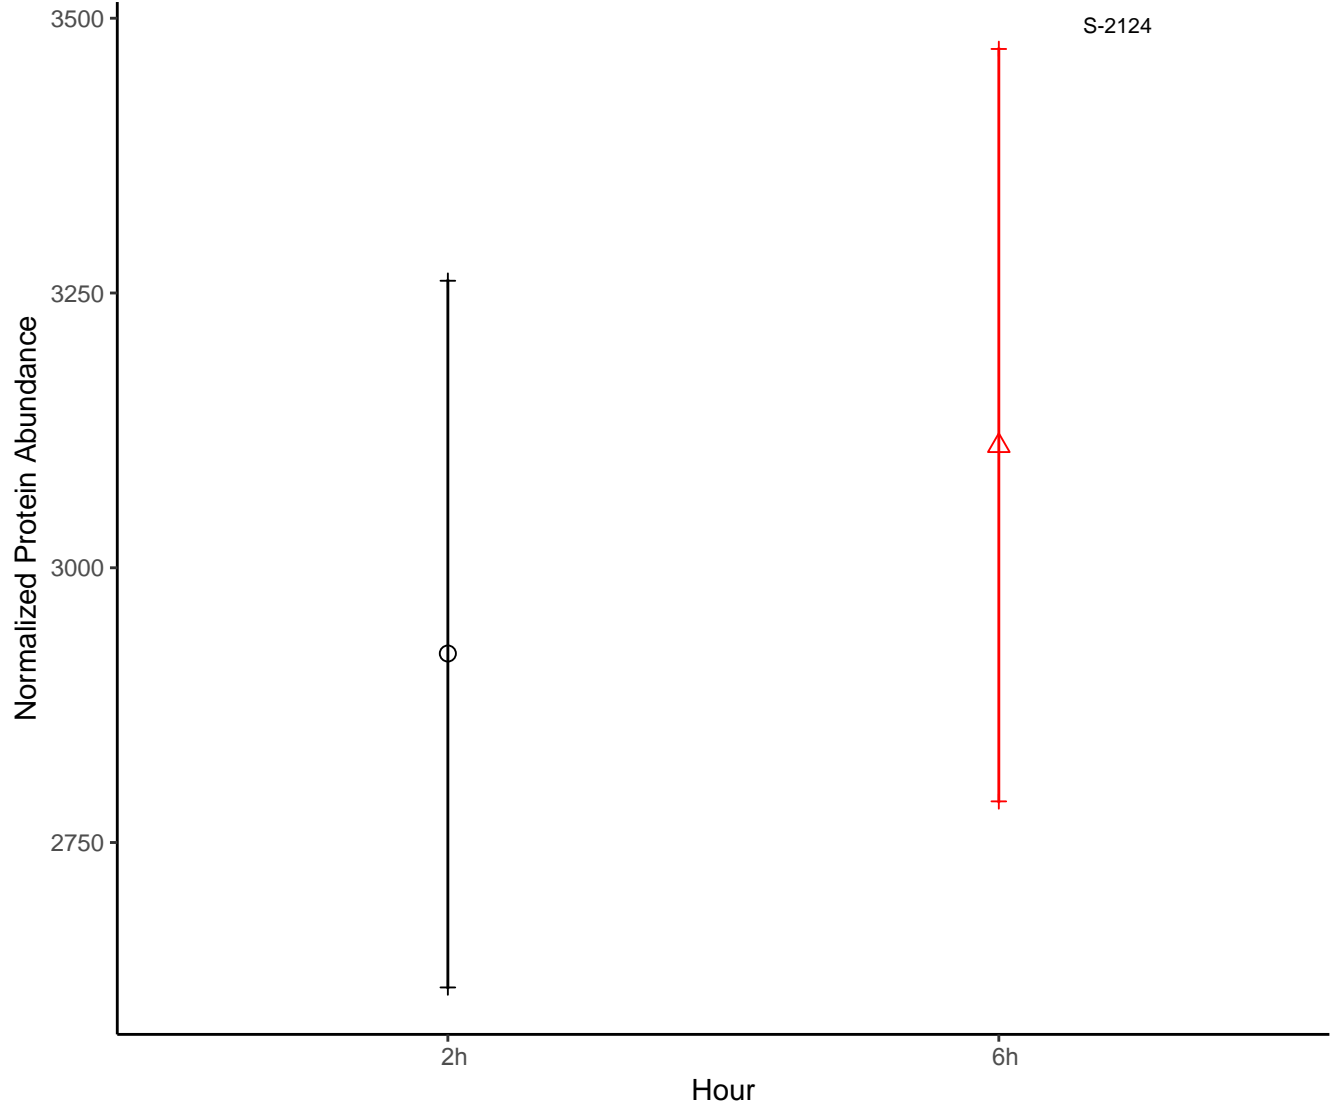

⊕ 2h

△ 6h

# FOLD\_STAAM

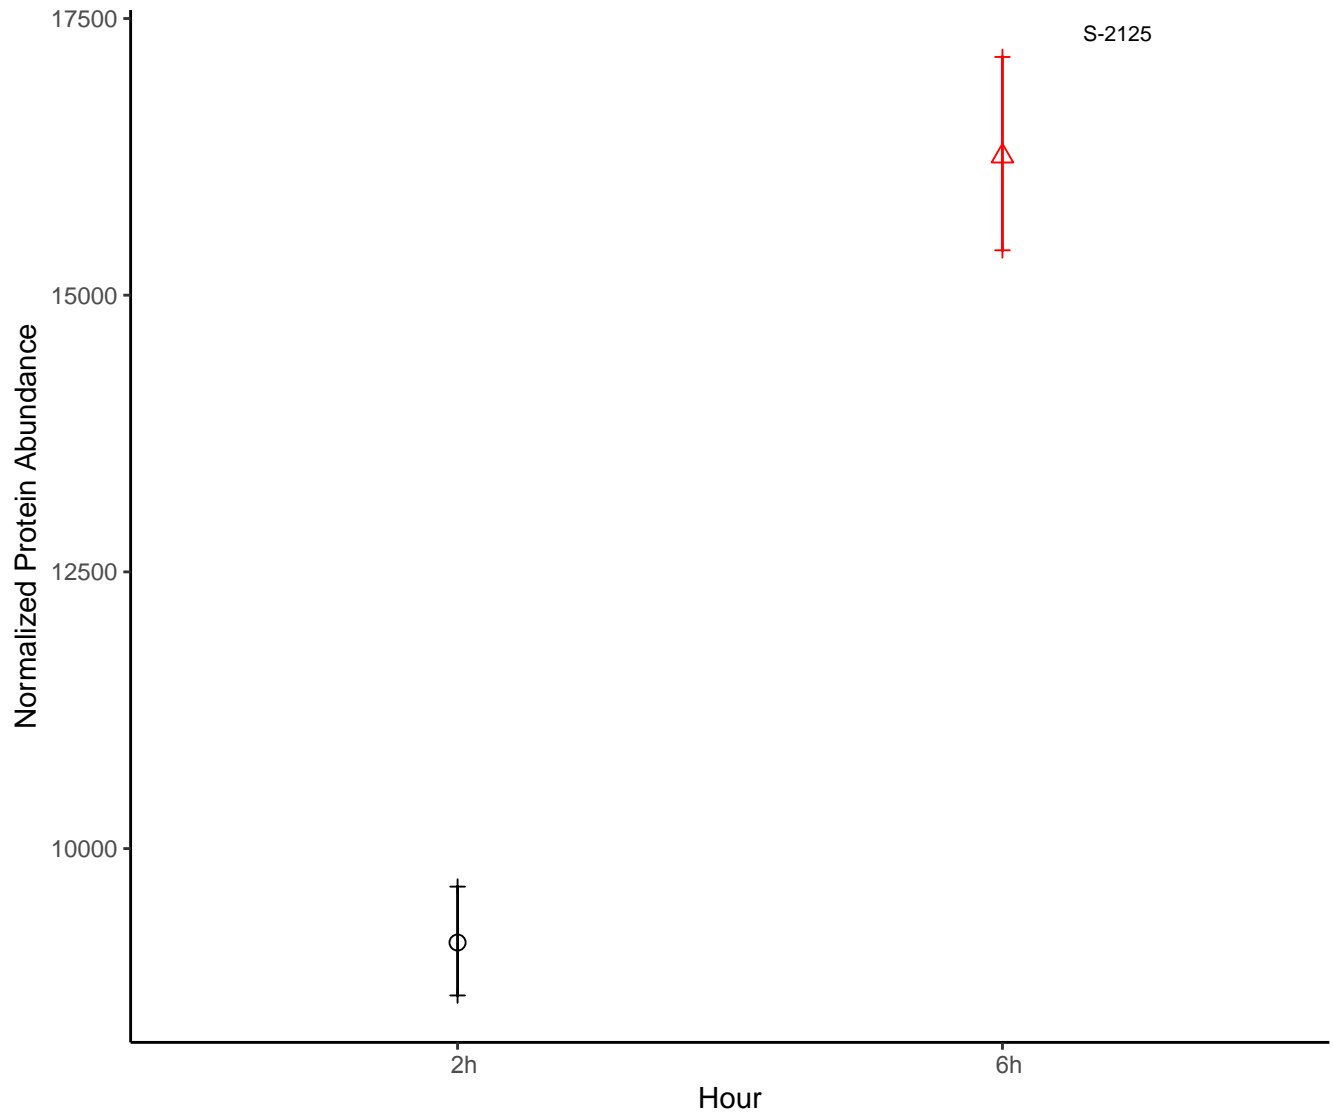

⊕ 2h

△ 6h

# FTHS\_STAAM

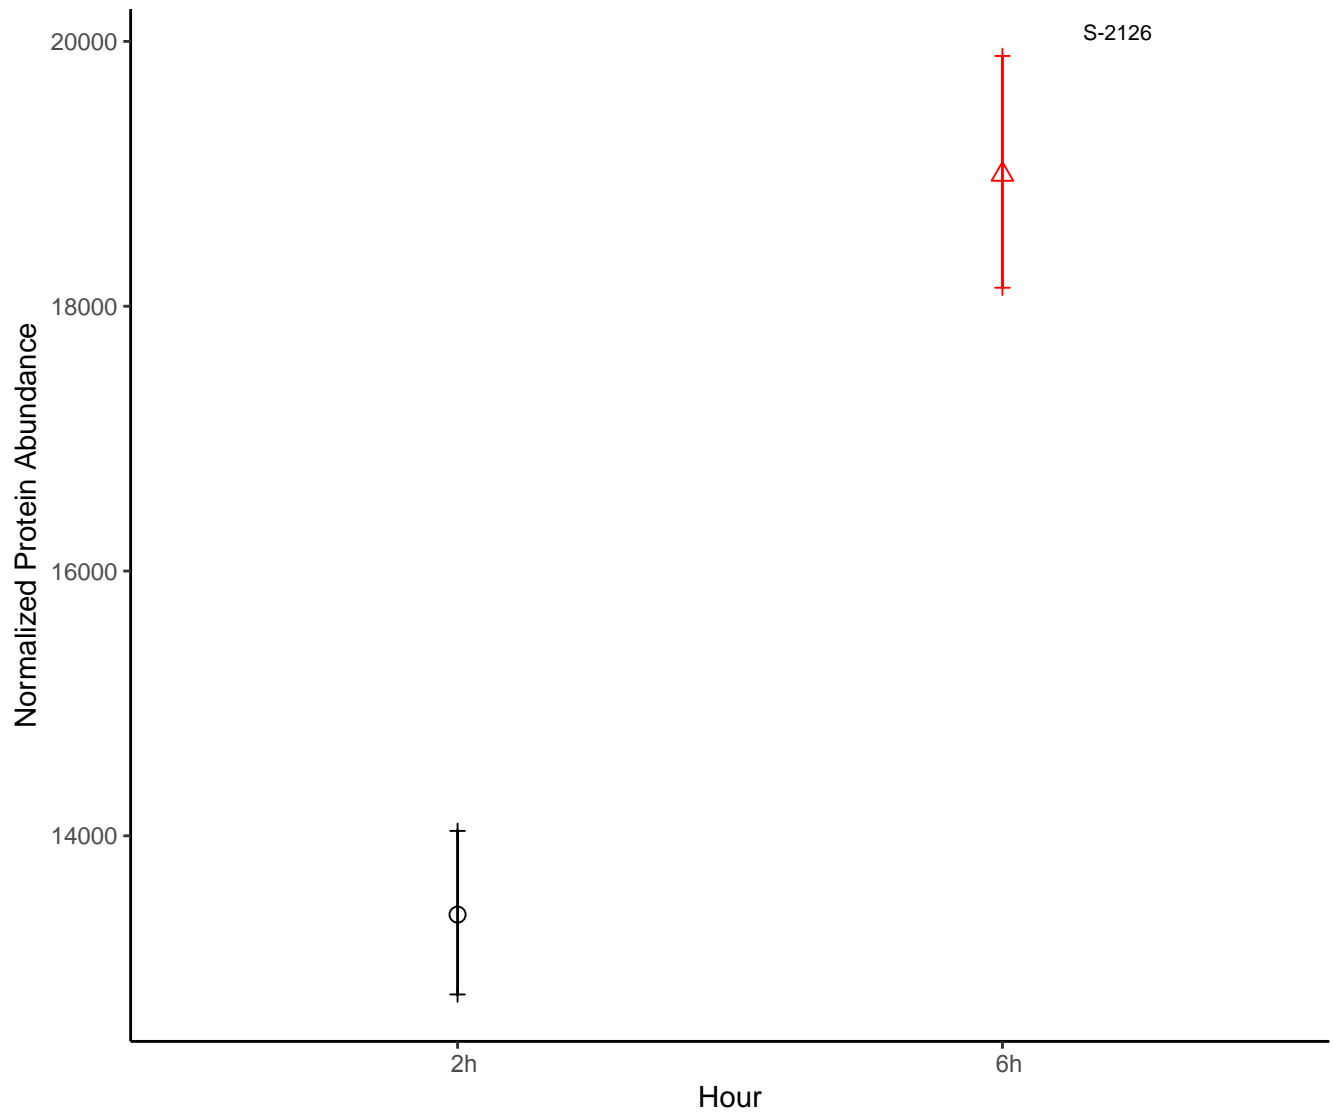

⊕ 2h

△ 6h

# FTN\_STAAM

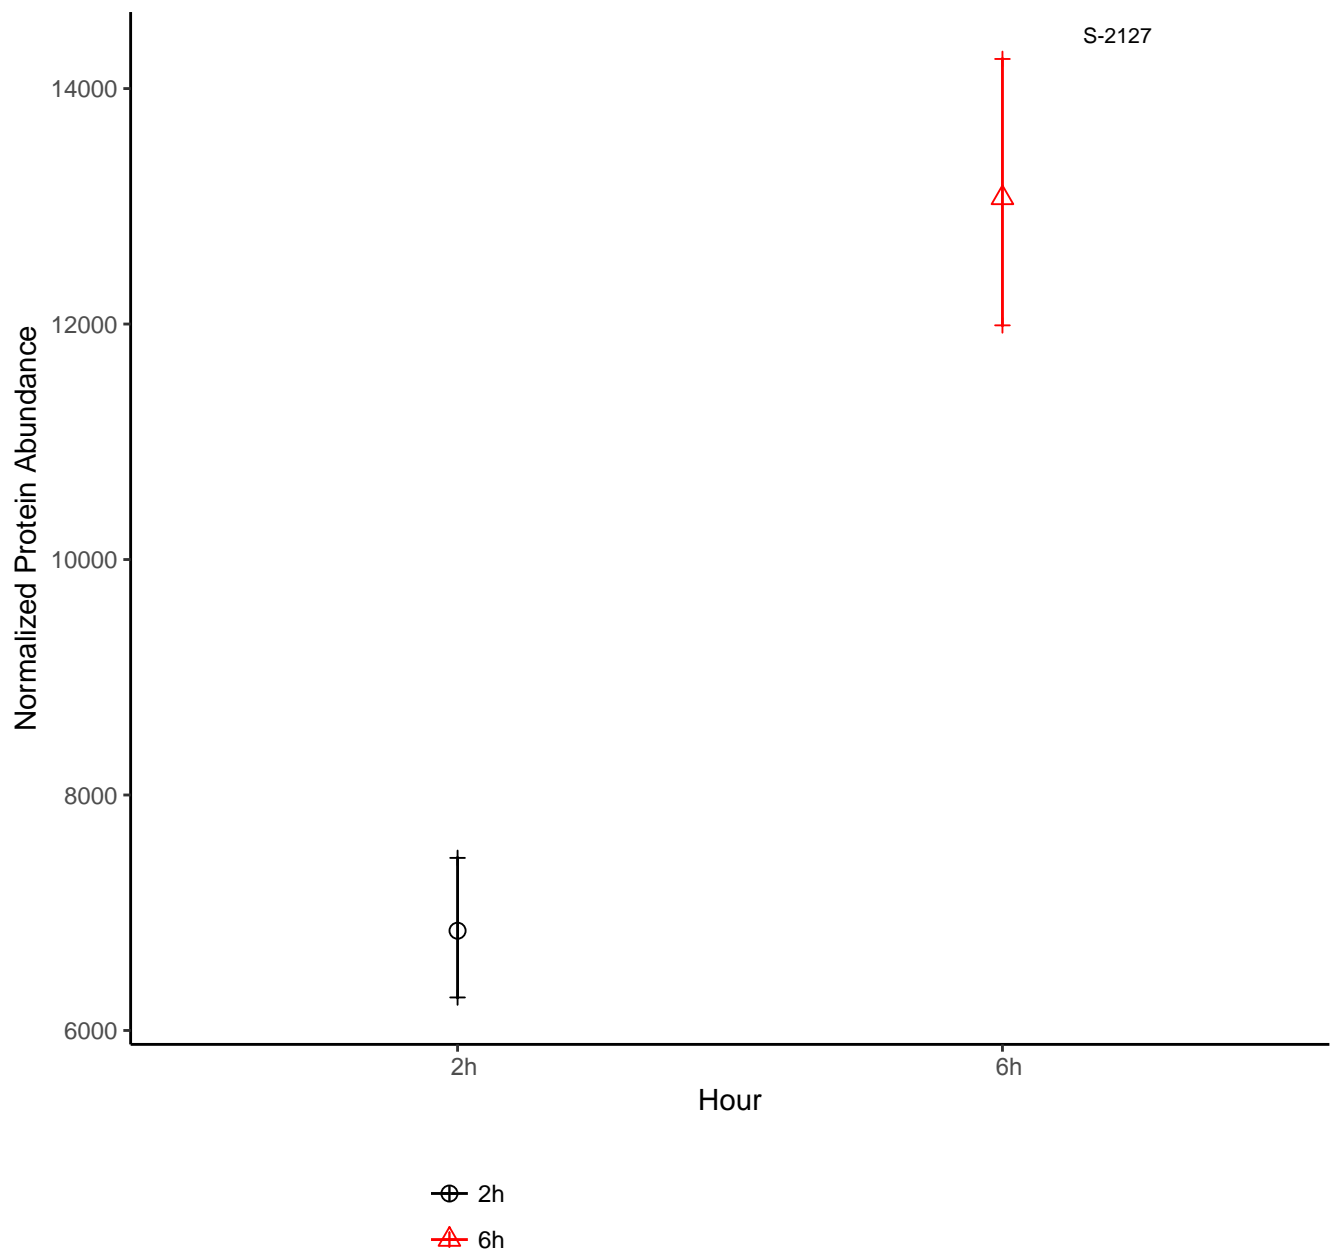

# FTSA\_STAAM

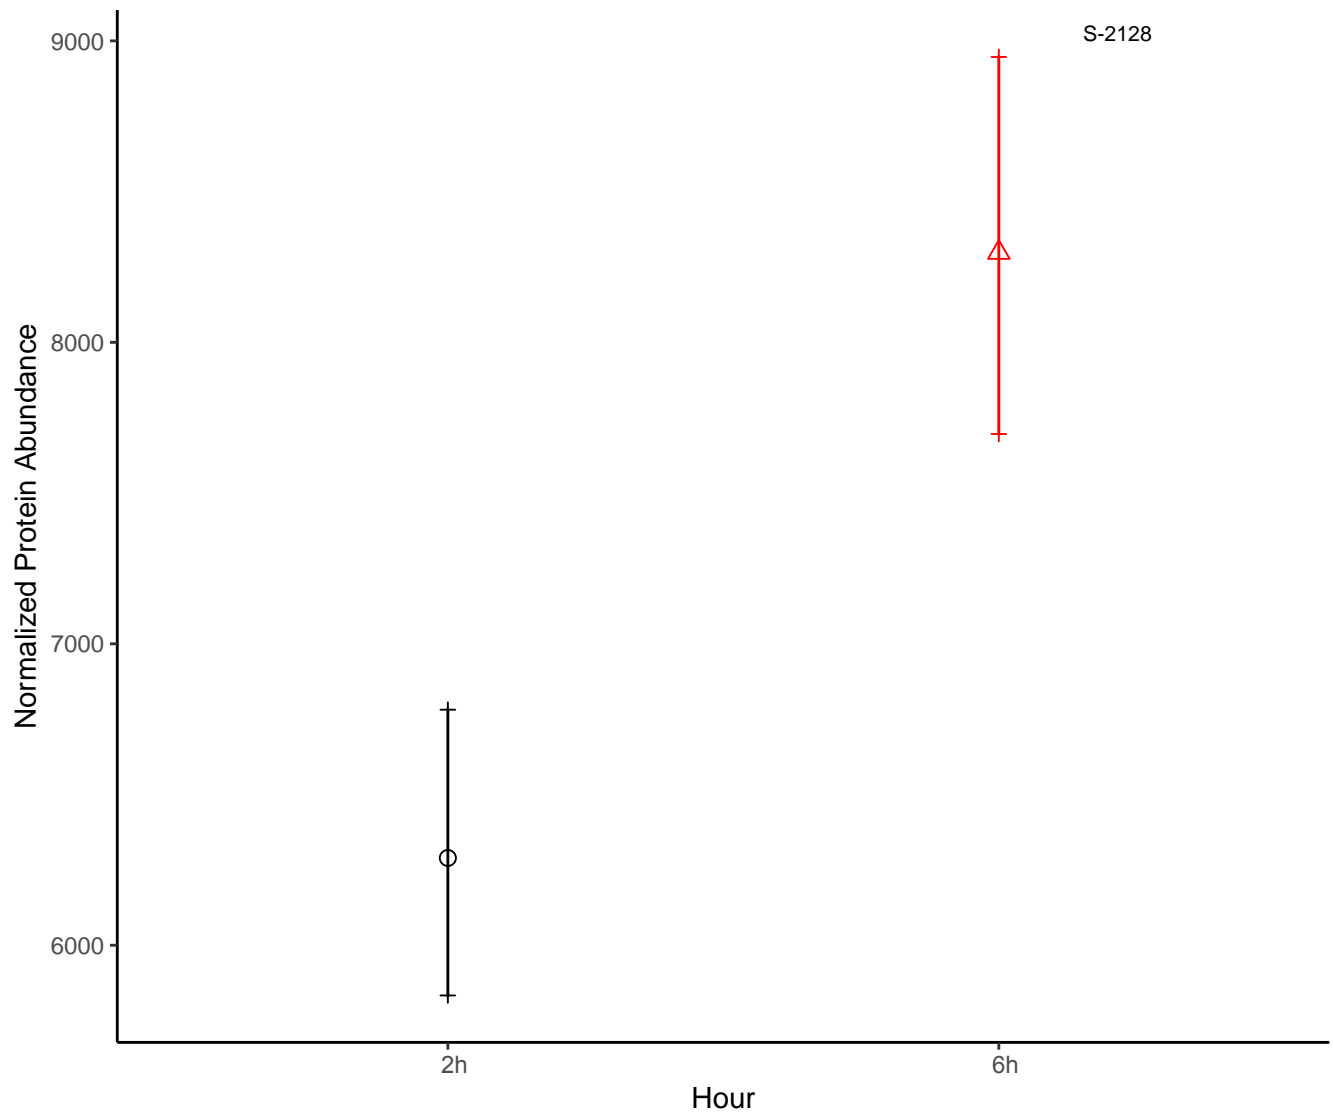

⊕ 2h

△ 6h



# FTSZ\_STAAM

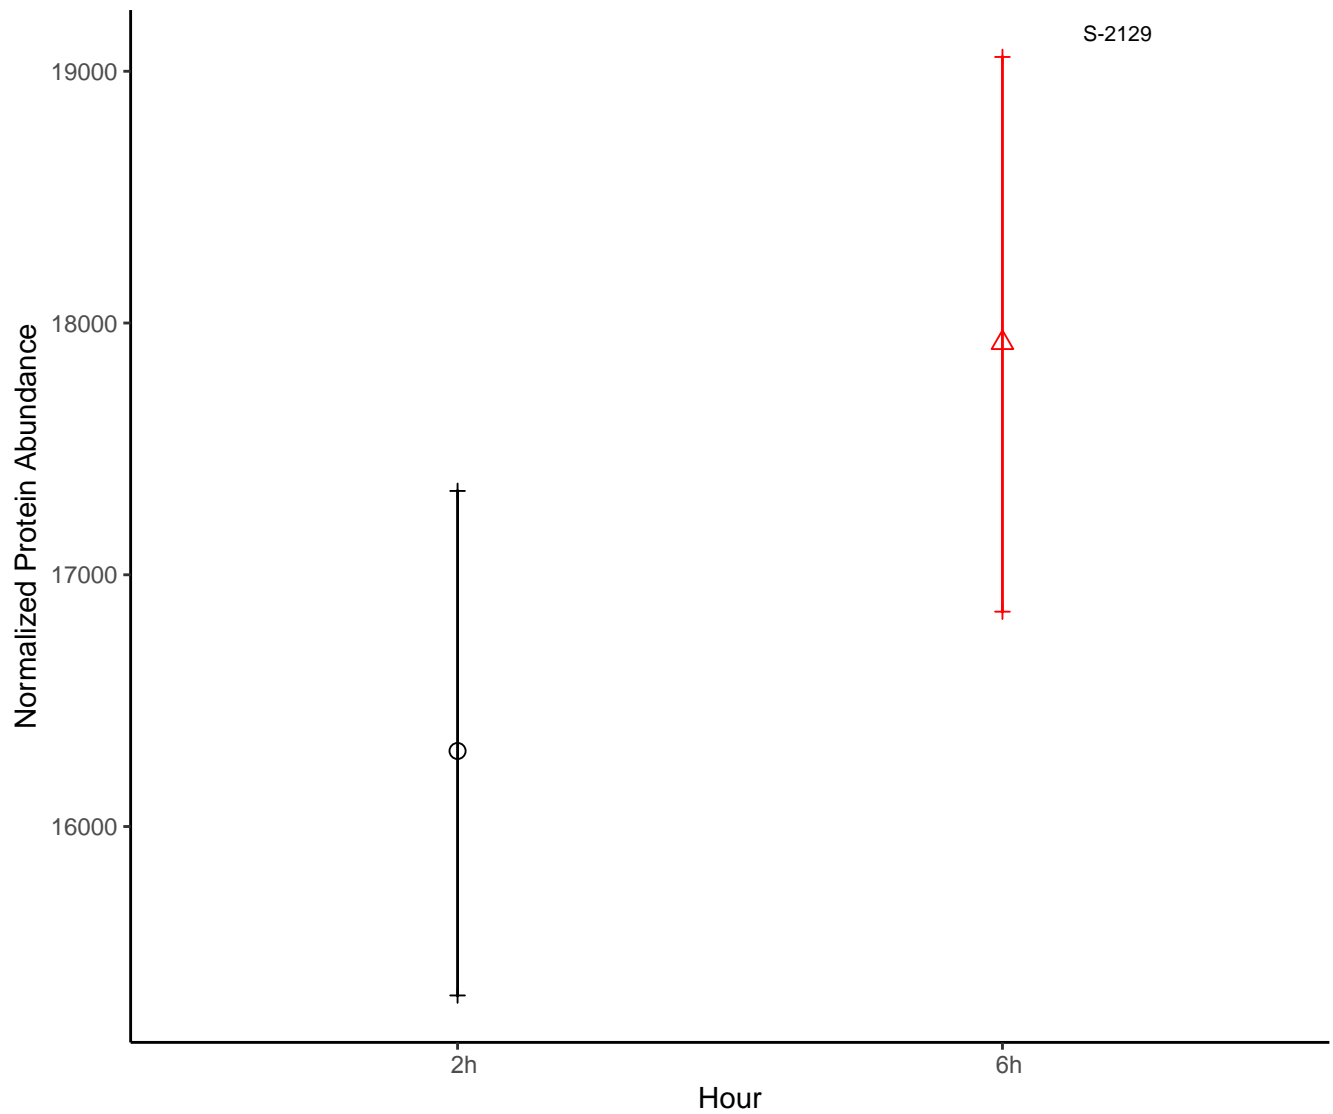

⊕ 2h

△ 6h

# FUMC\_STAAM

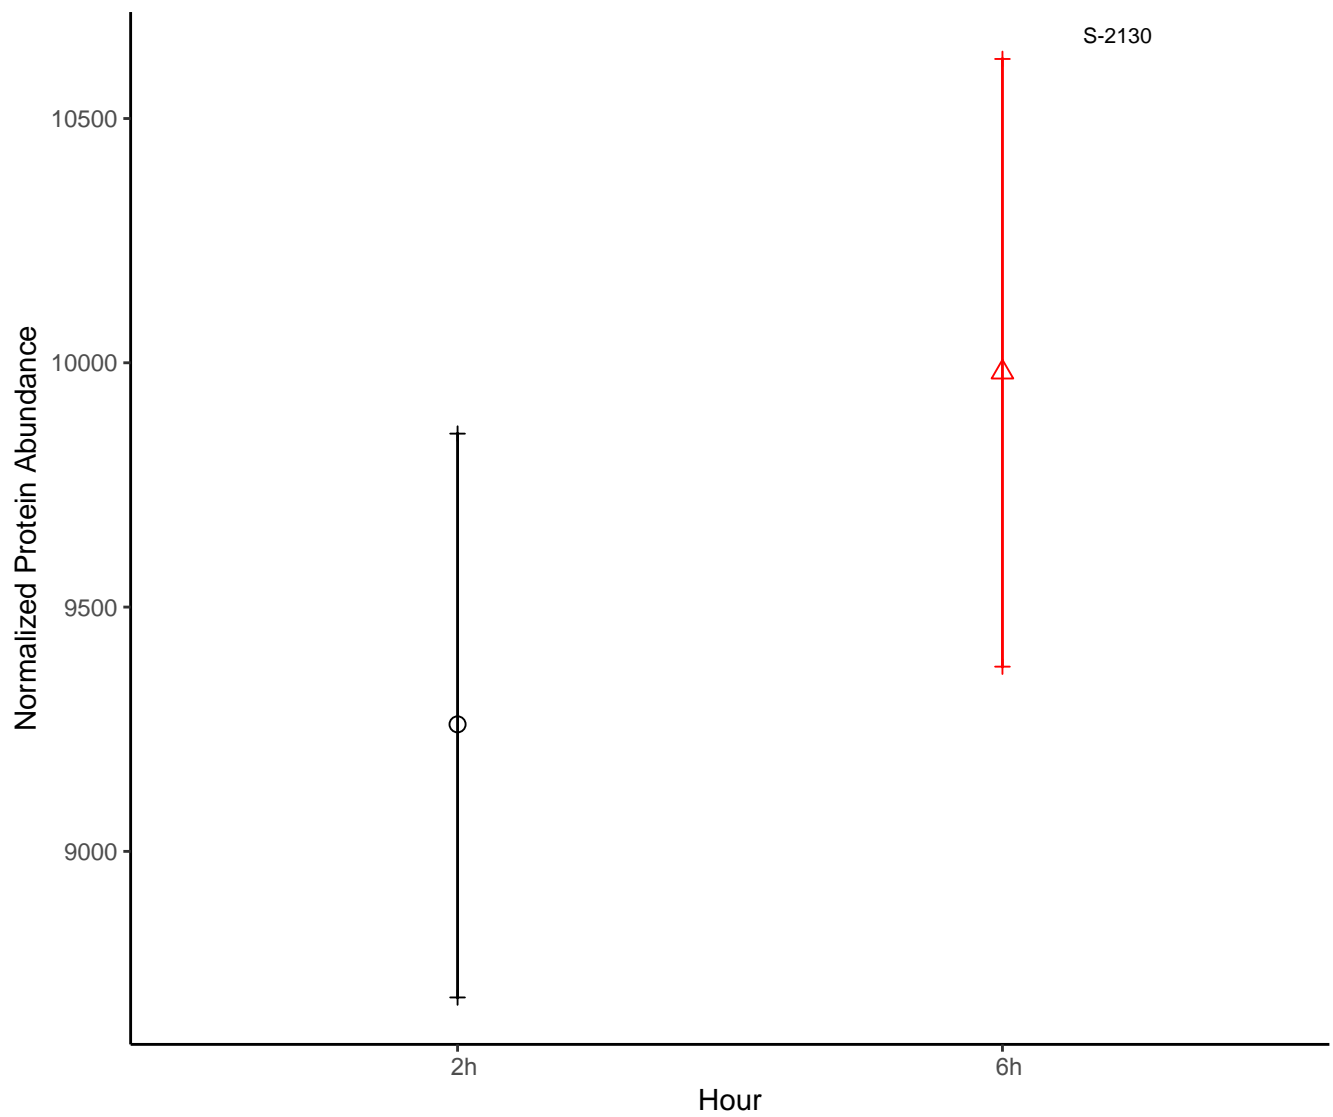

⊕ 2h

△ 6h

# G3P1\_STAAM

S-2131

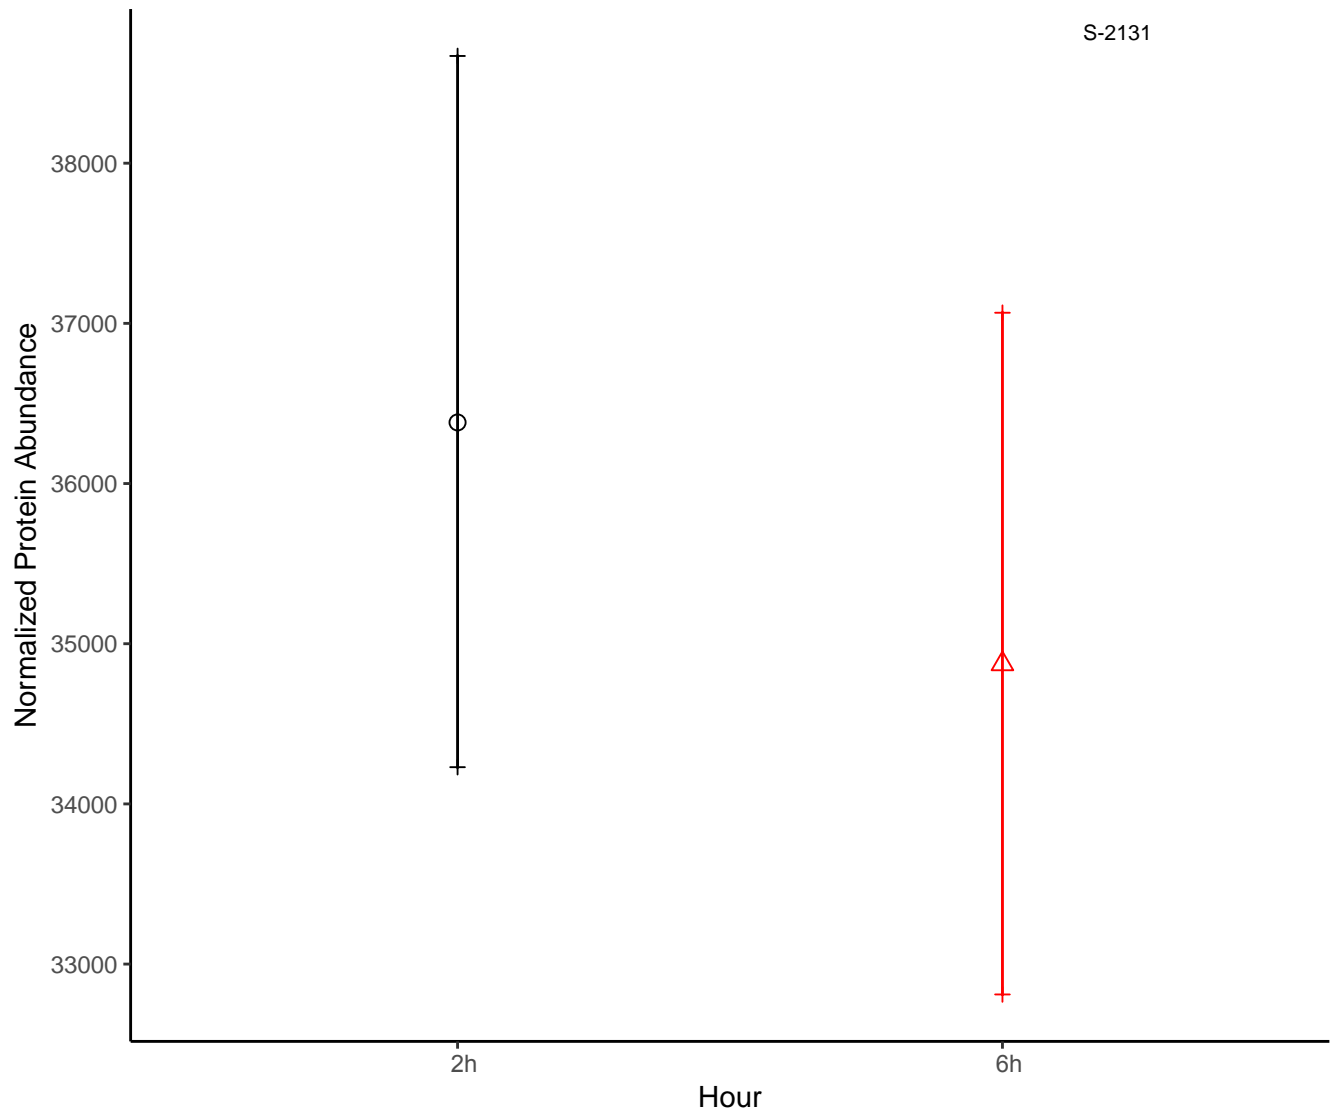

⊕ 2h

△ 6h

# G3P2\_STAAM

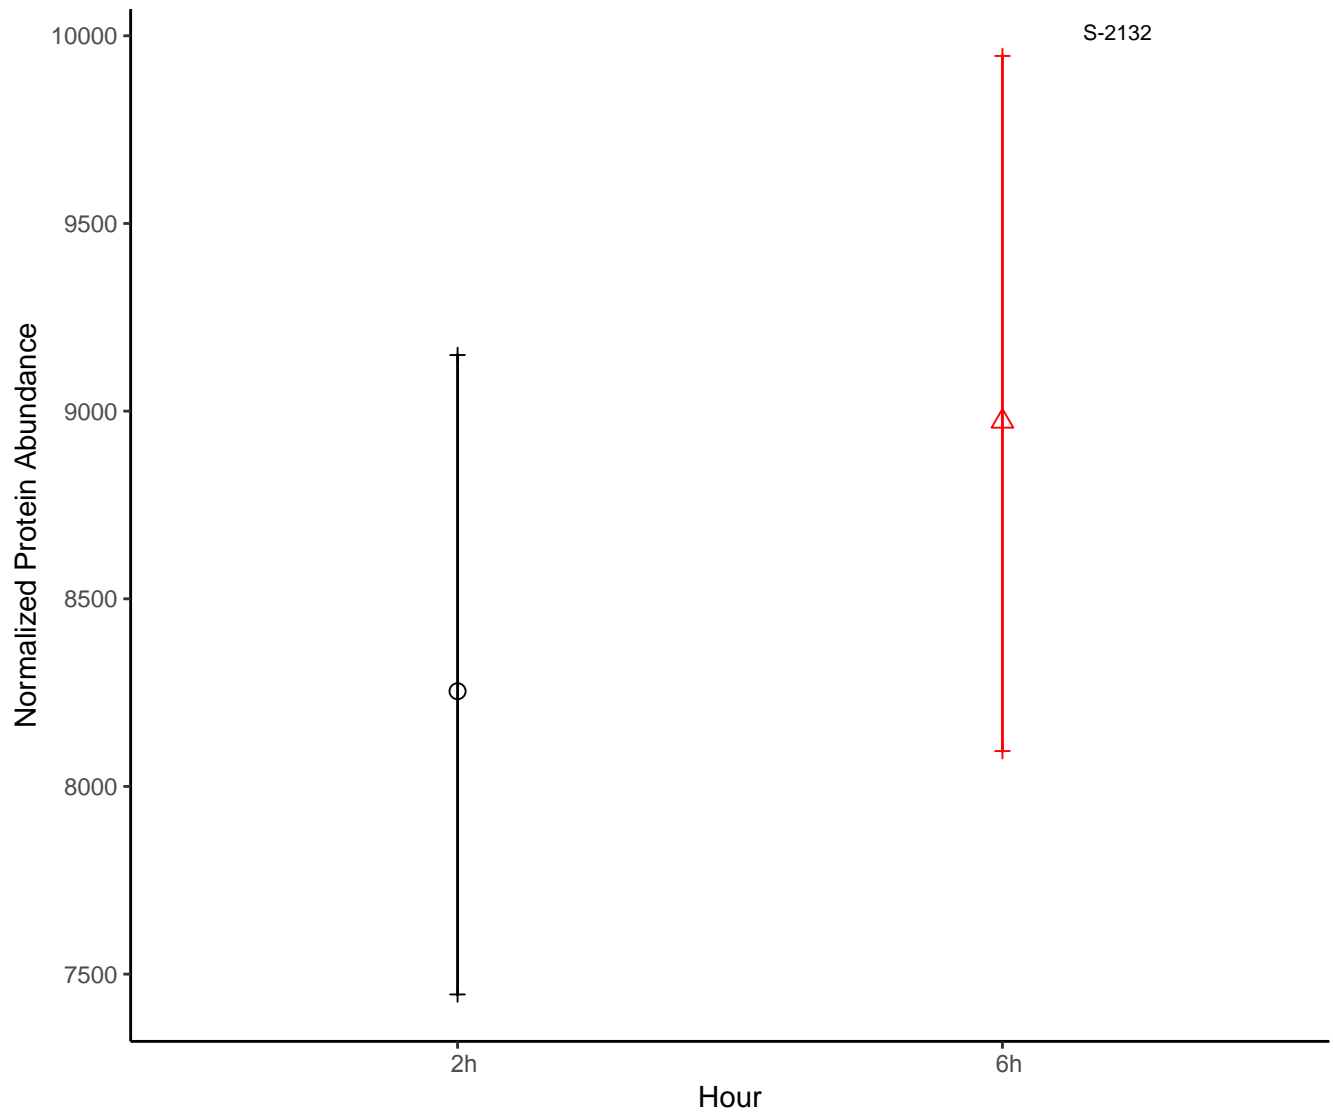

S-2132

⊕ 2h

△ 6h

# G6PI\_STAAM

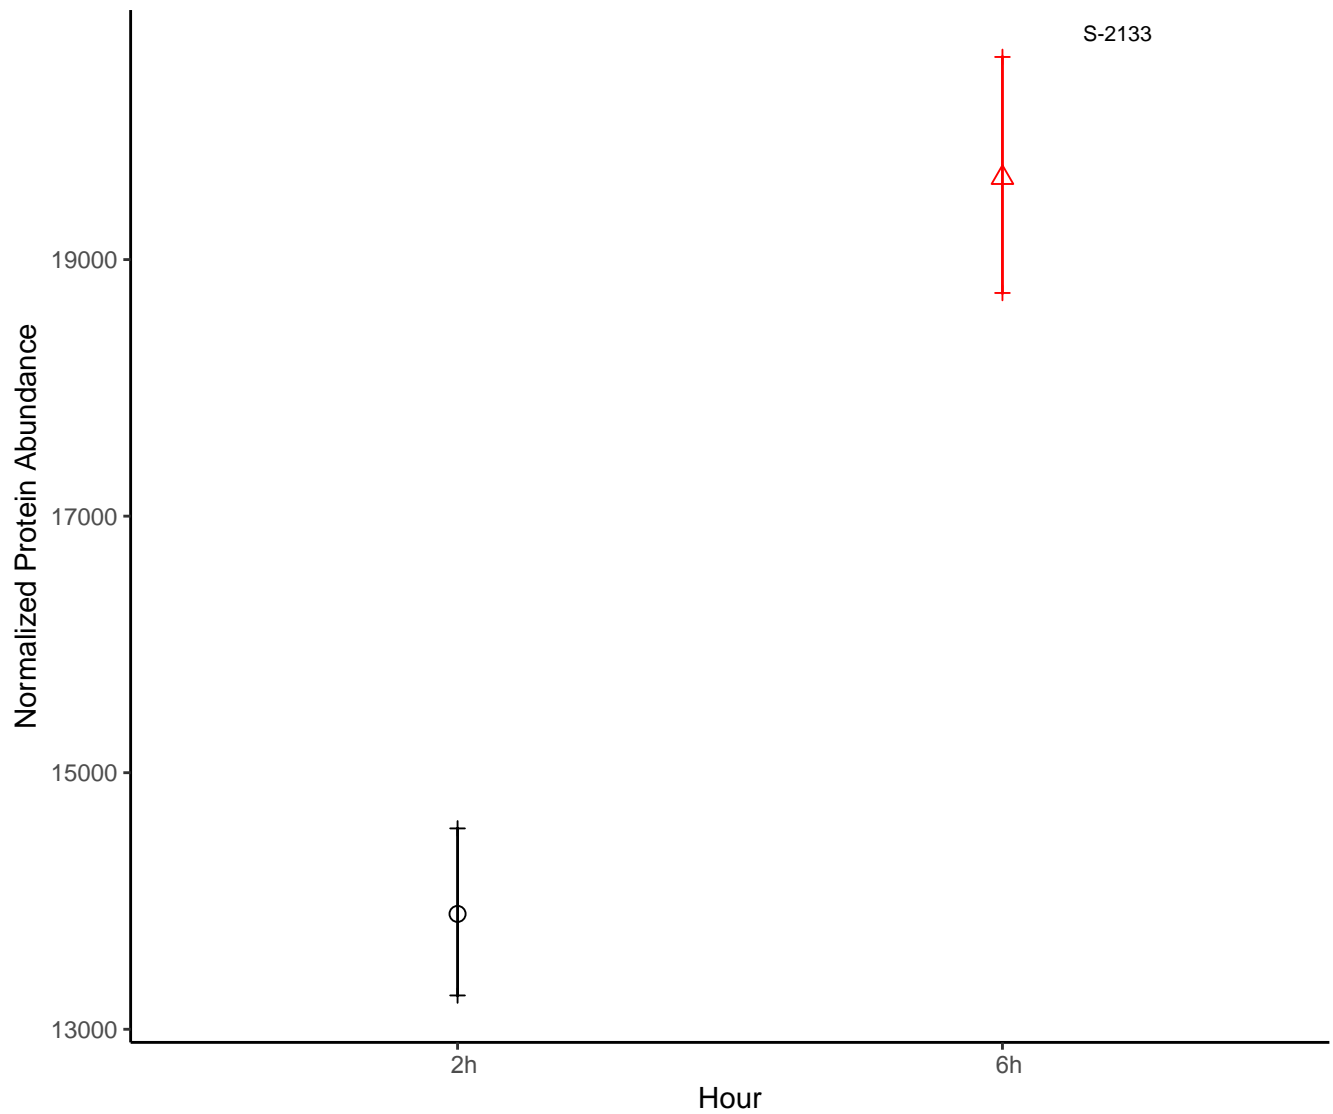

⊕ 2h

△ 6h

# GATA\_STAAM

S-2134

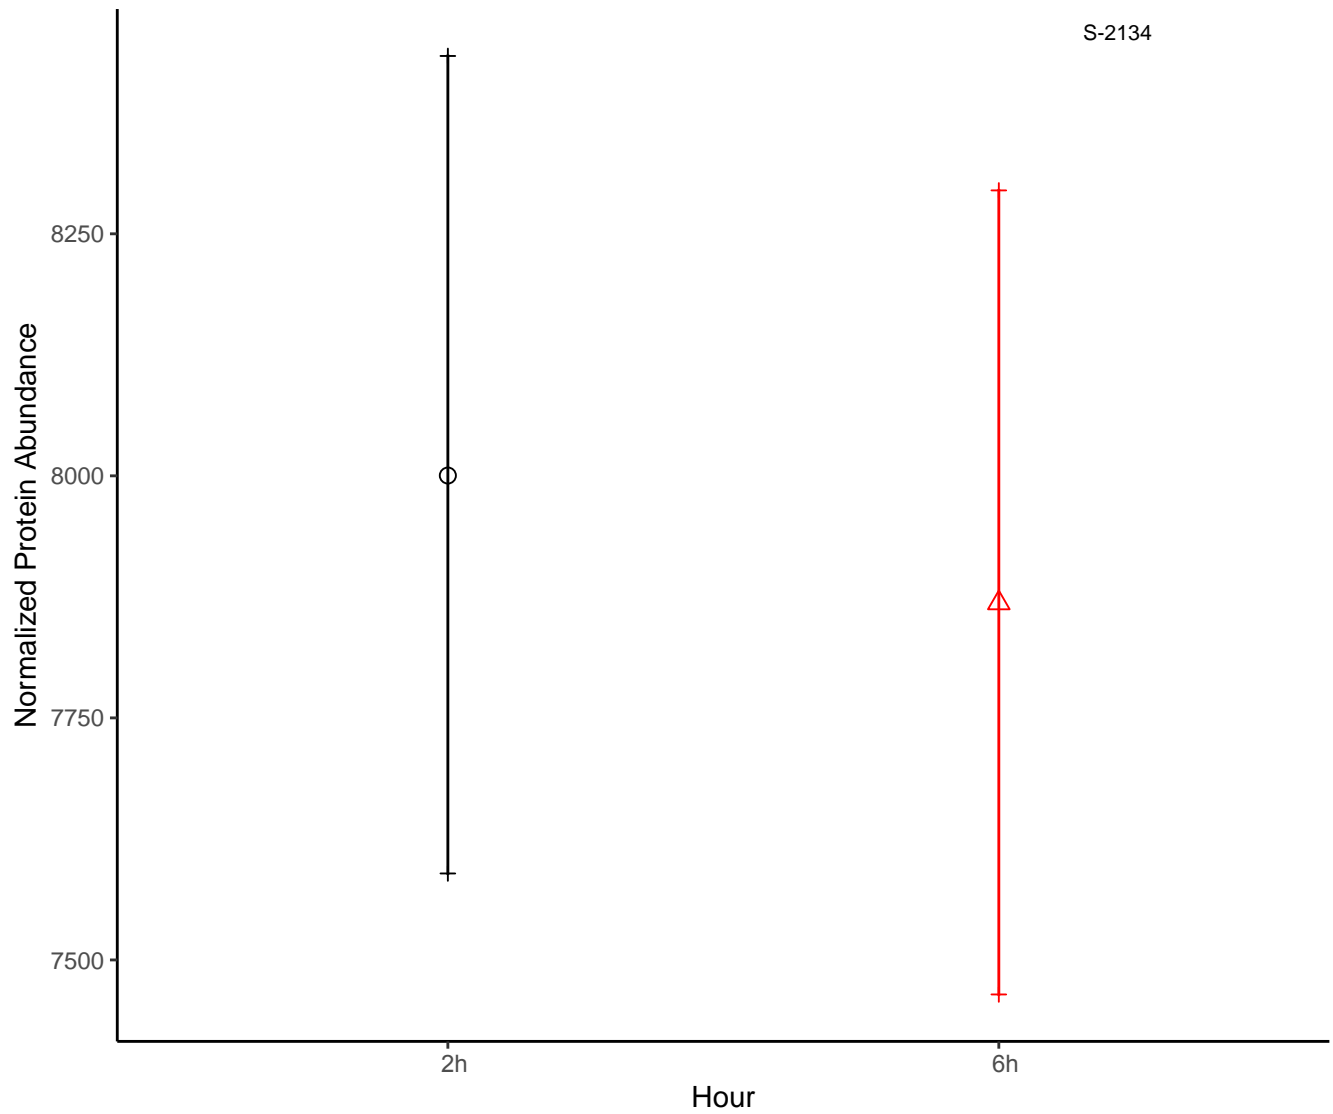

⊕ 2h

△ 6h

# GATB\_STAAM

S-2135

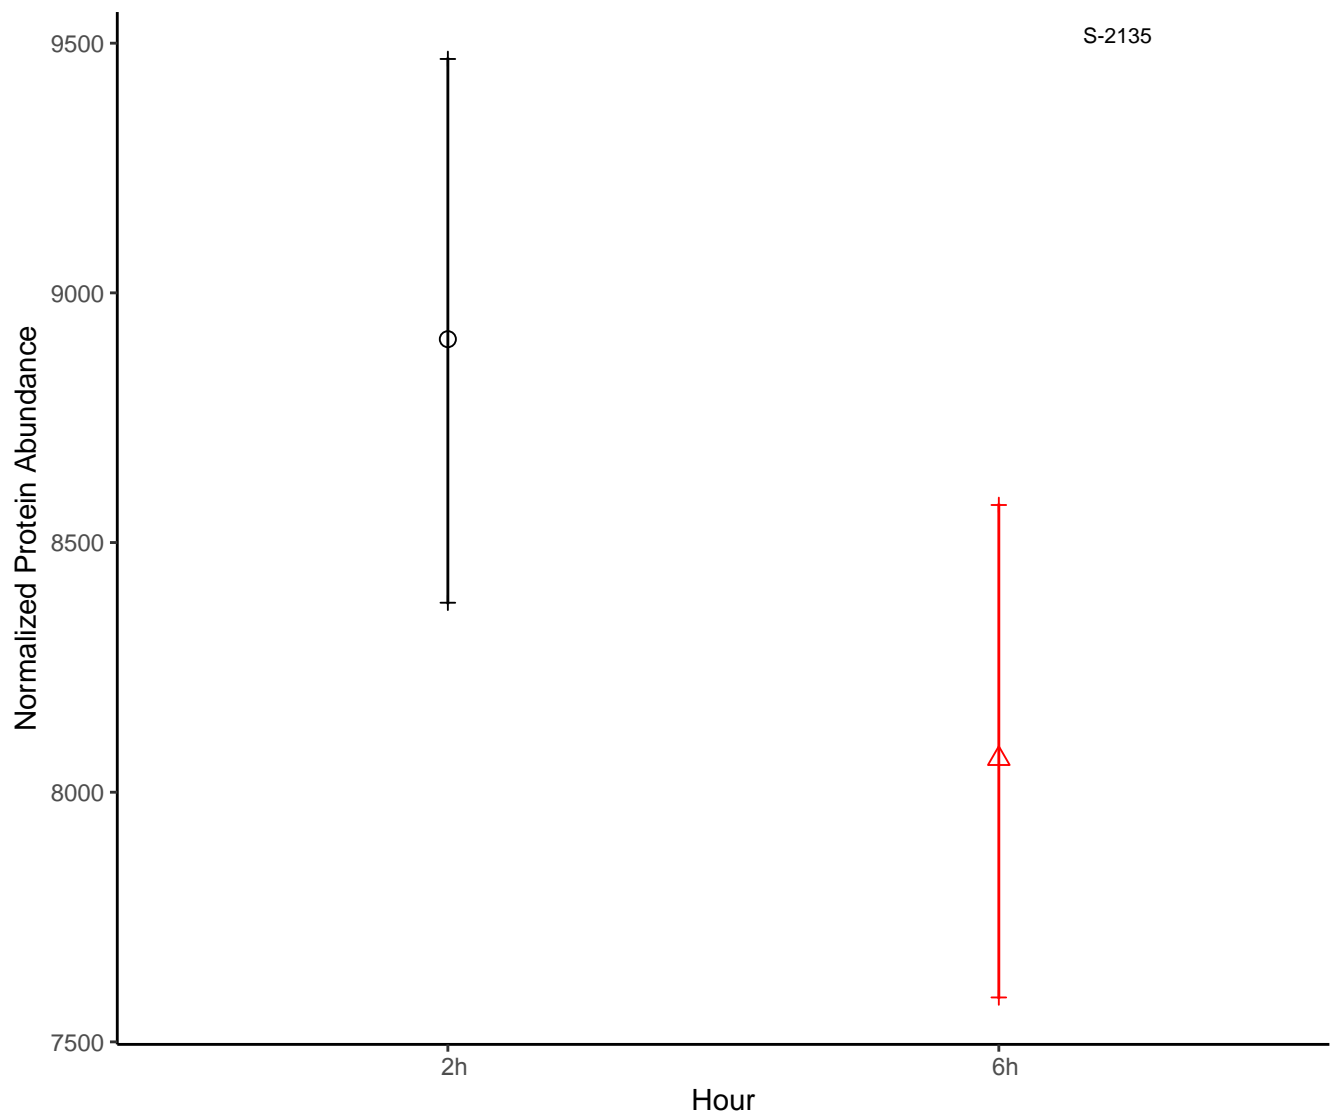

⊕ 2h

△ 6h

# GATC\_STAAM

S-2136

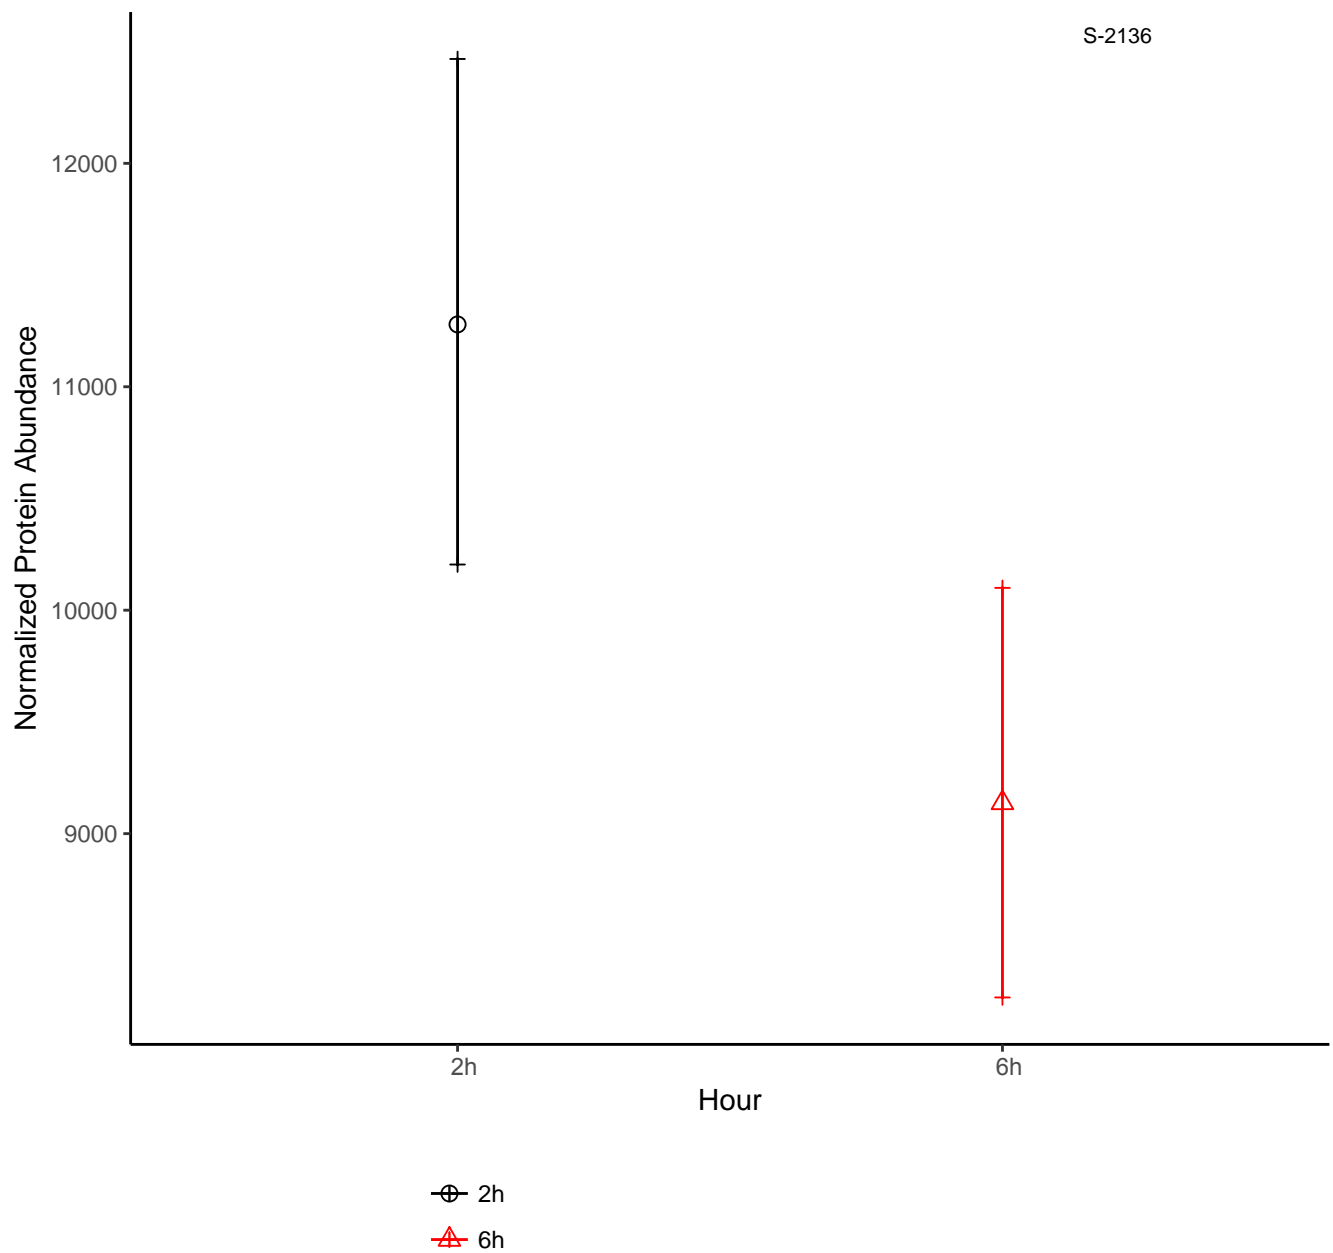



# GCH4\_STAAM

S-2137

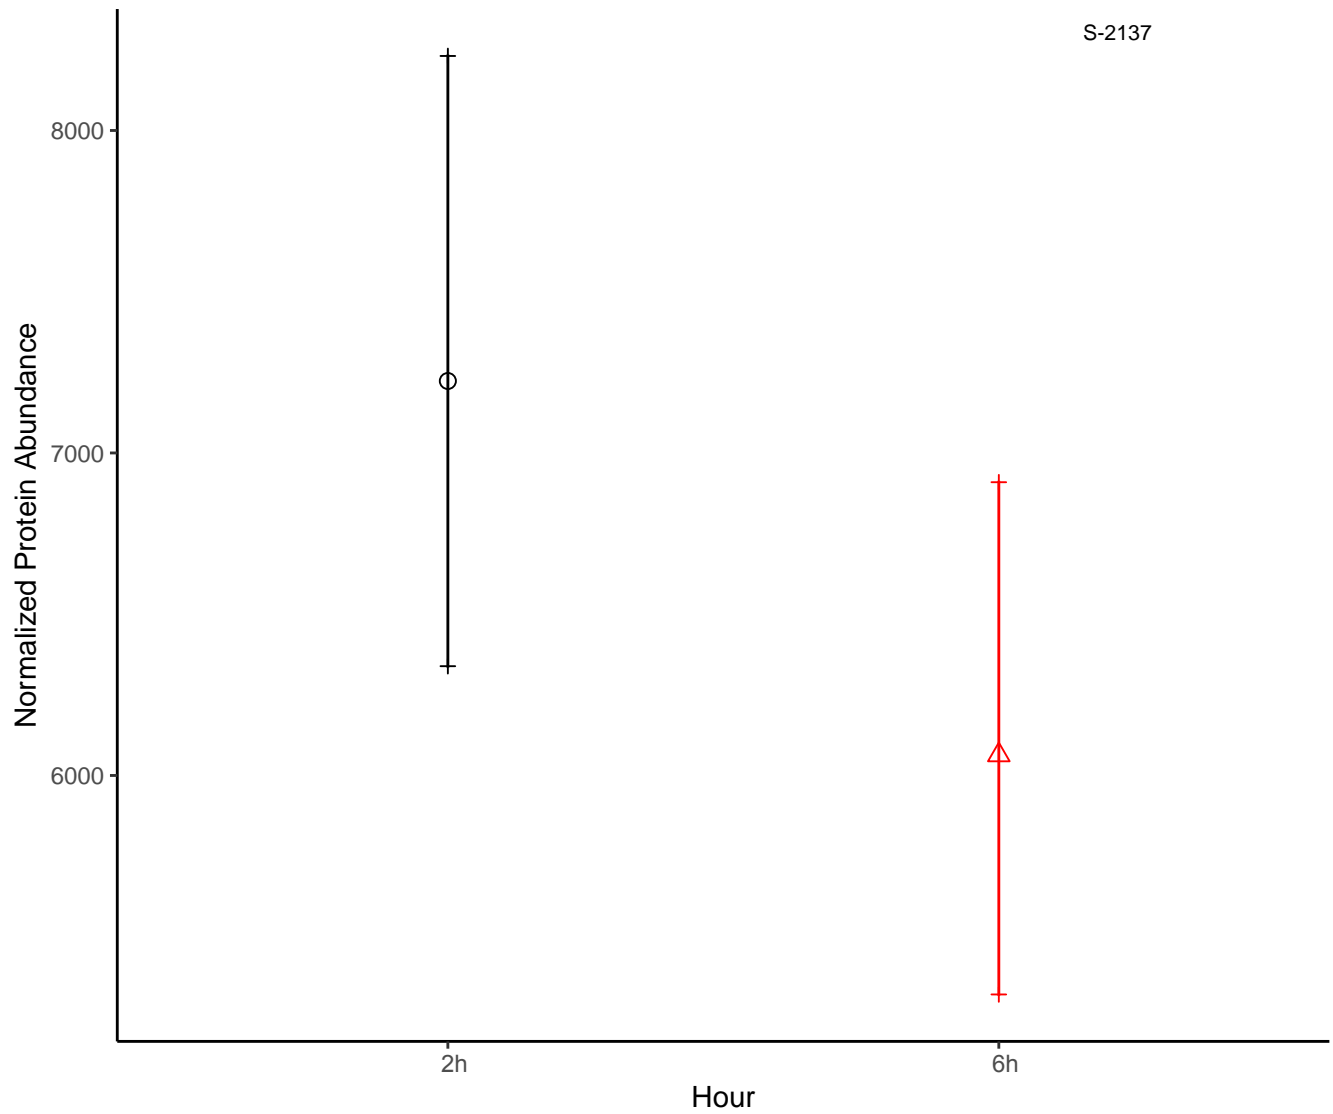

⊕ 2h

△ 6h

# GCSH\_STAAM

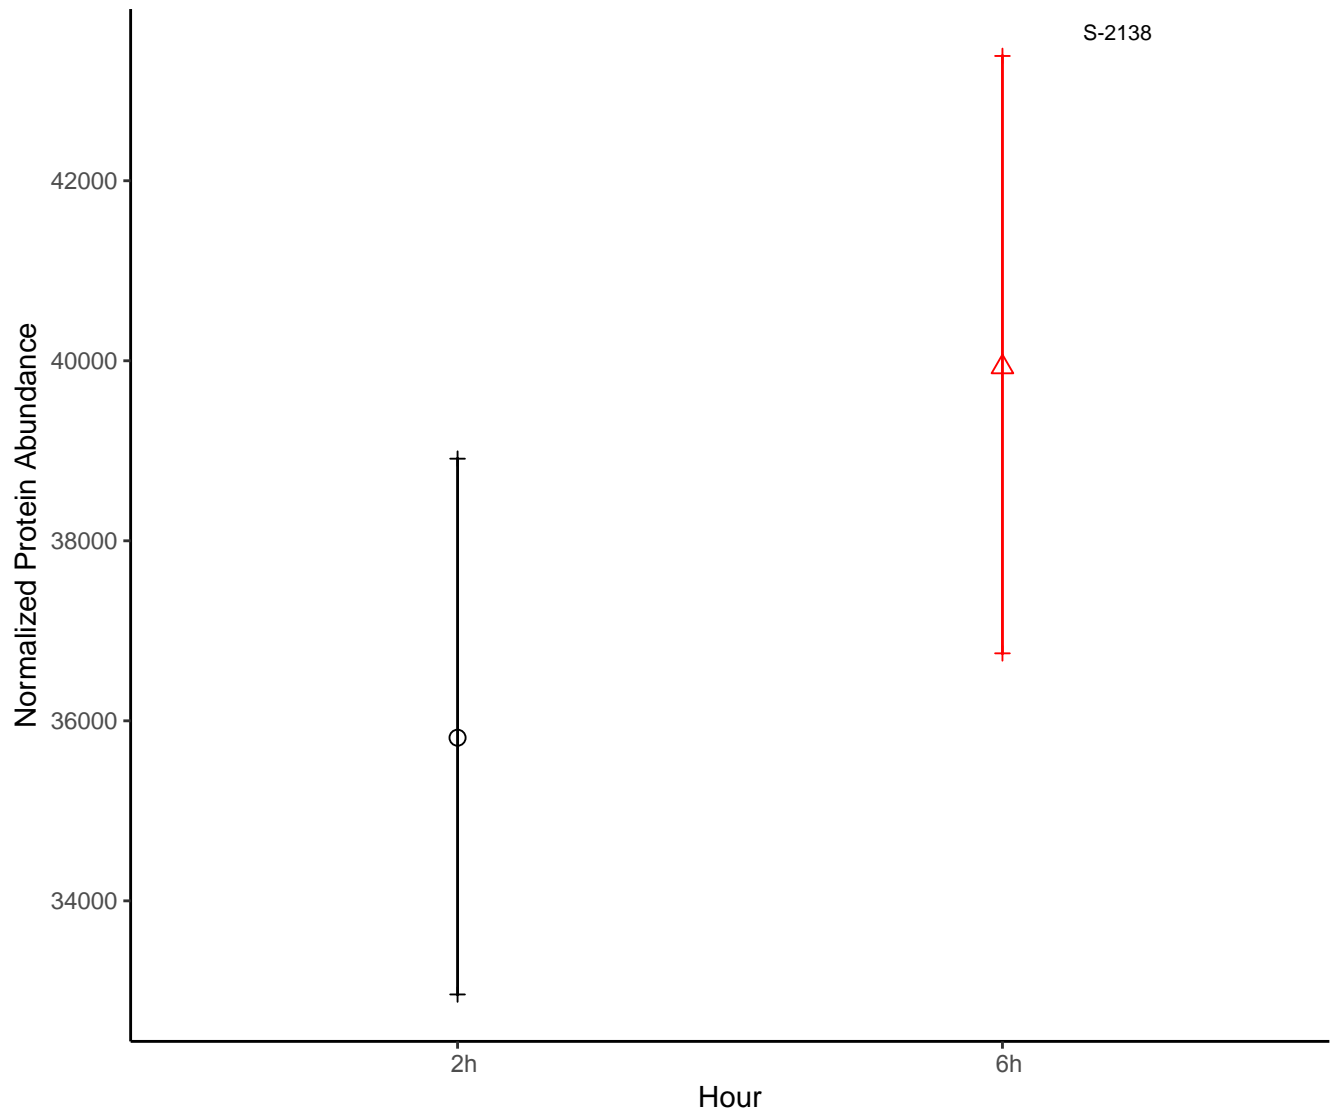

⊕ 2h

△ 6h

# GCSPA\_STAAM

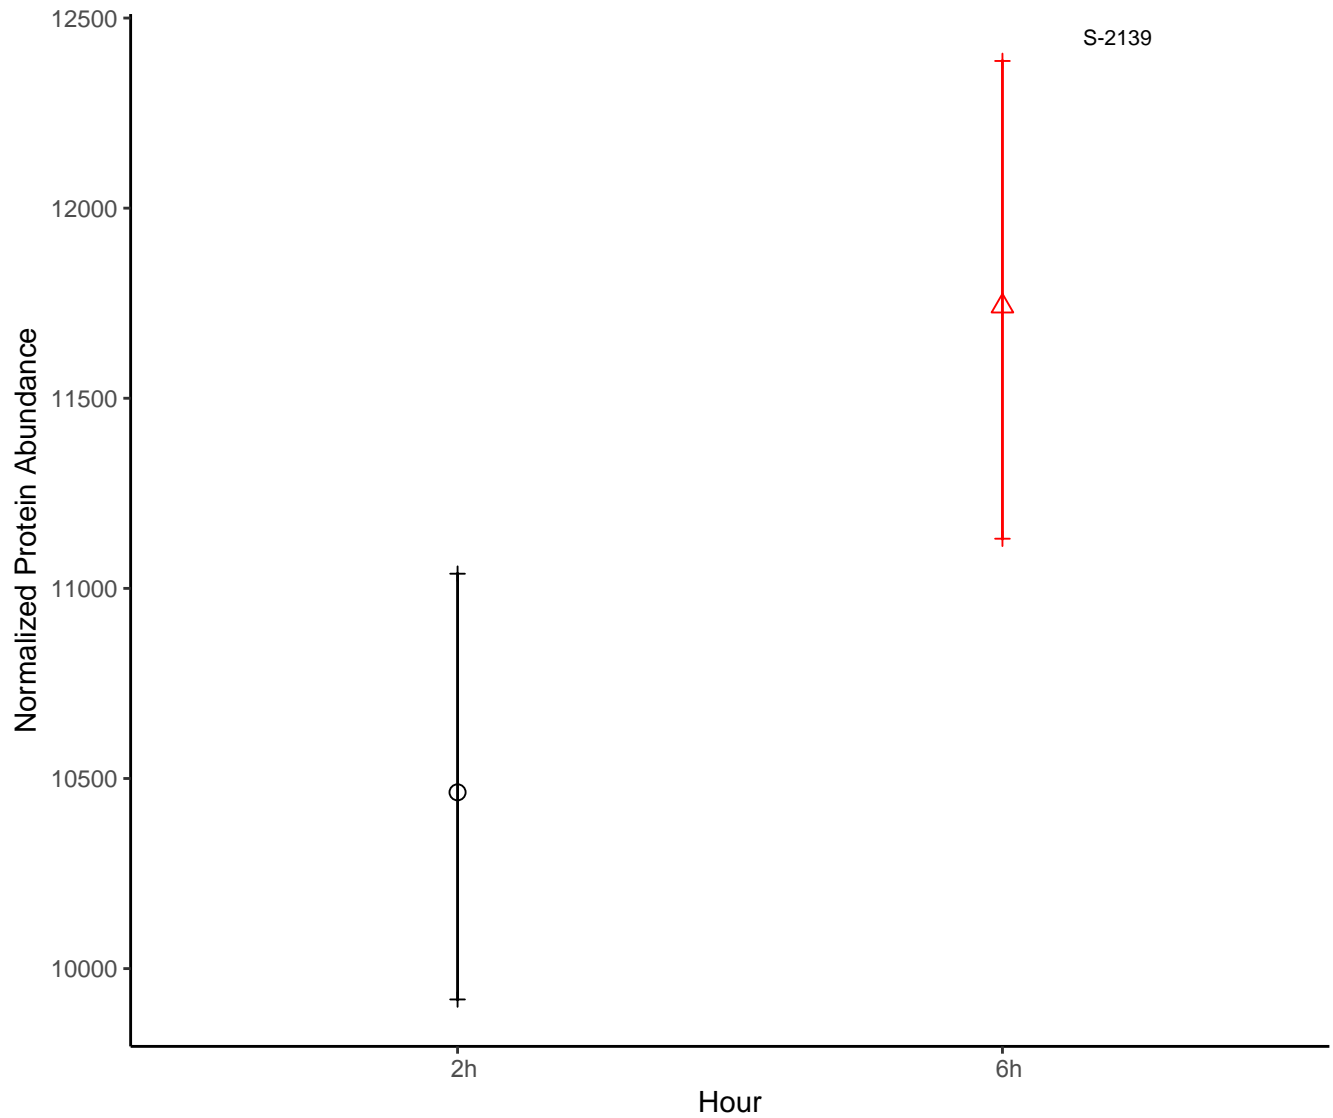

⊕ 2h

△ 6h

# GCSPB\_STAAM

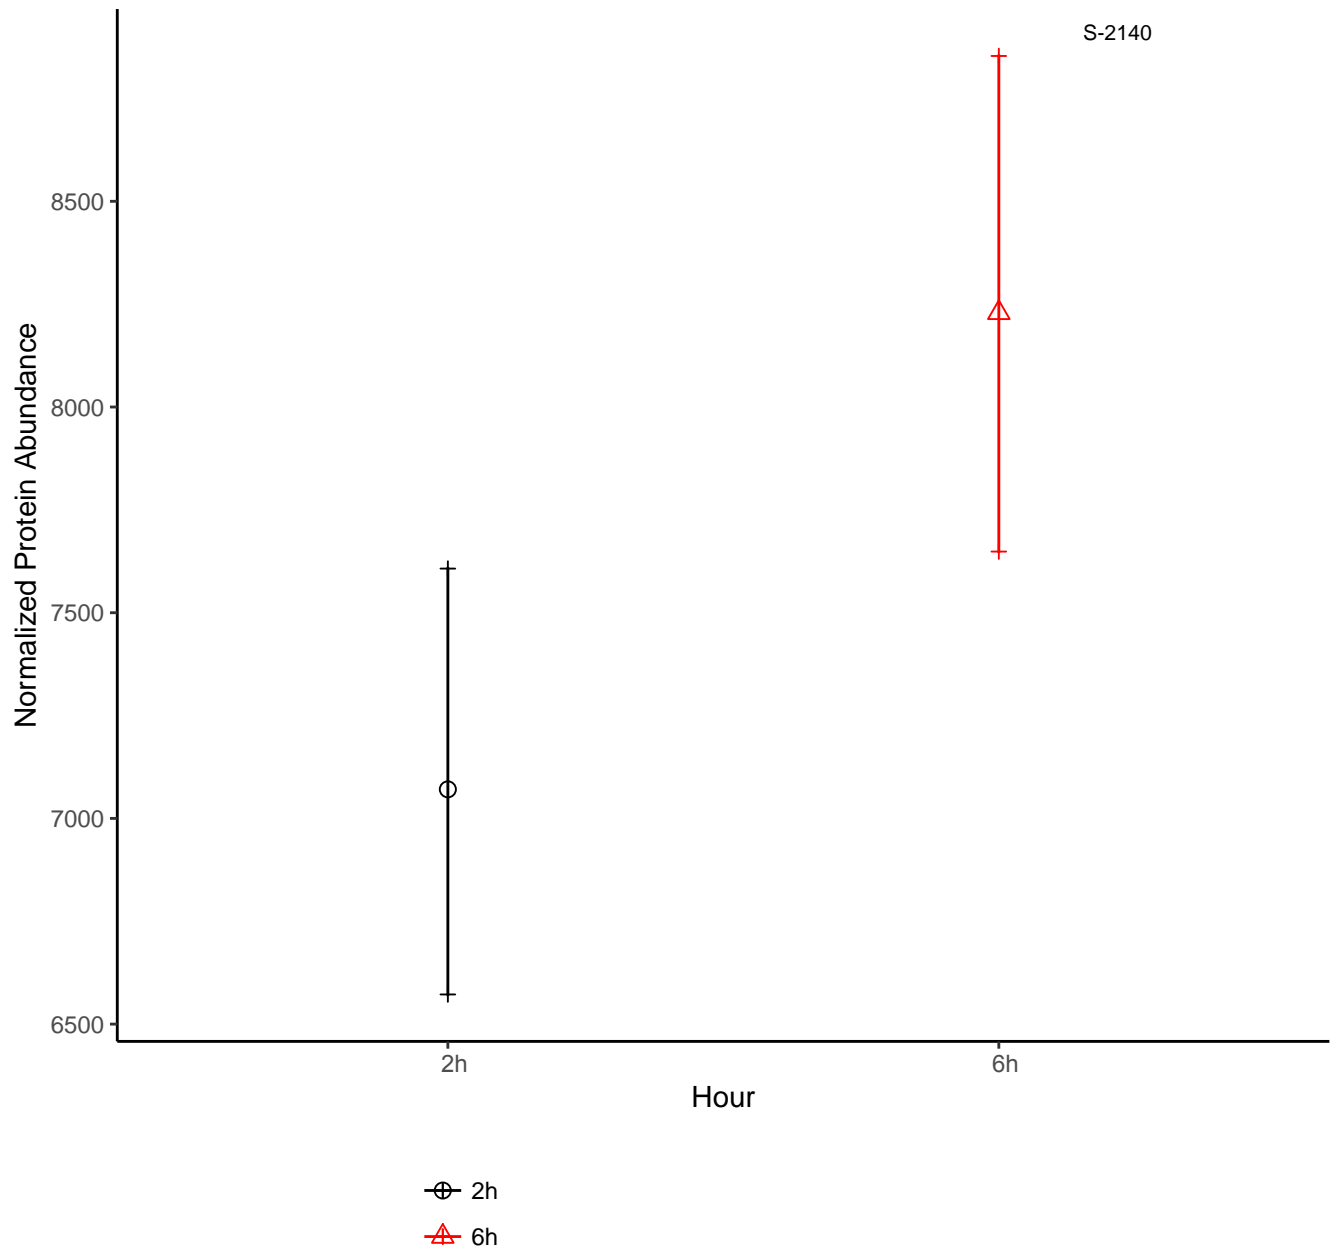

# GCST\_STAAM

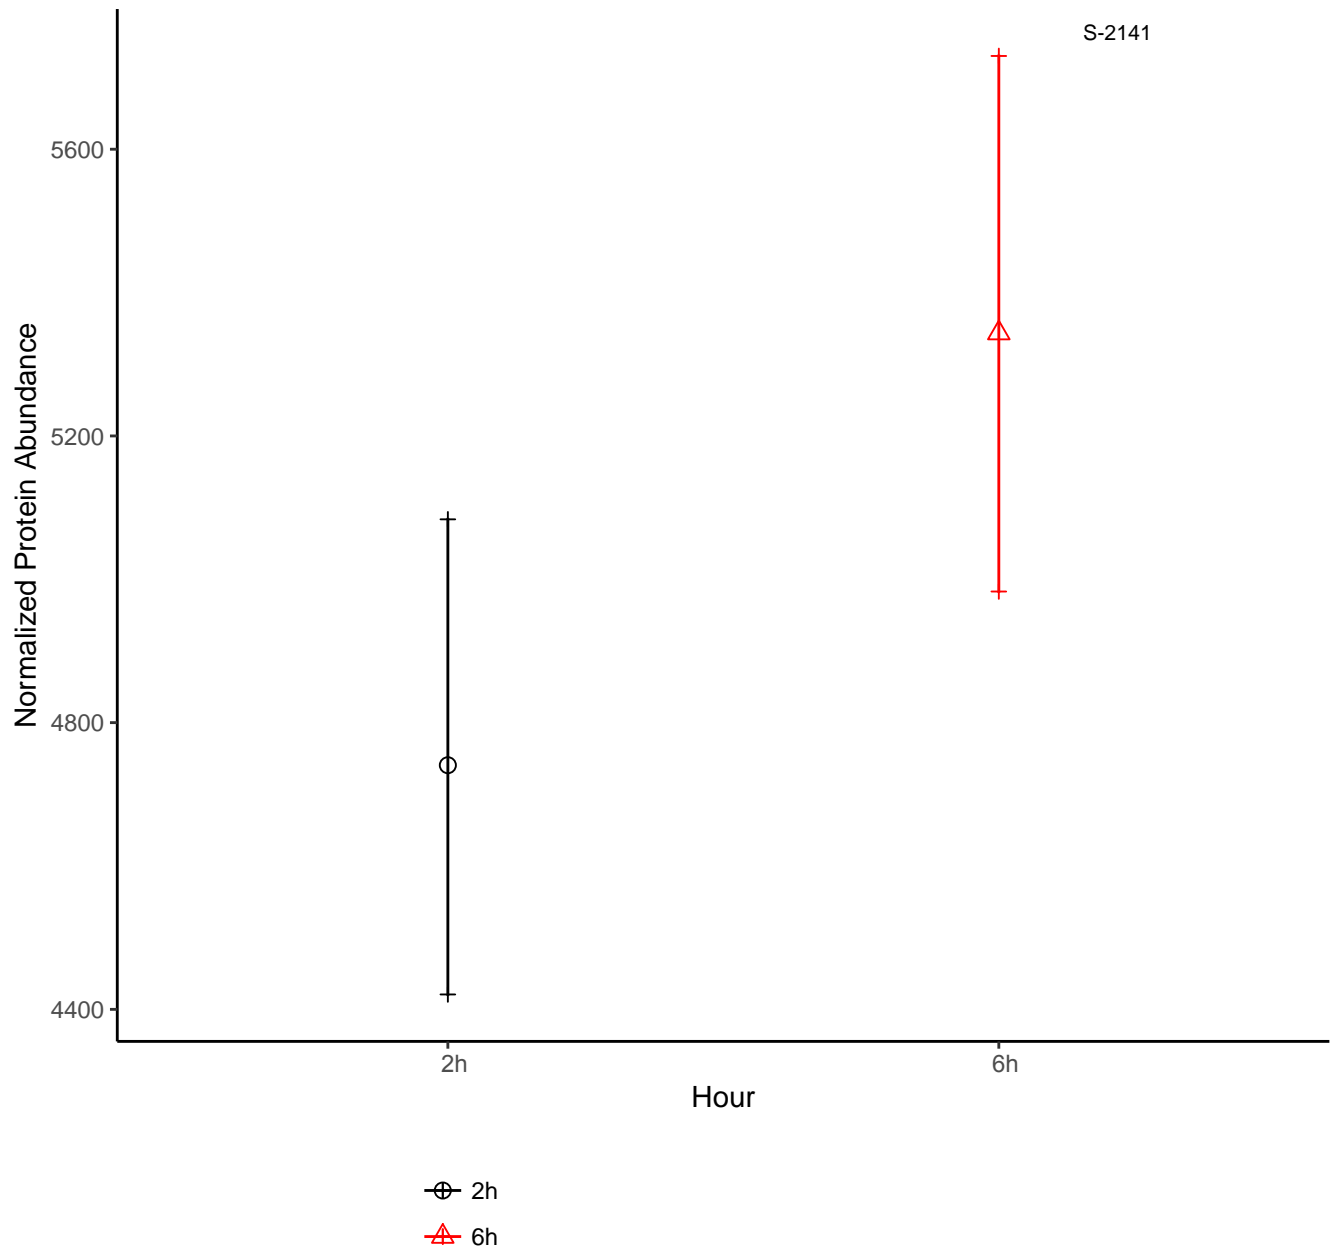

# GLMM\_STAAM

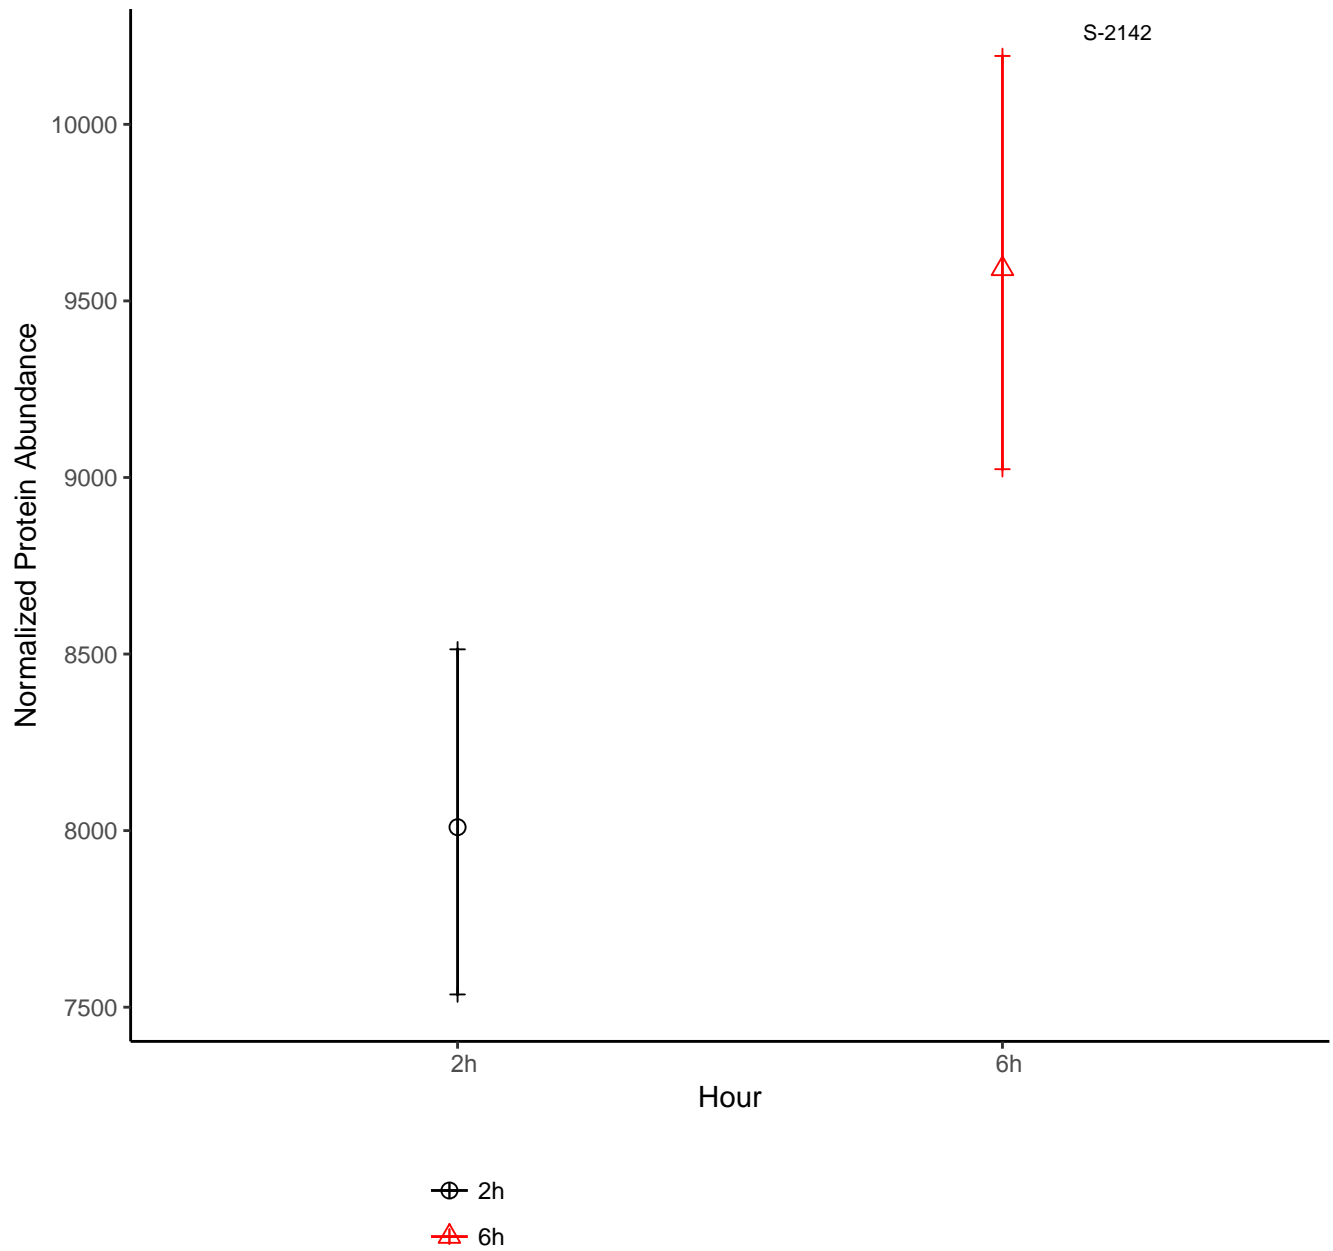

# GLMS\_STAAM

S-2143

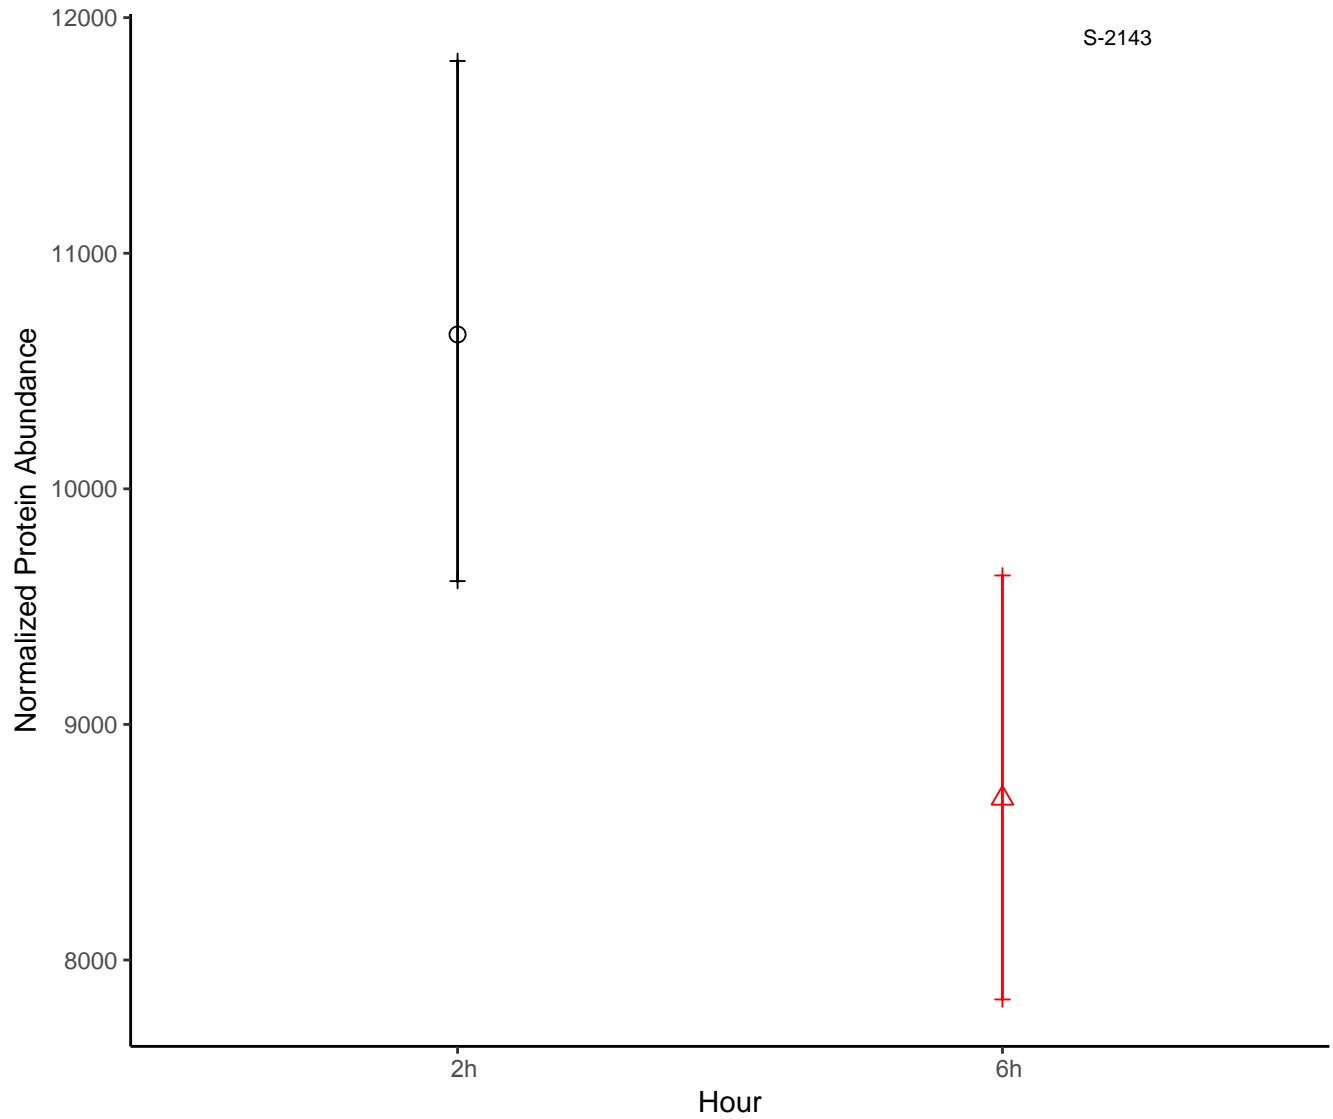

⊕ 2h

△ 6h

# GLMU\_STAAM

S-2144

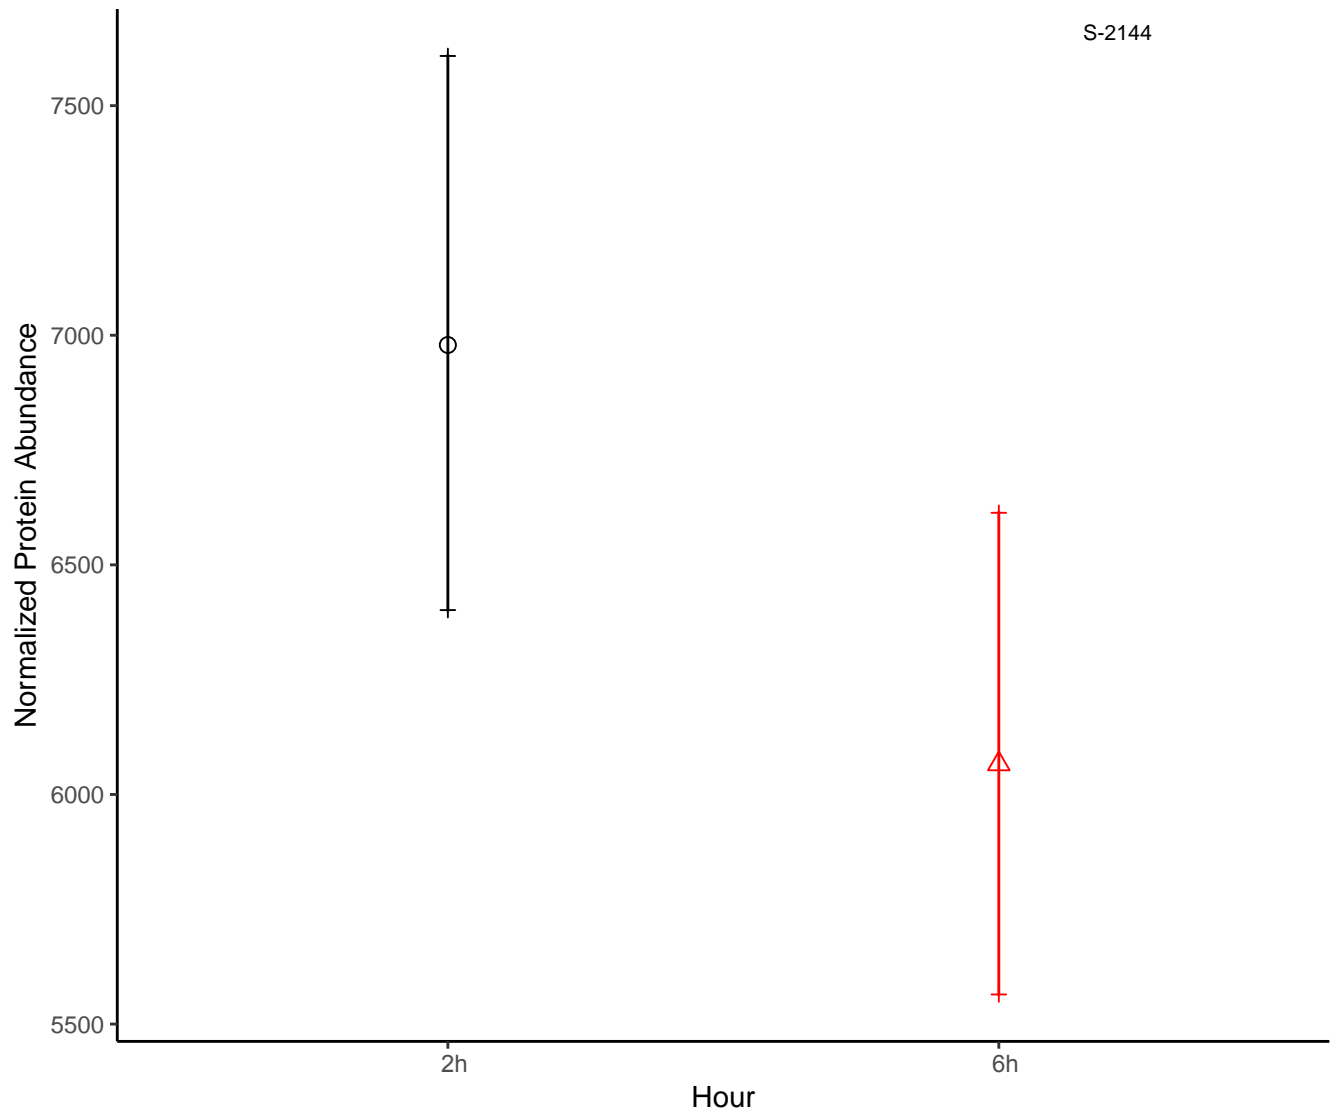

⊕ 2h

△ 6h



# GLNA\_STAAM

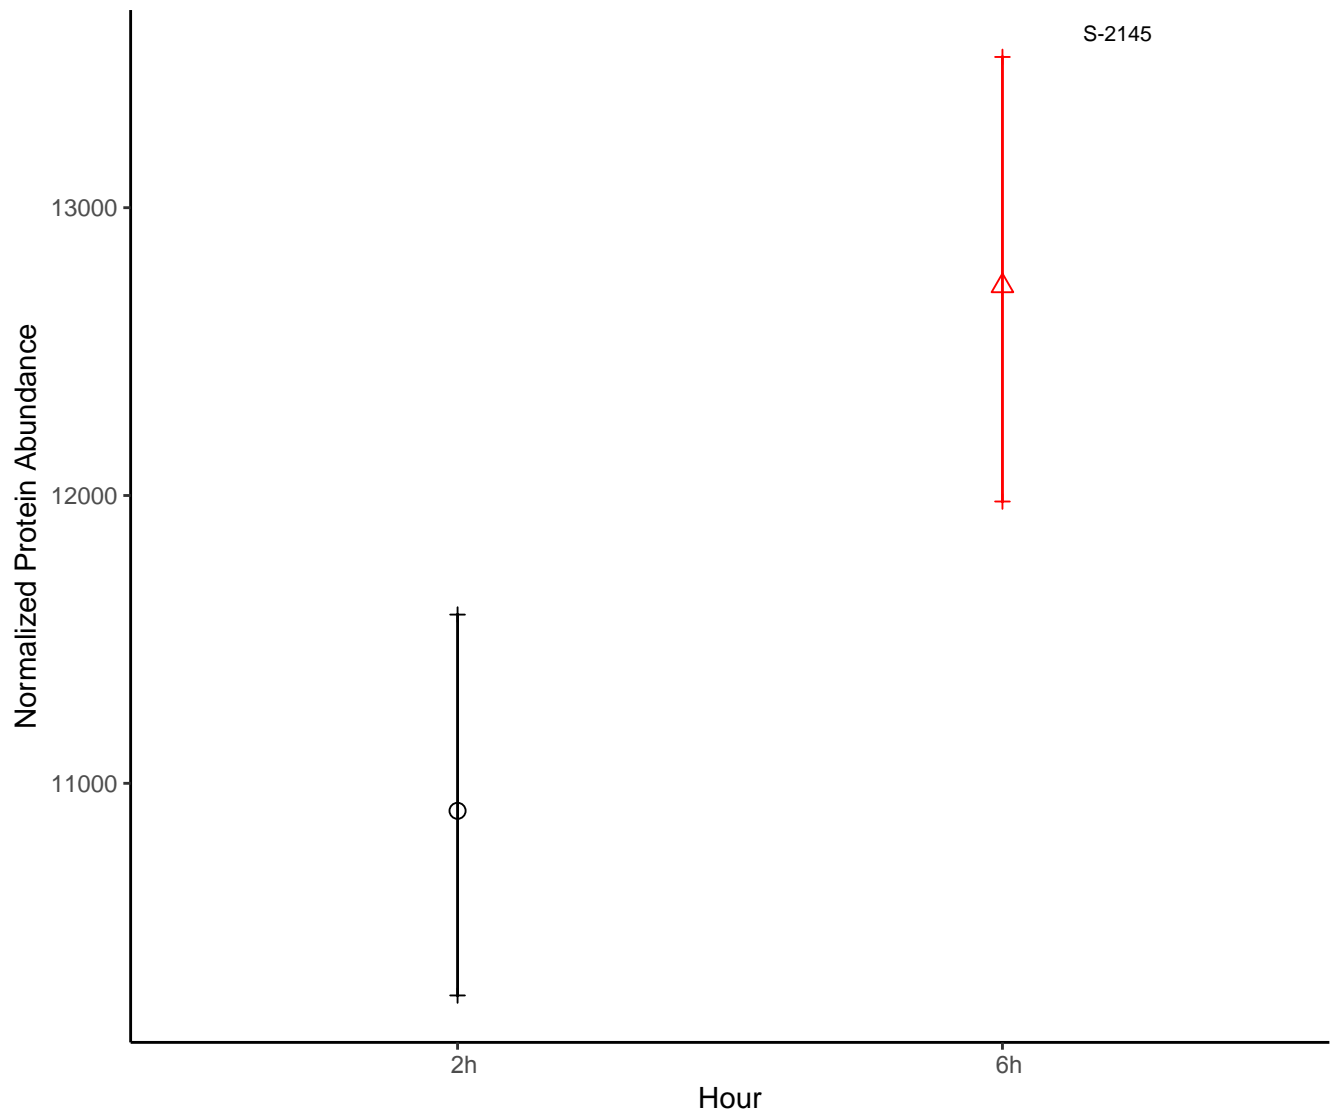

⊕ 2h

△ 6h

# GLPD\_STAAM

S-2146

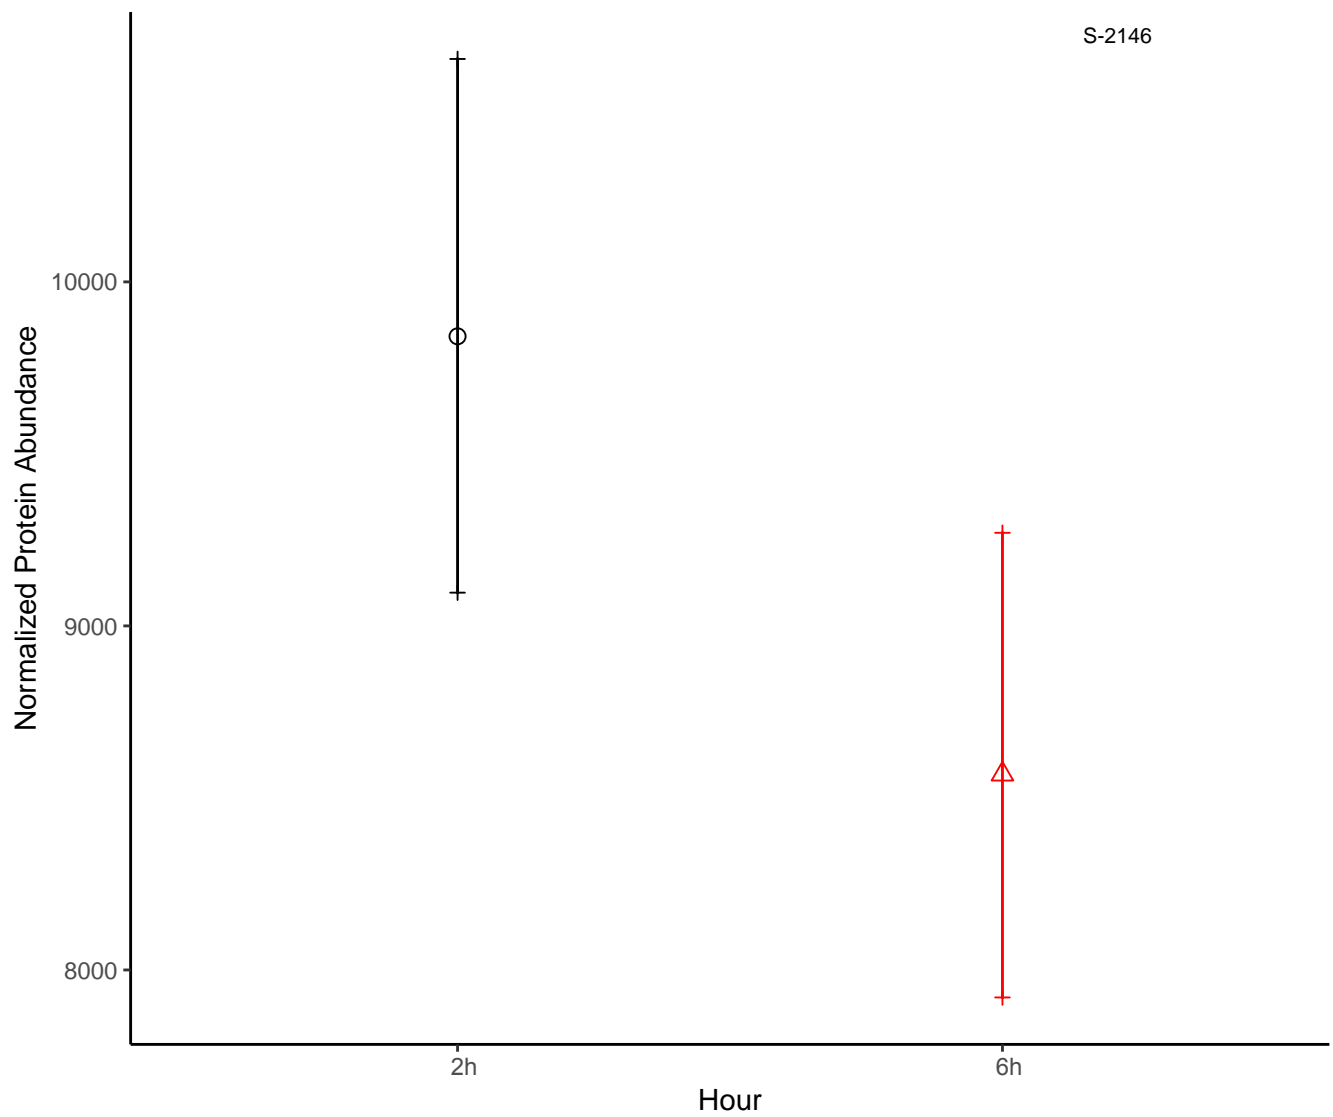

⊕ 2h

△ 6h

# GLPK\_STAAM

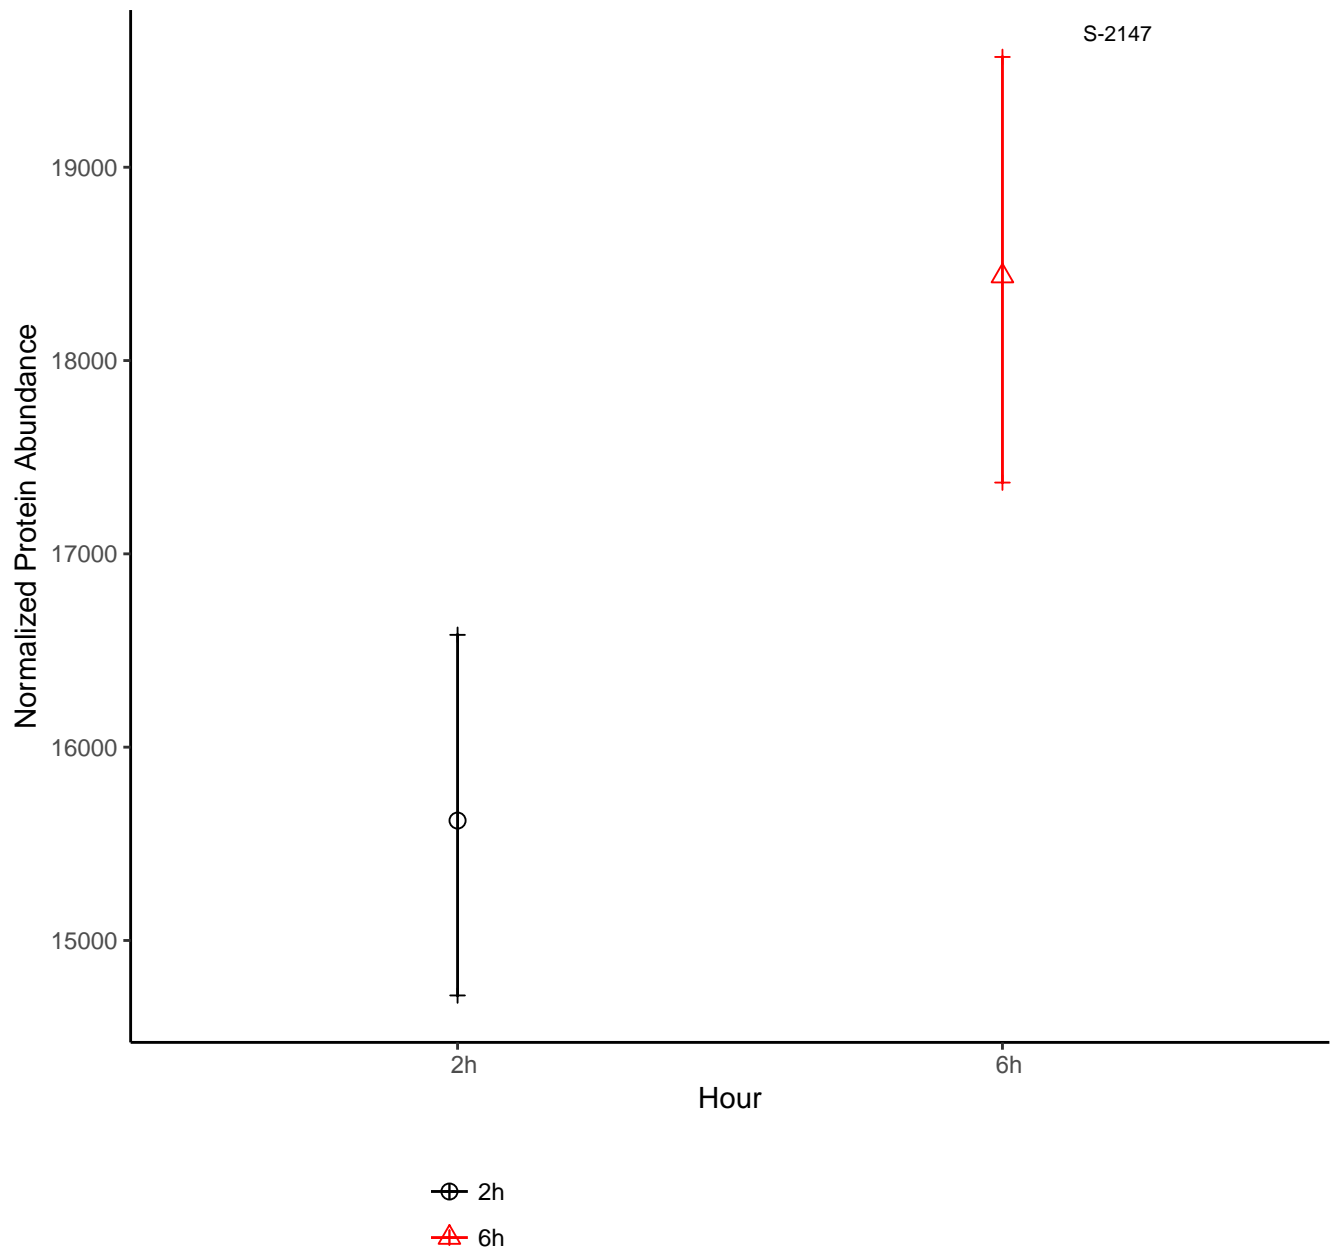

# GLYA\_STAAM

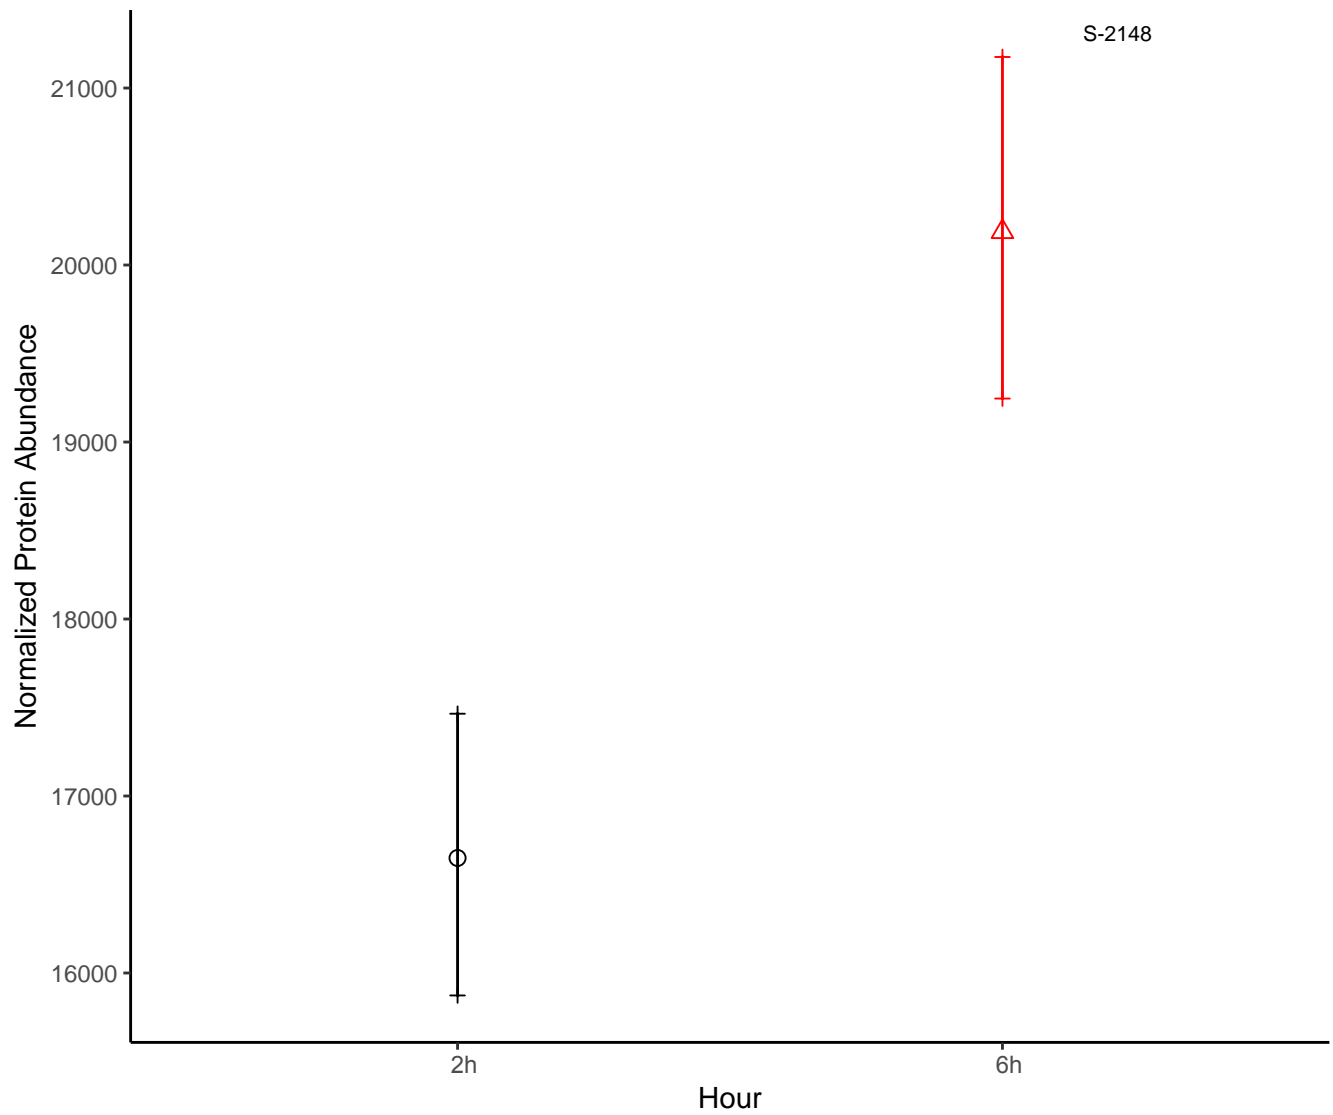

S-2148

⊕ 2h

△ 6h

# GPDA\_STAAM

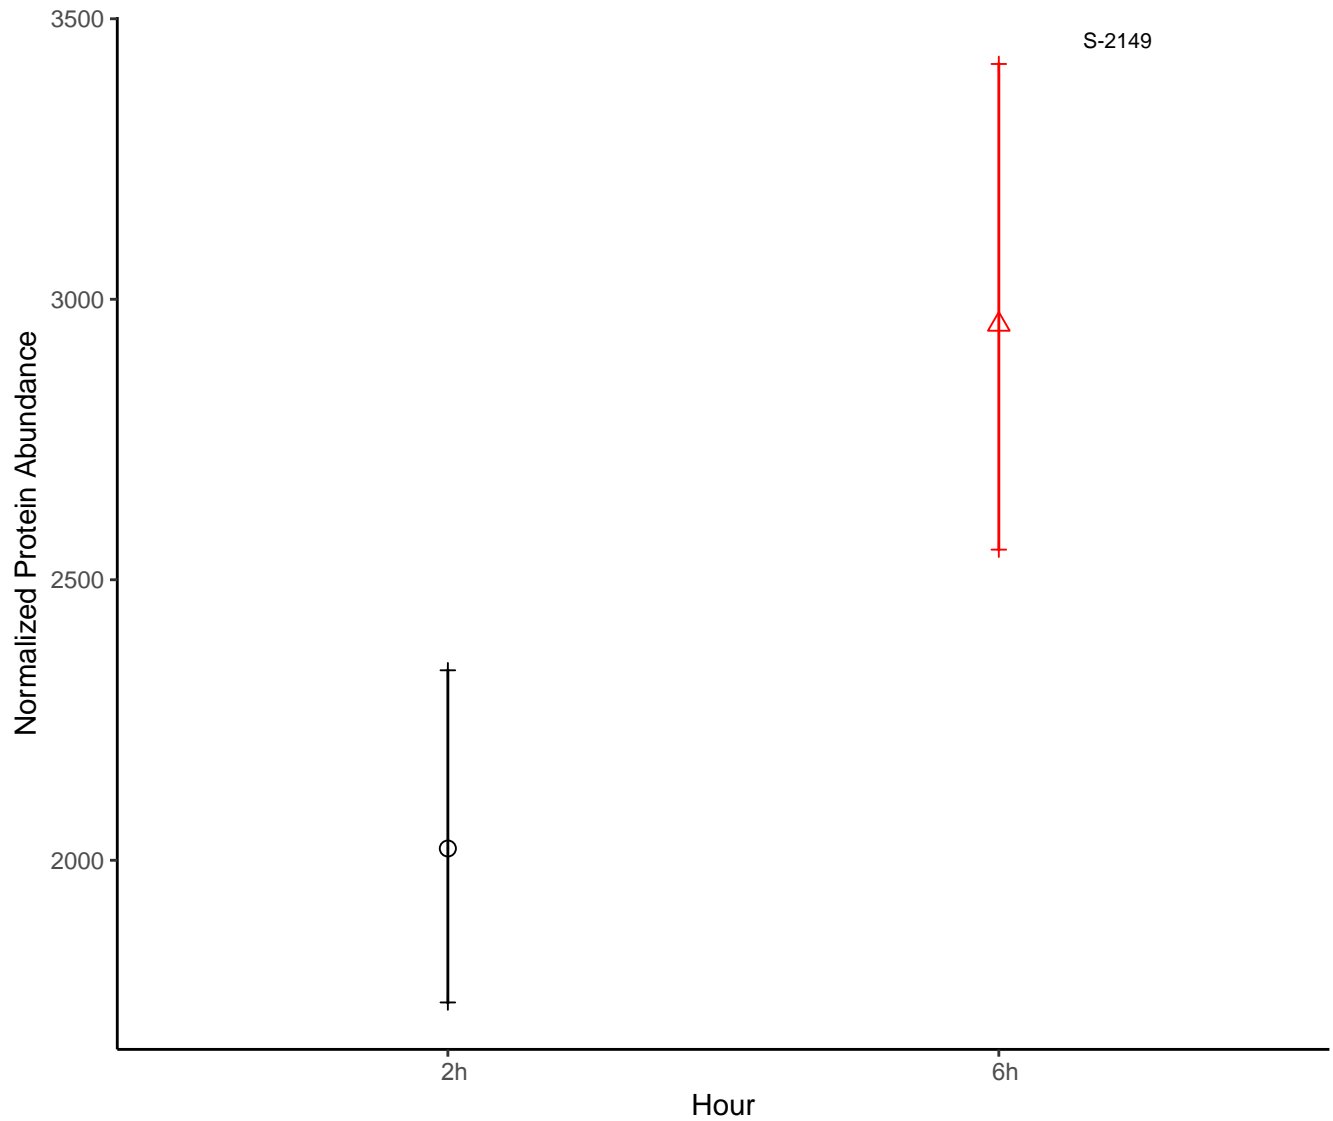

⊕ 2h

△ 6h

# GPMA\_STAAM

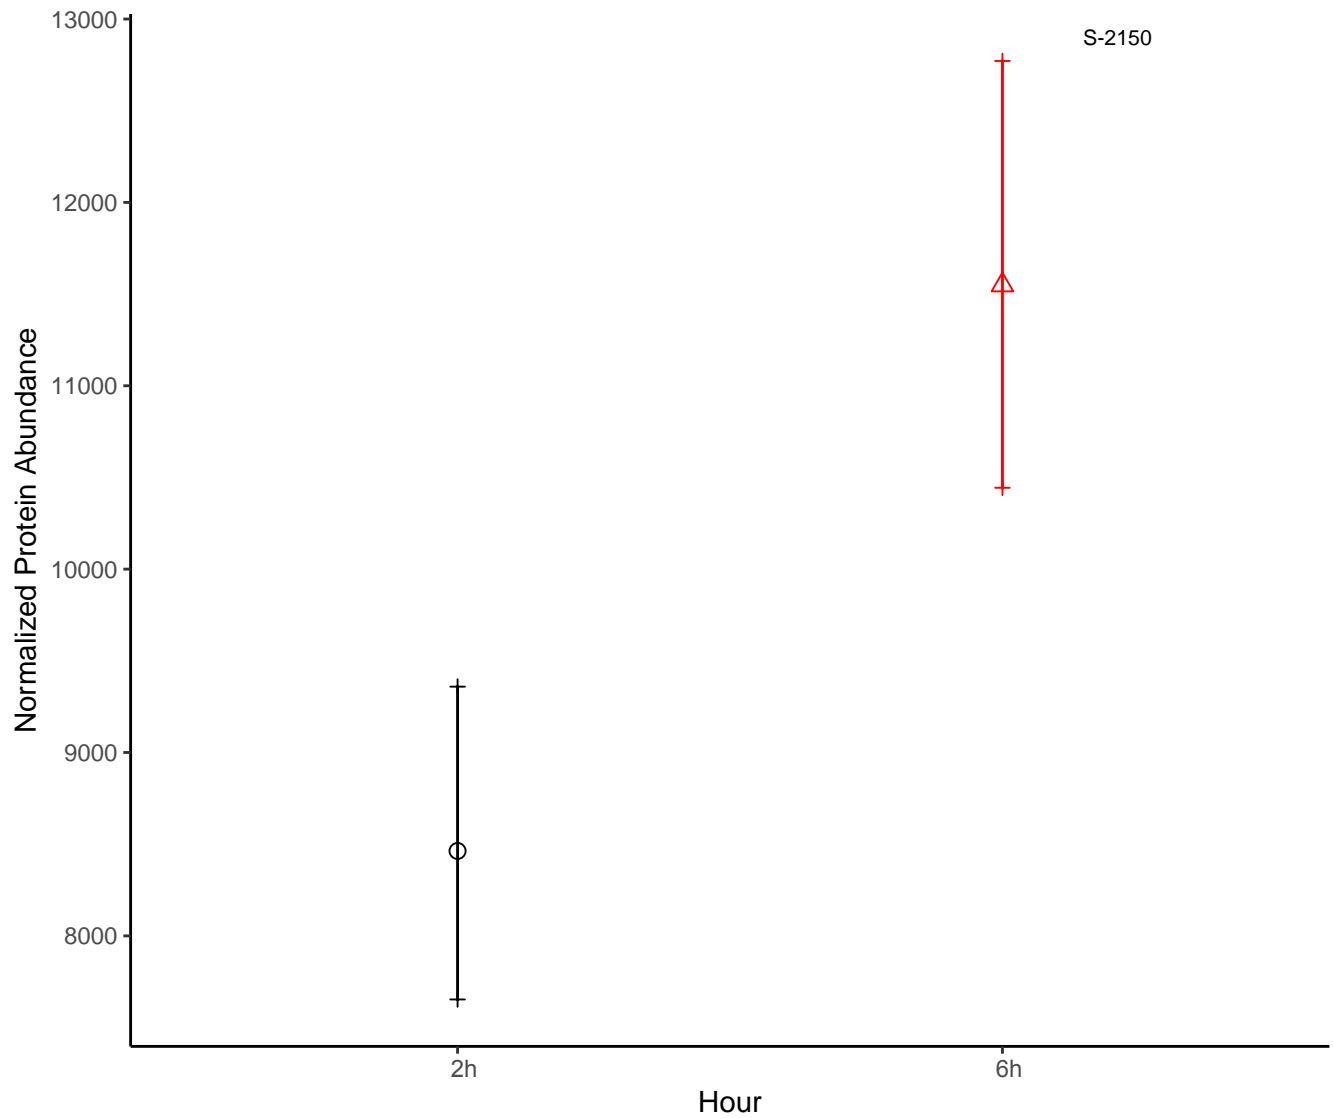

⊕ 2h

△ 6h

# GPMI\_STAAM

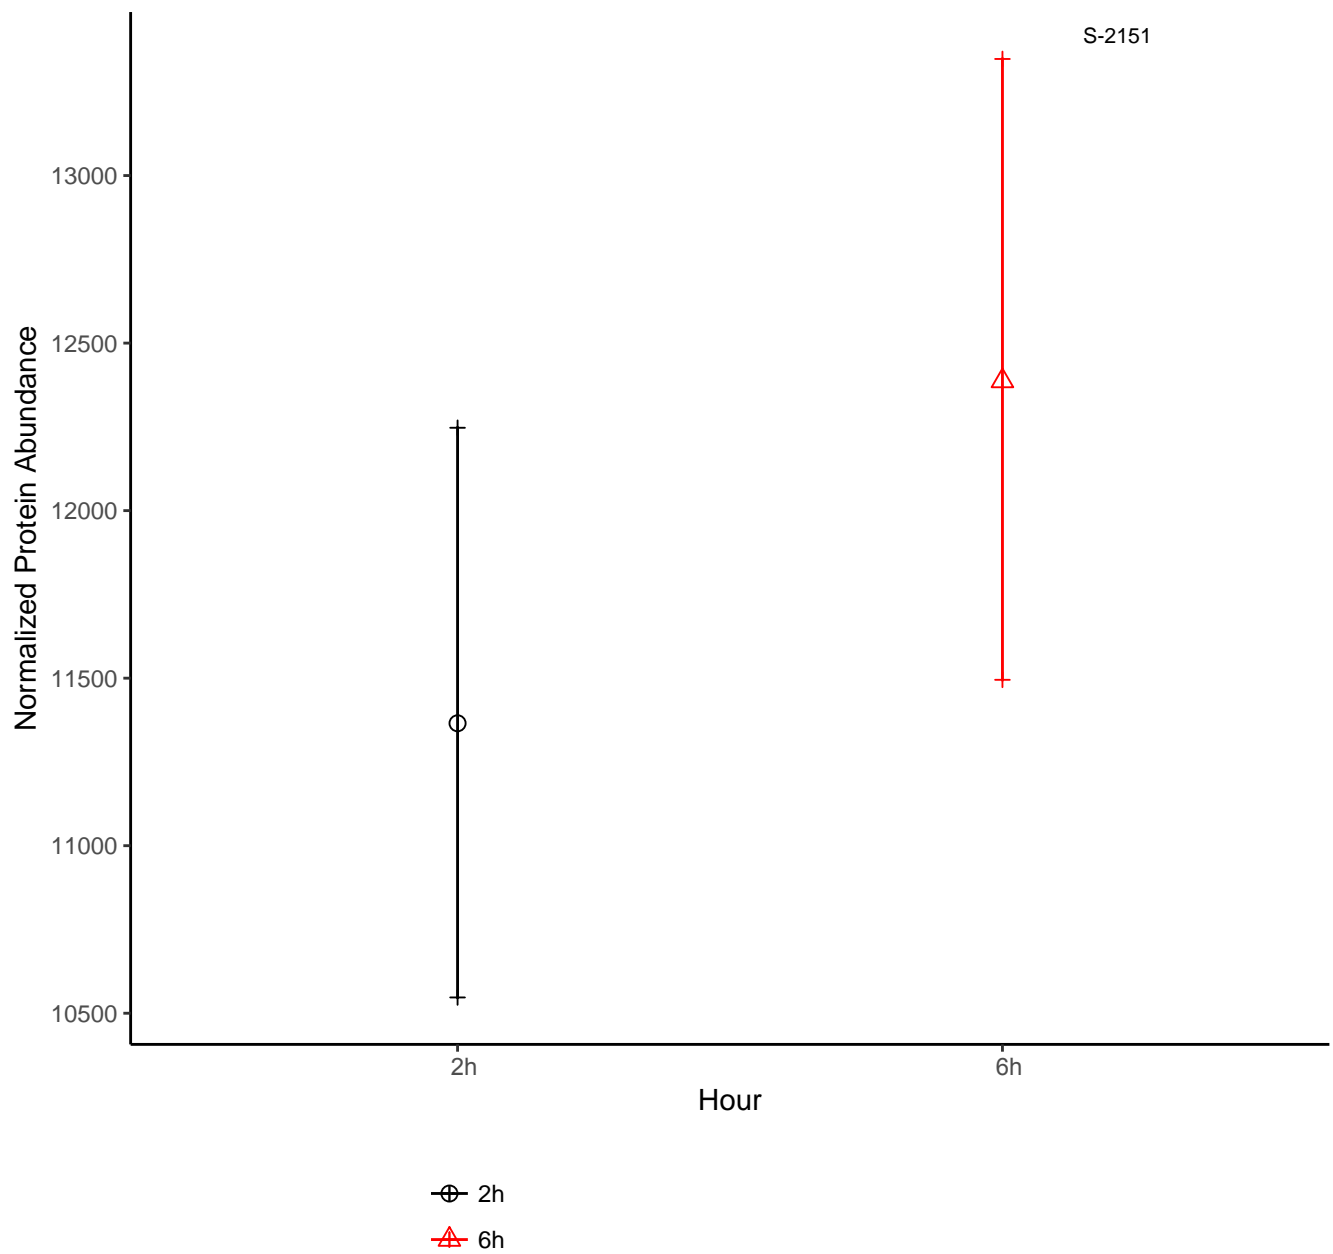

# GPSB\_STAAM

S-2152

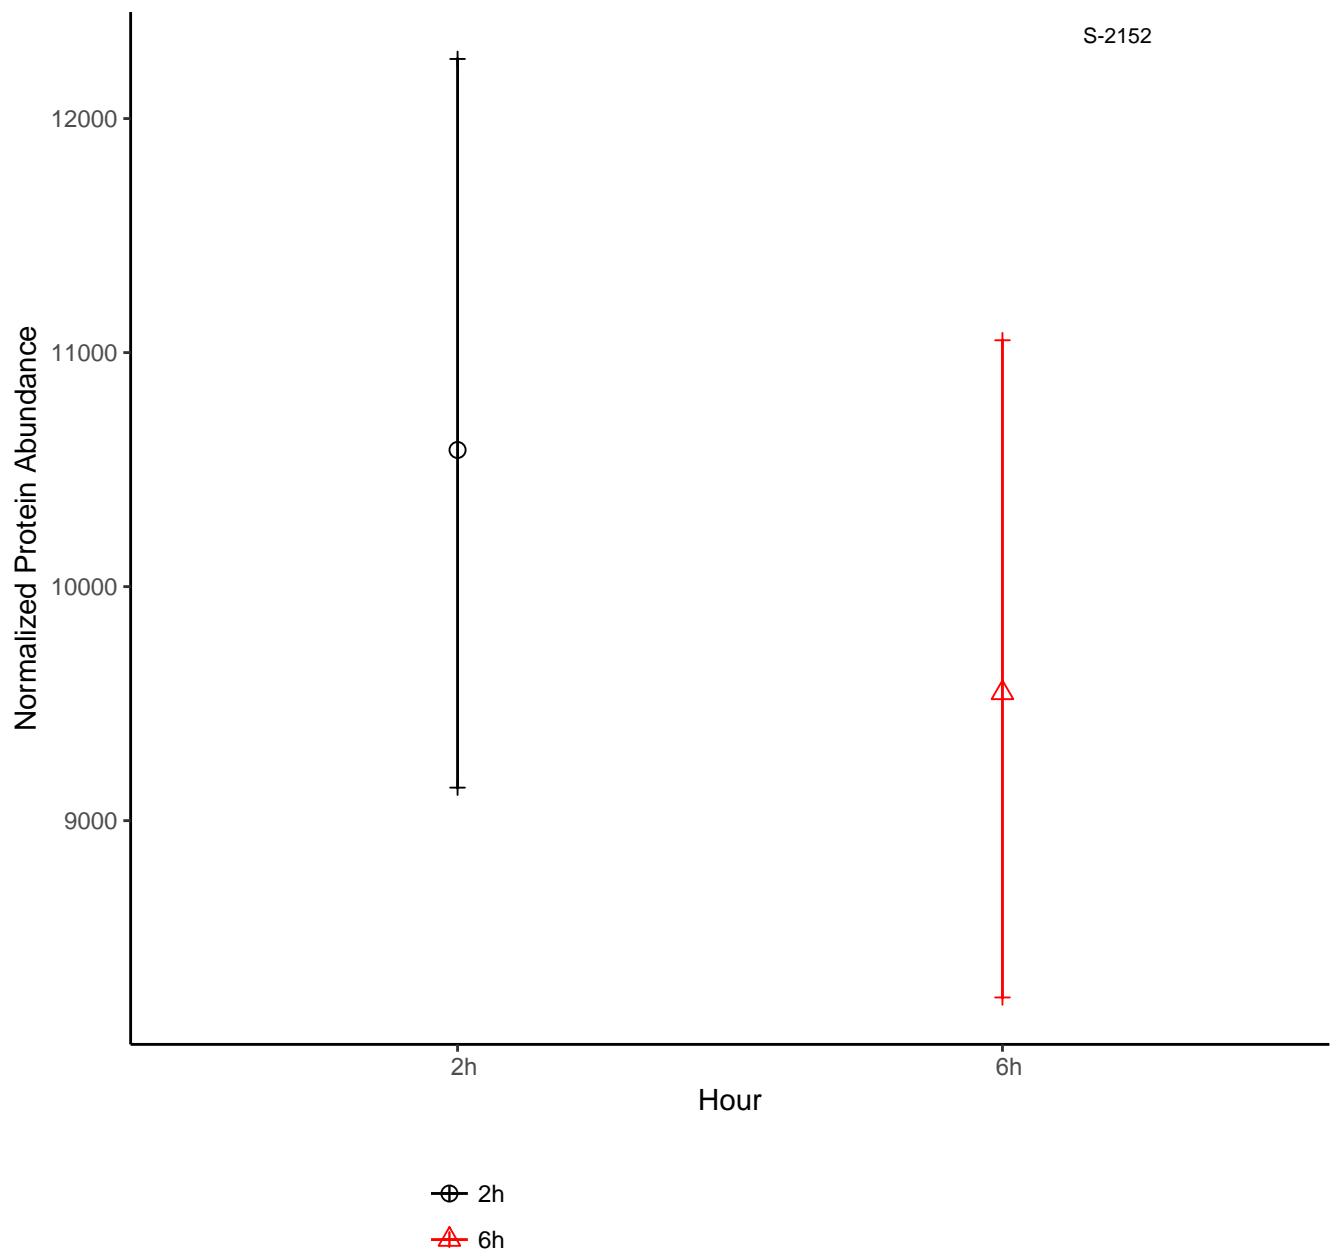



# GRAR\_STAAM

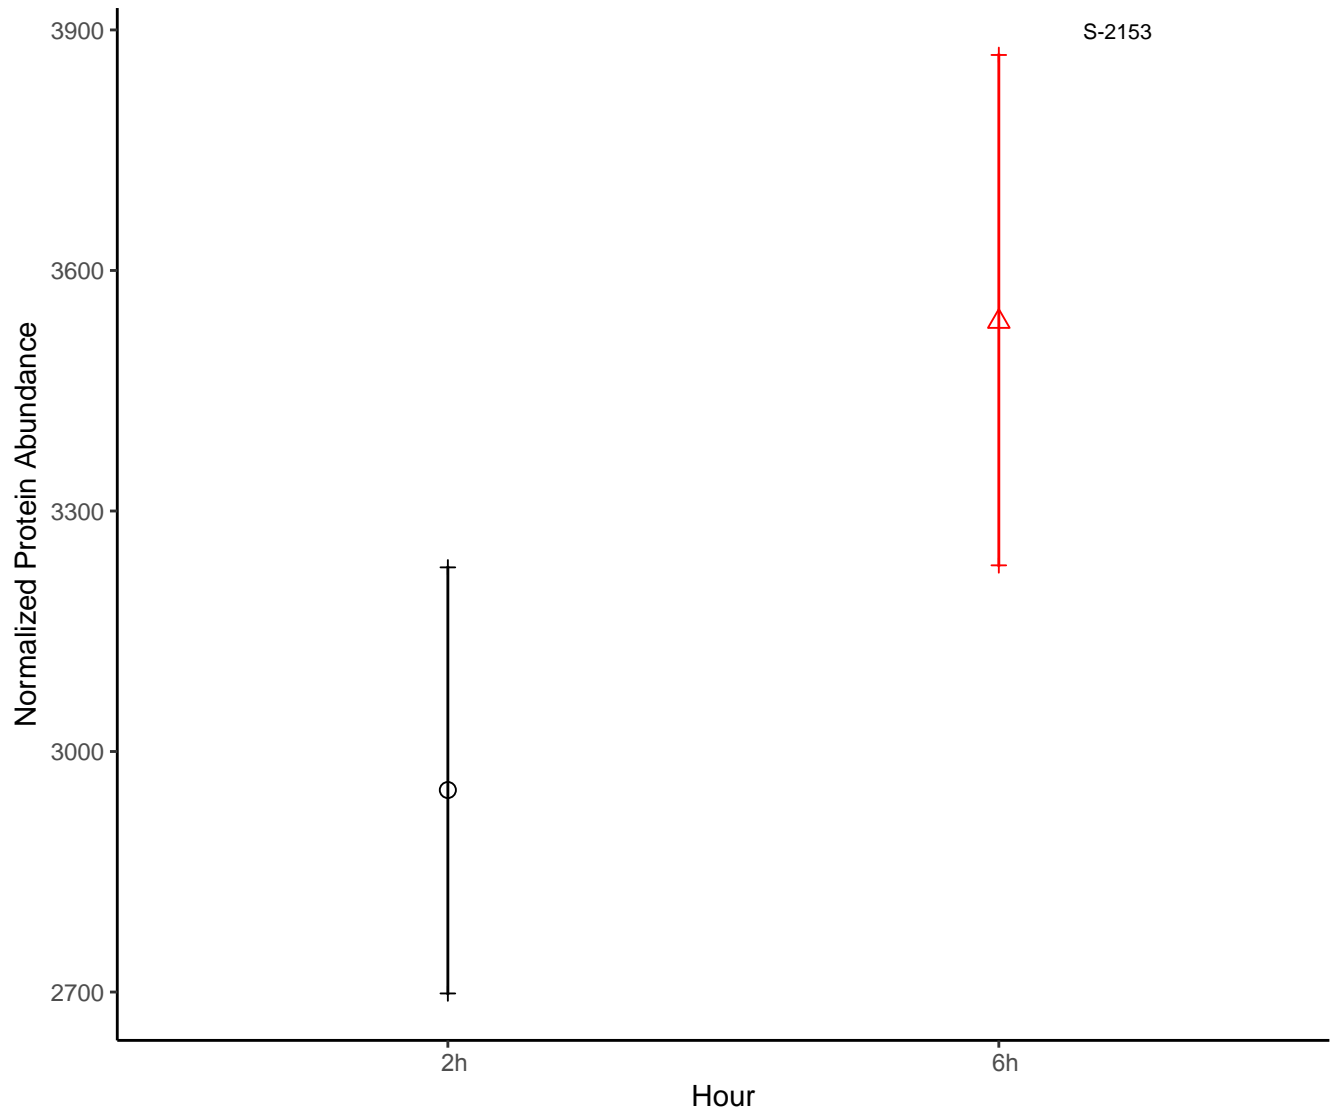

⊕ 2h

△ 6h

# GREASTAAM

S-2154

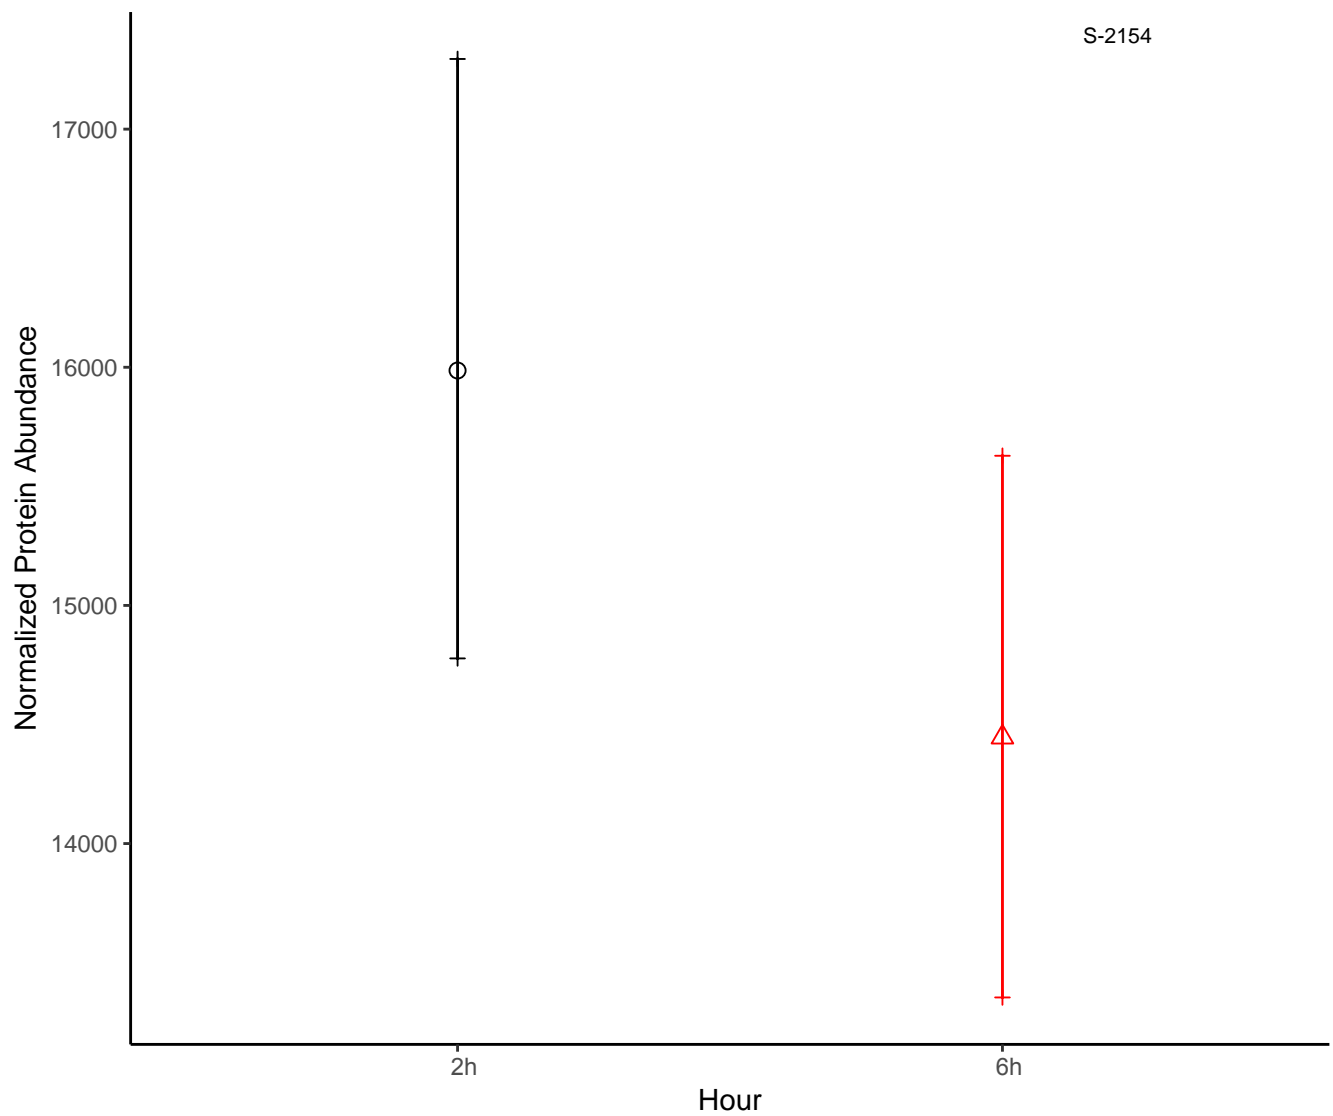

⊕ 2h

△ 6h

# GRPE\_STAAM

S-2155

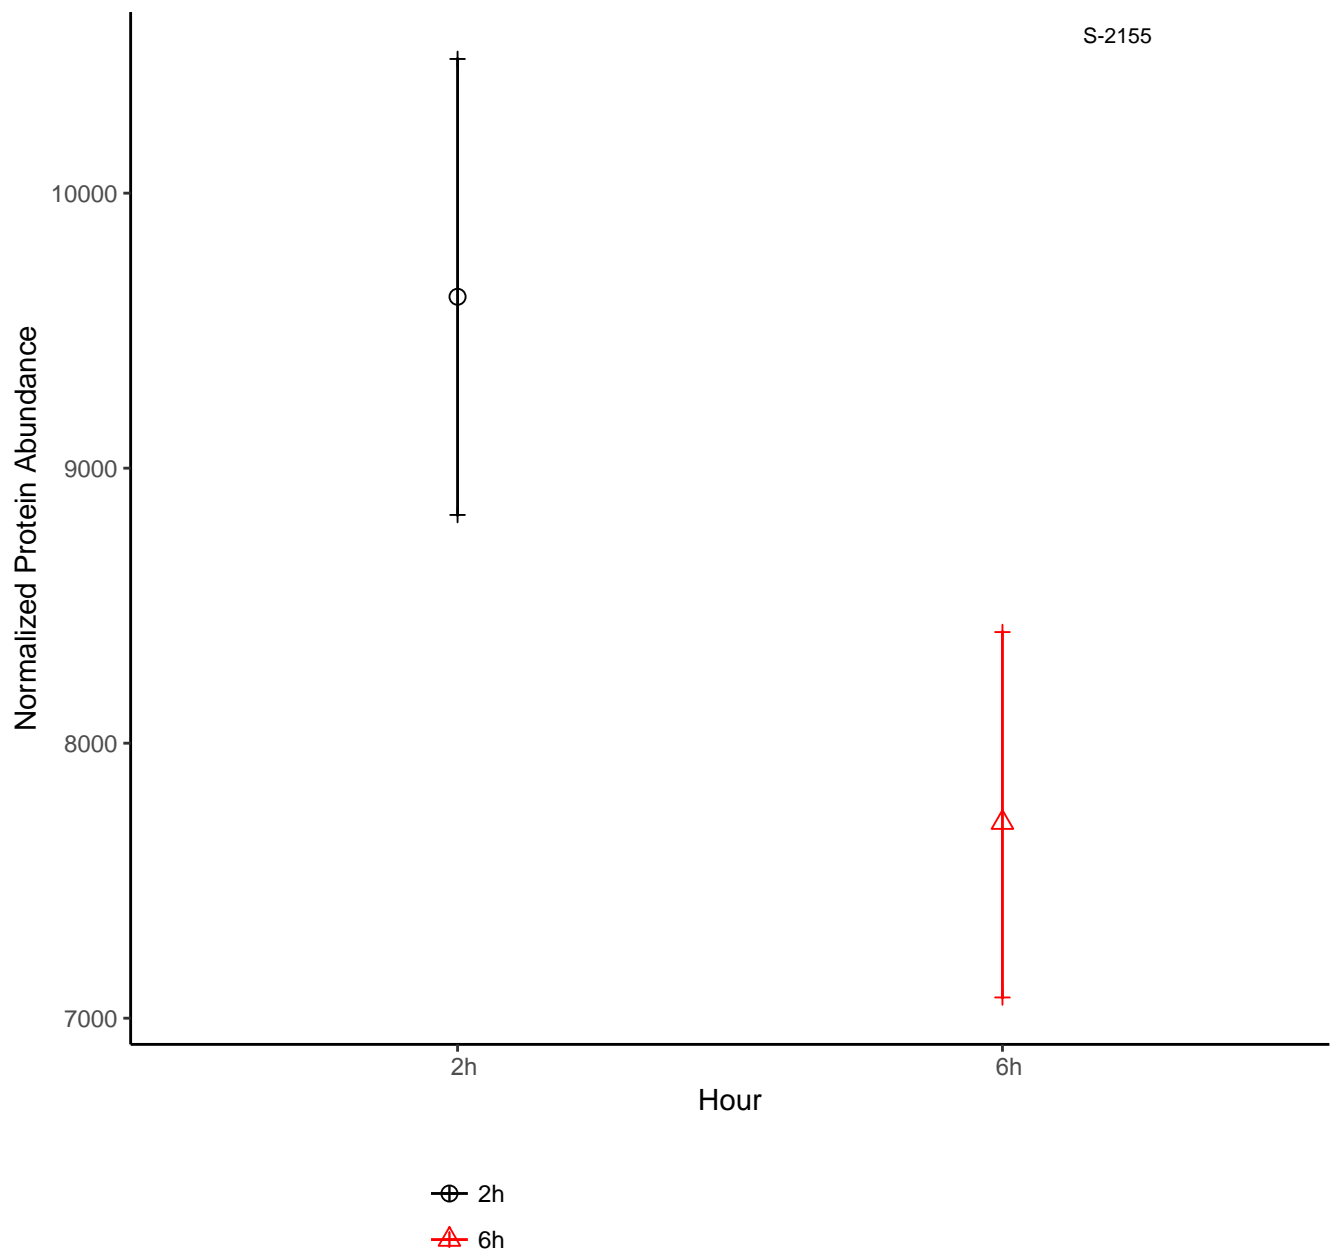

# GSA1\_STAAM

S-2156

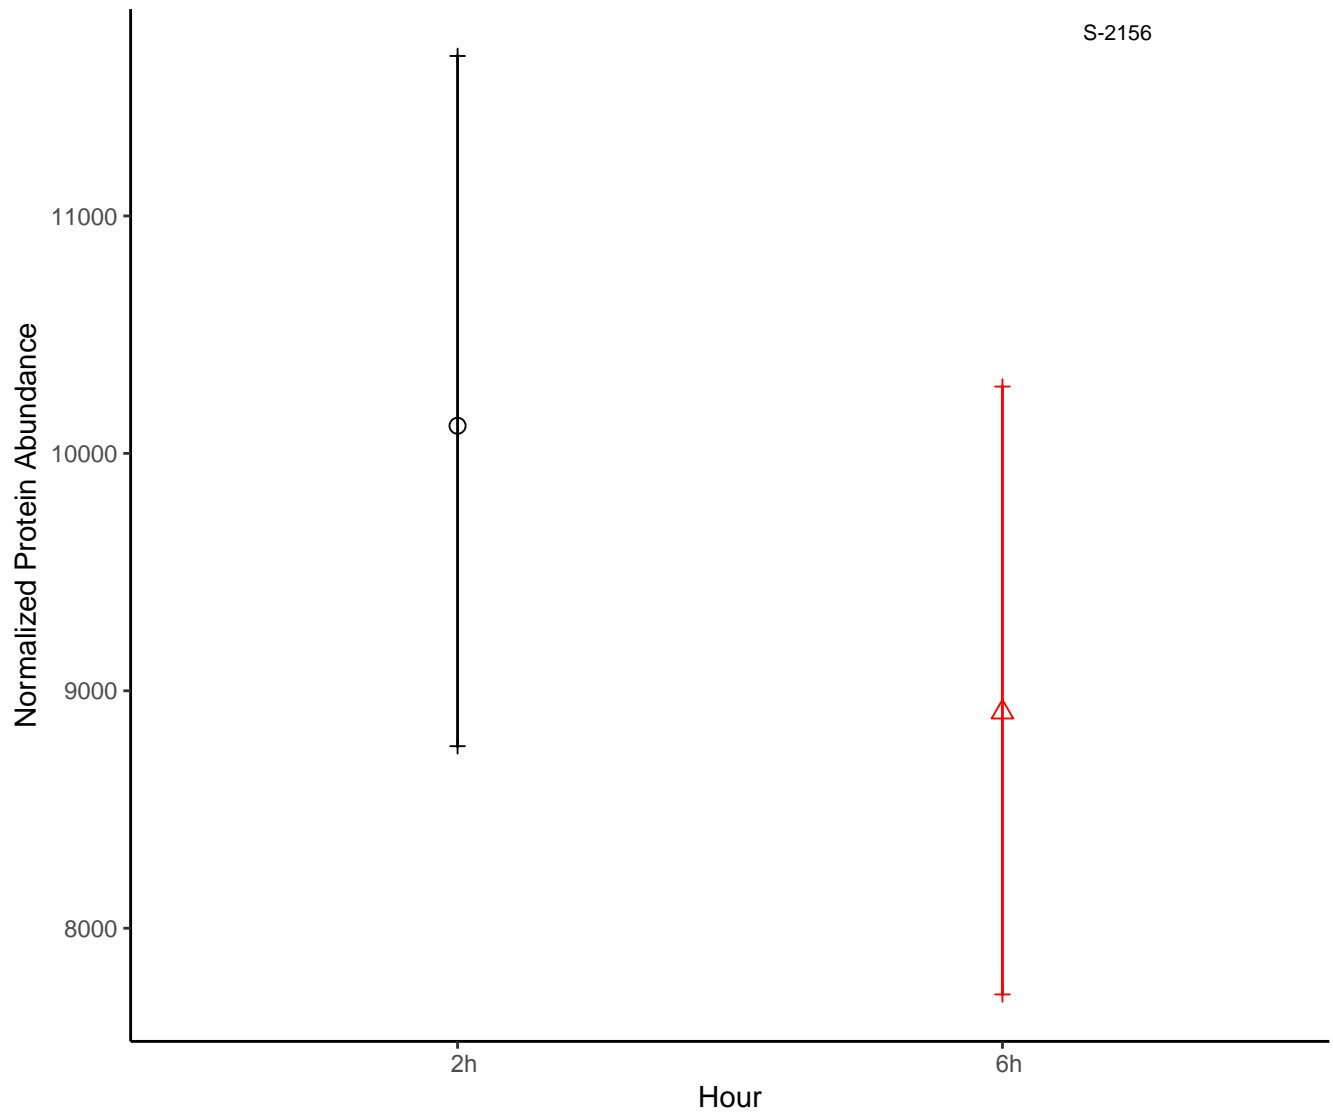

⊕ 2h

△ 6h

# GSA2\_STAAM

S-2157

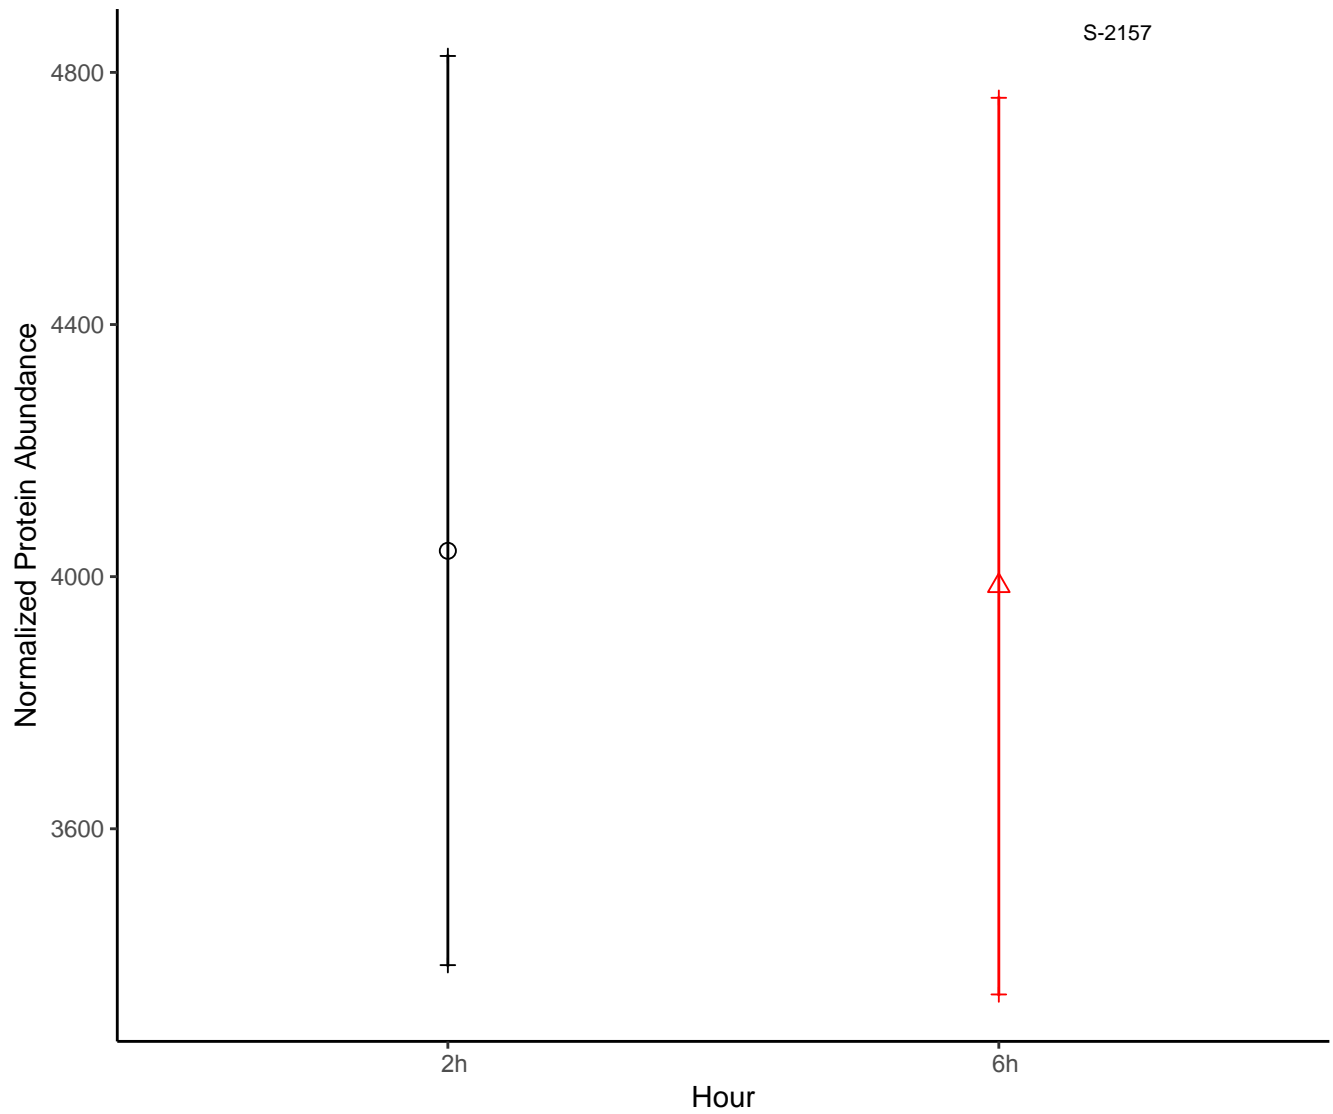

⊕ 2h

△ 6h

# GTAB\_STAAM

S-2158

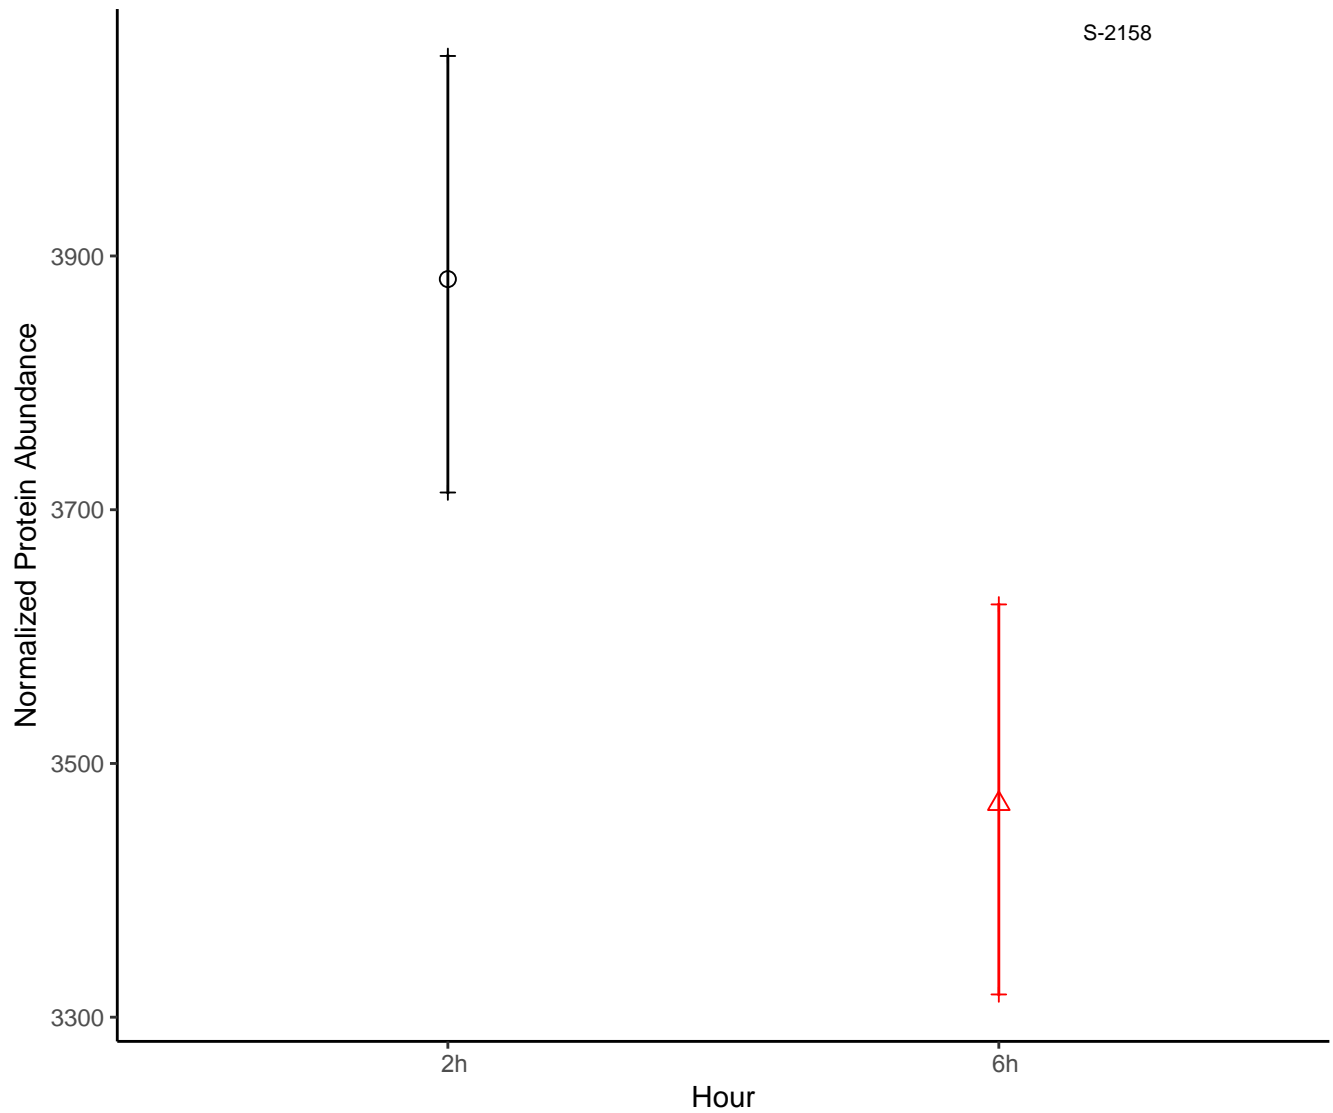

⊕ 2h

△ 6h

# GUAA\_STAAM

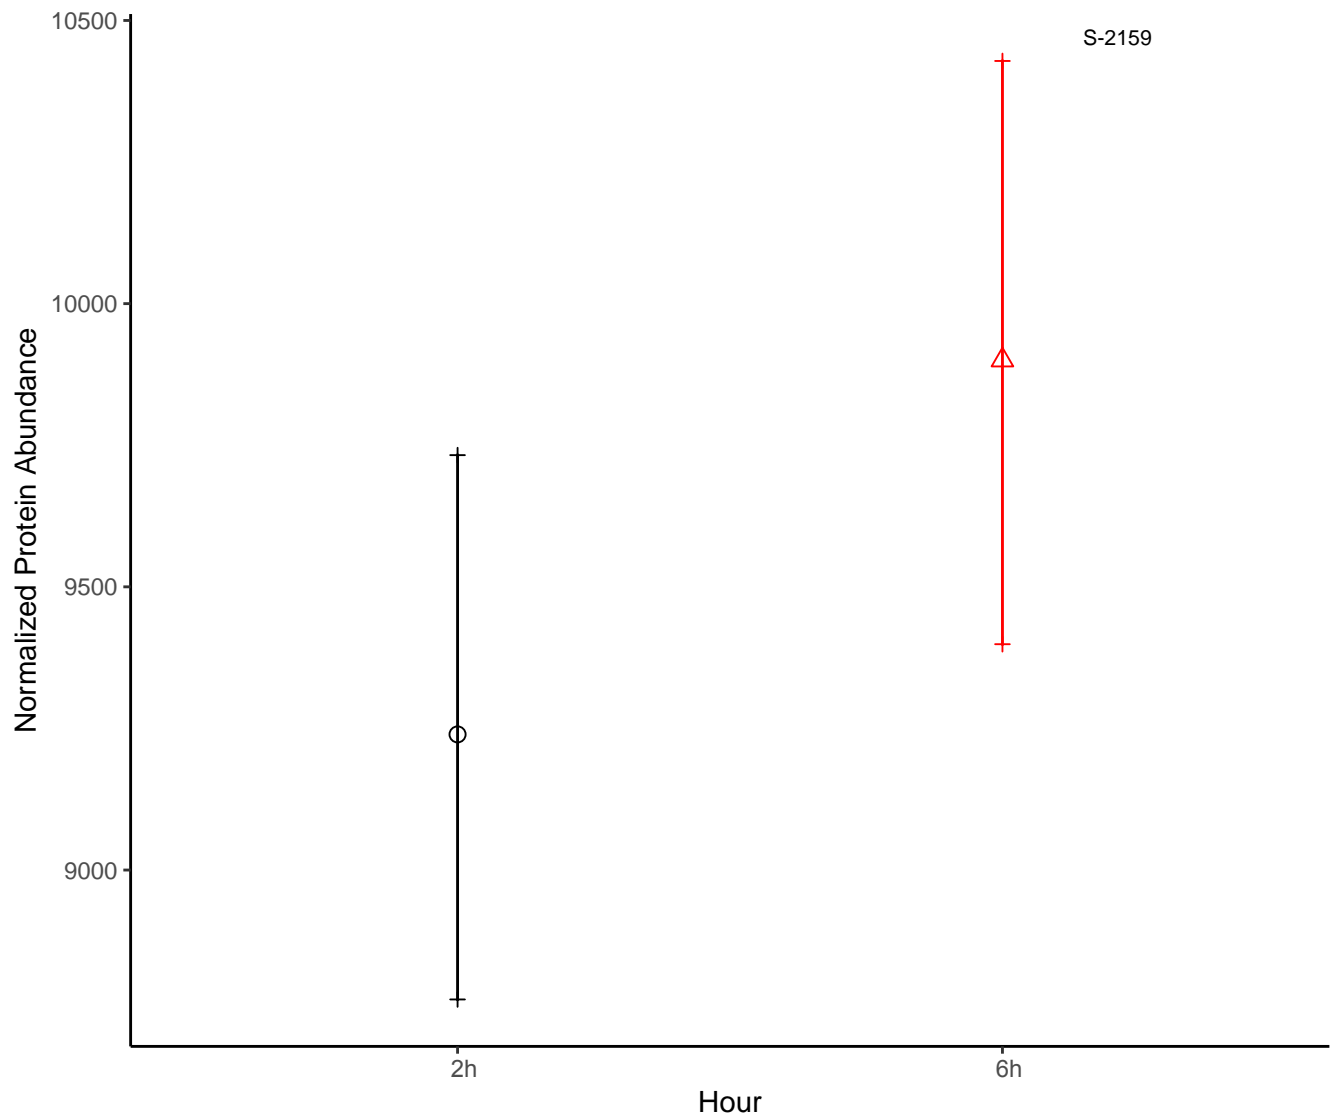

⊕ 2h

△ 6h

# GUAC\_STAAM

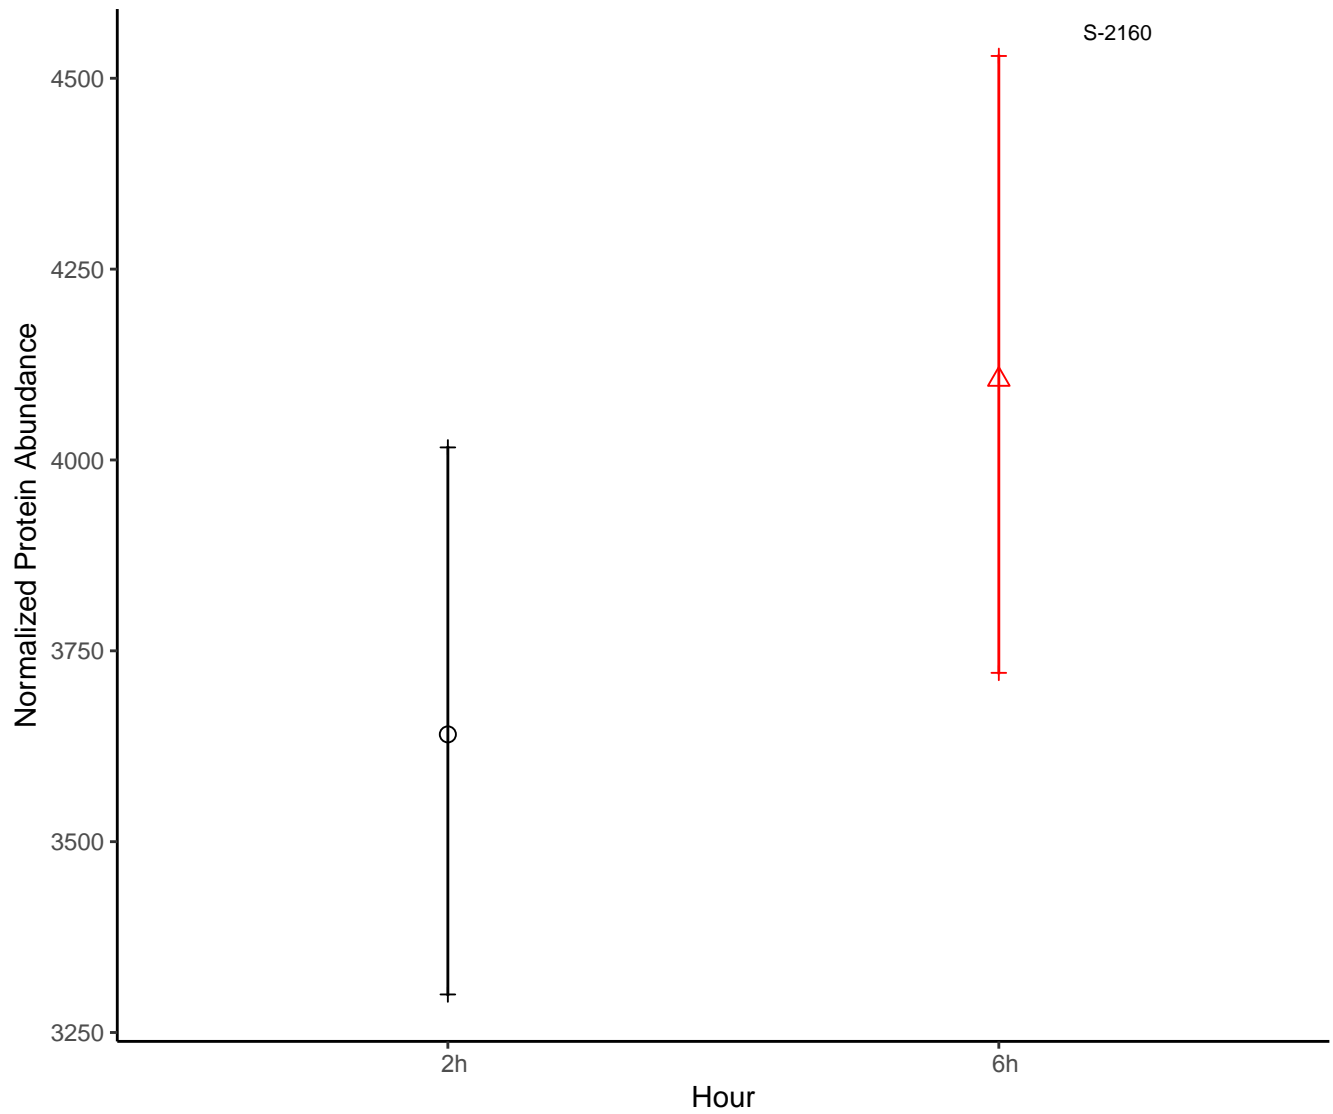

⊕ 2h

△ 6h



# GYRB\_STAAM

S-2161

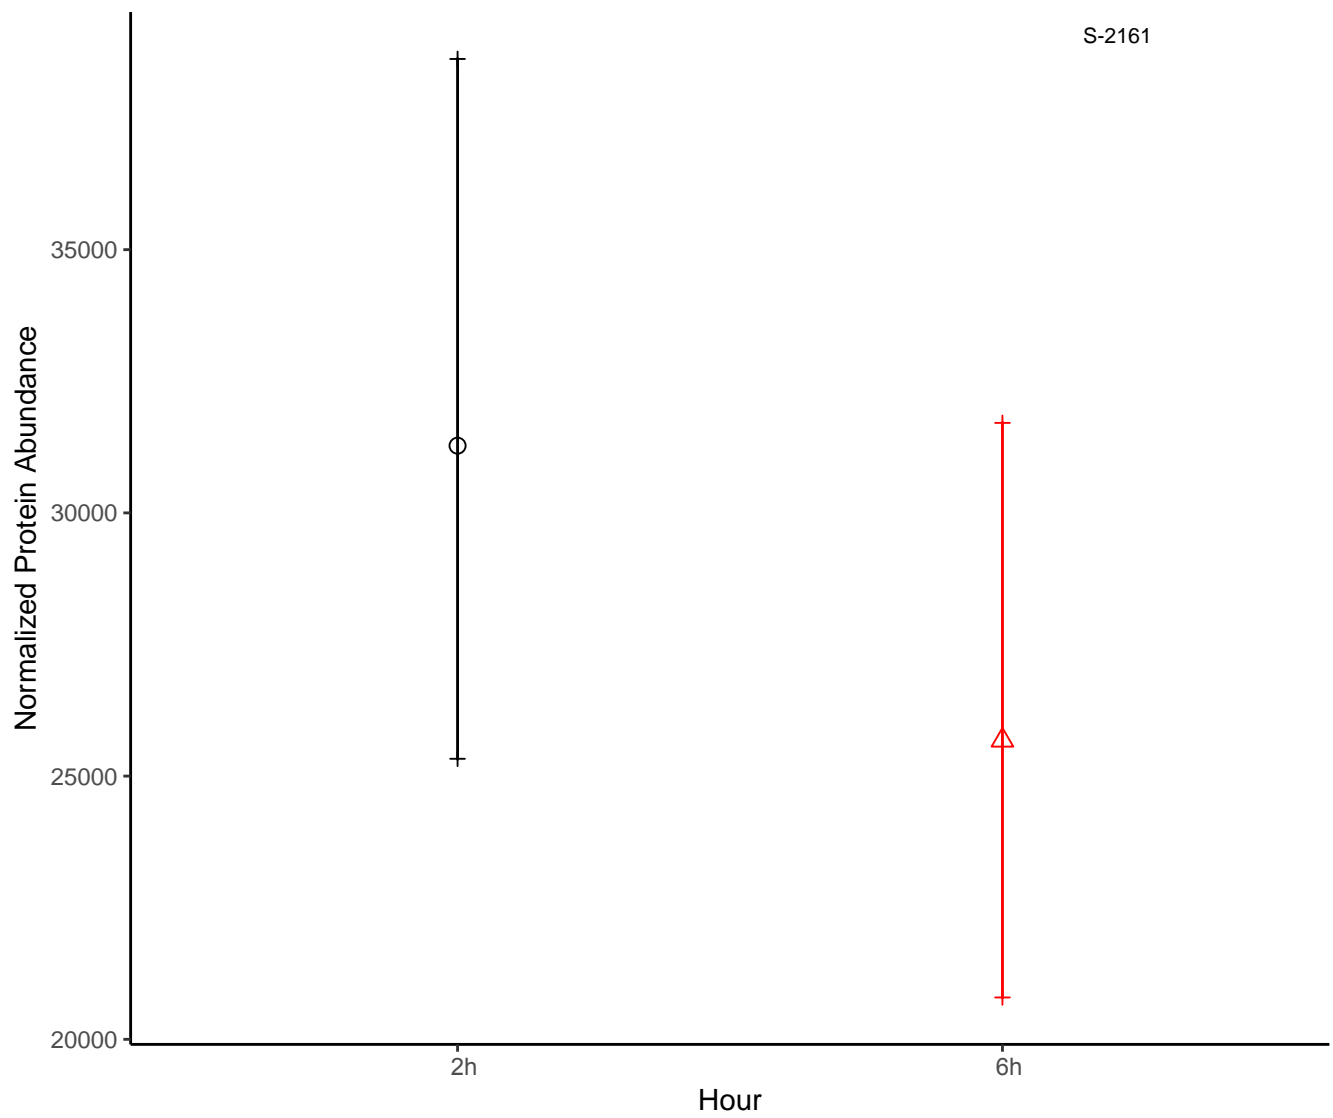

⊕ 2h

△ 6h

# HCHA\_STAAM

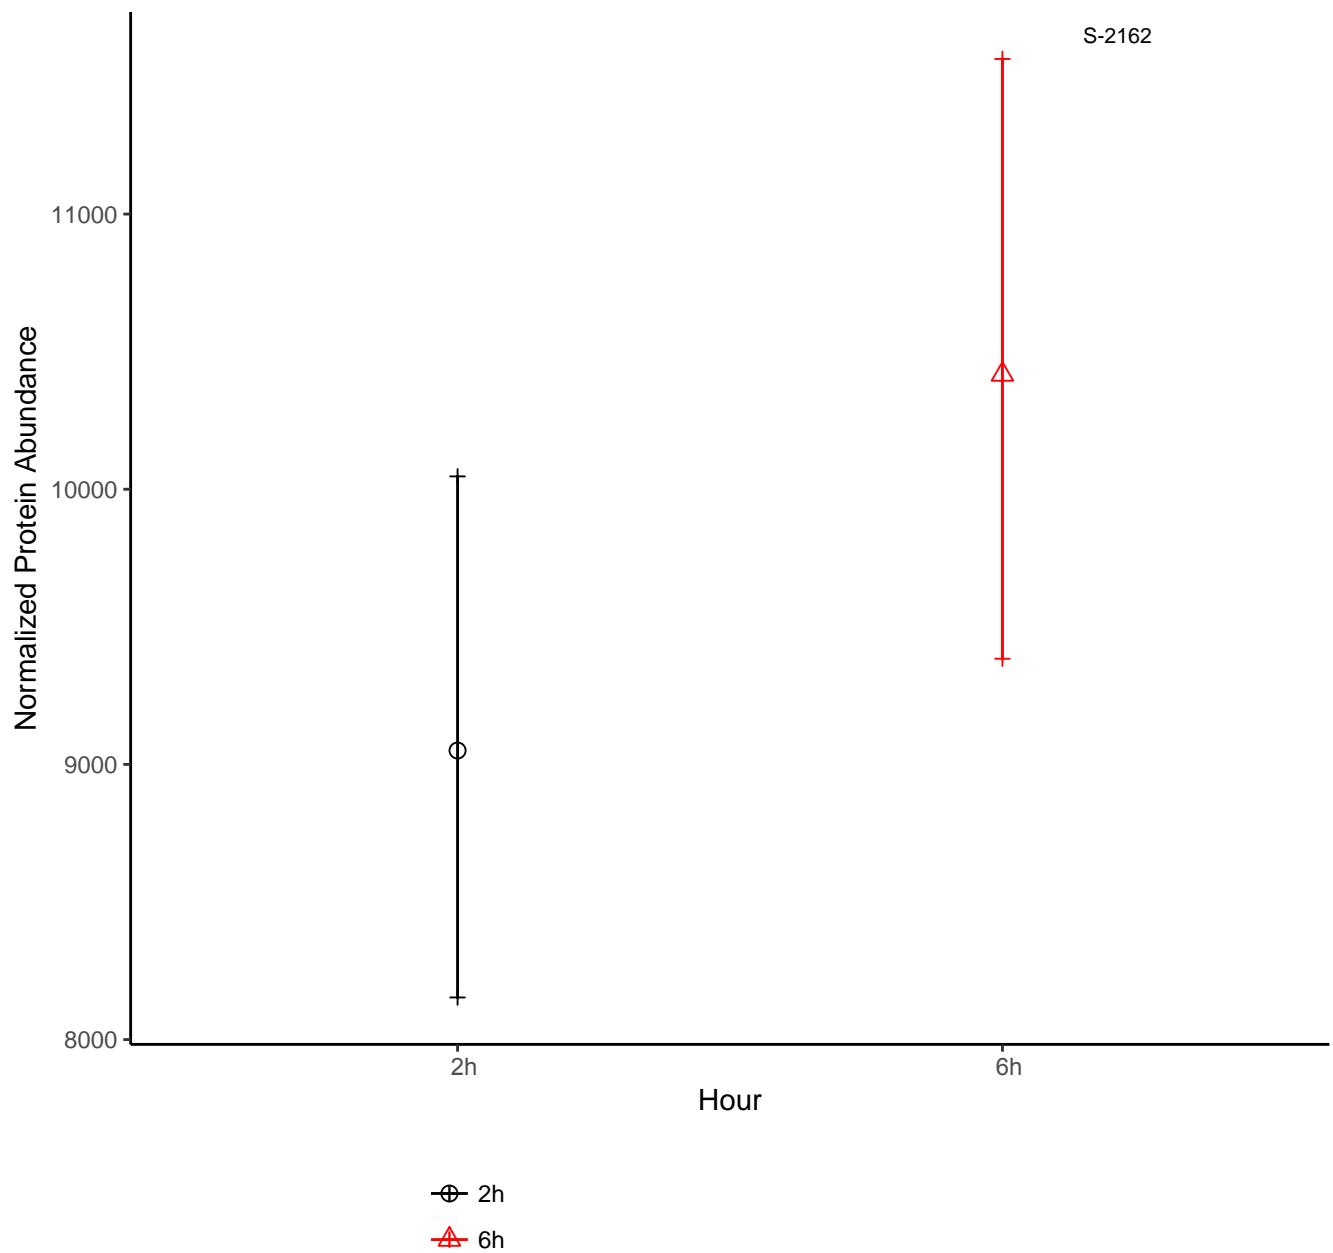

# HEM2\_STAAM

S-2163

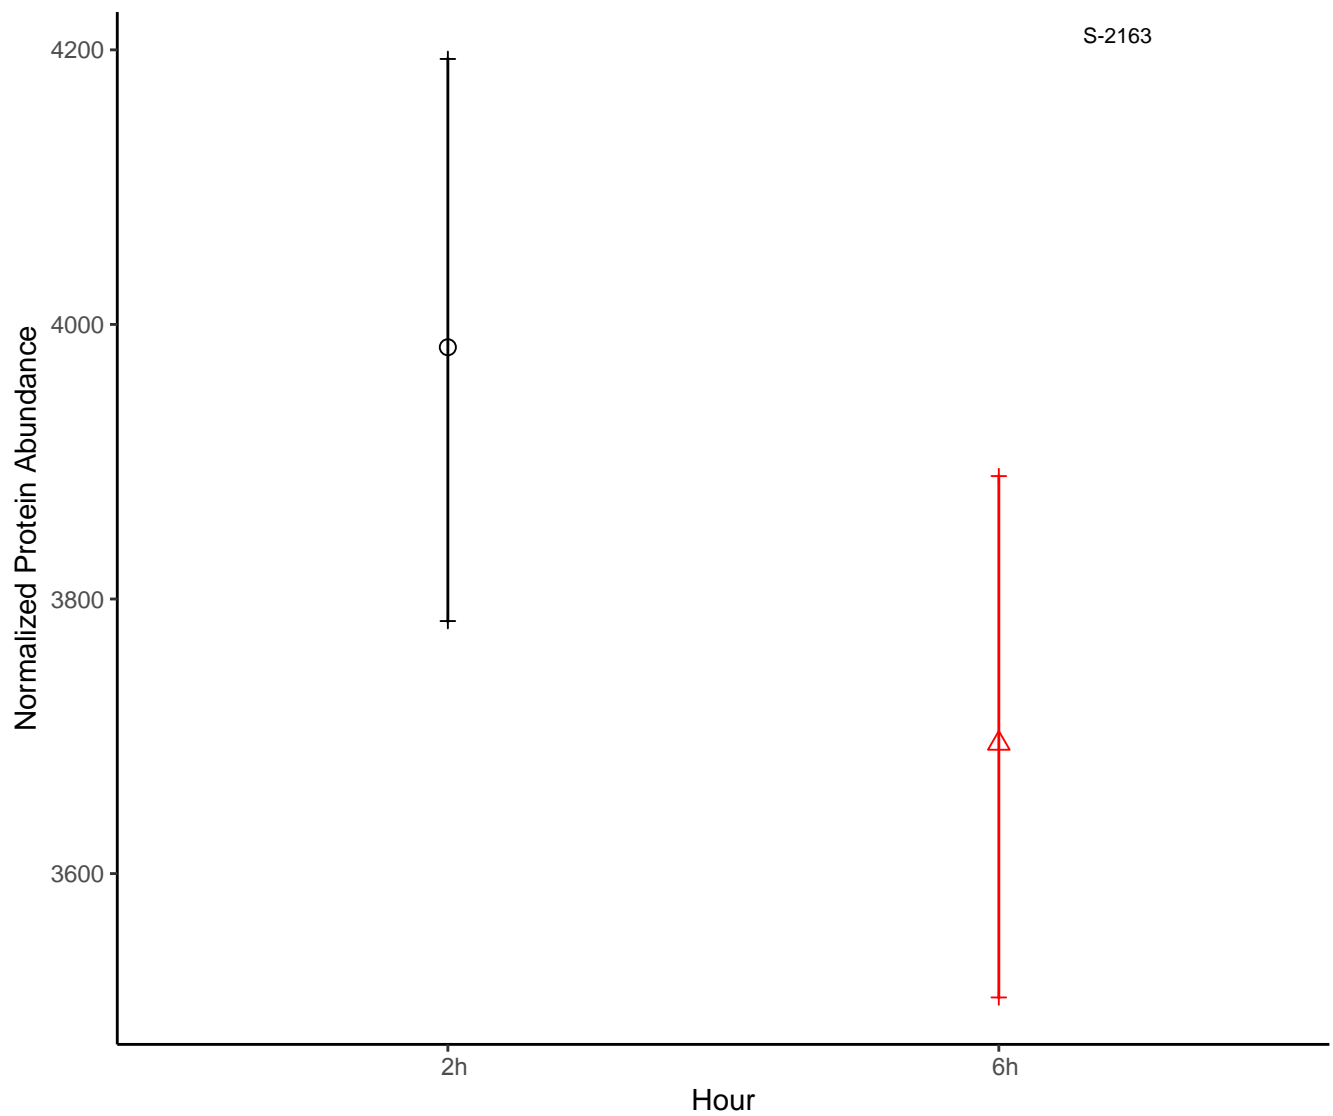

⊕ 2h

△ 6h

# HEM3\_STAAM

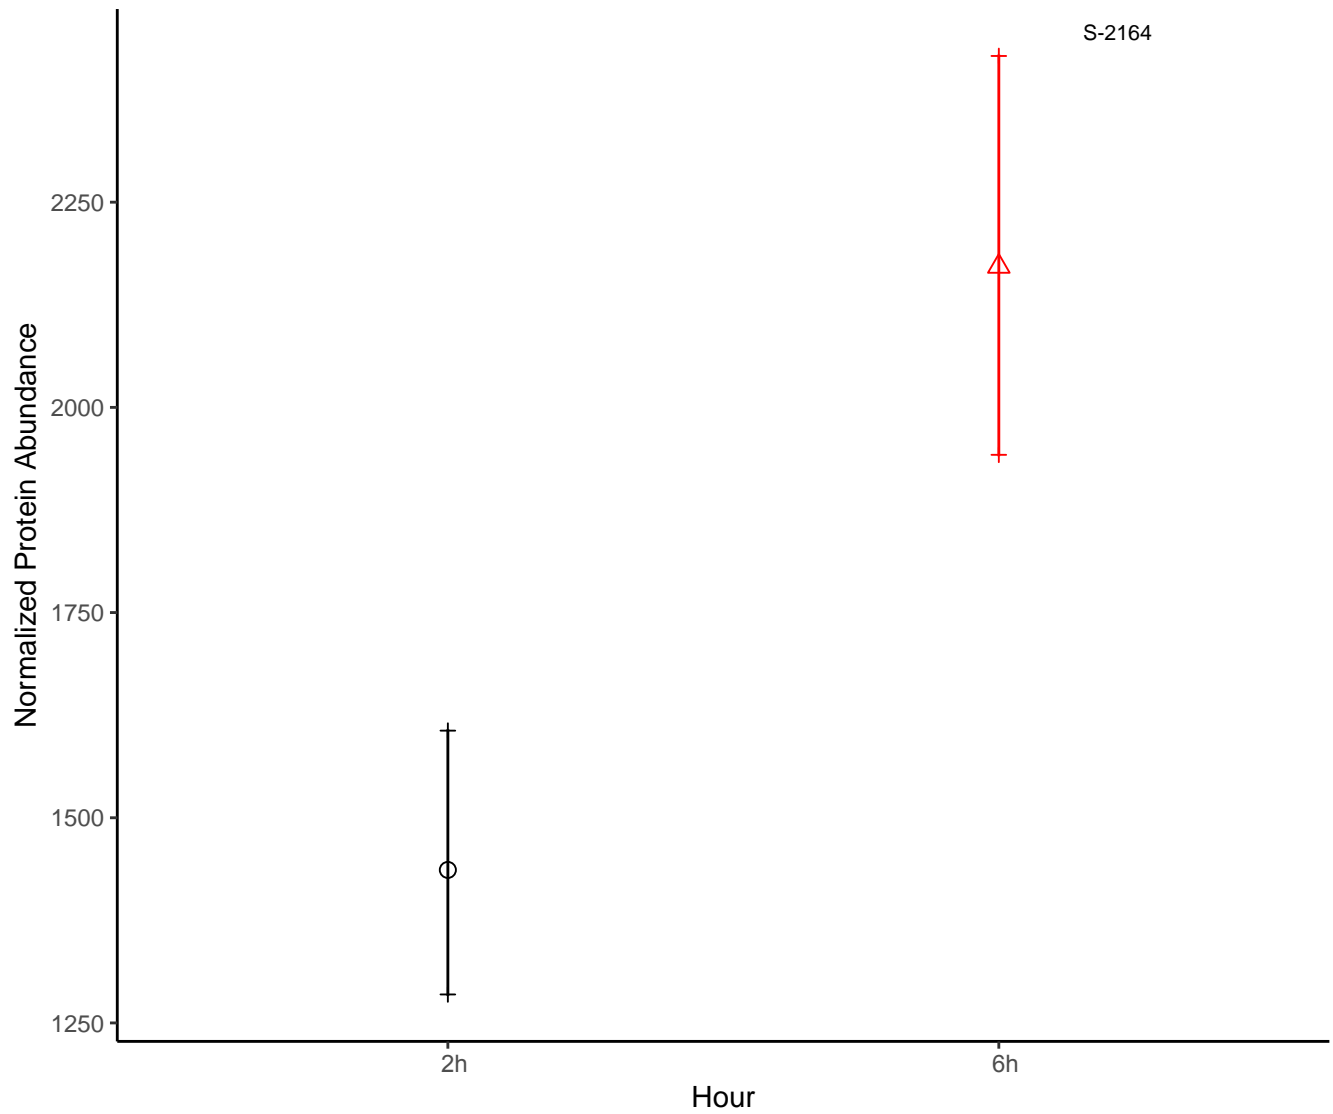

⊕ 2h

△ 6h

# HLD\_STAAM

S-2165

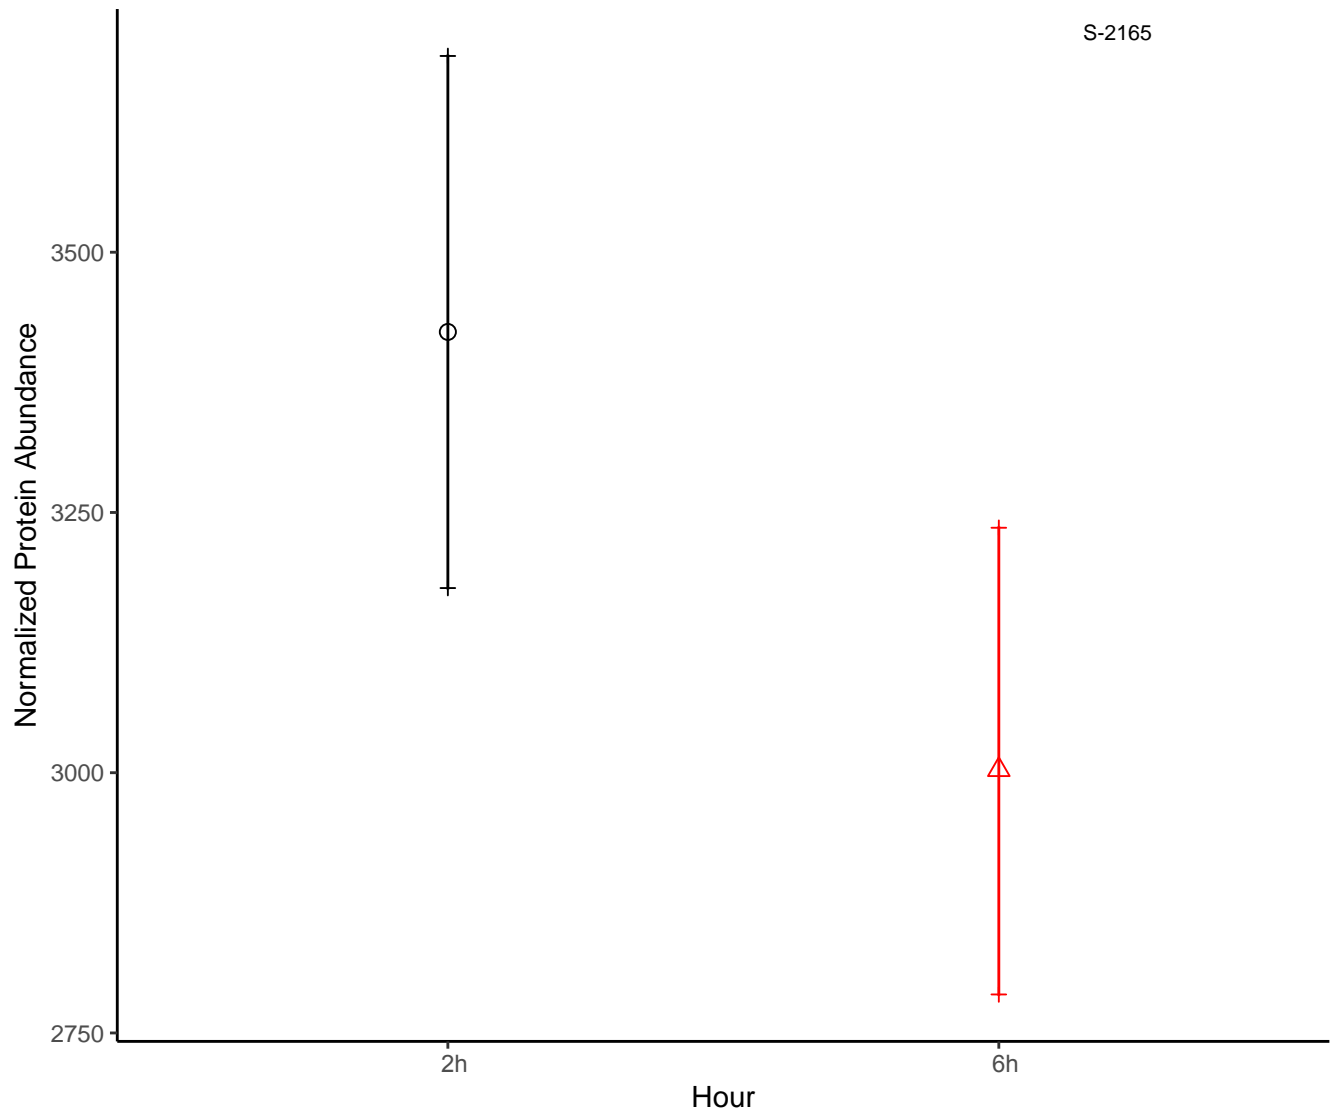

⊕ 2h

△ 6h

# HPRK\_STAAM

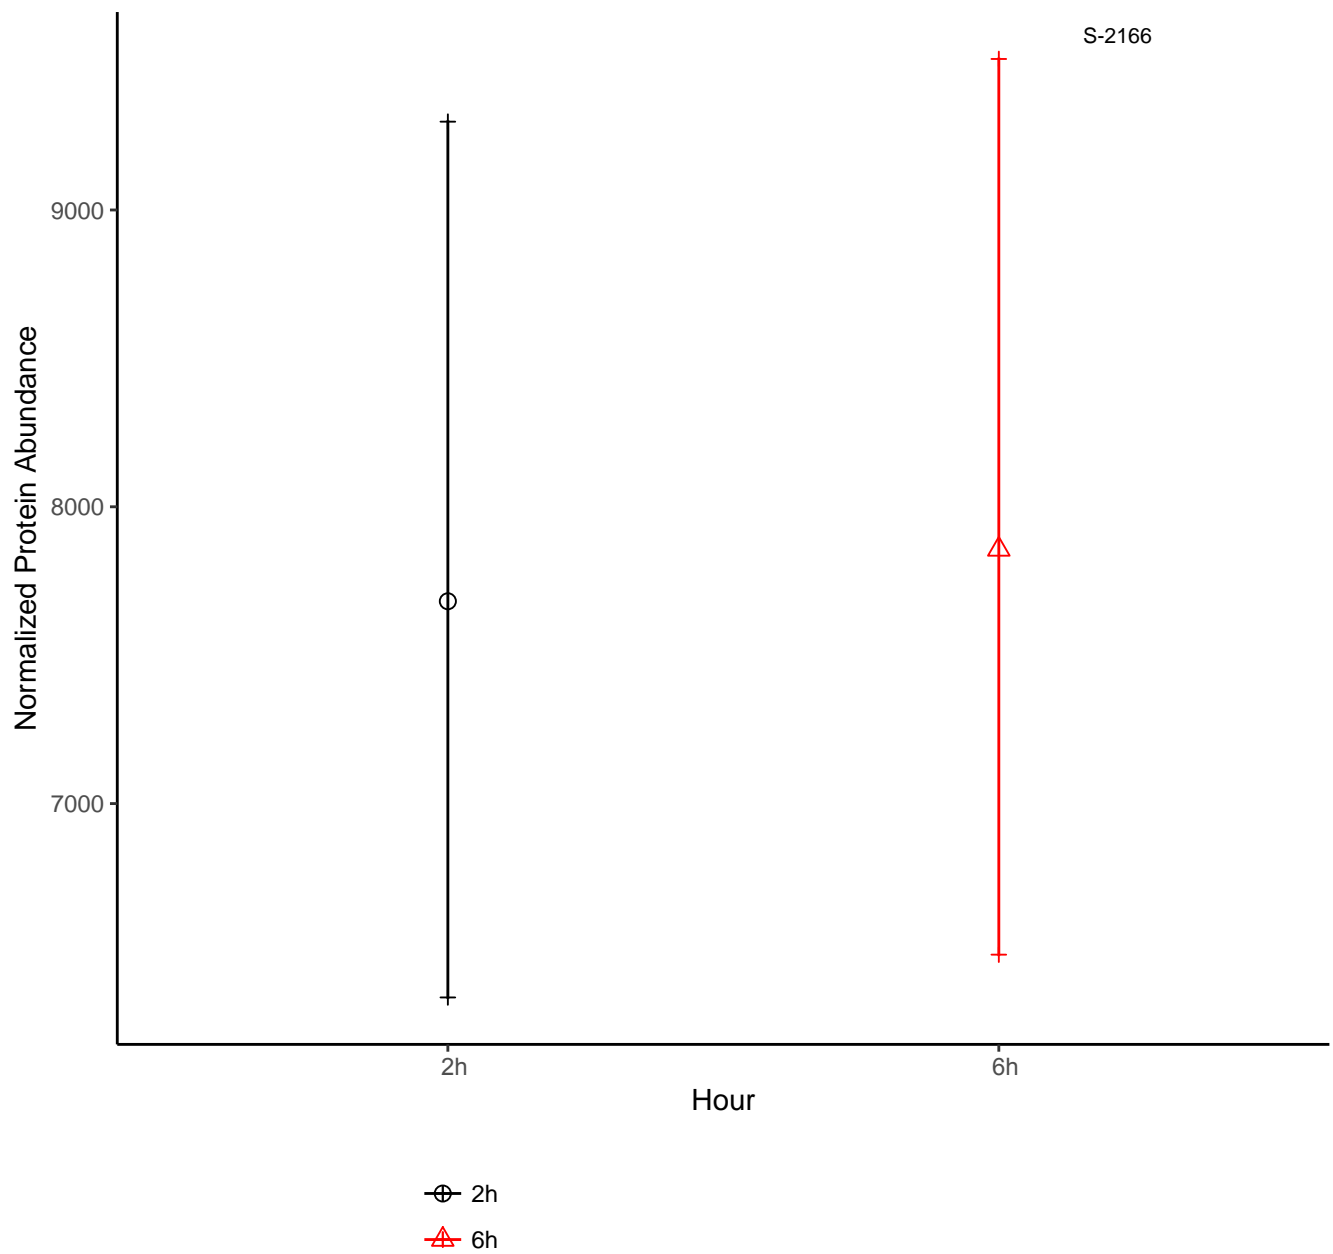

# HPRT\_STAAM

S-2167

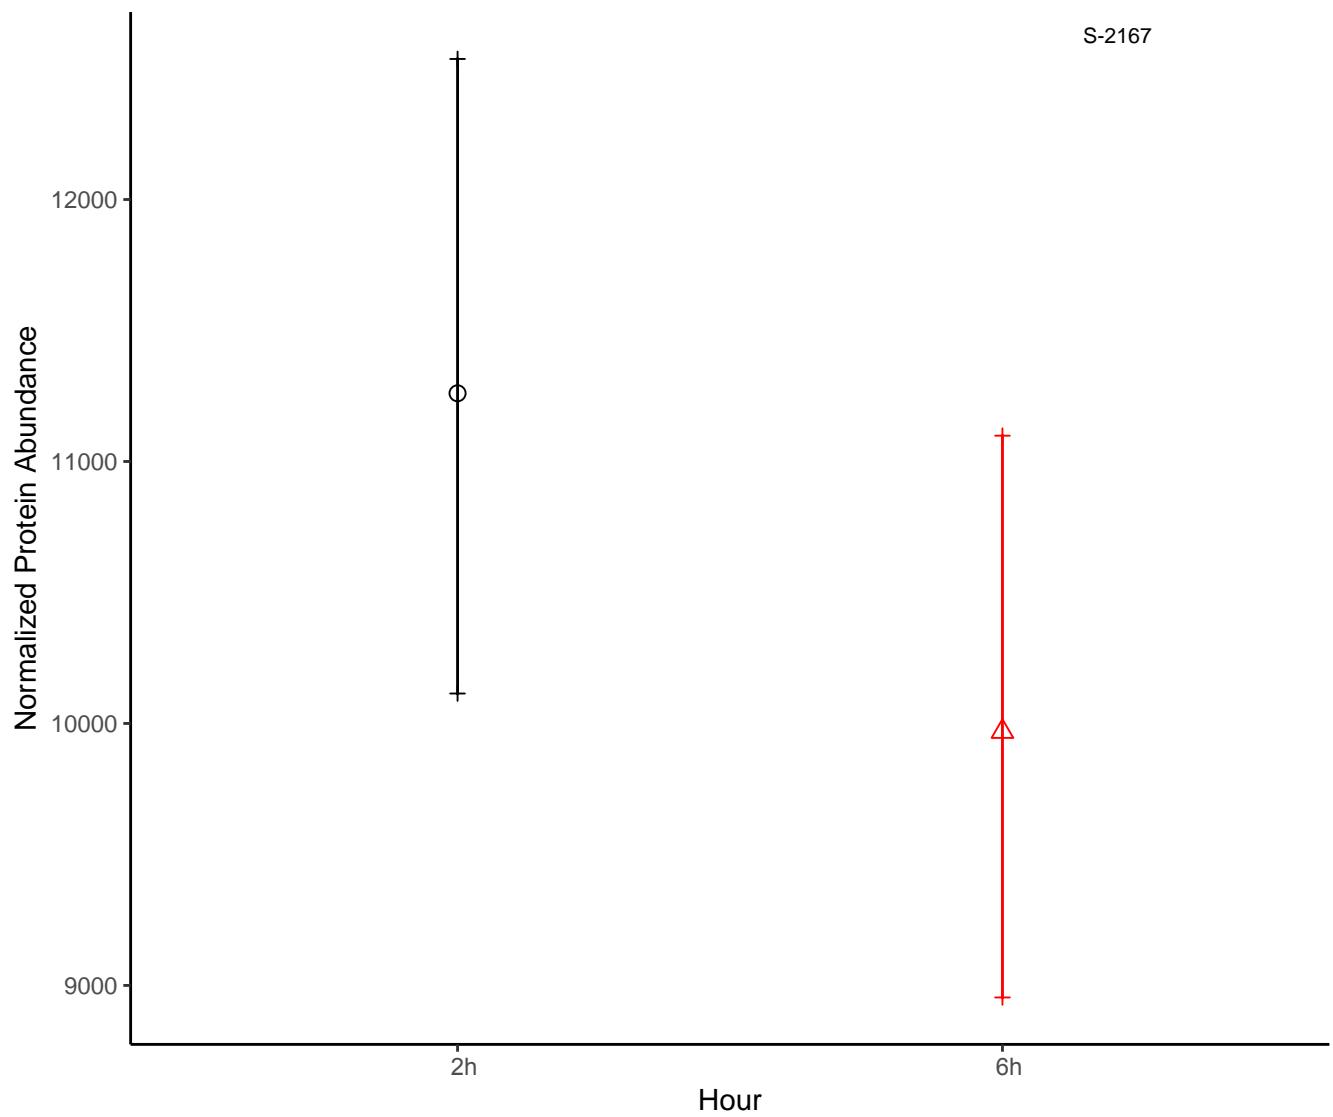

⊕ 2h

△ 6h

# HPS\_STAAM

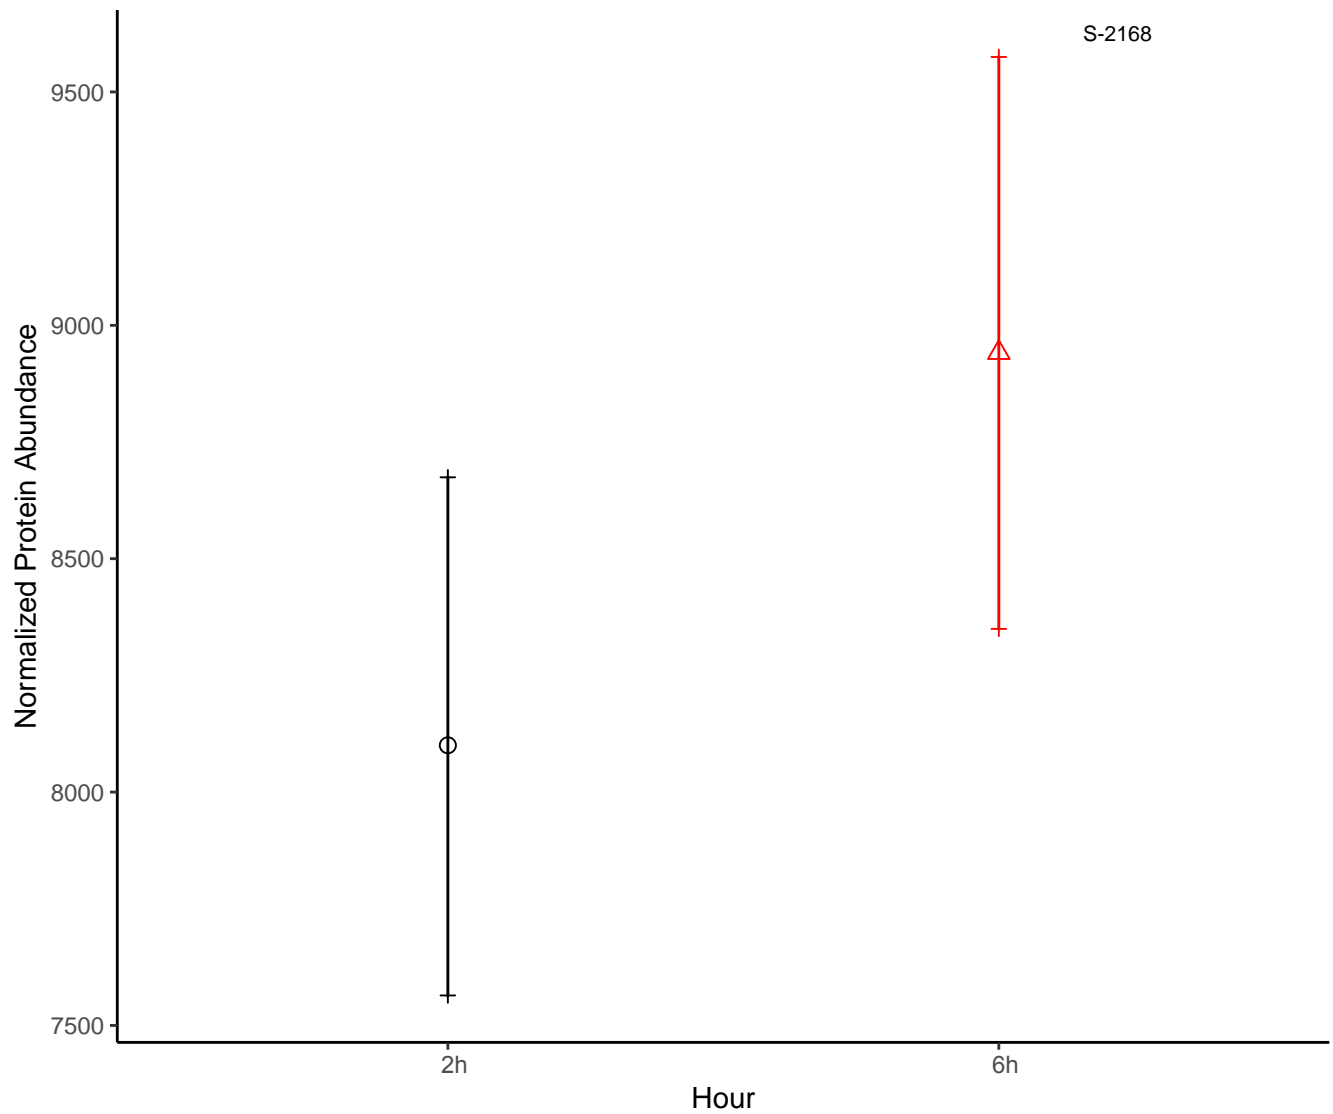

⊕ 2h

△ 6h



# HRTA\_STAAM

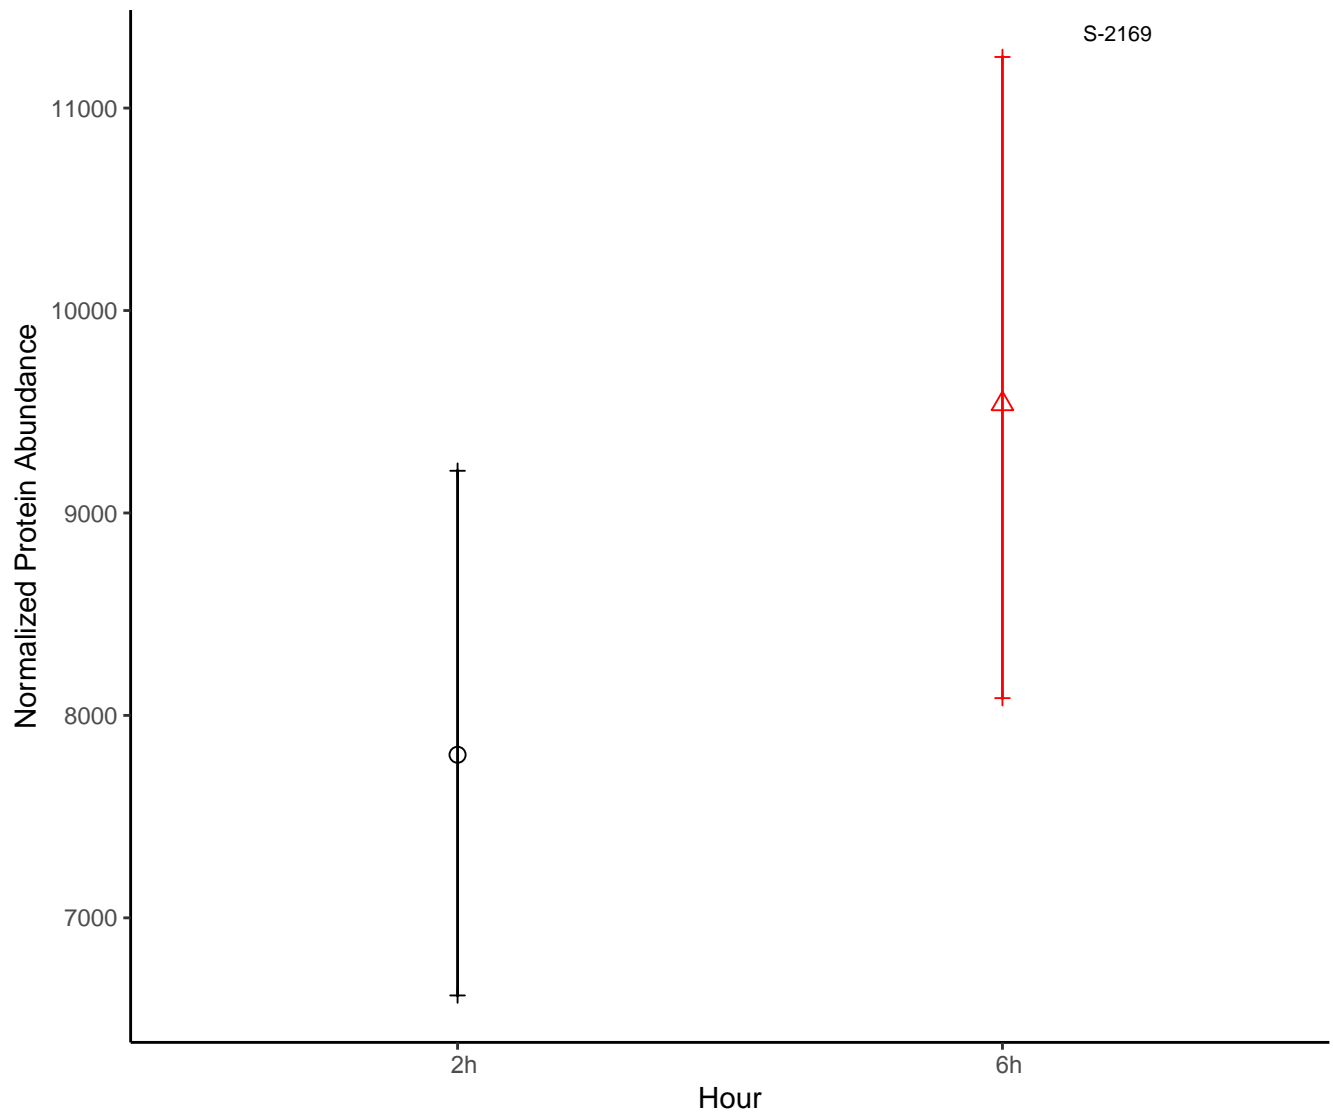

⊕ 2h

△ 6h

# HSLO\_STAAM

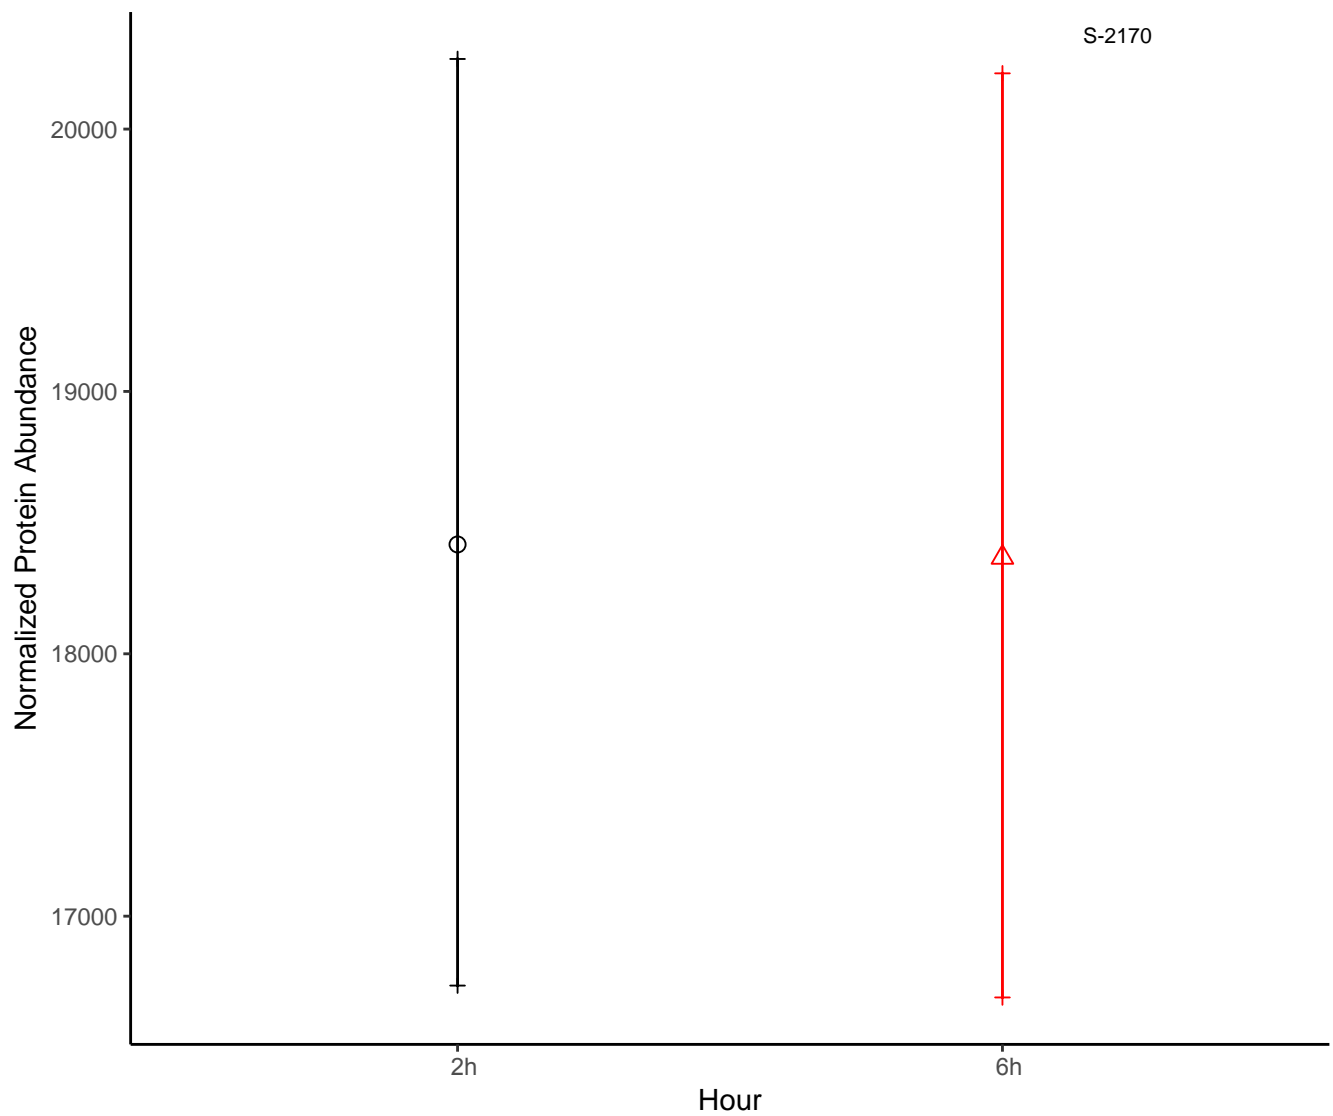

S-2170

⊕ 2h

△ 6h

# HSLU\_STAAM

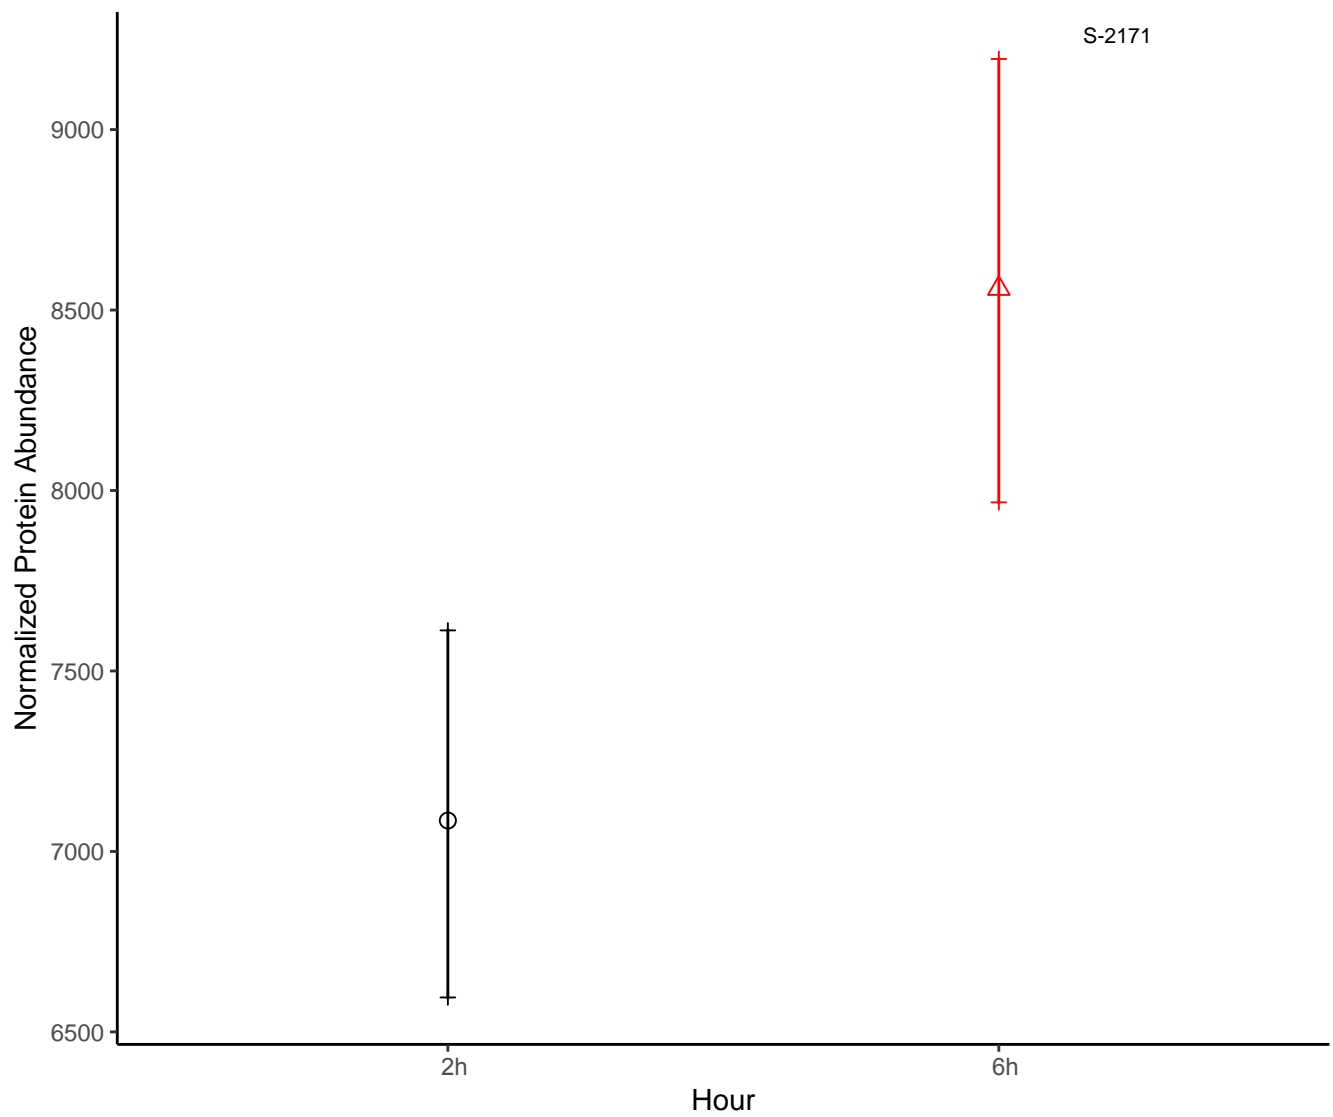

⊕ 2h

△ 6h

# HSLV\_STAAM

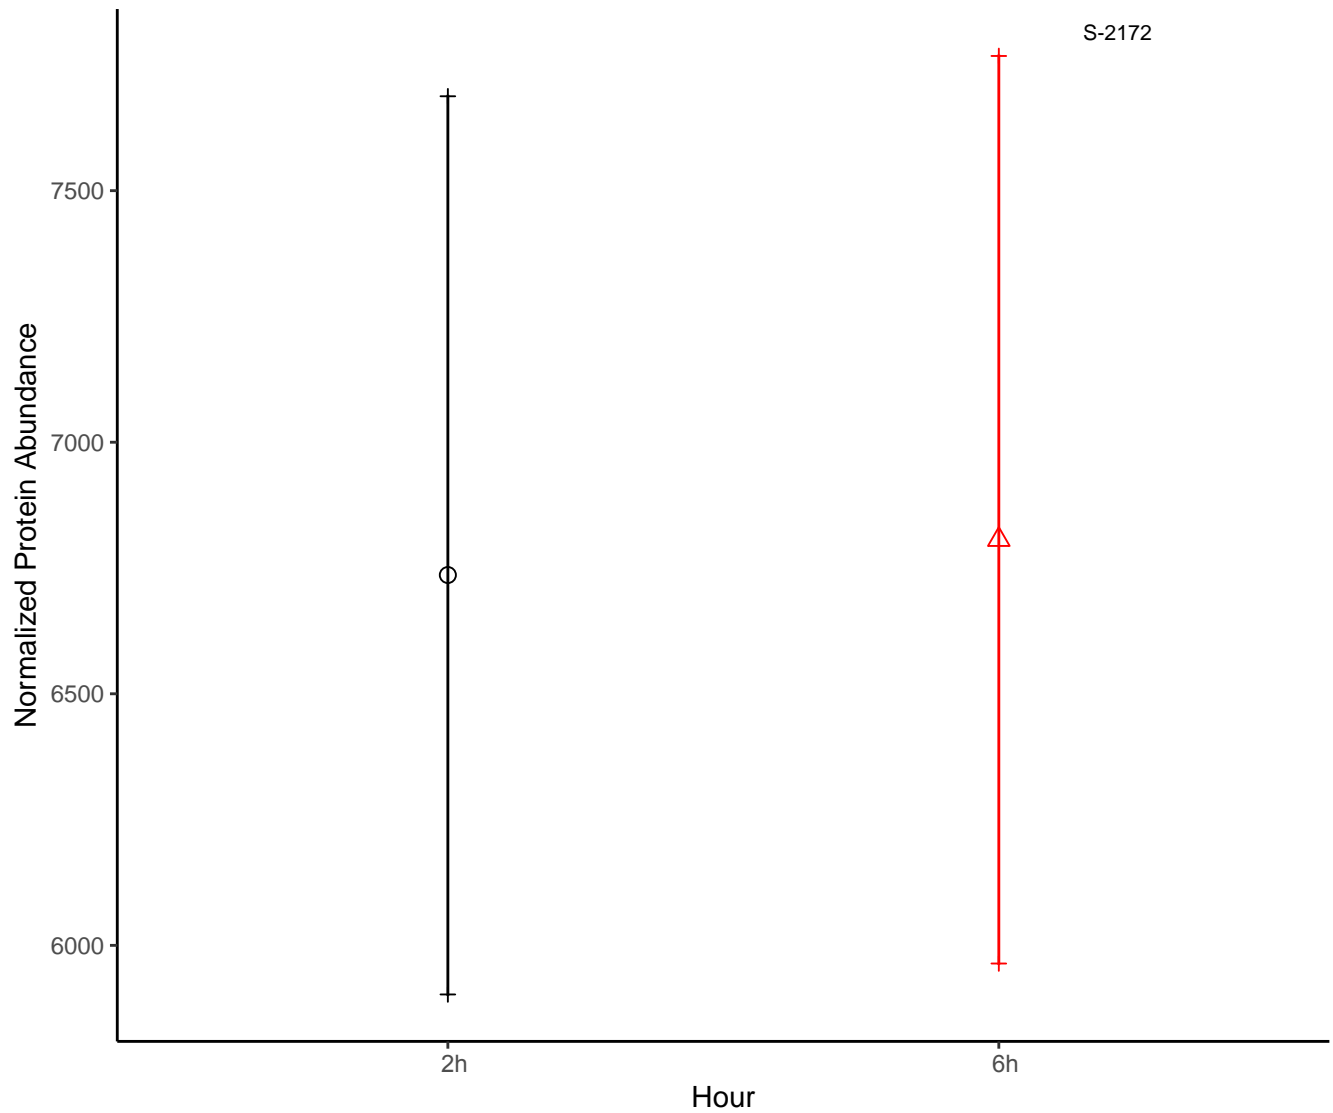

⊕ 2h

△ 6h

# HUTH\_STAAM

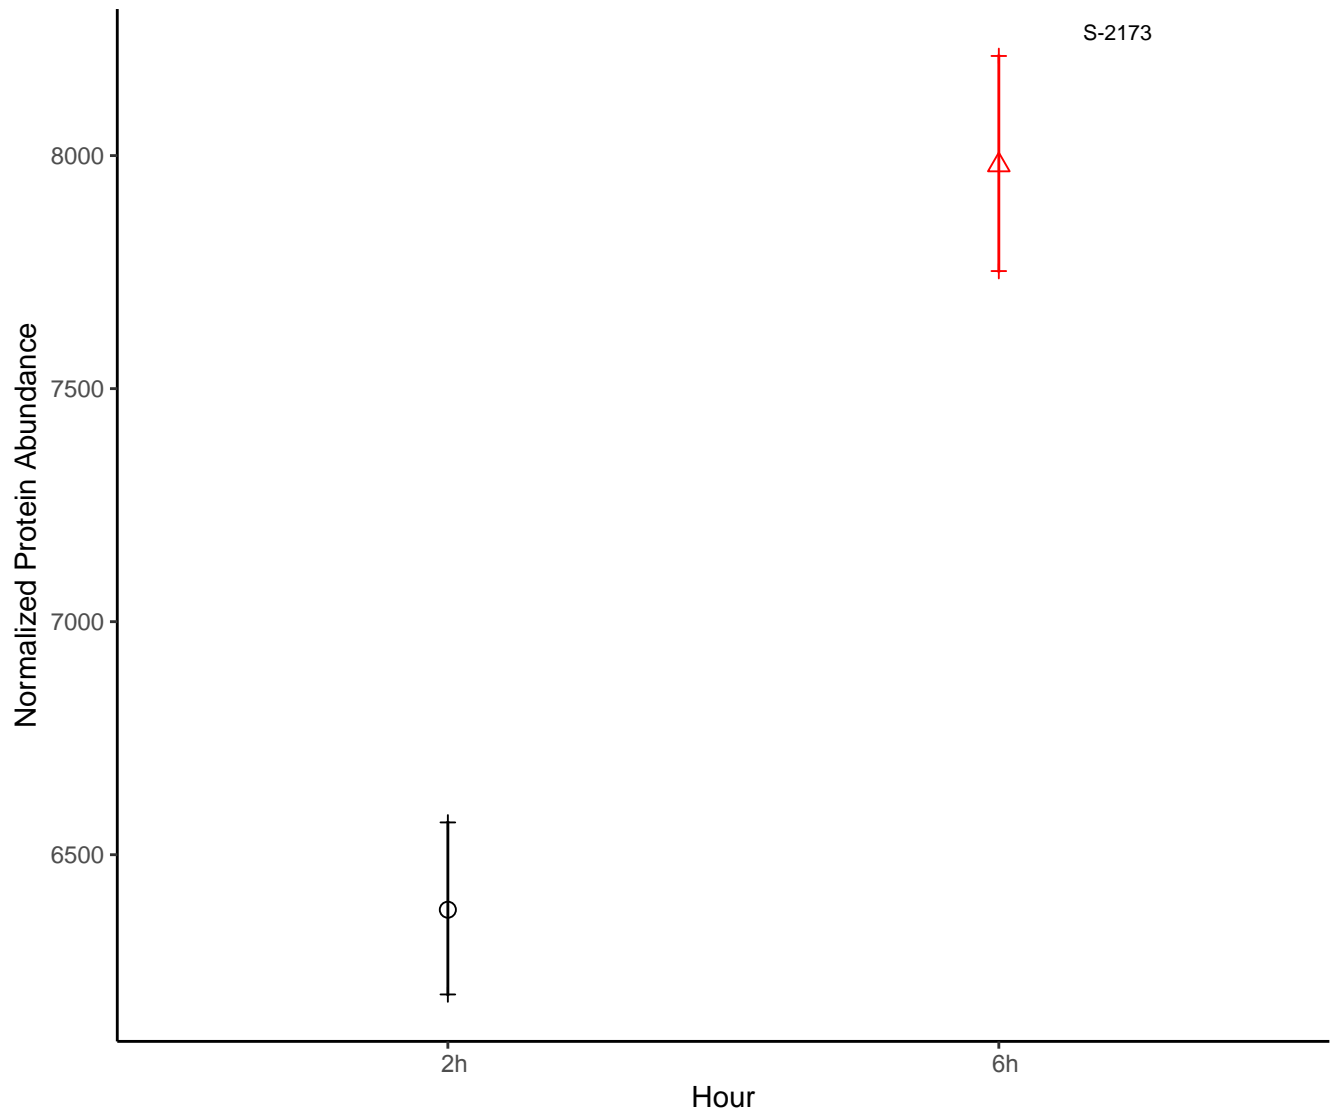

⊕ 2h

△ 6h

# HUTI\_STAAM

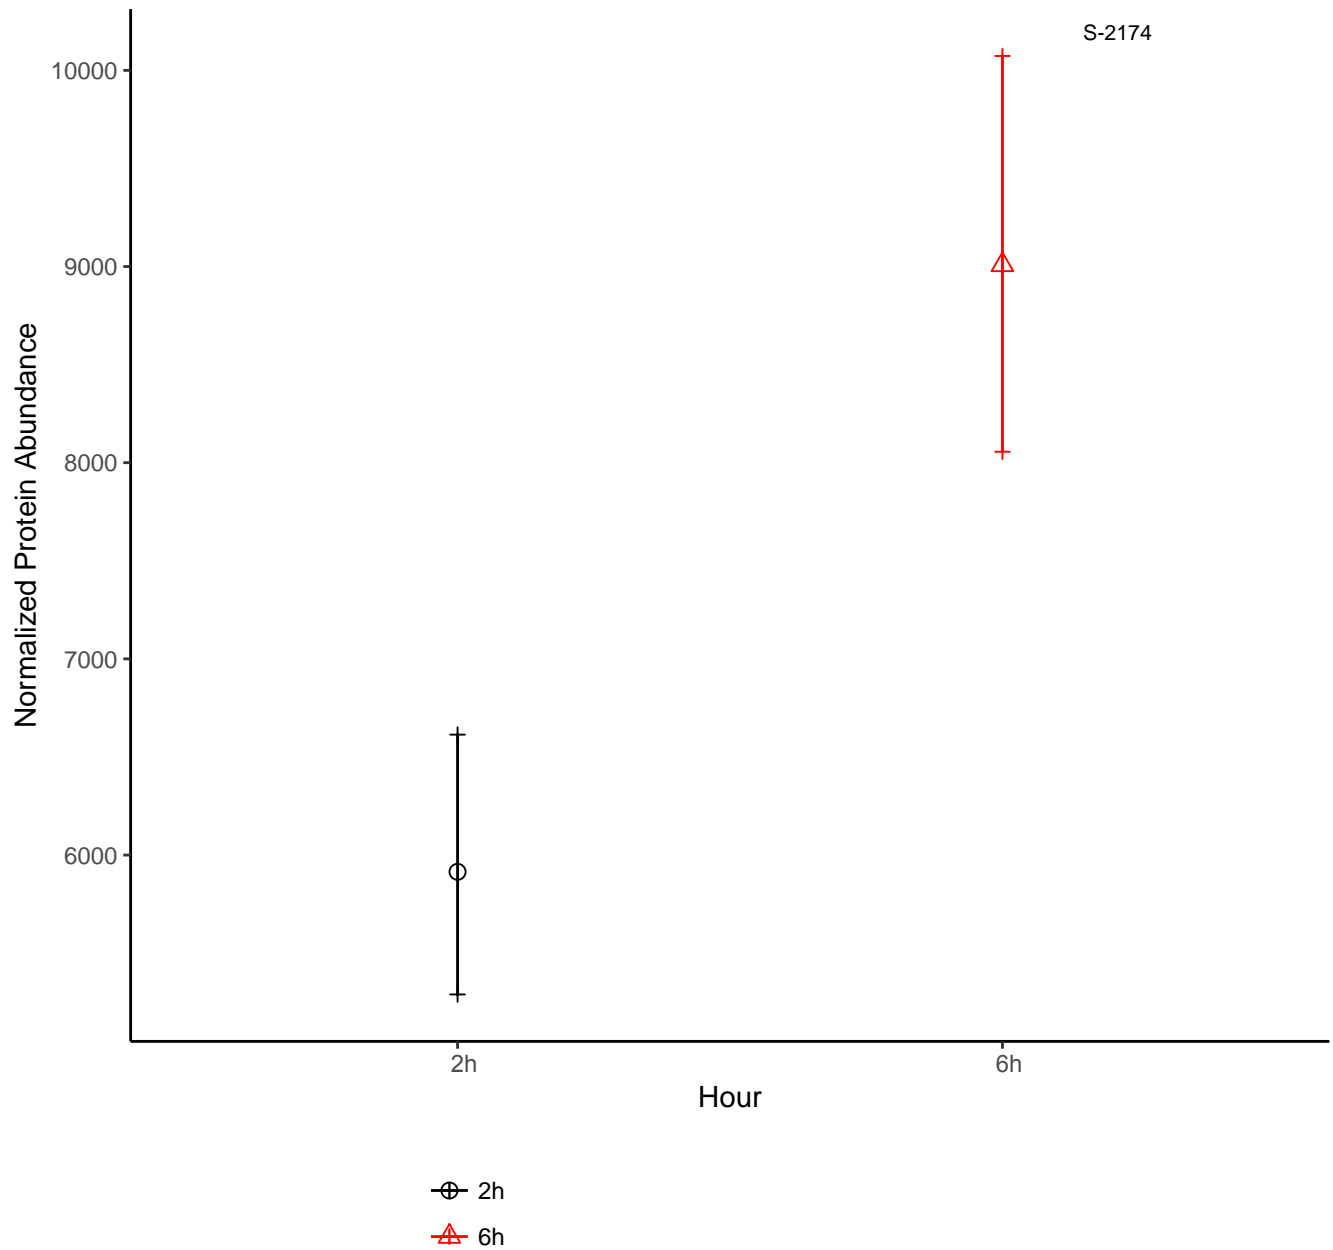

# HUTU\_STAAM

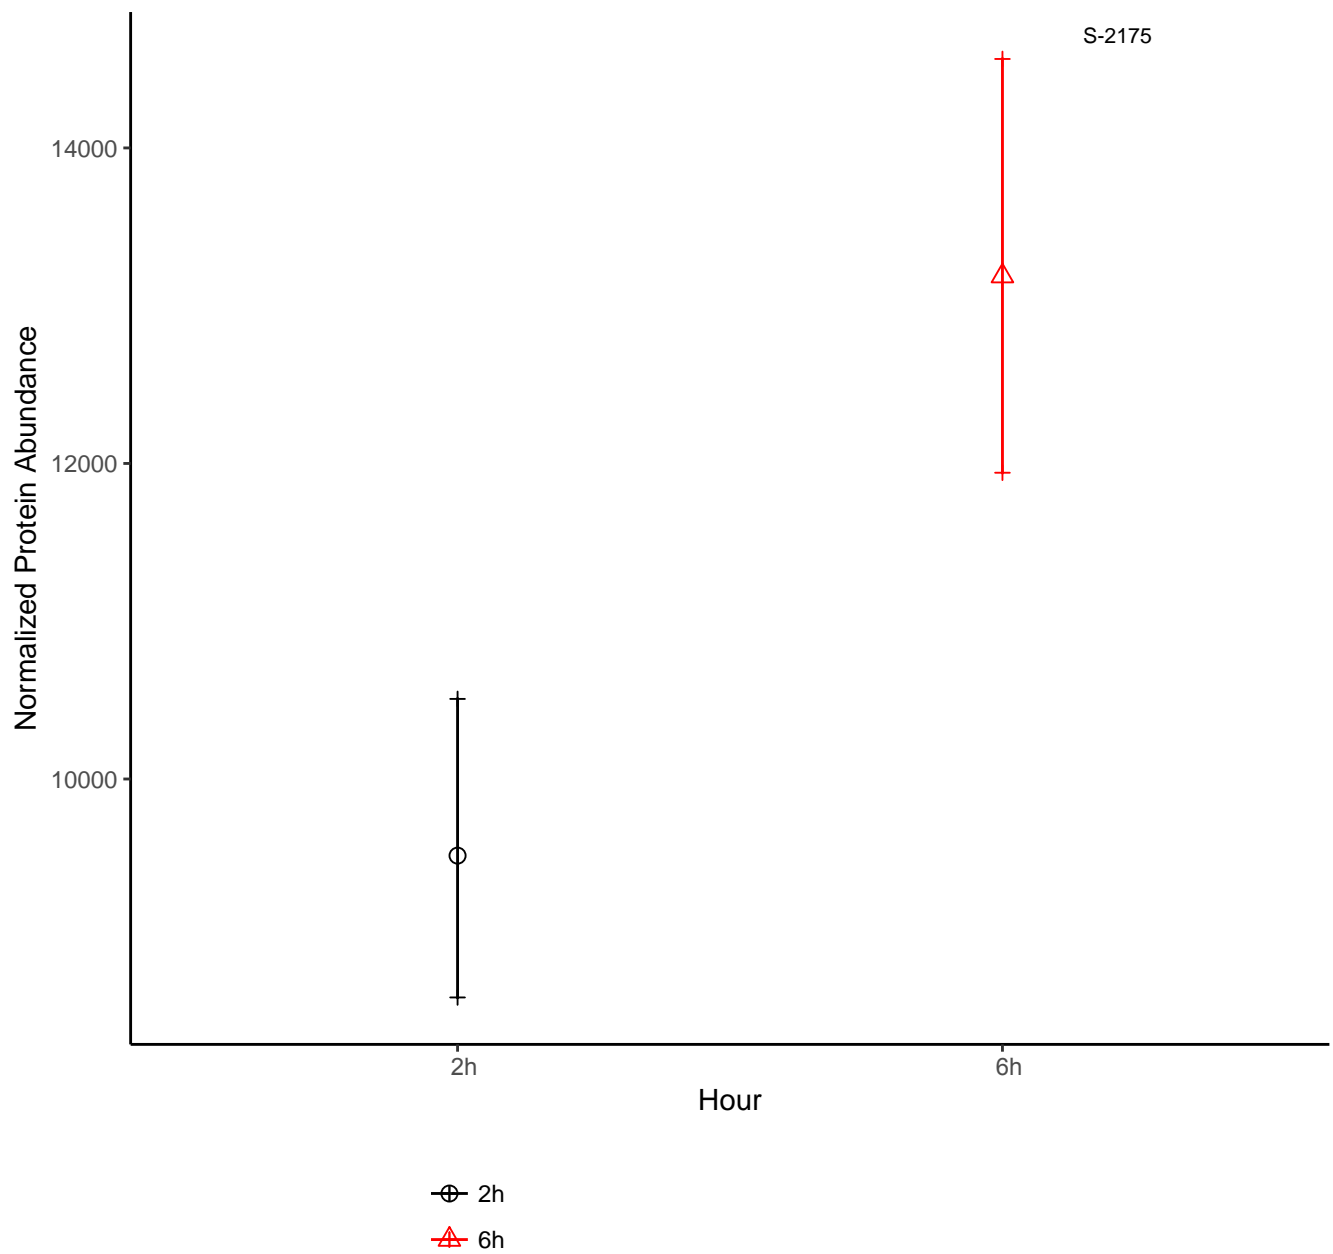

# ICAB\_STAAM

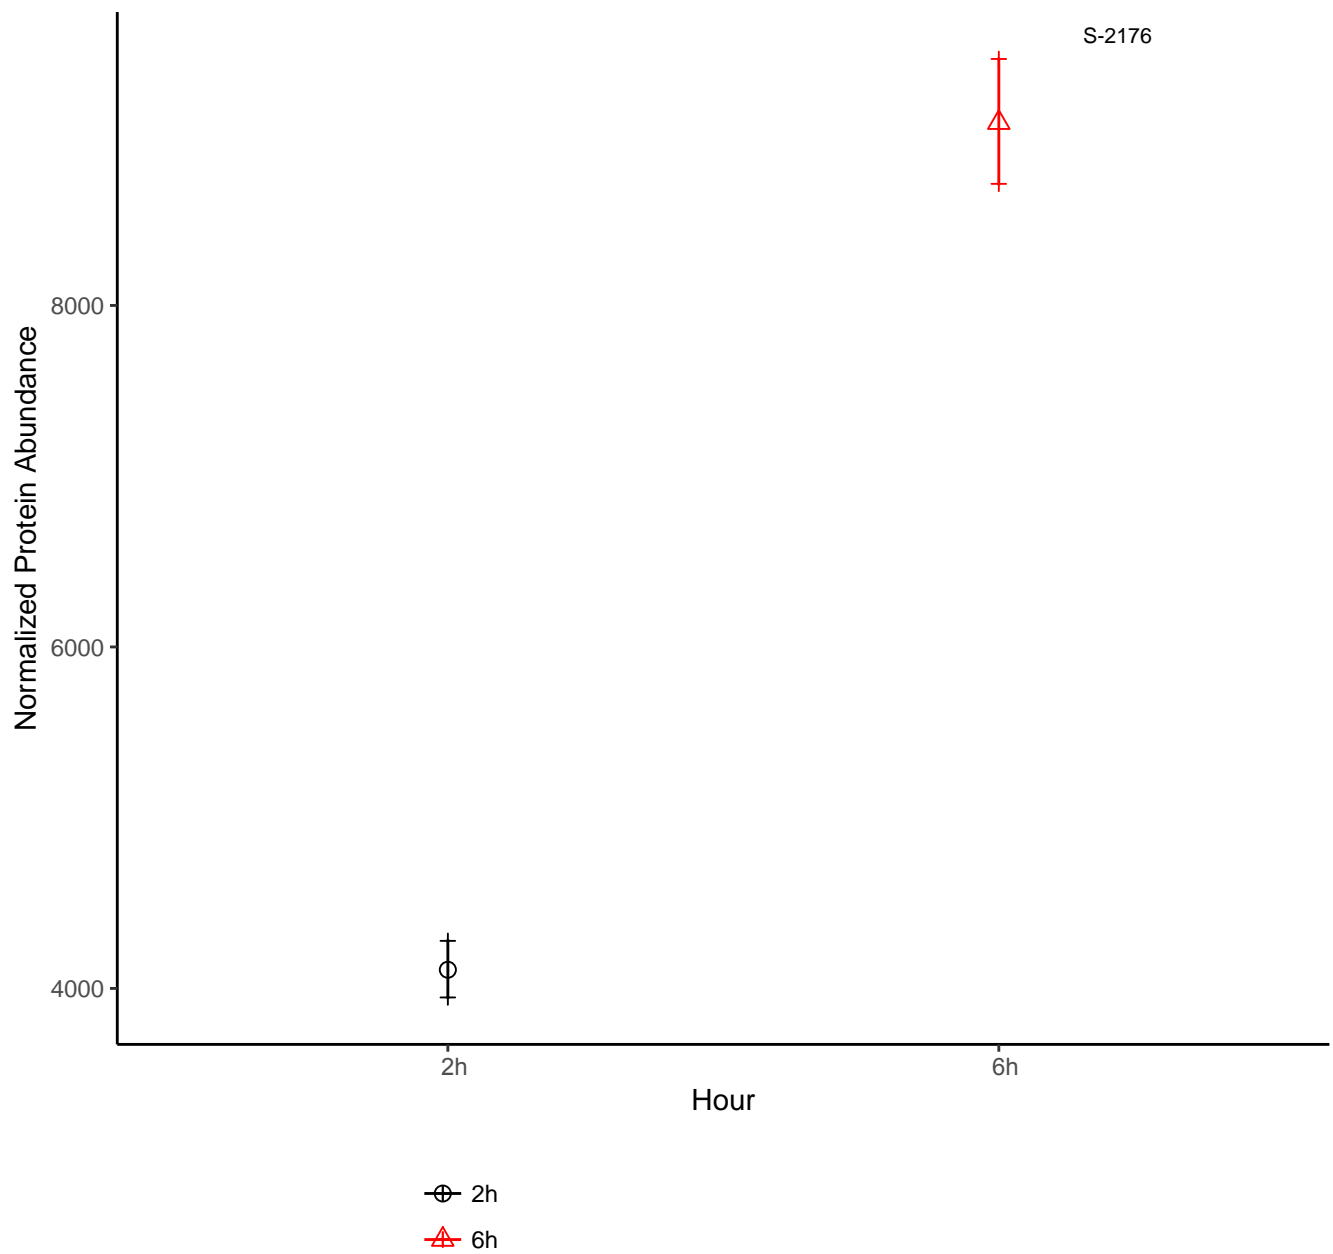



# IDH\_STAAM

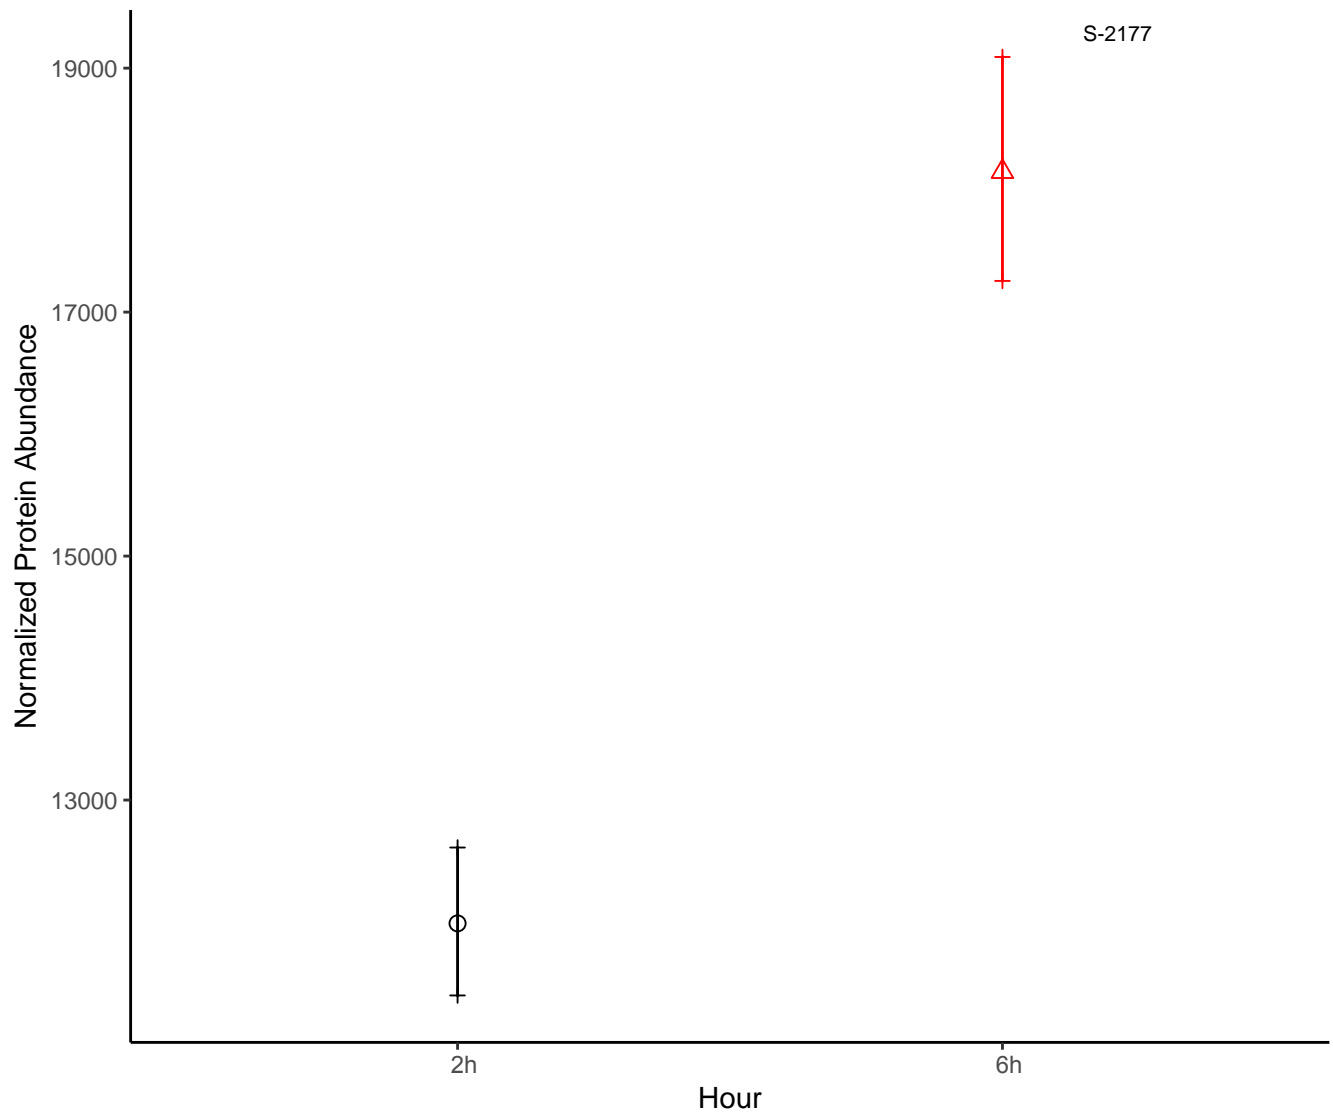

⊕ 2h

△ 6h

# IF1\_STAAM

S-2178

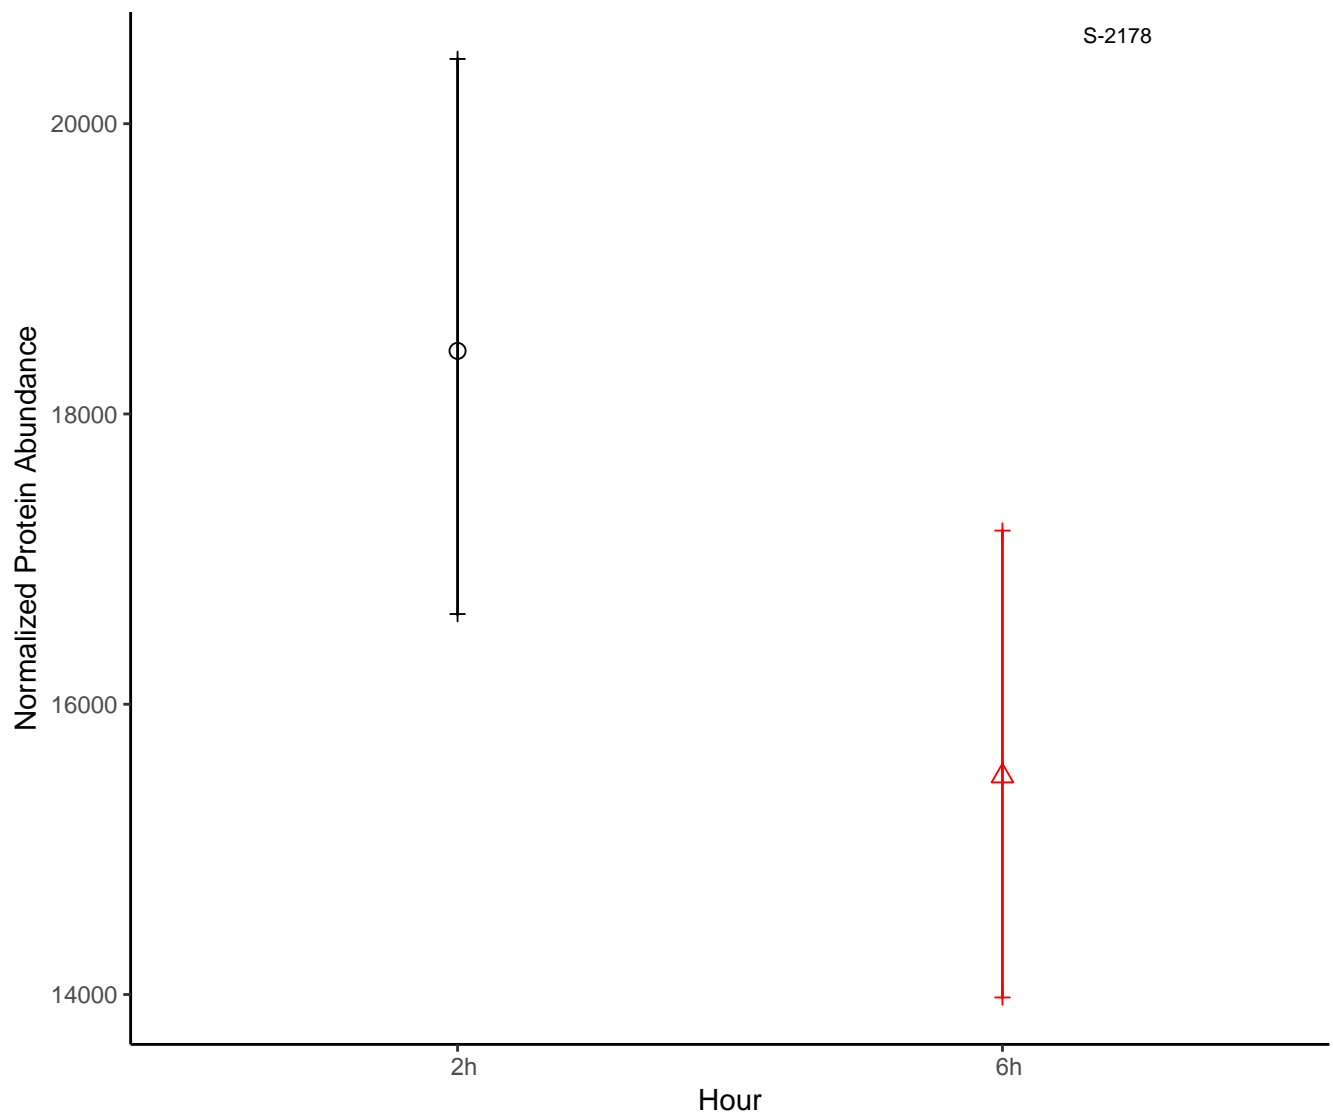

⊕ 2h

△ 6h

# IF2\_STAAM

S-2179

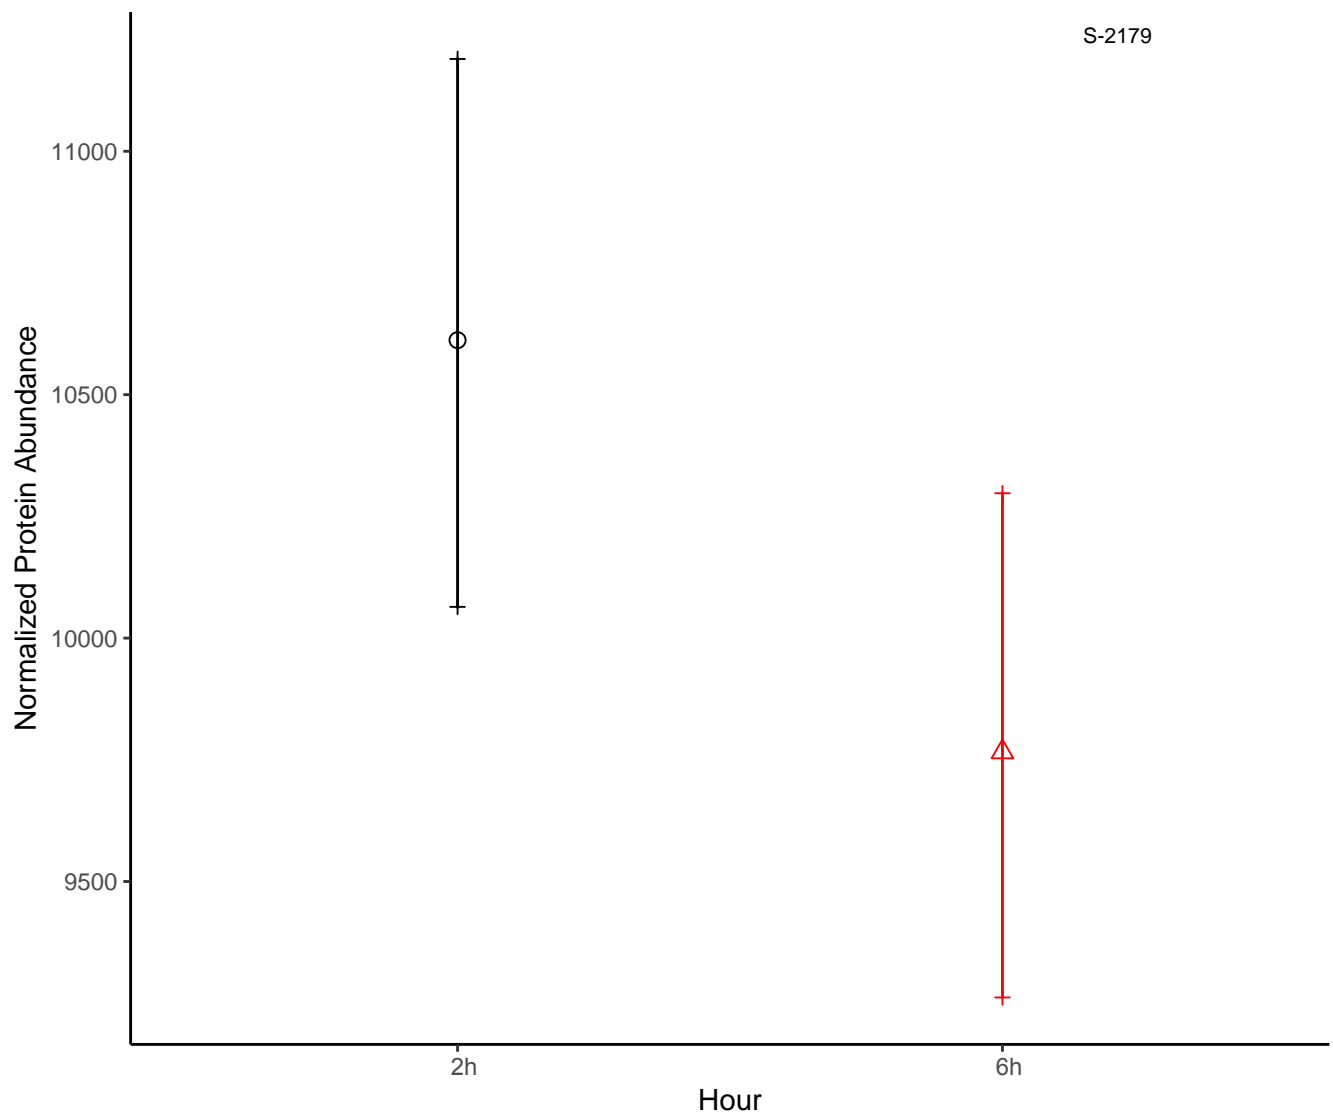

⊕ 2h

△ 6h

# IF3\_STAAM

S-2180

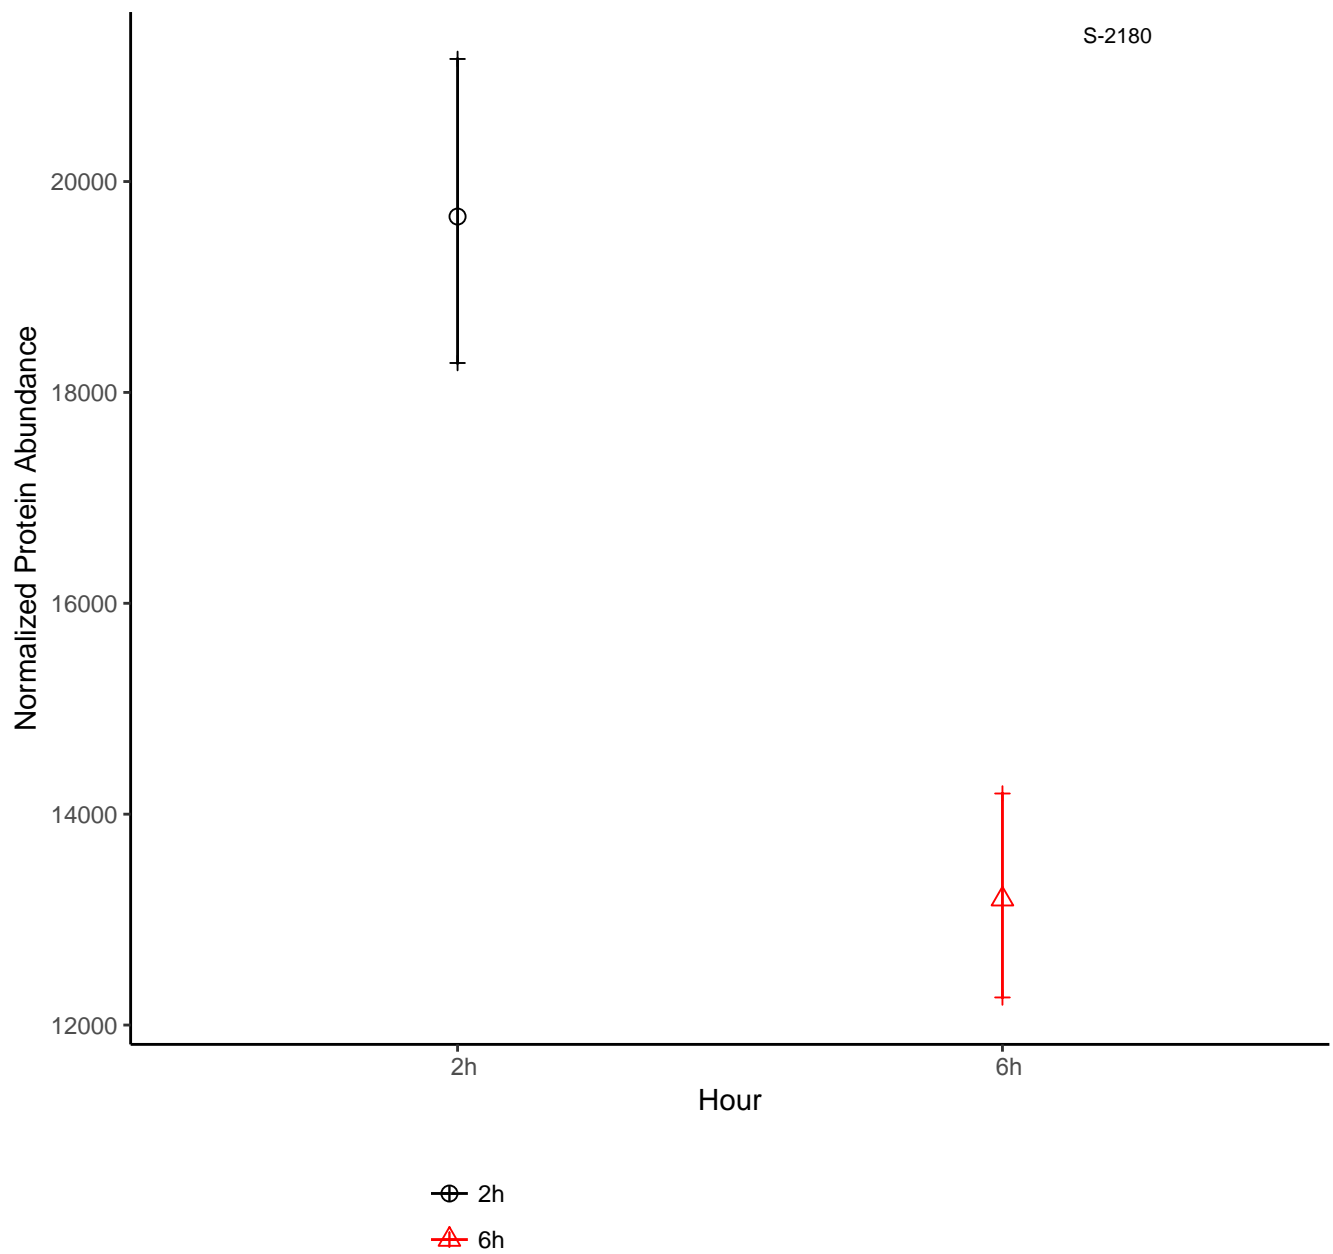

# ILVC\_STAAM

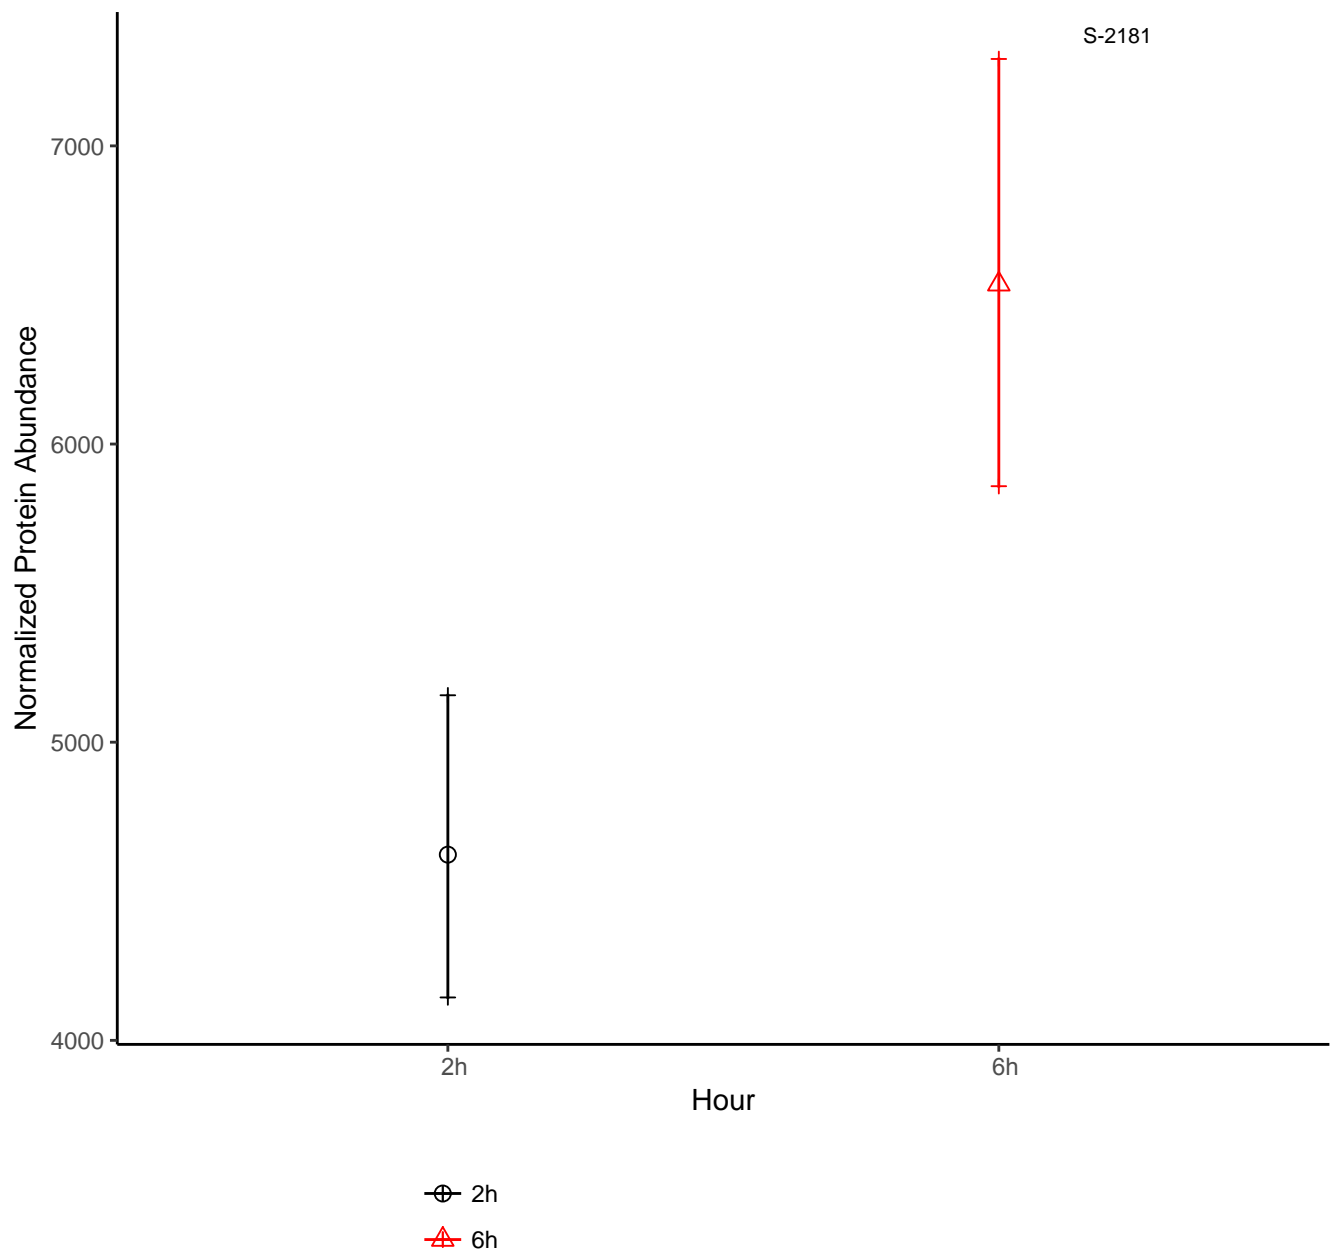

# ILVE\_STAAM

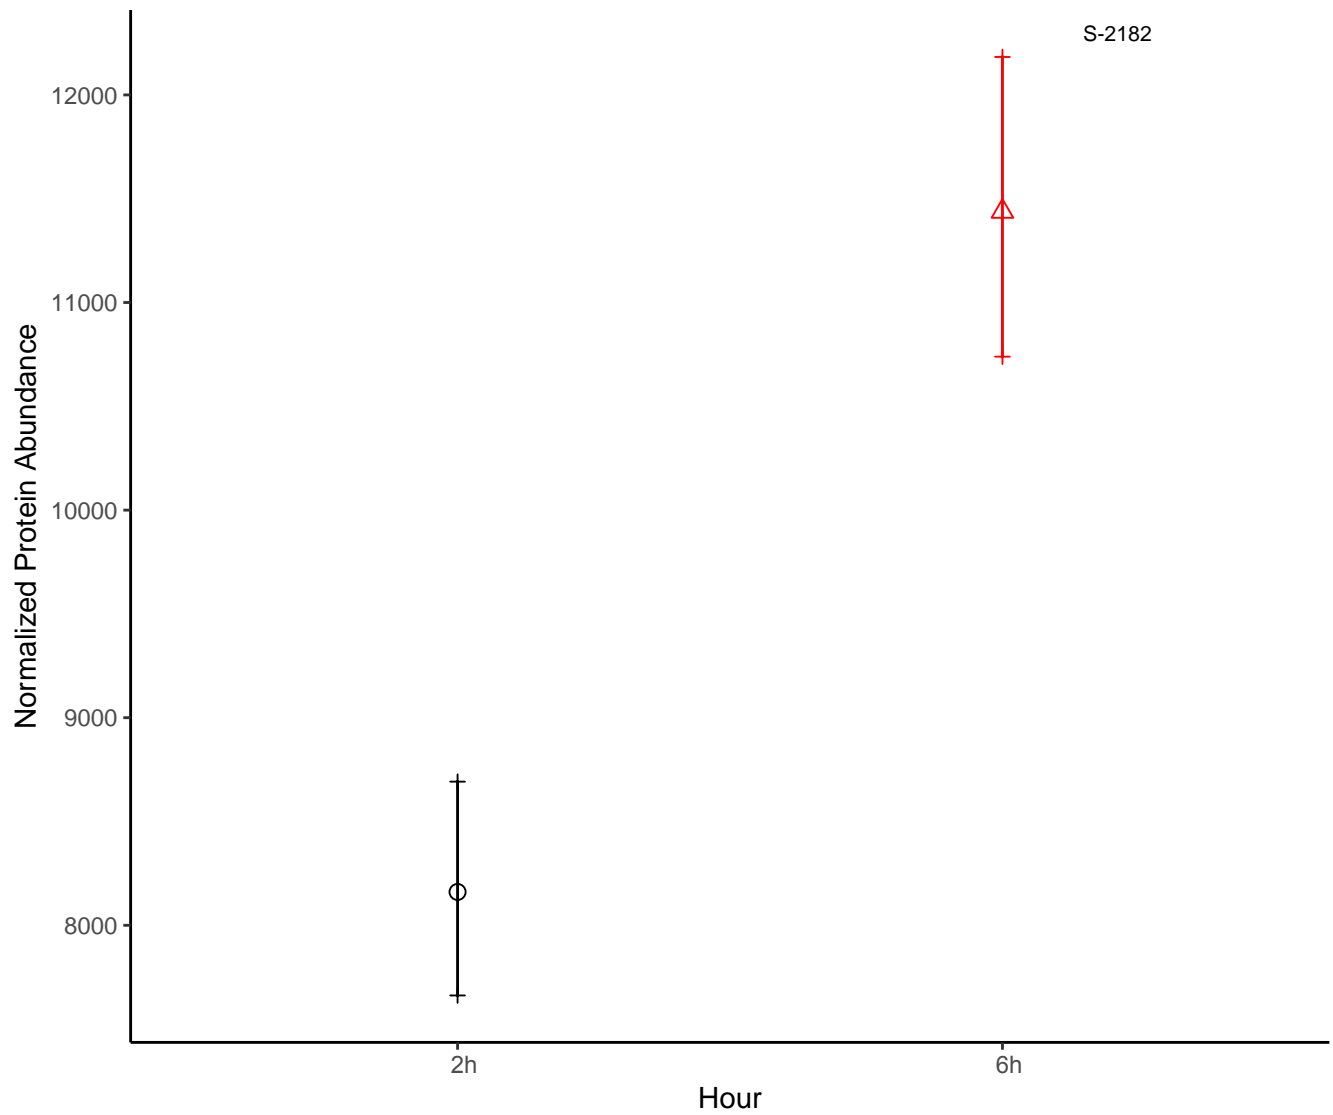

⊕ 2h

△ 6h

# IMDH\_STAAM

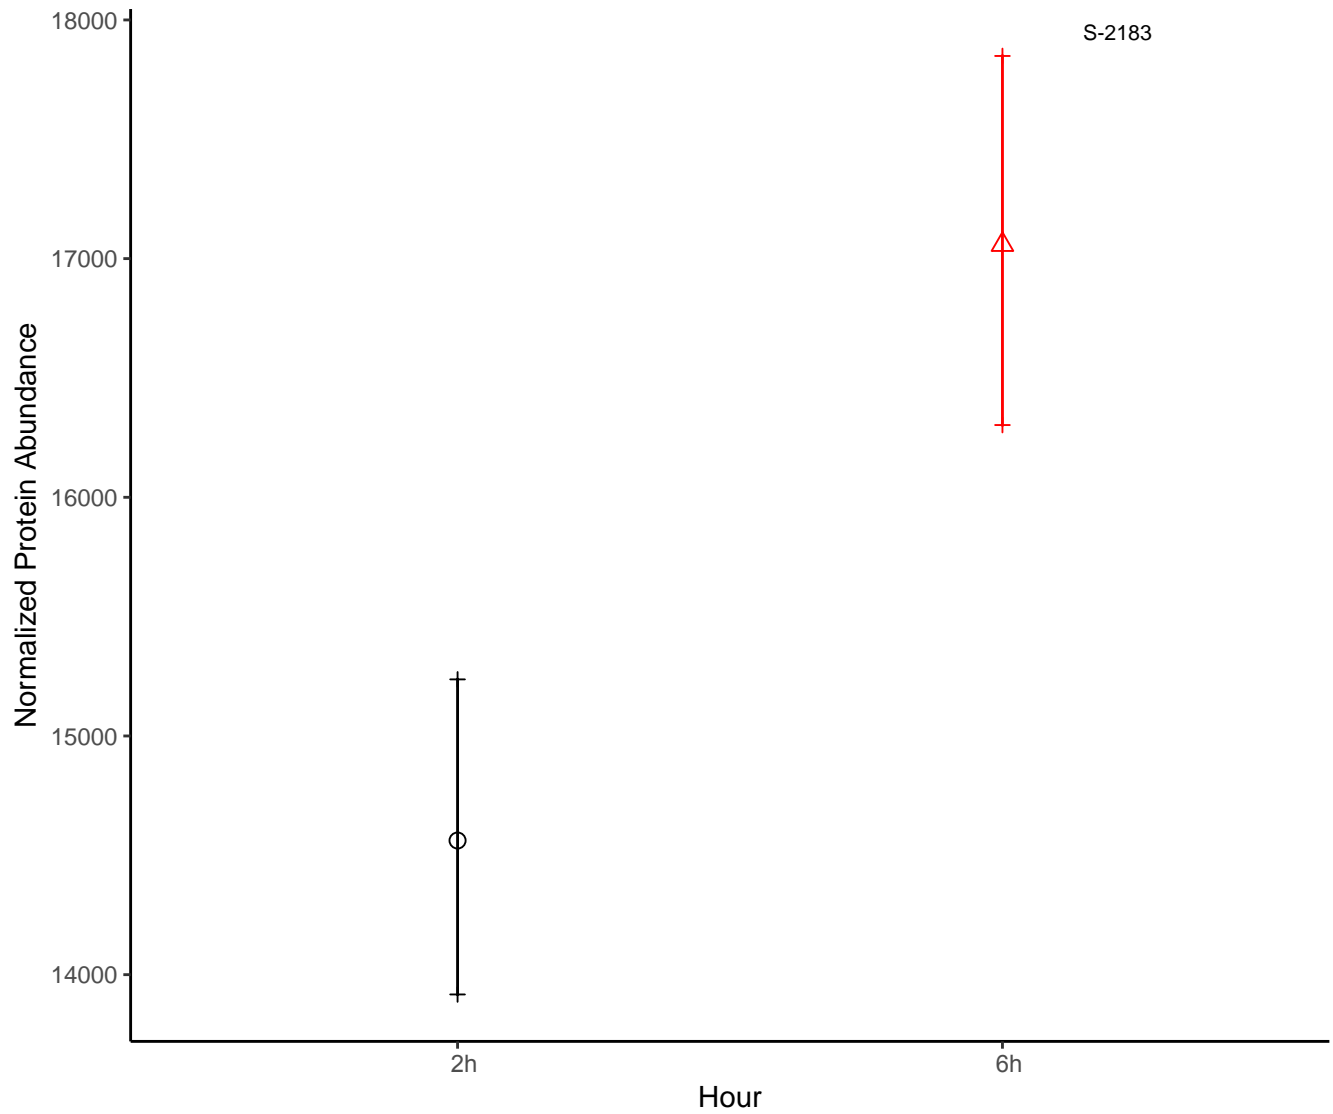

⊕ 2h

△ 6h

# ISAA\_STAAM

S-2184

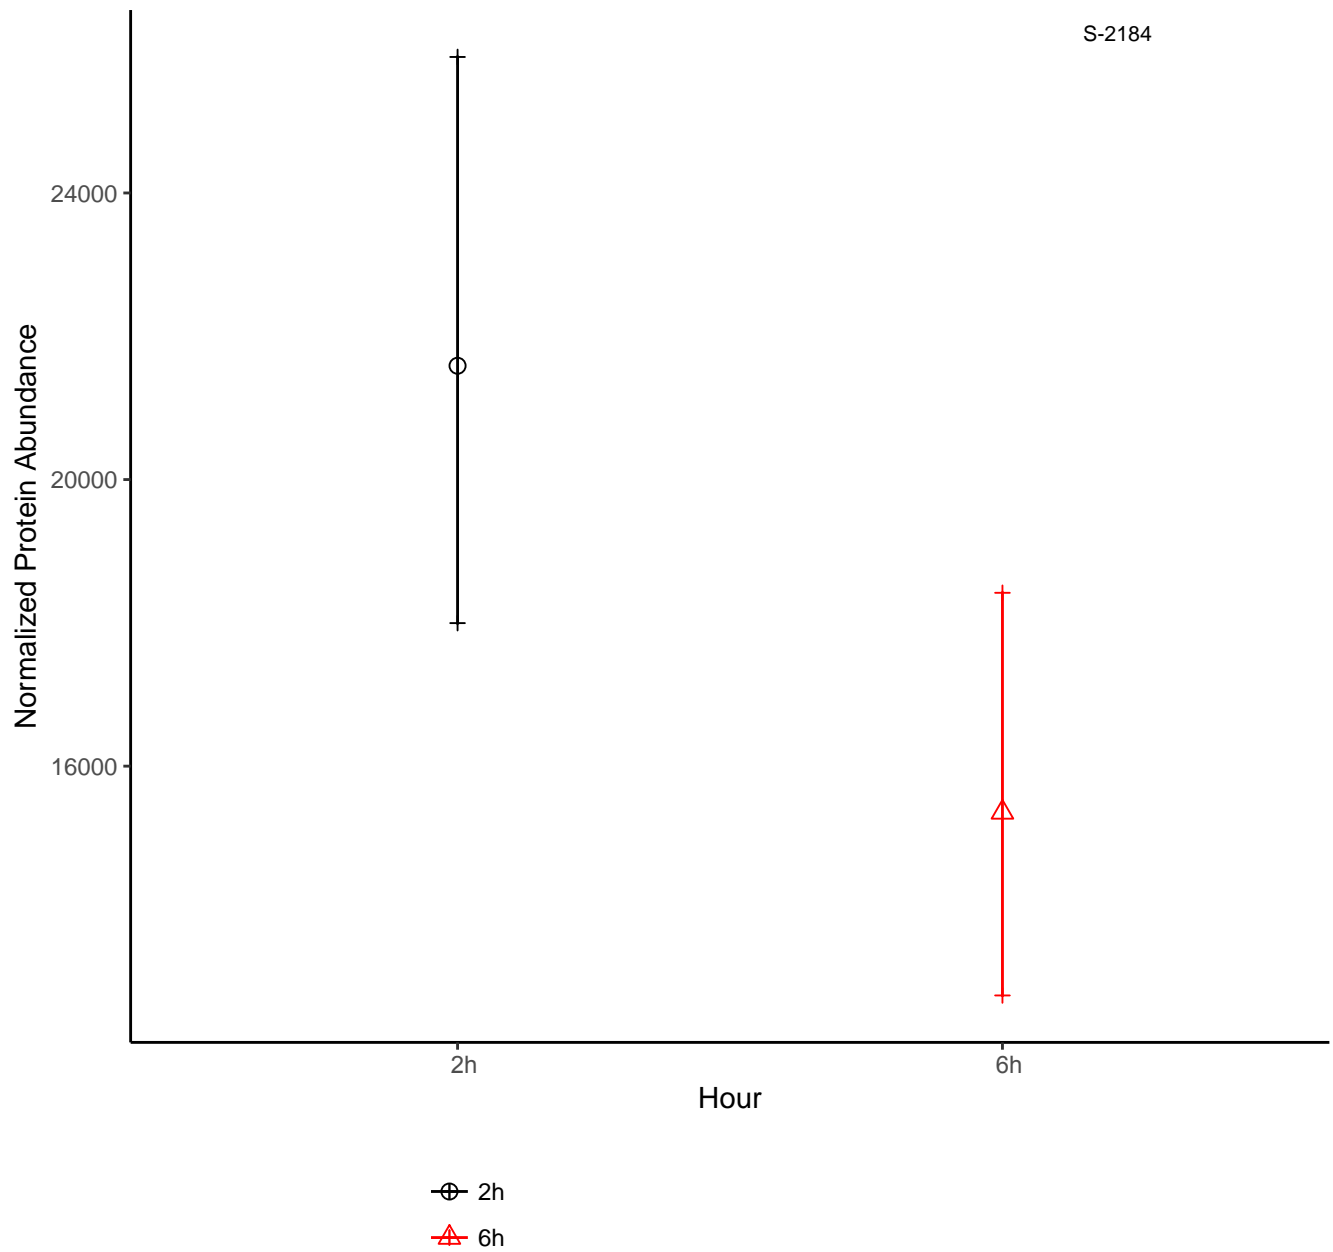



# ISPD1\_STAAM

S-2185

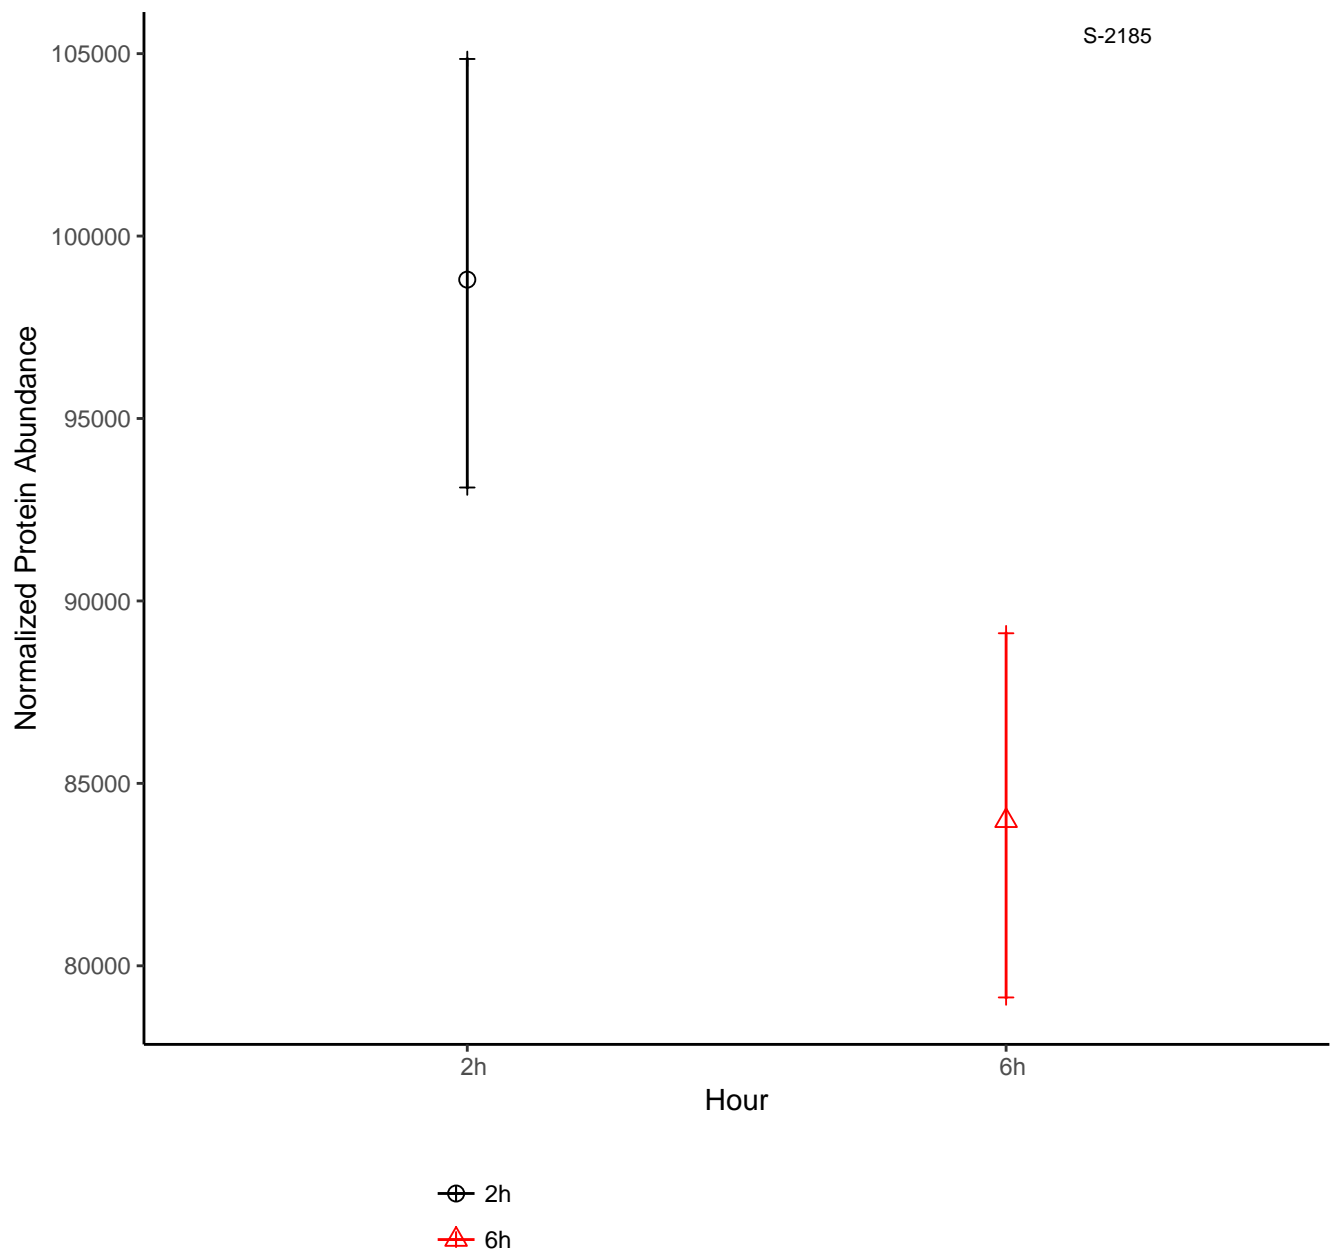

# ISPD2\_STAAM

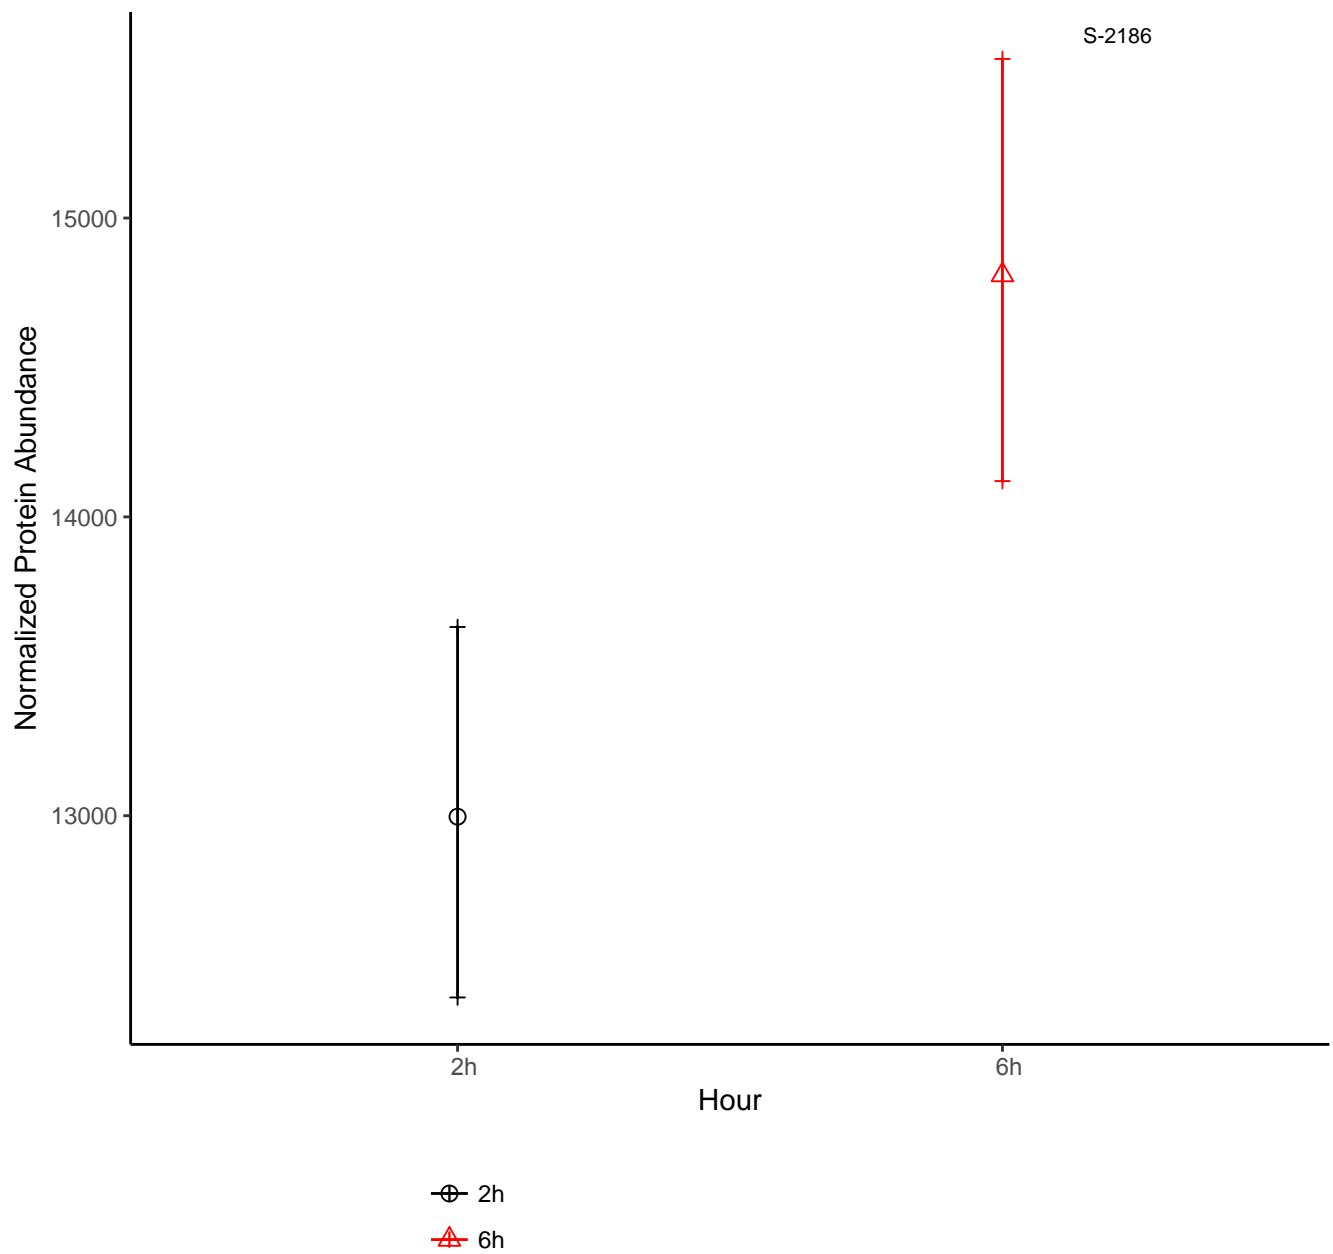

# ISPE\_STAAM

S-2187

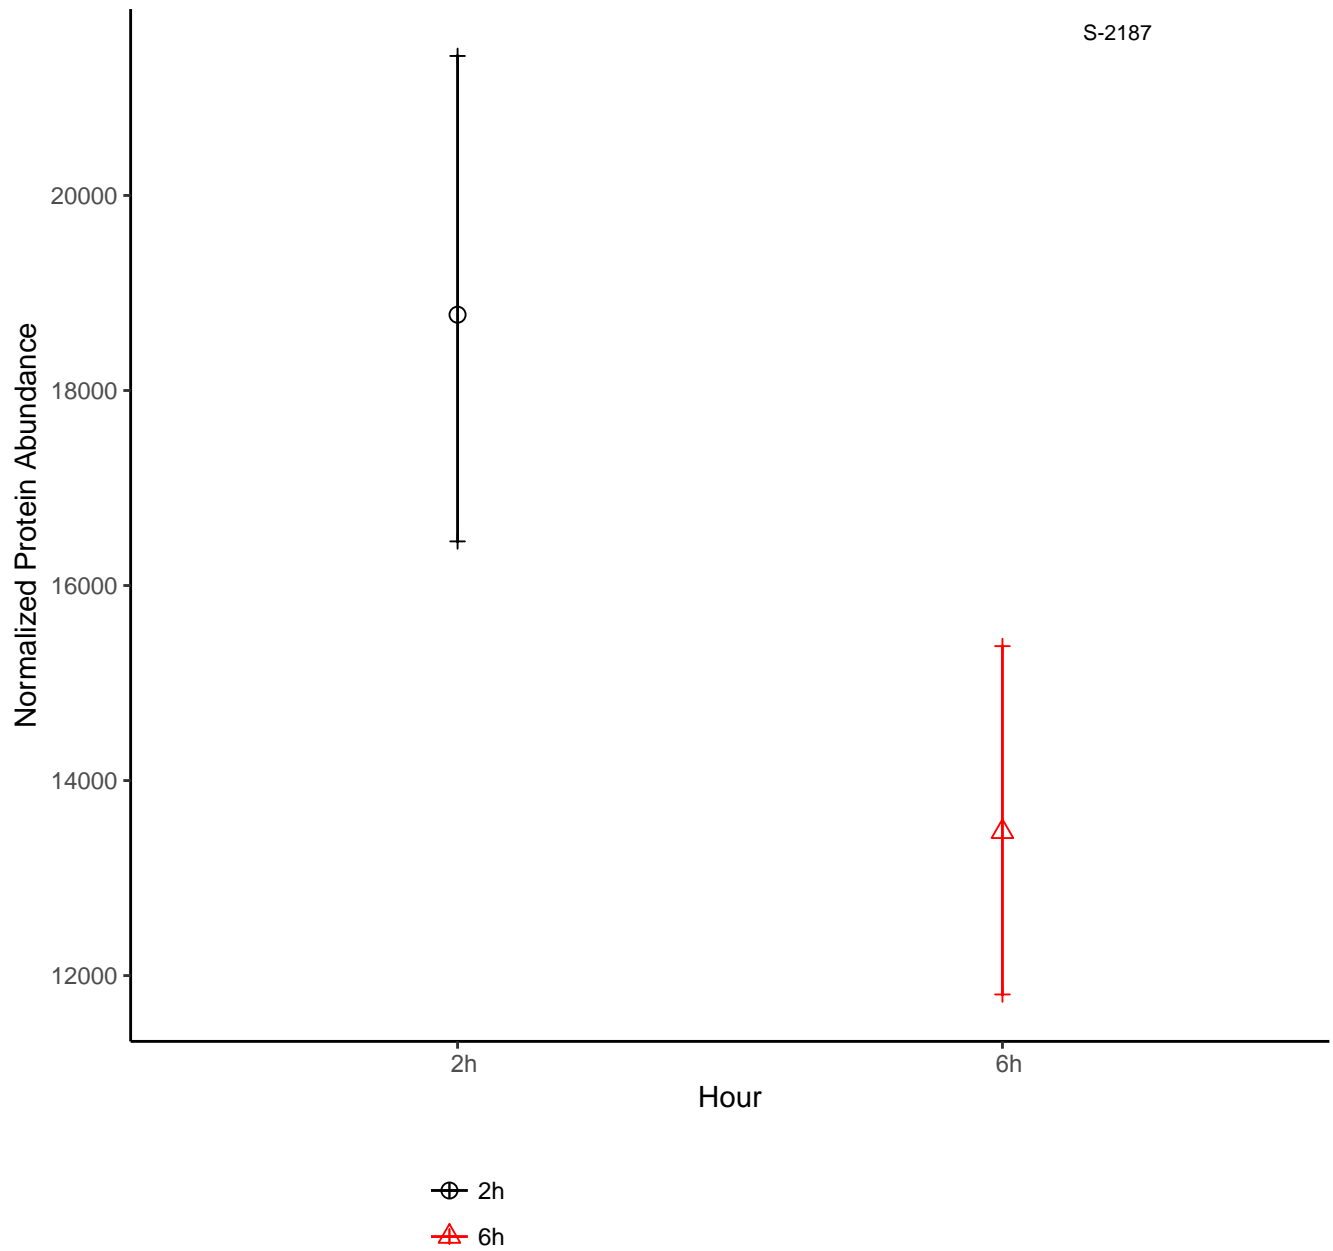

# KAD\_STAAM

S-2188

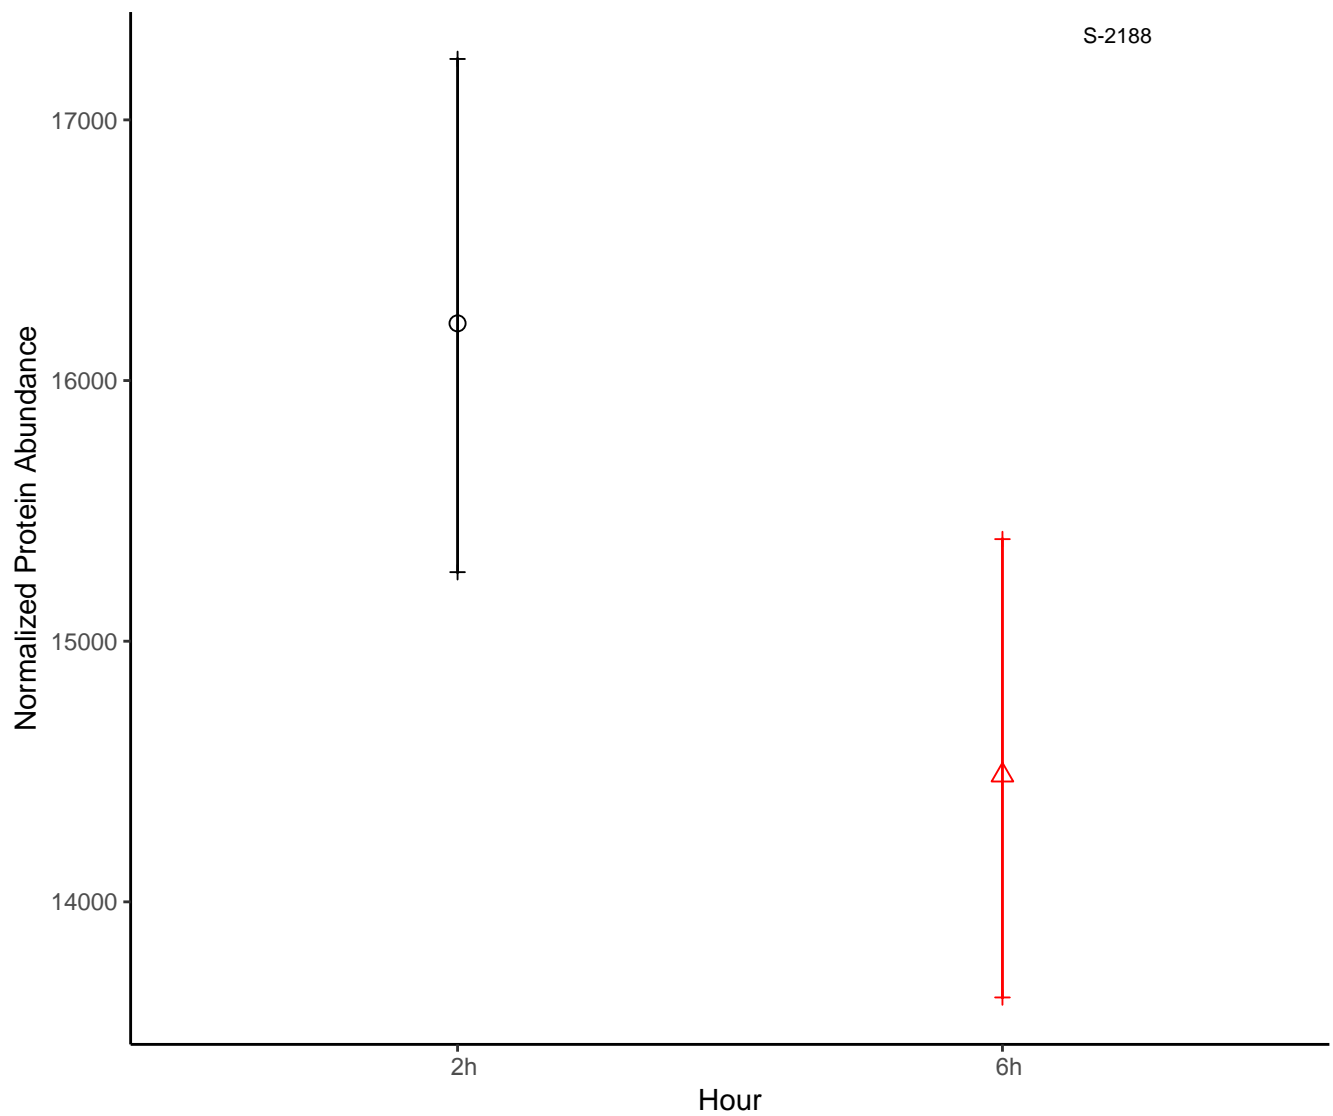

⊕ 2h

△ 6h

# KCY\_STAAM

S-2189

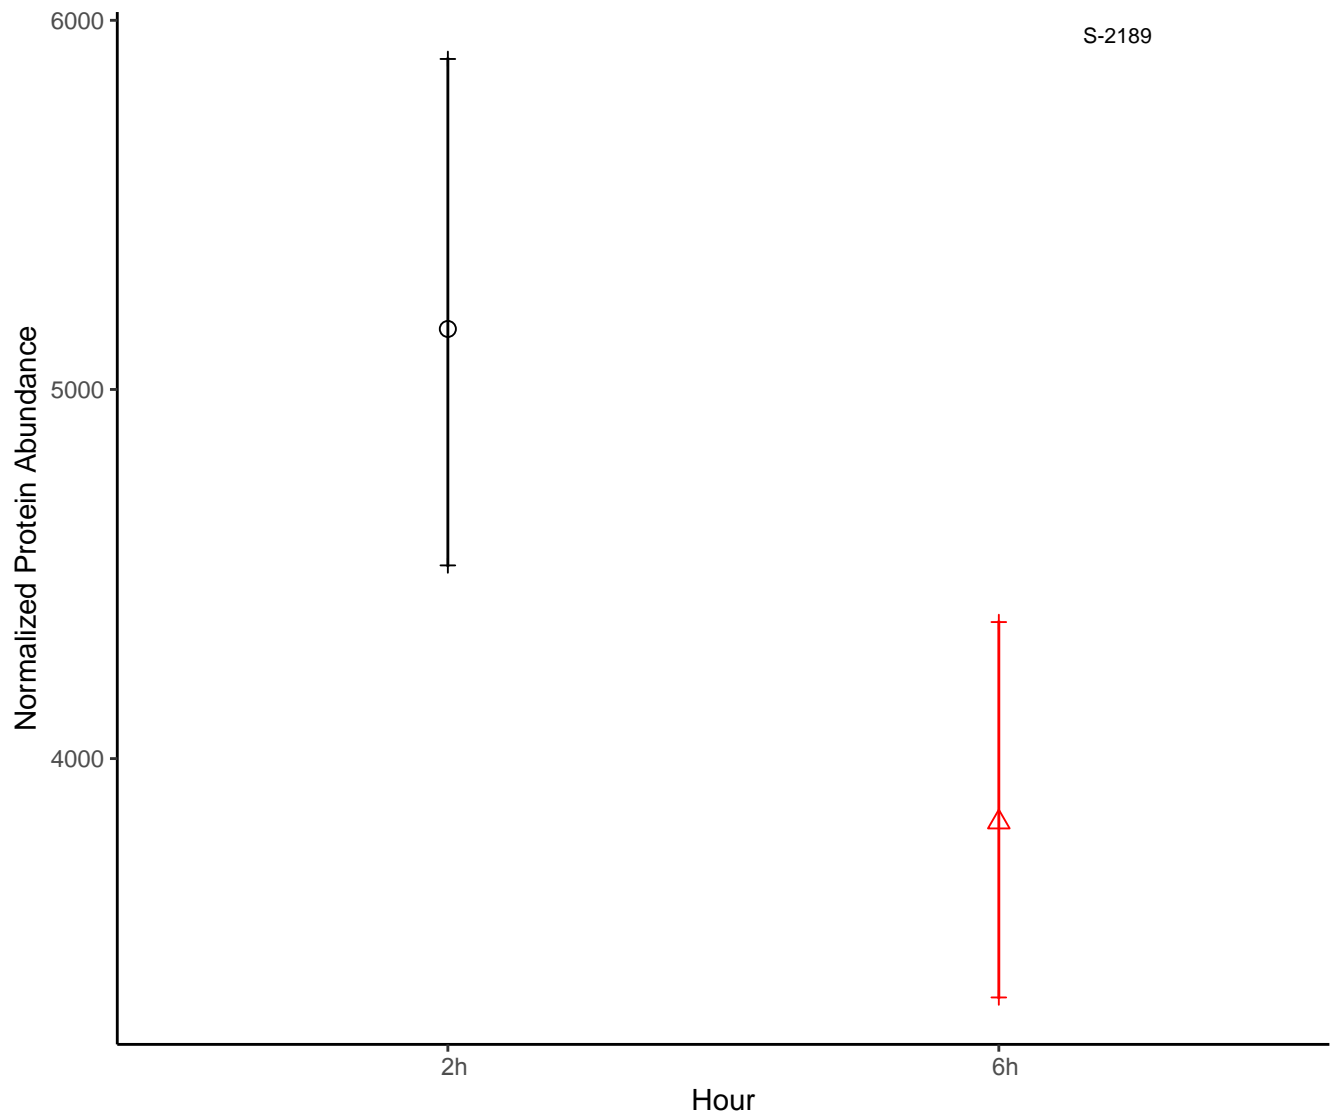

⊕ 2h

△ 6h

# KITH\_STAAM

S-2190

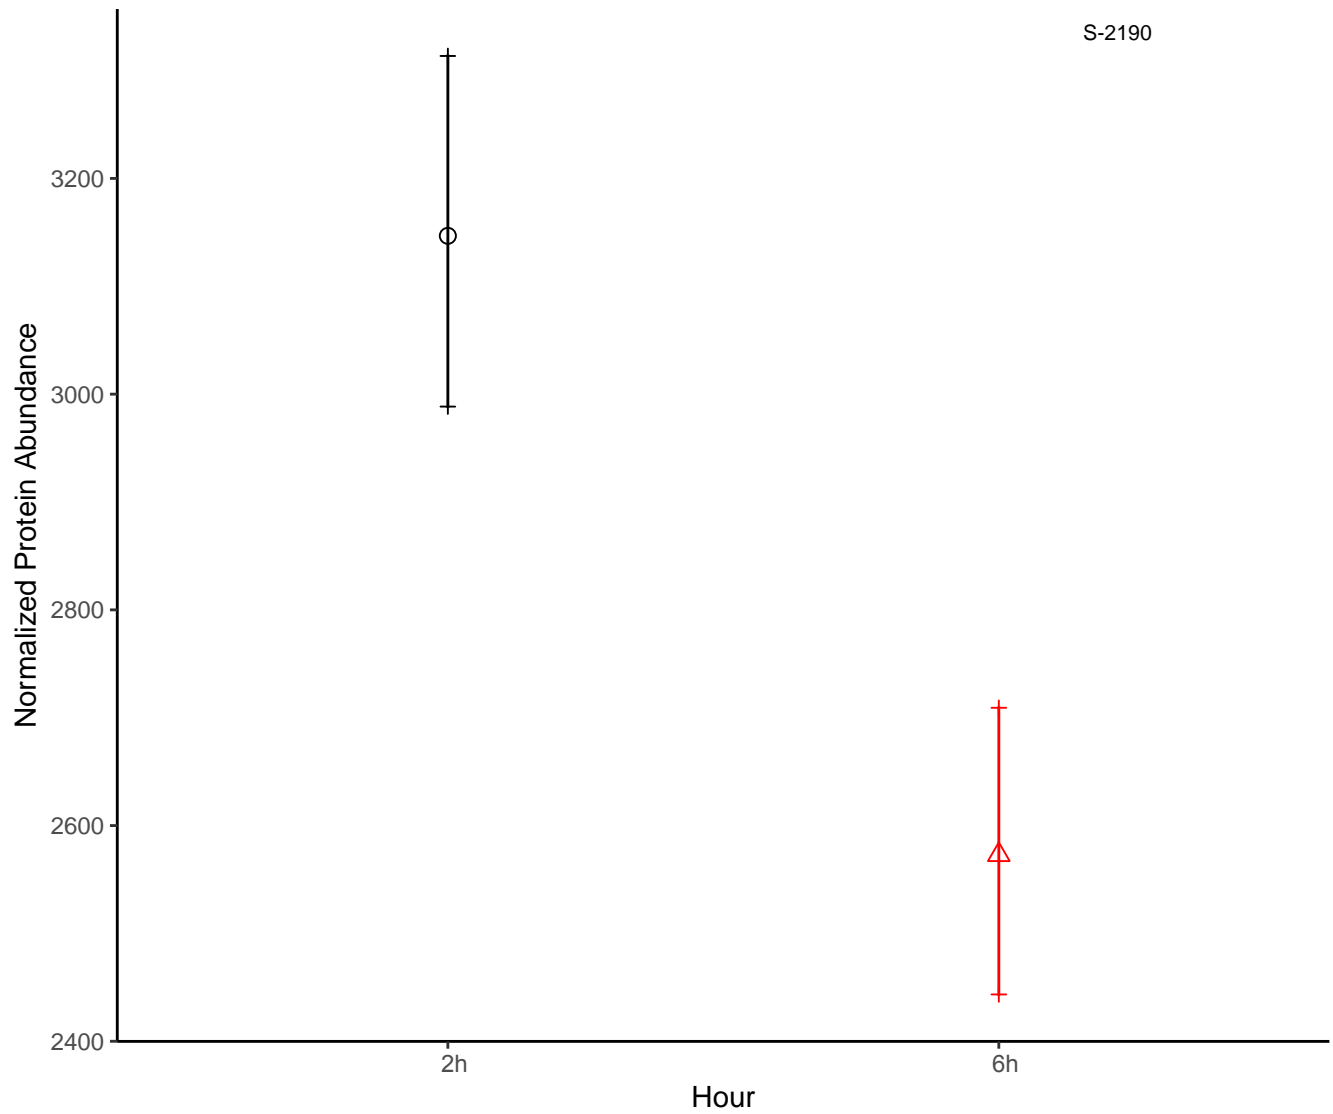

⊕ 2h

△ 6h

# KPRS\_STAAM

S-2191

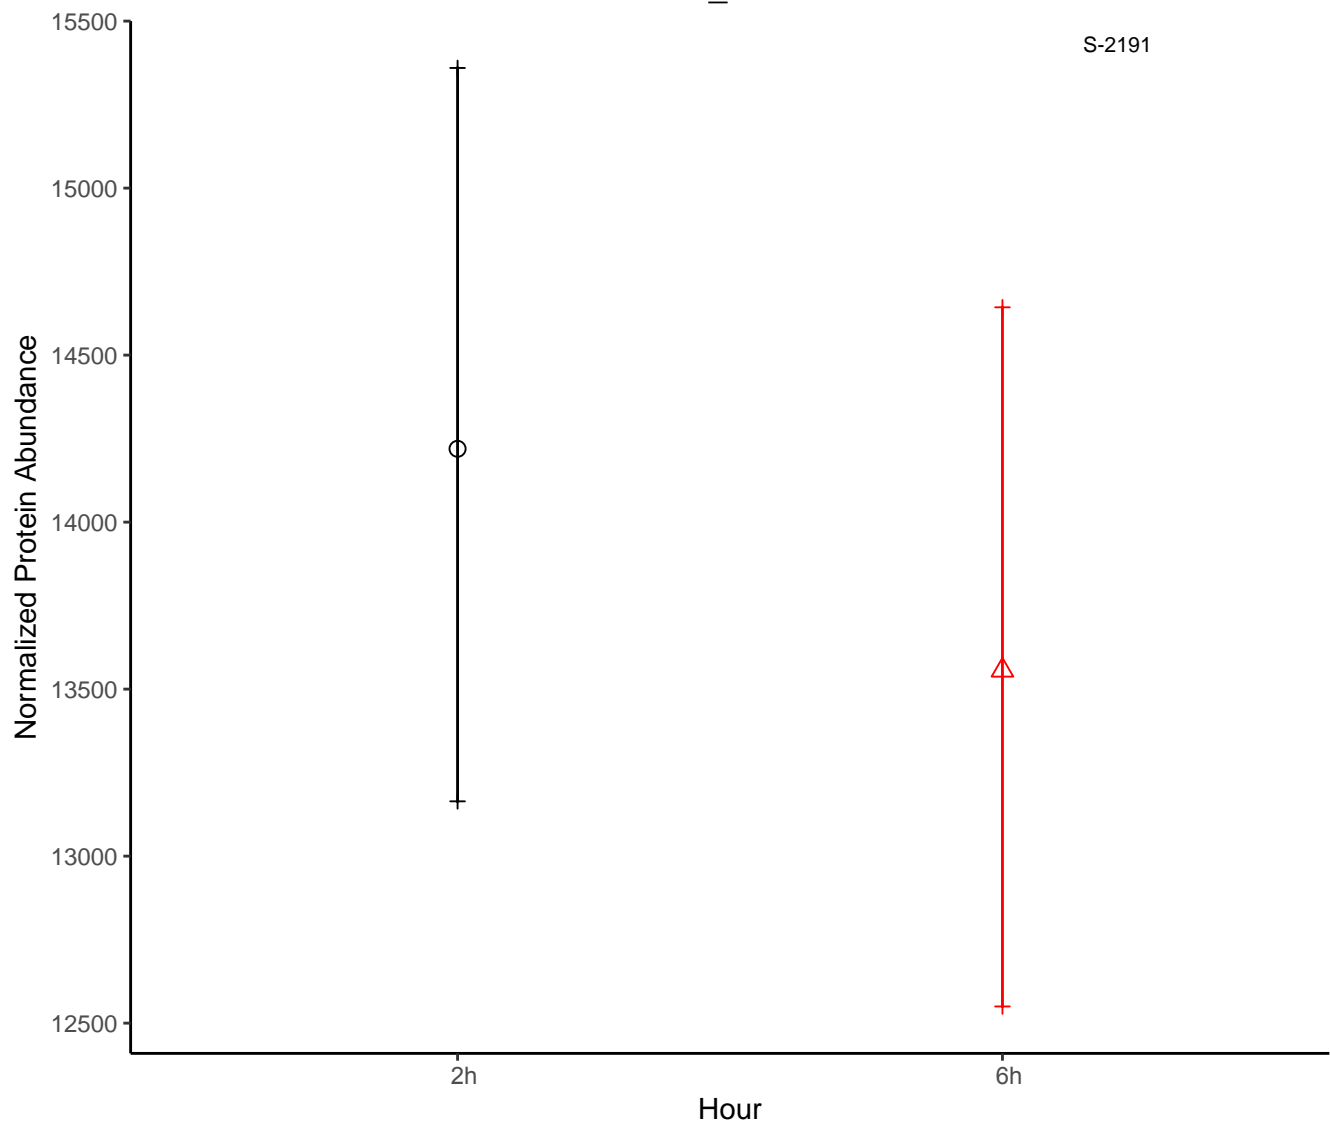

⊕ 2h

△ 6h

# KPYK\_STAAM

S-2192

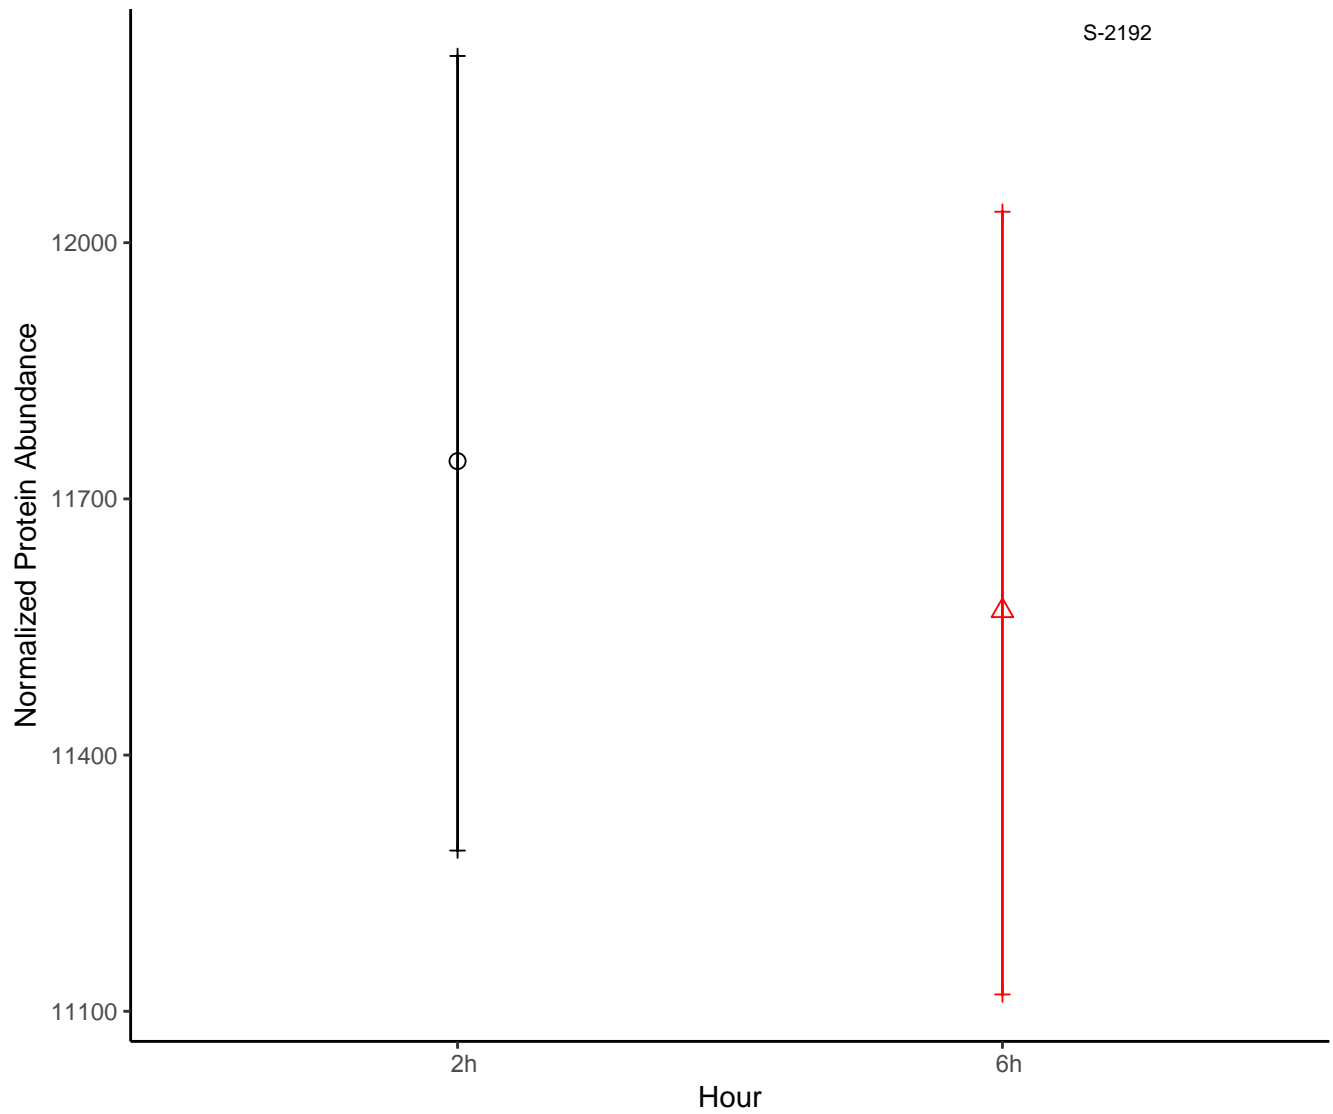

⊕ 2h

△ 6h



# KTHY\_STAAM

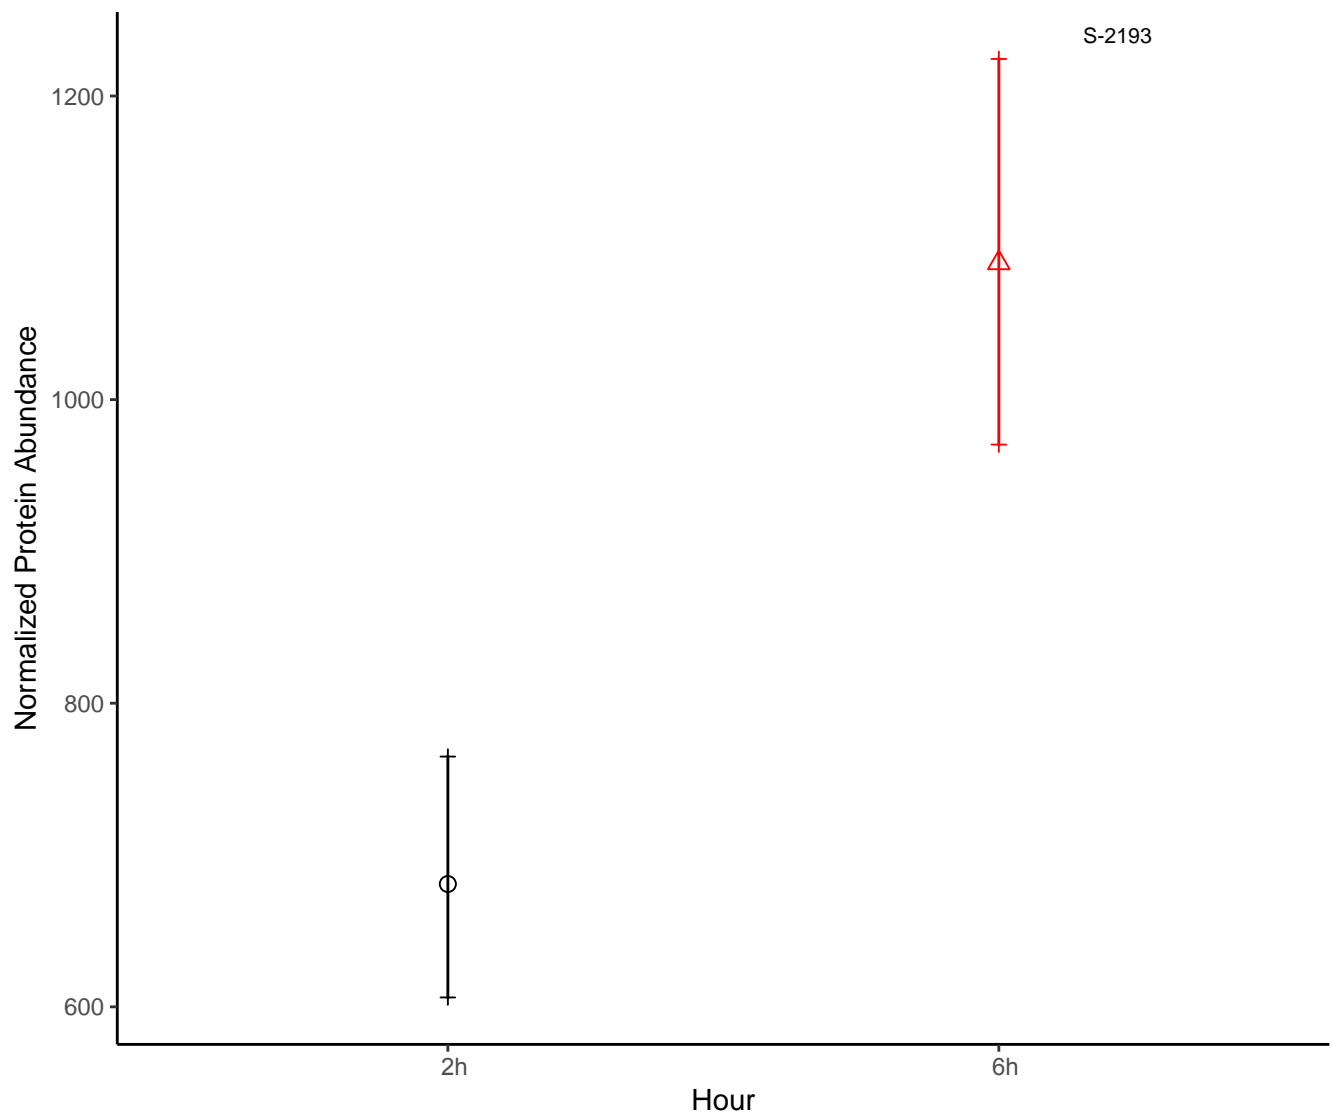

⊕ 2h

△ 6h

# LACA\_STAAM

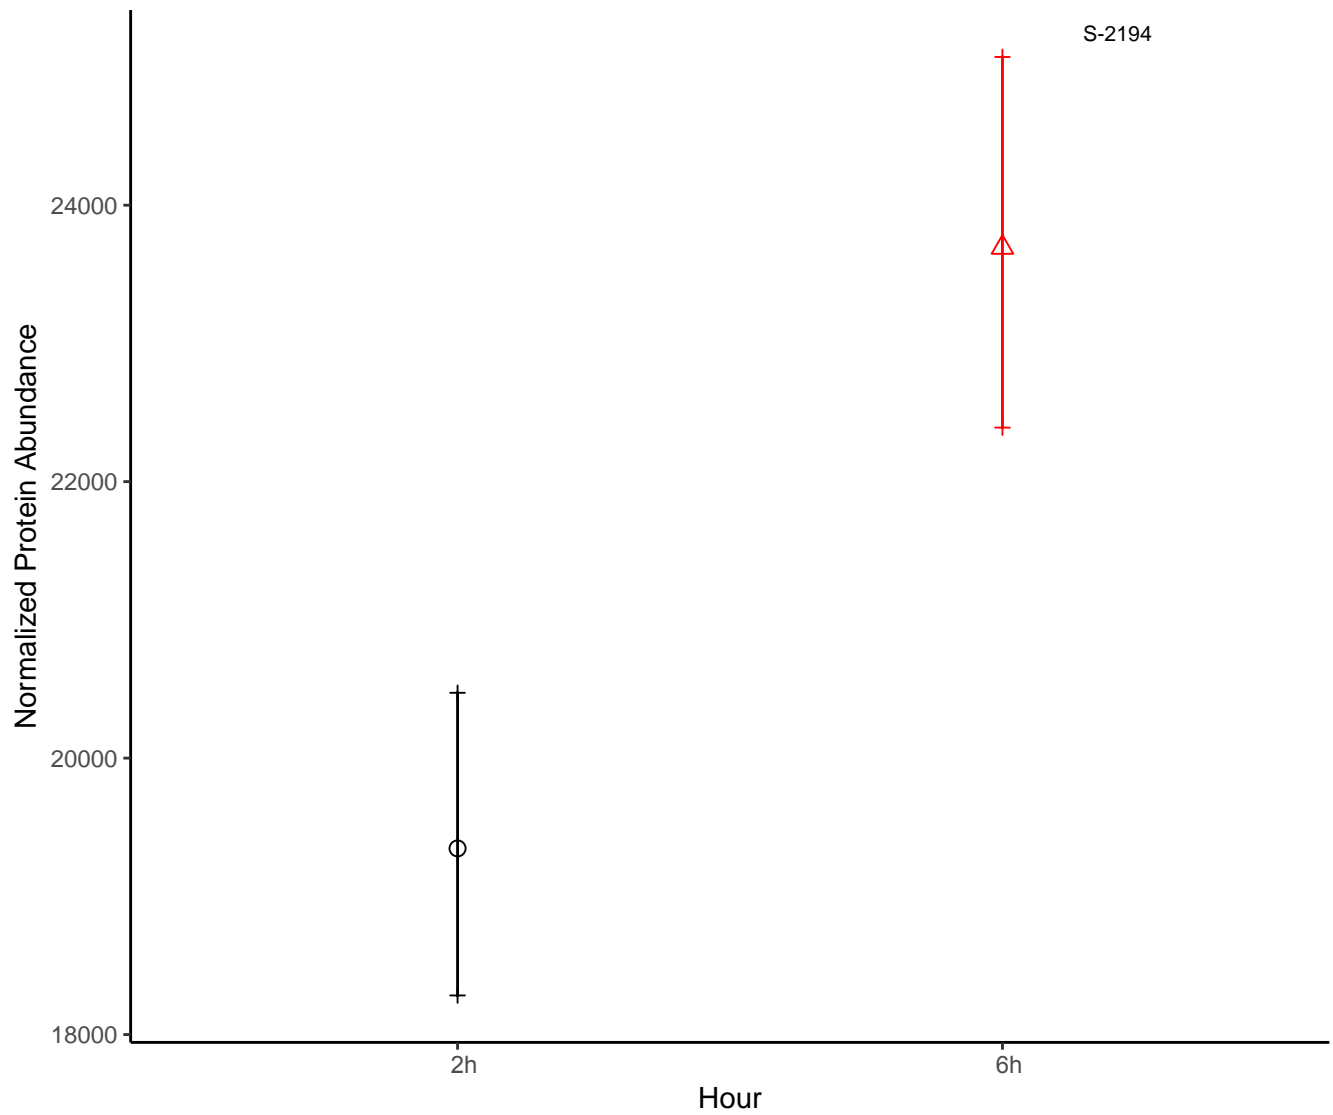

⊕ 2h

△ 6h

# LDH1\_STAAM

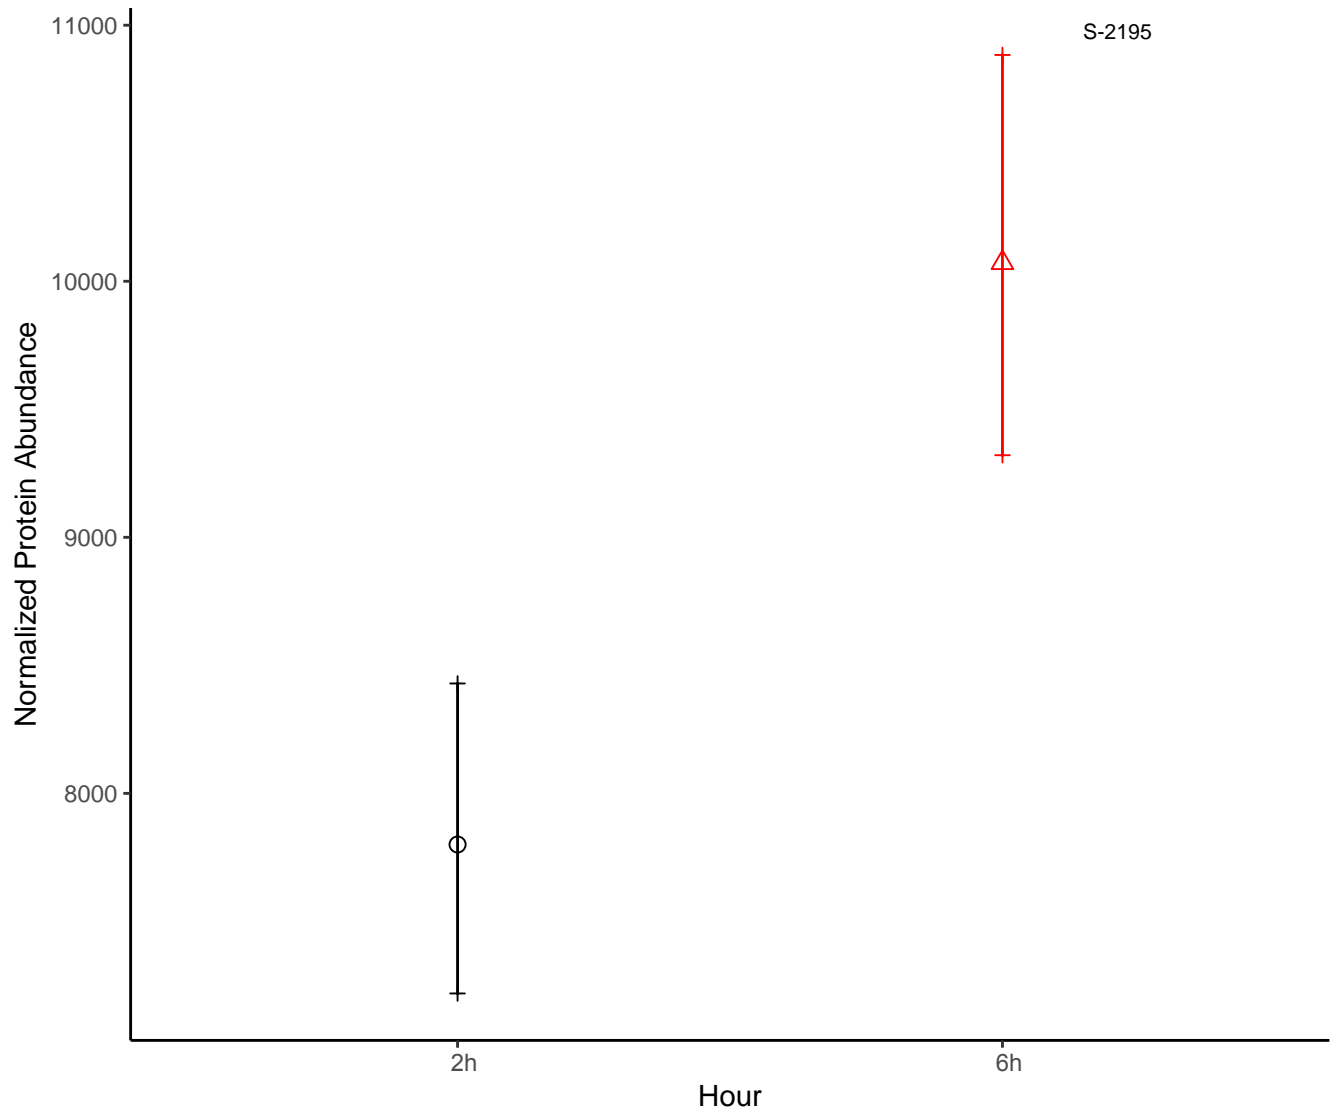

⊕ 2h

△ 6h

# LDH2\_STAAM

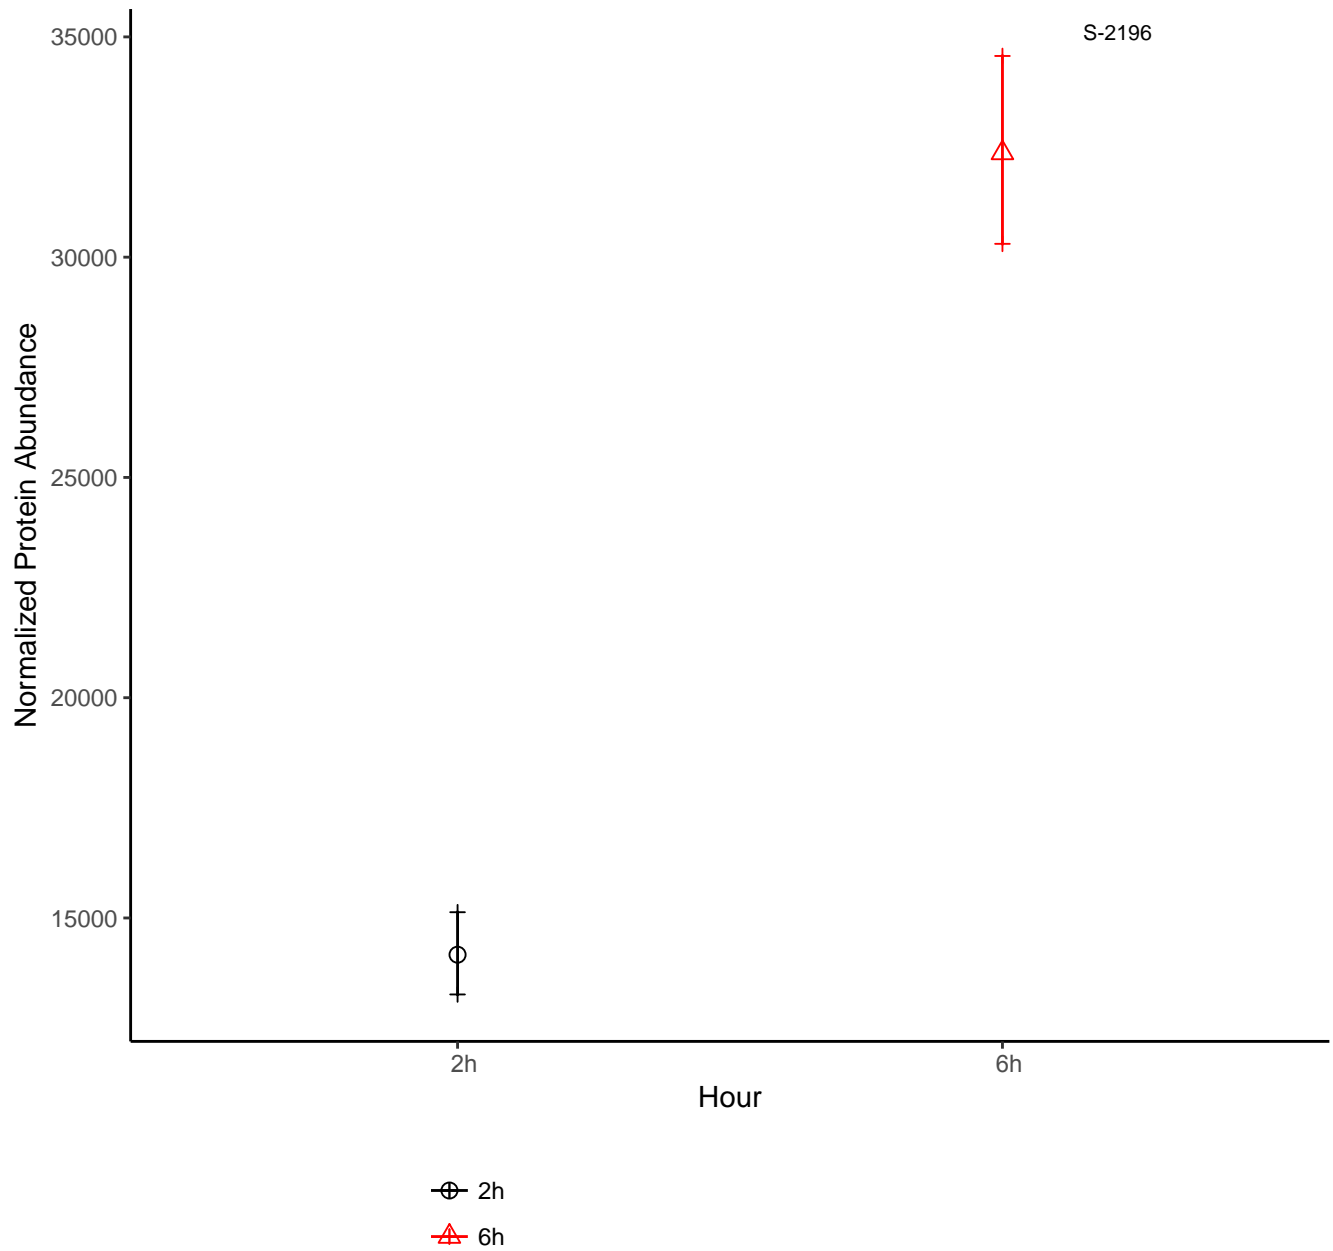

S-2196

# LDHD\_STAAM

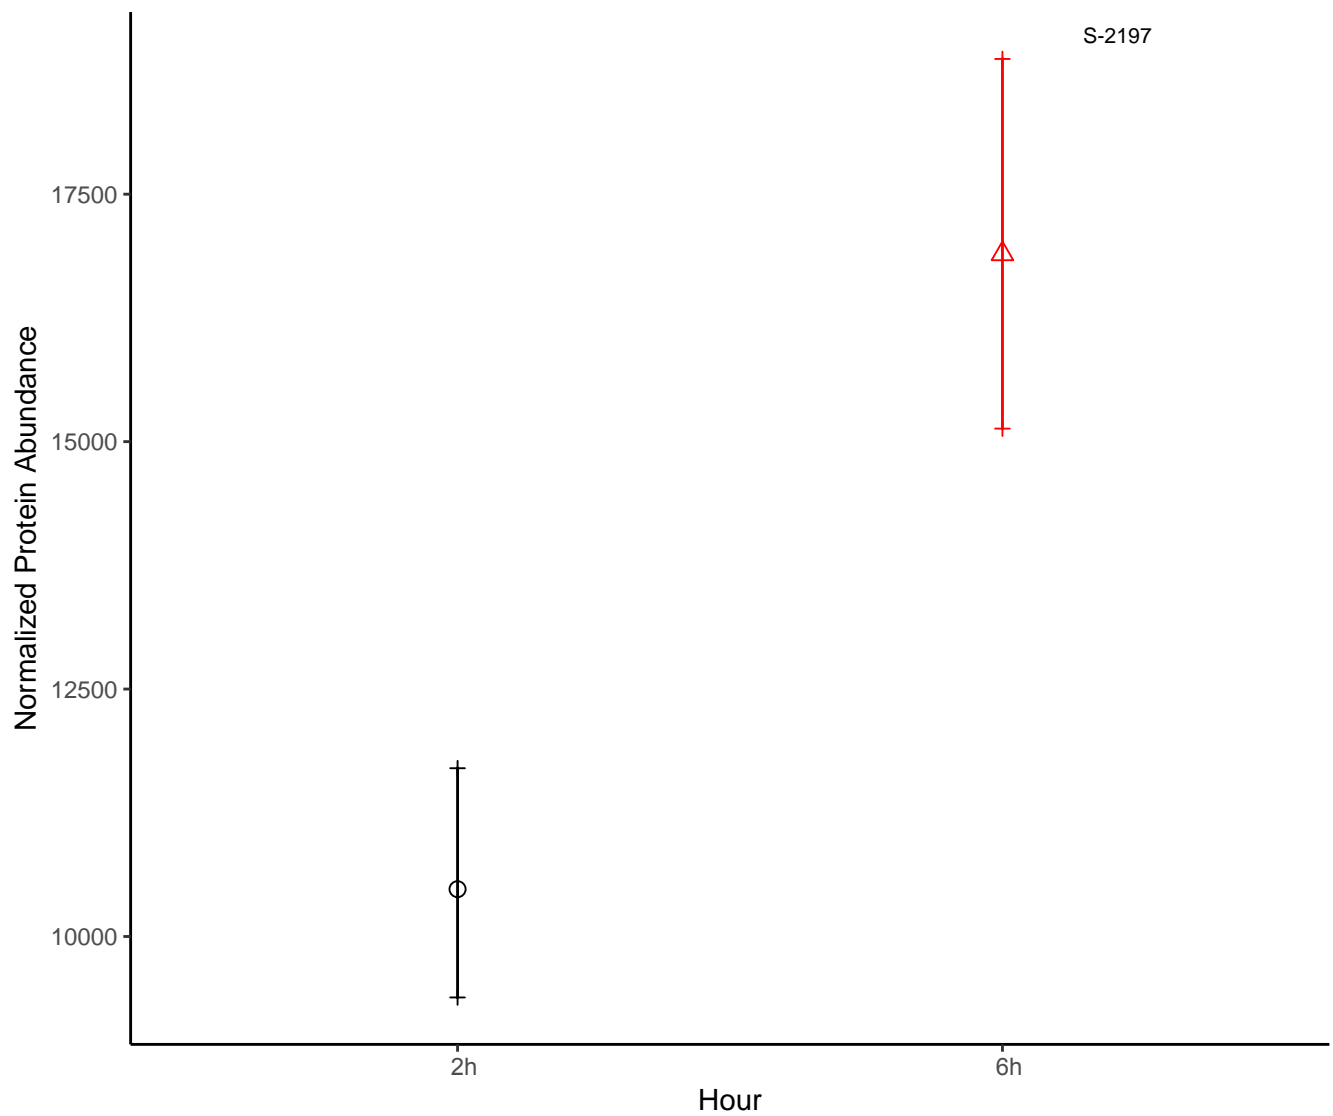

⊕ 2h

△ 6h

# LEP\_STAAM

S-2198

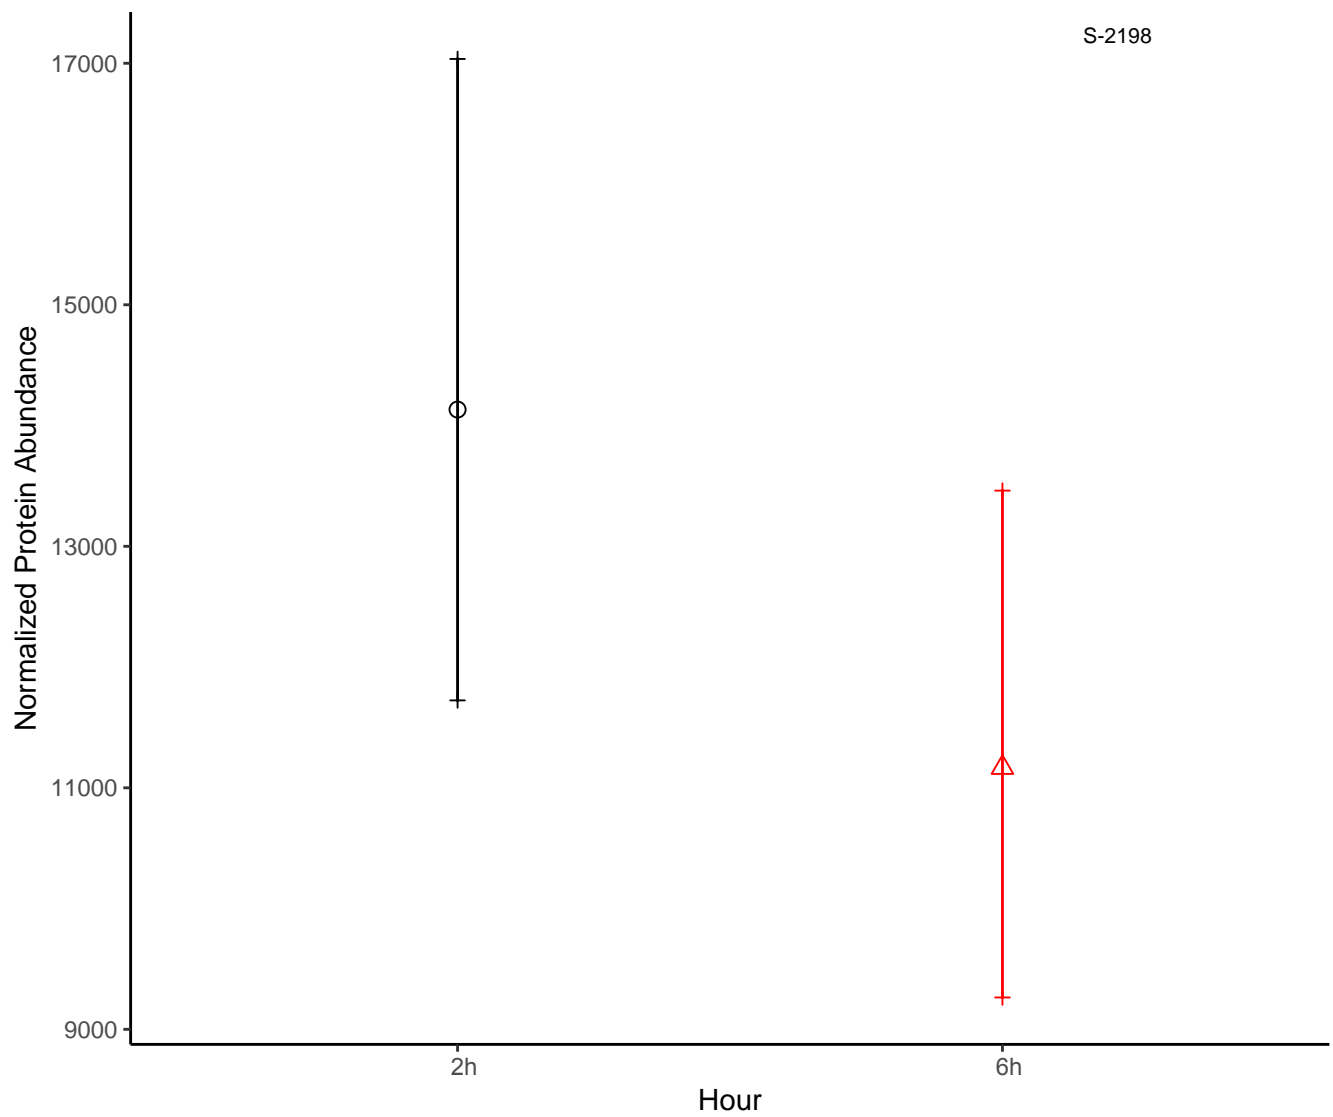

⊕ 2h

△ 6h

# LEPA\_STAAM

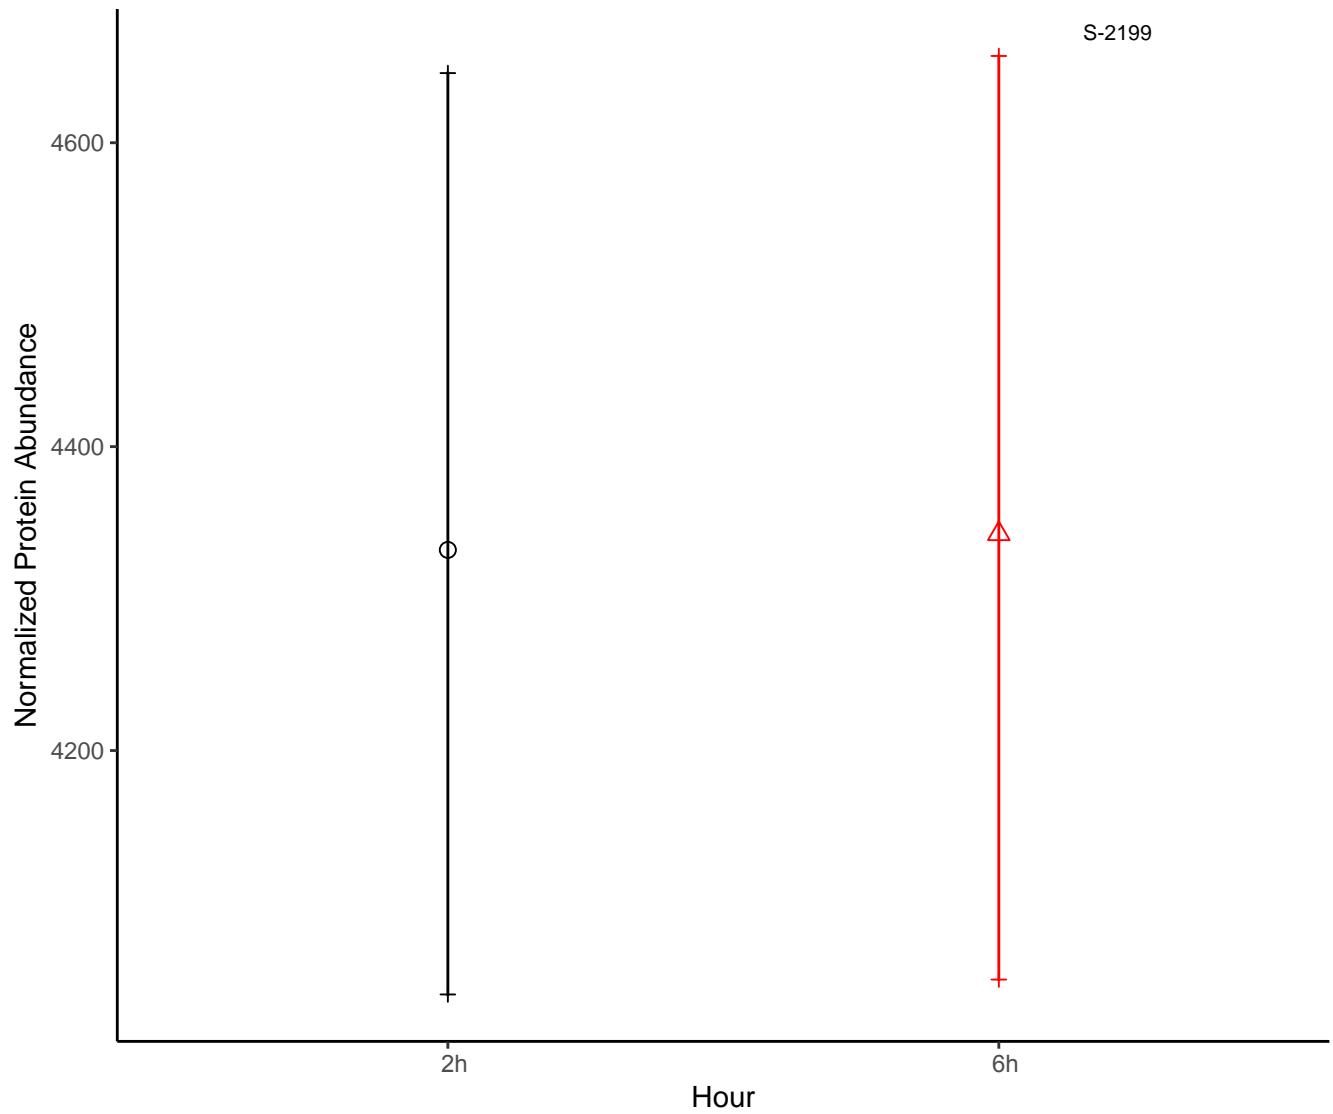

S-2199

⊕ 2h

△ 6h

# LEU1\_STAAM

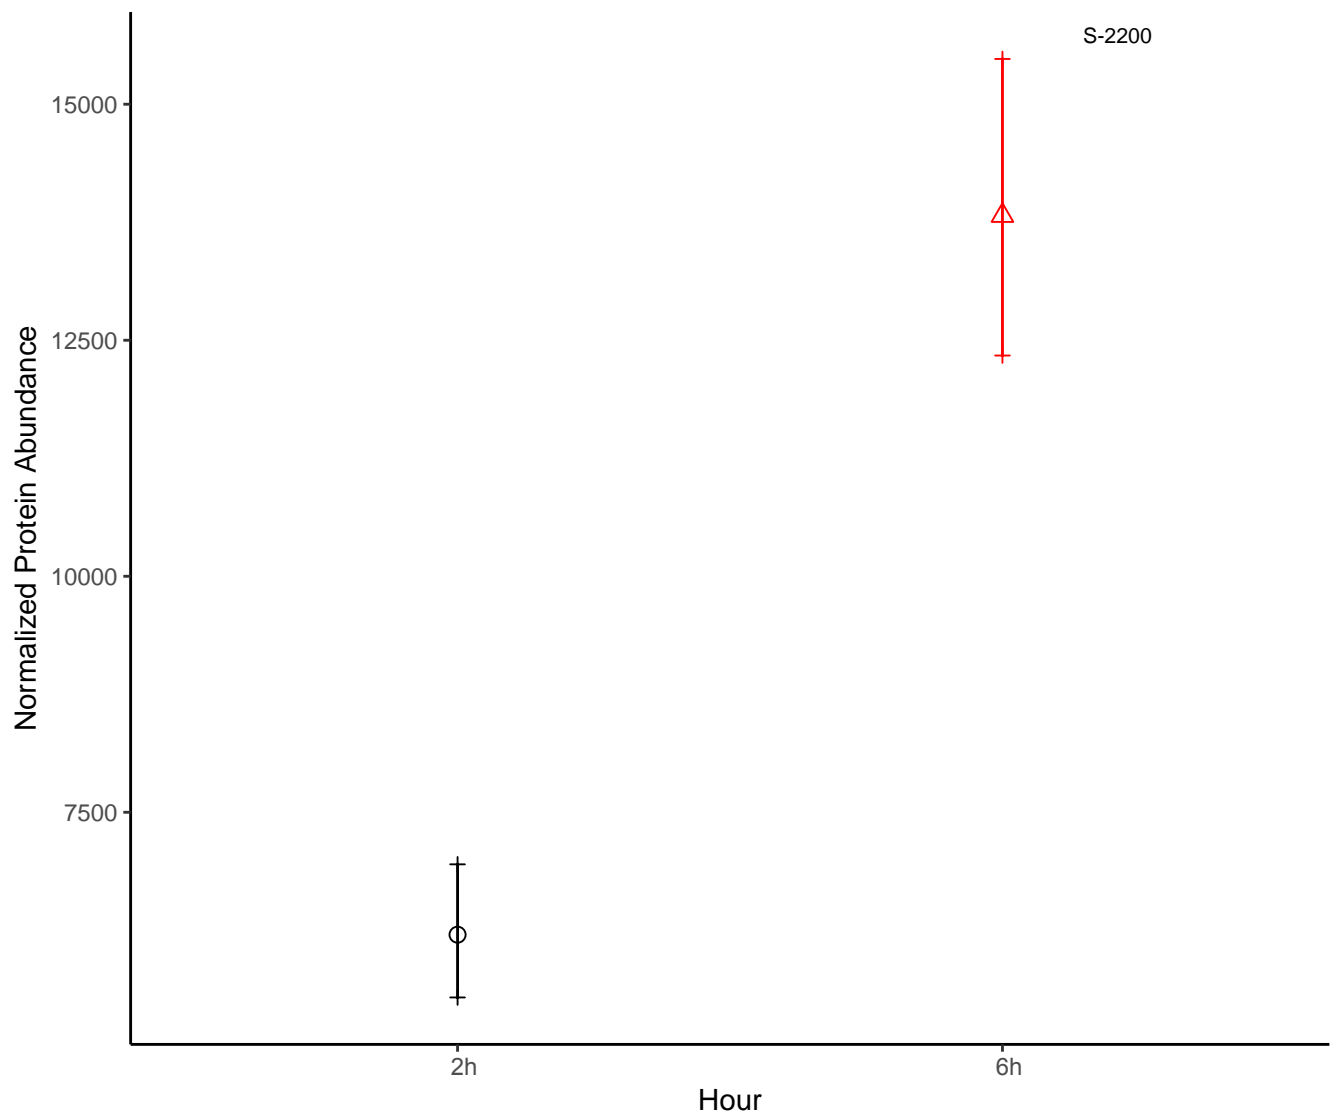

⊕ 2h

△ 6h



# LIPA\_STAAM

S-2201

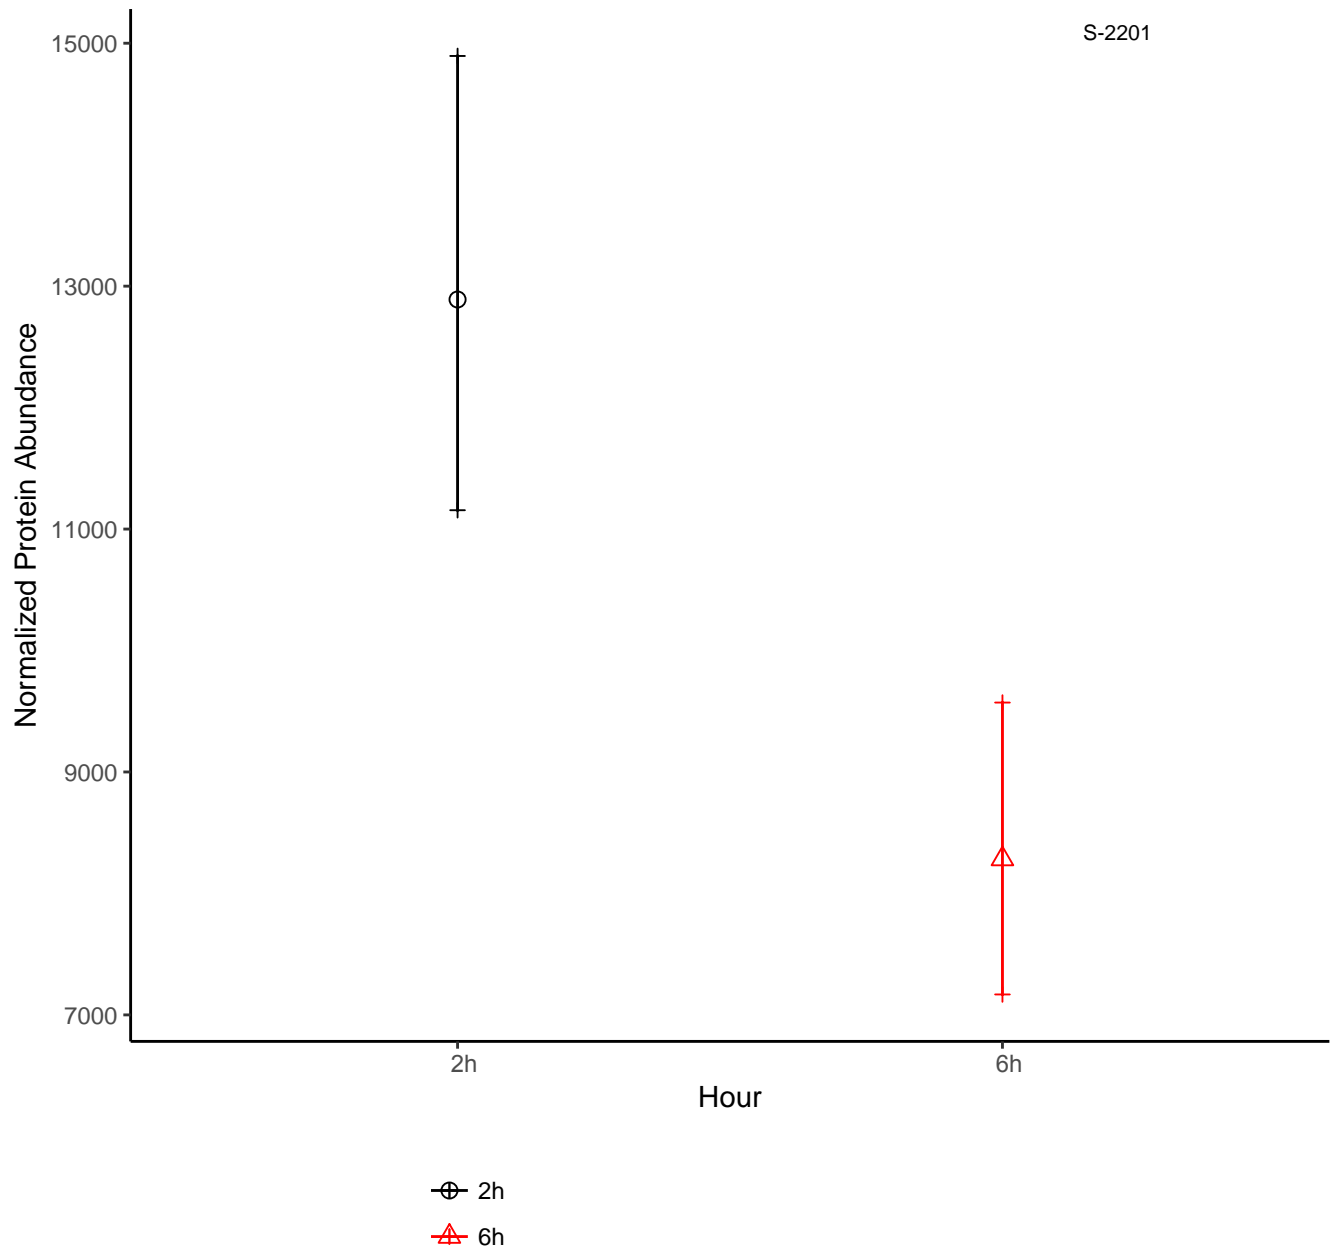

# LUXS\_STAAM

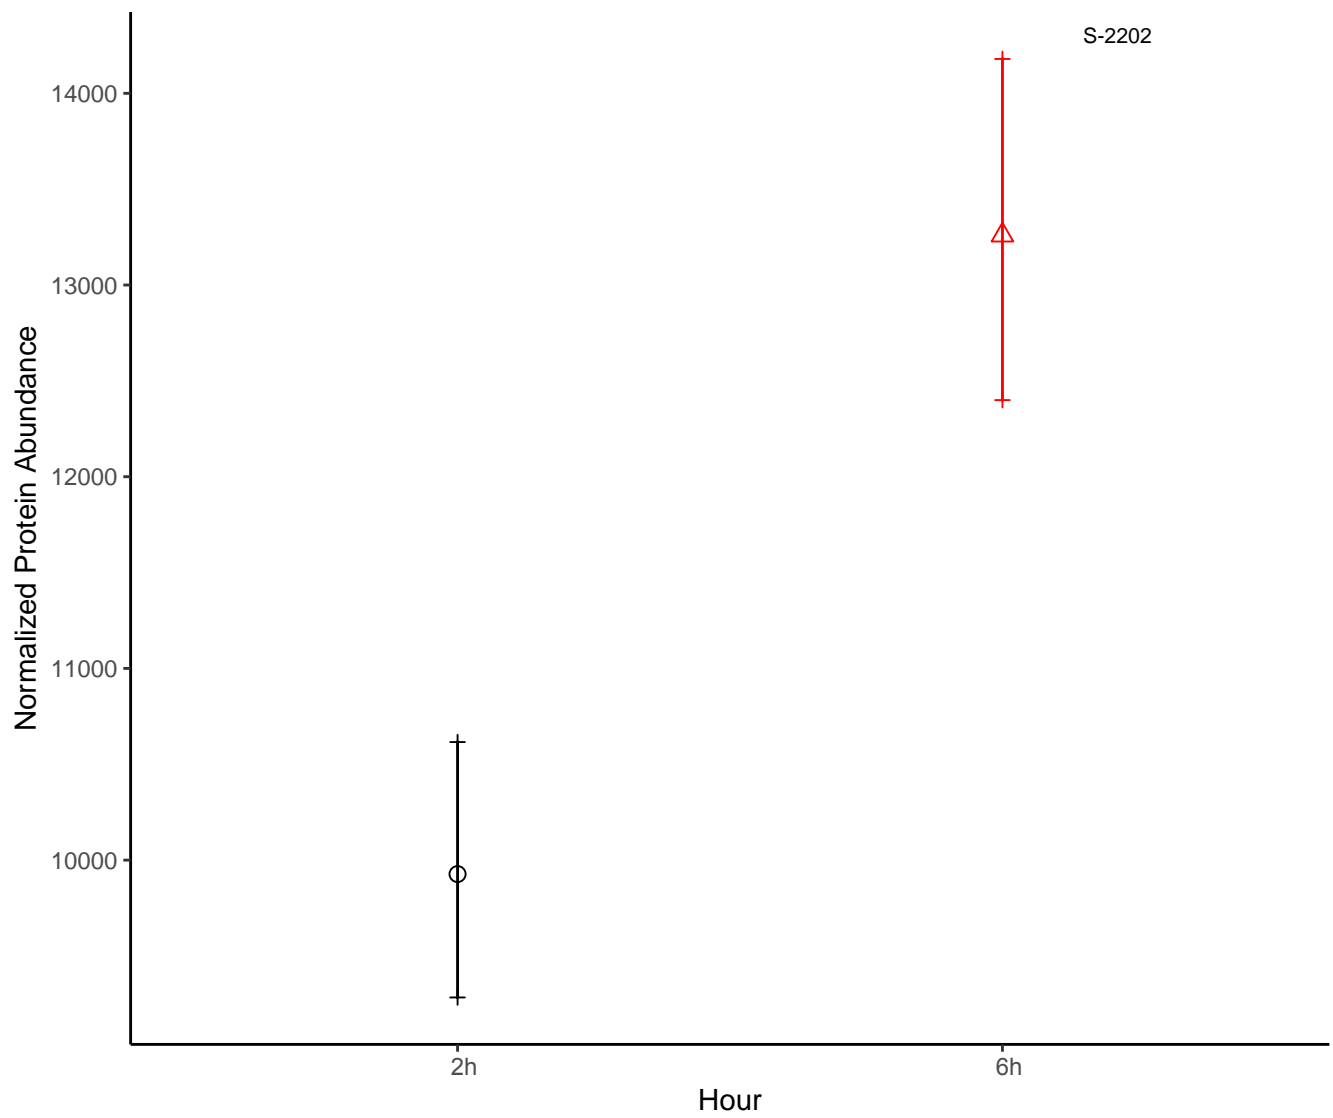

⊕ 2h

△ 6h

# LYTH\_STAAM

S-2203

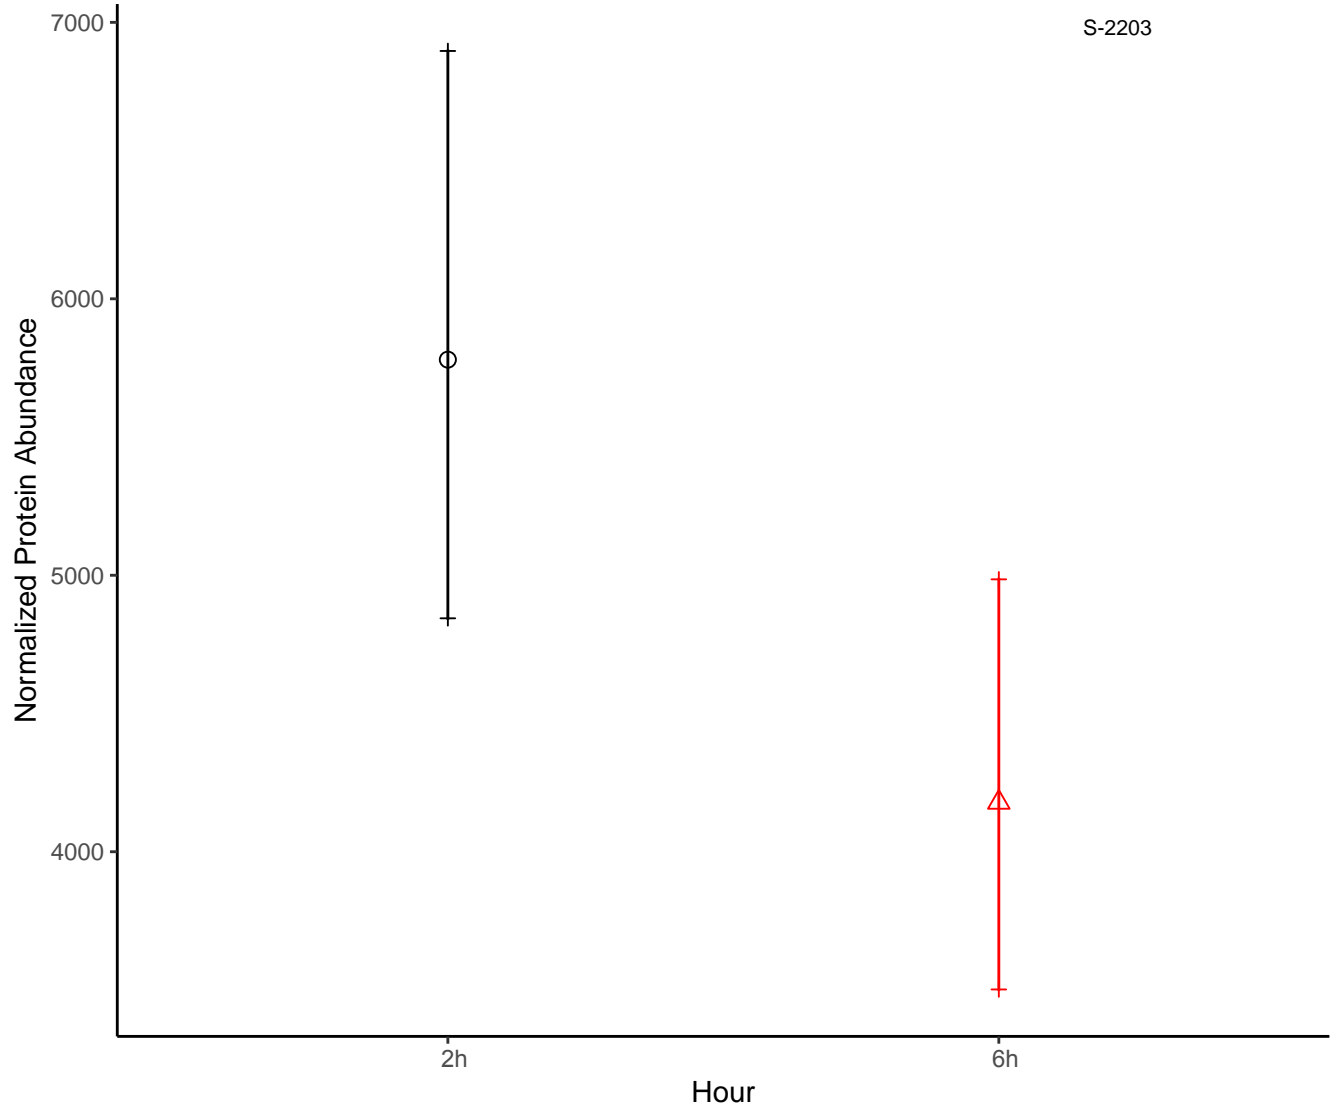

⊕ 2h

△ 6h

# LYTN\_STAAM

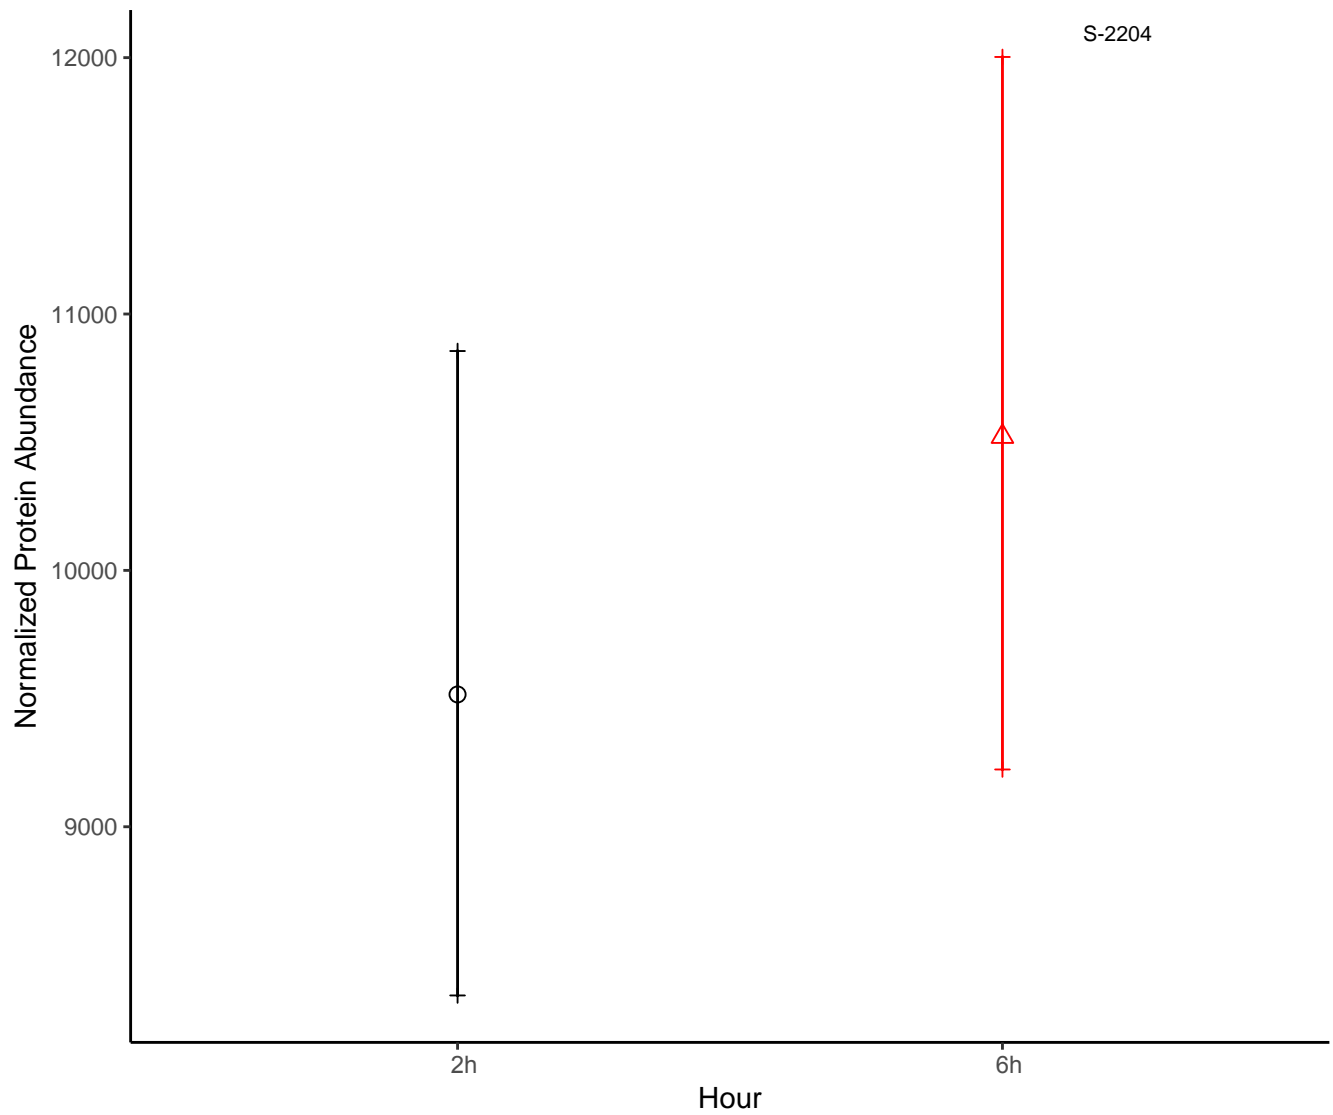

S-2204

⊕ 2h

△ 6h

# MAP\_STAAM

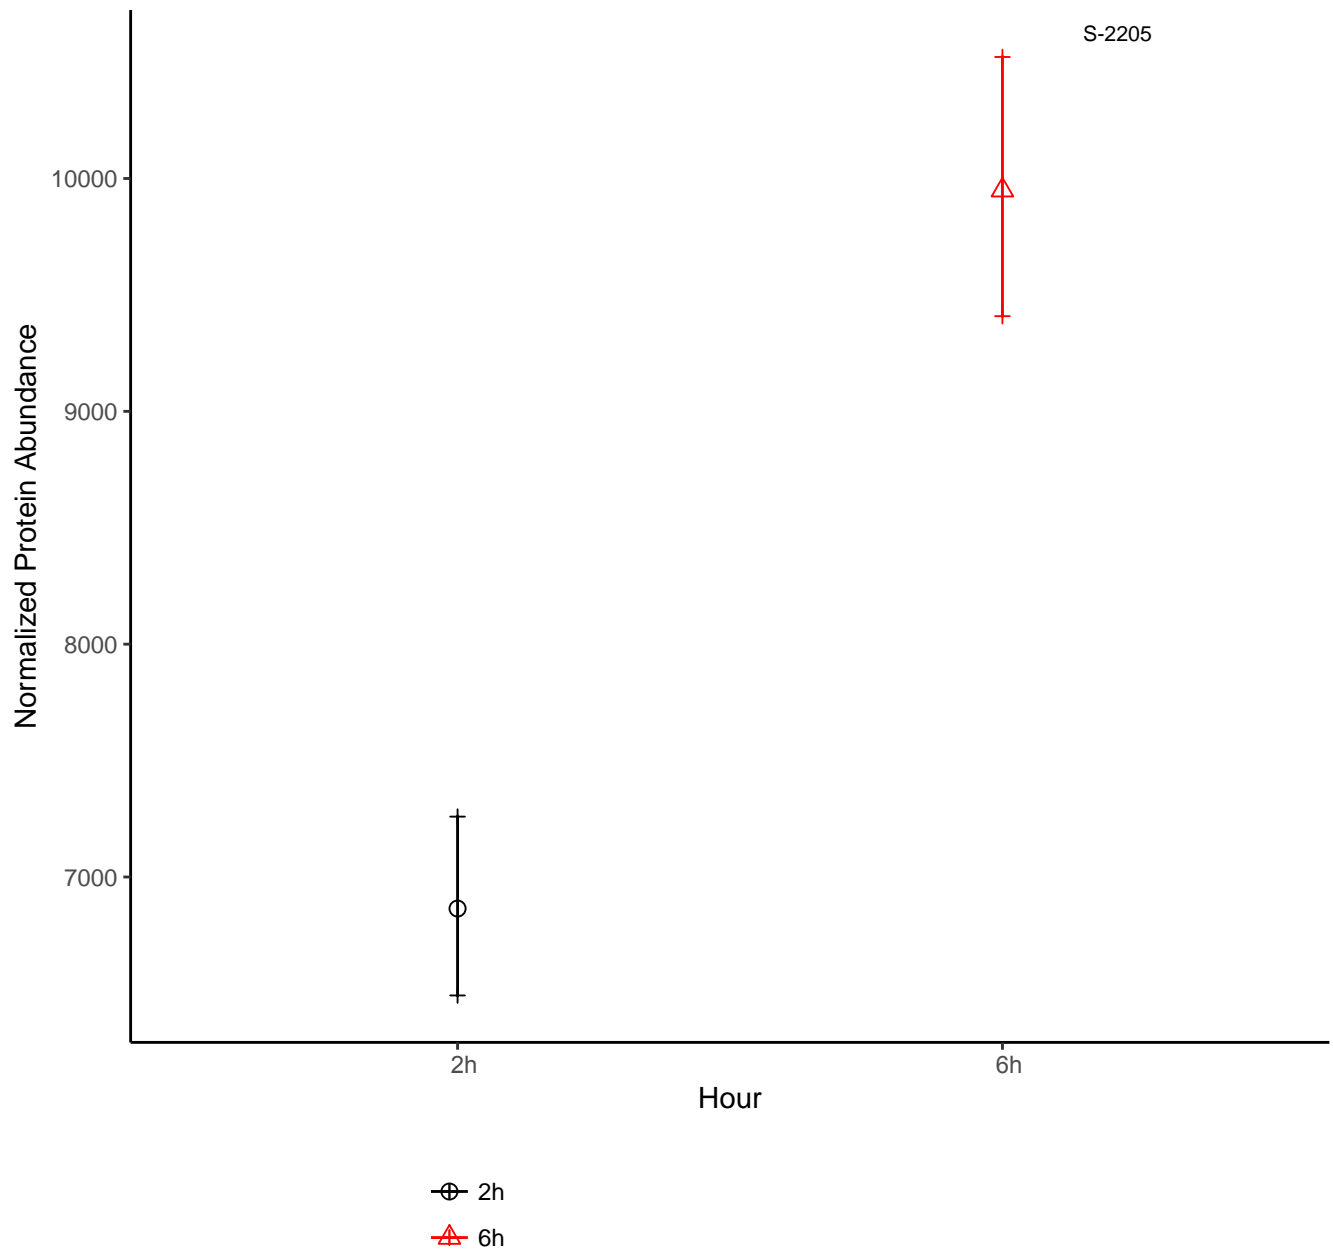

# MAP1\_STAAM

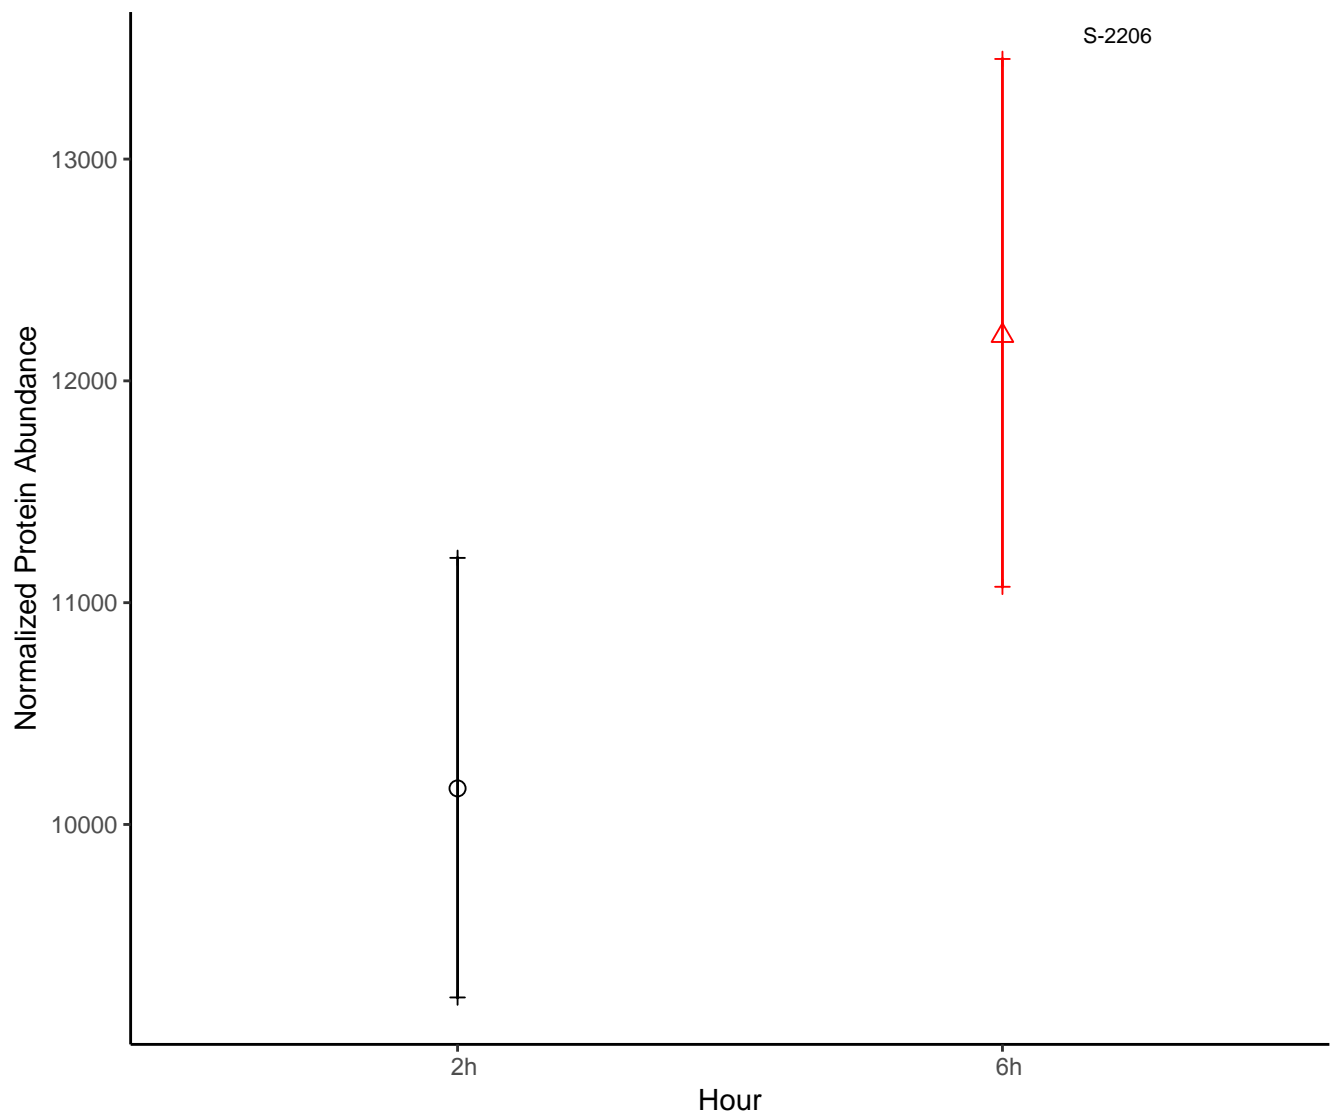

⊕ 2h

△ 6h

# MAZF\_STAAM

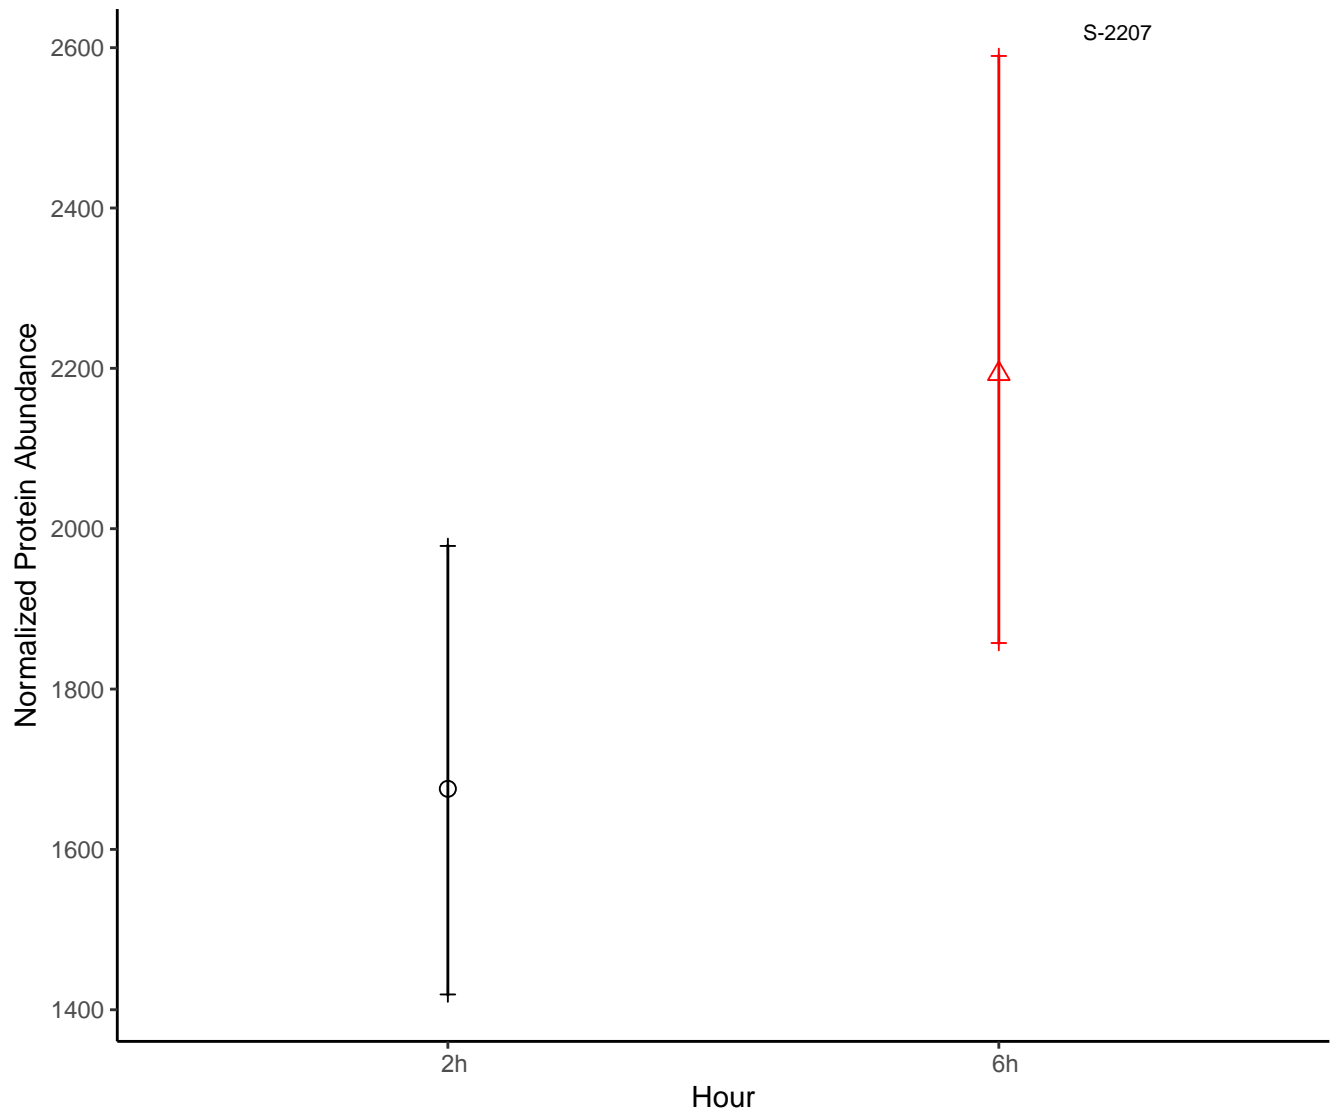

⊕ 2h

△ 6h

# MENB\_STAAM

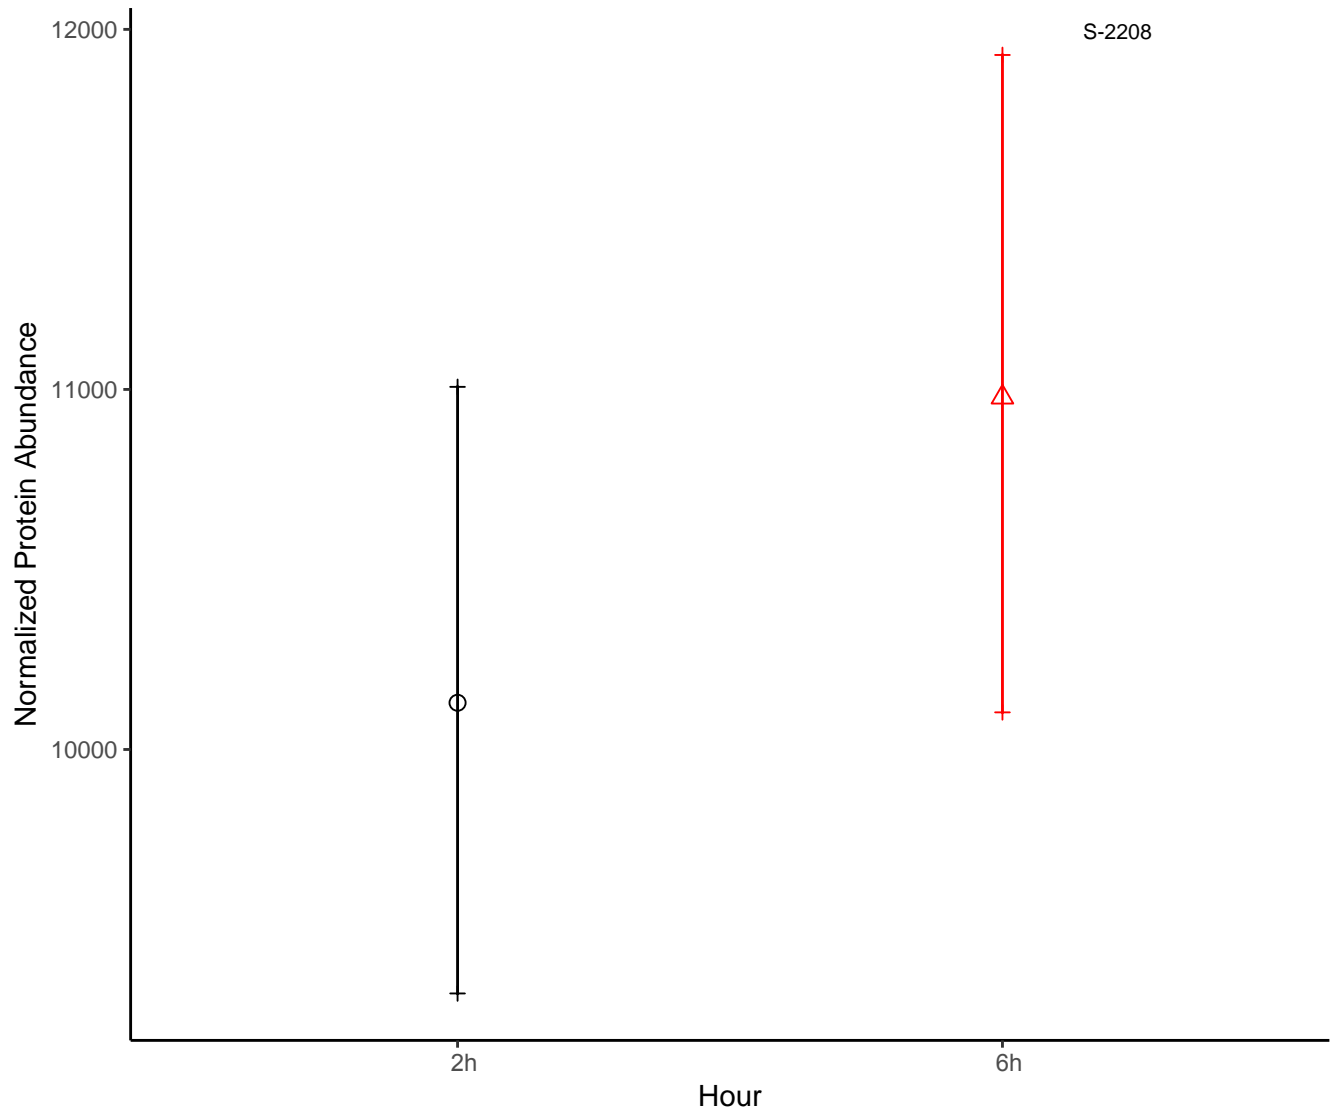

⊕ 2h

△ 6h



# MENG\_STAAM

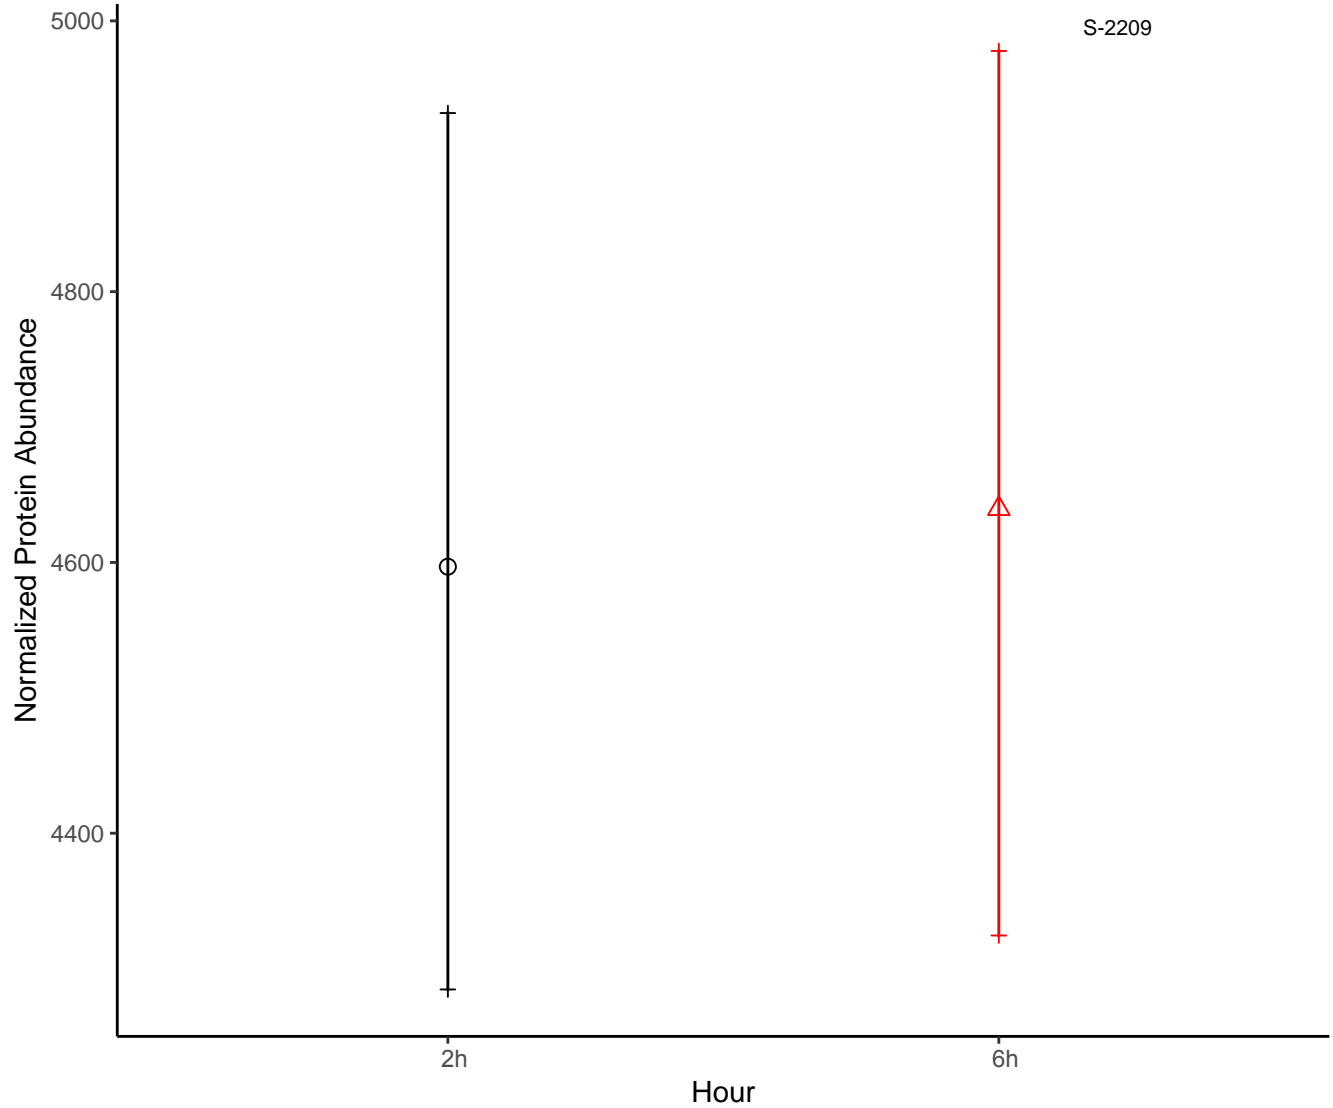

⊕ 2h

△ 6h

# METK\_STAAM

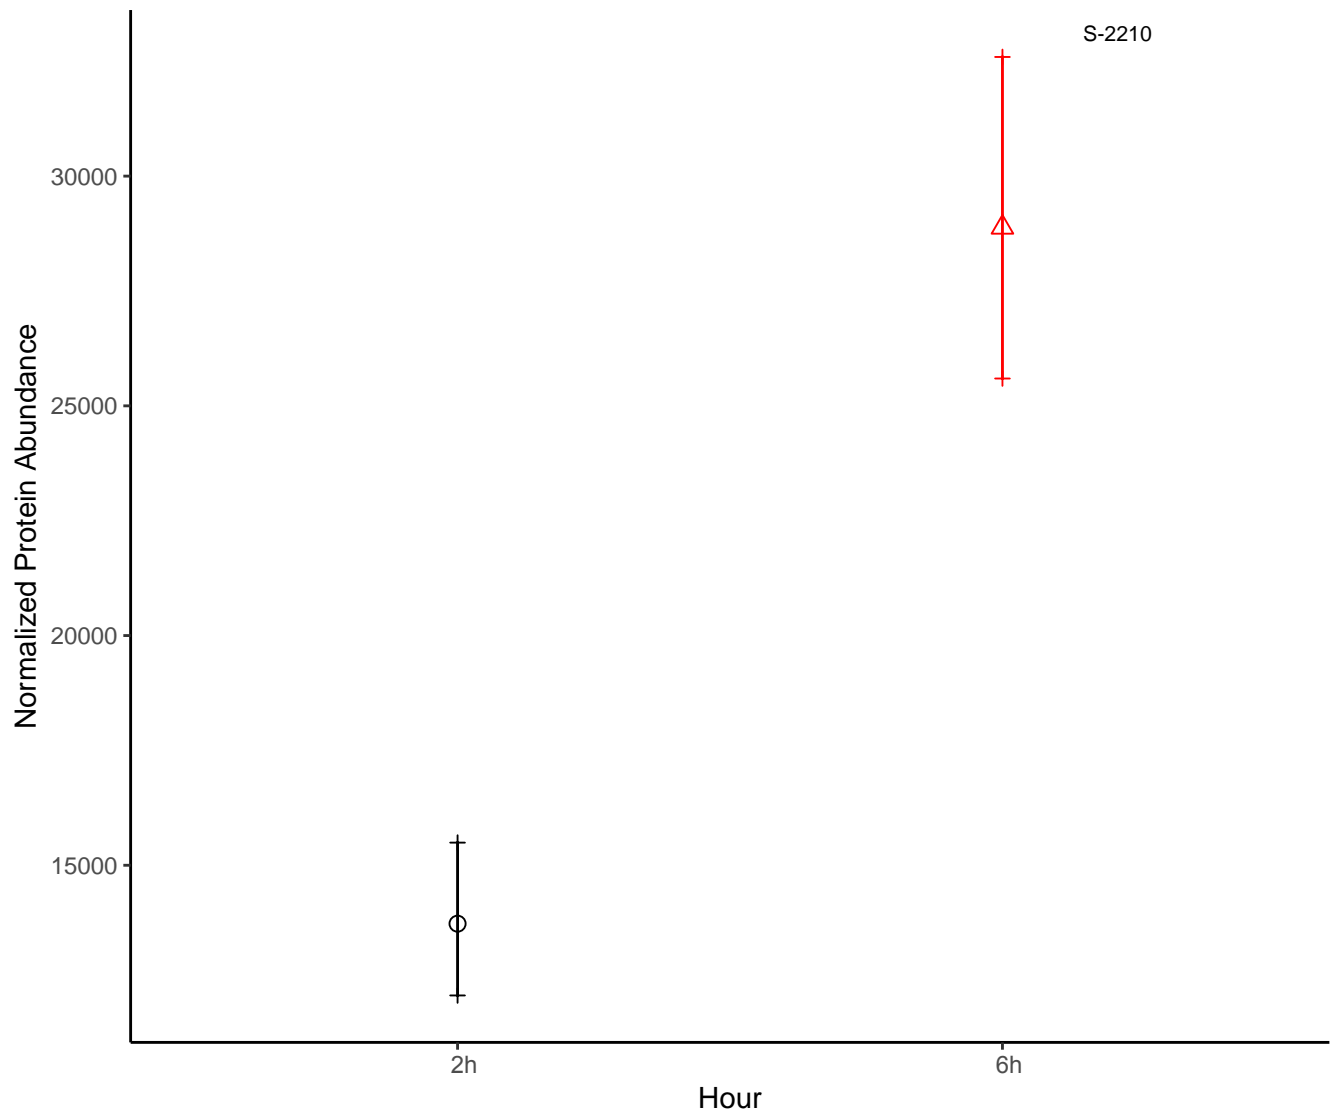

⊕ 2h

△ 6h

# METN2\_STAAM

S-2211

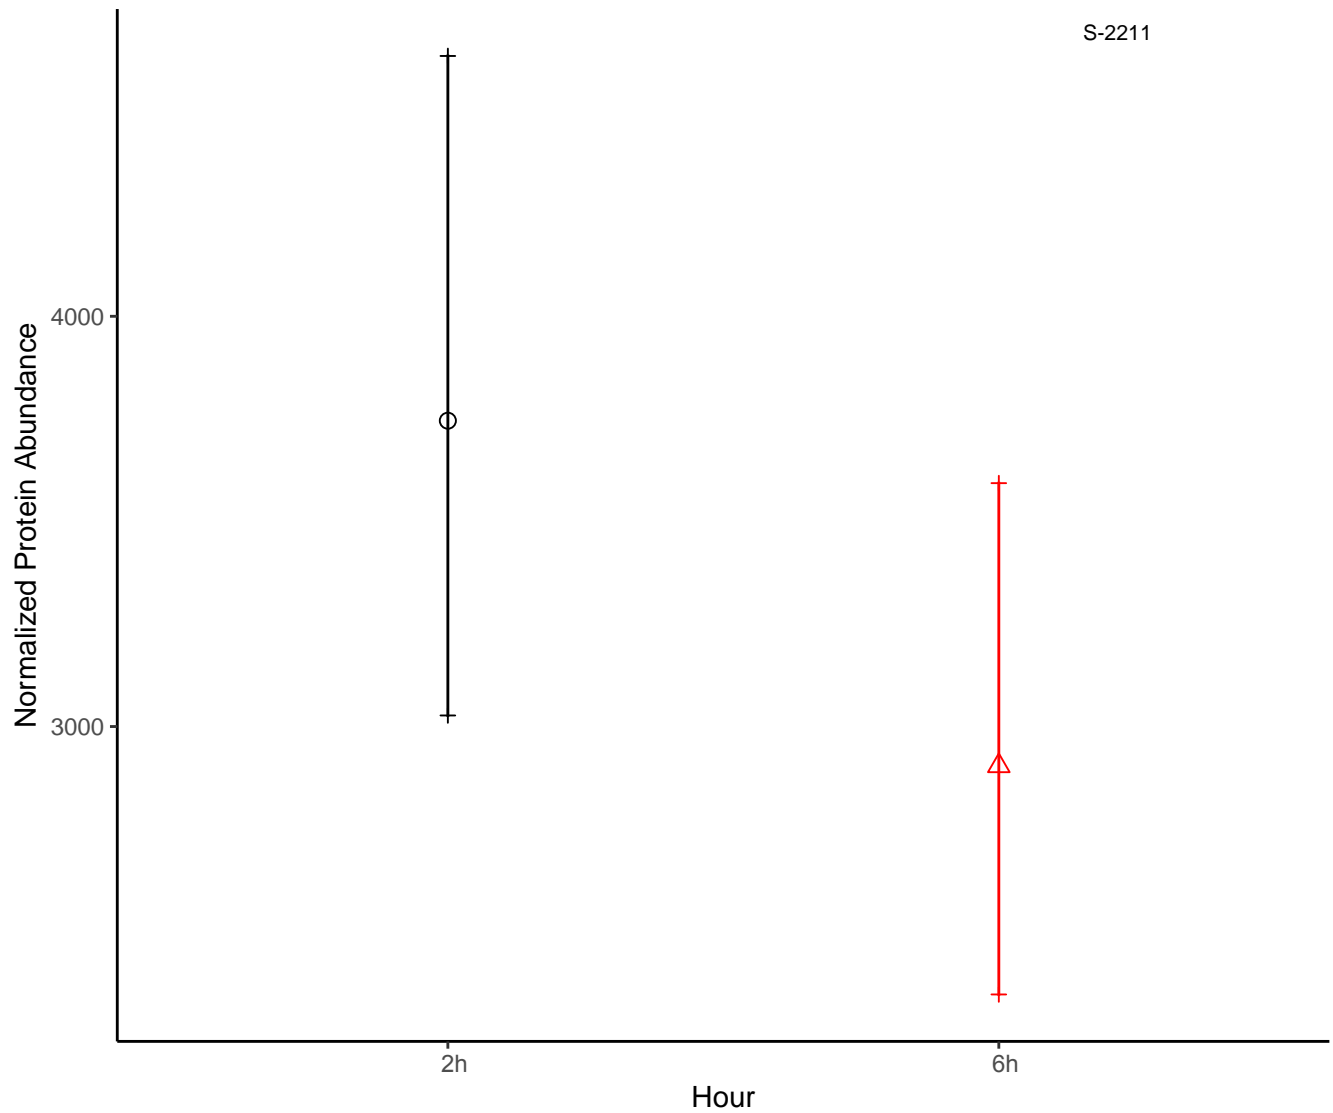

⊕ 2h

△ 6h

# MGRA\_STAAM

S-2212

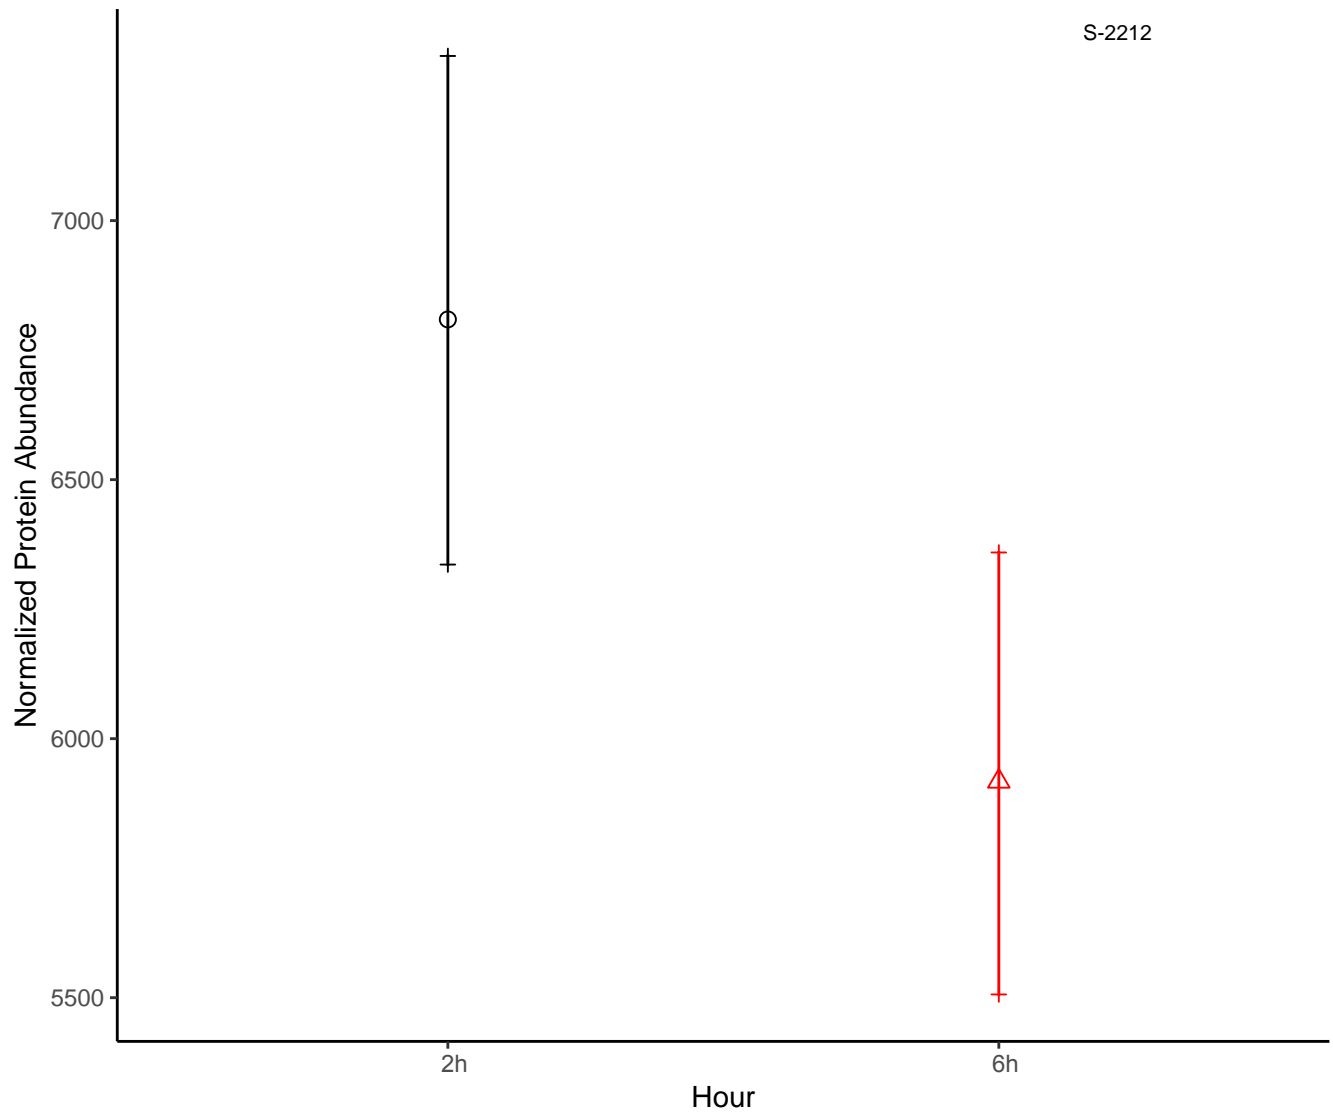

⊕ 2h

△ 6h

# MIAB\_STAAM

S-2213

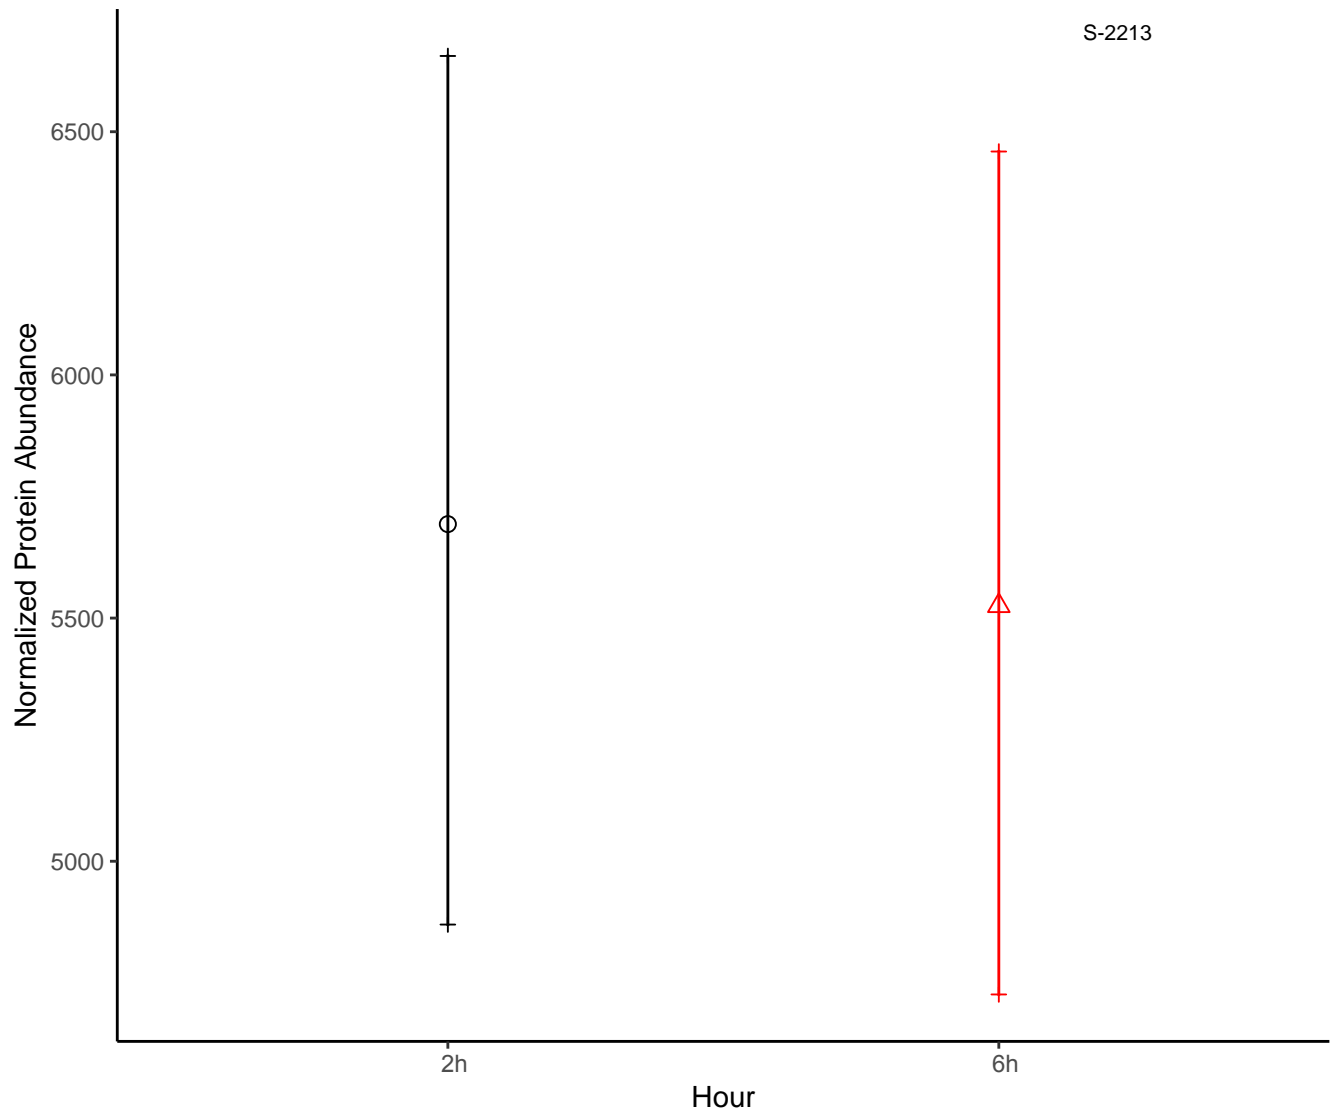

⊕ 2h

△ 6h

# MNME\_STAAM

S-2214

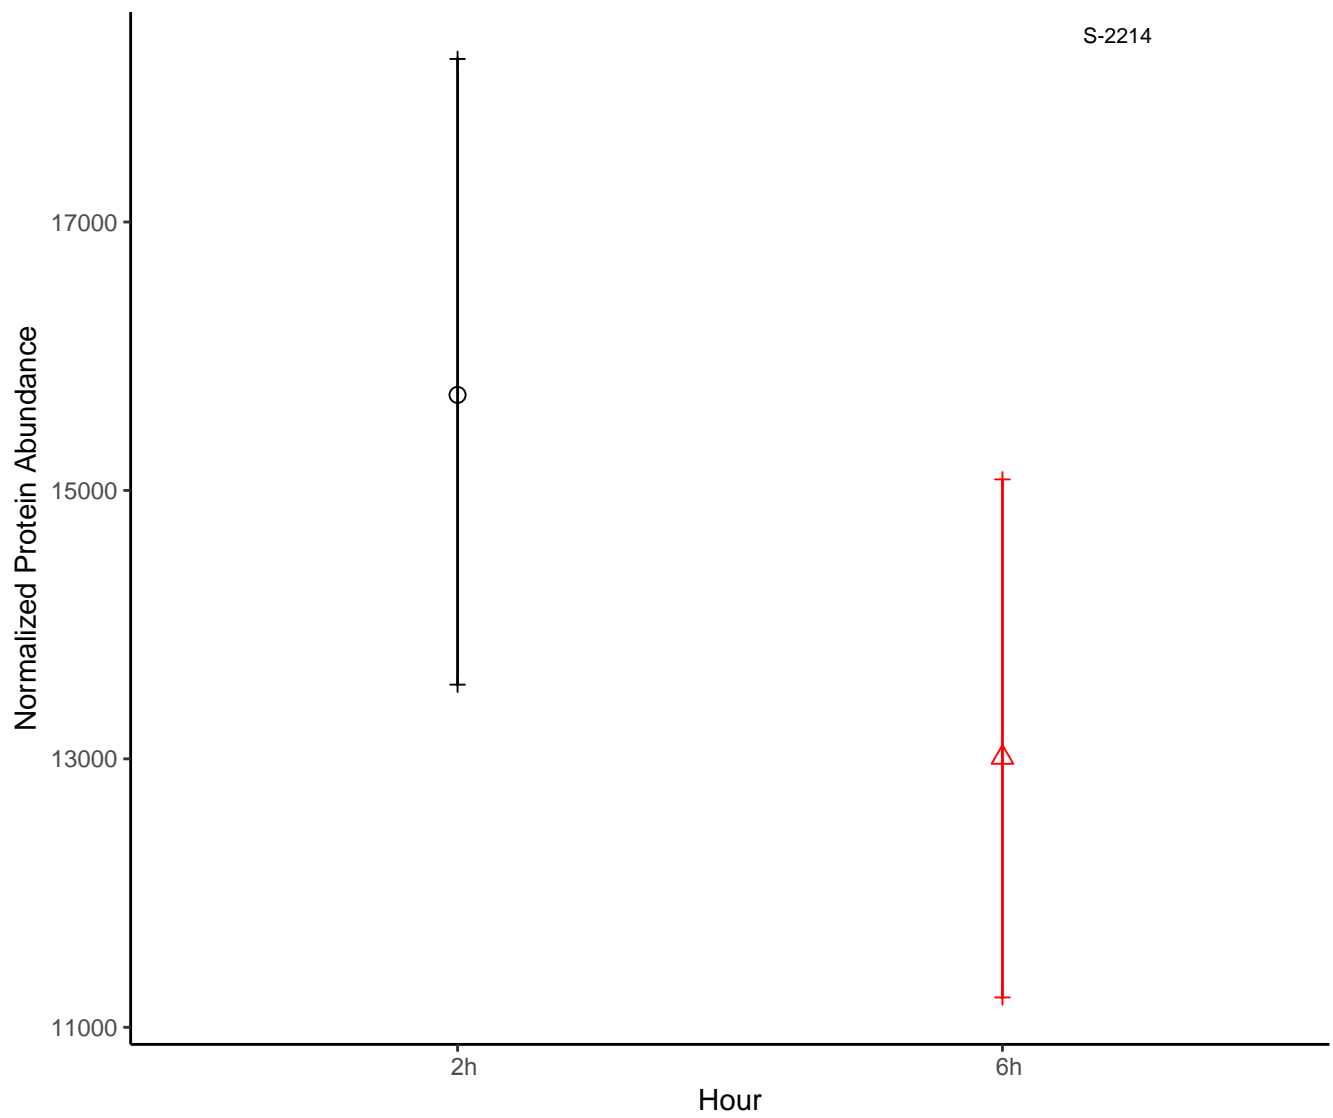

⊕ 2h

△ 6h

# MNMG\_STAAM

S-2215

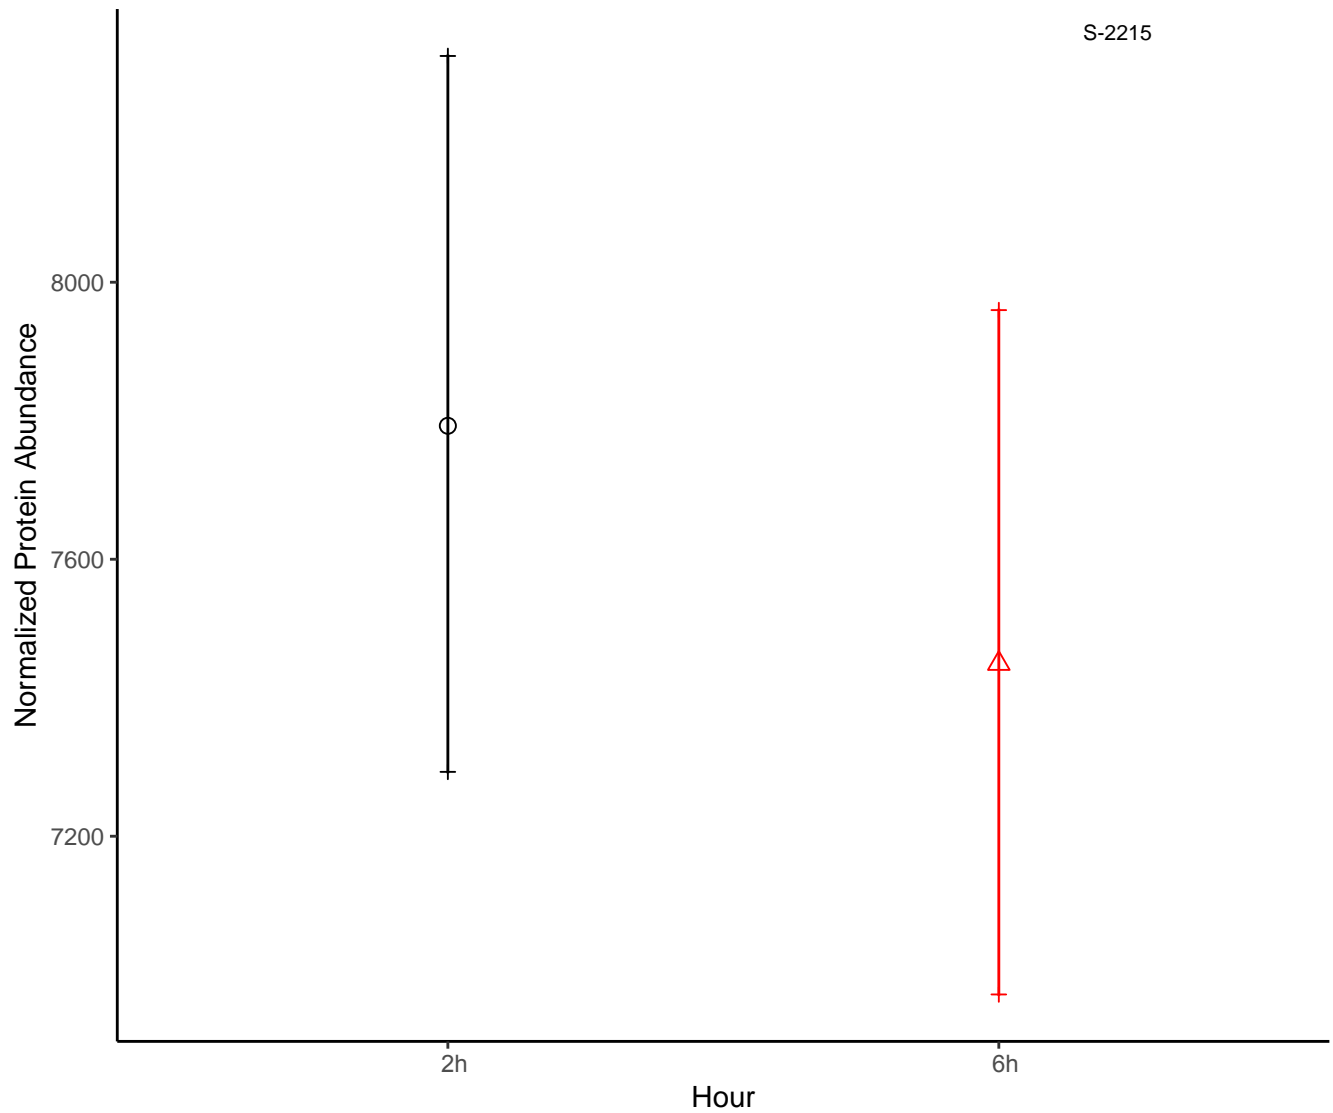

⊕ 2h

△ 6h

# MOAC\_STAAM

S-2216

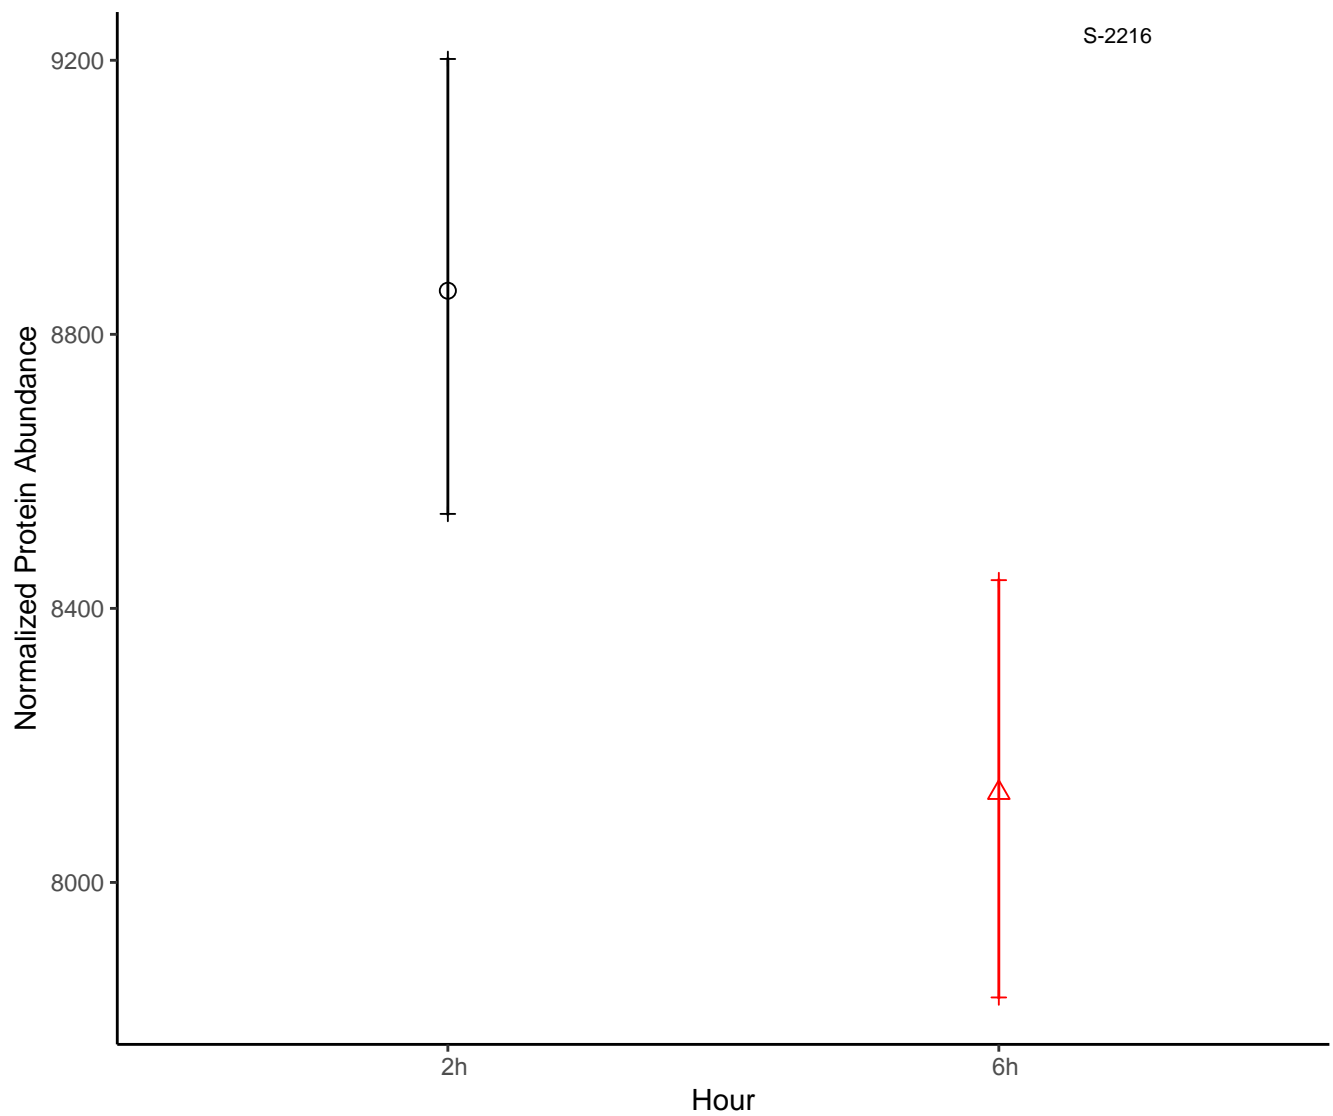

⊕ 2h

△ 6h



# MOEA\_STAAM

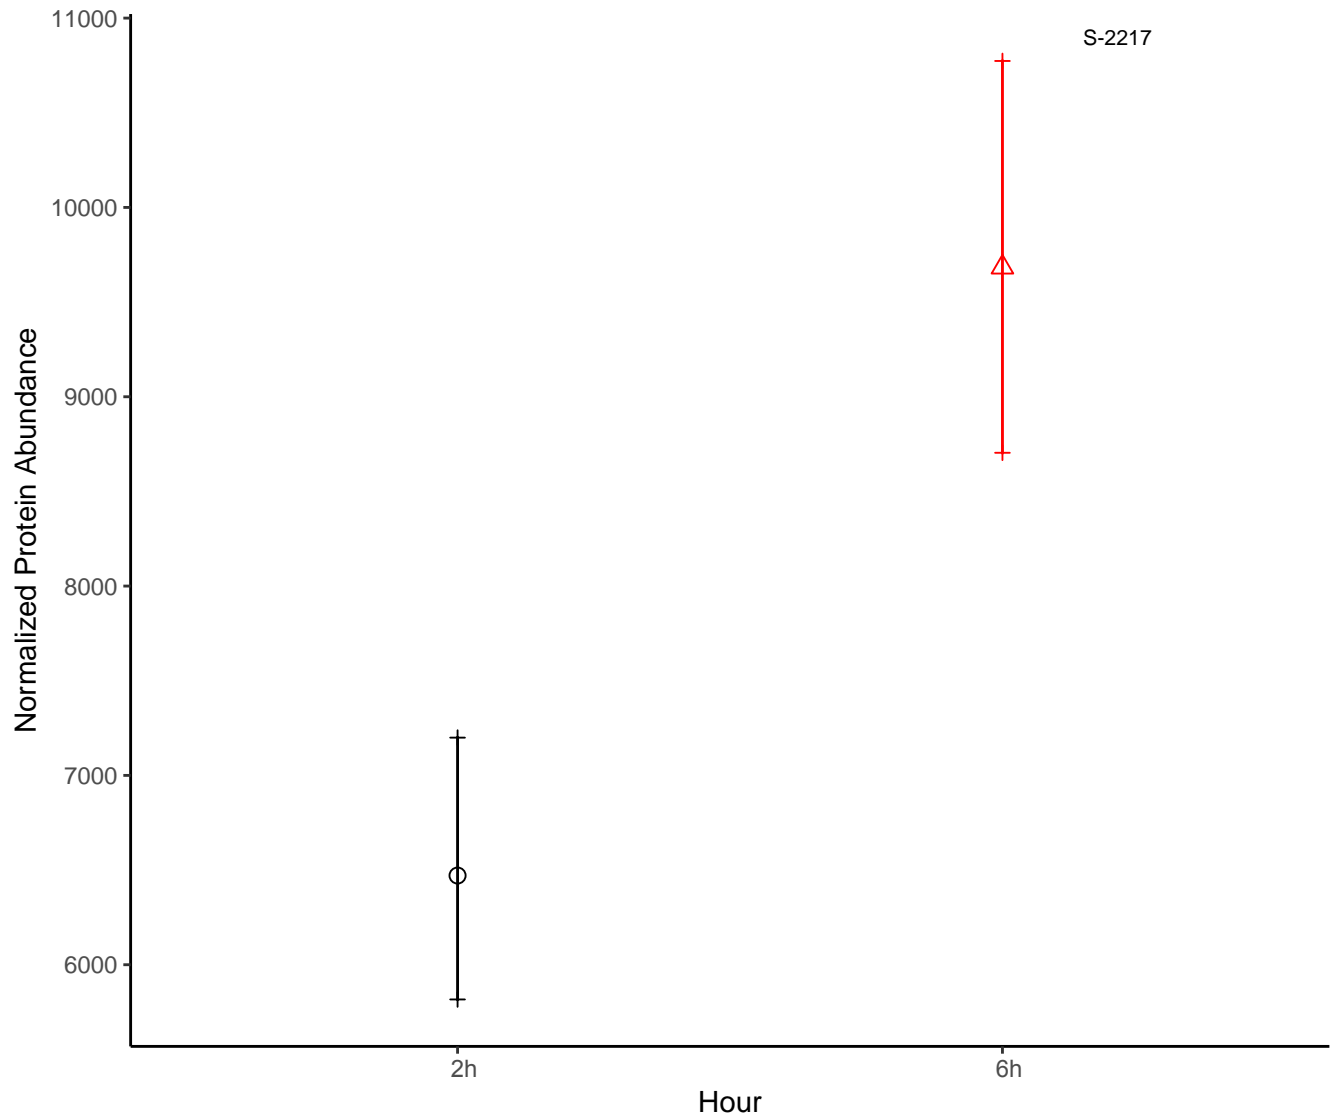

⊕ 2h

△ 6h

# MQO2\_STAAM

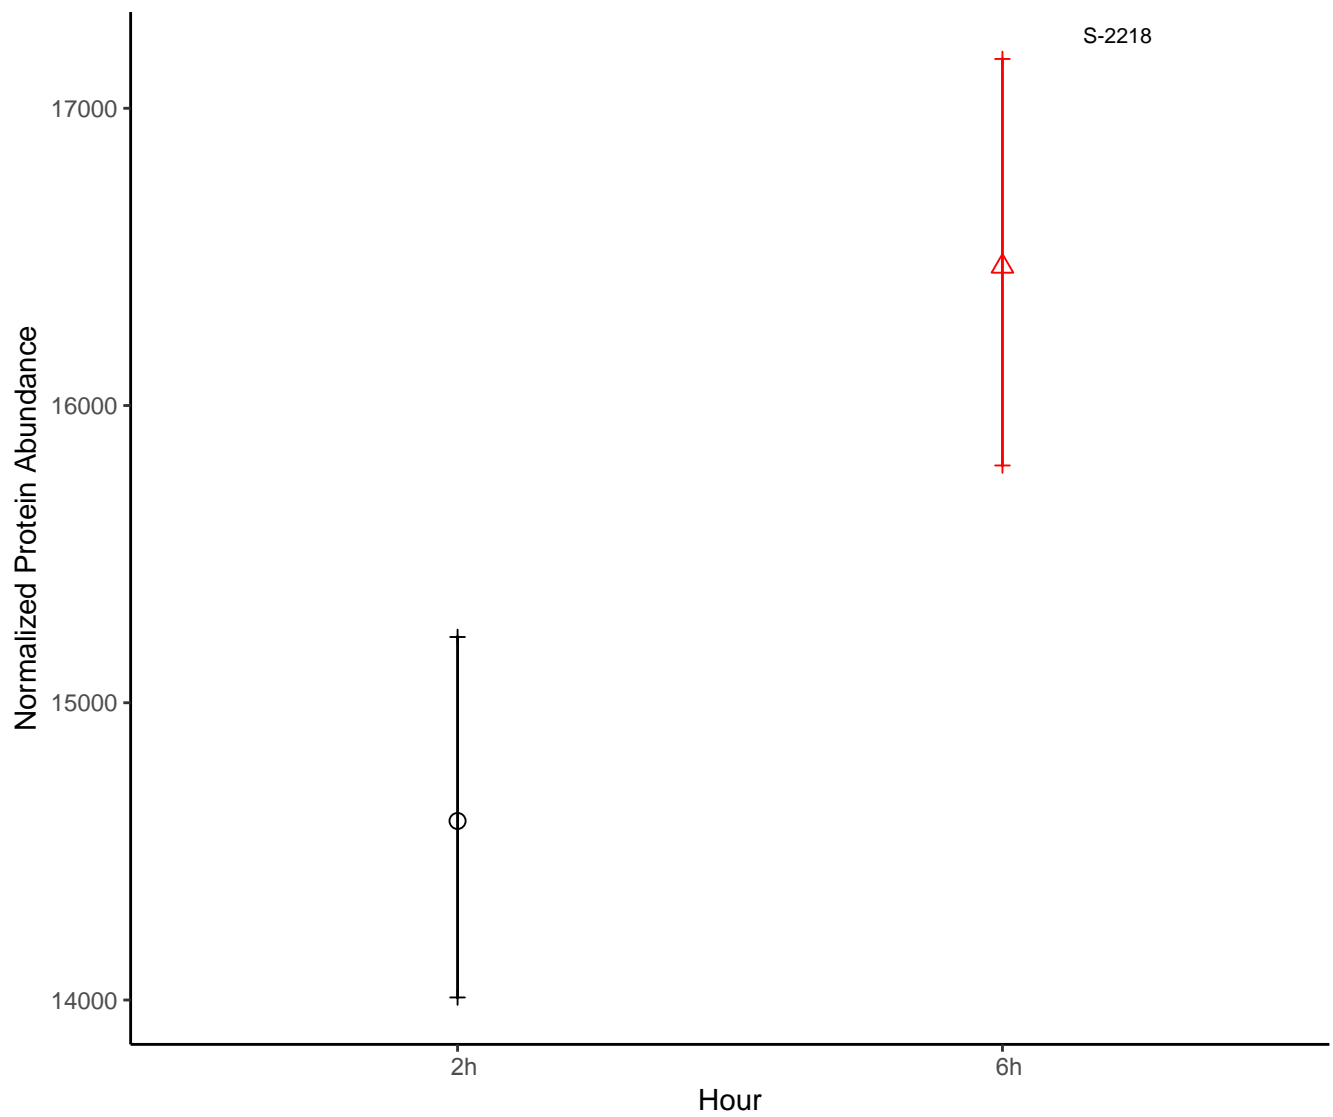

⊕ 2h

△ 6h

# MSRA1\_STAAM

S-2219

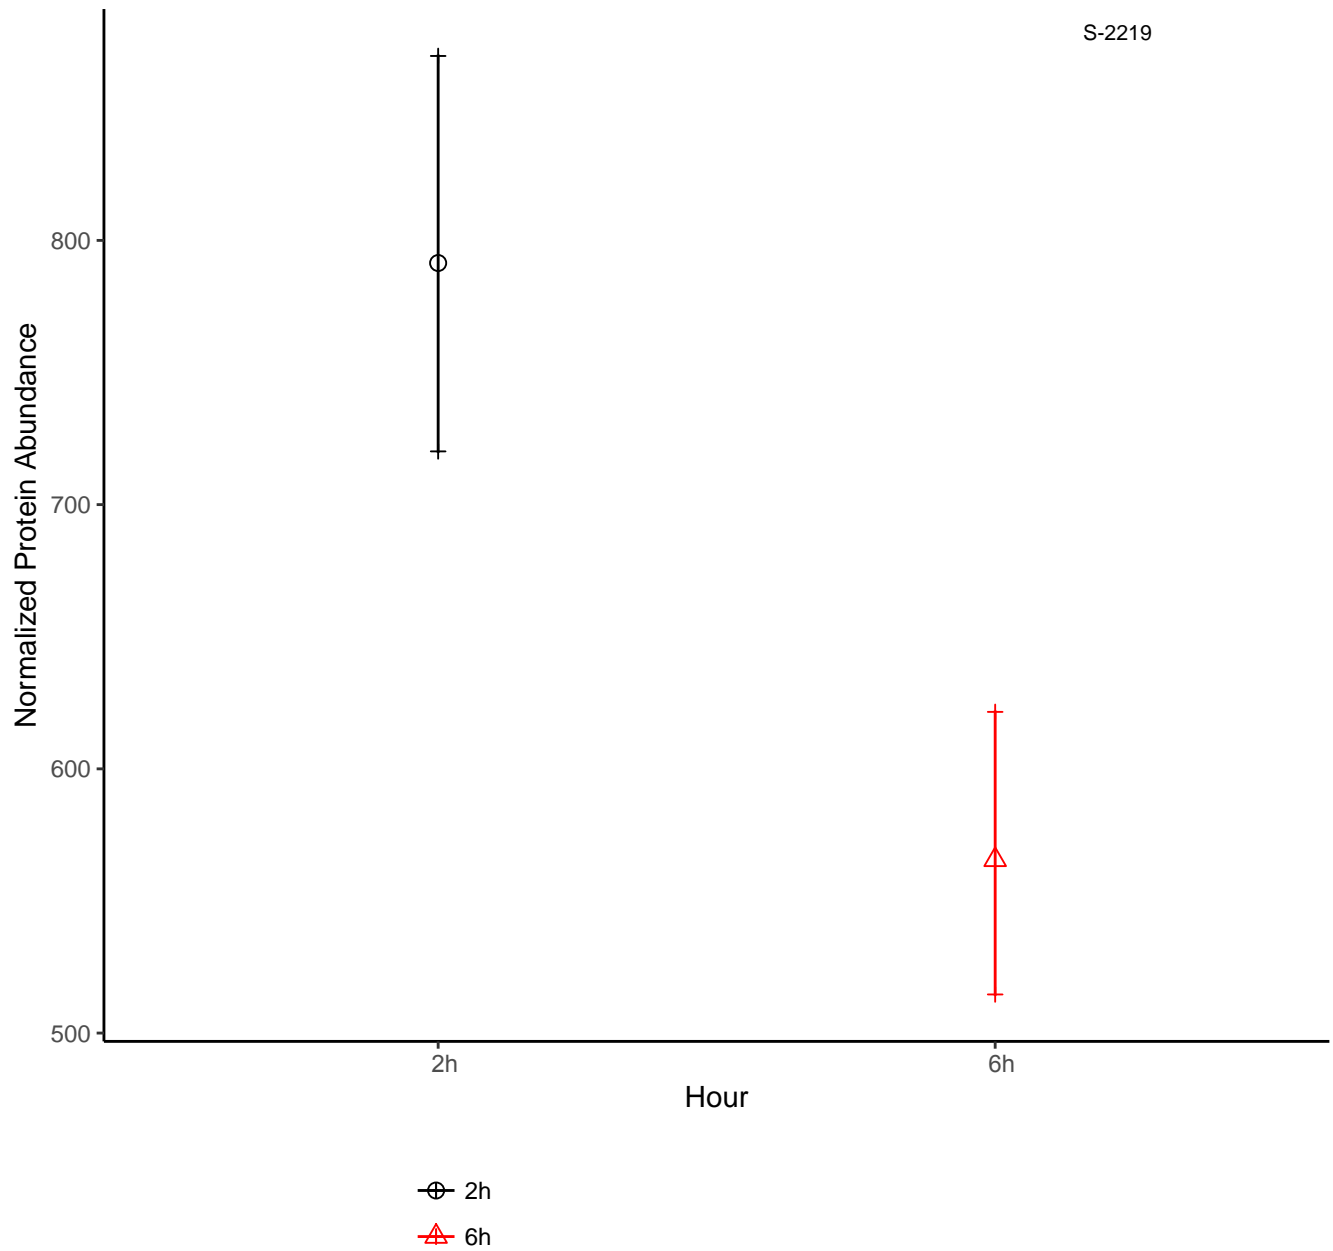

# MSRA2\_STAAM

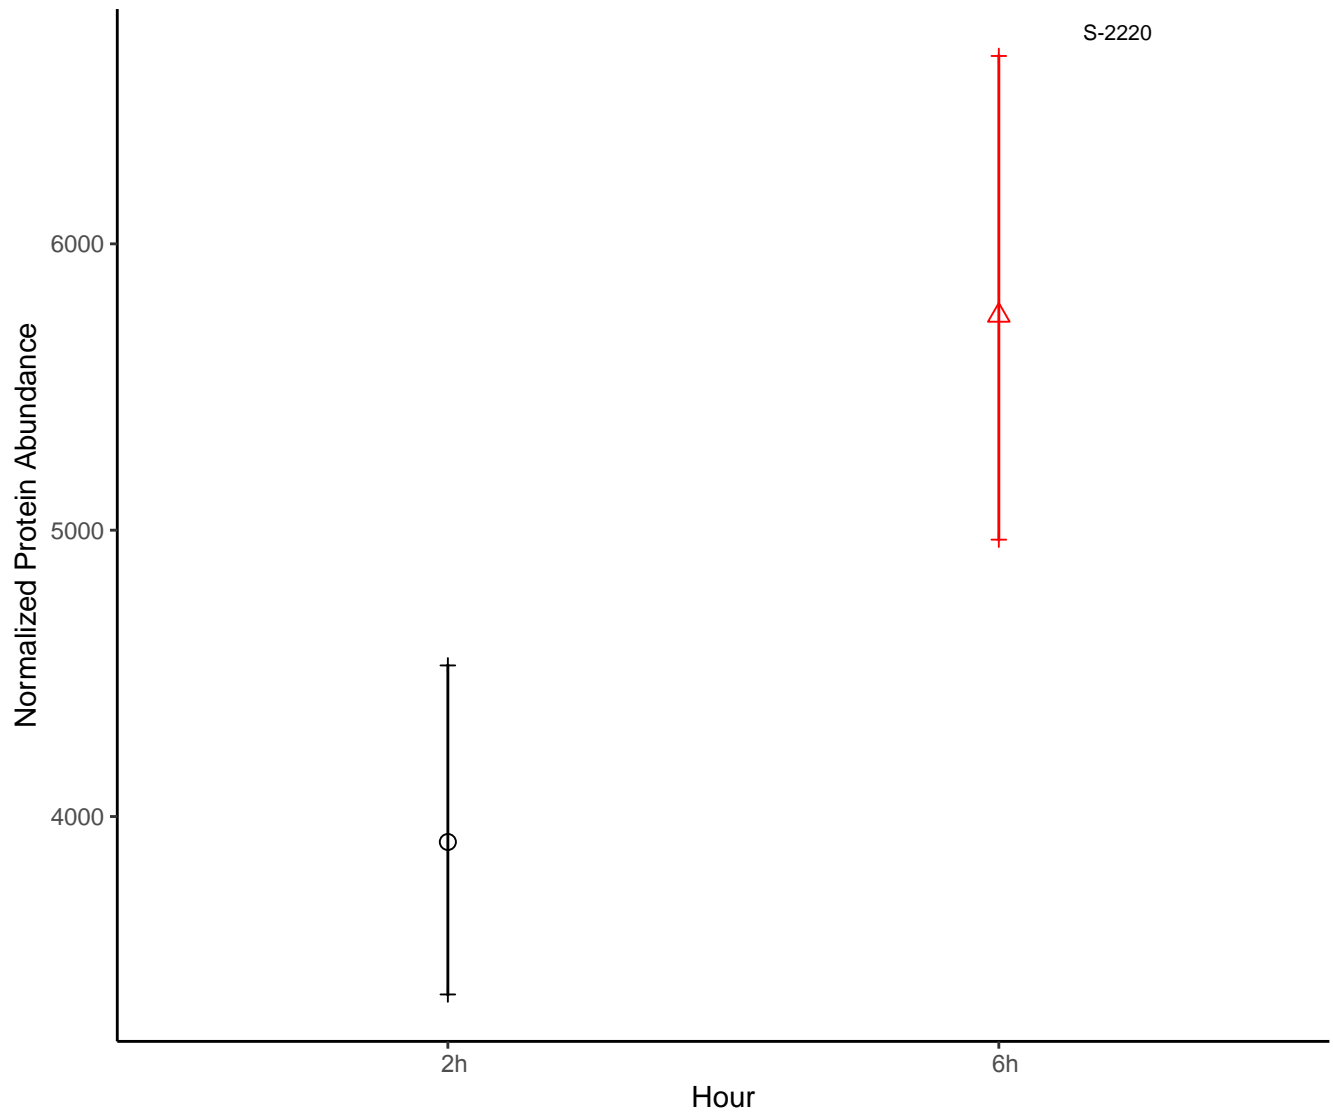

⊕ 2h

△ 6h

# MSRB\_STAAM

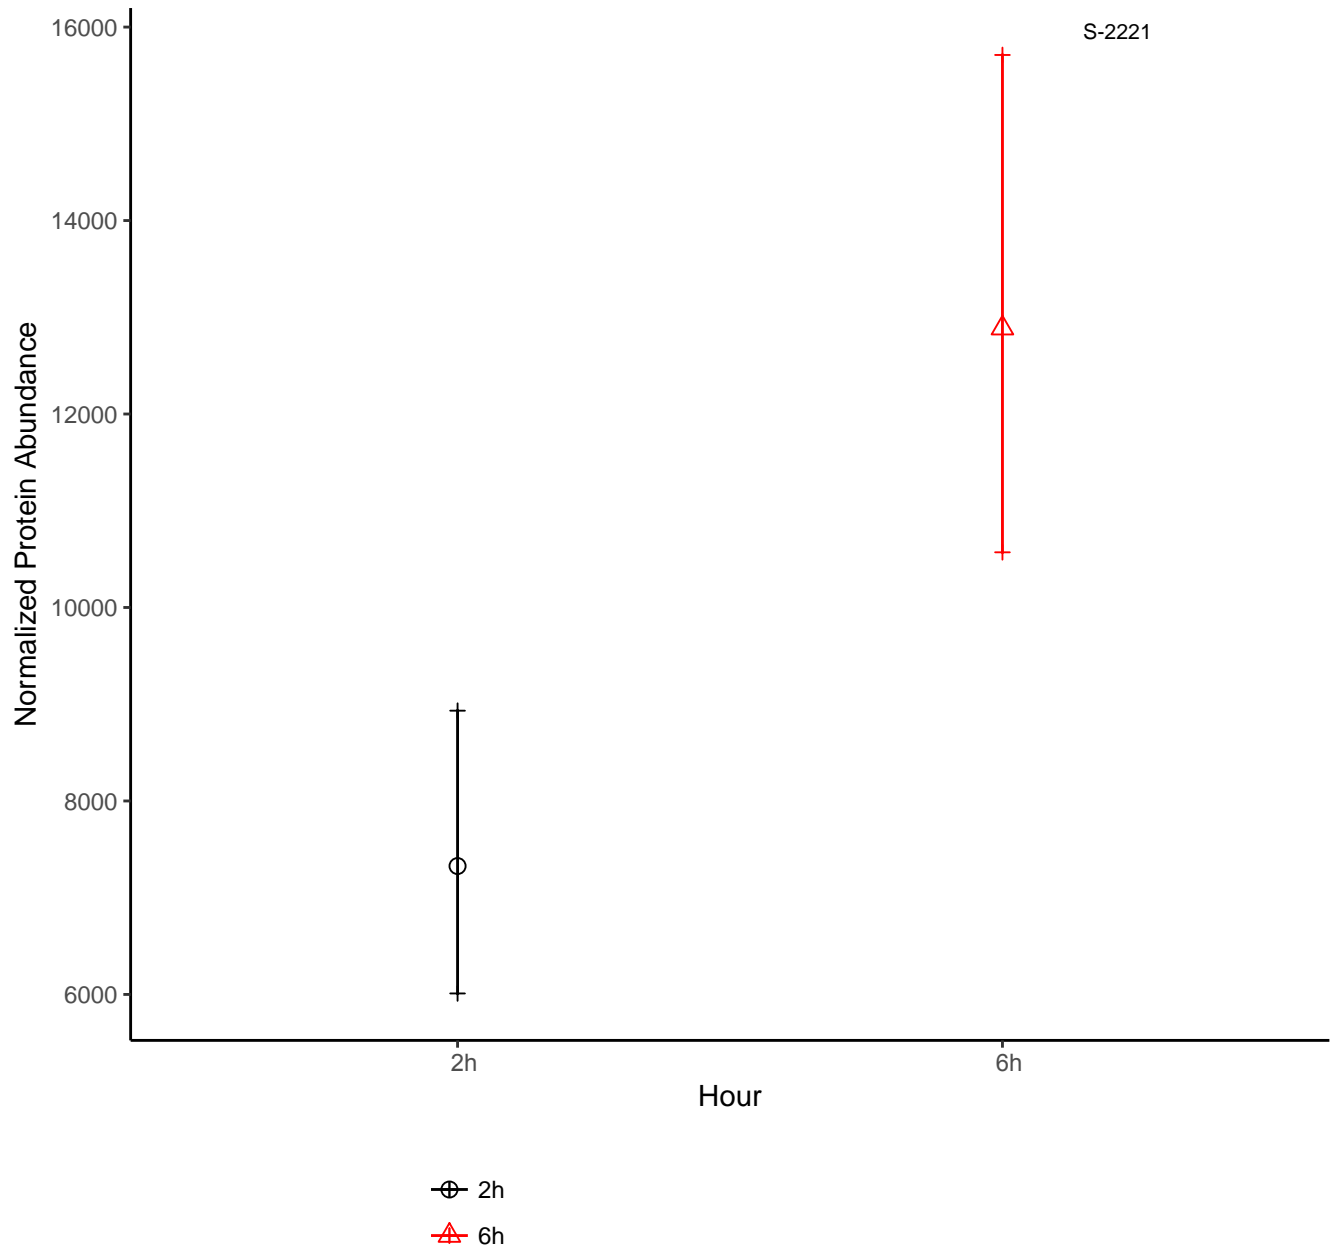

# MTLD\_STAAM

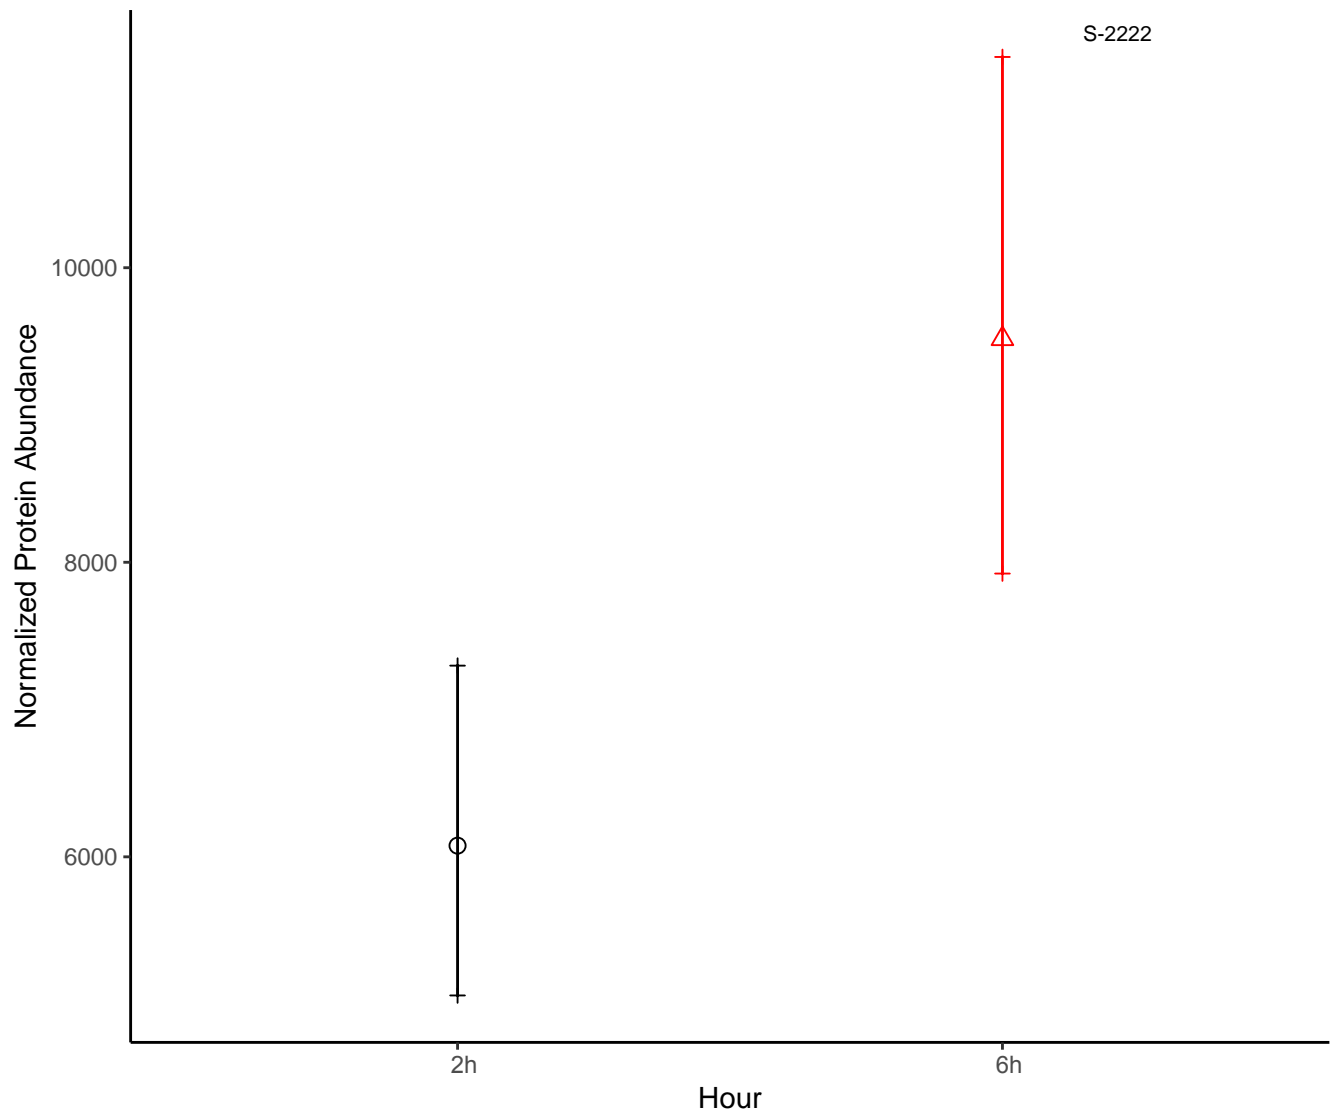

⊕ 2h

△ 6h

# MTNN\_STAAM

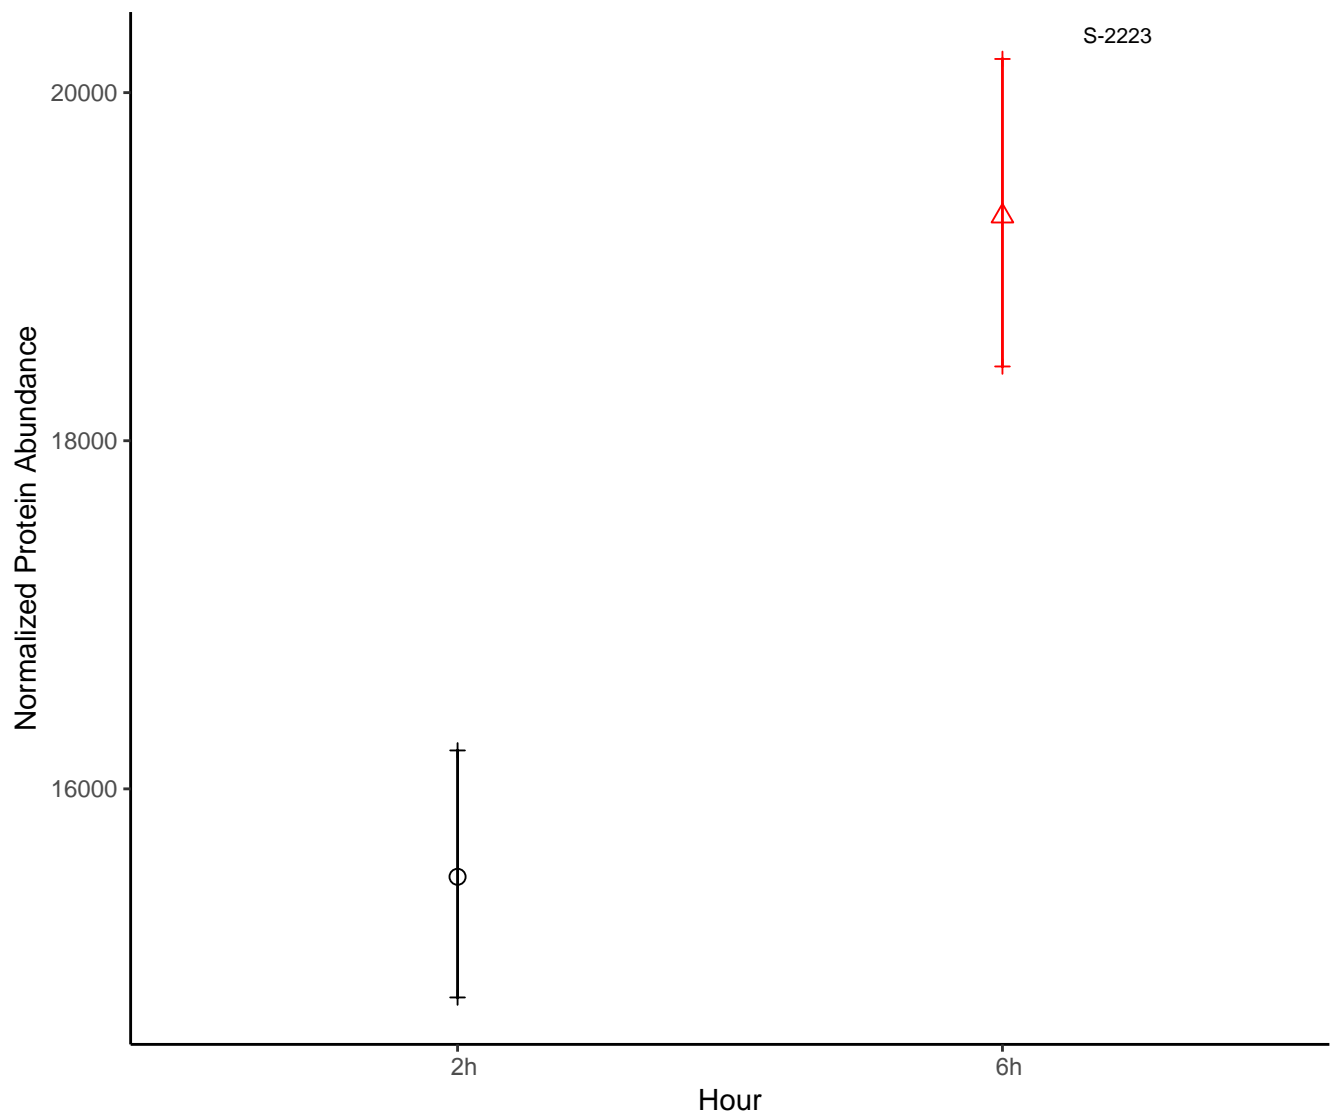

⊕ 2h

△ 6h

# MURA1\_STAAM

S-2224

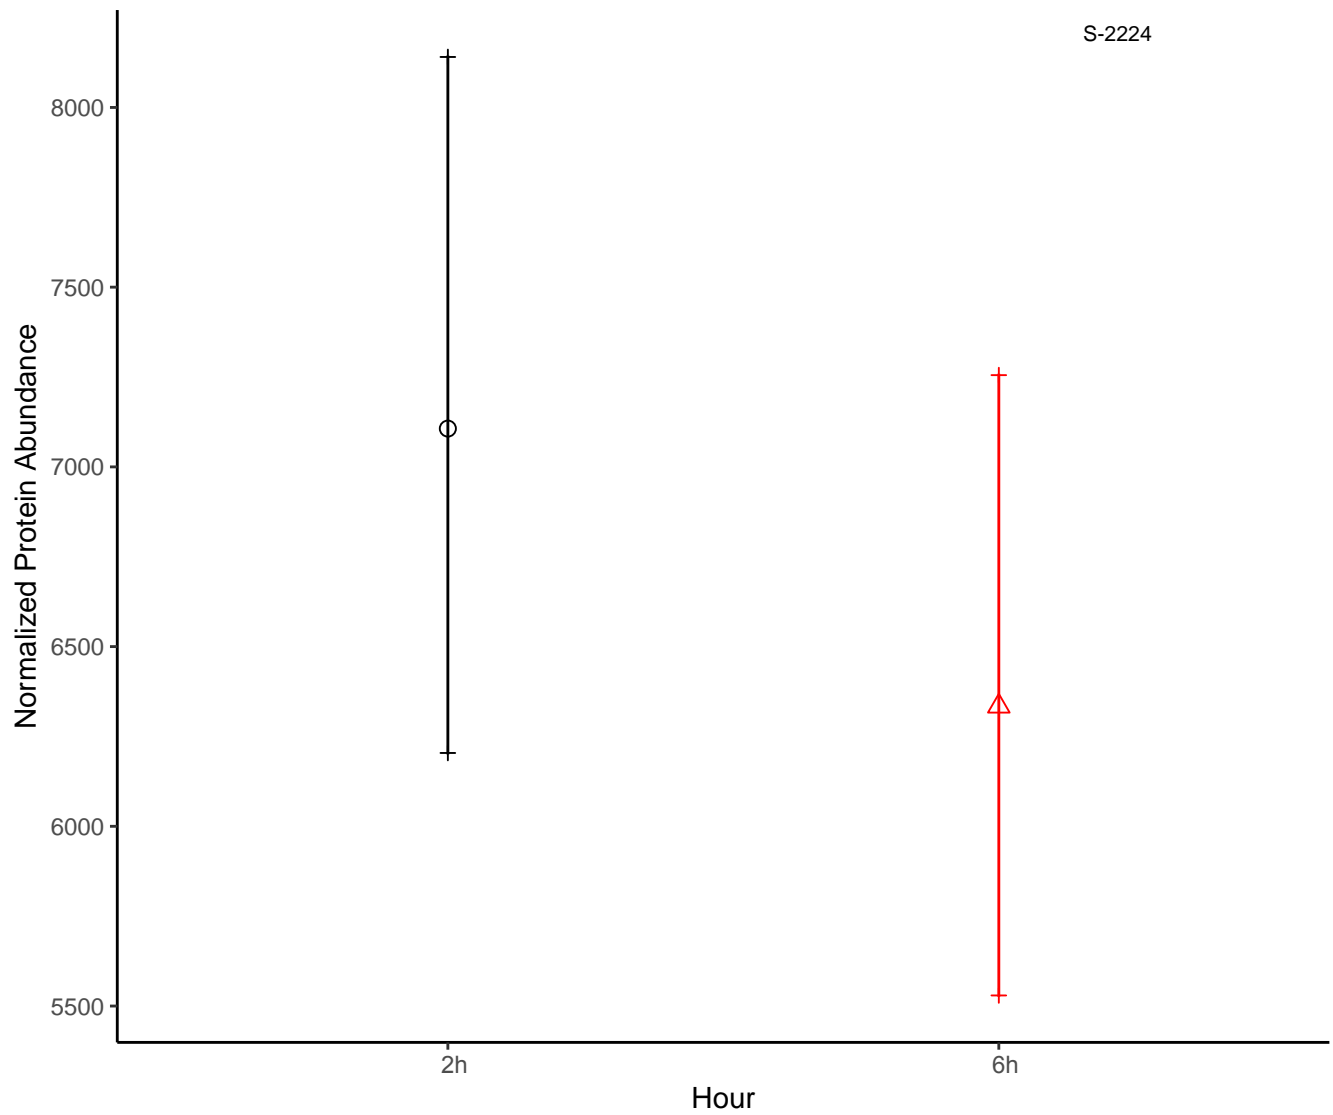

⊕ 2h

△ 6h



# MURA2\_STAAM

S-2225

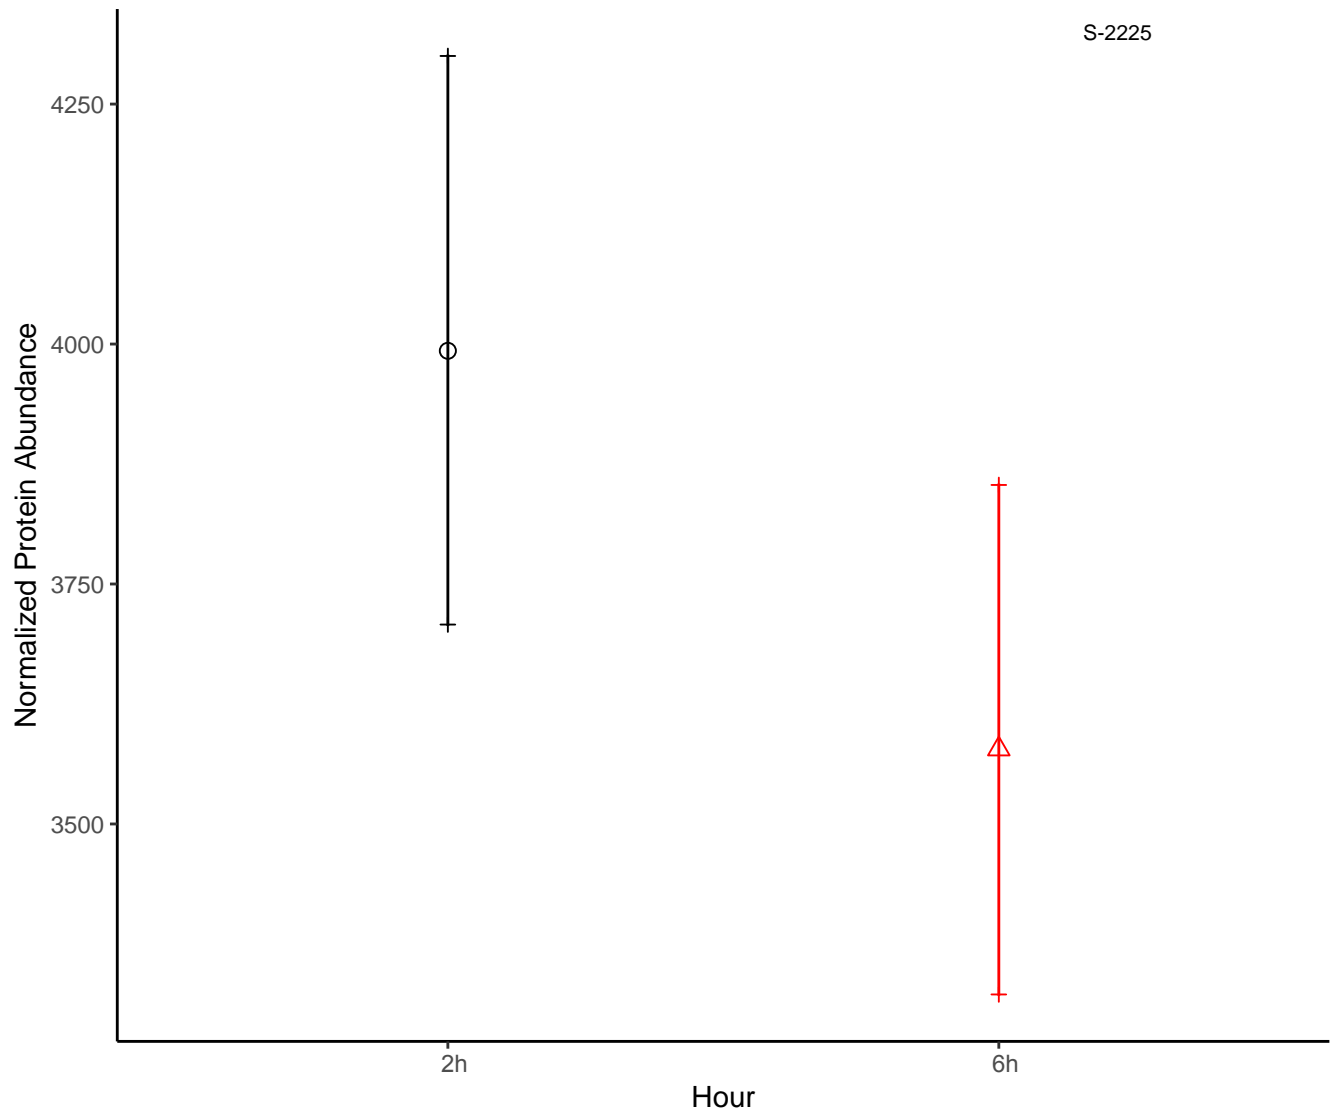

⊕ 2h

△ 6h

# MURC\_STAAM

S-2226

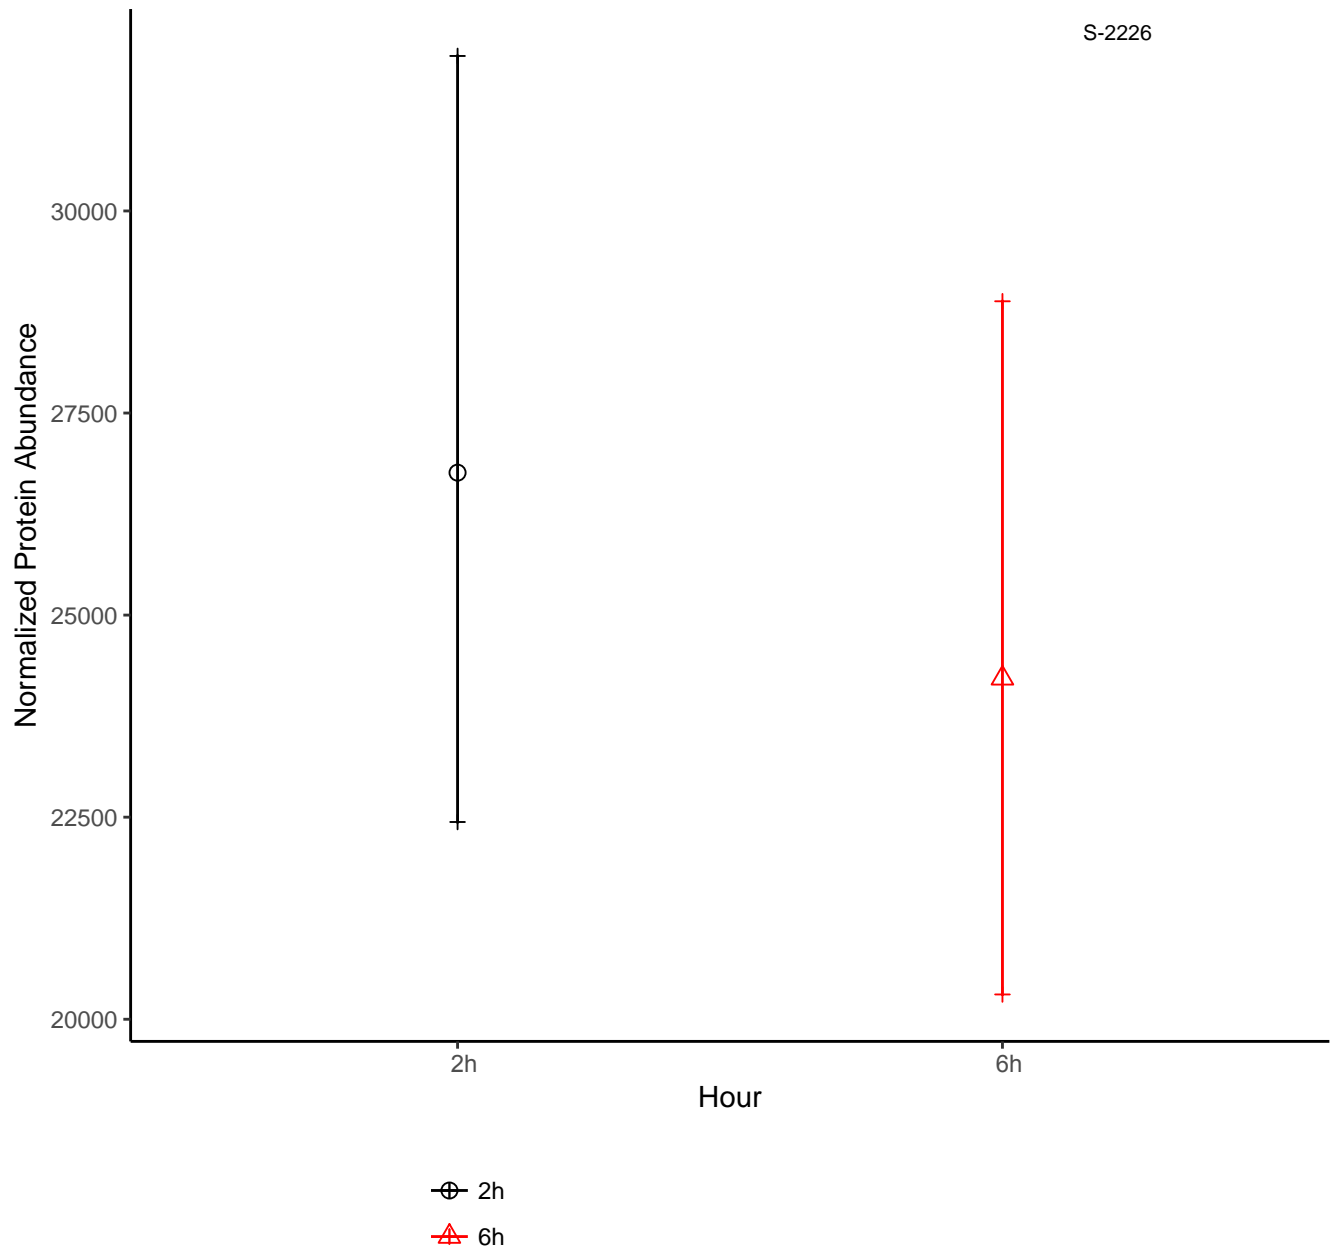

# MURD\_STAAM

S-2227

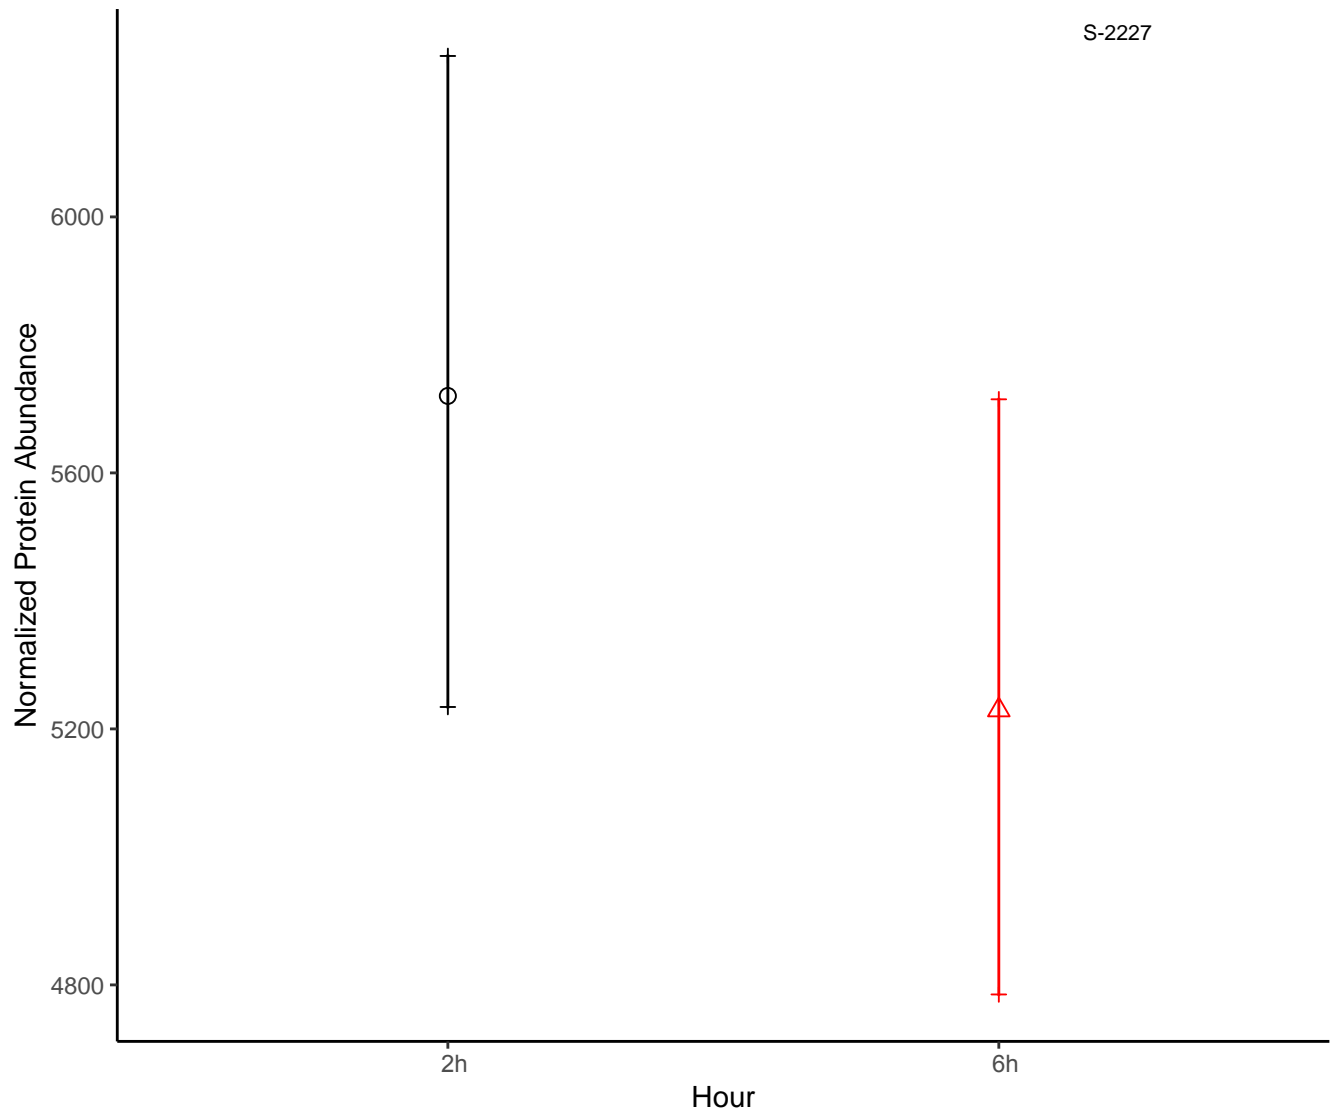

⊕ 2h

△ 6h

# MURE\_STAAM

S-2228

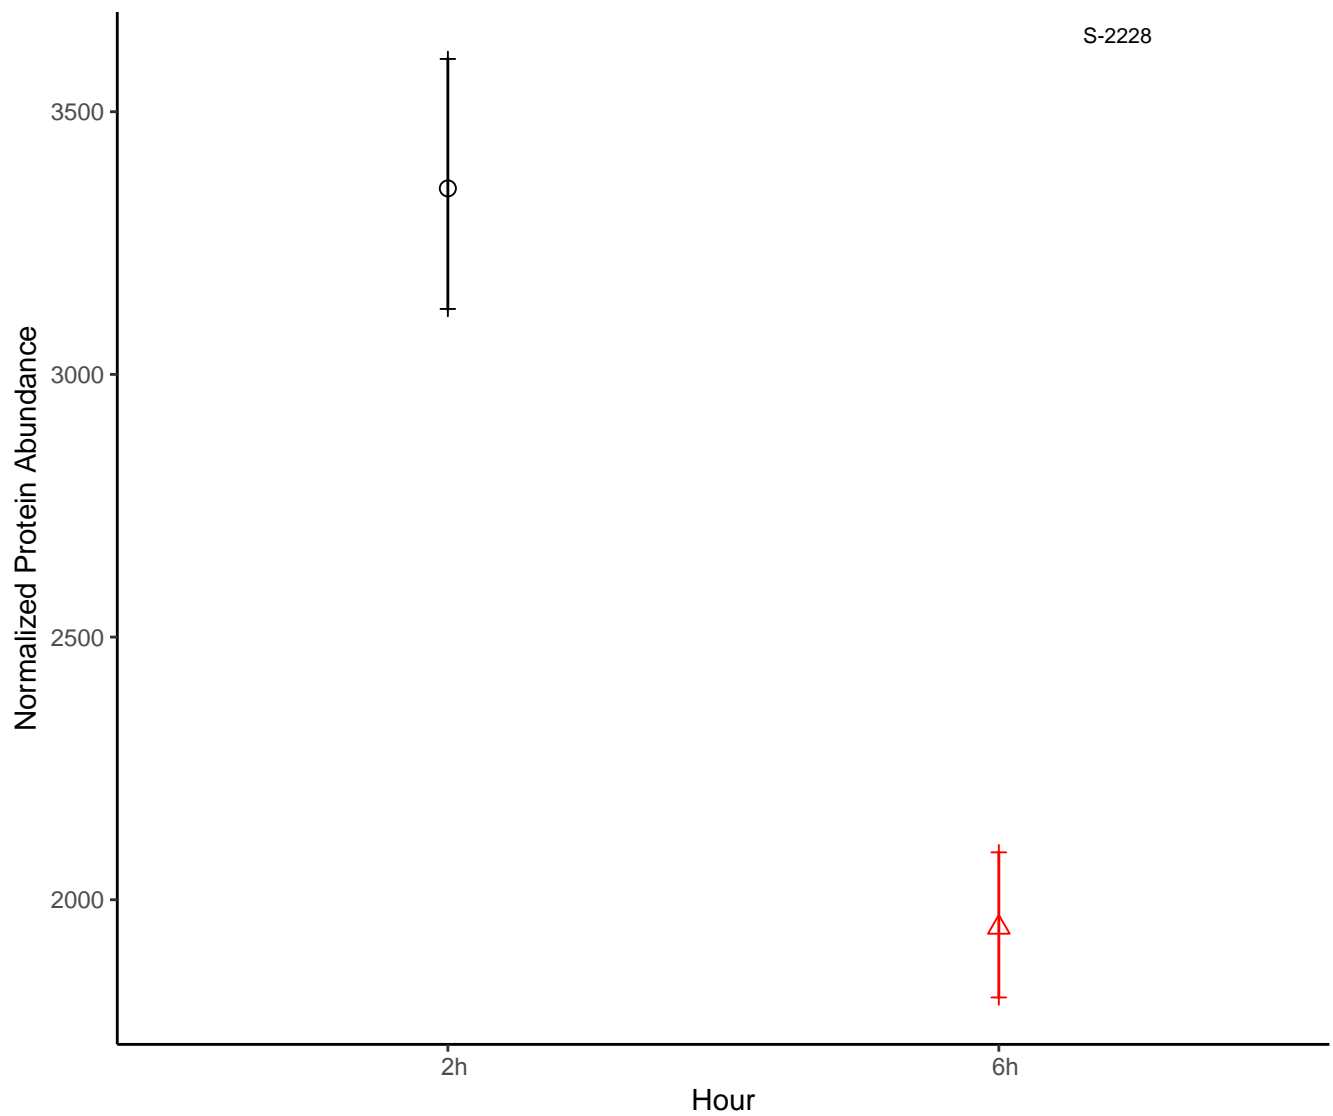

⊕ 2h

△ 6h

# MURG\_STAAM

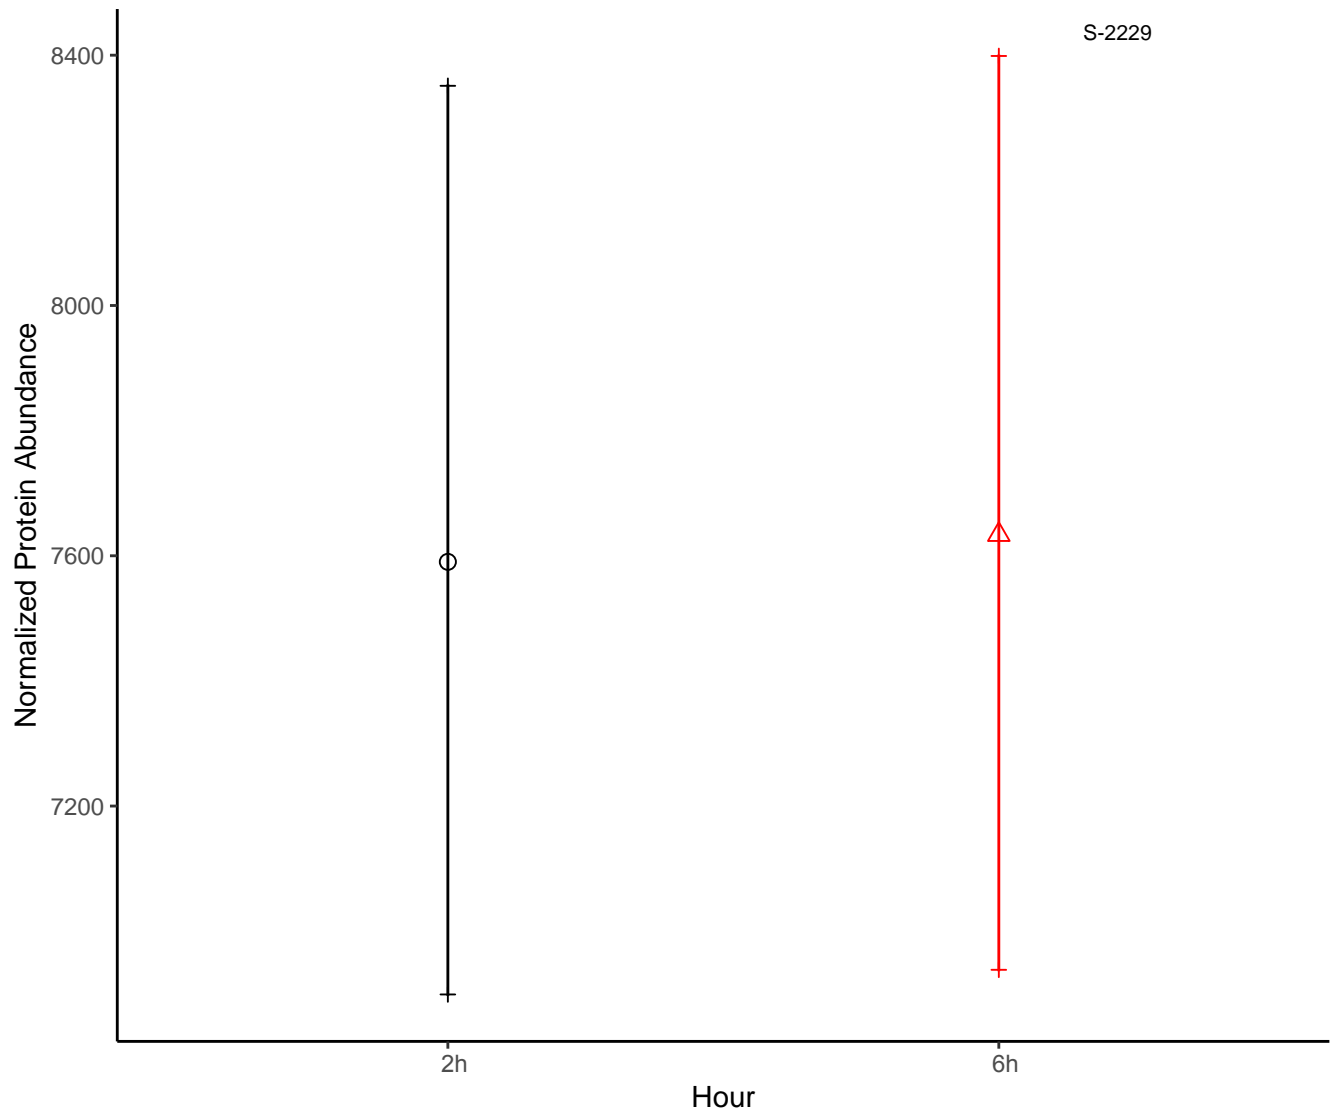

S-2229

⊕ 2h

△ 6h

# MURI\_STAAM

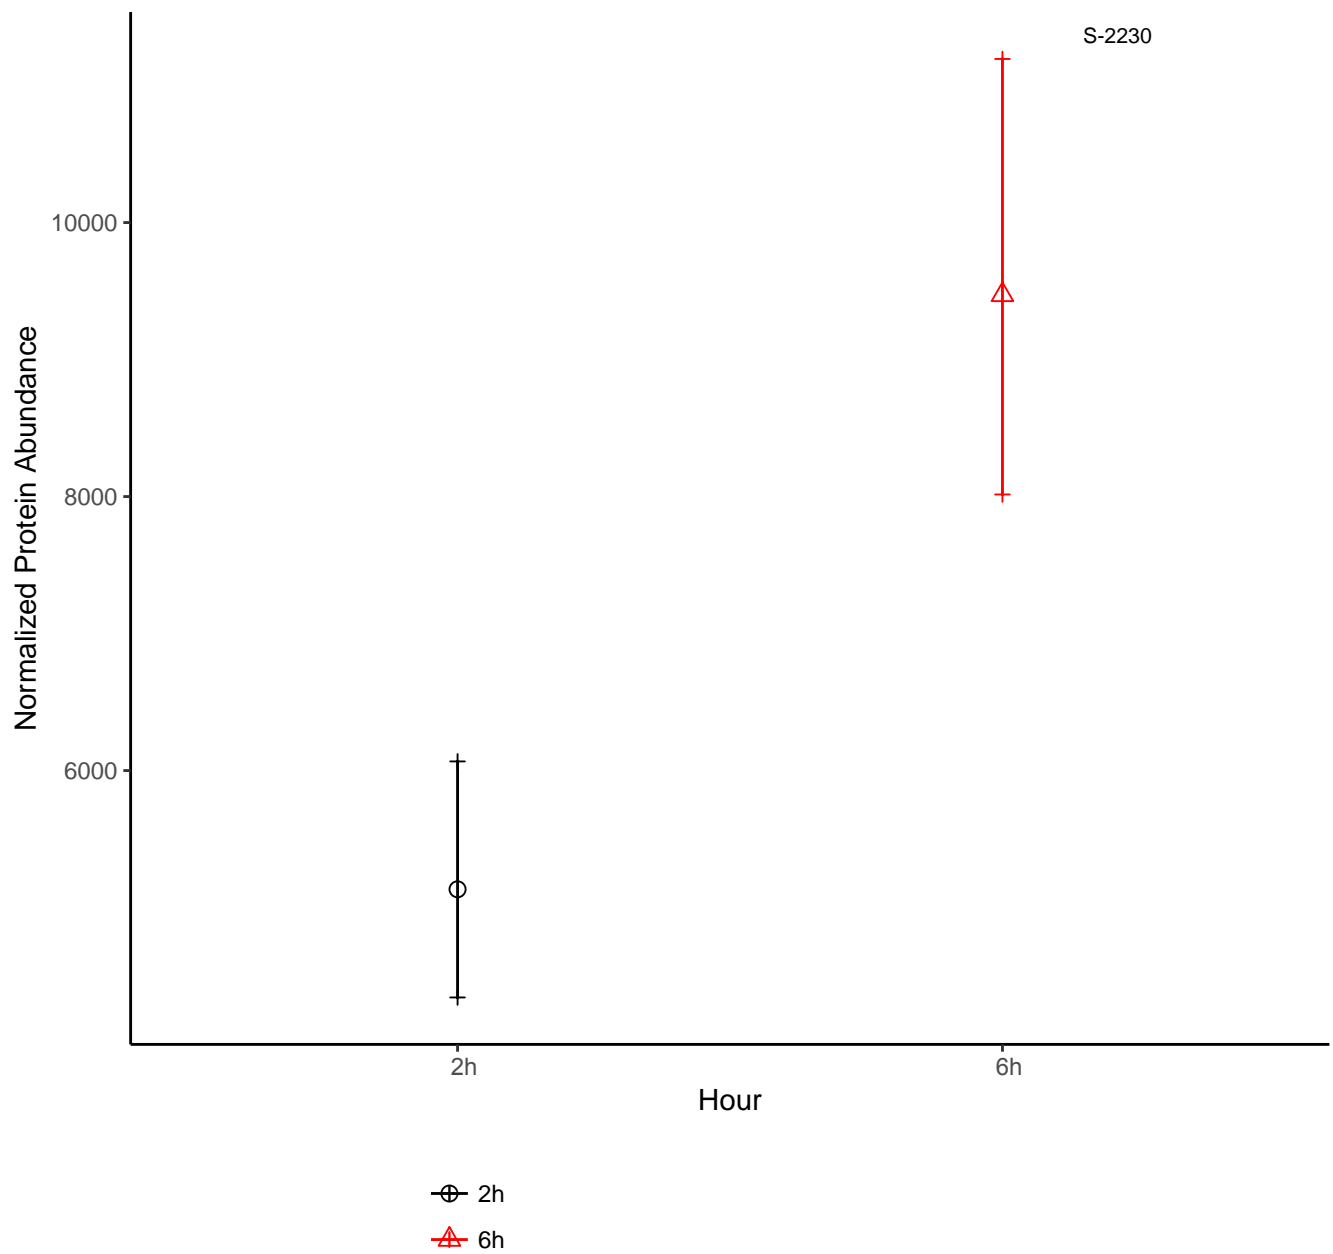

# MUTS\_STAAM

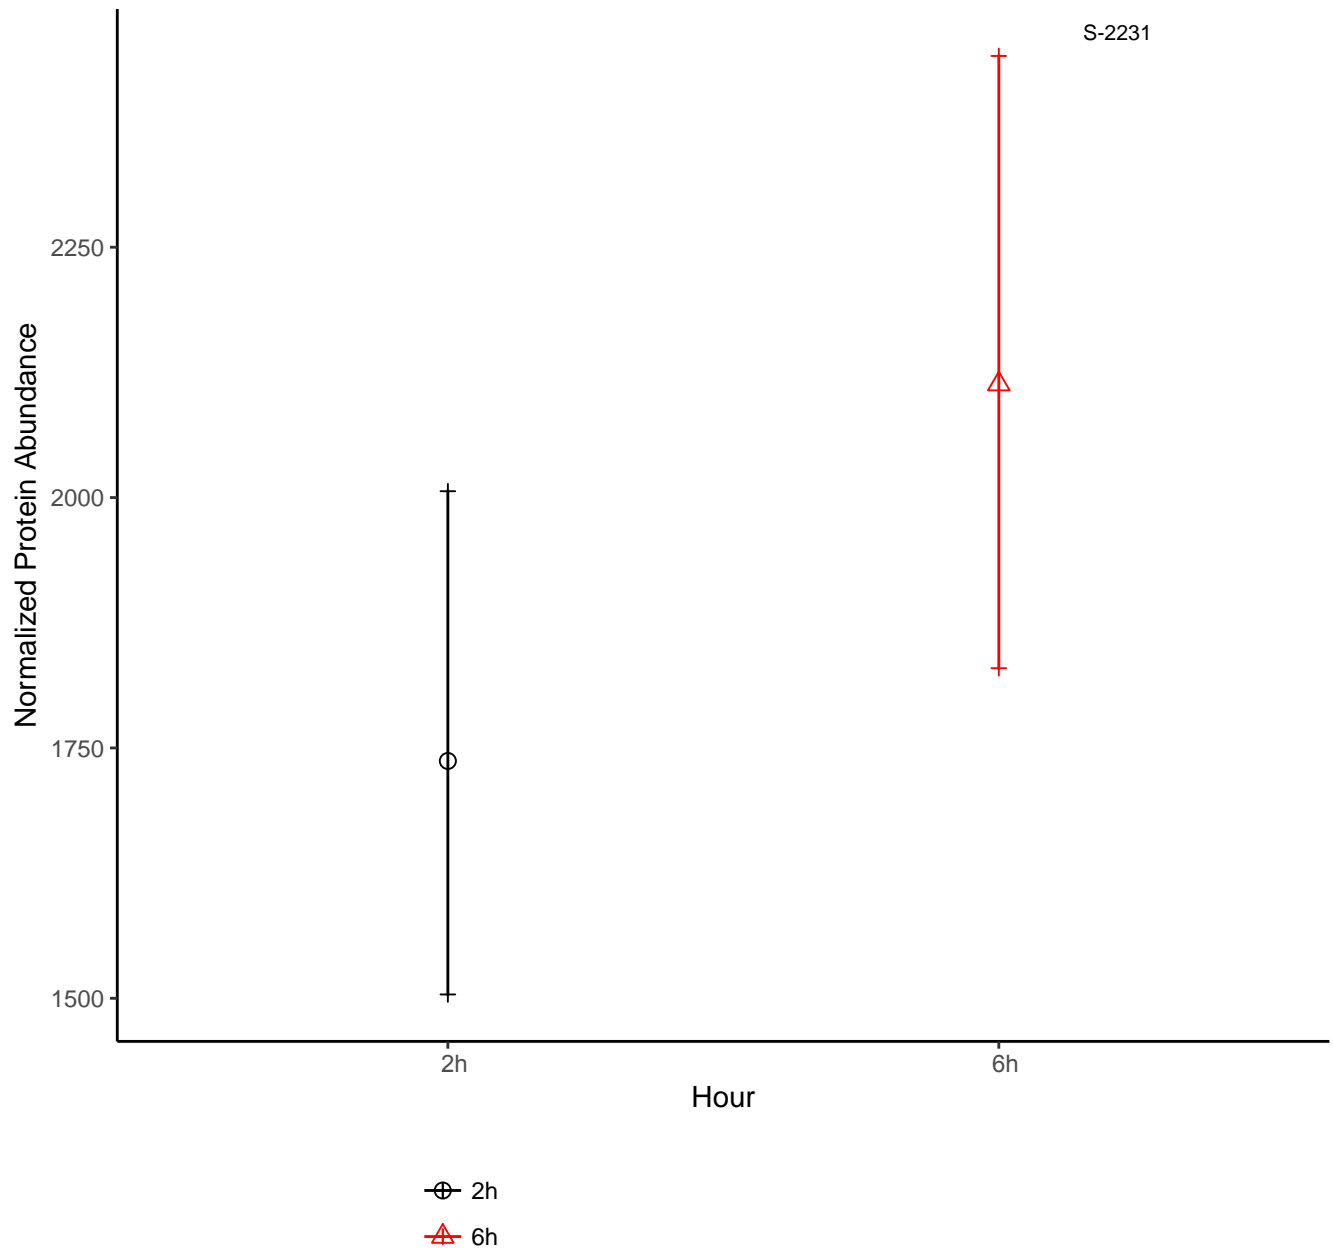

# NADD\_STAAM

S-2232

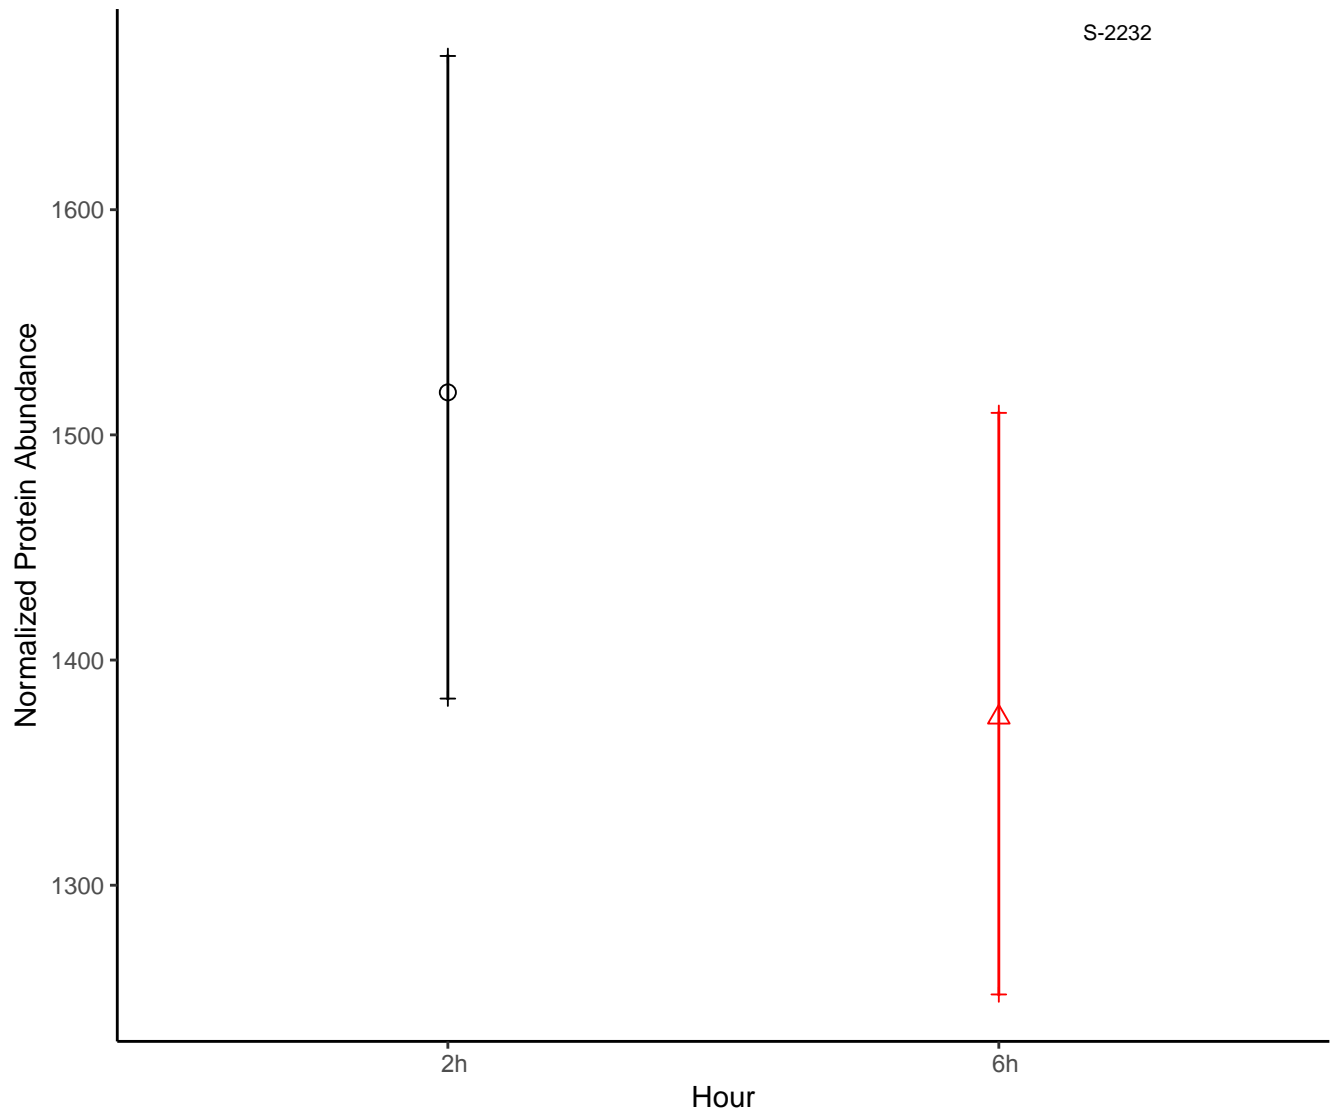

⊕ 2h

△ 6h



# NADE\_STAAM

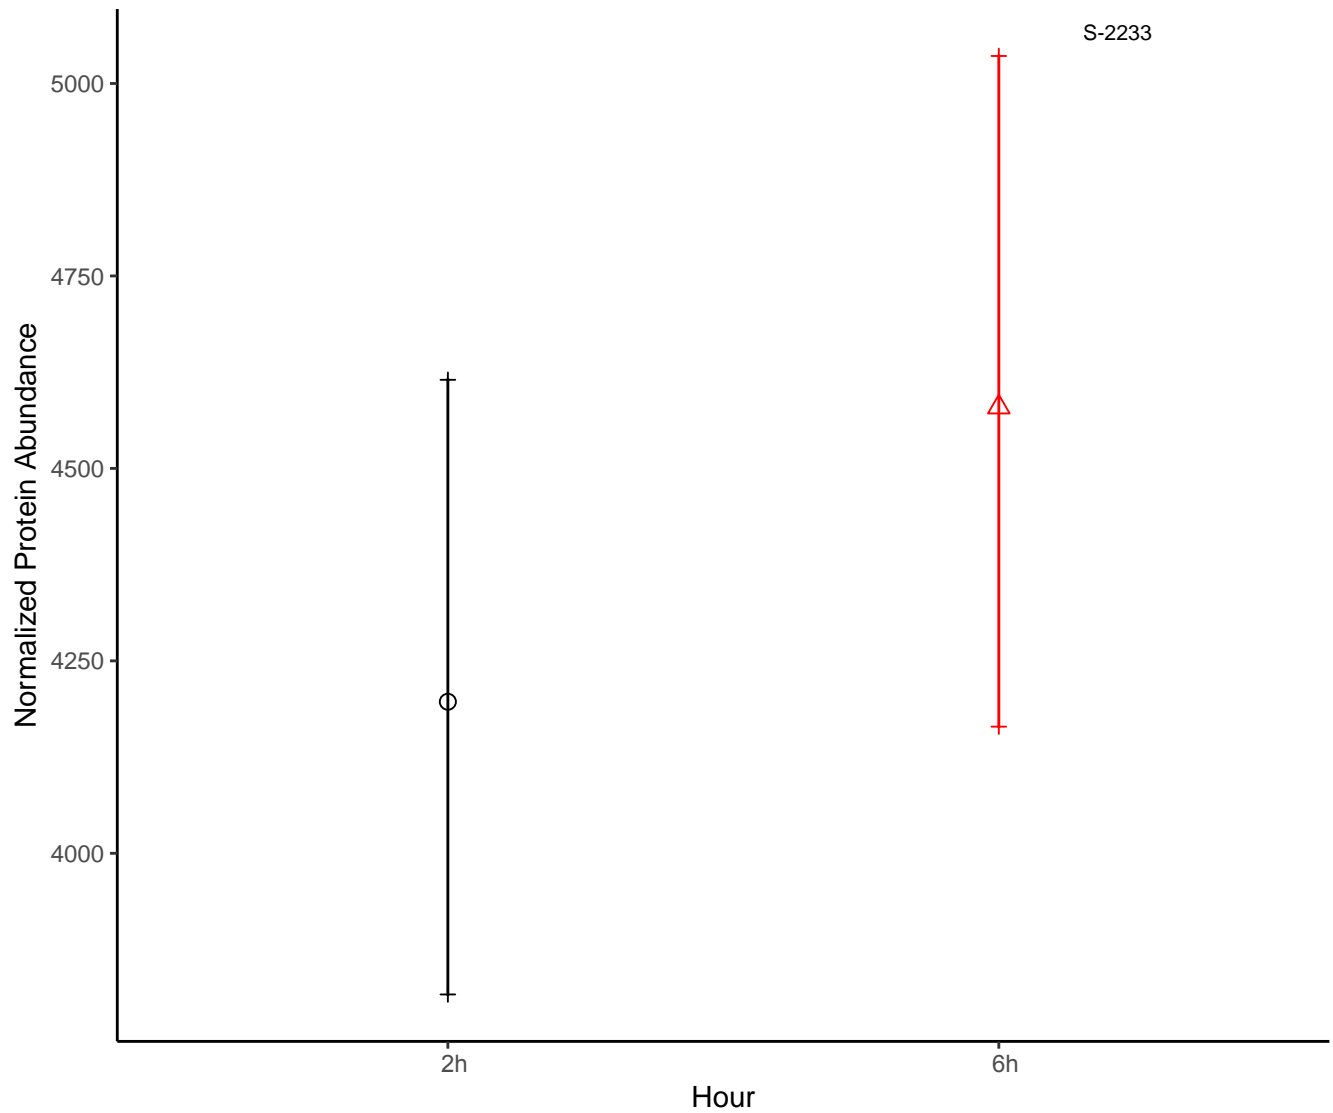

⊕ 2h

△ 6h

# NAGD\_STAAM

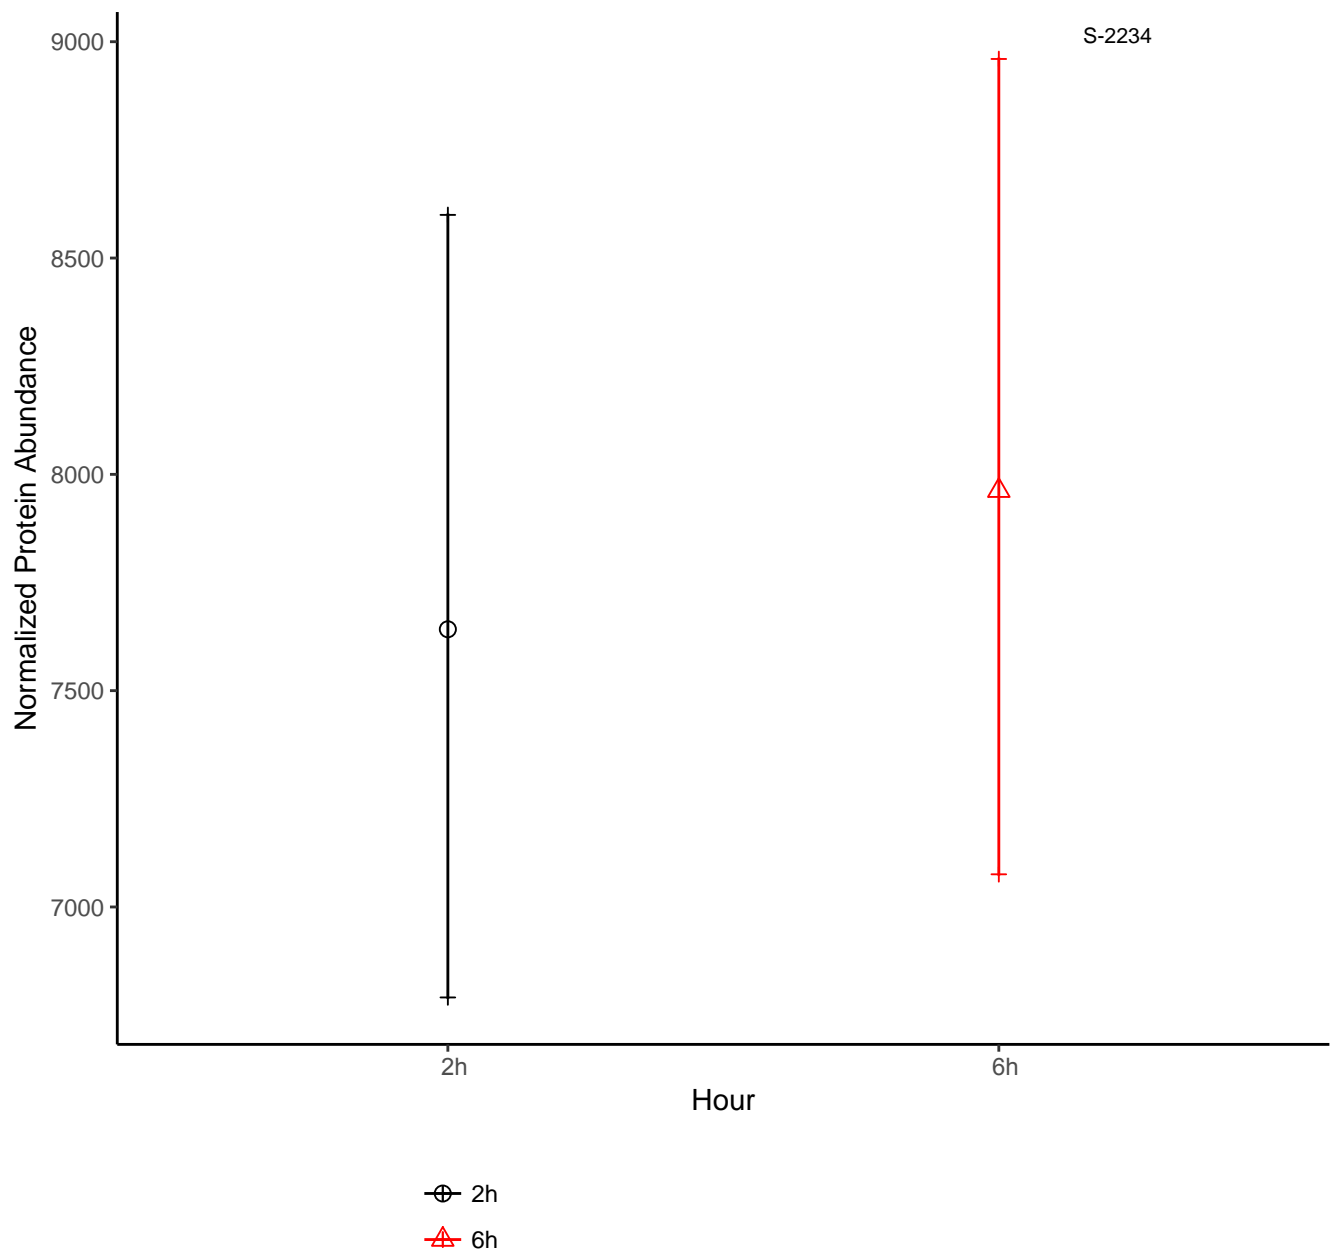

# NDK\_STAAM

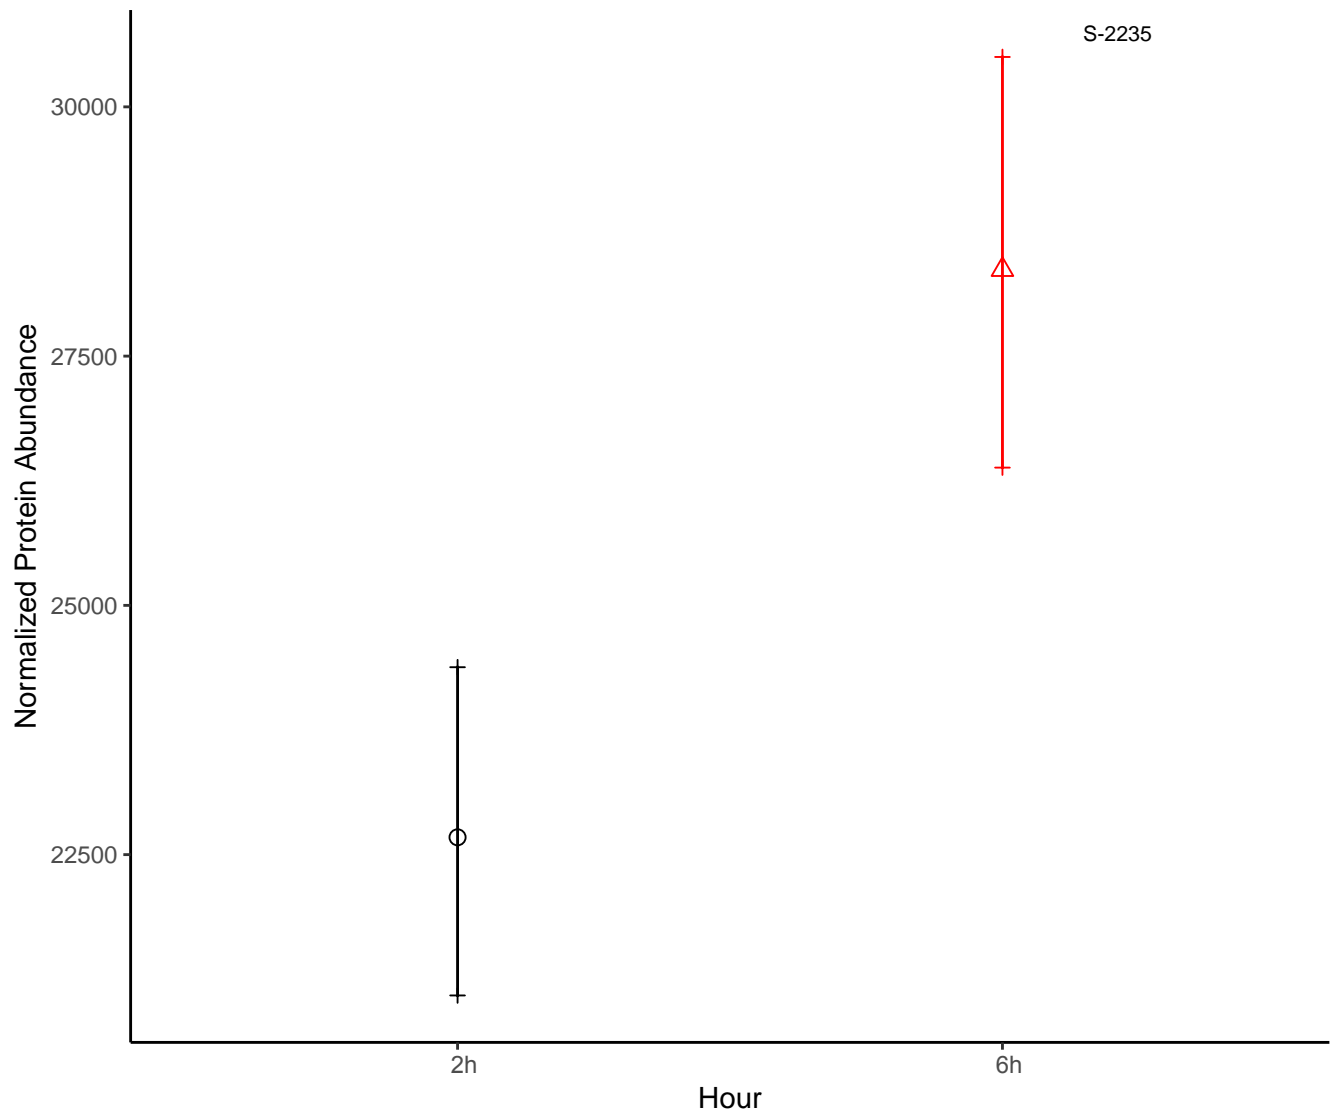

⊕ 2h

△ 6h

# NRDR\_STAAM

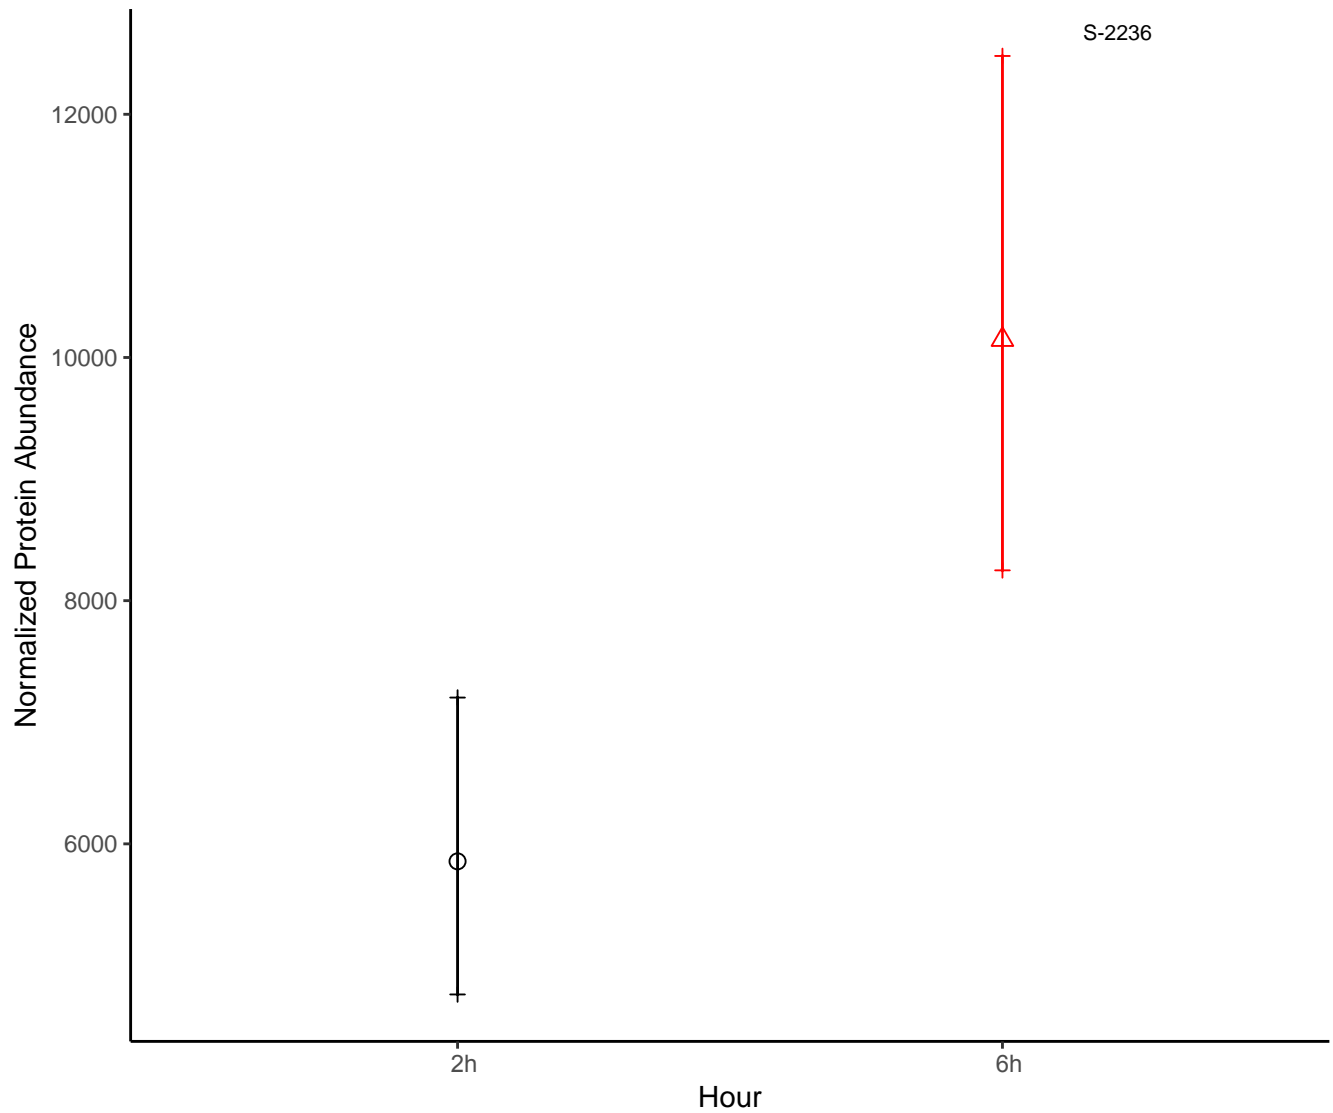

S-2236

⊕ 2h

△ 6h

# NREB\_STAAM

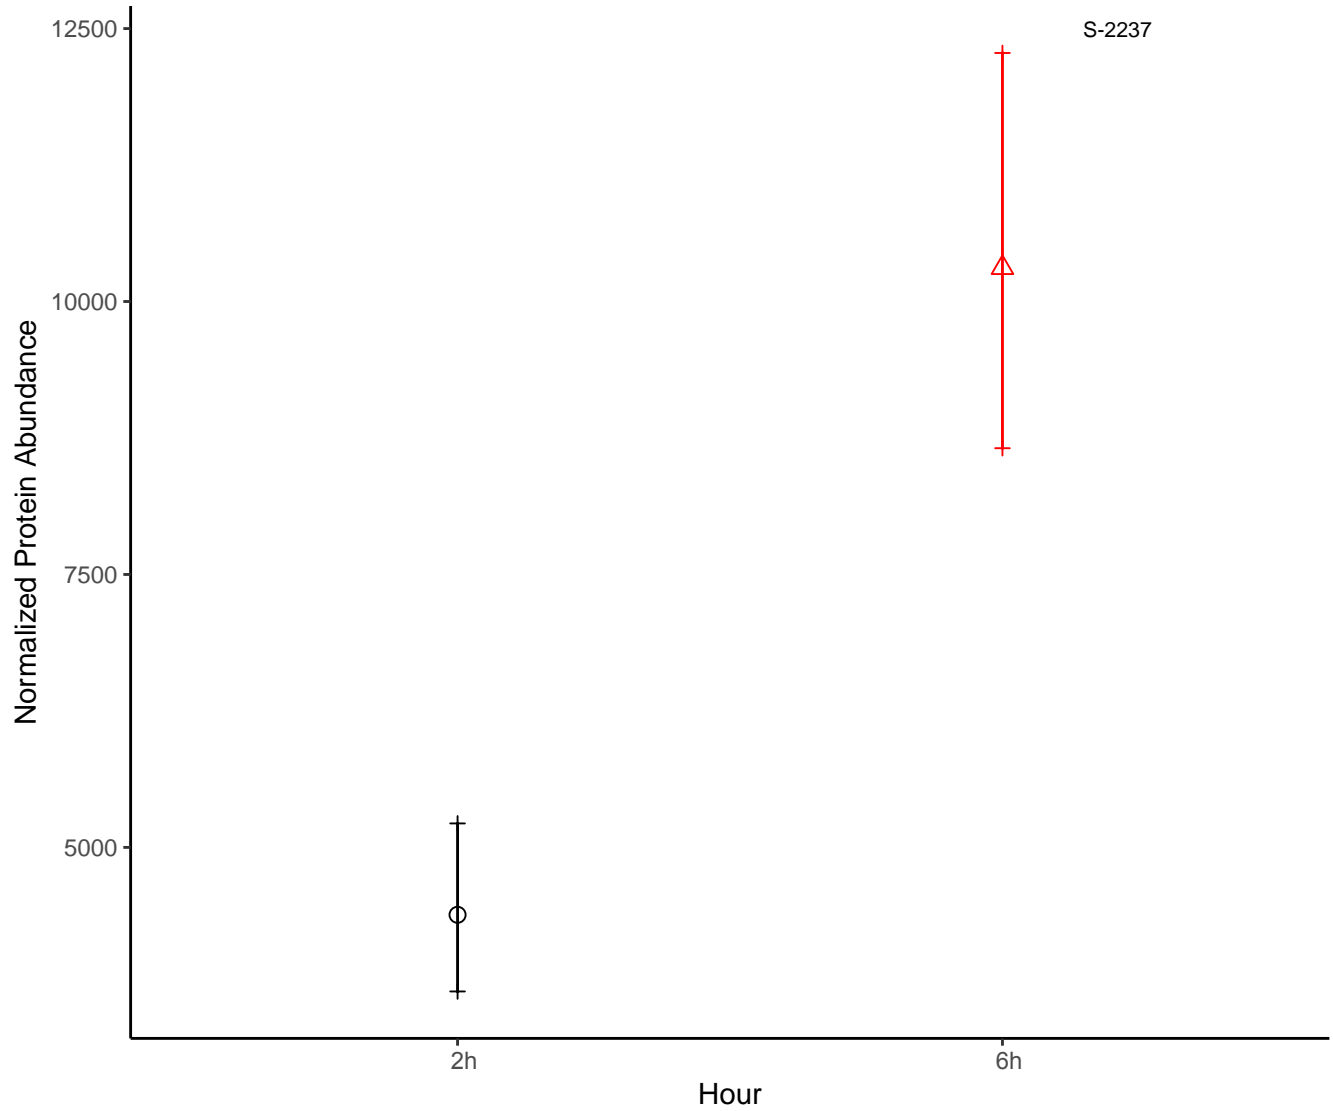

⊕ 2h

△ 6h

# NUSG\_STAAM

S-2238

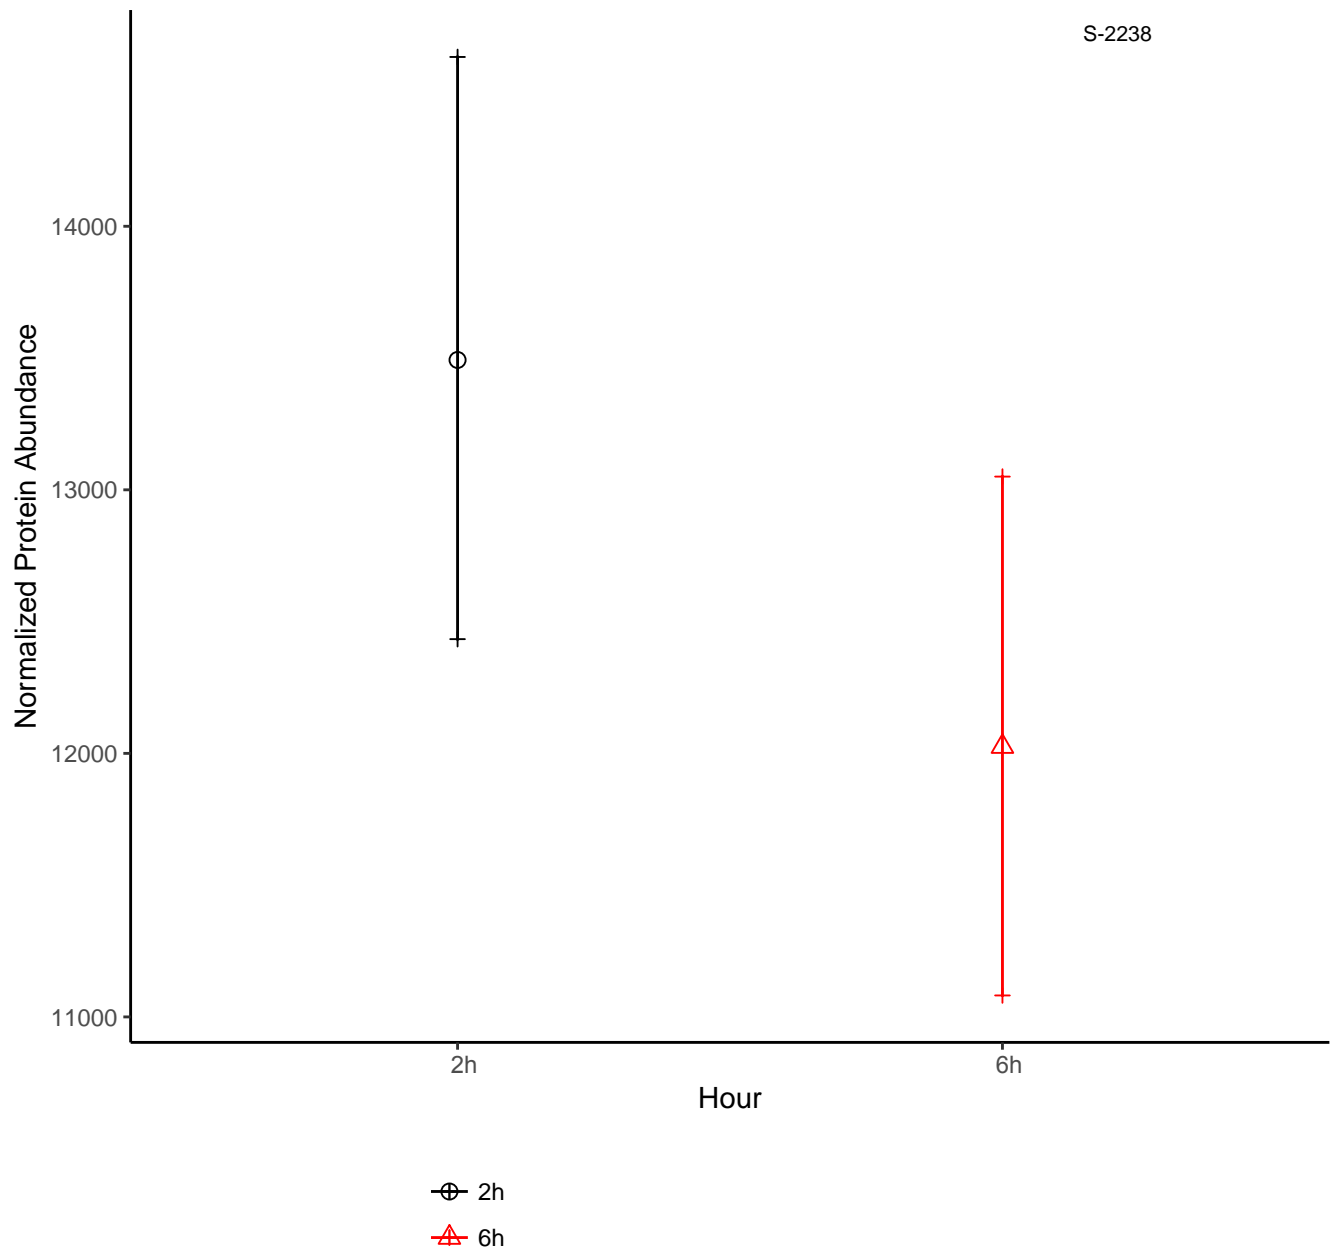

# OAT2\_STAAM

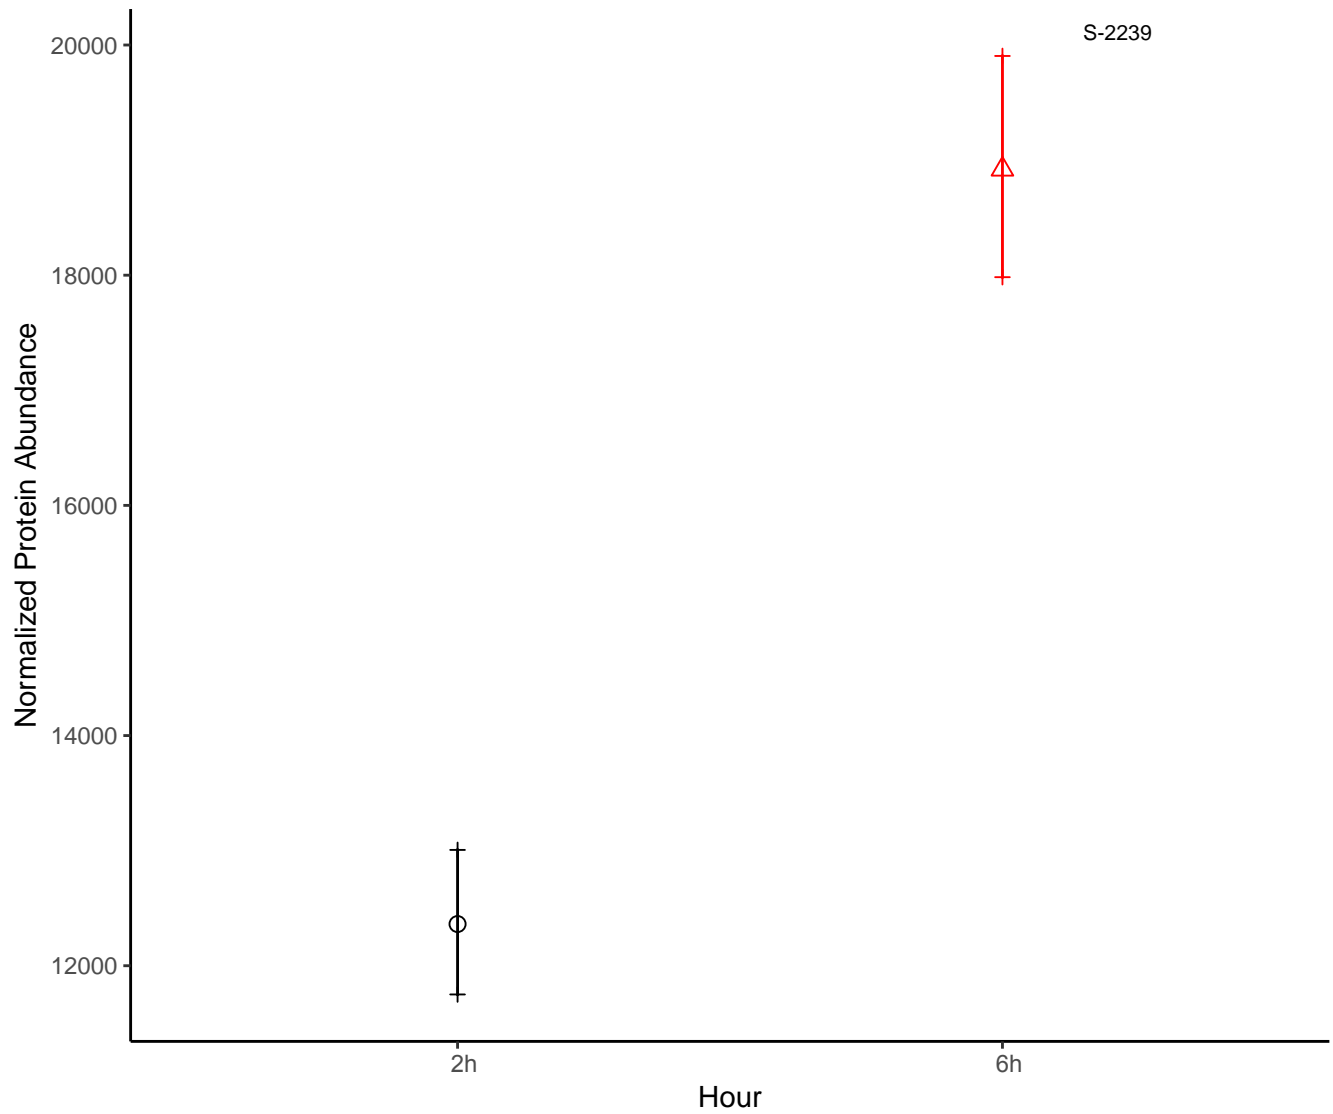

⊕ 2h

△ 6h

# OBG\_STAAM

S-2240

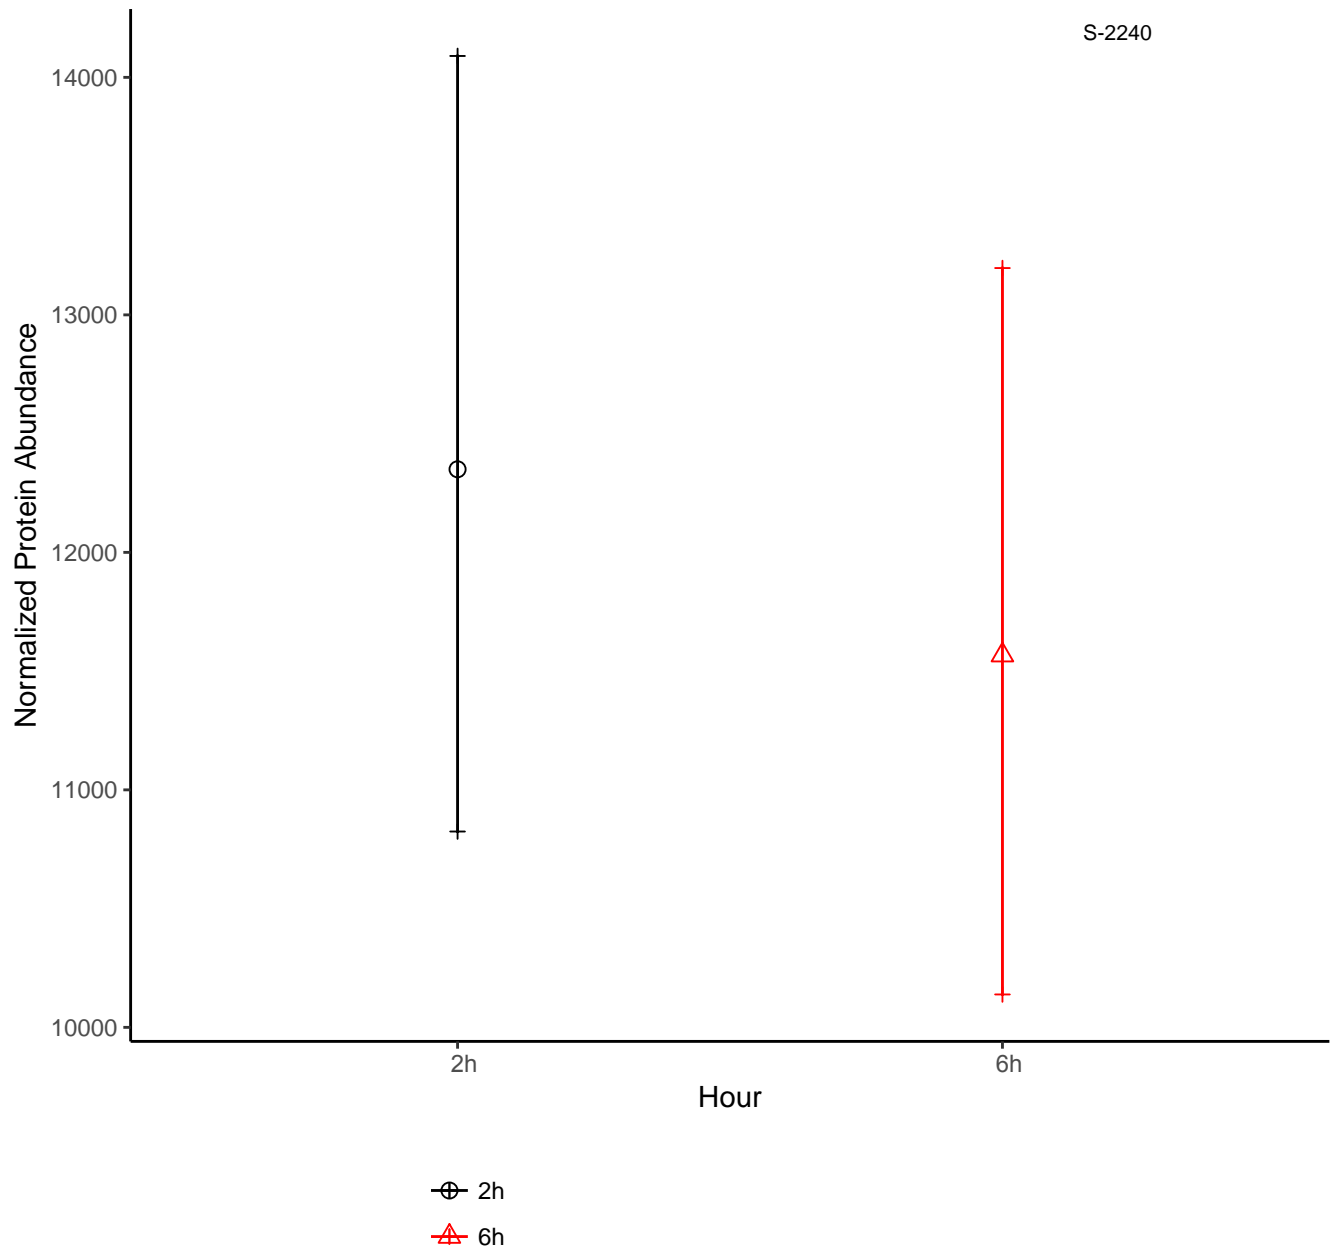



# ODO1\_STAAM

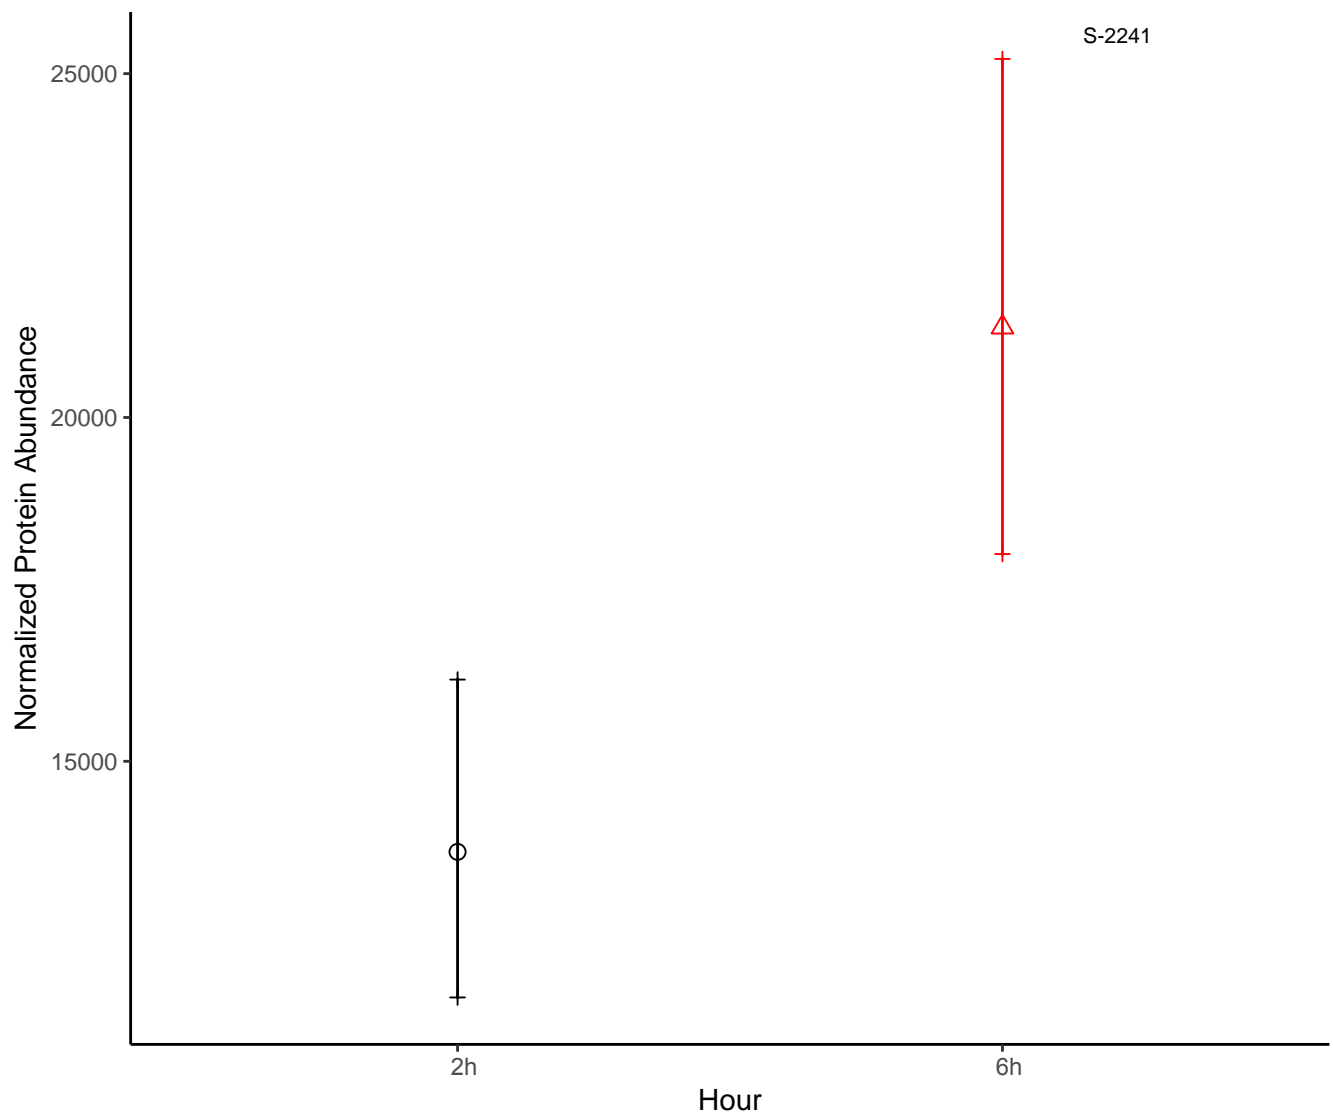

⊕ 2h

△ 6h

# ODO2\_STAAM

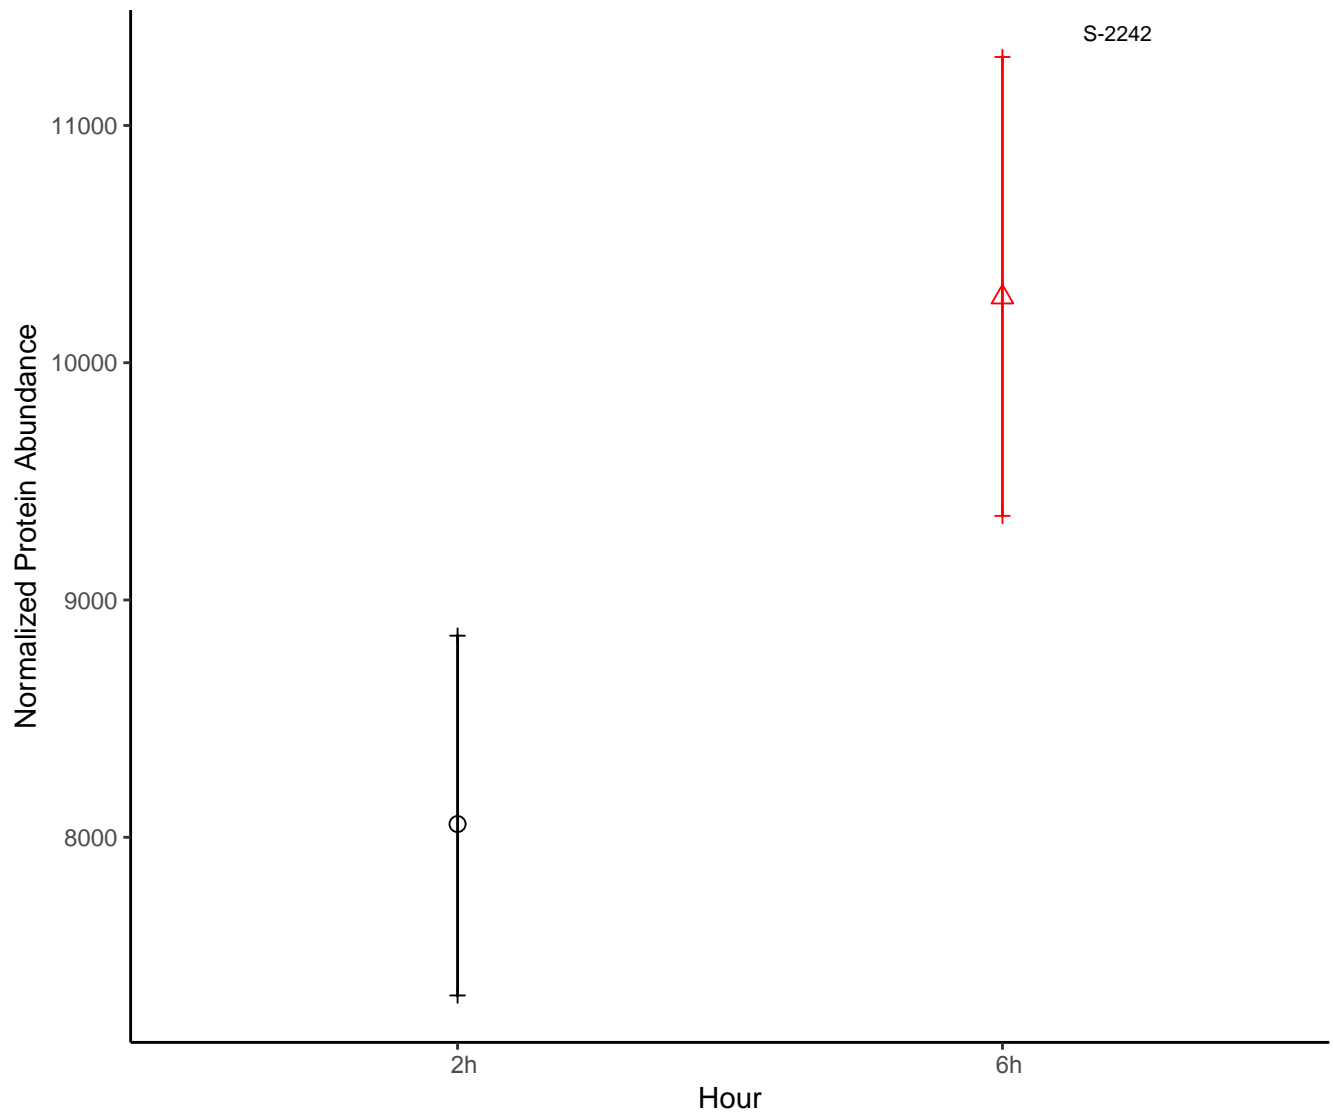

⊕ 2h

△ 6h

# ODP2\_STAAM

S-2243

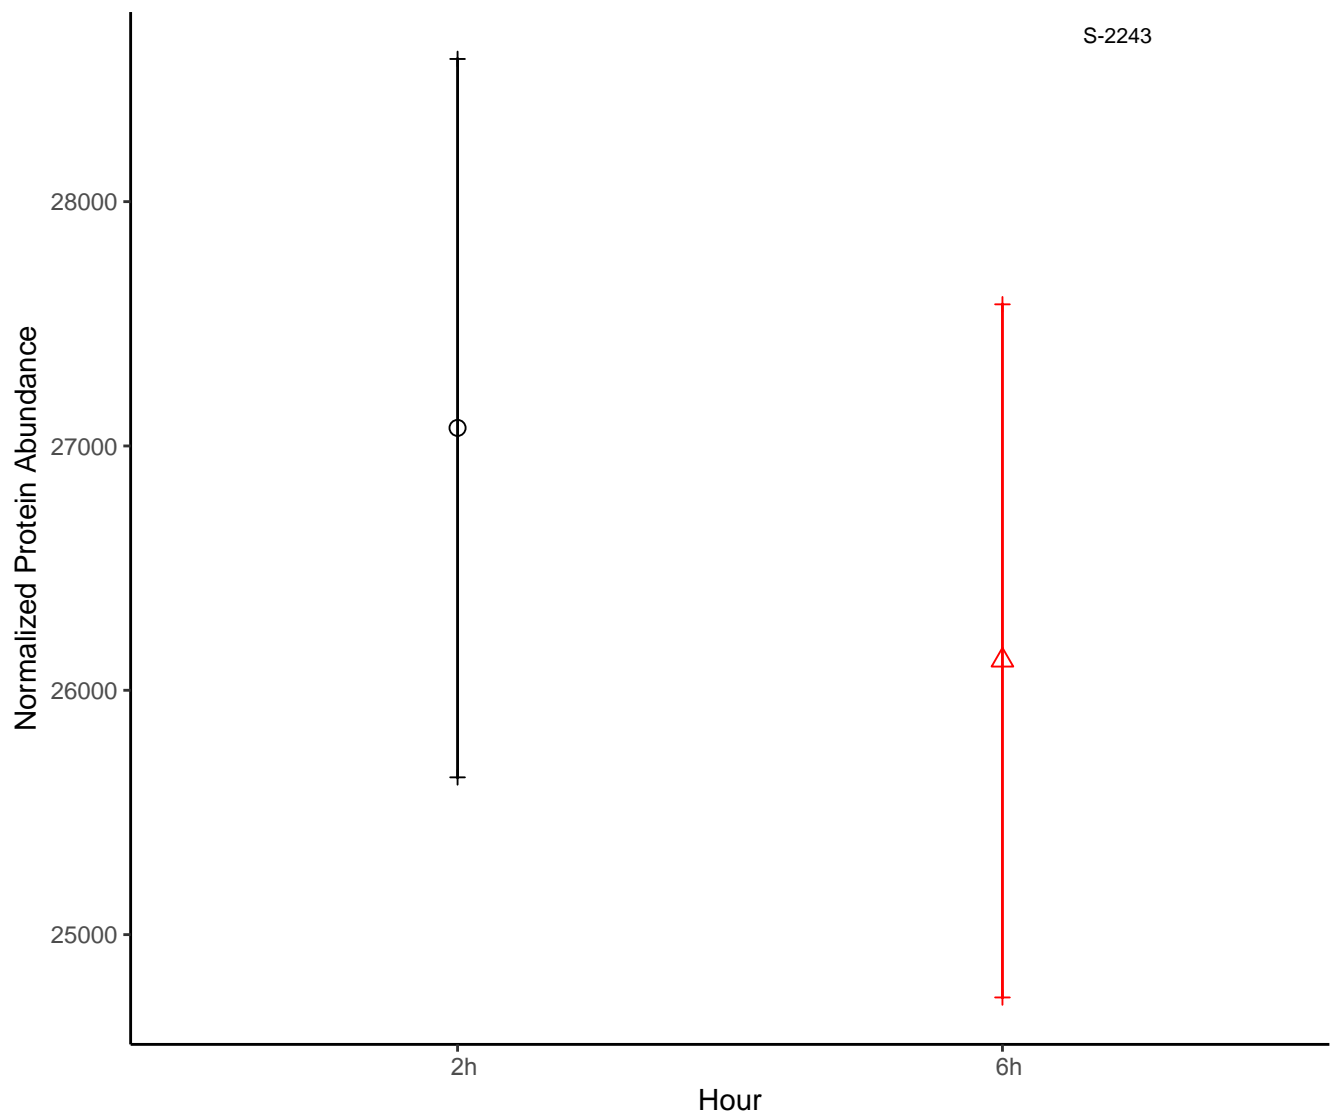

⊕ 2h

△ 6h

# ODPA\_STAAM

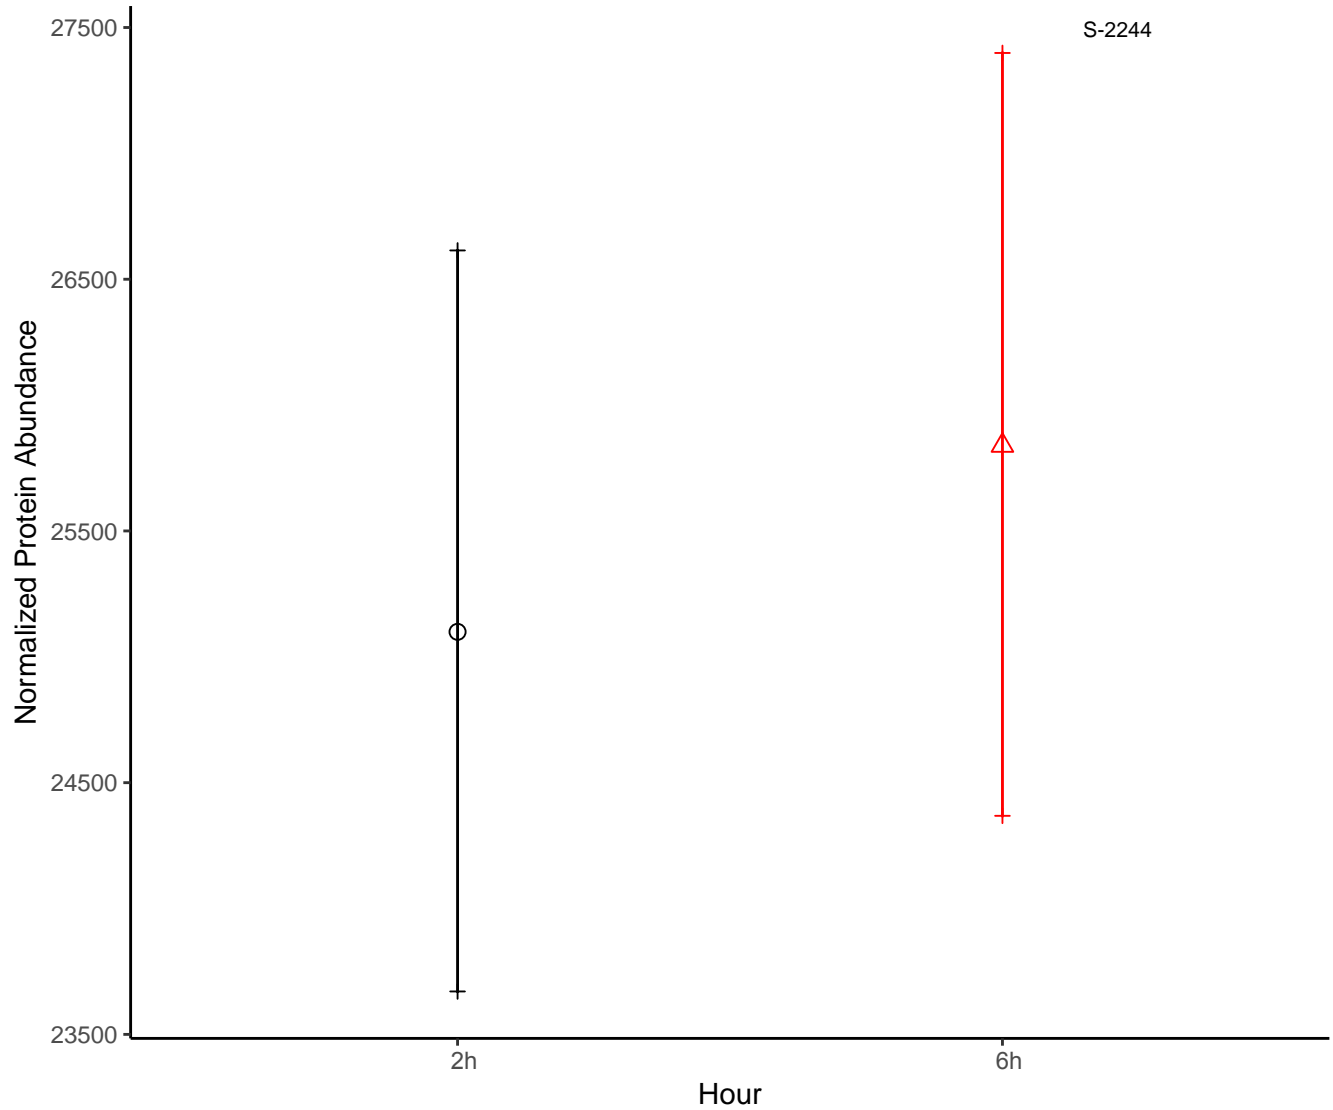

⊕ 2h

△ 6h

# ODPB\_STAAM

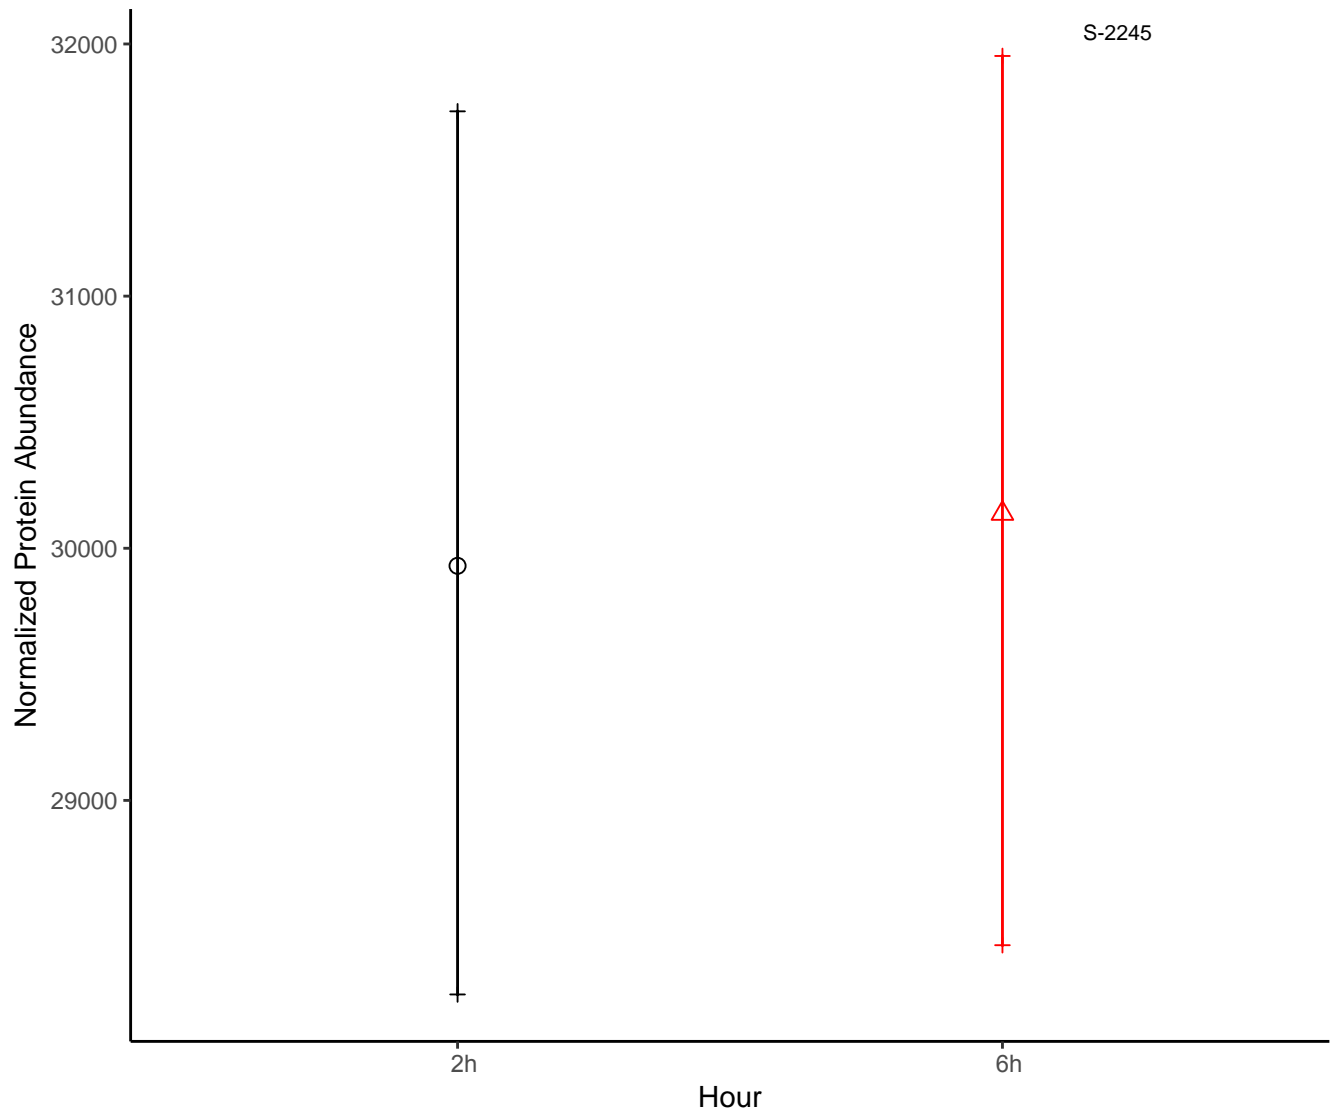

⊕ 2h

△ 6h

# OHRL\_STAAM

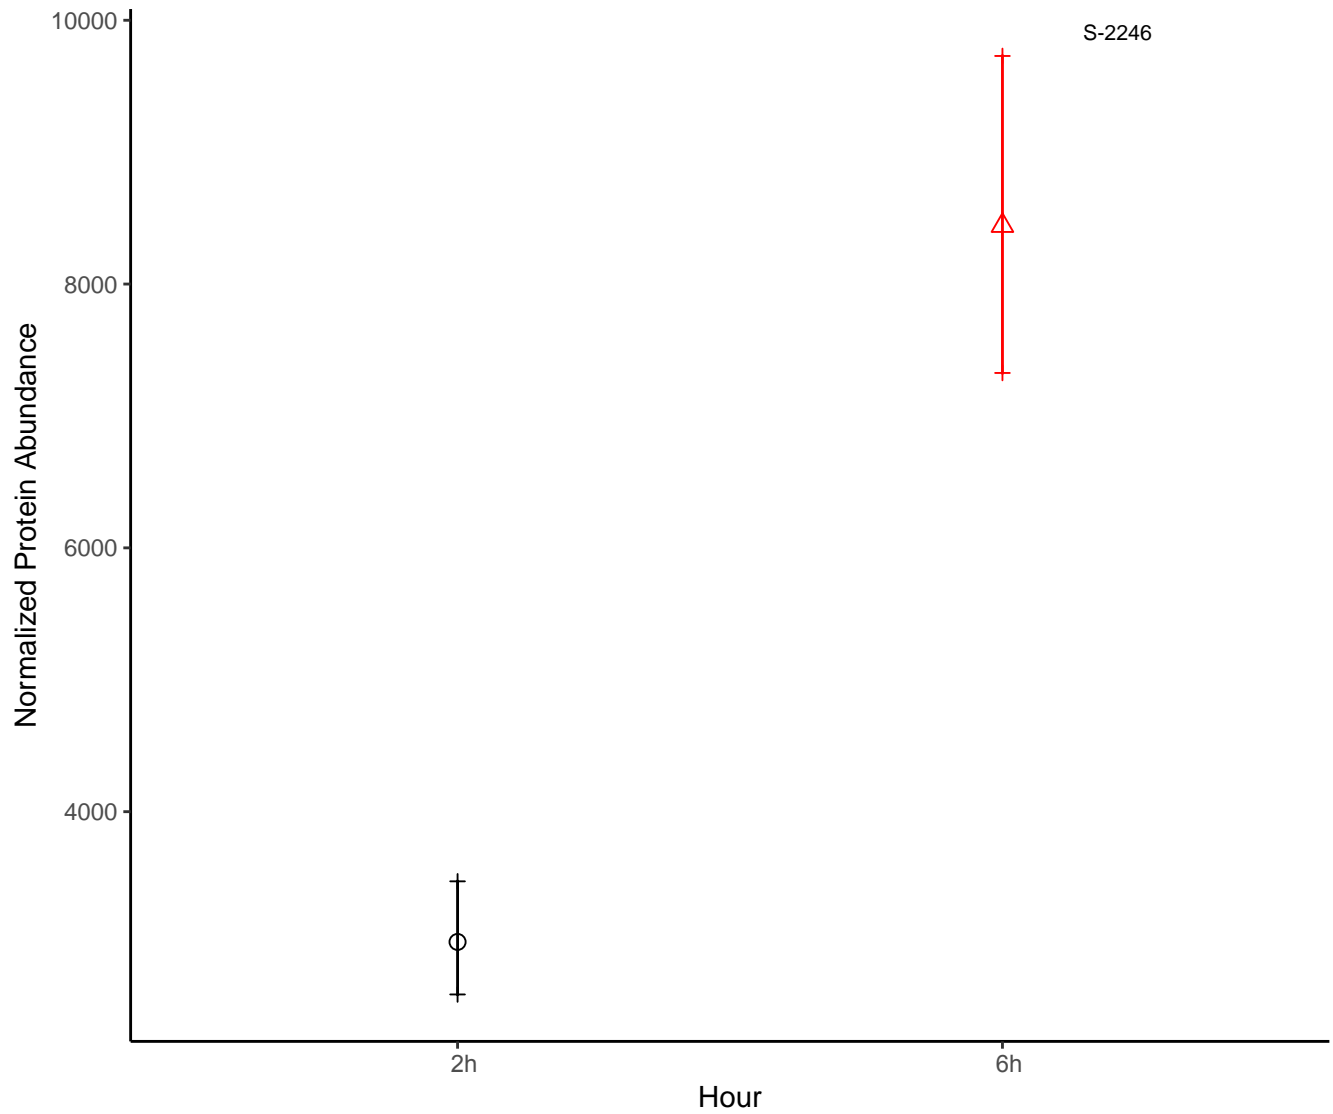

⊕ 2h

△ 6h

# OTC\_STAAM

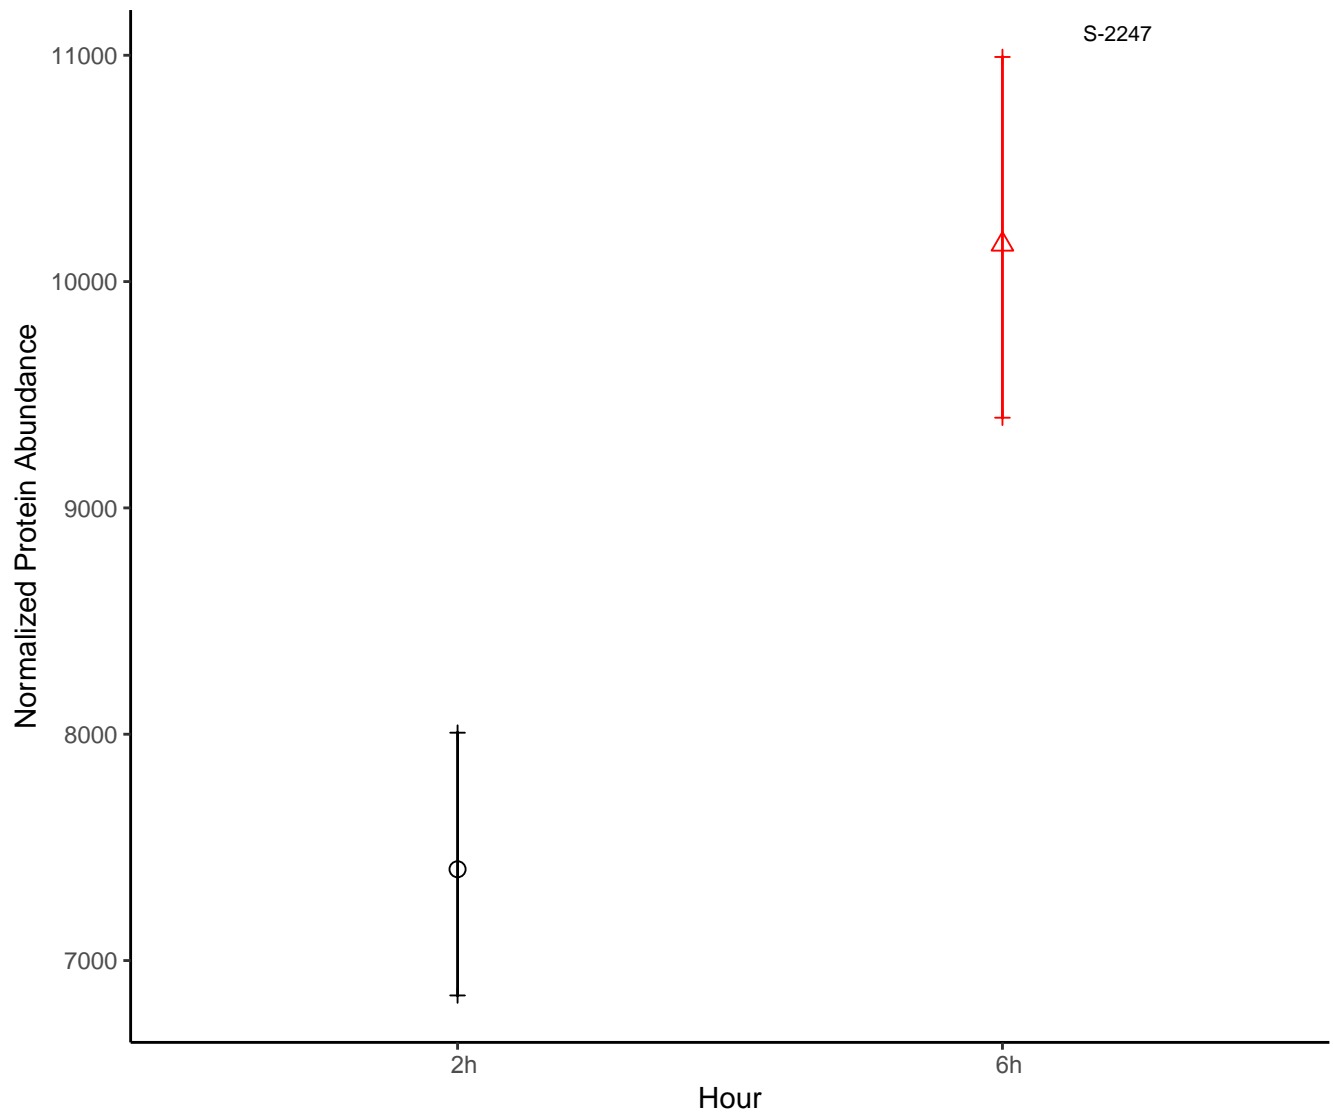

⊕ 2h

△ 6h

# OTCC\_STAAM

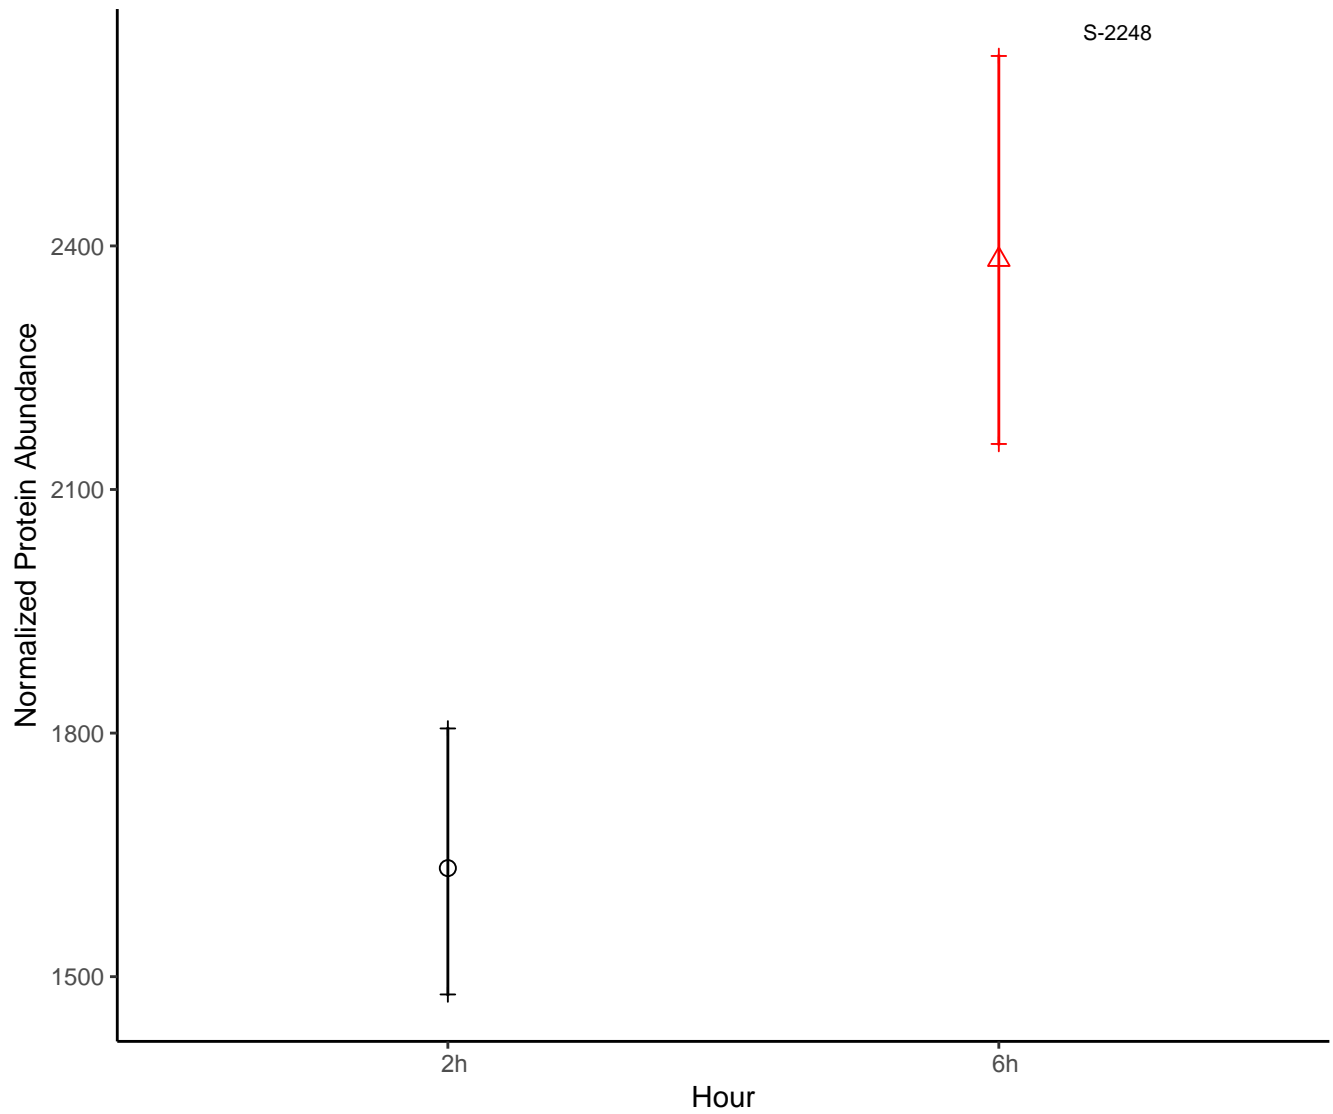

⊕ 2h

△ 6h



# P5CR\_STAAM

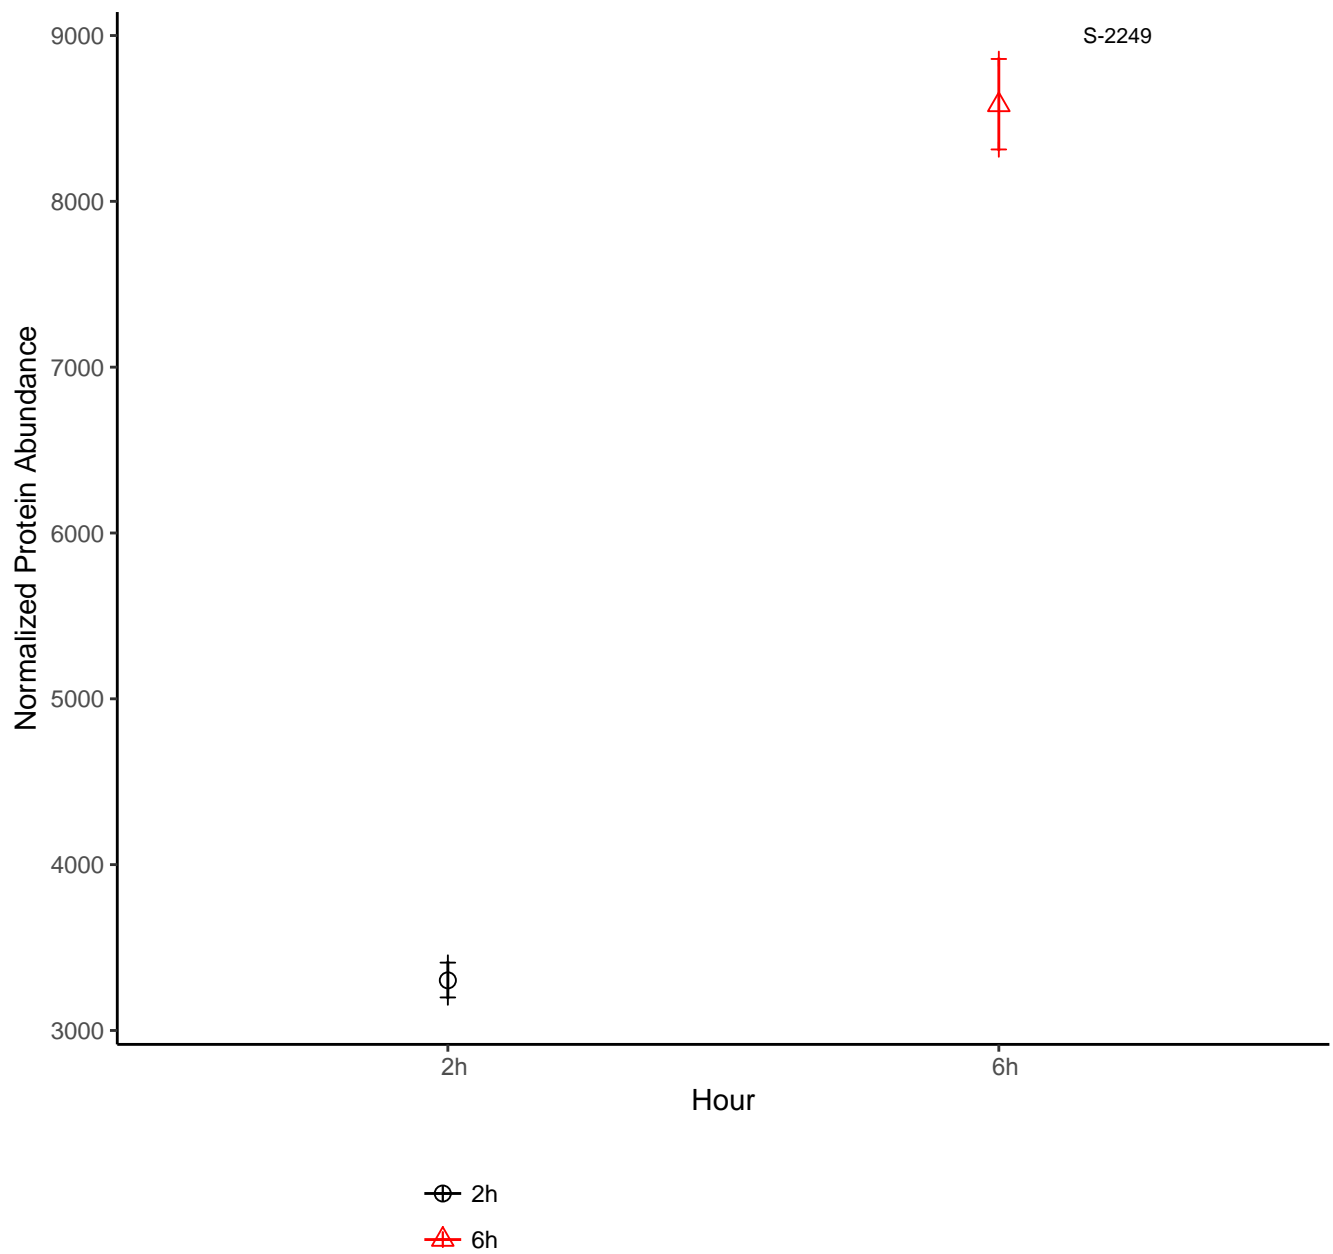

# PANB\_STAAM

S-2250

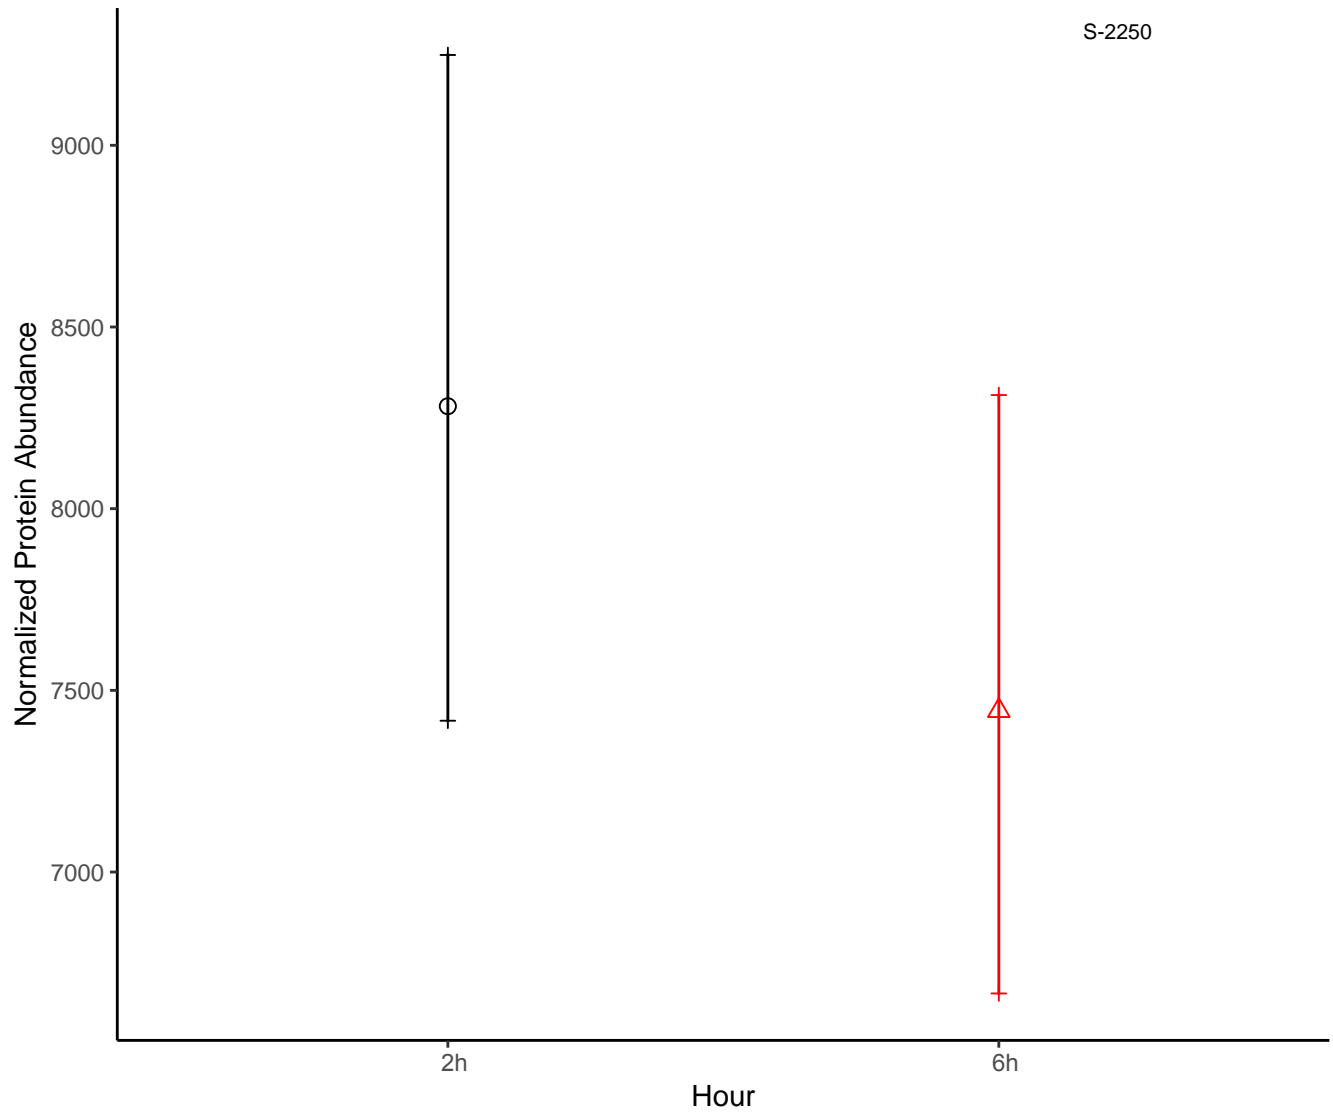

⊕ 2h

△ 6h

# PAND\_STAAM

S-2251

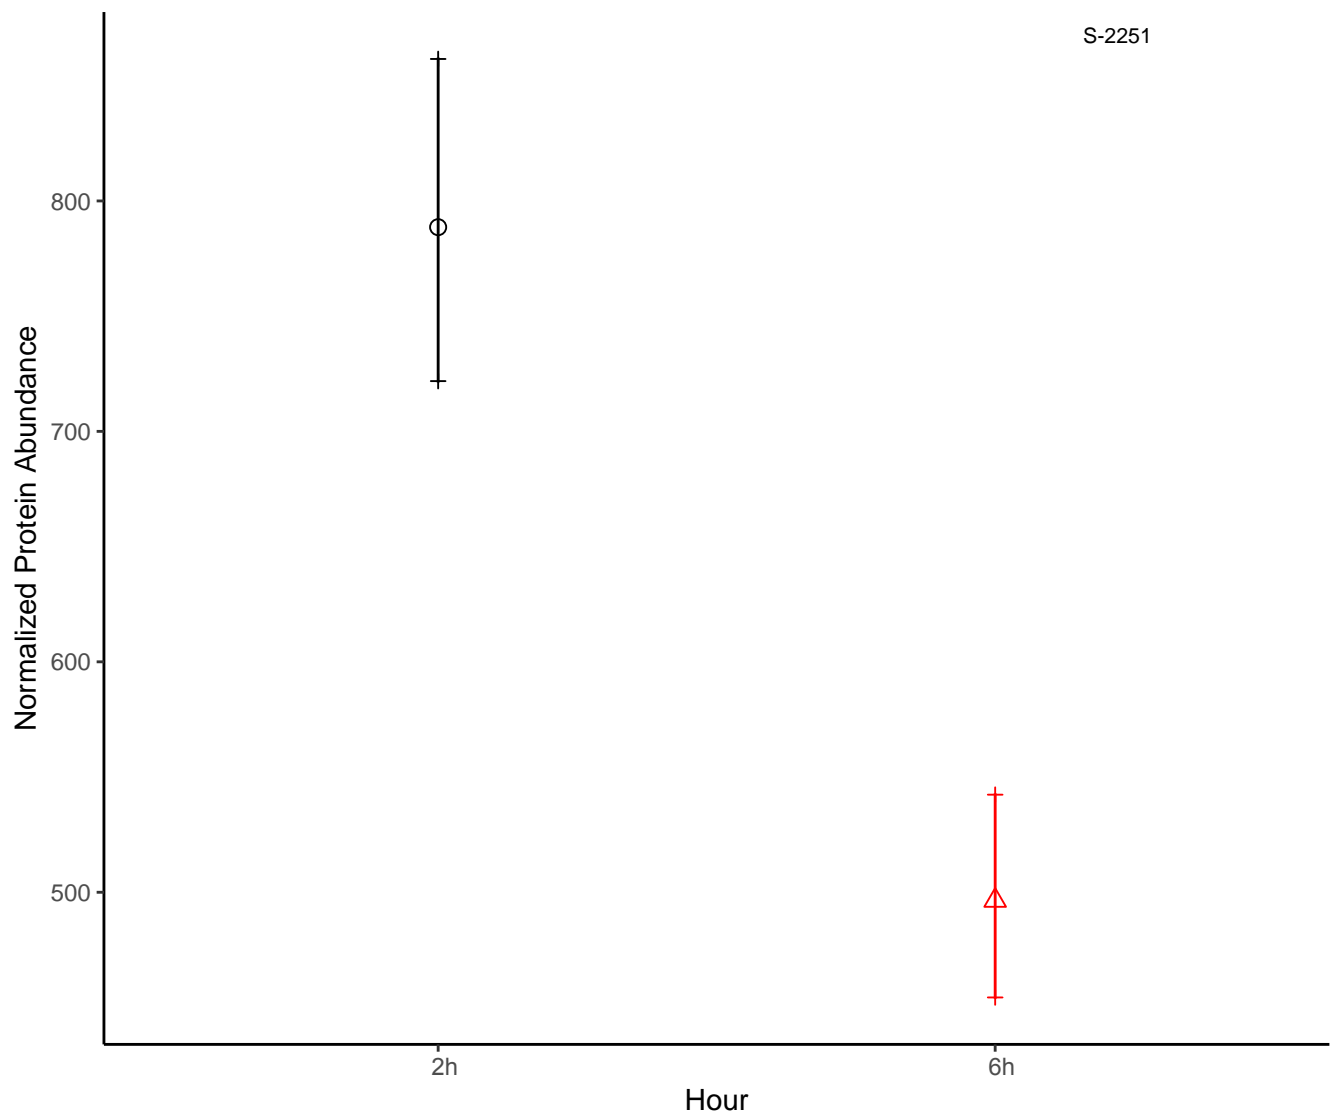

⊕ 2h

△ 6h

# PARC\_STAAM

S-2252

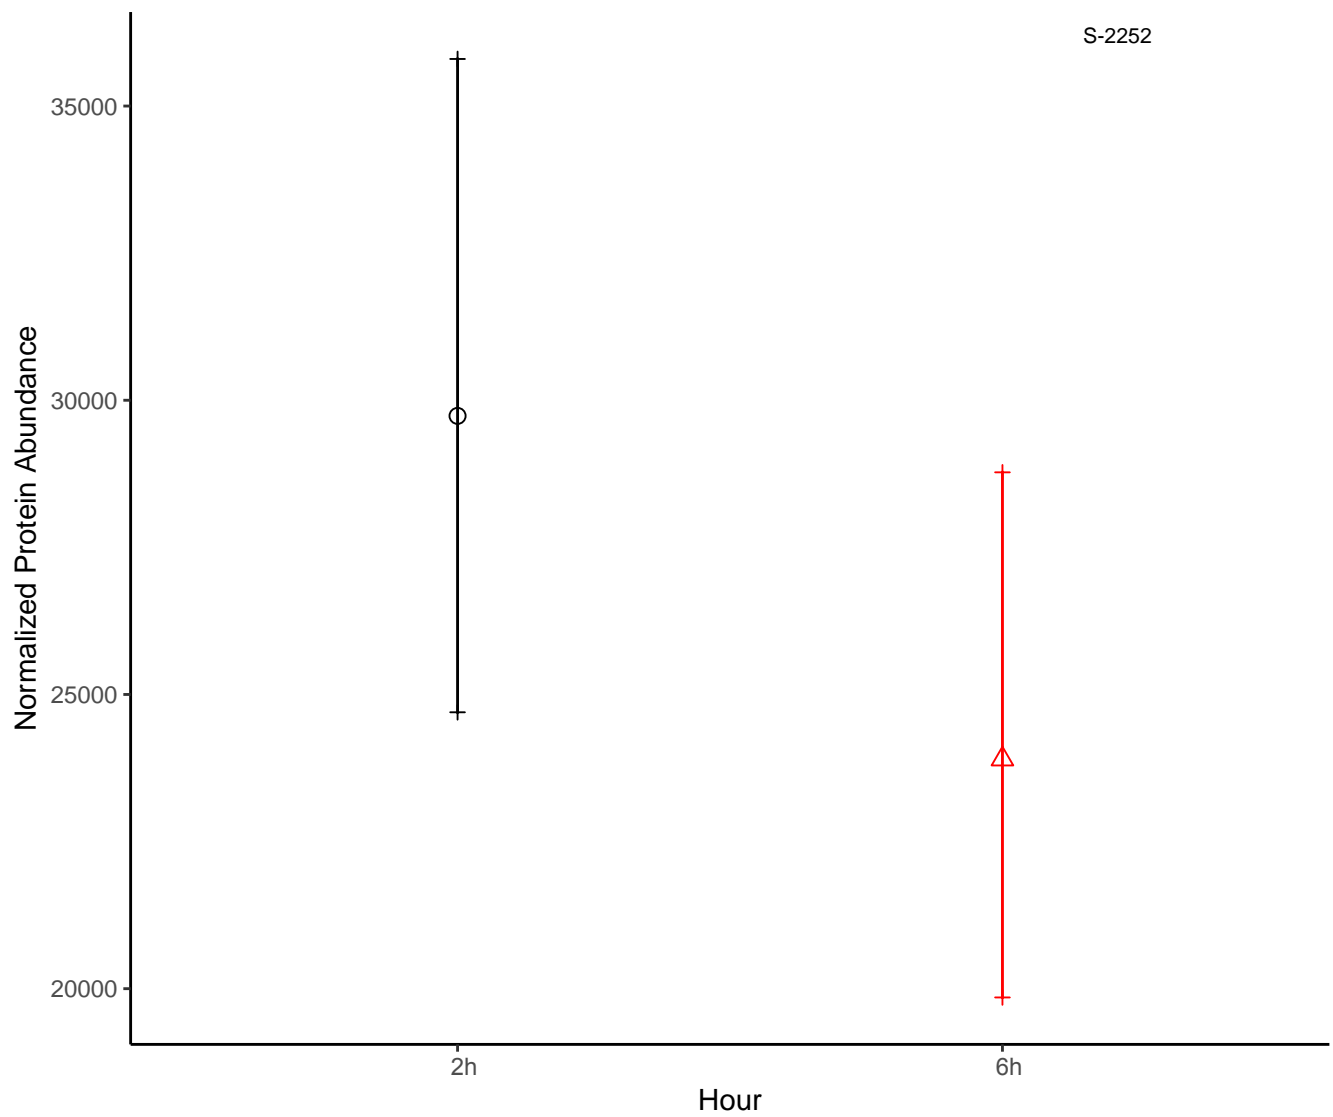

⊕ 2h

△ 6h

# PCKA\_STAAM

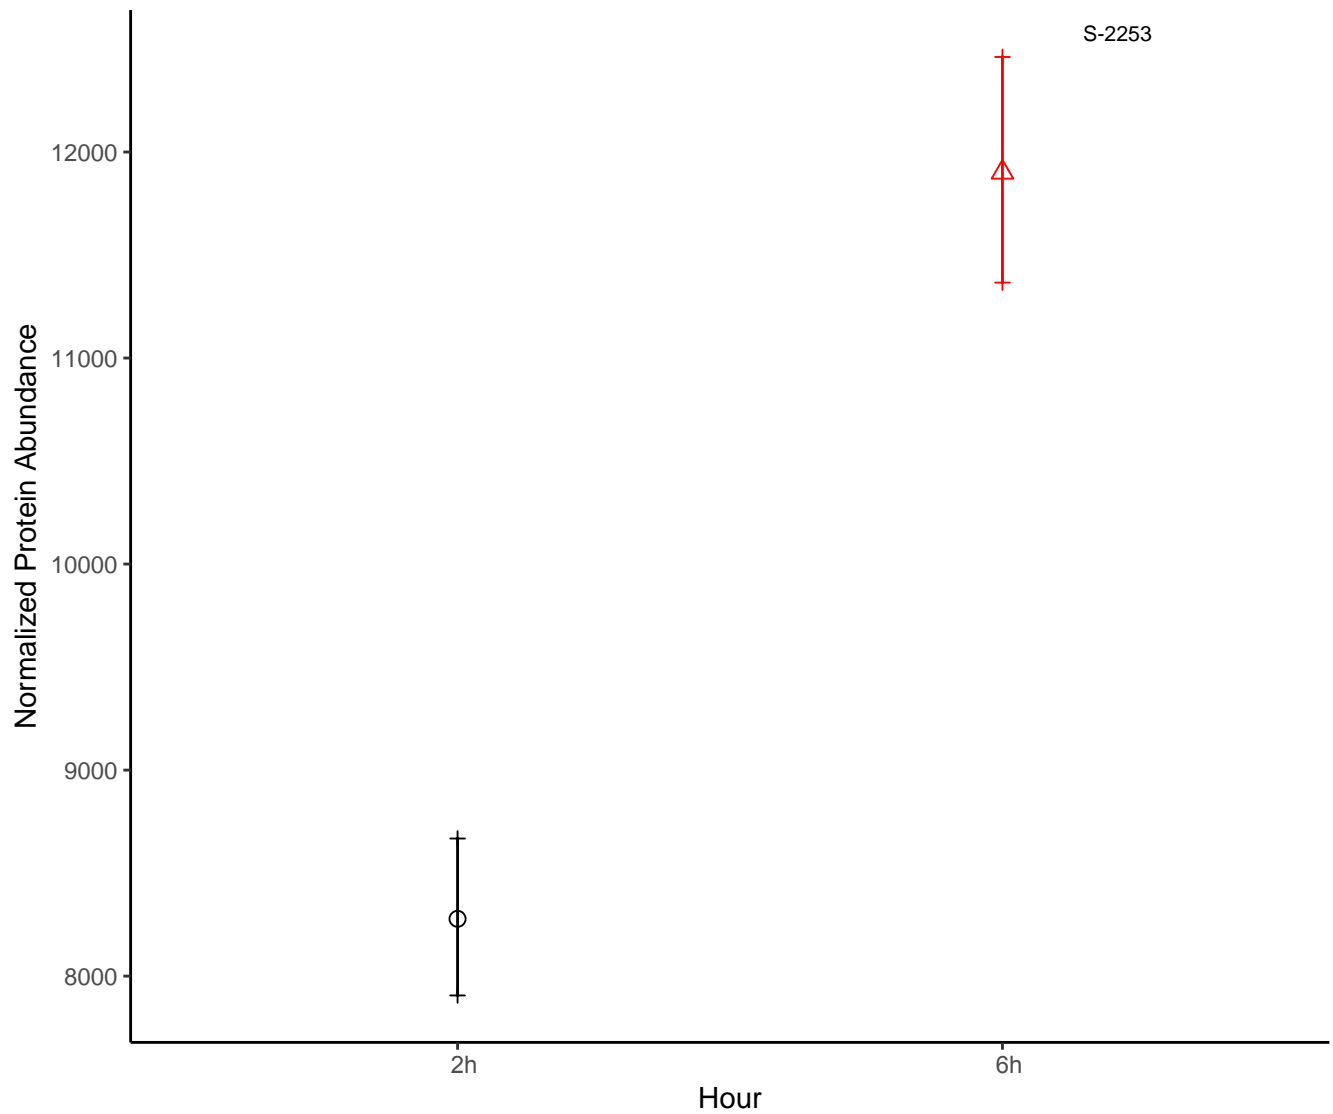

⊕ 2h

△ 6h

# PCRA\_STAAM

S-2254

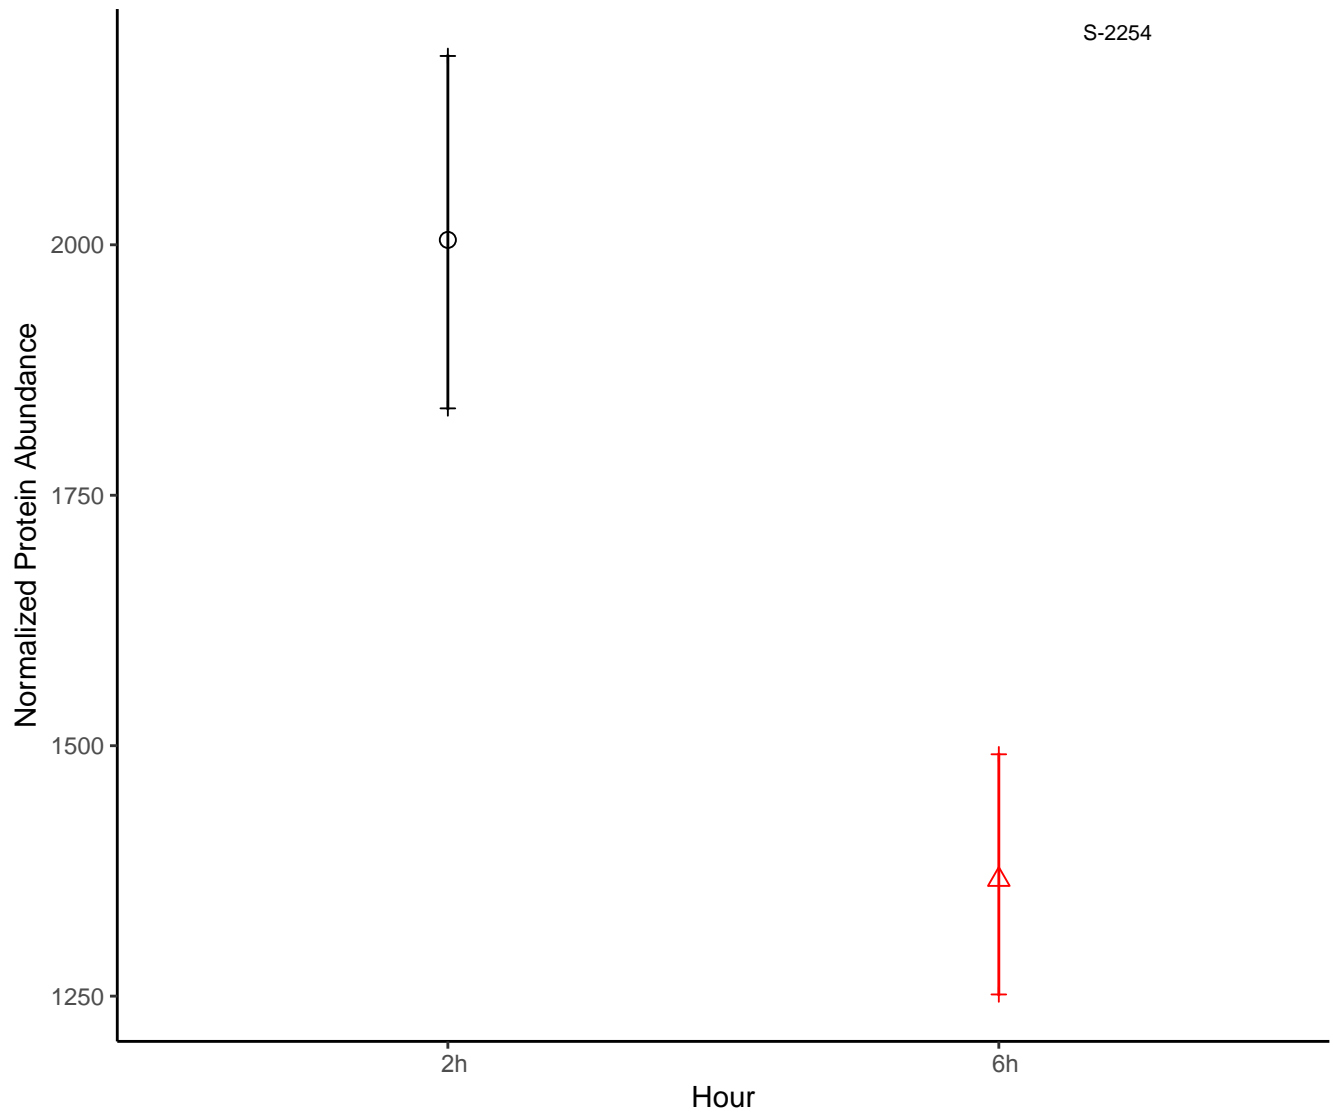

⊕ 2h

△ 6h

# PDP\_STAAM

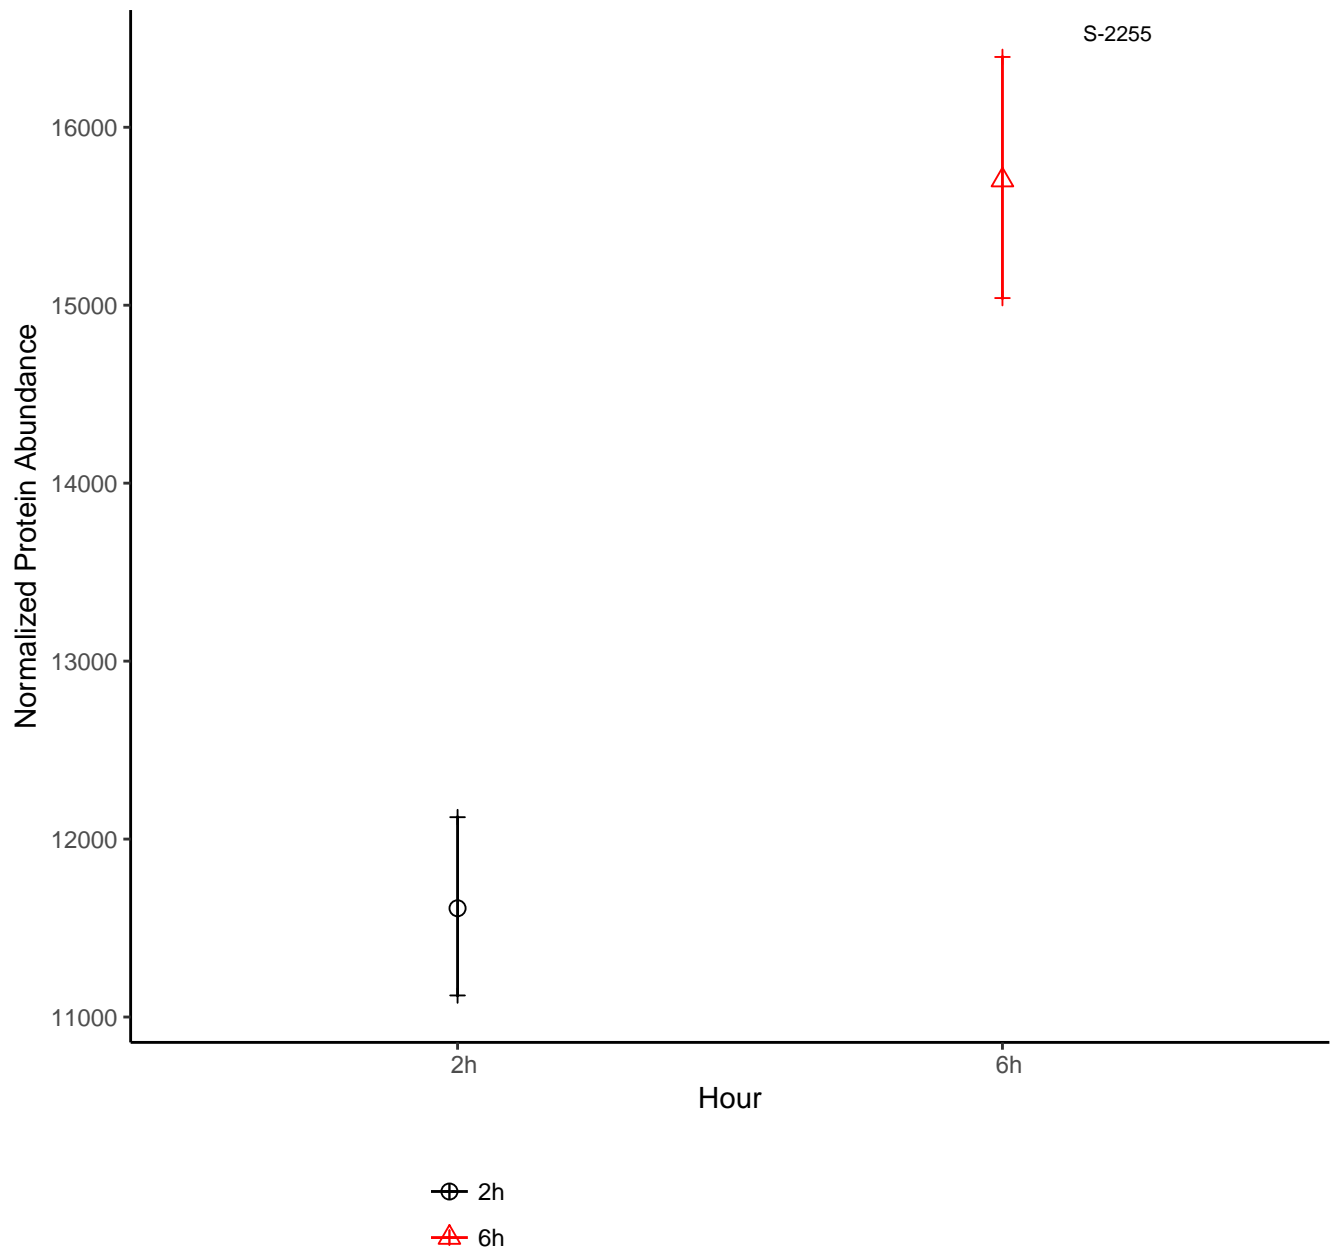

# PDRP\_STAAM

S-2256

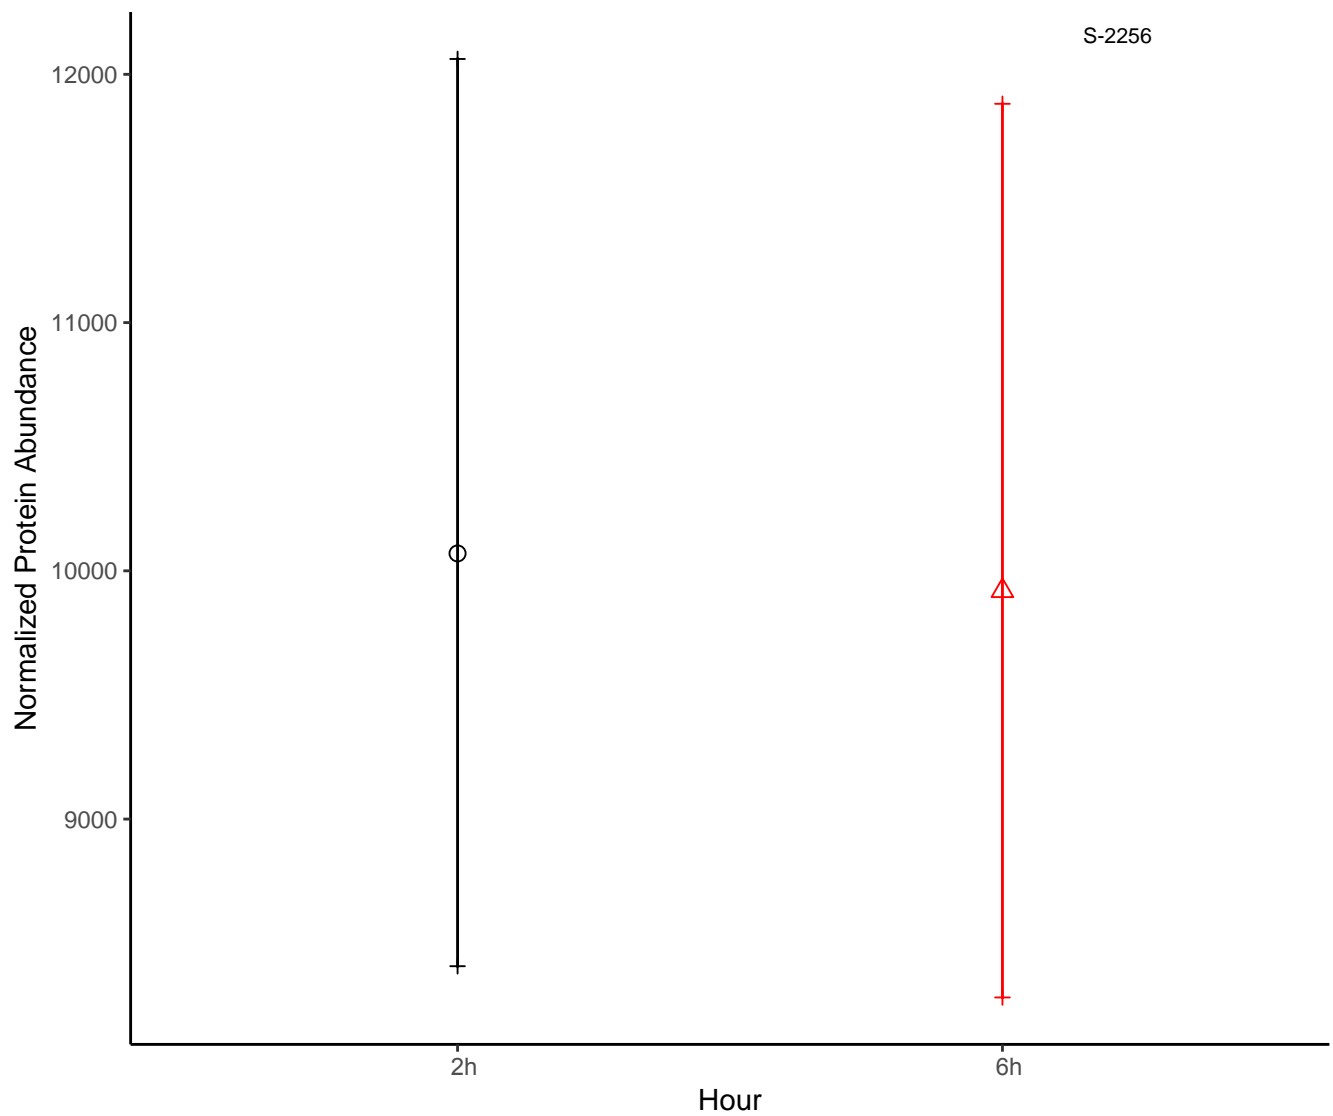

⊕ 2h

△ 6h



# PDXS\_STAAM

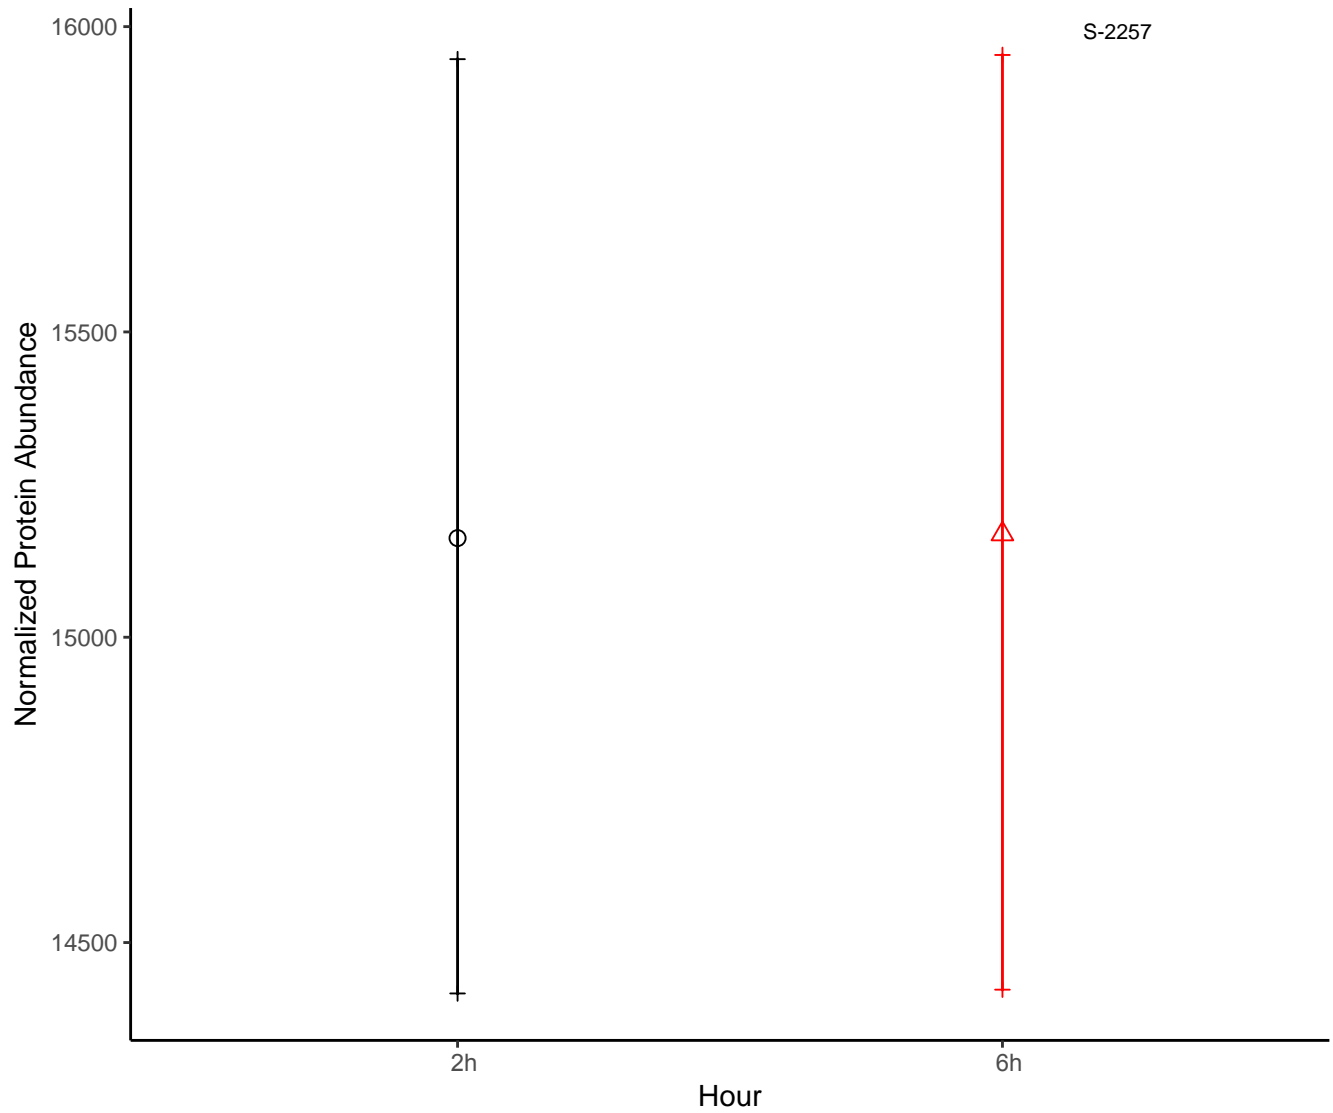

⊕ 2h

△ 6h

# PDXT\_STAAM

S-2258

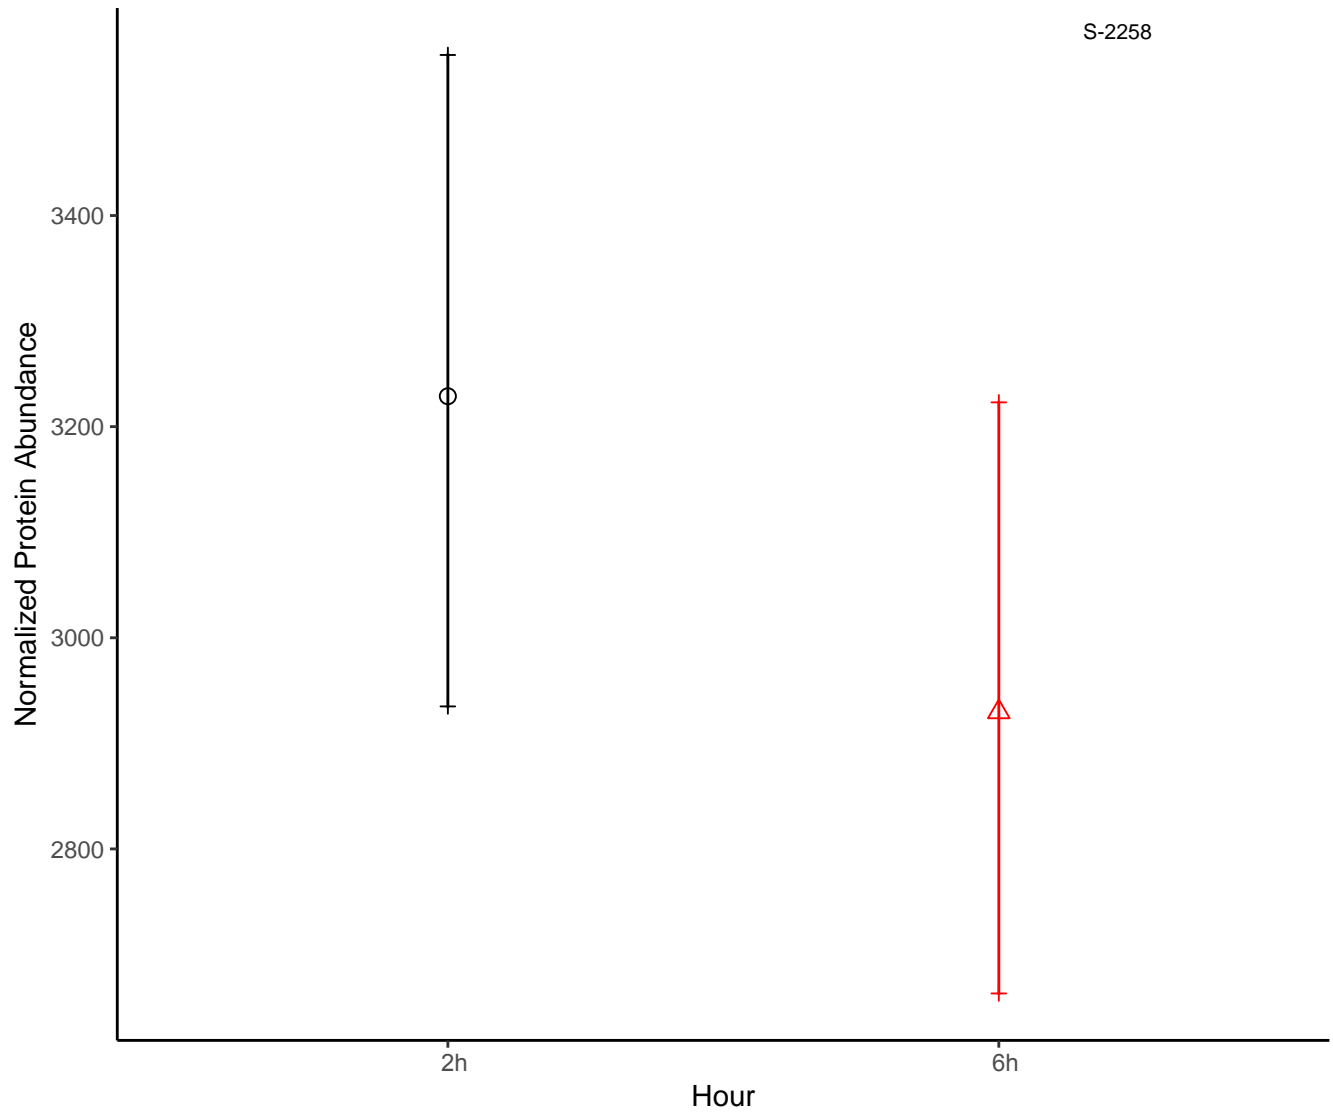

⊕ 2h

△ 6h

# PEPVL\_STAAM

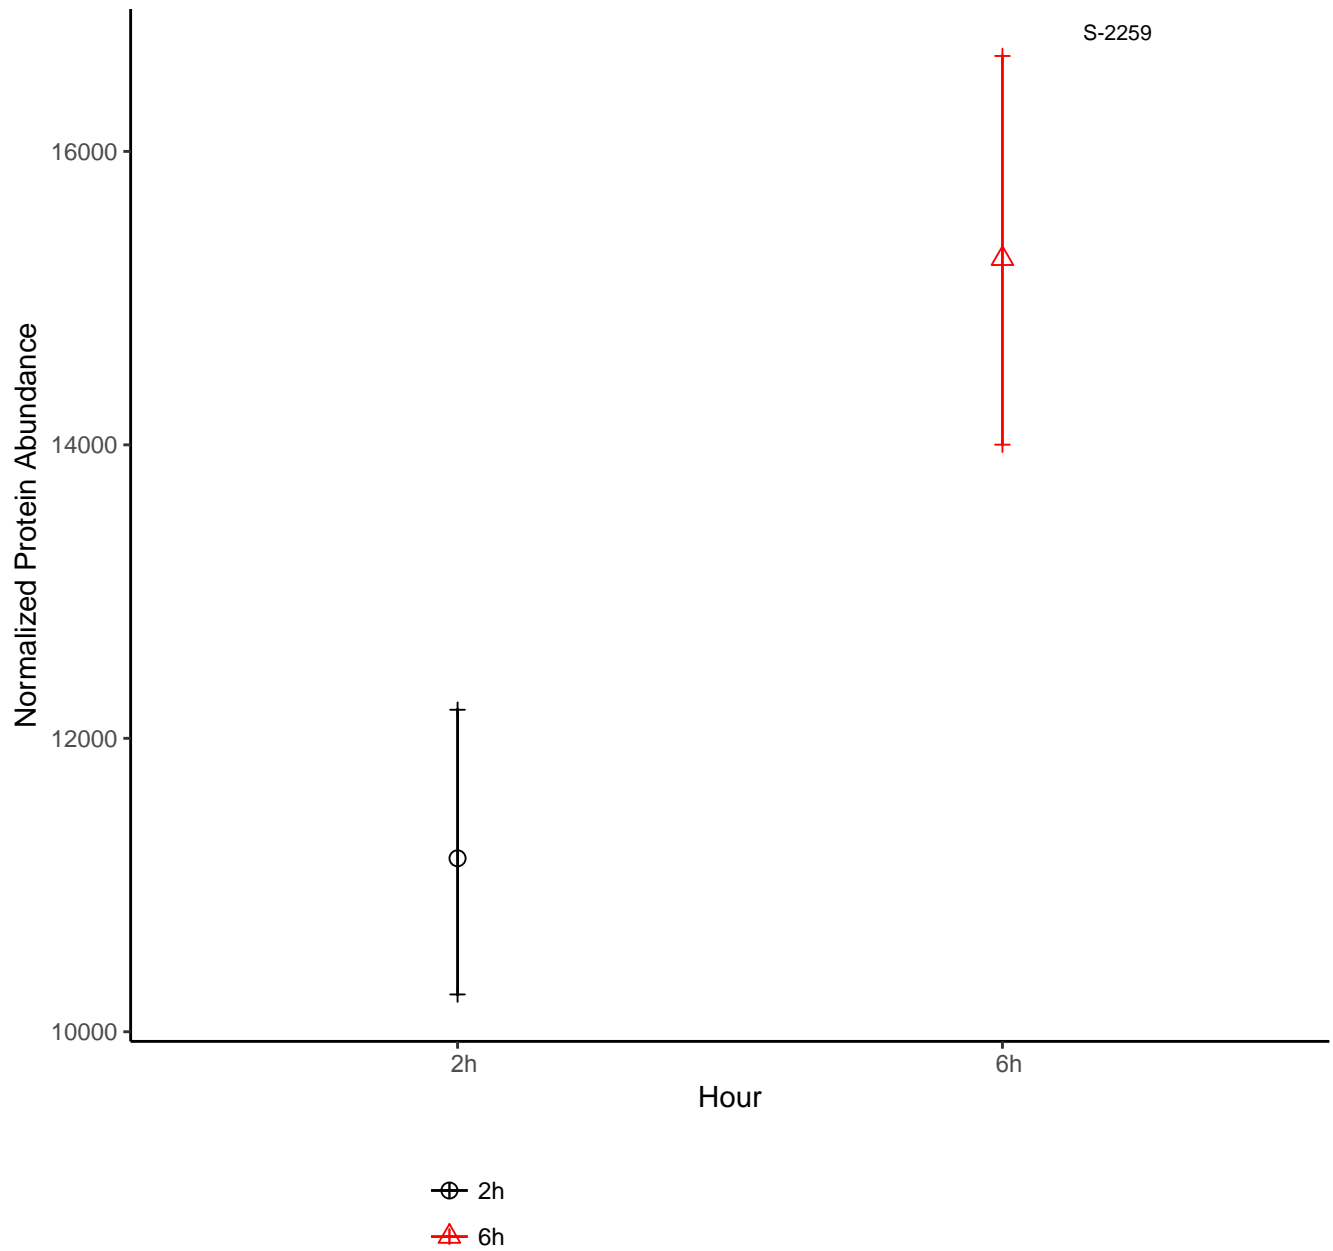

# PERR\_STAAM

S-2260

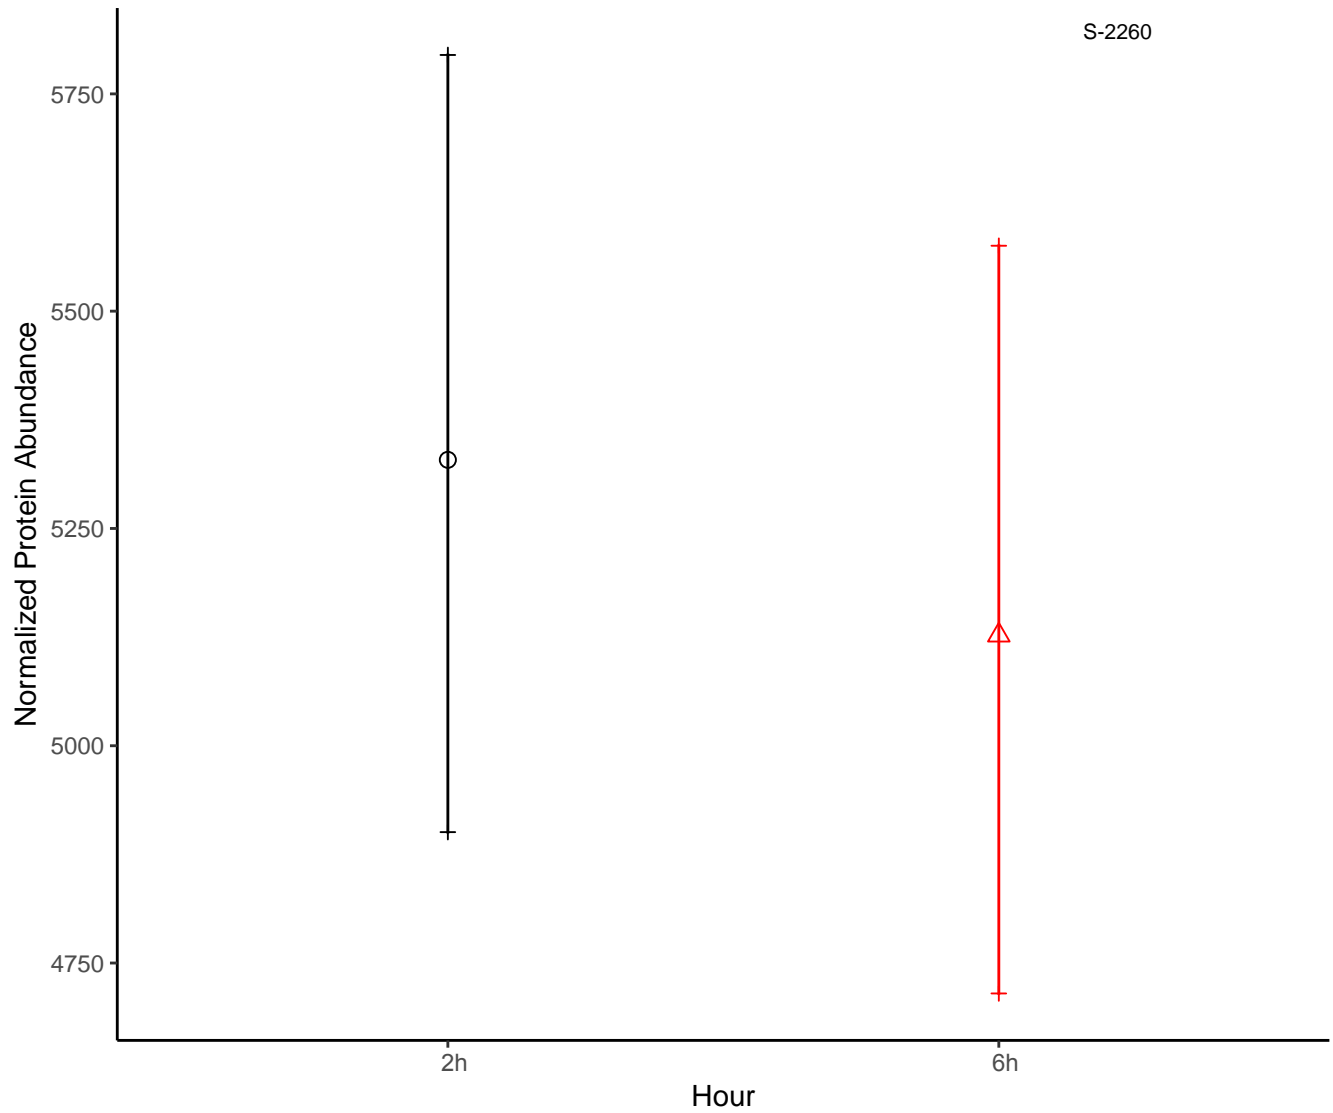

⊕ 2h

△ 6h

# PFKA\_STAAM

S-2261

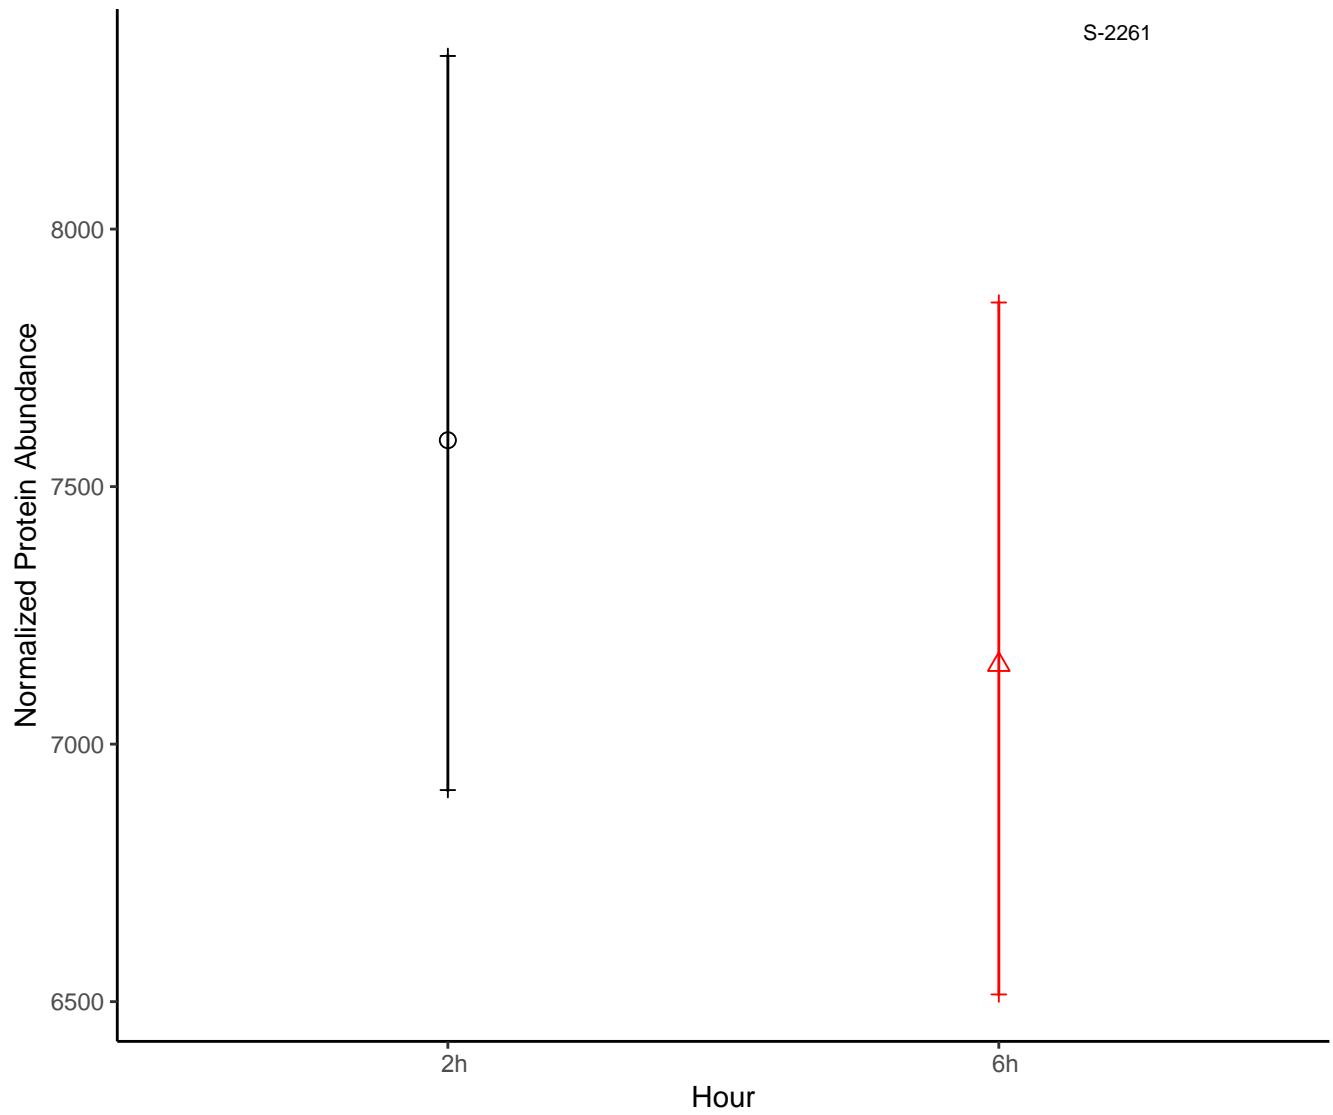

⊕ 2h

△ 6h

# PFLA\_STAAM

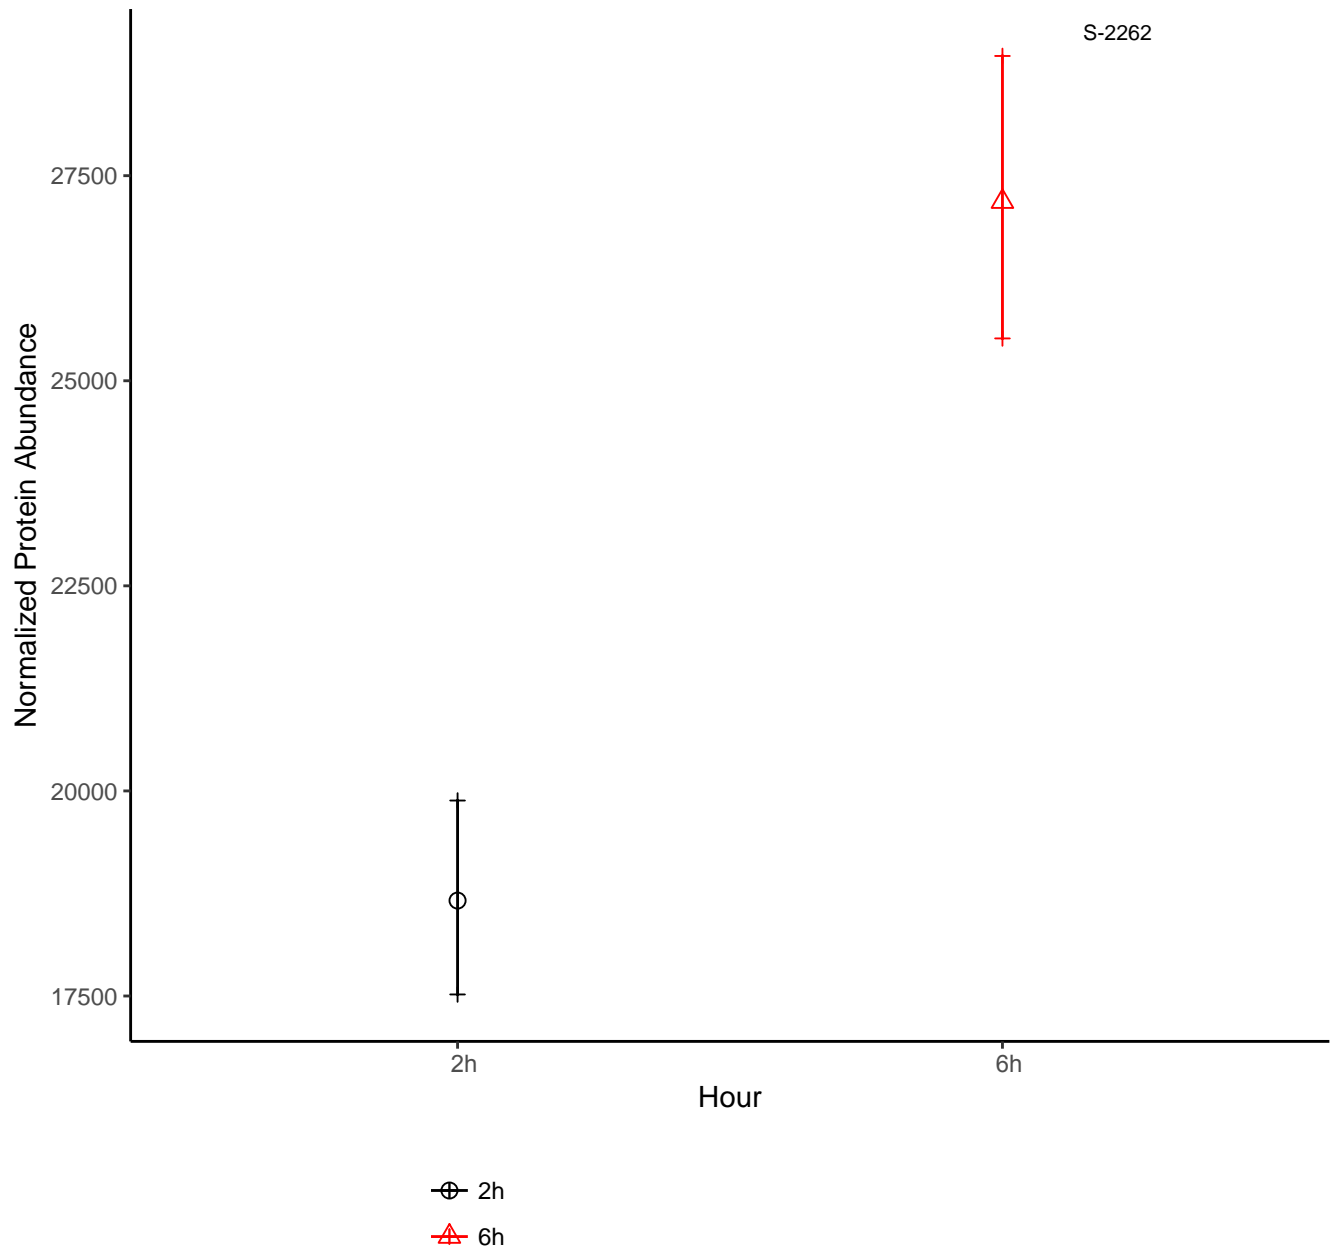

# PFLB\_STAAM

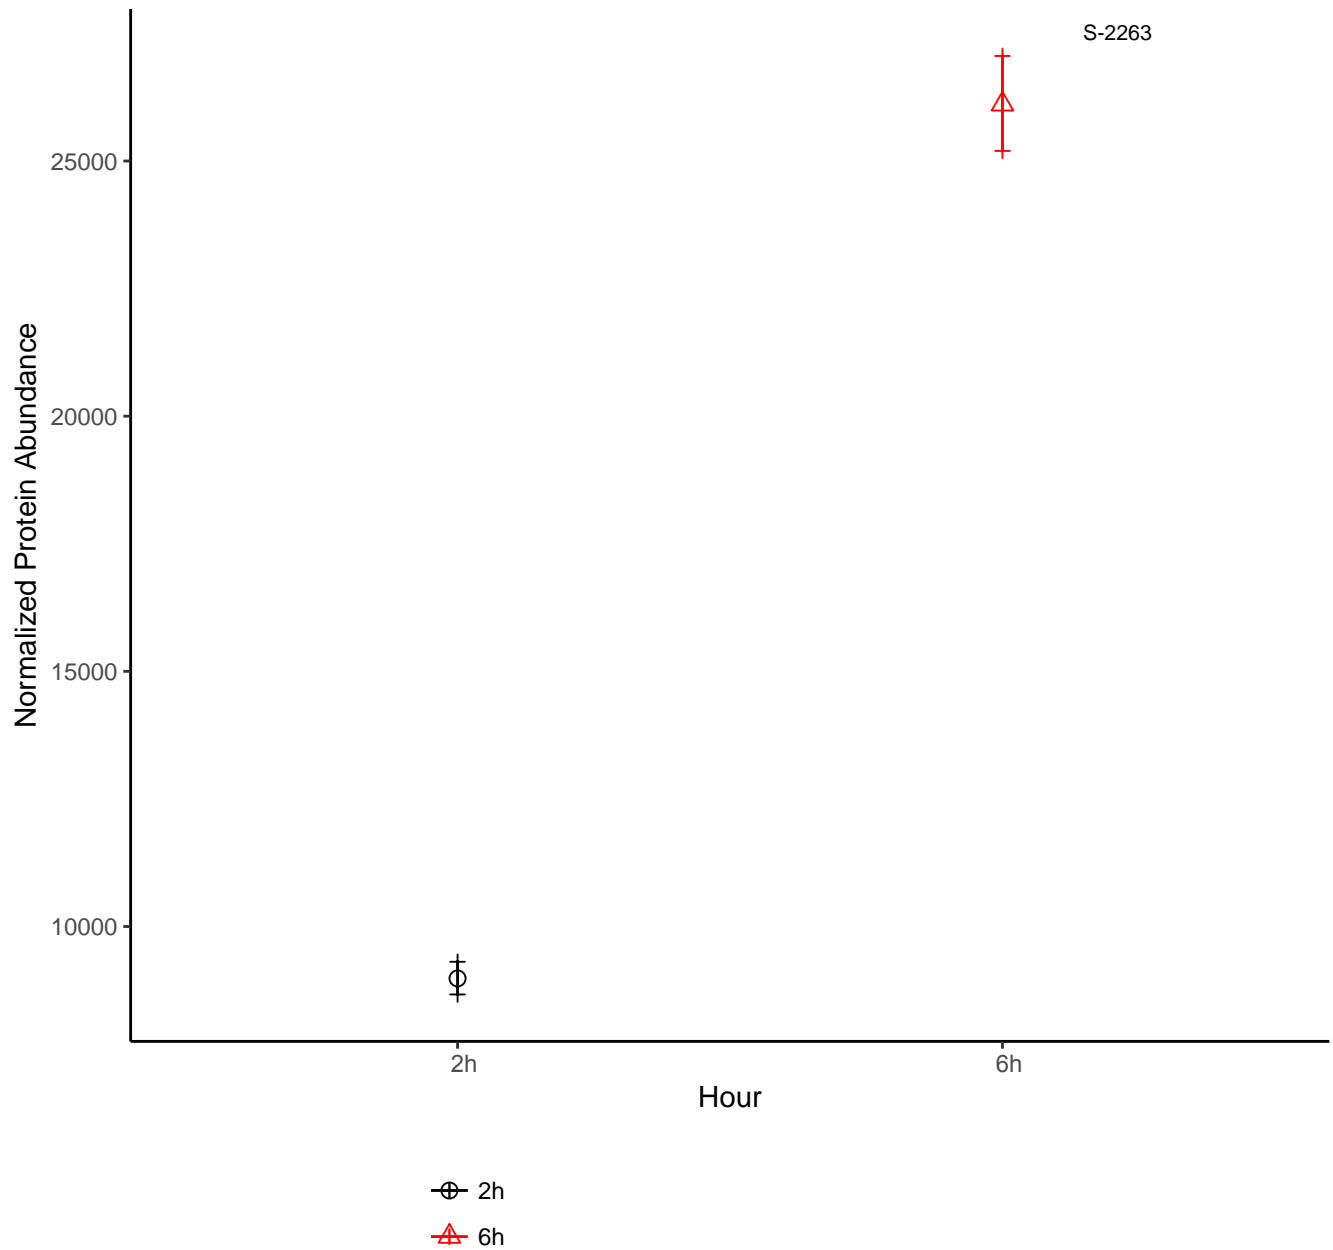

# PGCA\_STAAM

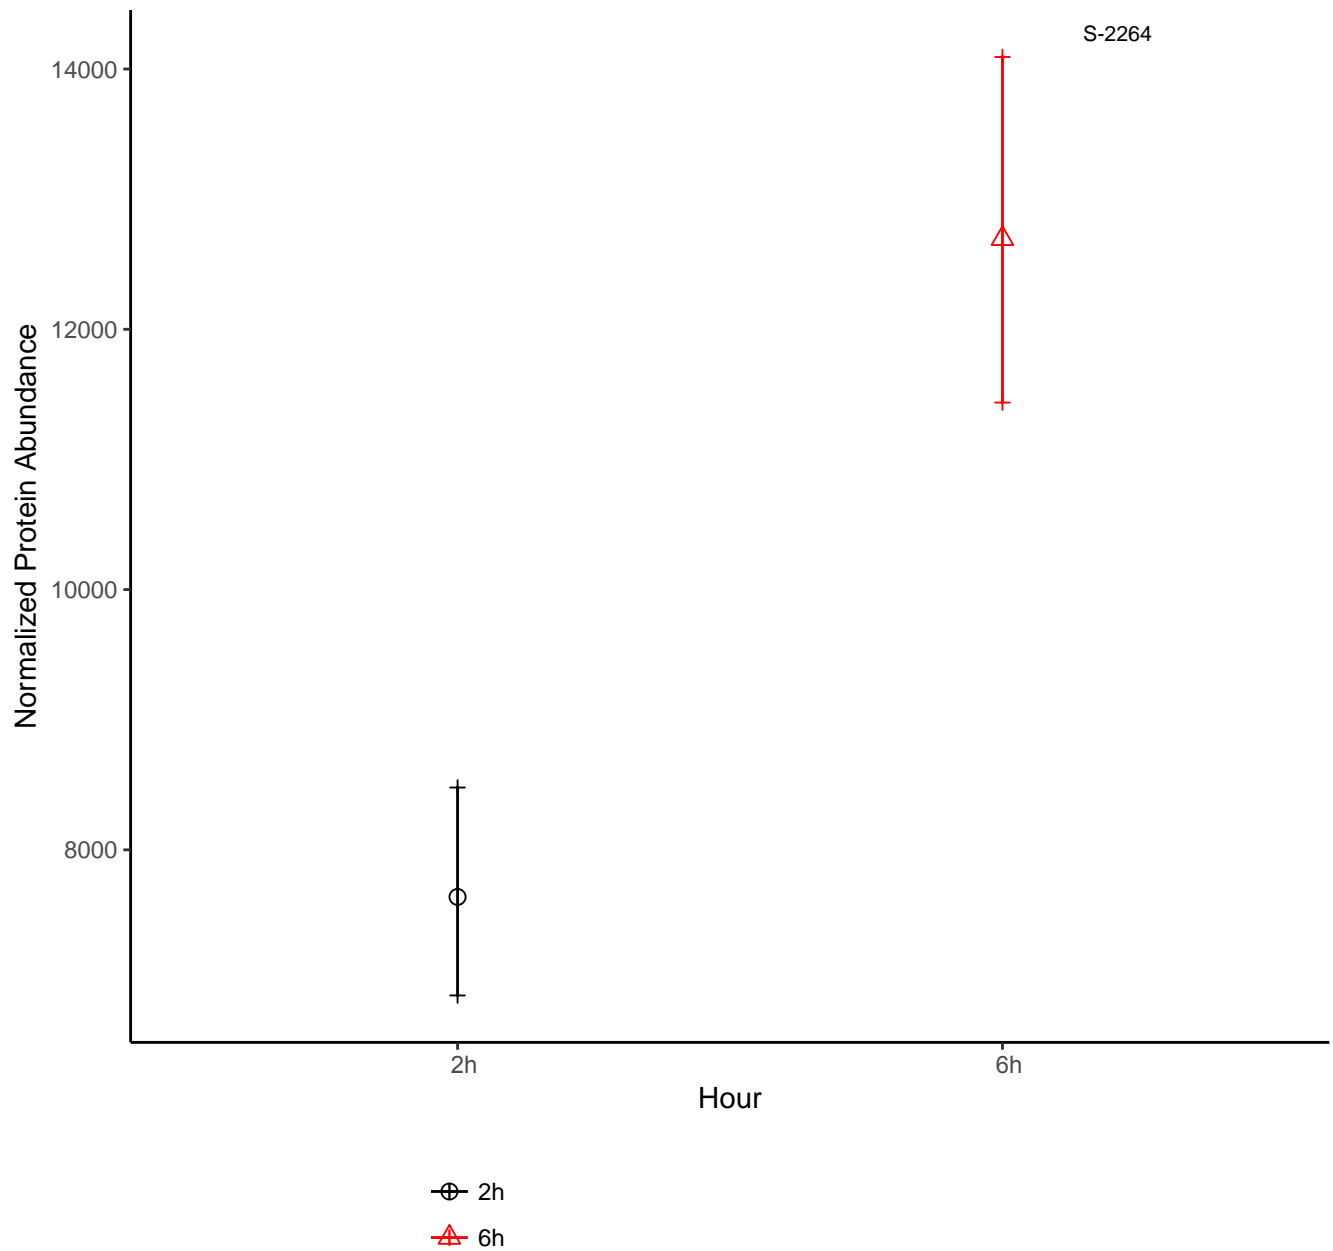



# PGK\_STAAM

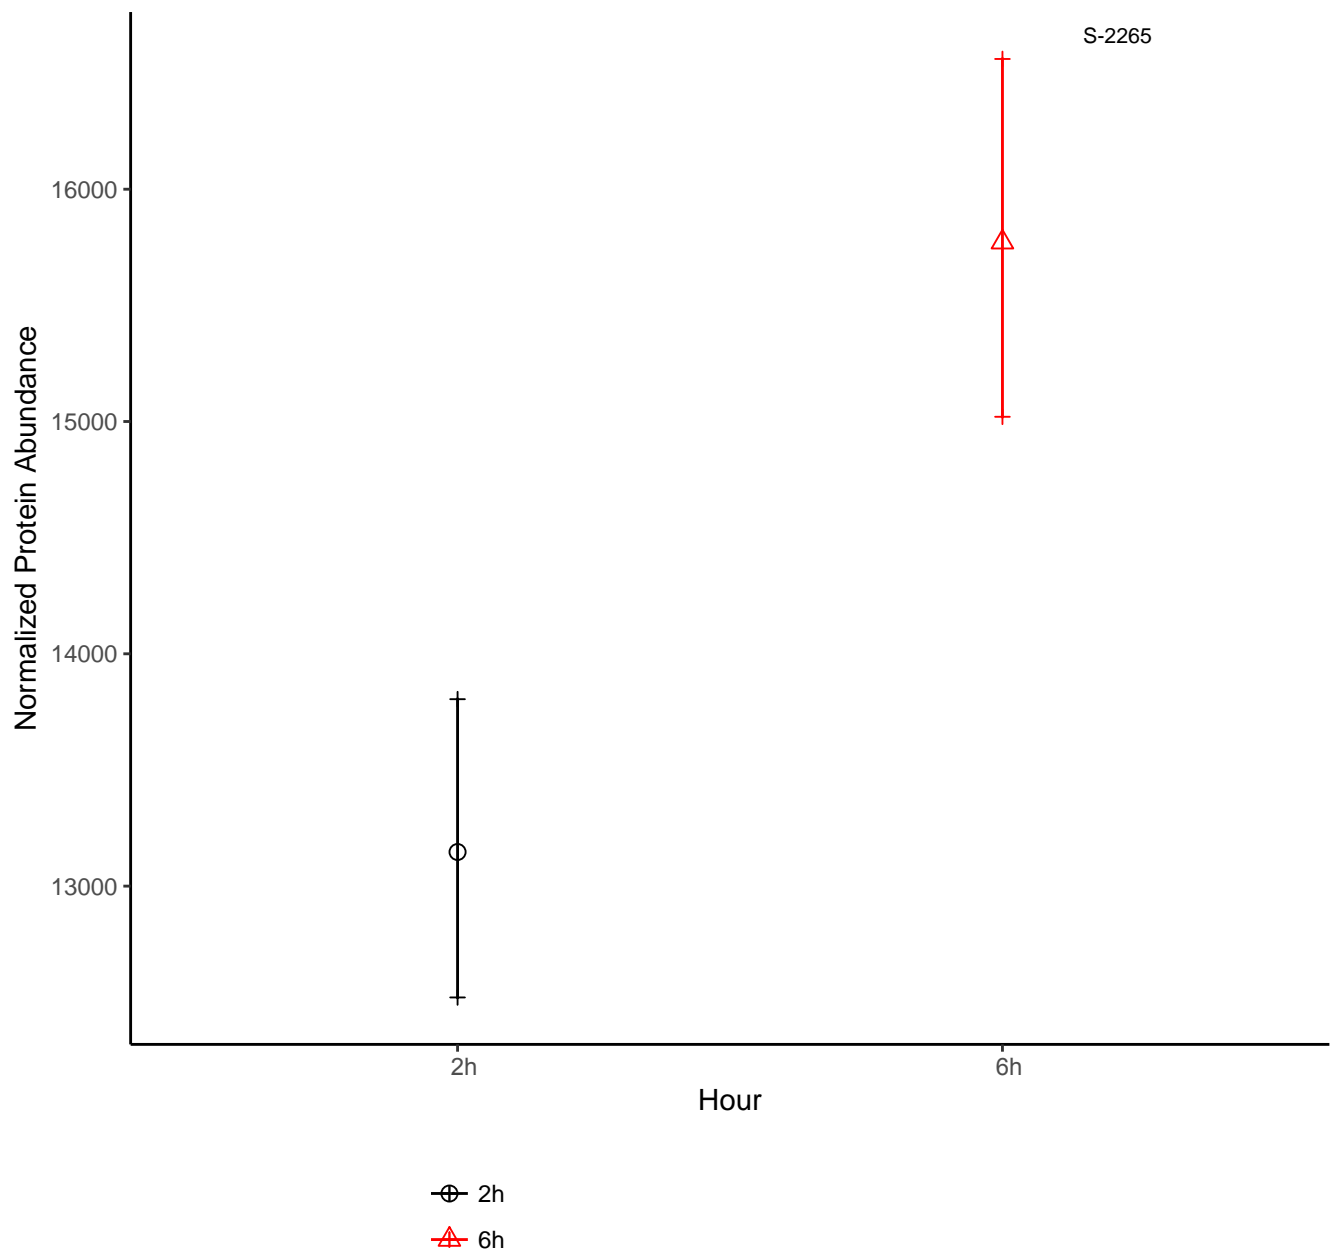

# PHNC\_STAAM

S-2266

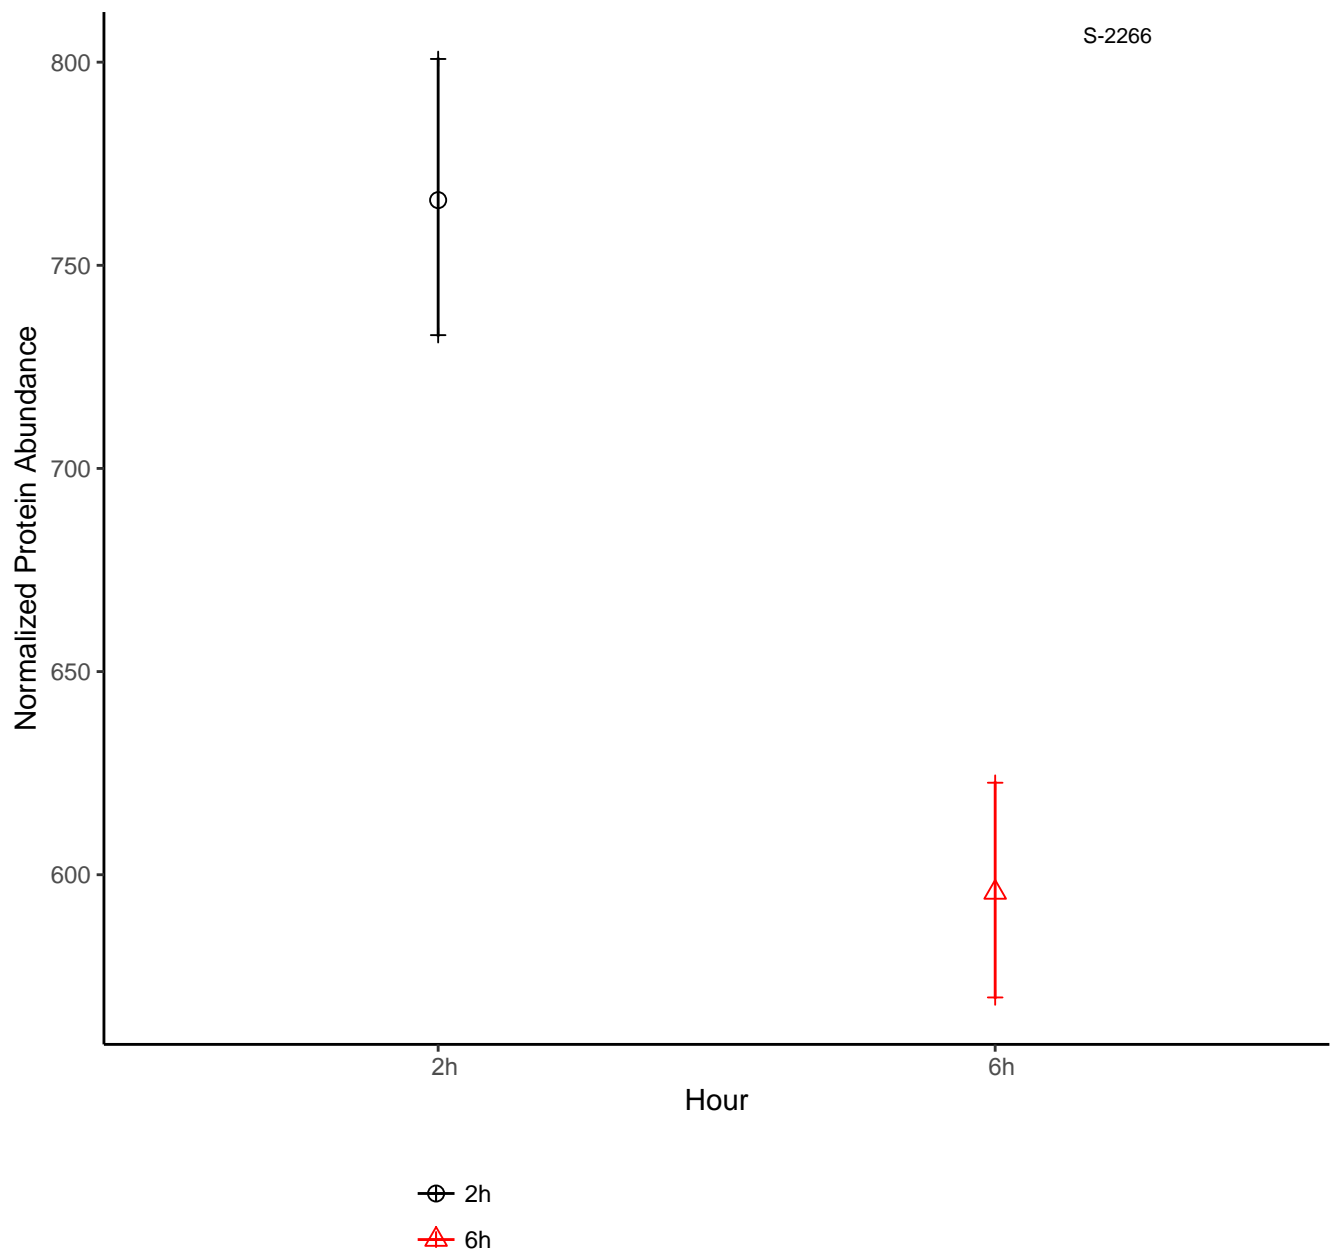

# PLSX\_STAAM

S-2267

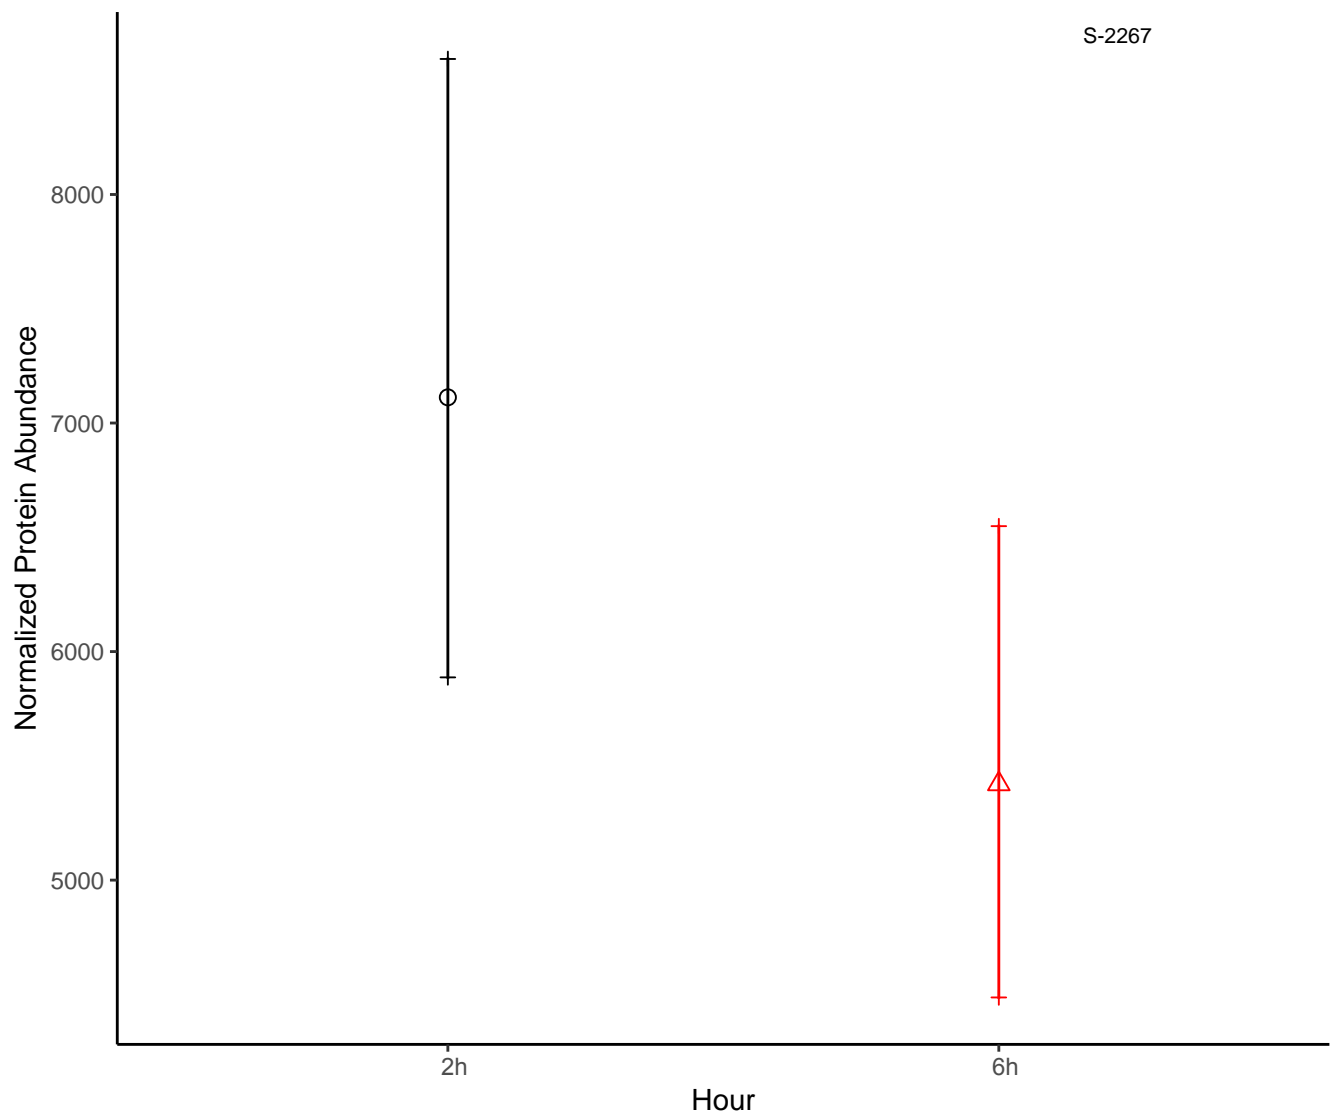

⊕ 2h

△ 6h

# PNP\_STAAM

S-2268

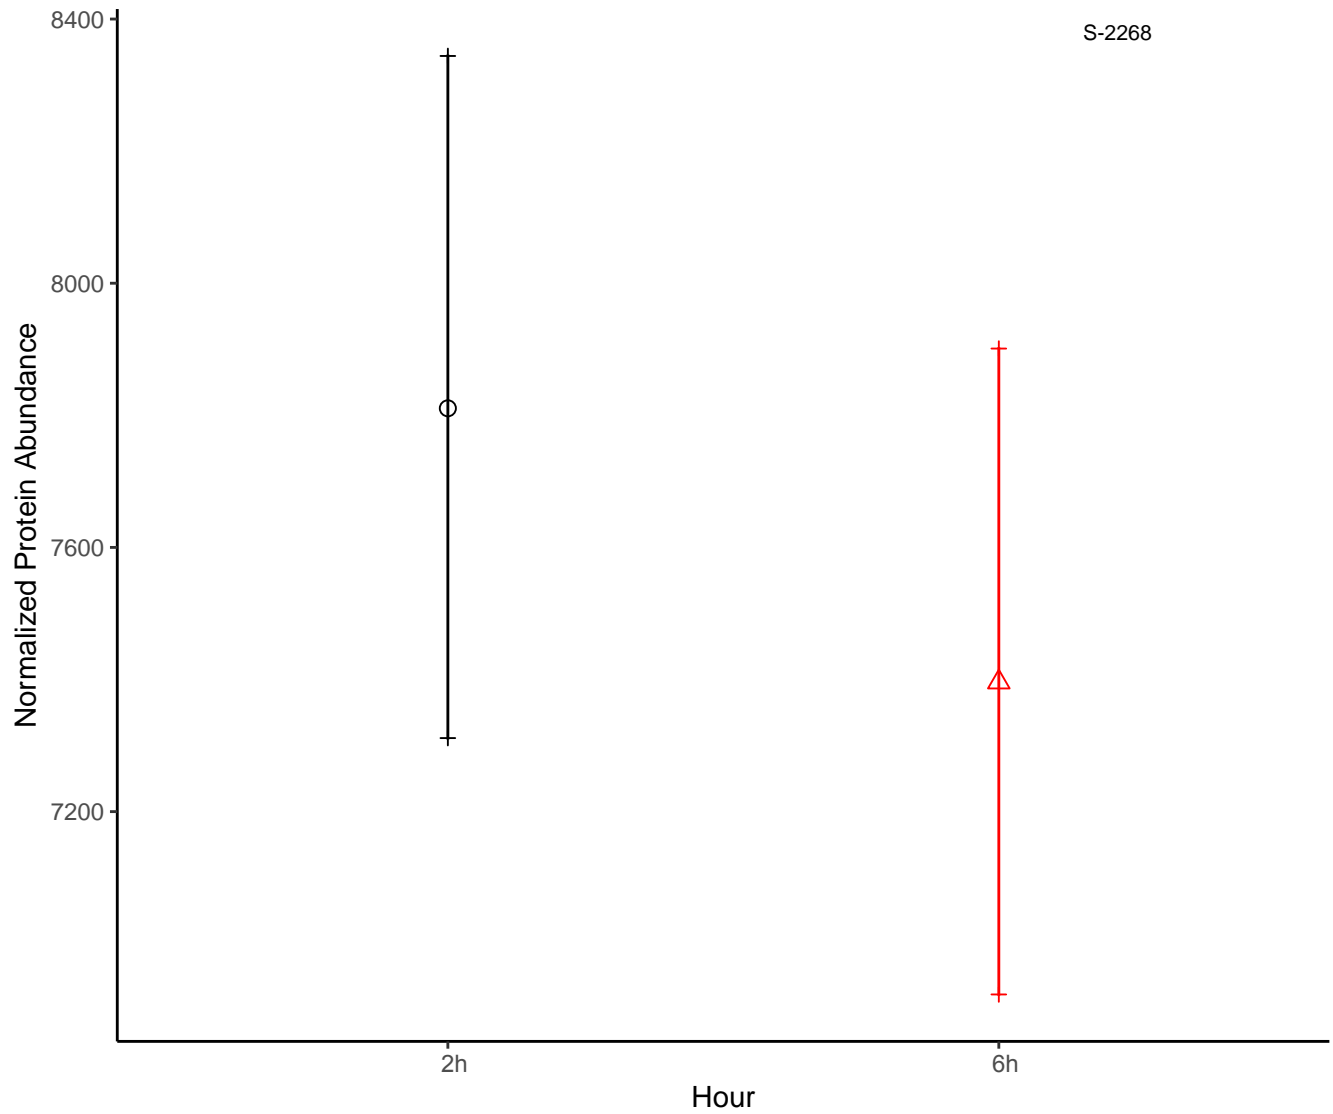

⊕ 2h

△ 6h

# PPAC\_STAAM

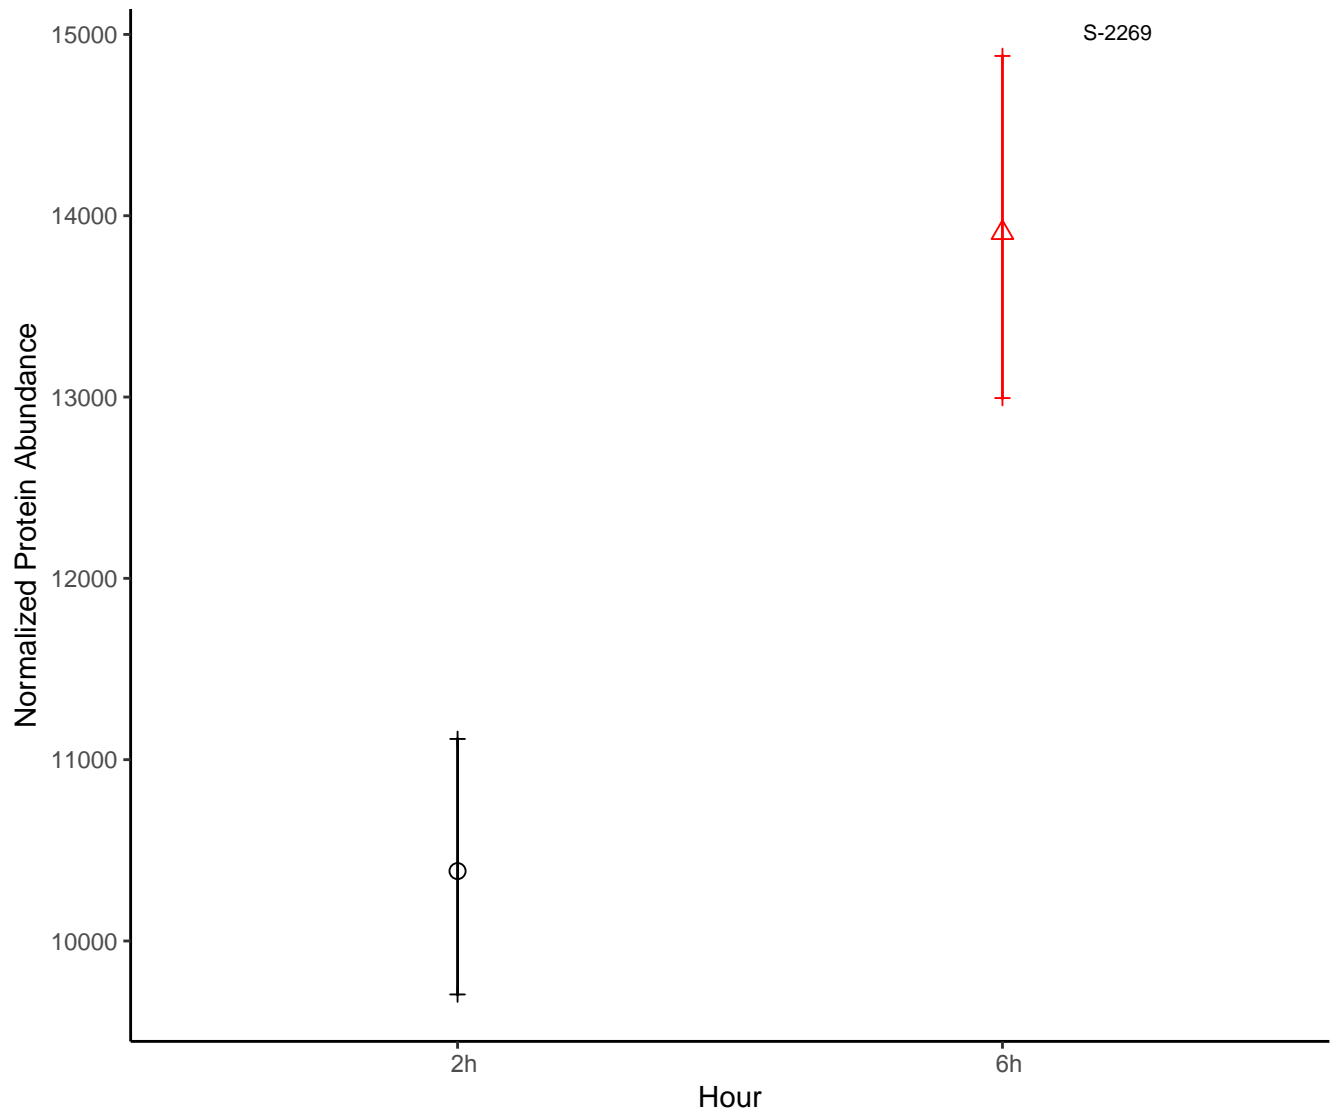

⊕ 2h

△ 6h

# PPAT\_STAAM

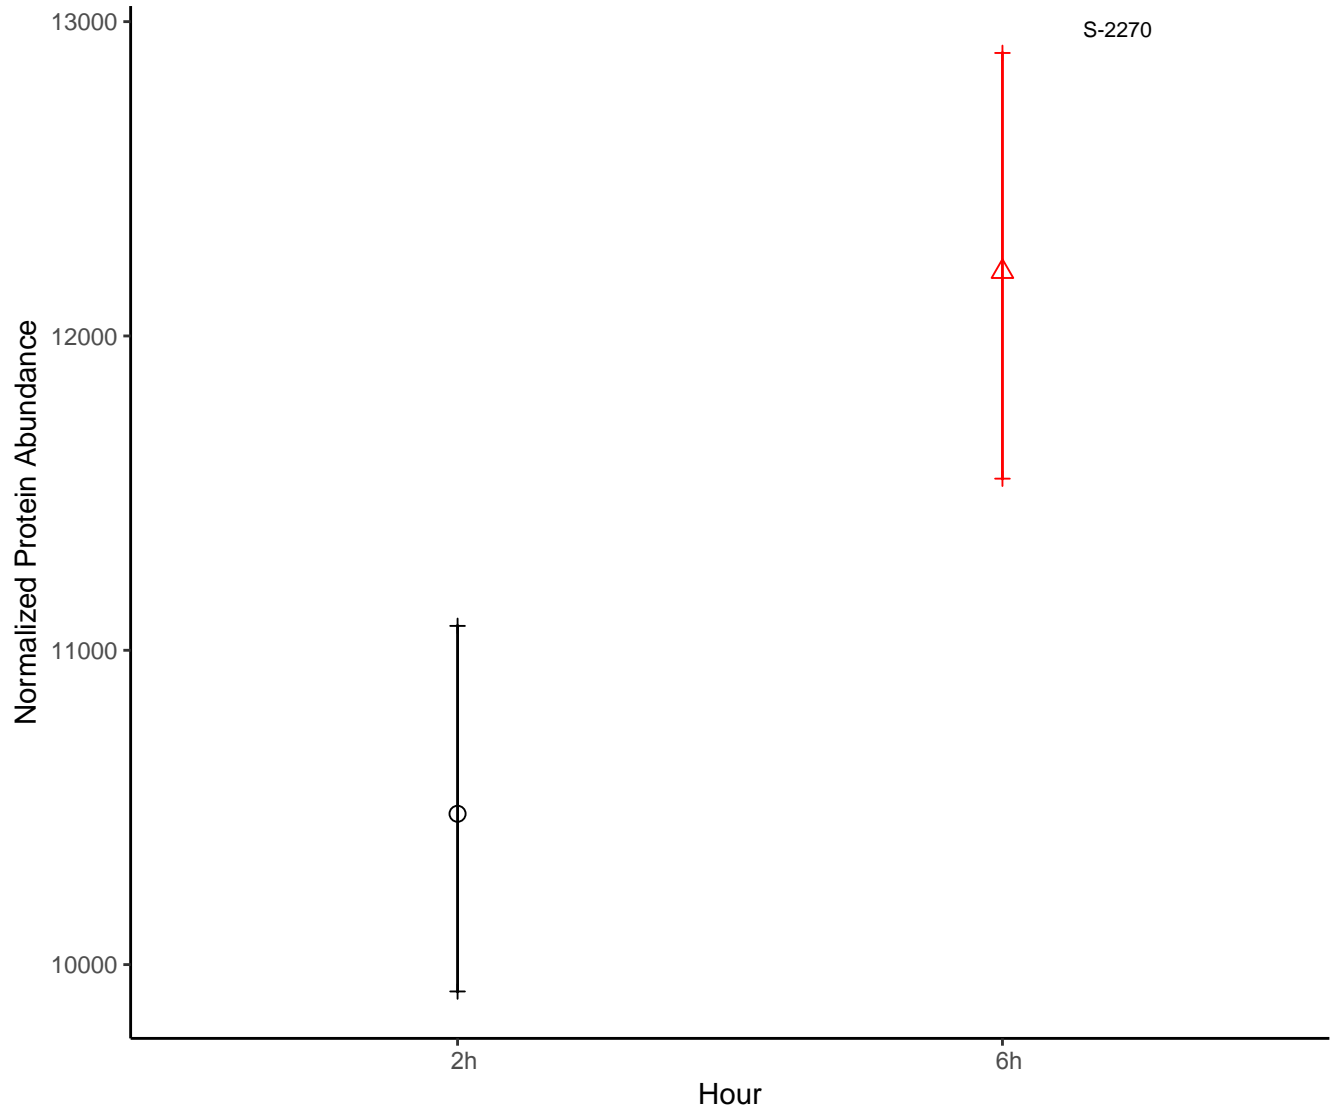

⊕ 2h

△ 6h

# PPI1\_STAAM

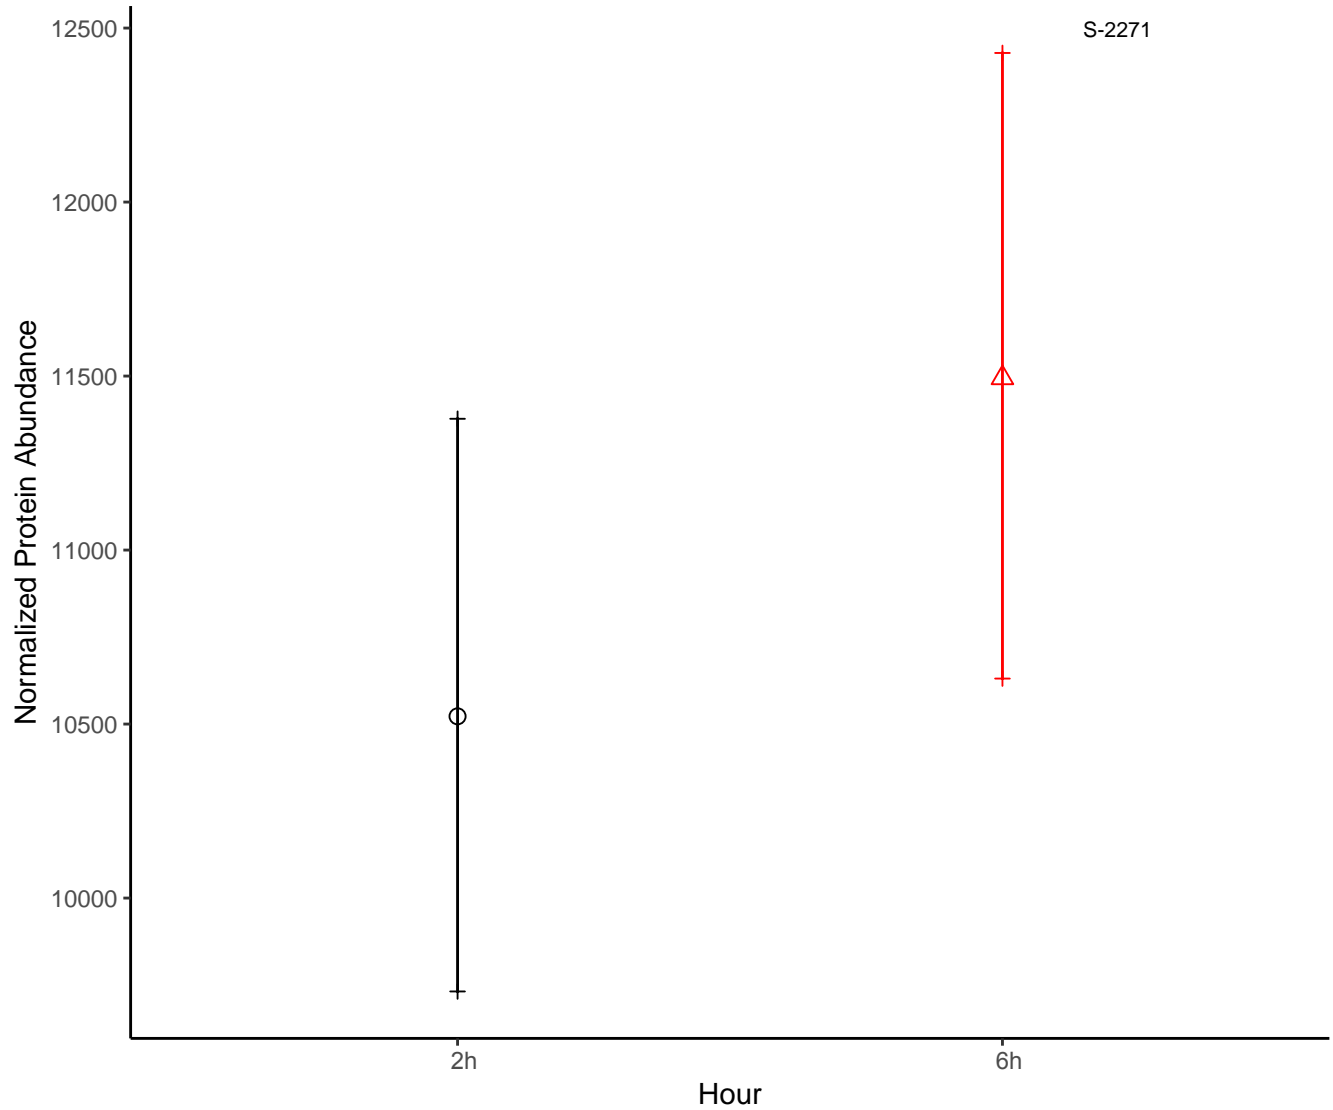

⊕ 2h

△ 6h

# PRSA\_STAAM

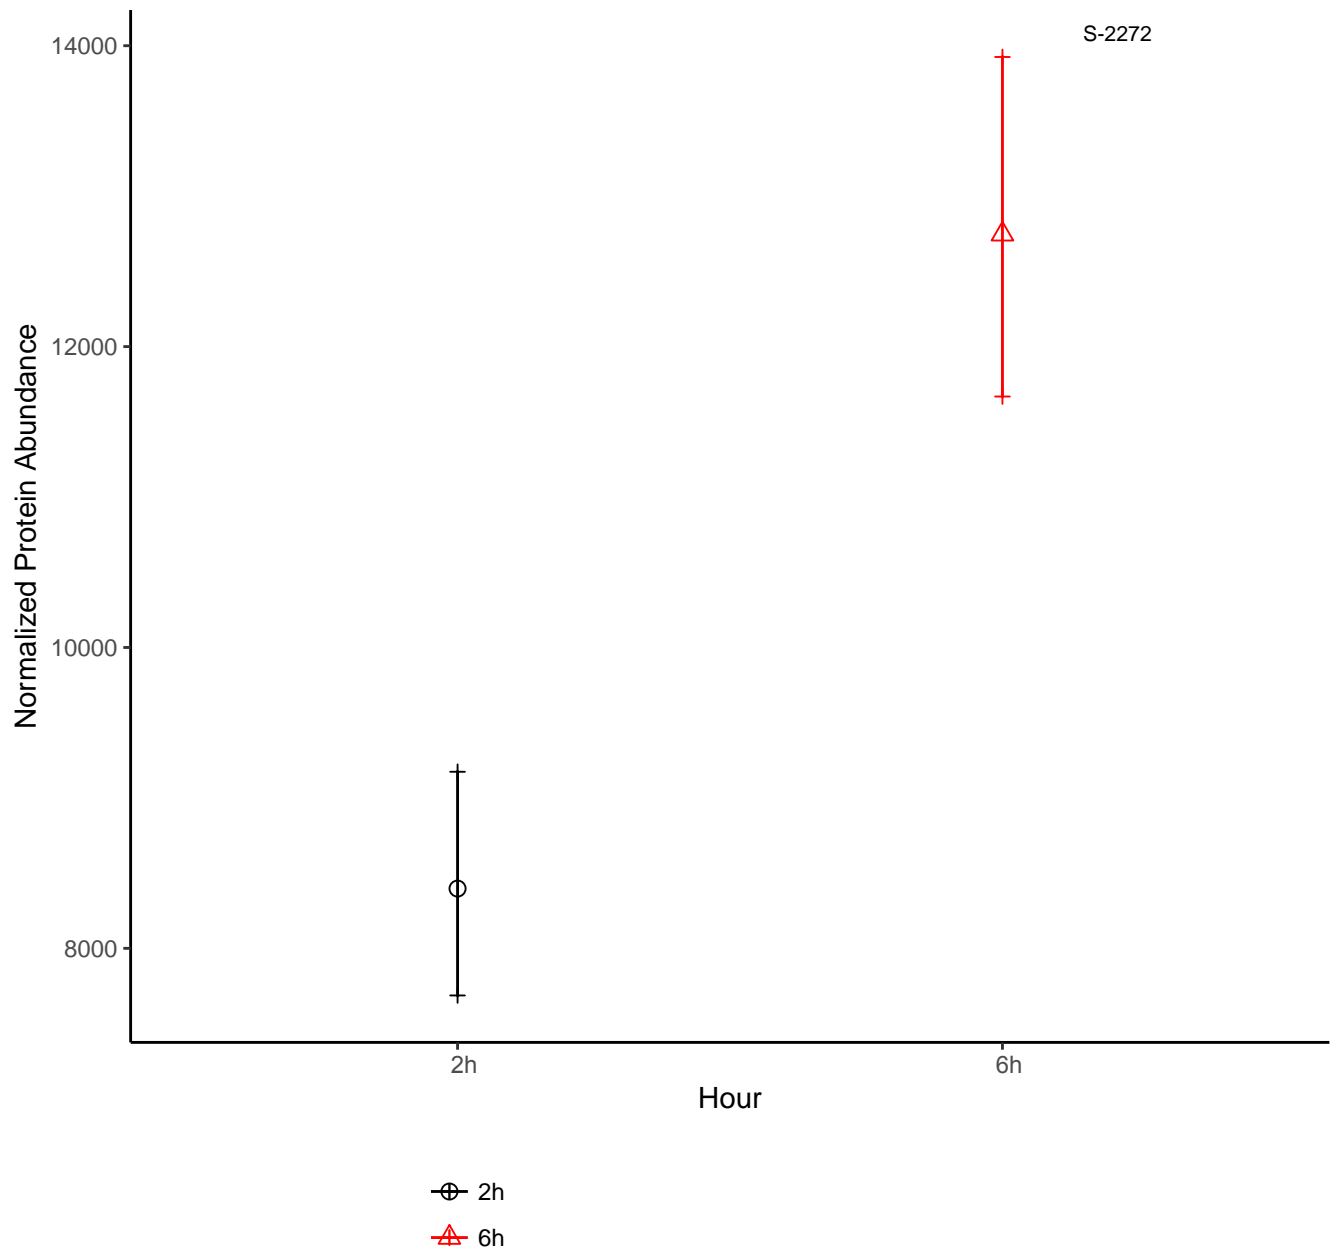



# PSTB\_STAAM

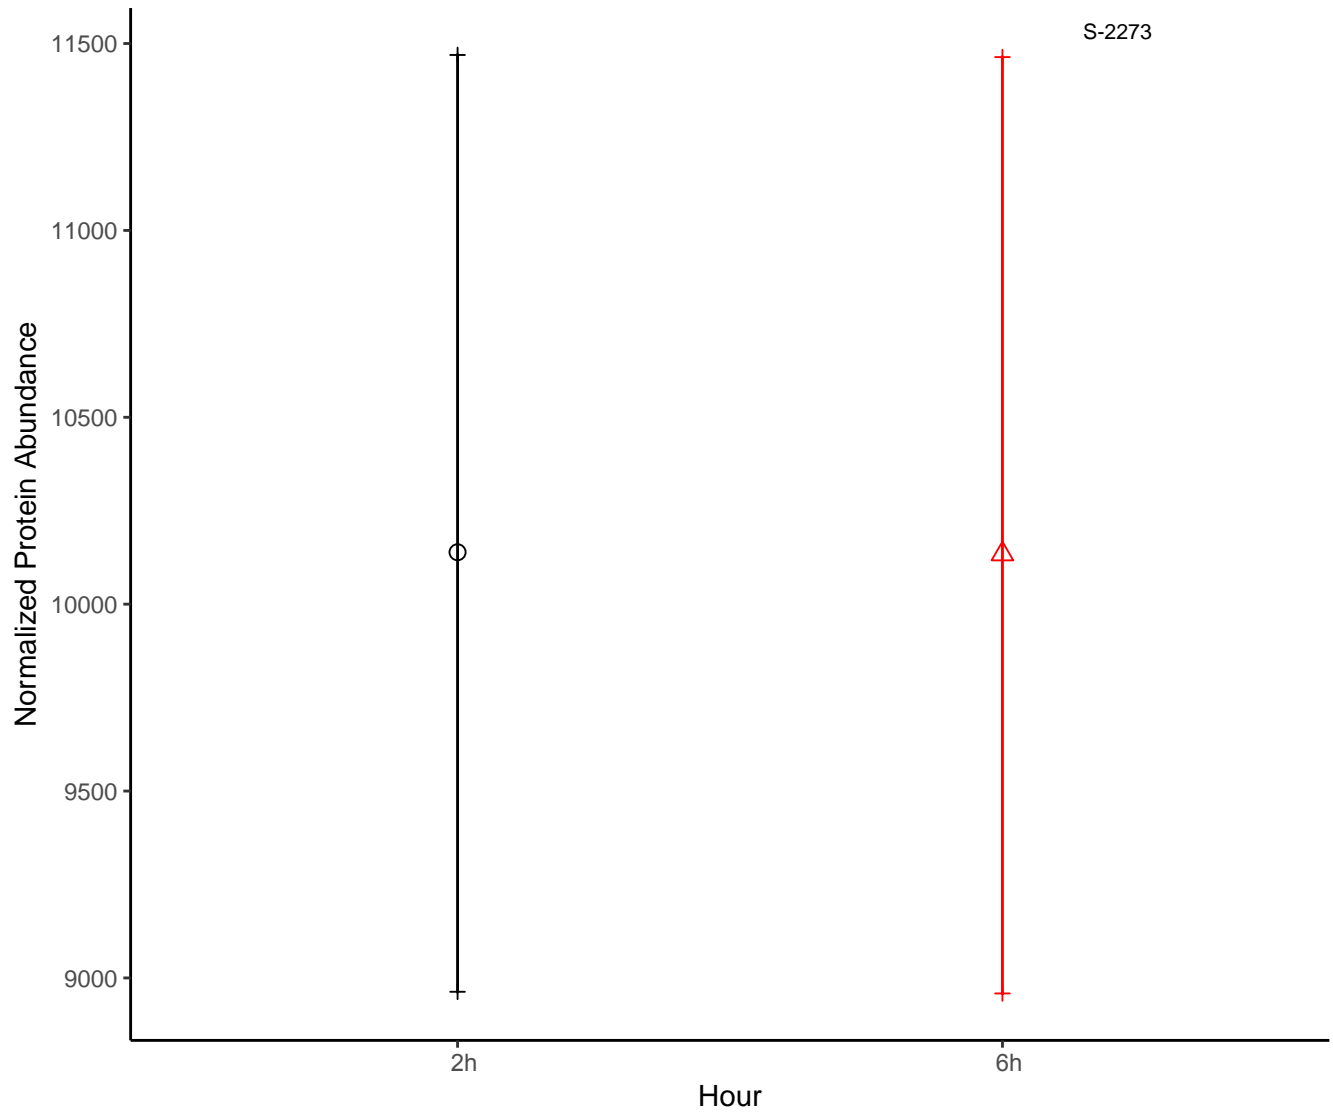

⊕ 2h

△ 6h

# PSTS\_STAAM

S-2274

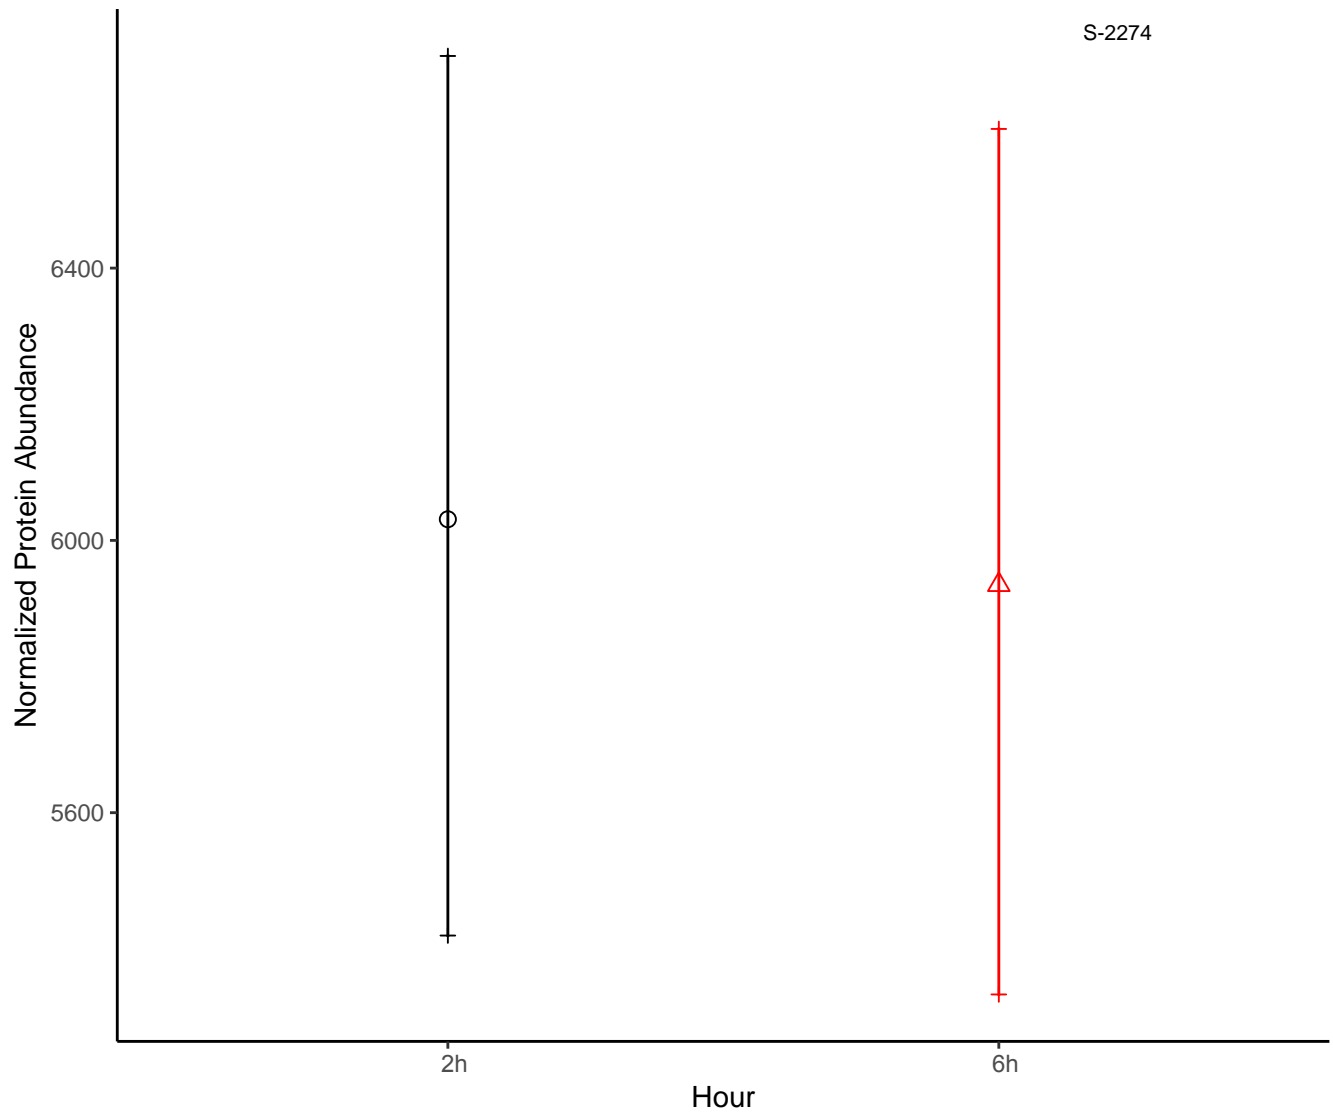

⊕ 2h

△ 6h

# PT1\_STAAM

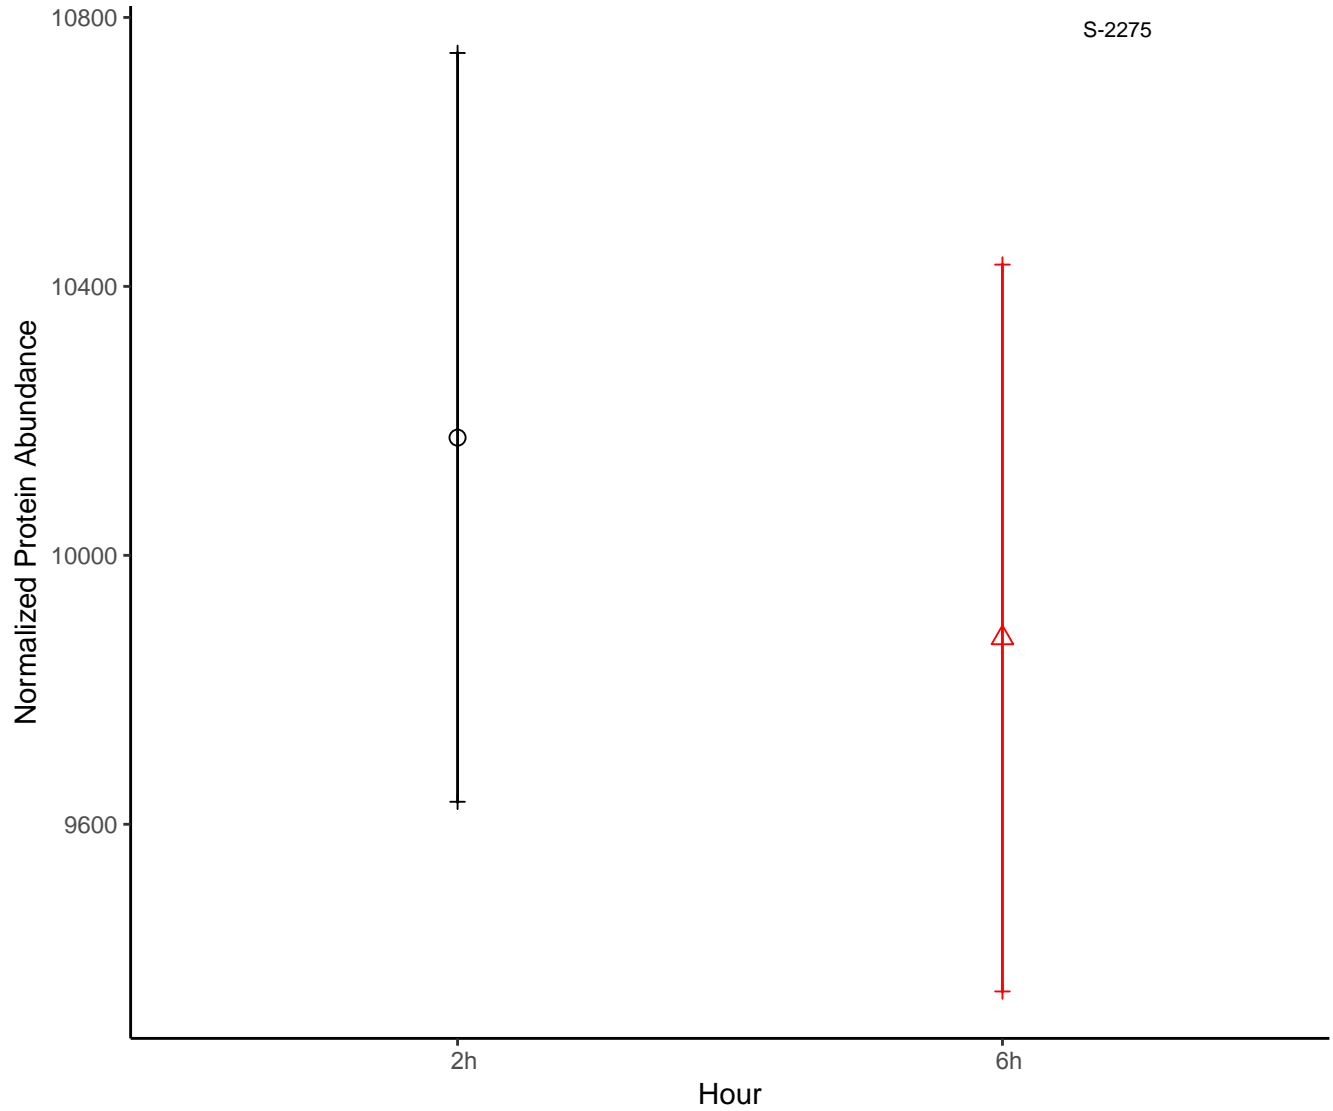

S-2275

⊕ 2h

△ 6h

# PTAS\_STAAM

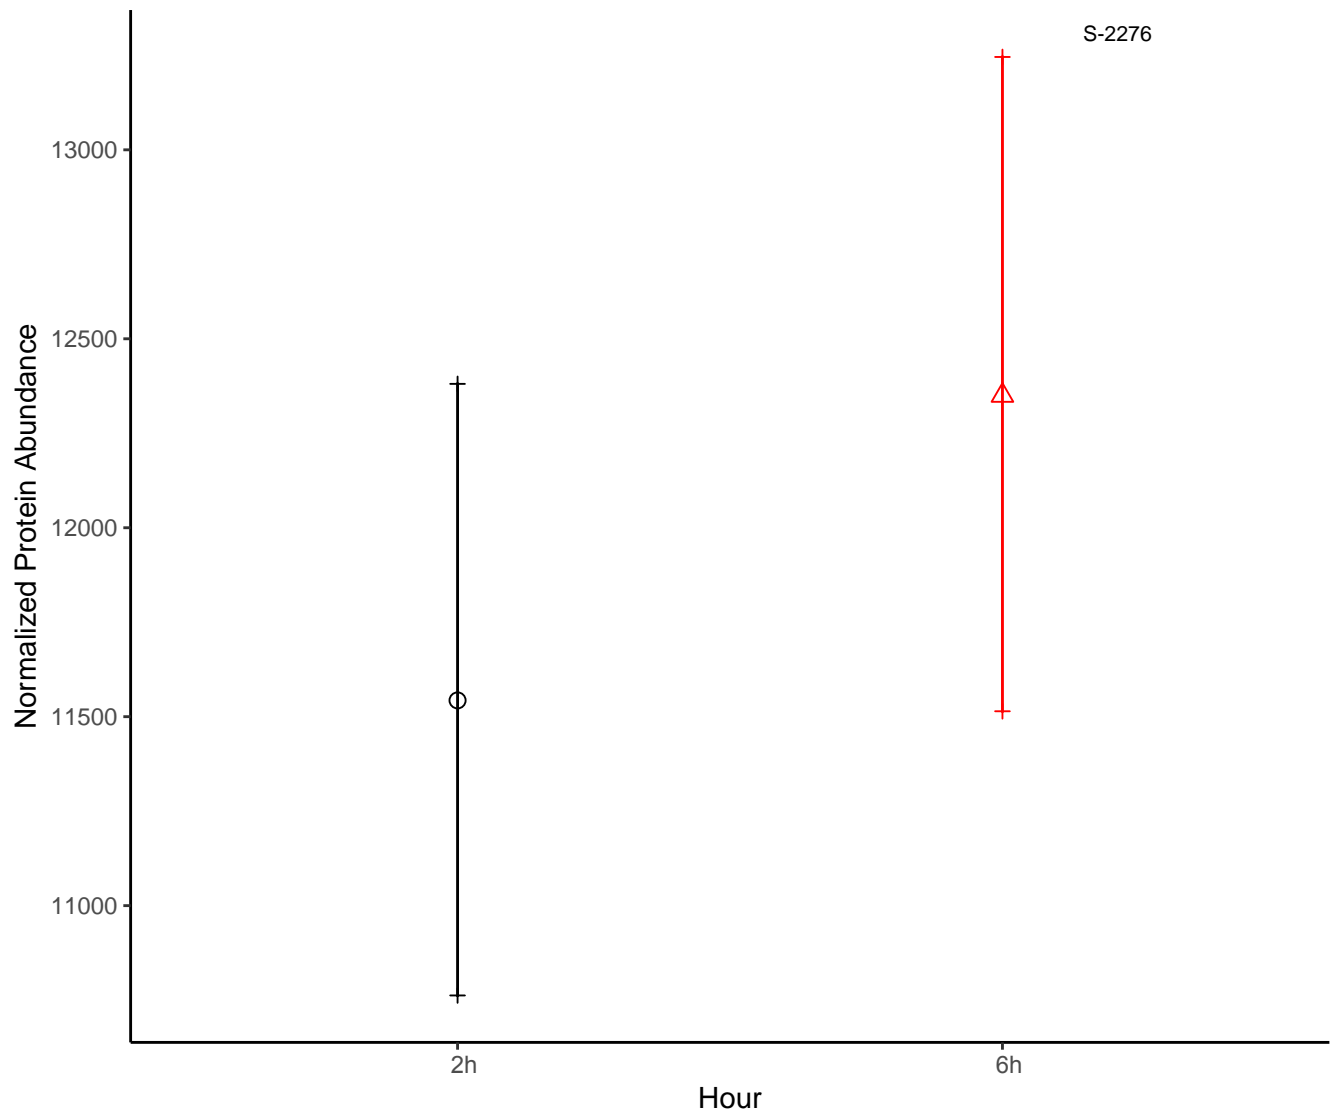

⊕ 2h

△ 6h

# PTG3C\_STAAM

S-2277

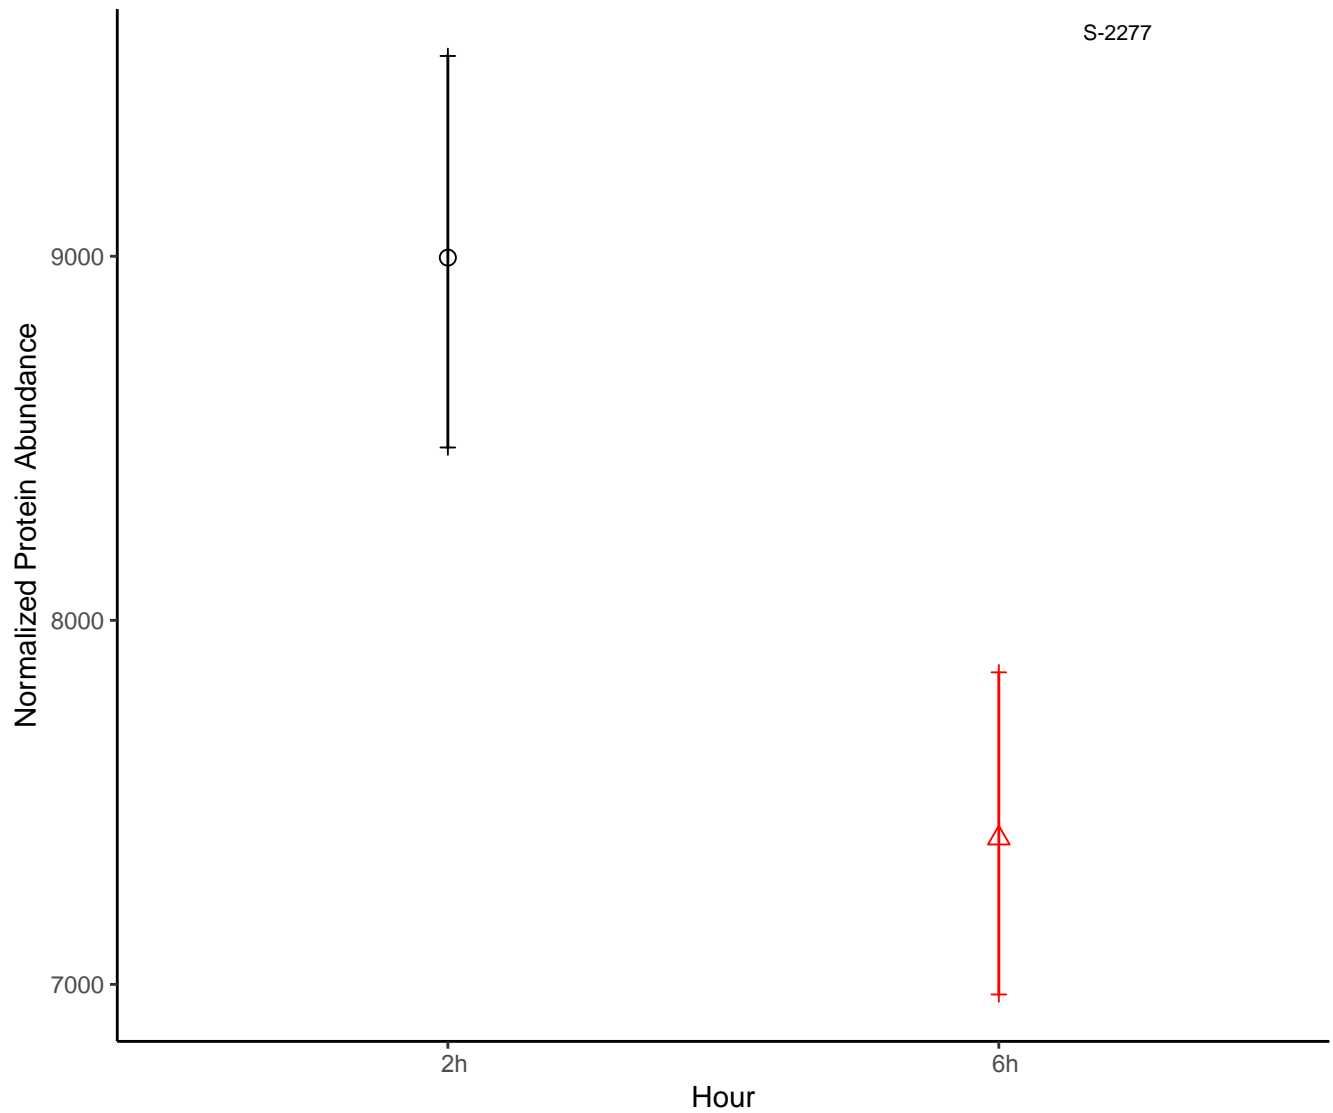

⊕ 2h

△ 6h

# PTGA\_STAAM

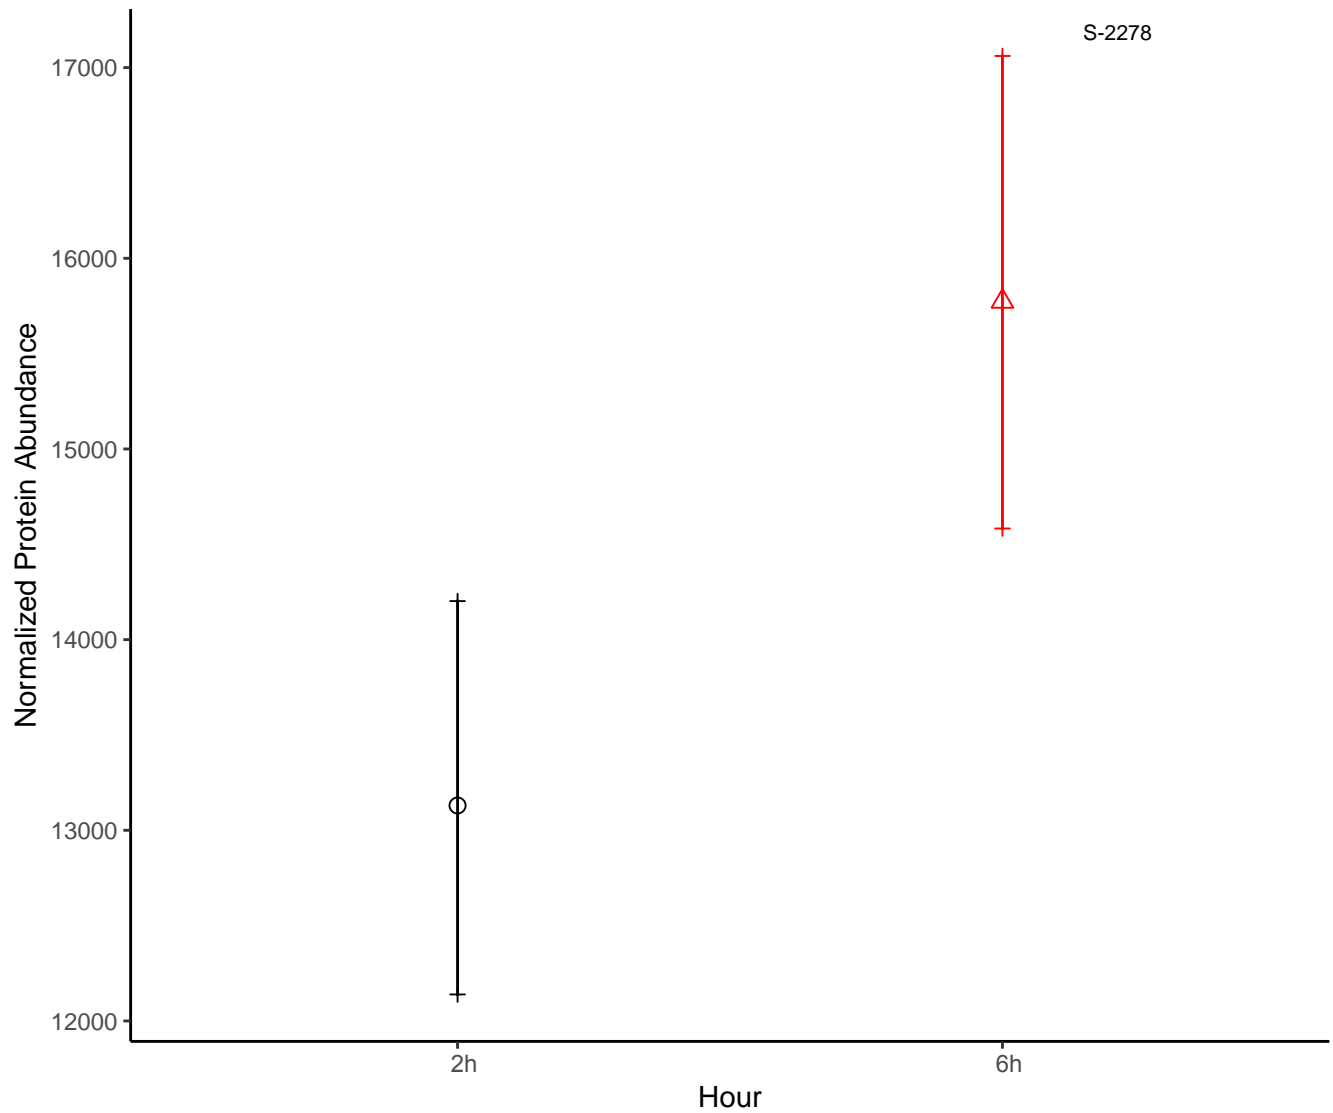

⊕ 2h

△ 6h

# PTH\_STAAM

S-2279

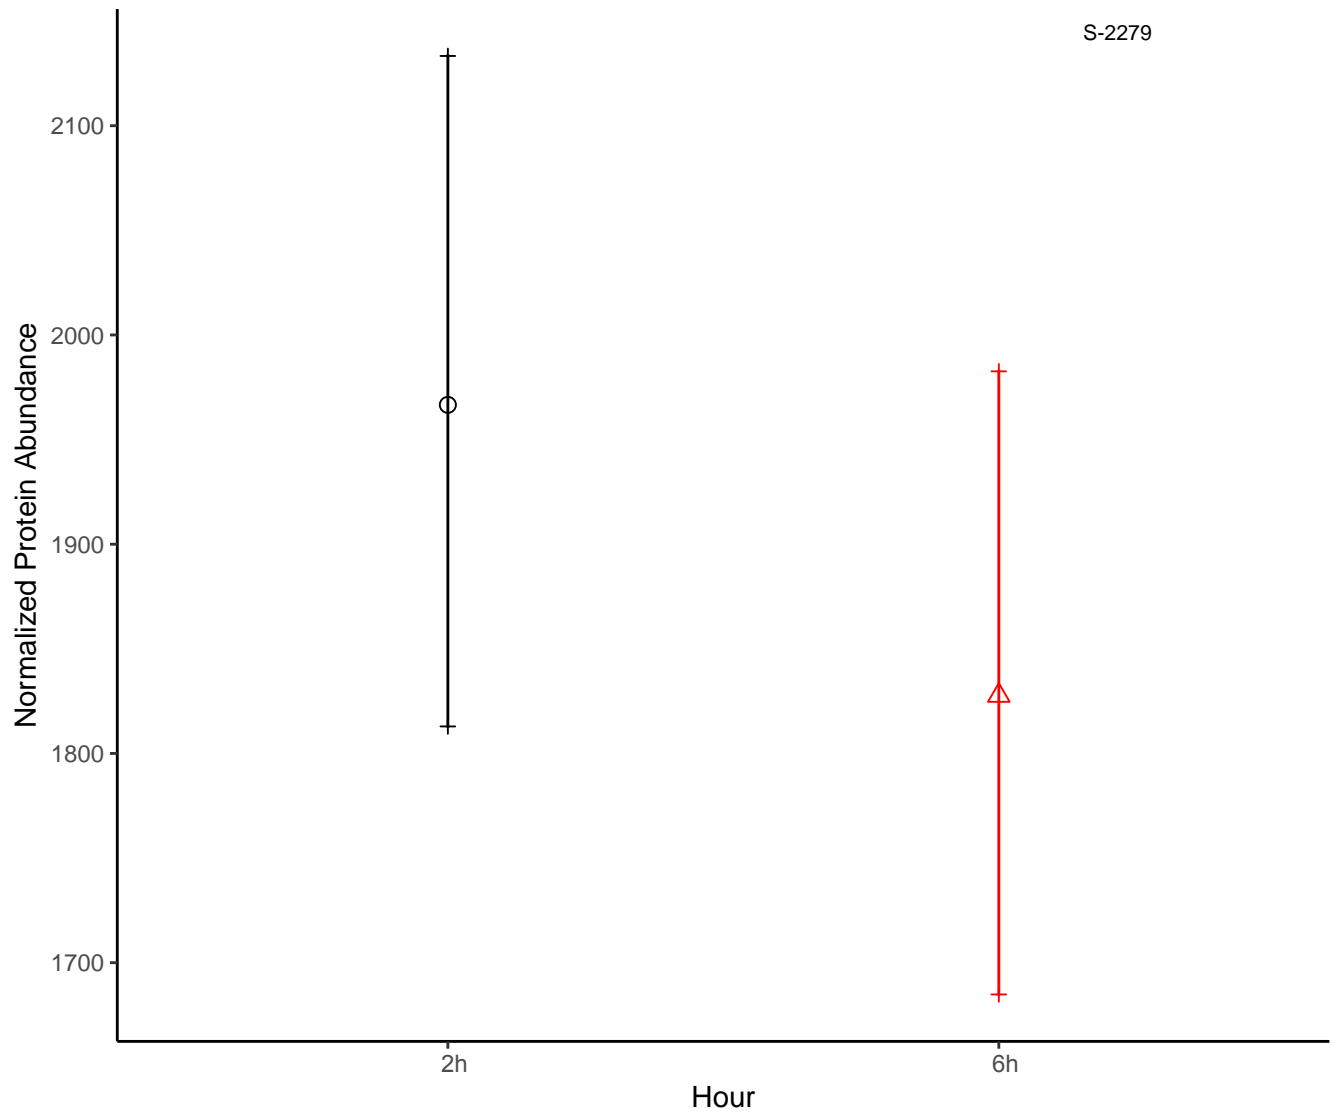

⊕ 2h

△ 6h

# PTHP\_STAAM

S-2280

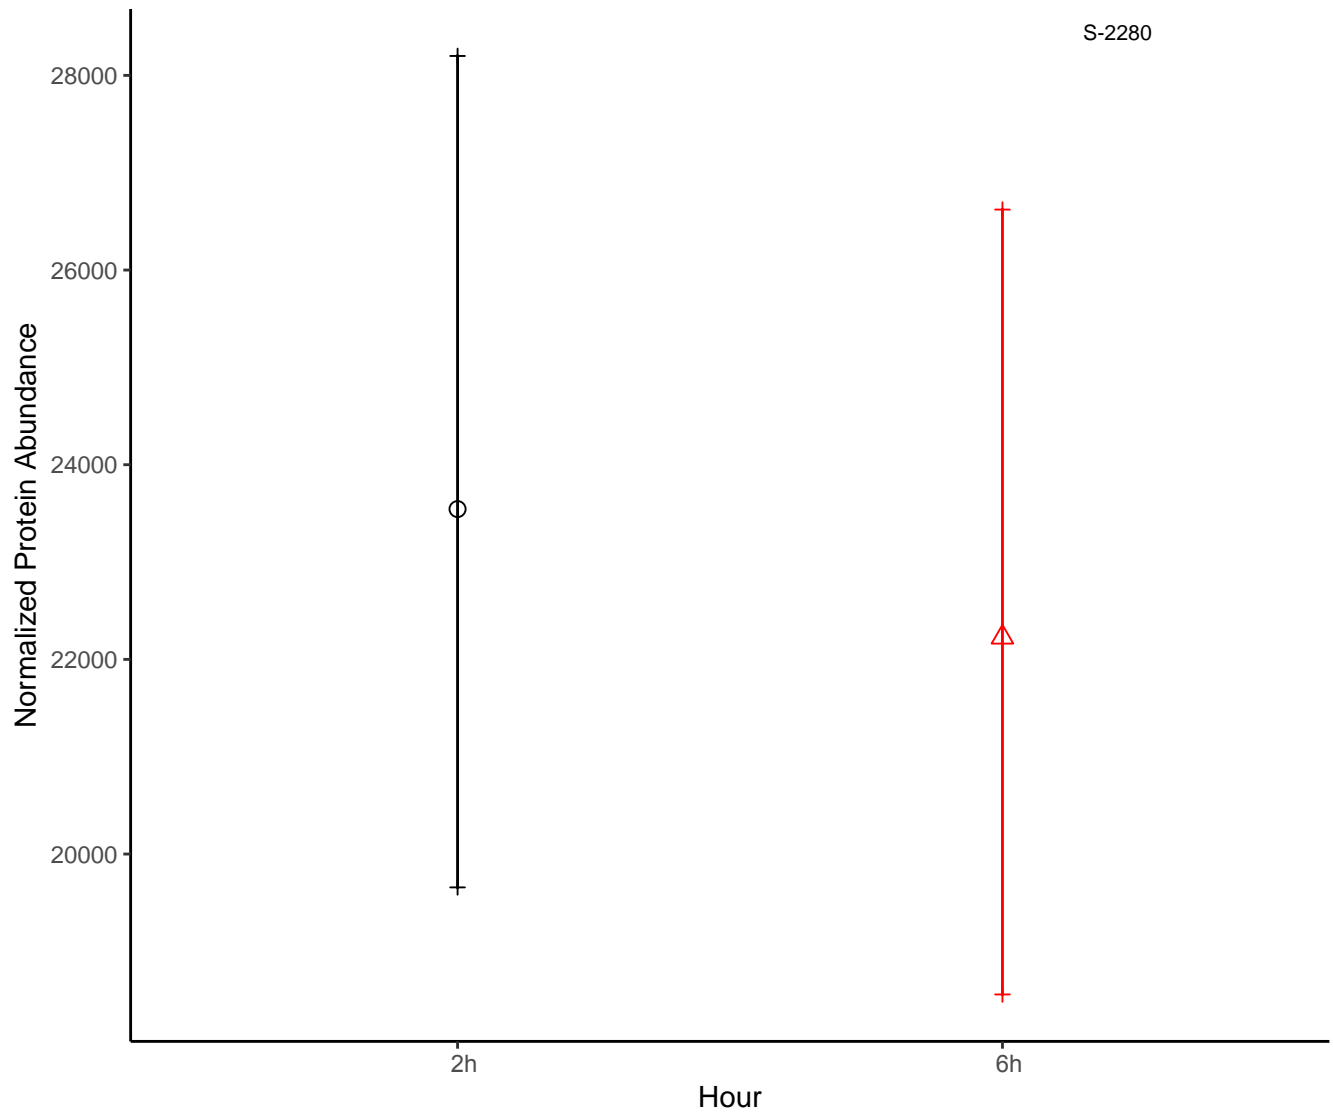

⊕ 2h

△ 6h



# PTMA\_STAAM

S-2281

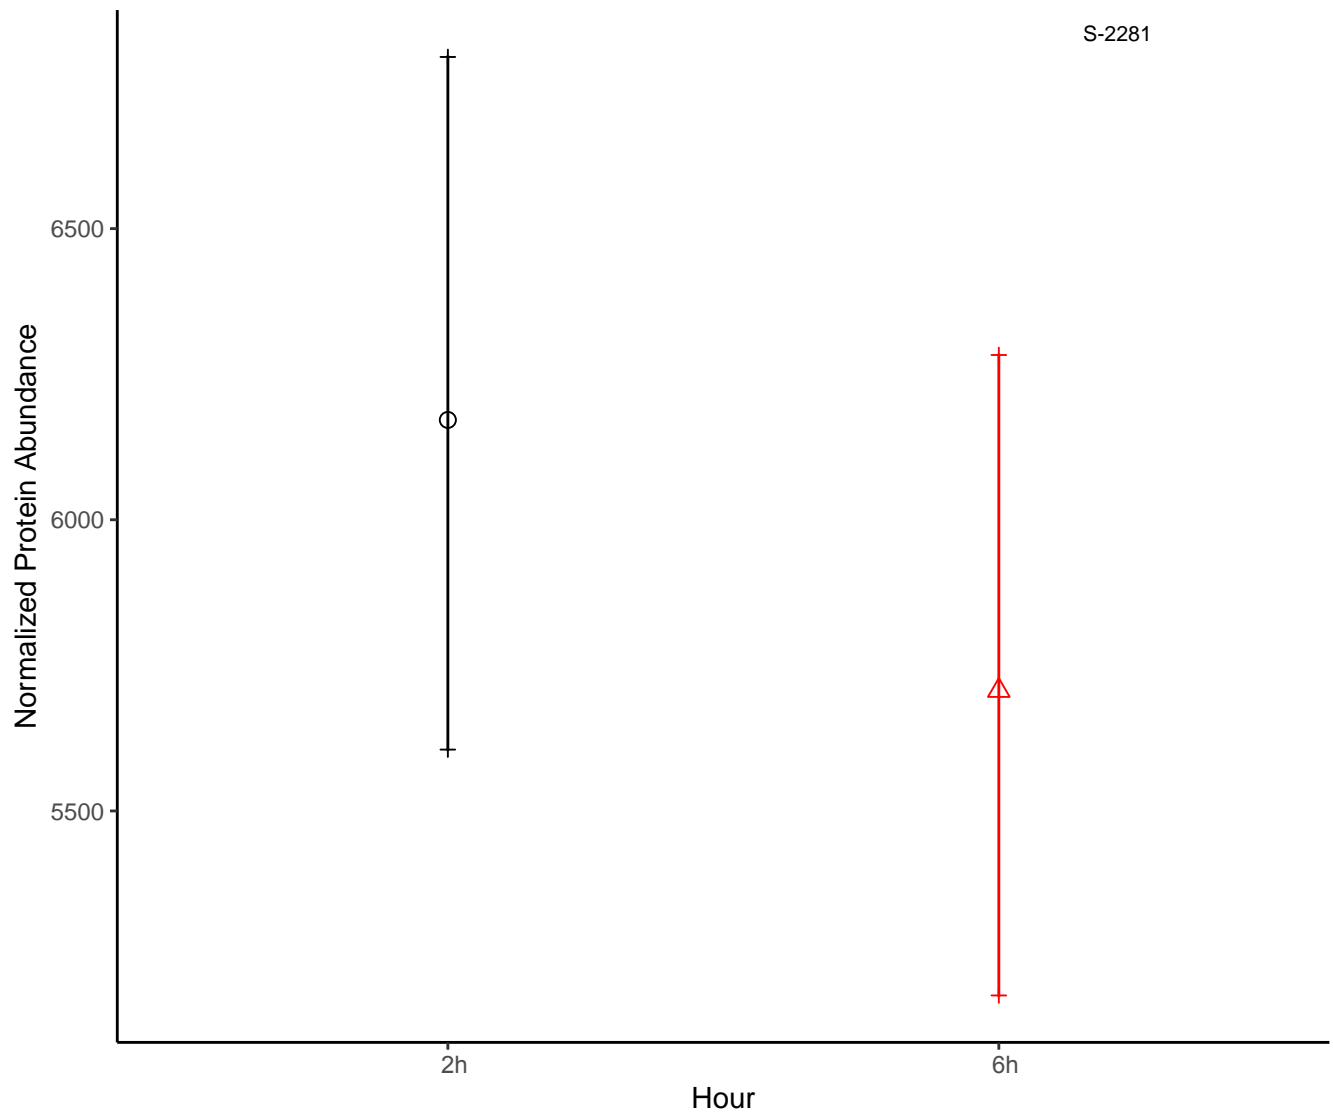

⊕ 2h

△ 6h

# PUR1\_STAAM

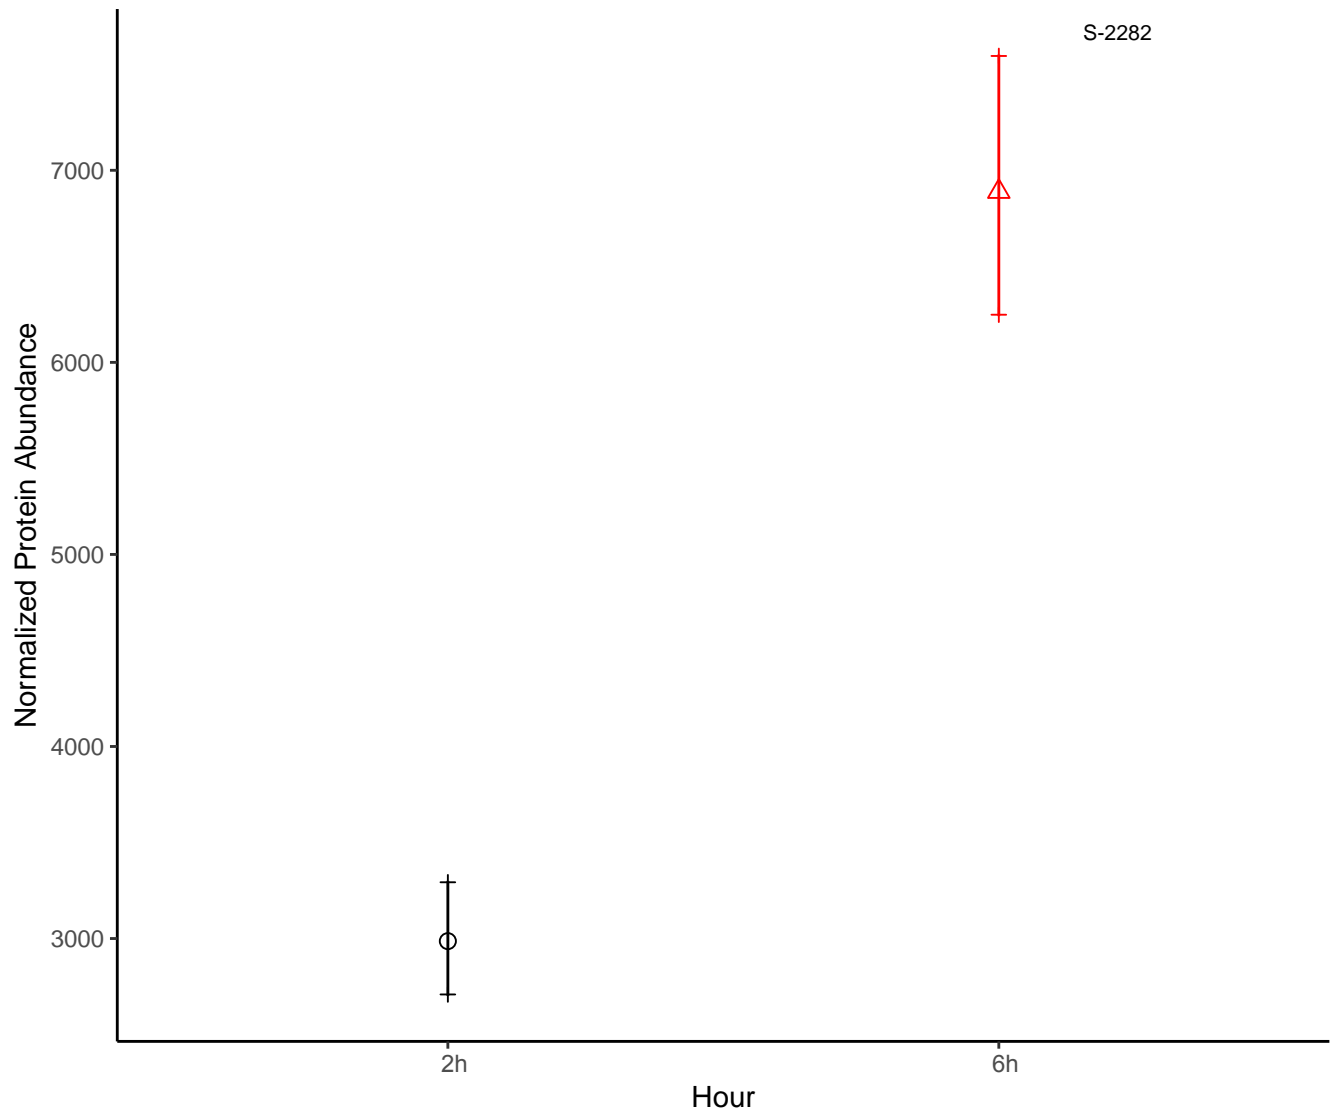

⊕ 2h

△ 6h

# PUR2\_STAAM

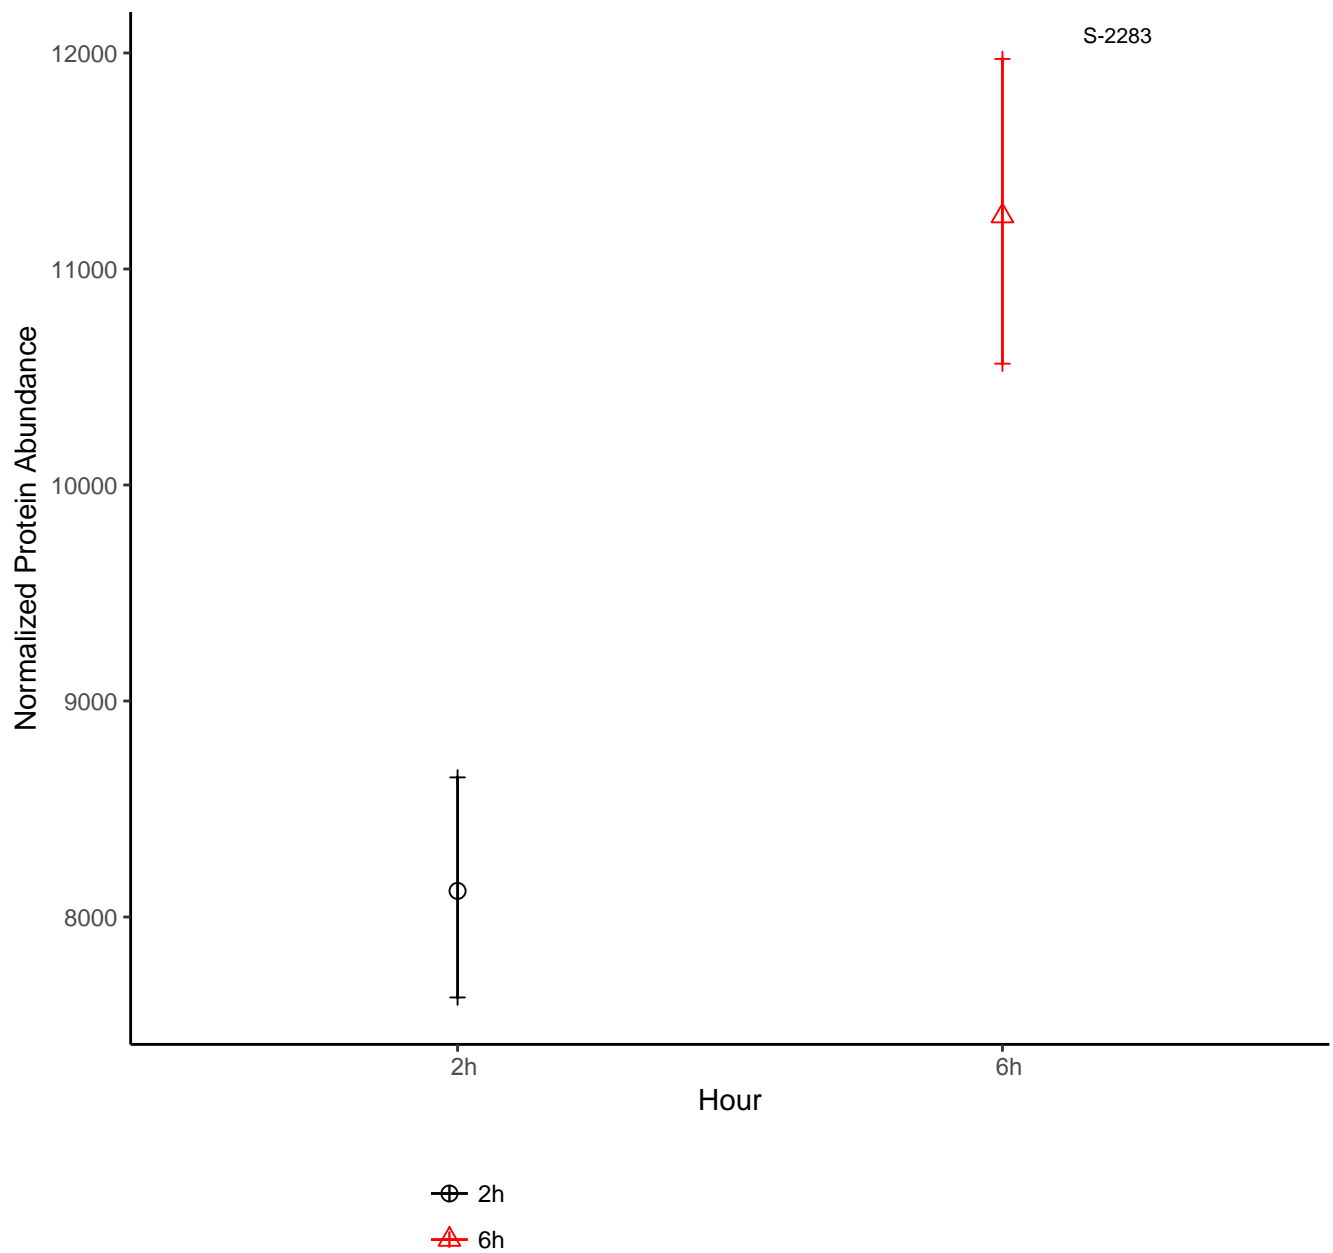

# PUR3\_STAAM

S-2284

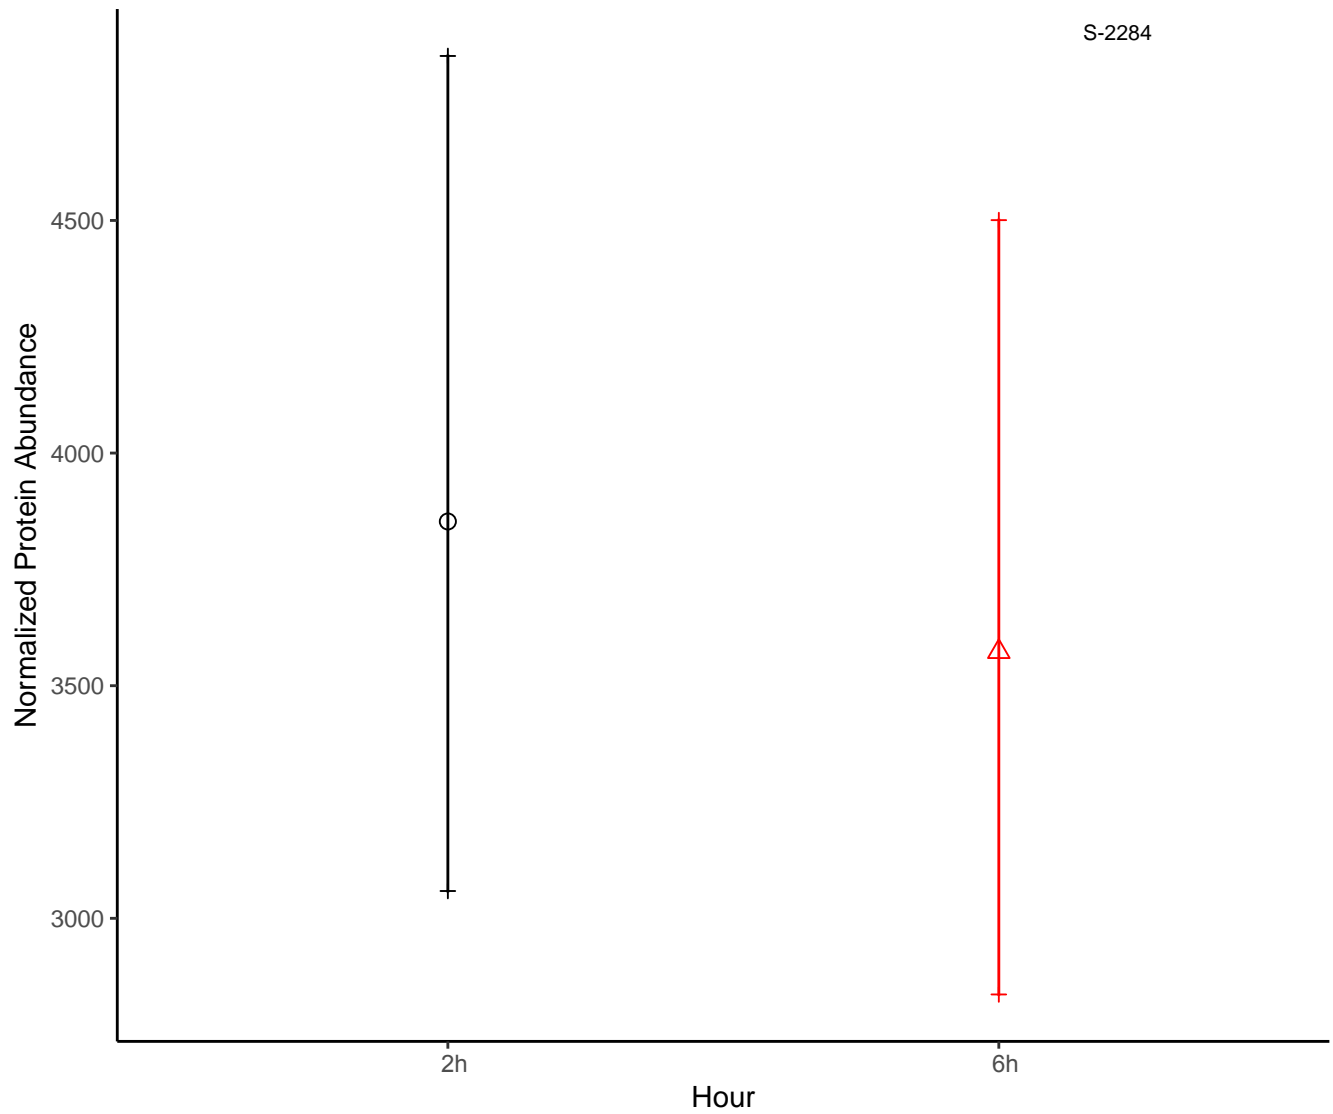

⊕ 2h

△ 6h

# PUR5\_STAAM

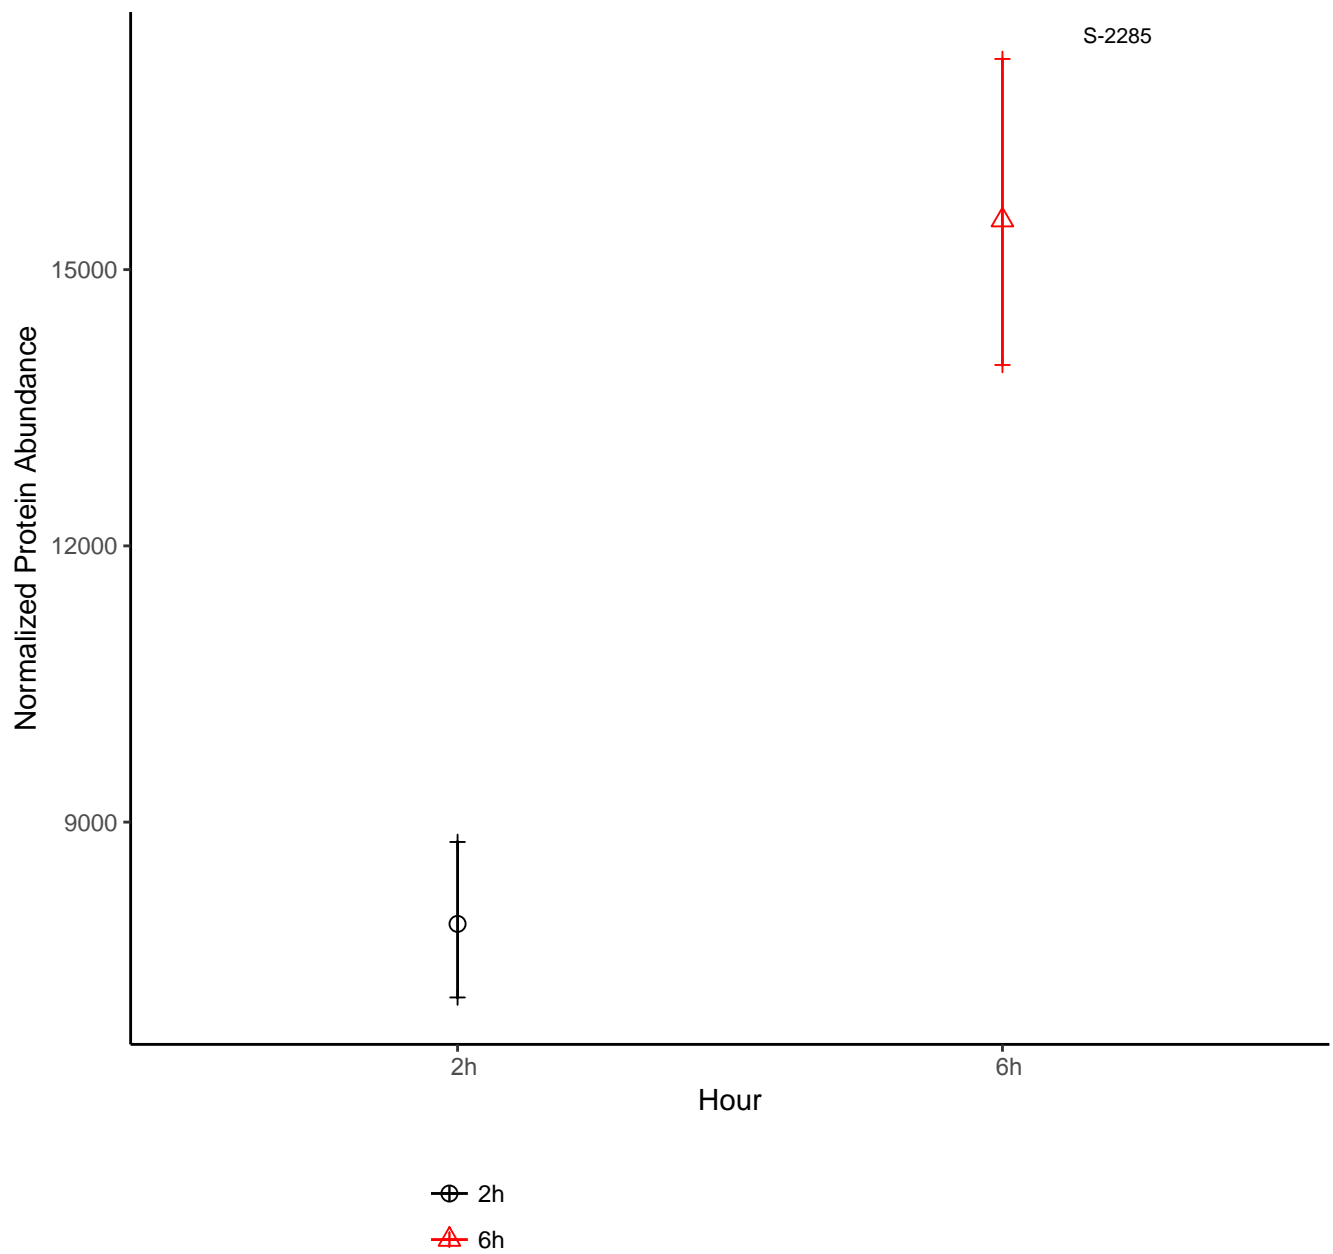

# PUR7\_STAAM

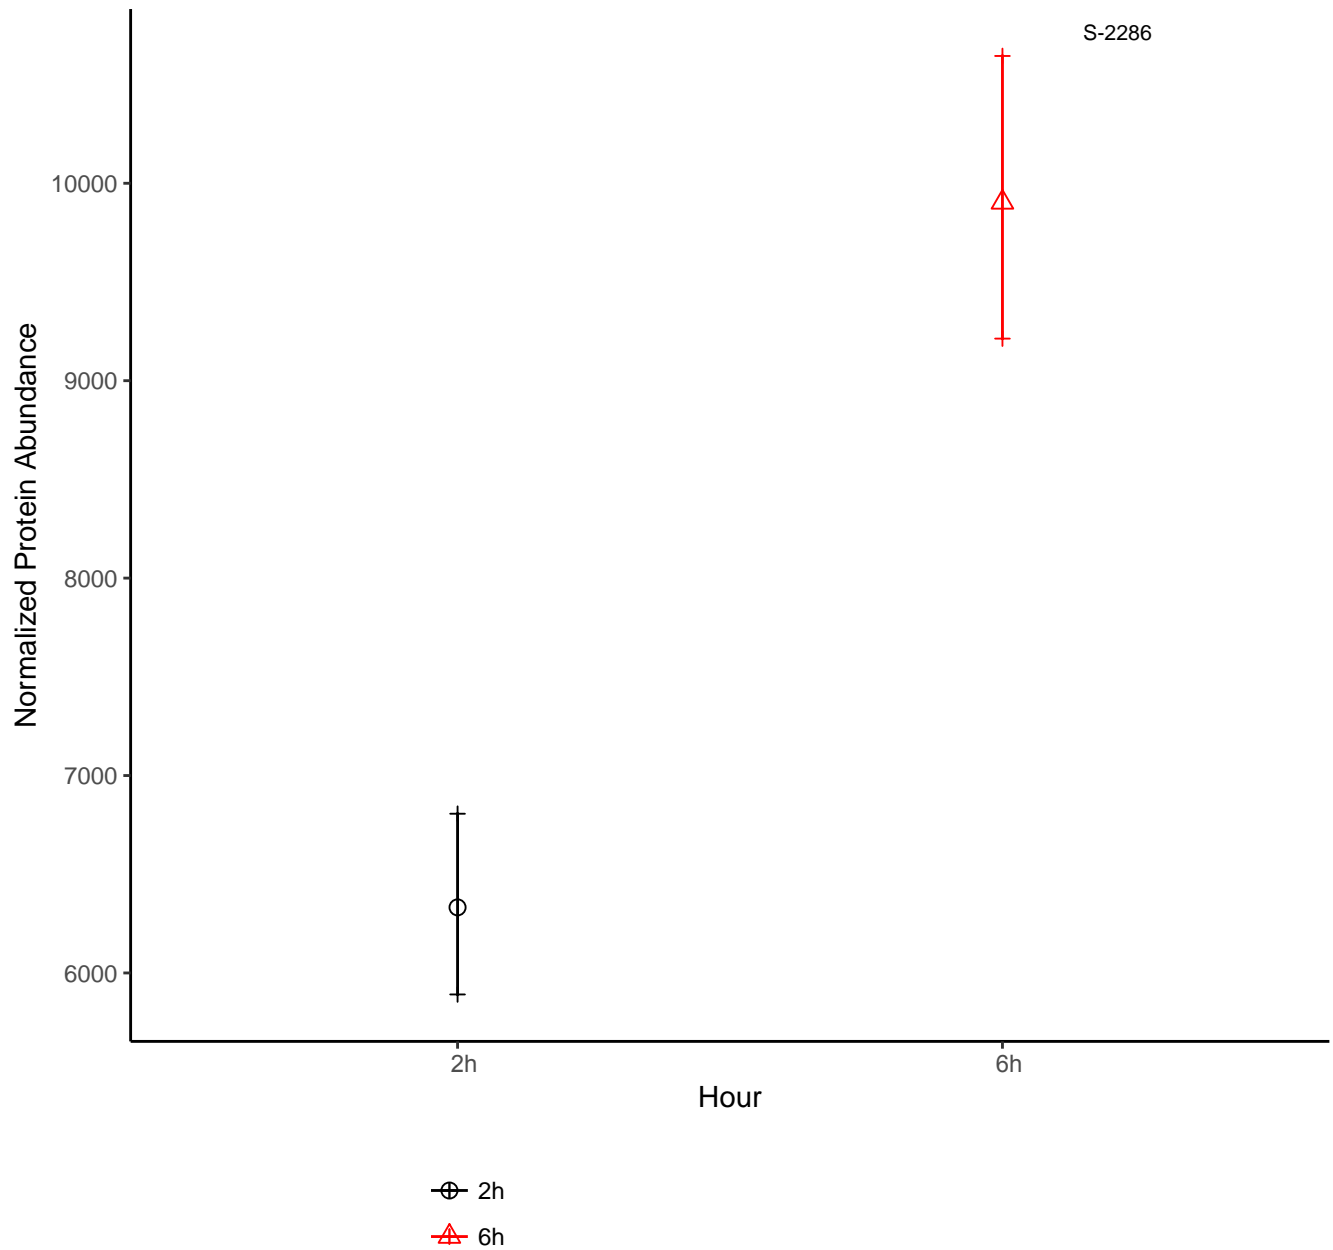

# PUR8\_STAAM

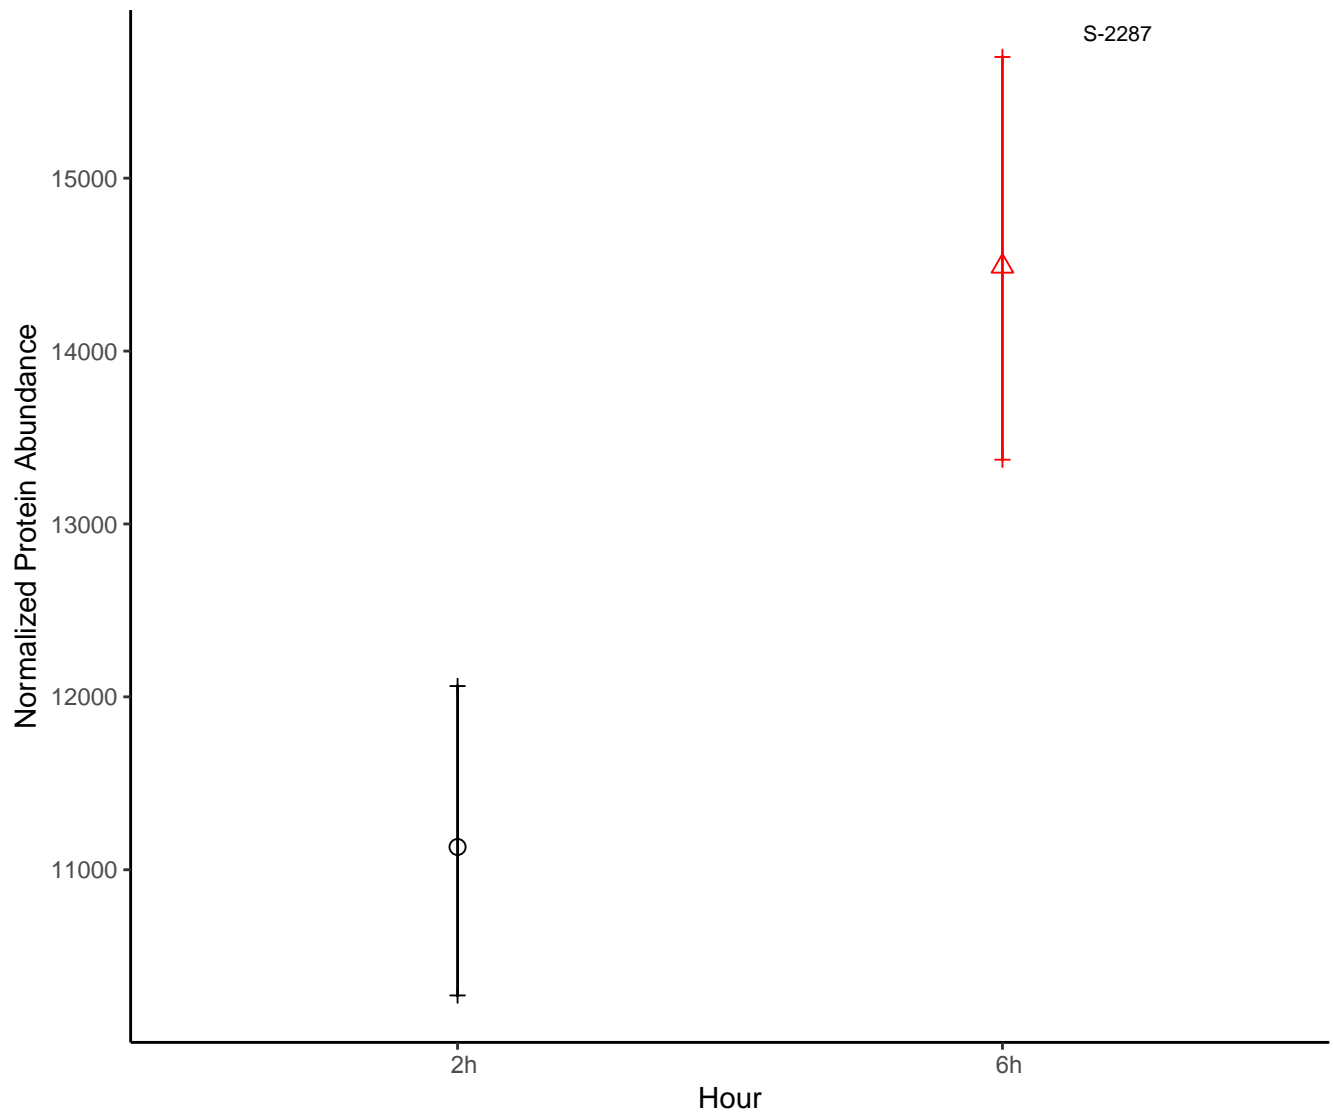

⊕ 2h

△ 6h

# PUR9\_STAAM

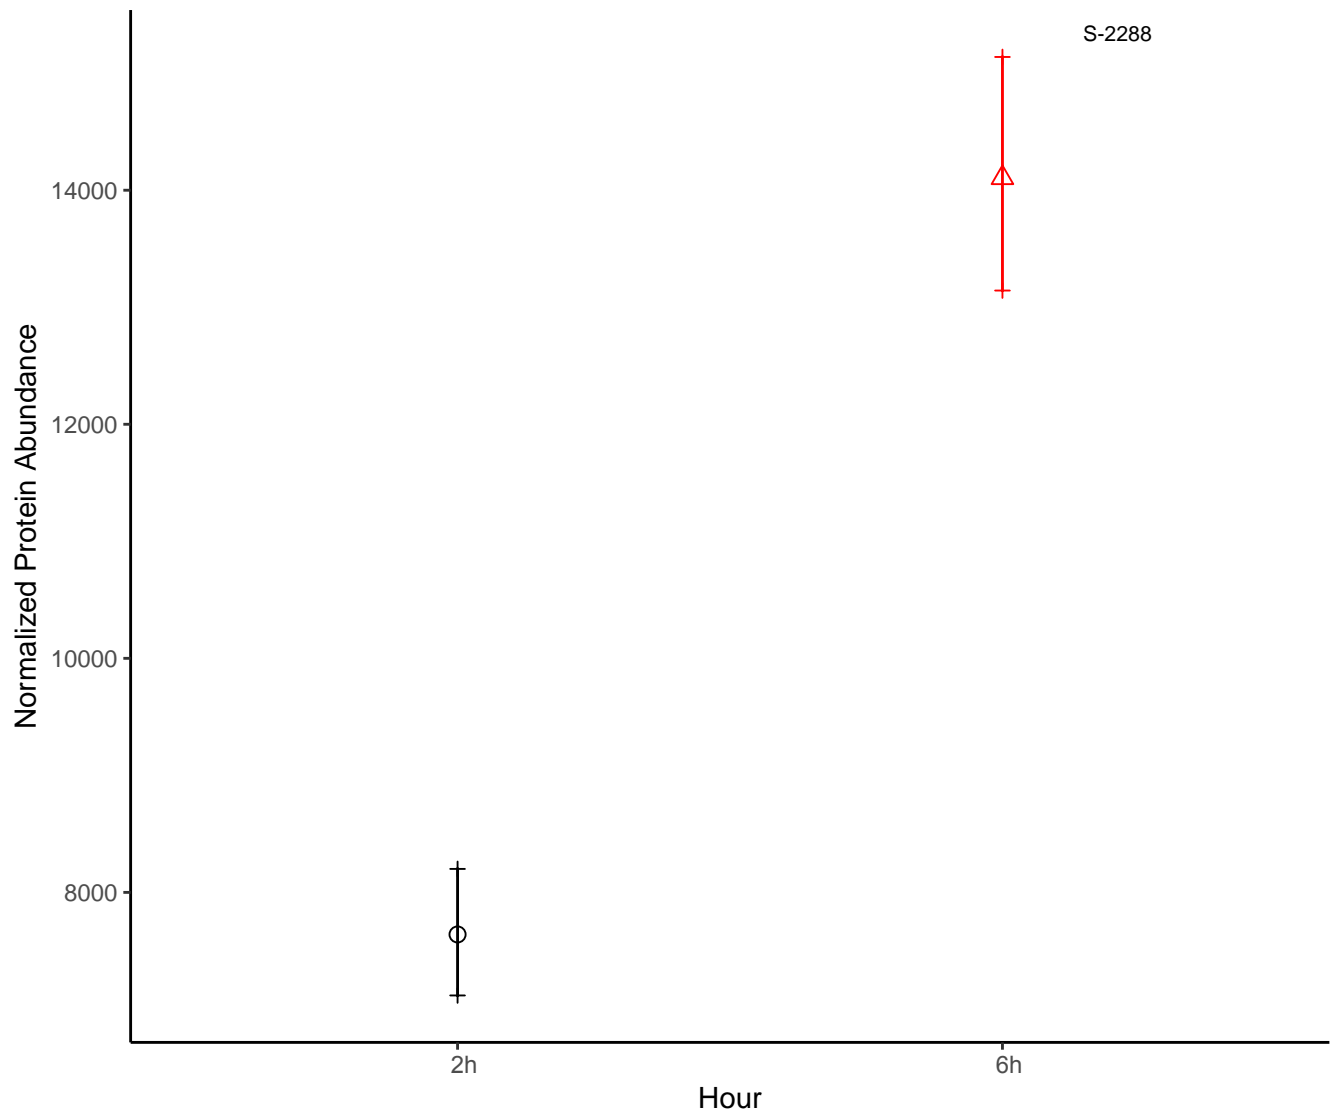

⊕ 2h

△ 6h



# PURA\_STAAM

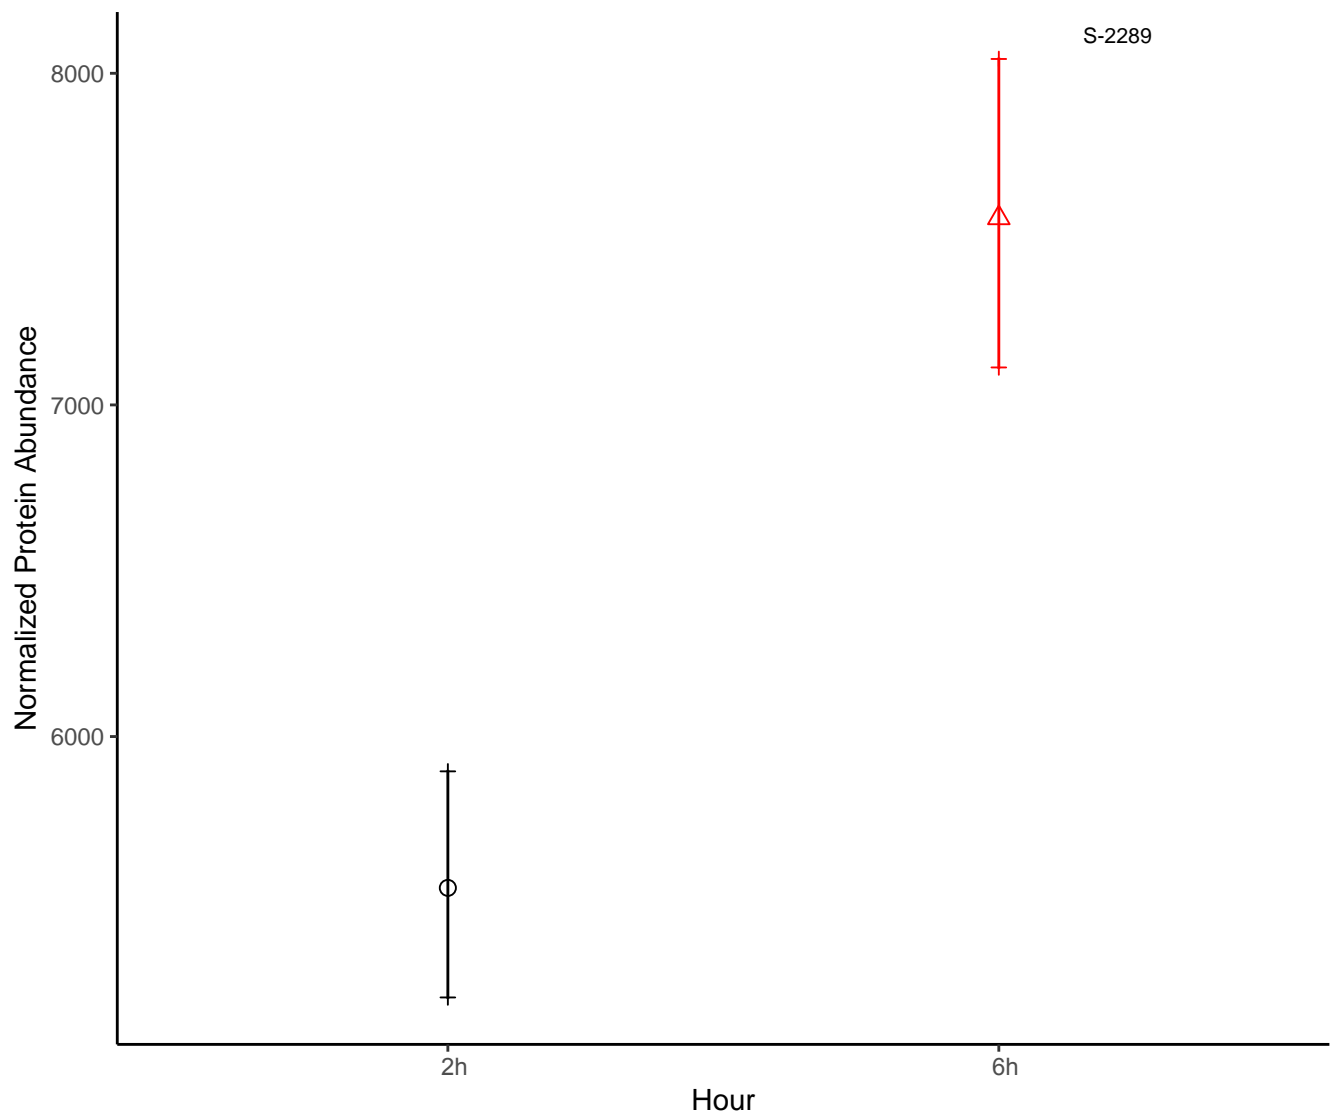

⊕ 2h

⊕ 6h

# PURK\_STAAM

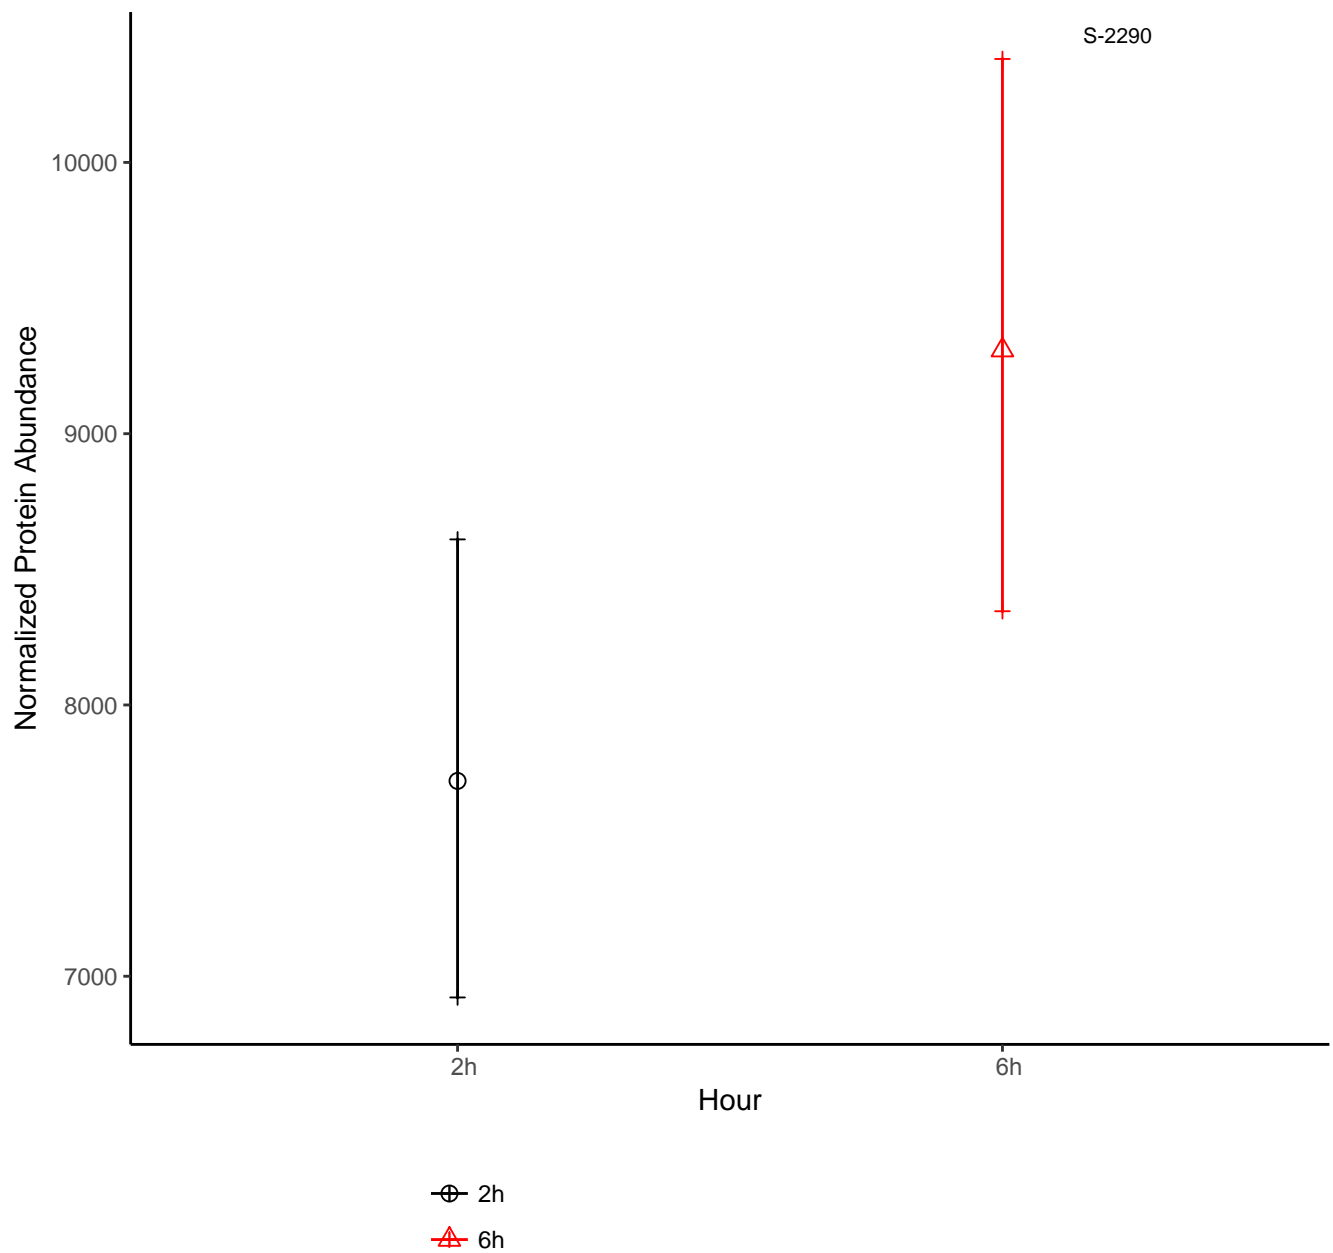

# PURL\_STAAM

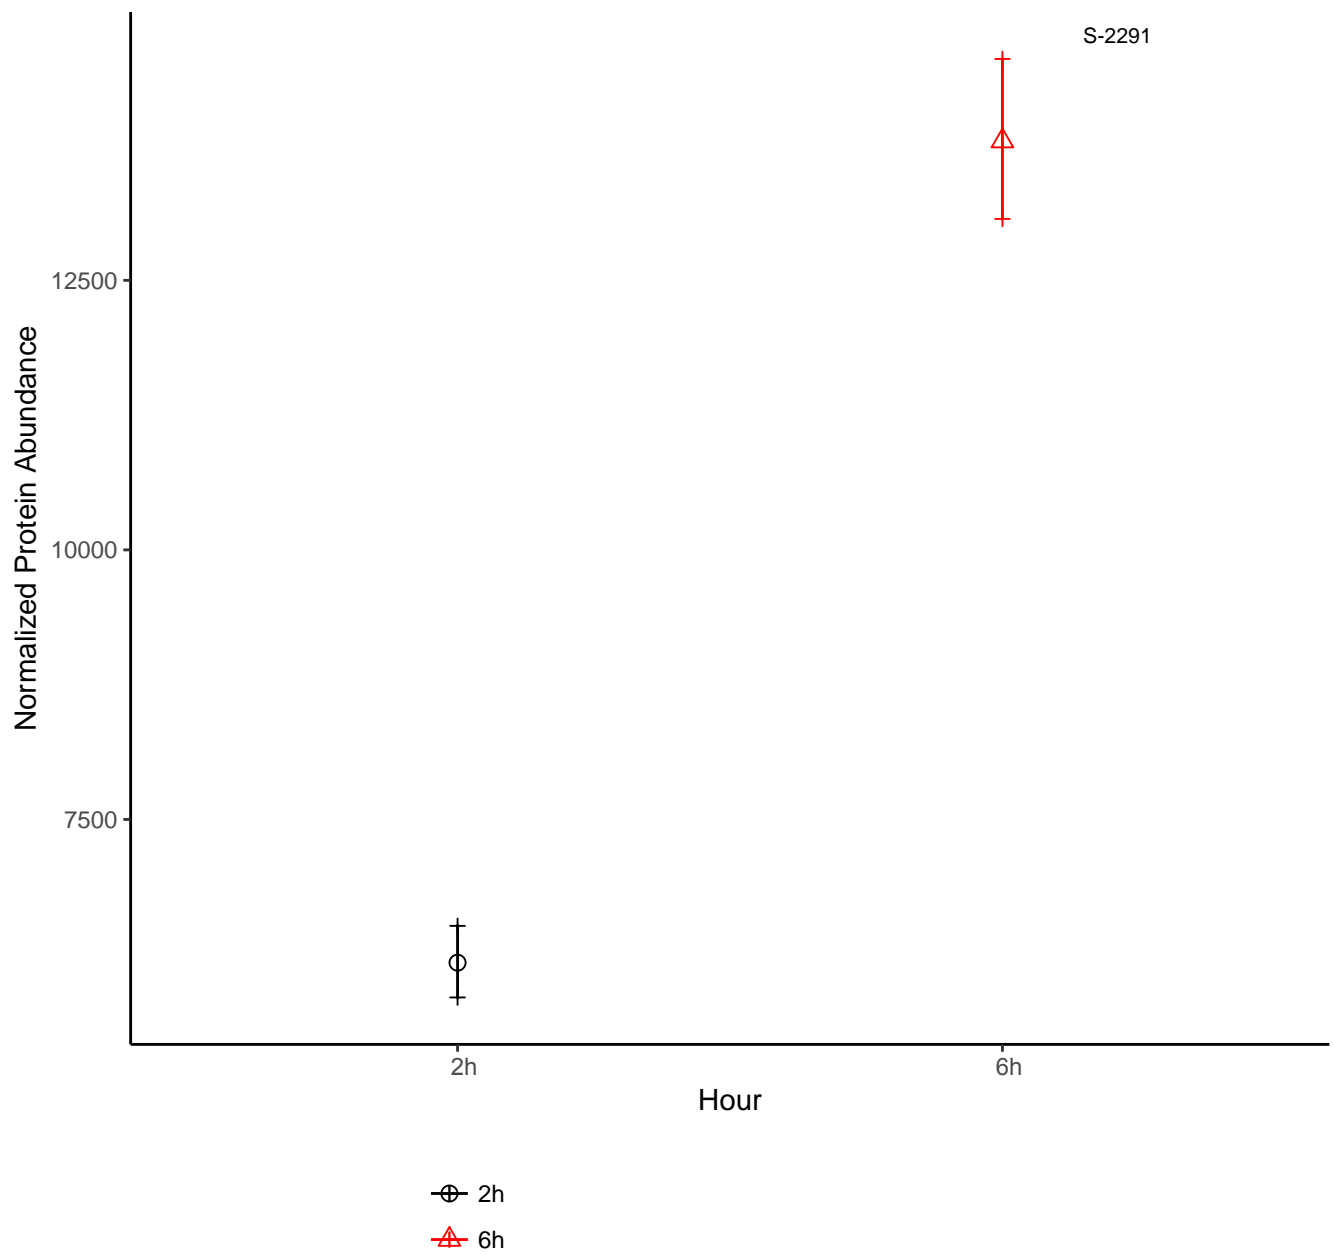

# PURQ\_STAAM

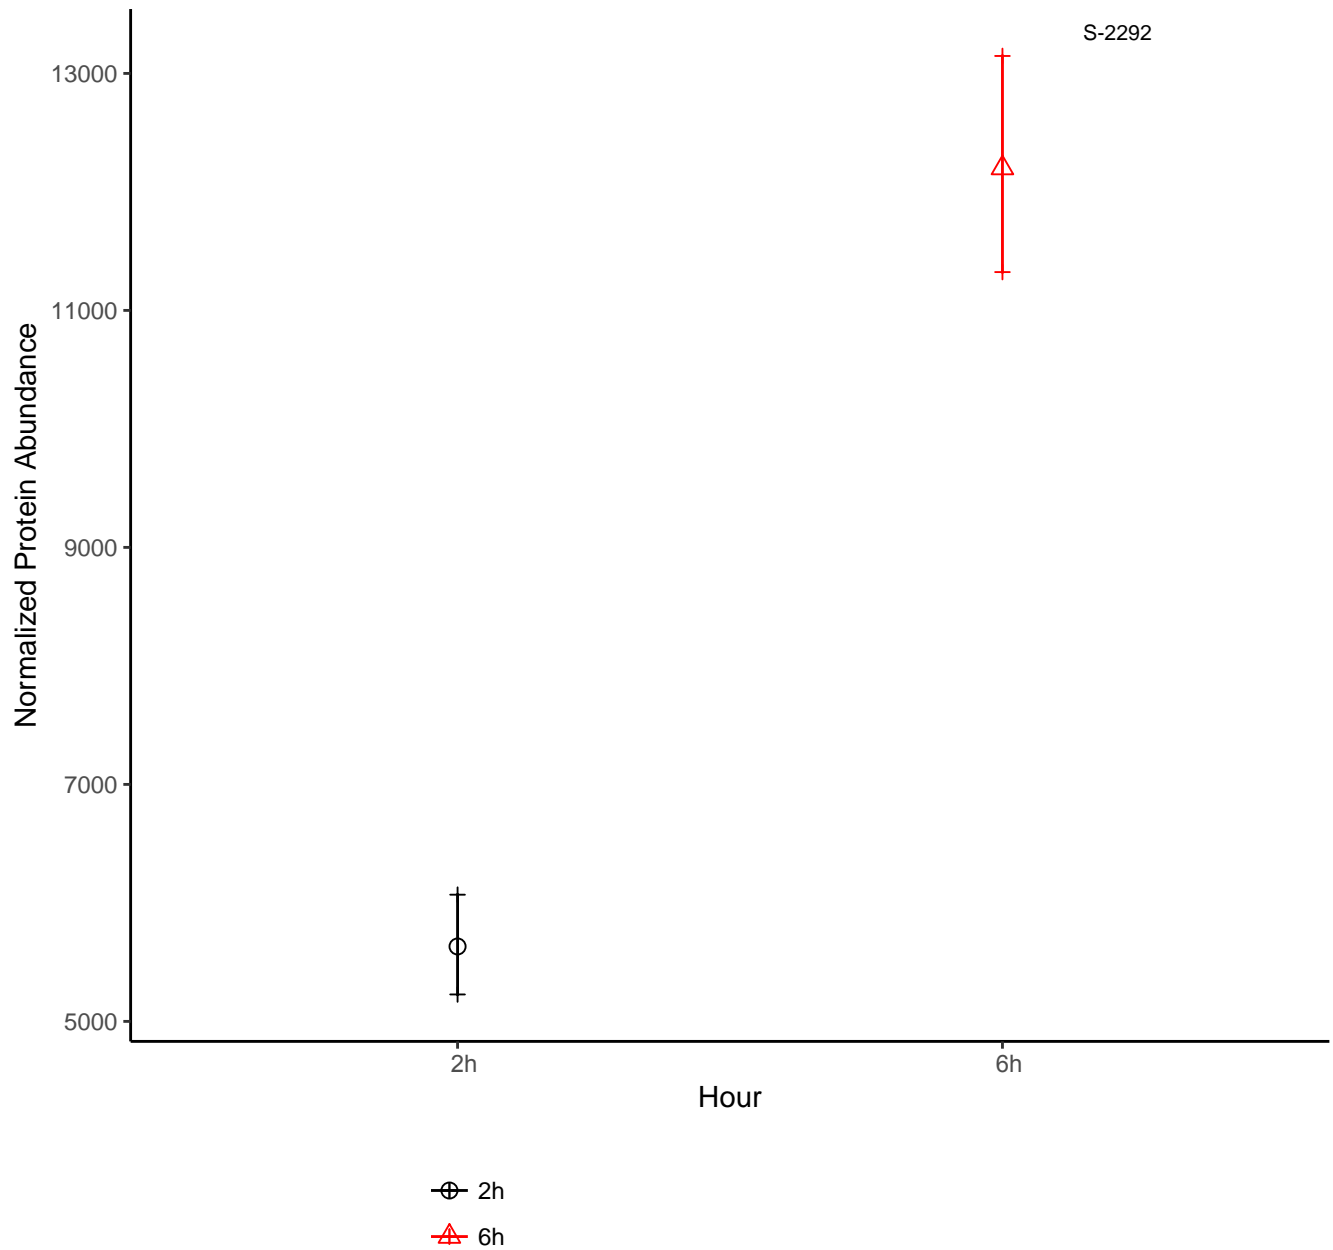

# PYRB\_STAAM

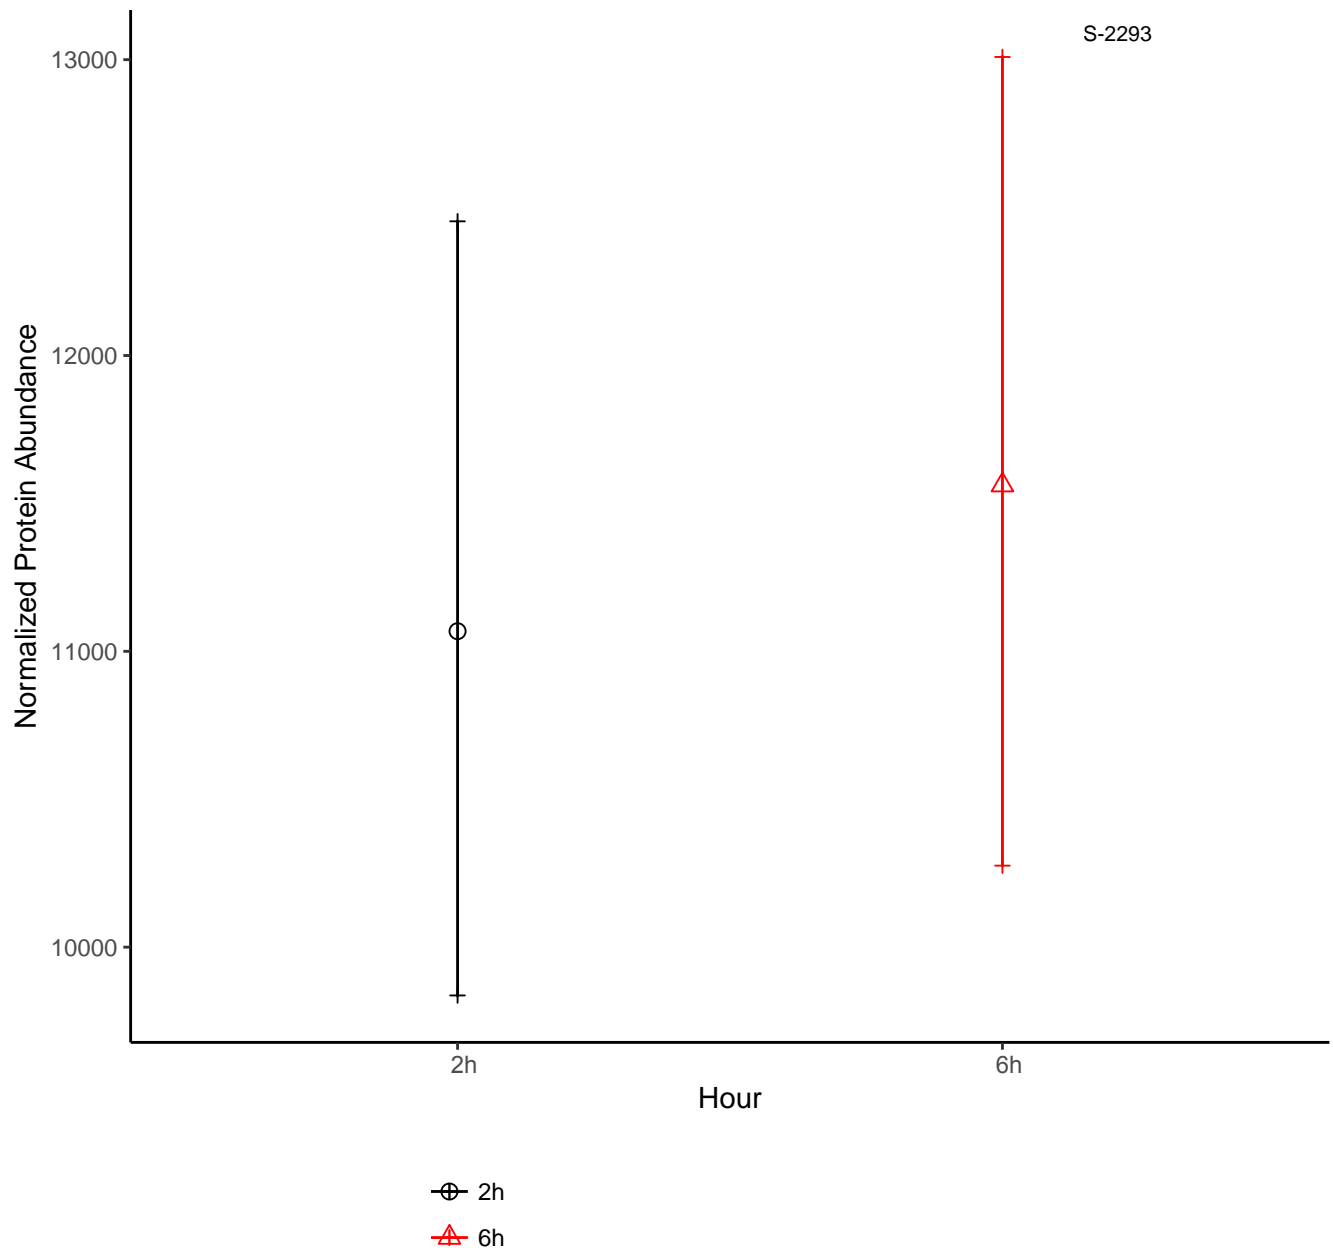

# PYRC\_STAAM

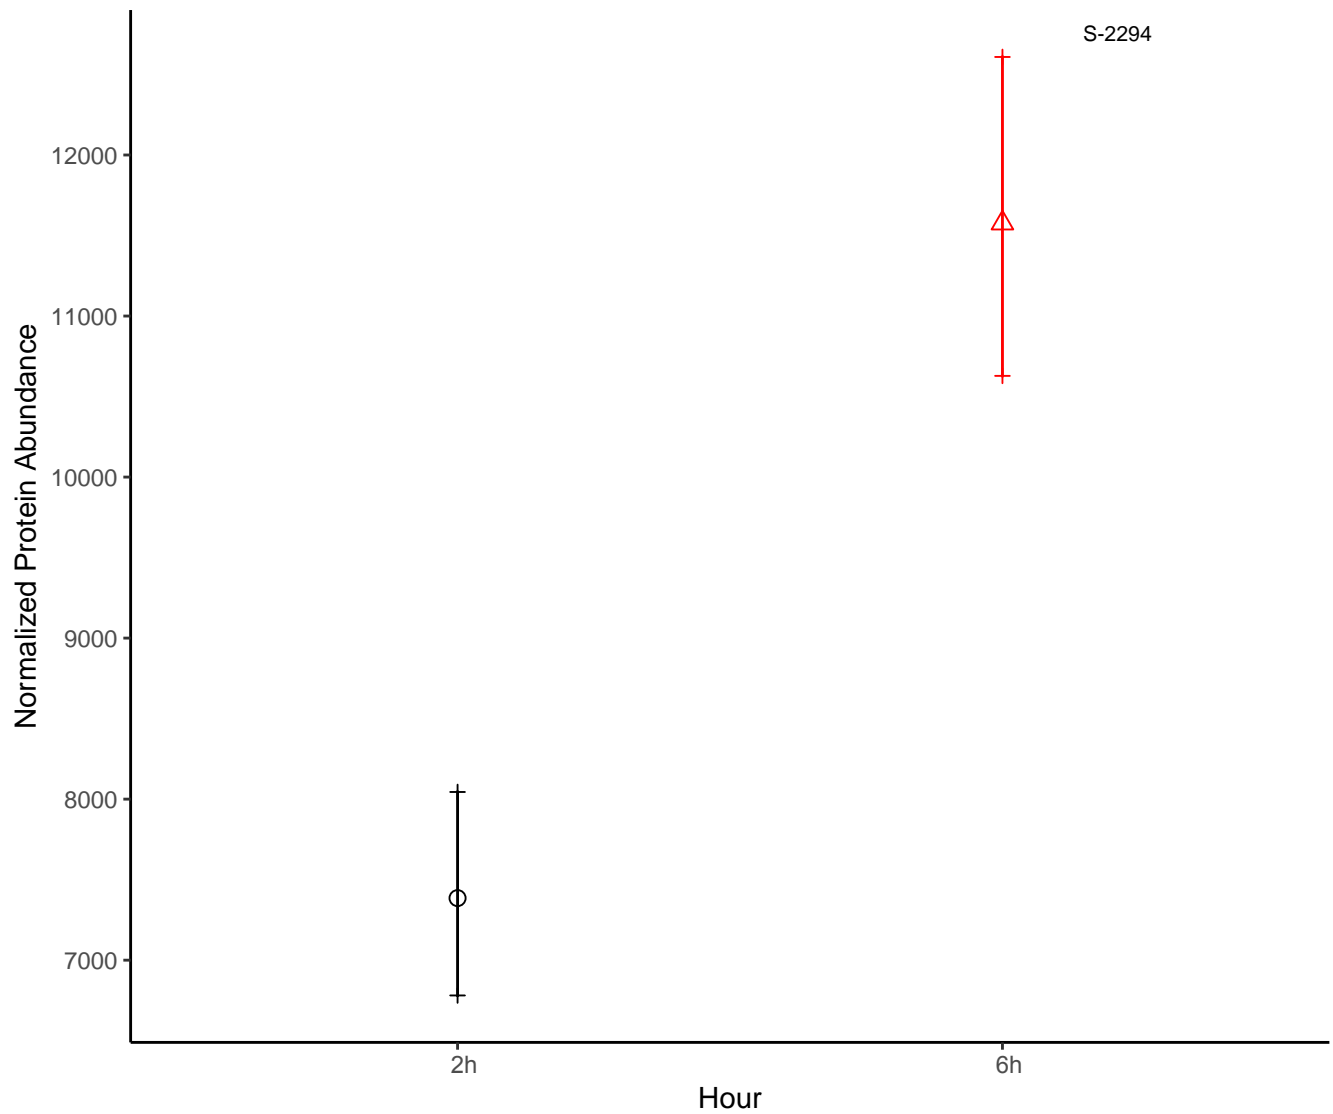

⊕ 2h

△ 6h

# PYRE\_STAAM

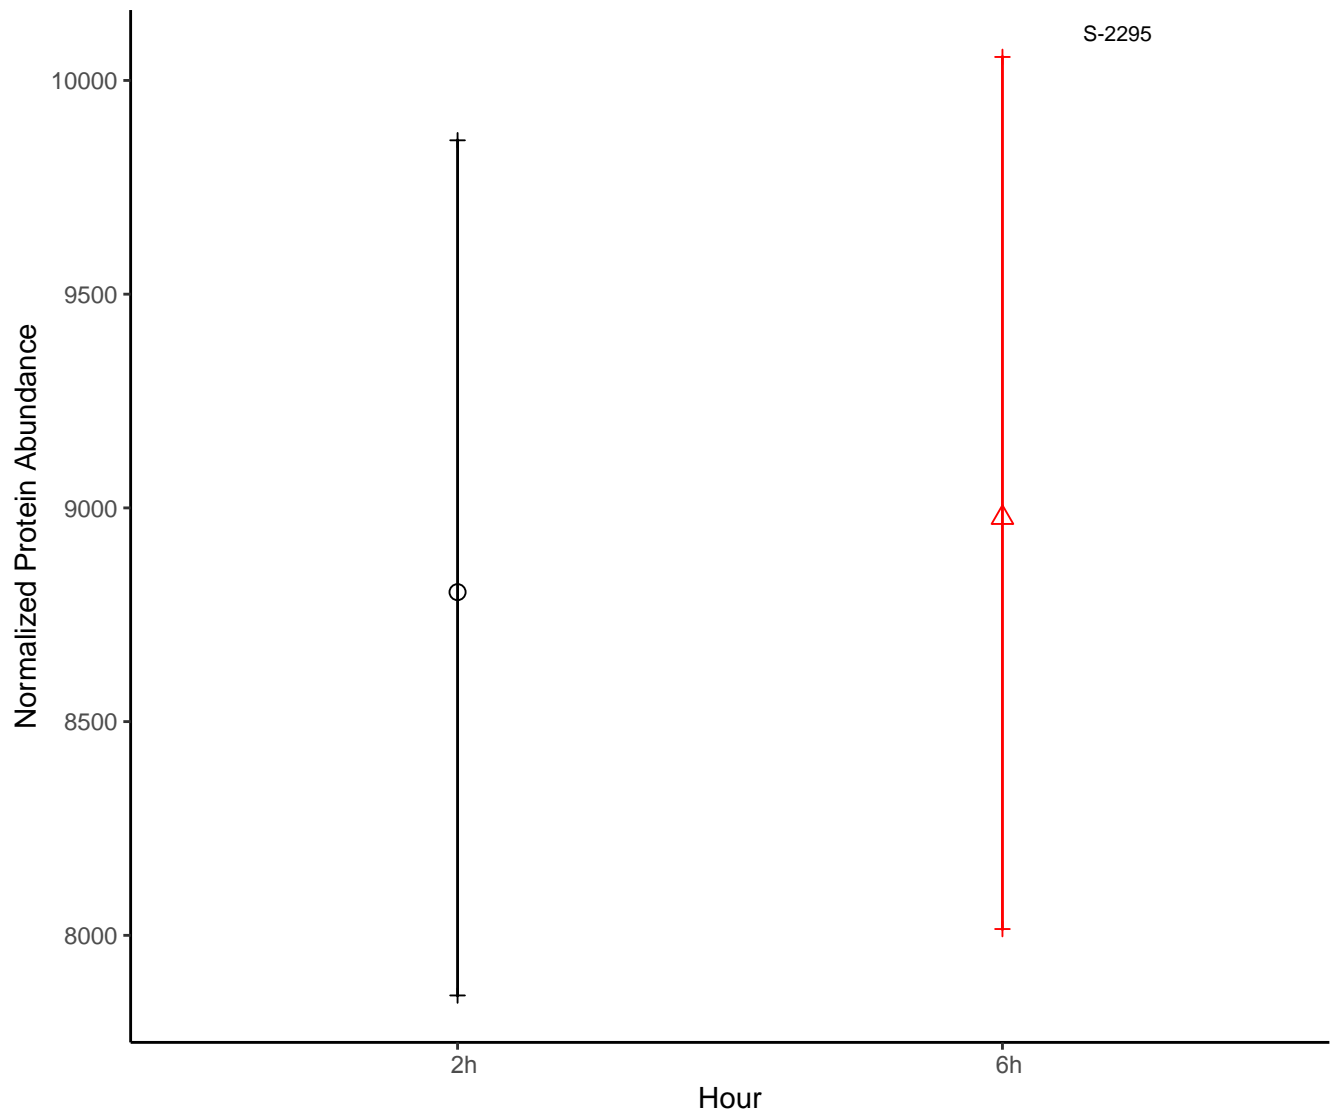

⊕ 2h

△ 6h

# PYRF\_STAAM

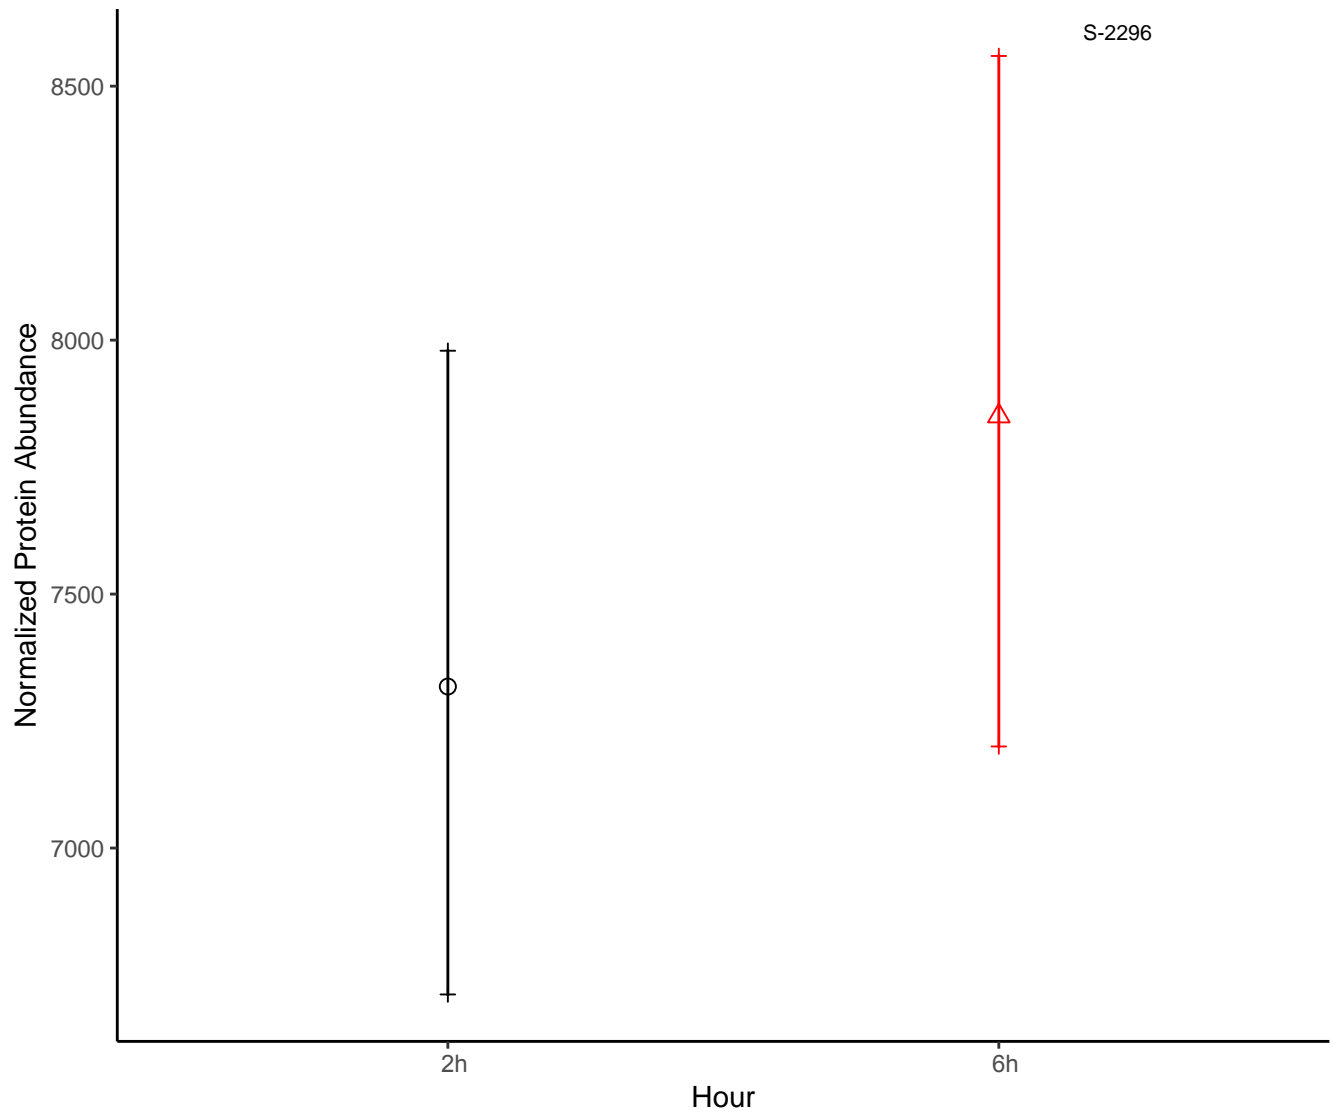

⊕ 2h

△ 6h



# PYRG\_STAAM

S-2297

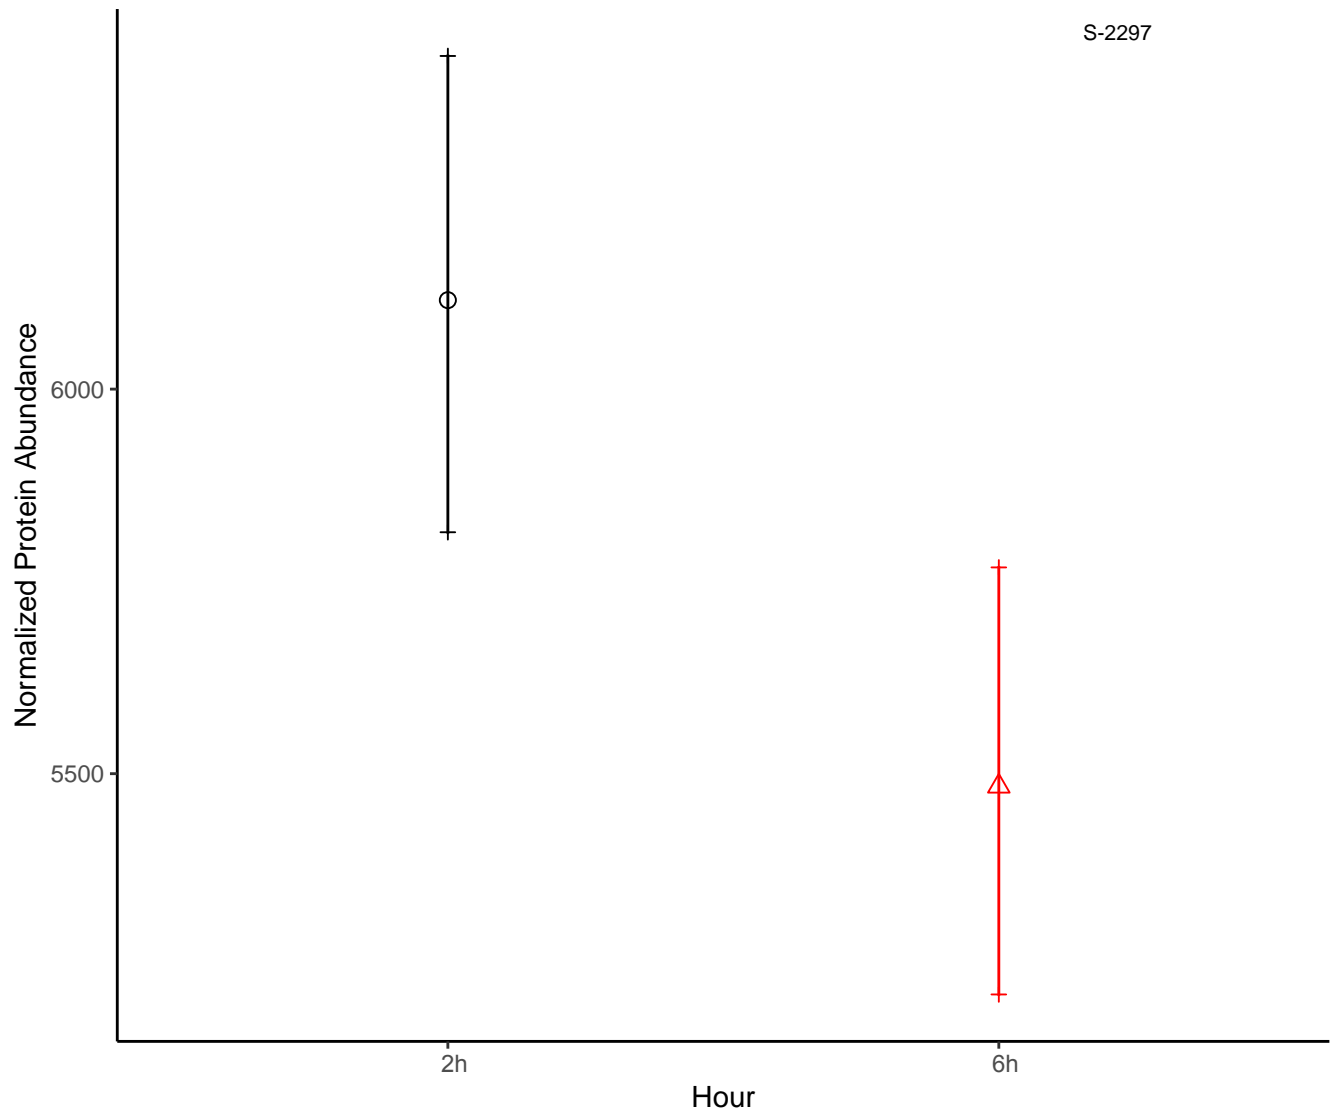

⊕ 2h

△ 6h

# PYRH\_STAAM

S-2298

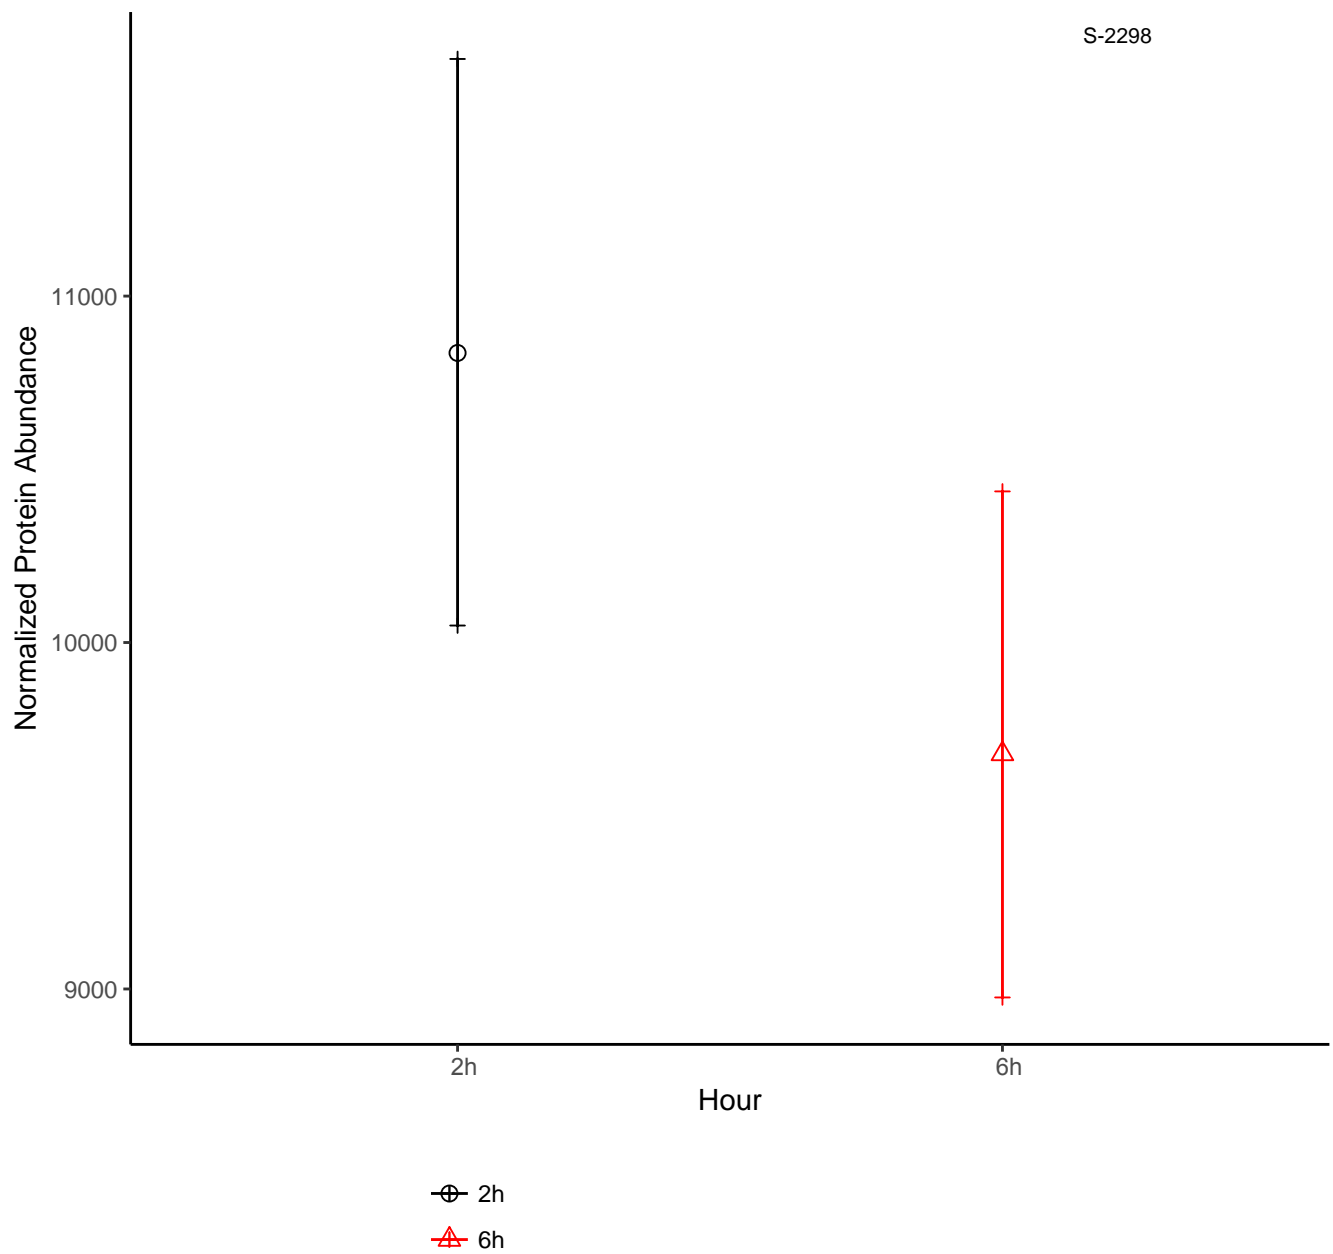

# PYRR\_STAAM

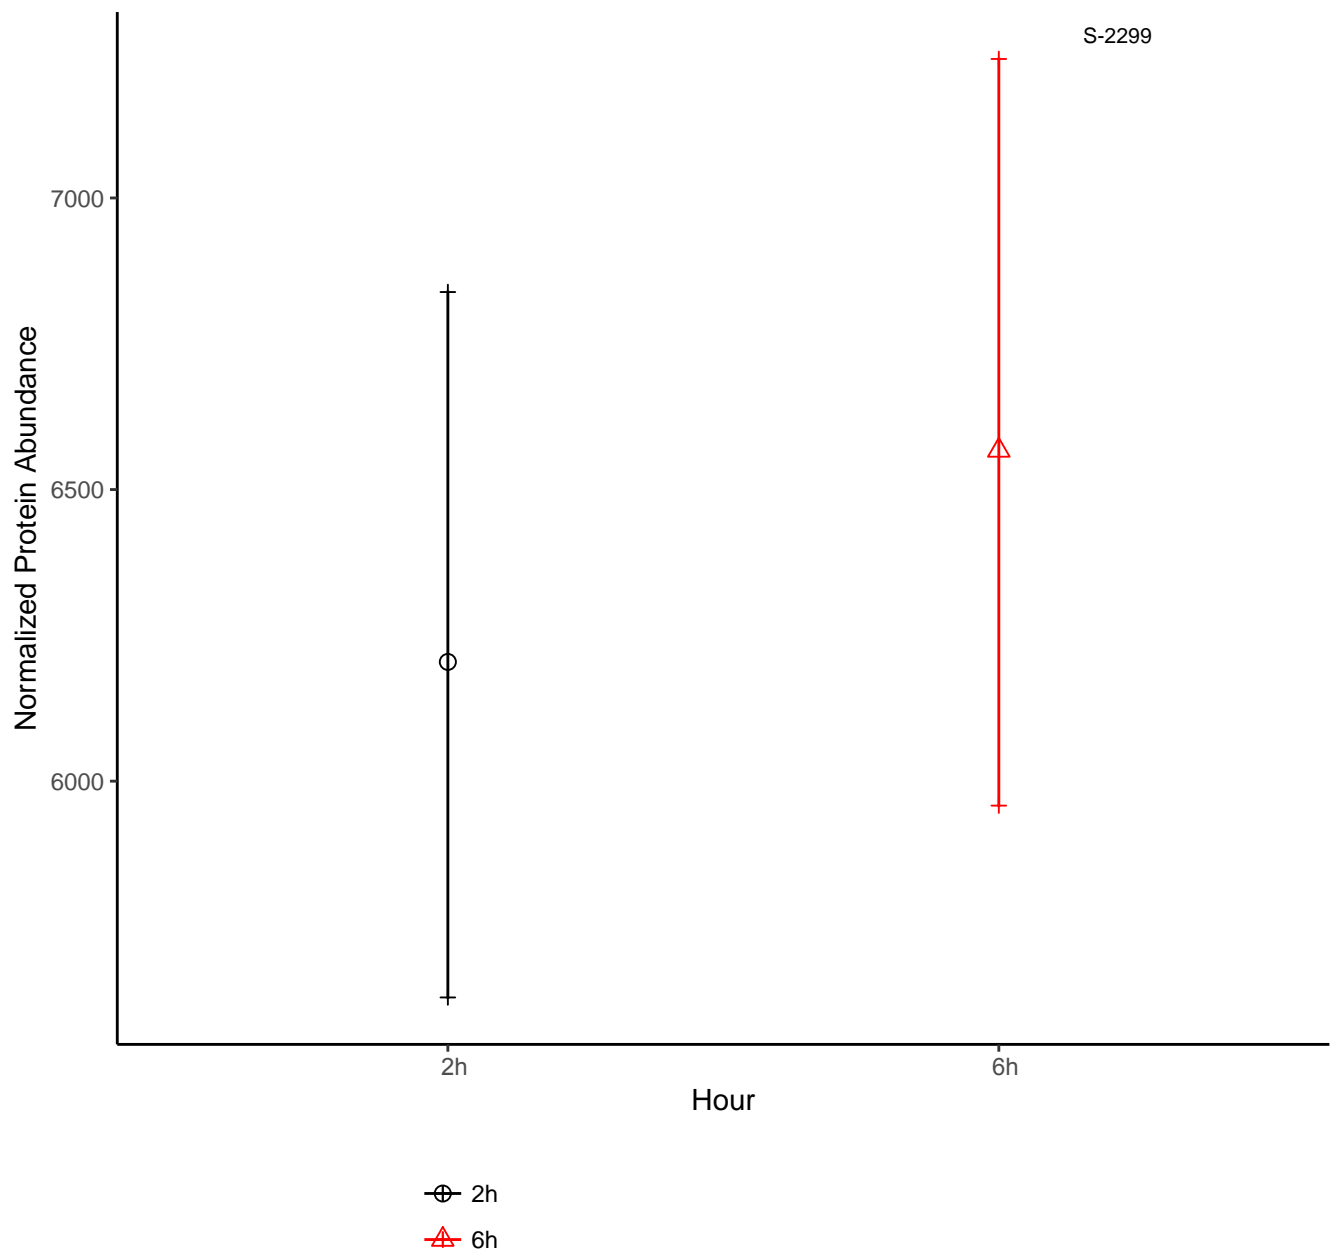

# QOX2\_STAAM

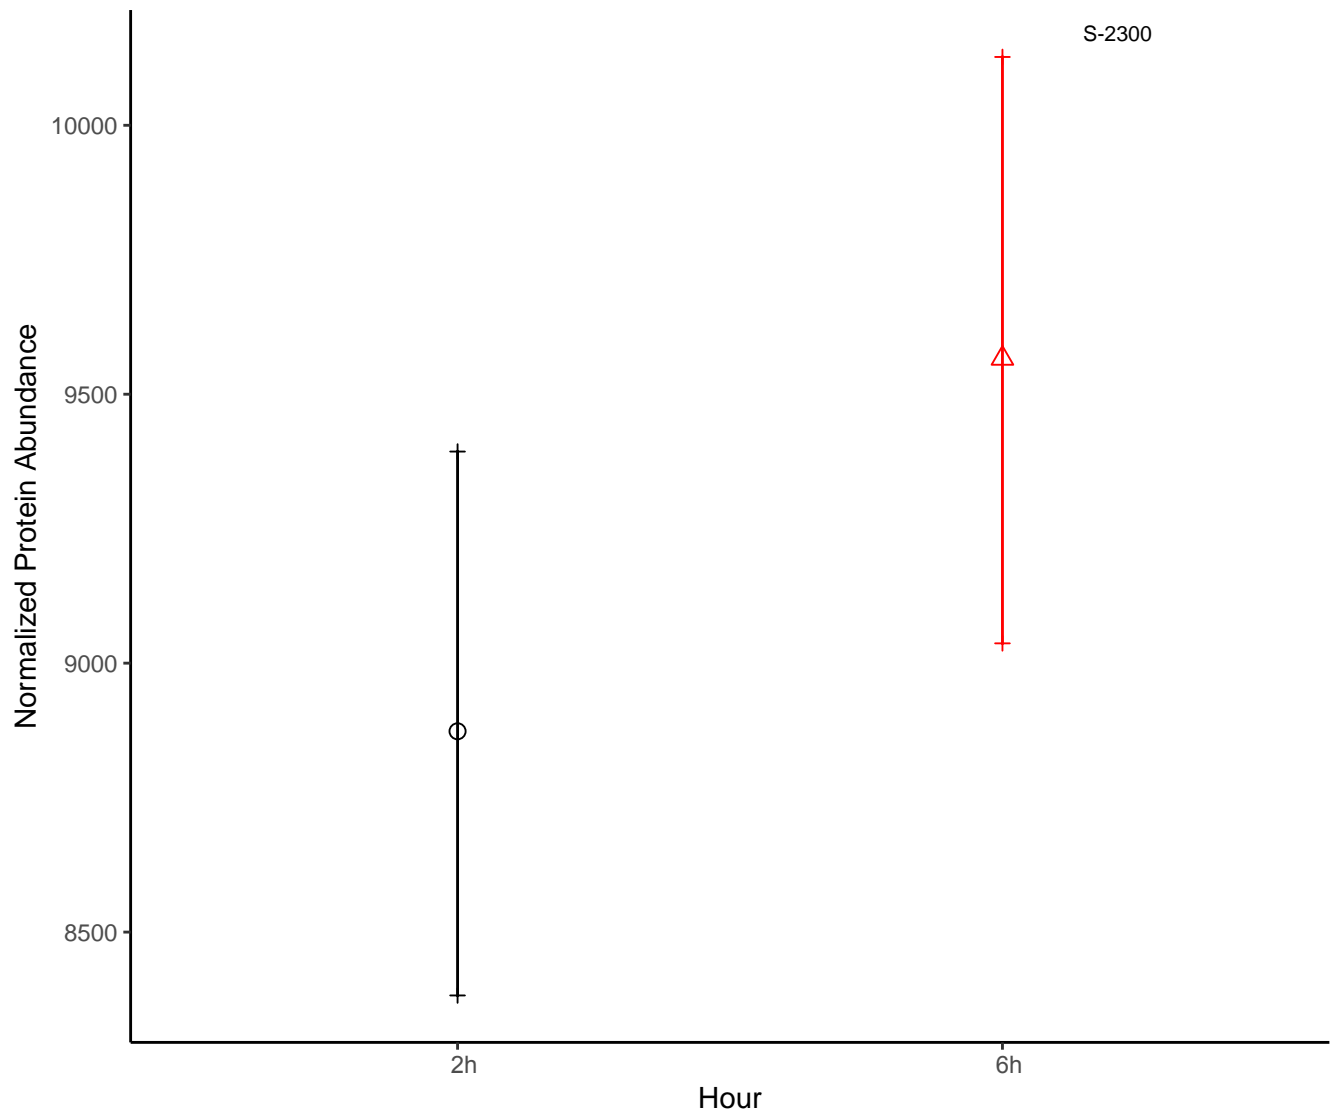

⊕ 2h

△ 6h

# QUEA\_STAAM

S-2301

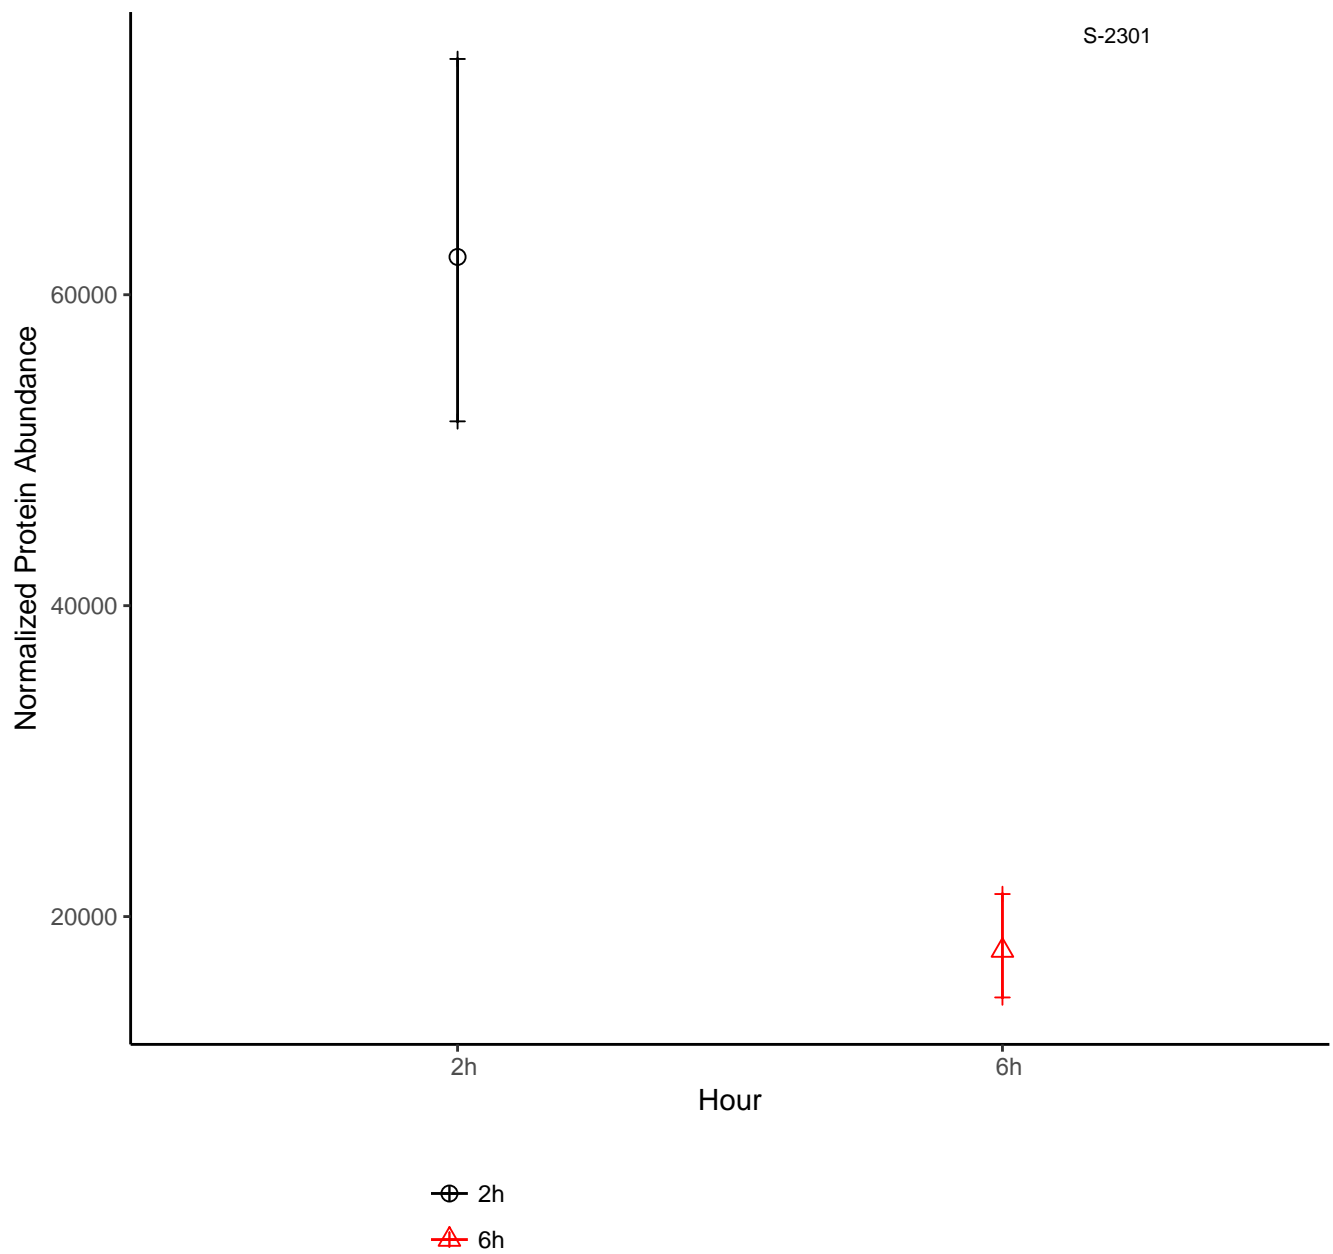

# QUEC\_STAAM

S-2302

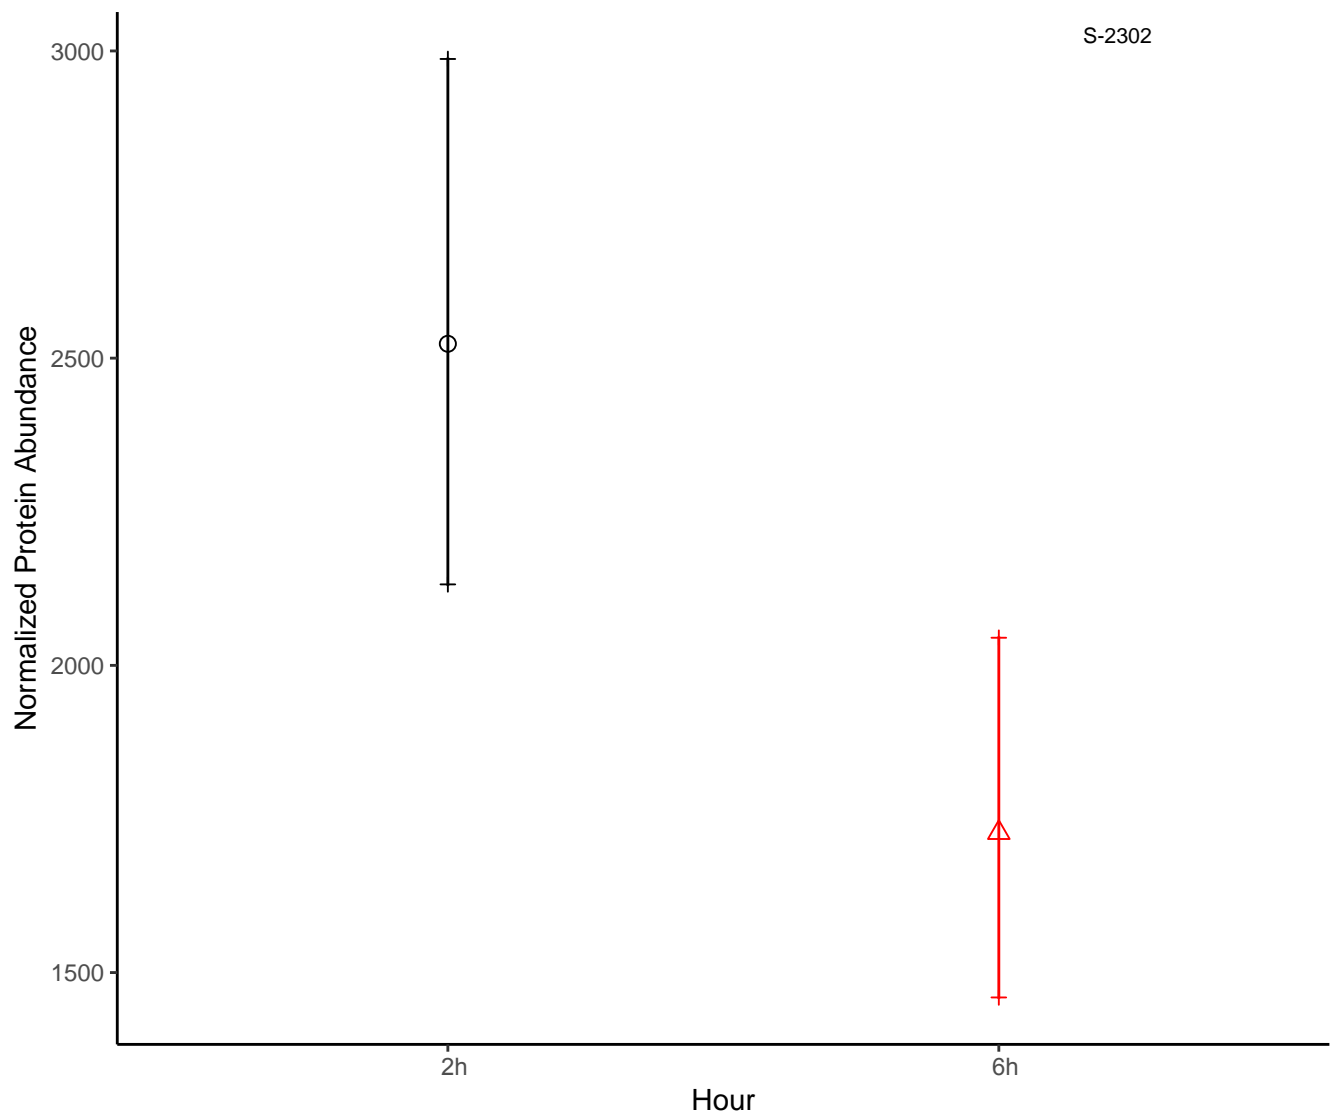

⊕ 2h

△ 6h

# RBFA\_STAAM

S-2303

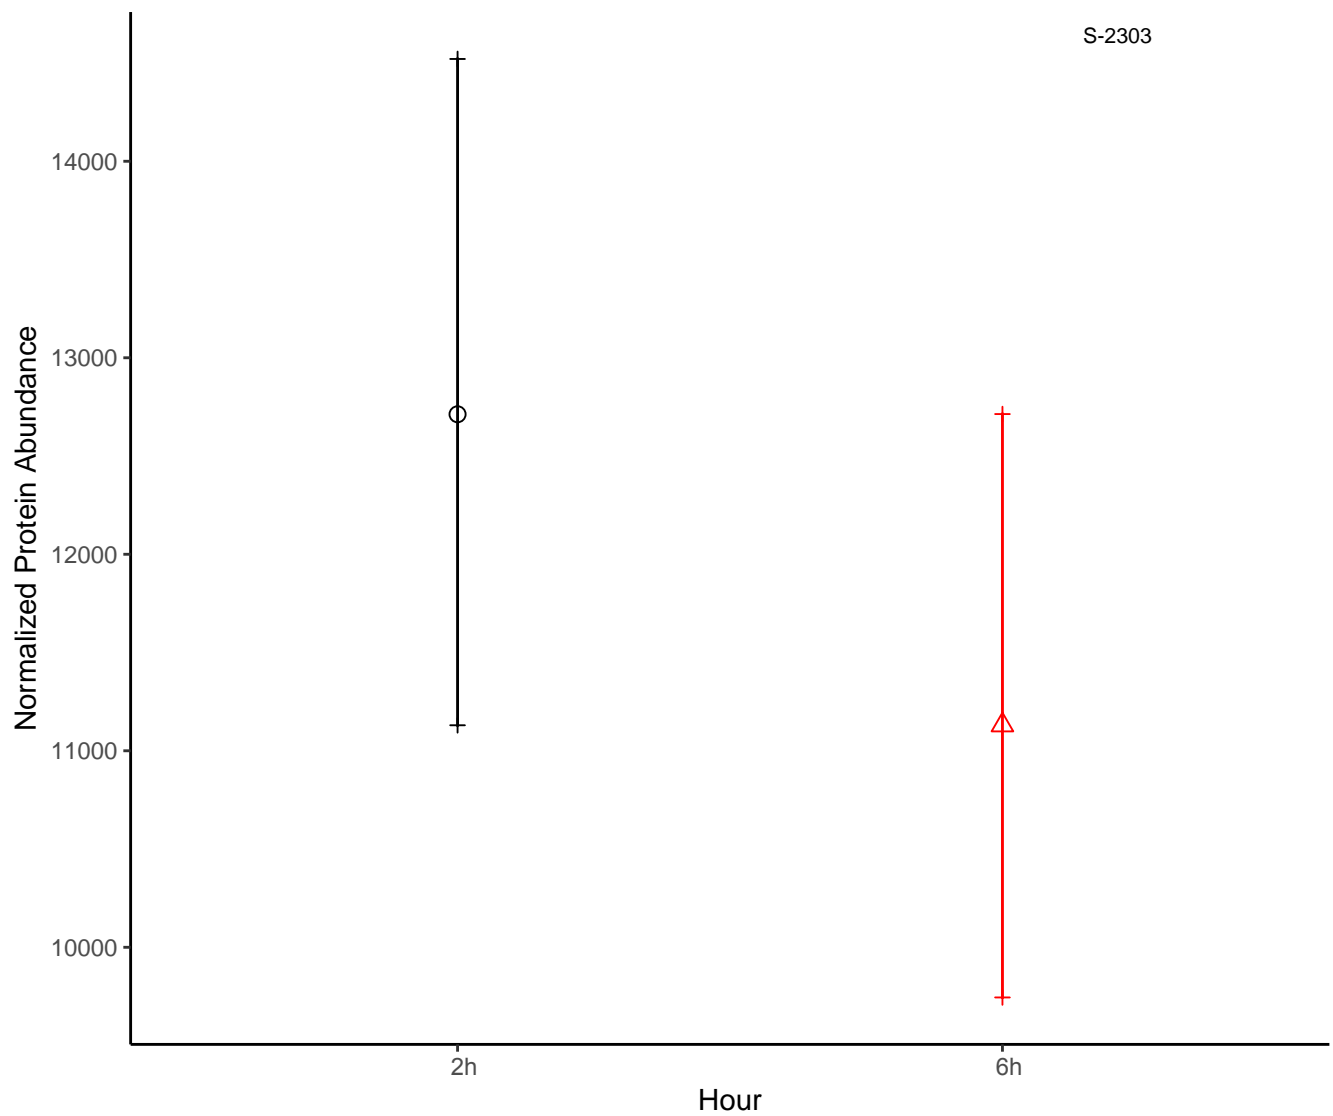

⊕ 2h

△ 6h

# RECA\_STAAM

S-2304

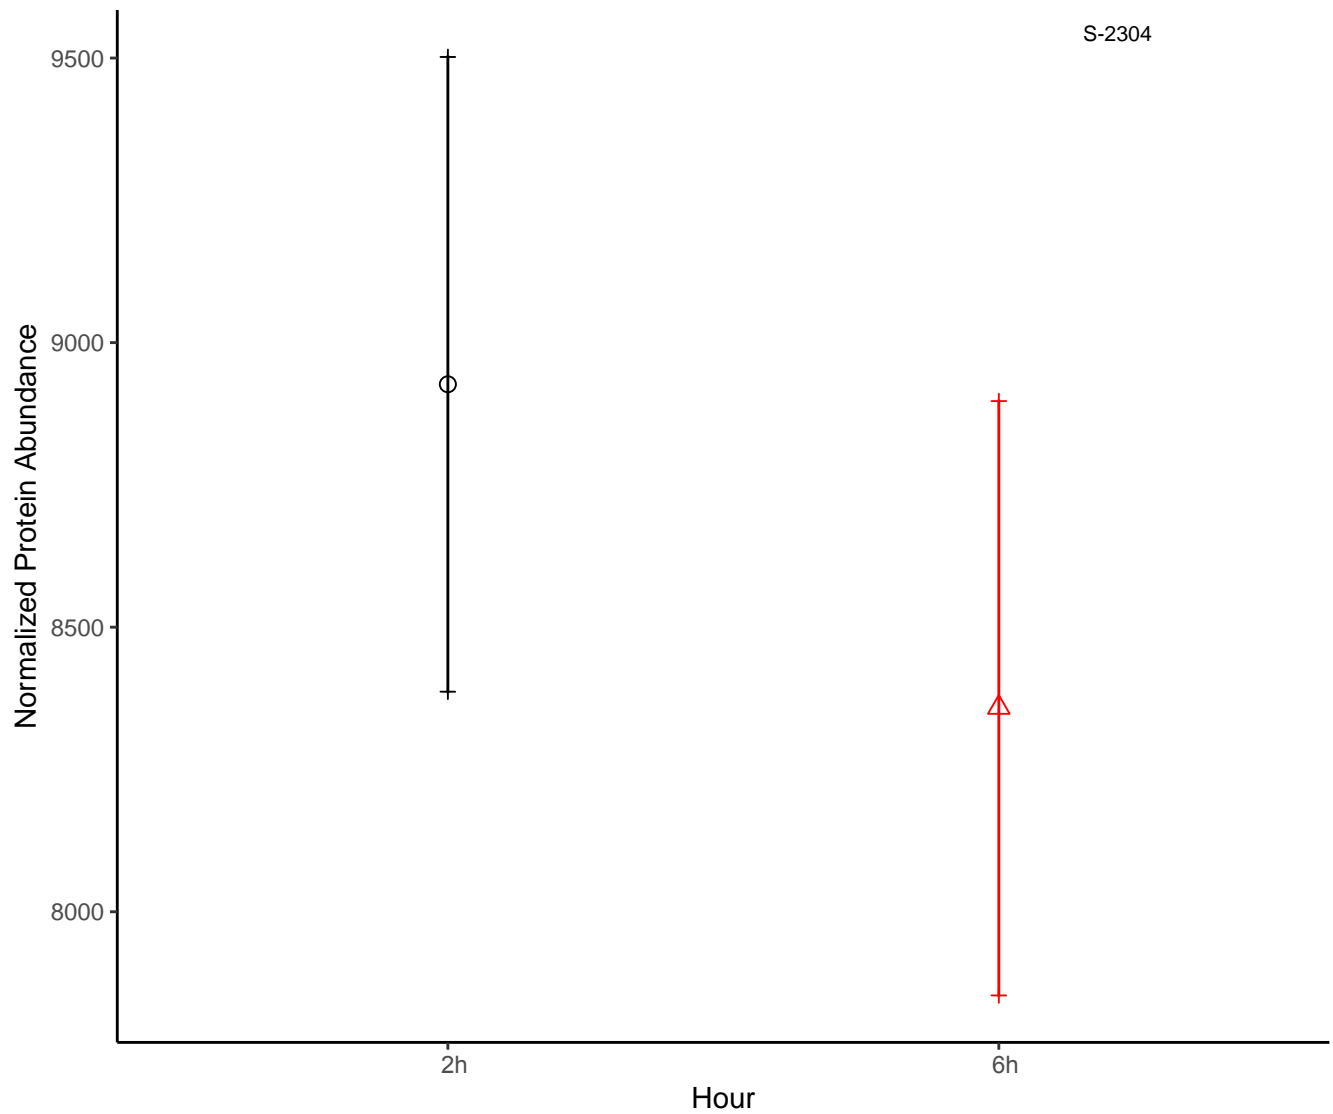

⊕ 2h

△ 6h



# RELA\_STAAM

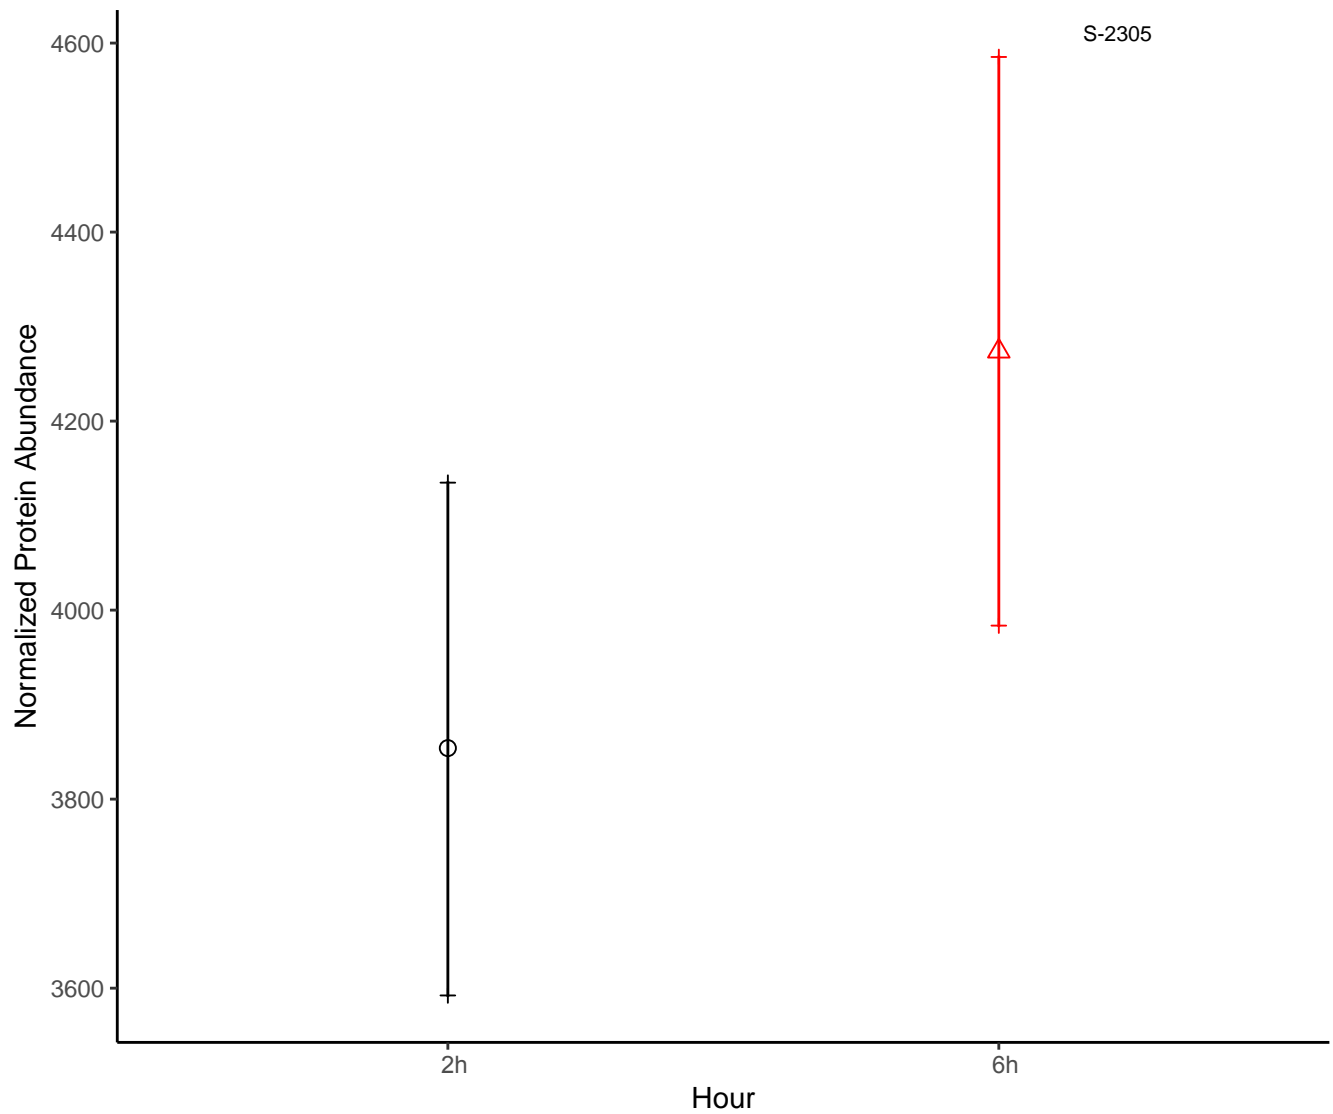

⊕ 2h

△ 6h

# REX\_STAAM

S-2306

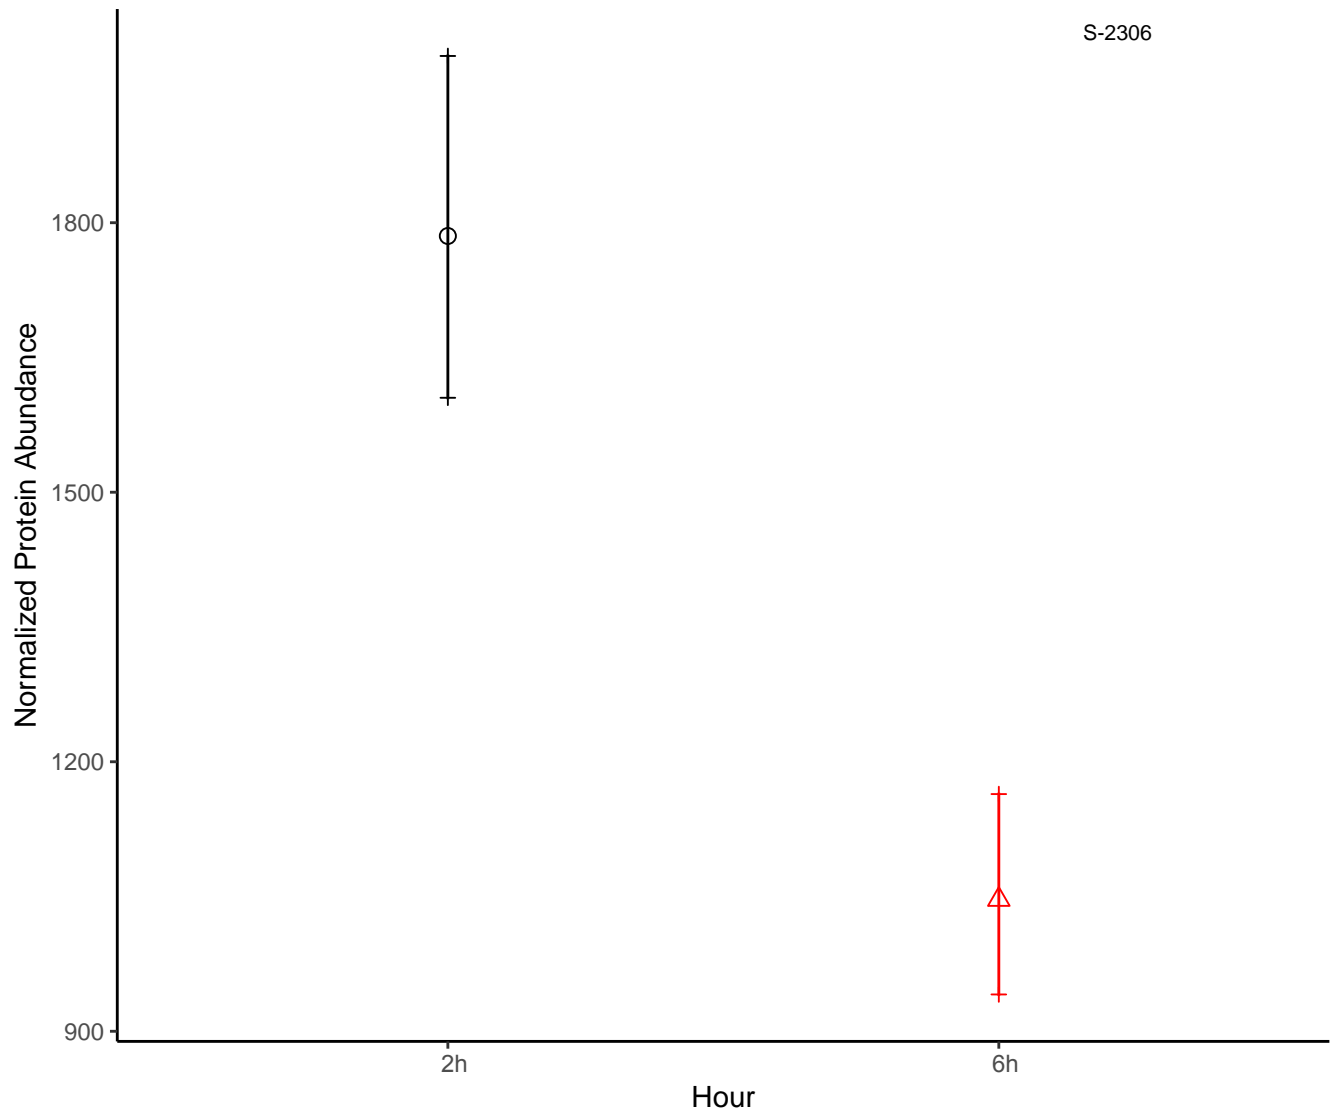

⊕ 2h

△ 6h

# RF1\_STAAM

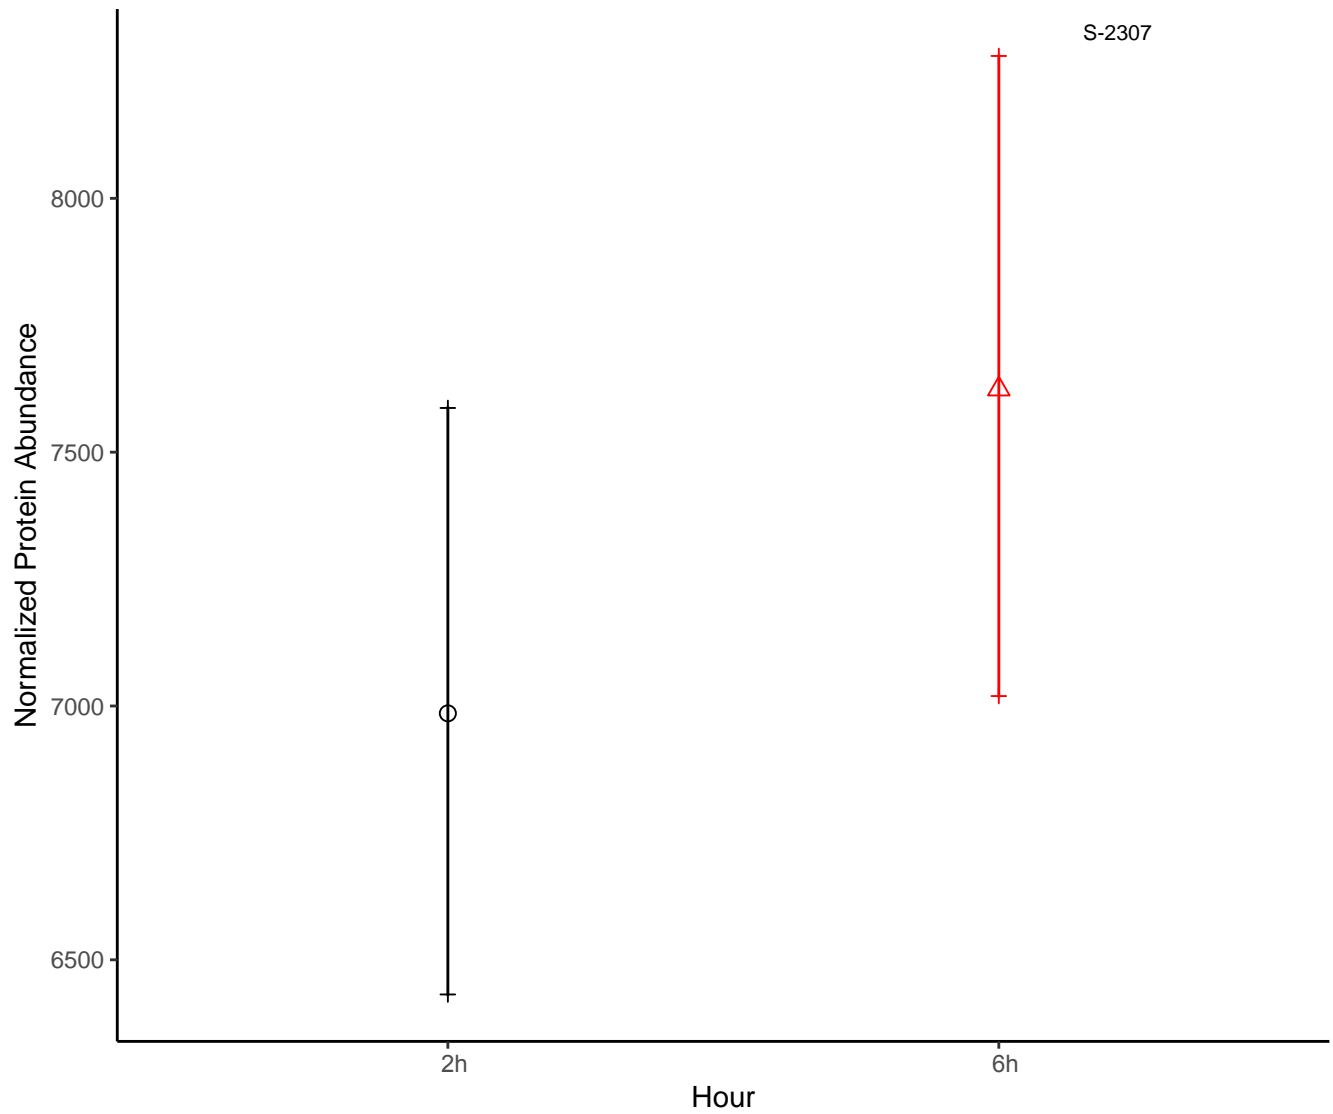

⊕ 2h

△ 6h

# RIBBA\_STAAM

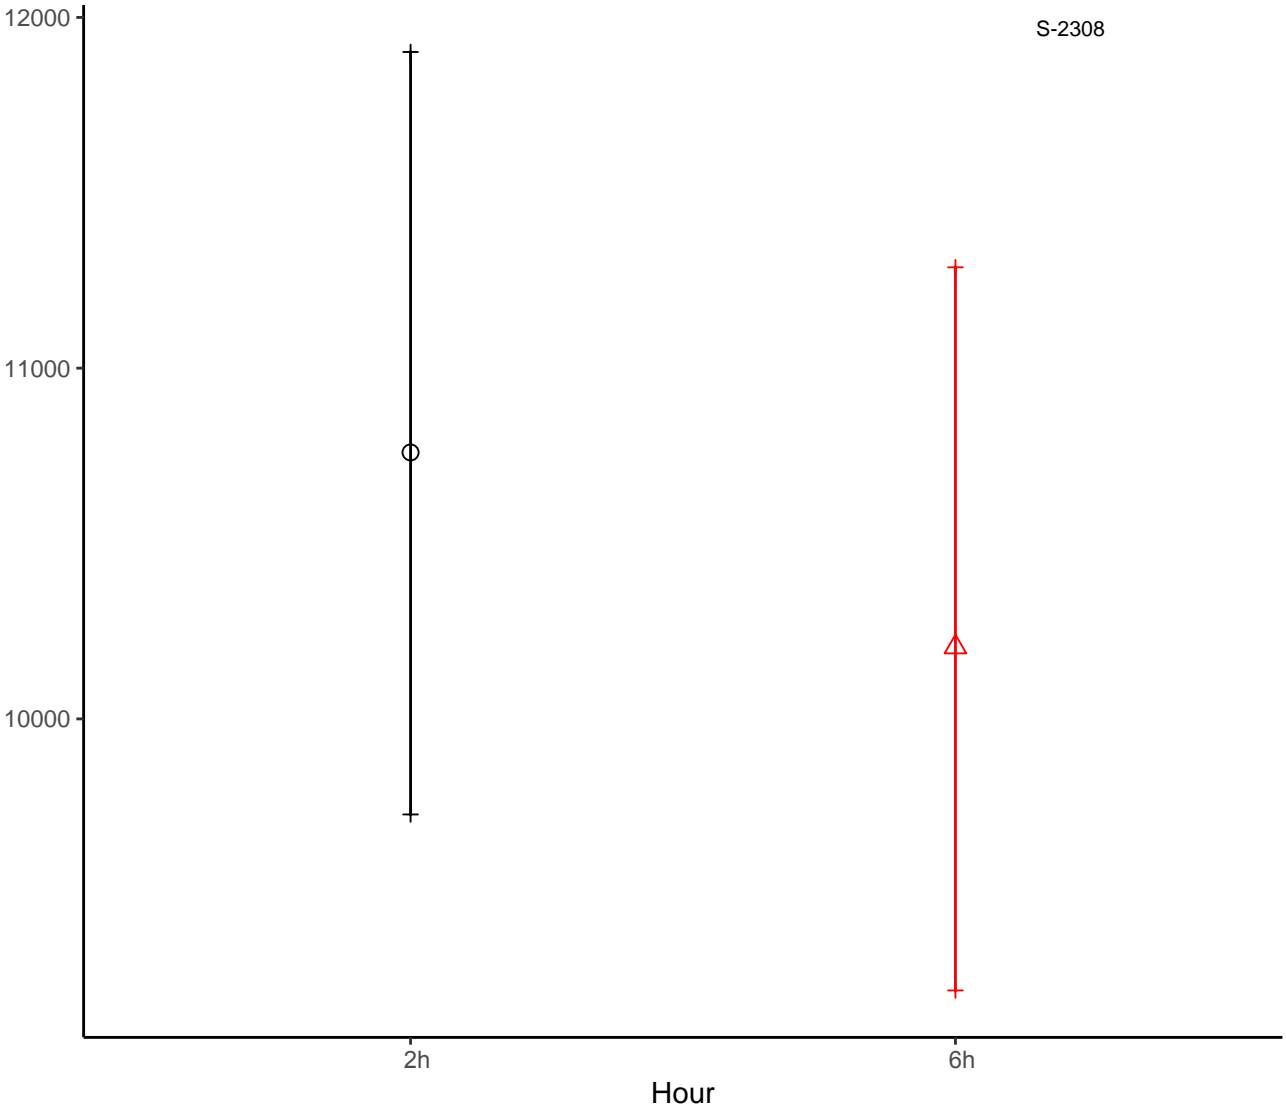

⊕ 2h

△ 6h

# RIMM\_STAAM

S-2309

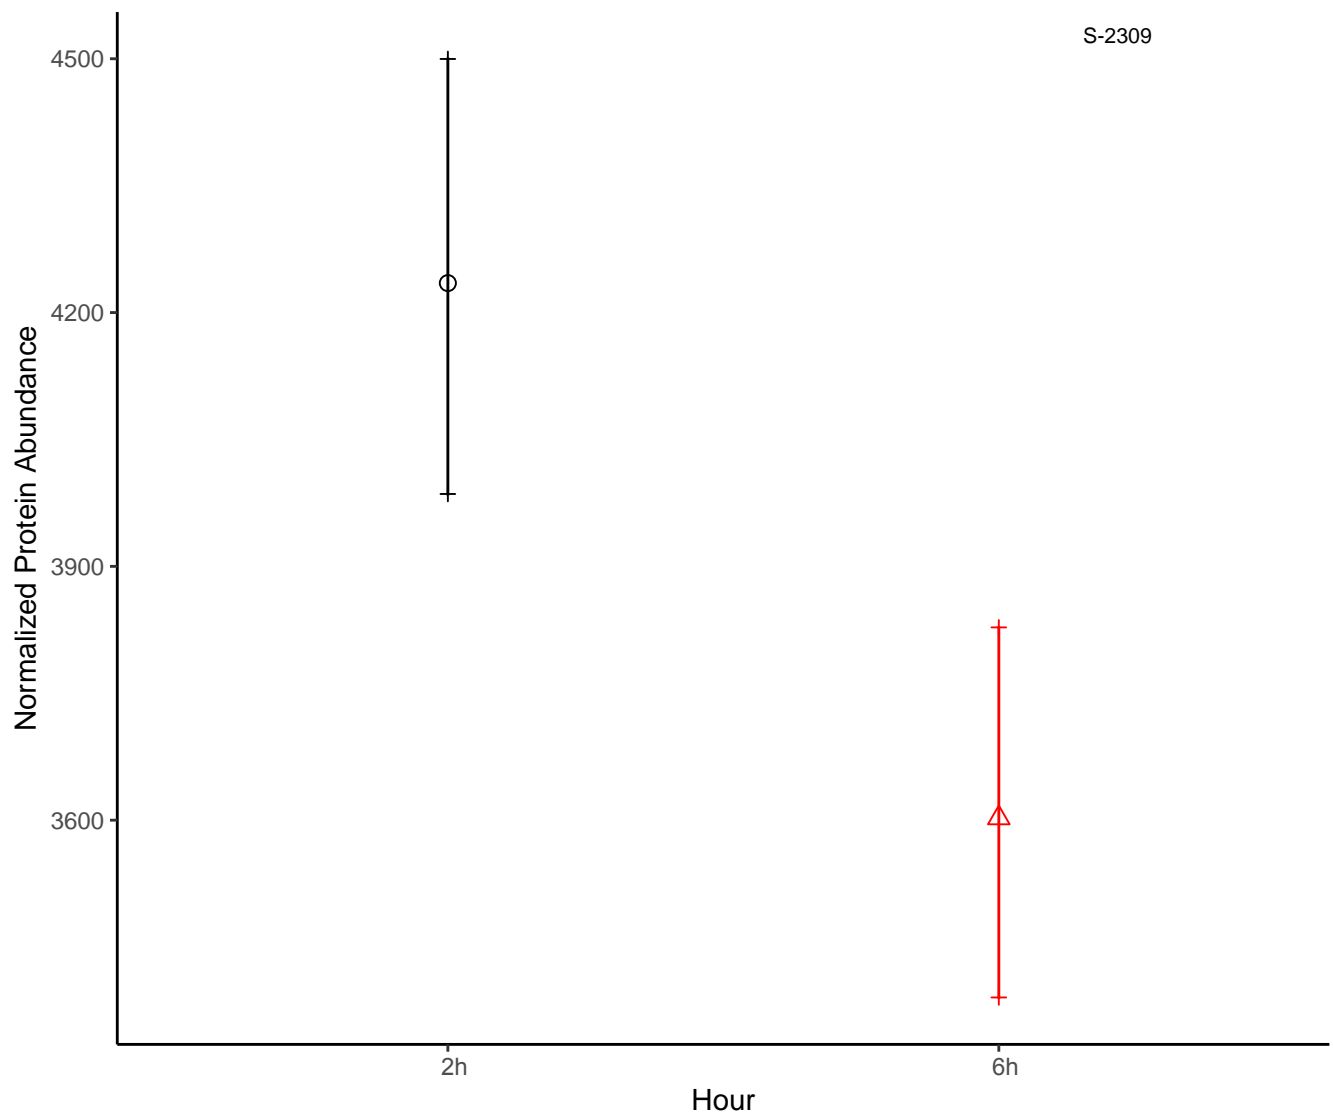

⊕ 2h

△ 6h

# RISB\_STAAM

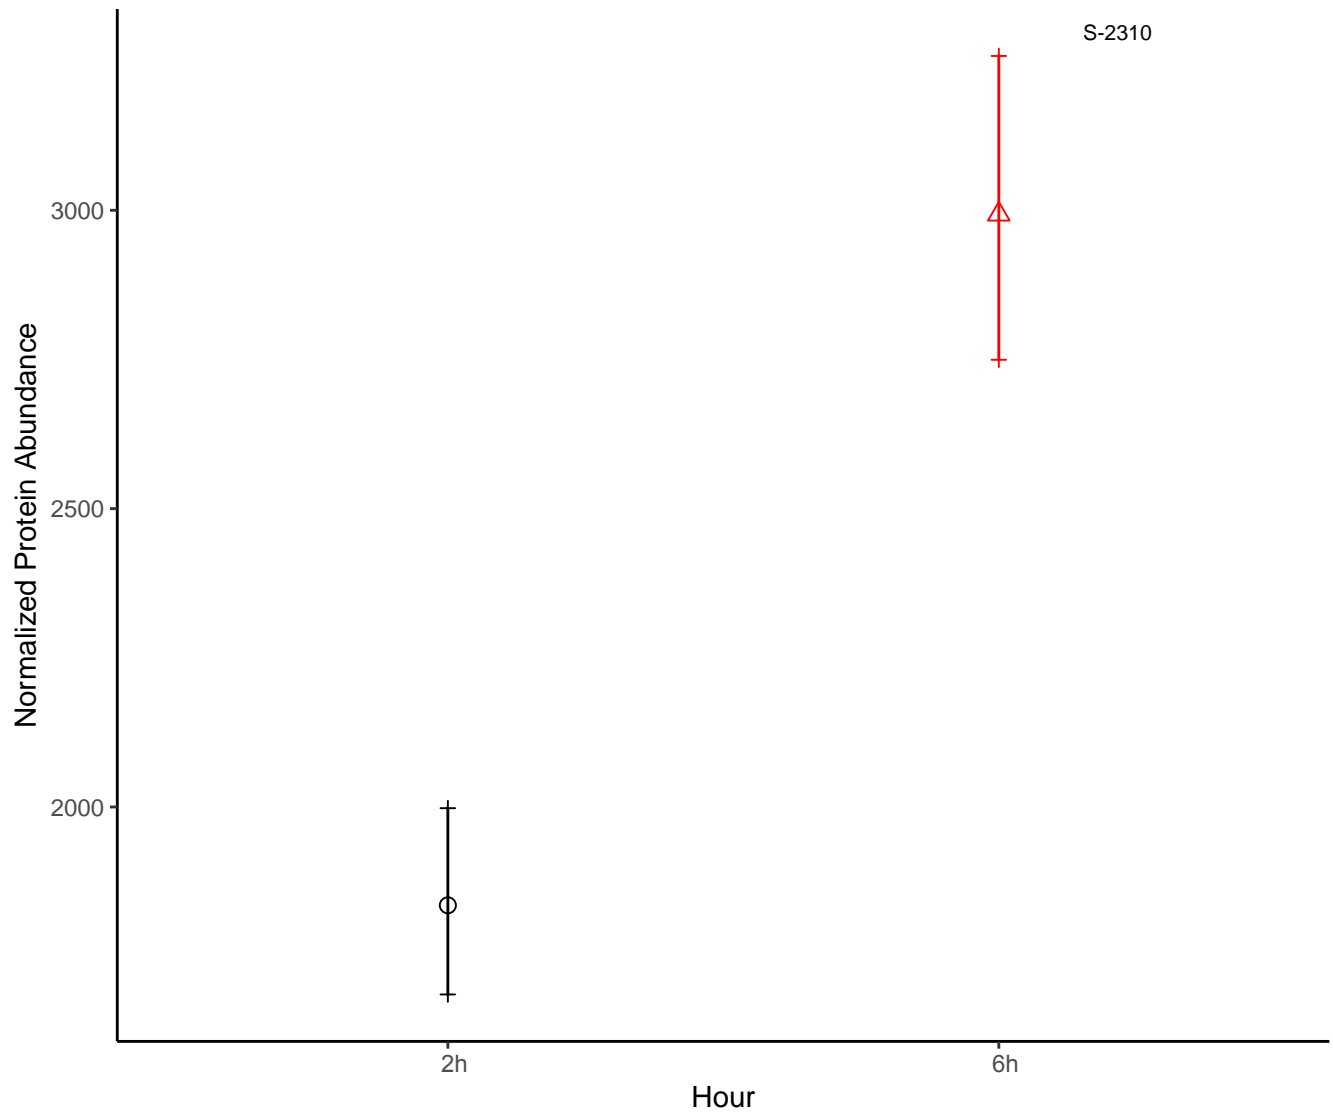

⊕ 2h

⊕ 6h

# RL1\_STAAM

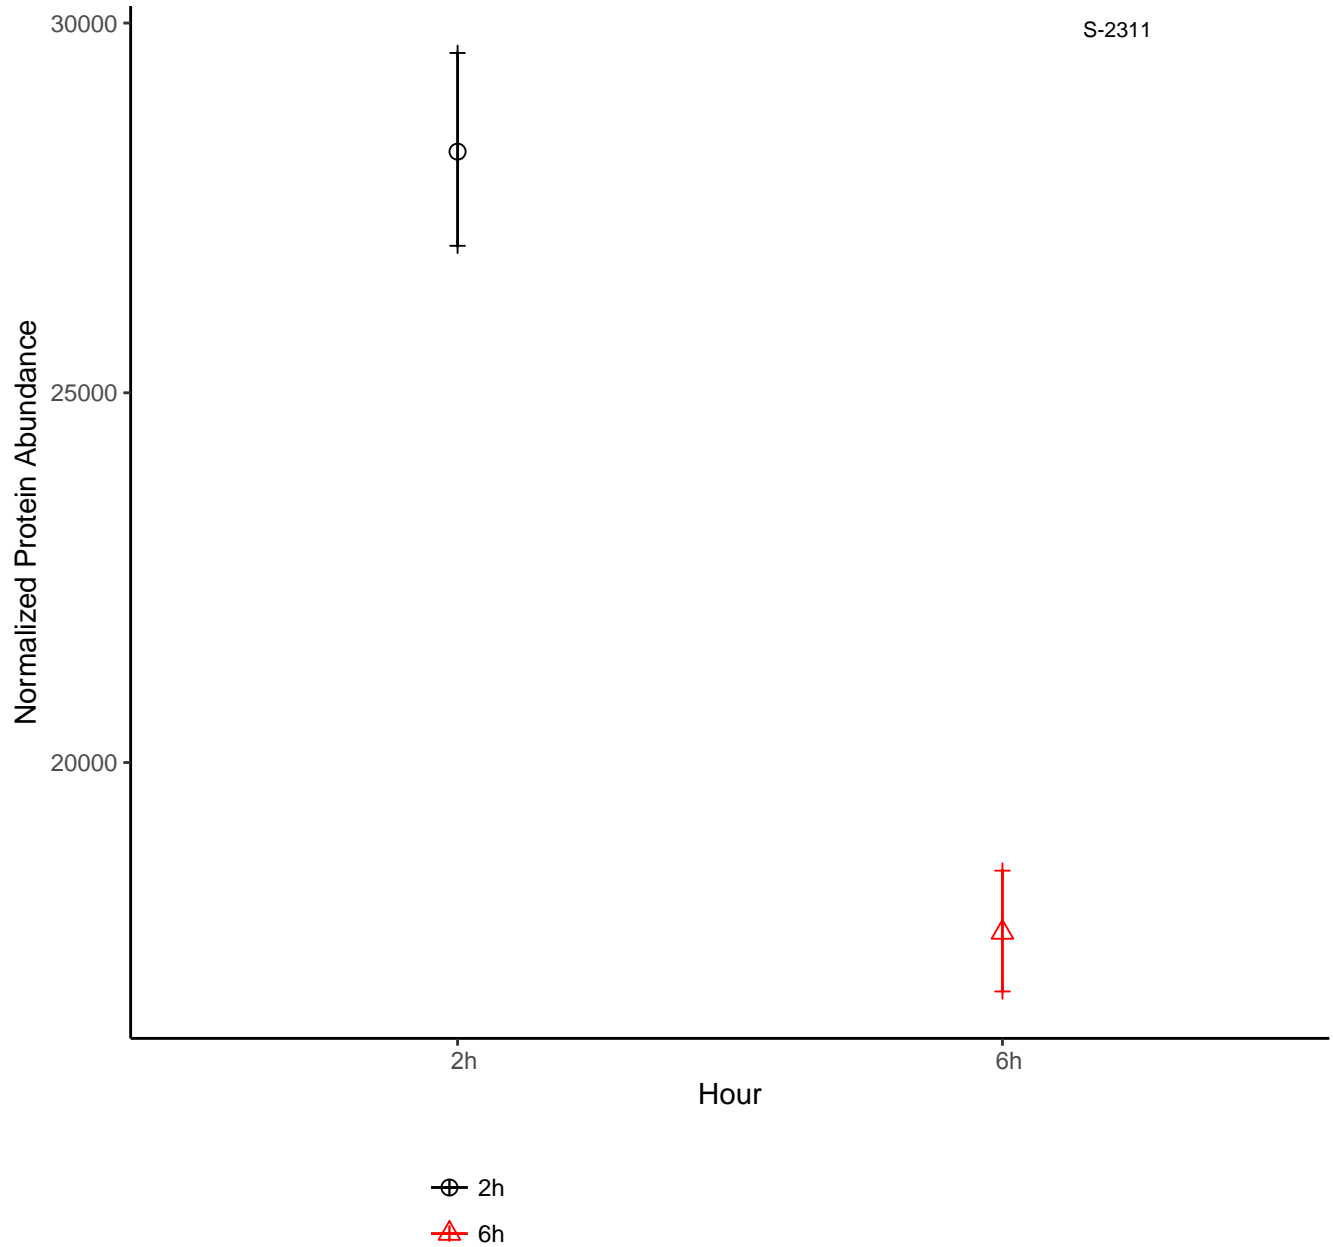

# RL10\_STAAM

S-2312

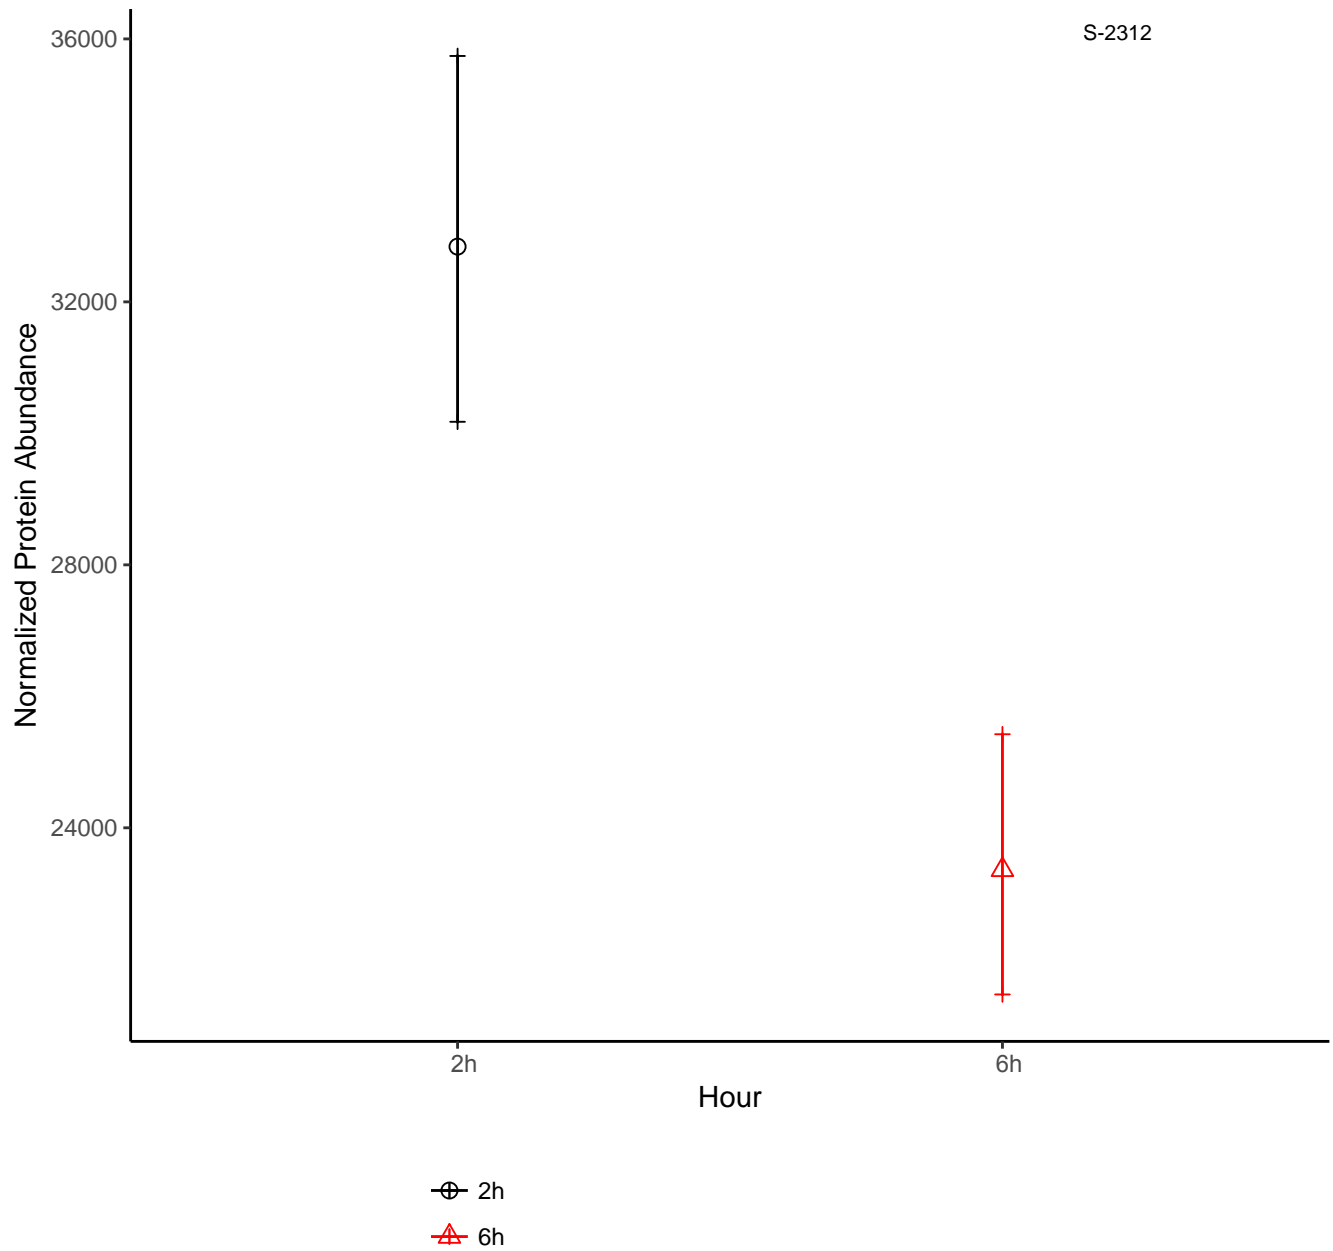



# RL11\_STAAM

S-2313

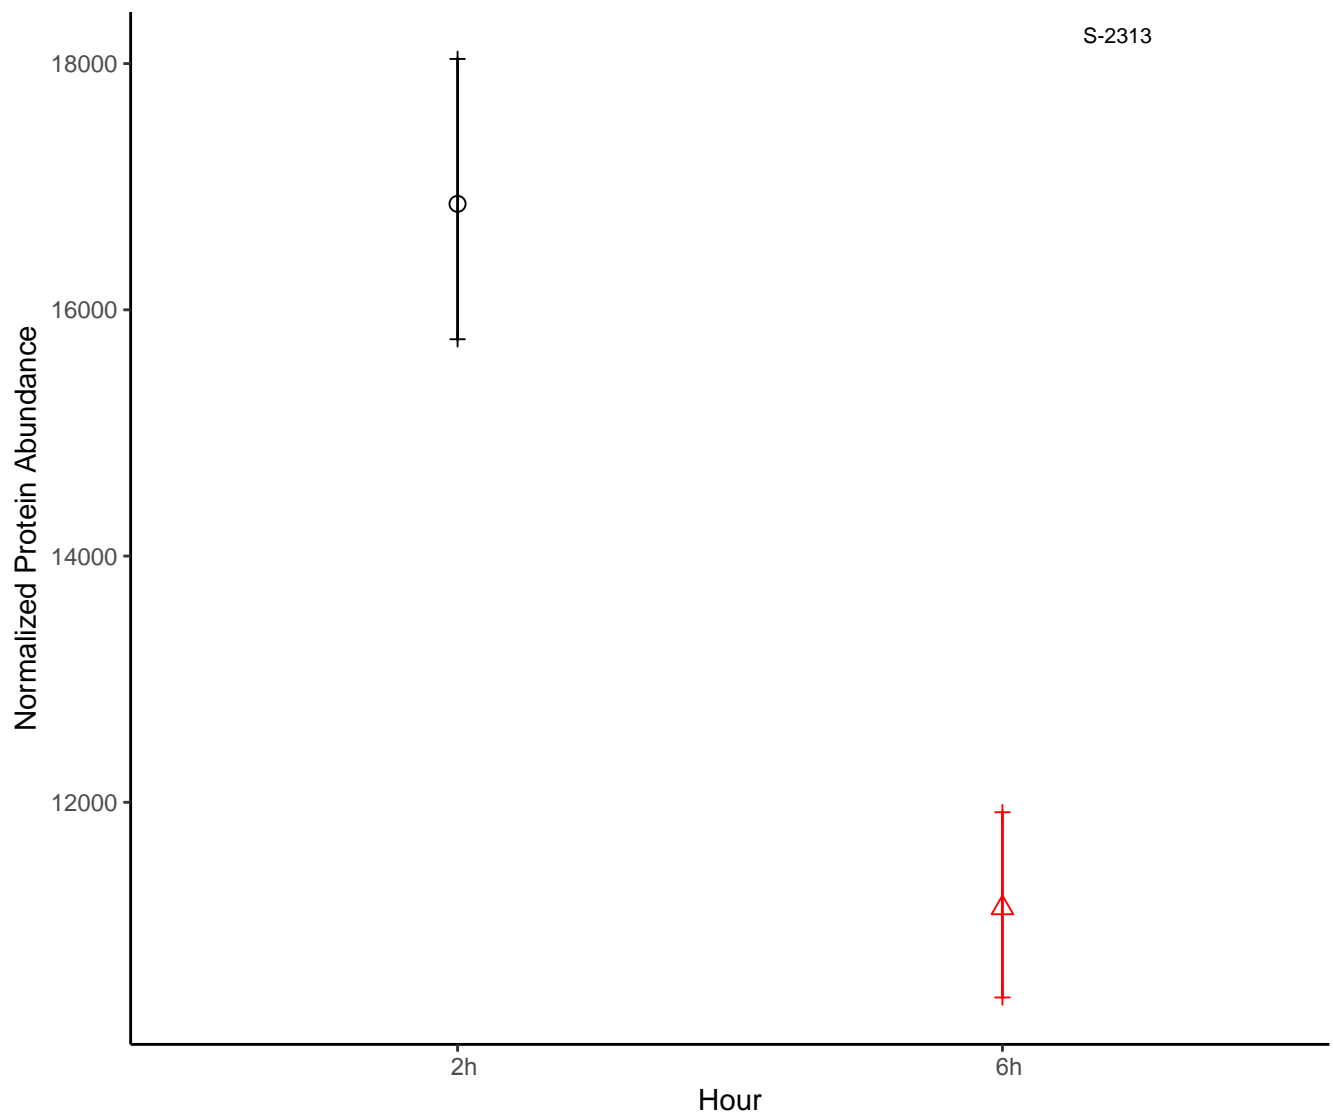

⊕ 2h

△ 6h

# RL13\_STAAM

S-2314

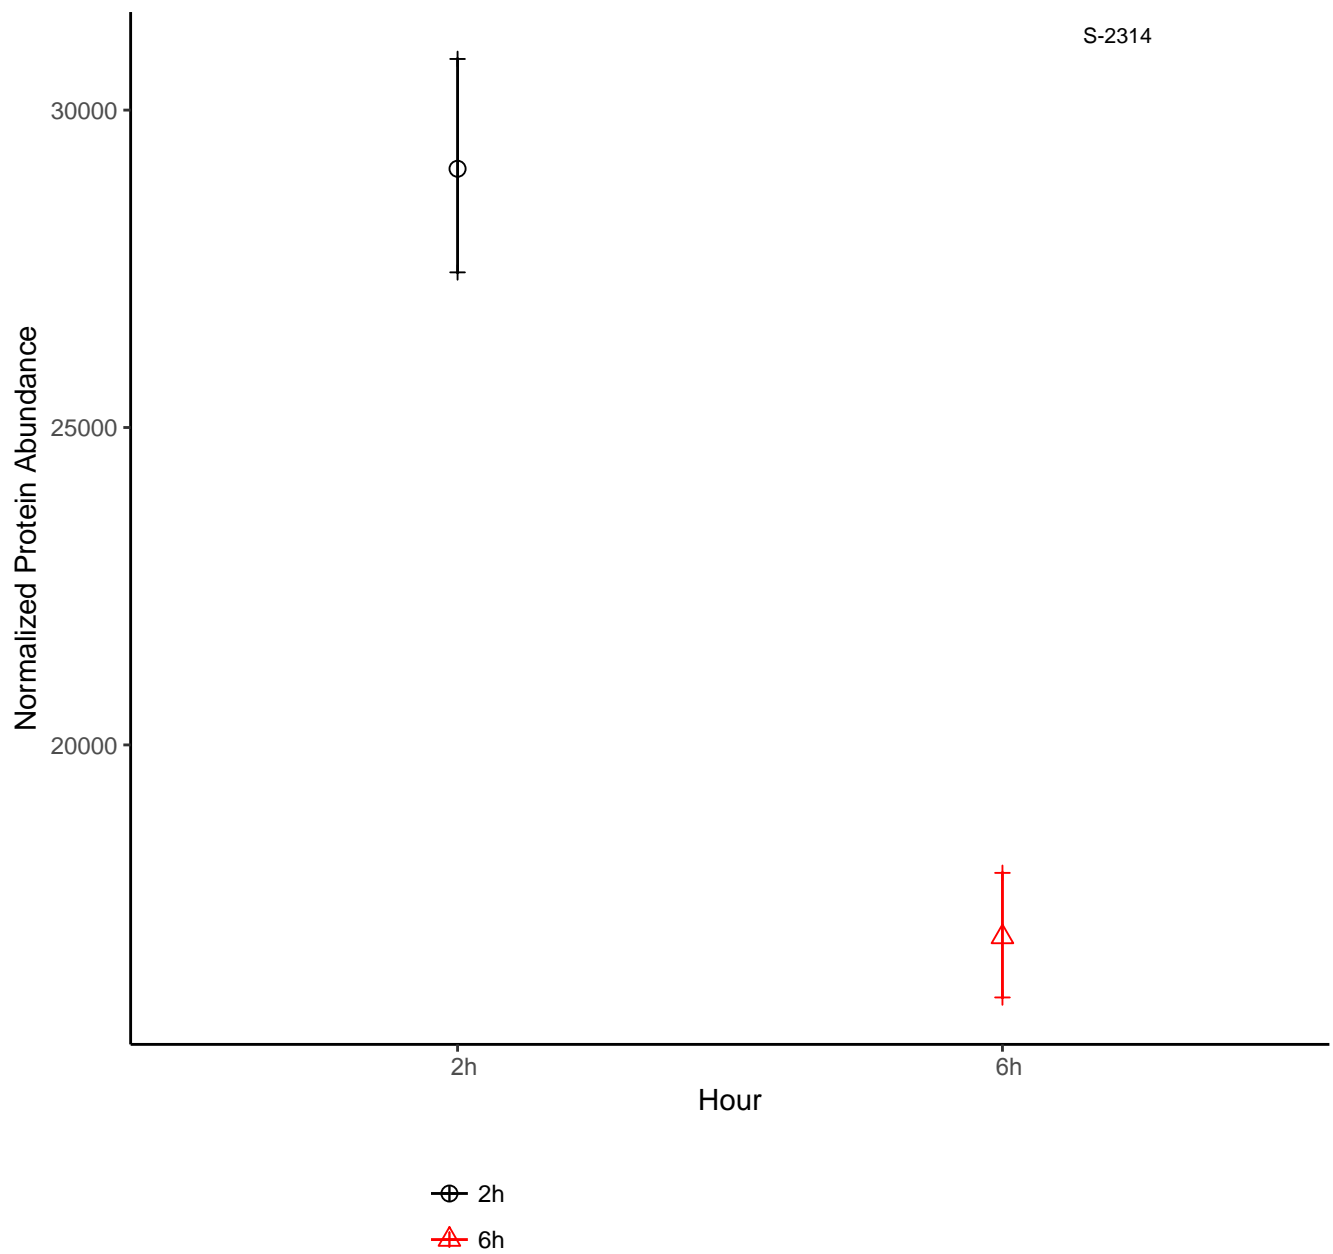

# RL14\_STAAM

S-2315

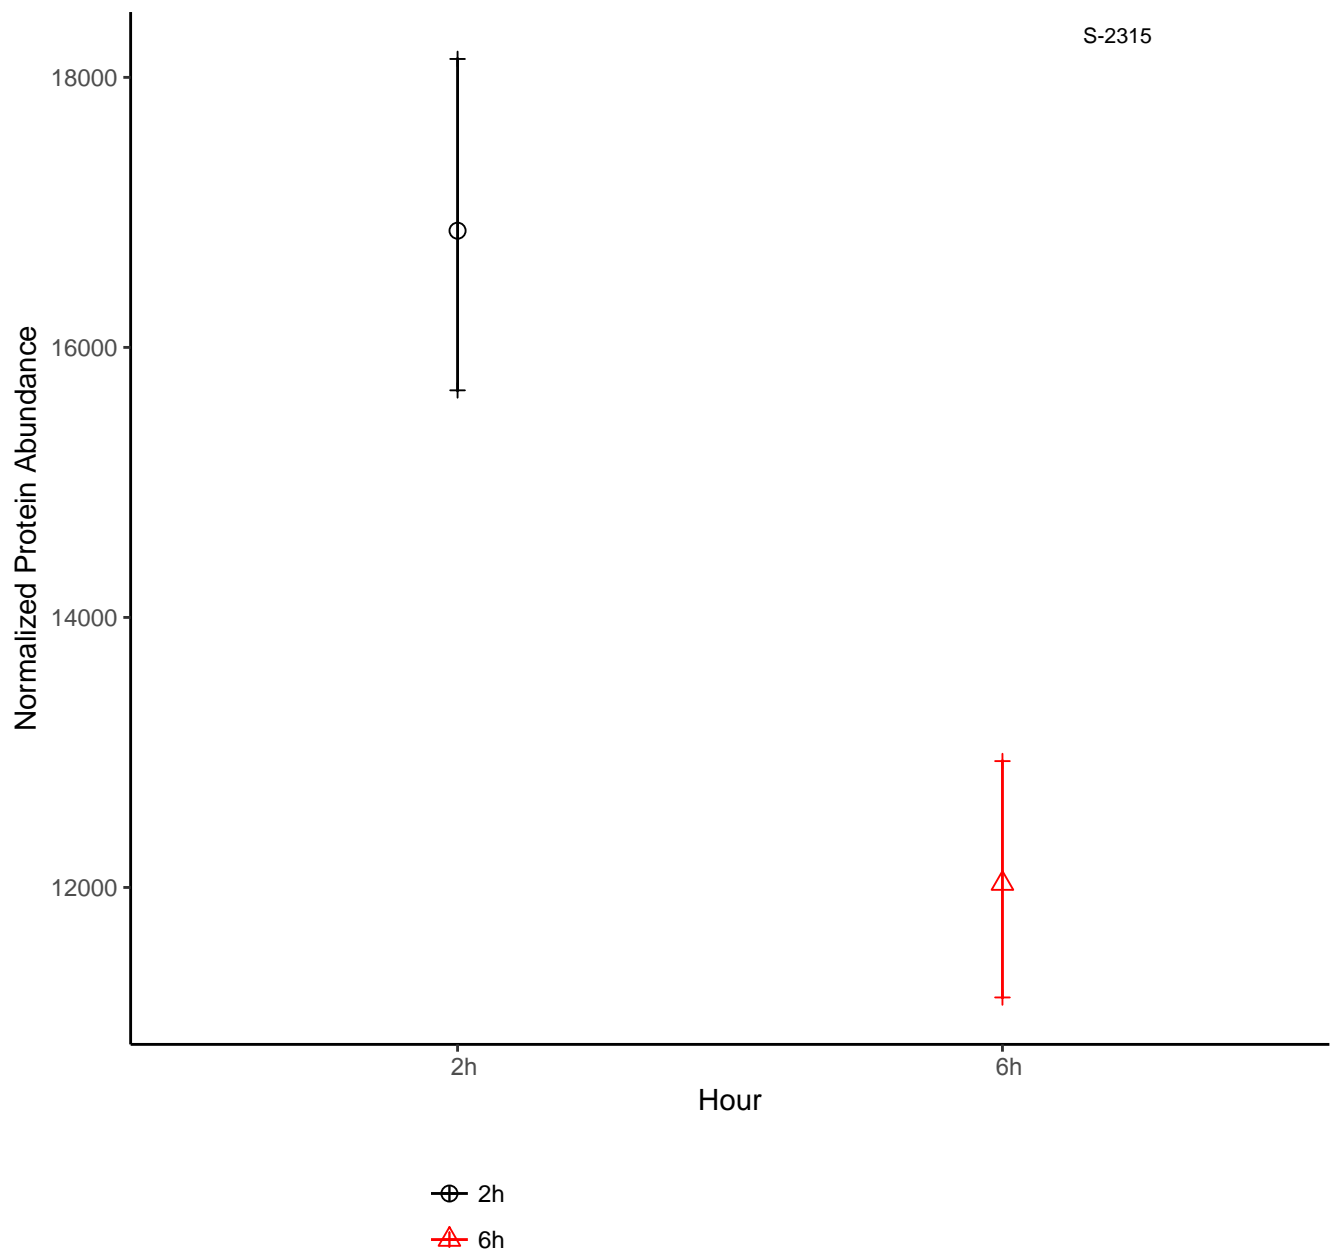

# RL15\_STAAM

S-2316

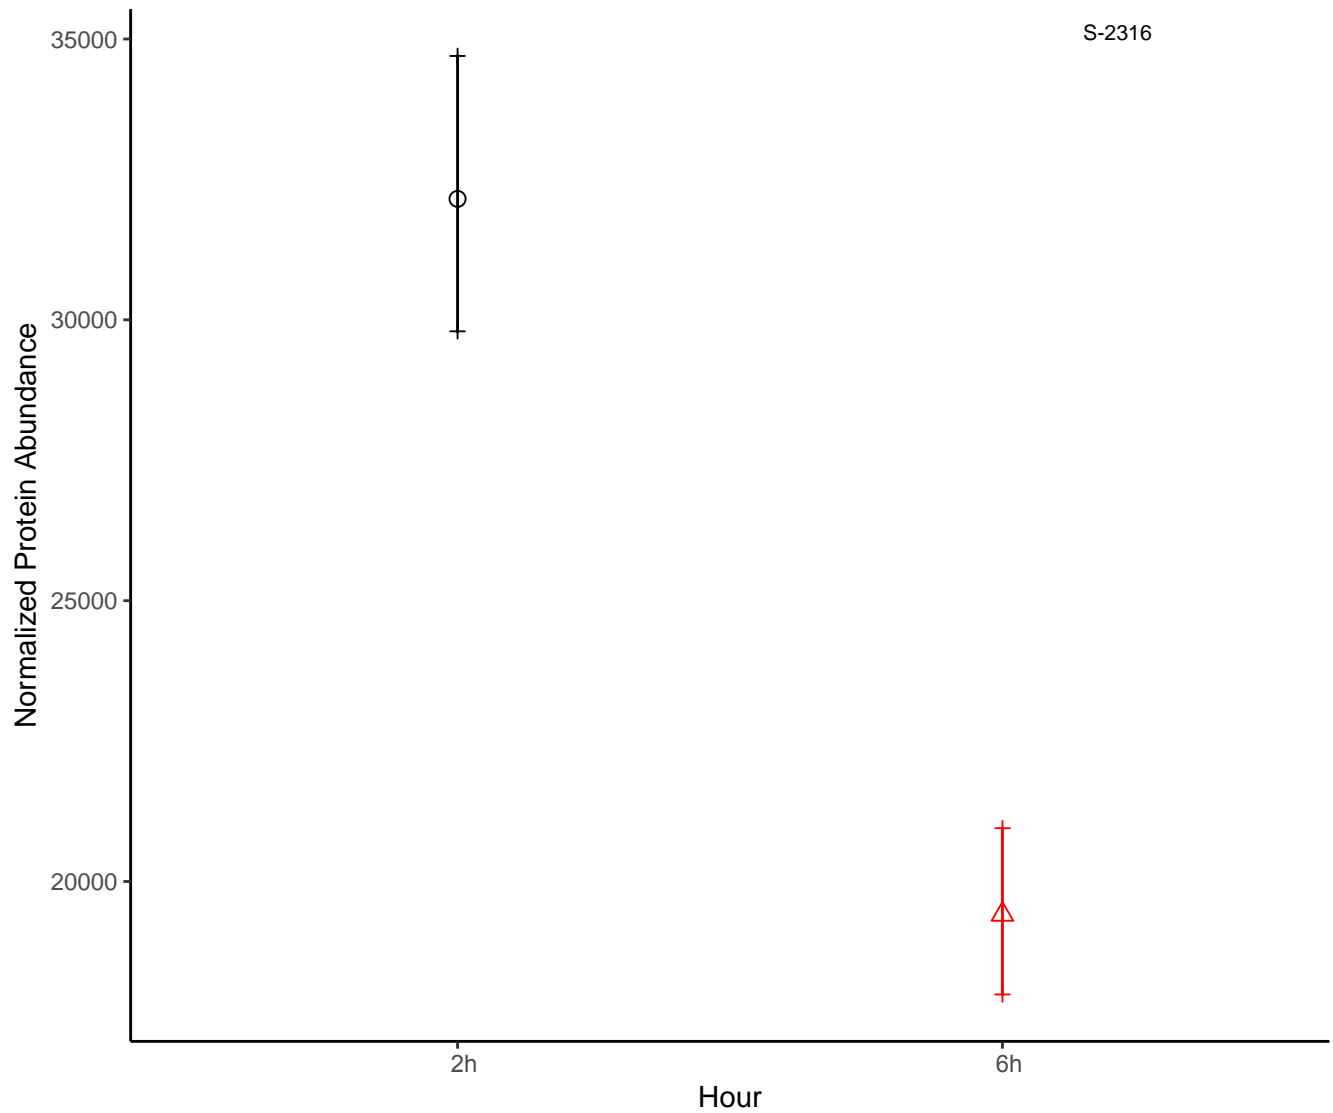

⊕ 2h

△ 6h

# RL16\_STAAM

S-2317

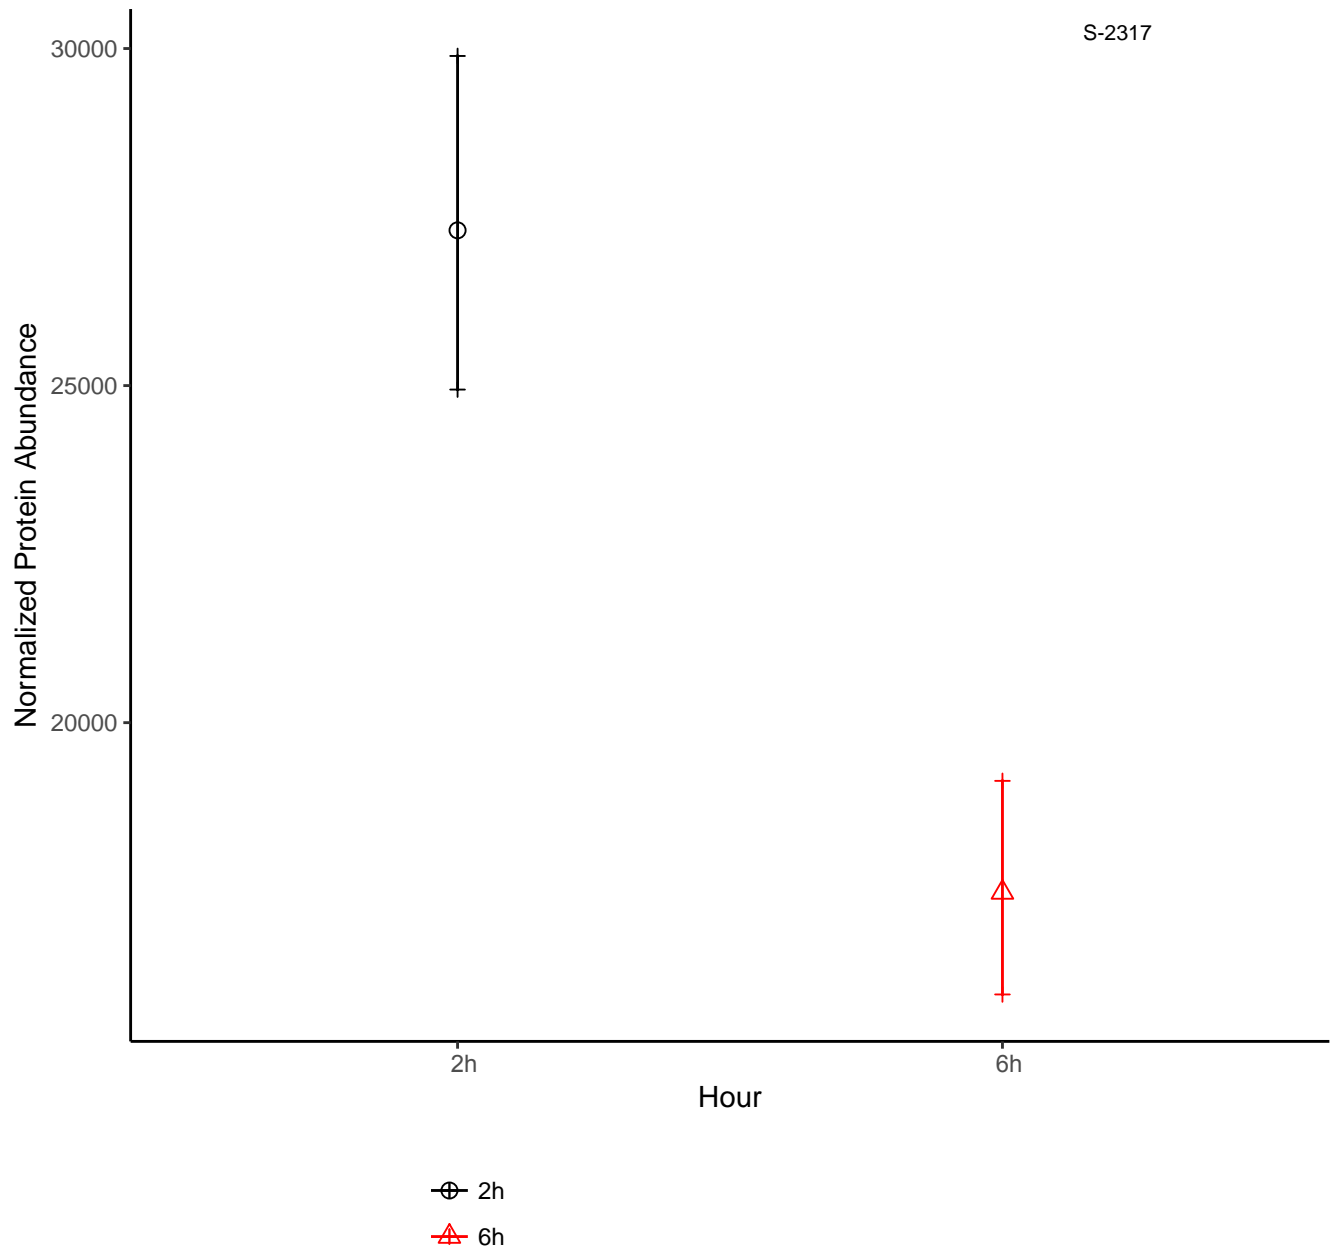

# RL17\_STAAM

S-2318

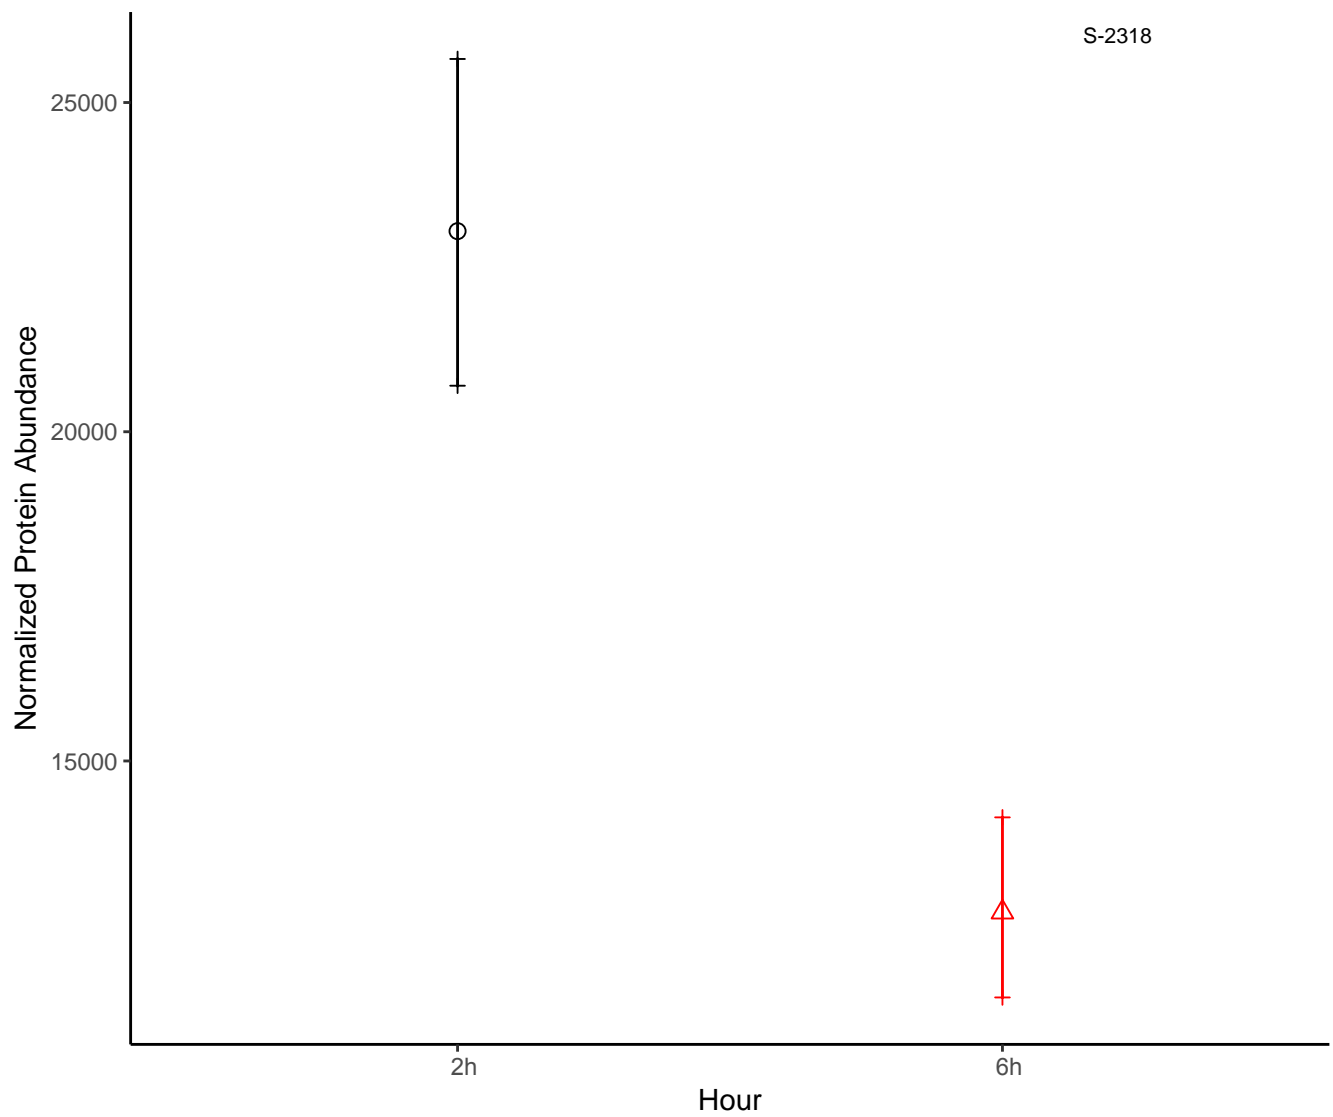

⊕ 2h

△ 6h

# RL18\_STAAM

S-2319

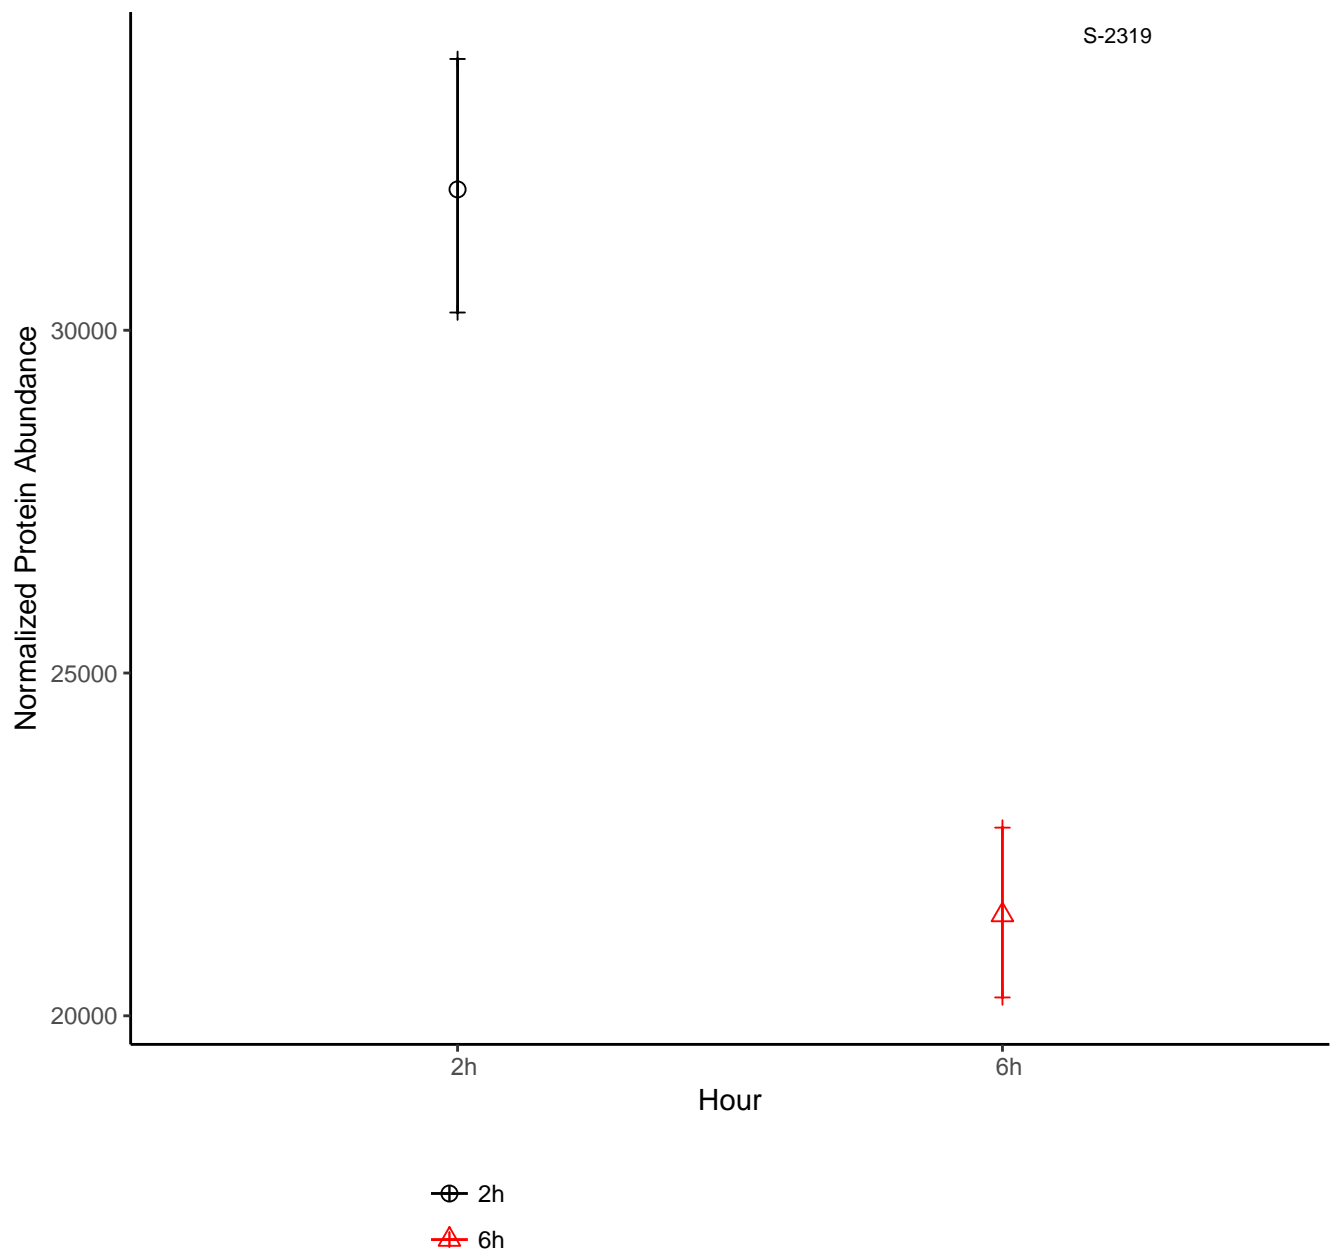

# RL19\_STAAM

S-2320

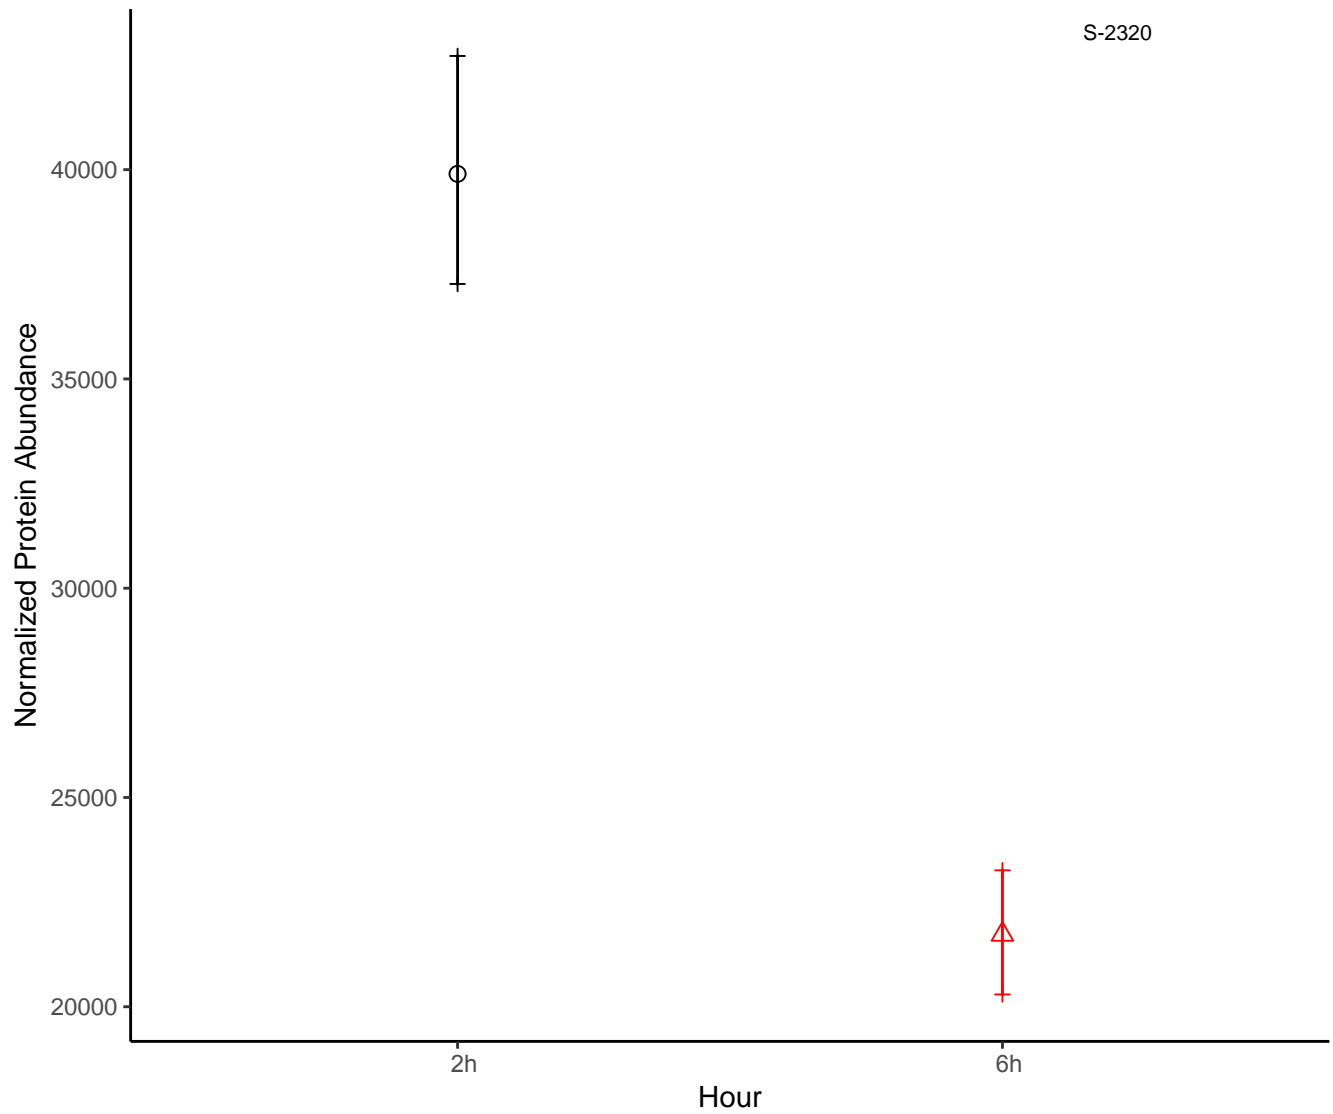

⊕ 2h

△ 6h



# RL2\_STAAM

S-2321

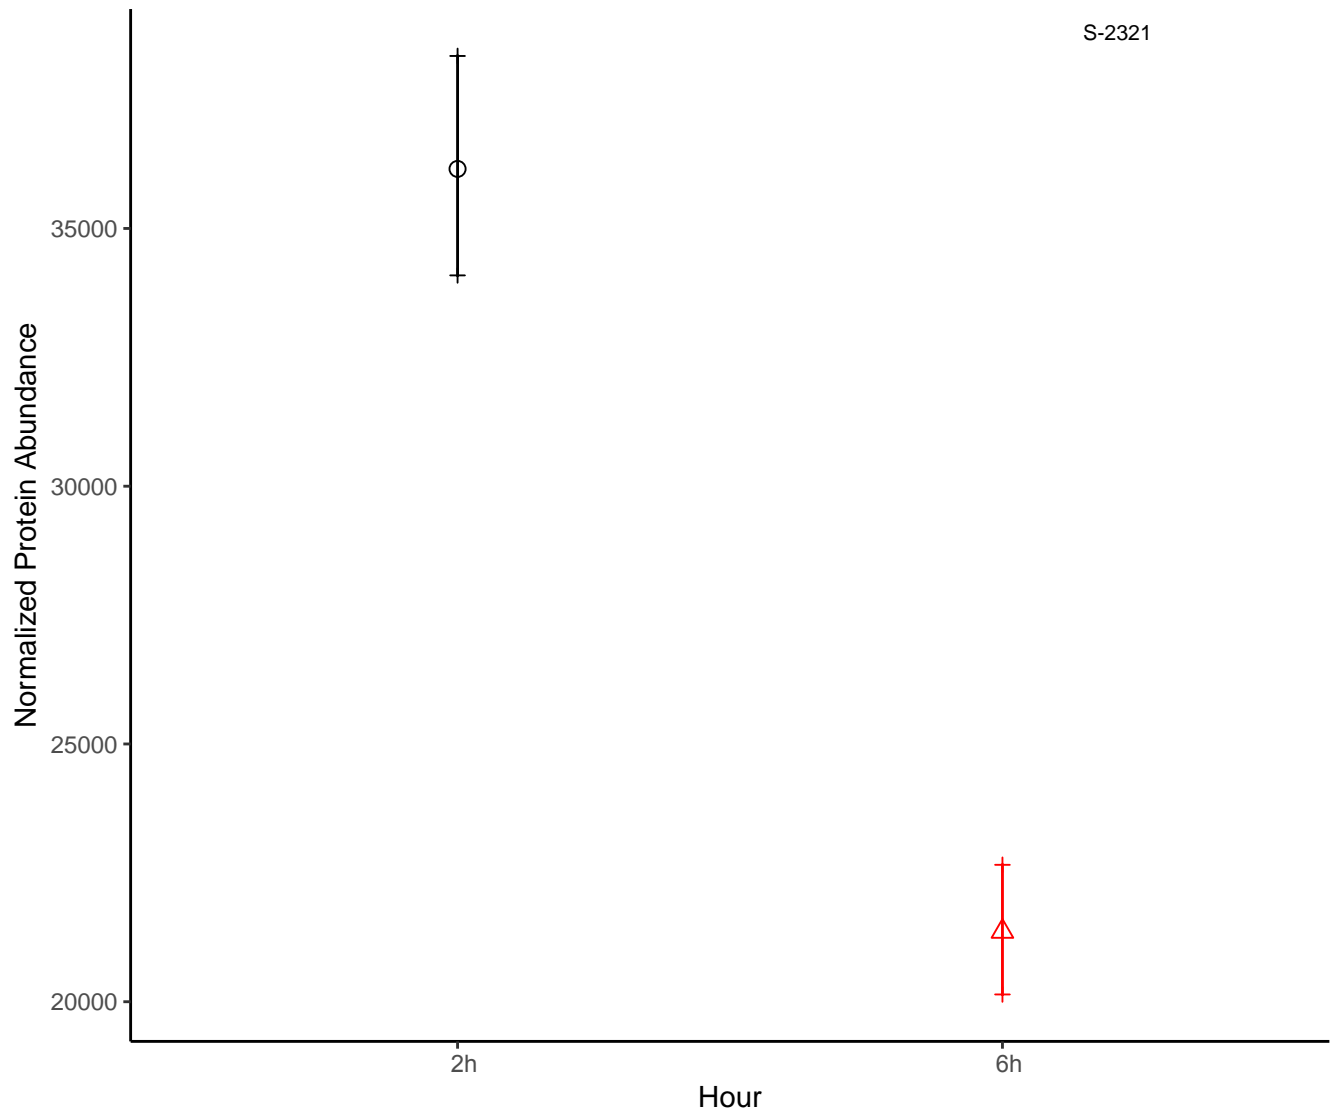

⊕ 2h

△ 6h

# RL20\_STAAM

S-2322

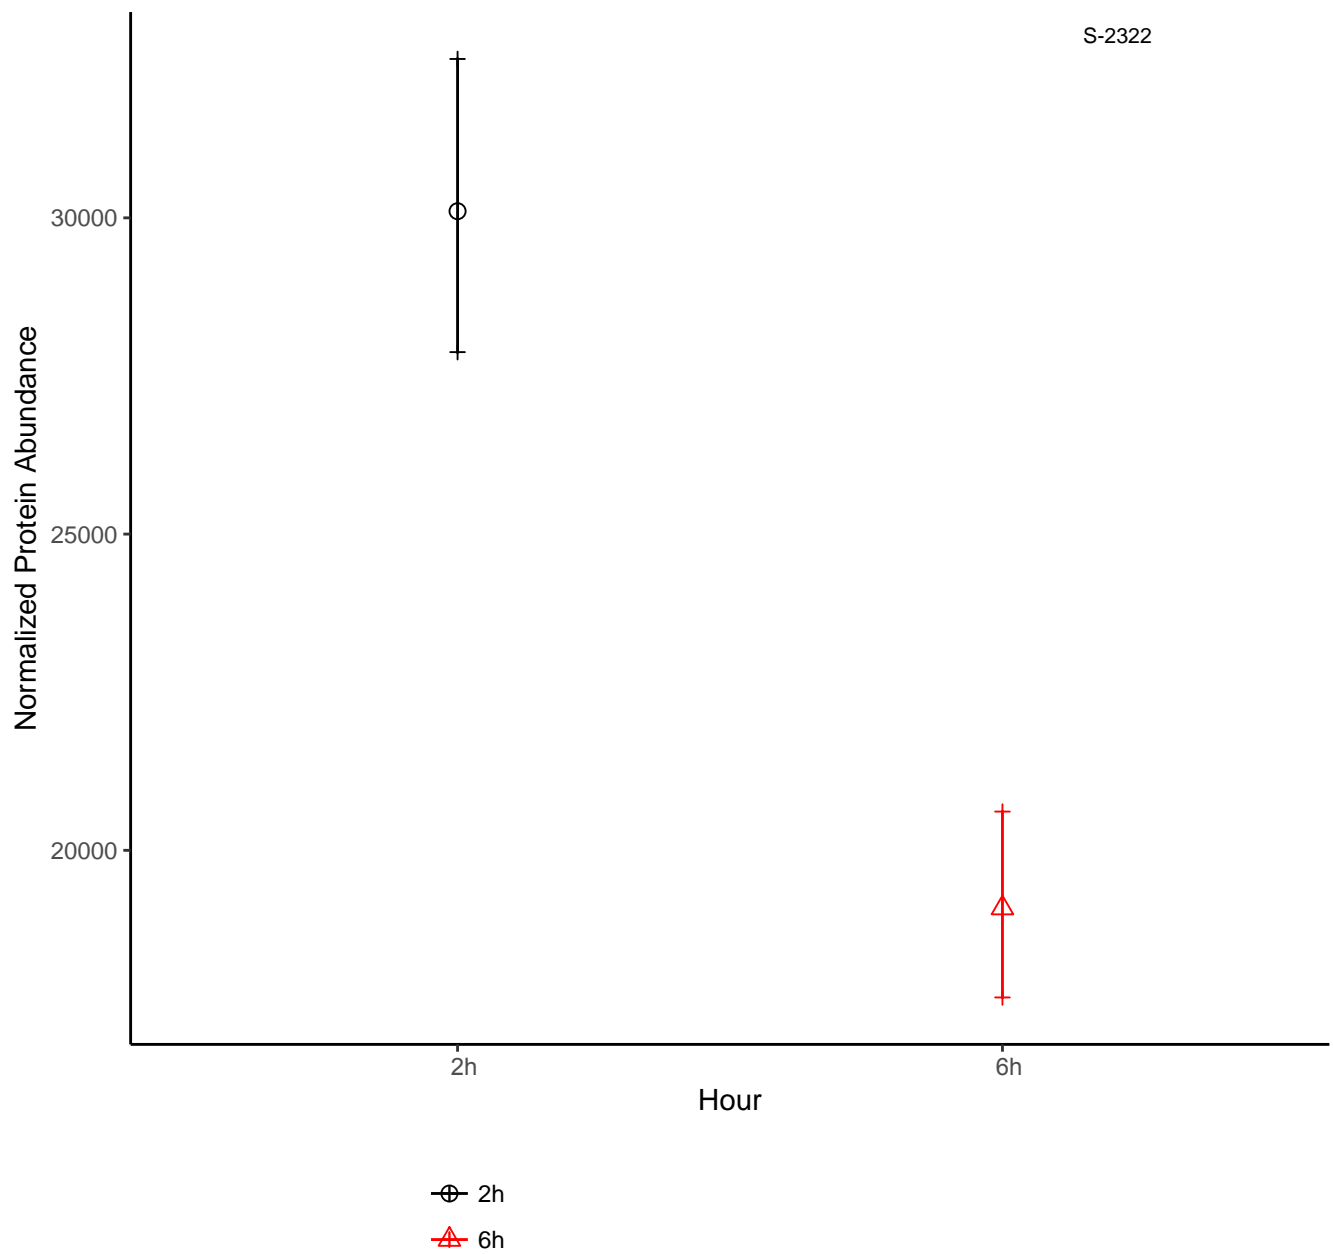

# RL21\_STAAM

S-2323

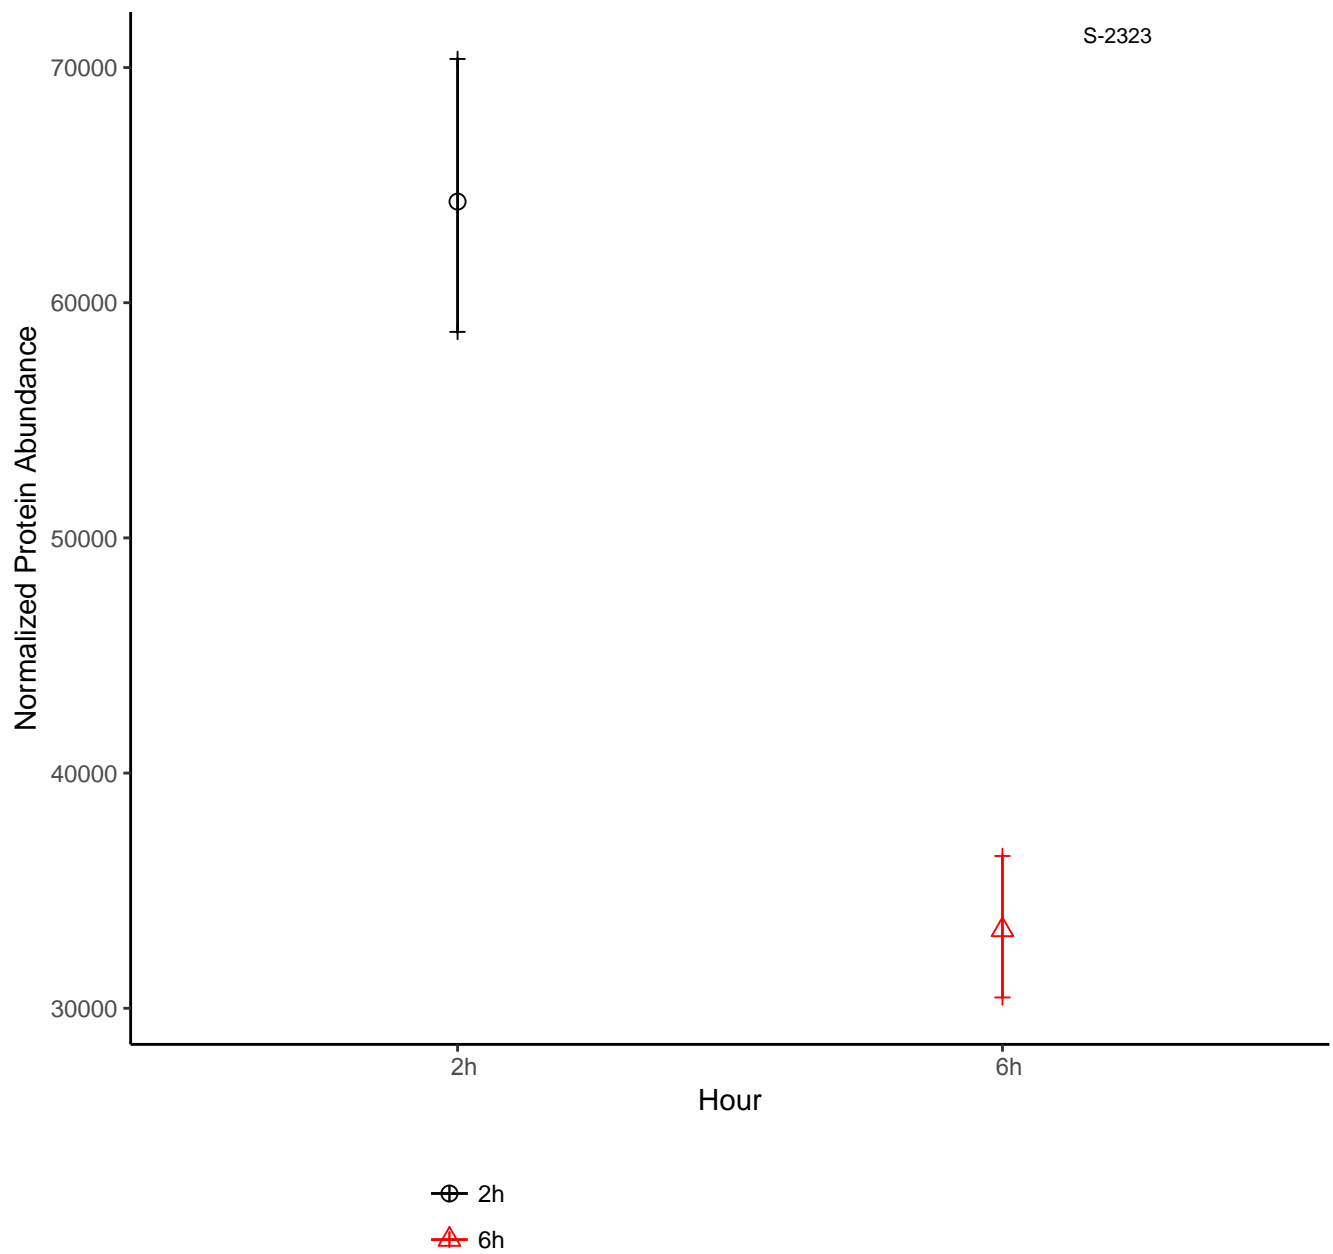

# RL22\_STAAM

S-2324

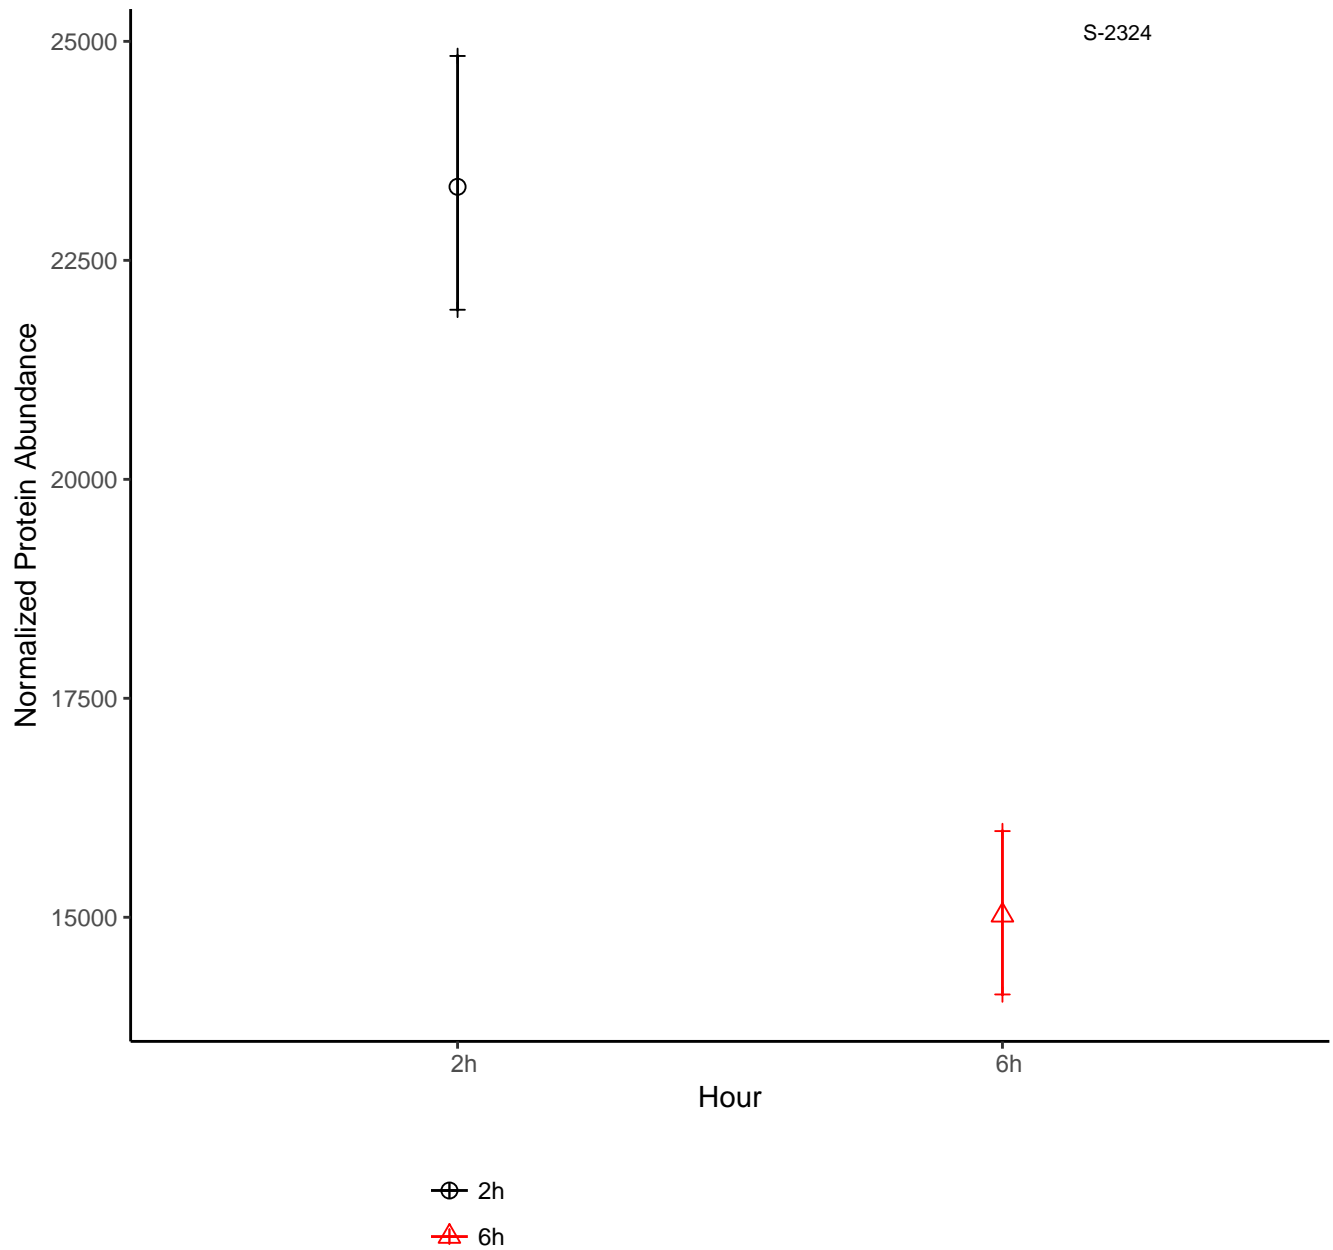

# RL23\_STAAM

S-2325

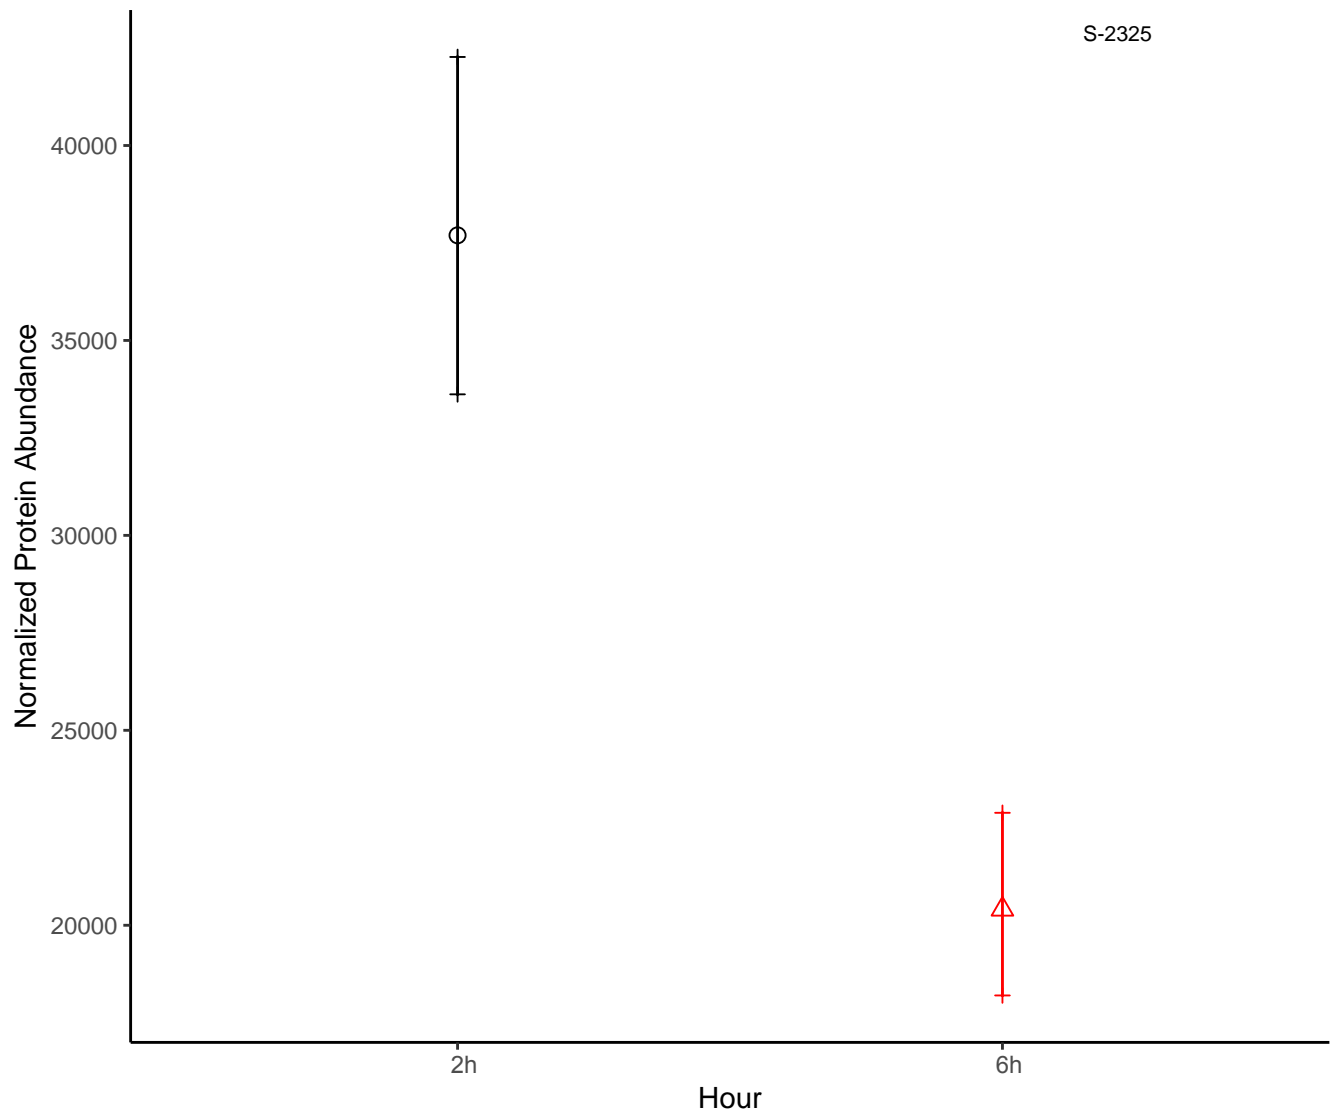

⊕ 2h

△ 6h

# RL24\_STAAM

S-2326

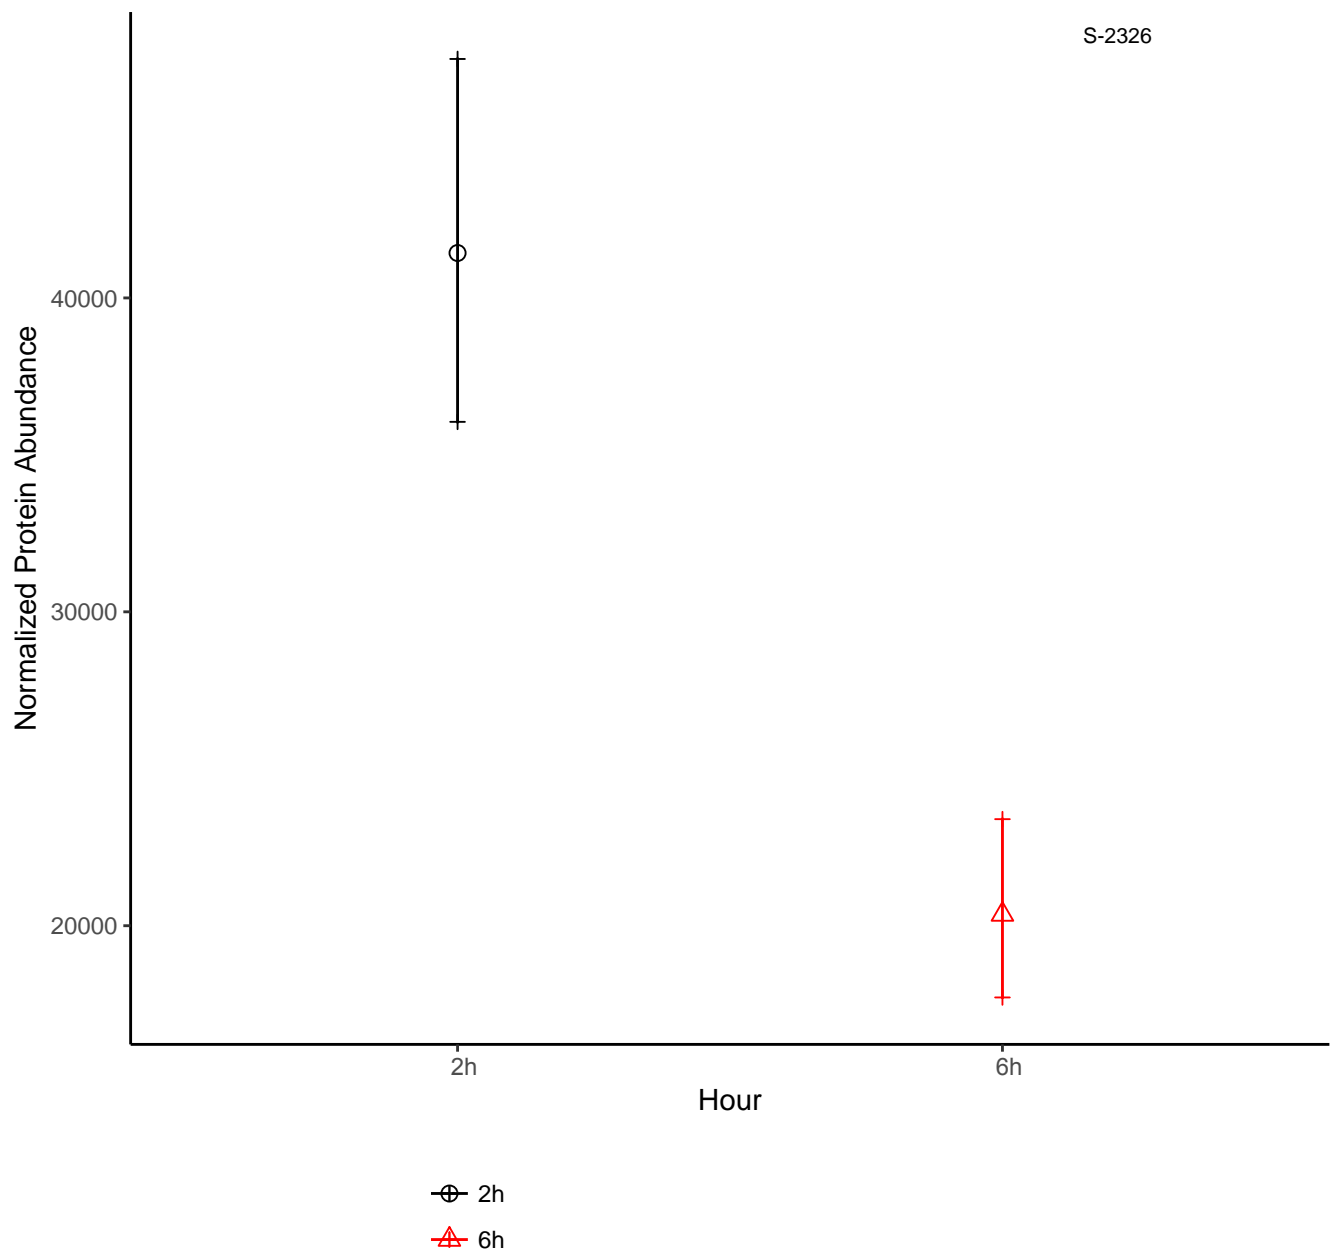

# RL25\_STAAM

S-2327

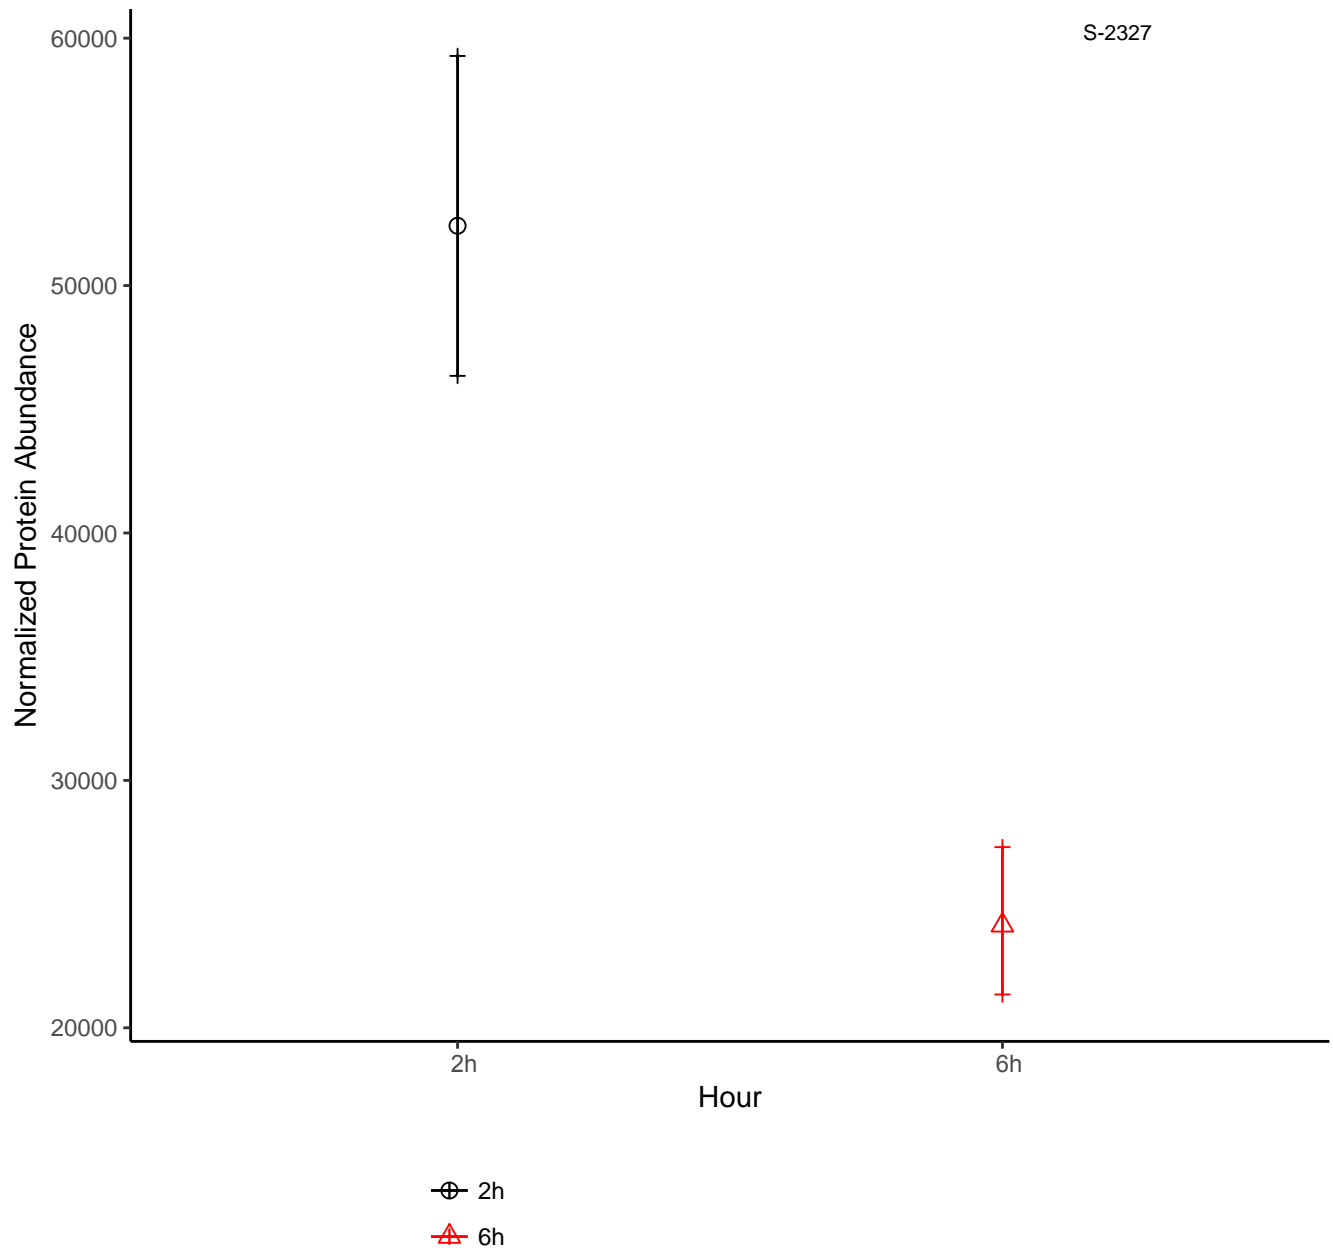

# RL27\_STAAM

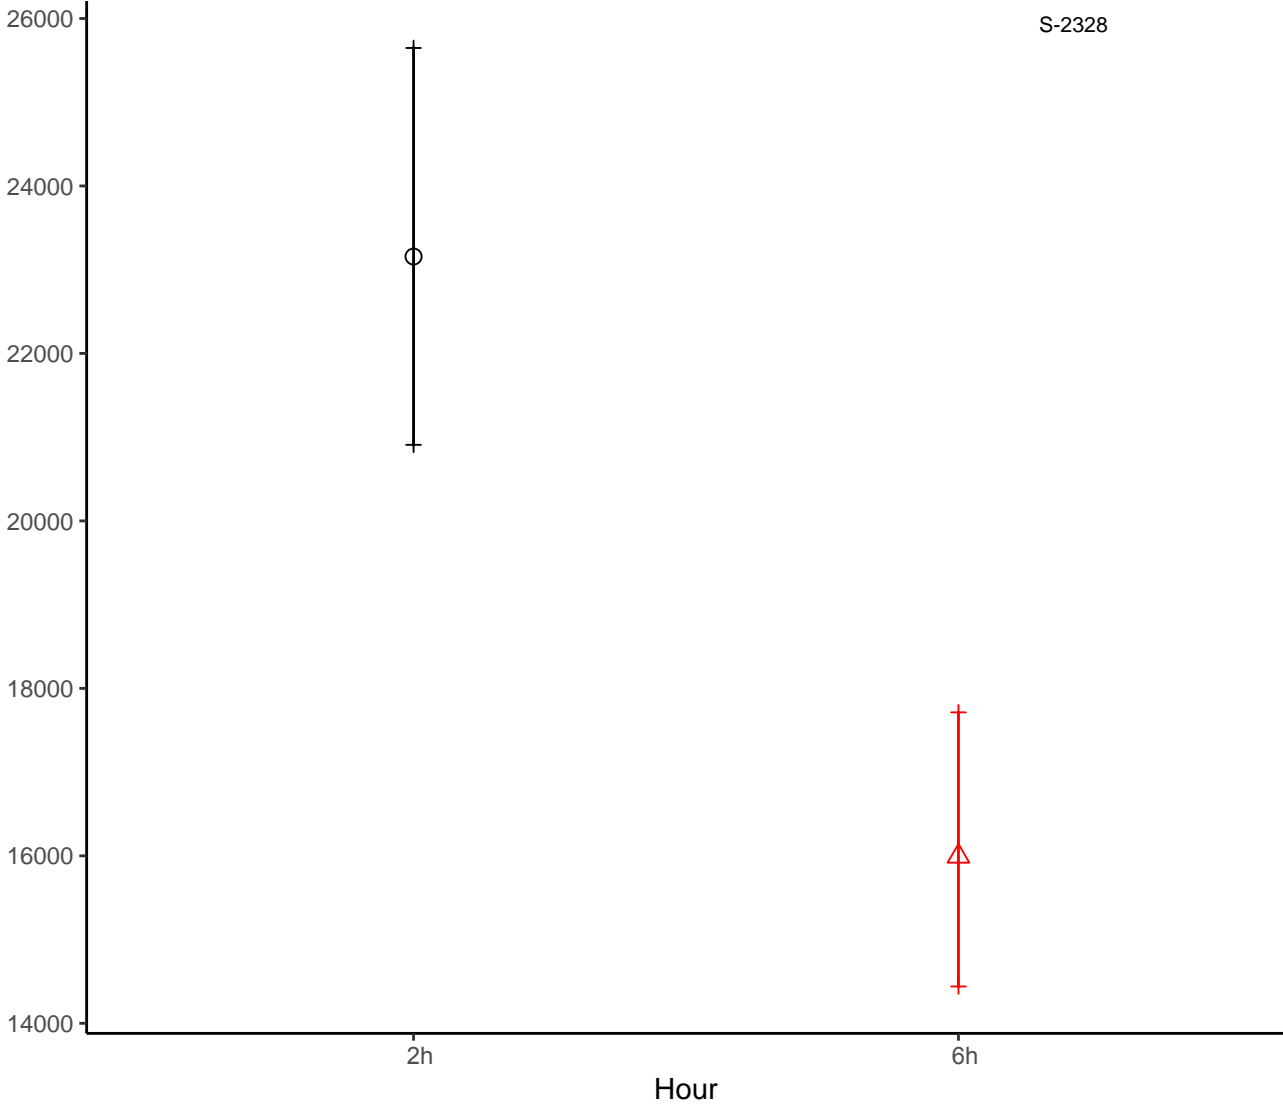

⊕ 2h

△ 6h



# RL28\_STAAM

S-2329

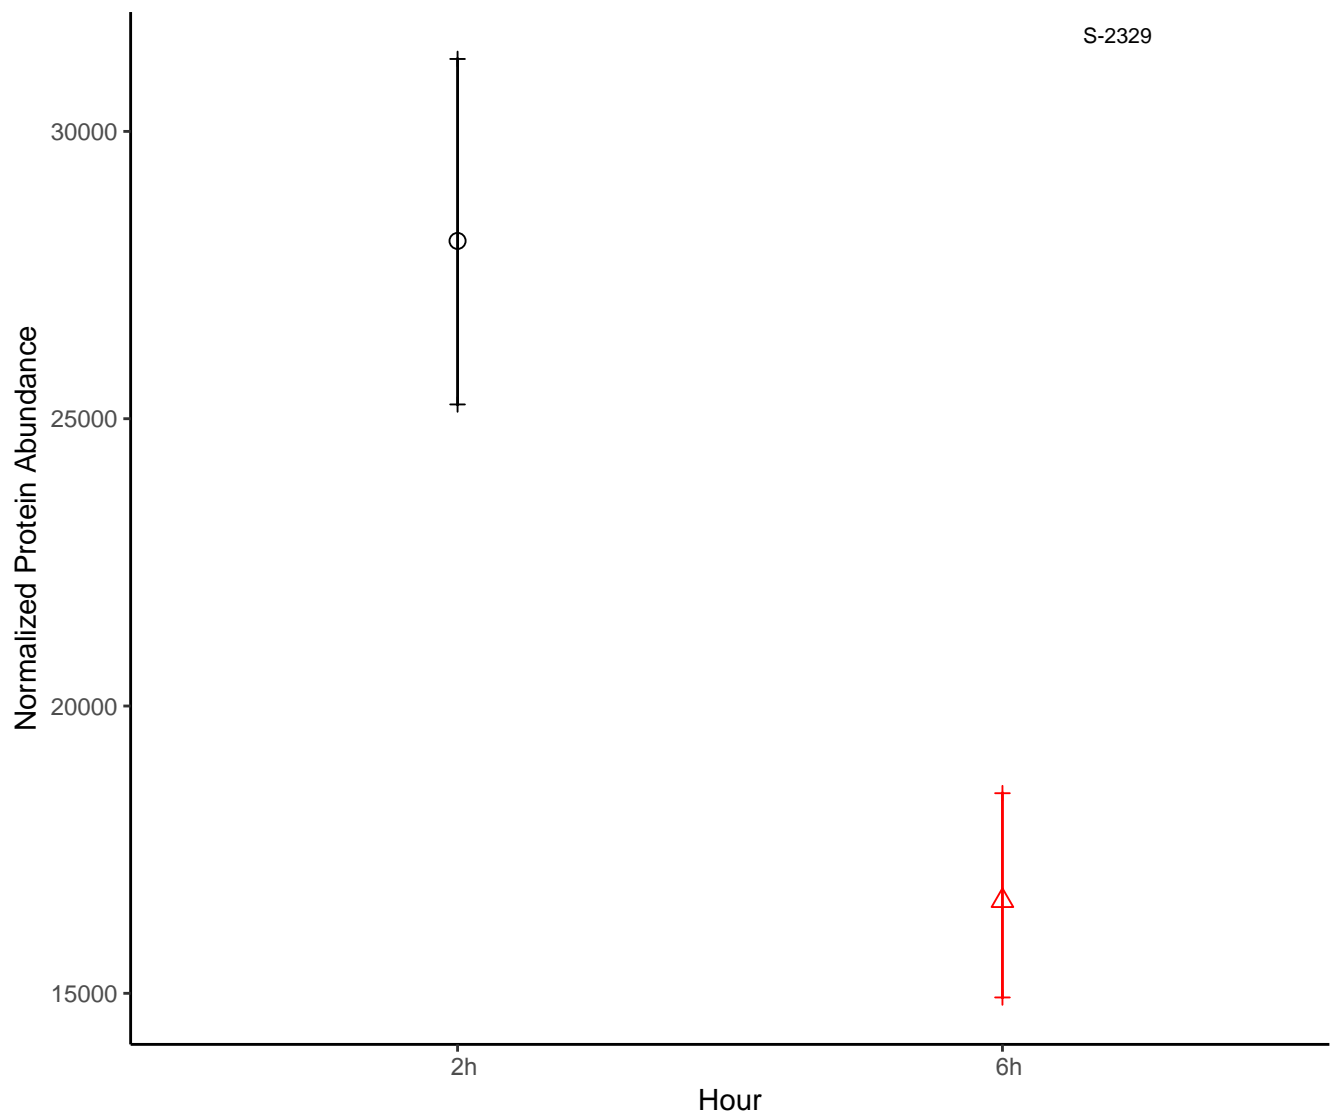

⊕ 2h

△ 6h

# RL29\_STAAM

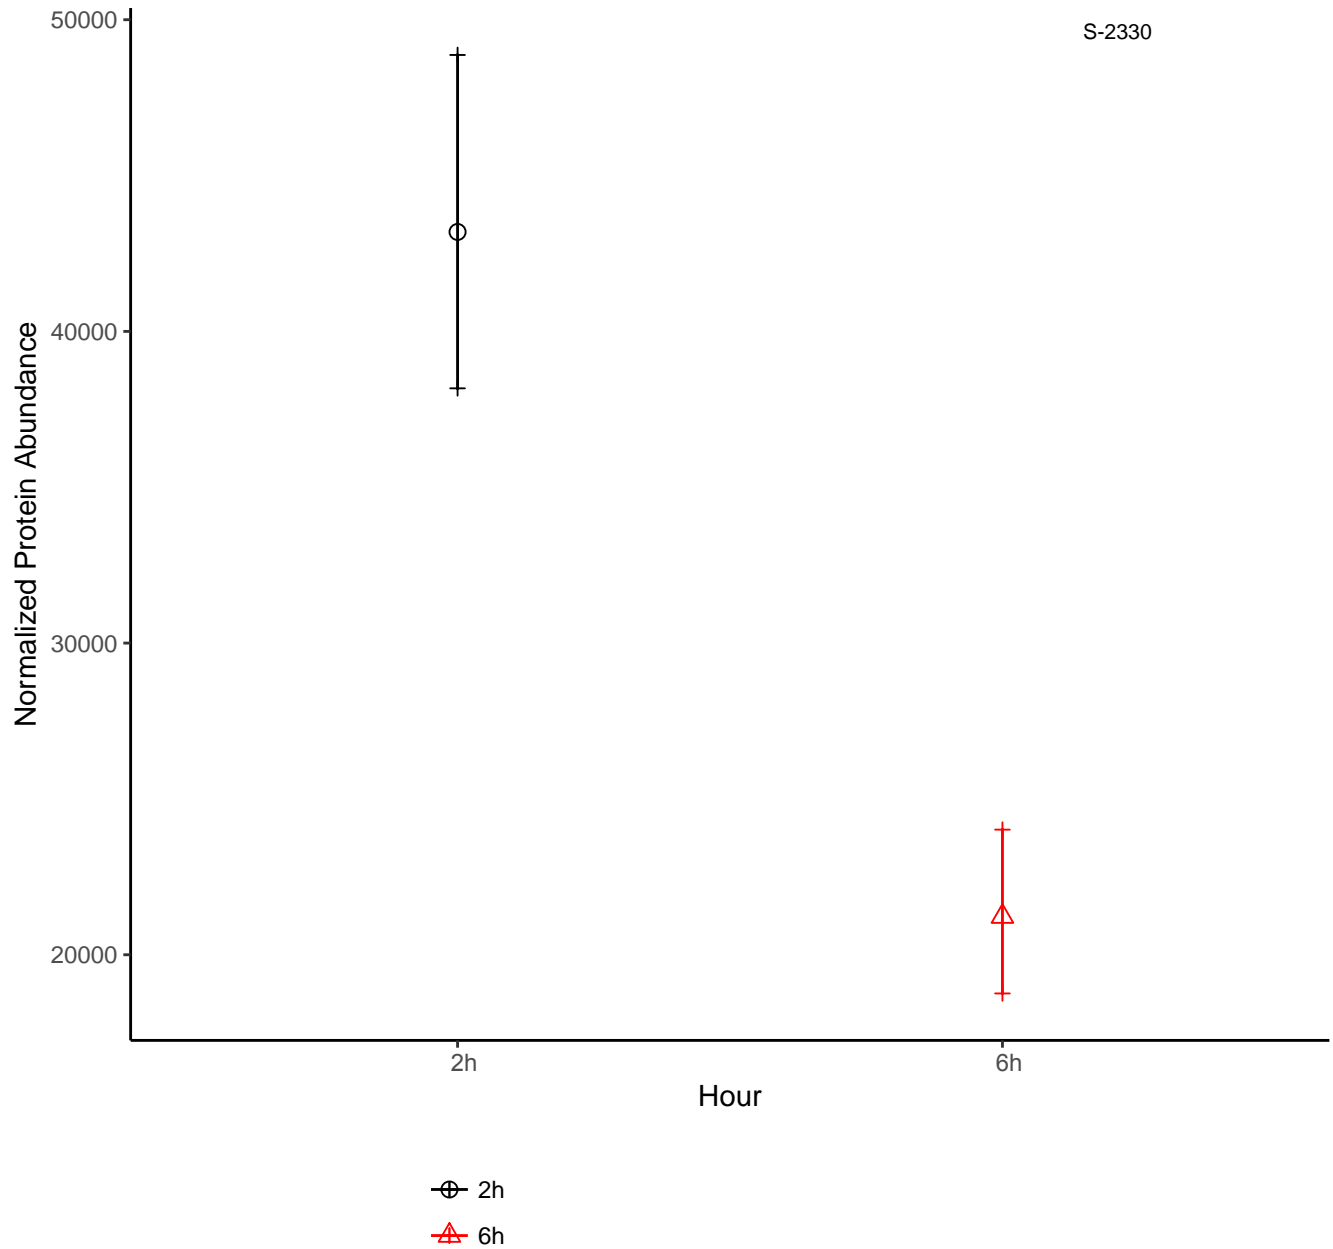

# RL3\_STAAM

S-2331

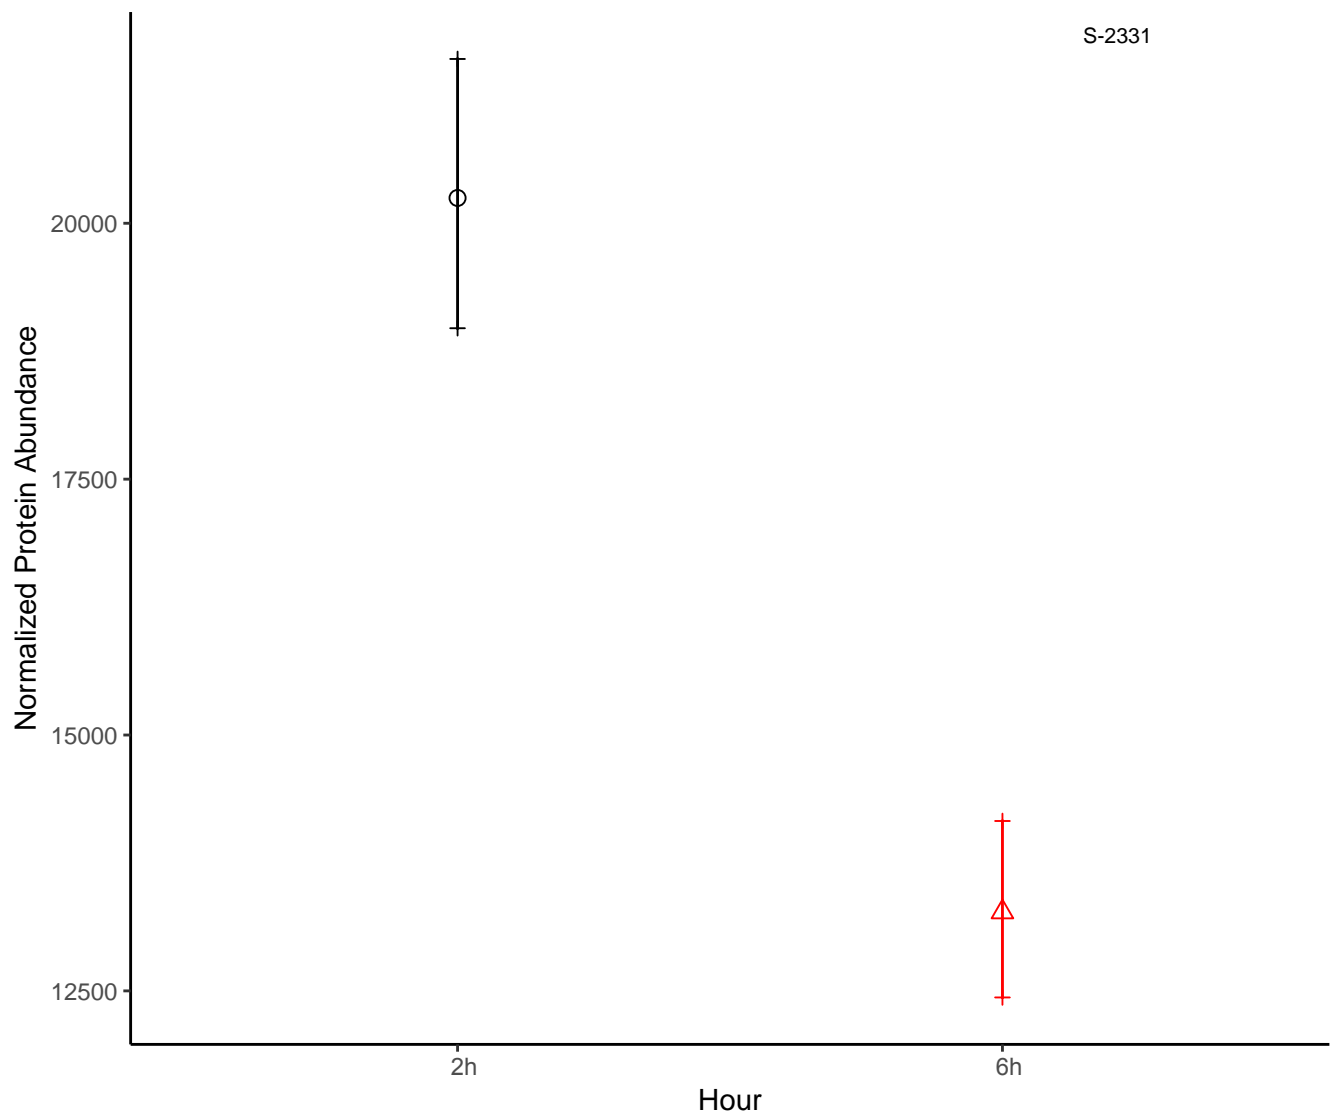

⊕ 2h

△ 6h

# RL30\_STAAM

S-2332

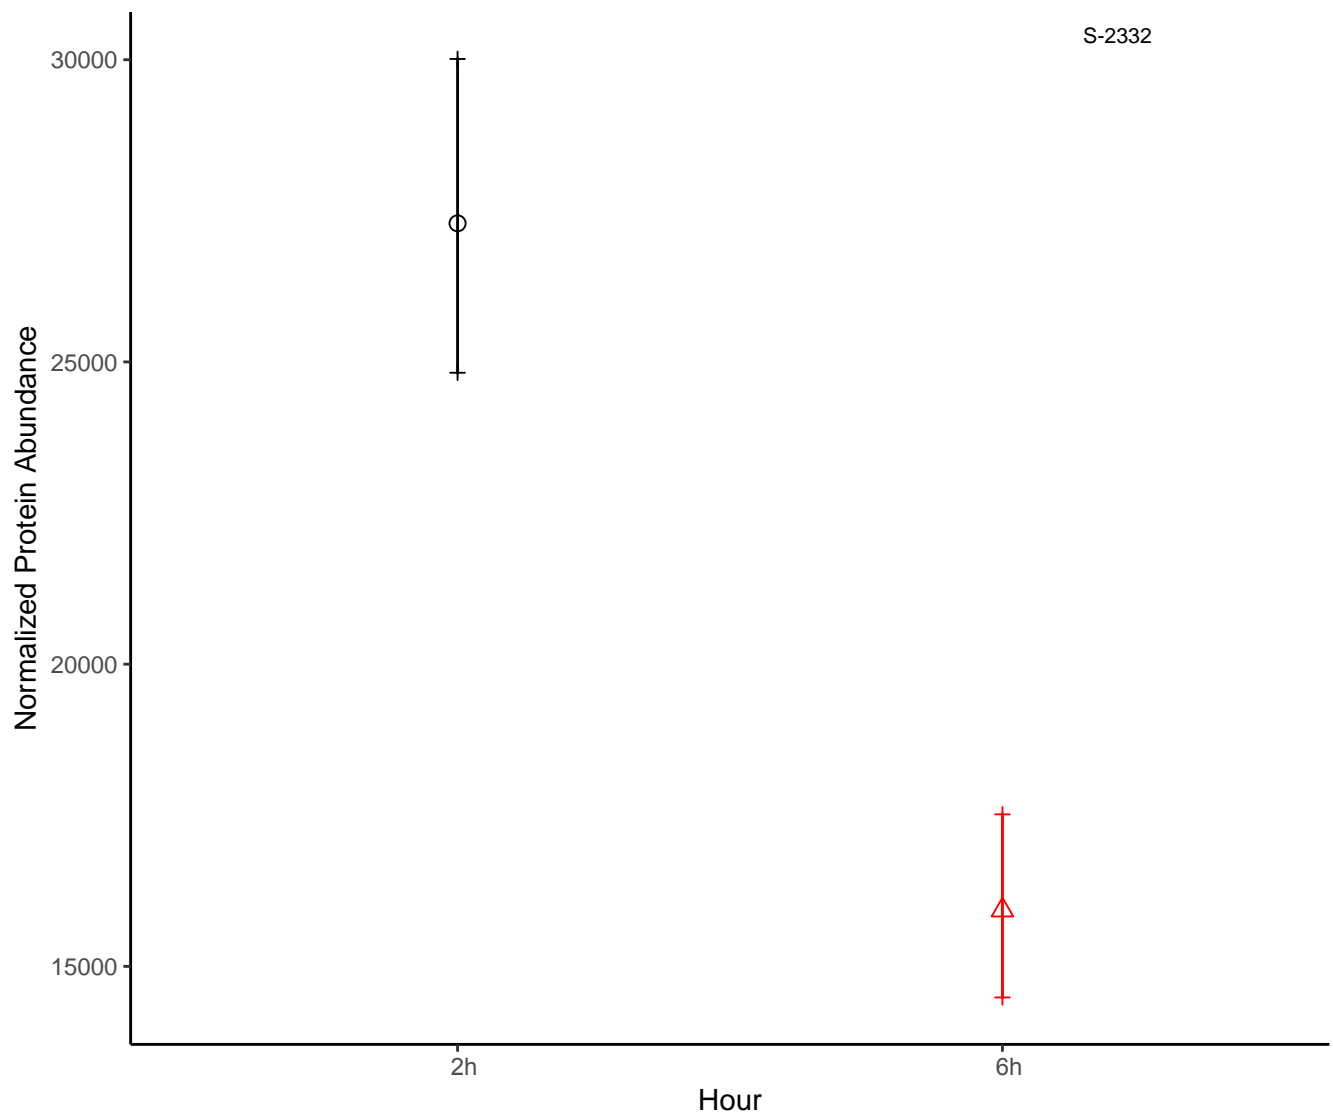

⊕ 2h

△ 6h

# RL31B\_STAAM

S-2333

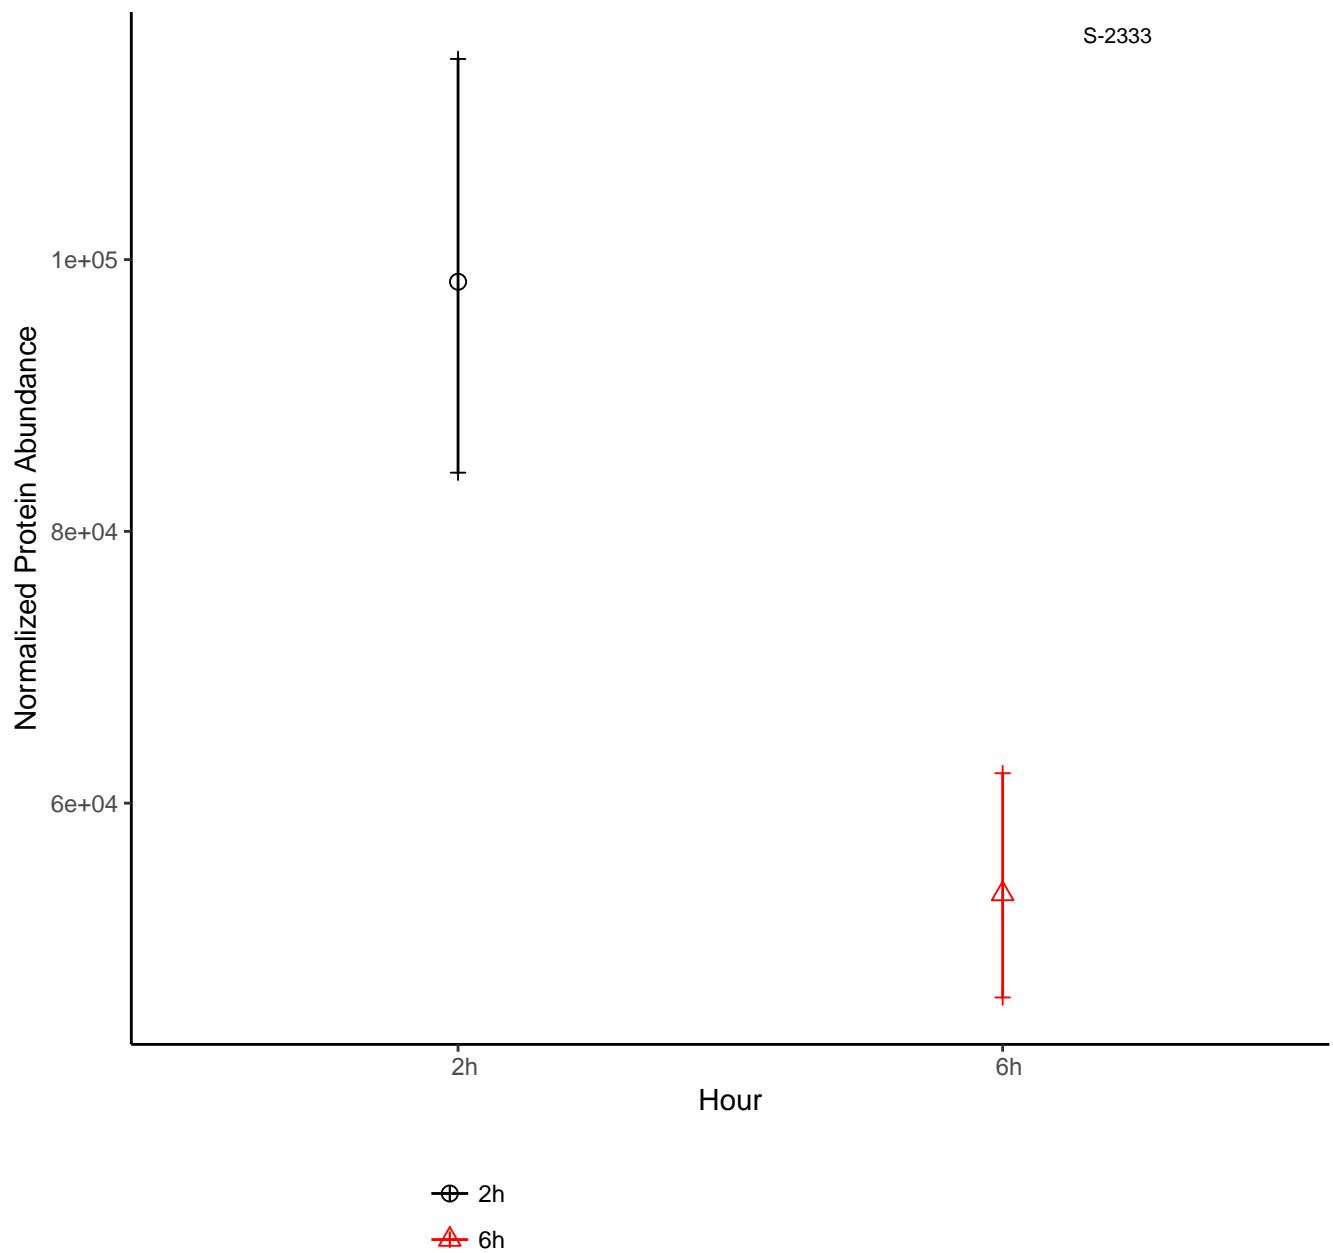

# RL32\_STAAM

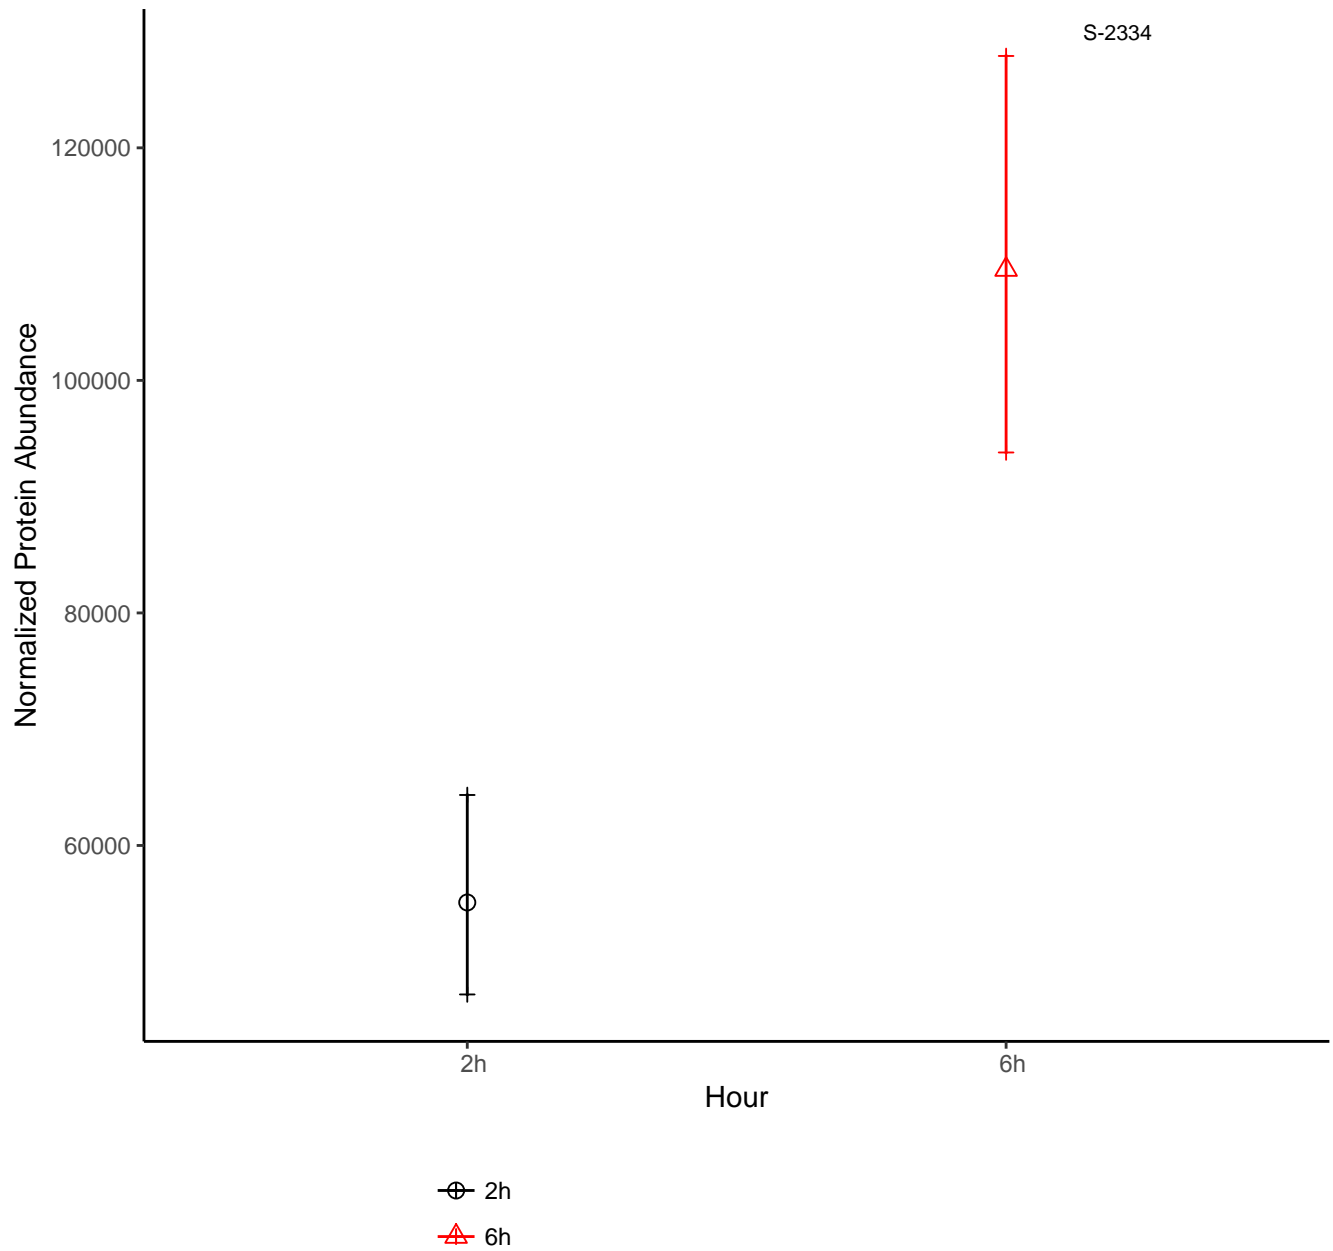

# RL331\_STAAM

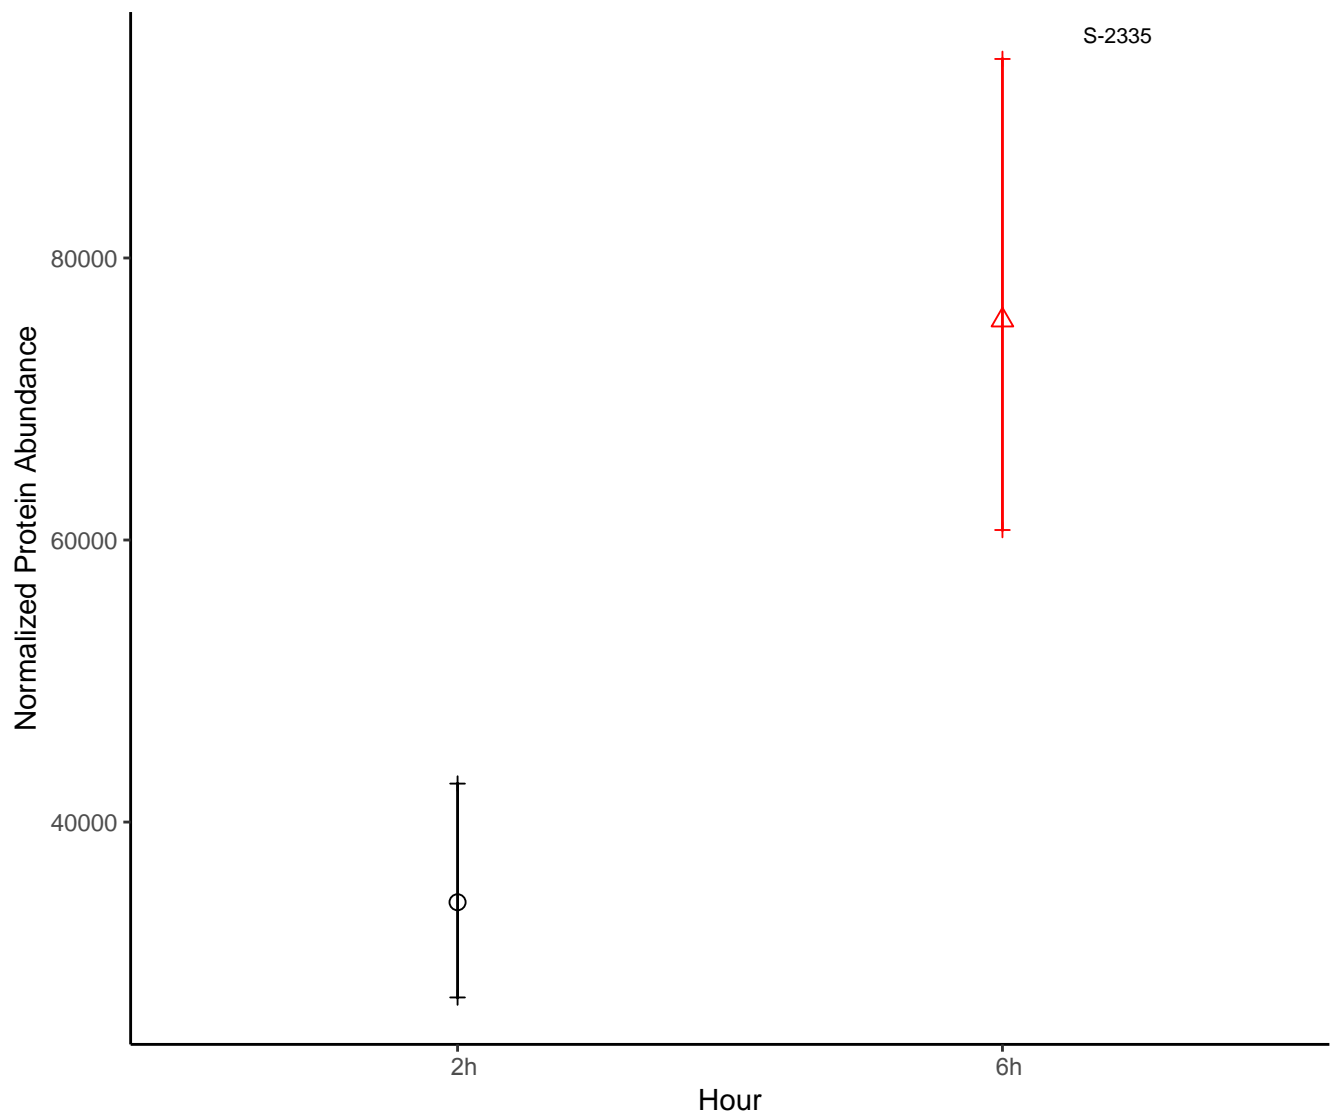

⊕ 2h

△ 6h

# RL332\_STAAM

S-2336

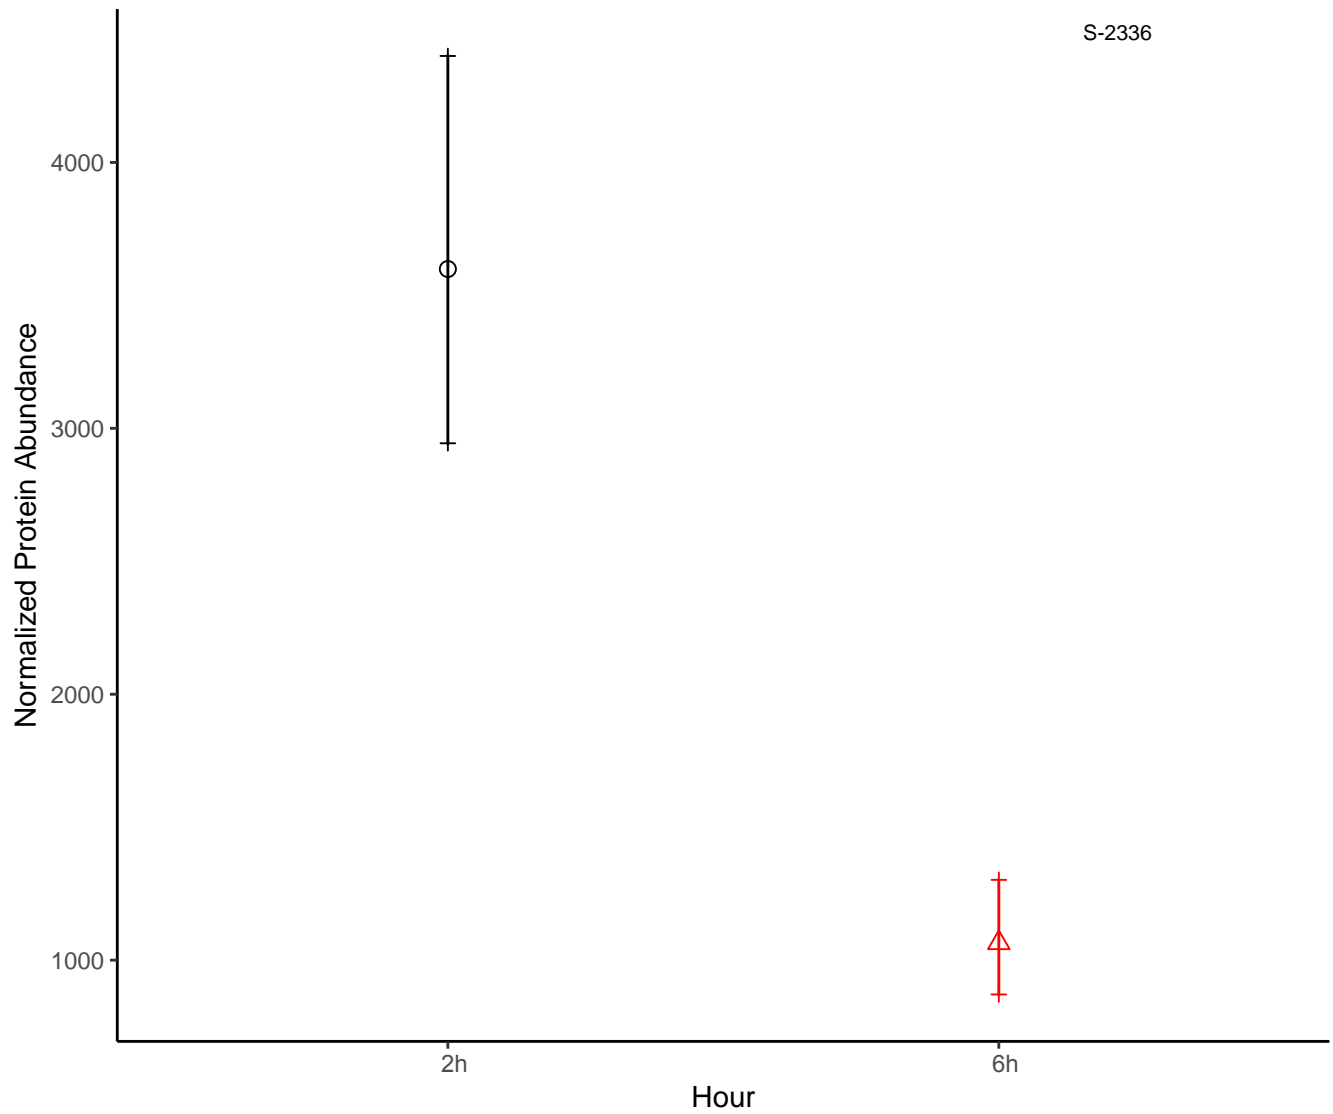

⊕ 2h

△ 6h



# RL35\_STAAM

S-2337

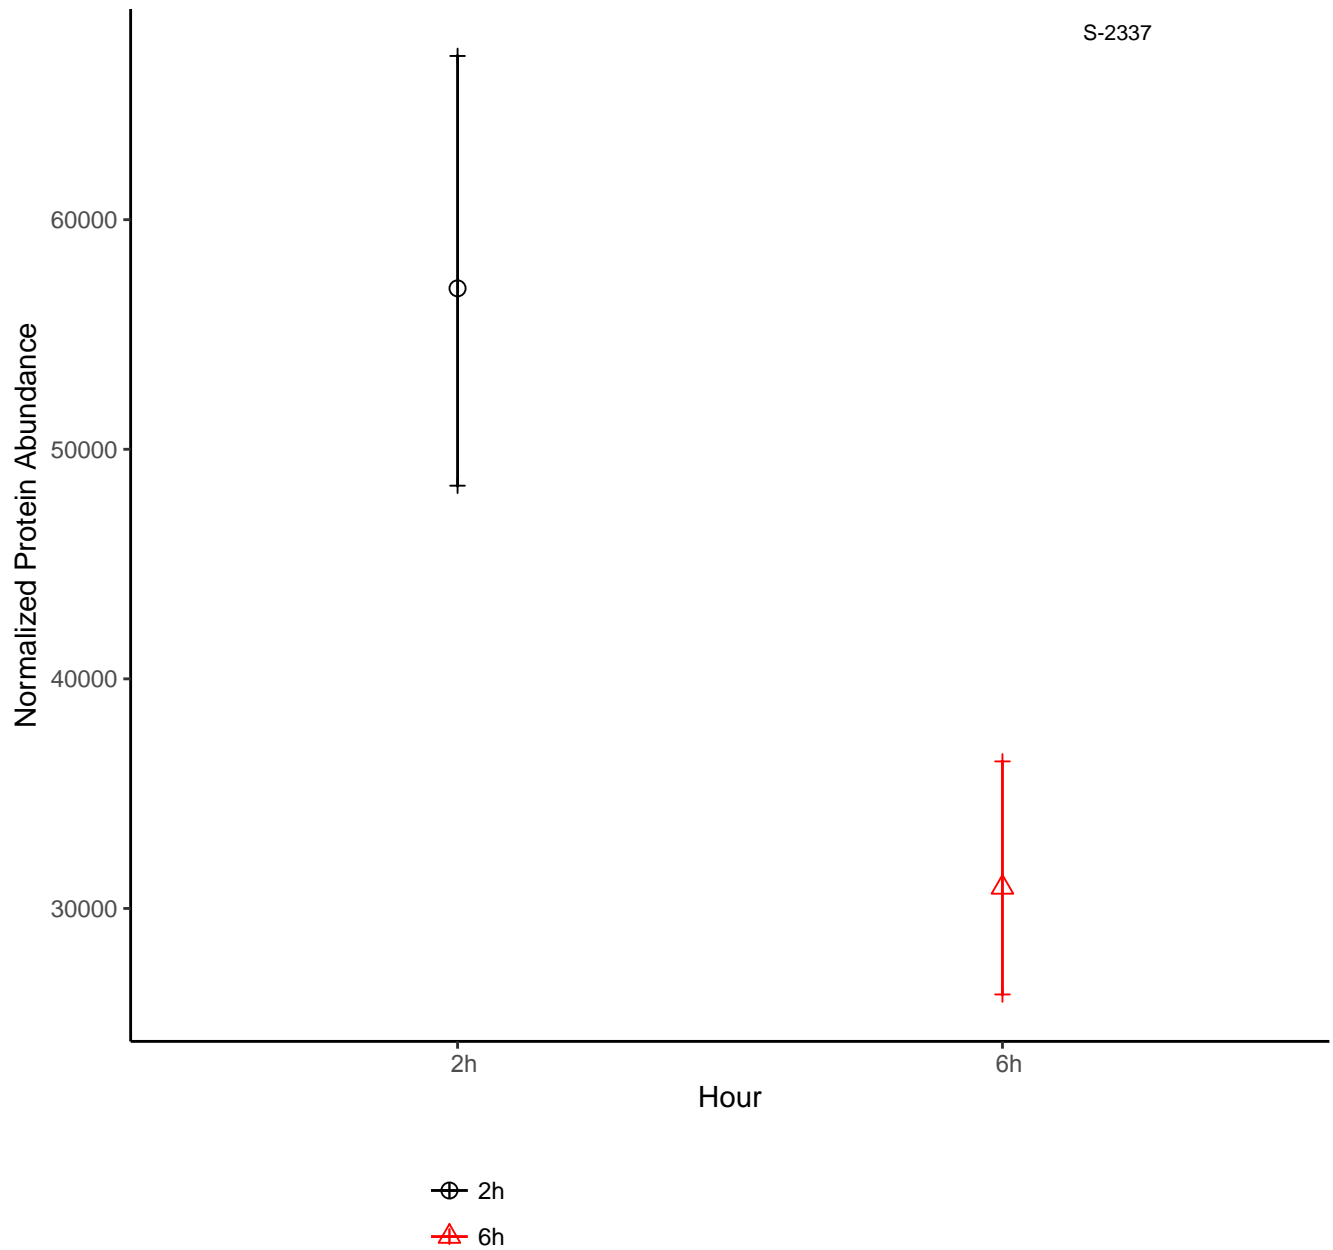

# RL36\_STAAM

S-2338

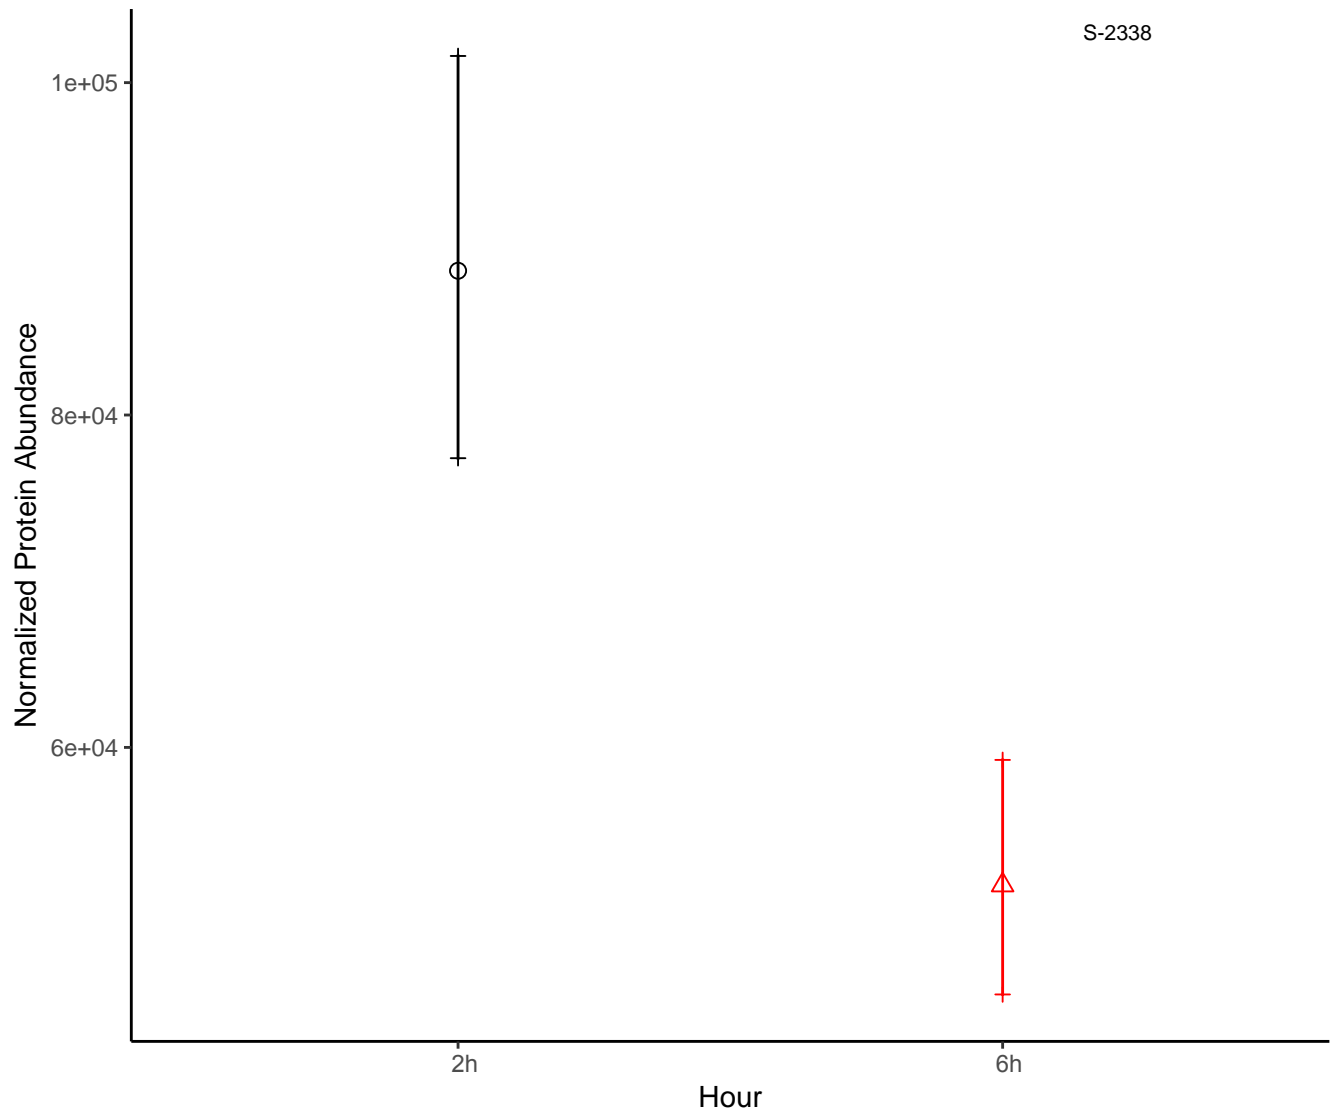

⊕ 2h

△ 6h

# RL4\_STAAM

S-2339

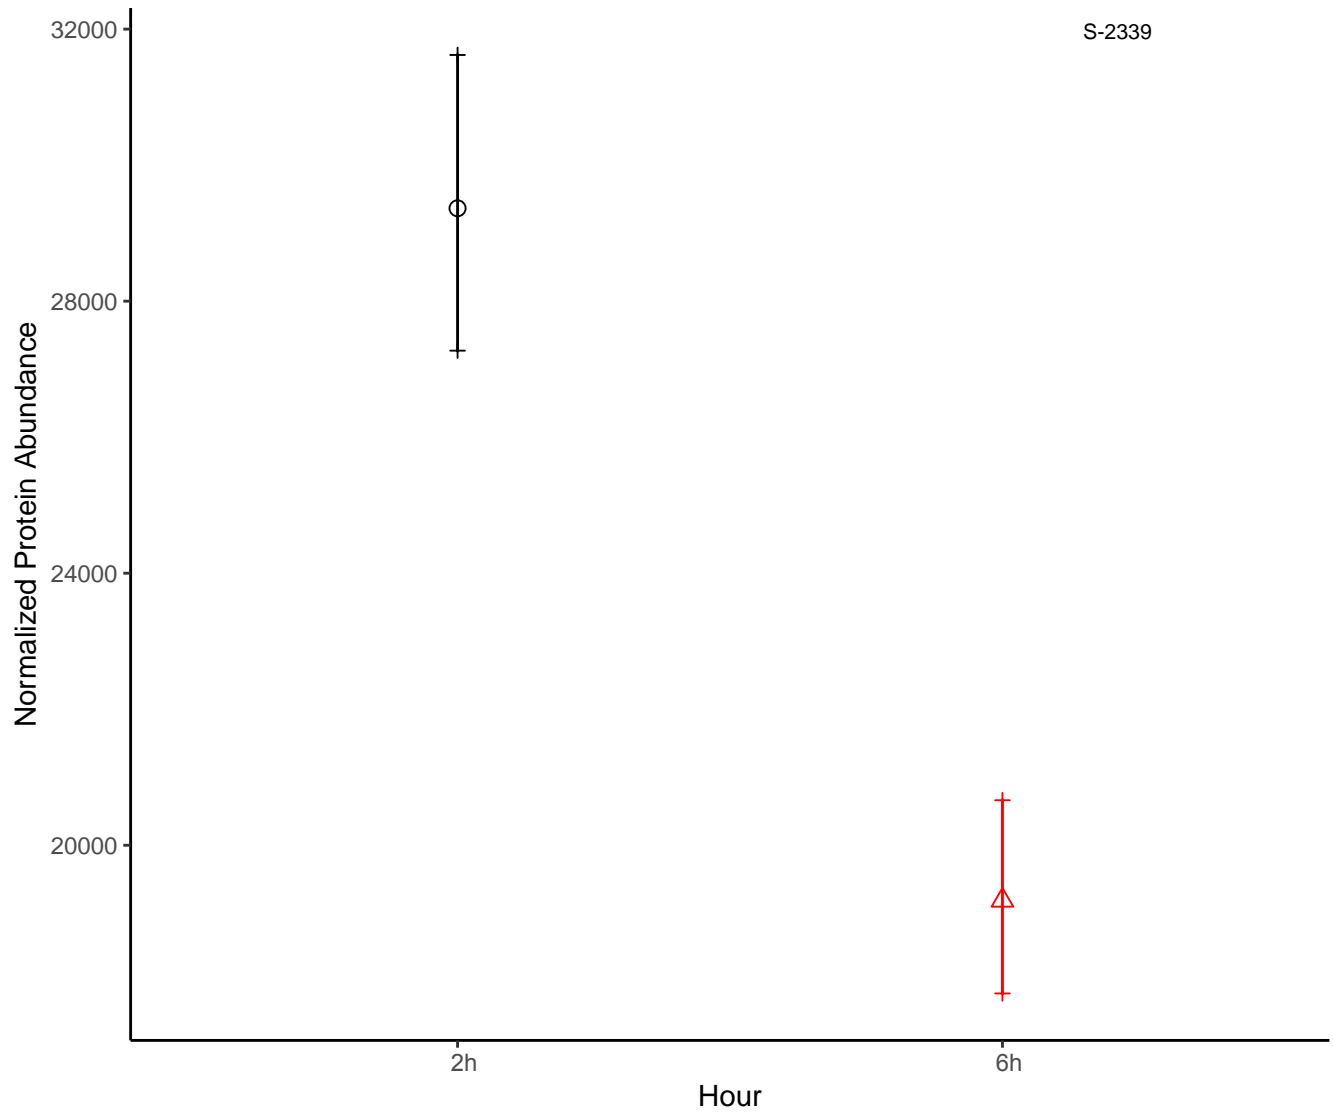

⊕ 2h

△ 6h

# RL5\_STAAM

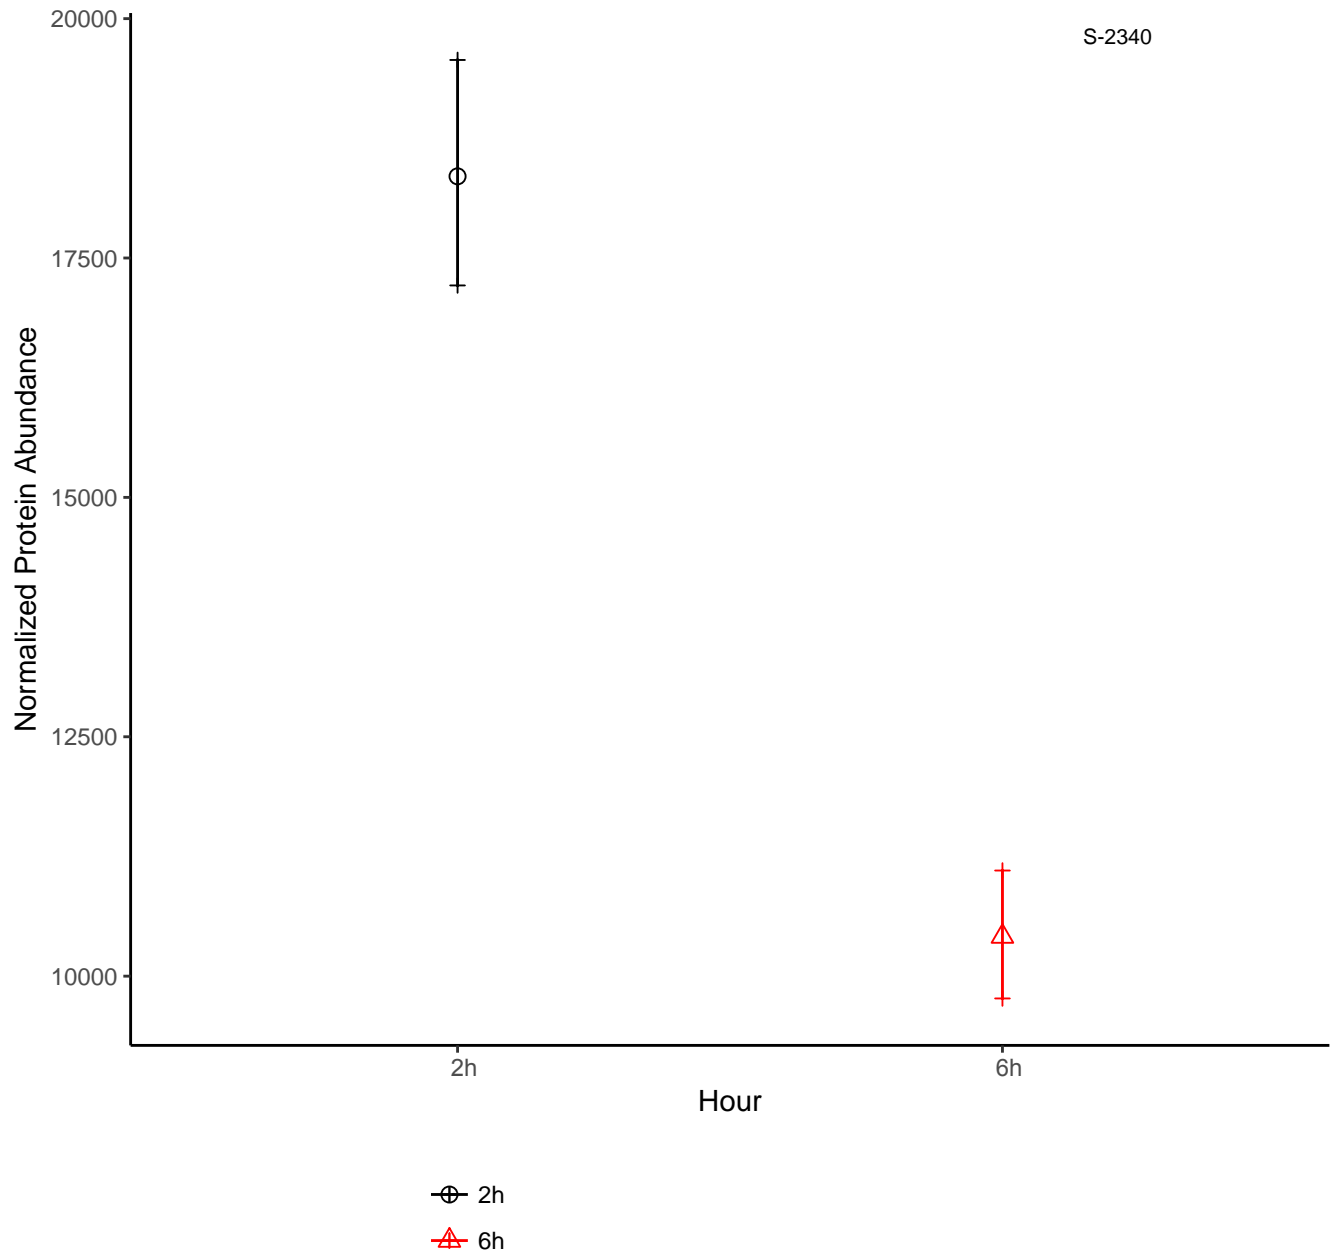

# RL6\_STAAM

S-2341

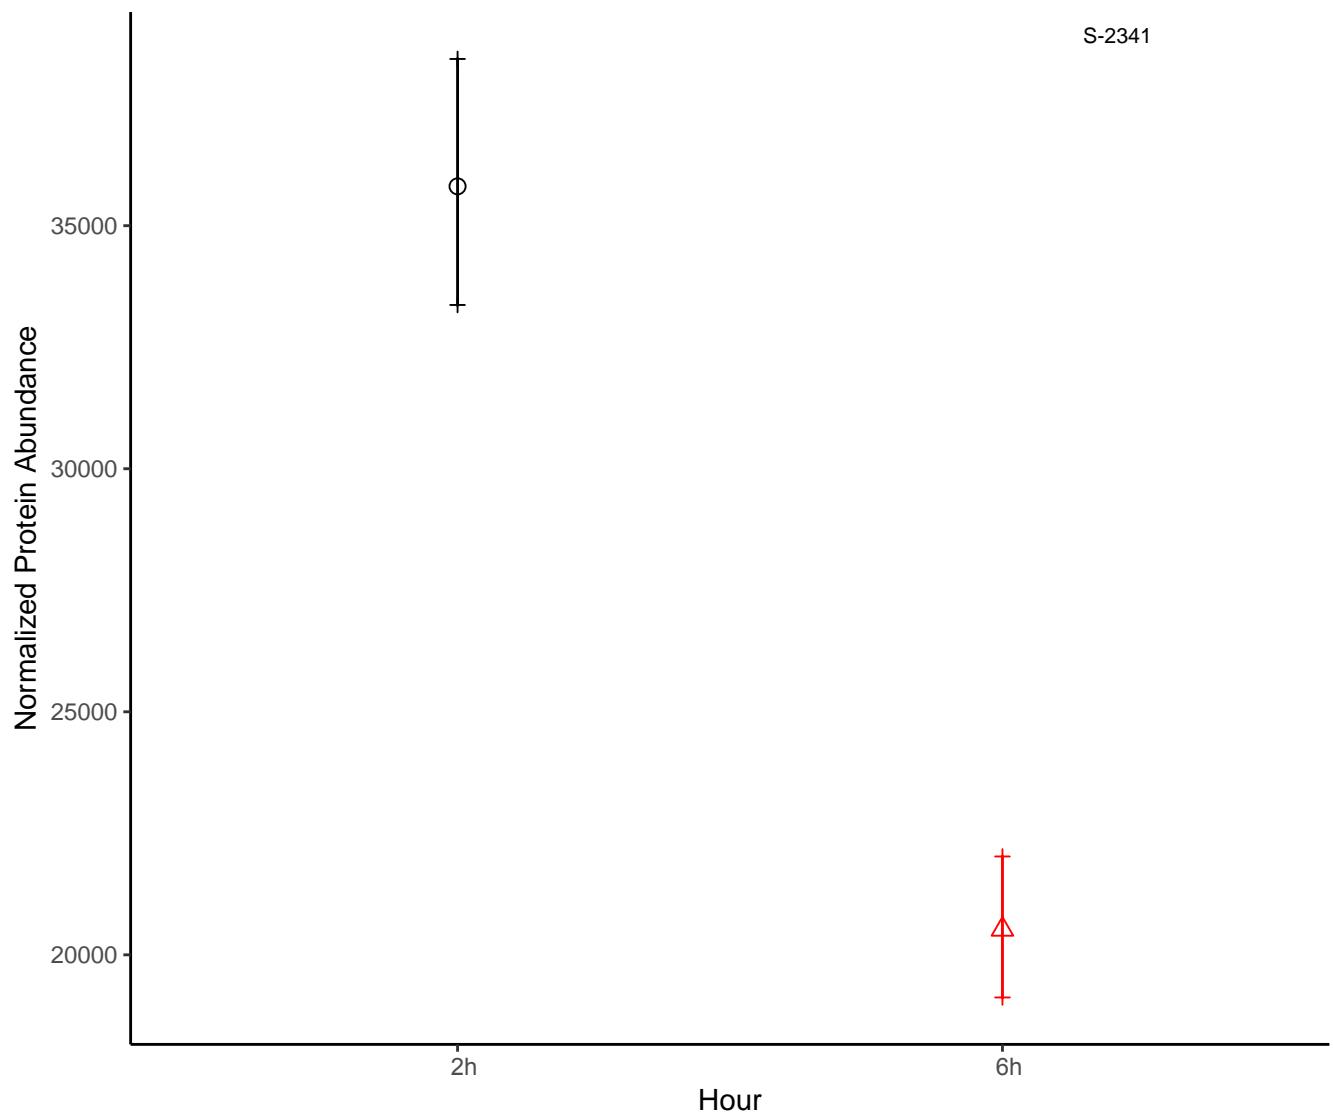

⊕ 2h

△ 6h

# RL7\_STAAM

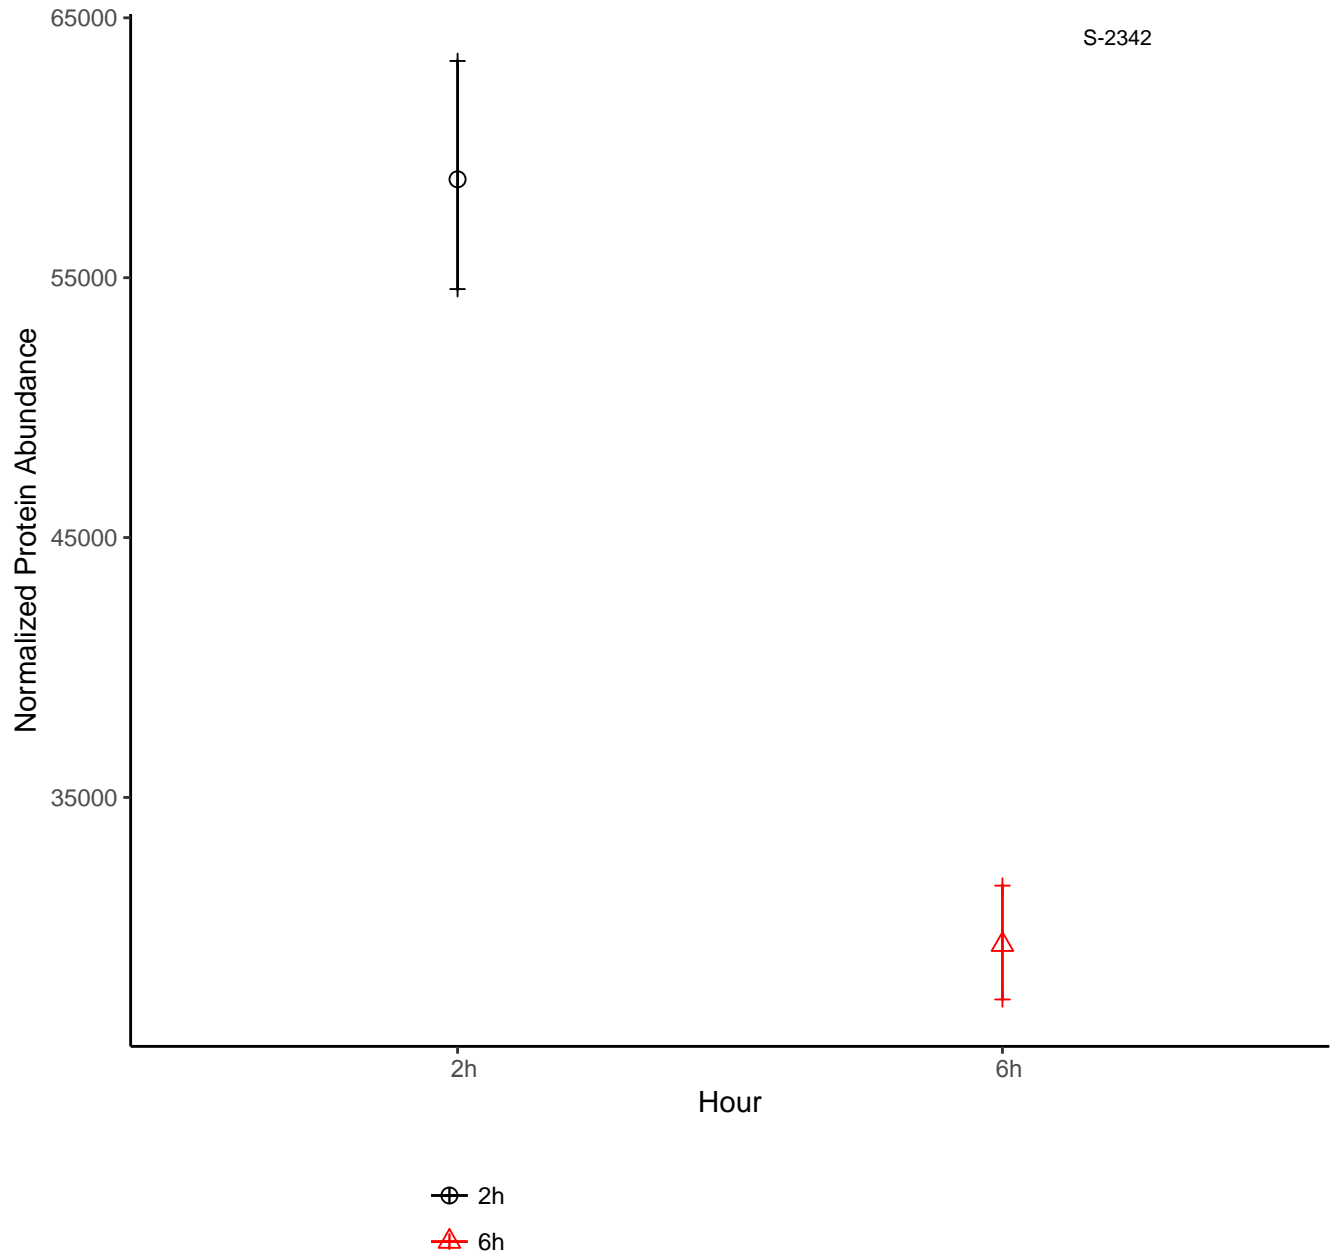

# RL9\_STAAM

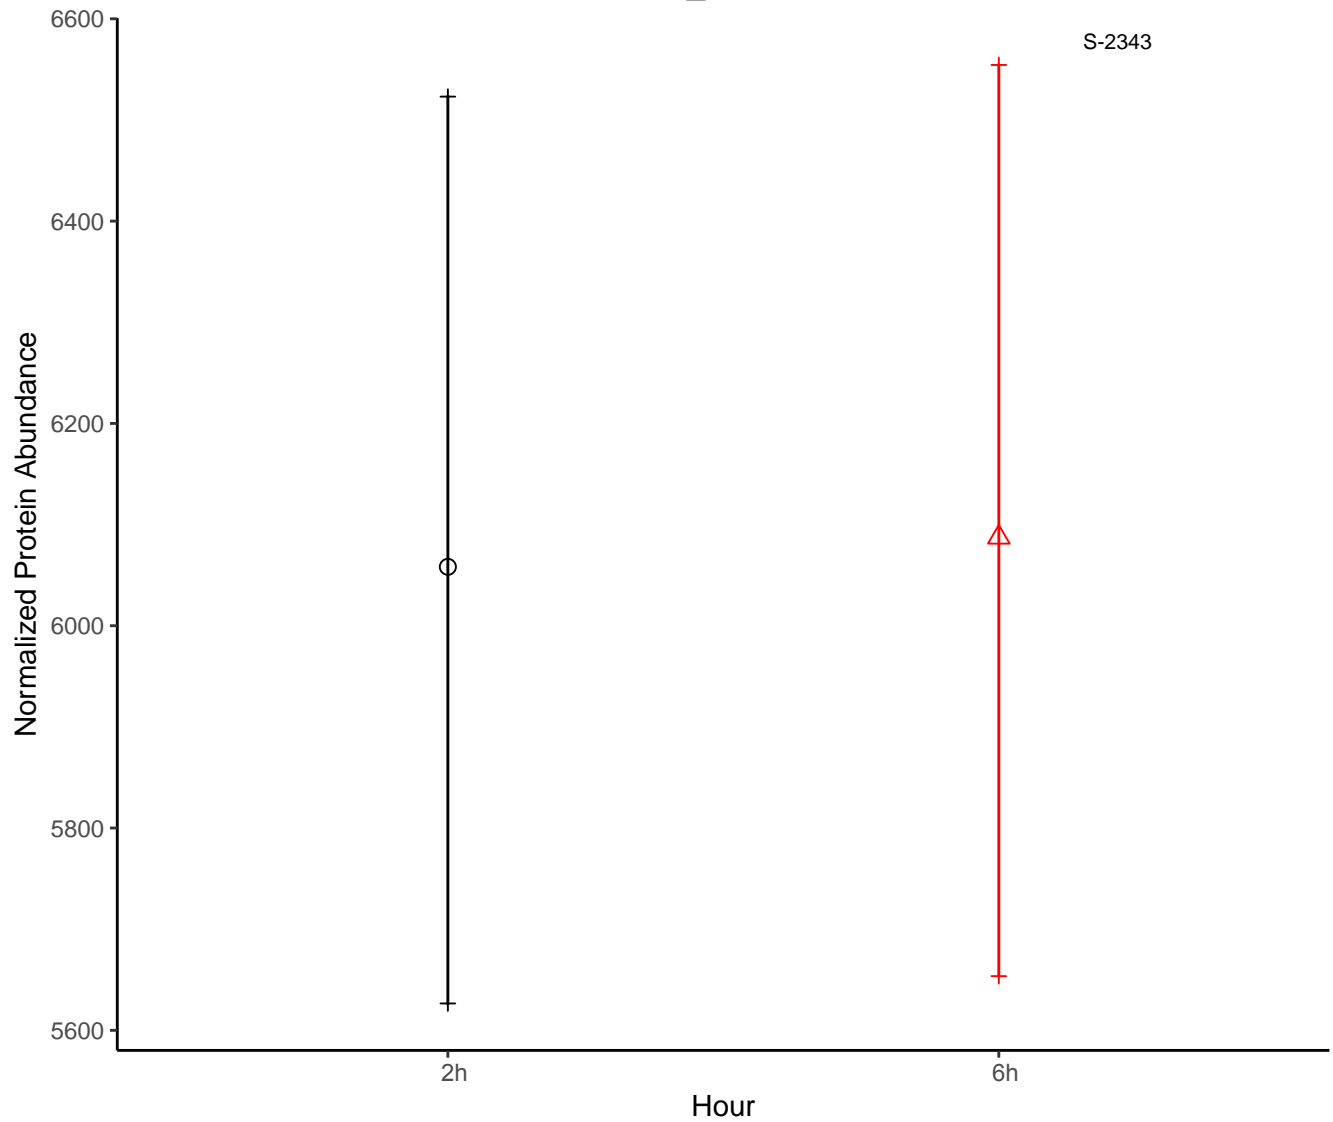

⊕ 2h

△ 6h

# RNJ1\_STAAM

S-2344

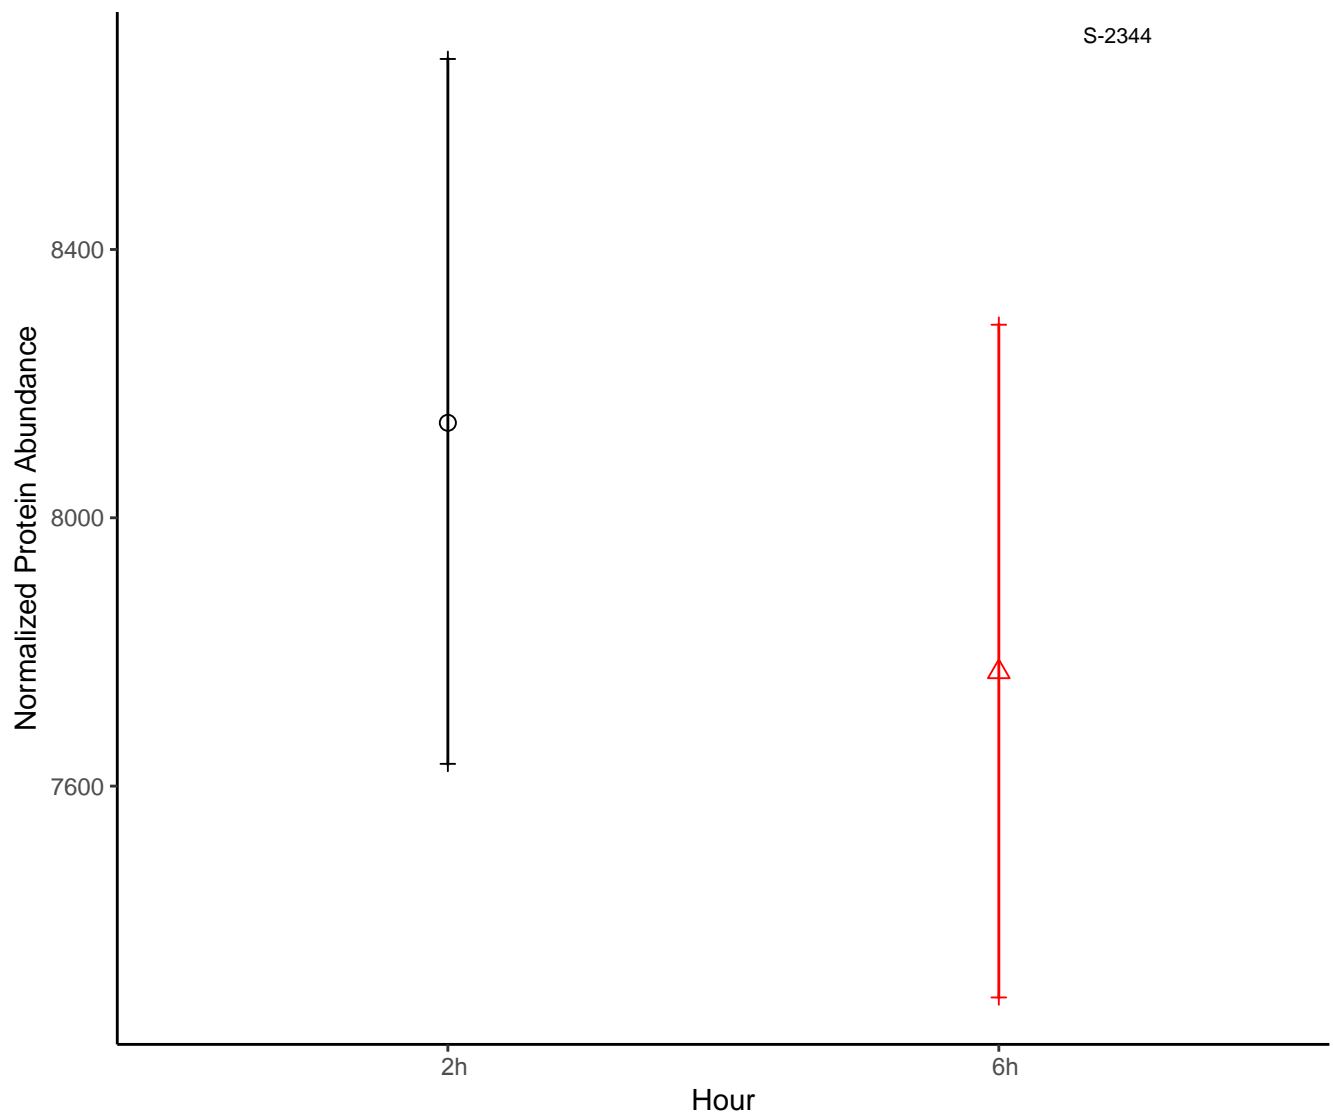

⊕ 2h

△ 6h



# RNJ2\_STAAM

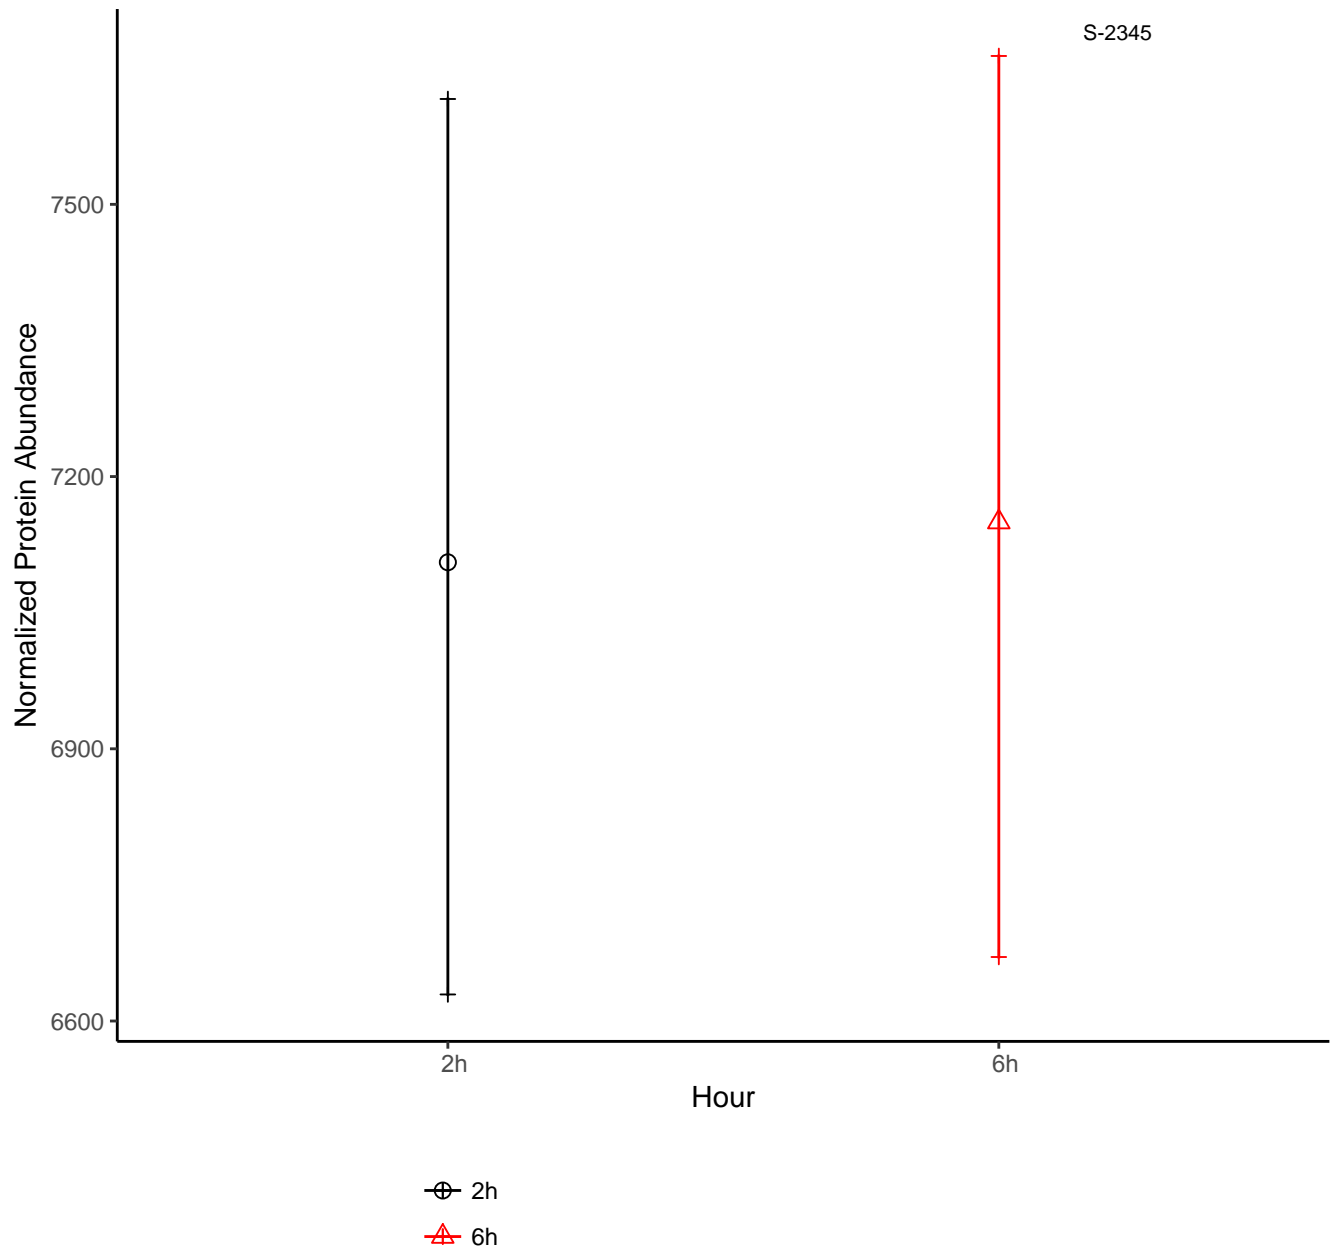

# RNY\_STAAM

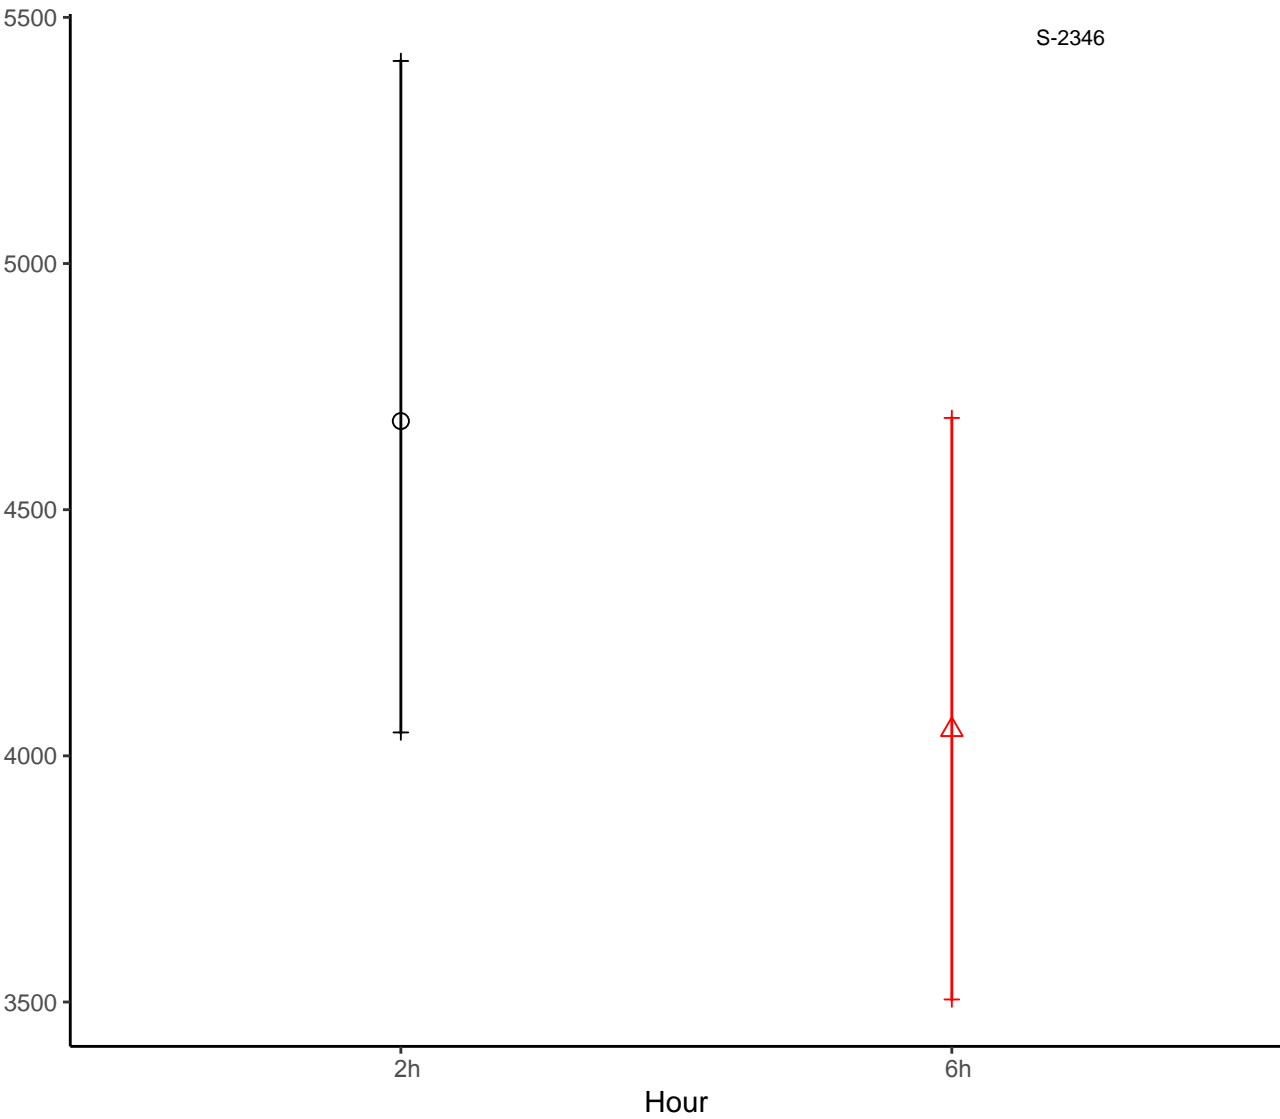

⊕ 2h

△ 6h

# ROCA\_STAAM

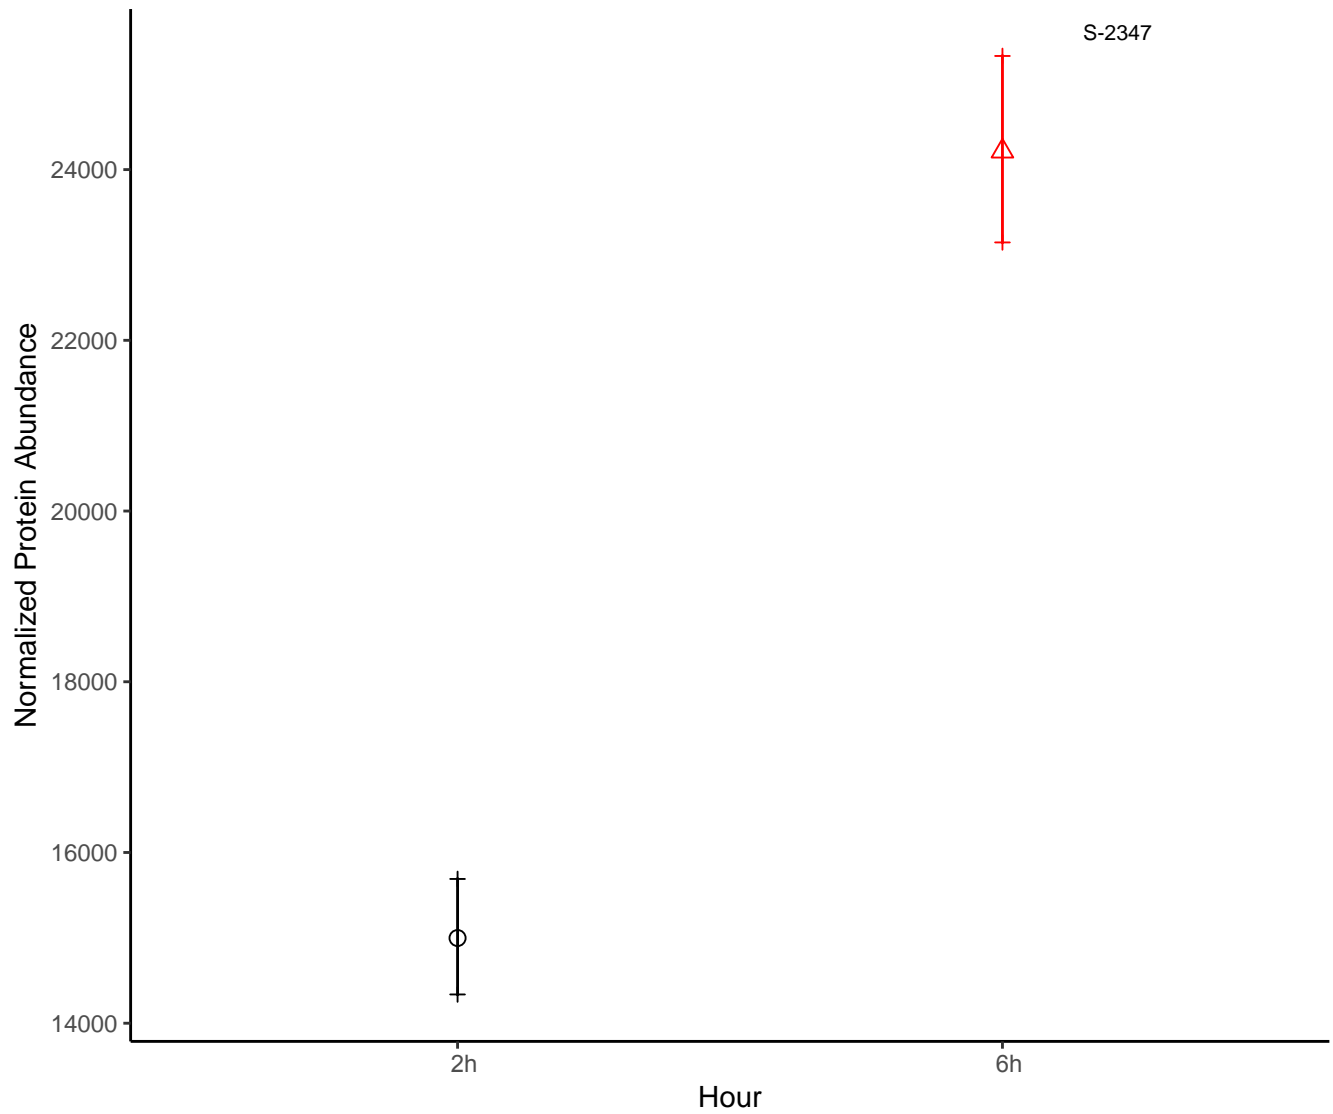

⊕ 2h

△ 6h

# ROT\_STAAM

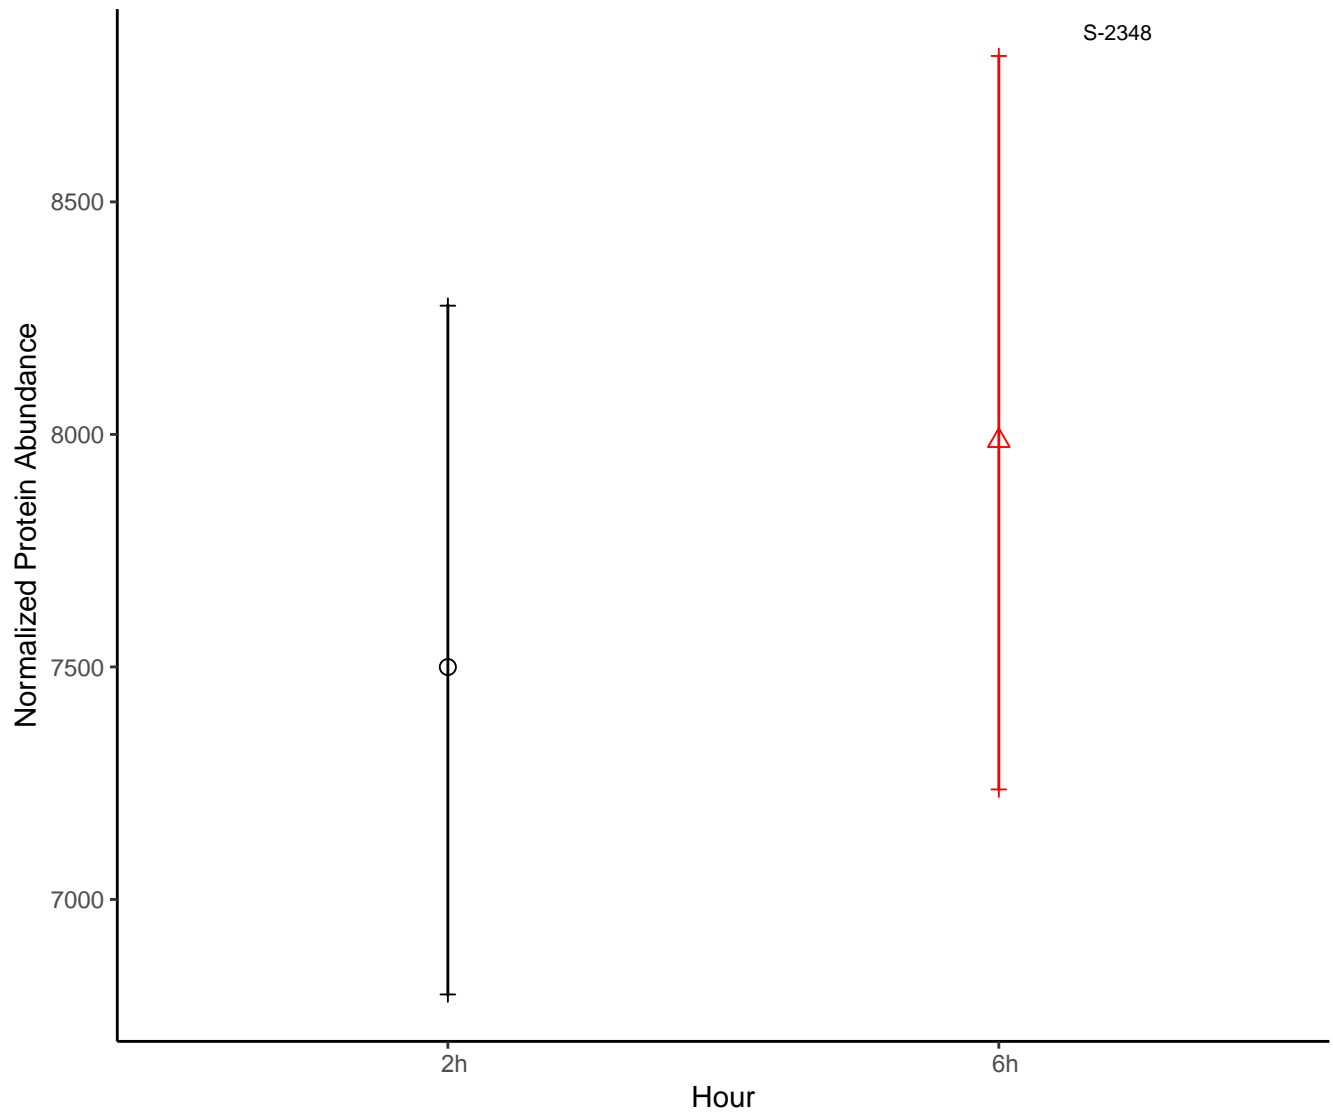

⊕ 2h

△ 6h

# RPOA\_STAAM

S-2349

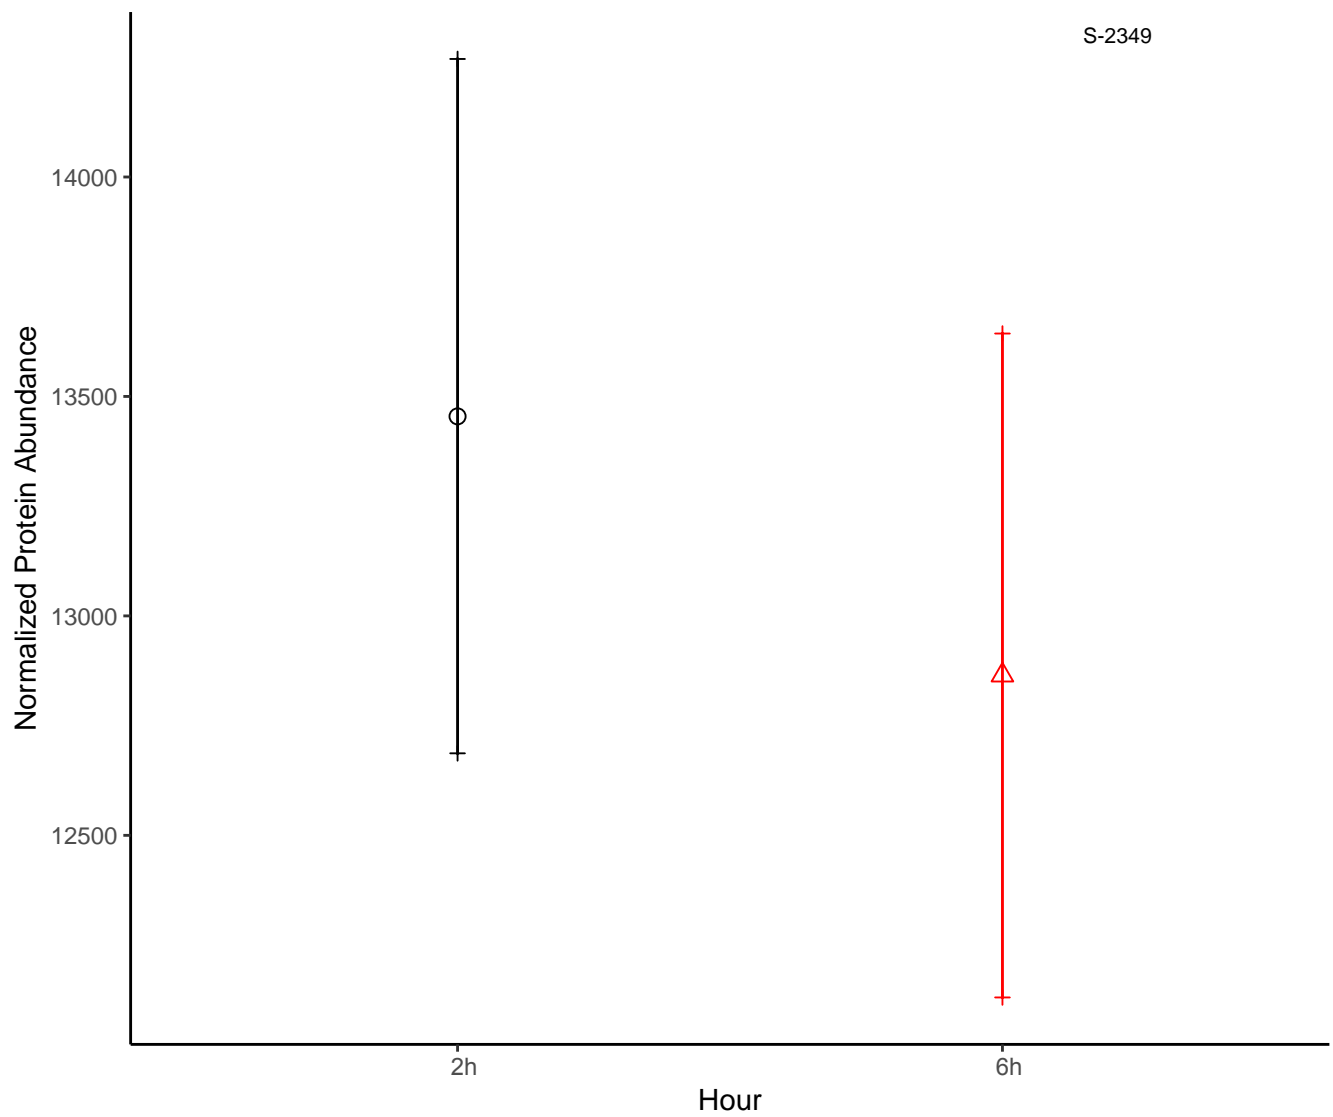

⊕ 2h

△ 6h

# RPOB\_STAAM

S-2350

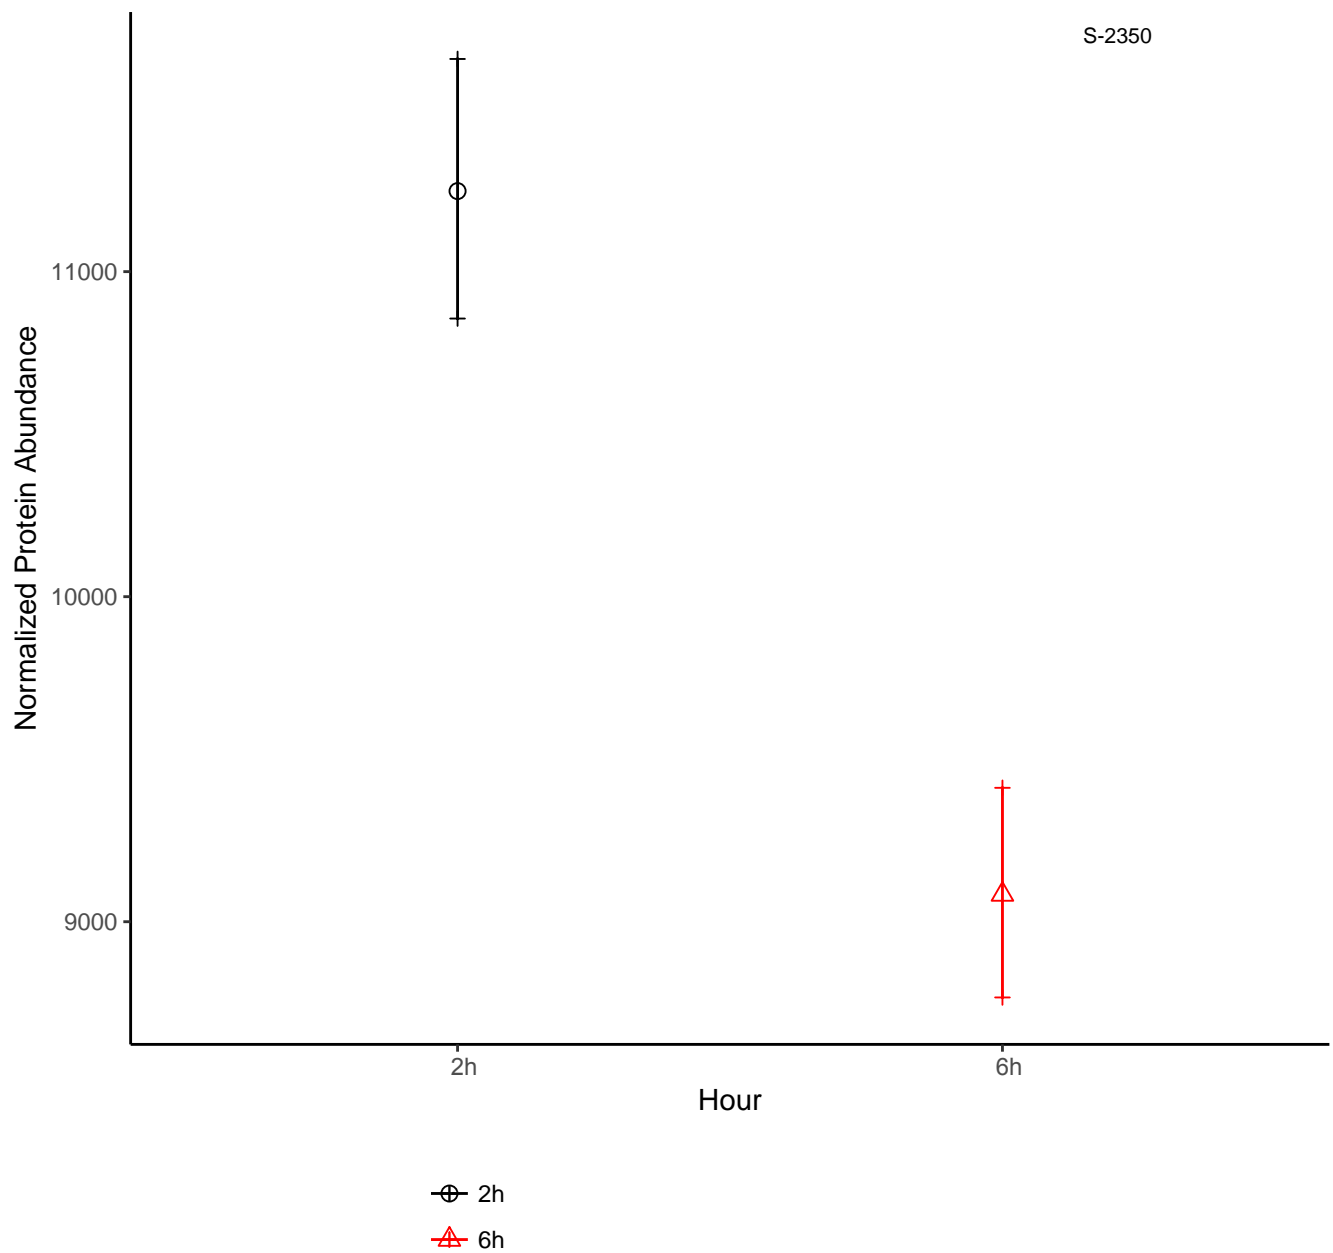

# RPOC\_STAAM

S-2351

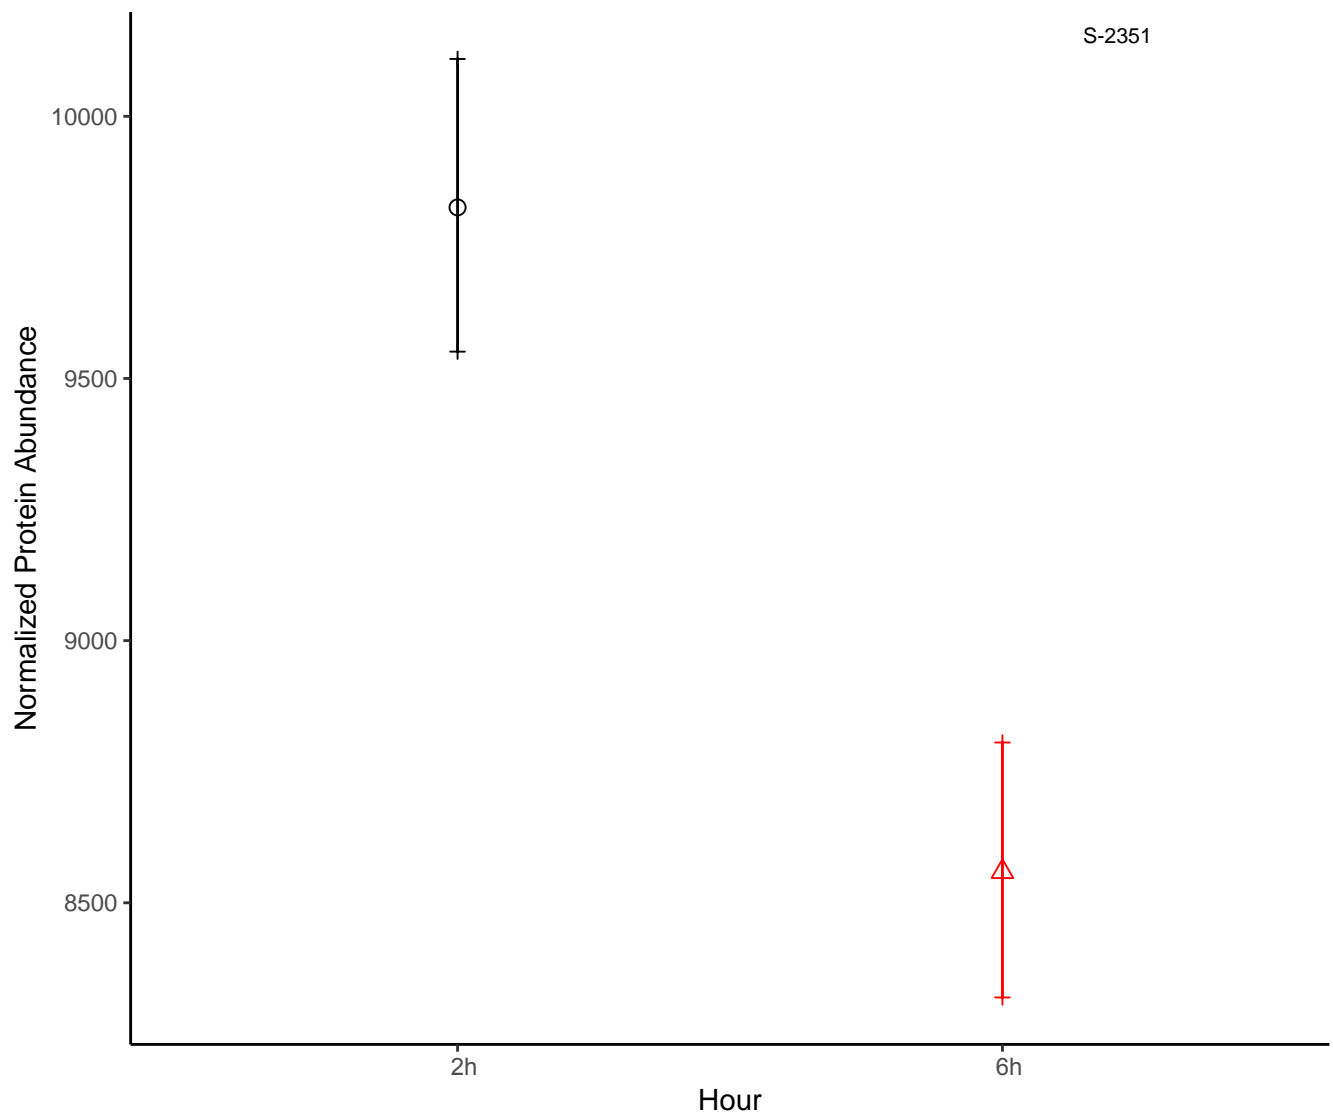

⊕ 2h

△ 6h

# RPOE\_STAAM

S-2352

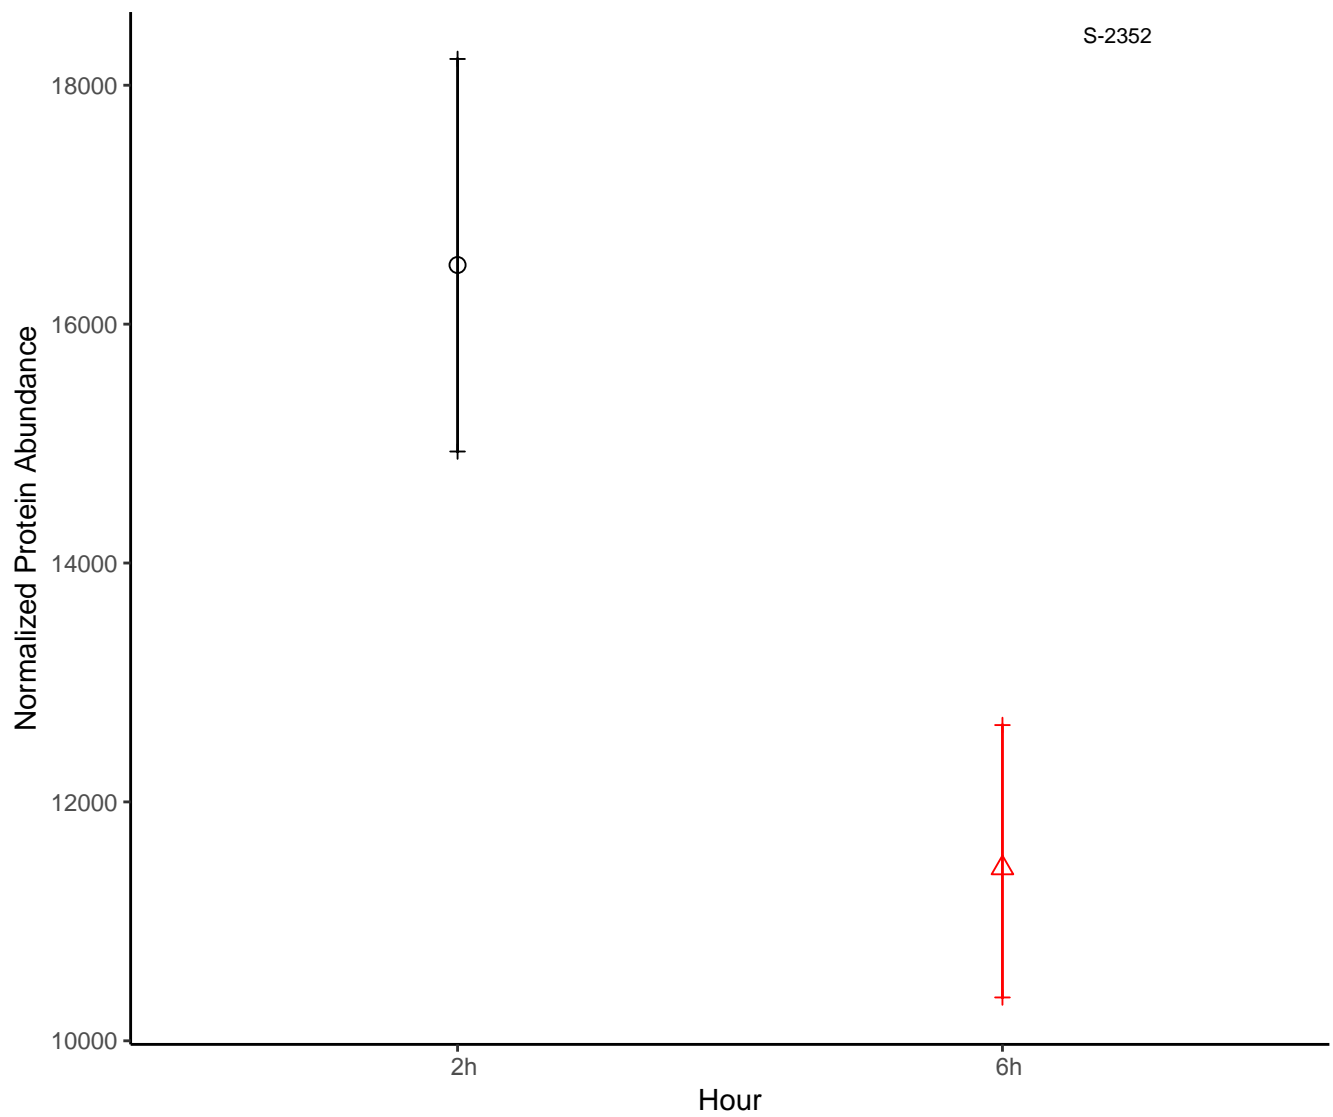

⊕ 2h

△ 6h



# RPOZ\_STAAM

S-2353

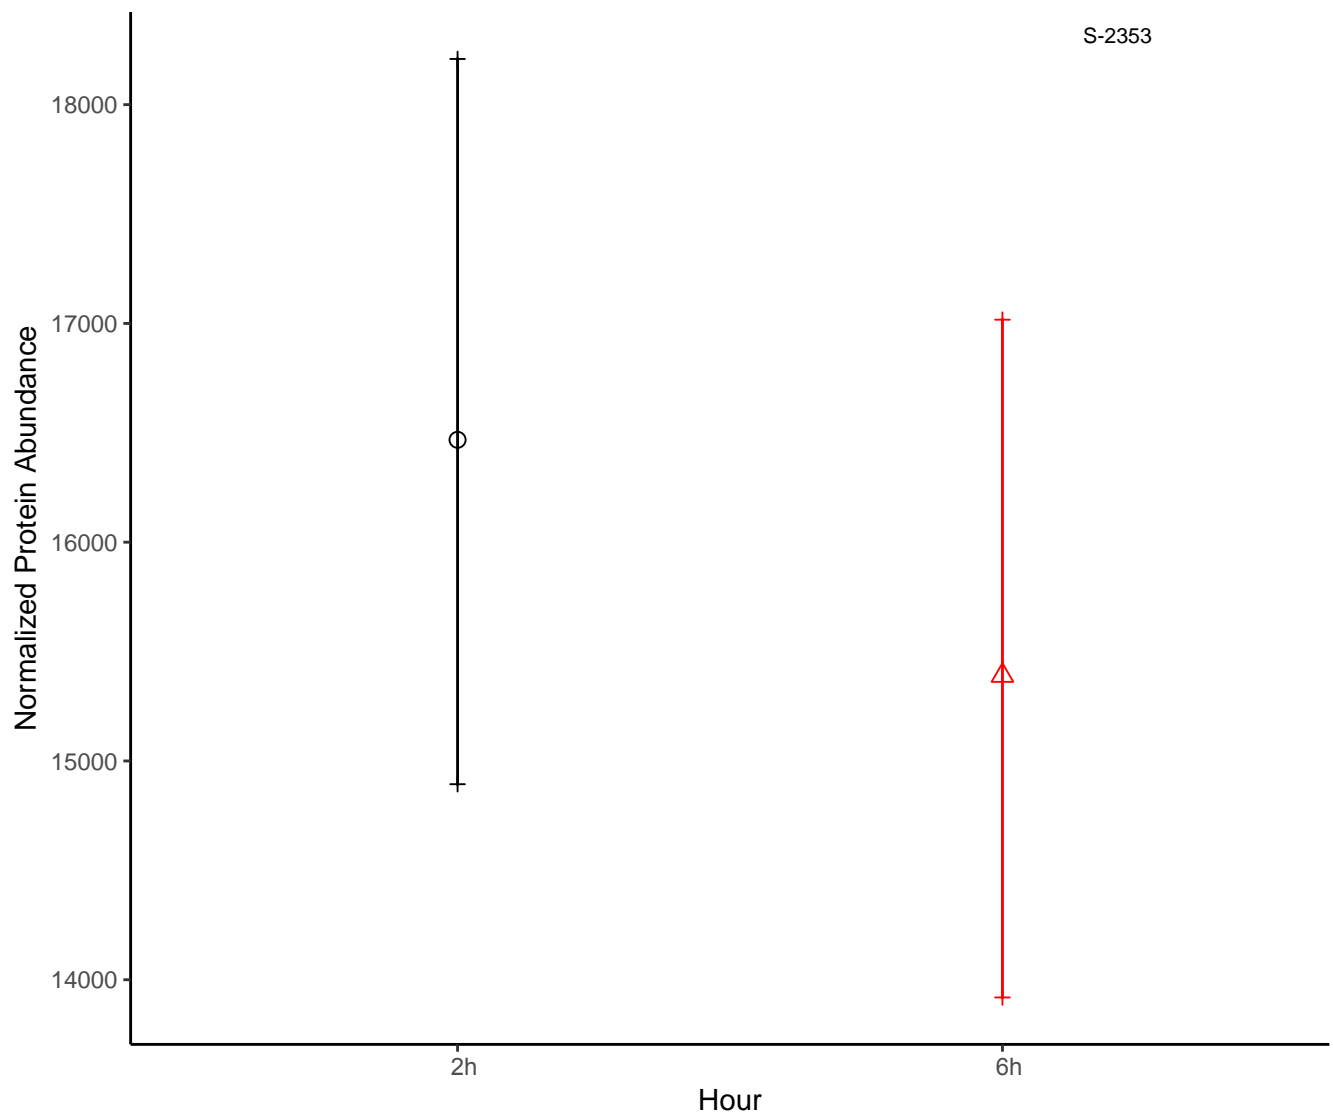

⊕ 2h

△ 6h

# RRF\_STAAM

S-2354

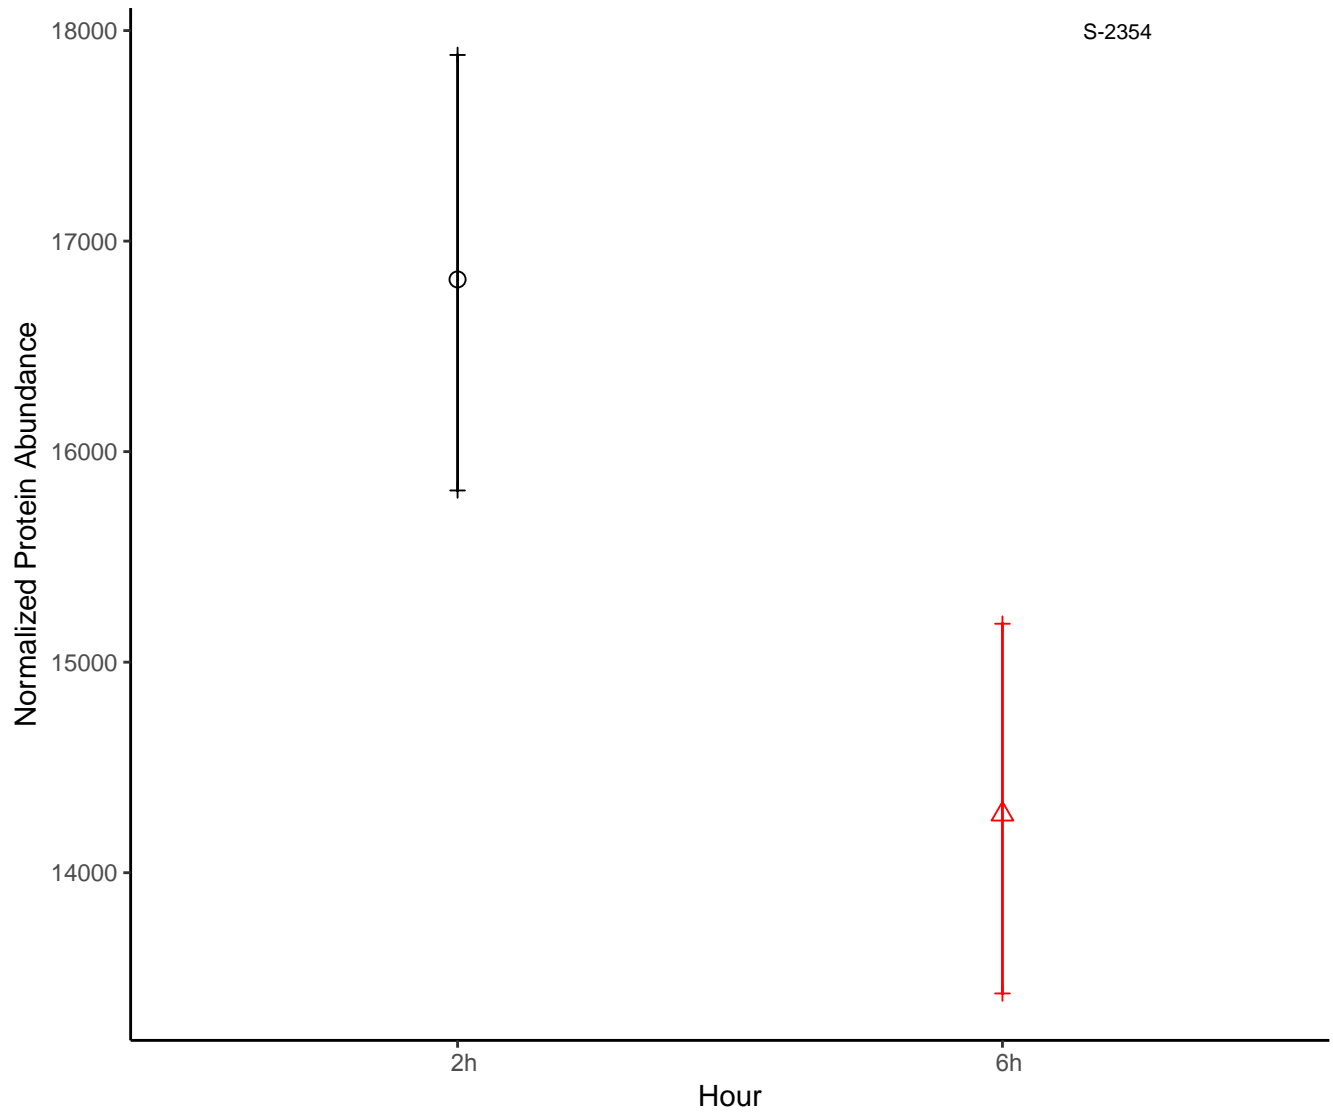

⊕ 2h

△ 6h

# RS1\_STAAM

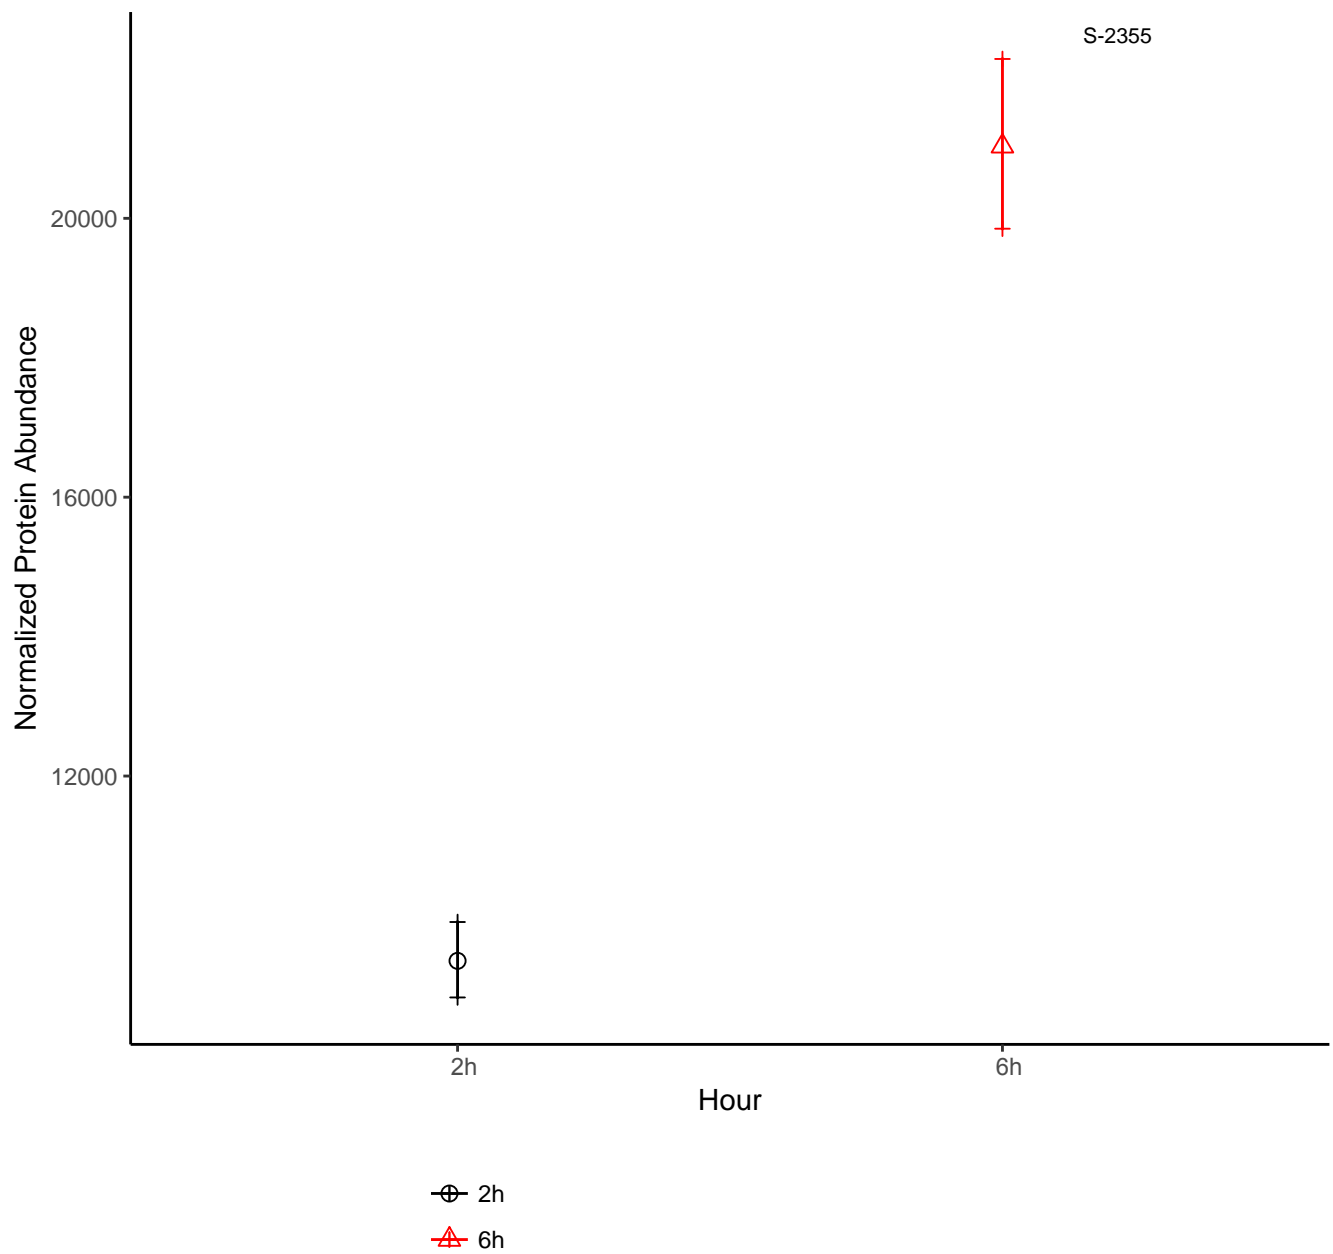

# RS10\_STAAM

S-2356

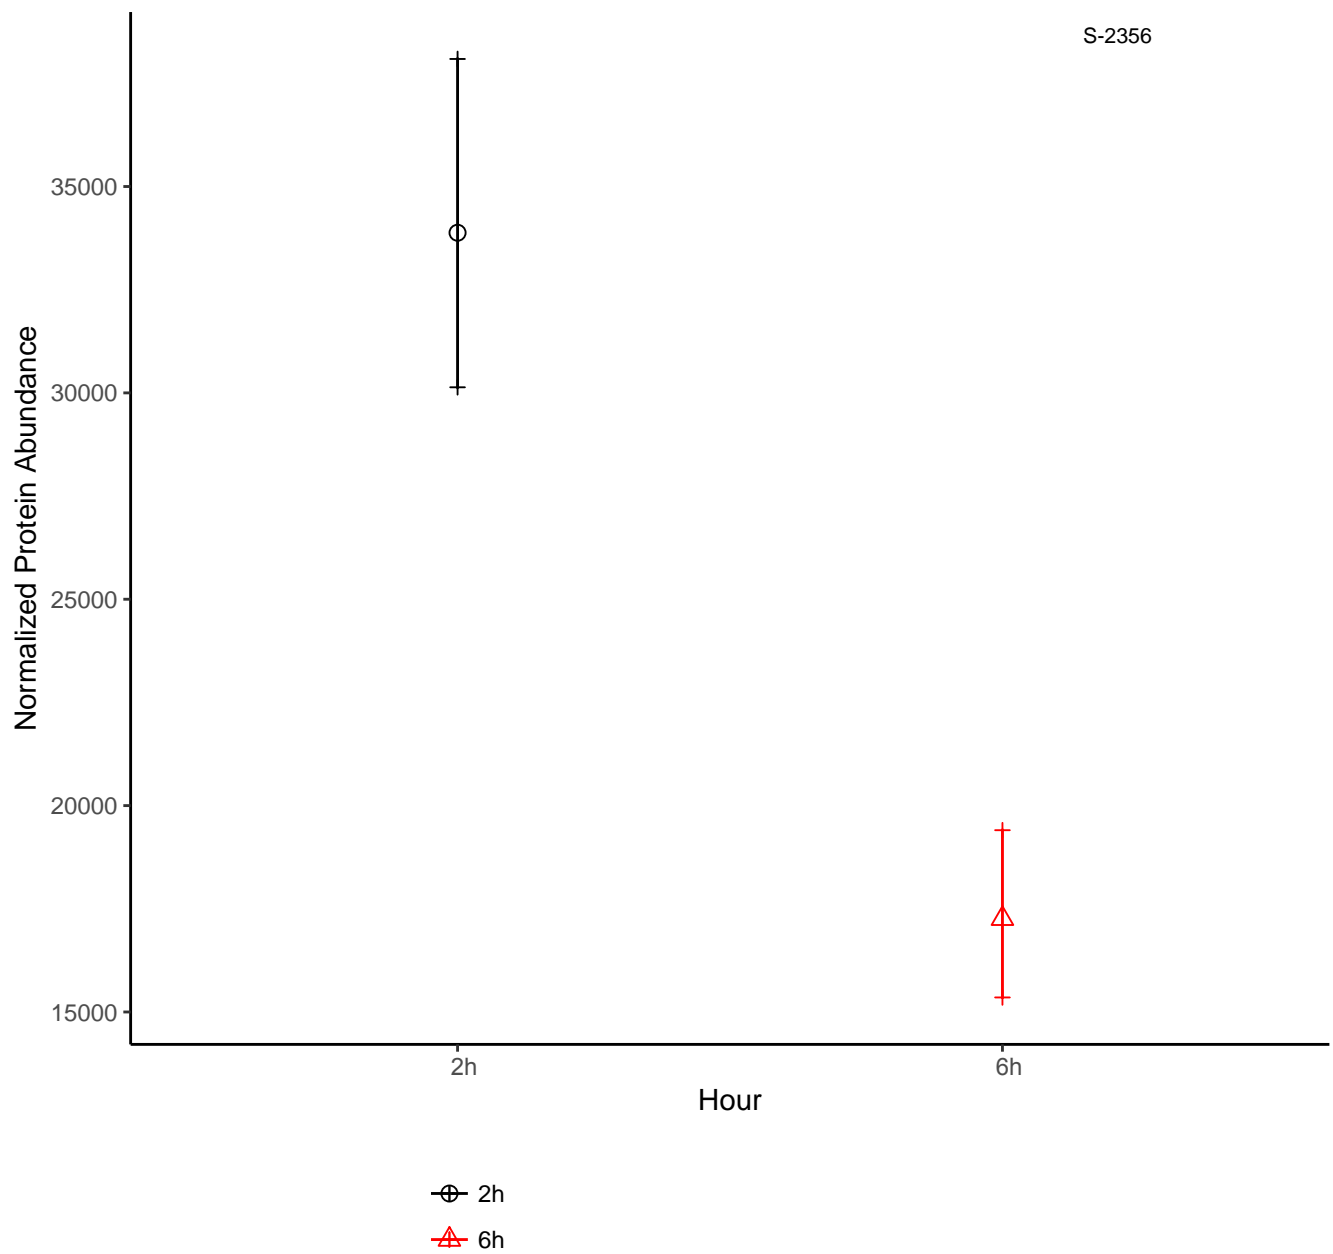

# RS11\_STAAM

S-2357

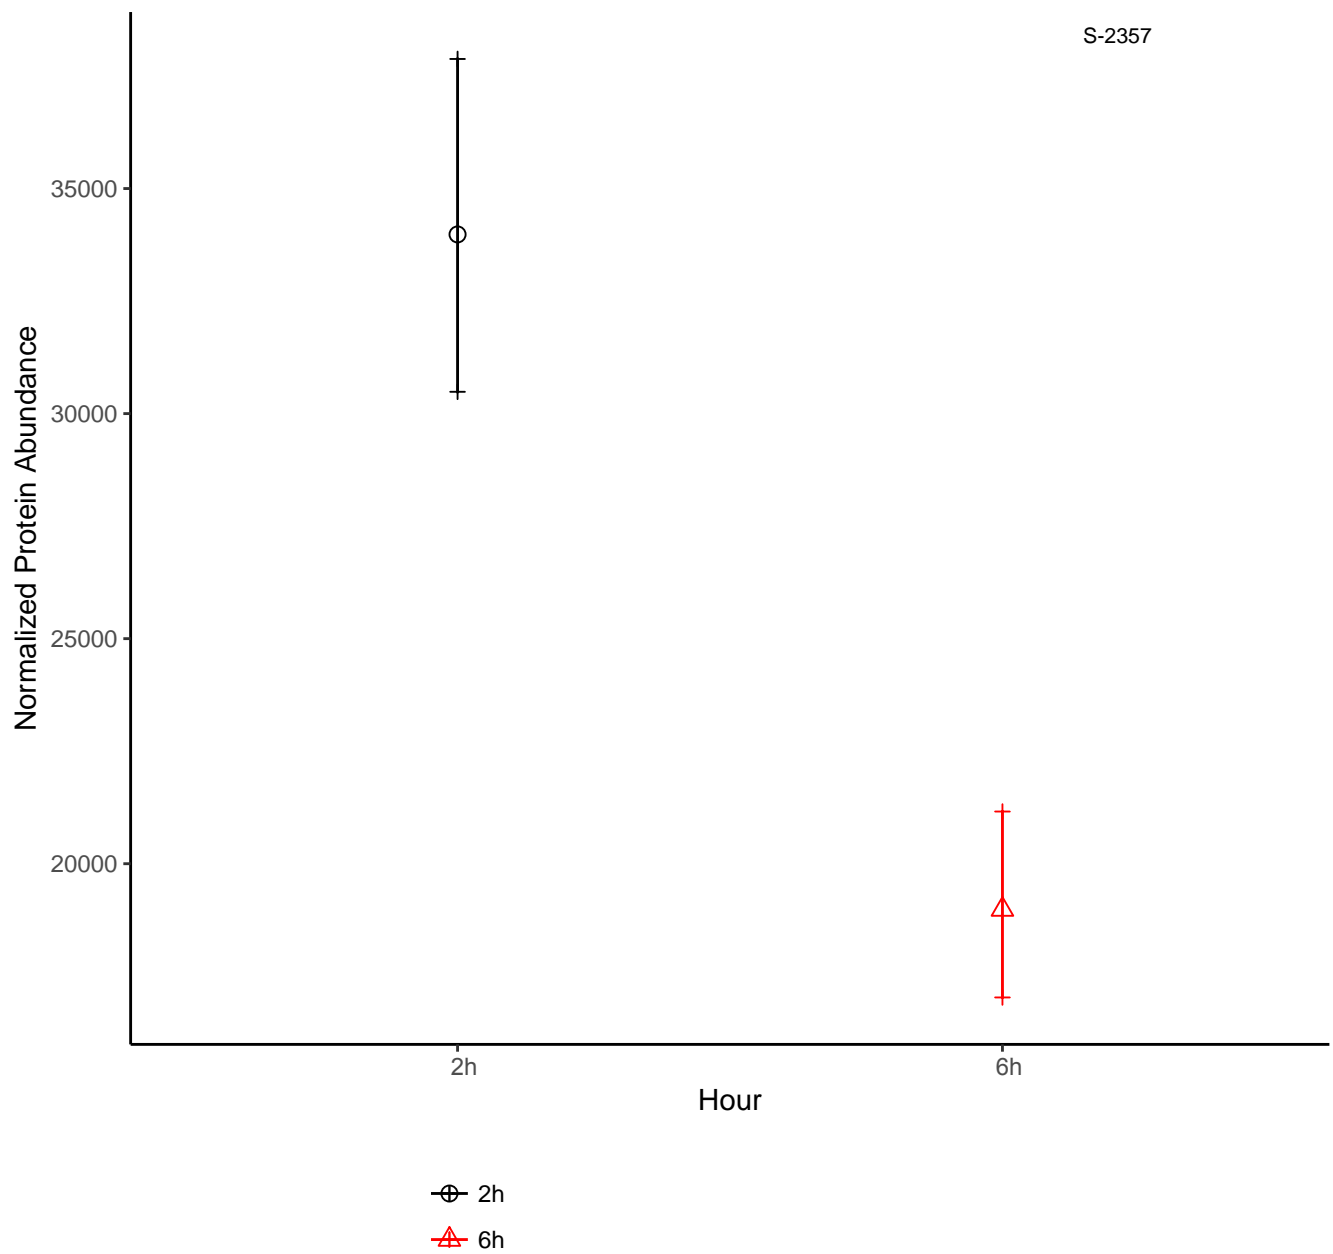

# RS12\_STAAM

S-2358

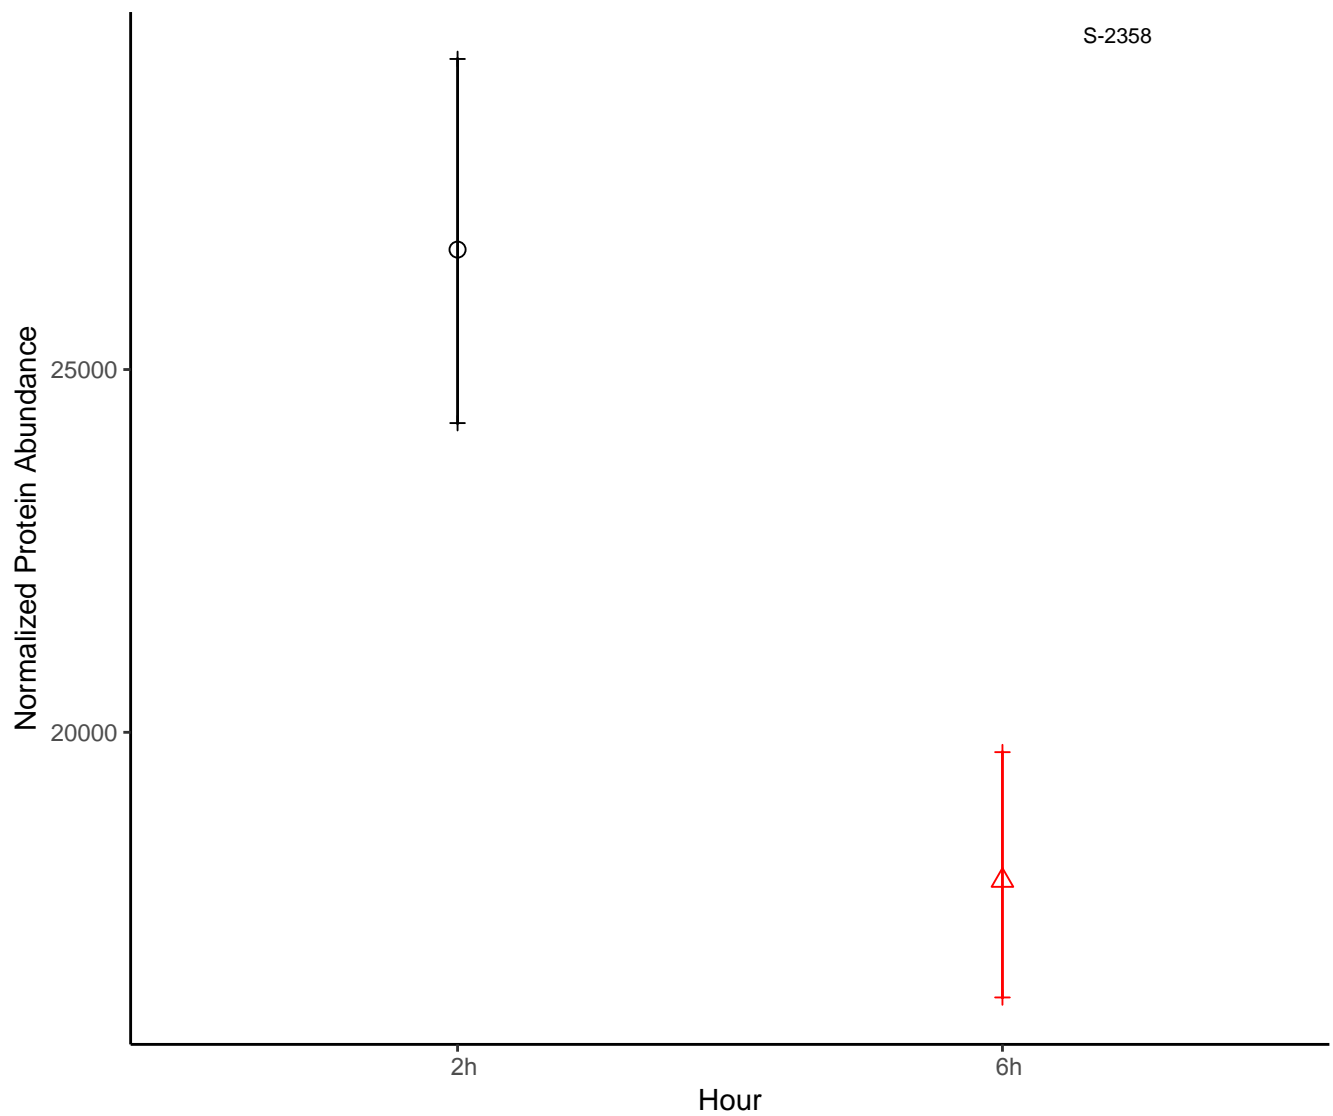

⊕ 2h

△ 6h

# RS13\_STAAM

S-2359

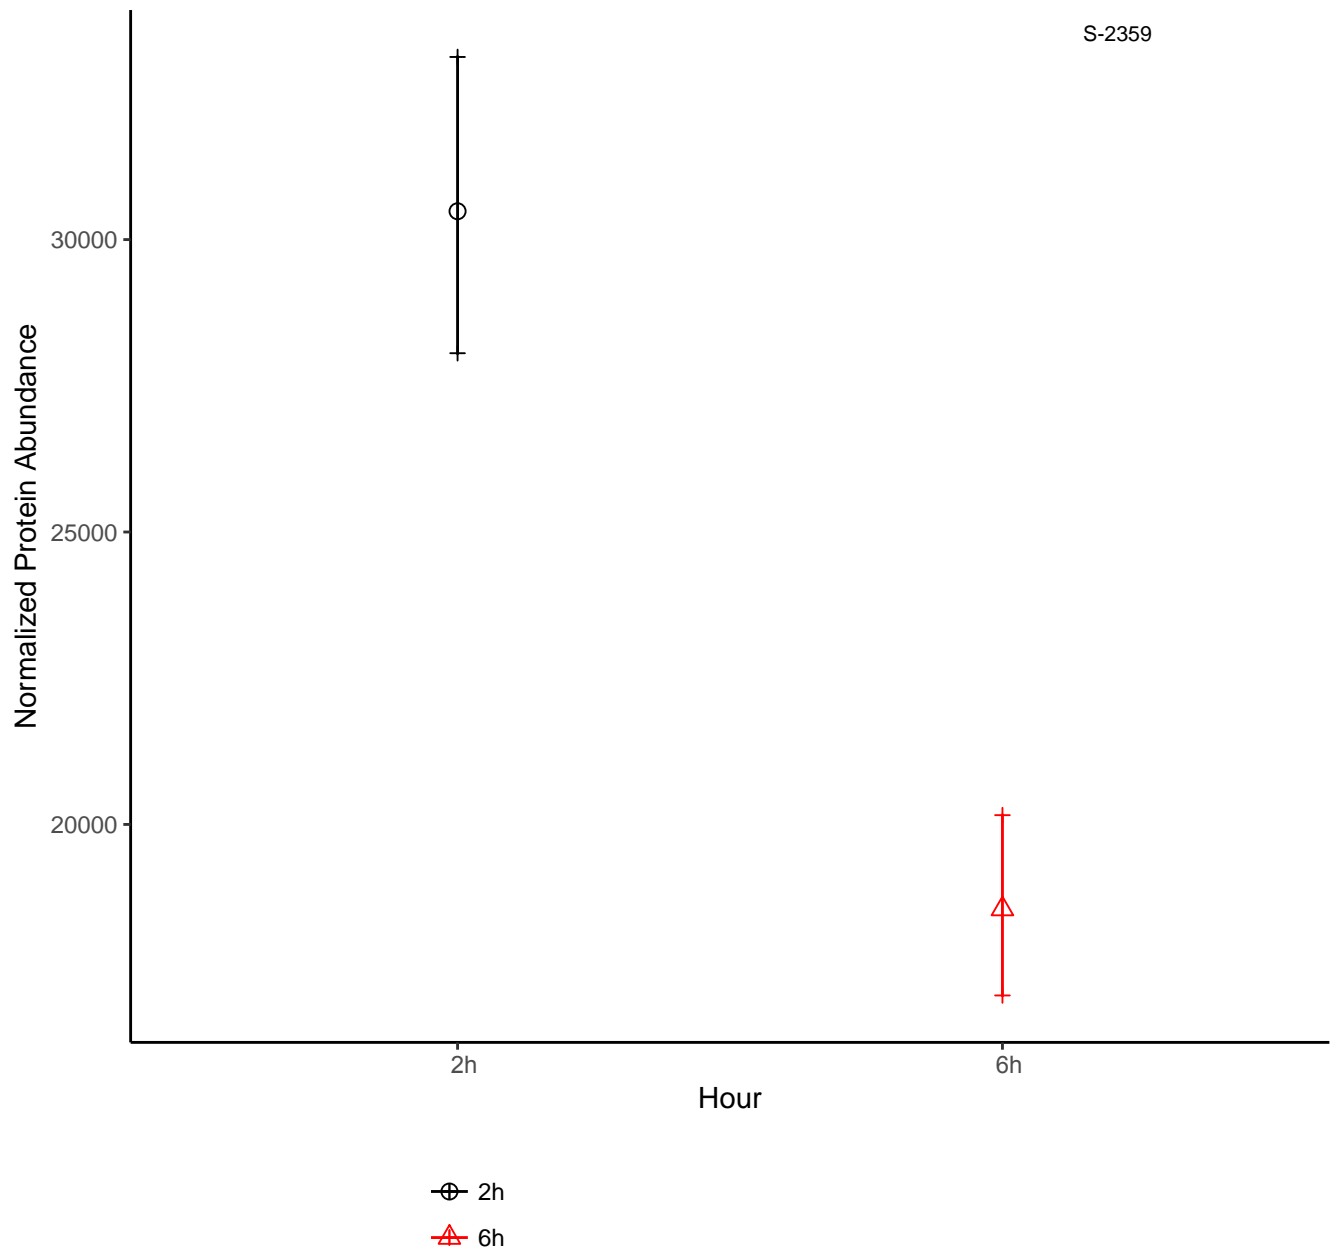

# RS15\_STAAM

S-2360

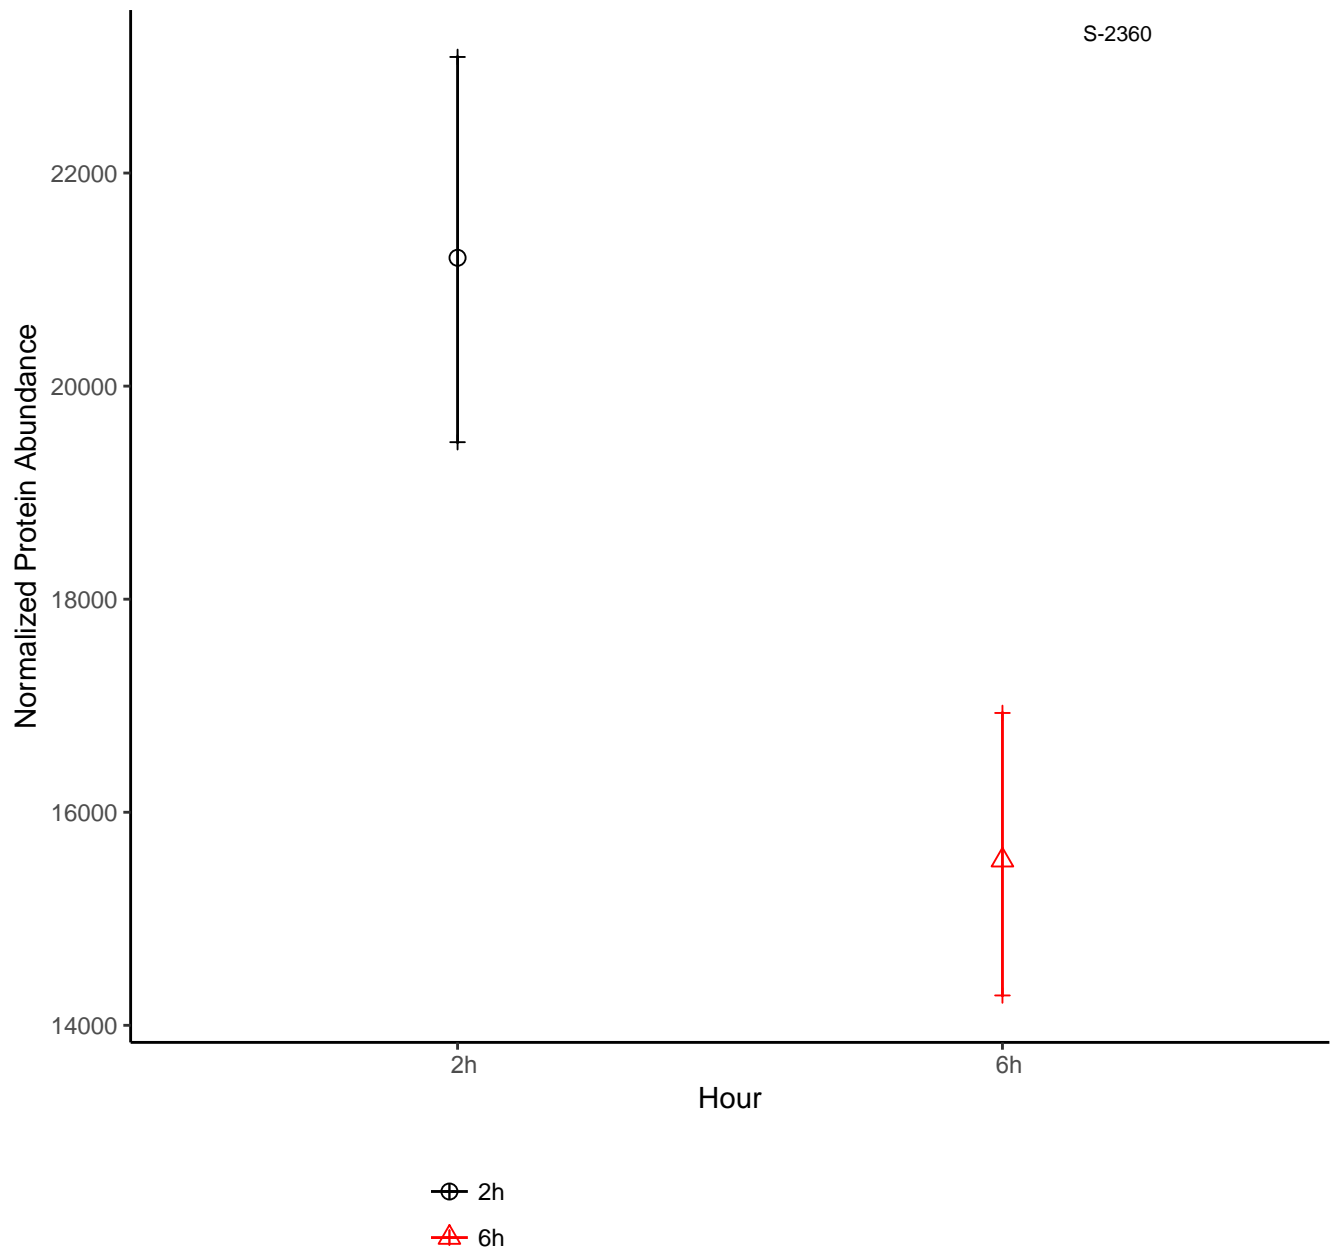



# RS16\_STAAM

S-2361

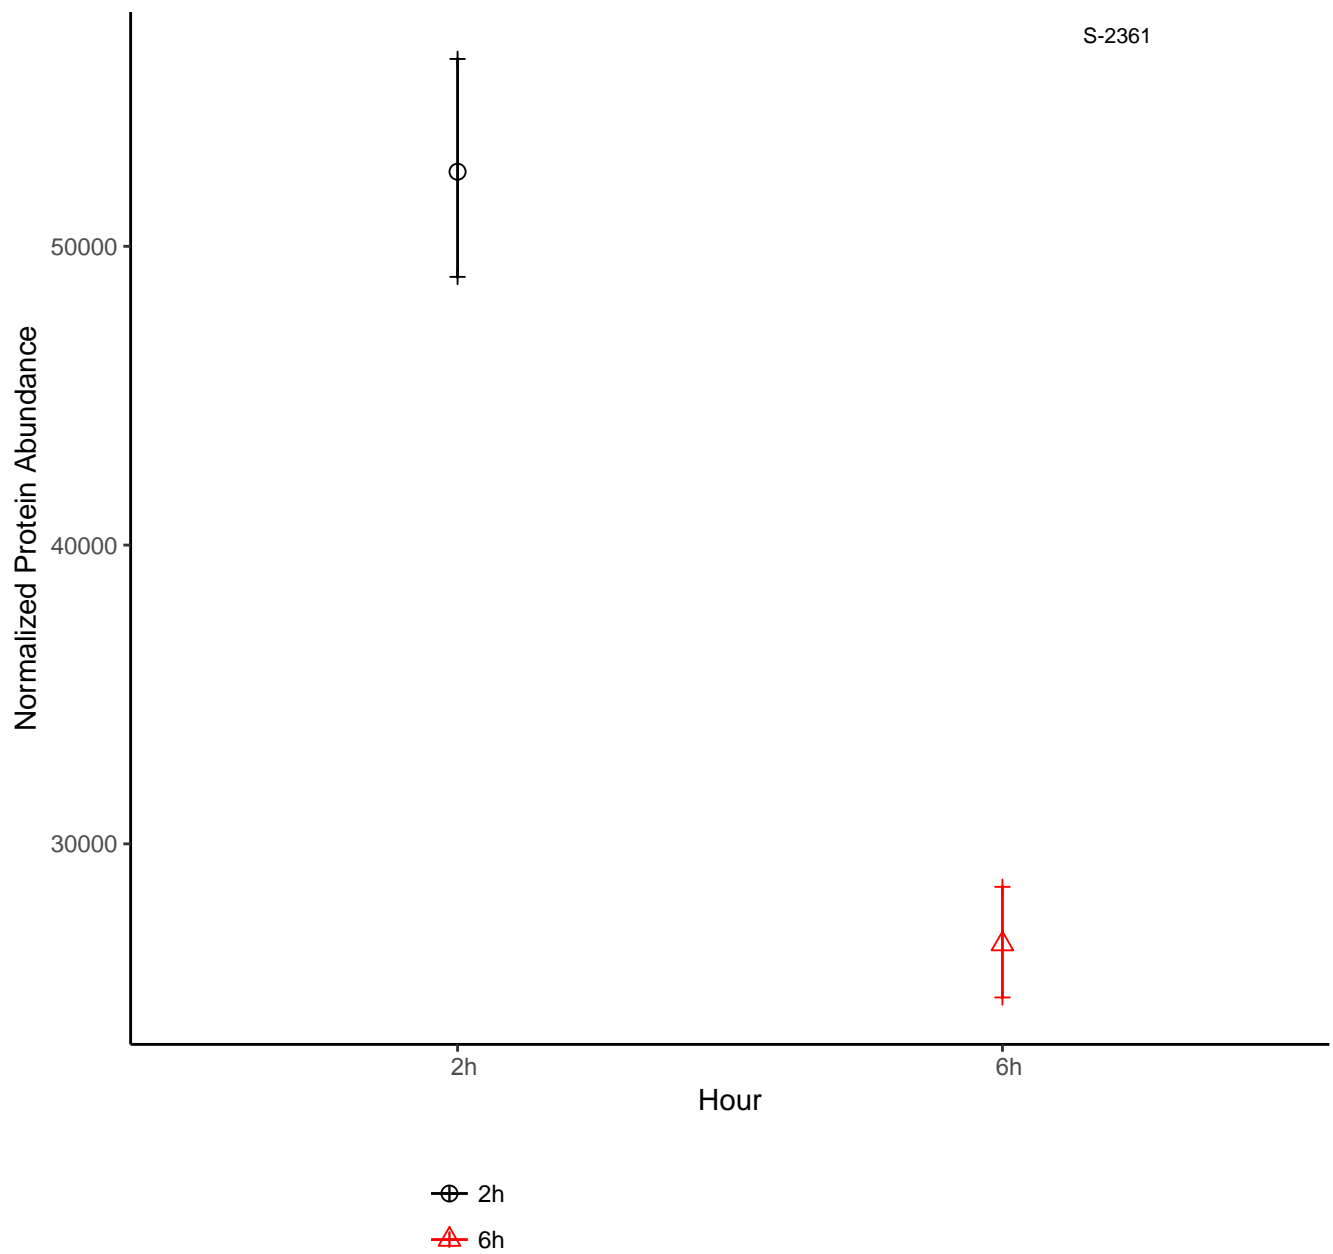

# RS17\_STAAM

S-2362

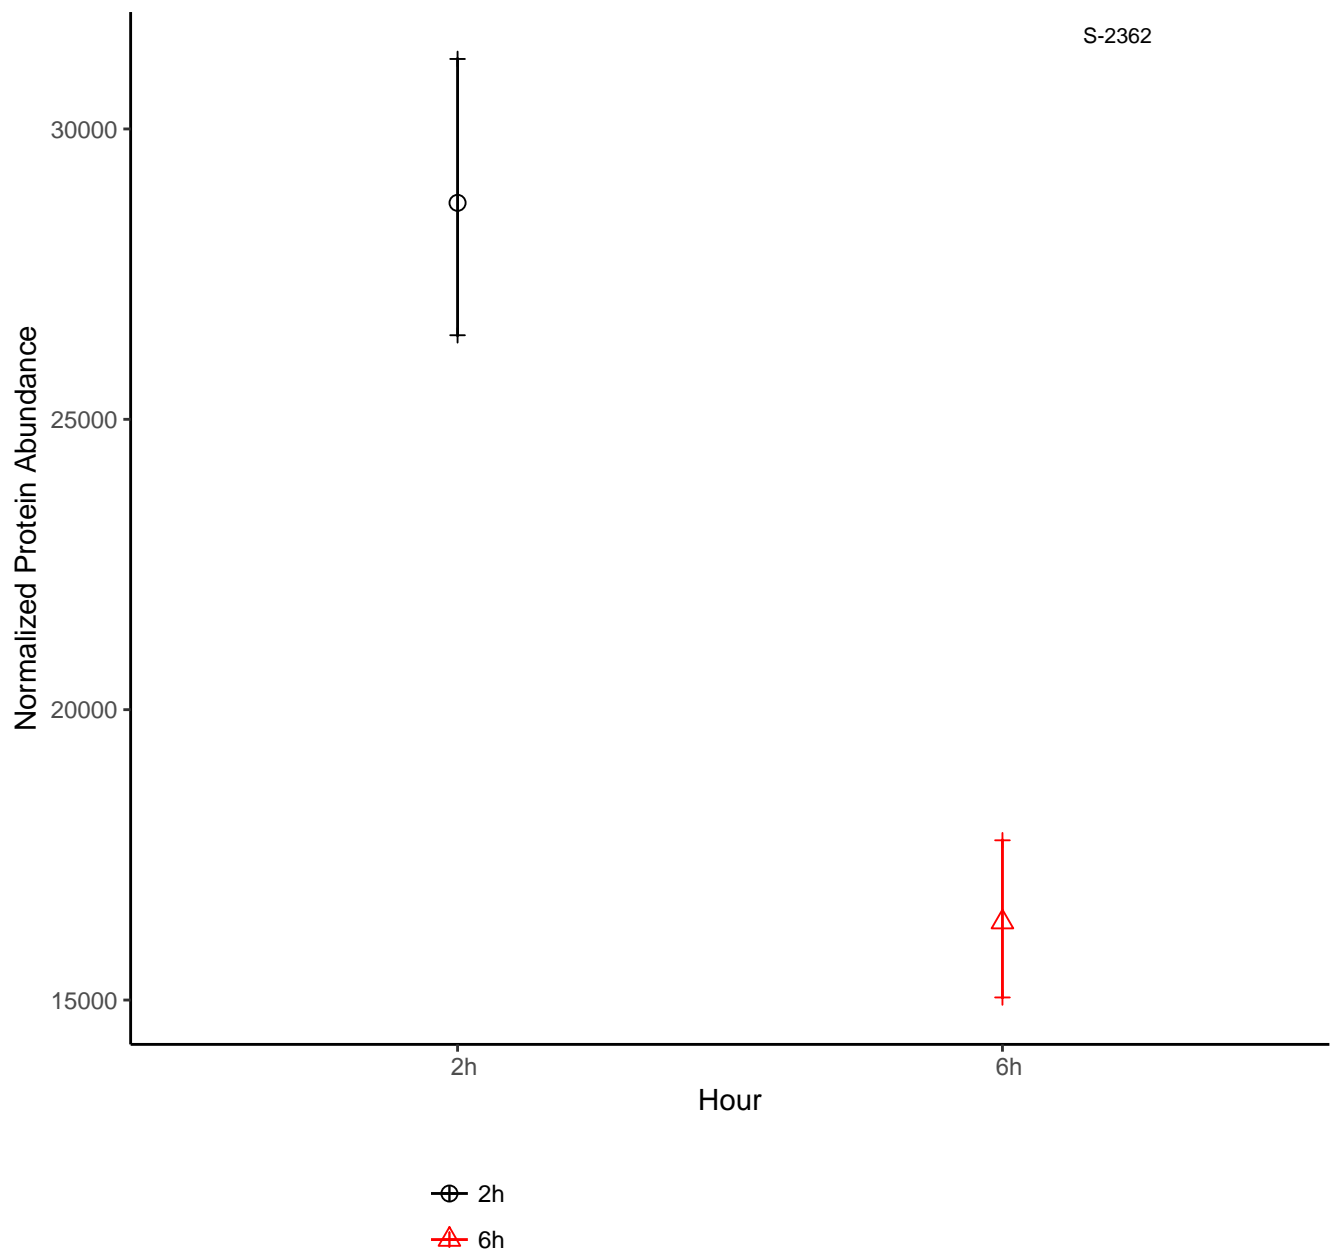

# RS18\_STAAM

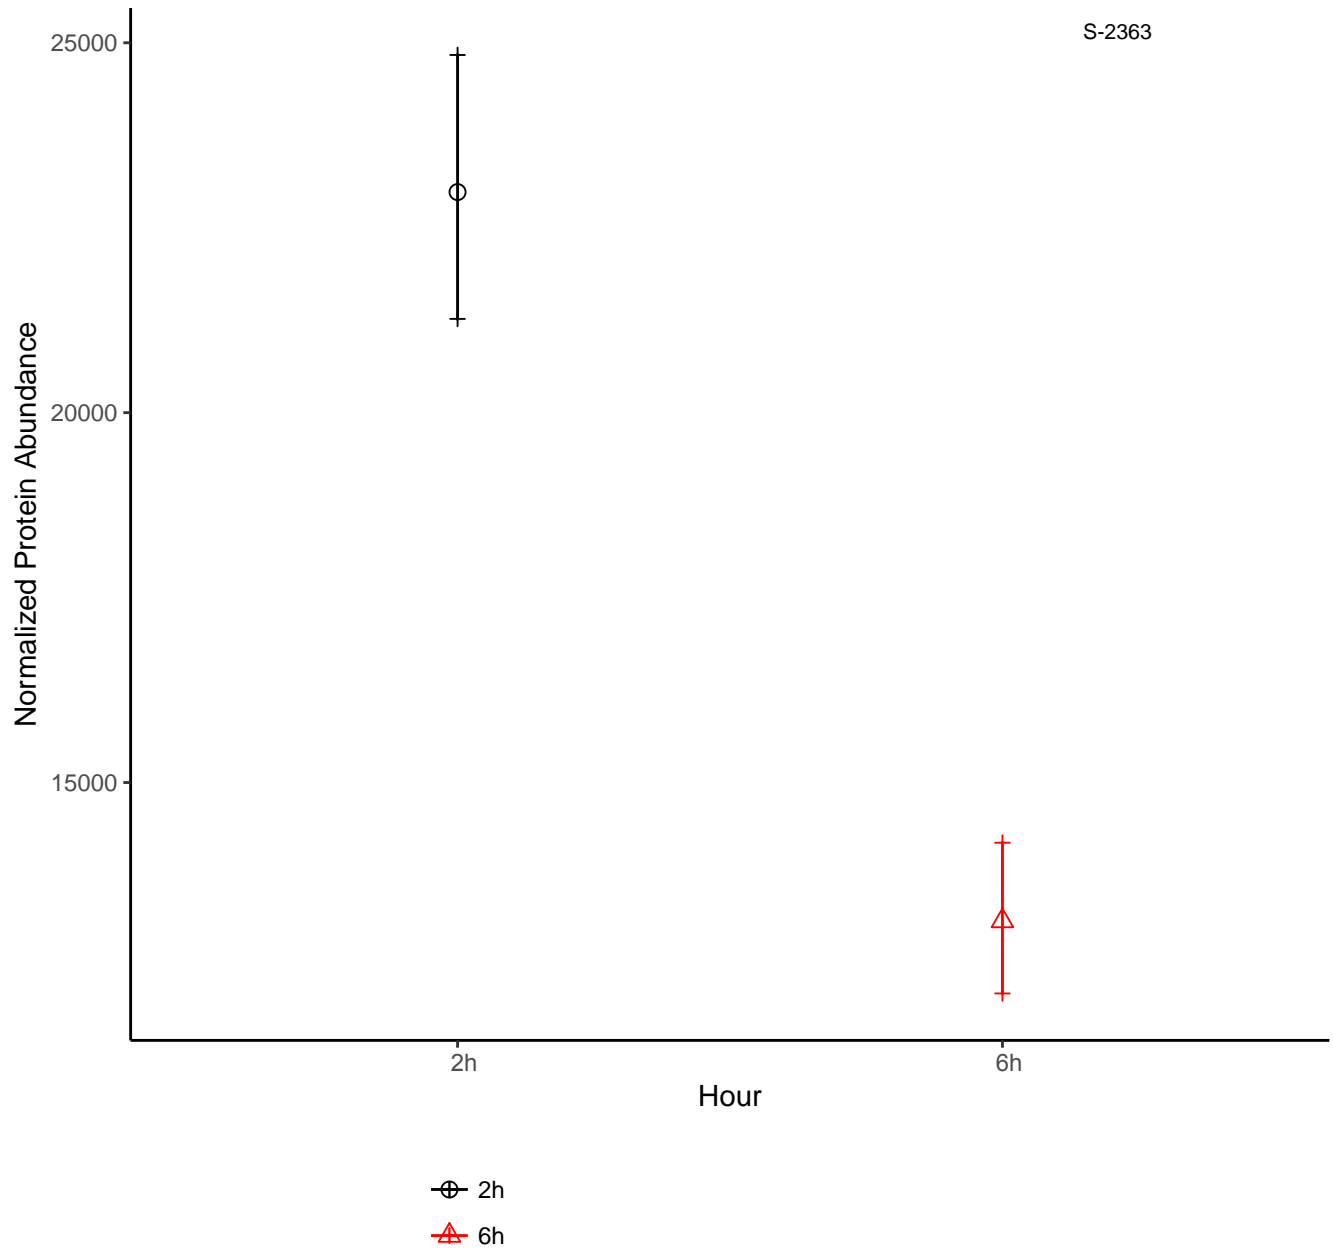

# RS19\_STAAM

S-2364

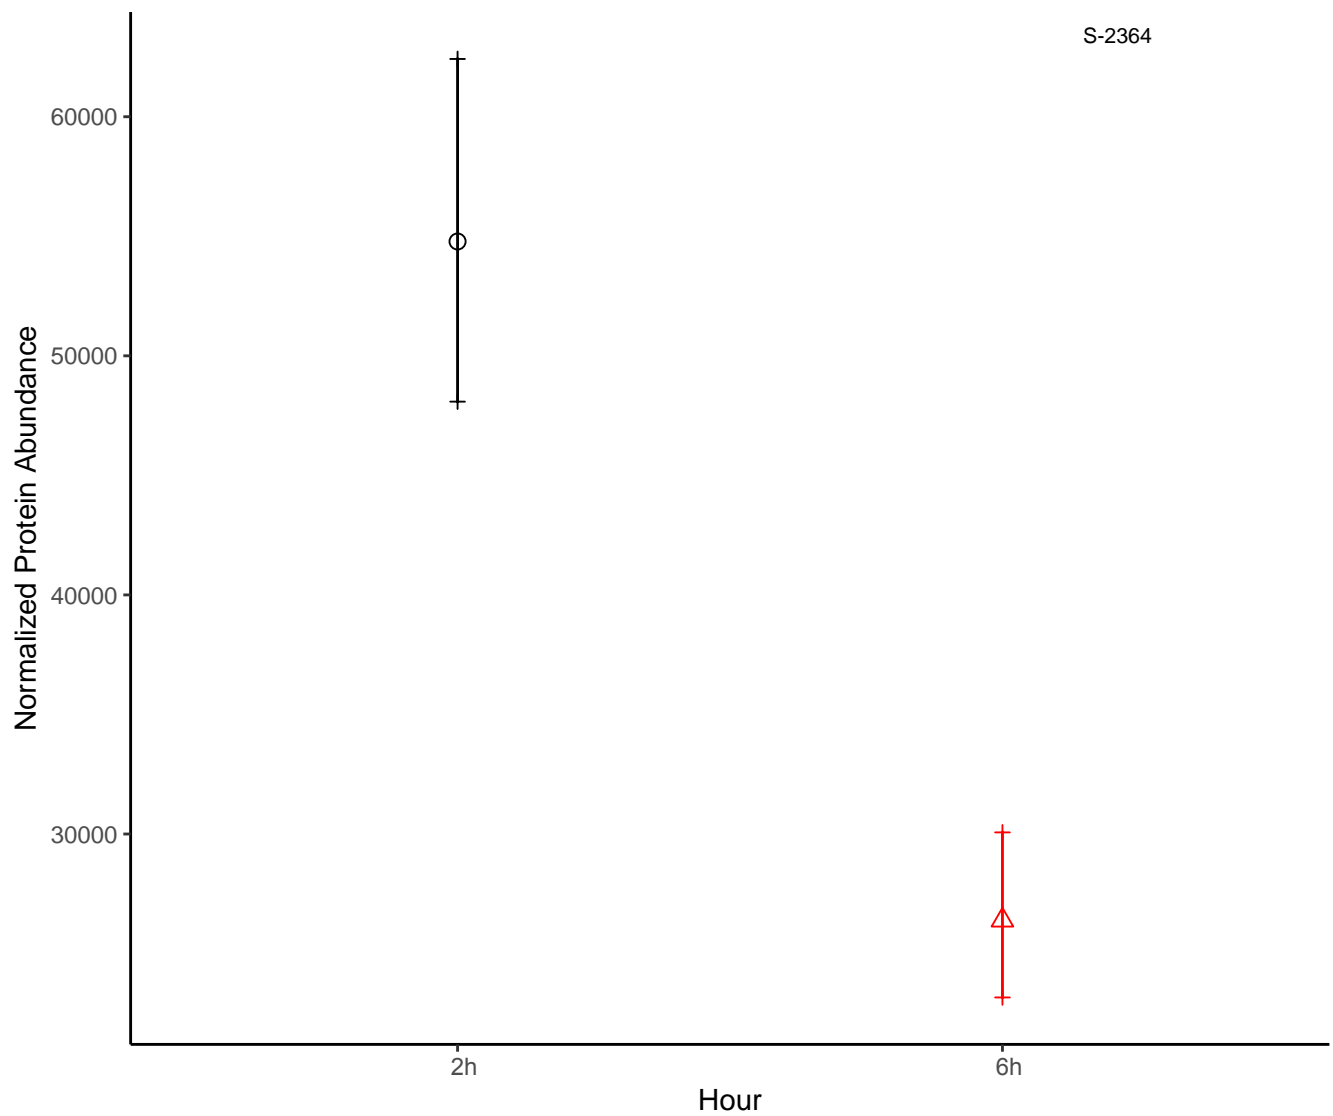

⊕ 2h

△ 6h

# RS2\_STAAM

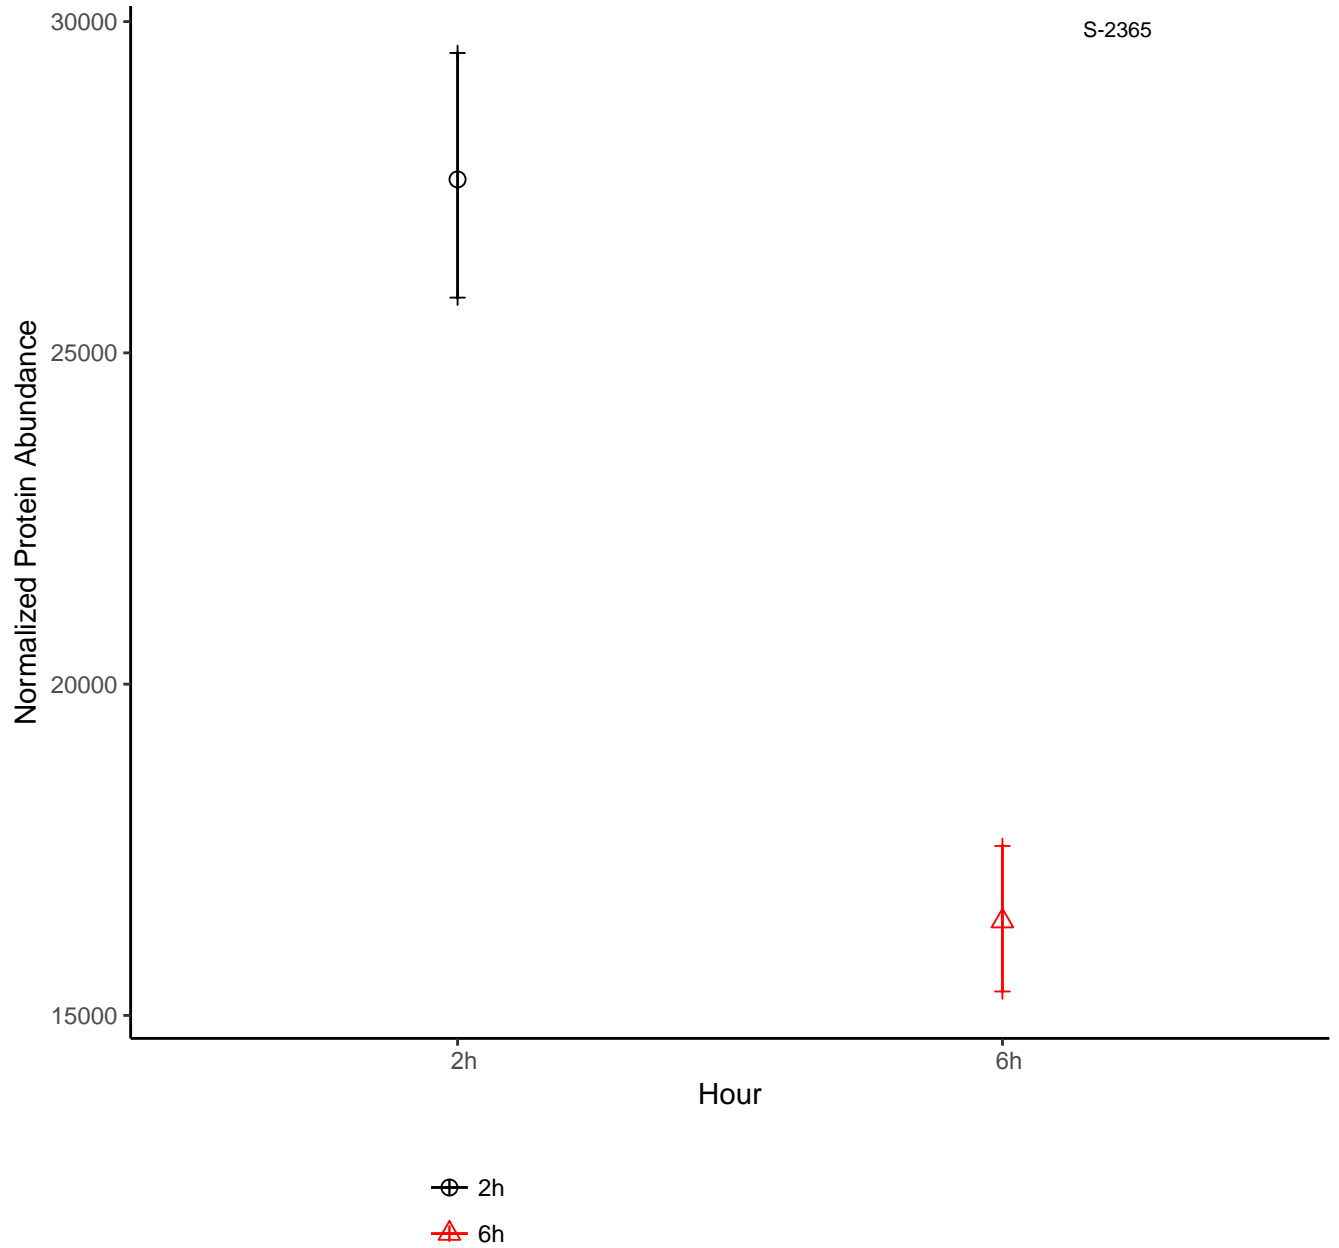

# RS20\_STAAM

S-2366

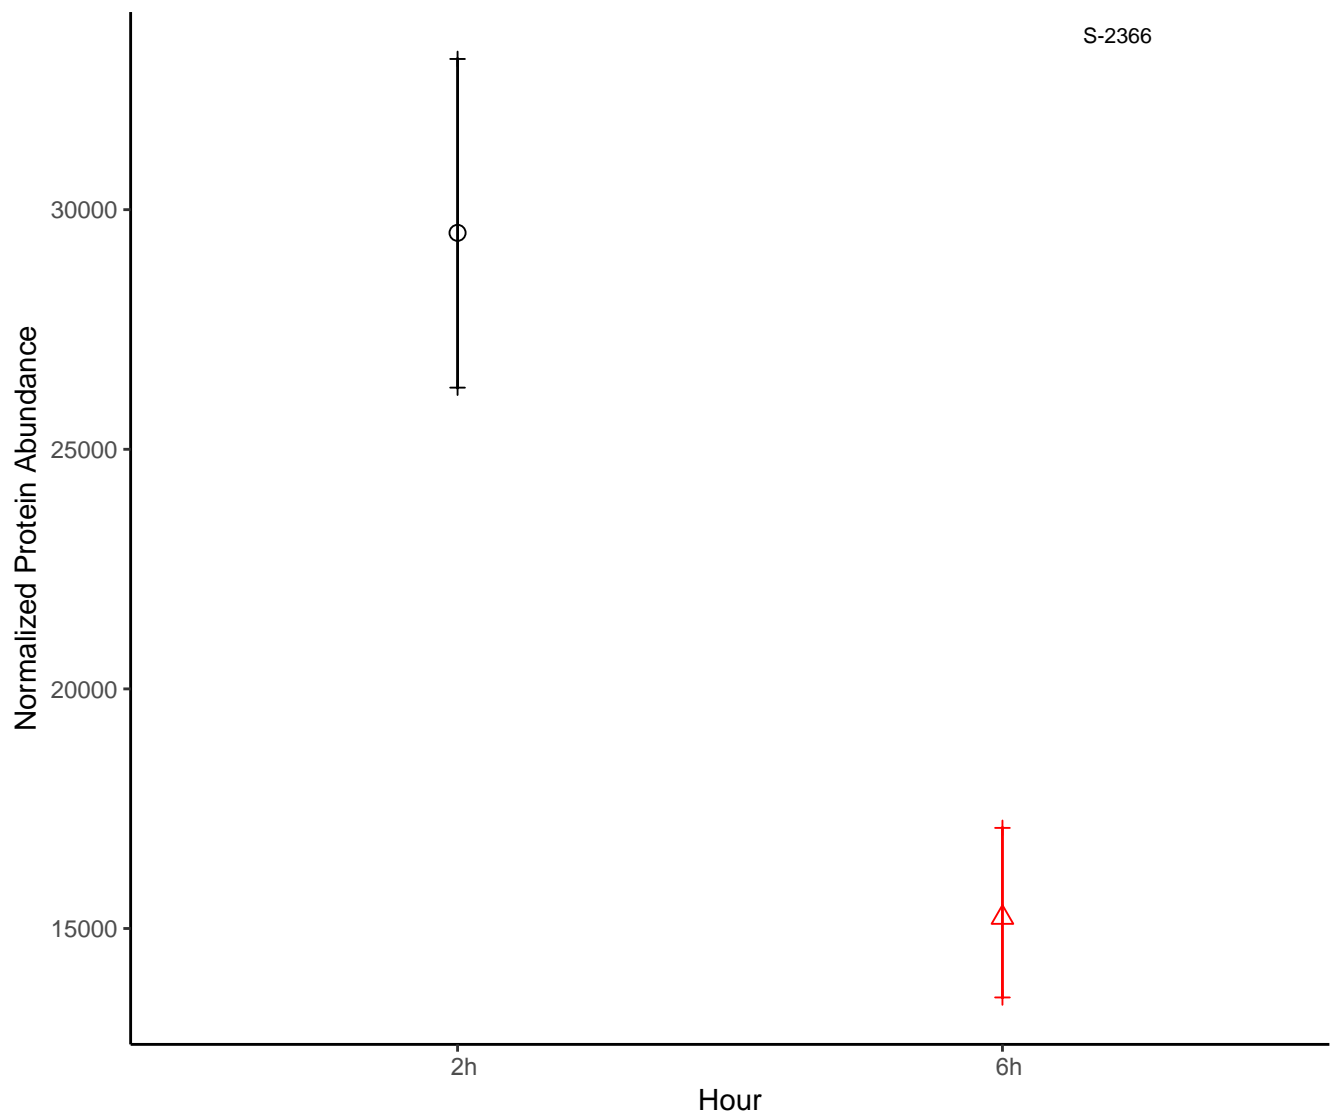

⊕ 2h

△ 6h

# RS21\_STAAM

S-2367

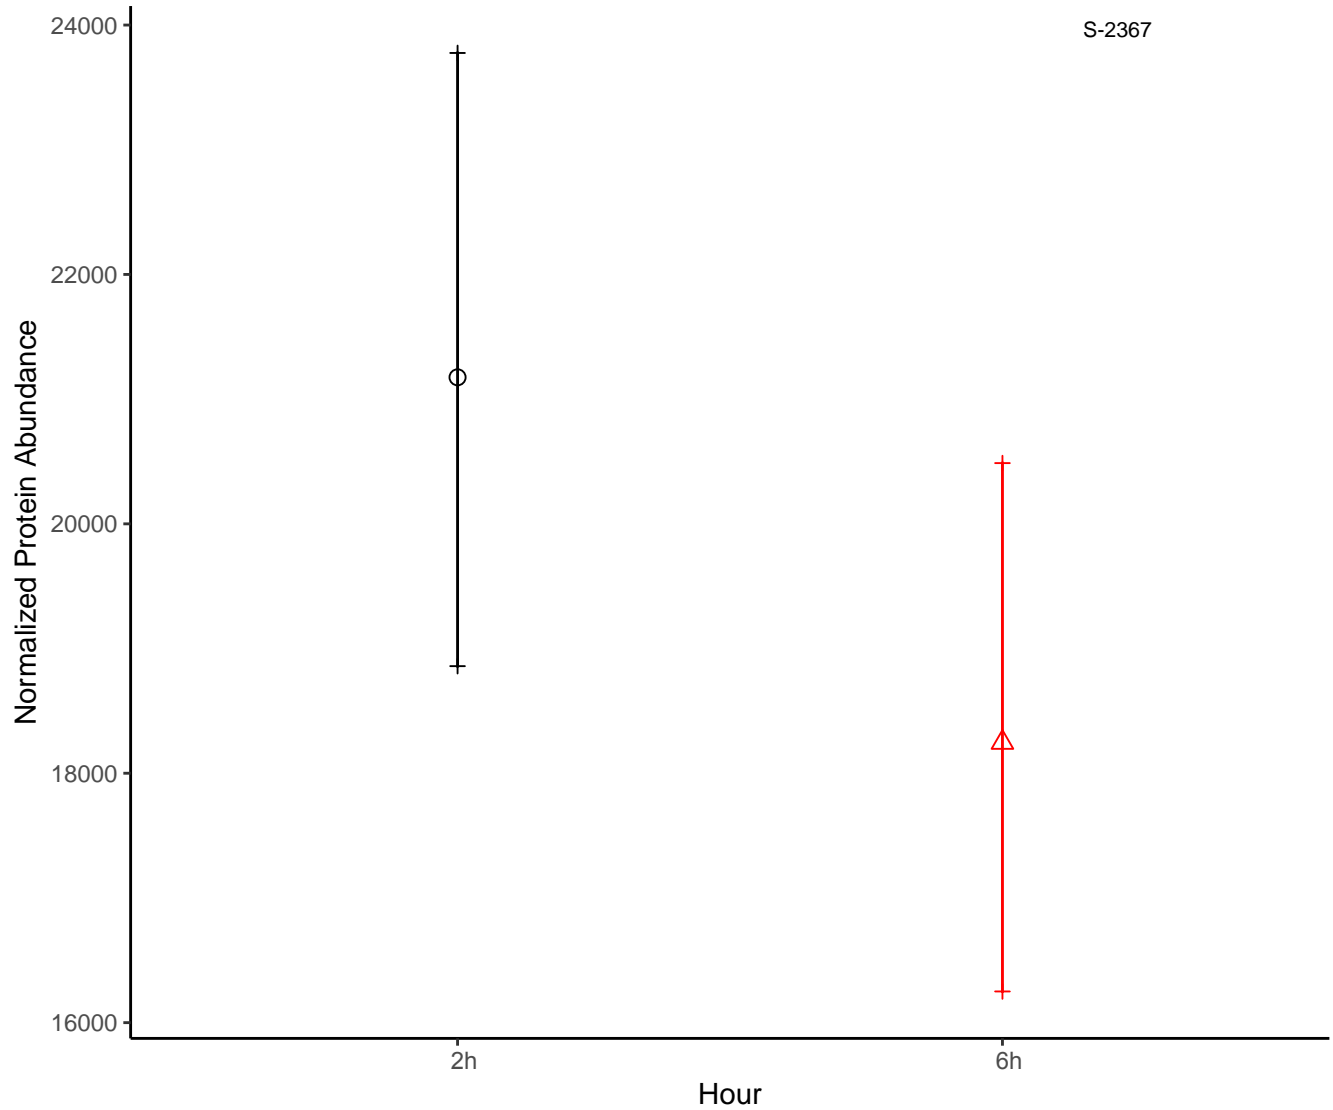

⊕ 2h

△ 6h

# RS3\_STAAM

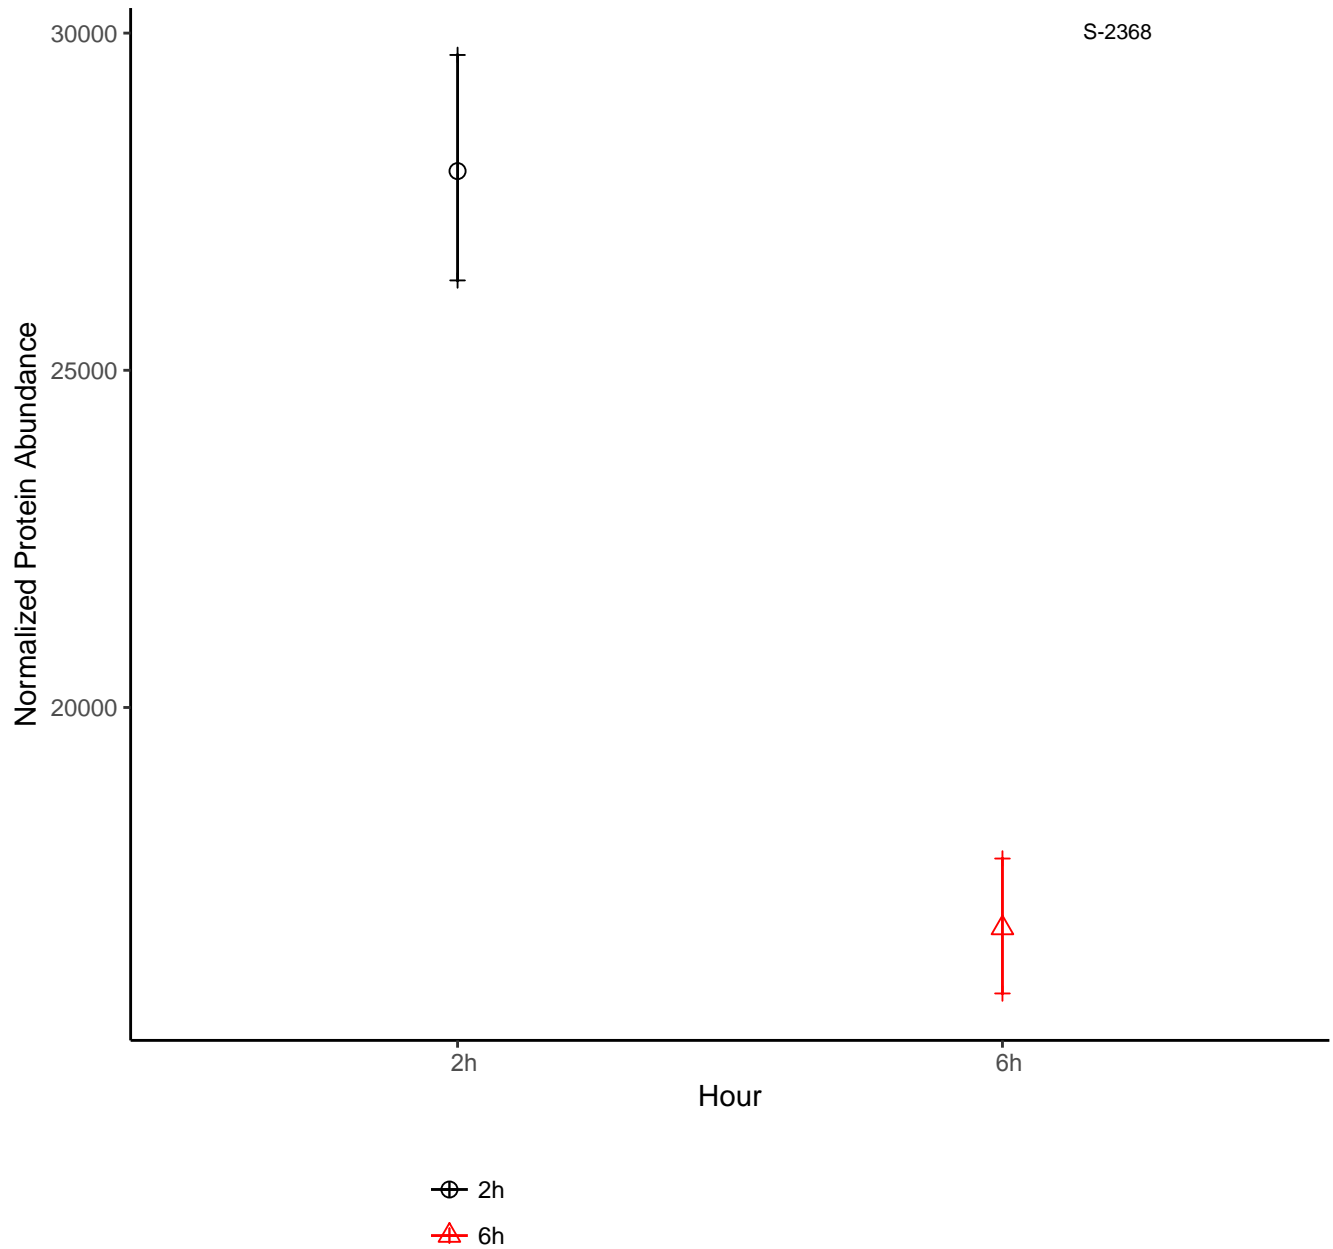



# RS4\_STAAM

S-2369

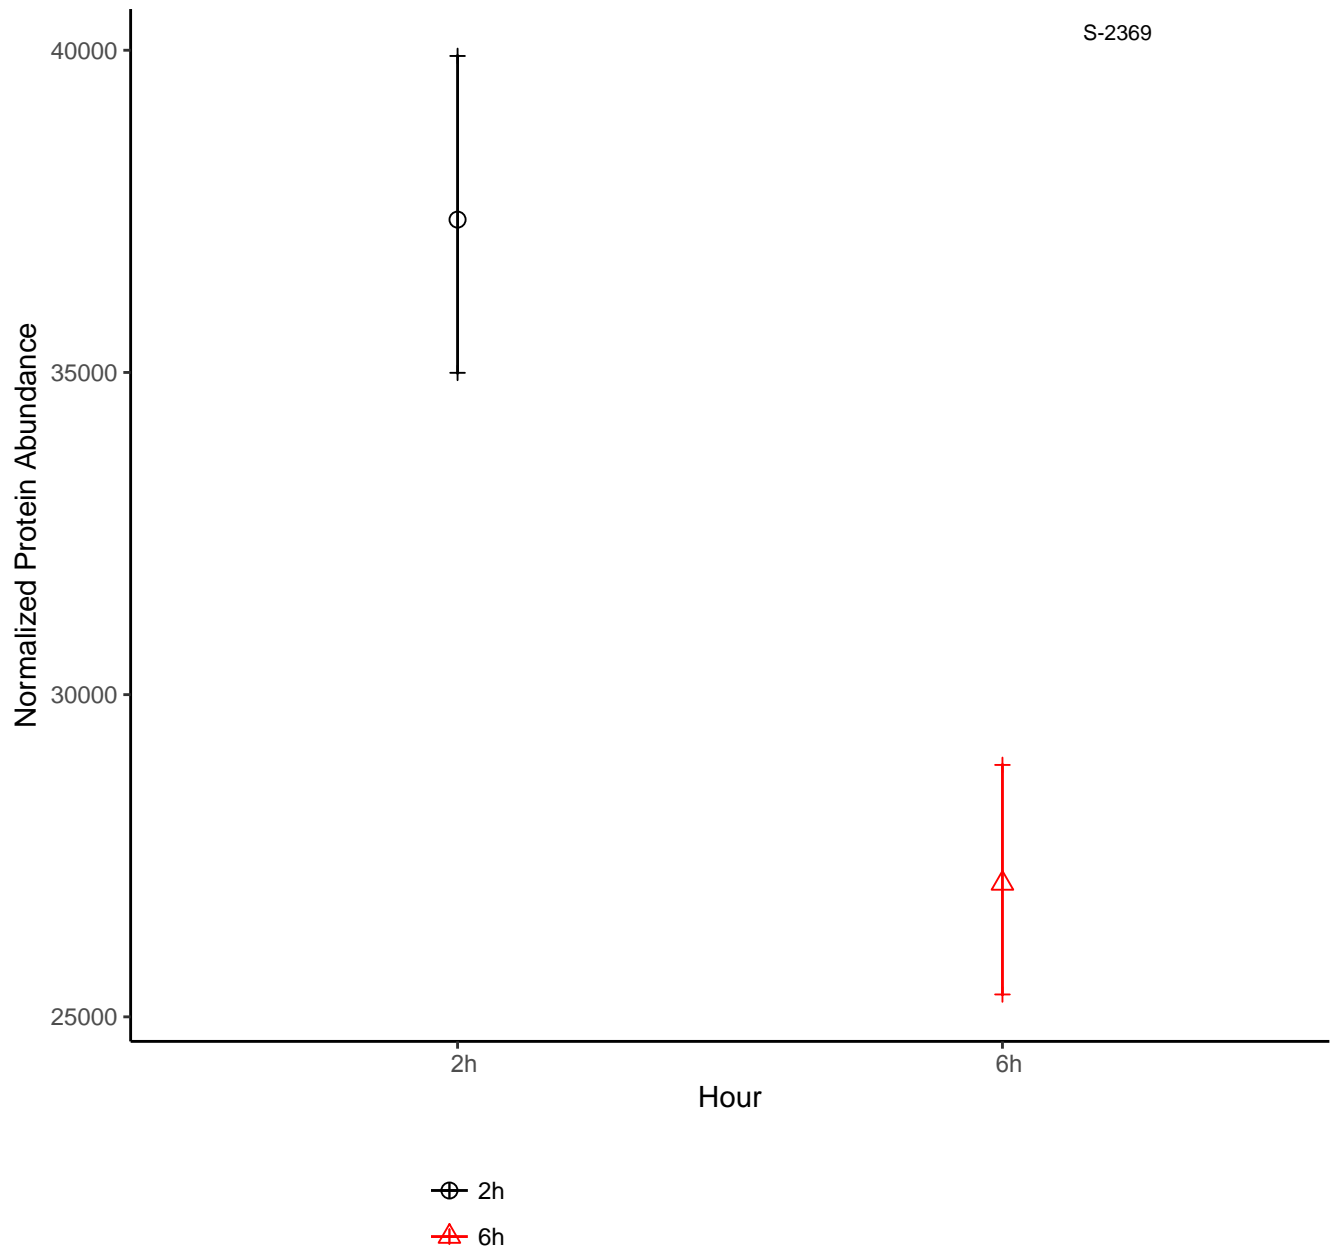

# RS5\_STAAM

S-2370

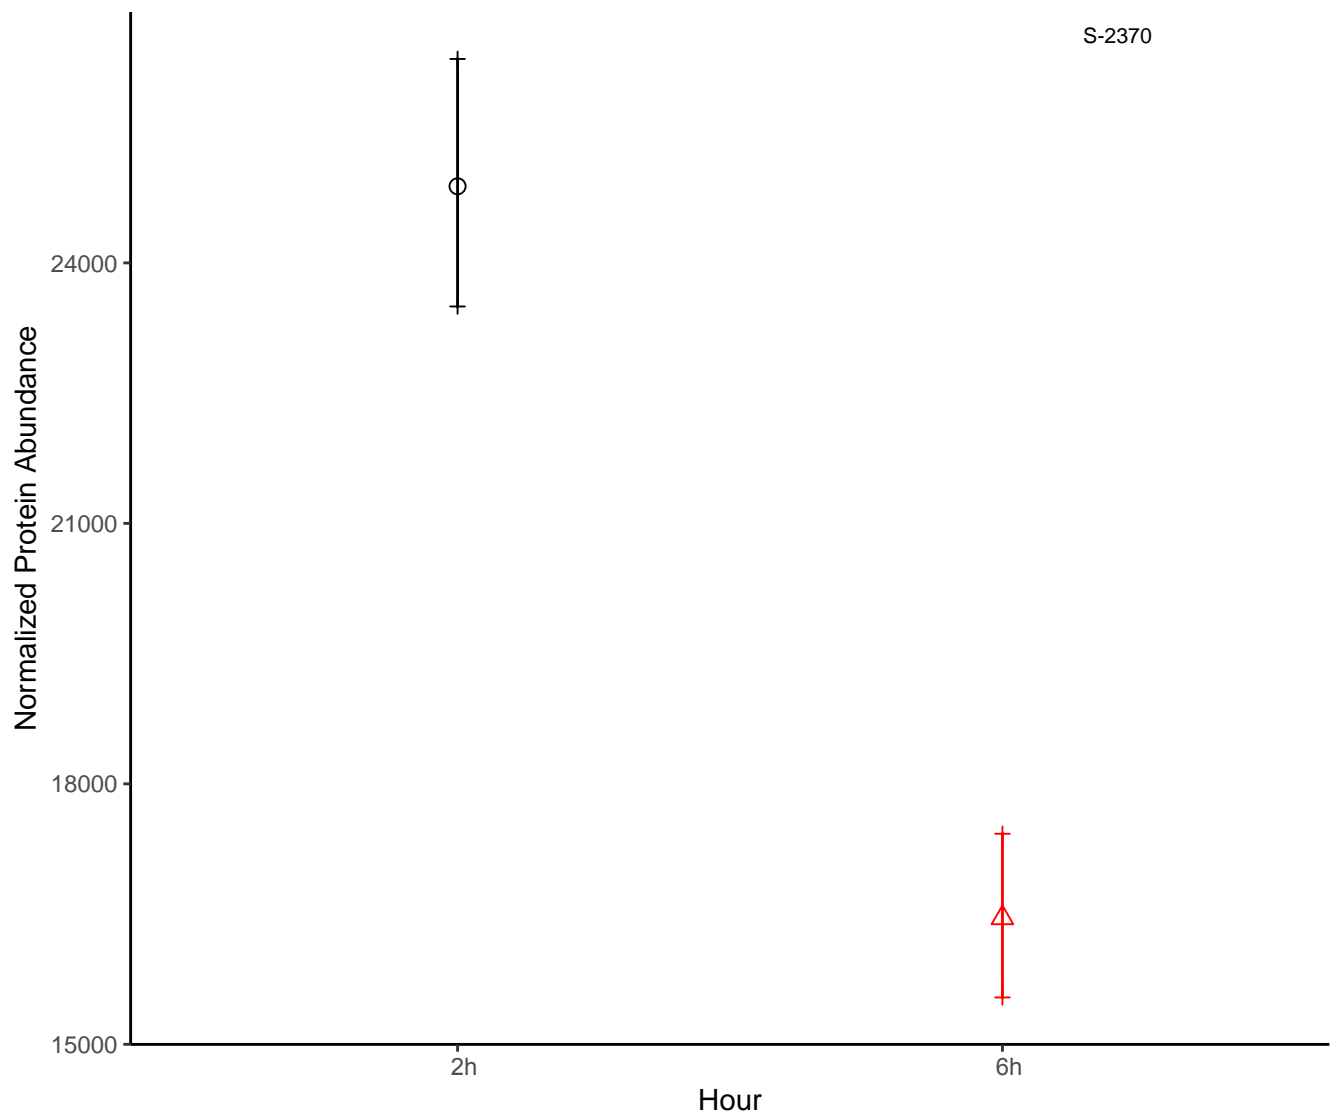

⊕ 2h

△ 6h

# RS6\_STAAM

S-2371

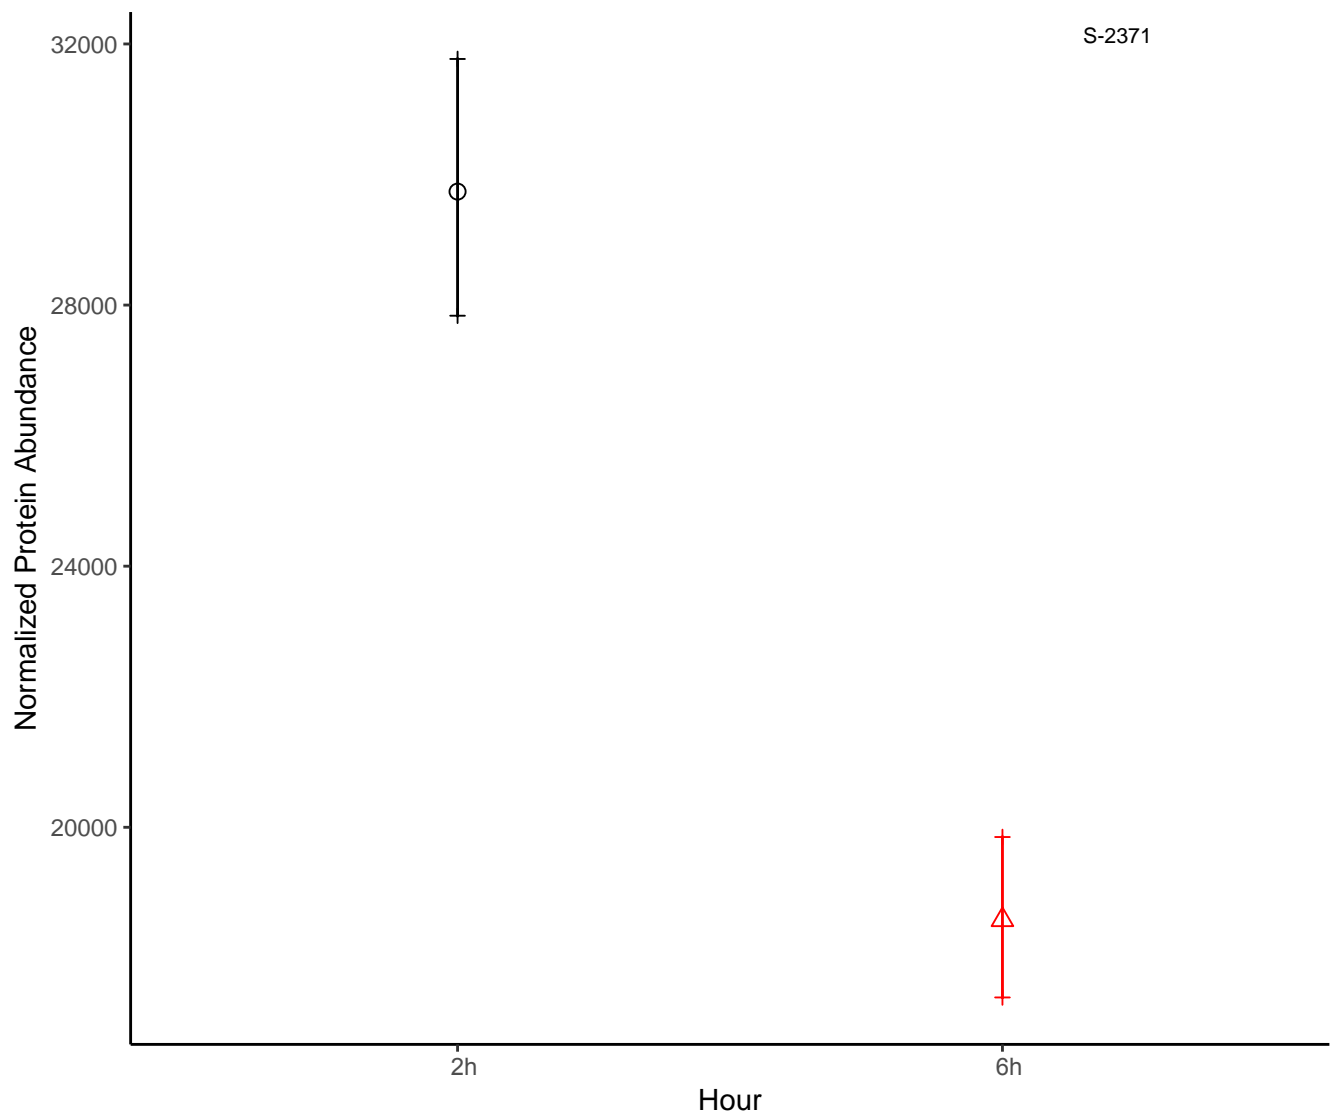

⊕ 2h

△ 6h

# RS7\_STAAM

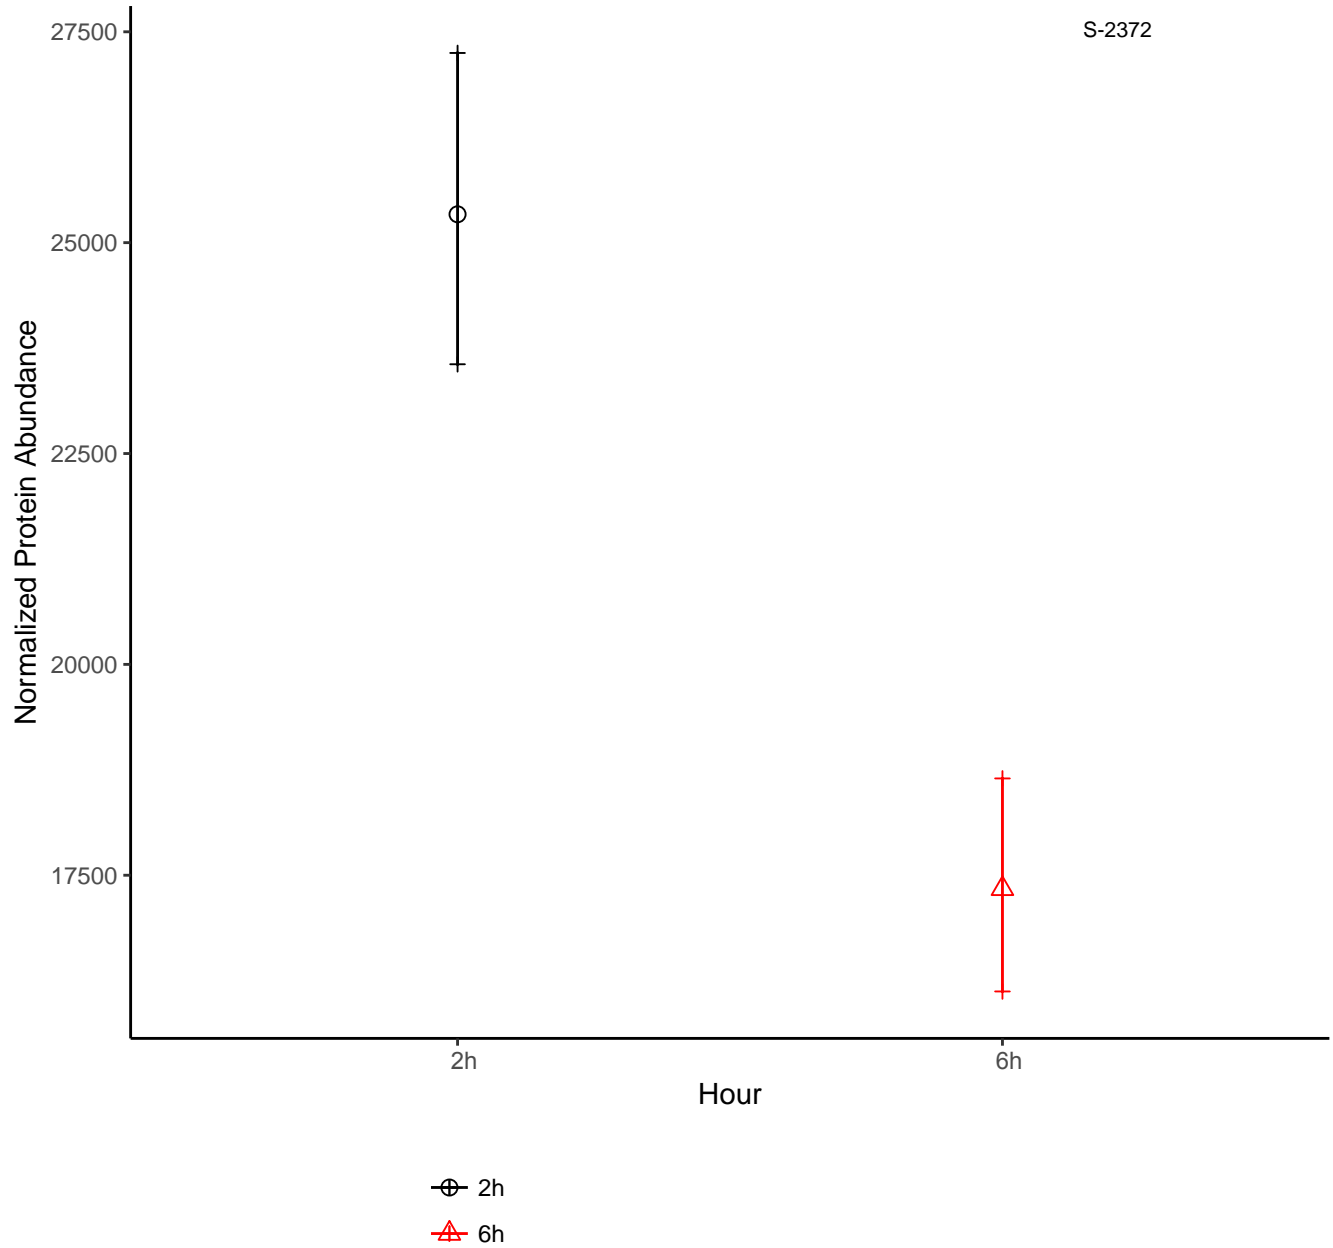

# RS8\_STAAM

S-2373

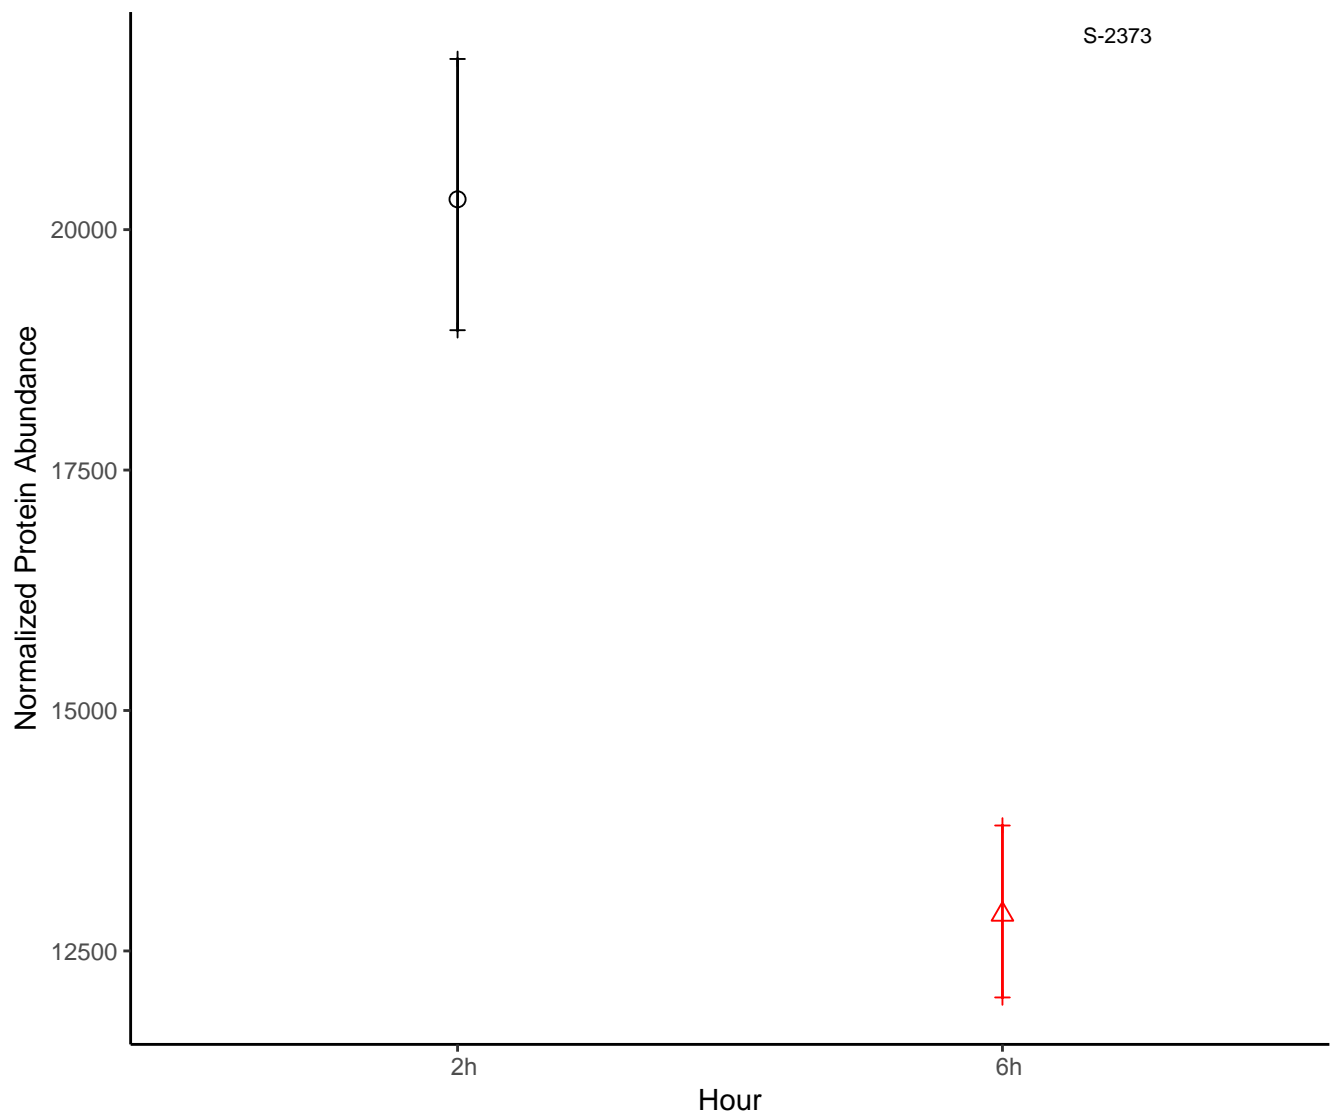

⊕ 2h

△ 6h

# RS9\_STAAM

S-2374

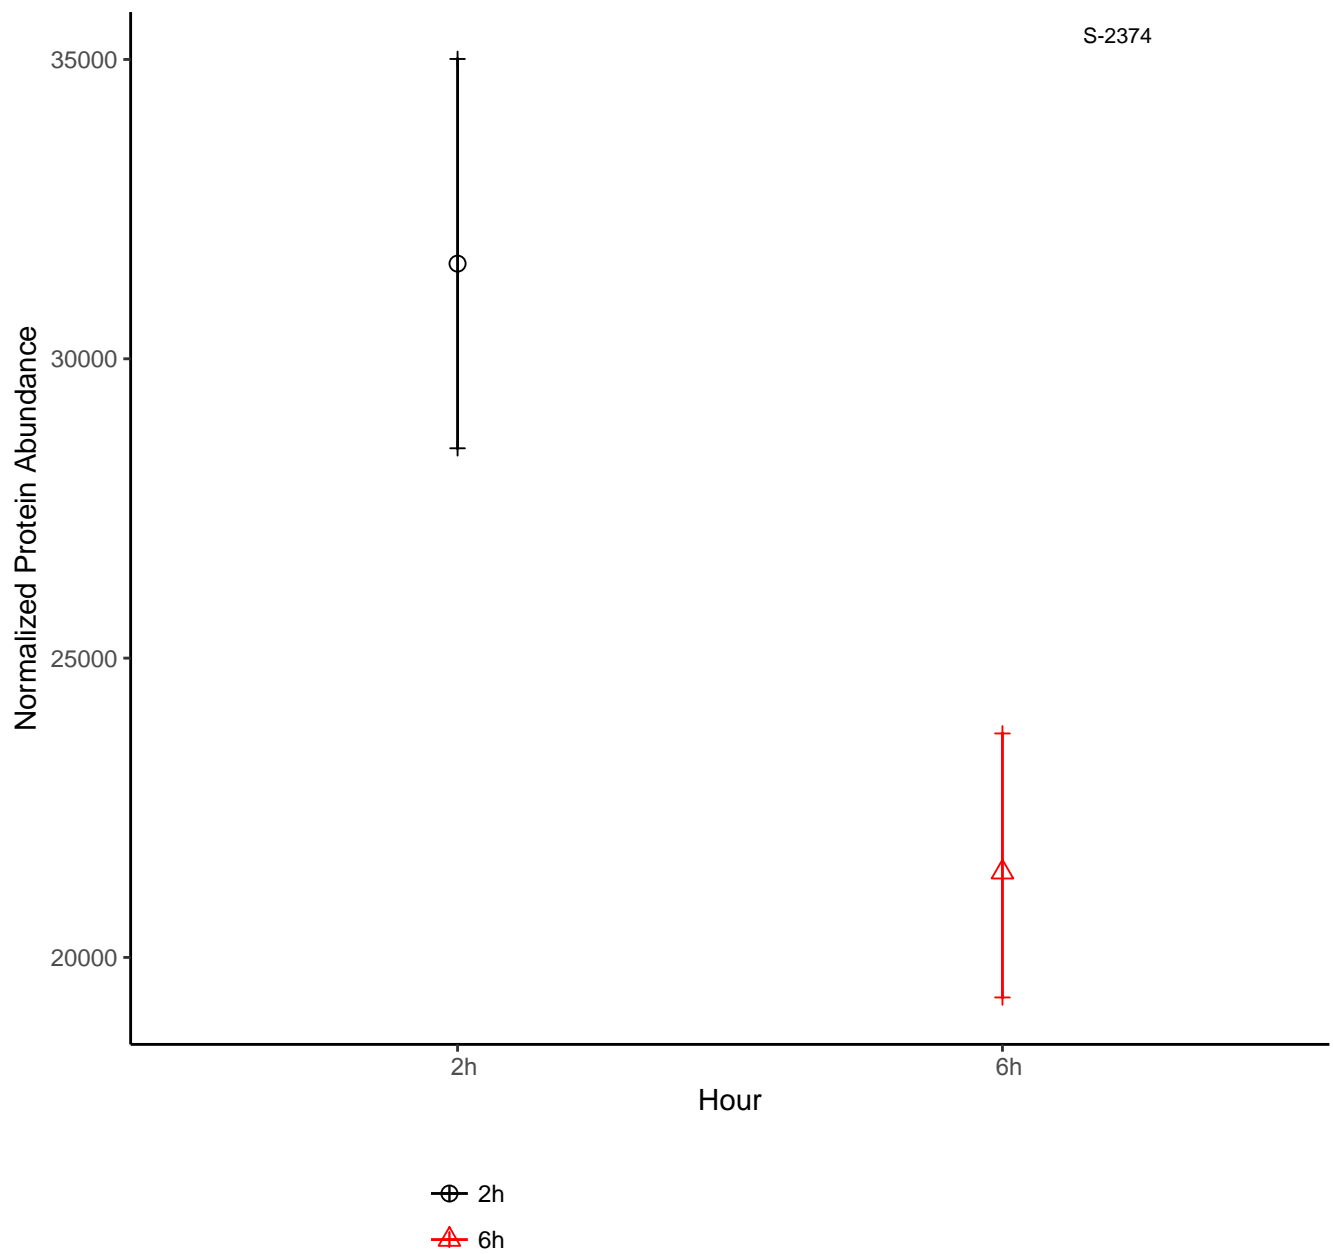

# RSBV\_STAAM

S-2375

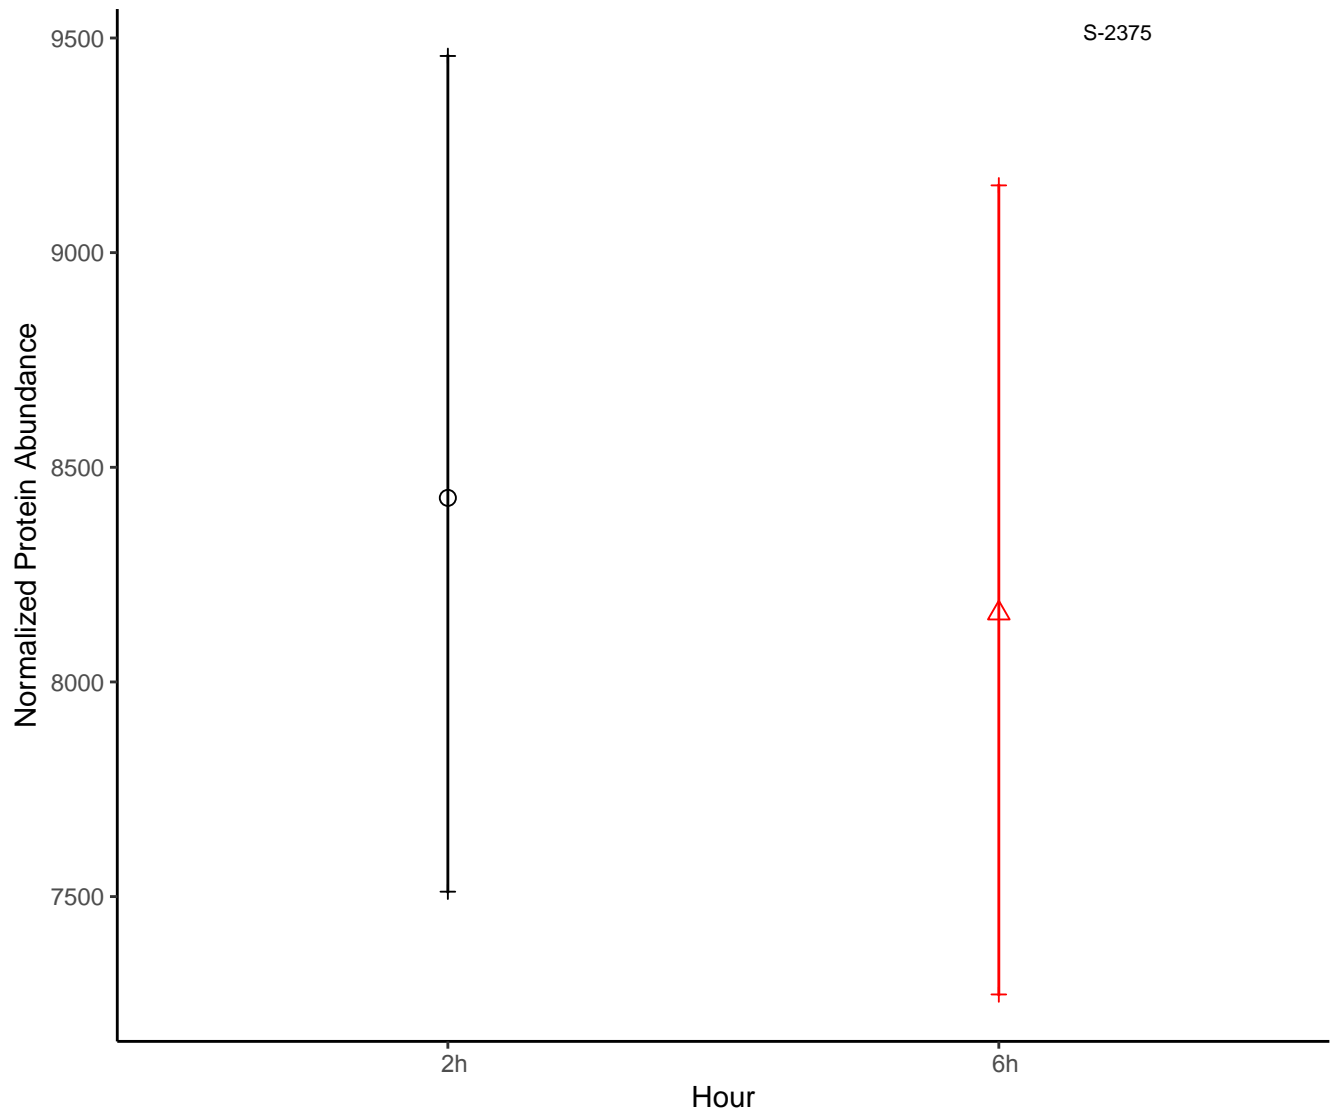

⊕ 2h

△ 6h

# RSBW\_STAAM

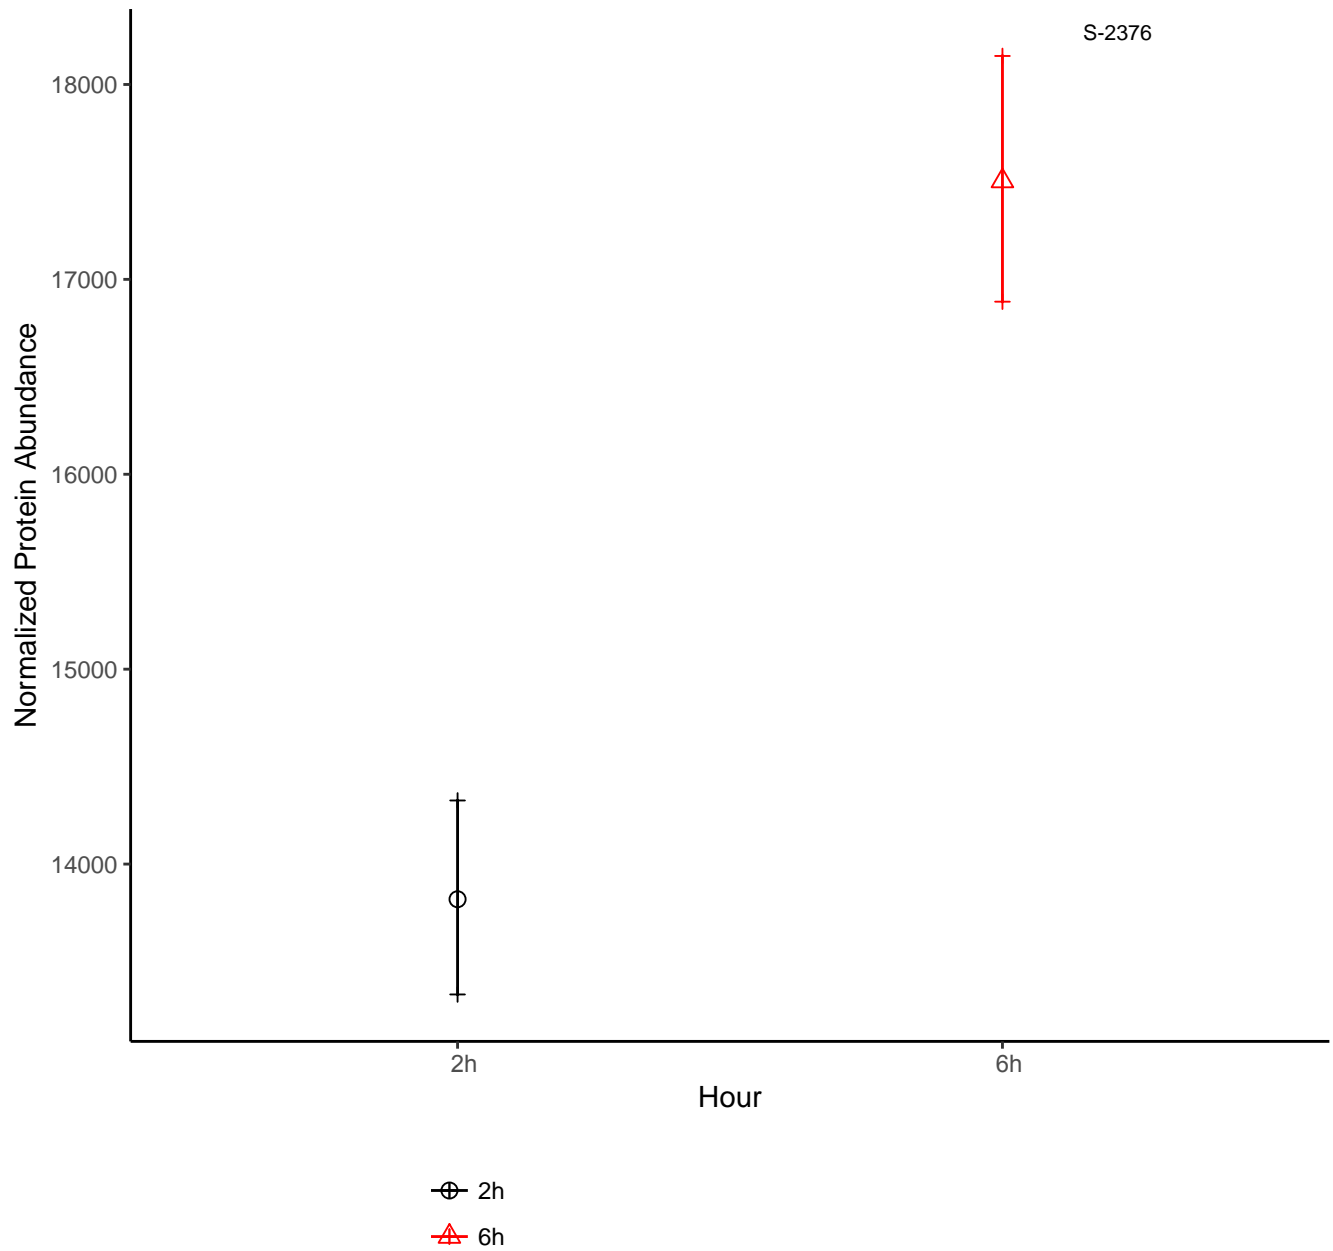



# RSMA\_STAAM

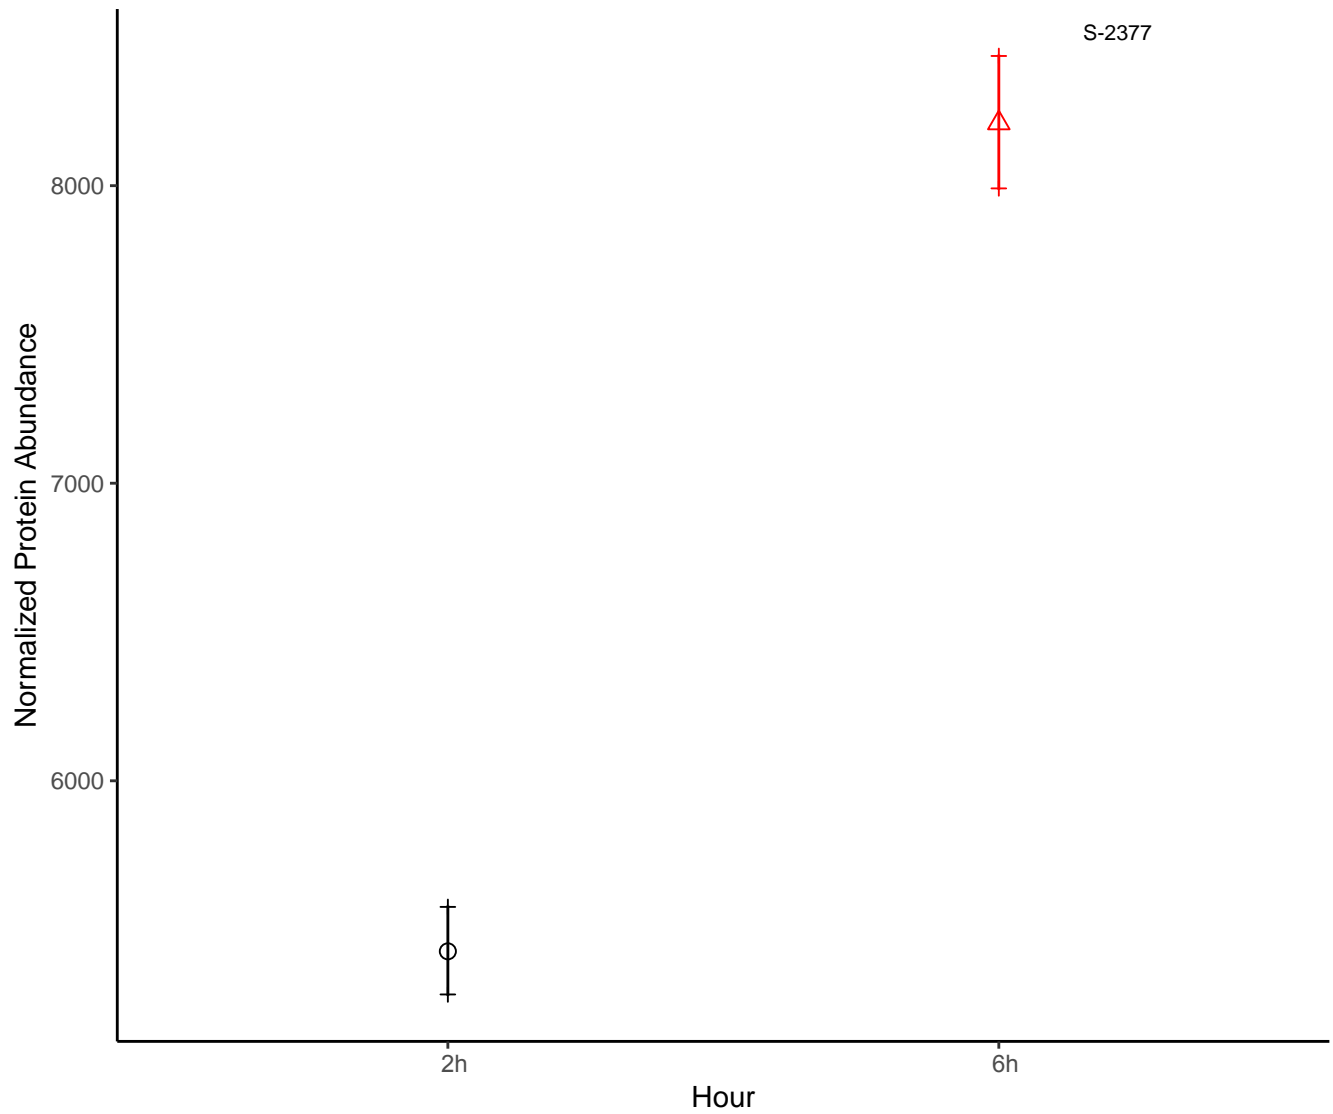

⊕ 2h

△ 6h

# RSMG\_STAAM

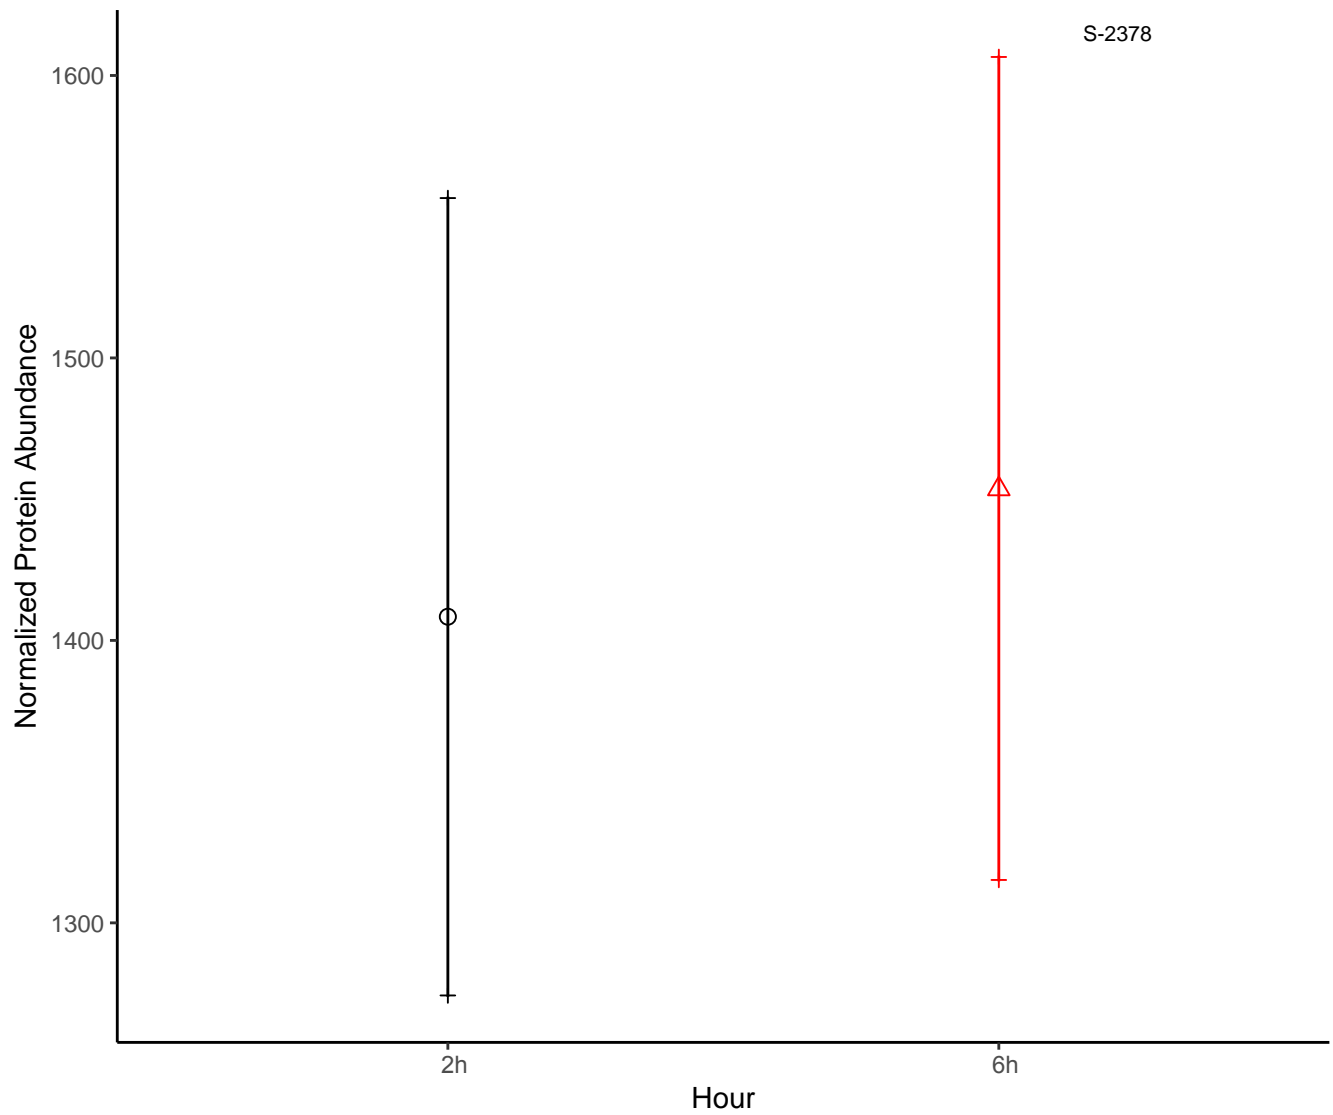

⊕ 2h

△ 6h

# RUVX\_STAAM

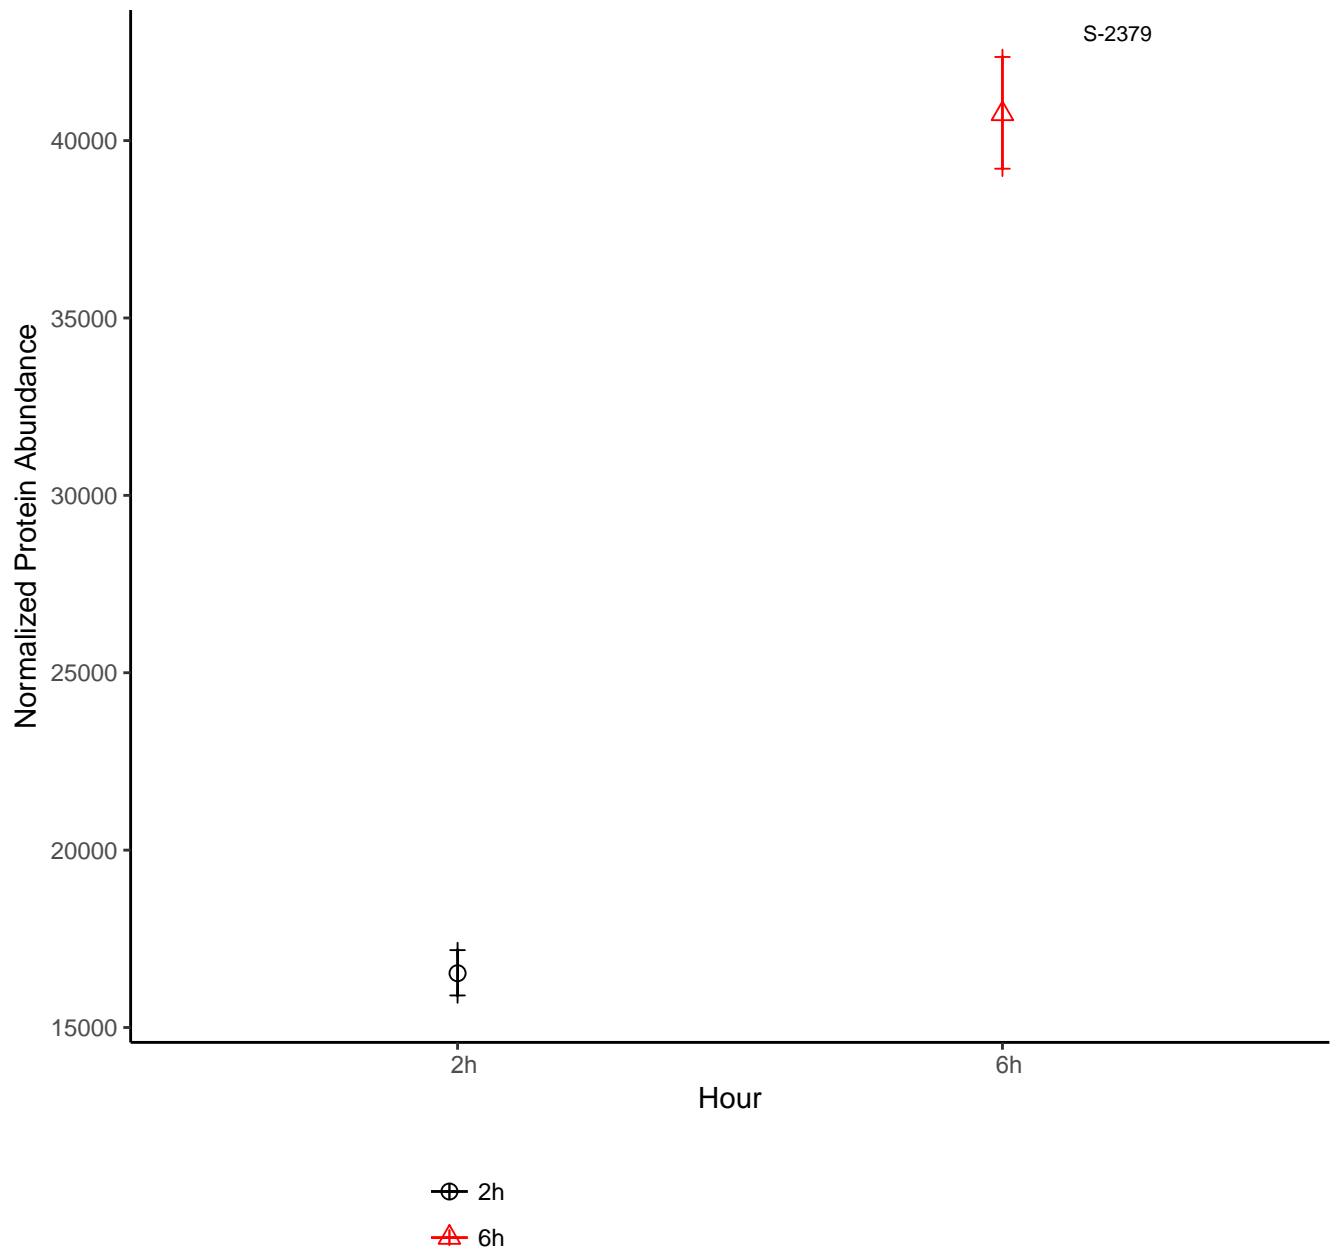

# S3AD\_STAAM

S-2380

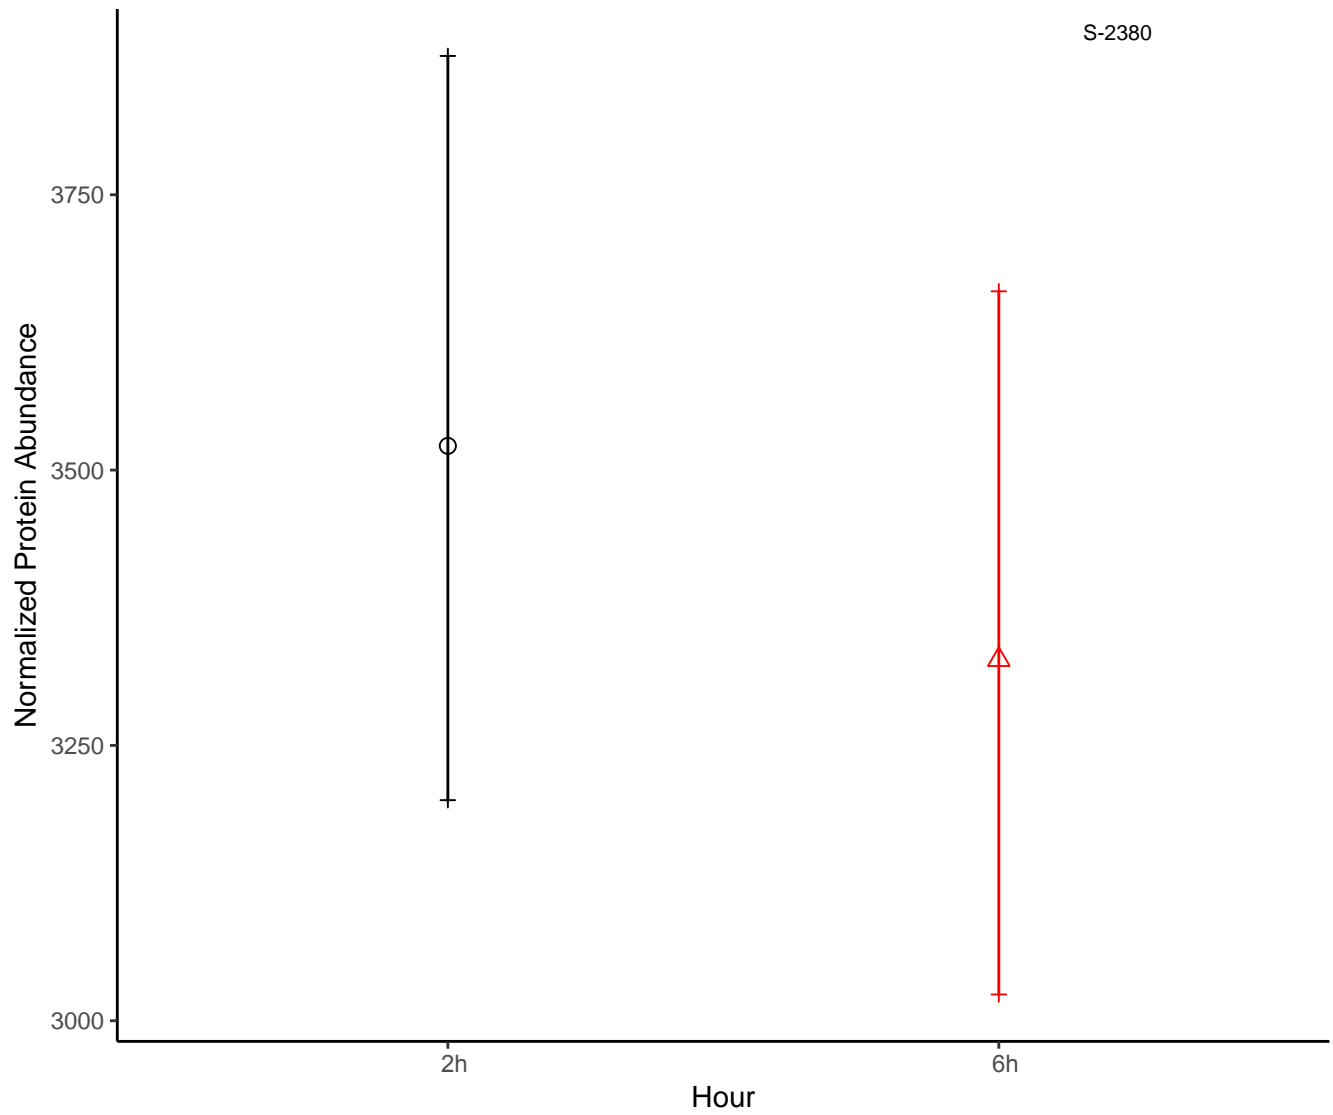

⊕ 2h

△ 6h

# SAER\_STAAM

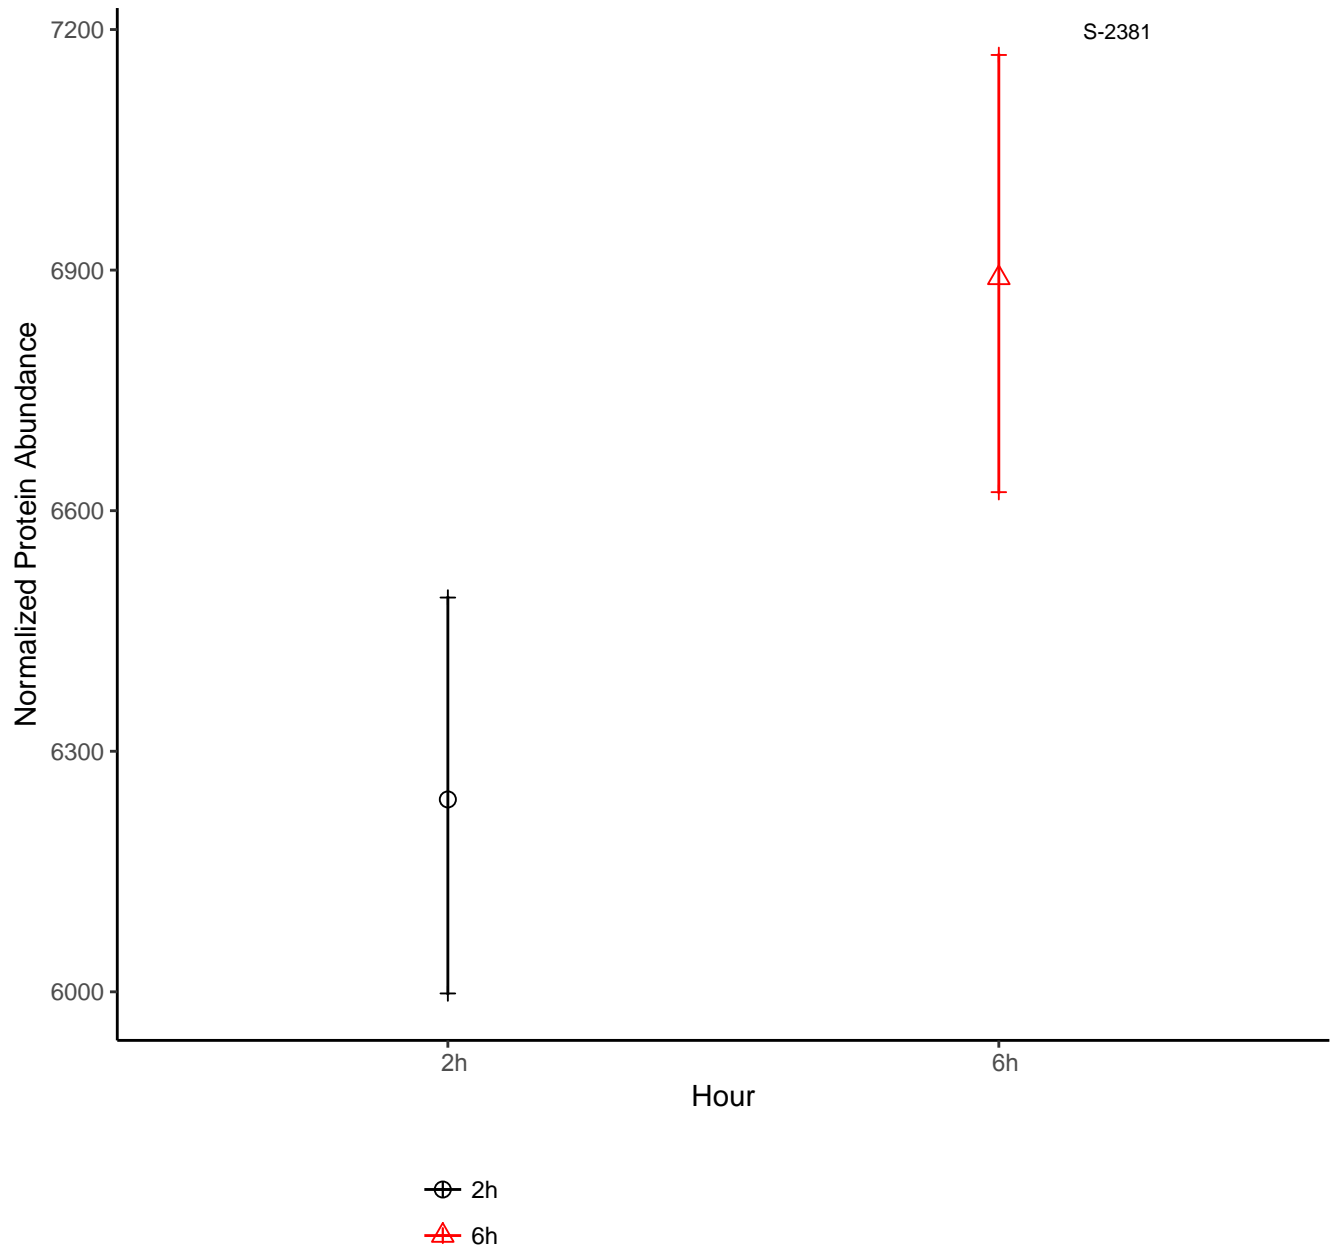

# SARA\_STAAM

S-2382

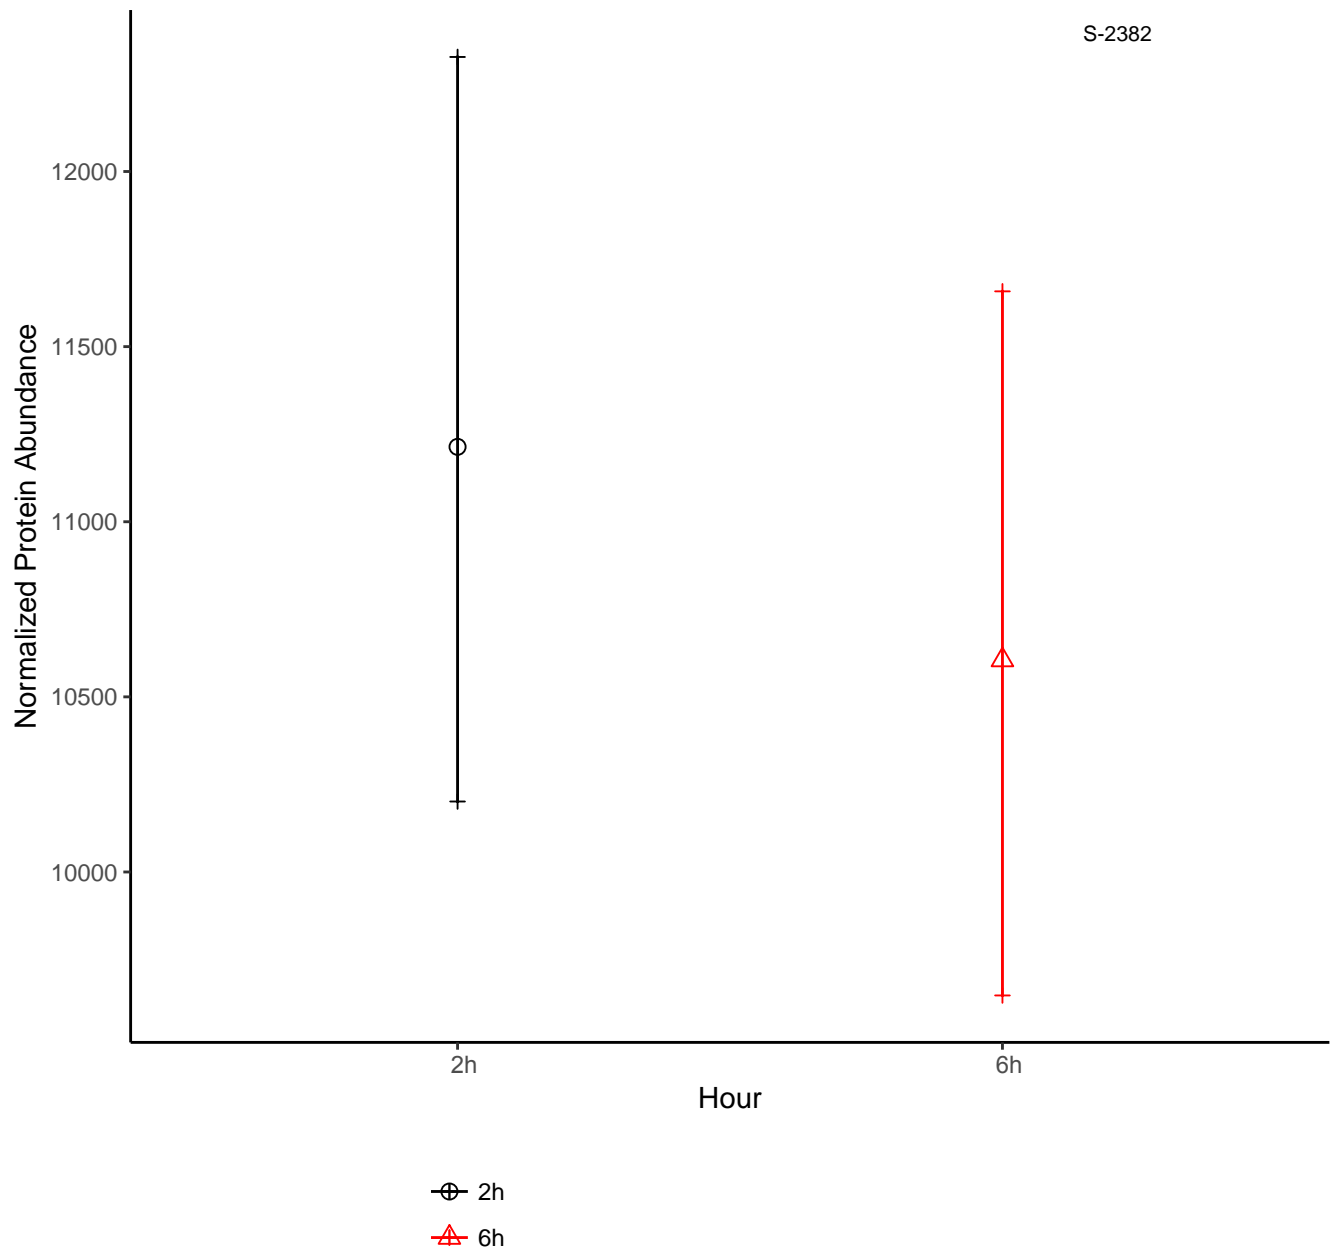

# SARR\_STAAM

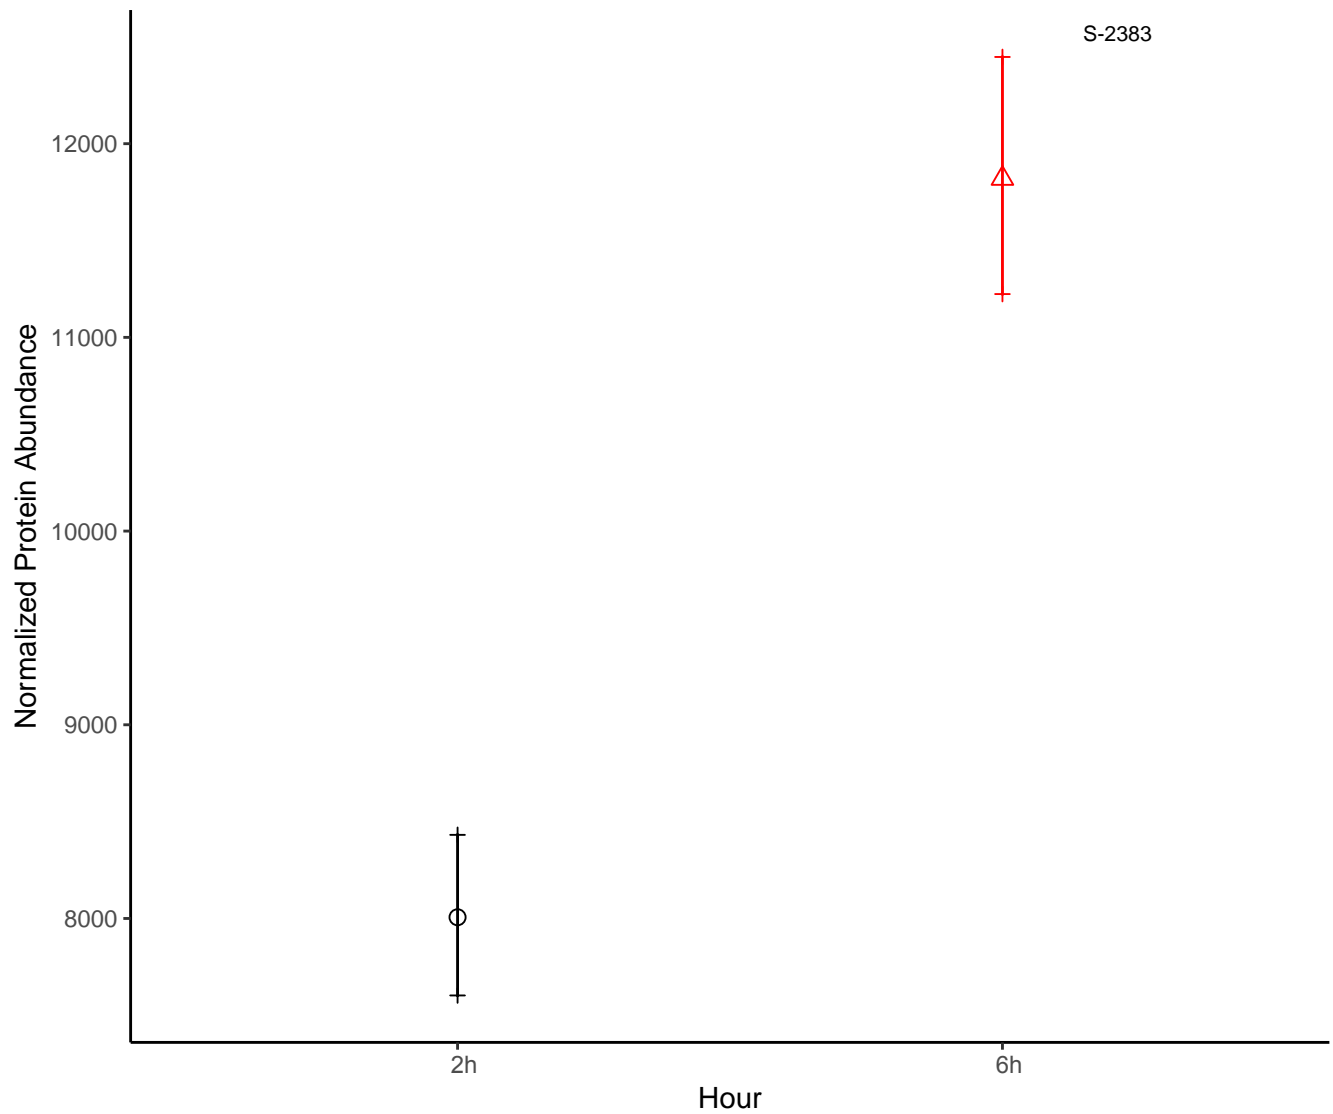

⊕ 2h

△ 6h

# SARS\_STAAM

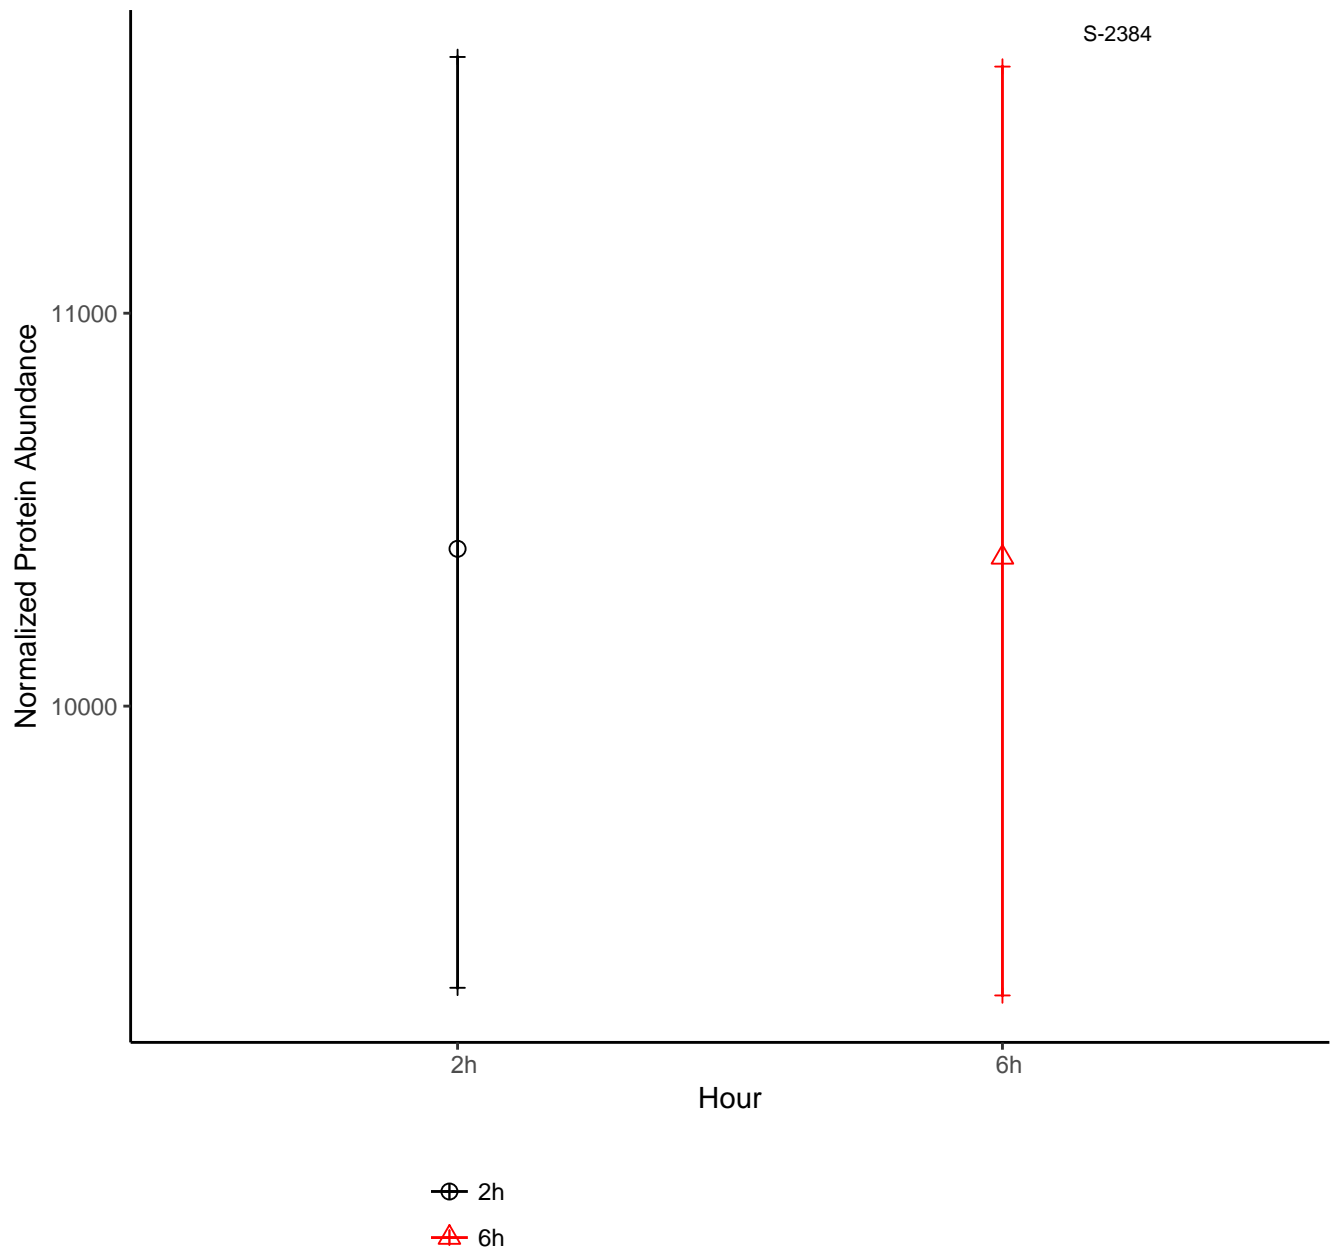



# SBCC\_STAAM

S-2385

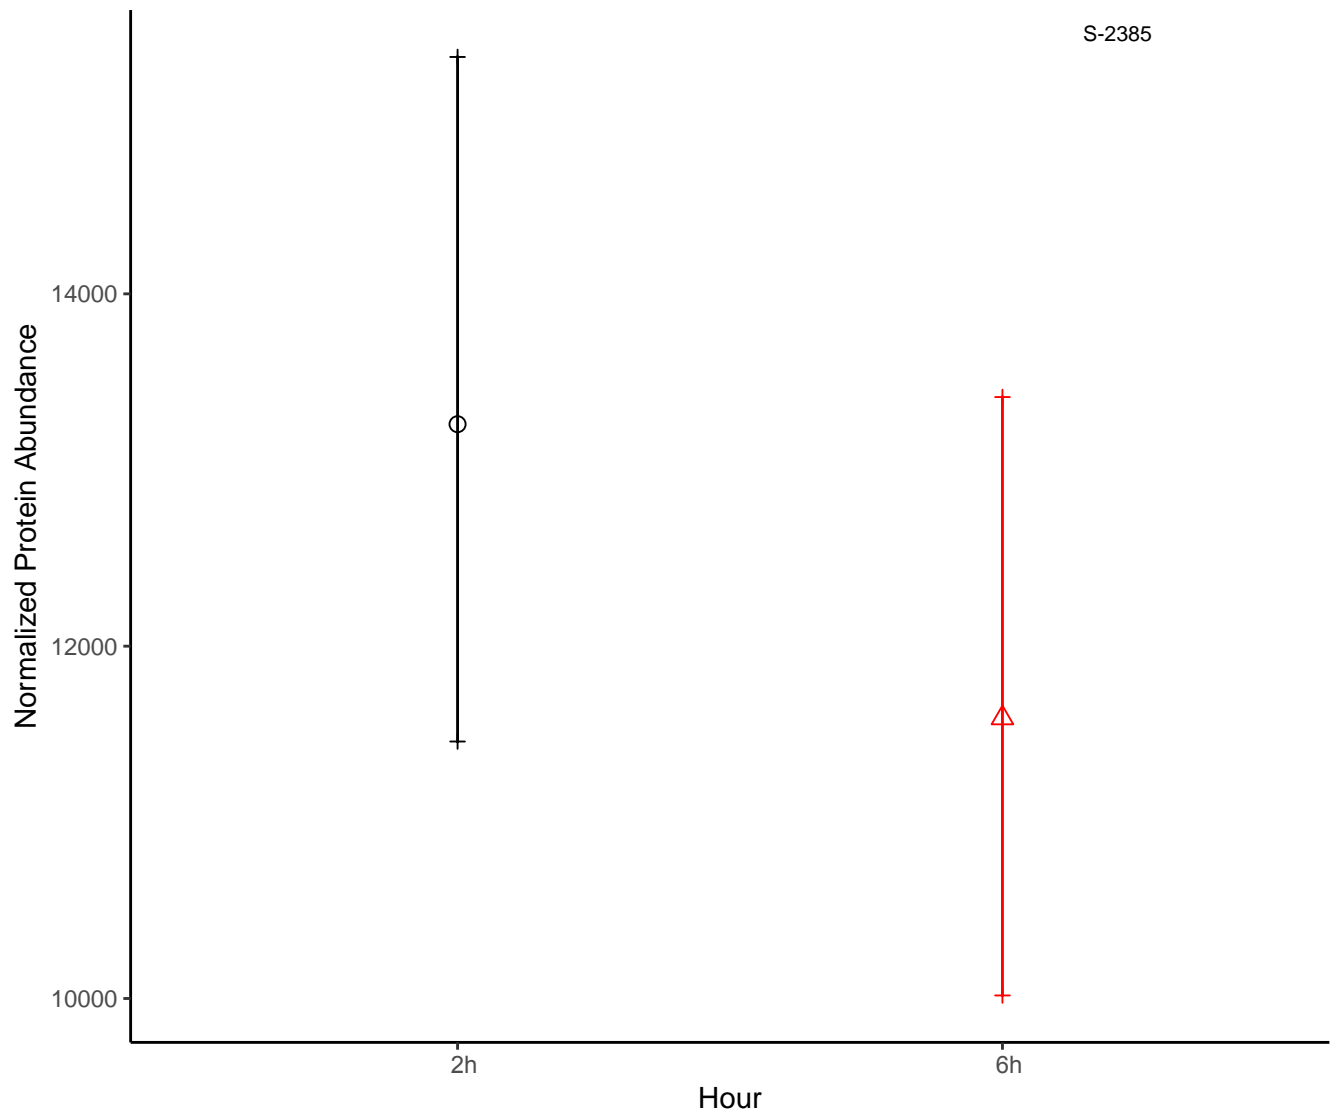

⊕ 2h

△ 6h

# SBI\_STAAM

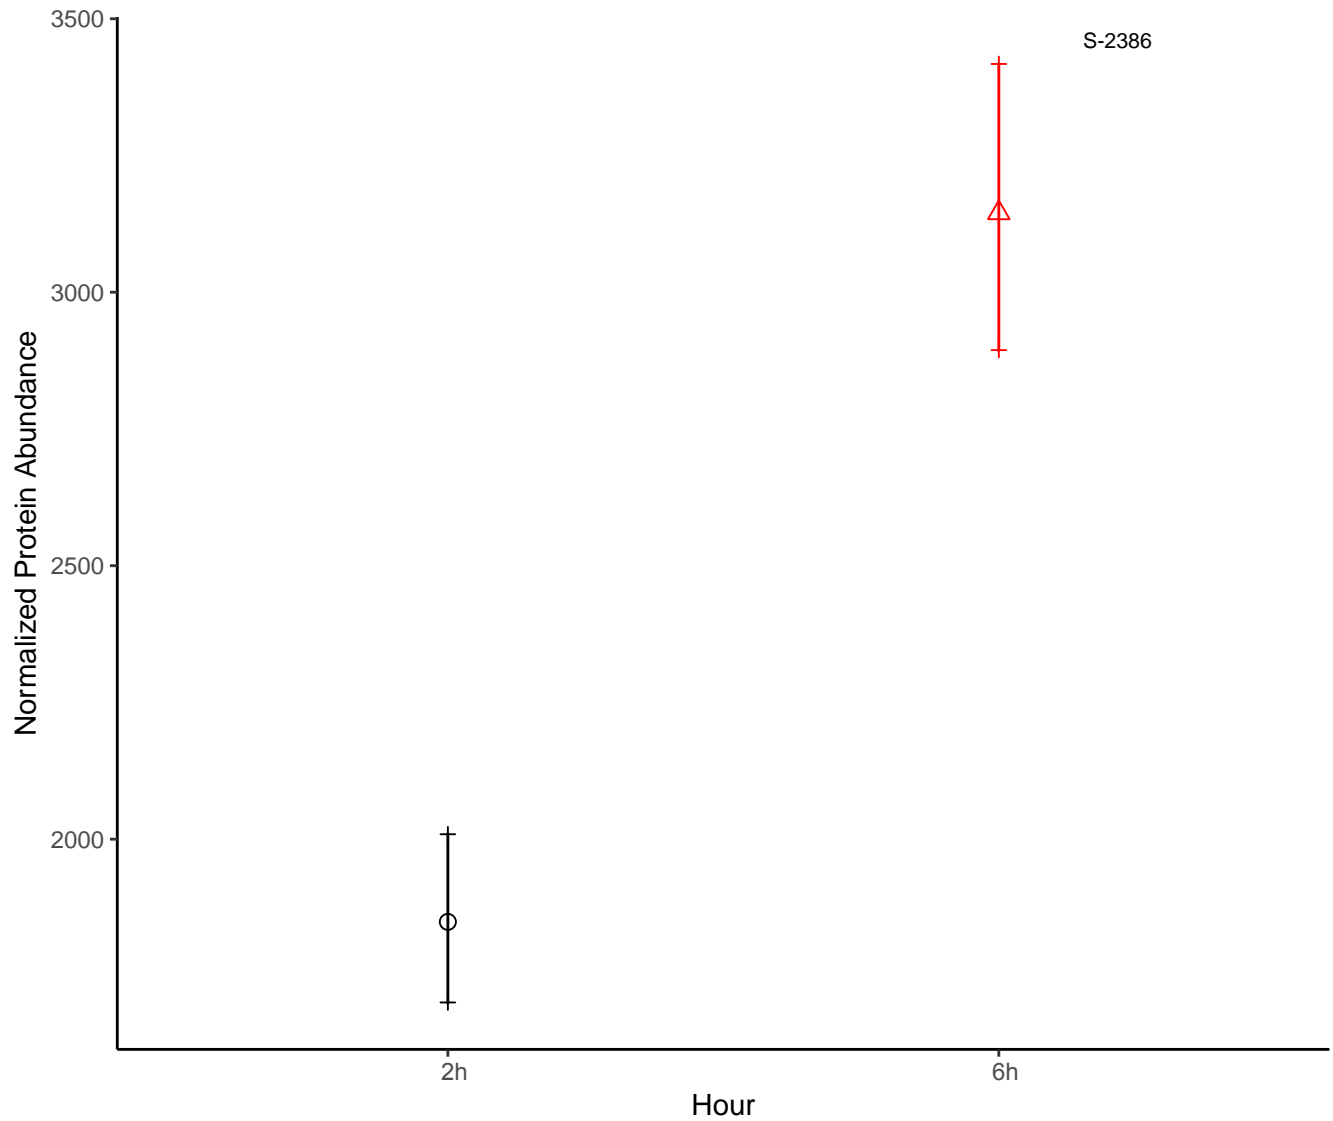

⊕ 2h

△ 6h

# SCPA\_STAAM

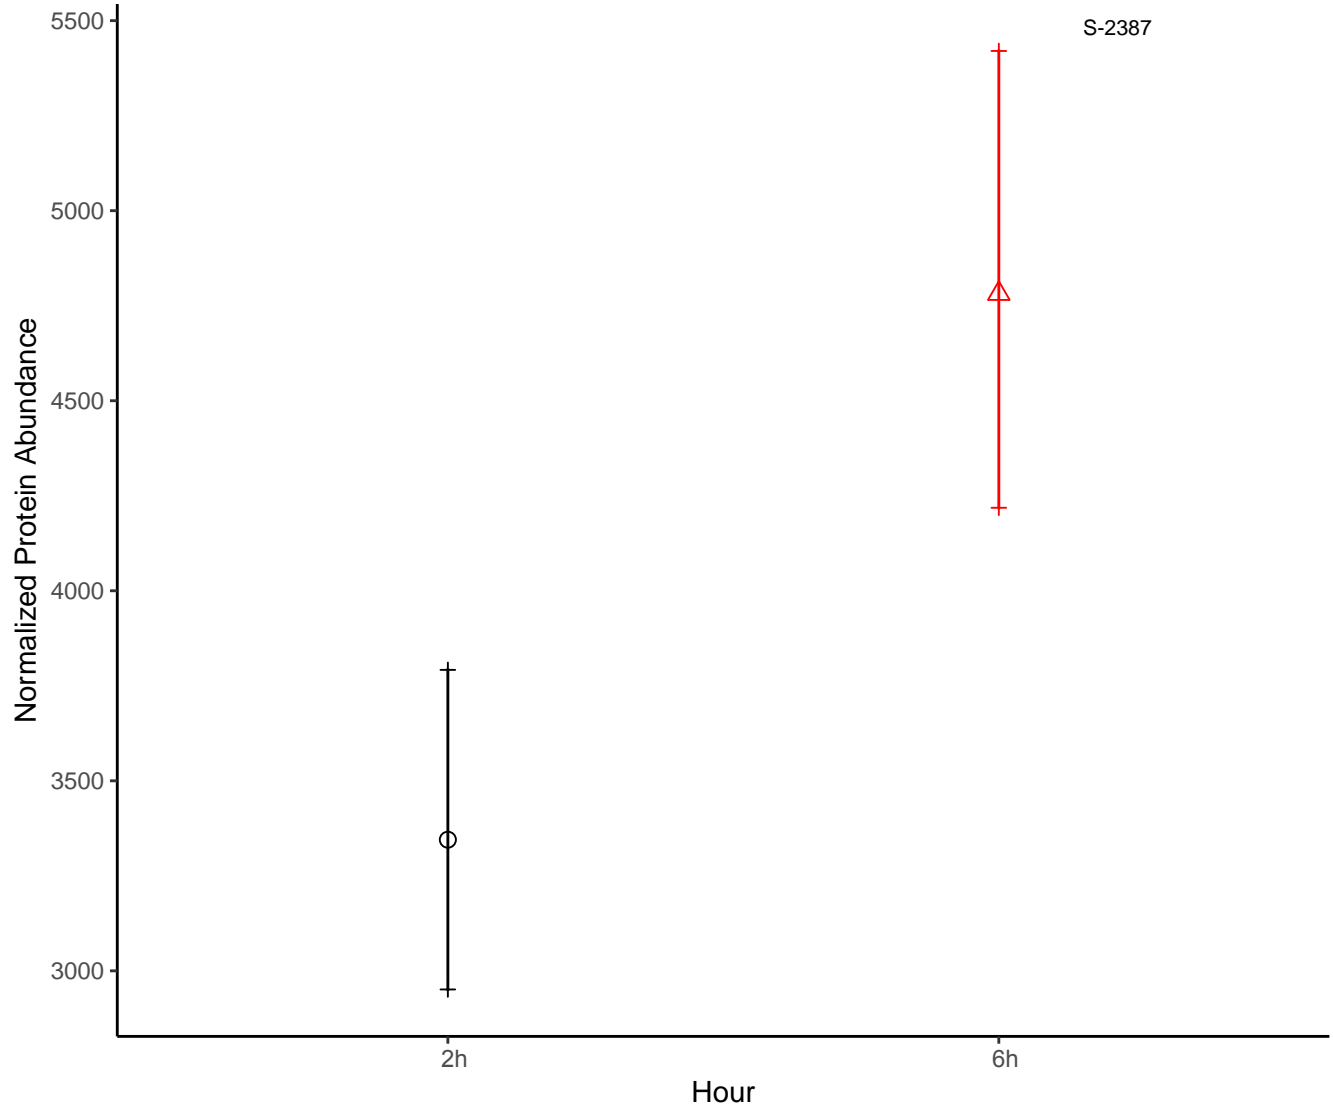

⊕ 2h

△ 6h

# SCPB\_STAAM

S-2388

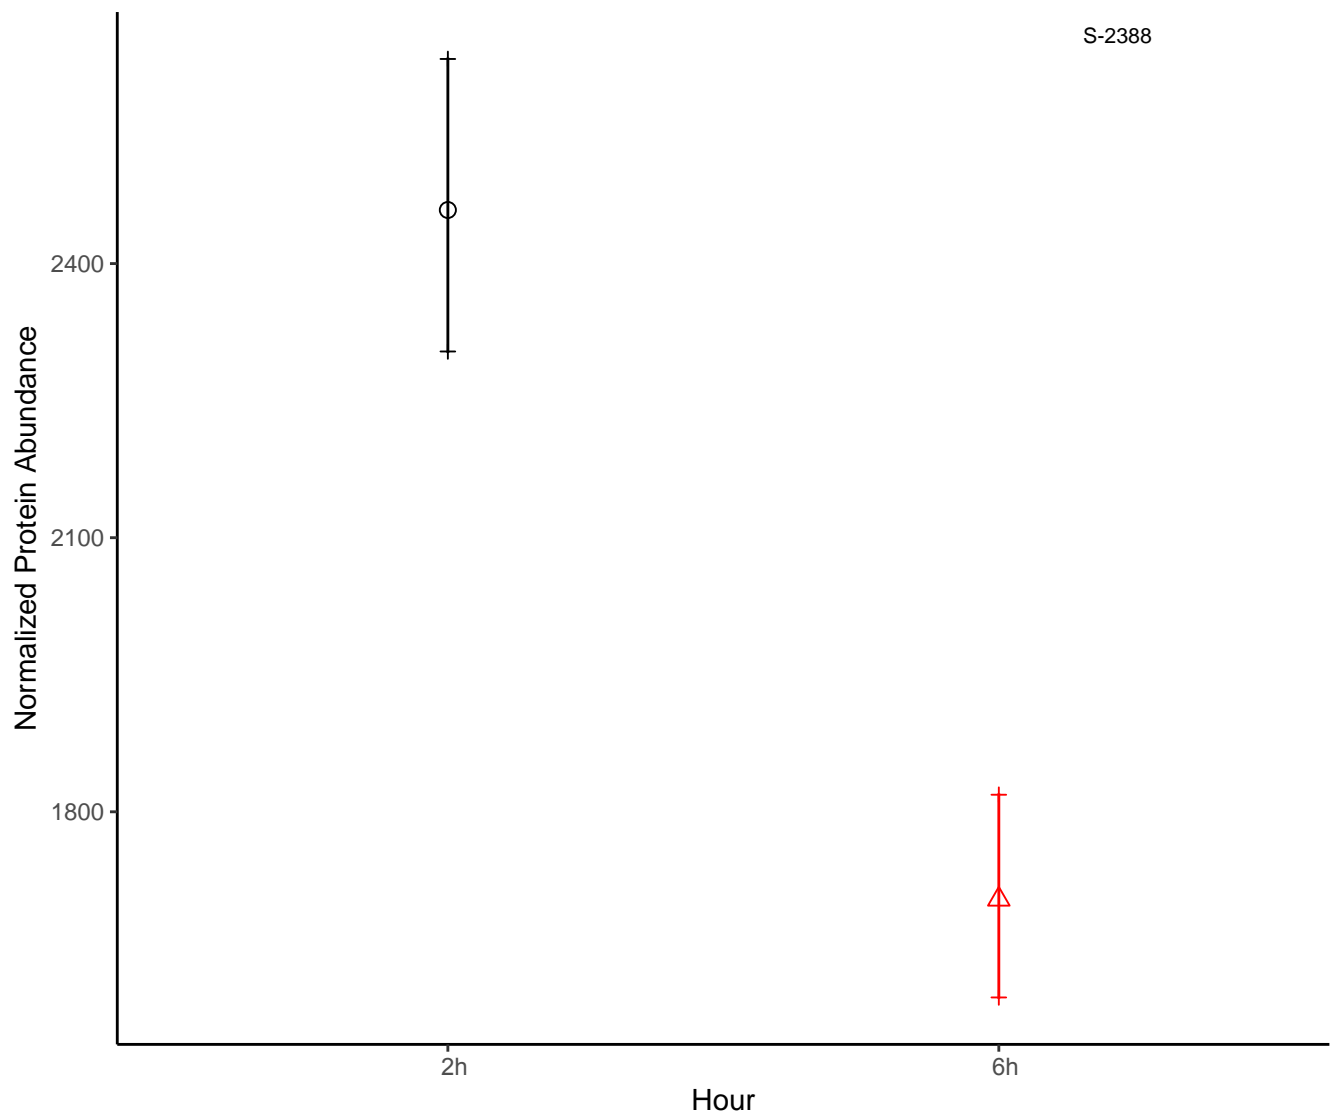

⊕ 2h

△ 6h

# SECA1\_STAAM

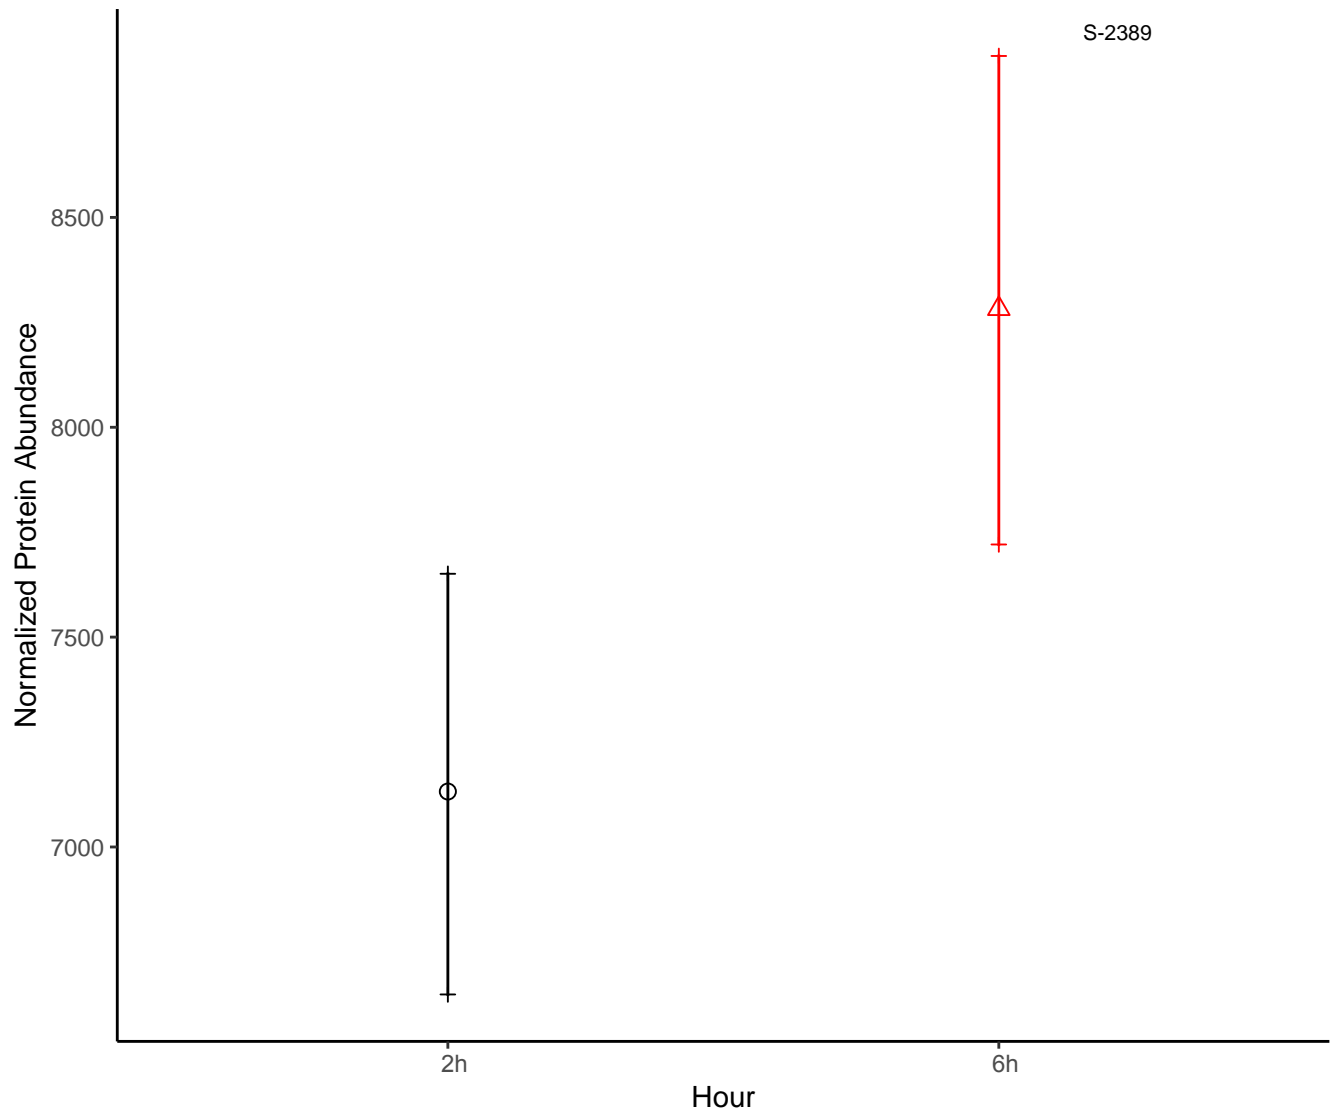

⊕ 2h

△ 6h

# SIGA\_STAAM

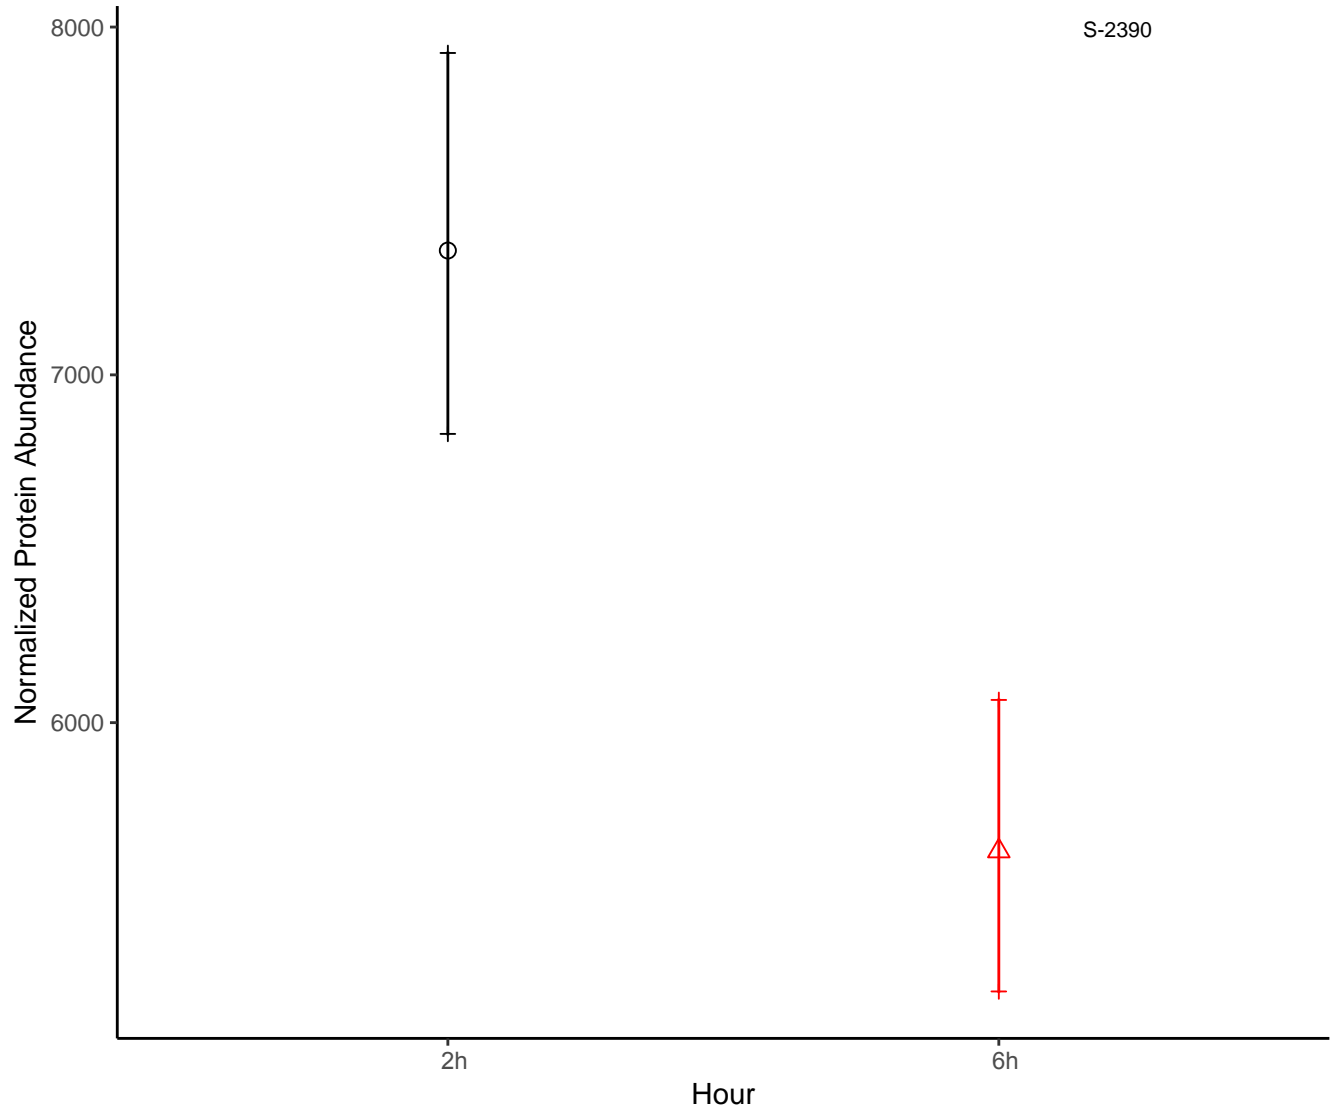

⊕ 2h

△ 6h

# SODM1\_STAAM

S-2391

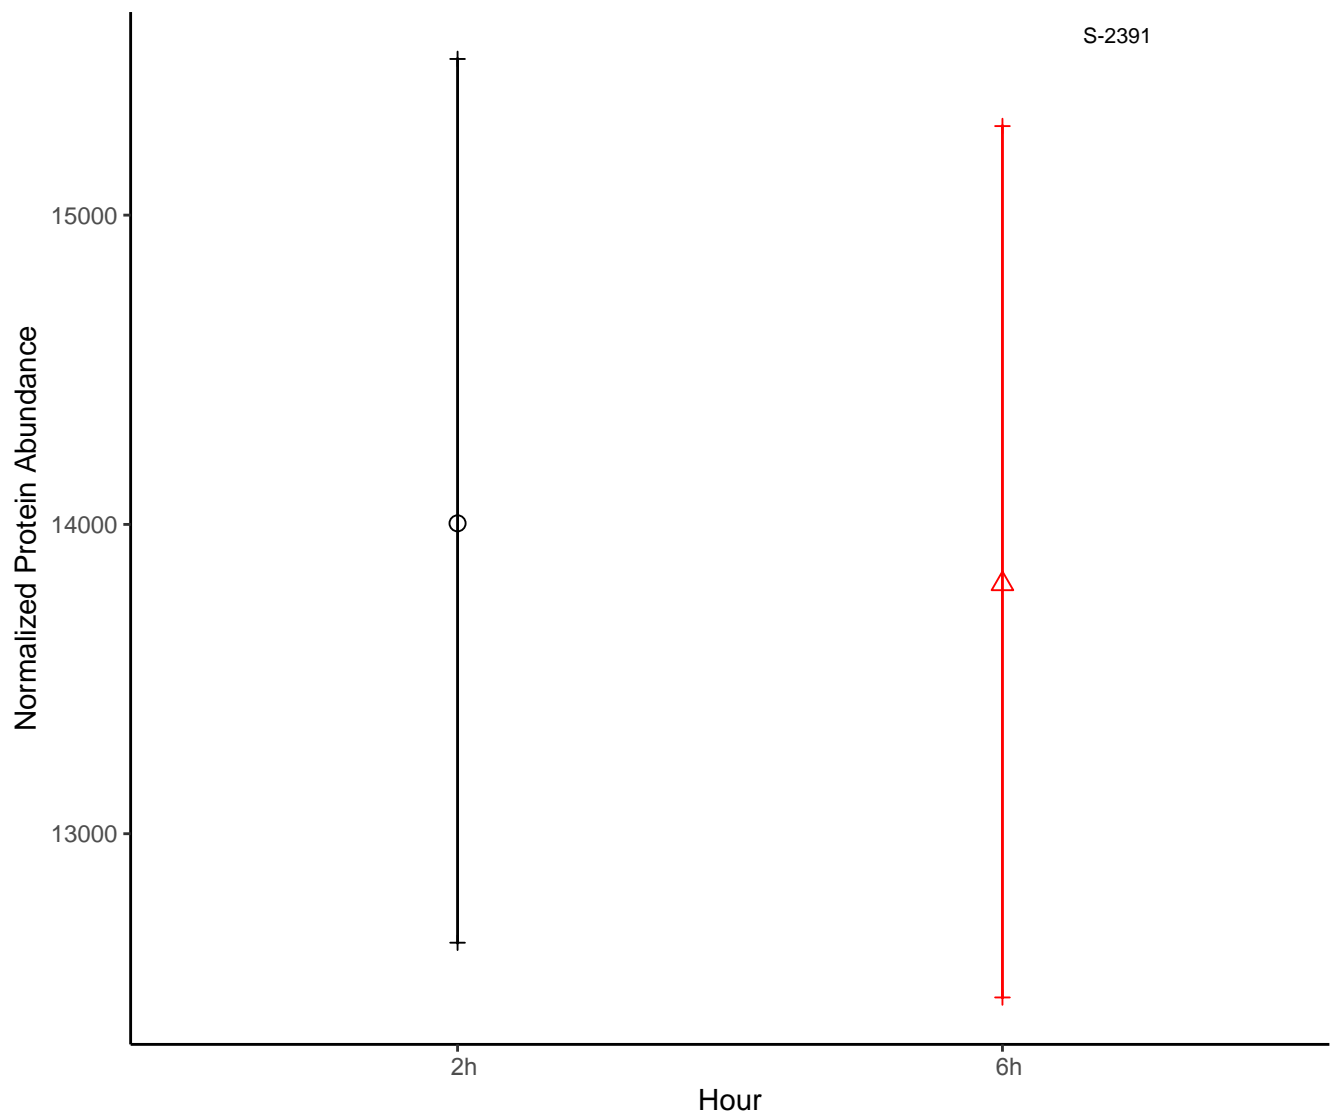

⊕ 2h

△ 6h

# SODM2\_STAAM

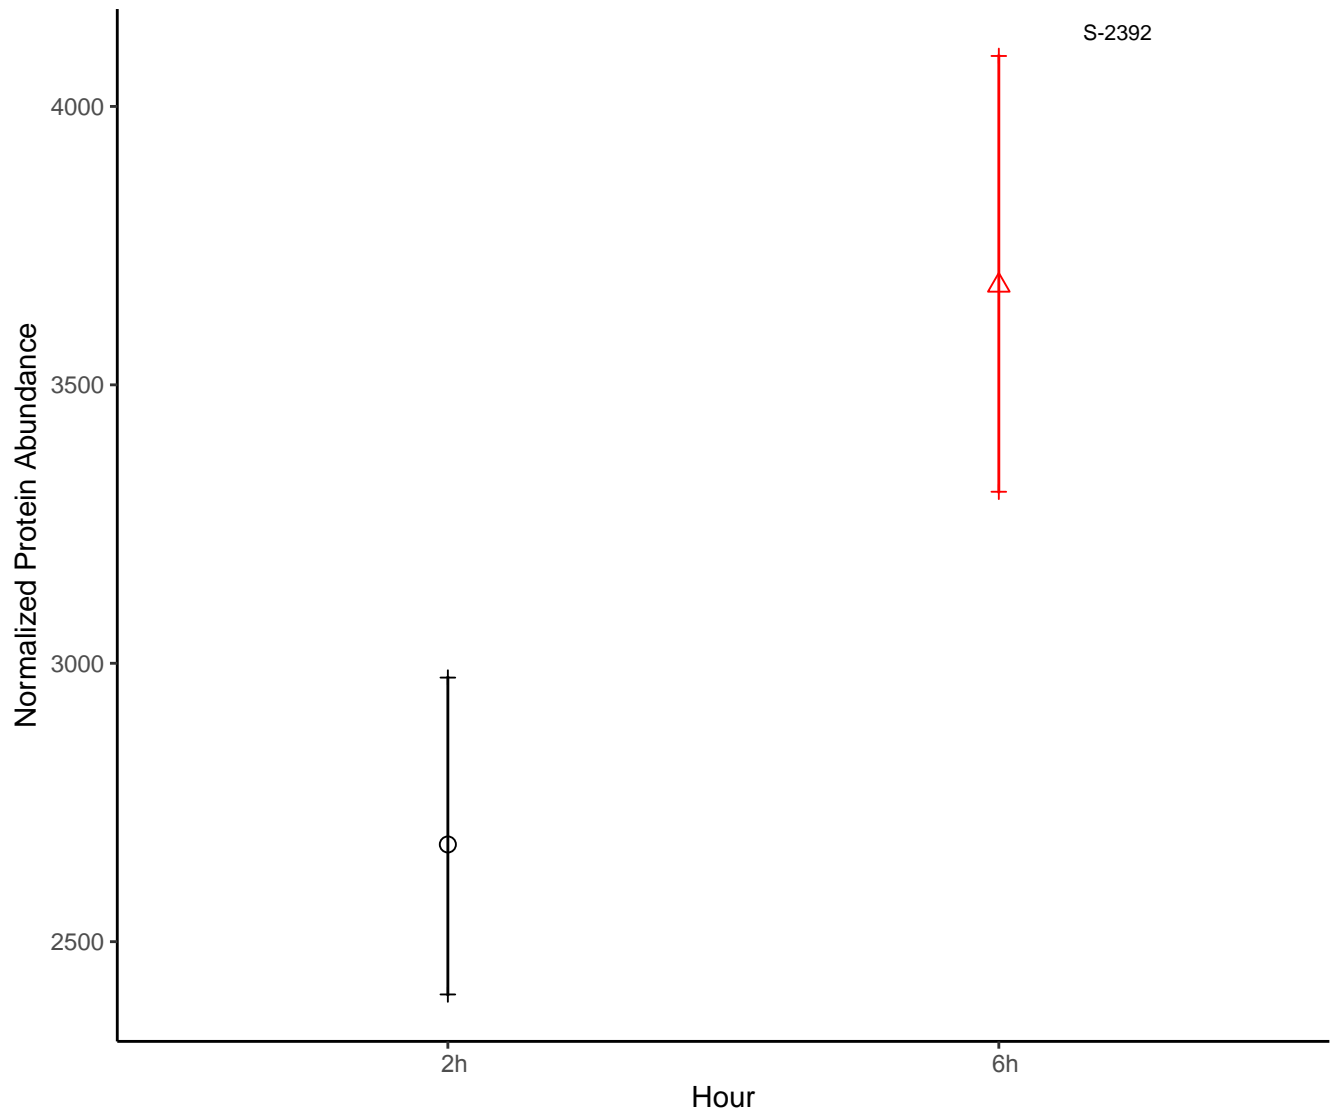

⊕ 2h

△ 6h



# SP5G\_STAAM

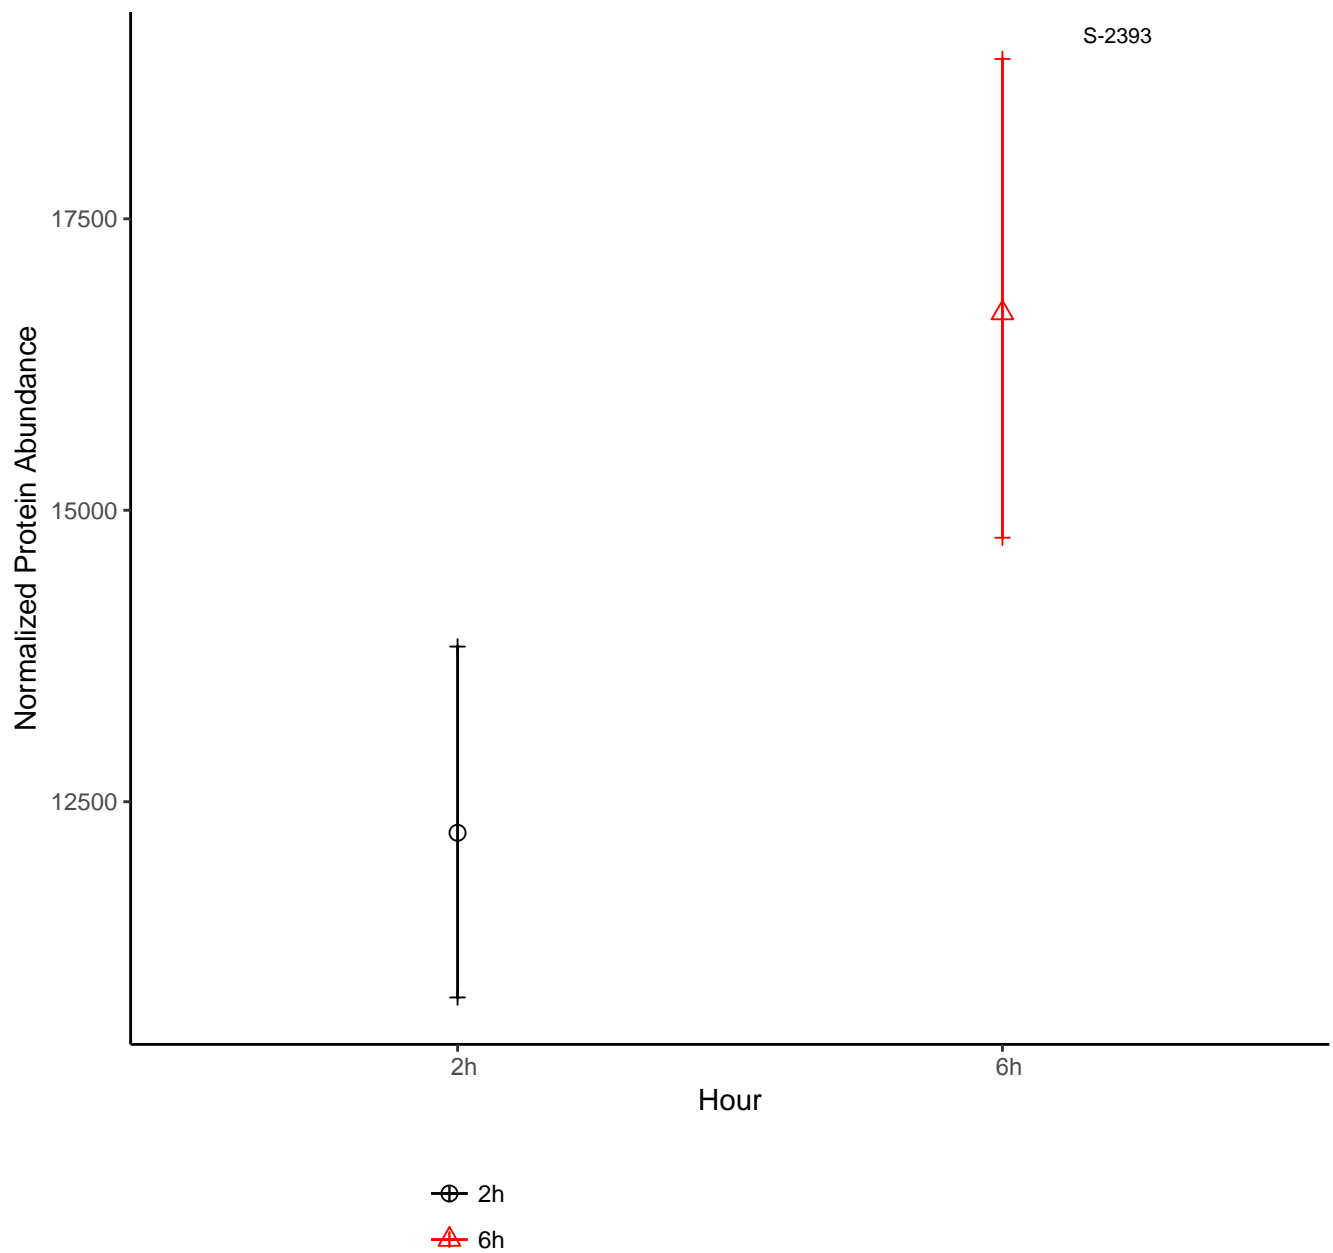

# SPA\_STAAM

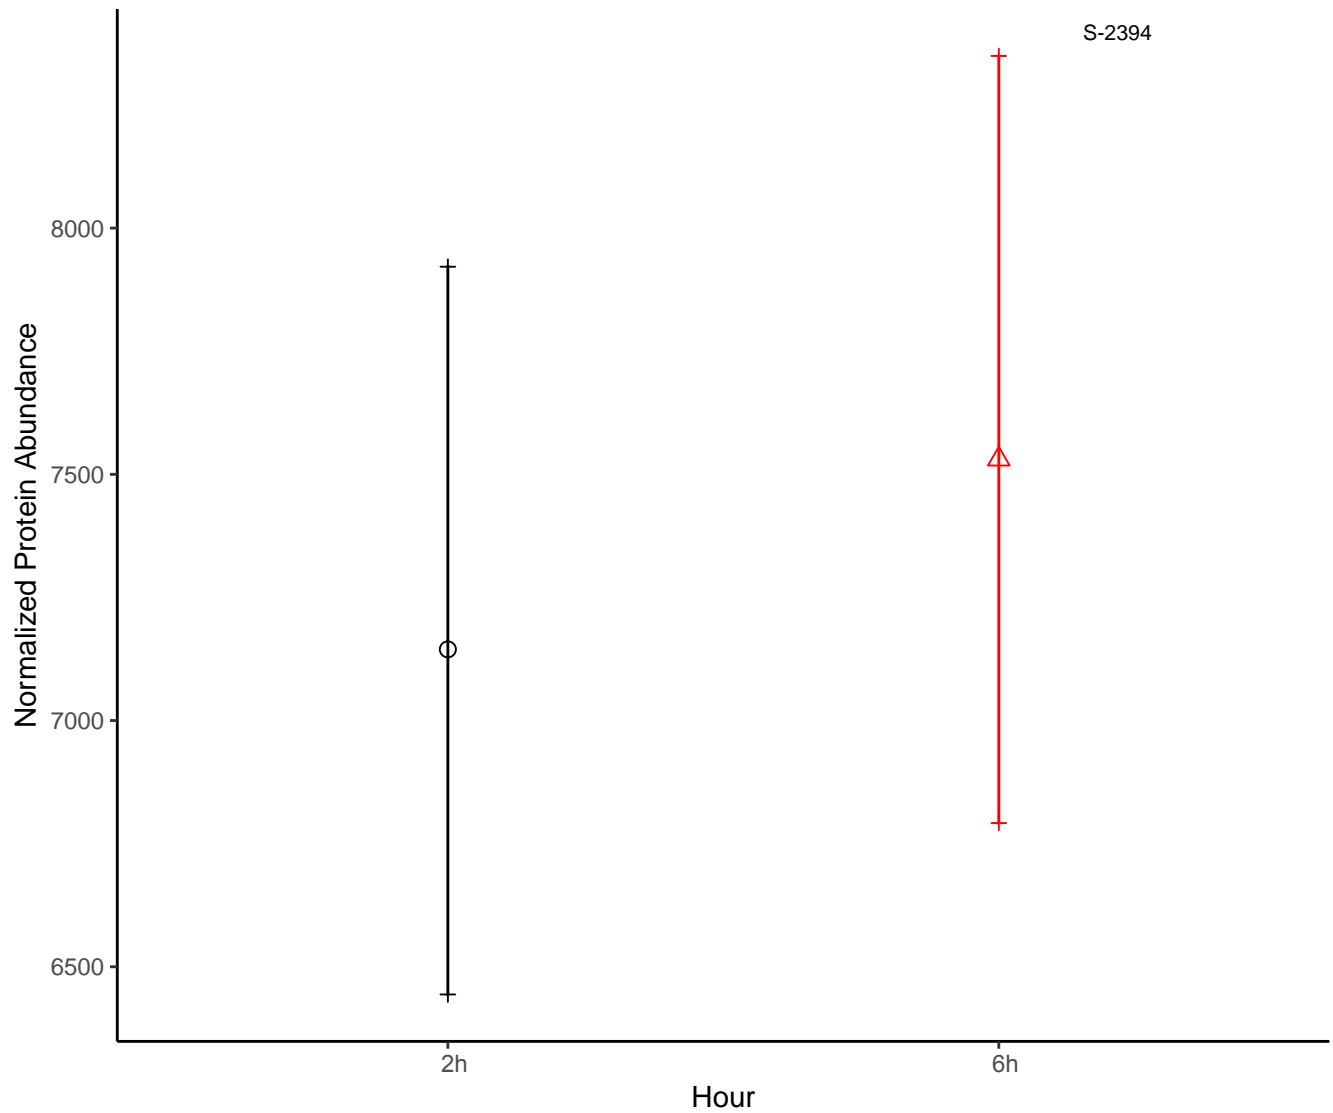

S-2394

⊕ 2h

△ 6h

# SPLD\_STAAM

S-2395

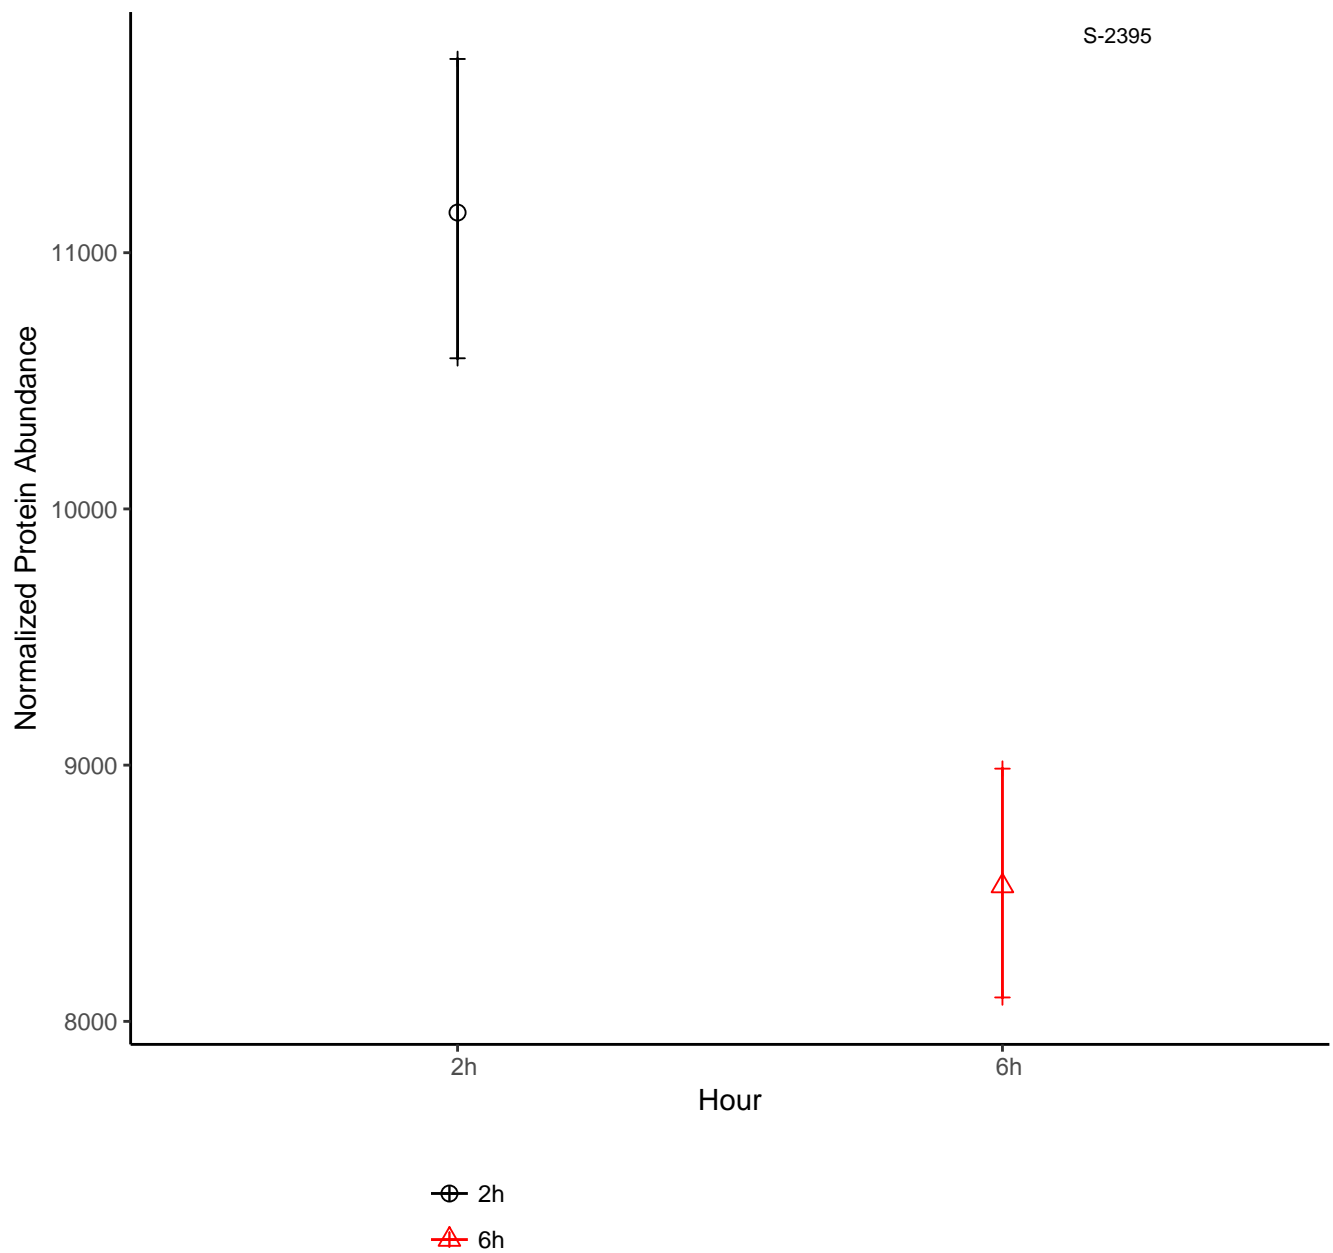

# SPX\_STAAM

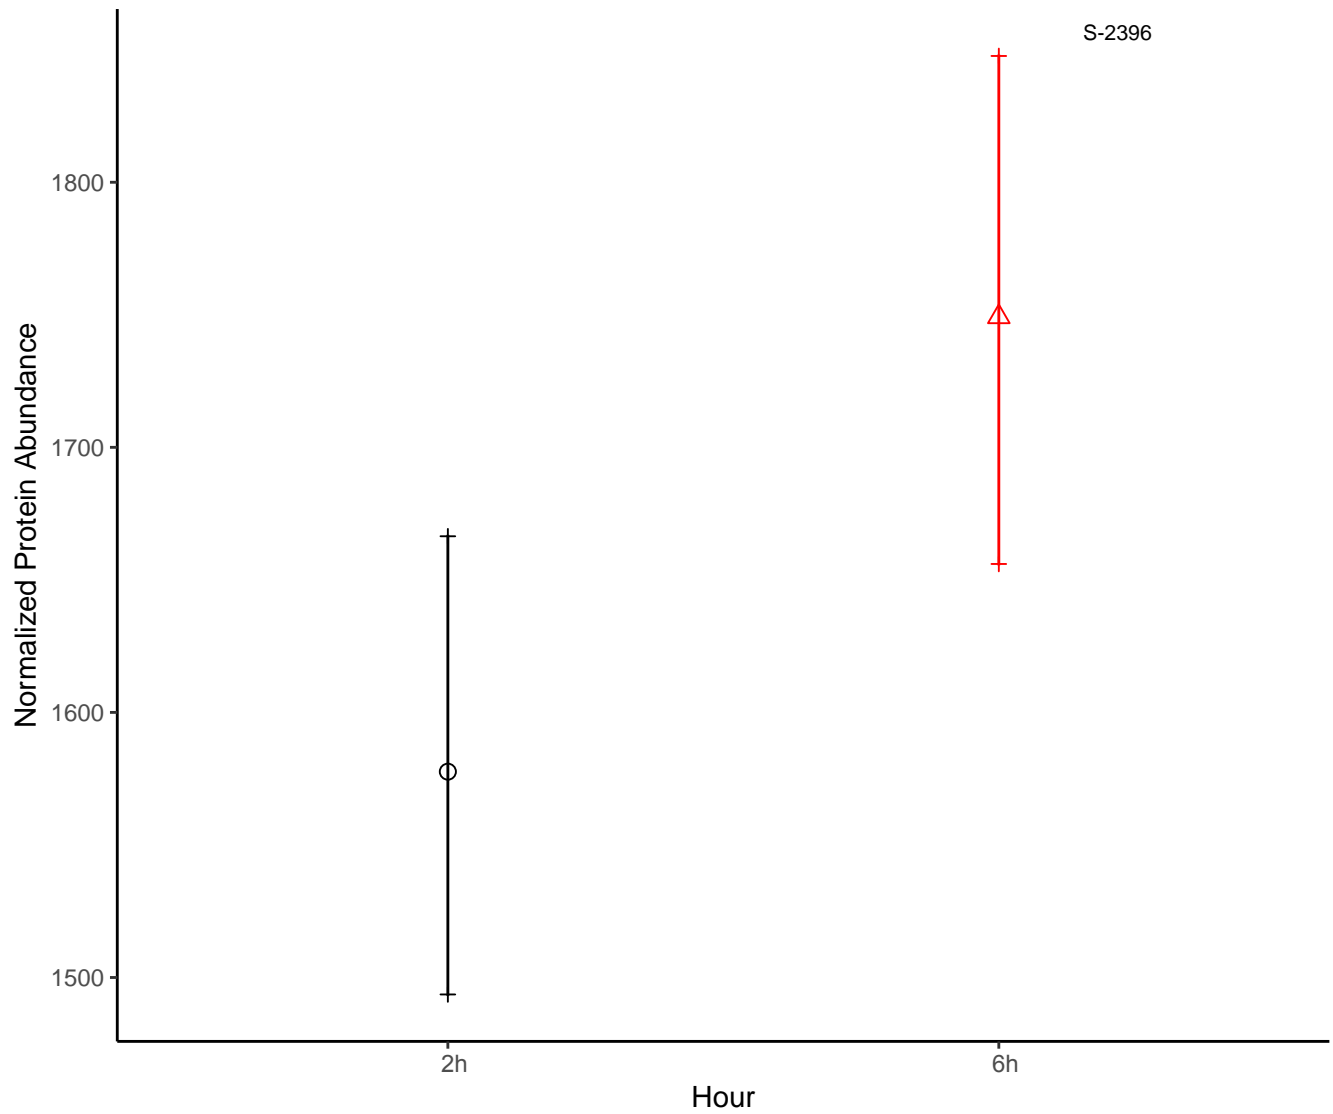

⊕ 2h

△ 6h

# SRRRA\_STAAM

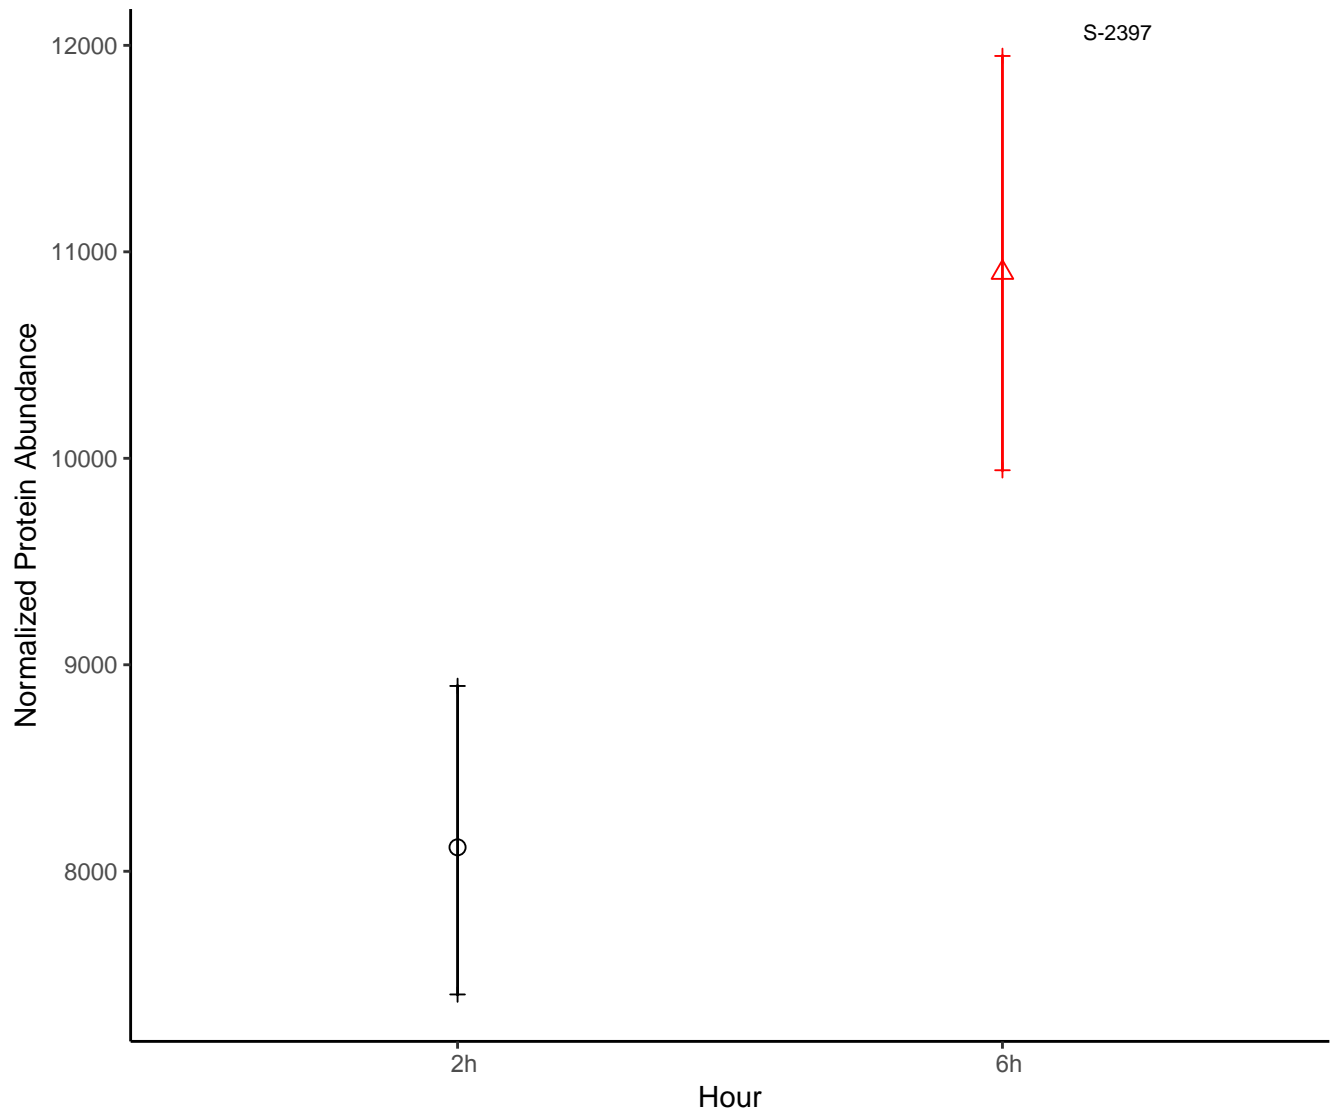

⊕ 2h

△ 6h

# SSAA2\_STAAM

S-2398

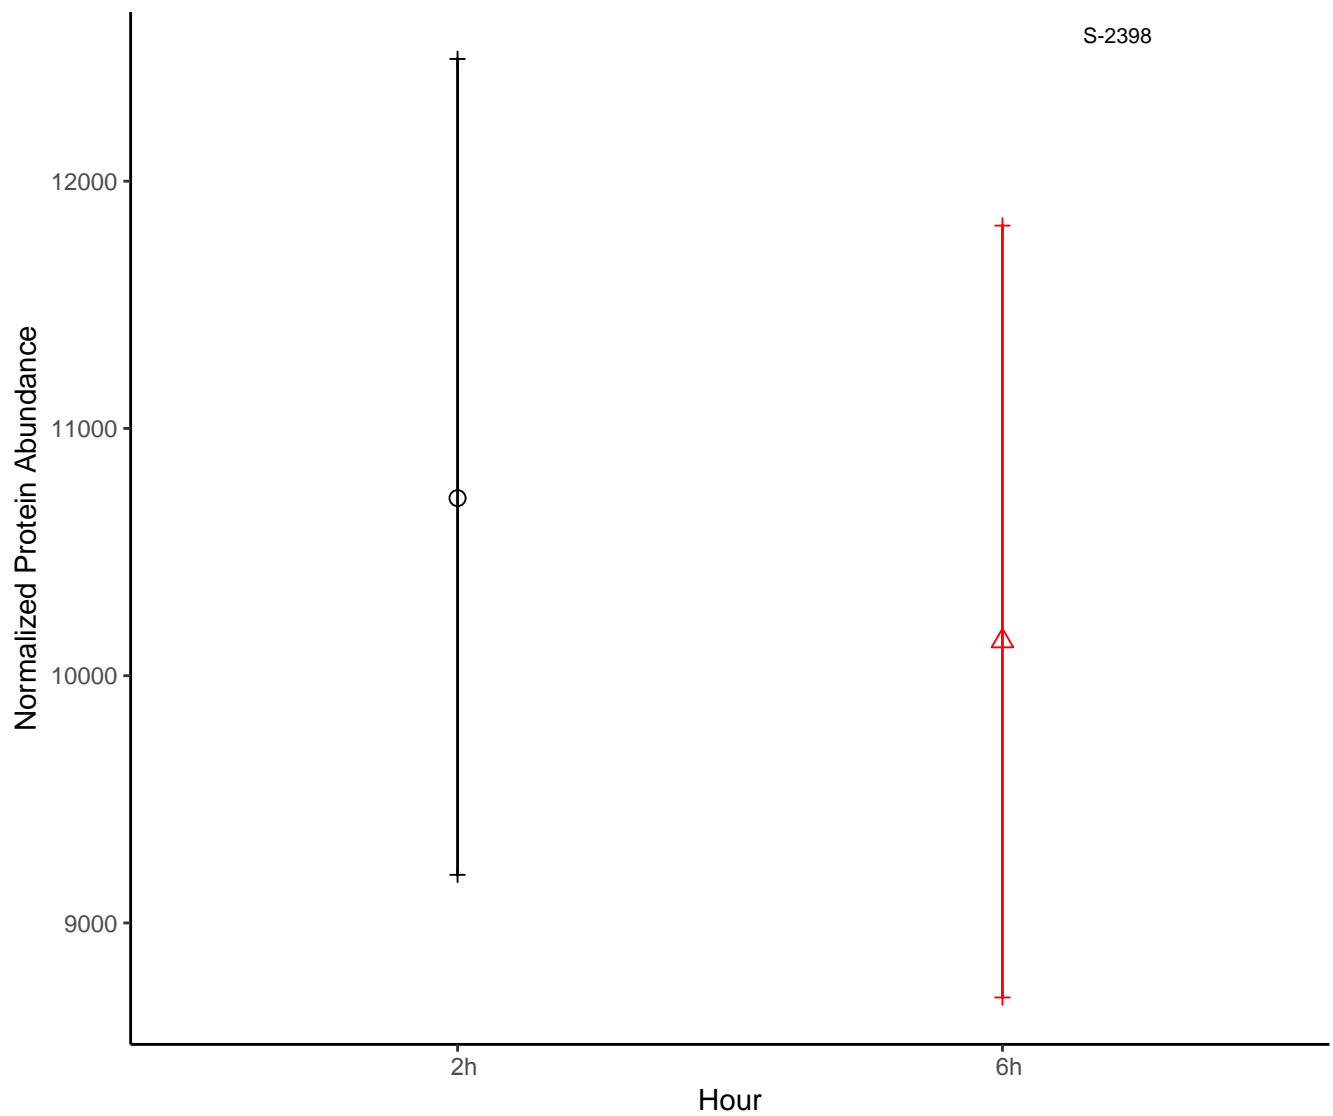

⊕ 2h

△ 6h

# SSB1\_STAAM

S-2399

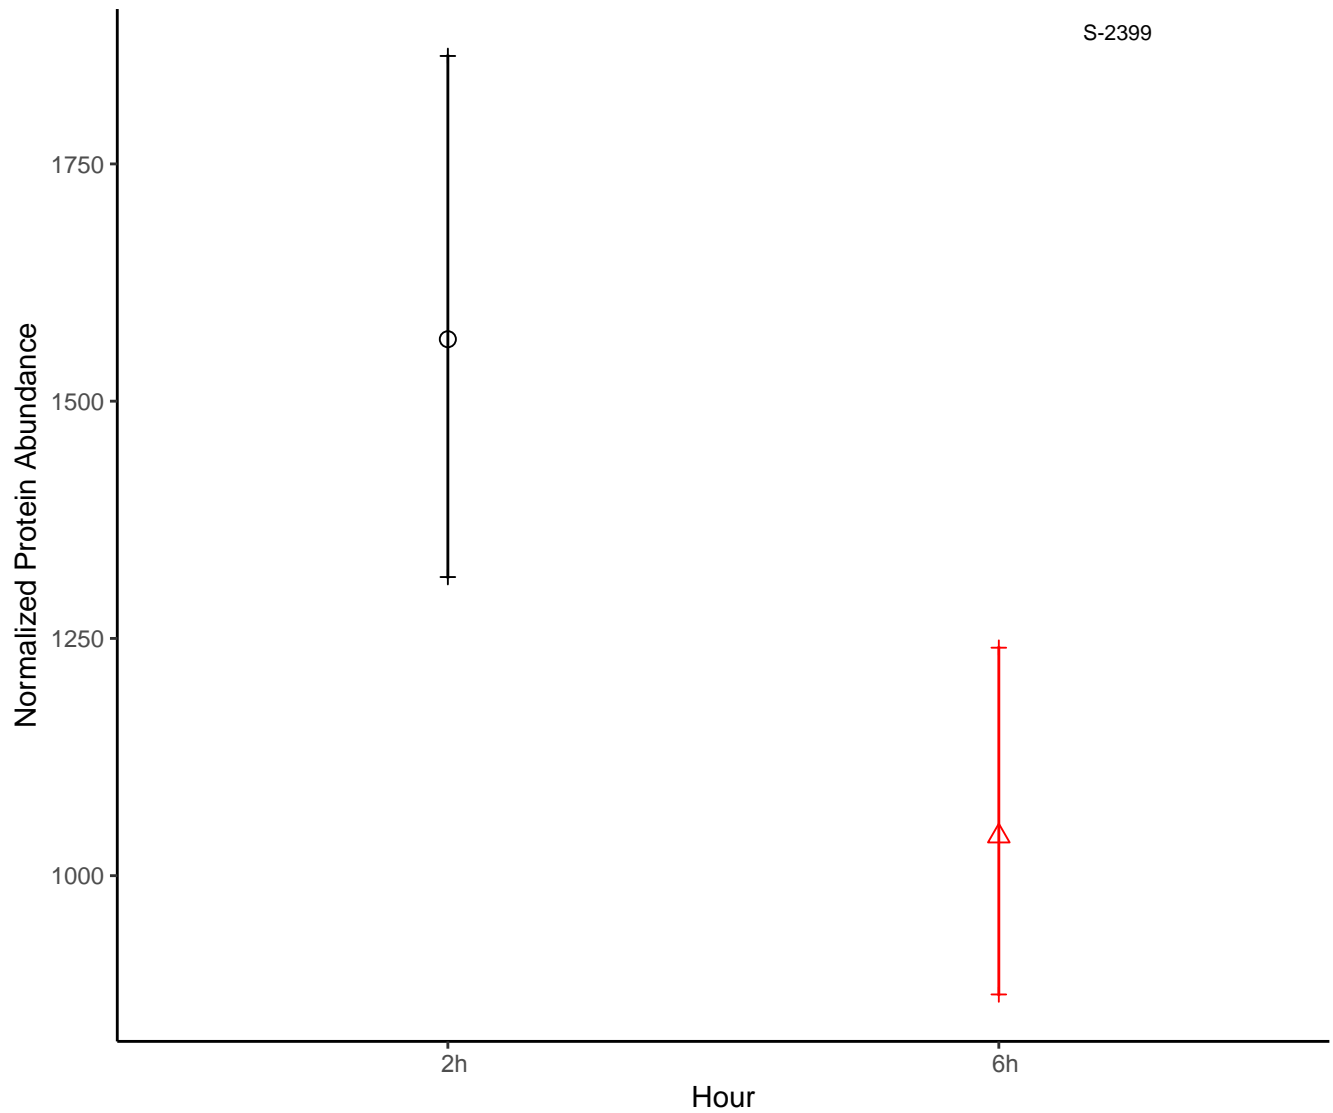

⊕ 2h

△ 6h

# SSB2\_STAAM

S-2400

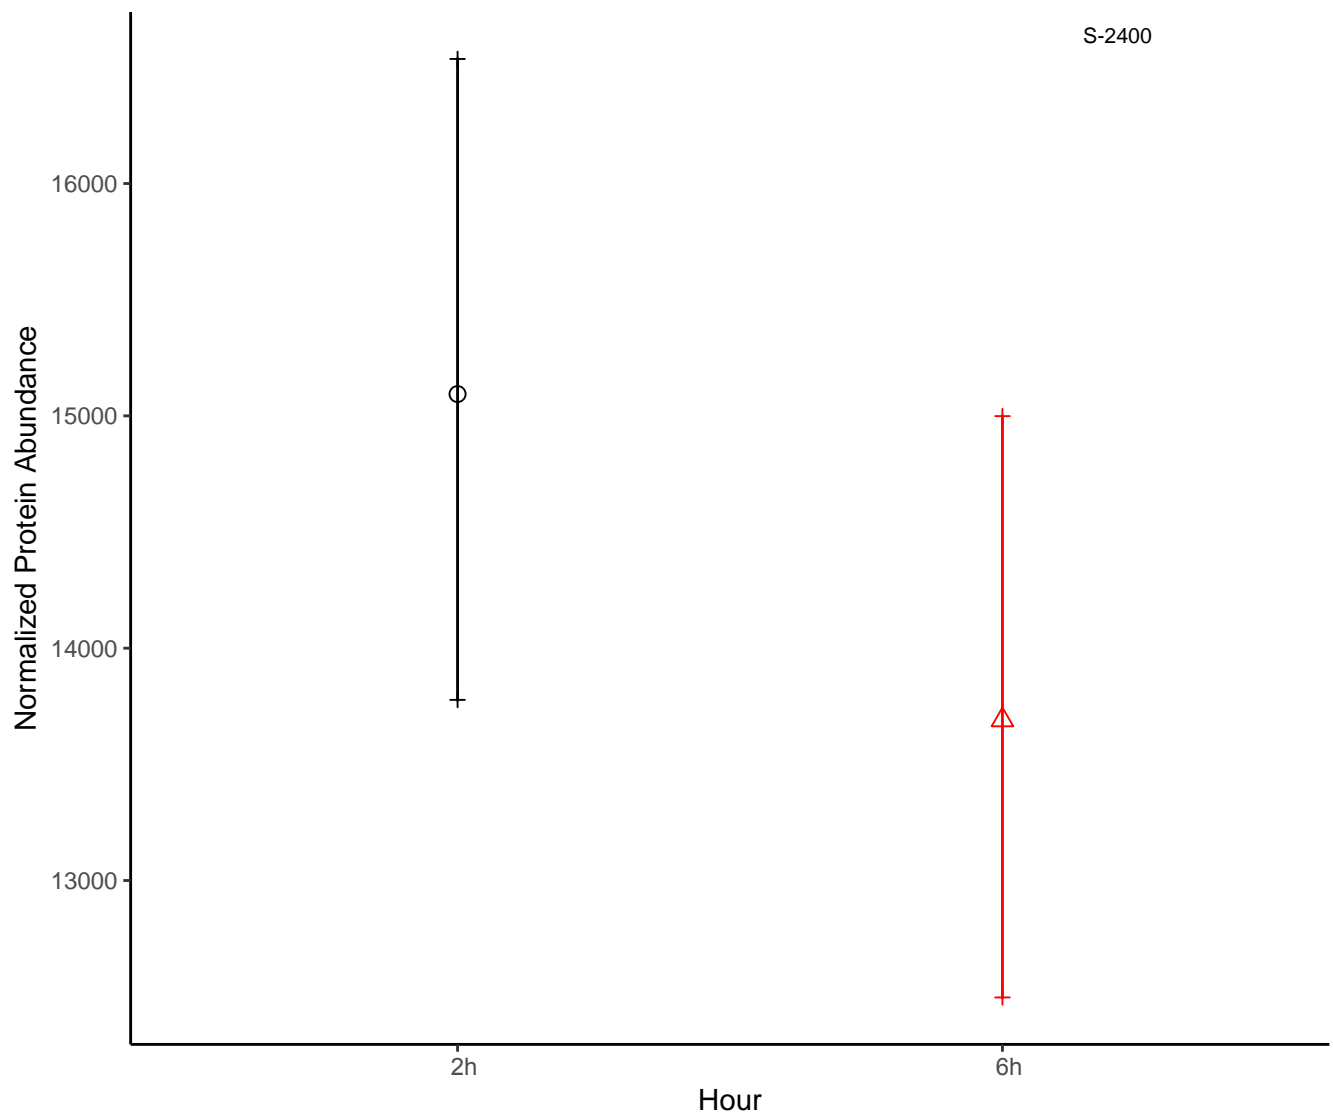

⊕ 2h

△ 6h



# SUCC\_STAAM

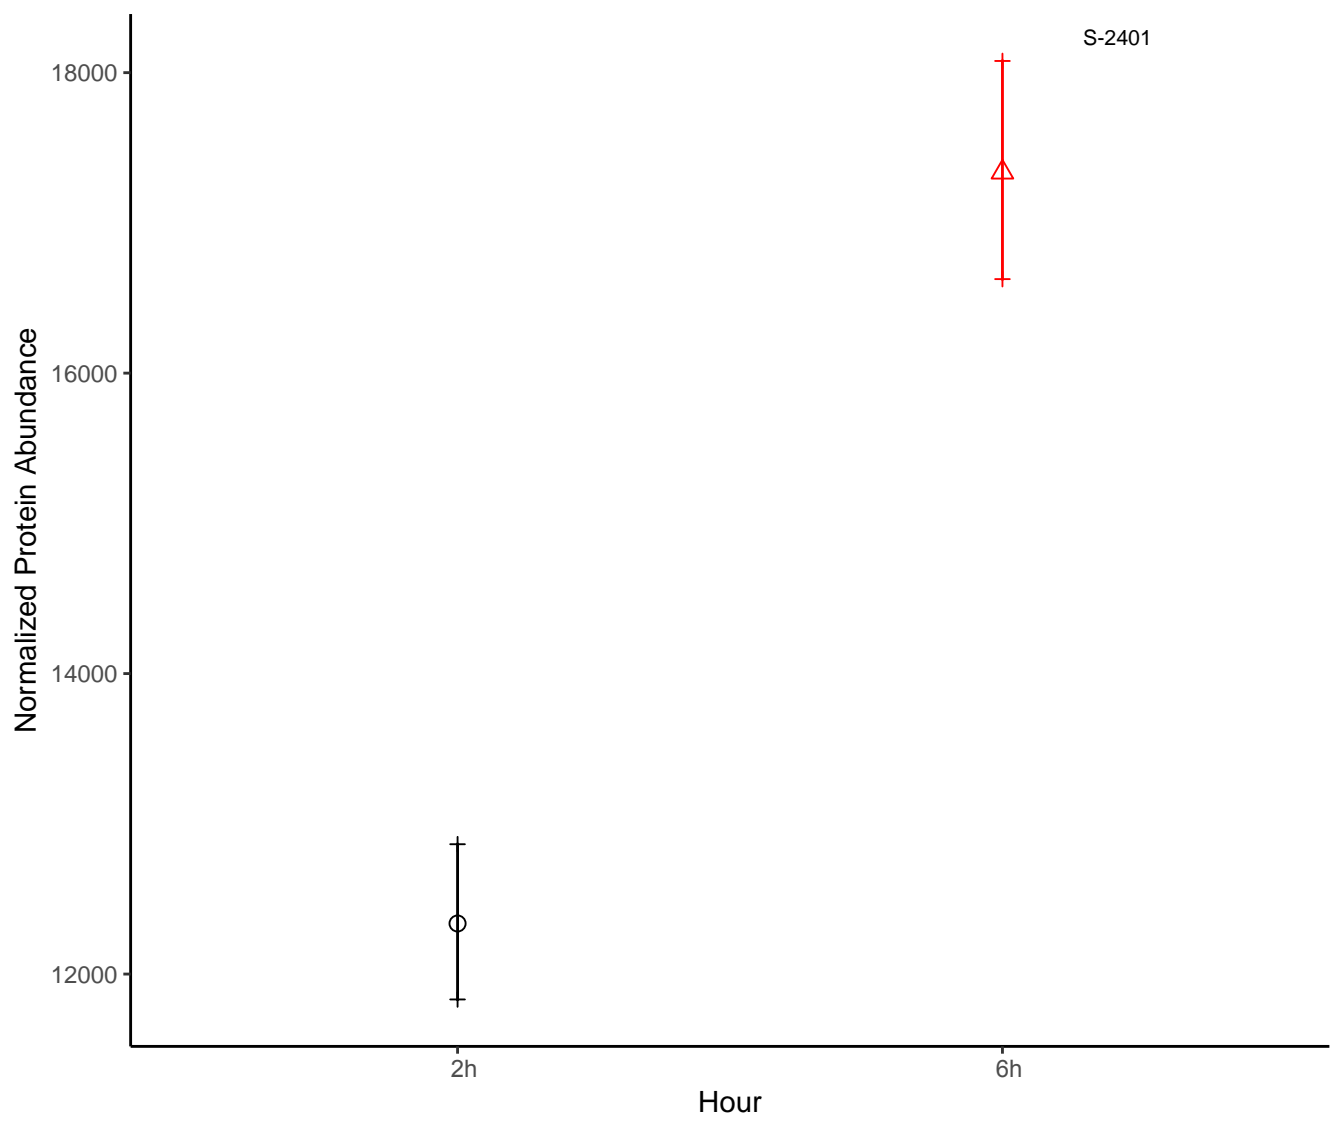

S-2401

- ⊕ 2h
- △ 6h

# SUCD\_STAAM

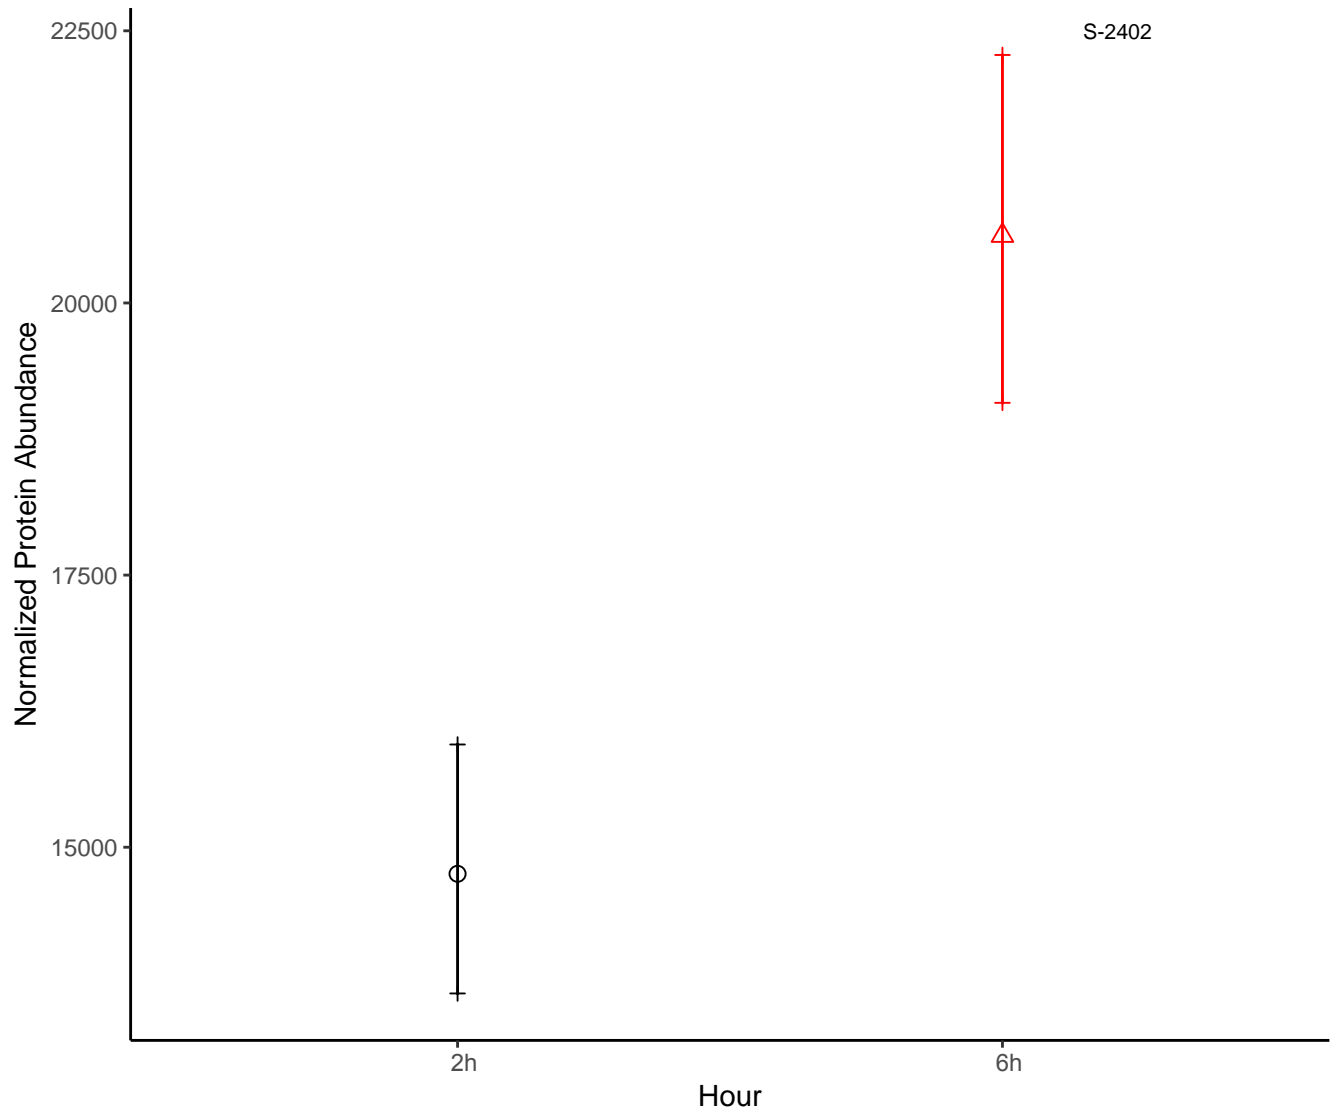

⊕ 2h

△ 6h

# SYA\_STAAM

S-2403

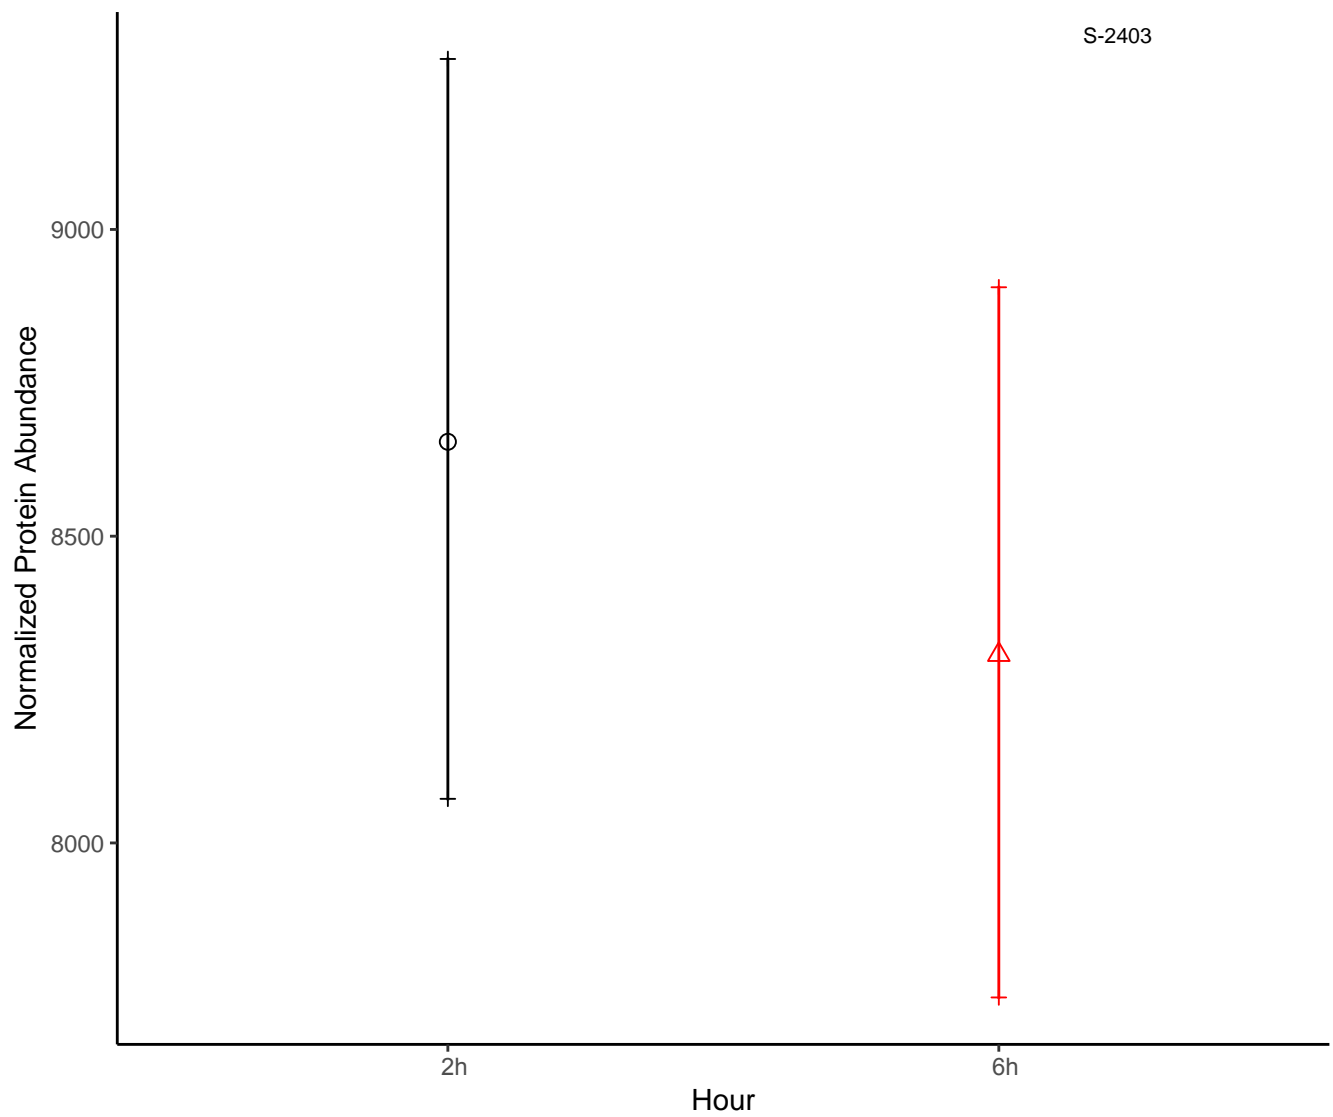

⊕ 2h

△ 6h

# SYC\_STAAM

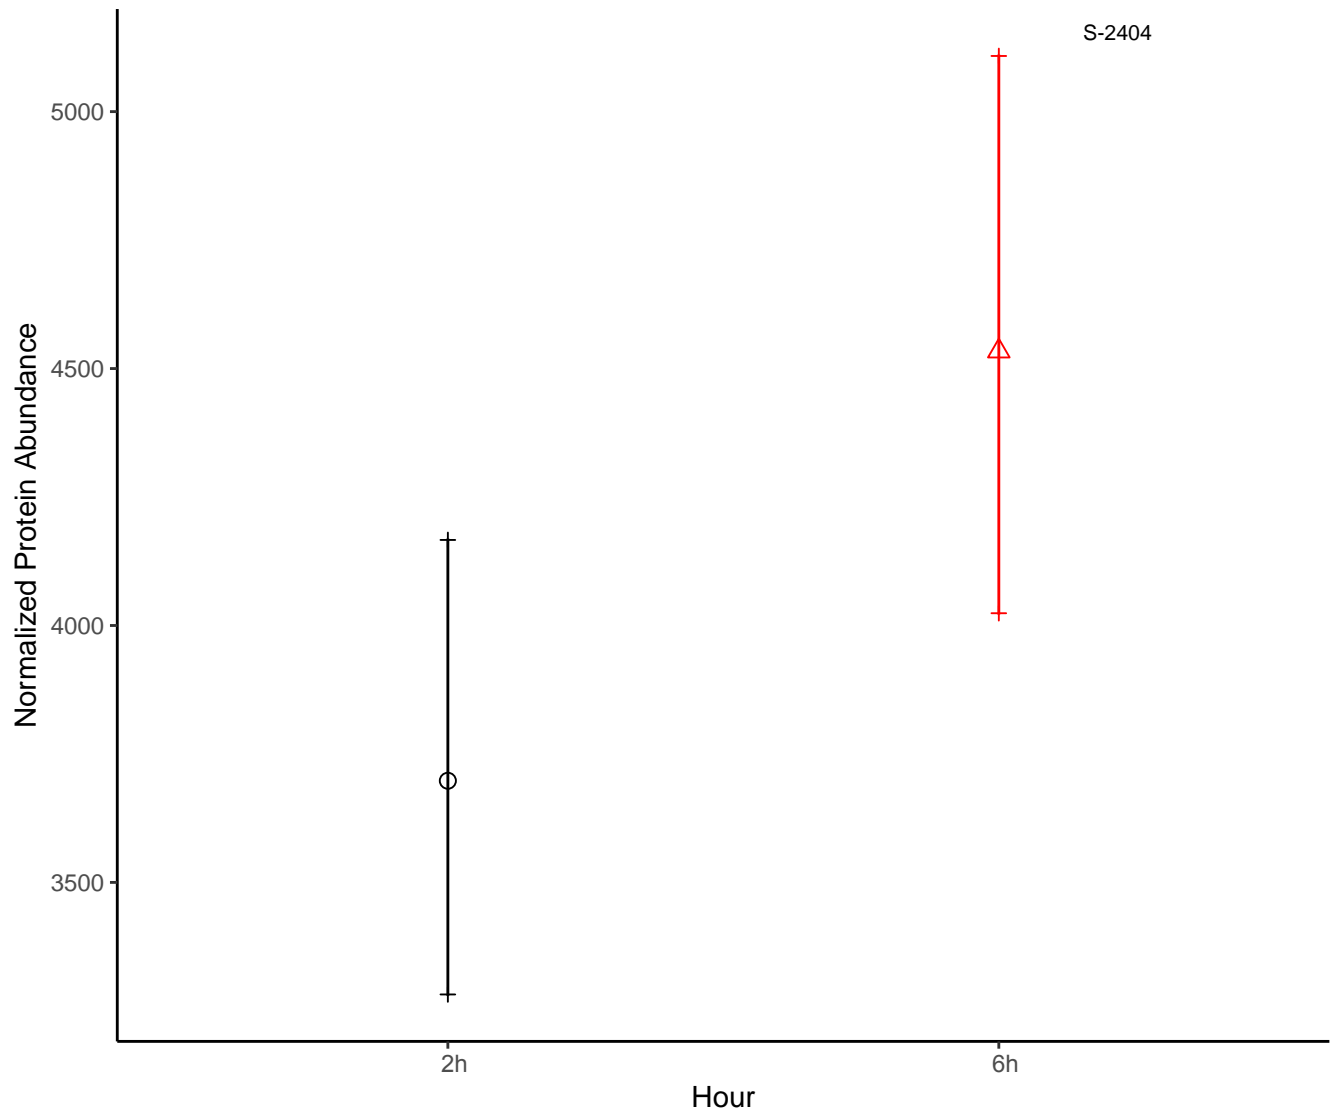

⊕ 2h

△ 6h

# SYD\_STAAM

S-2405

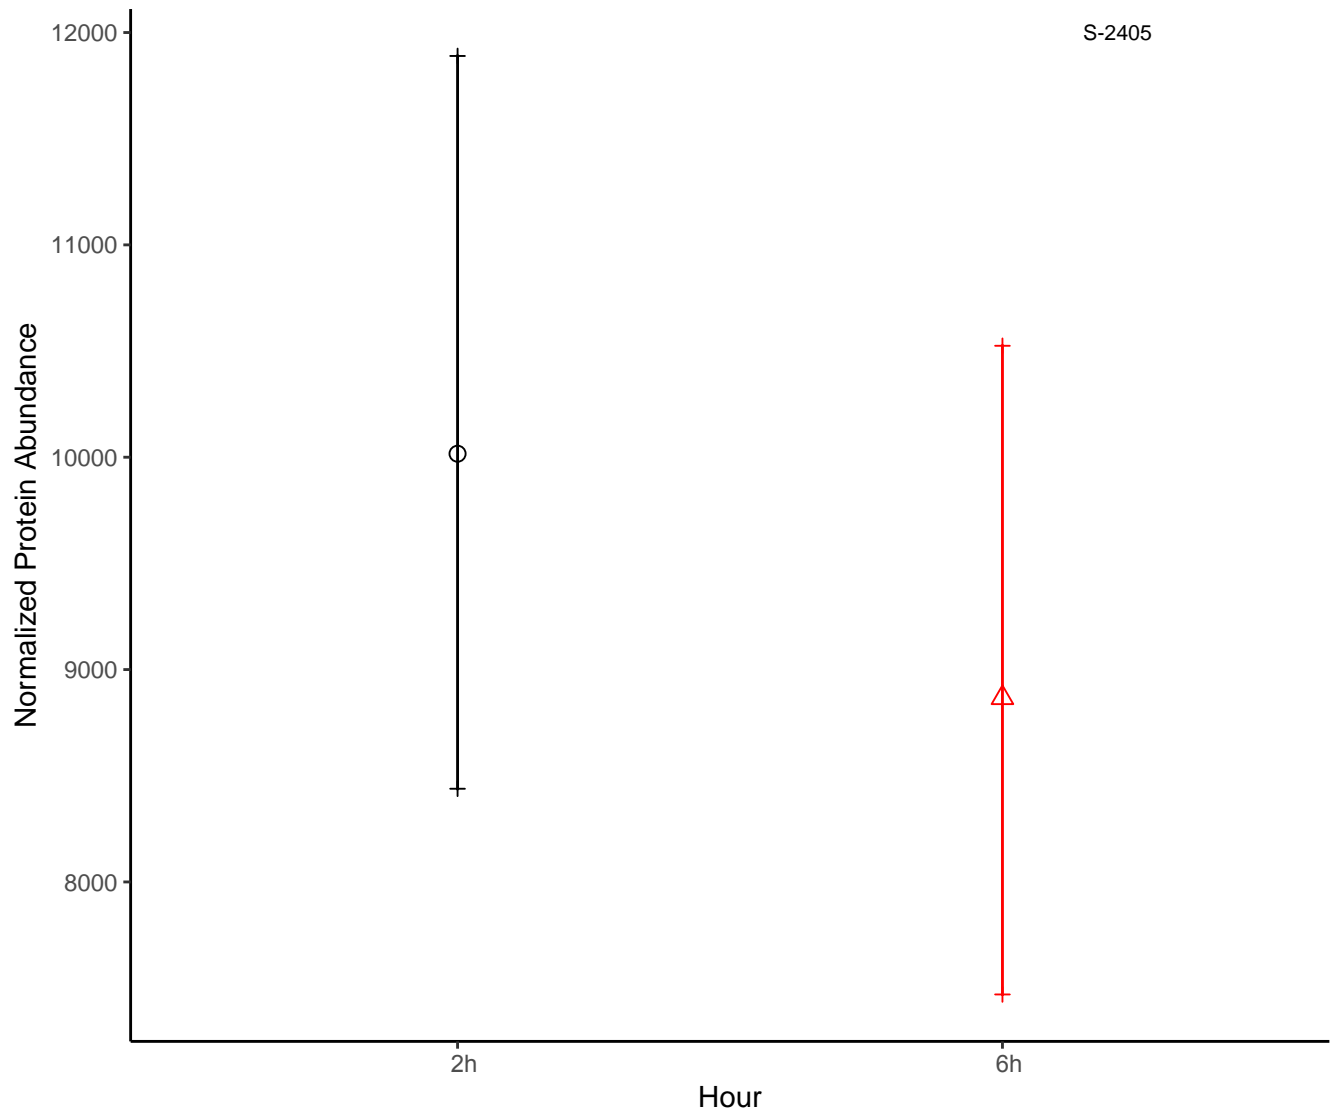

⊕ 2h

△ 6h

# SYE\_STAAM

S-2406

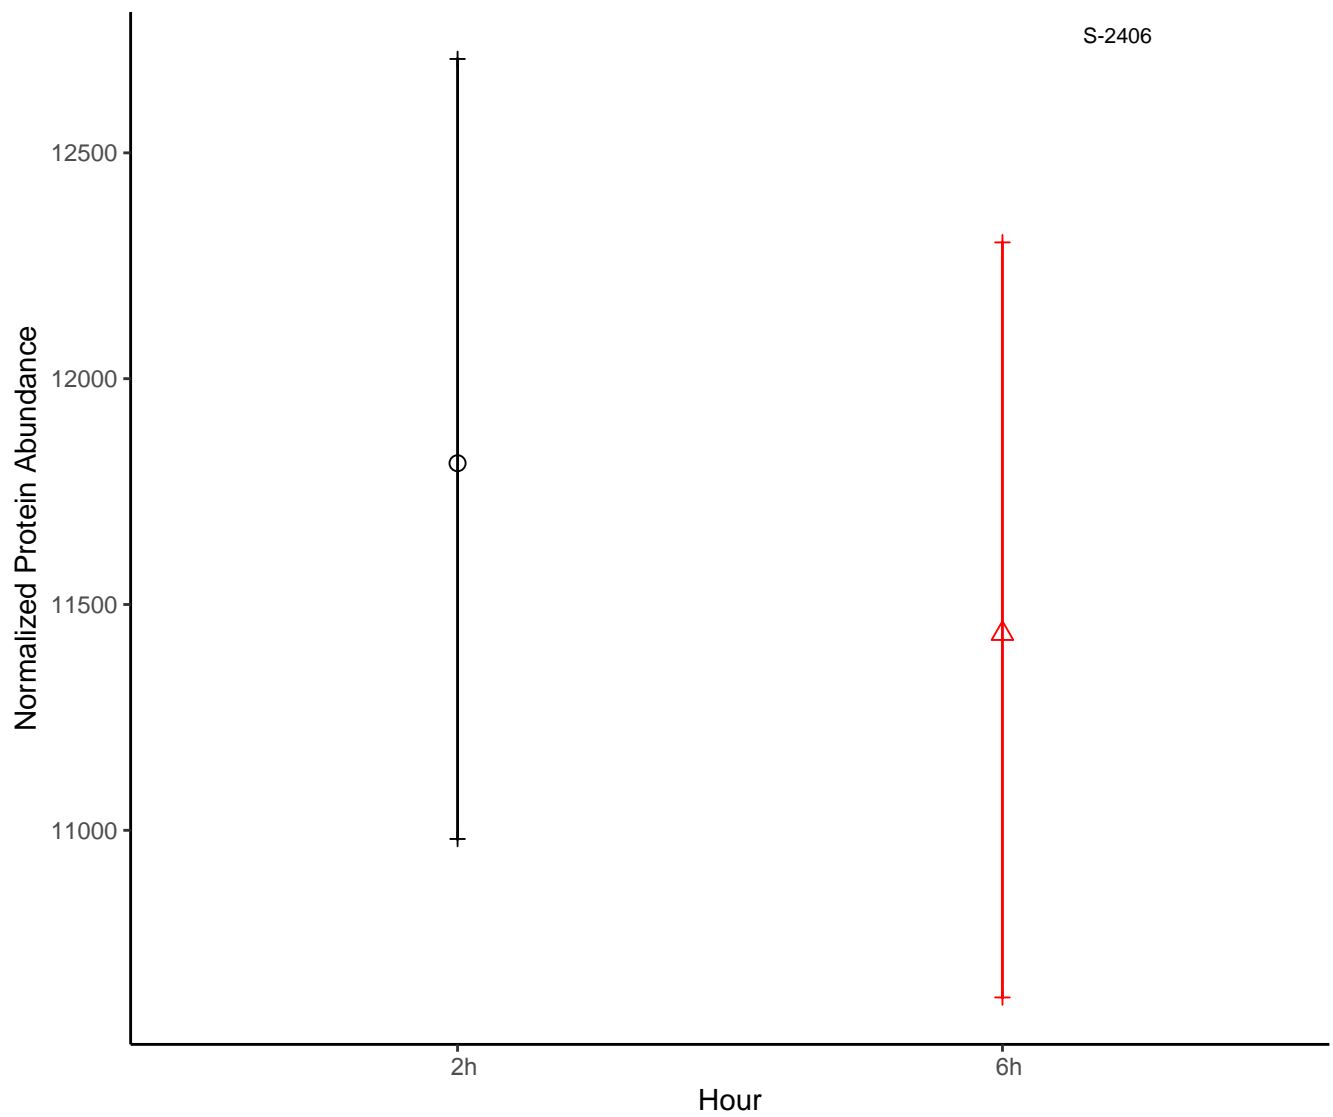

⊕ 2h

△ 6h

# SYFB\_STAAM

S-2407

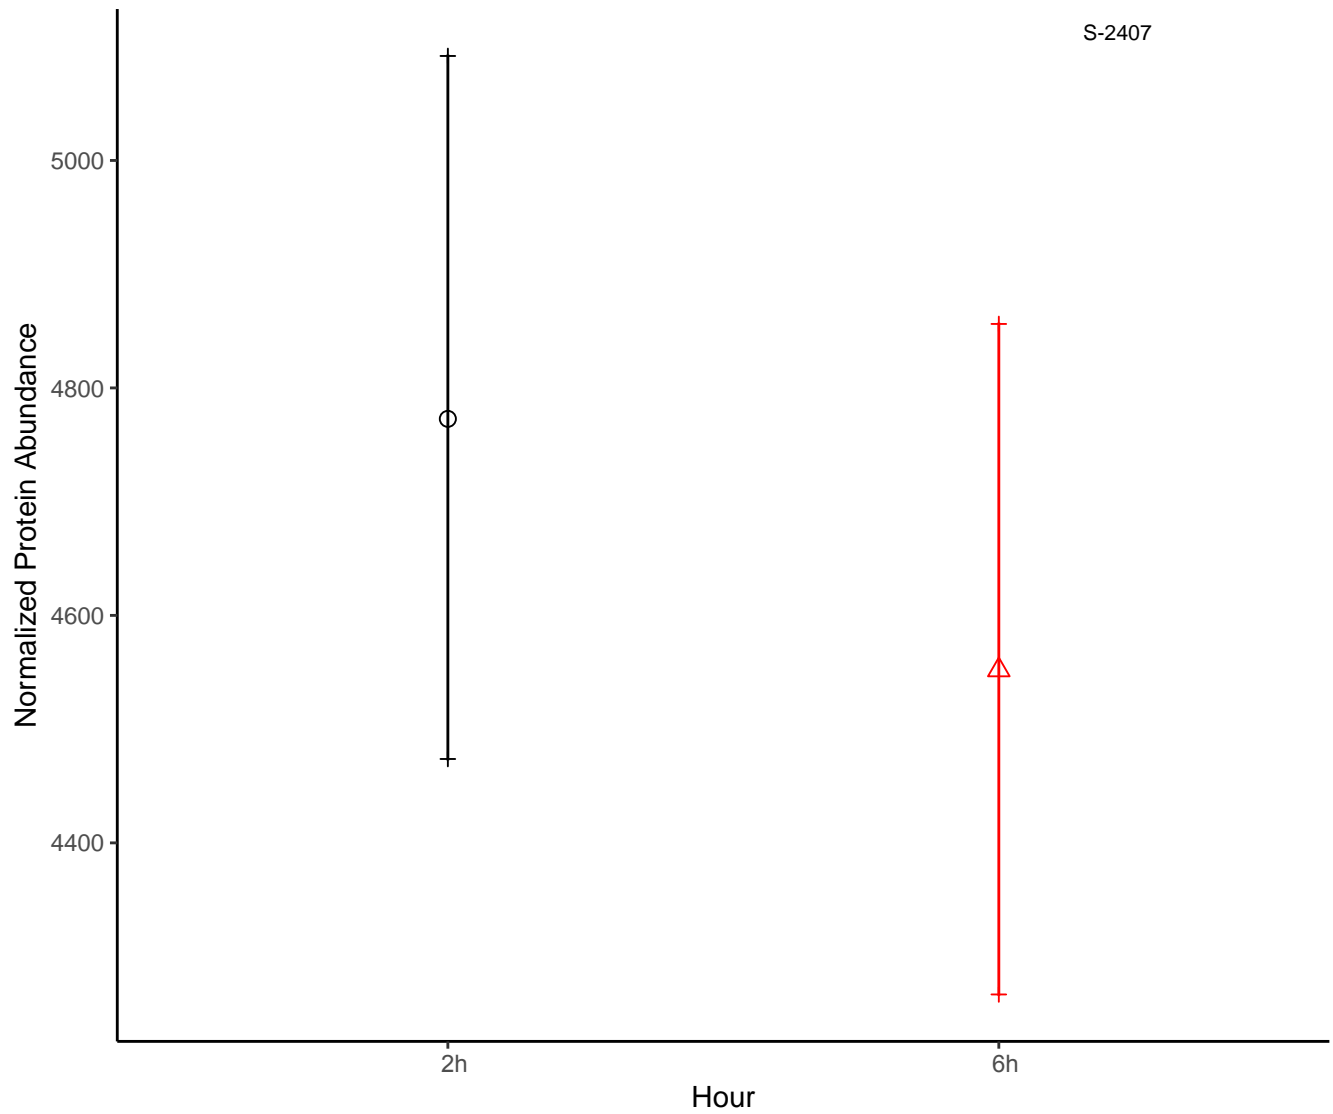

⊕ 2h

△ 6h

# SYG\_STAAM

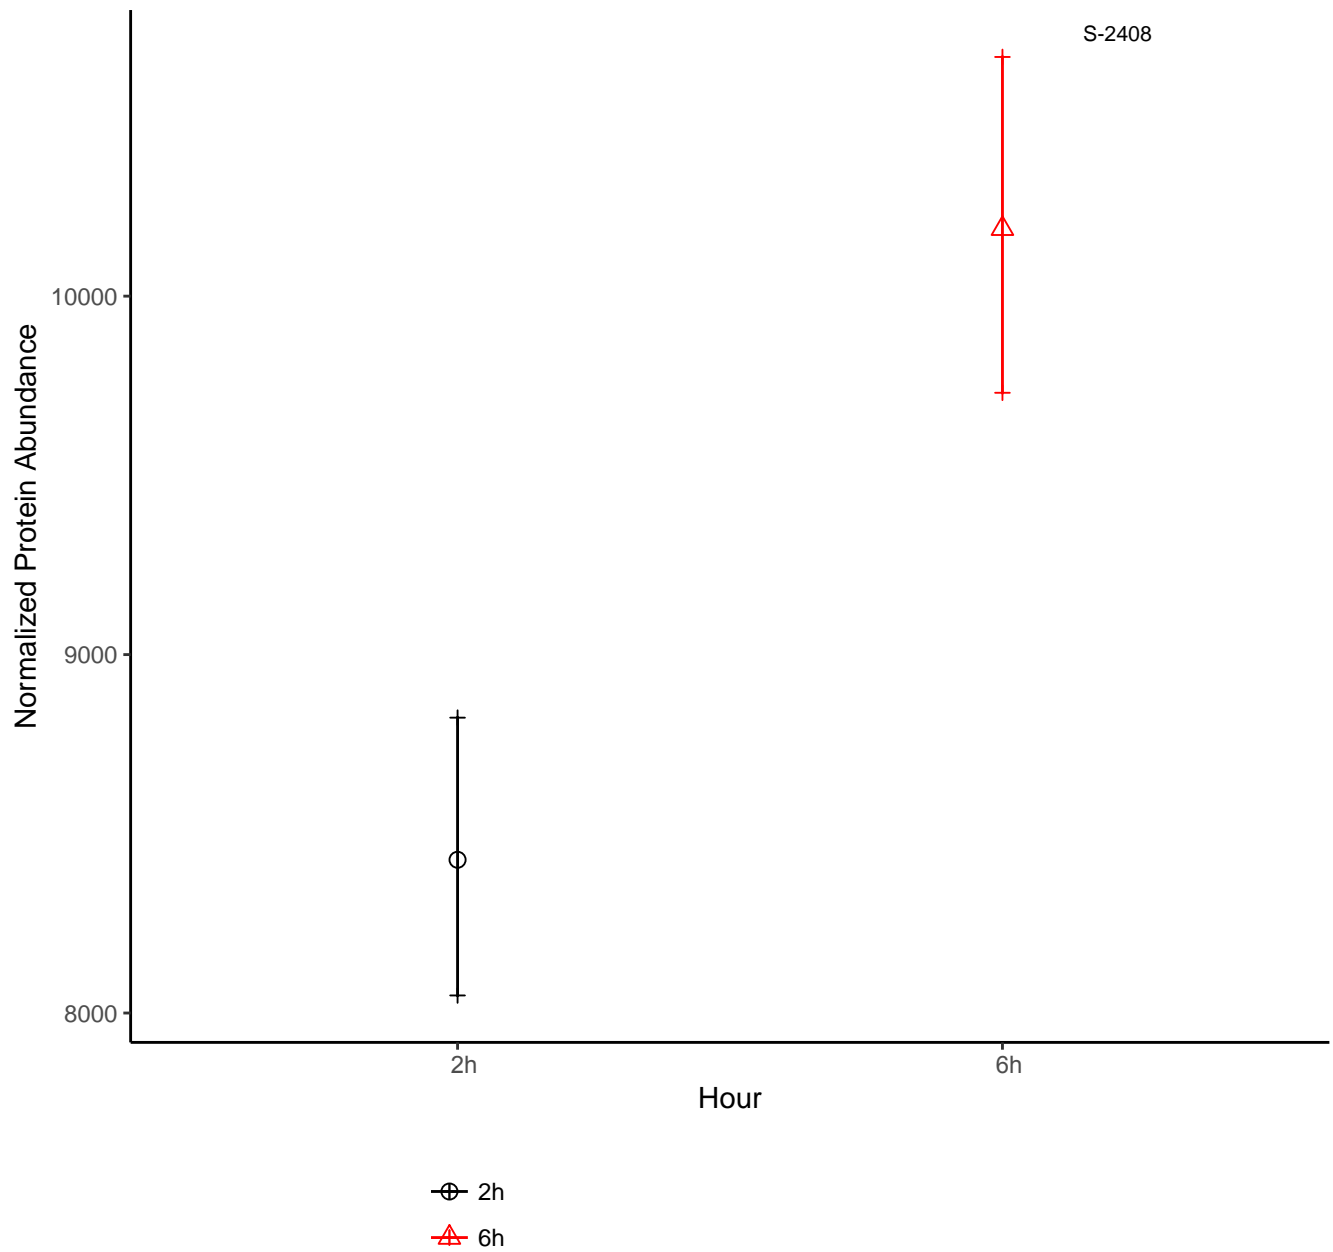



# SYH\_STAAM

S-2409

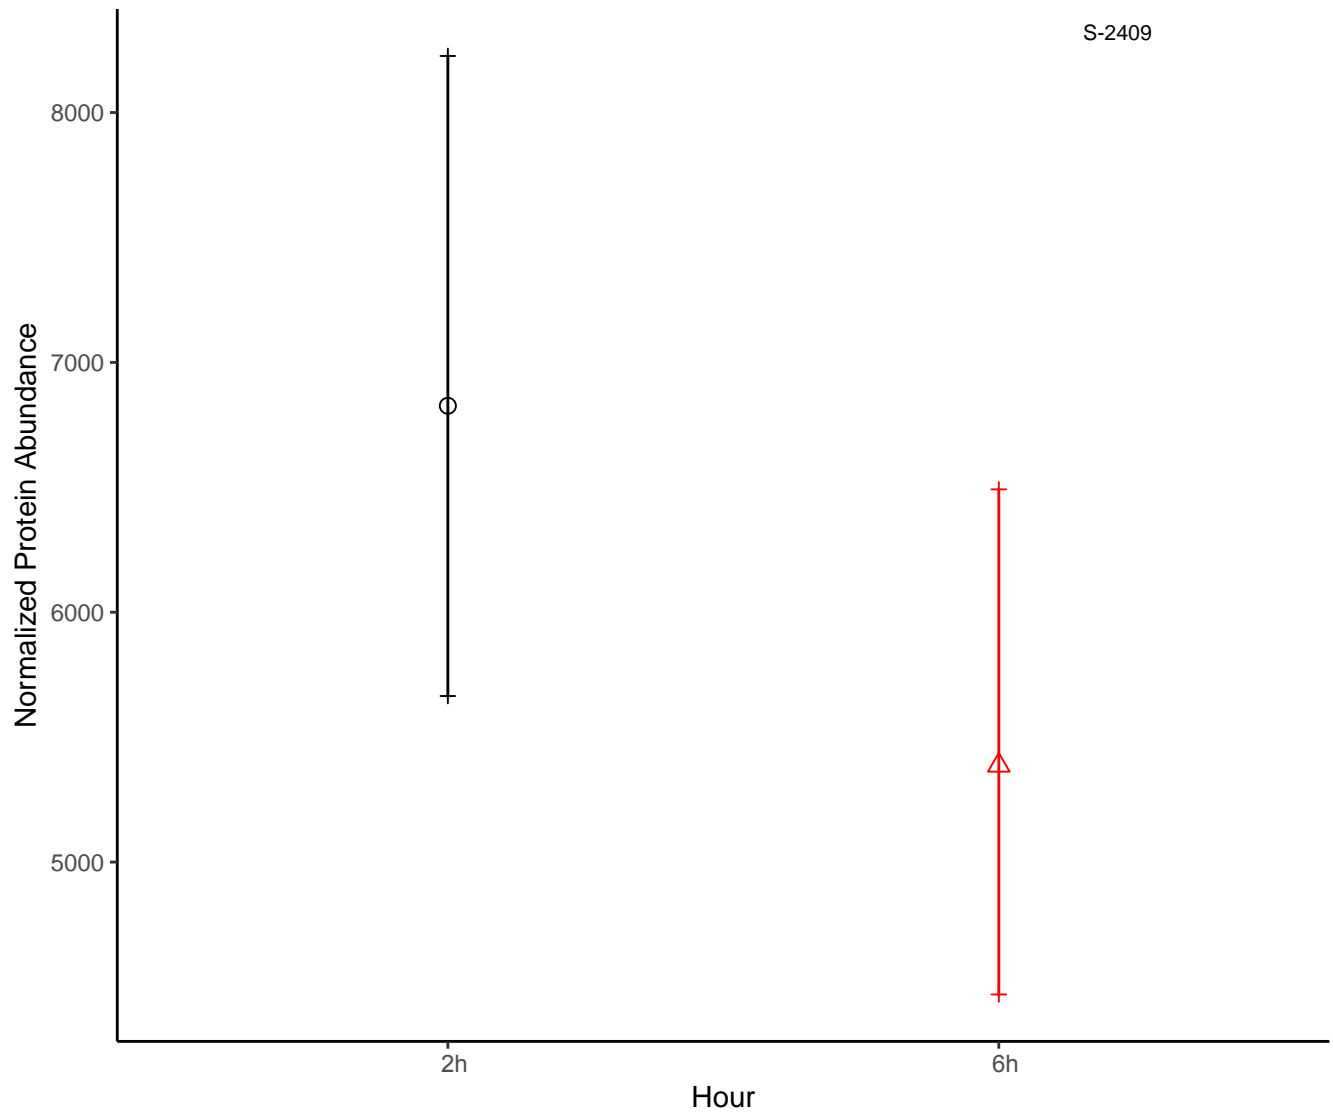

⊕ 2h

△ 6h

# SYI\_STAAM

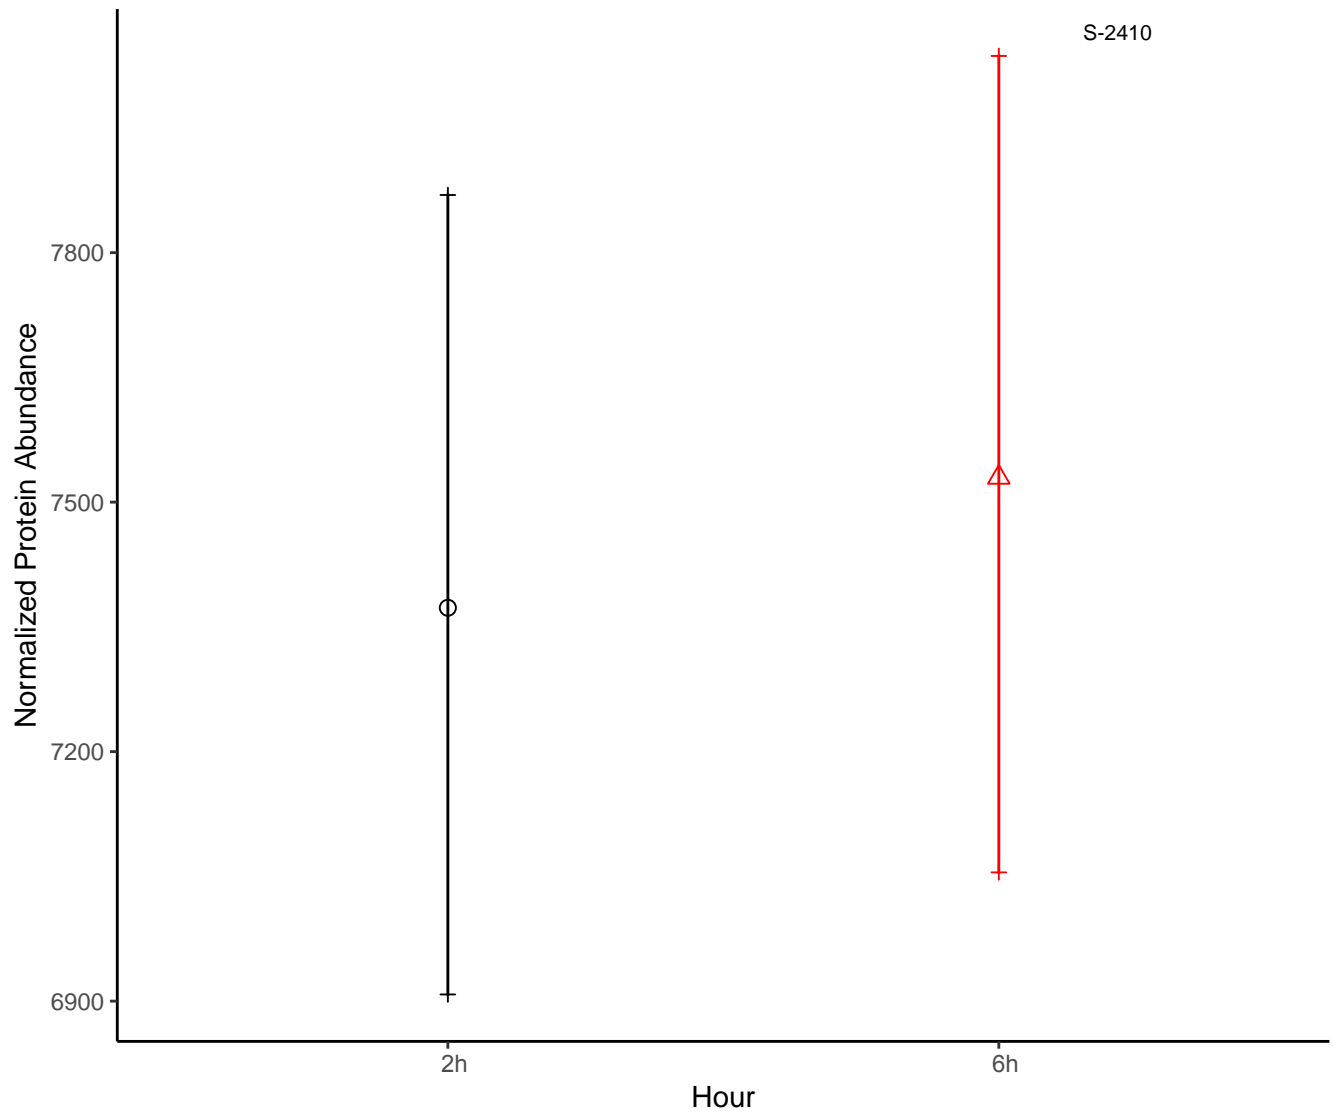

⊕ 2h

△ 6h

# SYK\_STAAM

S-2411

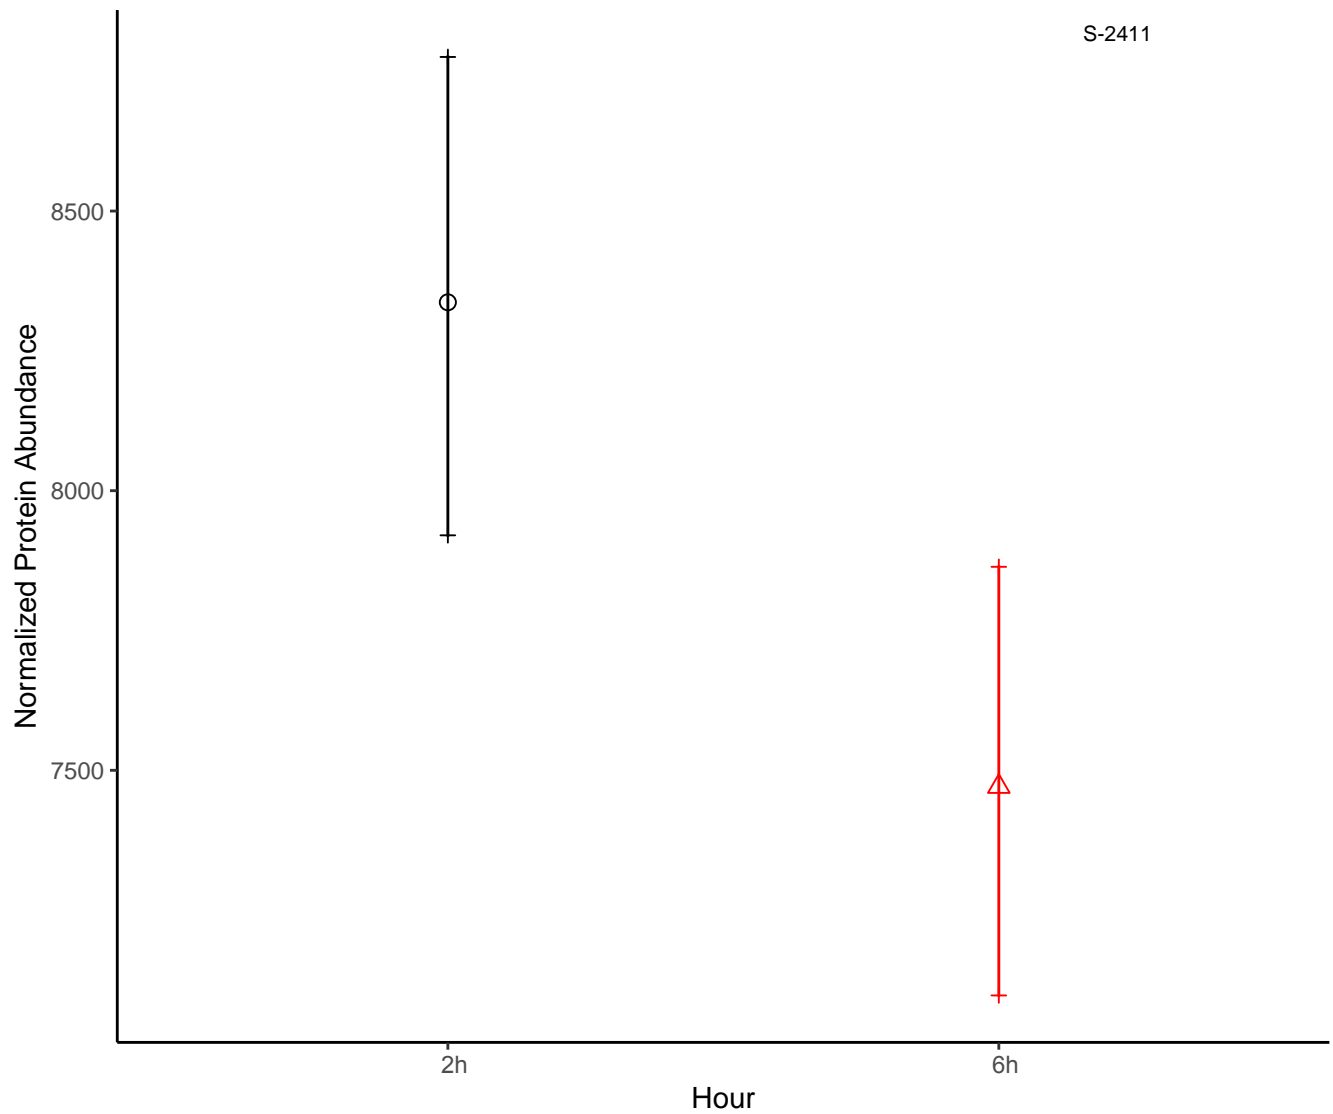

⊕ 2h

△ 6h

# SYM\_STAAM

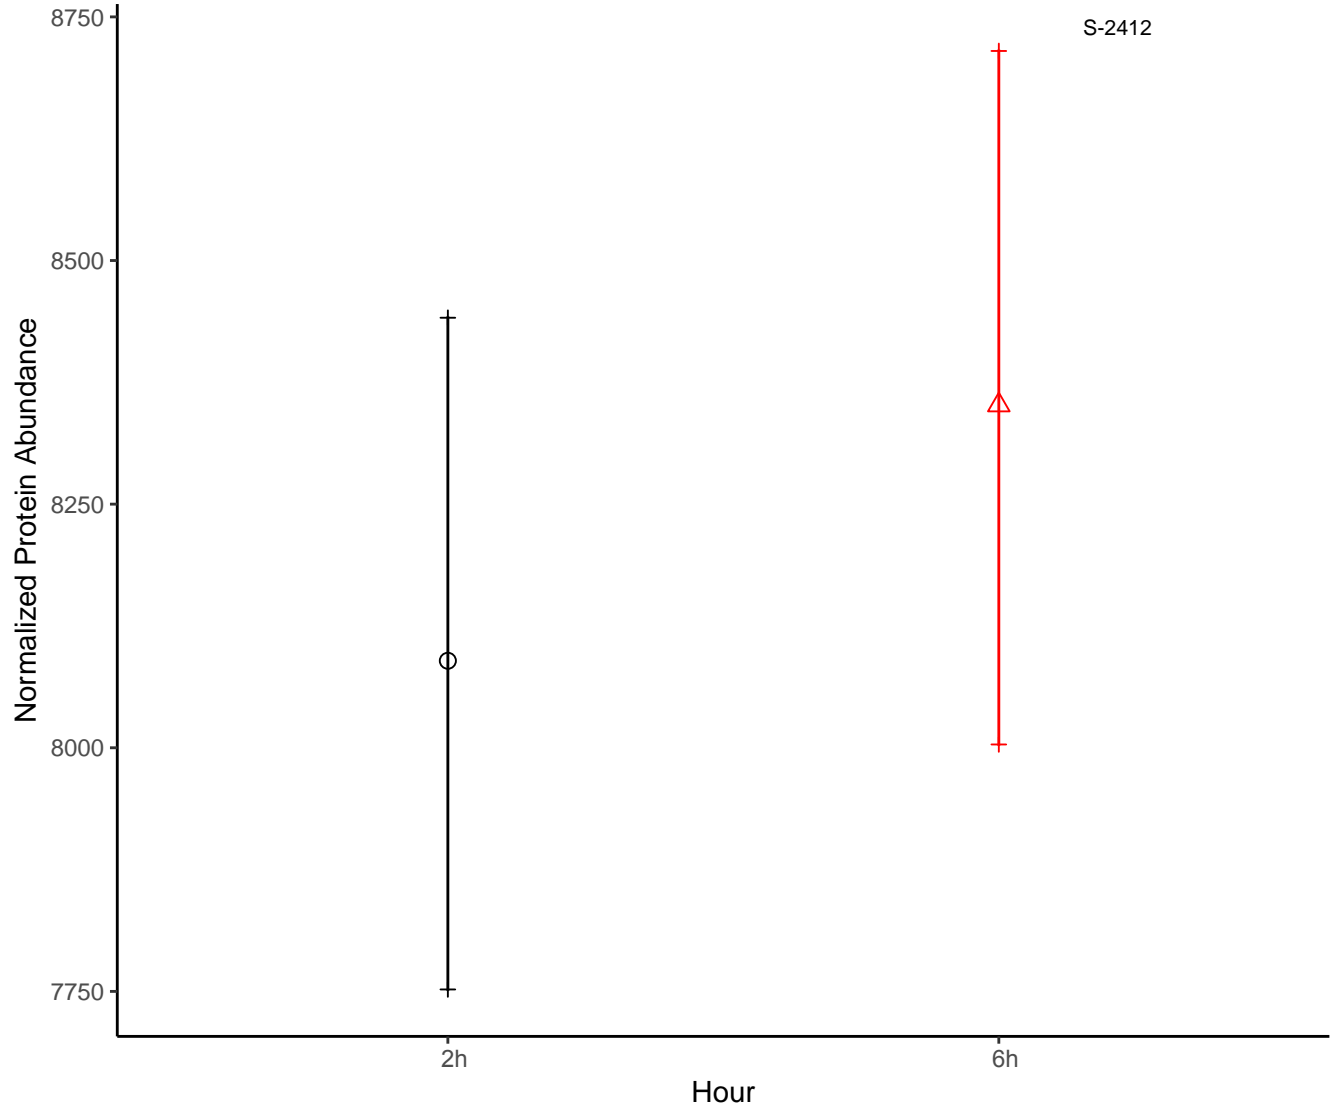

⊕ 2h

△ 6h

# SYN\_STAAM

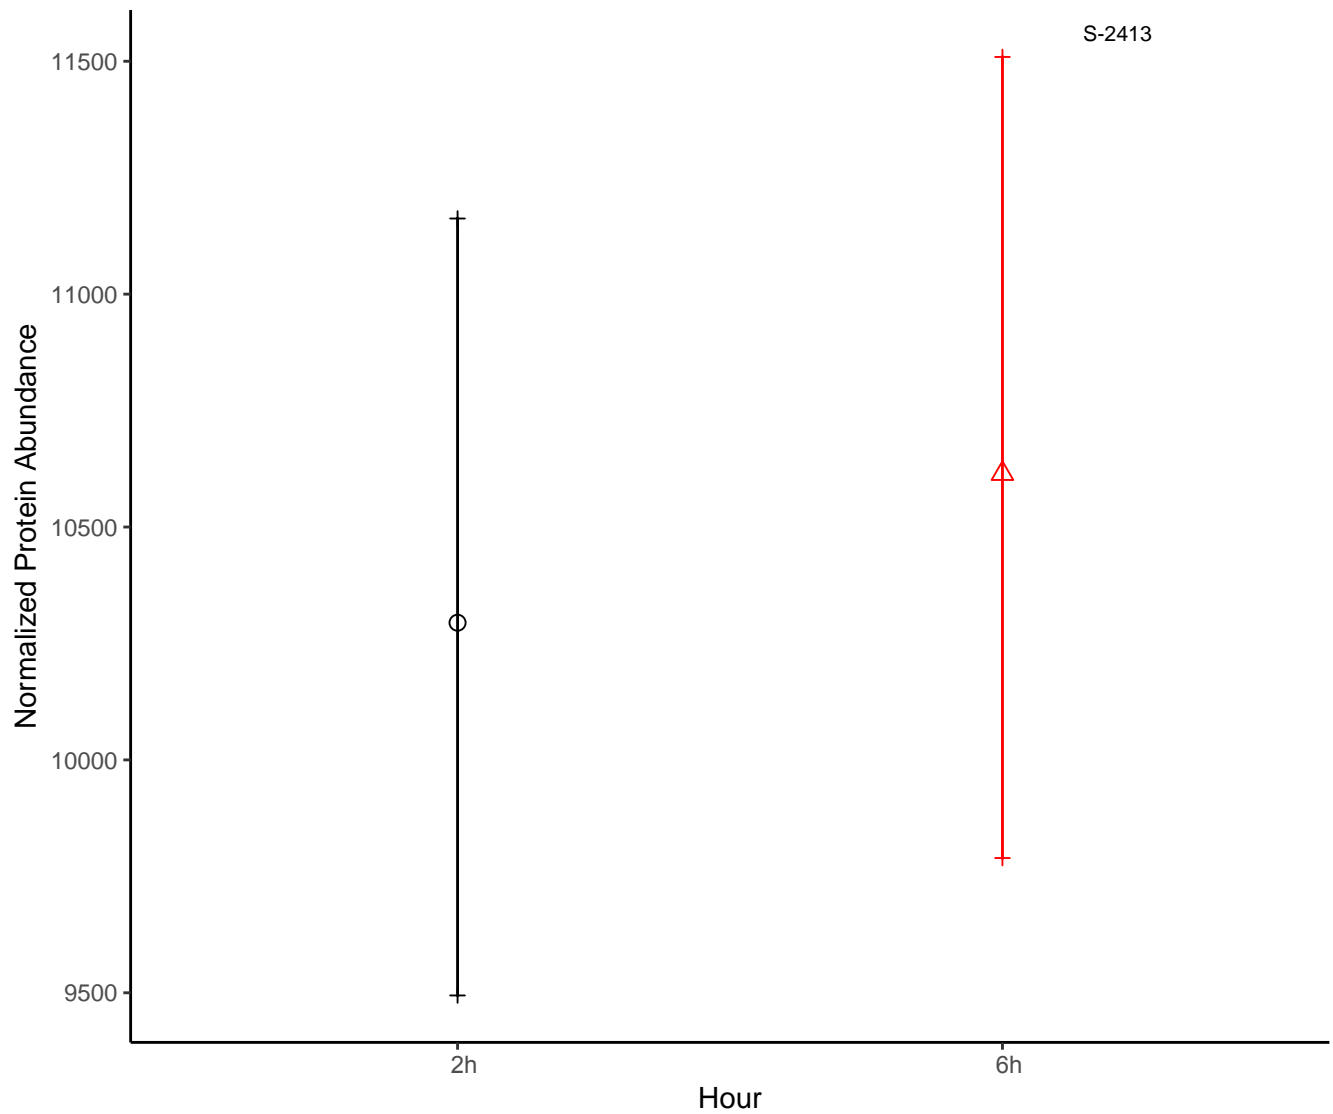

⊕ 2h

△ 6h

# SYP\_STAAM

S-2414

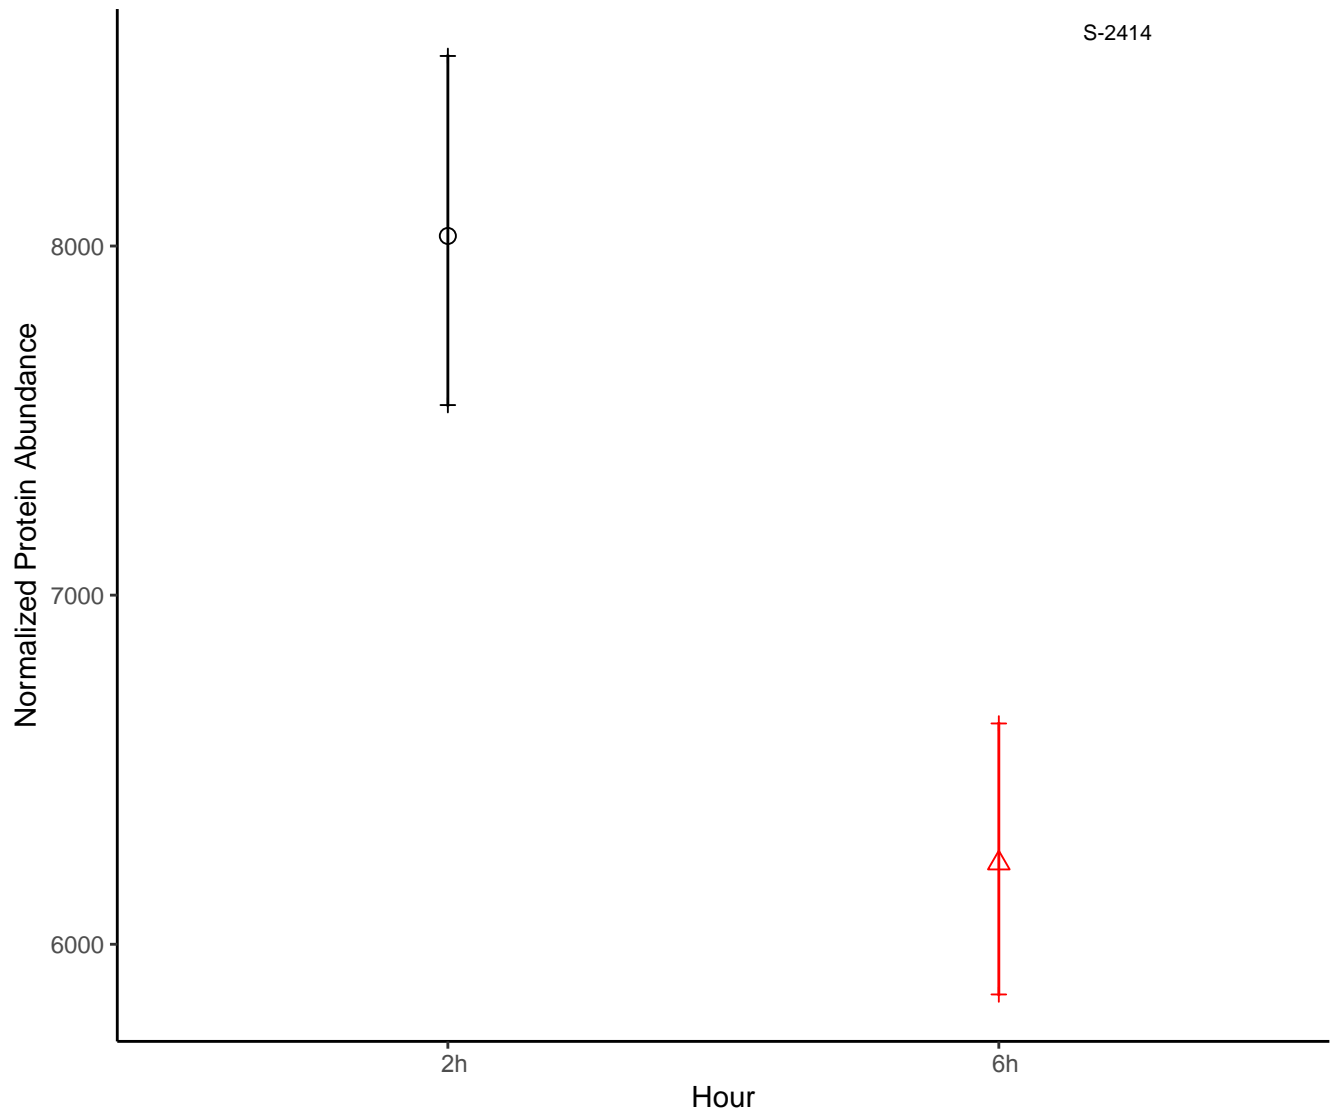

⊕ 2h

△ 6h

# SYR\_STAAM

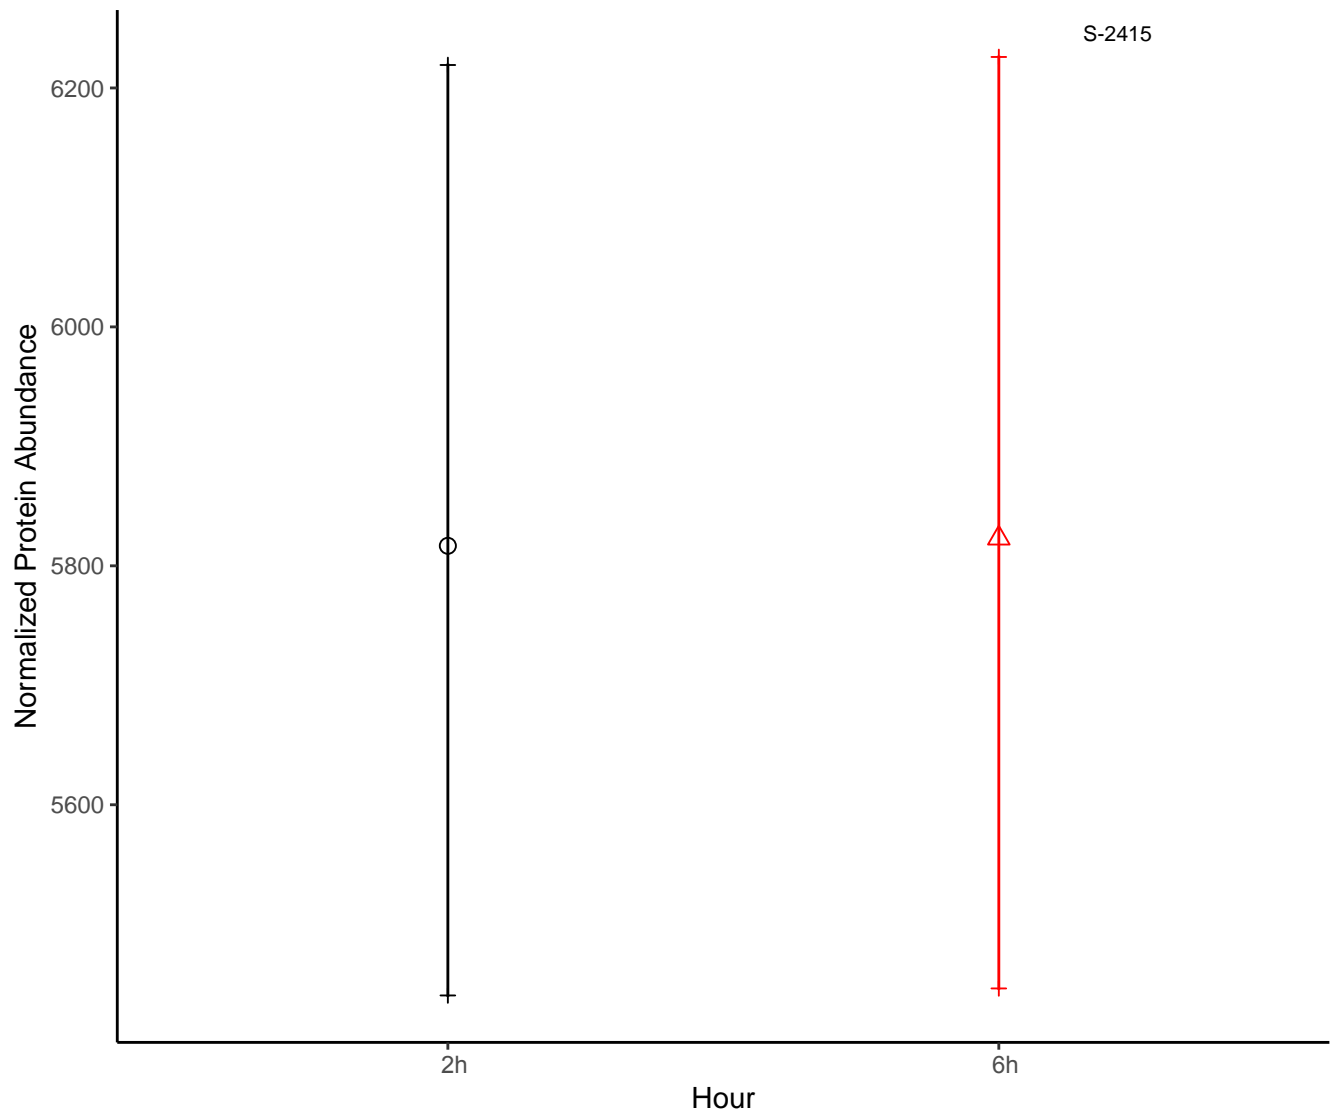

⊕ 2h

△ 6h

# SYS\_STAAM

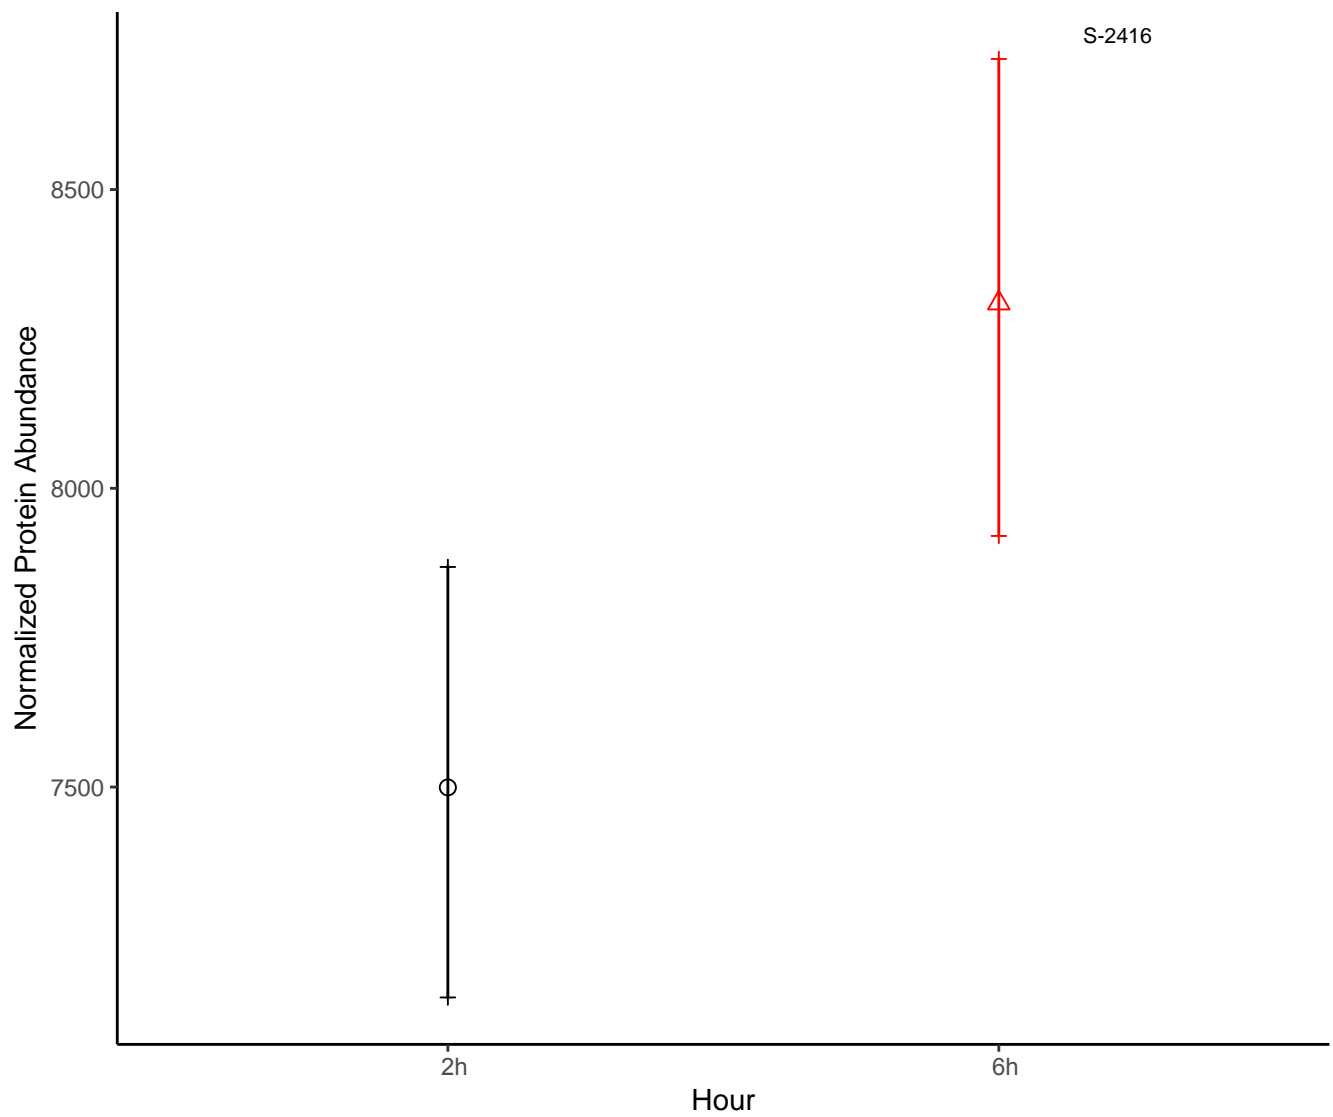

⊕ 2h

△ 6h



# SYT\_STAAM

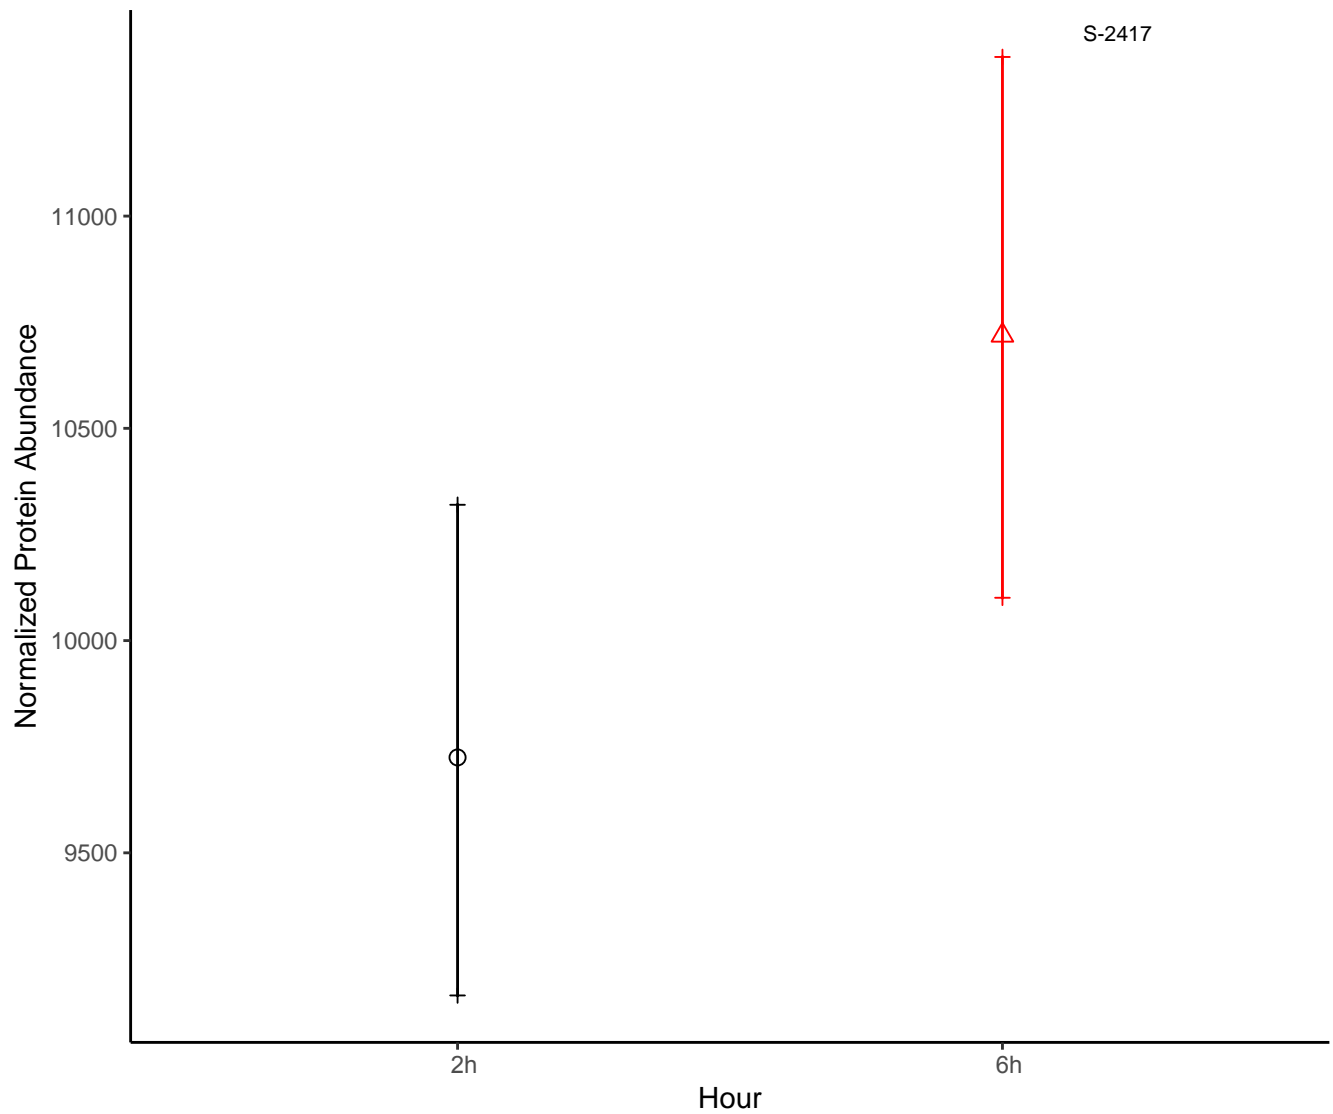

⊕ 2h

△ 6h

# SYV\_STAAM

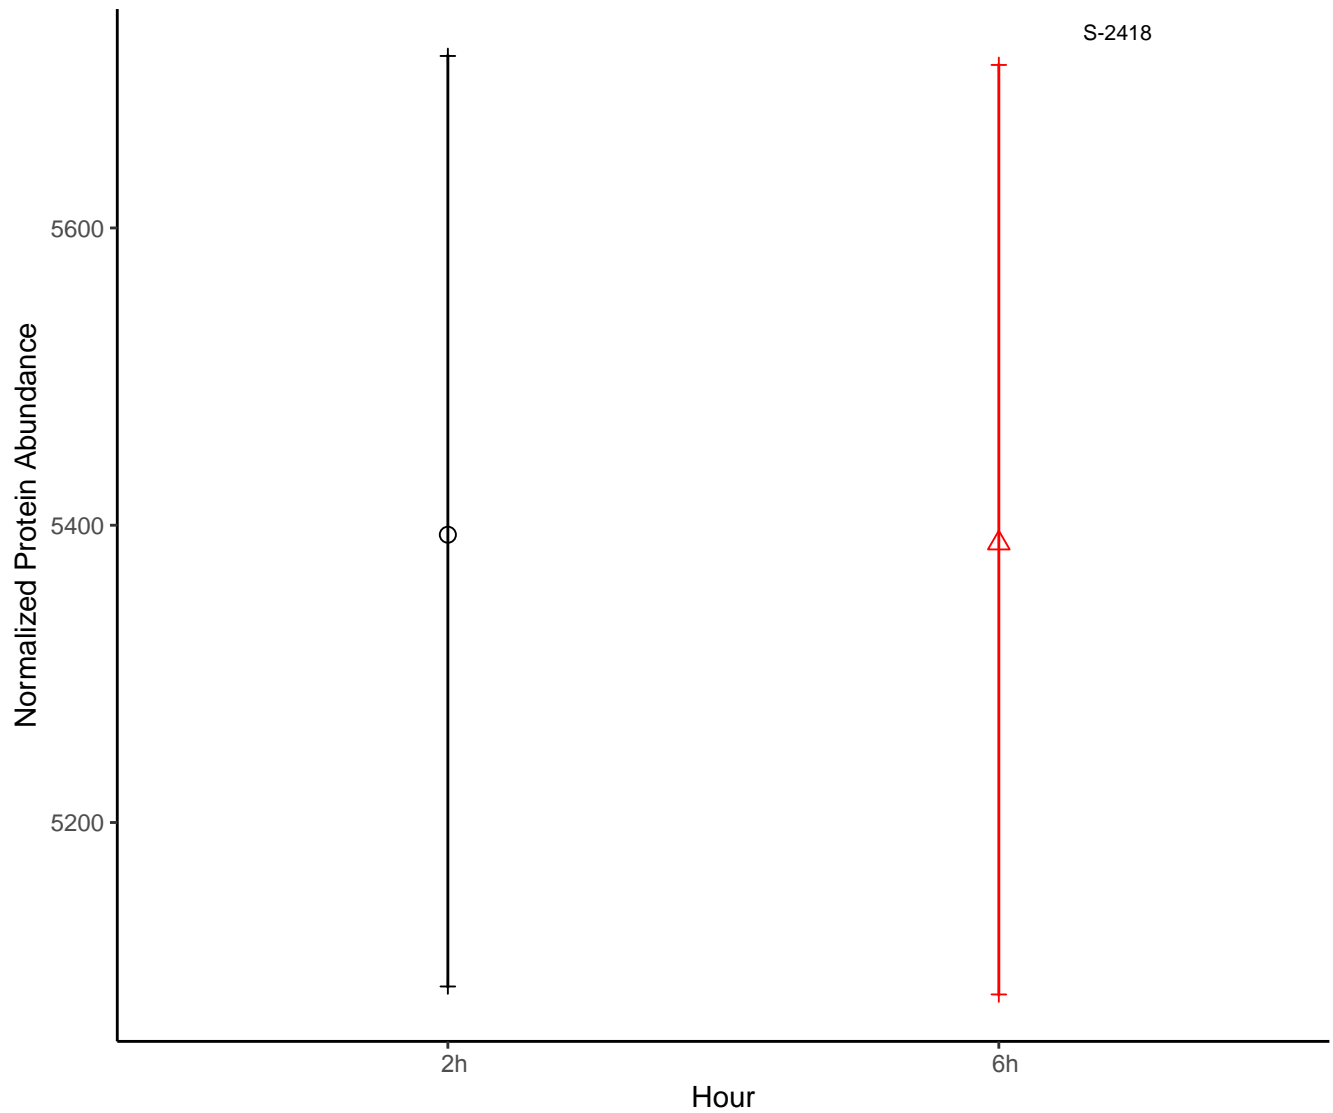

S-2418

⊕ 2h

△ 6h

# SYW\_STAAM

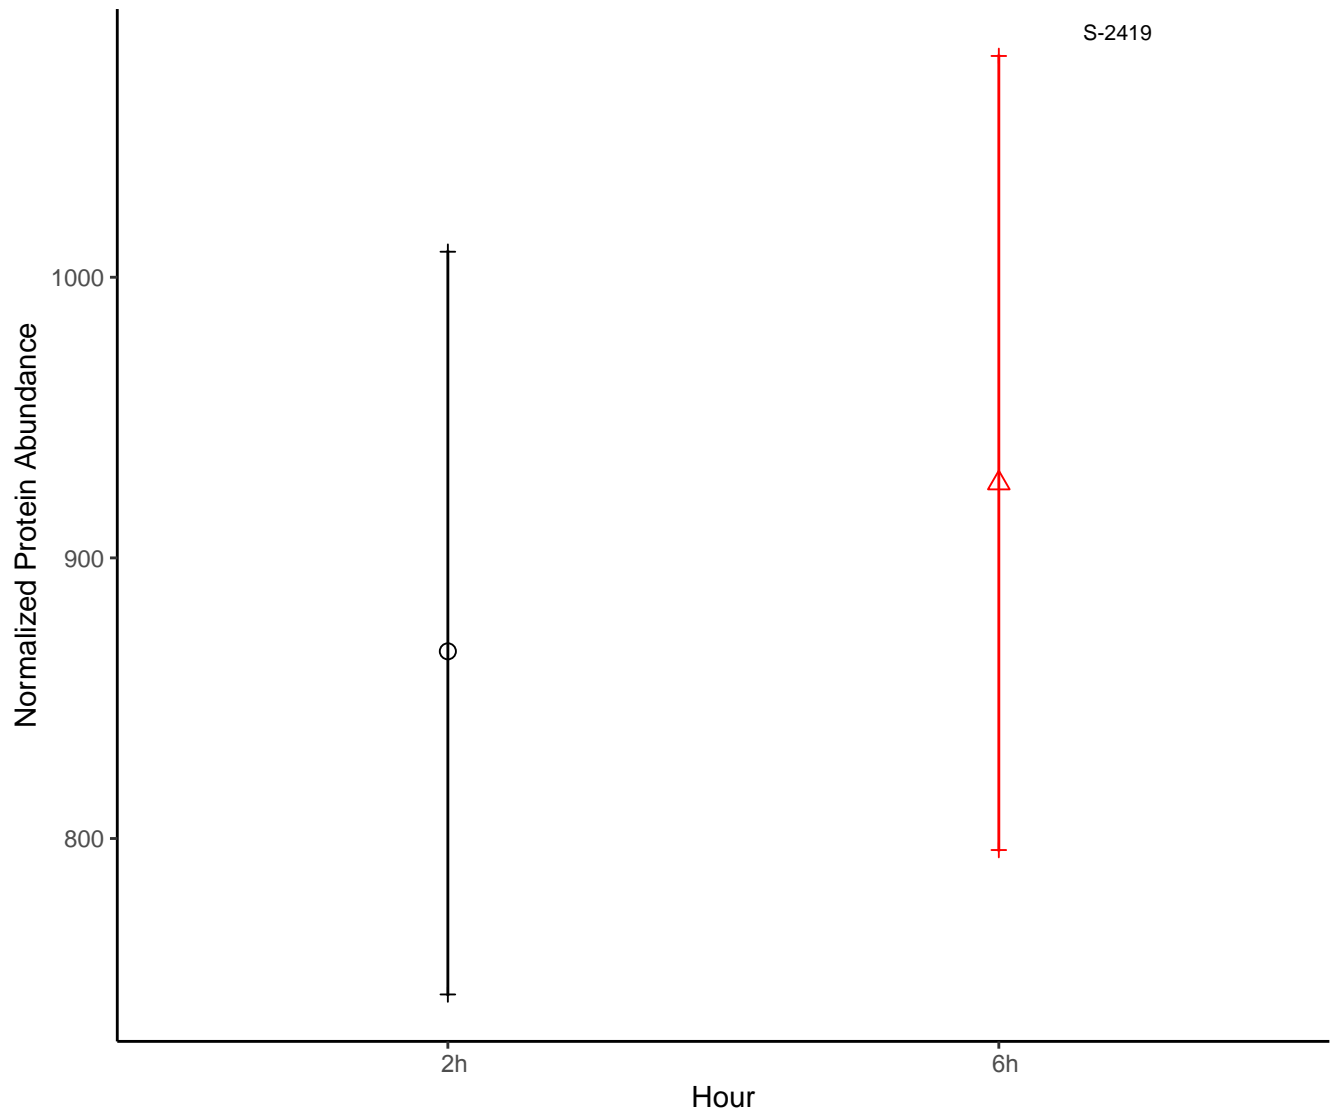

⊕ 2h

△ 6h

# SYT\_STAAM

S-2420

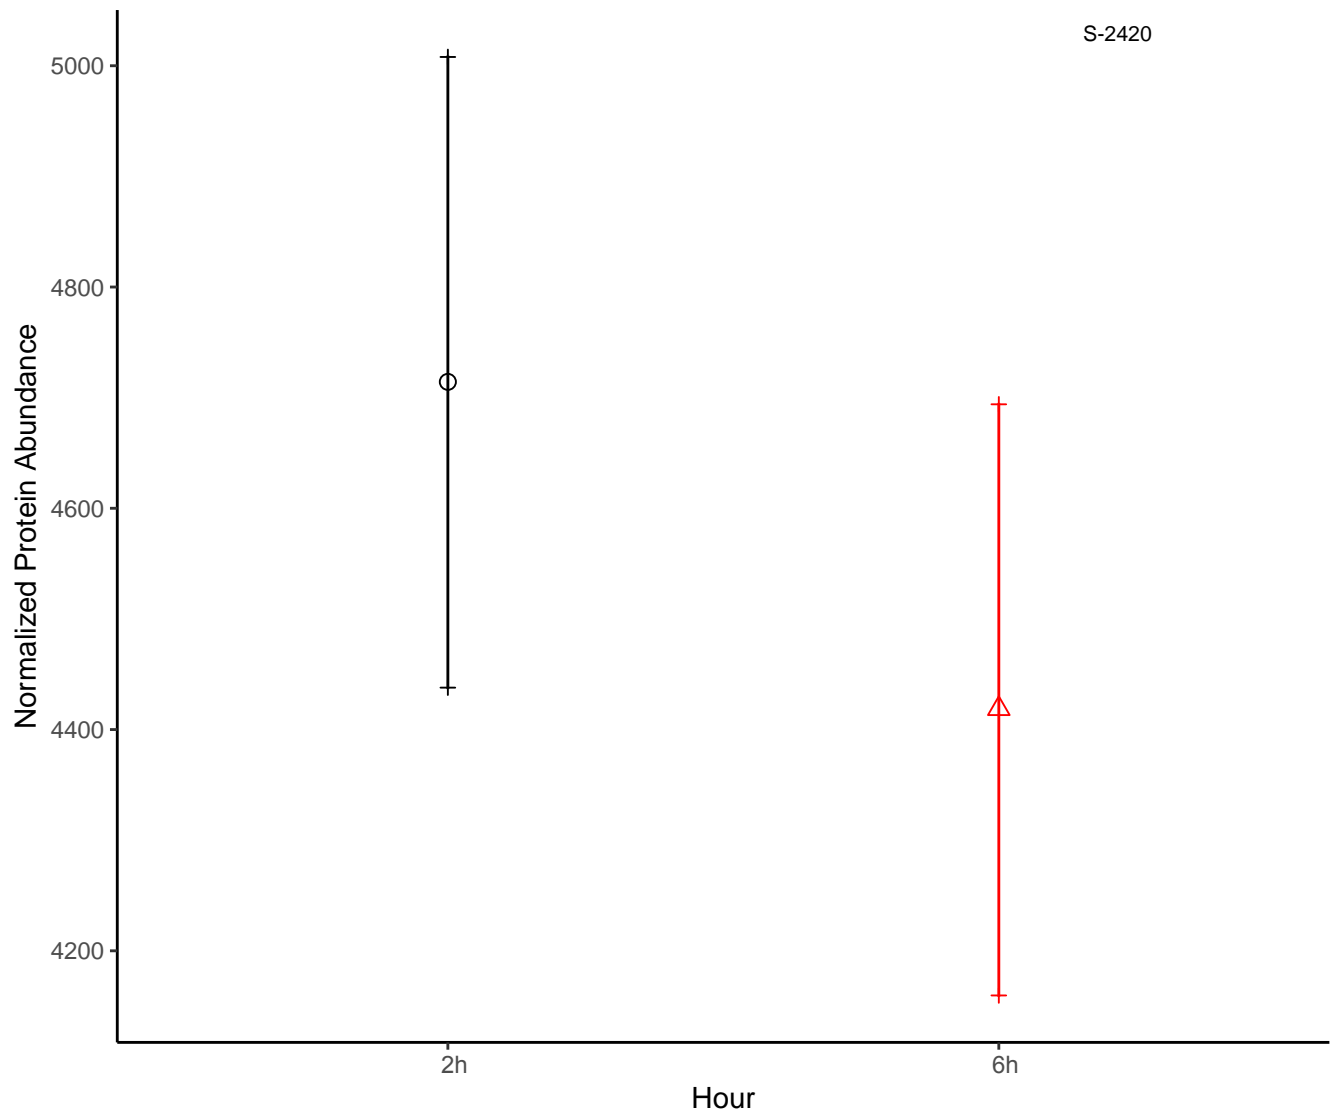

⊕ 2h

△ 6h

# T431\_STAAM

S-2421

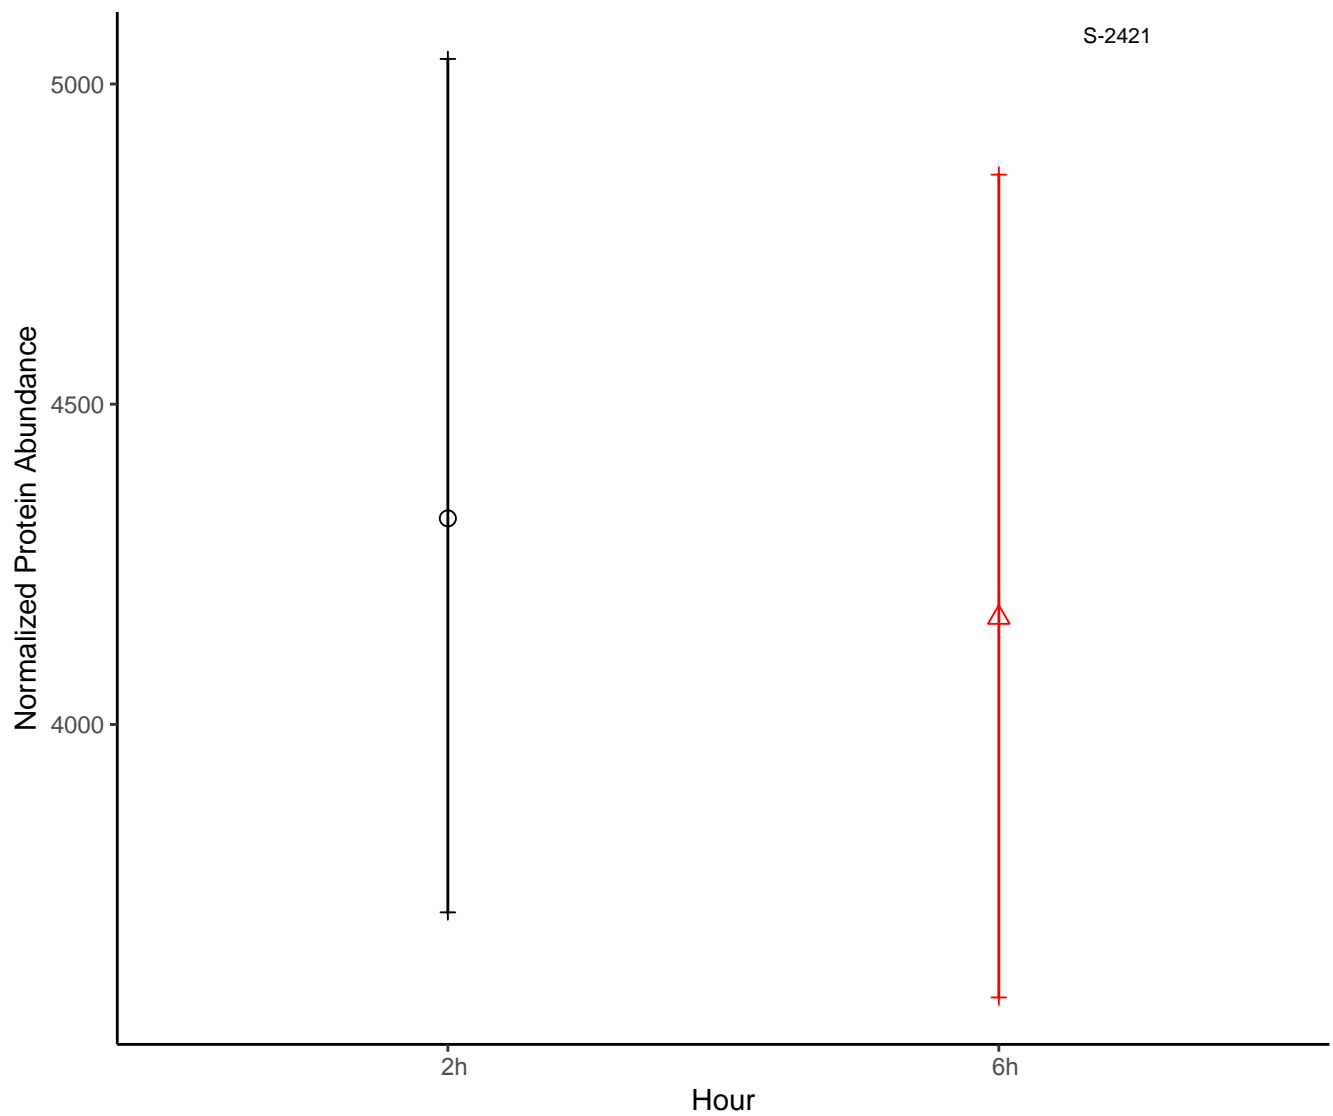

⊕ 2h

△ 6h

# TADA\_STAAM

S-2422

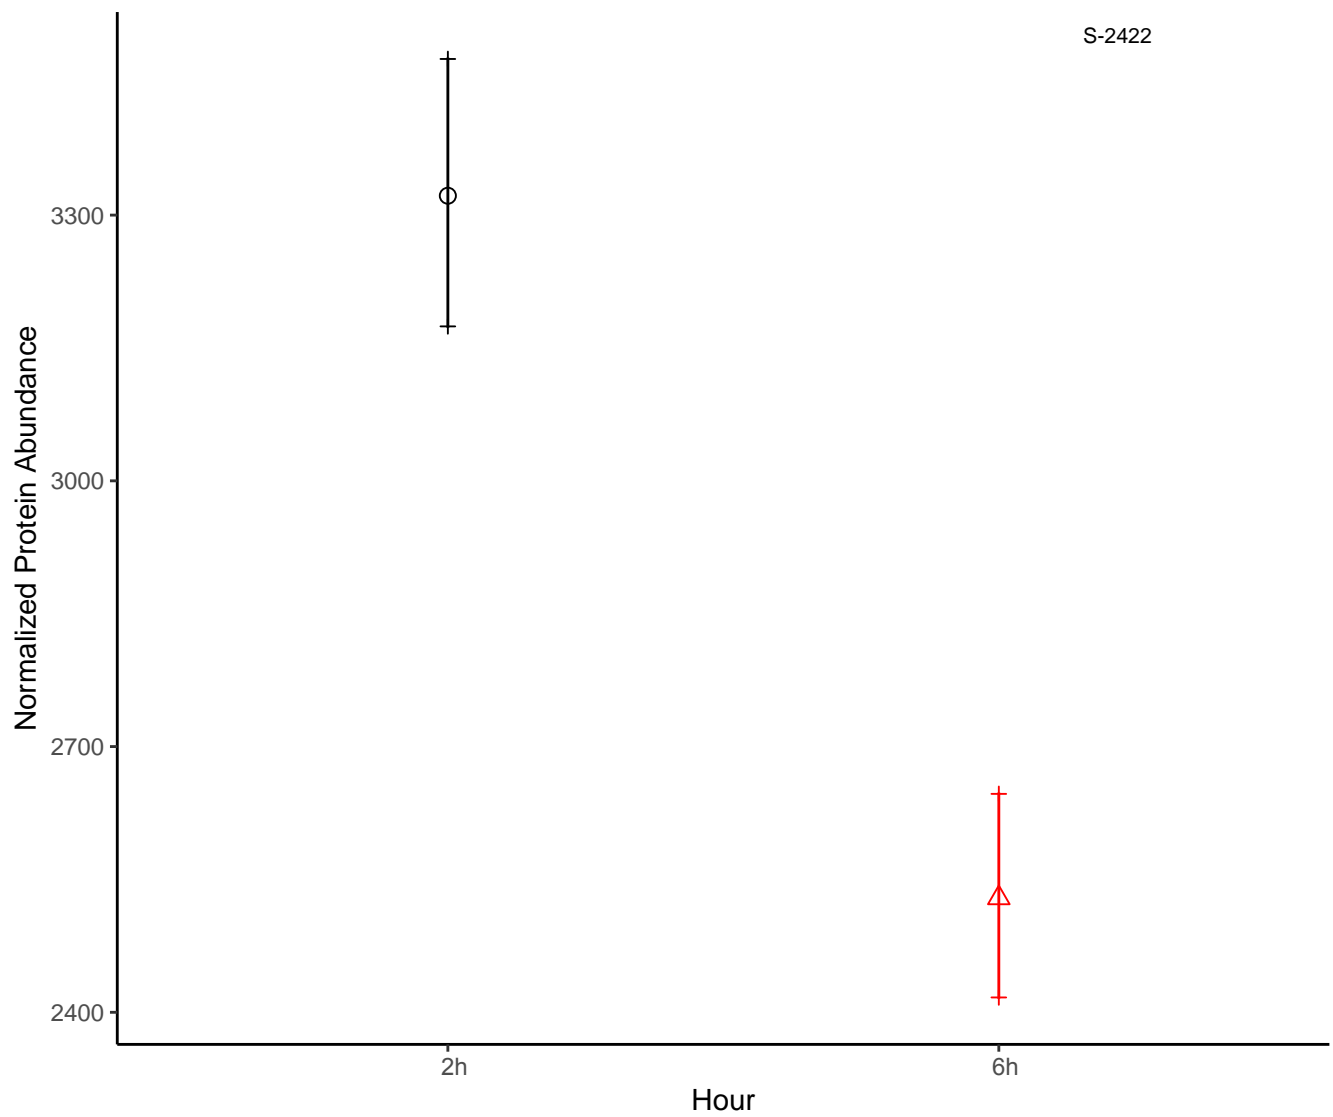

⊕ 2h

△ 6h

# TAGA\_STAAM

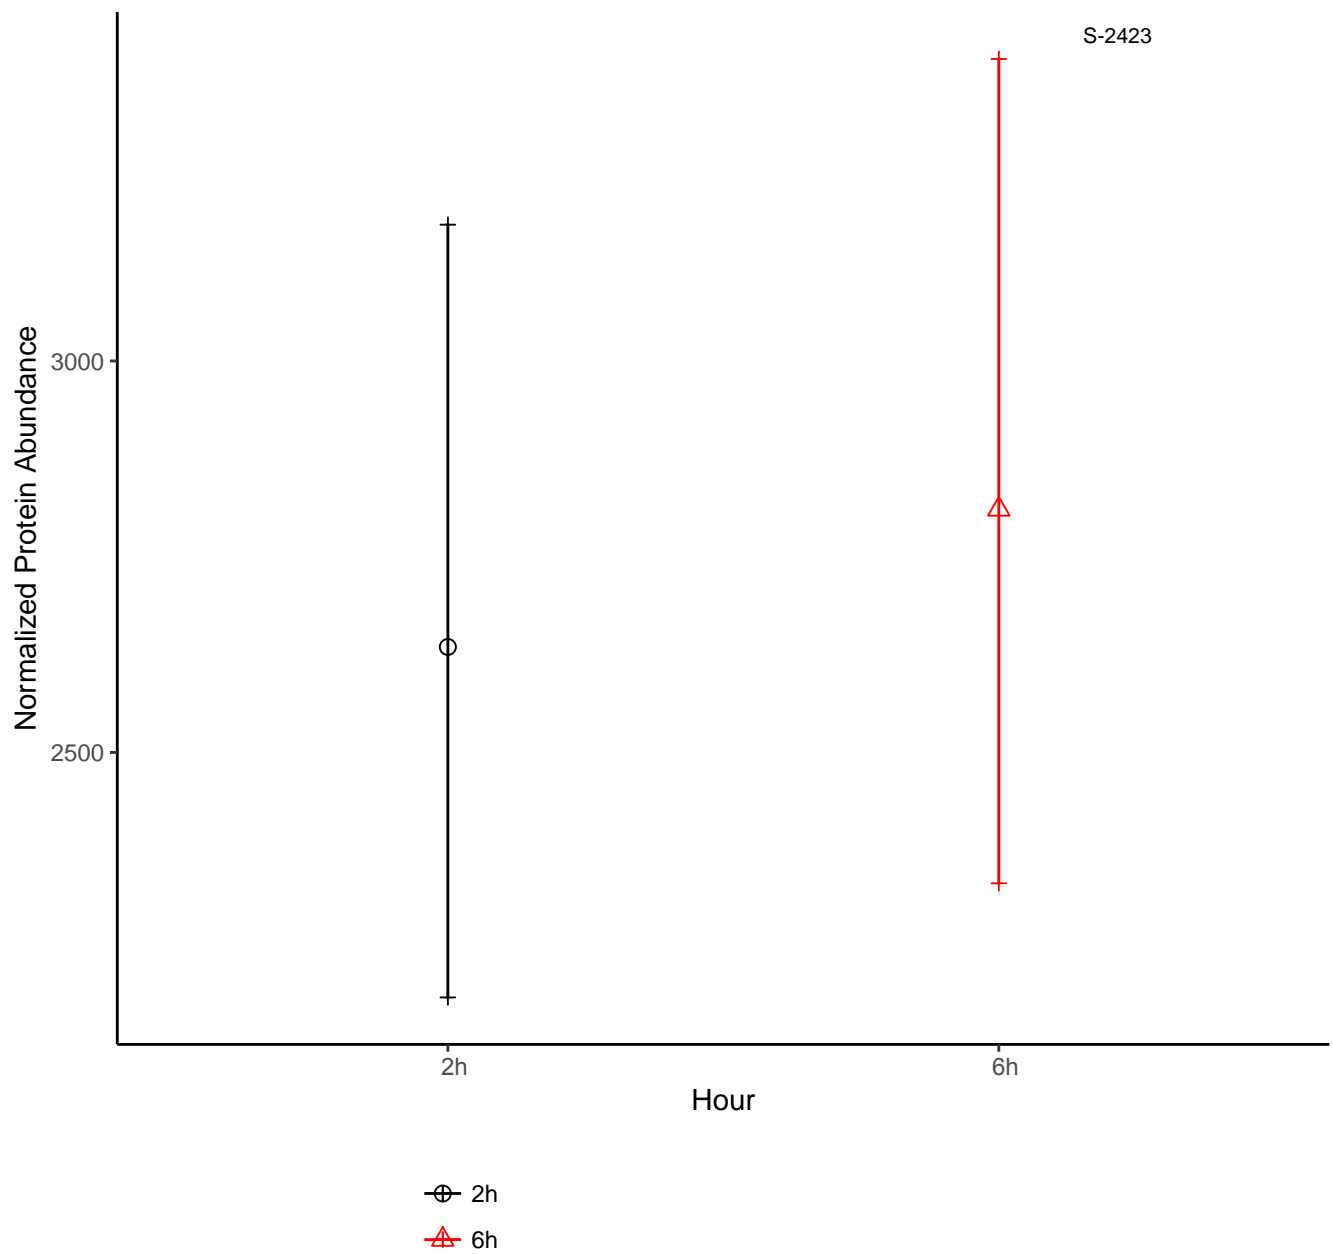

# TDCB\_STAAM

S-2424

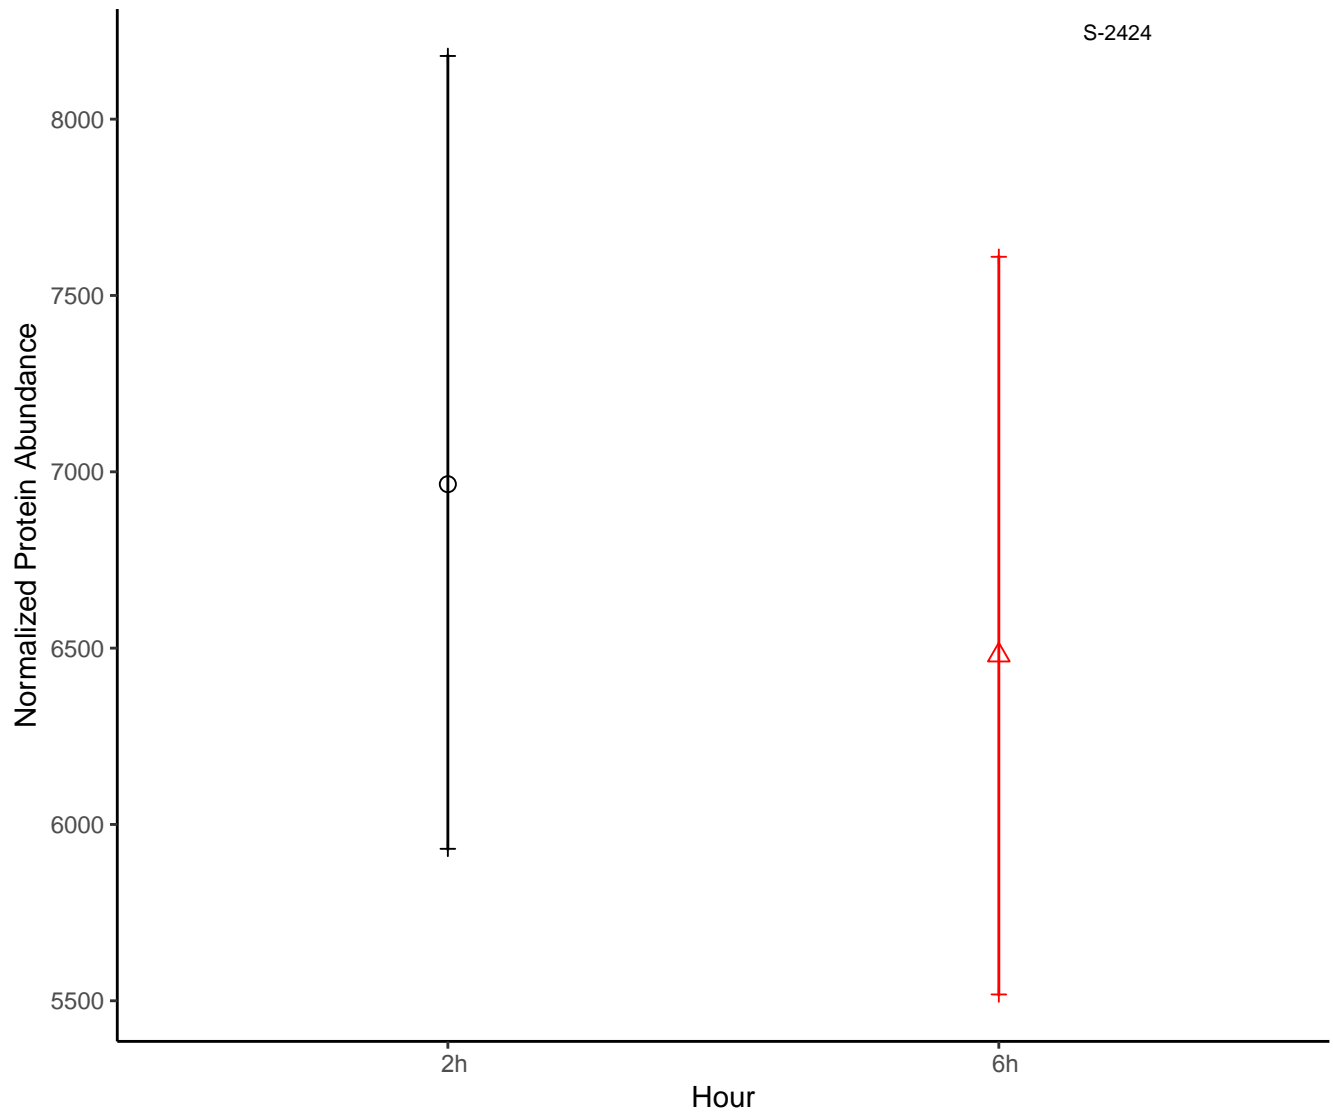

⊕ 2h

△ 6h



# TELL\_STAAM

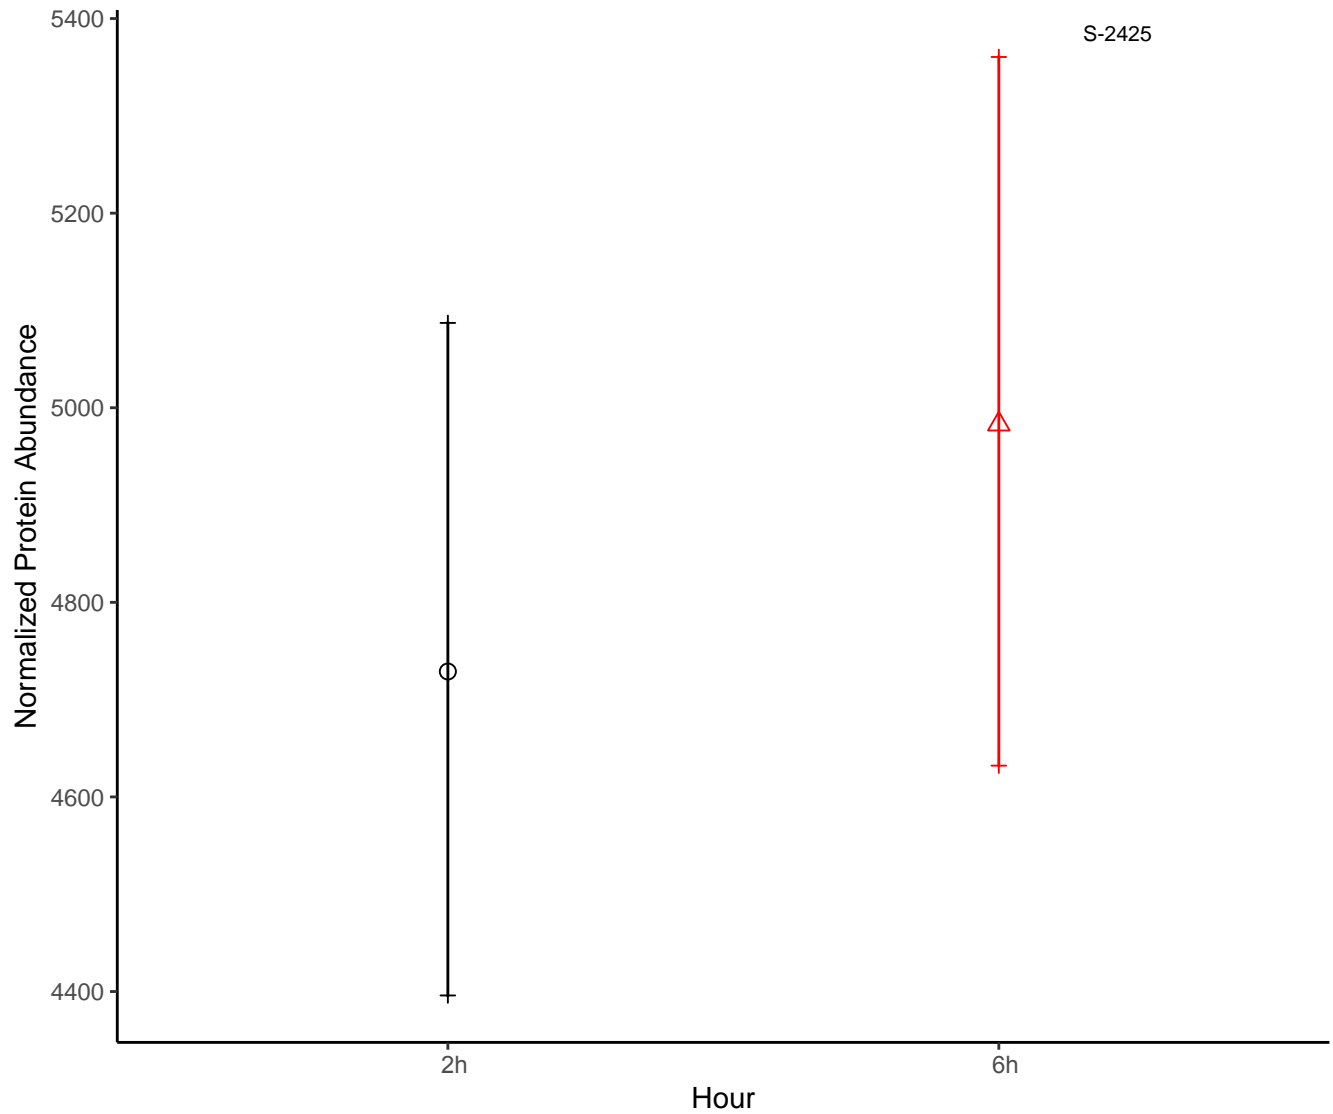

⊕ 2h

△ 6h

# THID\_STAAM

S-2426

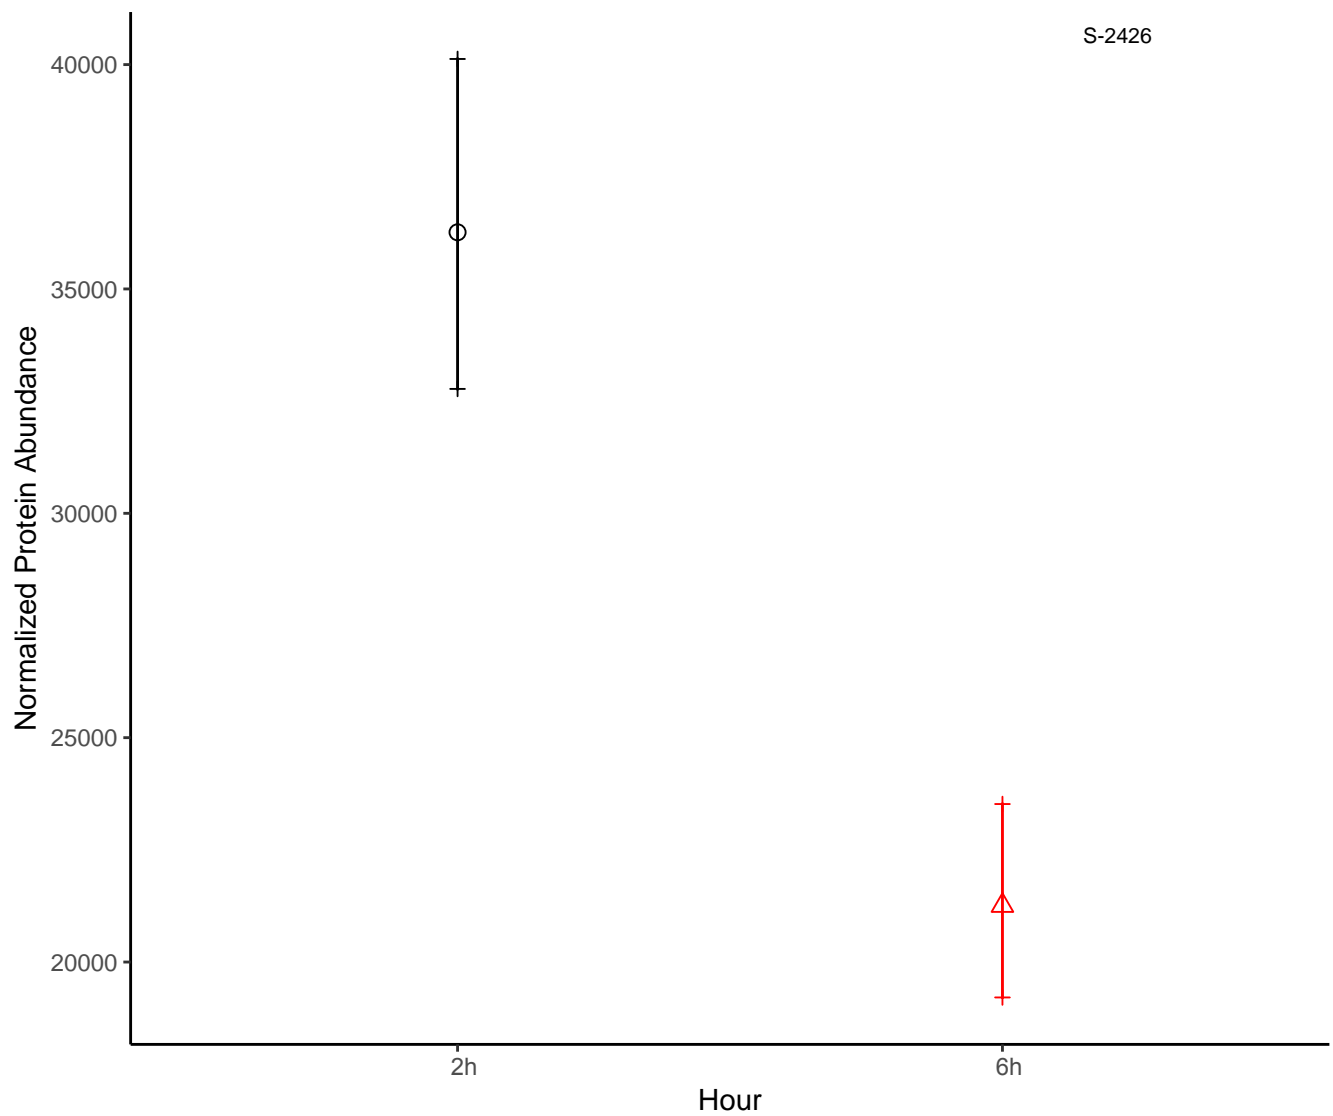

⊕ 2h

△ 6h

# THIM\_STAAM

S-2427

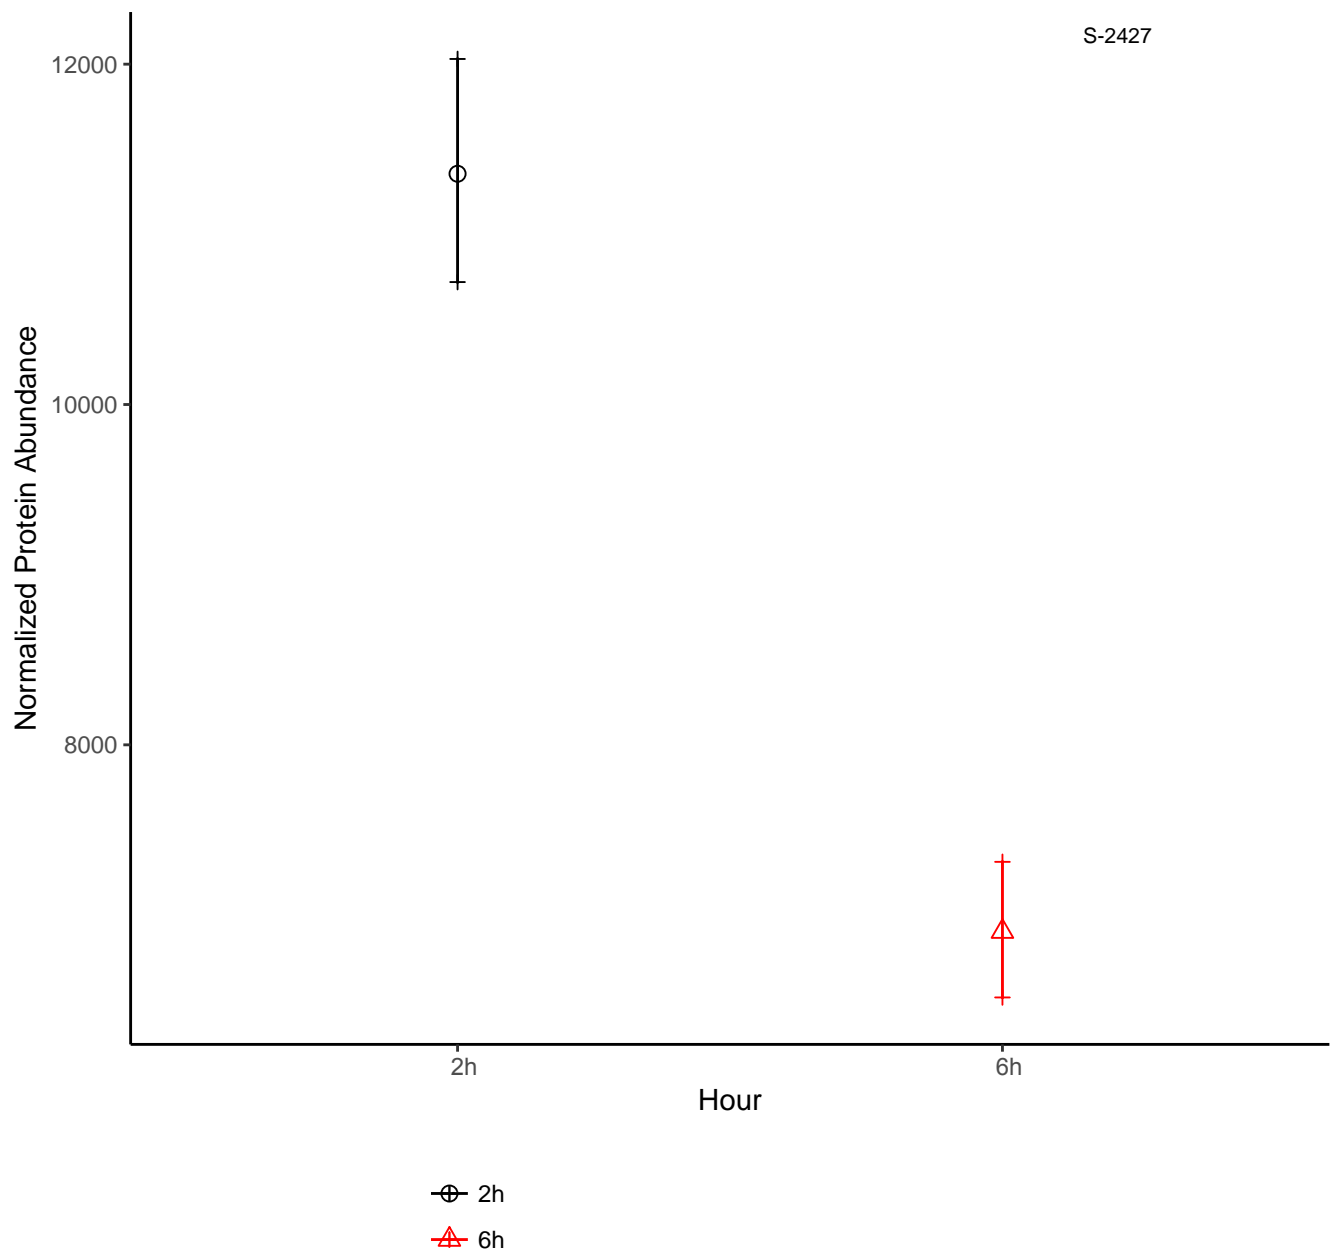

# THIO\_STAAM

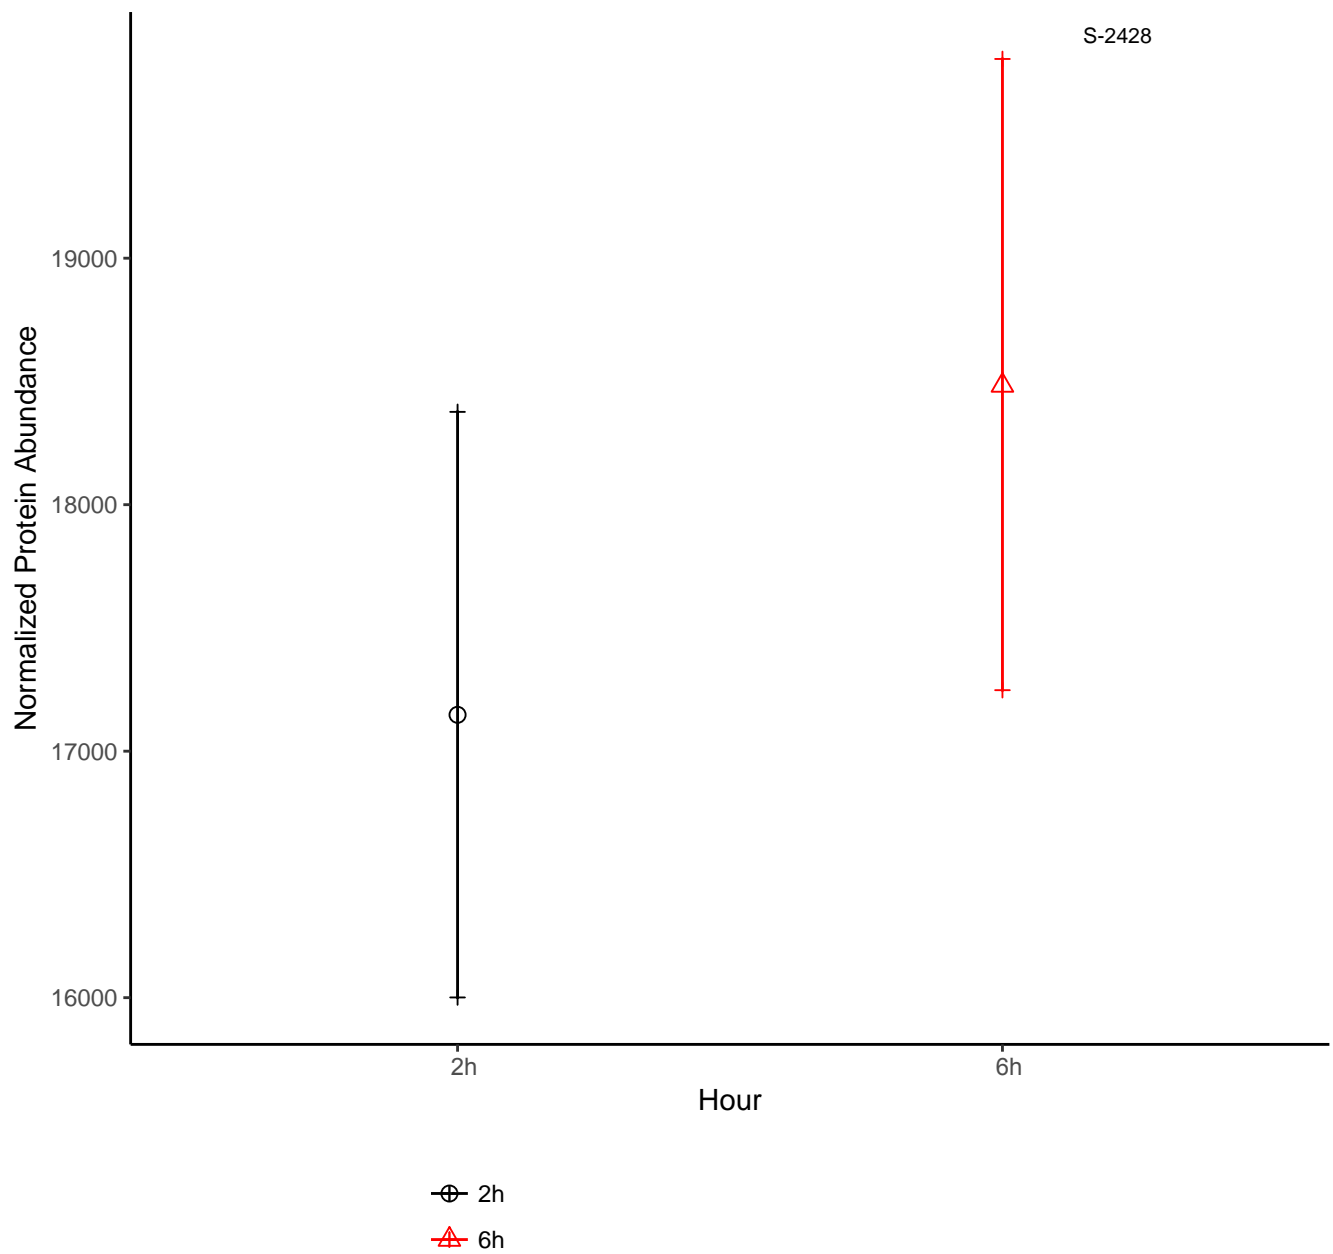

# THLA\_STAAM

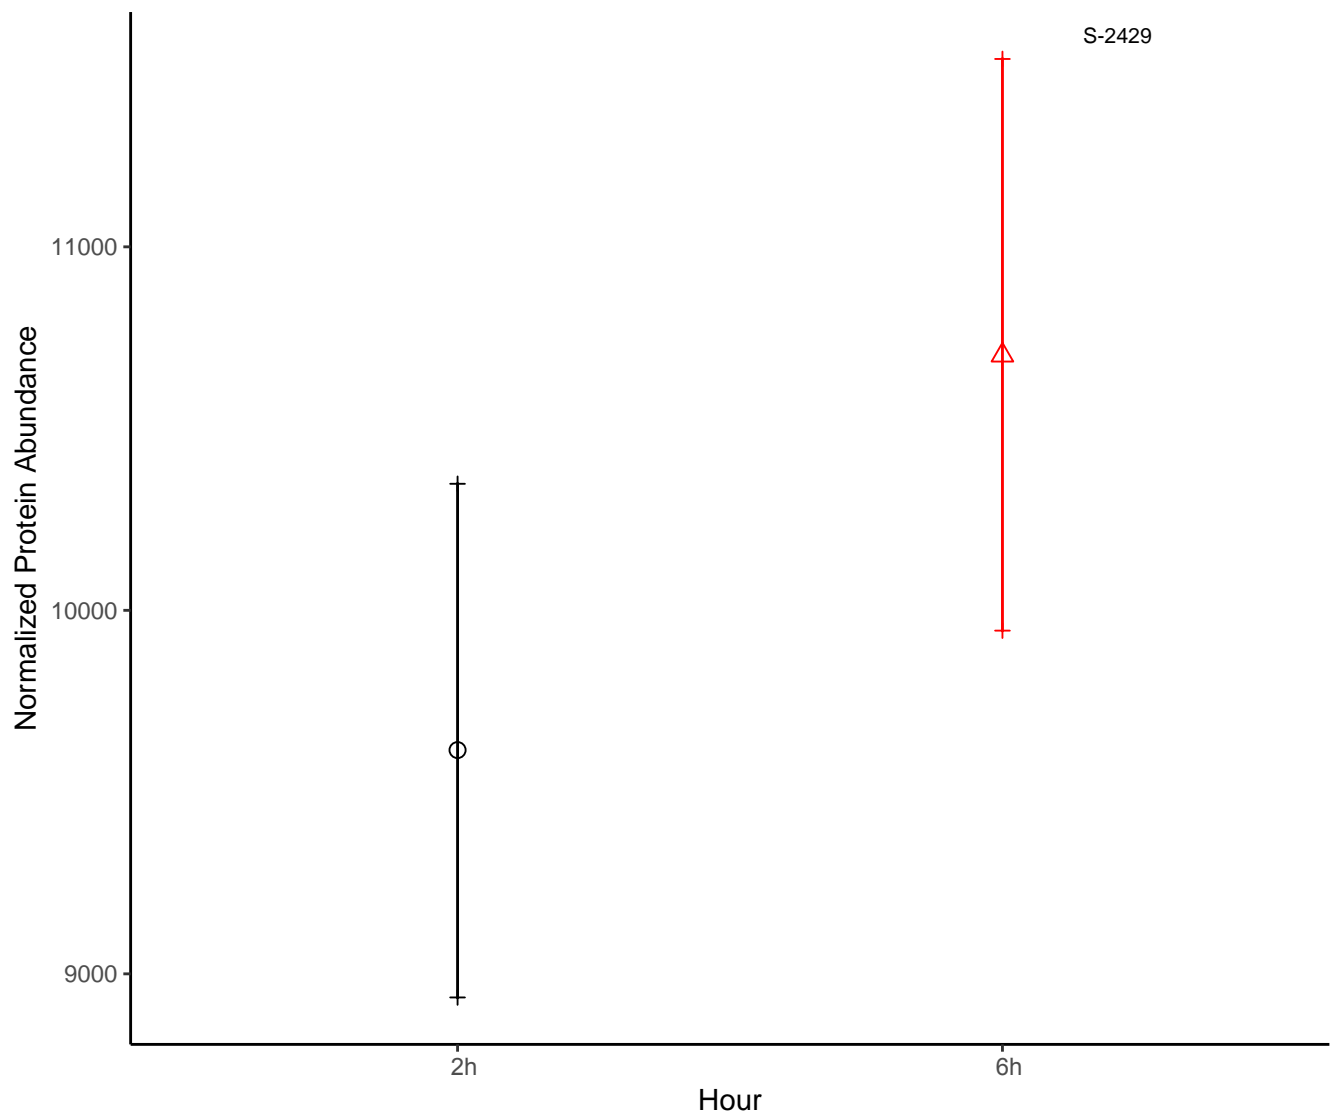

⊕ 2h

△ 6h

# TIG\_STAAM

S-2430

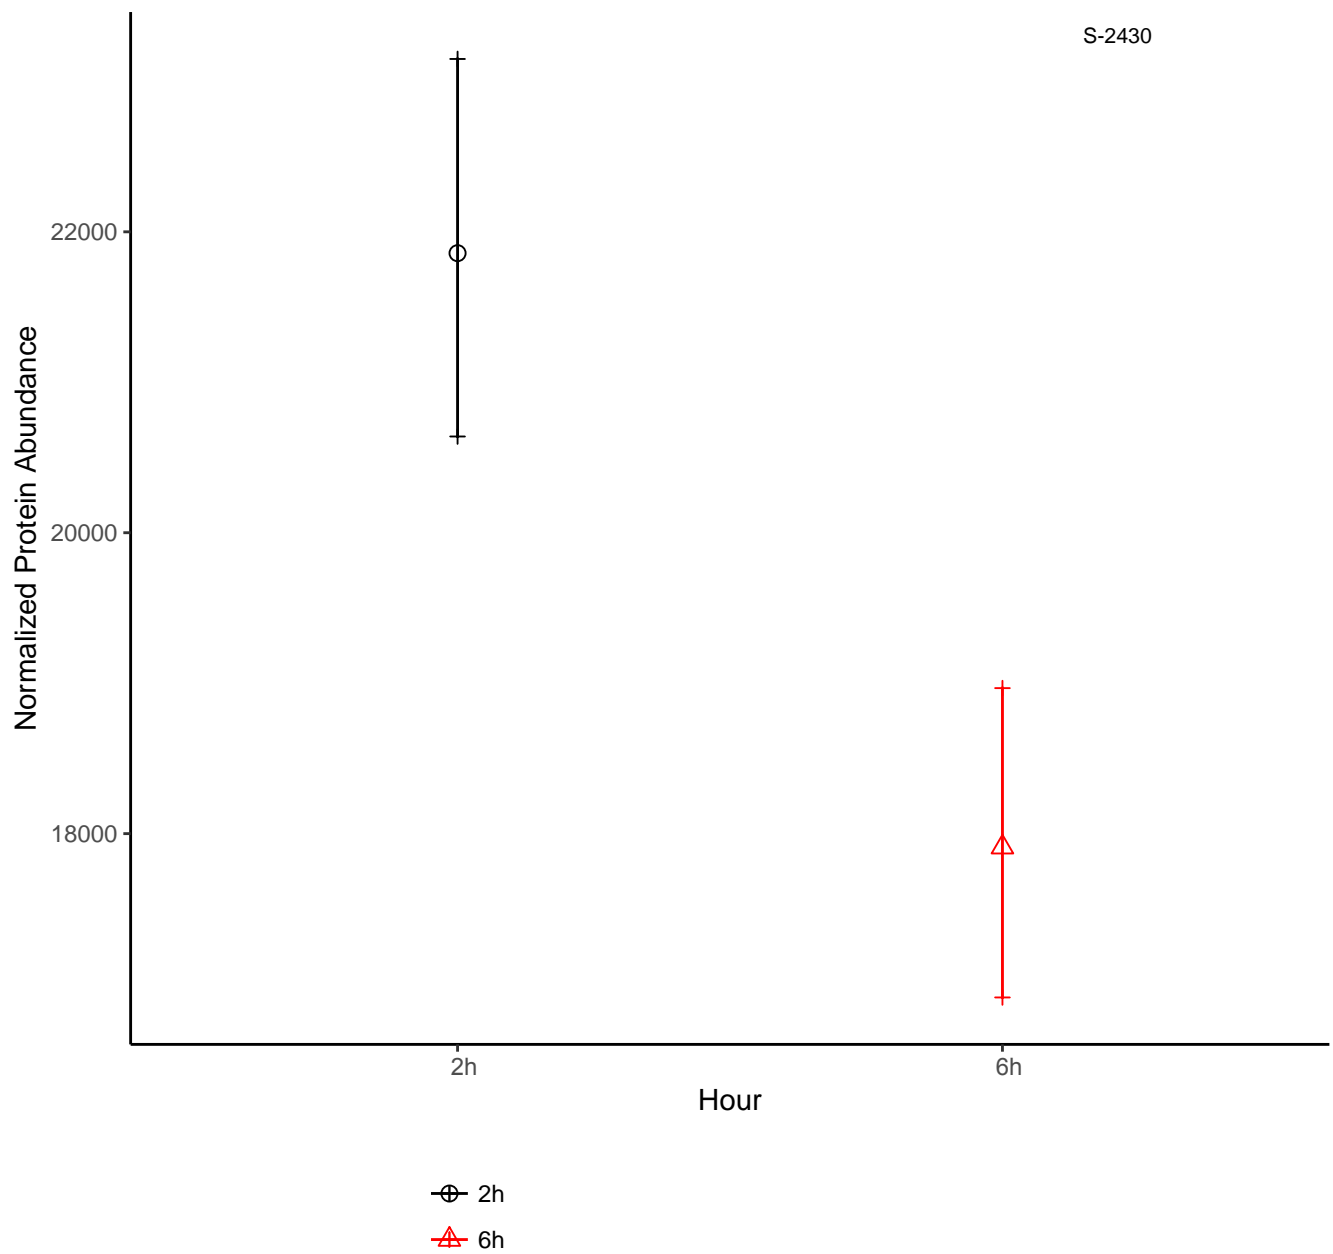

# TKT\_STAAM

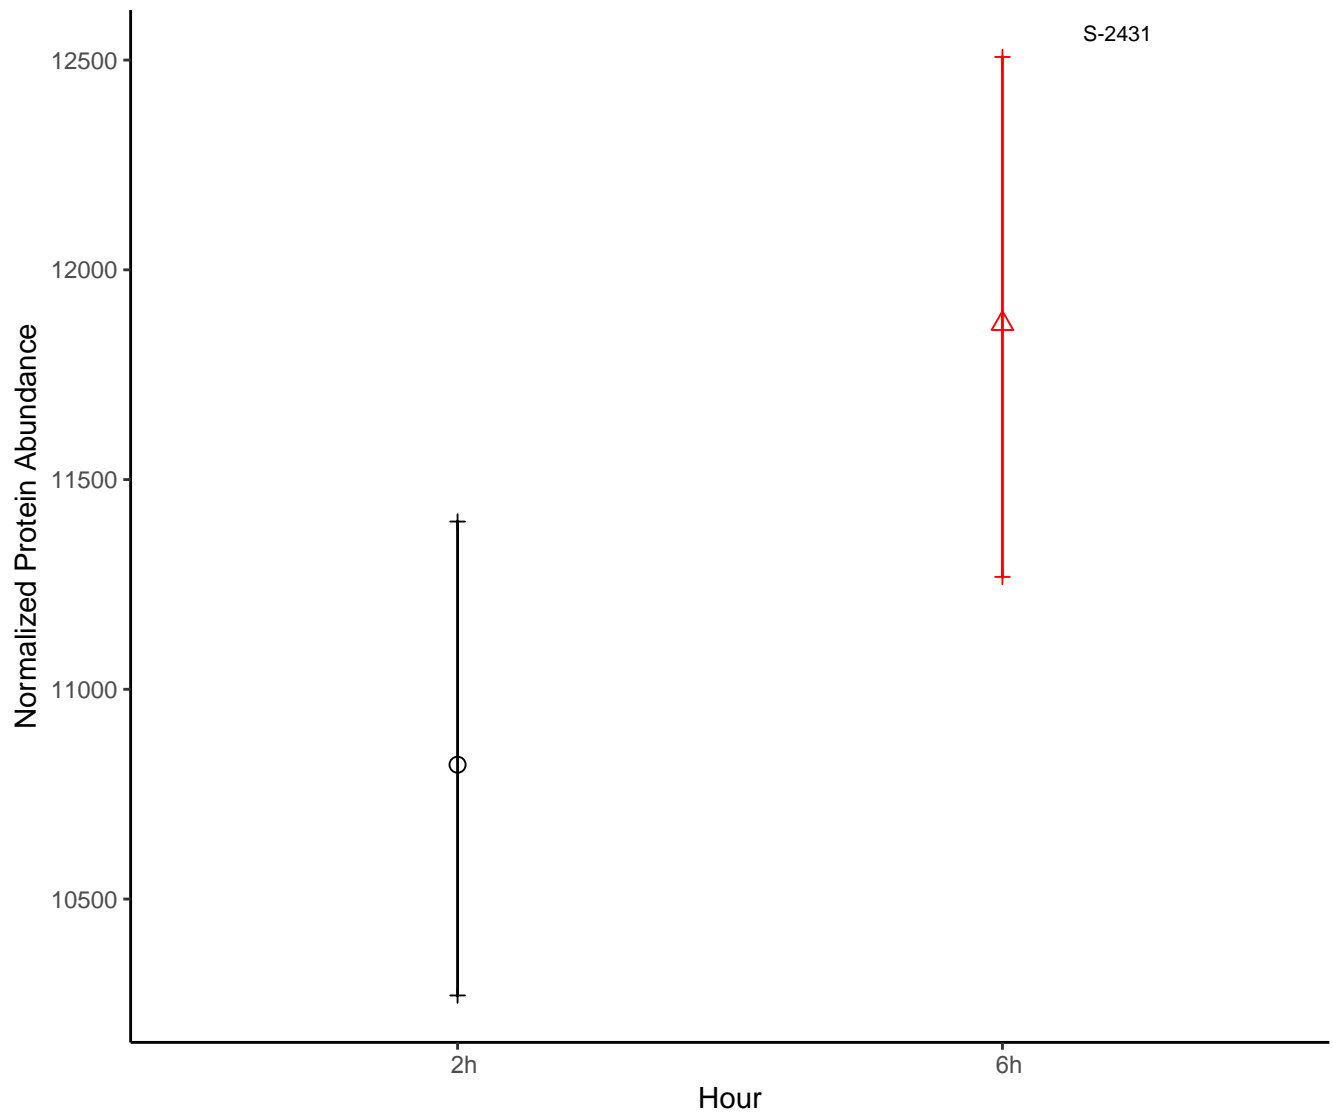

⊕ 2h

△ 6h

# TOP1\_STAAM

S-2432

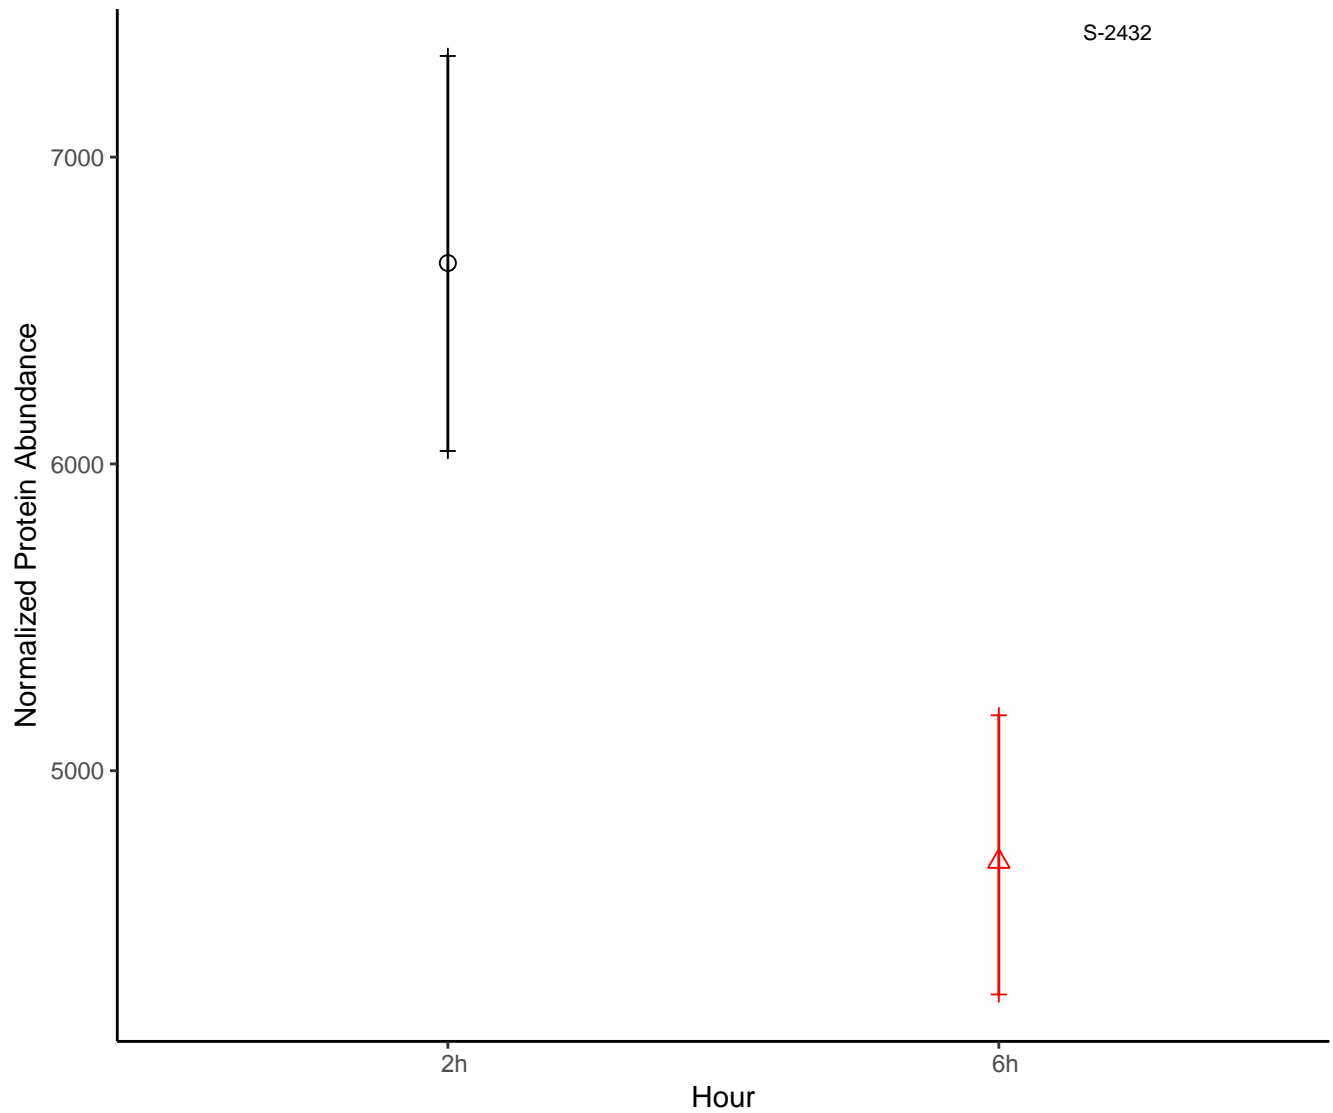

⊕ 2h

△ 6h



# TOP3\_STAAM

S-2433

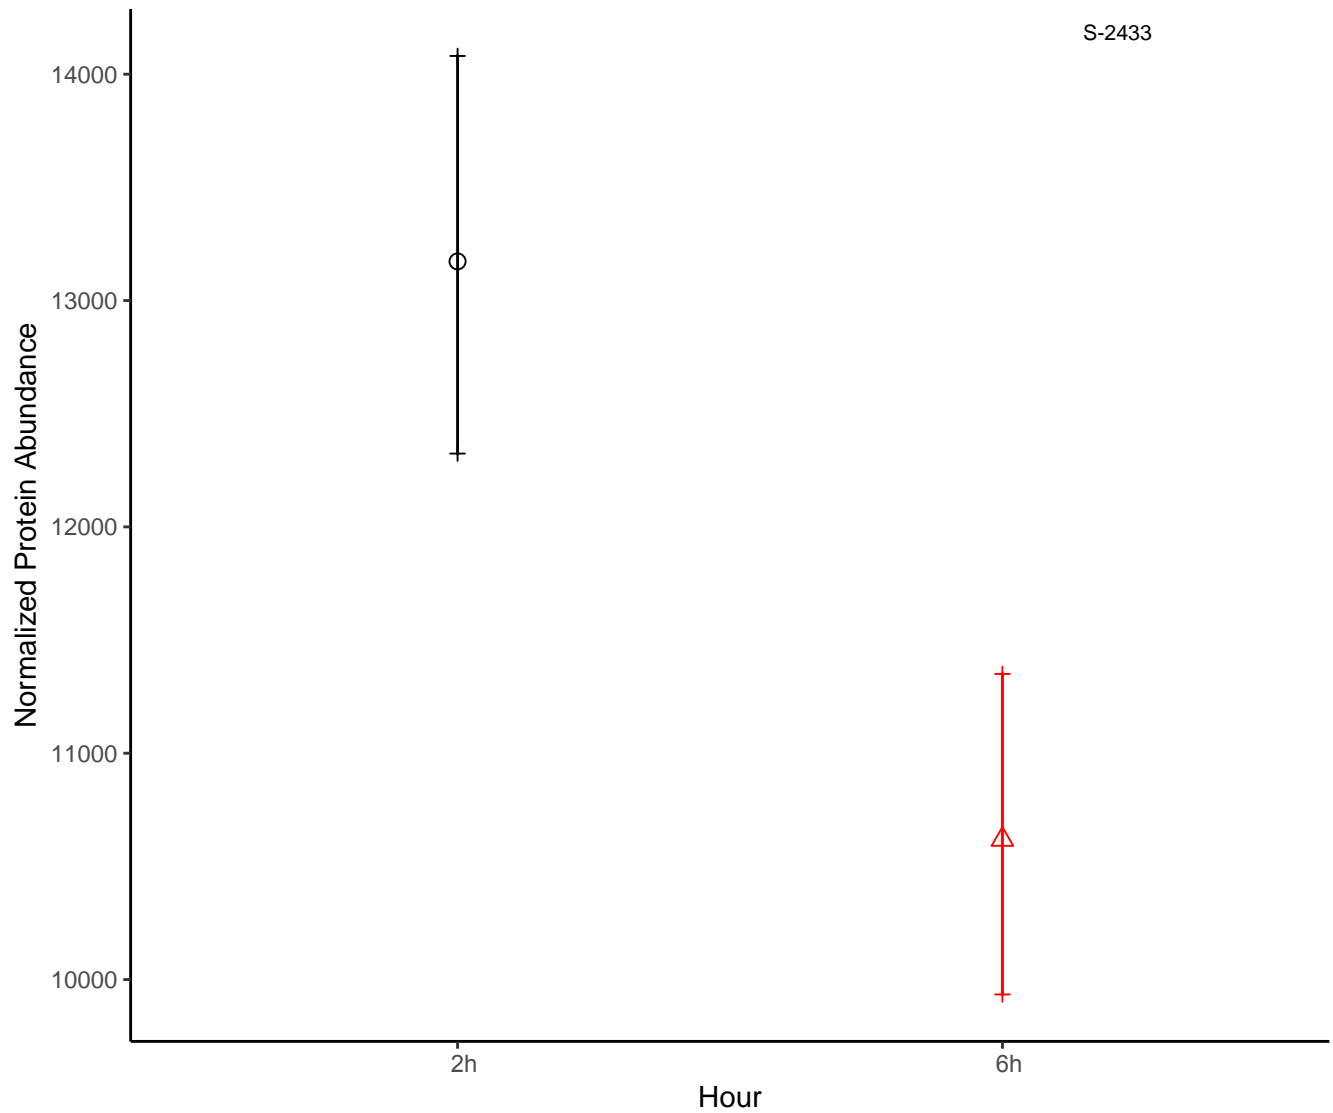

⊕ 2h

△ 6h

# TPIS\_STAAM

S-2434

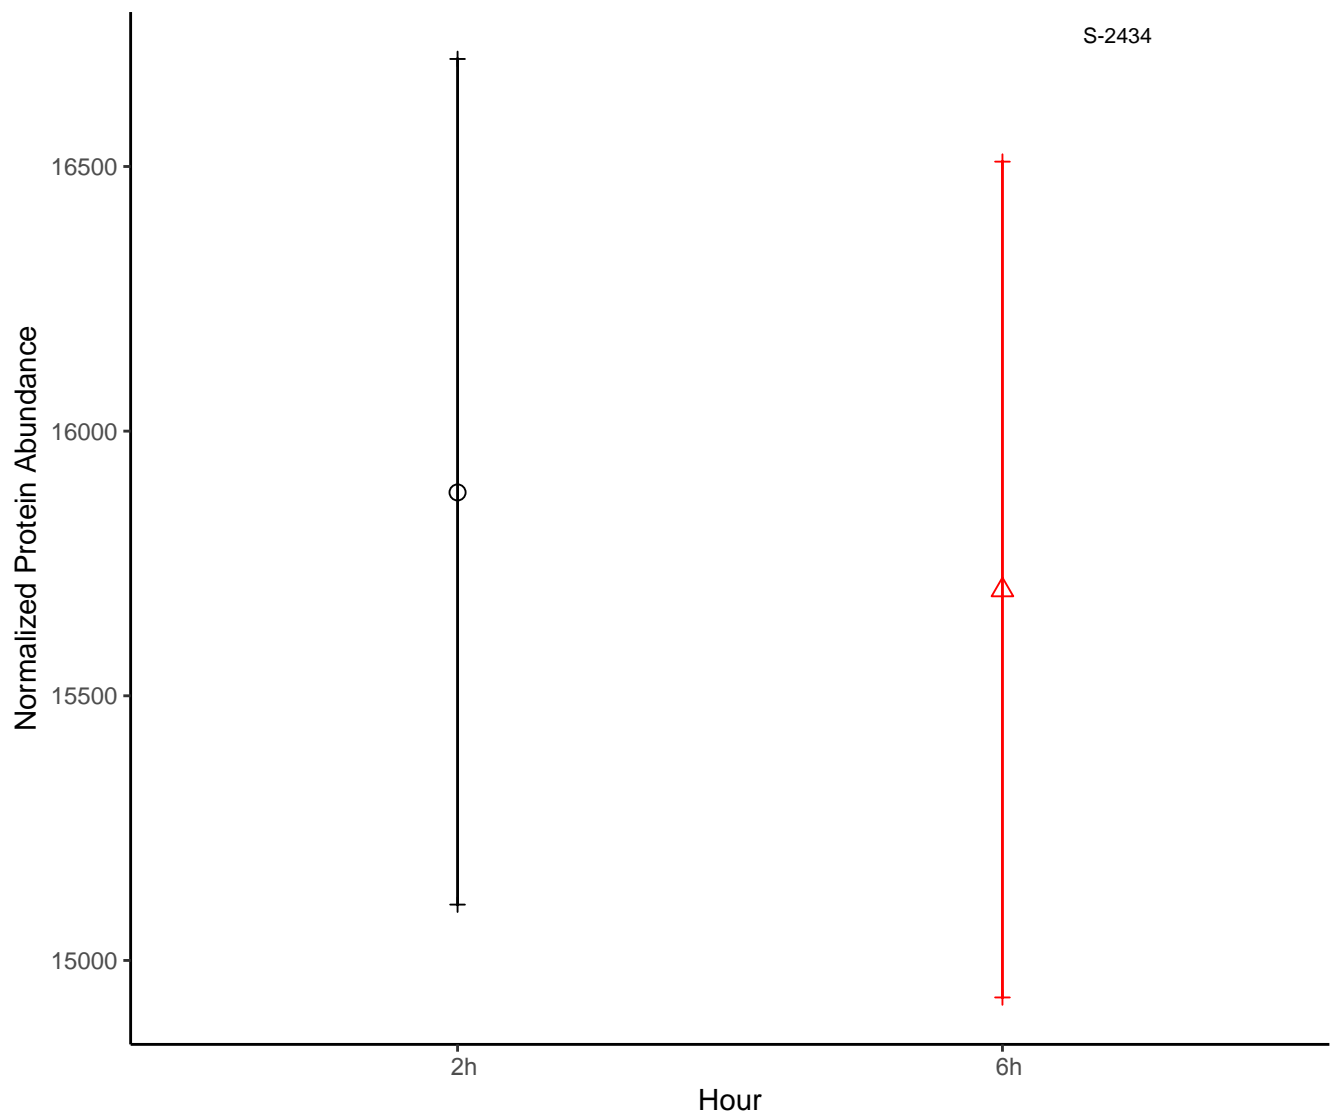

⊕ 2h

△ 6h

# TPX\_STAAM

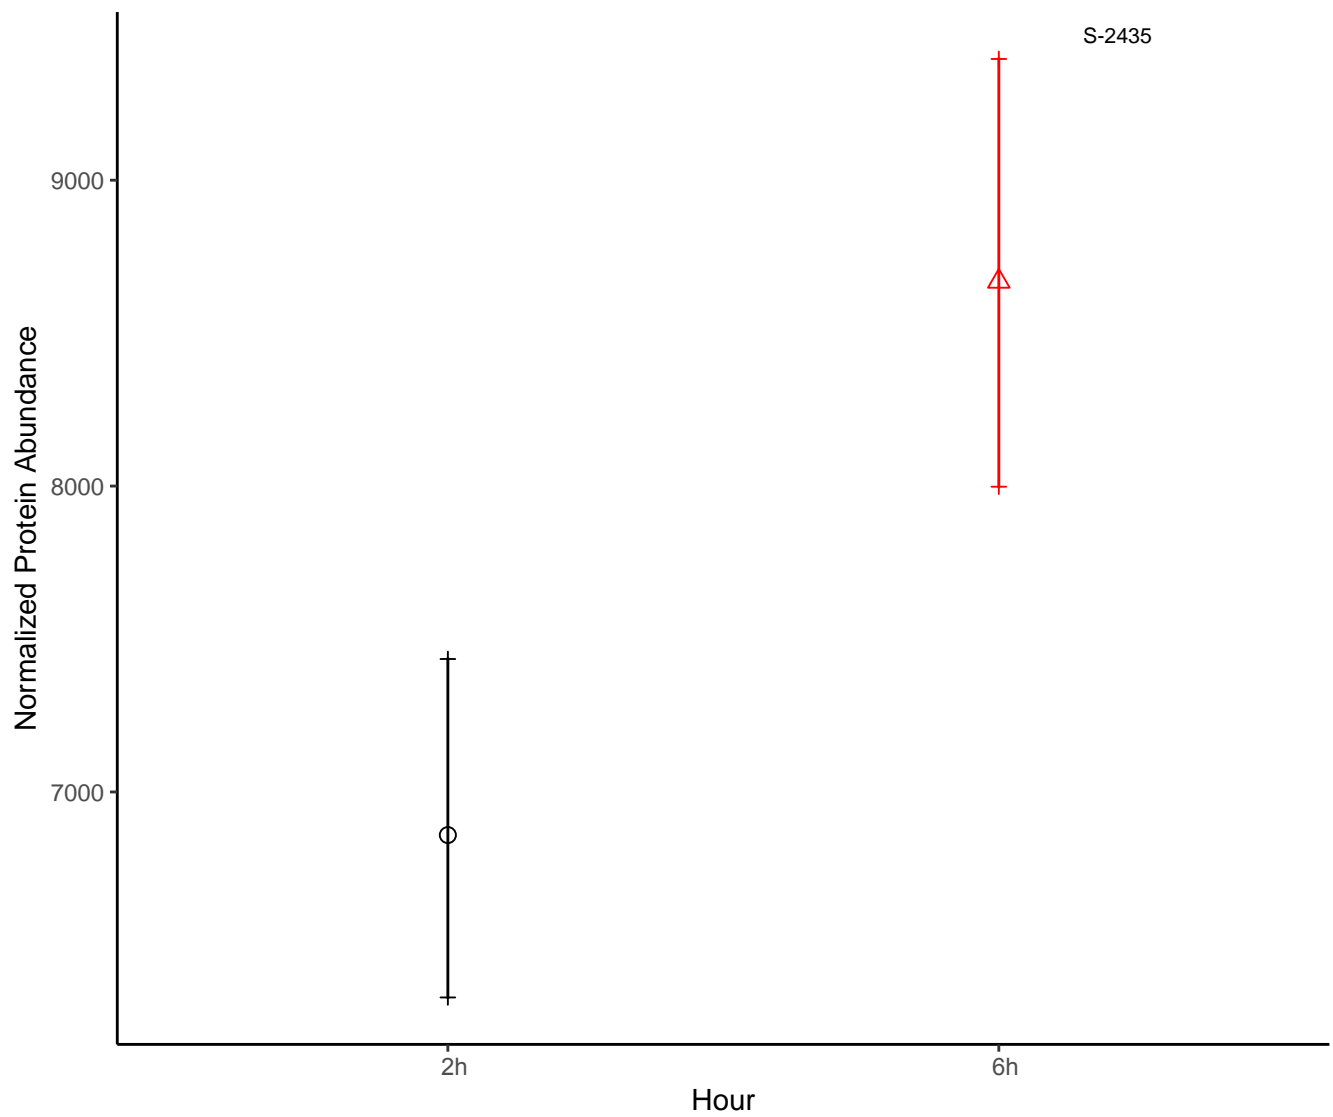

⊕ 2h

△ 6h

# TRAC\_STAAM

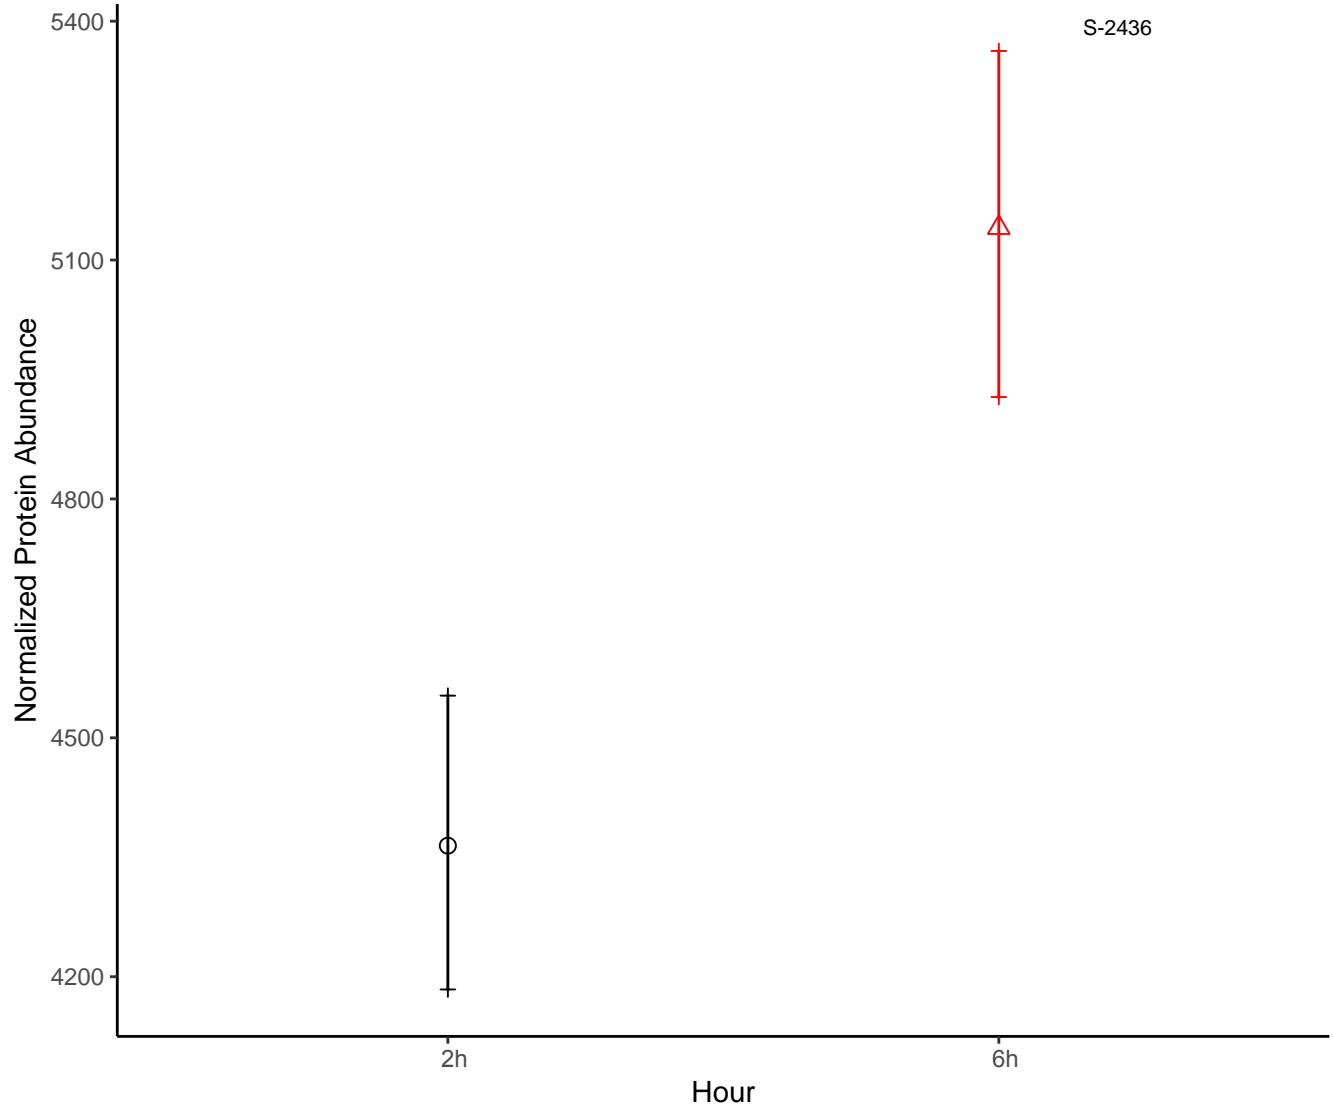

⊕ 2h

△ 6h

# TRAP\_STAAM

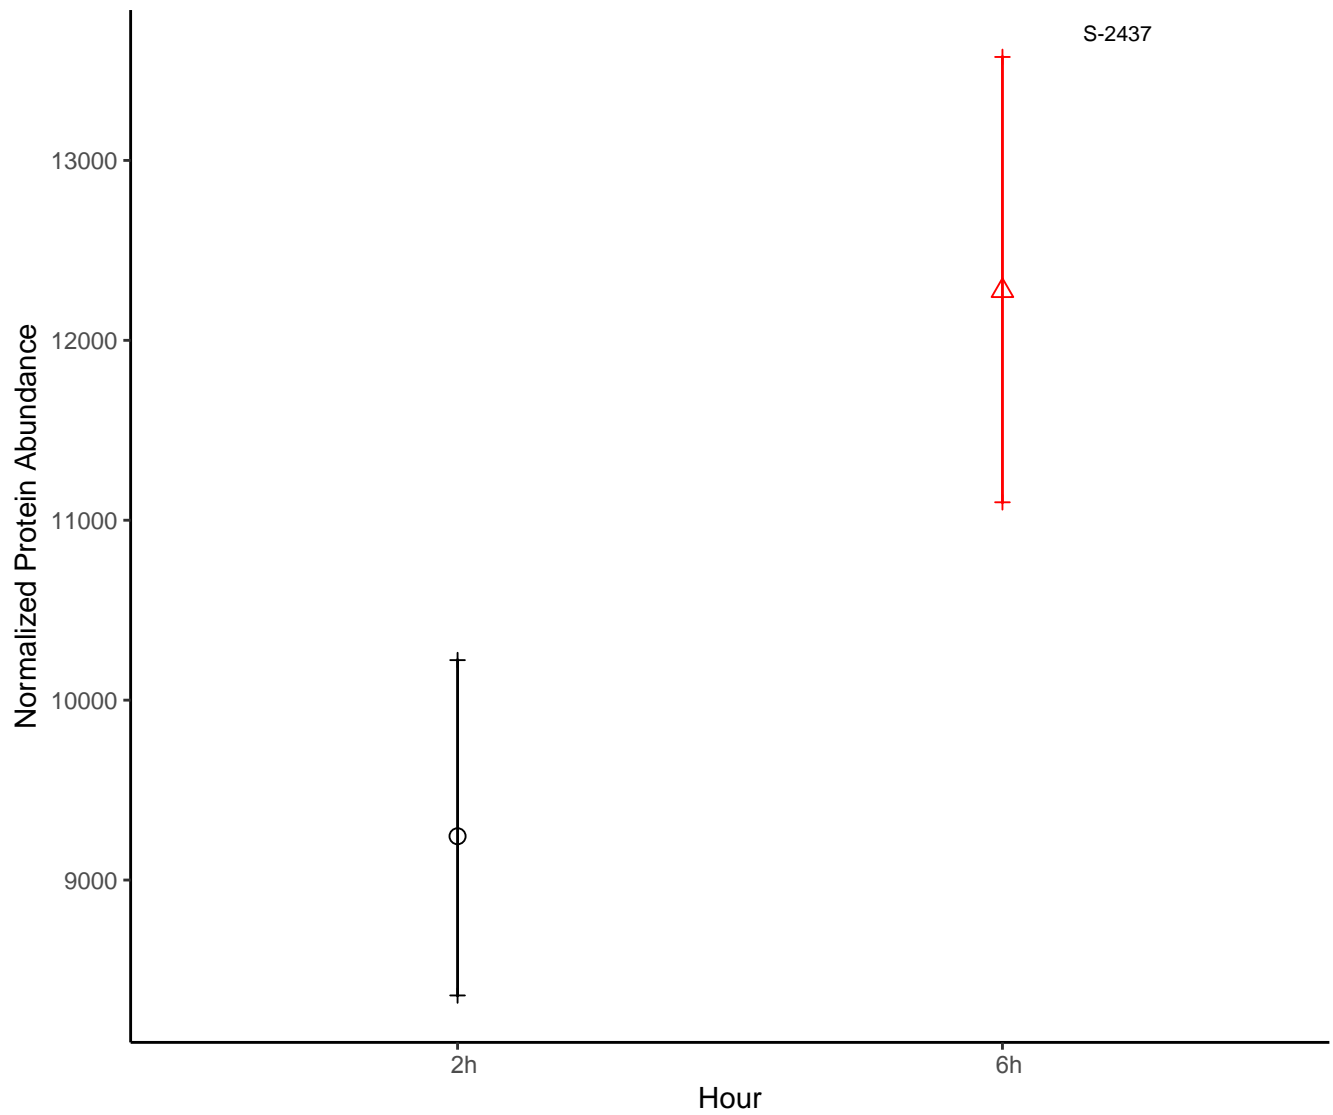

⊕ 2h

△ 6h

# TRMB\_STAAM

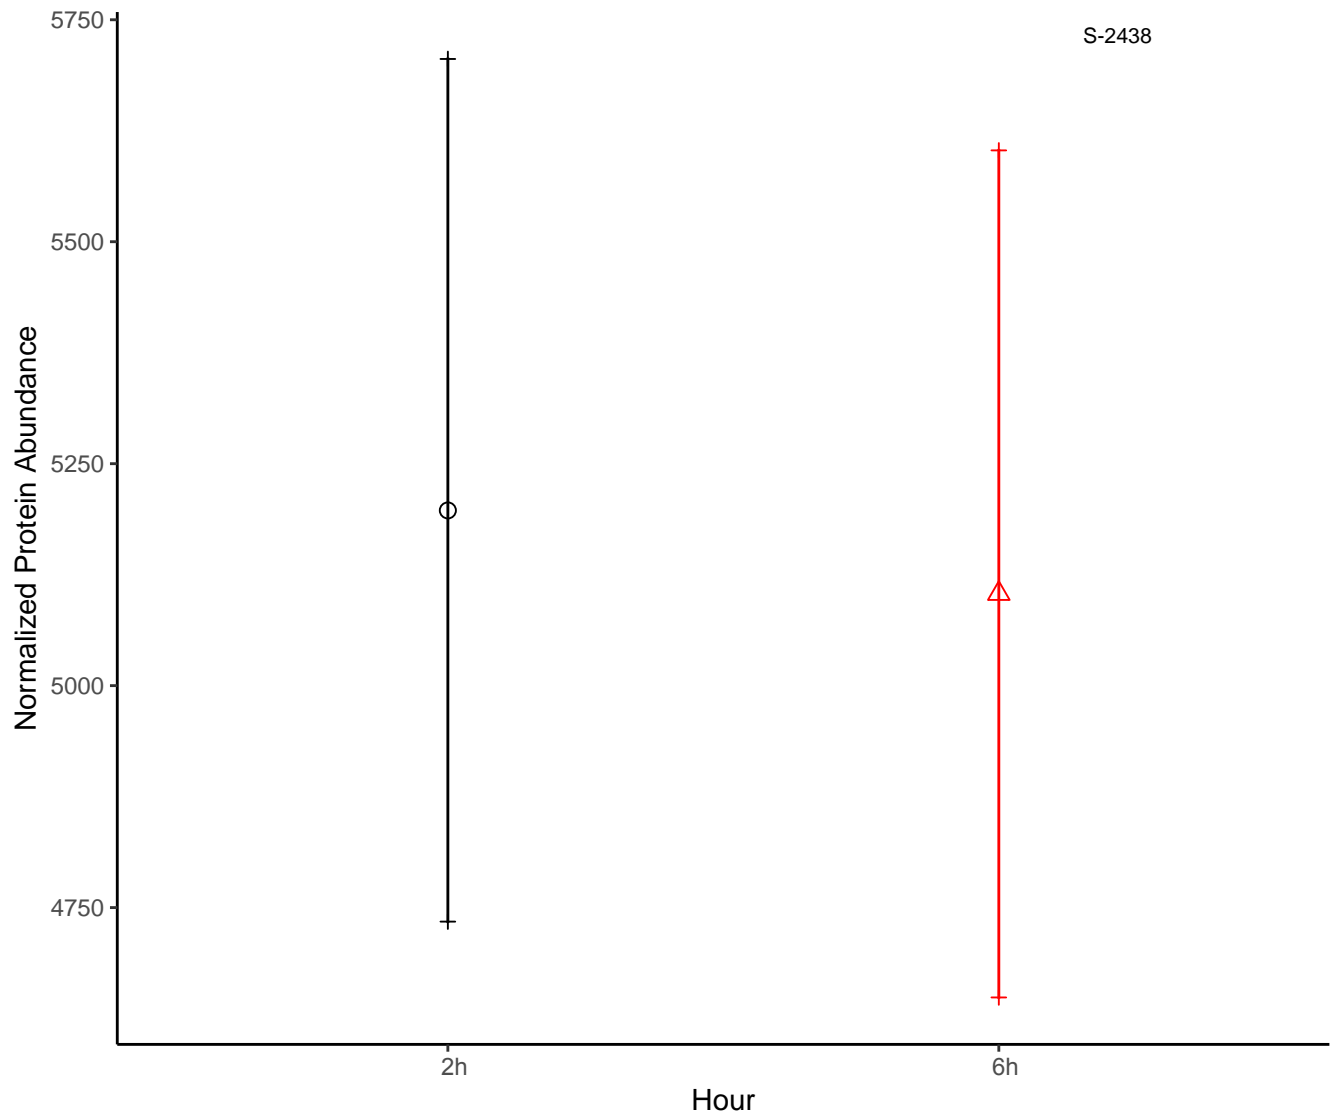

⊕ 2h

△ 6h

# TRMFO\_STAAM

S-2439

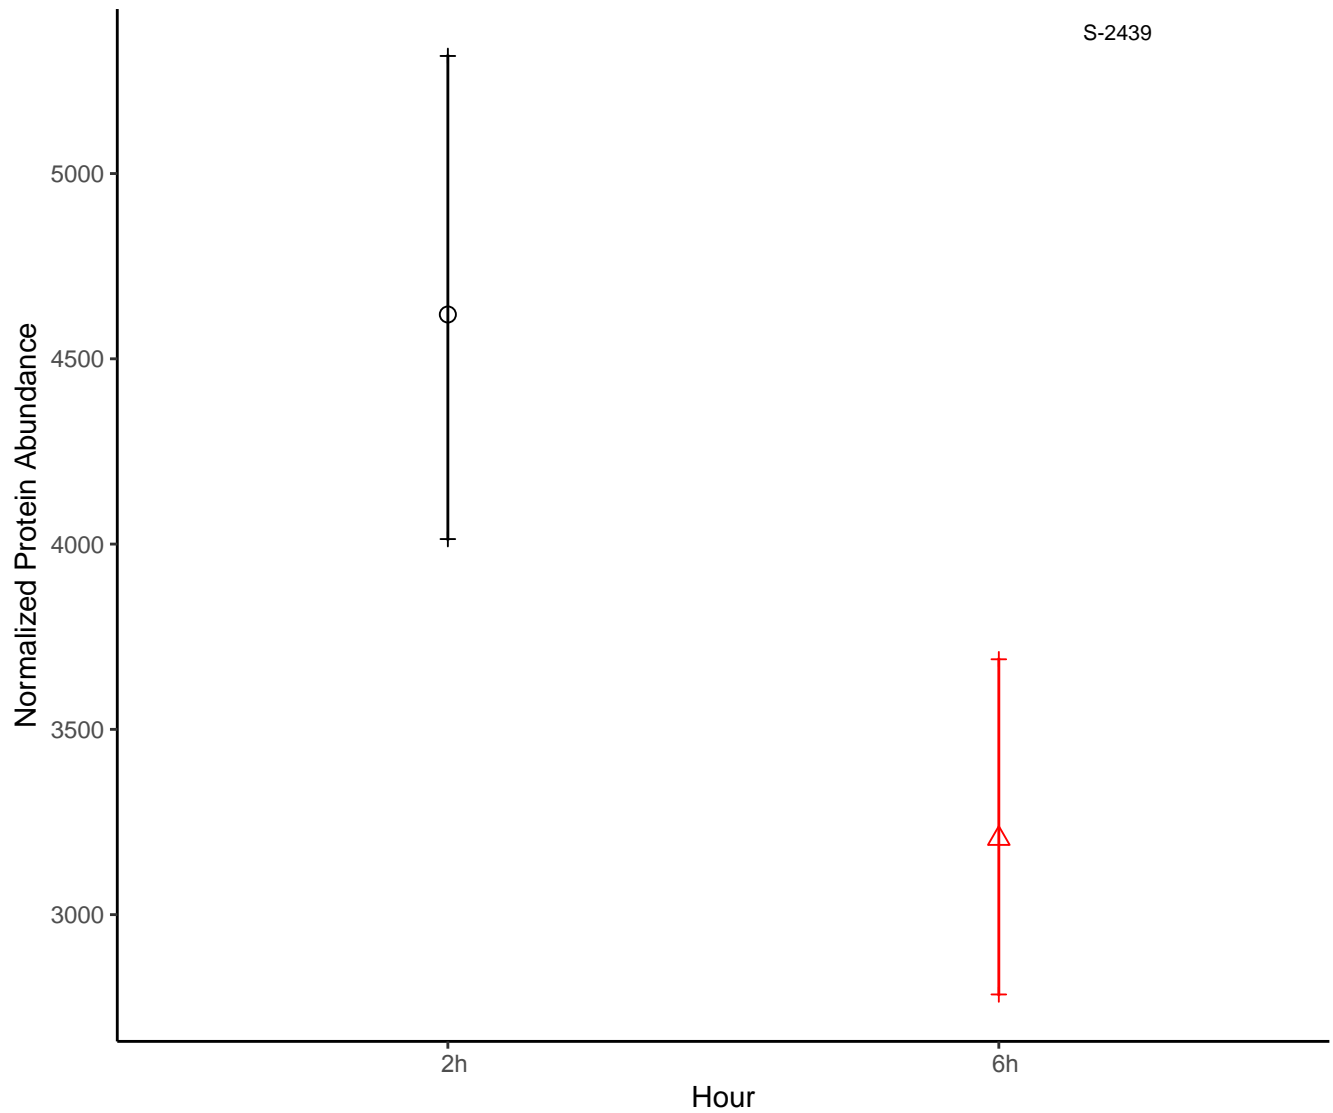

⊕ 2h

△ 6h

# TRMHL\_STAAM

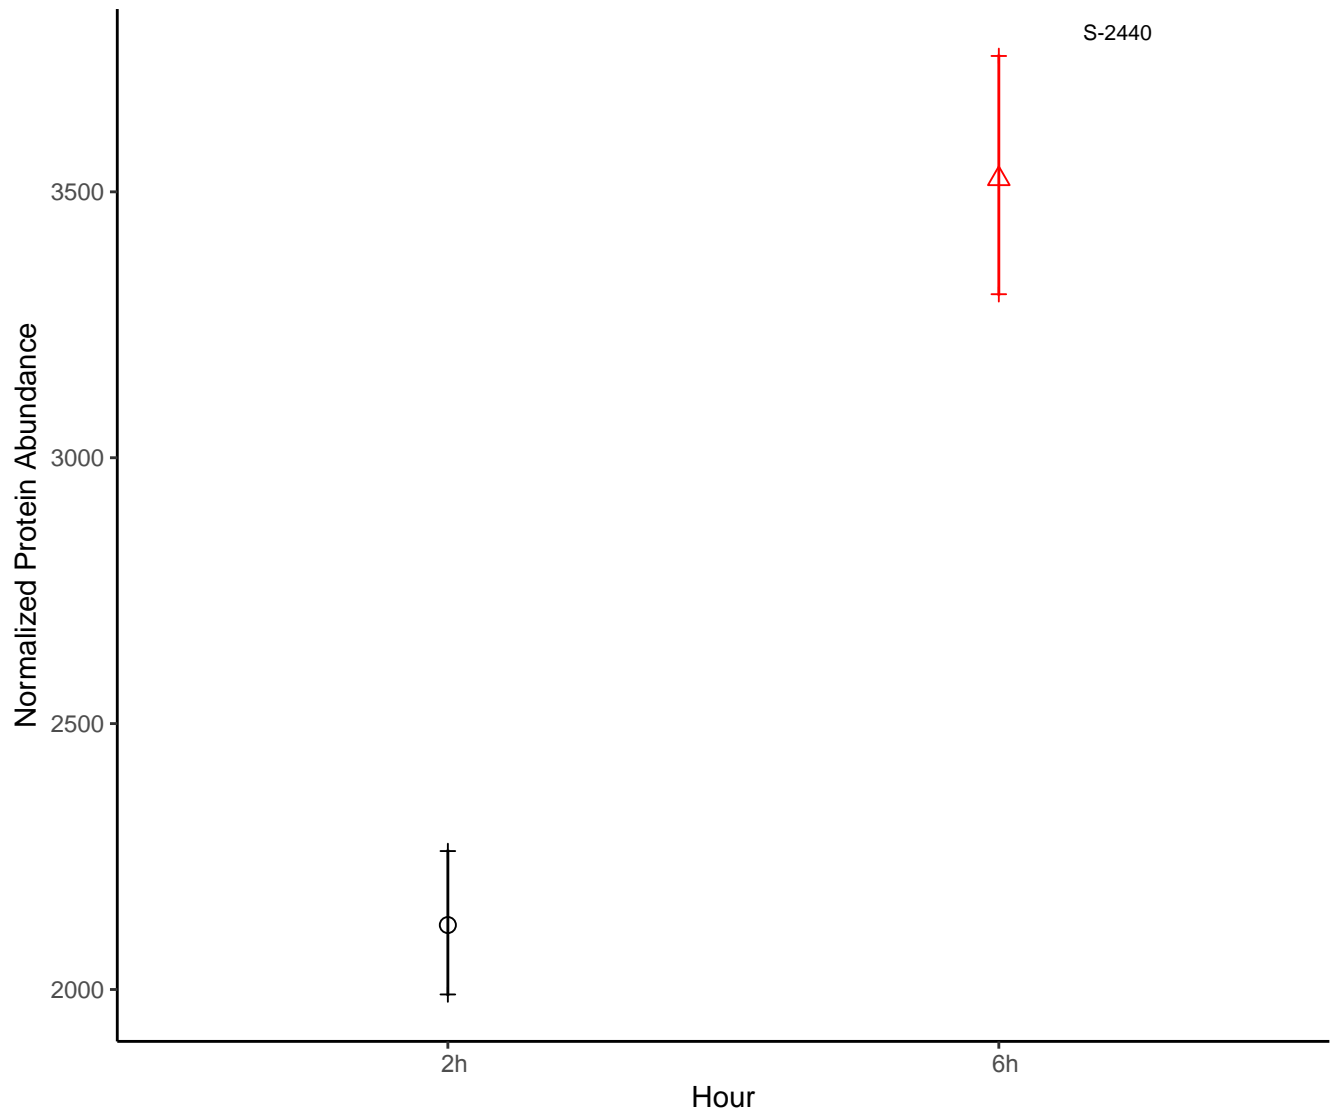

⊕ 2h

△ 6h



# TRPA\_STAAM

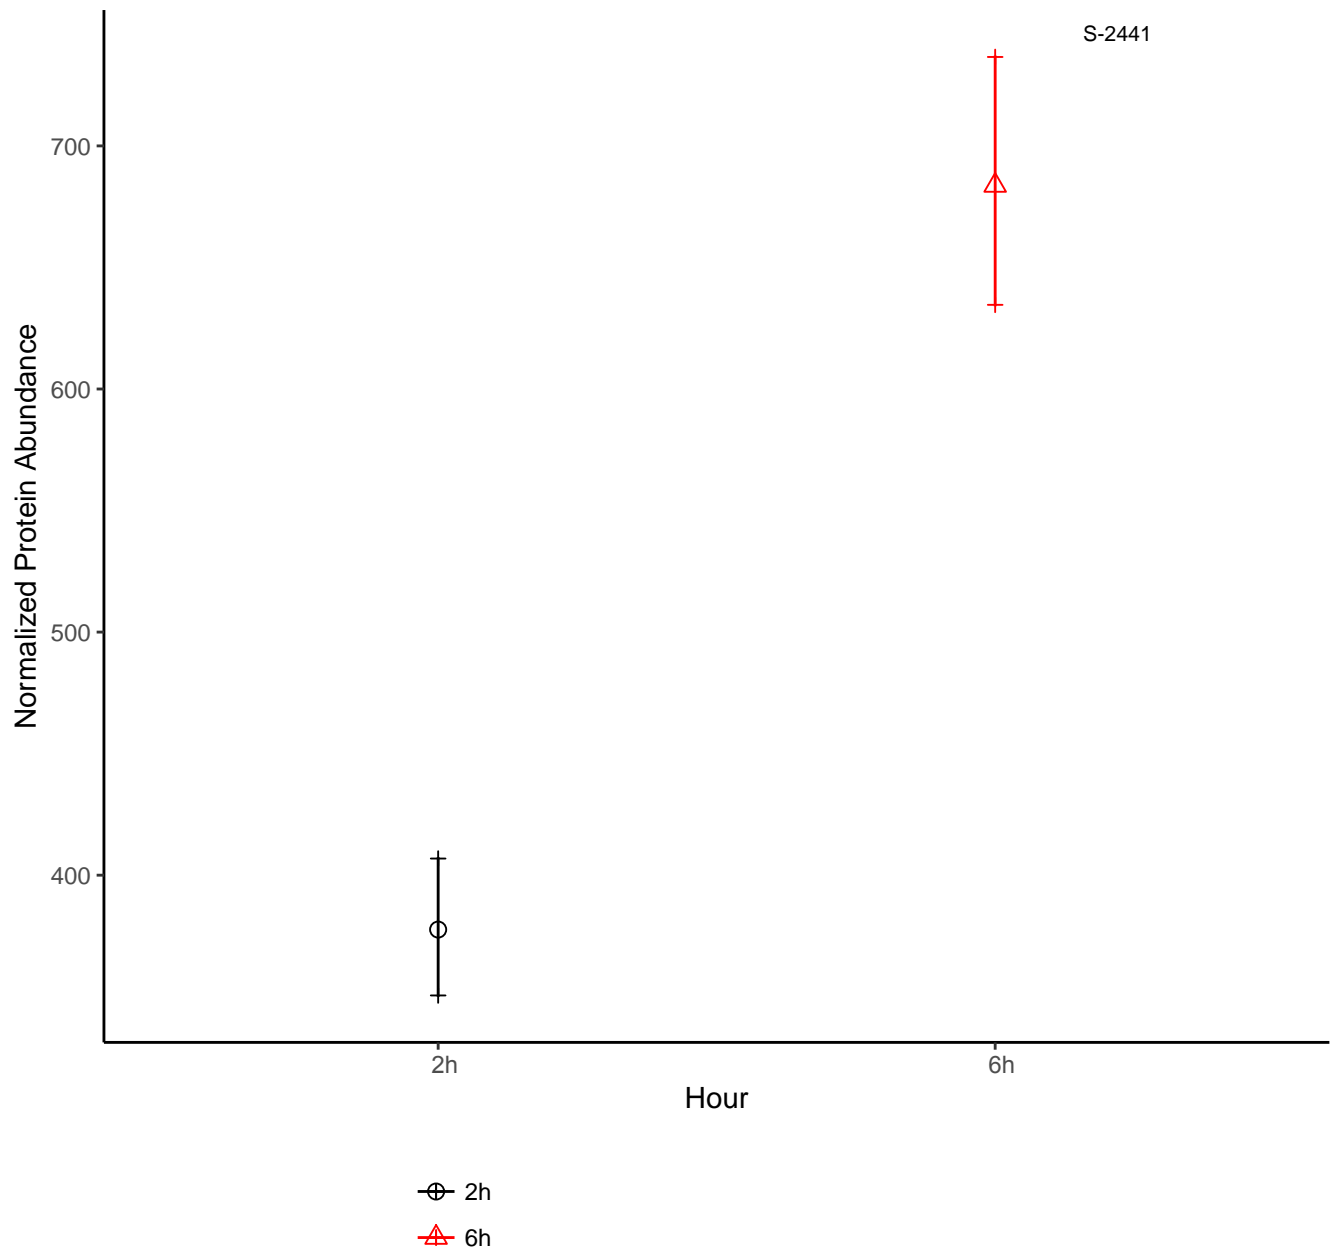

# TRPF\_STAAM

S-2442

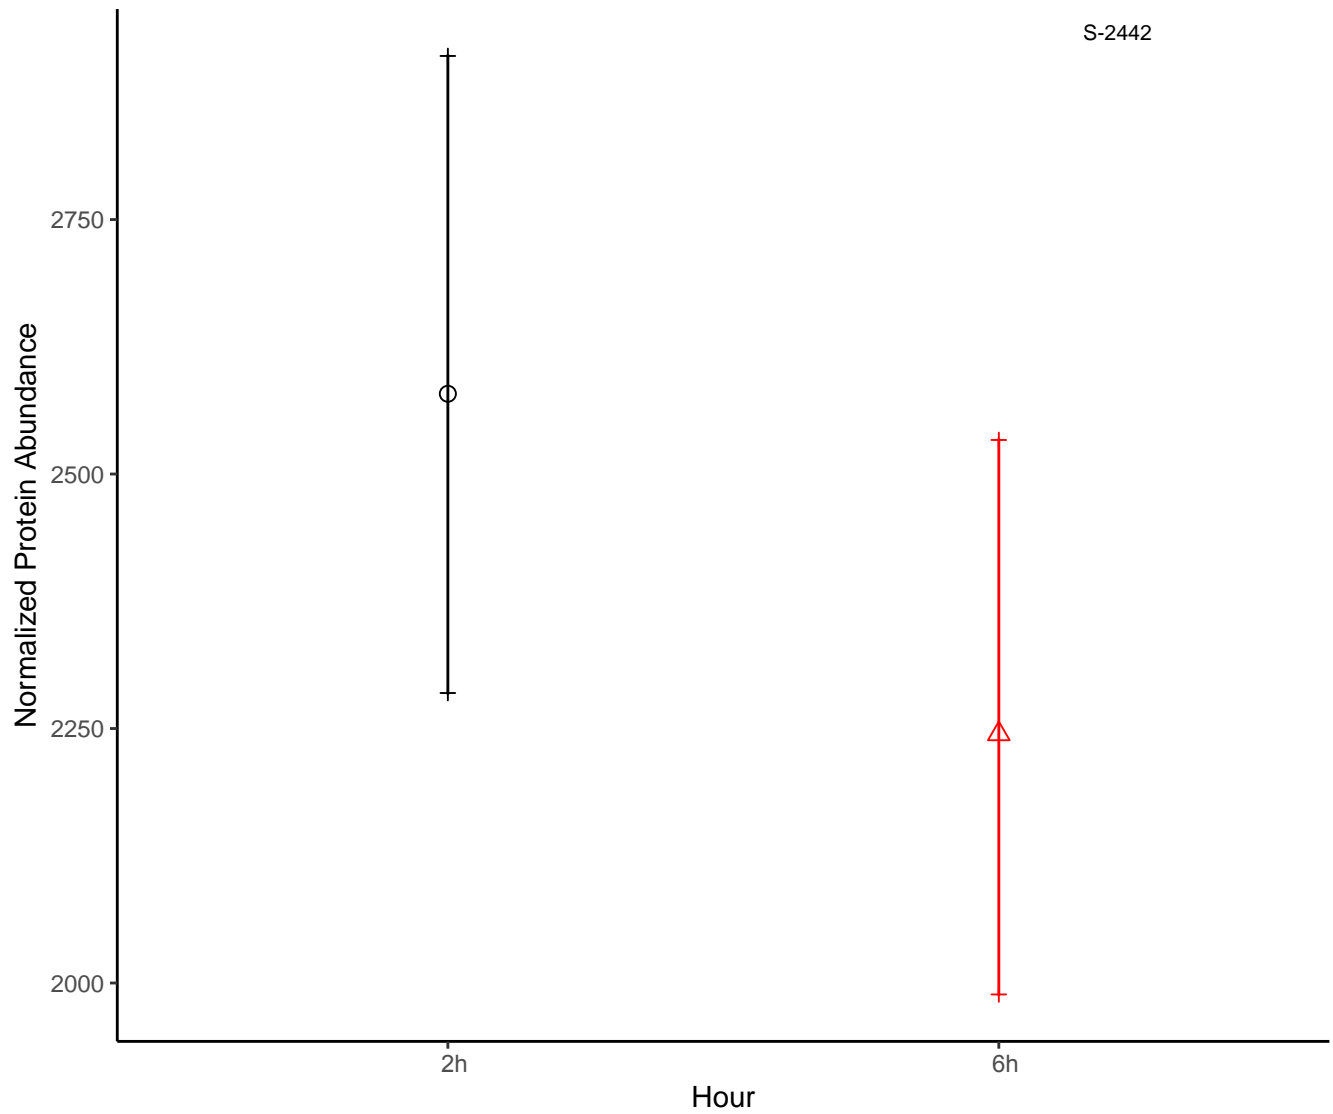

⊕ 2h

△ 6h

# TRUB\_STAAM

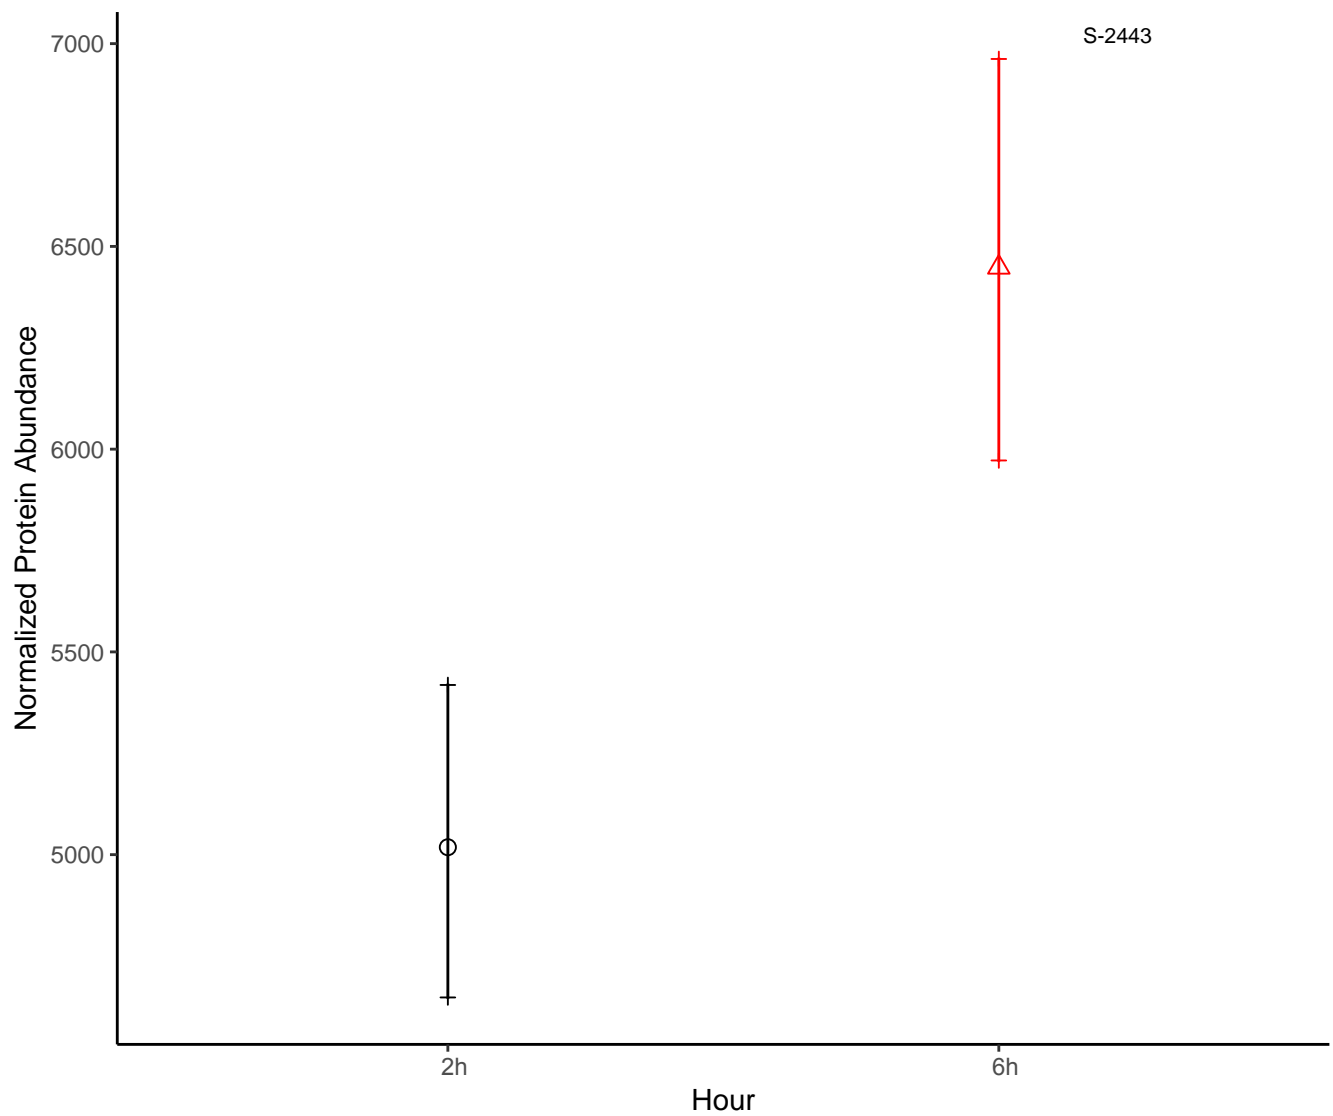

⊕ 2h

△ 6h

# TRXB\_STAAM

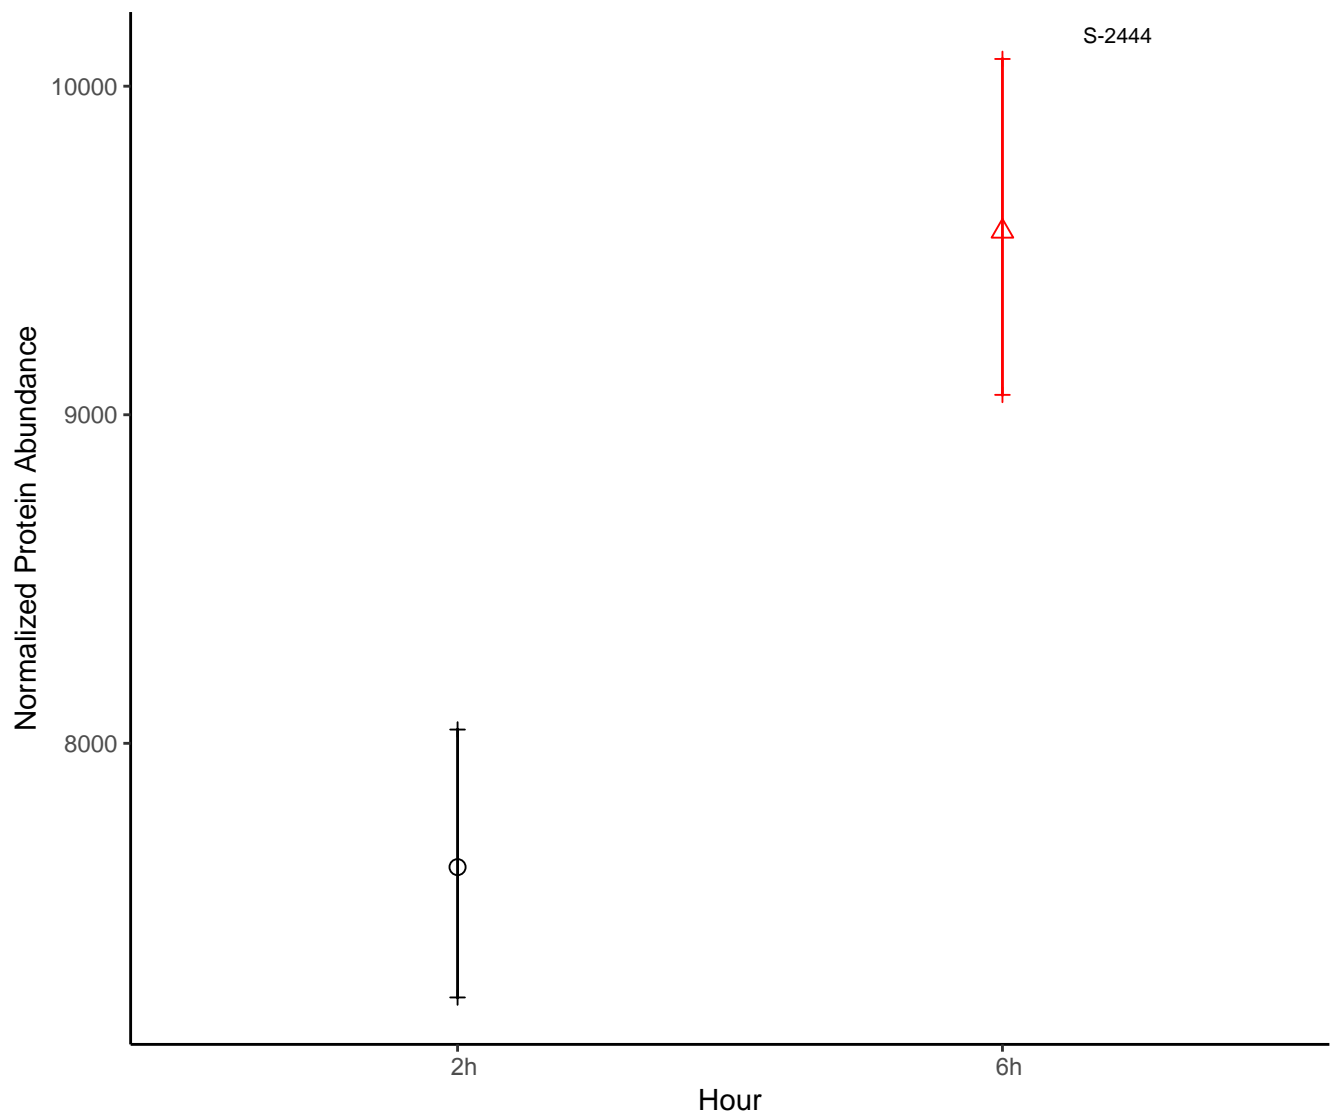

⊕ 2h

△ 6h

# TSAD\_STAAM

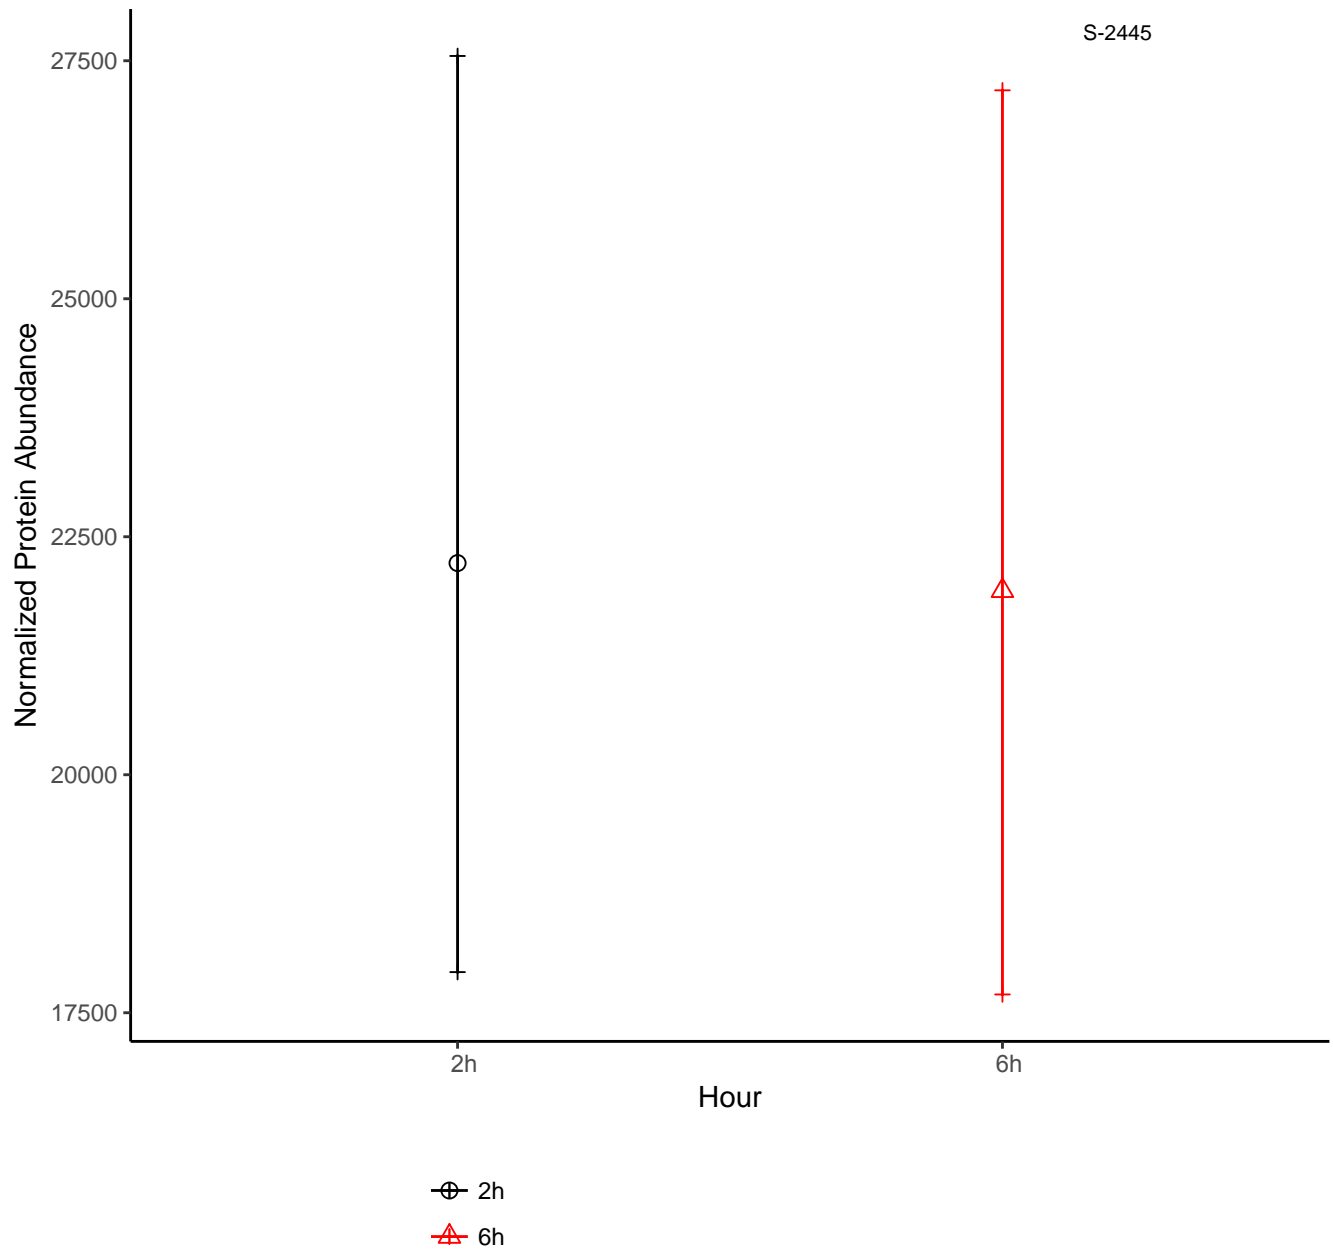

# TYRA\_STAAM

S-2446

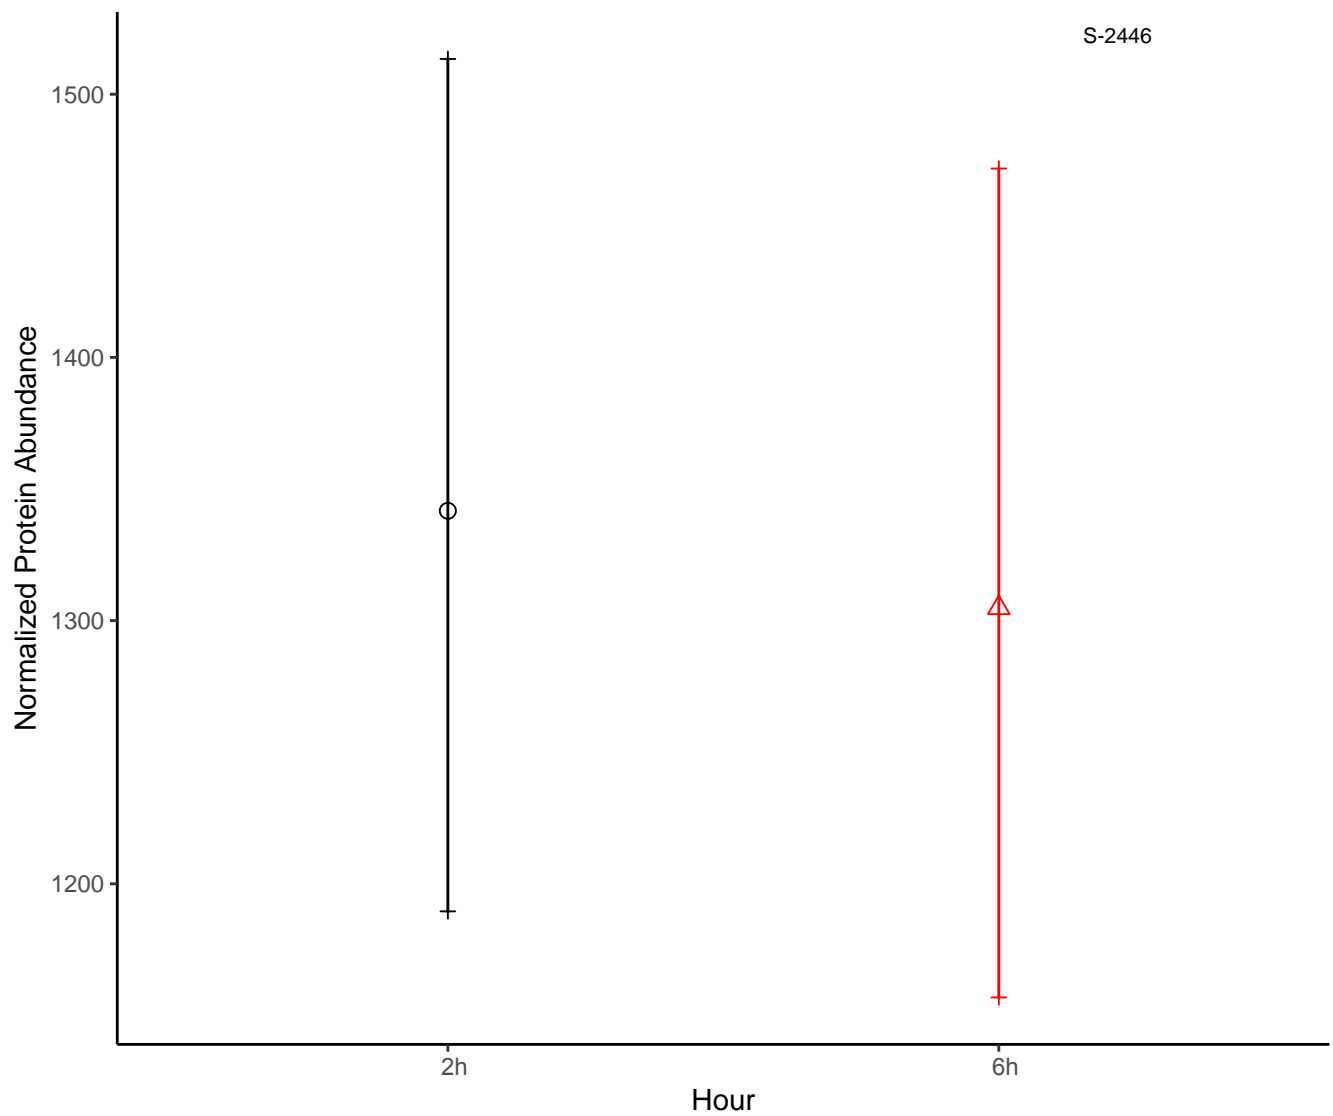

⊕ 2h

△ 6h

# TYSY\_STAAM

S-2447

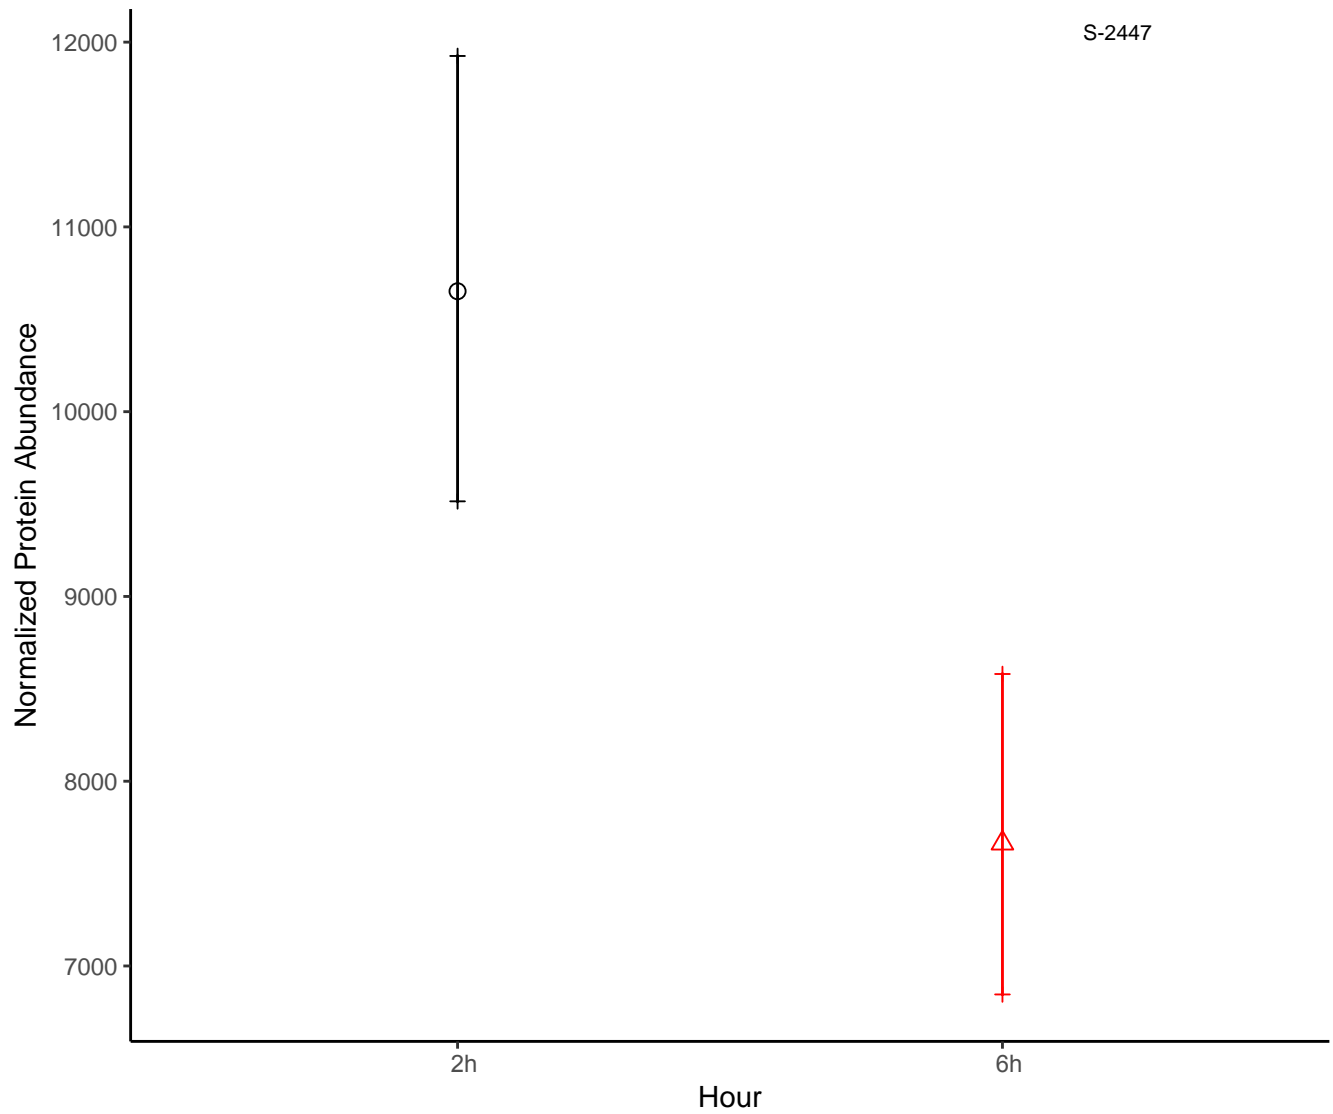

⊕ 2h

△ 6h

# UNG\_STAAM

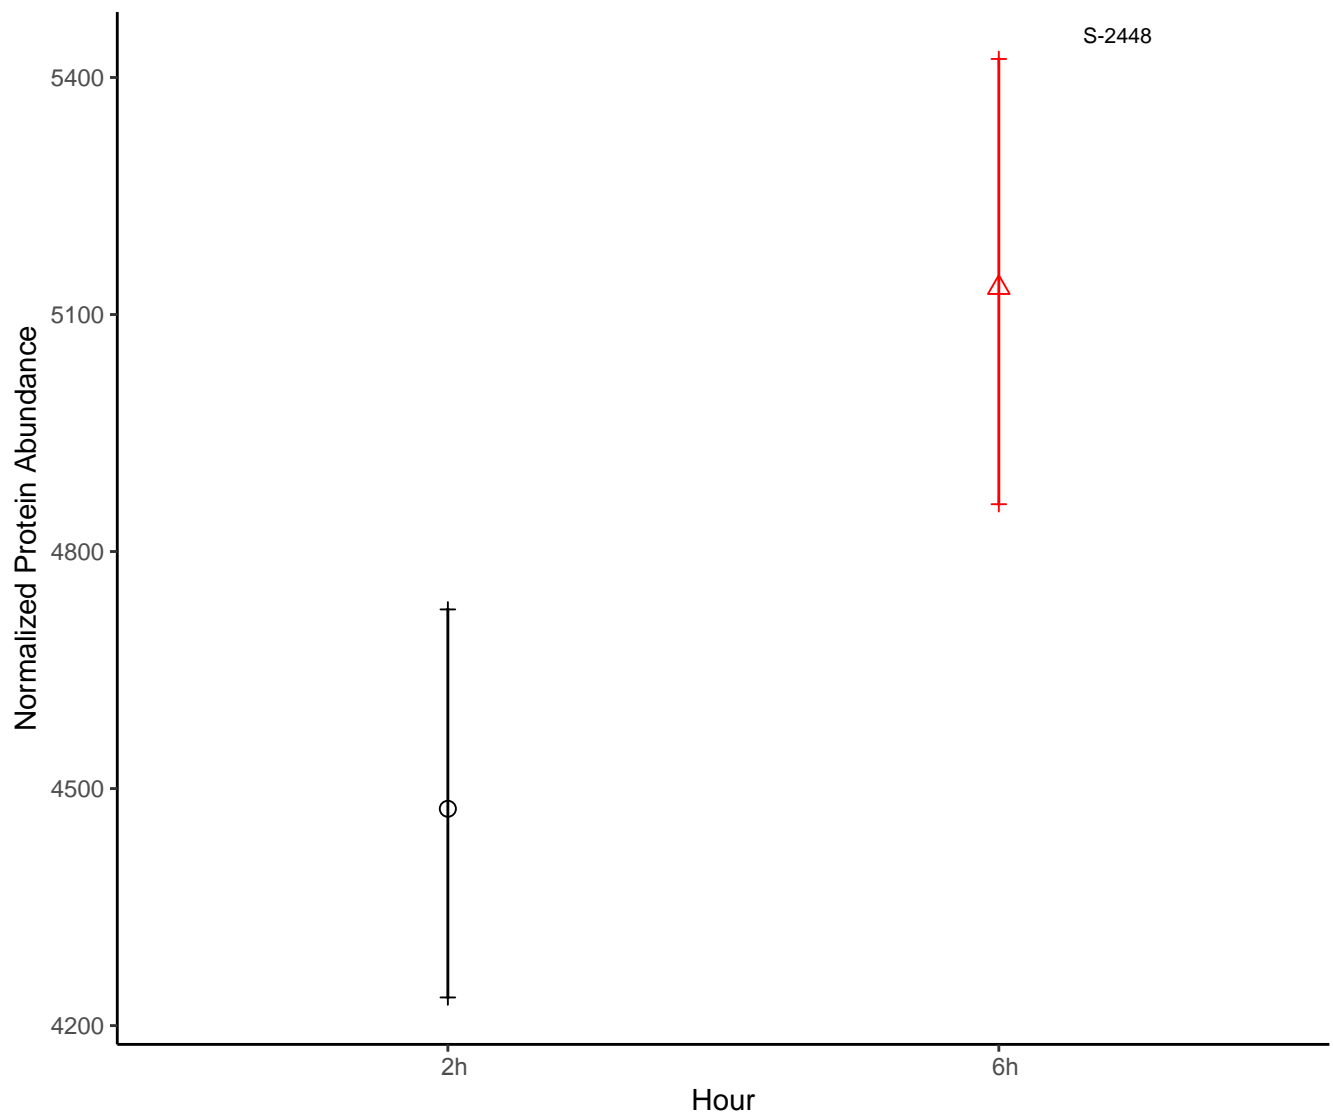

⊕ 2h

△ 6h



# UP355\_STAAM

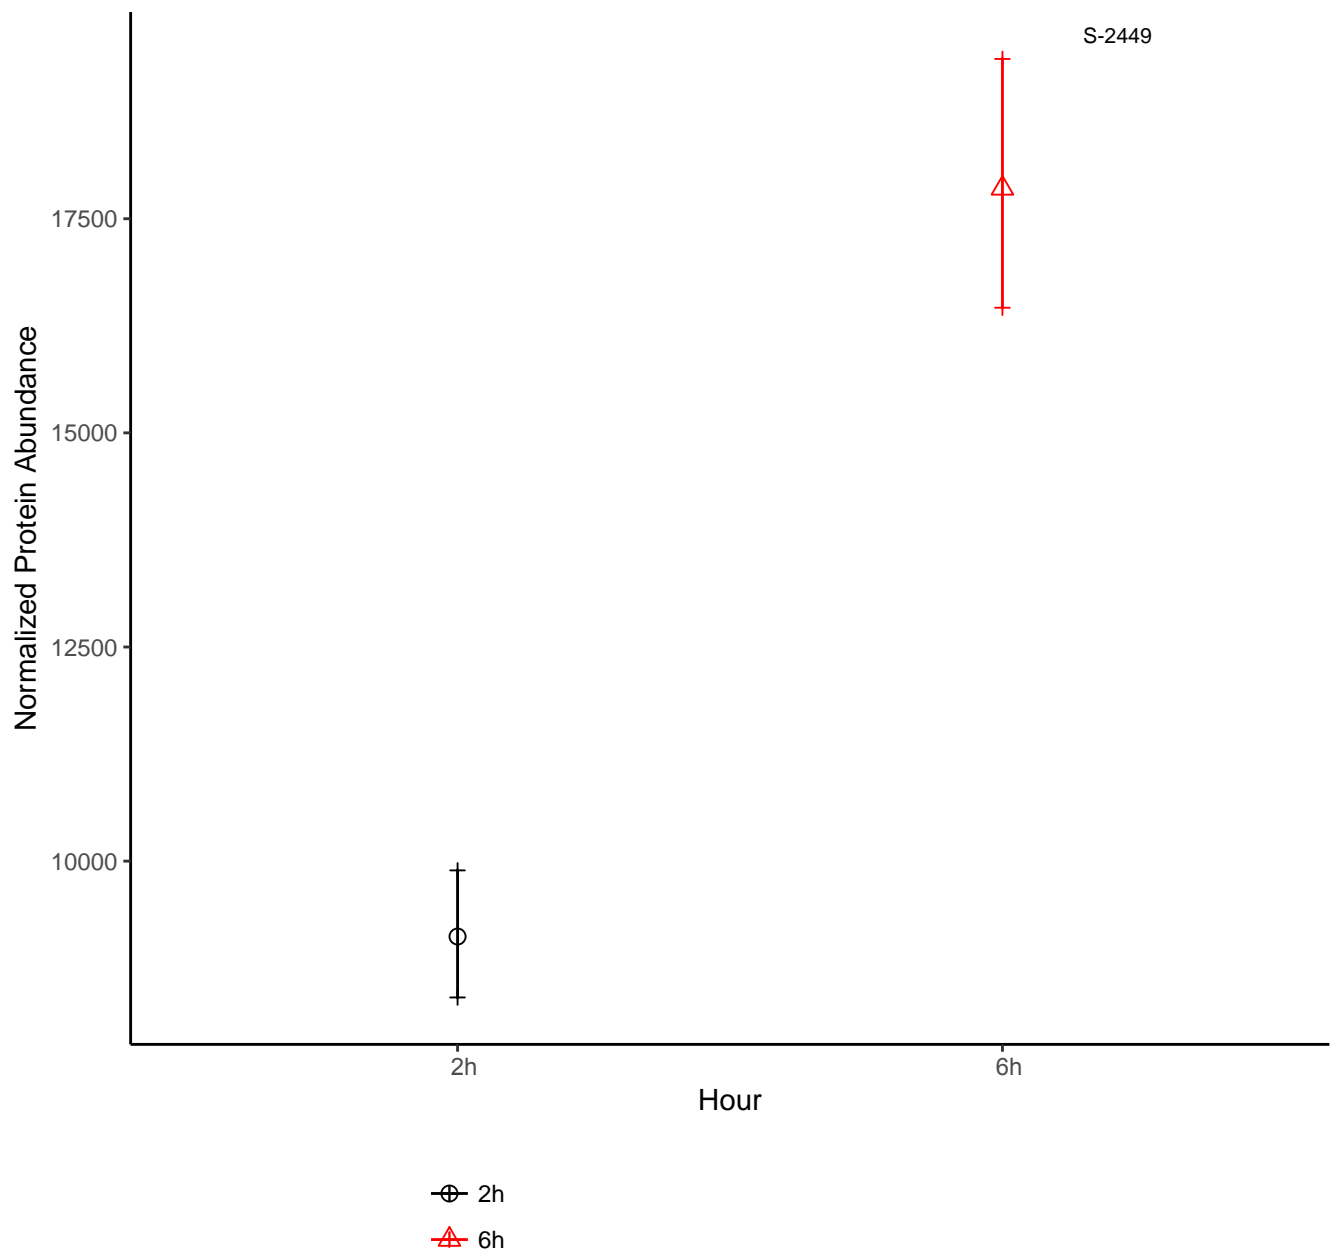

# UPP\_STAAM

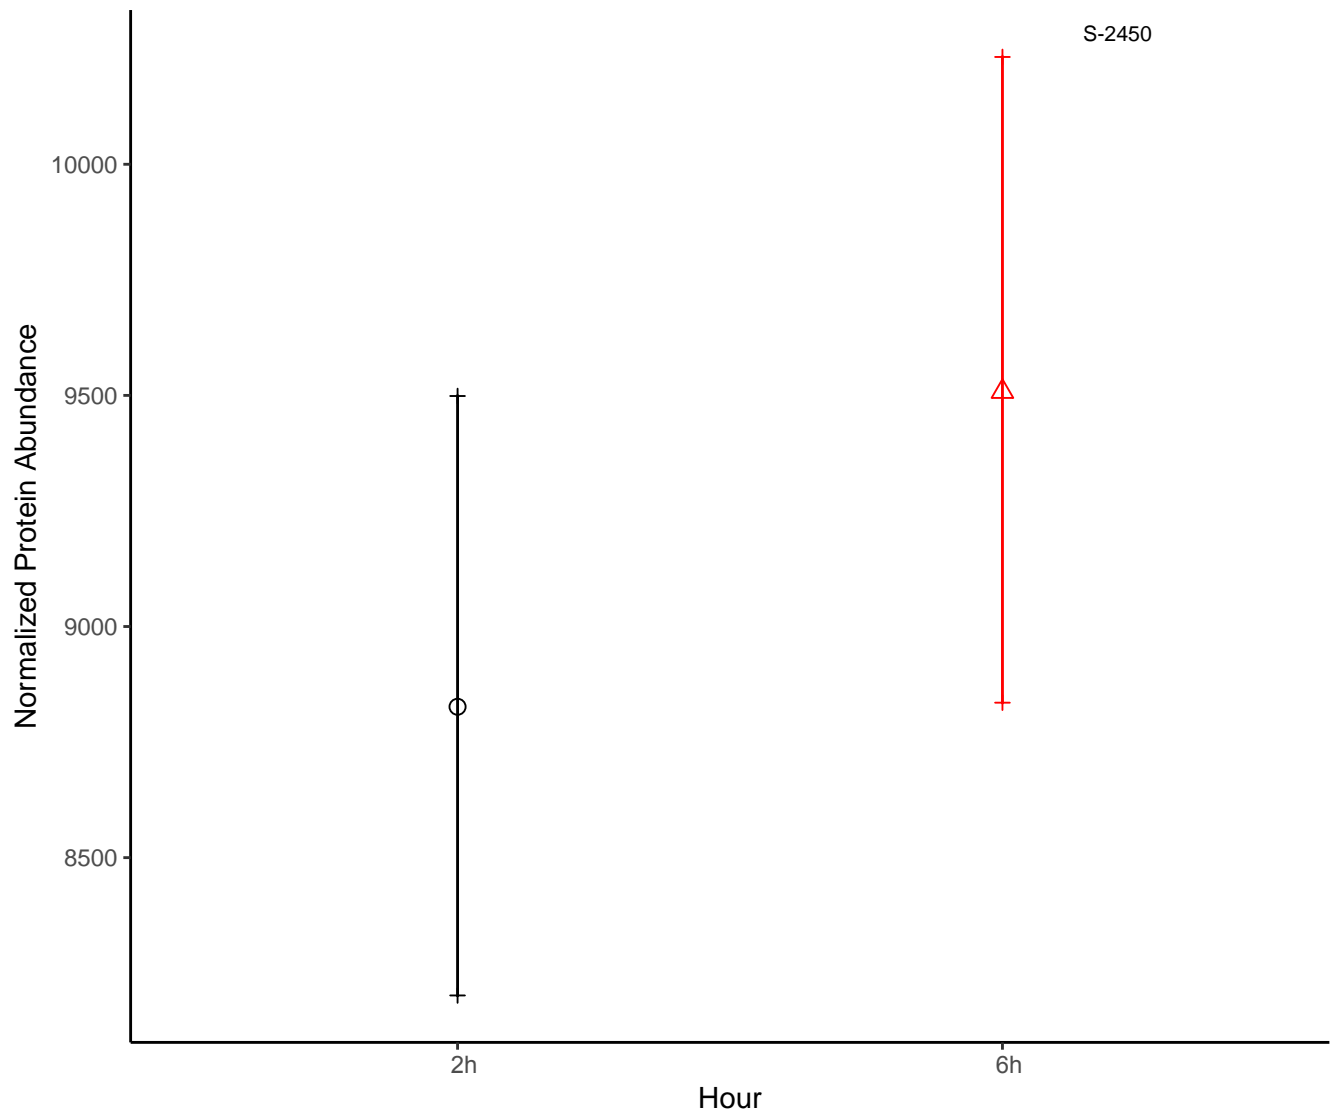

⊕ 2h

△ 6h

# UREE\_STAAM

S-2451

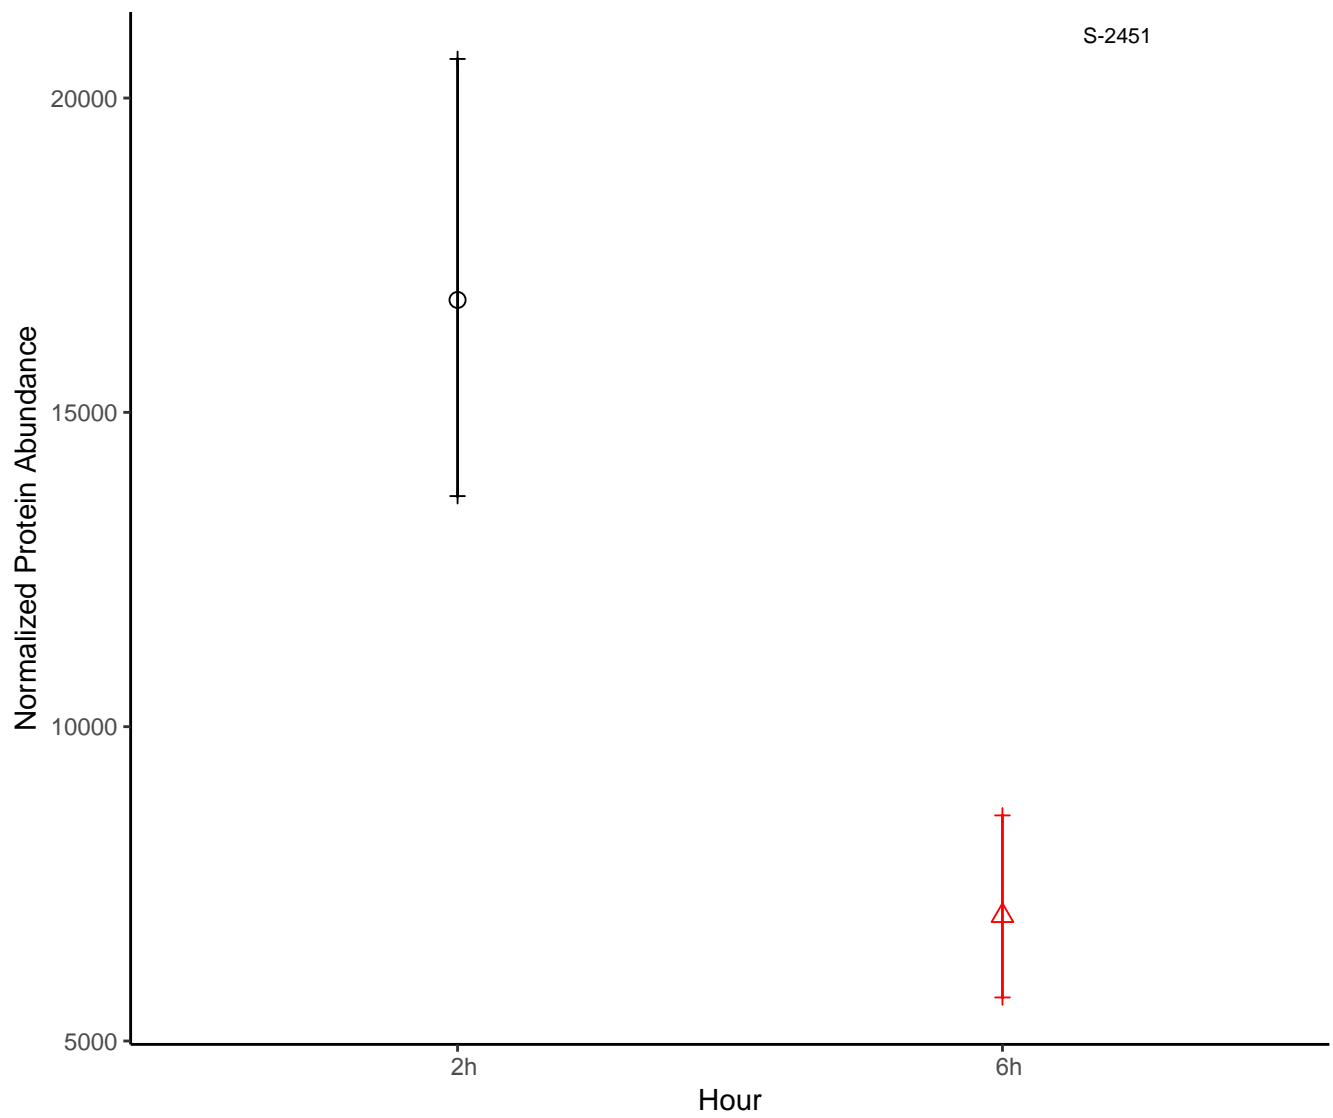

⊕ 2h

△ 6h

# UREG\_STAAM

S-2452

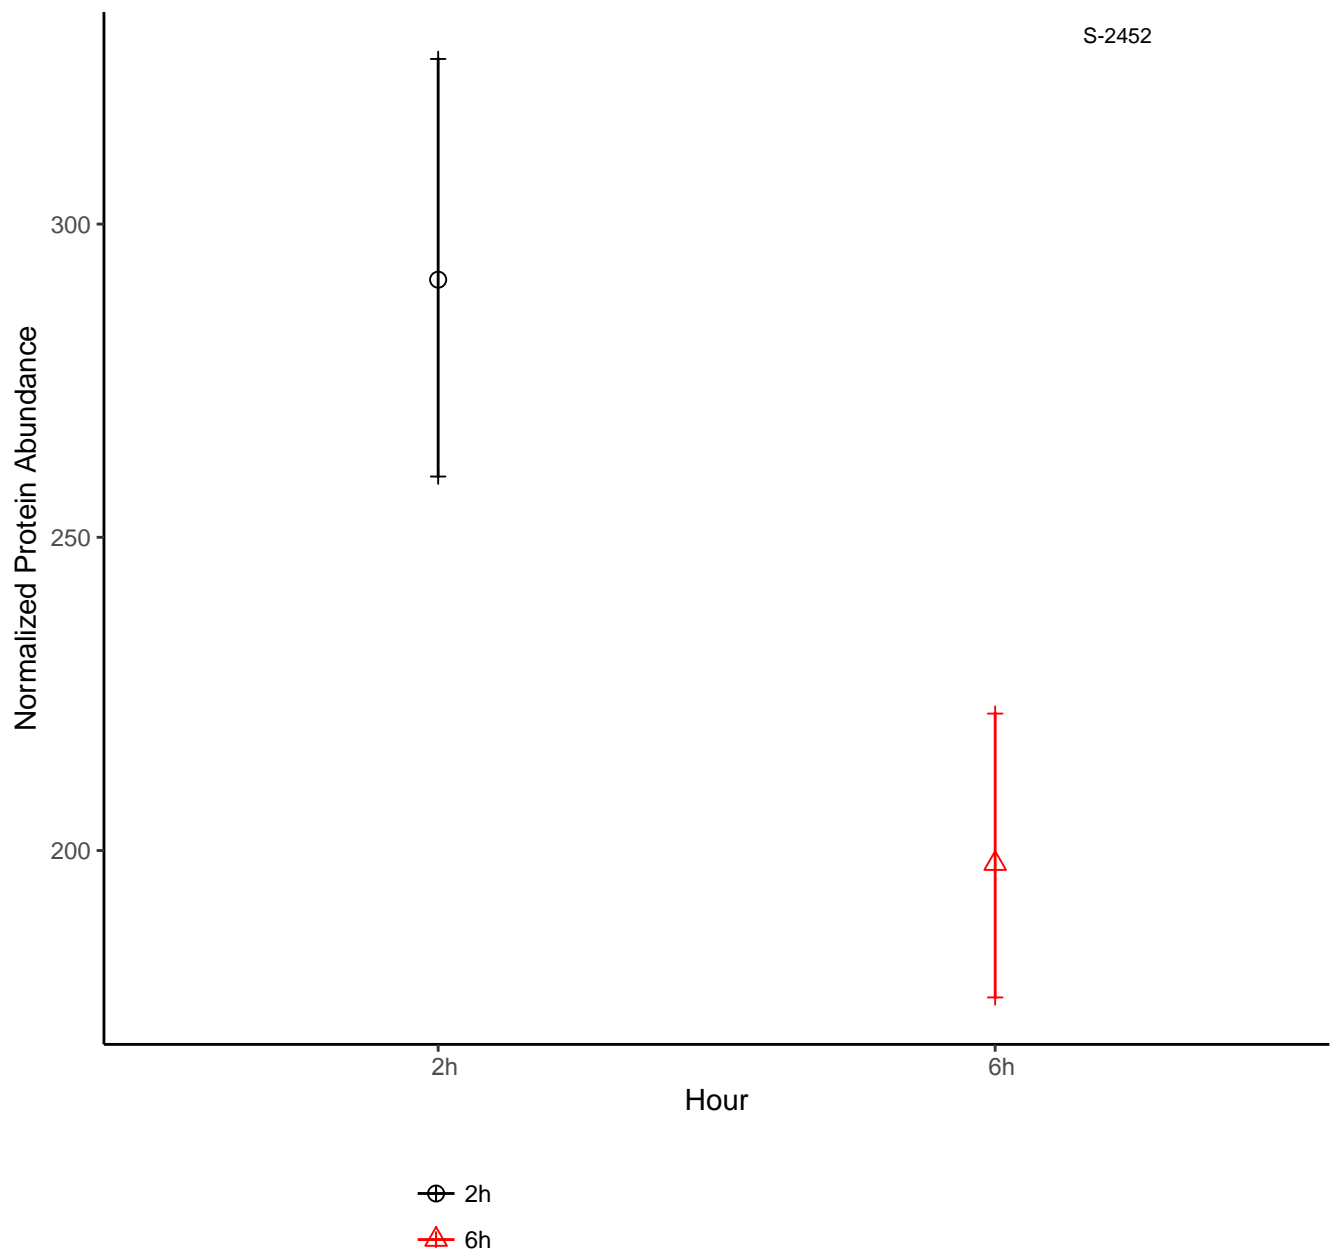

# URK\_STAAM

S-2453

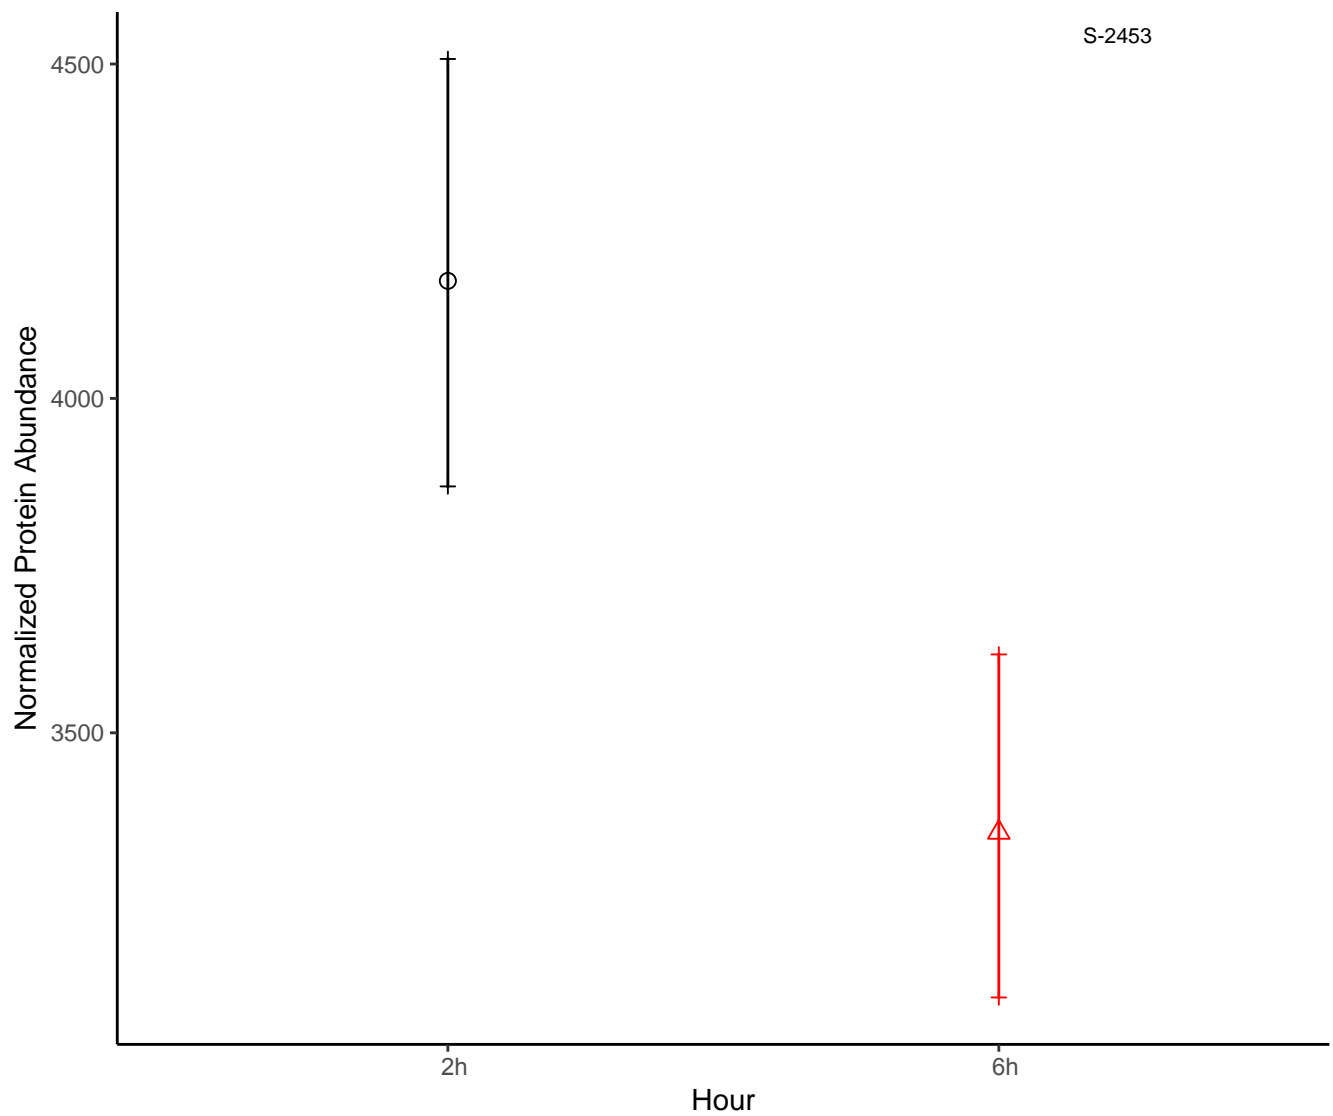

⊕ 2h

△ 6h

# URTF\_STAAM

S-2454

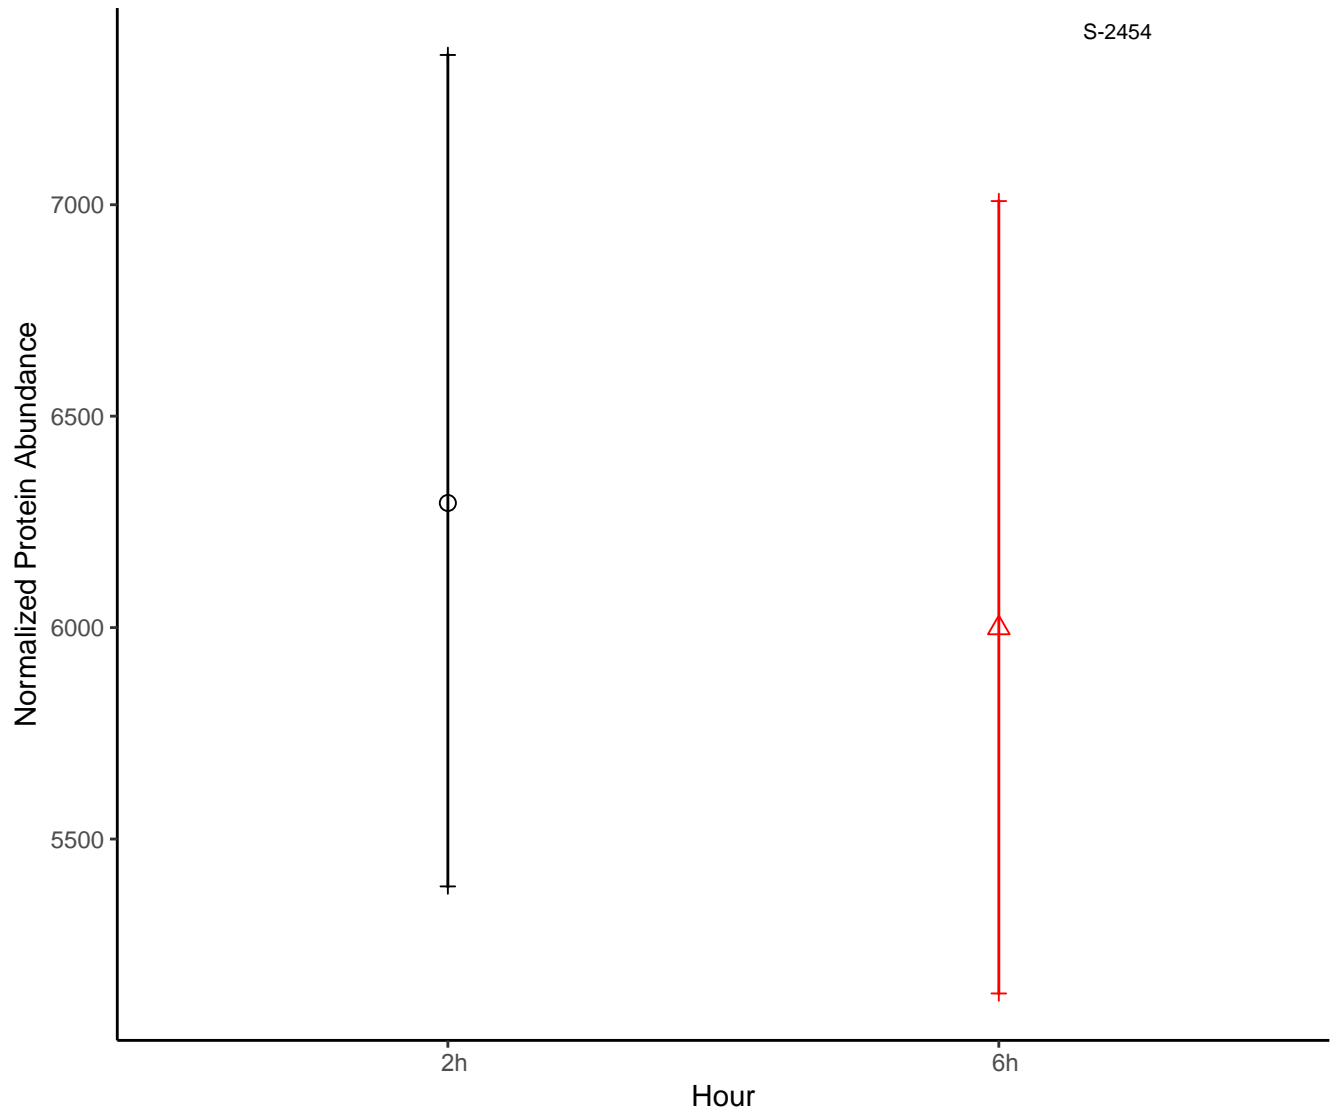

⊕ 2h

△ 6h

# UVRA\_STAAM

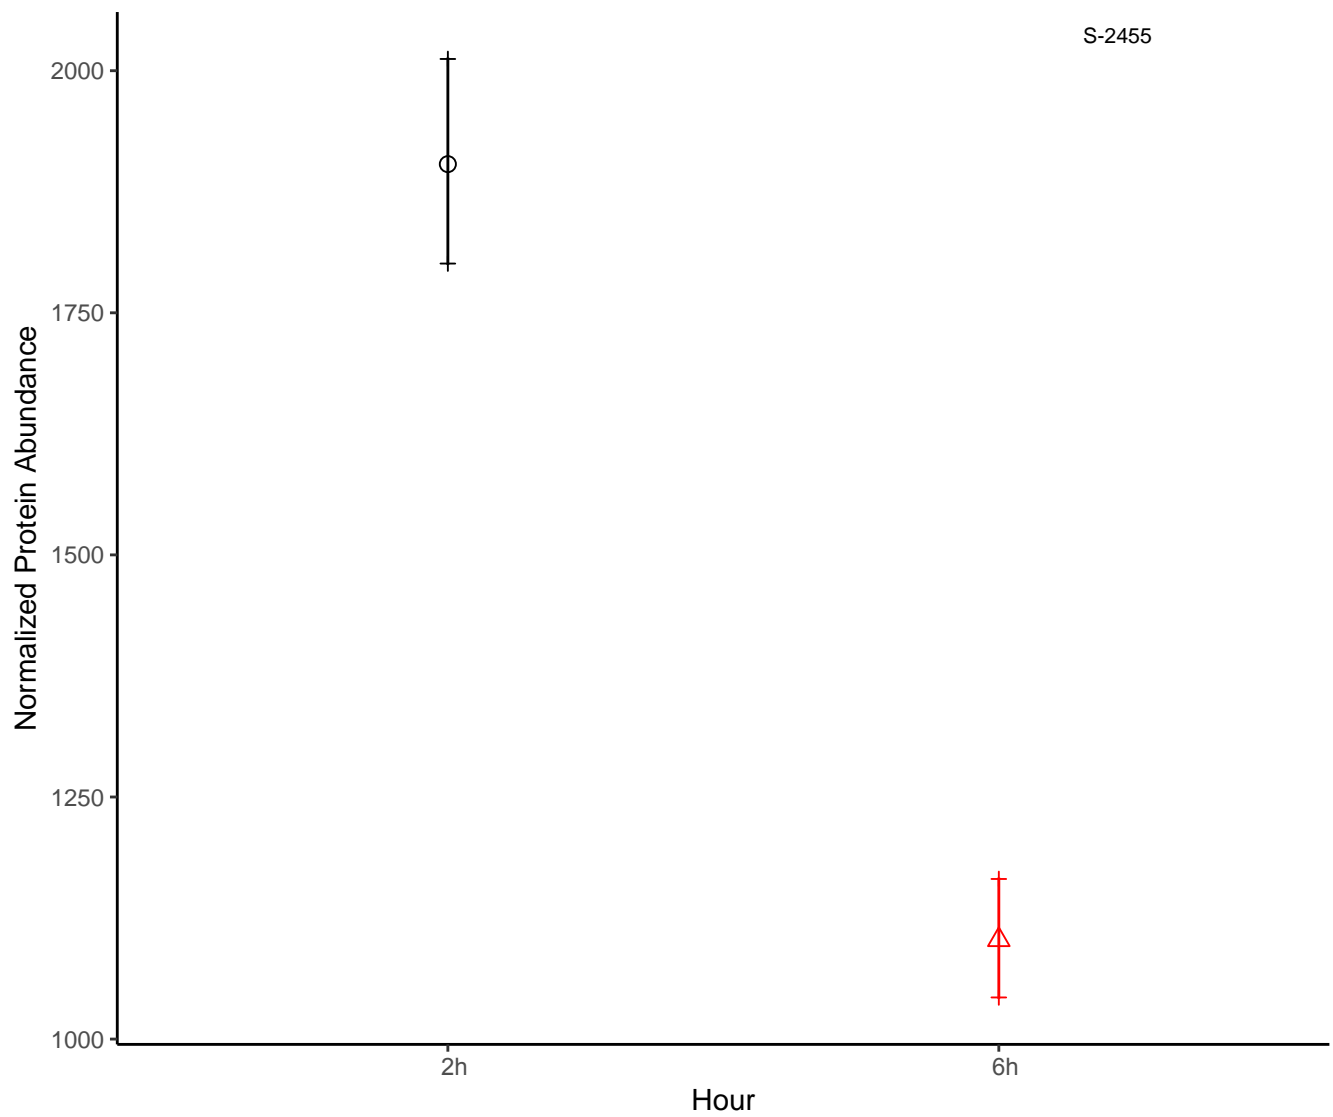

⊕ 2h

△ 6h

# VRAC\_STAAM

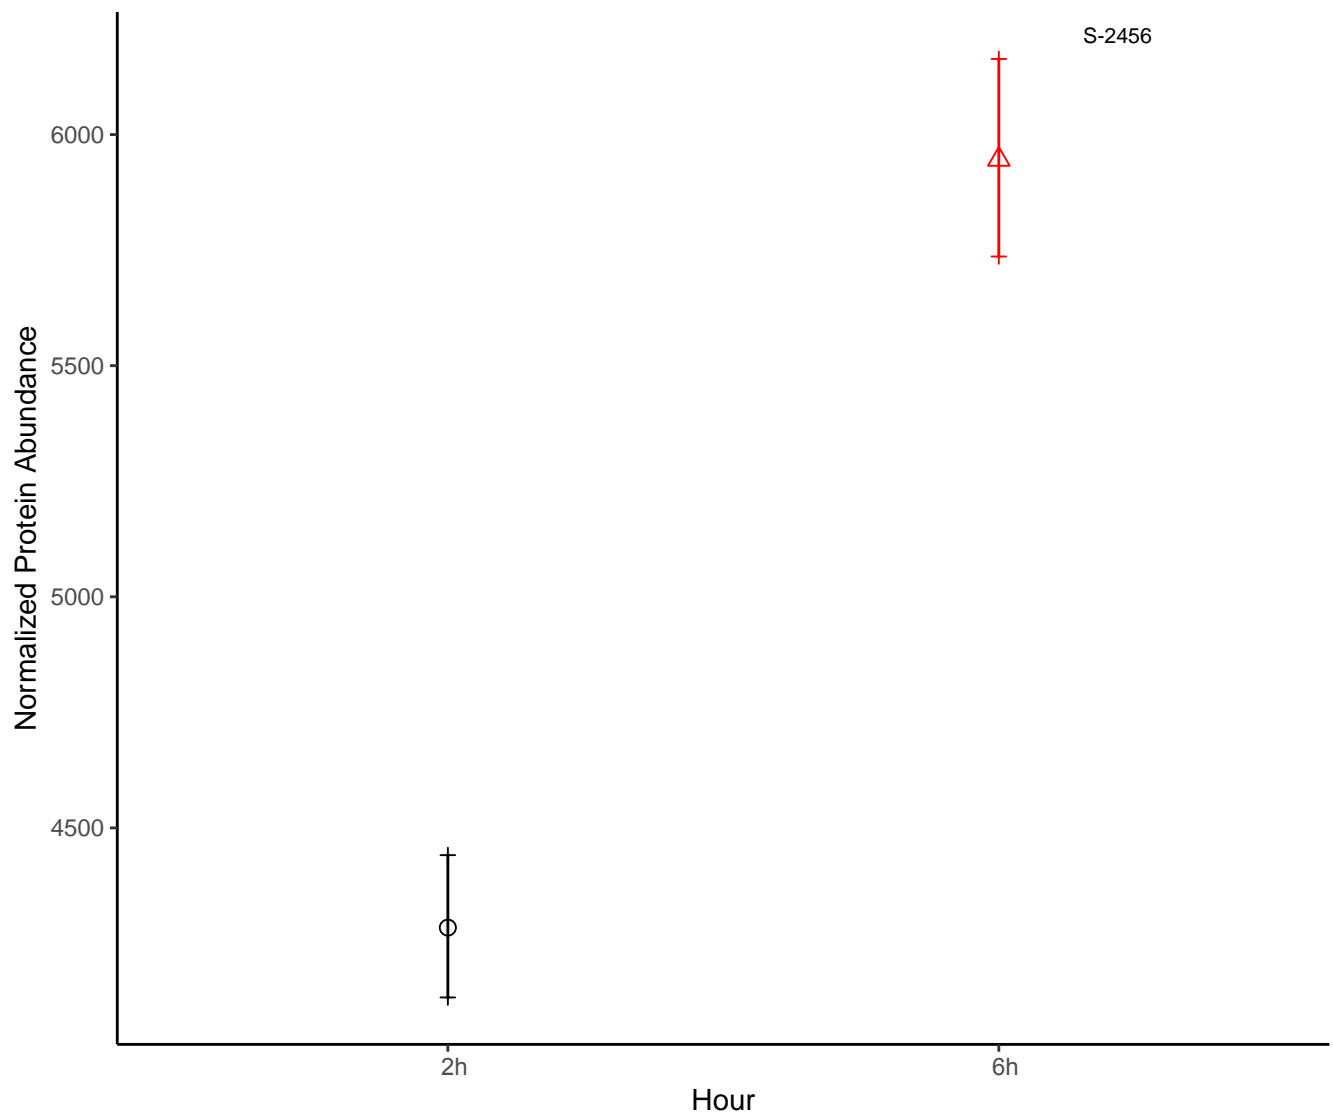

⊕ 2h

△ 6h



# VRAR\_STAAM

S-2457

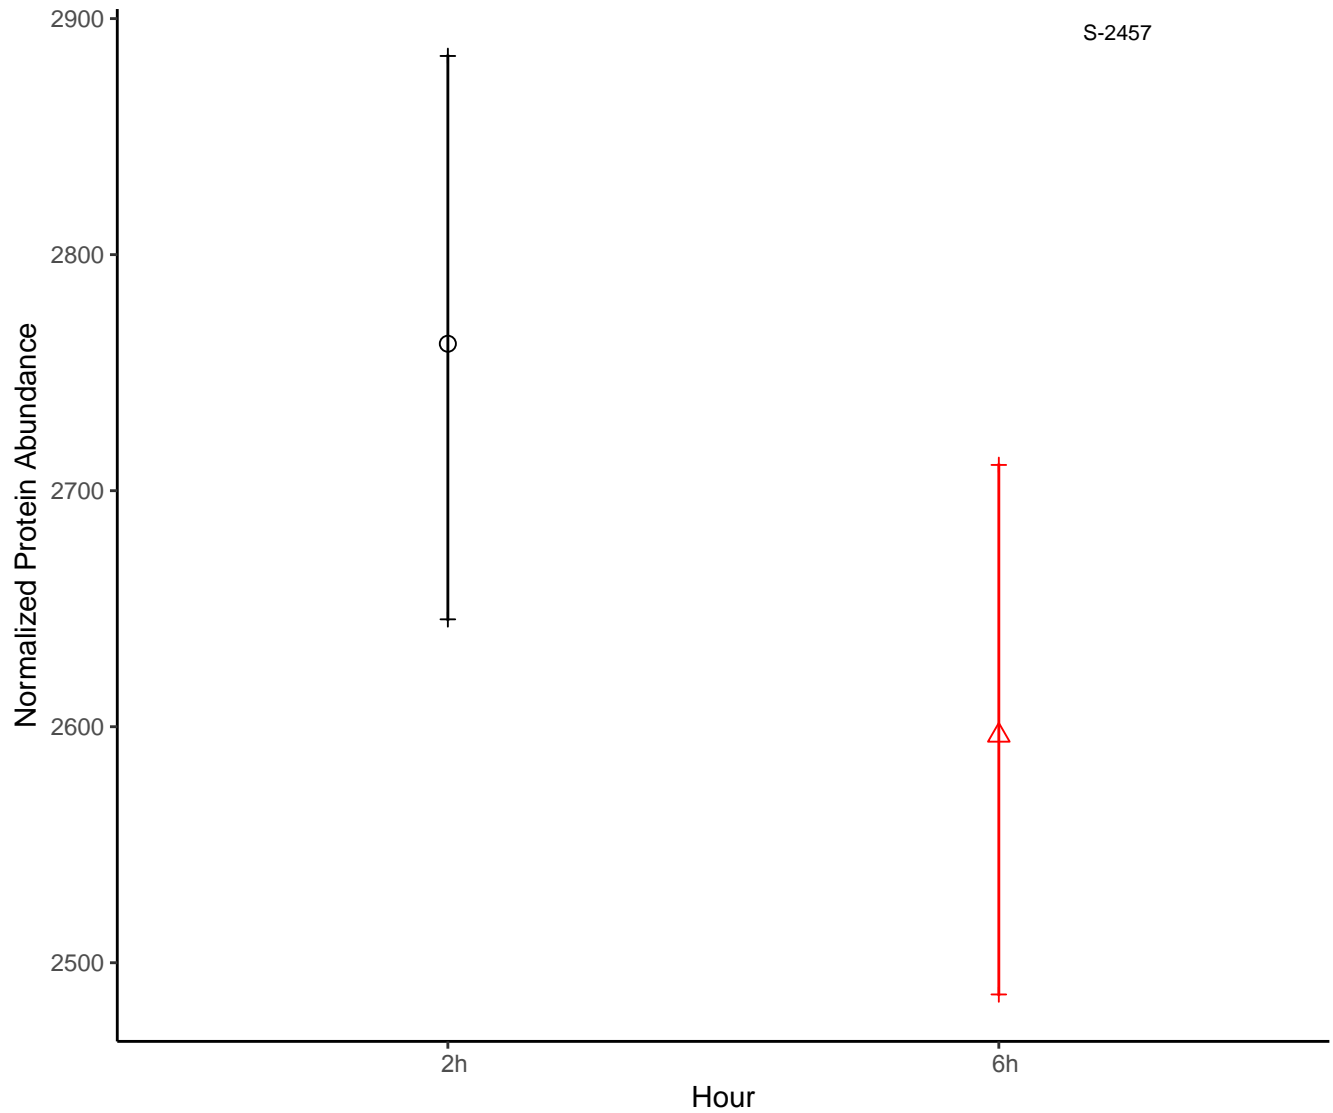

⊕ 2h

△ 6h

# WALK\_STAAM

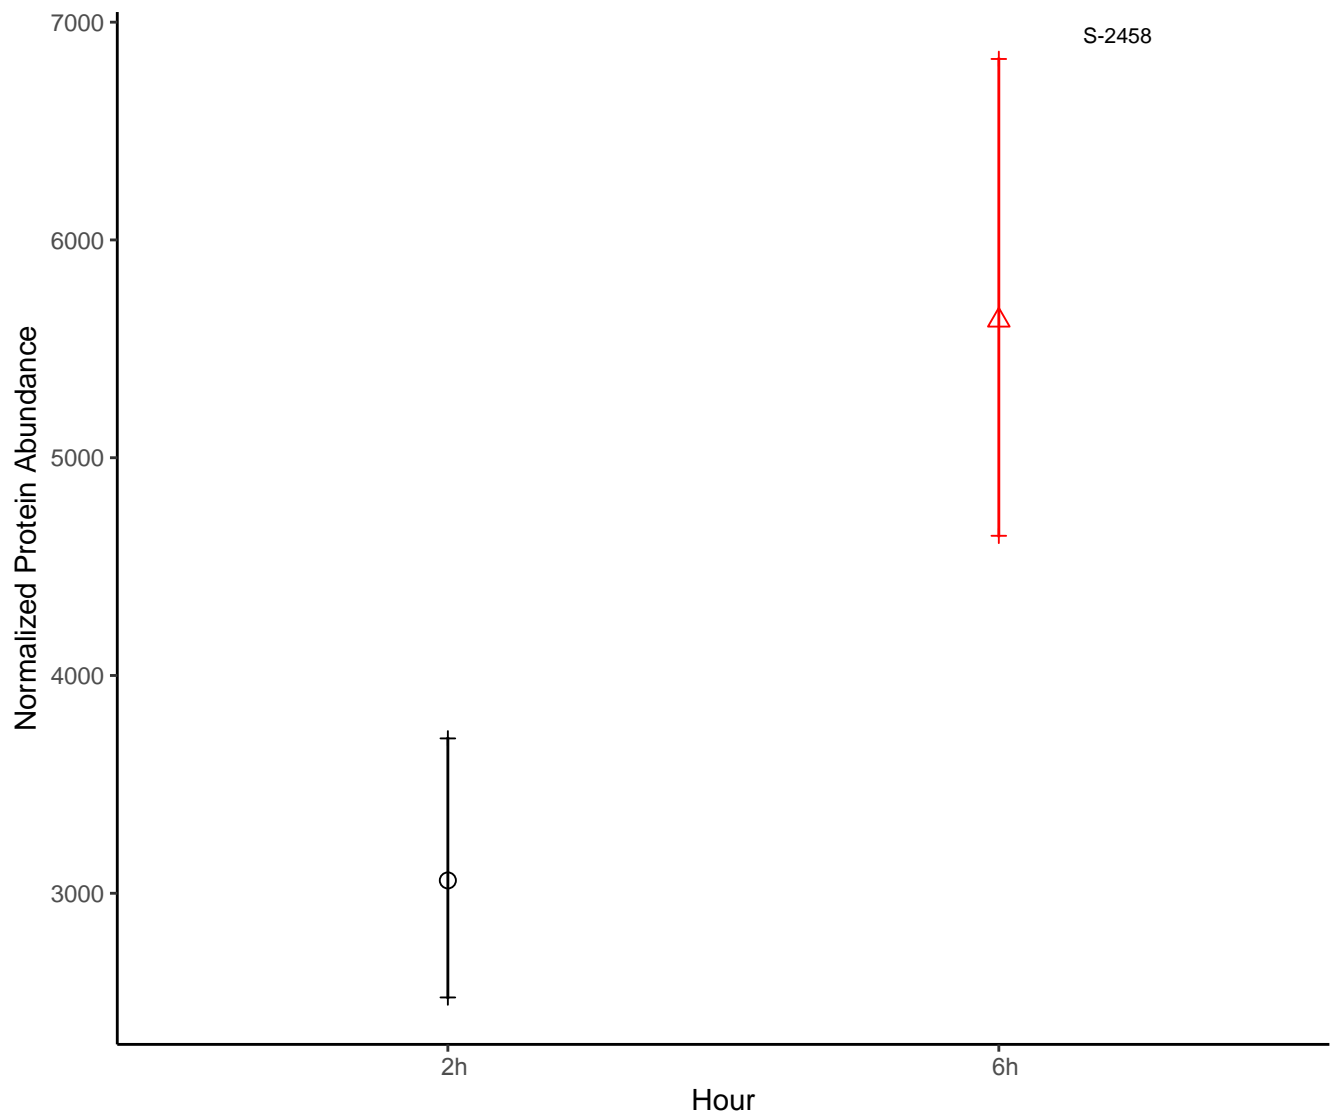

⊕ 2h

△ 6h

# WALR\_STAAM

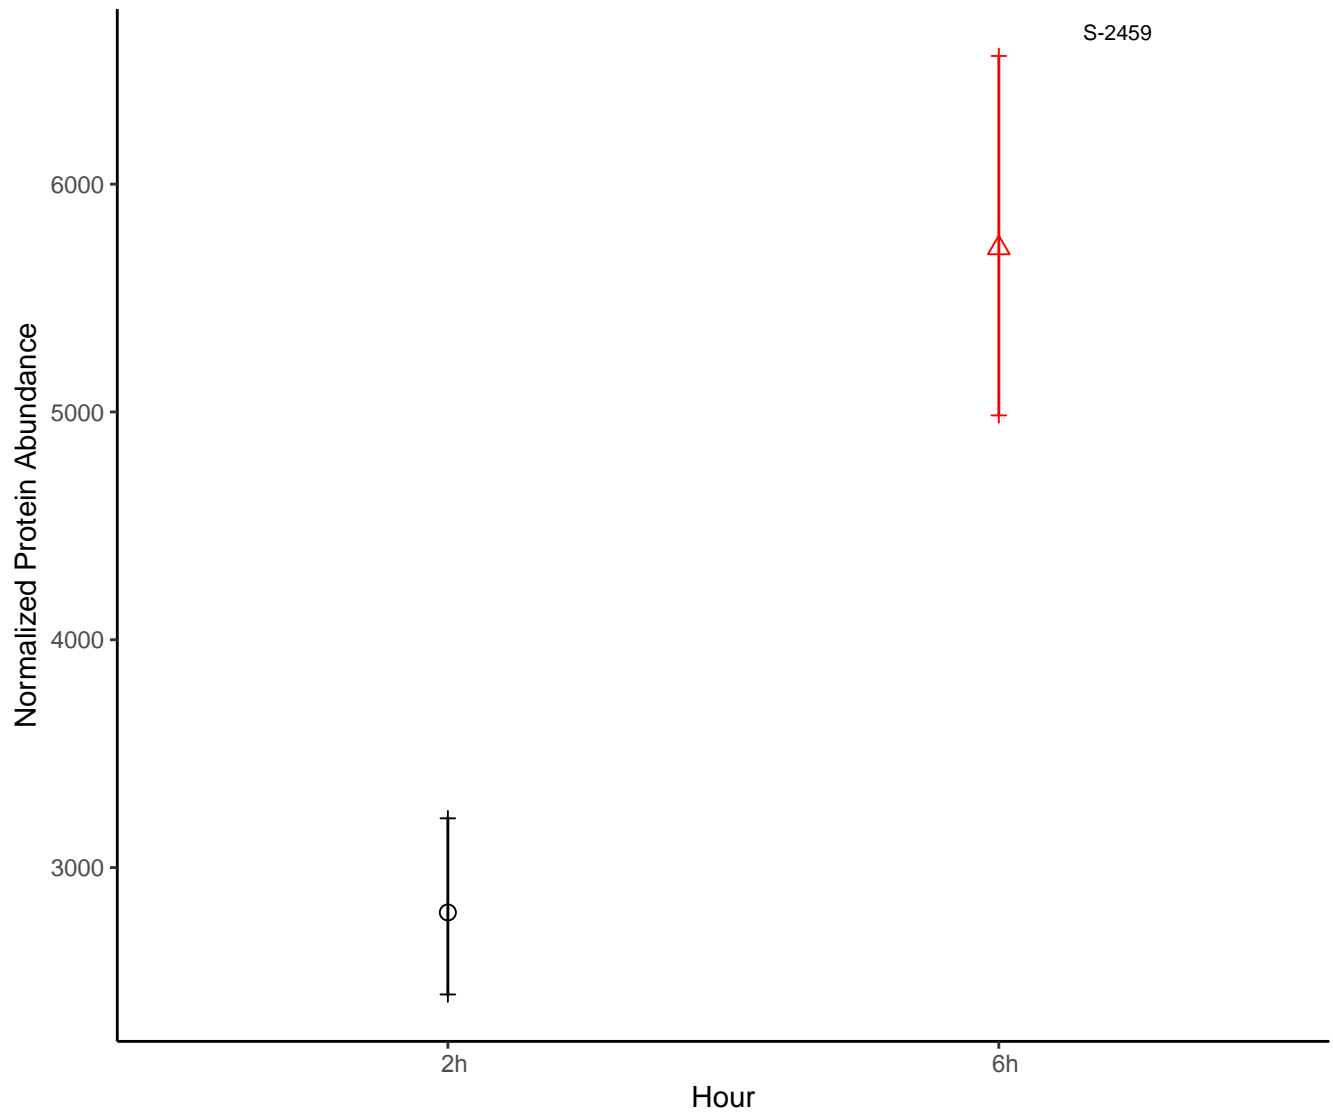

⊕ 2h

△ 6h

# XERD\_STAAM

S-2460

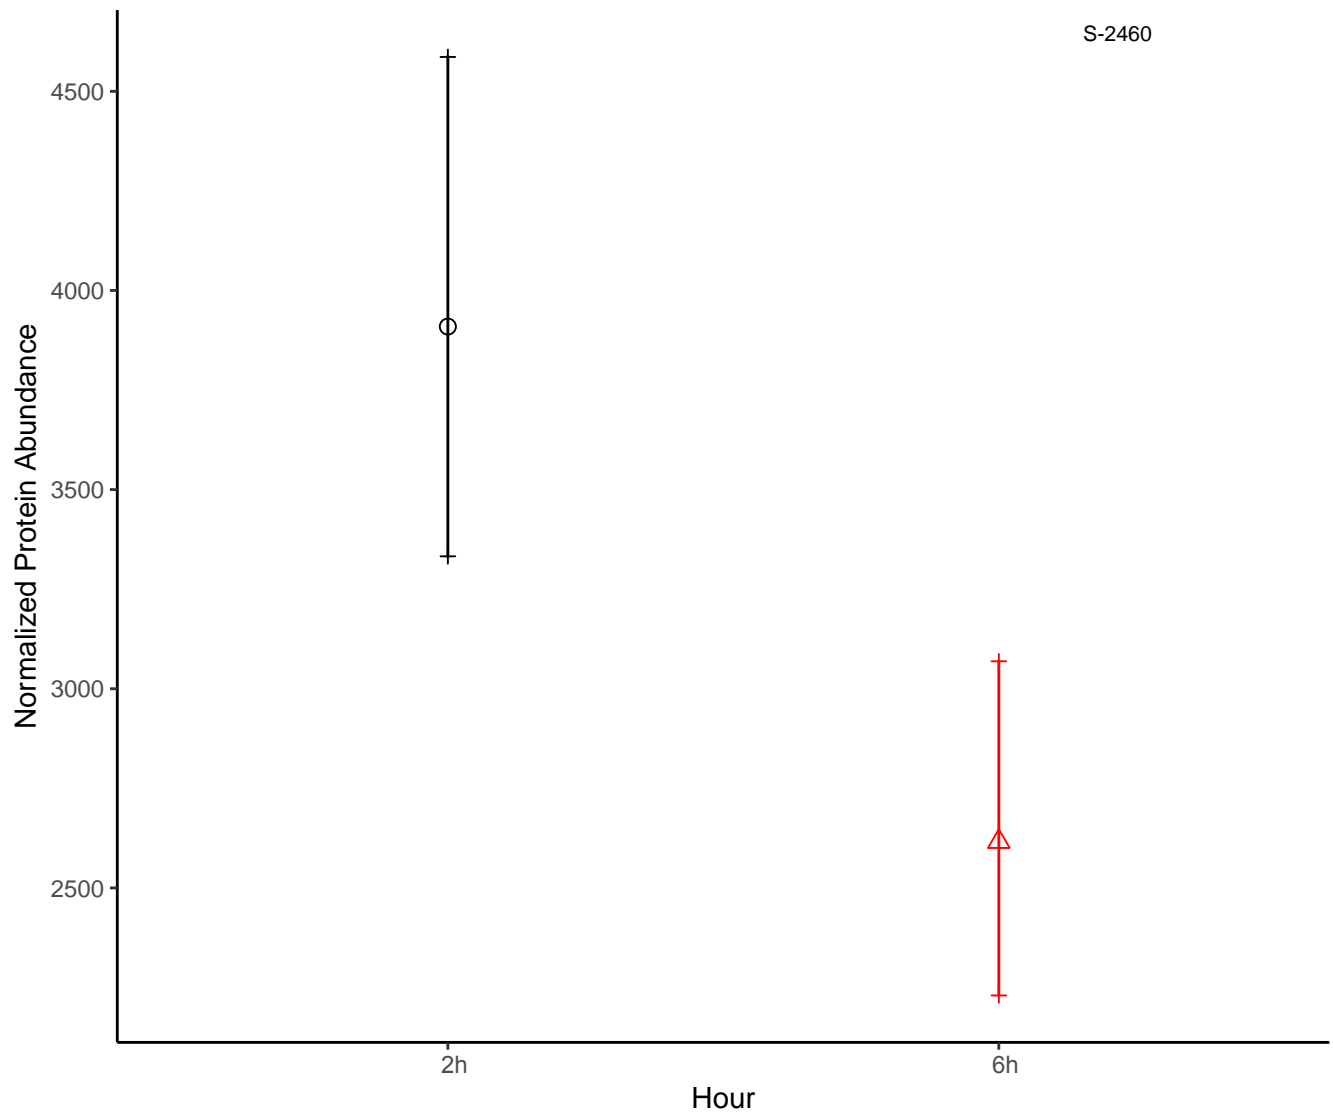

⊕ 2h

△ 6h

# XPT\_STAAM

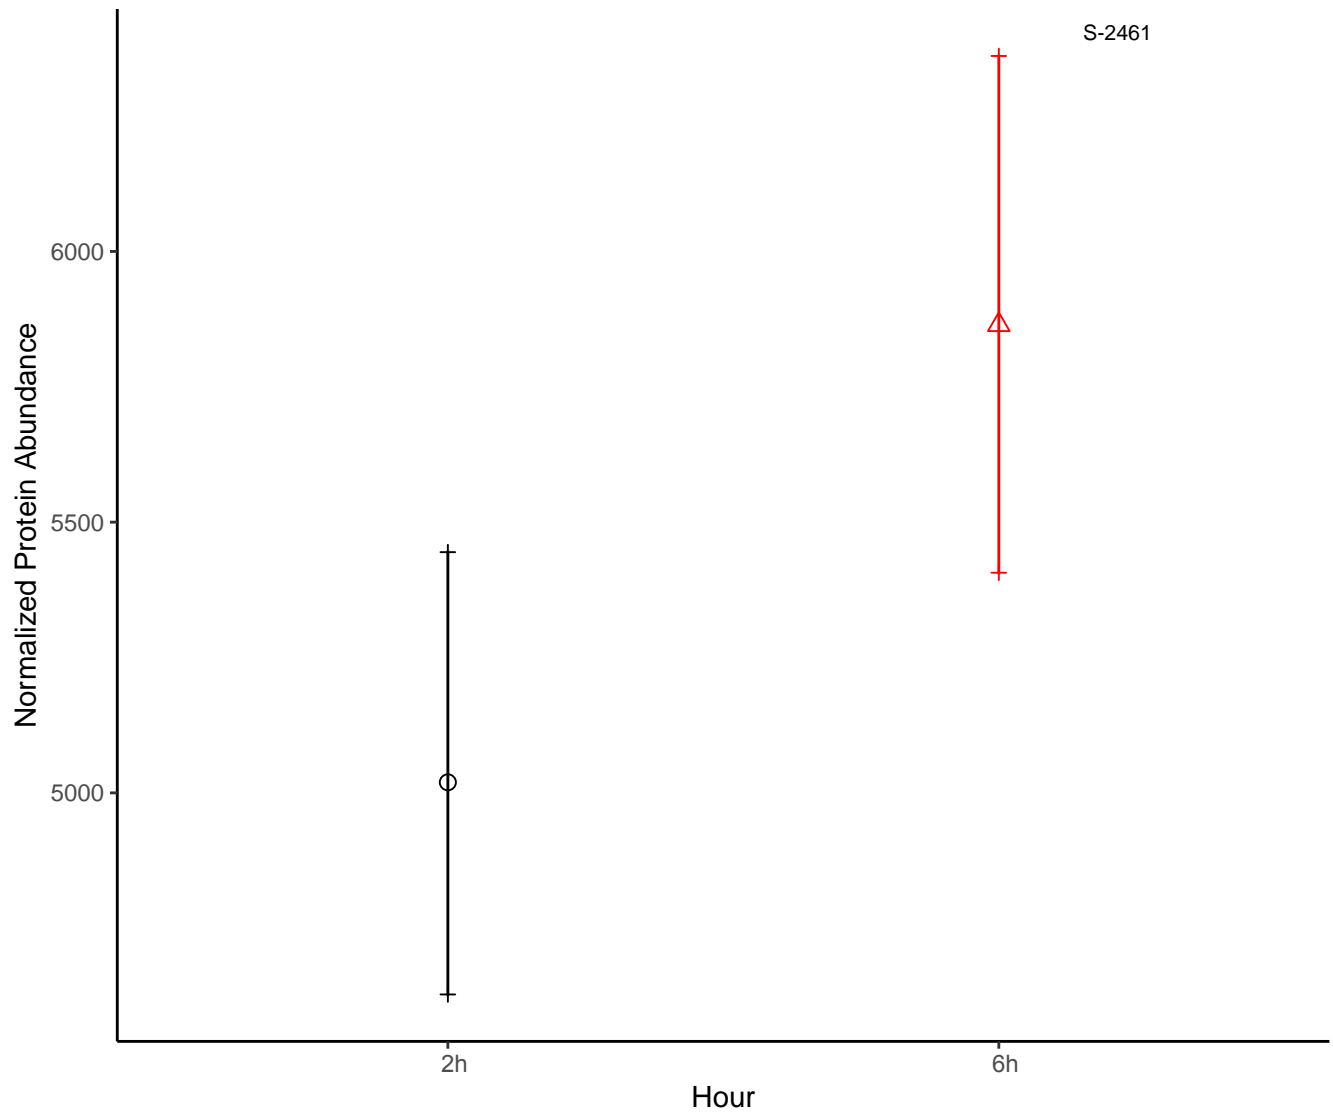

⊕ 2h

△ 6h

# Y098\_STAAM

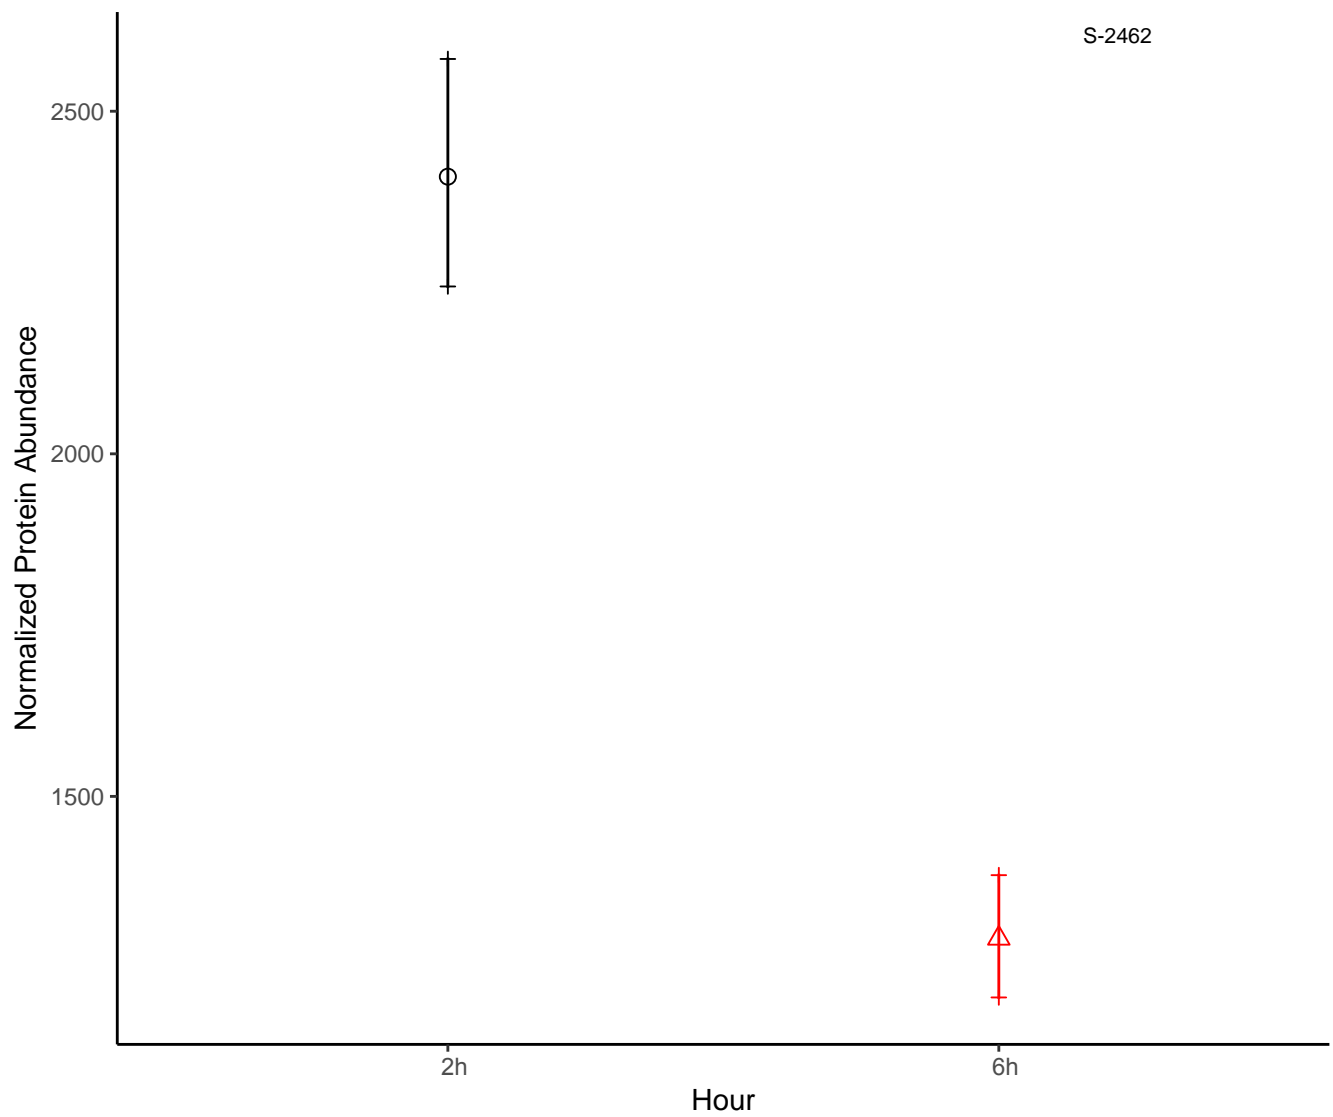

⊕ 2h

△ 6h

# Y099\_STAAM

S-2463

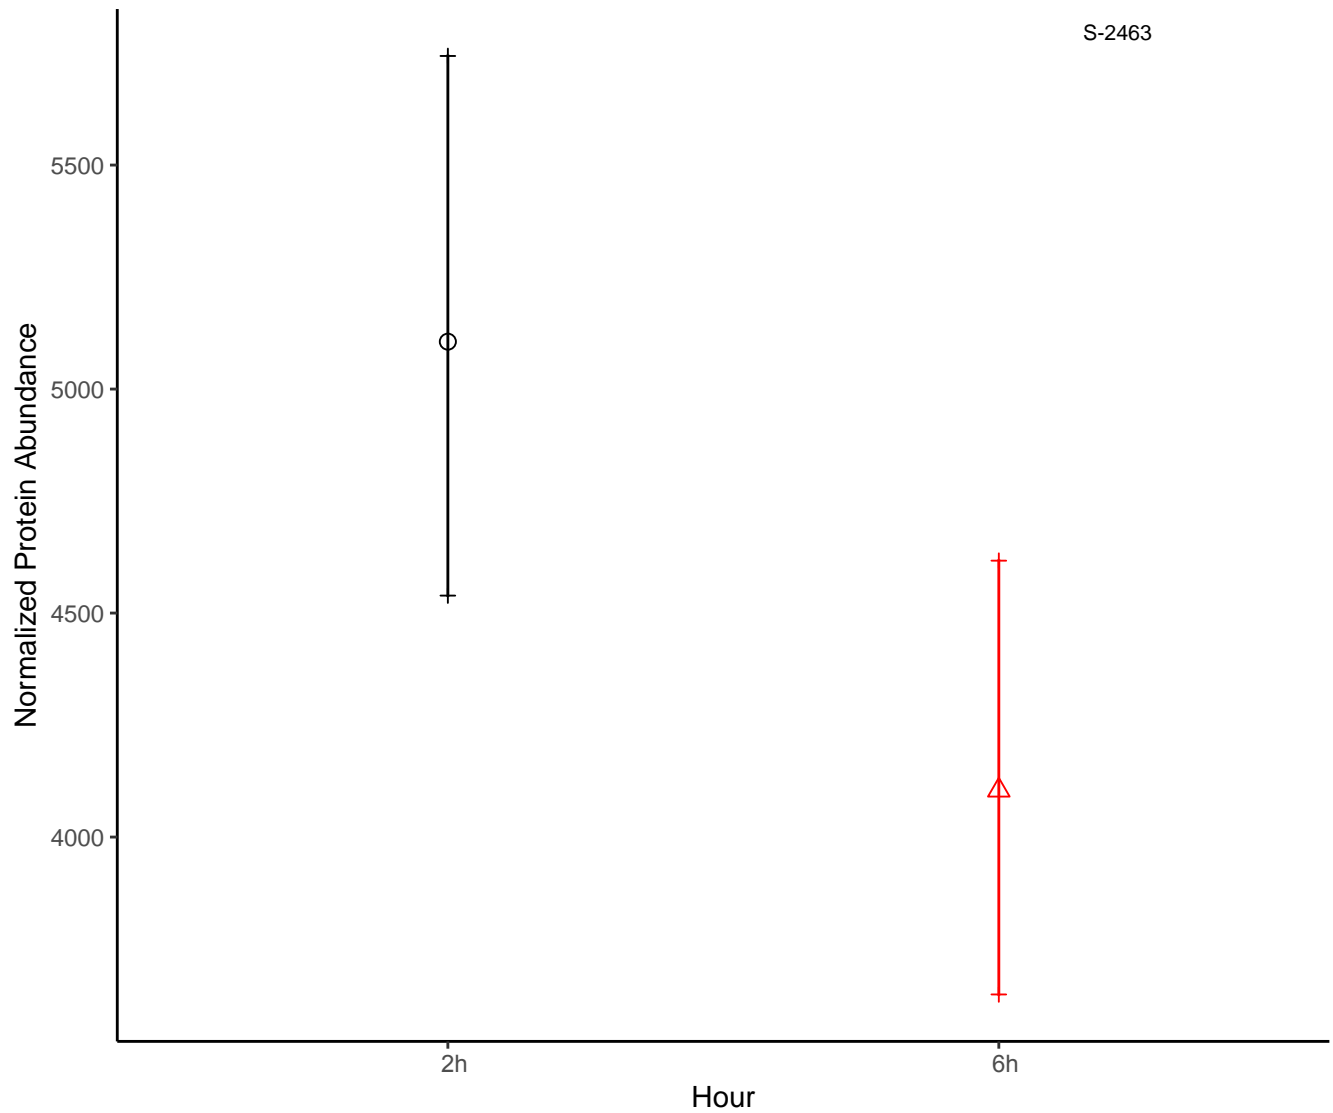

⊕ 2h

△ 6h

# Y1015\_STAAM

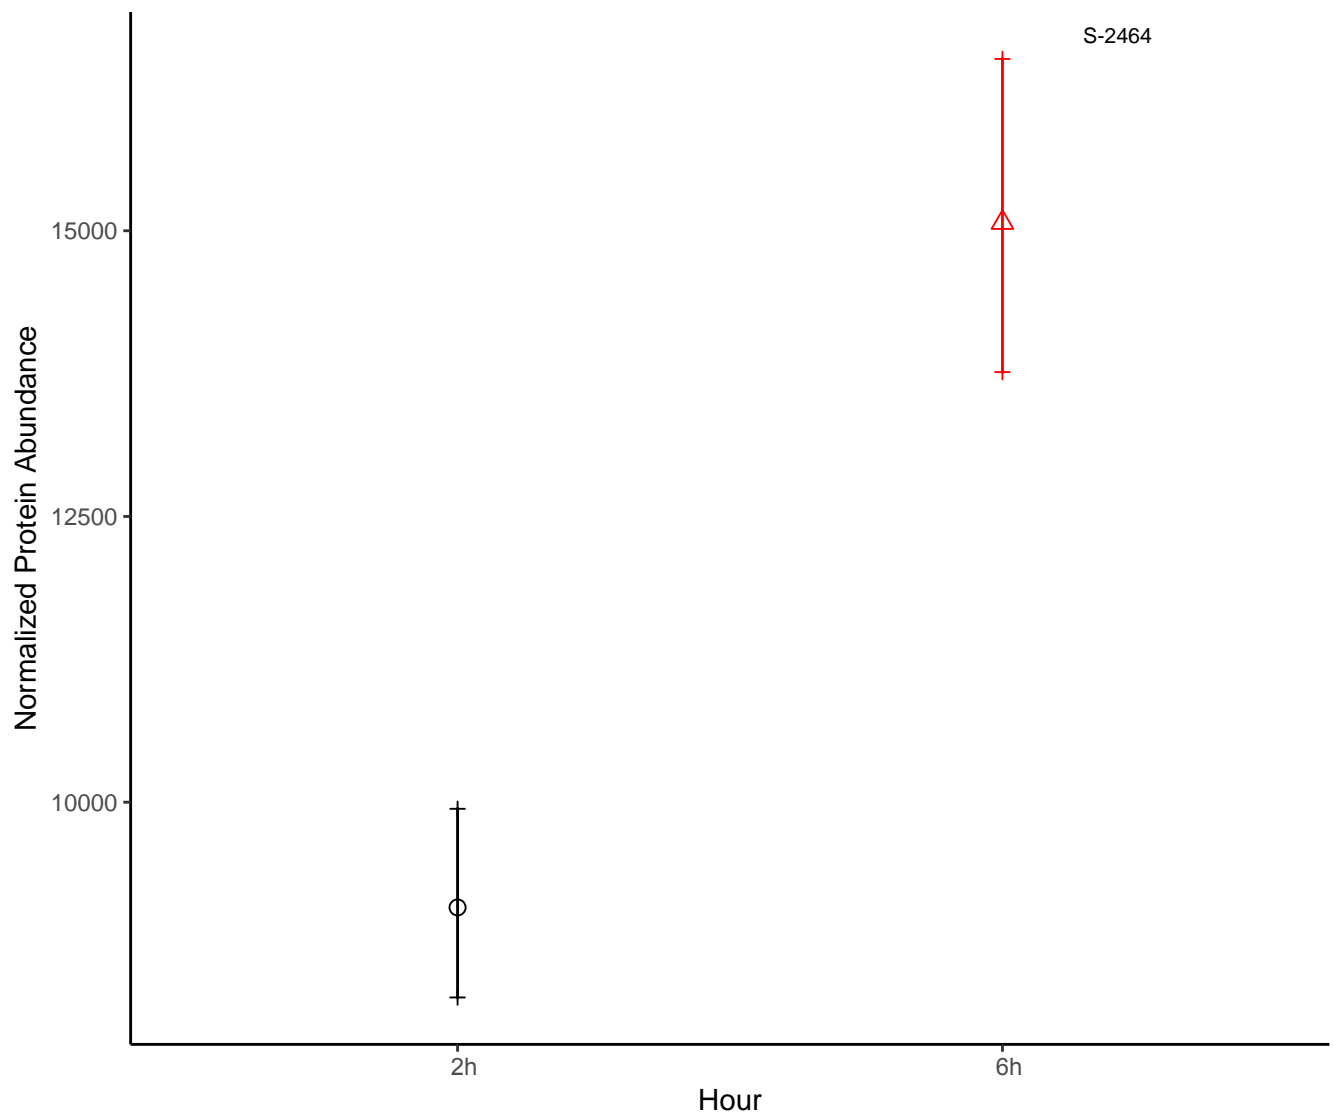

⊕ 2h

△ 6h



# Y1090\_STAAM

S-2465

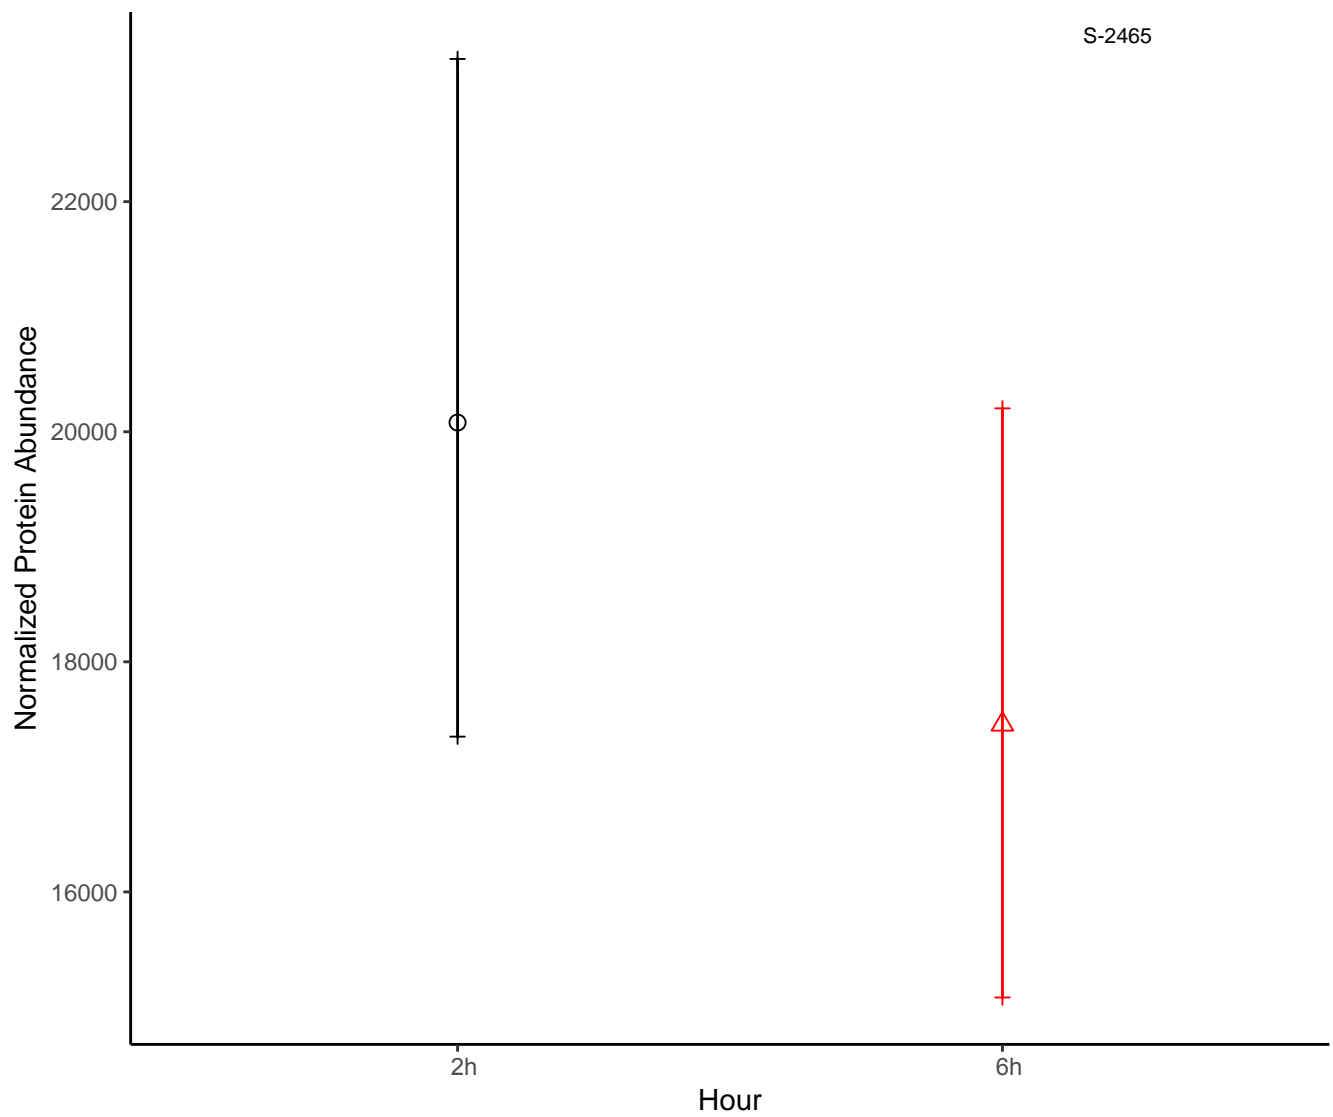

⊕ 2h

△ 6h

# Y1176\_STAAM

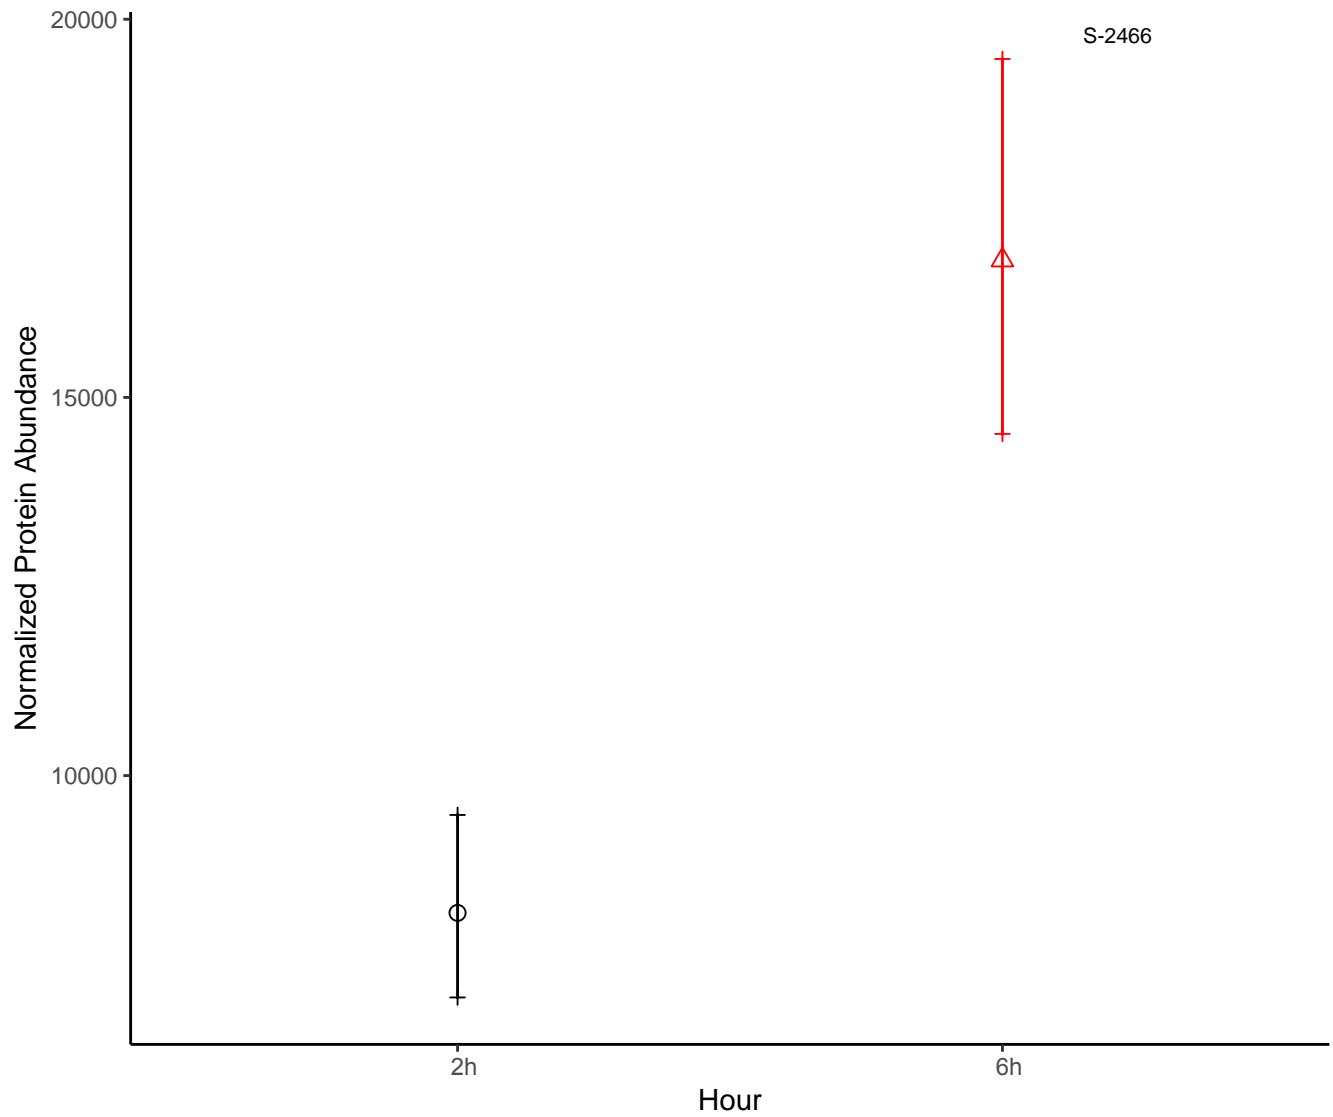

⊕ 2h

△ 6h

# Y1177\_STAAM

S-2467

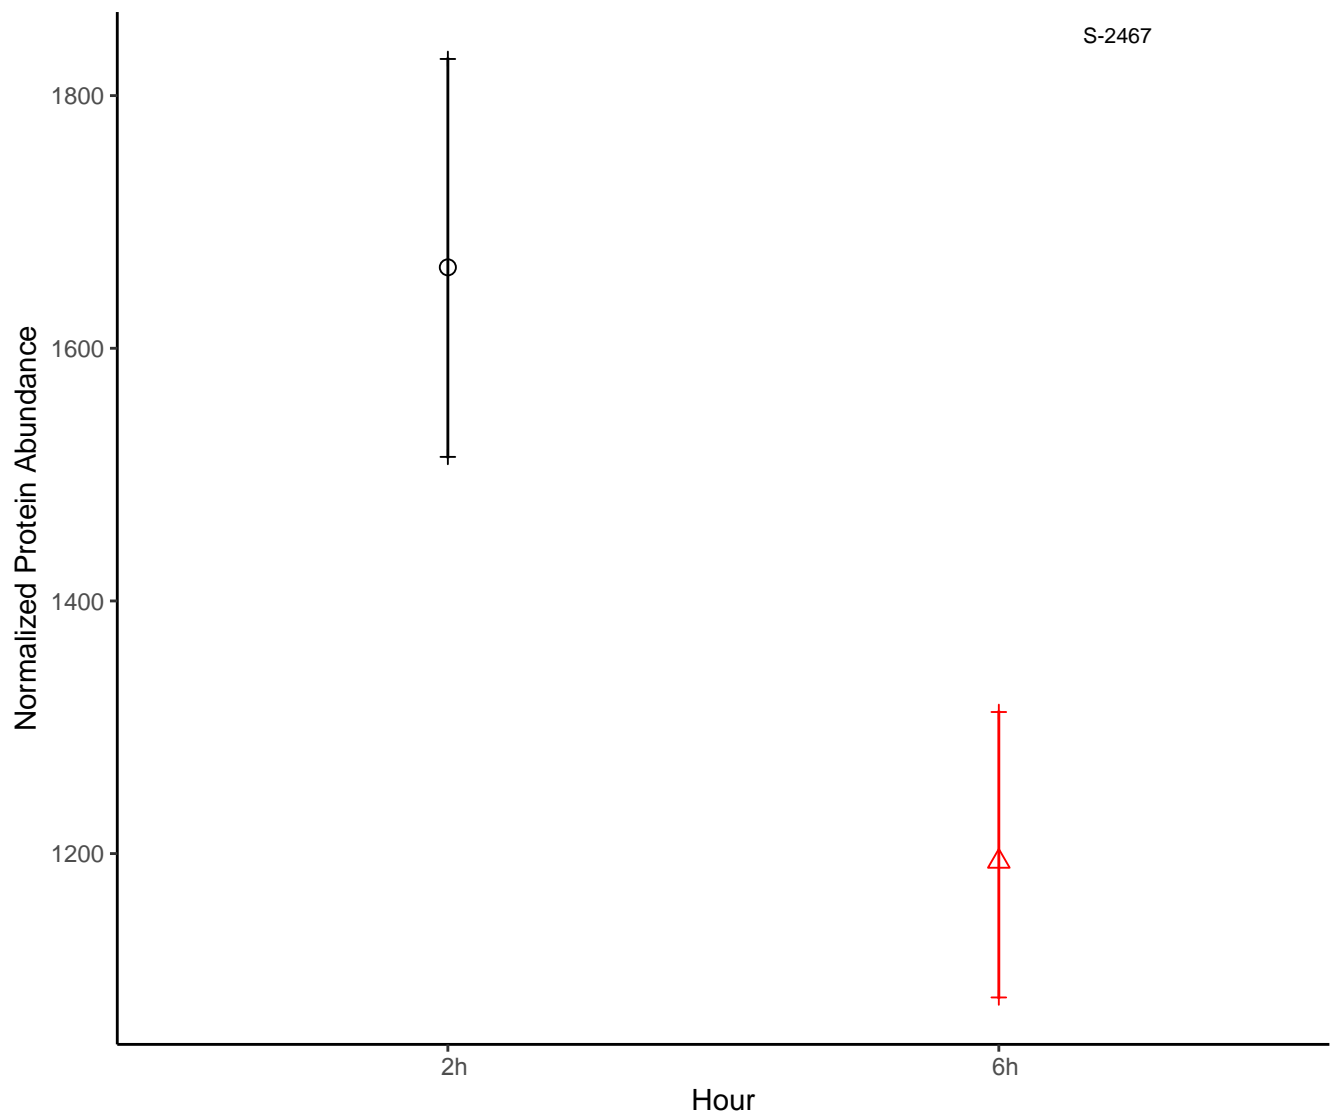

⊕ 2h

△ 6h

# Y1187\_STAAM

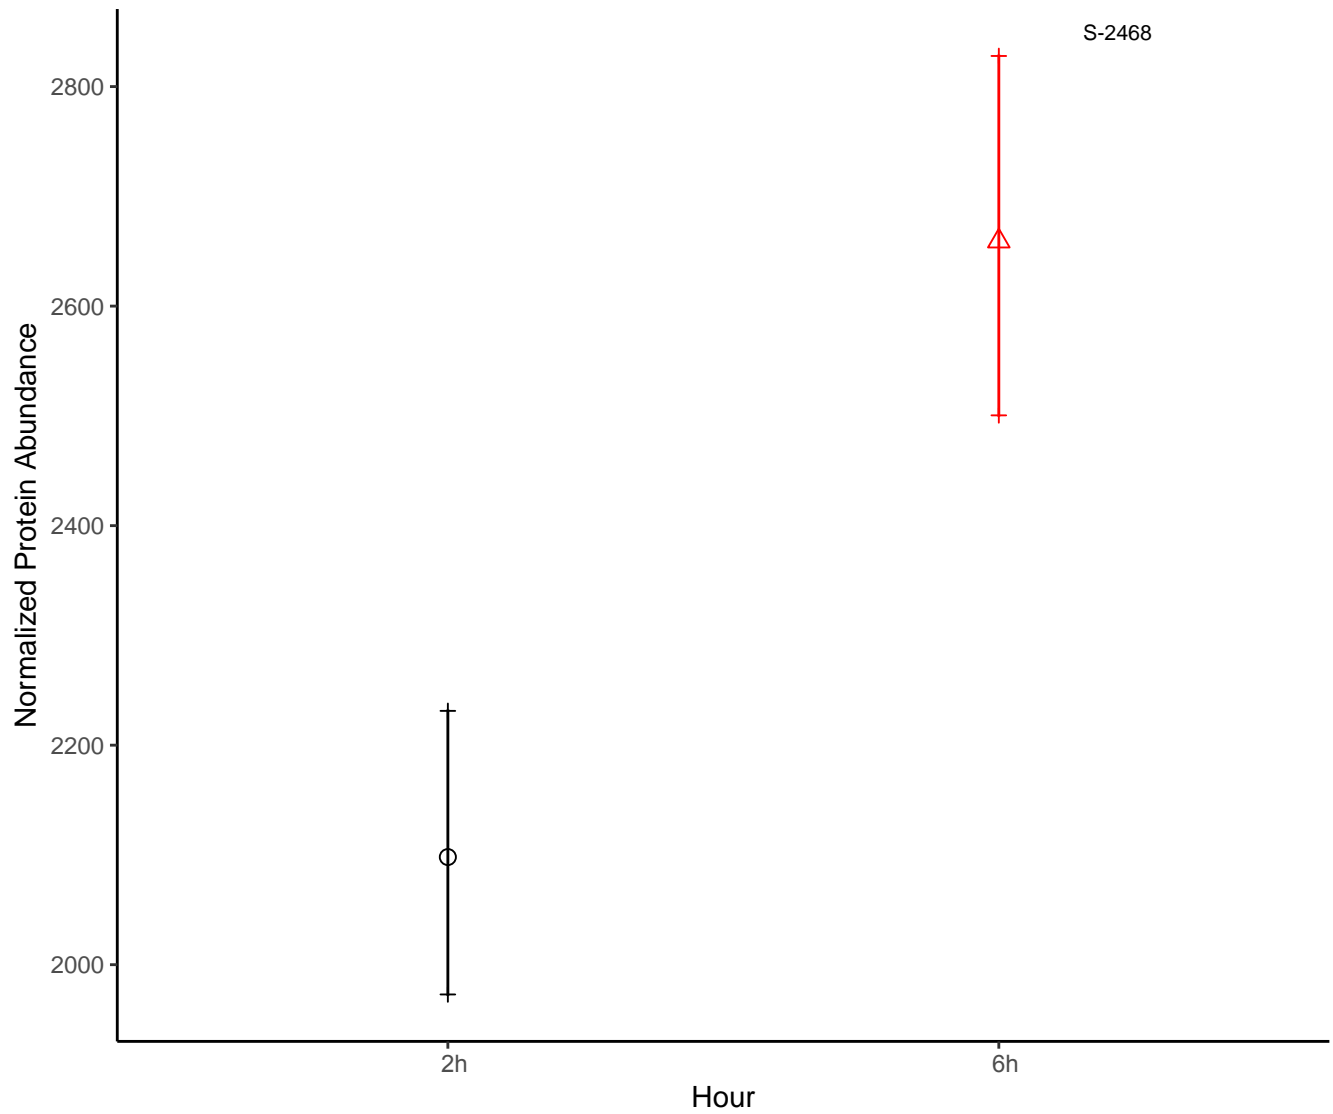

⊕ 2h

△ 6h

# Y1226\_STAAM

S-2469

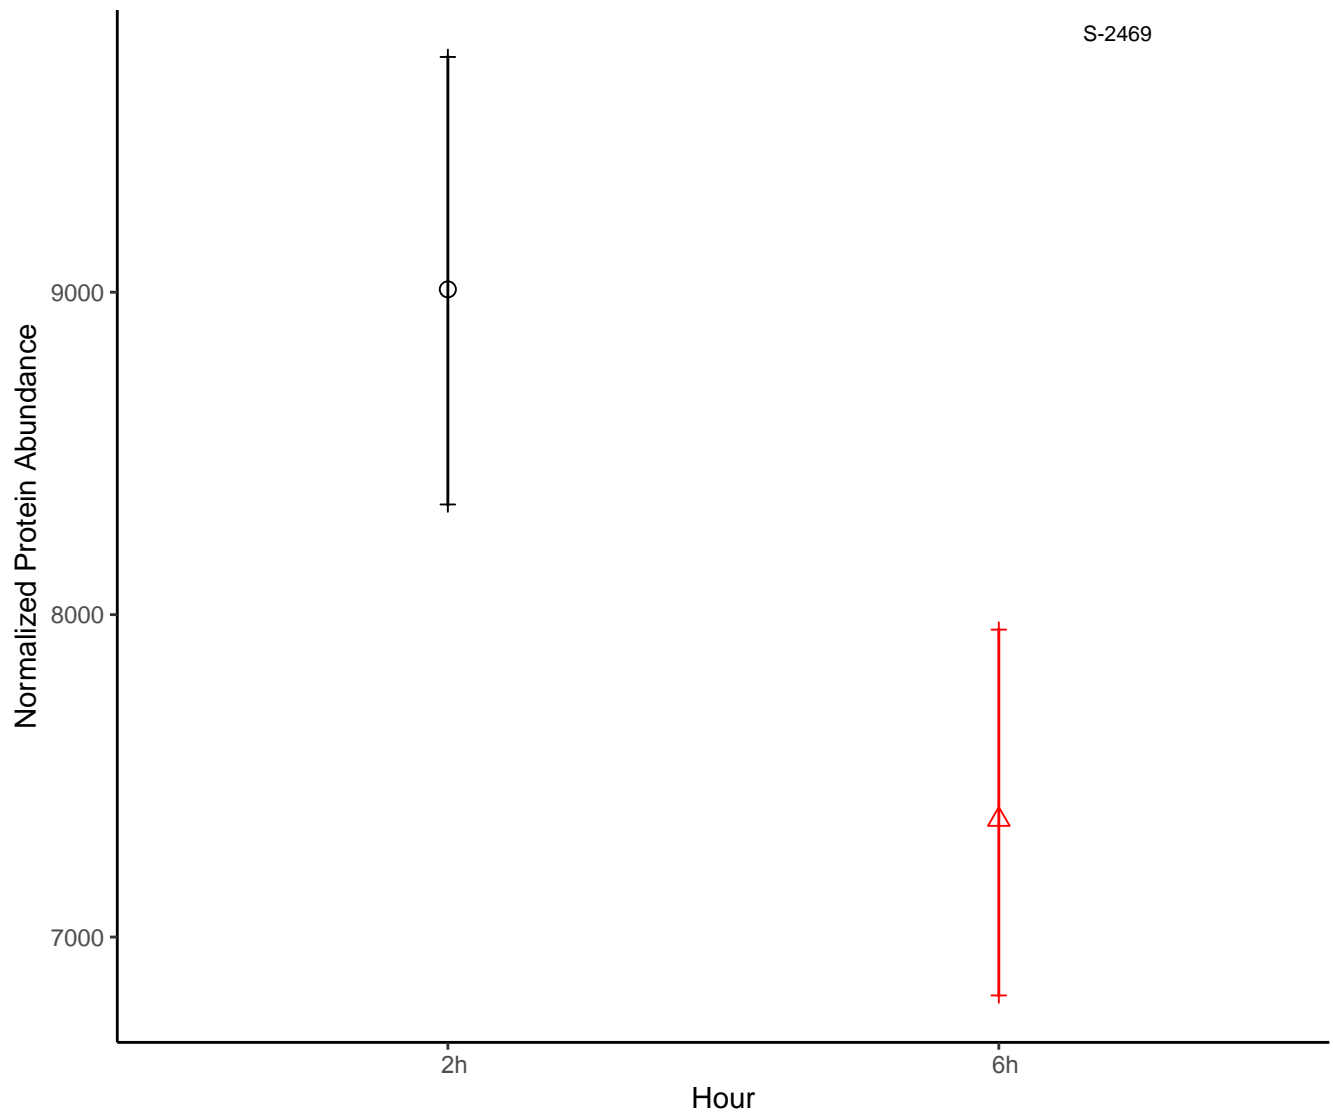

⊕ 2h

△ 6h

# Y1341\_STAAM

S-2470

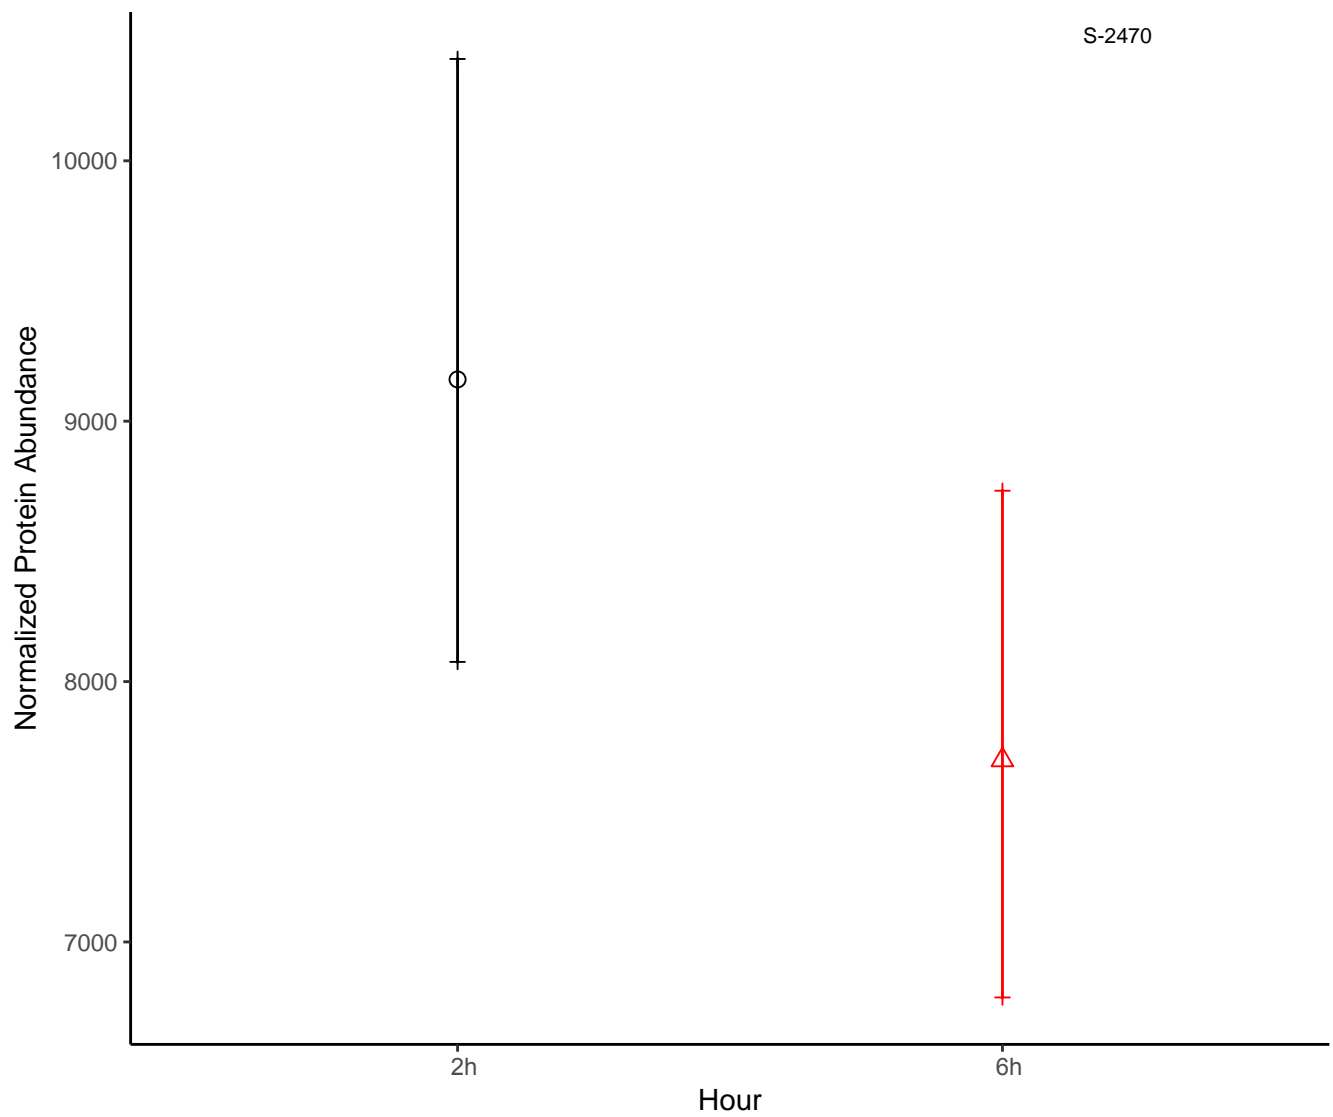

⊕ 2h

△ 6h

# Y1343\_STAAM

S-2471

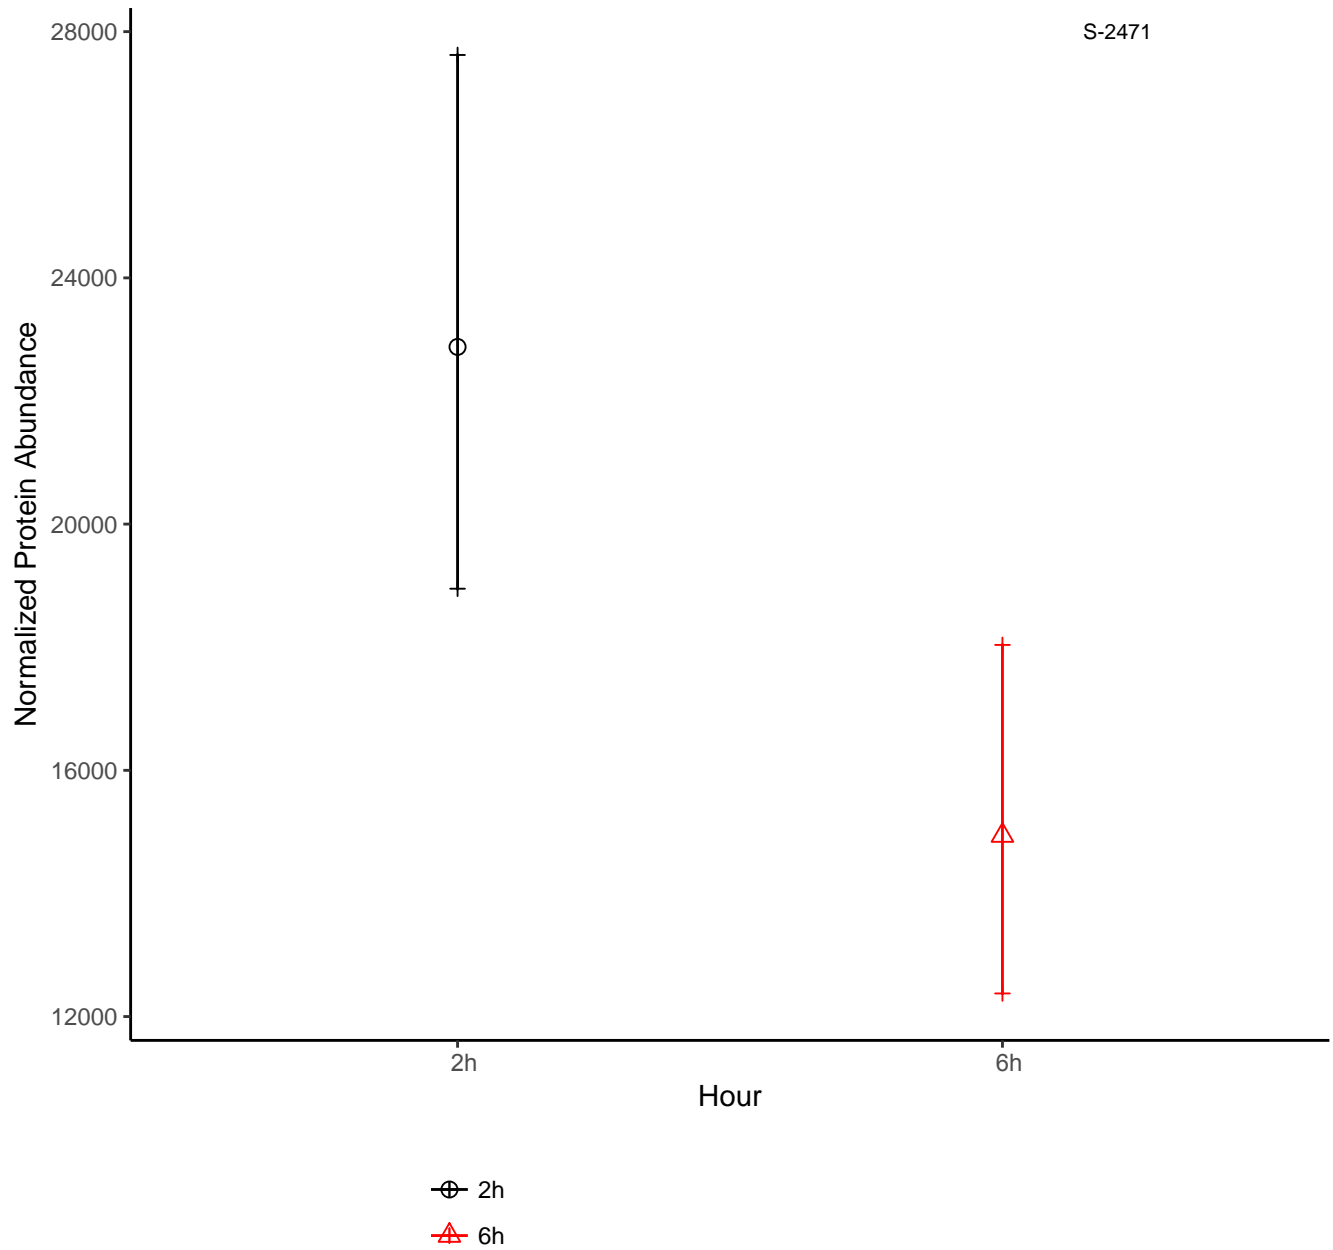

# Y1352\_STAAM

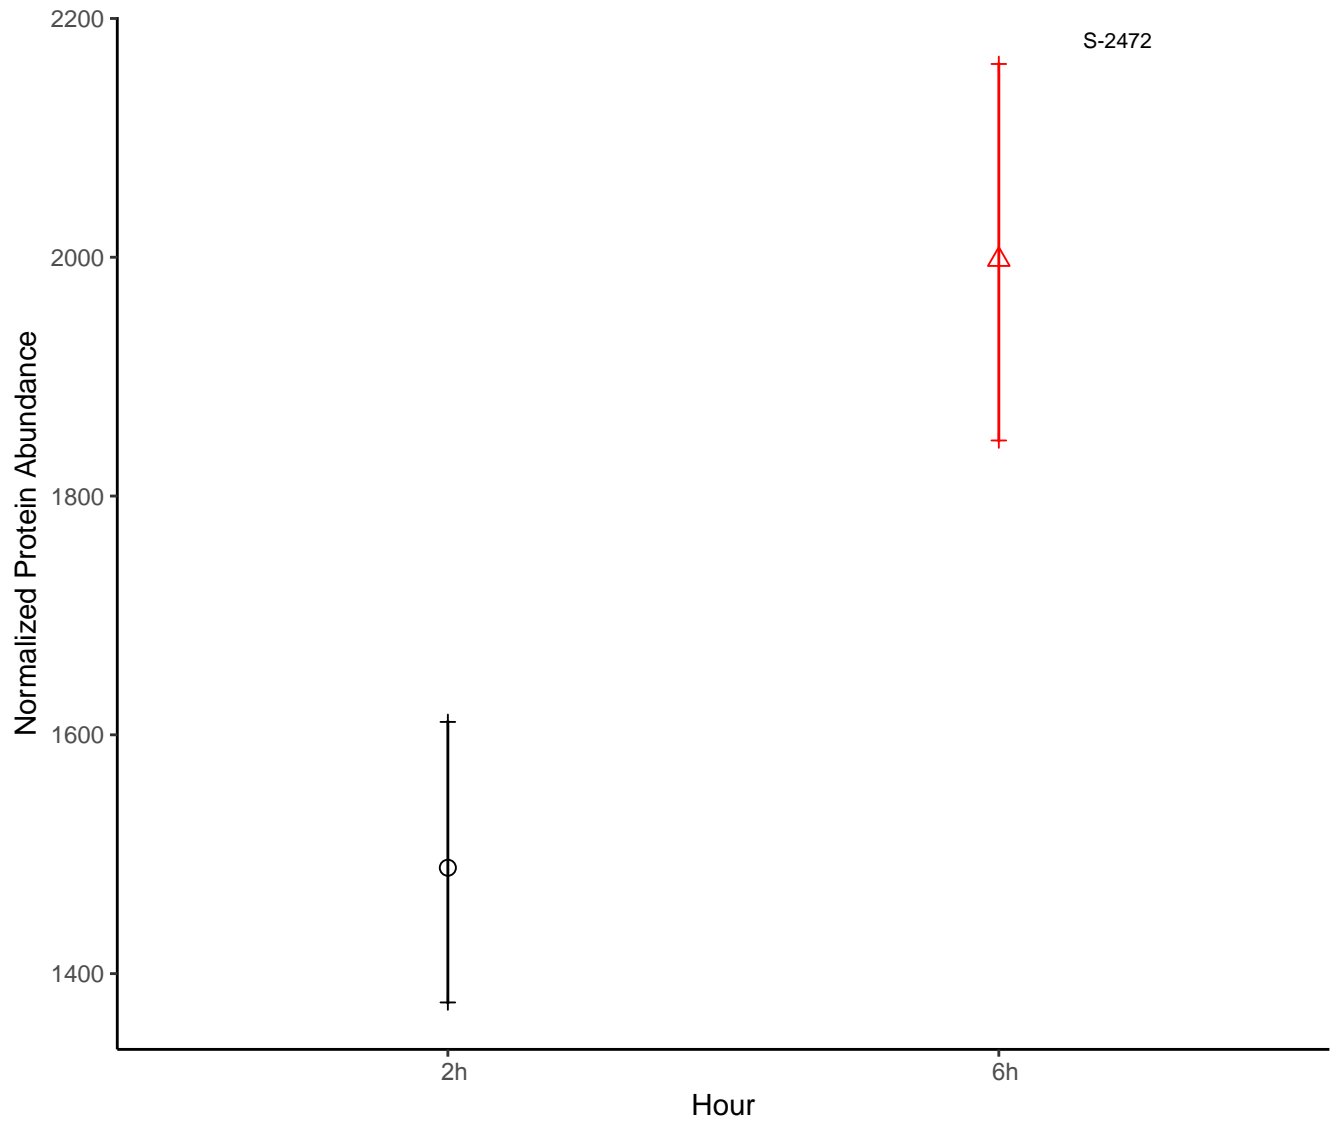

⊕ 2h

△ 6h



# Y1363\_STAAM

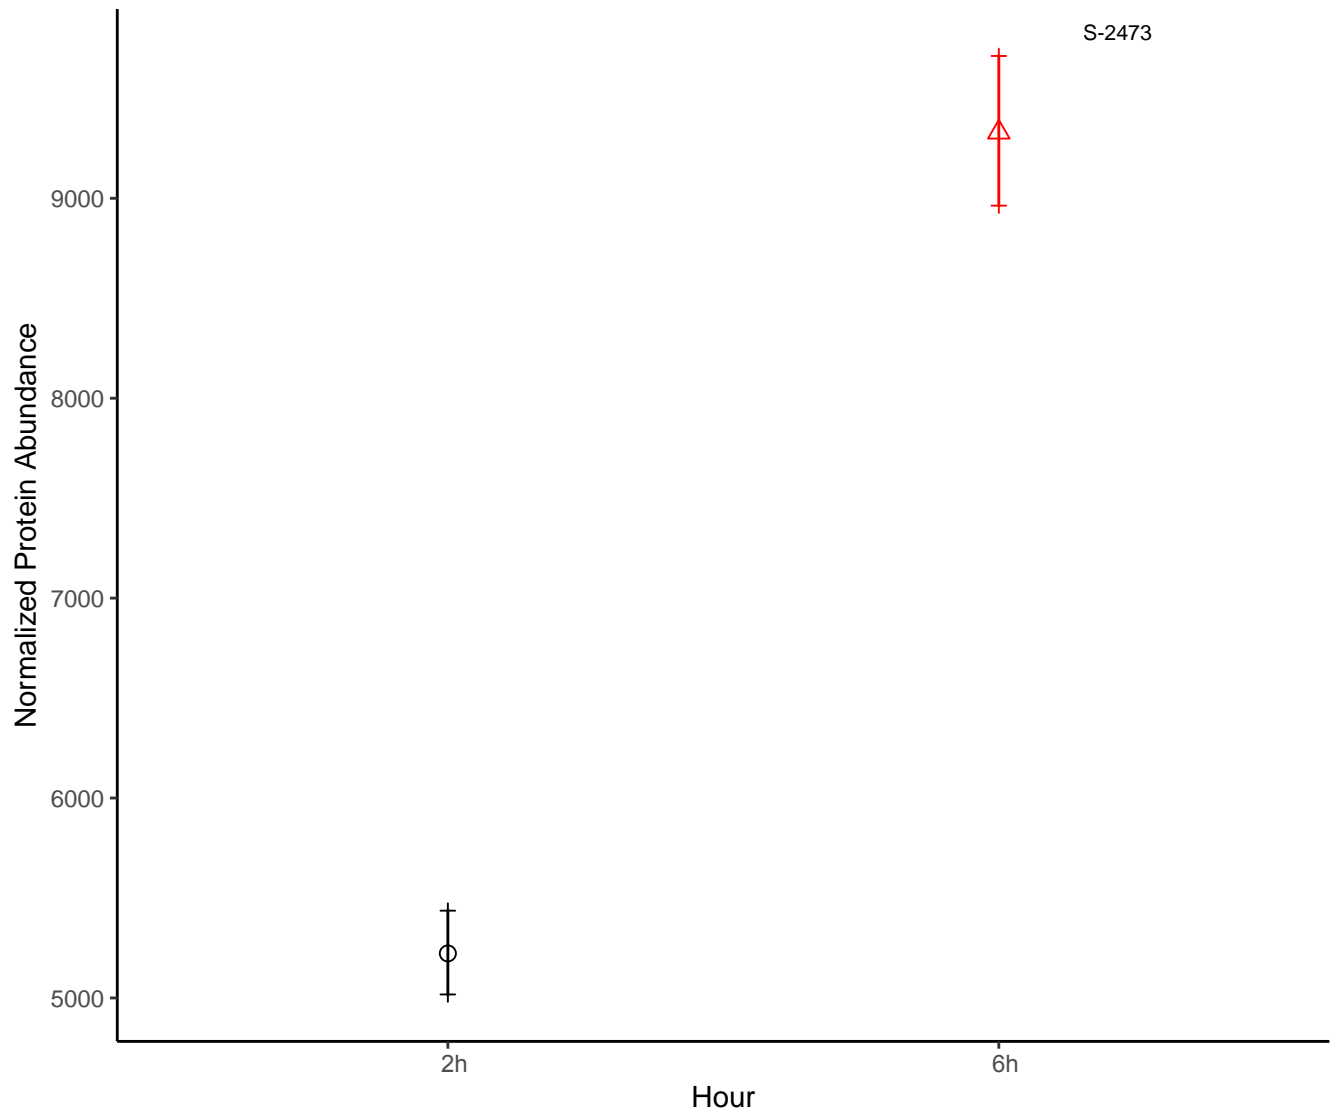

⊕ 2h

△ 6h

# Y1409\_STAAM

S-2474

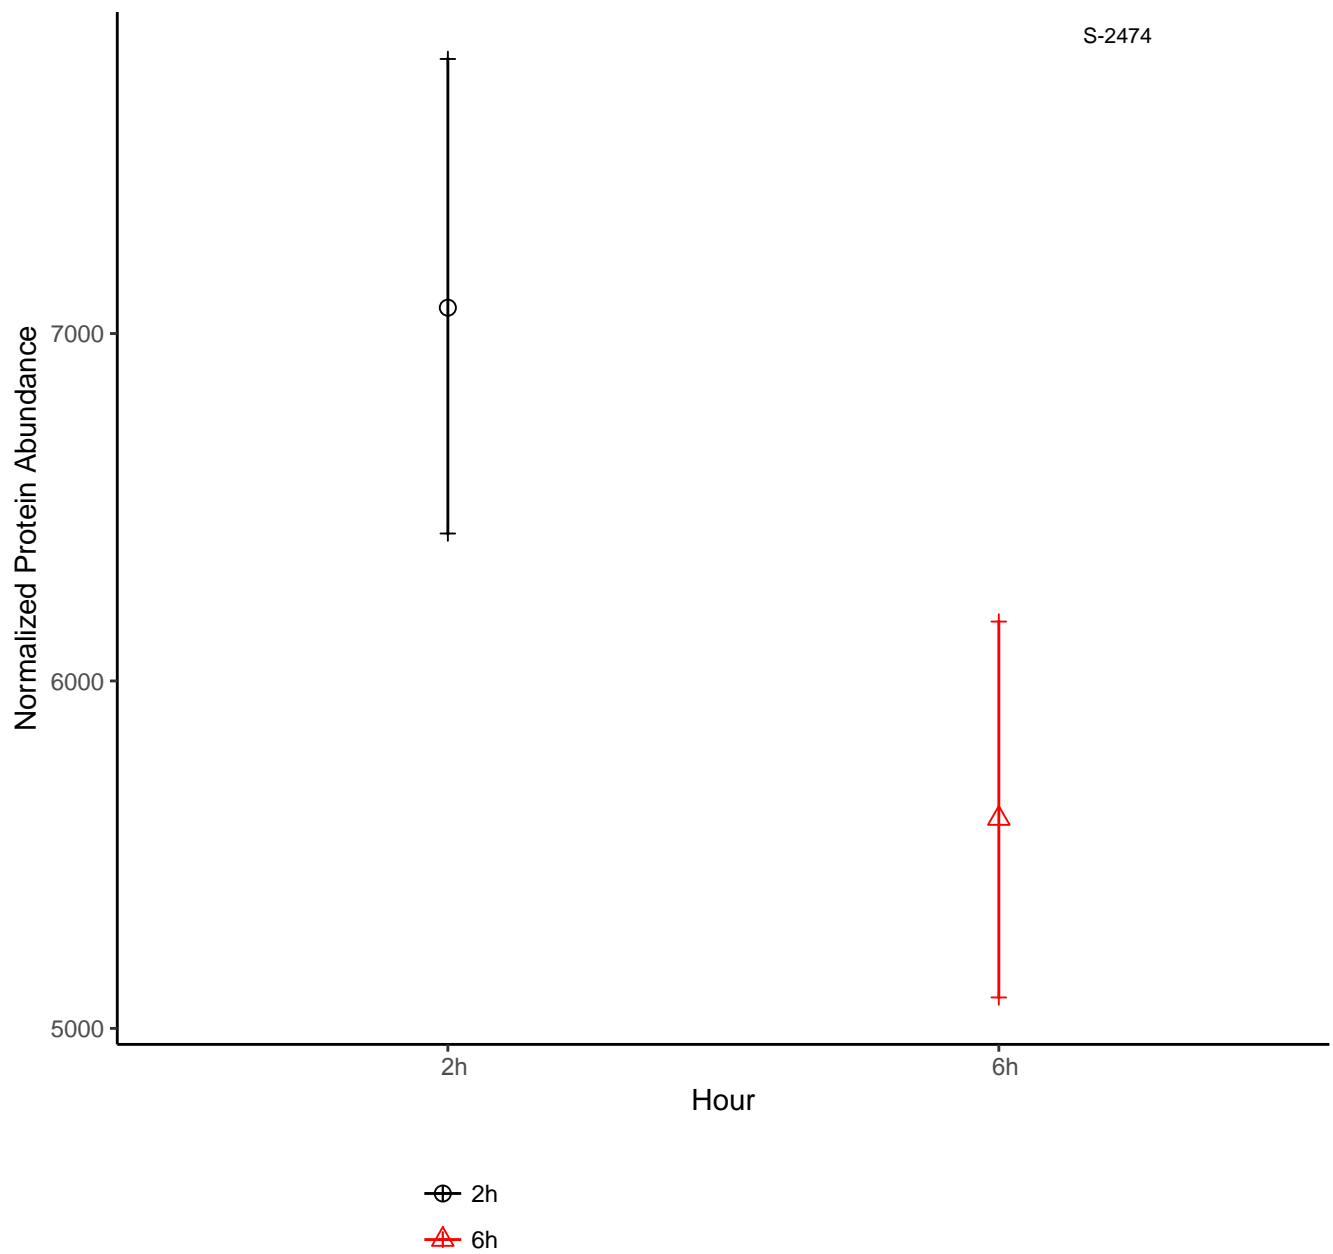

# Y1425\_STAAM

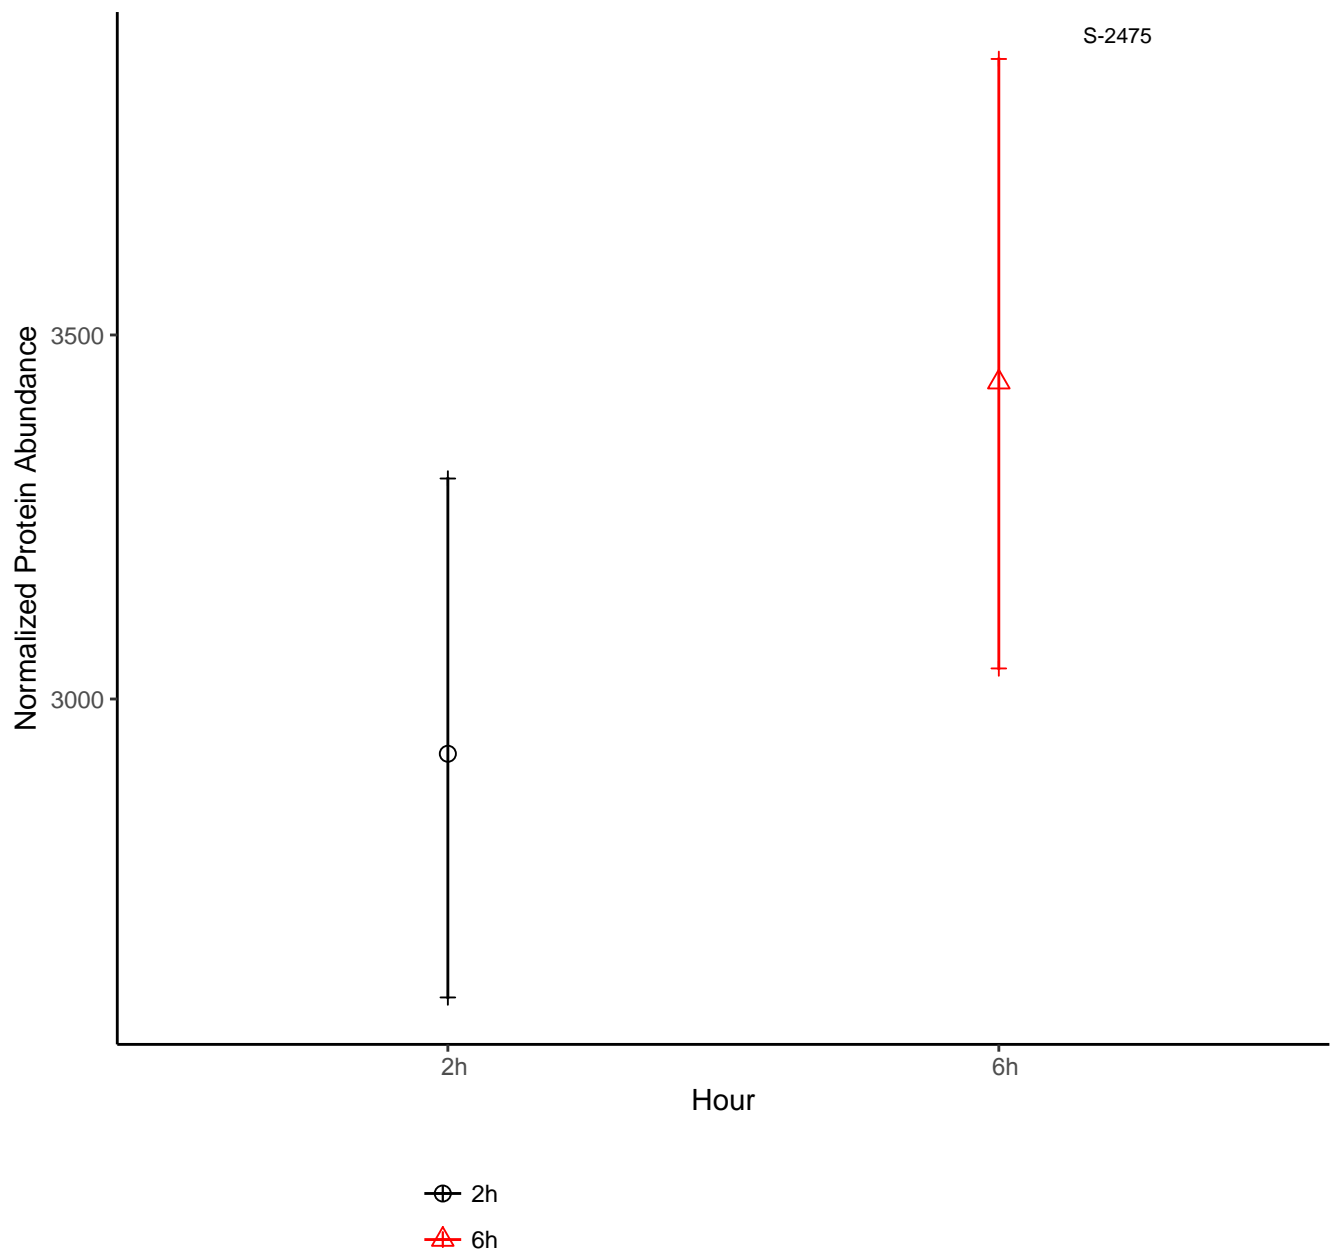

# Y1462\_STAAM

S-2476

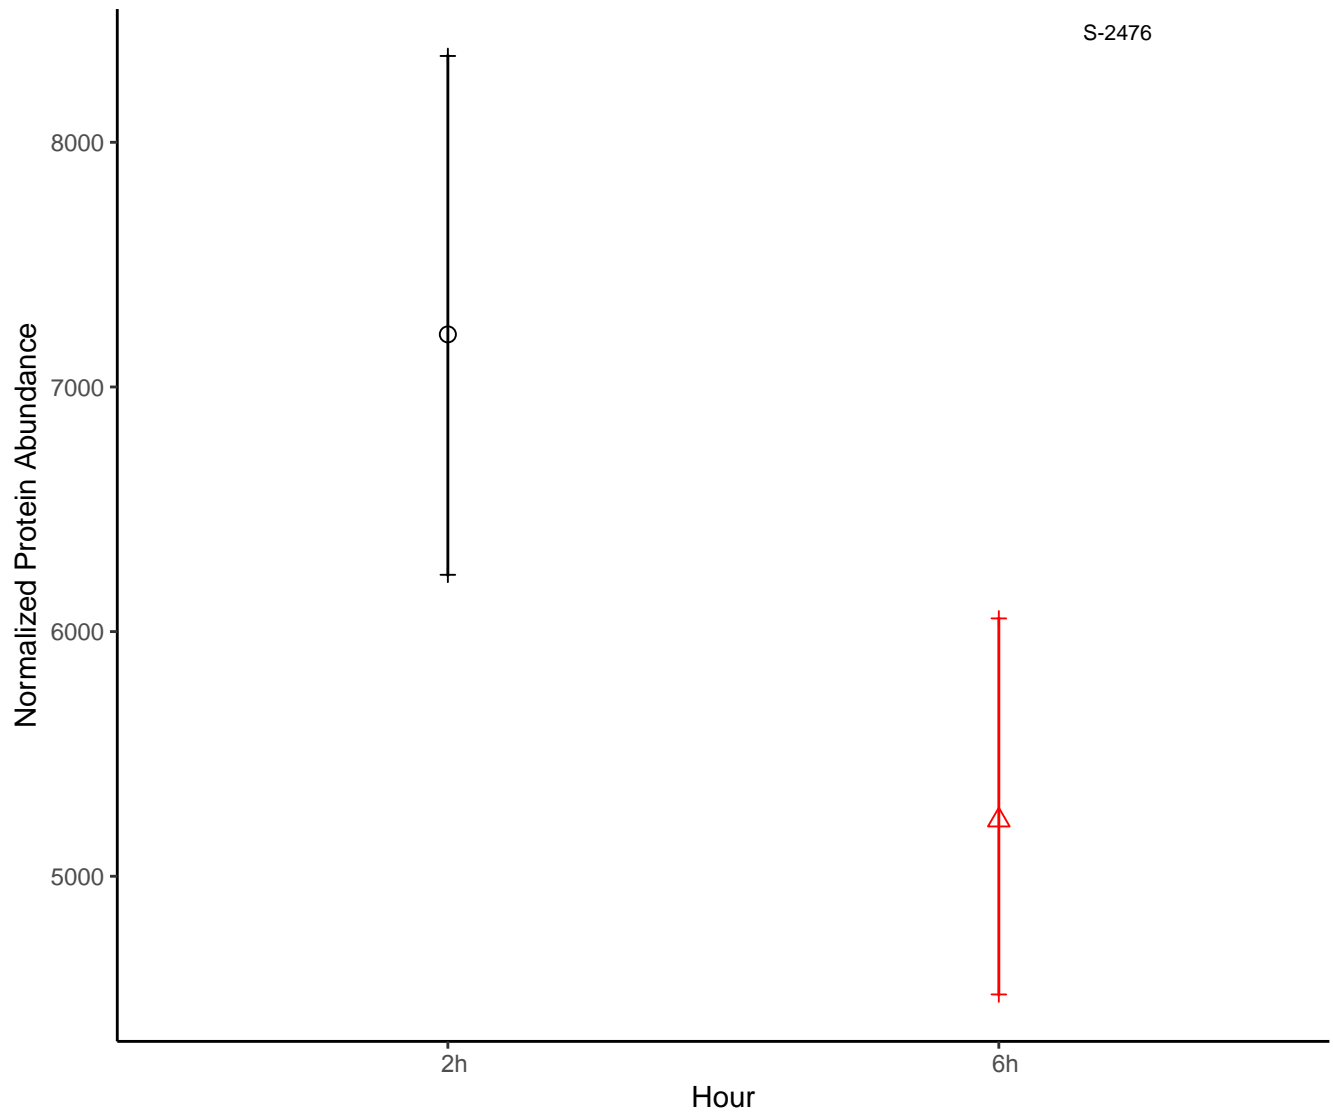

⊕ 2h

△ 6h

# Y1514\_STAAM

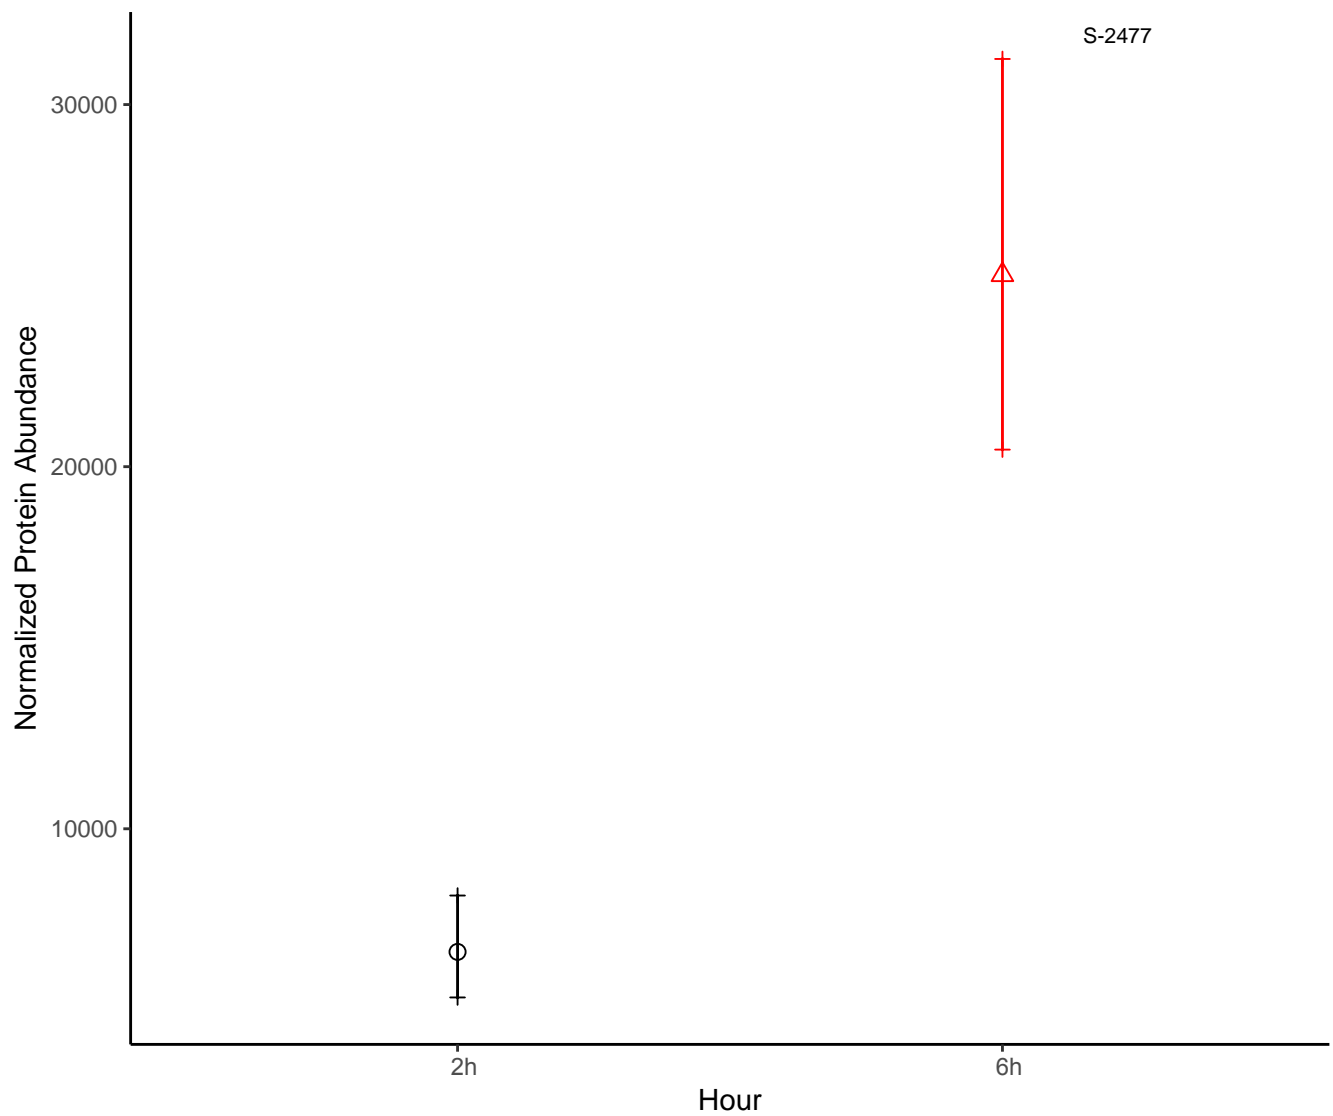

⊕ 2h

△ 6h

# Y1573\_STAAM

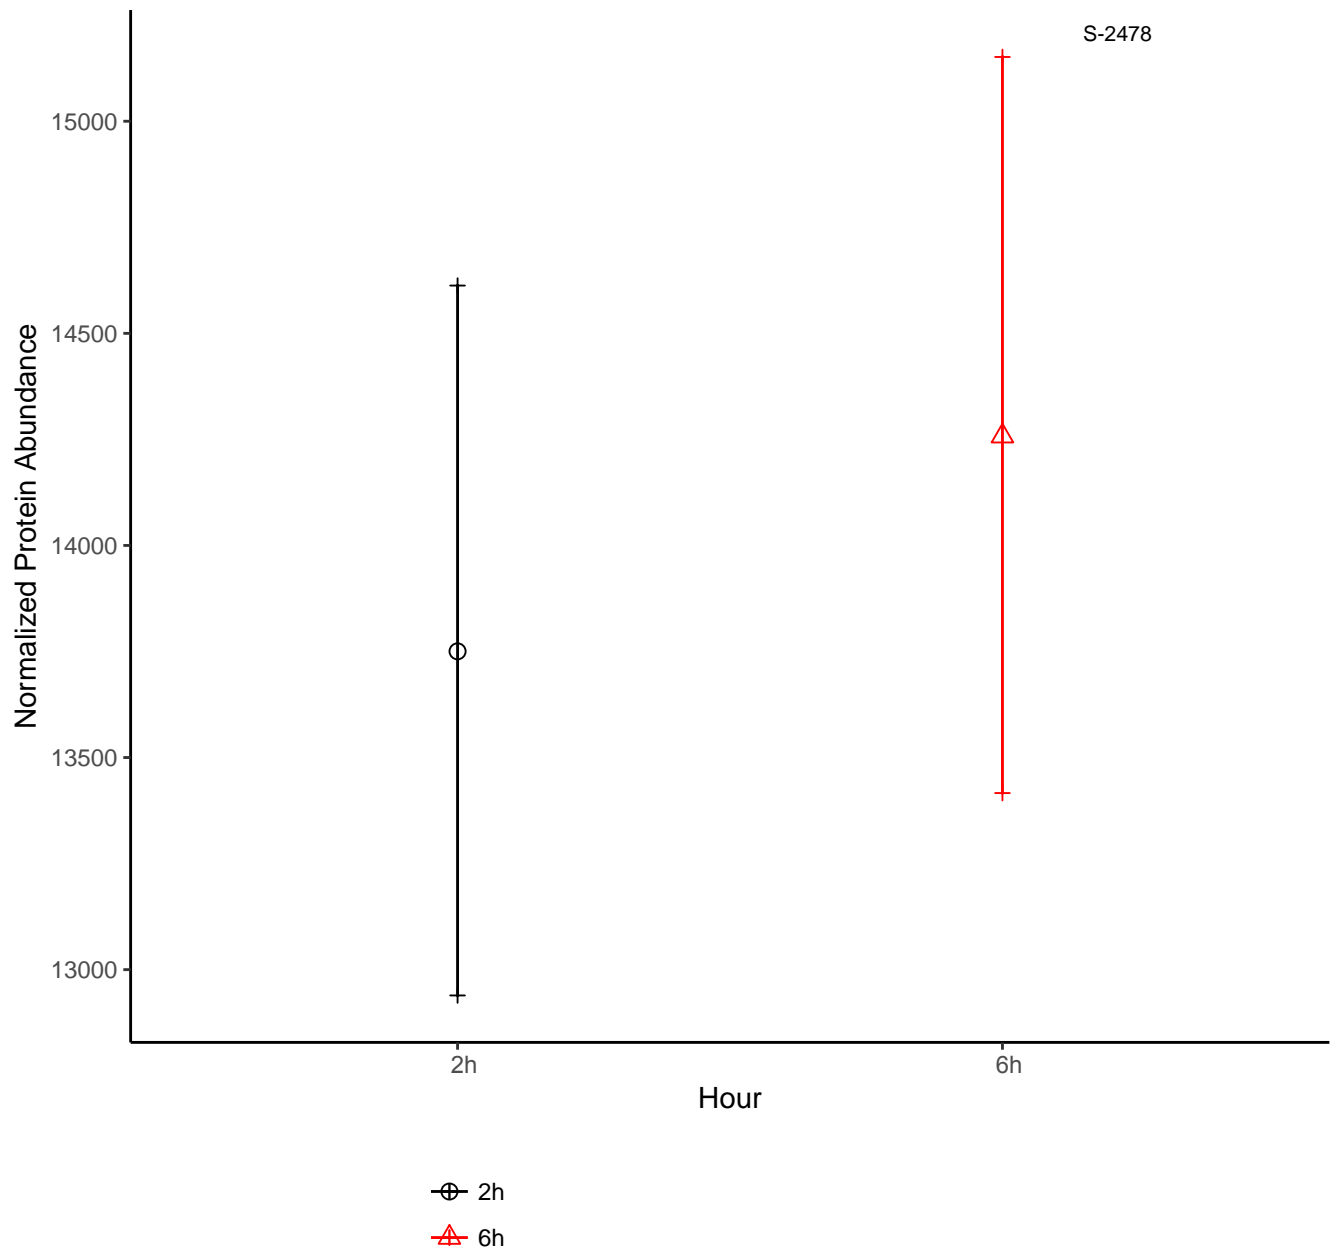

# Y1605\_STAAM

S-2479

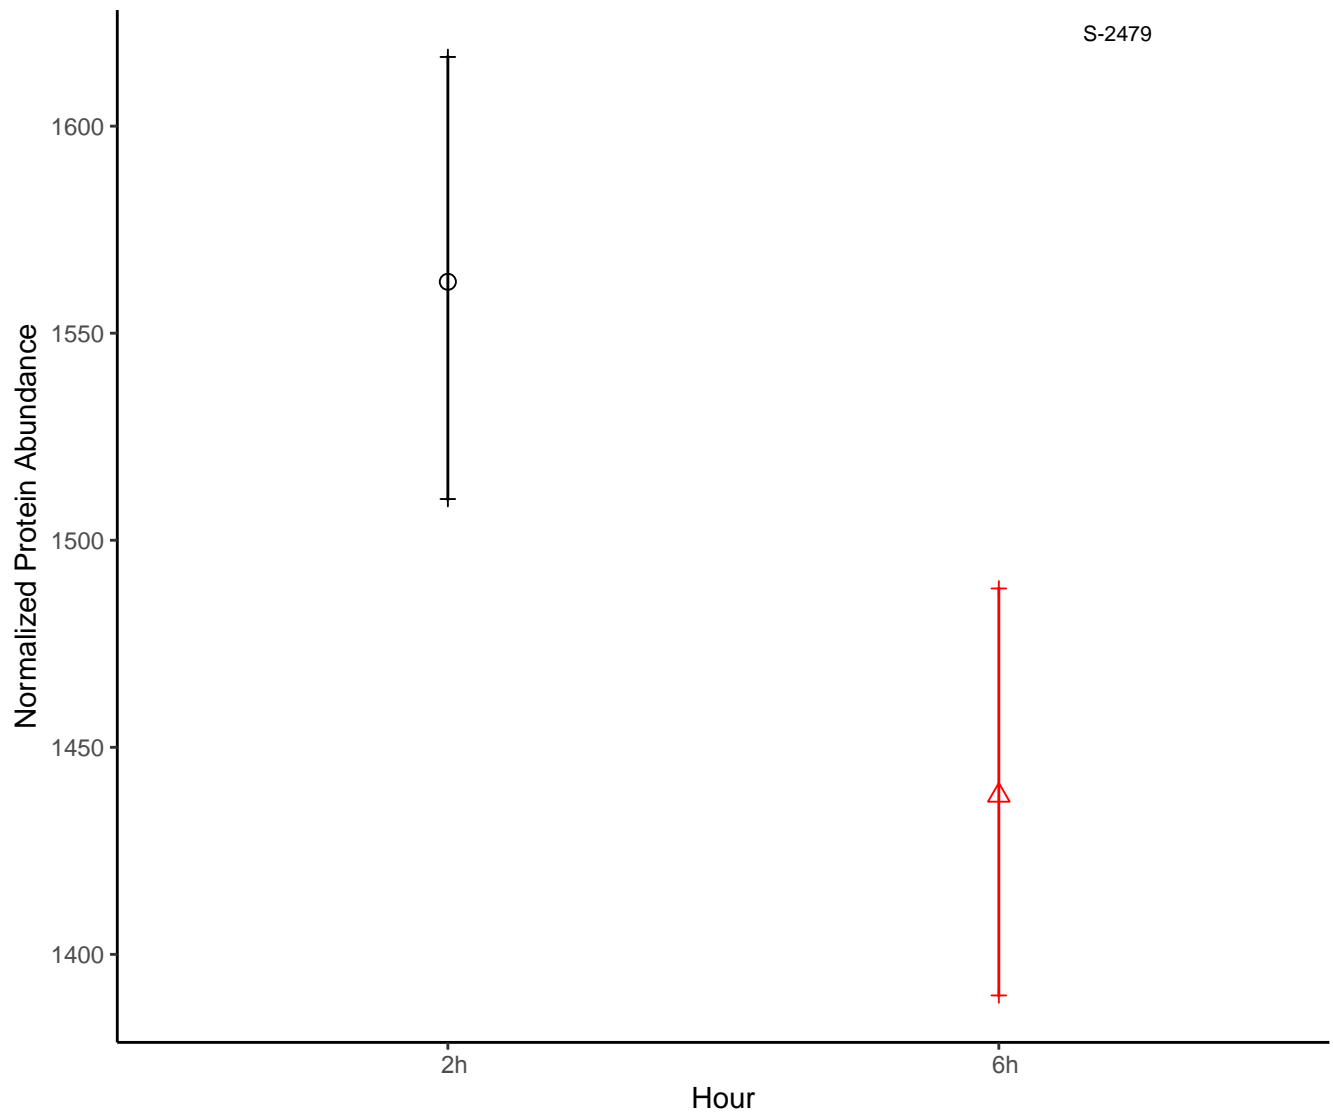

⊕ 2h

△ 6h

# Y1617\_STAAM

S-2480

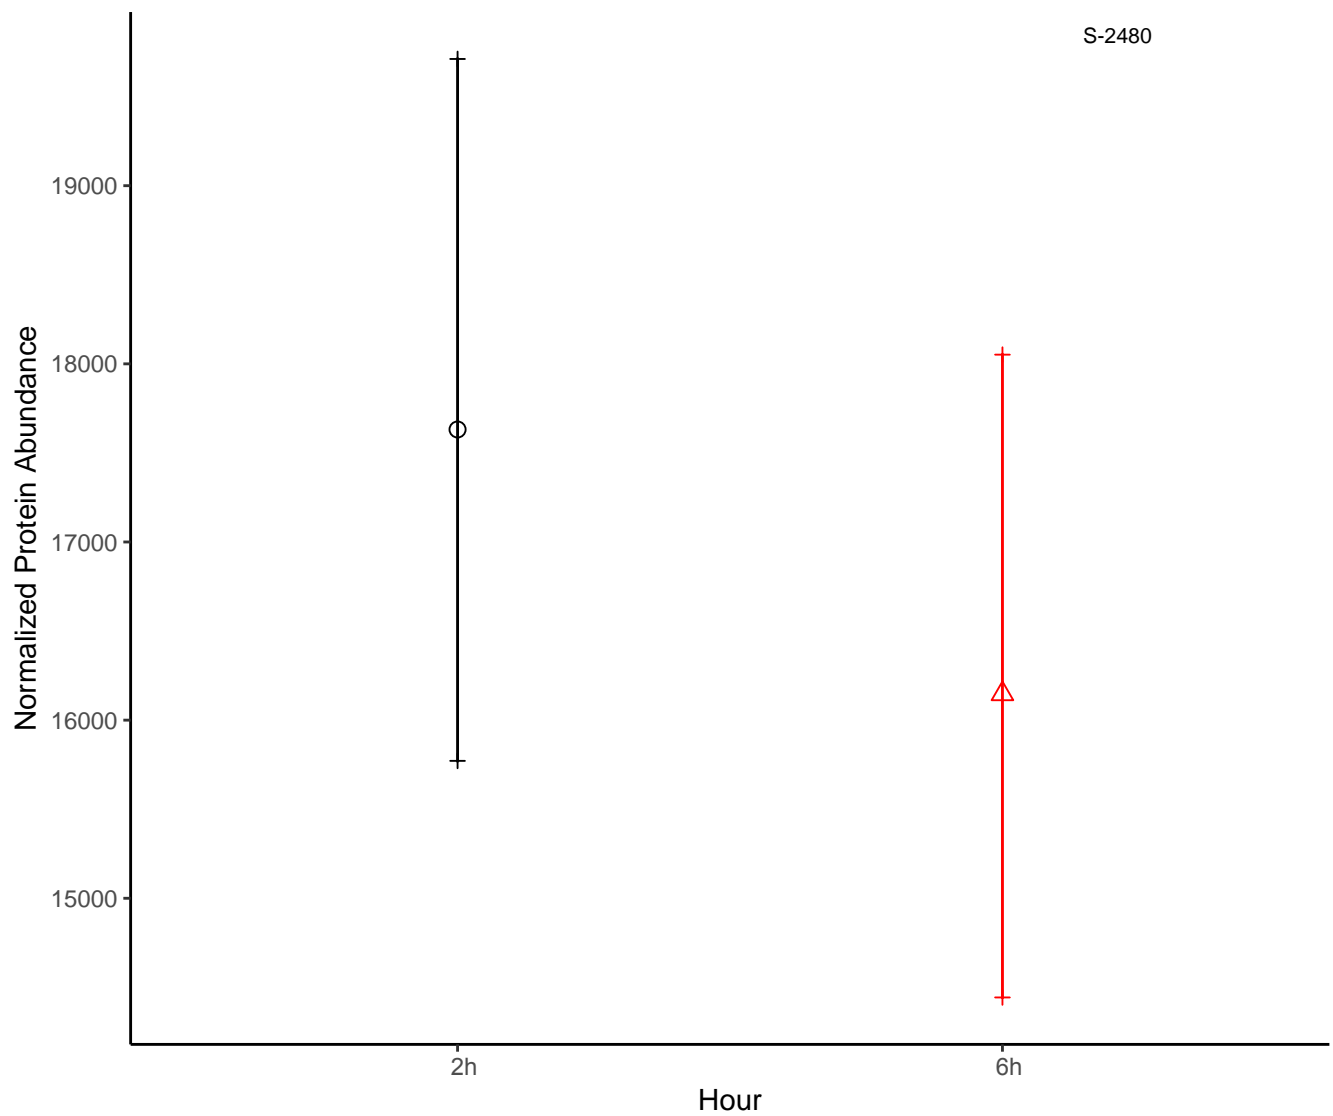

⊕ 2h

△ 6h



# Y1625\_STAAM

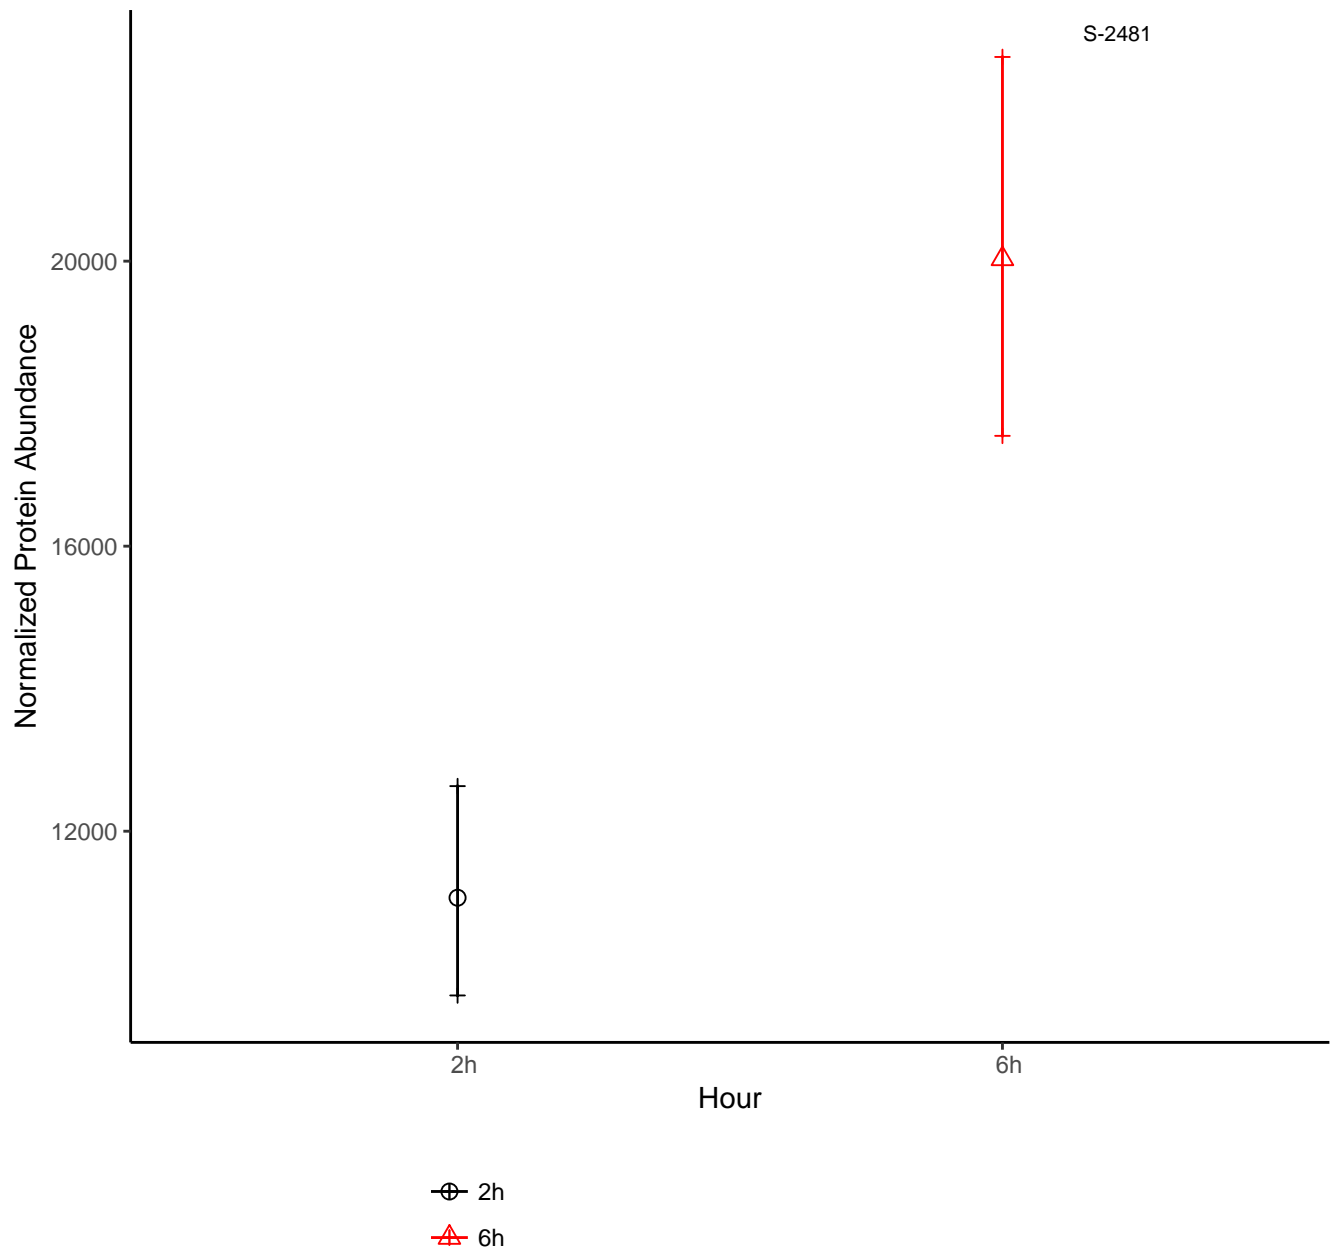

# Y1710\_STAAM

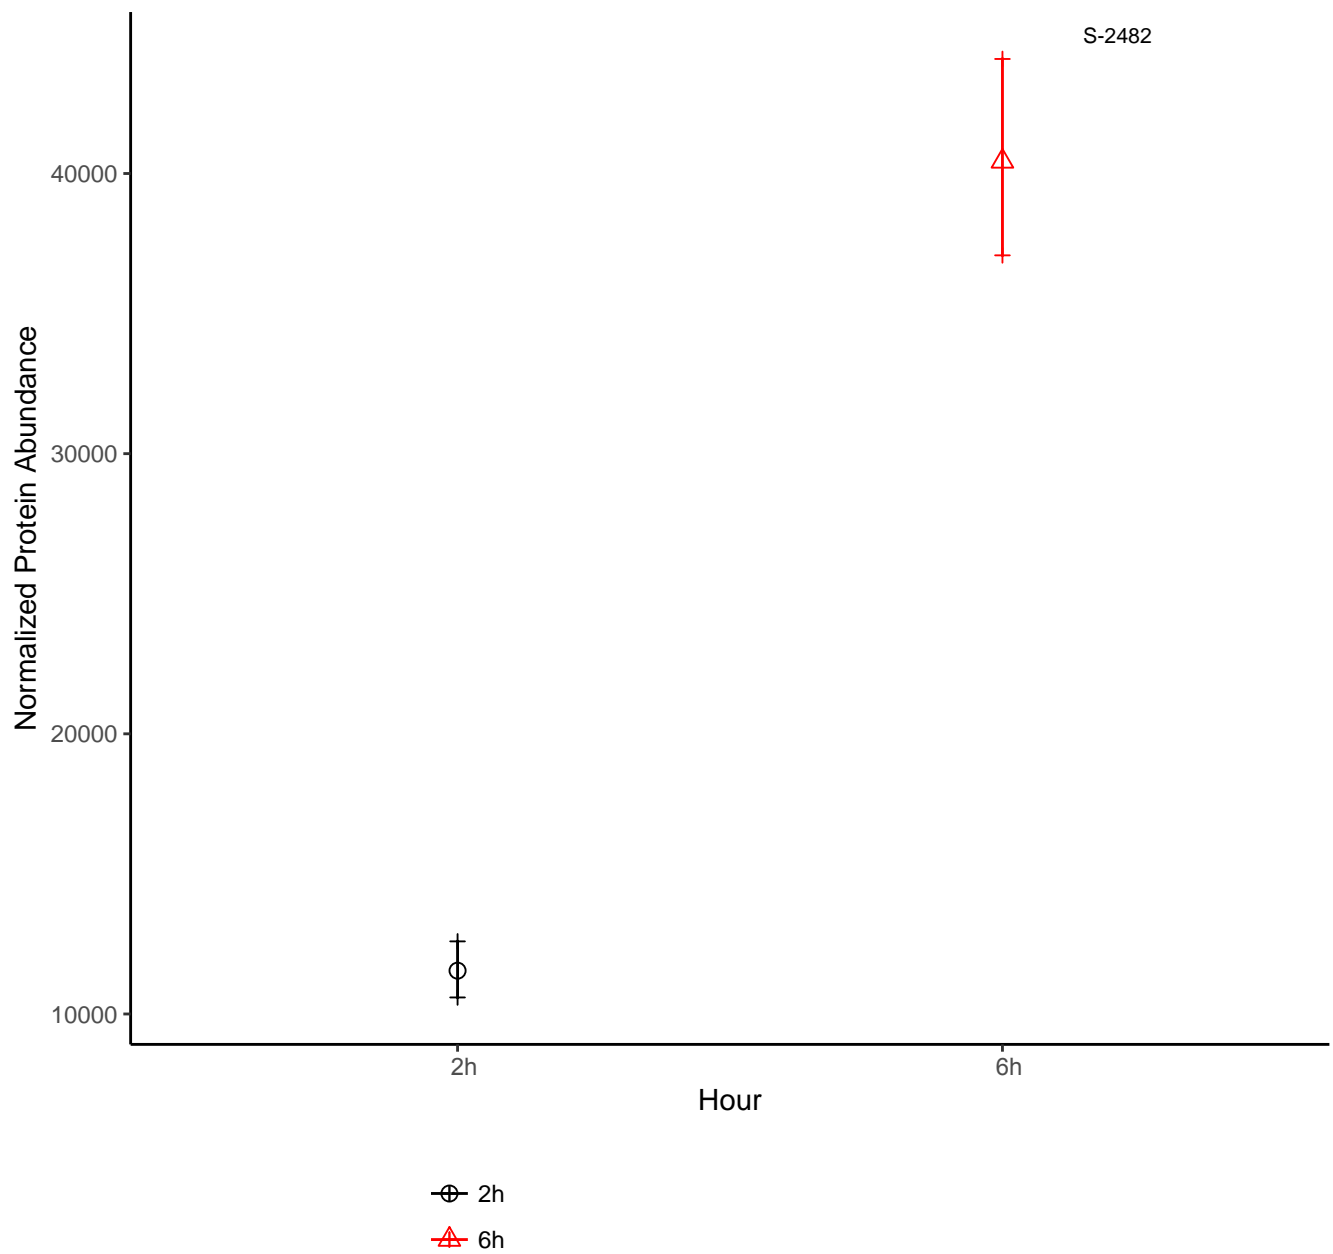

# Y1739\_STAAM

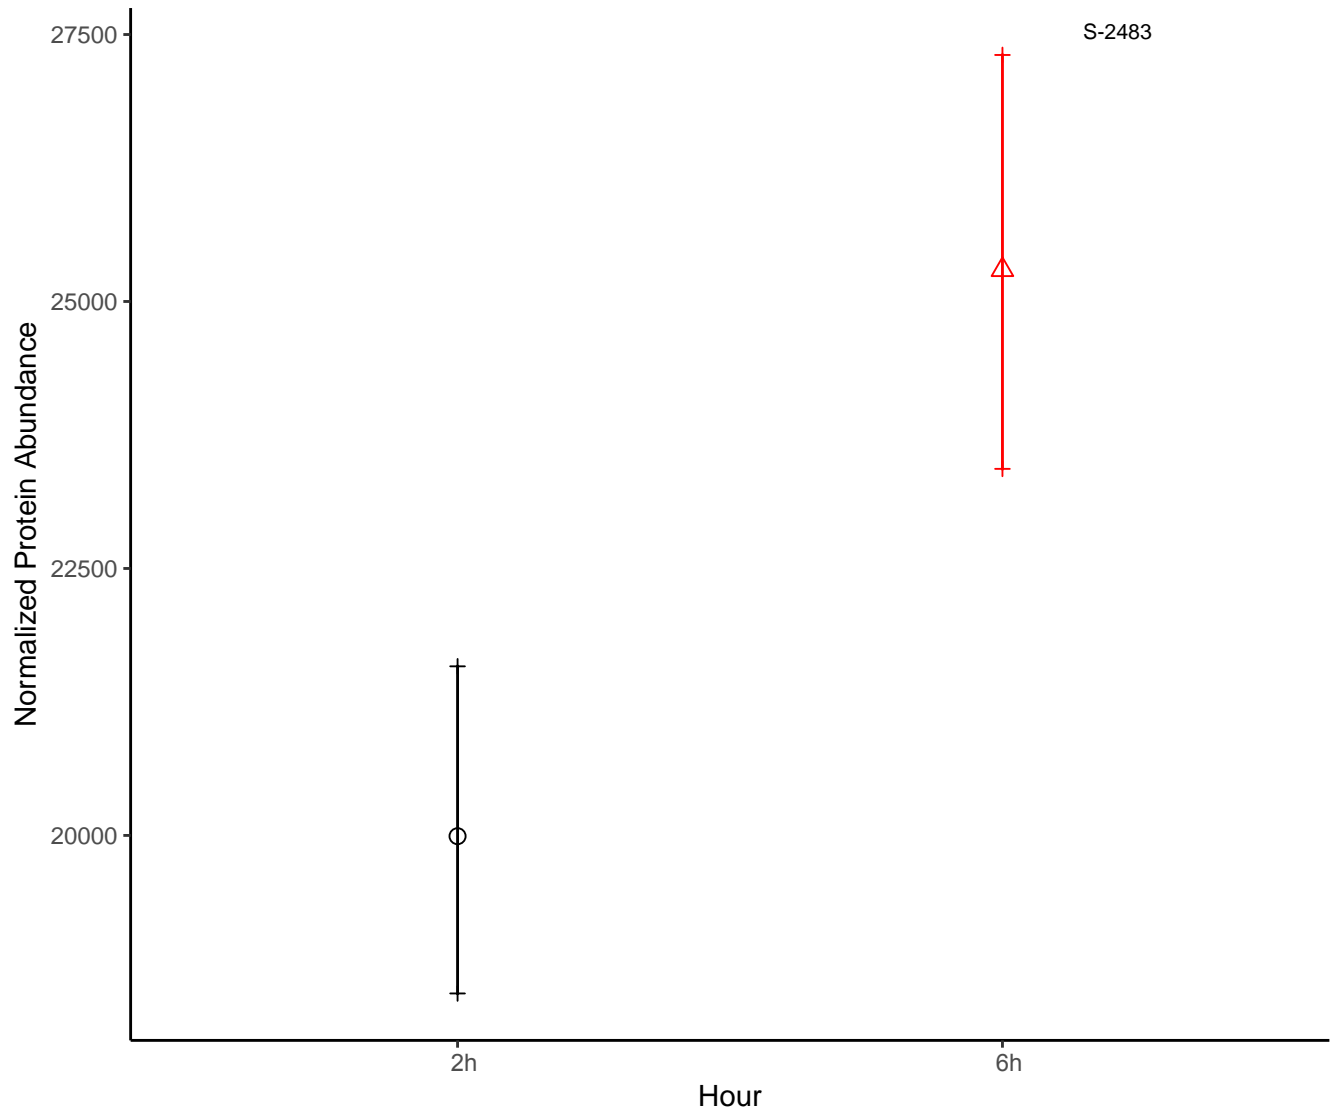

⊕ 2h

△ 6h

# Y1845\_STAAM

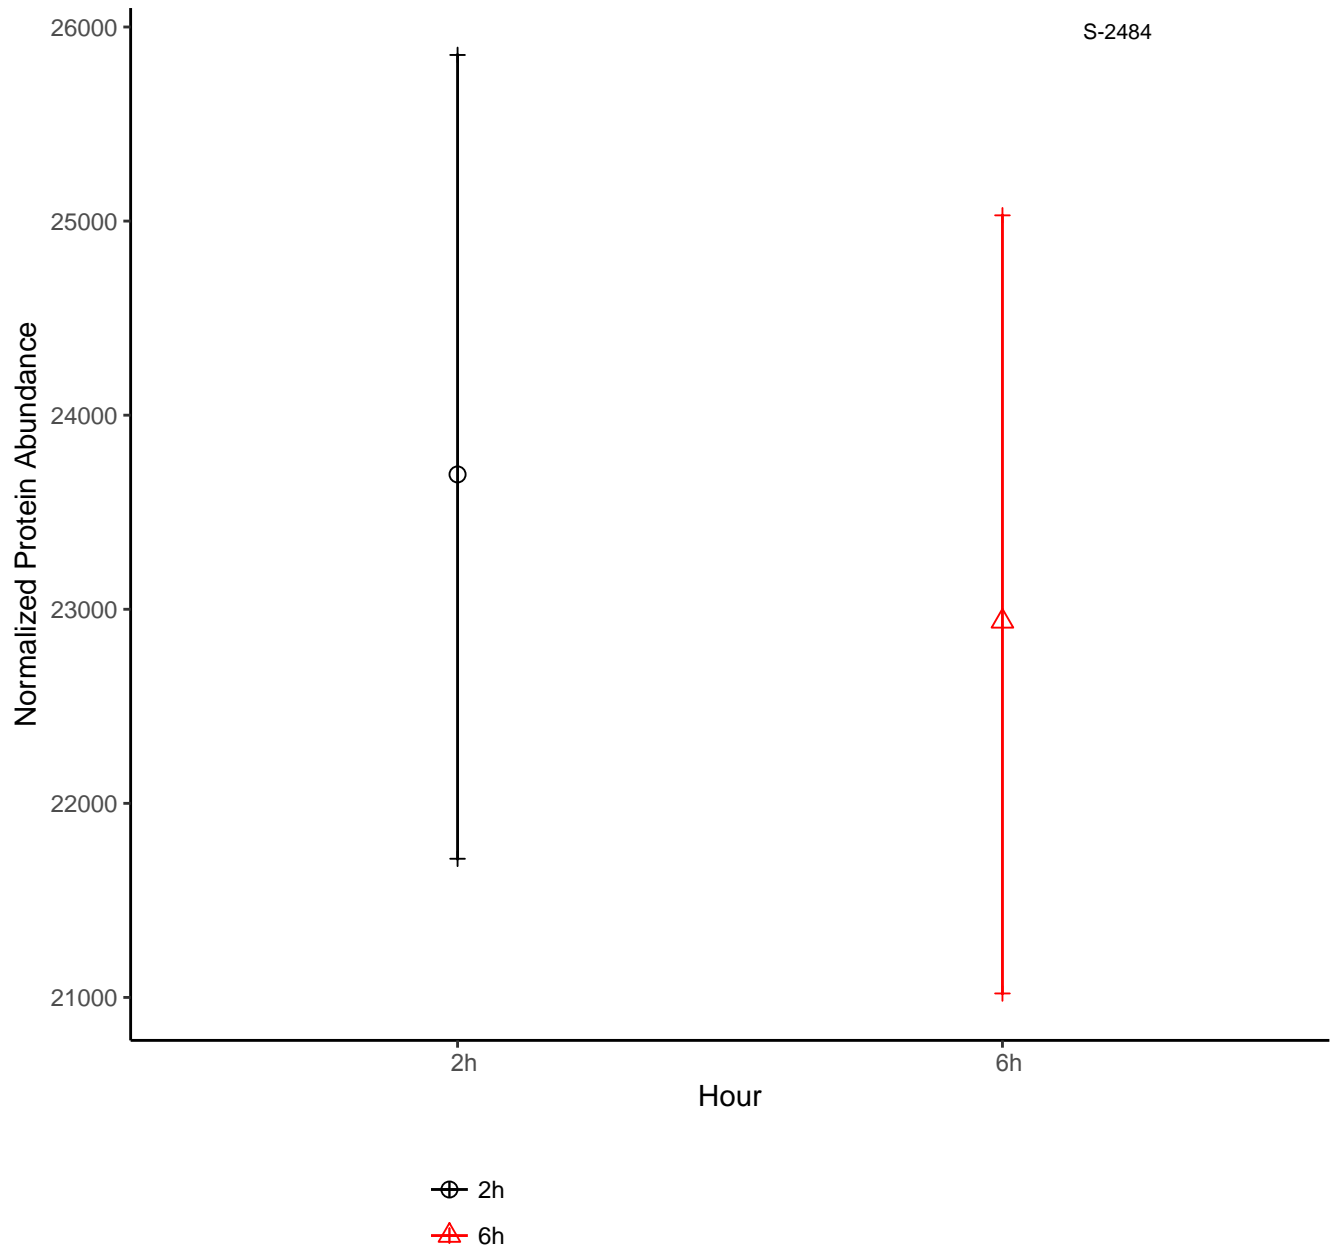

# Y1866\_STAAM

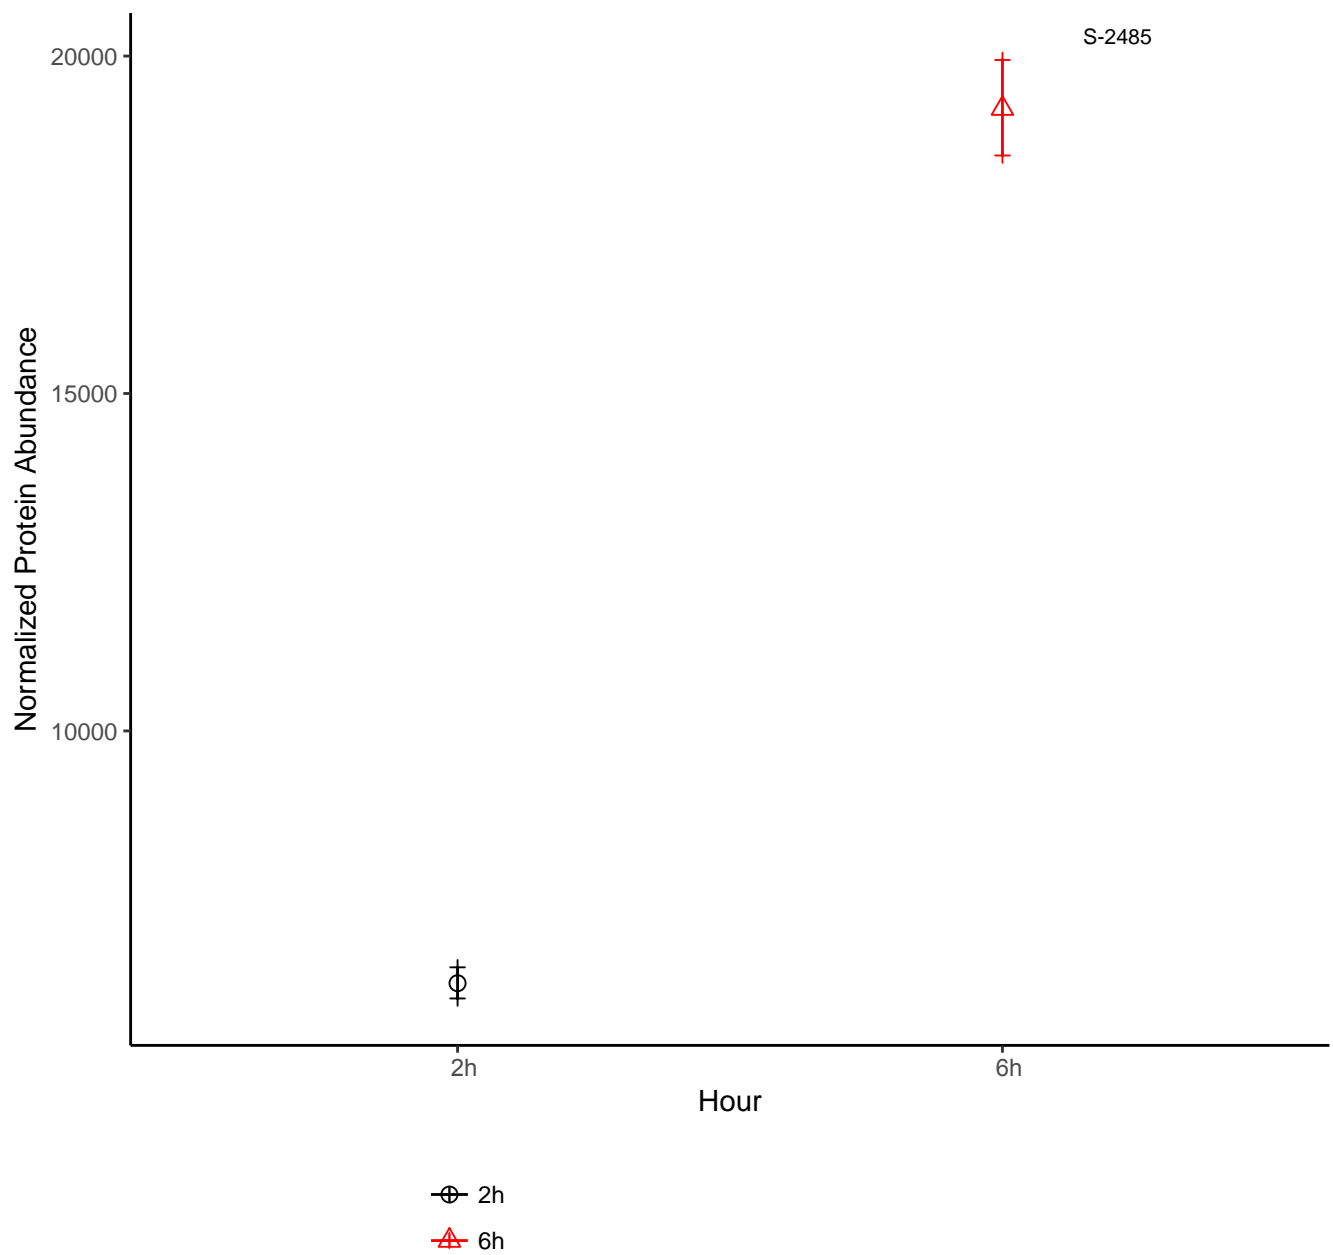

# Y1880\_STAAM

S-2486

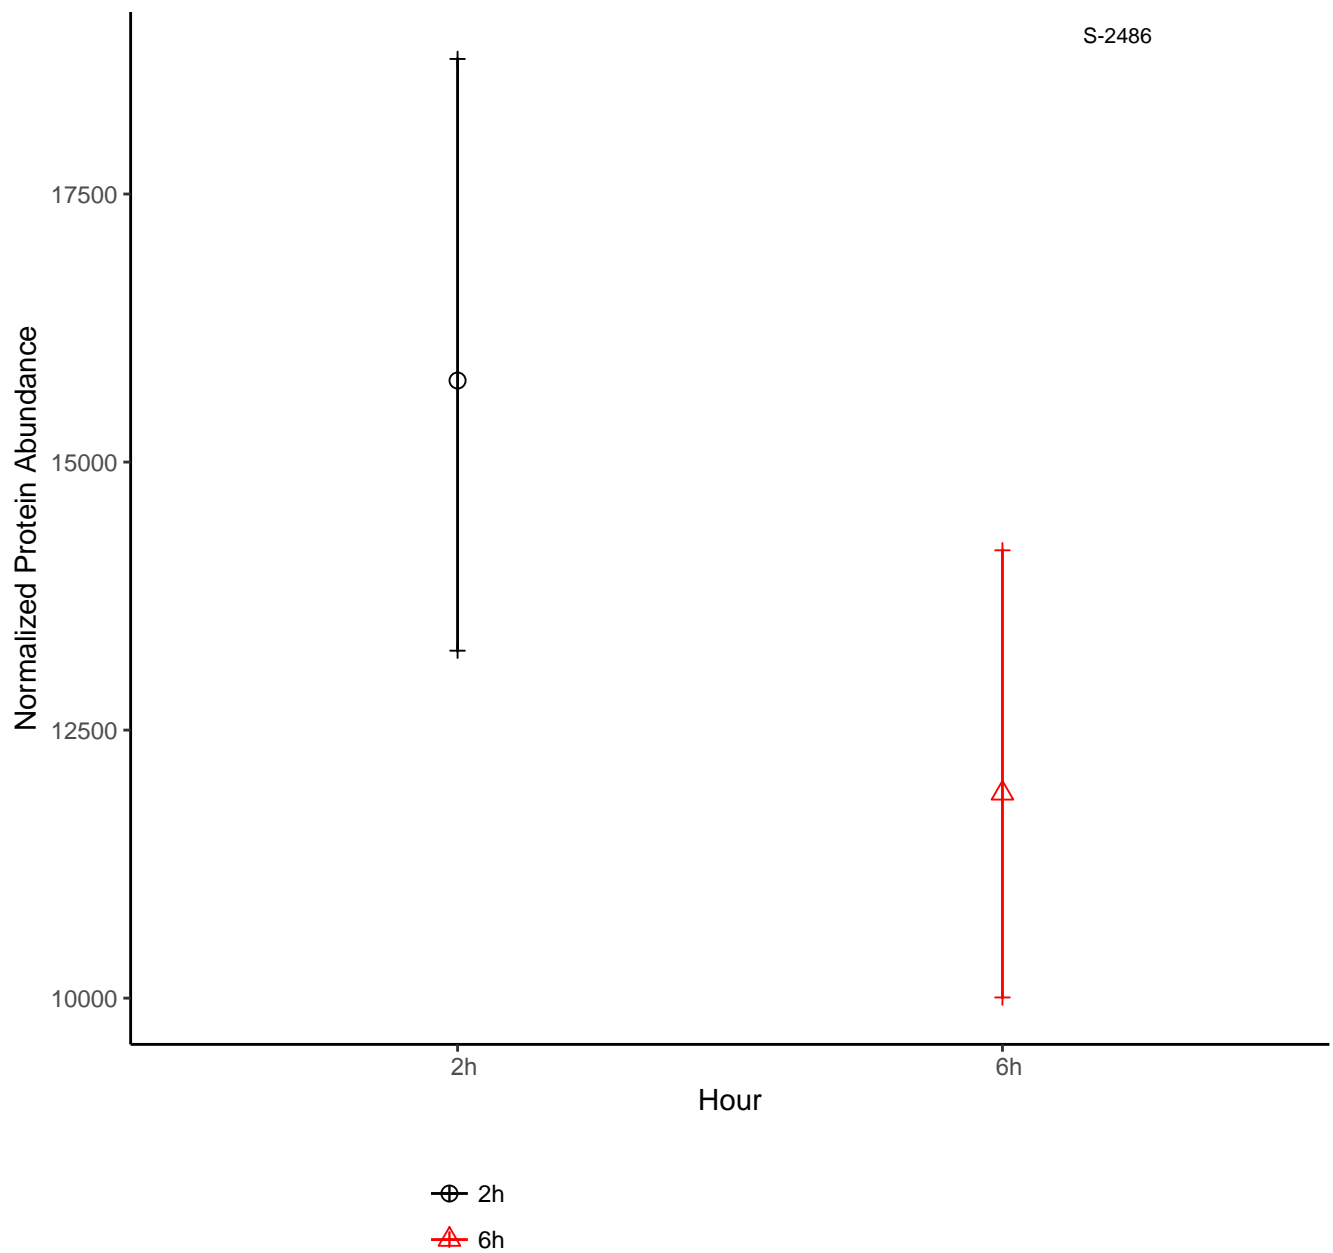

# Y1921\_STAAM

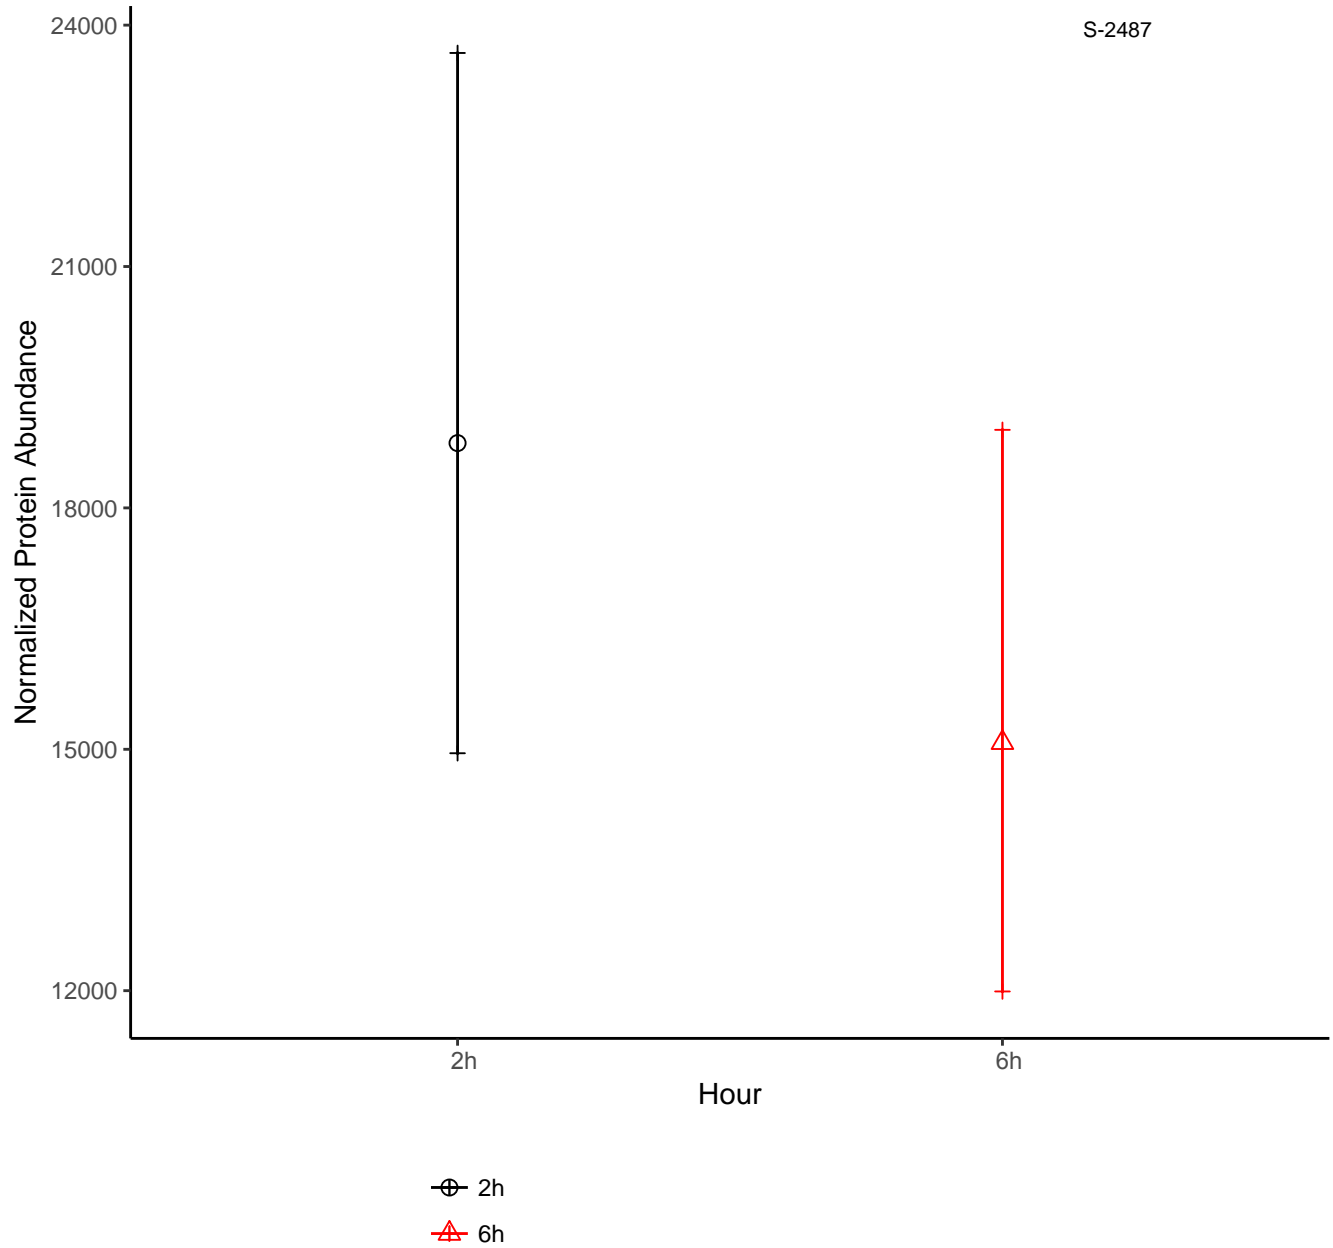

# Y2173\_STAAM

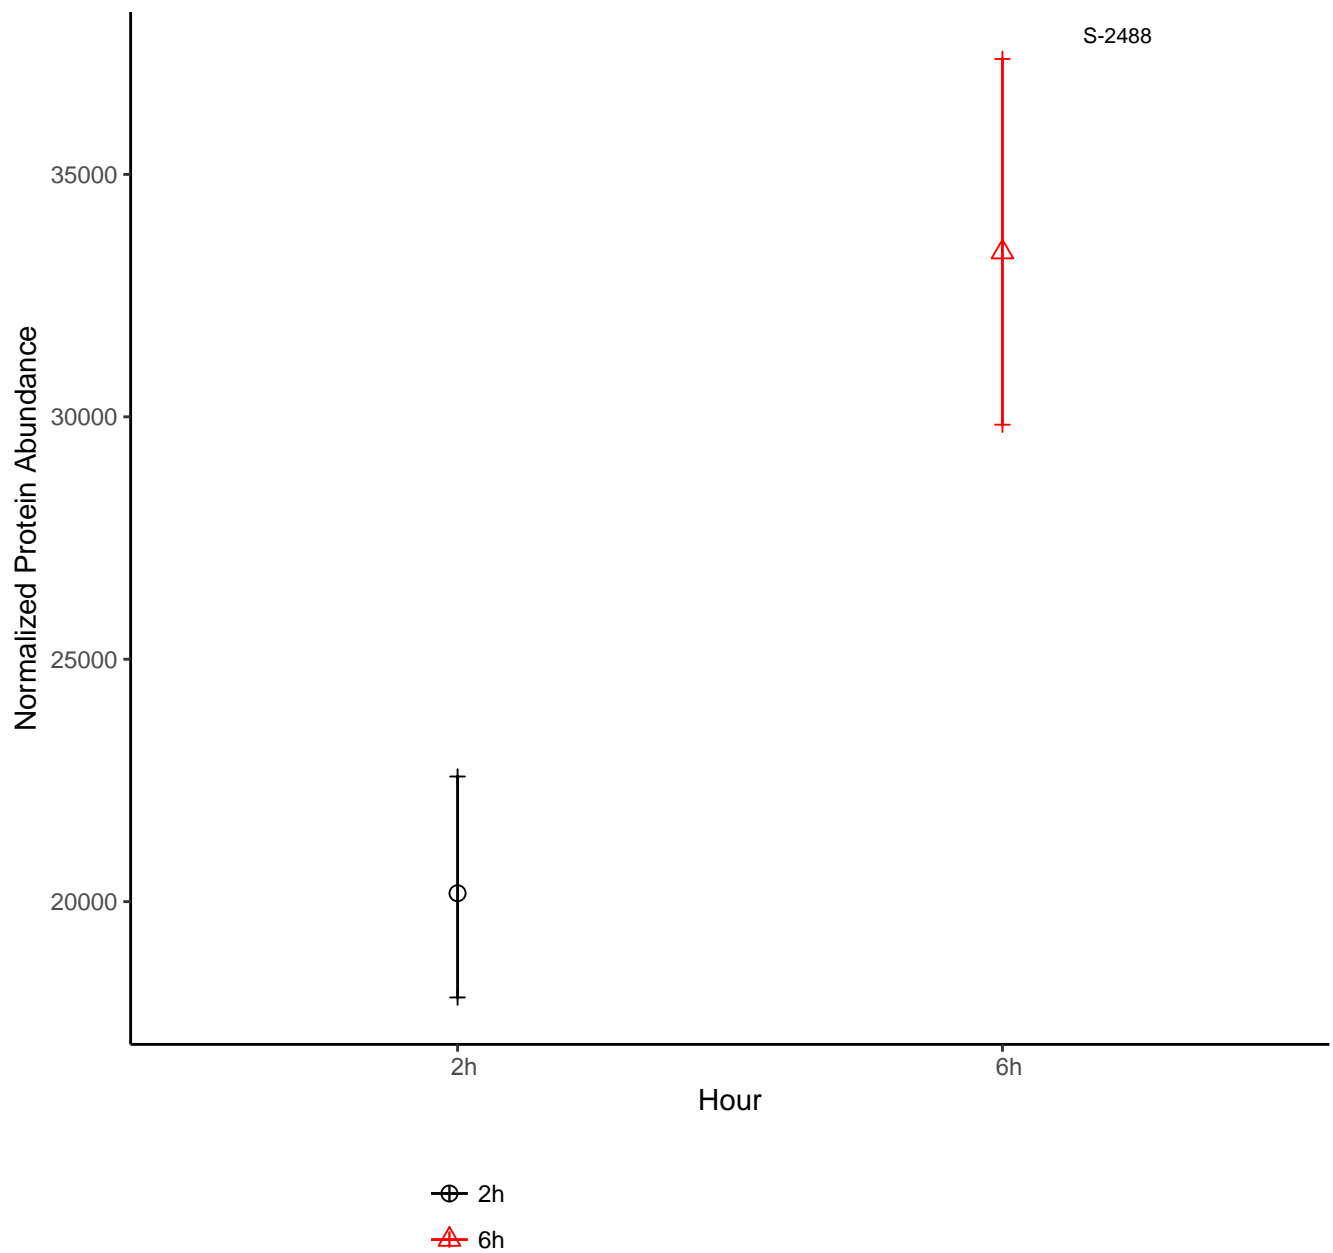



# Y2204\_STAAM

S-2489

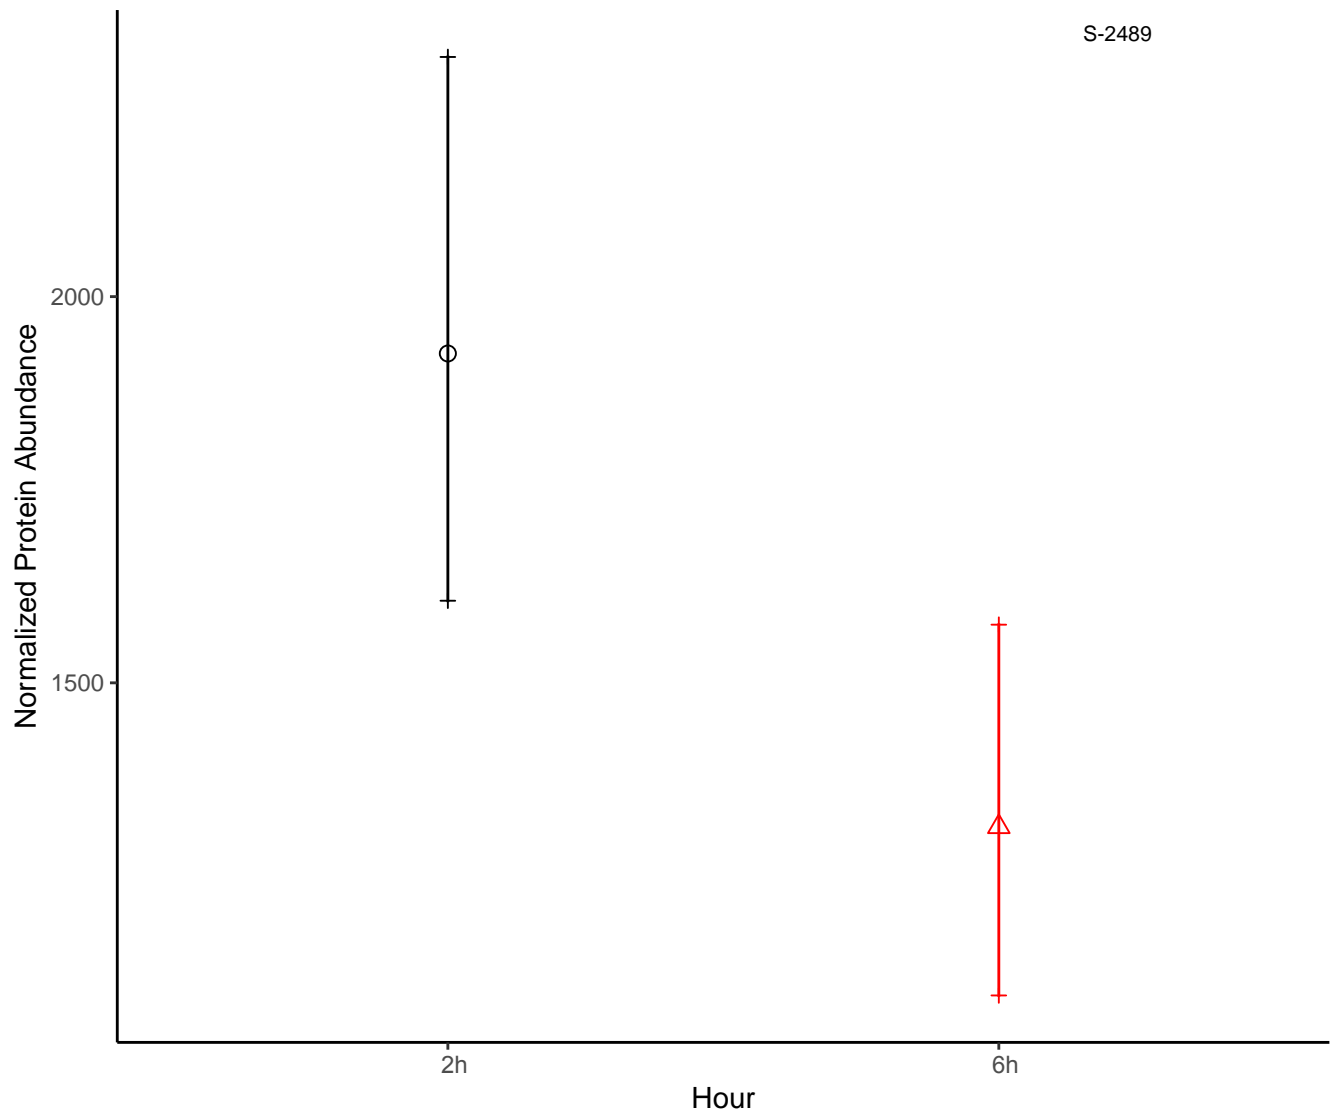

⊕ 2h

△ 6h

# Y2265\_STAAM

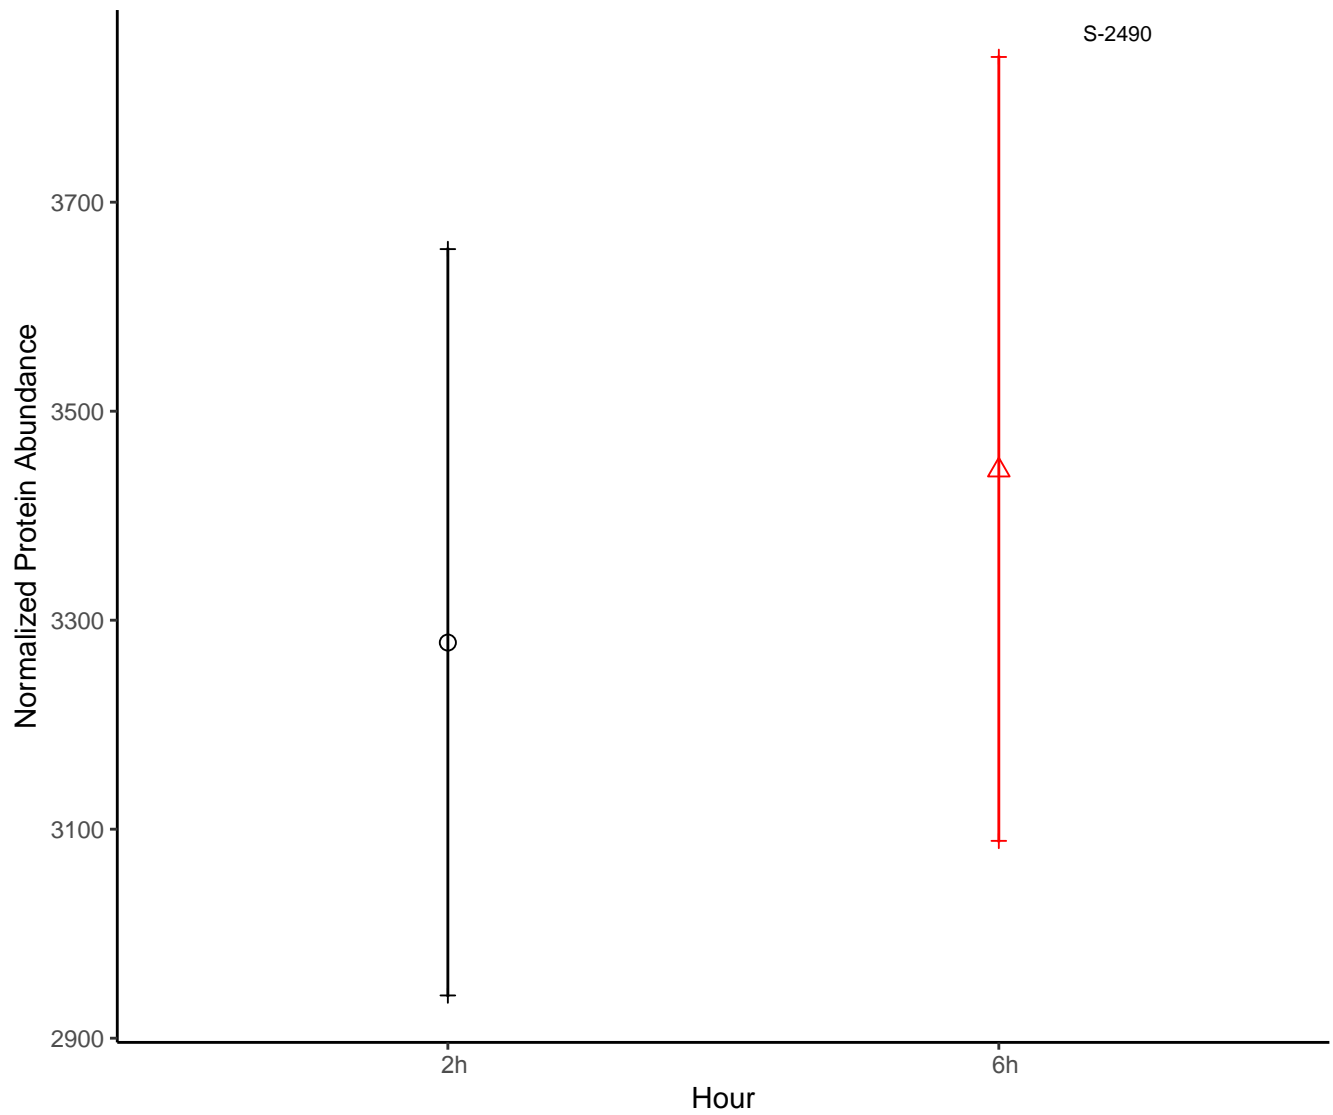

⊕ 2h

△ 6h

# Y2305\_STAAM

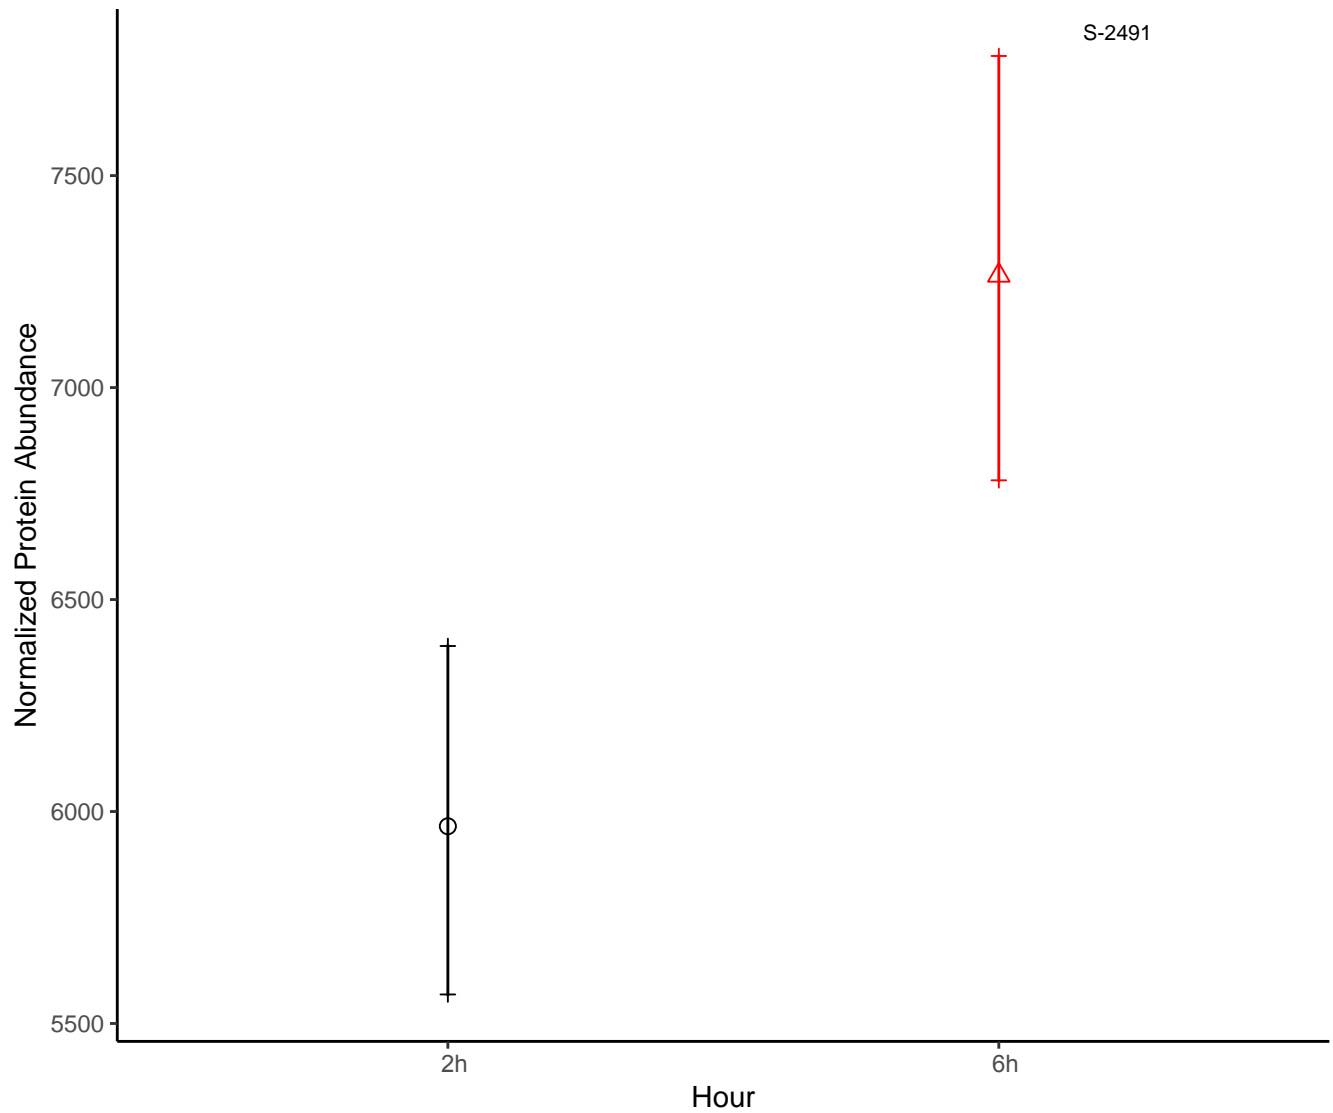

⊕ 2h

△ 6h

# Y2363\_STAAM

S-2492

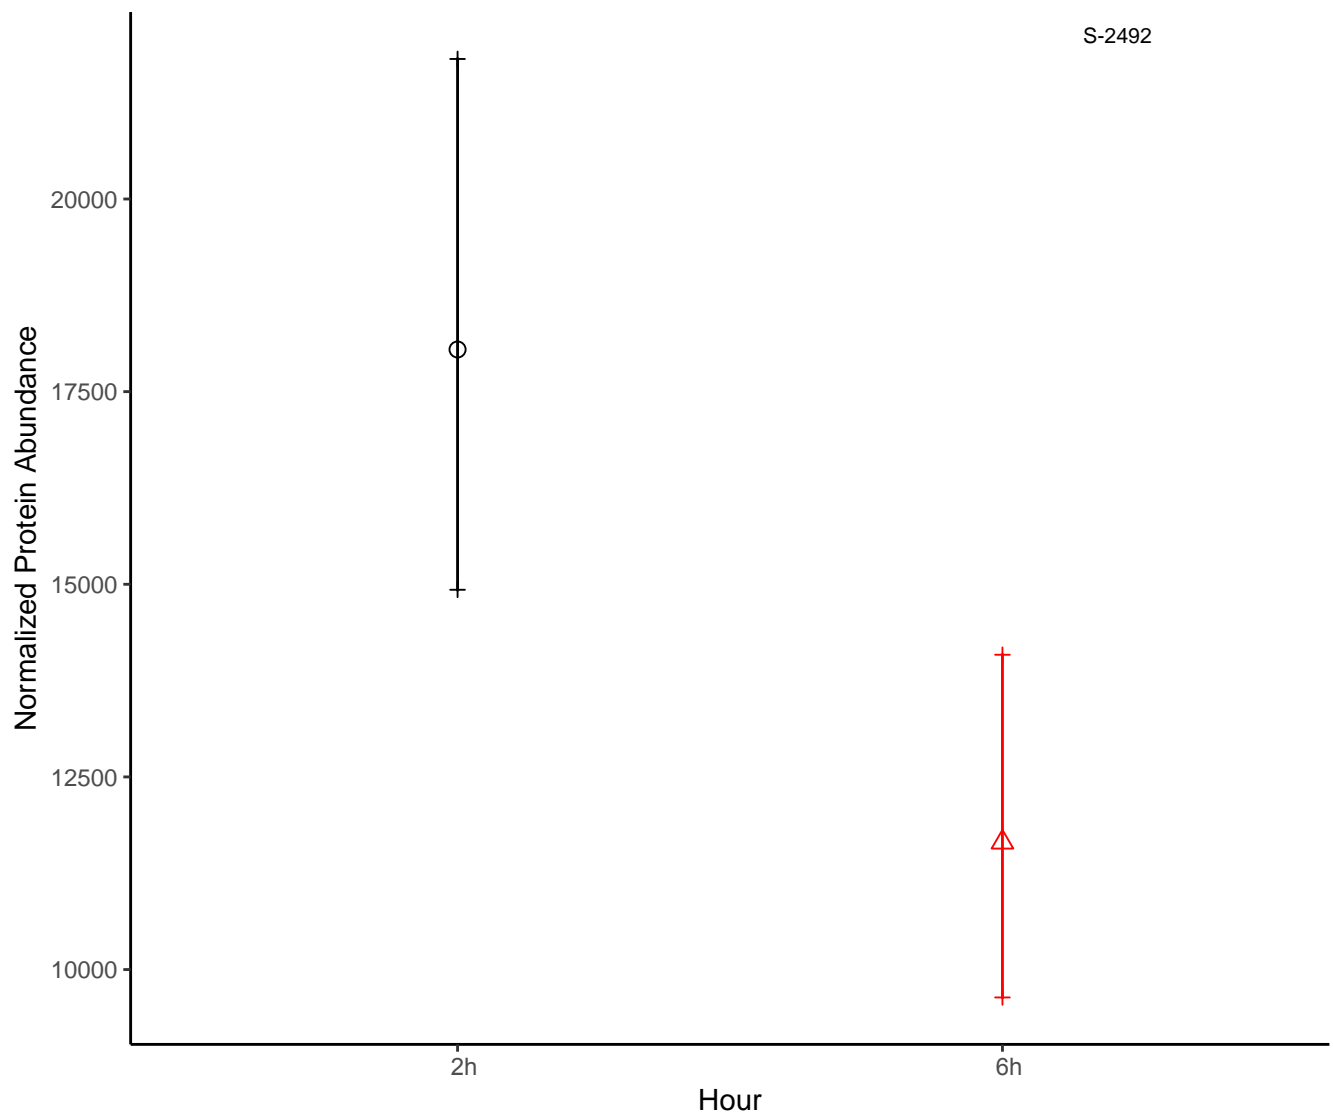

⊕ 2h

△ 6h

# Y2368\_STAAM

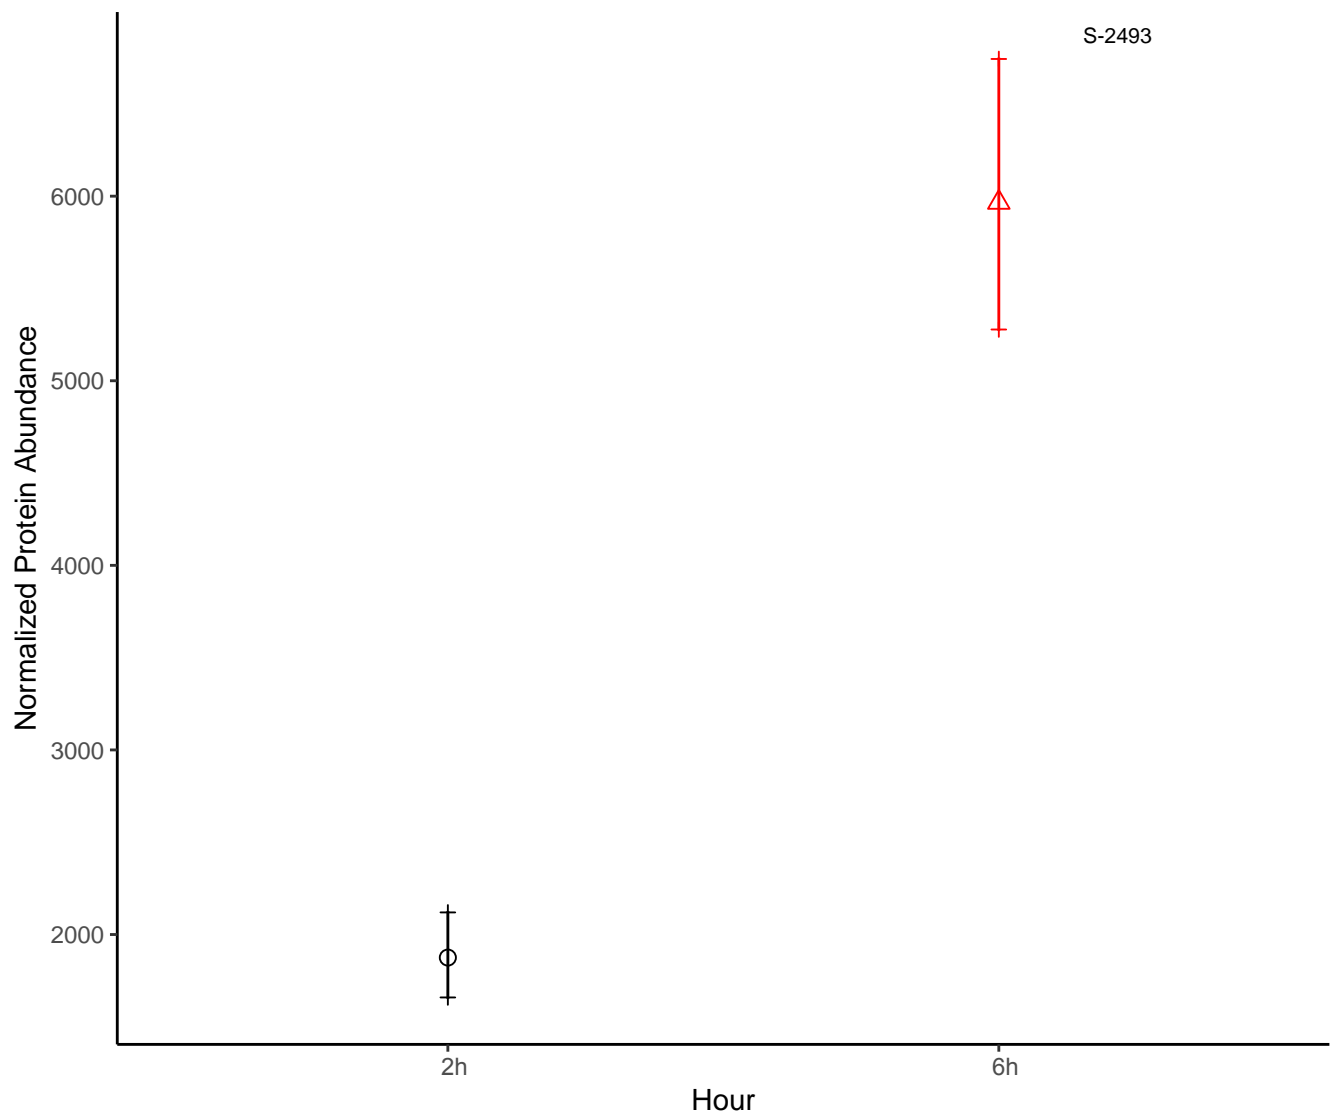

⊕ 2h

△ 6h

# Y2478\_STAAM

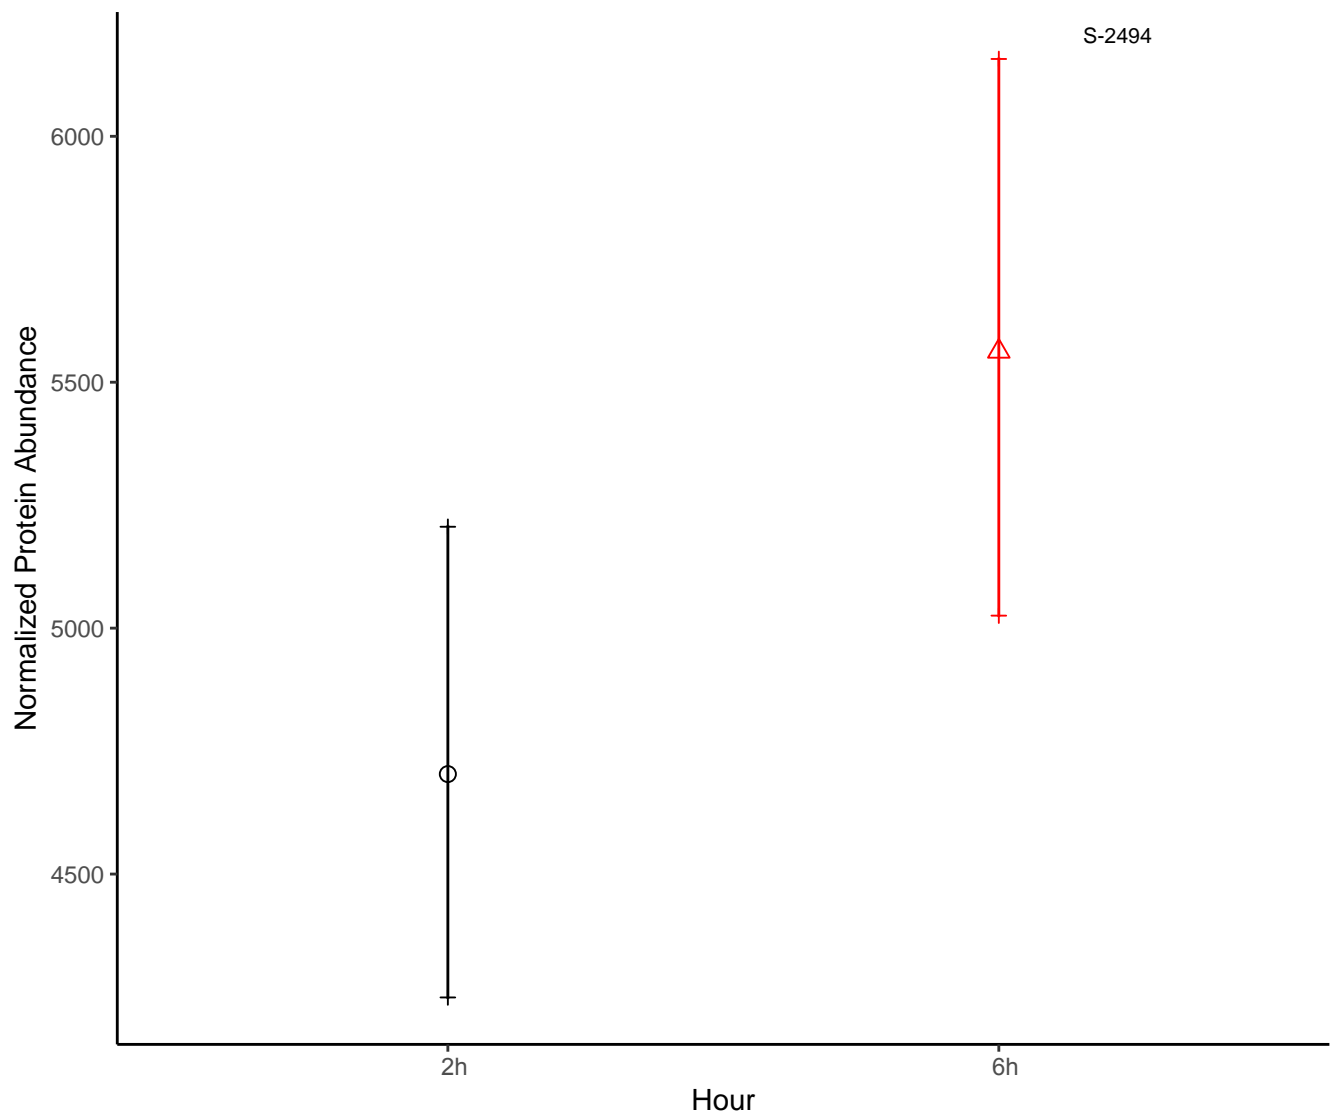

⊕ 2h

△ 6h

# Y2523\_STAAM

S-2495

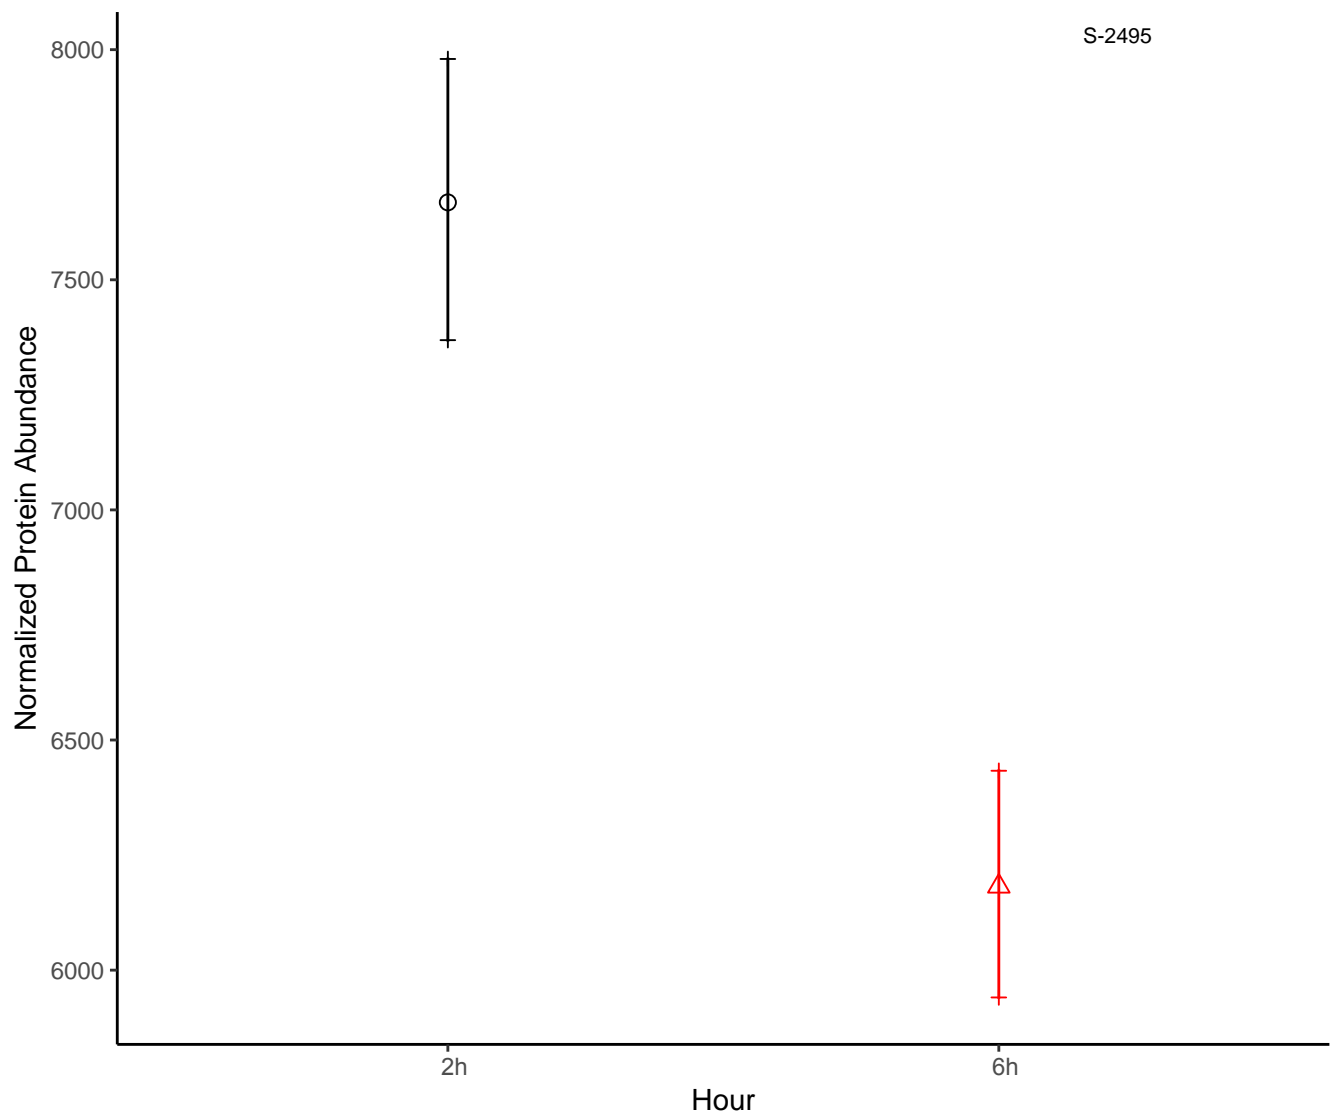

⊕ 2h

△ 6h

# Y2573\_STAAM

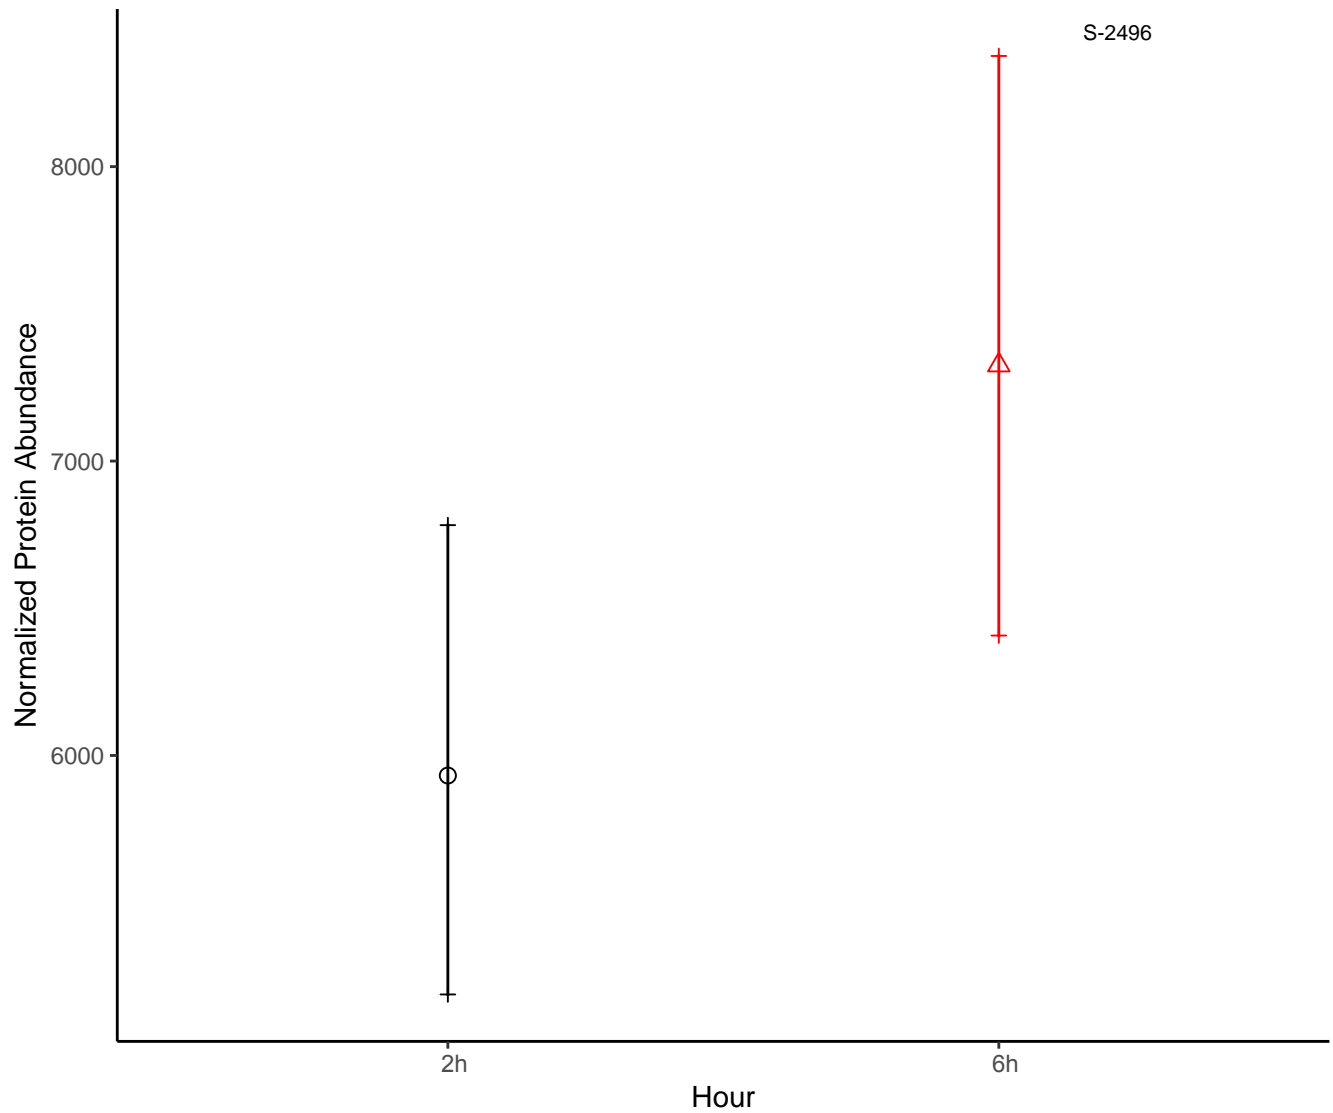

⊕ 2h

△ 6h



# Y2578\_STAAM

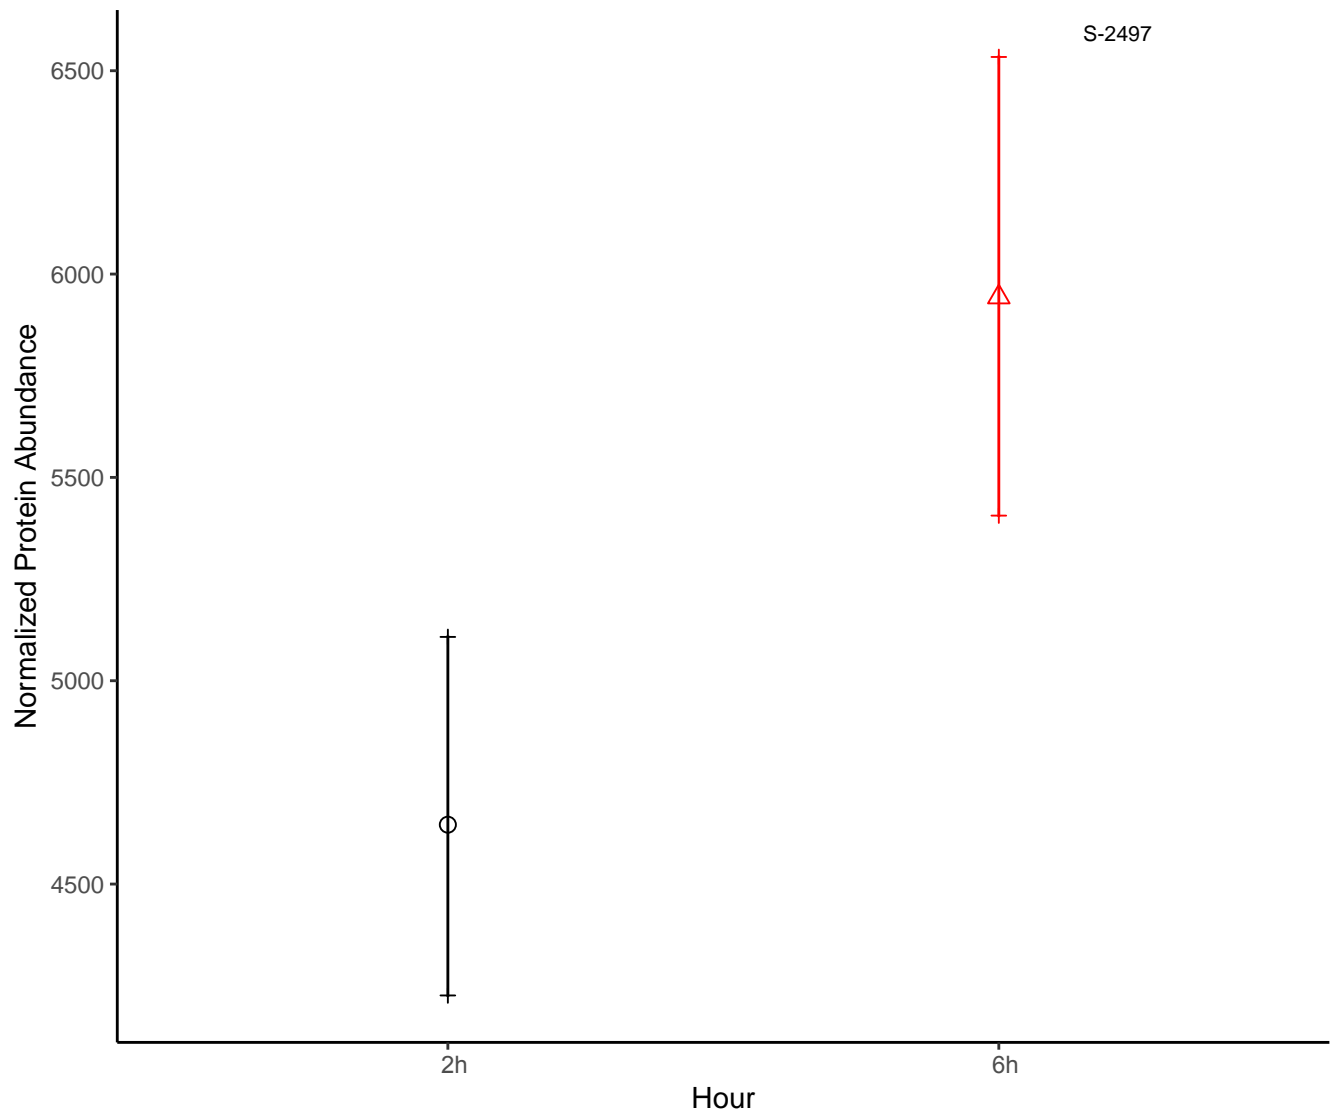

⊕ 2h

△ 6h

# Y2581\_STAAM

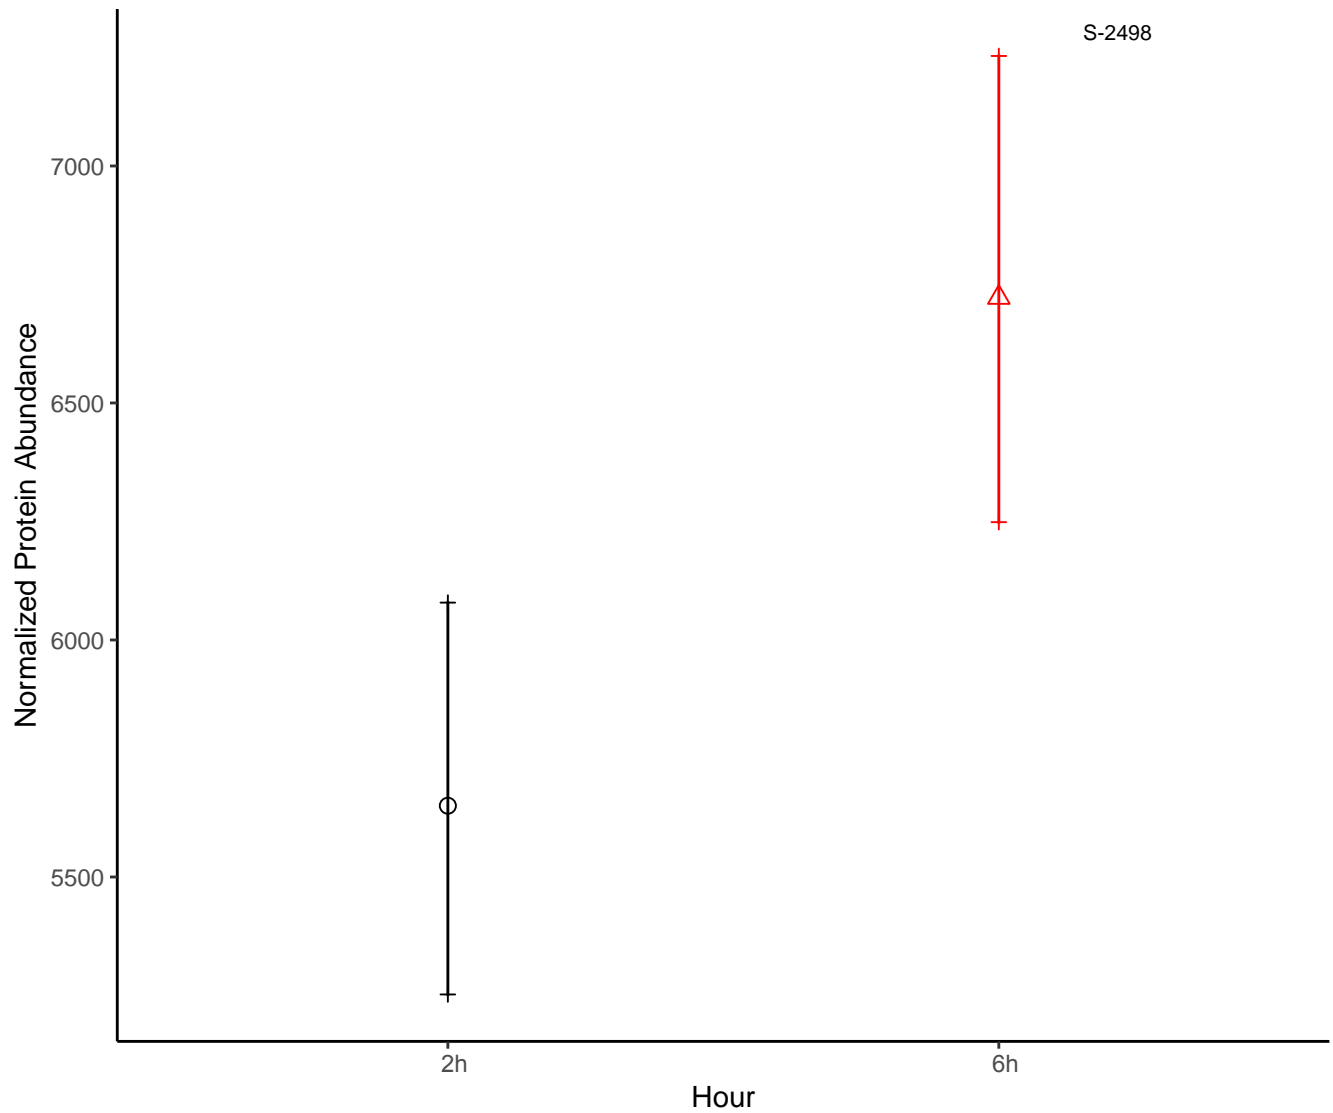

⊕ 2h

△ 6h

# Y2627\_STAAM

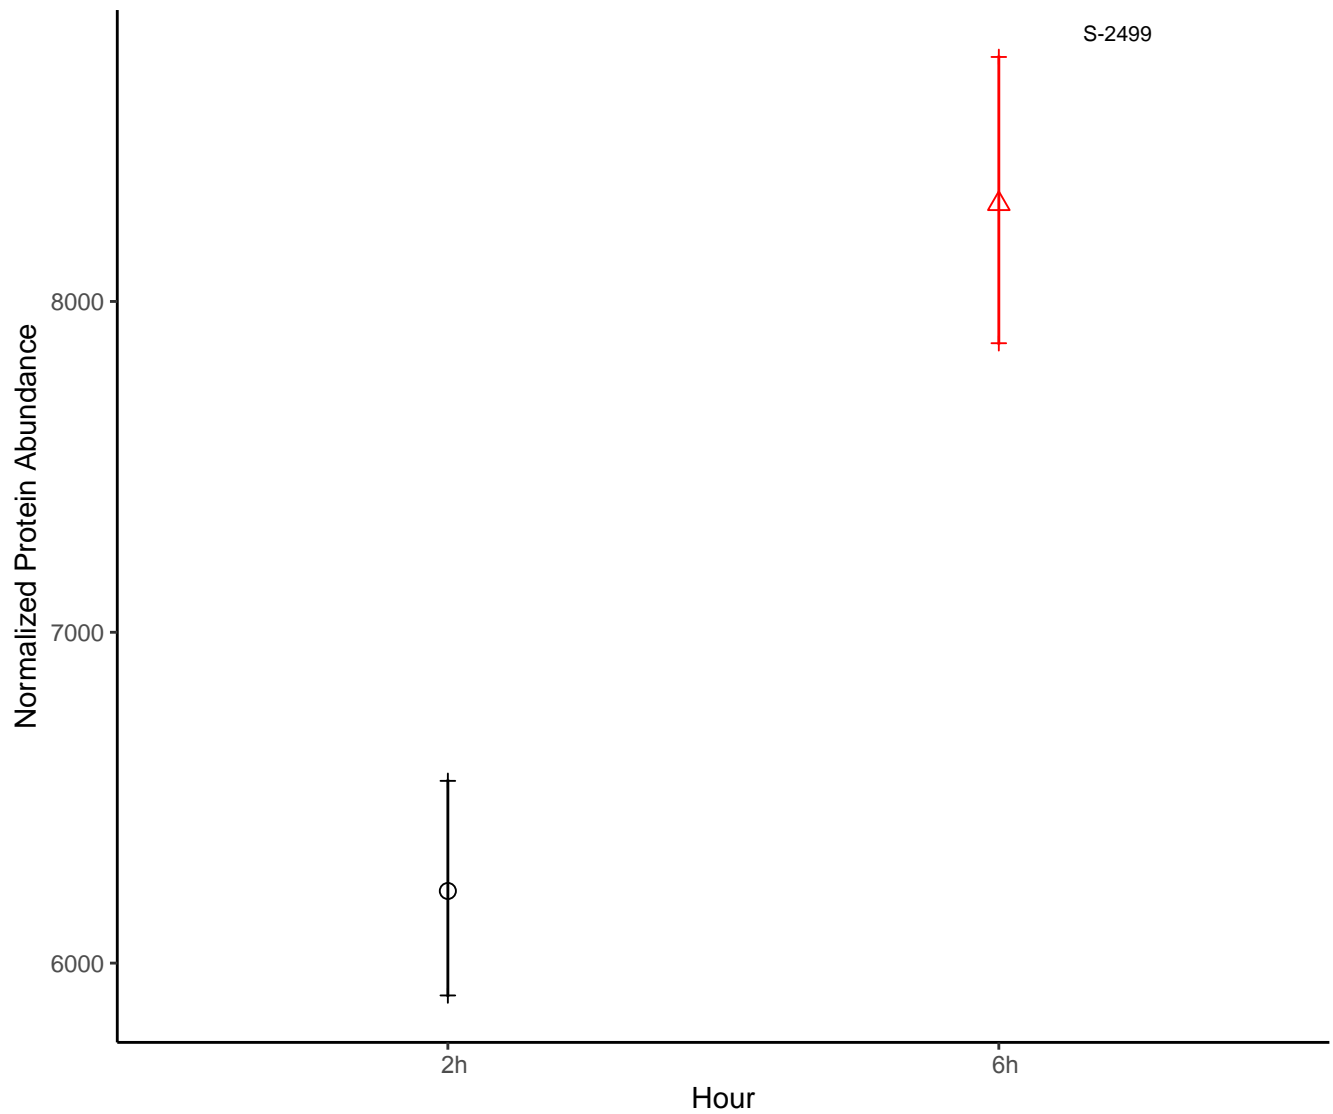

⊕ 2h

△ 6h

# Y2687\_STAAM

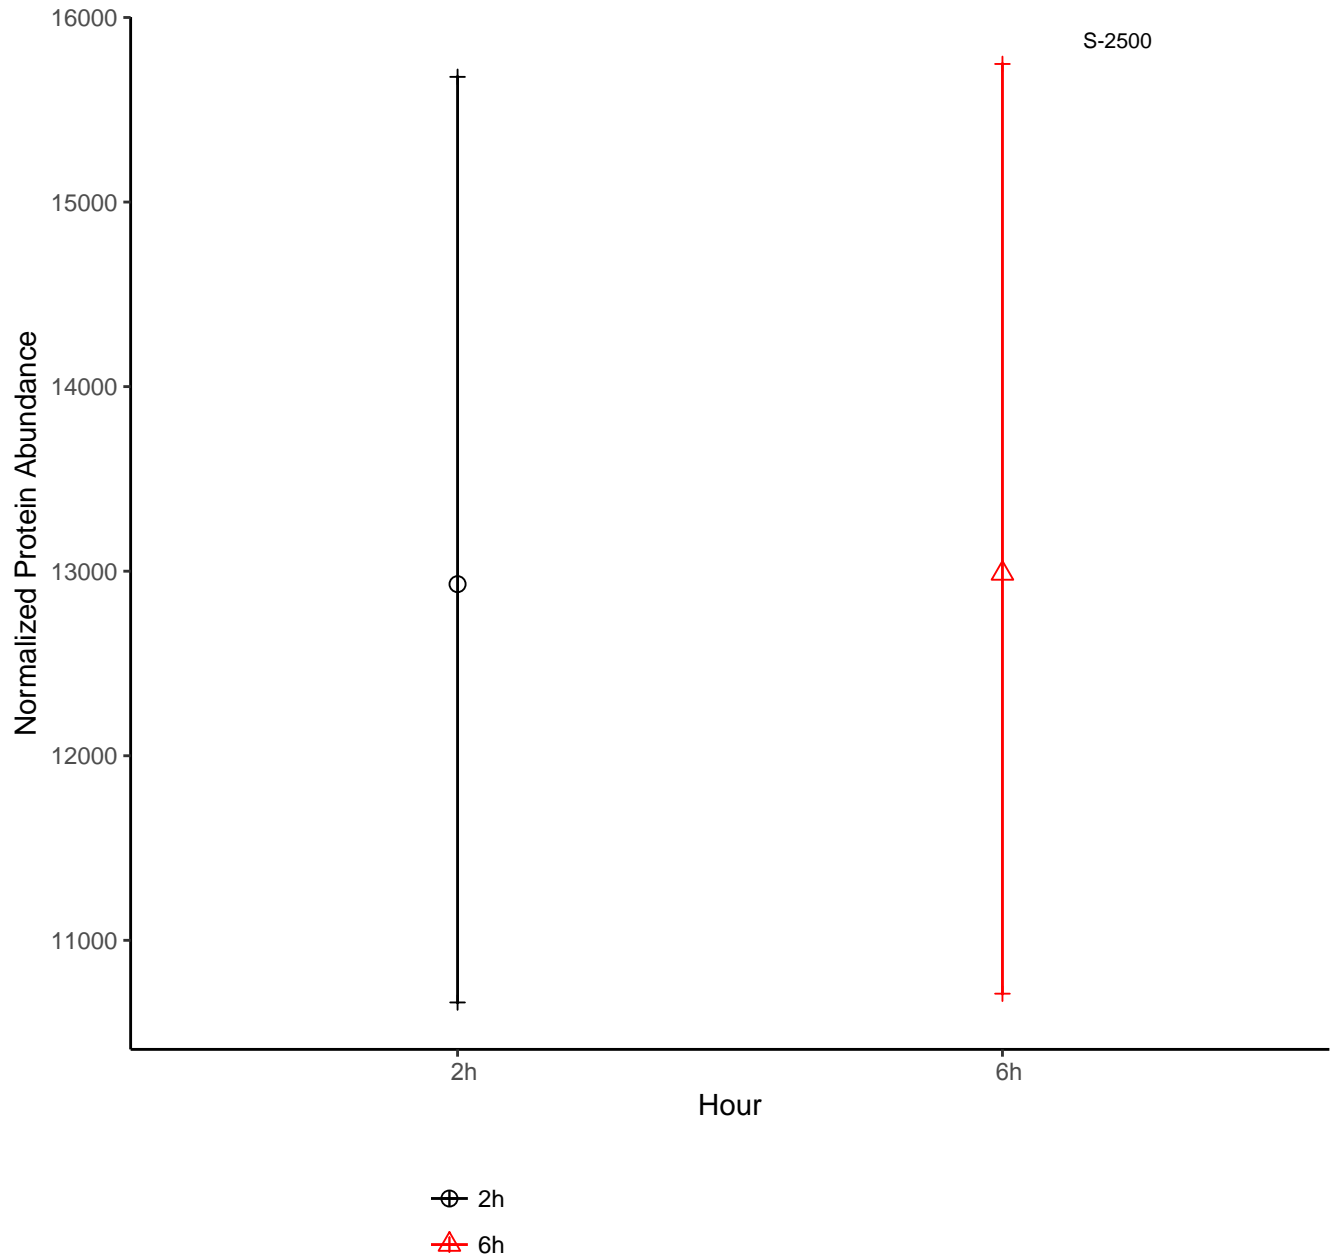

# Y2689\_STAAM

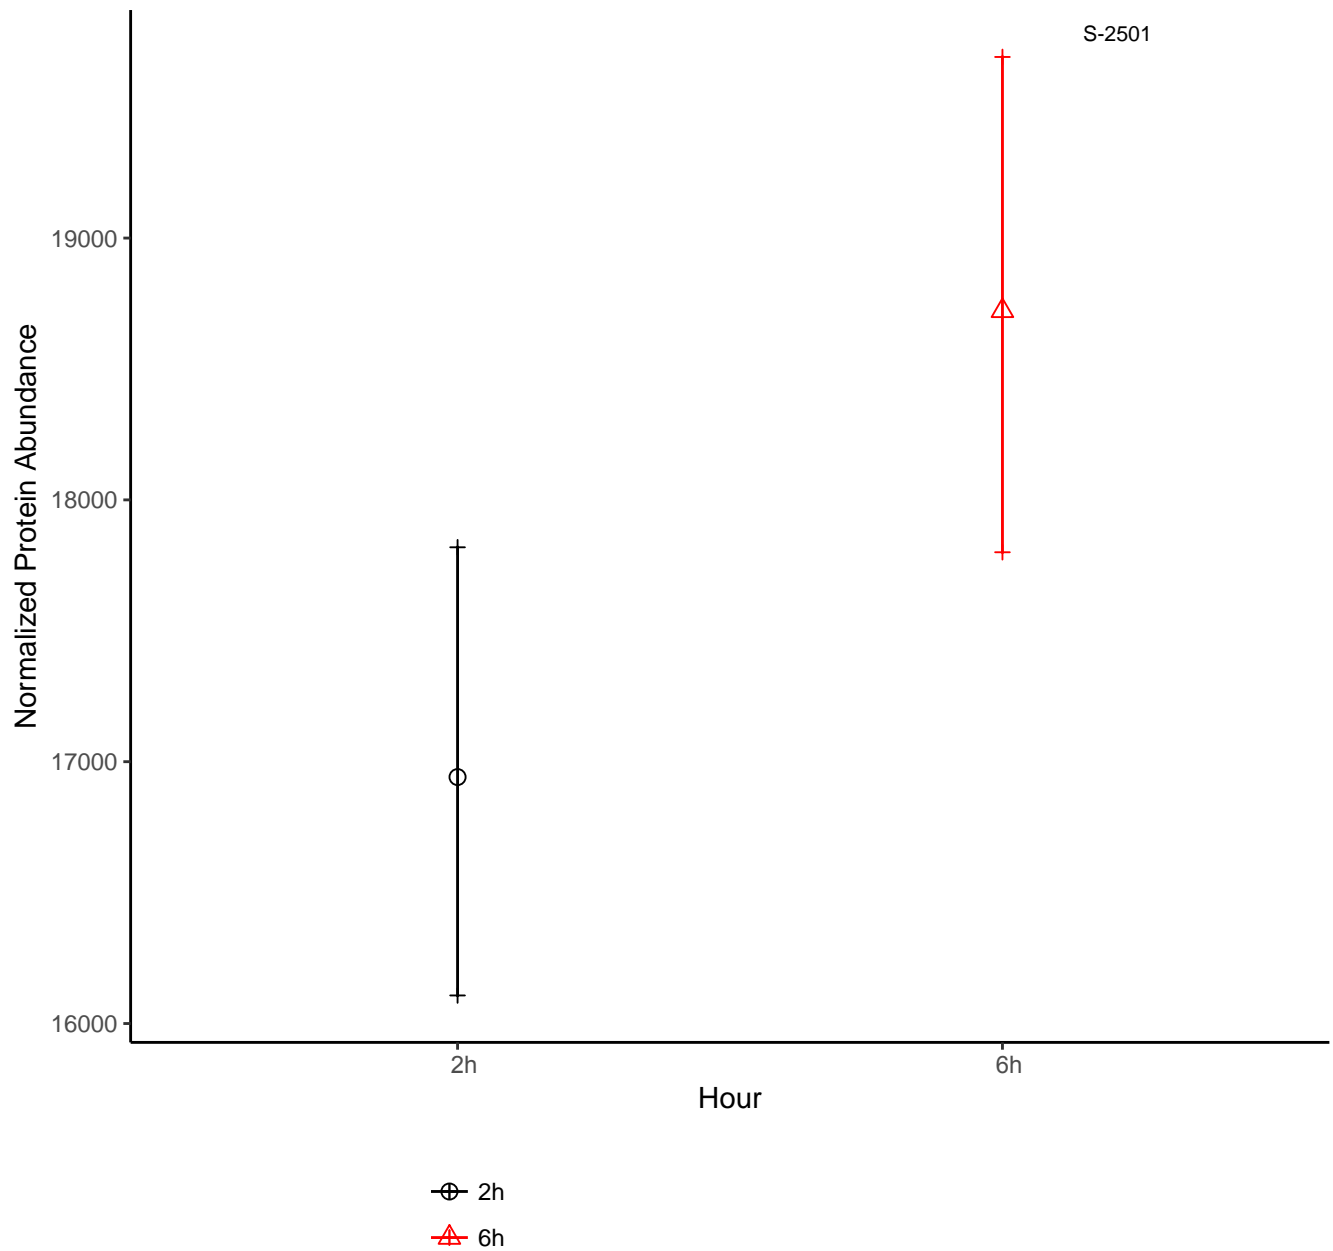

# Y385\_STAAM

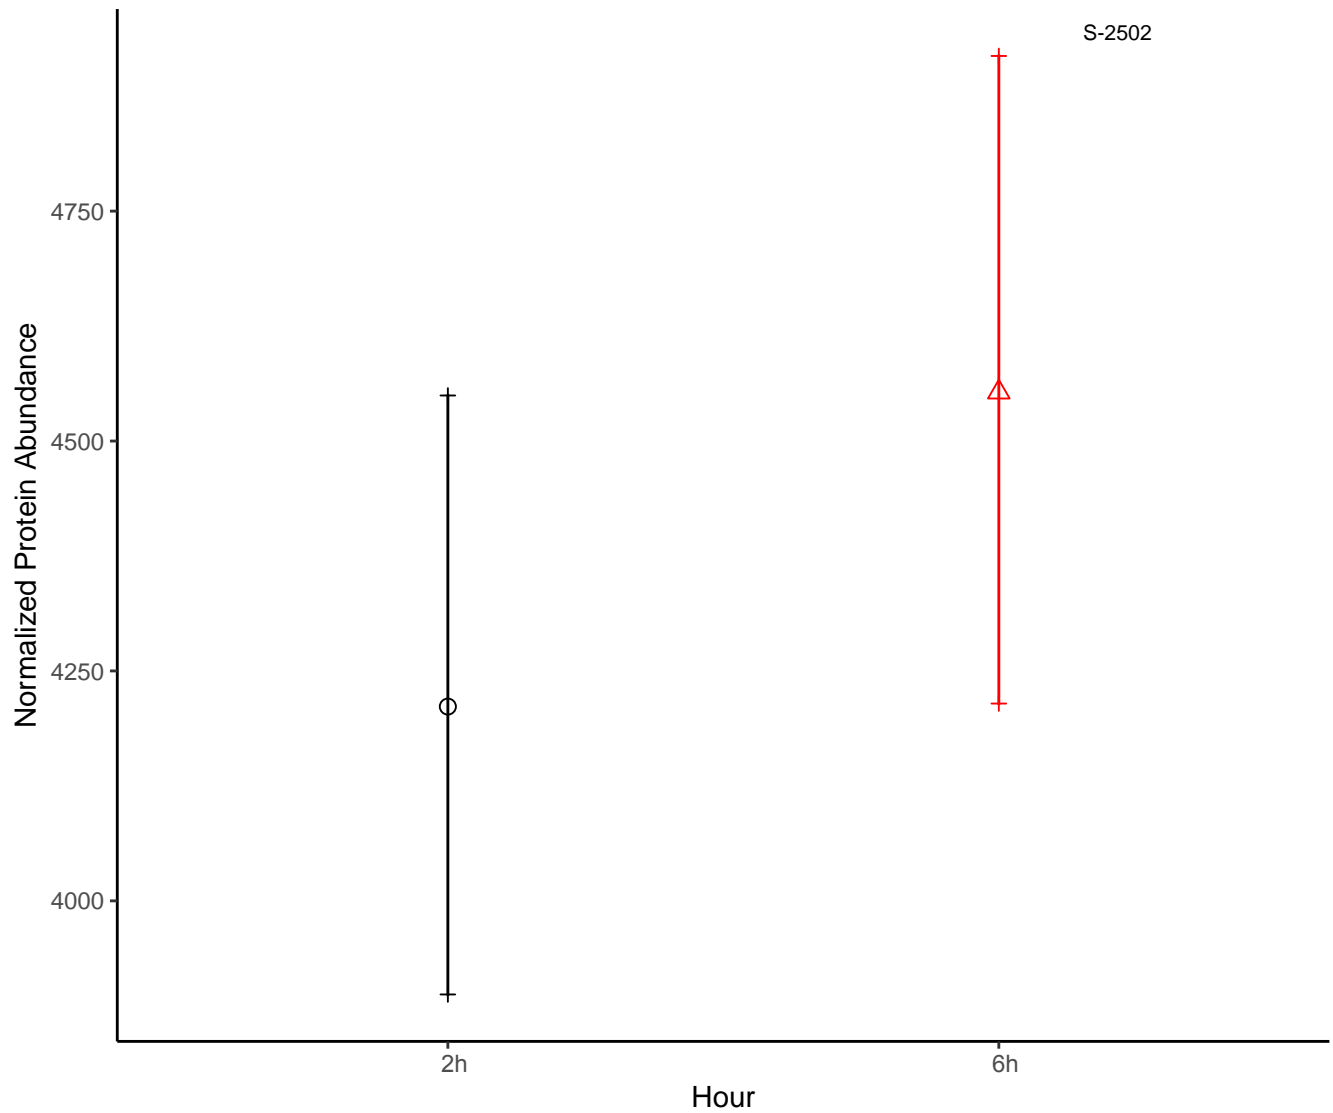

⊕ 2h

△ 6h

# Y437\_STAAM

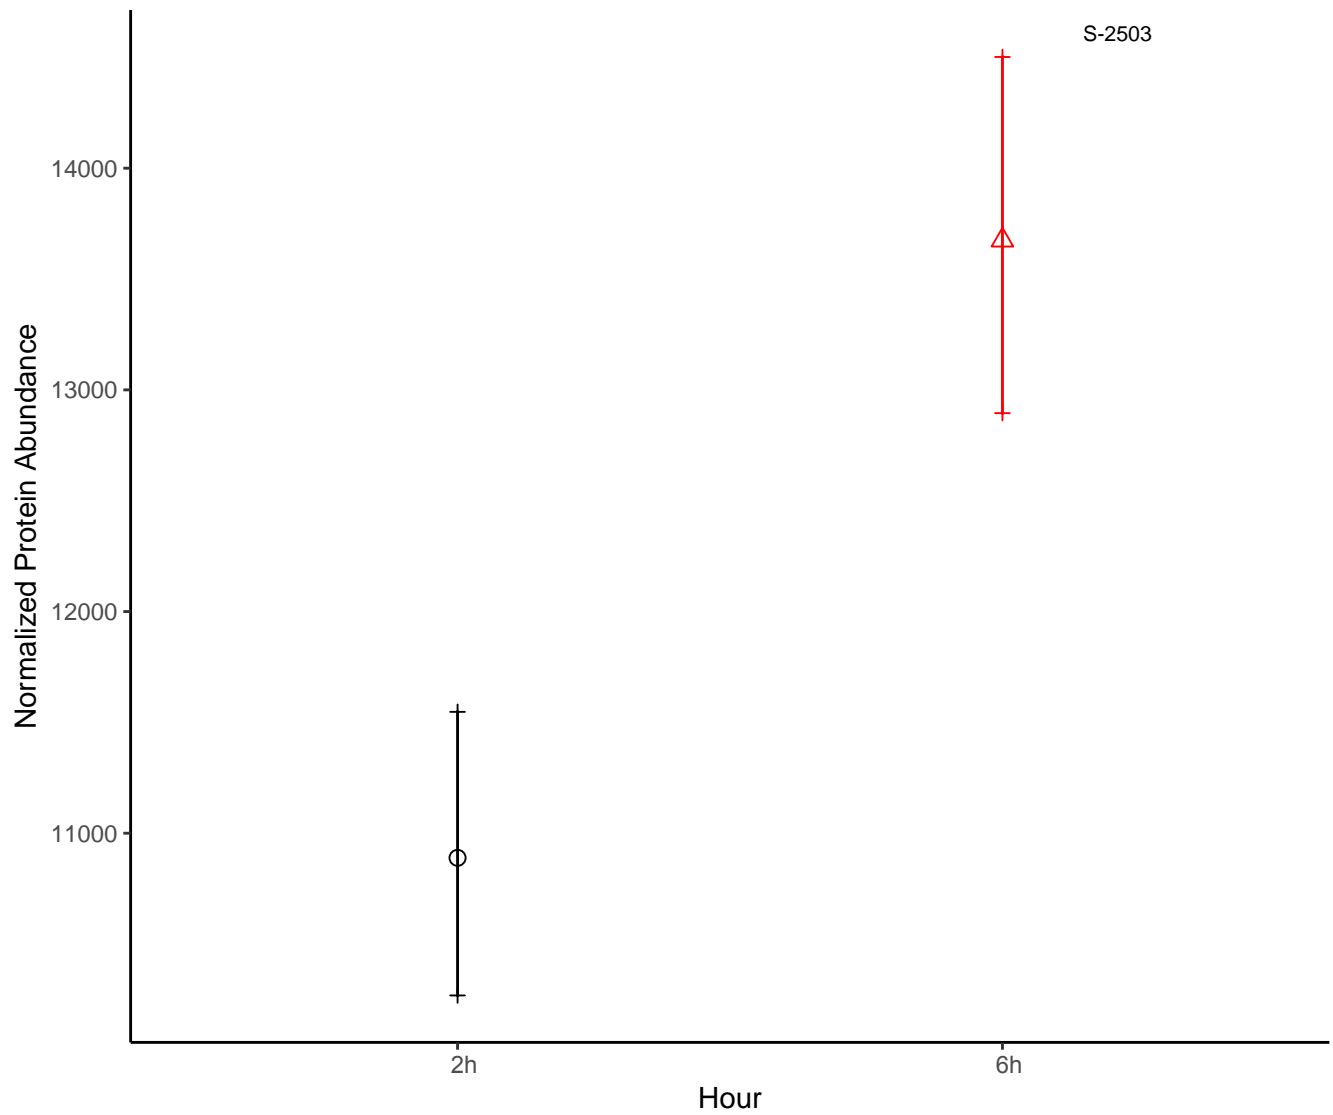

⊕ 2h

△ 6h

# Y479\_STAAM

S-2504

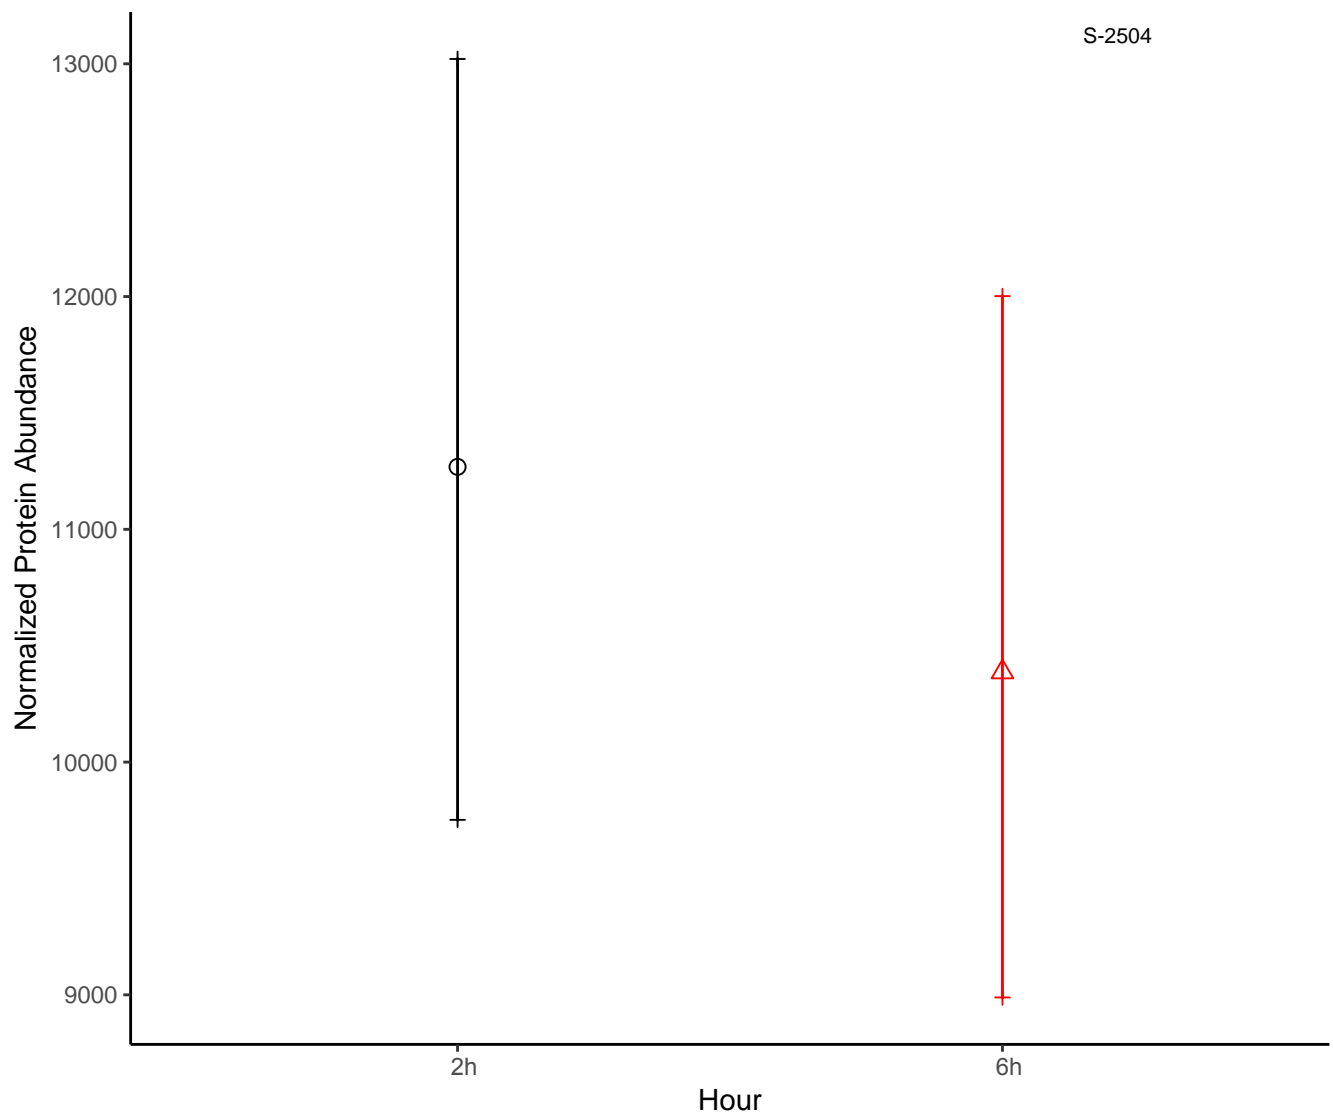

⊕ 2h

△ 6h



# Y553\_STAAM

S-2505

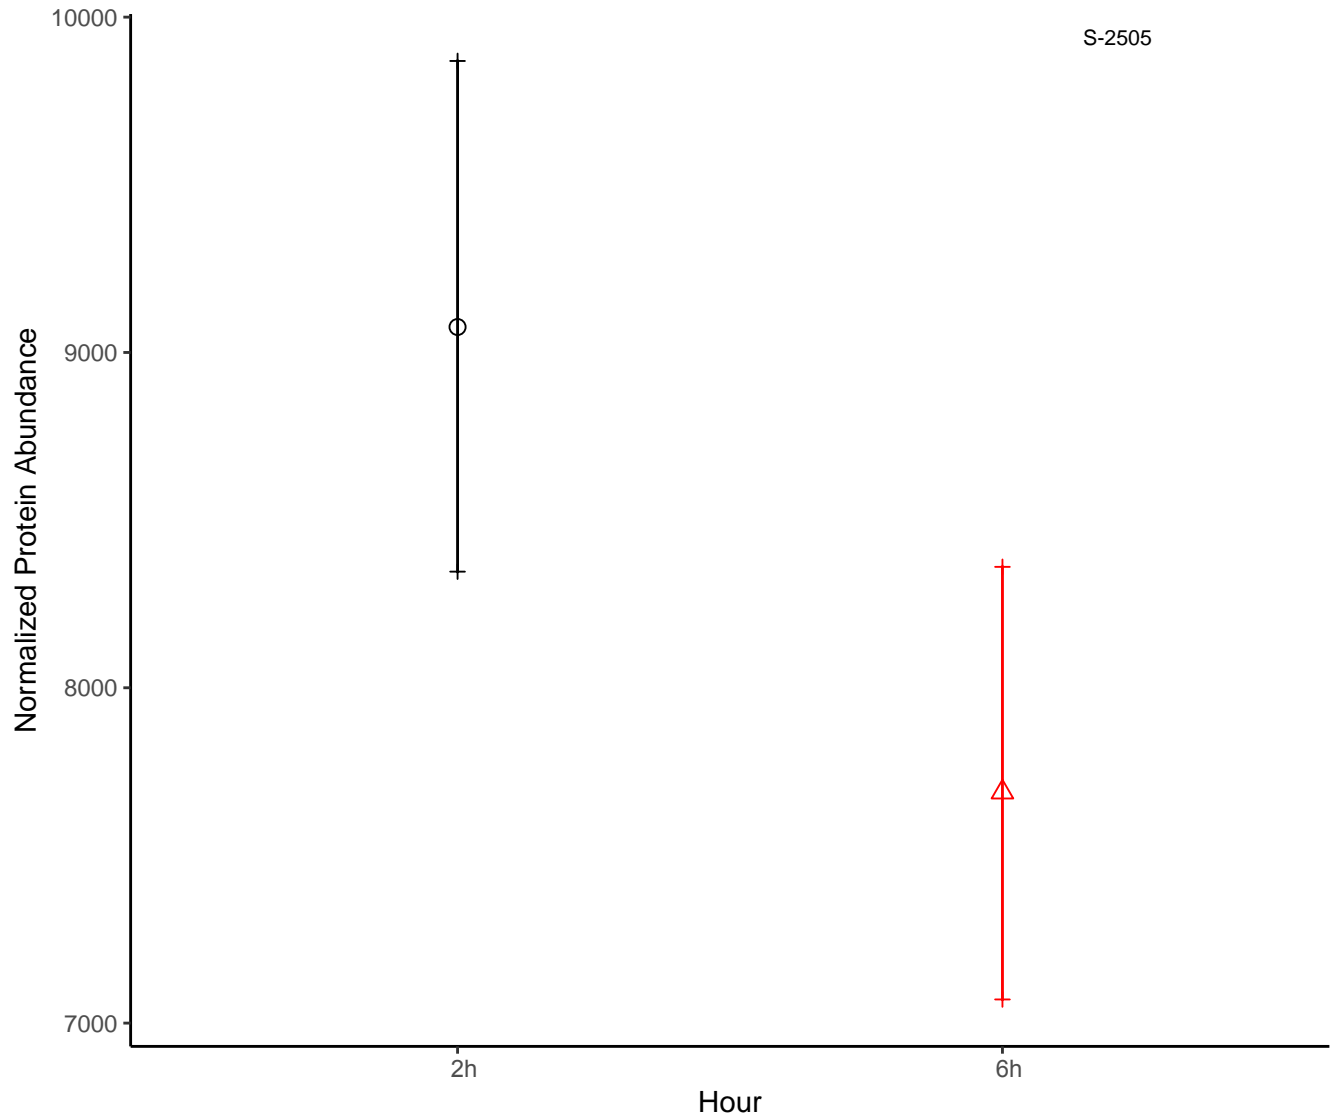

⊕ 2h

△ 6h

# Y587\_STAAM

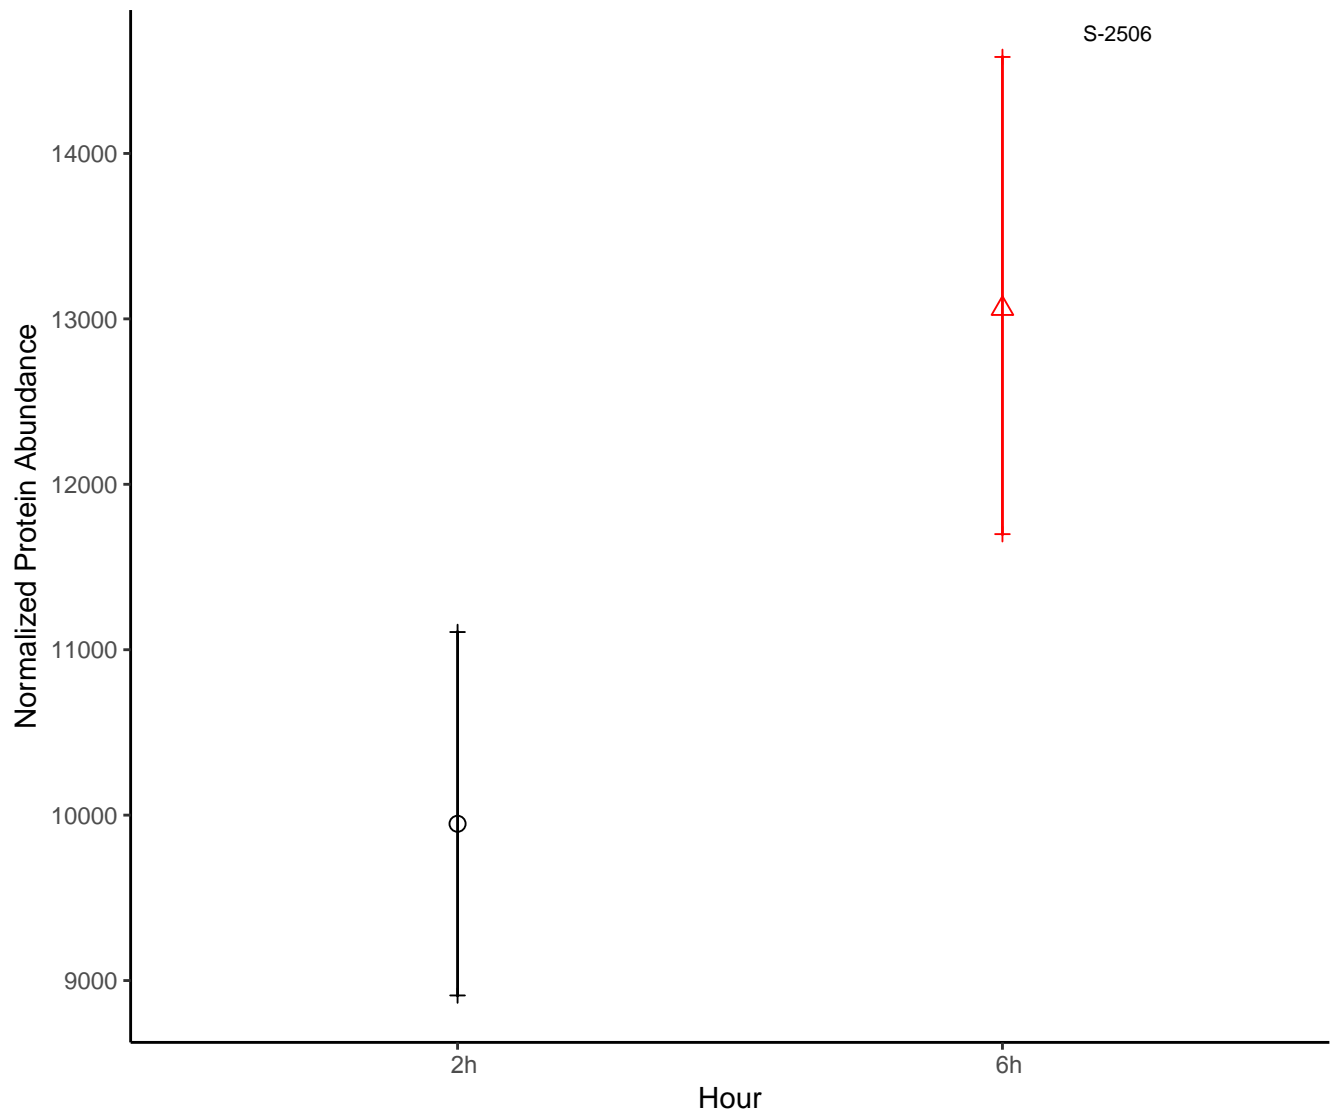

⊕ 2h

△ 6h

# Y669\_STAAM

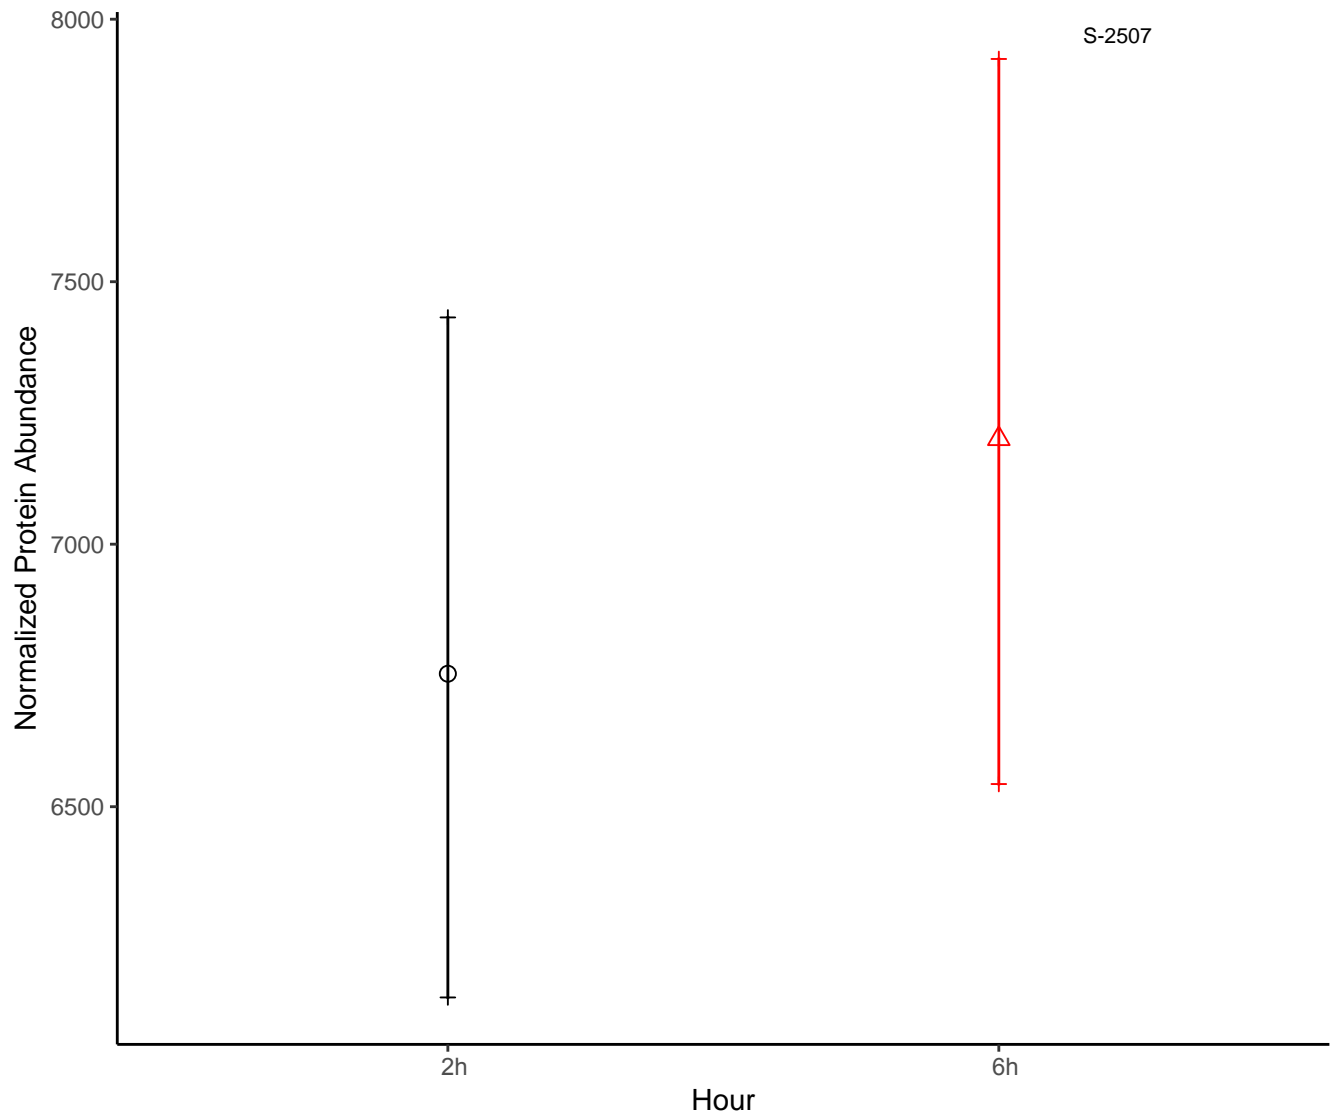

⊕ 2h

△ 6h

# Y752\_STAAM

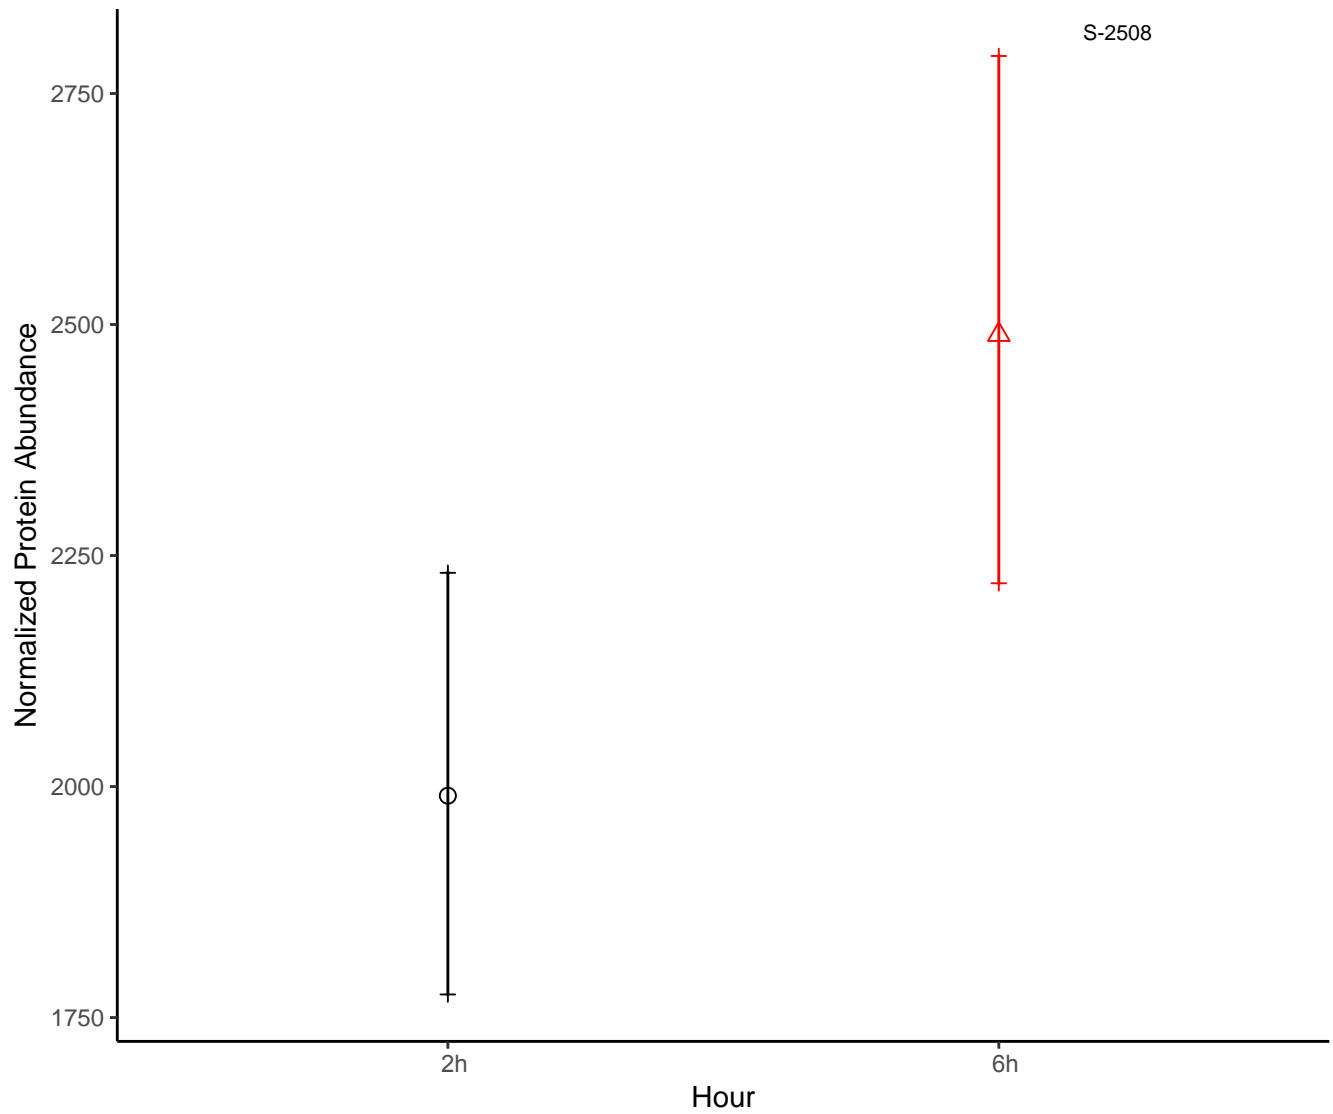

⊕ 2h

△ 6h

# Y765\_STAAM

S-2509

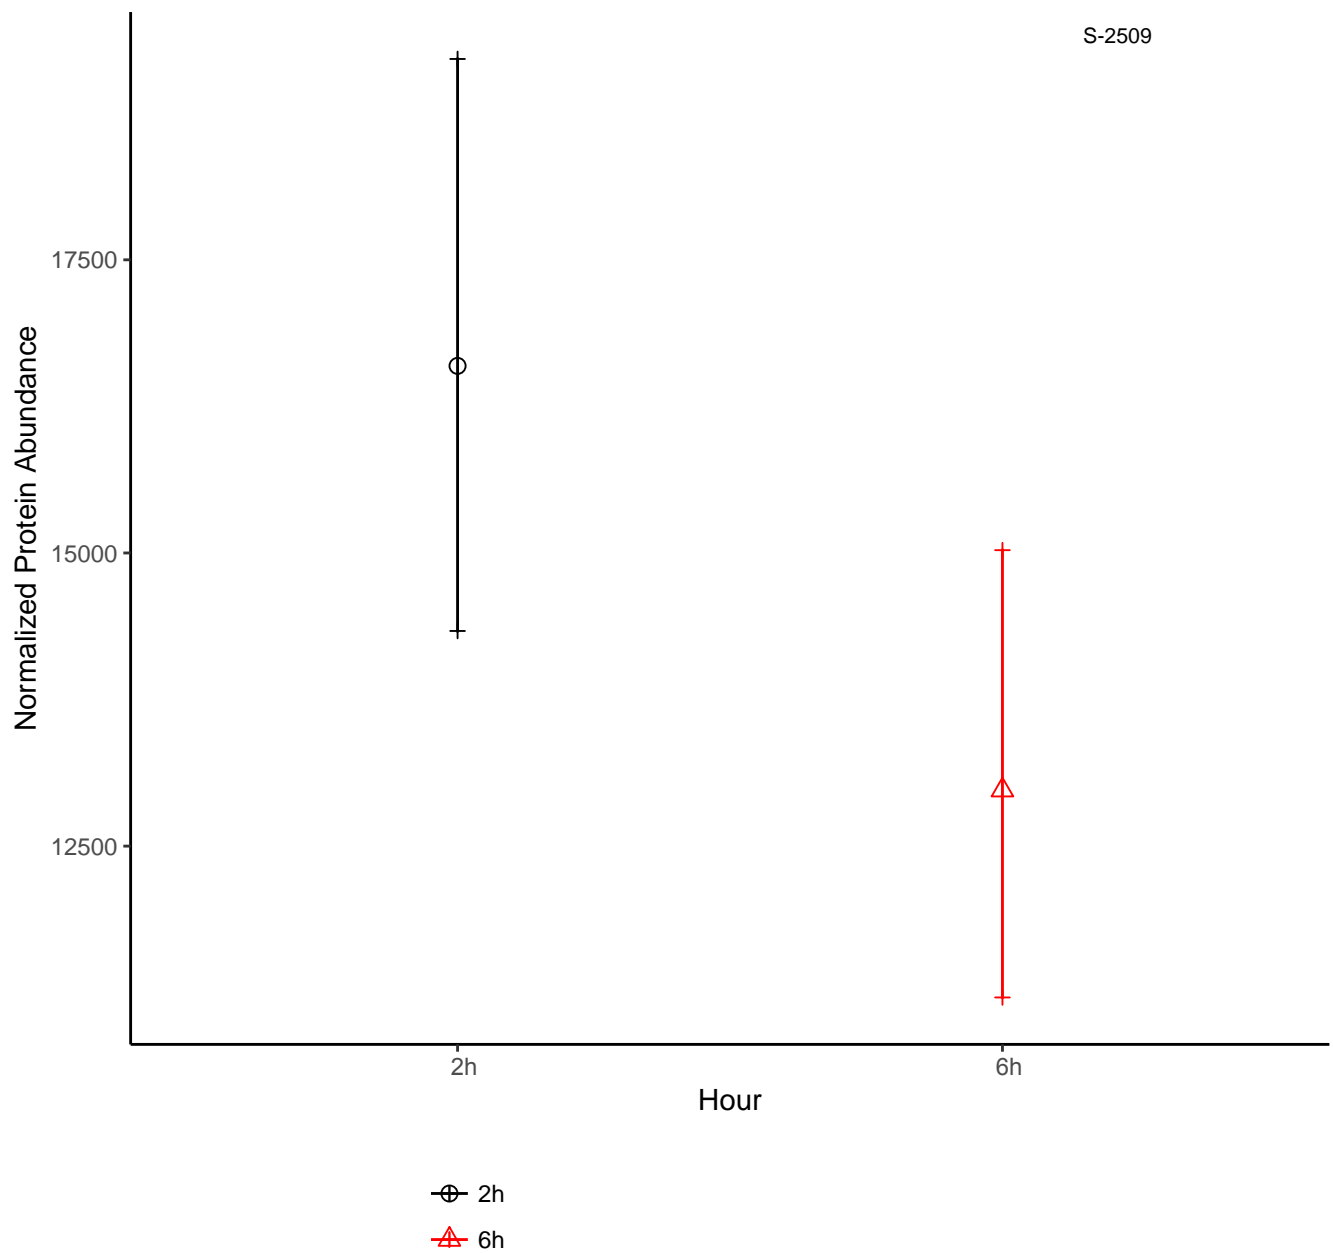

# Y769\_STAAM

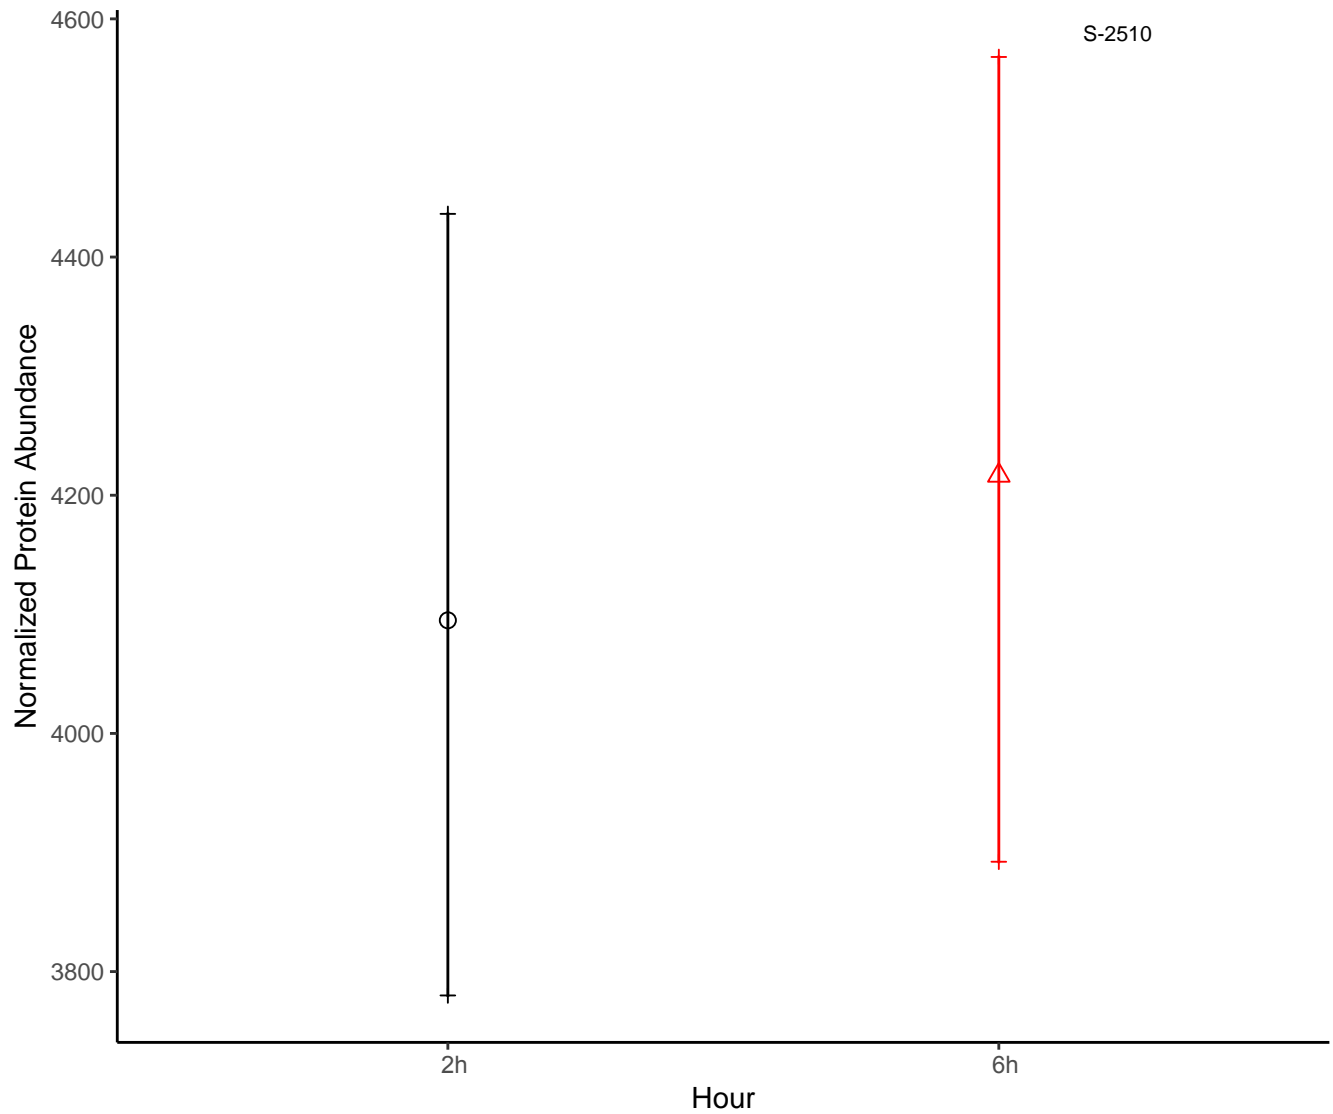

⊕ 2h

△ 6h

# Y840\_STAAM

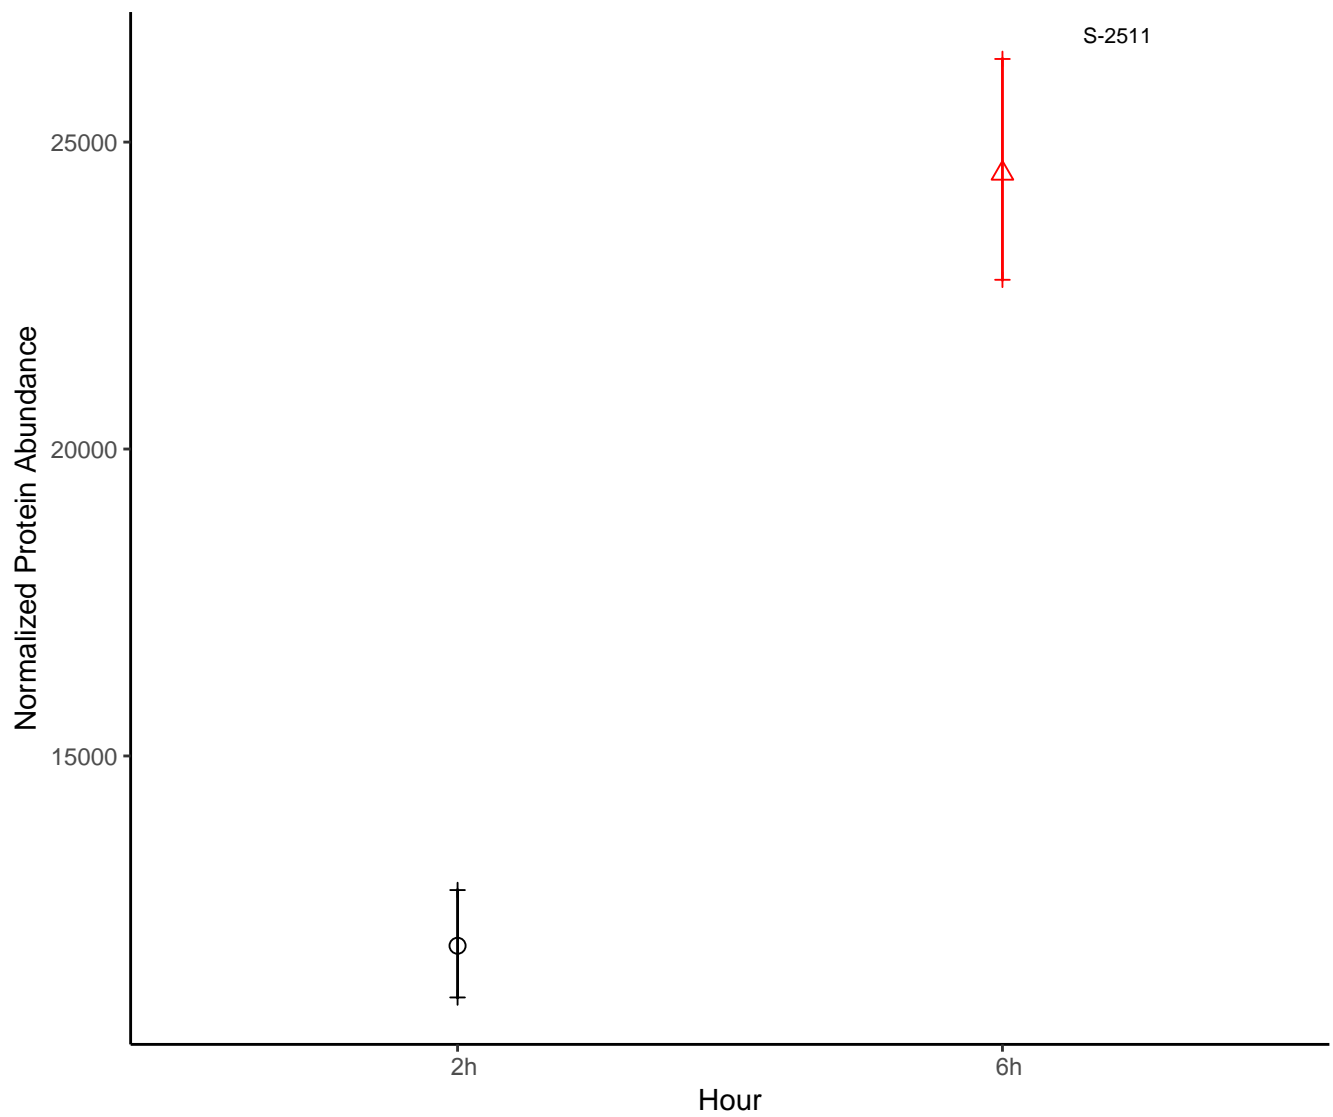

⊕ 2h

△ 6h

# Y846\_STAAM

S-2512

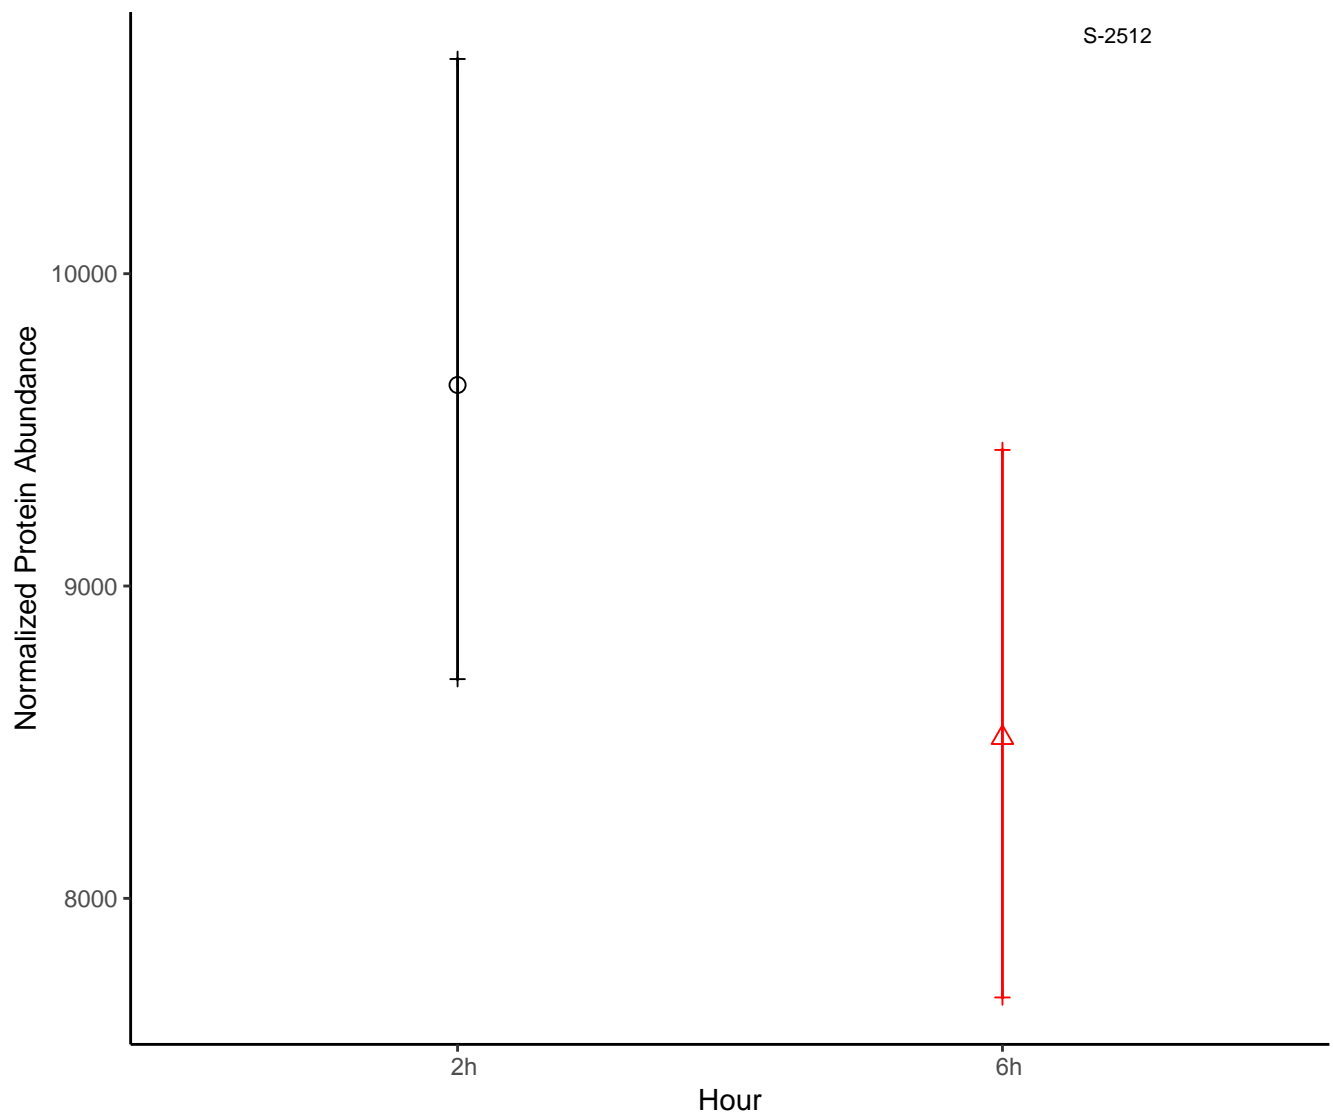

⊕ 2h

△ 6h



# Y941\_STAAM

S-2513

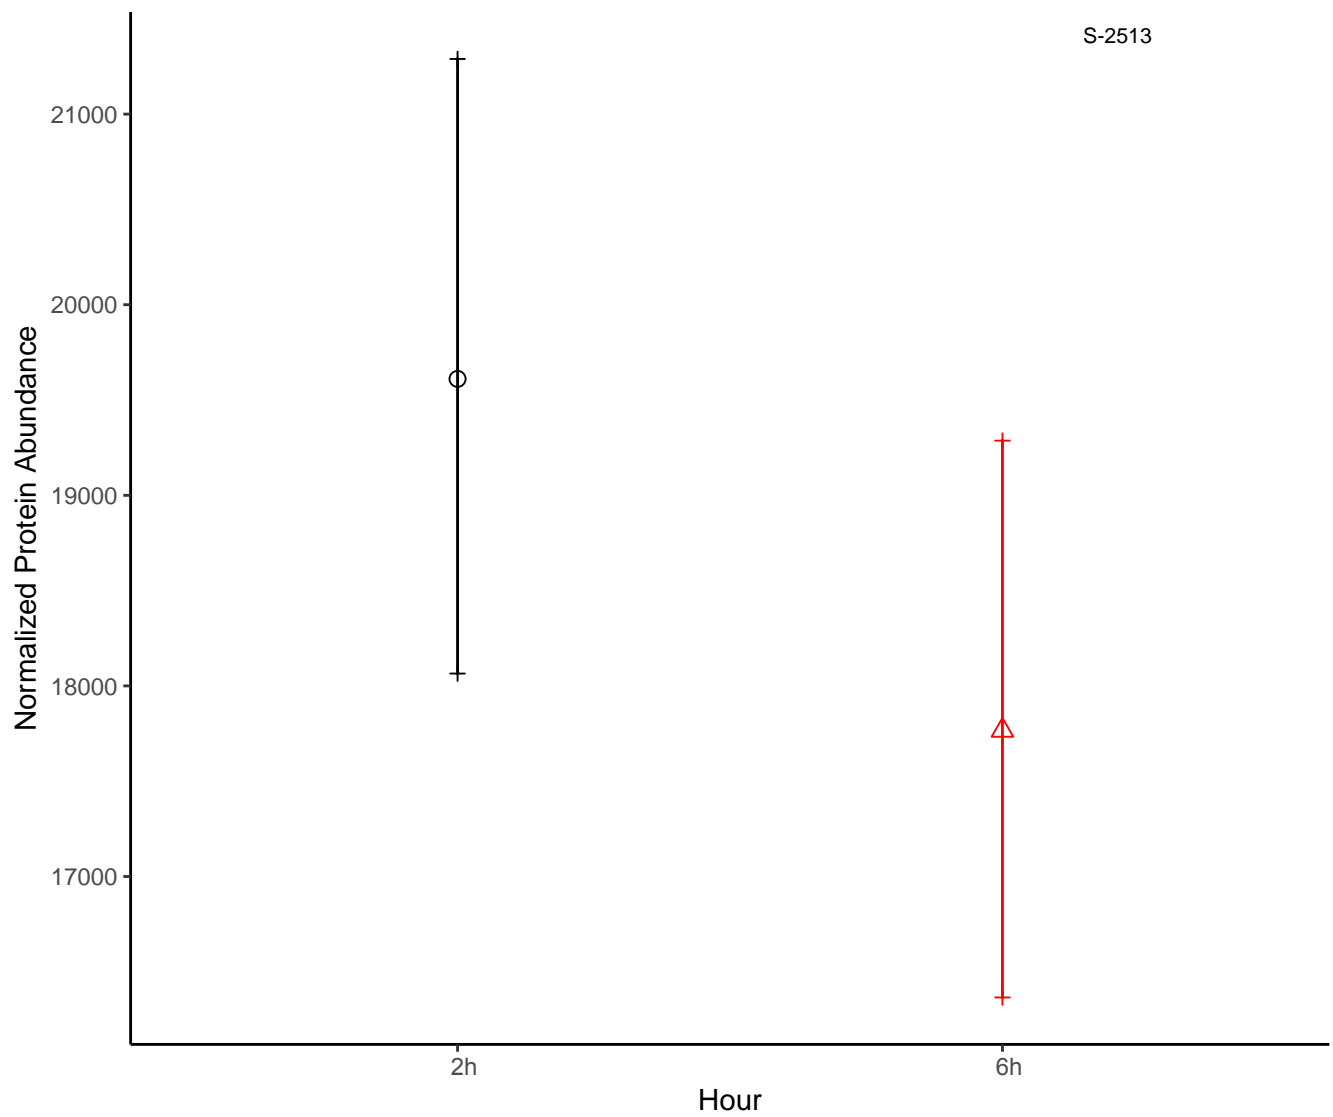

⊕ 2h

△ 6h

# Y968\_STAAM

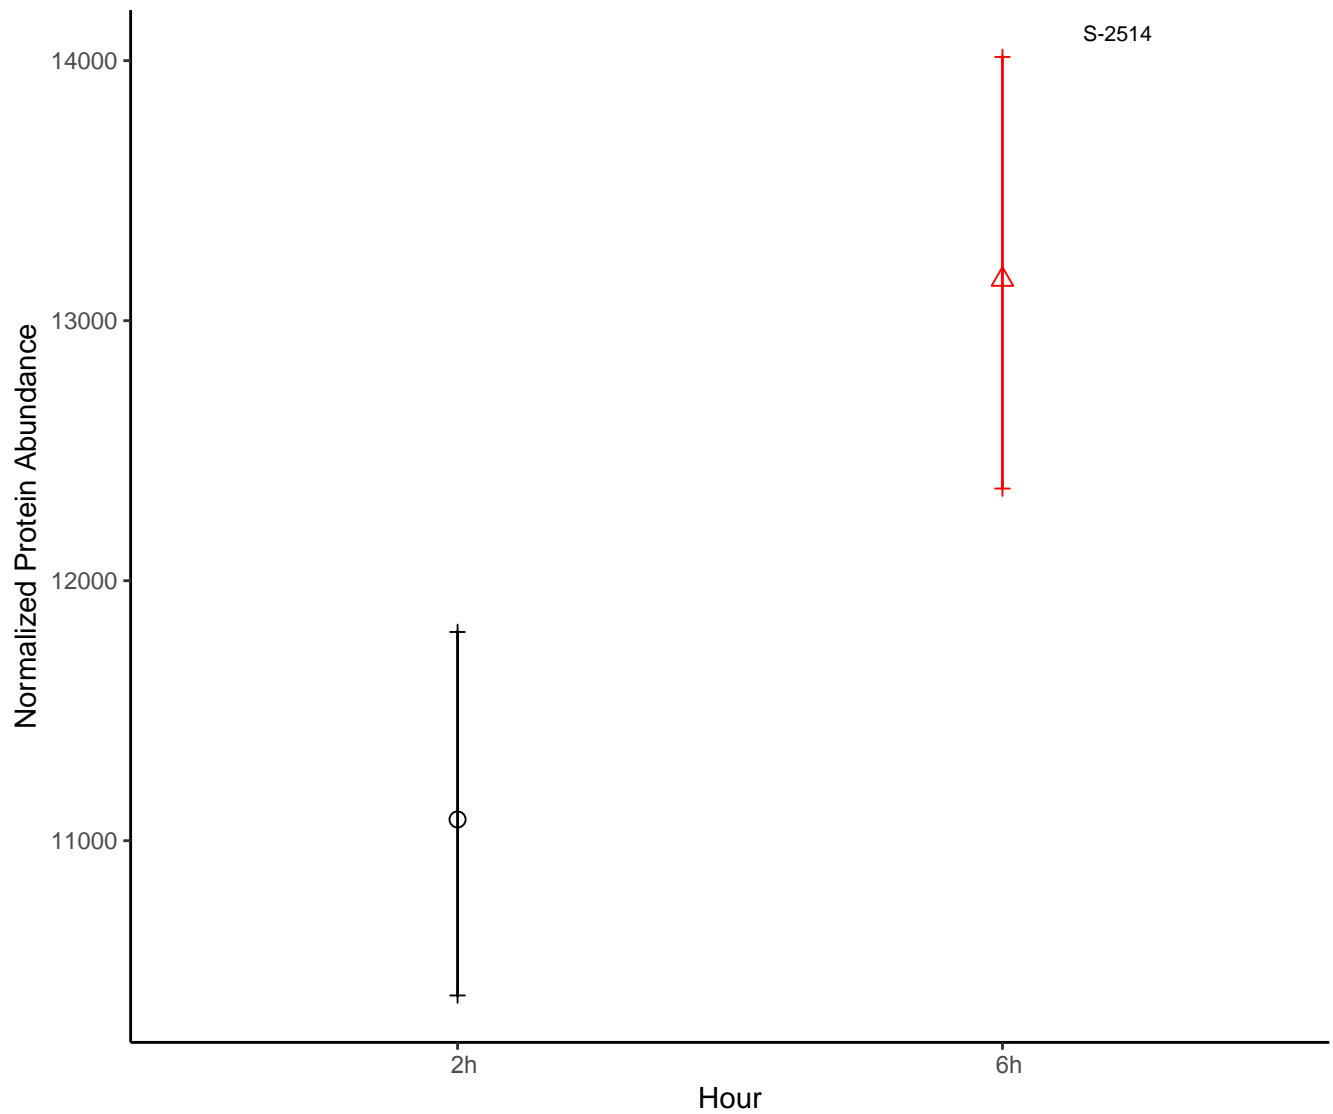

⊕ 2h

△ 6h

# YABA\_STAAM

S-2515

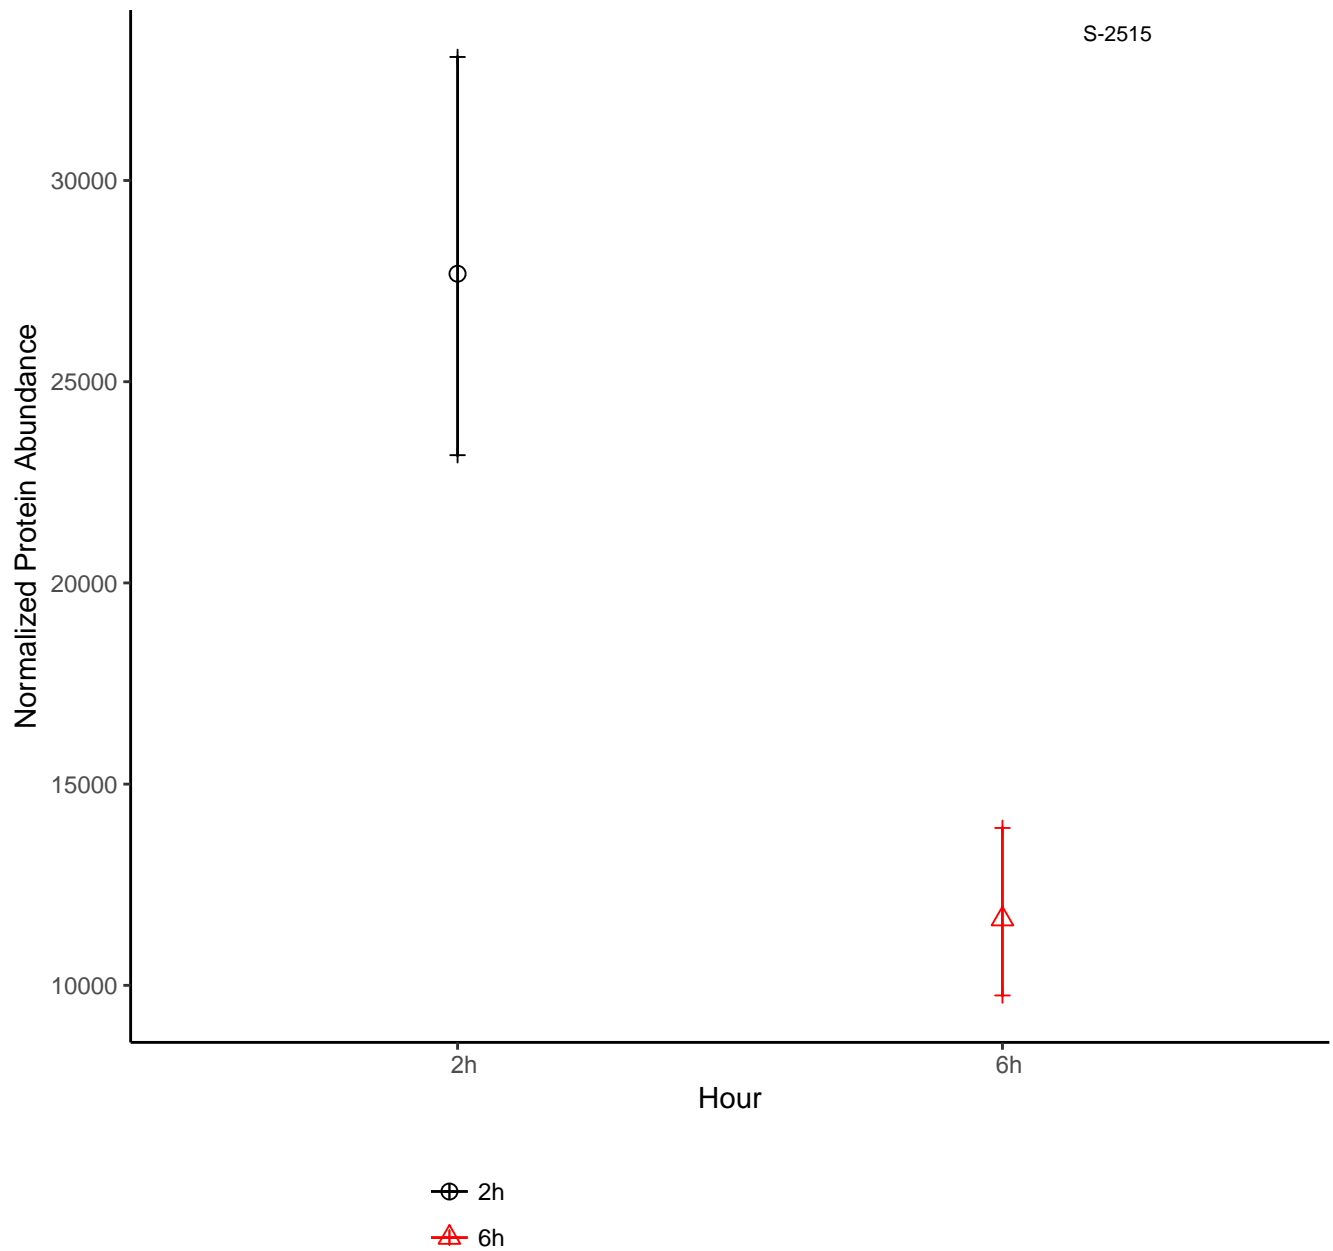

# YBEY\_STAAM

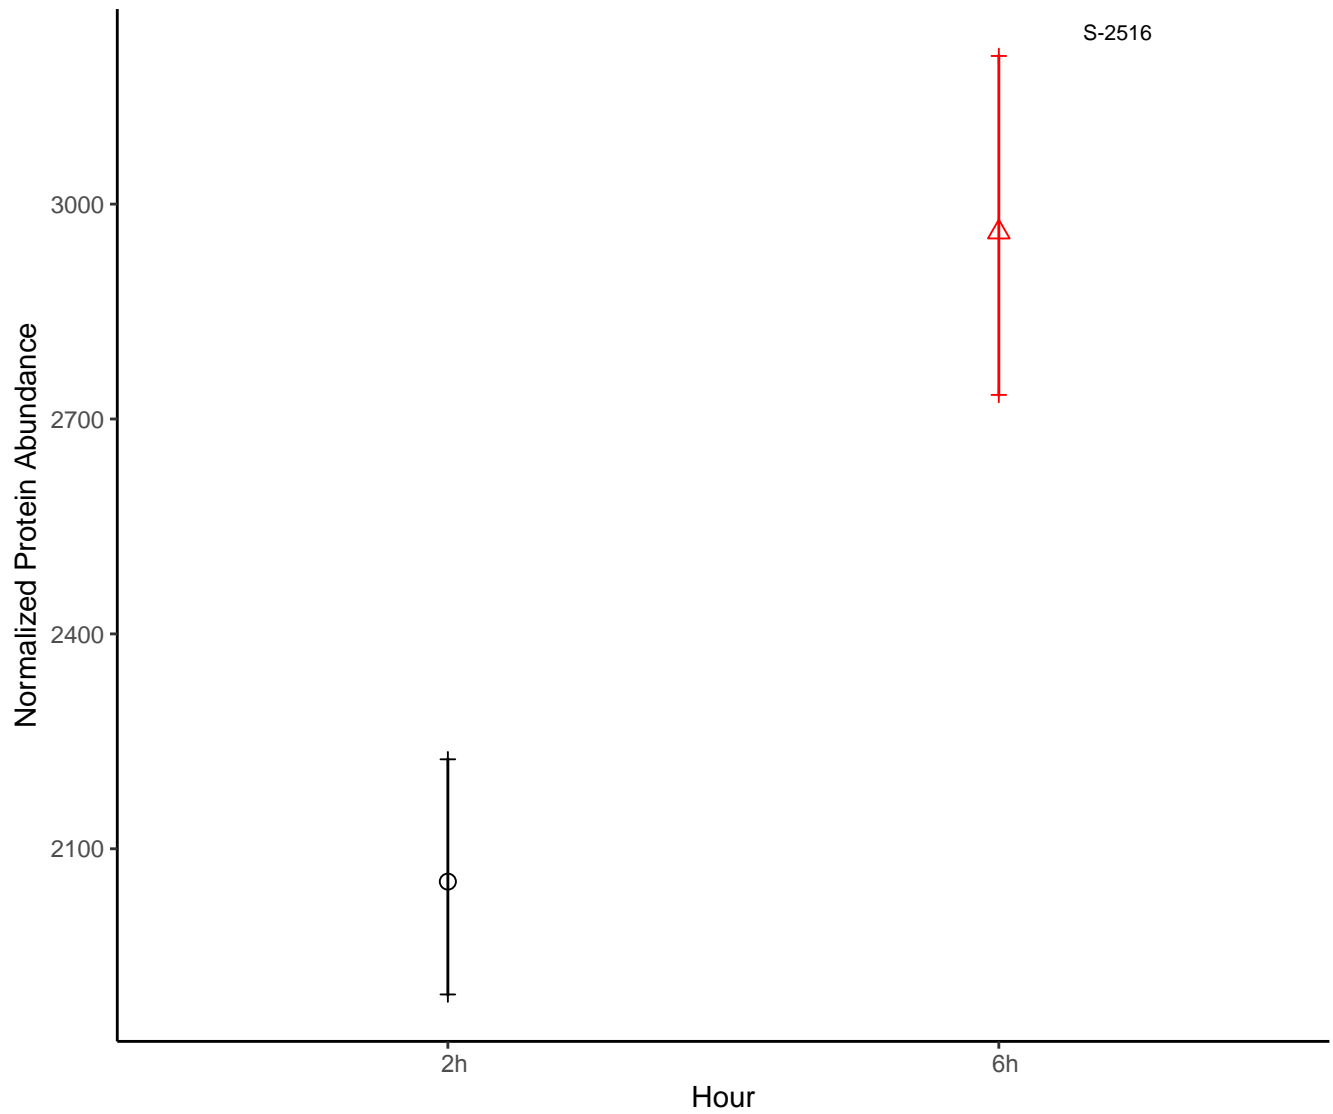

⊕ 2h

△ 6h

**Figure K.**

1-way analysis: m

Pages: S217-S3018

The normalized protein abundance, lower 95% confidence interval, and upper 95% confidence interval were plotted for each protein. These plots were analyzed if the 3-way and 2-way interactions were rejected and a significant main effect (1-way) was identified for media.

# 6PGD\_STAAM

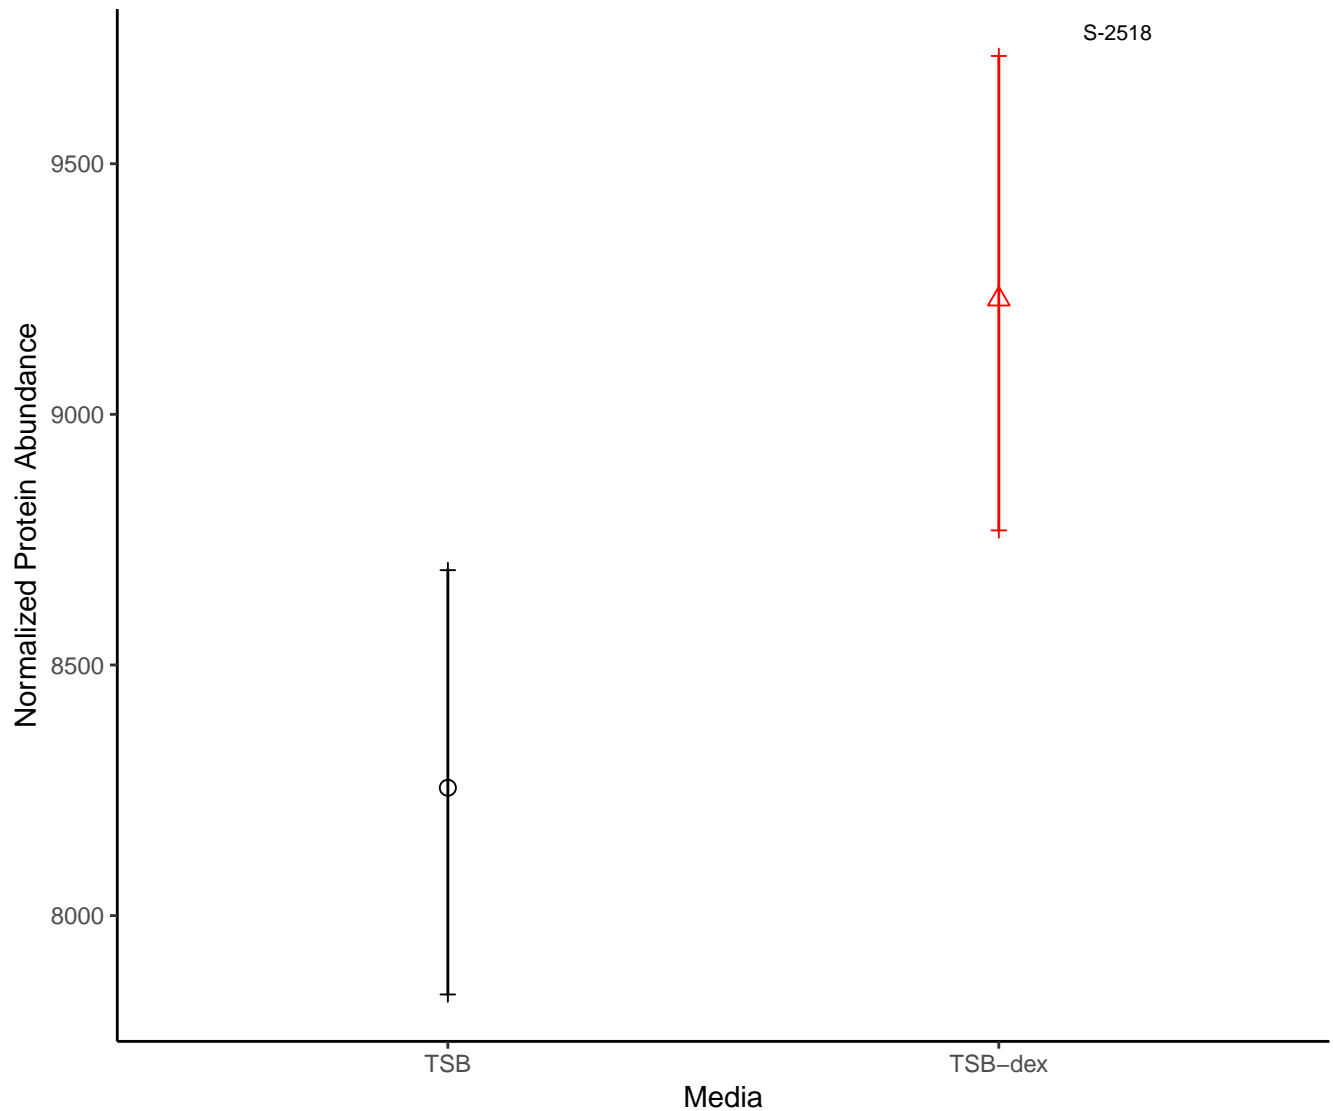

⊕ TSB-dex

△ TSB

# ACCA\_STAAM

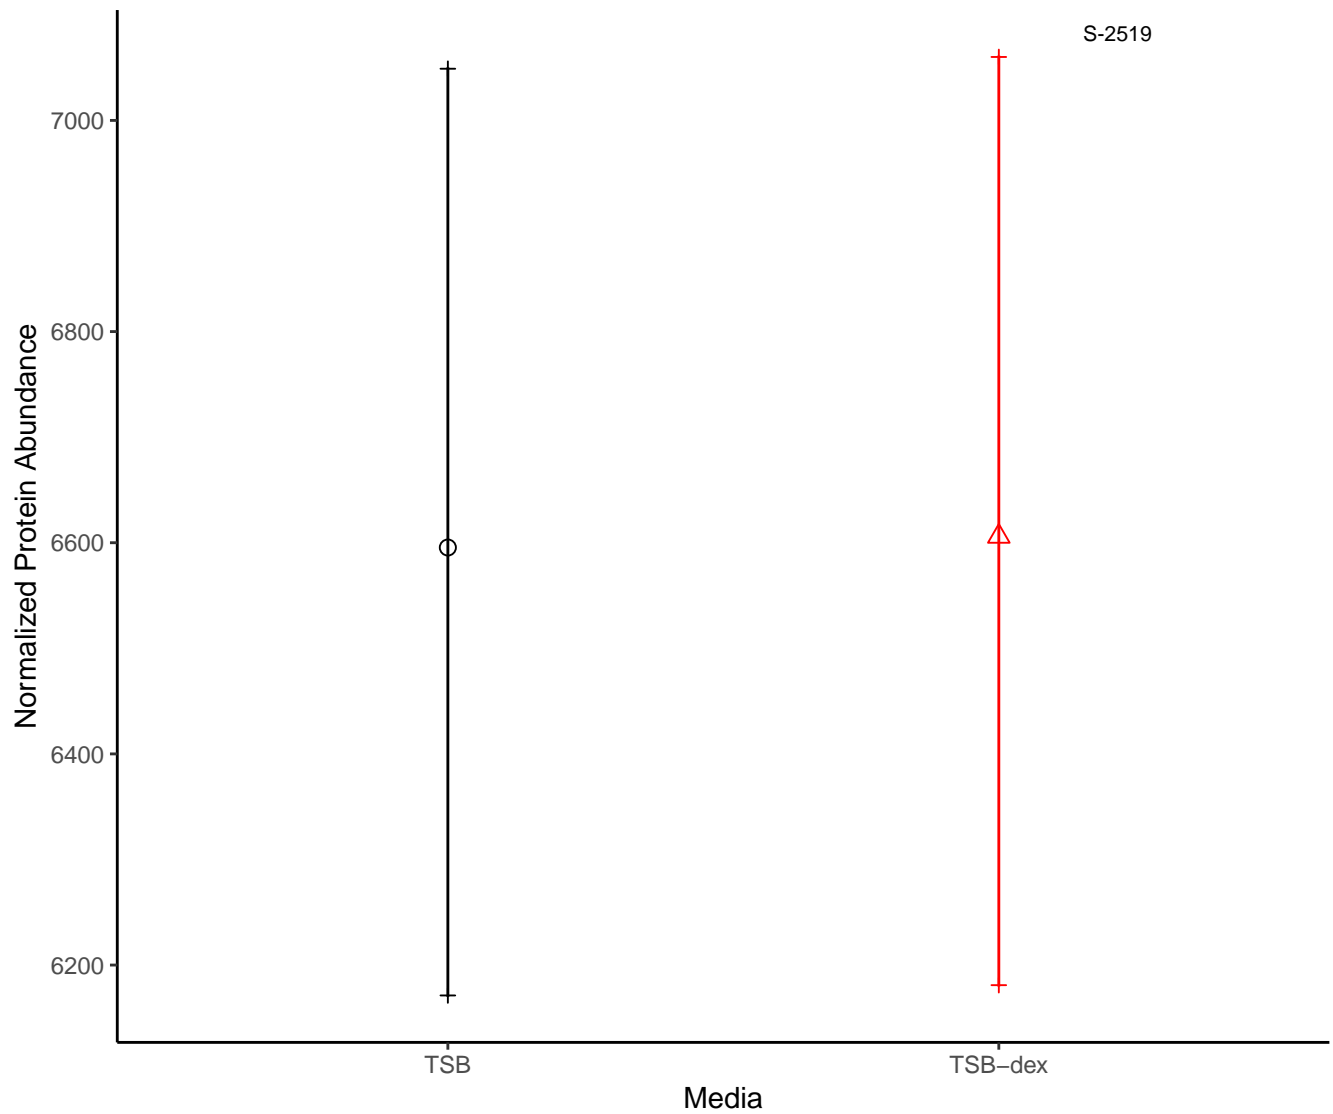

⊕ TSB-dex

△ TSB

# ACKA\_STAAM

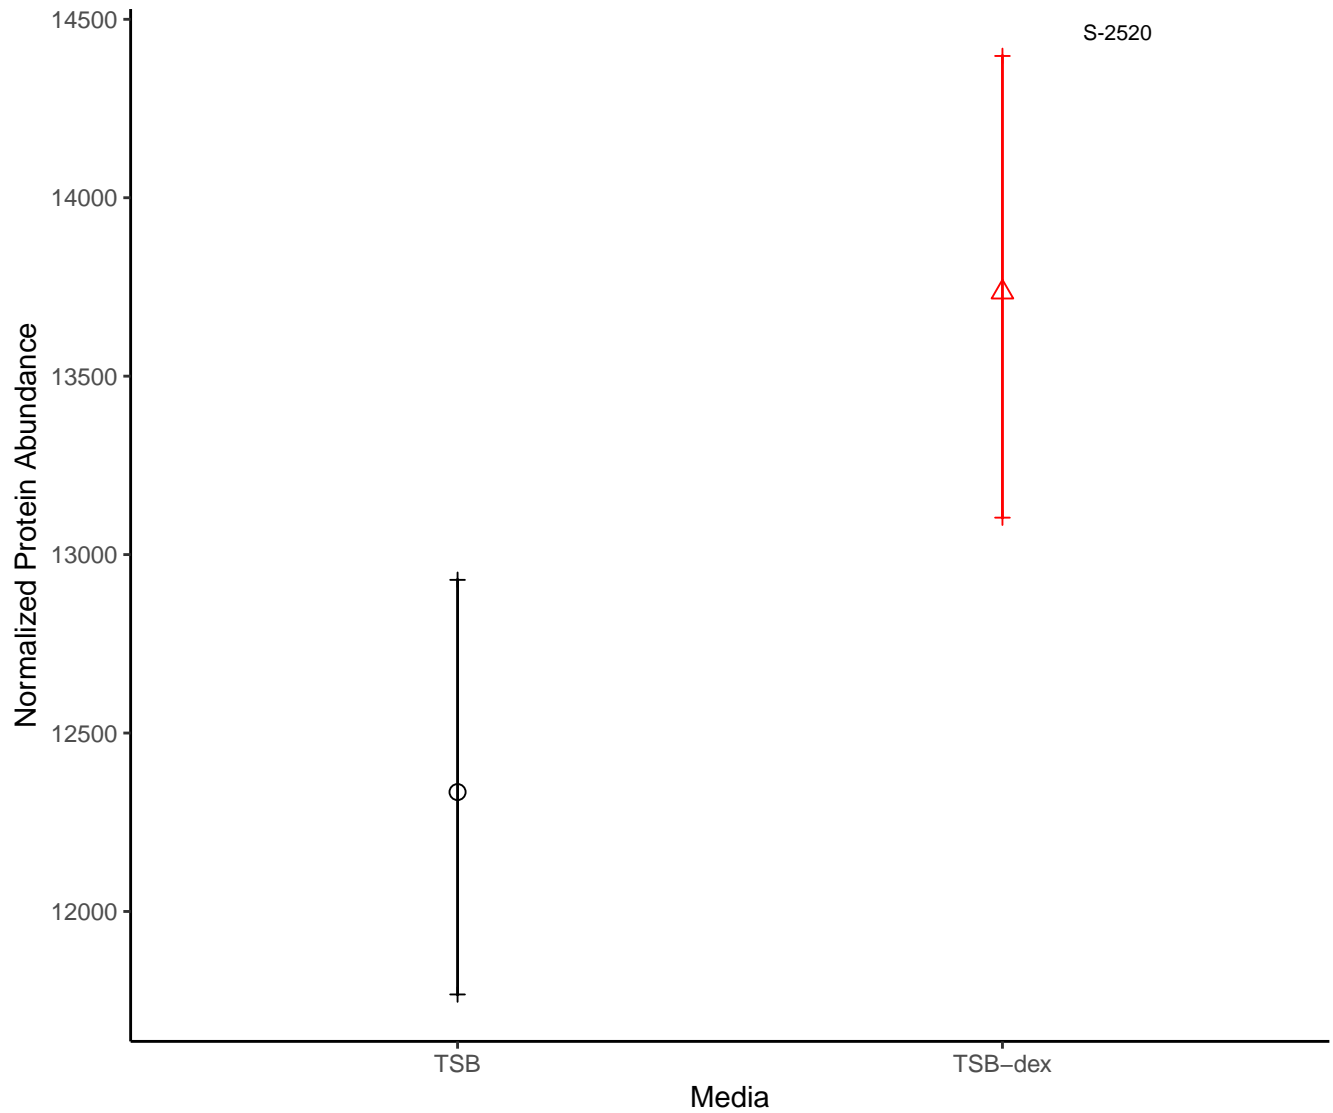

⊖ TSB-dex

△ TSB



# ACON\_STAAM

S-2521

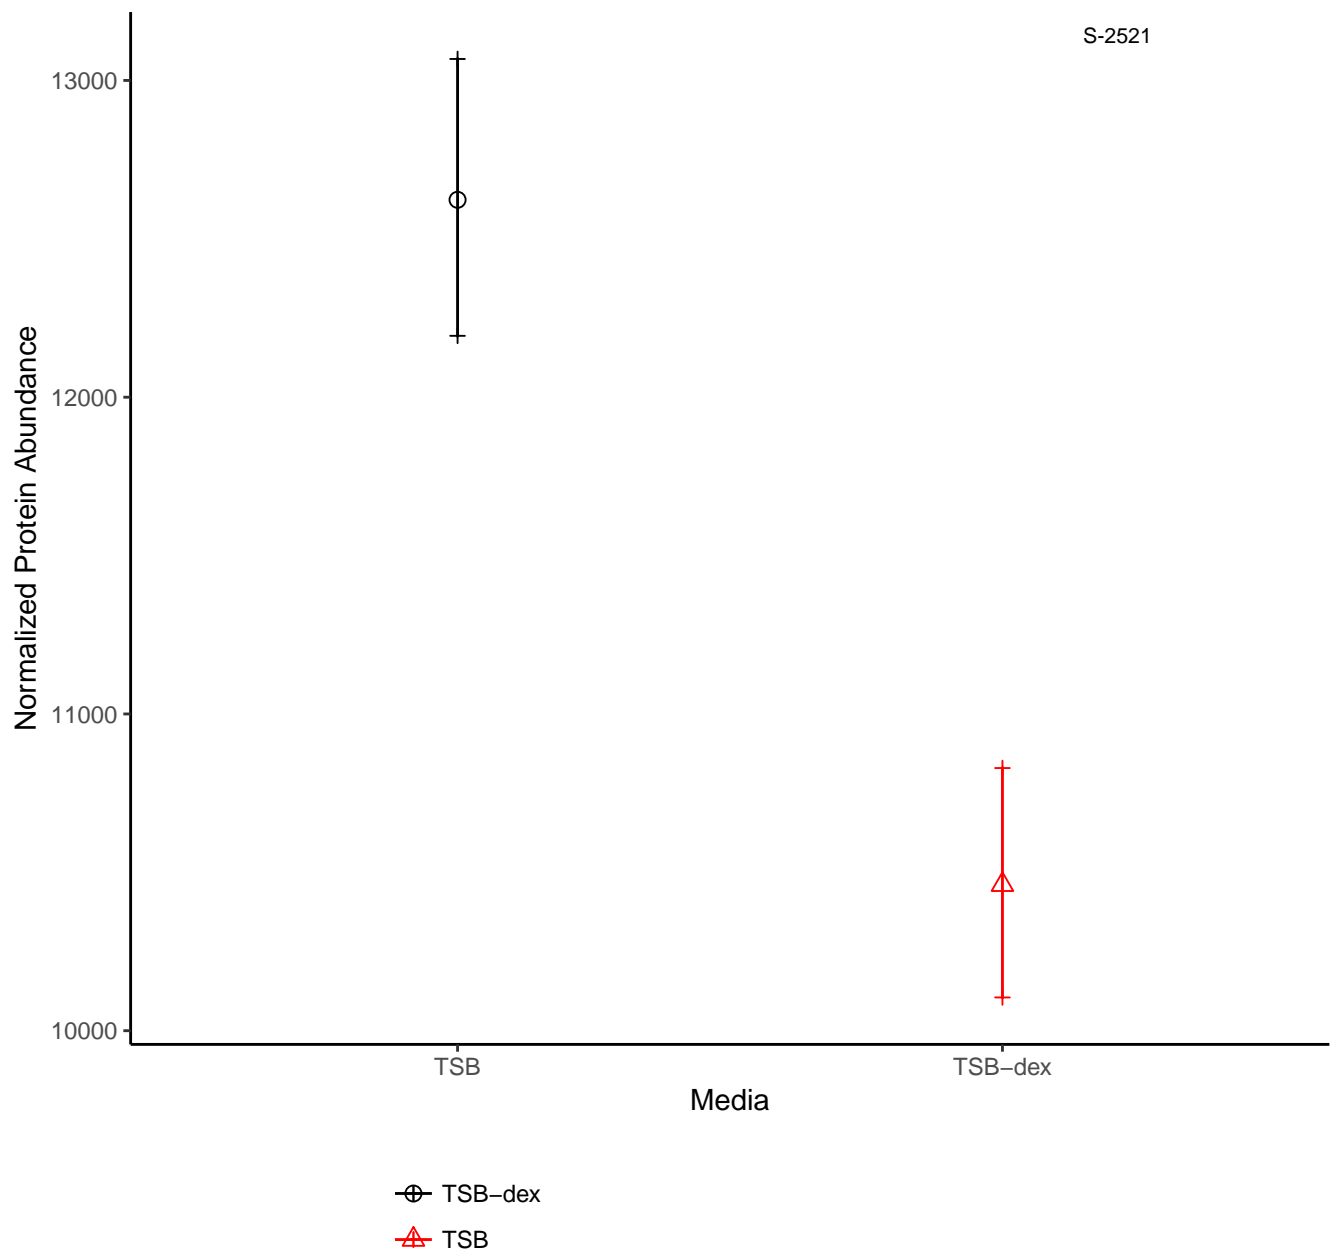

# ACP\_STAAM

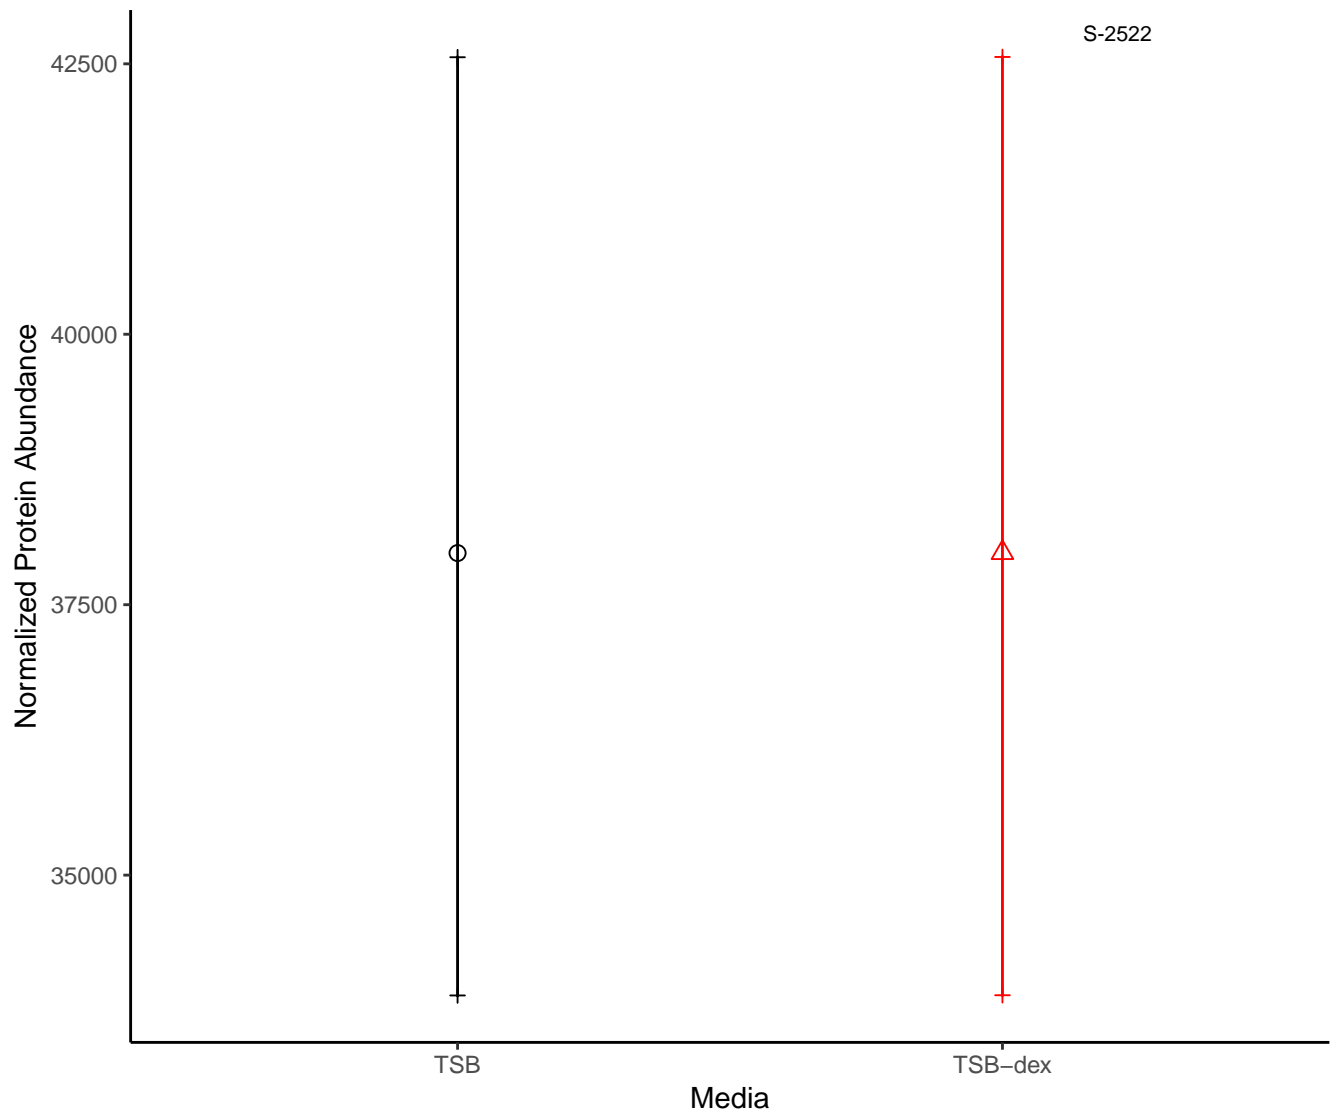

⊕ TSB-dex

△ TSB

# ADH\_STAAM

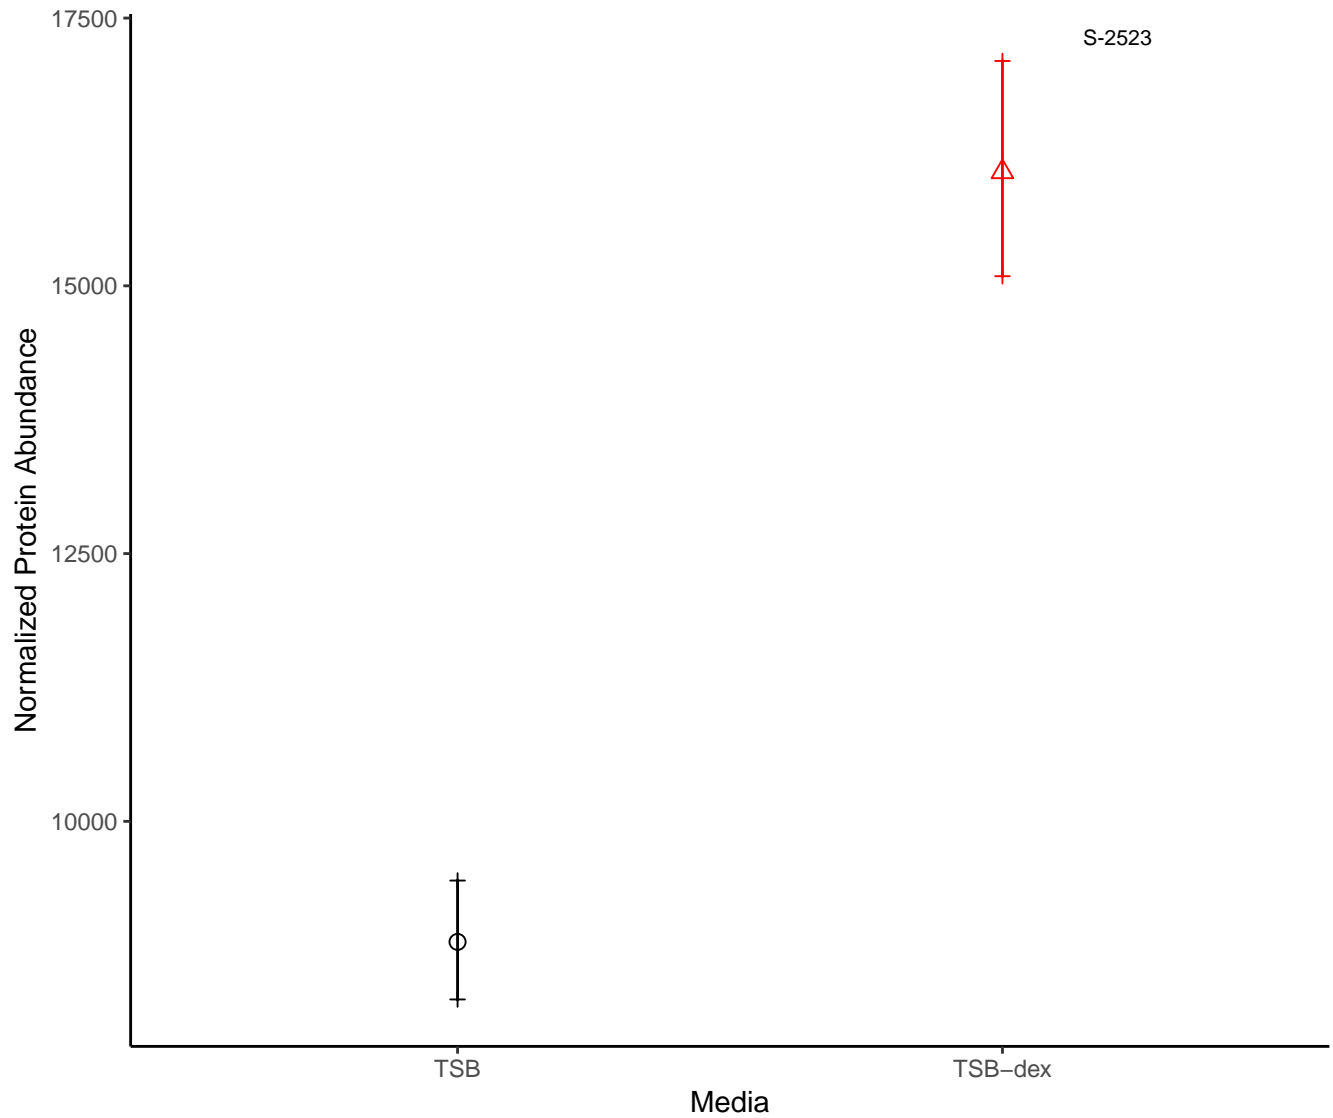

⊕ TSB-dex

△ TSB

# AHPC\_STAAM

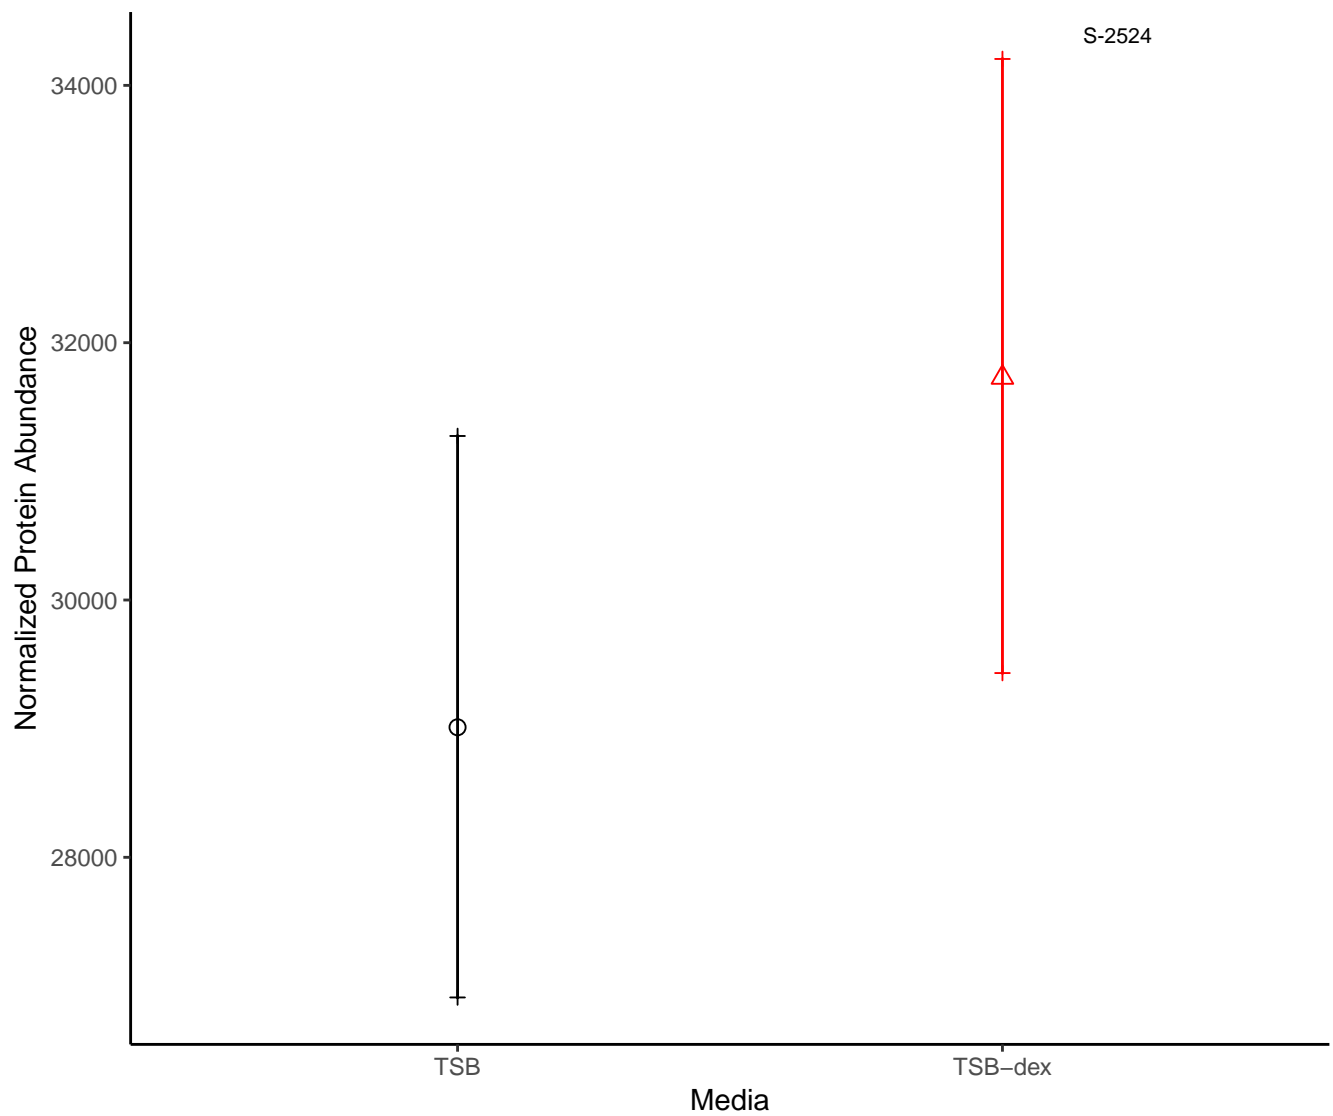

⊕ TSB-dex

△ TSB

# AHPF\_STAAM

S-2525

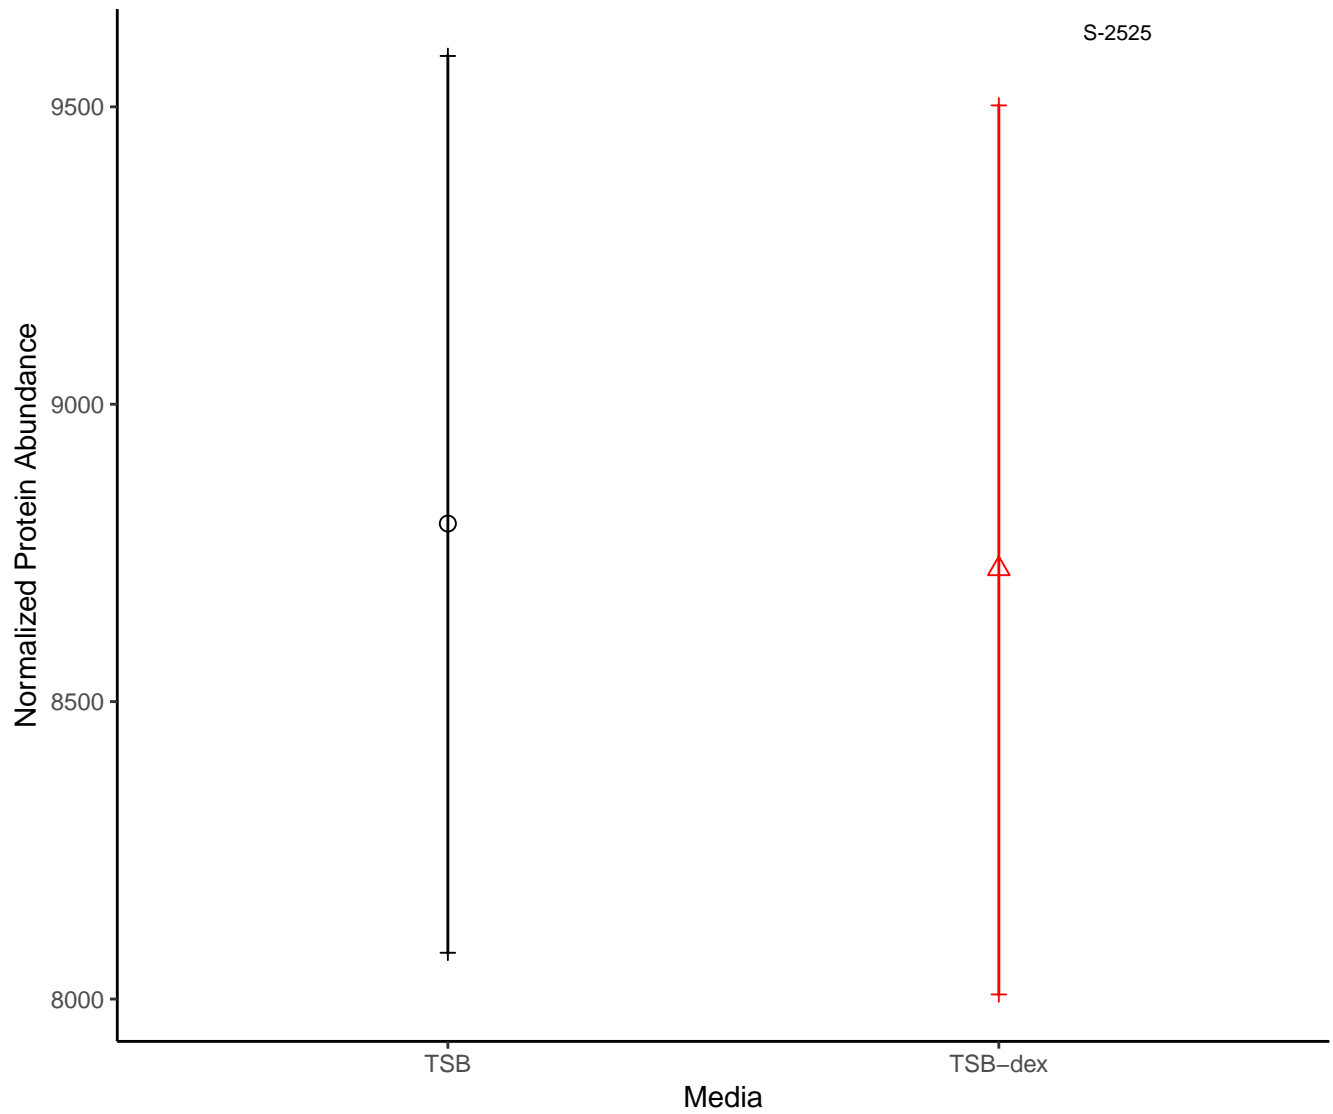

⊕ TSB-dex

△ TSB

# ALD1\_STAAM

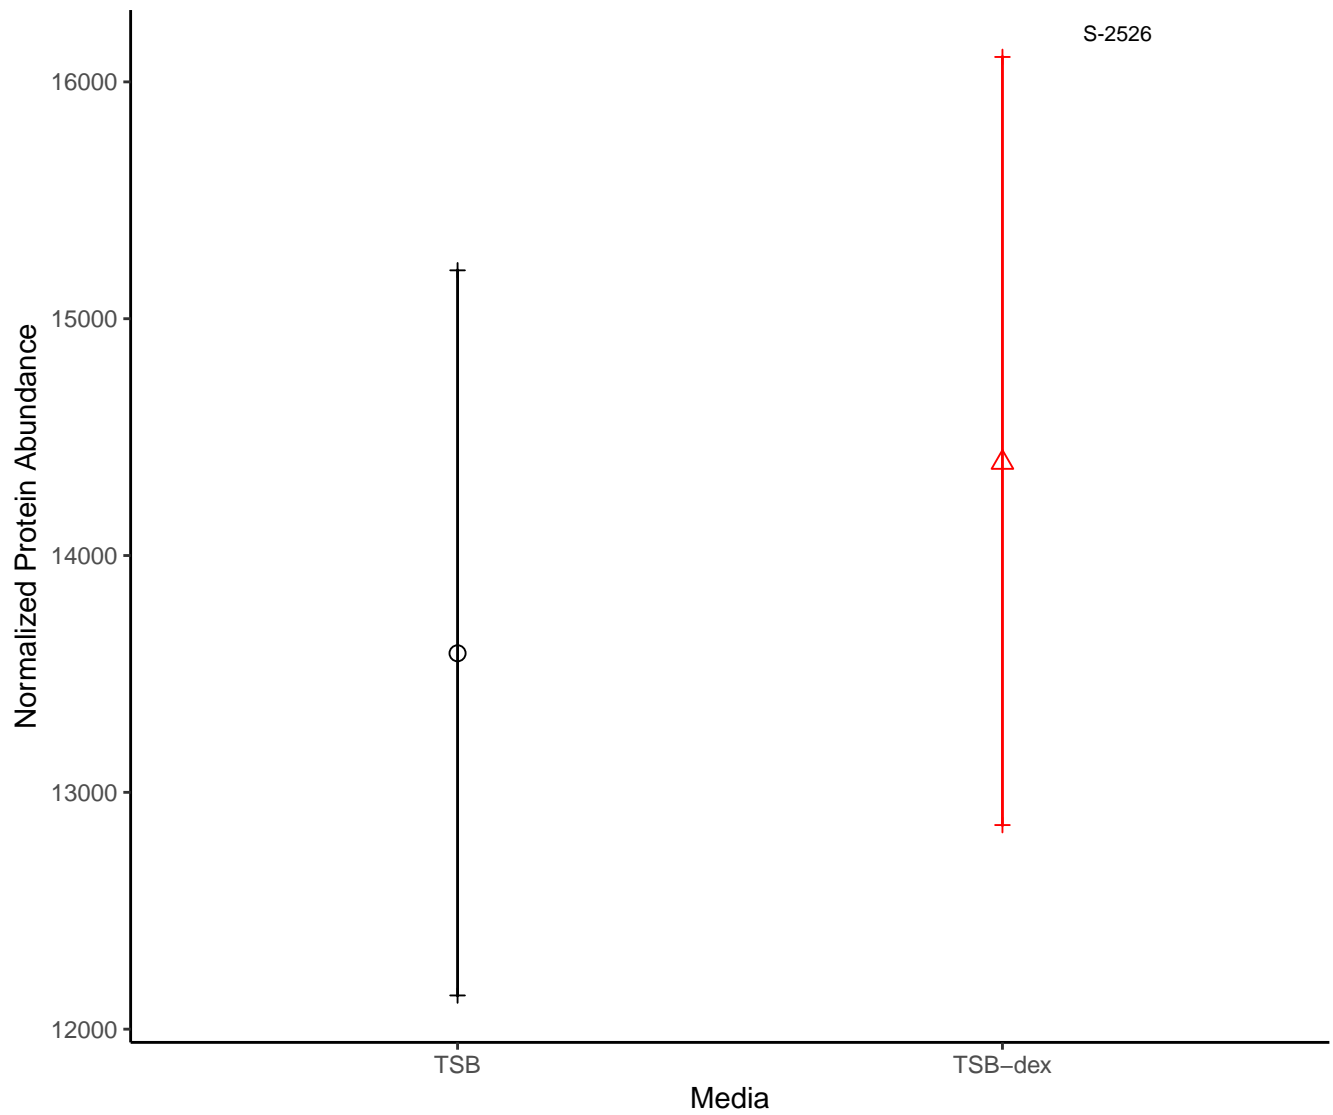

⊕ TSB-dex

△ TSB

# ALDA\_STAAM

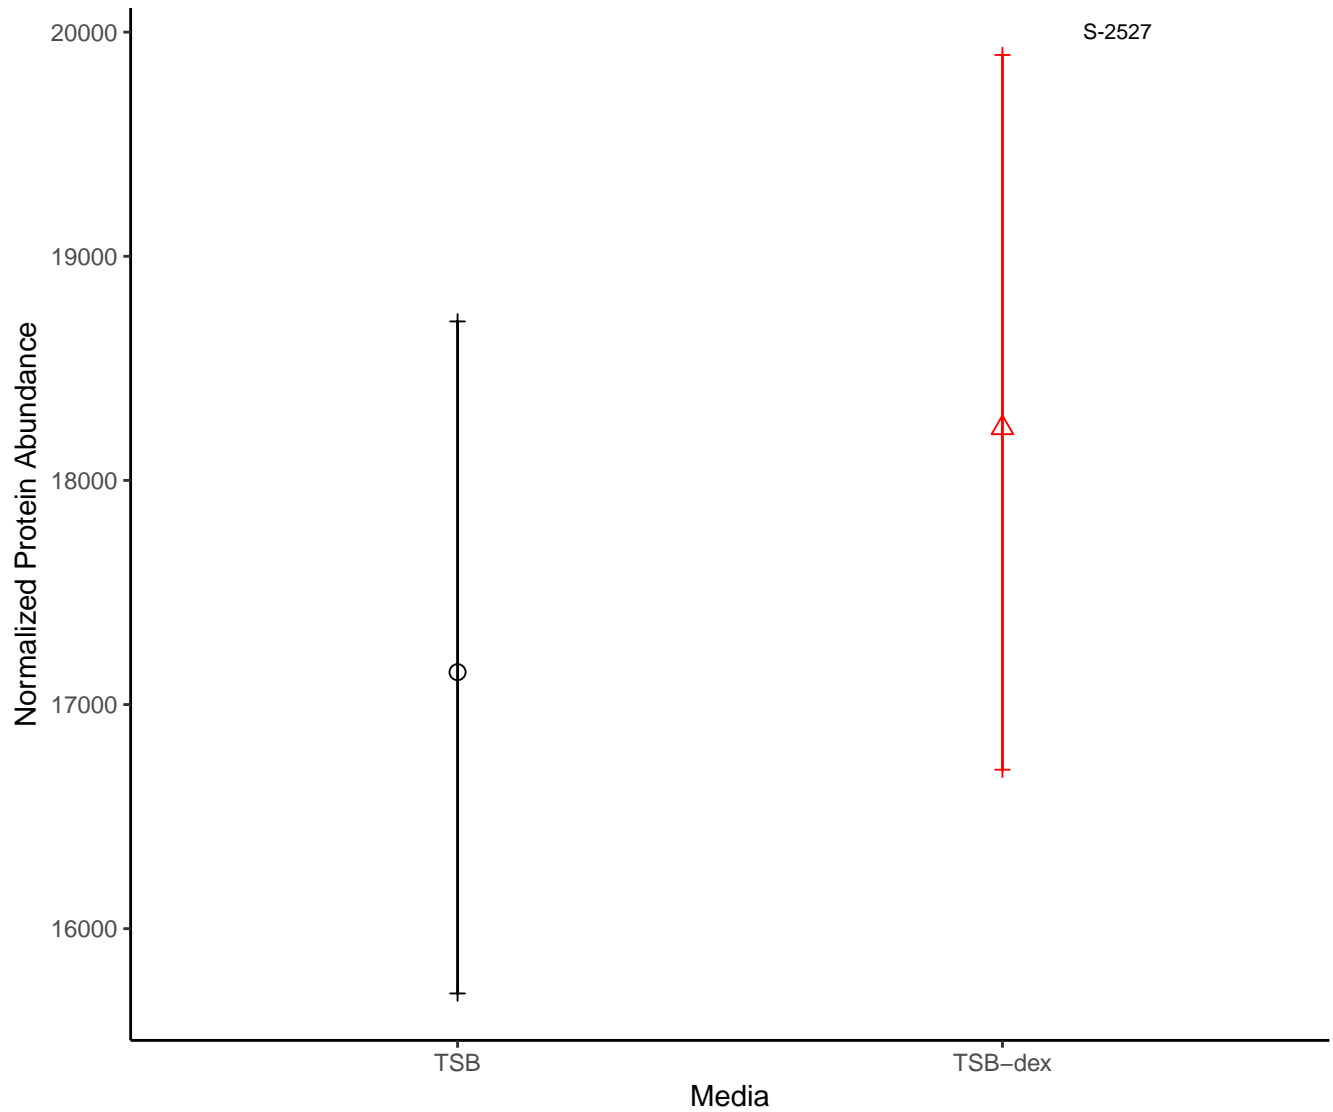

⊕ TSB-dex

△ TSB

# ALF1\_STAAM

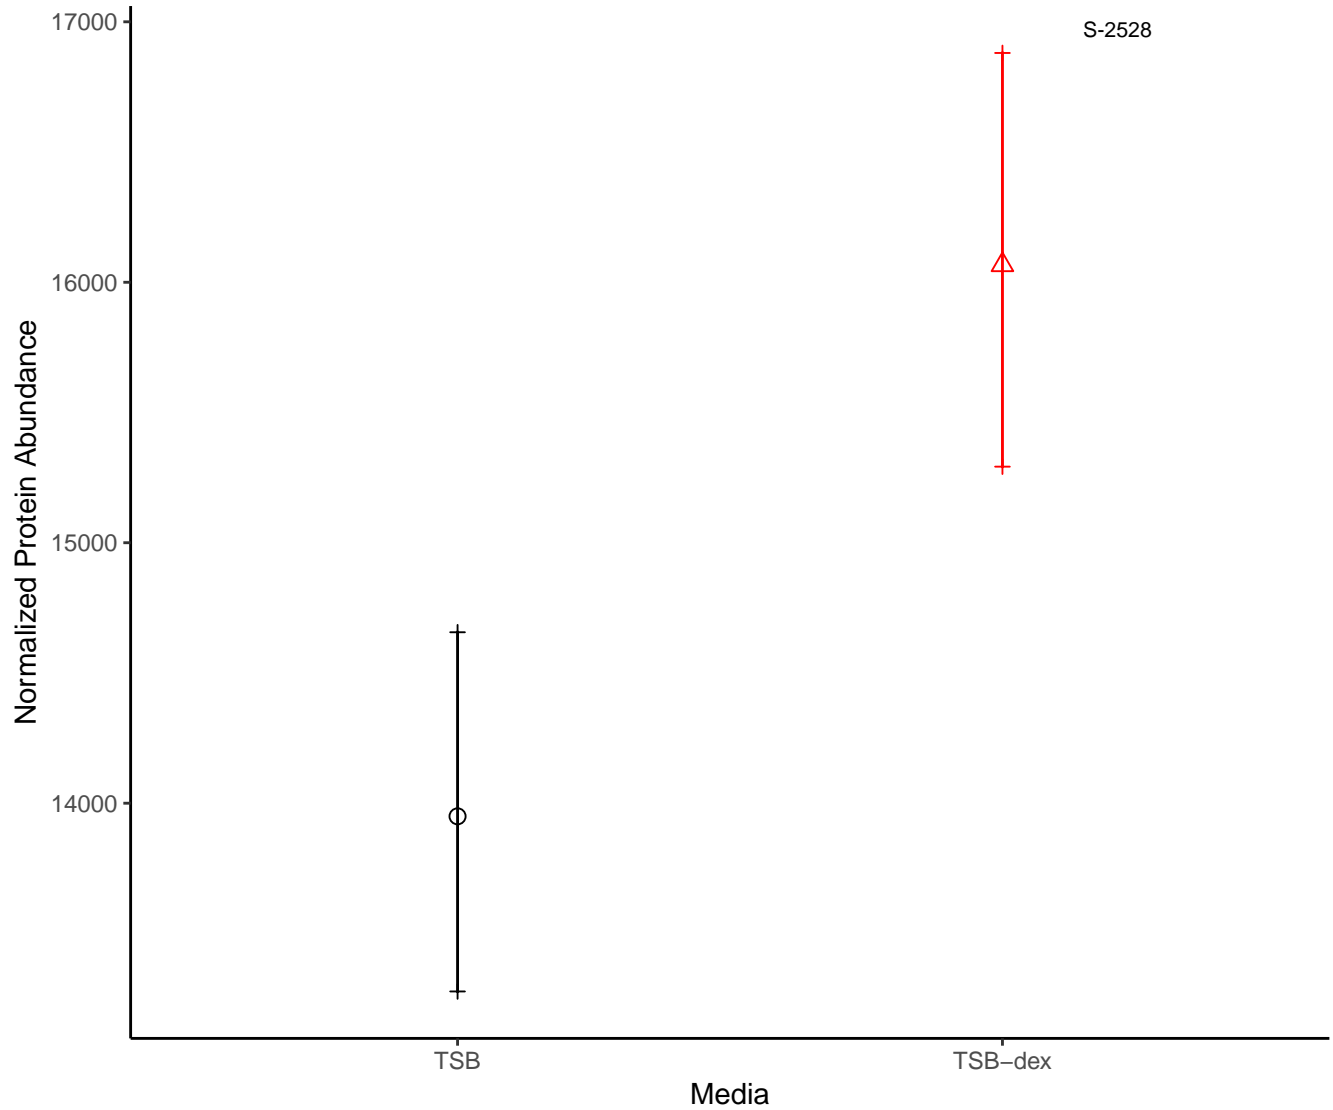

⊖ TSB-dex

△ TSB



# ALF2\_STAAM

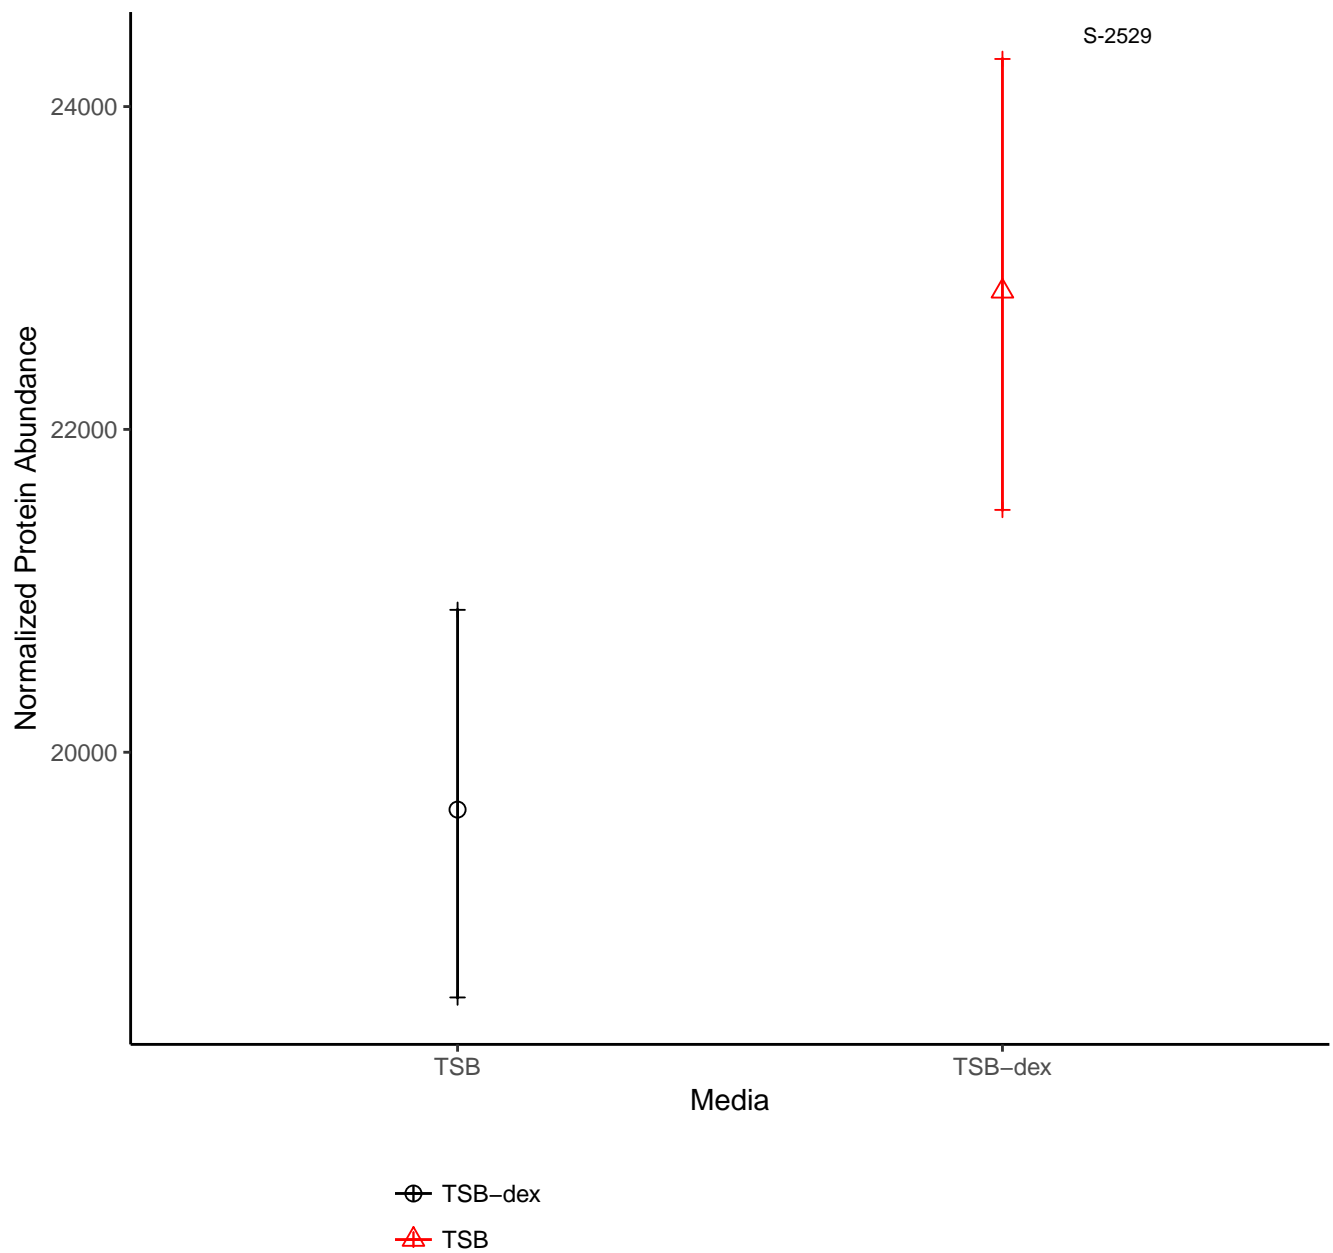

# APT\_STAAM

S-2530

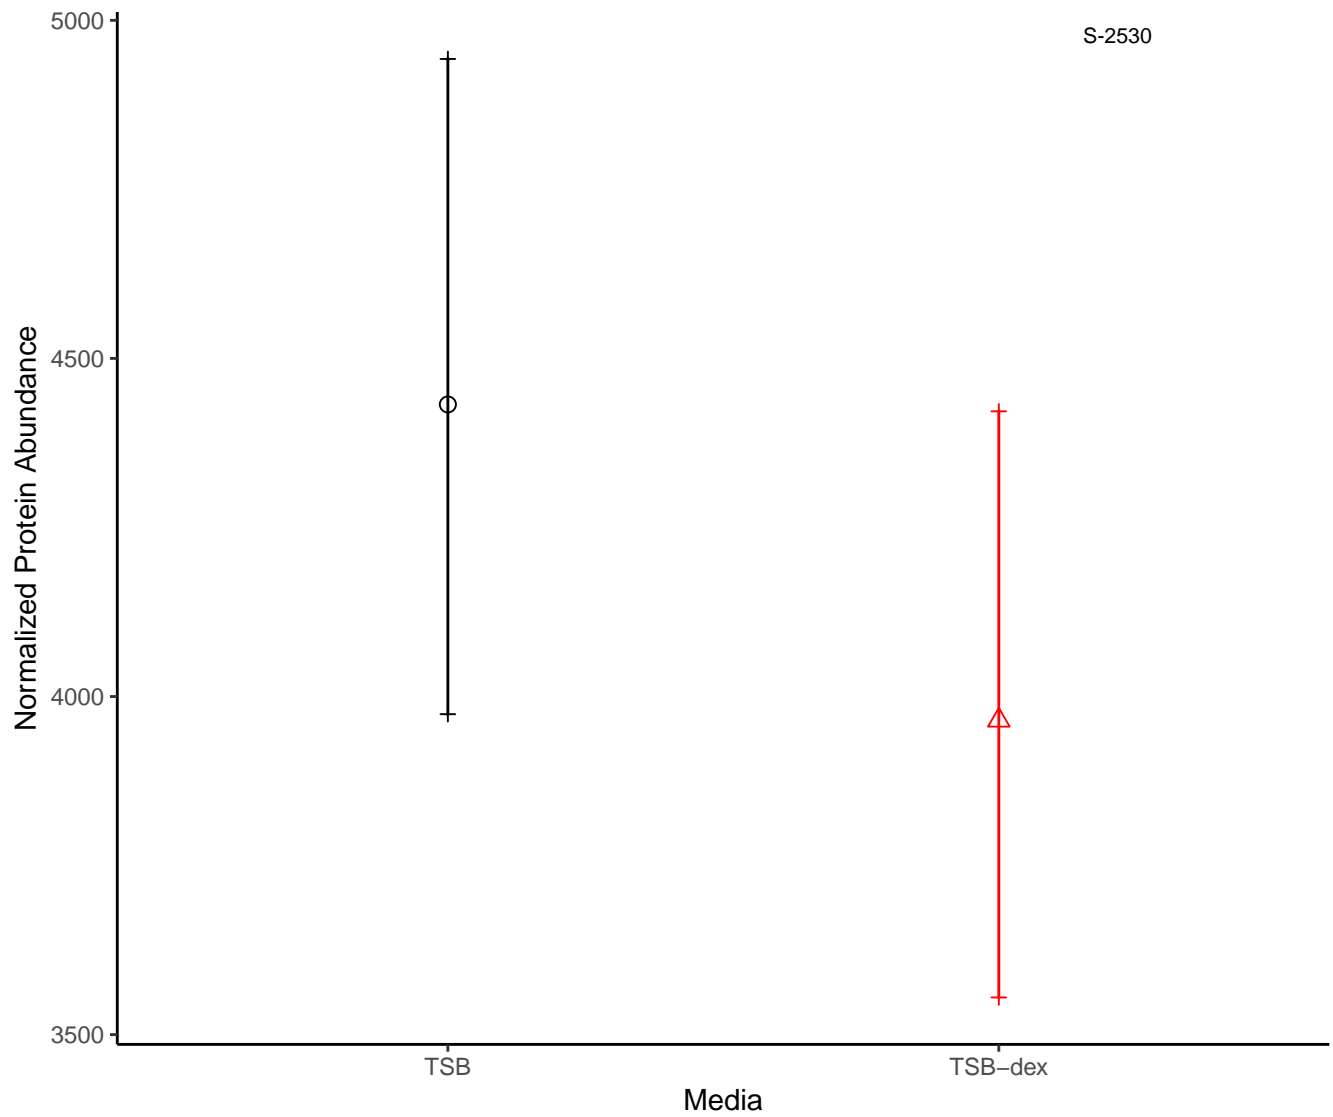

⊕ TSB-dex

△ TSB

# ARCA\_STAAM

S-2531

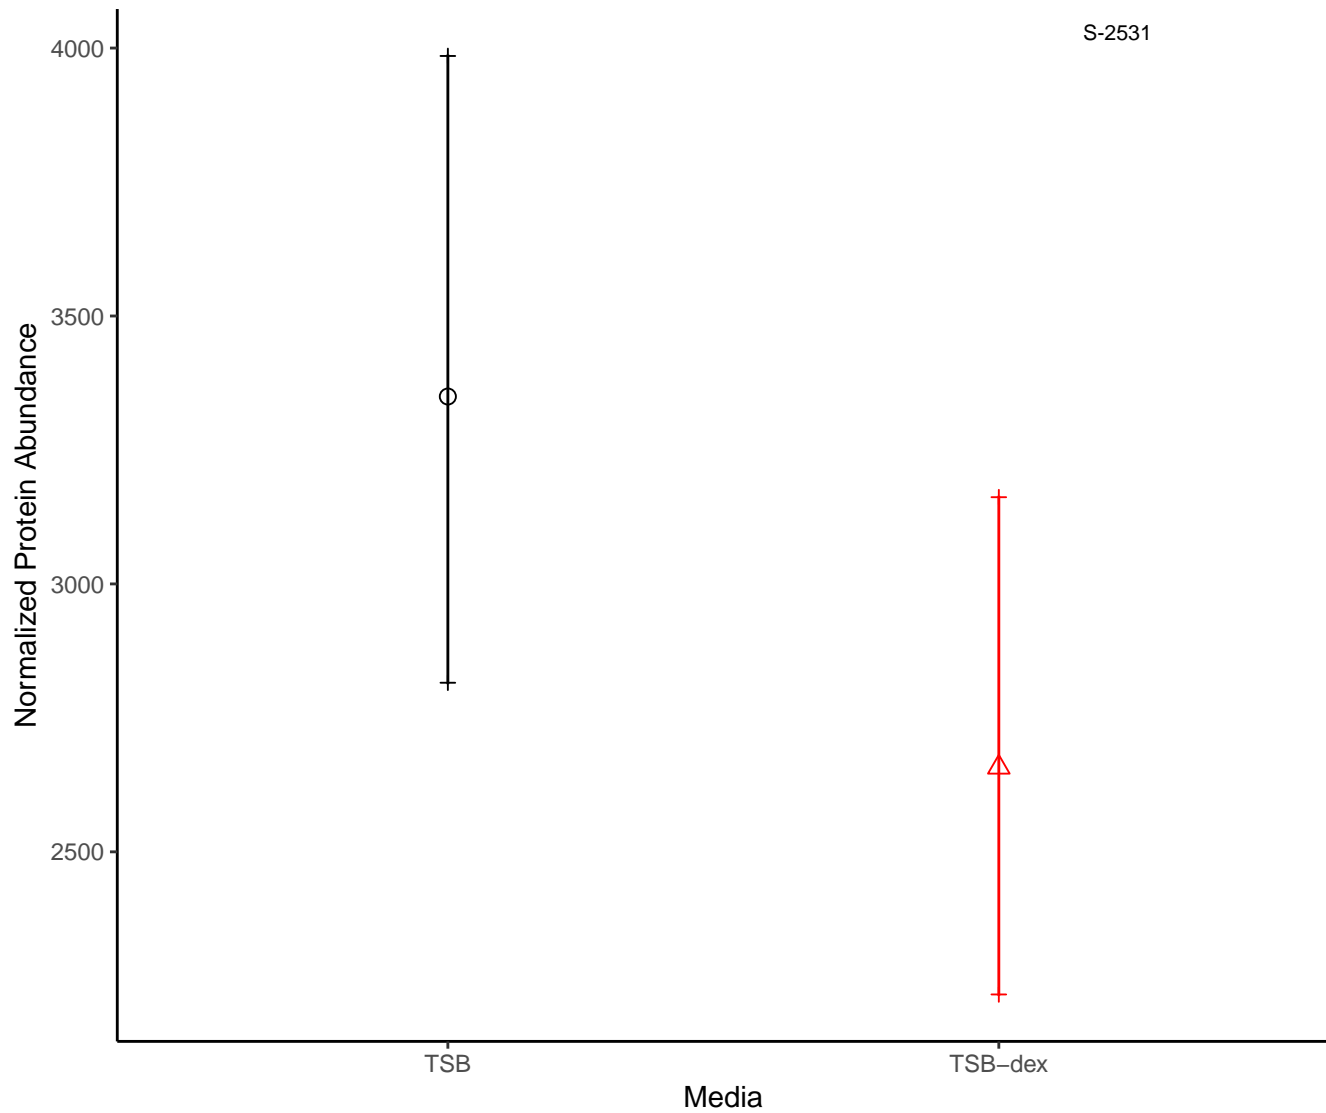

⊕ TSB-dex

△ TSB

# ARCC1\_STAAM

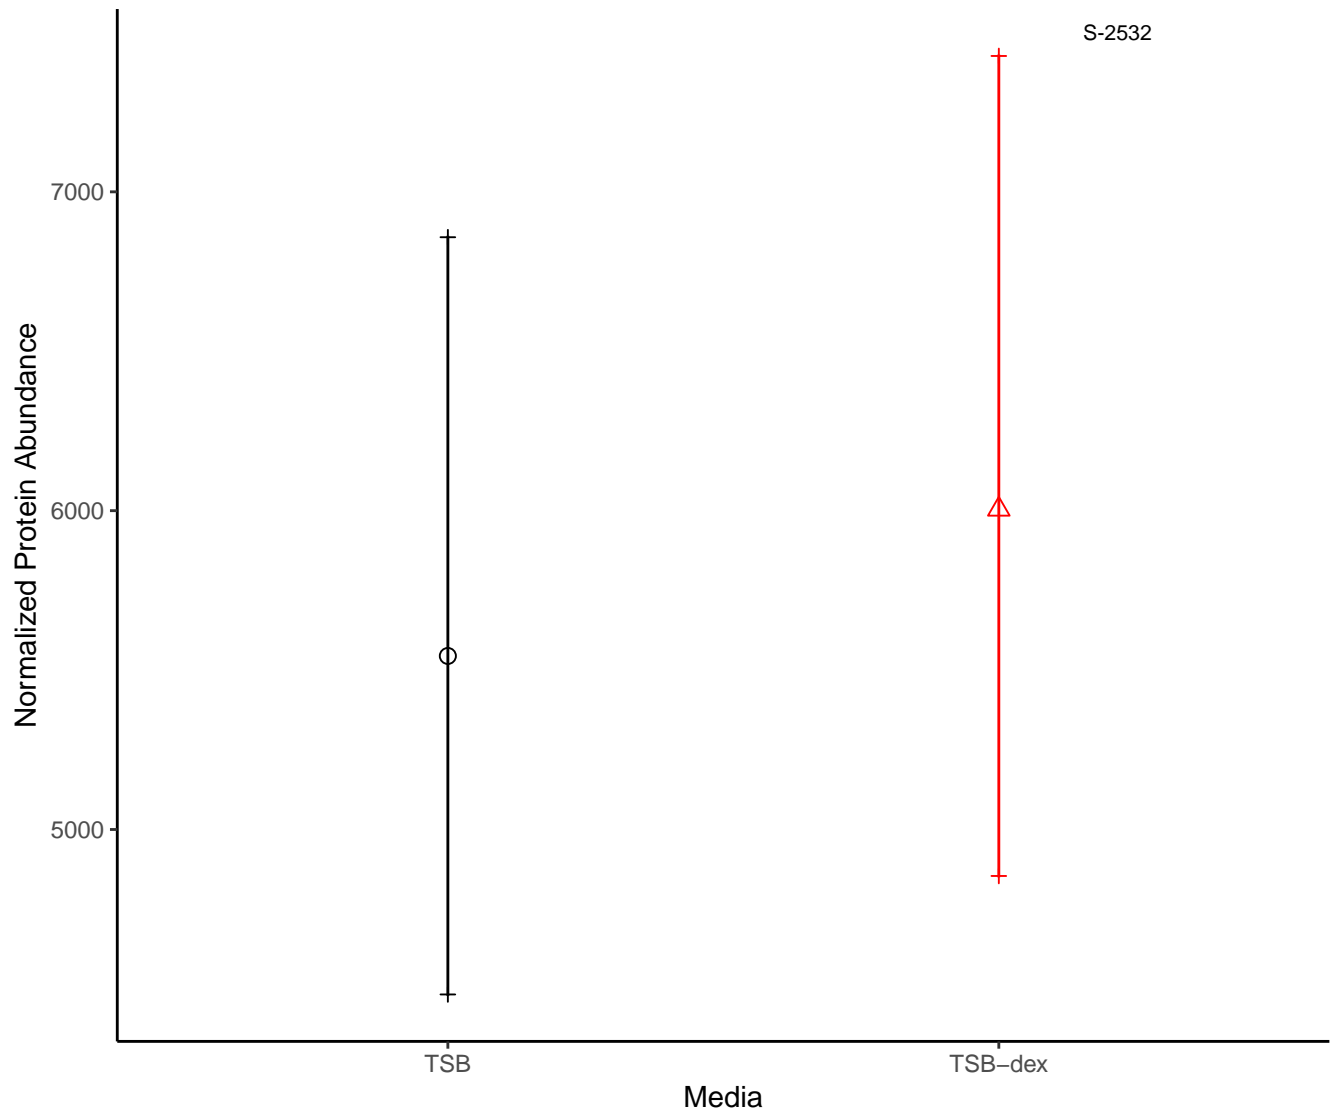

⊕ TSB-dex

△ TSB

# ARGI\_STAAM

S-2533

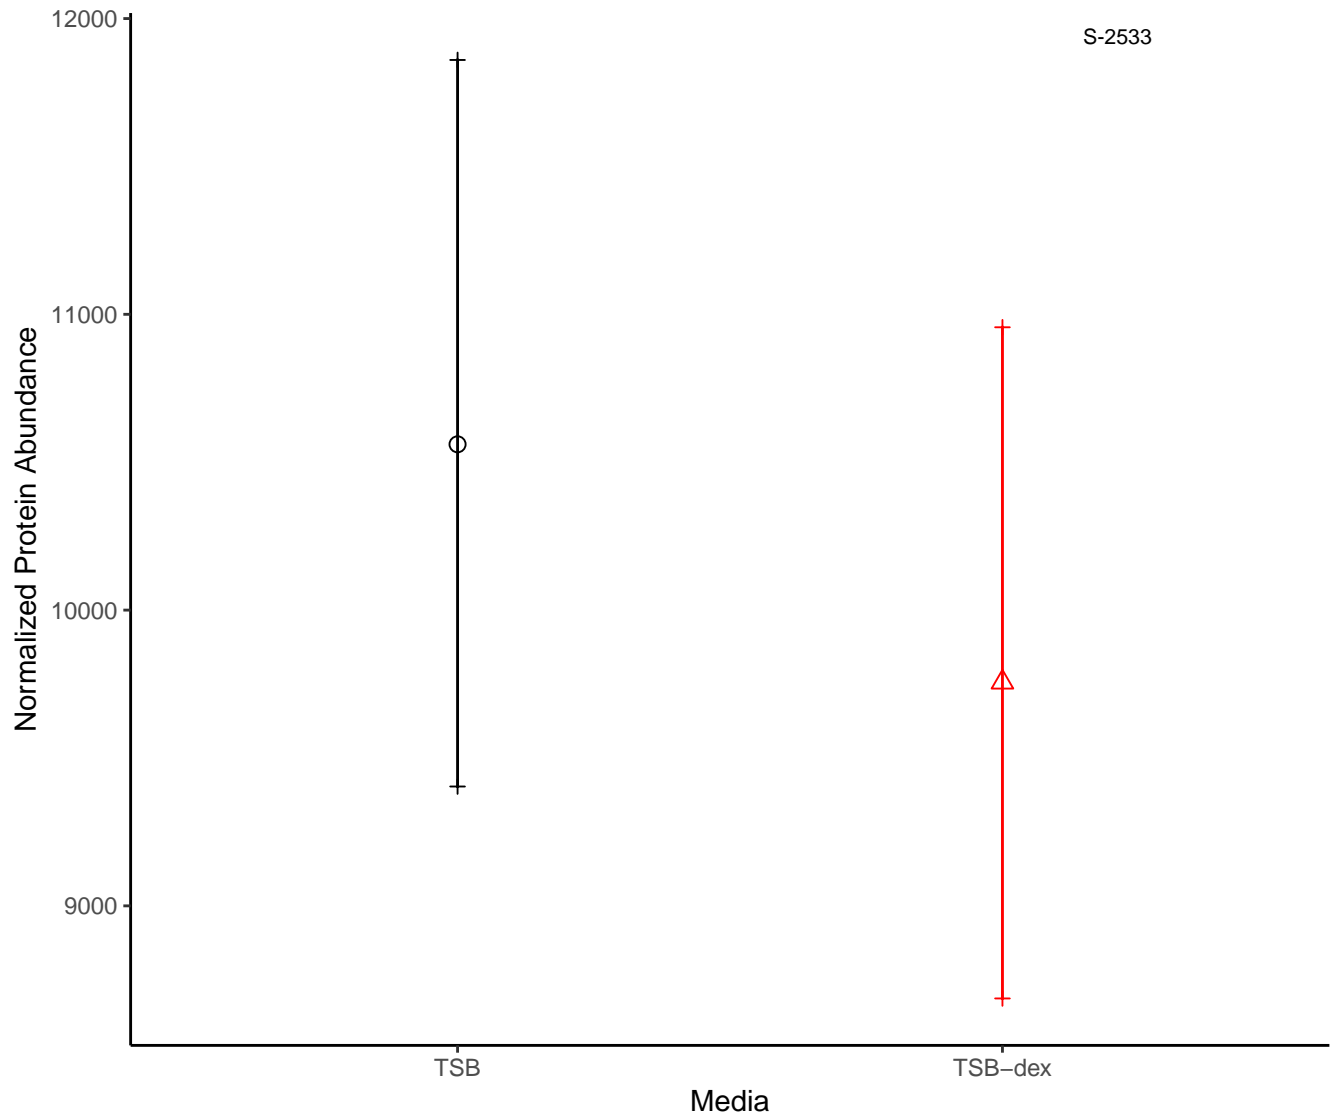

⊖ TSB-dex

△ TSB

# ARGR\_STAAM

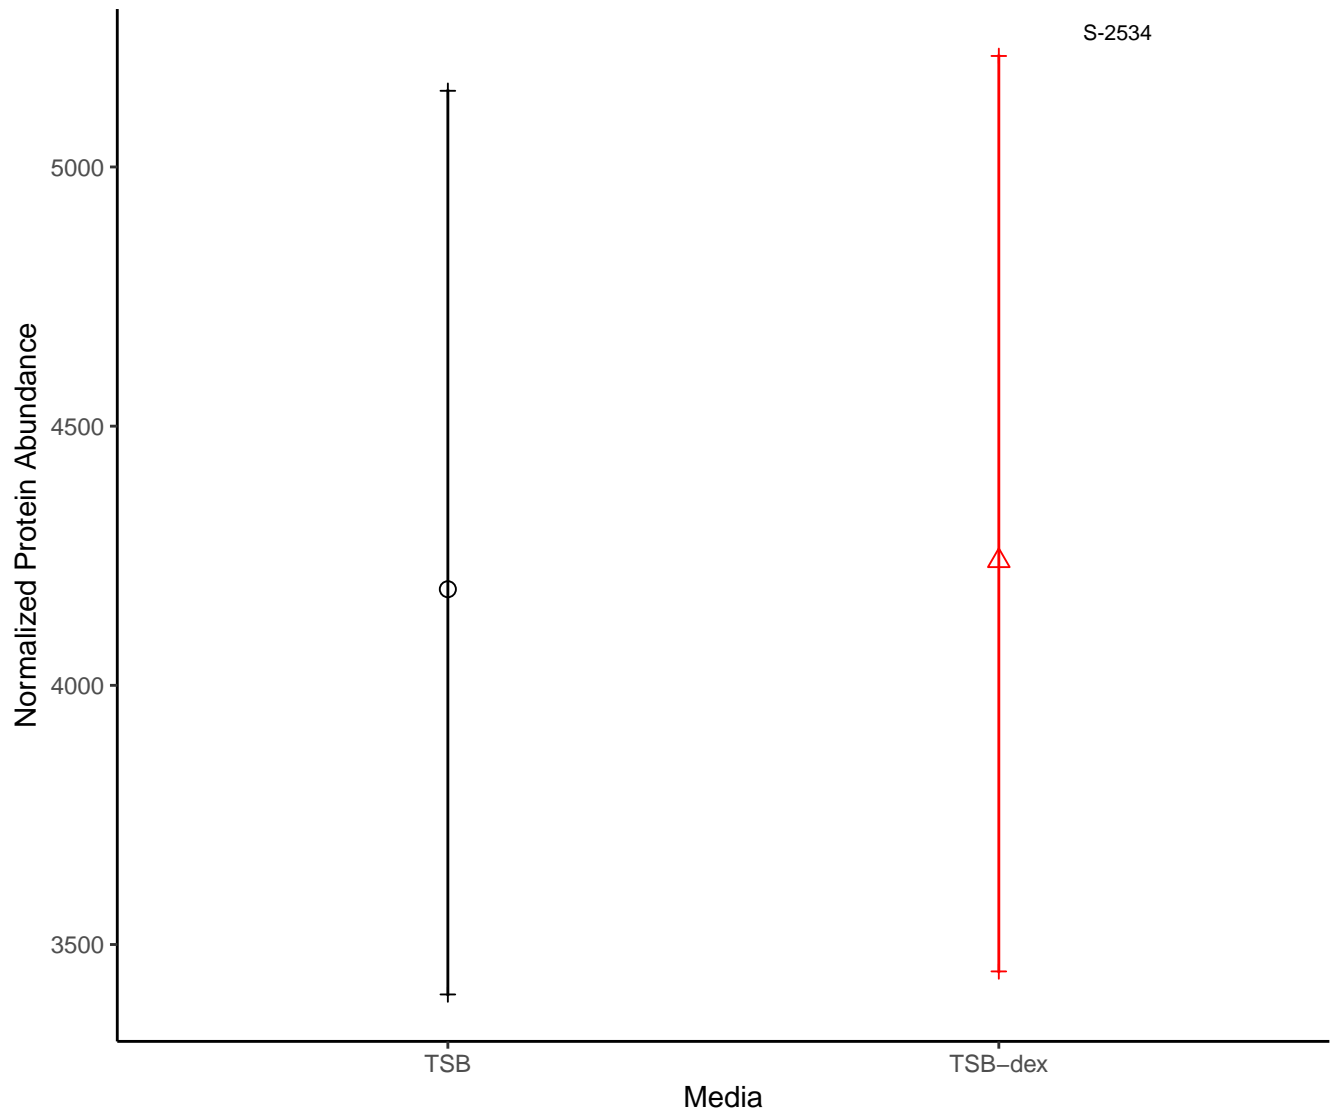

⊕ TSB-dex

△ TSB

# ARLR\_STAAM

S-2535

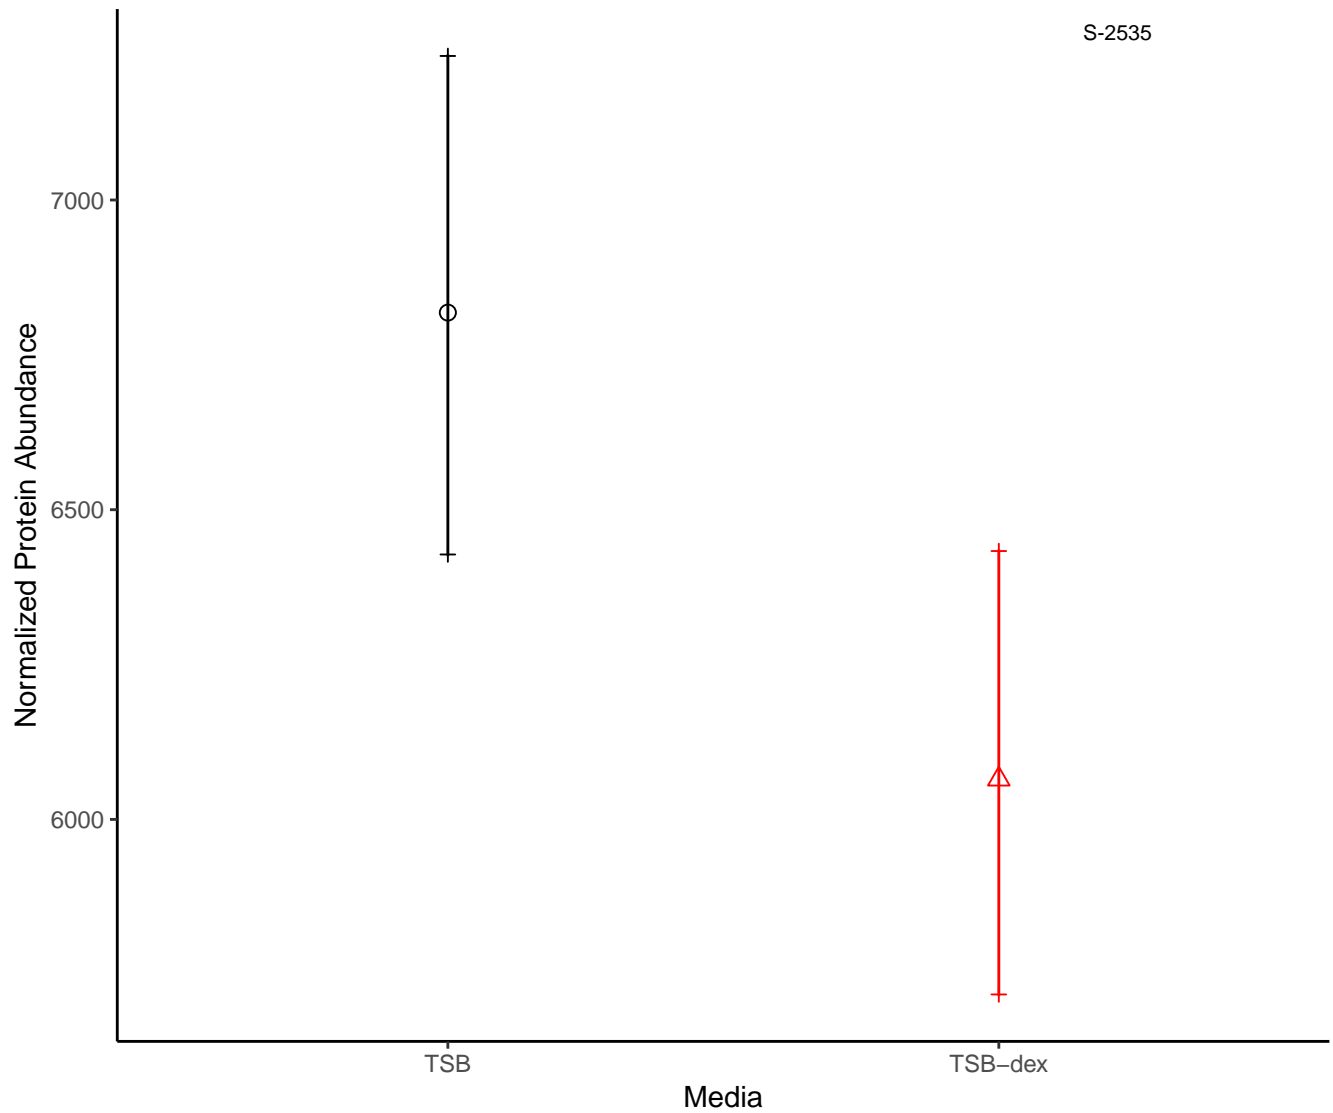

⊕ TSB-dex

△ TSB

# ARLY\_STAAM

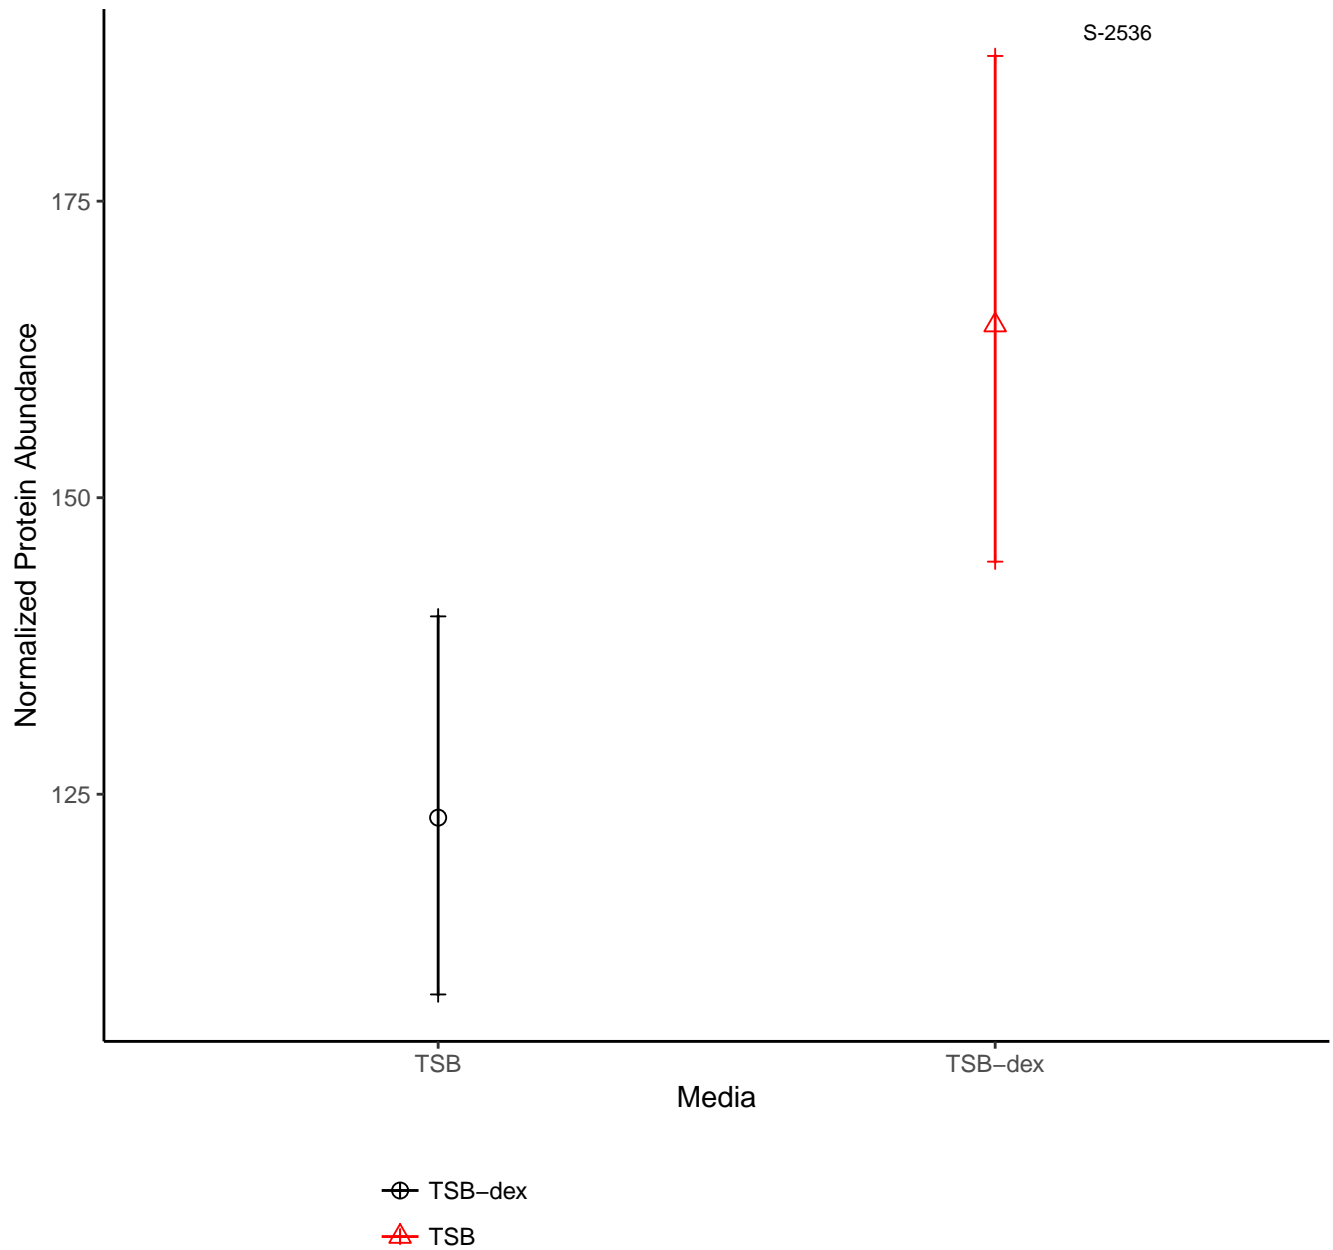



# AROA\_STAAM

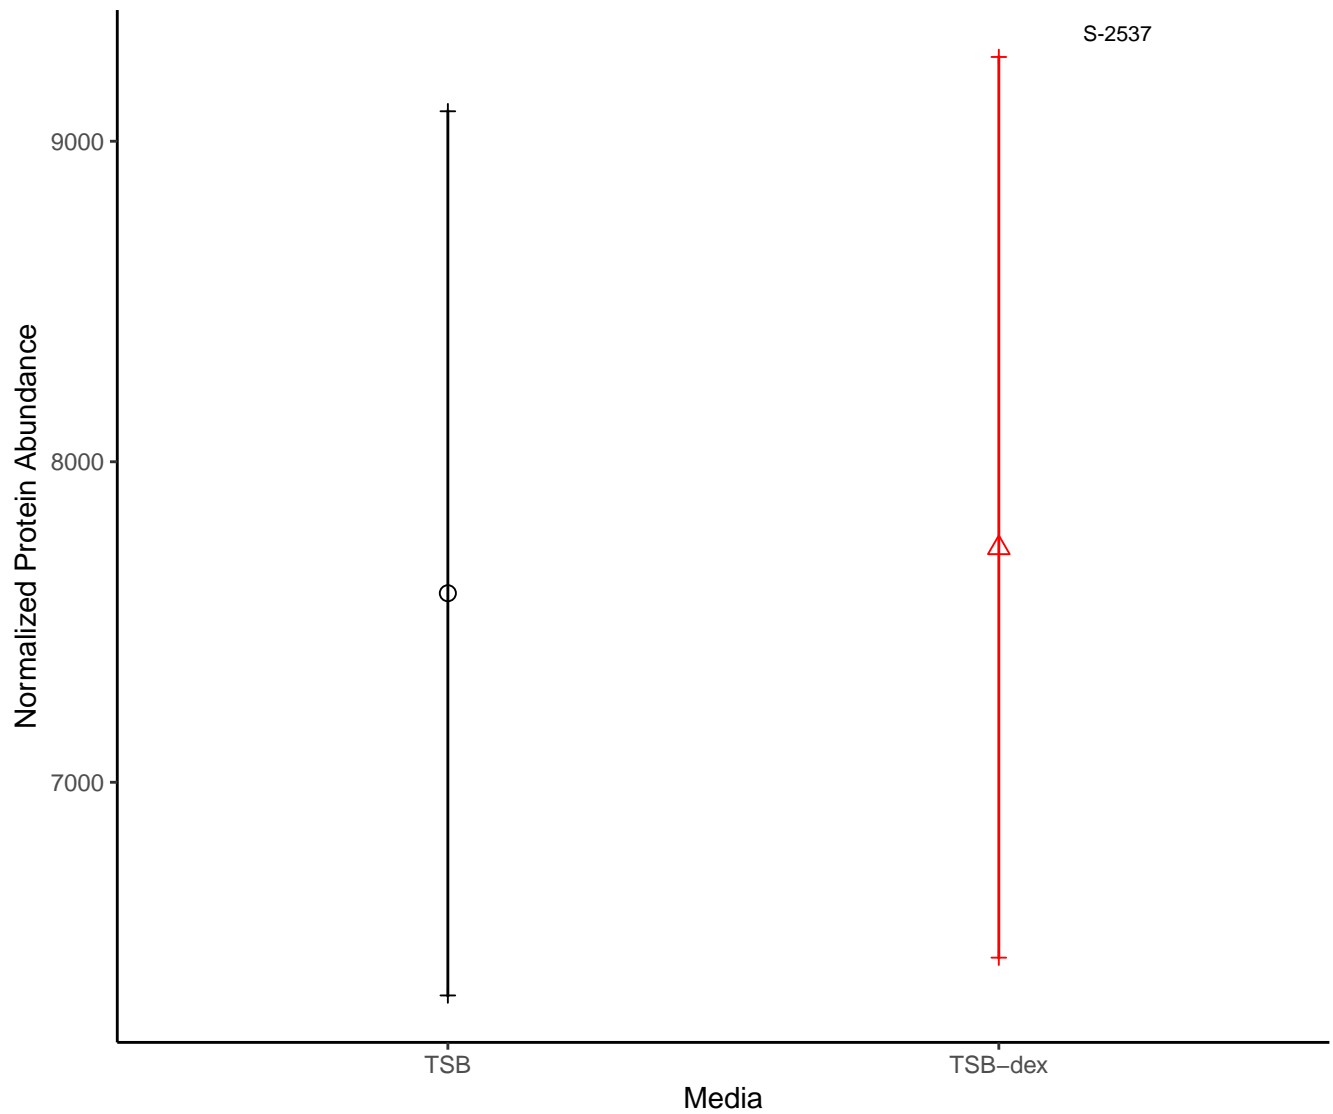

⊕ TSB-dex

△ TSB

# AROB\_STAAM

S-2538

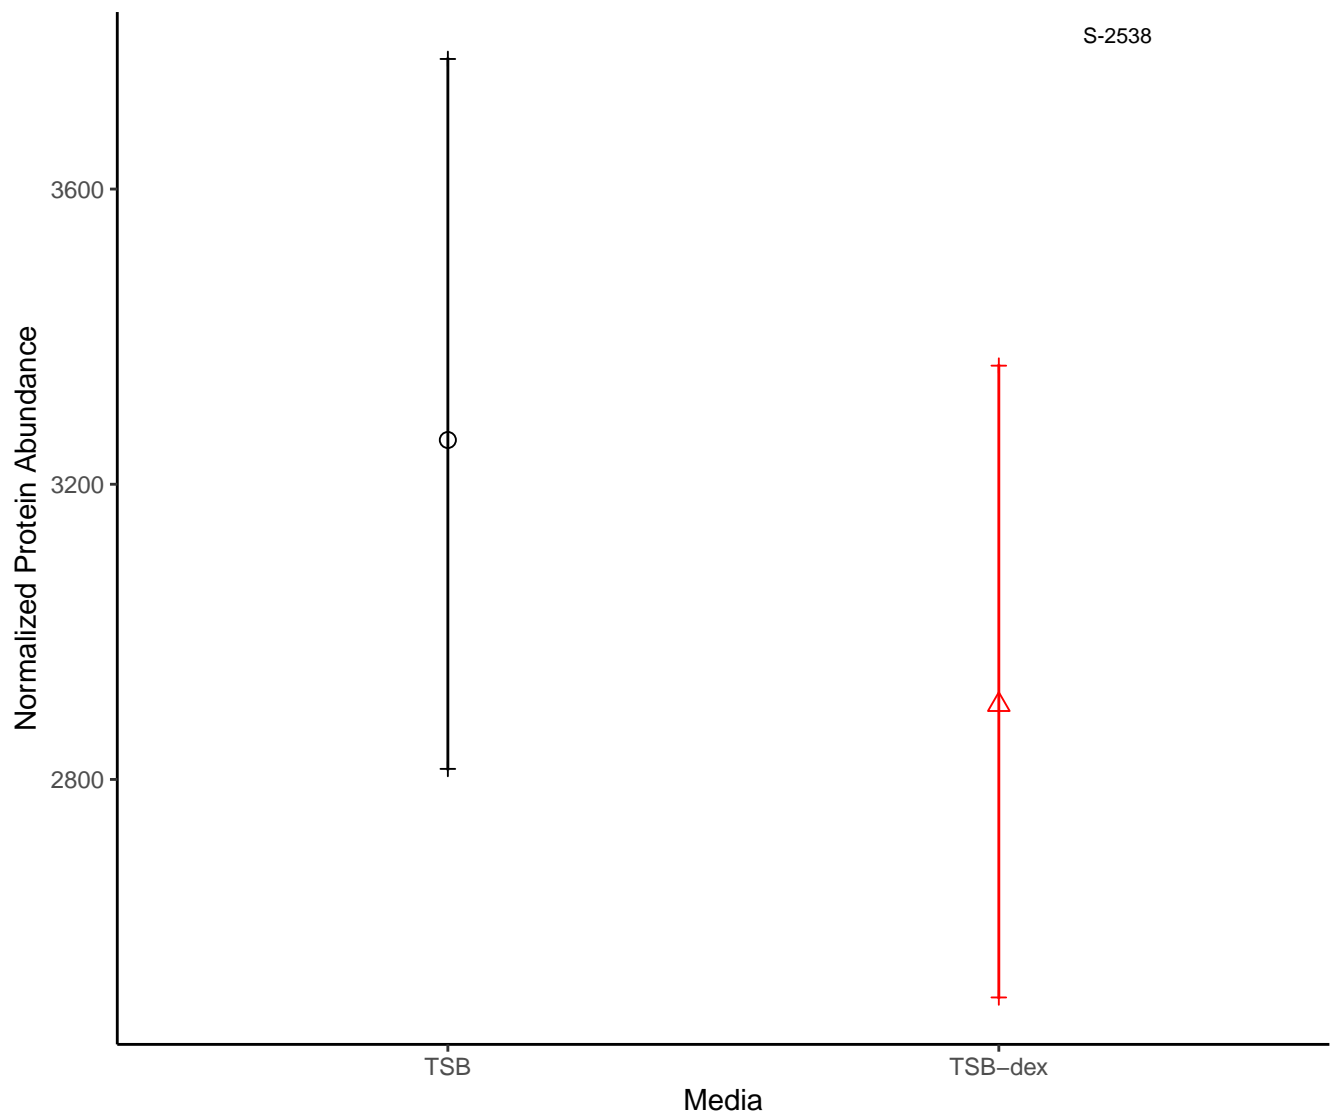

⊕ TSB-dex

△ TSB

# AROE\_STAAM

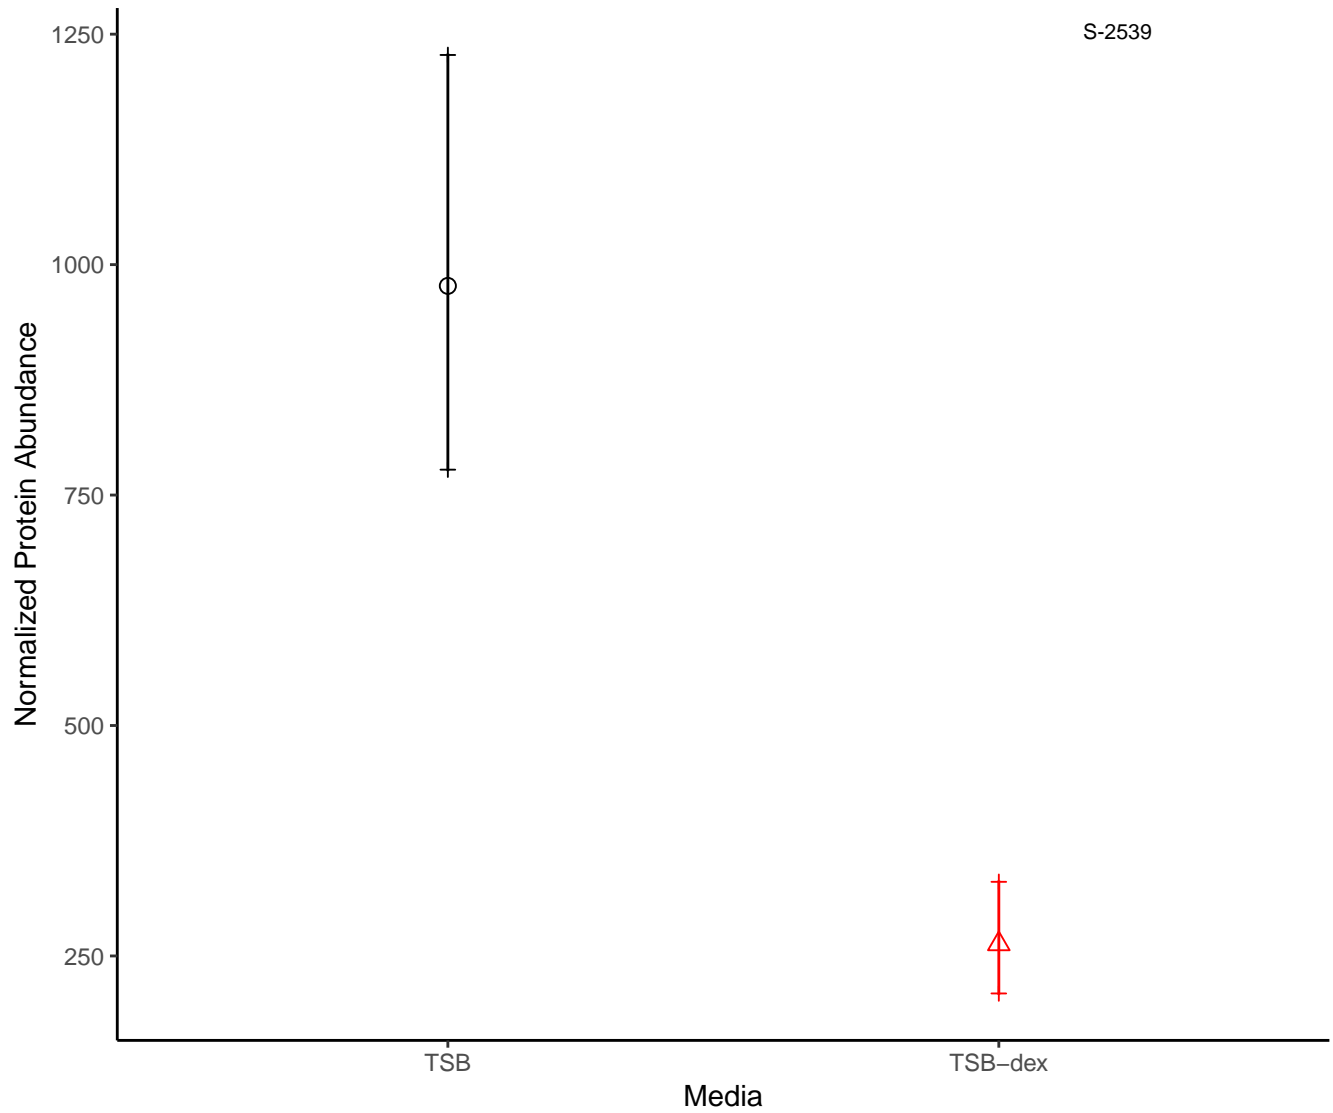

⊕ TSB-dex

△ TSB

# ASP23\_STAAM

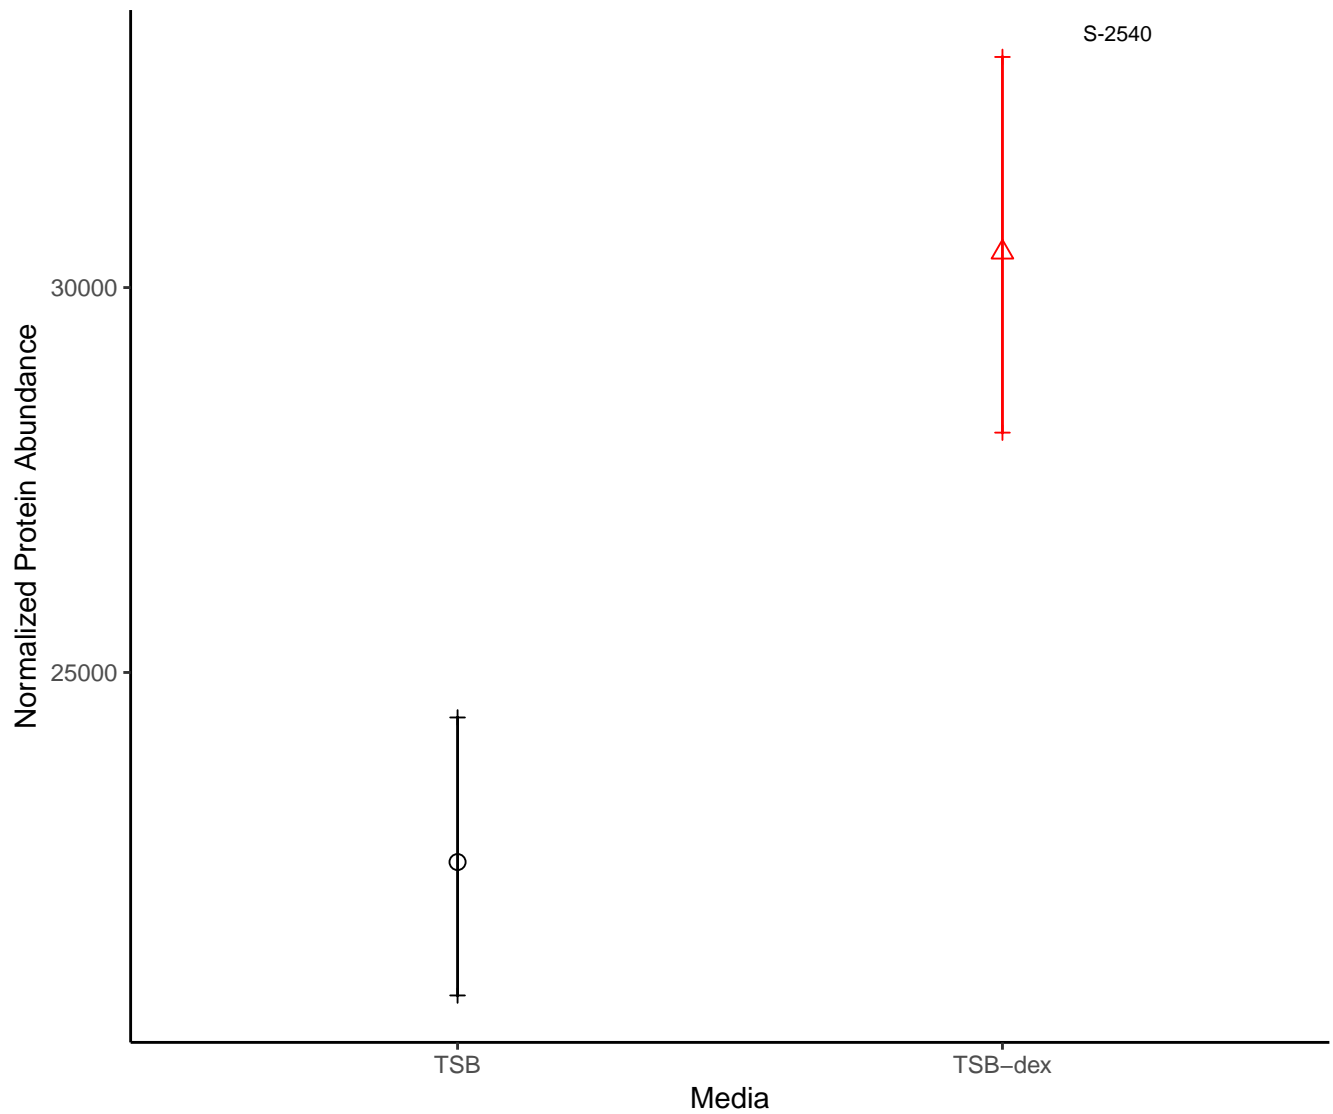

⊕ TSB-dex

△ TSB

# ATL\_STAAM

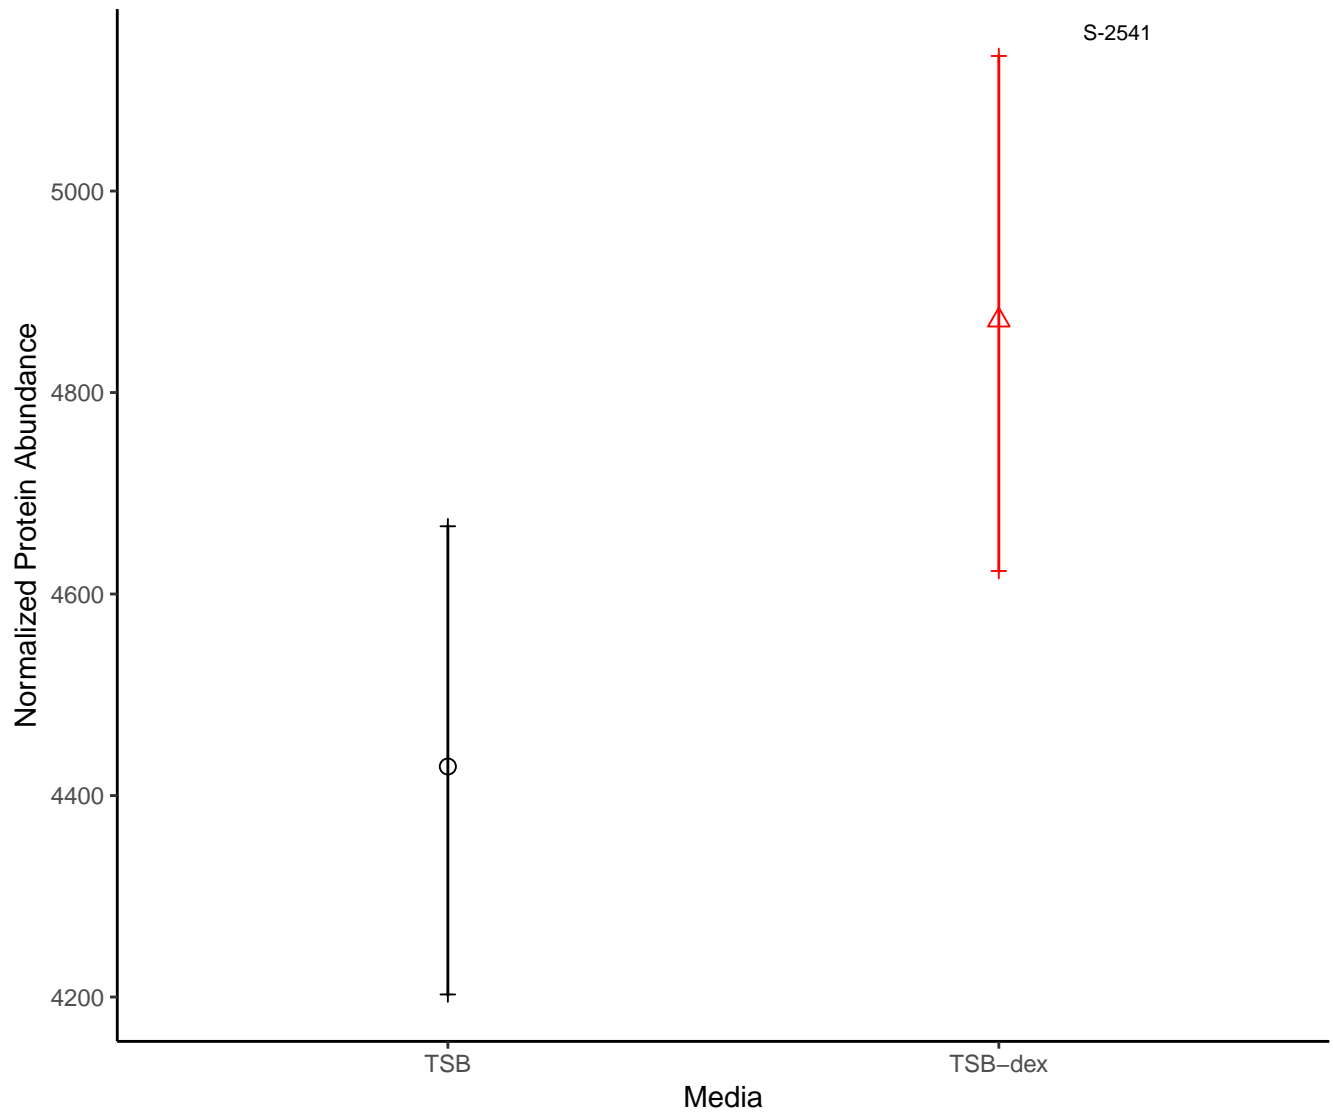

⊕ TSB-dex

△ TSB

# ATPA\_STAAM

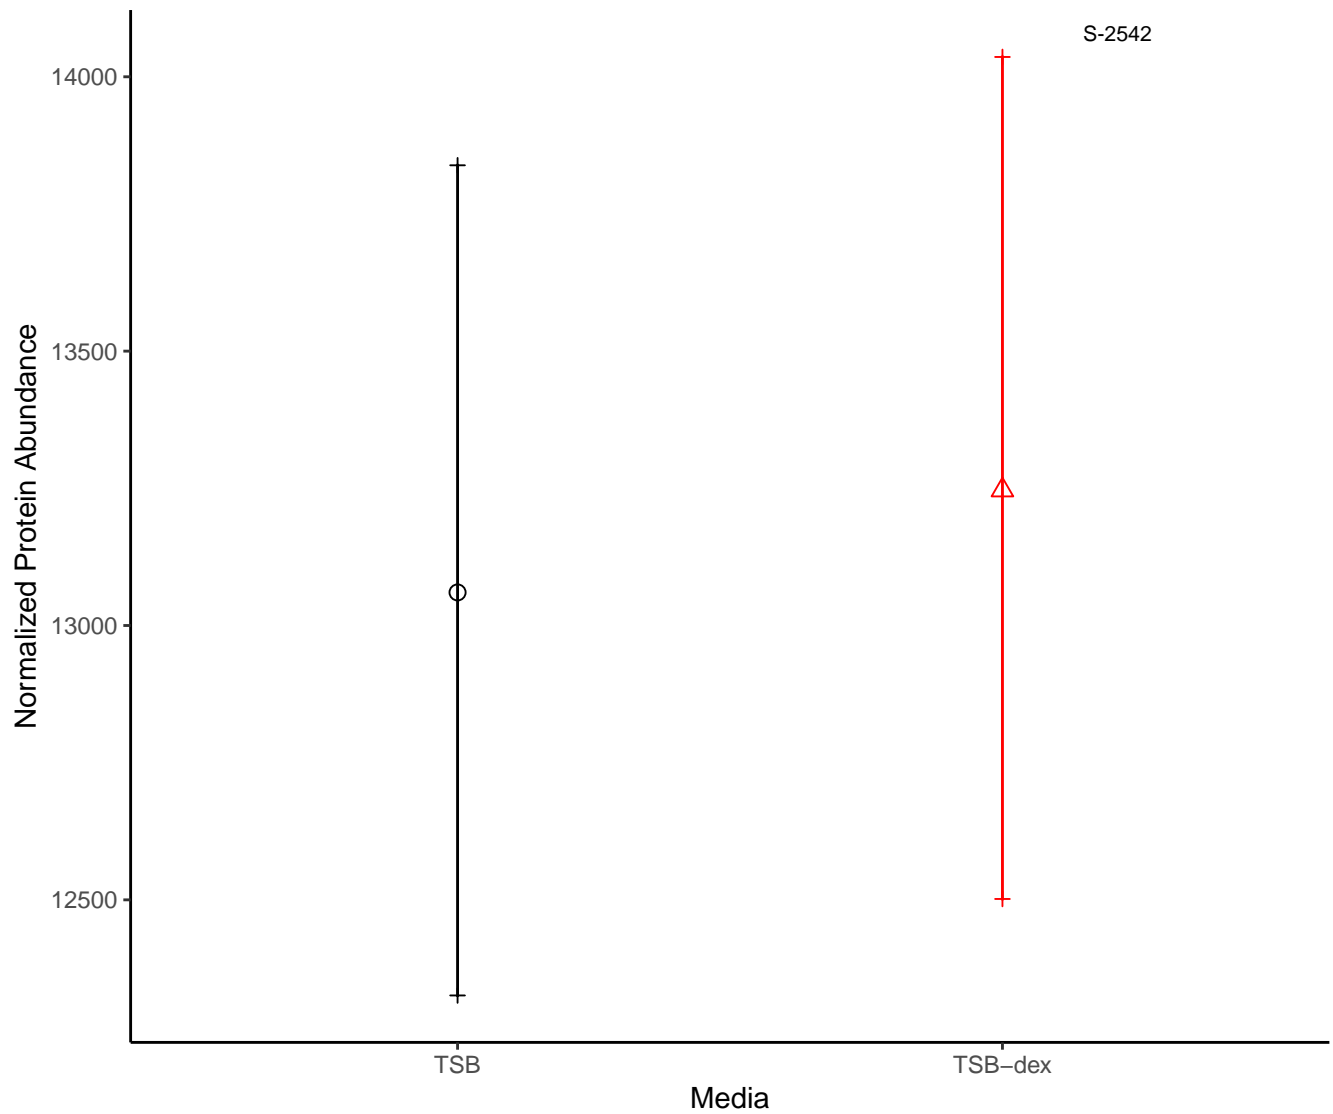

⊕ TSB-dex

△ TSB

# ATPB\_STAAM

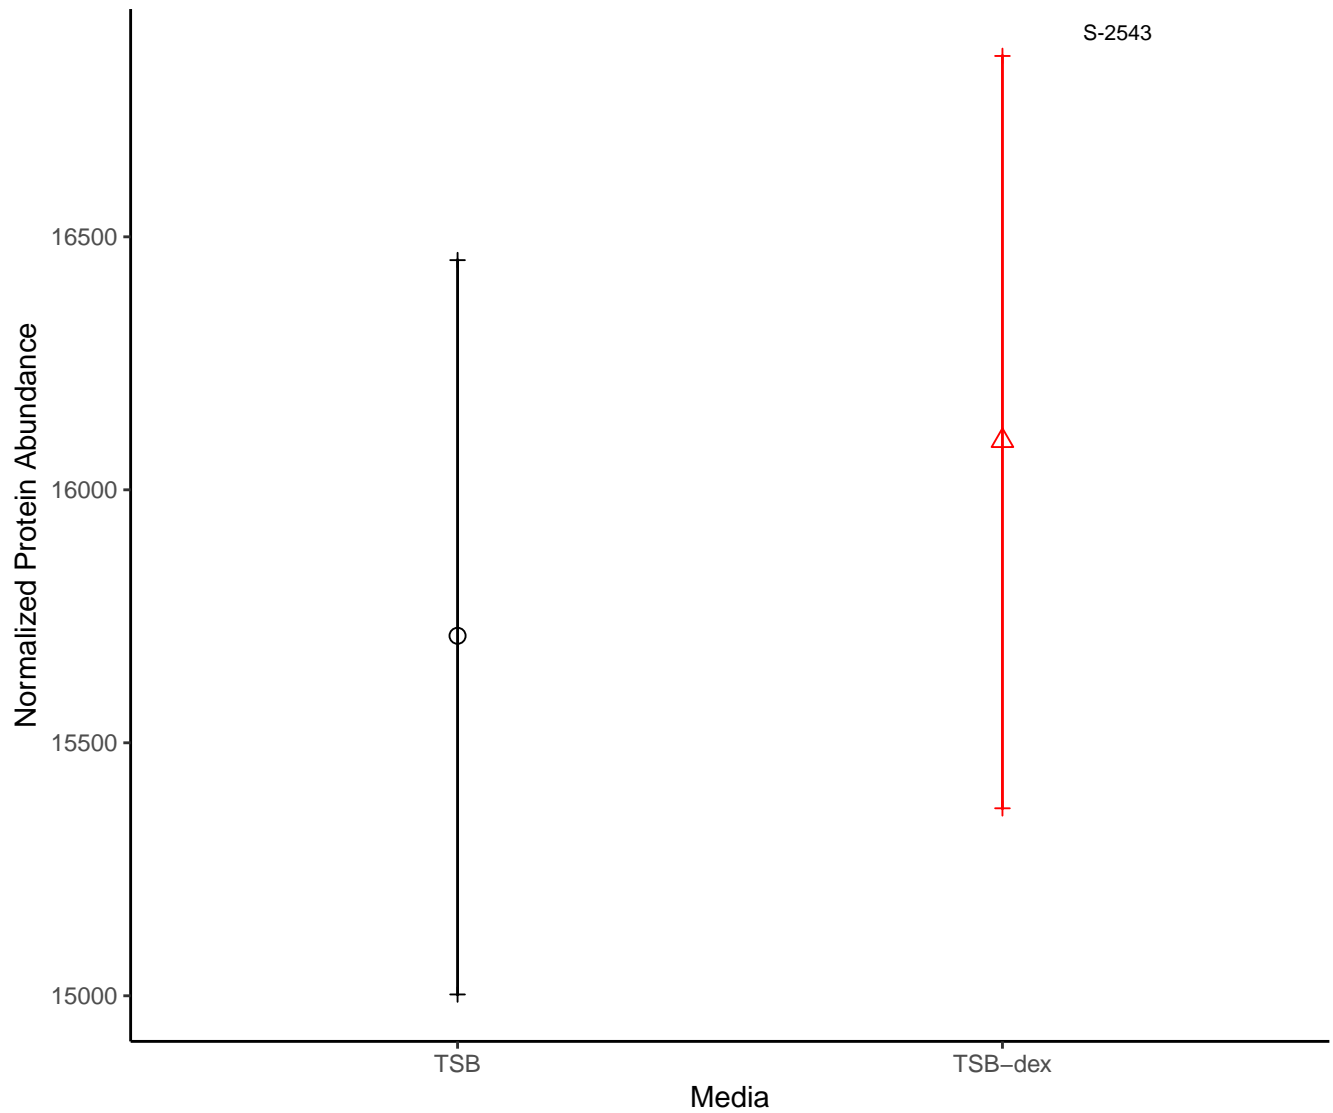

⊖ TSB-dex

△ TSB

# ATPD\_STAAM

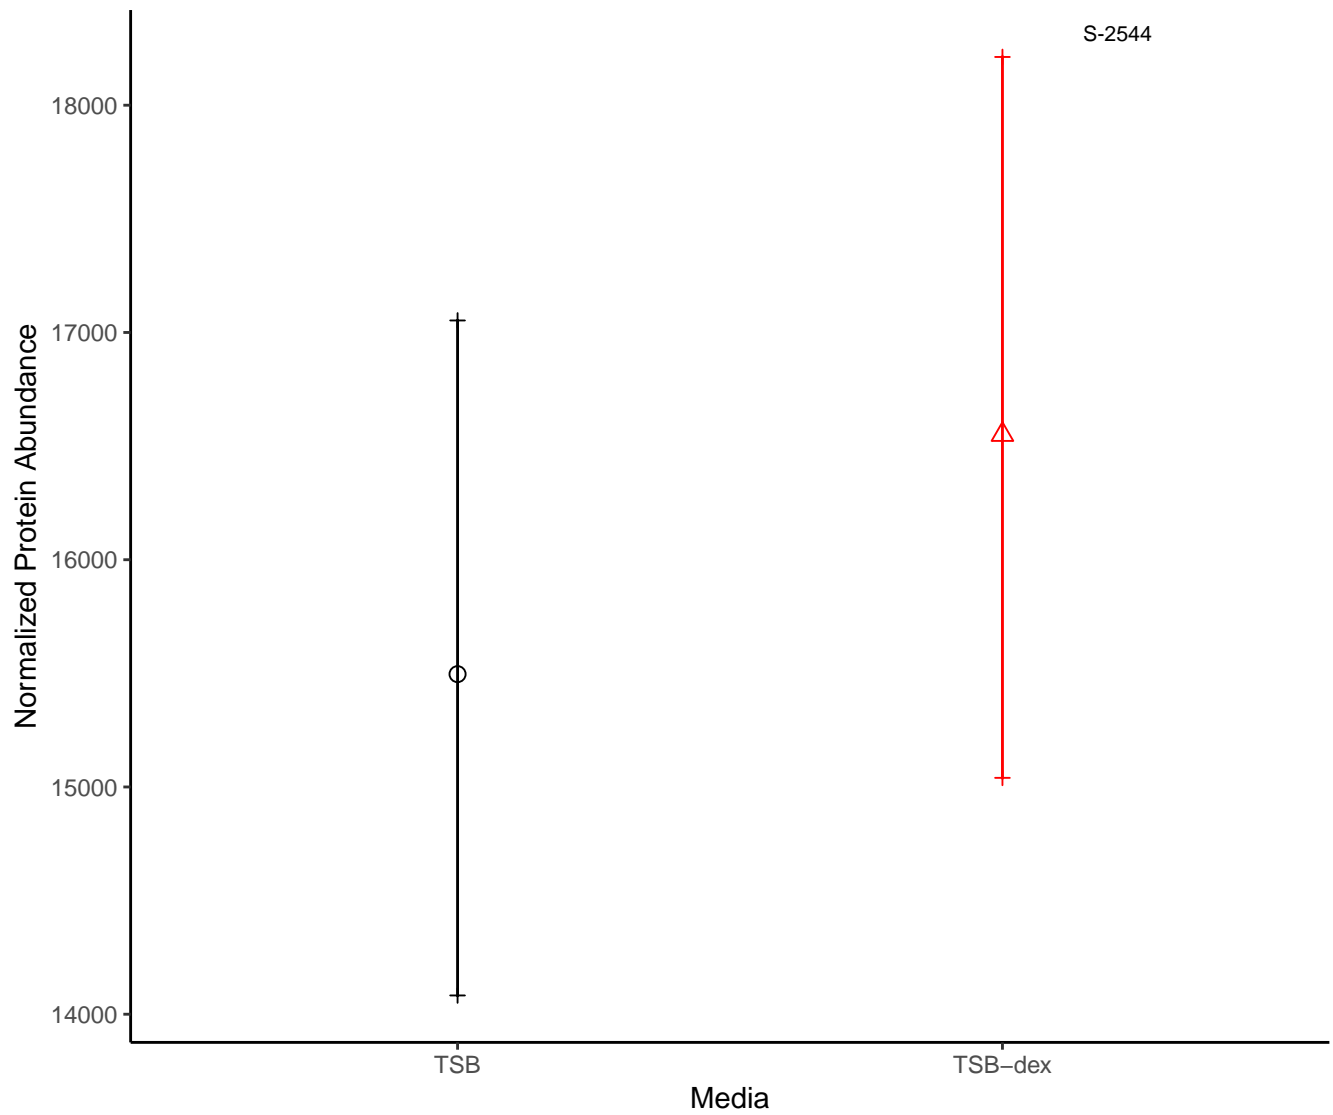

⊕ TSB-dex

△ TSB



# ATPE\_STAAM

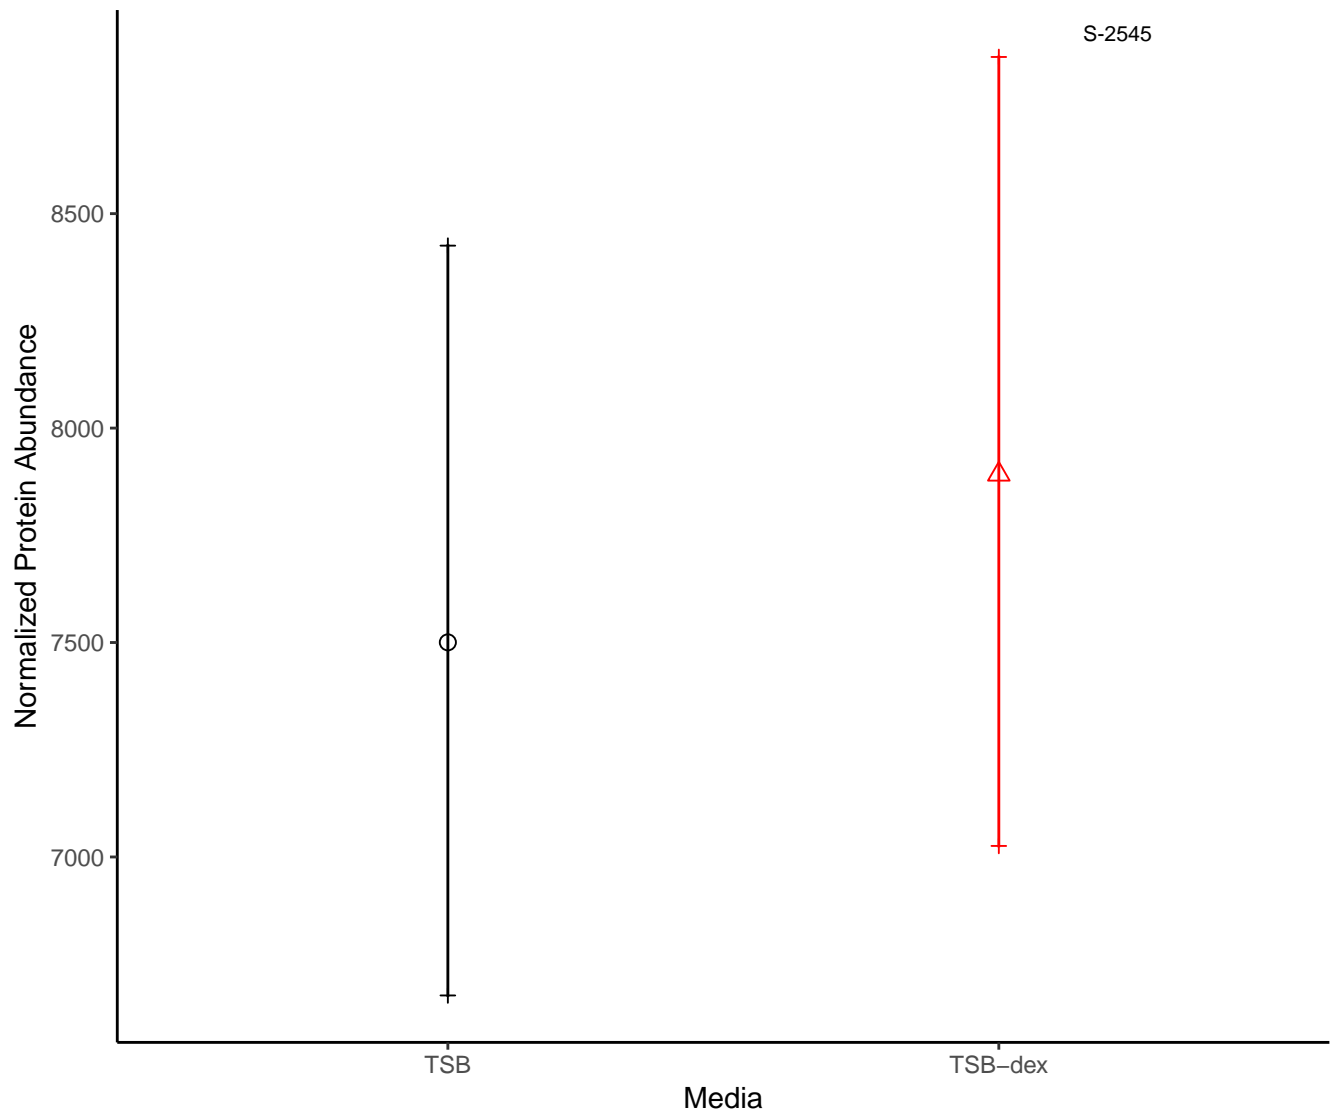

⊕ TSB-dex

△ TSB

# ATPF\_STAAM

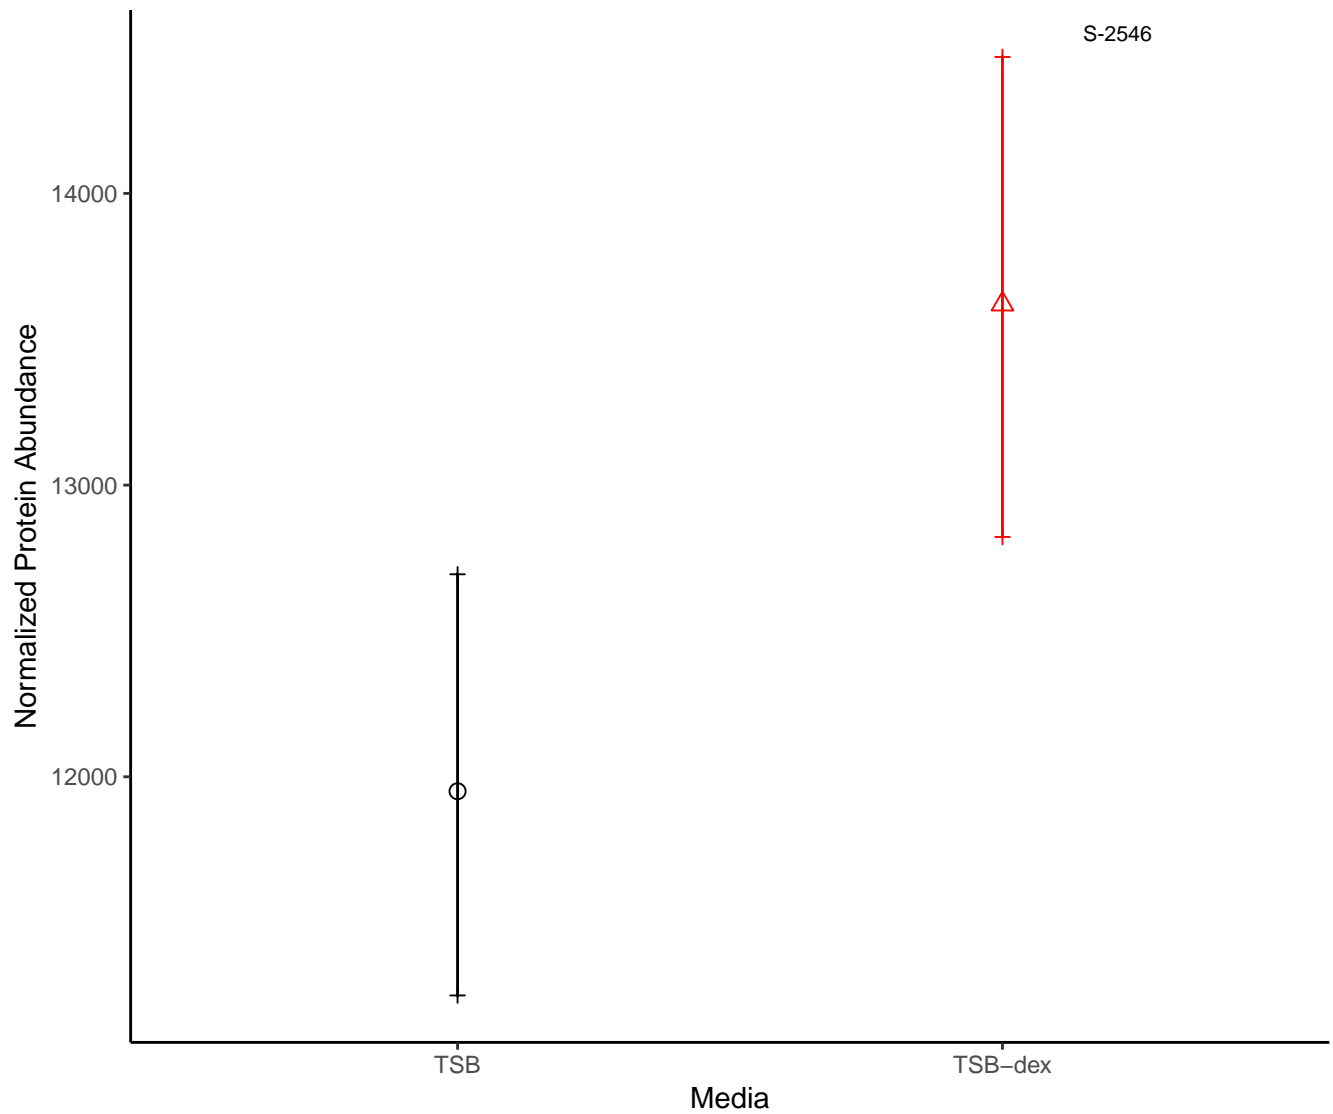

⊖ TSB-dex

⊖ TSB

# ATPG\_STAAM

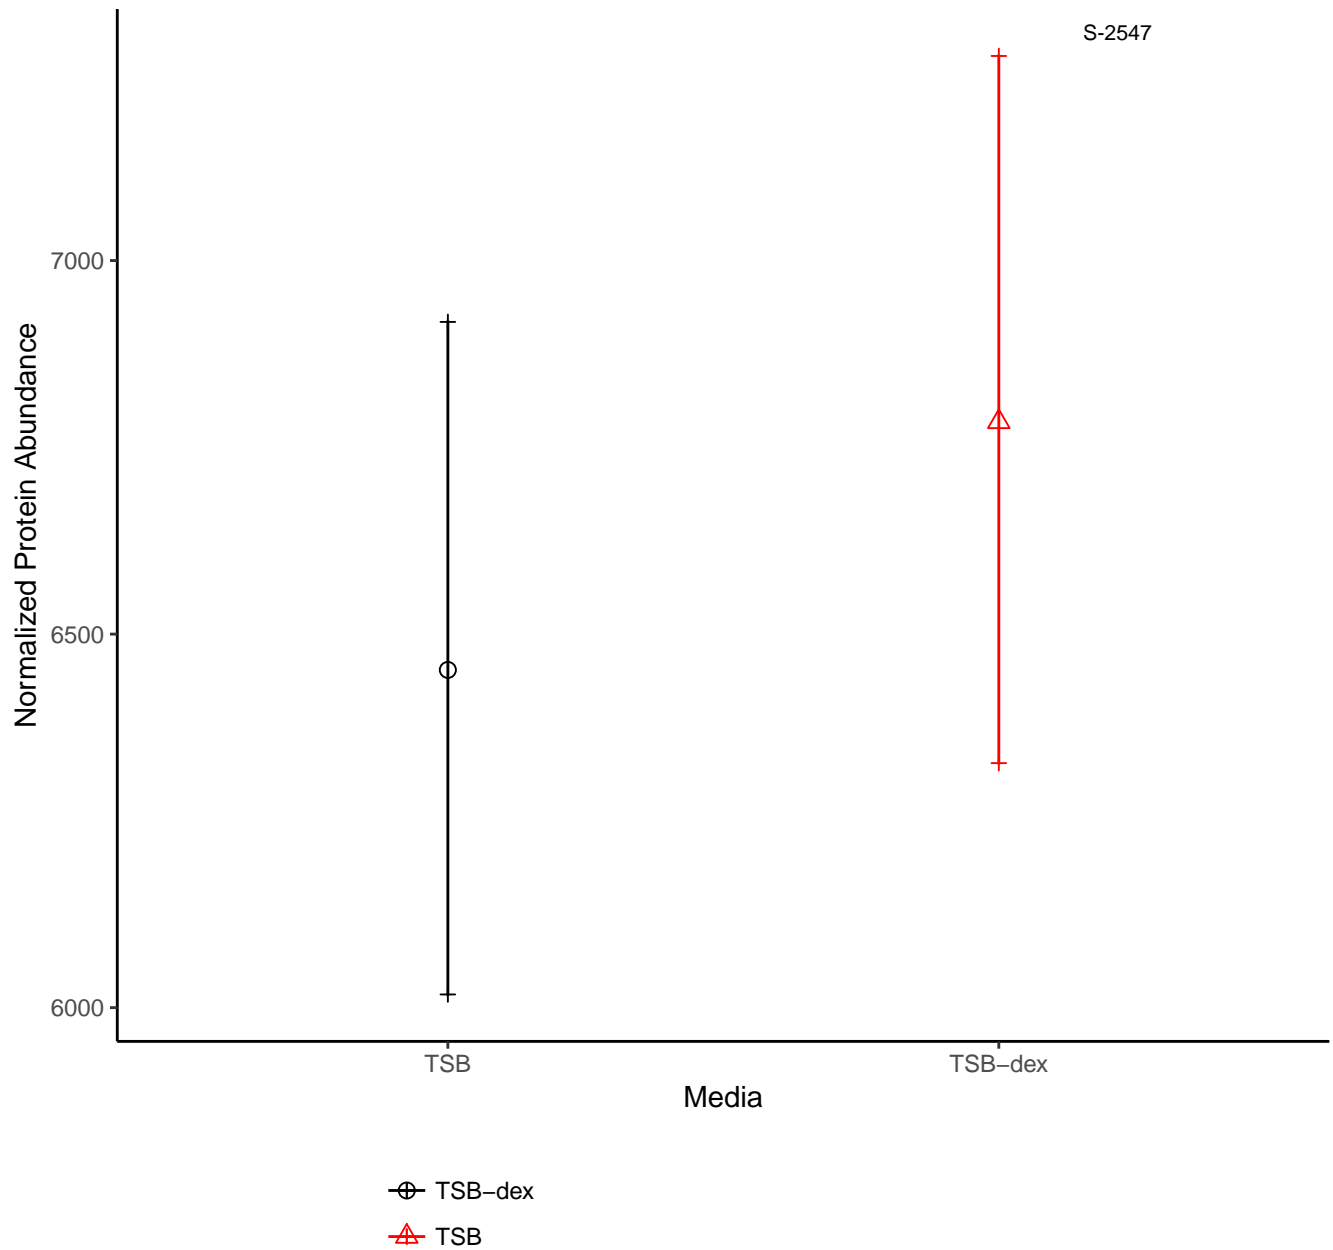

# AZO1\_STAAM

S-2548

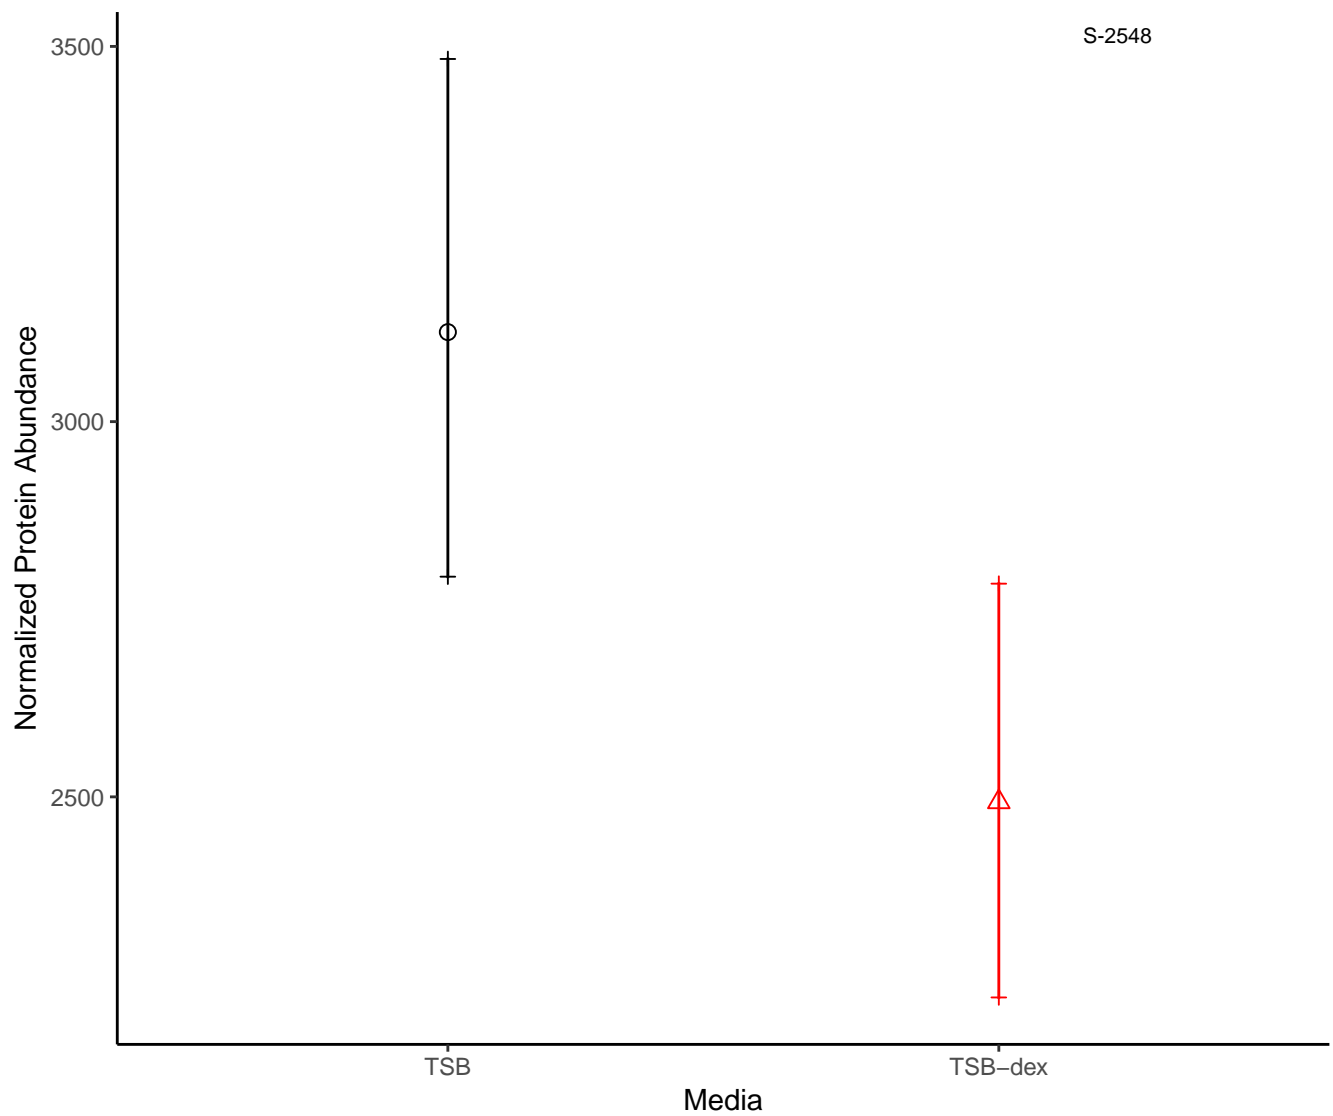

⊕ TSB-dex

△ TSB

# AZOR\_STAAM

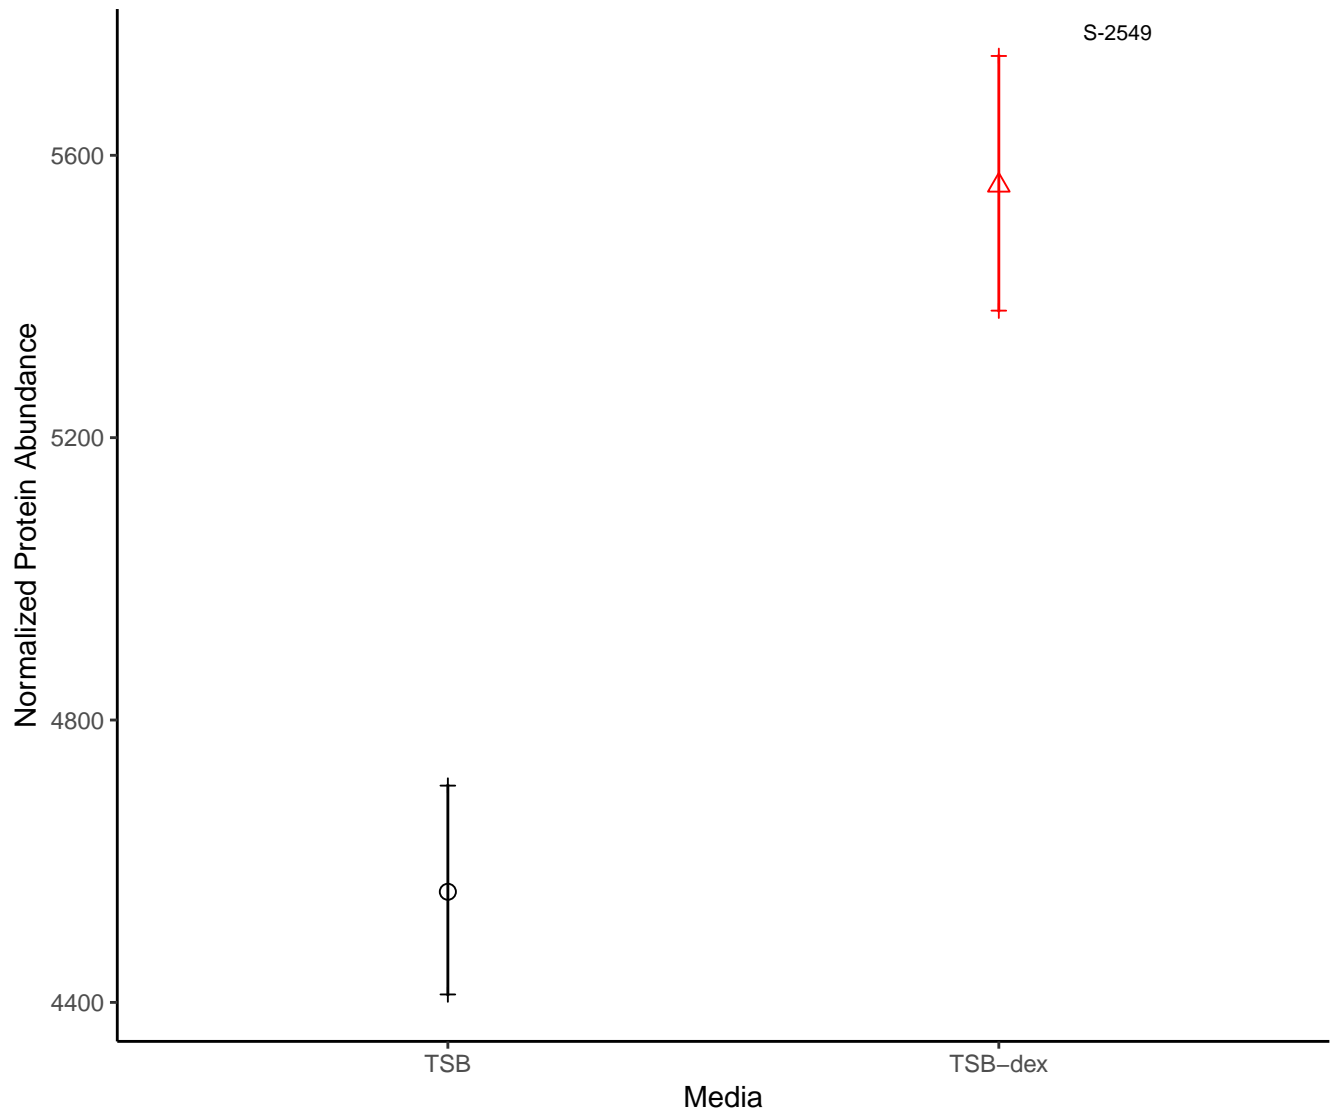

⊕ TSB-dex

△ TSB

# BSAA\_STAAM

S-2550

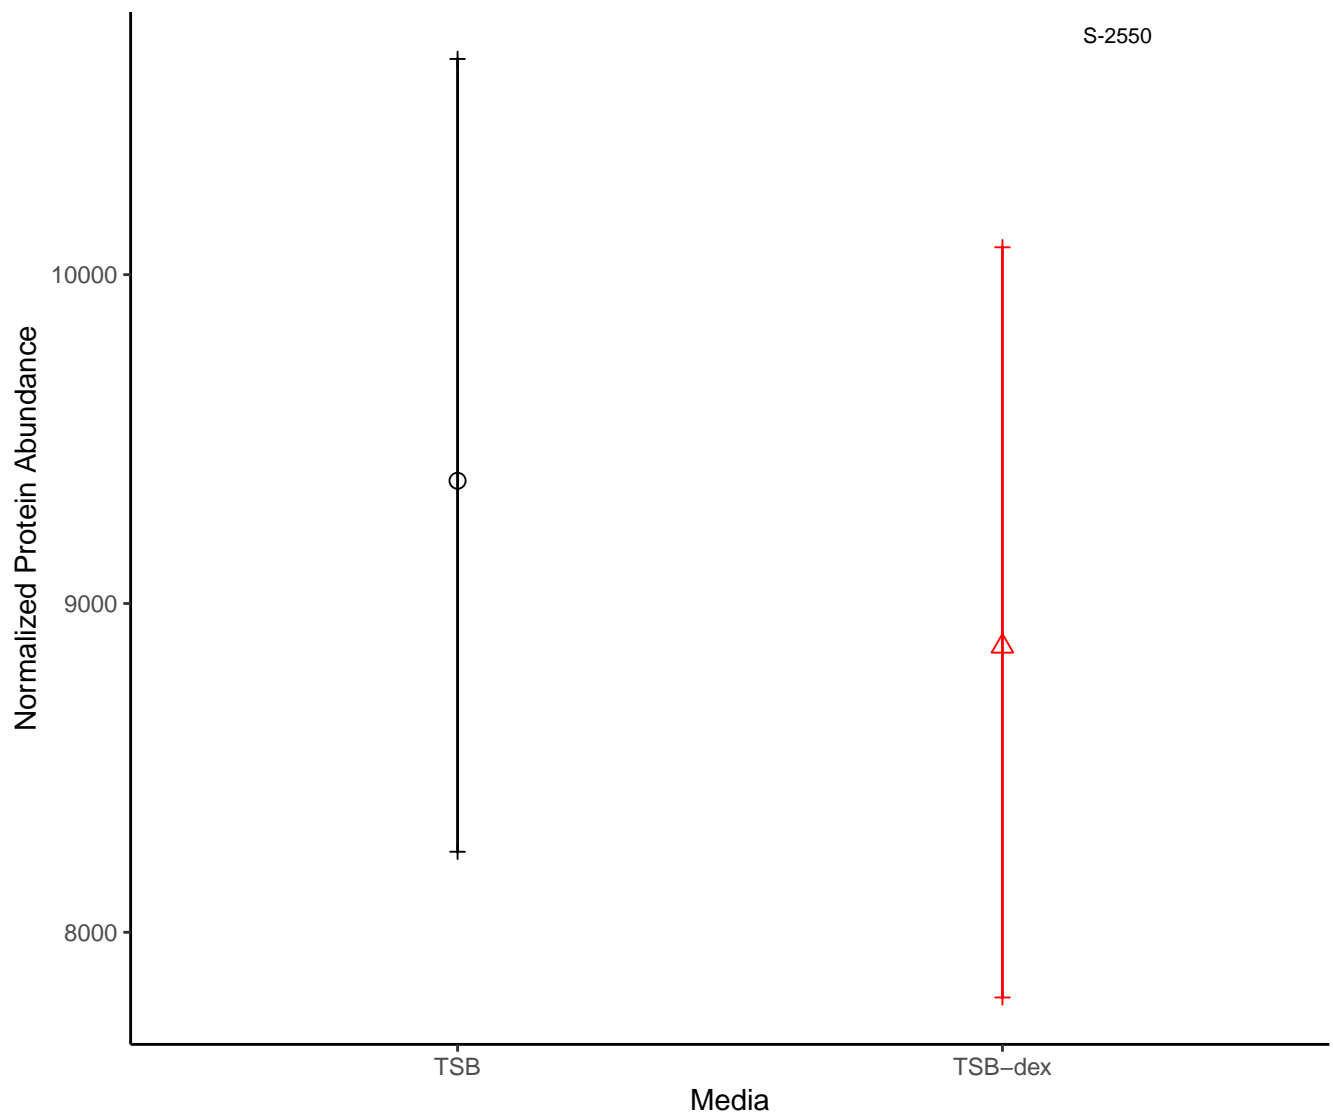

⊕ TSB-dex

△ TSB

# BUTA\_STAAM

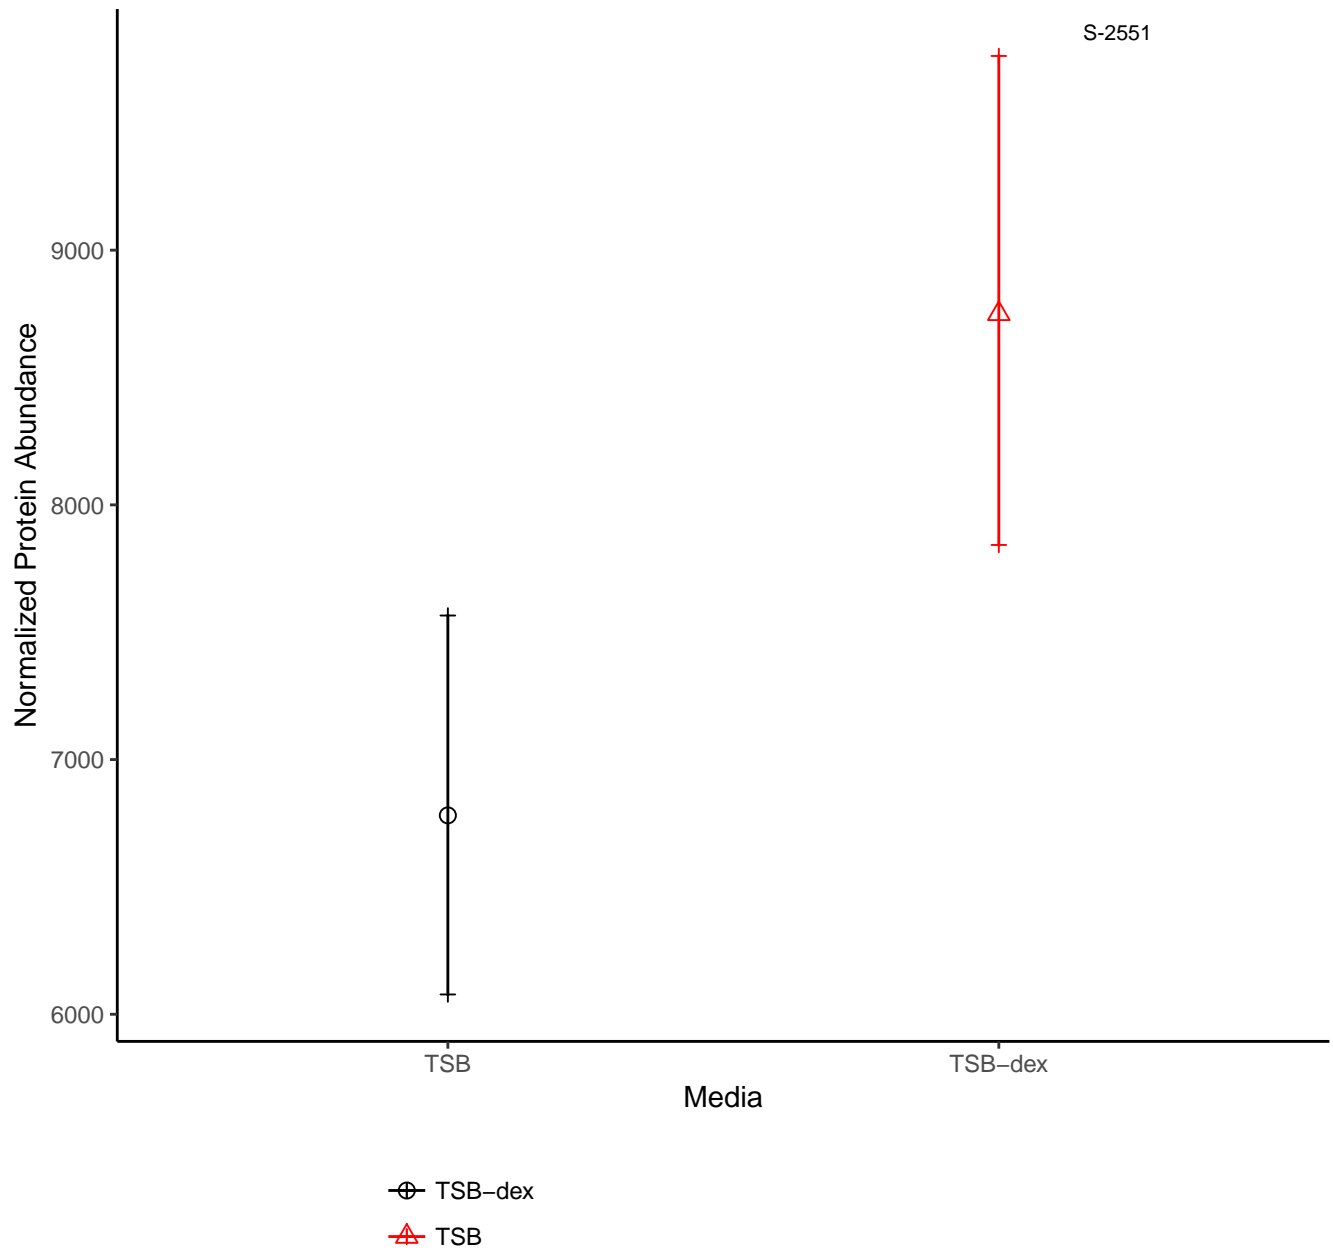

# CARA\_STAAM

S-2552

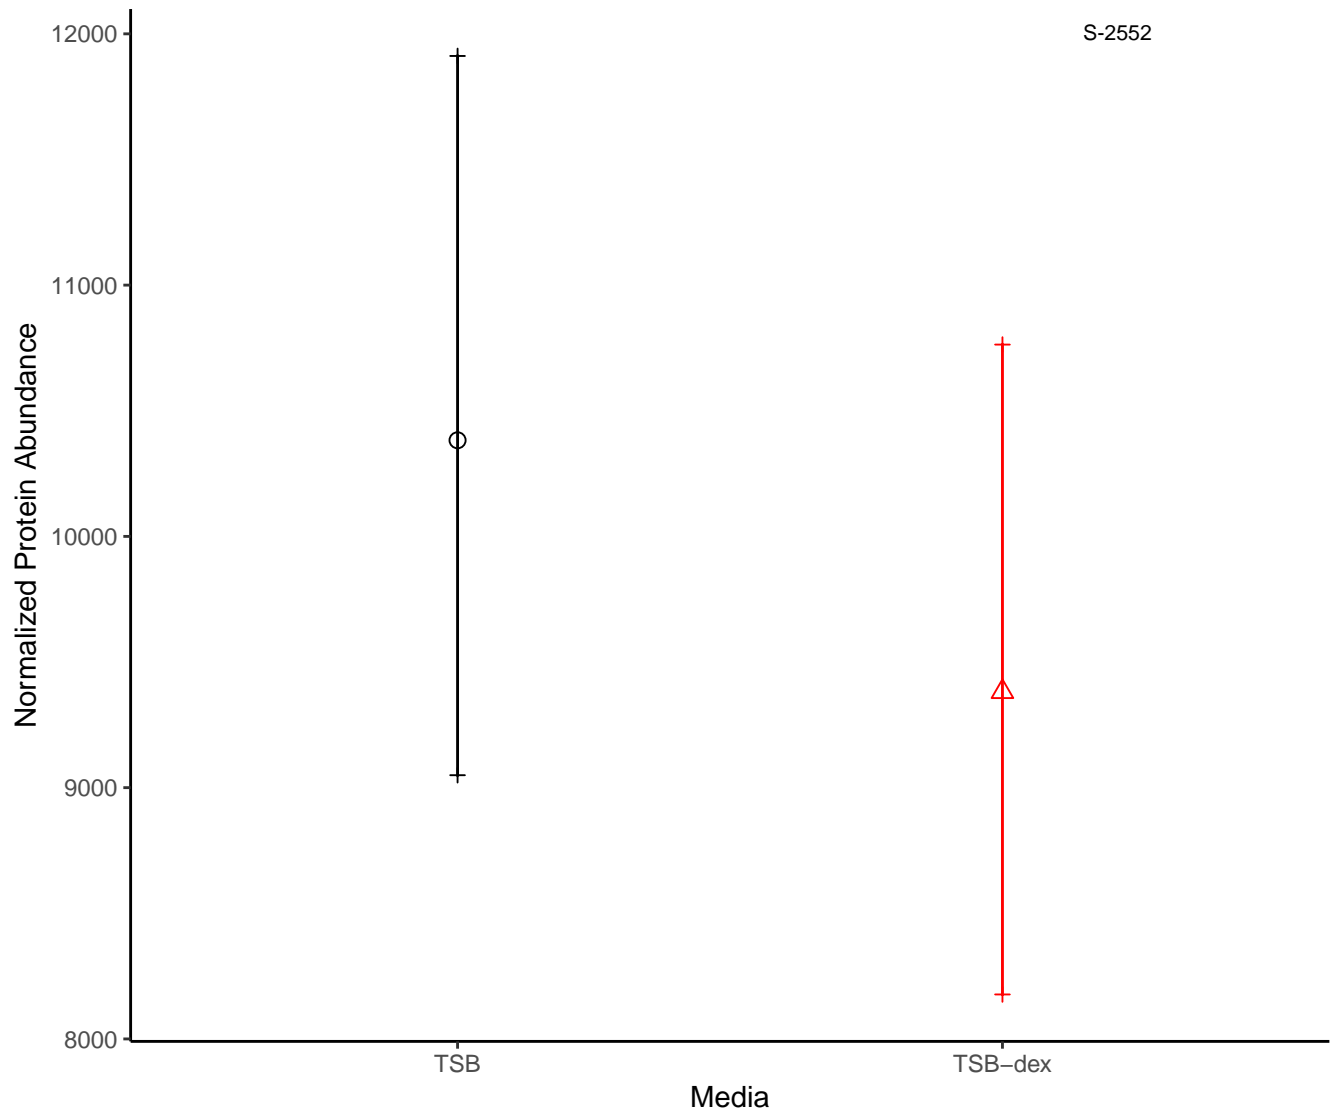

⊖ TSB-dex

△ TSB



# CARB\_STAAM

S-2553

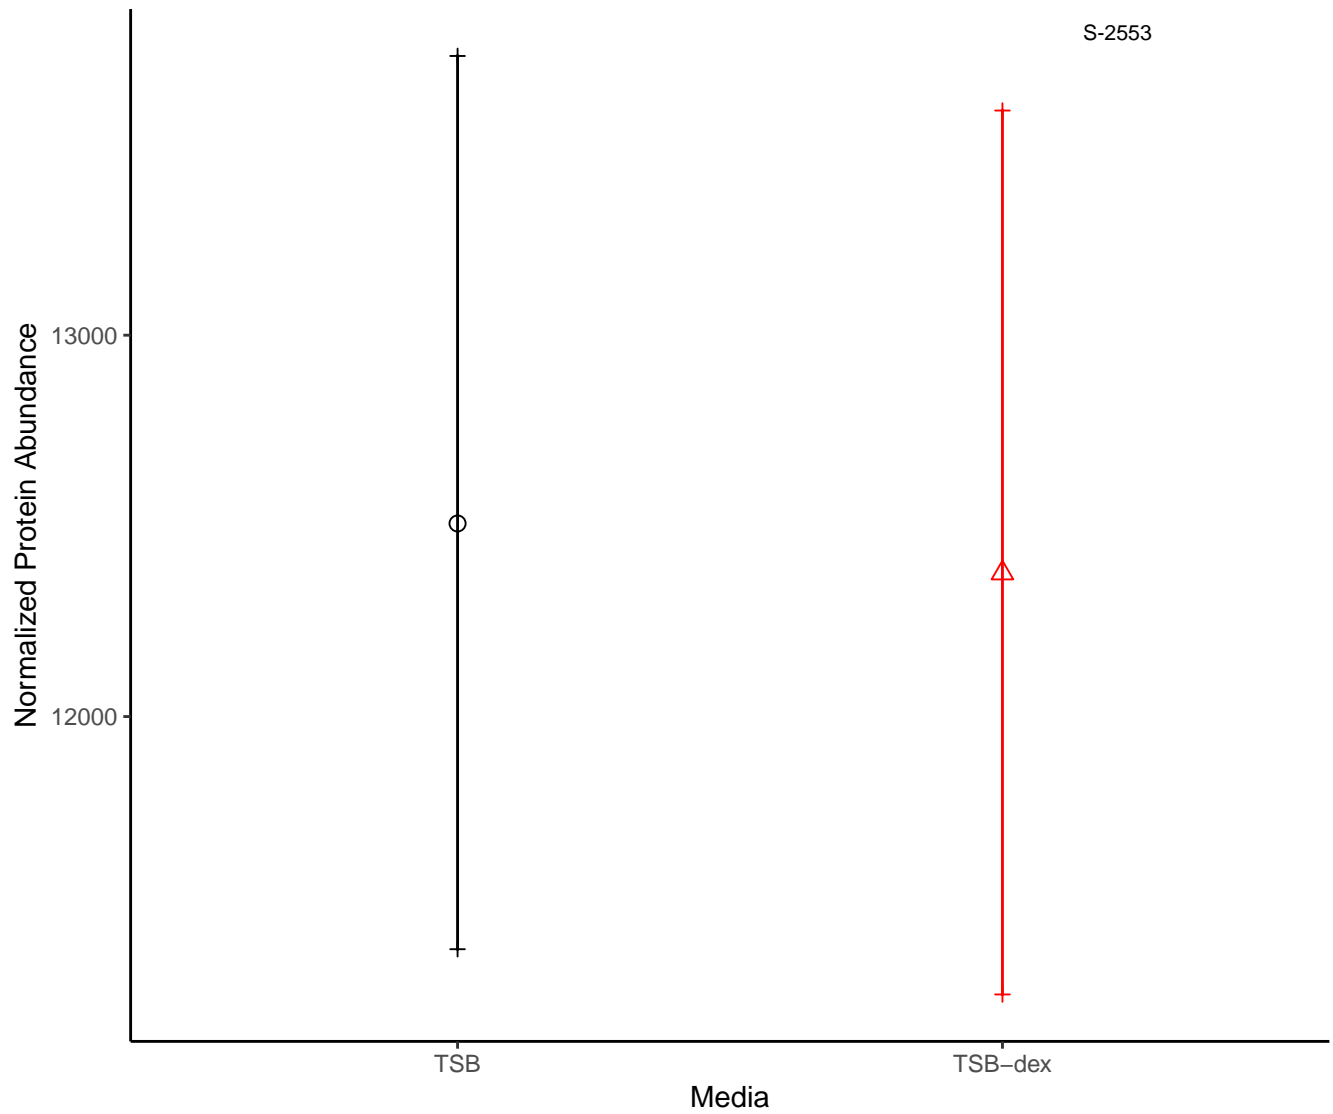

⊕ TSB-dex

△ TSB

# CATA\_STAAM

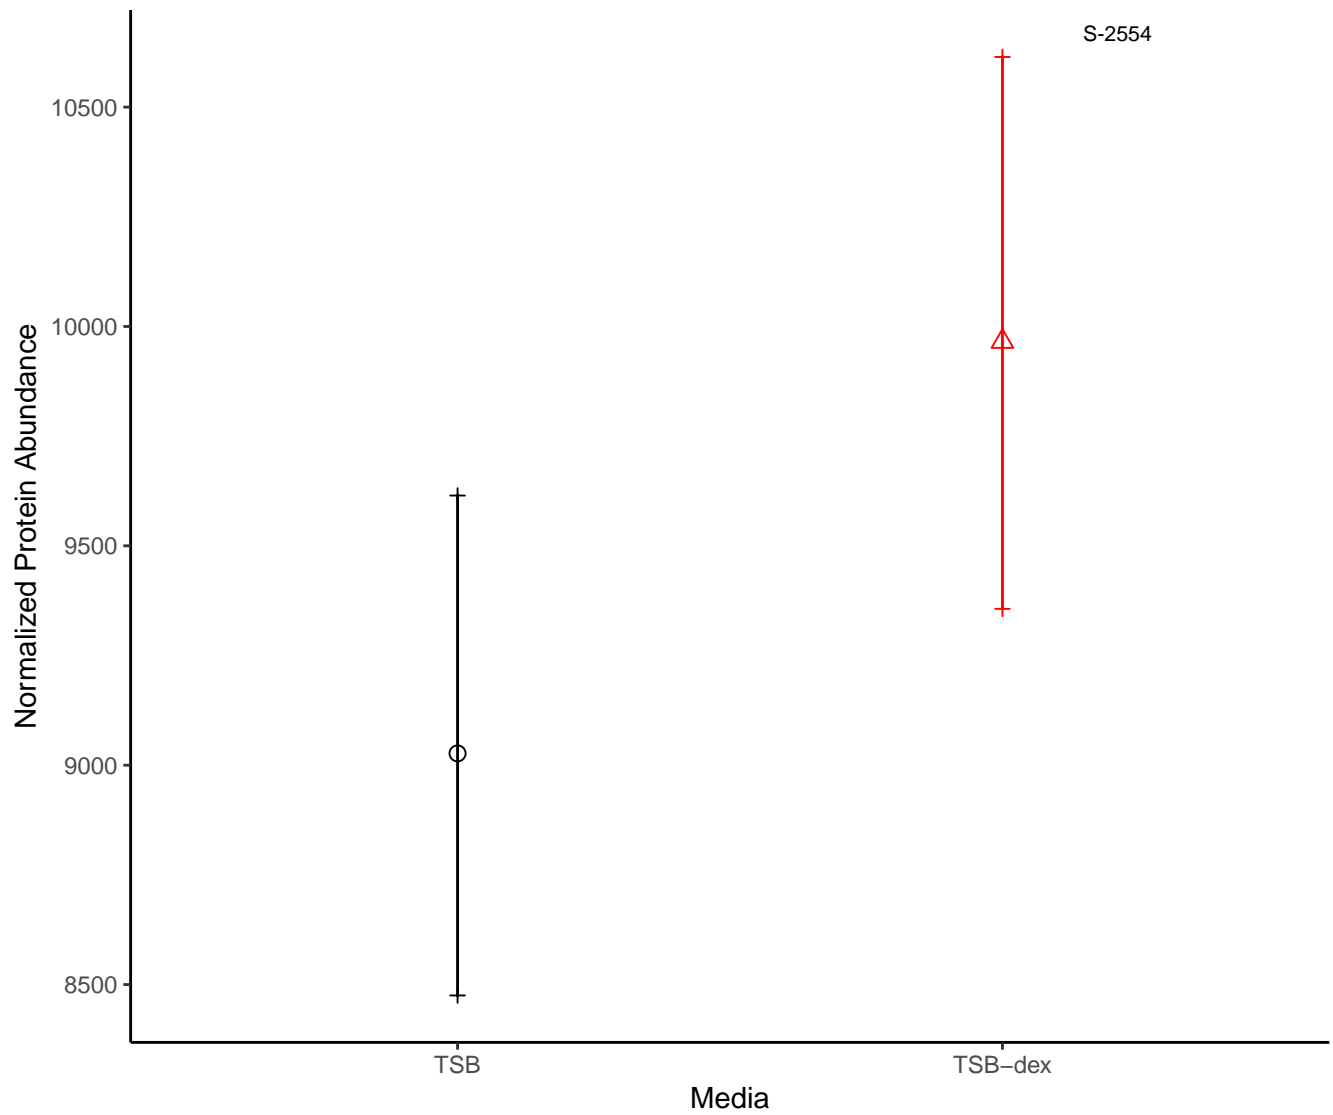

⊕ TSB-dex

△ TSB

# CCPA\_STAAM

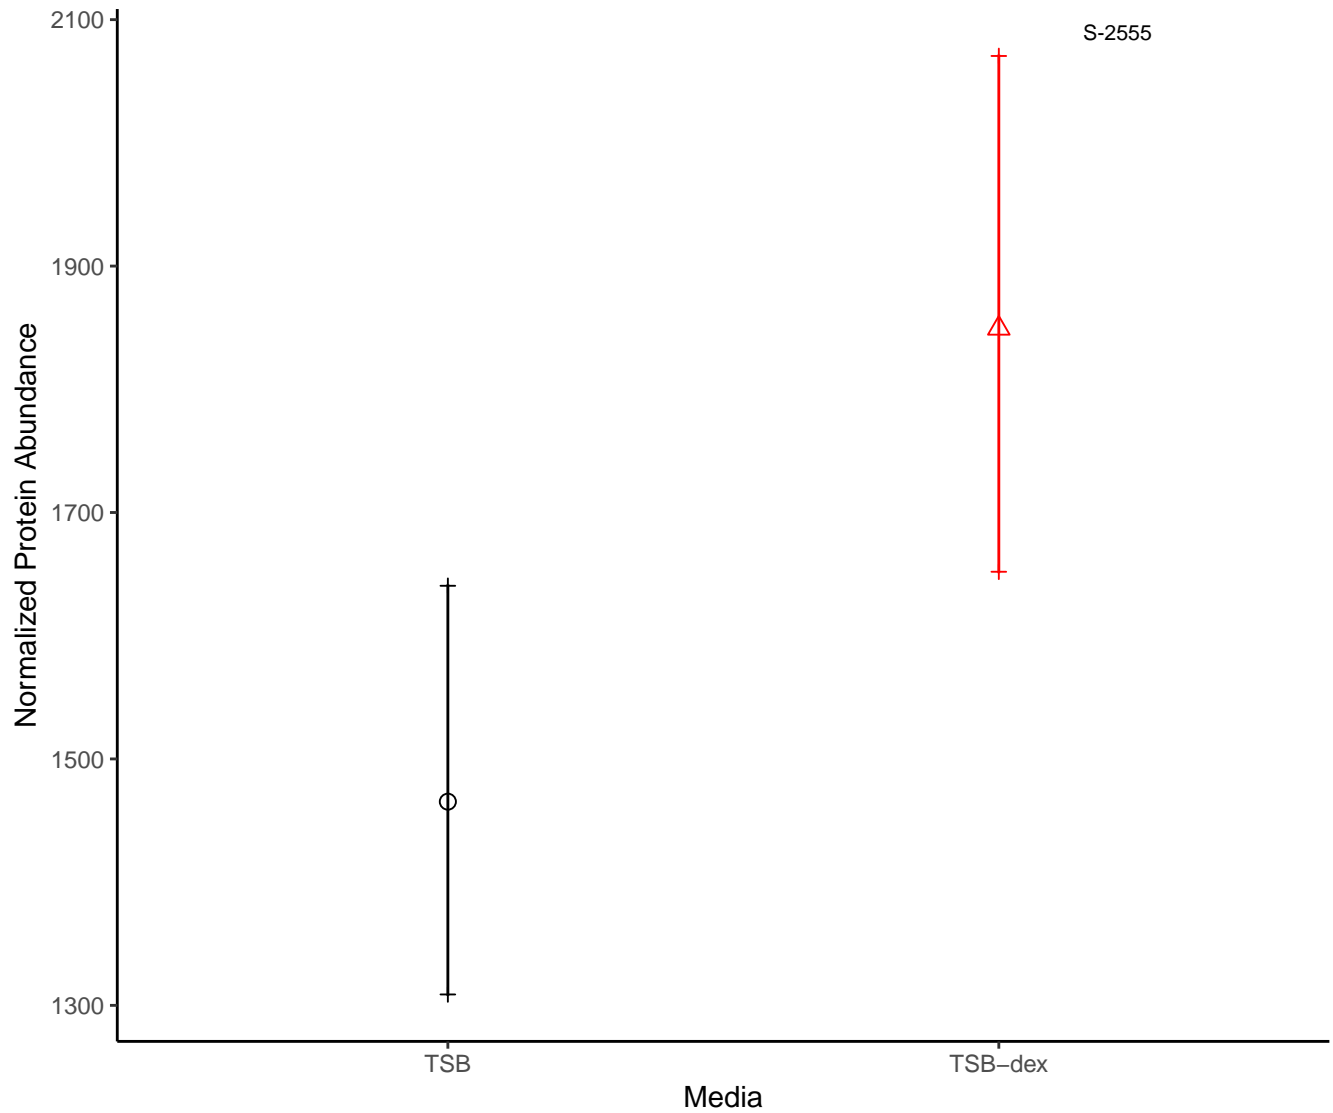

⊕ TSB-dex

△ TSB

# CDR\_STAAM

S-2556

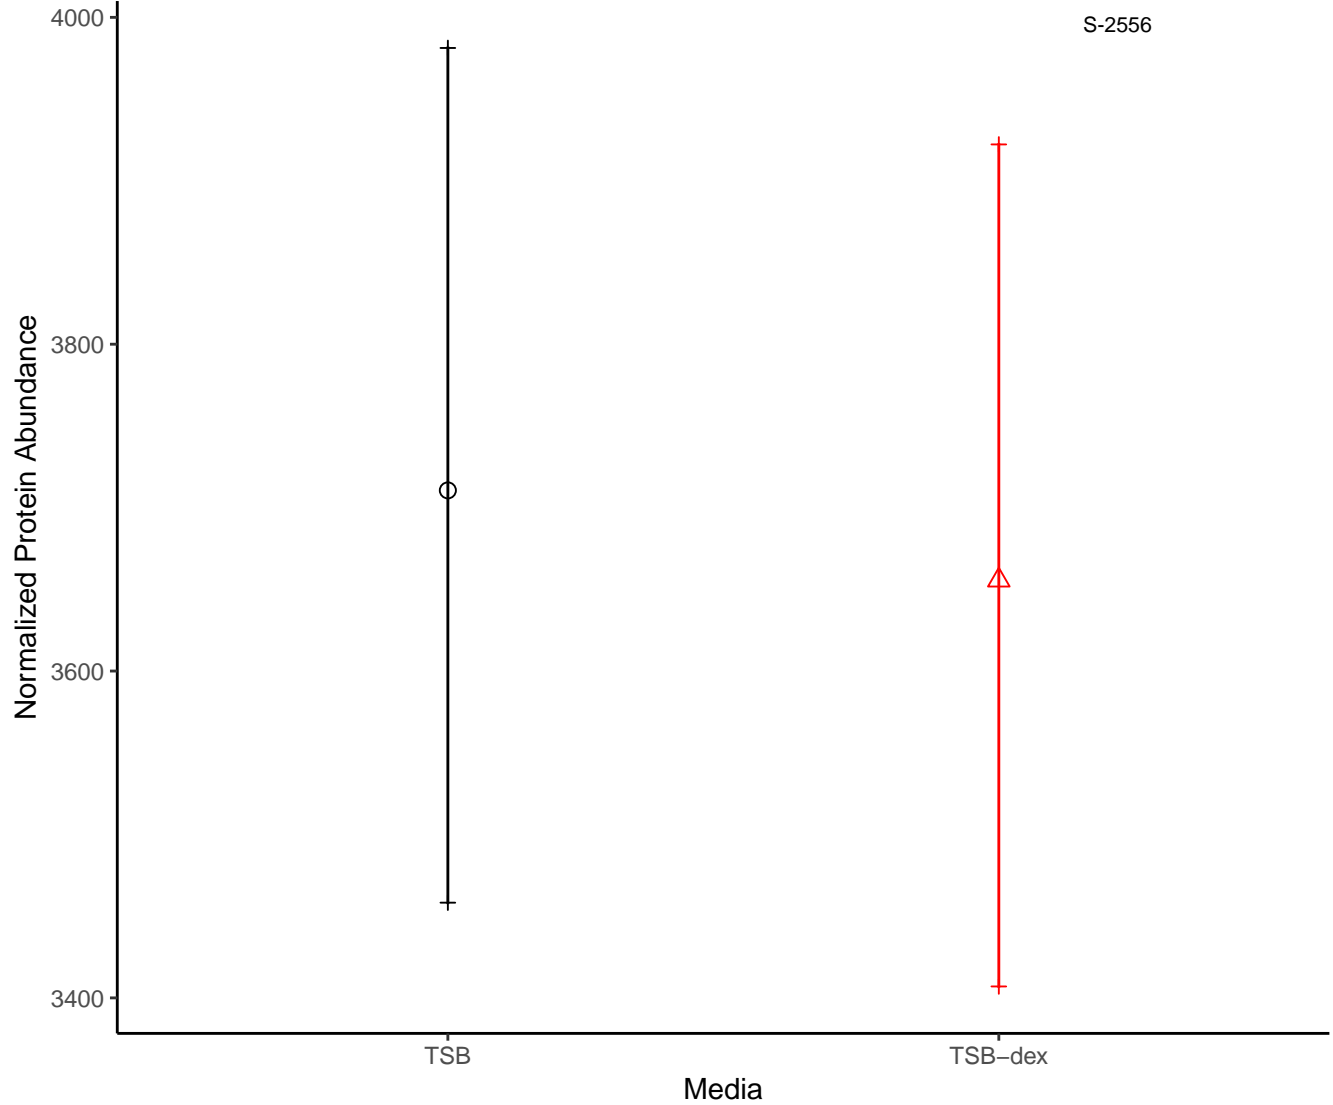

⊕ TSB-dex

△ TSB

# CH10\_STAAM

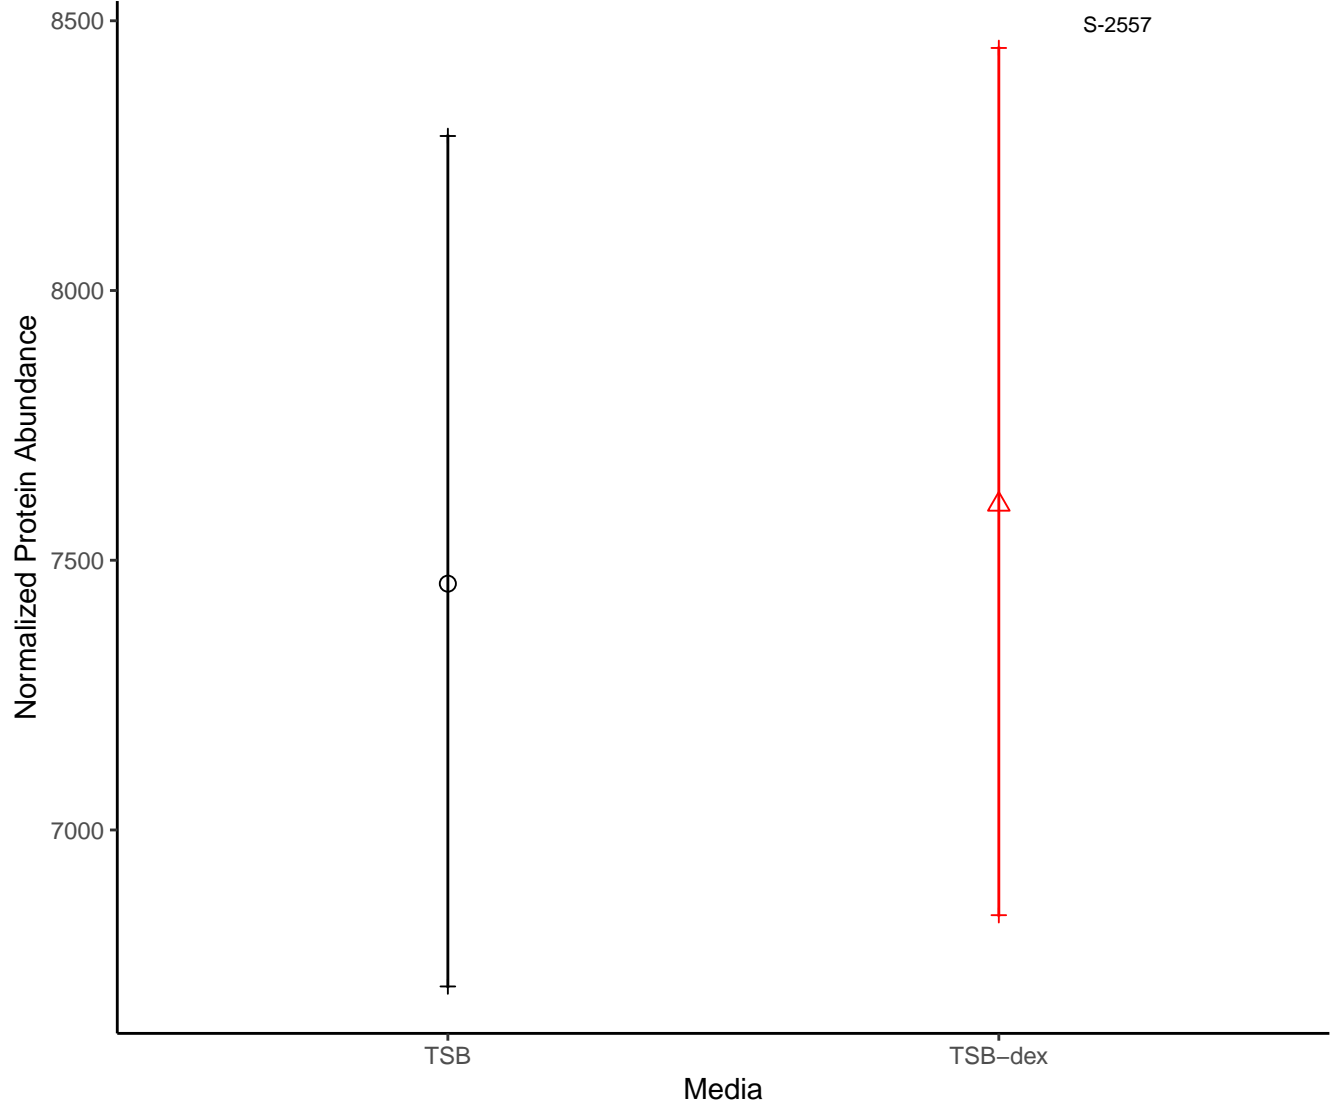

⊕ TSB-dex

△ TSB

# CH60\_STAAM

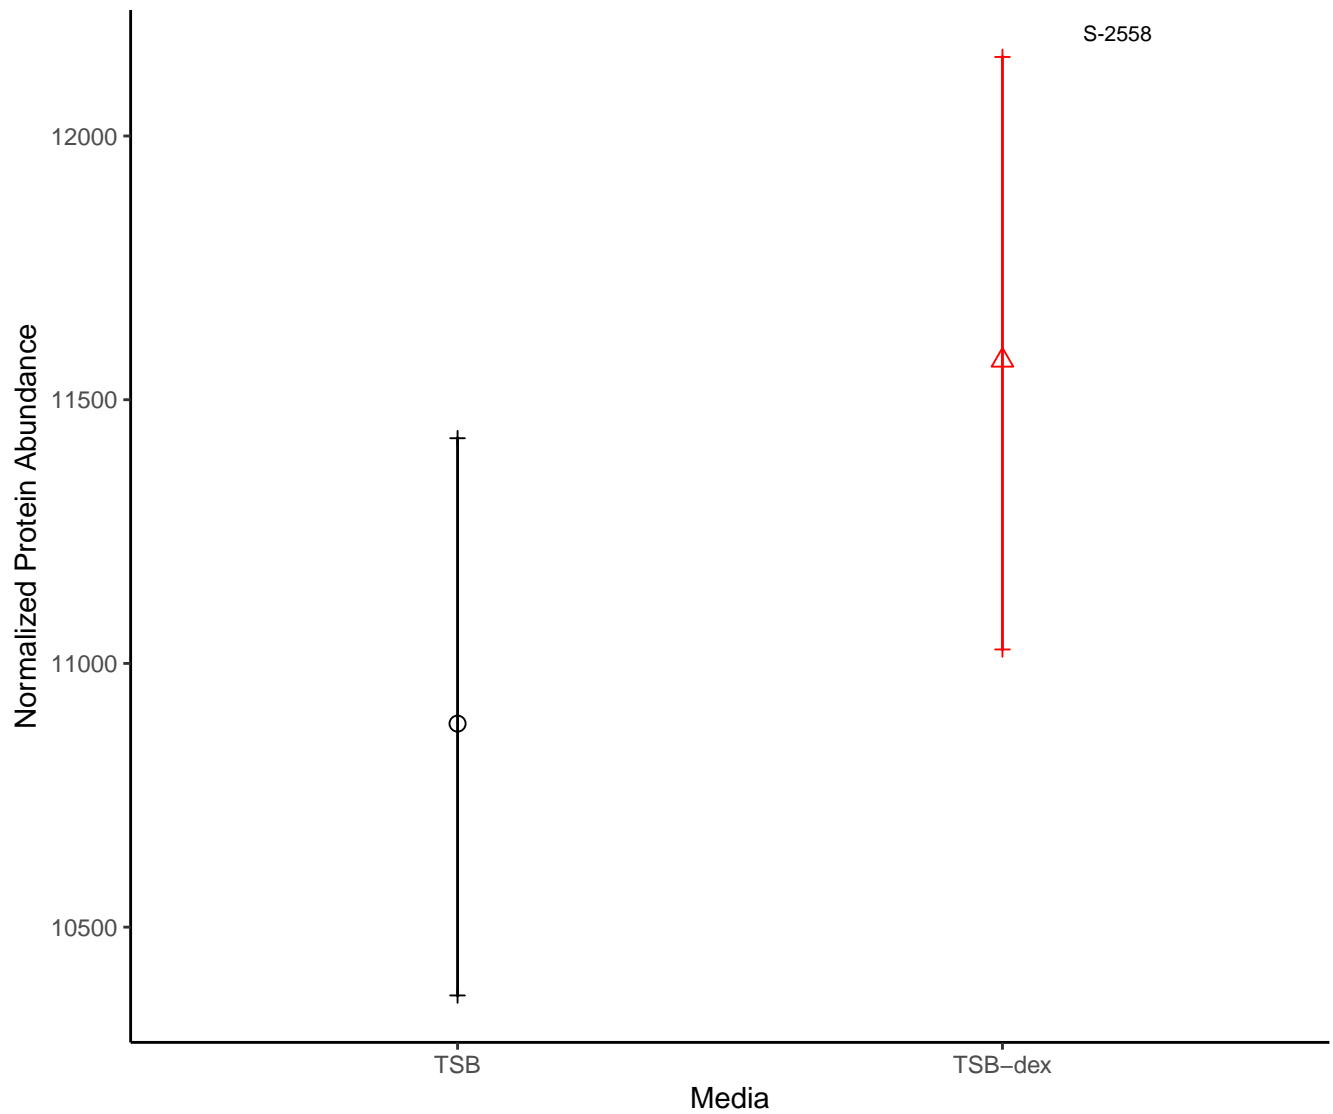

⊖ TSB-dex

△ TSB

# CLPB\_STAAM

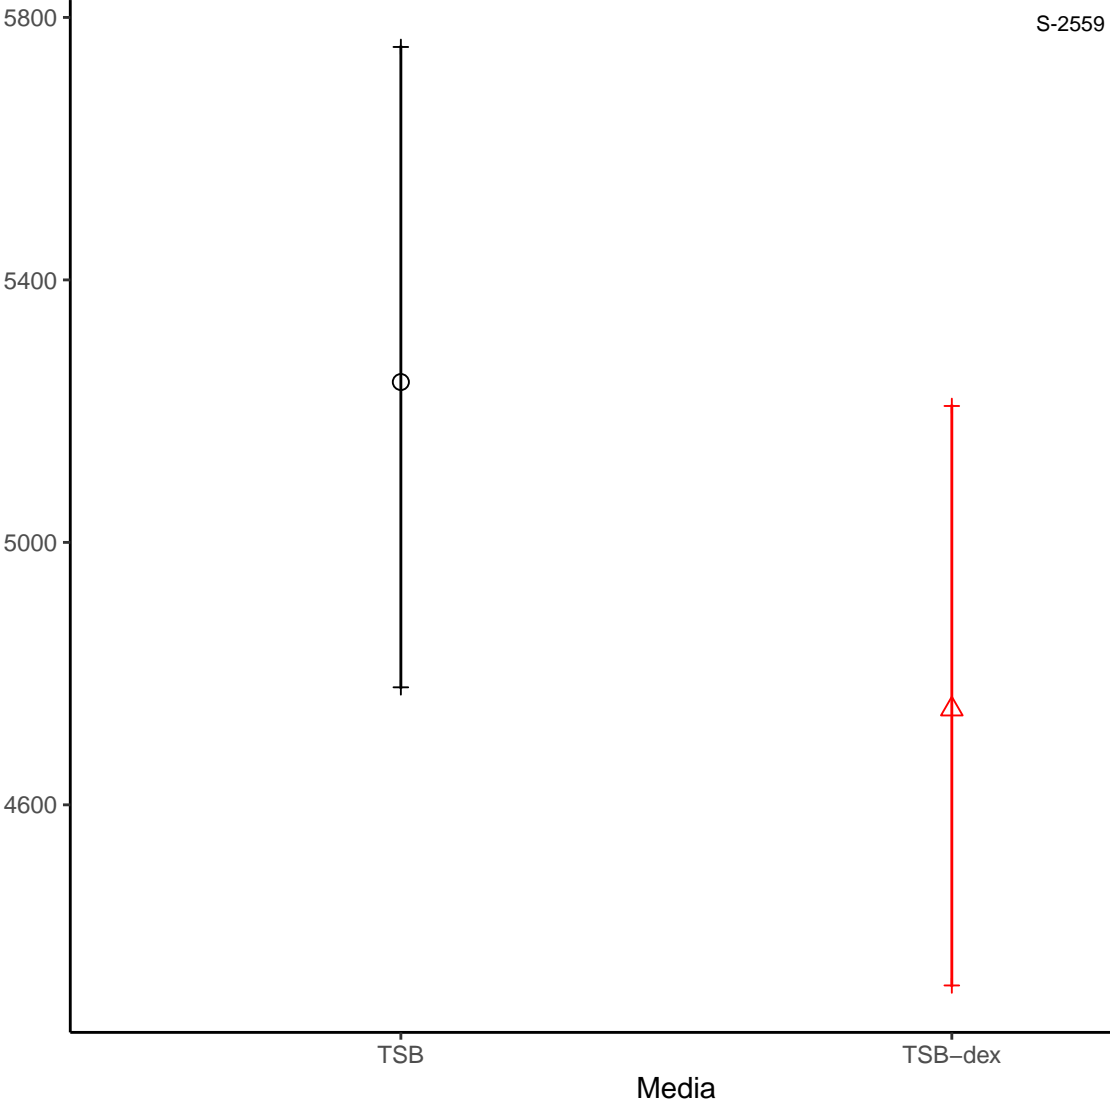

# CLPC\_STAAM

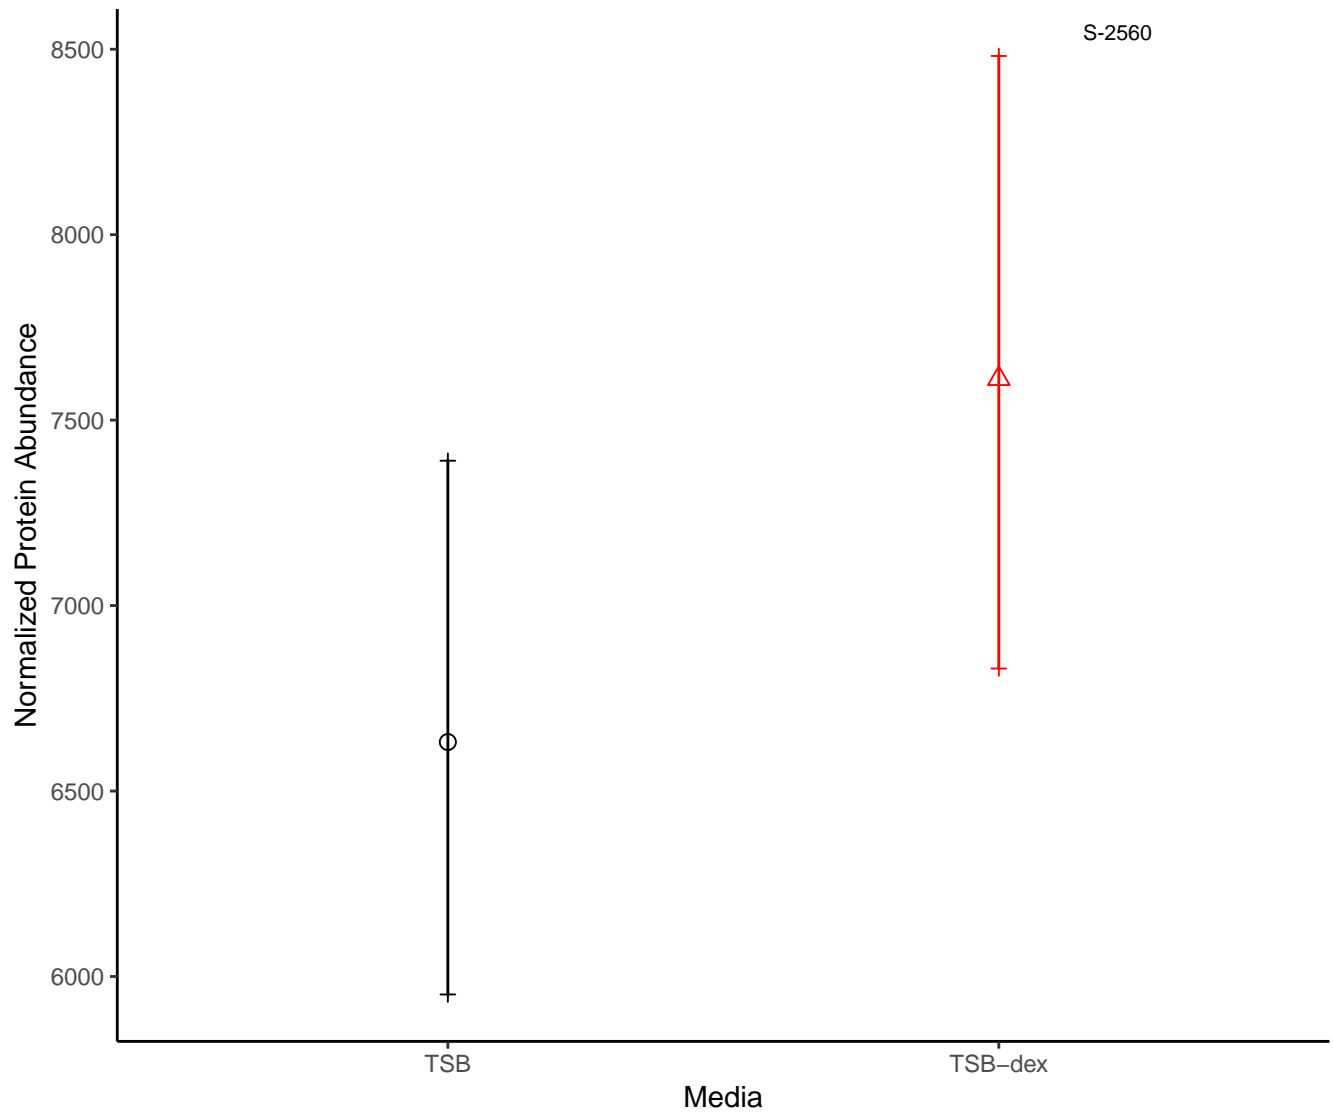

⊕ TSB-dex

△ TSB



# CLPL\_STAAM

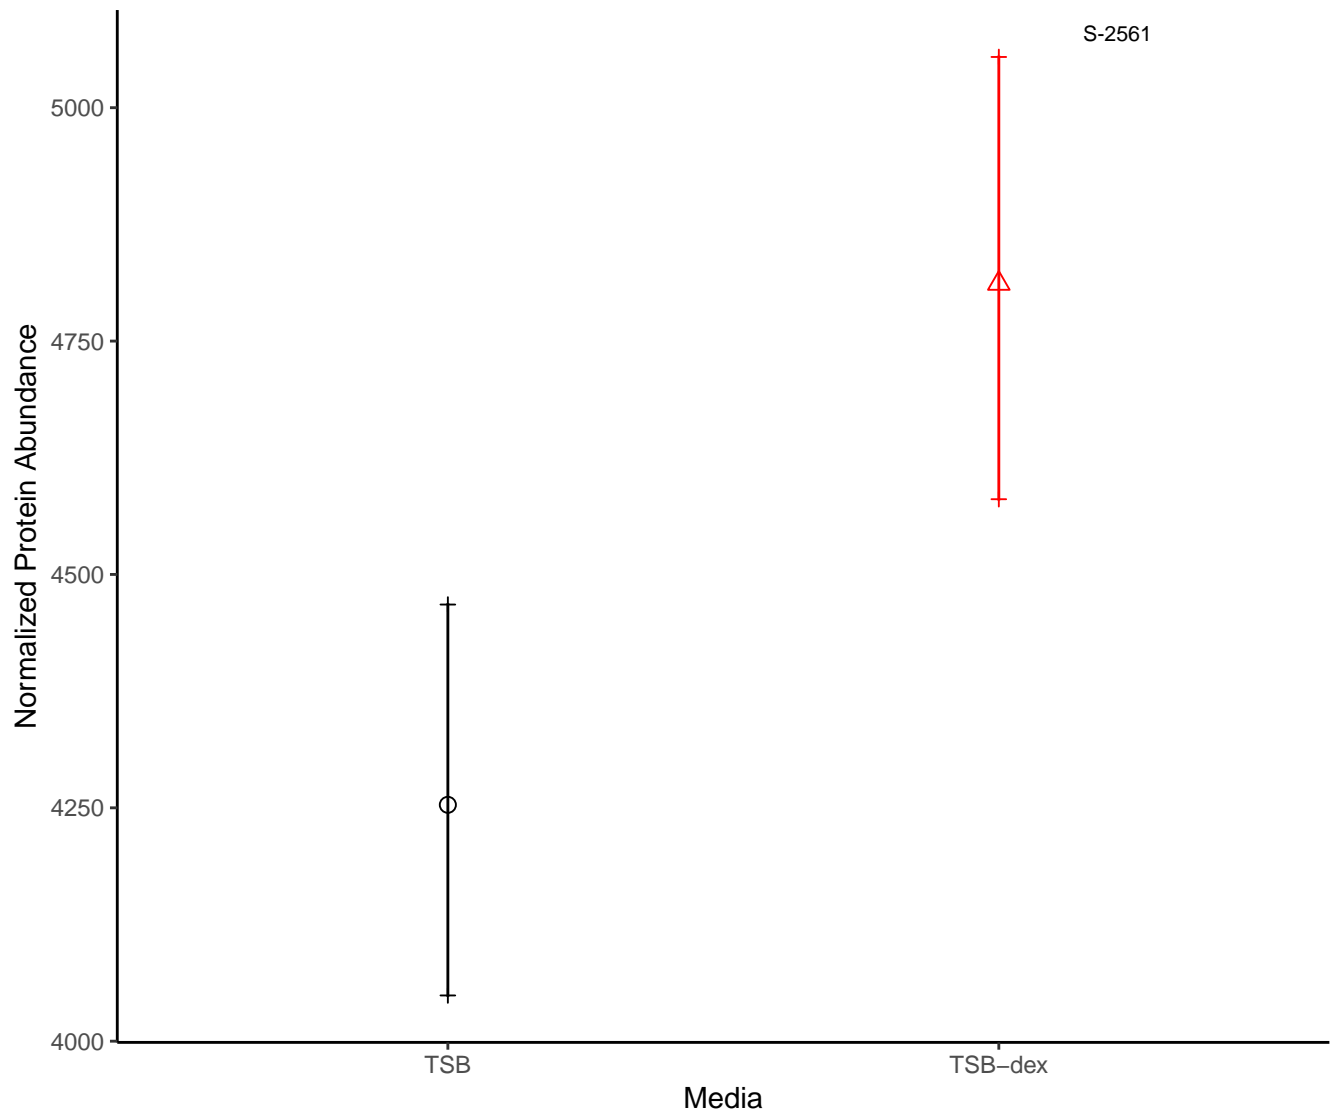

# CLPP\_STAAM

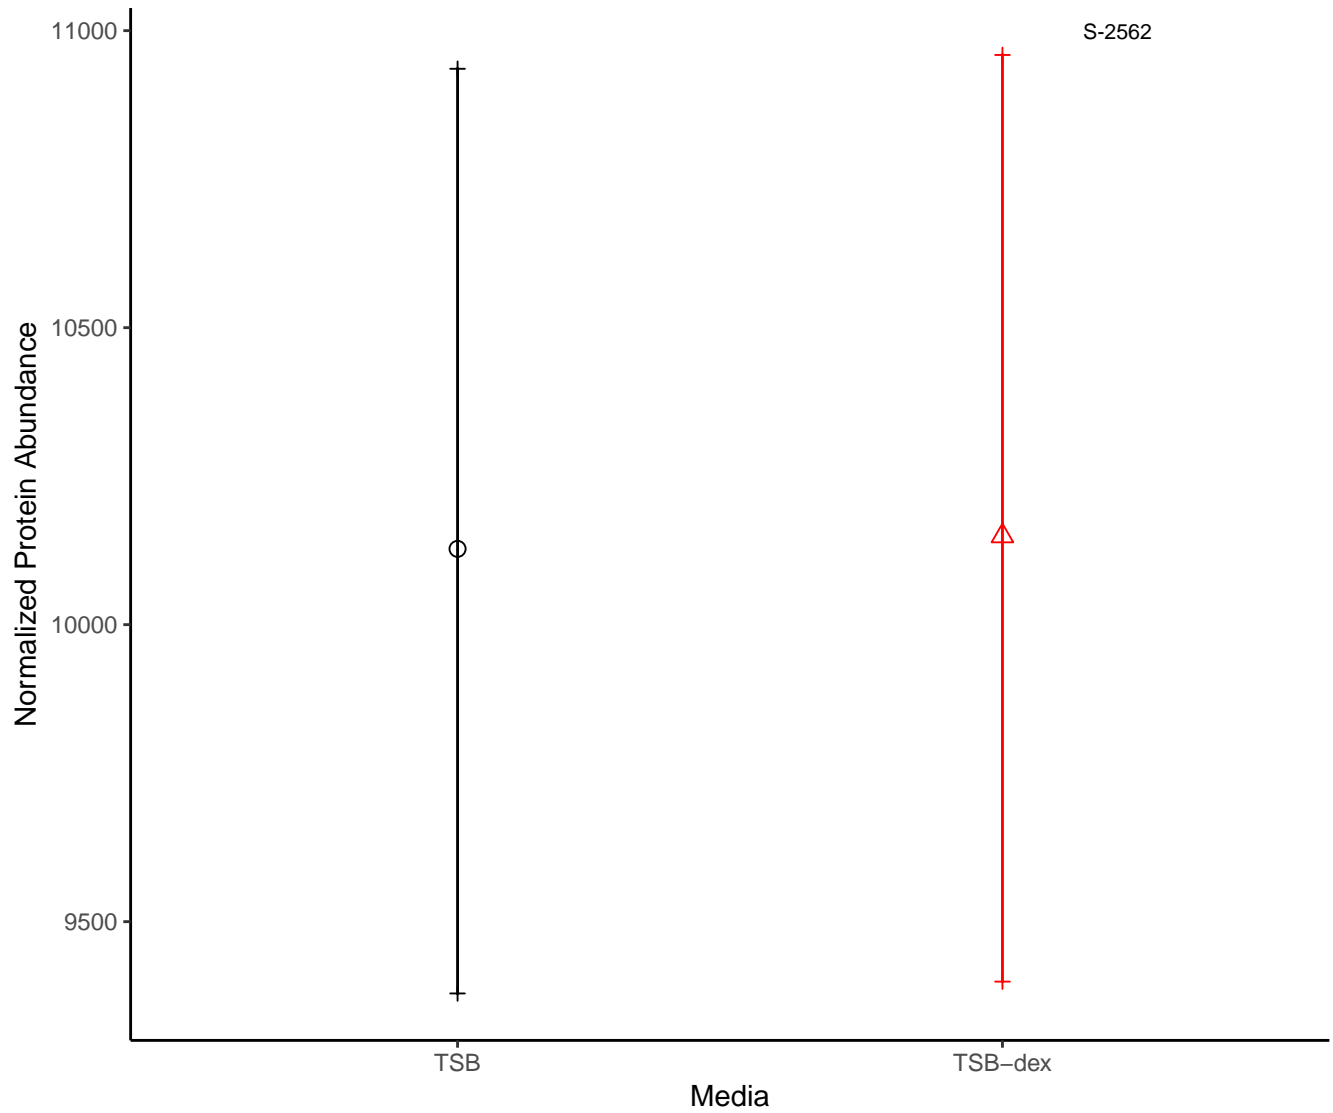

⊖ TSB-dex

△ TSB

# CLPX\_STAAM

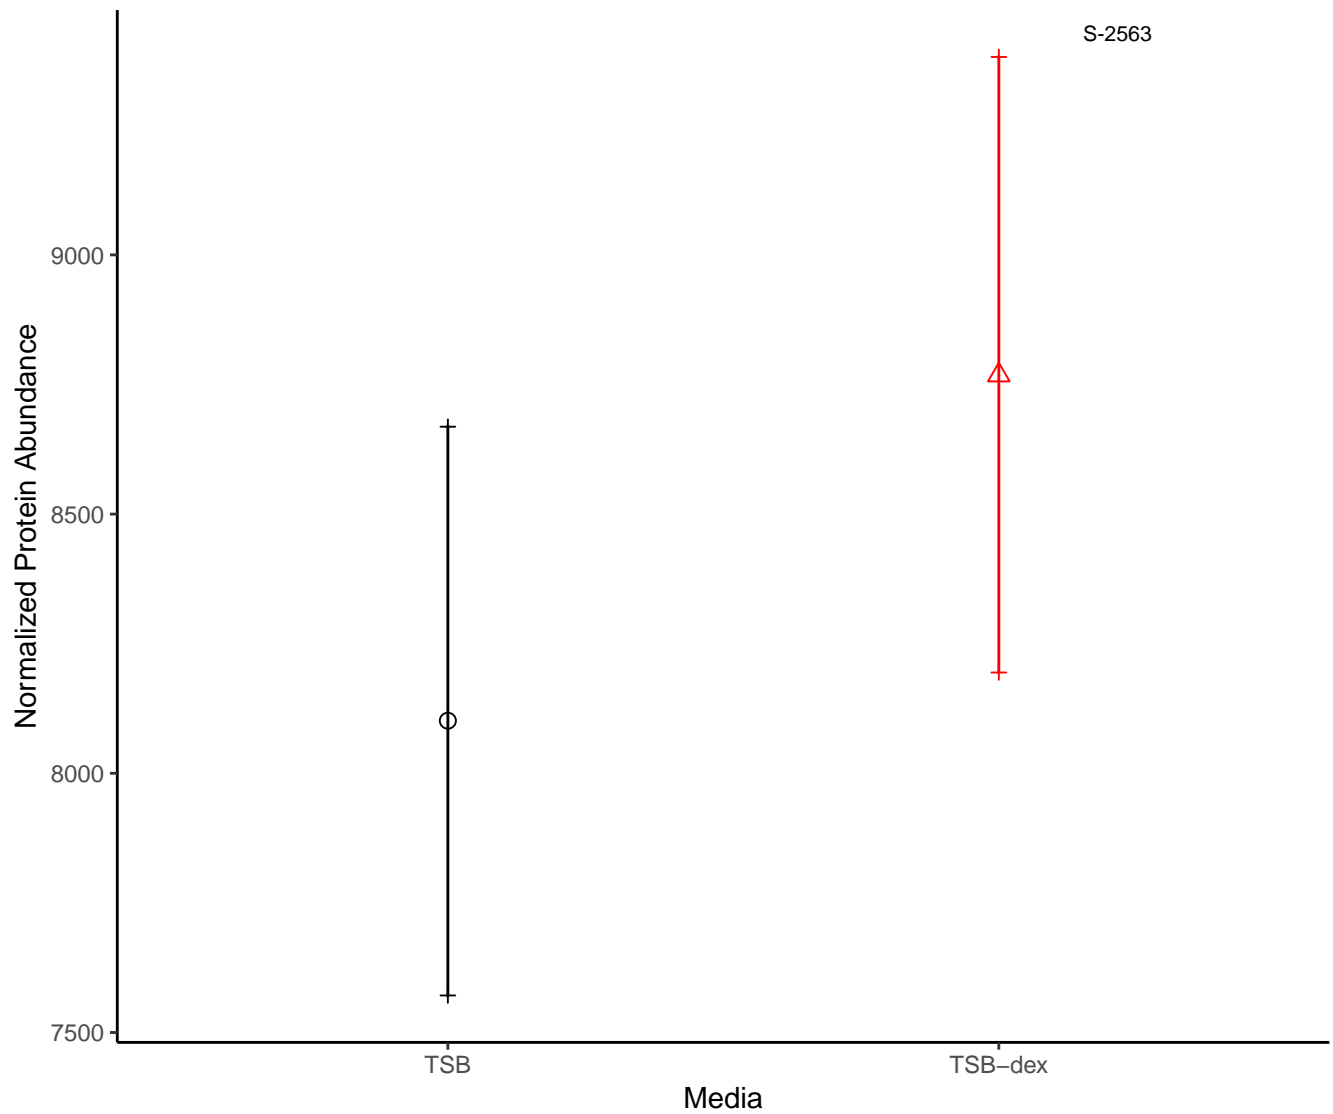

⊕ TSB-dex

△ TSB

# CODY\_STAAM

S-2564

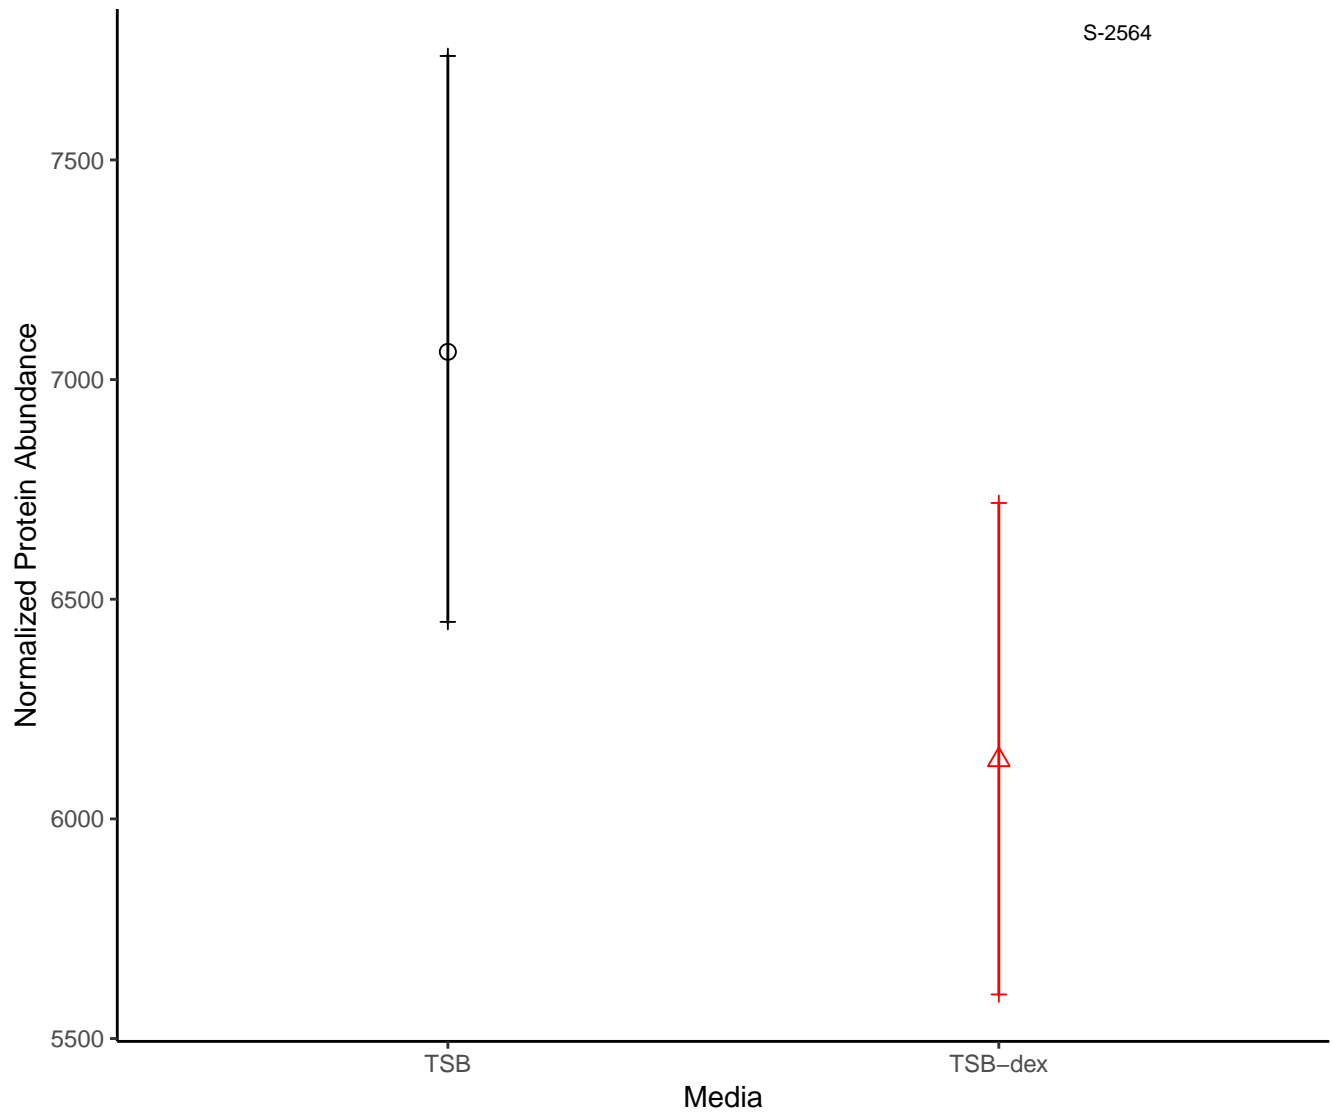

⊕ TSB-dex

△ TSB

# COPZ\_STAAM

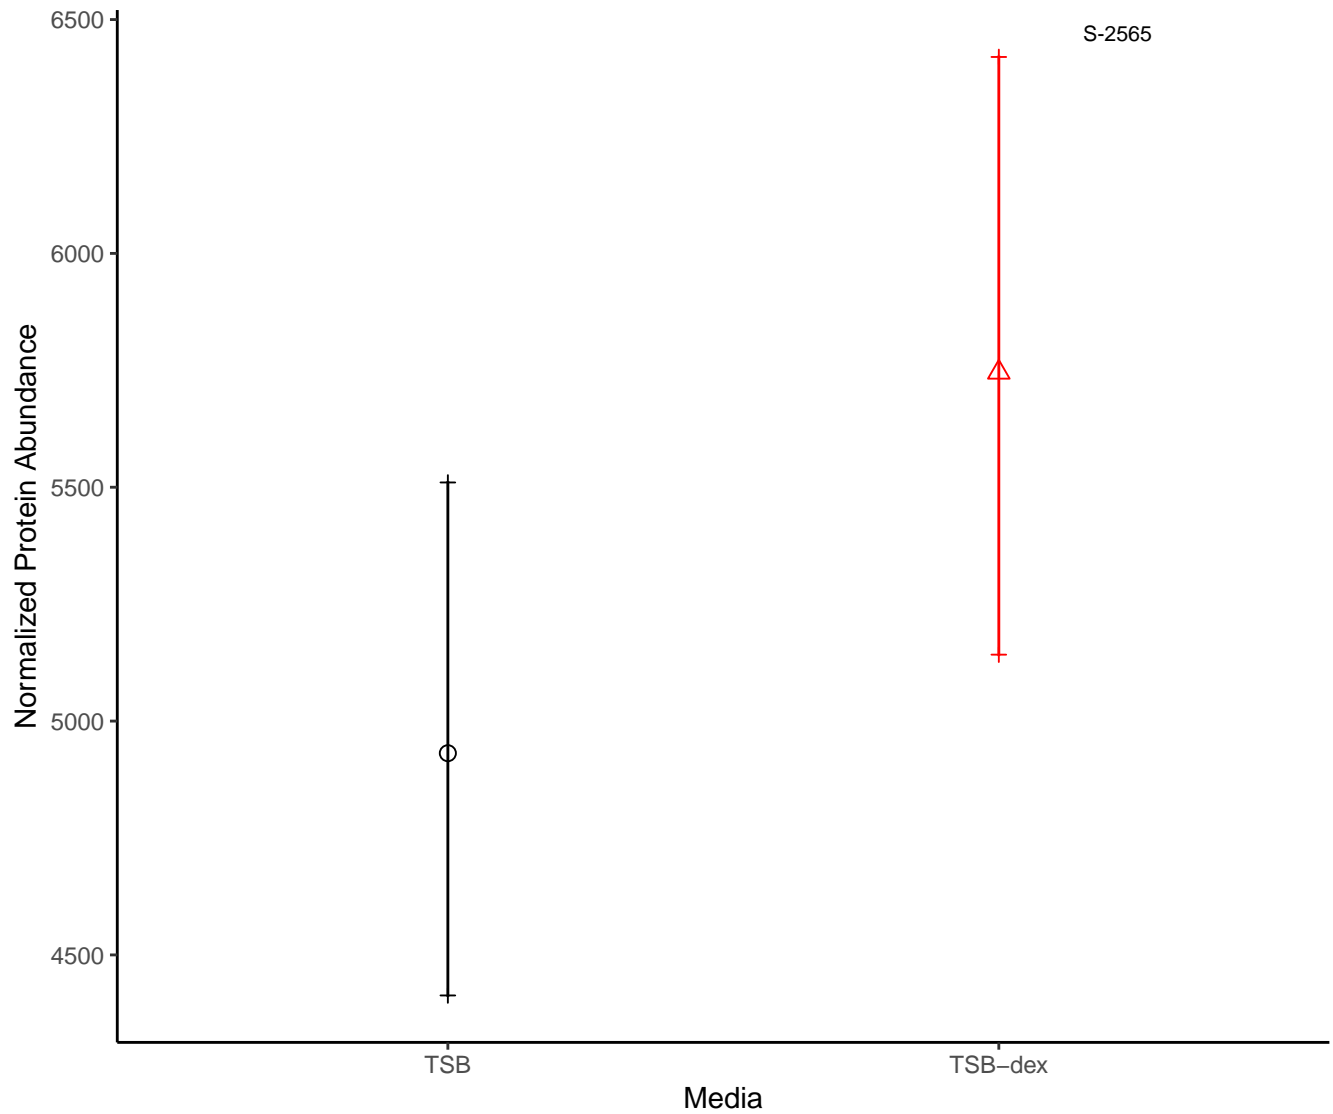

⊕ TSB-dex

△ TSB

# CRTN\_STAAM

S-2566

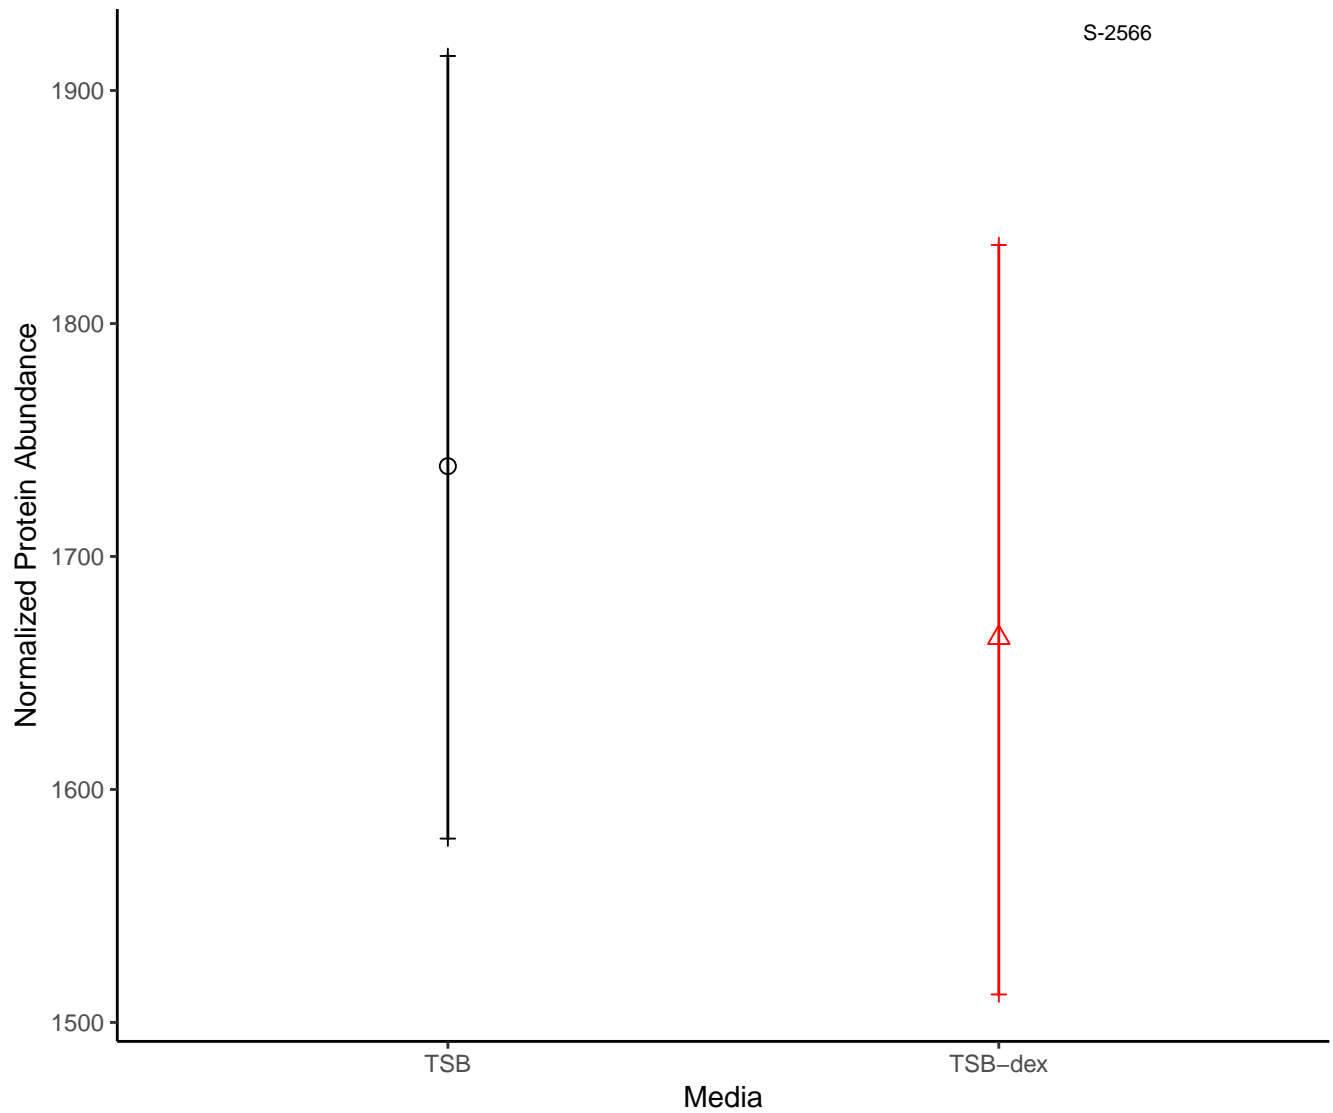

⊕ TSB-dex

△ TSB

# CSD\_STAAM

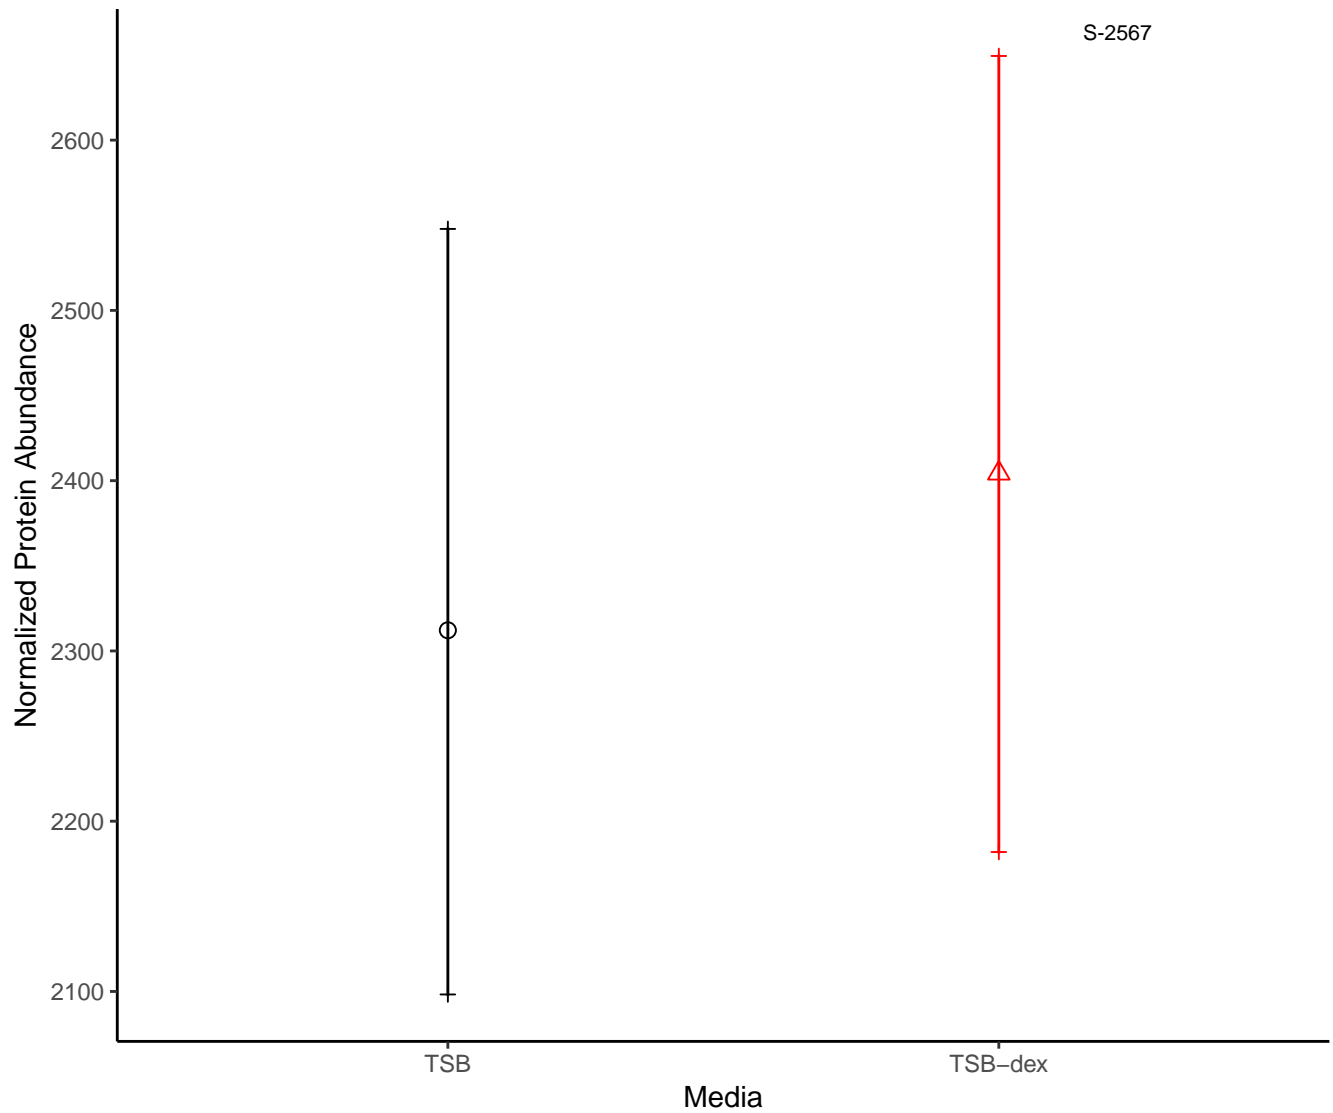

⊕ TSB-dex

△ TSB

# CSHA\_STAAM

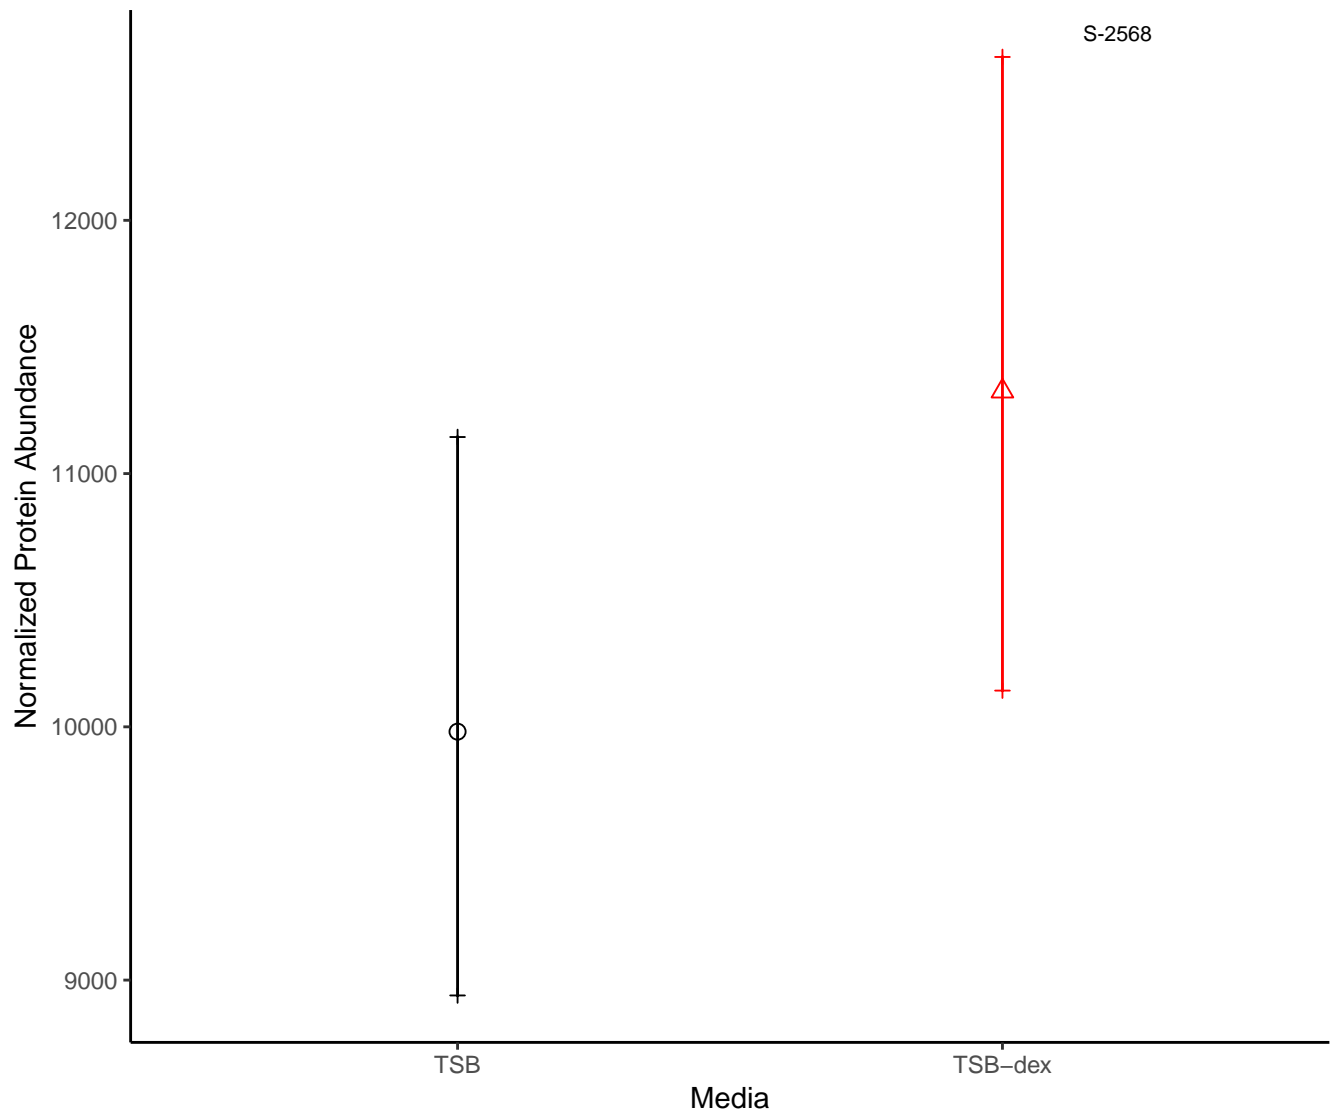

⊕ TSB-dex

△ TSB



# CSPA\_STAAM

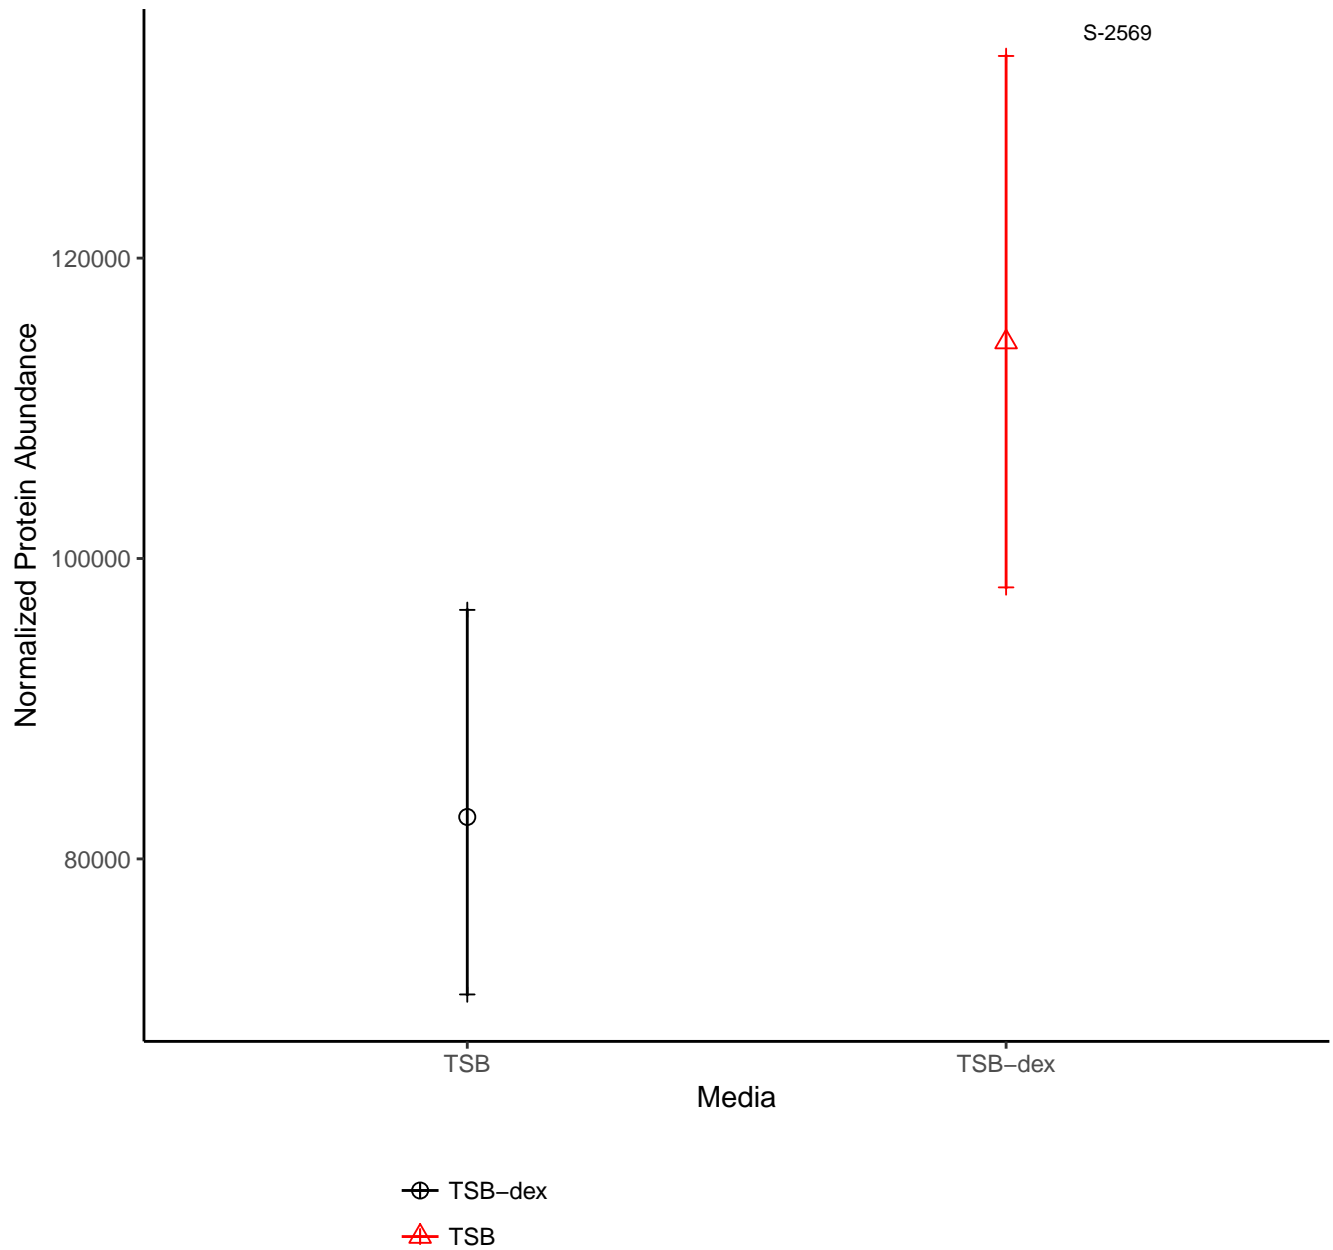

# CTPAL\_STAAM

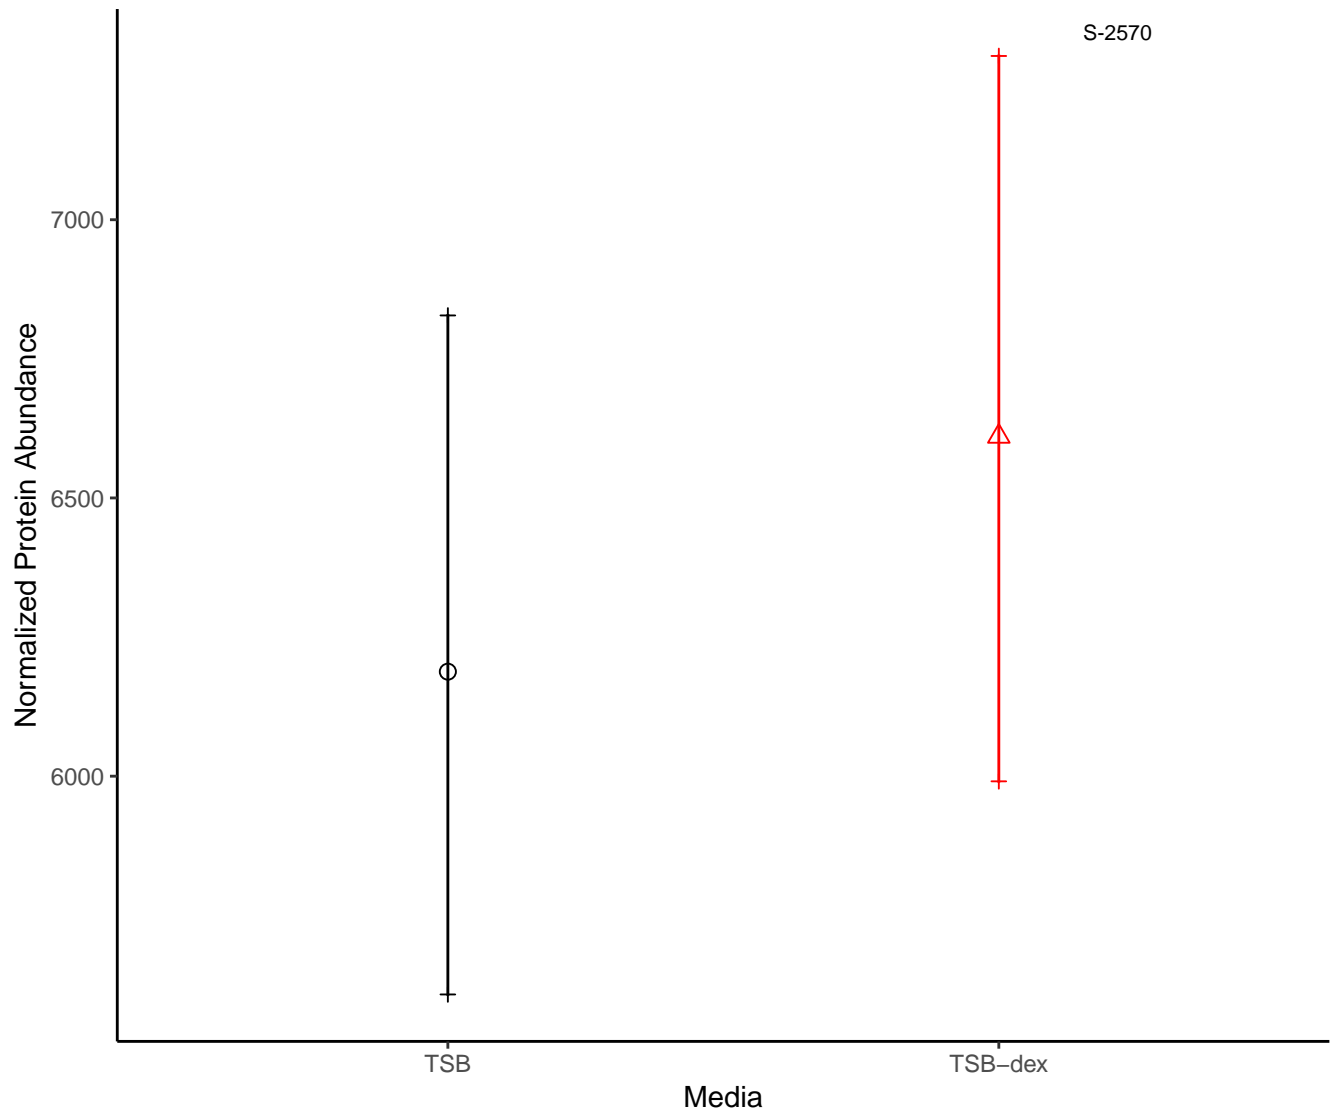

⊕ TSB-dex

△ TSB

# CVFB\_STAAM

S-2571

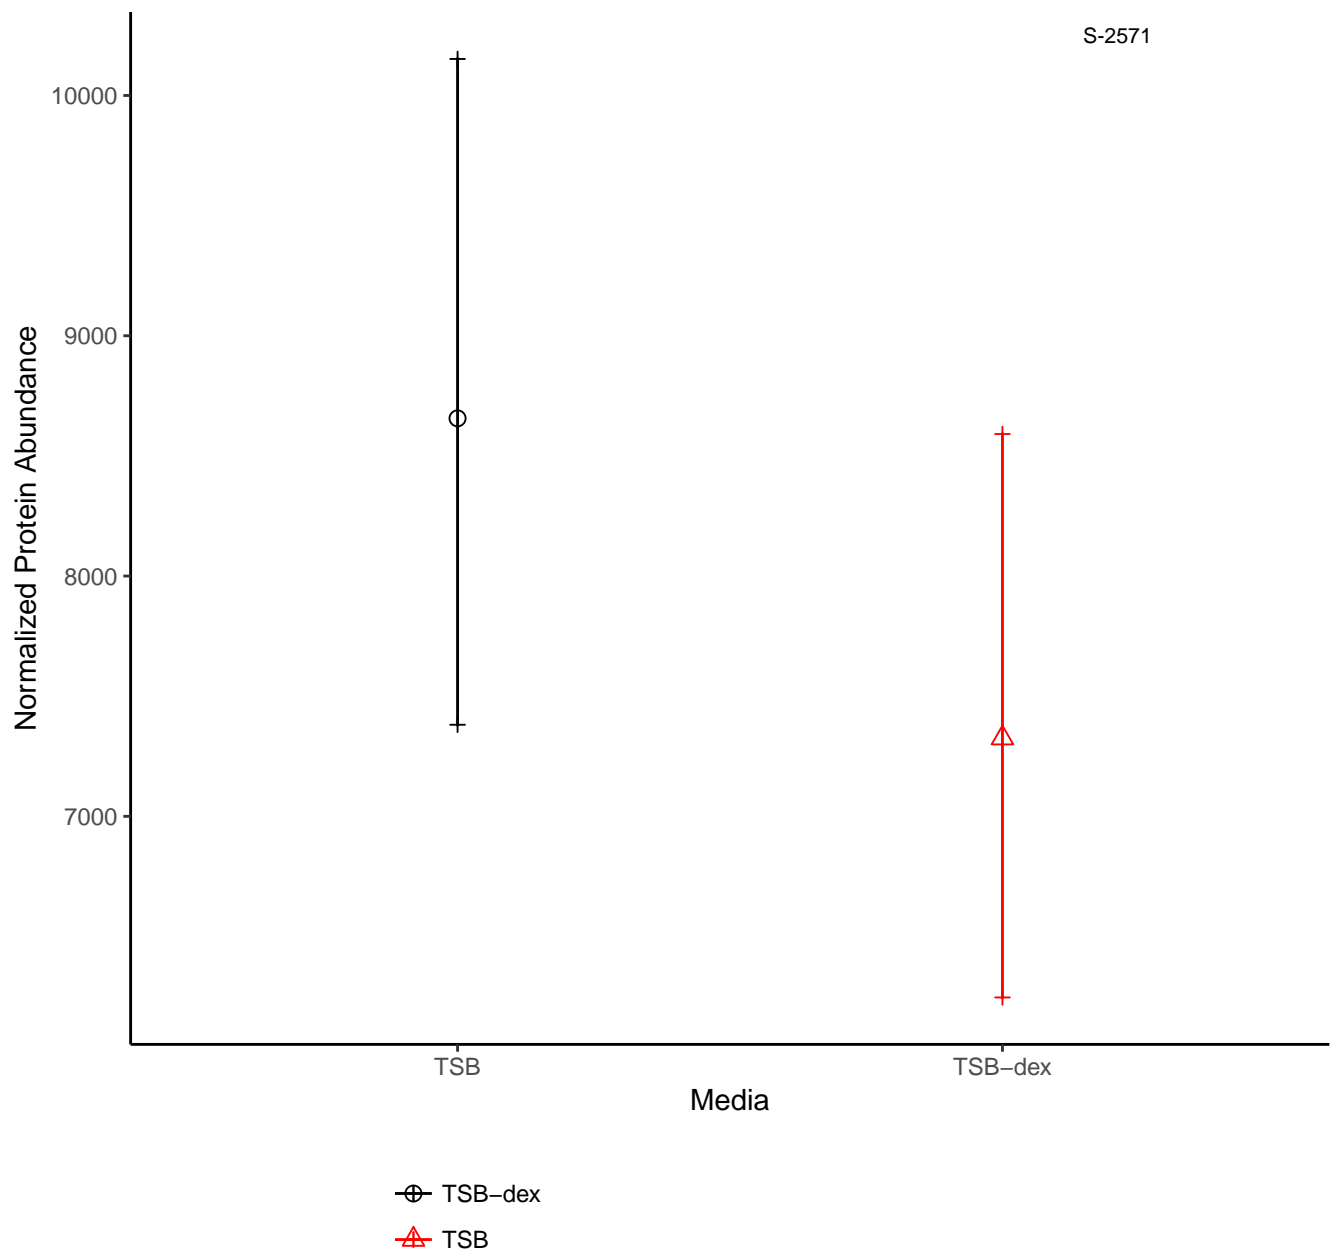

# CYSE\_STAAM

S-2572

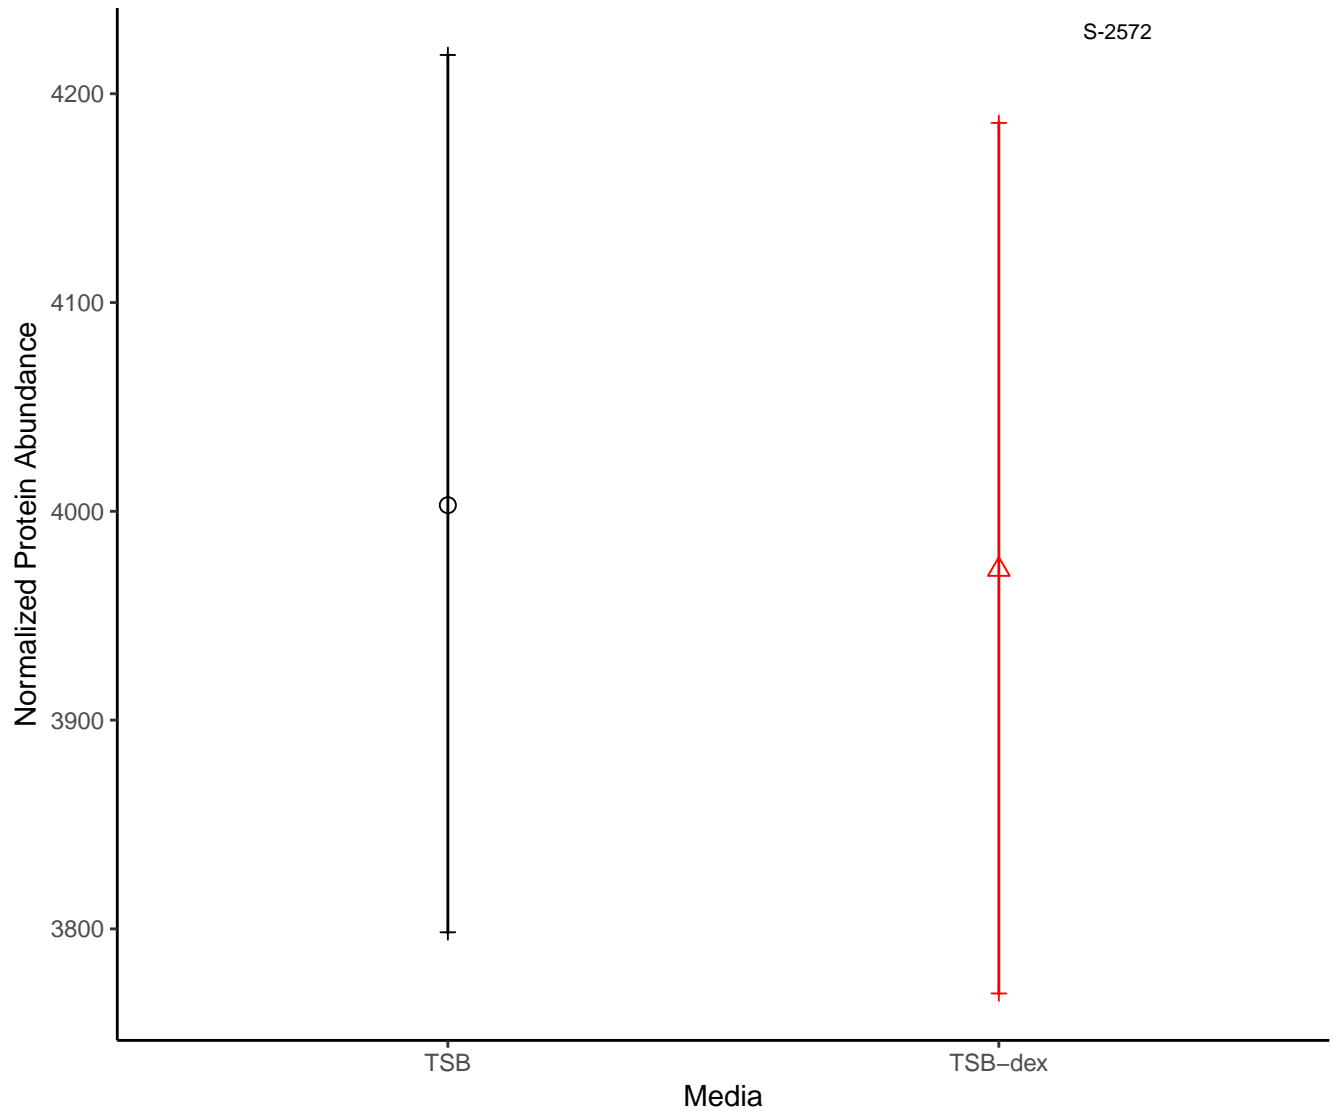

⊕ TSB-dex

△ TSB

# CYSK\_STAAM

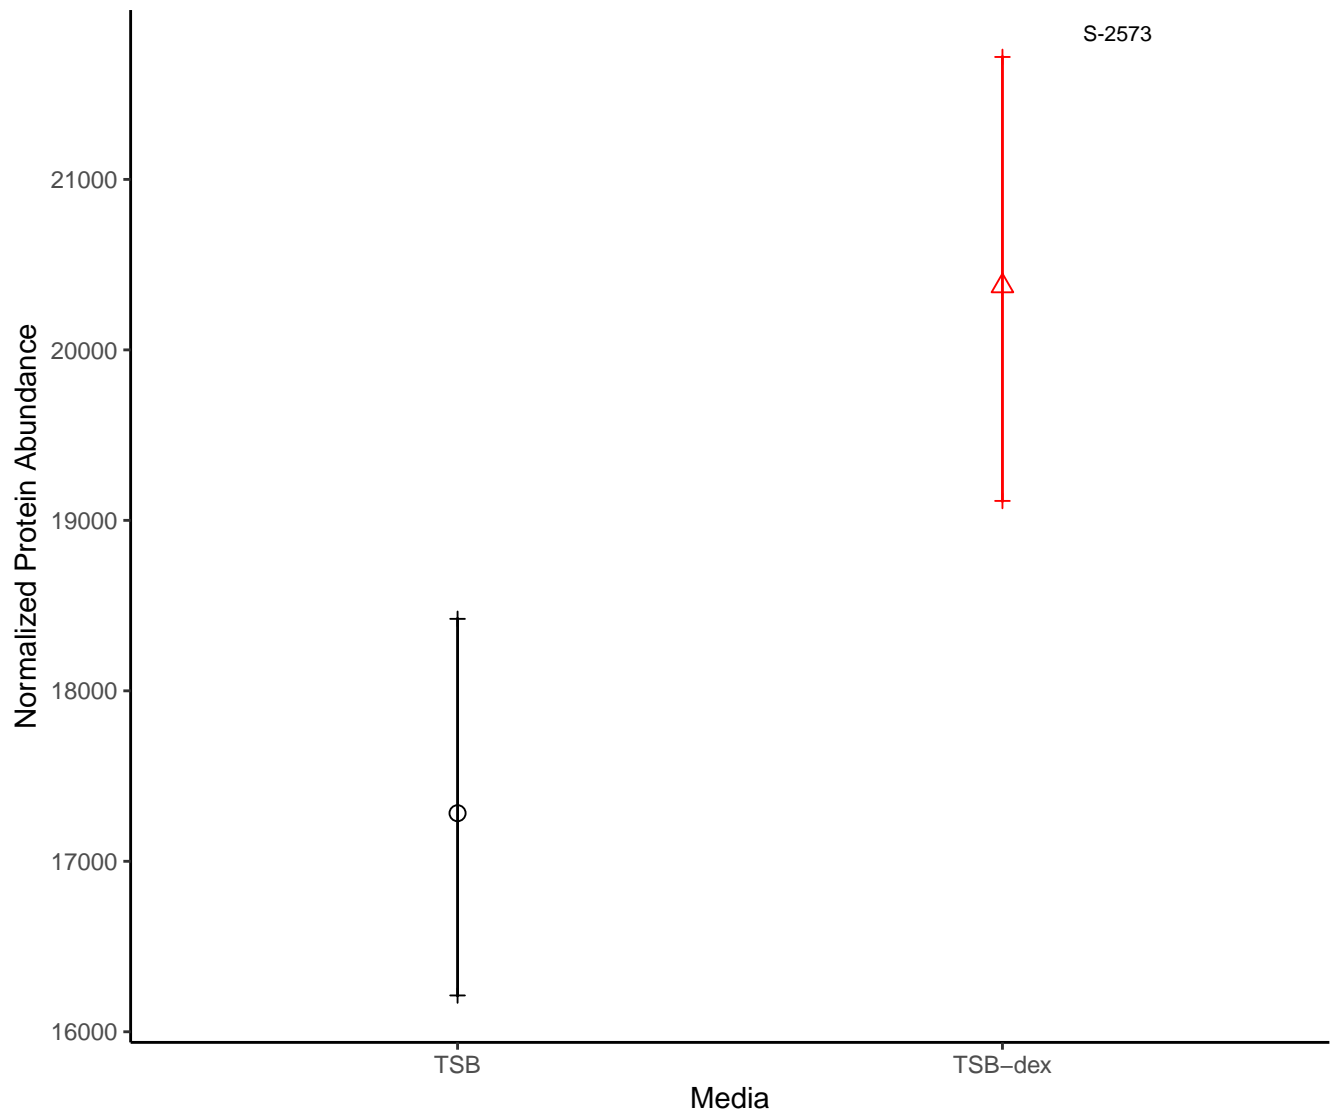

⊖ TSB-dex

△ TSB

# DAAA\_STAAM

S-2574

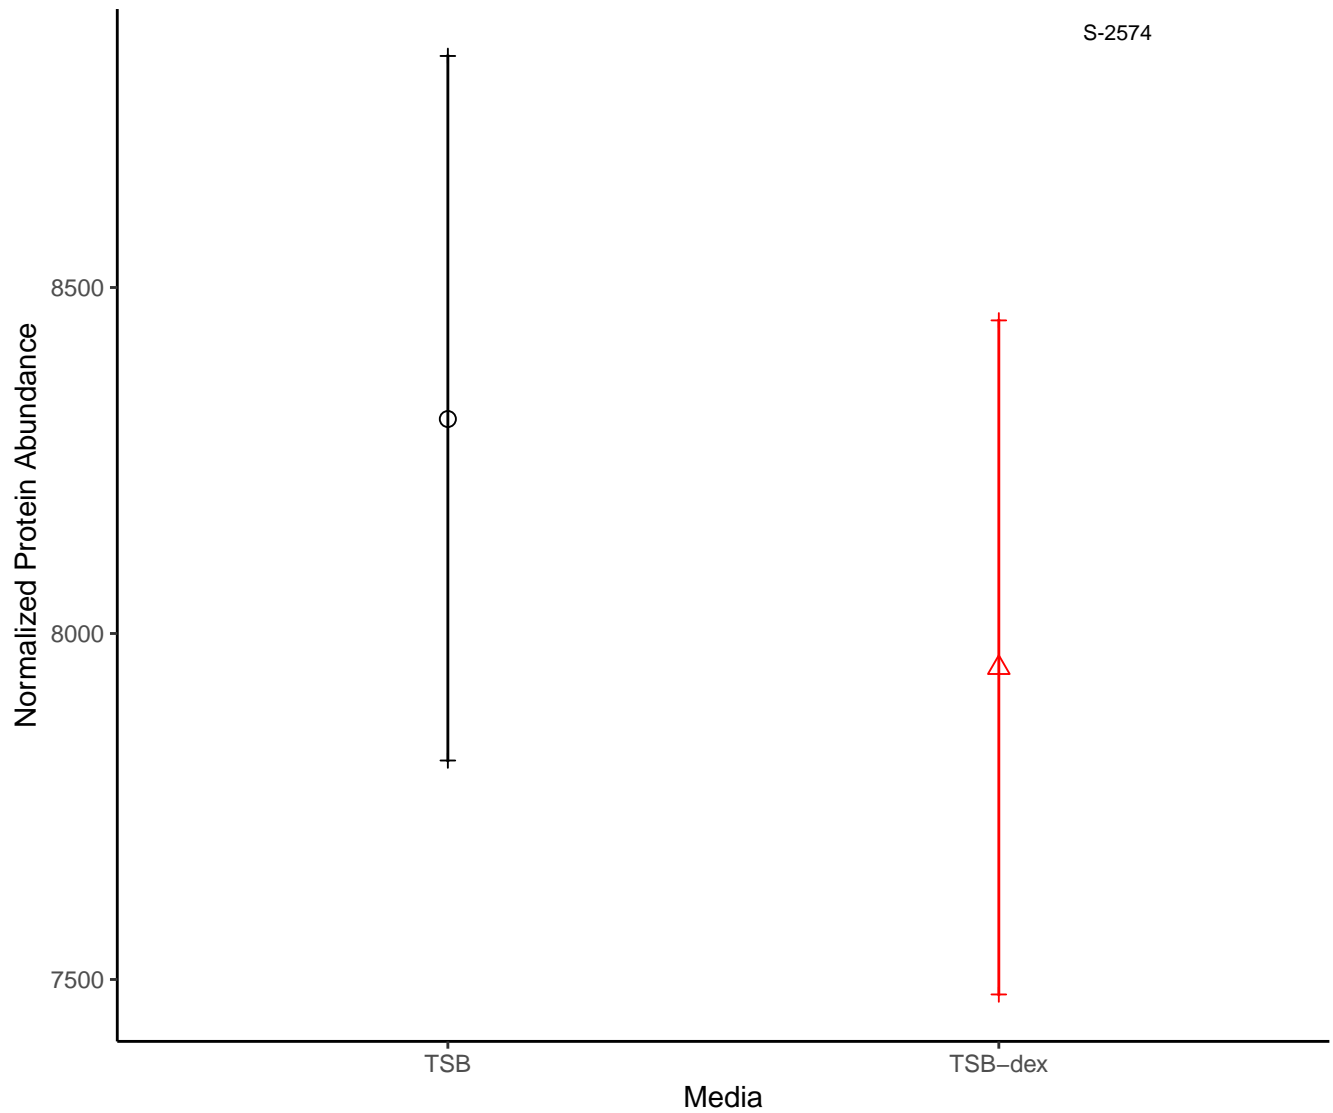

⊕ TSB-dex

△ TSB

# DAPB\_STAAM

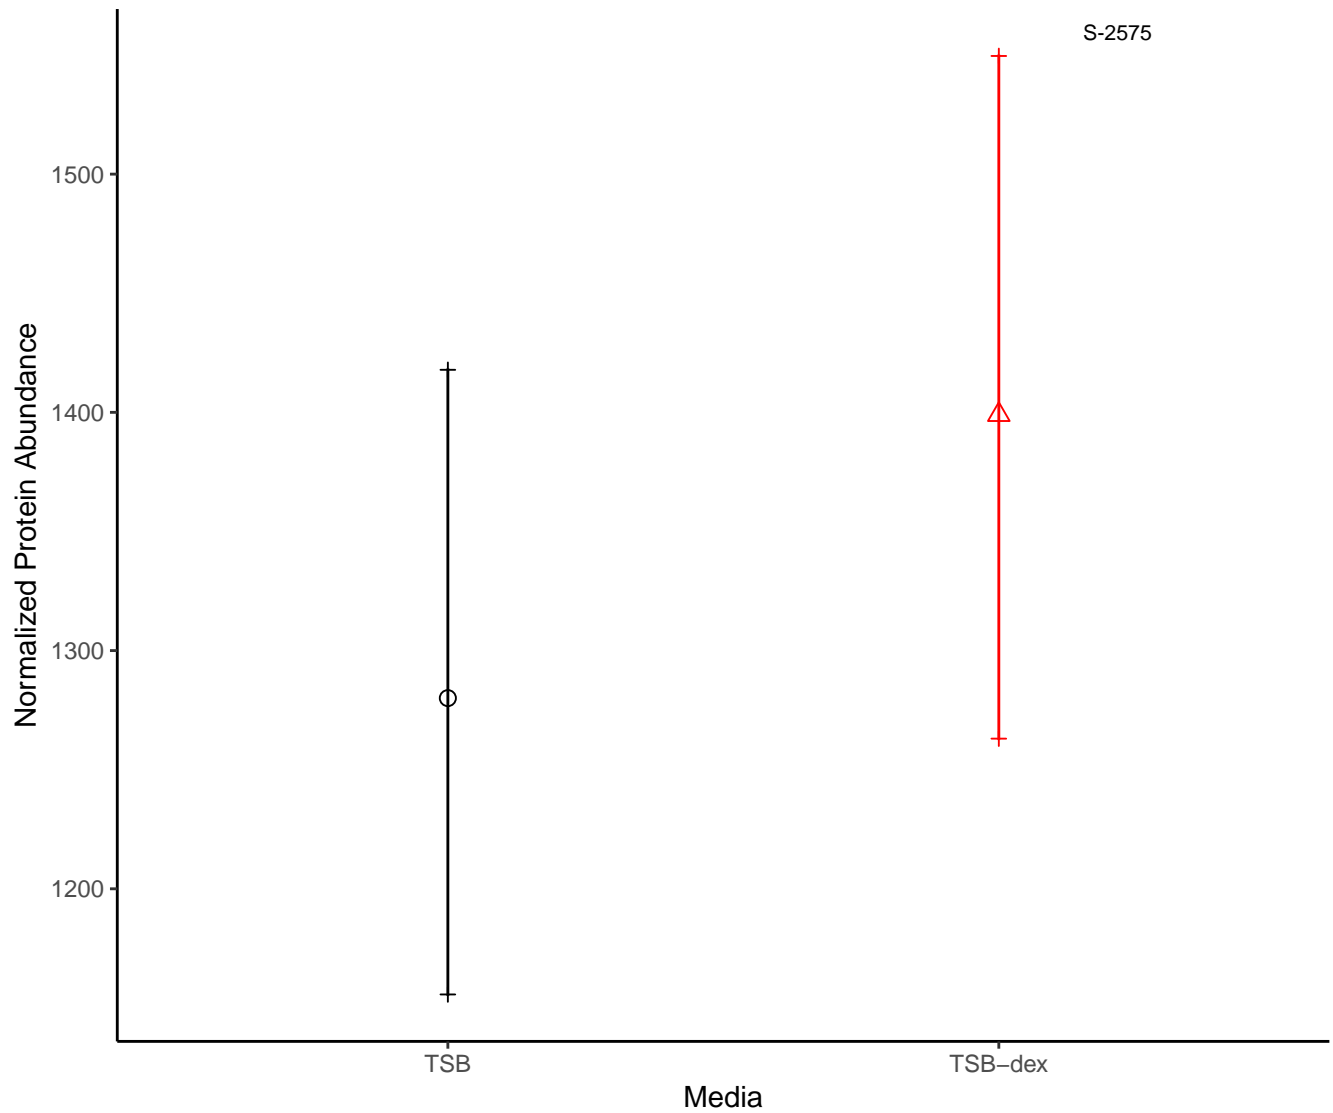

⊕ TSB-dex

△ TSB

# DAPH\_STAAM

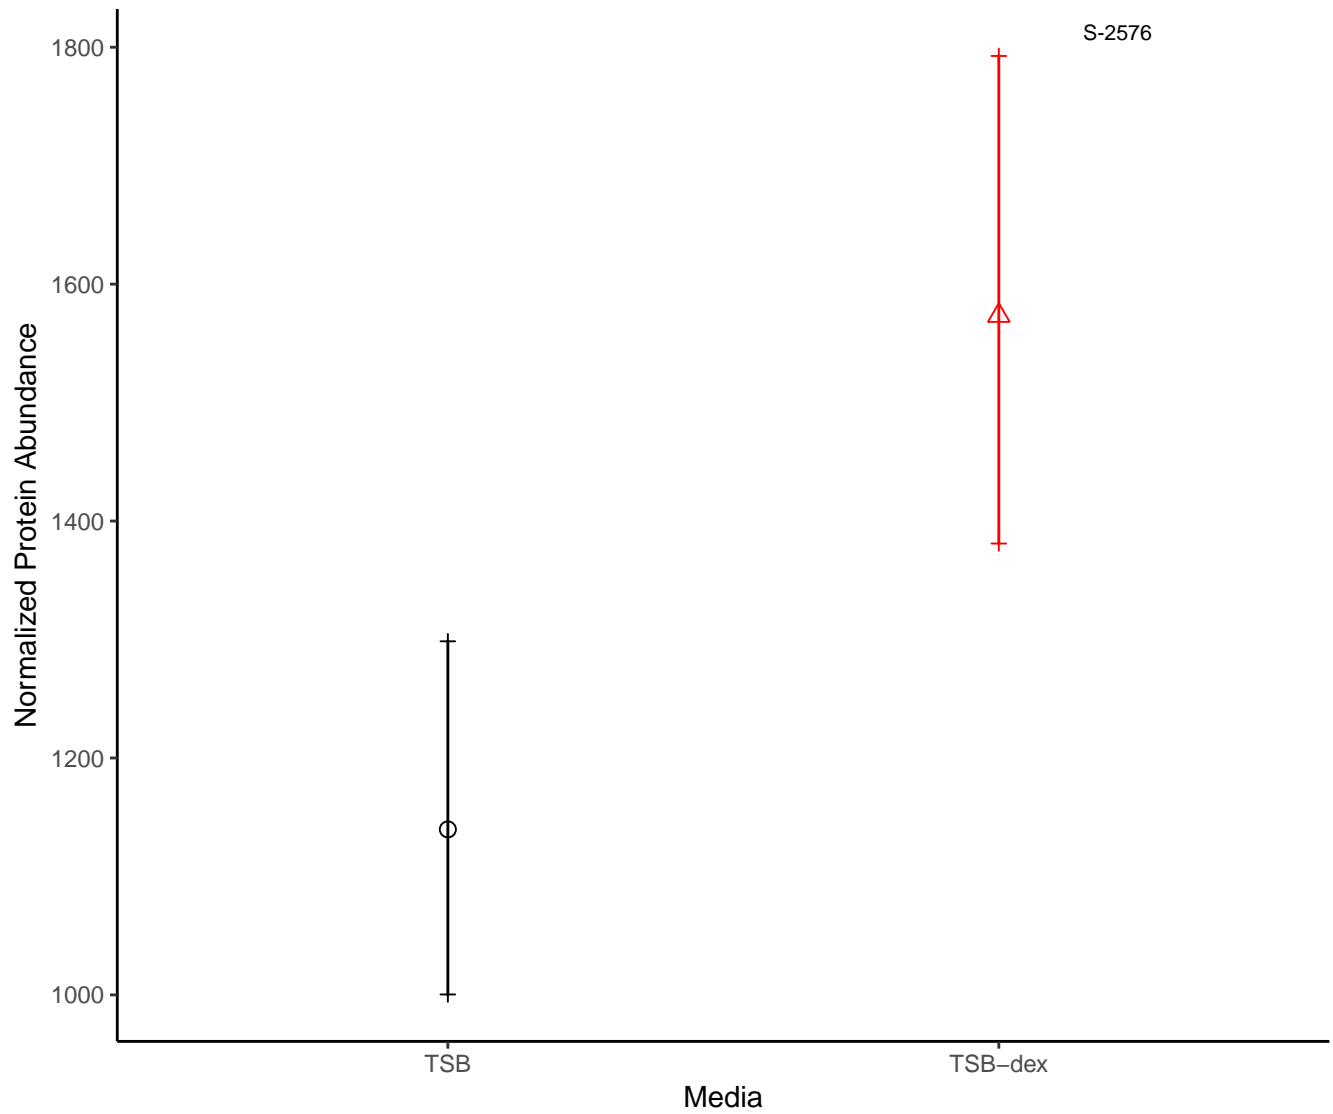

⊕ TSB-dex

△ TSB



# DBH\_STAAM

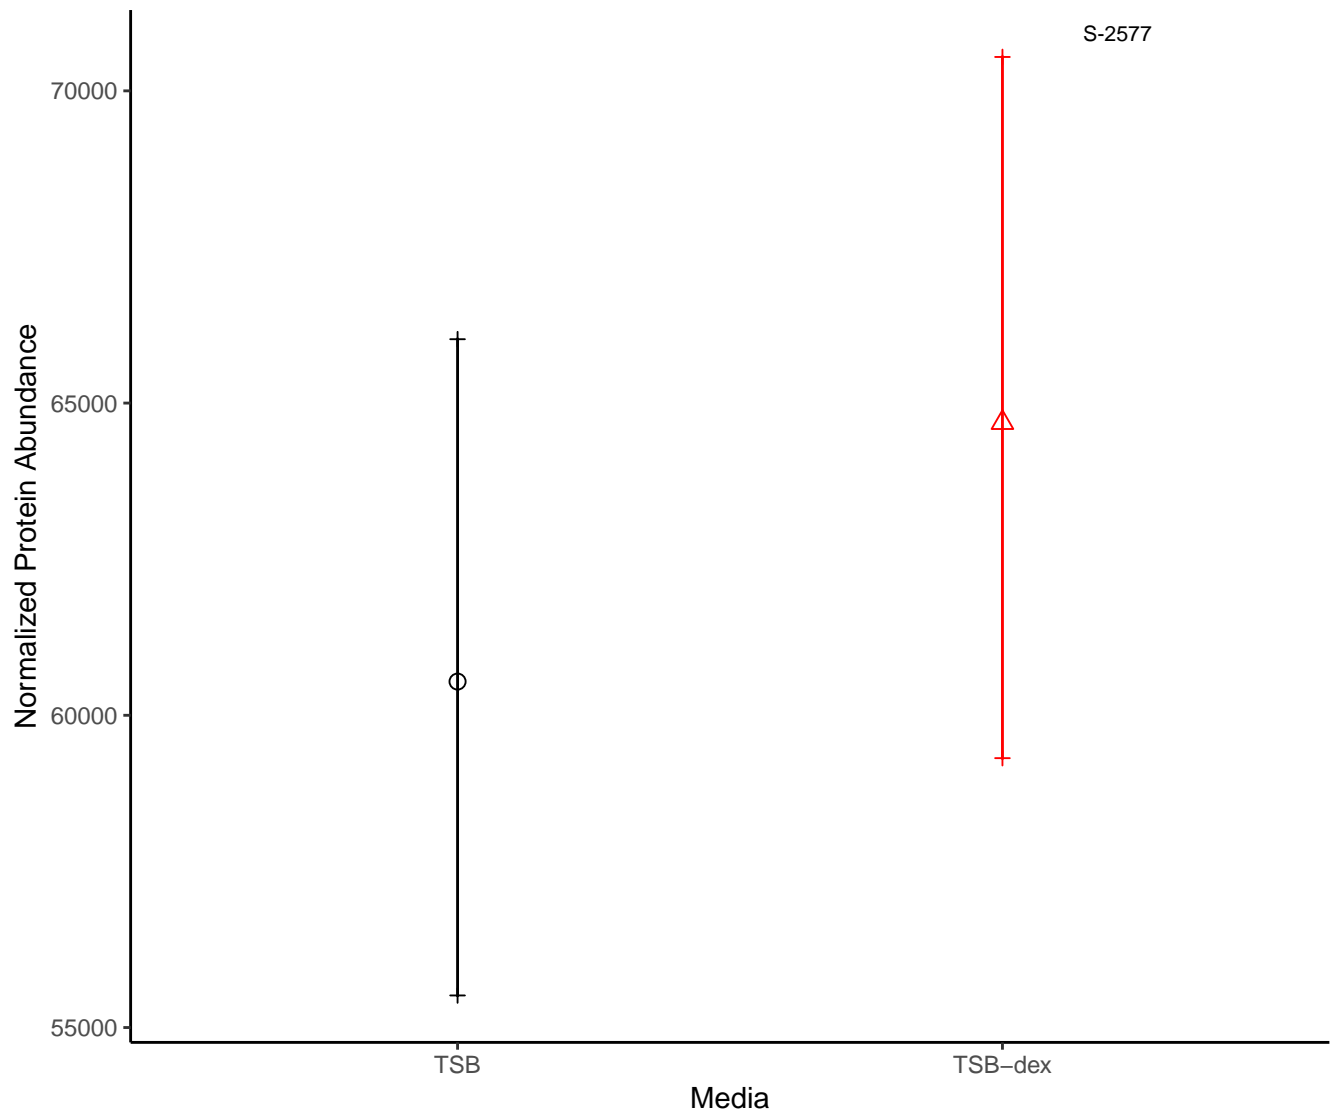

⊕ TSB-dex

△ TSB

# DCUP\_STAAM

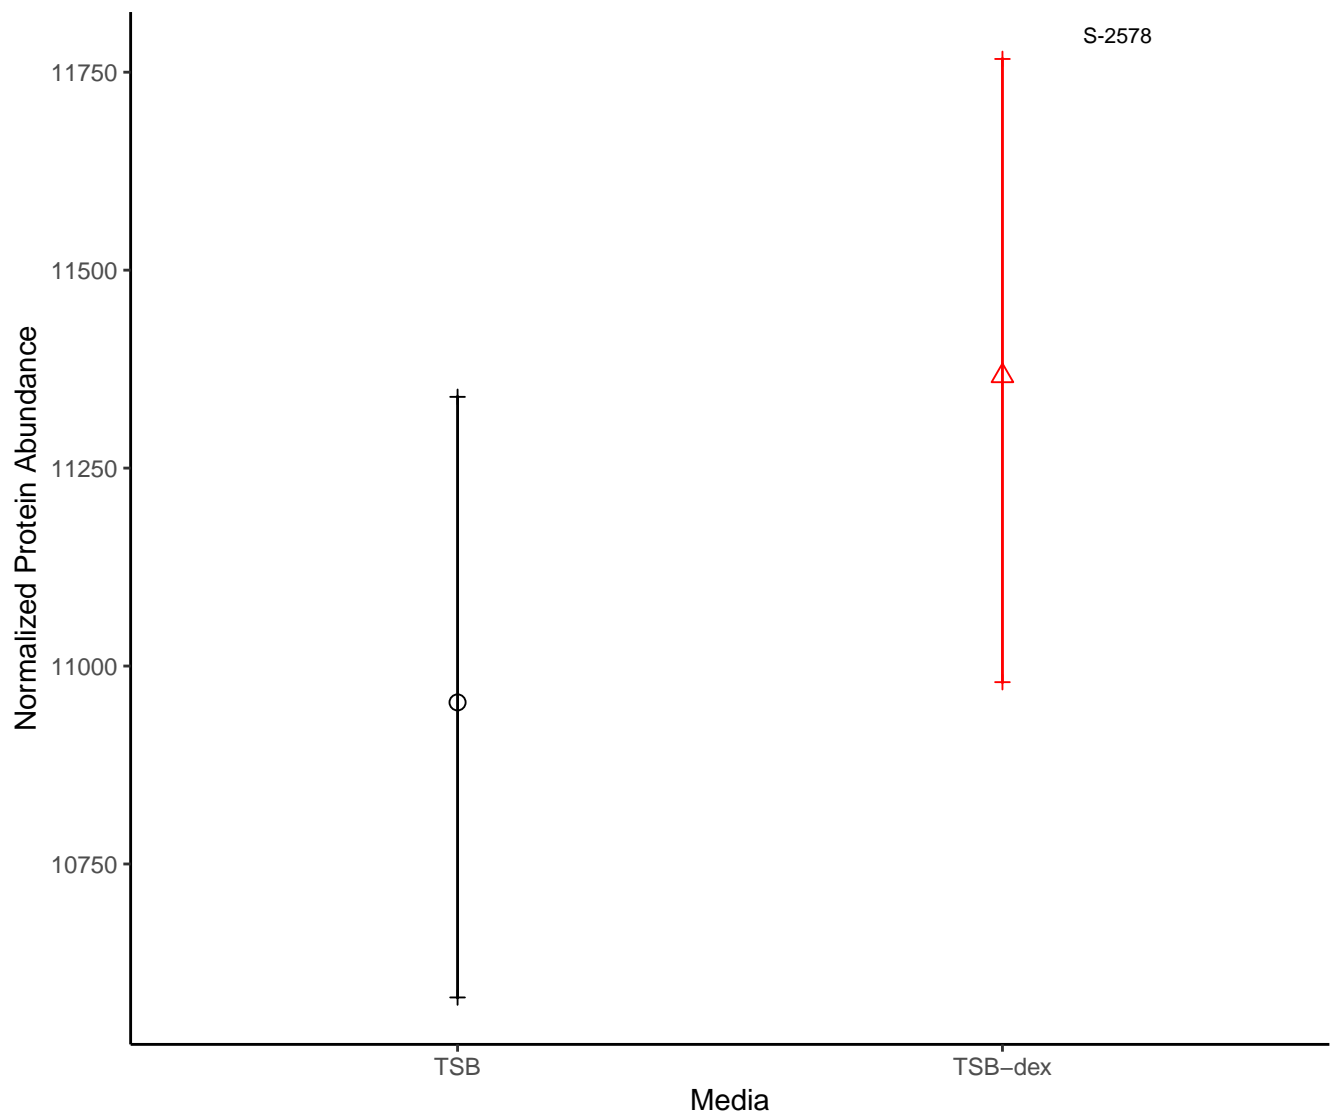

⊕ TSB-dex

△ TSB

# DDL\_STAAM

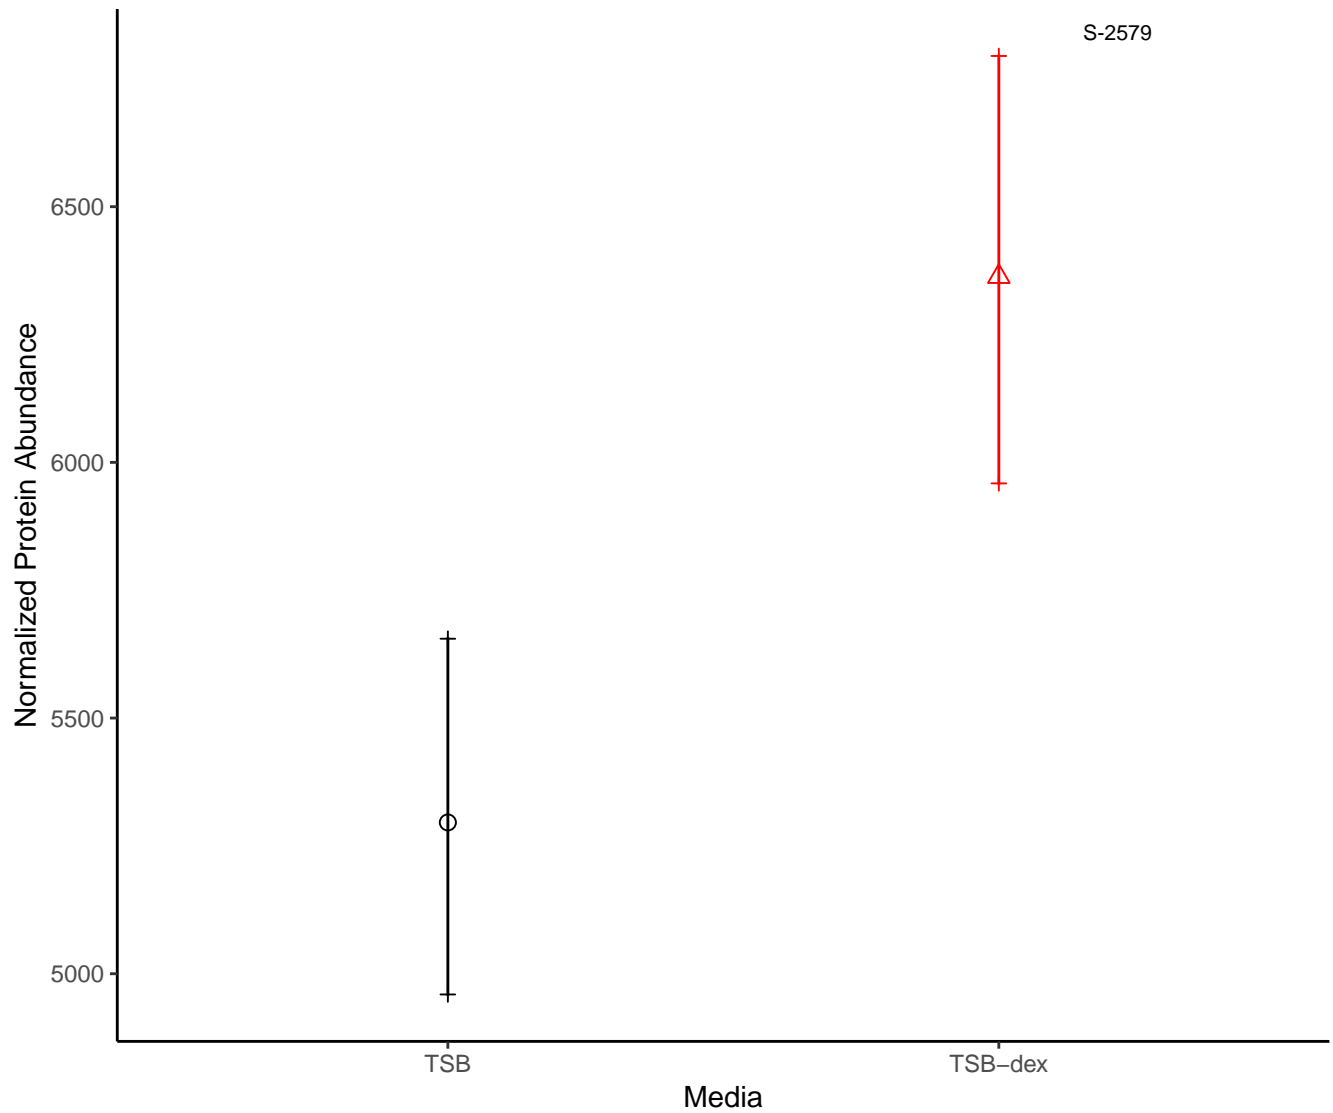

⊕ TSB-dex

△ TSB

# DEF\_STAAM

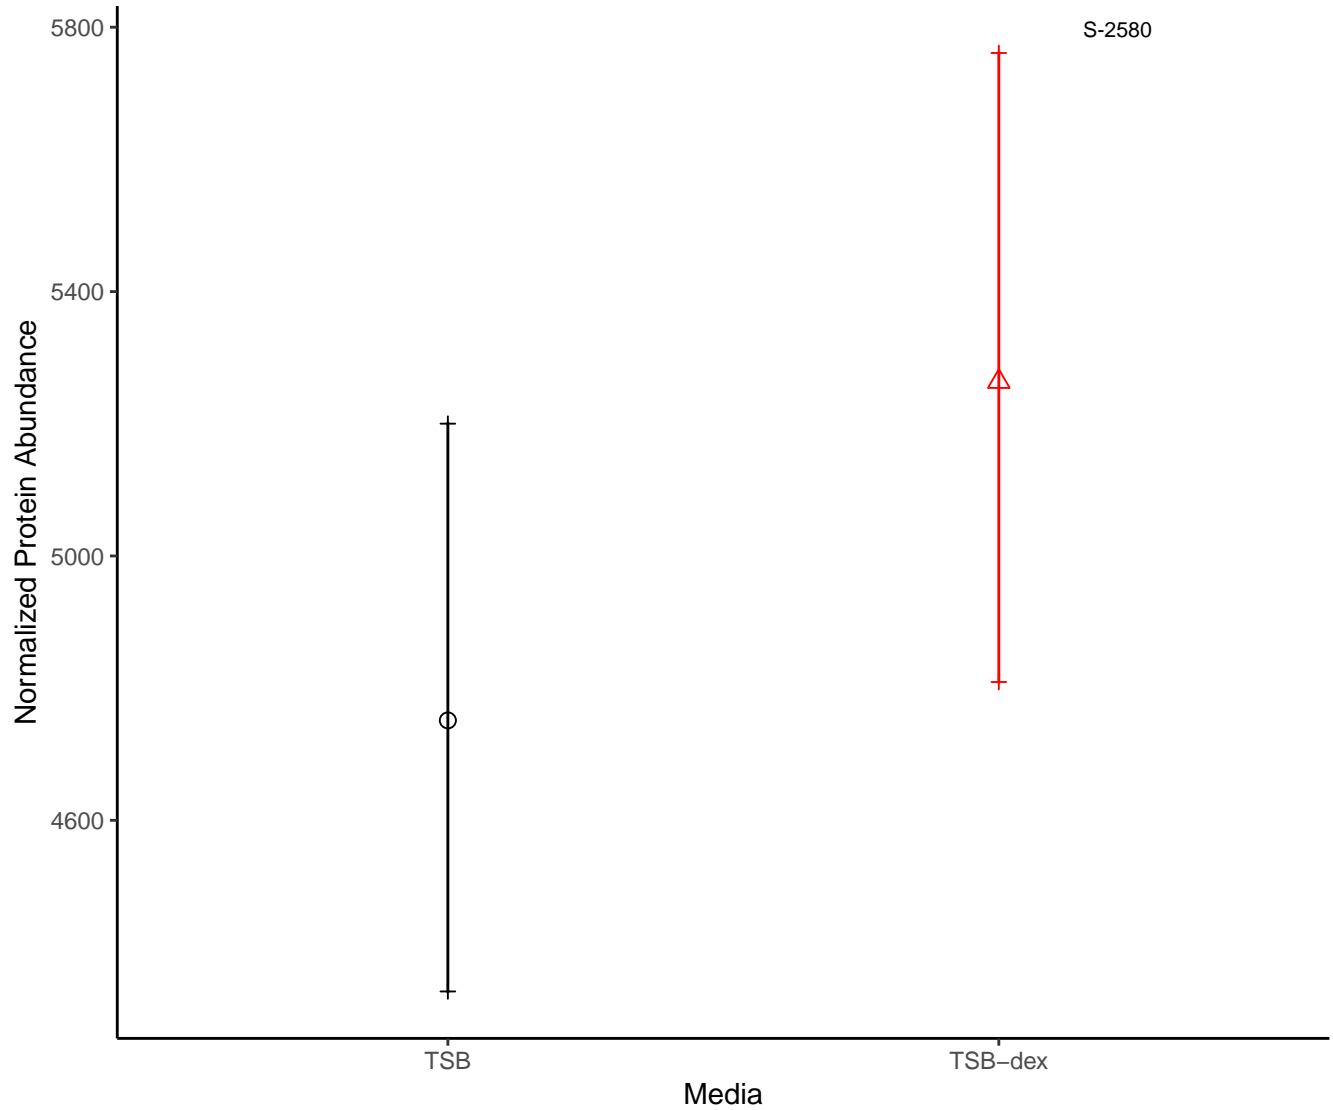

⊕ TSB-dex

△ TSB

# DEOB\_STAAM

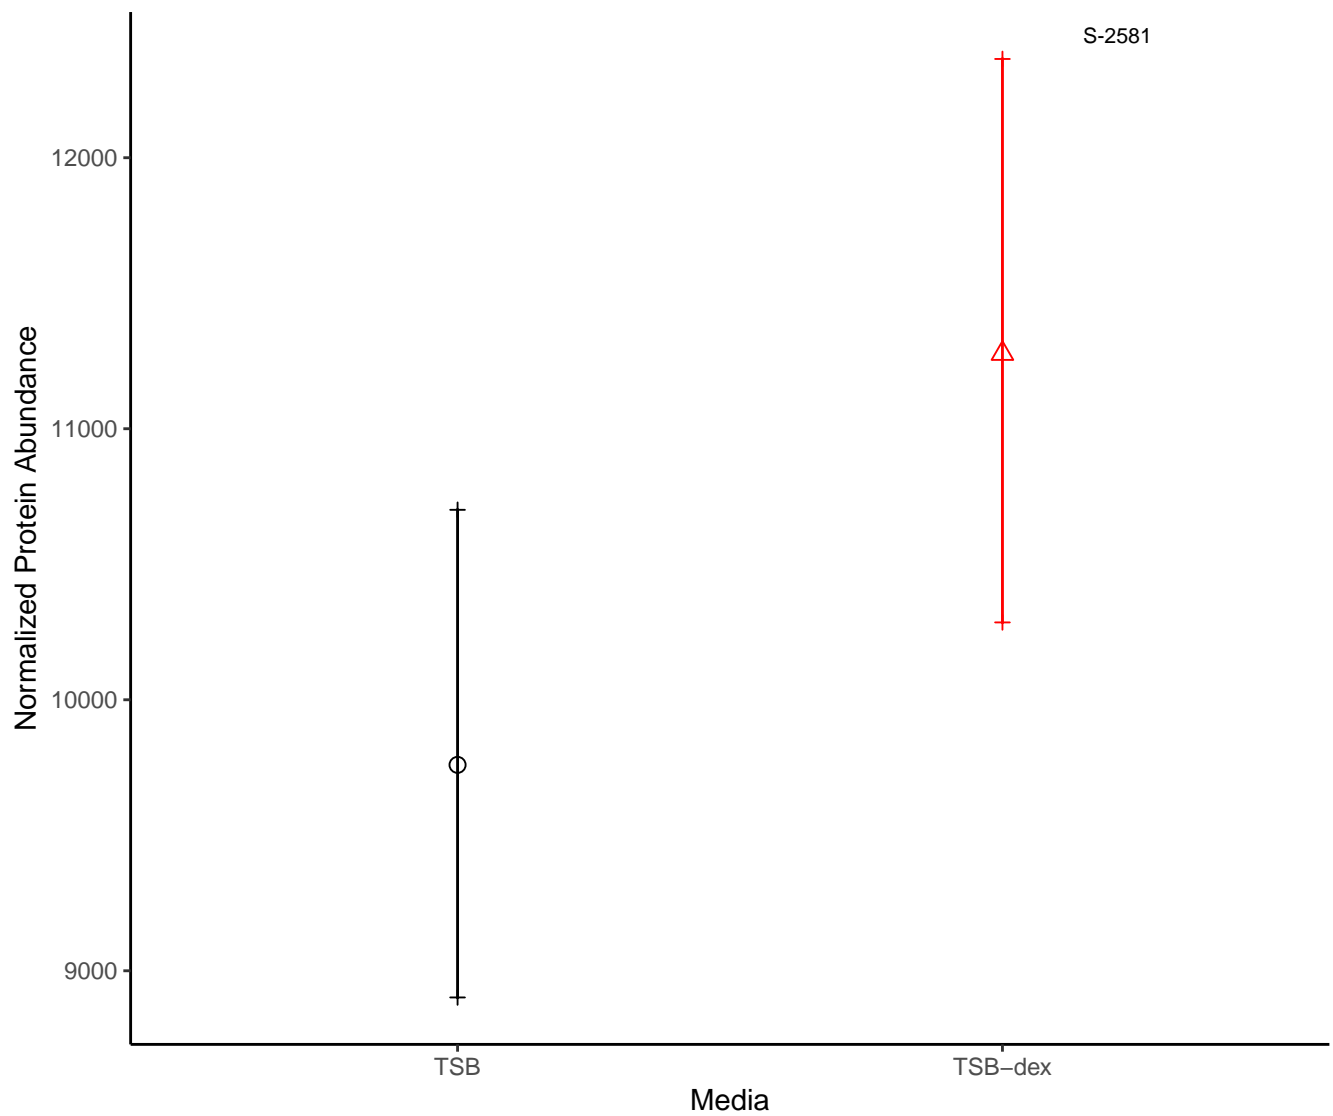

⊖ TSB-dex

△ TSB

# DEOC1\_STAAM

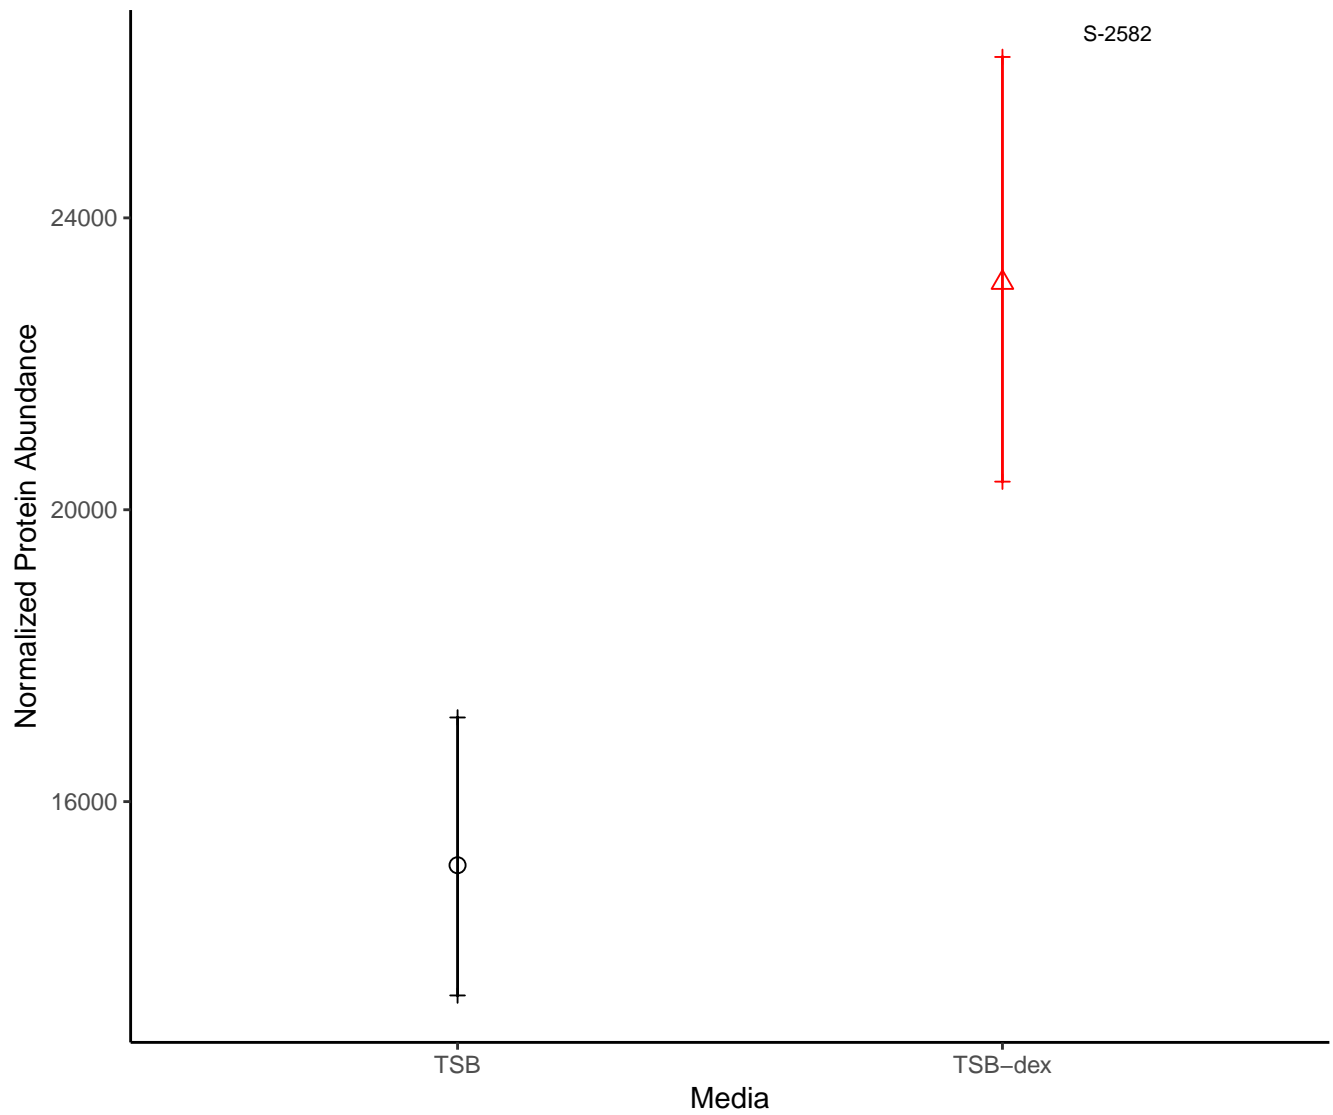

⊕ TSB-dex

△ TSB

# DEOC2\_STAAM

S-2583

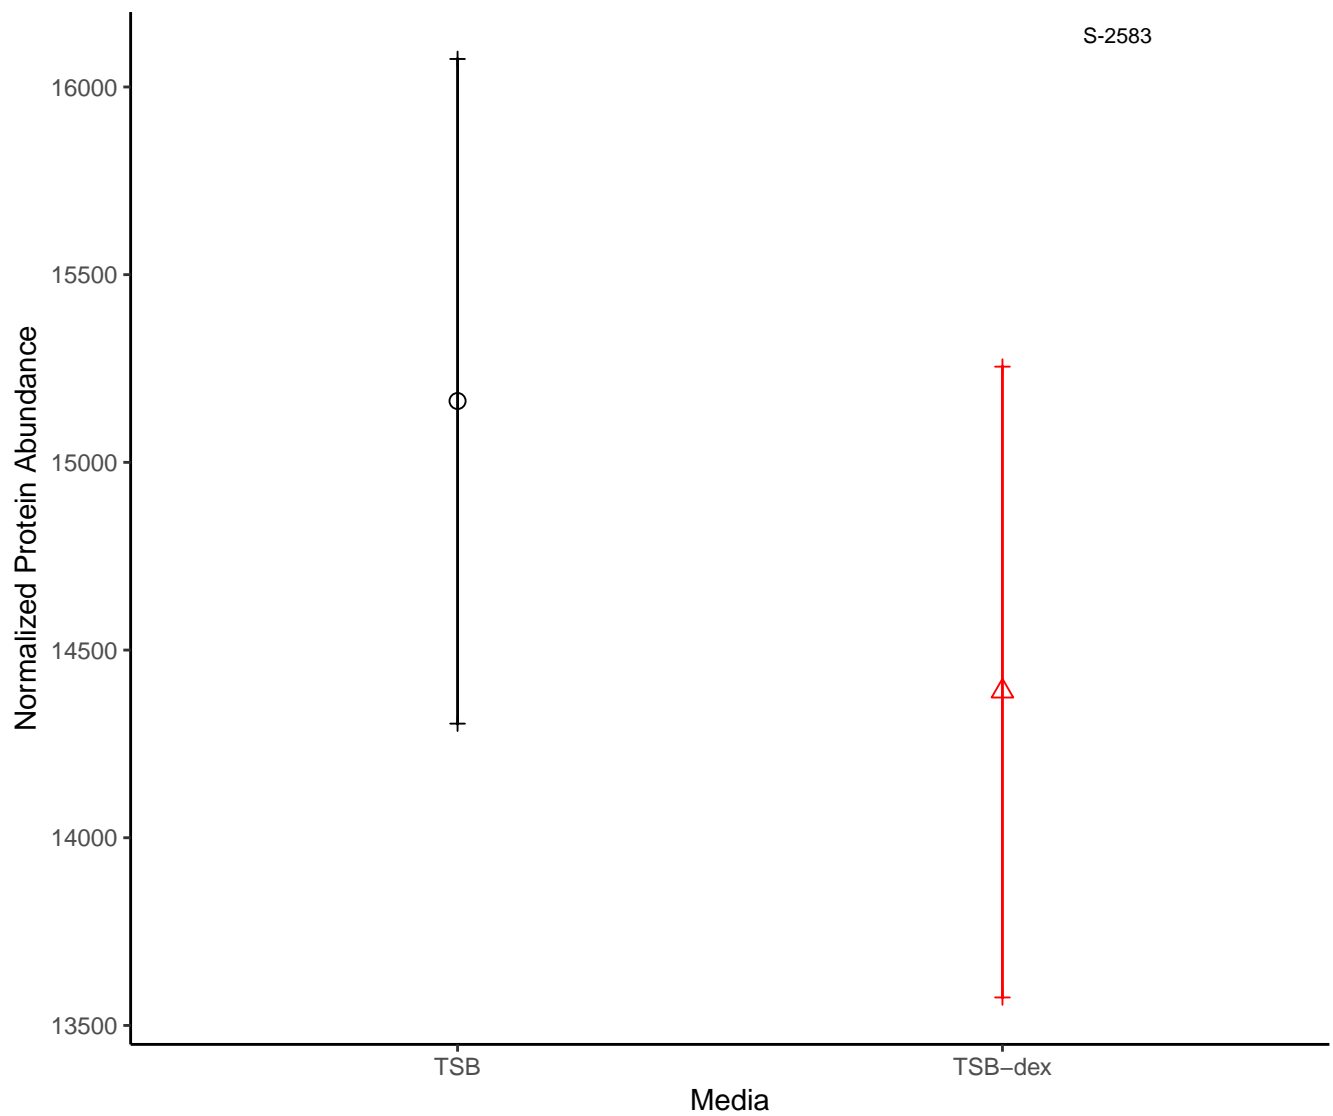

⊖ TSB-dex

△ TSB

# DER\_STAAM

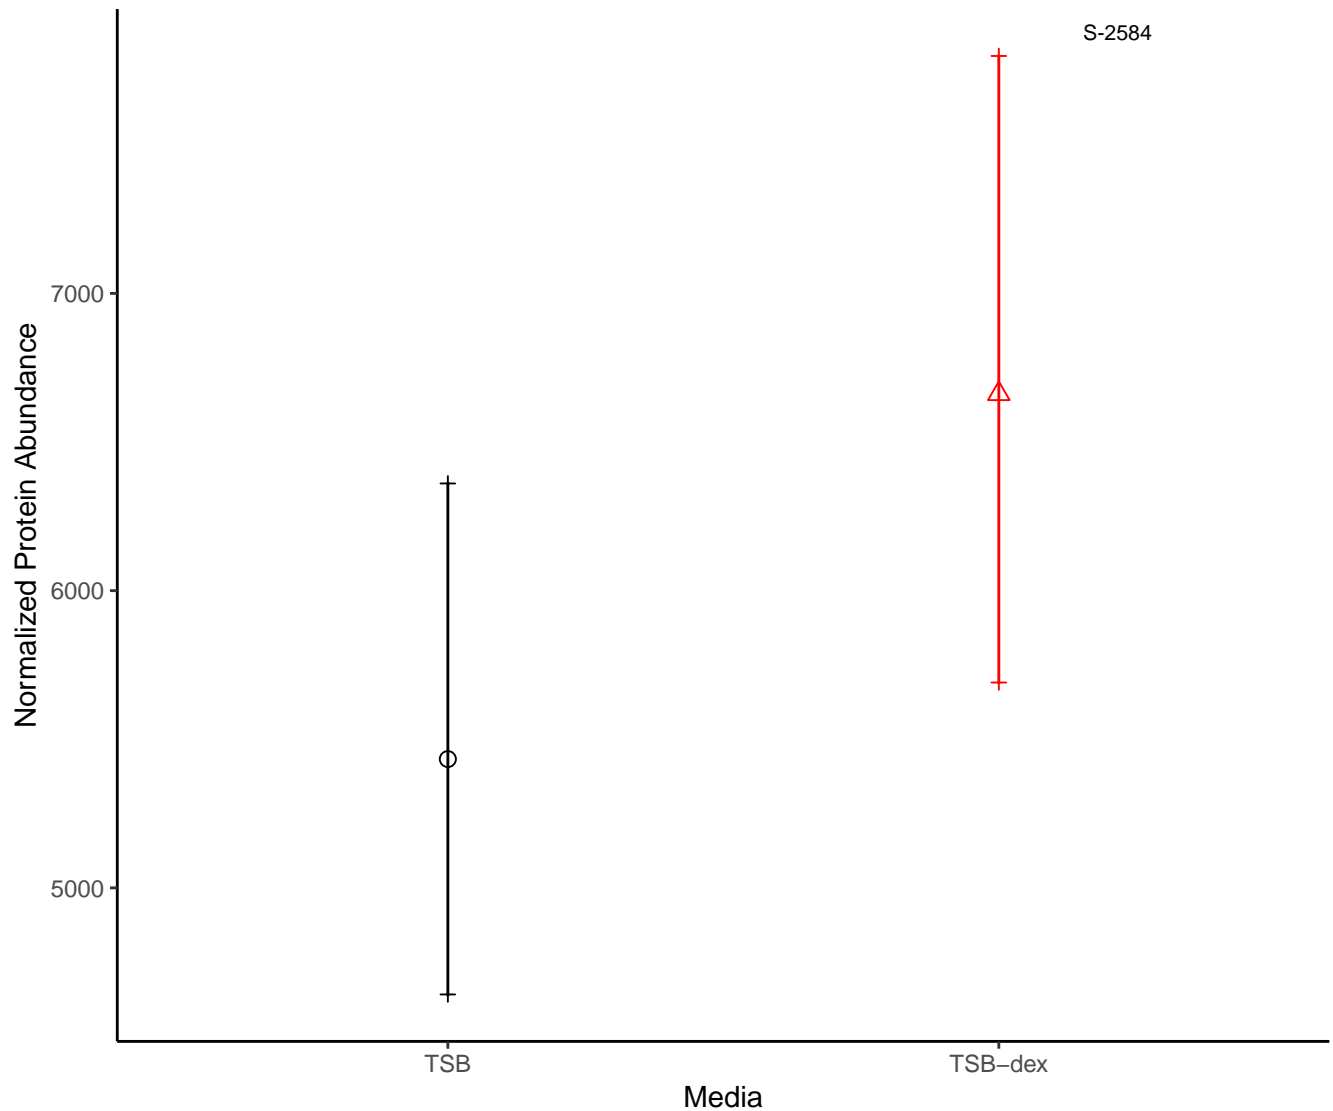

⊕ TSB-dex

△ TSB



# DHA1\_STAAM

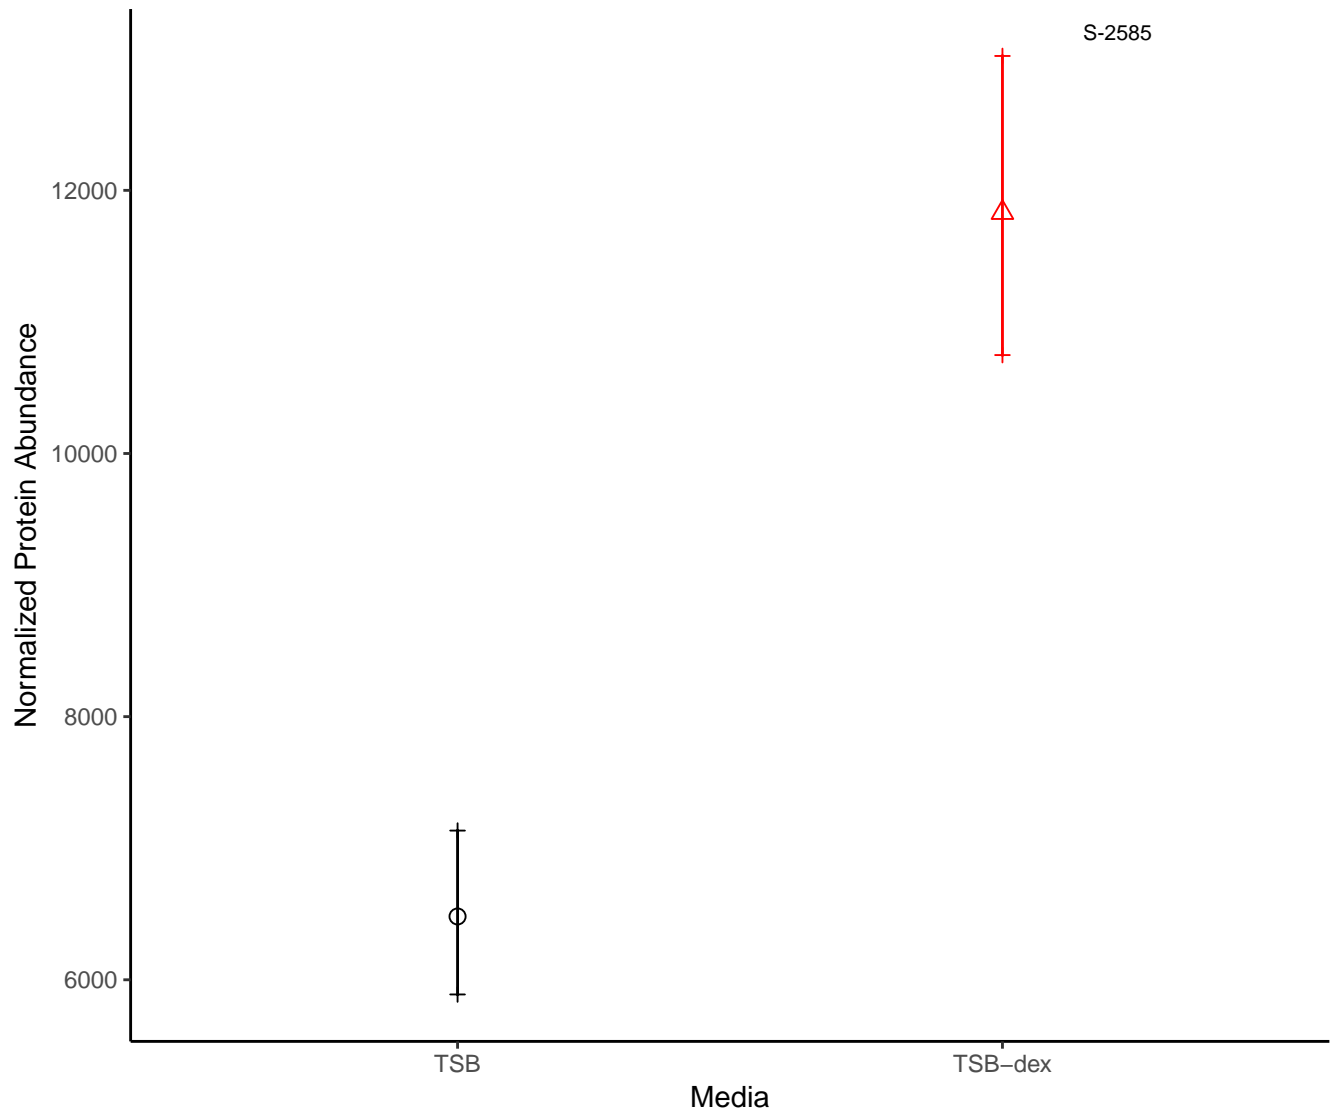

⊖ TSB-dex

⊖ TSB

# DHA2\_STAAM

S-2586

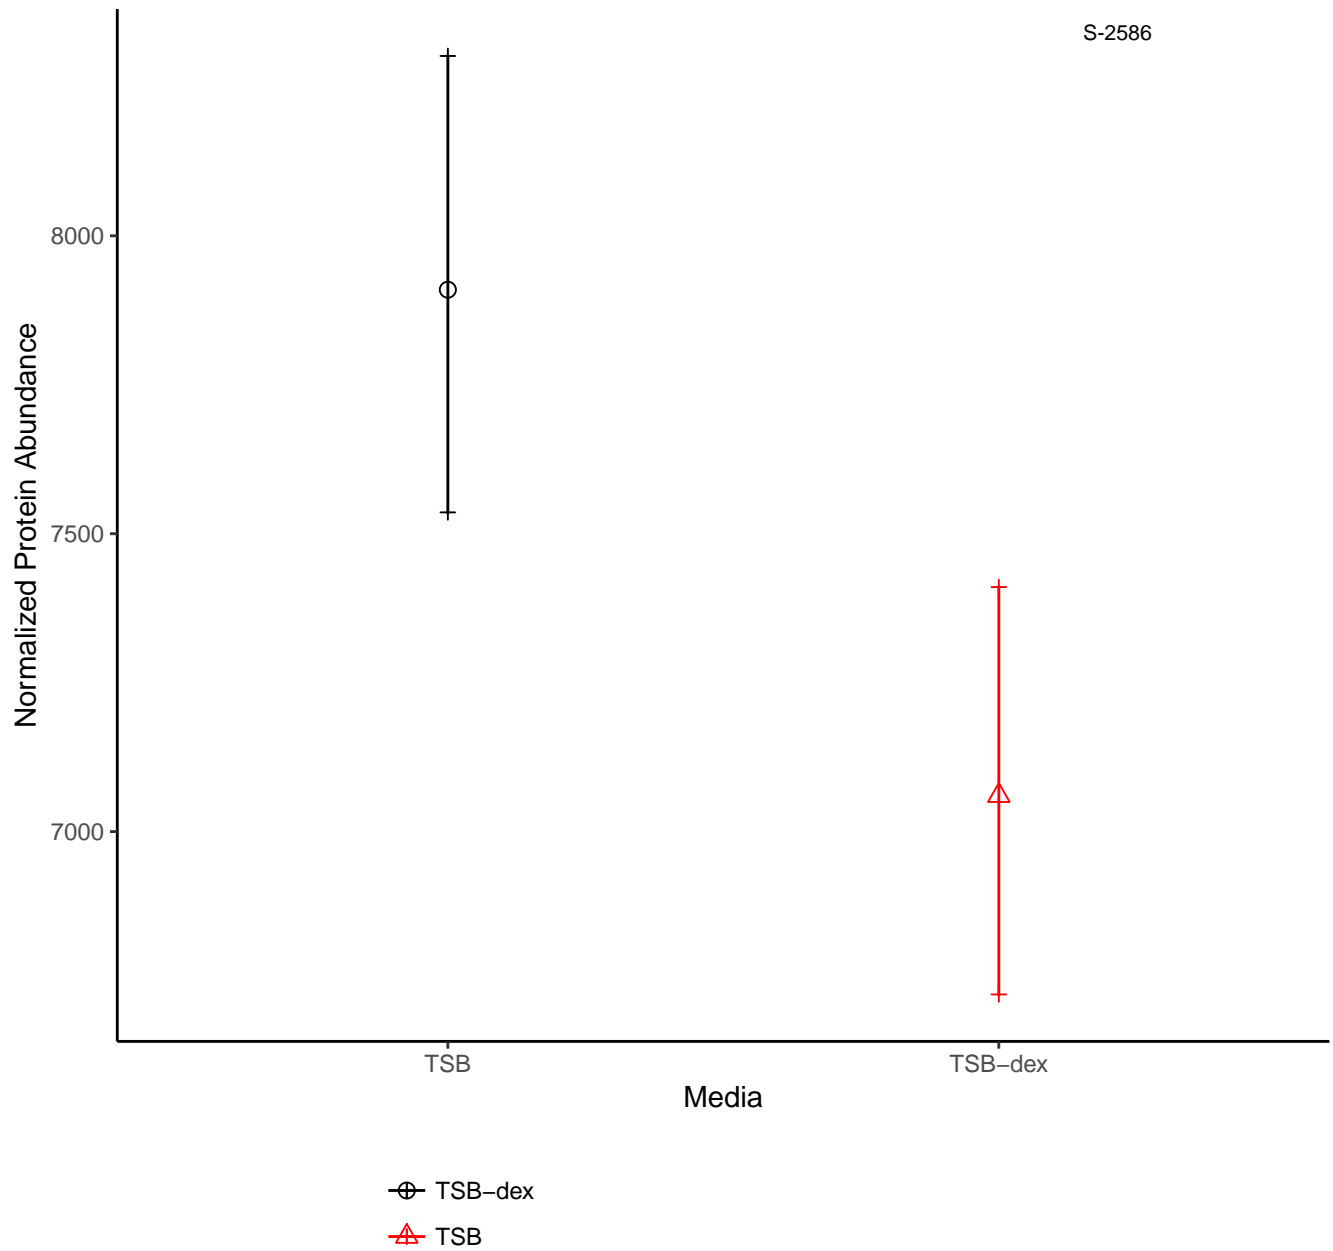

# DHE2\_STAAM

S-2587

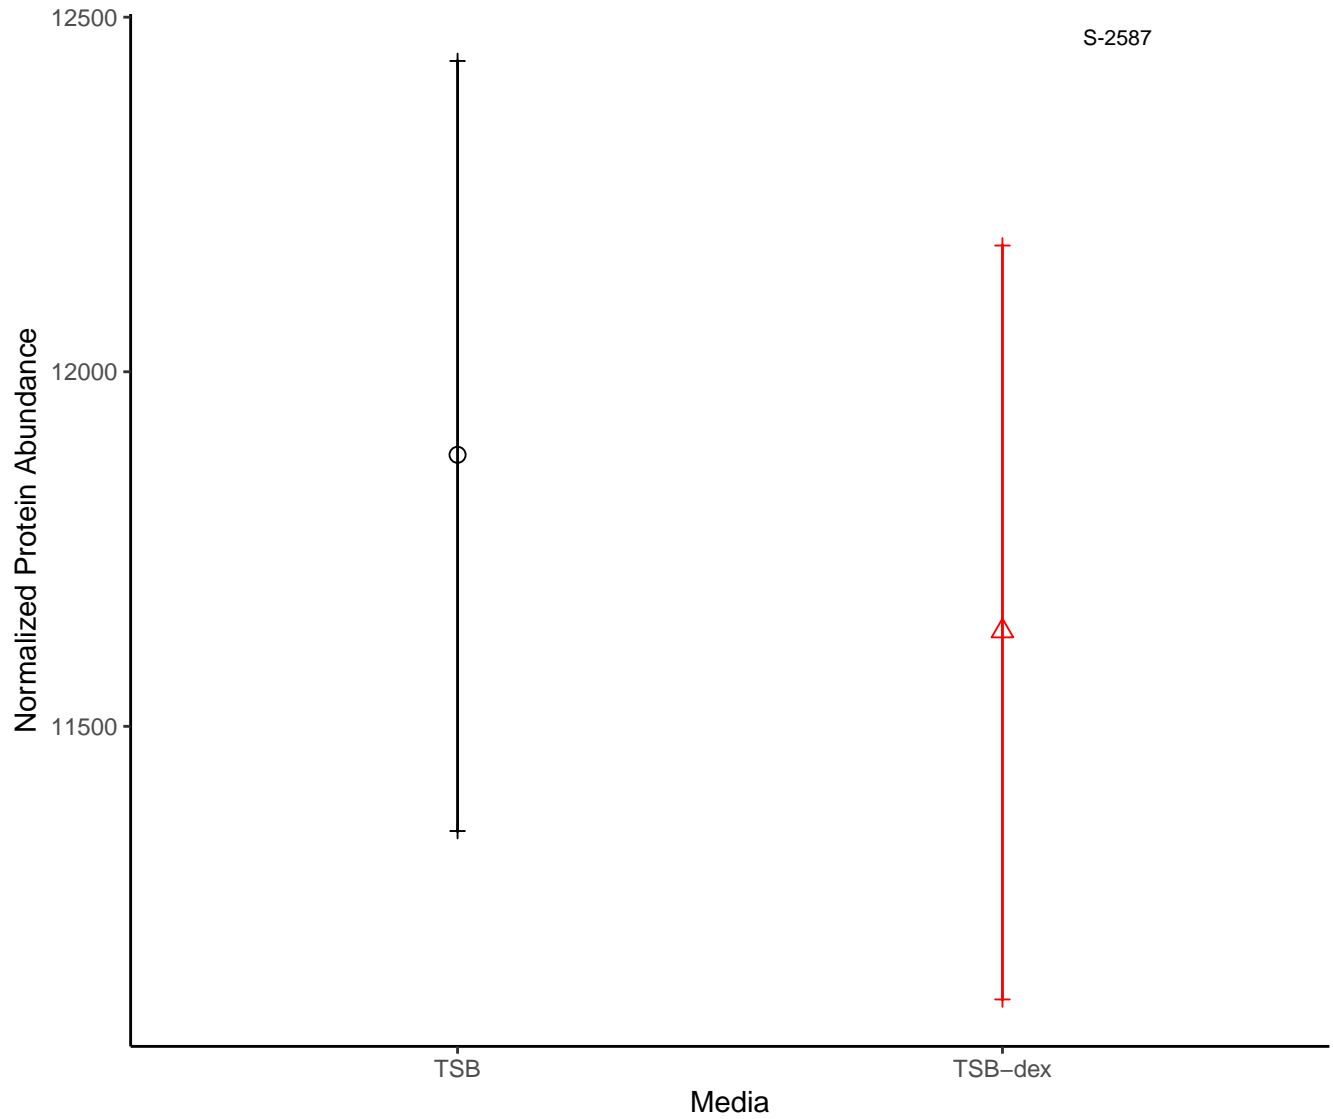

⊕ TSB-dex

△ TSB

# DHPS\_STAAM

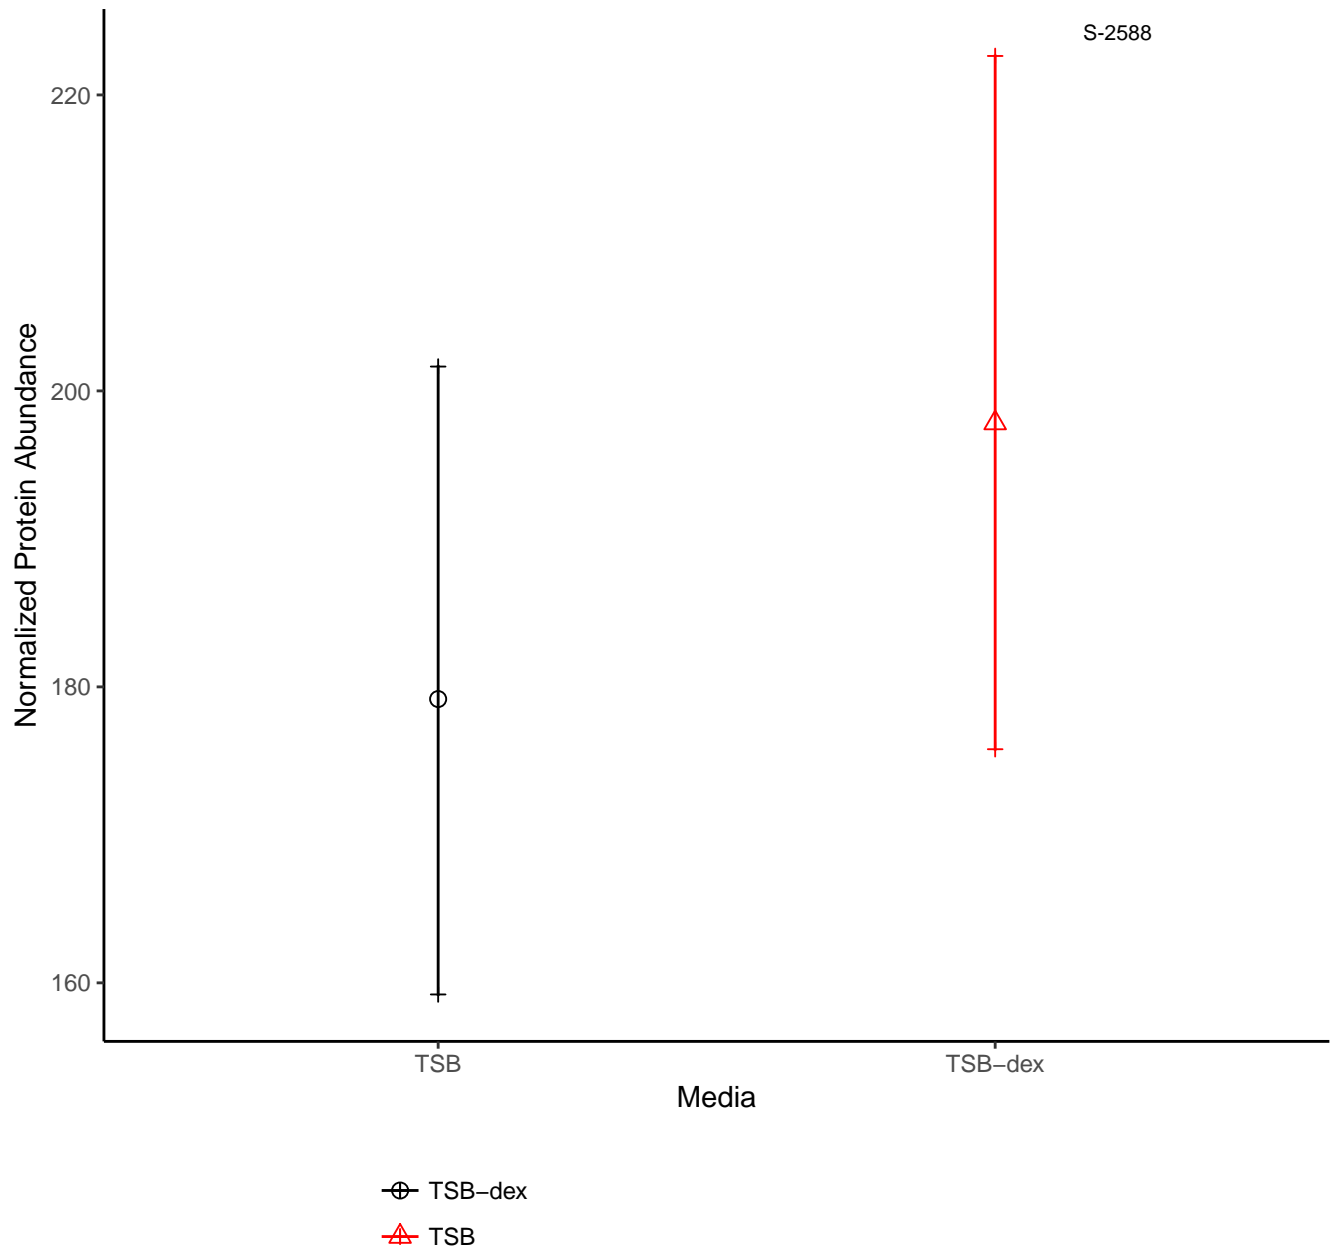

# DLDH\_STAAM

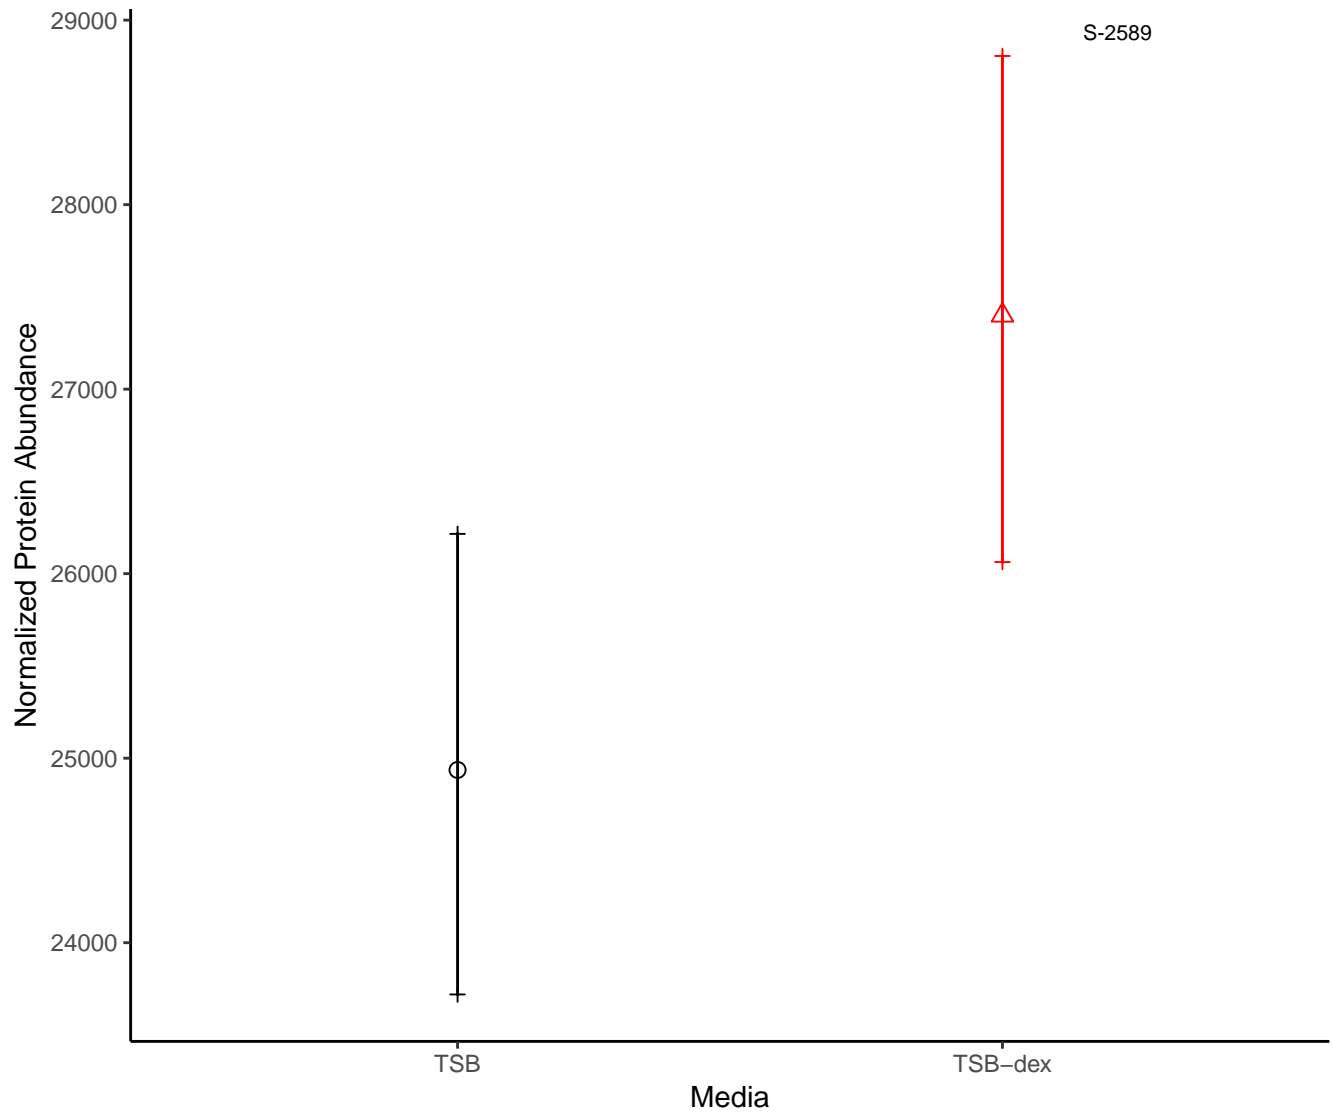

⊕ TSB-dex

△ TSB

# DLTA\_STAAM

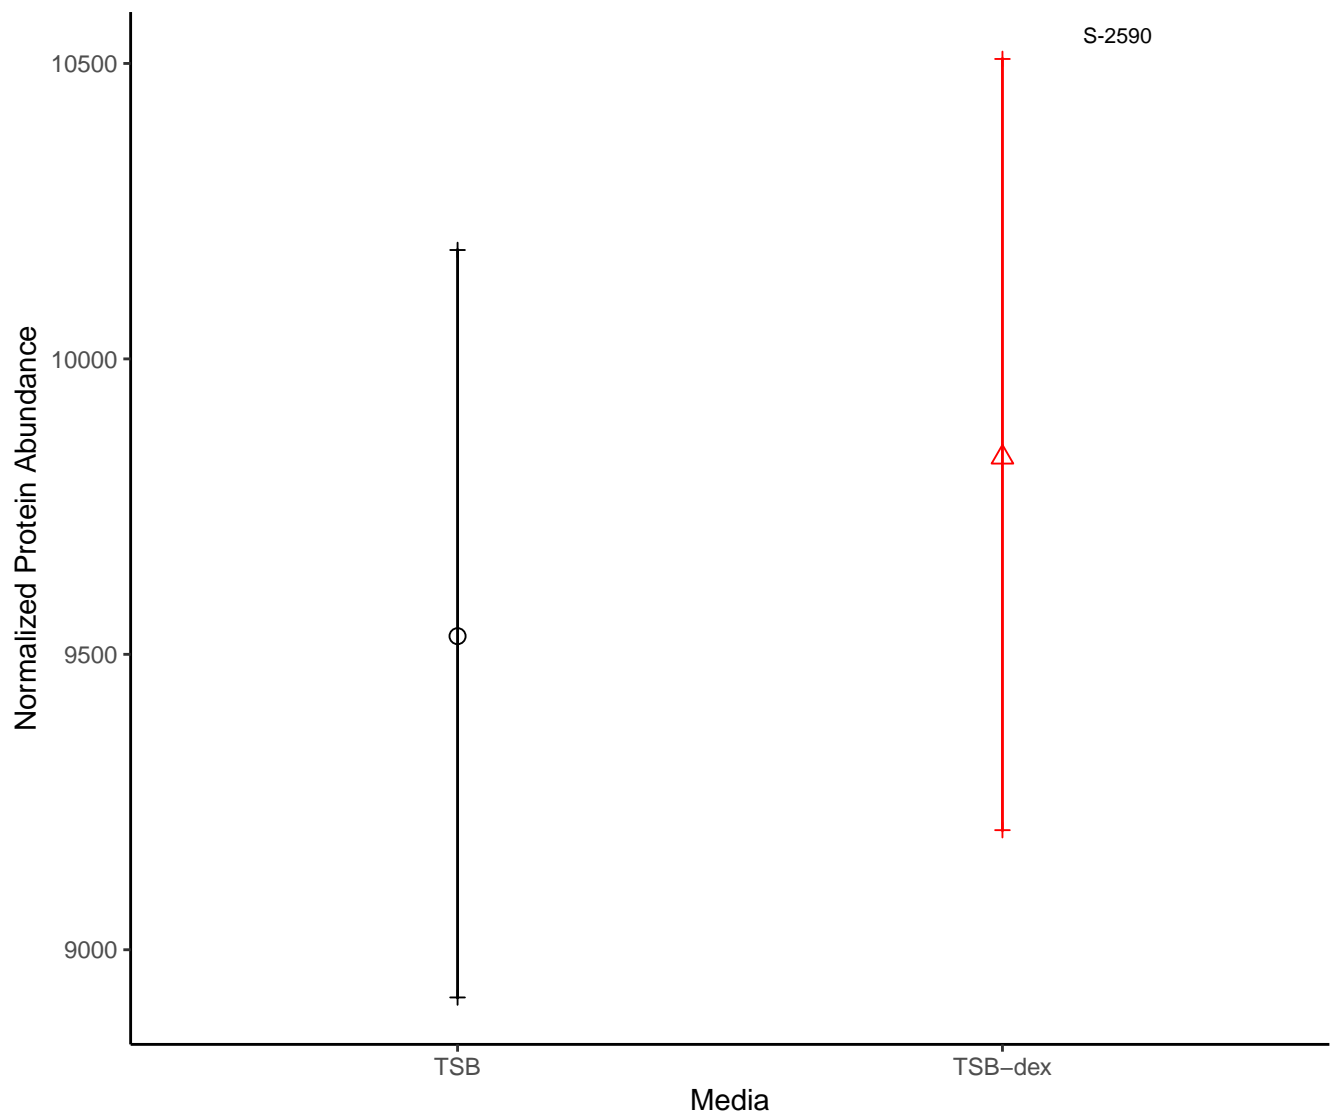

● TSB-dex

▲ TSB

# DLTC\_STAAM

S-2591

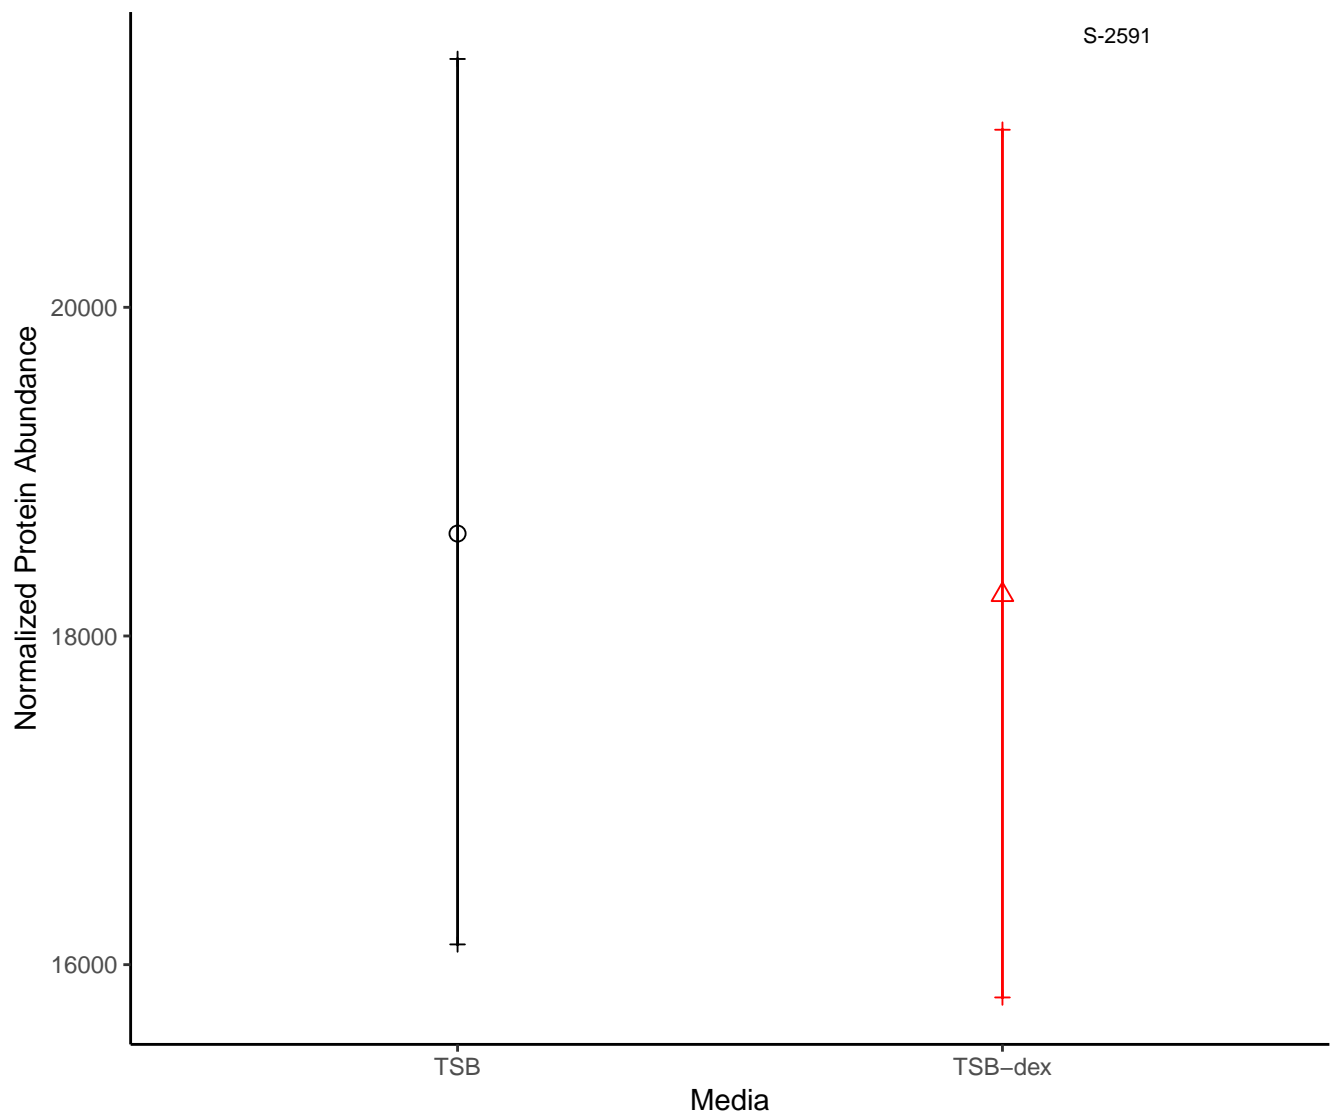

⊕ TSB-dex

△ TSB

# DNAA\_STAAM

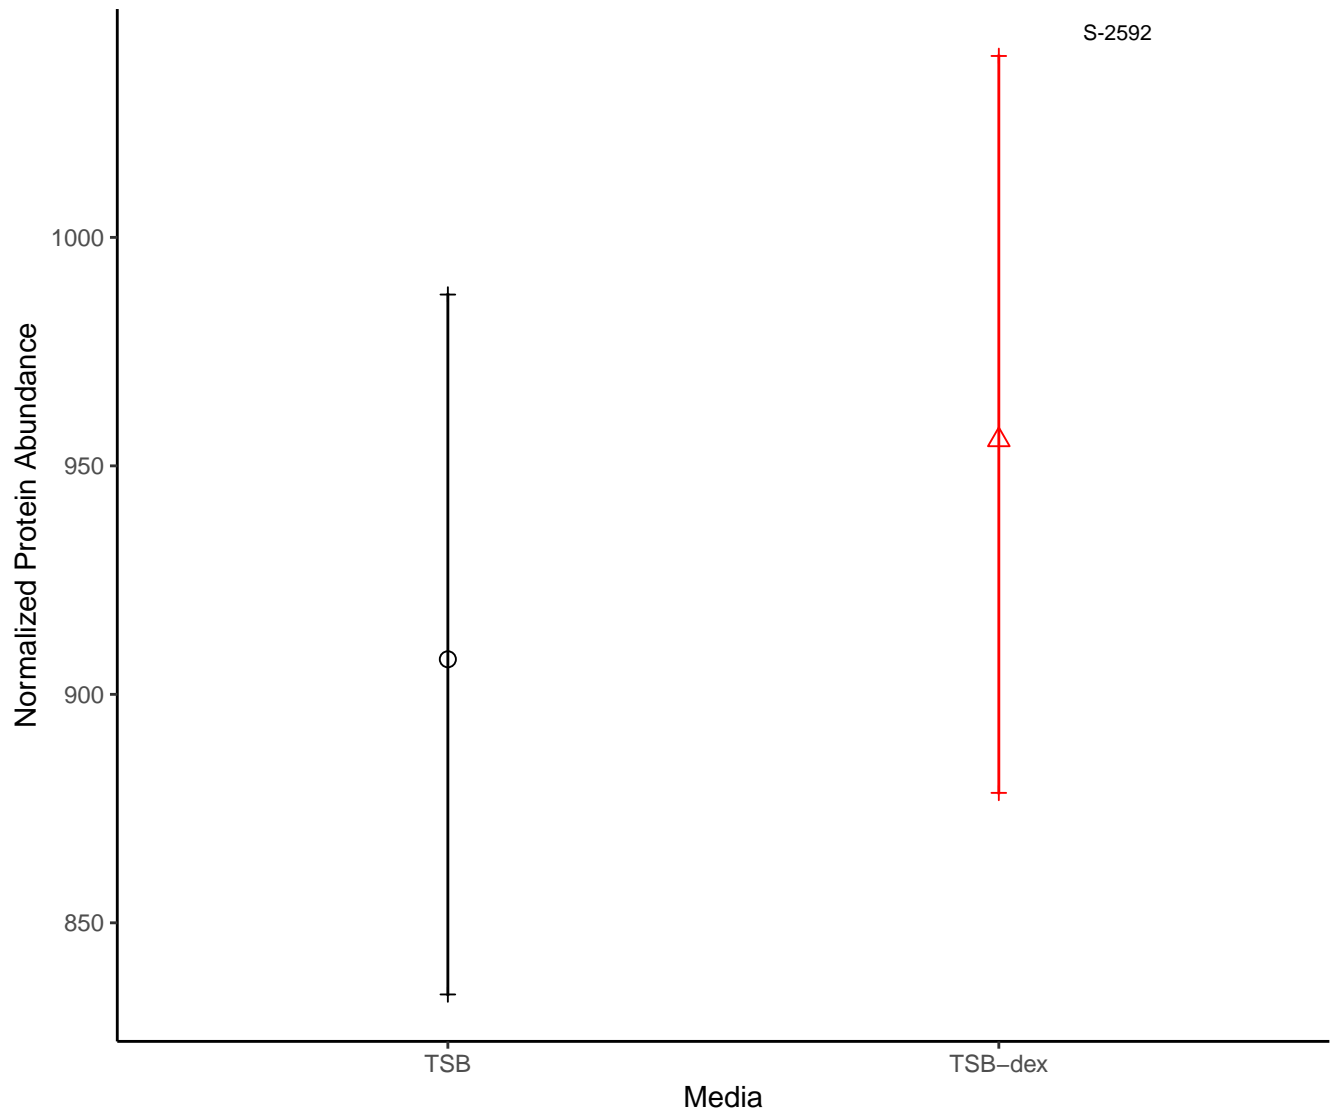

⊕ TSB-dex

△ TSB



# DNAG\_STAAM

S-2593

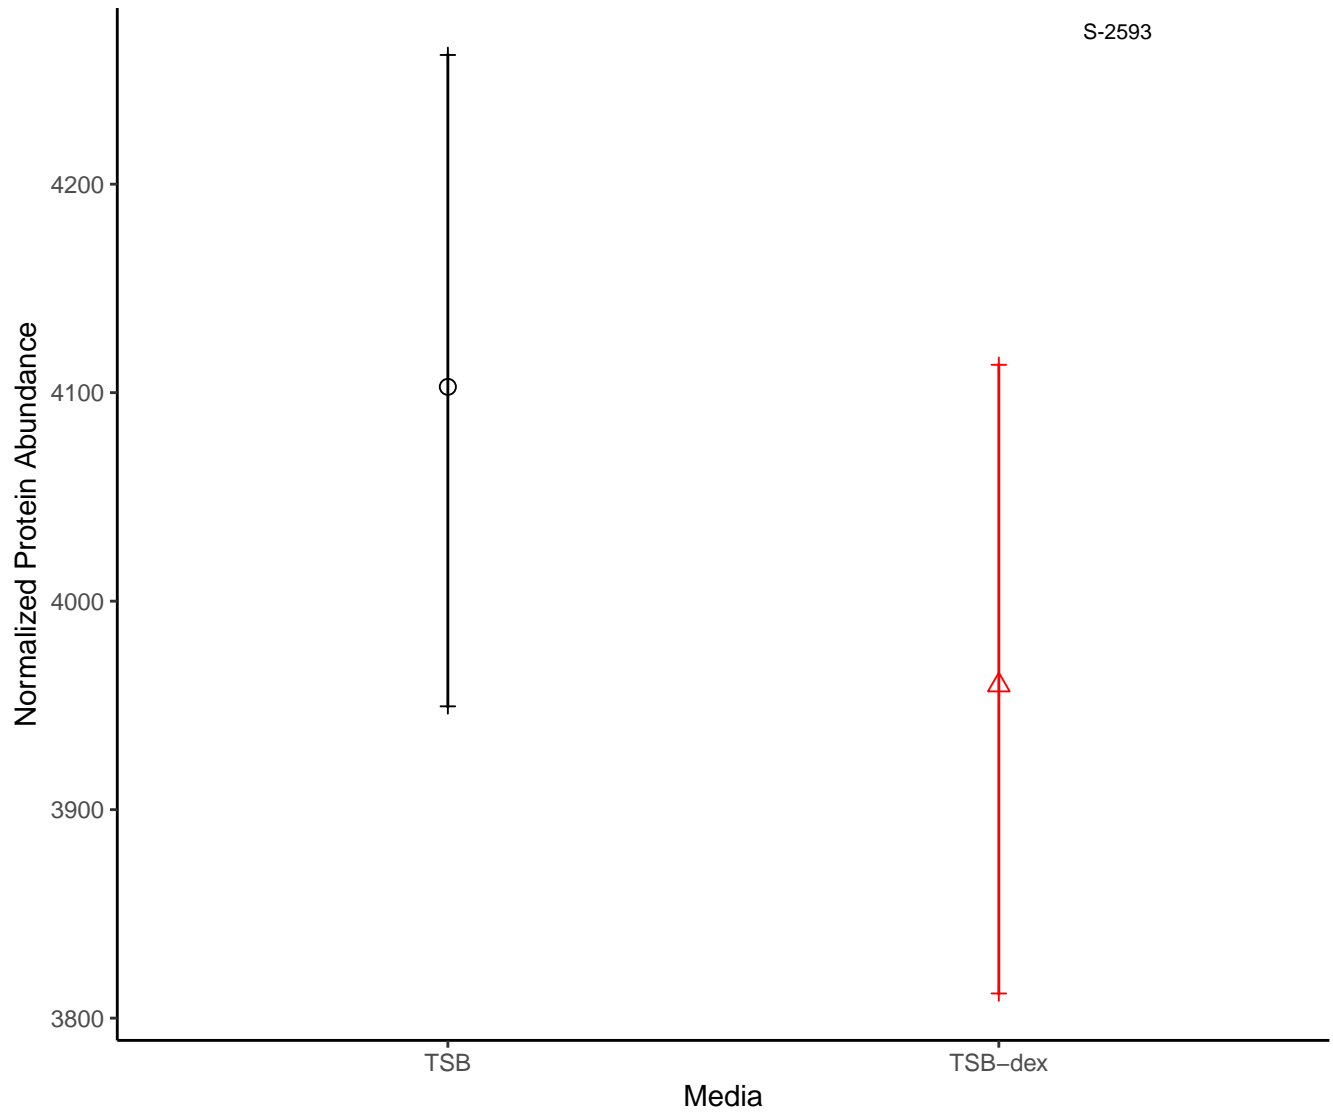

⊕ TSB-dex

△ TSB

# DNAJ\_STAAM

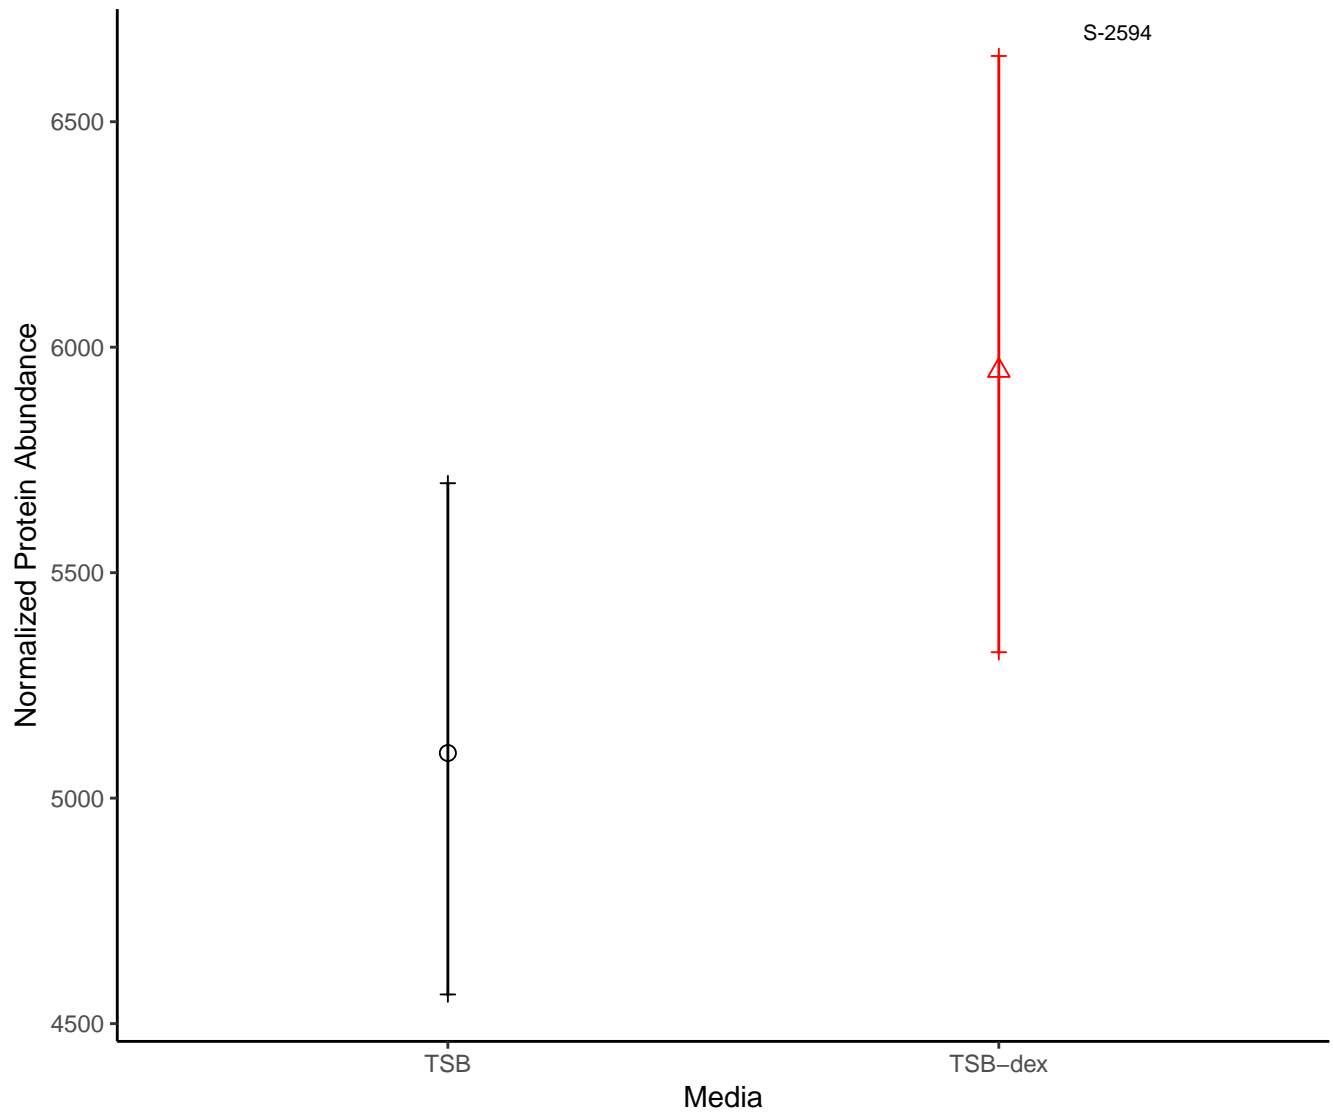

S-2594

⊕ TSB-dex

△ TSB

# DNAK\_STAAM

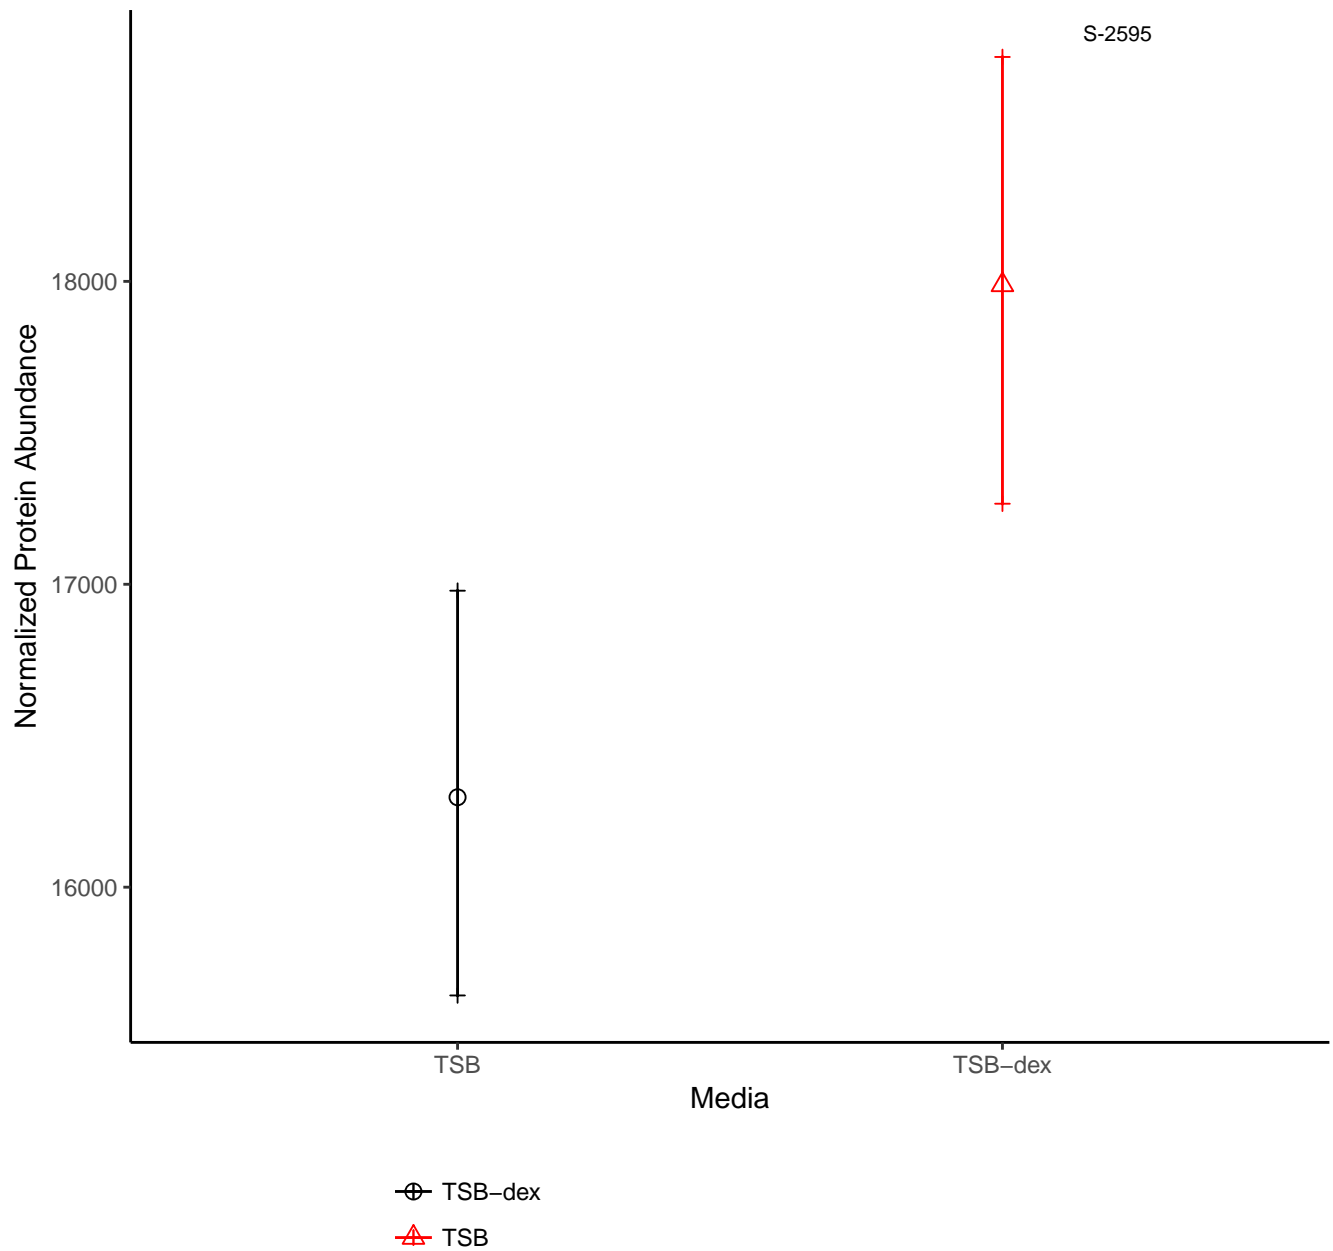

# DNLJ\_STAAM

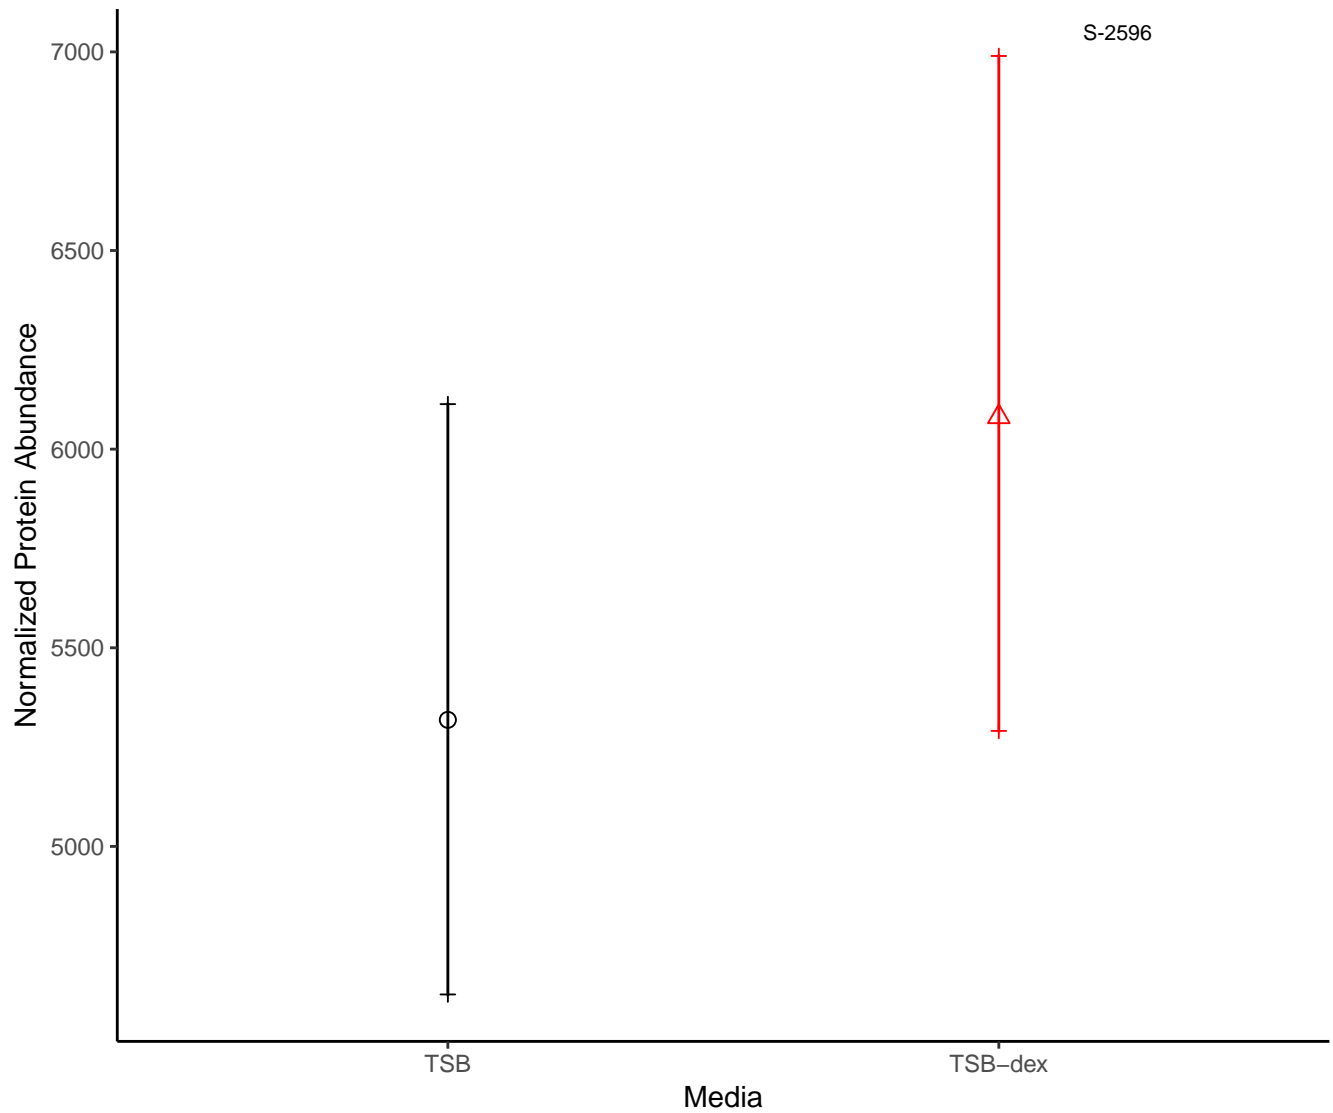

⊕ TSB-dex

△ TSB

# DPO3B\_STAAM

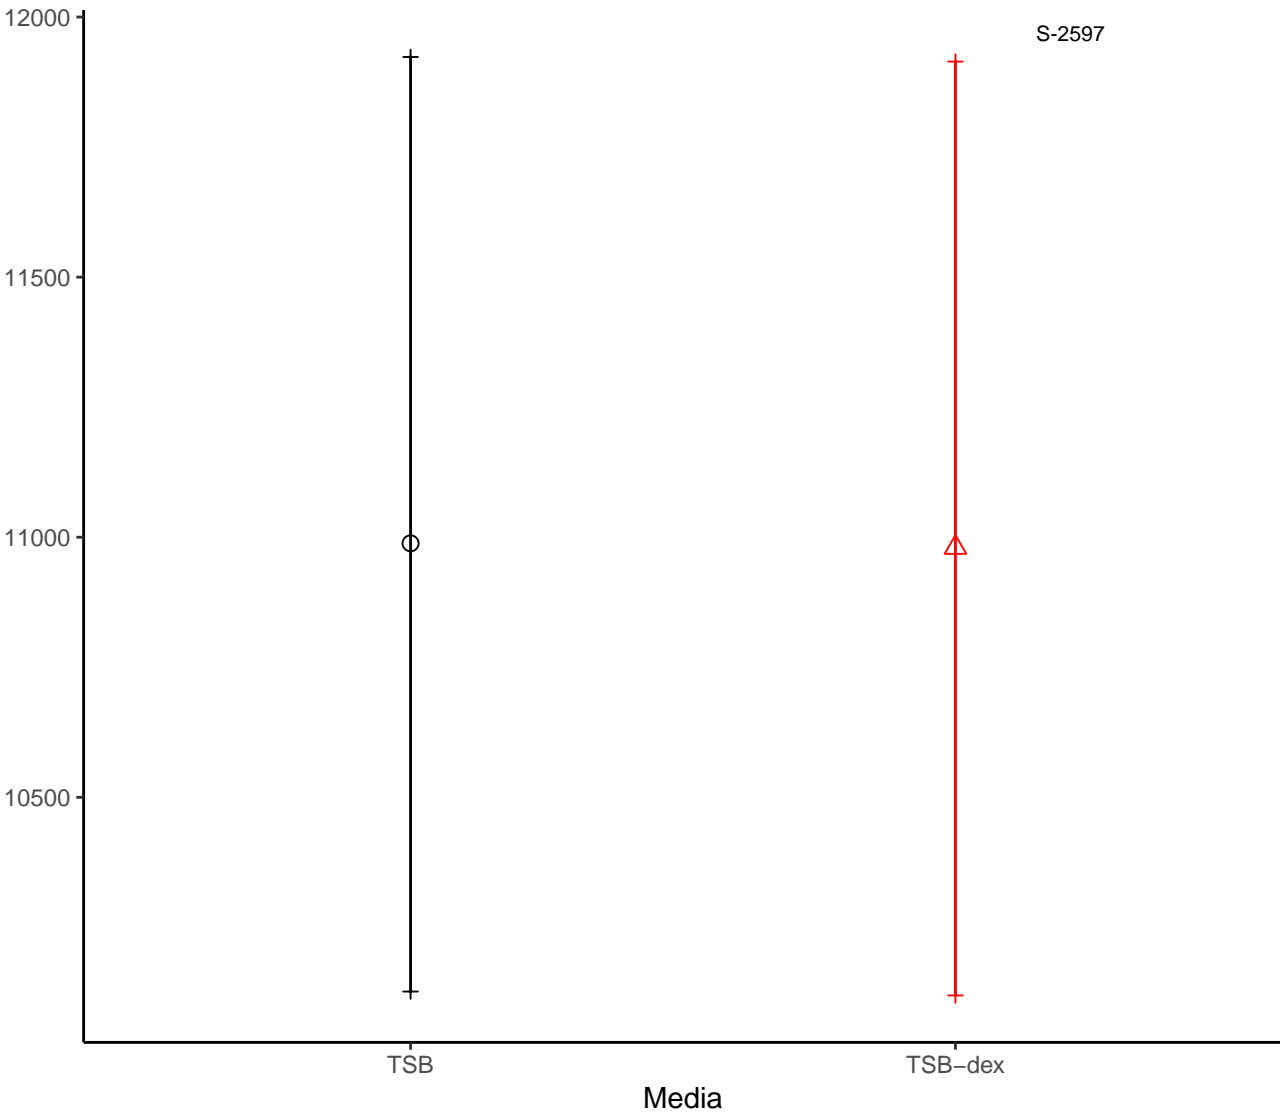

⊕ TSB-dex

△ TSB

# DPO4\_STAAM

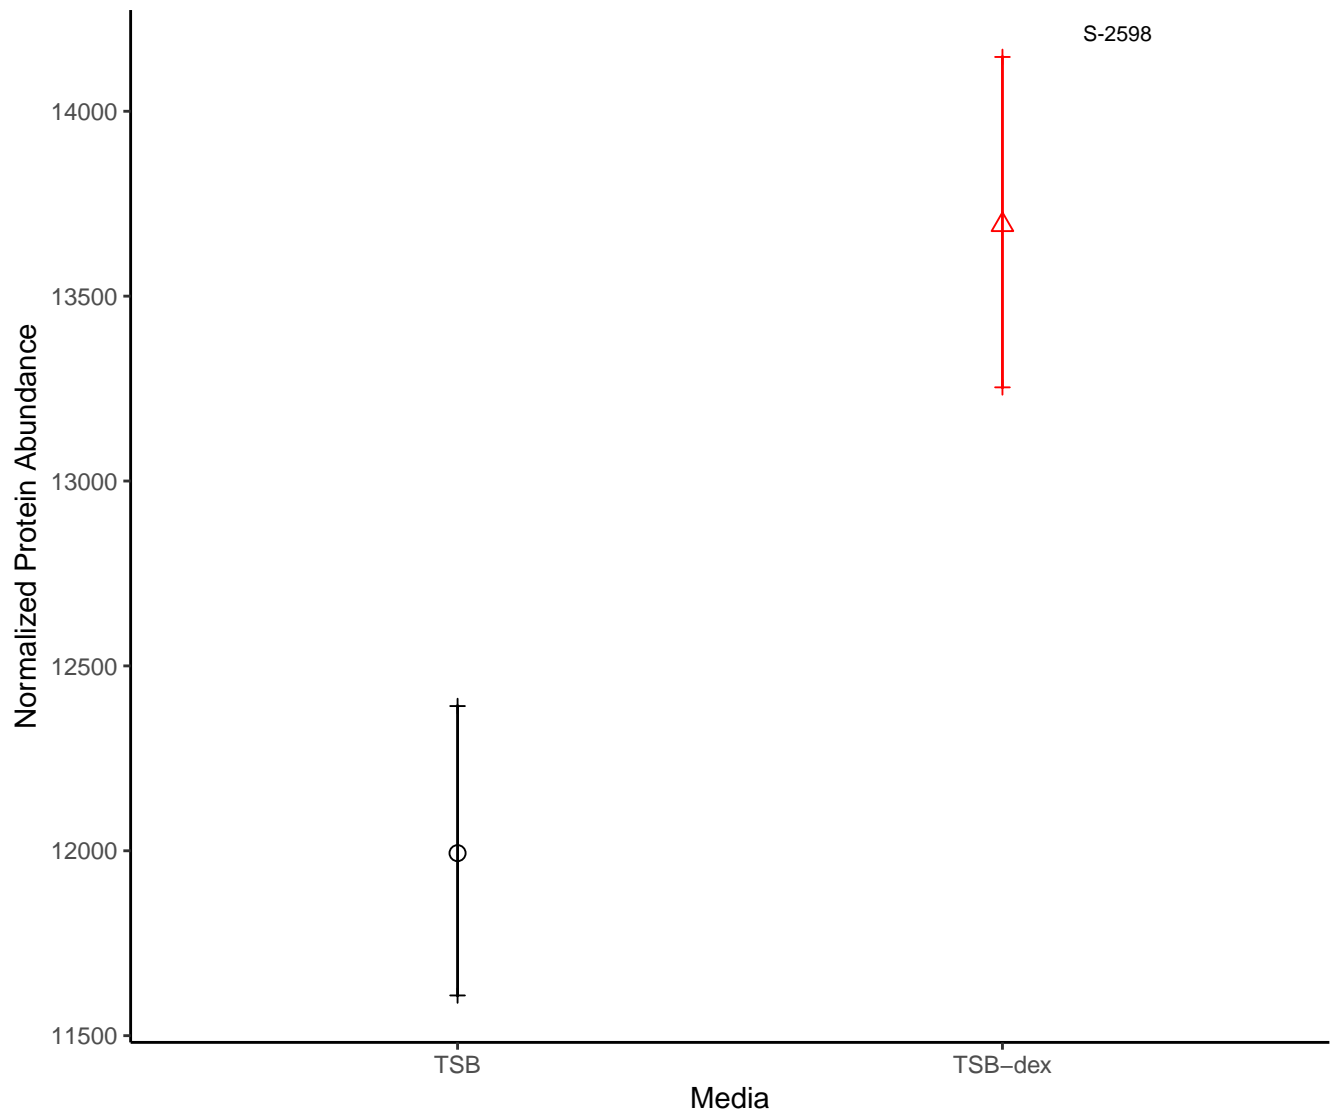

⊕ TSB-dex

△ TSB

# DTD\_STAAM

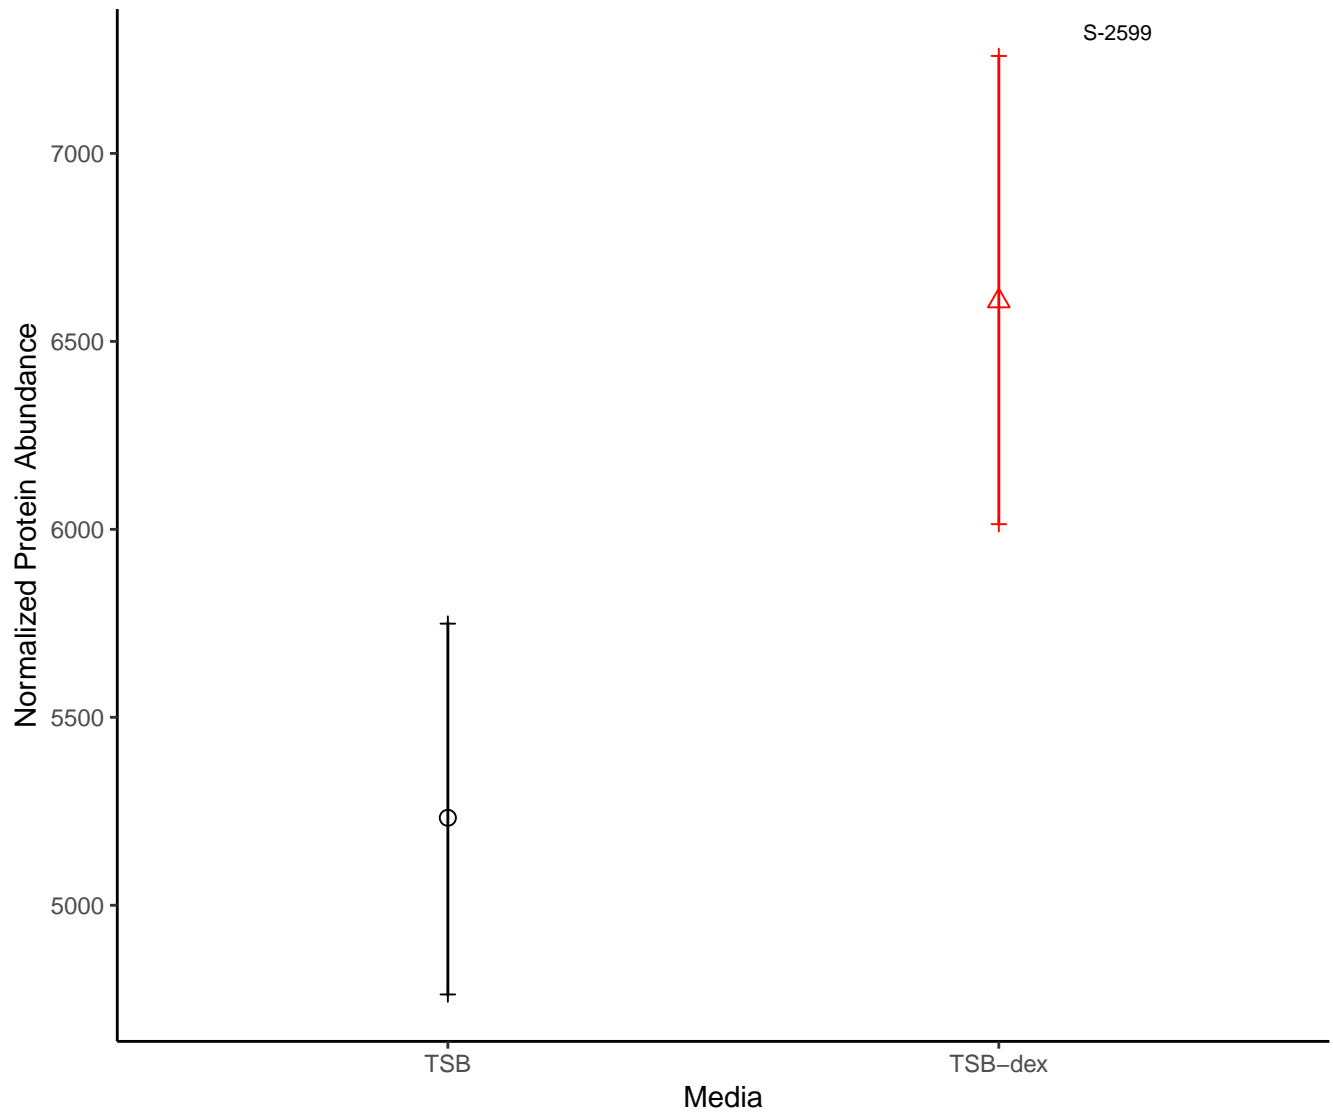

⊕ TSB-dex

△ TSB

# DYR\_STAAM

S-2600

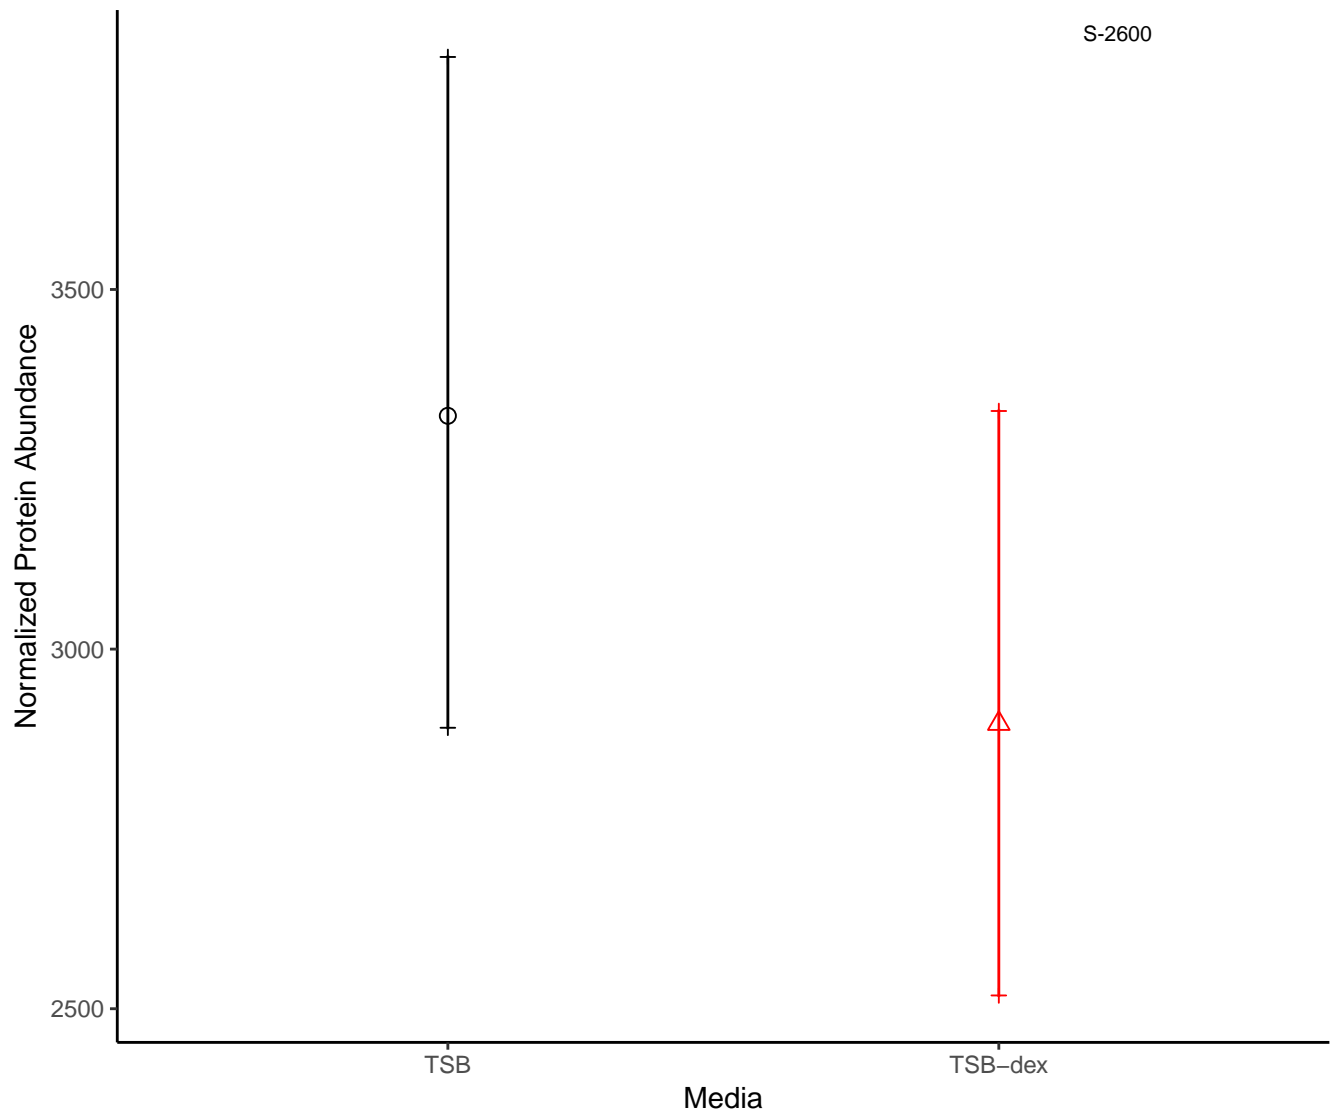

⊕ TSB-dex

△ TSB



# EBPS\_STAAM

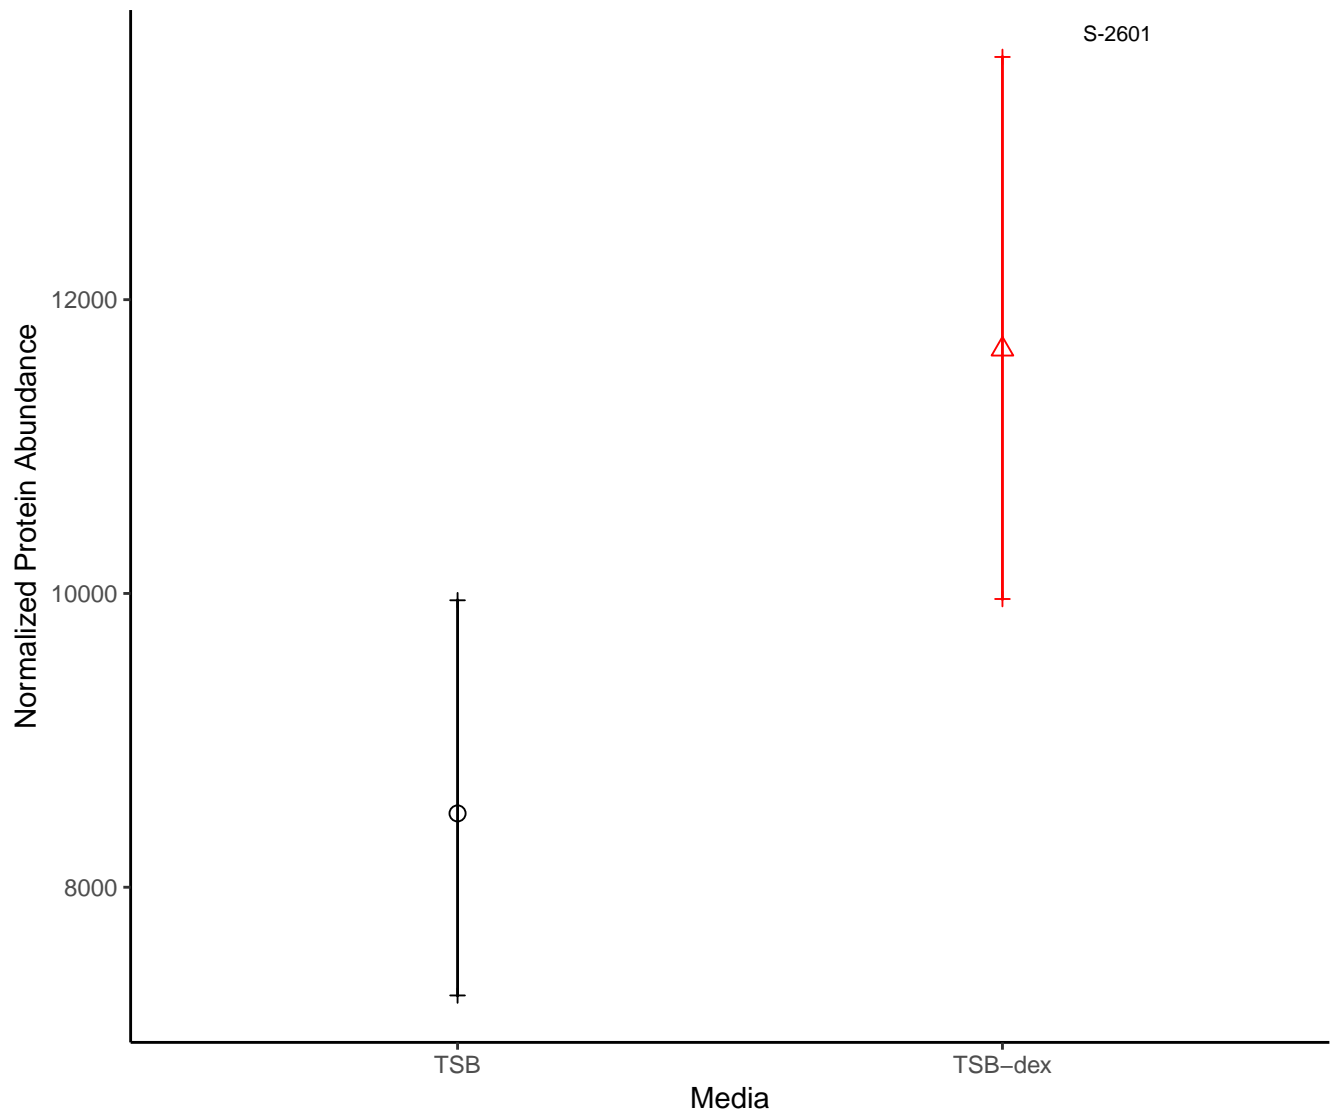

⊕ TSB-dex

△ TSB

# ECFA1\_STAAM

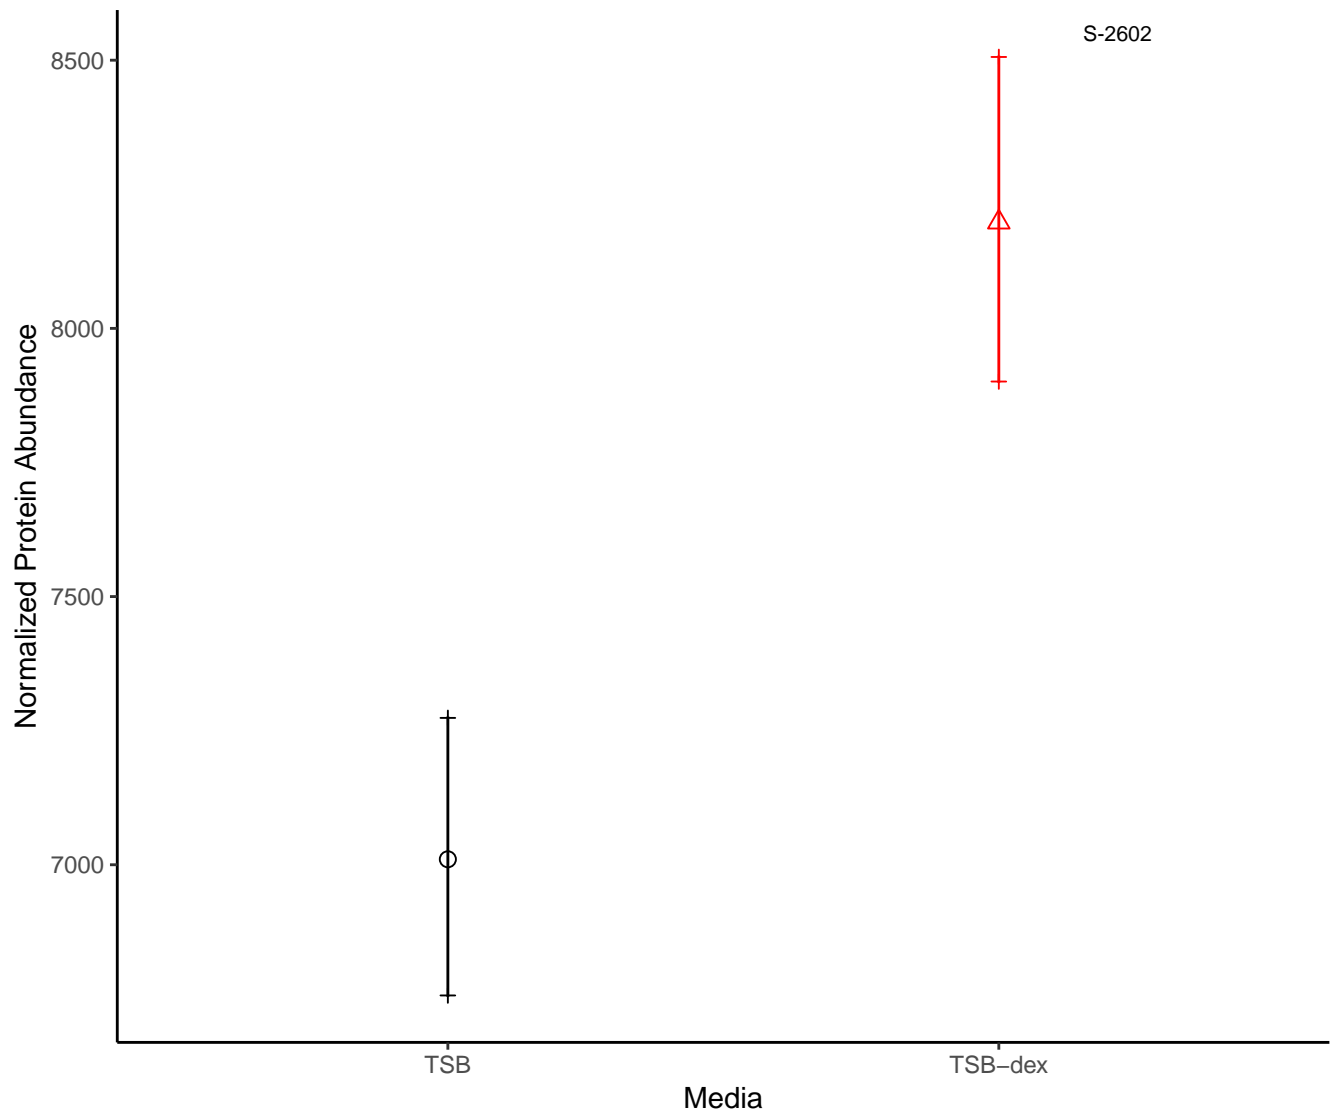

⊕ TSB-dex

△ TSB

# EFG\_STAAM

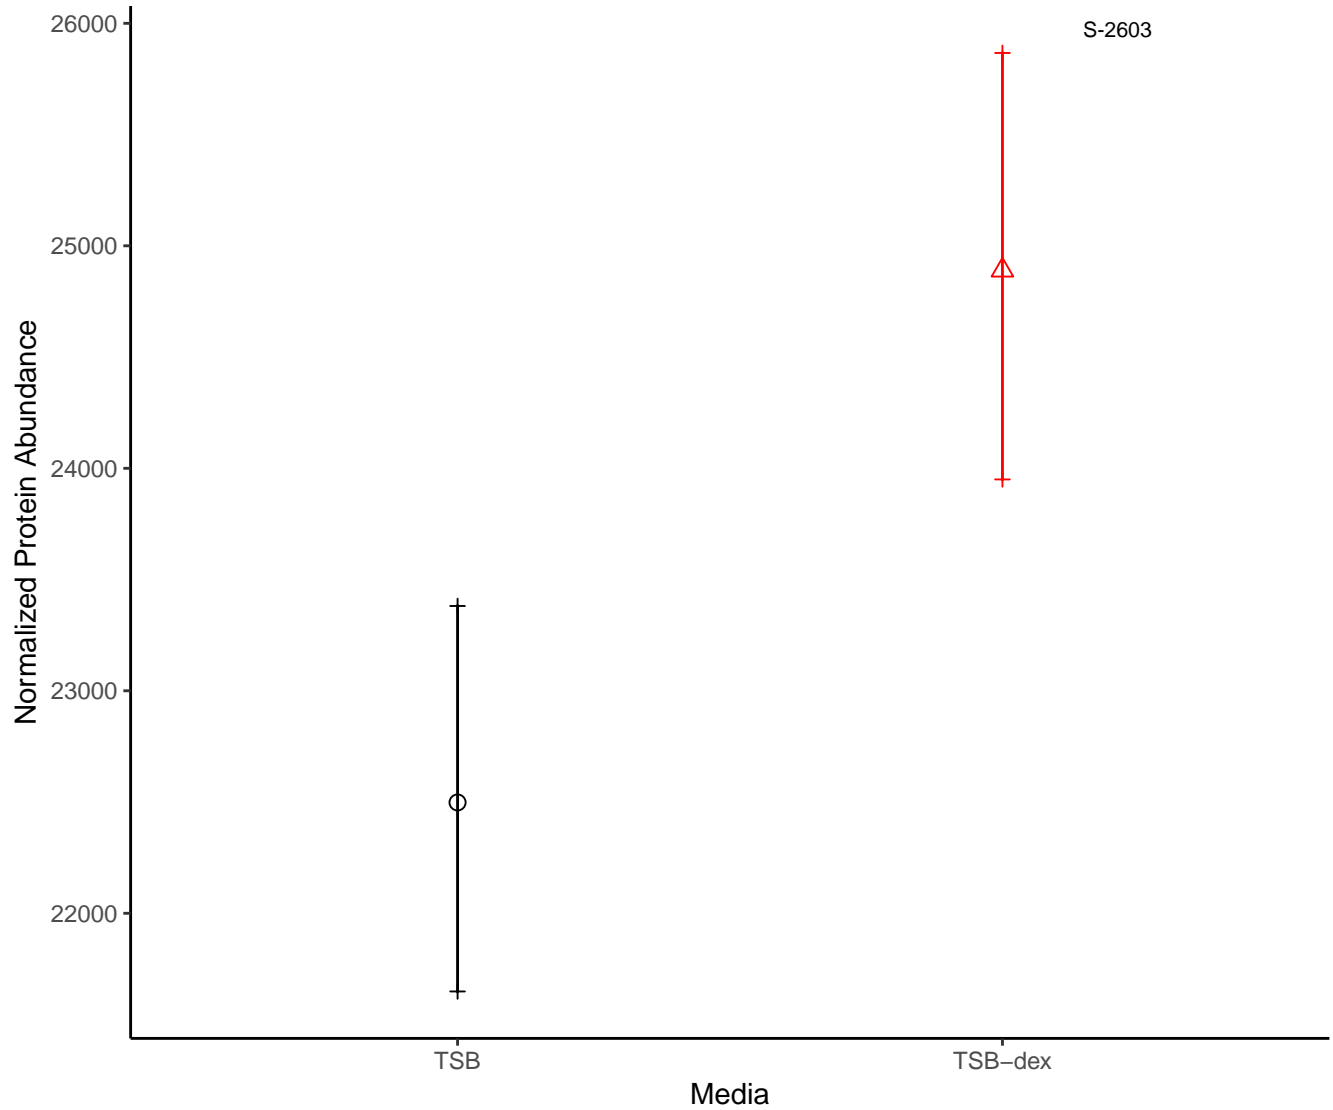

⊕ TSB-dex

△ TSB

# EFP\_STAAM

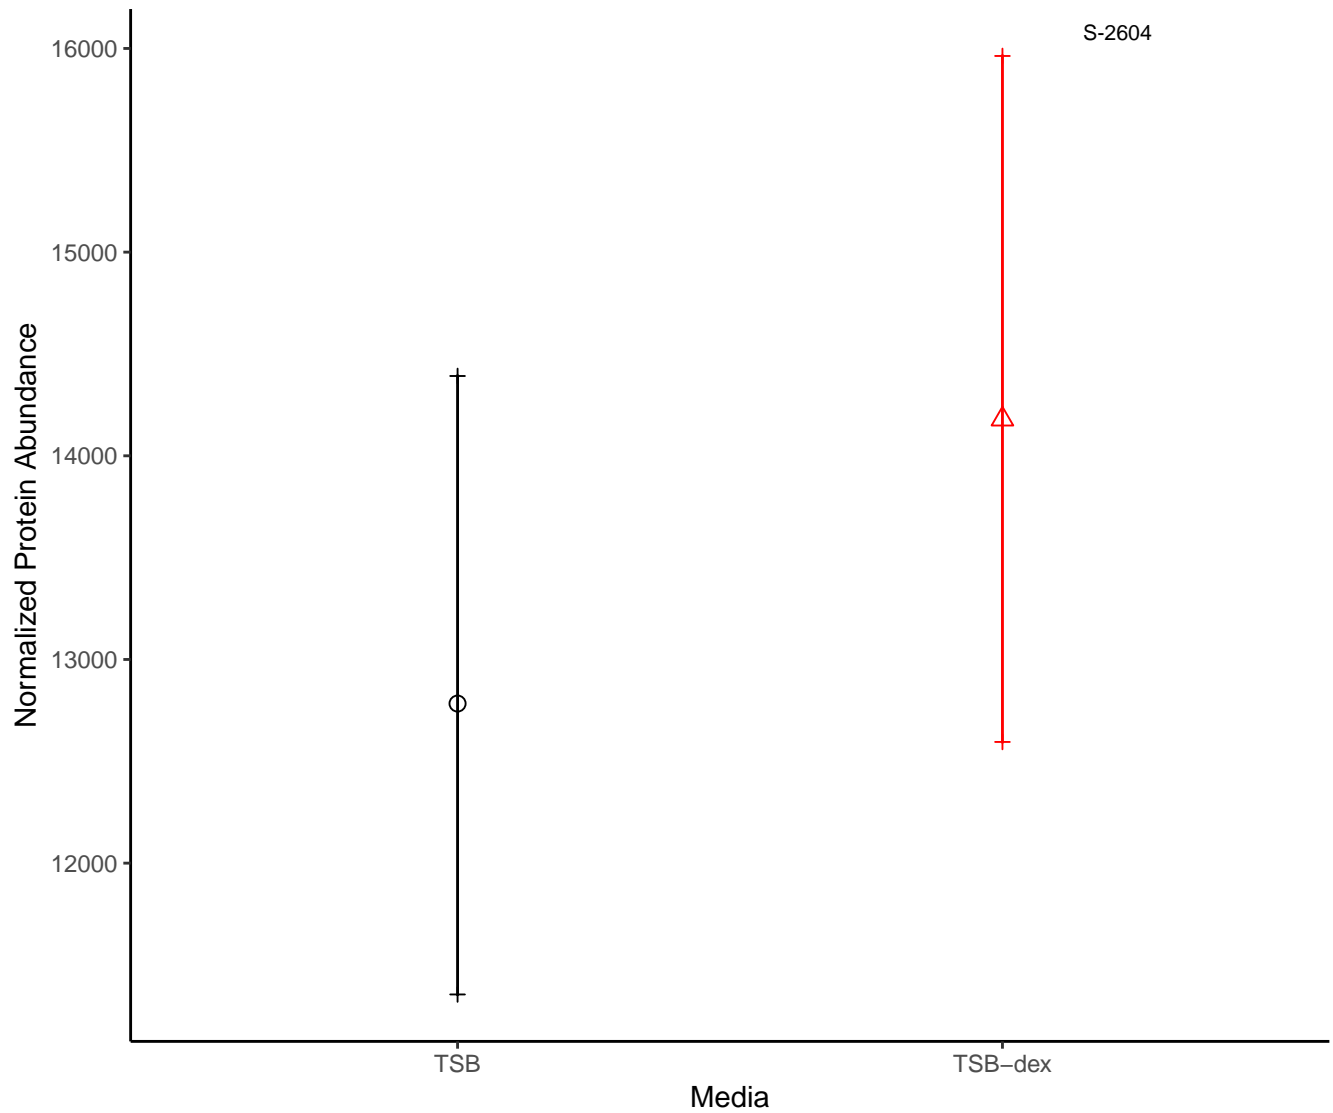

⊕ TSB-dex

△ TSB

# EFTS\_STAAM

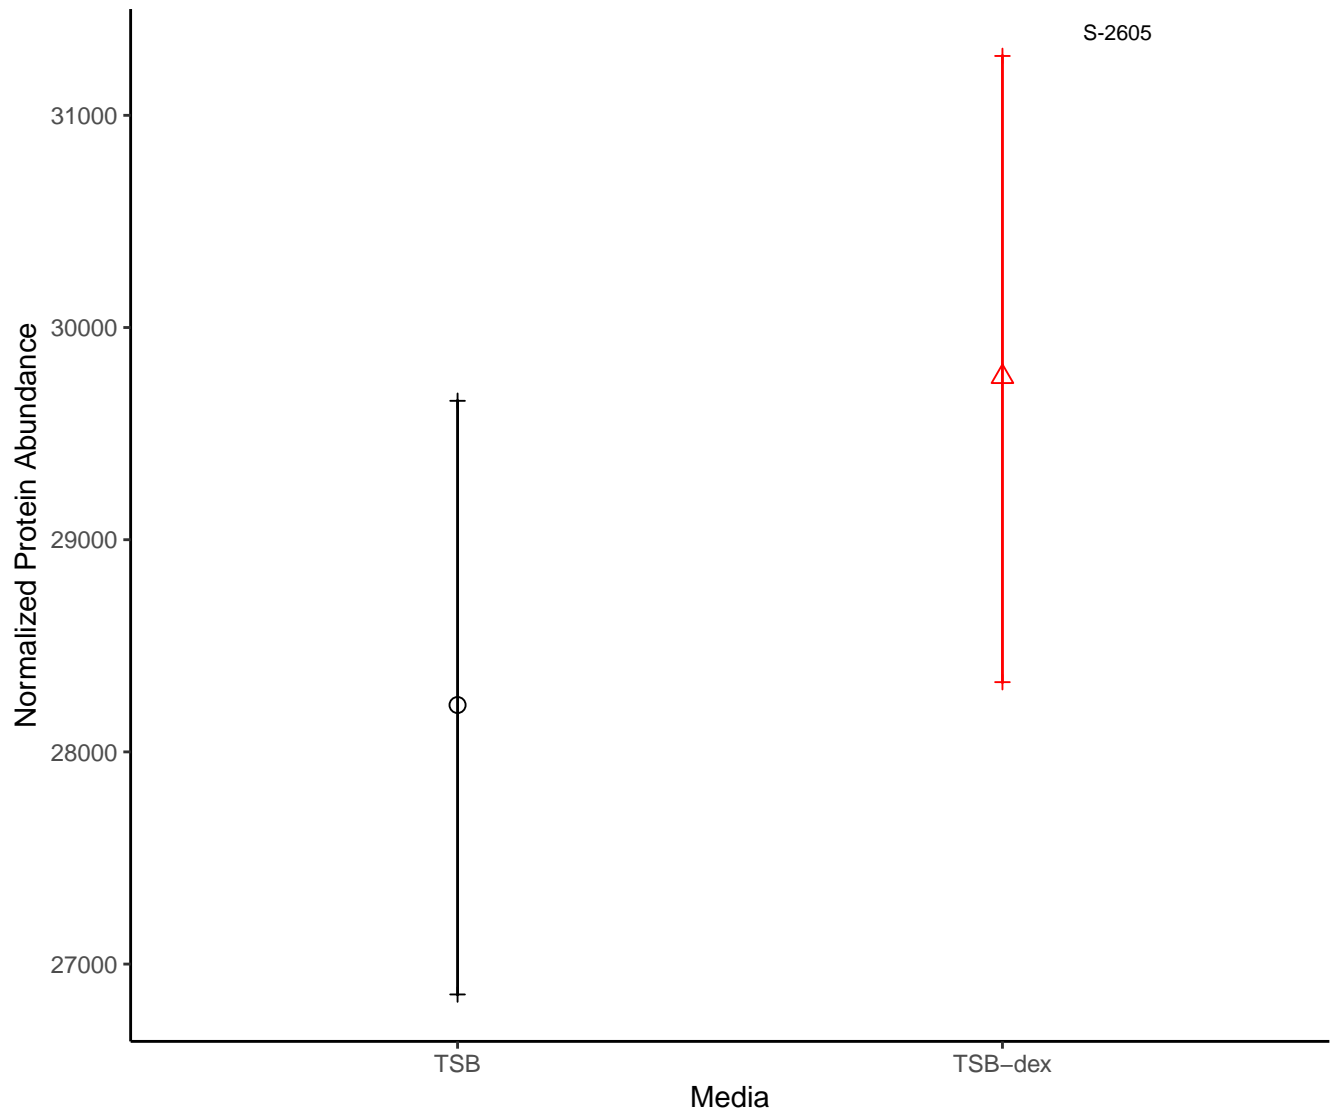

⊖ TSB-dex

△ TSB

# EFTU\_STAAM

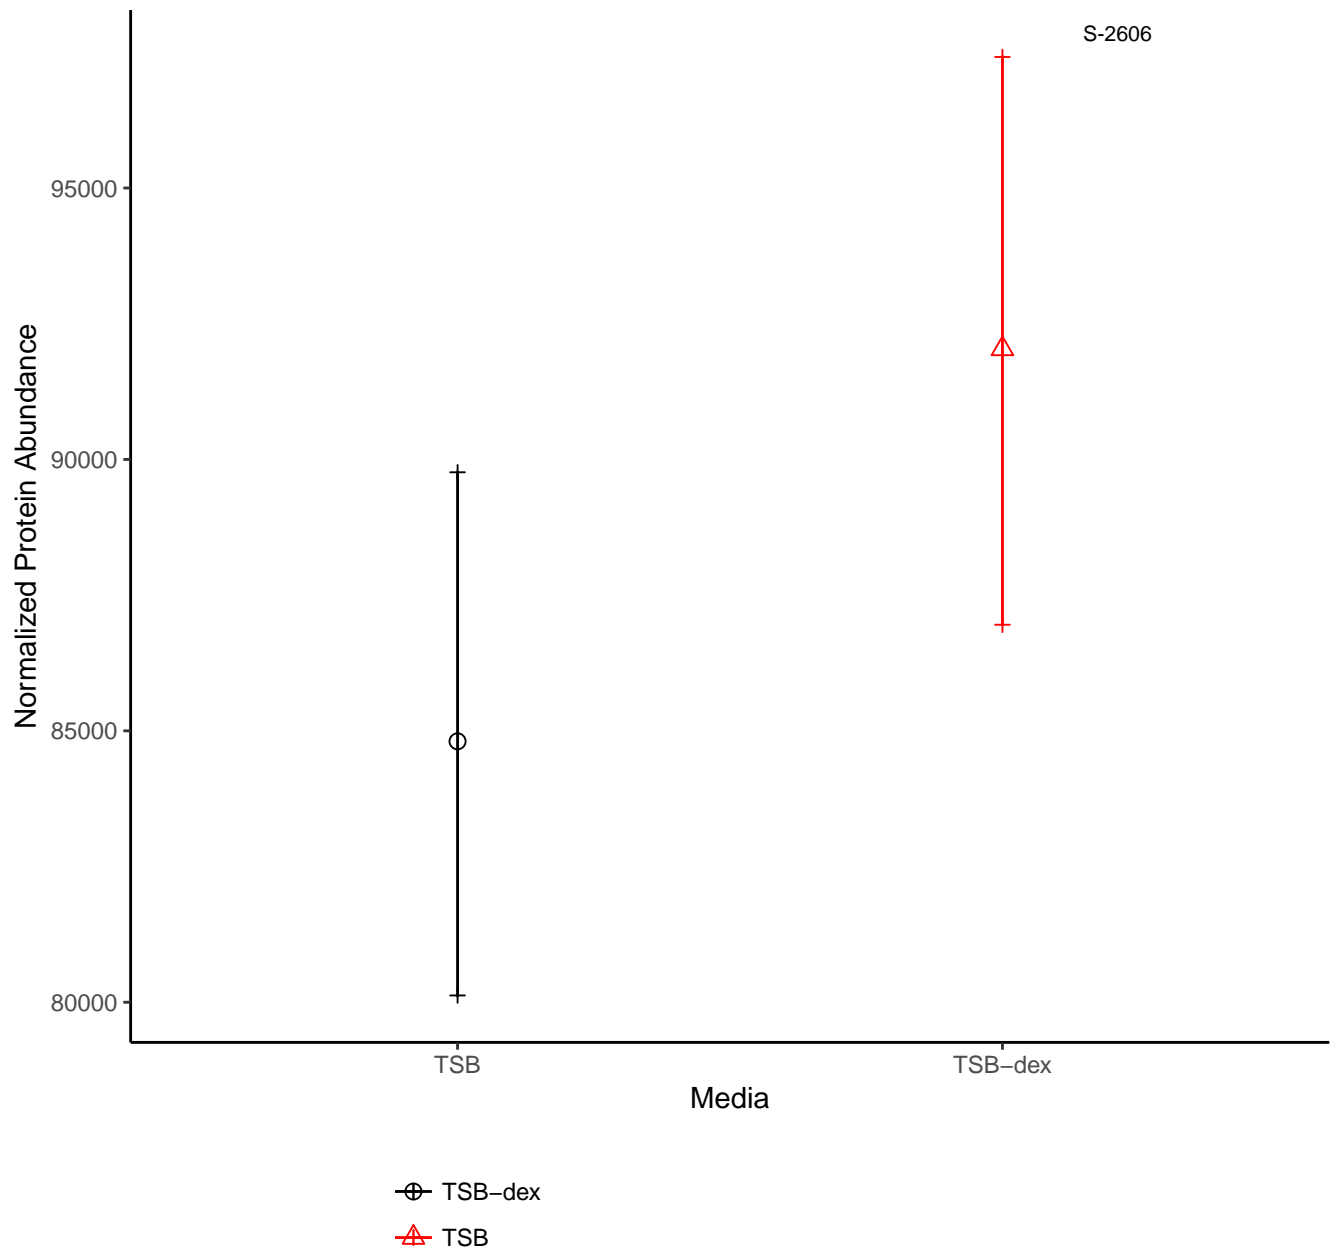

# ENO\_STAAM

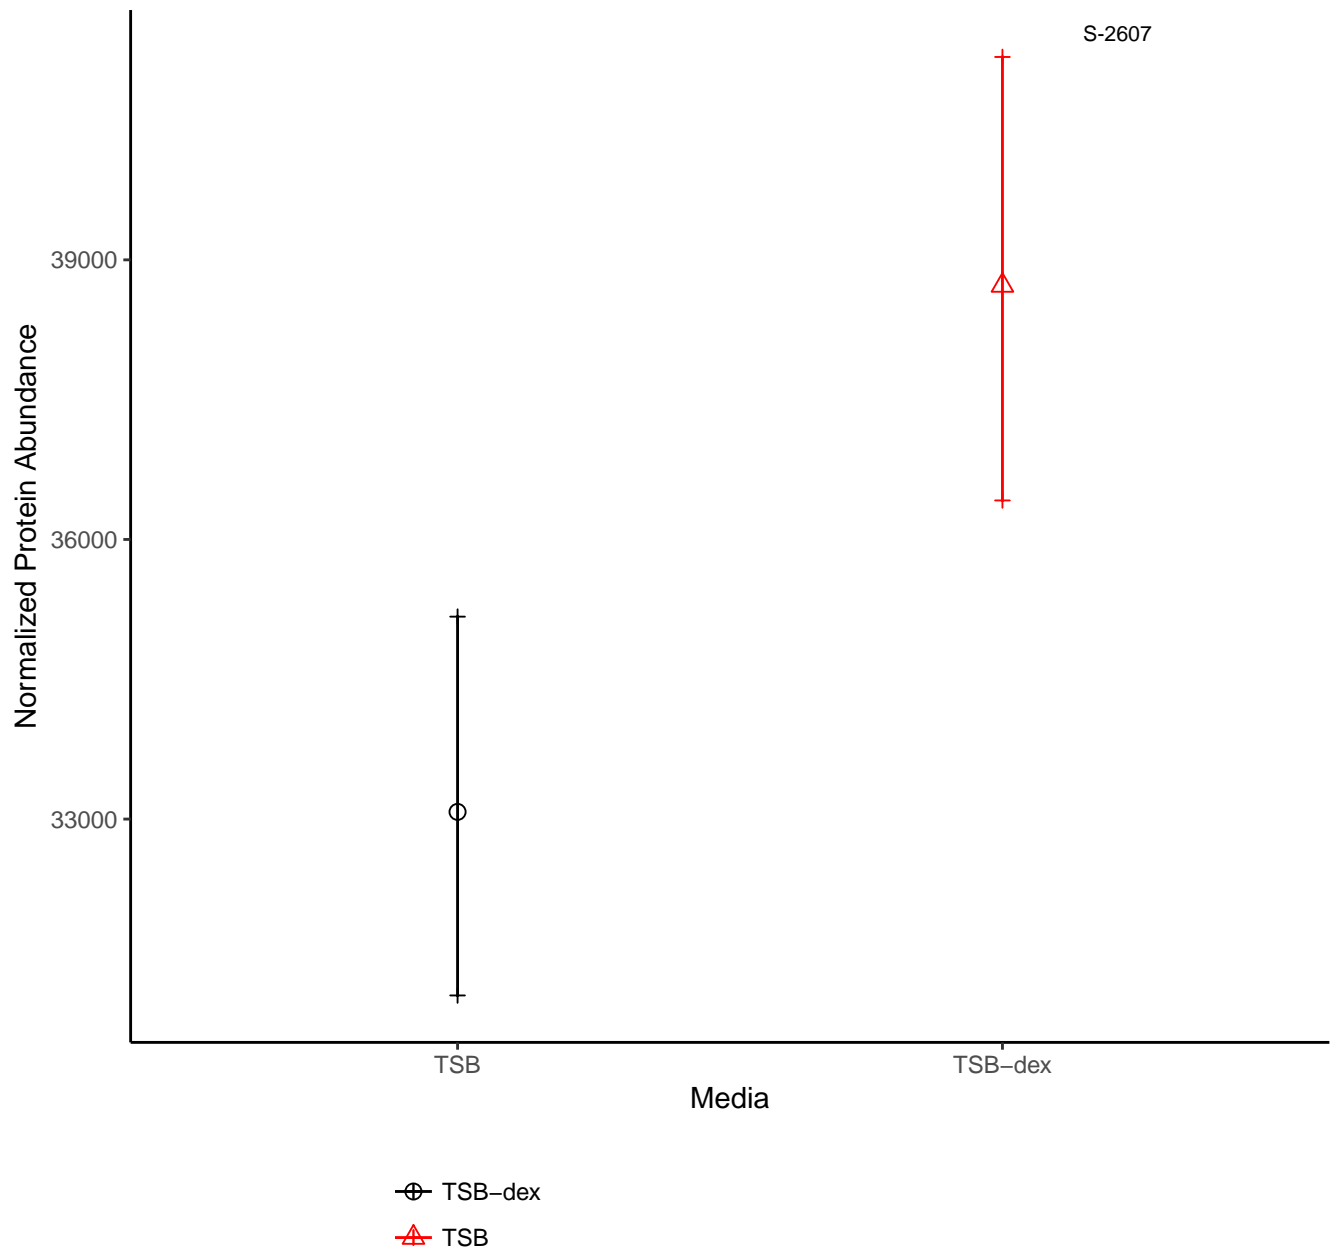

# ERA\_STAAM

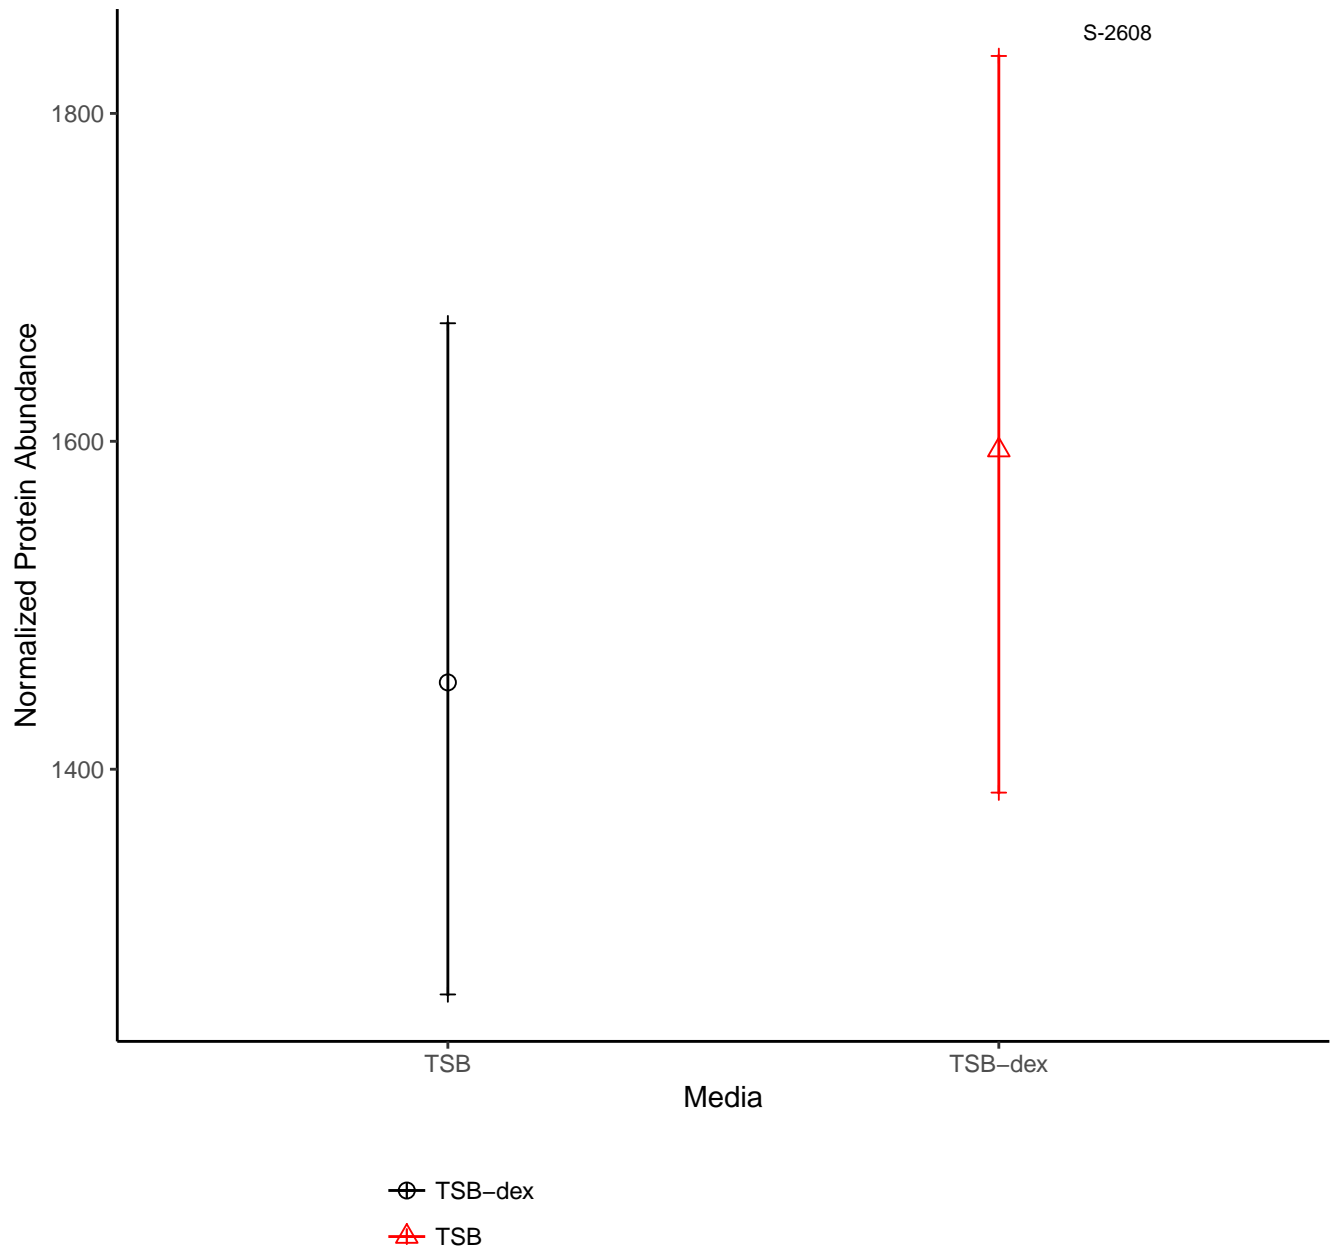



# ERMA\_STAAM

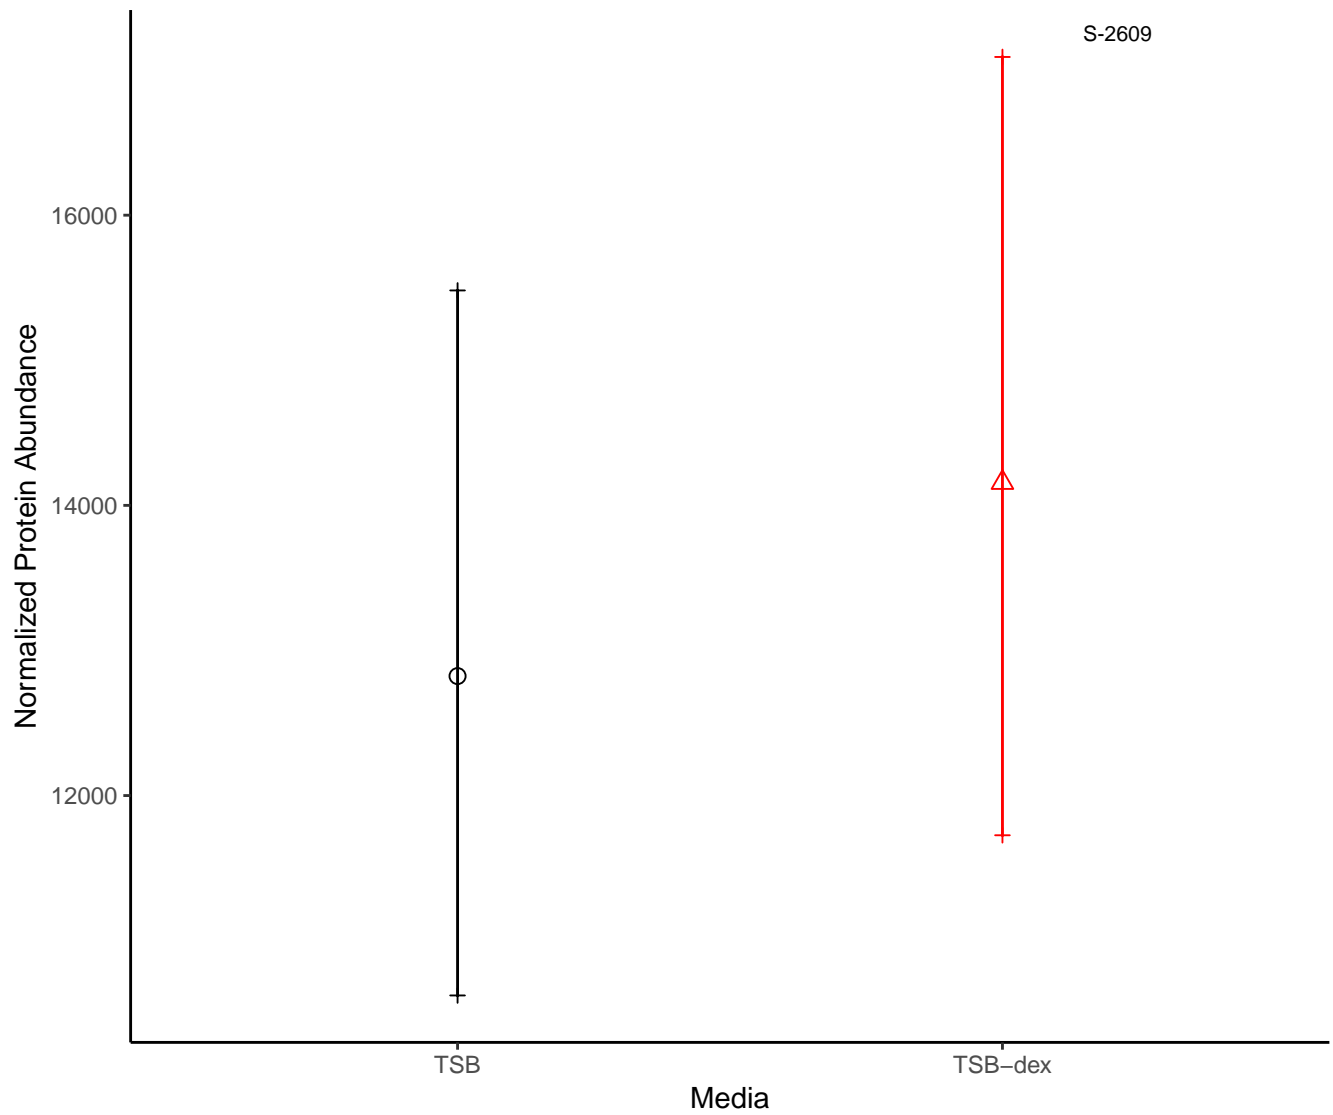

⊕ TSB-dex

△ TSB

# ESSA\_STAAM

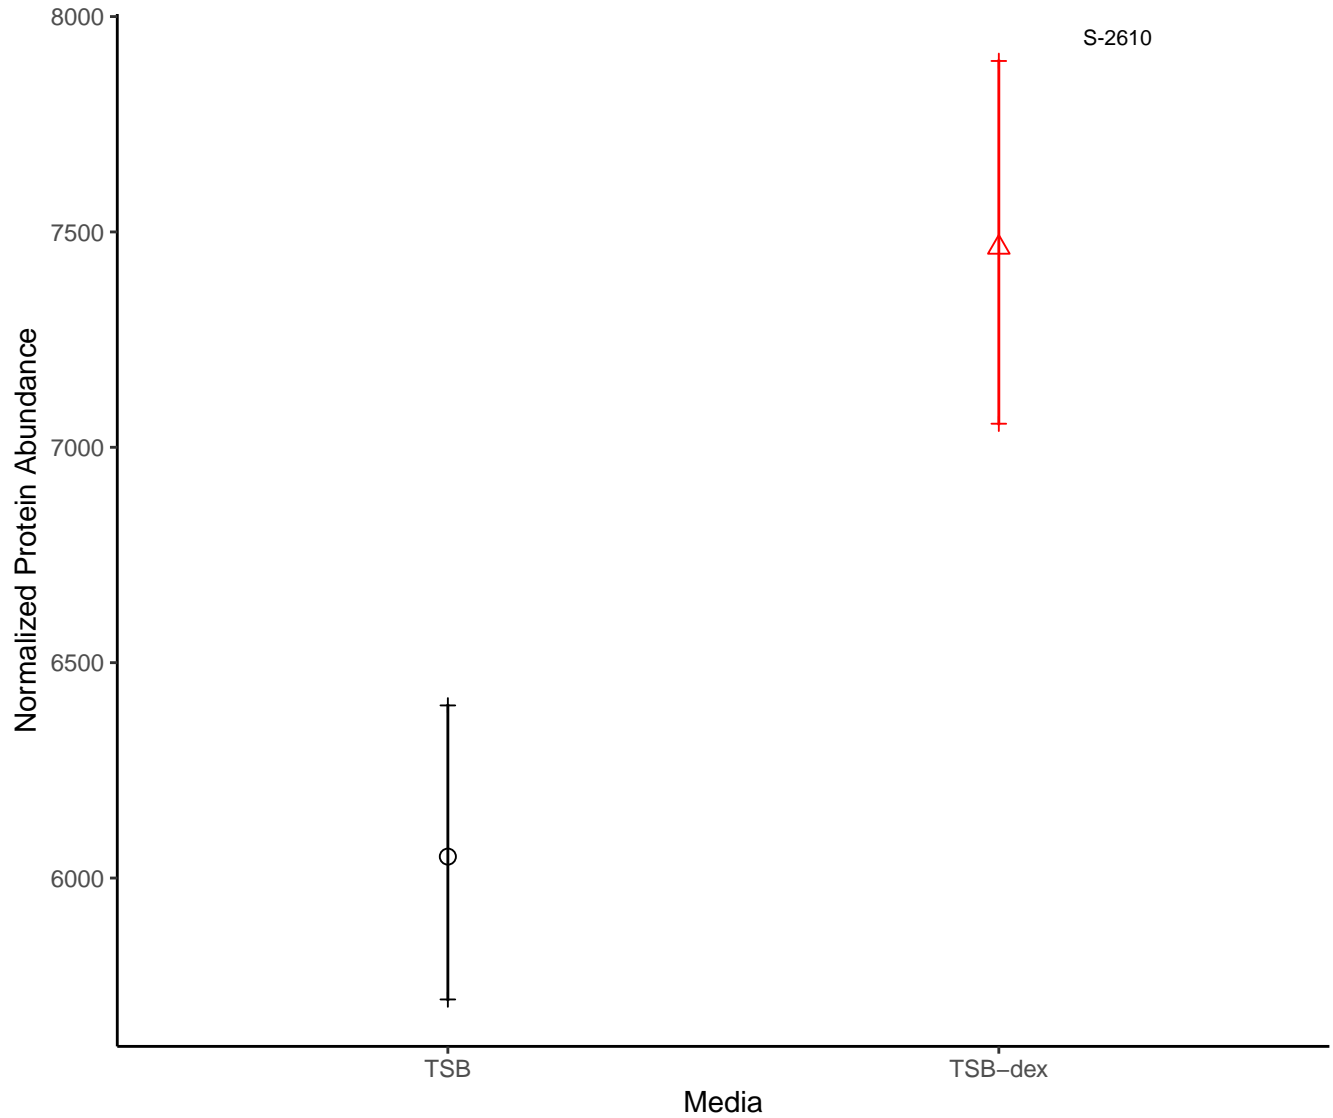

⊕ TSB-dex

△ TSB

# ESXA\_STAAM

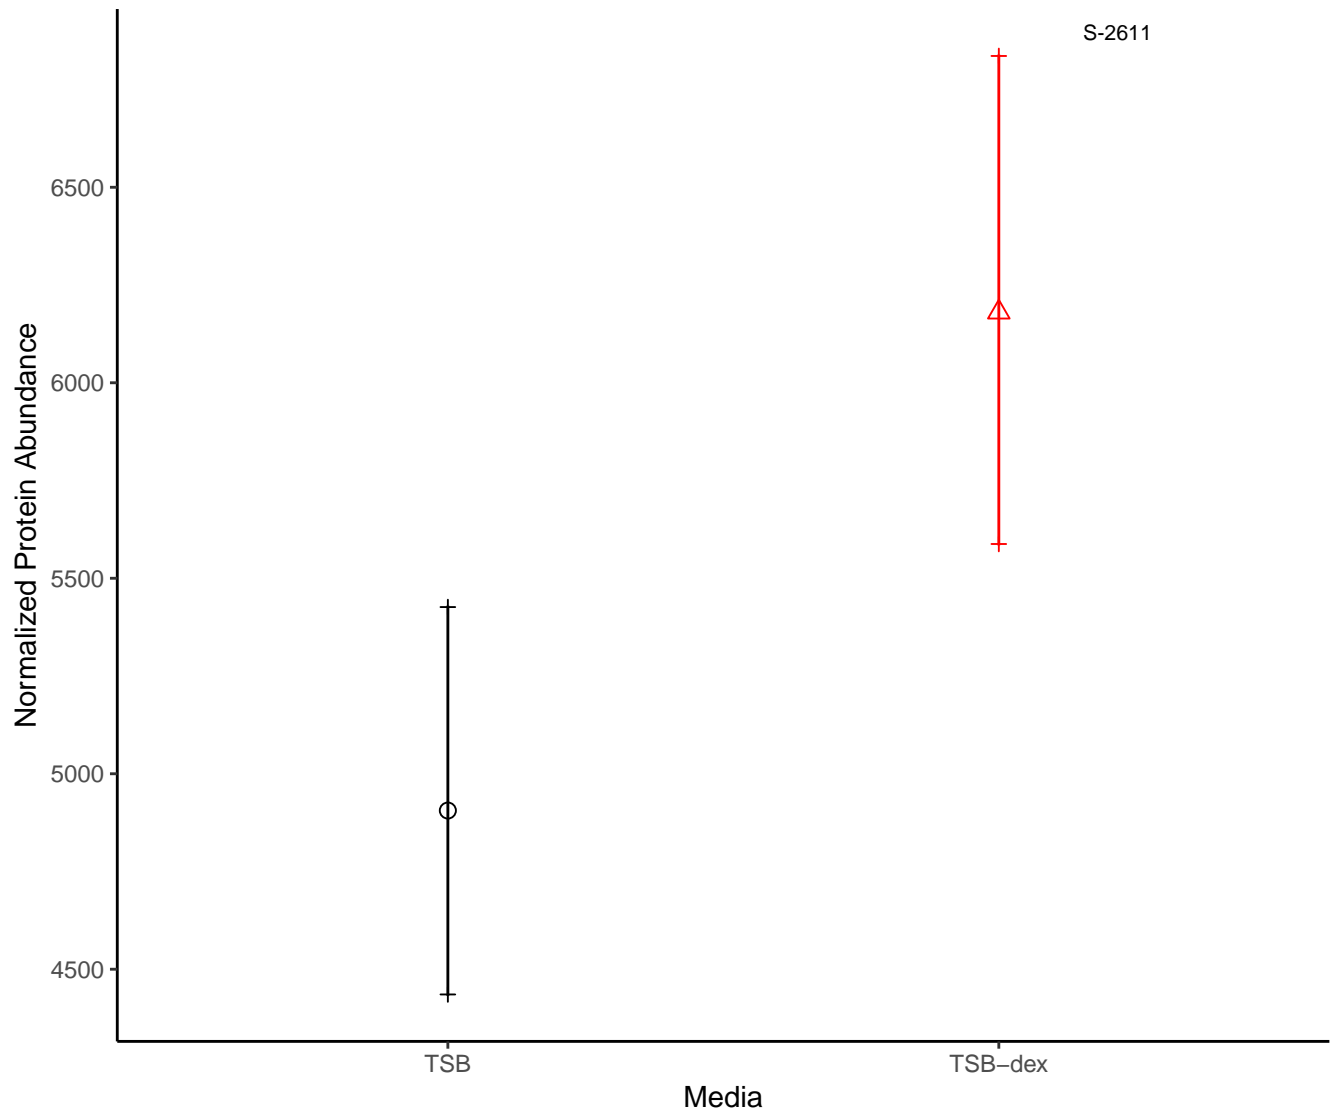

⊕ TSB-dex

△ TSB

# EX7L\_STAAM

S-2612

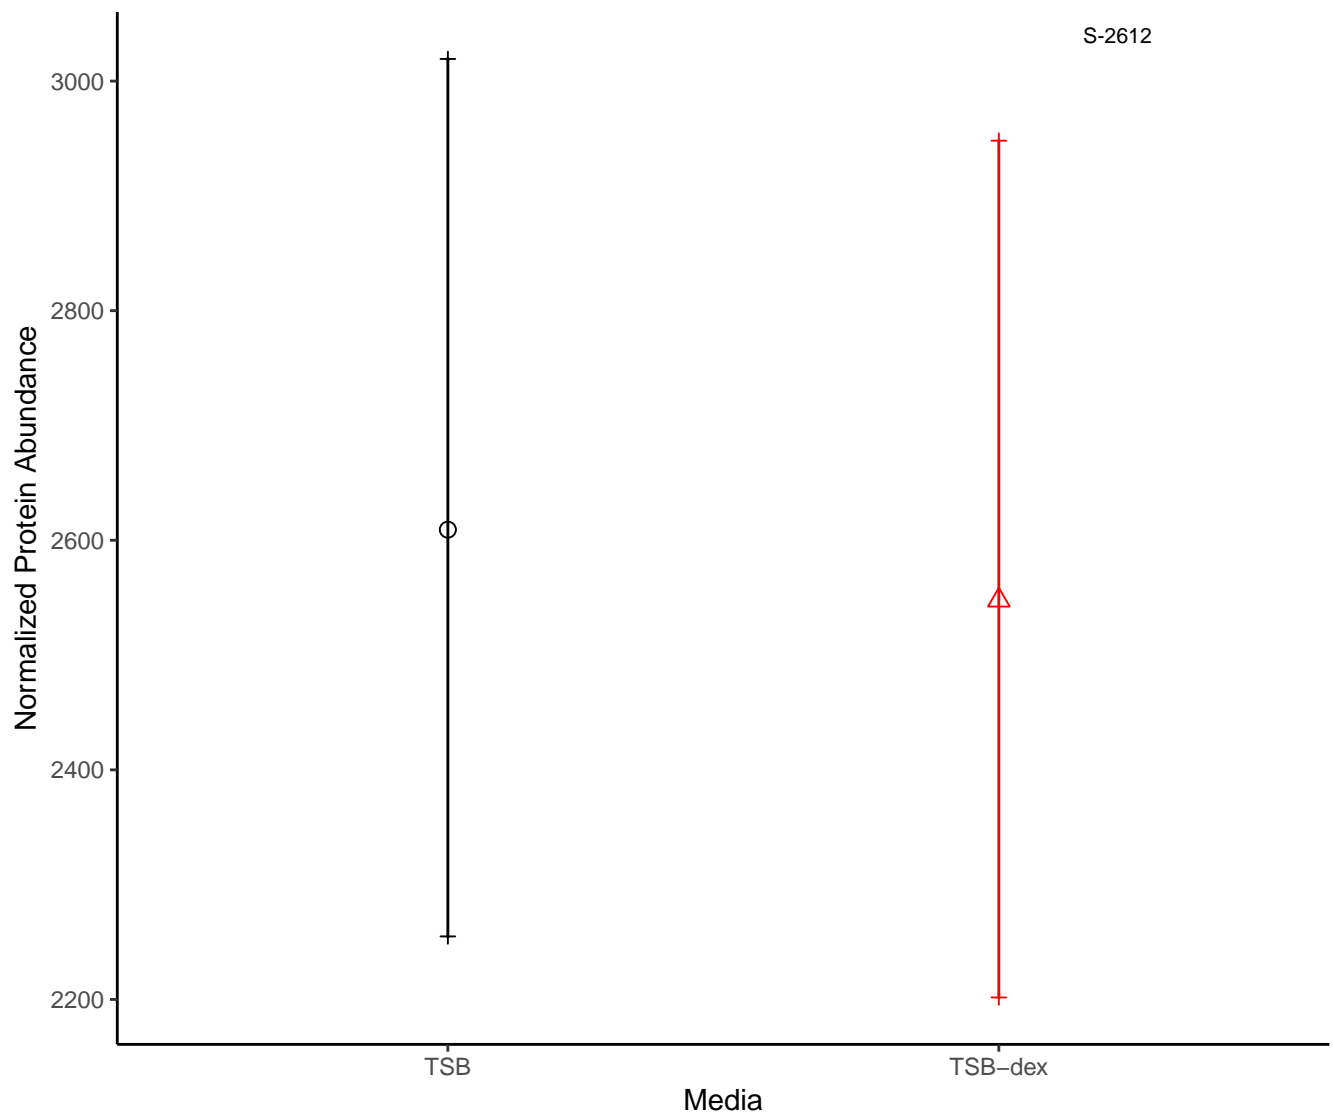

⊕ TSB-dex

△ TSB

# EZRA\_STAAM

S-2613

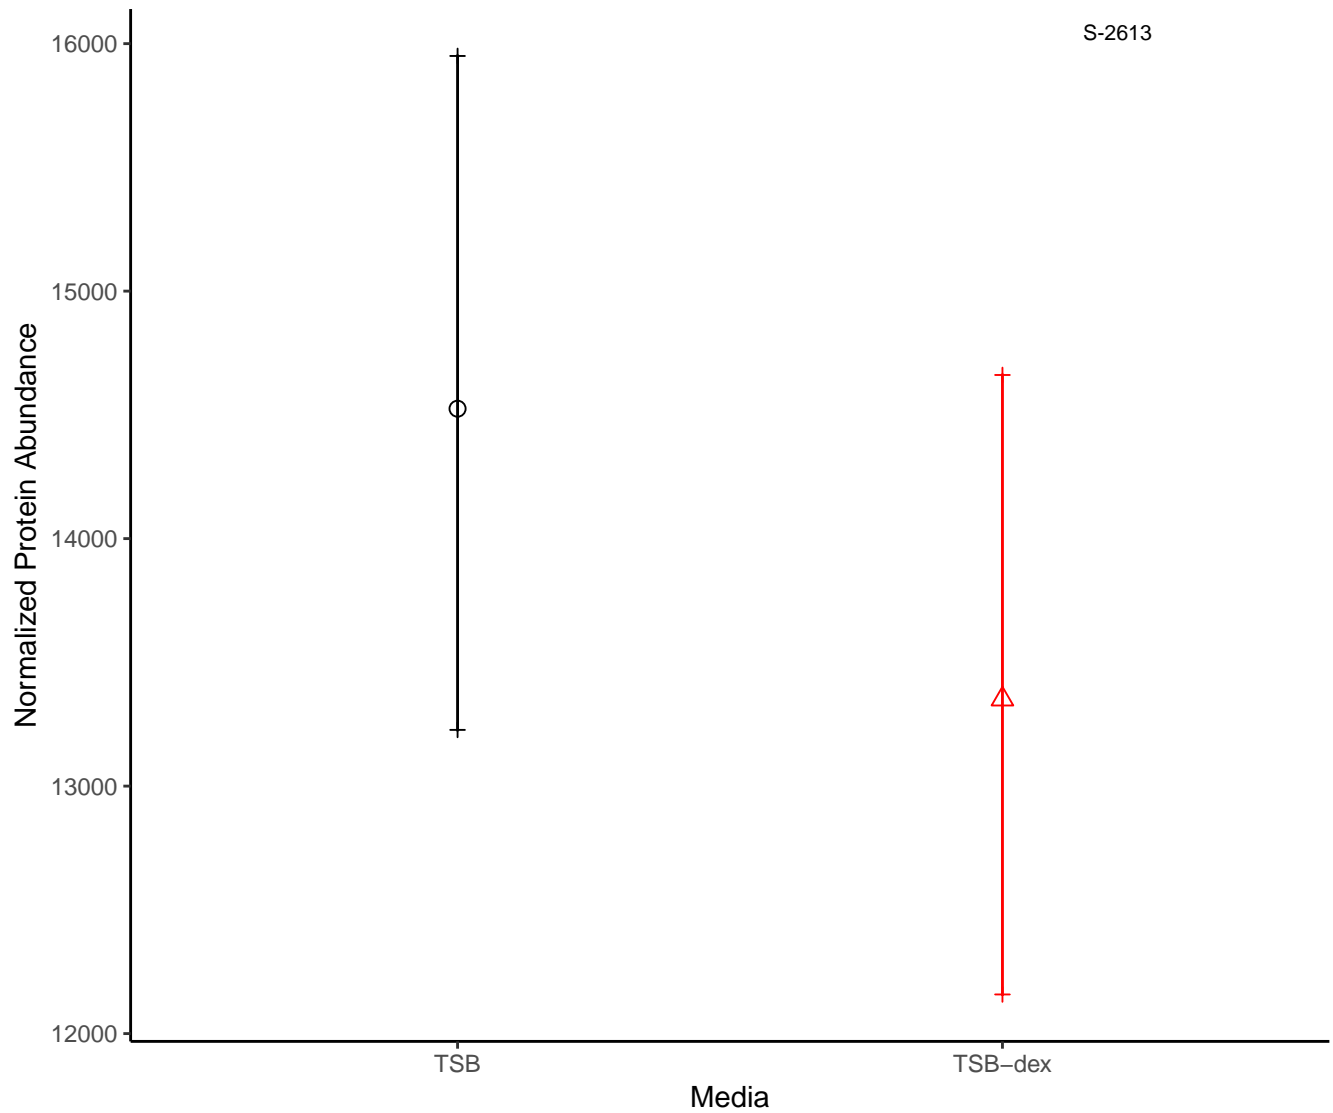

⊕ TSB-dex

△ TSB

# FABD\_STAAM

S-2614

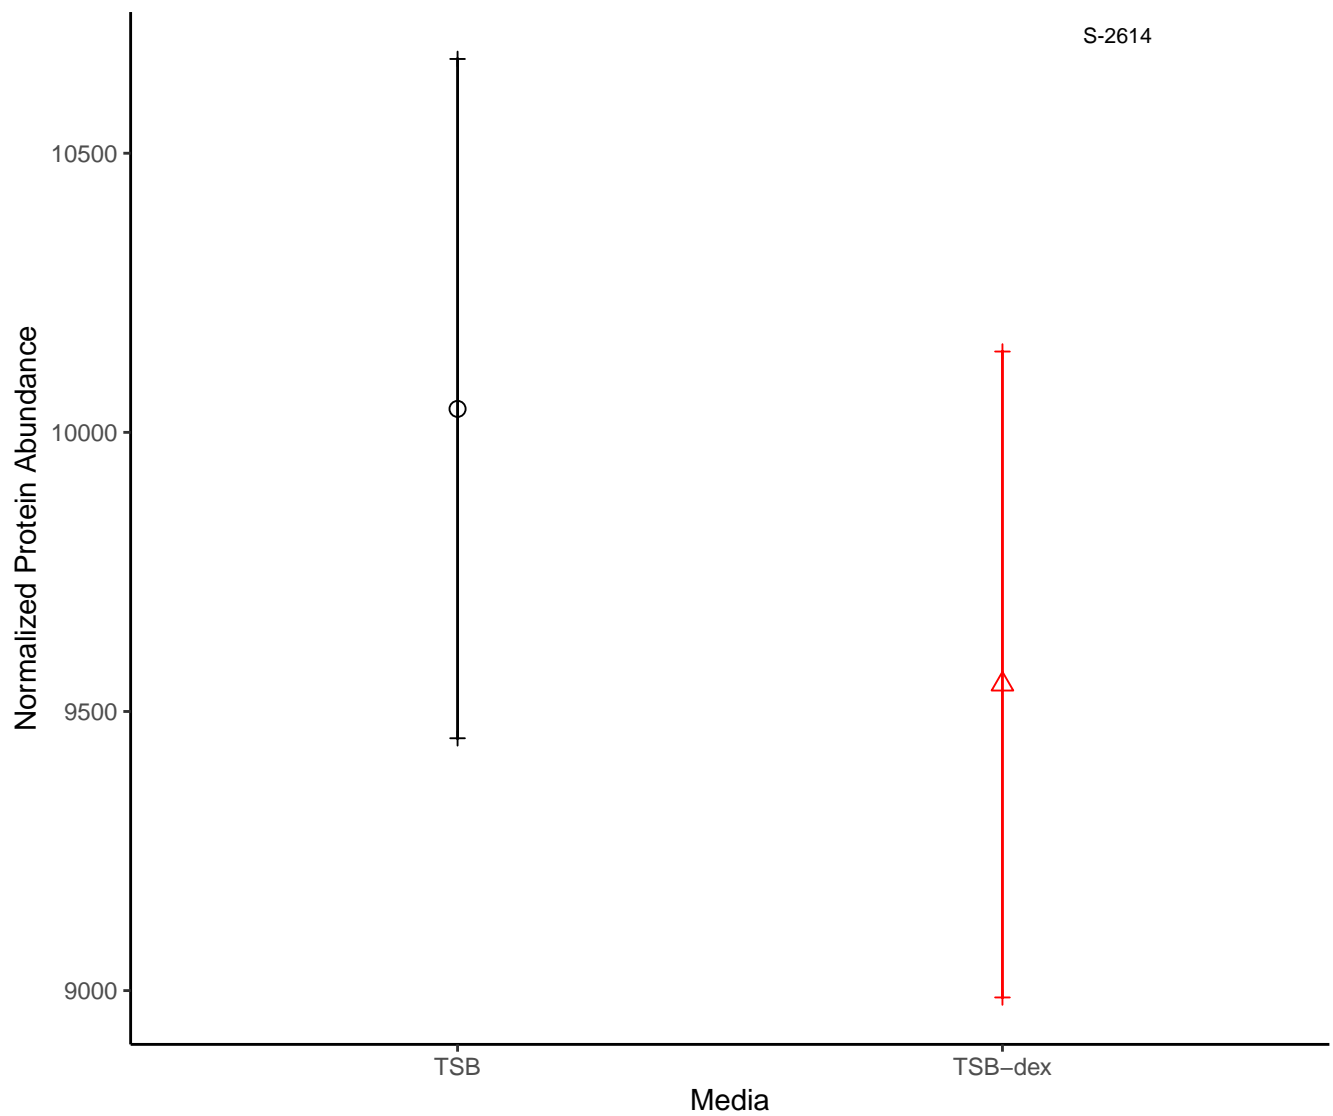

⊖ TSB-dex

△ TSB

# FABF\_STAAM

S-2615

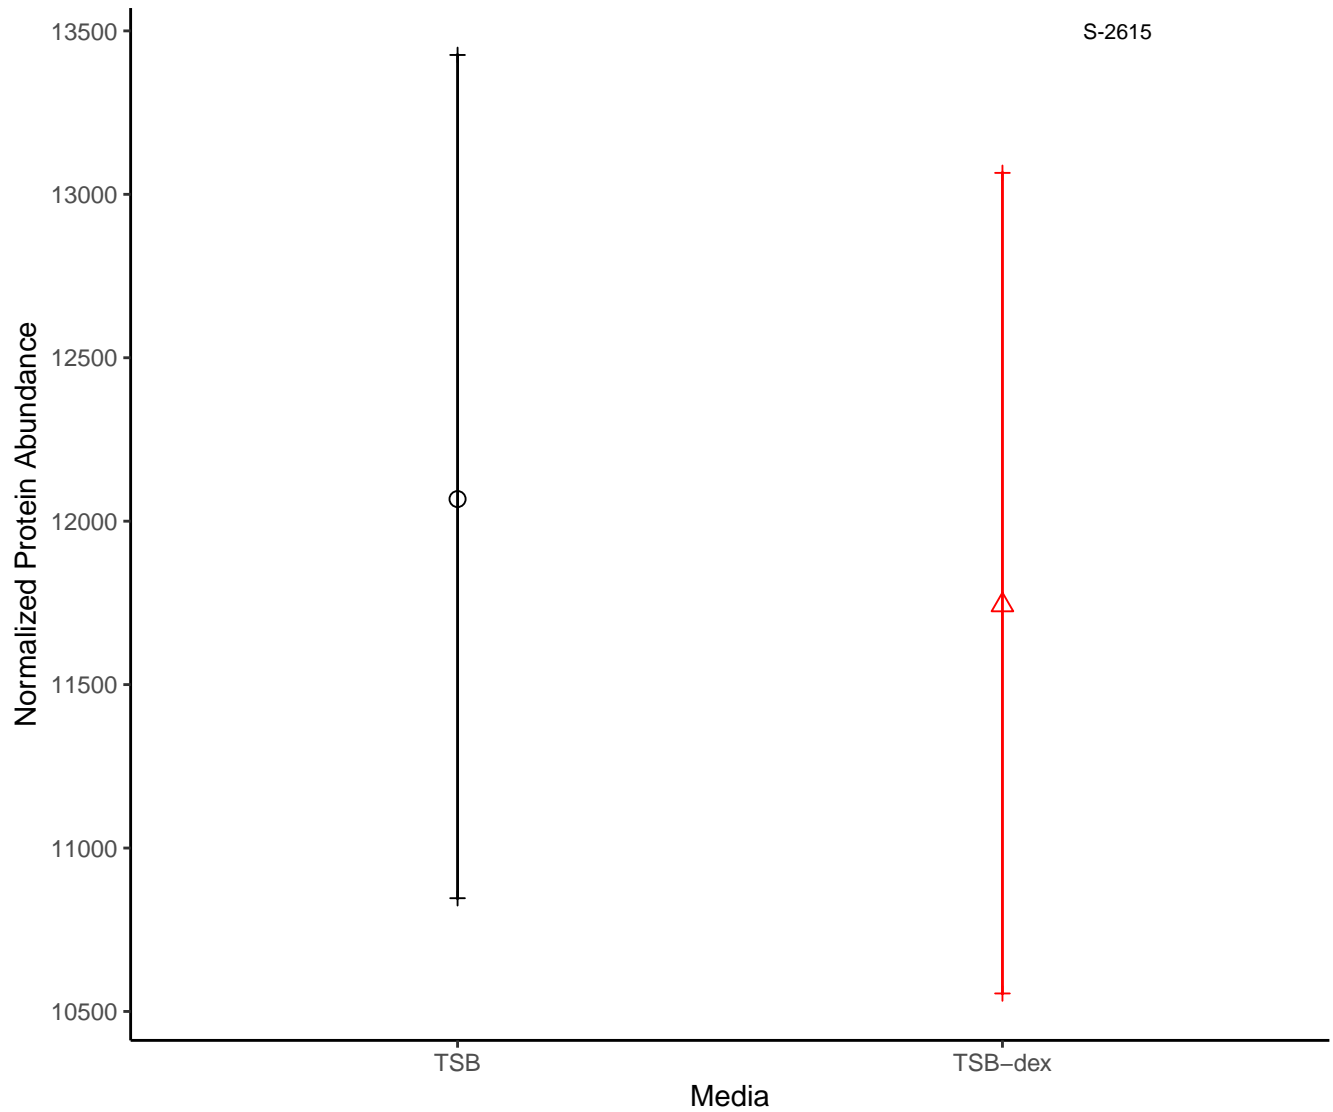

⊕ TSB-dex

△ TSB

# FABG\_STAAM

S-2616

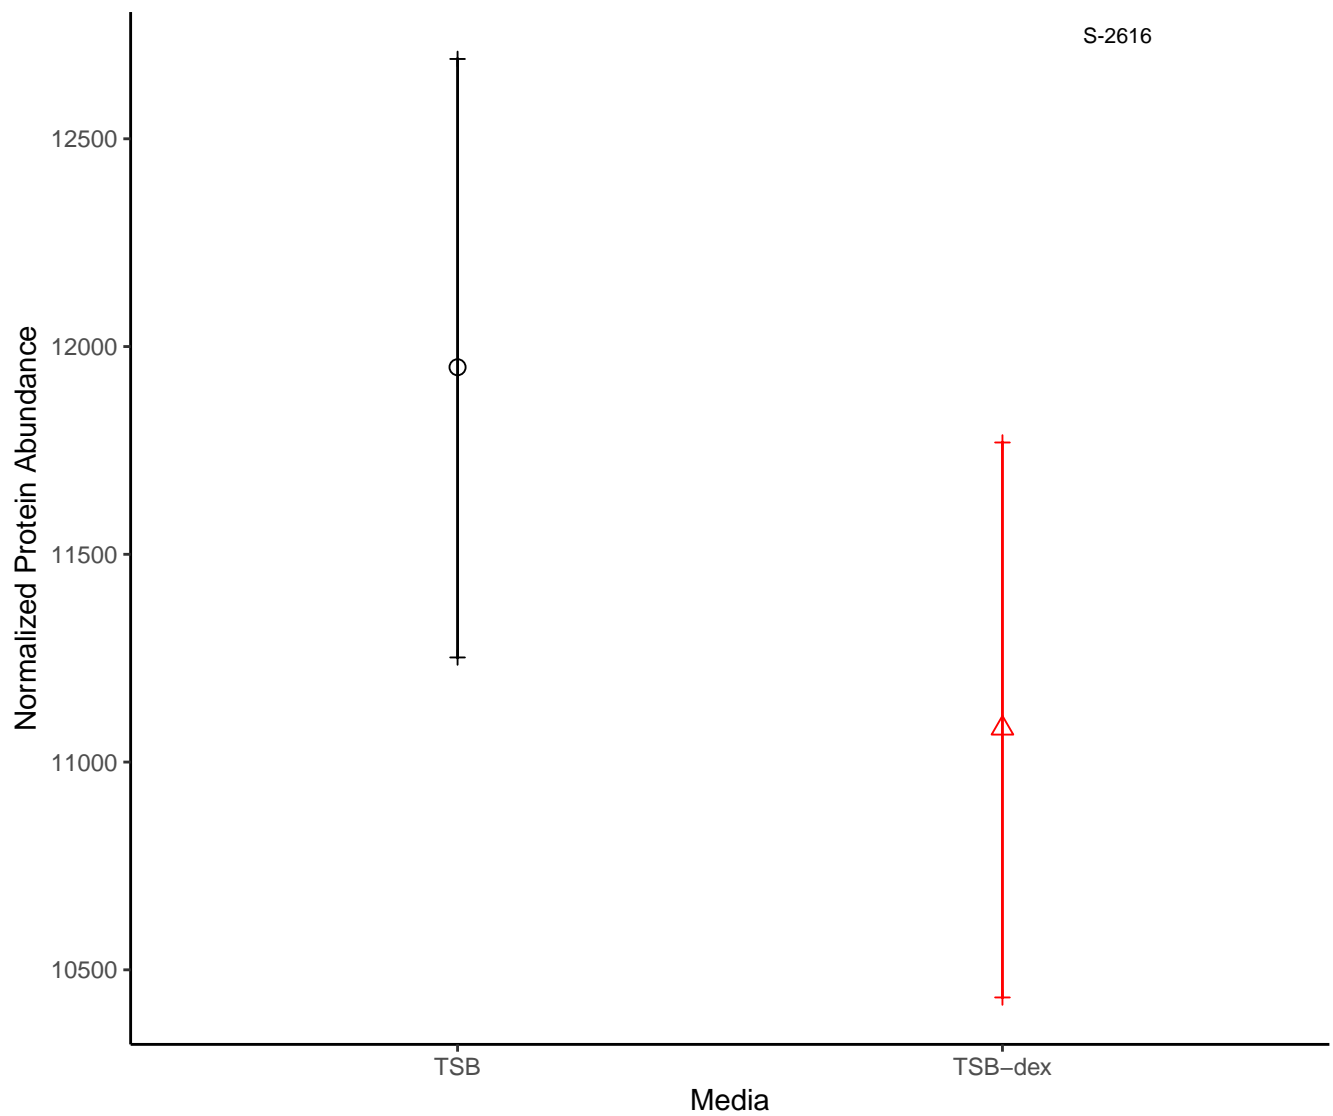

⊙ TSB-dex

△ TSB



# FABH\_STAAM

S-2617

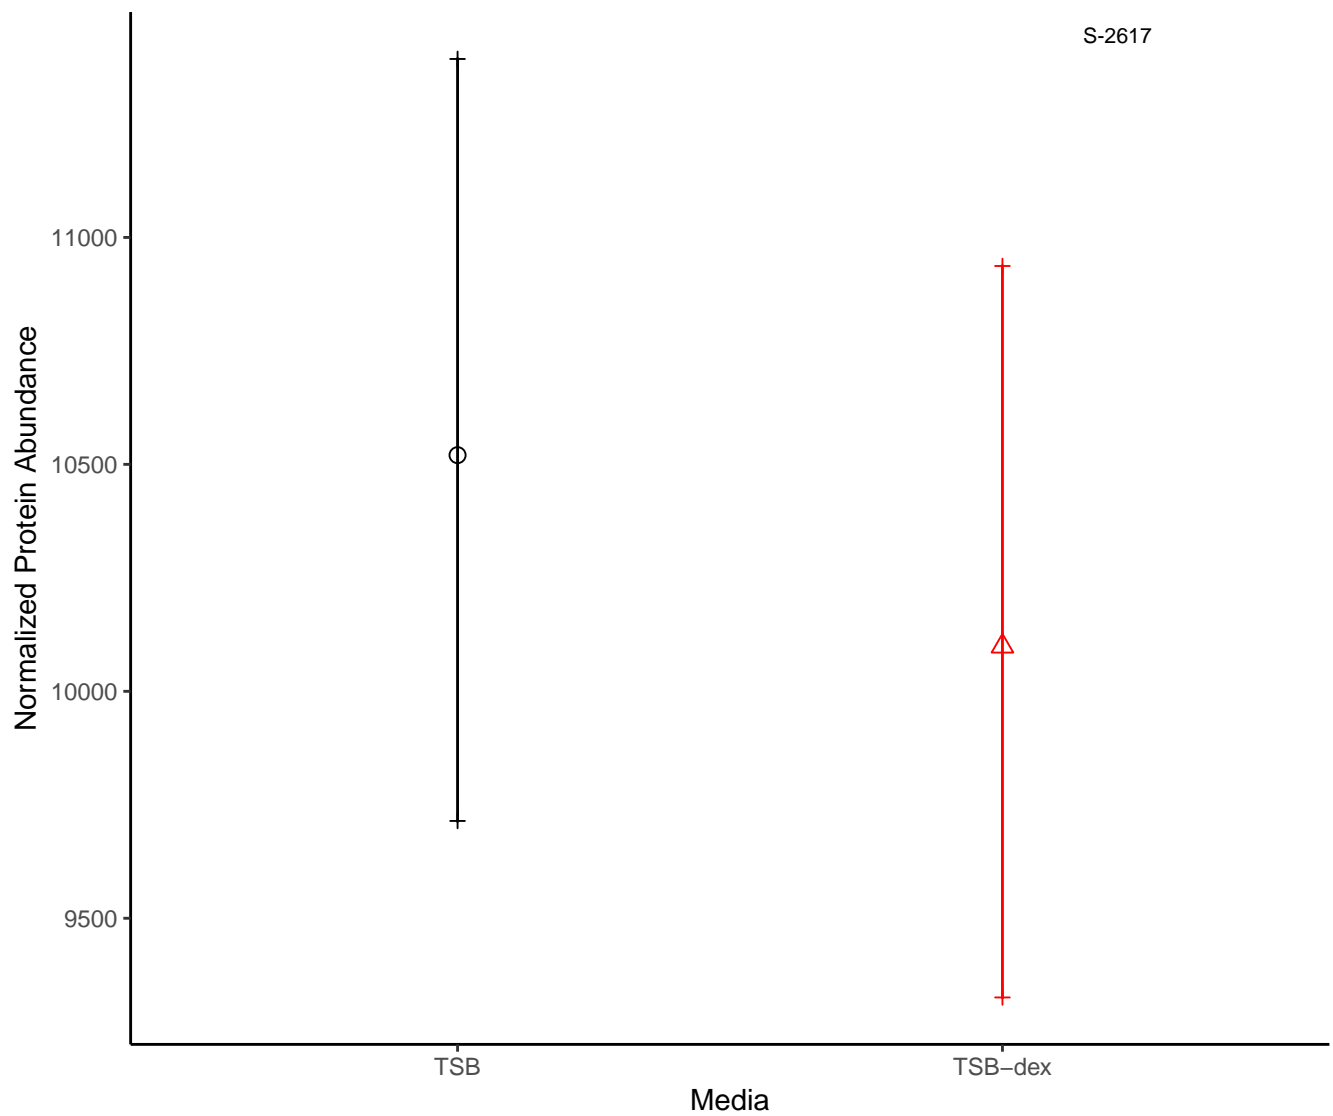

⊕ TSB-dex

△ TSB

# FABZ\_STAAM

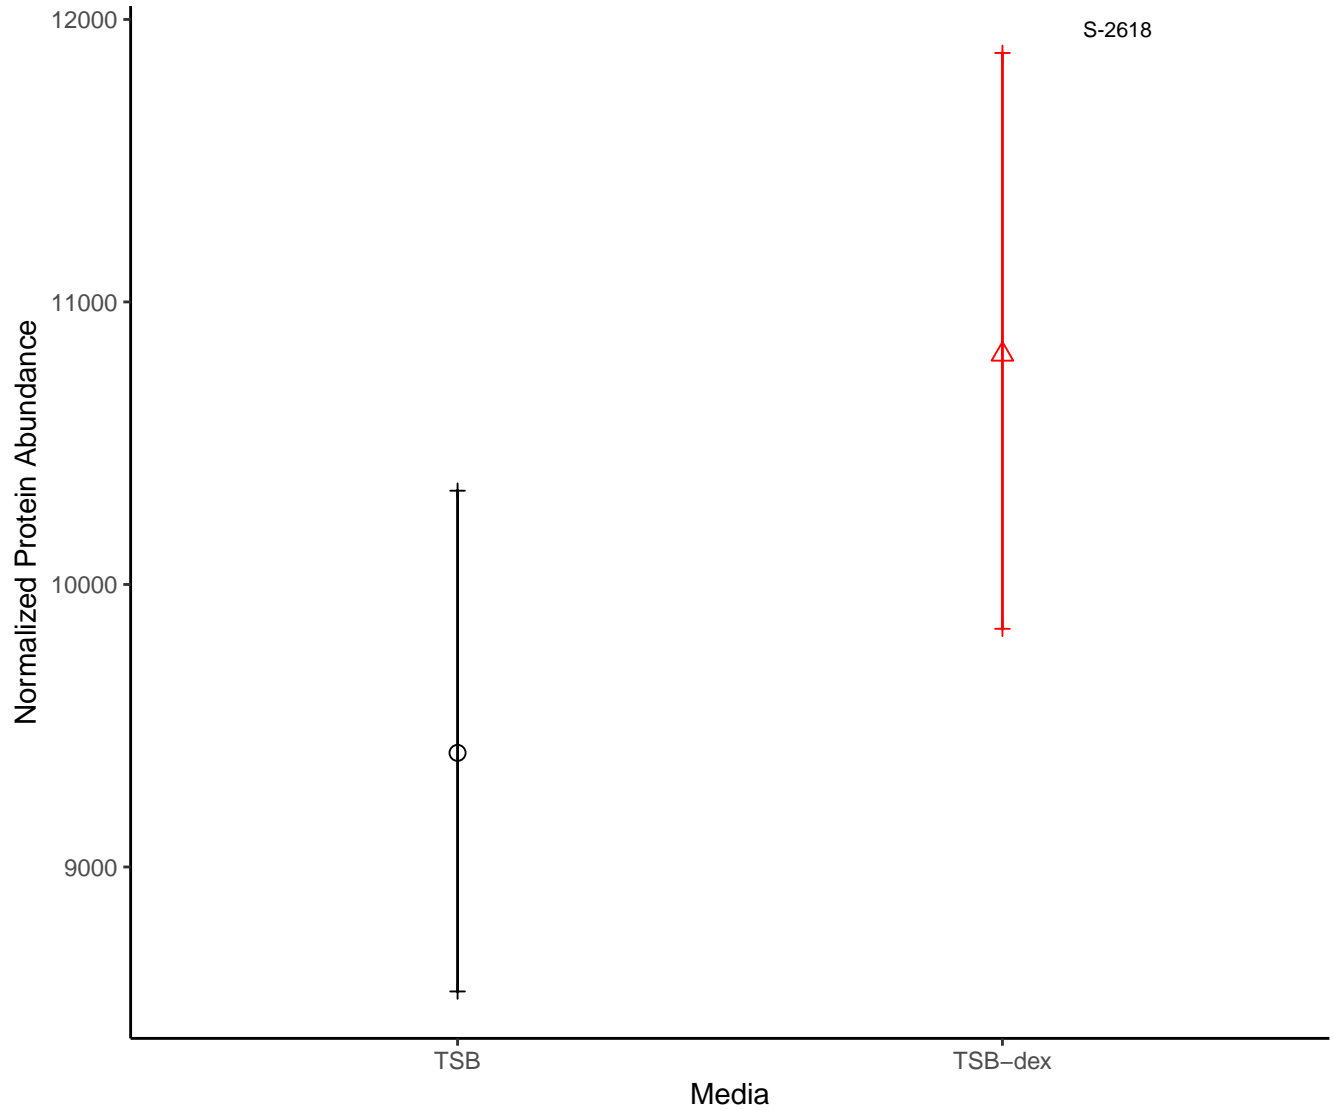

⊖ TSB-dex

△ TSB

# FEMA\_STAAM

S-2619

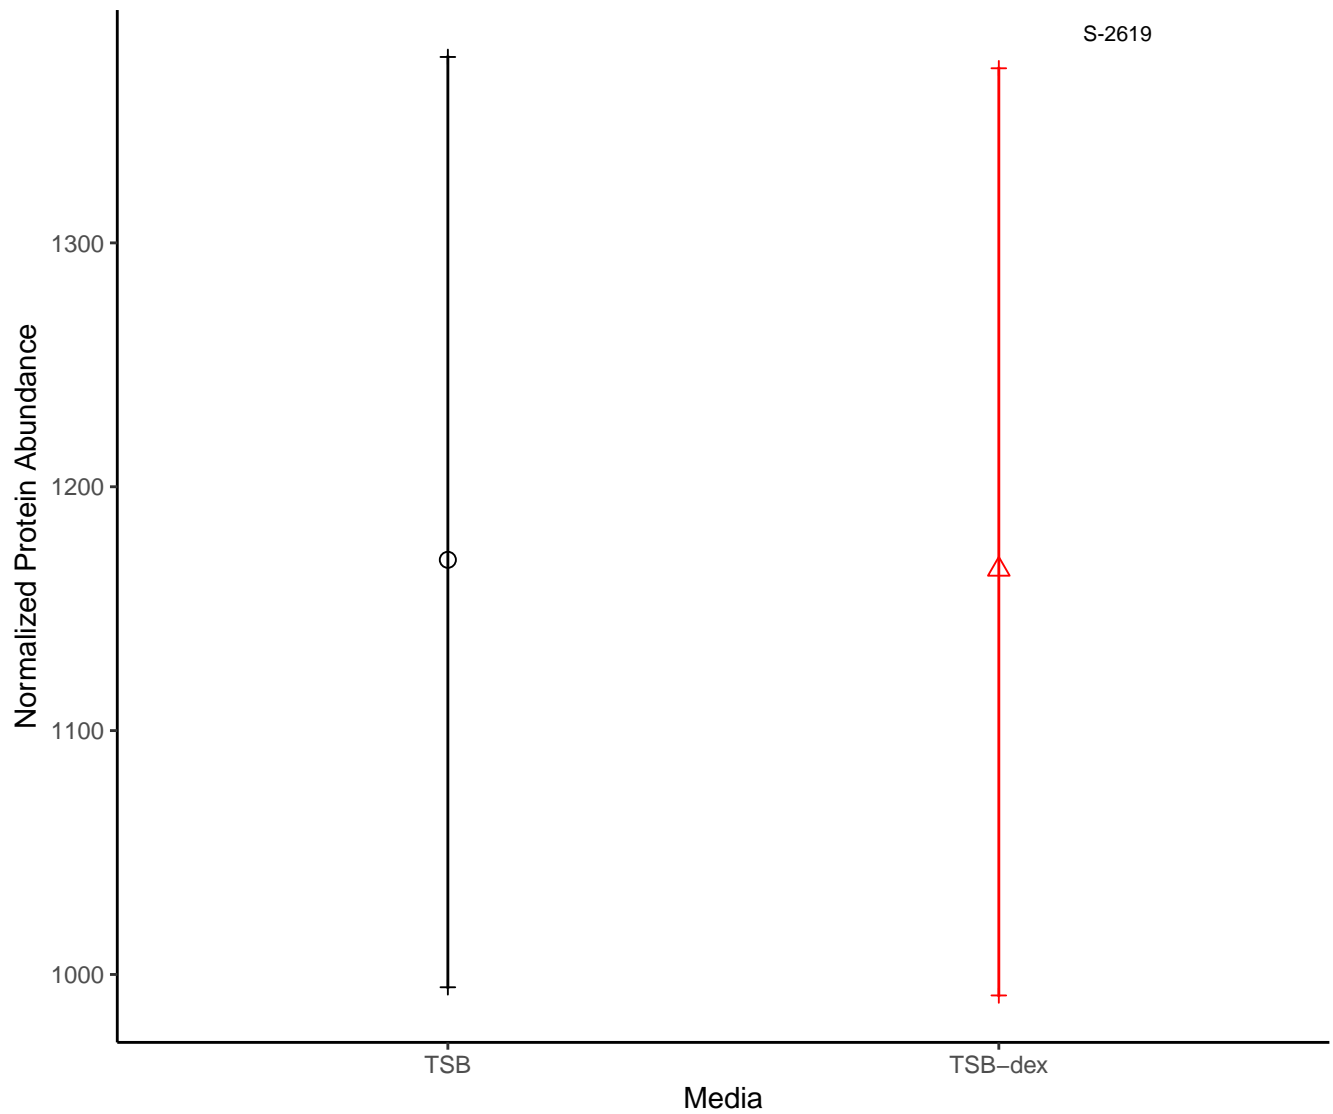

⊕ TSB-dex

△ TSB

# FEMB\_STAAM

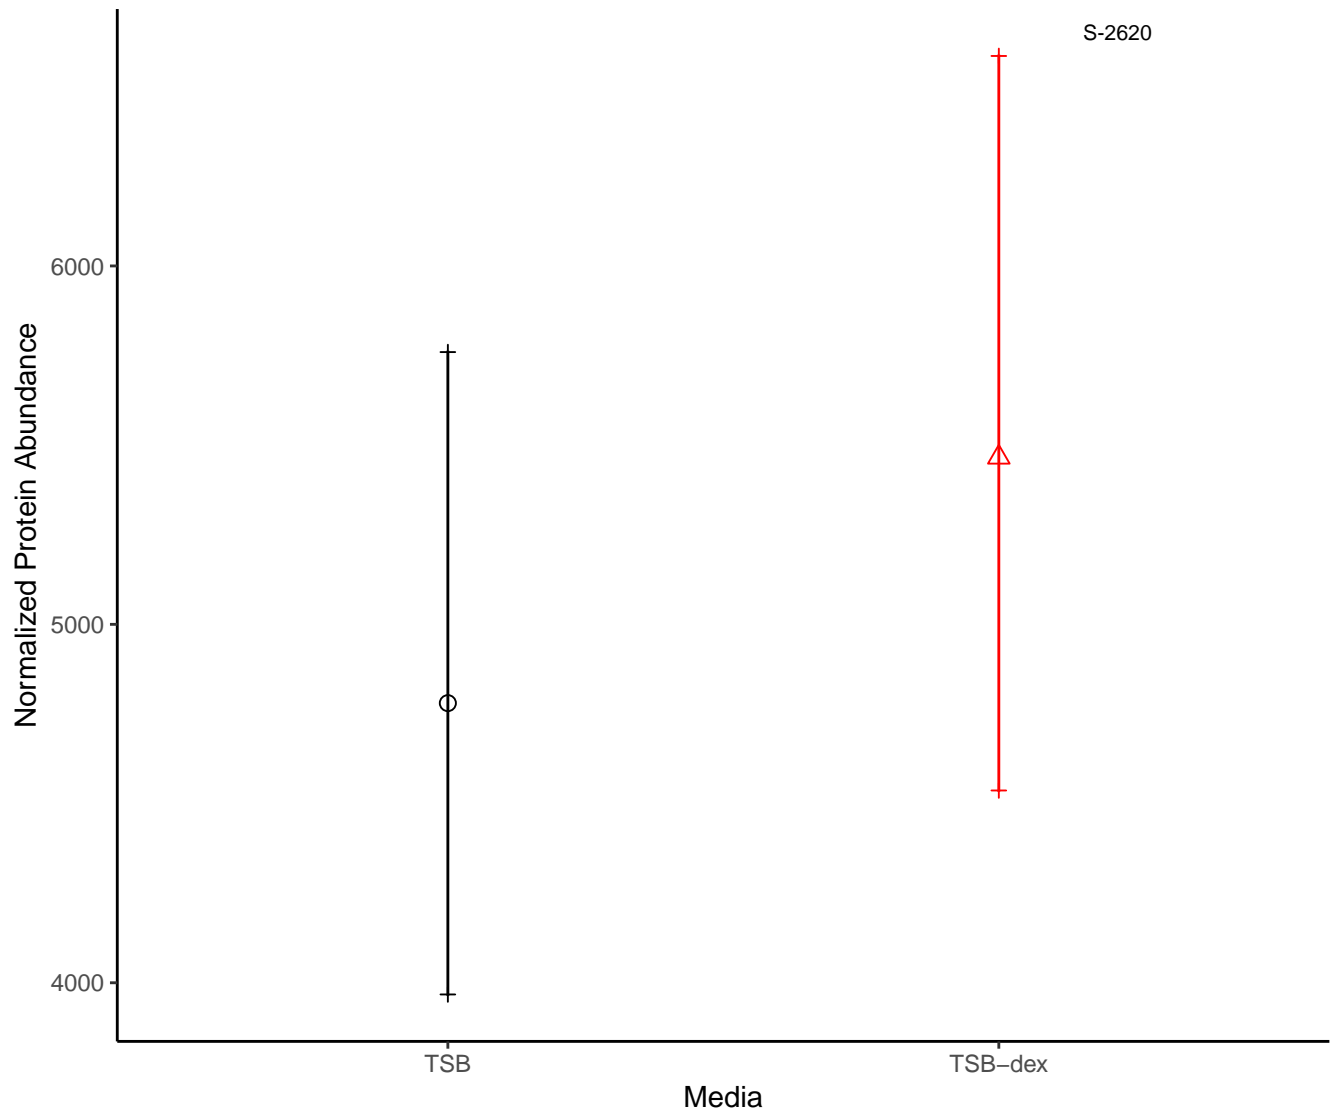

⊕ TSB-dex

△ TSB

# FEMX\_STAAM

S-2621

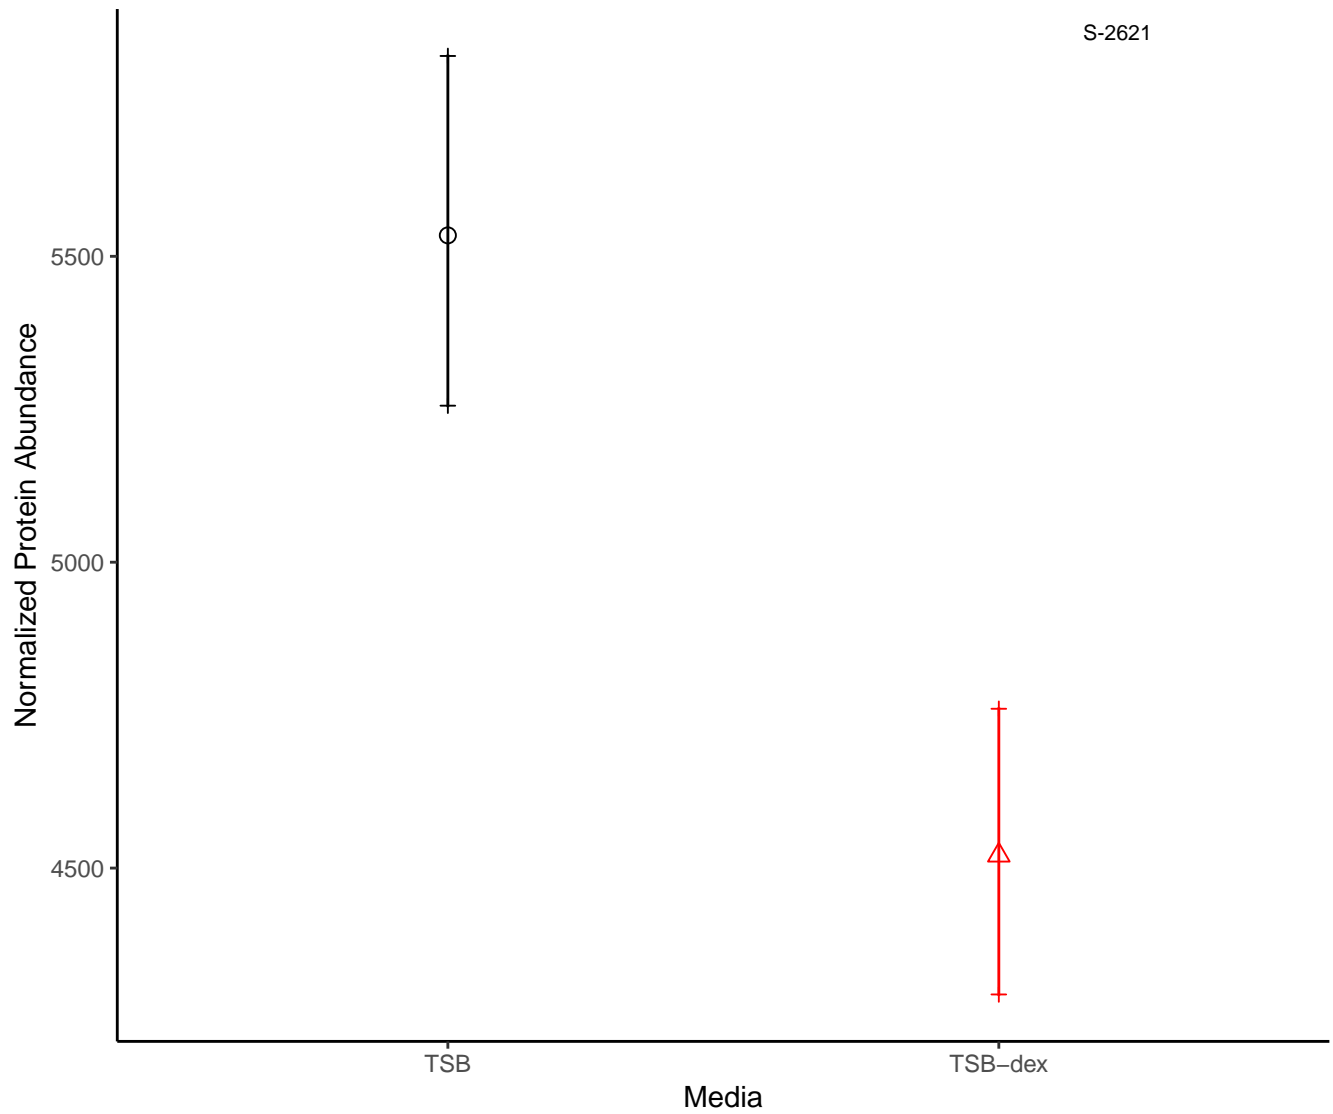

⊕ TSB-dex

△ TSB

# FENR\_STAAM

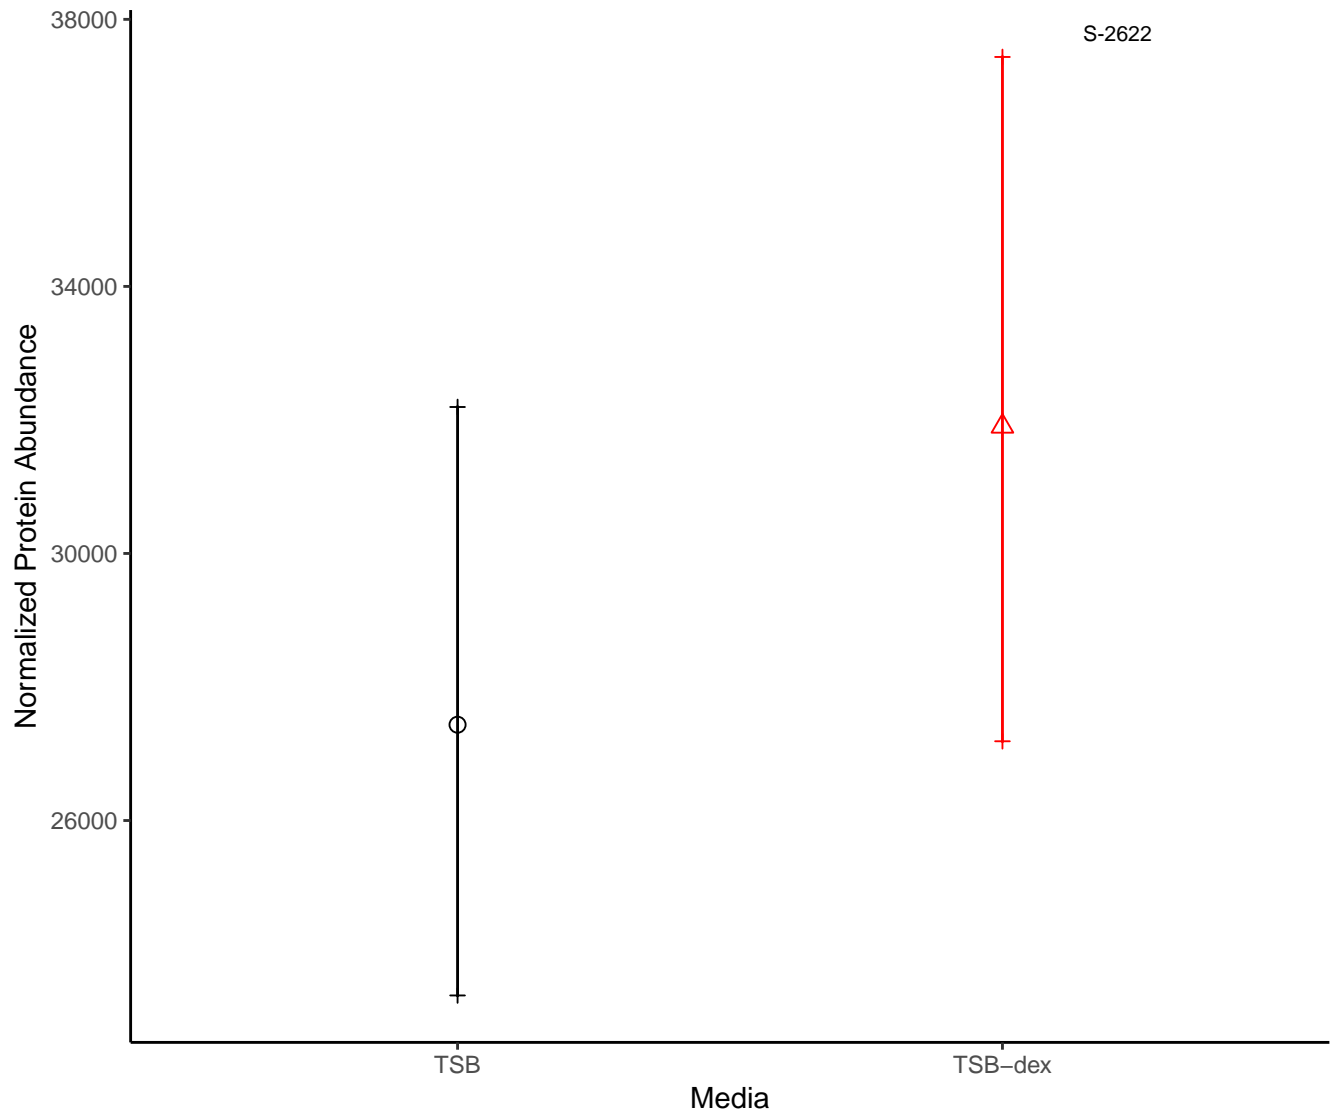

⊕ TSB-dex

△ TSB

# FLIPR\_STAAM

S-2623

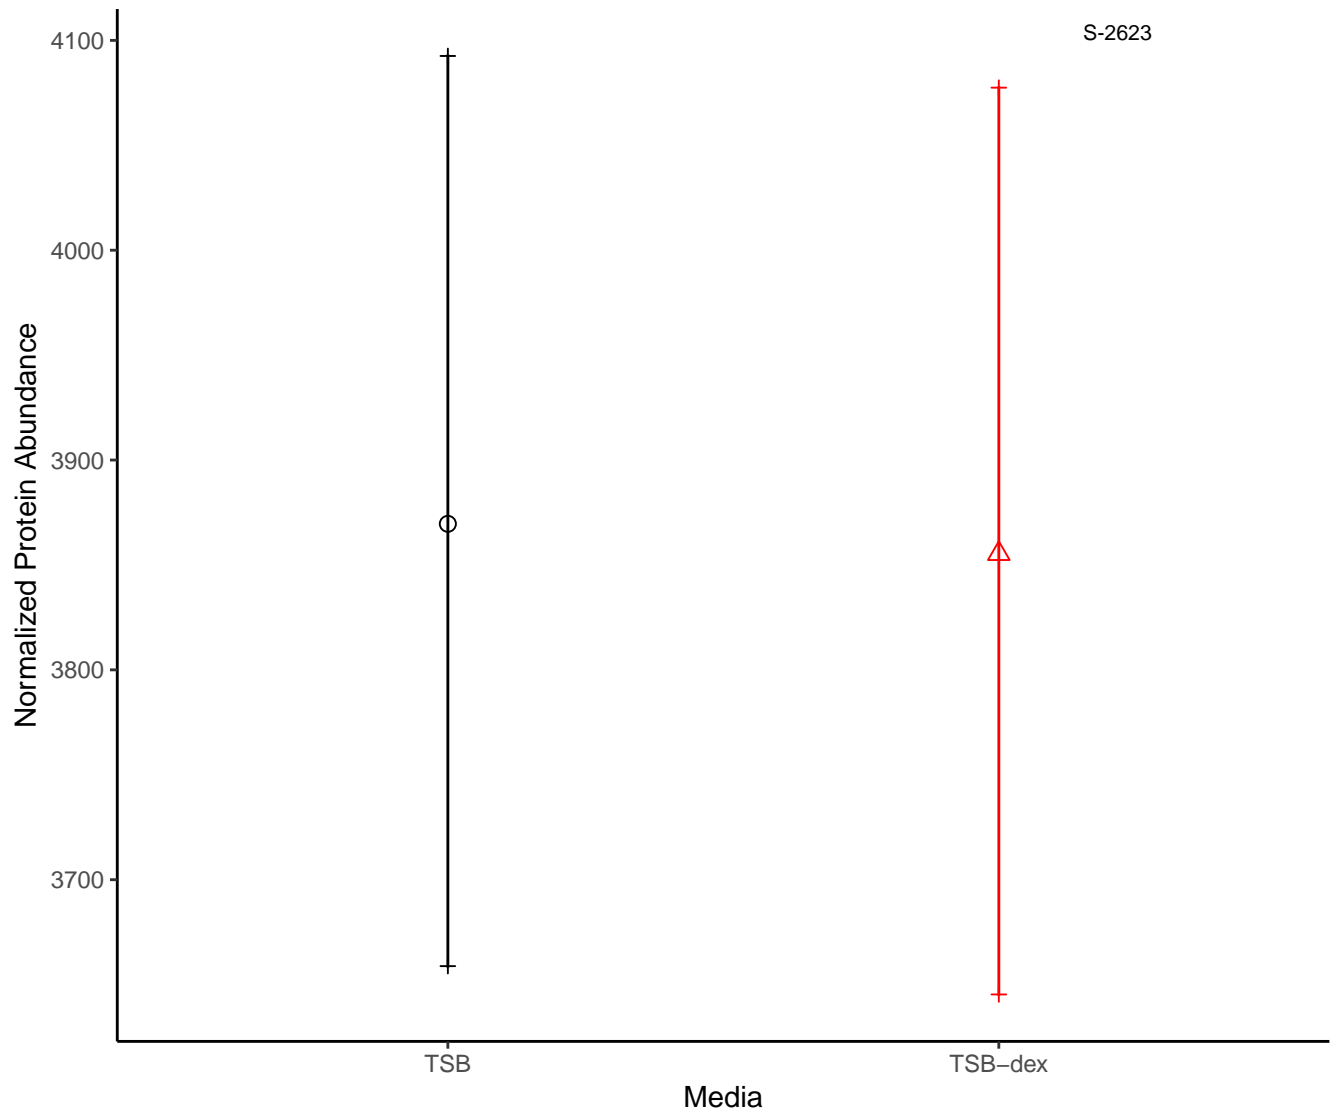

⊕ TSB-dex

△ TSB

# FMT\_STAAM

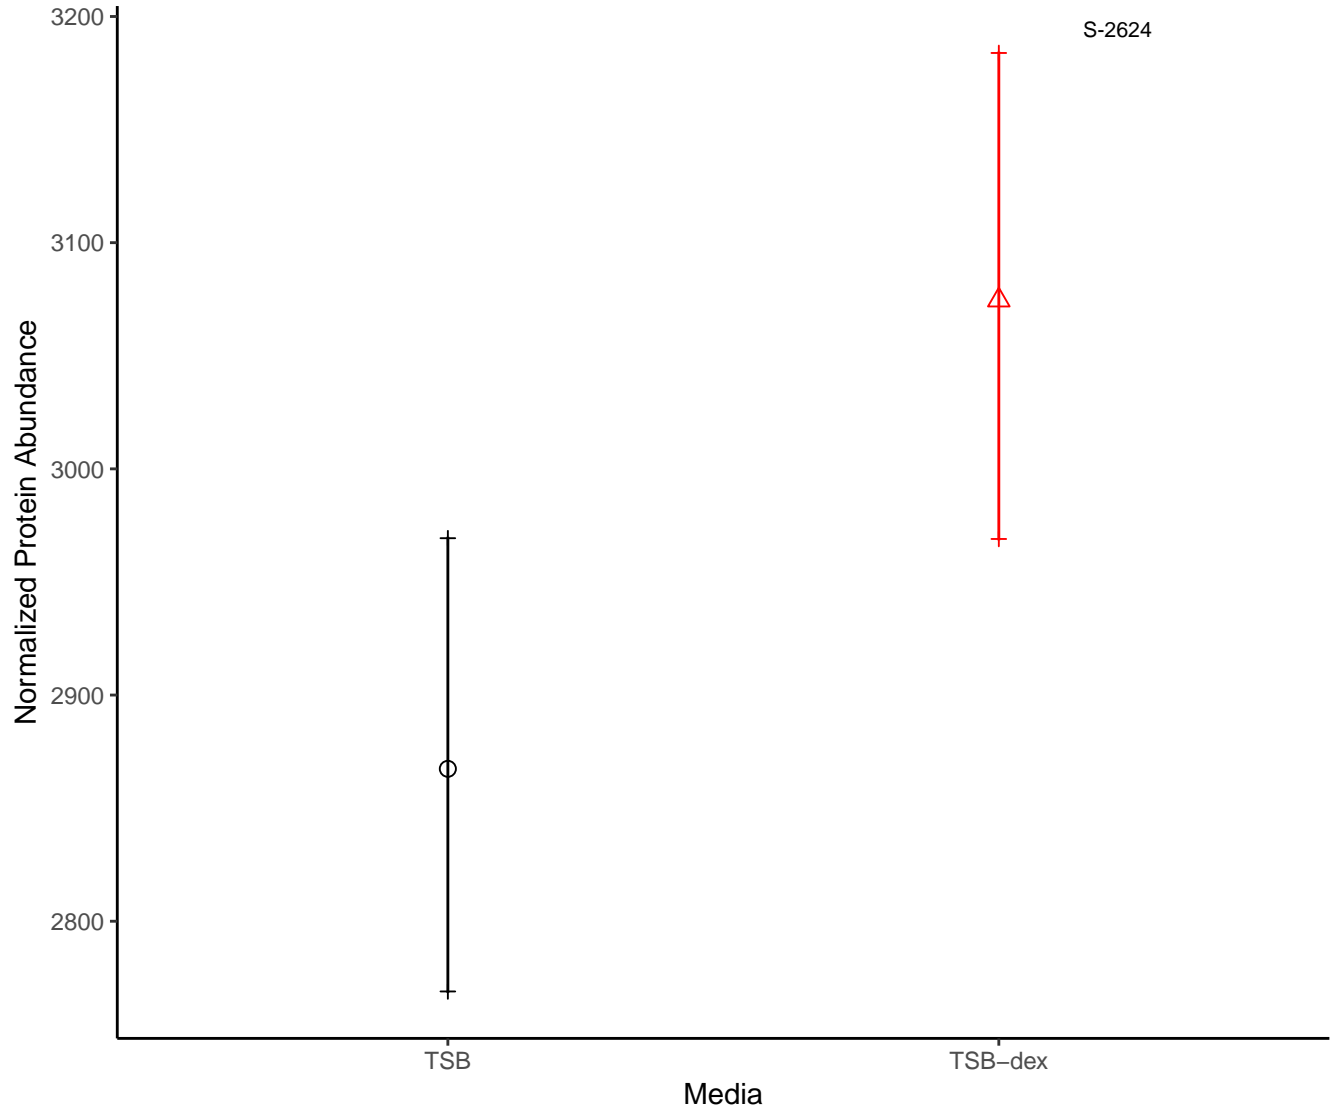

⊕ TSB-dex

△ TSB



# FMTA\_STAAM

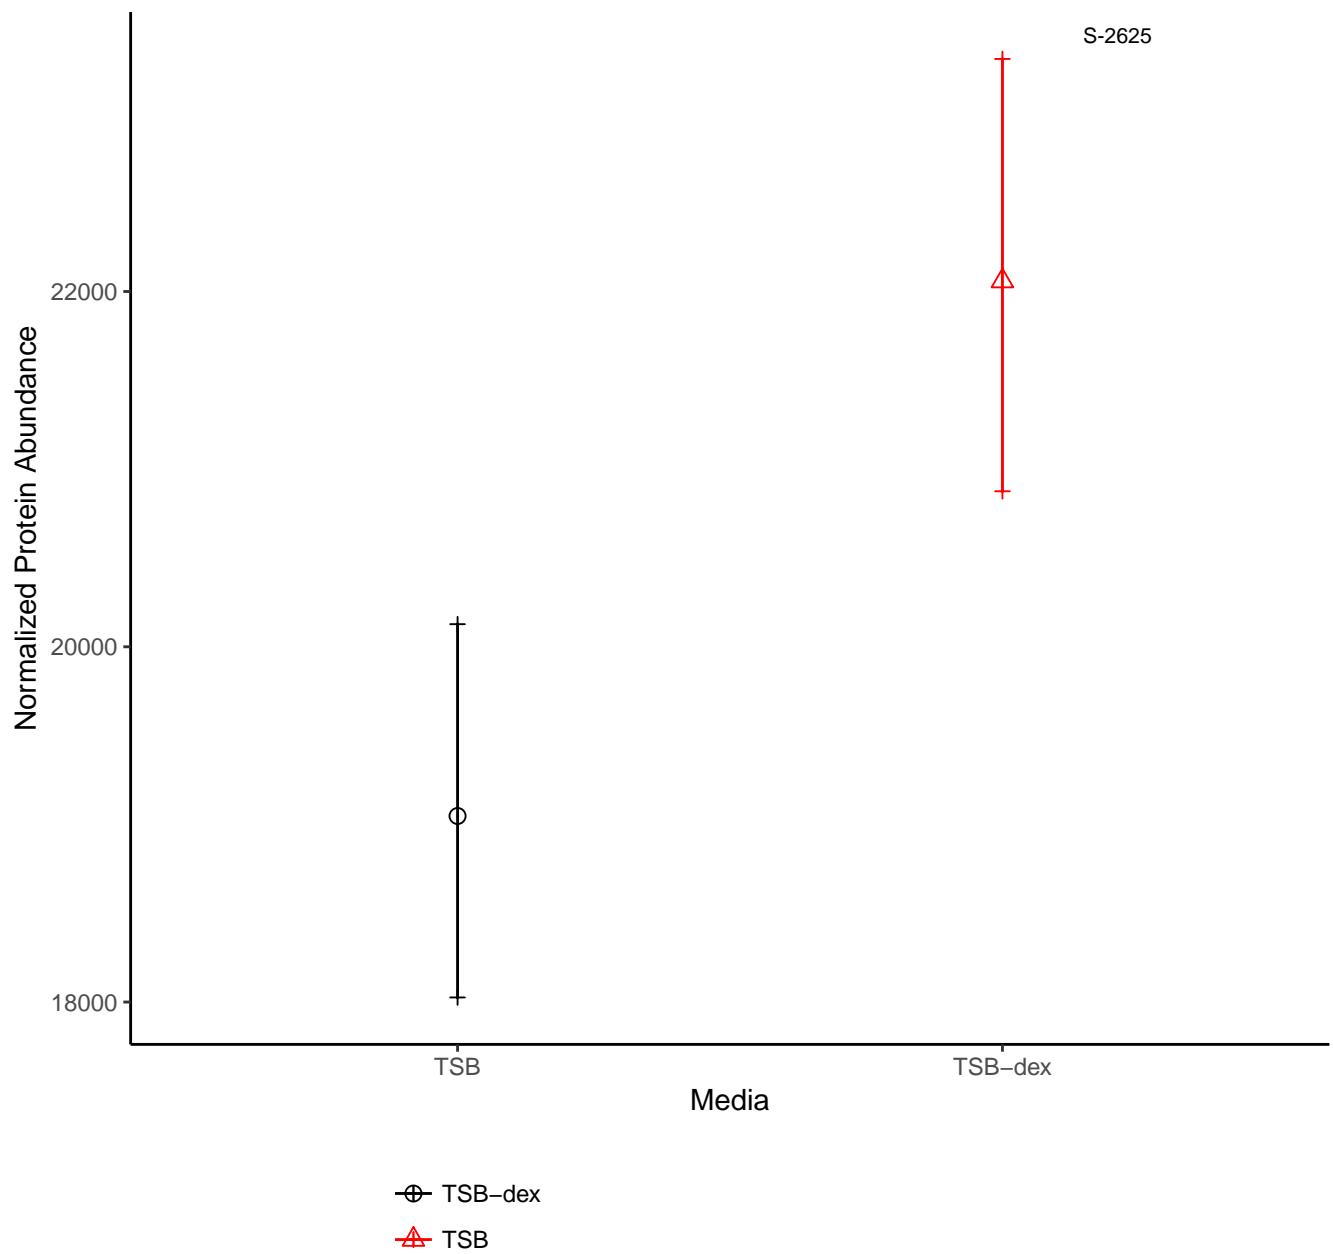

# FOLB\_STAAM

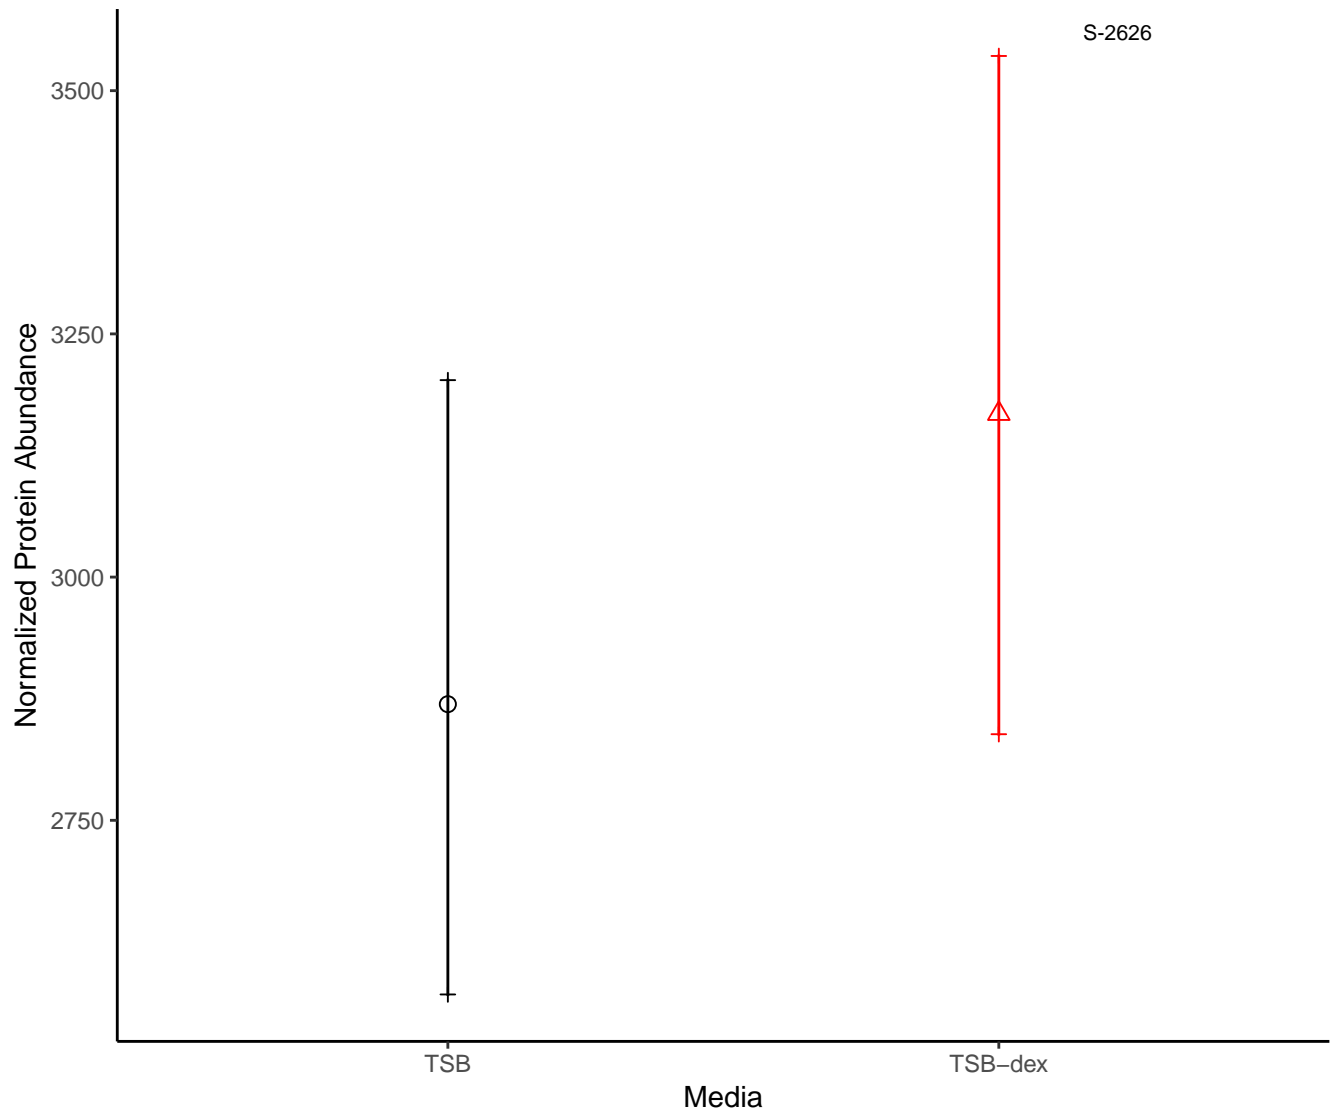

⊕ TSB-dex

△ TSB

# FOLD\_STAAM

S-2627

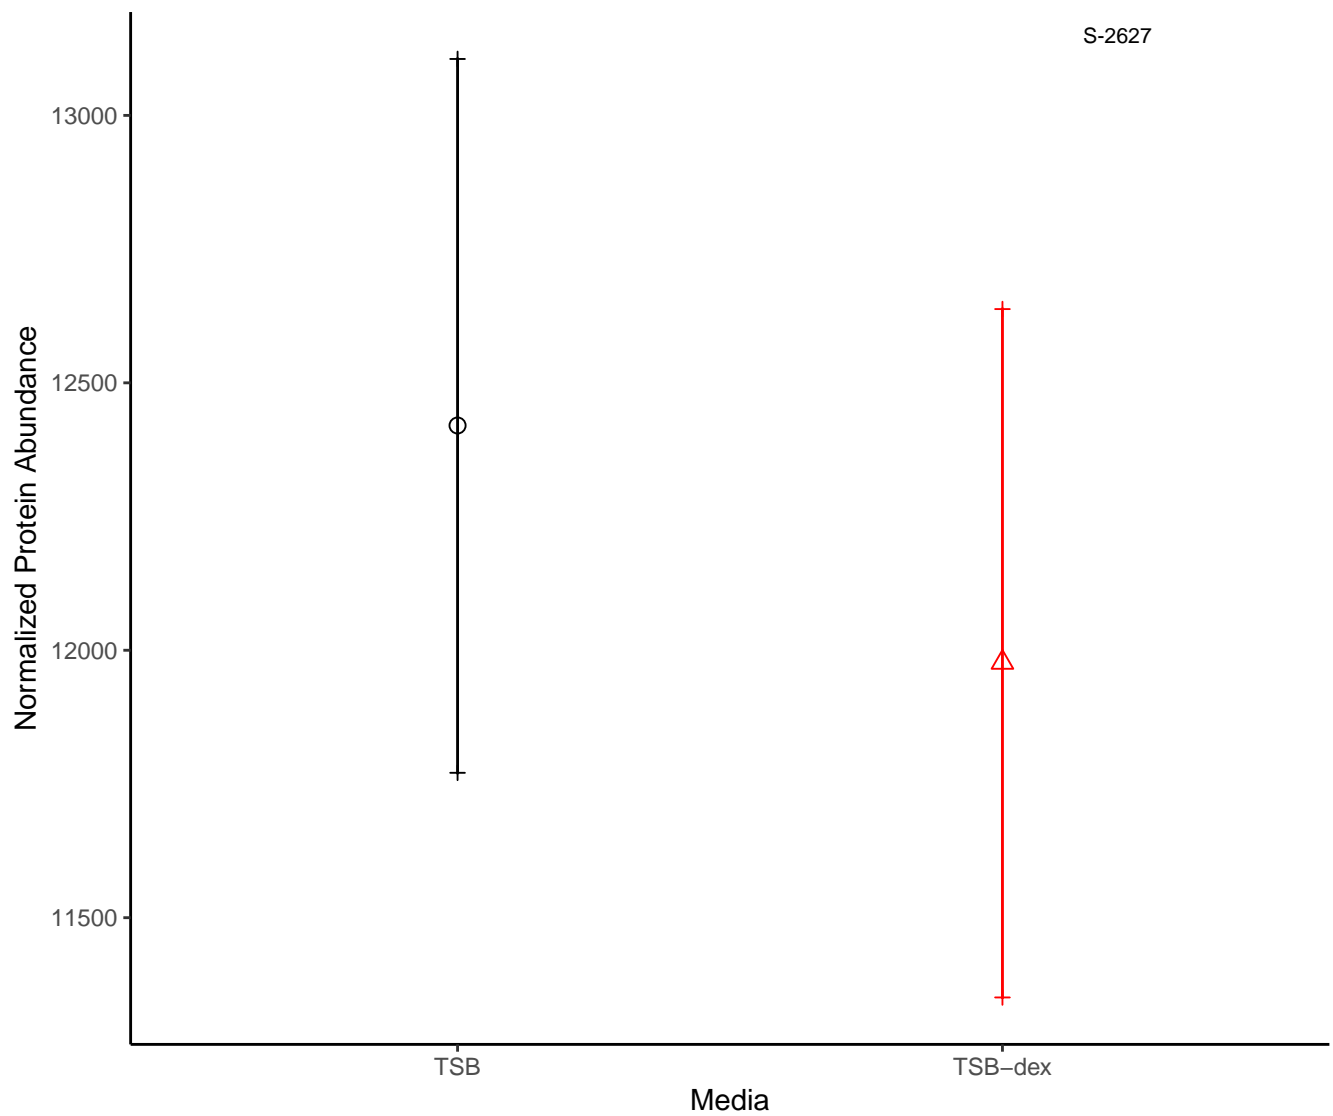

⊙ TSB-dex

△ TSB

# FTHS\_STAAM

S-2628

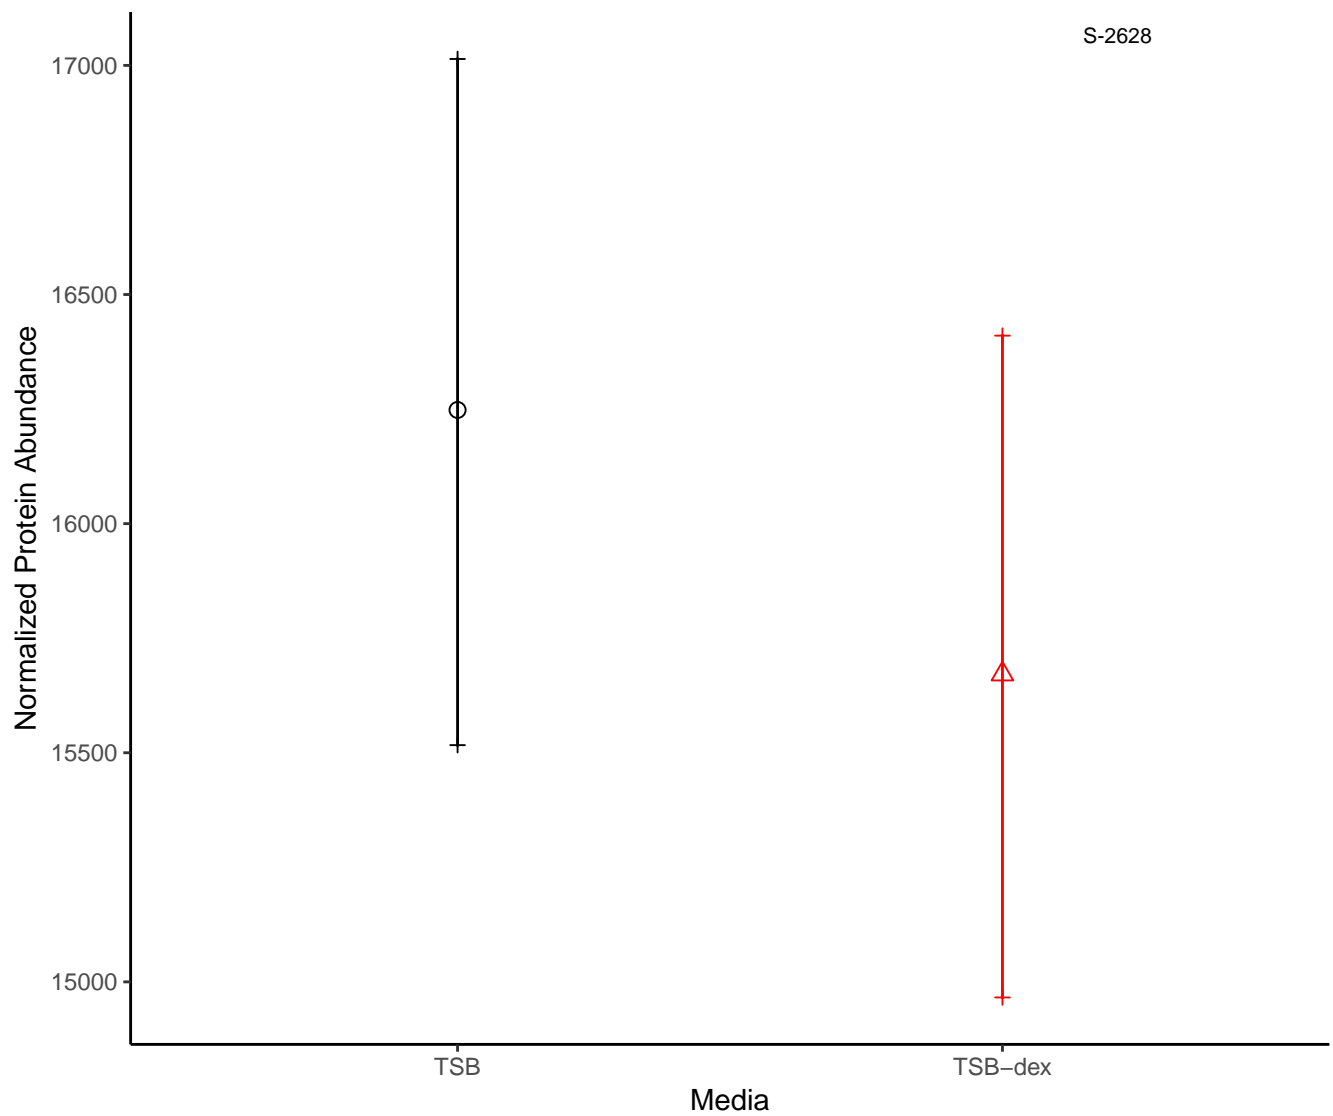

⊕ TSB-dex

△ TSB

# FTN\_STAAM

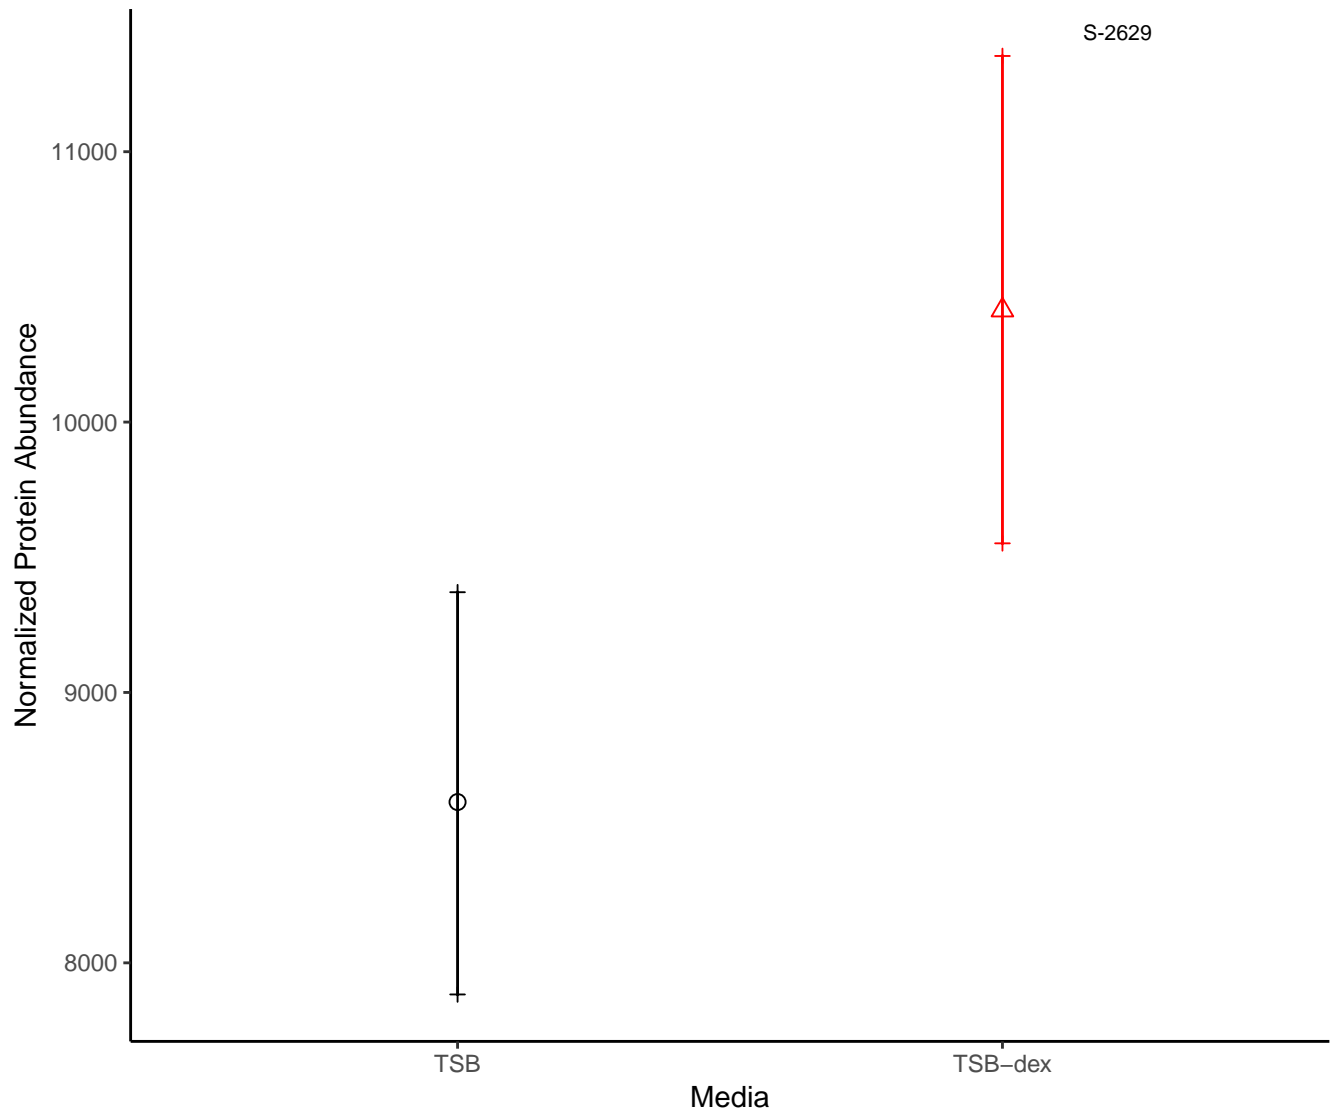

⊖ TSB-dex

△ TSB

# FTSA\_STAAM

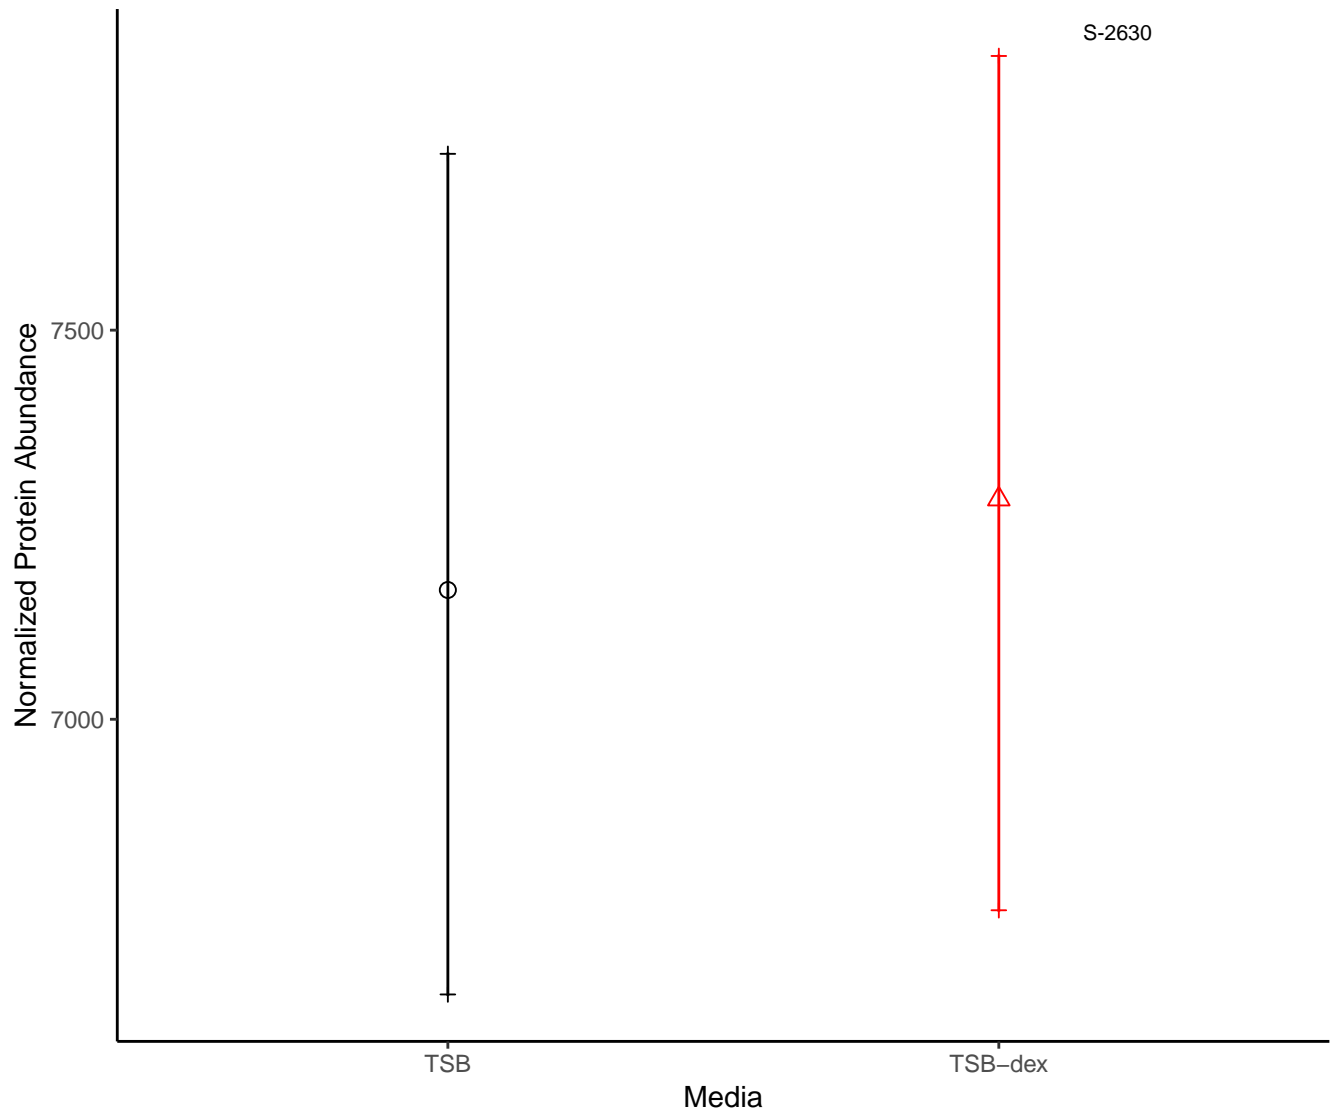

⊕ TSB-dex

△ TSB

# FTSZ\_STAAM

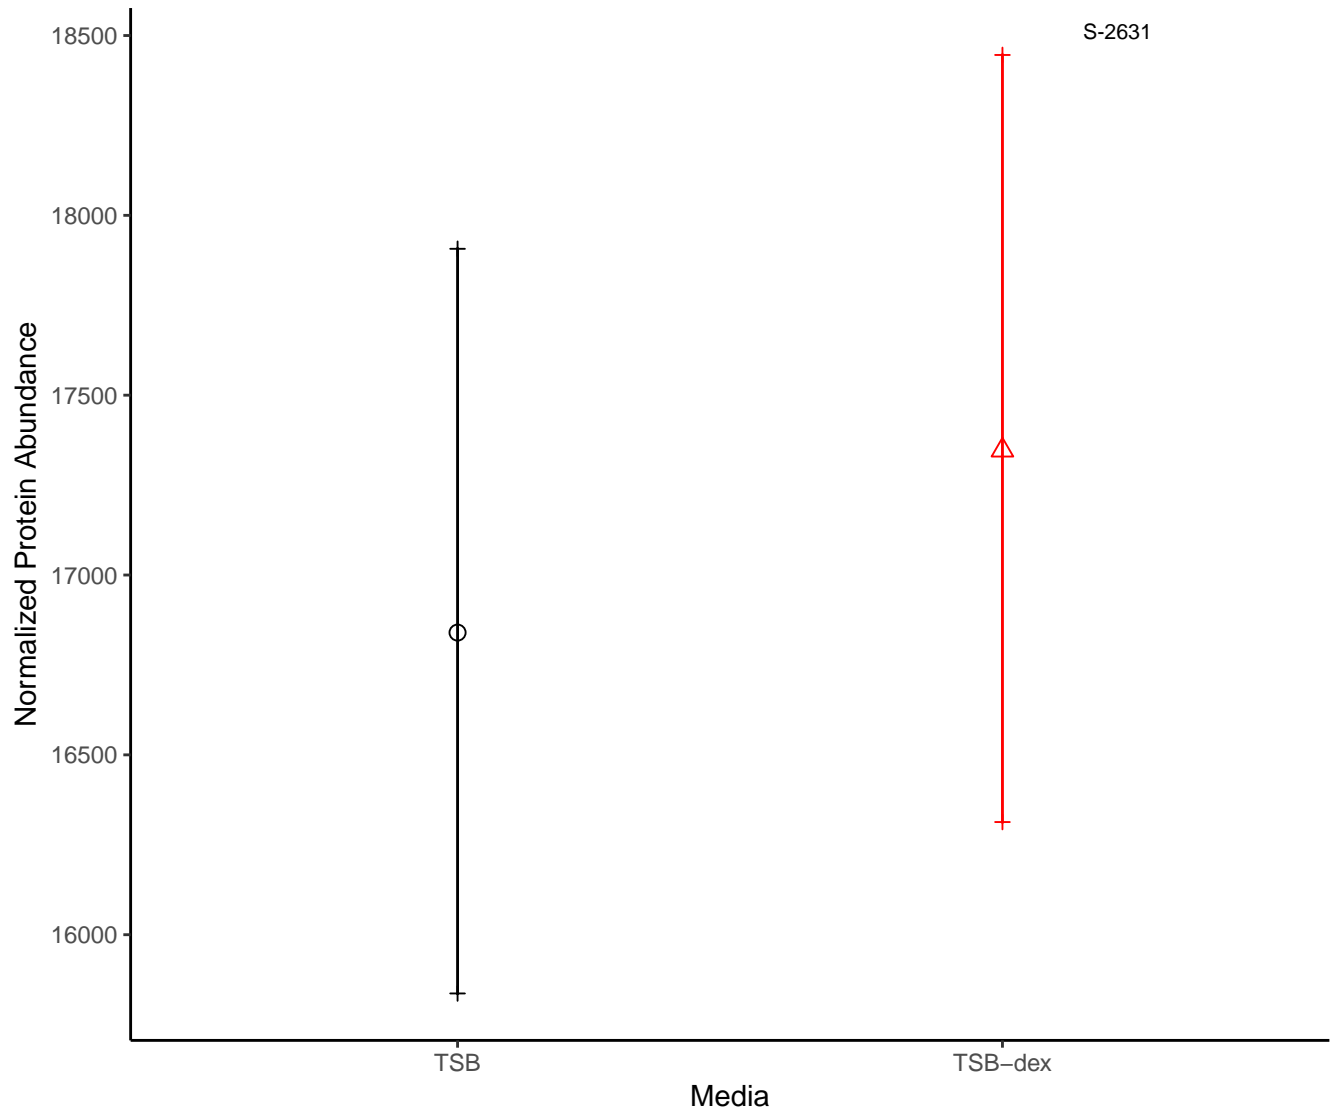

⊕ TSB-dex

△ TSB

# FUMC\_STAAM

S-2632

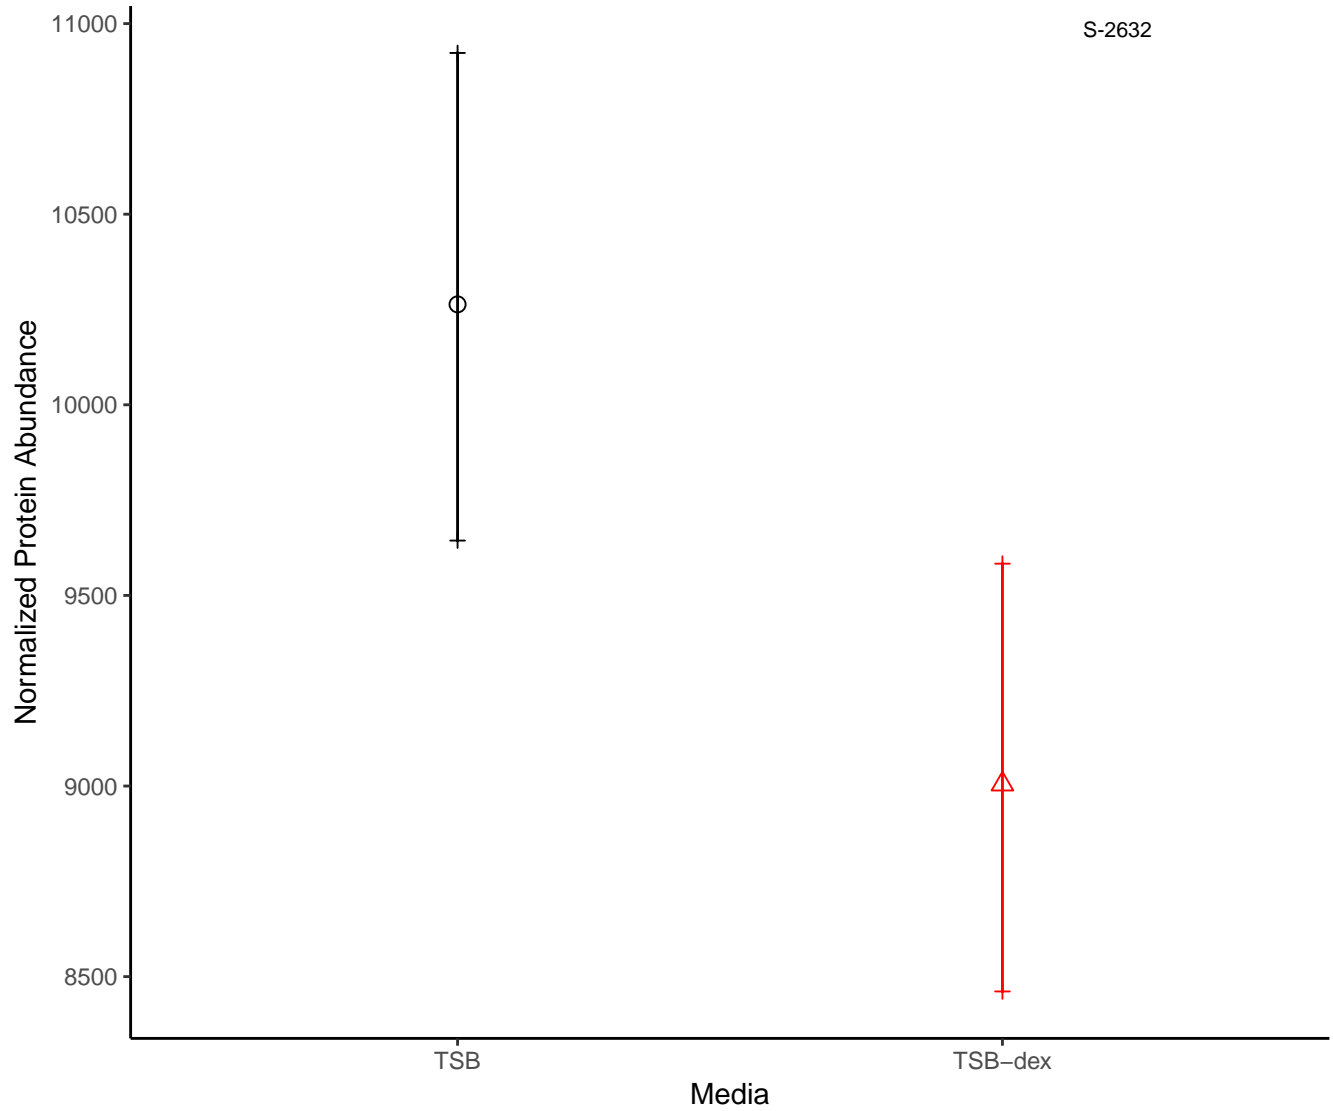

⊖ TSB-dex

△ TSB



# G3P1\_STAAM

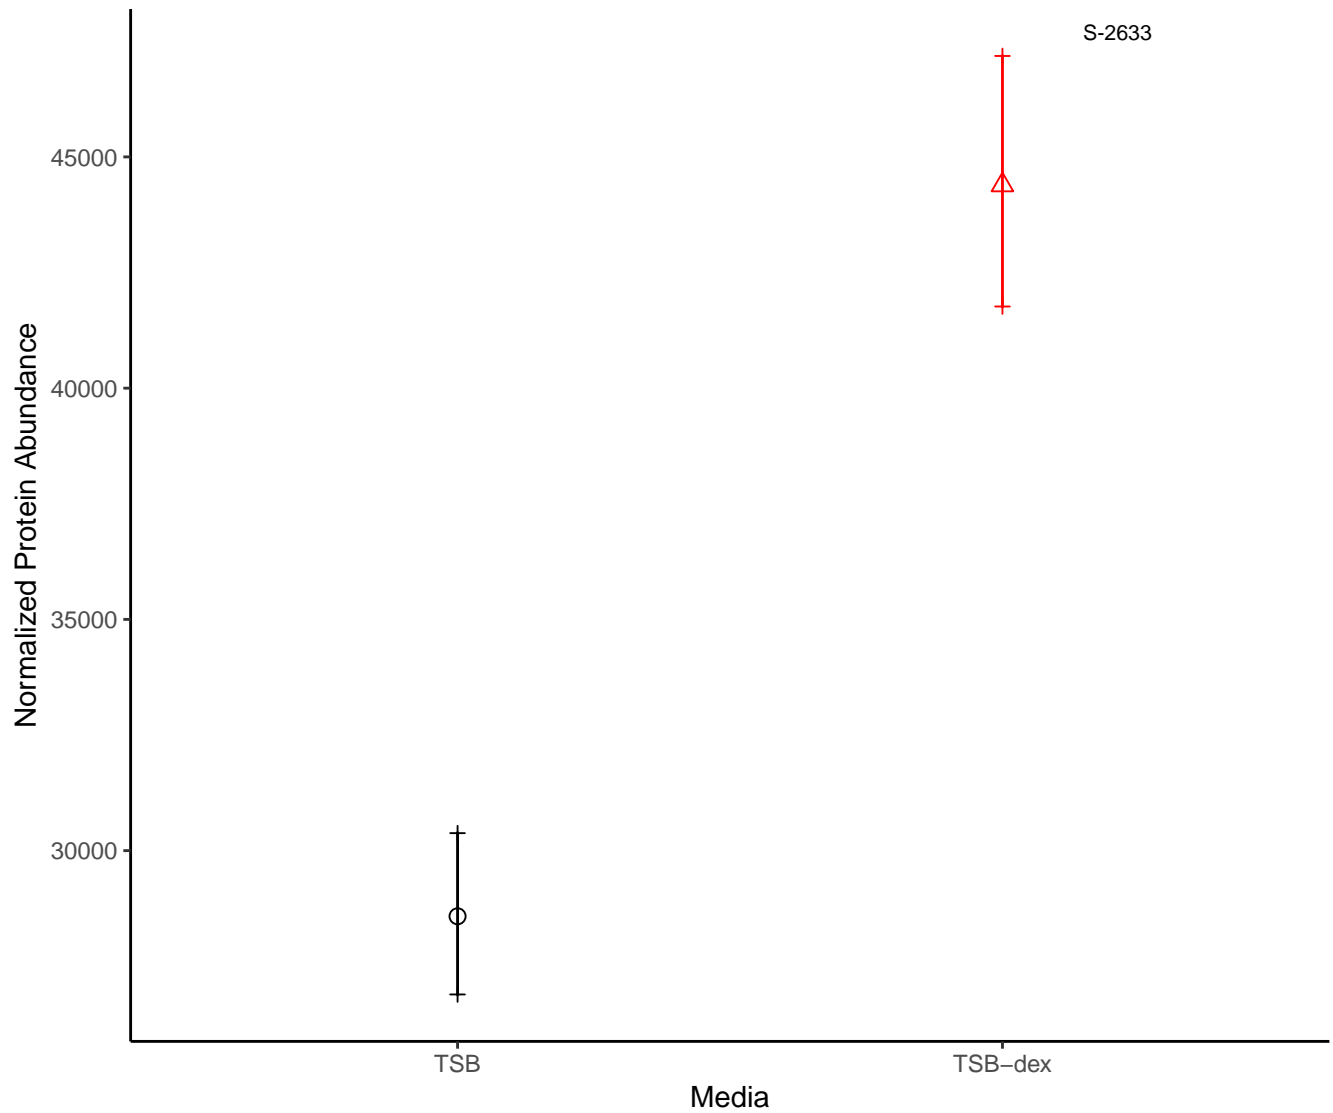

⊖ TSB-dex

△ TSB

# G3P2\_STAAM

S-2634

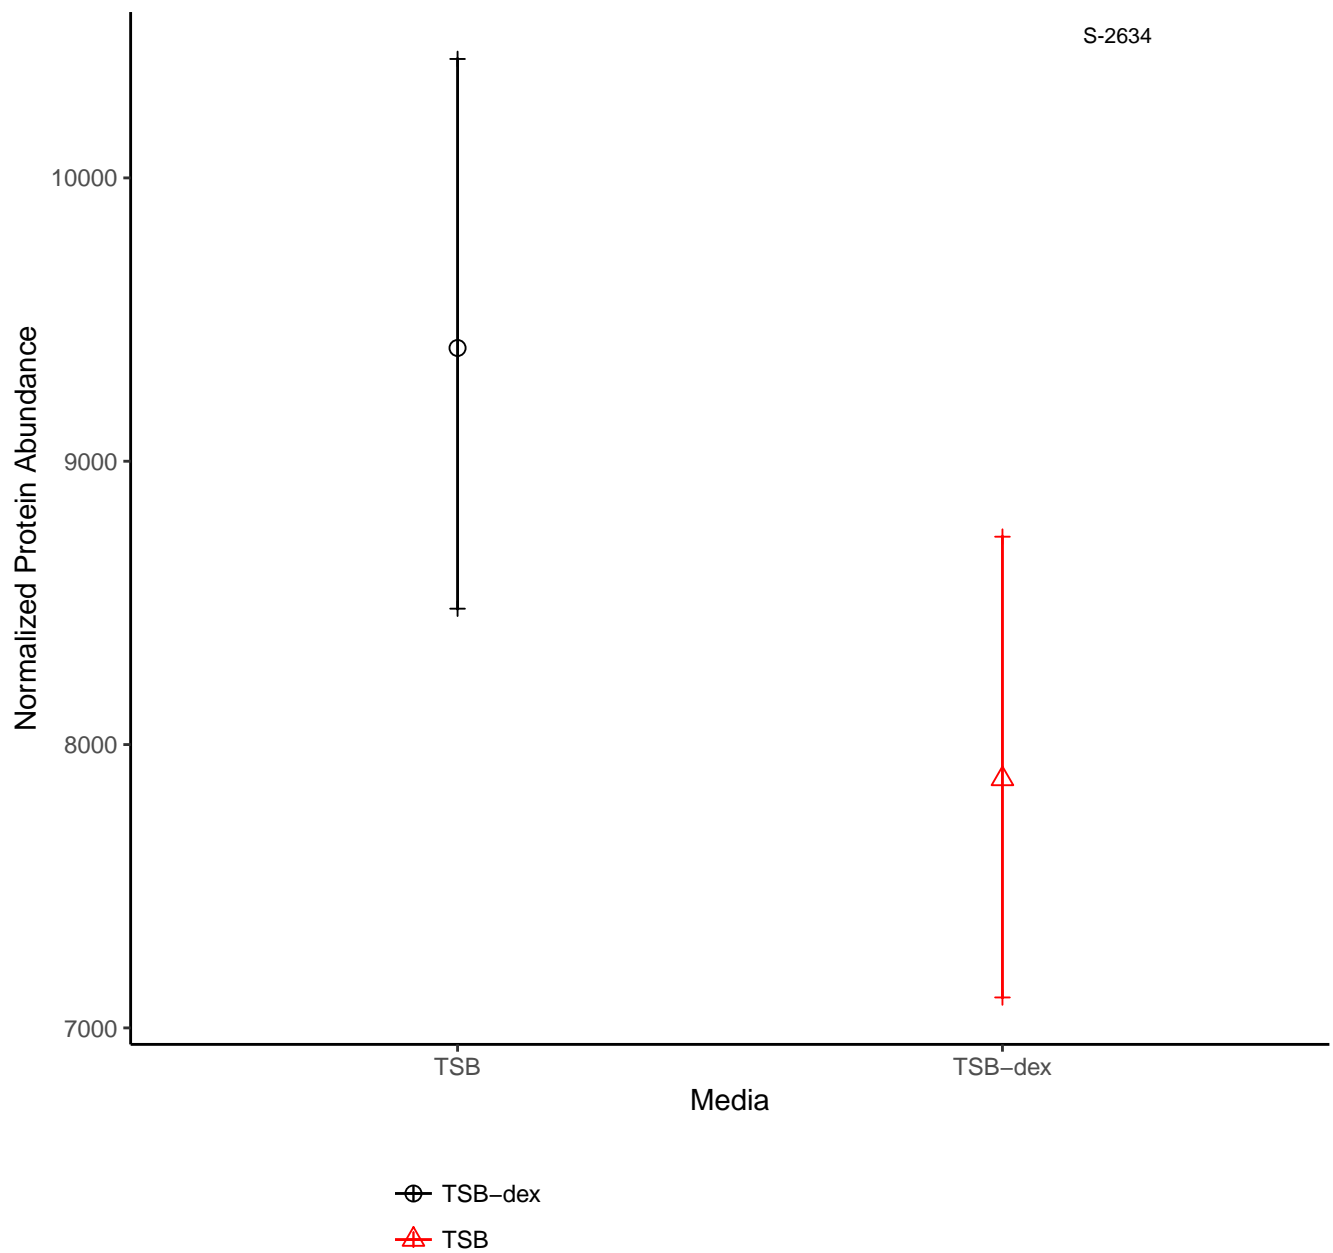

# G6PI\_STAAM

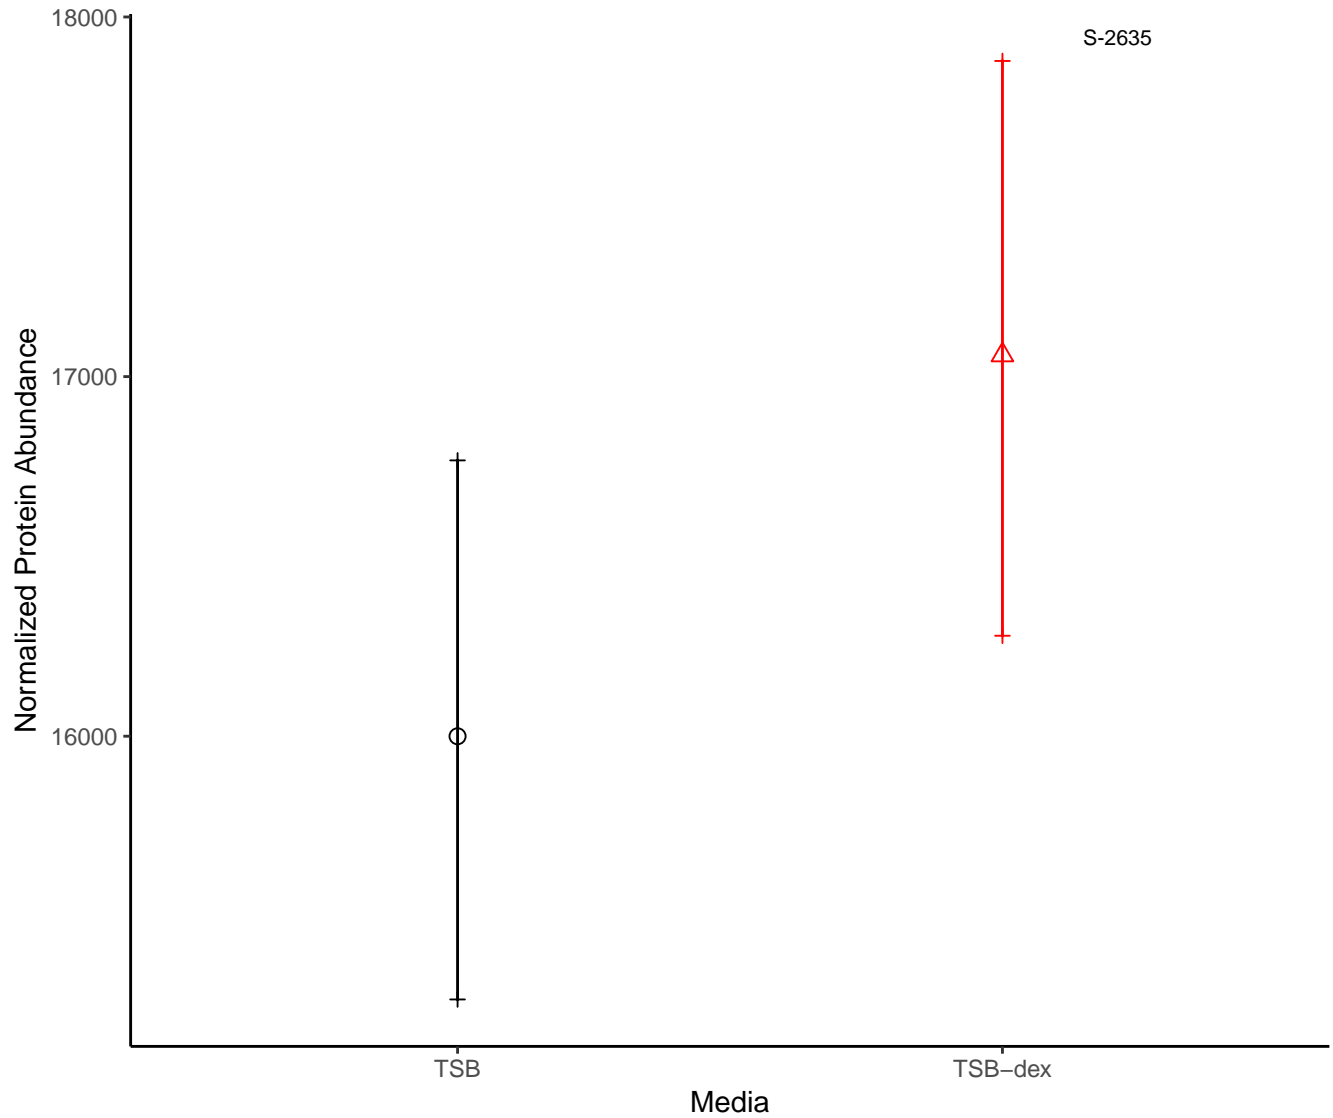

⊕ TSB-dex

△ TSB

# GATA\_STAAM

S-2636

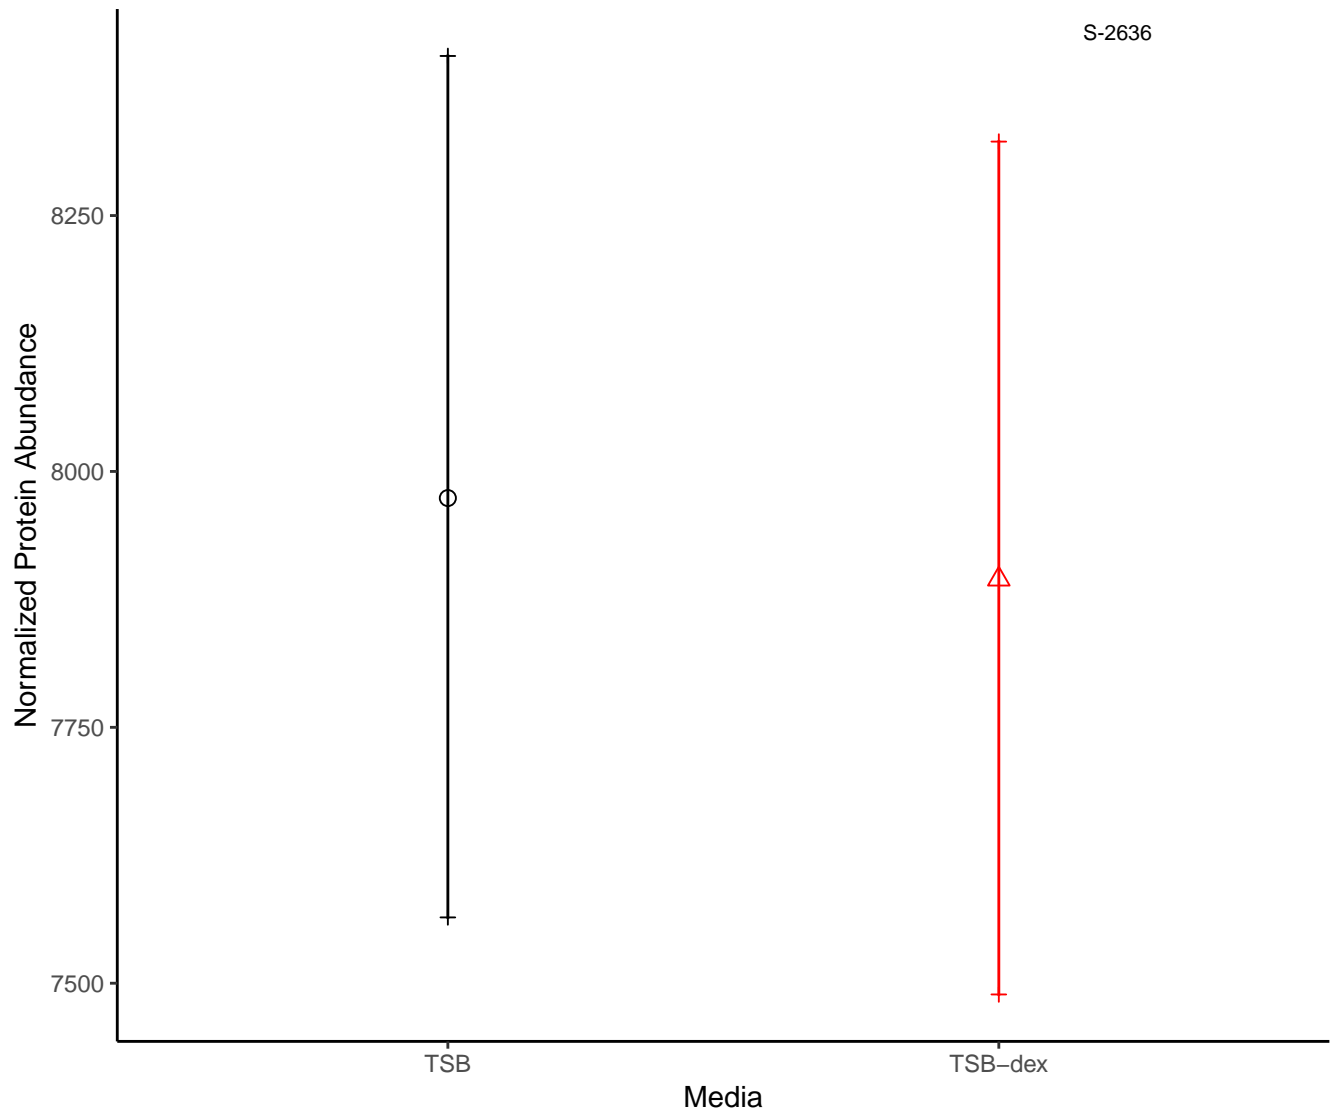

⊕ TSB-dex

△ TSB

# GATB\_STAAM

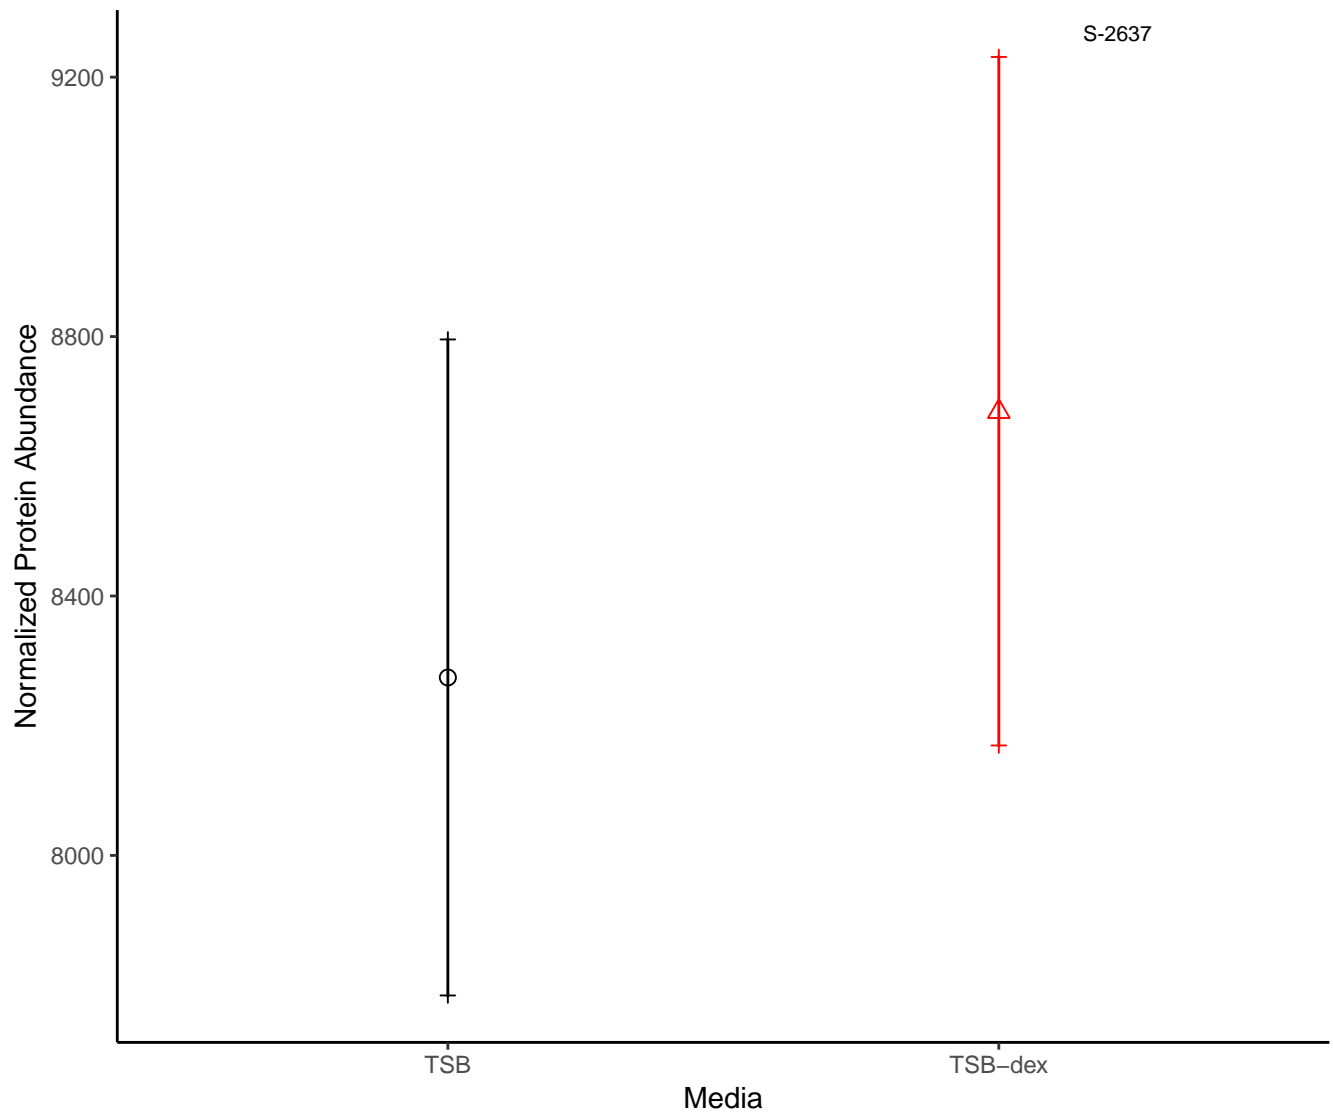

⊕ TSB-dex

△ TSB

# GATC\_STAAM

S-2638

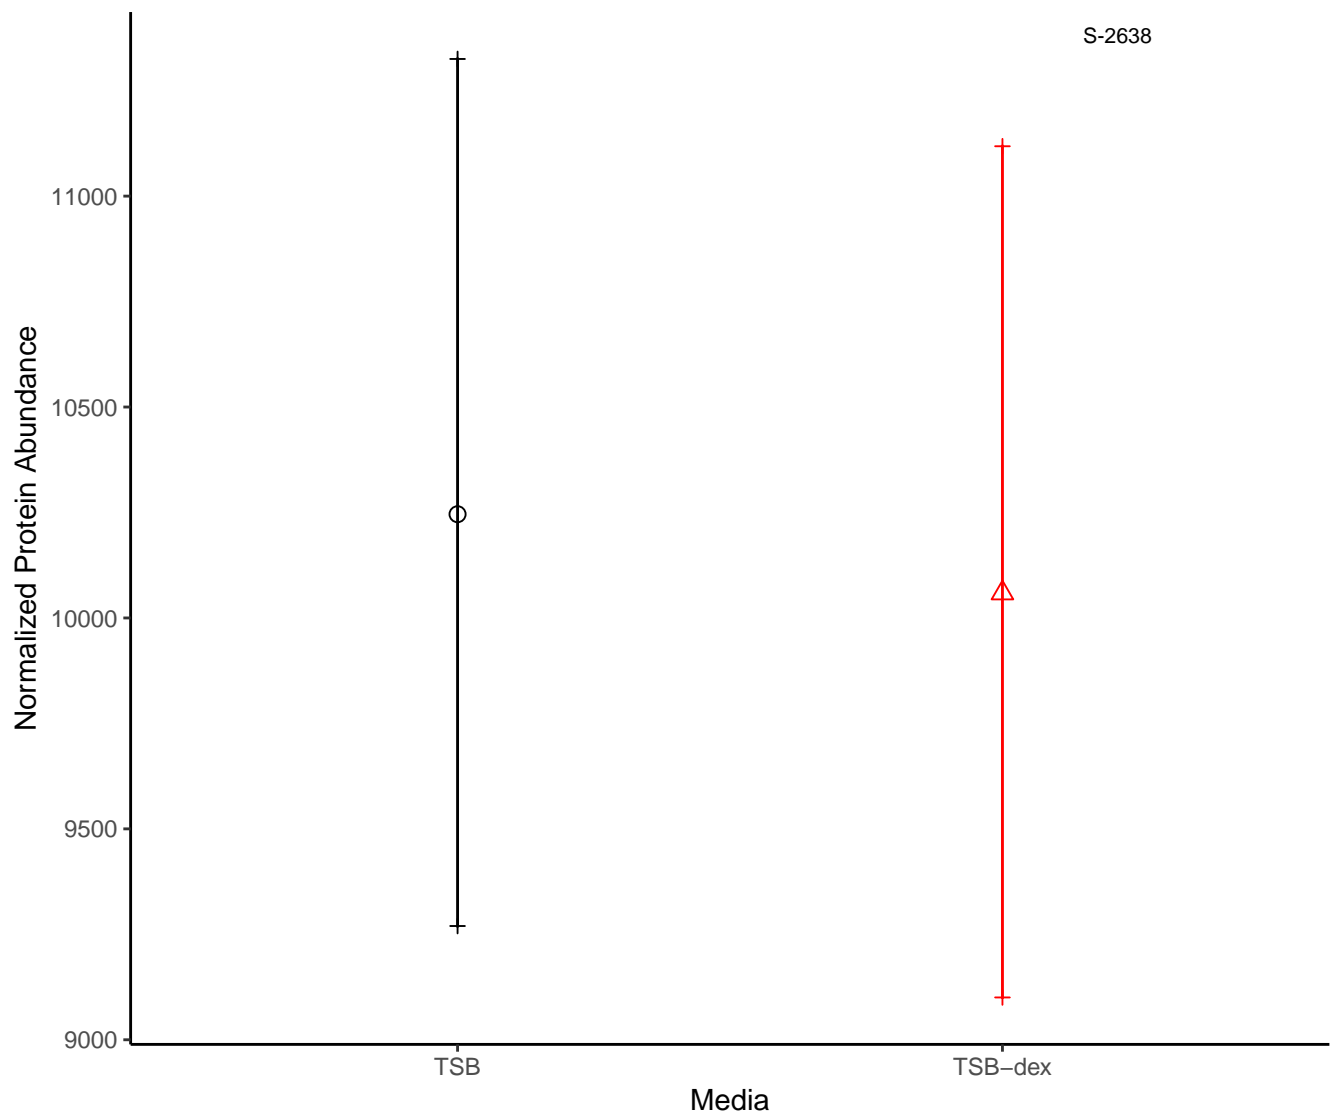

⊕ TSB-dex

△ TSB

# GCH4\_STAAM

S-2639

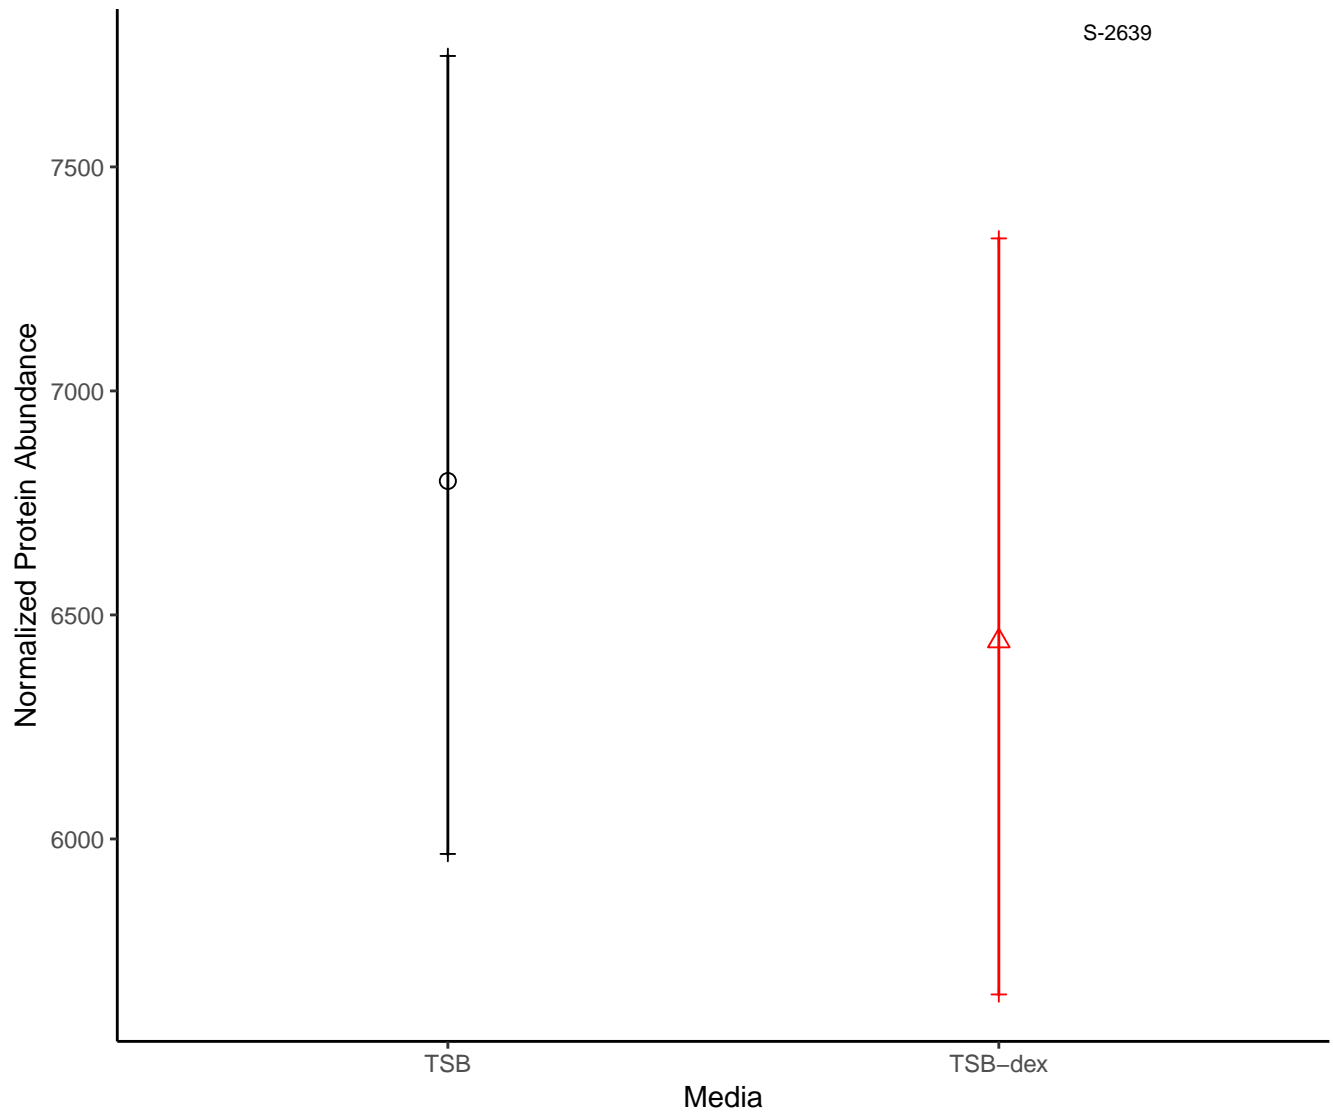

⊕ TSB-dex

△ TSB

# GCSH\_STAAM

S-2640

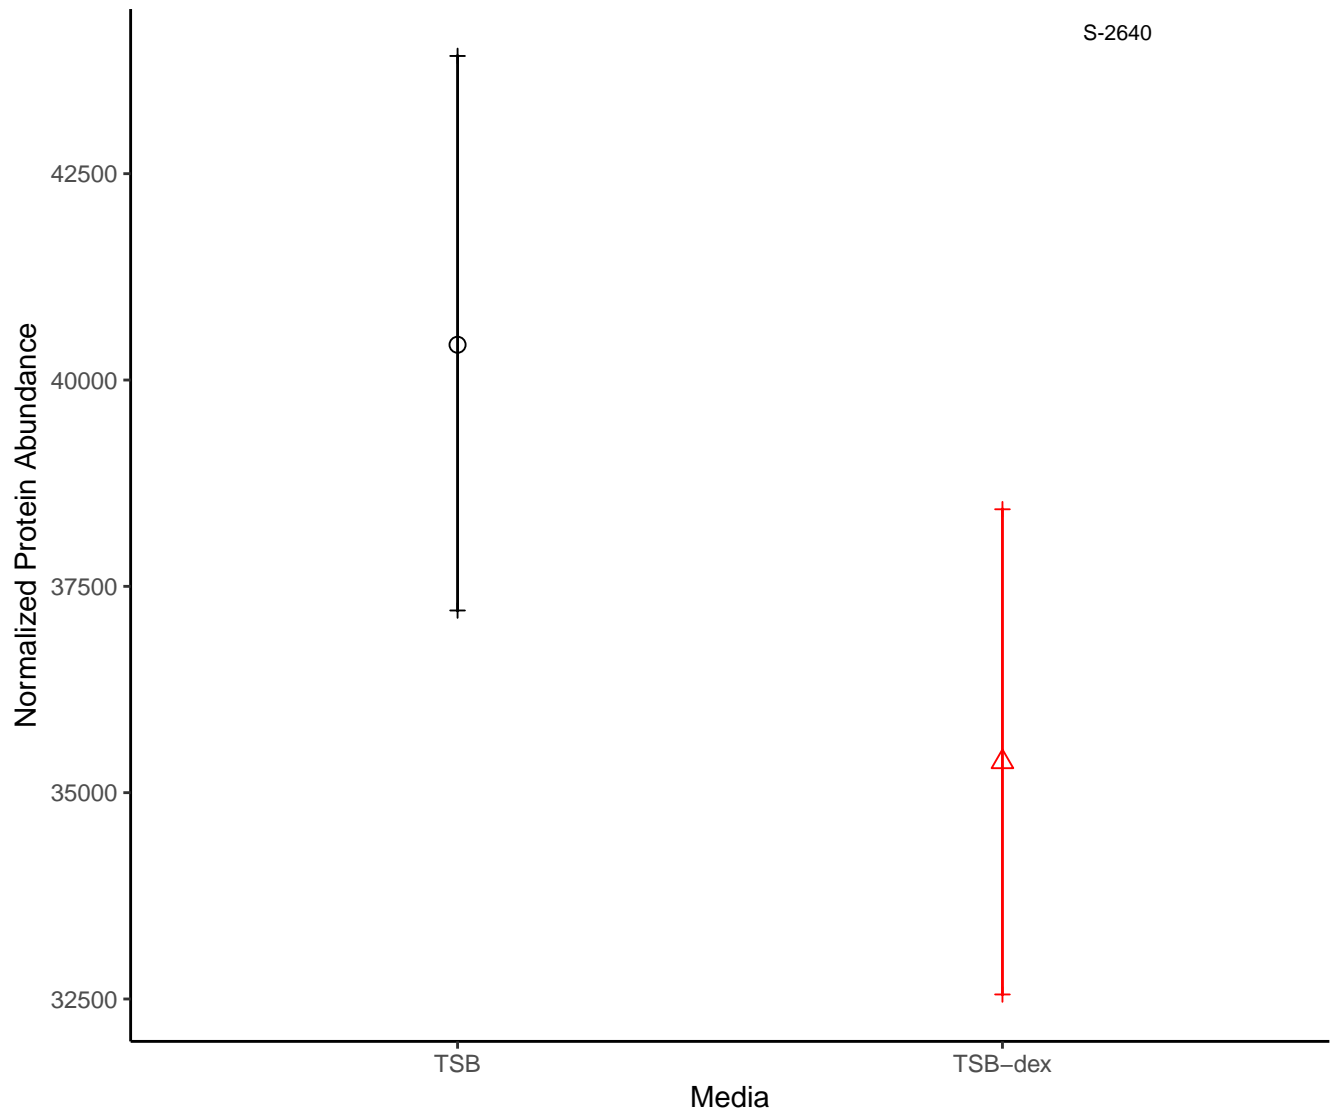

● TSB-dex

▲ TSB



# GCSPA\_STAAM

S-2641

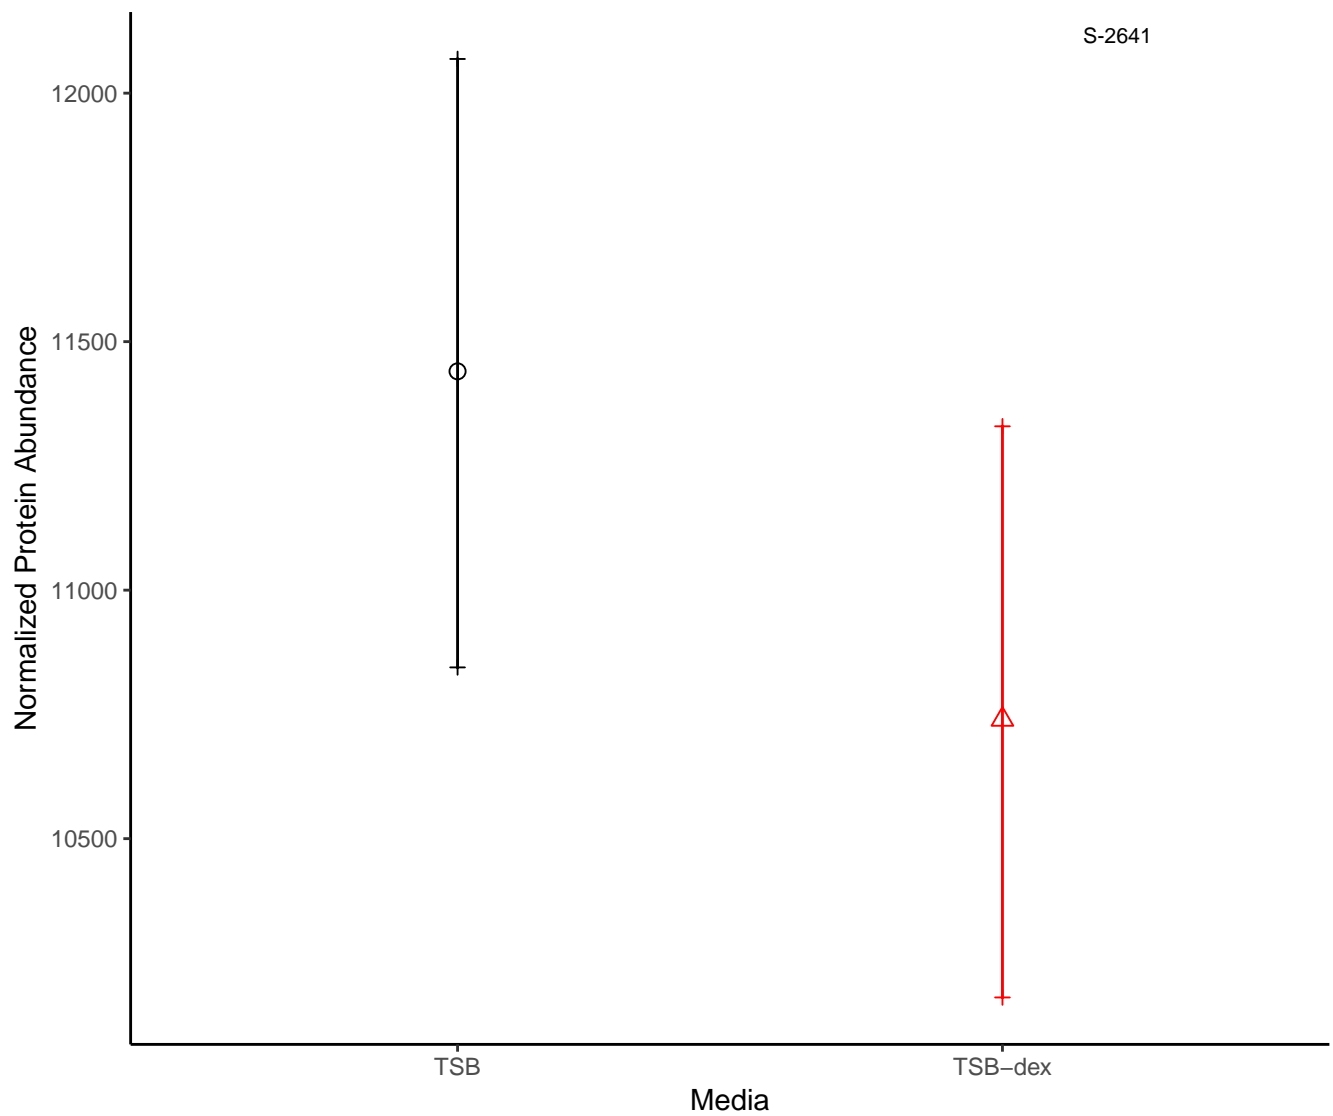

⊕ TSB-dex

△ TSB

# GCSPB\_STAAM

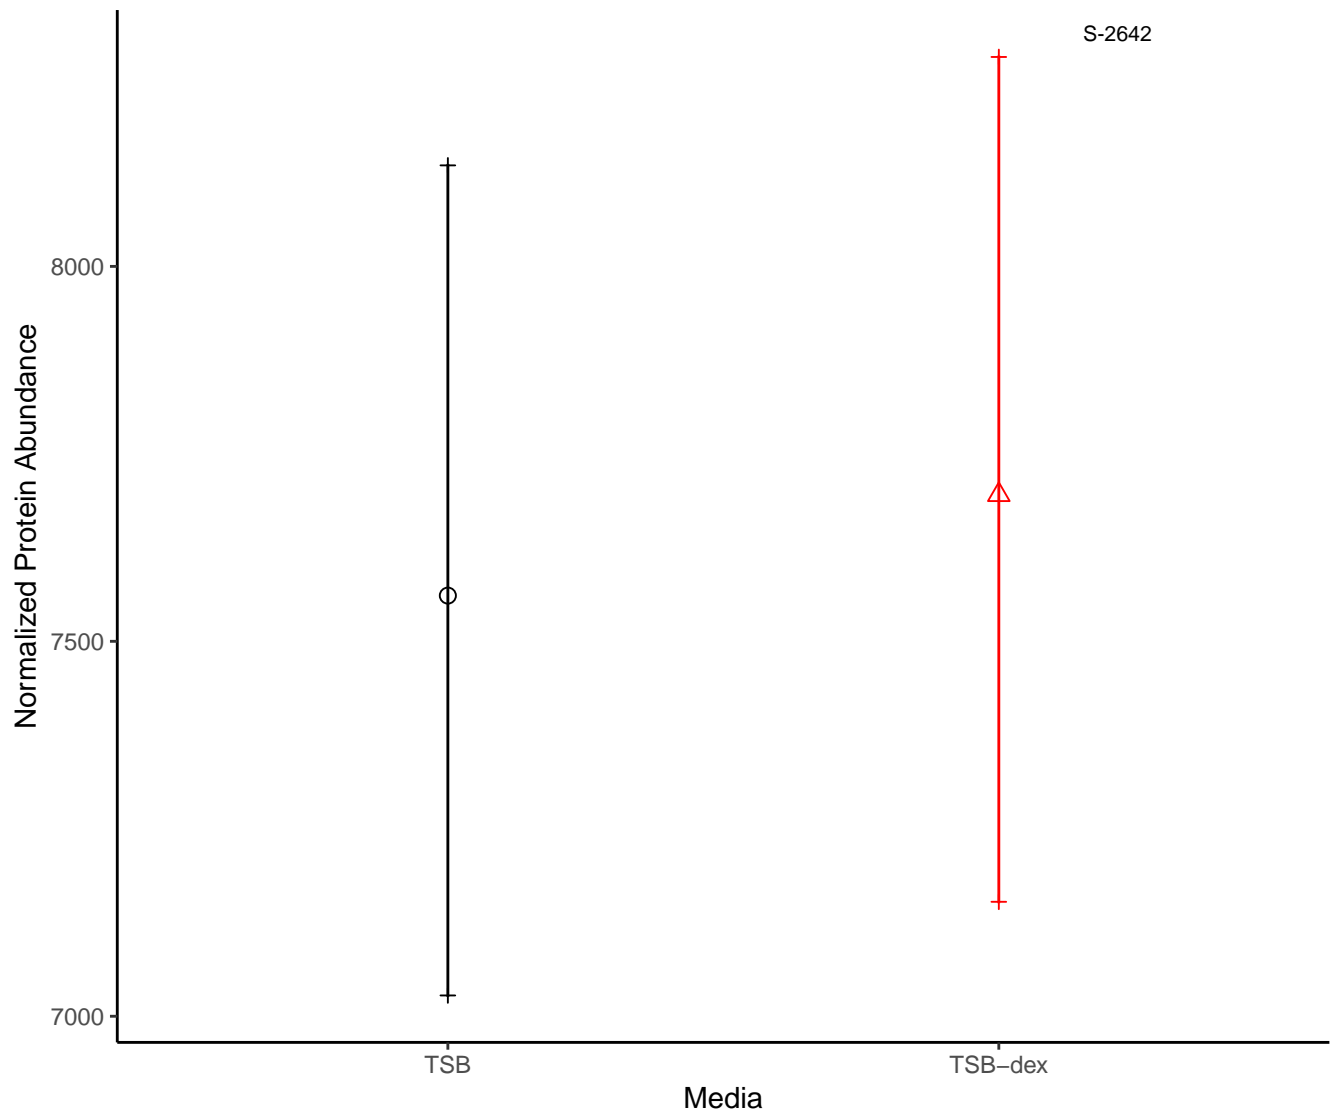

⊕ TSB-dex

△ TSB

# GCST\_STAAM

S-2643

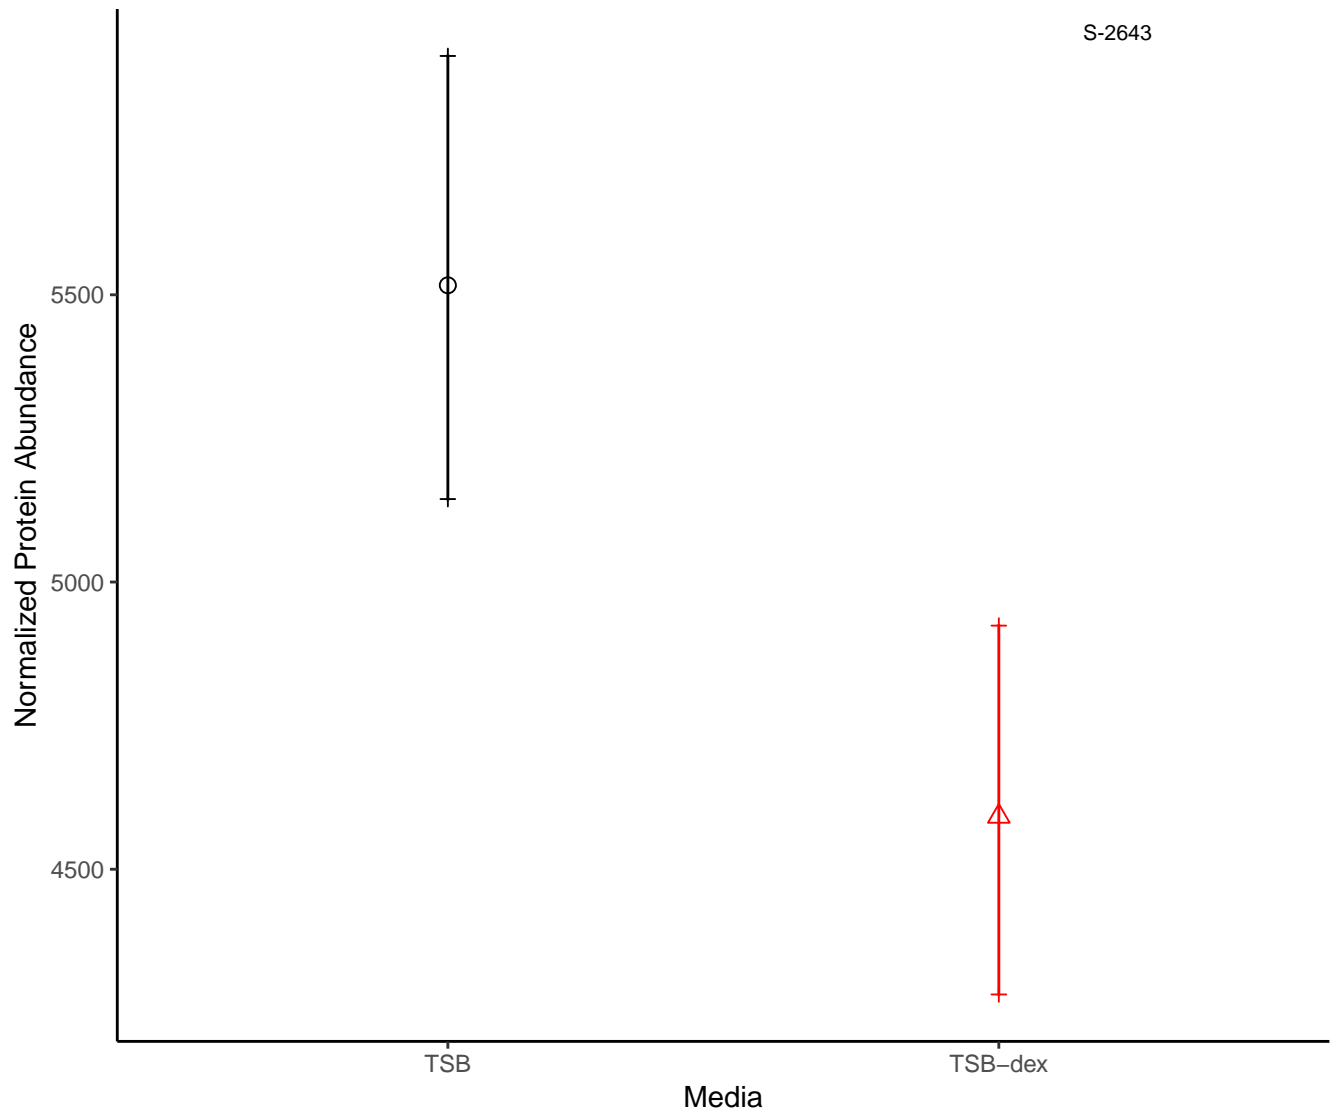

⊕ TSB-dex

△ TSB

# GLMM\_STAAM

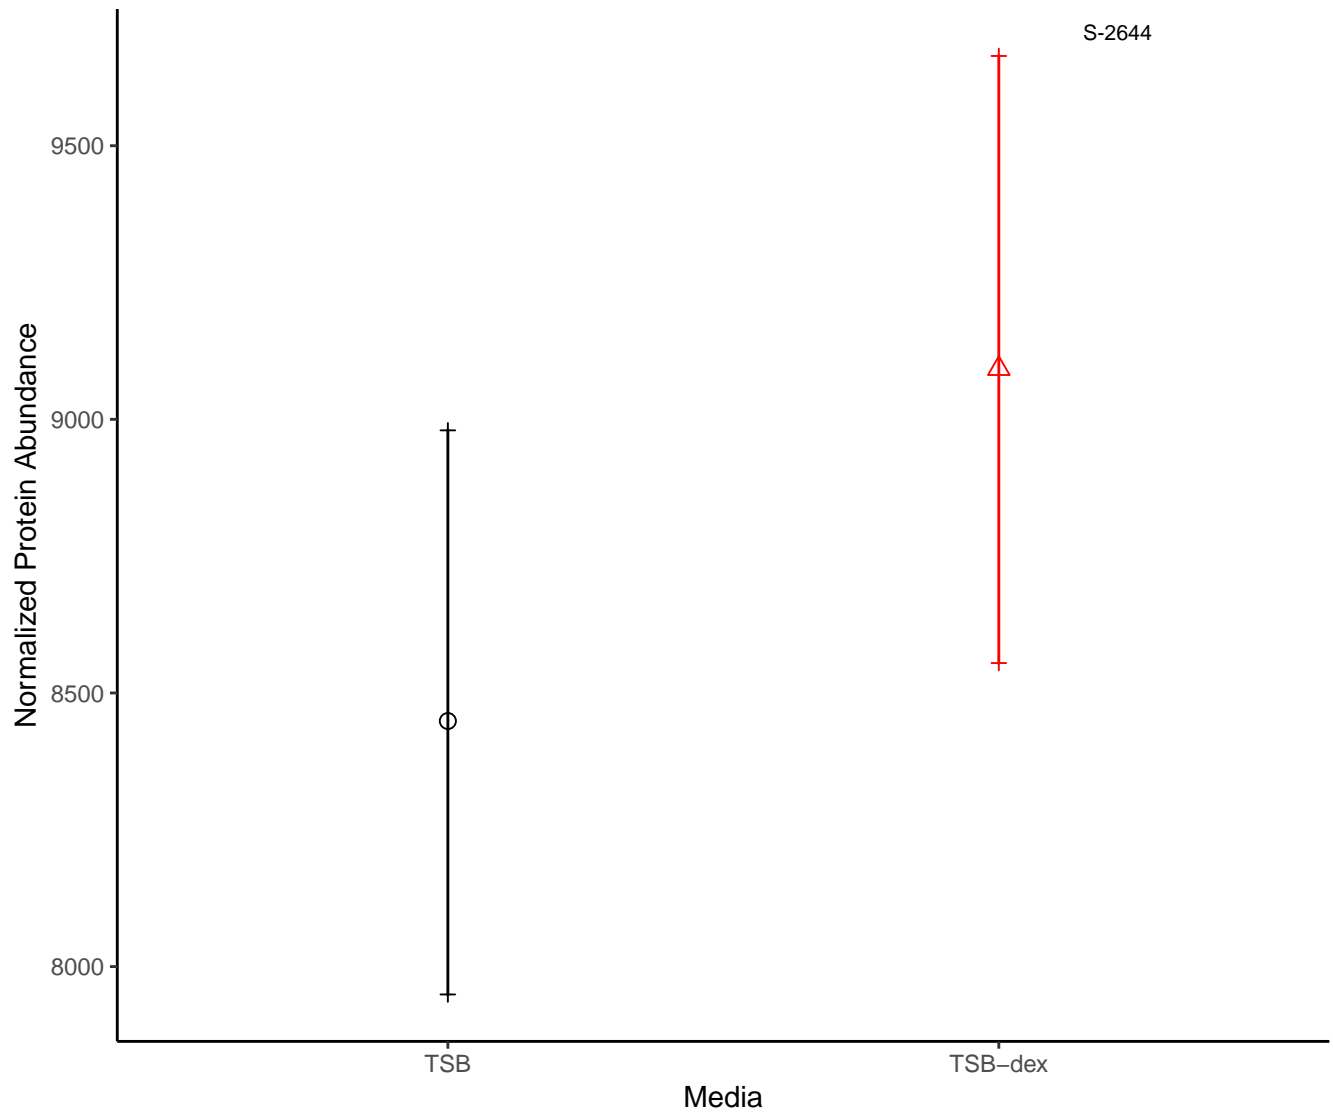

⊕ TSB-dex

△ TSB

# GLMS\_STAAM

S-2645

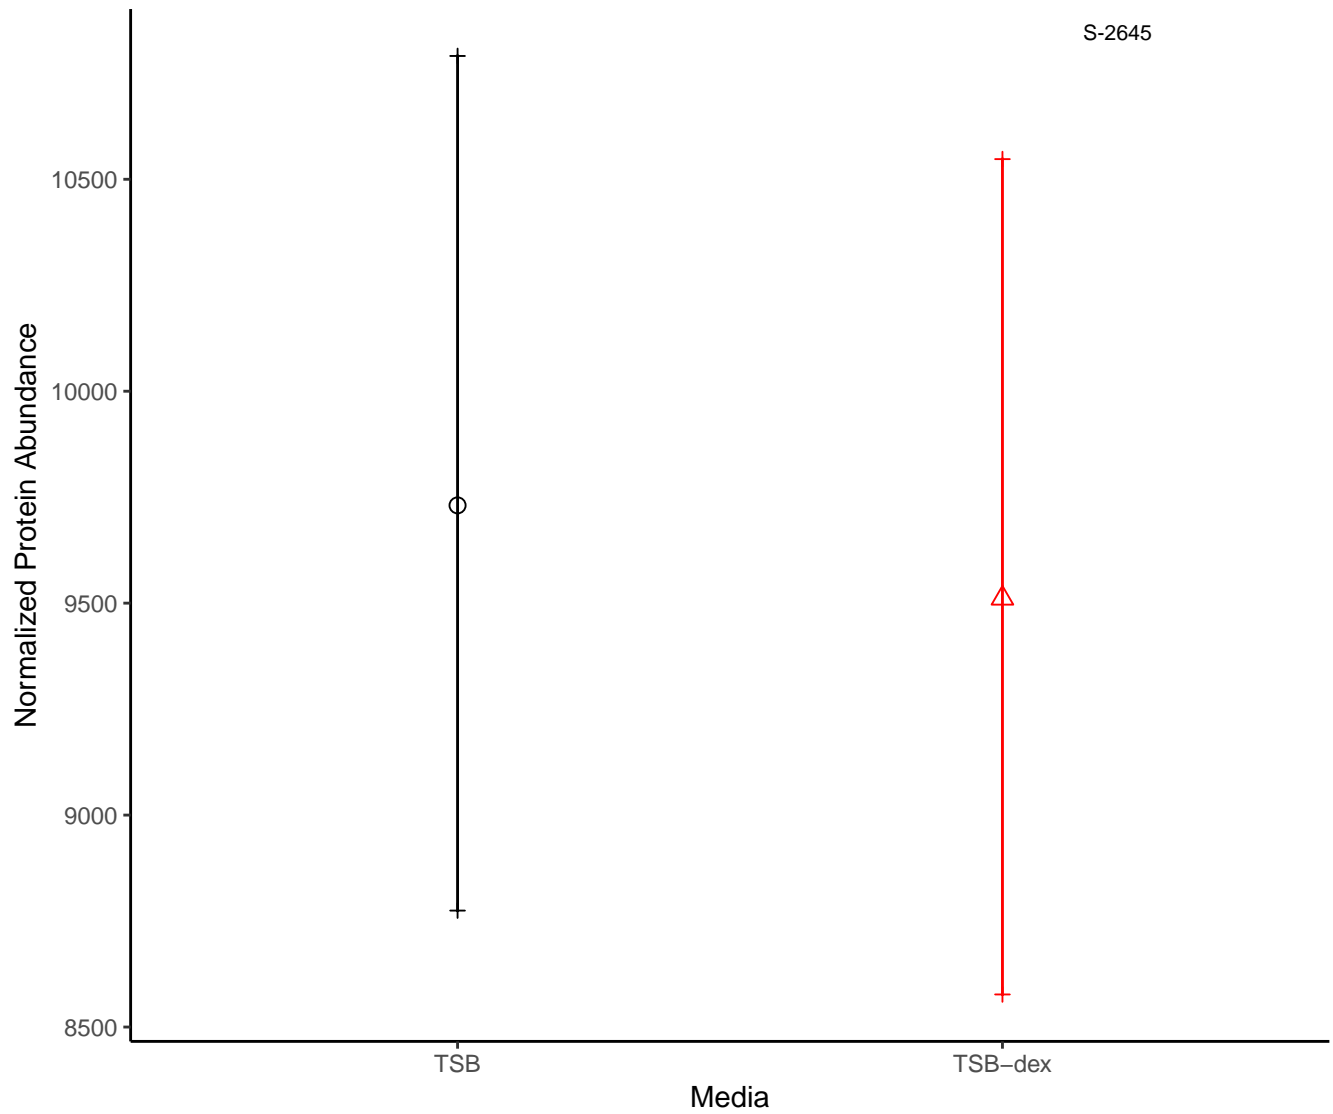

⊕ TSB-dex

△ TSB

# GLMU\_STAAM

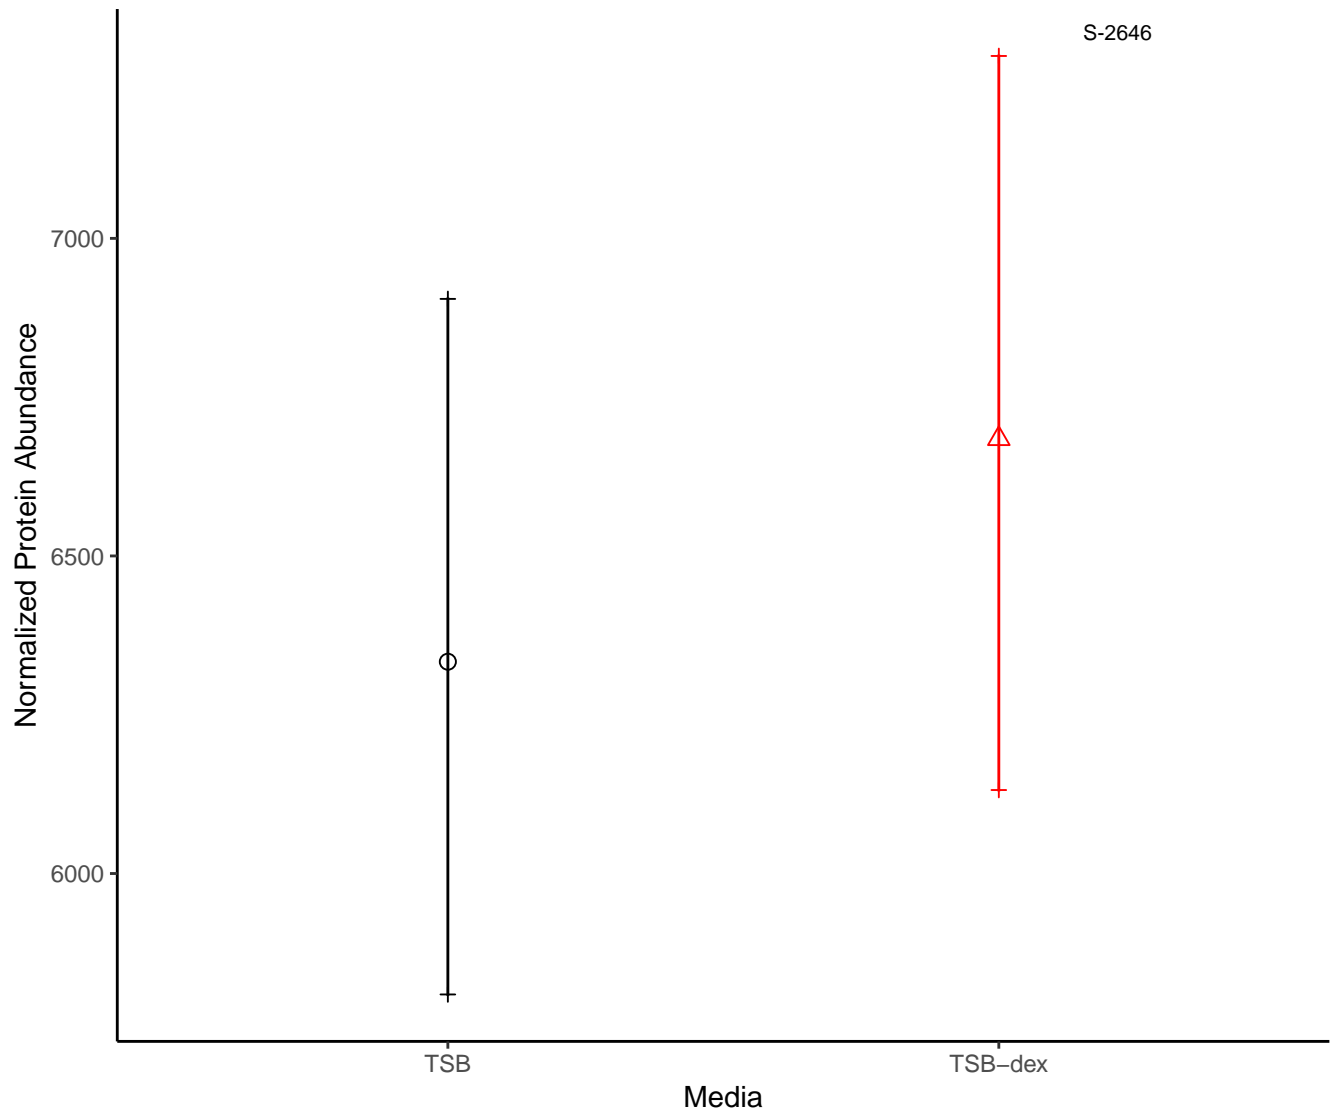

⊕ TSB-dex

△ TSB

# GLNA\_STAAM

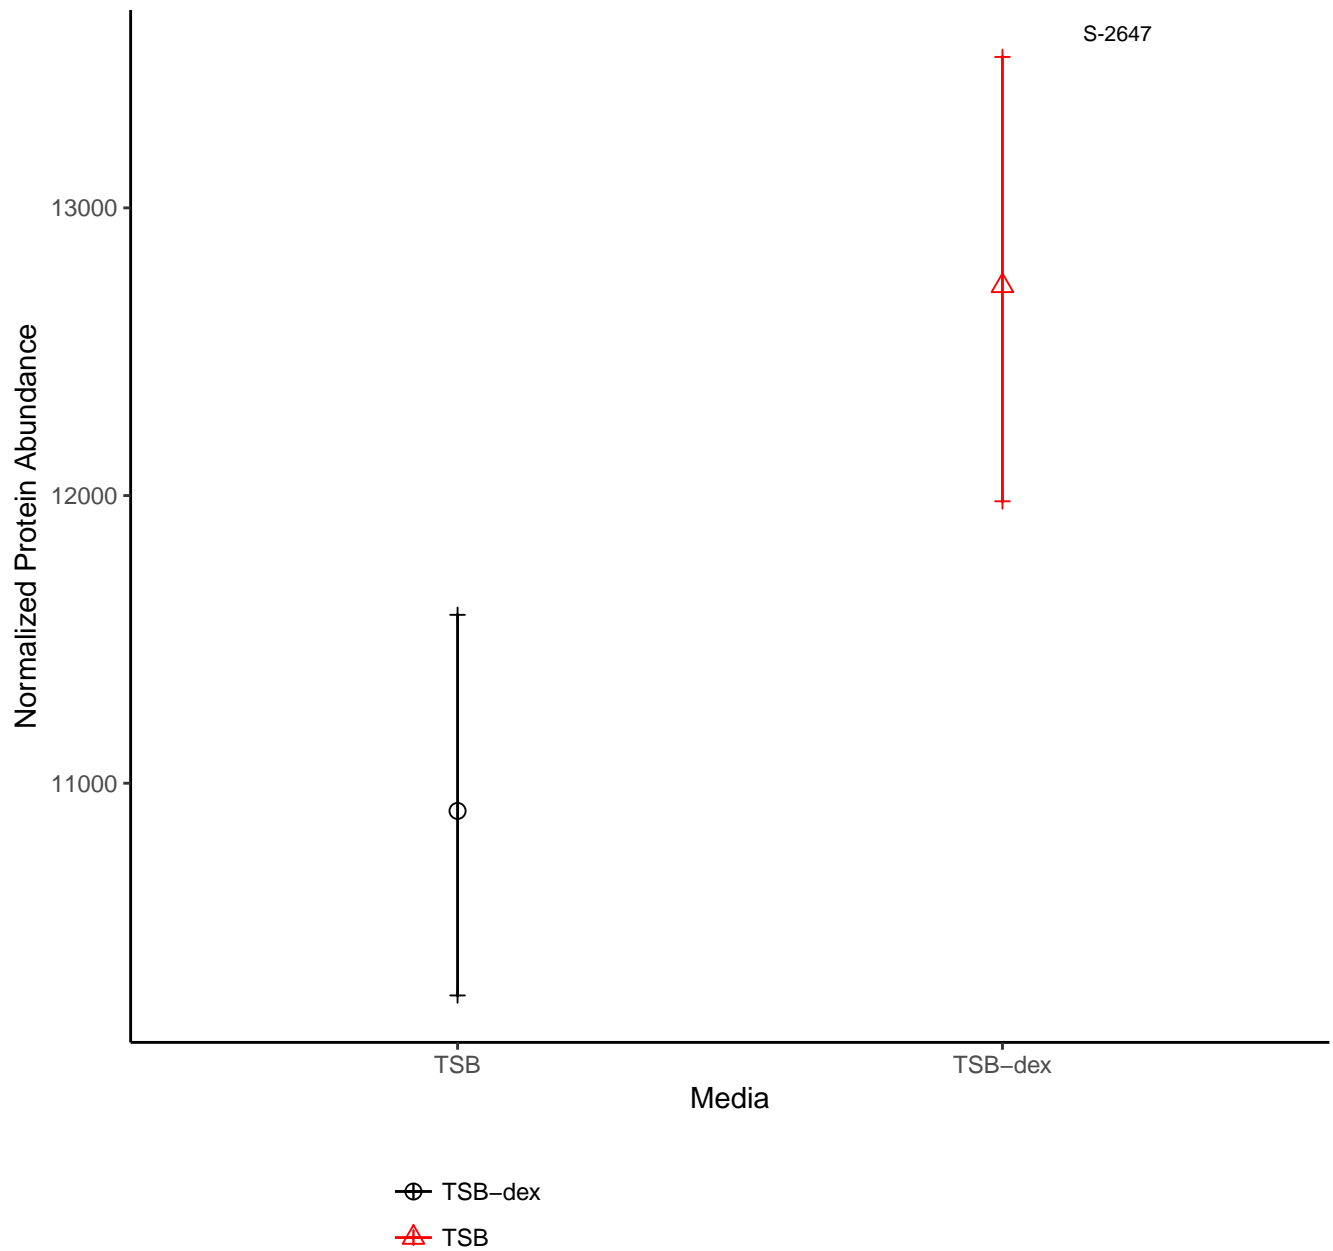

# GLPD\_STAAM

S-2648

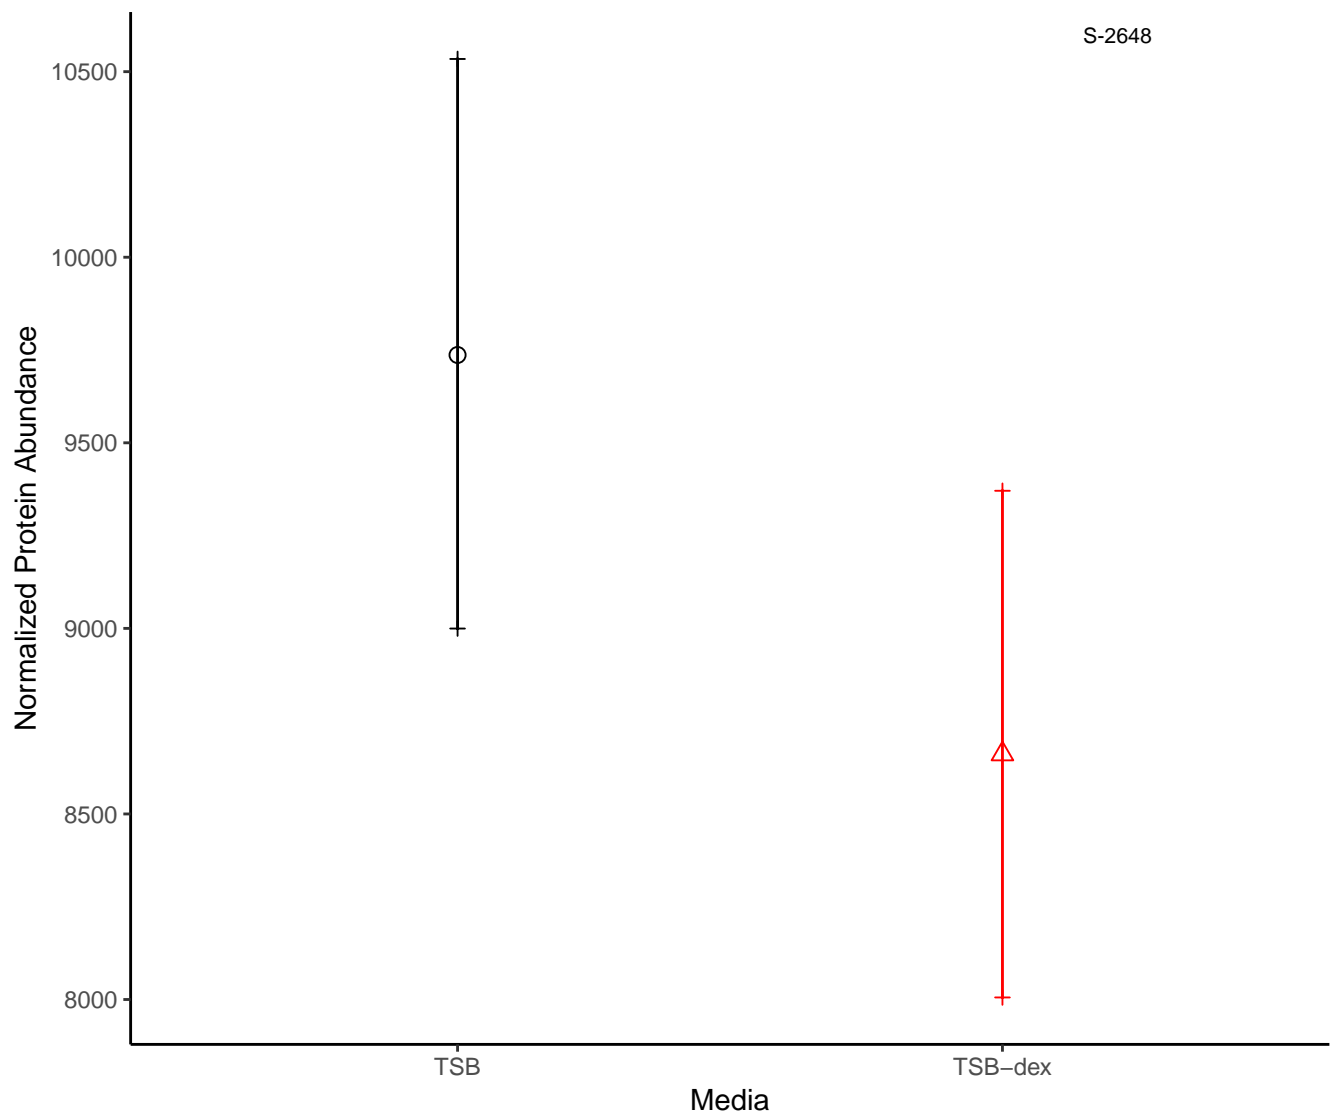

⊖ TSB-dex

△ TSB



# GLPK\_STAAM

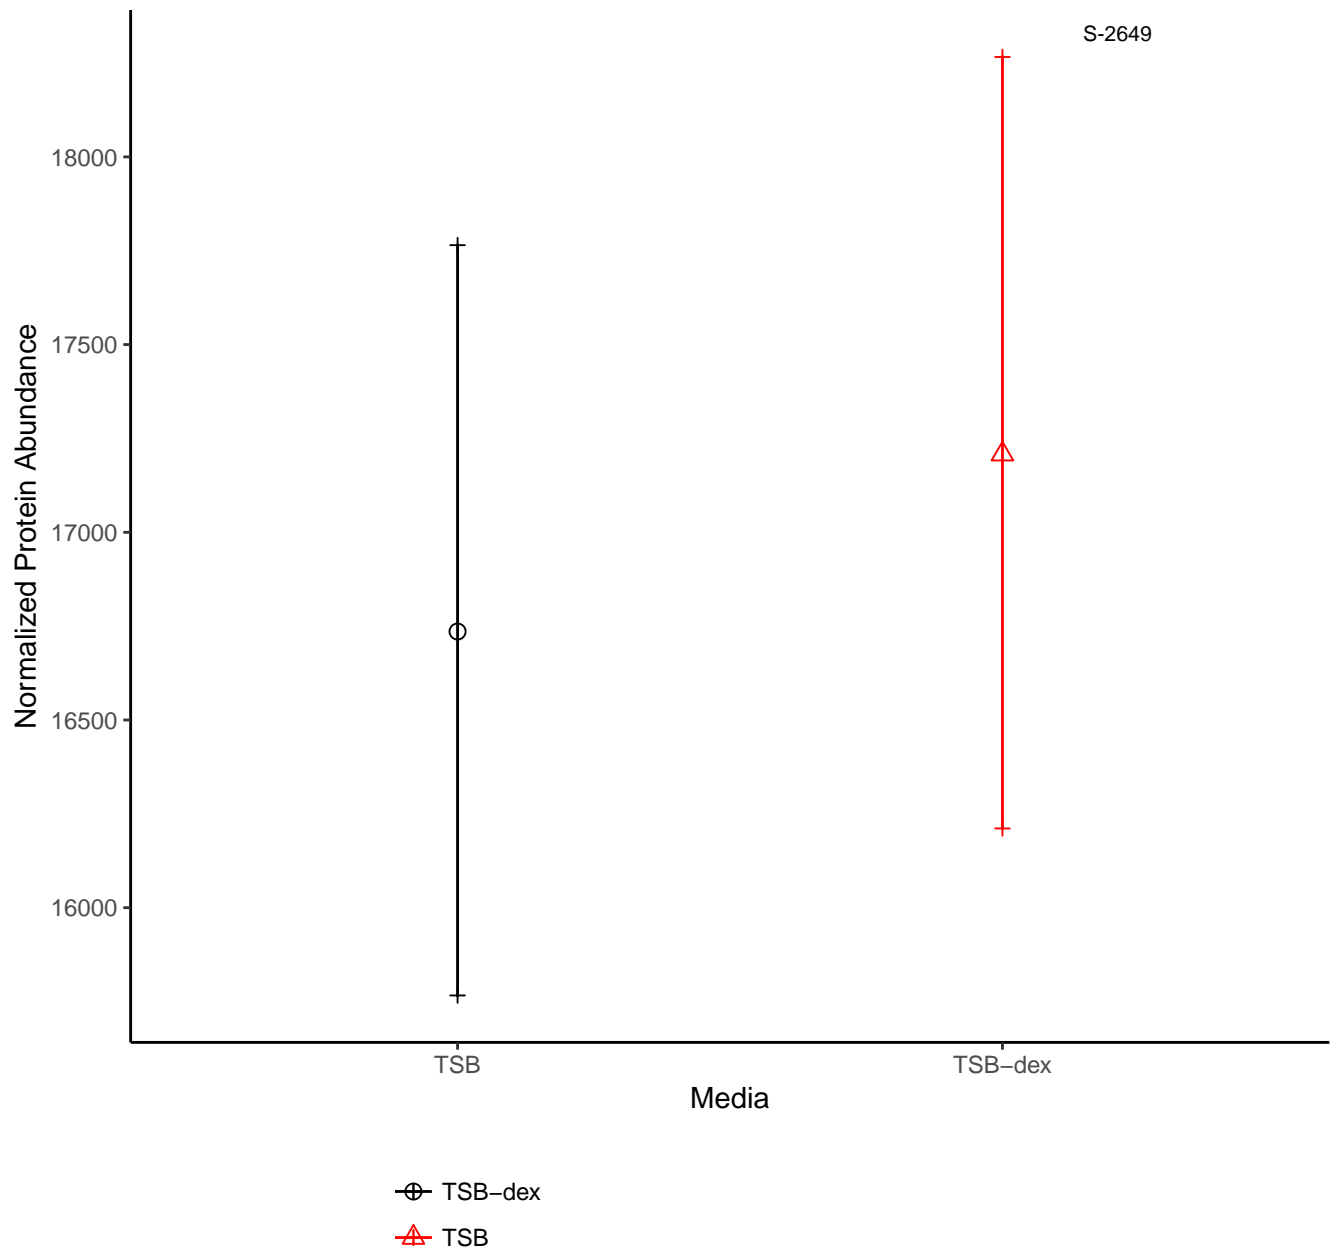

# GLYA\_STAAM

S-2650

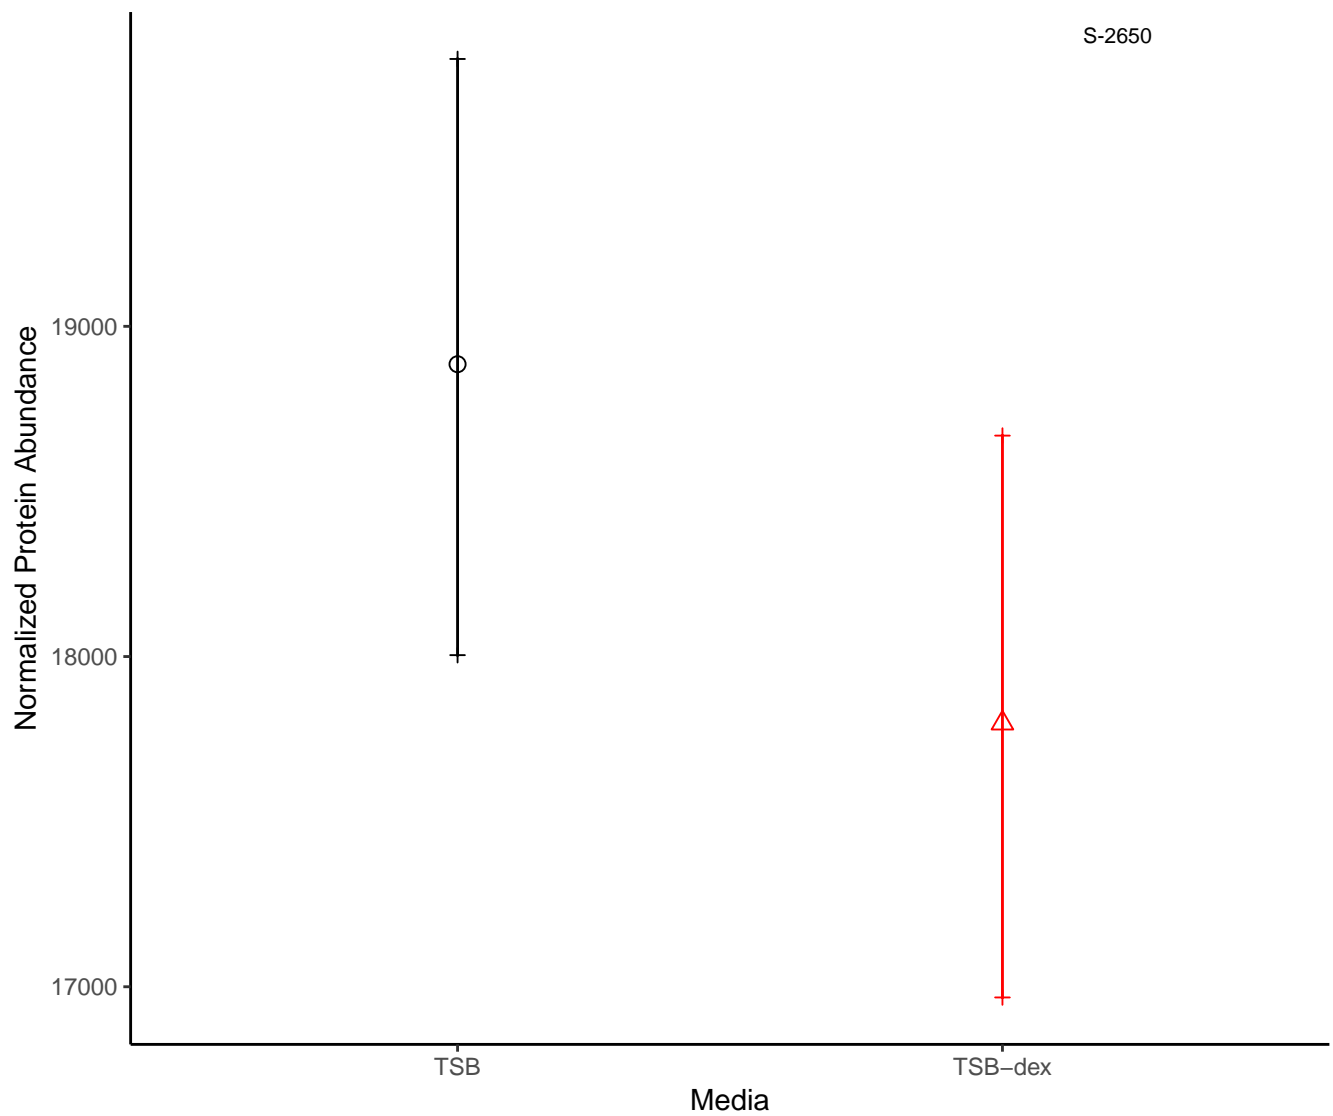

⊕ TSB-dex

△ TSB

# GPDA\_STAAM

S-2651

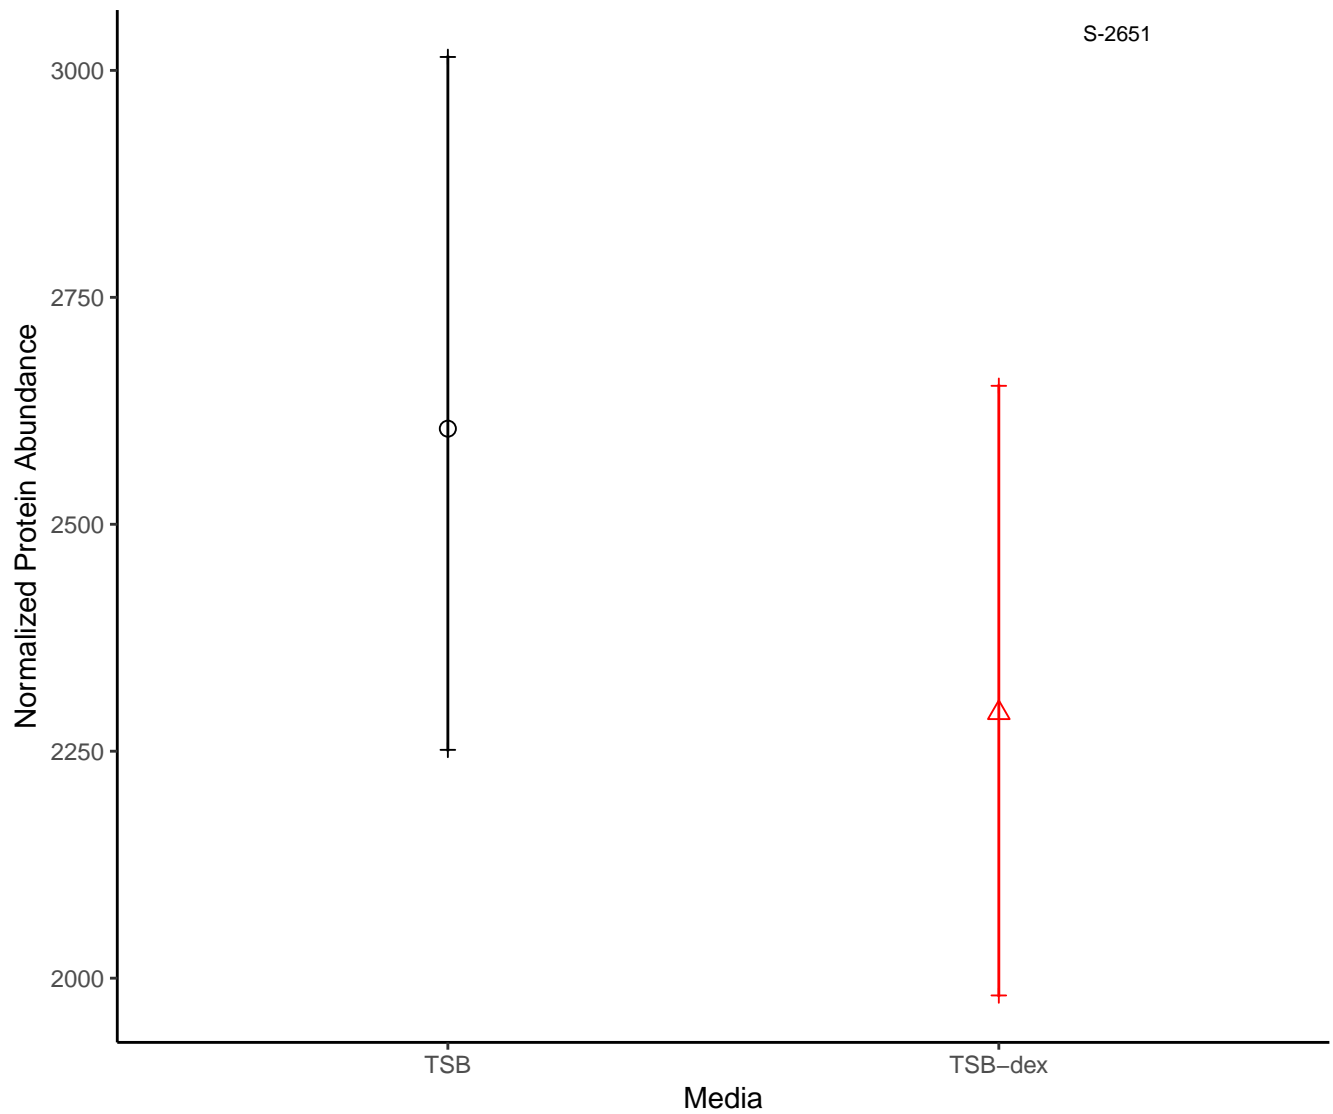

⊕ TSB-dex

△ TSB

# GPMA\_STAAM

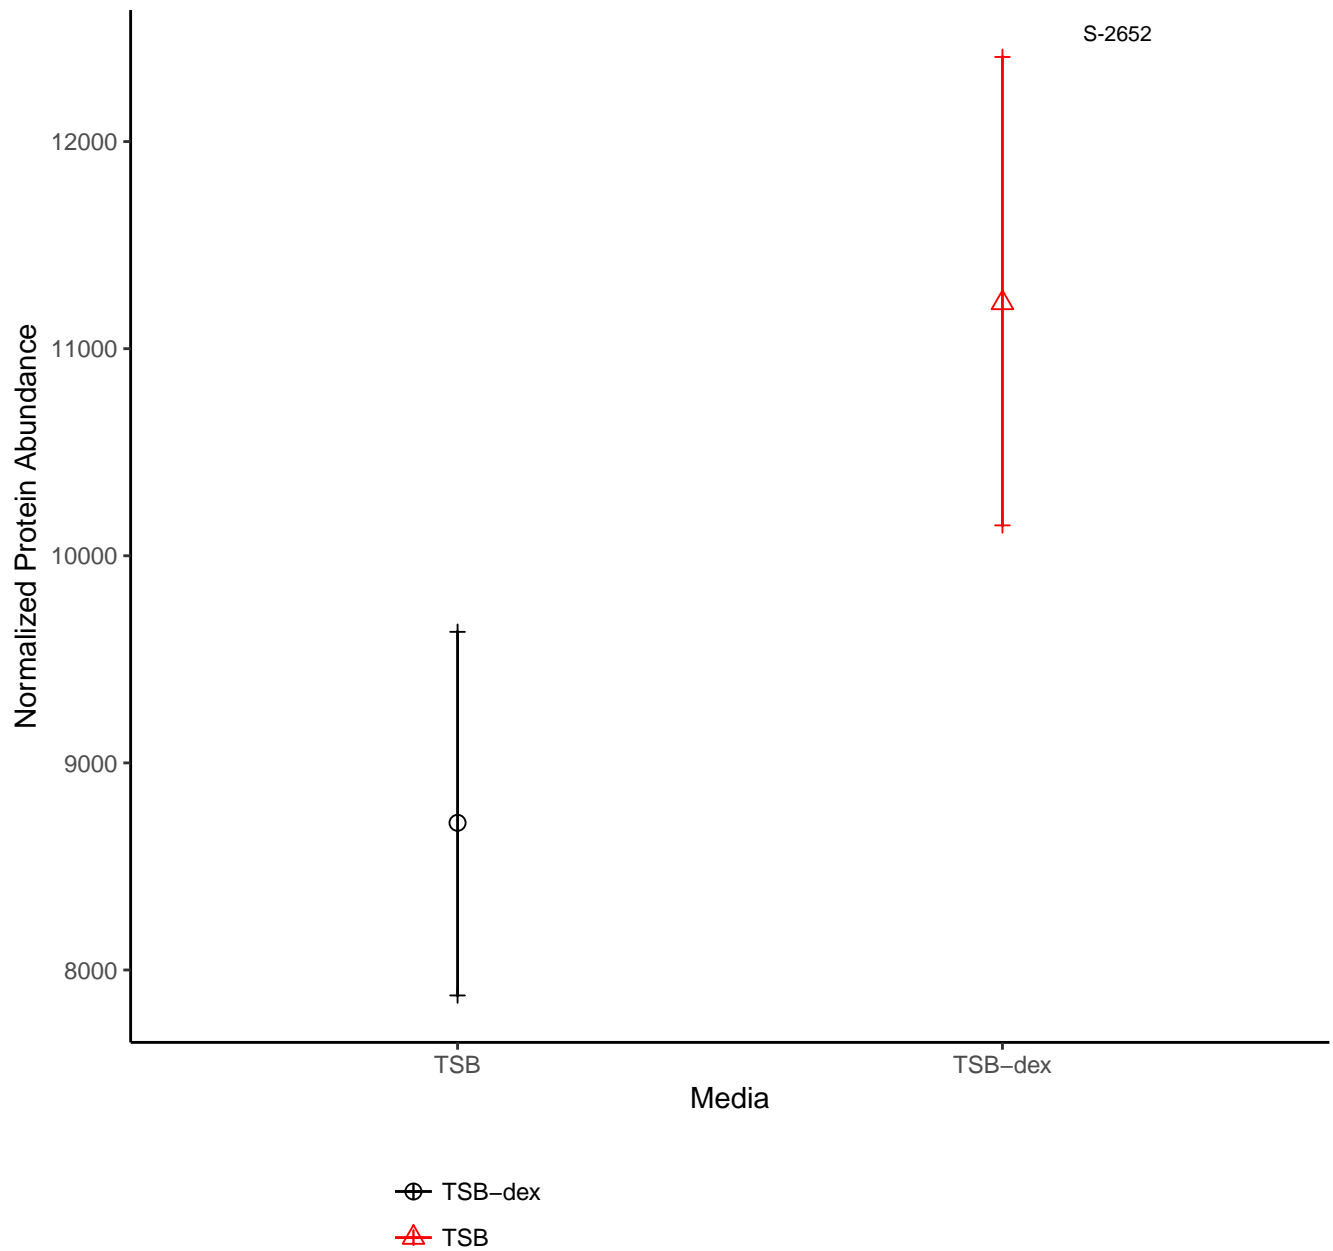

# GPMI\_STAAM

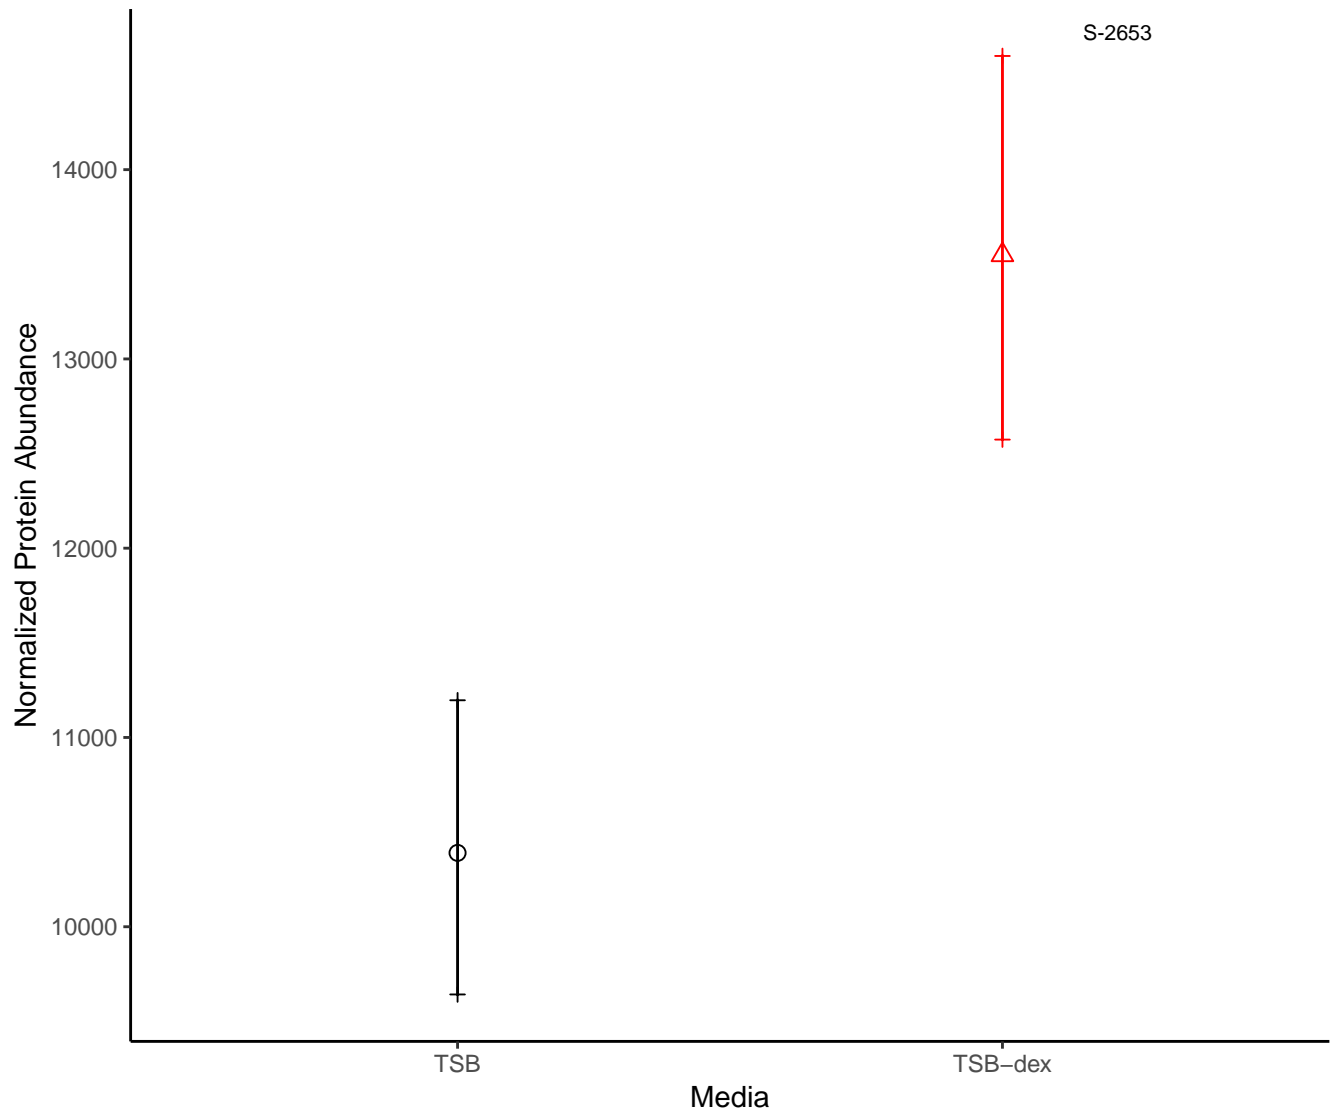

⊕ TSB-dex

△ TSB

# GPSB\_STAAM

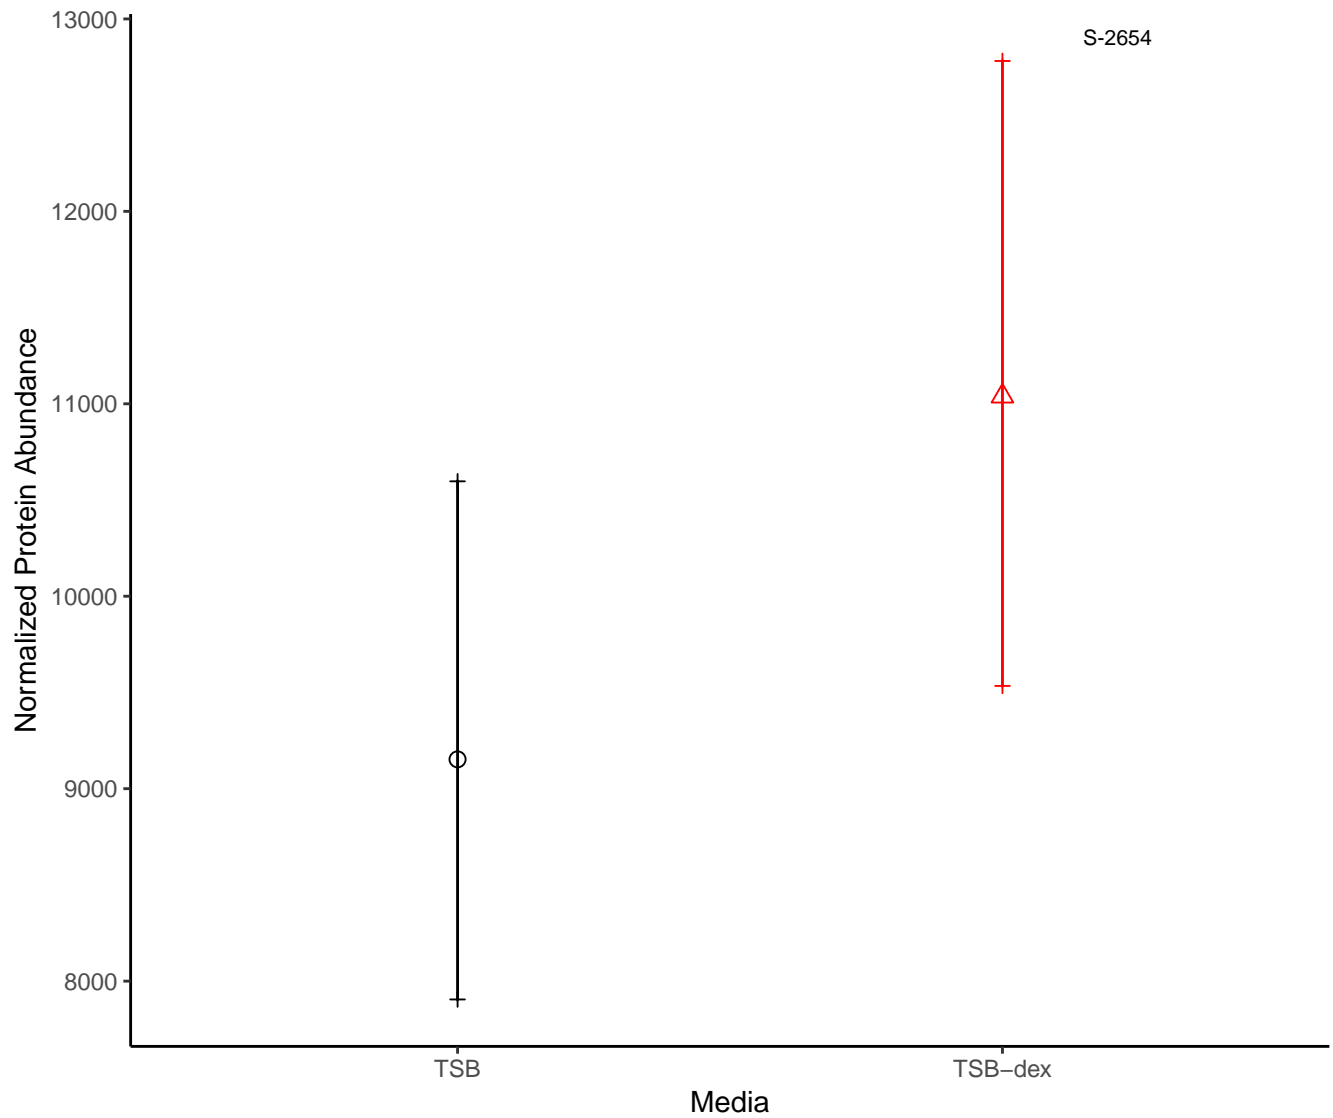

⊕ TSB-dex

△ TSB

# GRAR\_STAAM

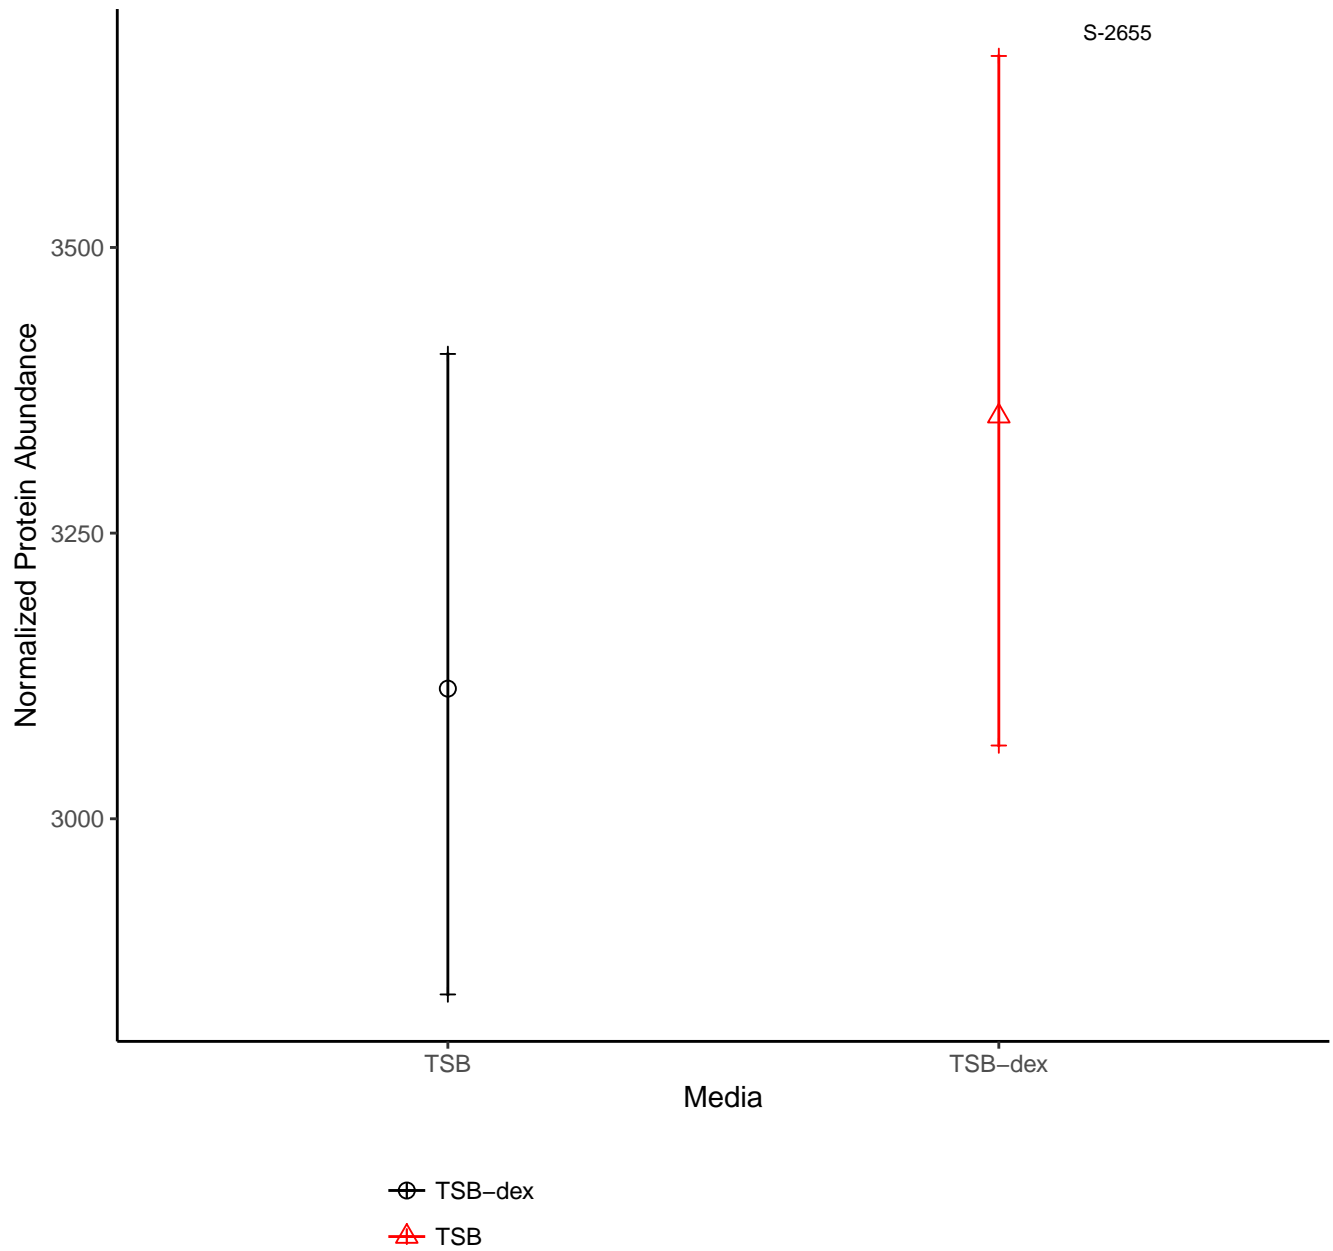

# GRE\_A\_STAAM

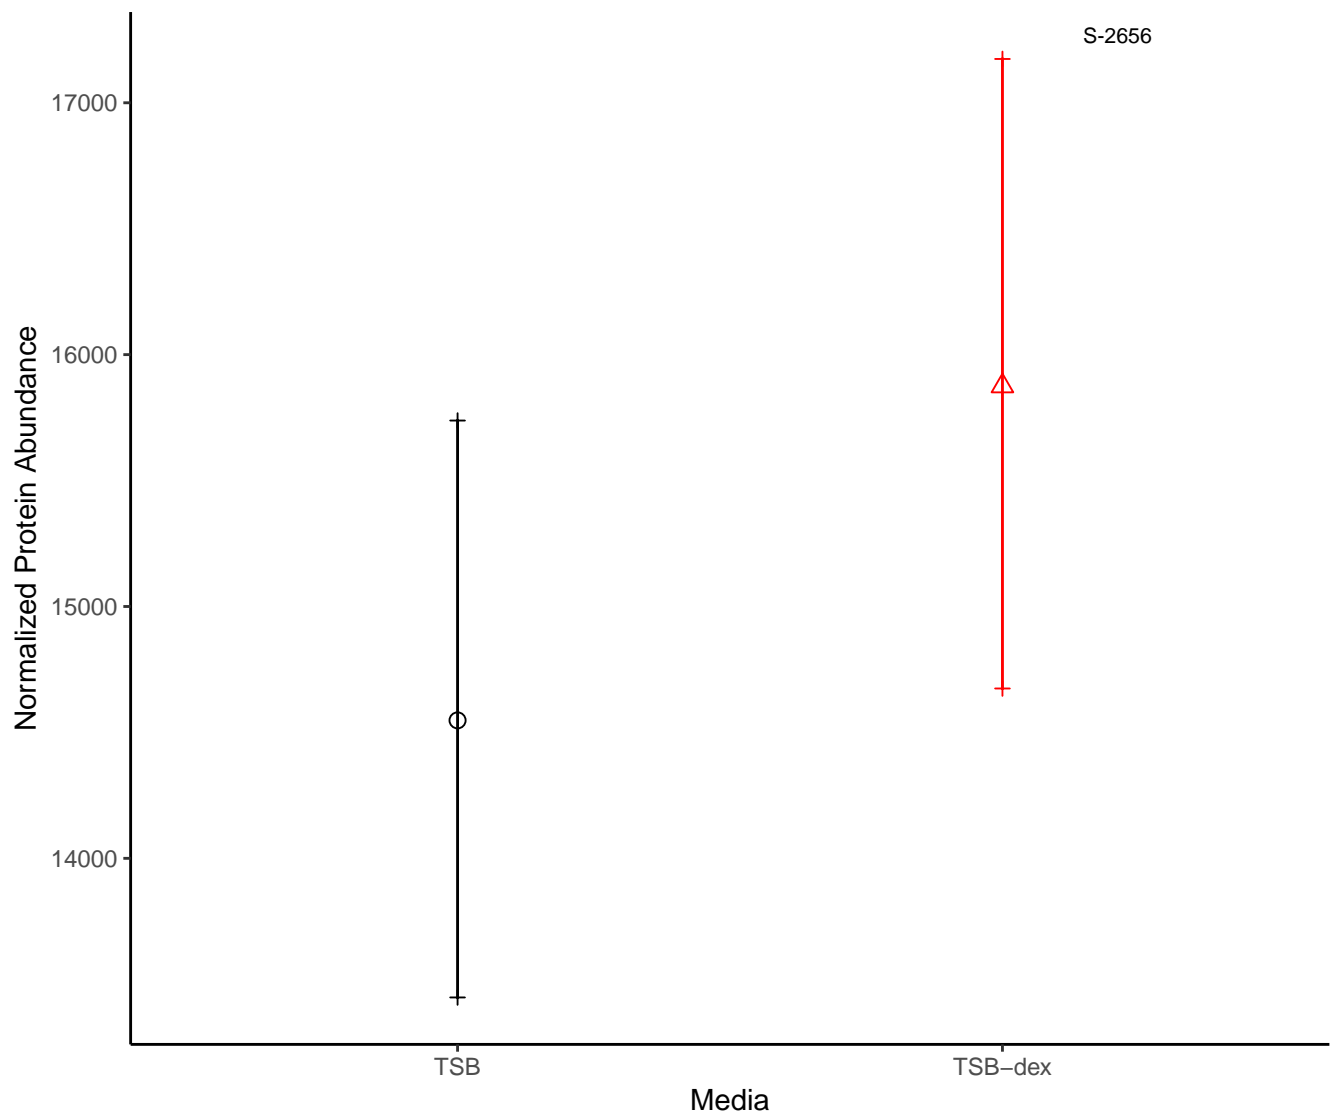

⊕ TSB-dex

△ TSB



# GRPE\_STAAM

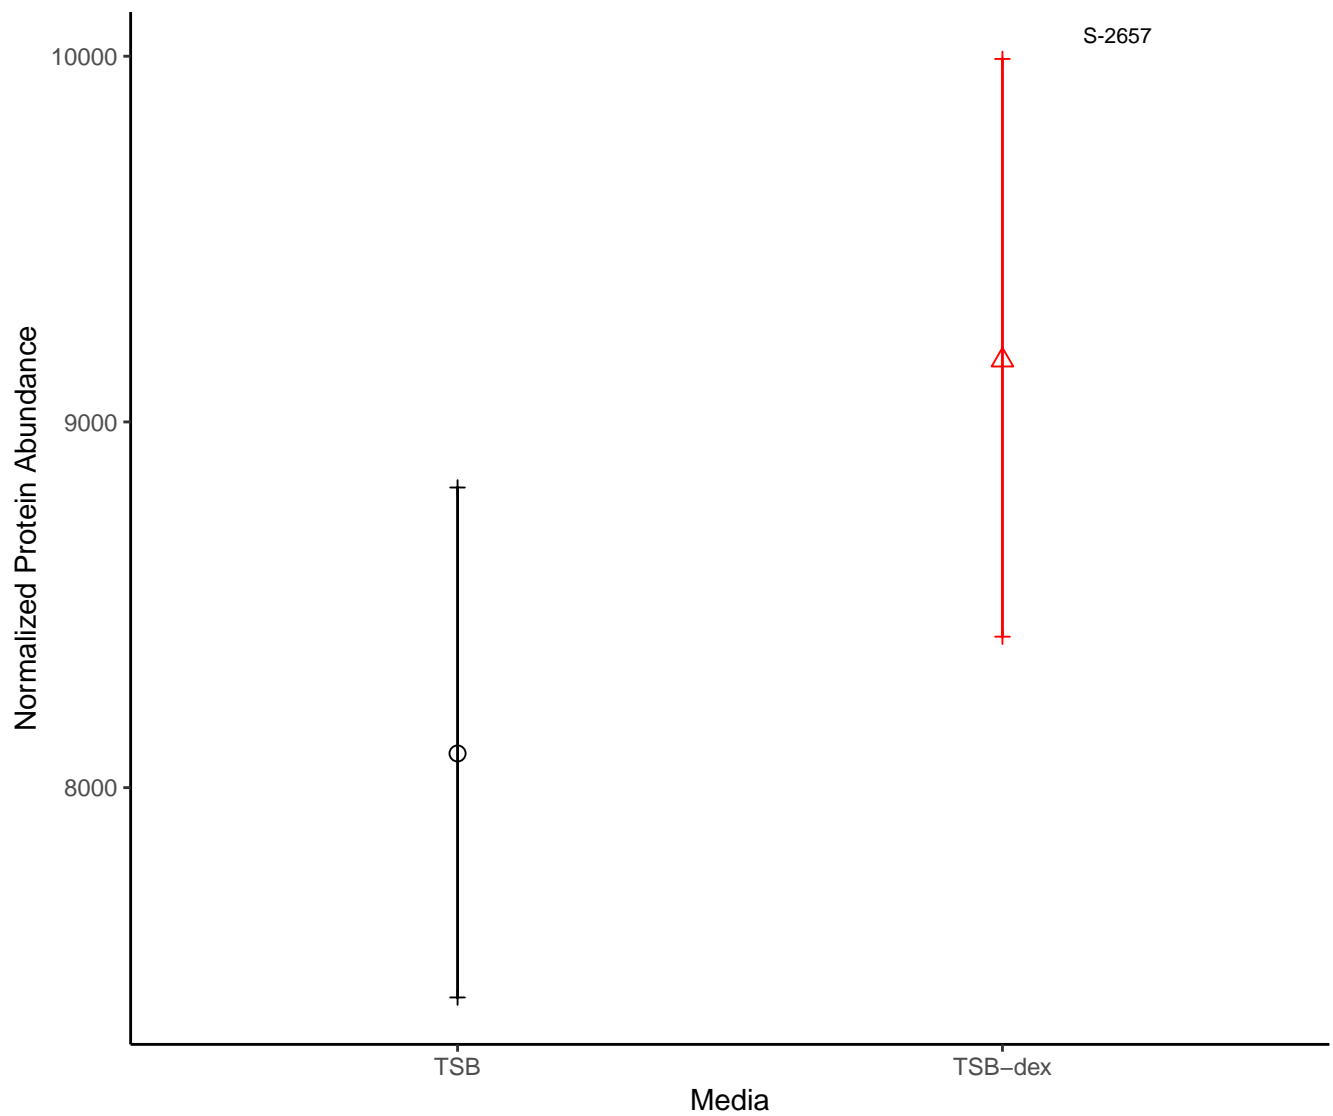

⊕ TSB-dex

△ TSB

# GSA1\_STAAM

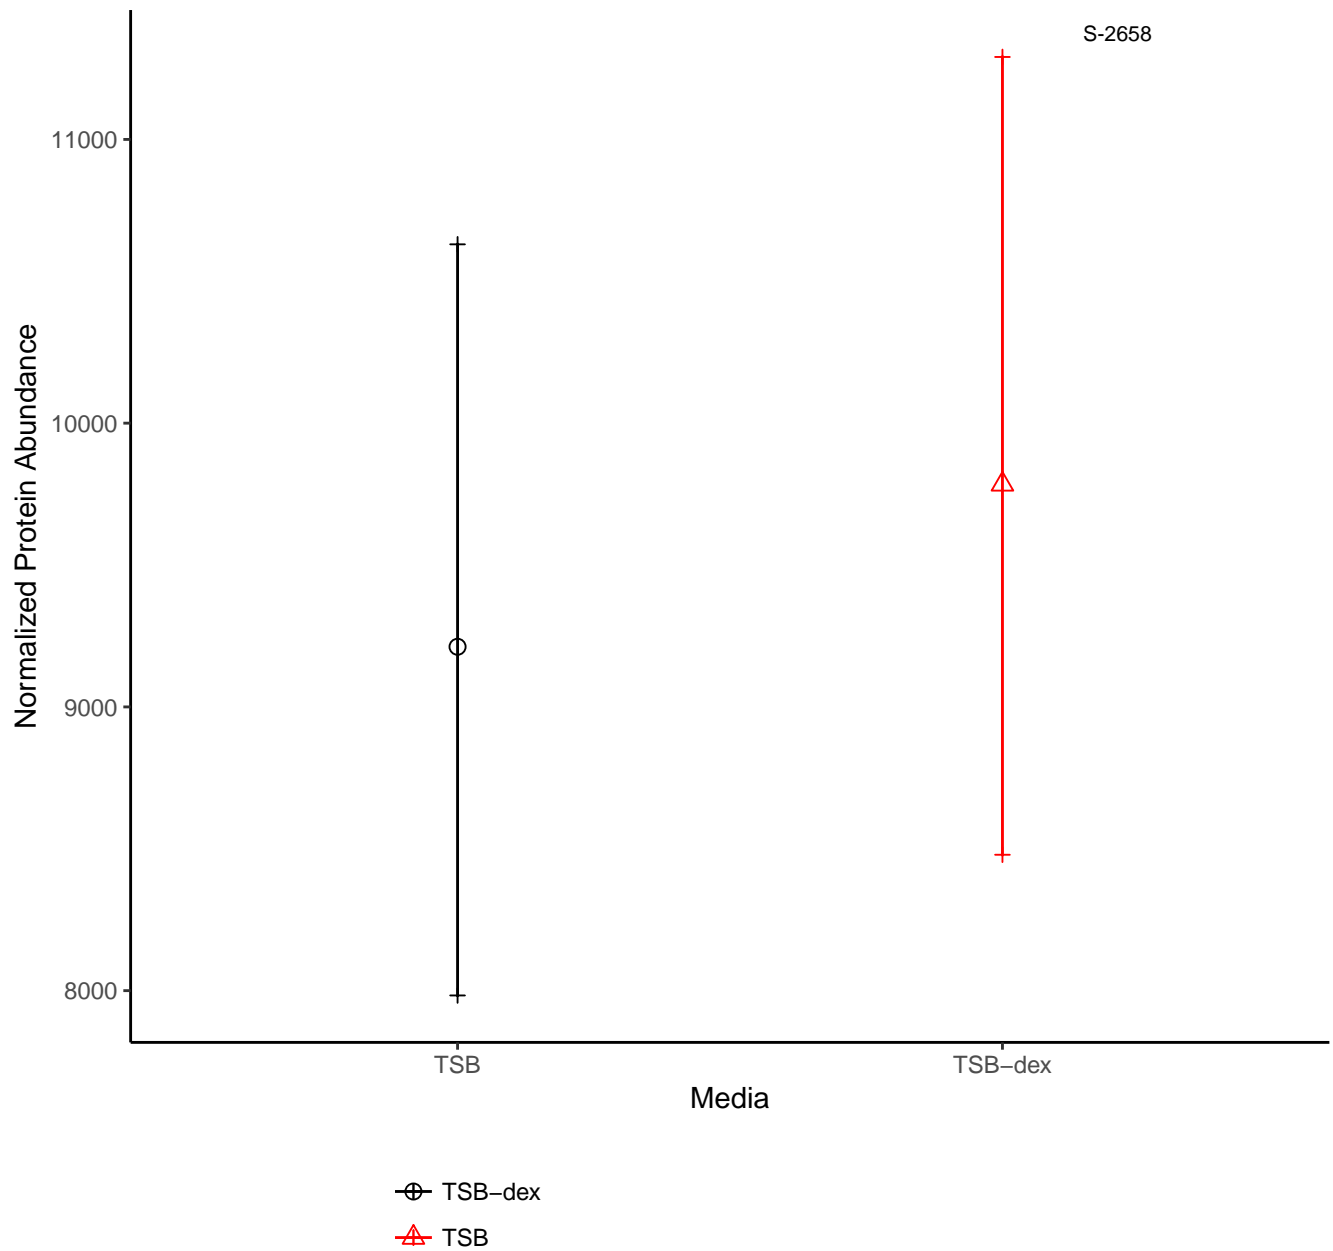

# GSA2\_STAAM

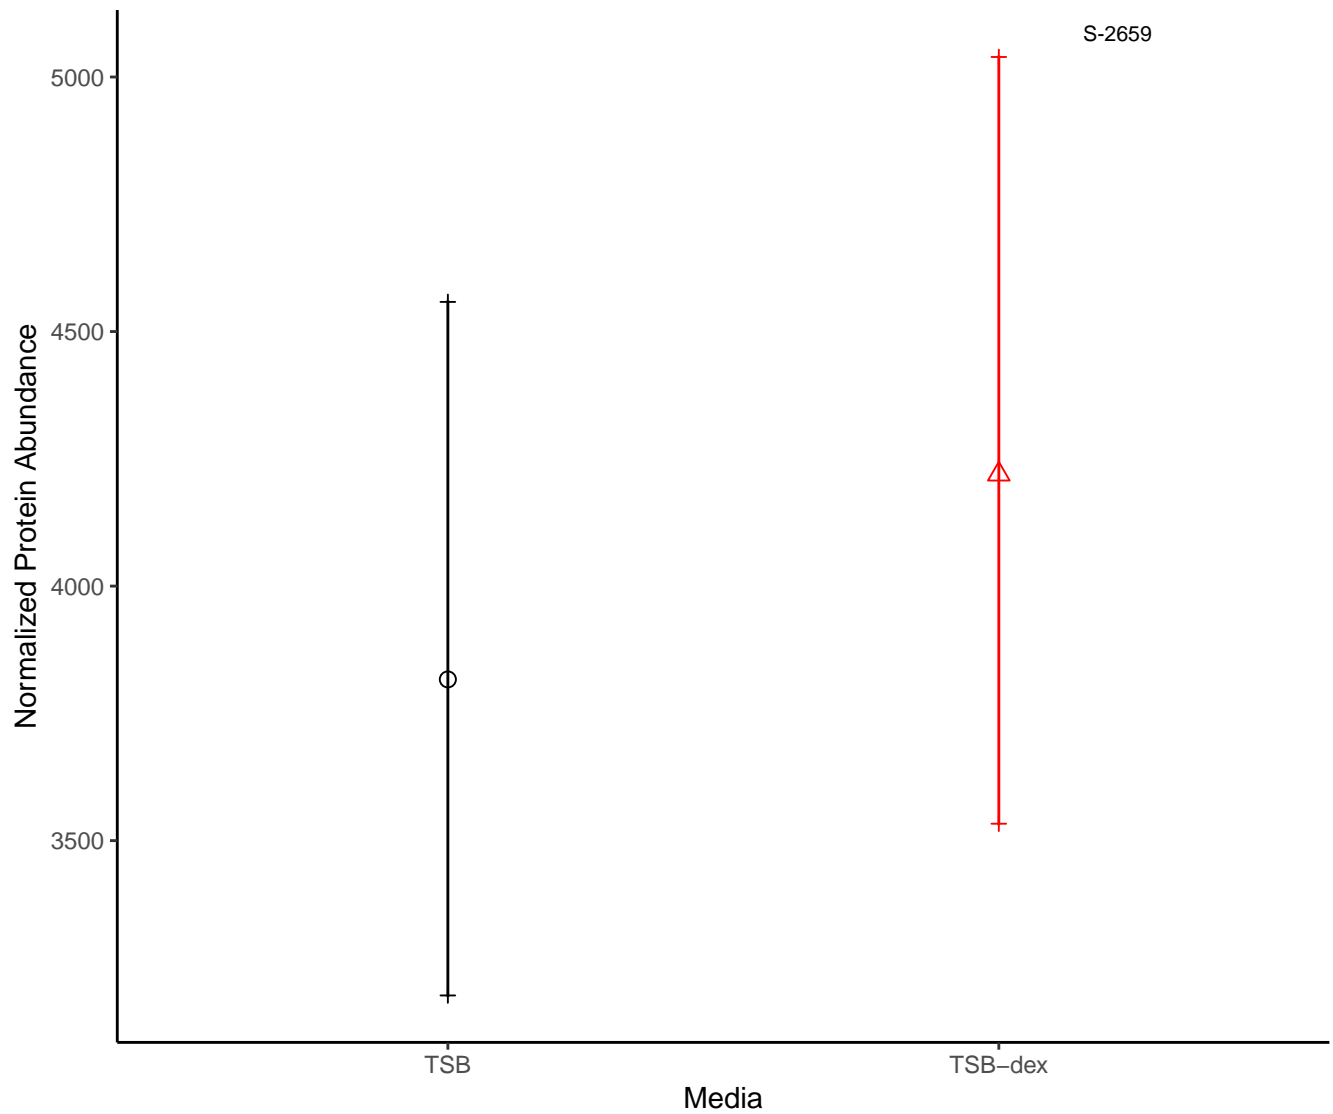

⊕ TSB-dex

△ TSB

# GTAB\_STAAM

S-2660

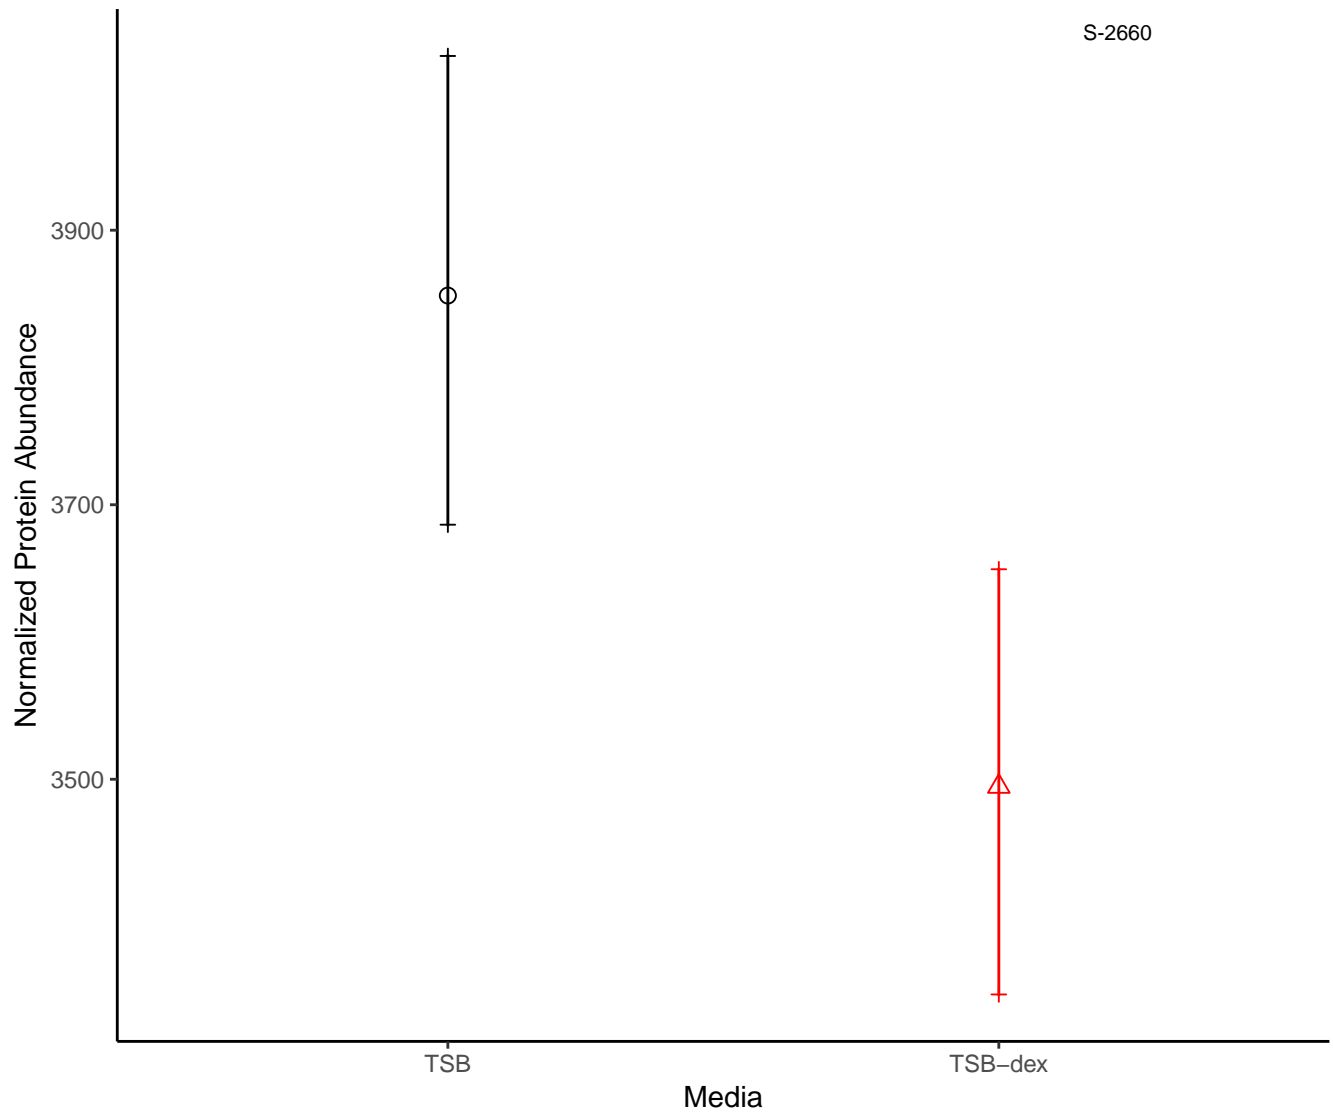

⊕ TSB-dex

△ TSB

# GUAA\_STAAM

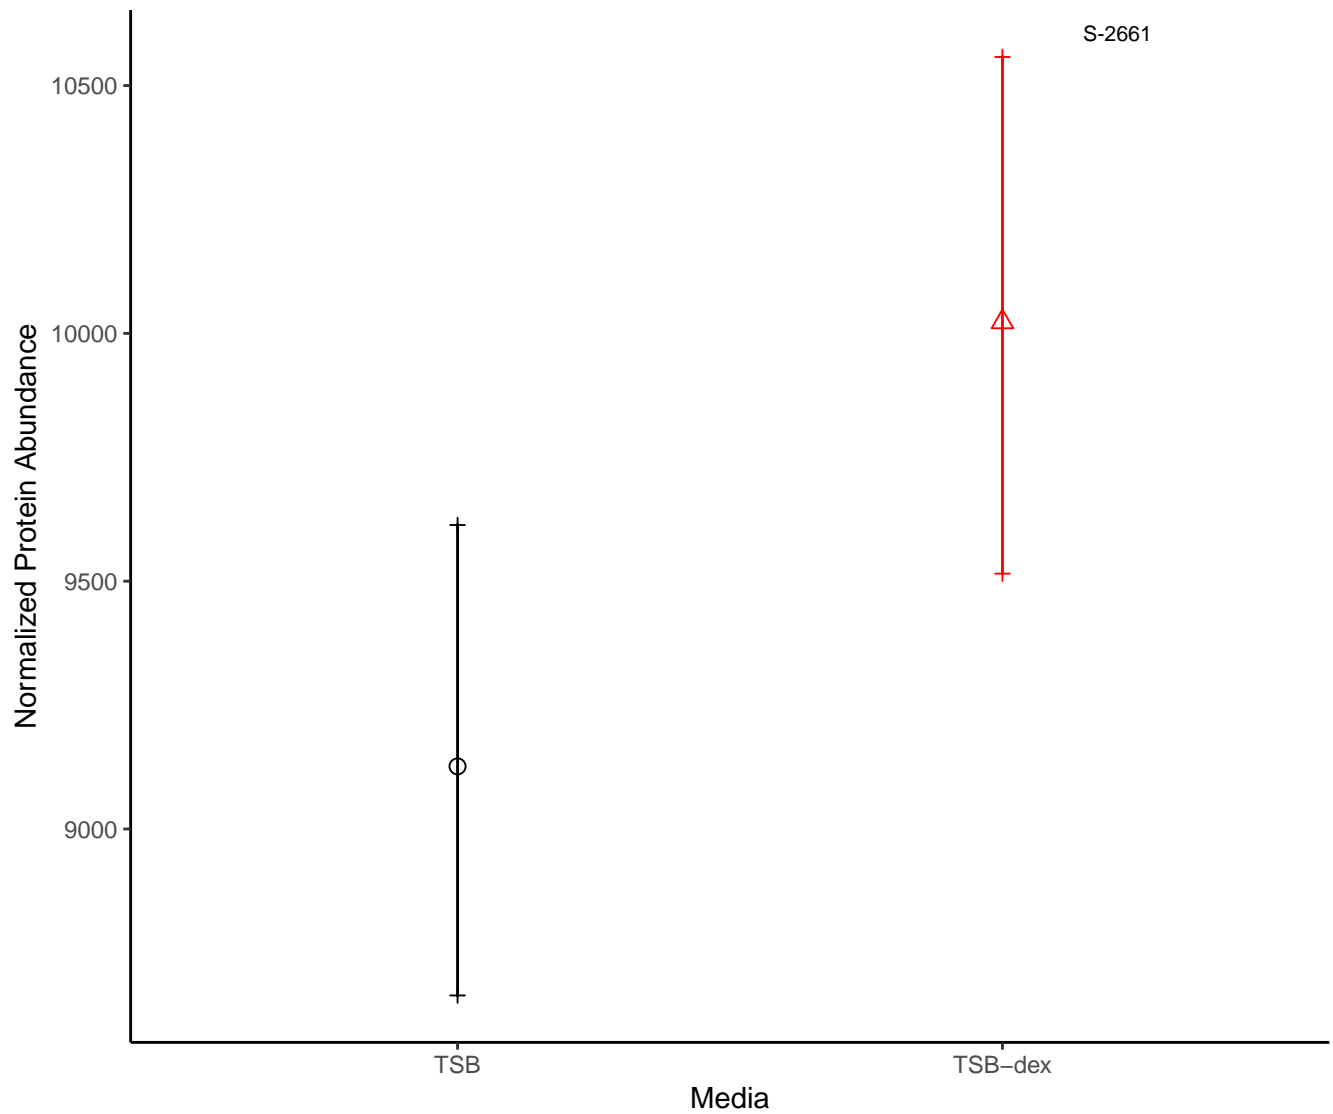

⊕ TSB-dex

△ TSB

# GUAC\_STAAM

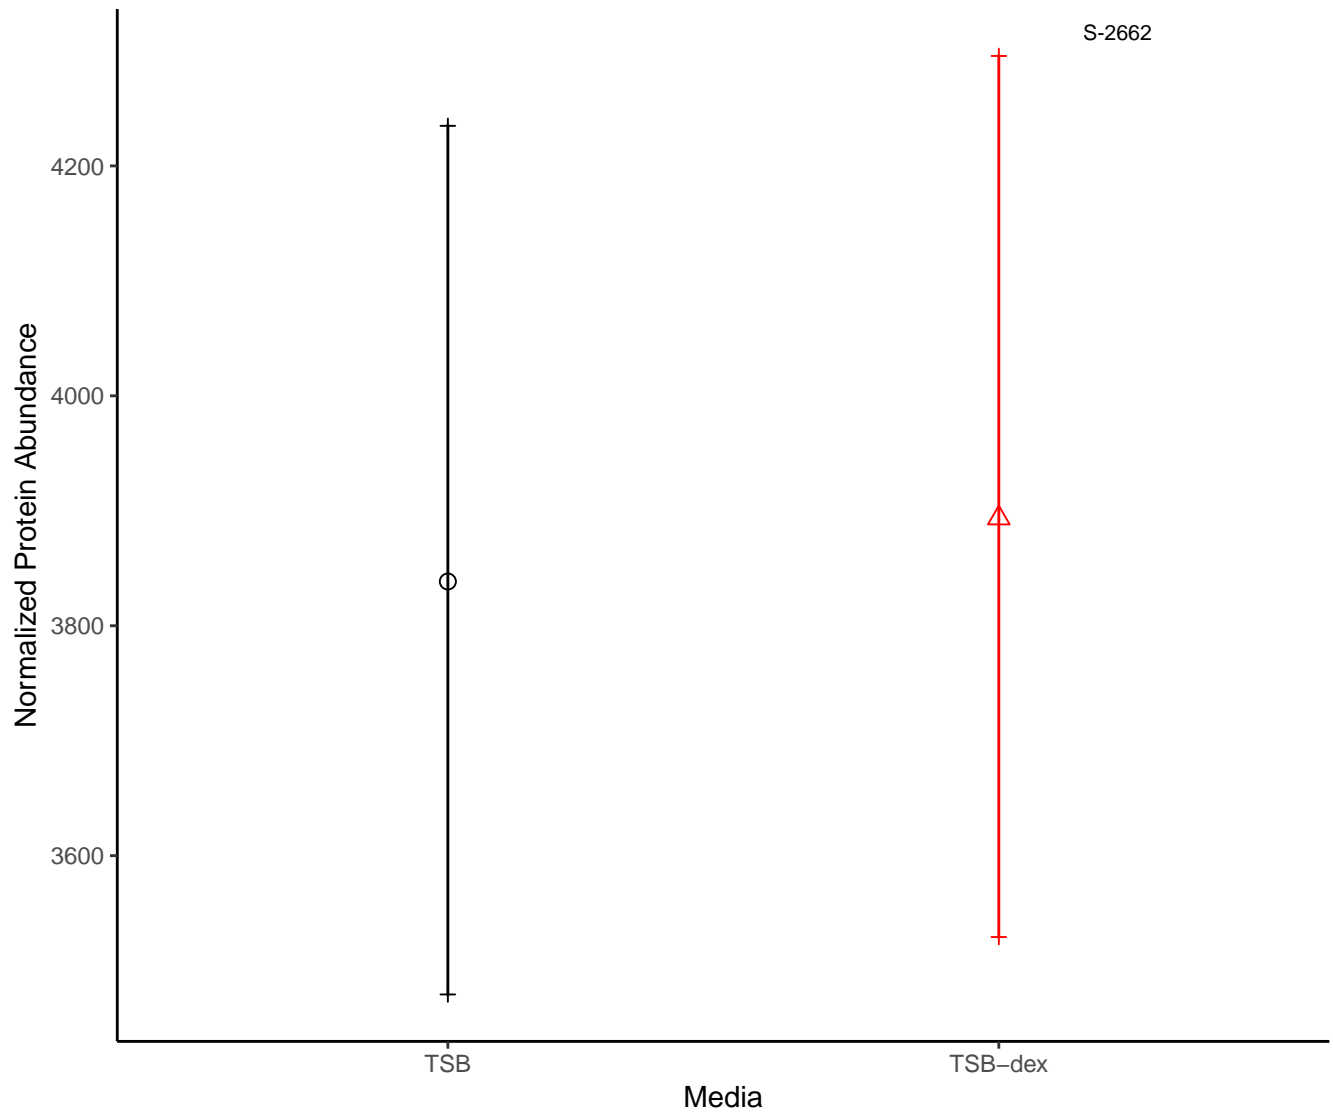

⊕ TSB-dex

△ TSB

# GYRB\_STAAM

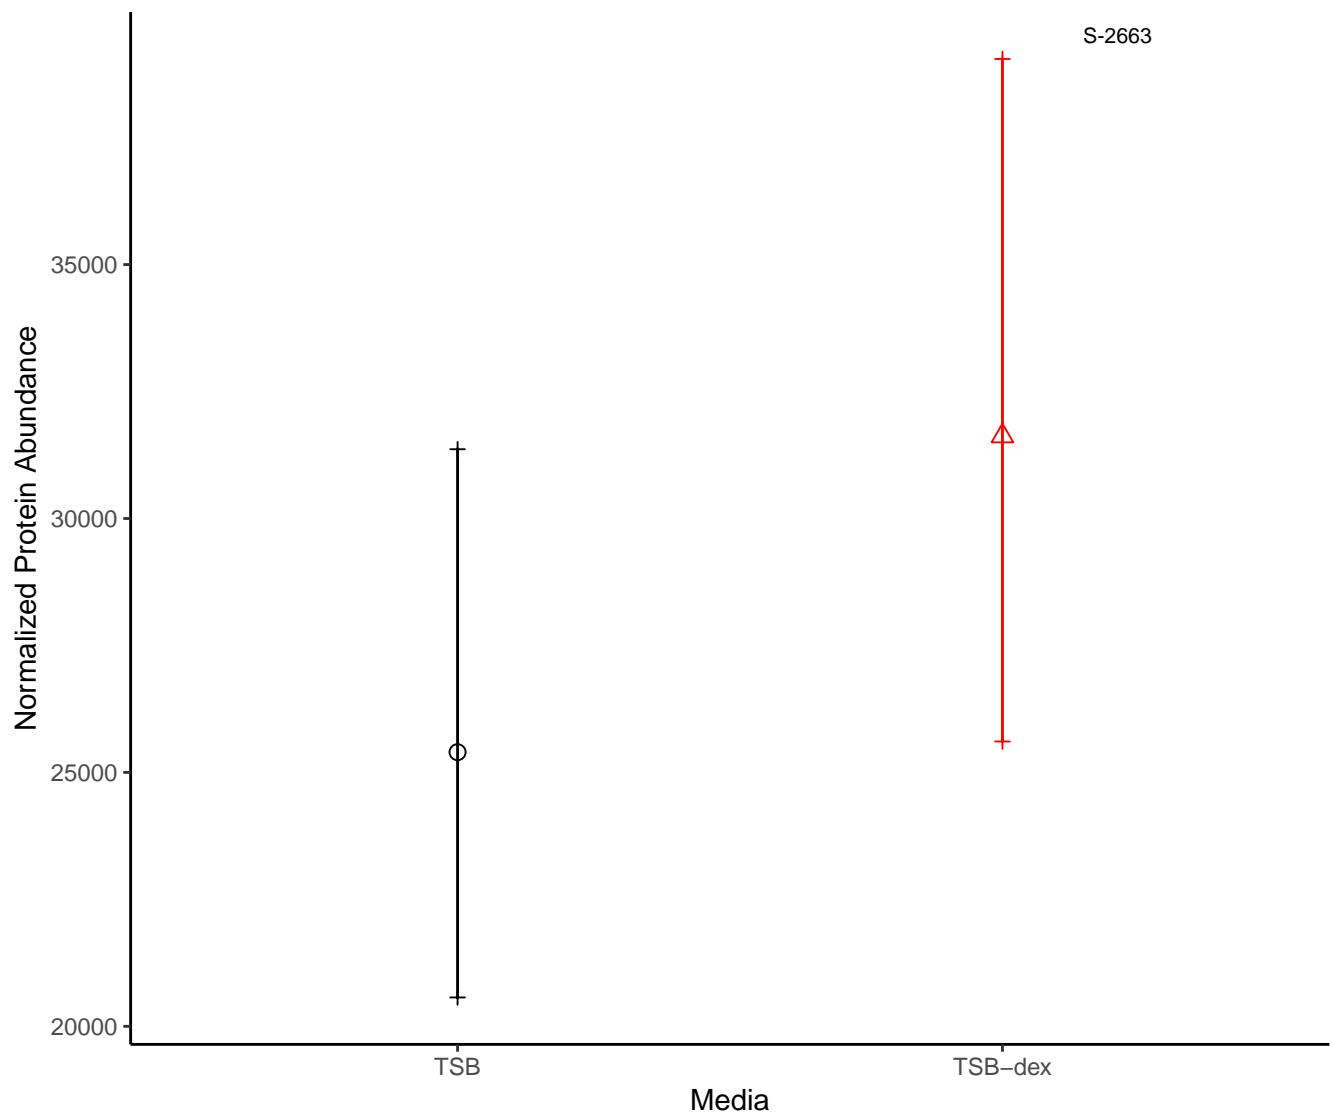

# HCHA\_STAAM

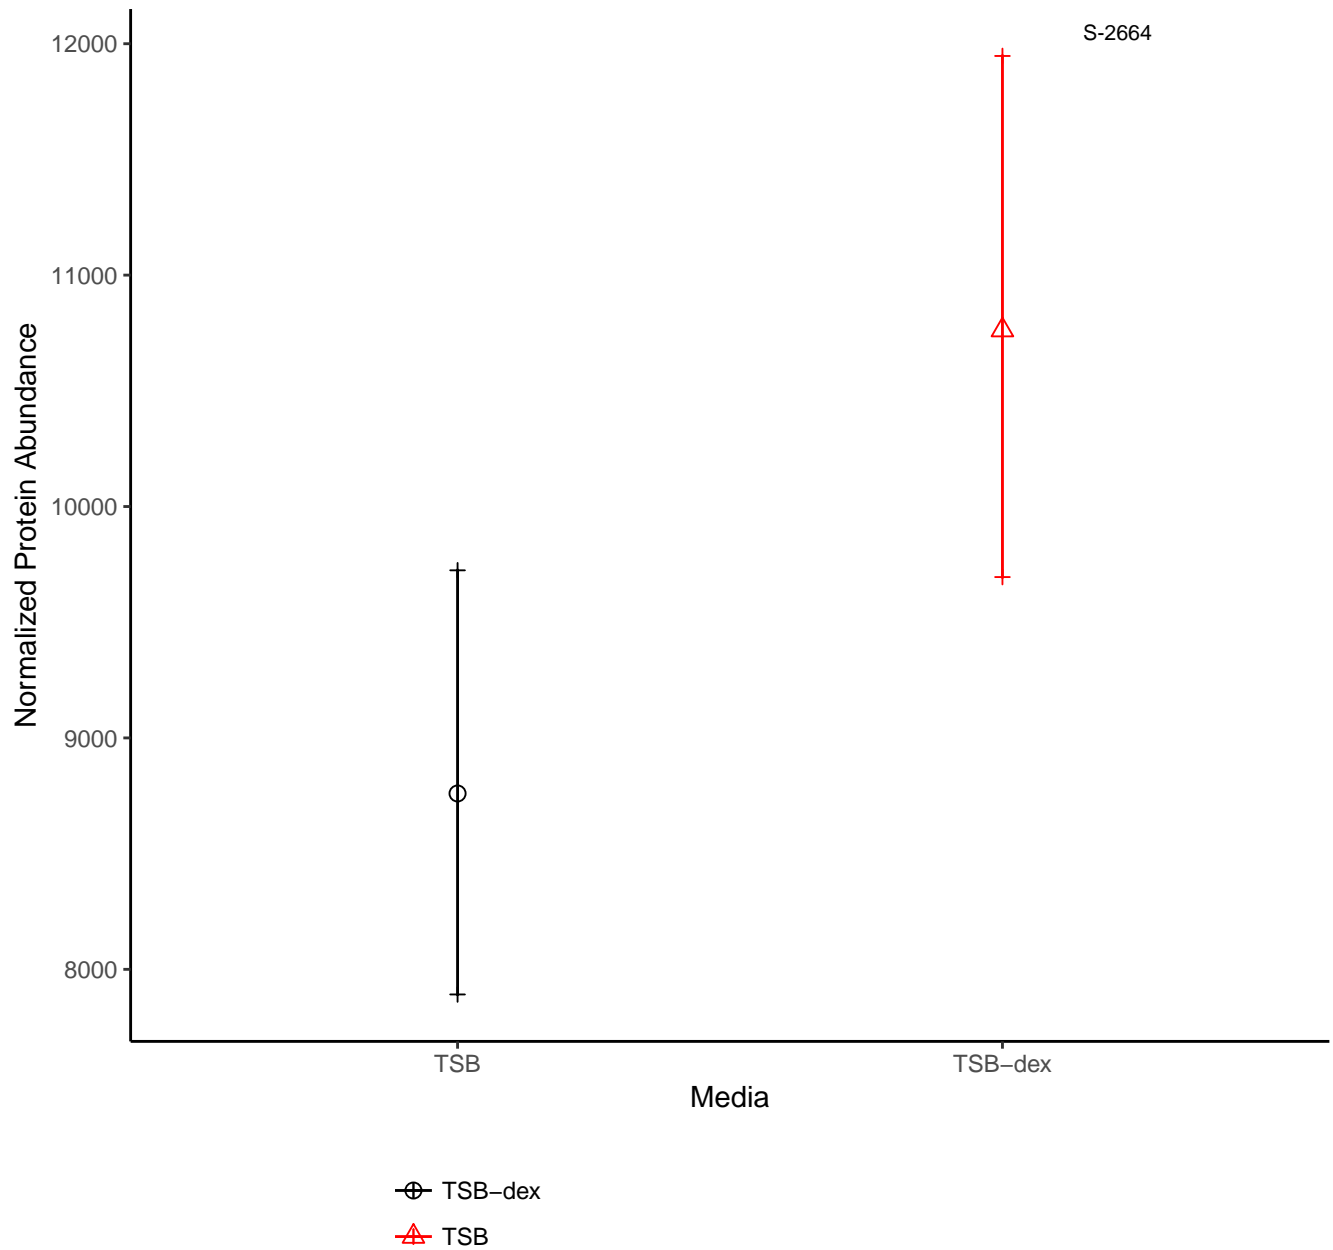



# HEM2\_STAAM

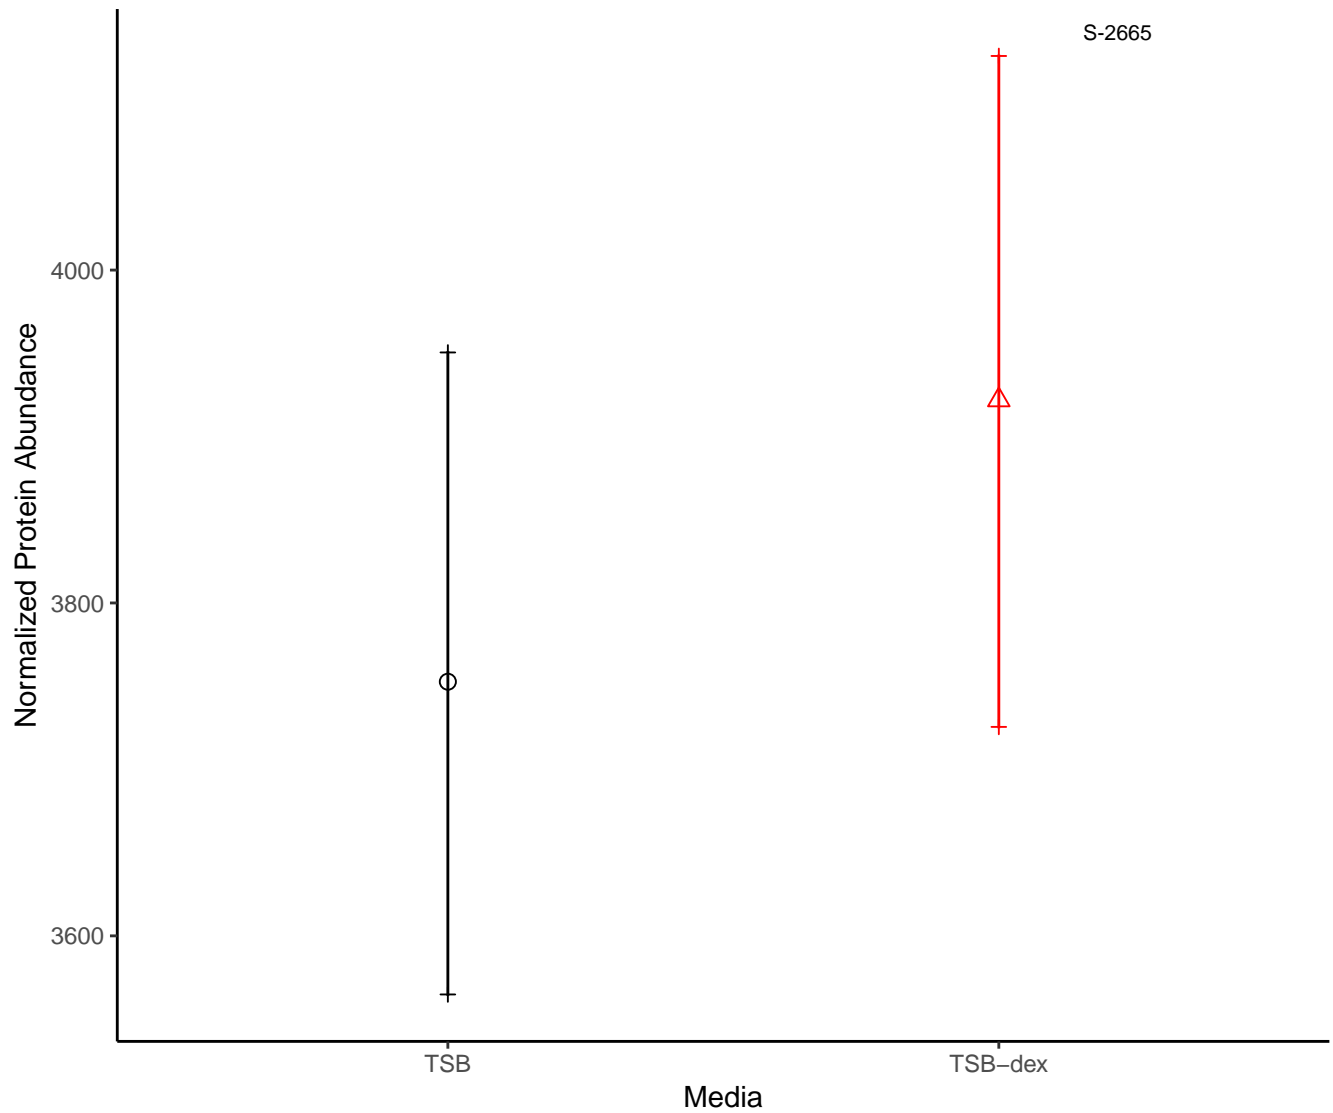

⊕ TSB-dex

△ TSB

# HEM3\_STAAM

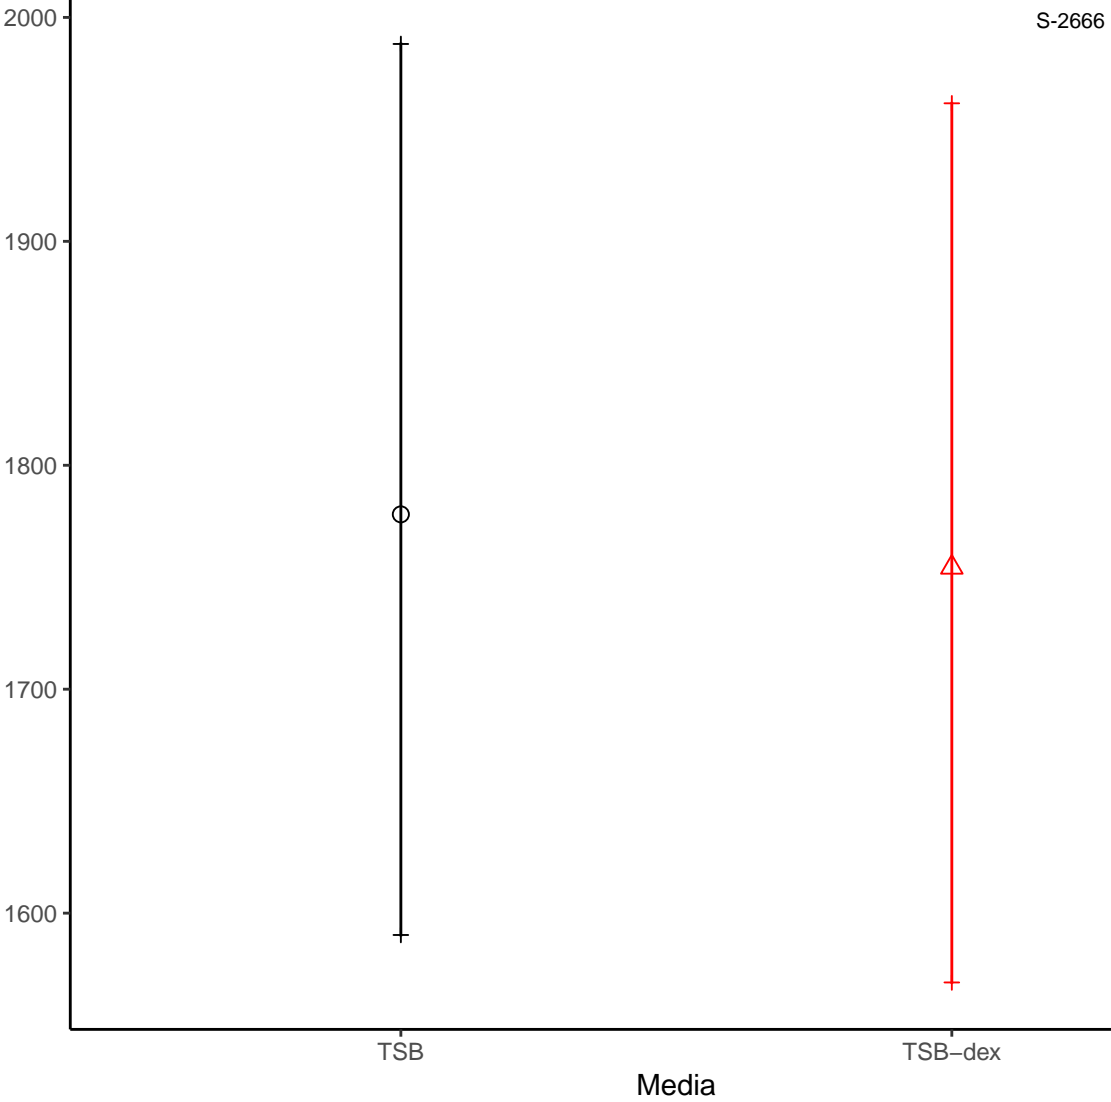

⊕ TSB-dex

△ TSB

# HLD\_STAAM

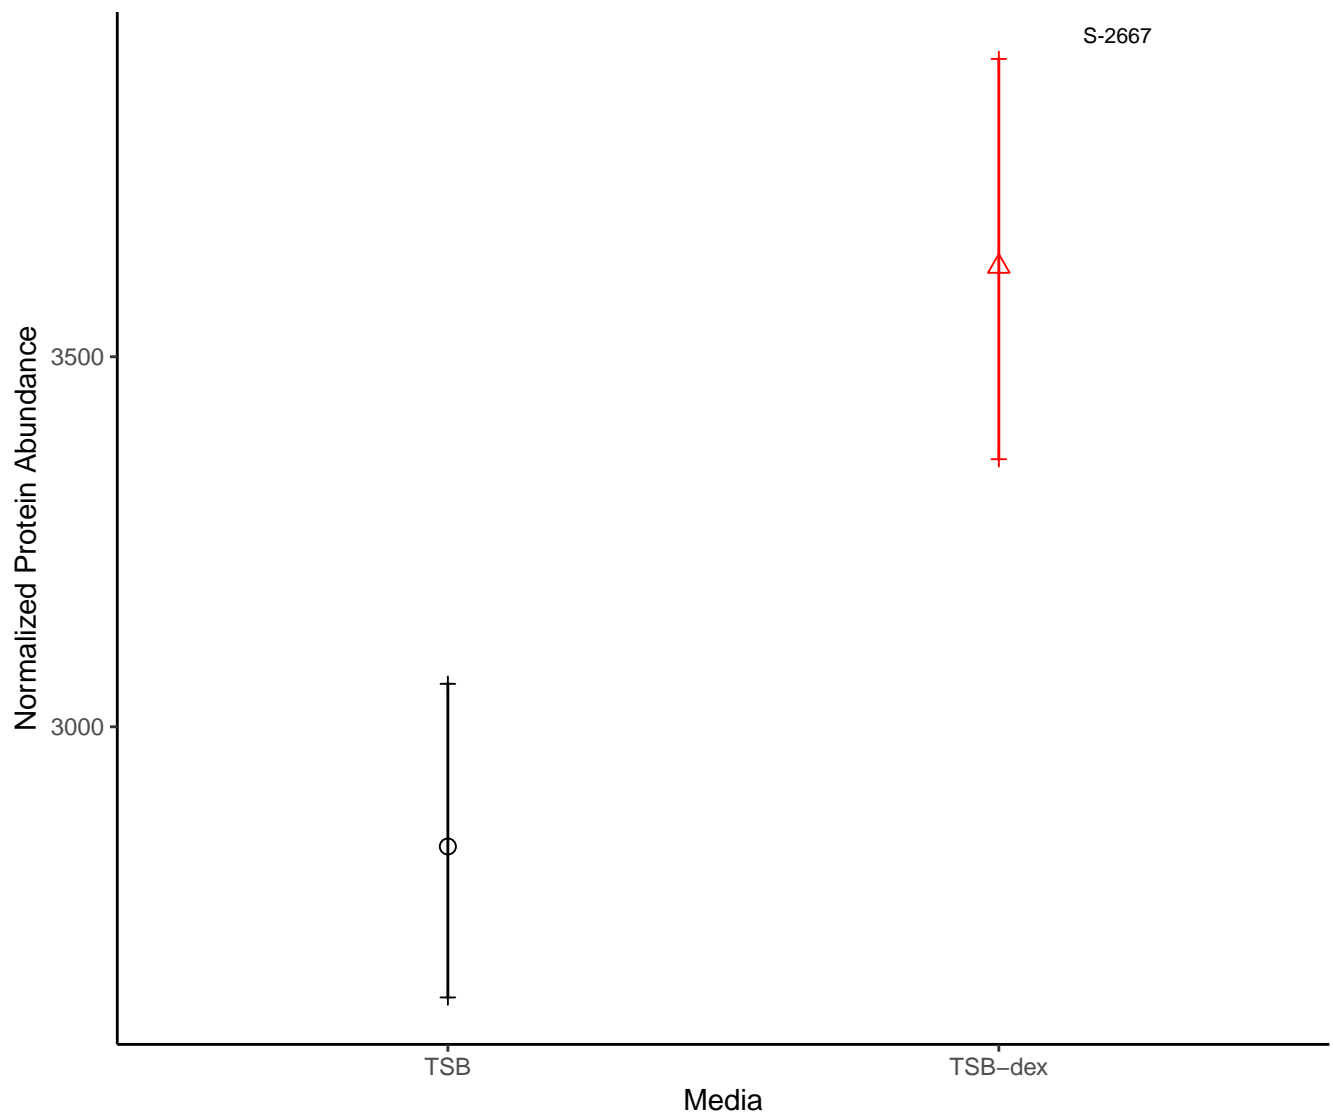

⊕ TSB-dex

△ TSB

# HPRK\_STAAM

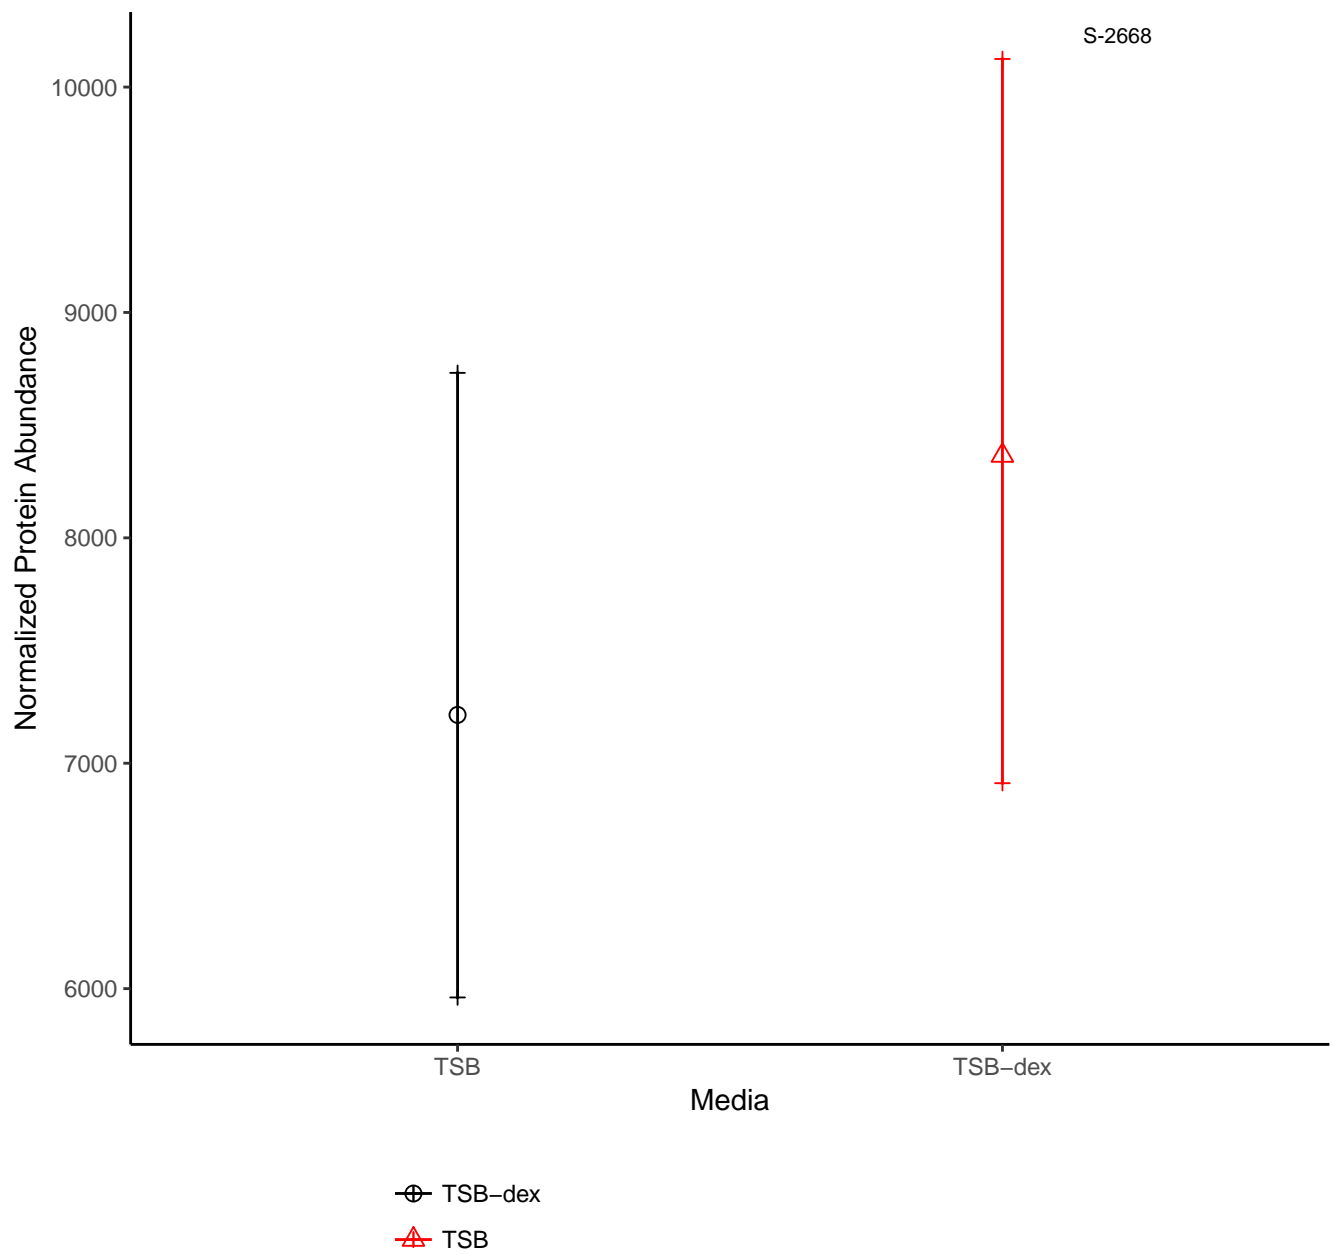

# HPRT\_STAAM

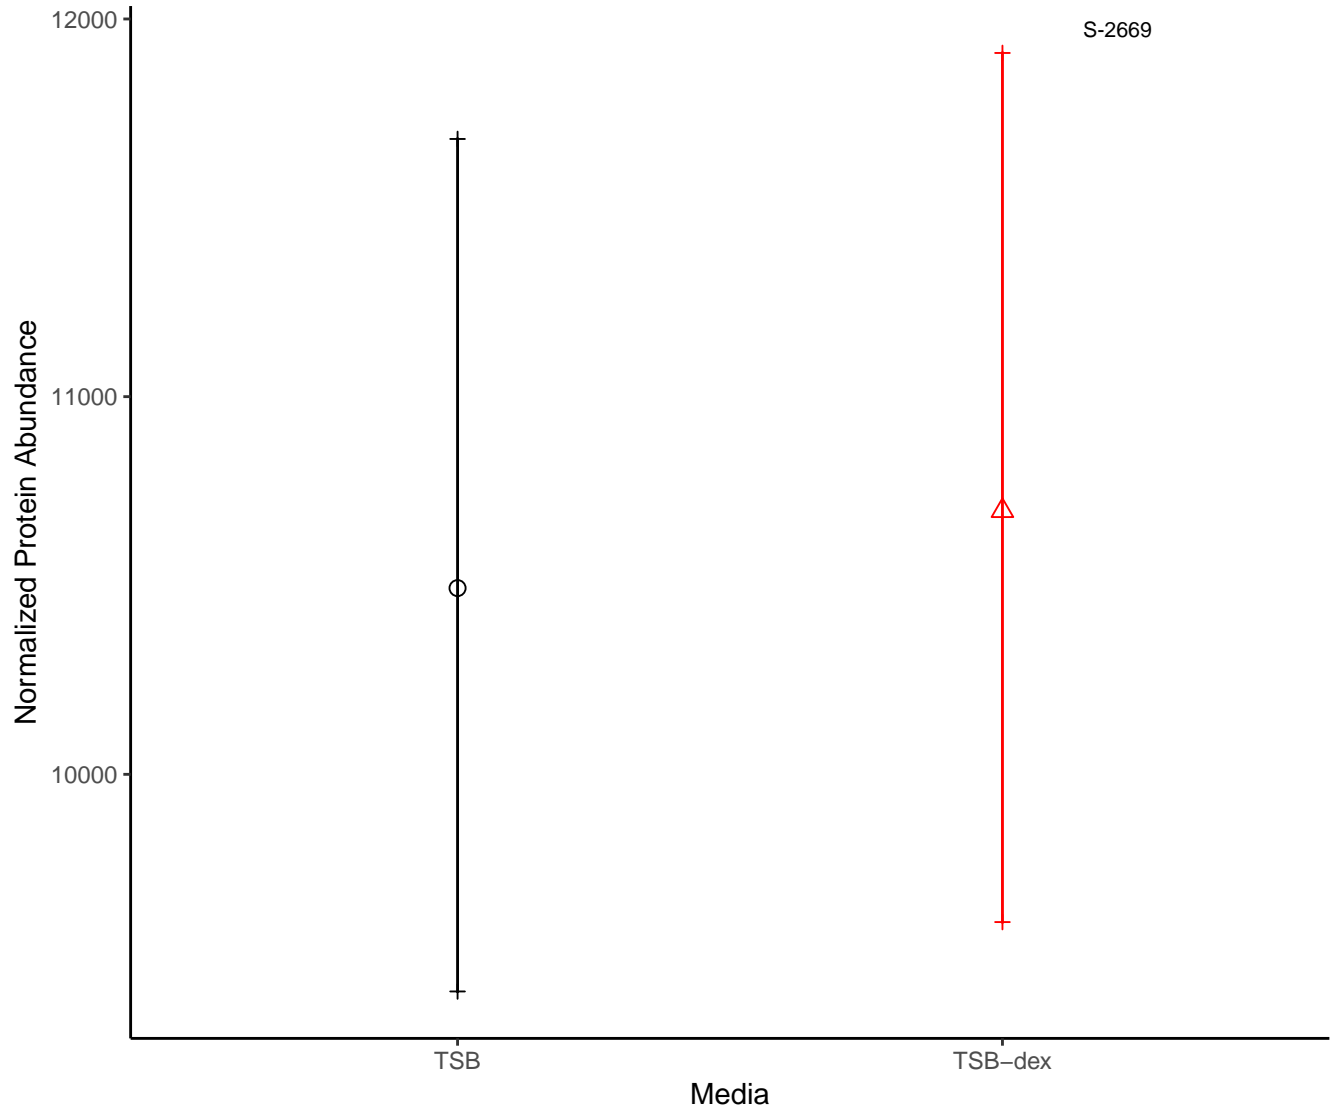

⊕ TSB-dex

△ TSB

# HPS\_STAAM

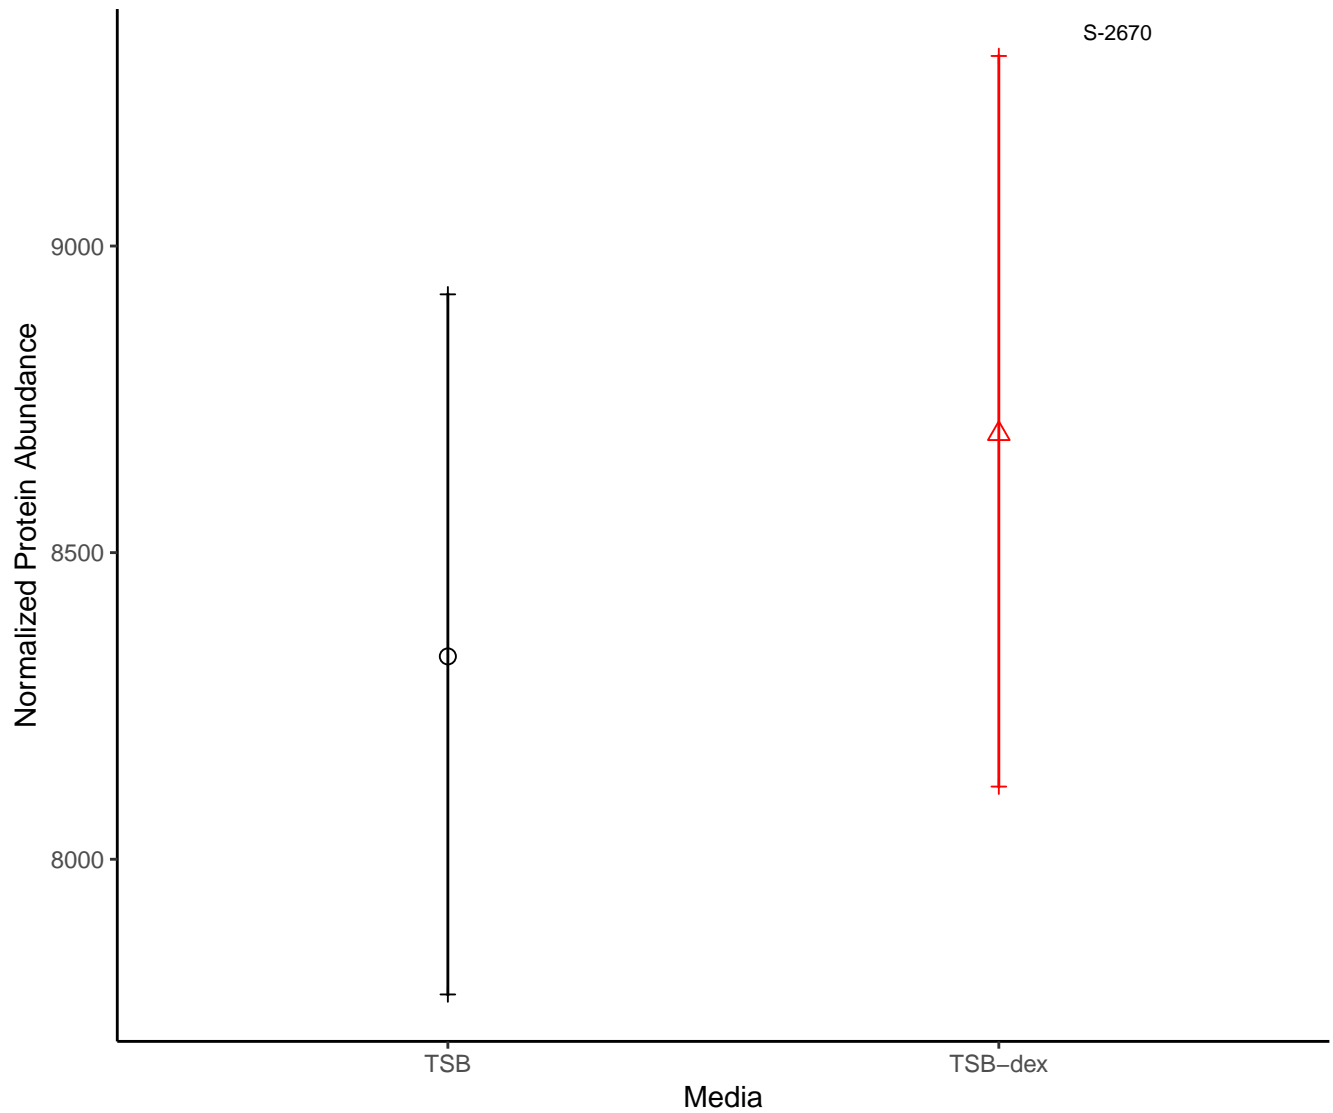

⊕ TSB-dex

△ TSB

# HRTA\_STAAM

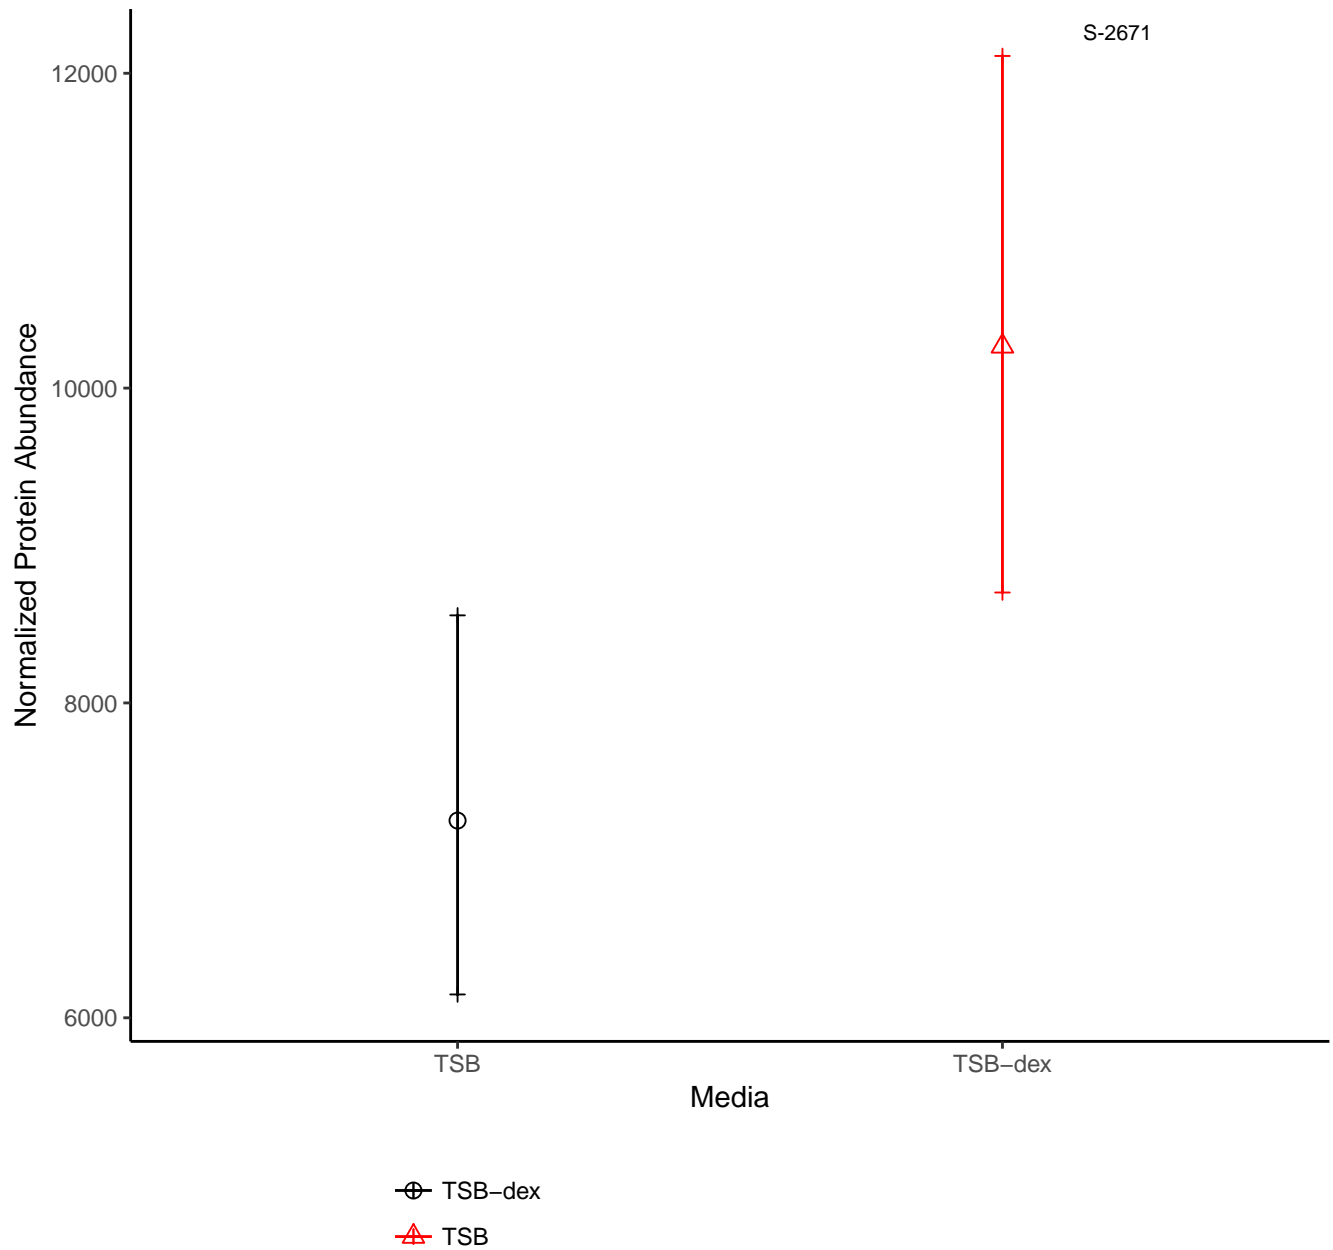

# HSLO\_STAAM

S-2672

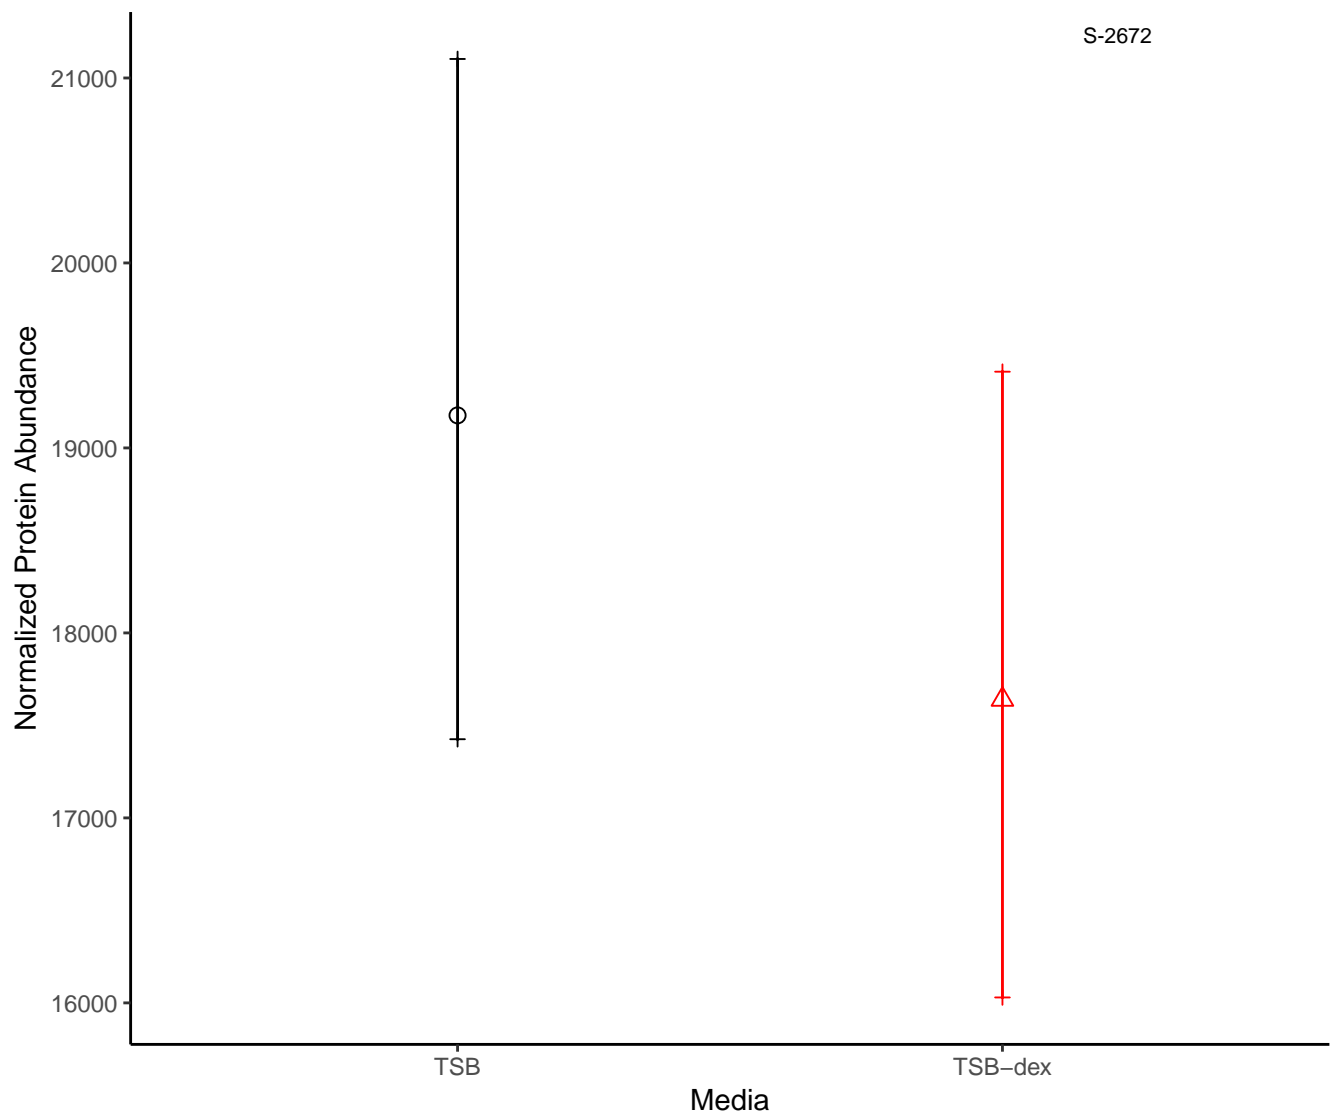

⊕ TSB-dex

△ TSB



# HSLU\_STAAM

S-2673

Normalized Protein Abundance

8000

7500

TSB

Media

TSB-dex

⊕ TSB-dex

△ TSB

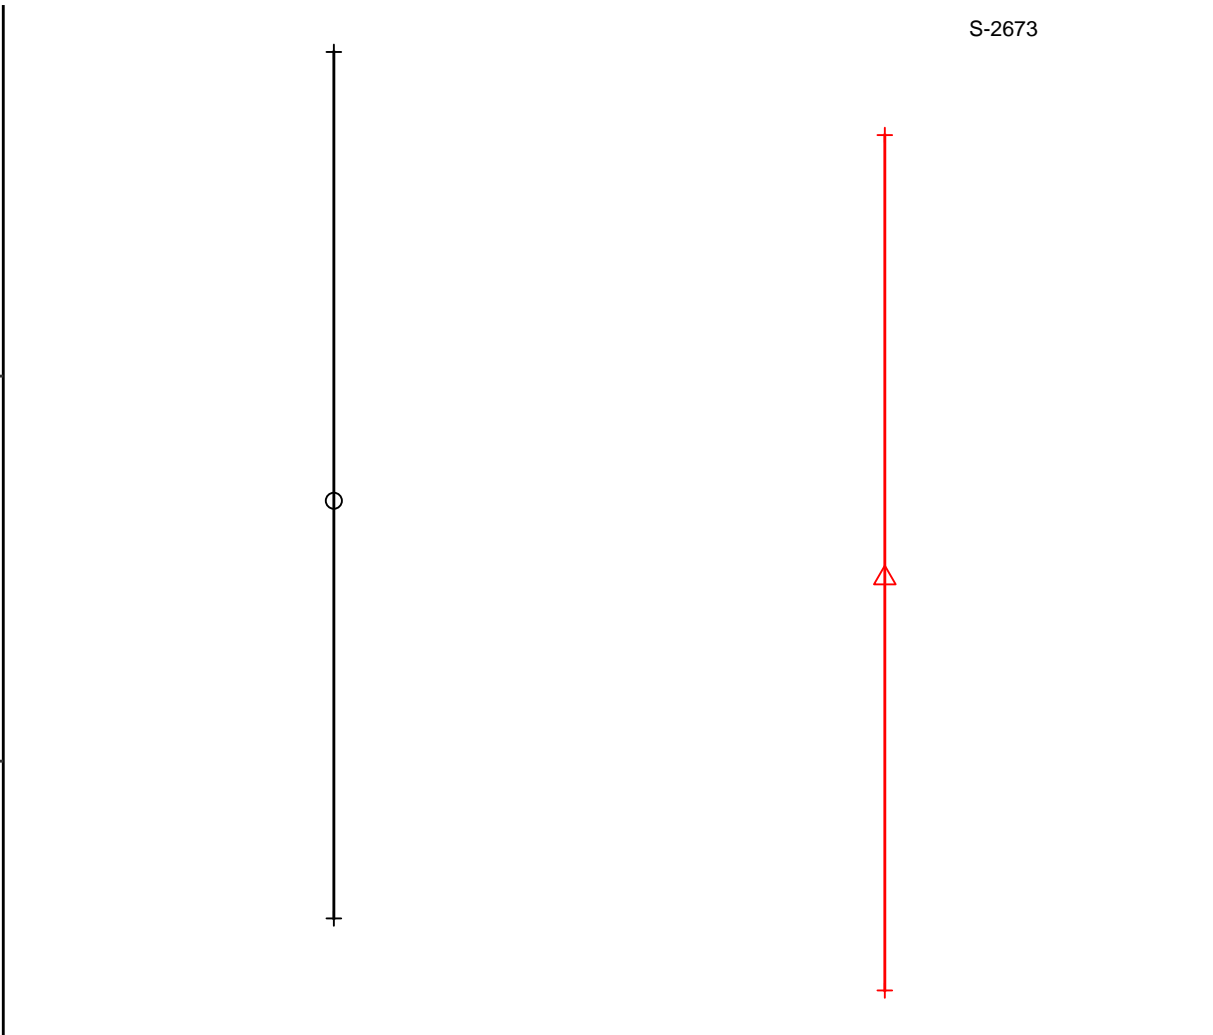

# HSLV\_STAAM

S-2674

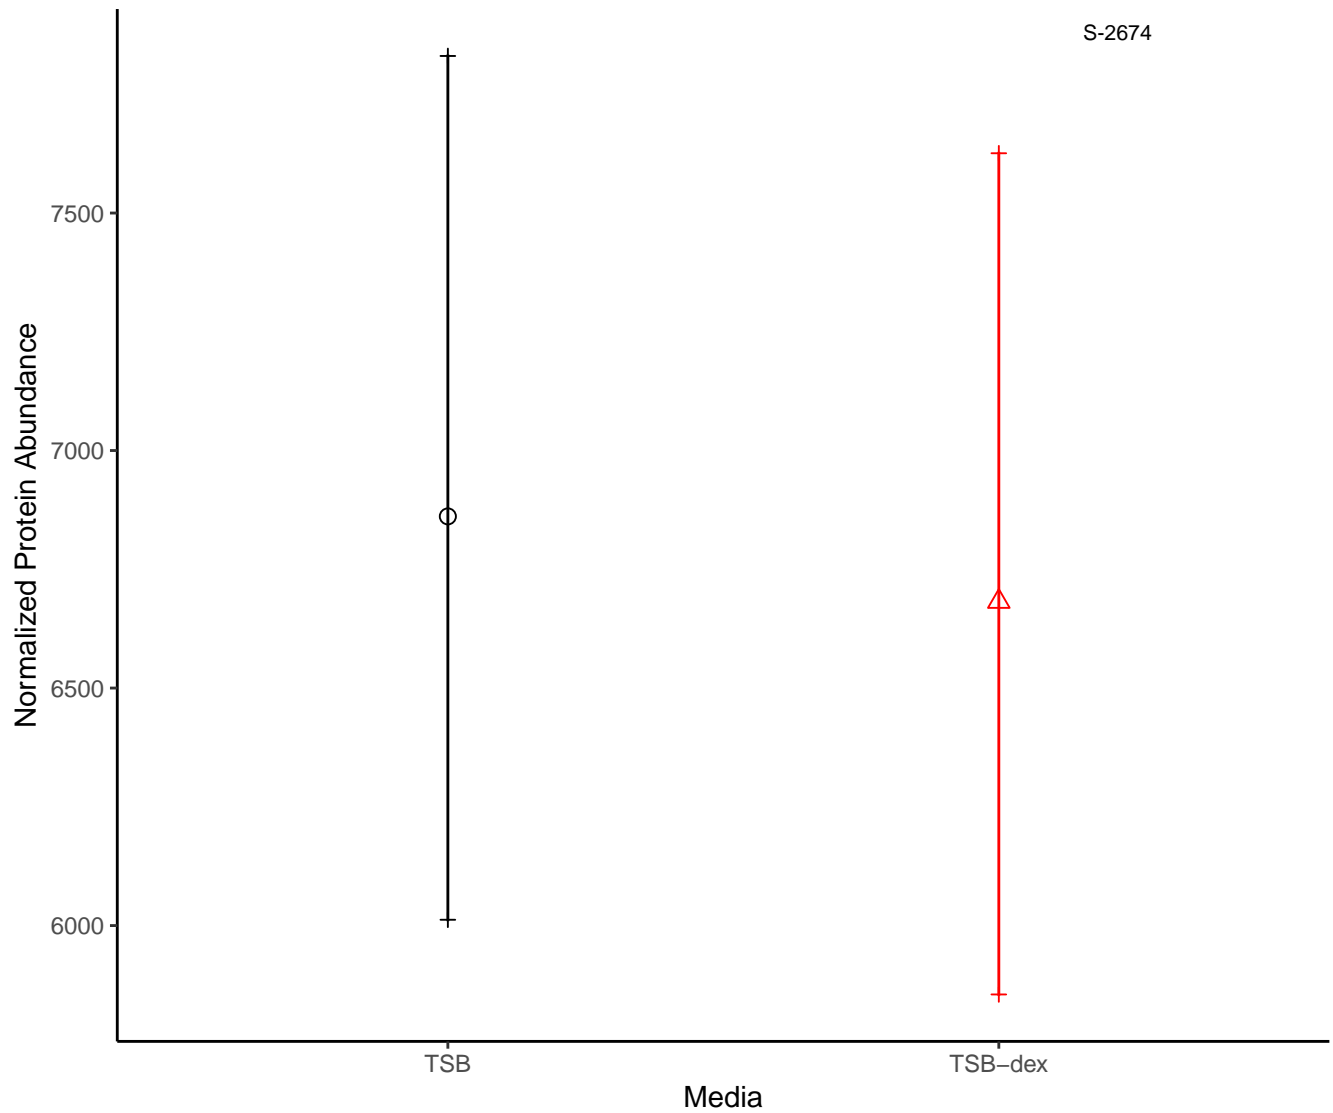

⊕ TSB-dex

△ TSB

# HUTH\_STAAM

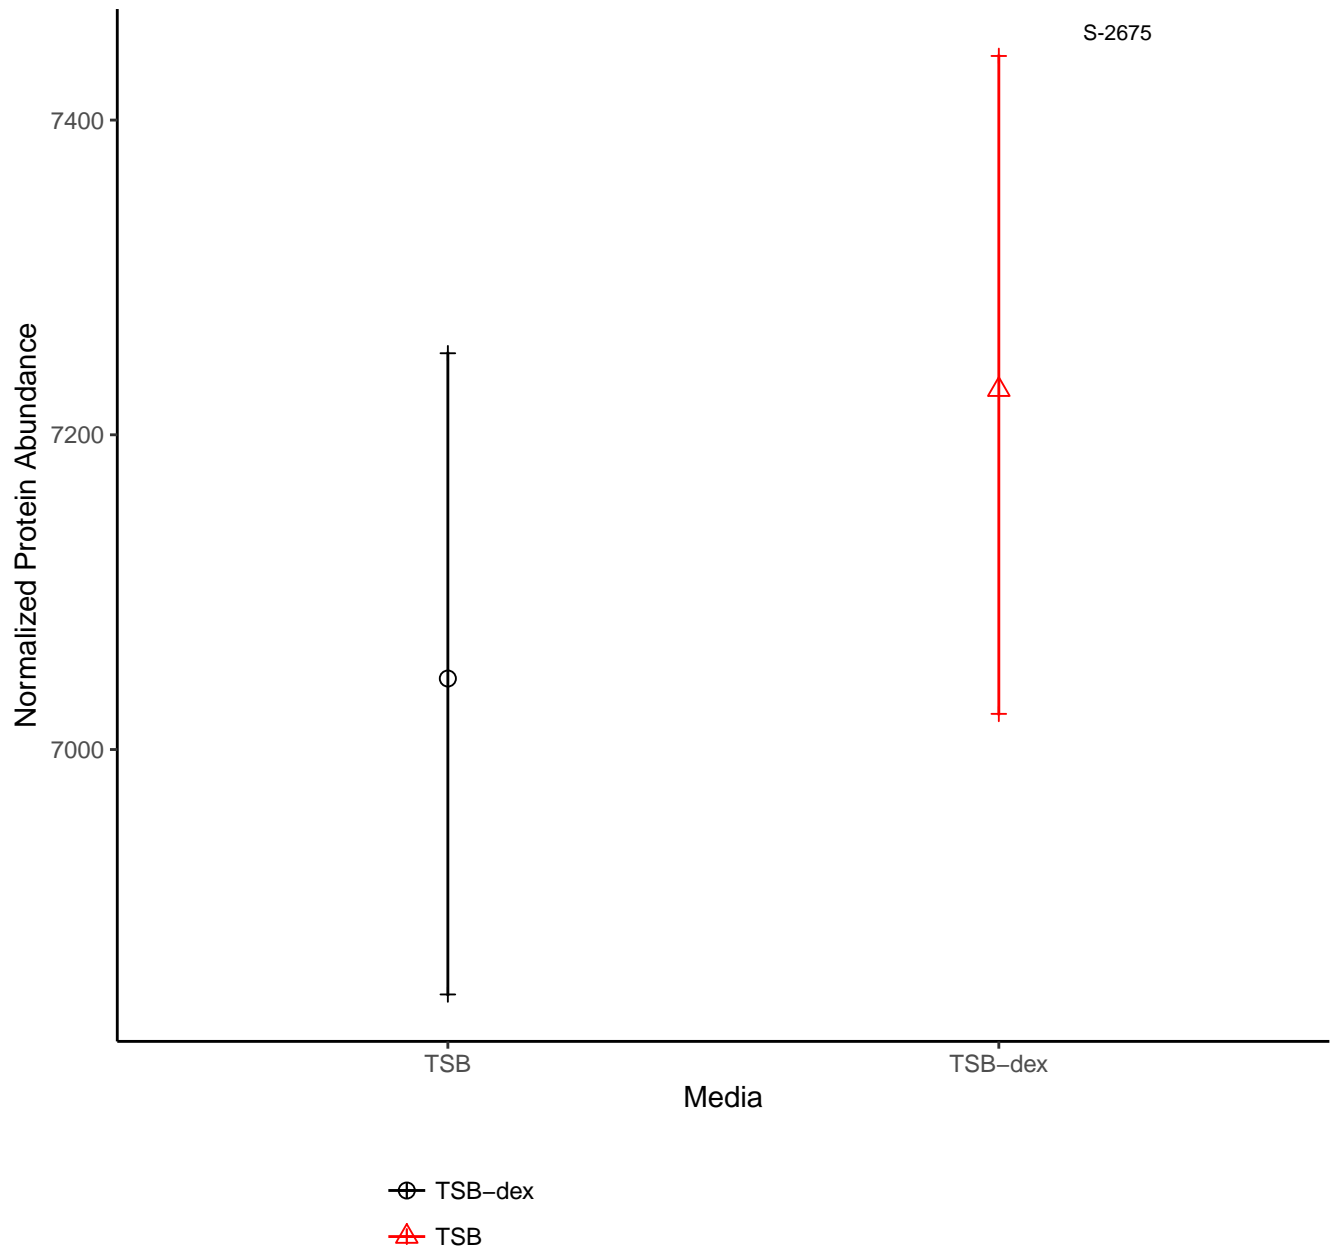

# HUTI\_STAAM

S-2676

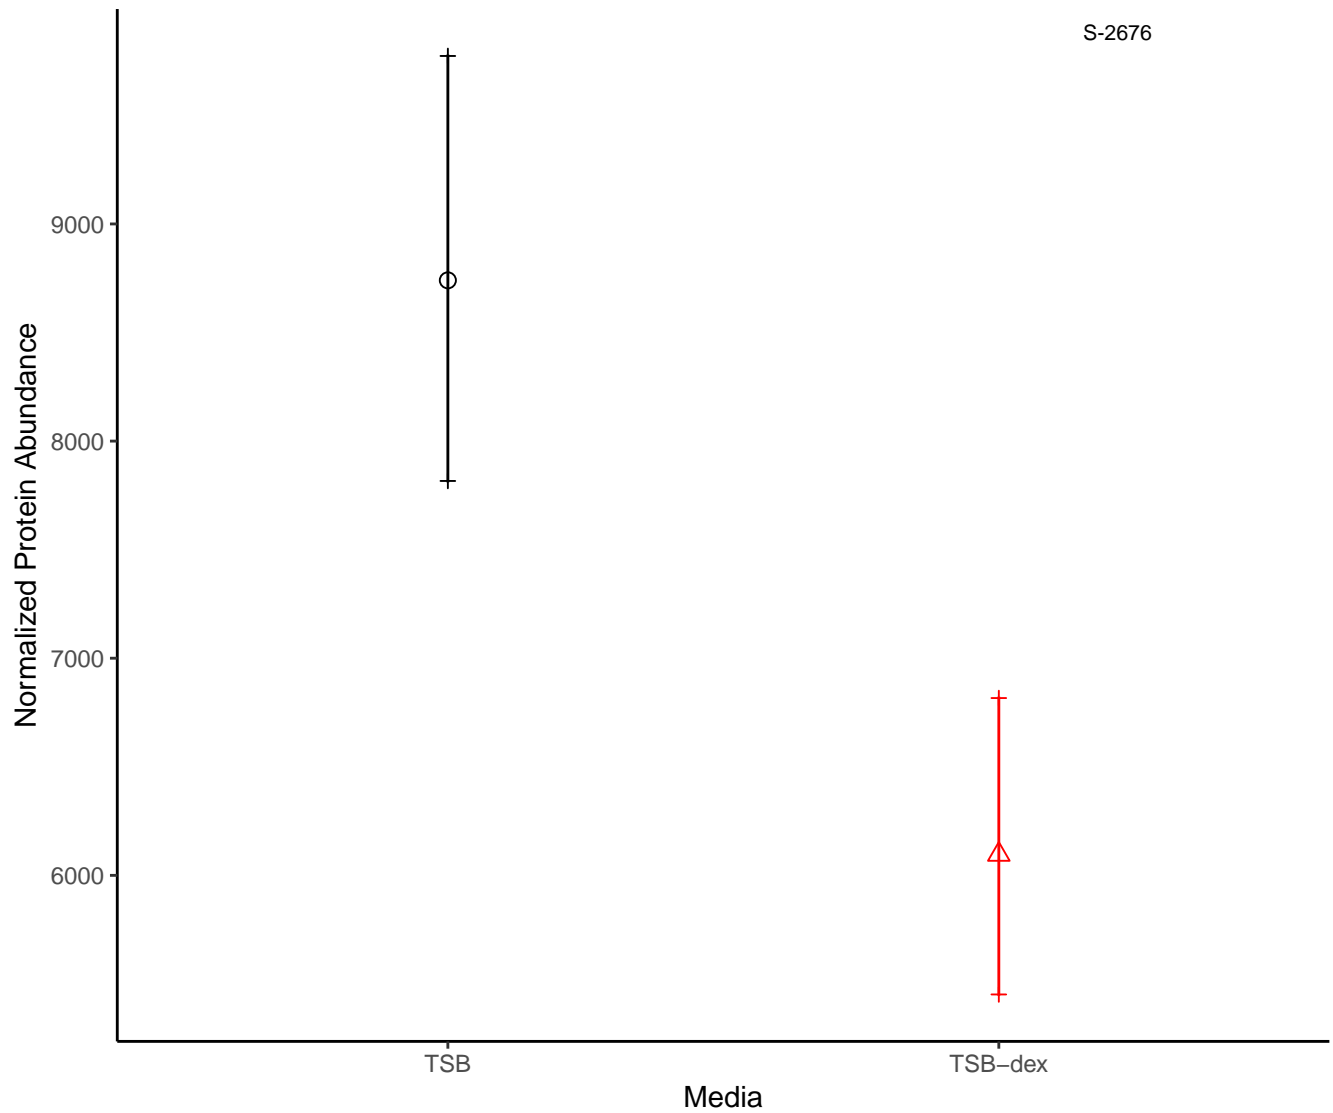

⊕ TSB-dex

△ TSB

# HUTU\_STAAM

S-2677

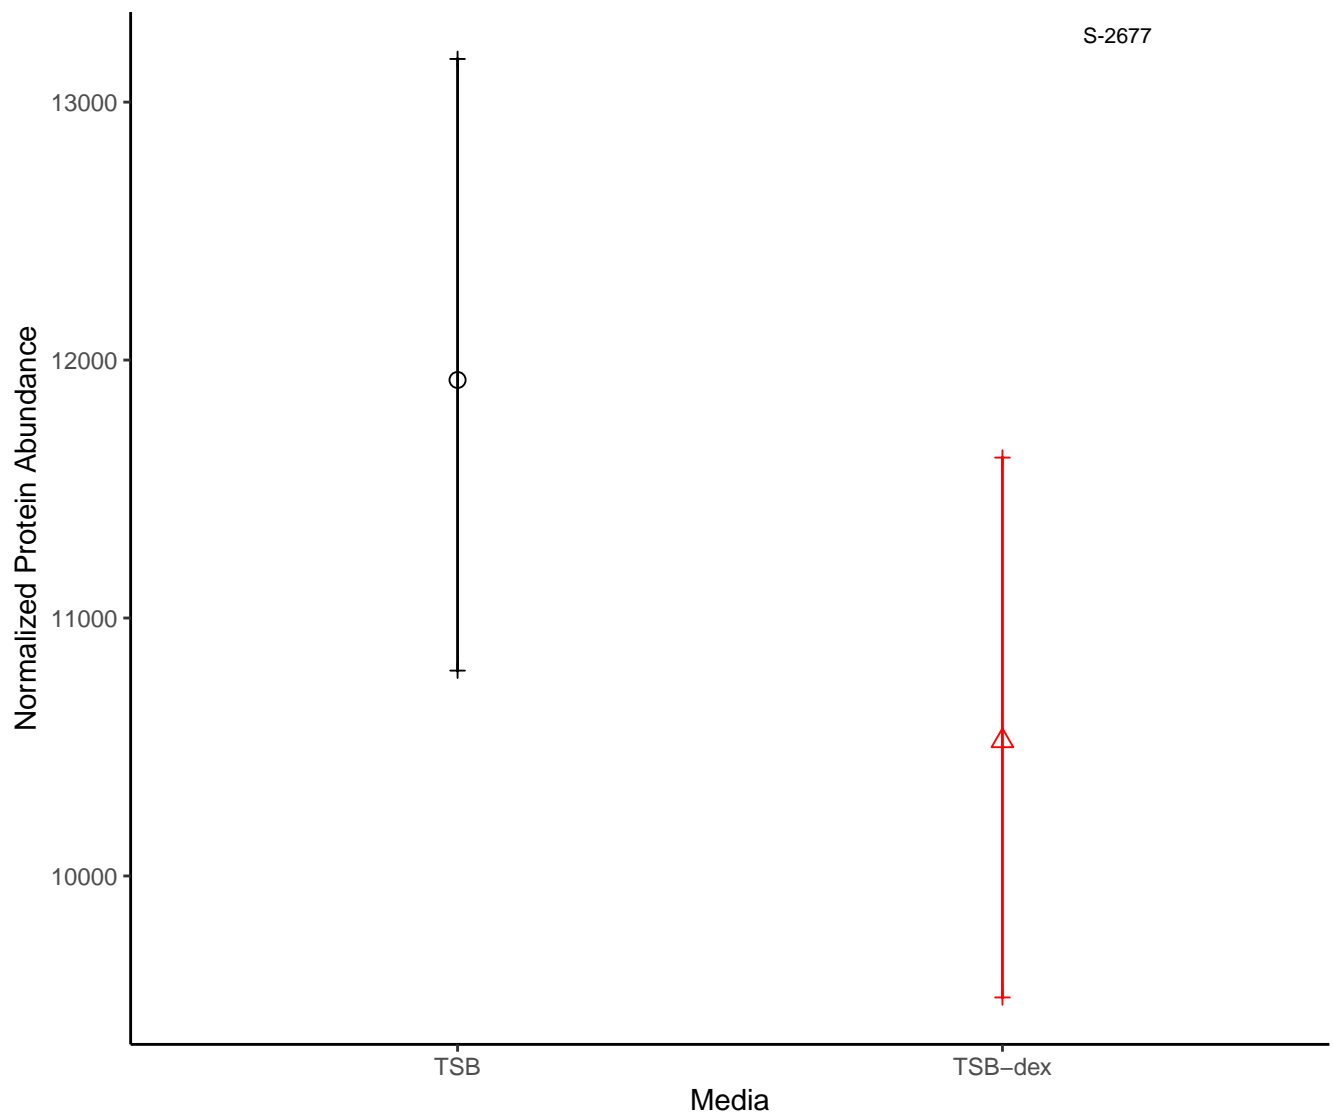

⊙ TSB-dex

△ TSB

# ICAB\_STAAM

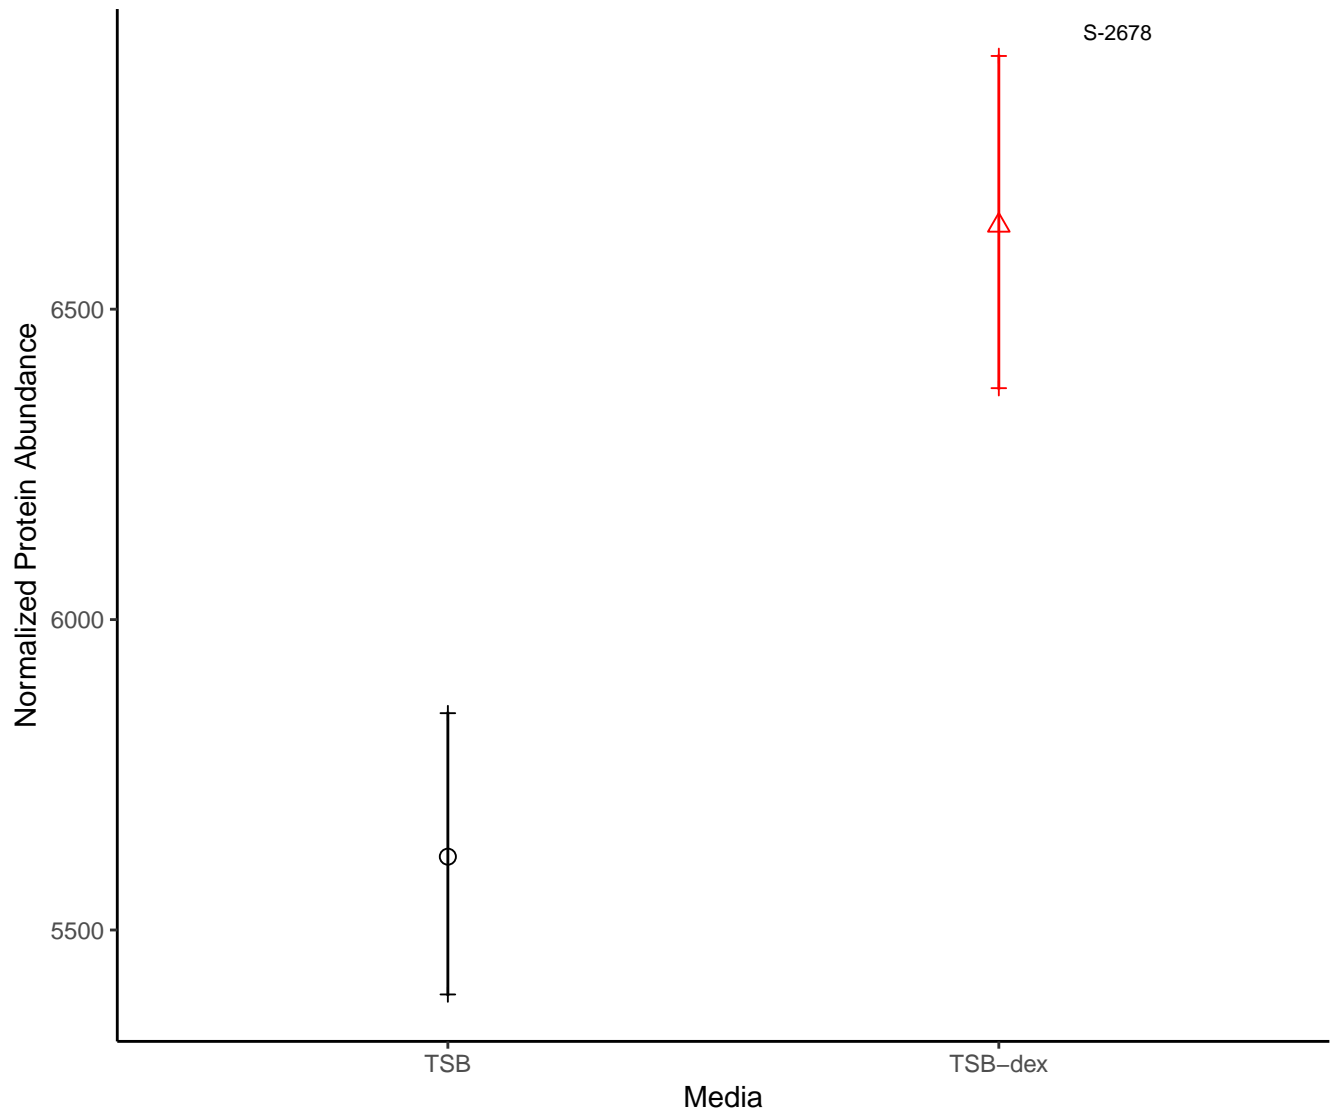

⊕ TSB-dex

△ TSB

# IDH\_STAAM

S-2679

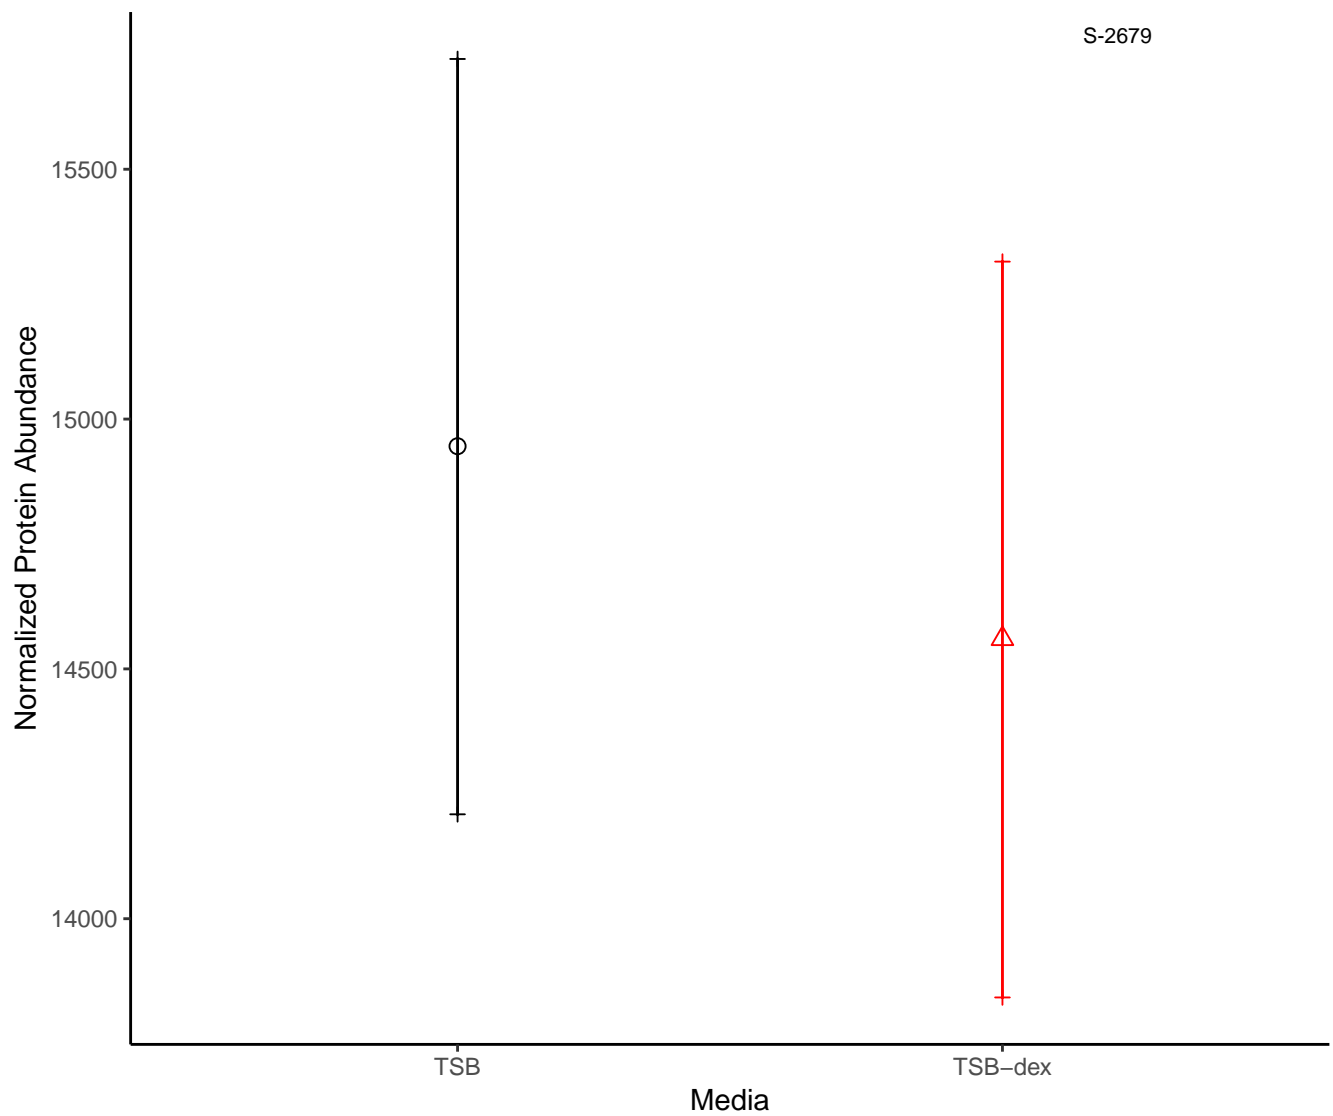

⊕ TSB-dex

△ TSB

# IF1\_STAAM

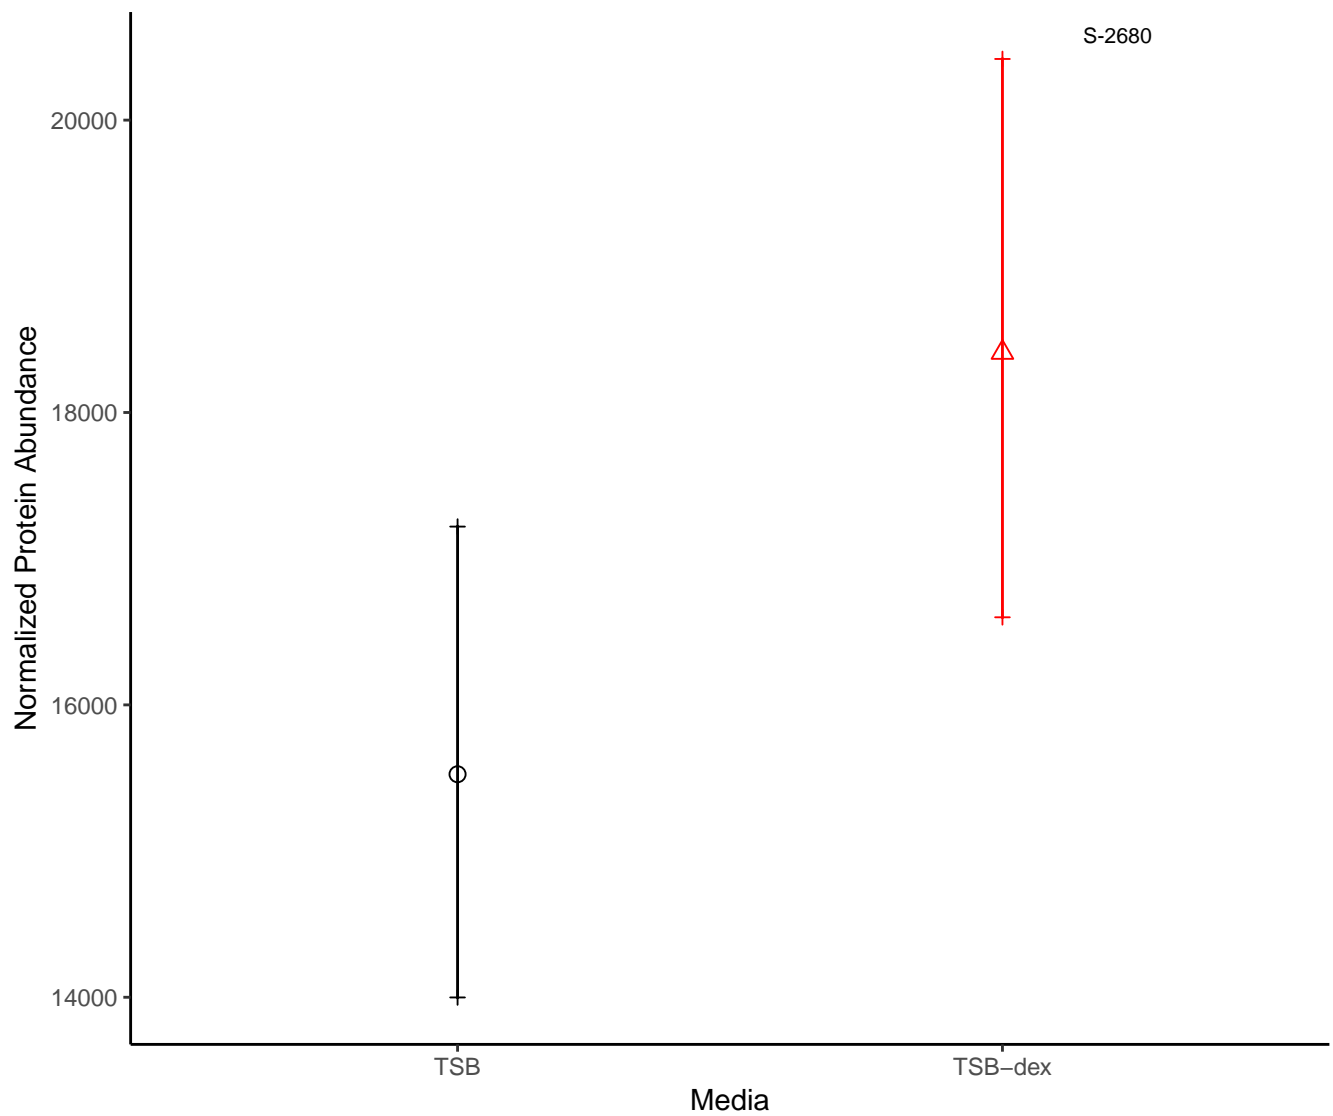

⊖ TSB-dex

△ TSB



# IF2\_STAAM

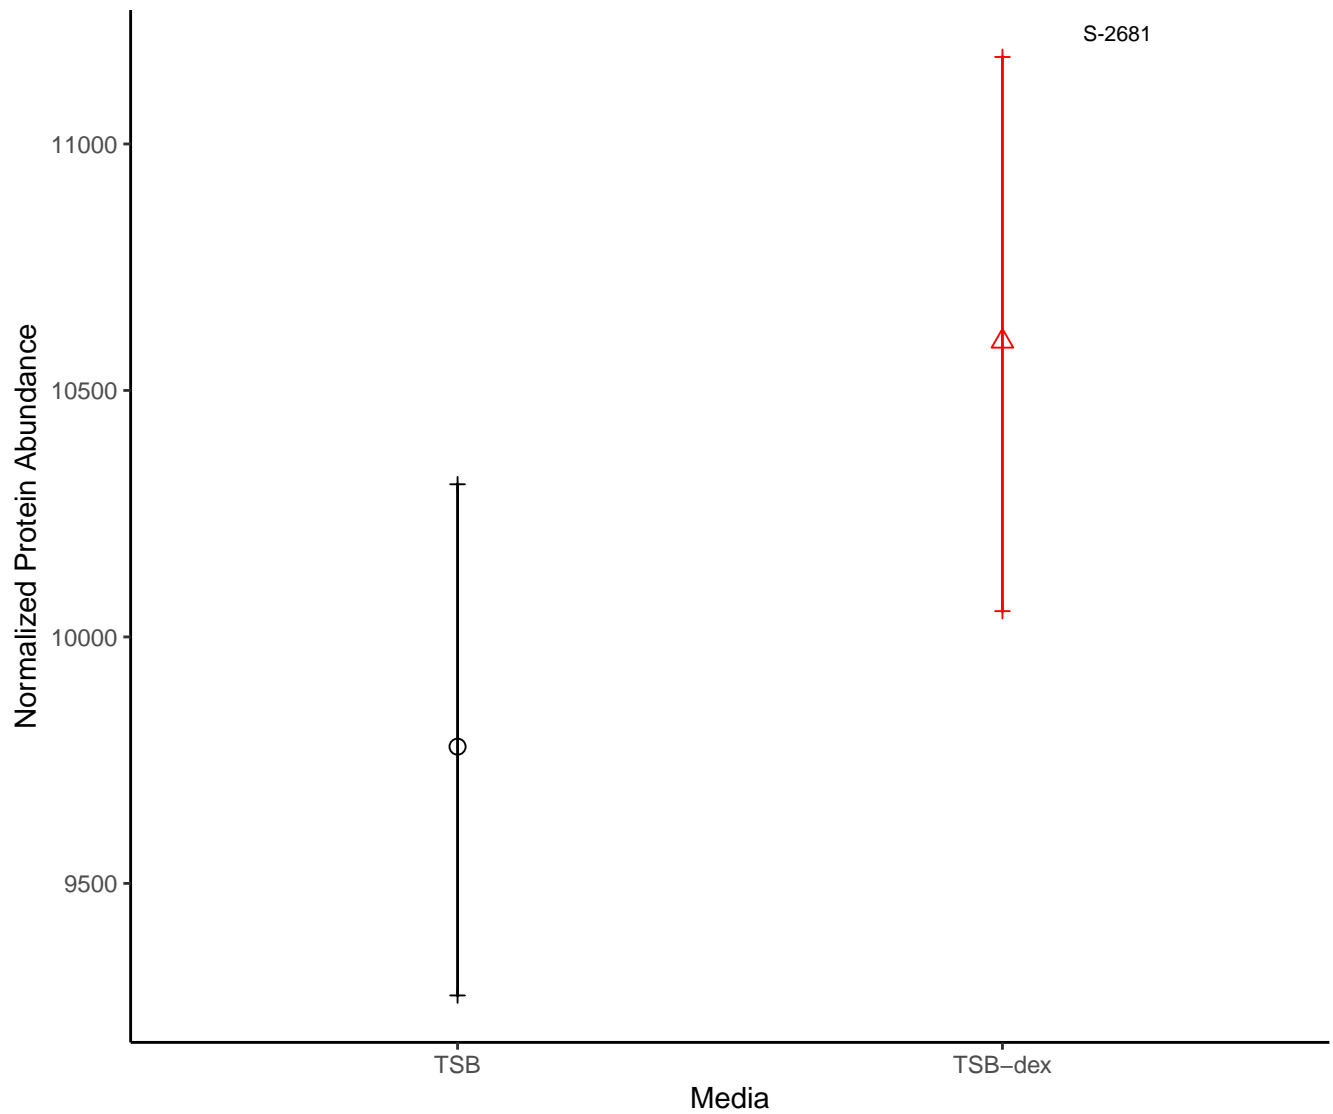

⊖ TSB-dex

△ TSB

# IF3\_STAAM

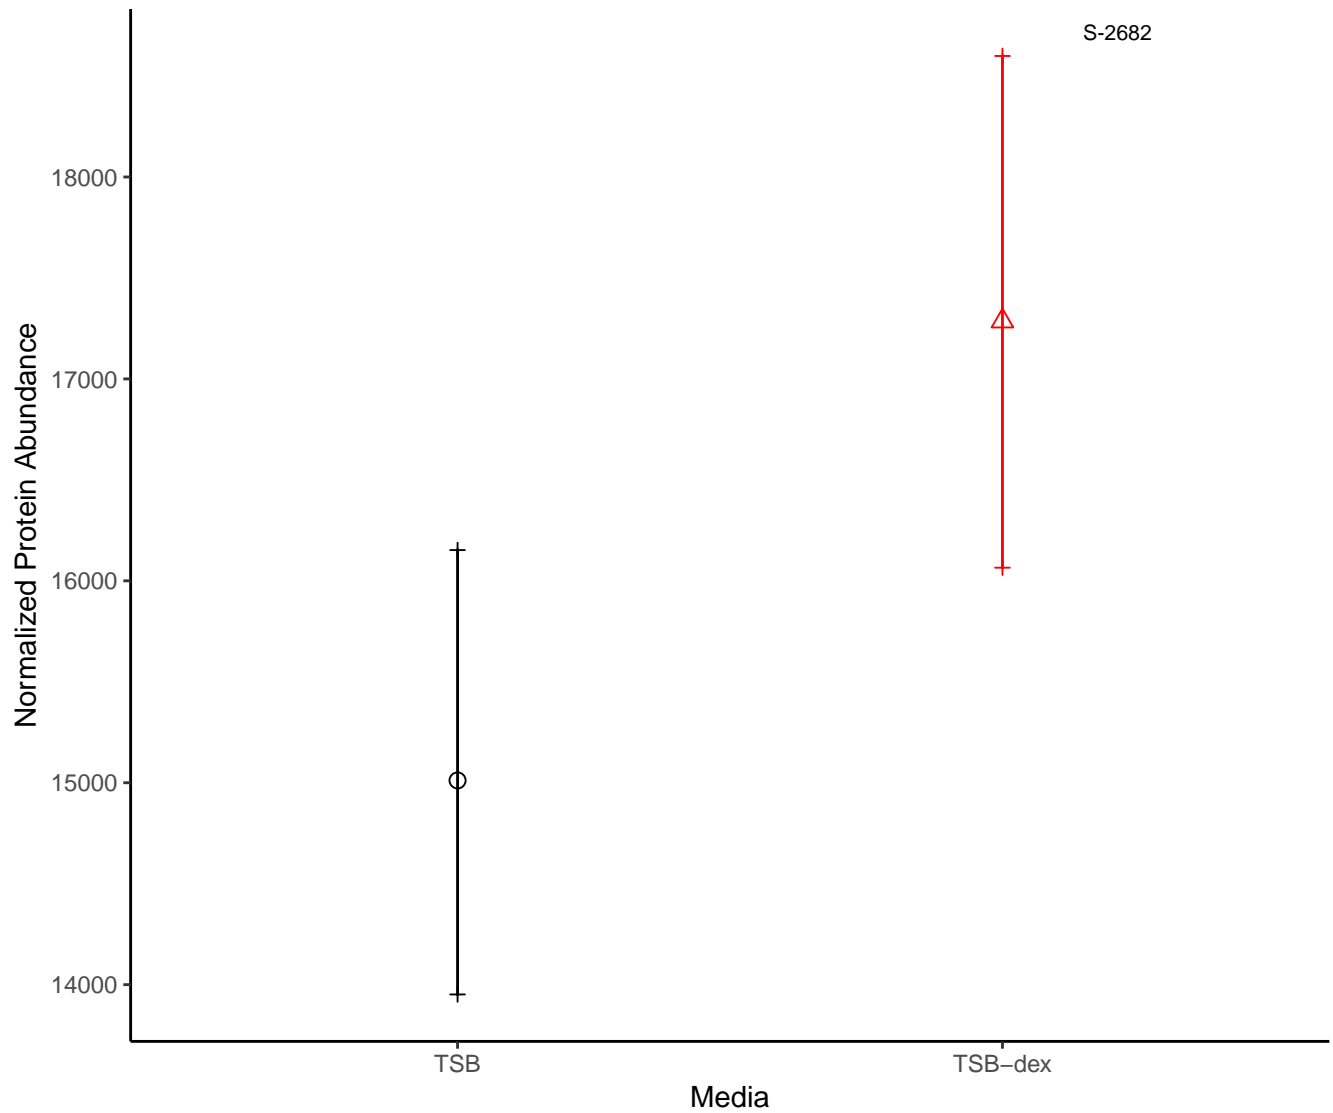

⊖ TSB-dex

△ TSB

# ILVC\_STAAM

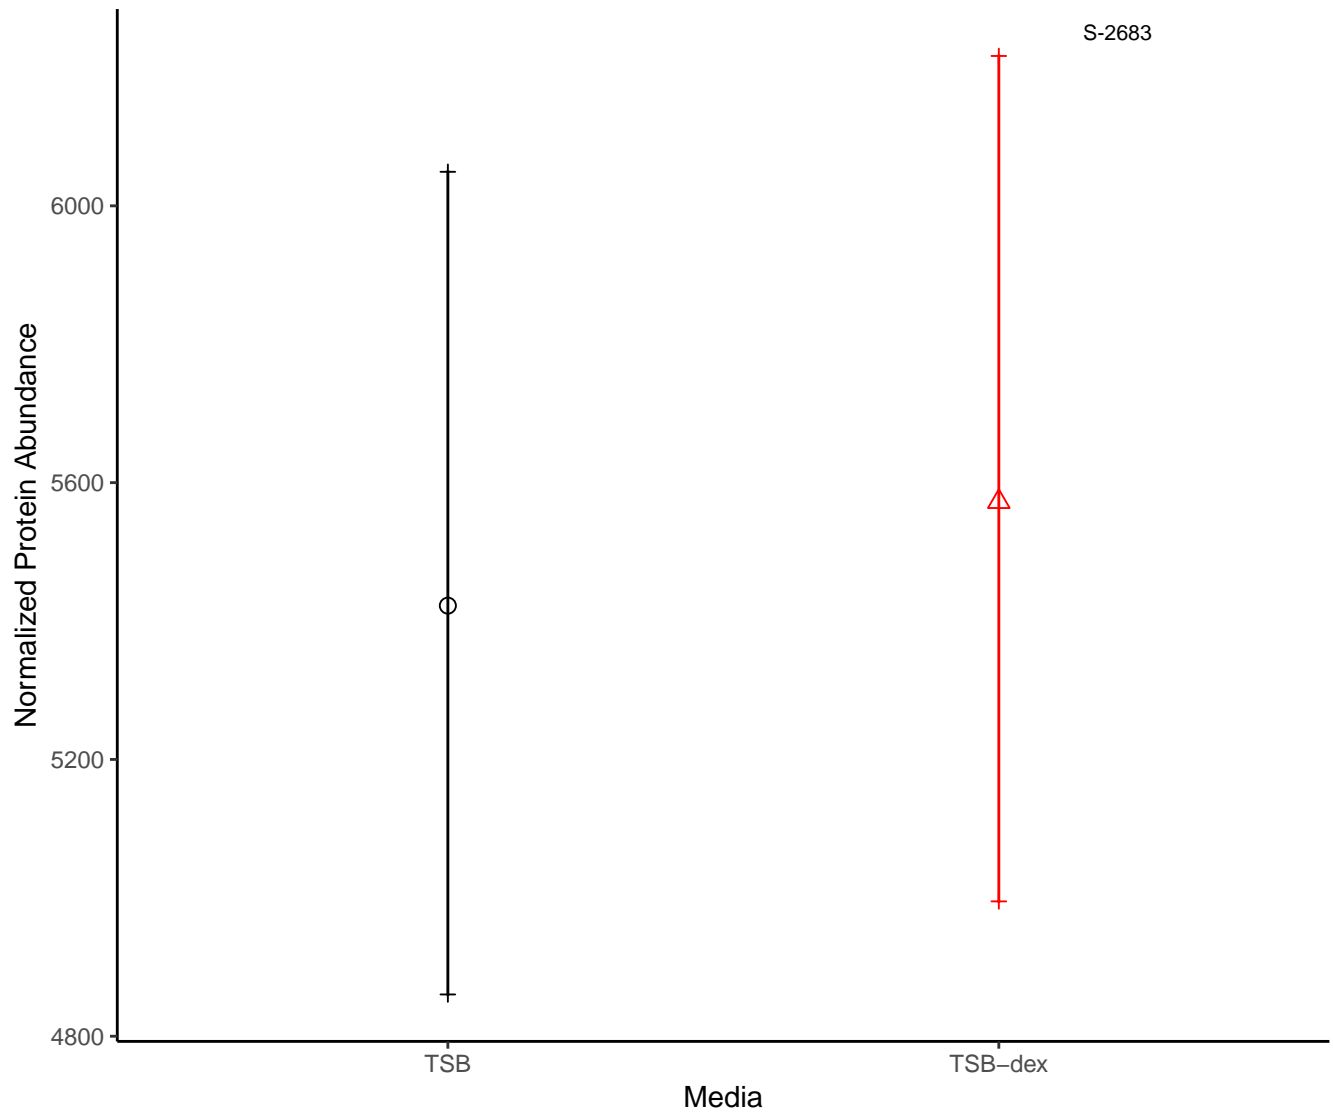

# ILVE\_STAAM

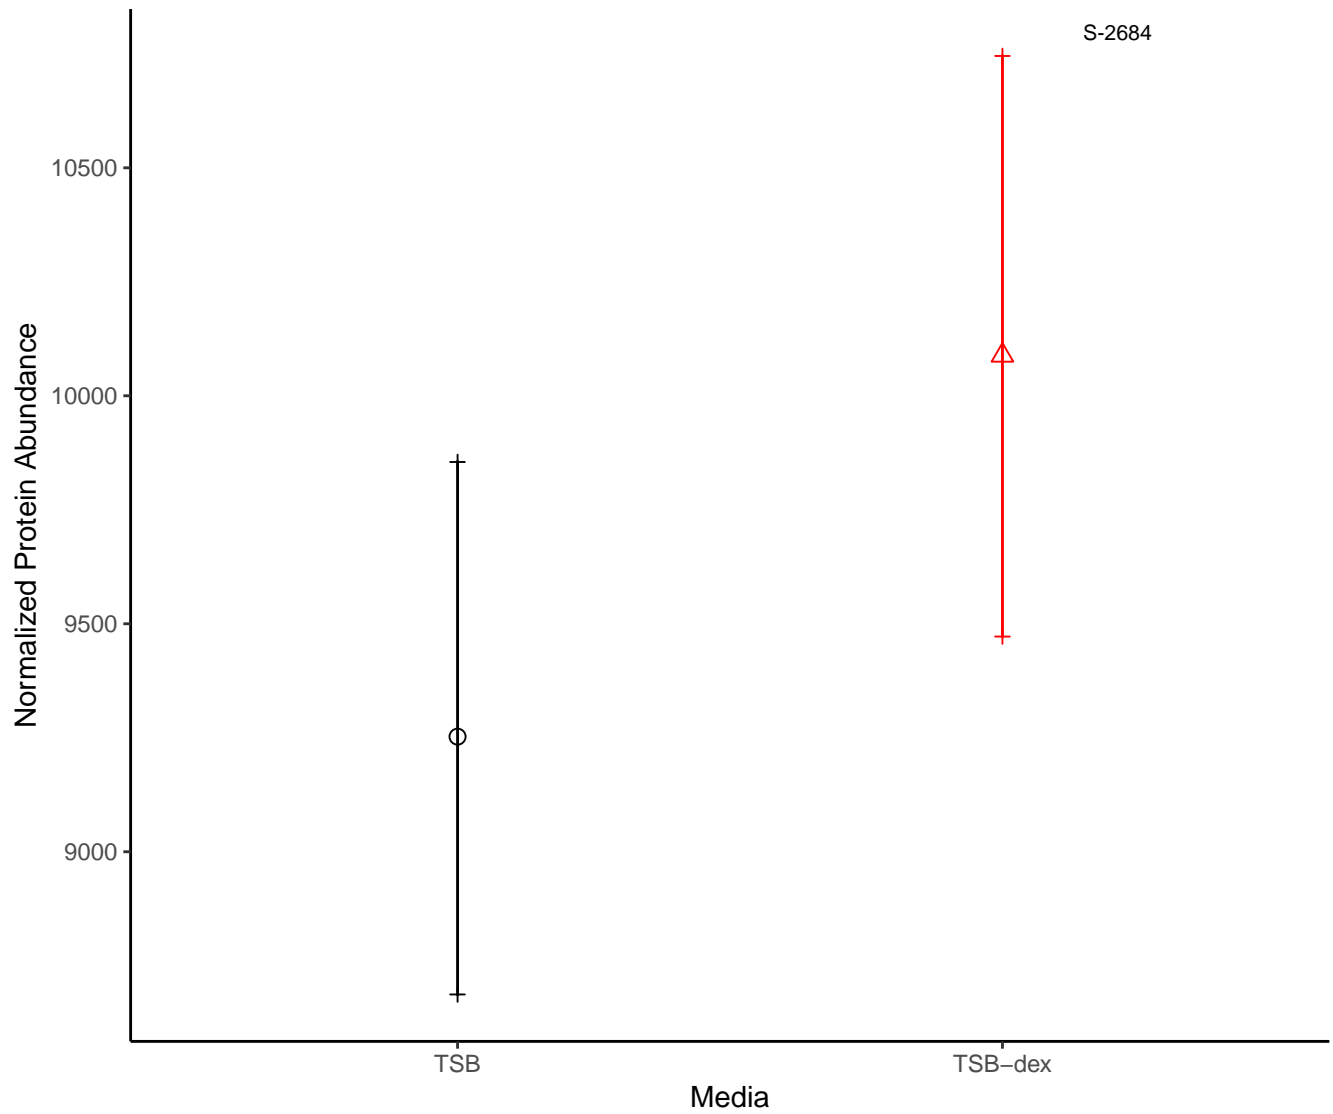

⊖ TSB-dex

△ TSB

# IMDH\_STAAM

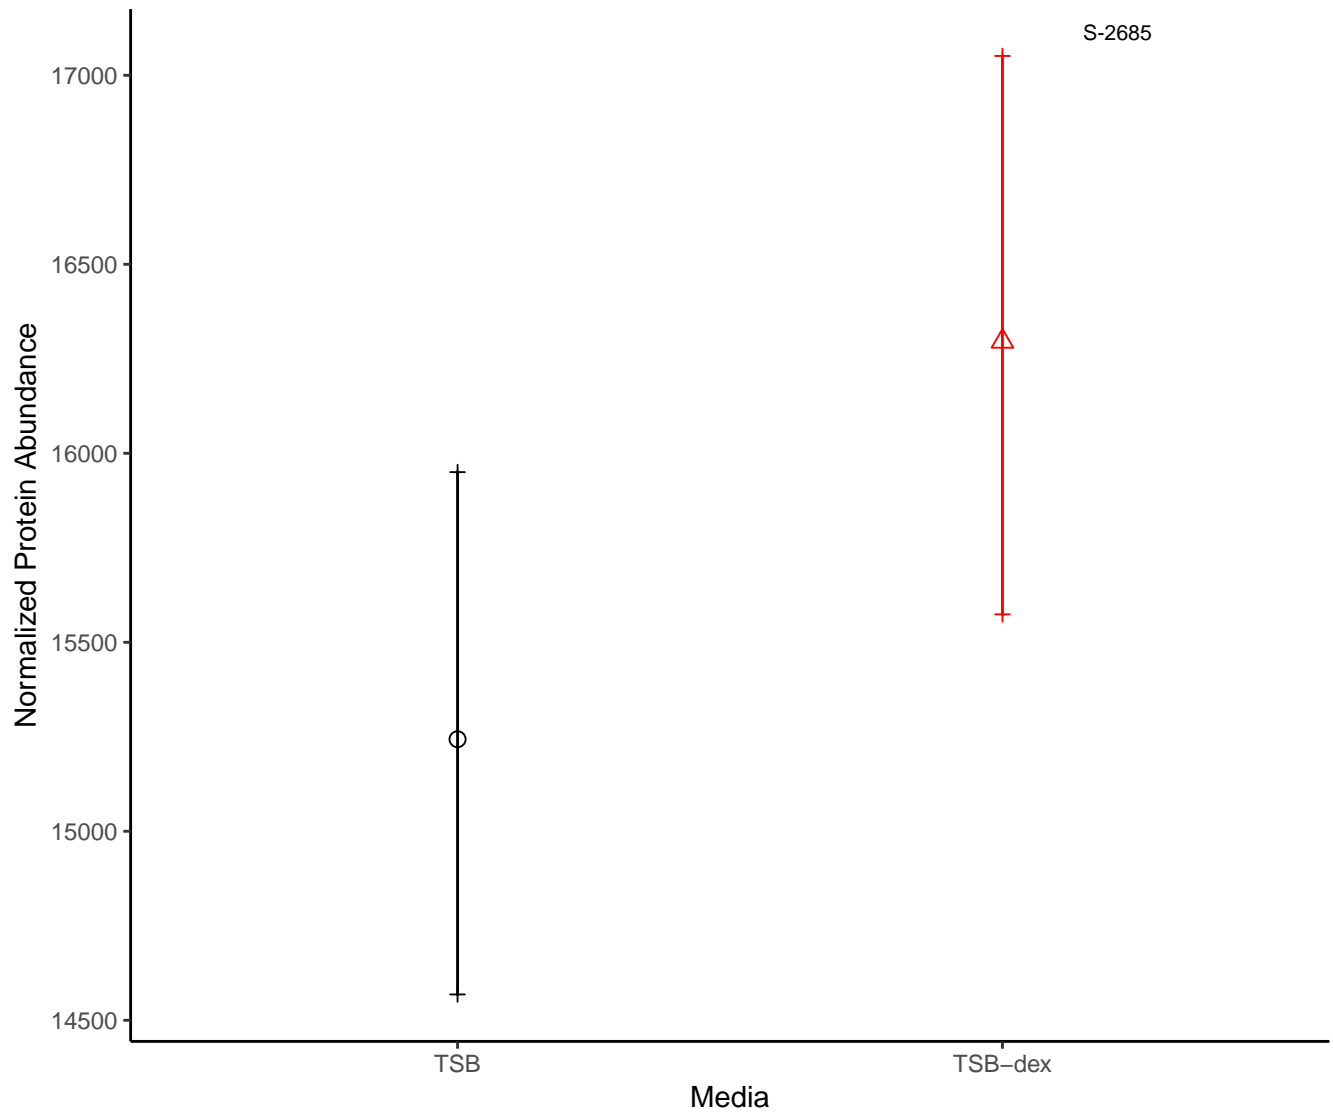

⊕ TSB-dex

△ TSB

# ISAA\_STAAM

S-2686

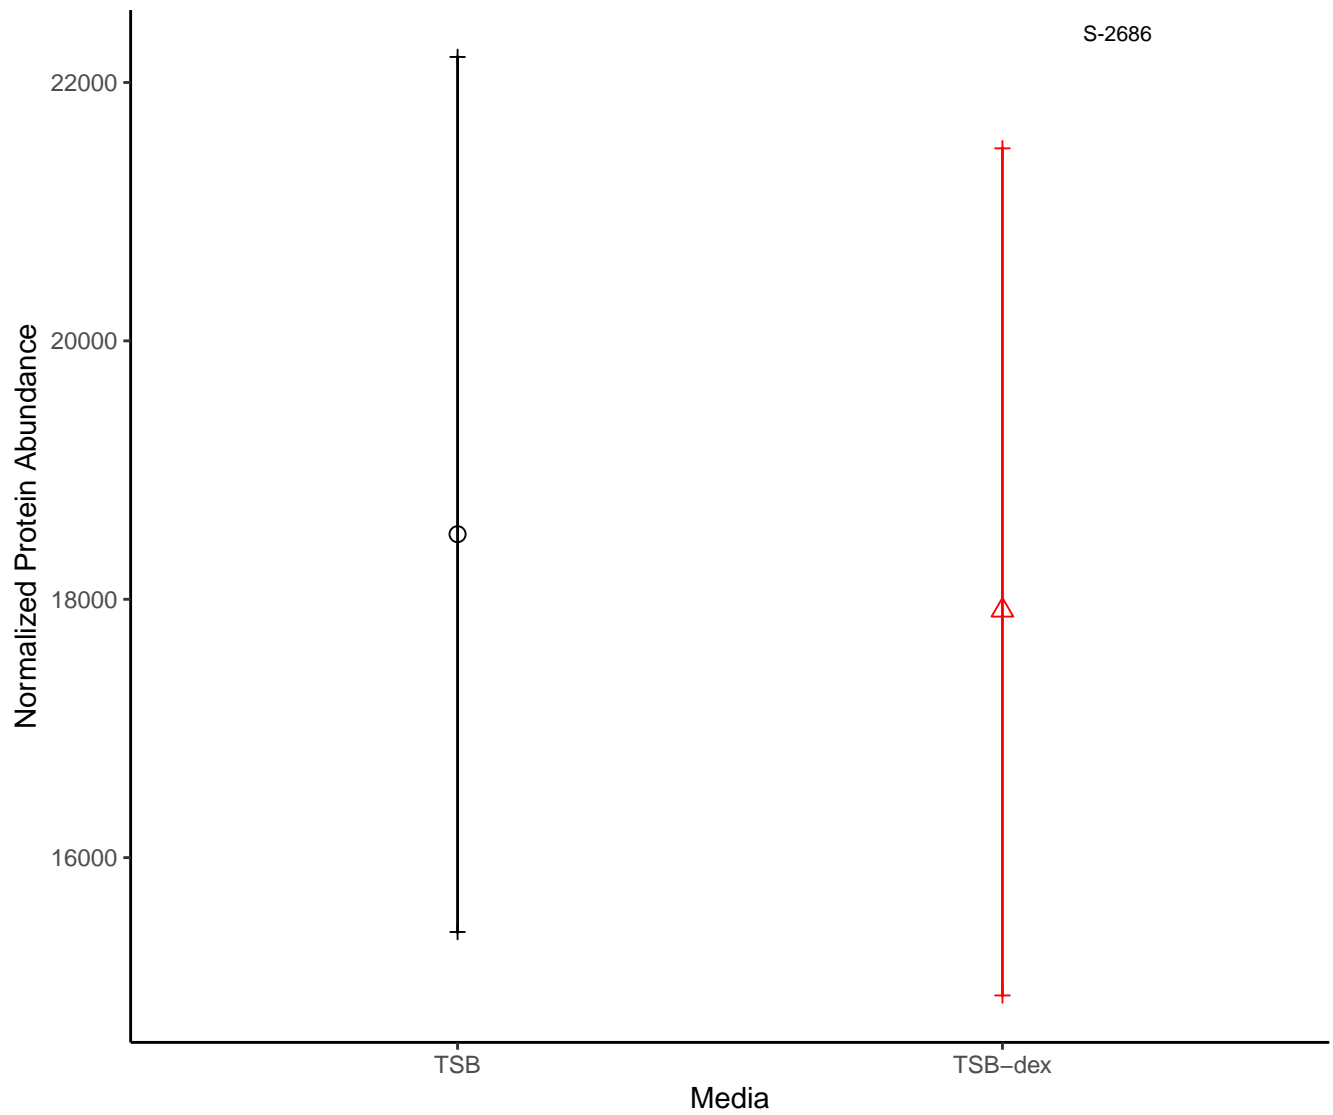

⊕ TSB-dex

△ TSB

# ISPD1\_STAAM

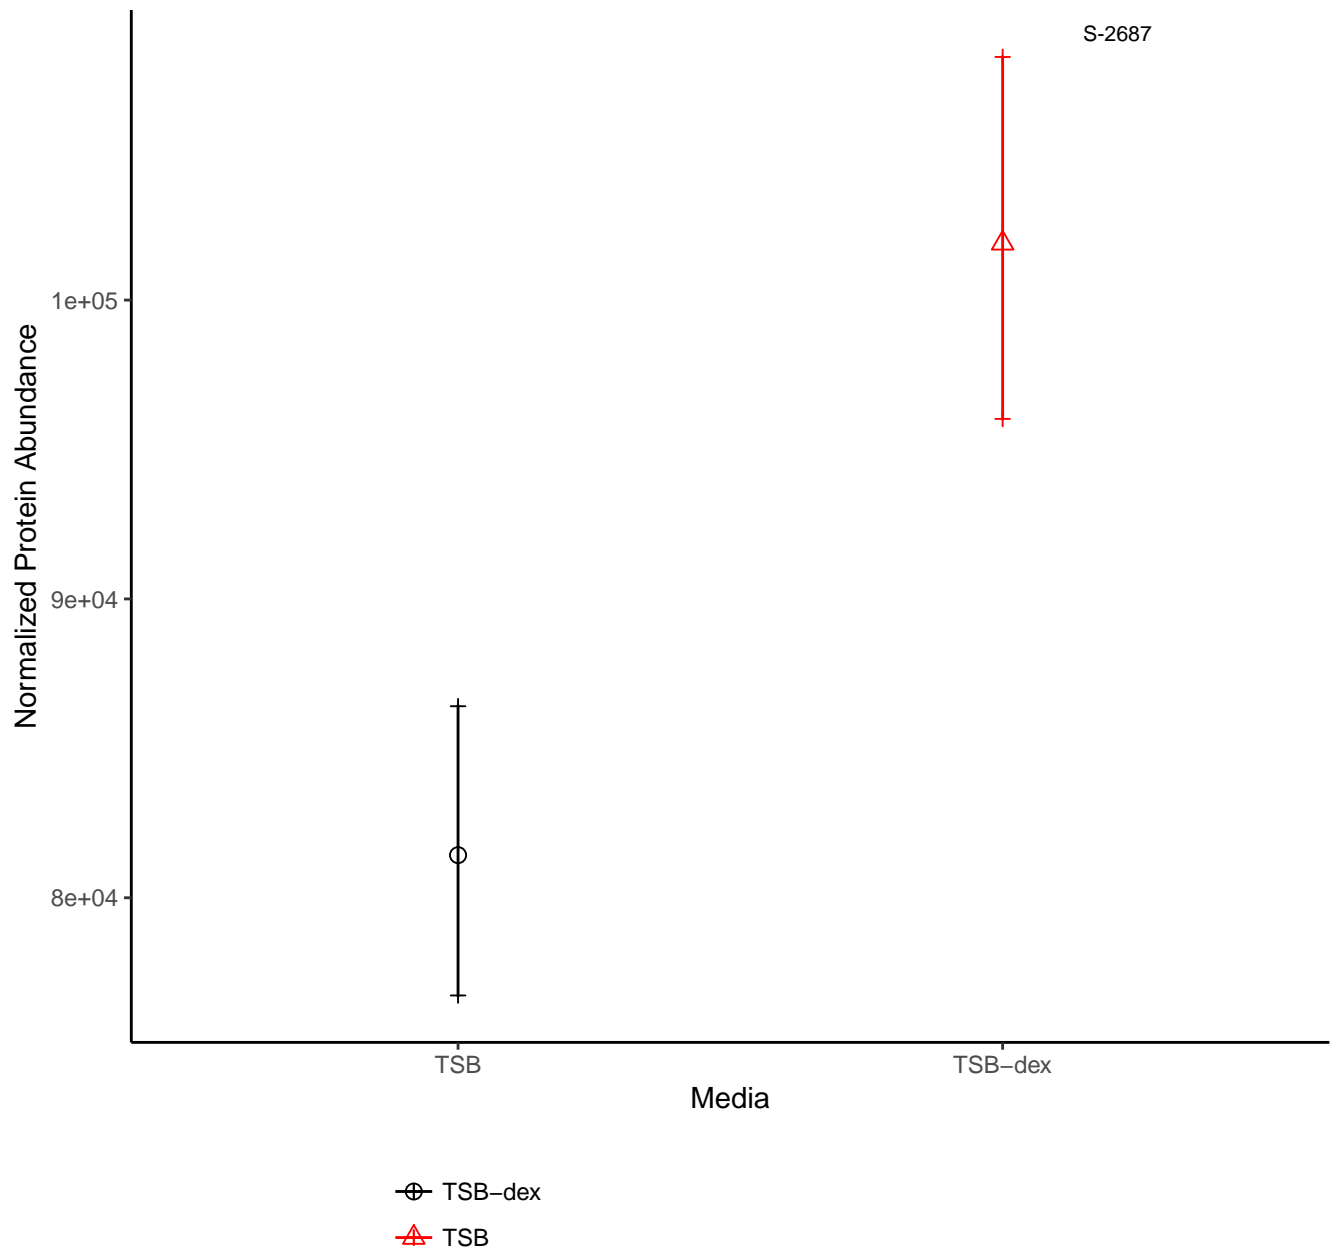

# ISPD2\_STAAM

S-2688

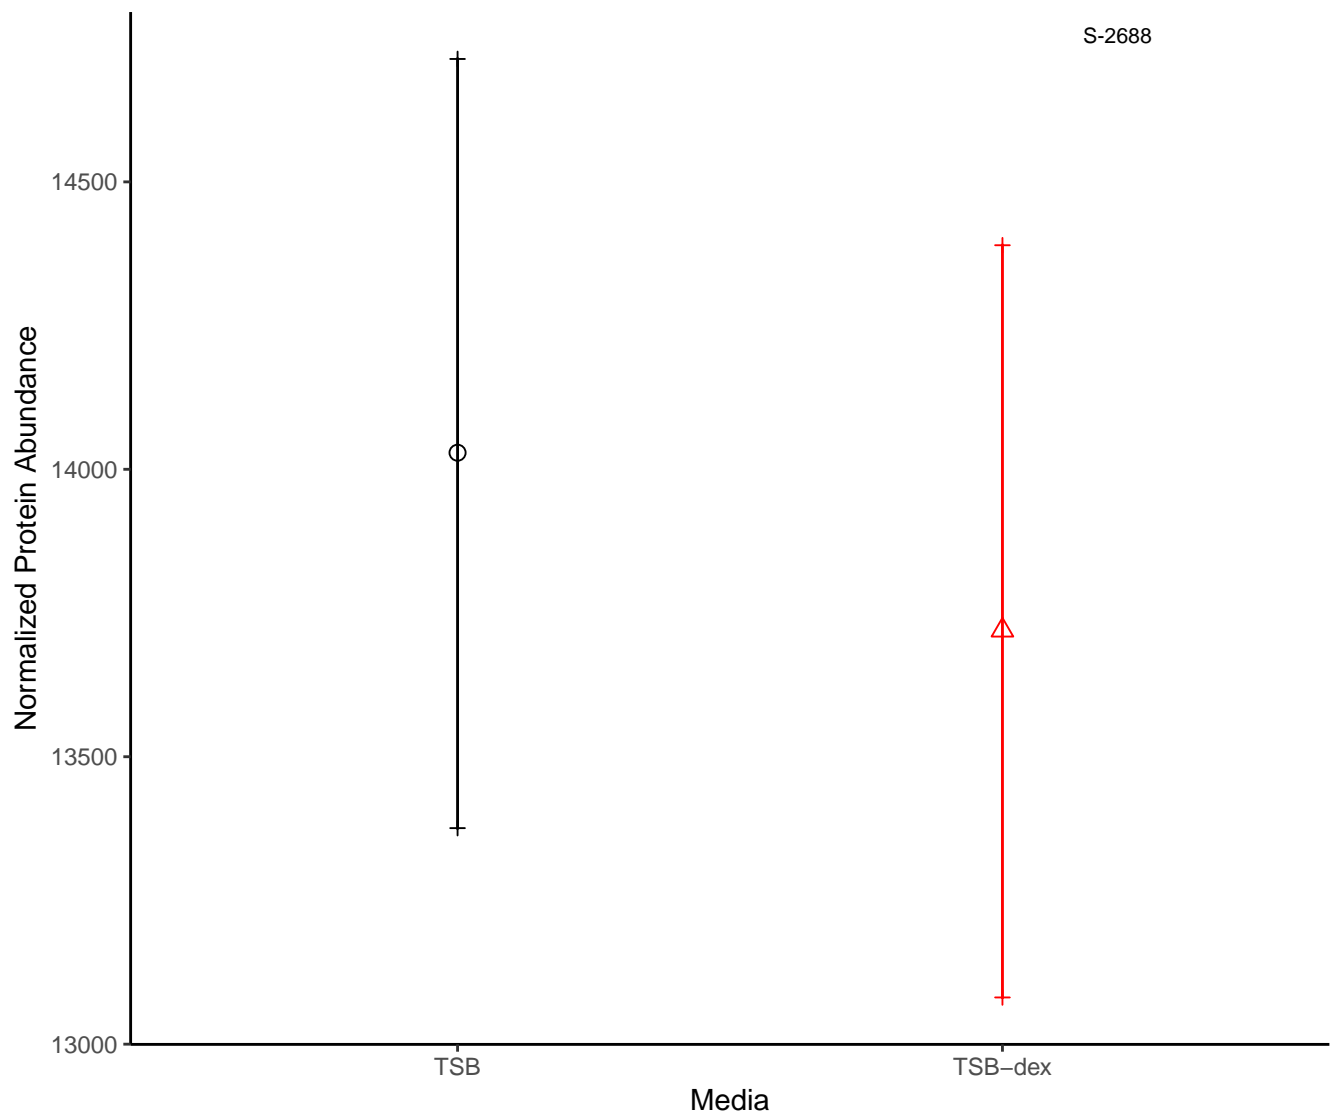

⊕ TSB-dex

△ TSB



# ISPE\_STAAM

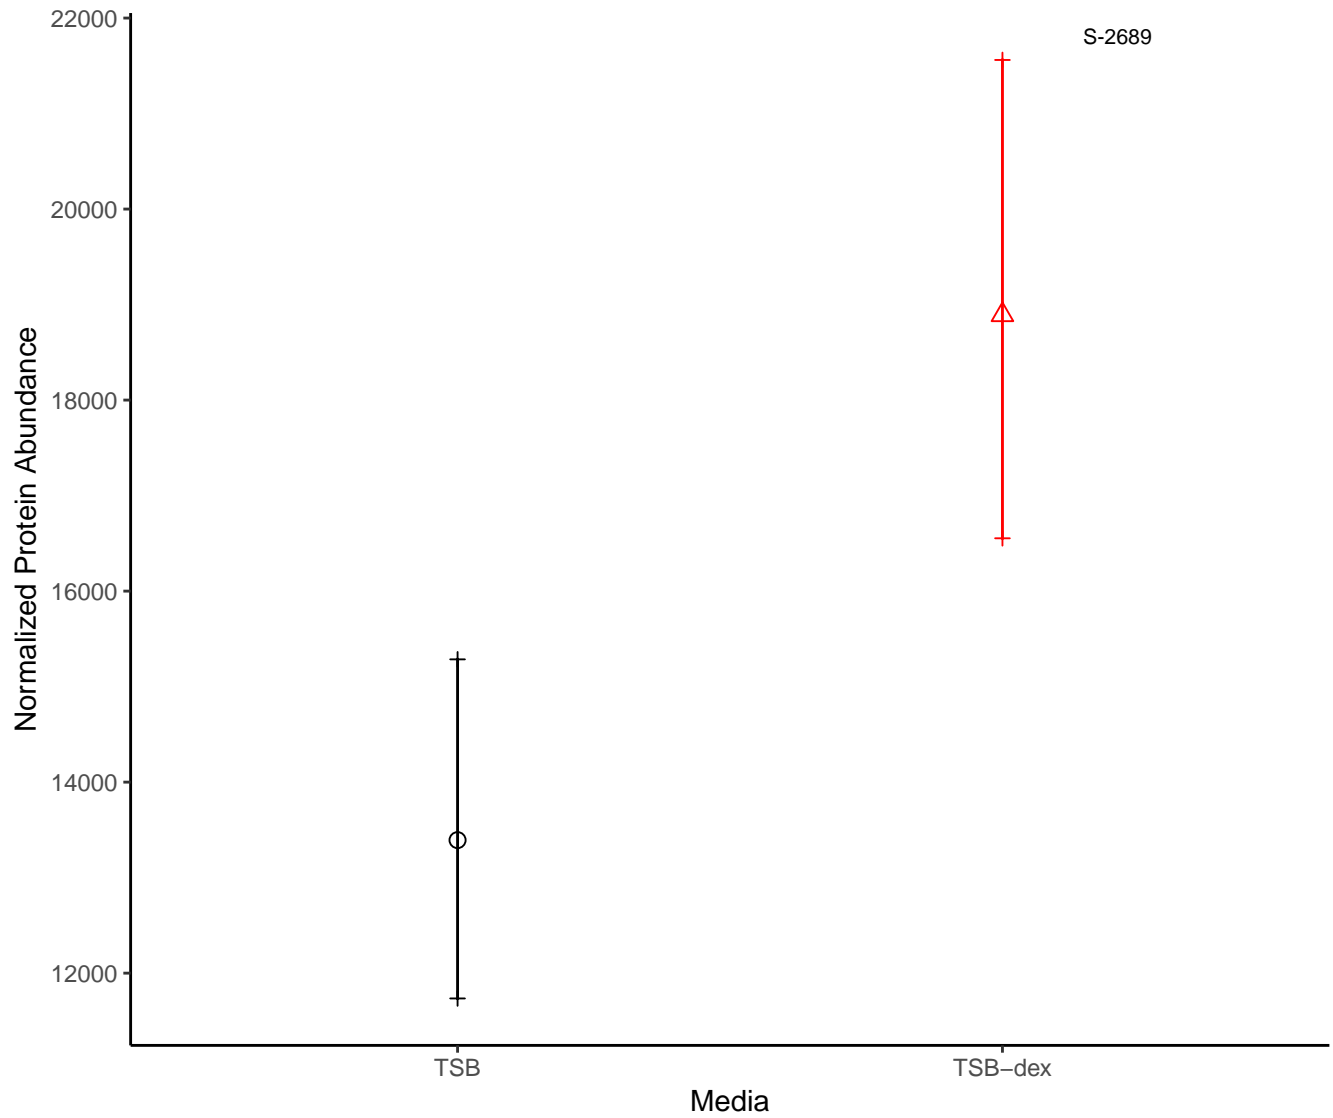

⊕ TSB-dex

△ TSB

# KAD\_STAAM

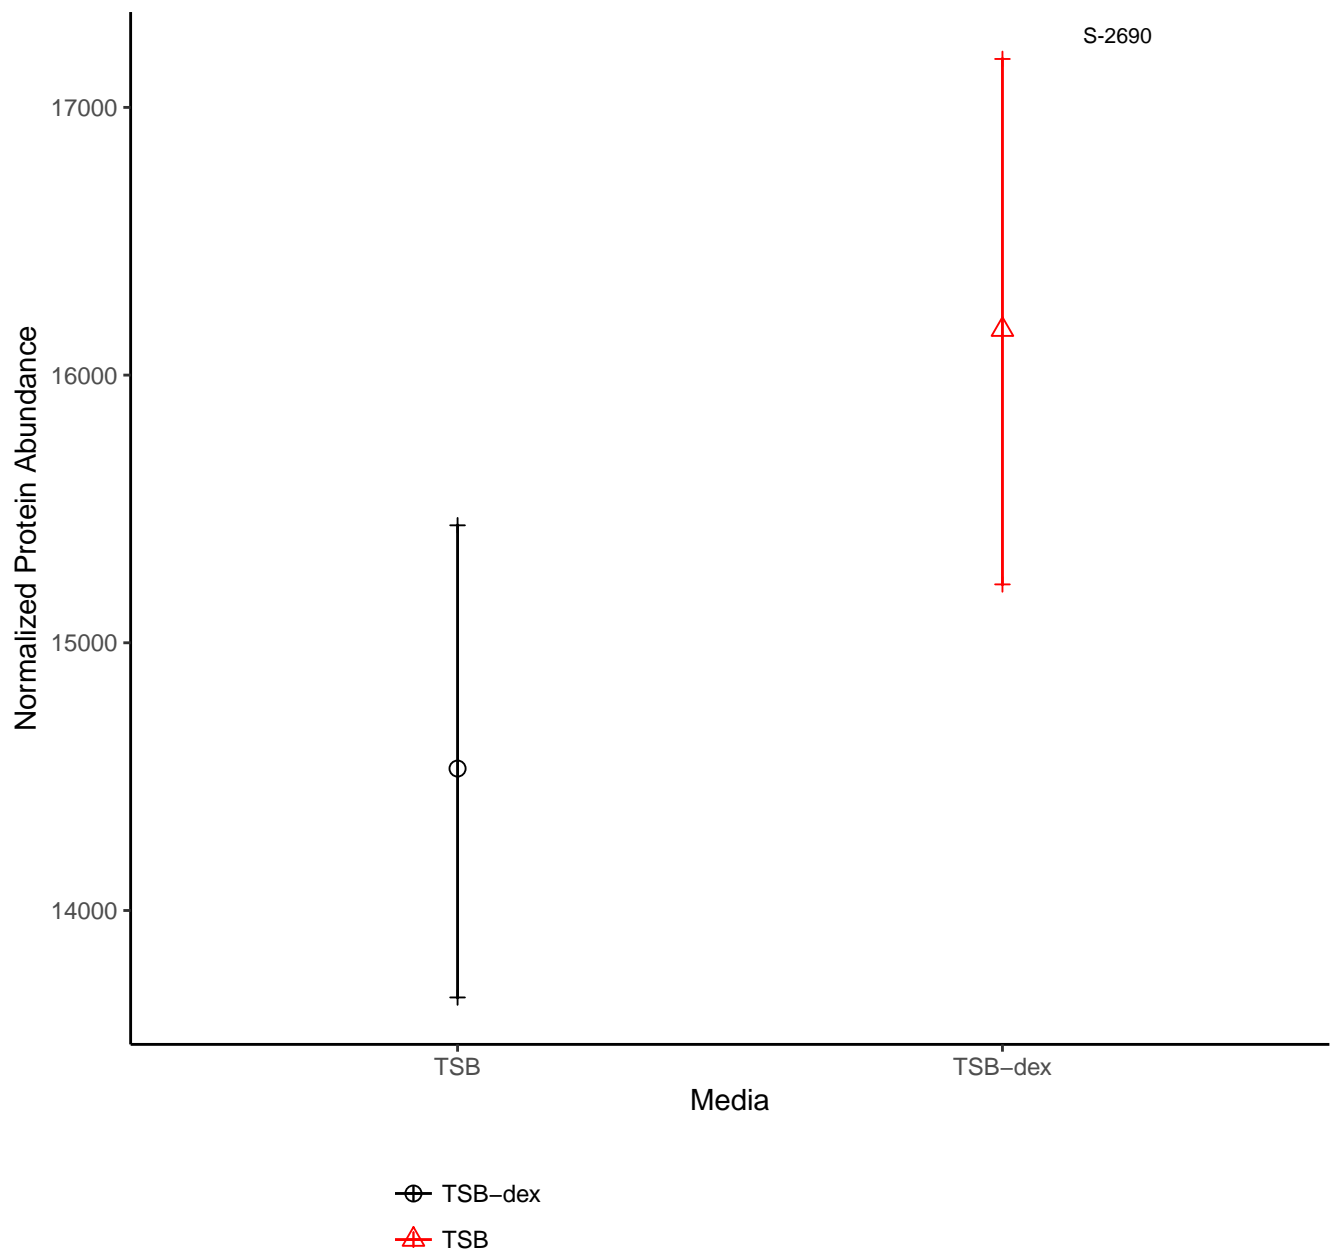

# KCY\_STAAM

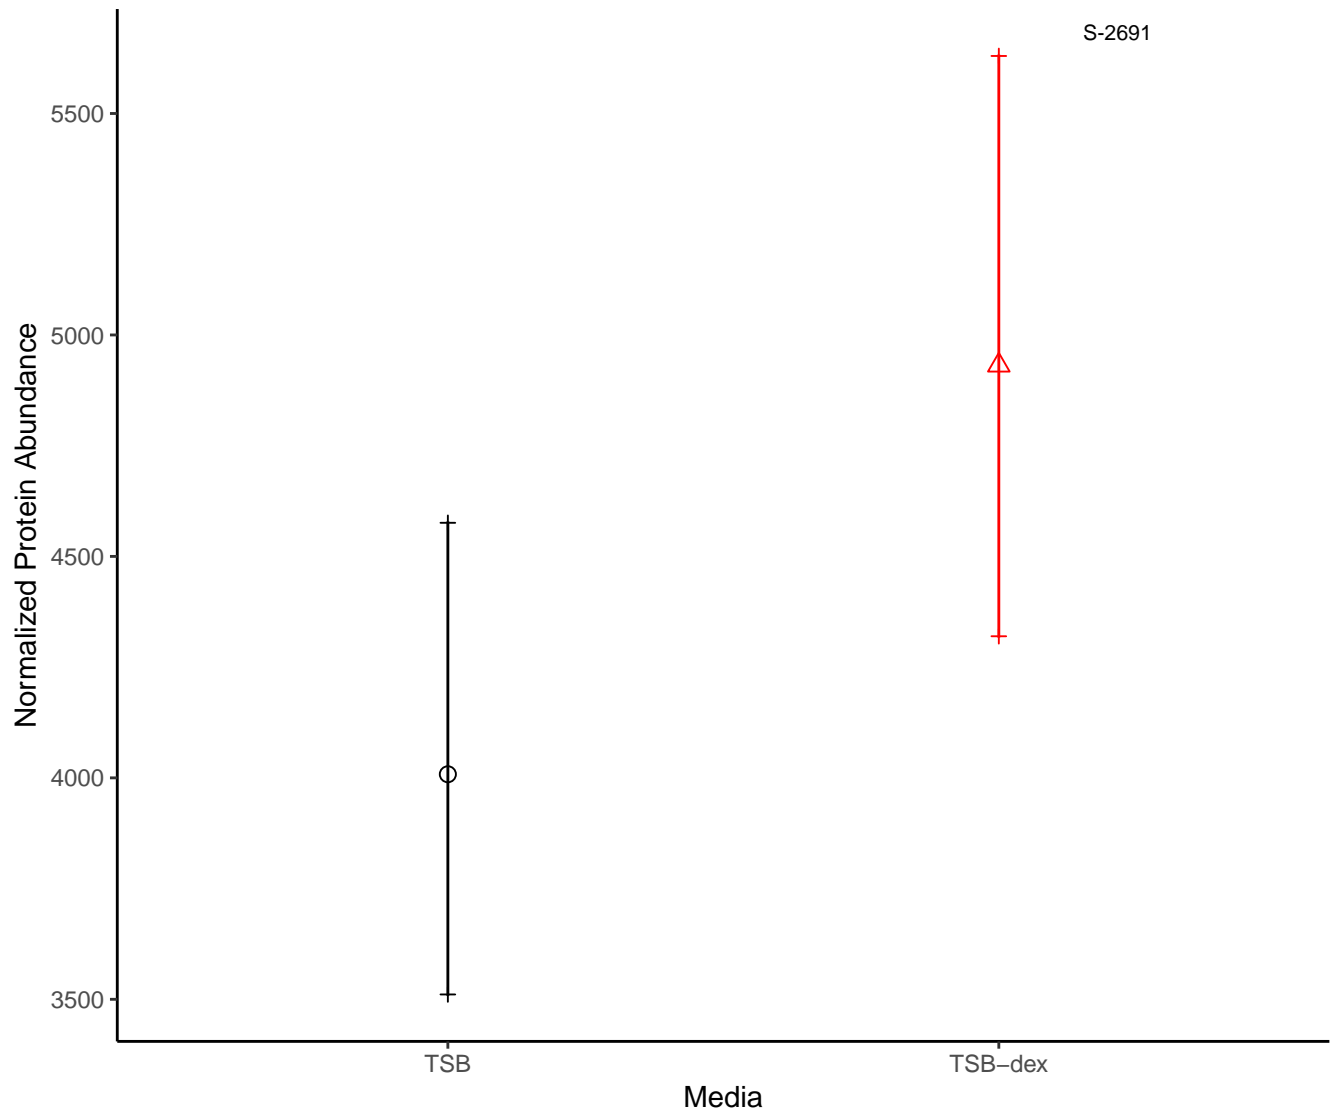

⊕ TSB-dex

△ TSB

# KITH\_STAAM

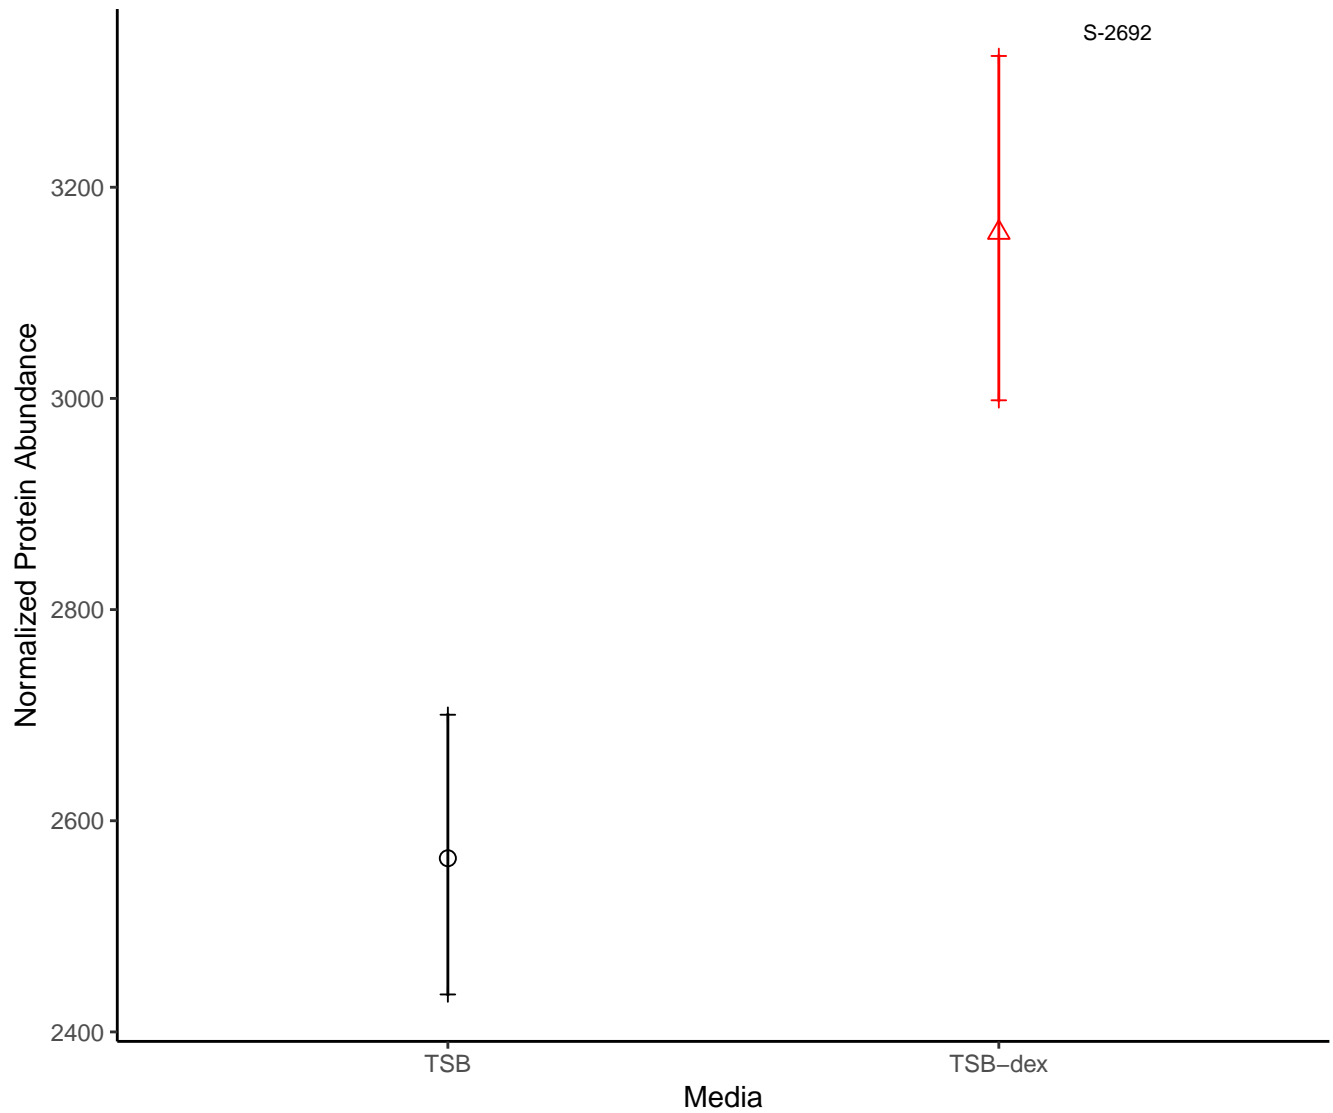

⊕ TSB-dex

△ TSB

# KPRS\_STAAM

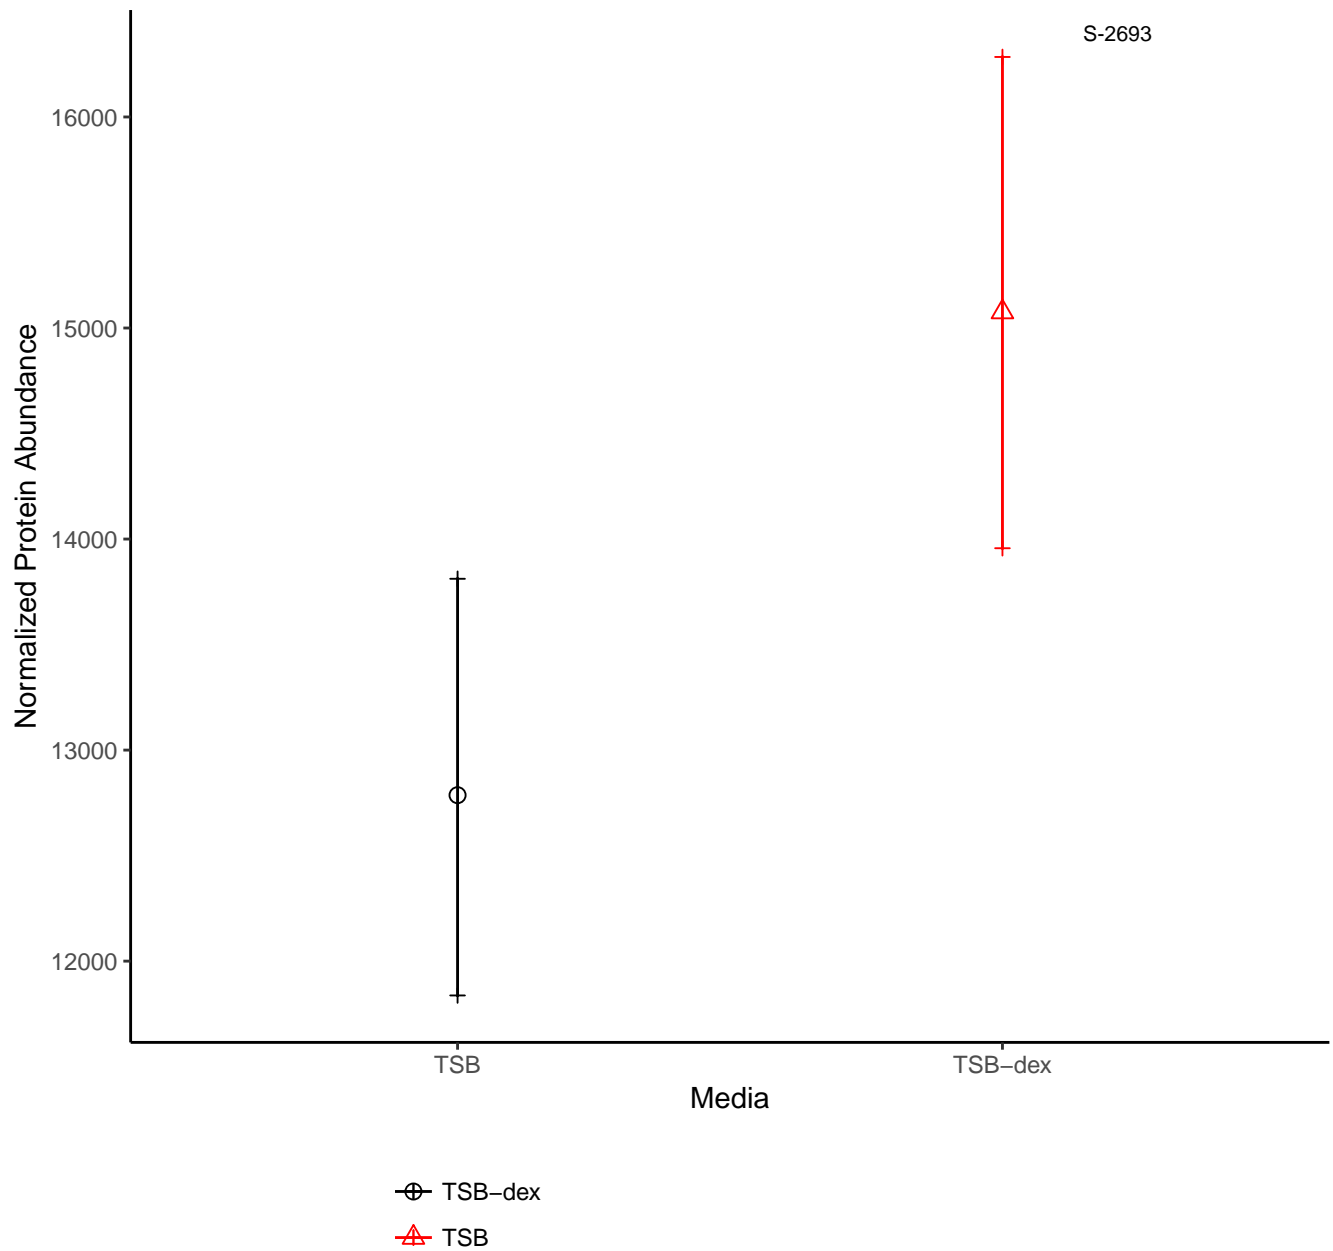

# KPYK\_STAAM

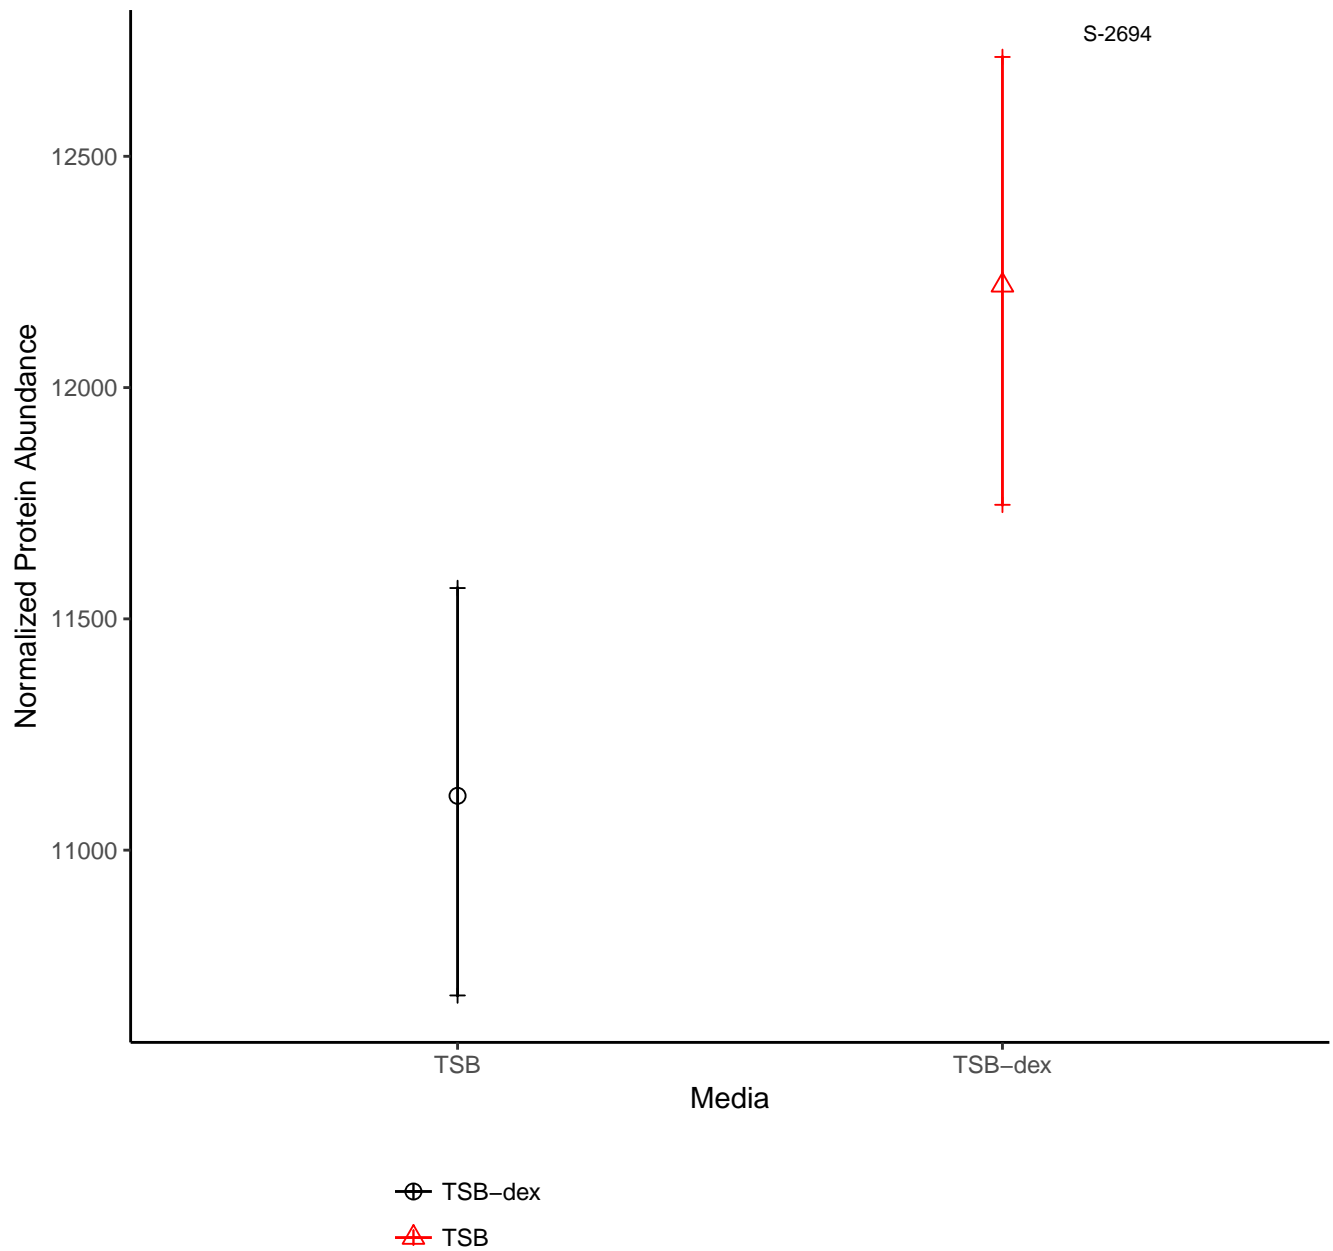

# KTHY\_STAAM

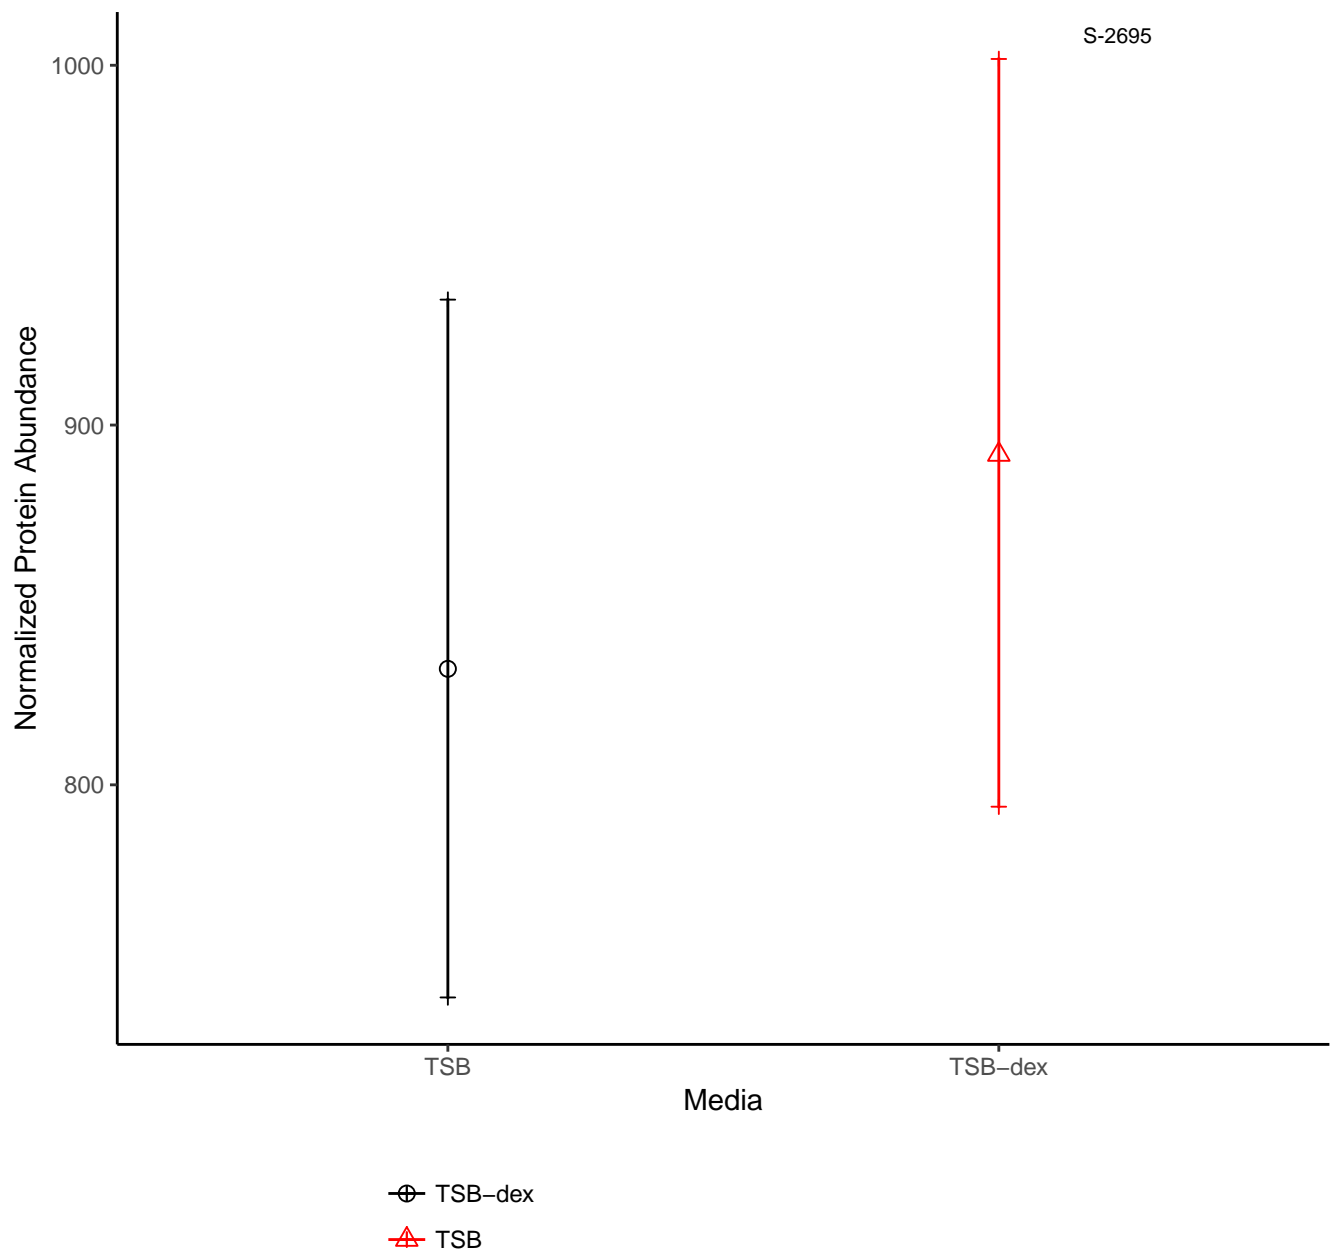

# LACA\_STAAM

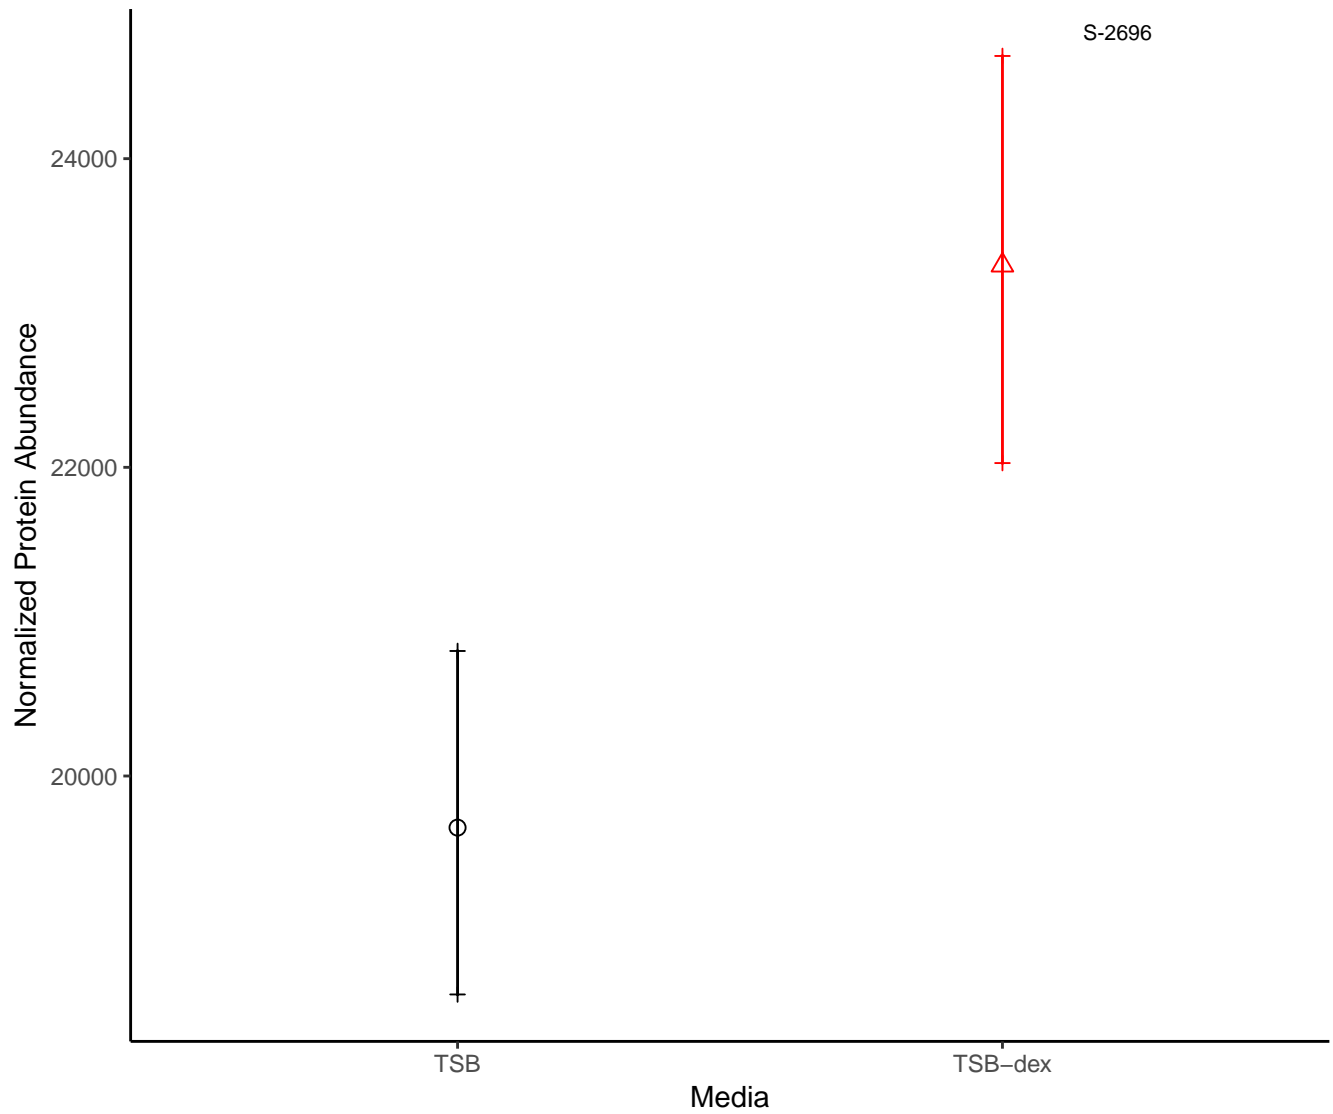

⊖ TSB-dex

⊖ TSB



# LDH1\_STAAM

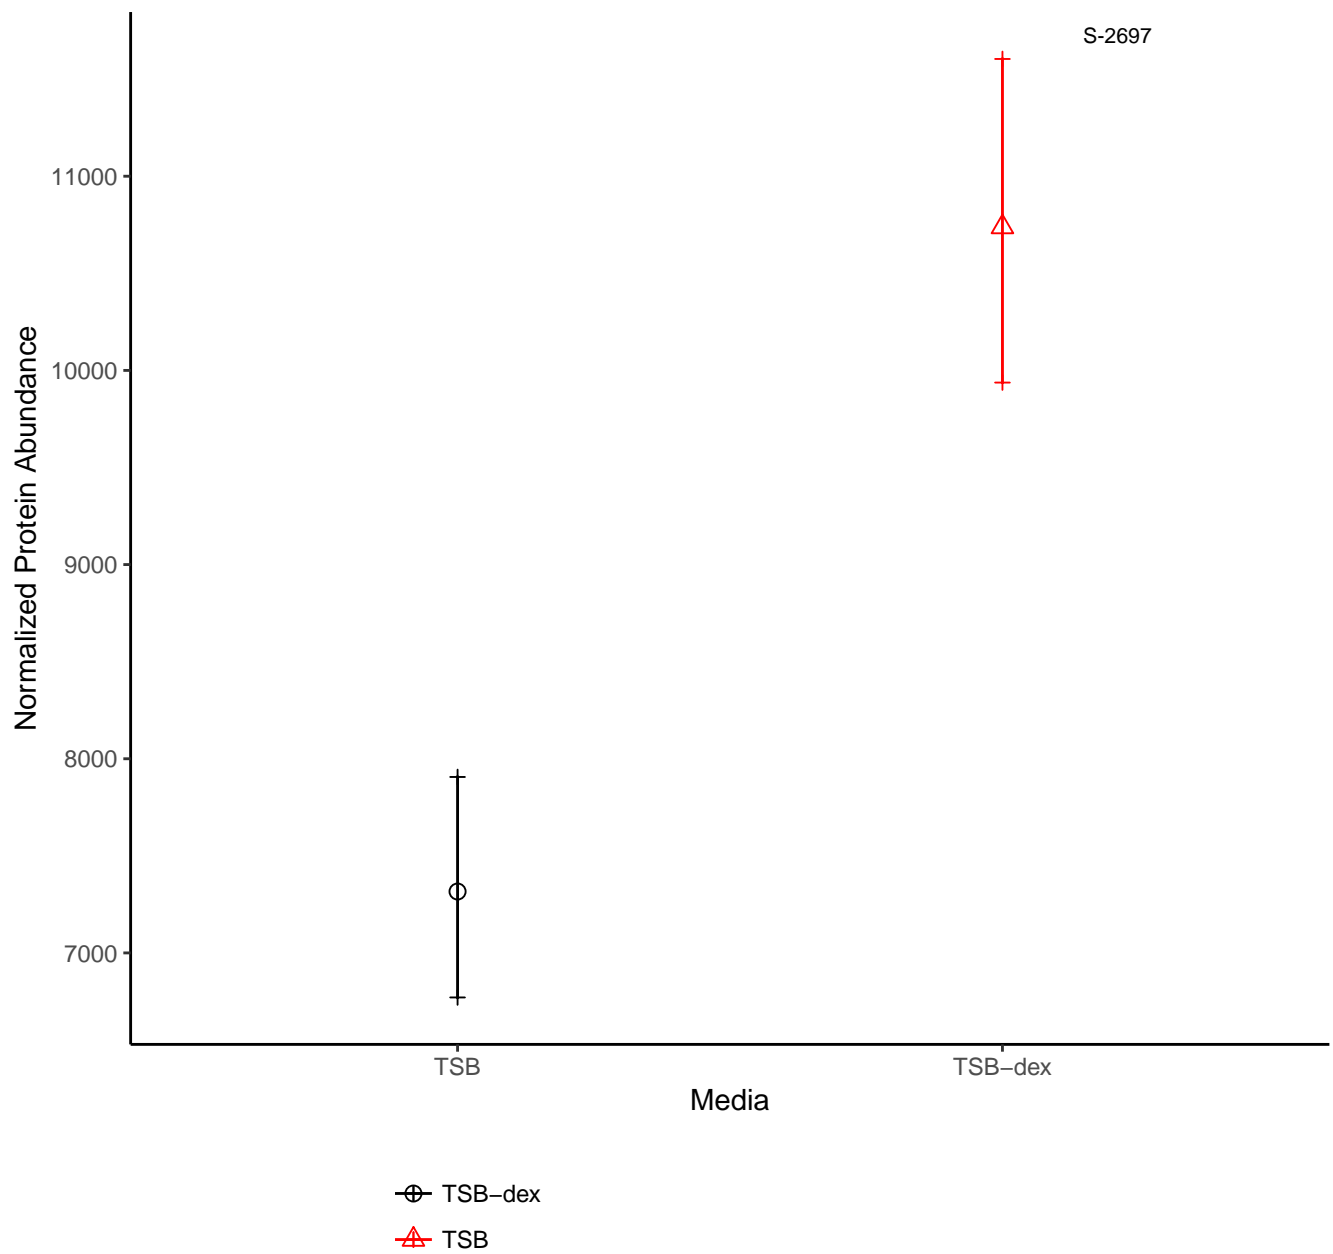

# LDH2\_STAAM

S-2698

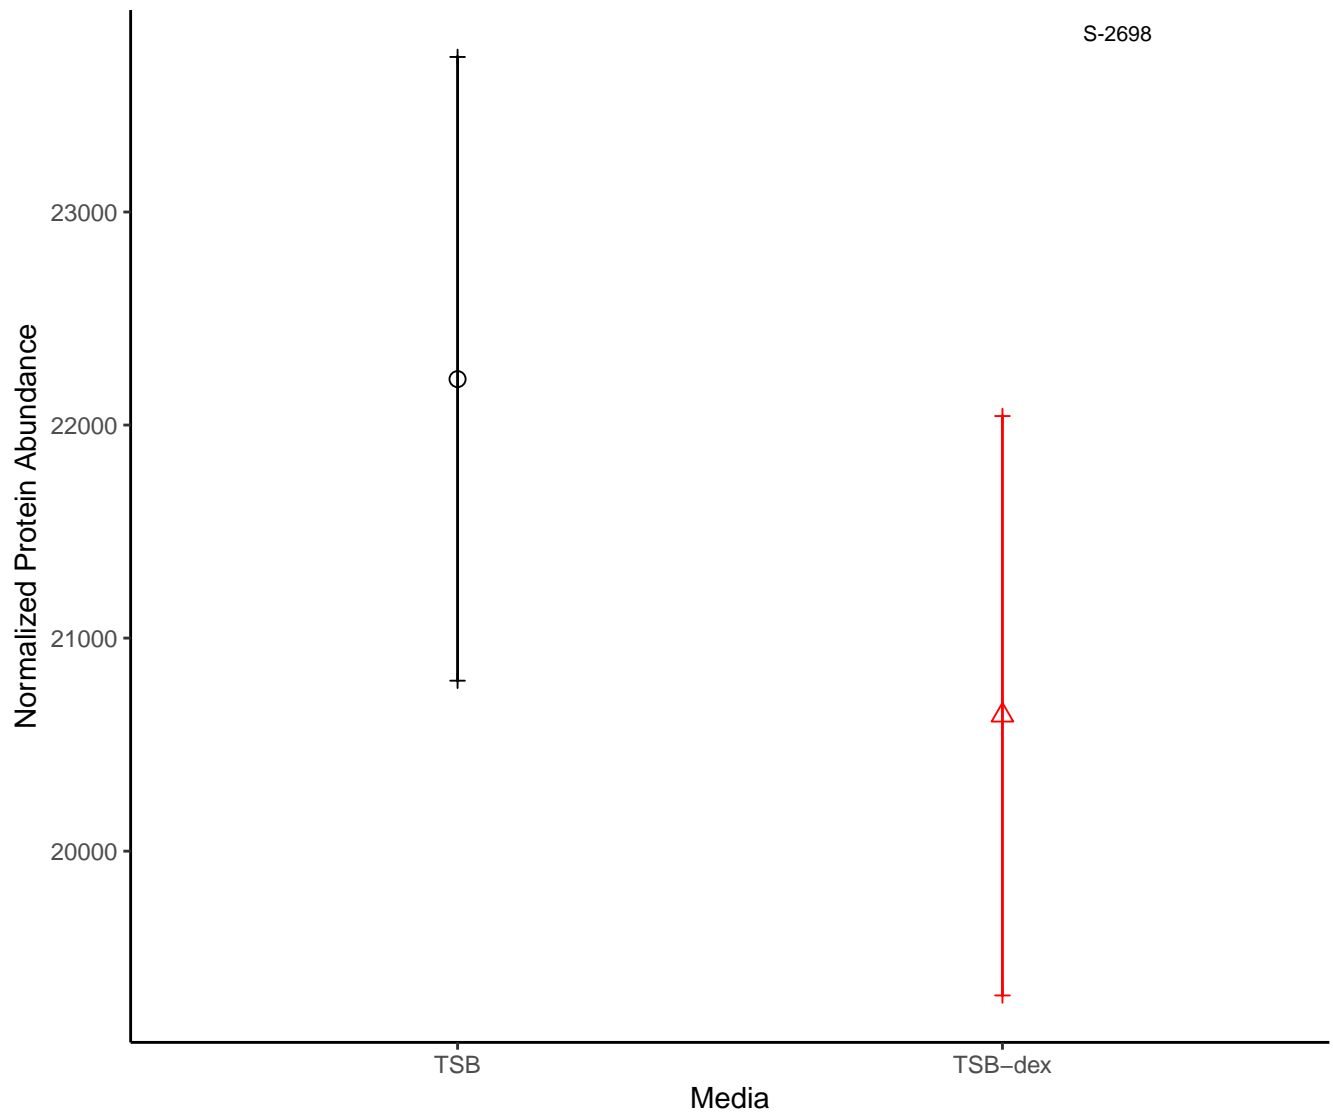

⊕ TSB-dex

△ TSB

# LDHD\_STAAM

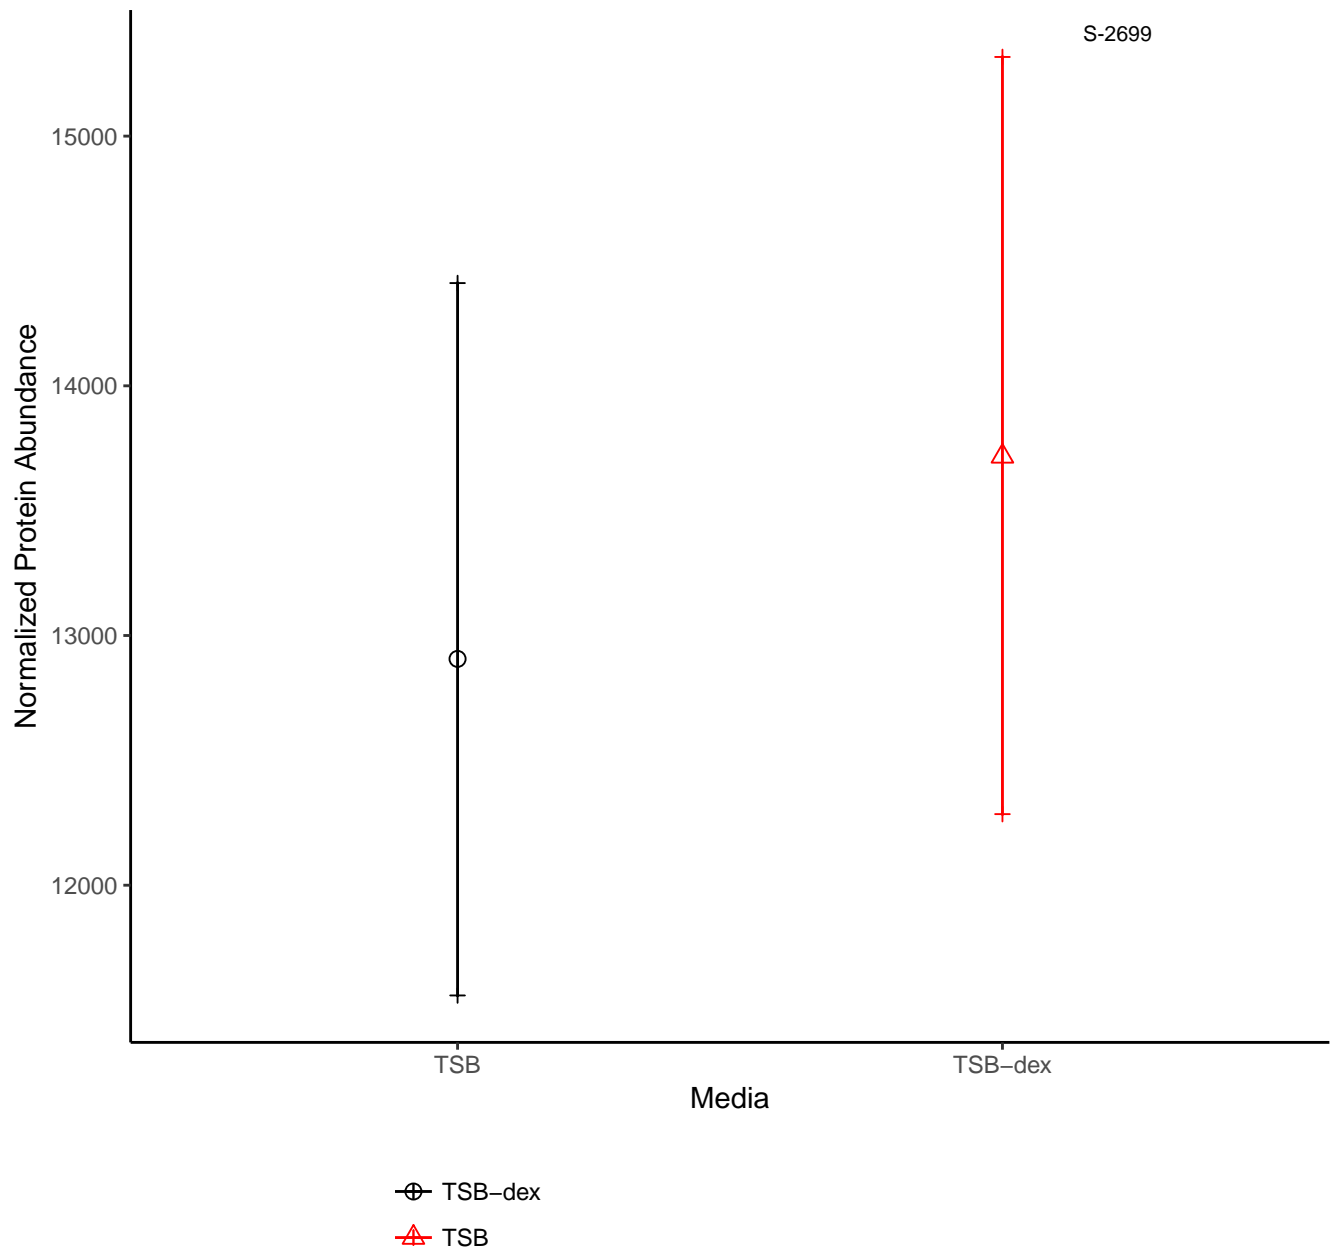

# LEP\_STAAM

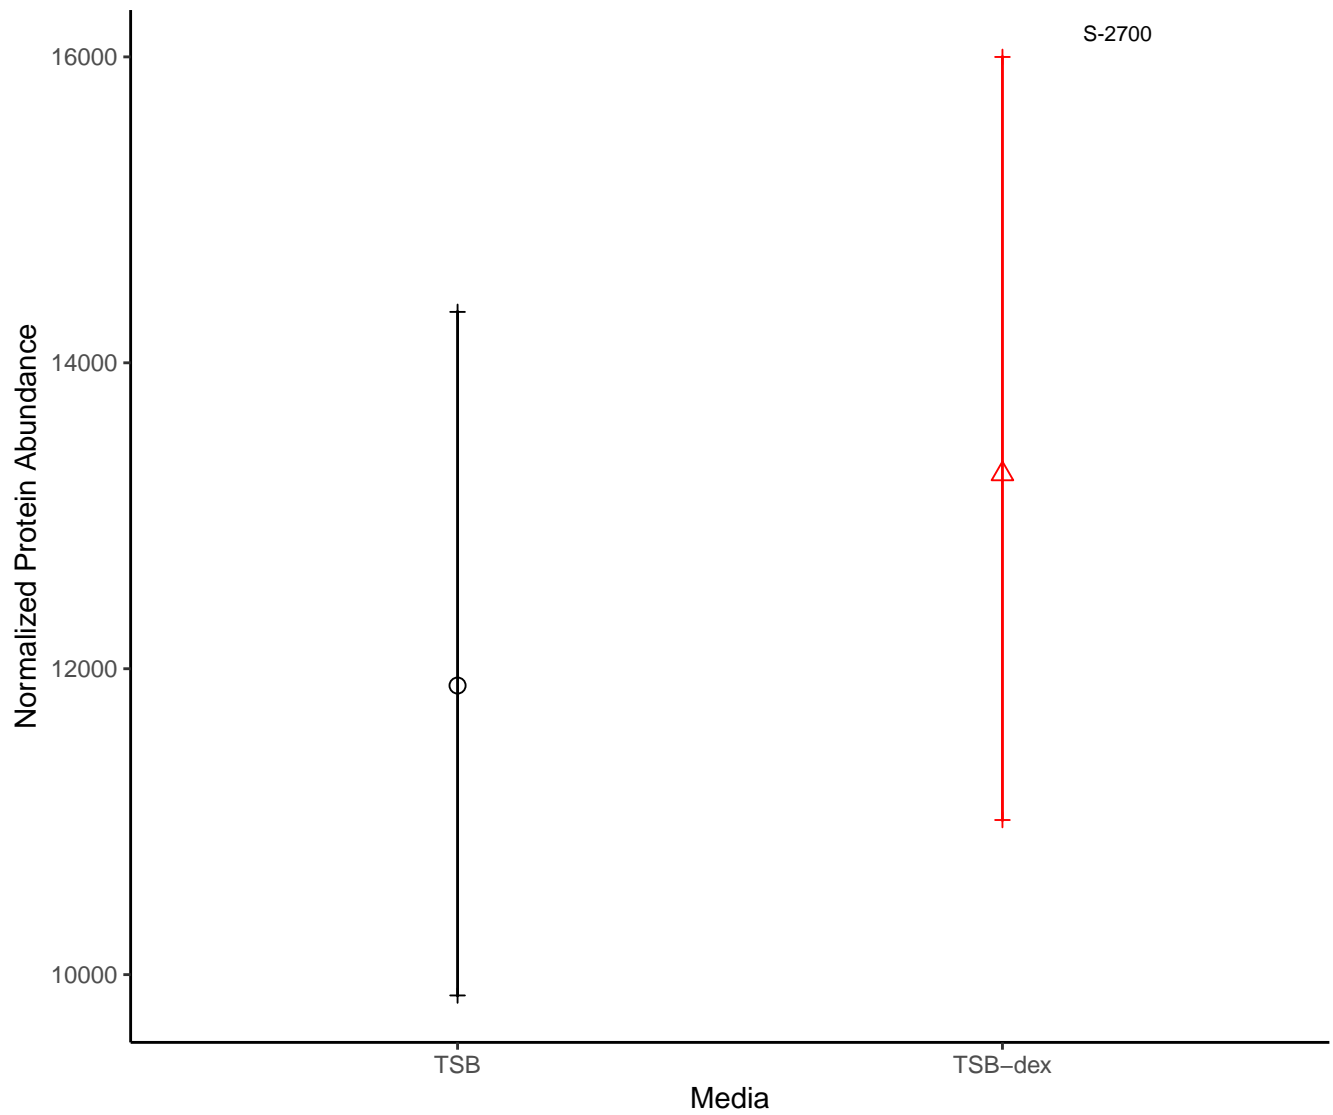

⊕ TSB-dex

△ TSB

# LEPA\_STAAM

S-2701

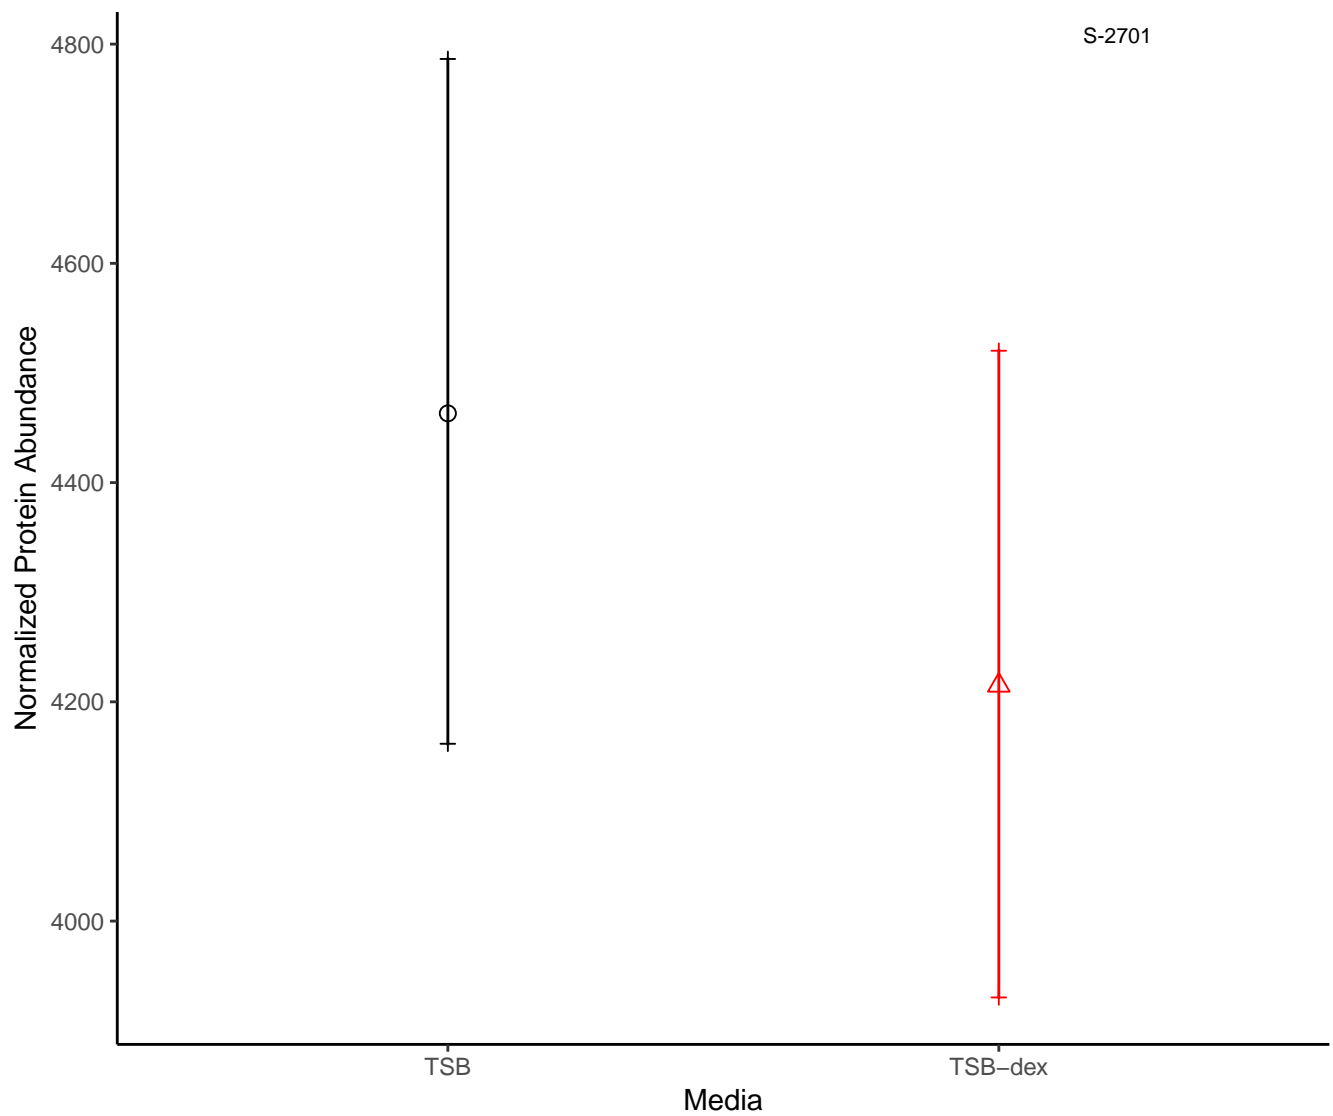

⊕ TSB-dex

△ TSB

# LEU1\_STAAM

S-2702

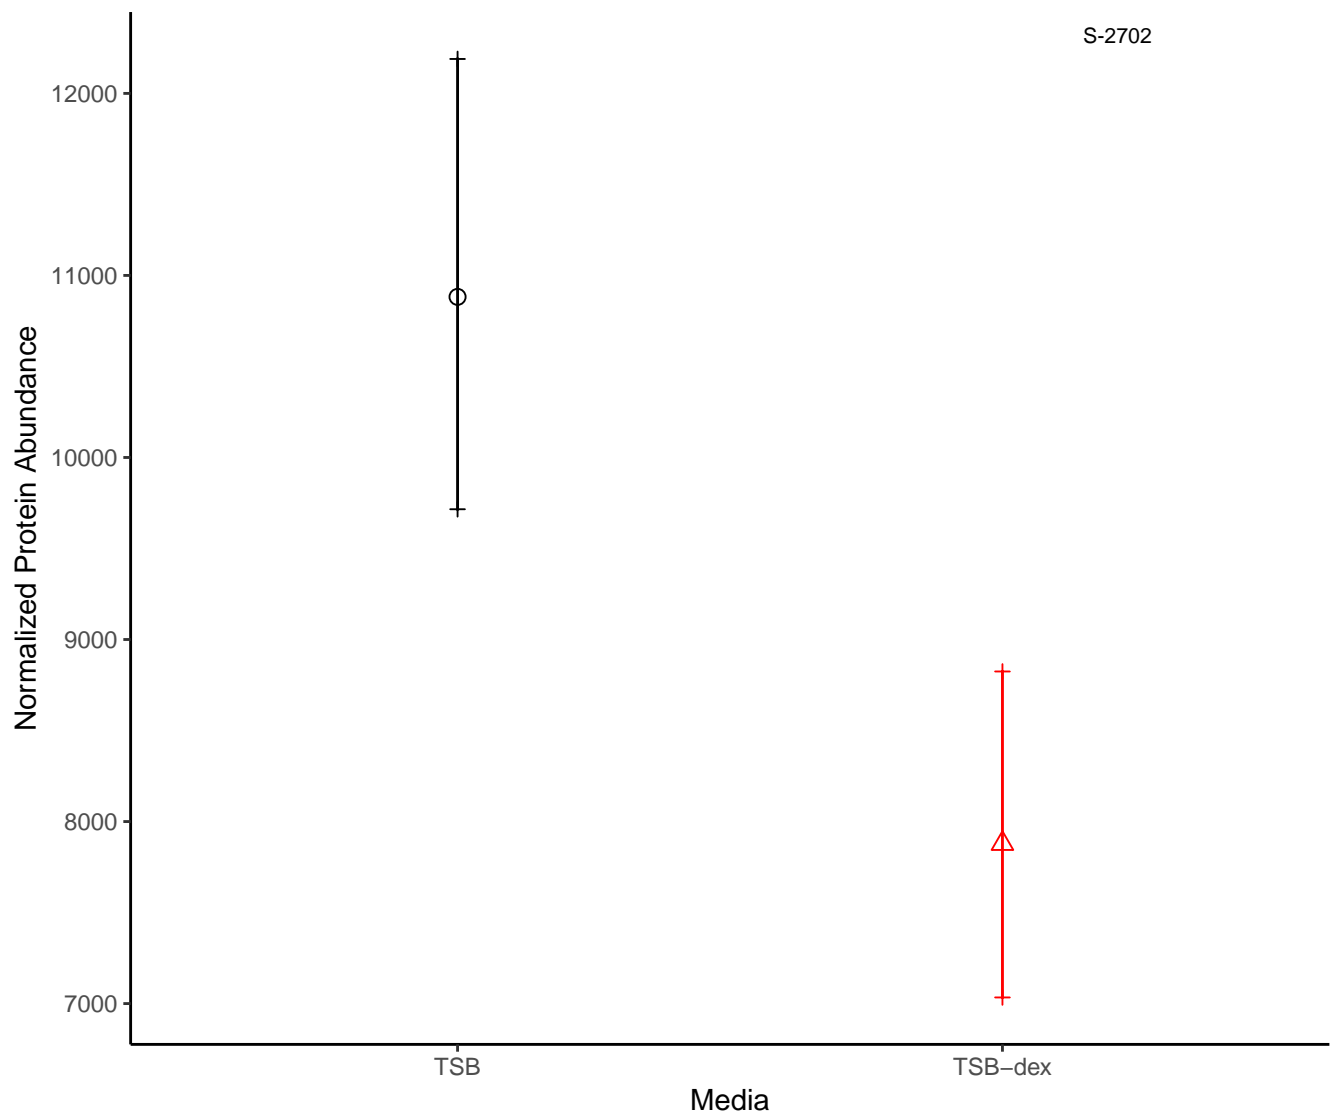

⊖ TSB-dex

△ TSB

# LIPA\_STAAM

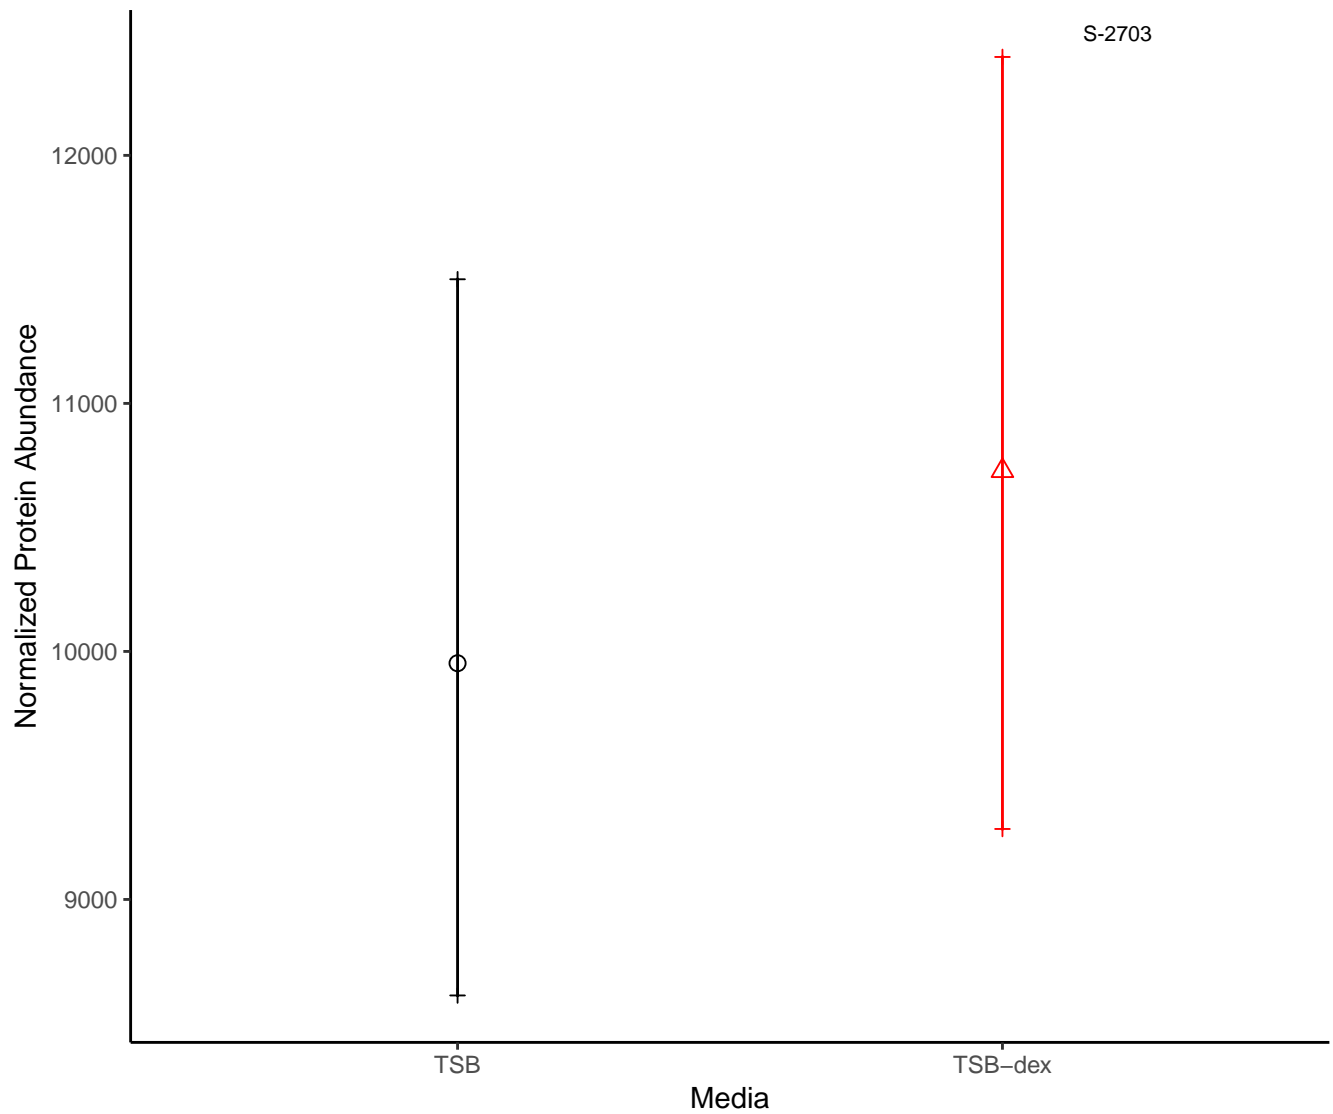

⊕ TSB-dex

△ TSB

# LUXS\_STAAM

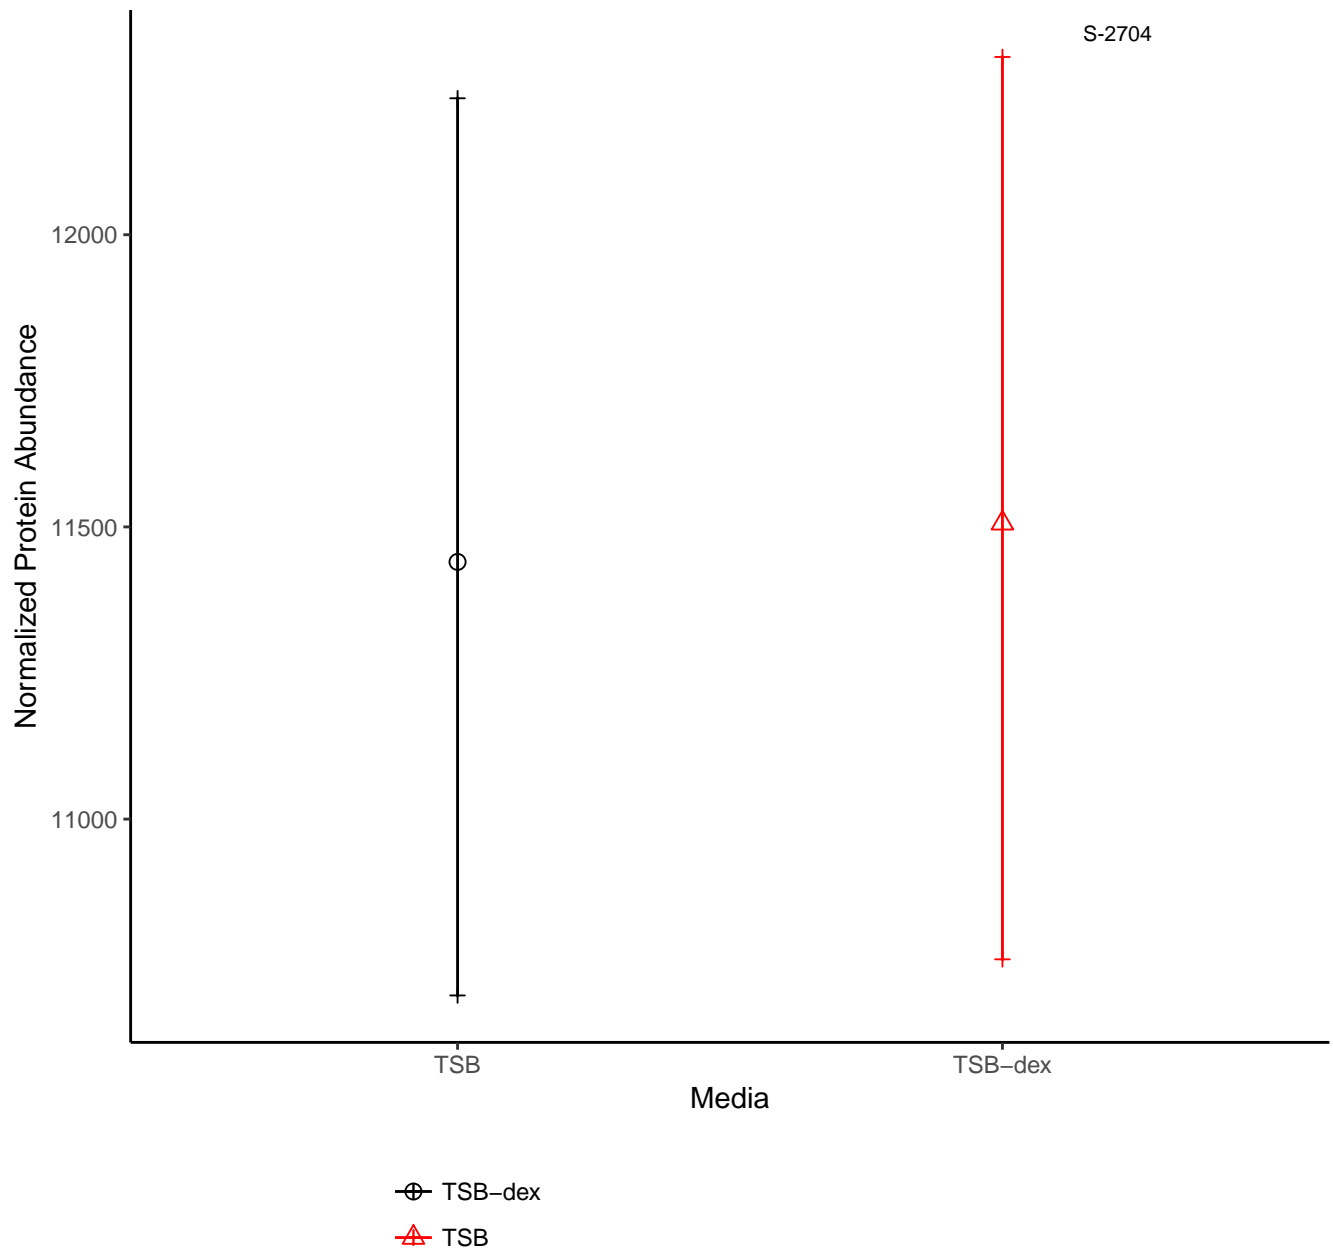



# LYTH\_STAAM

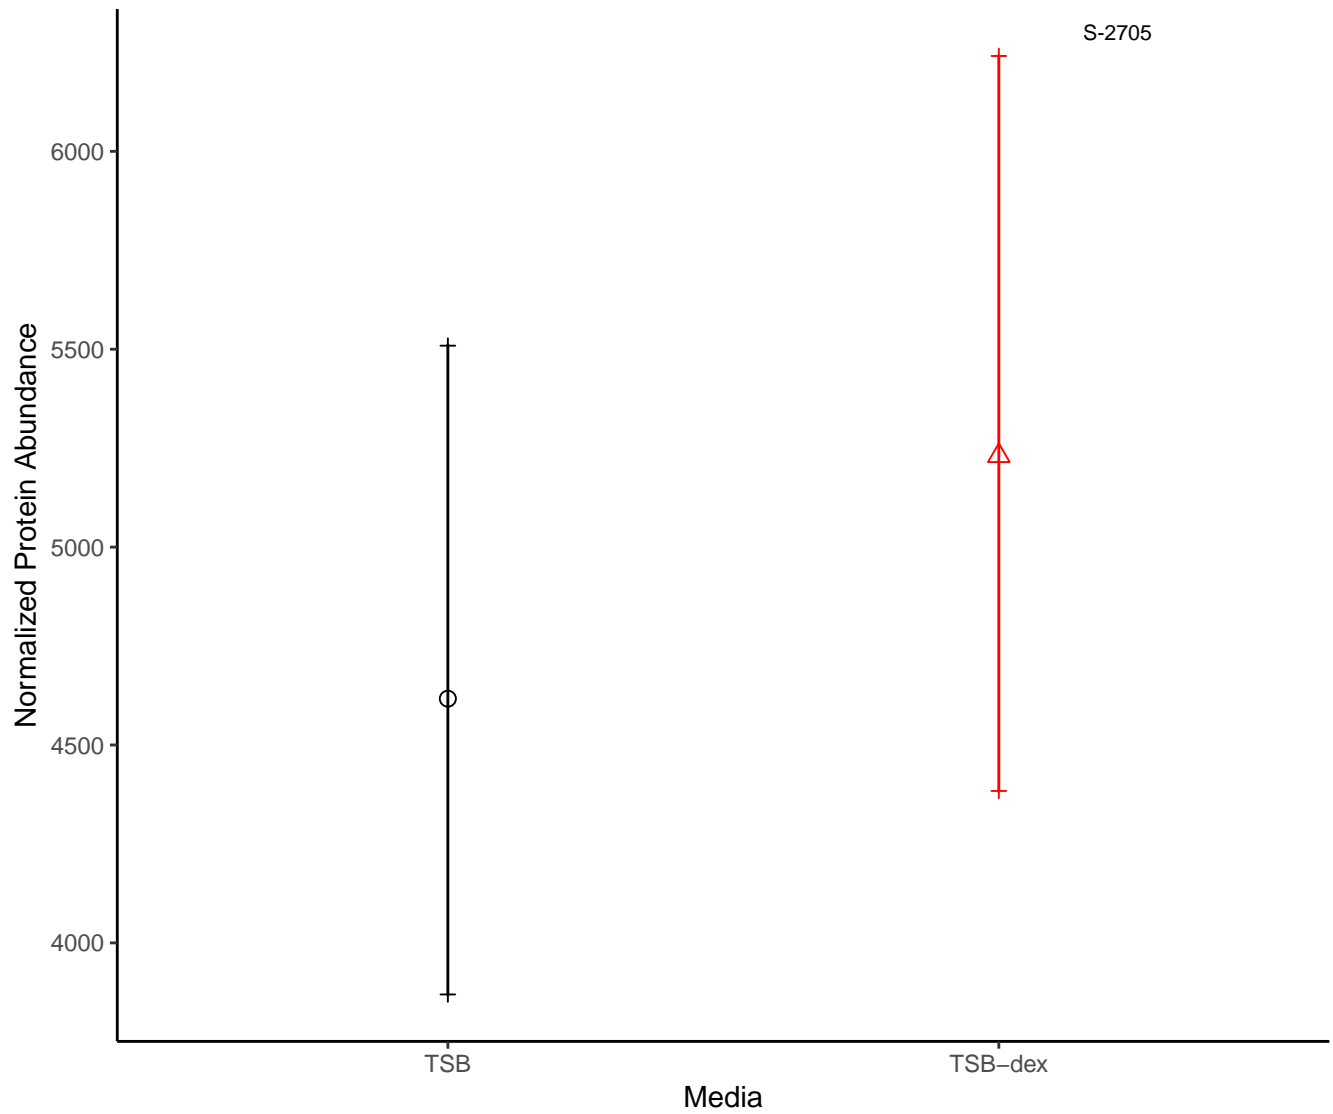

⊕ TSB-dex

△ TSB

# LYTN\_STAAM

S-2706

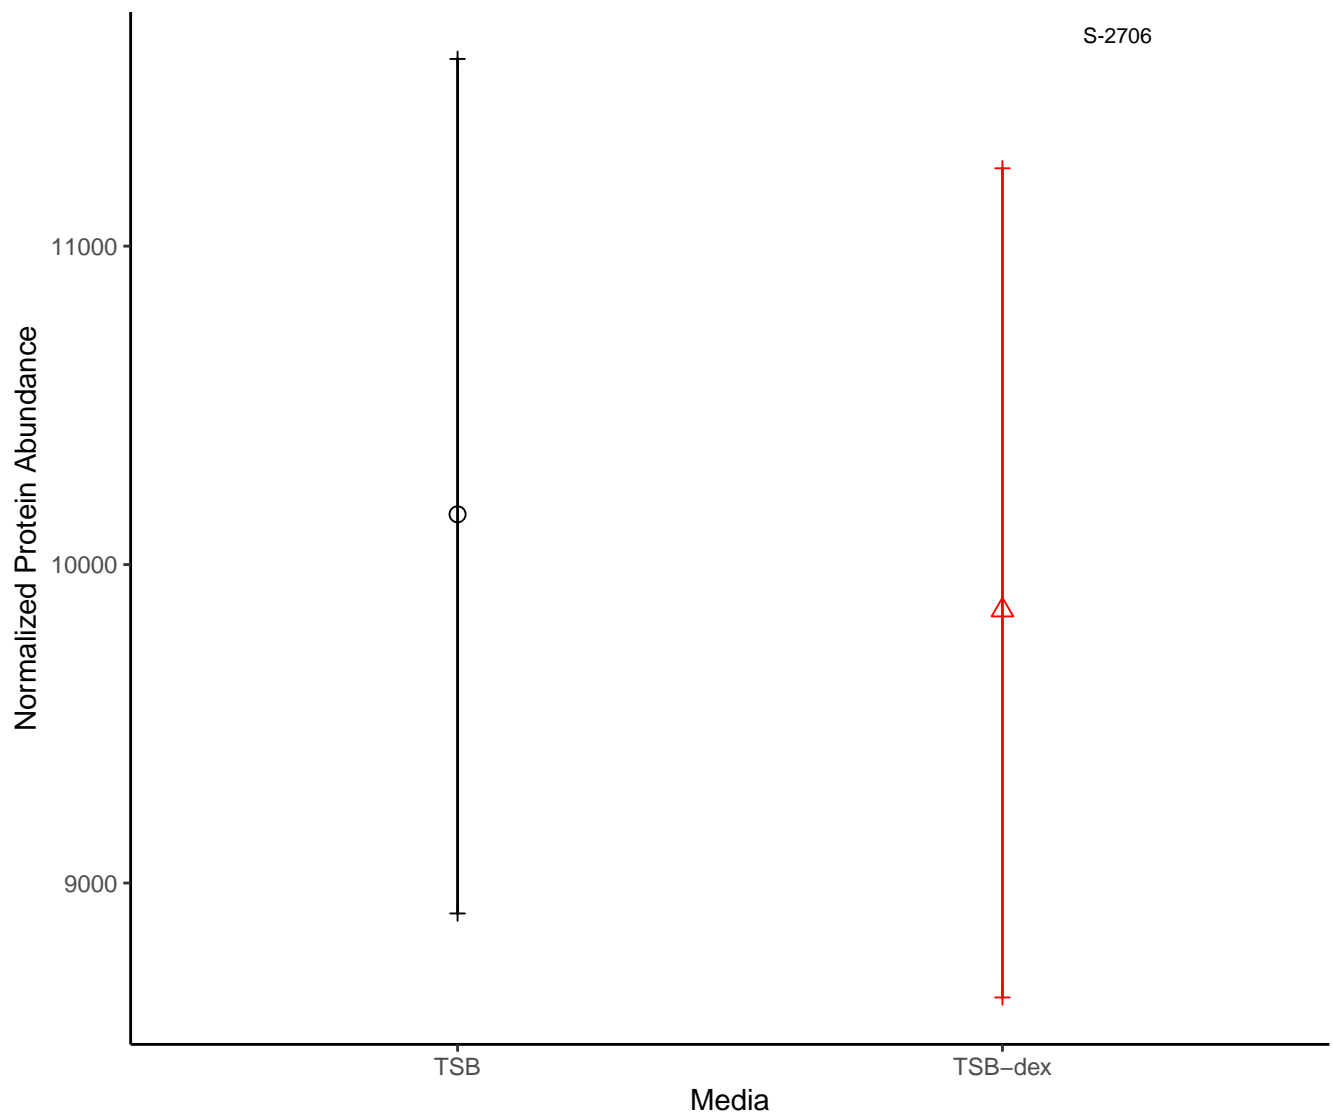

⊕ TSB-dex

△ TSB

# MAP\_STAAM

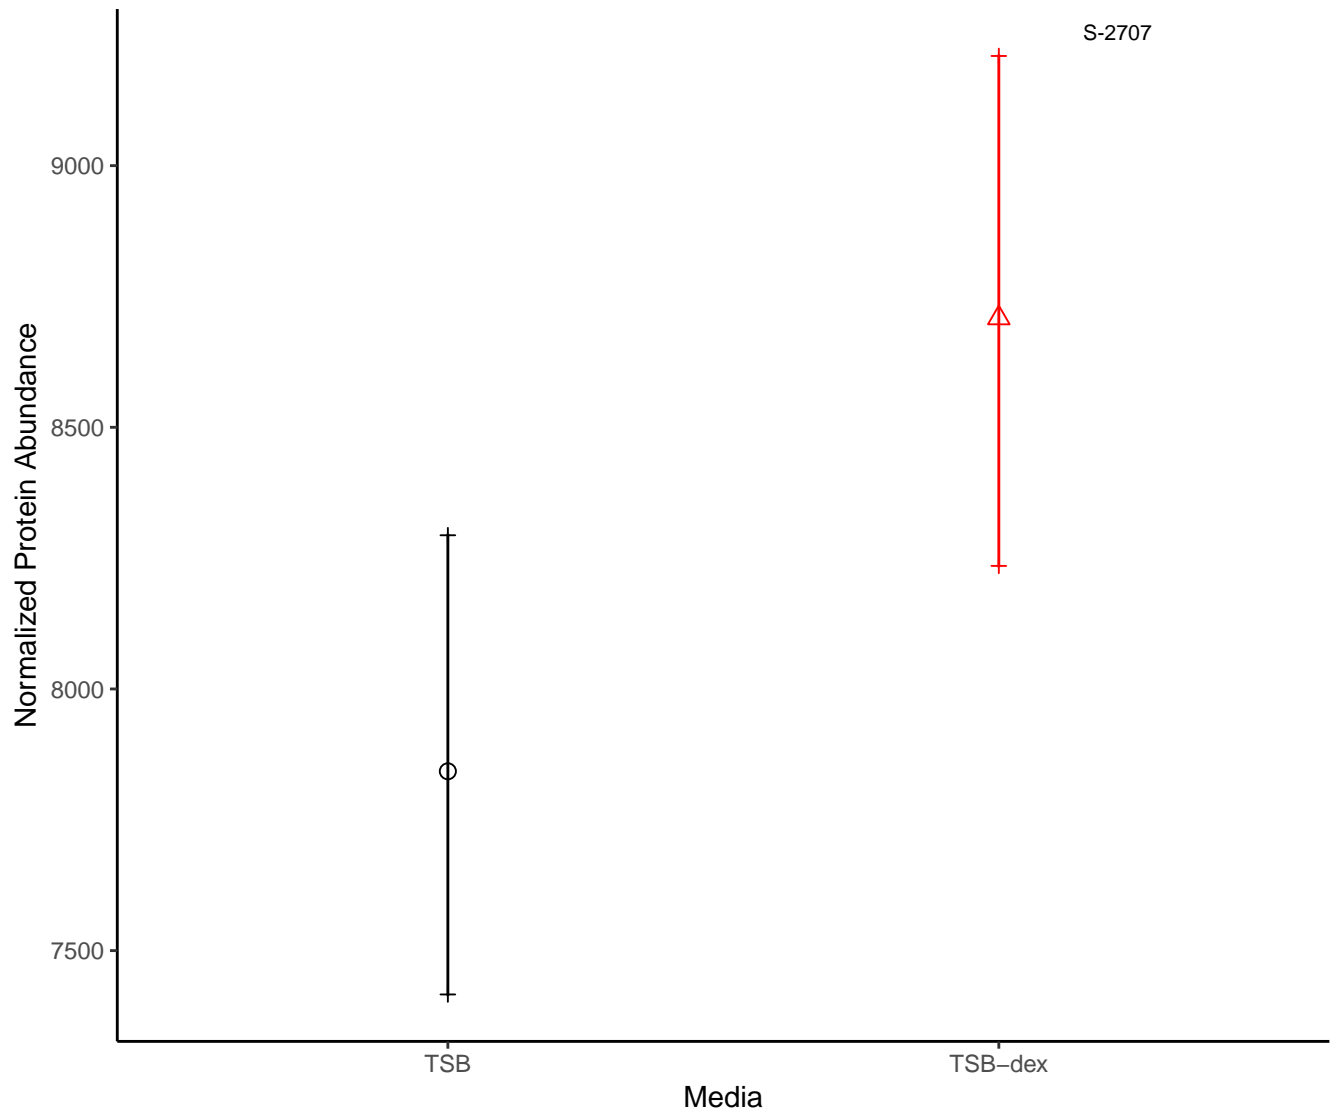

⊕ TSB-dex

△ TSB

# MAP1\_STAAM

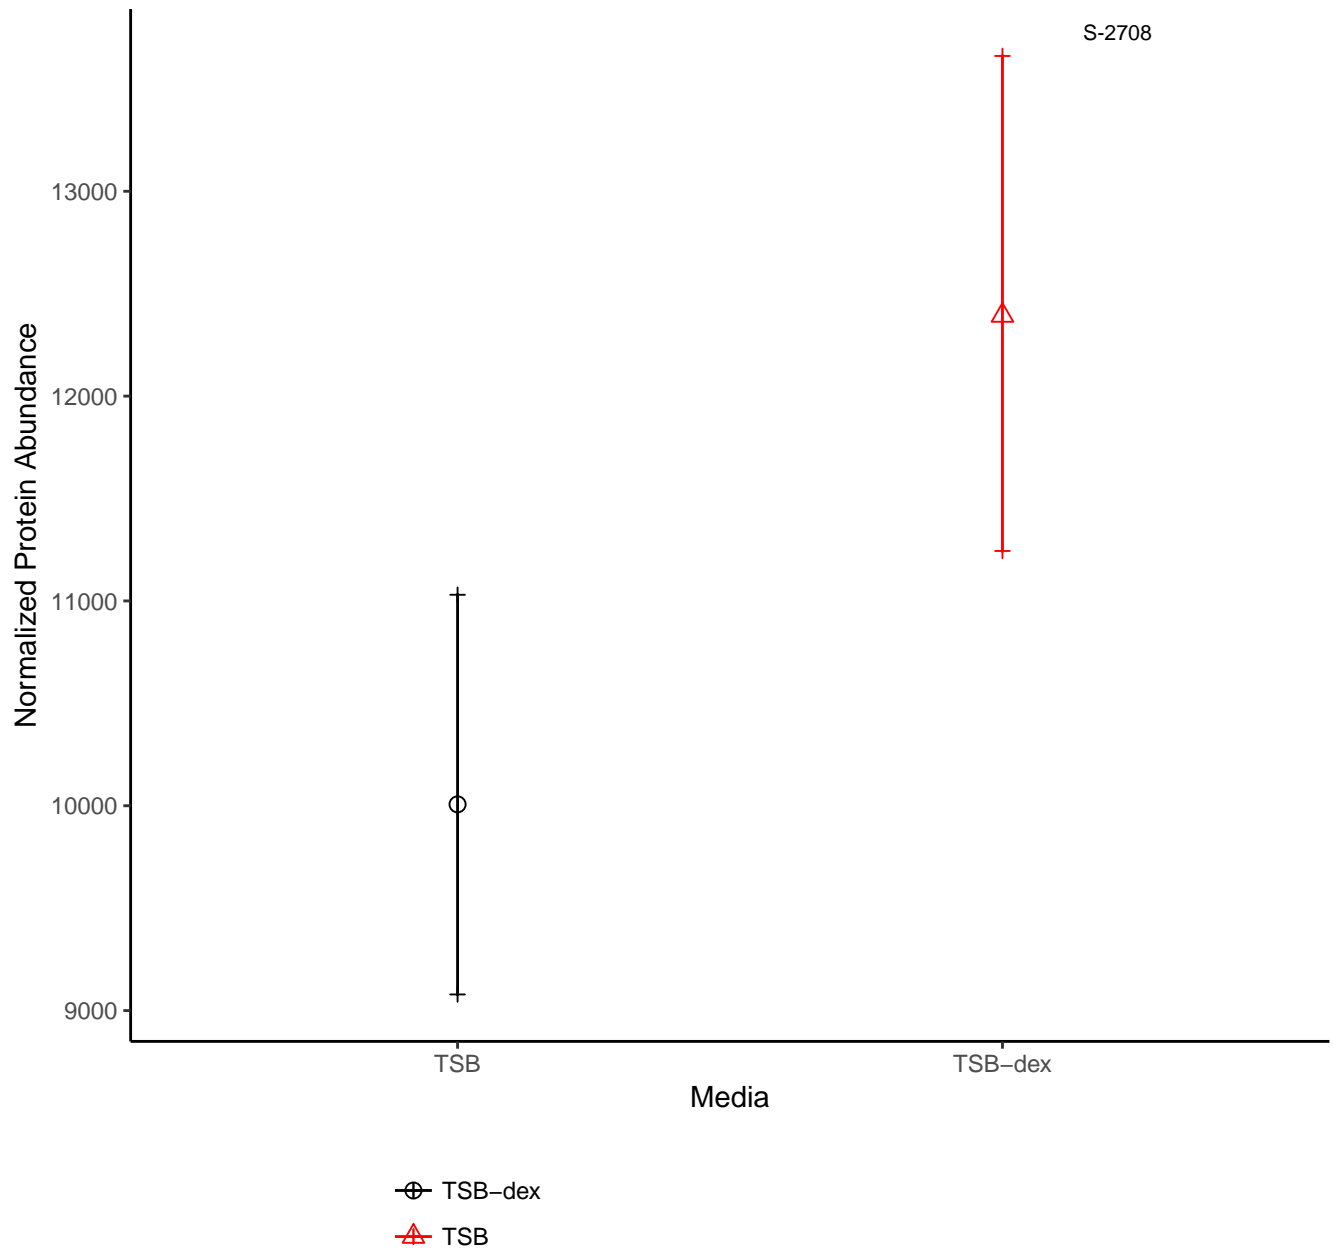

# MAZF\_STAAM

S-2709

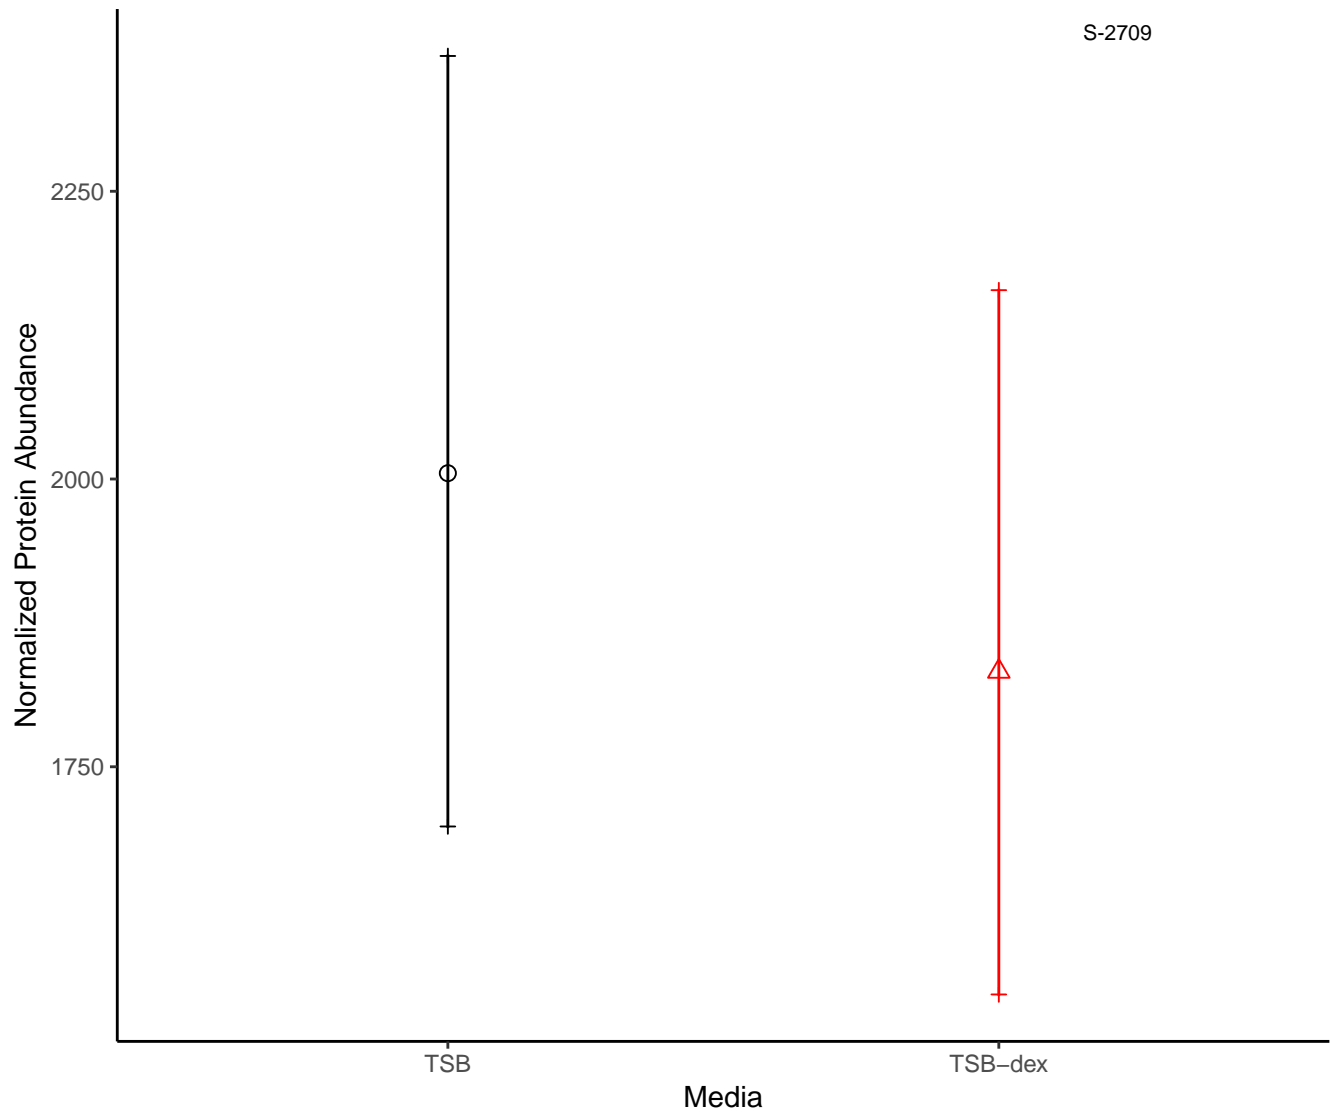

⊕ TSB-dex

△ TSB

# MENB\_STAAM

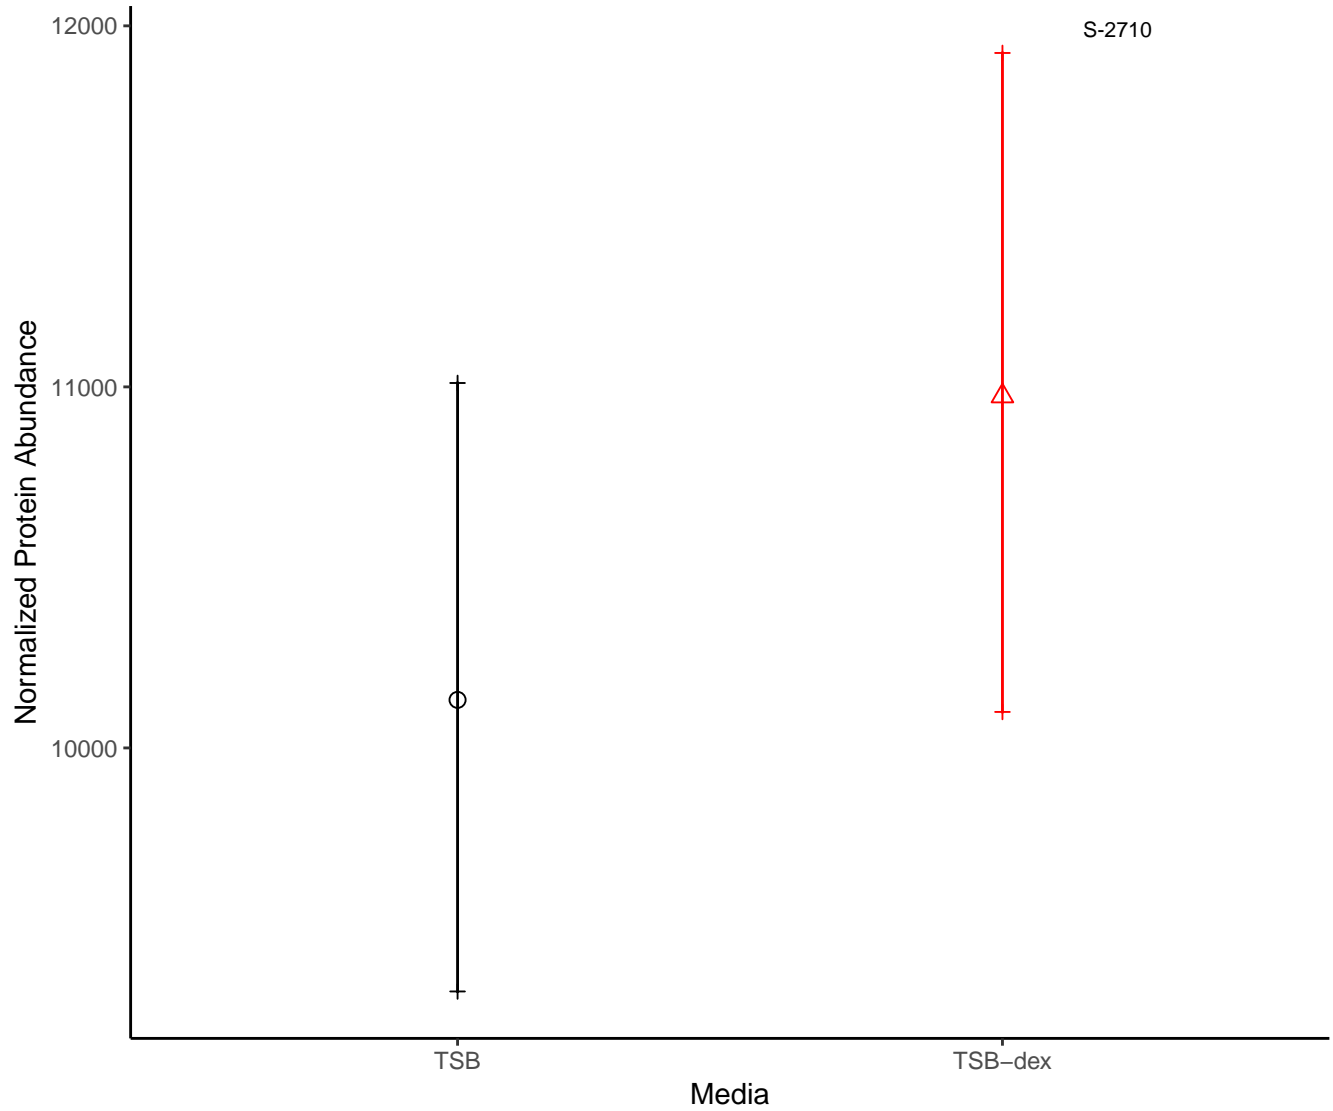

⊖ TSB-dex

△ TSB

# MENG\_STAAM

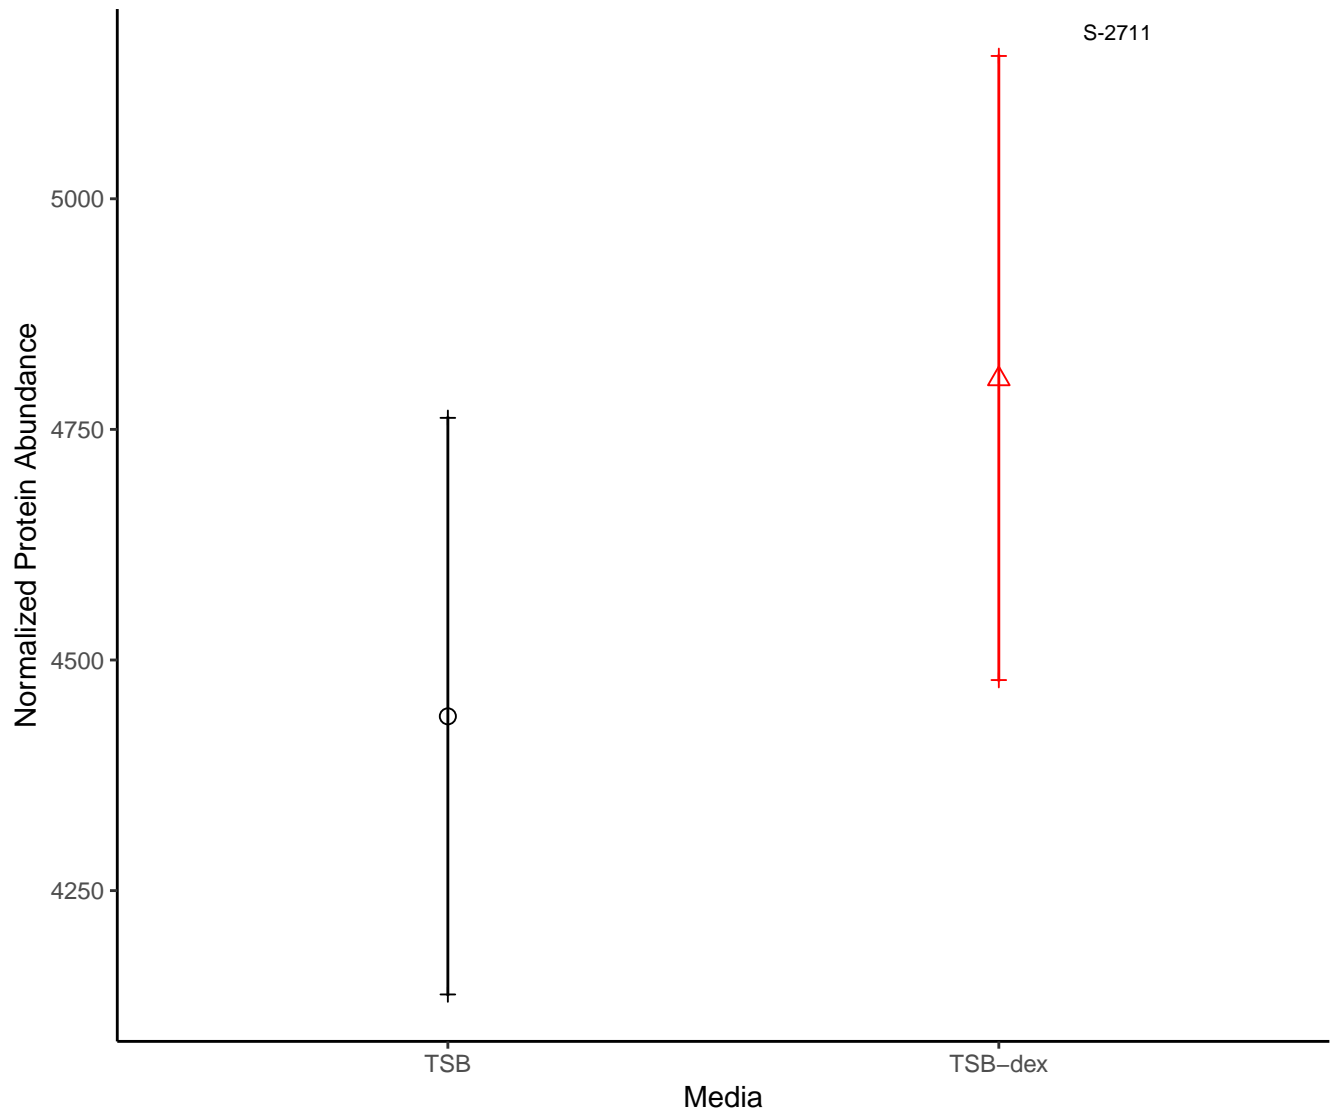

⊕ TSB-dex

△ TSB

# METK\_STAAM

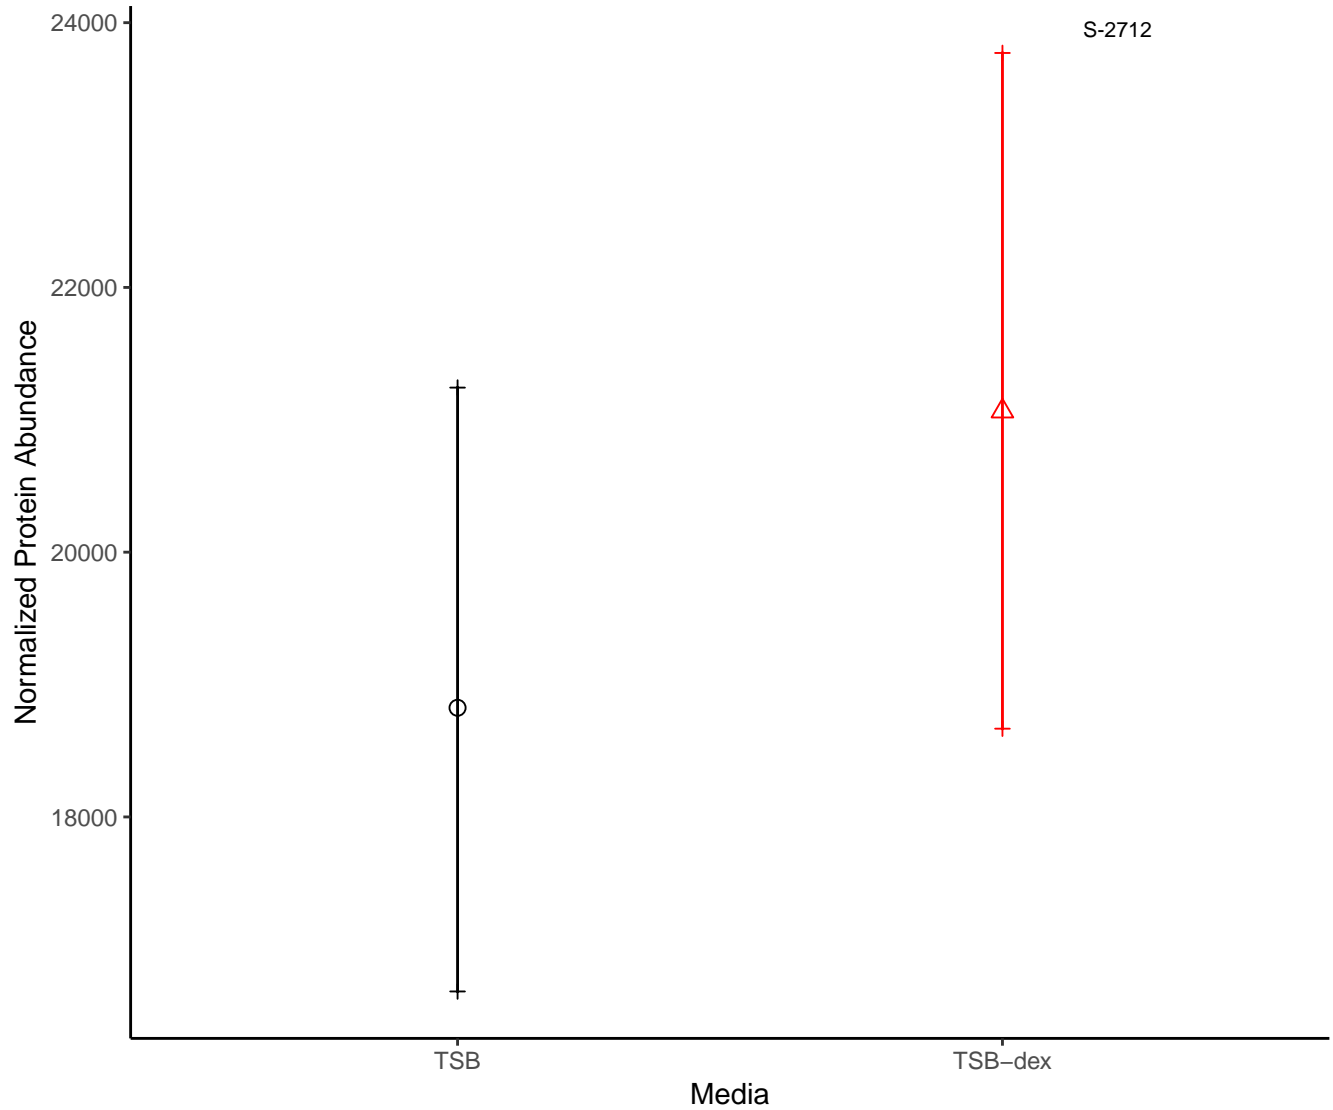

⊖ TSB-dex

△ TSB



# METN2\_STAAM

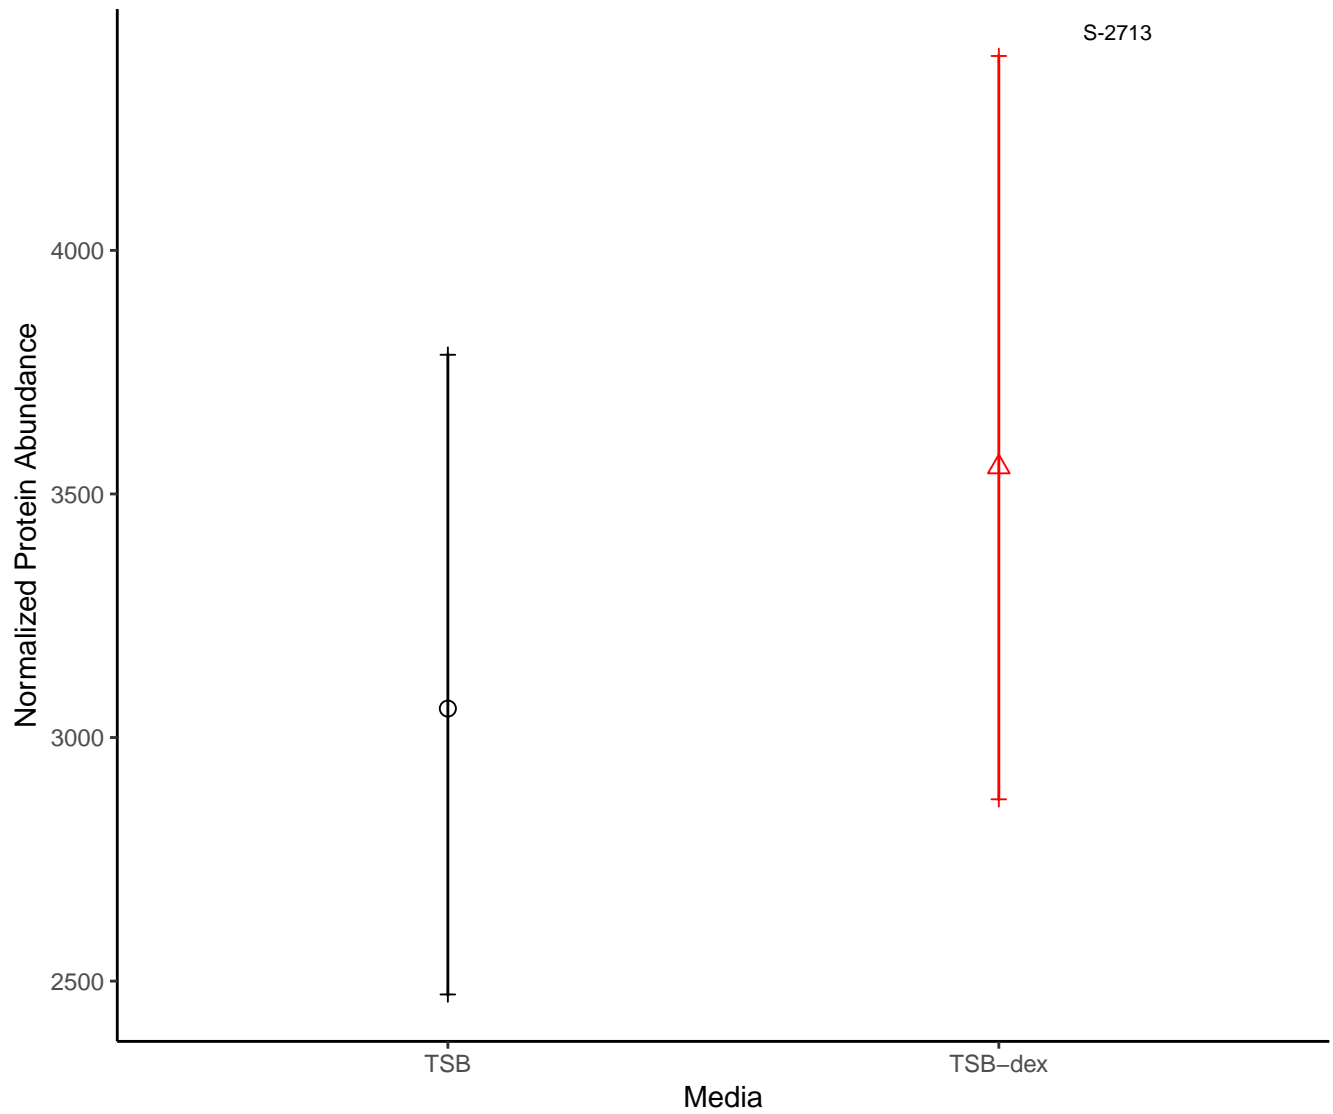

⊕ TSB-dex

△ TSB

# MGRA\_STAAM

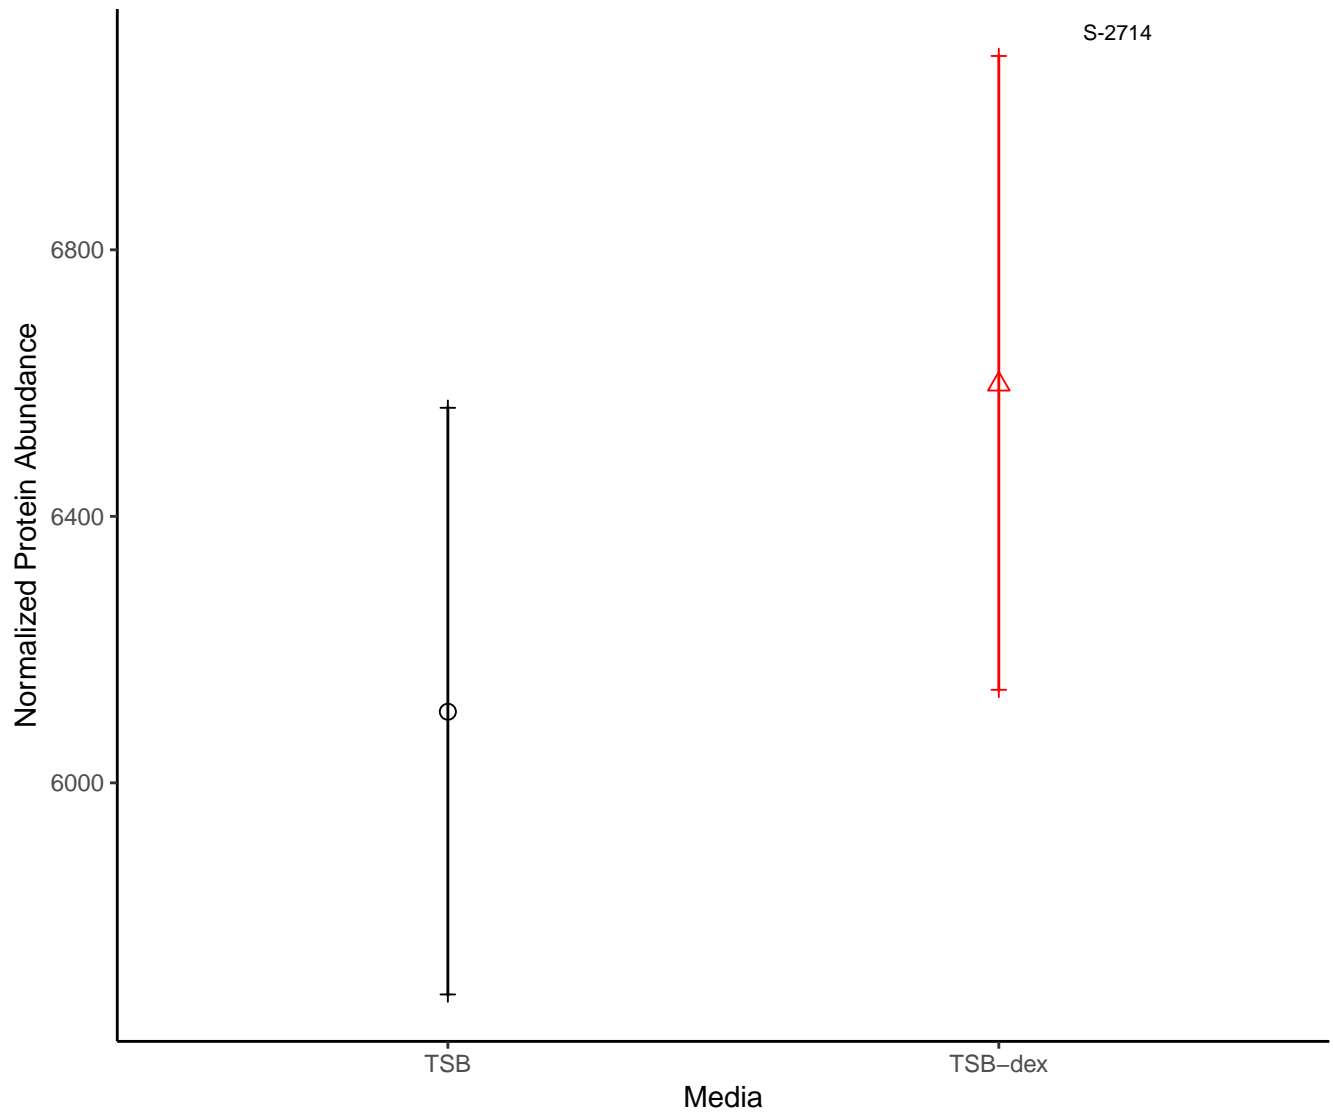

⊕ TSB-dex

△ TSB

# MIAB\_STAAM

S-2715

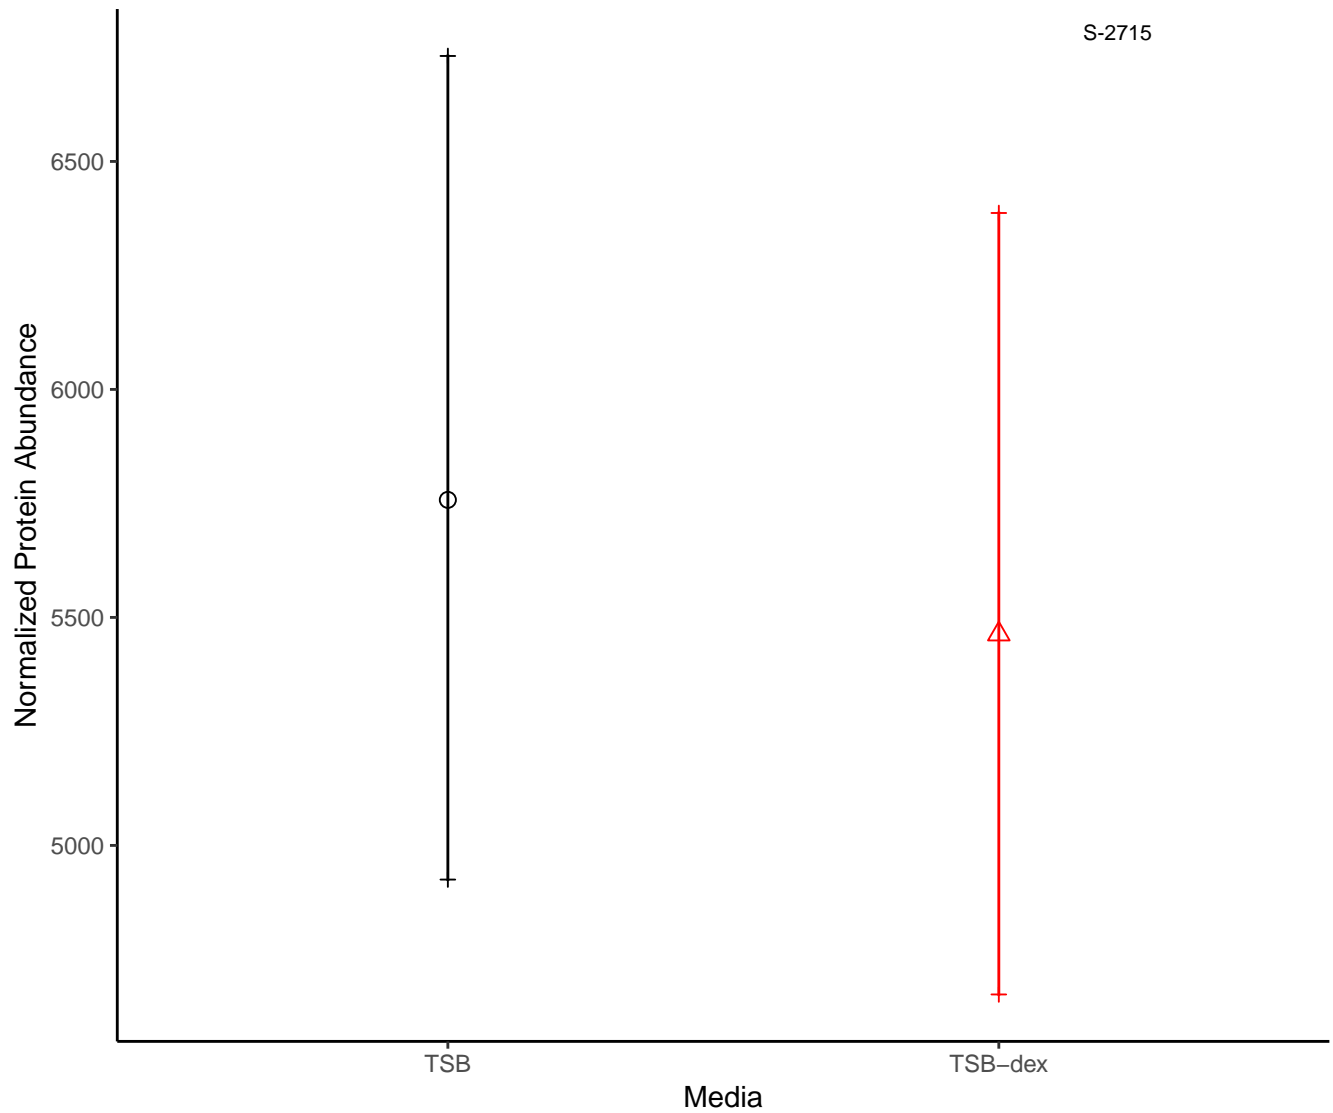

⊕ TSB-dex

△ TSB

# MNME\_STAAM

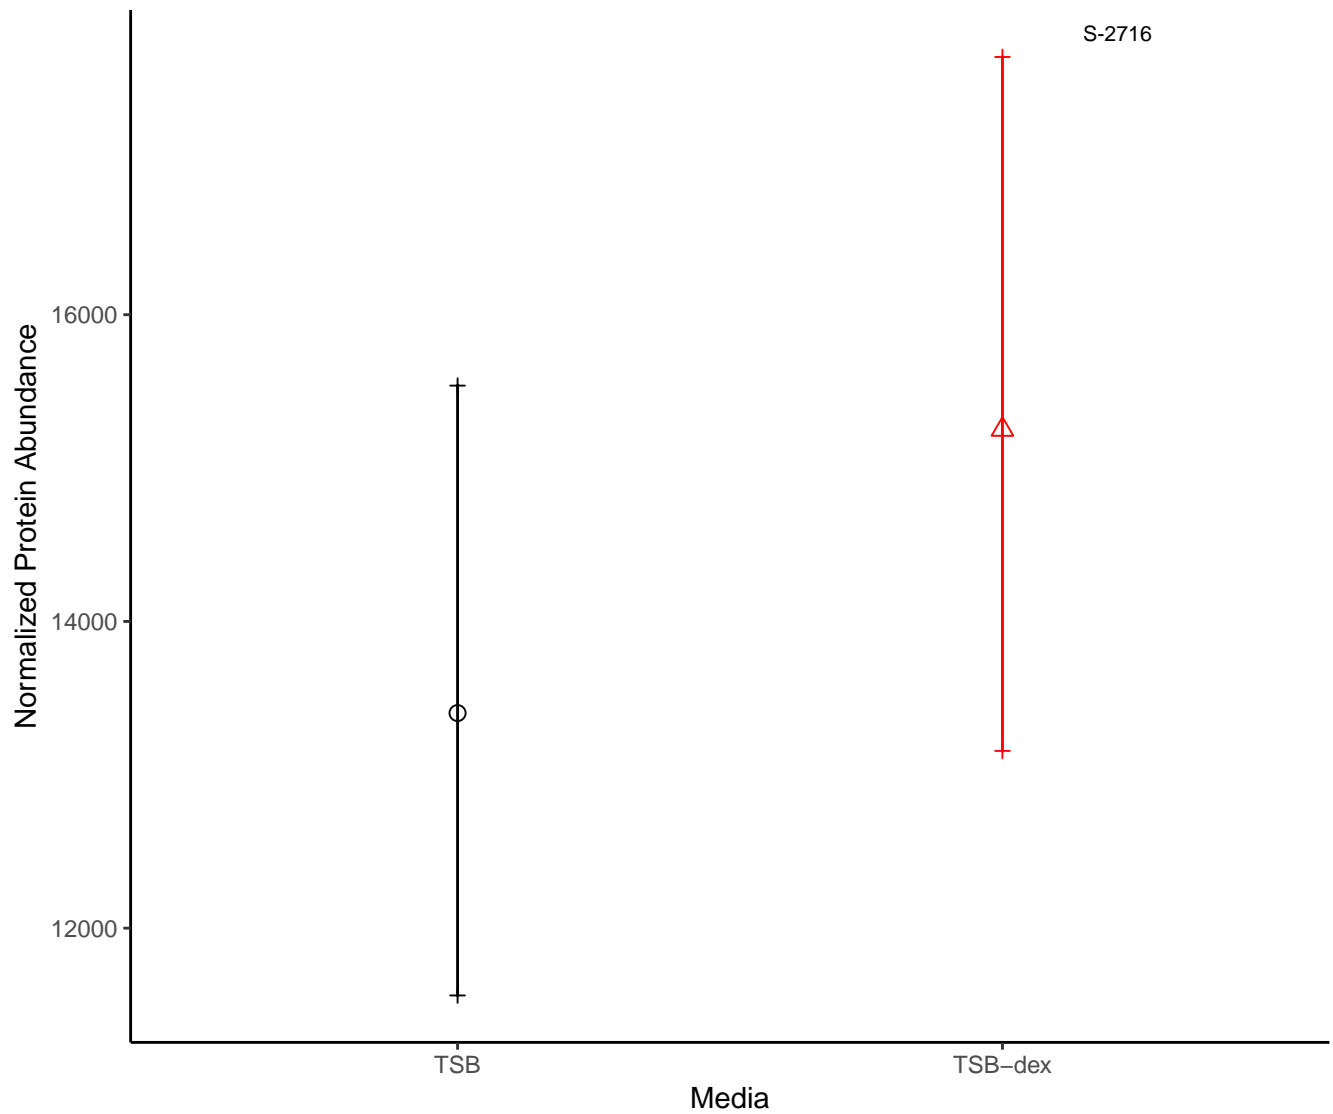

⊖ TSB-dex

△ TSB

# MNMG\_STAAM

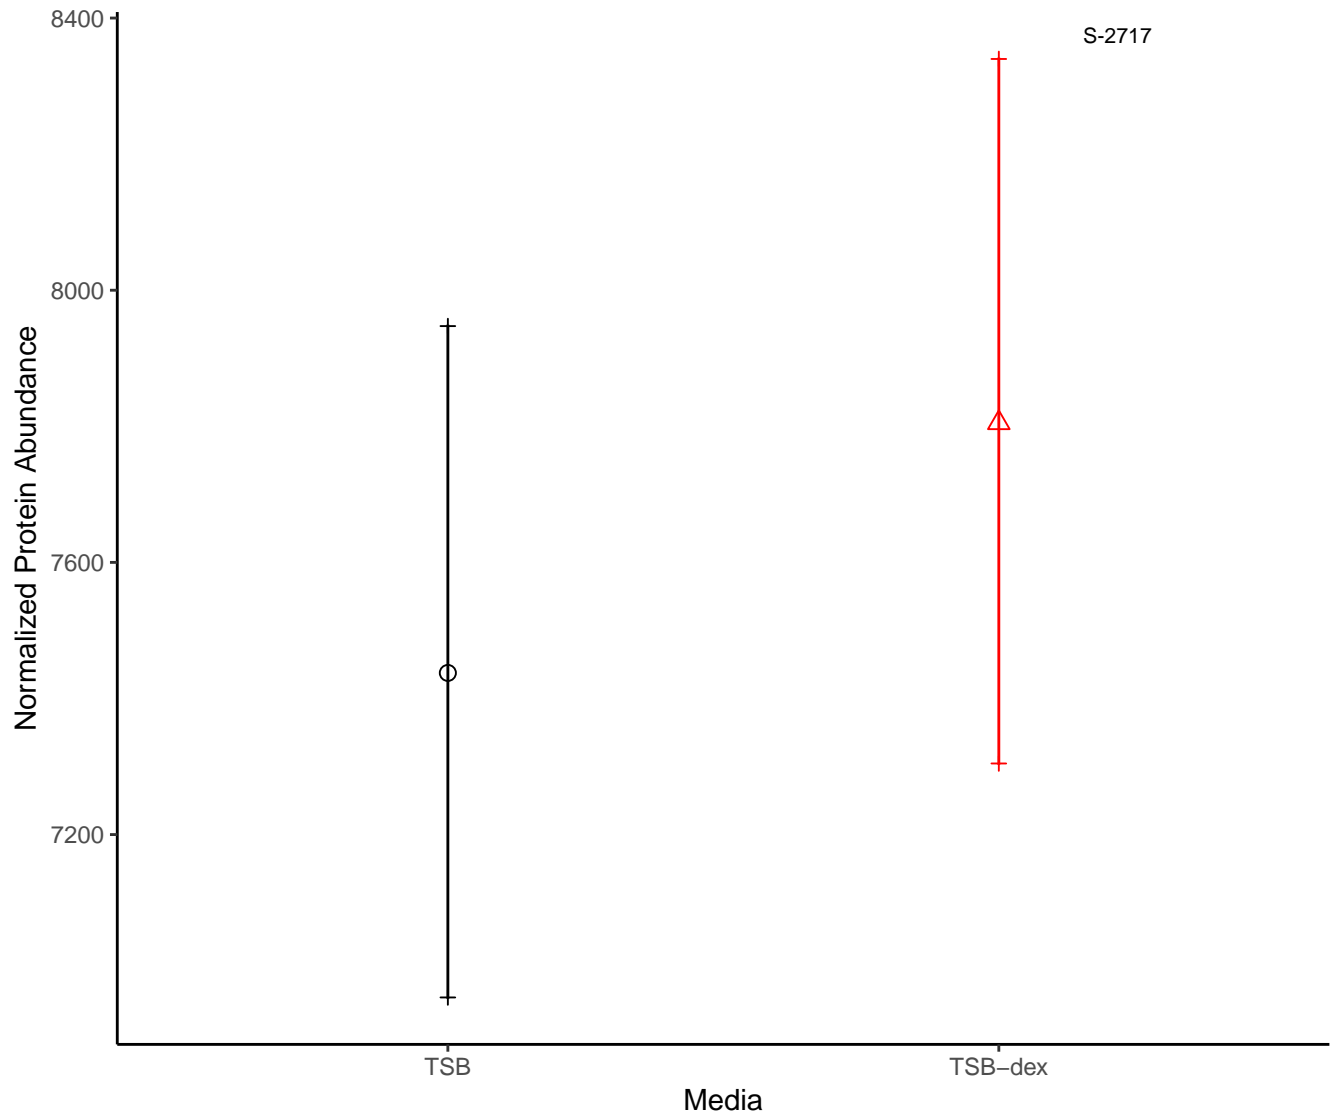

⊕ TSB-dex

△ TSB

# MOAC\_STAAM

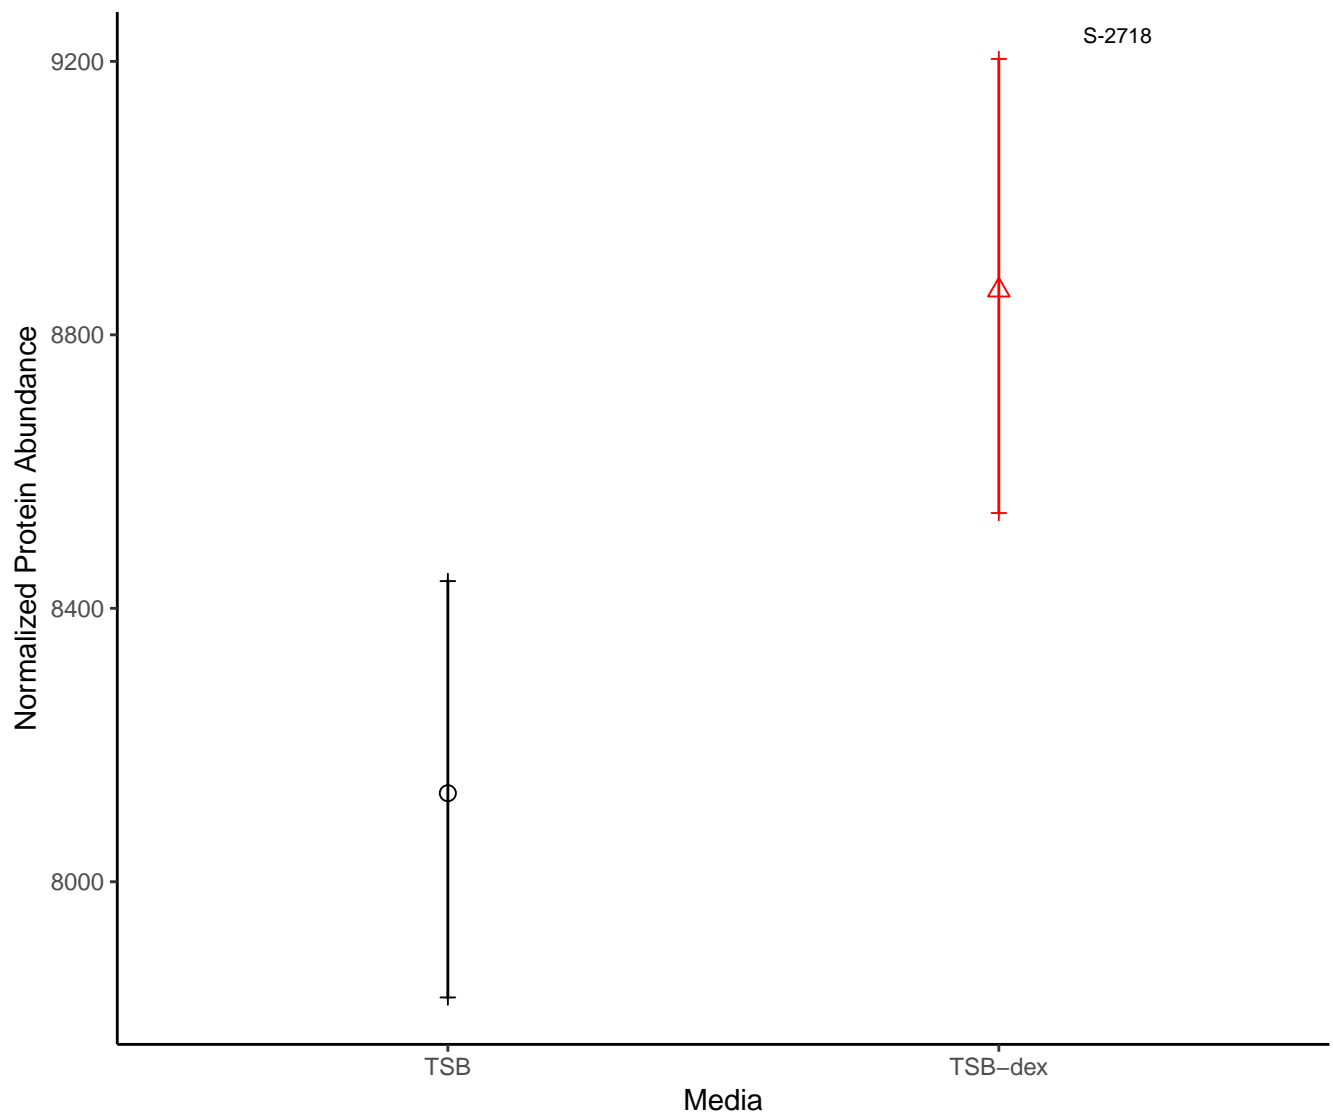

⊕ TSB-dex

△ TSB

# MOEA\_STAAM

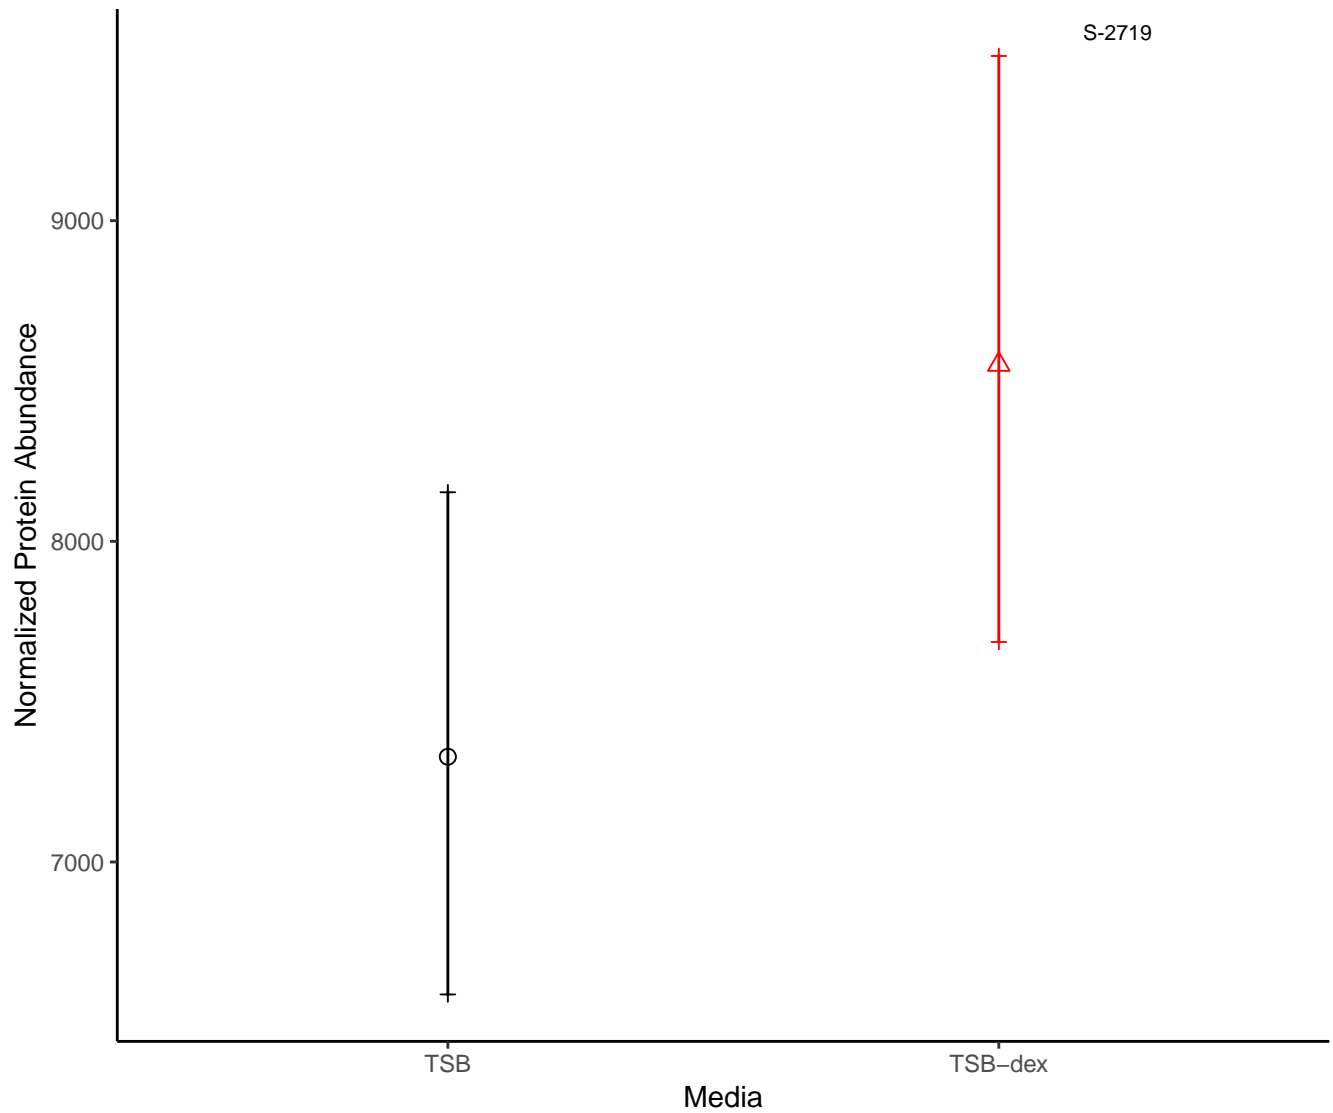

⊕ TSB-dex

△ TSB

# MQO2\_STAAM

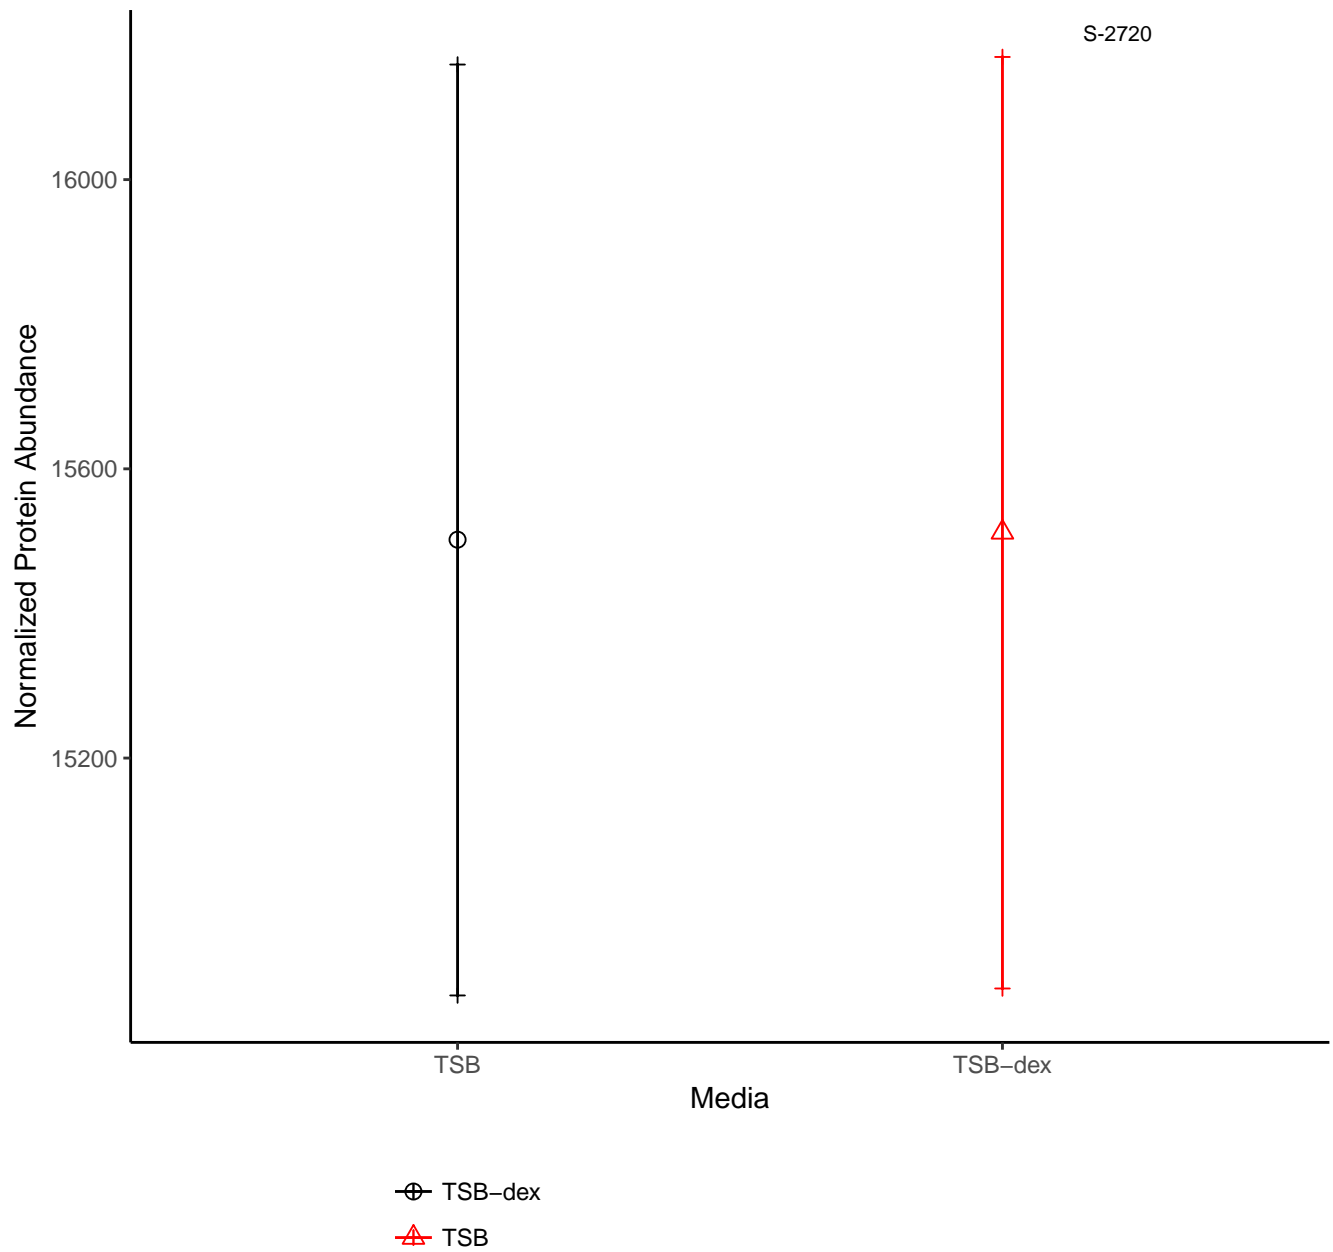



# MSRA1\_STAAM

S-2721

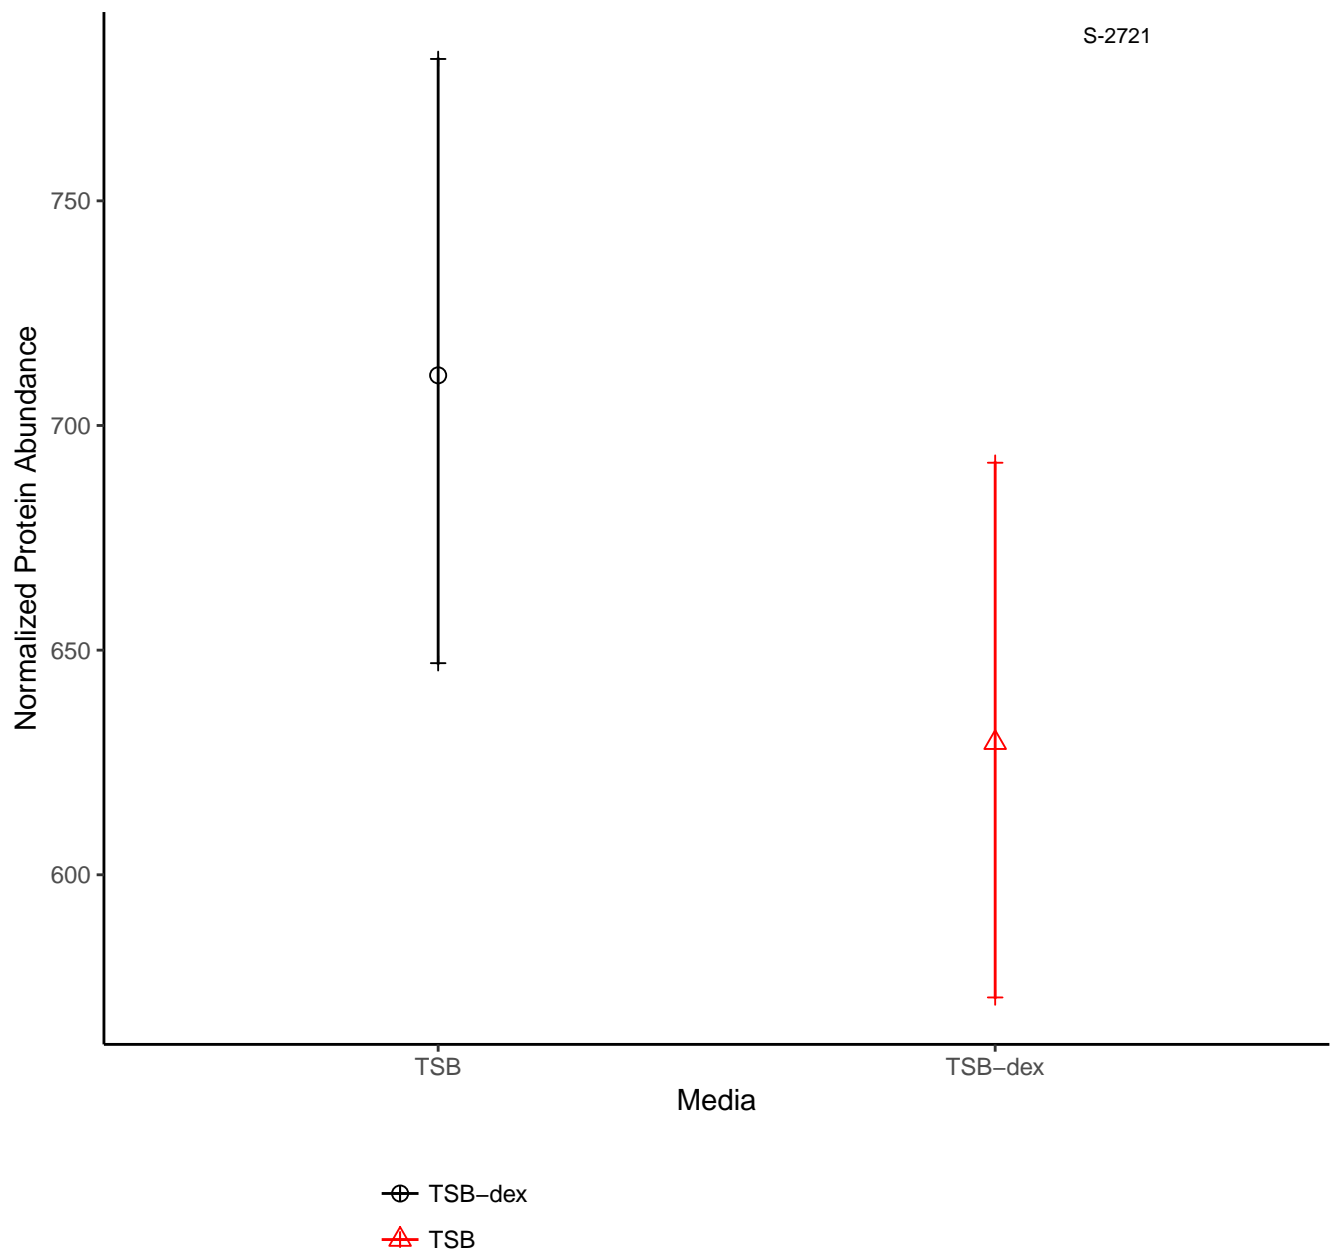

# MSRA2\_STAAM

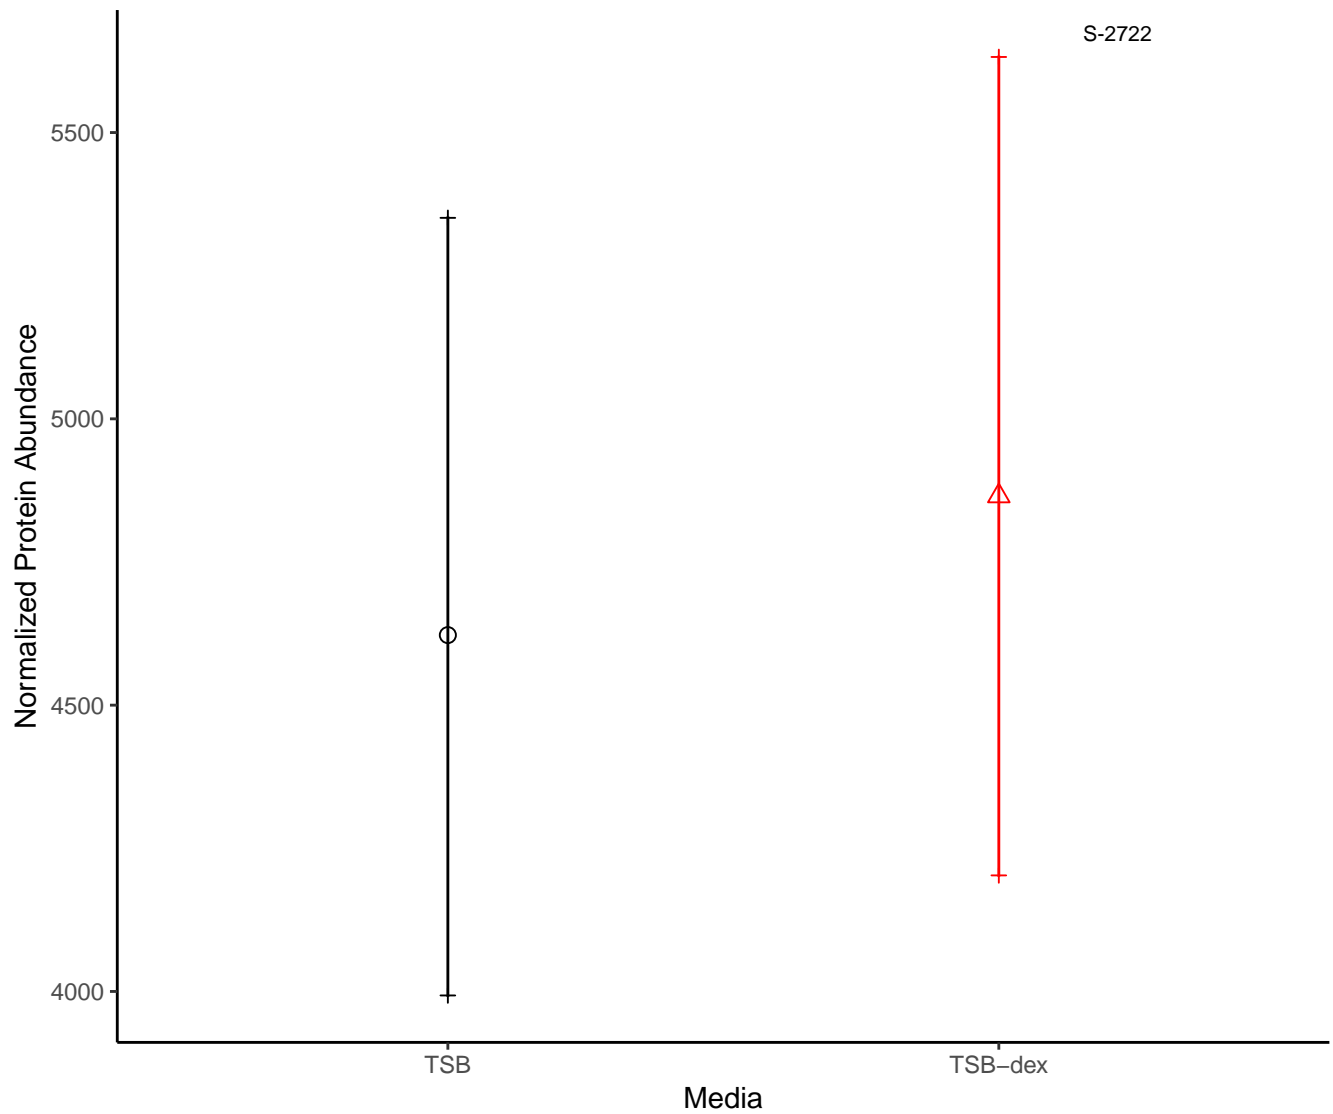

⊕ TSB-dex

△ TSB

# MSRB\_STAAM

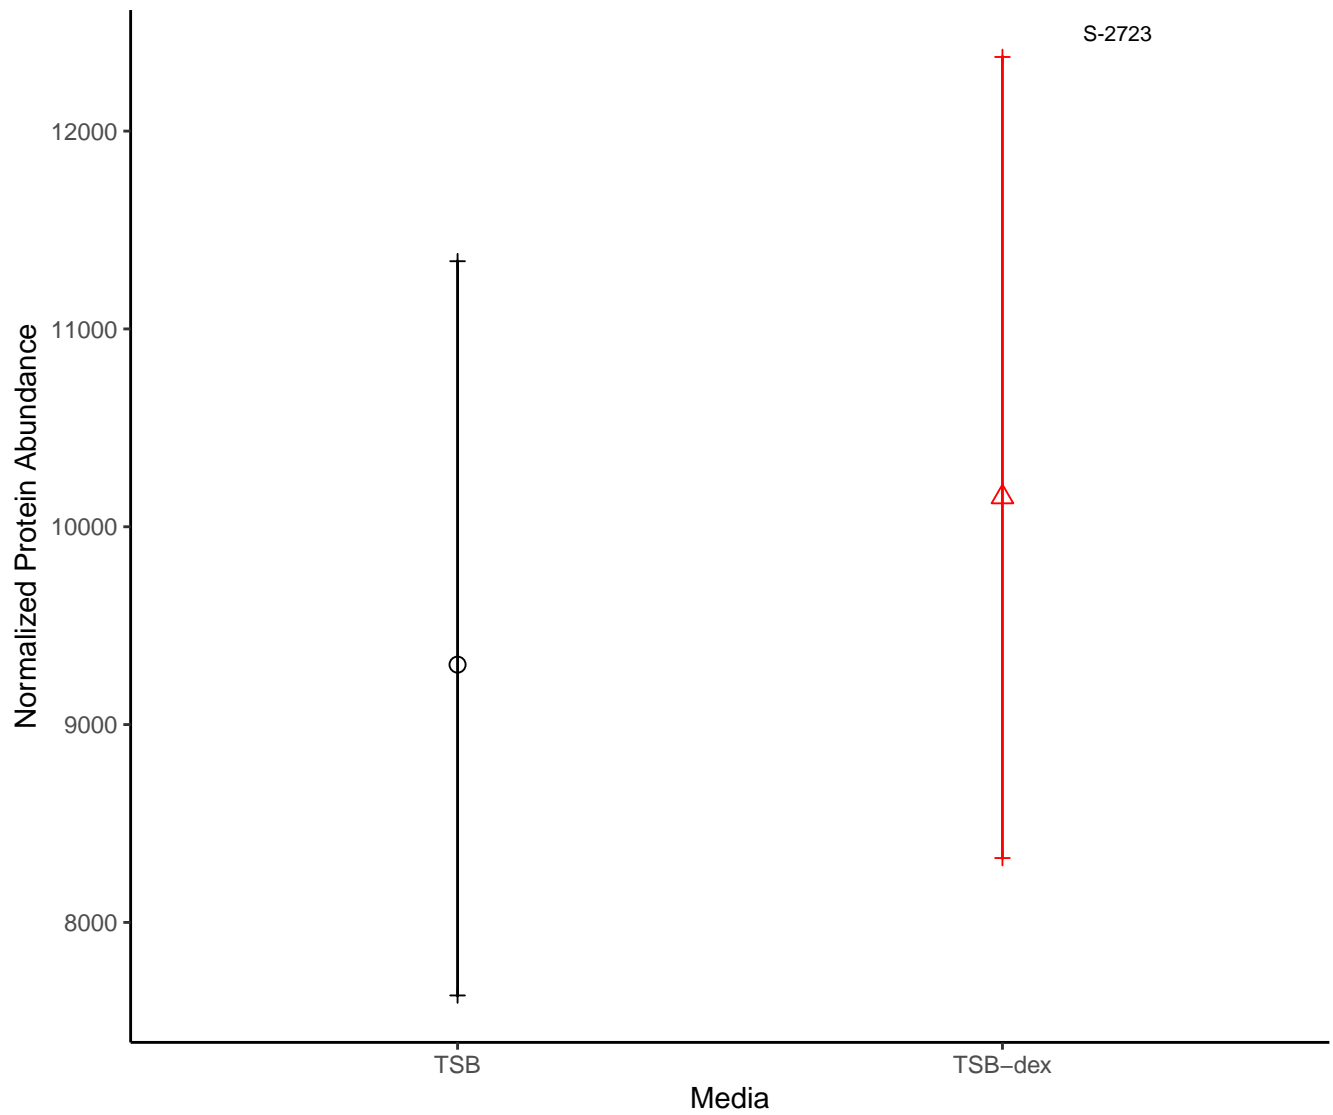

⊕ TSB-dex

△ TSB

# MTLD\_STAAM

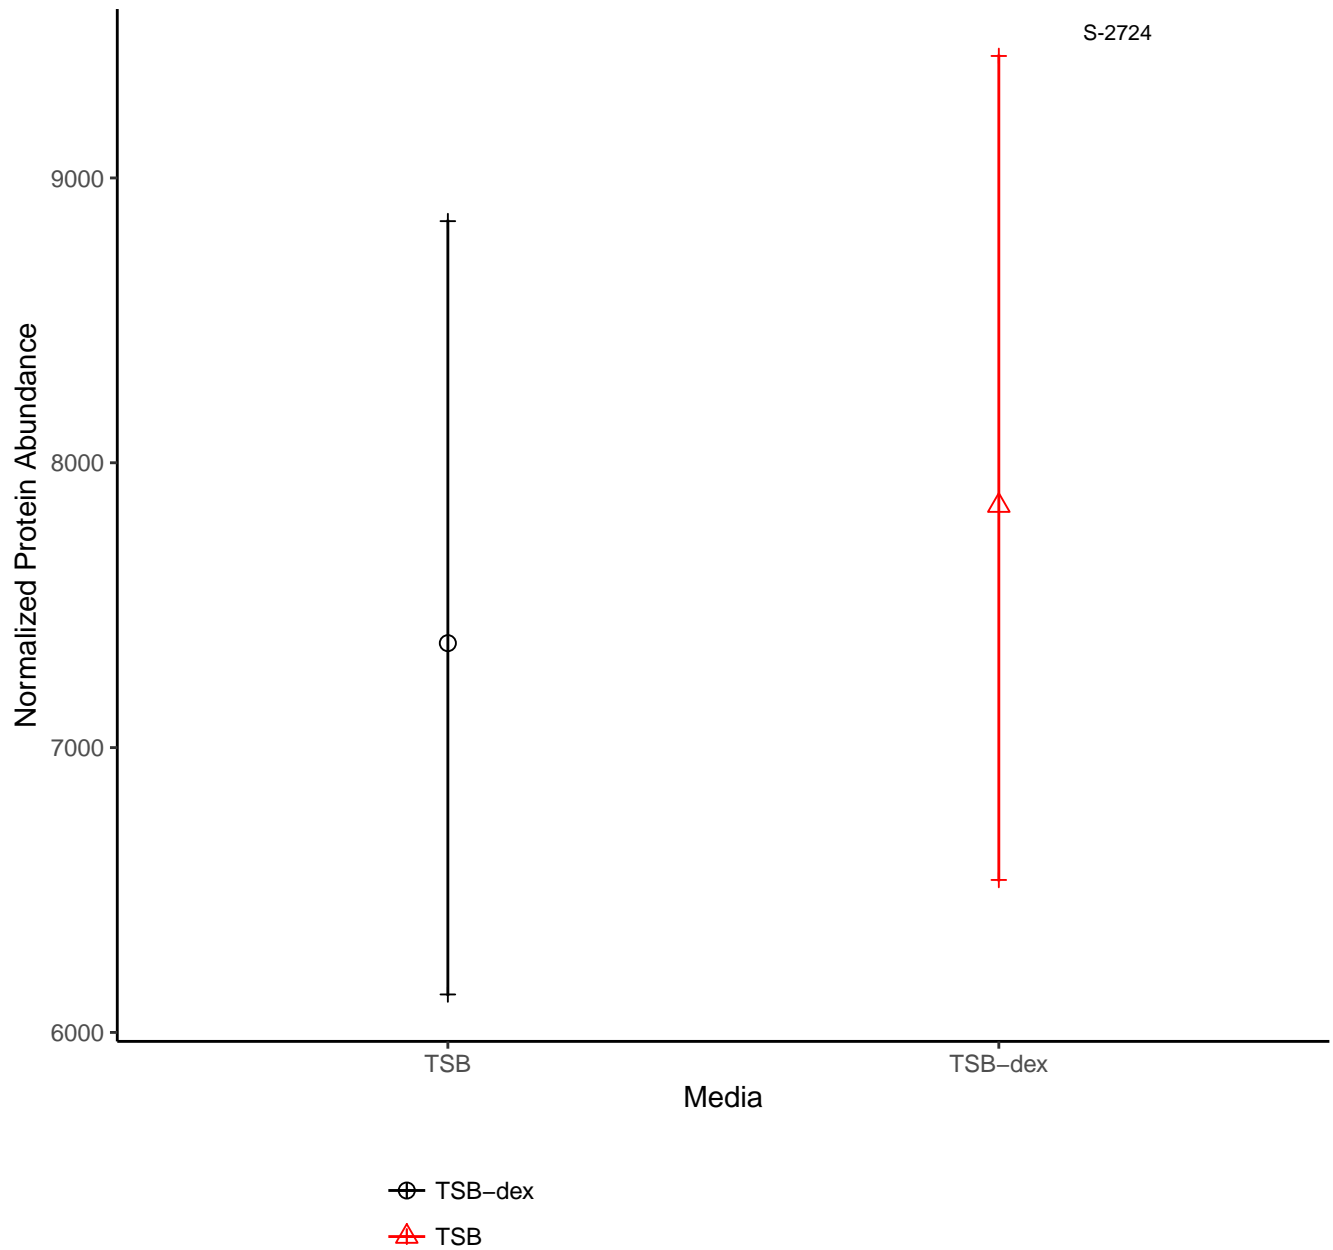

# MTNN\_STAAM

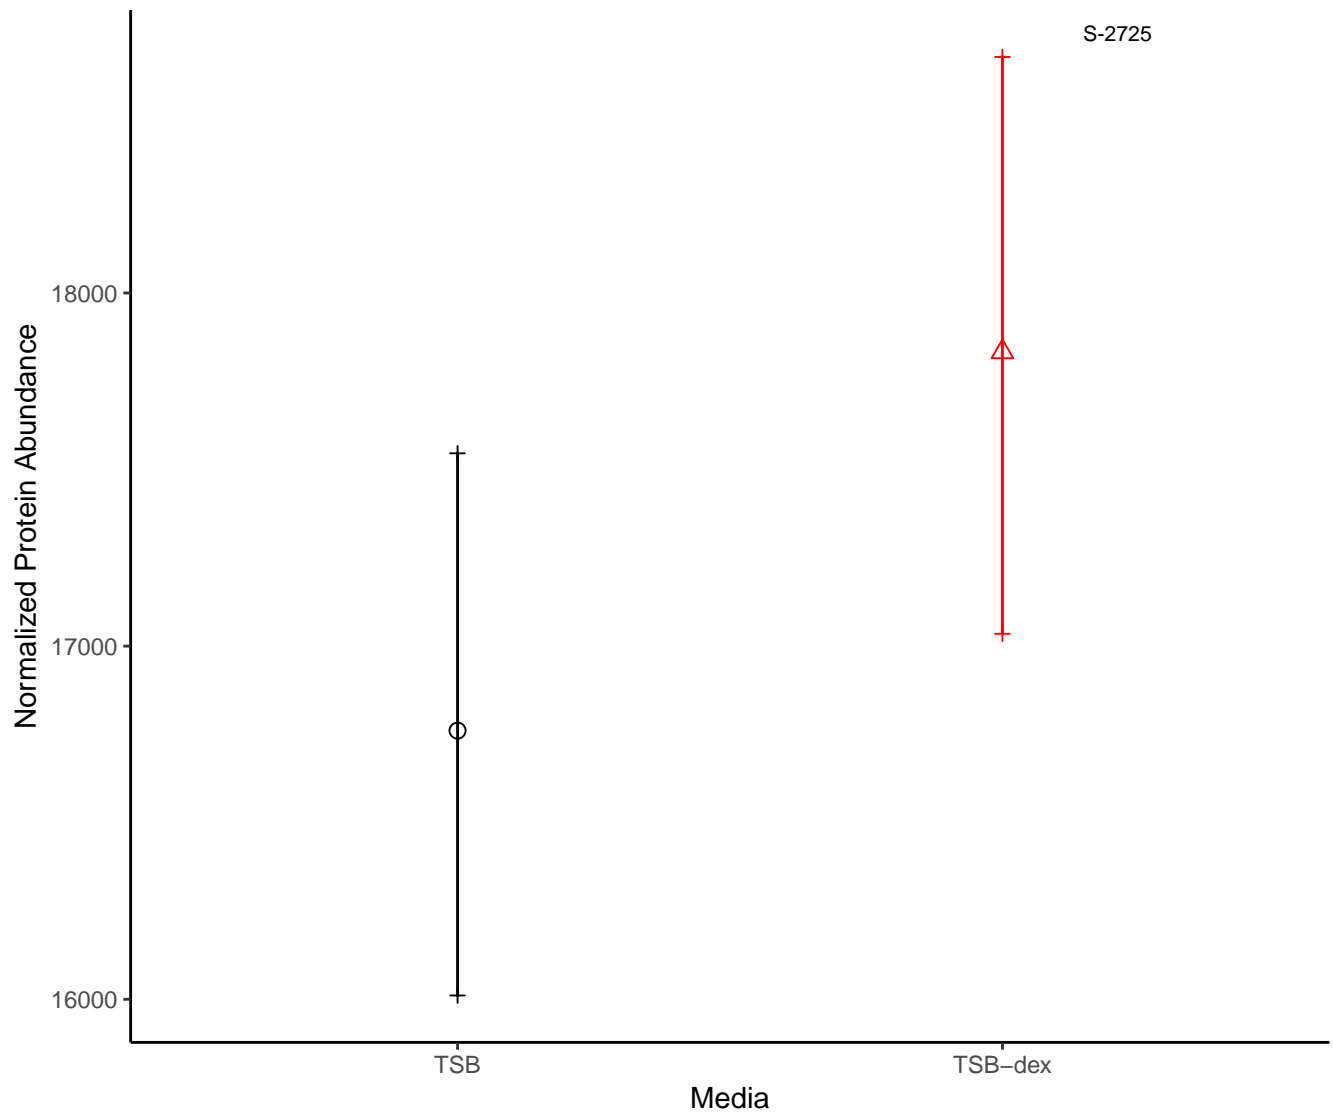

⊕ TSB-dex

△ TSB

# MURA1\_STAAM

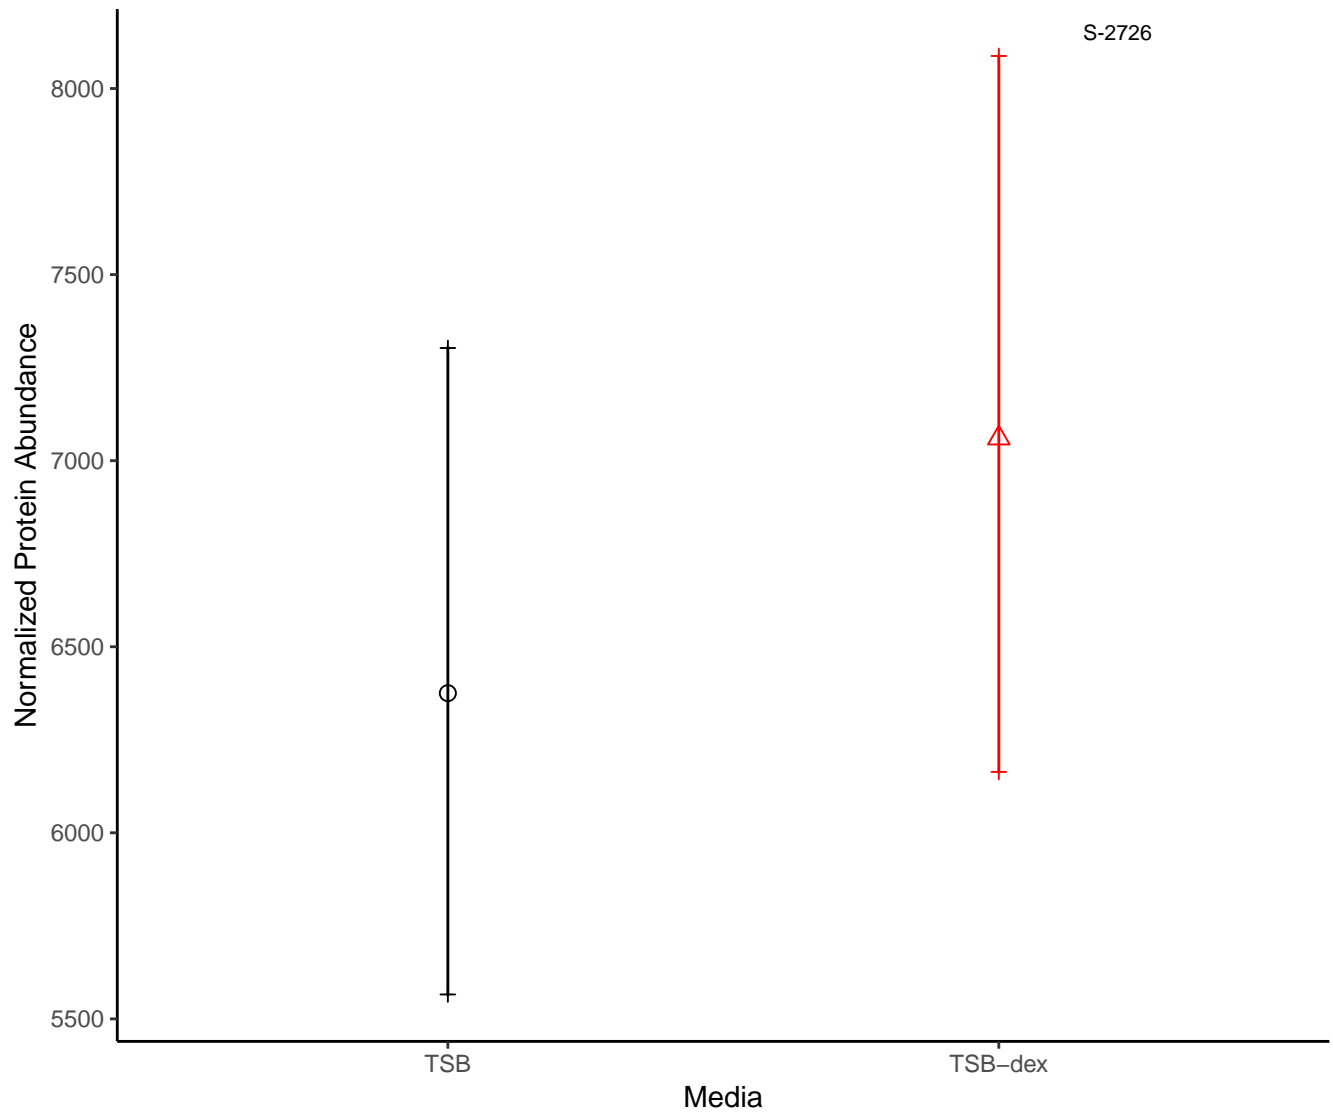

S-2726

⊕ TSB-dex

△ TSB

# MURA2\_STAAM

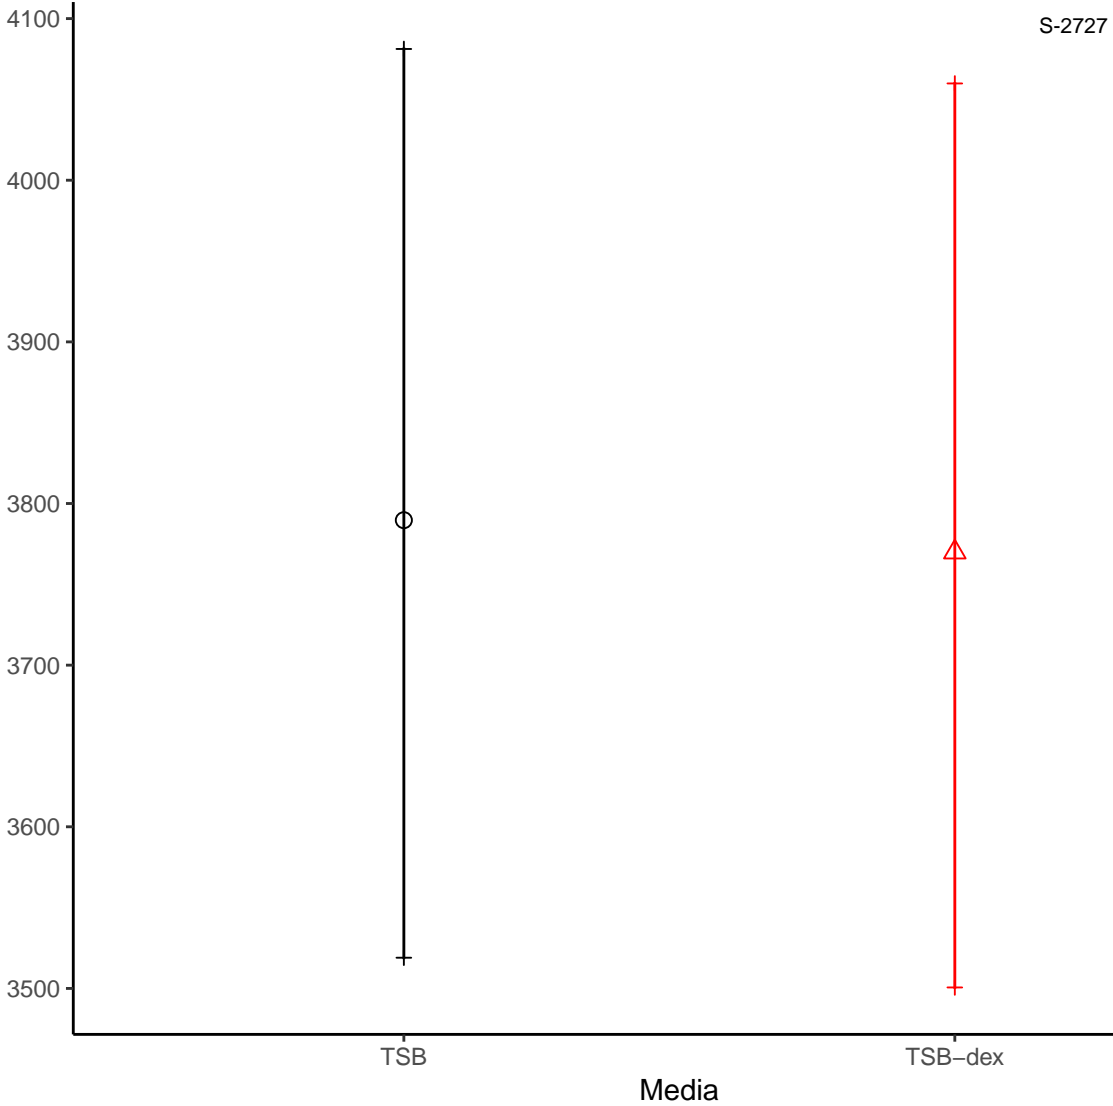

⊕ TSB-dex

△ TSB

# MURC\_STAAM

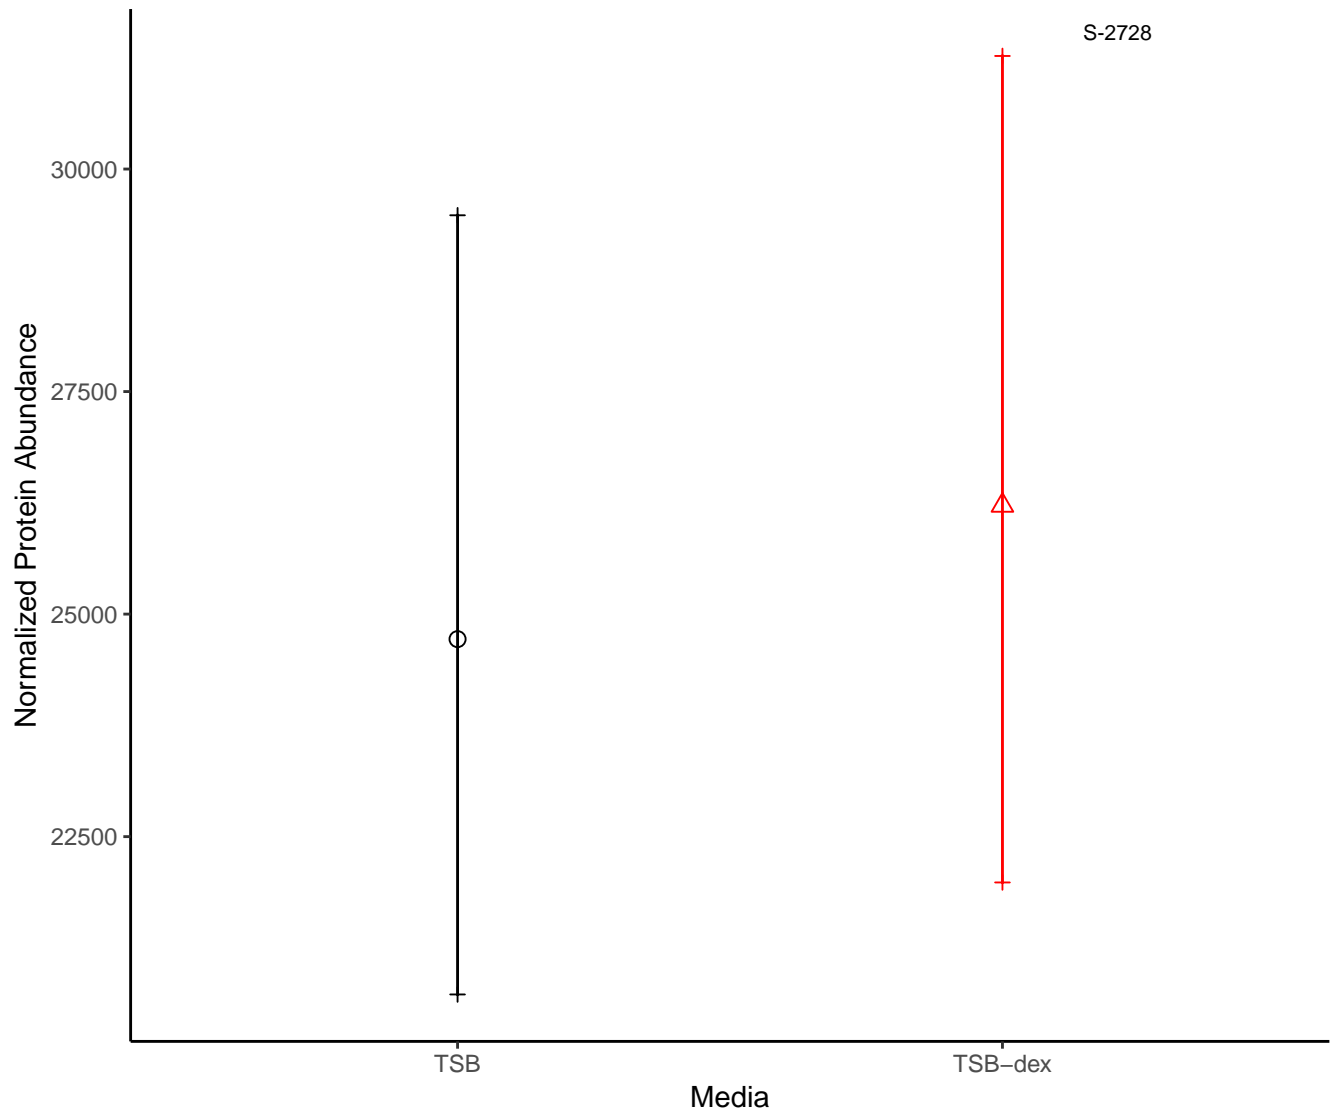

⊕ TSB-dex

△ TSB



# MURD\_STAAM

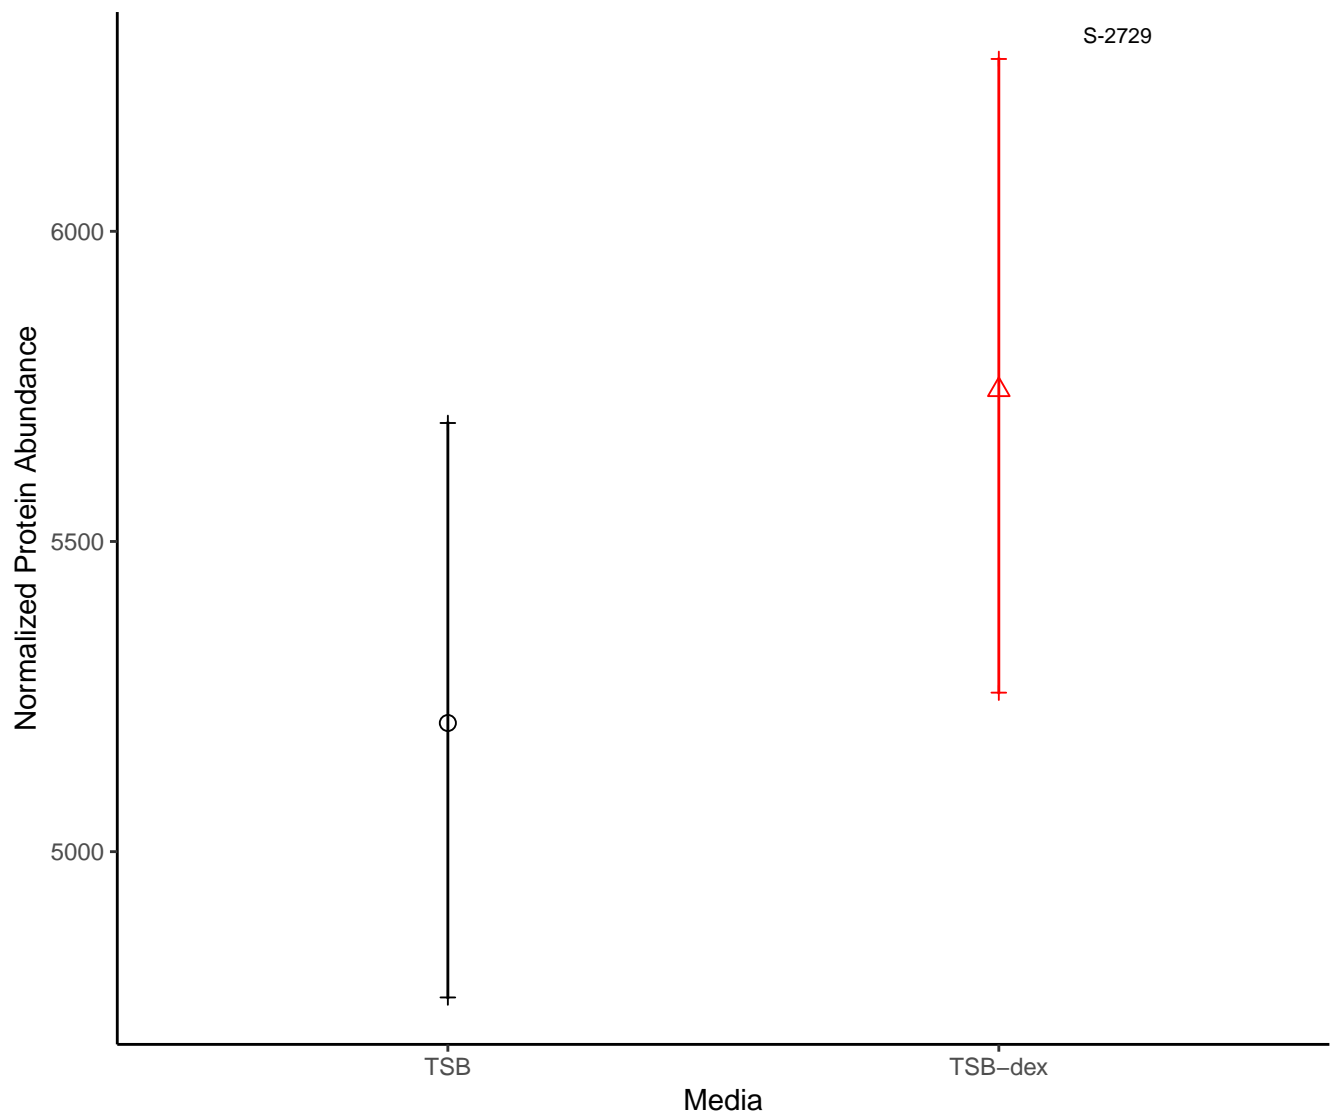

⊕ TSB-dex

△ TSB

# MURE\_STAAM

S-2730

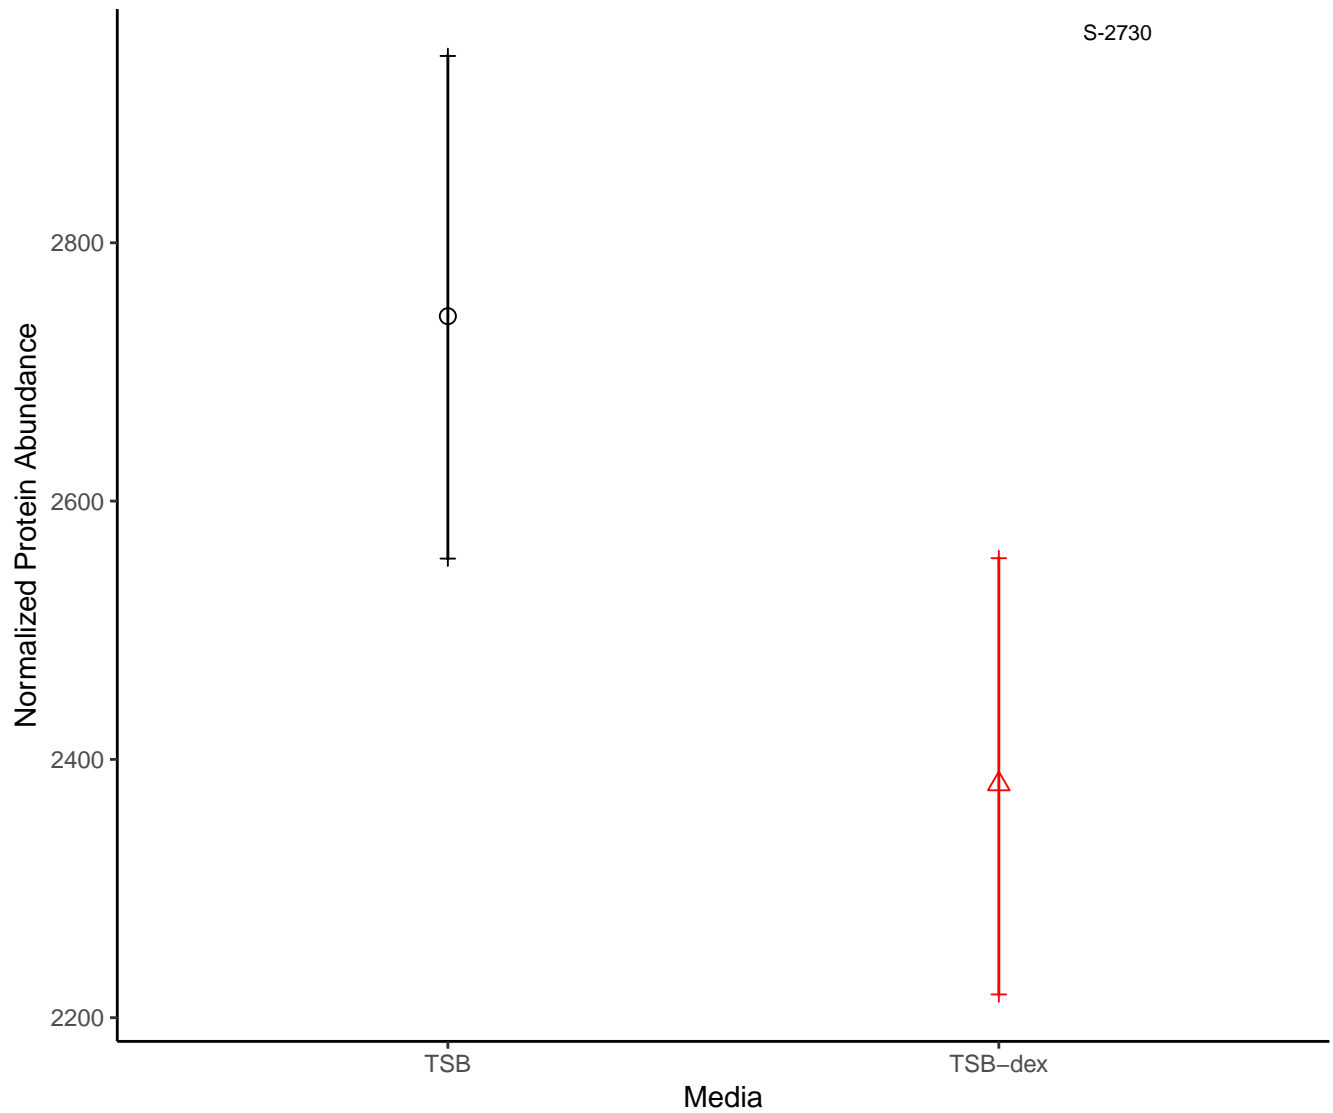

⊕ TSB-dex

△ TSB

# MURG\_STAAM

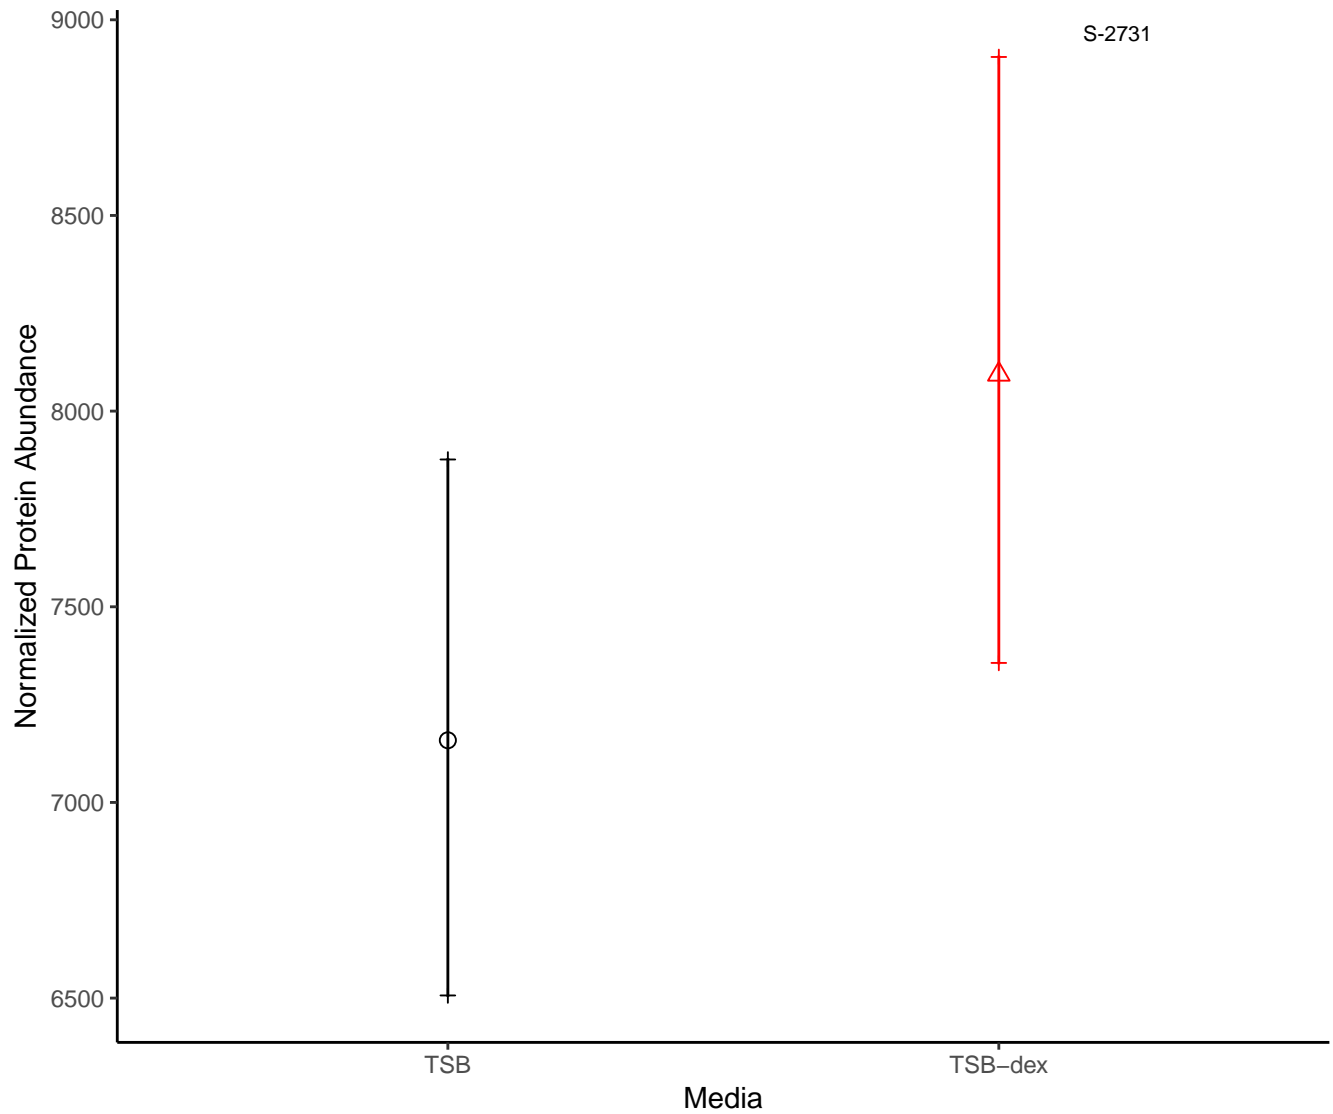

S-2731

⊕ TSB-dex

△ TSB

# MURI\_STAAM

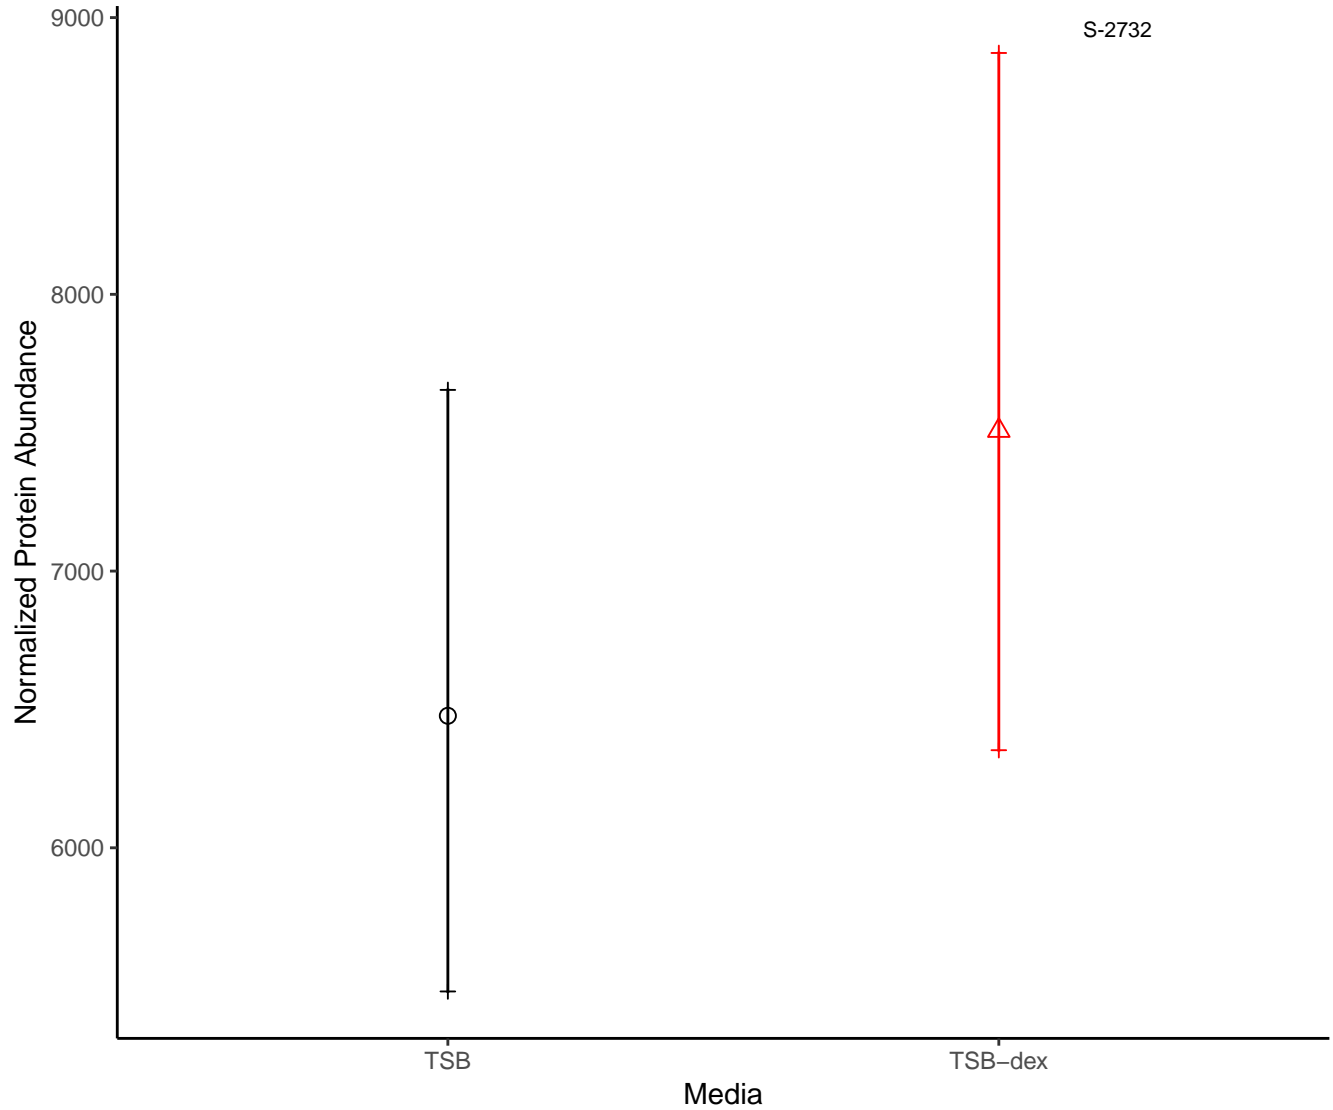

⊕ TSB-dex

△ TSB

# MUTS\_STAAM

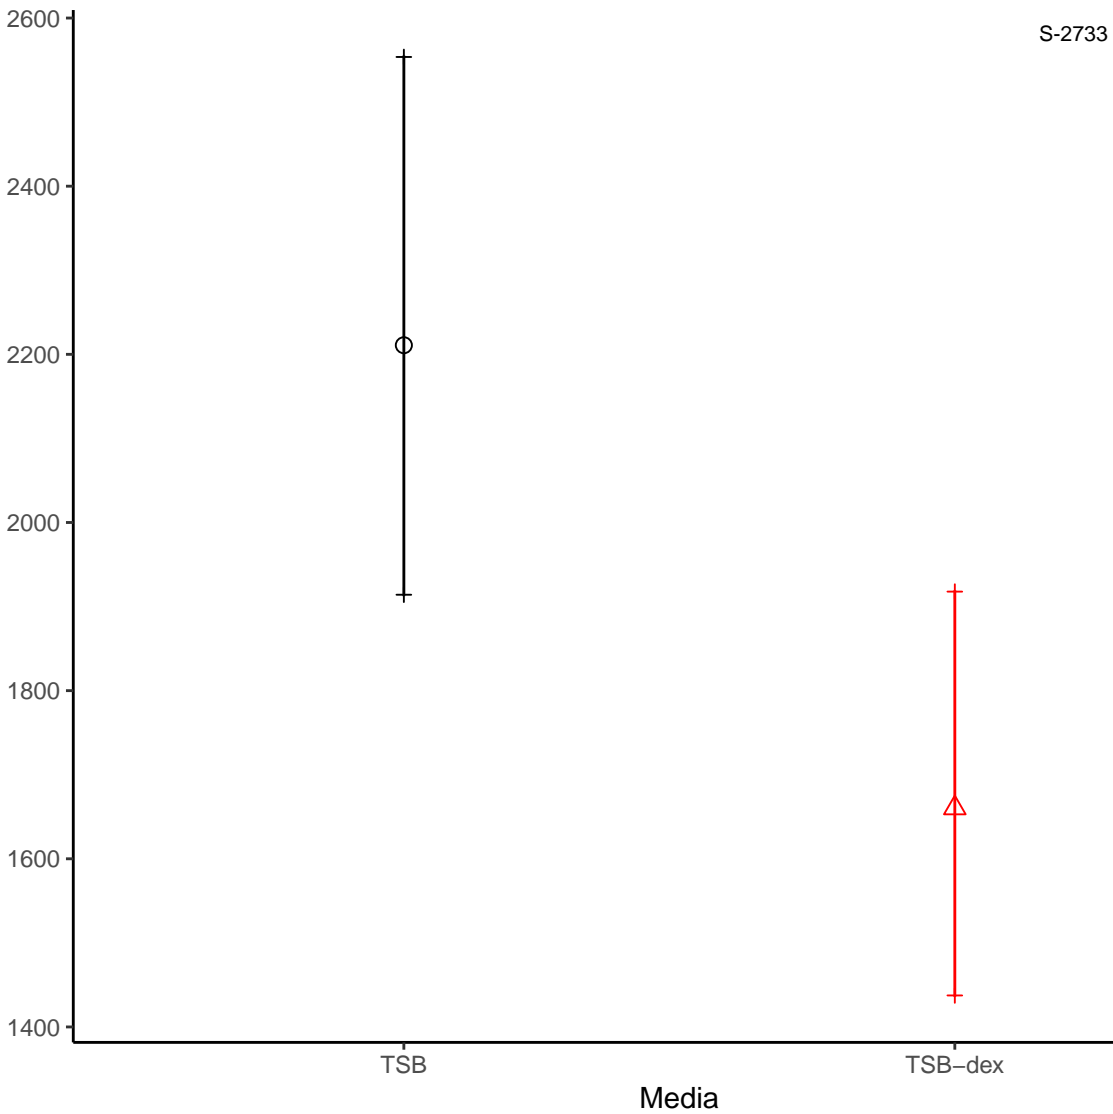

⊕ TSB-dex

△ TSB

# NADD\_STAAM

S-2734

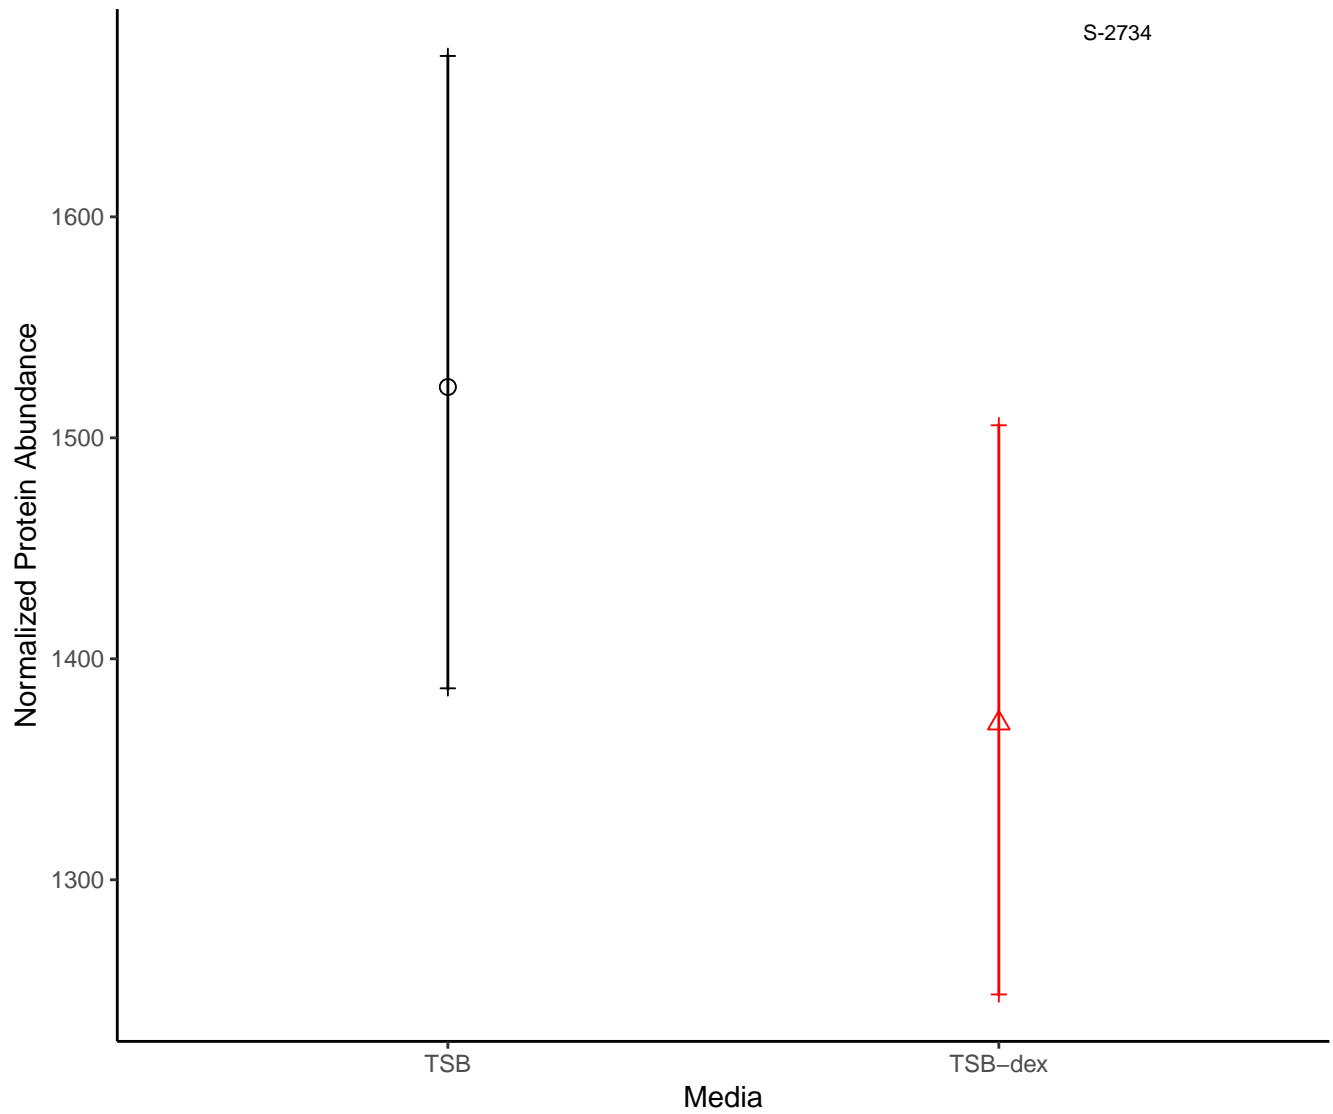

⊕ TSB-dex

△ TSB

# NADE\_STAAM

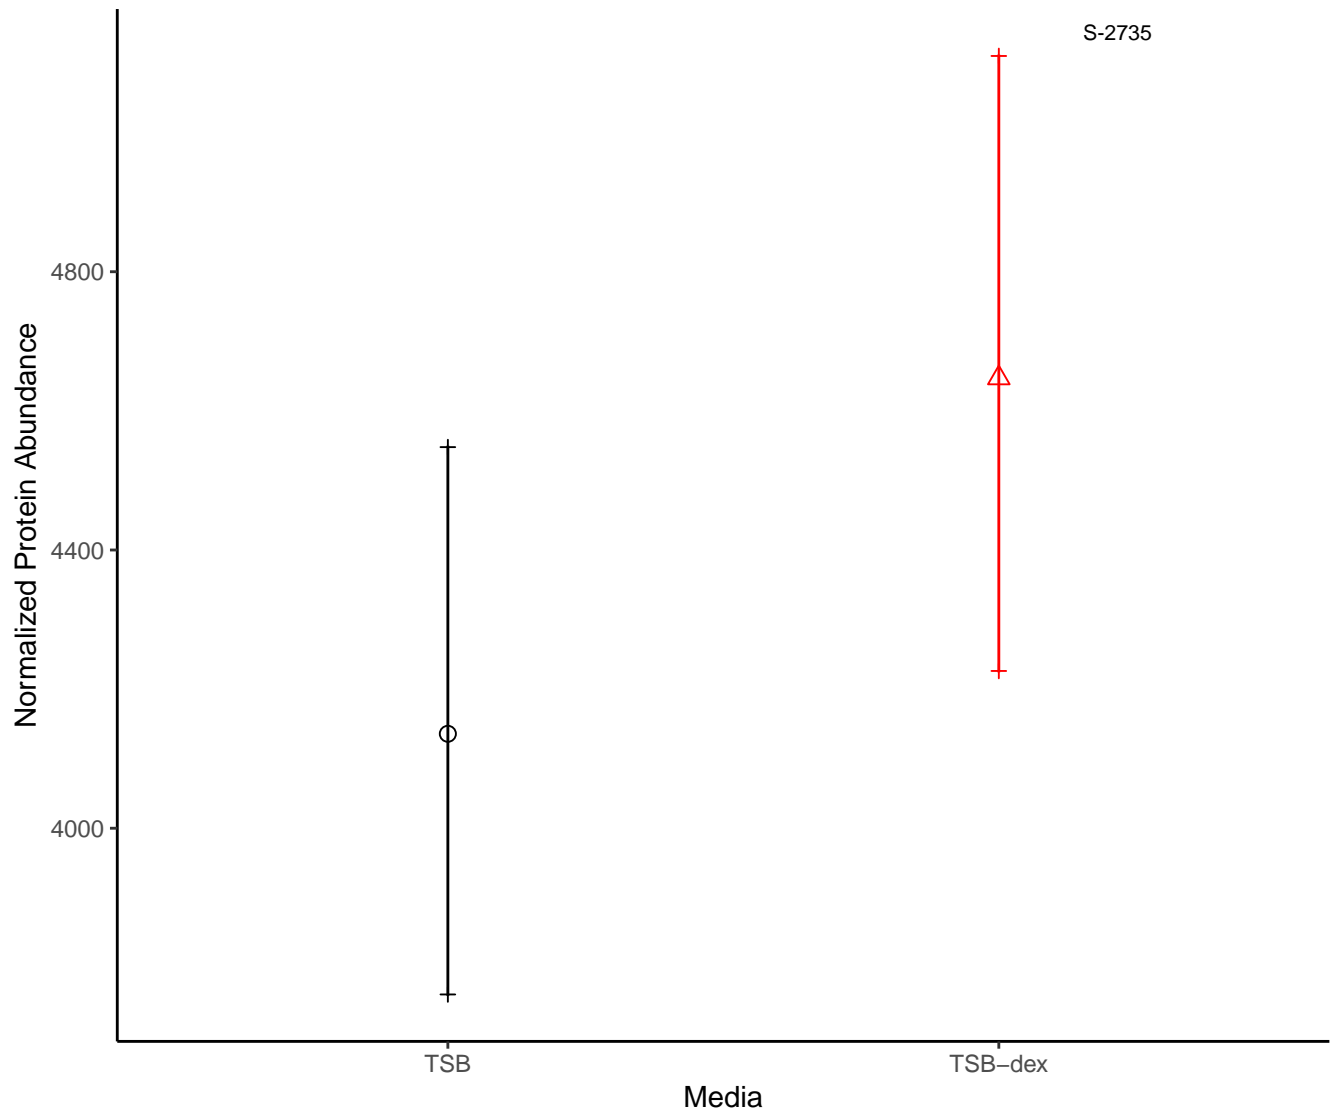

S-2735

⊕ TSB-dex

△ TSB

# NAGD\_STAAM

S-2736

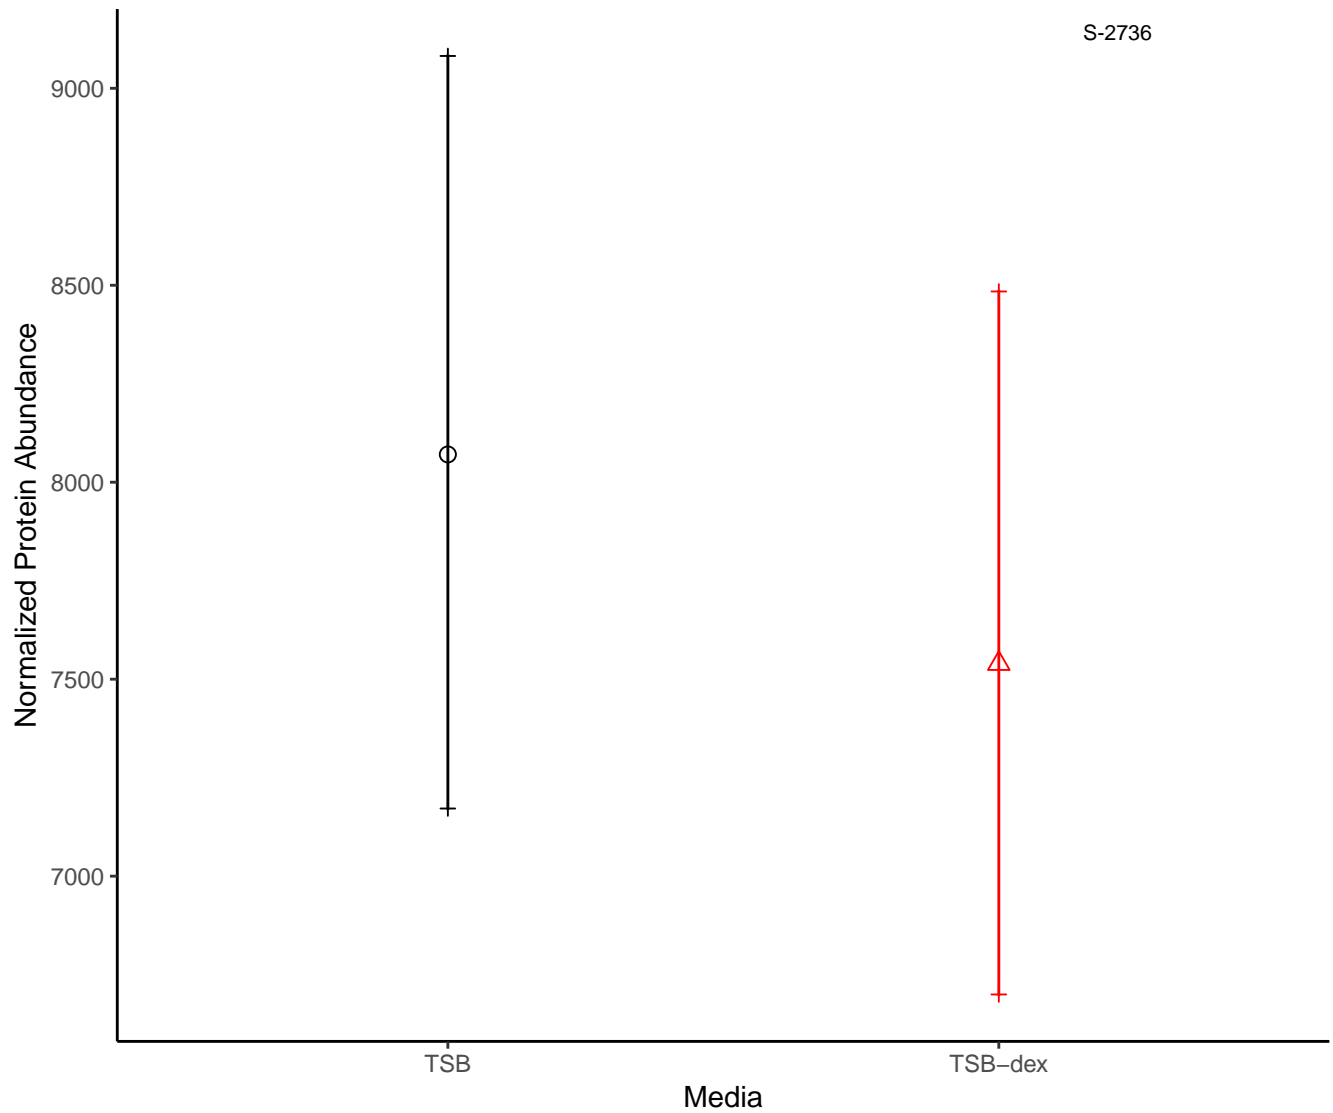

⊕ TSB-dex

△ TSB



# NDK\_STAAM

S-2737

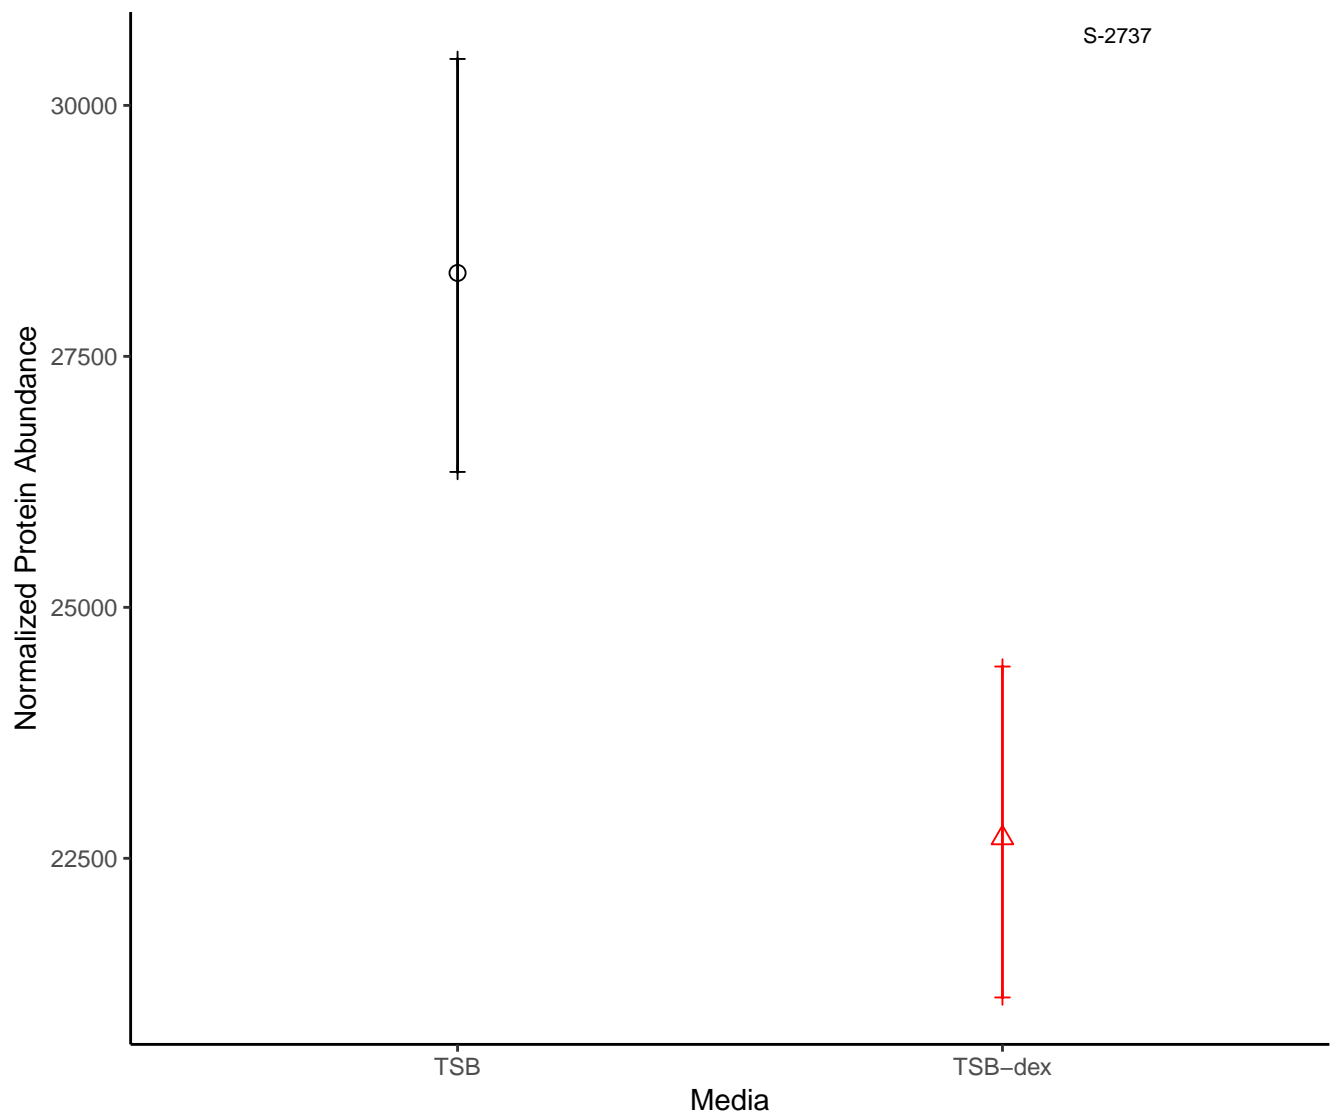

⊕ TSB-dex

△ TSB

# NRDR\_STAAM

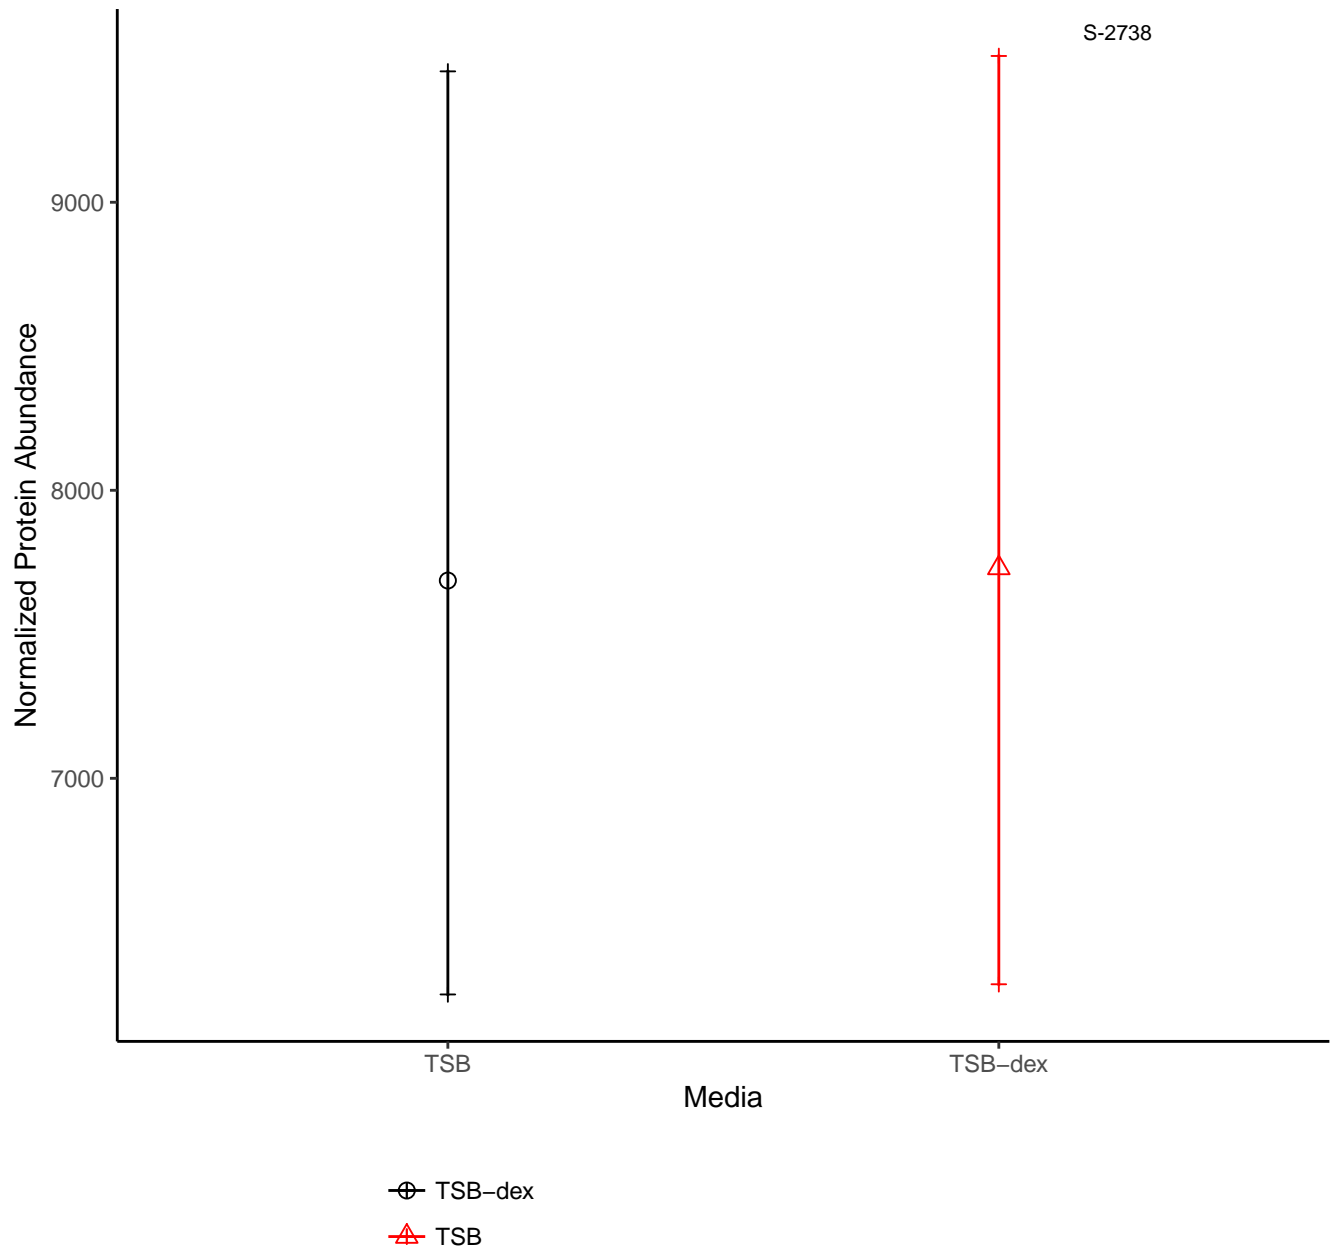

# NREB\_STAAM

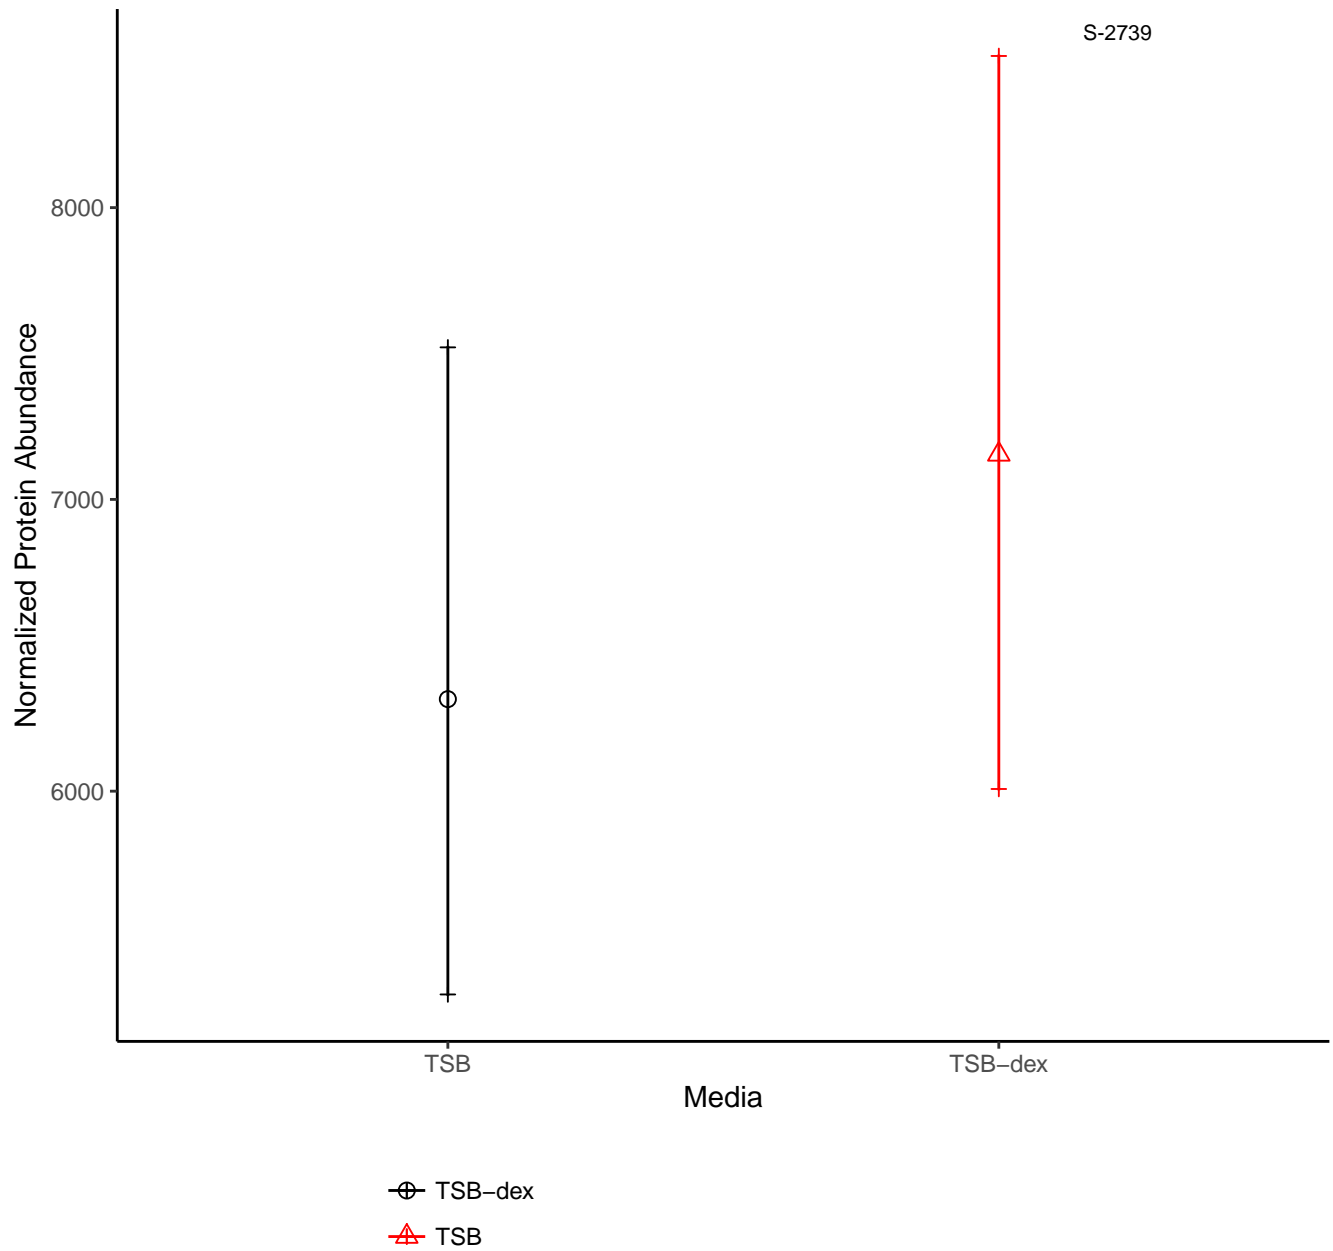

# NUSG\_STAAM

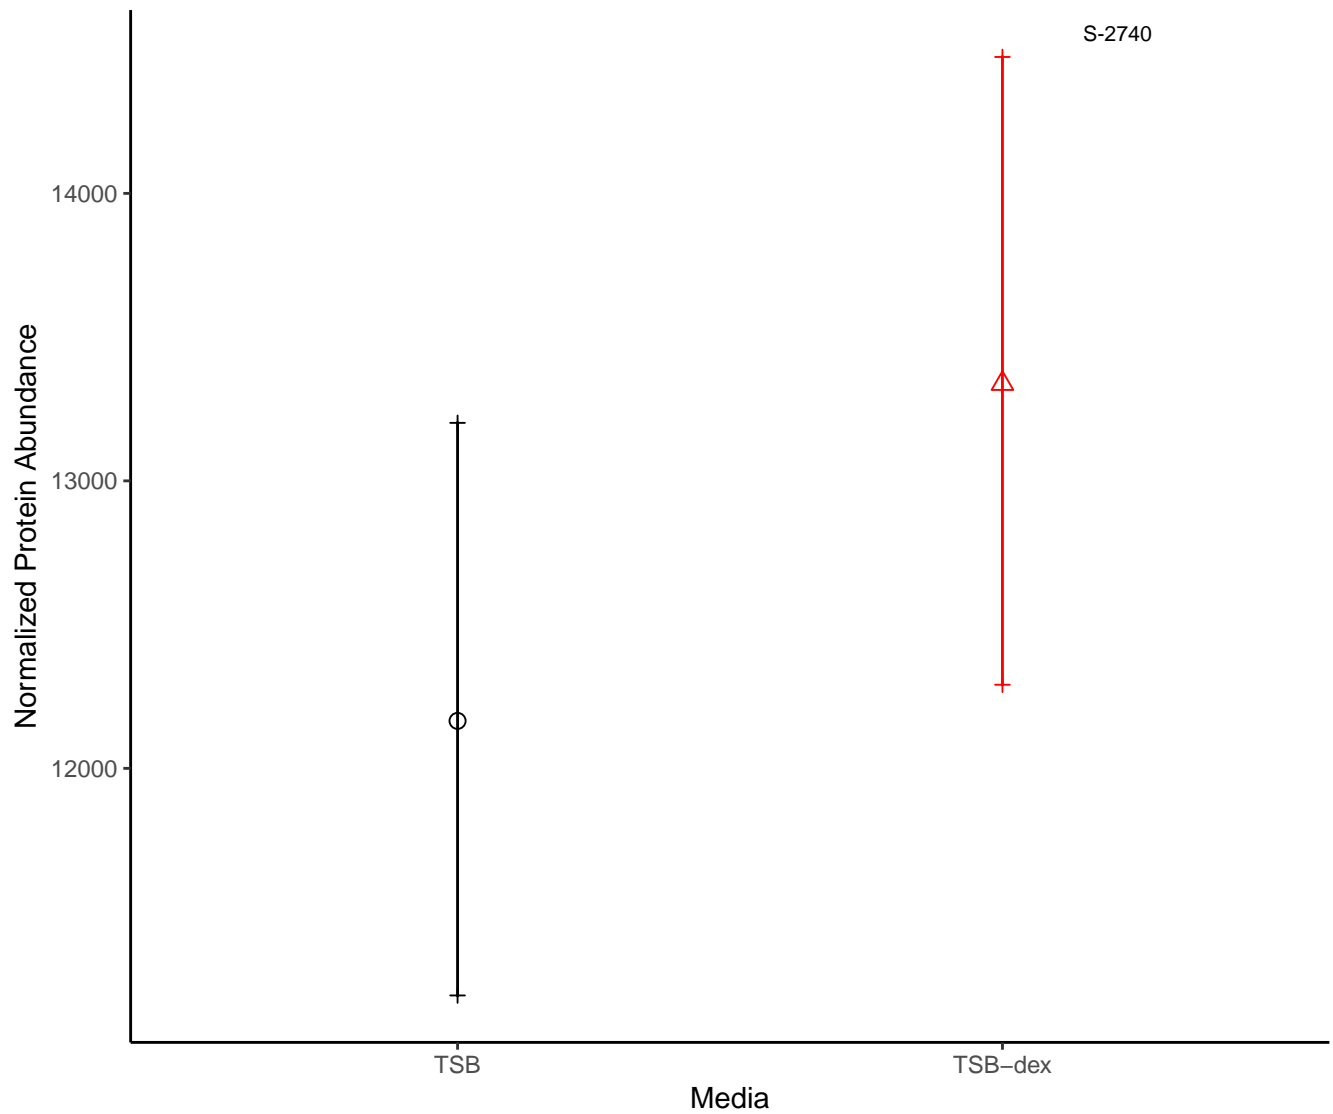

⊕ TSB-dex

△ TSB

# OAT2\_STAAM

S-2741

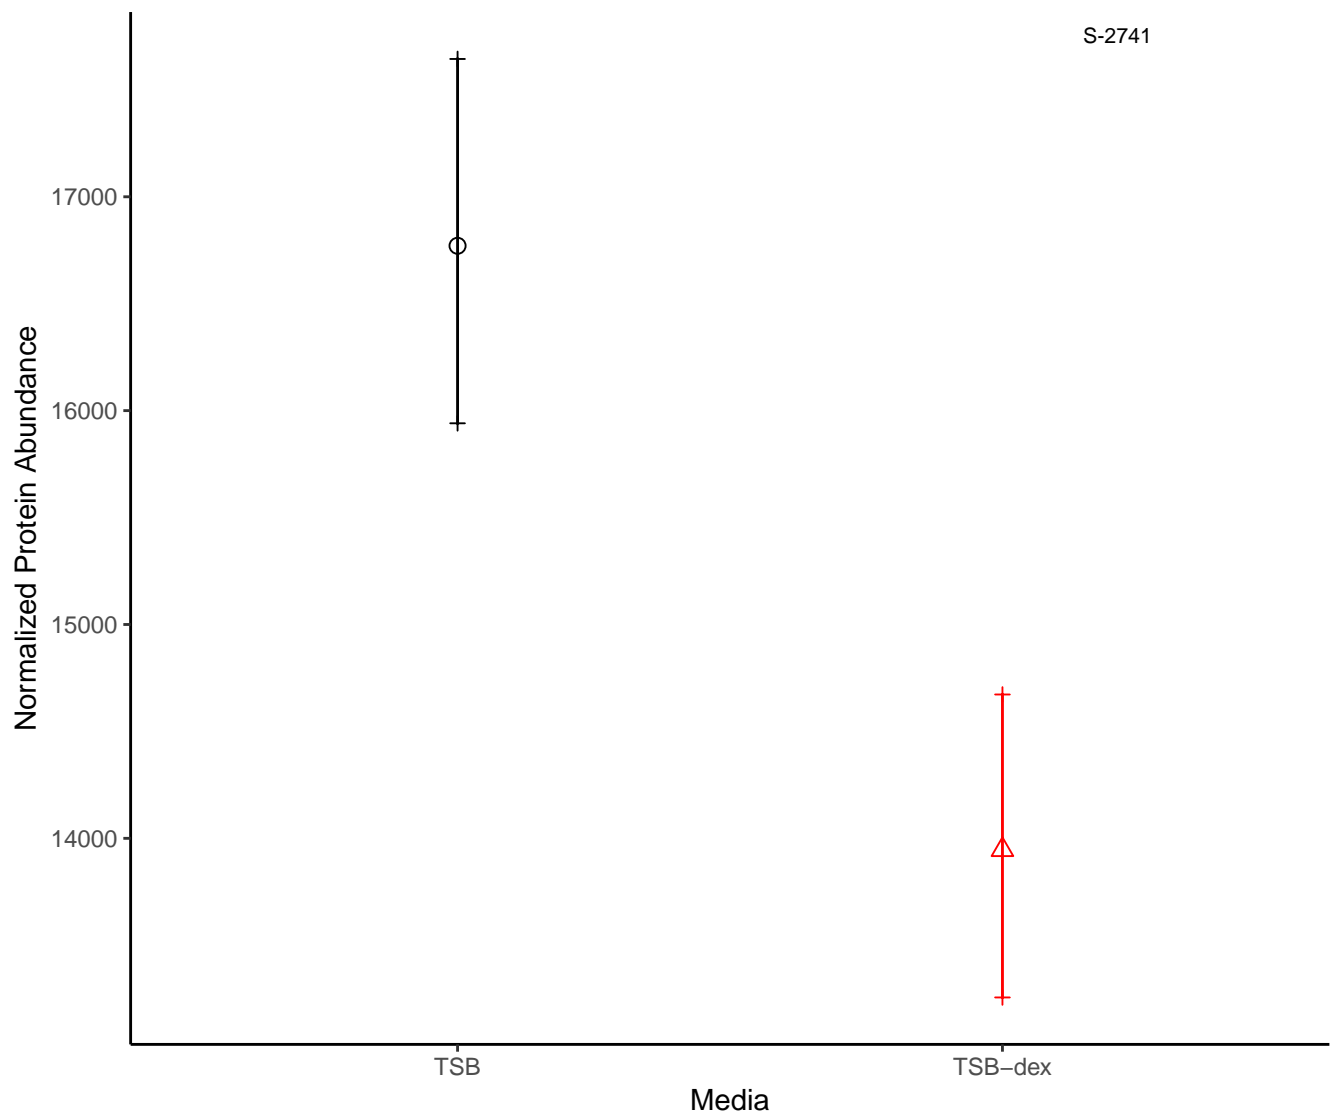

⊕ TSB-dex

△ TSB

# OBG\_STAAM

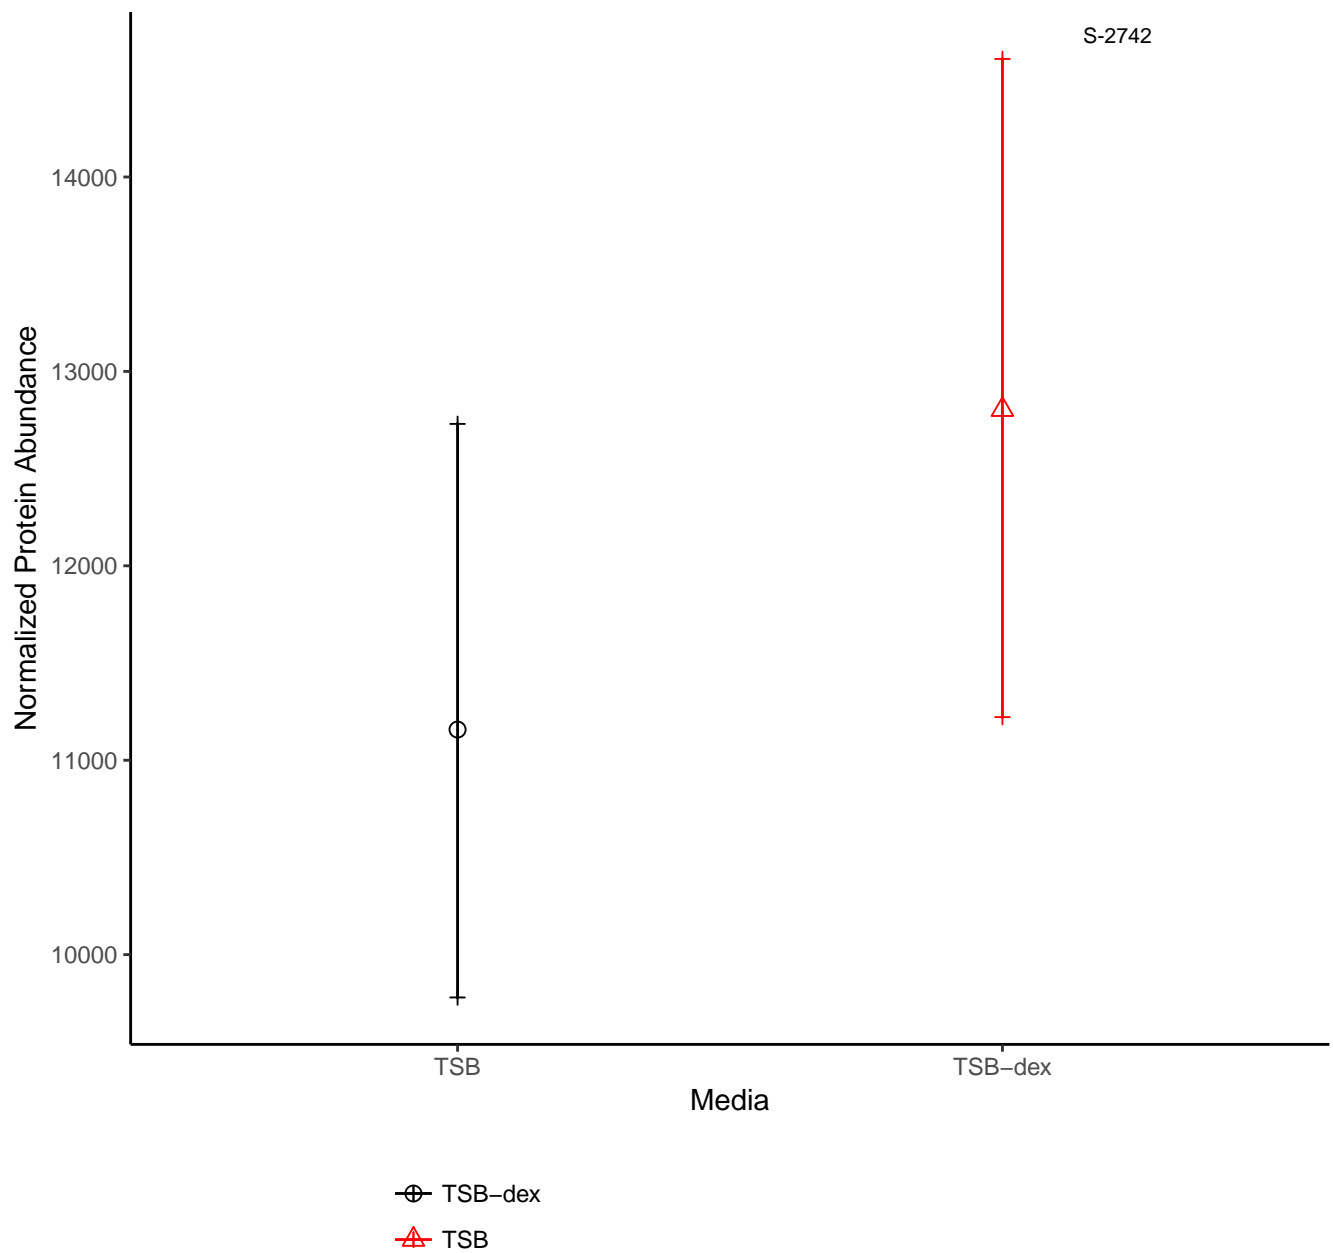

# ODO1\_STAAM

S-2743

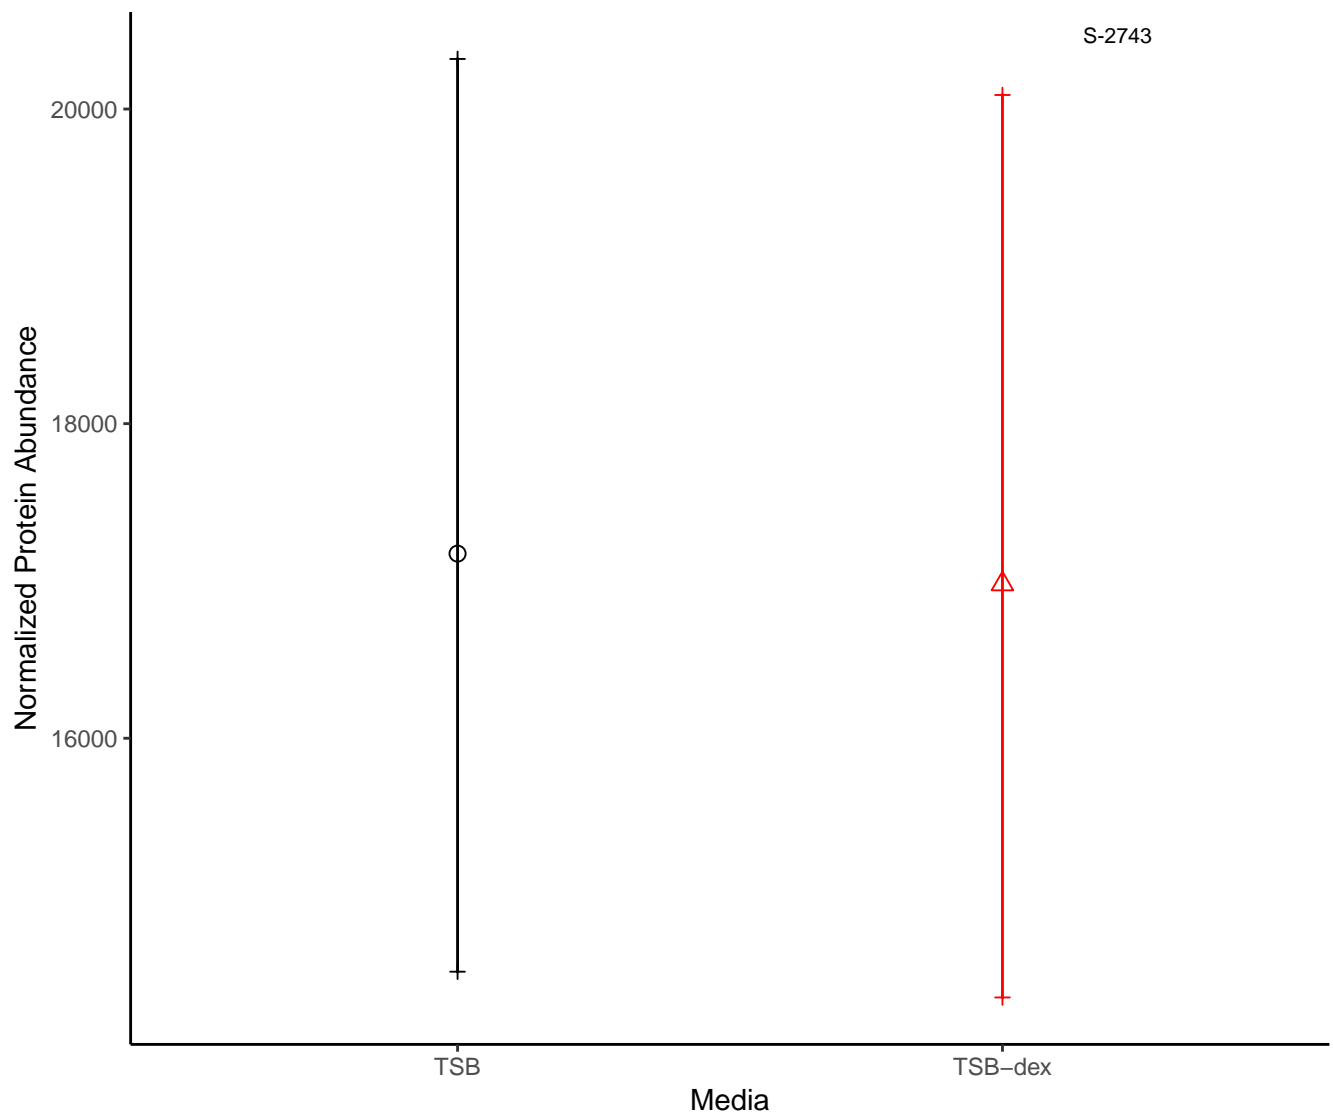

⊕ TSB-dex

△ TSB

# ODO2\_STAAM

S-2744

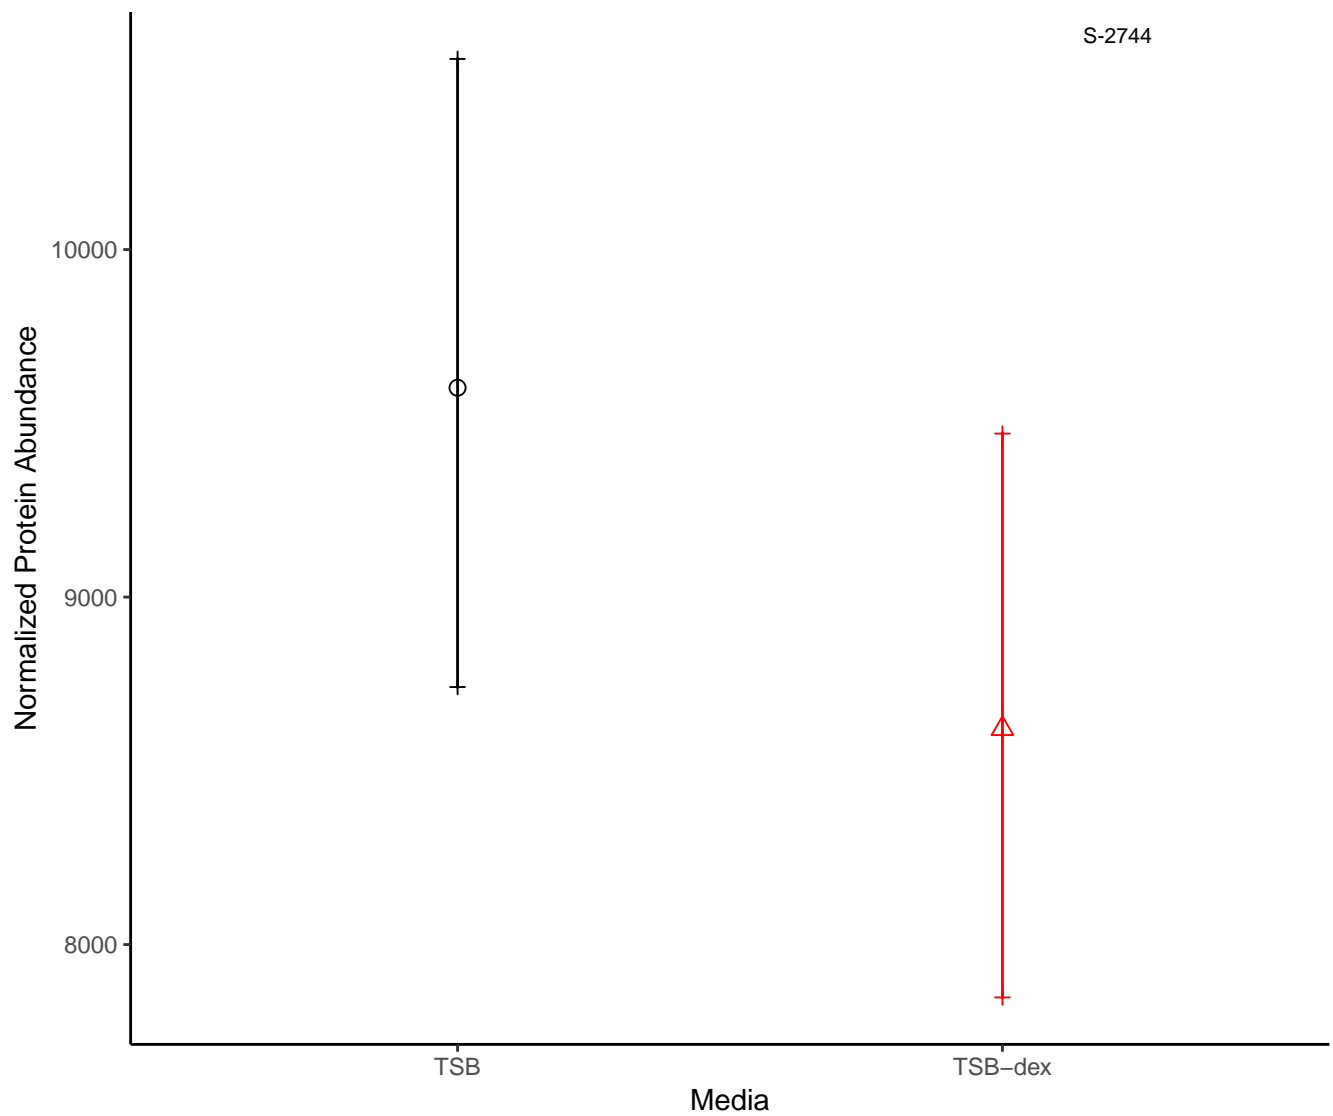

⊕ TSB-dex

△ TSB



# ODP2\_STAAM

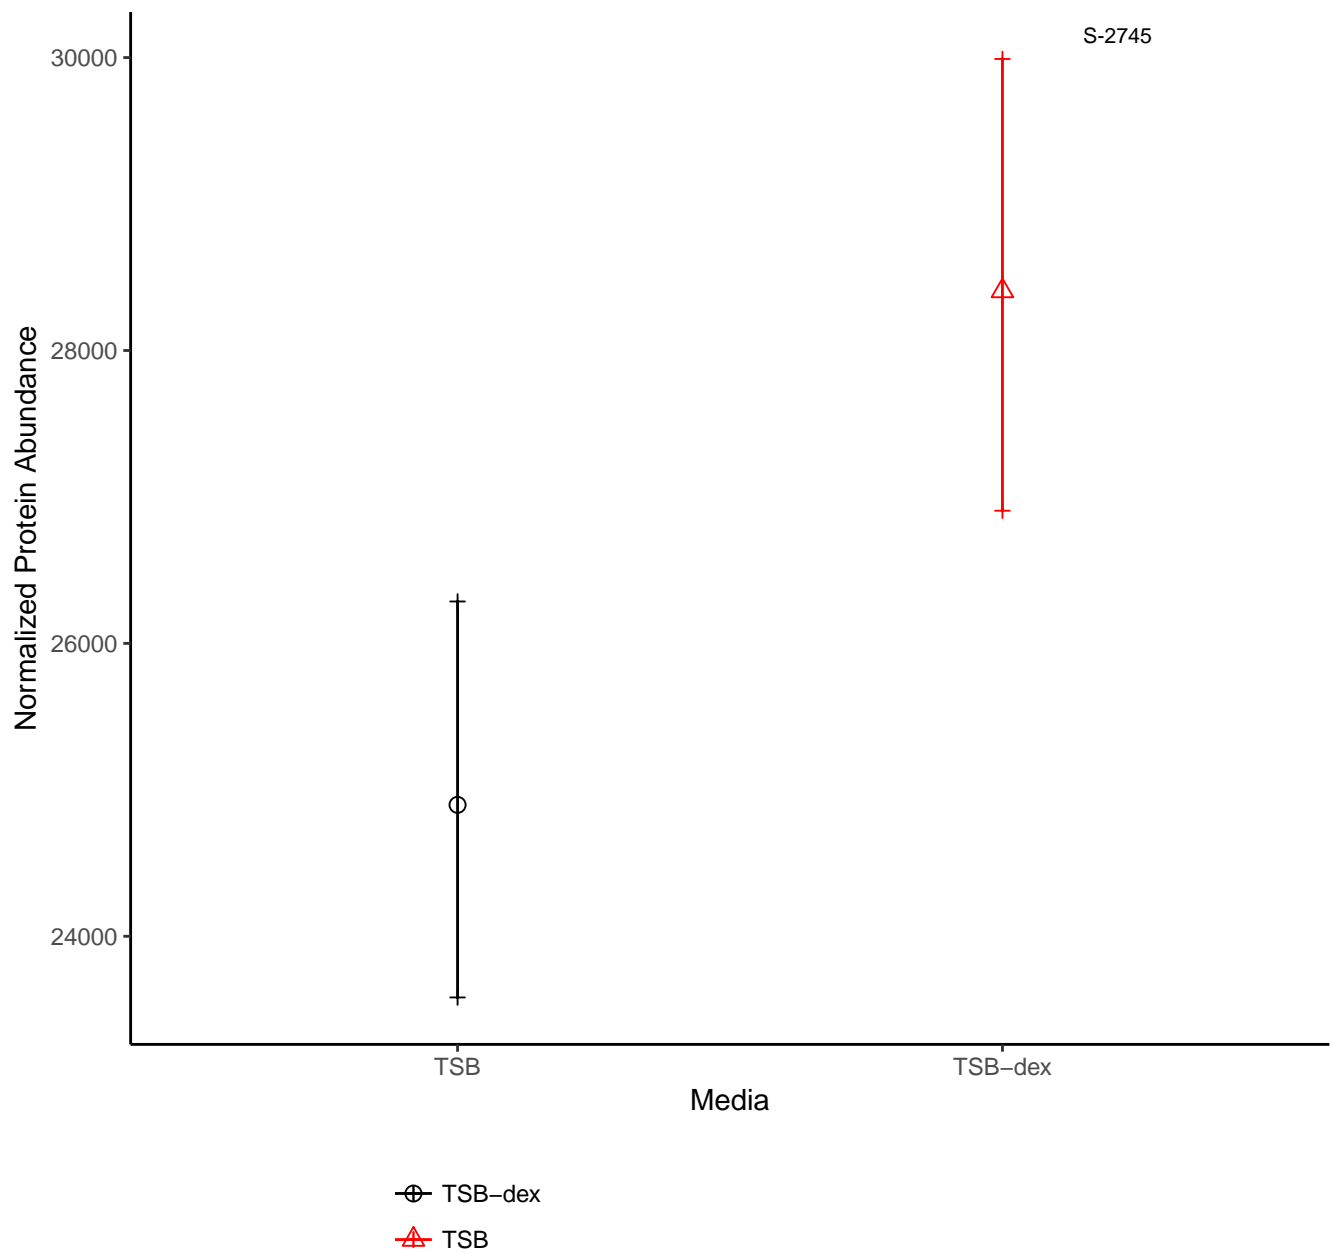

# ODPA\_STAAM

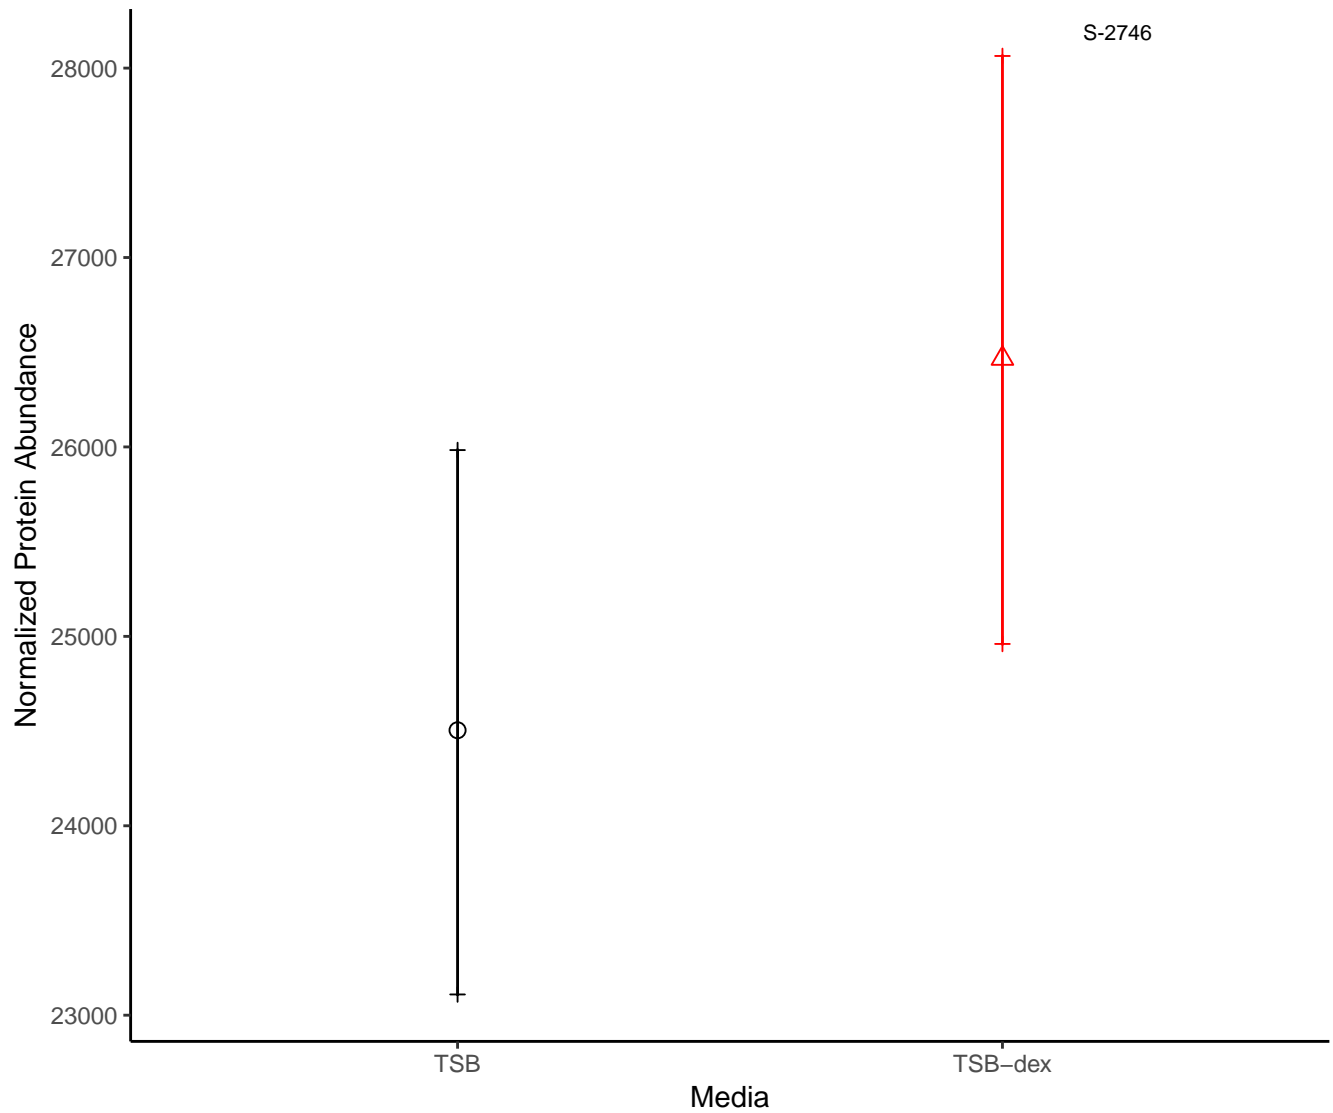

⊕ TSB-dex

△ TSB

# ODPB\_STAAM

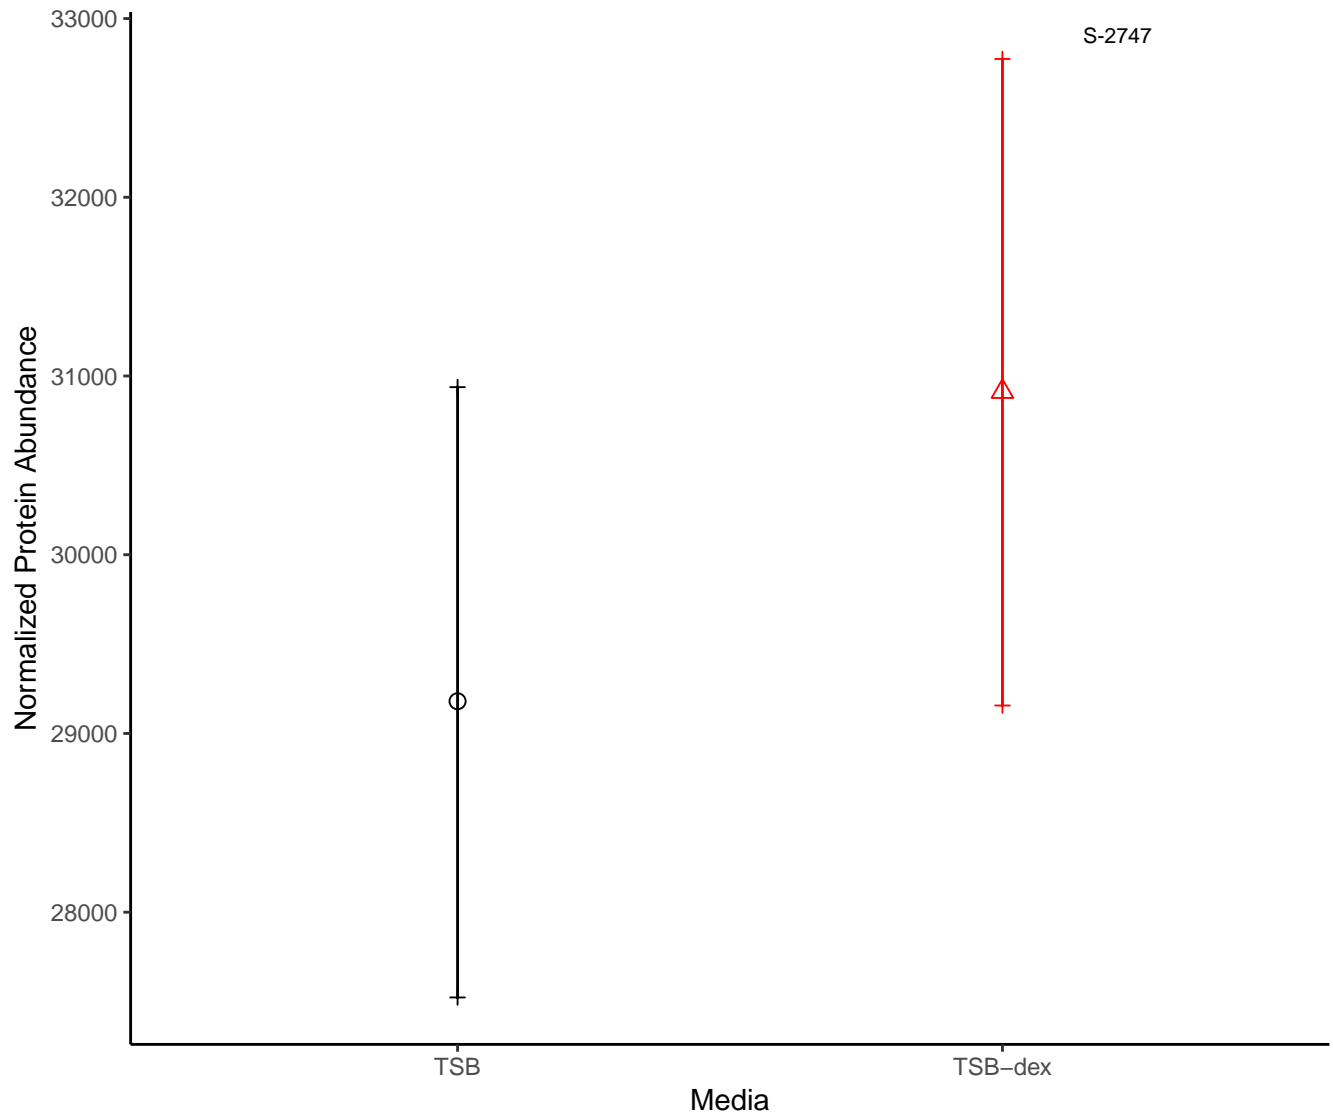

⊕ TSB-dex

△ TSB

# OHRL\_STAAM

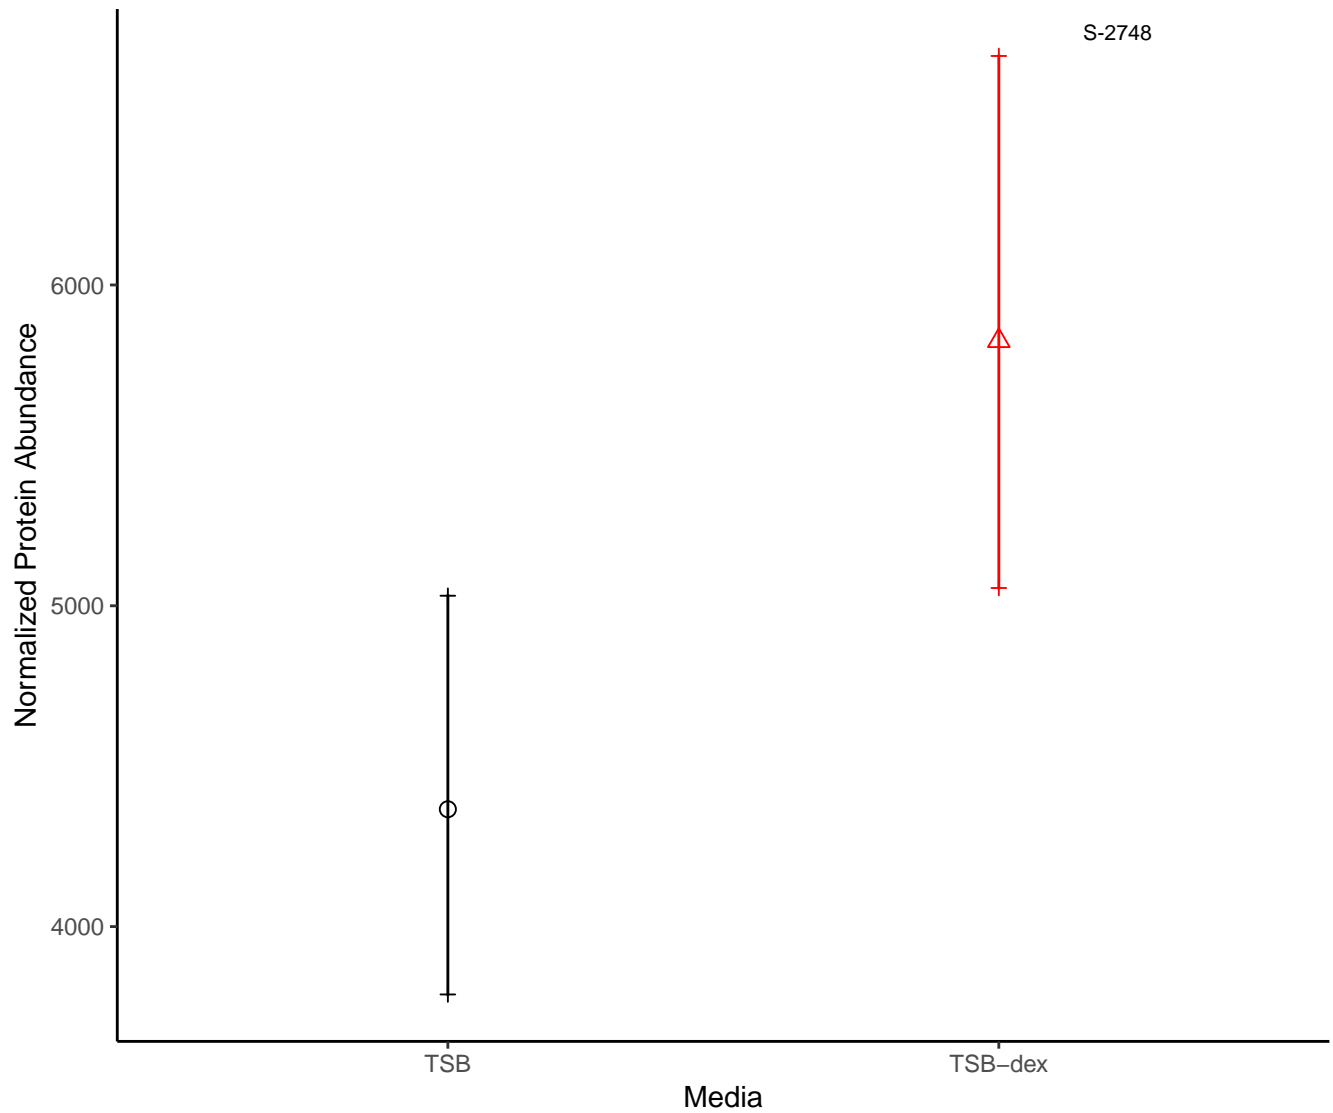

⊕ TSB-dex

△ TSB

# OTC\_STAAM

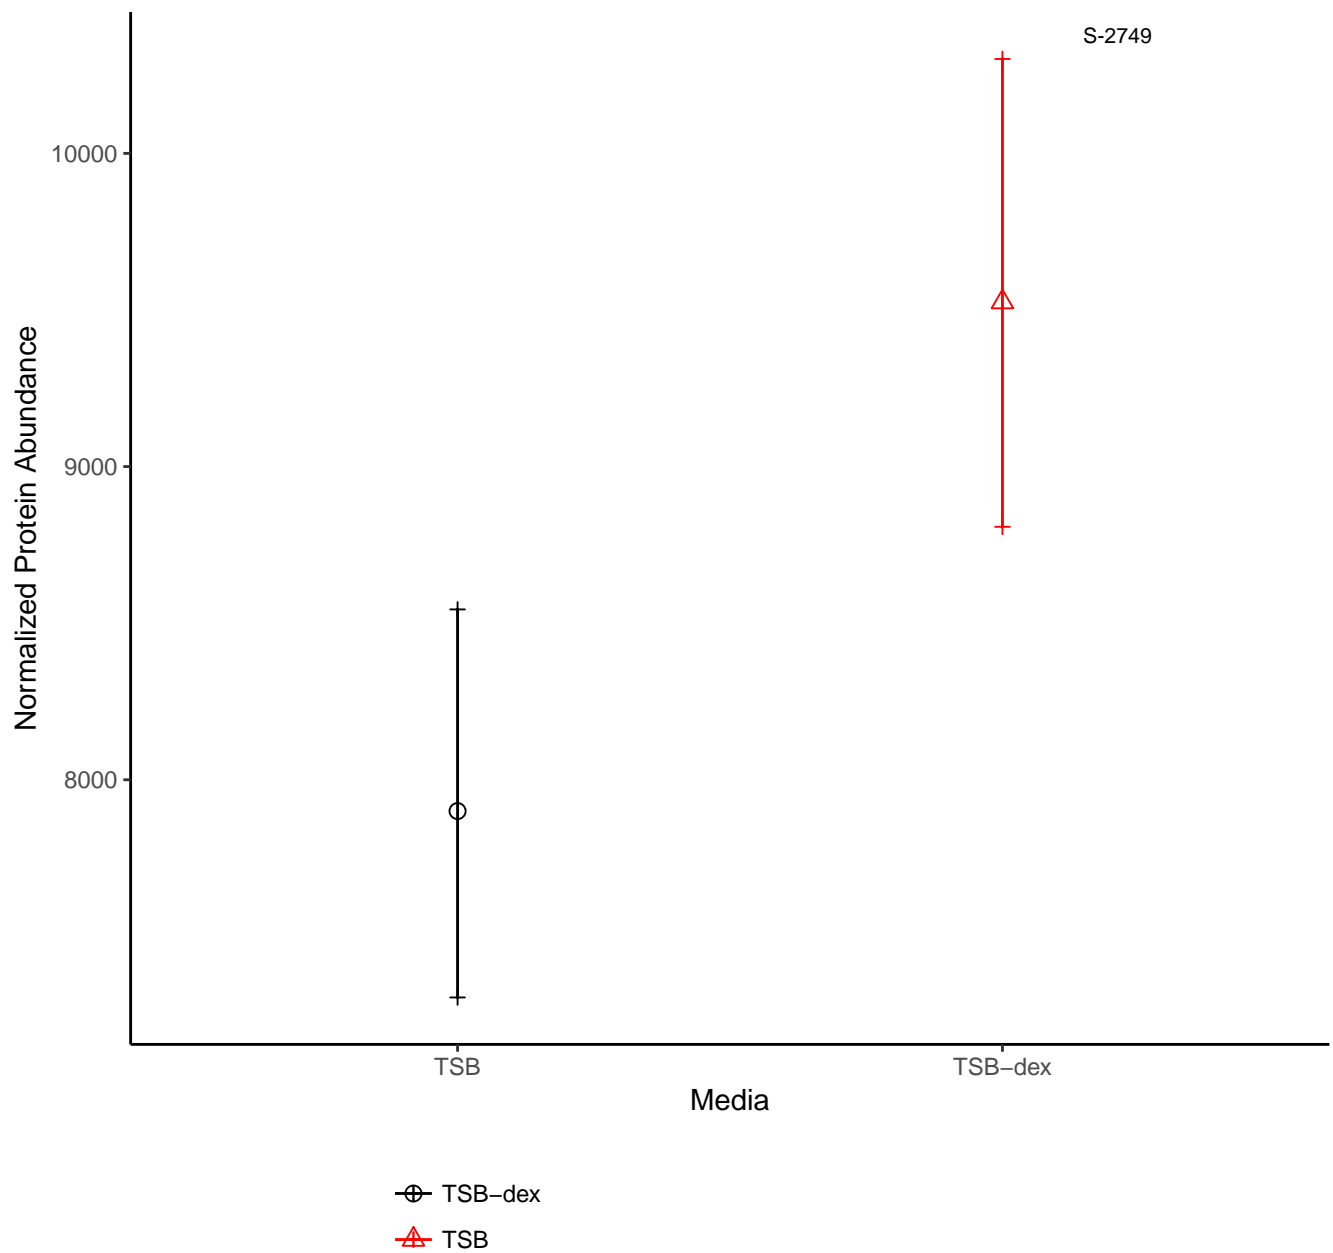

# OTCC\_STAAM

S-2750

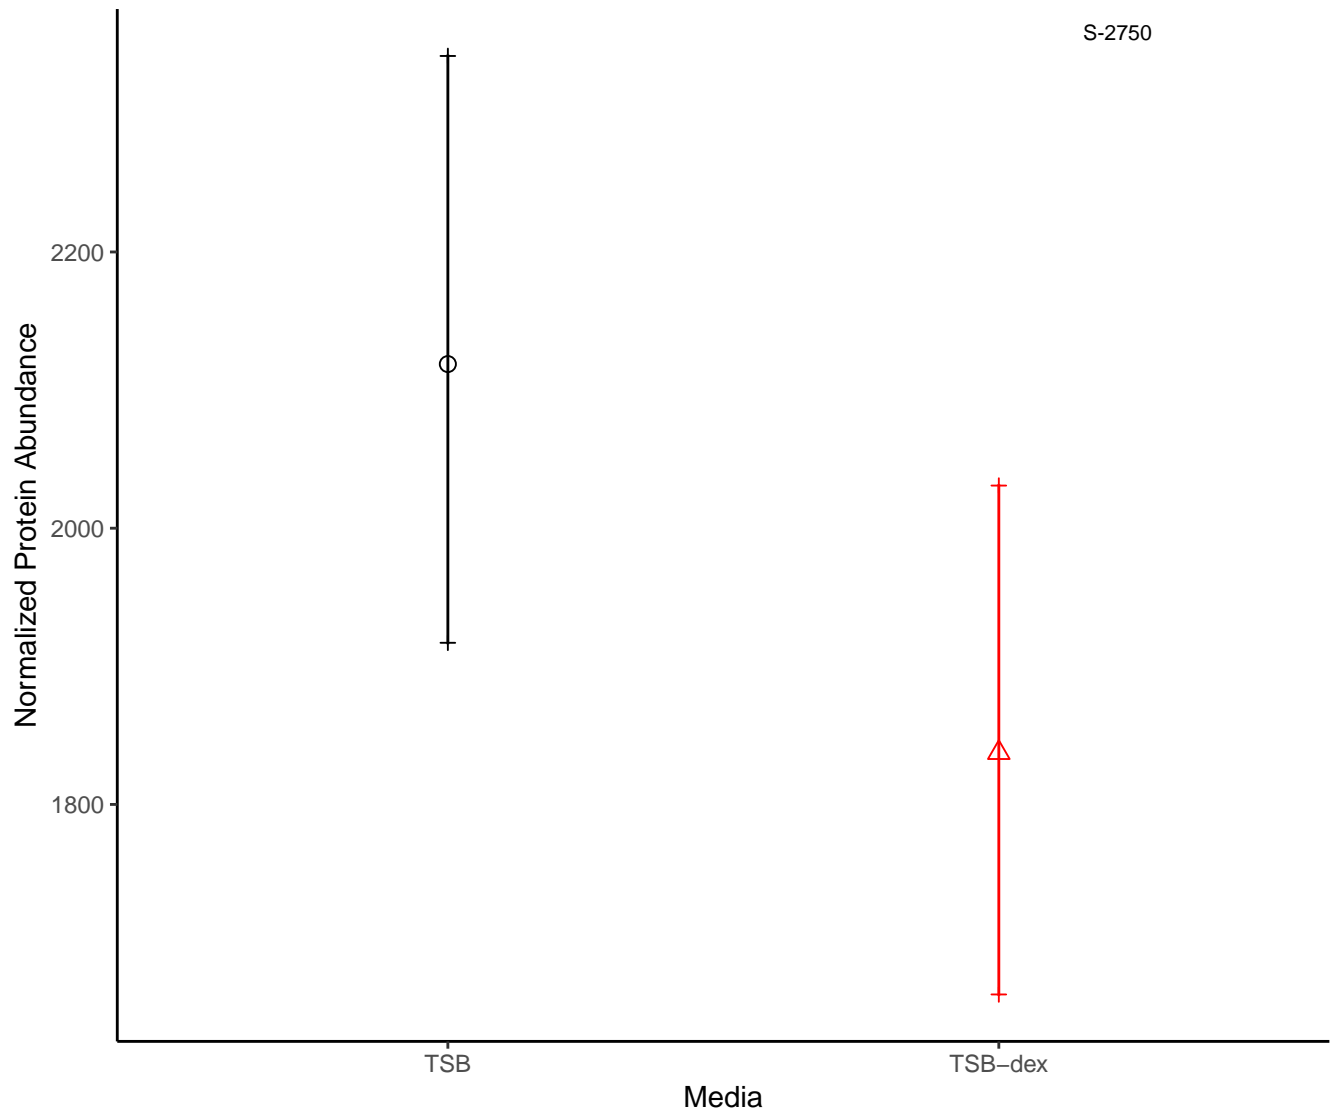

⊕ TSB-dex

△ TSB

# P5CR\_STAAM

S-2751

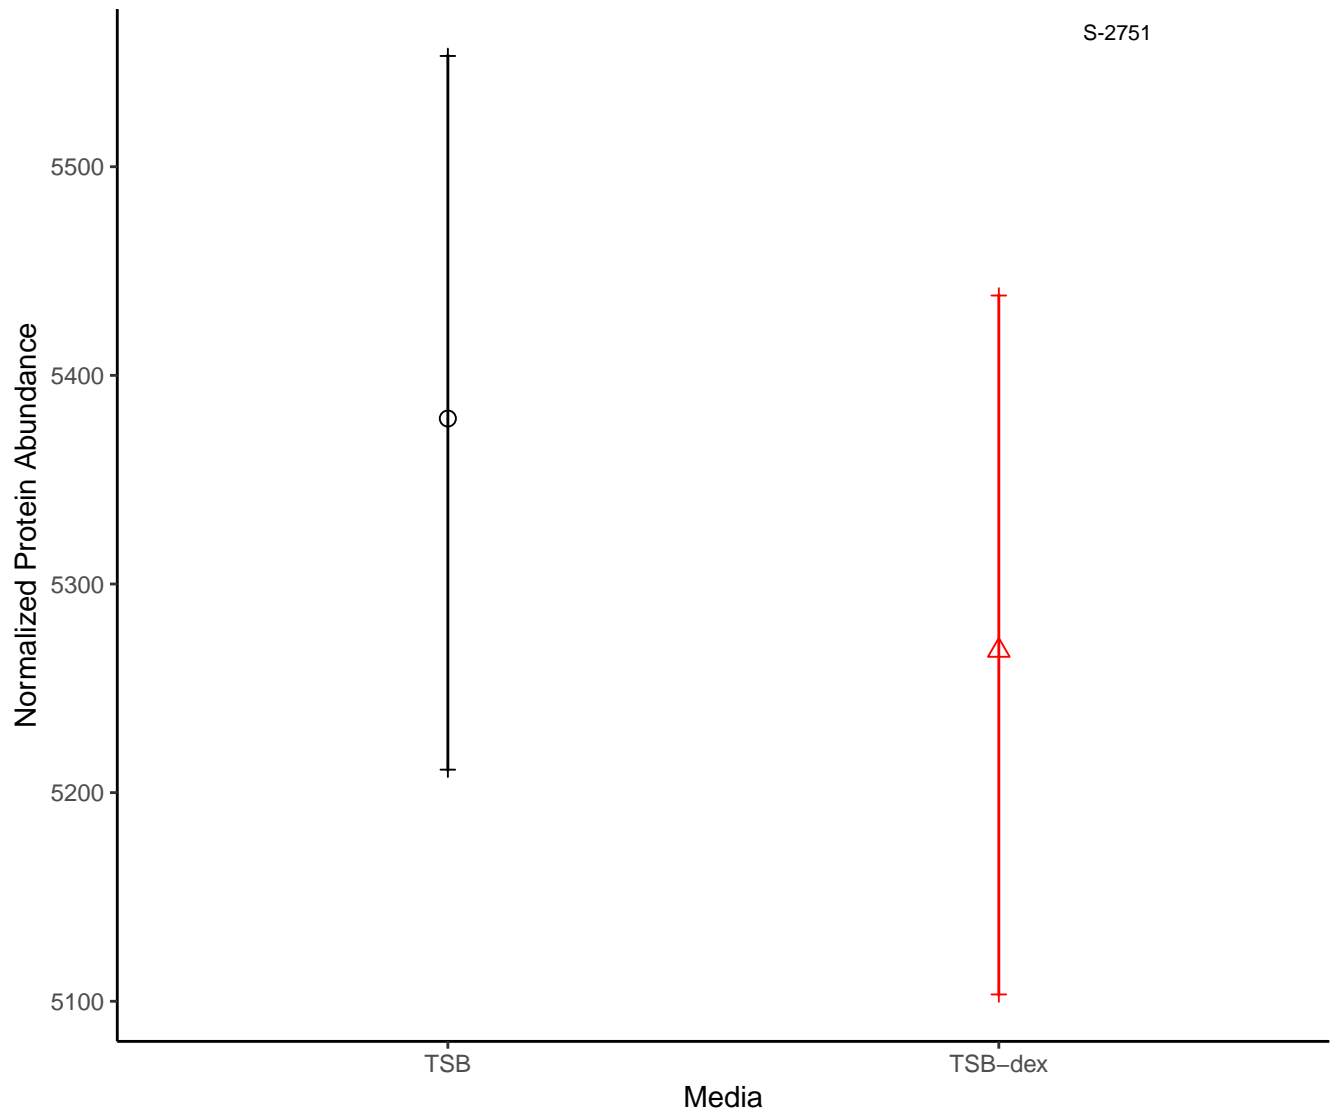

⊕ TSB-dex

△ TSB

# PANB\_STAAM

S-2752

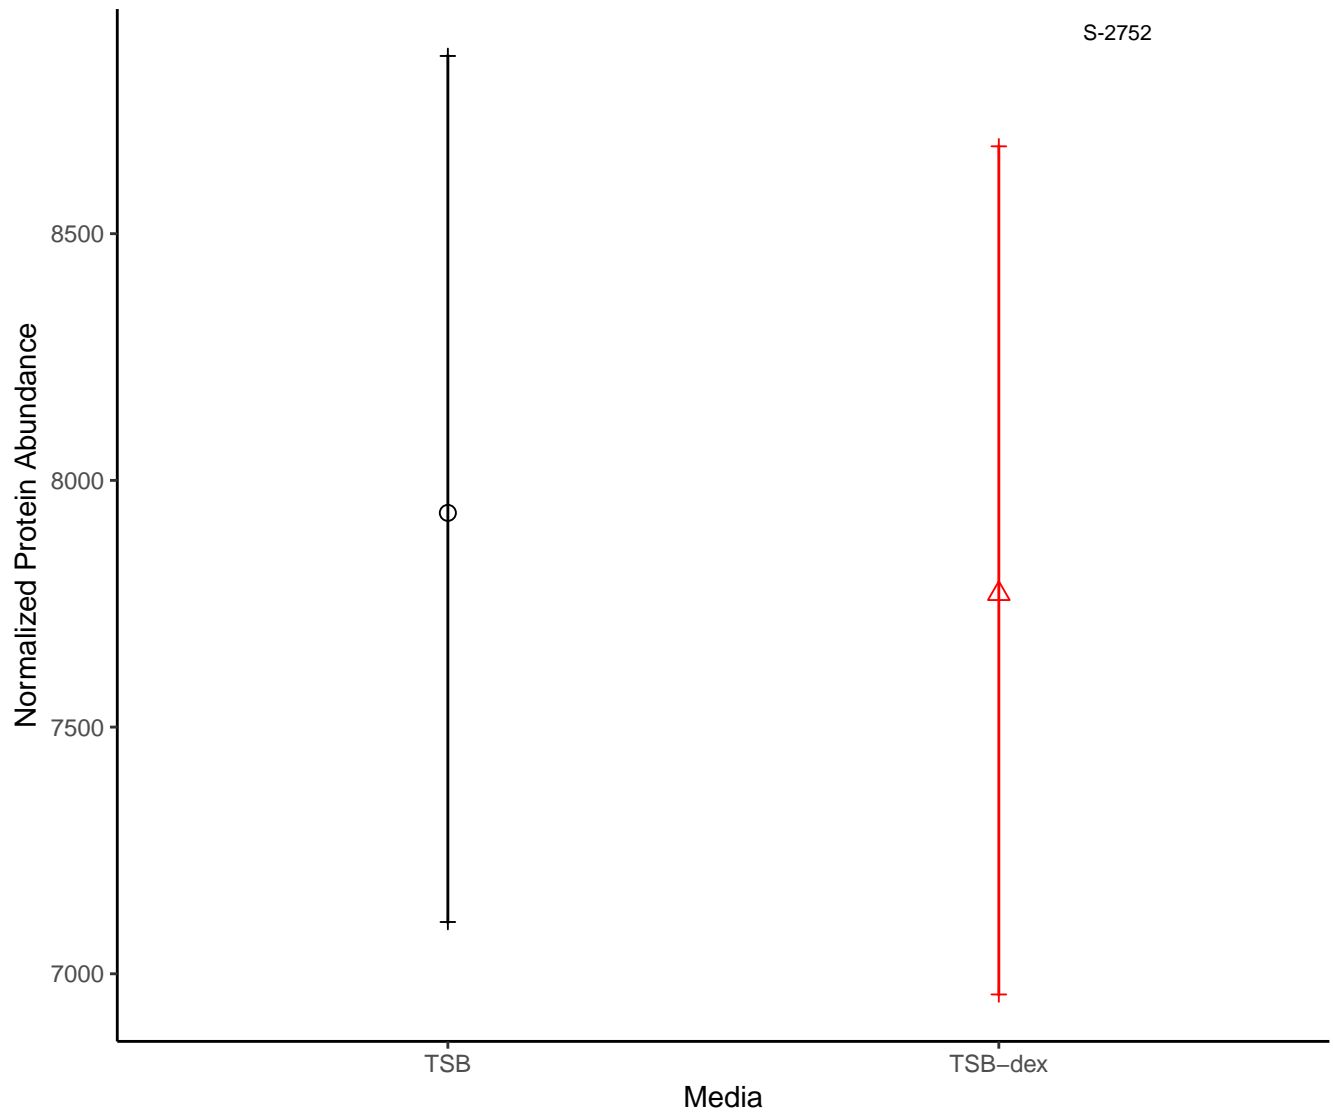

⊕ TSB-dex

△ TSB



# PAND\_STAAM

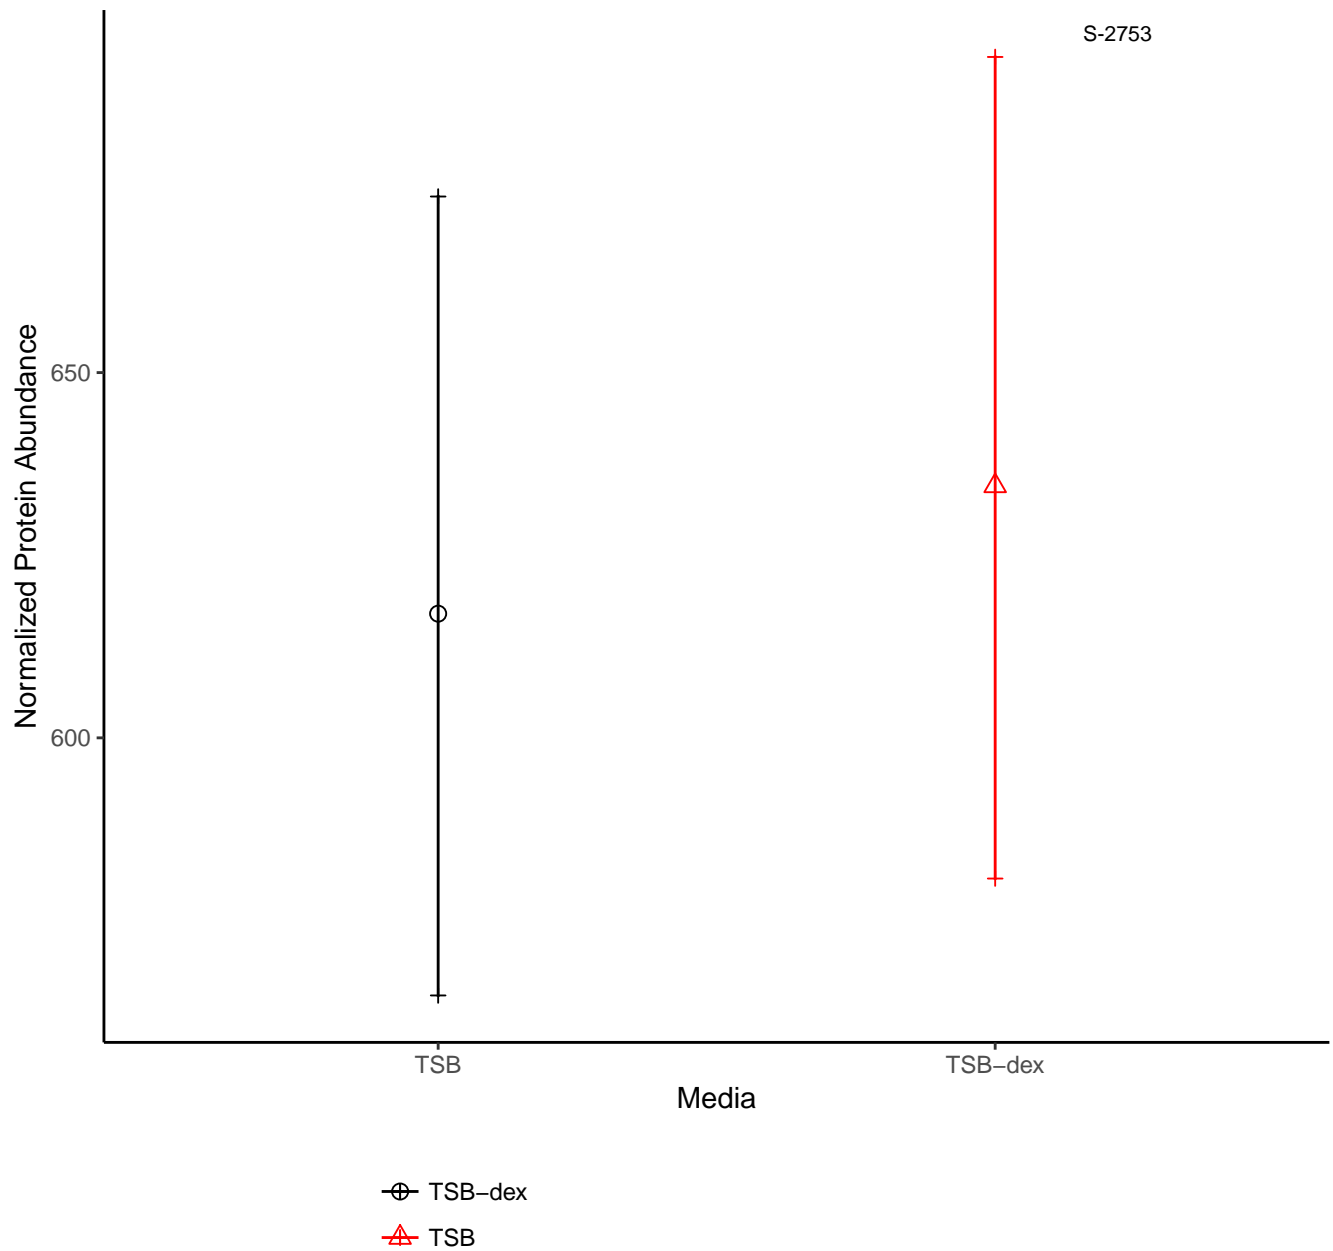

# PARC\_STAAM

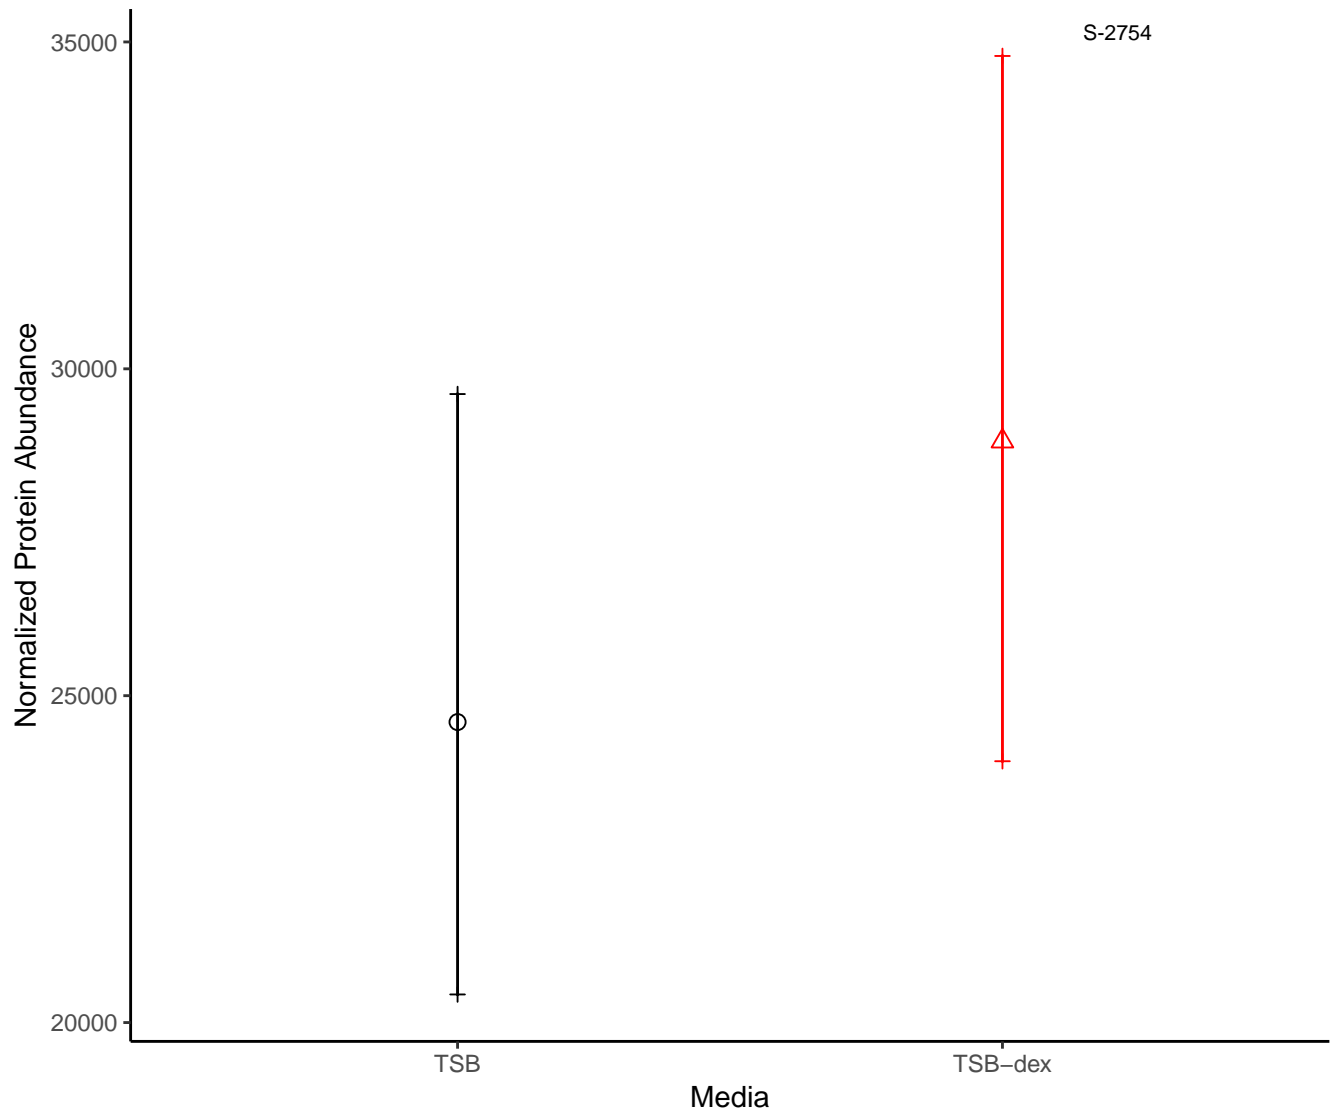

⊕ TSB-dex

△ TSB

# PCKA\_STAAM

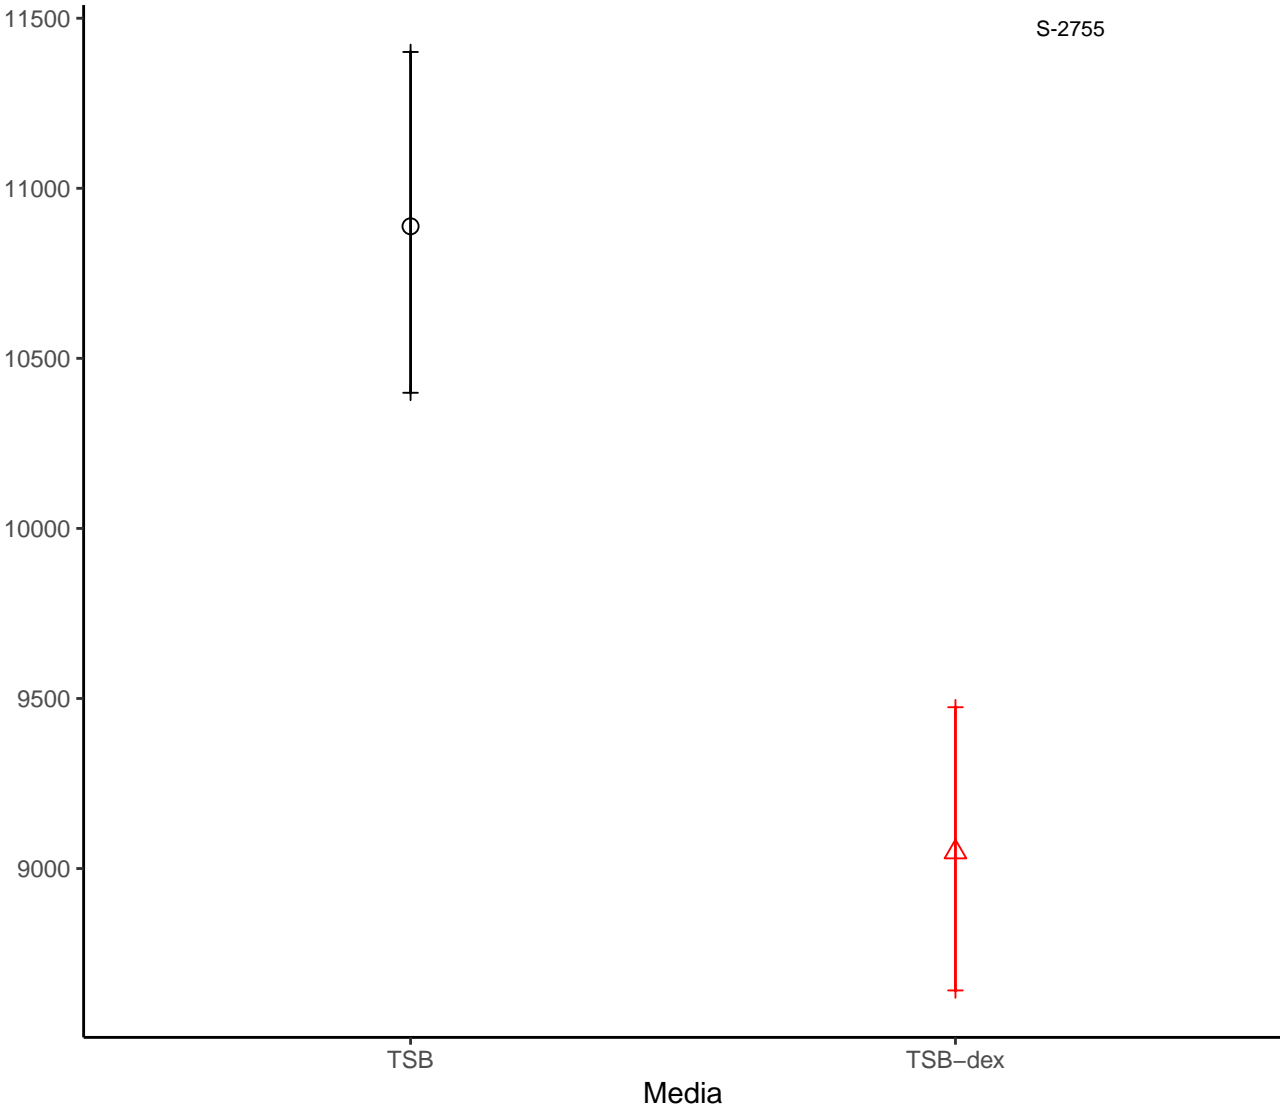

⊕ TSB-dex

△ TSB

# PCRA\_STAAM

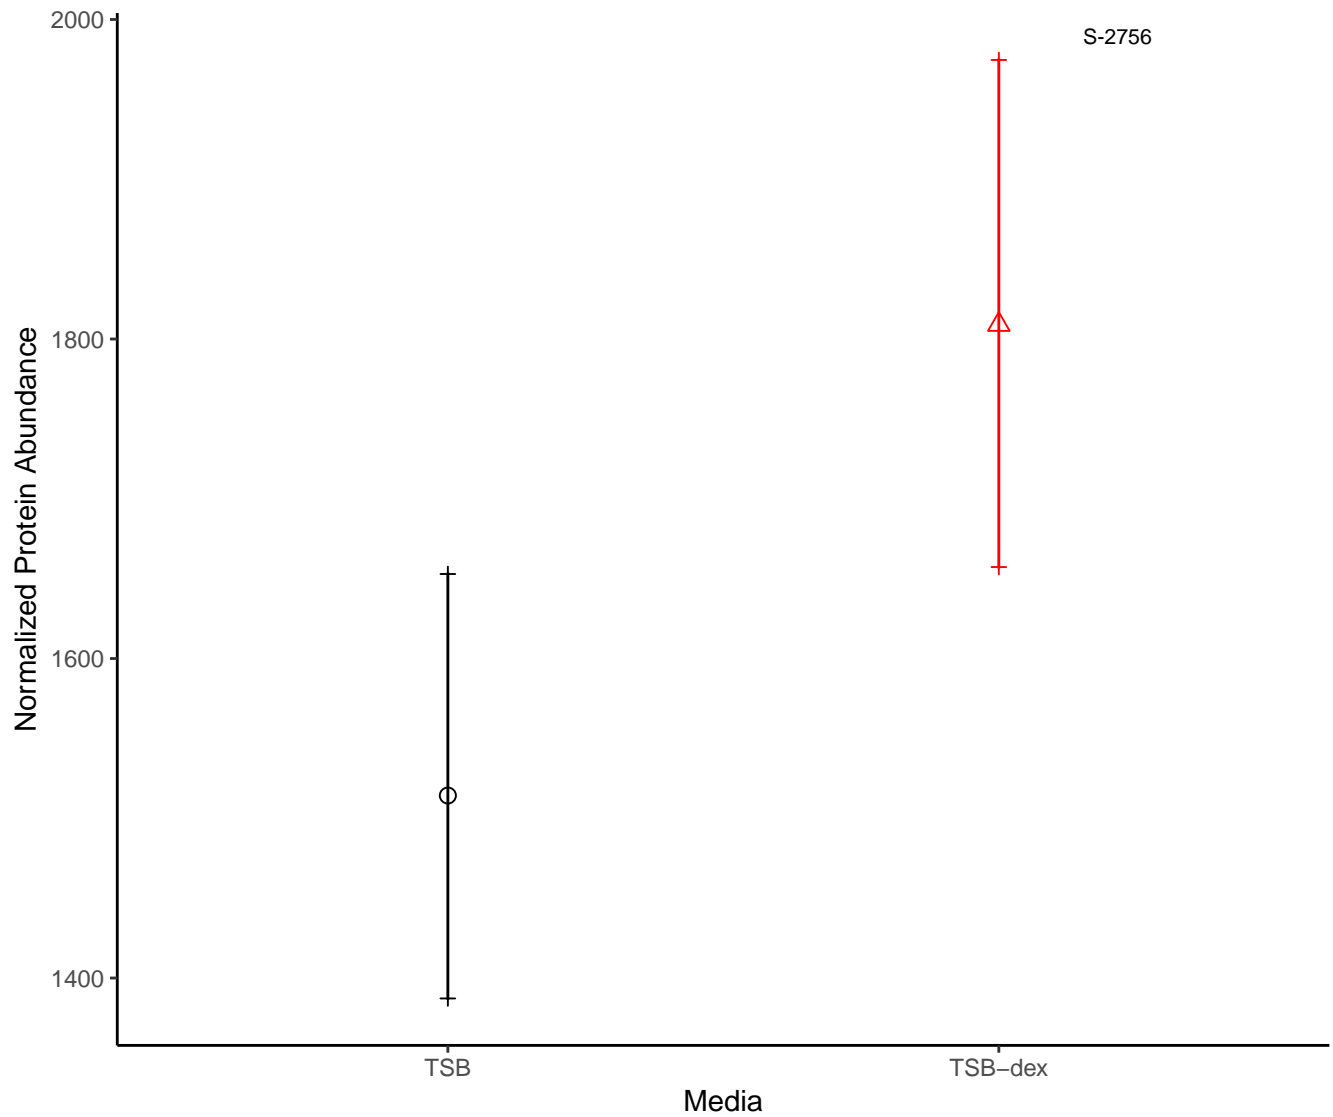

⊕ TSB-dex

△ TSB

# PDP\_STAAM

S-2757

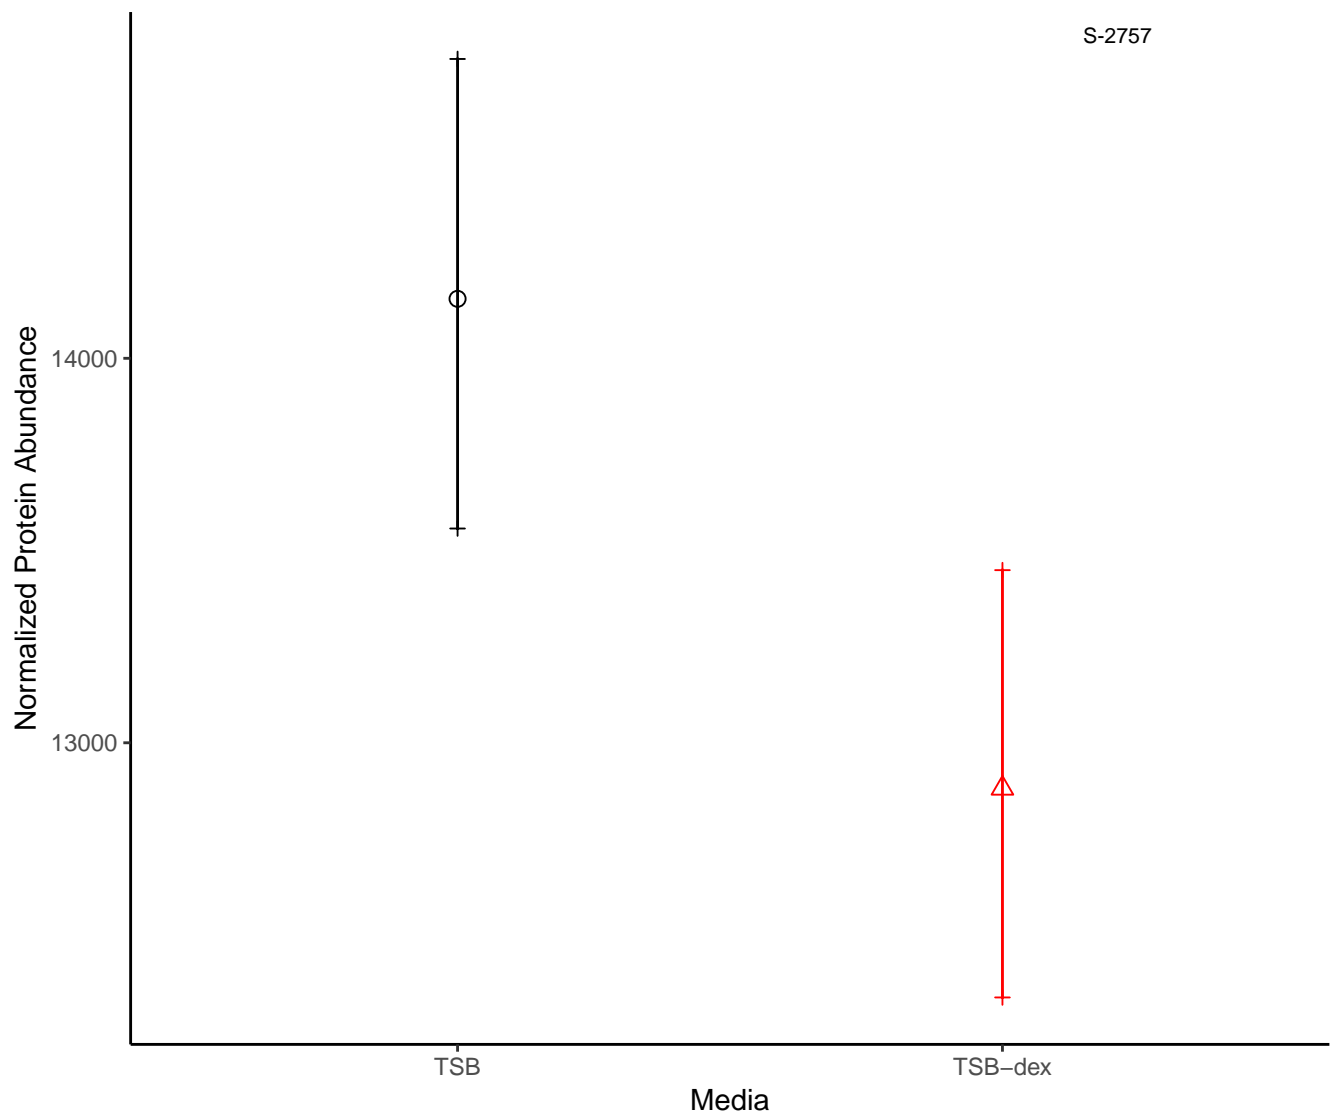

⊕ TSB-dex

△ TSB

# PDRP\_STAAM

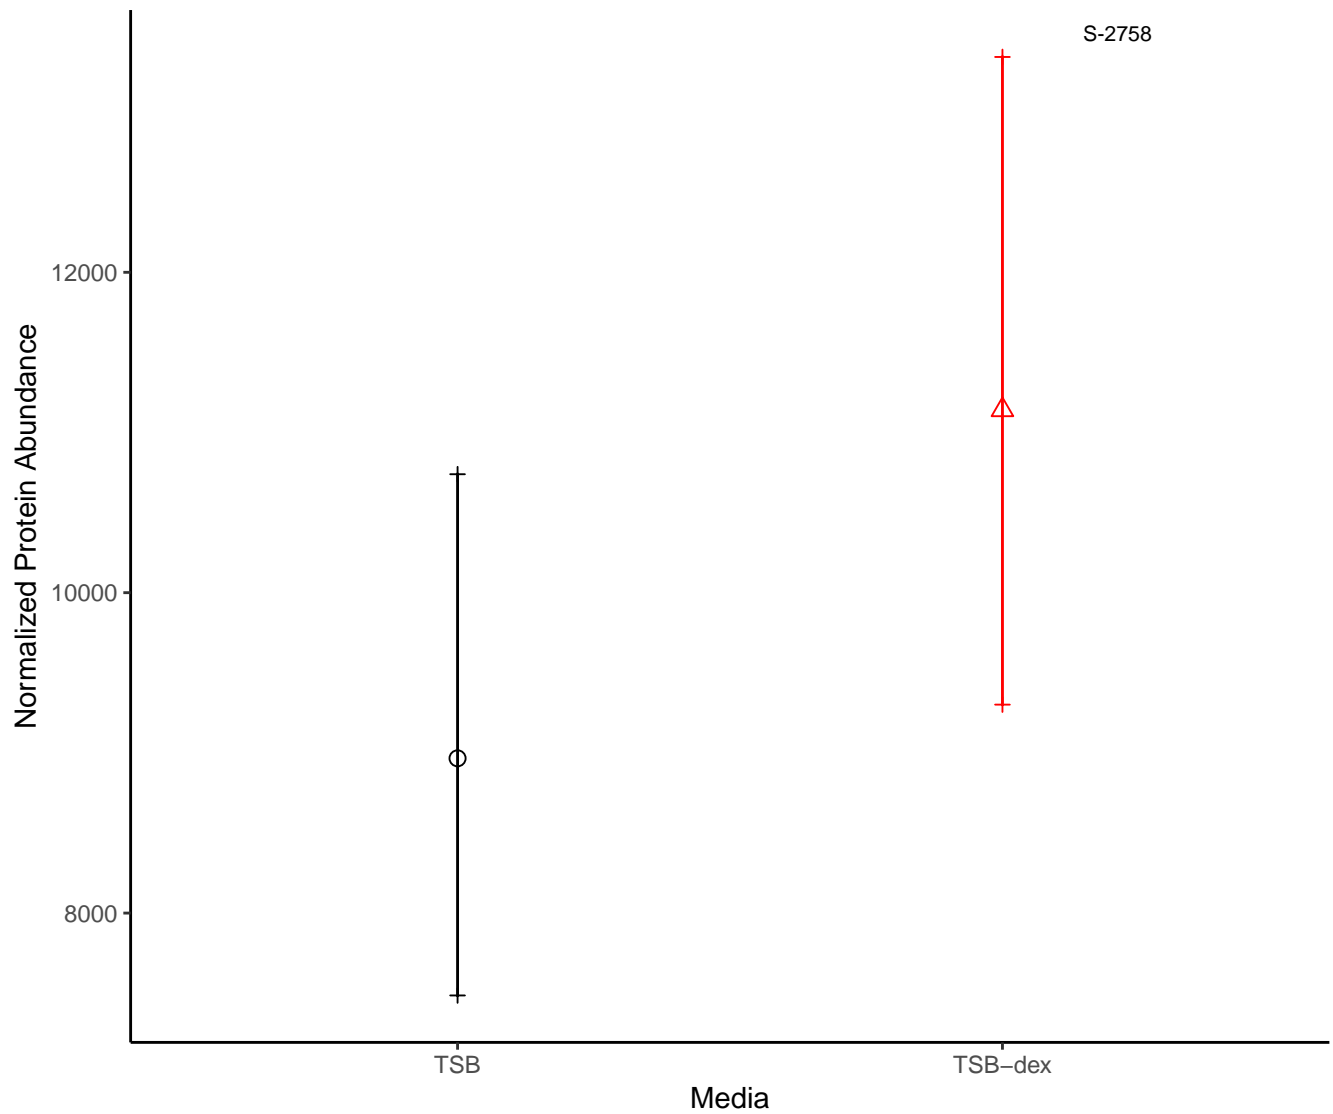

⊖ TSB-dex

△ TSB

# PDXS\_STAAM

S-2759

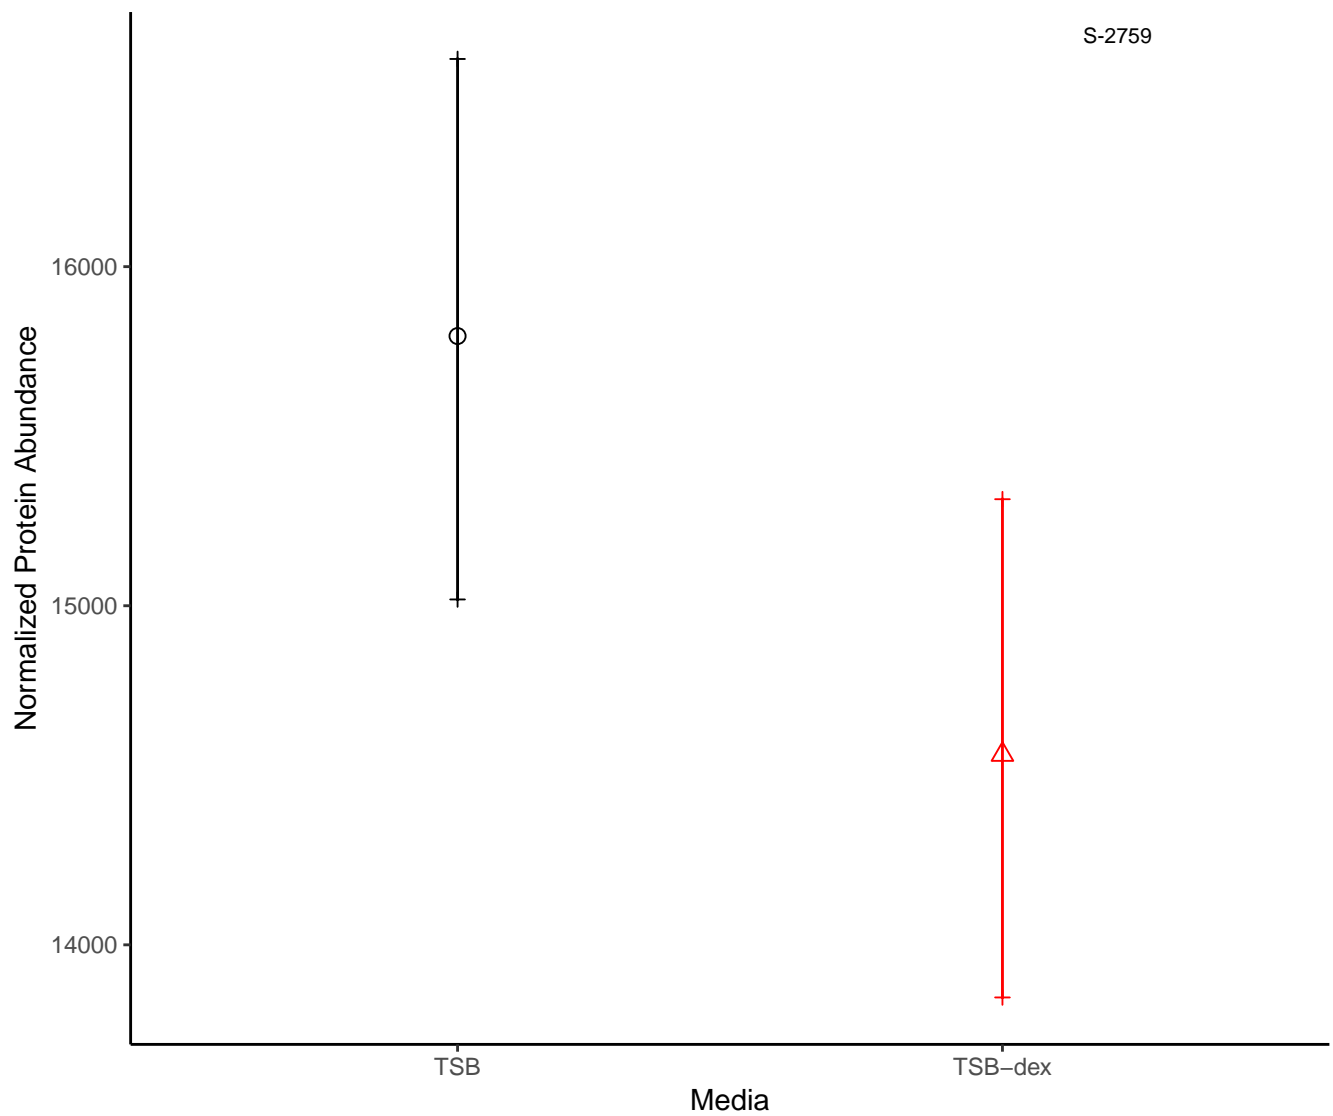

⊕ TSB-dex

△ TSB

# PDXT\_STAAM

S-2760

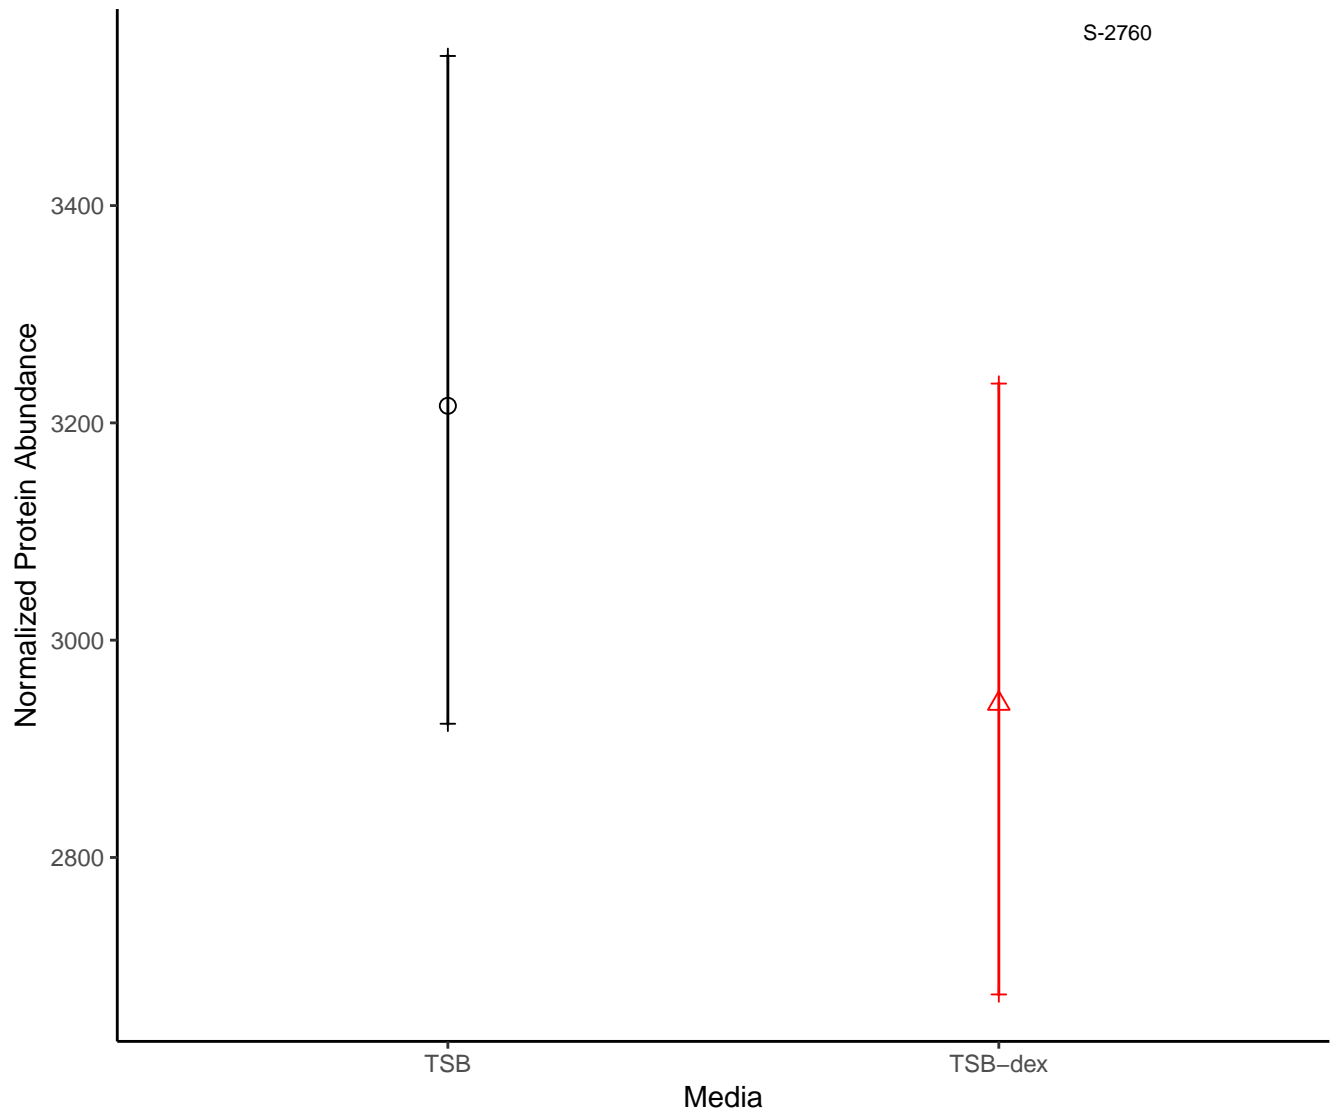

⊕ TSB-dex

△ TSB



# PEPVL\_STAAM

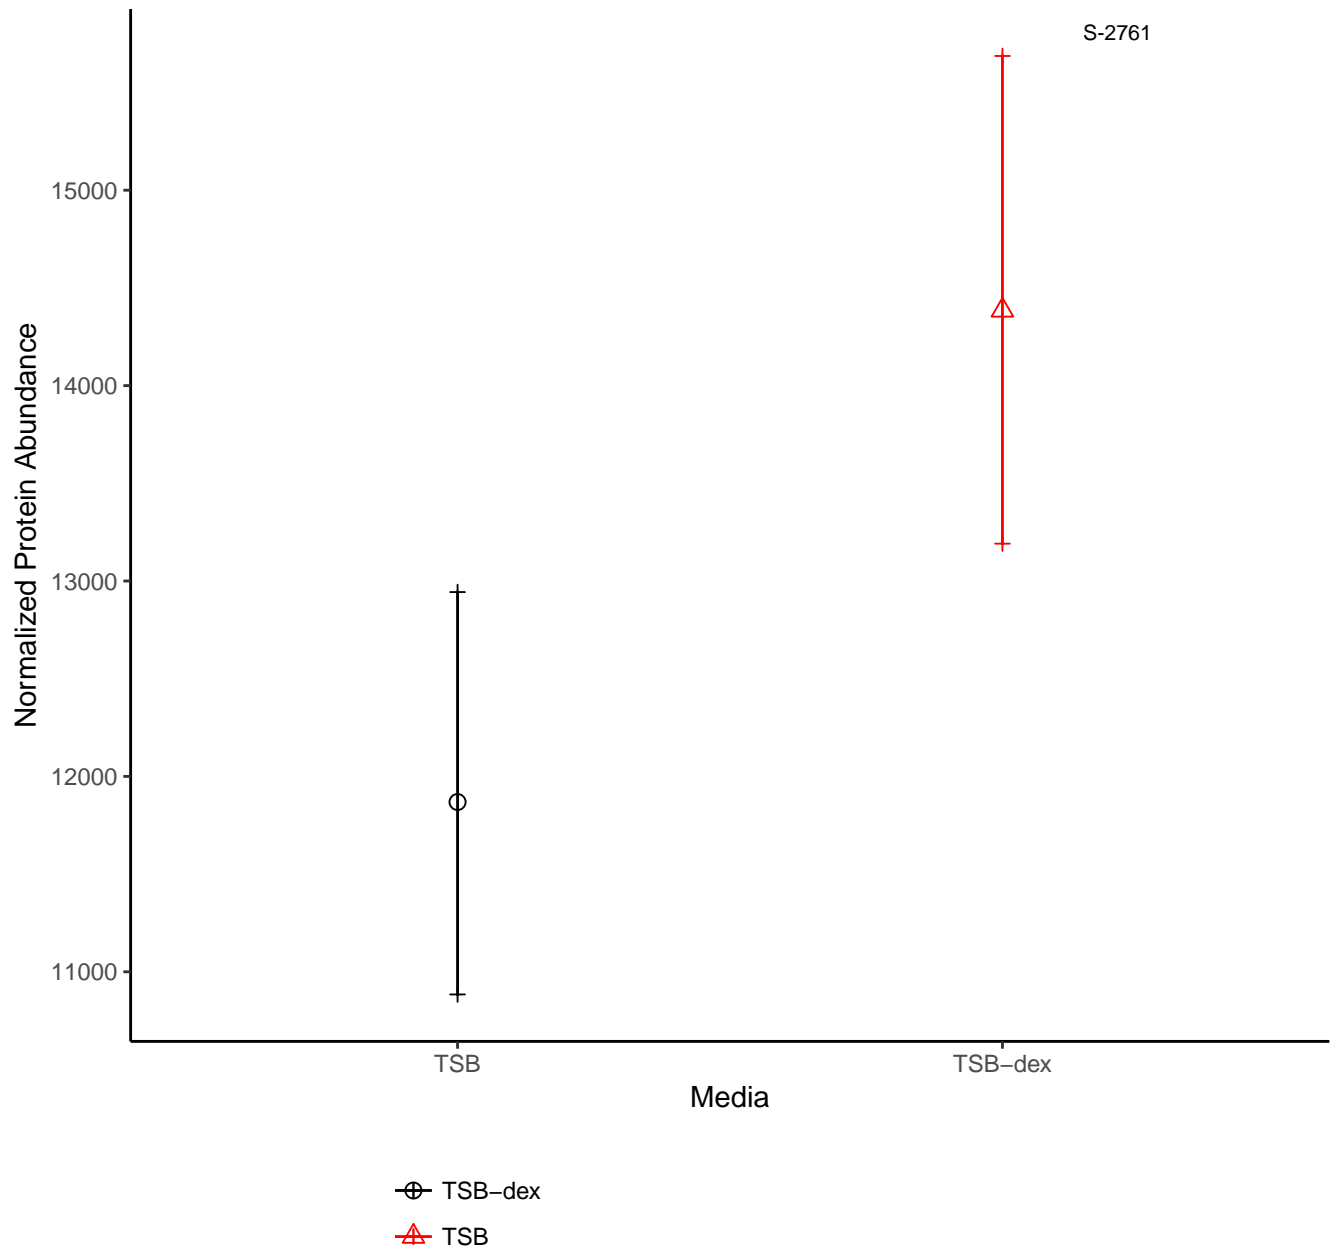

# PERR\_STAAM

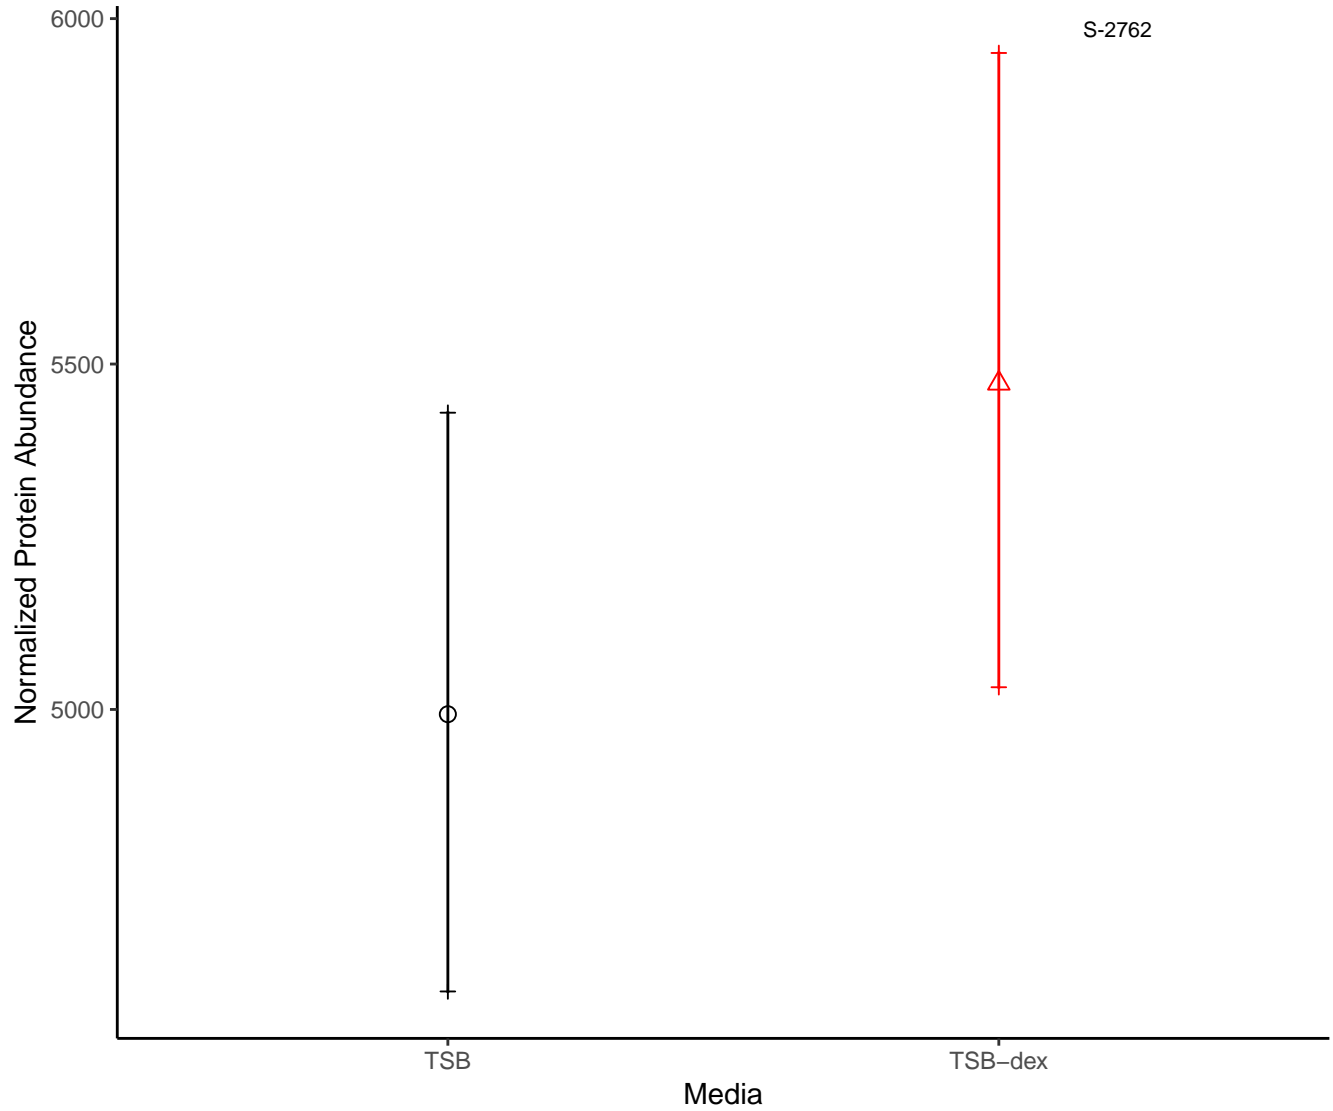

⊕ TSB-dex

△ TSB

# PFKA\_STAAM

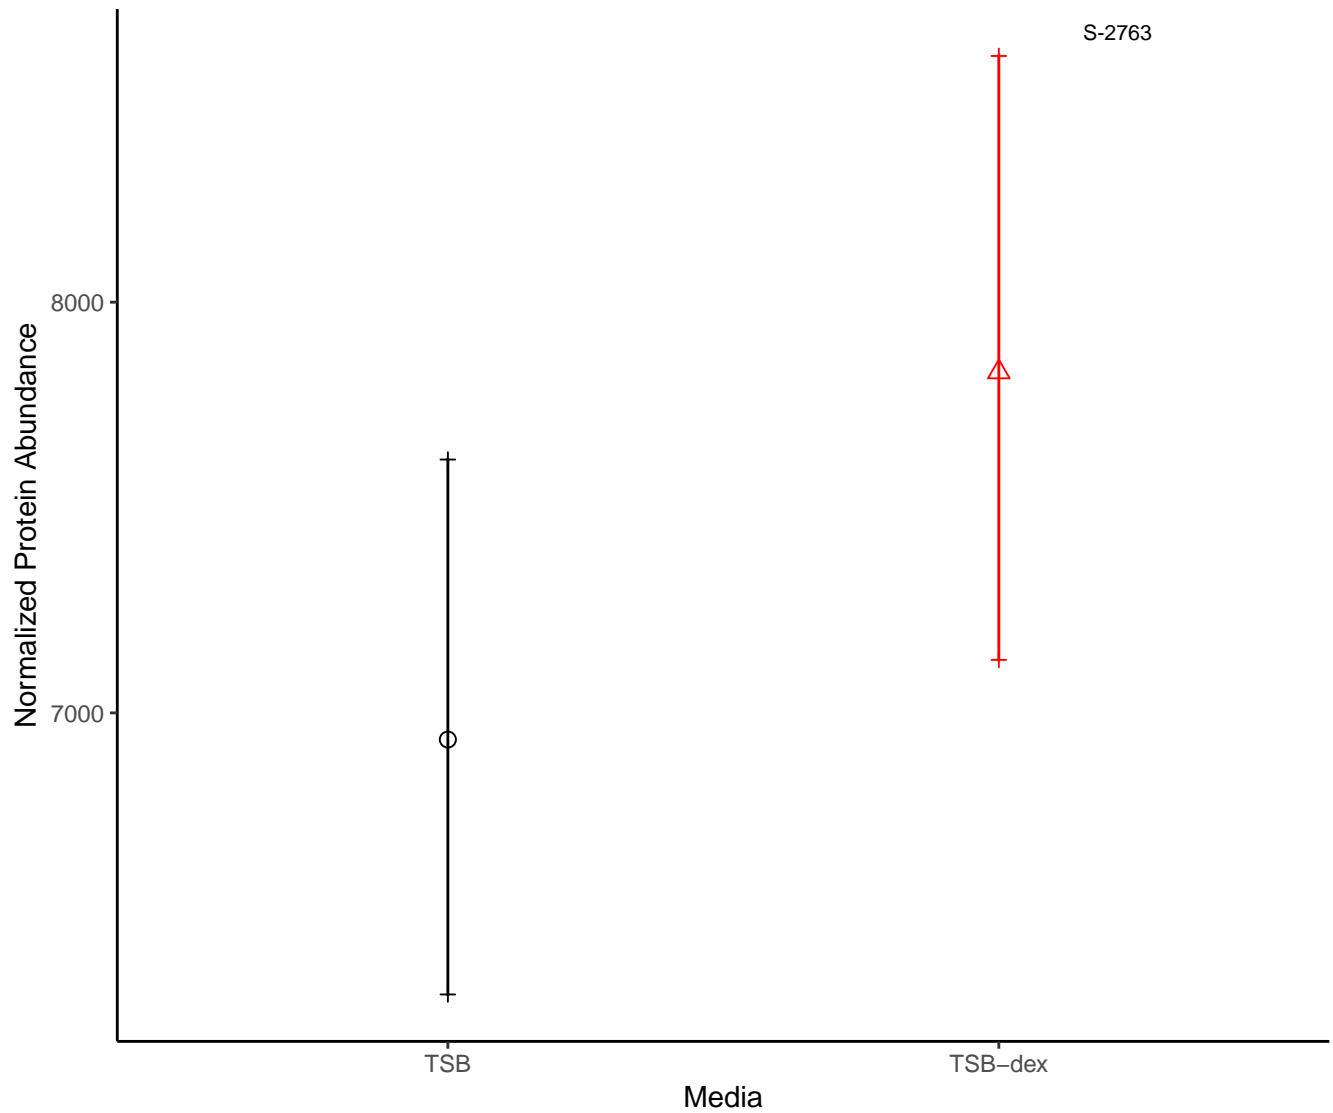

⊕ TSB-dex

△ TSB

# PFLA\_STAAM

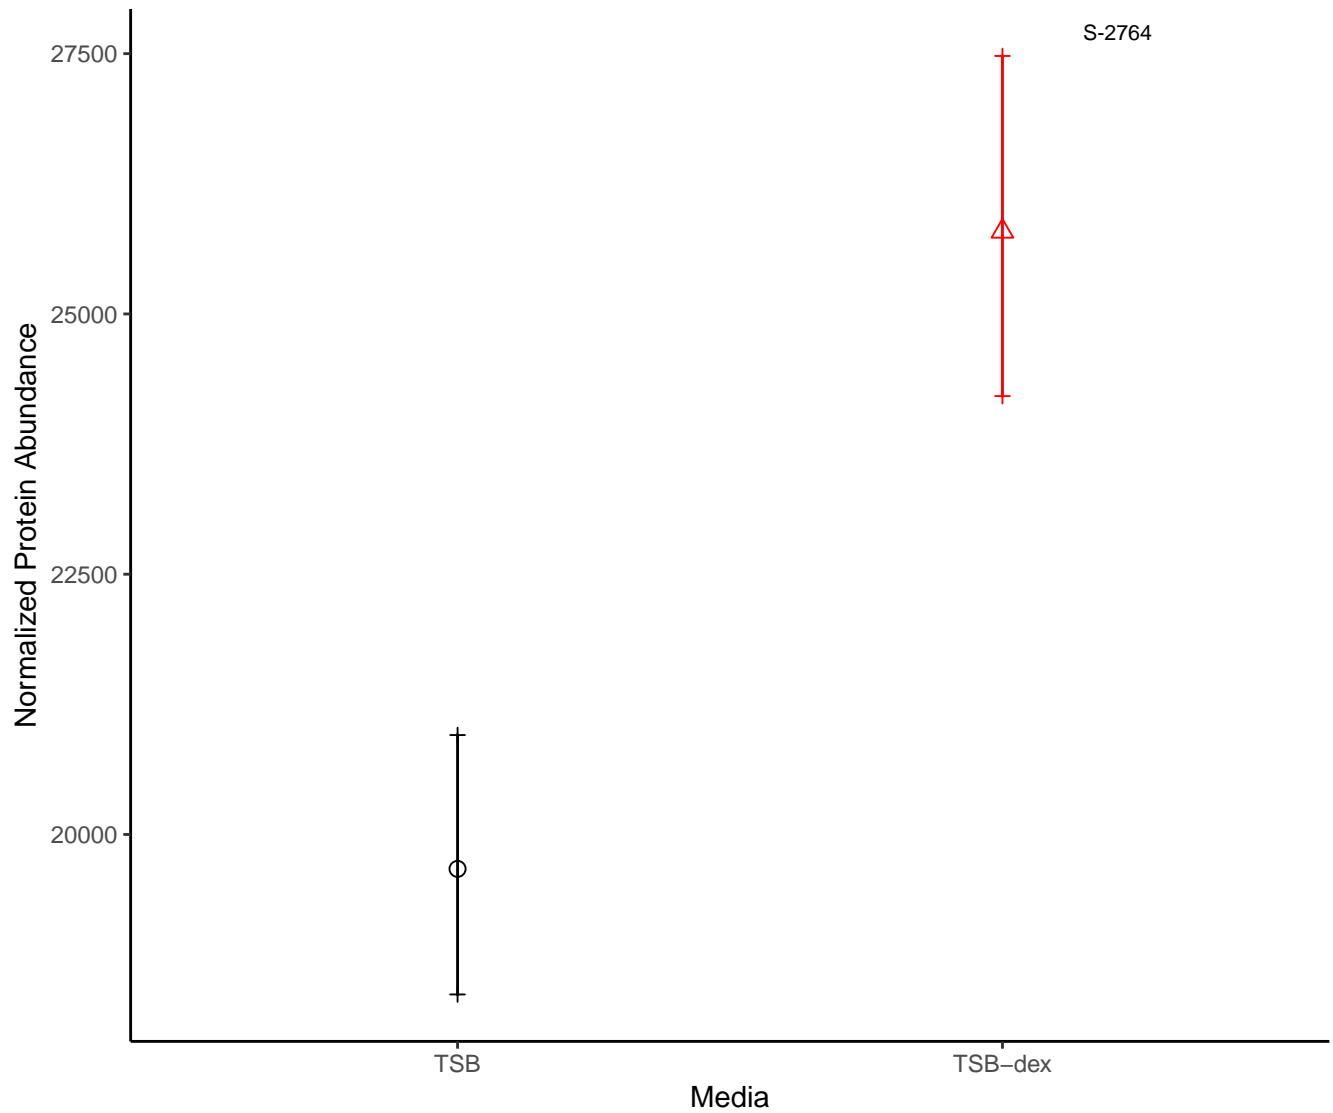

⊕ TSB-dex

△ TSB

# PFLB\_STAAM

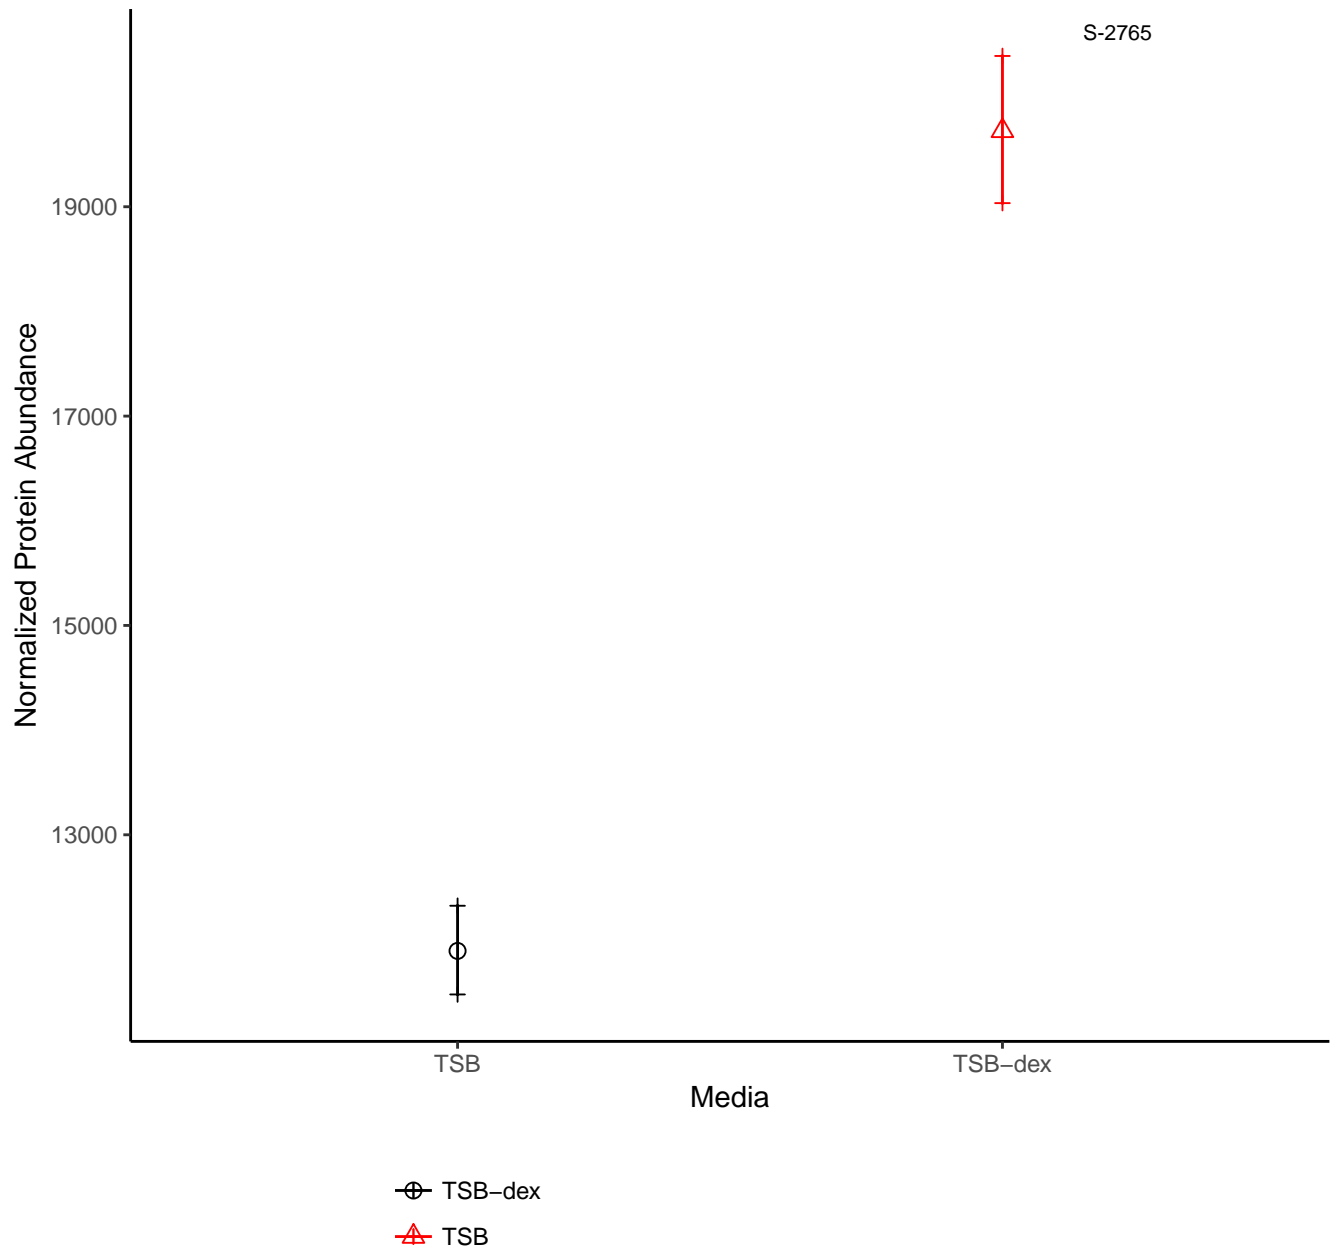

# PGCA\_STAAM

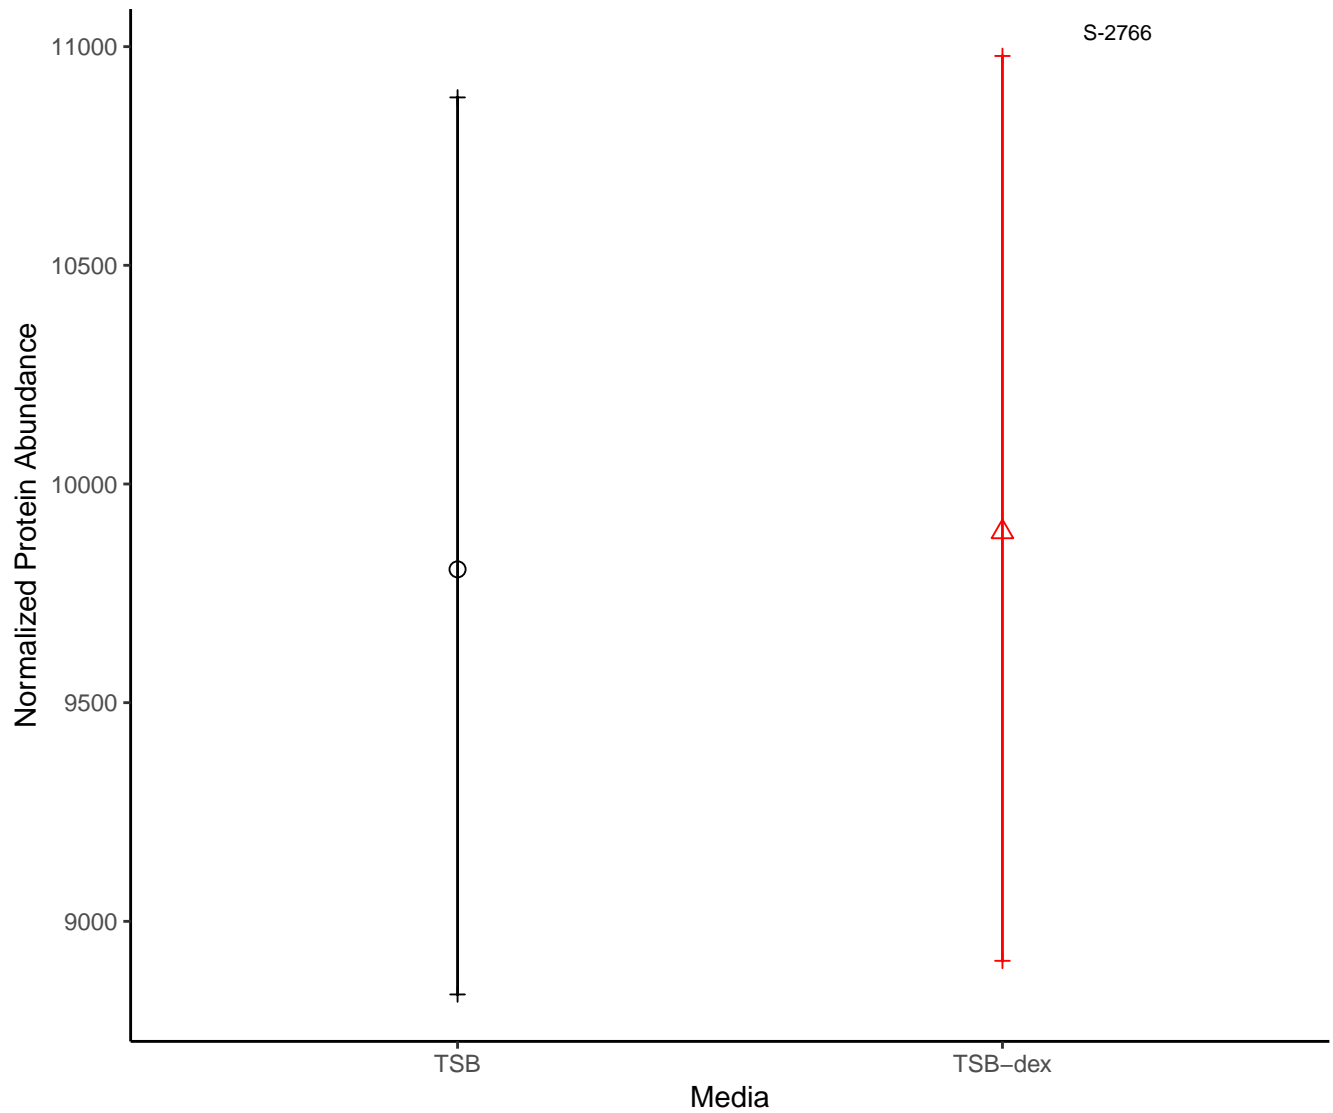

⊕ TSB-dex

△ TSB

# PGK\_STAAM

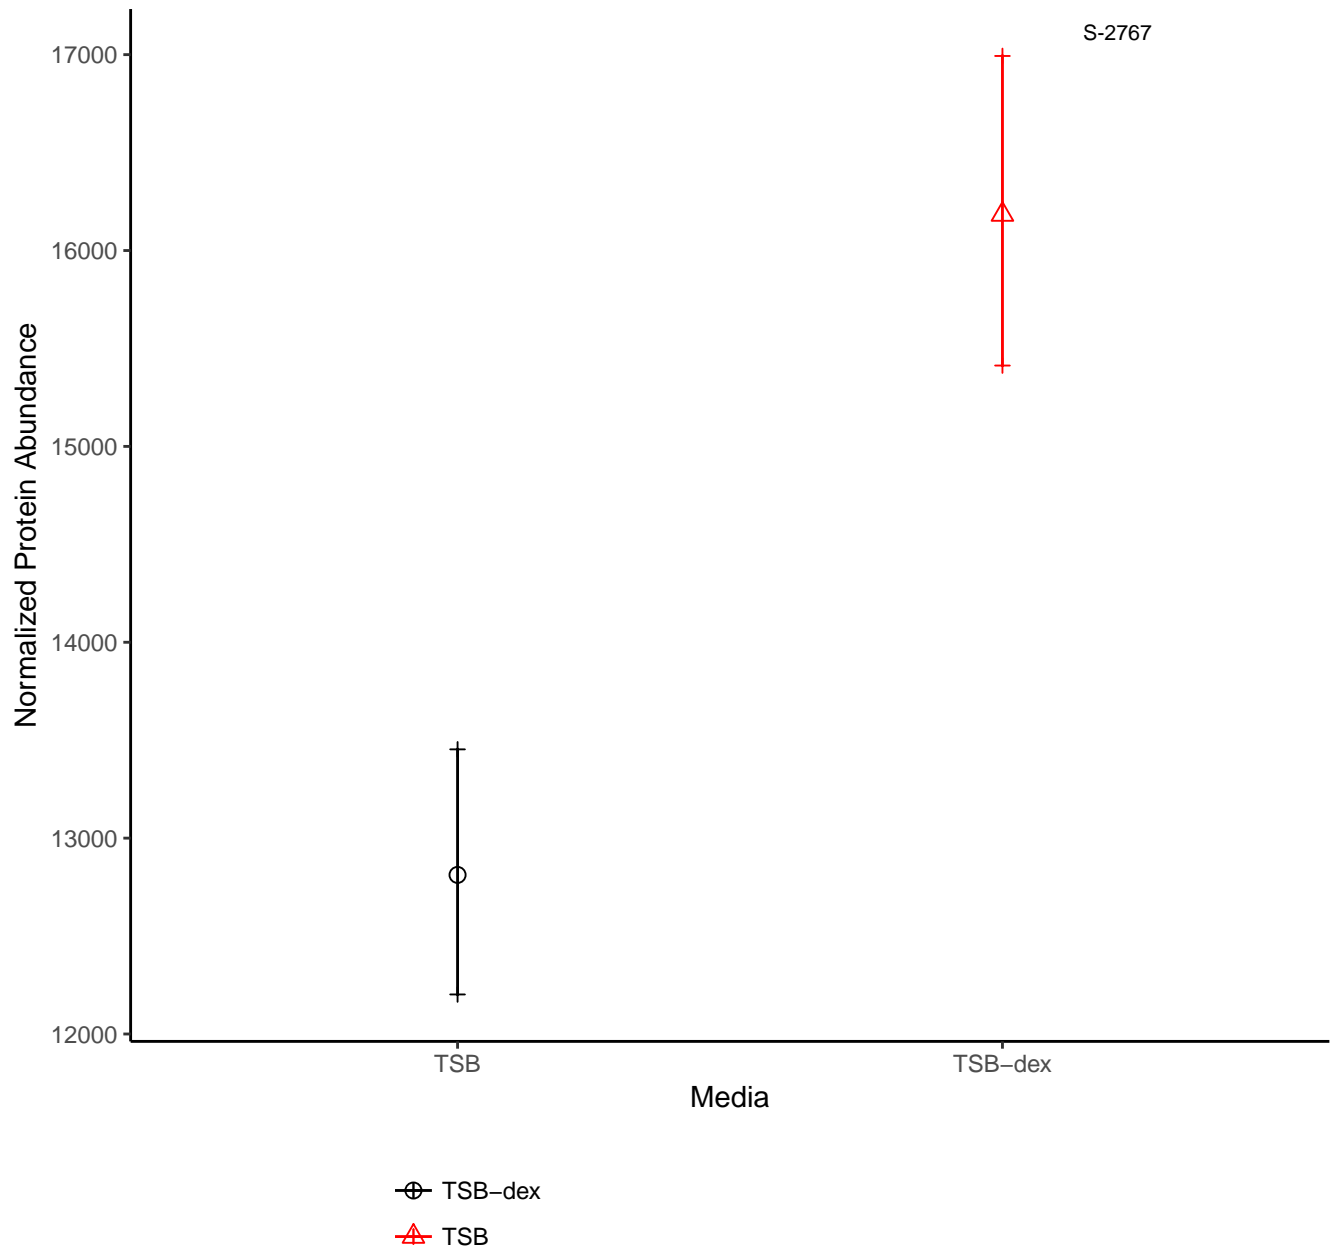

# PHNC\_STAAM

S-2768

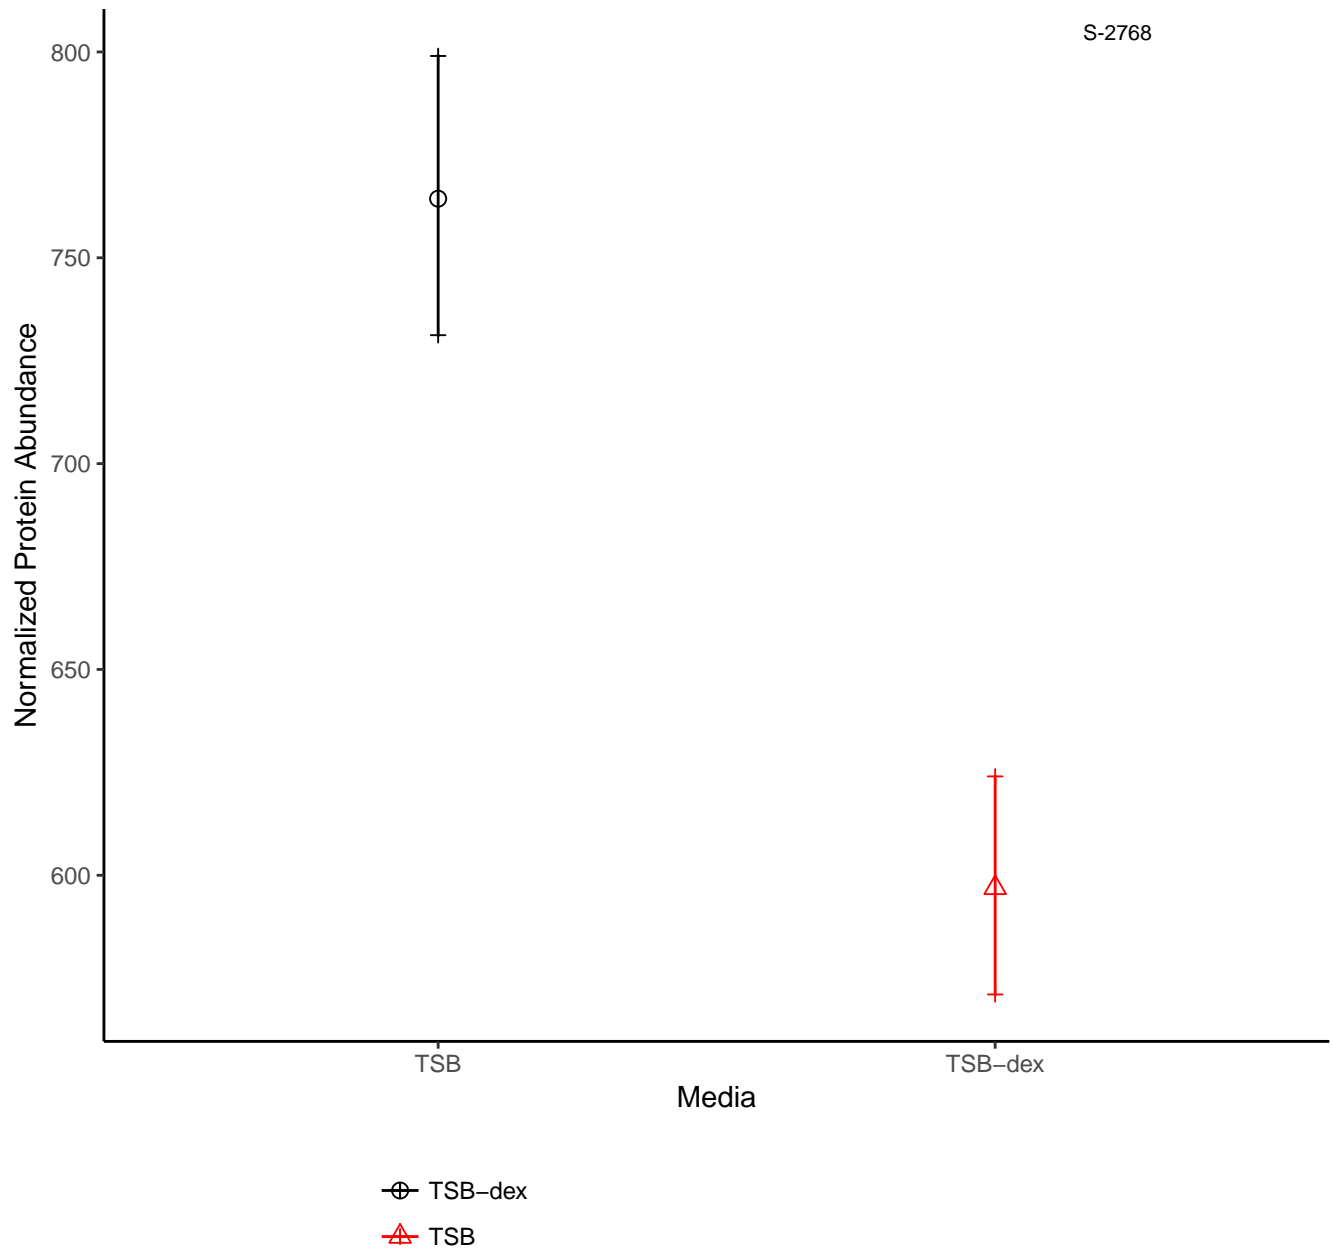



# PLSX\_STAAM

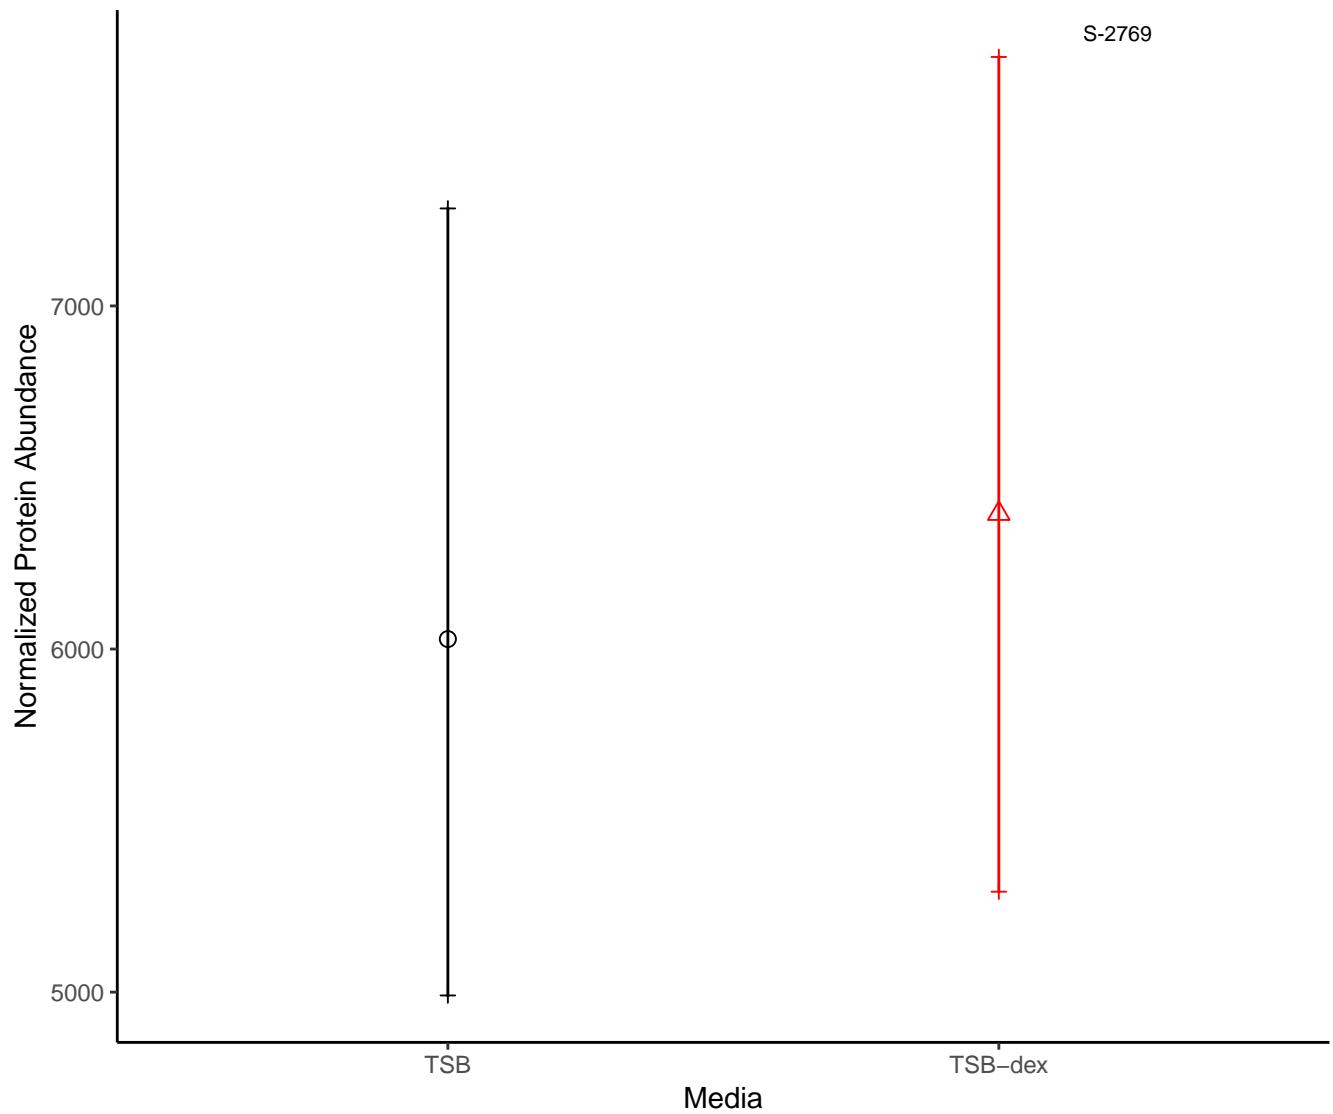

⊕ TSB-dex

△ TSB

# PNP\_STAAM

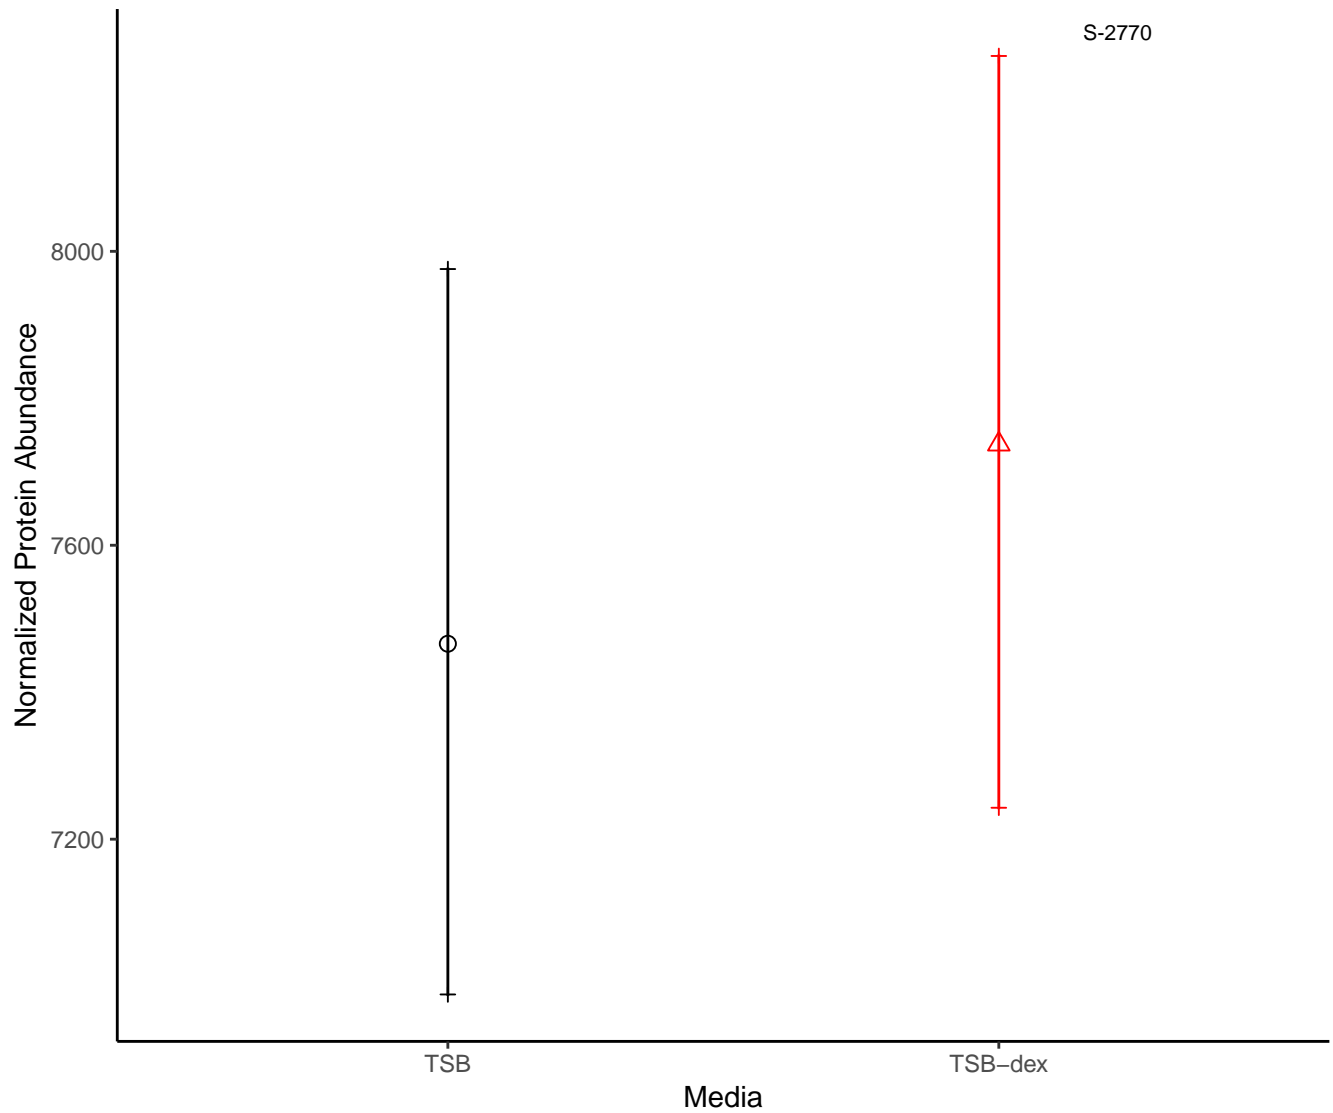

S-2770

⊕ TSB-dex

△ TSB

# PPAC\_STAAM

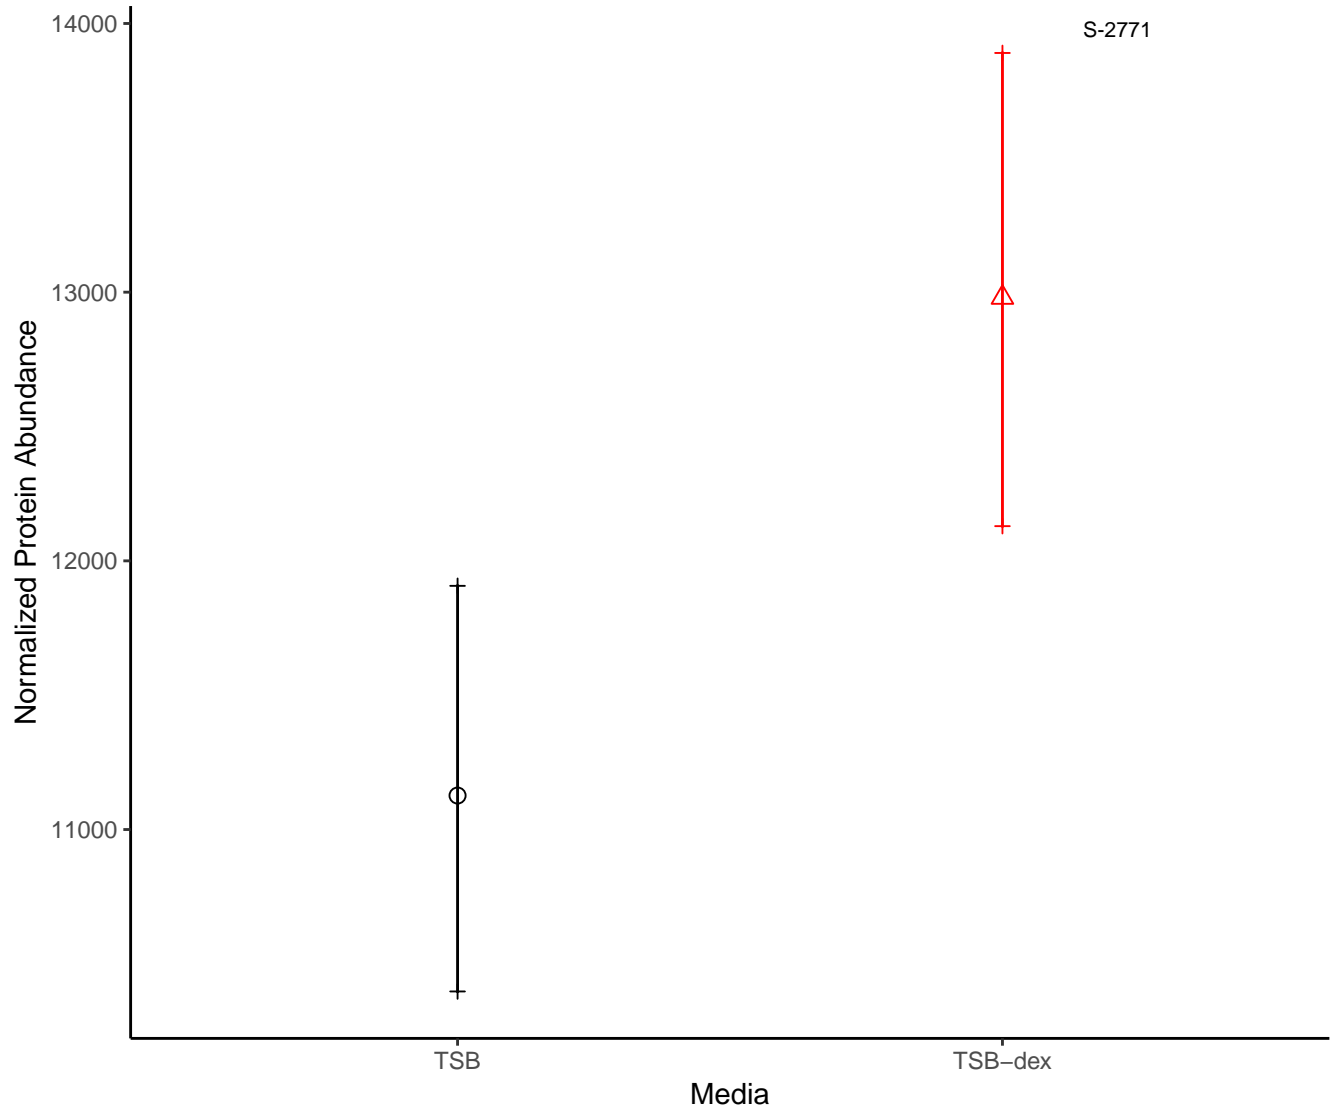

⊕ TSB-dex

△ TSB

# PPAT\_STAAM

S-2772

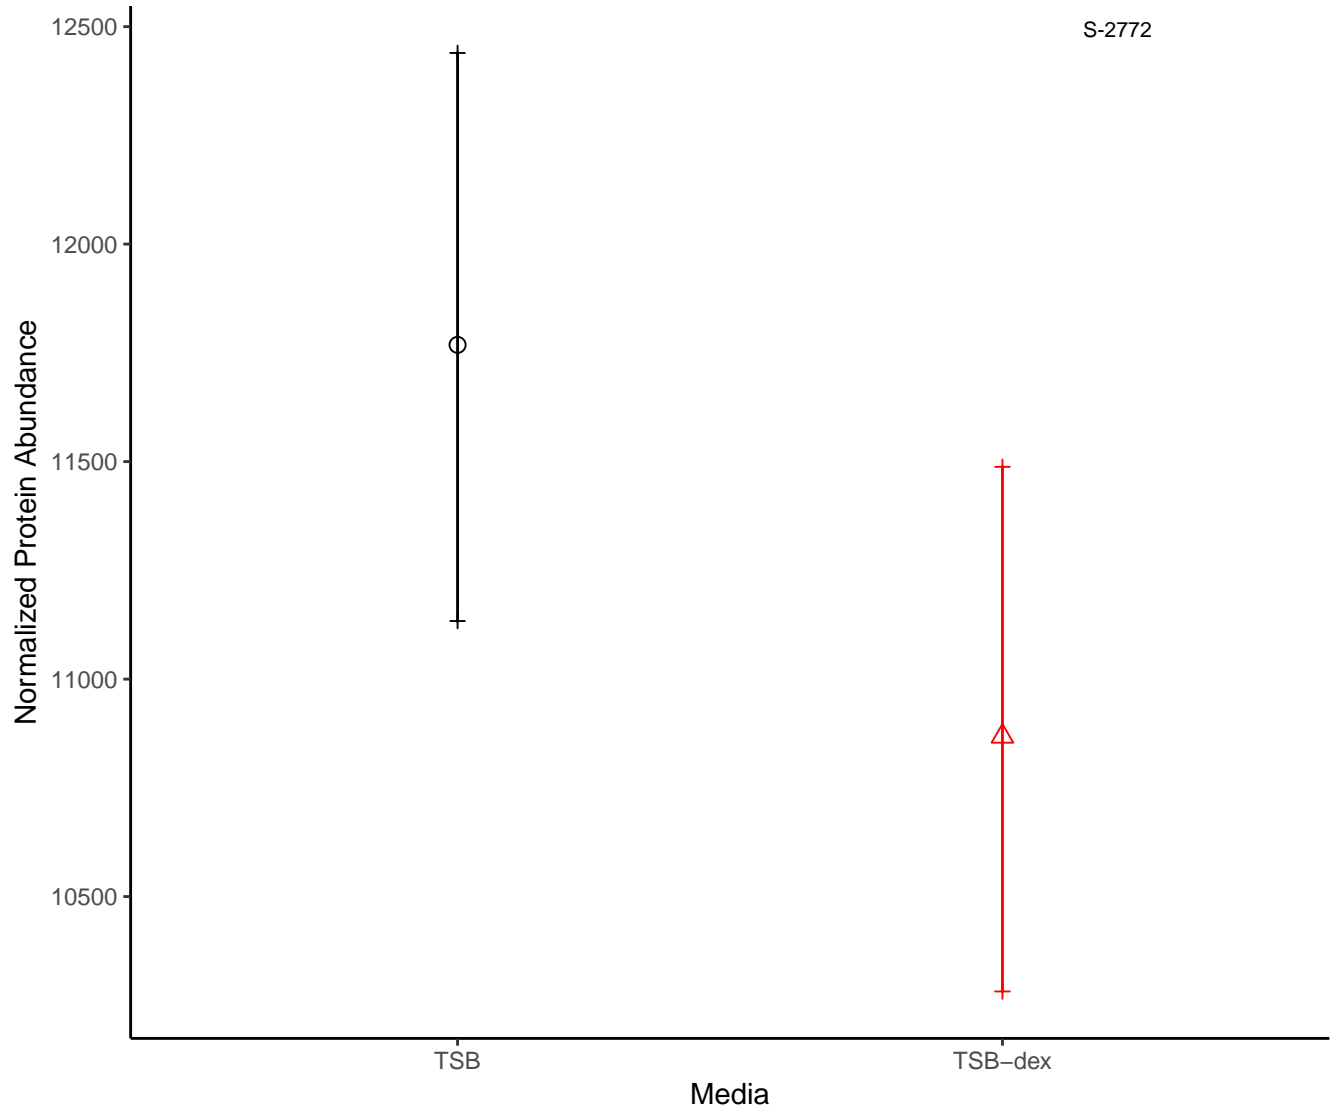

⊕ TSB-dex

△ TSB

# PPI1\_STAAM

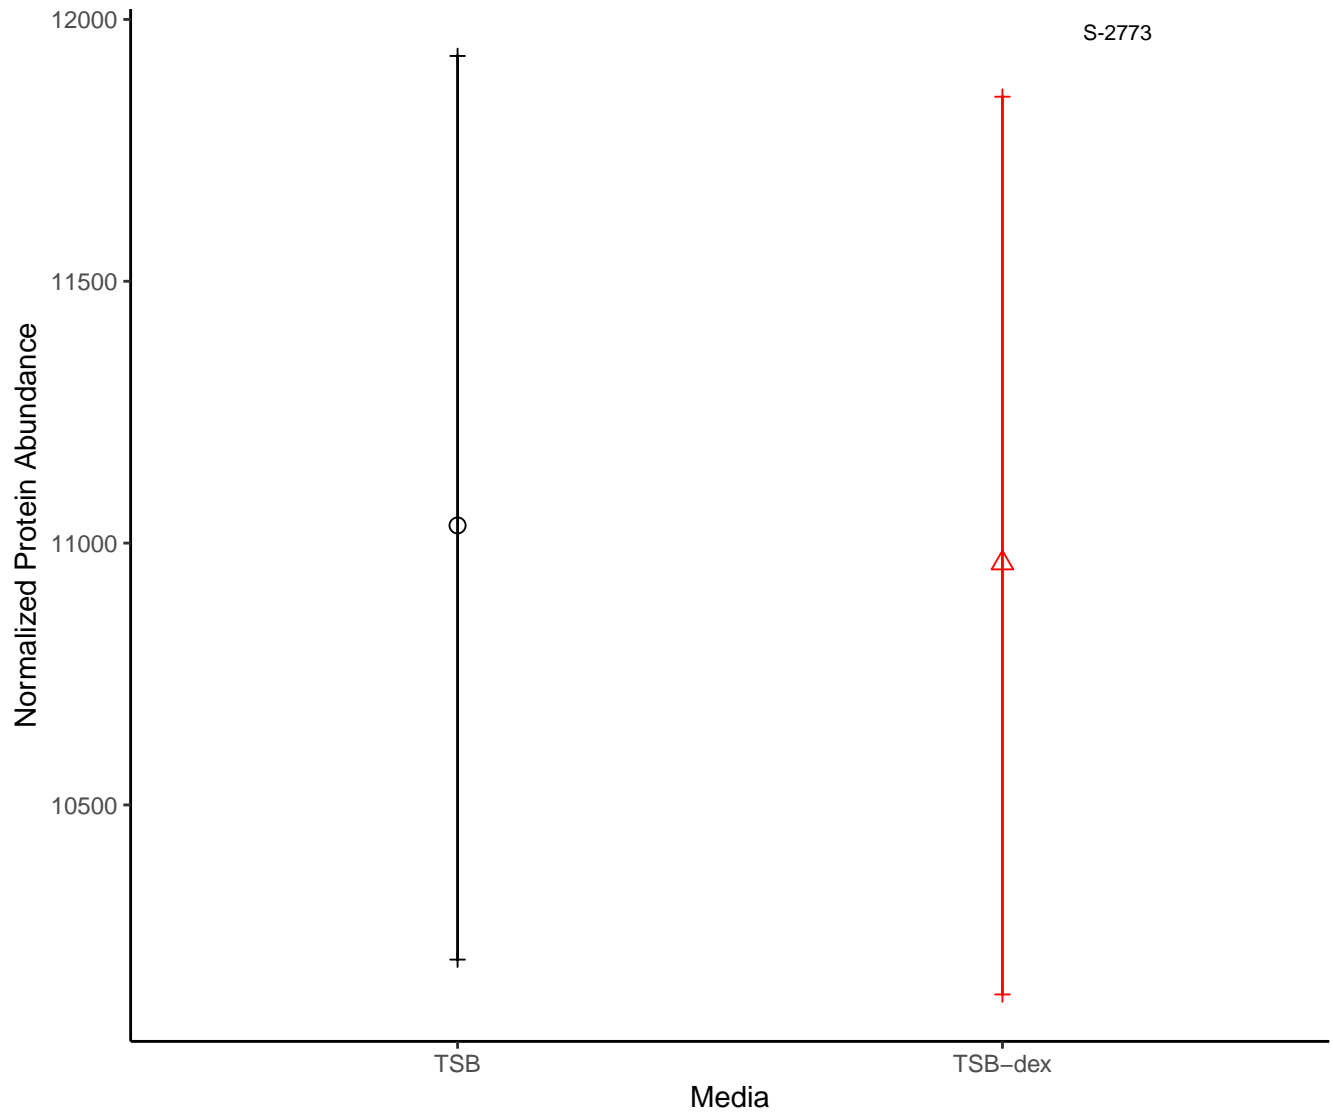

⊕ TSB-dex

△ TSB

# PRSA\_STAAM

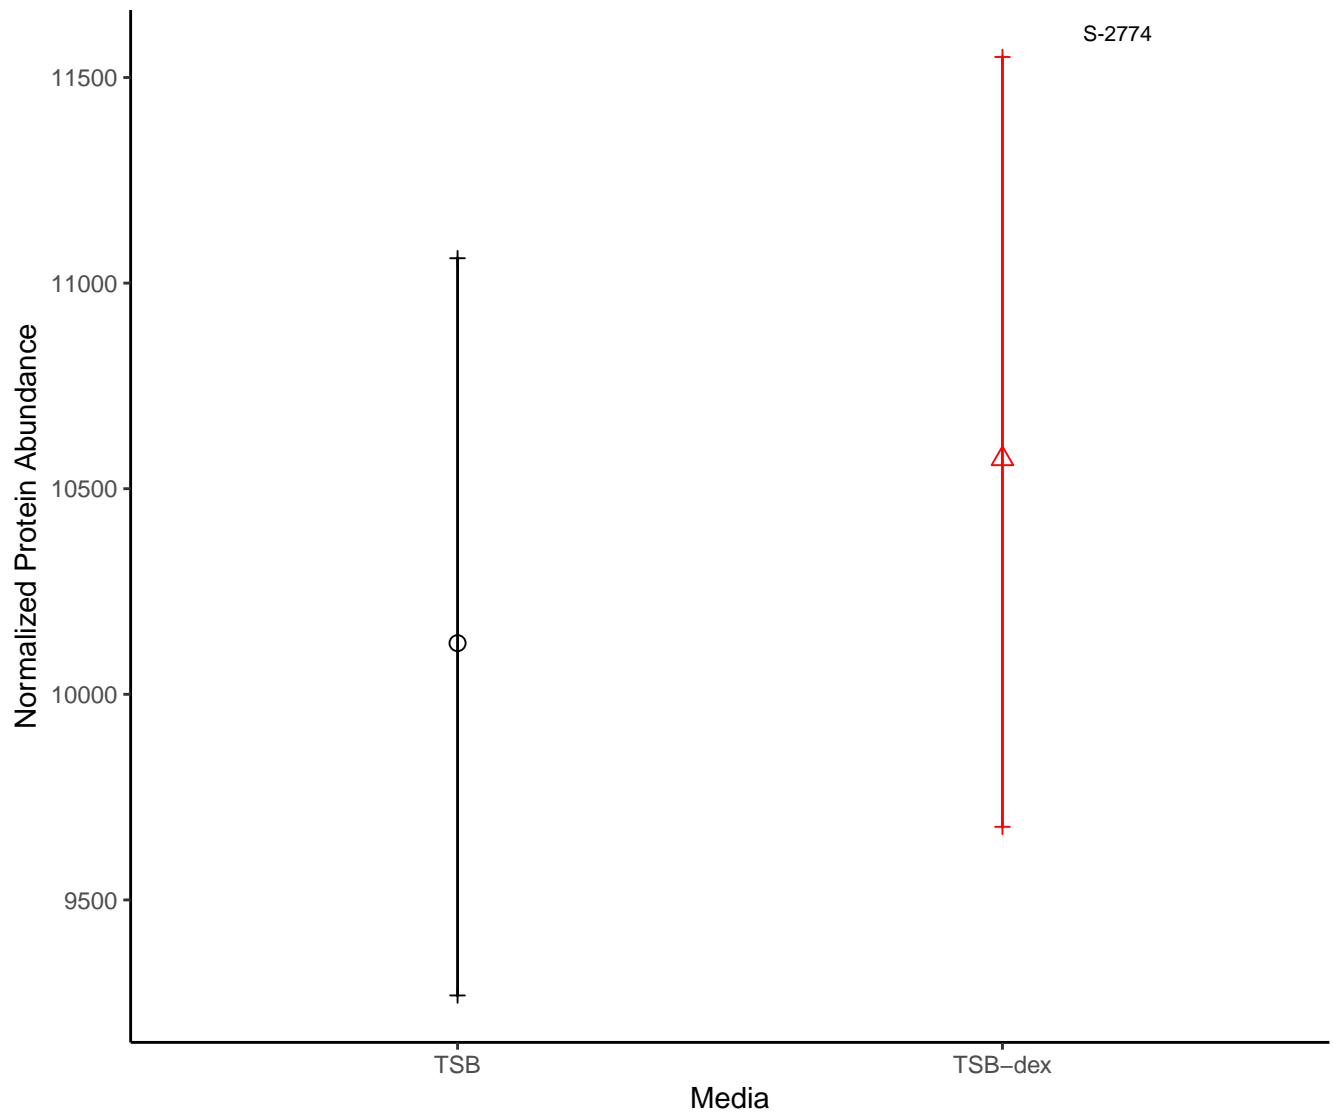

⊕ TSB-dex

△ TSB

# PSTB\_STAAM

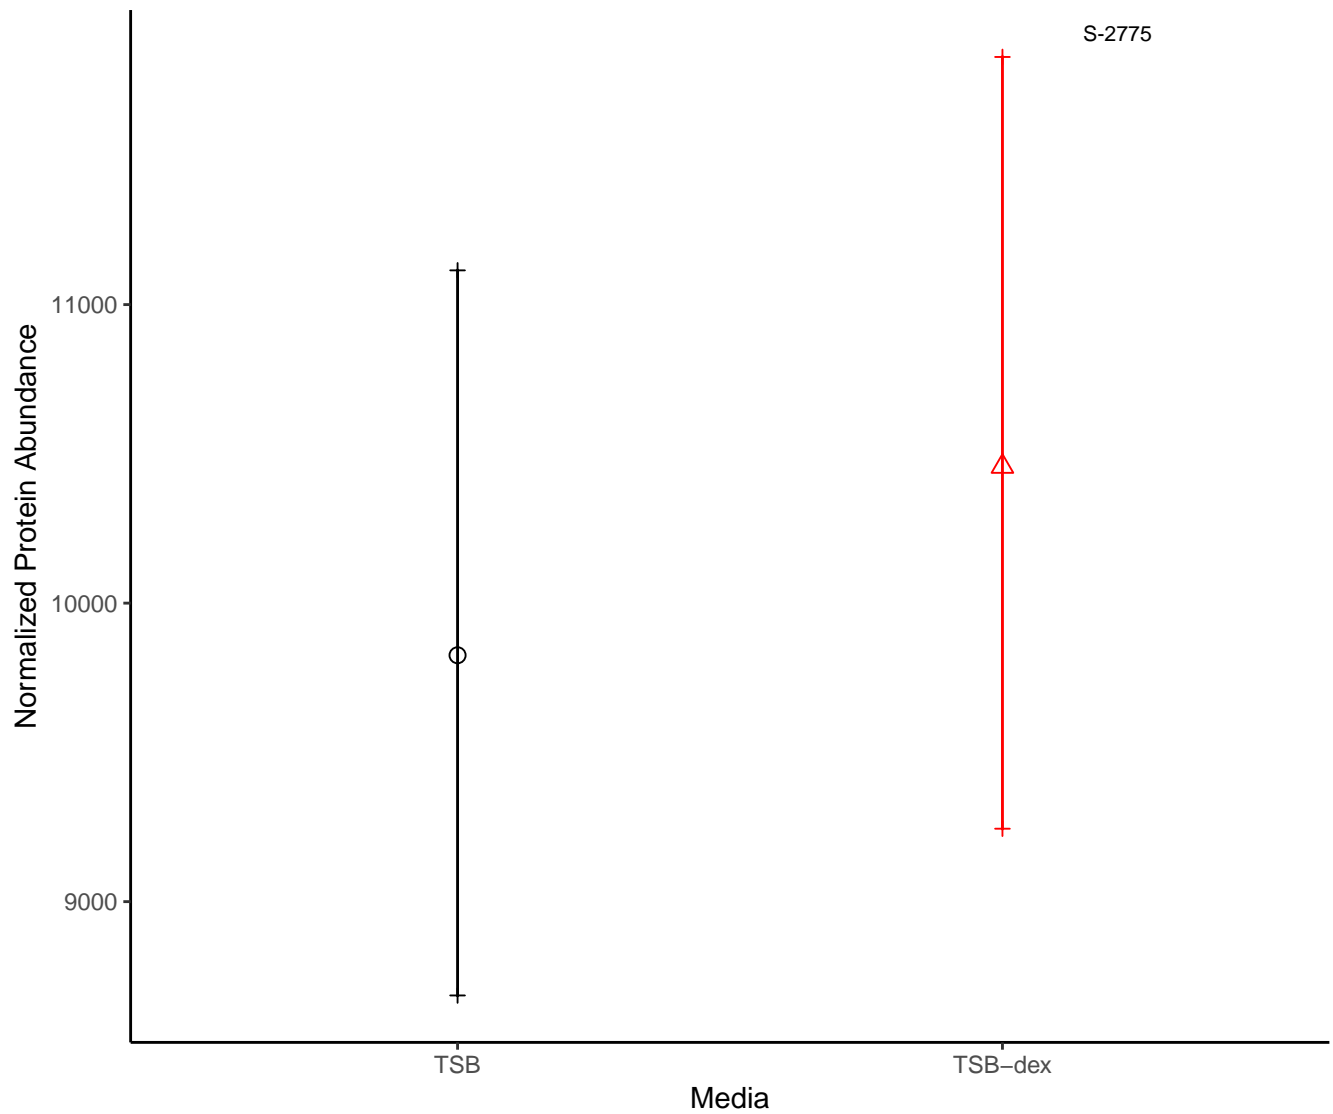

⊕ TSB-dex

△ TSB

# PSTS\_STAAM

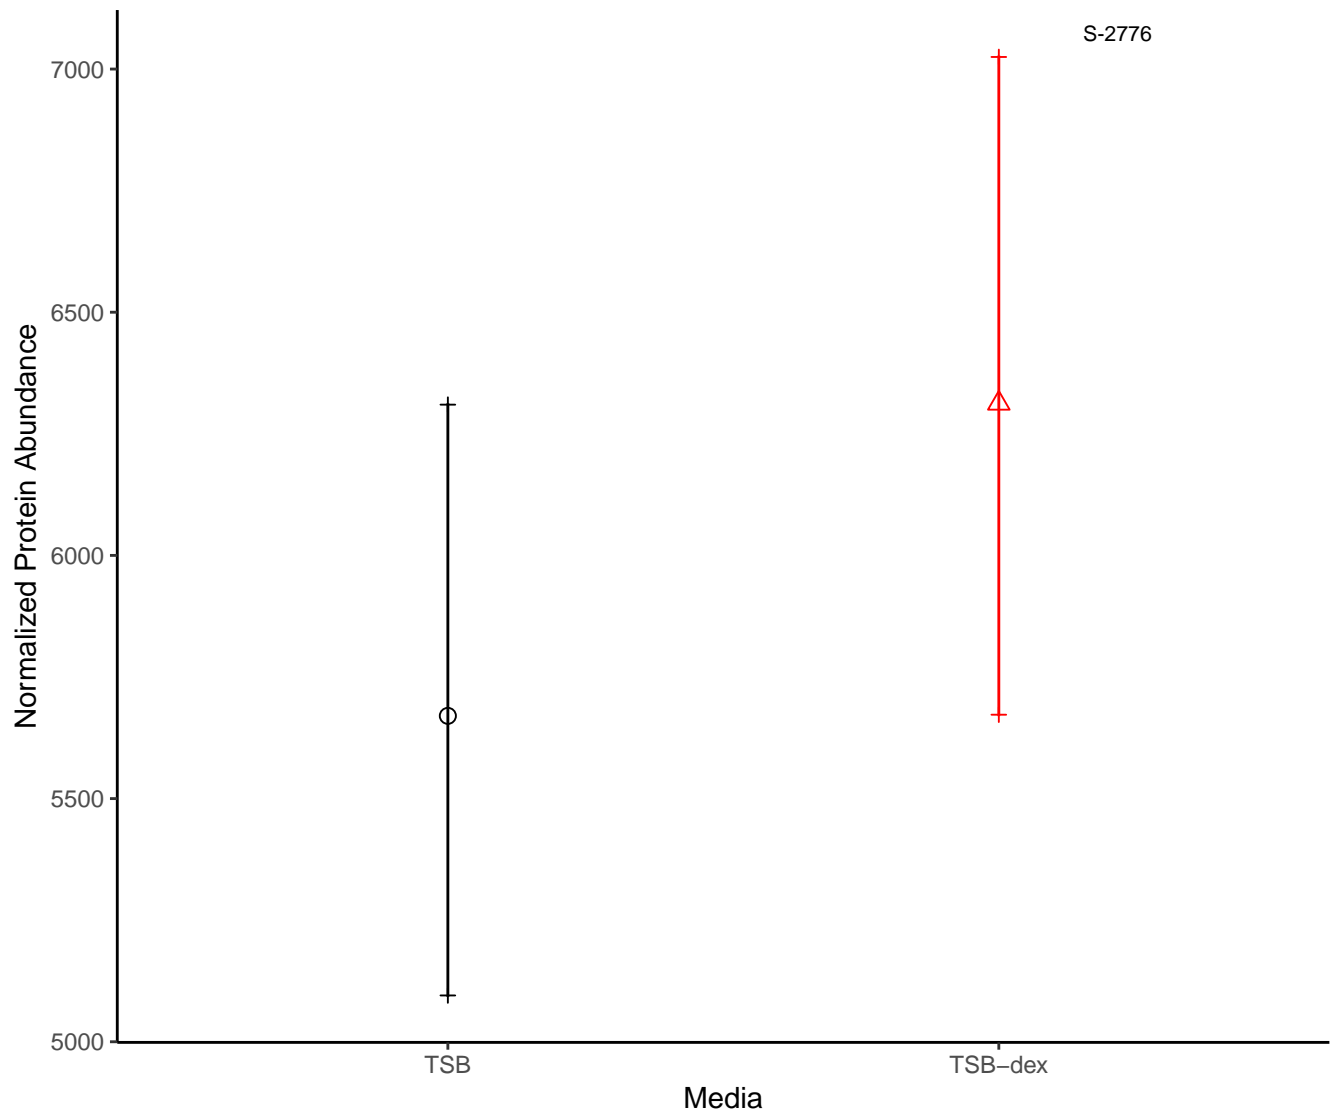



# PT1\_STAAM

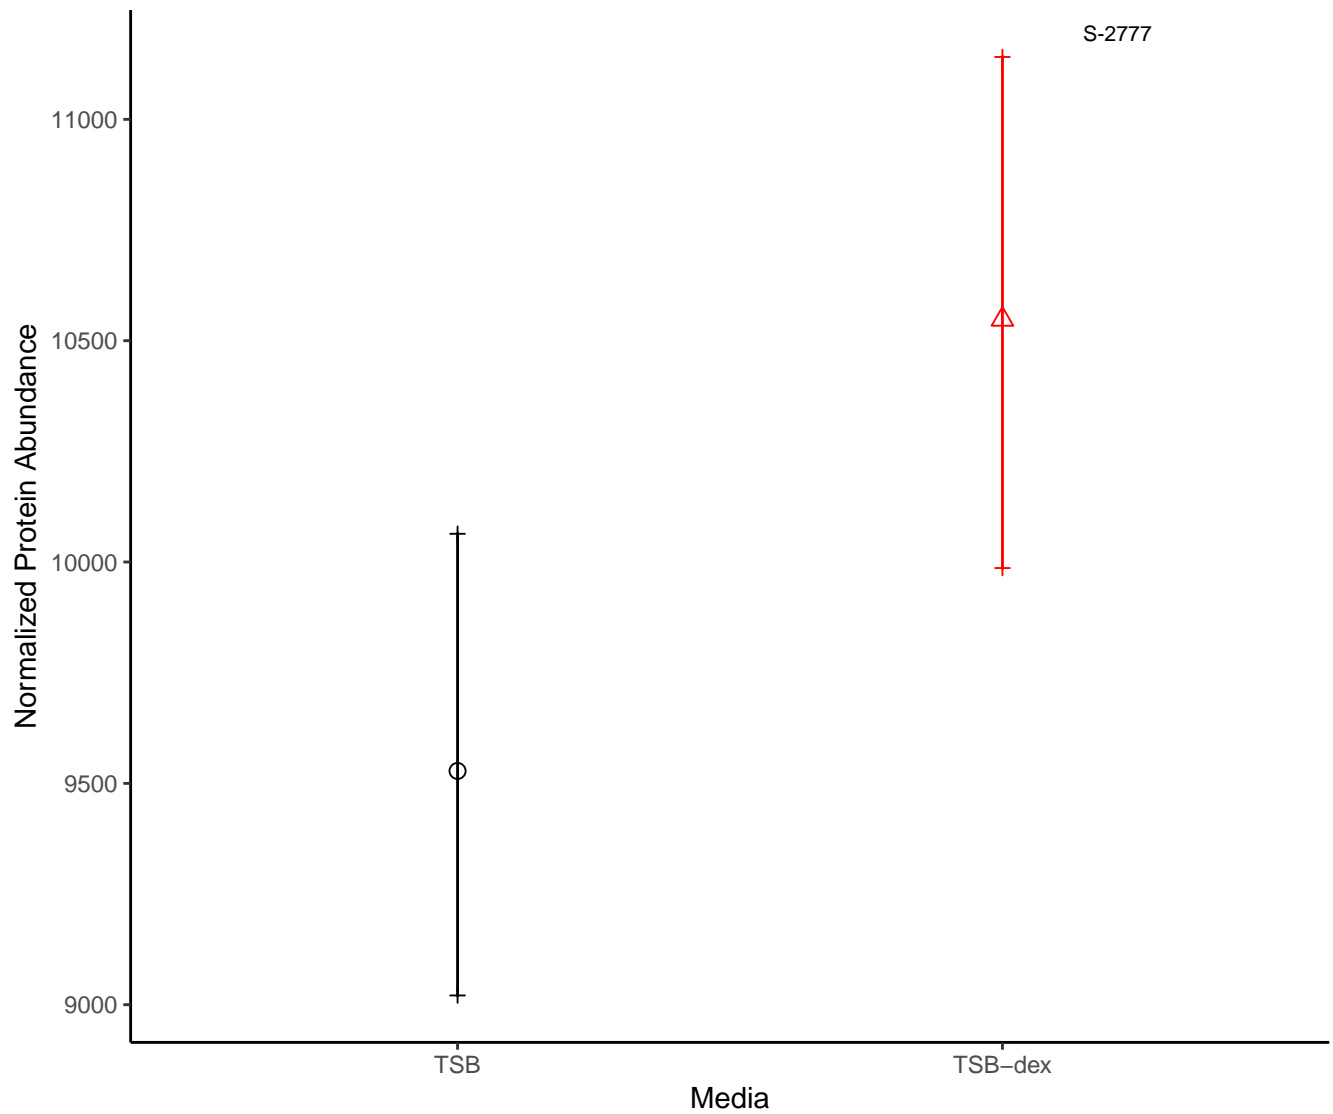

⊕ TSB-dex

△ TSB

# PTAS\_STAAM

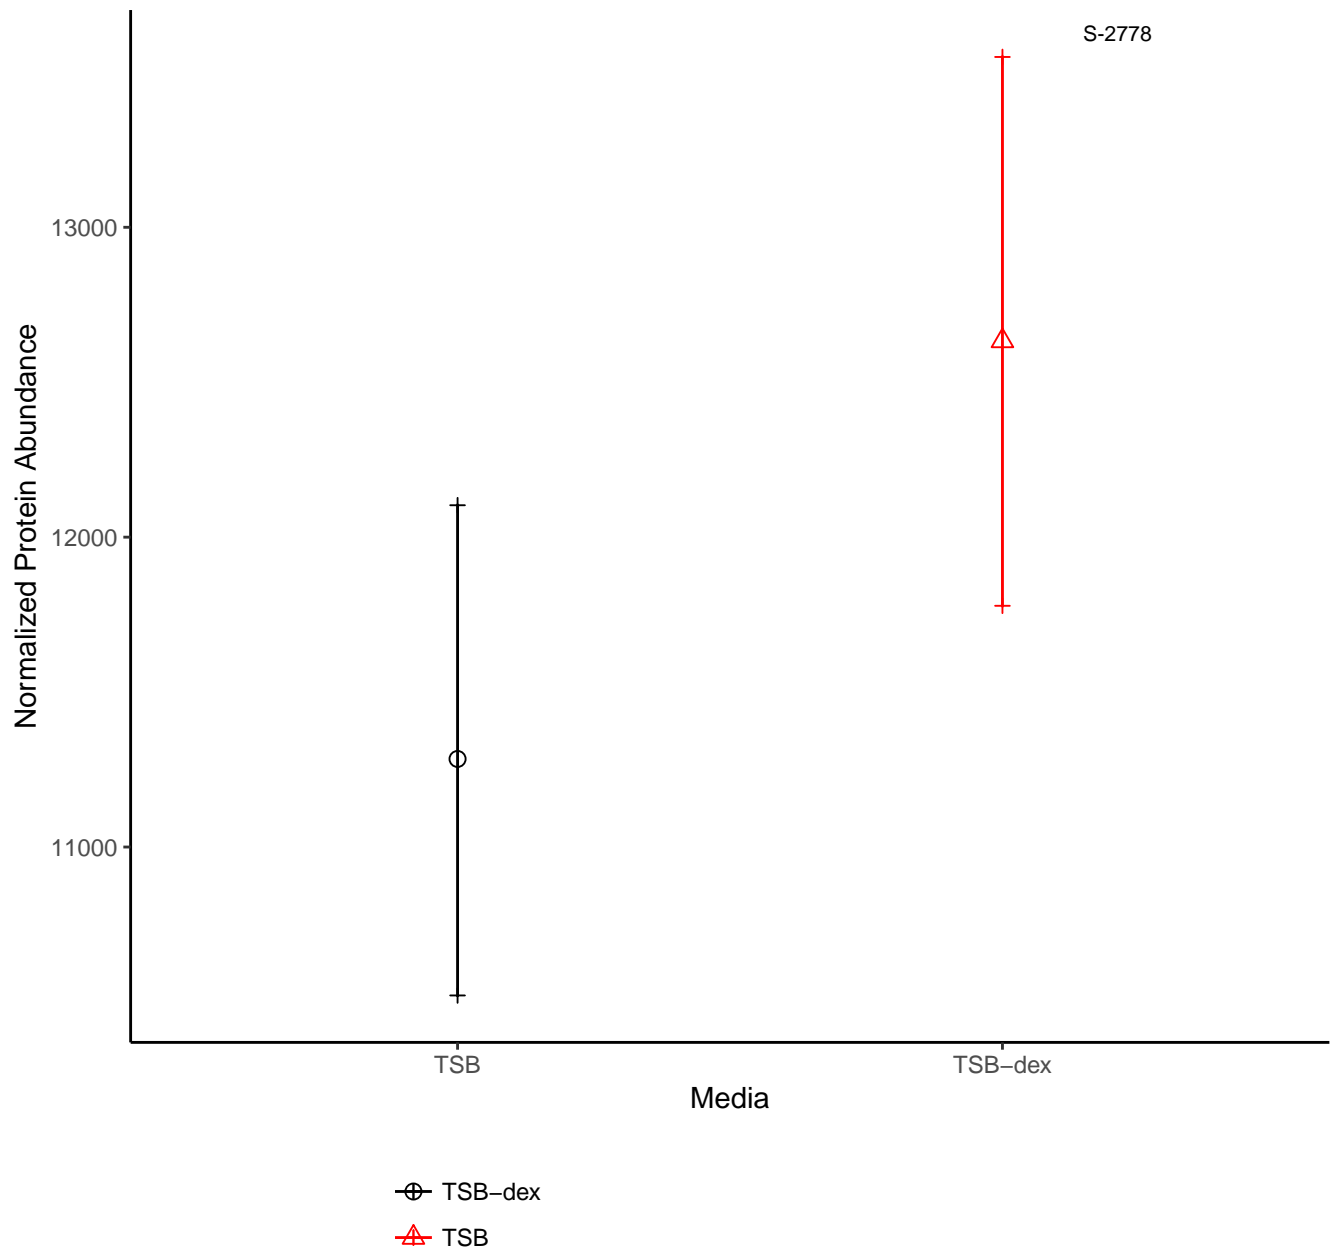

# PTG3C\_STAAM

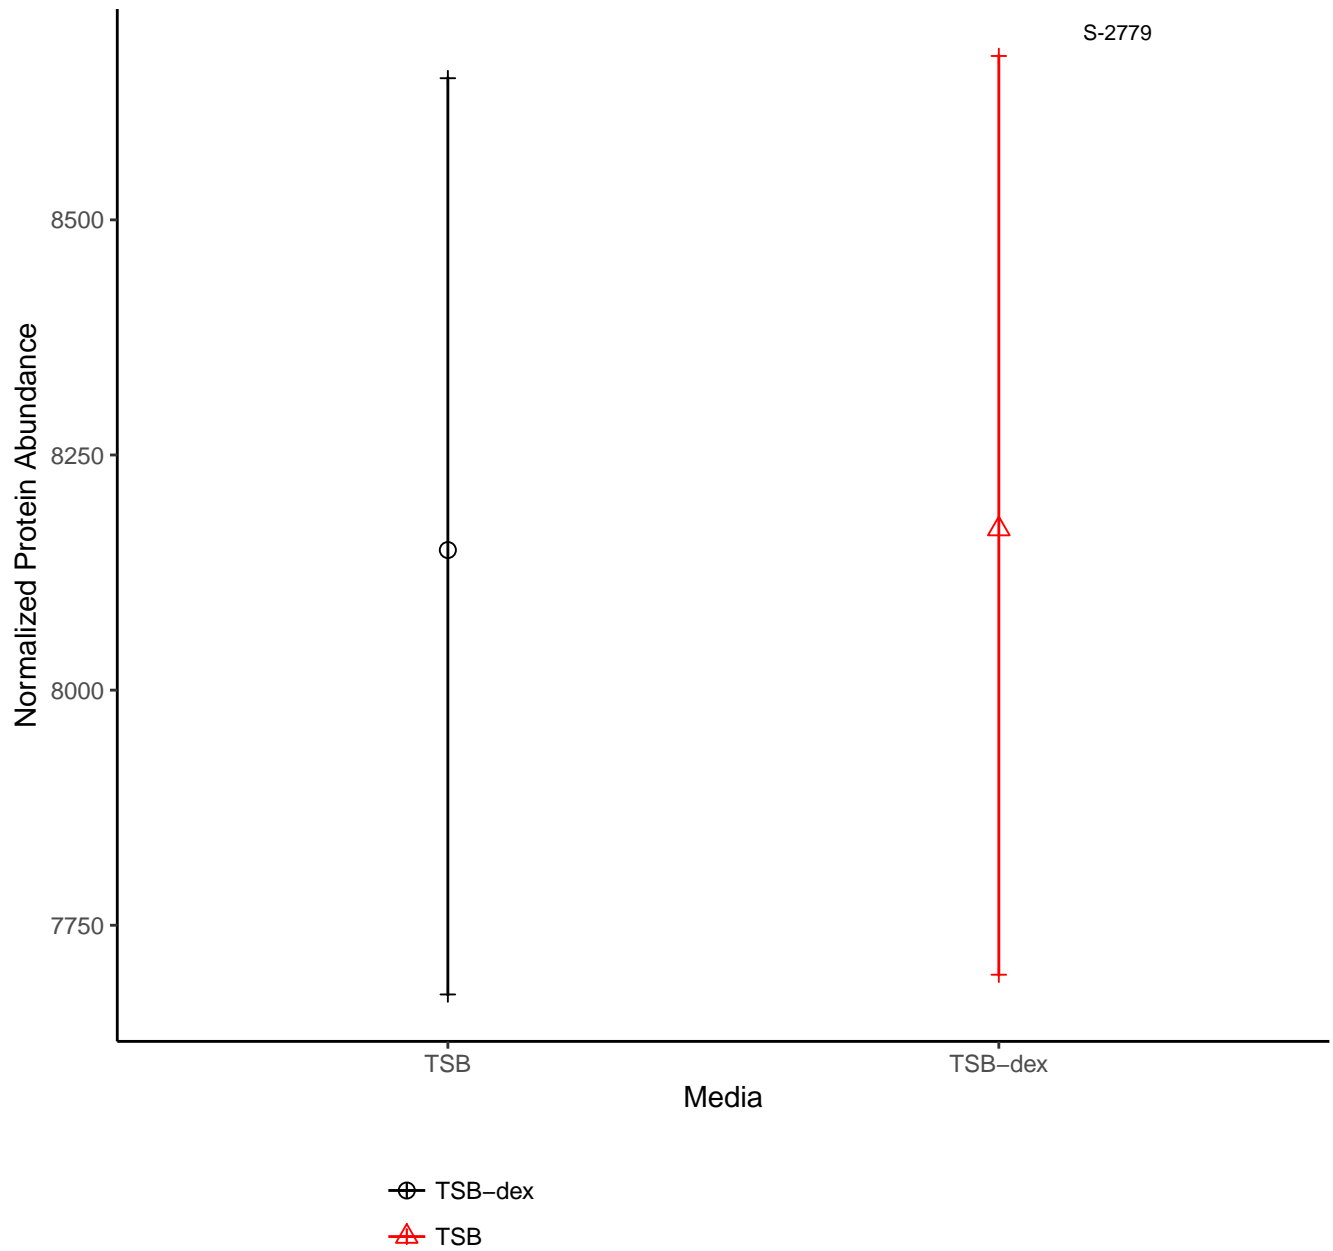

# PTGA\_STAAM

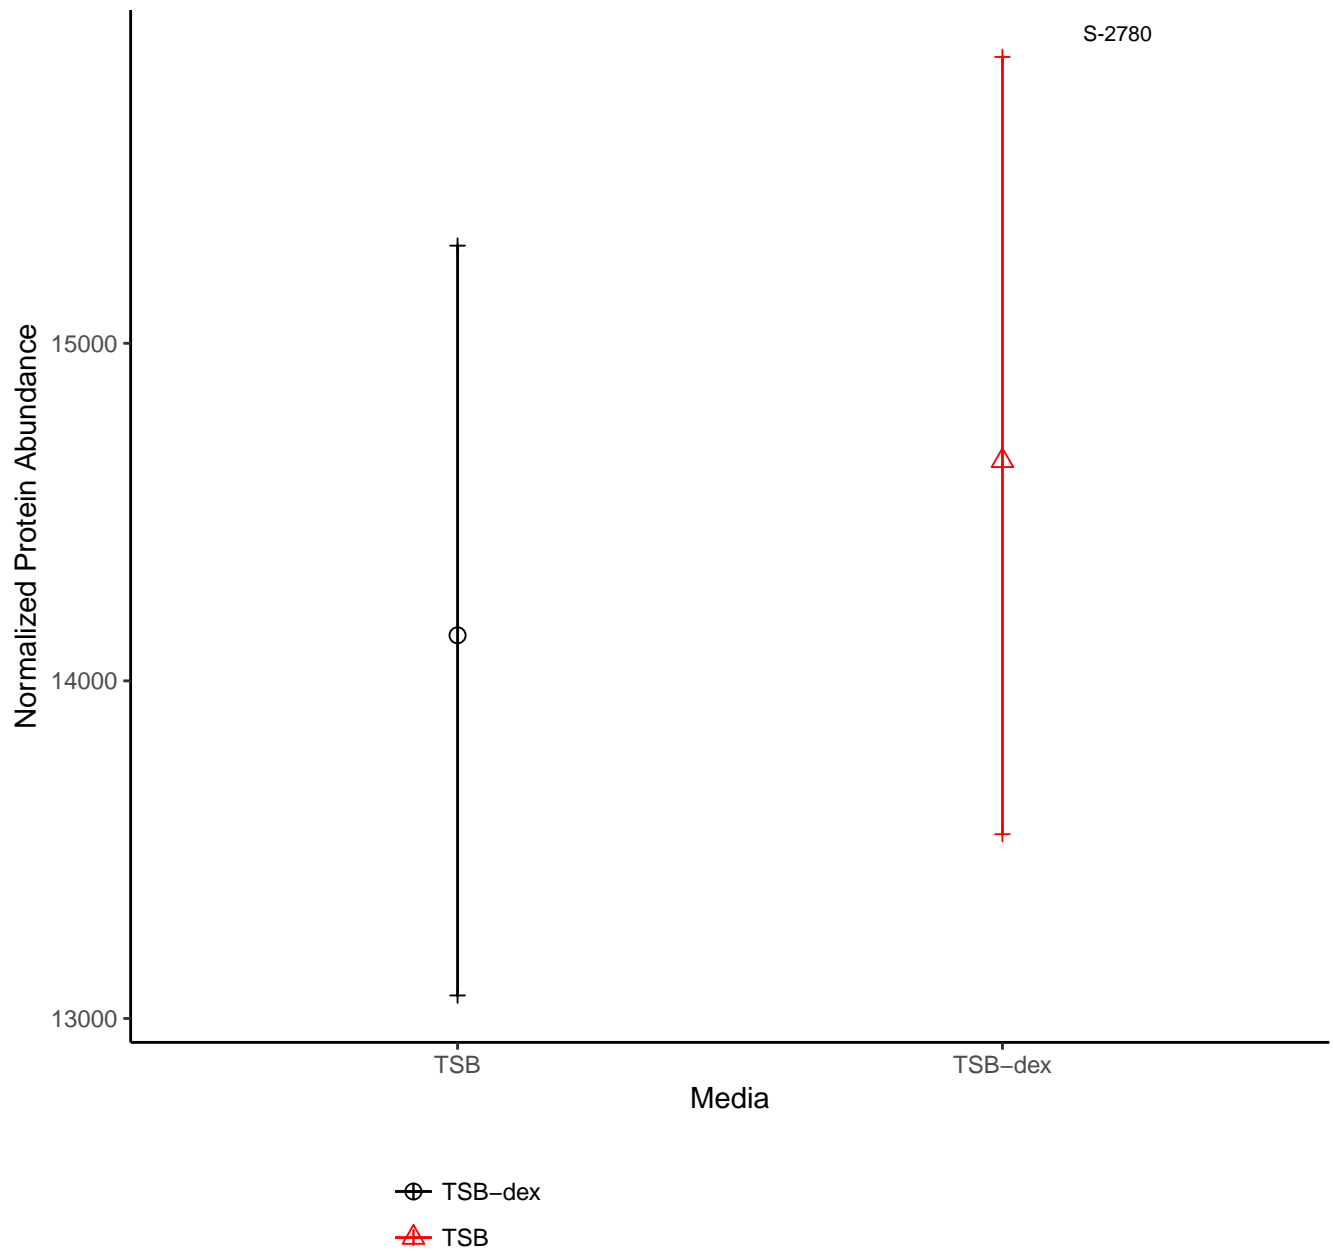

# PTH\_STAAM

S-2781

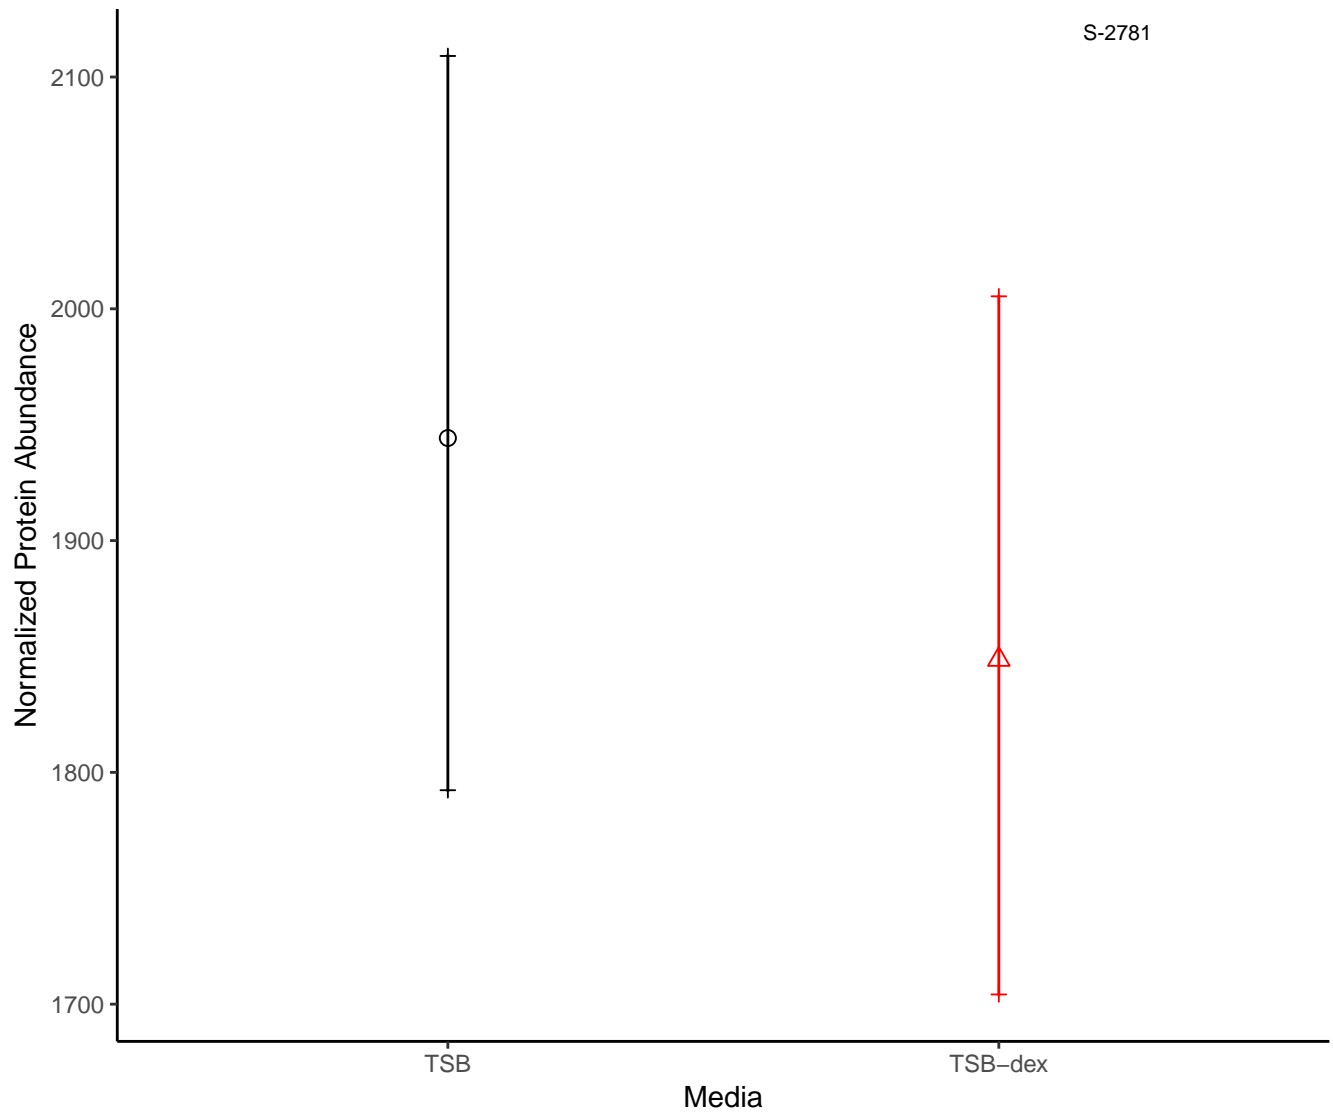

⊕ TSB-dex

△ TSB

# PTHP\_STAAM

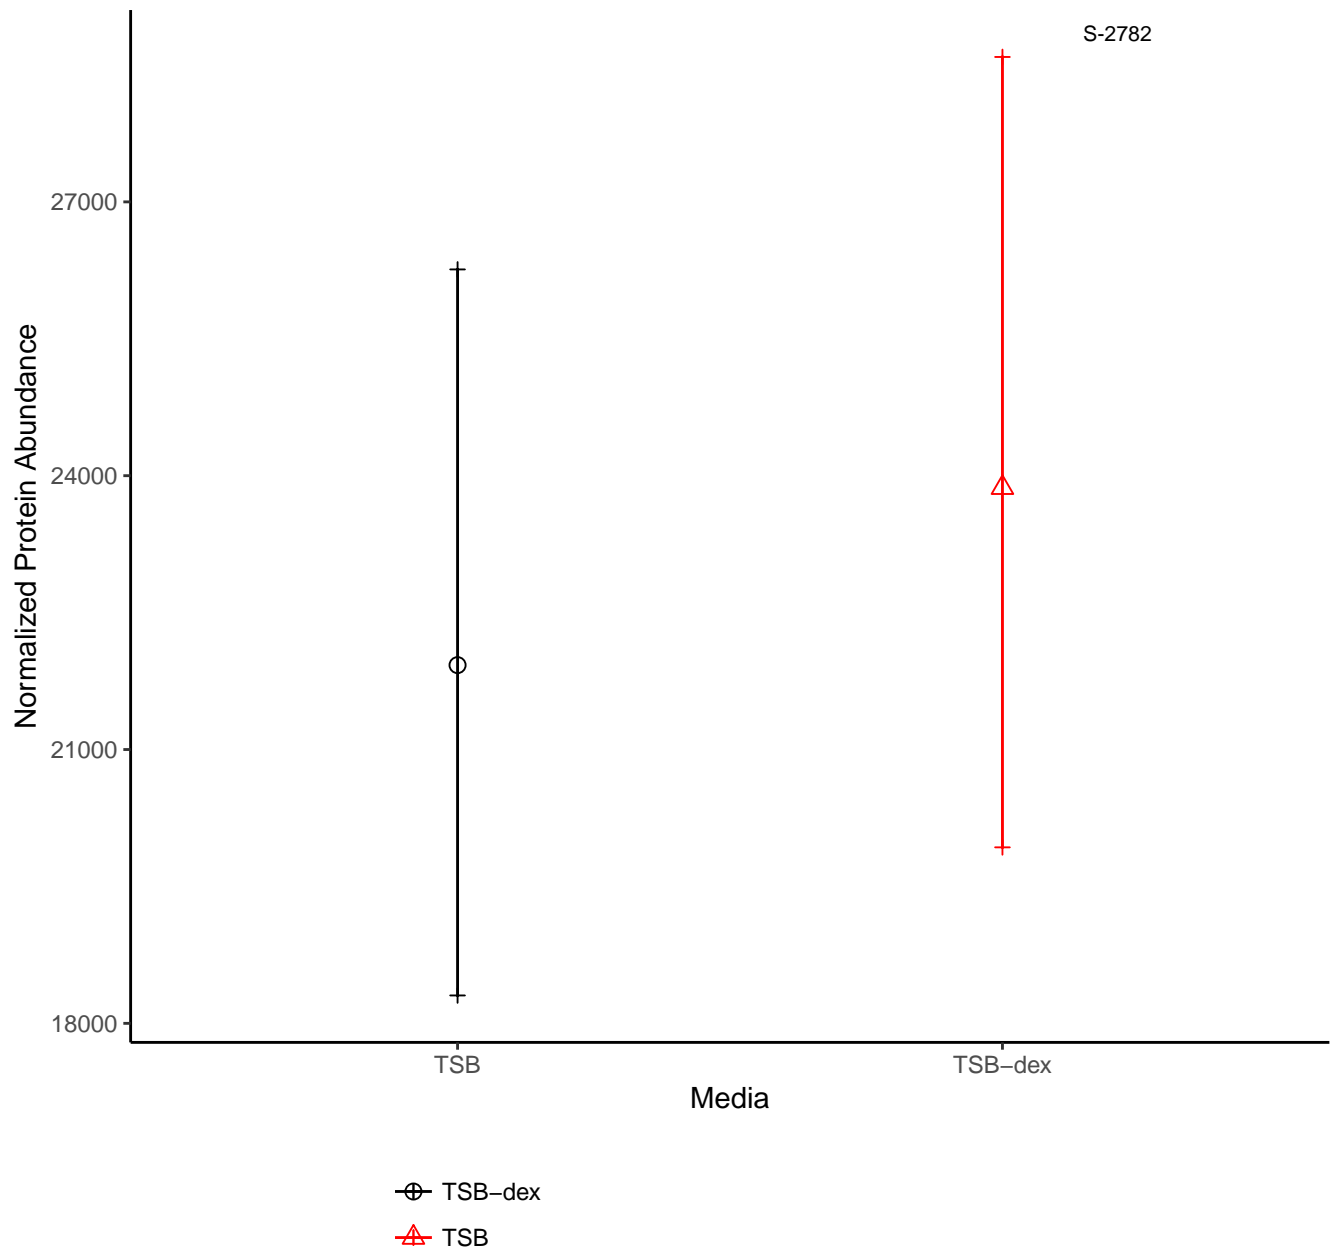

# PTMA\_STAAM

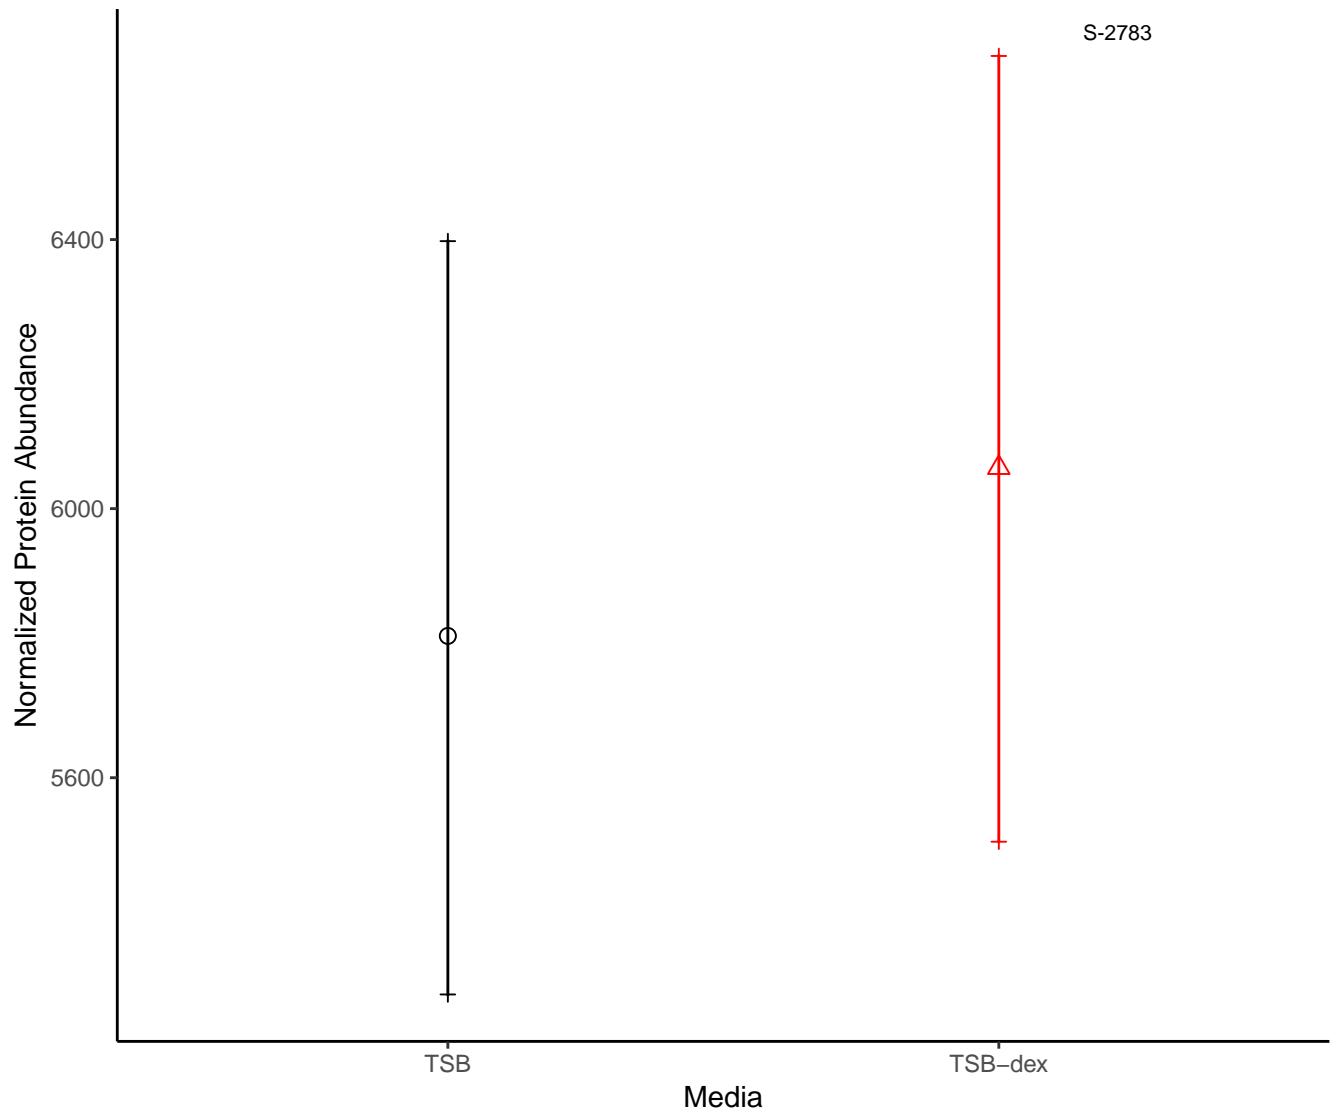

⊕ TSB-dex

△ TSB

# PUR1\_STAAM

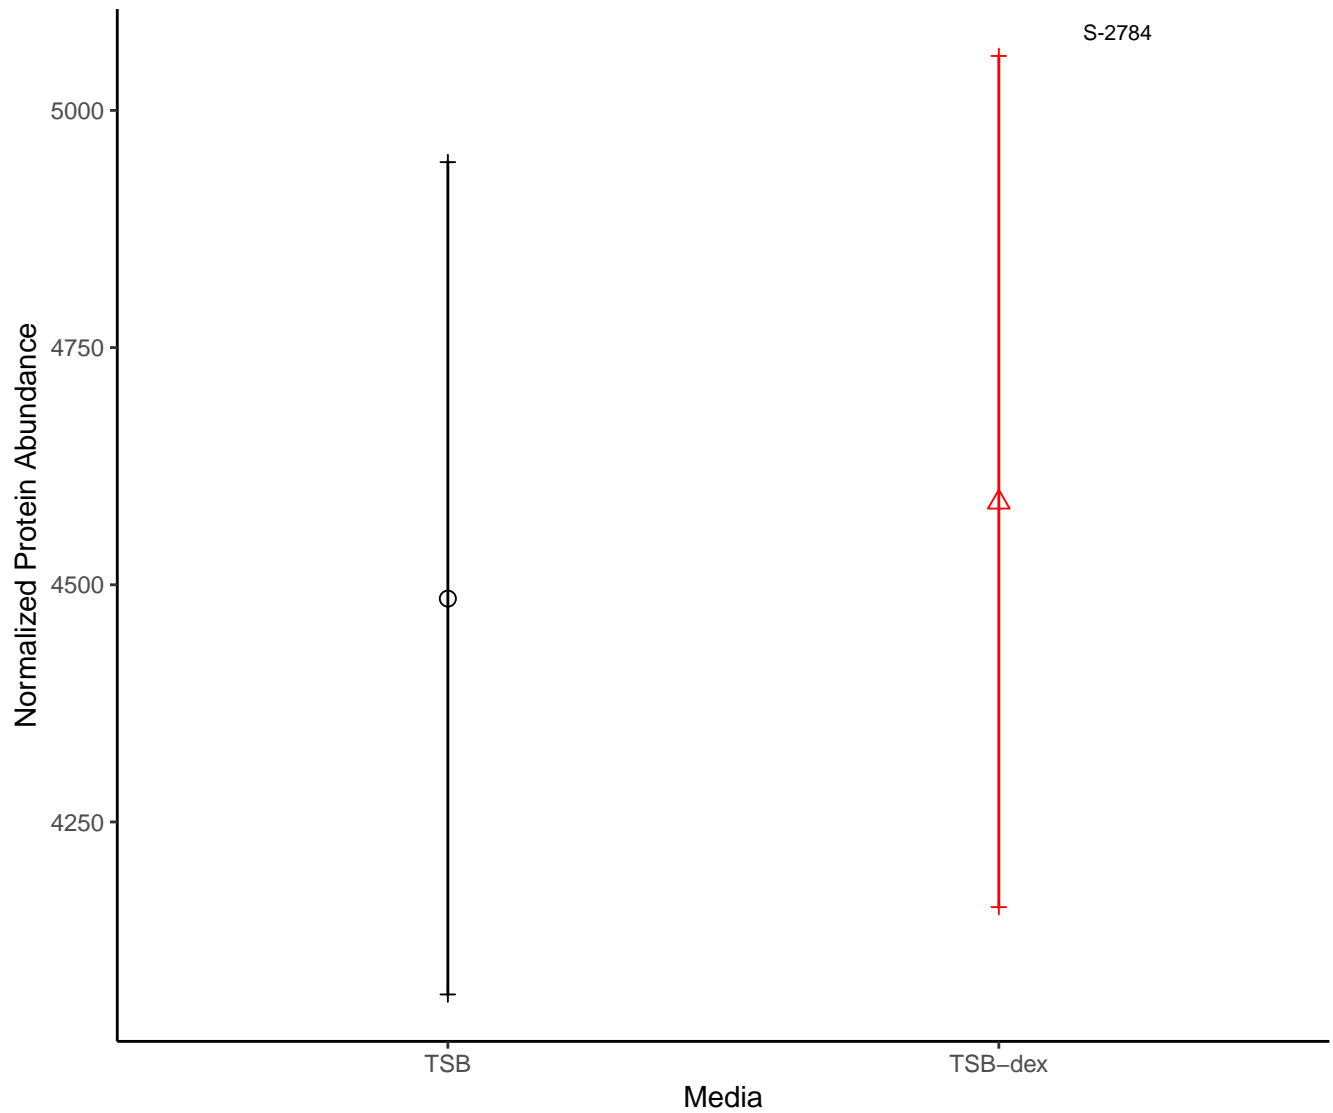

⊕ TSB-dex

△ TSB



# PUR2\_STAAM

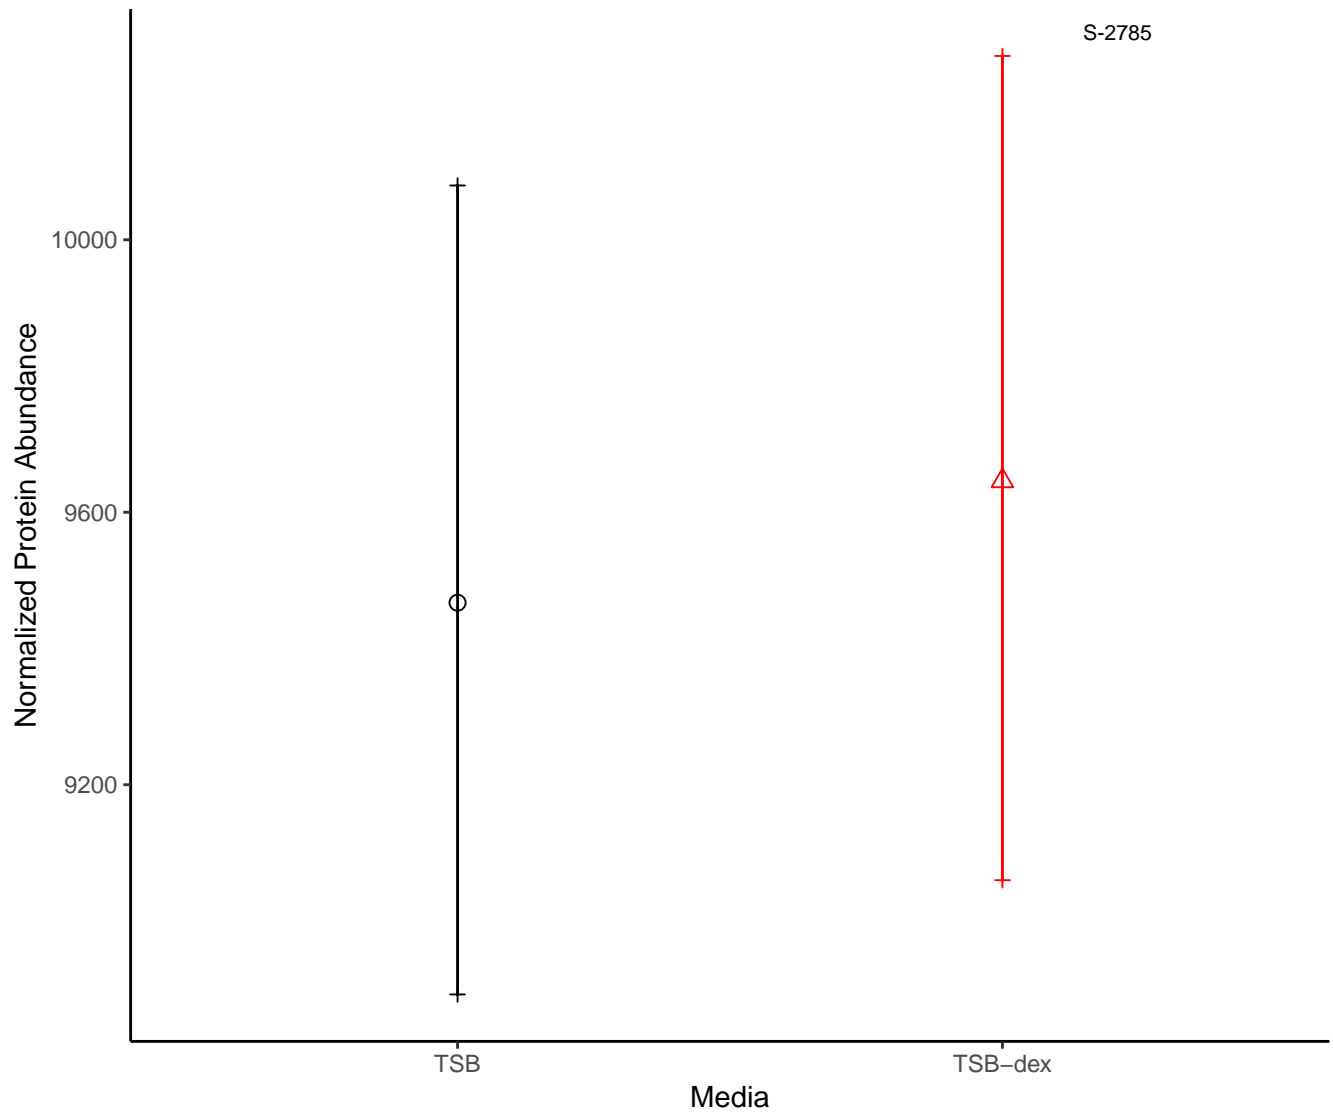

⊕ TSB-dex

△ TSB

# PUR3\_STAAM

S-2786

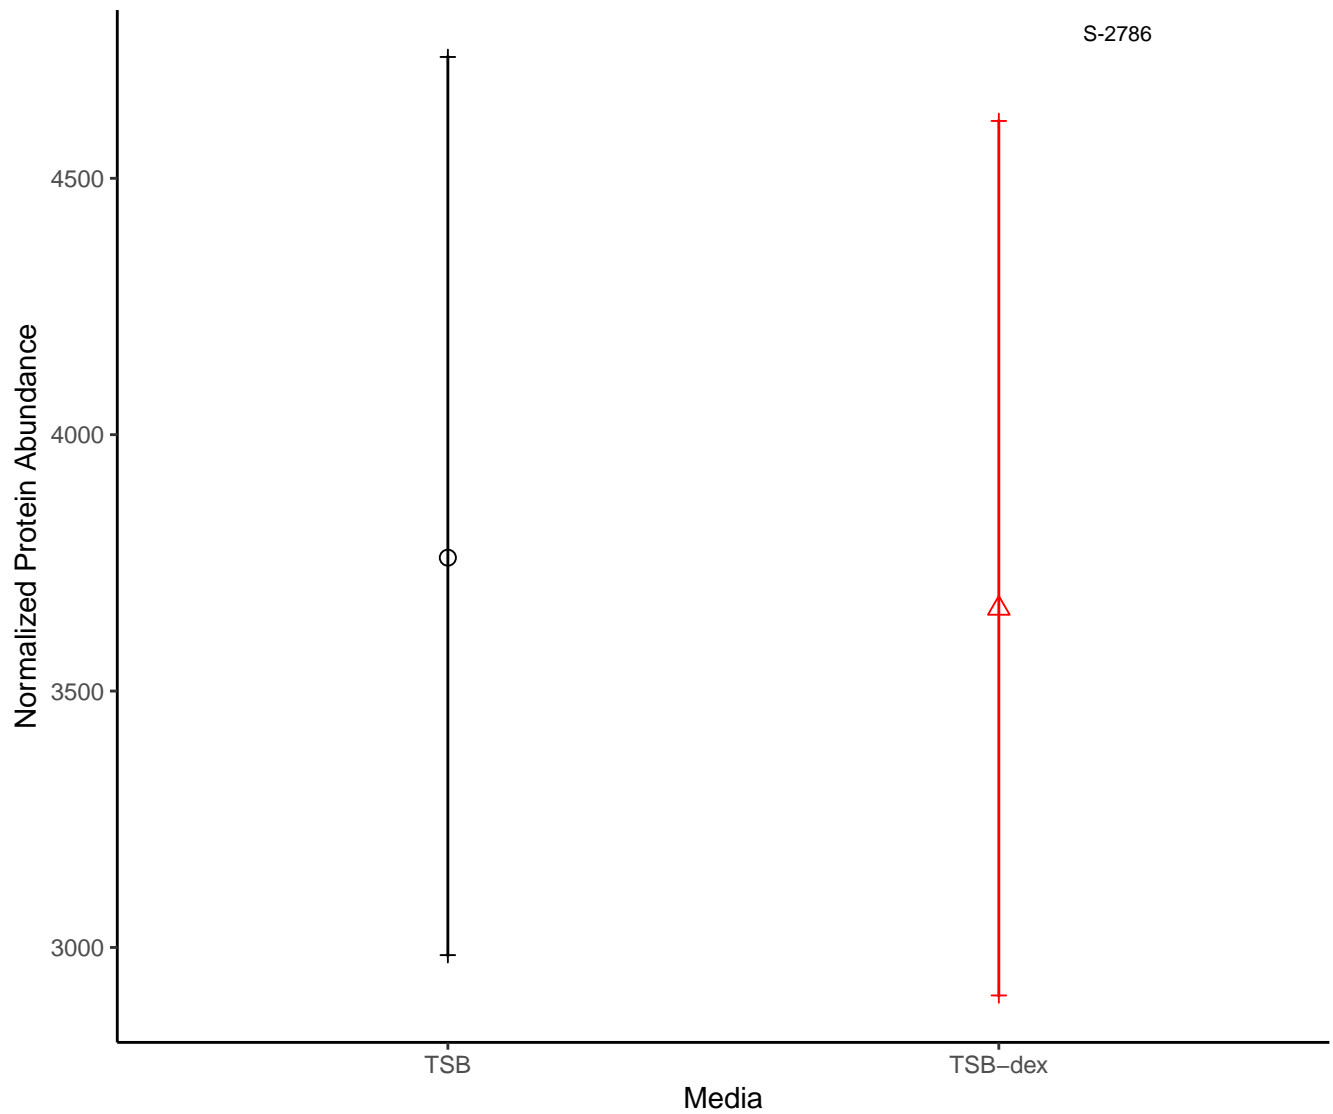

⊕ TSB-dex

△ TSB

# PUR5\_STAAM

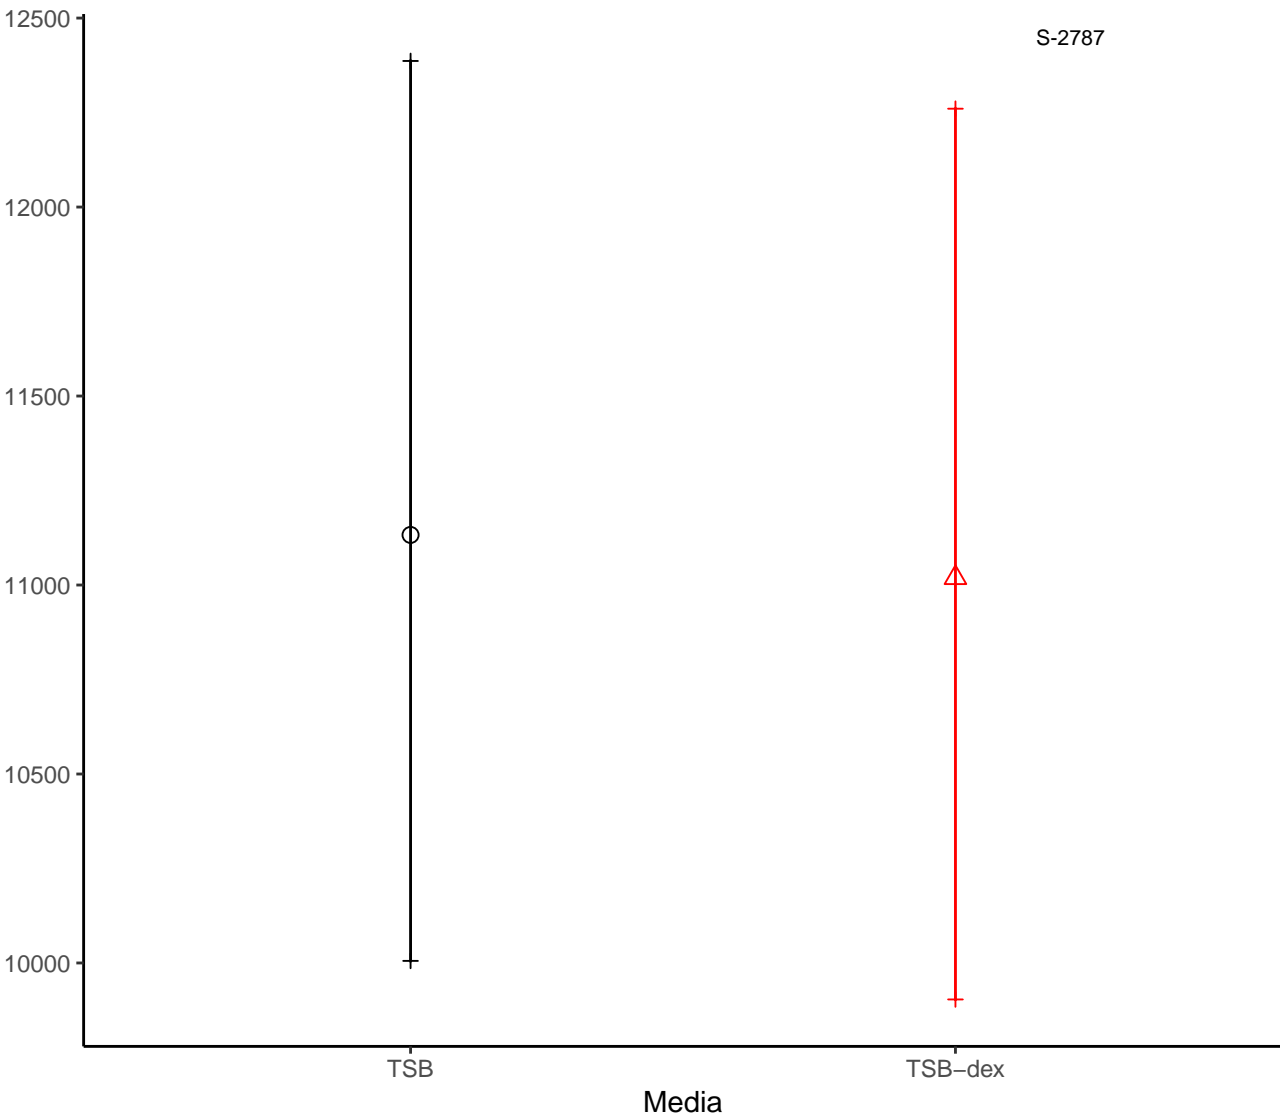

⊕ TSB-dex

△ TSB

# PUR7\_STAAM

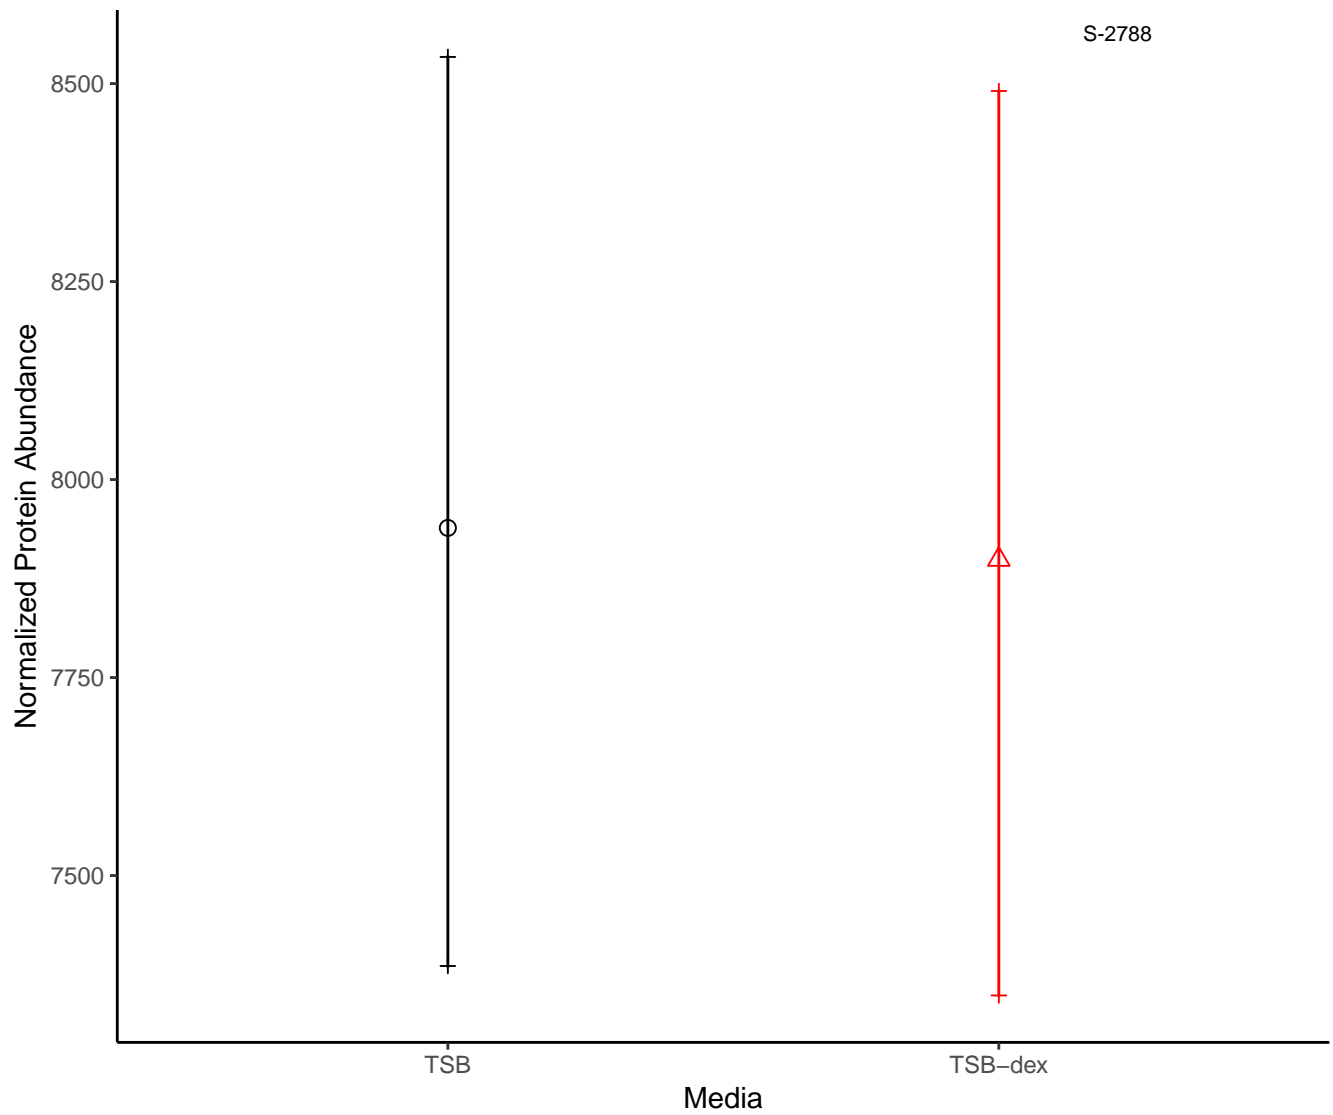

⊕ TSB-dex

△ TSB

# PUR8\_STAAM

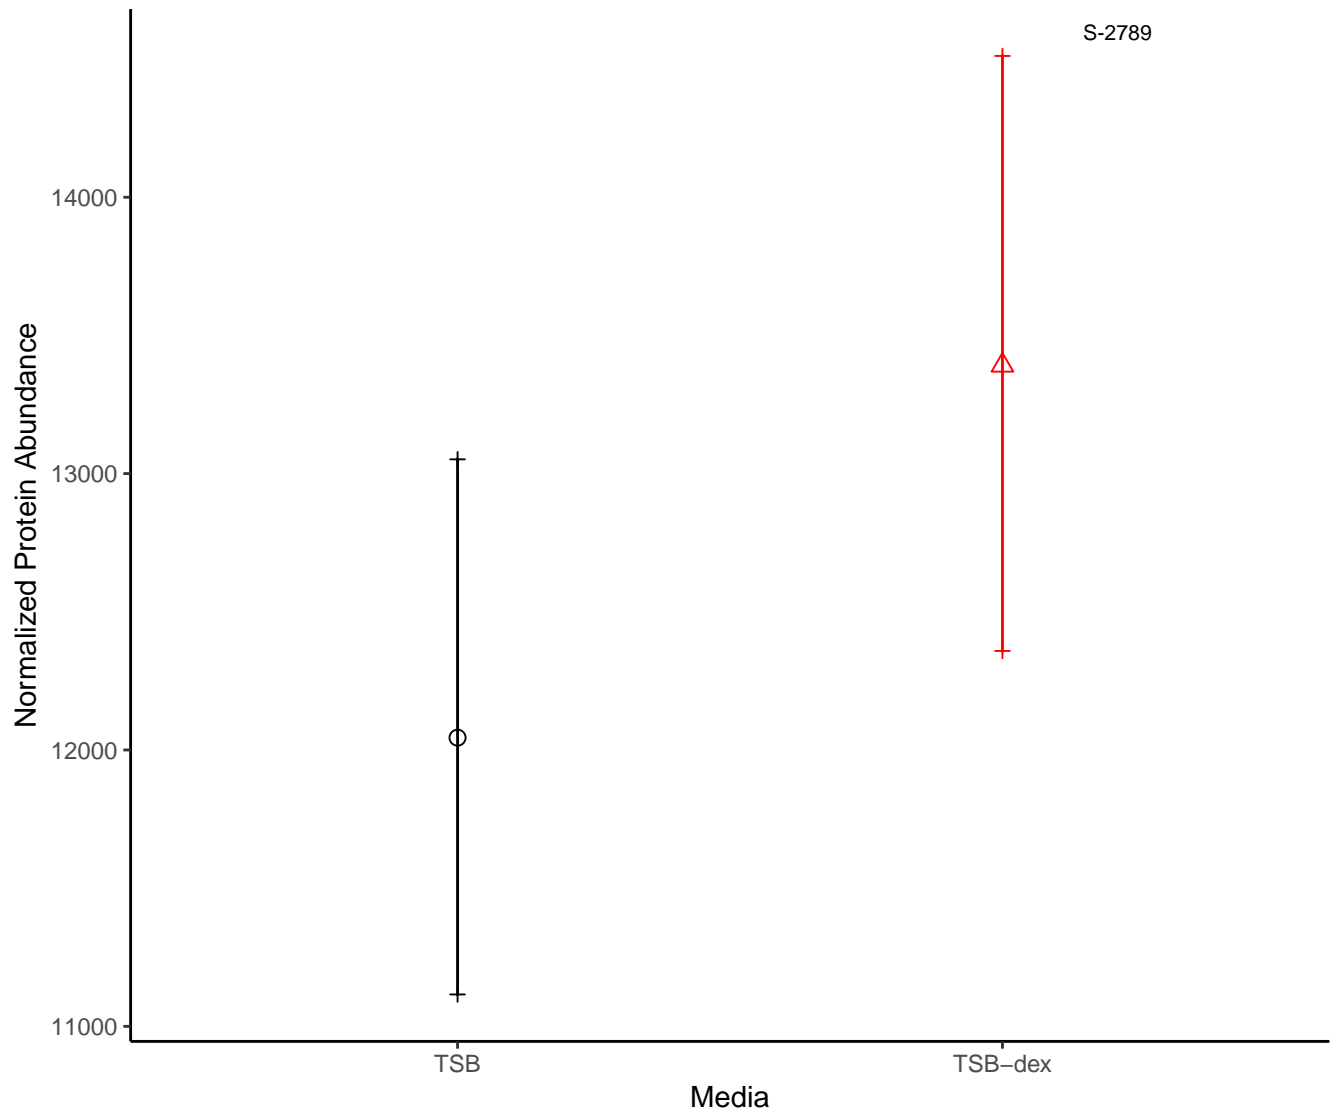

⊕ TSB-dex

△ TSB

# PUR9\_STAAM

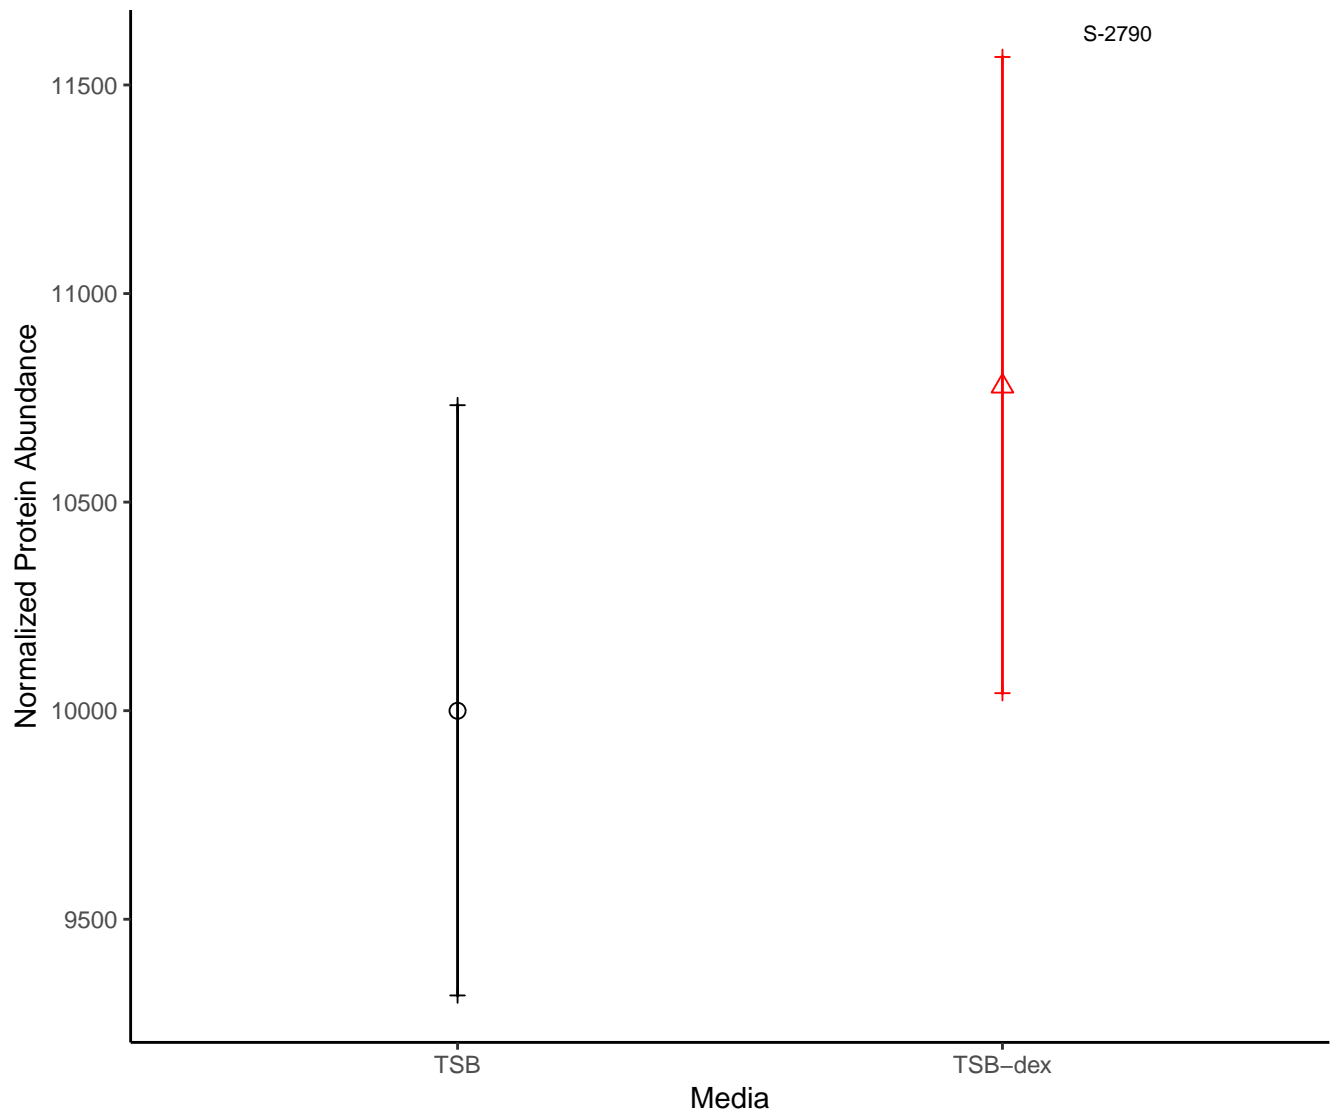

⊖ TSB-dex

△ TSB

# PURA\_STAAM

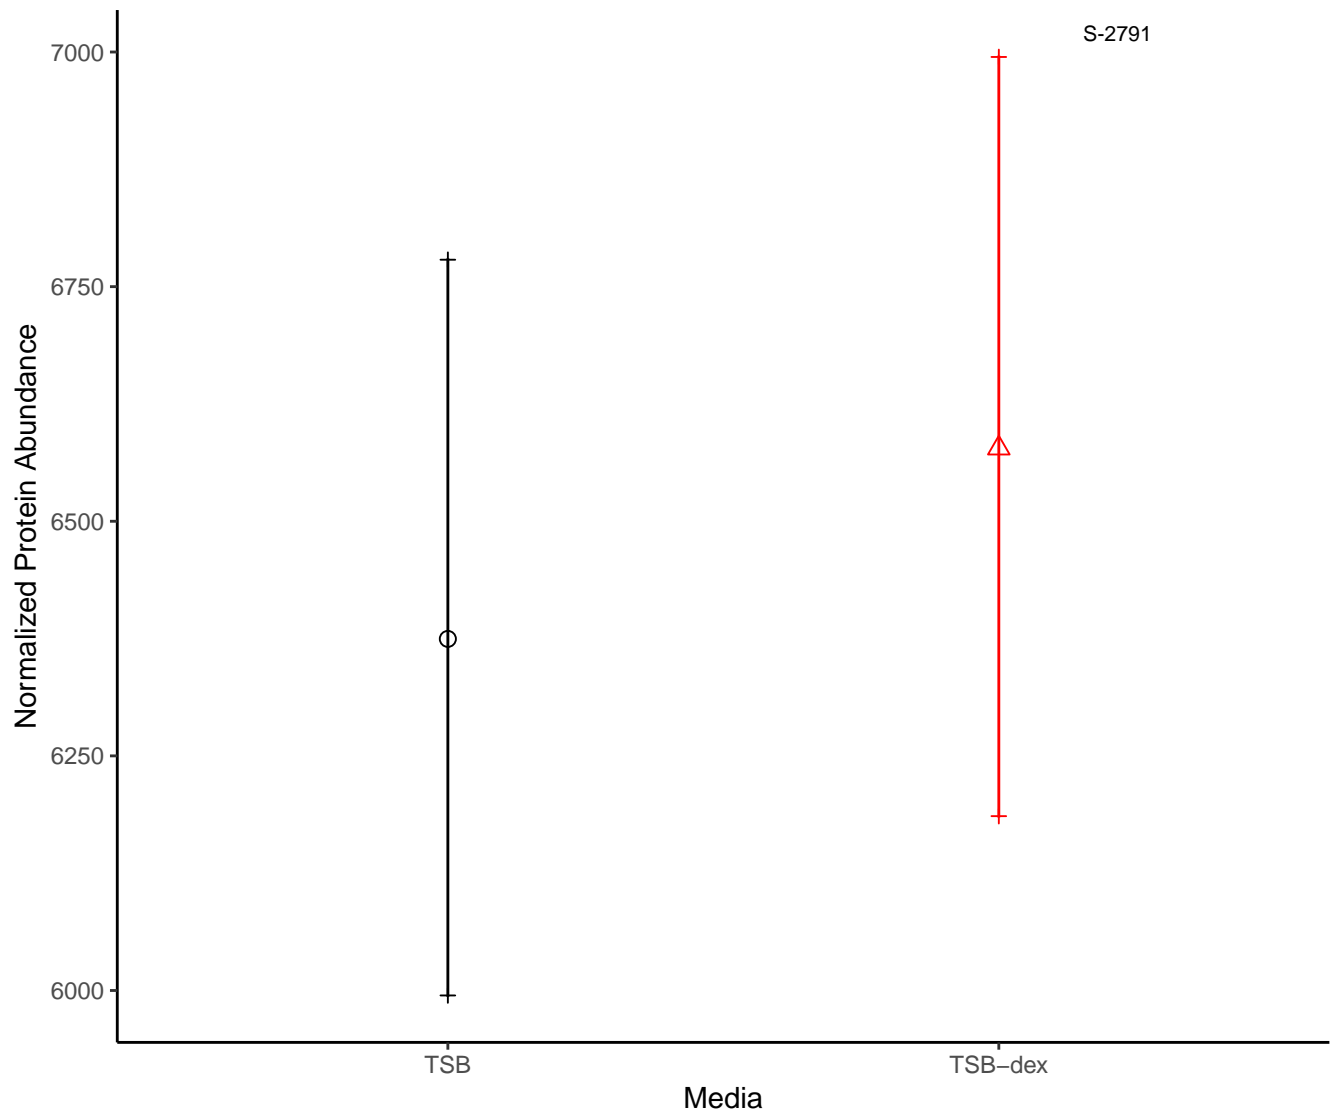

⊕ TSB-dex

△ TSB

# PURK\_STAAM

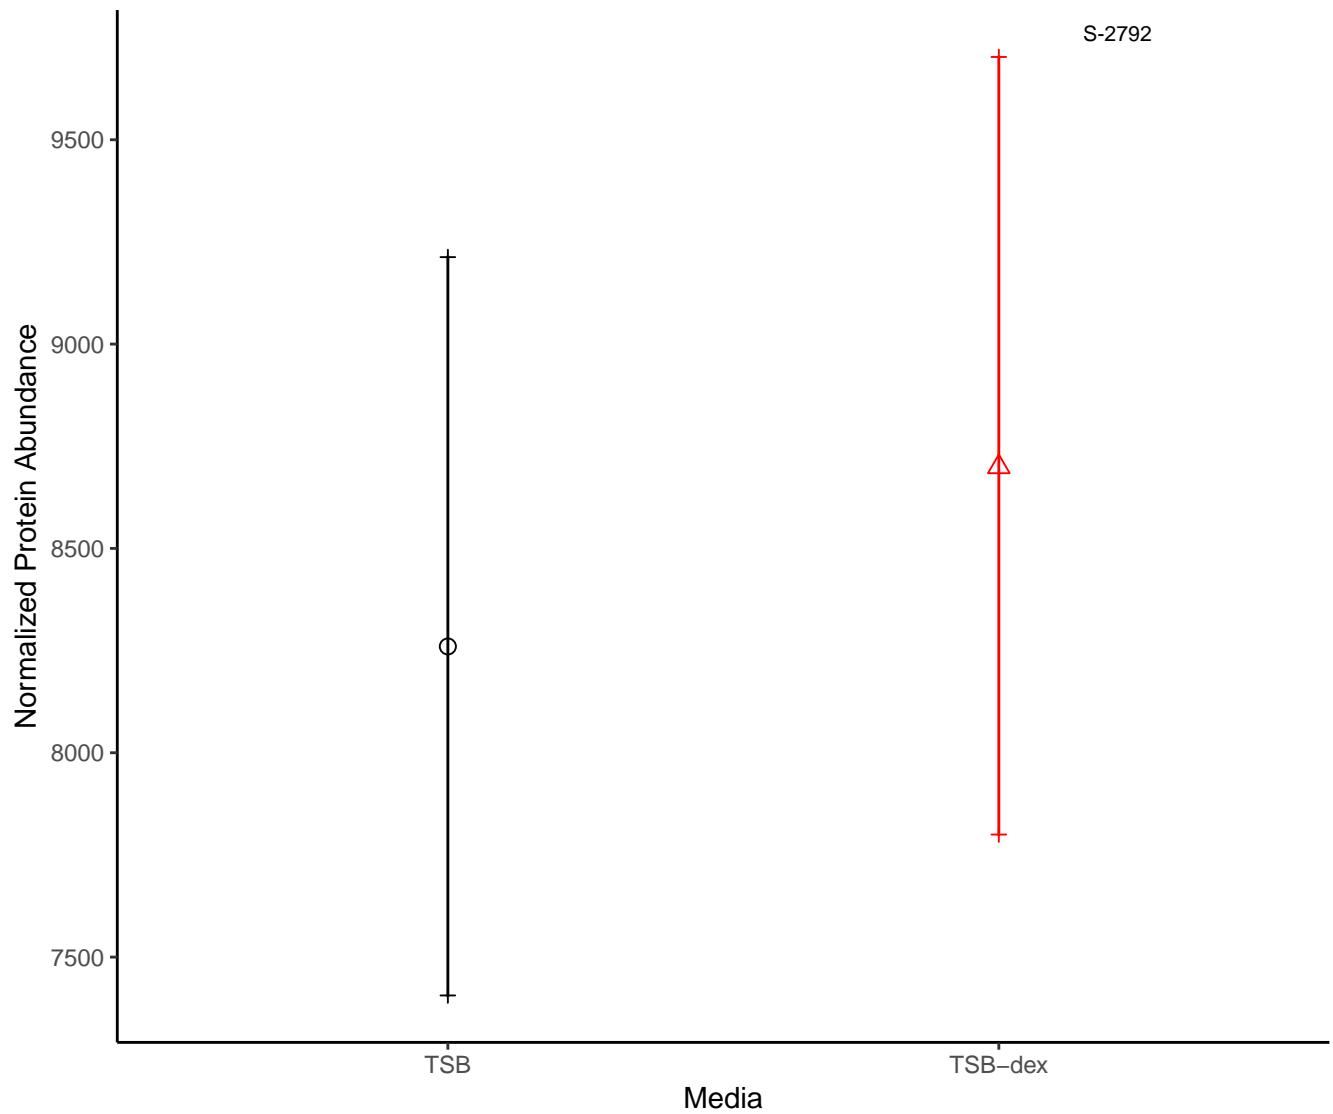

⊕ TSB-dex

△ TSB



# PURL\_STAAM

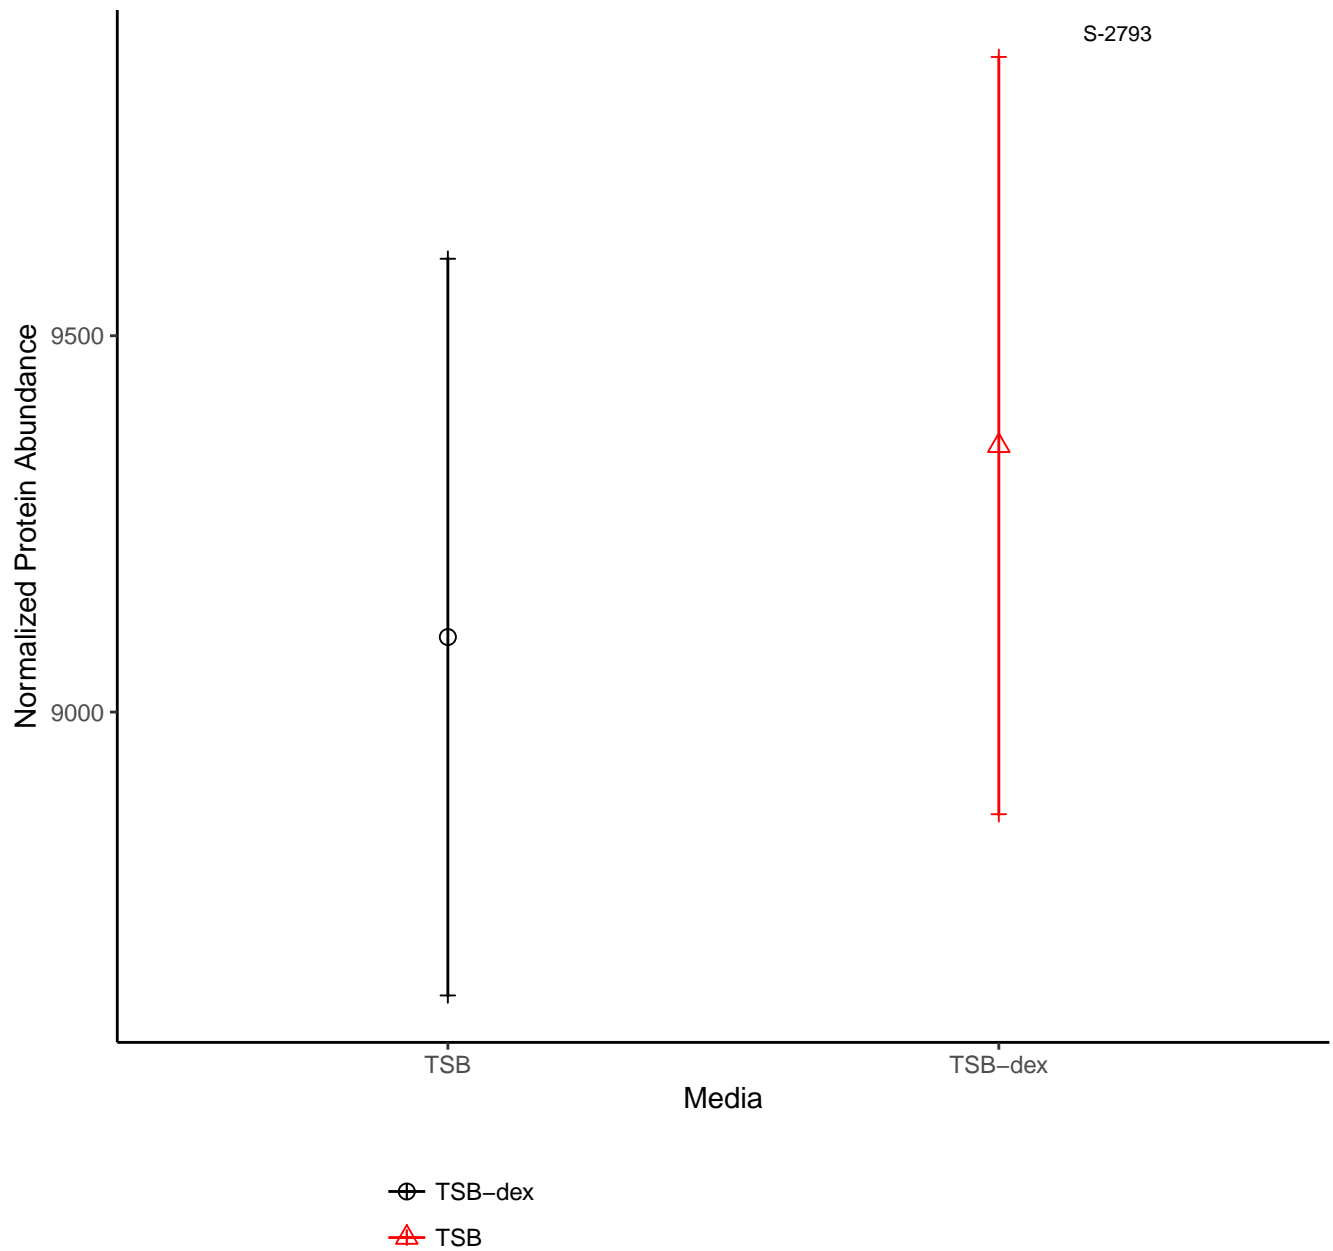

# PURQ\_STAAM

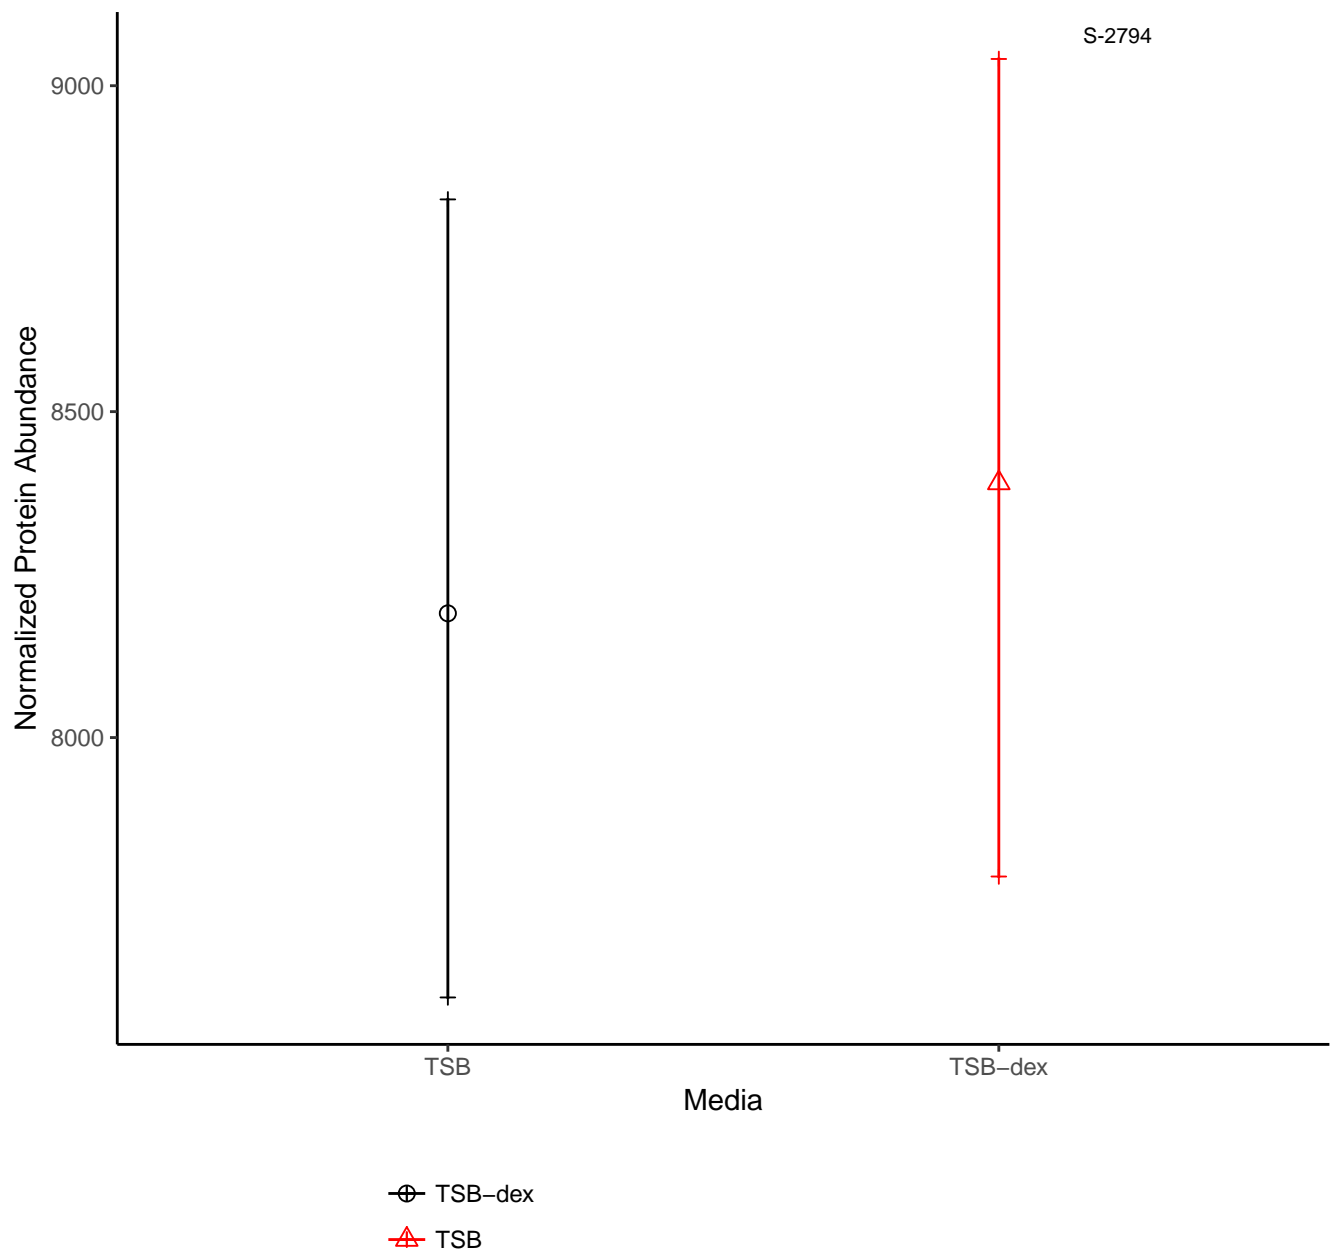

# PYRB\_STAAM

S-2795

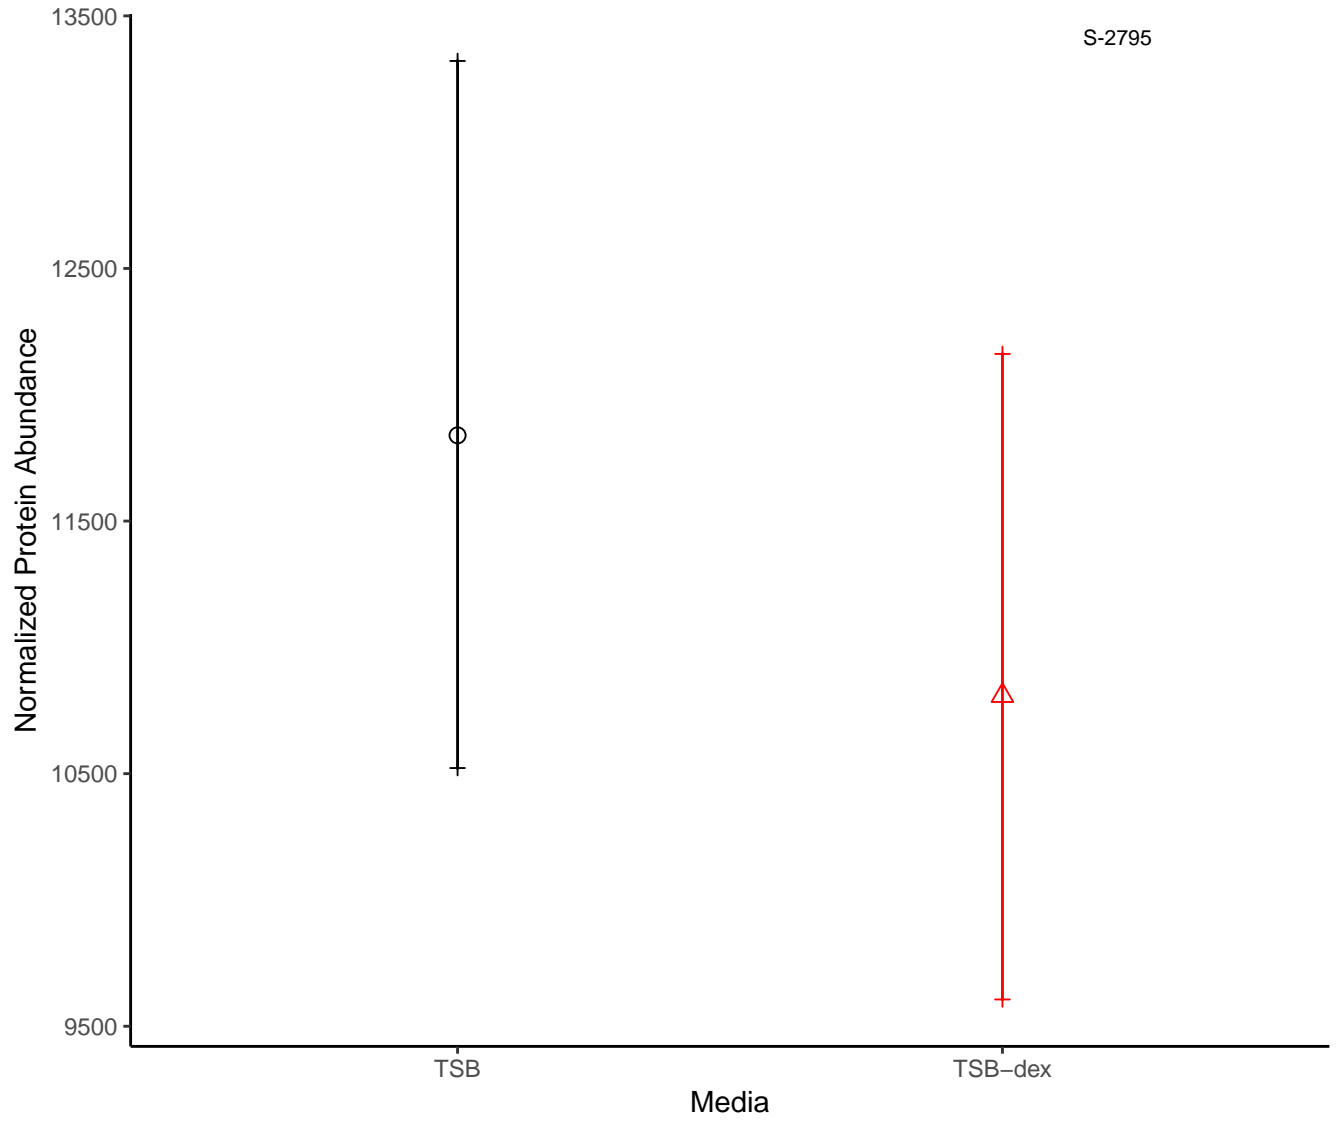

⊖ TSB-dex

△ TSB

# PYRC\_STAAM

S-2796

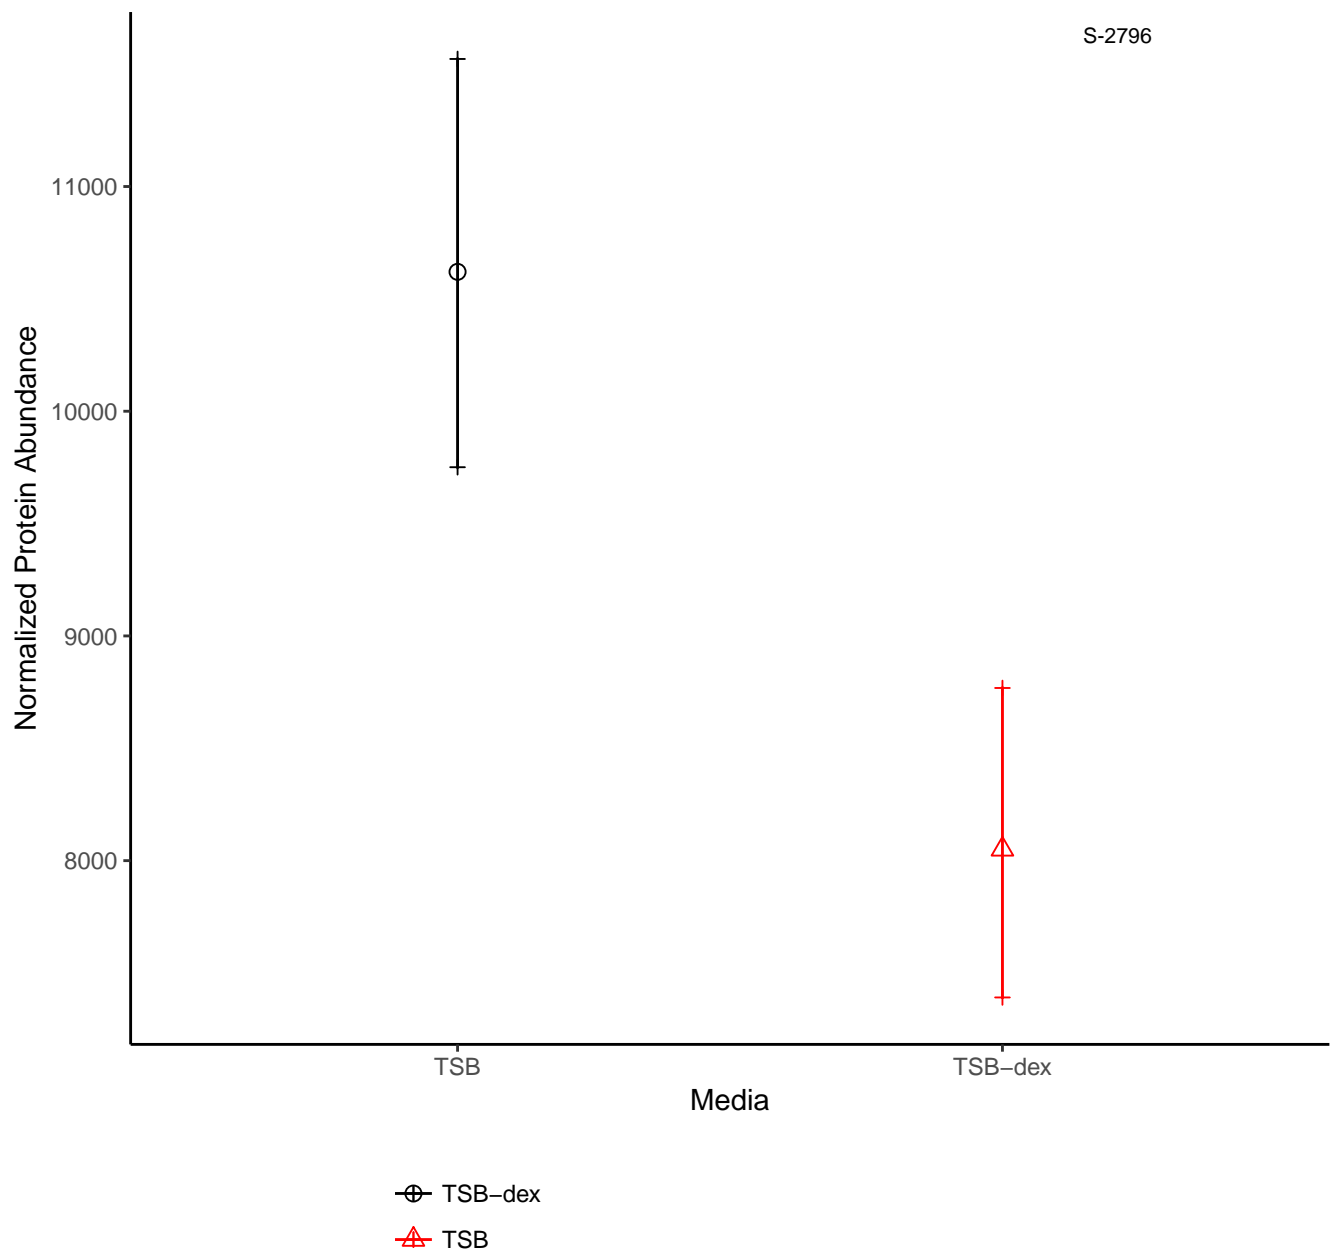

# PYRE\_STAAM

S-2797

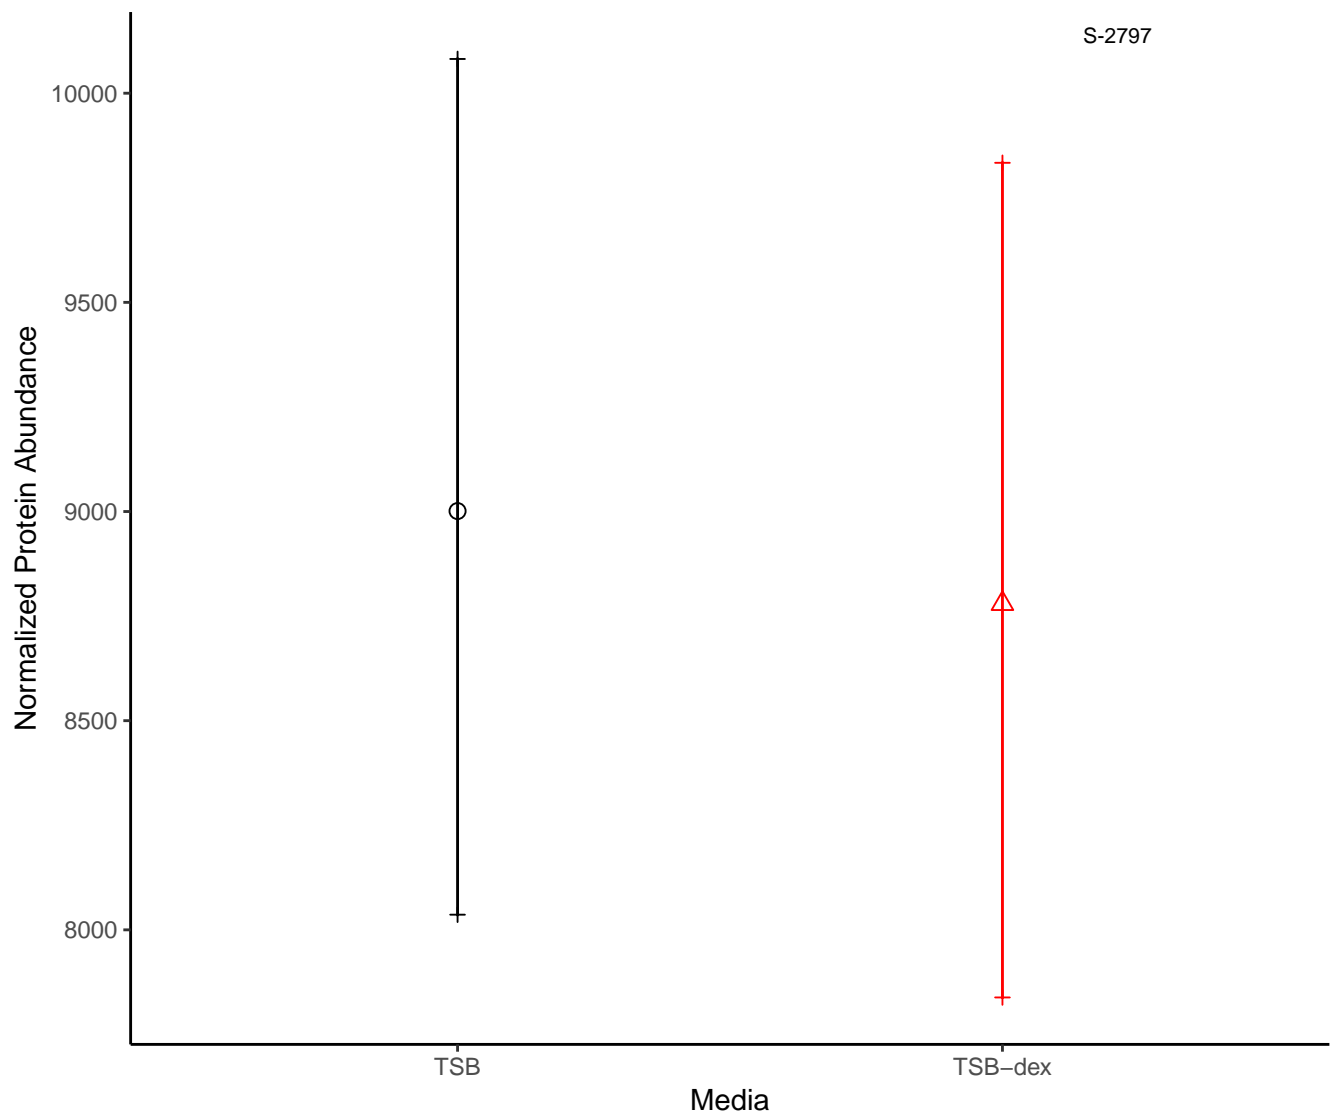

⊕ TSB-dex

△ TSB

# PYRF\_STAAM

S-2798

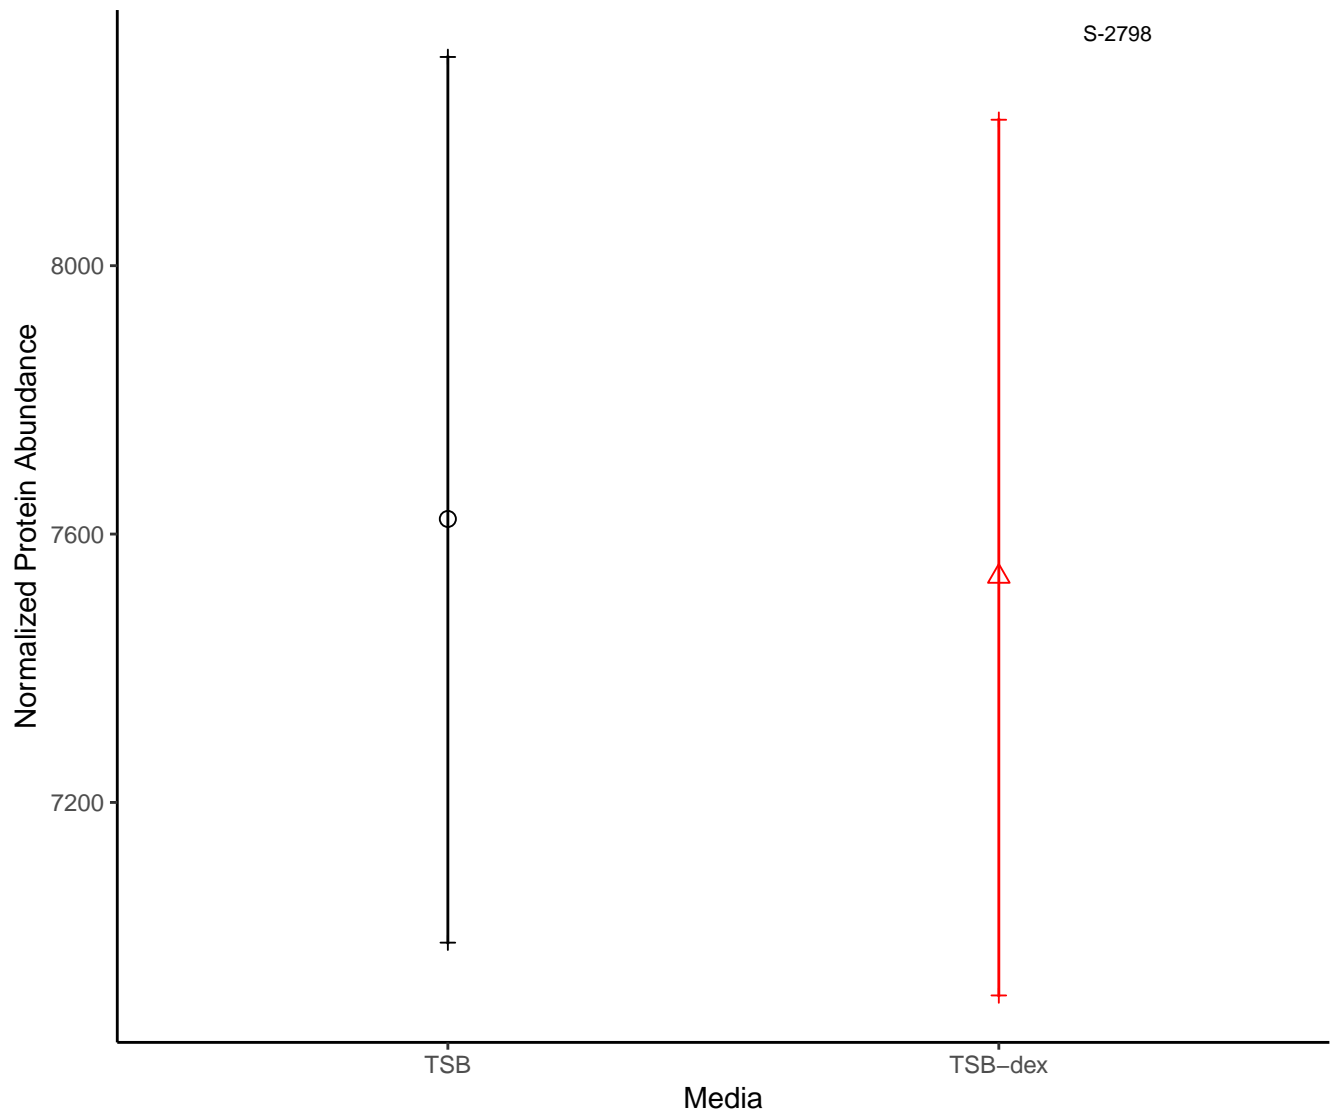

⊕ TSB-dex

△ TSB

# PYRG\_STAAM

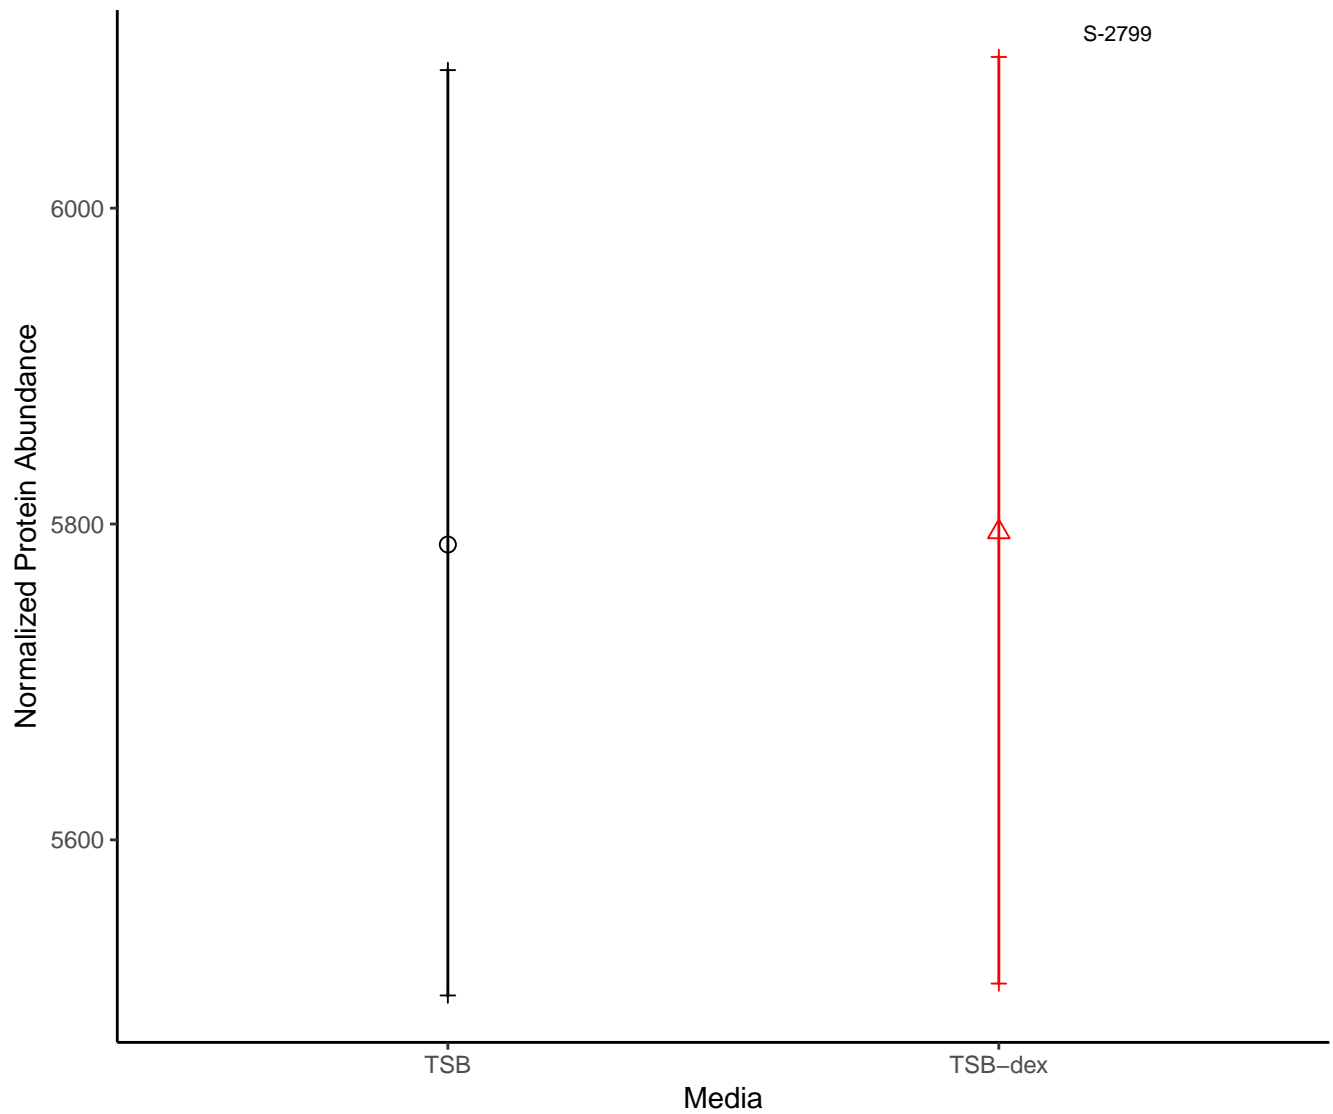

⊕ TSB-dex

△ TSB

# PYRH\_STAAM

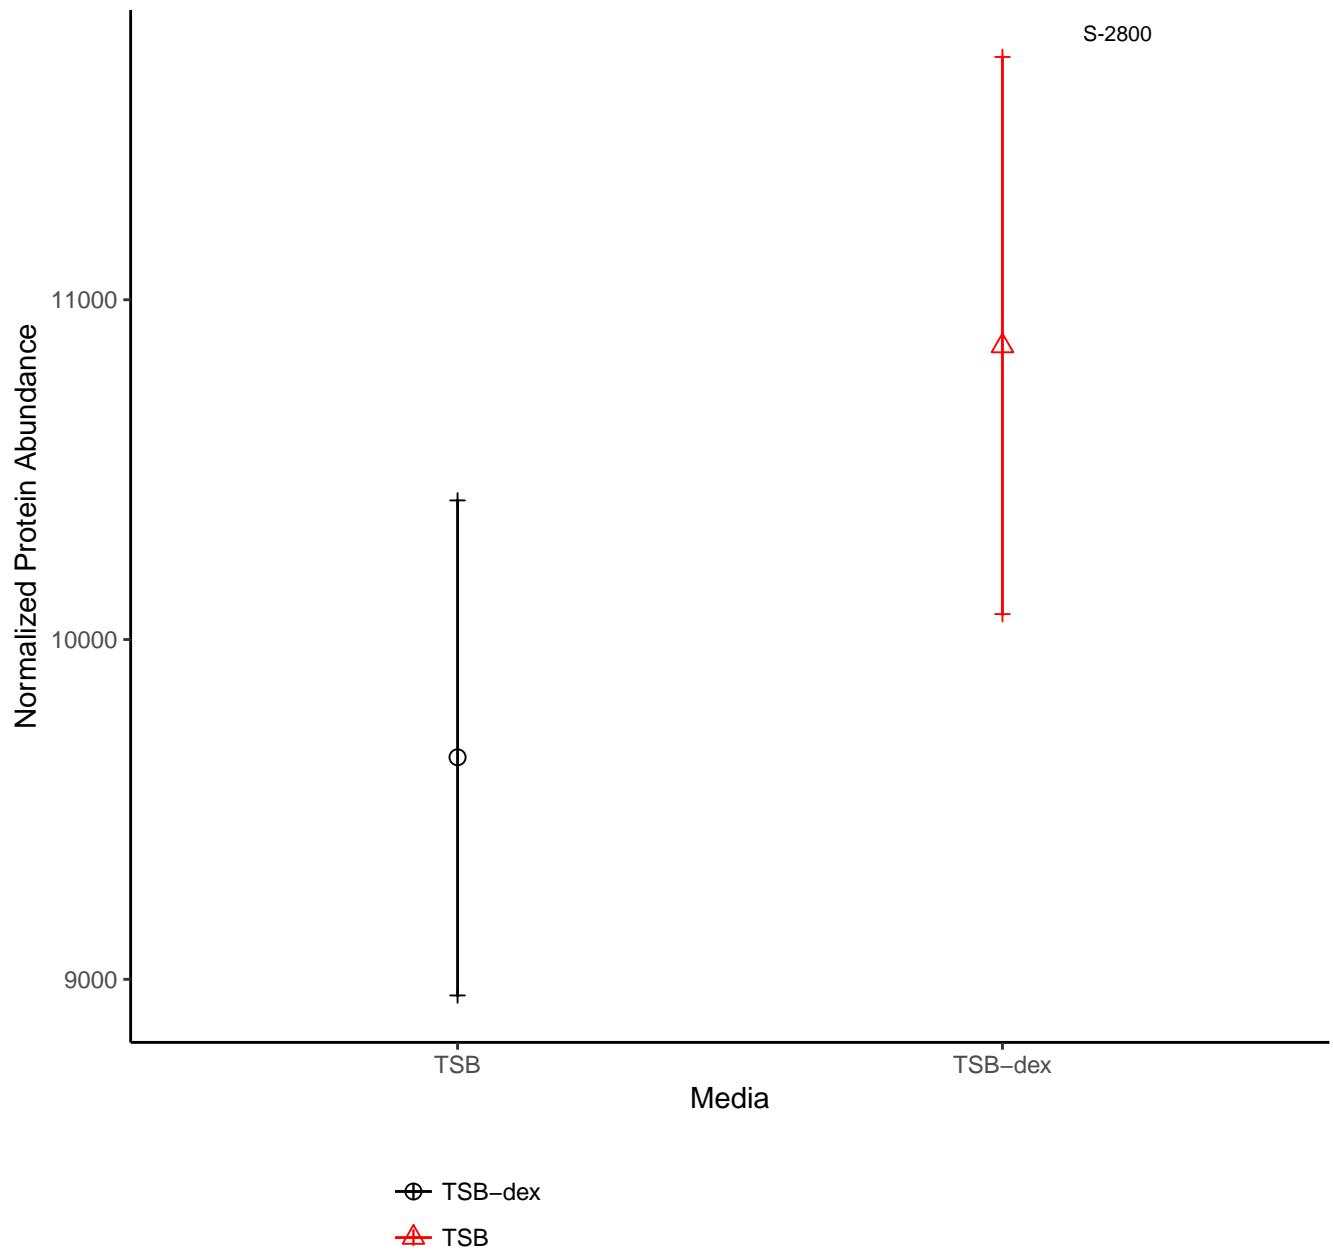



# PYRR\_STAAM

S-2801

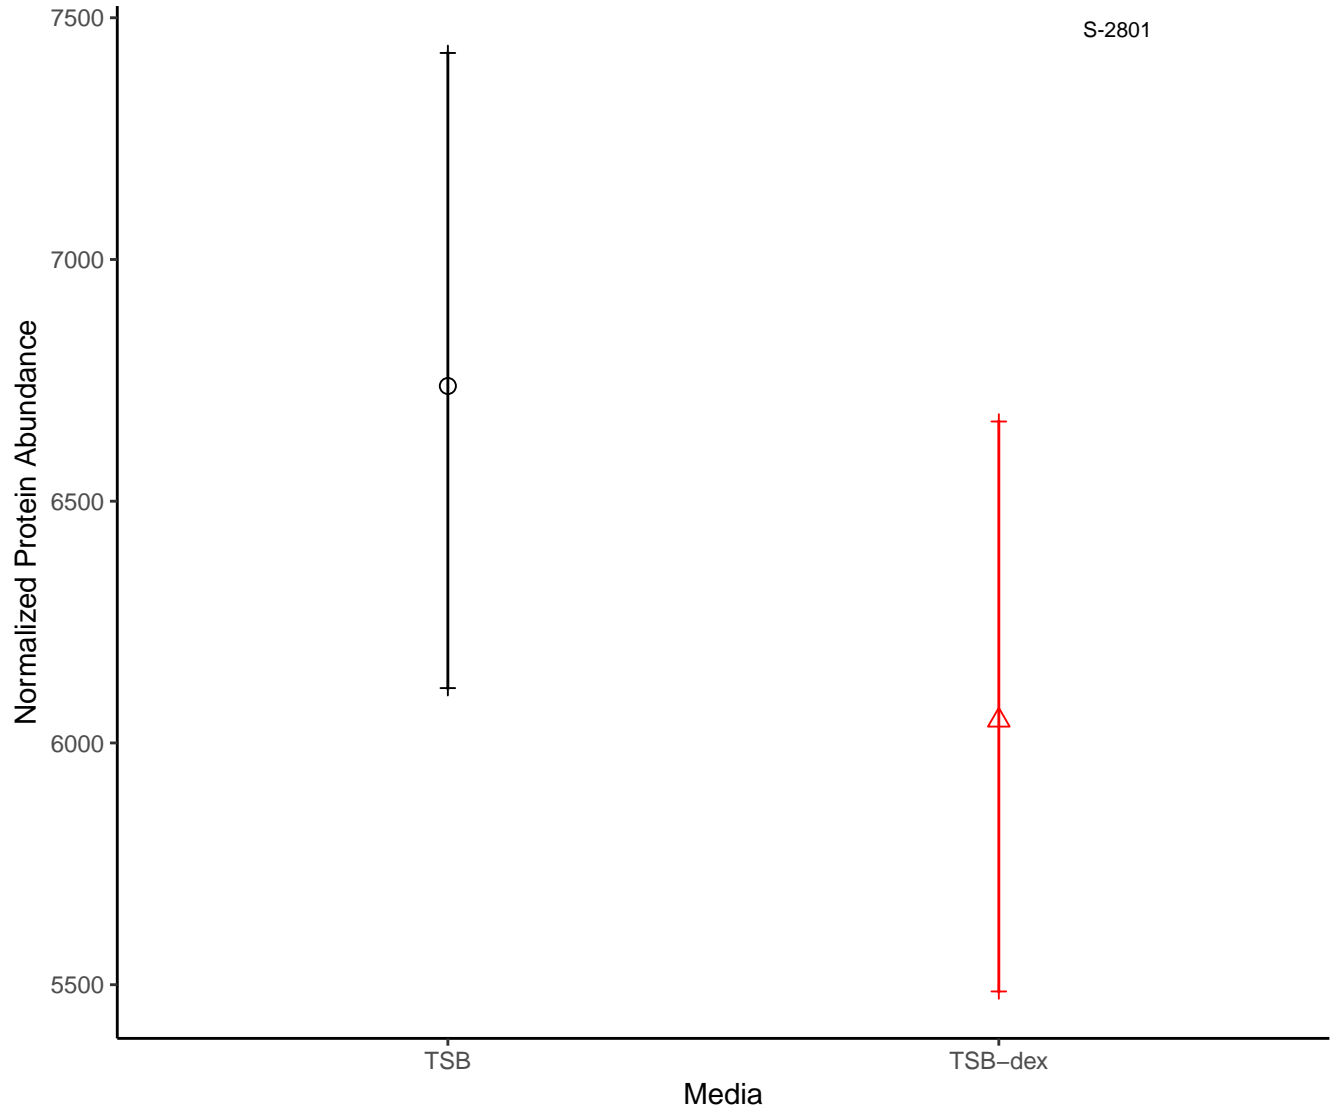

⊕ TSB-dex

△ TSB

# QOX2\_STAAM

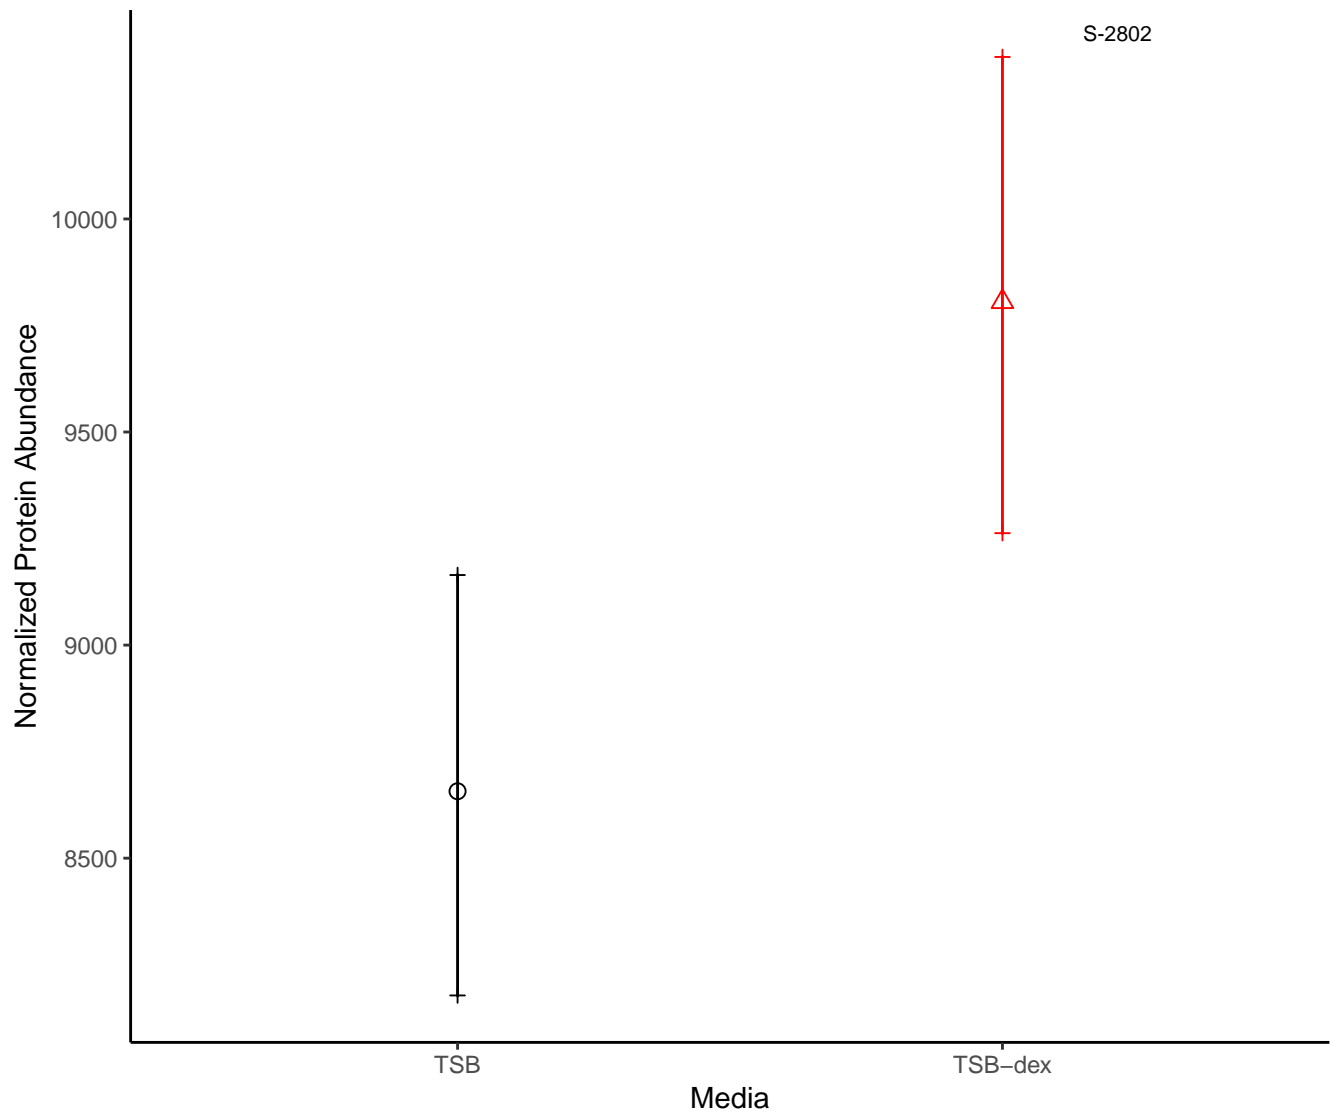

⊕ TSB-dex

△ TSB

# QUEA\_STAAM

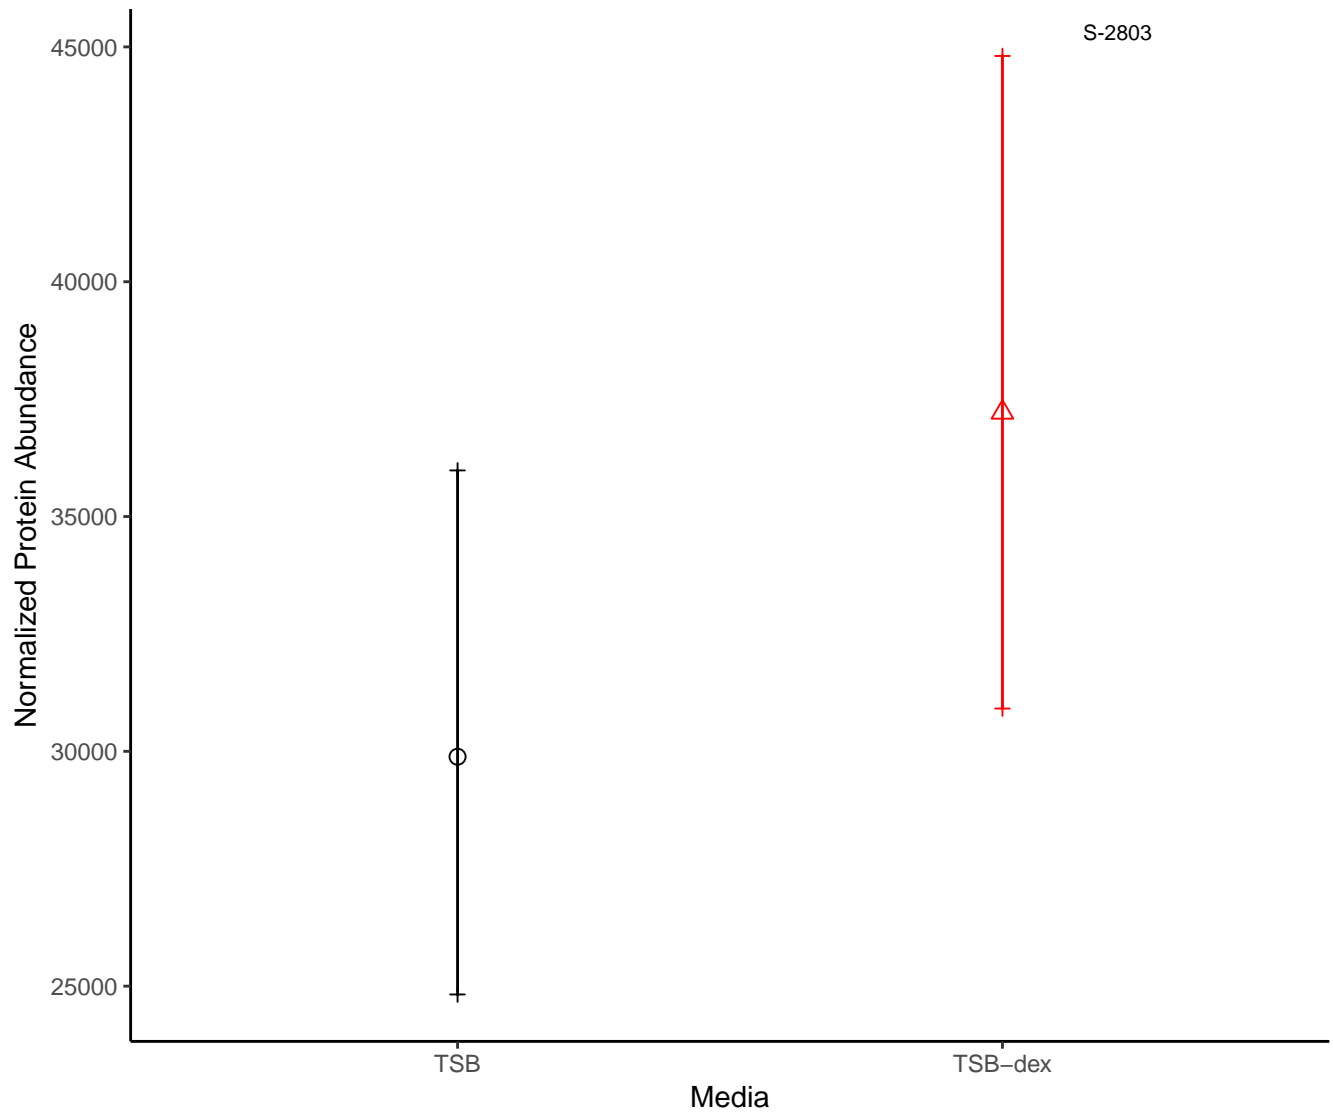

⊕ TSB-dex

△ TSB

# QUEC\_STAAM

S-2804

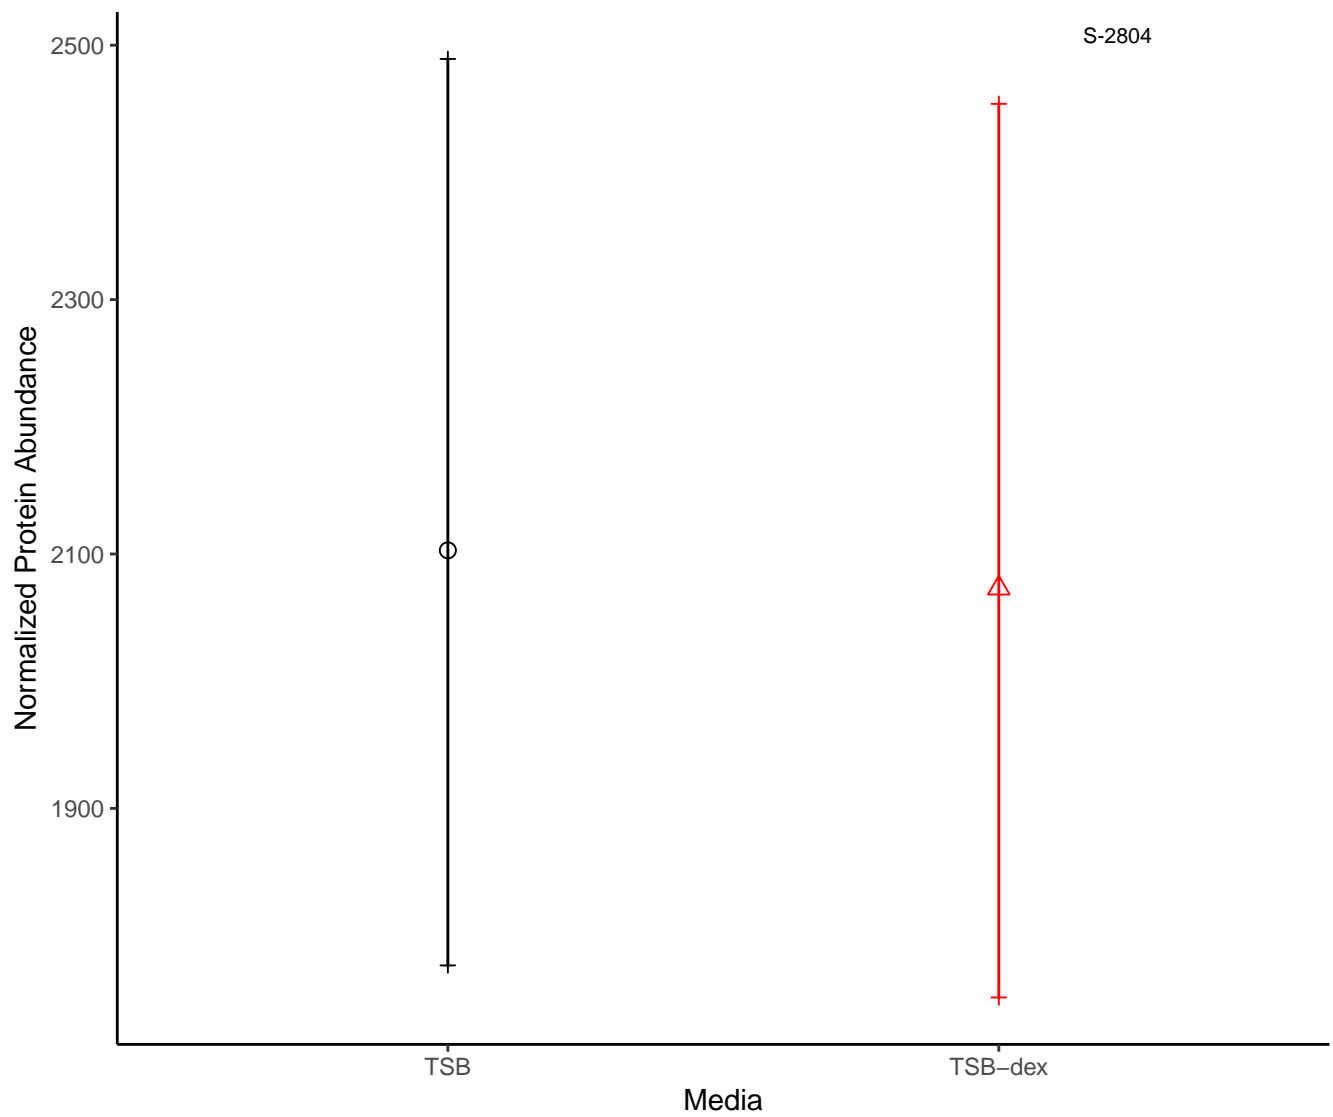

⊕ TSB-dex

△ TSB

# RBFA\_STAAM

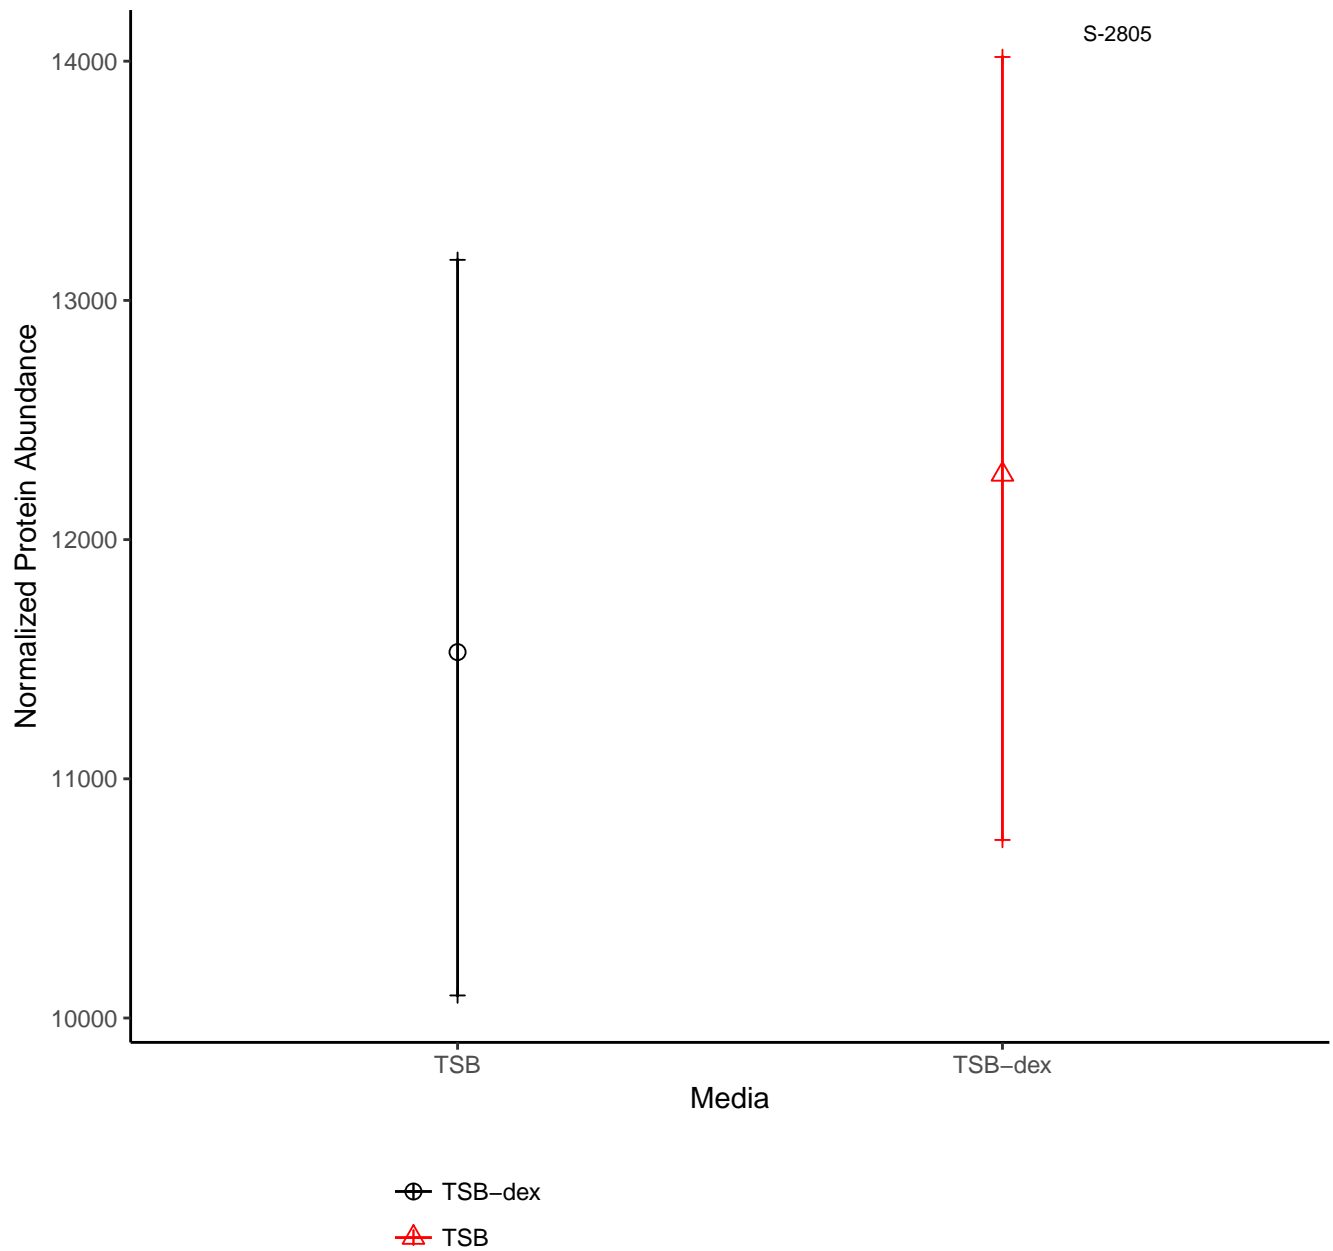

# RECA\_STAAM

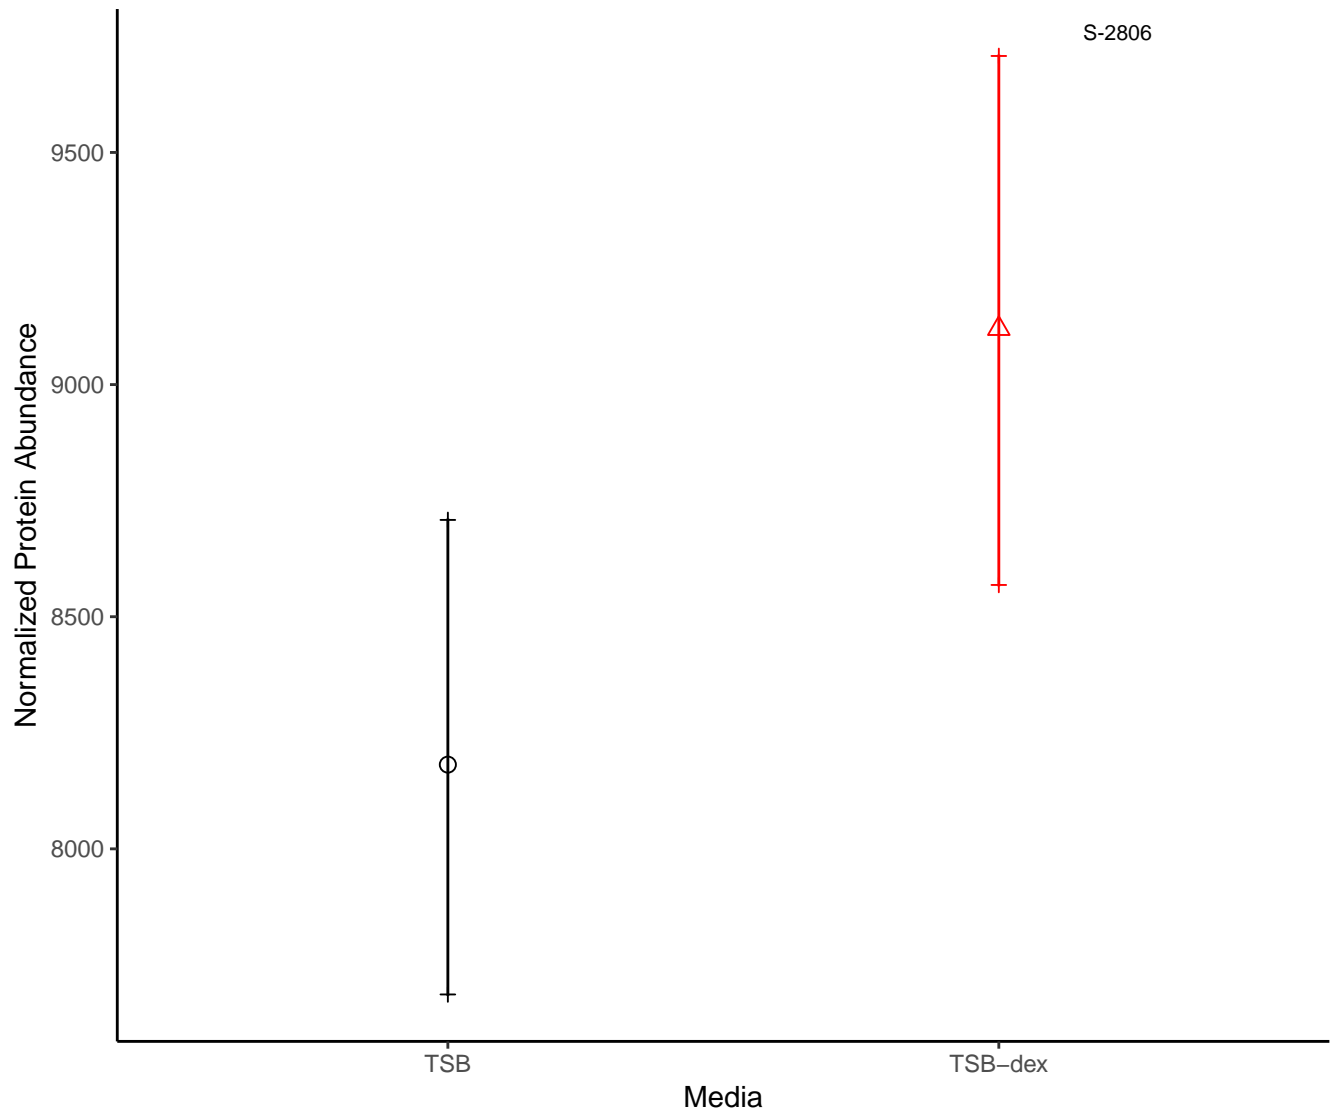

⊕ TSB-dex

△ TSB

# RELA\_STAAM

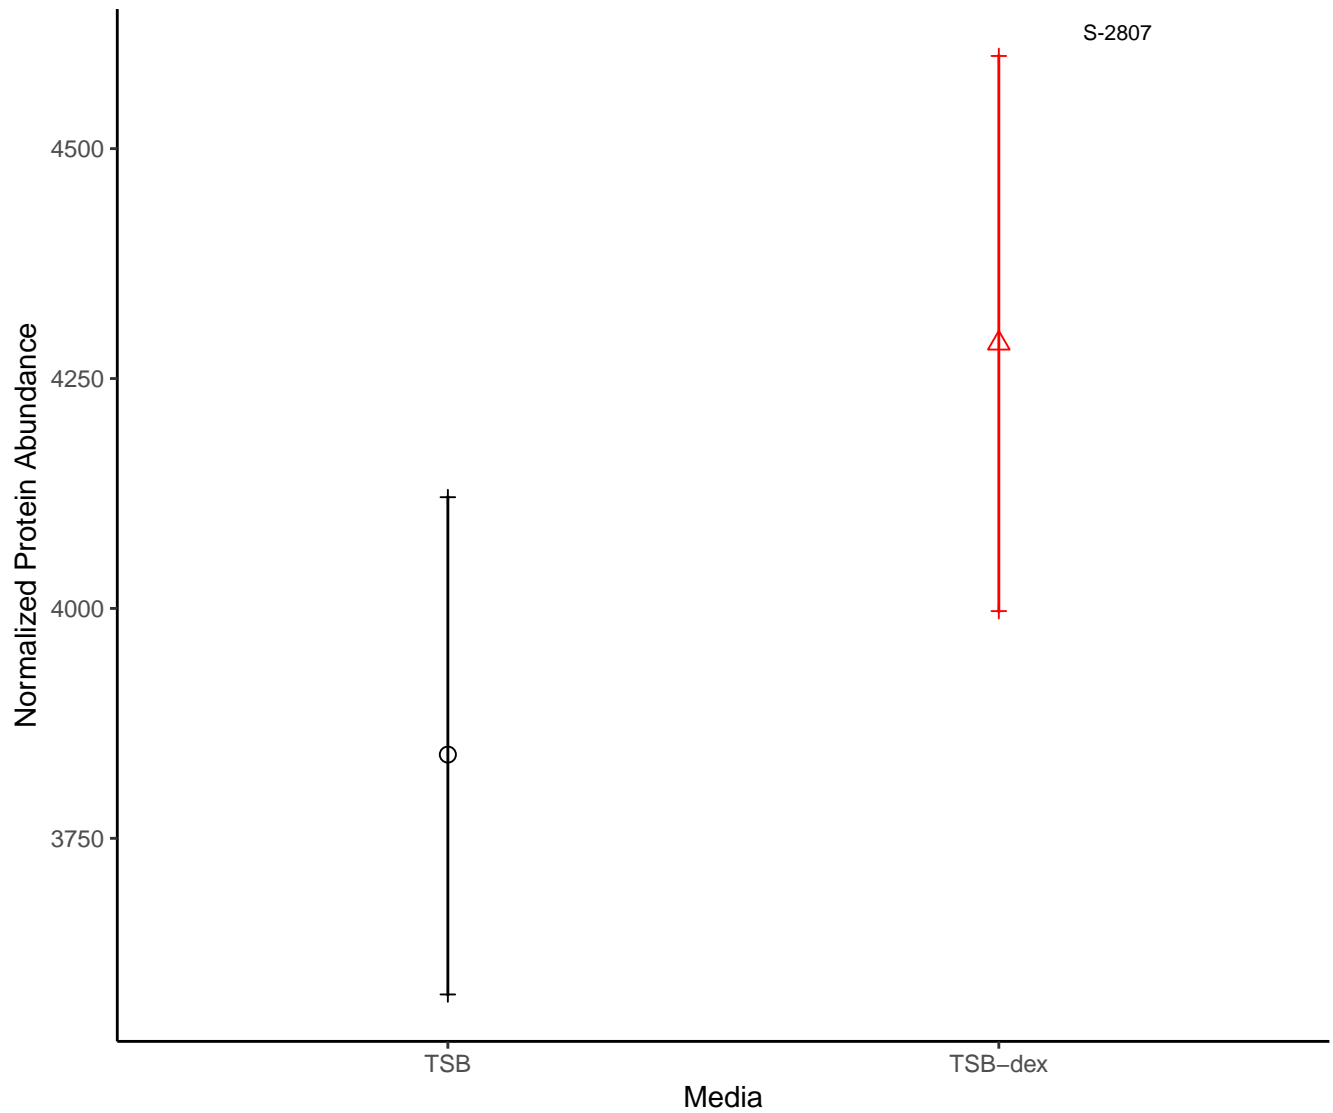

⊕ TSB-dex

△ TSB

# REX\_STAAM

S-2808

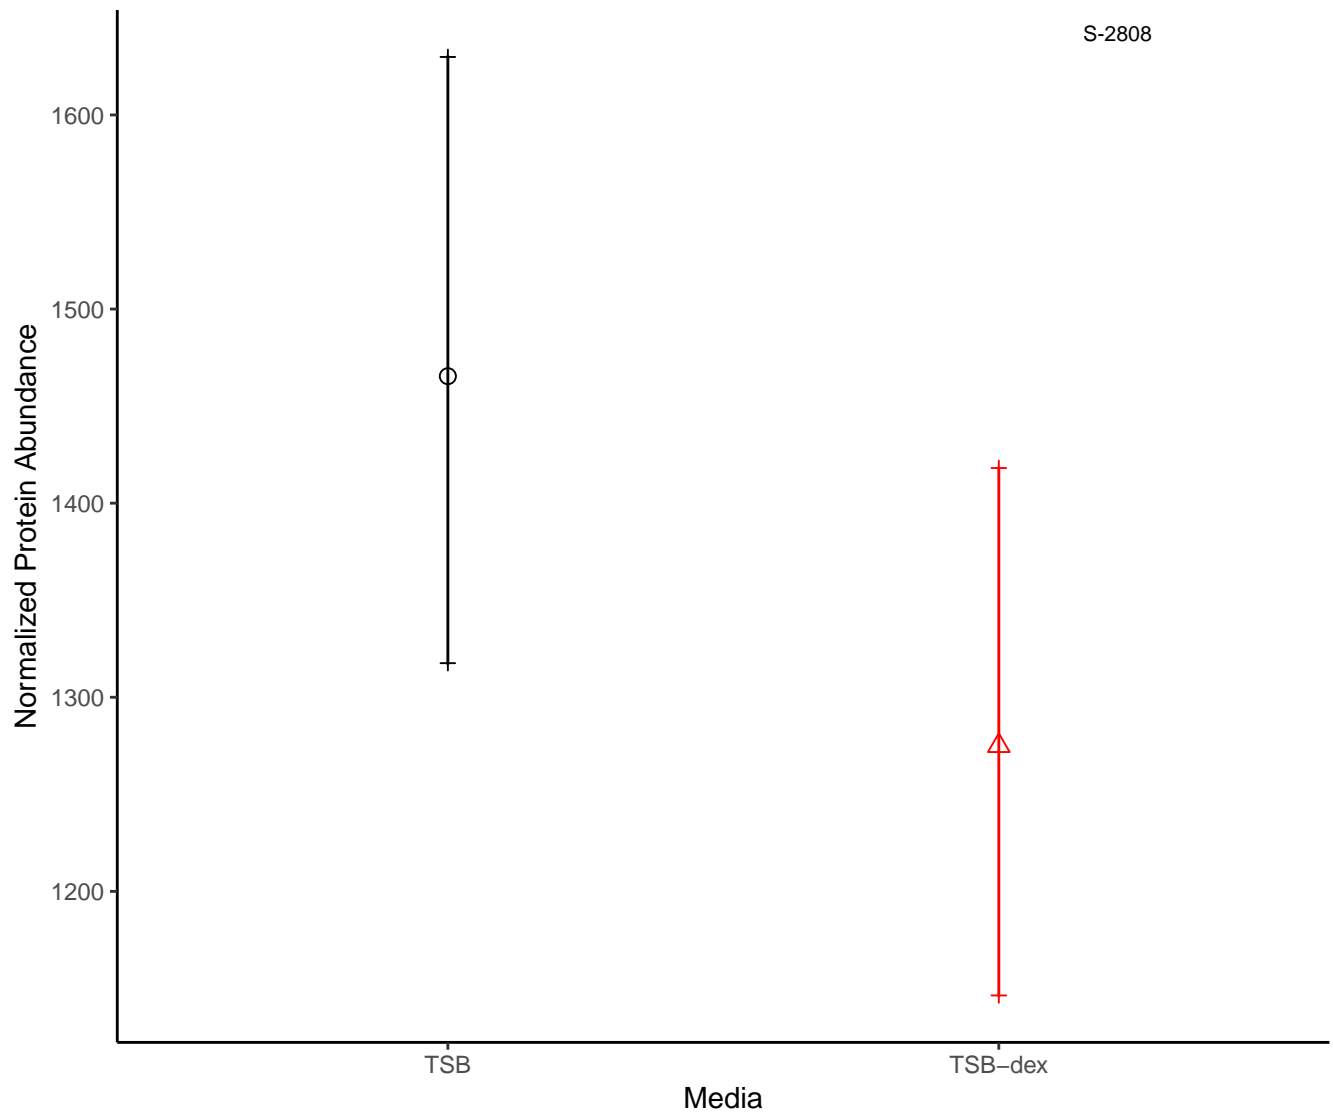

⊕ TSB-dex

△ TSB



# RF1\_STAAM

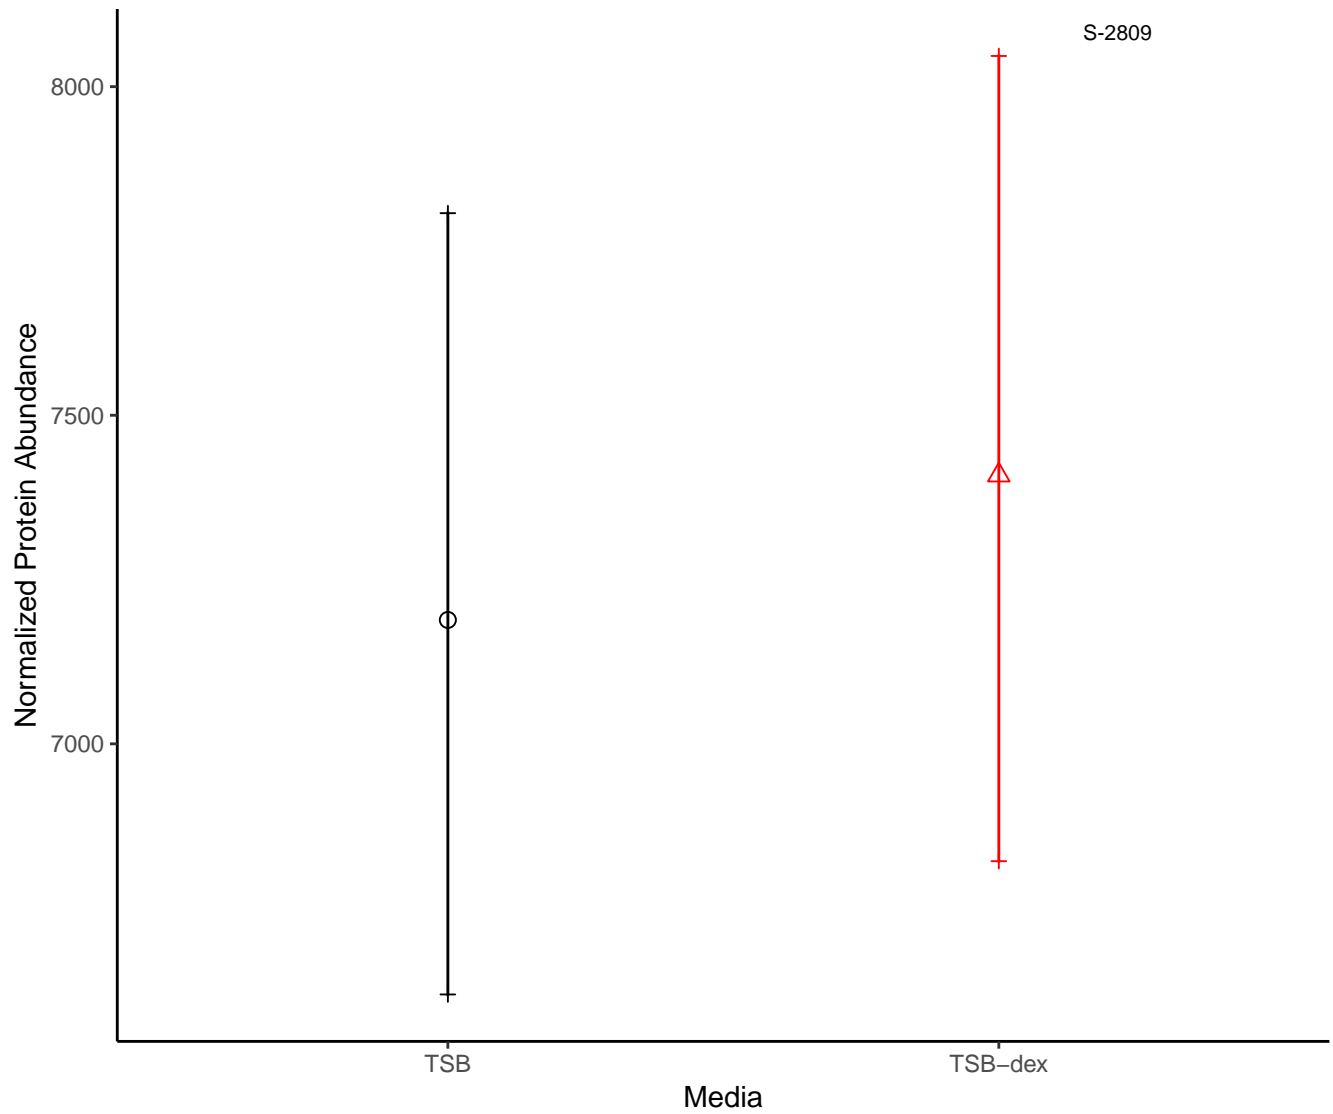

⊕ TSB-dex

△ TSB

# RIBBA\_STAAM

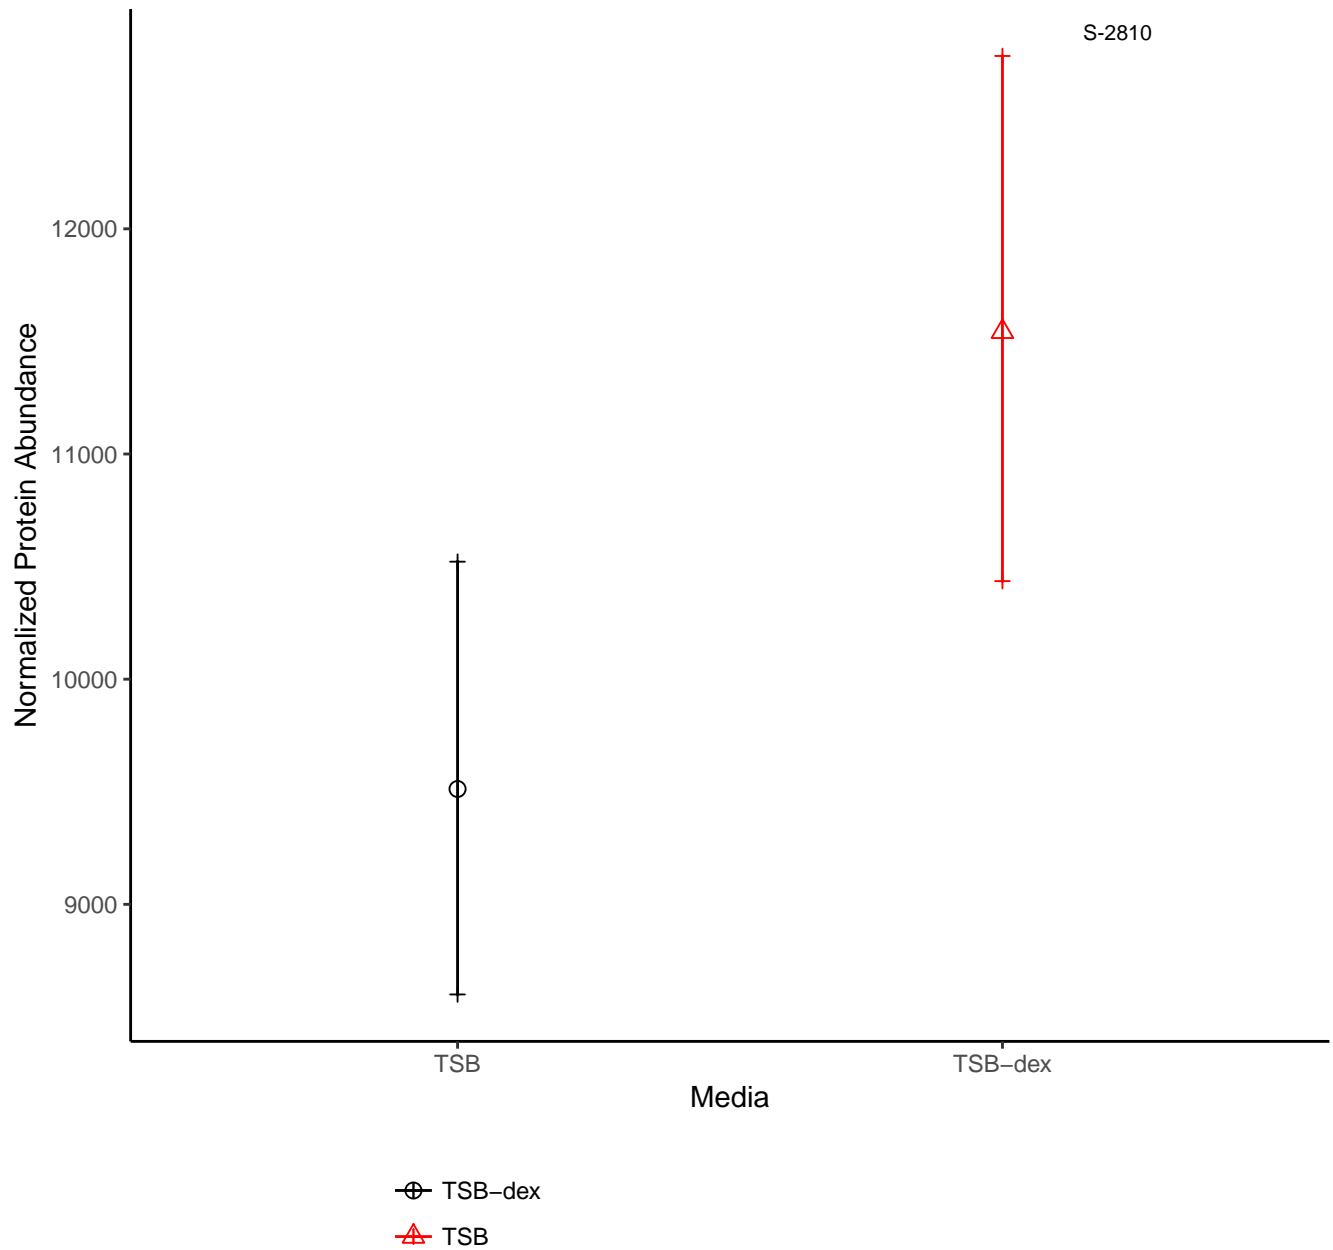

# RIMM\_STAAM

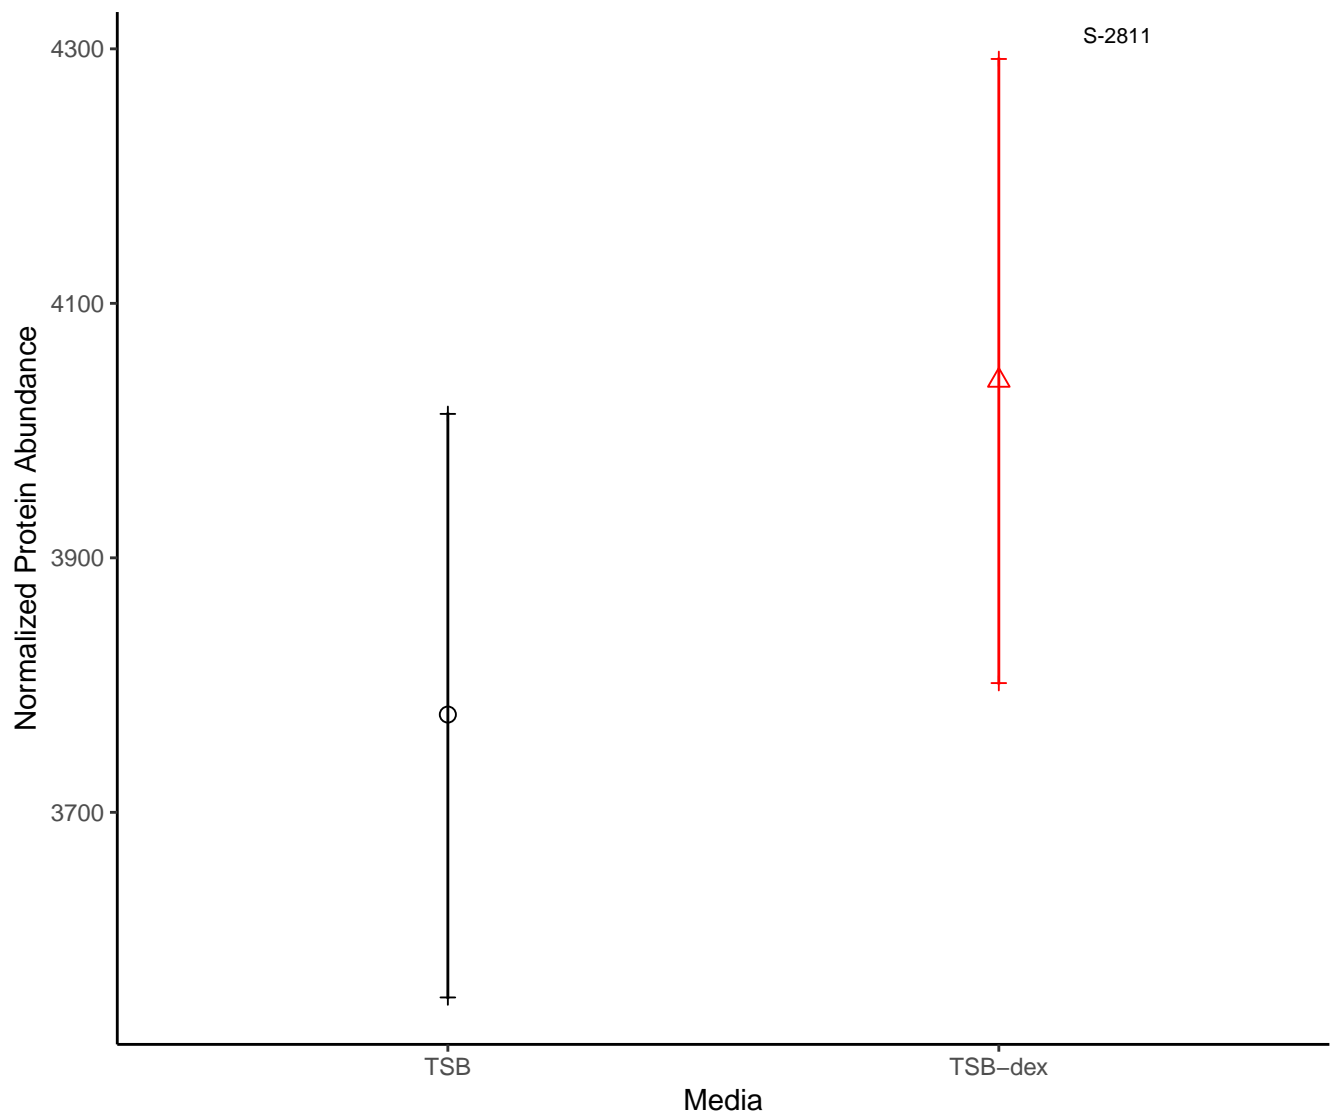

⊕ TSB-dex

△ TSB

# RISB\_STAAM

S-2812

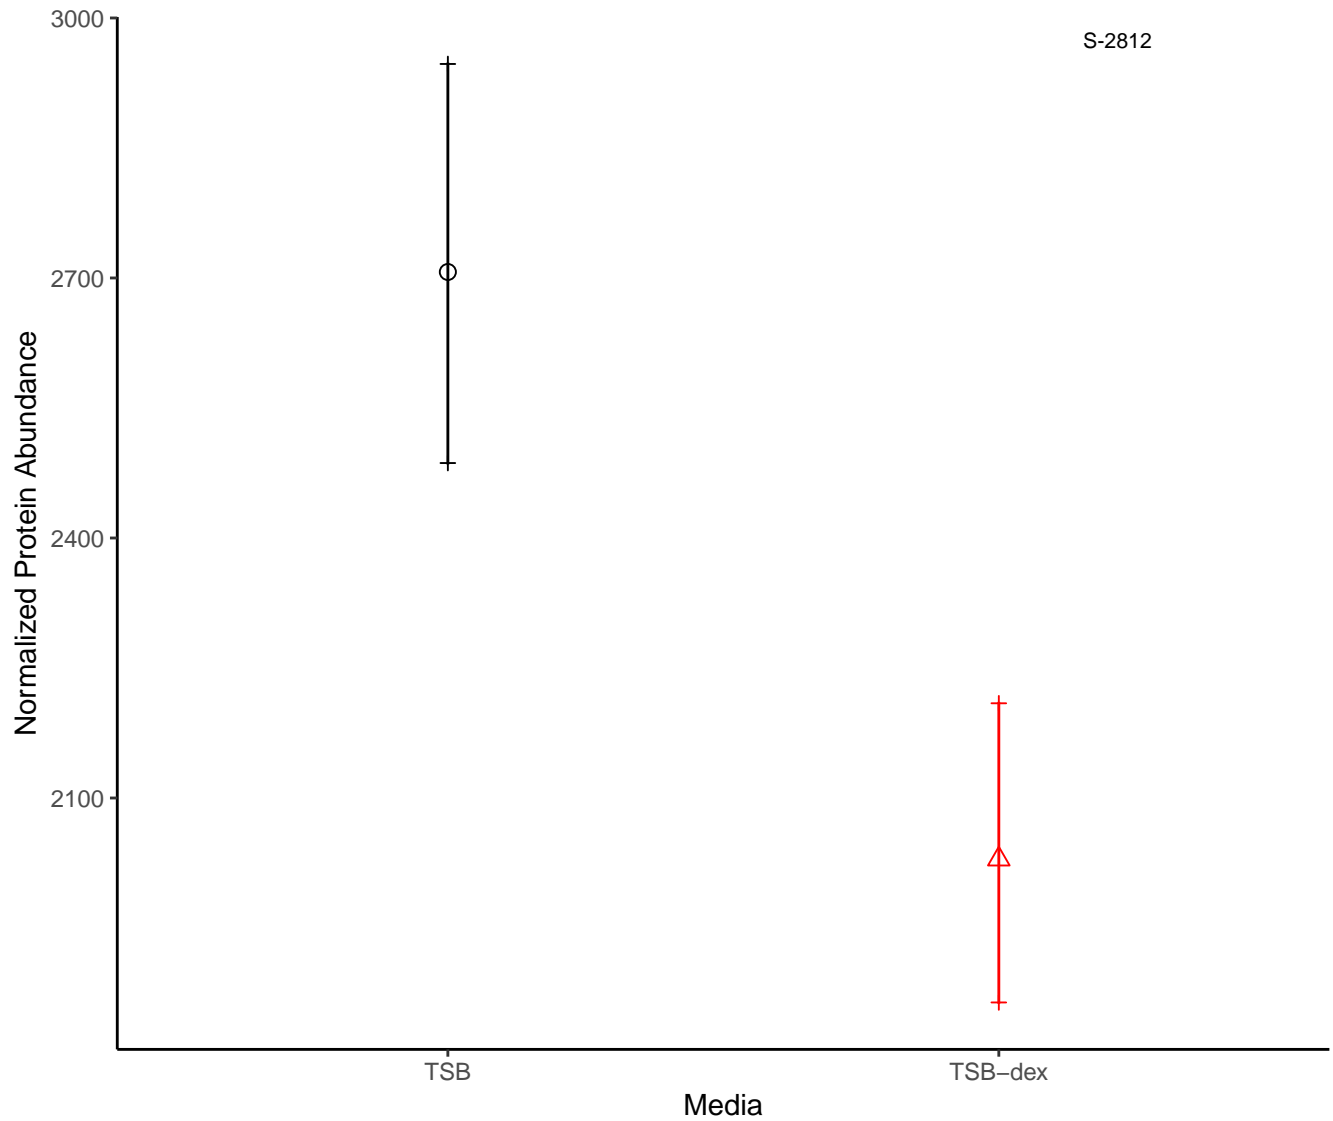

⊕ TSB-dex

△ TSB

# RL1\_STAAM

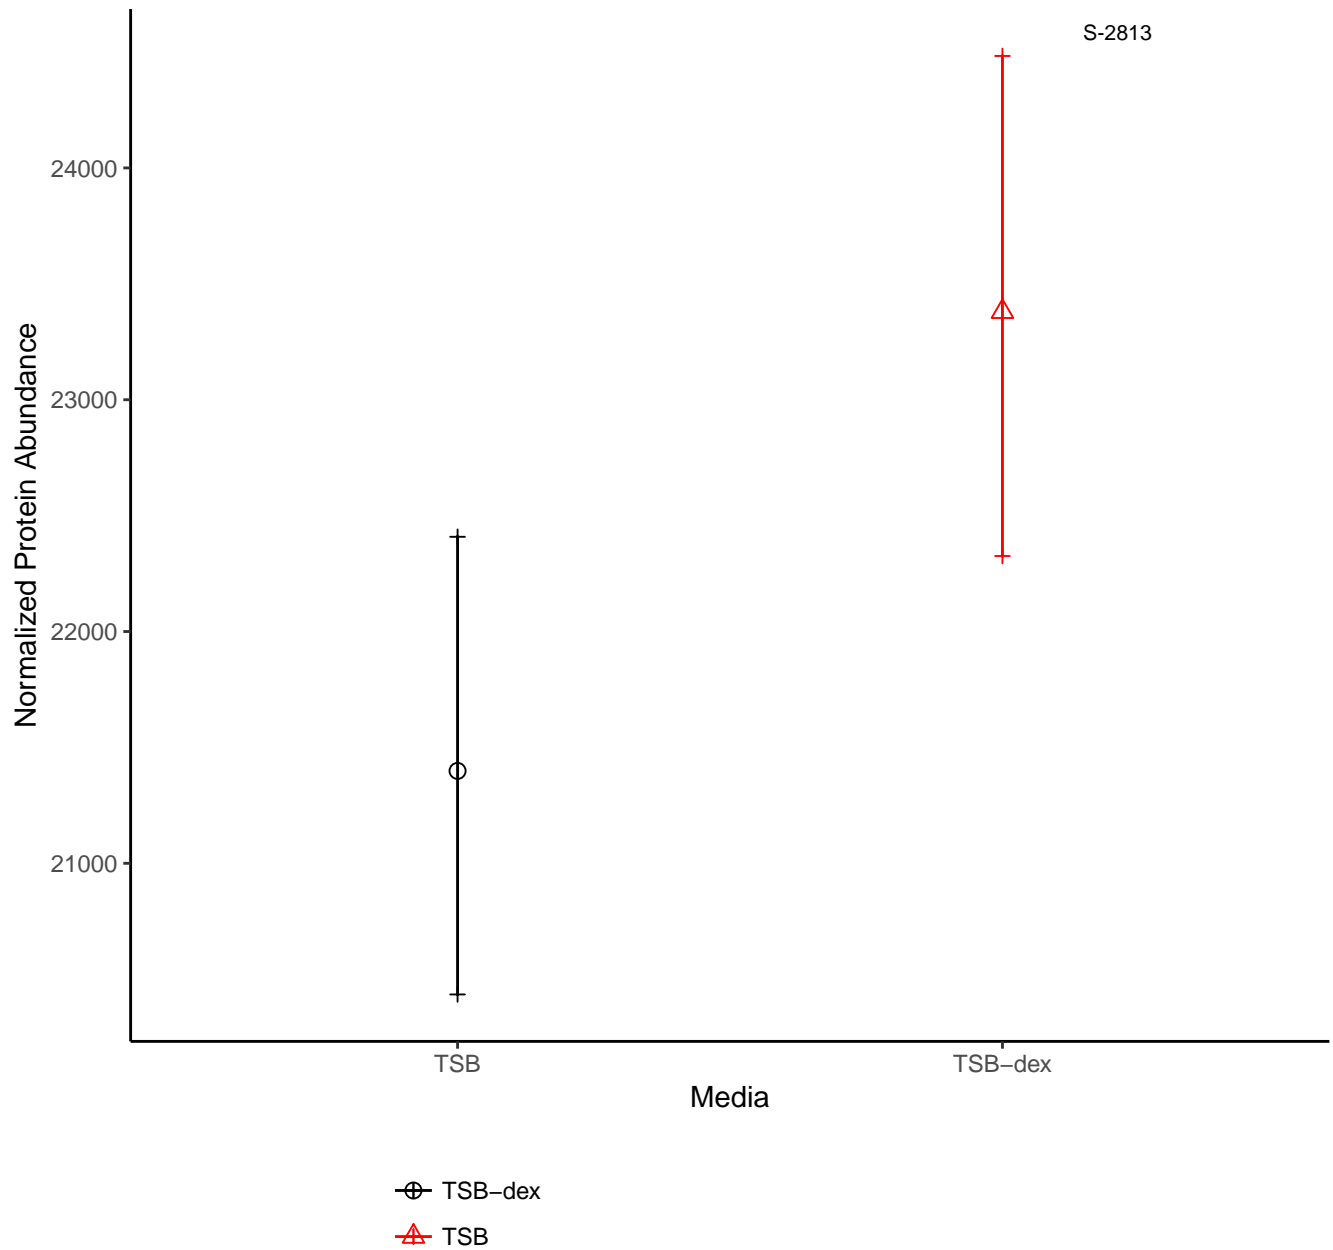

# RL10\_STAAM

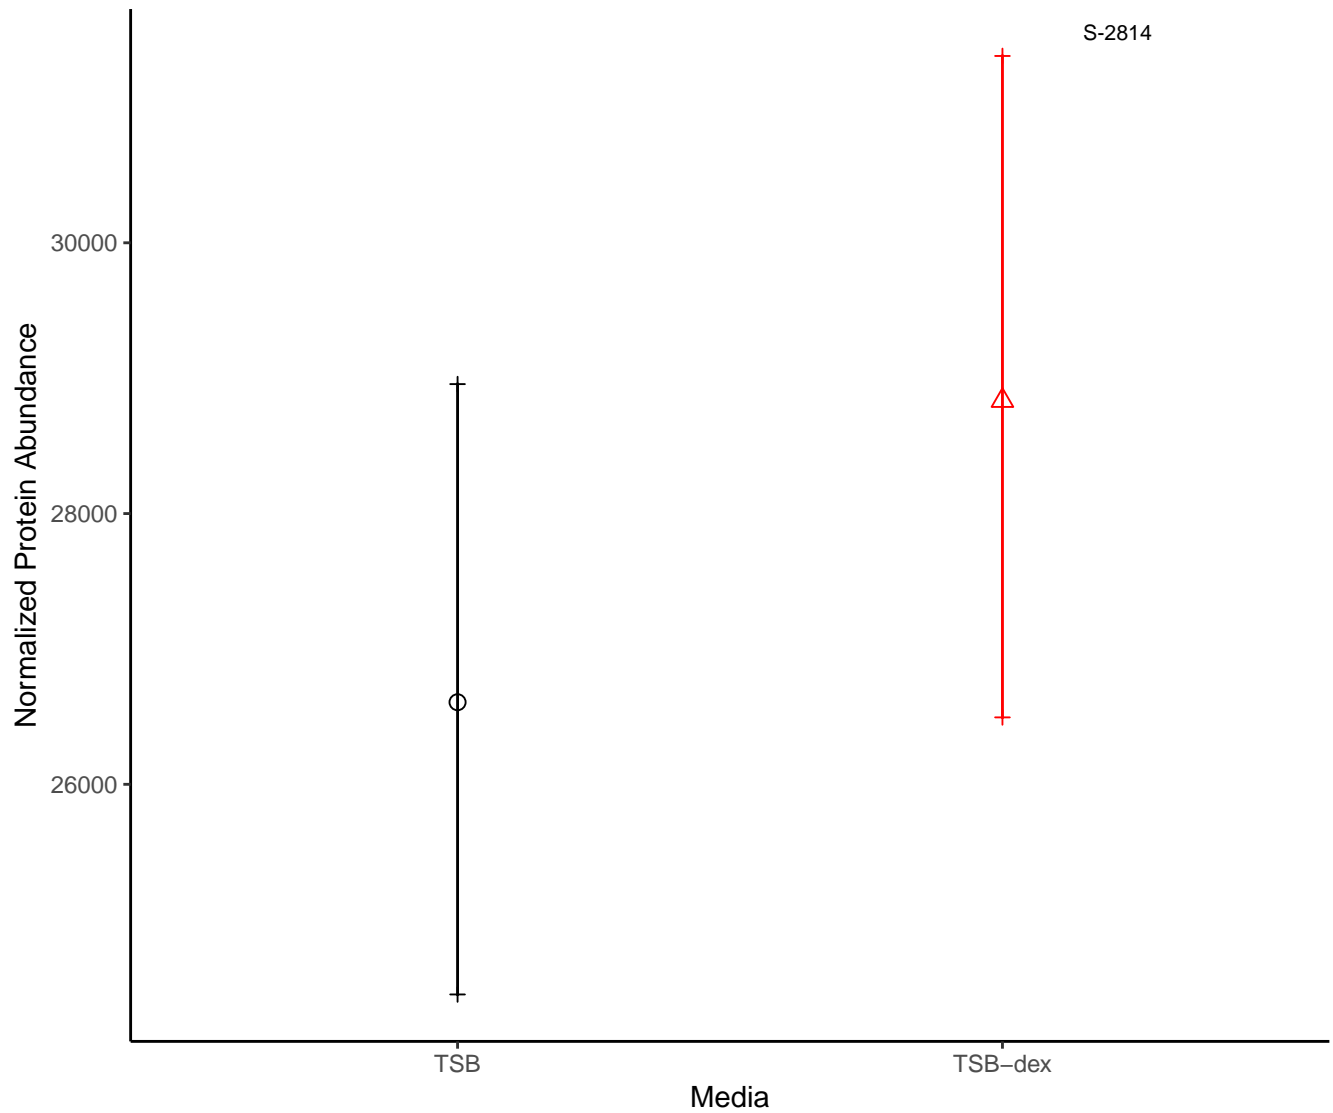

⊖ TSB-dex

△ TSB

# RL11\_STAAM

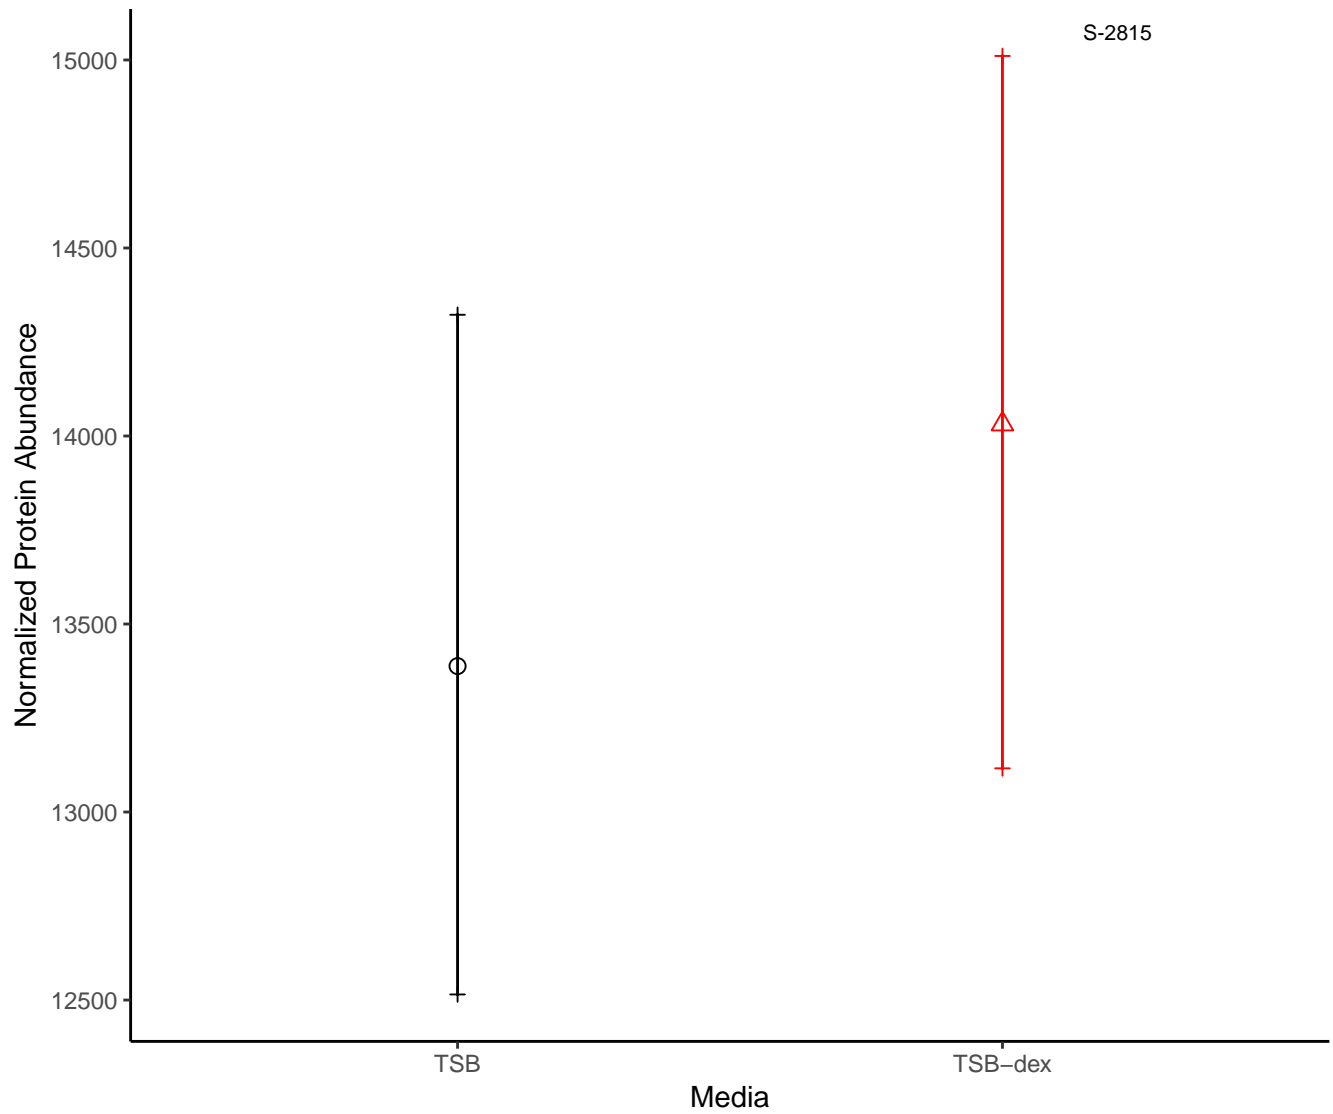

⊕ TSB-dex

△ TSB

# RL13\_STAAM

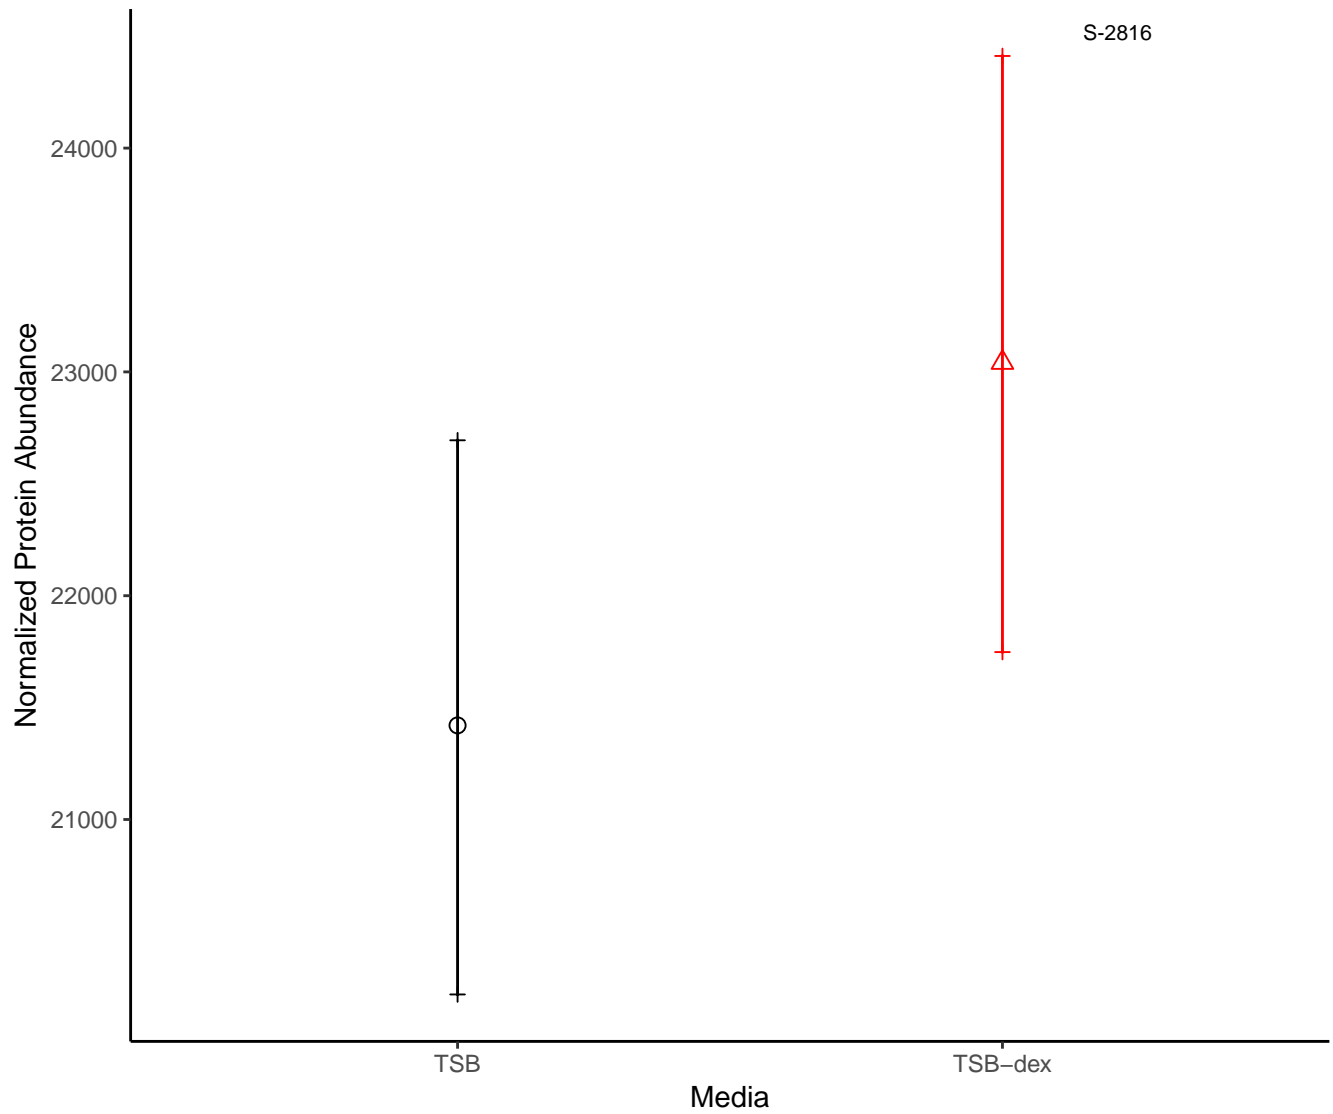

⊕ TSB-dex

△ TSB



# RL14\_STAAM

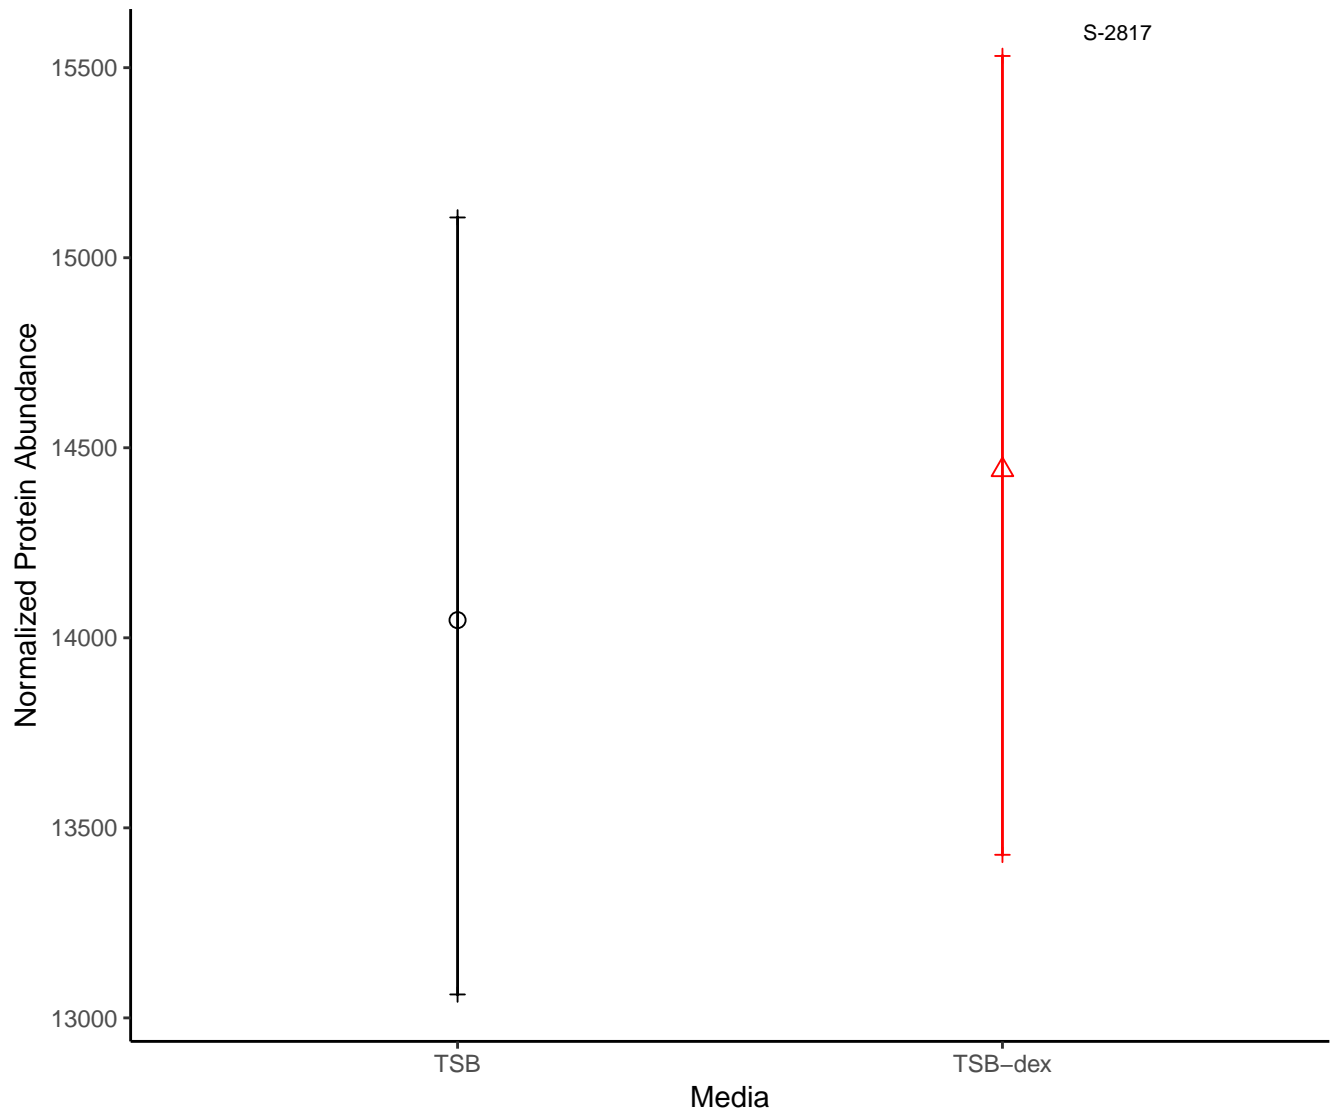

⊕ TSB-dex

△ TSB

# RL15\_STAAM

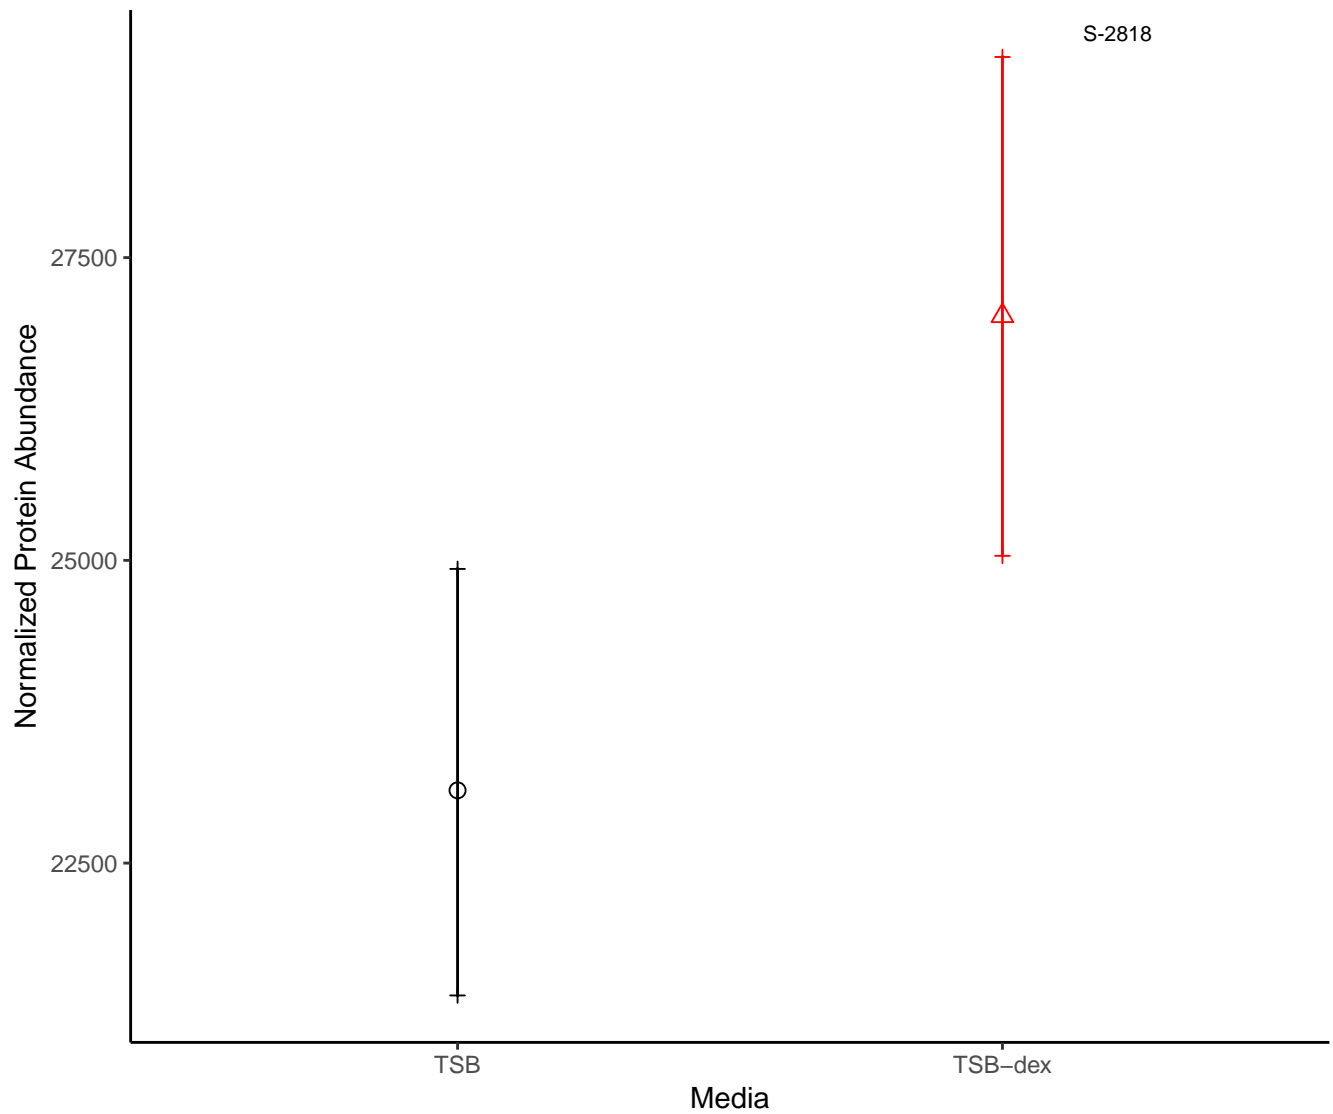

⊕ TSB-dex

△ TSB

# RL16\_STAAM

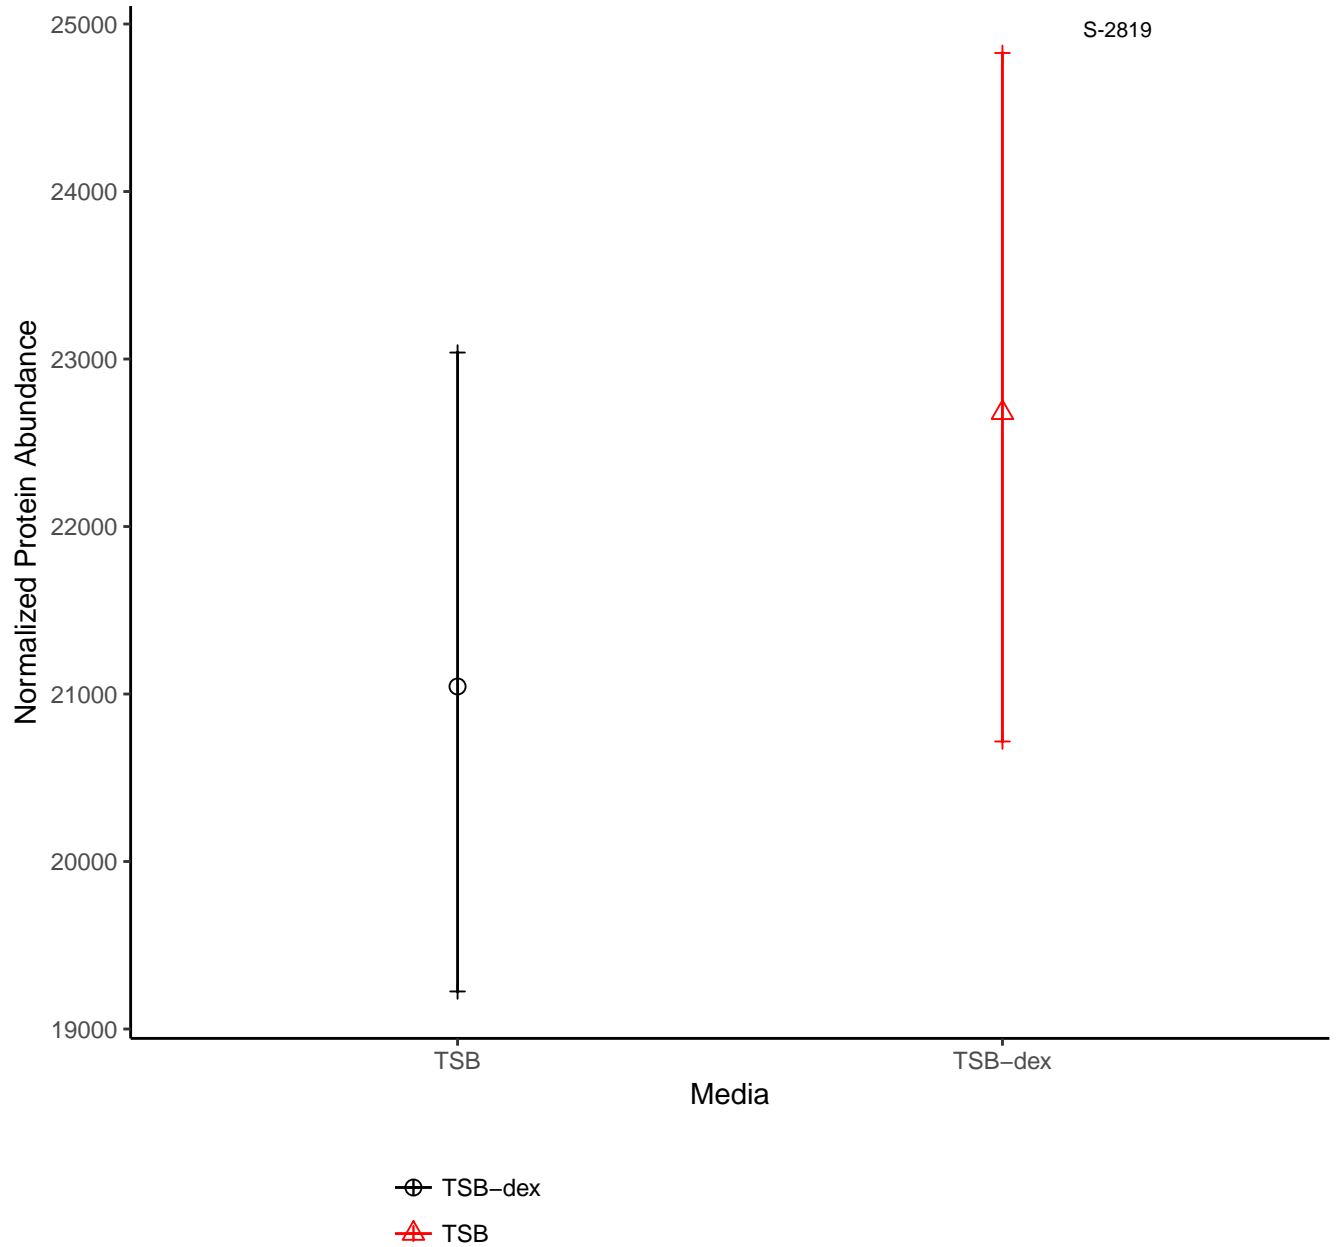

# RL17\_STAAM

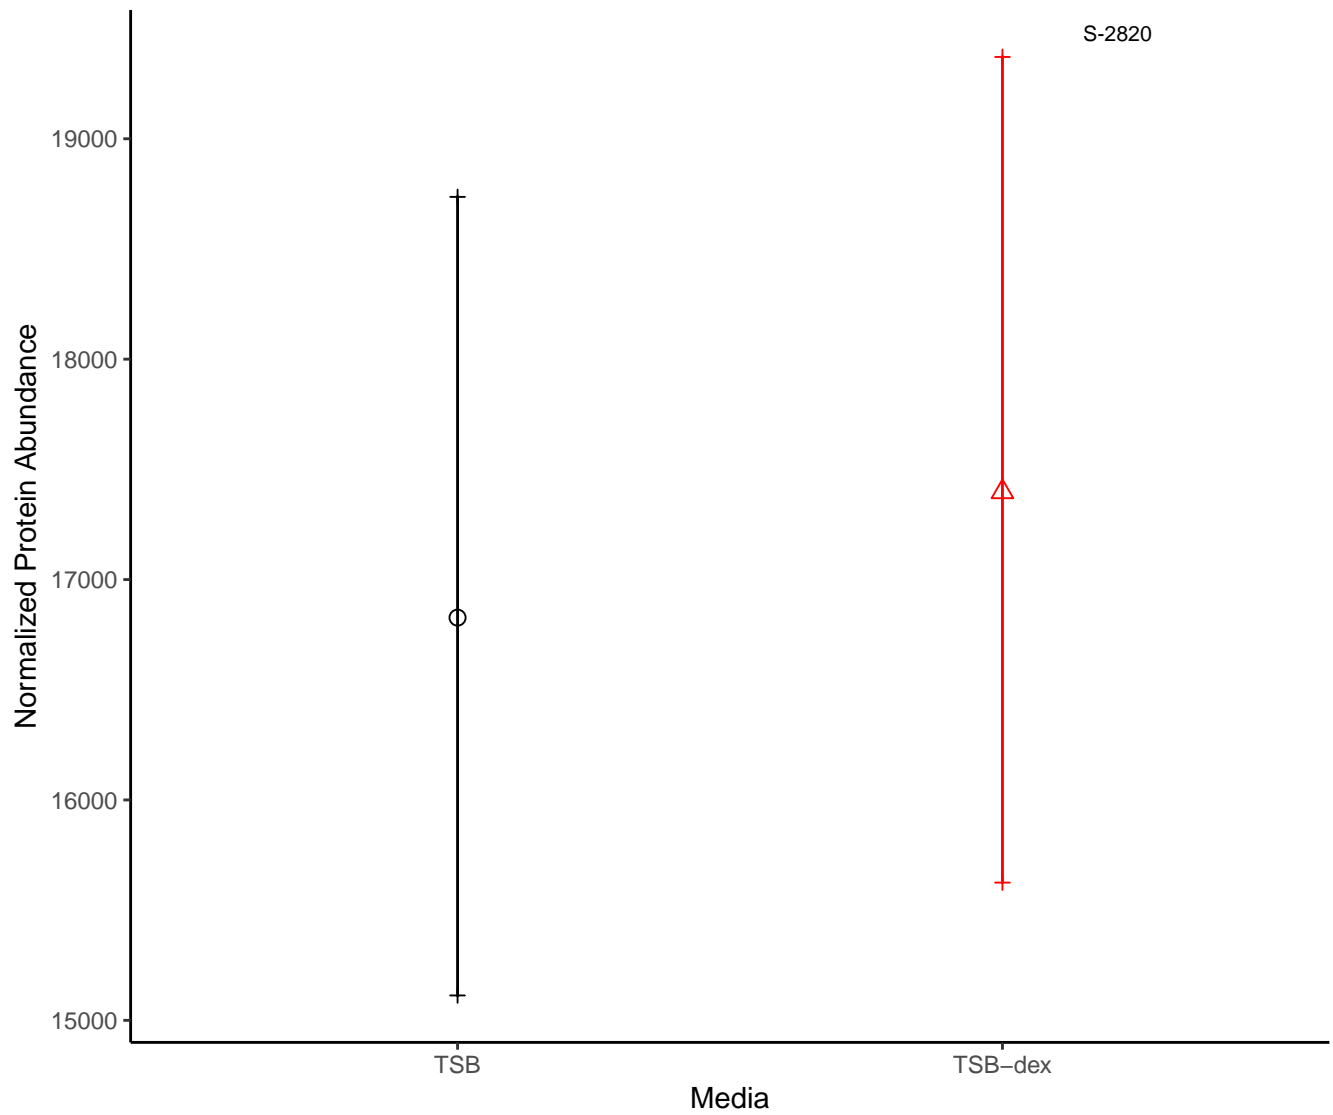

⊖ TSB-dex

△ TSB

# RL18\_STAAM

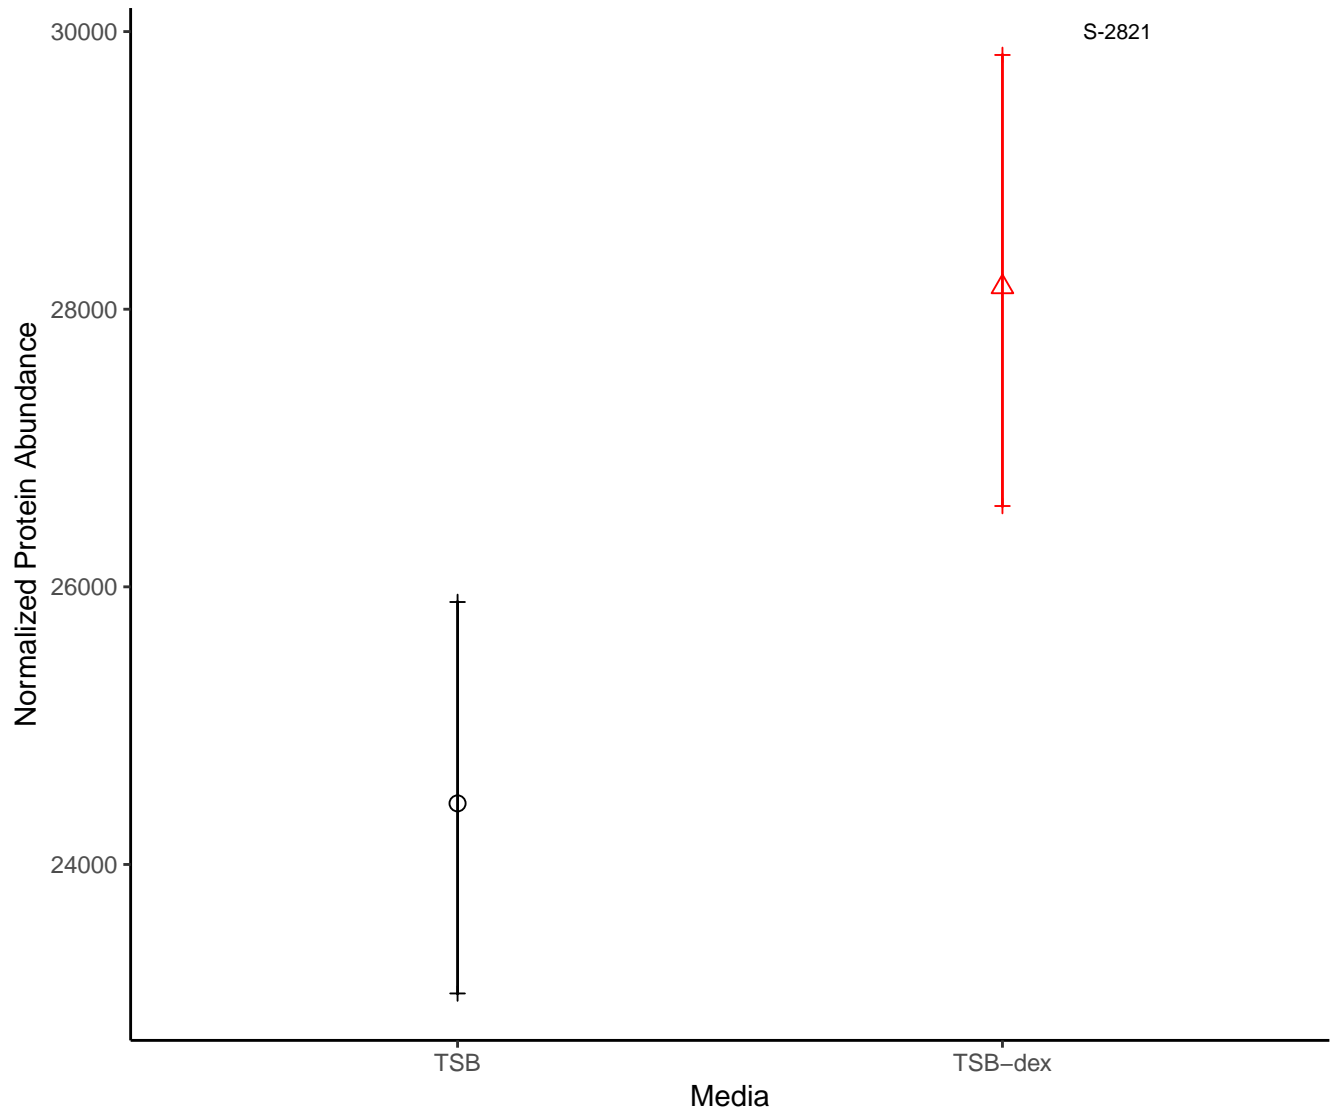

⊖ TSB-dex

⊖ TSB

# RL19\_STAAM

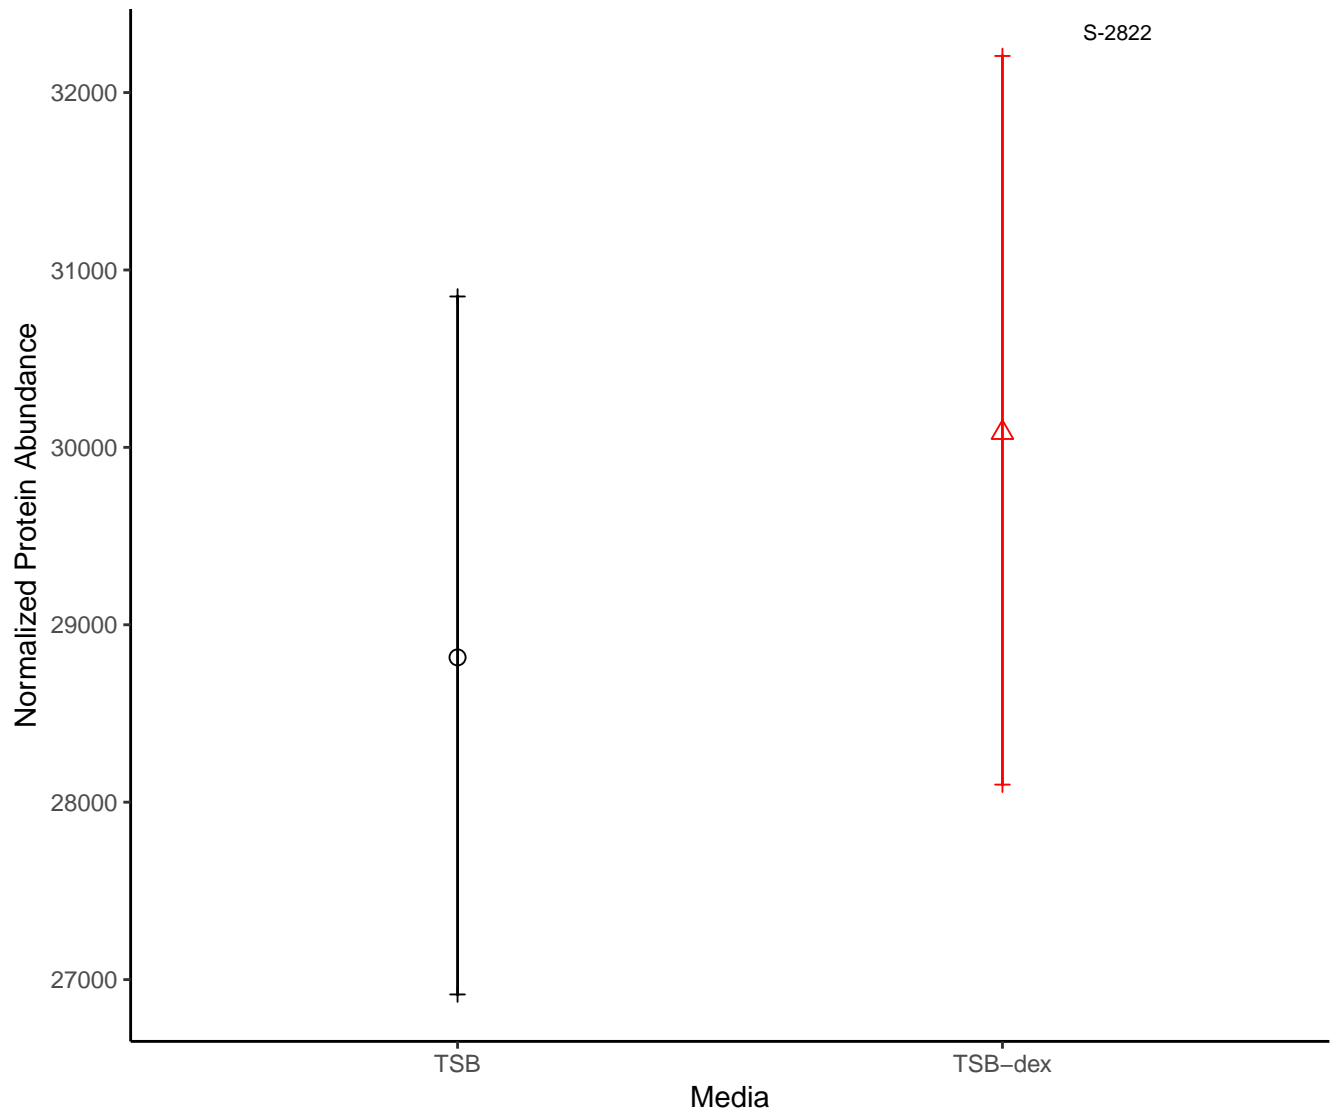

⊕ TSB-dex

△ TSB

# RL2\_STAAM

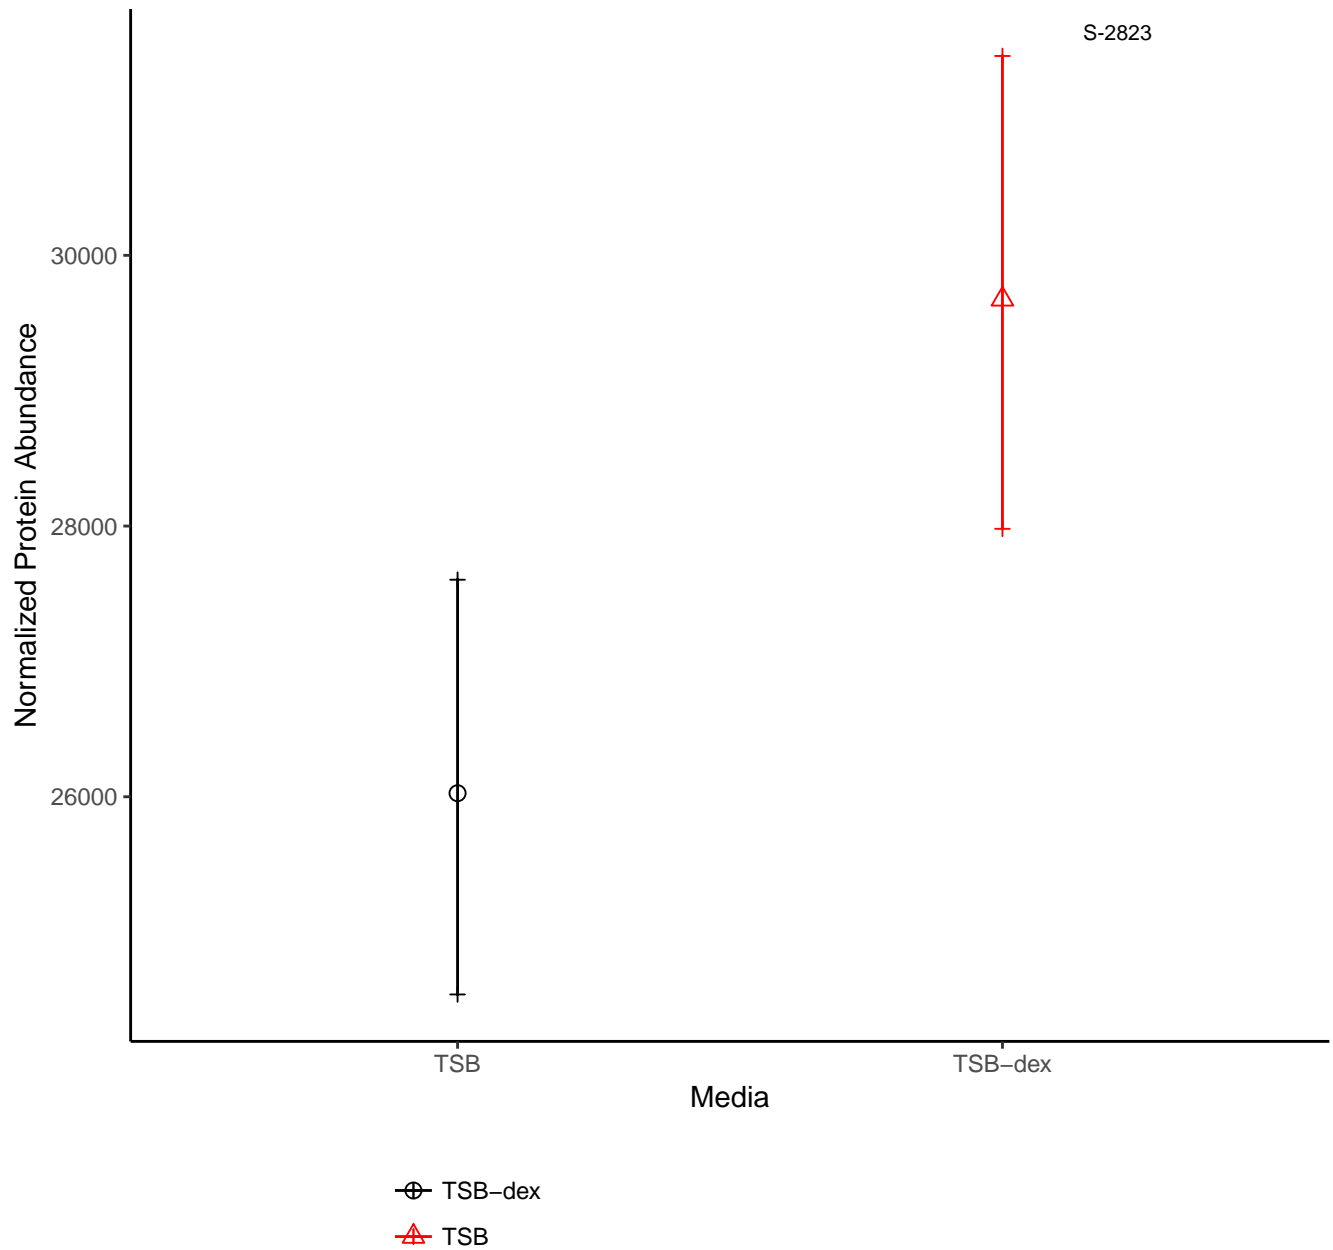

# RL20\_STAAM

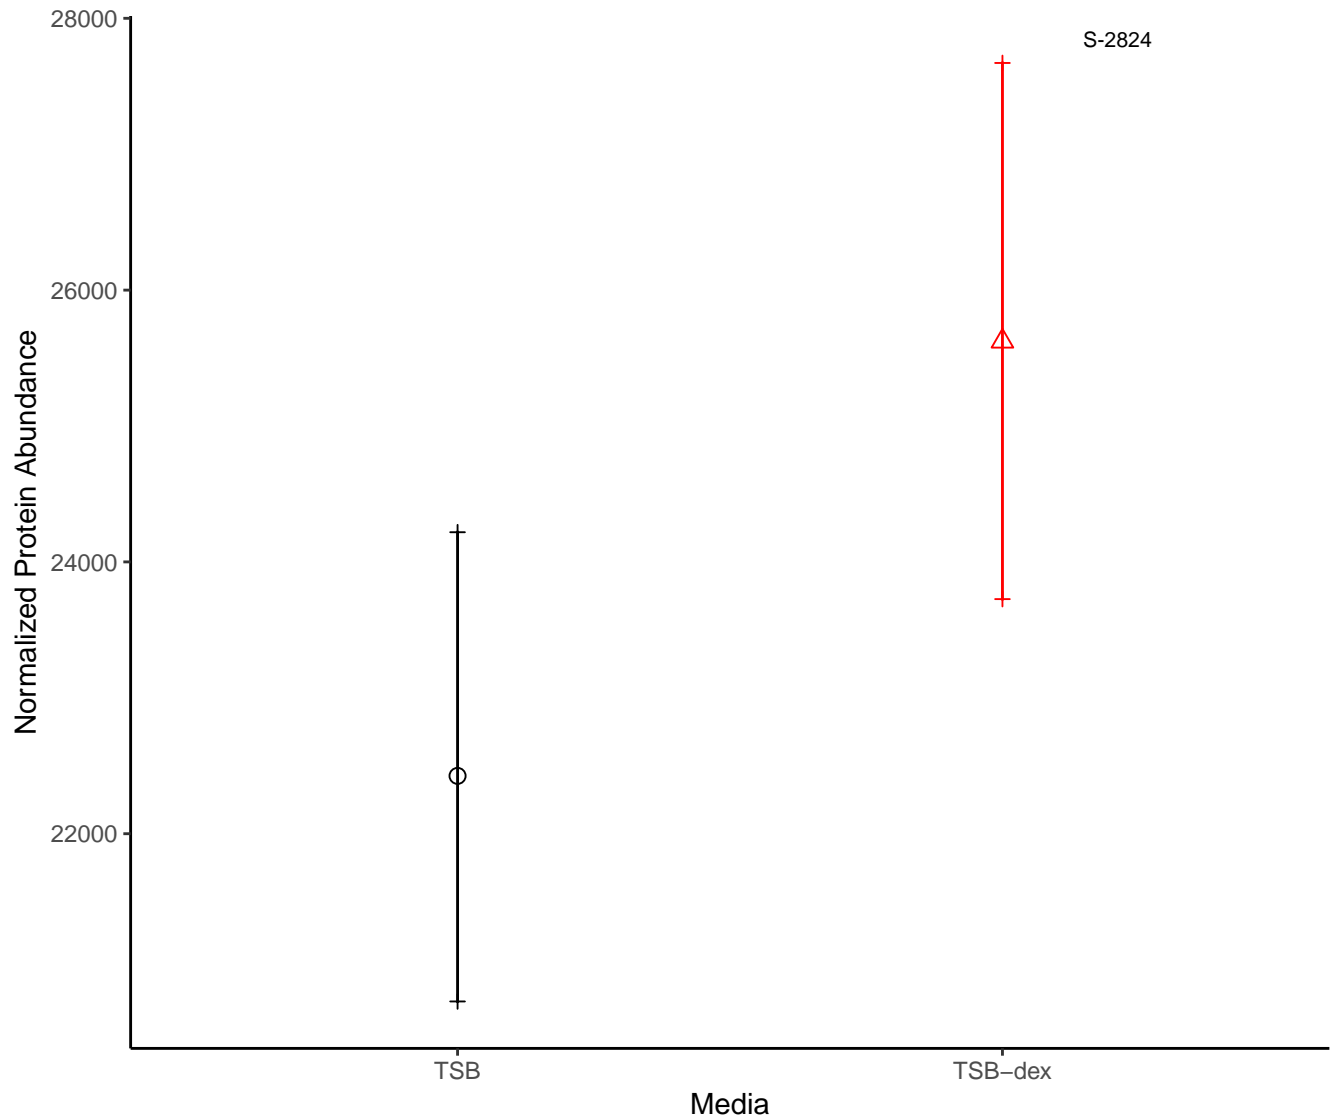

⊕ TSB-dex

△ TSB



# RL21\_STAAM

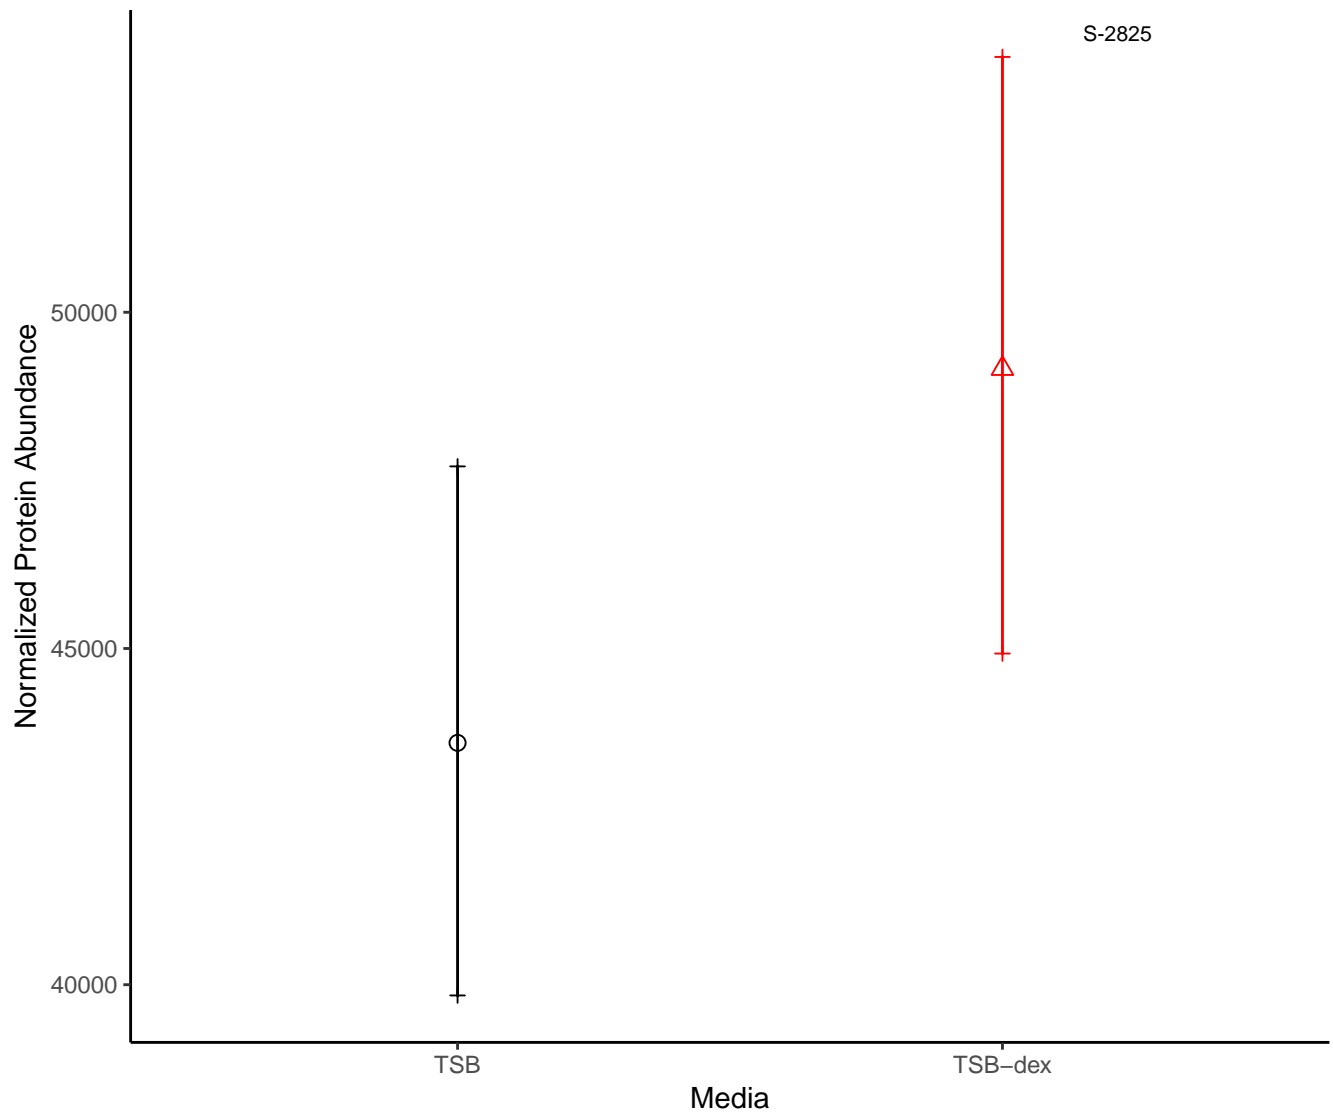

⊕ TSB-dex

△ TSB

# RL22\_STAAM

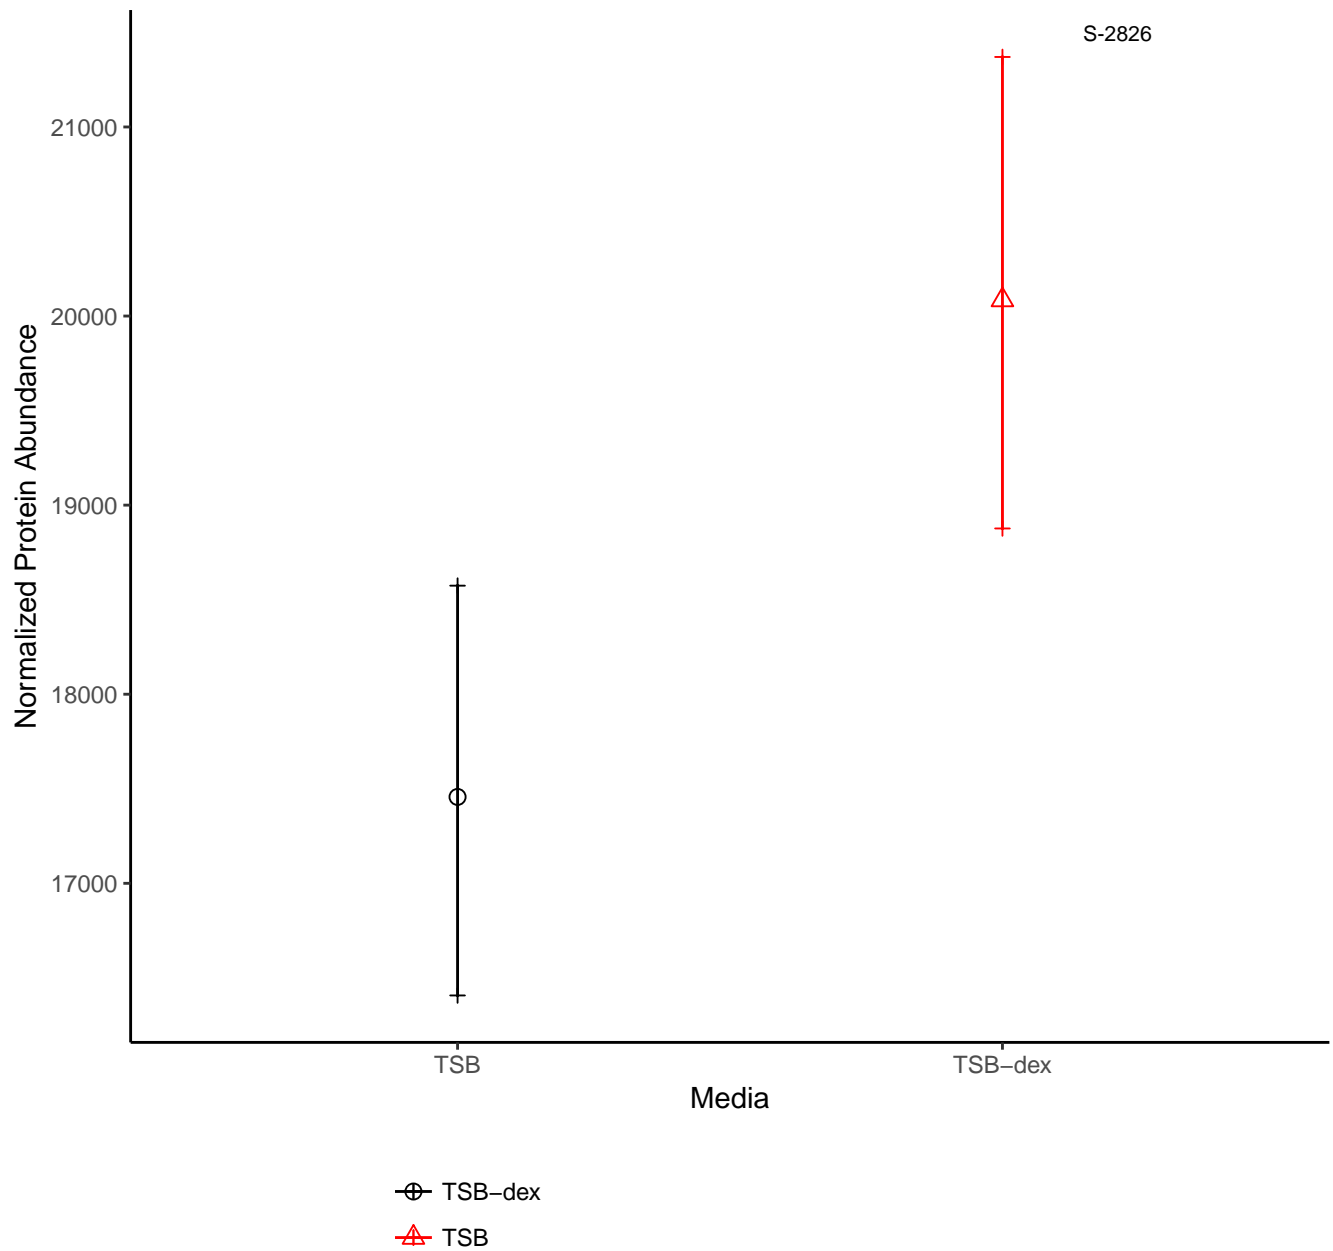

# RL23\_STAAM

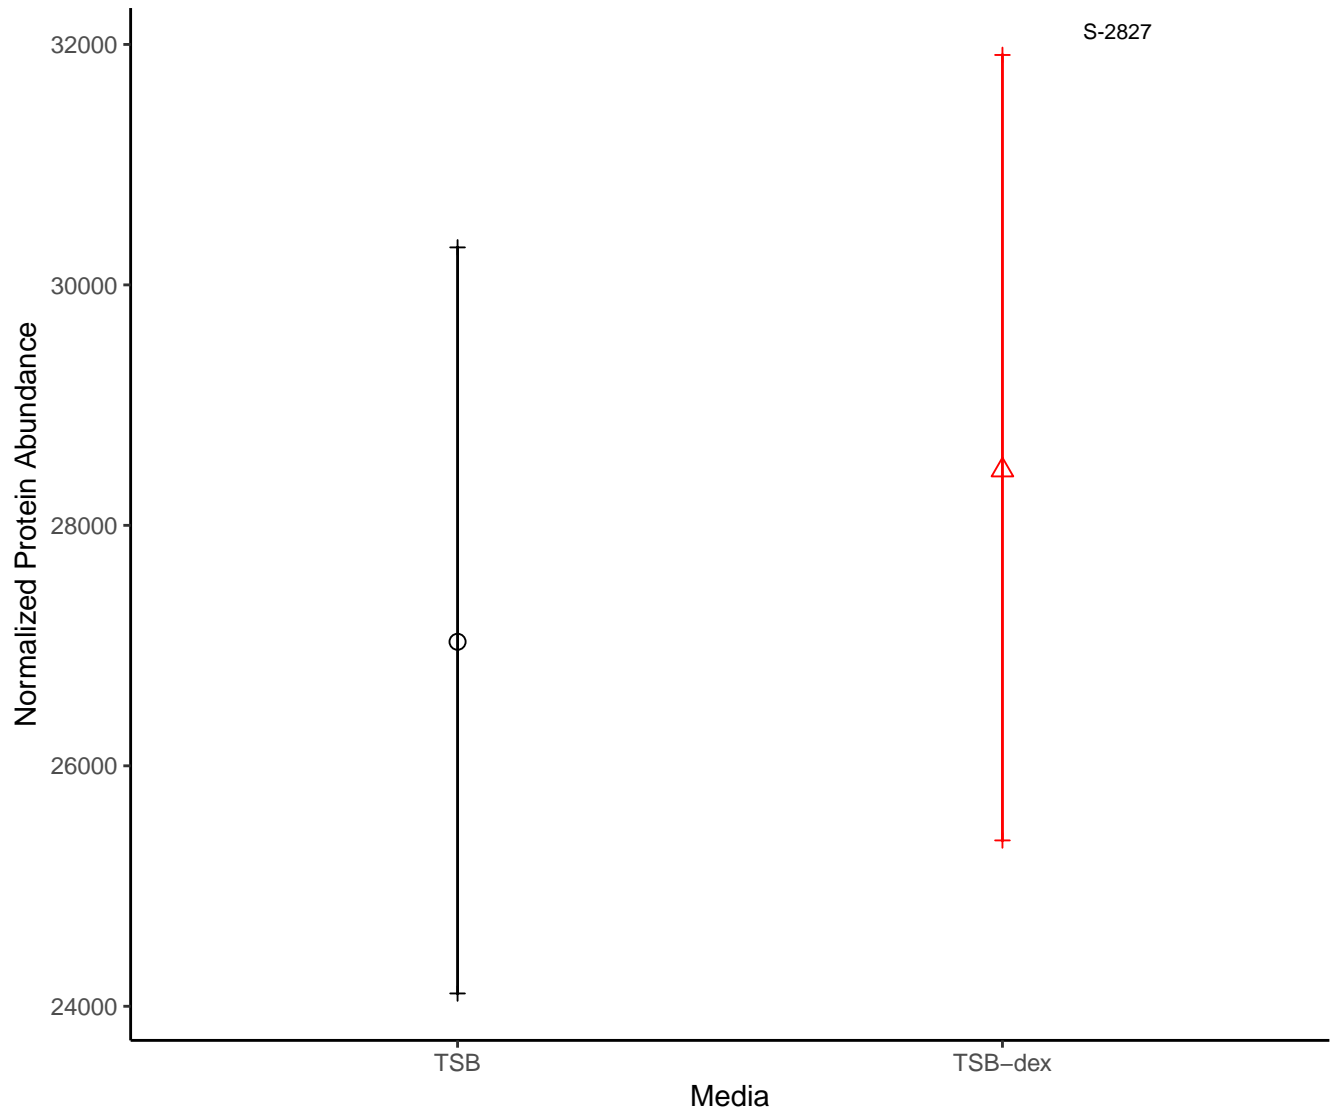

⊕ TSB-dex

△ TSB

# RL24\_STAAM

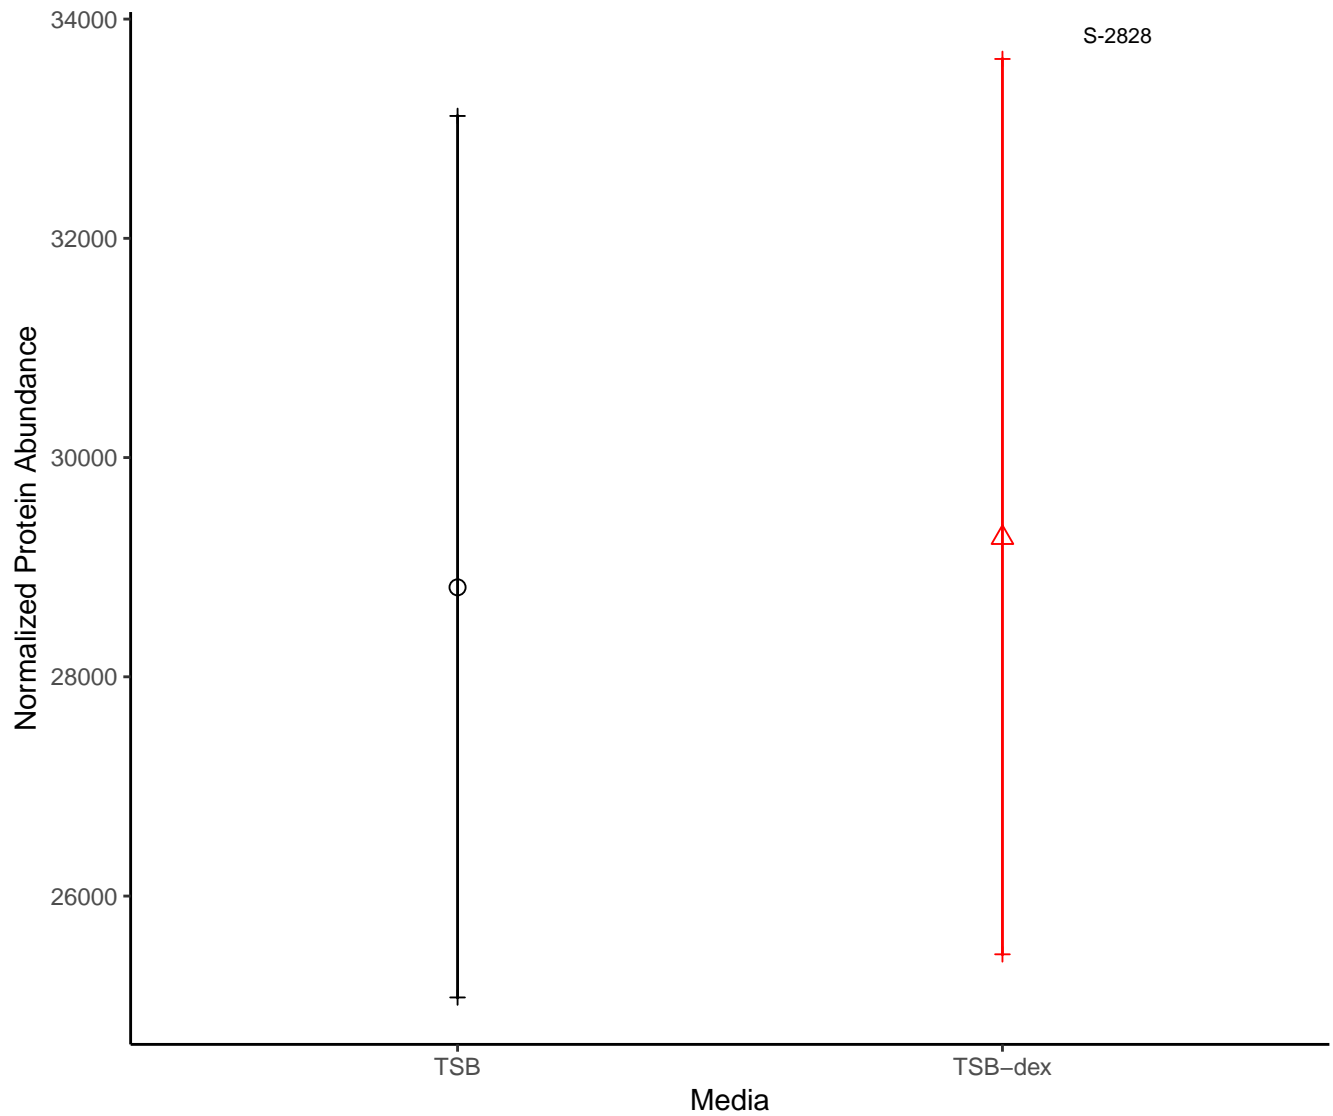

⊕ TSB-dex

△ TSB

# RL25\_STAAM

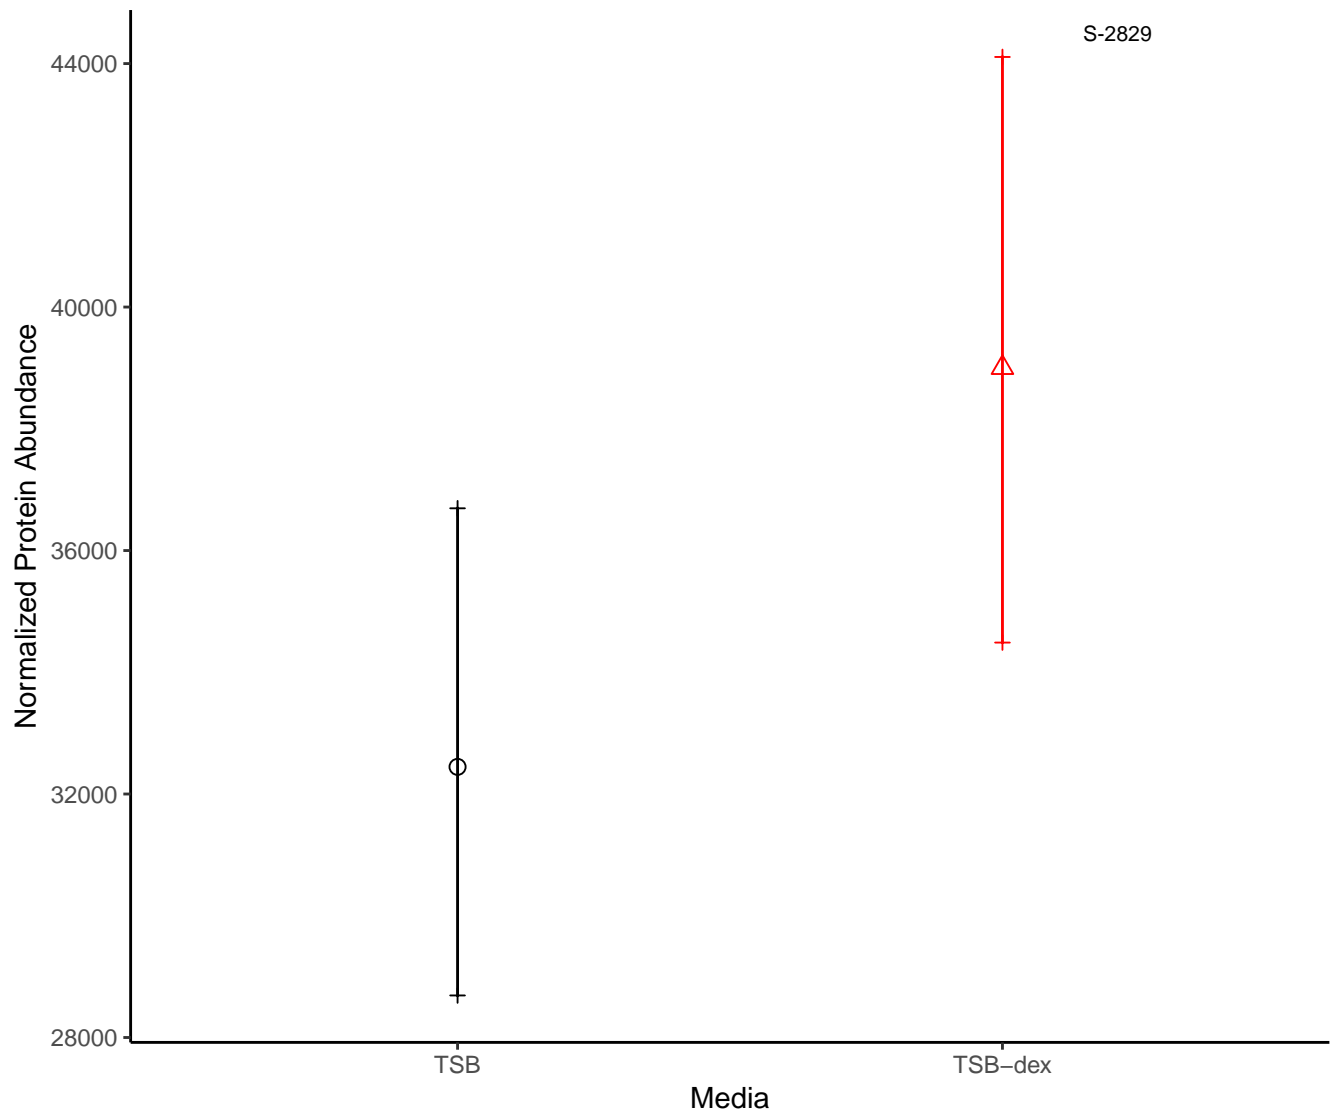

⊕ TSB-dex

△ TSB

# RL27\_STAAM

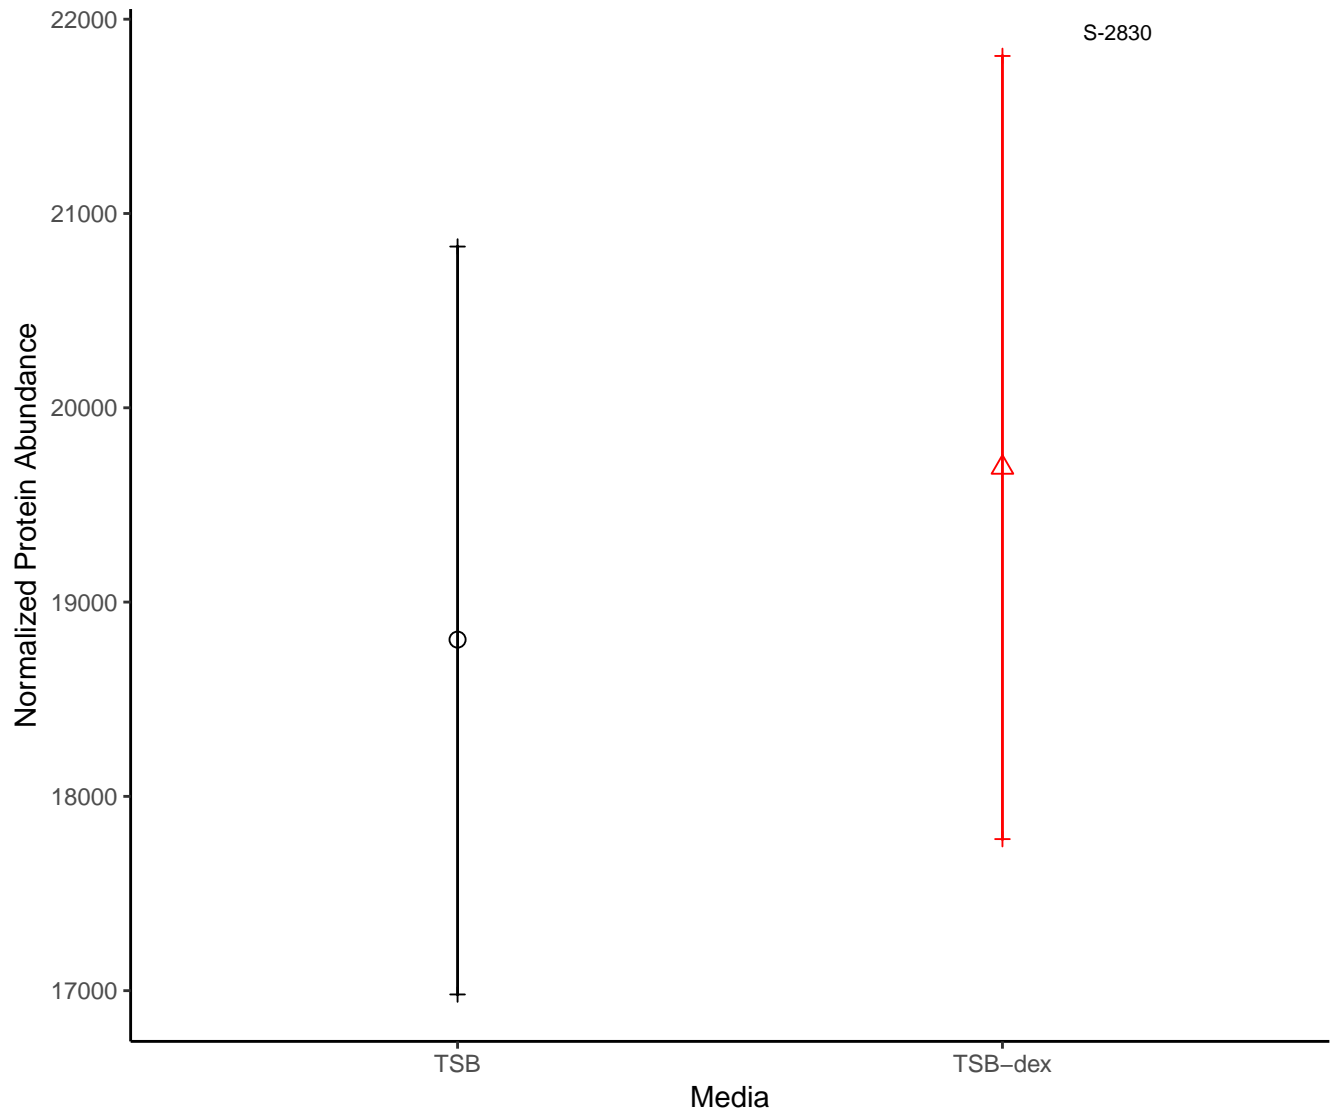

⊕ TSB-dex

△ TSB

# RL28\_STAAM

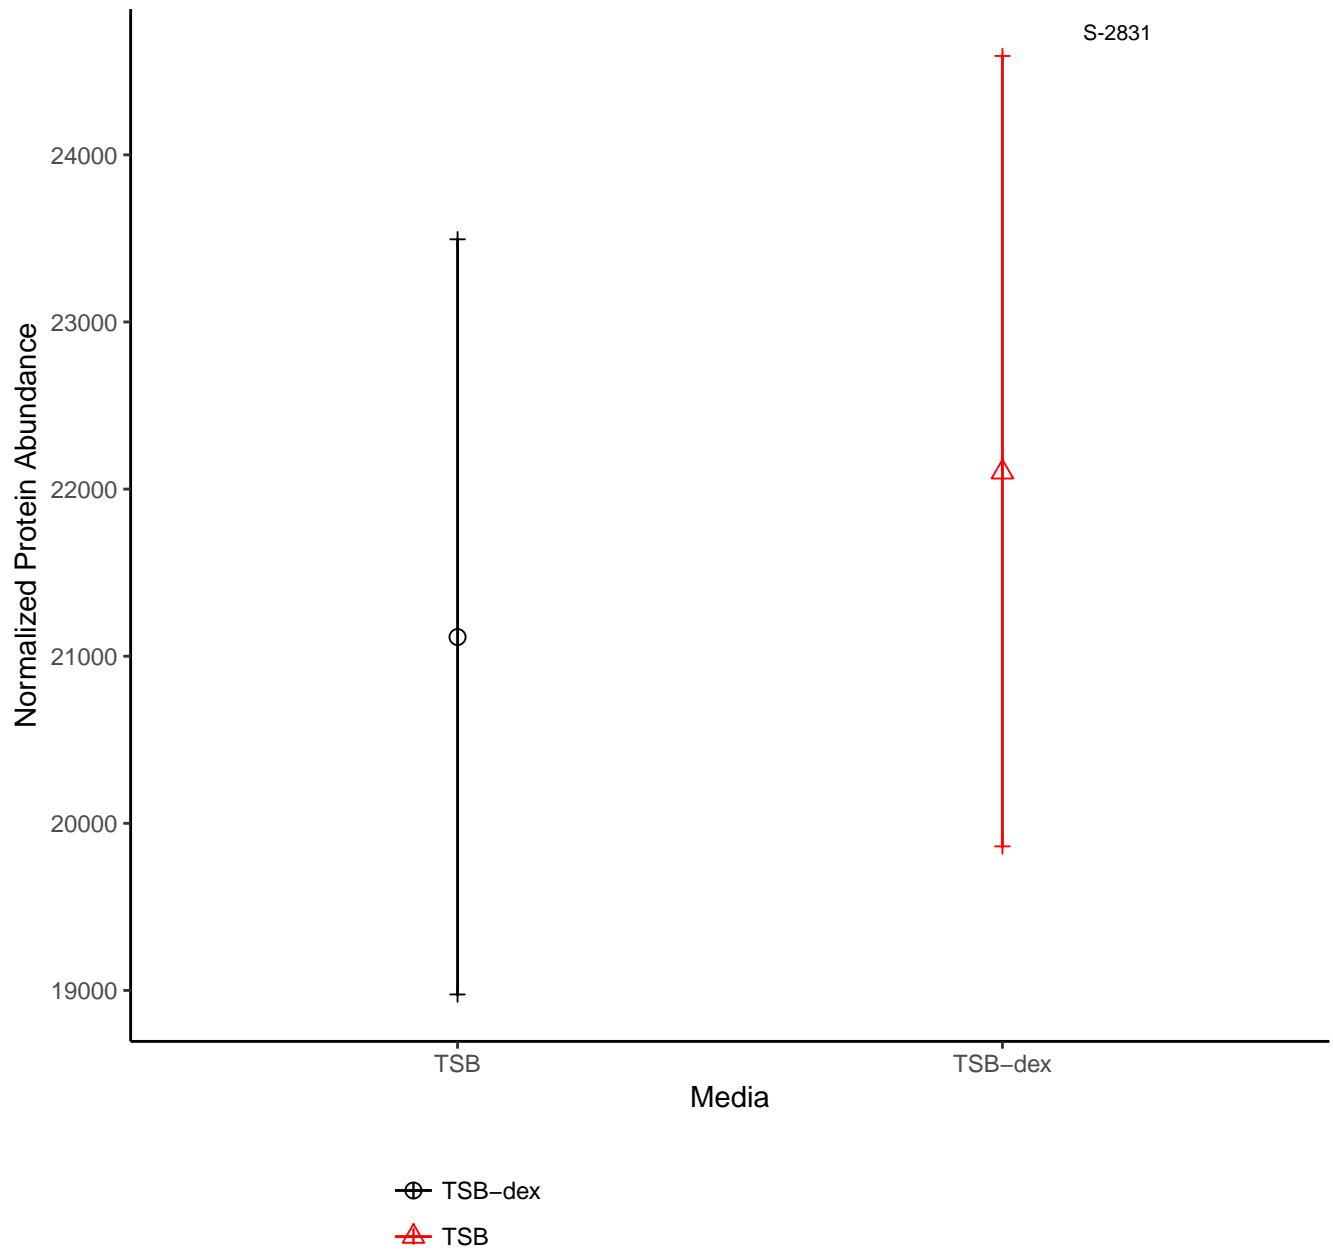

# RL29\_STAAM

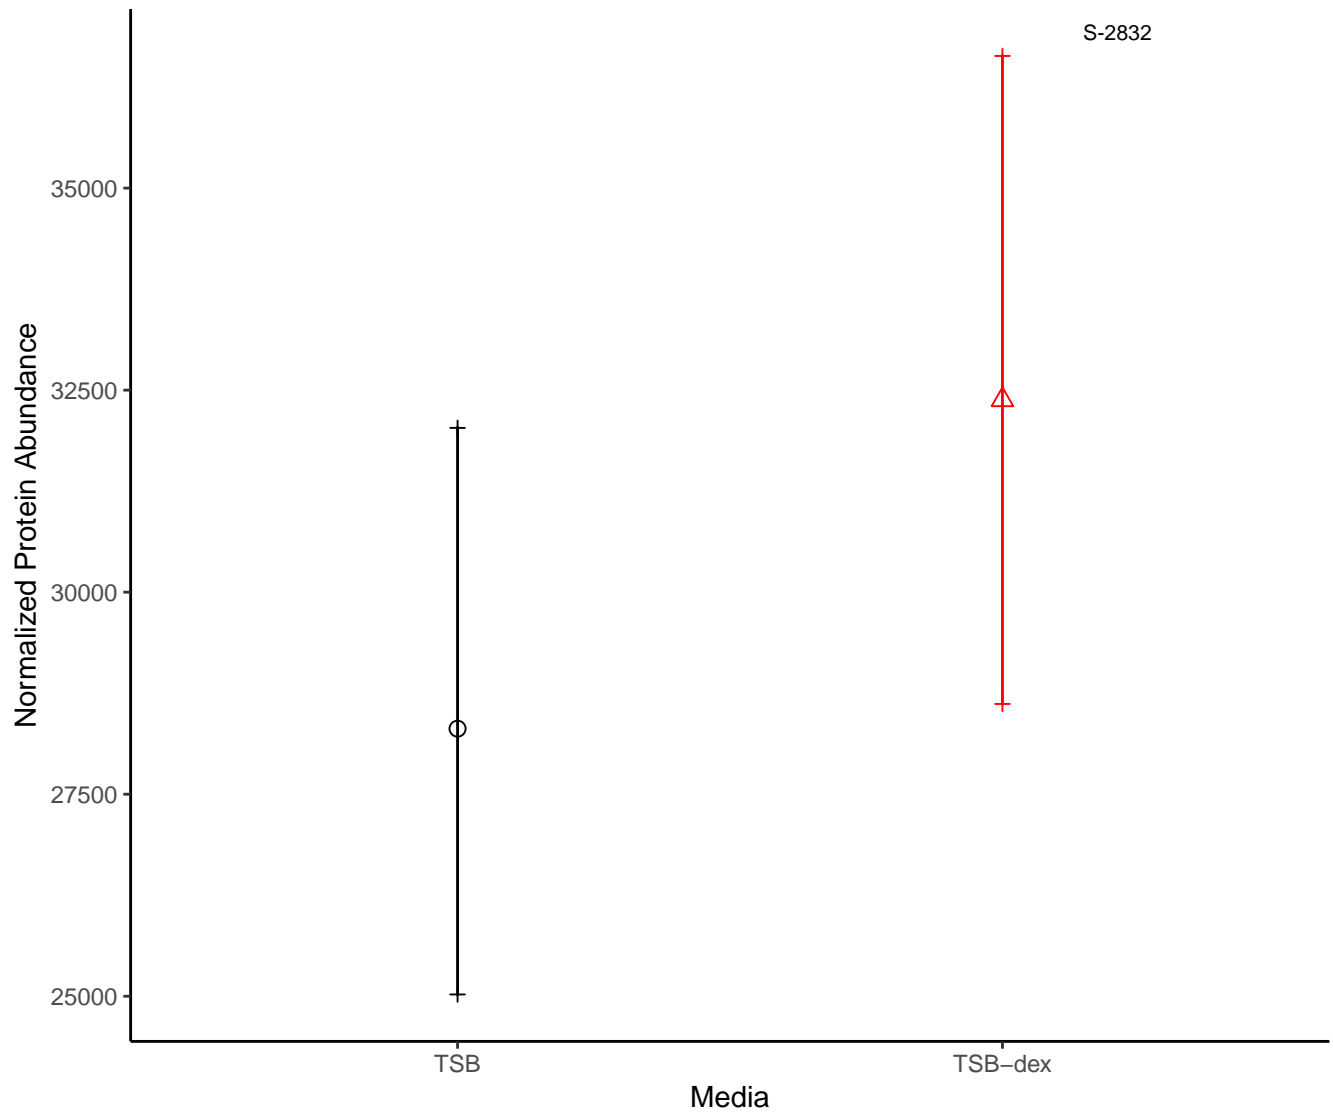

● TSB-dex

▲ TSB



# RL3\_STAAM

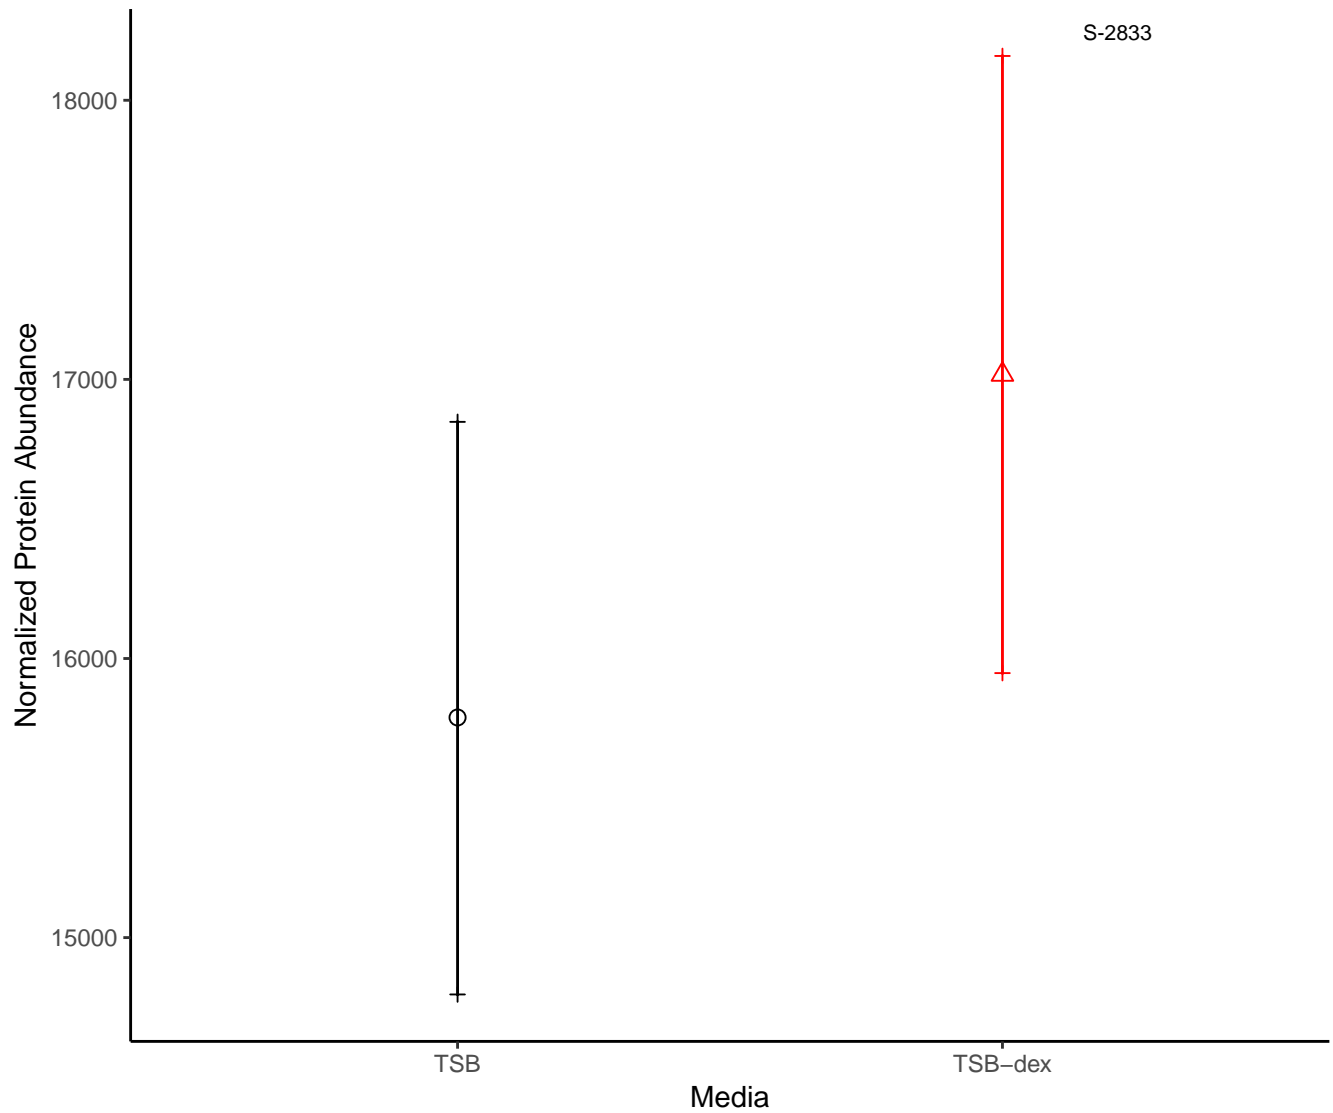

⊖ TSB-dex

△ TSB

# RL30\_STAAM

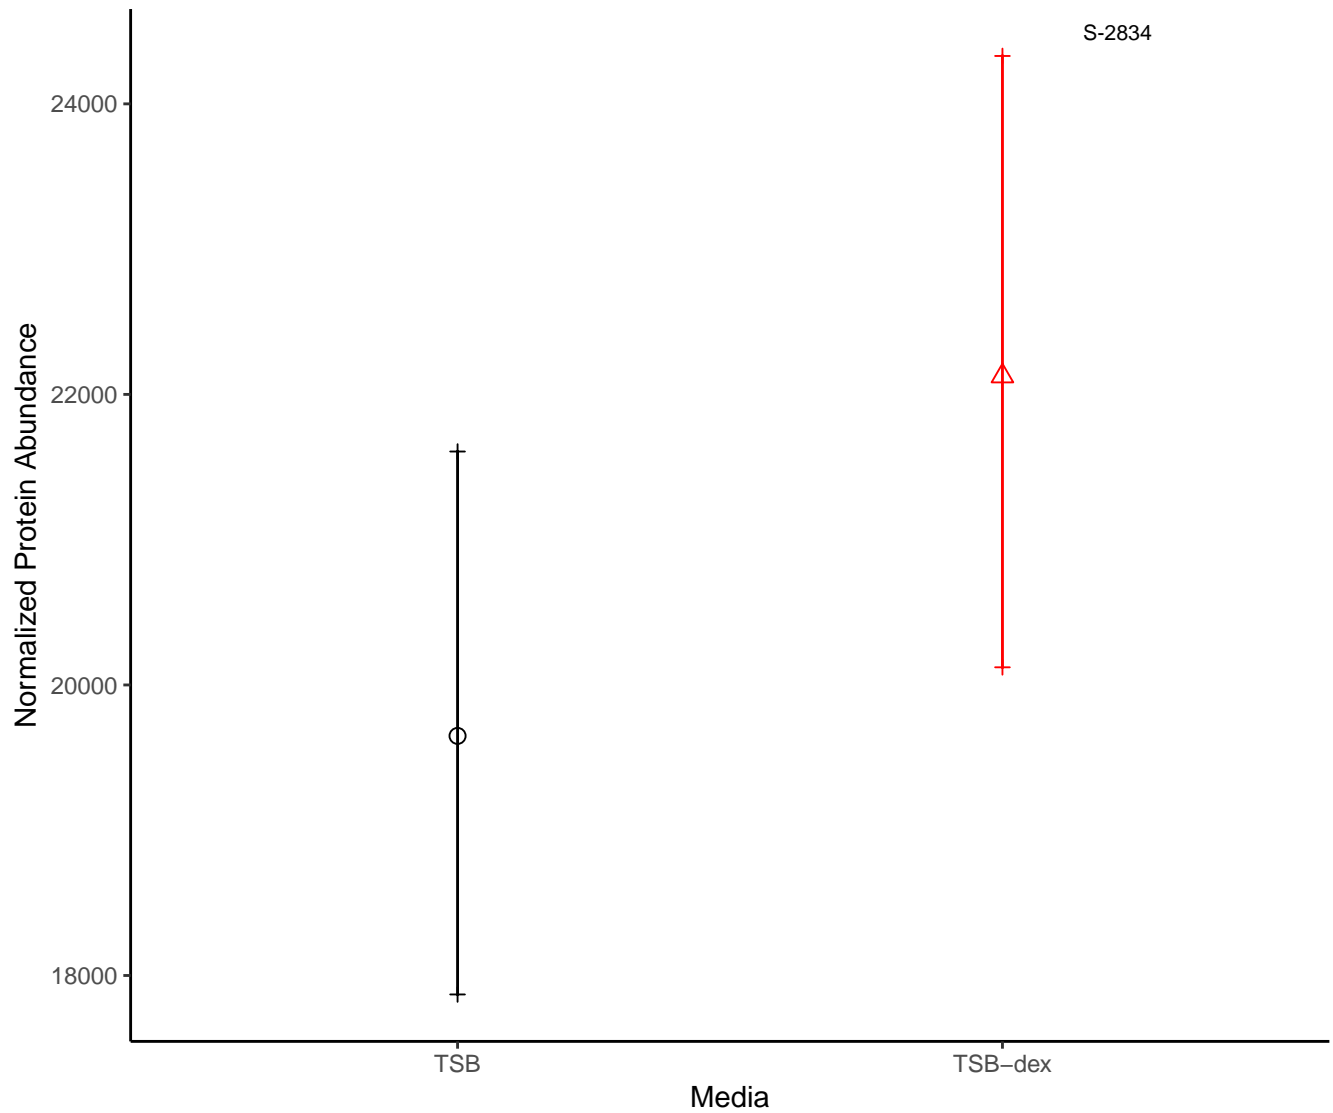

⊕ TSB-dex

△ TSB

# RL31B\_STAAM

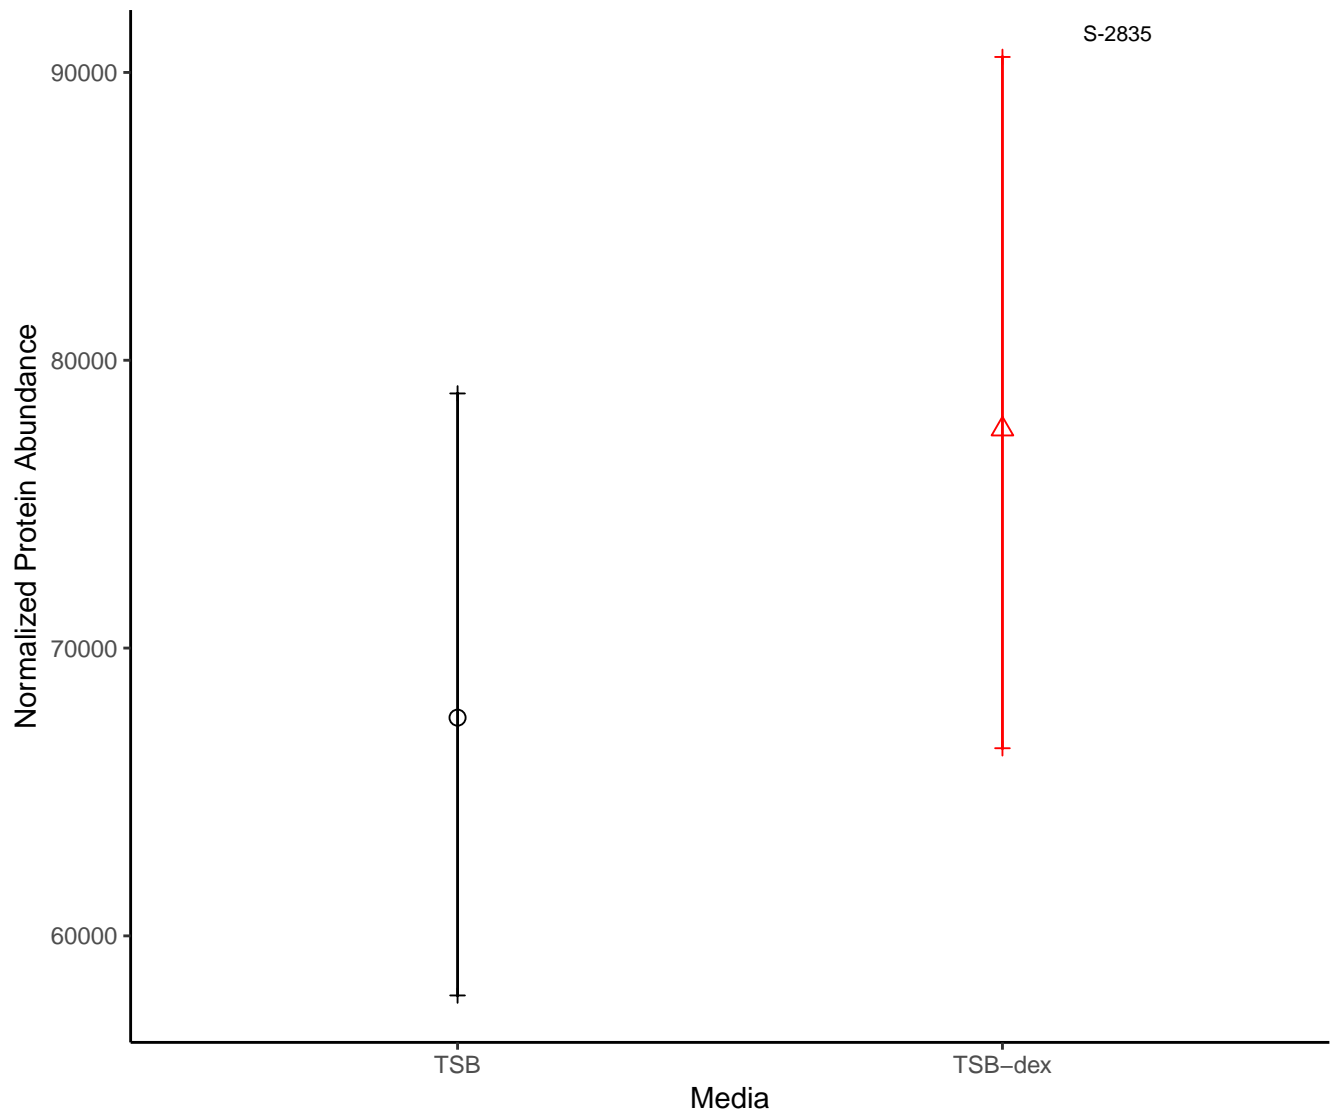

⊖ TSB-dex

△ TSB

# RL32\_STAAM

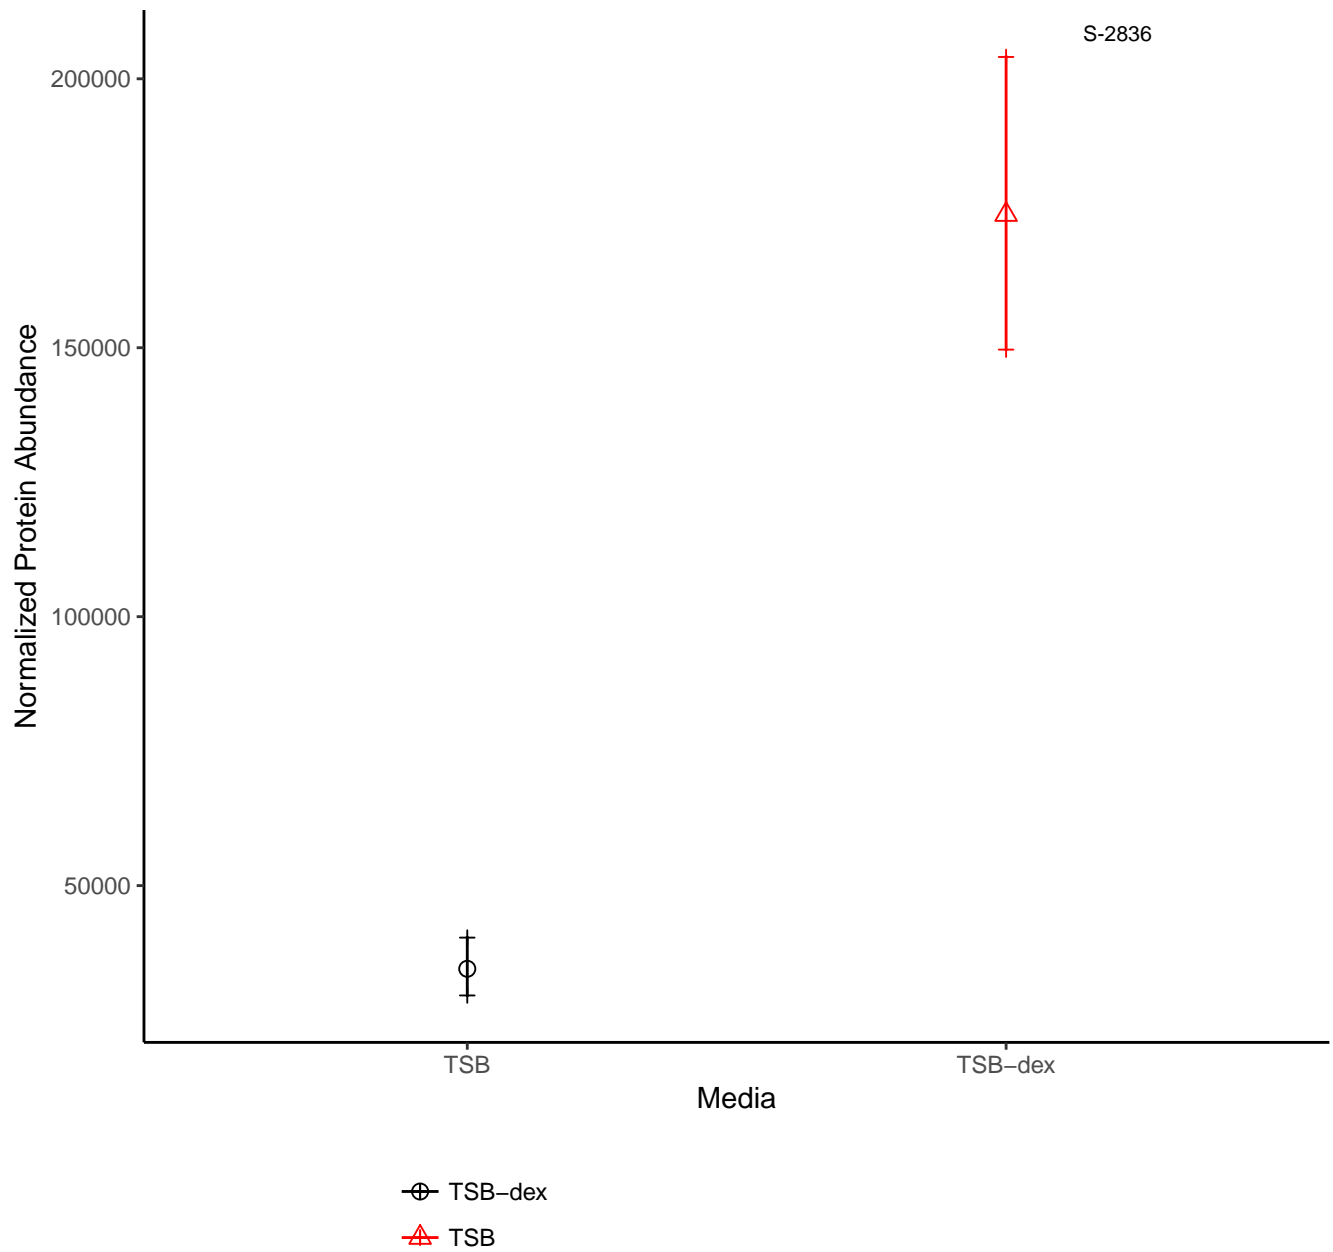

# RL331\_STAAM

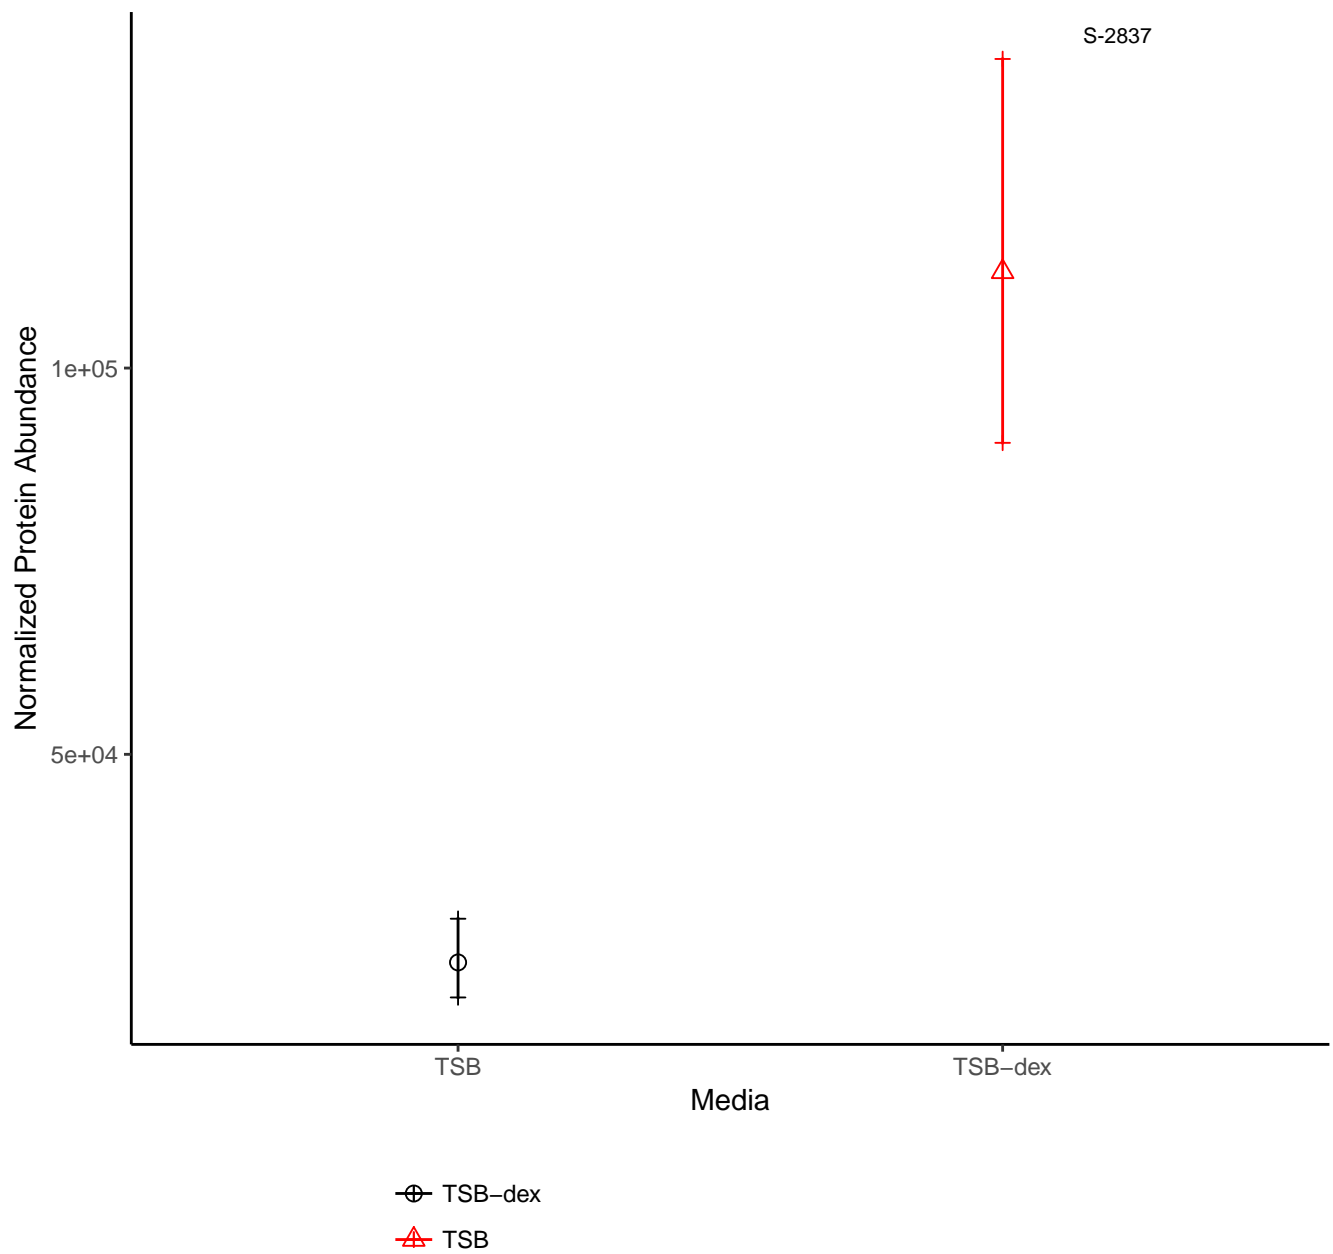

# RL332\_STAAM

S-2838

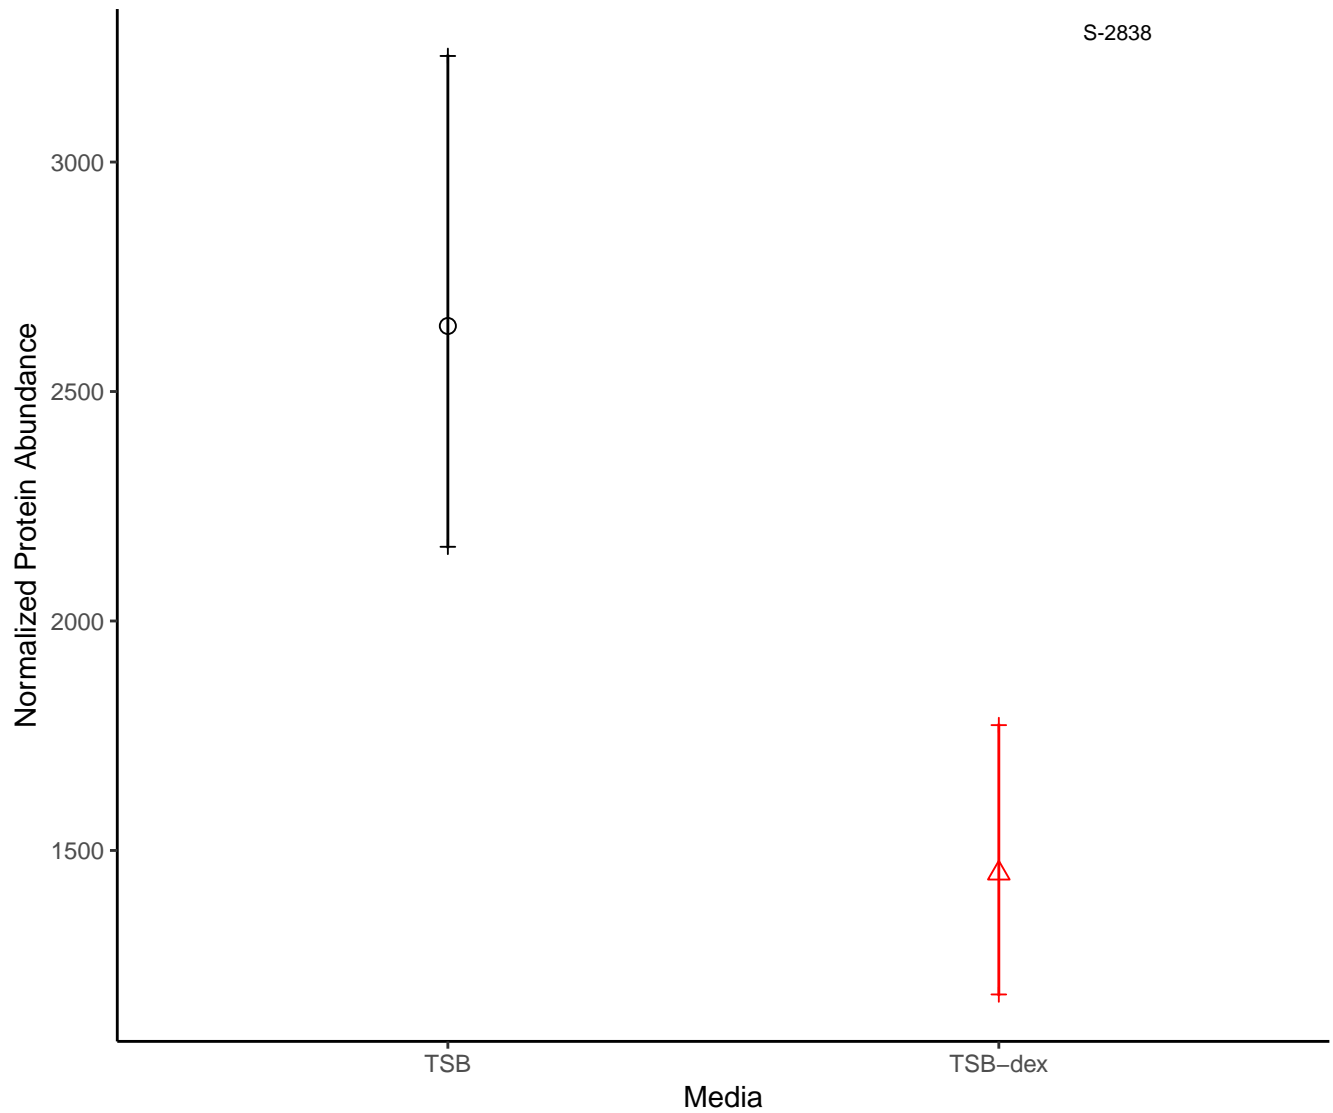

⊕ TSB-dex

△ TSB

# RL35\_STAAM

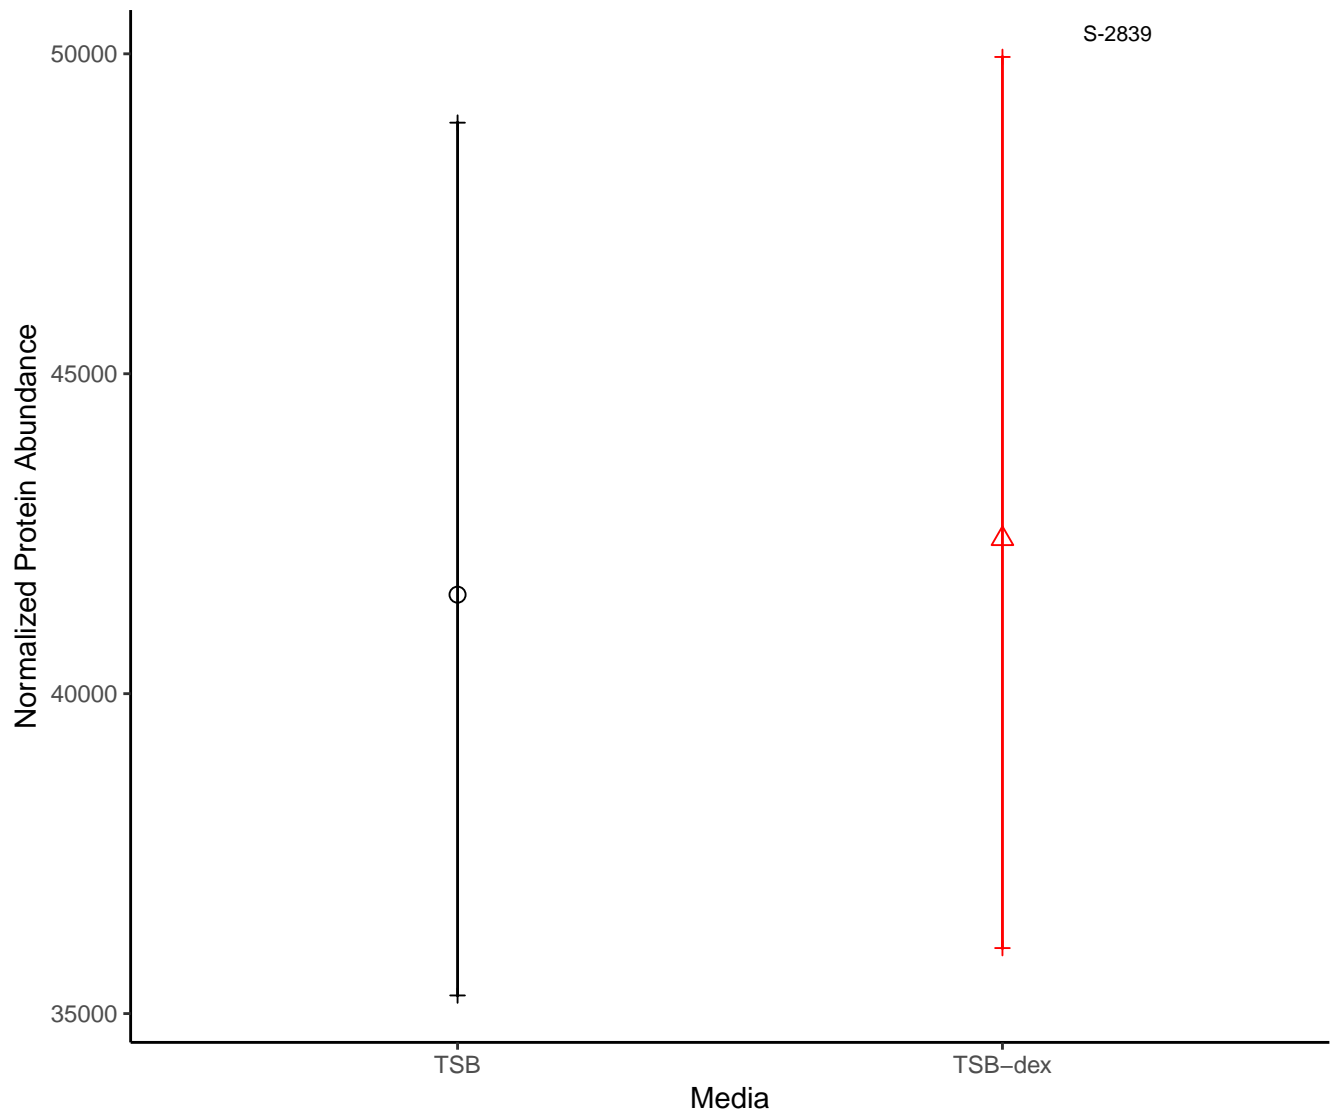

⊕ TSB-dex

△ TSB

# RL36\_STAAM

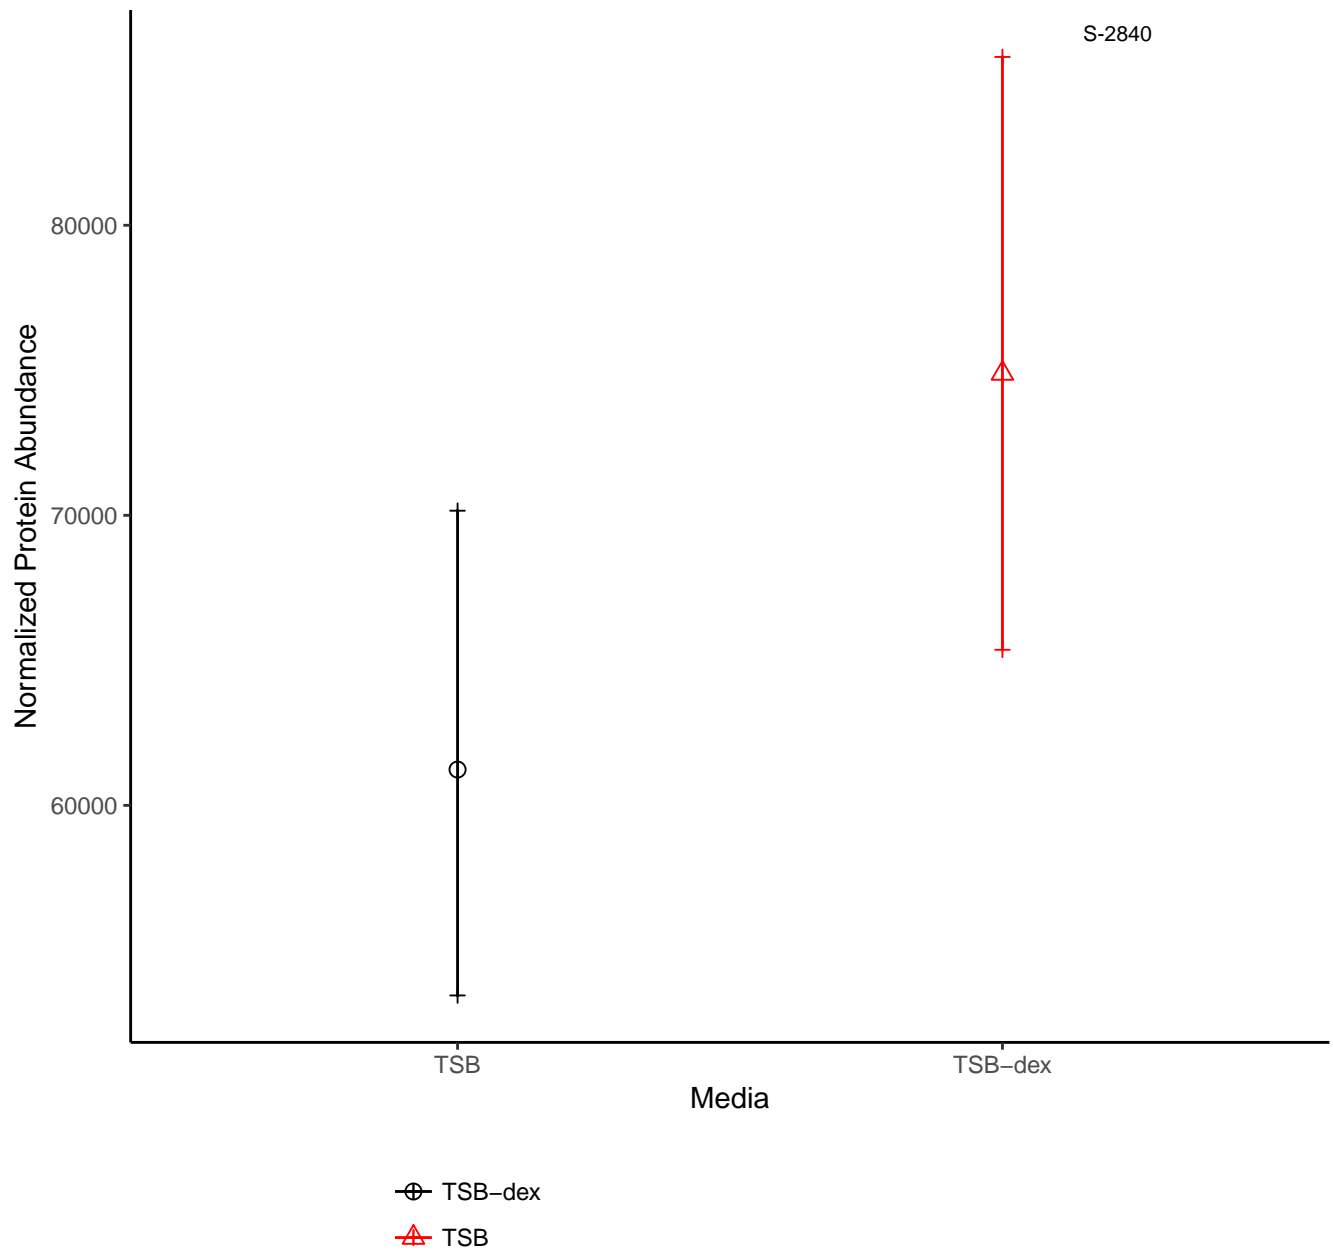



# RL4\_STAAM

S-2841

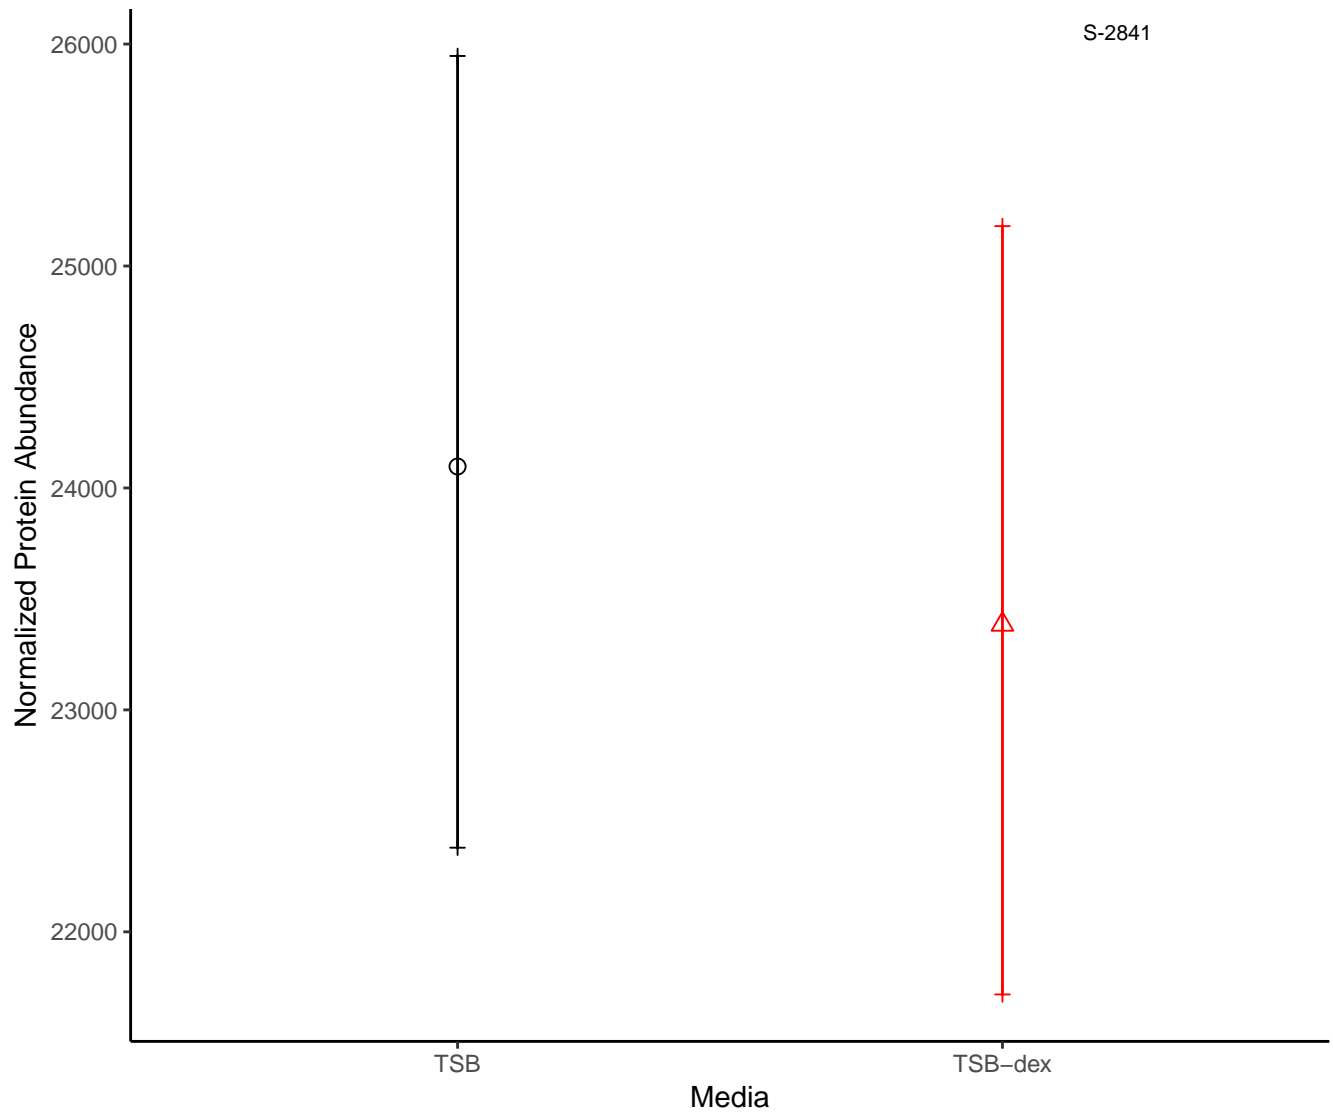

⊕ TSB-dex

△ TSB

# RL5\_STAAM

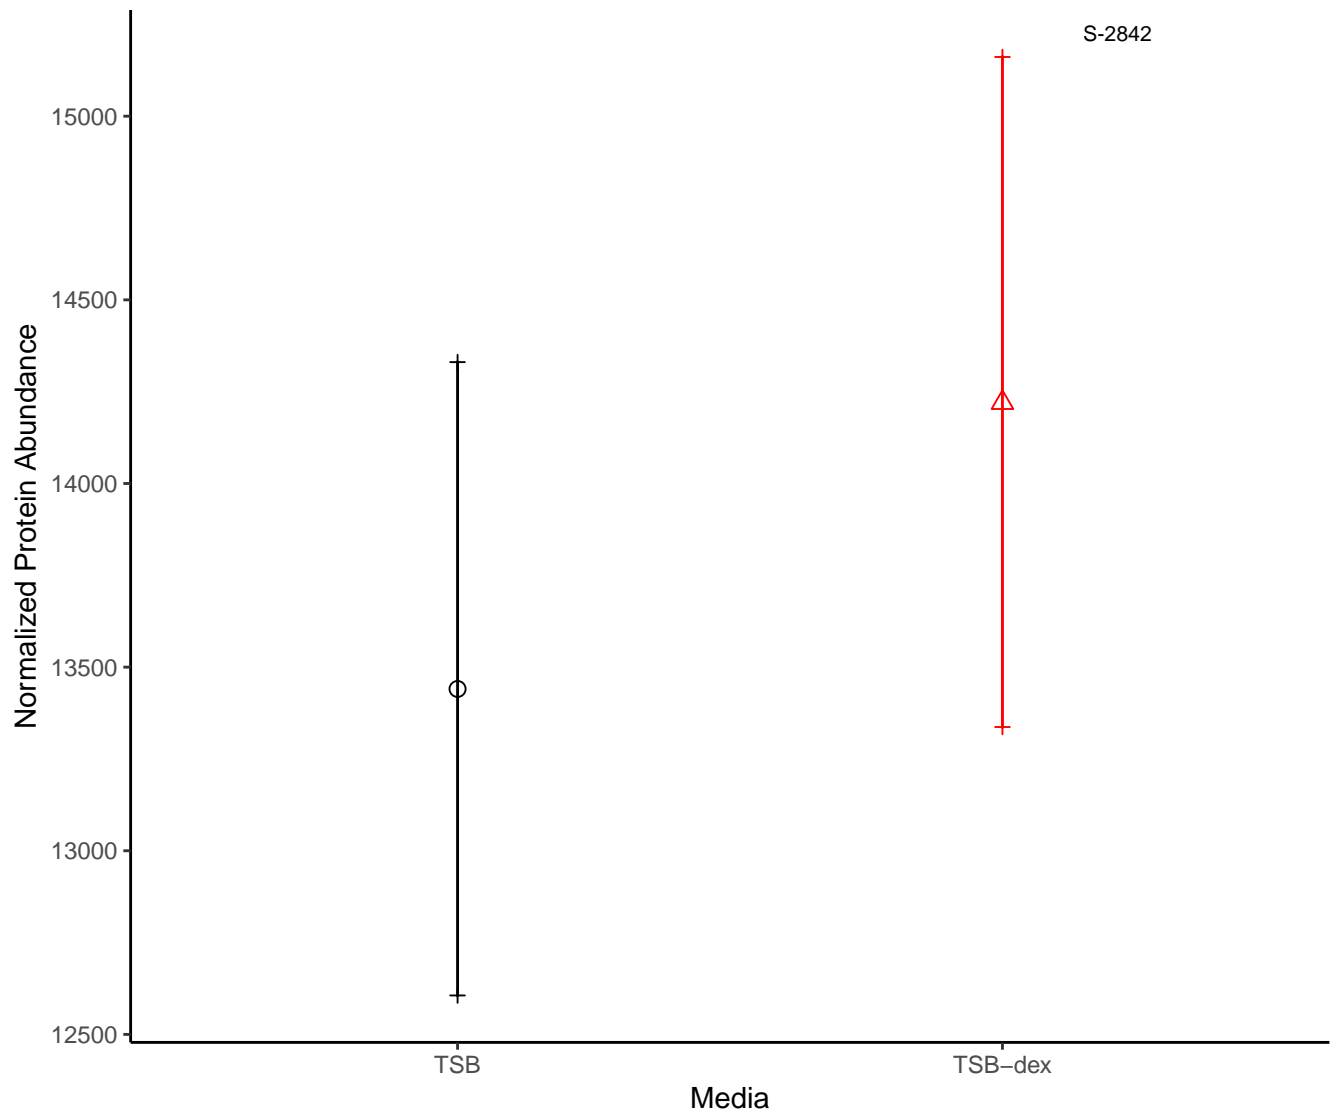

⊕ TSB-dex

△ TSB

# RL6\_STAAM

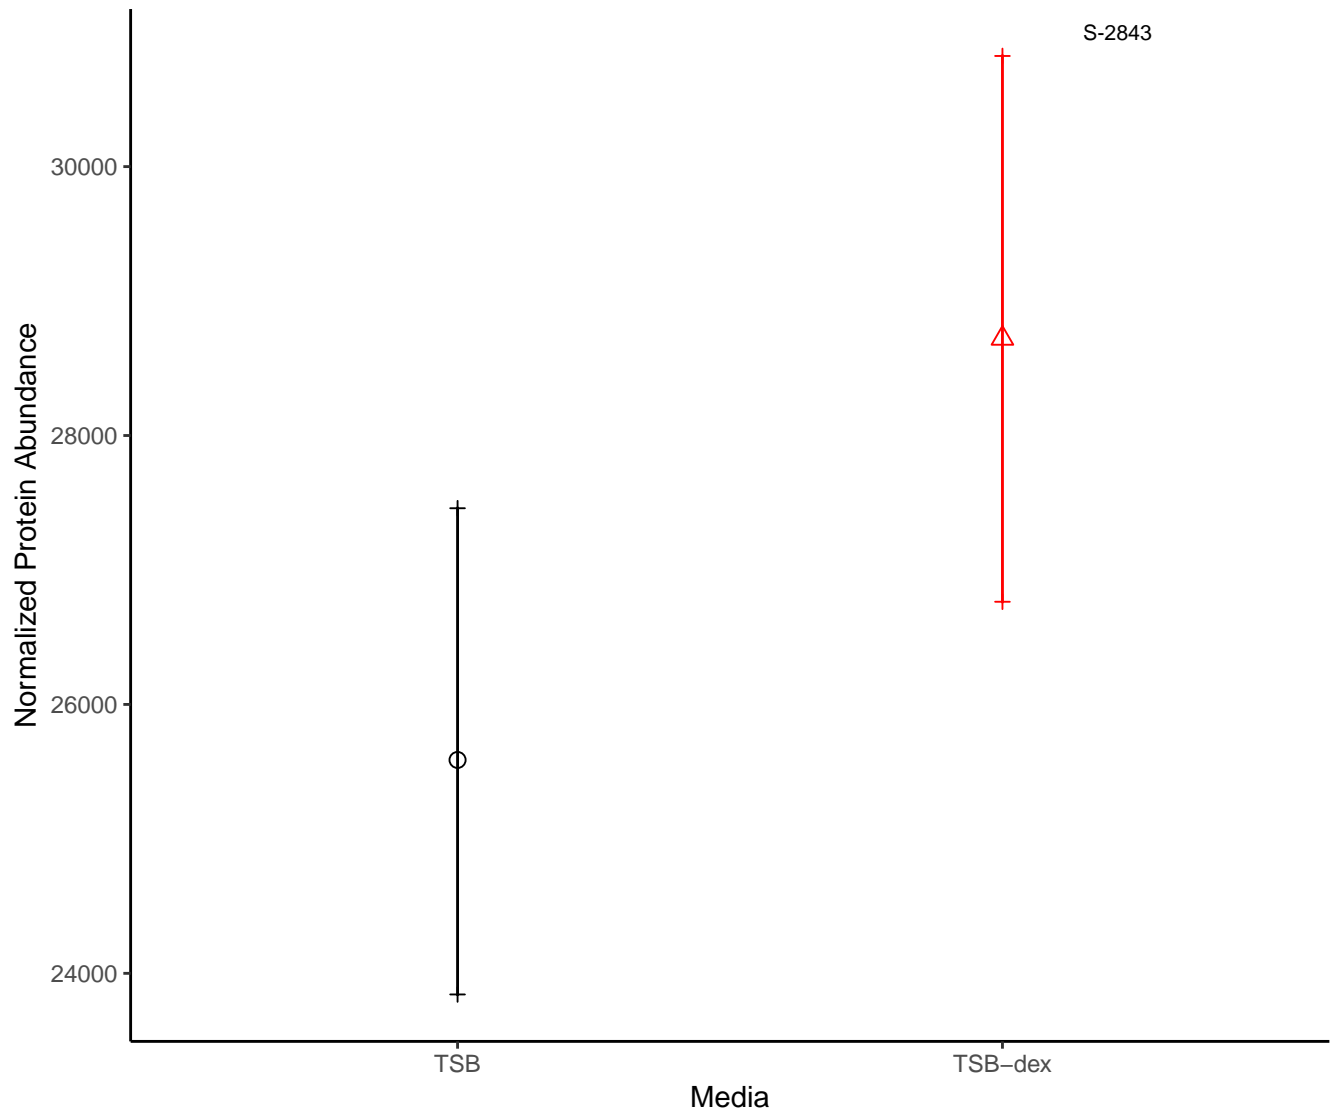

⊖ TSB-dex

△ TSB

# RL7\_STAAM

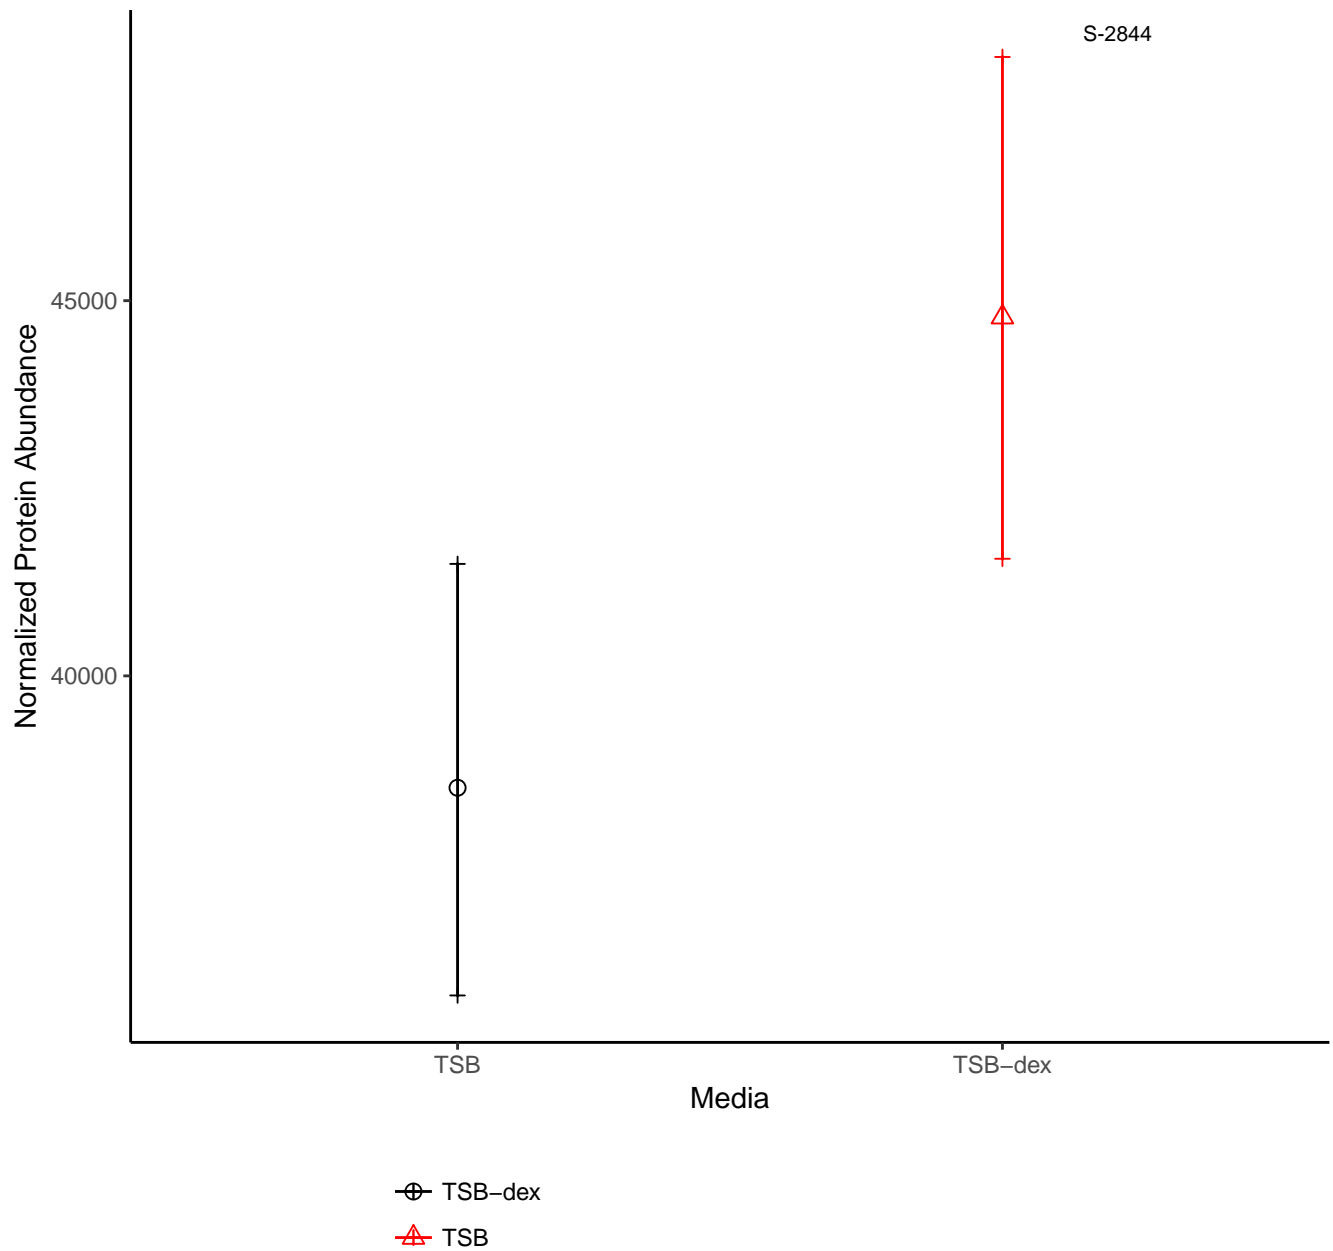

# RL9\_STAAM

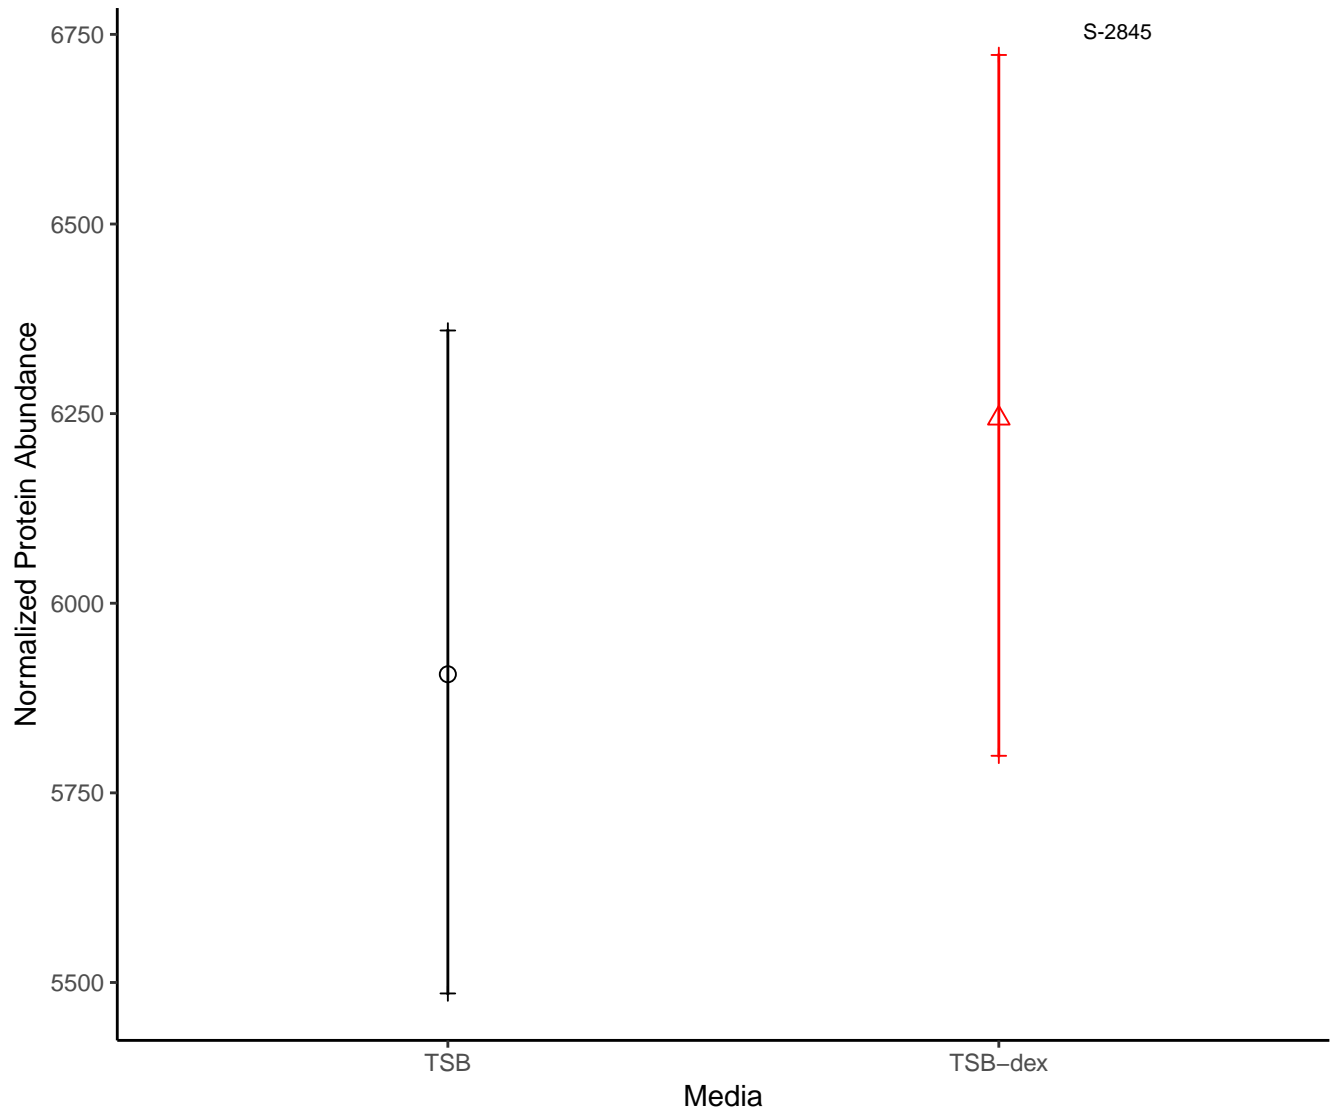

⊕ TSB-dex

△ TSB

# RNJ1\_STAAM

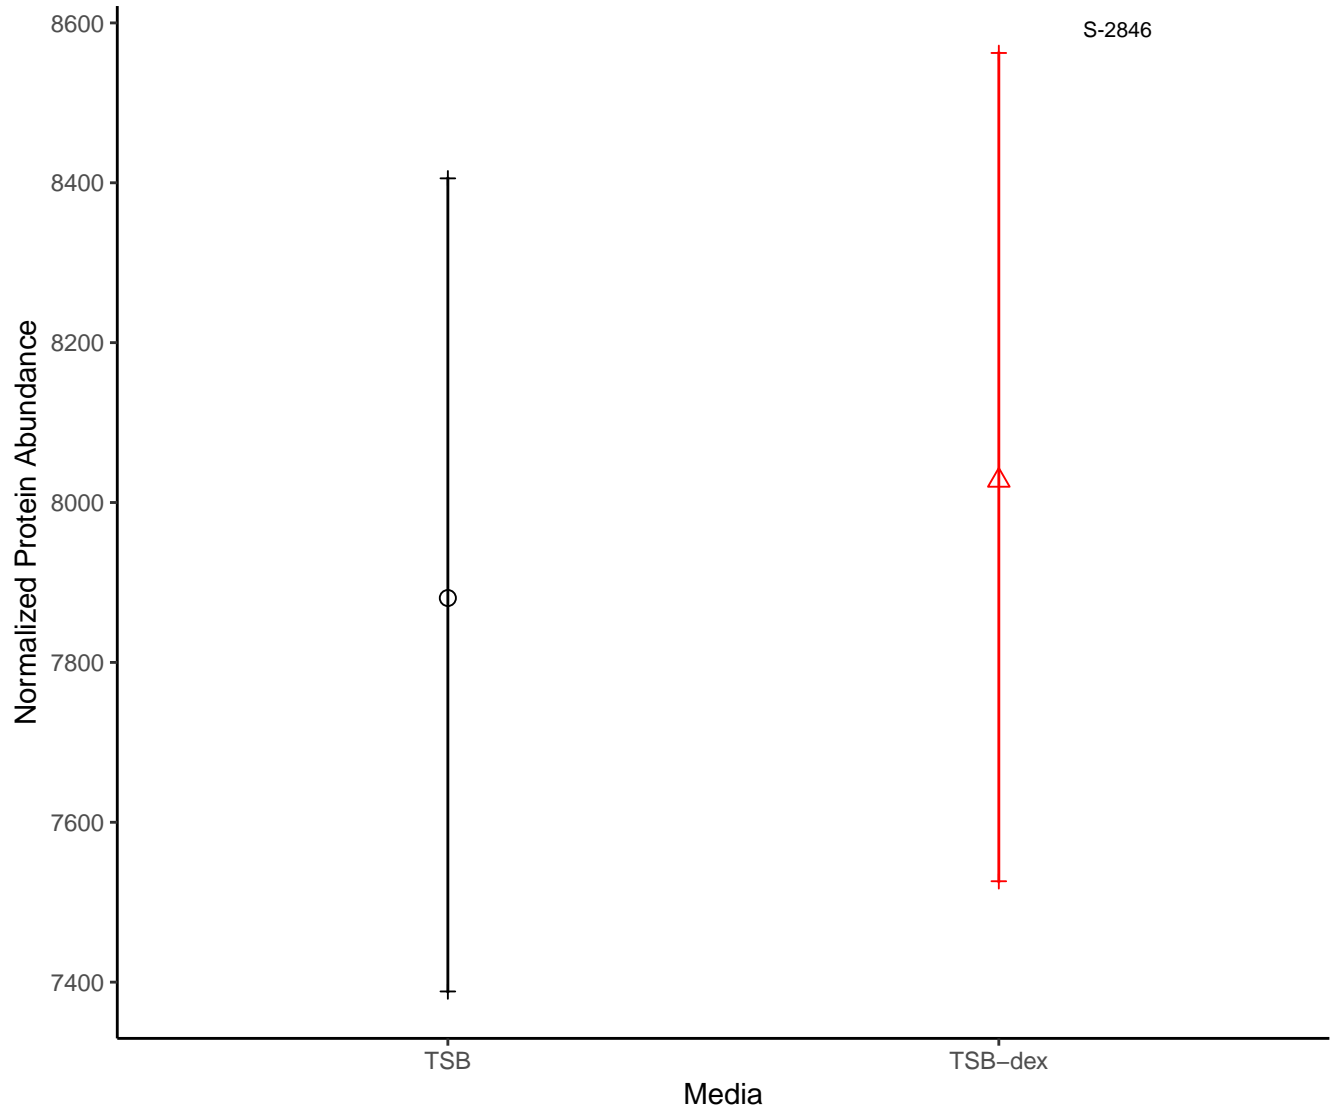

⊕ TSB-dex

△ TSB

# RNJ2\_STAAM

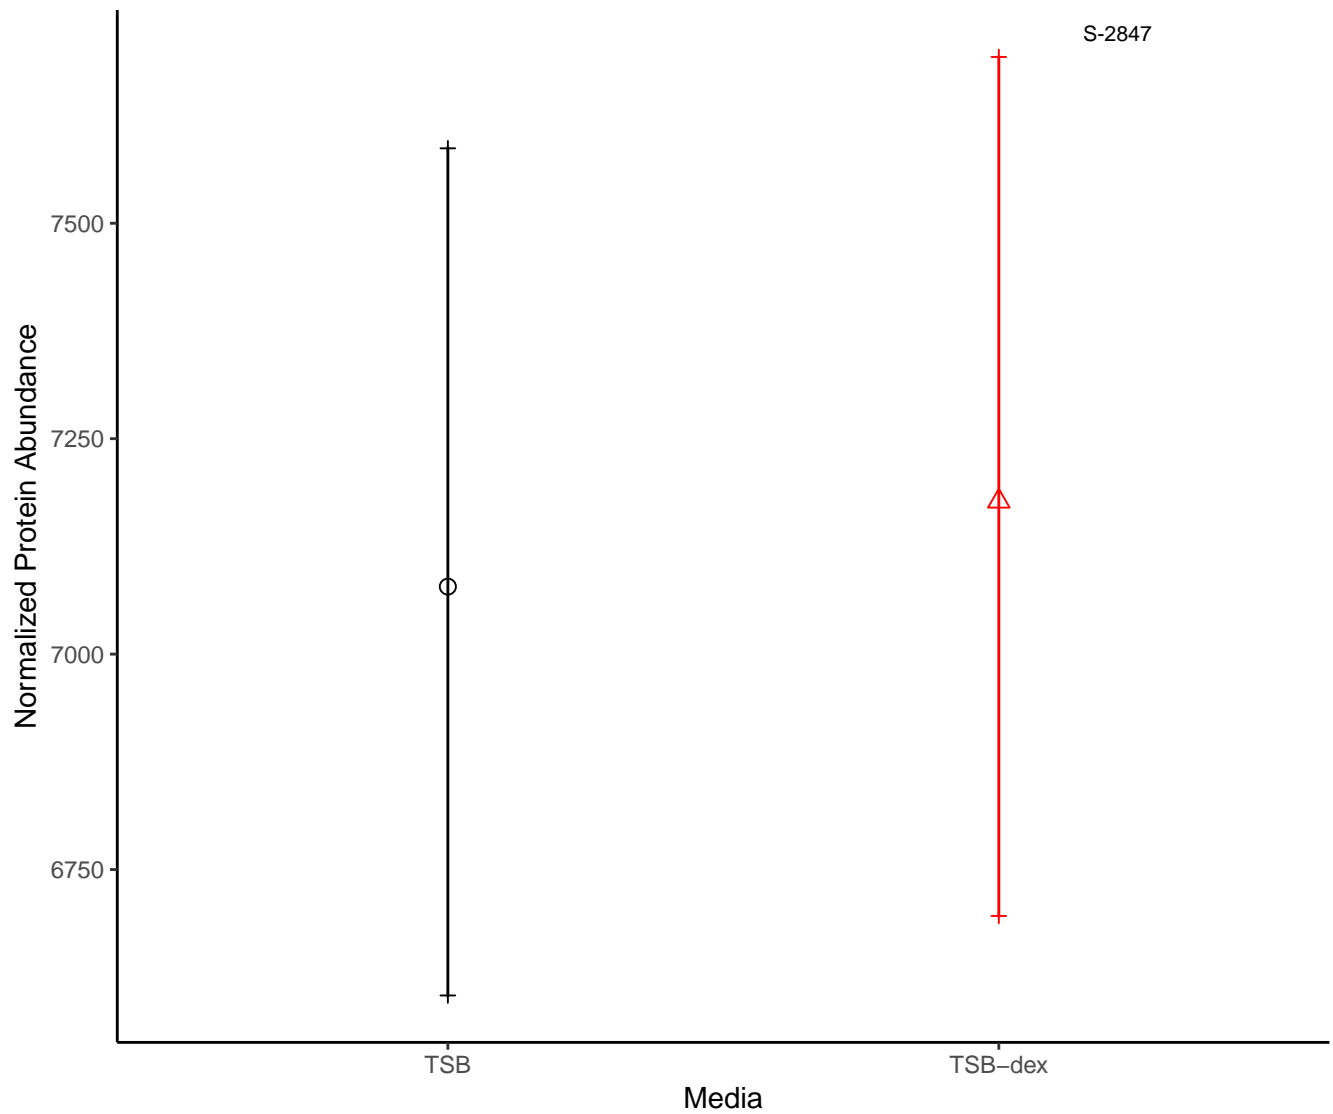

⊕ TSB-dex

△ TSB

# RNY\_STAAM

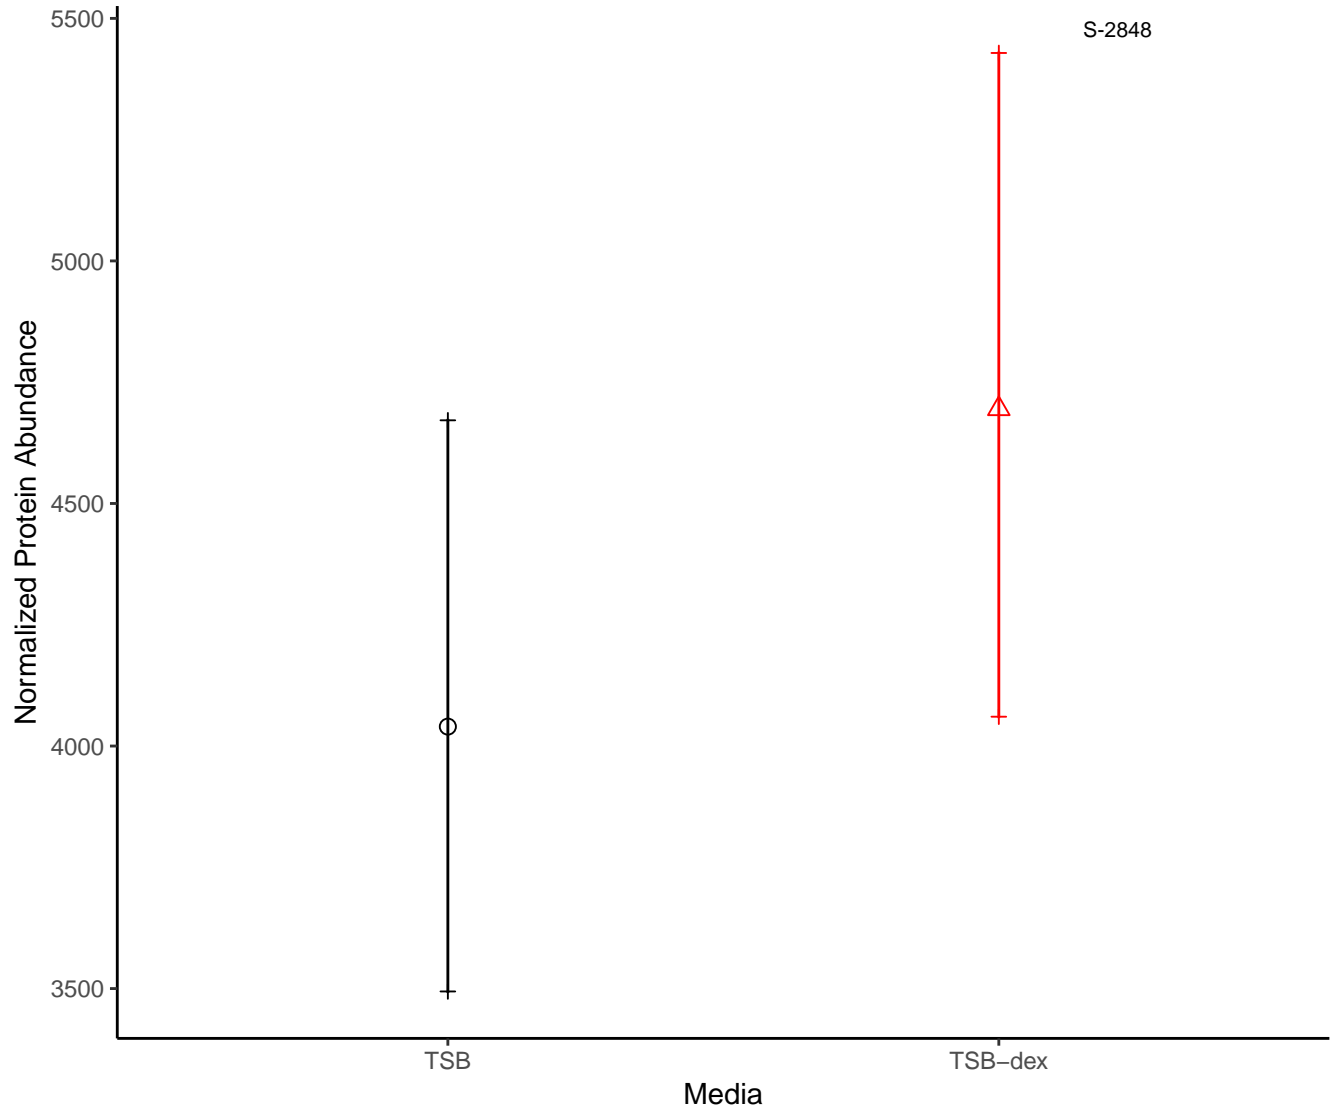

⊕ TSB-dex

△ TSB



# ROCA\_STAAM

S-2849

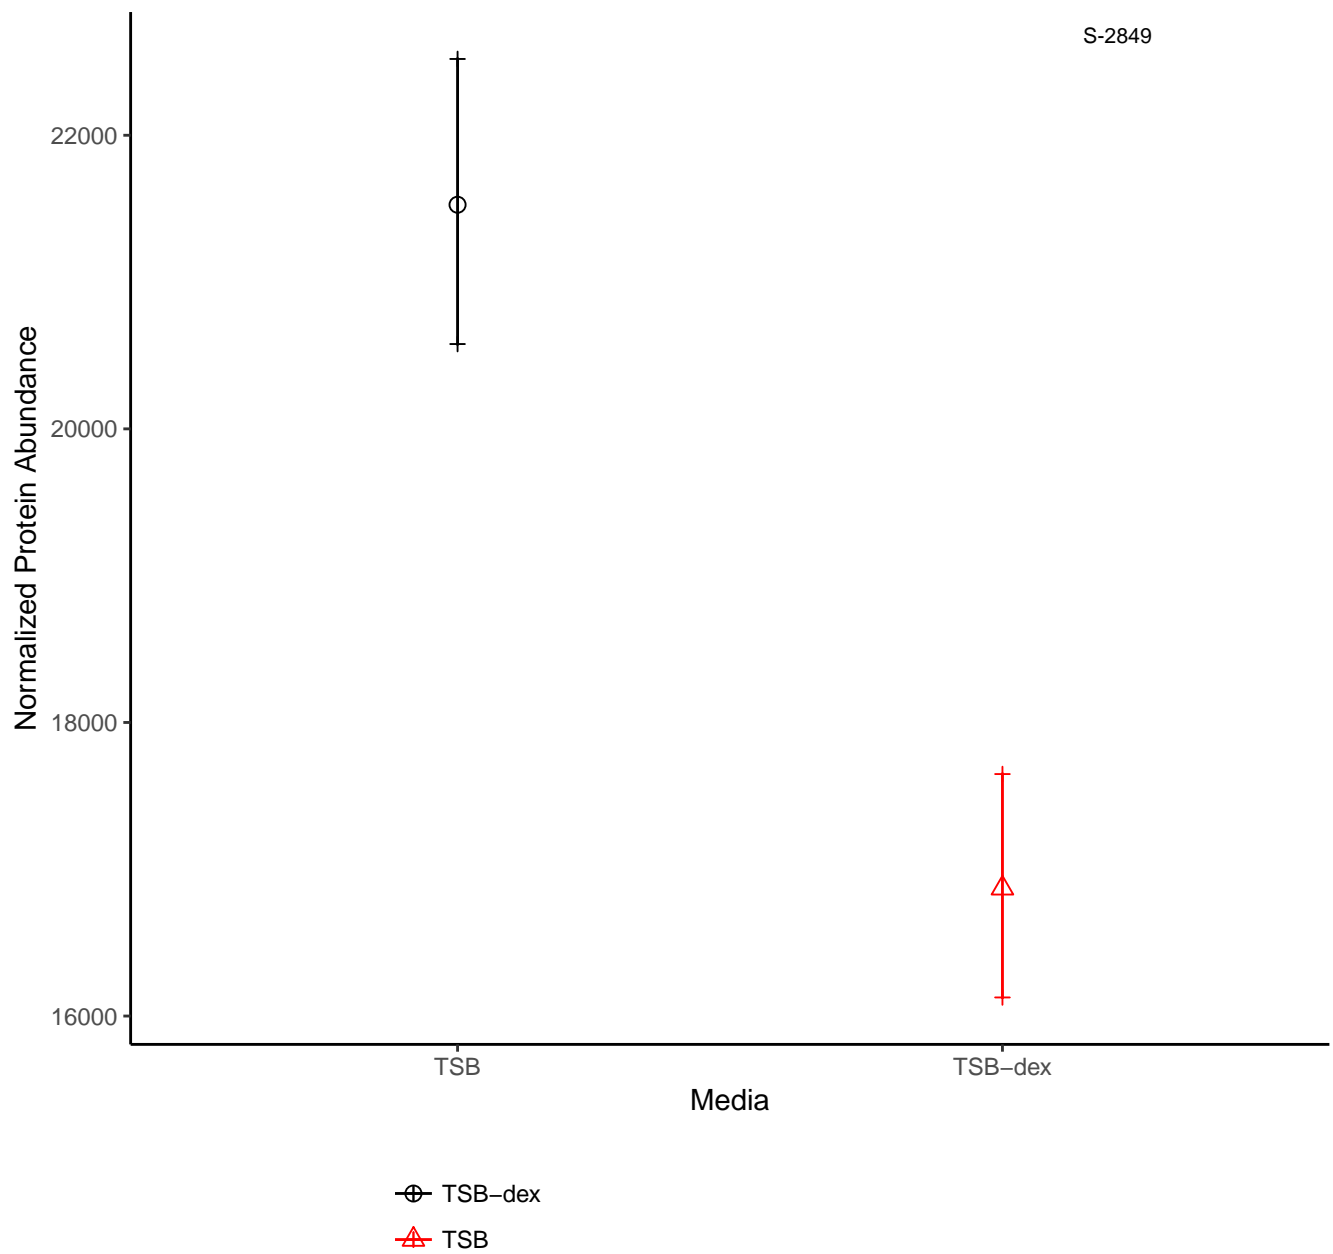

# ROT\_STAAM

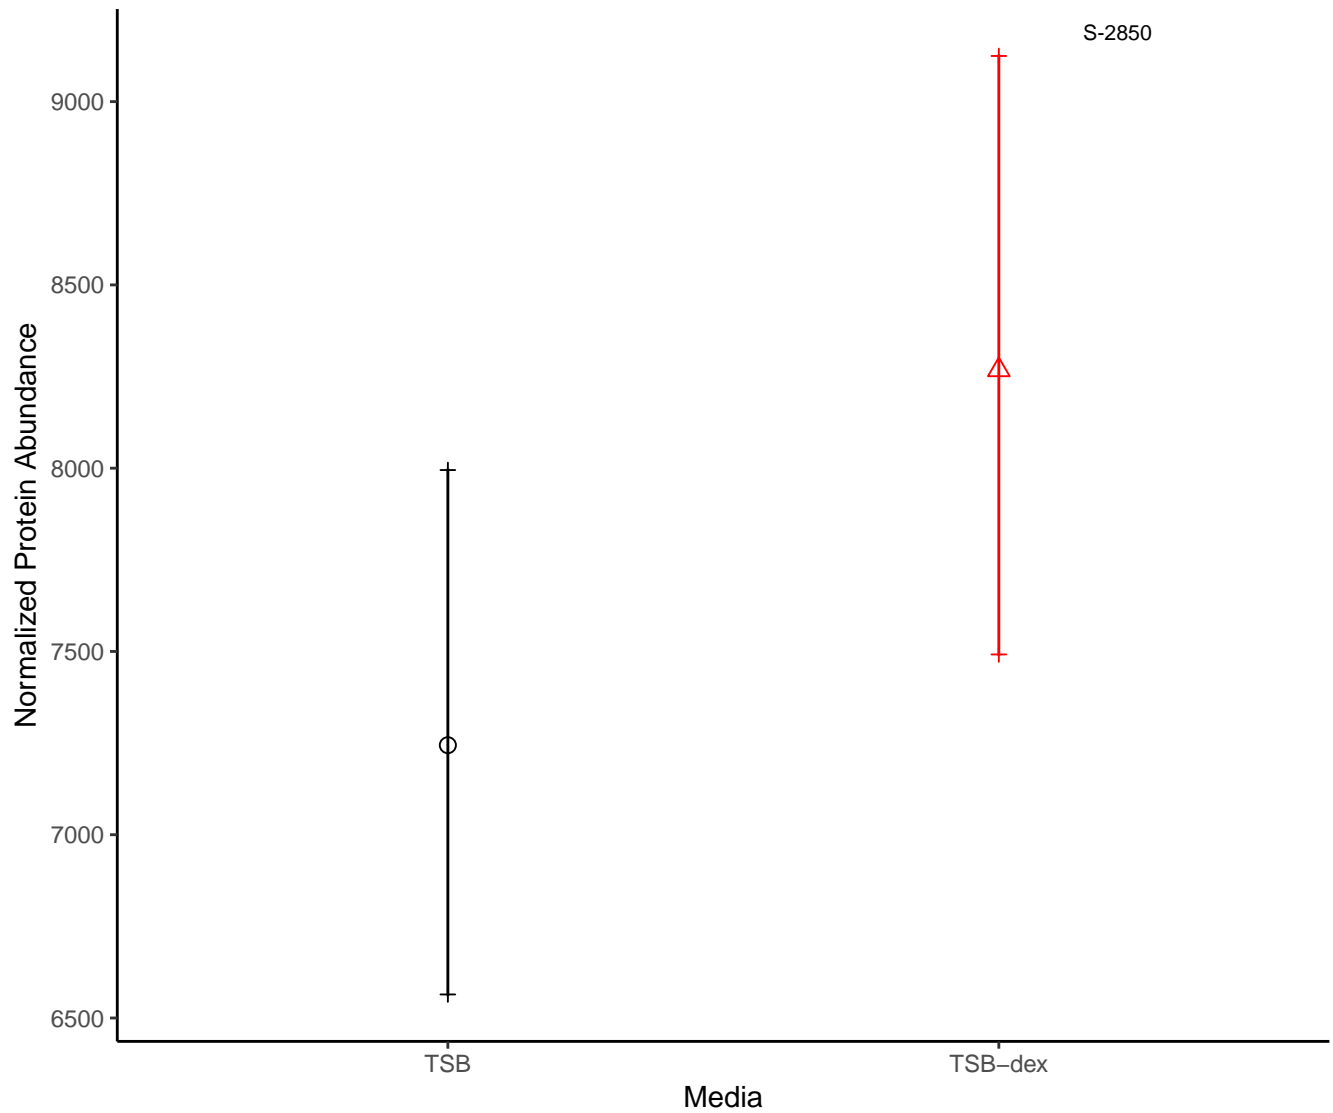

⊕ TSB-dex

△ TSB

# RPOA\_STAAM

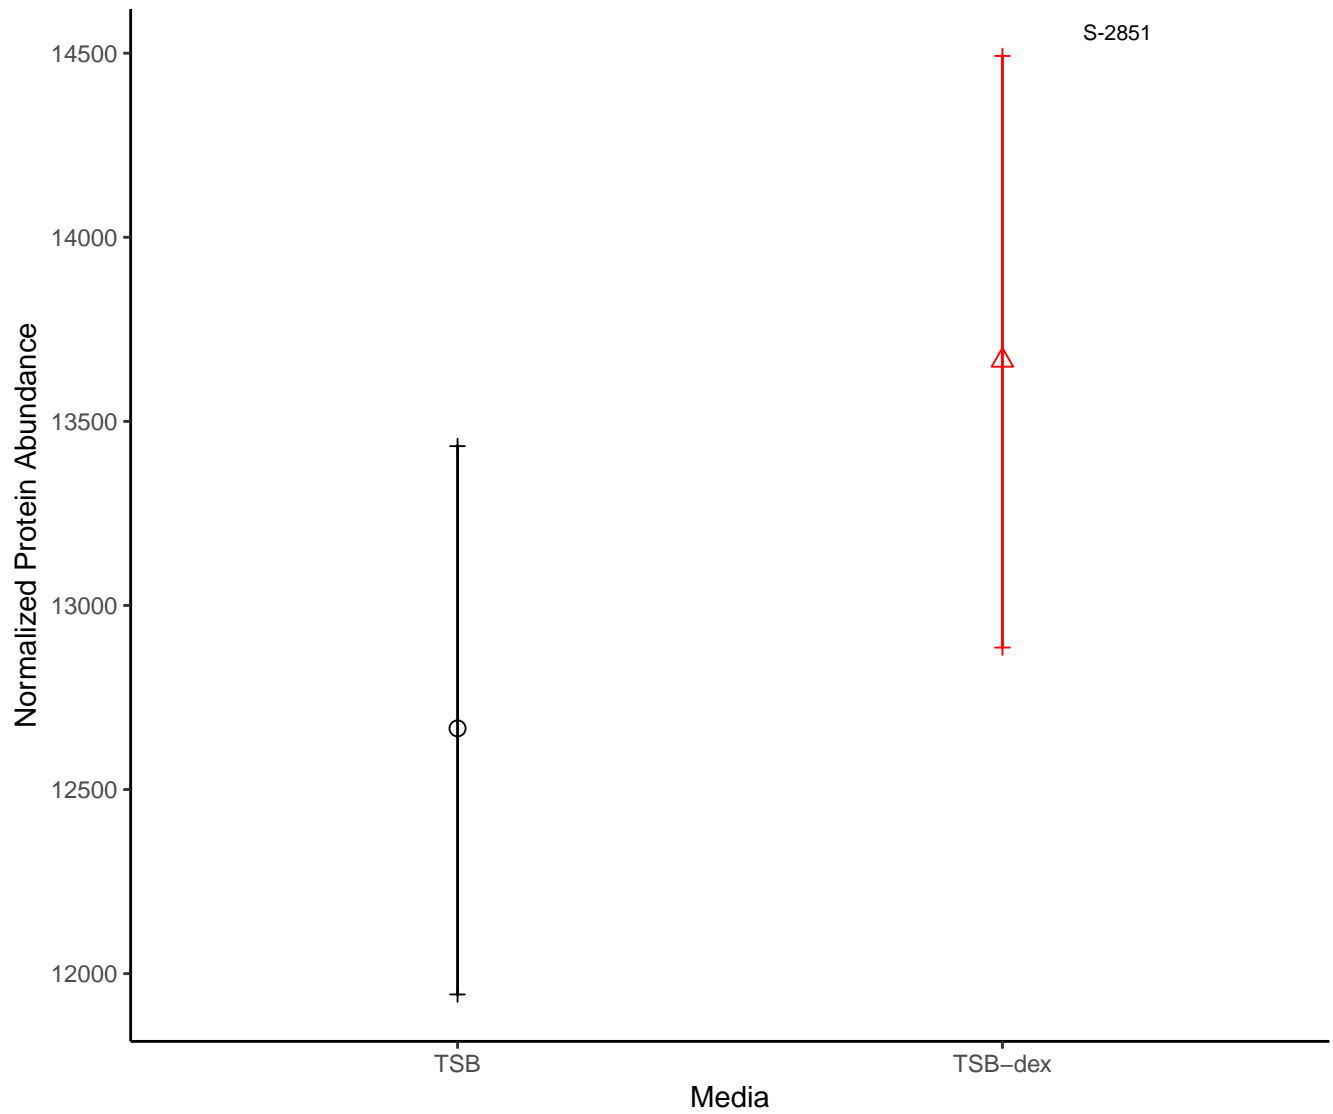

⊕ TSB-dex

△ TSB

# RPOB\_STAAM

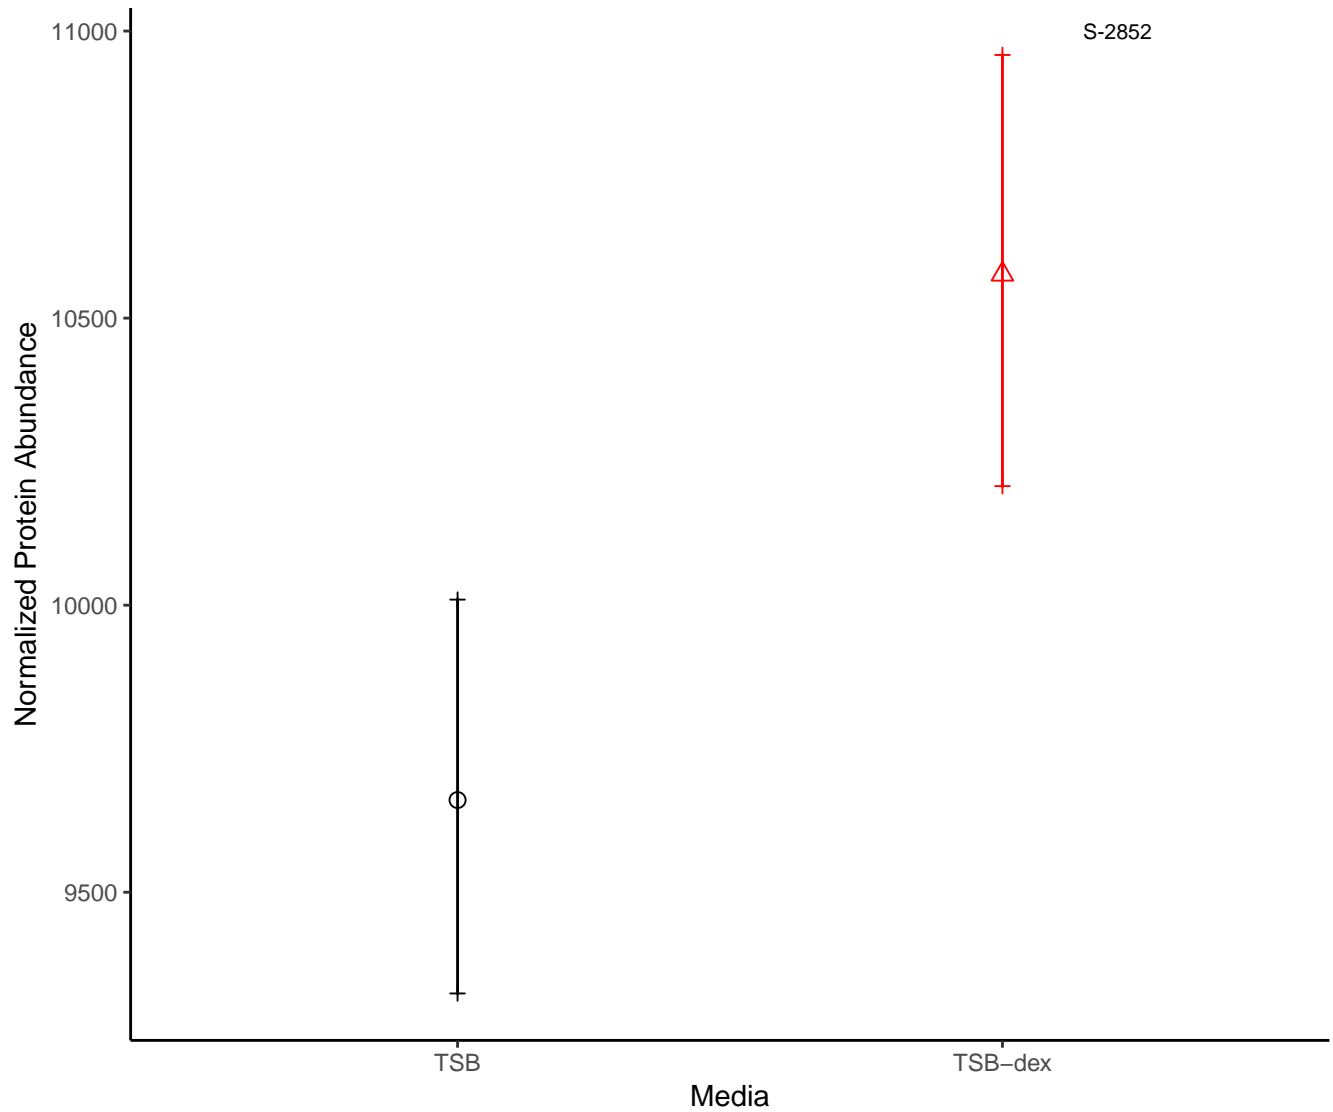

⊕ TSB-dex

△ TSB

# RPOC\_STAAM

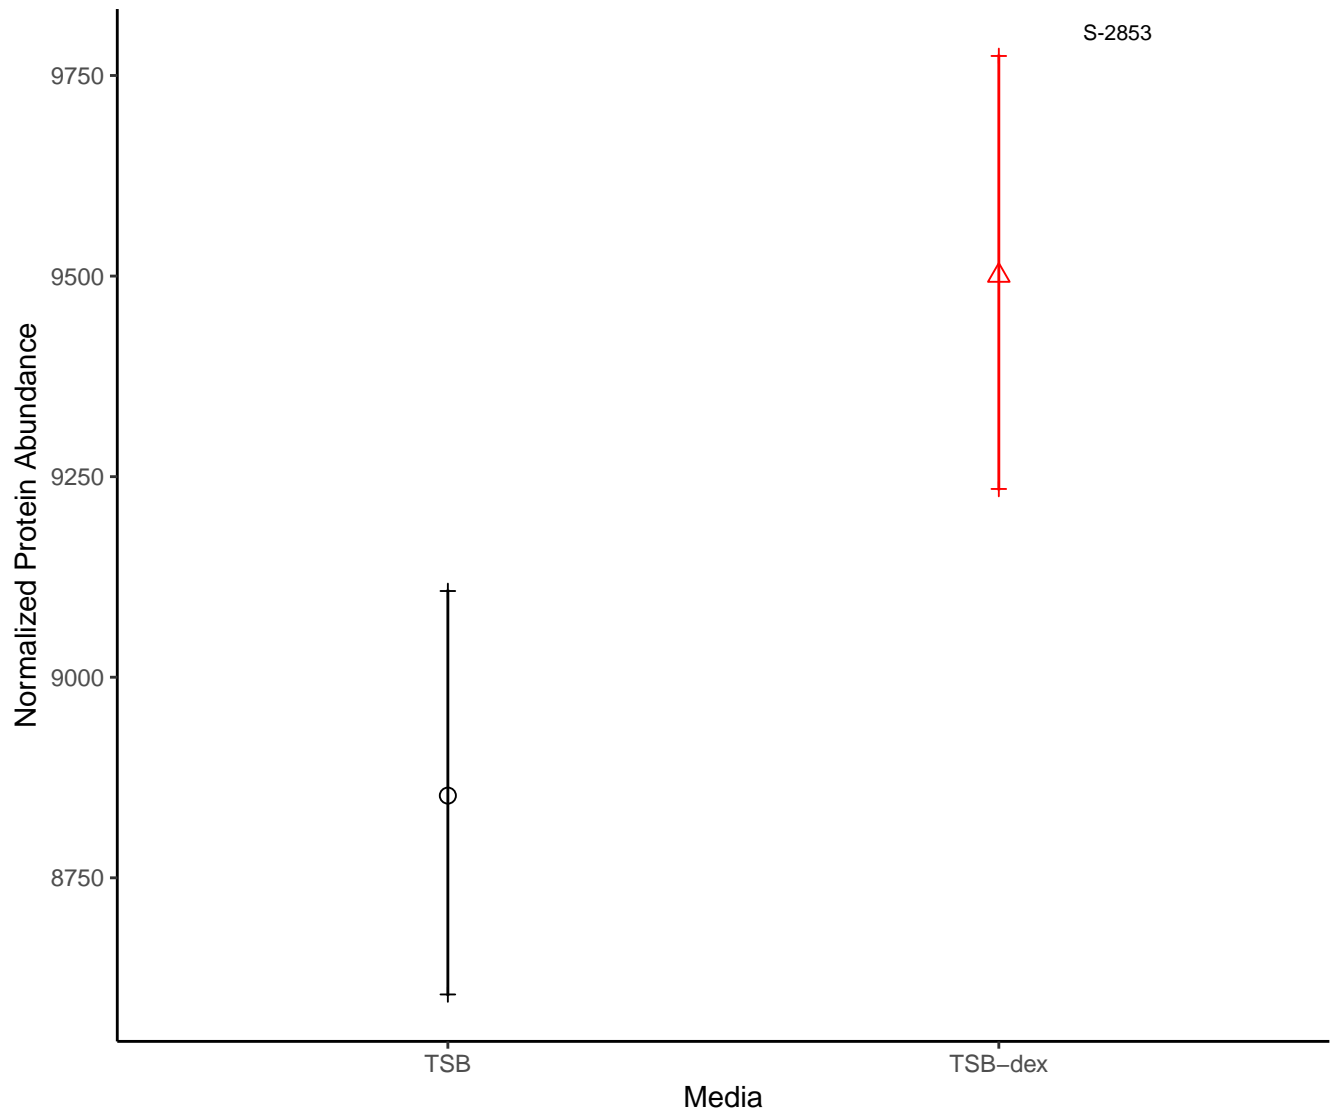

⊕ TSB-dex

△ TSB

# RPOE\_STAAM

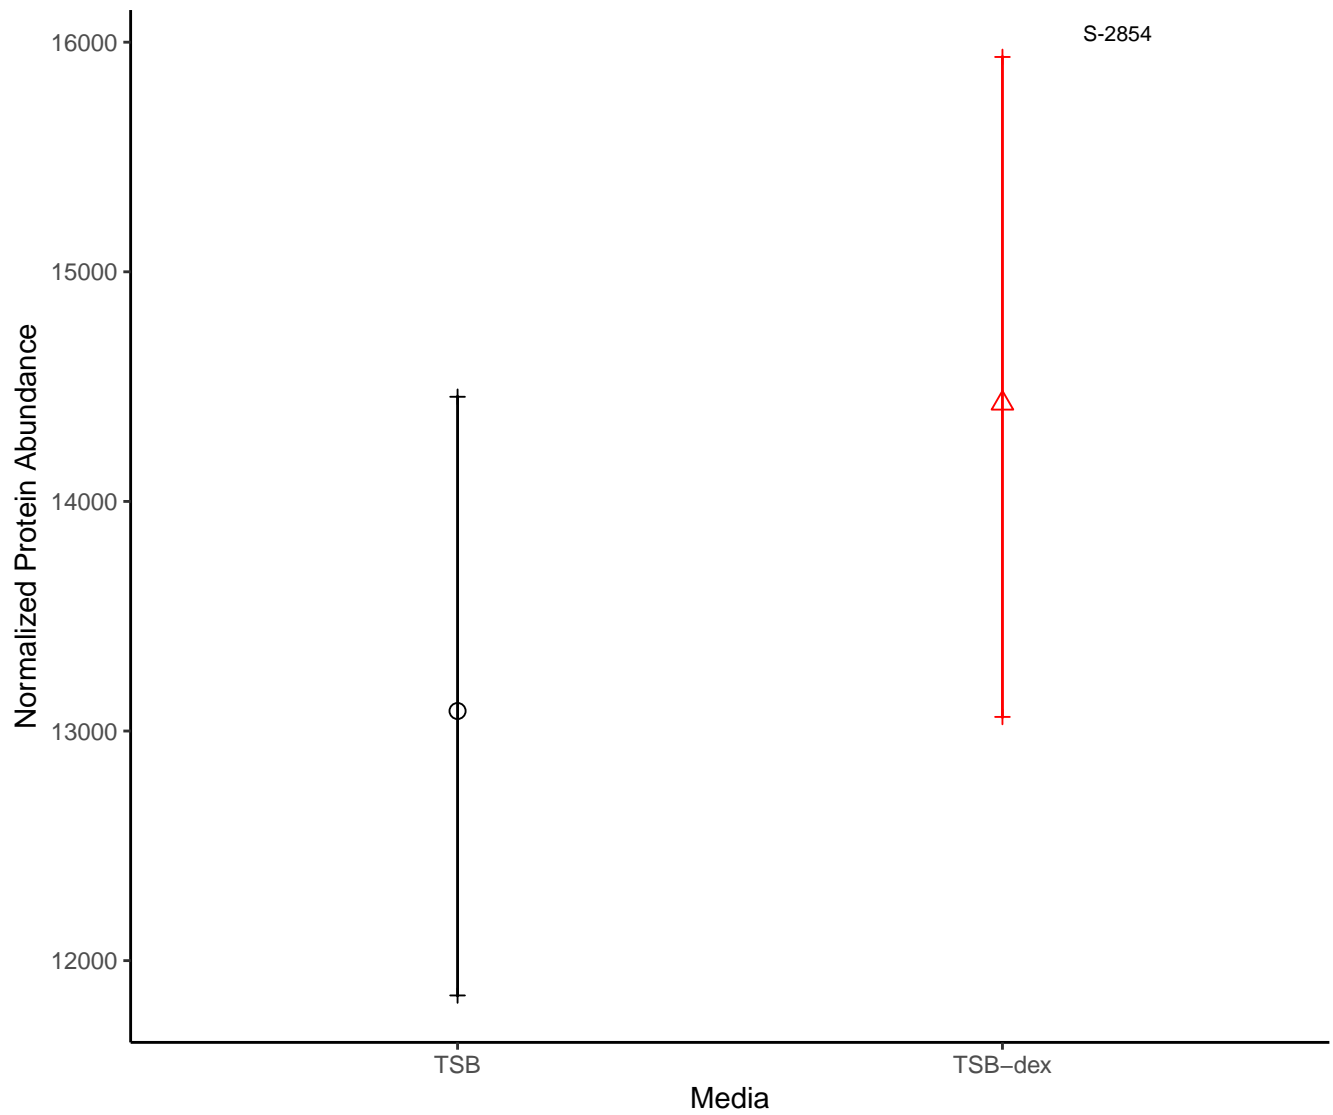

⊕ TSB-dex

△ TSB

# RPOZ\_STAAM

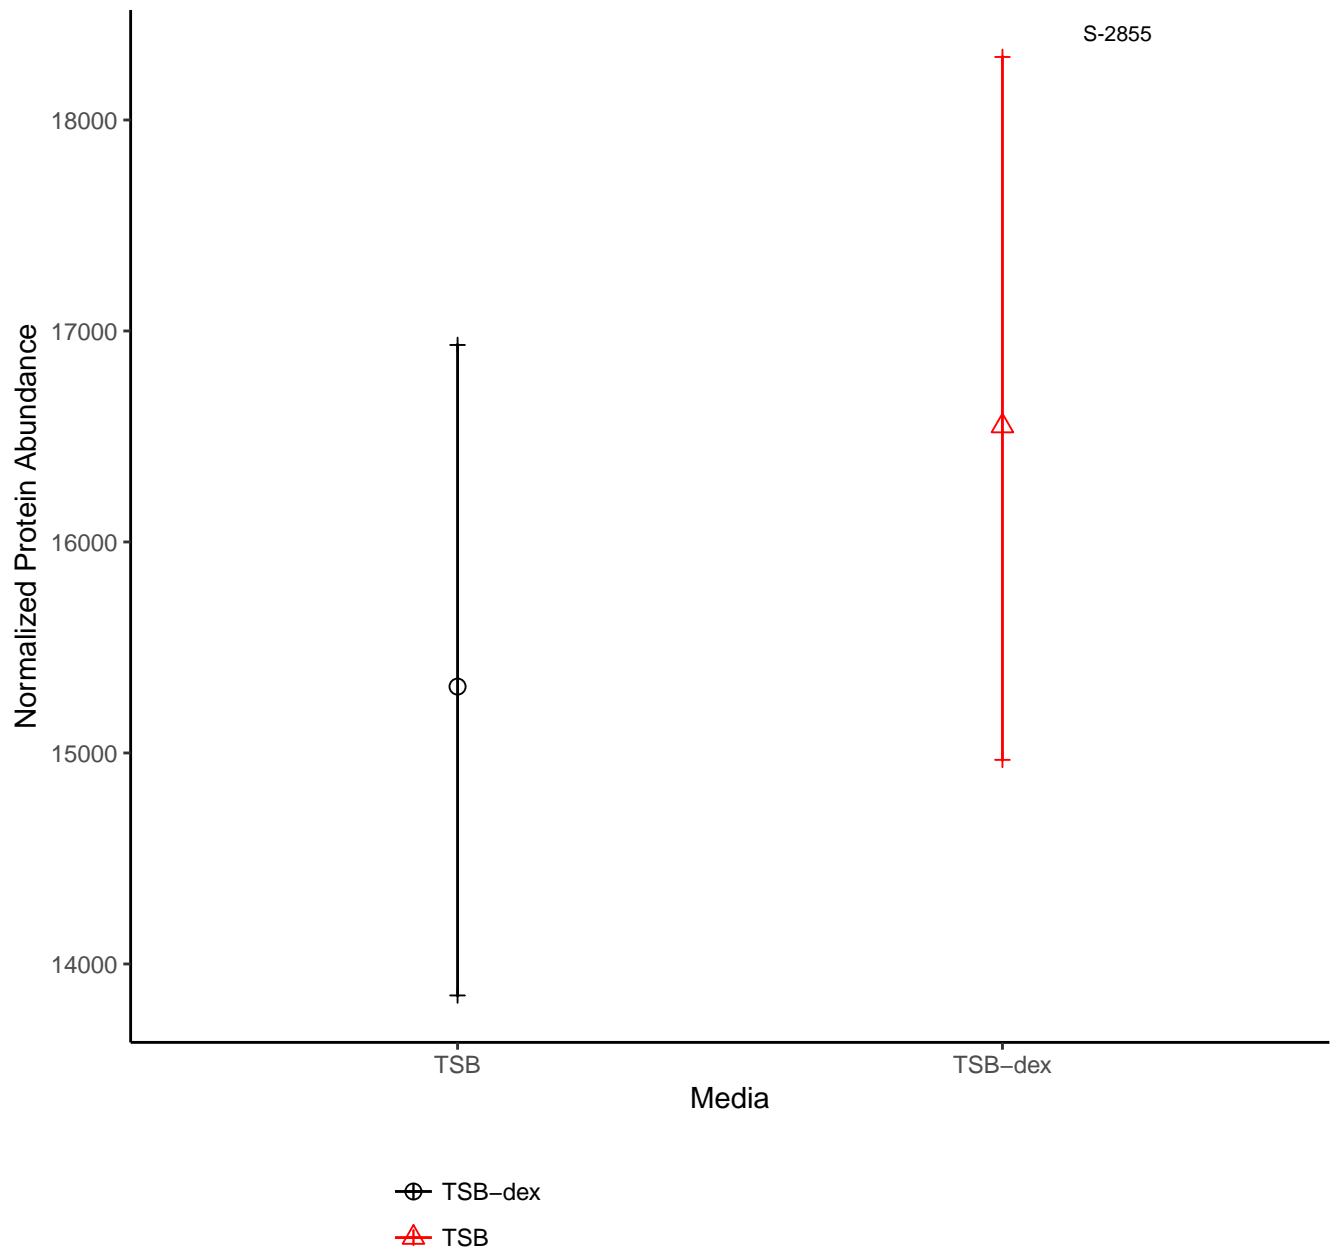

# RRF\_STAAM

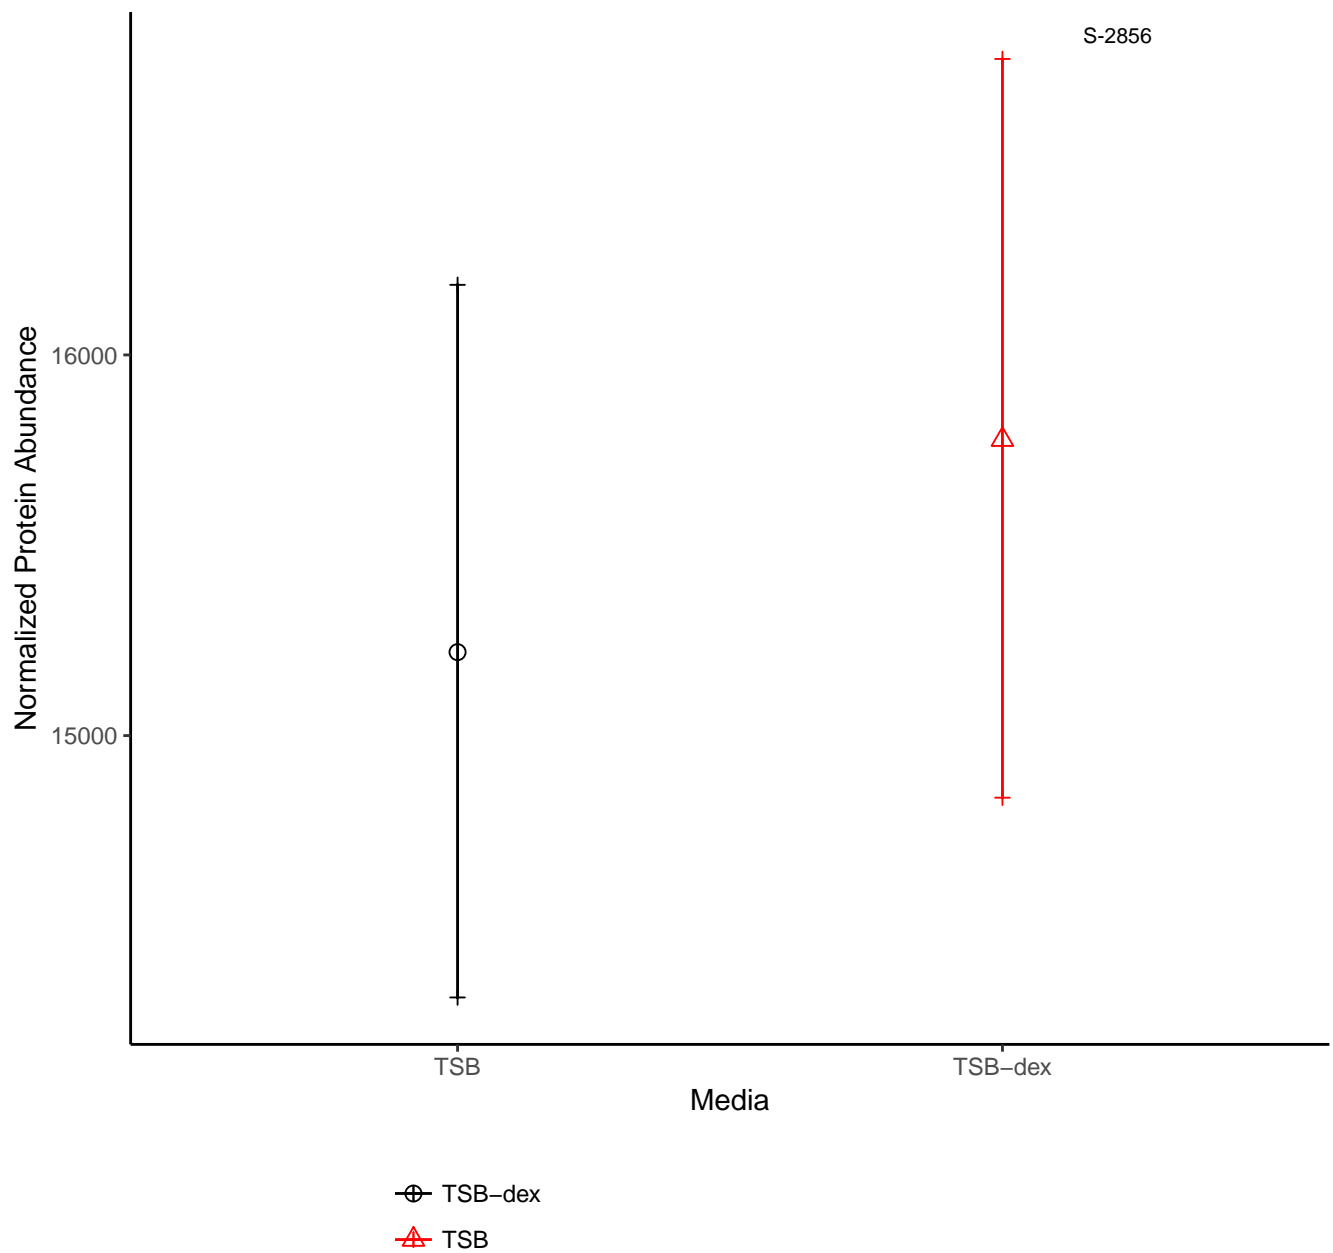



# RS1\_STAAM

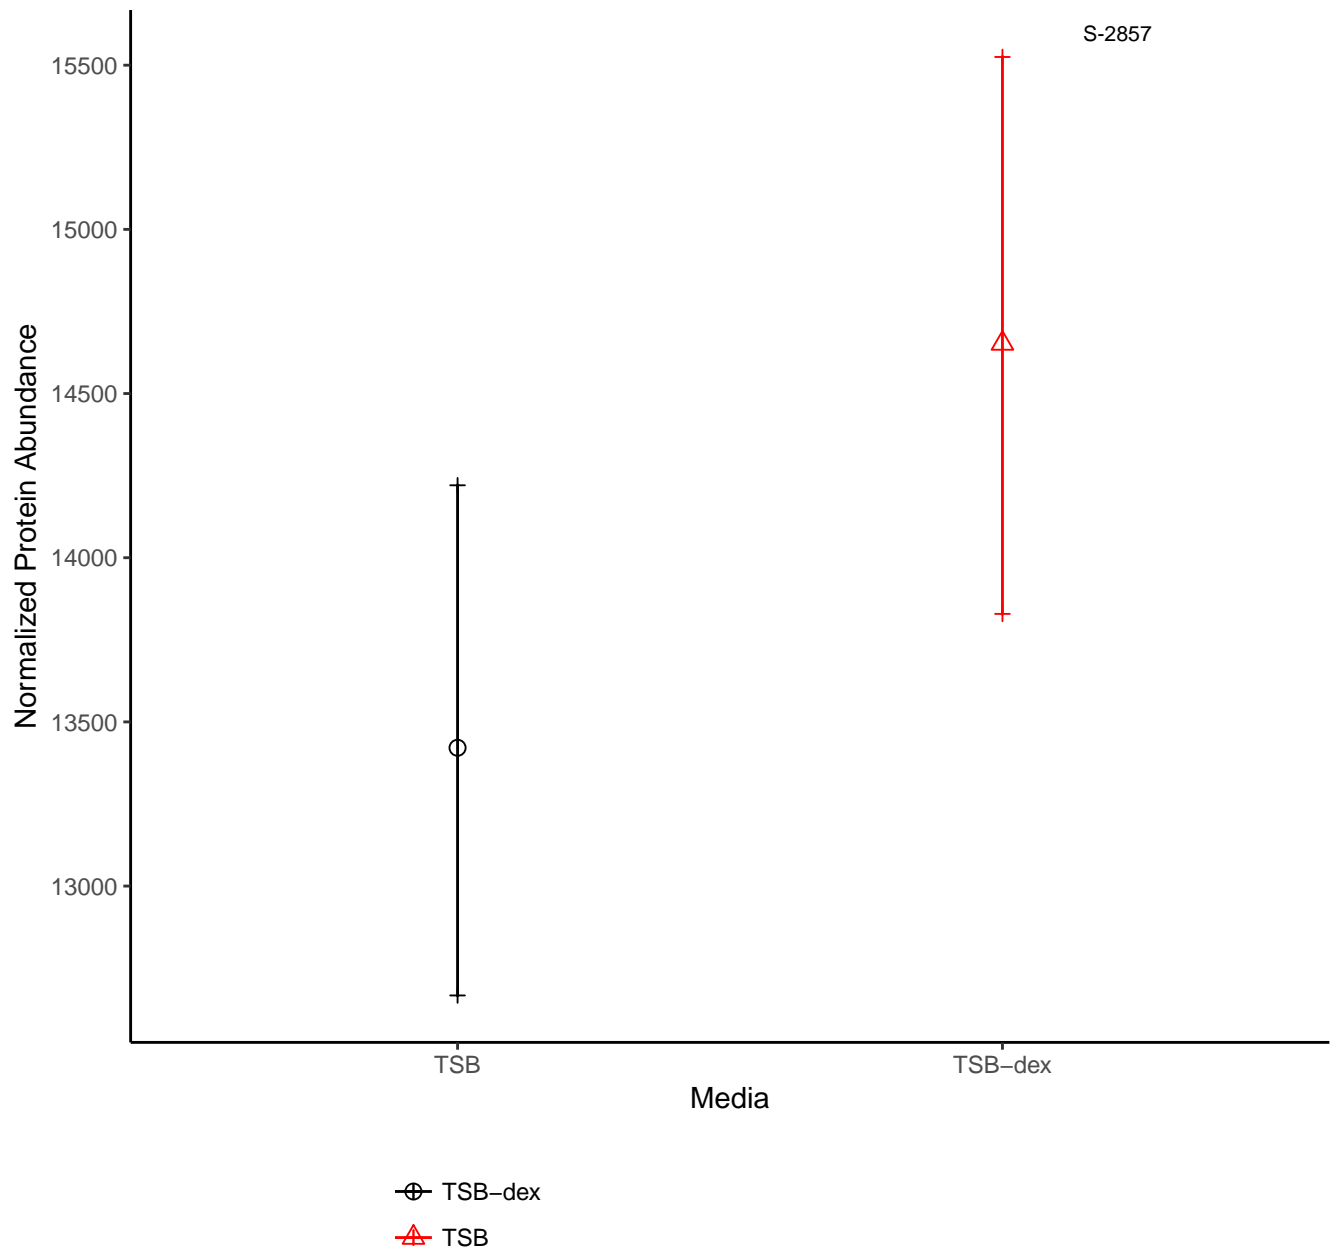

# RS10\_STAAM

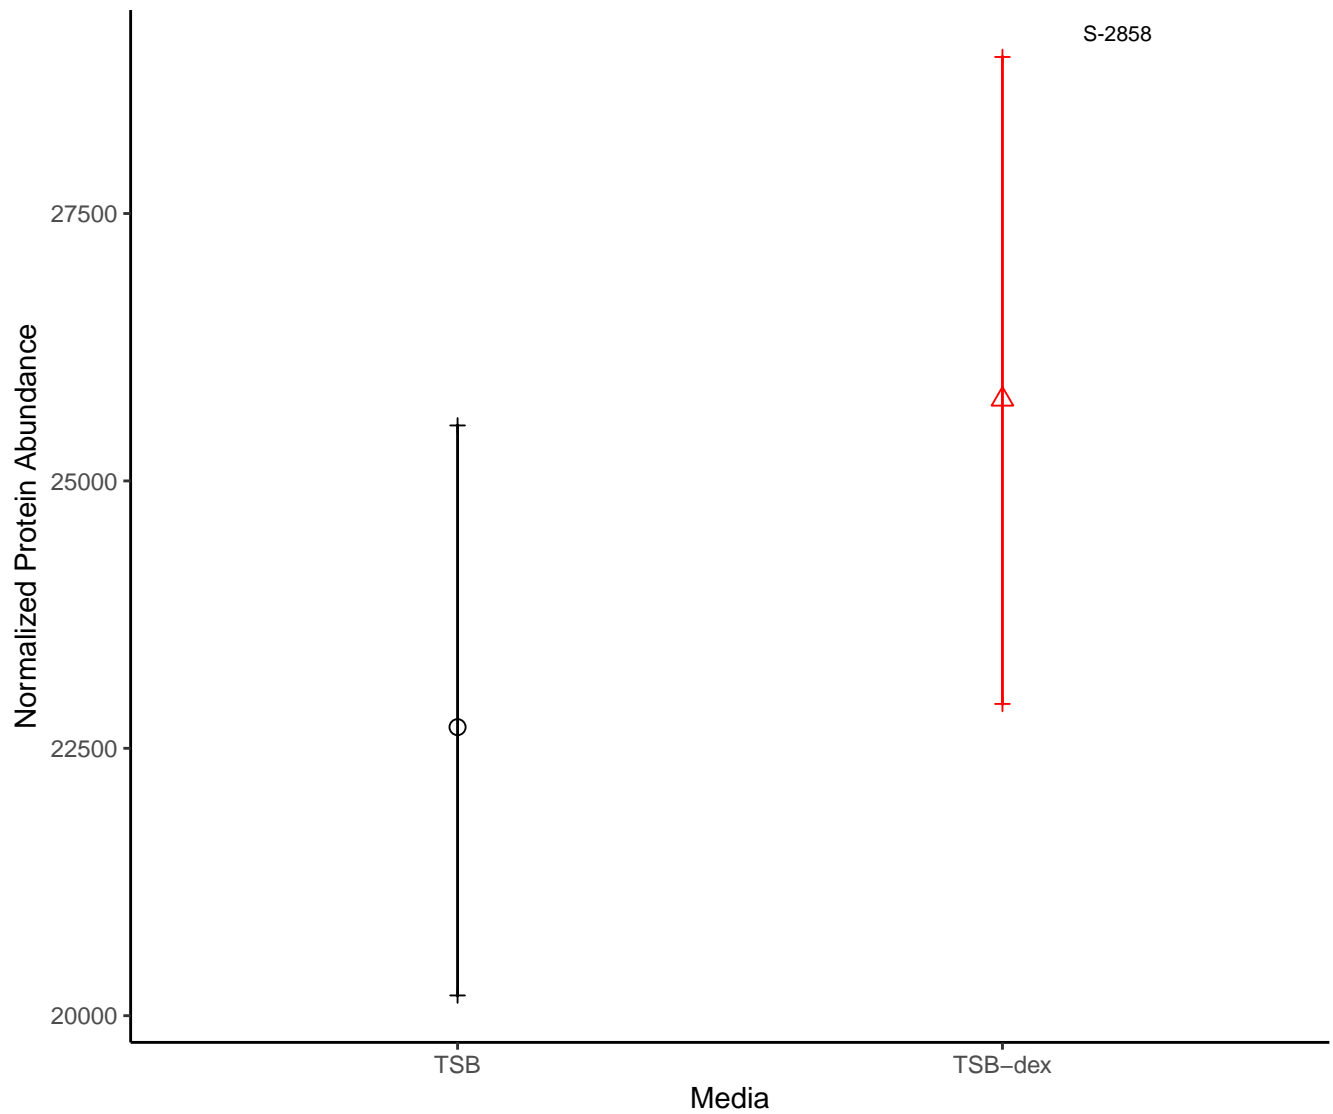

⊕ TSB-dex

△ TSB

# RS11\_STAAM

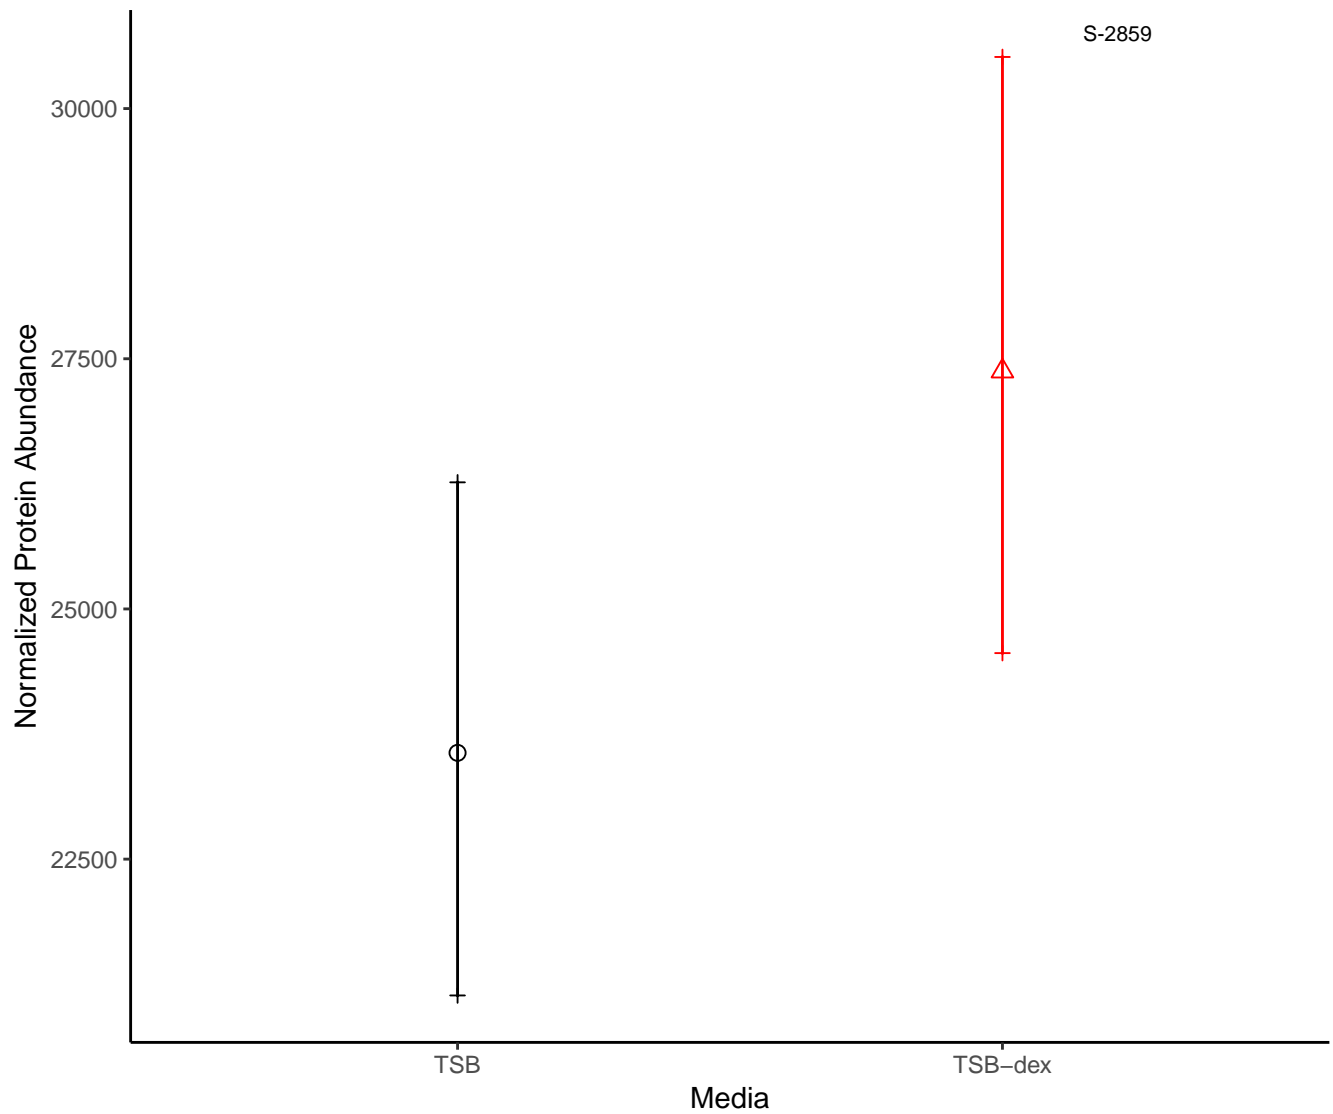

⊕ TSB-dex

△ TSB

# RS12\_STAAM

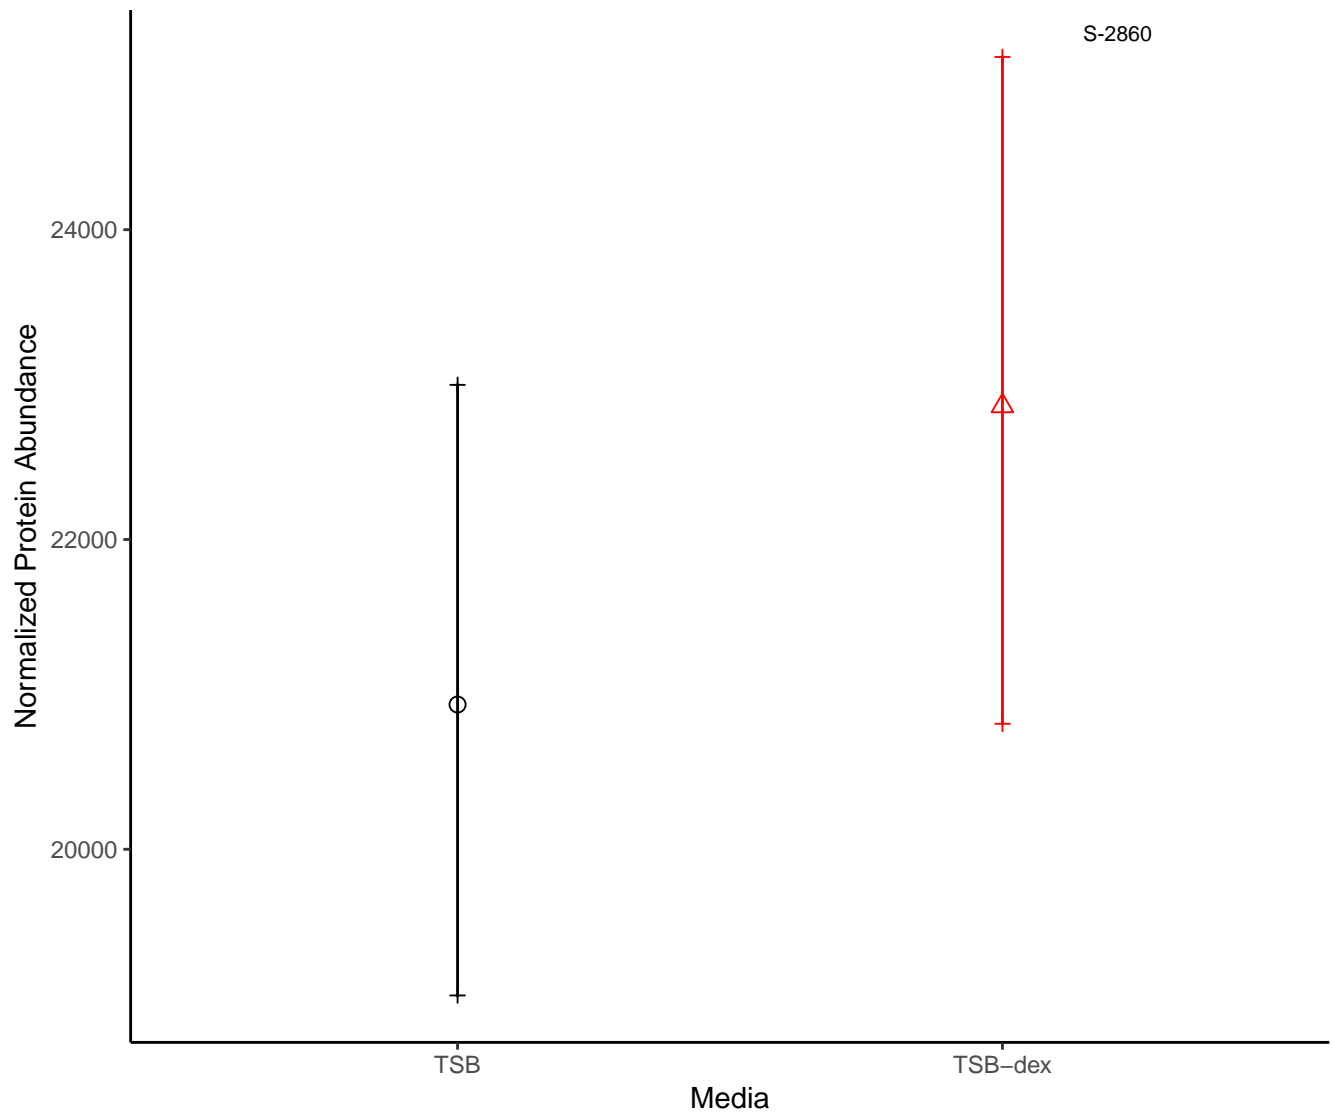

⊕ TSB-dex

△ TSB

# RS13\_STAAM

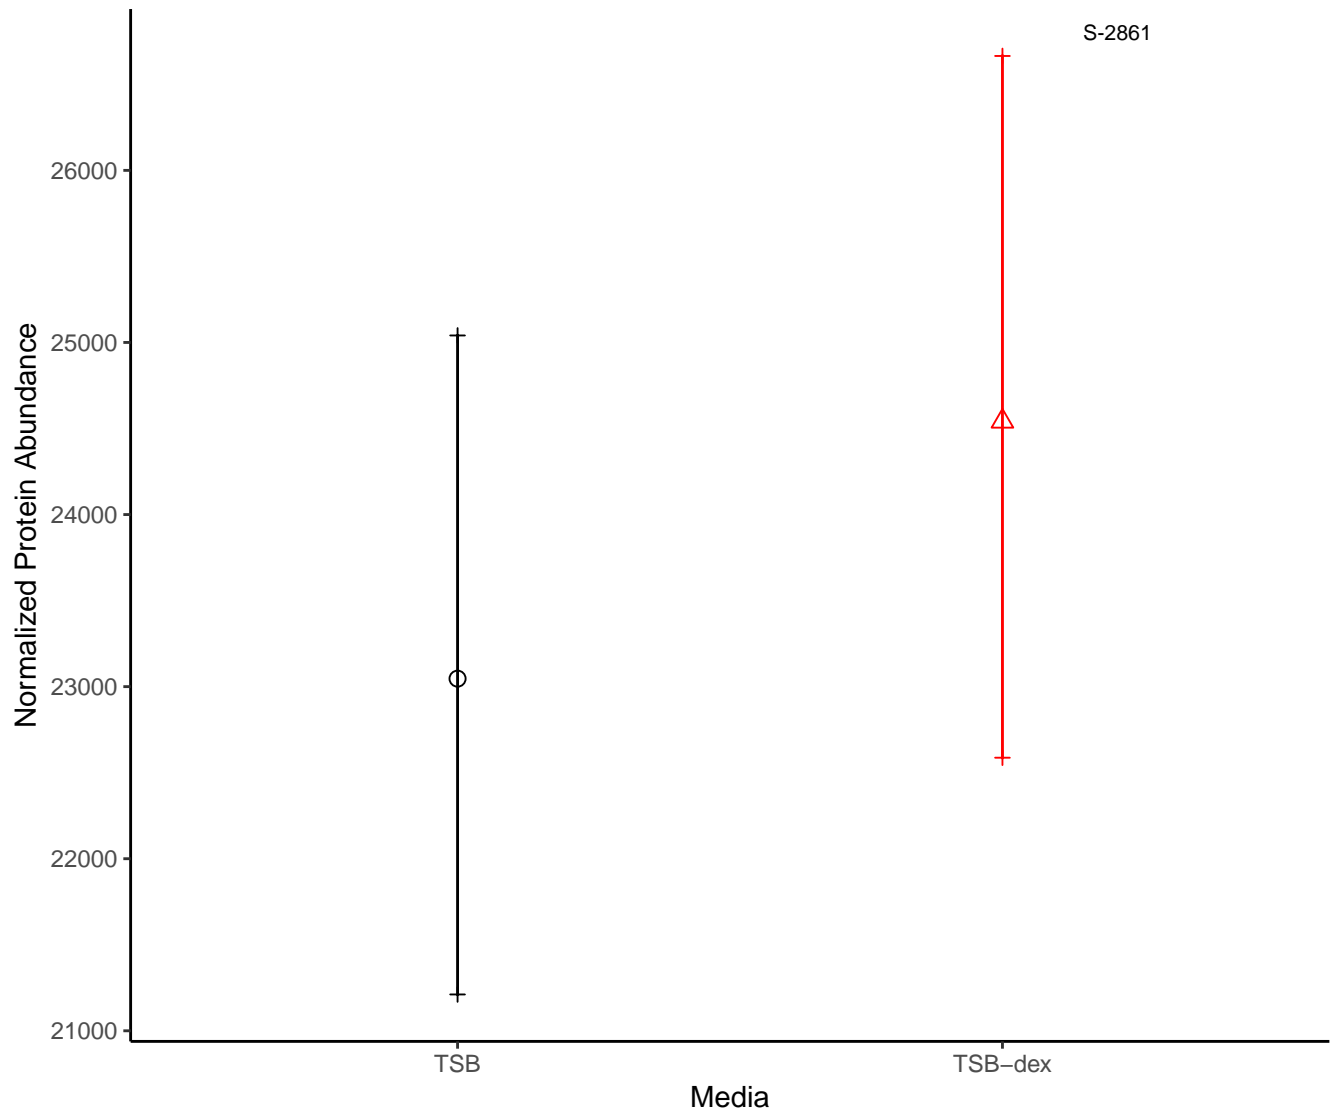

⊕ TSB-dex

△ TSB

# RS15\_STAAM

S-2862

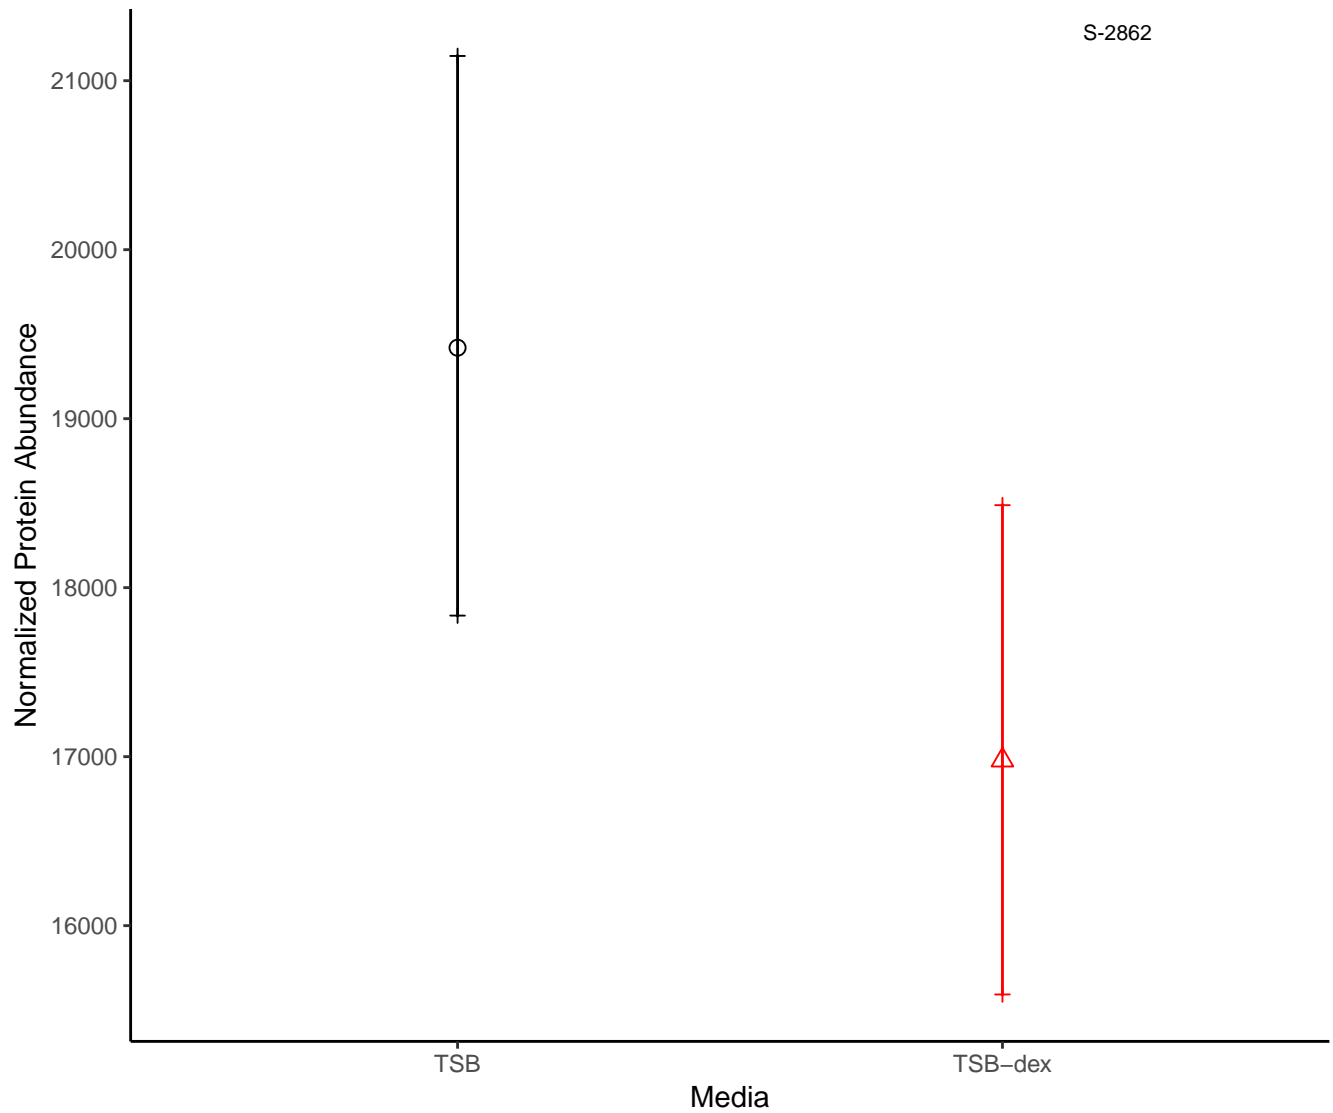

⊖ TSB-dex

△ TSB

# RS16\_STAAM

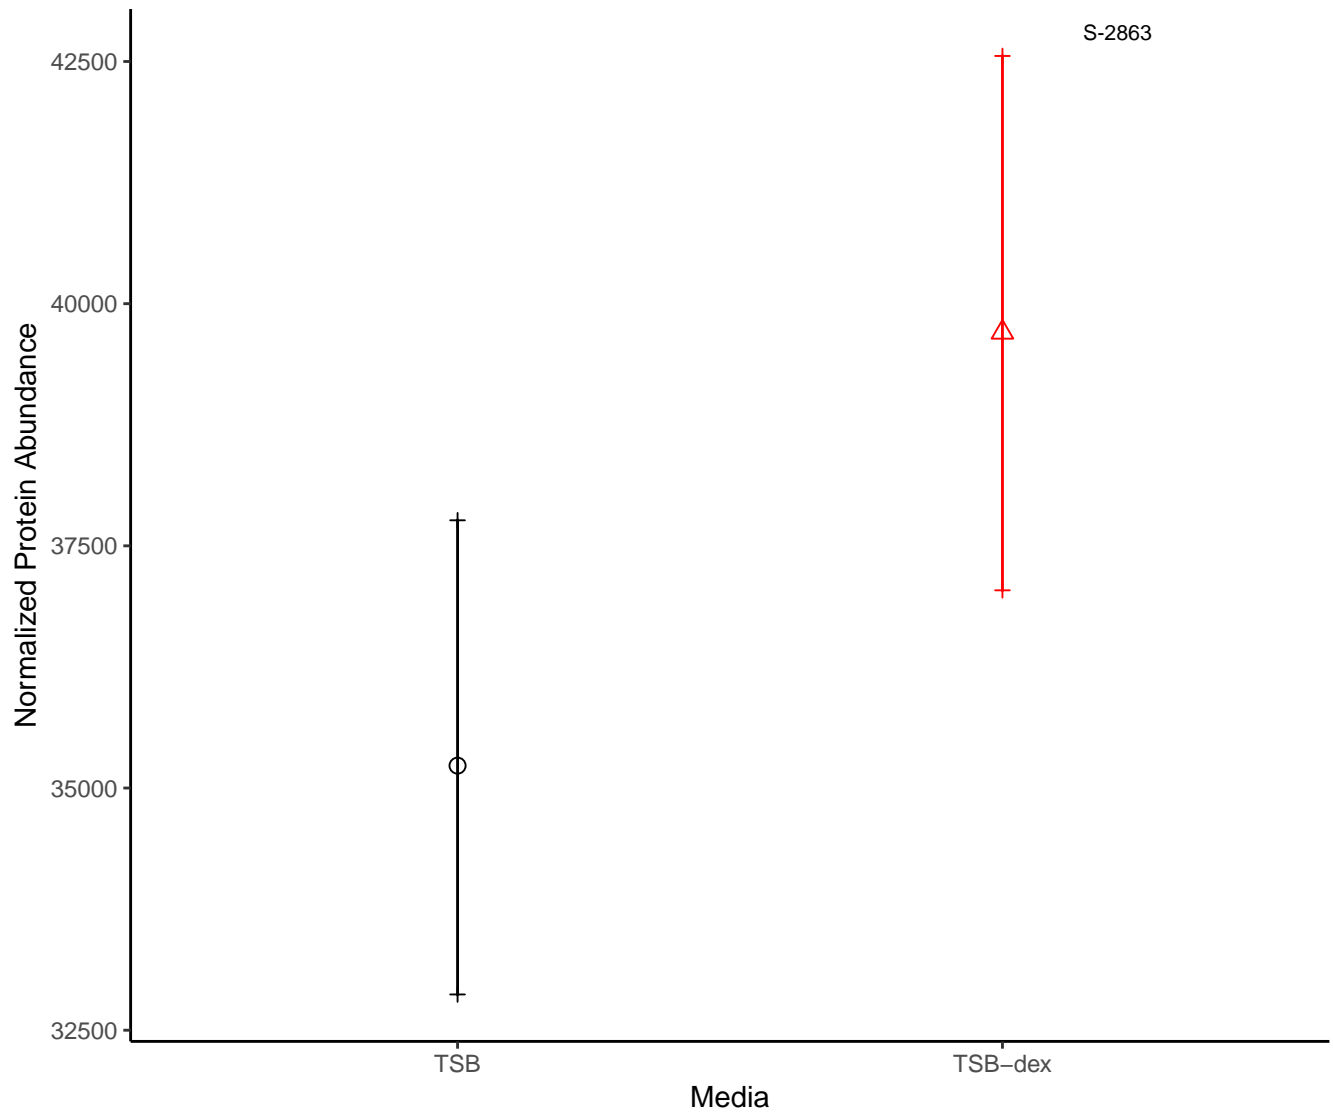

⊕ TSB-dex

△ TSB

# RS17\_STAAM

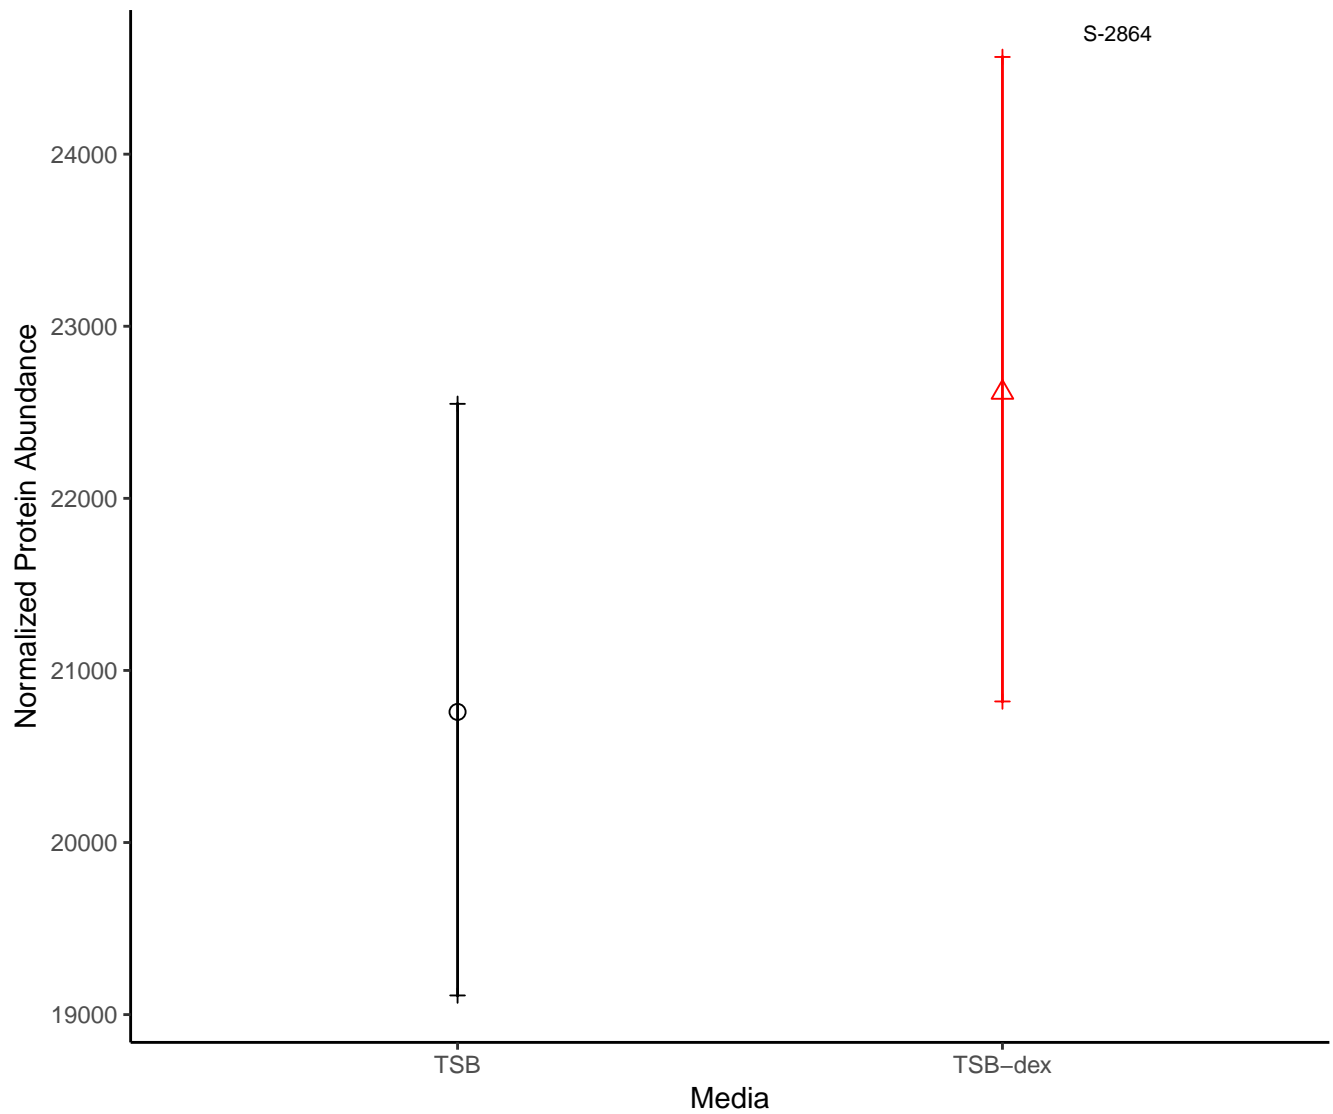

⊕ TSB-dex

△ TSB



# RS18\_STAAM

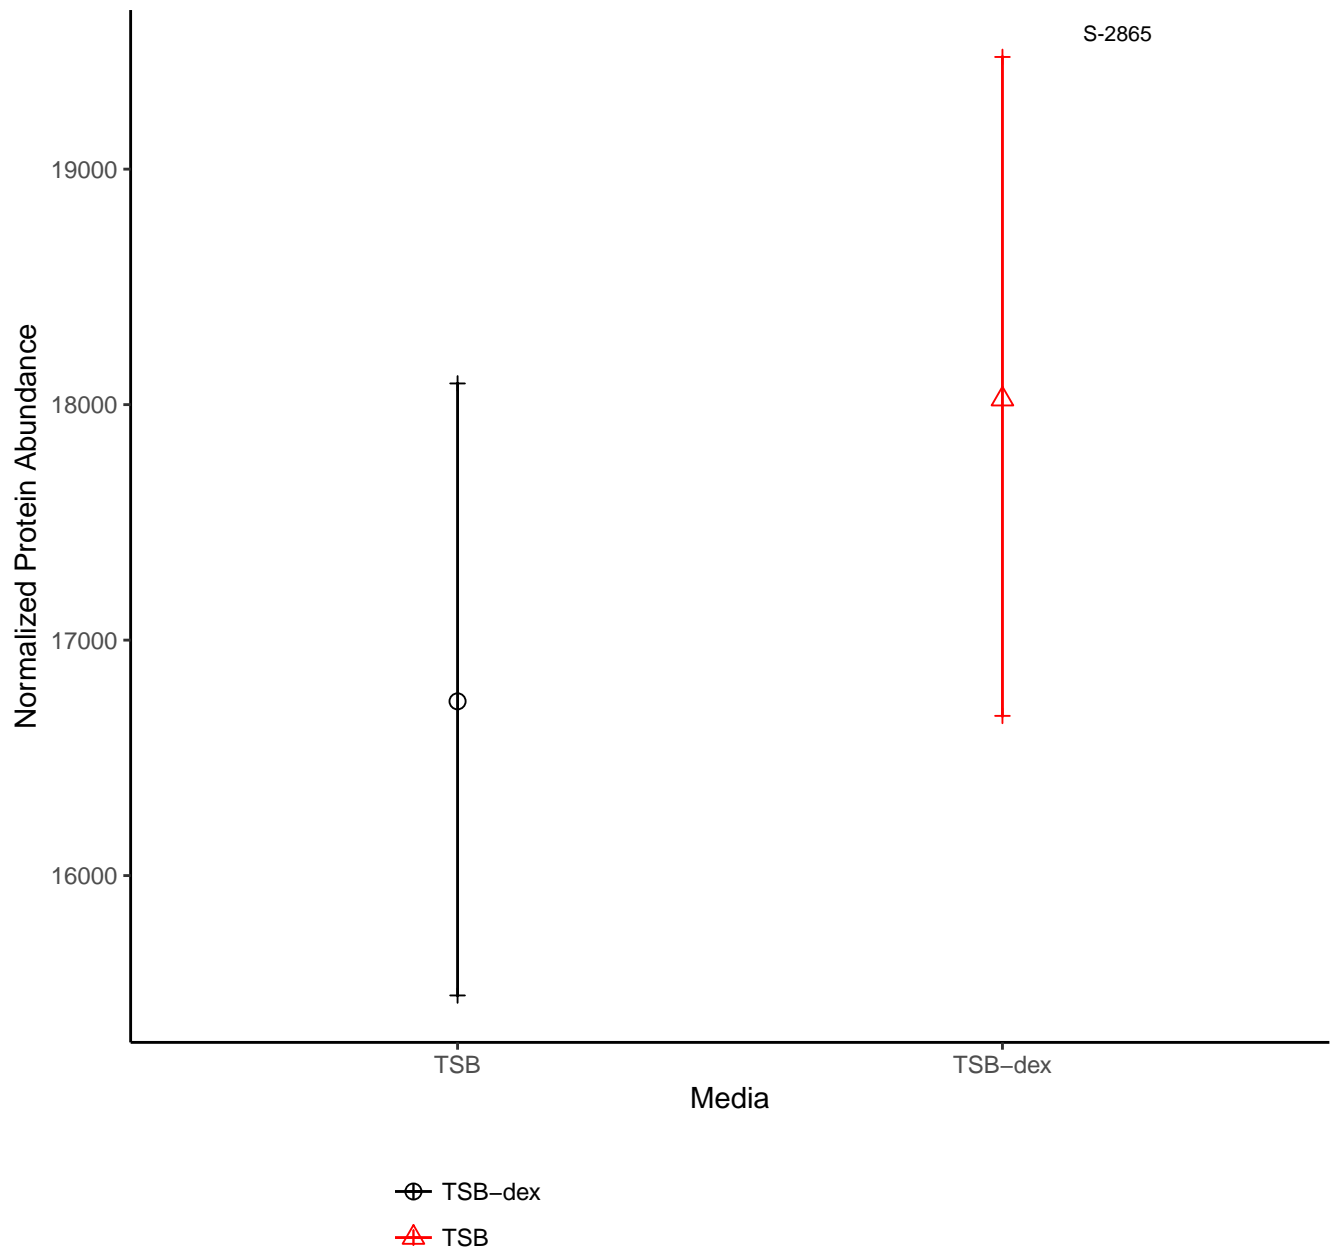

# RS19\_STAAM

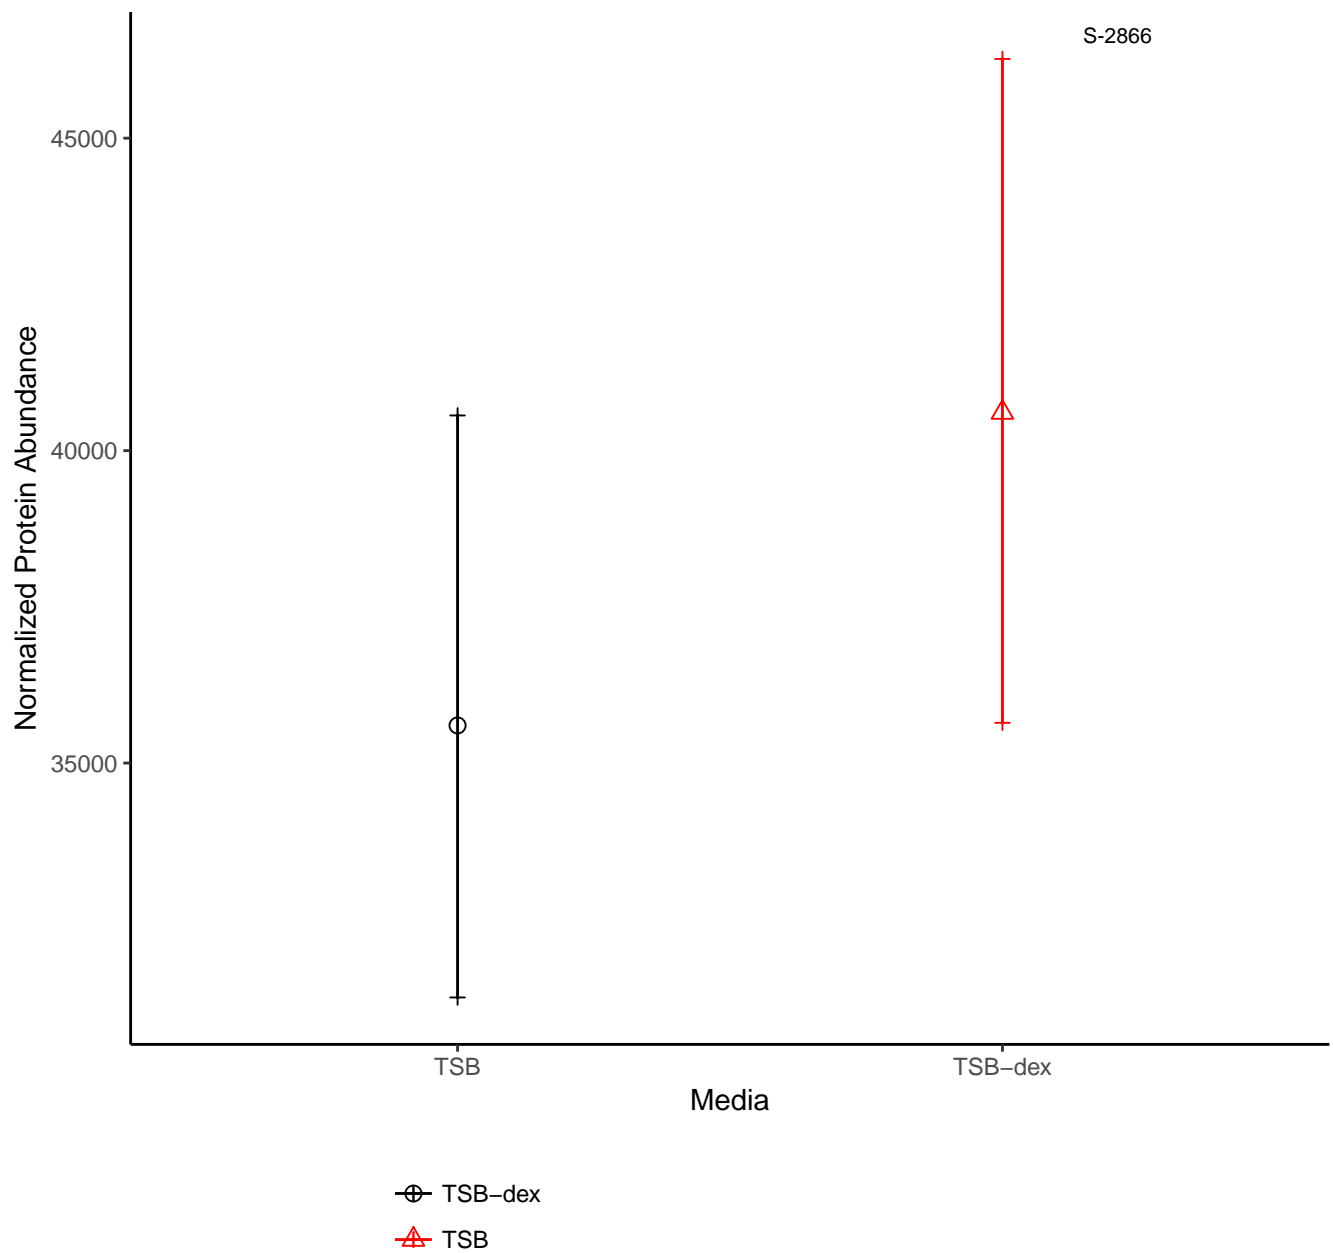

# RS2\_STAAM

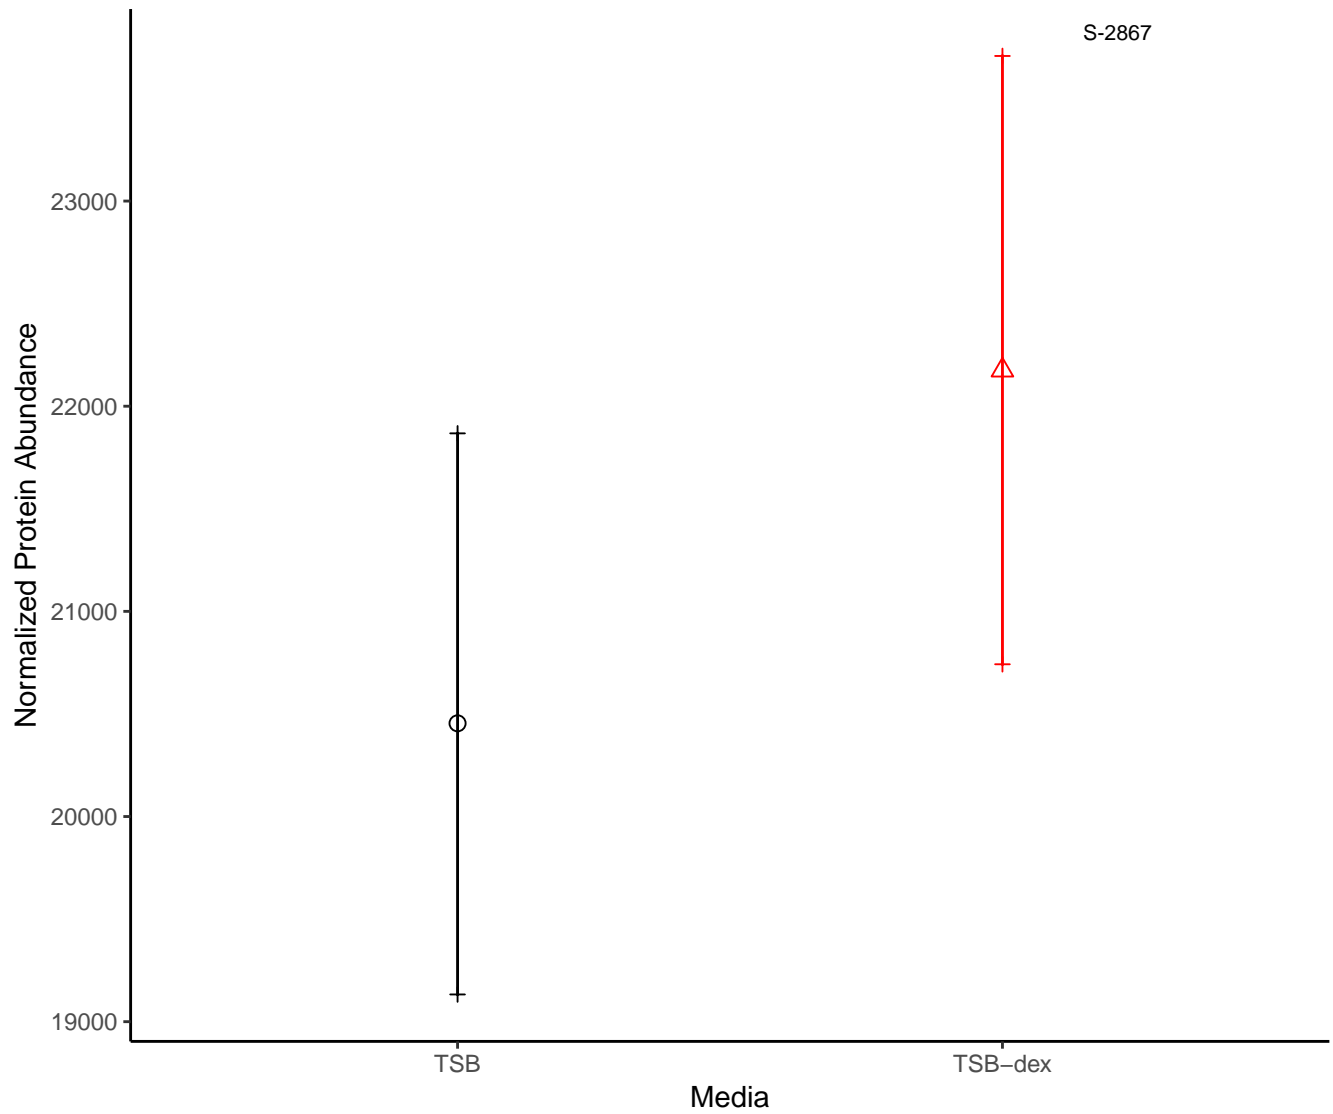

⊕ TSB-dex

△ TSB

# RS20\_STAAM

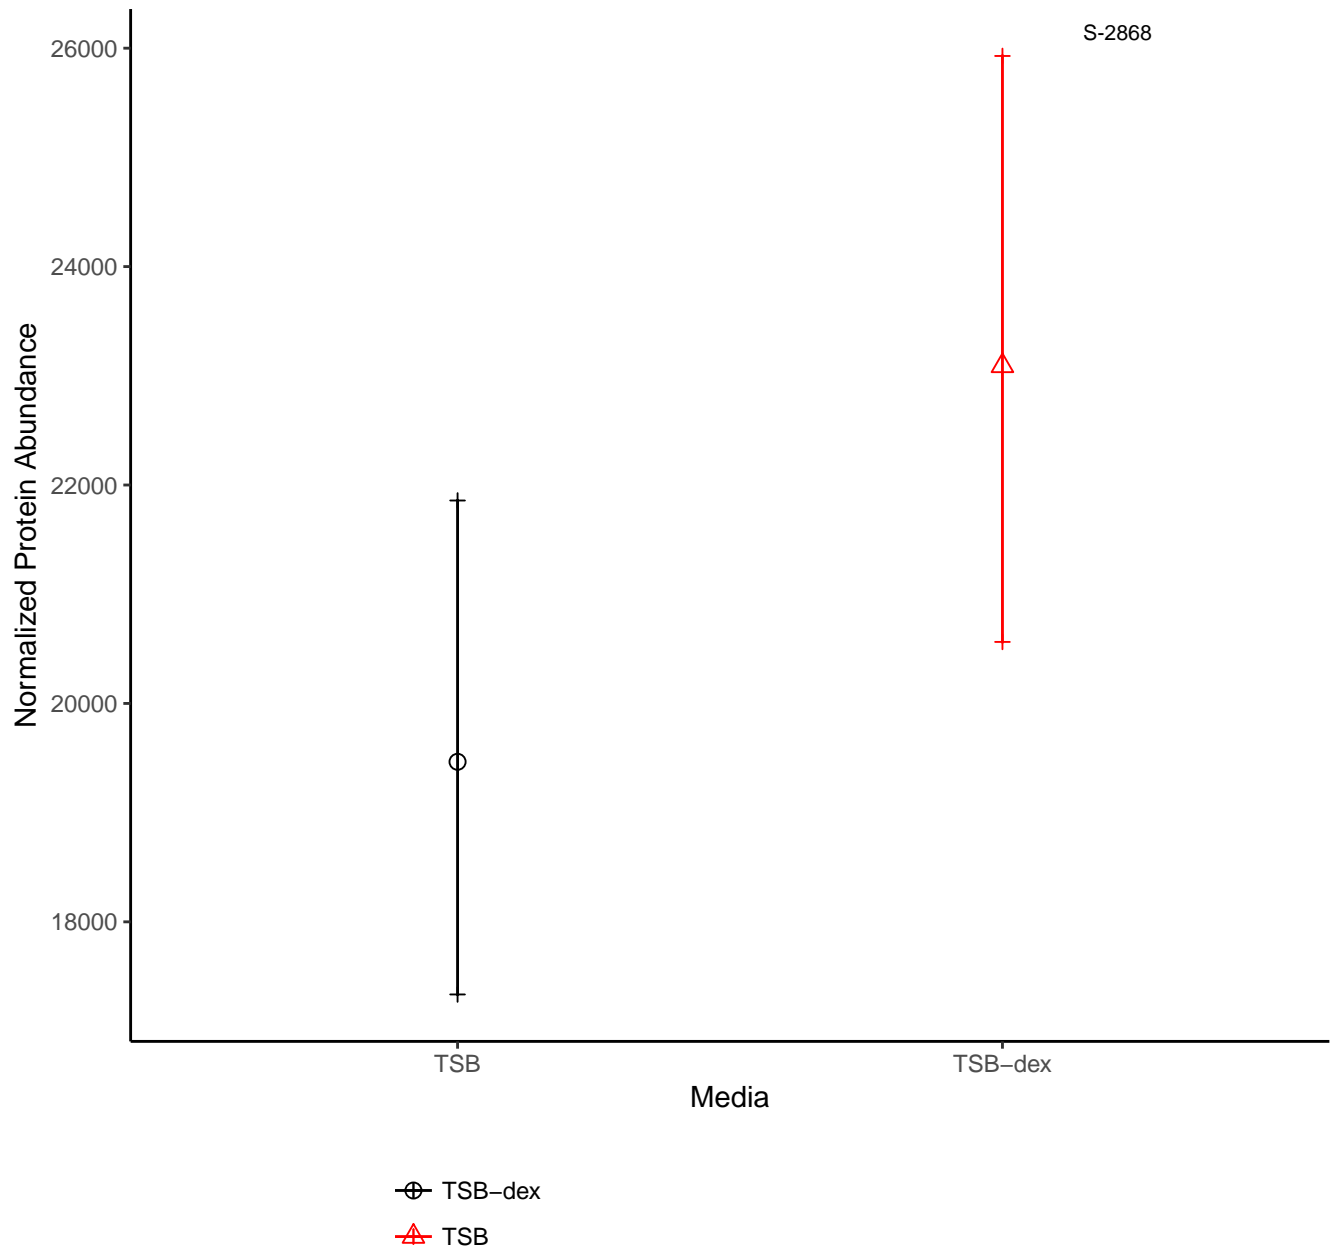

# RS21\_STAAM

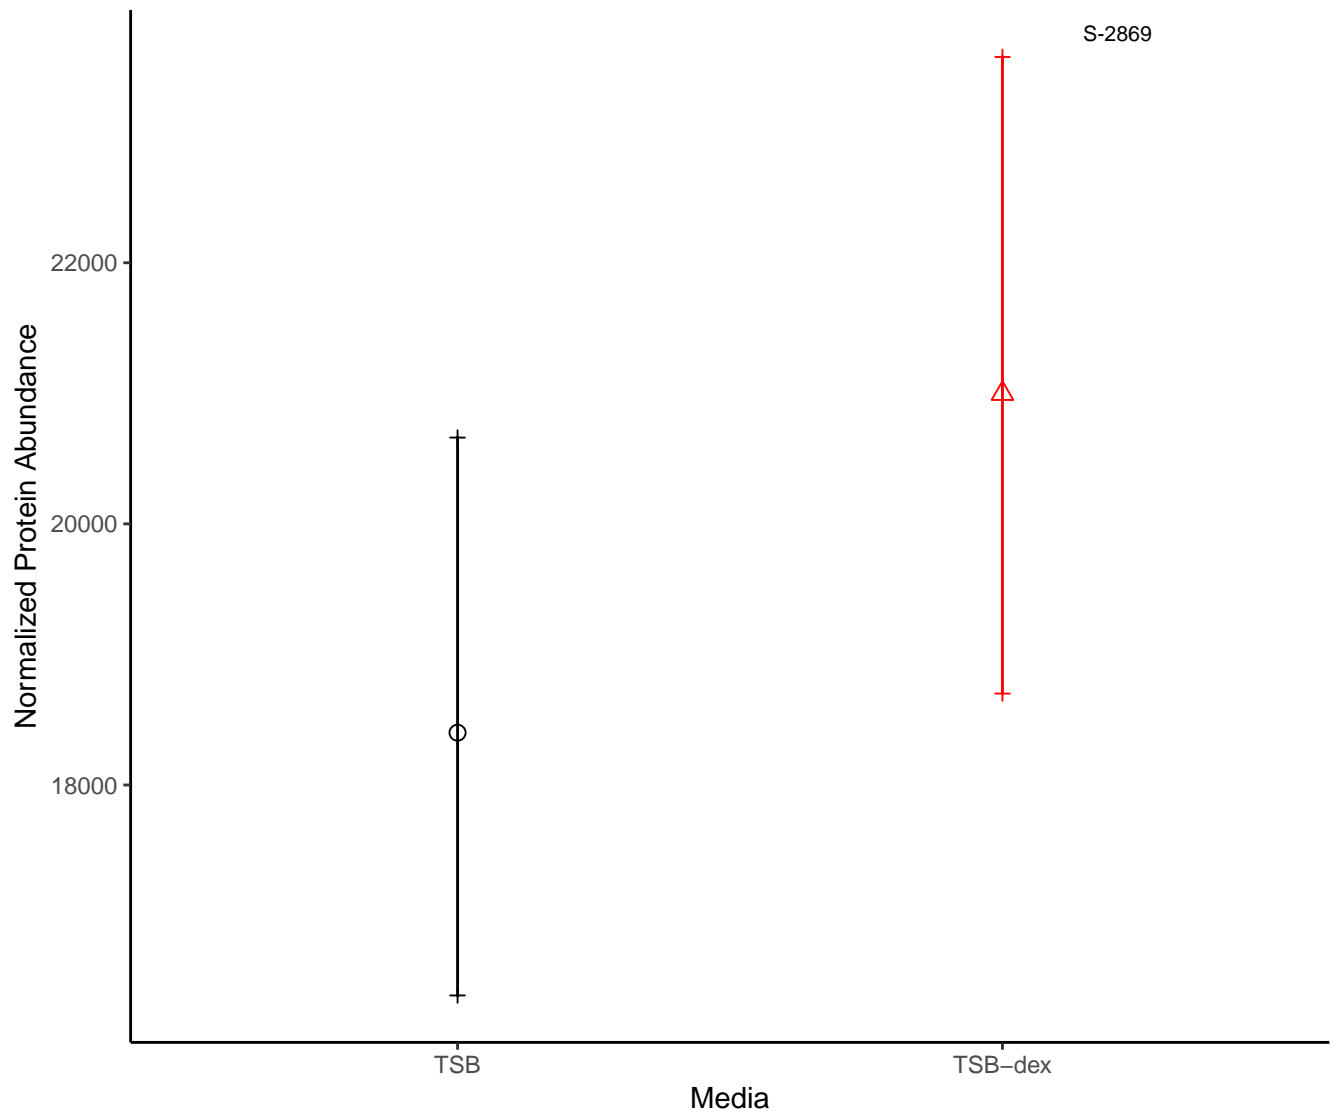

● TSB-dex

▲ TSB

# RS3\_STAAM

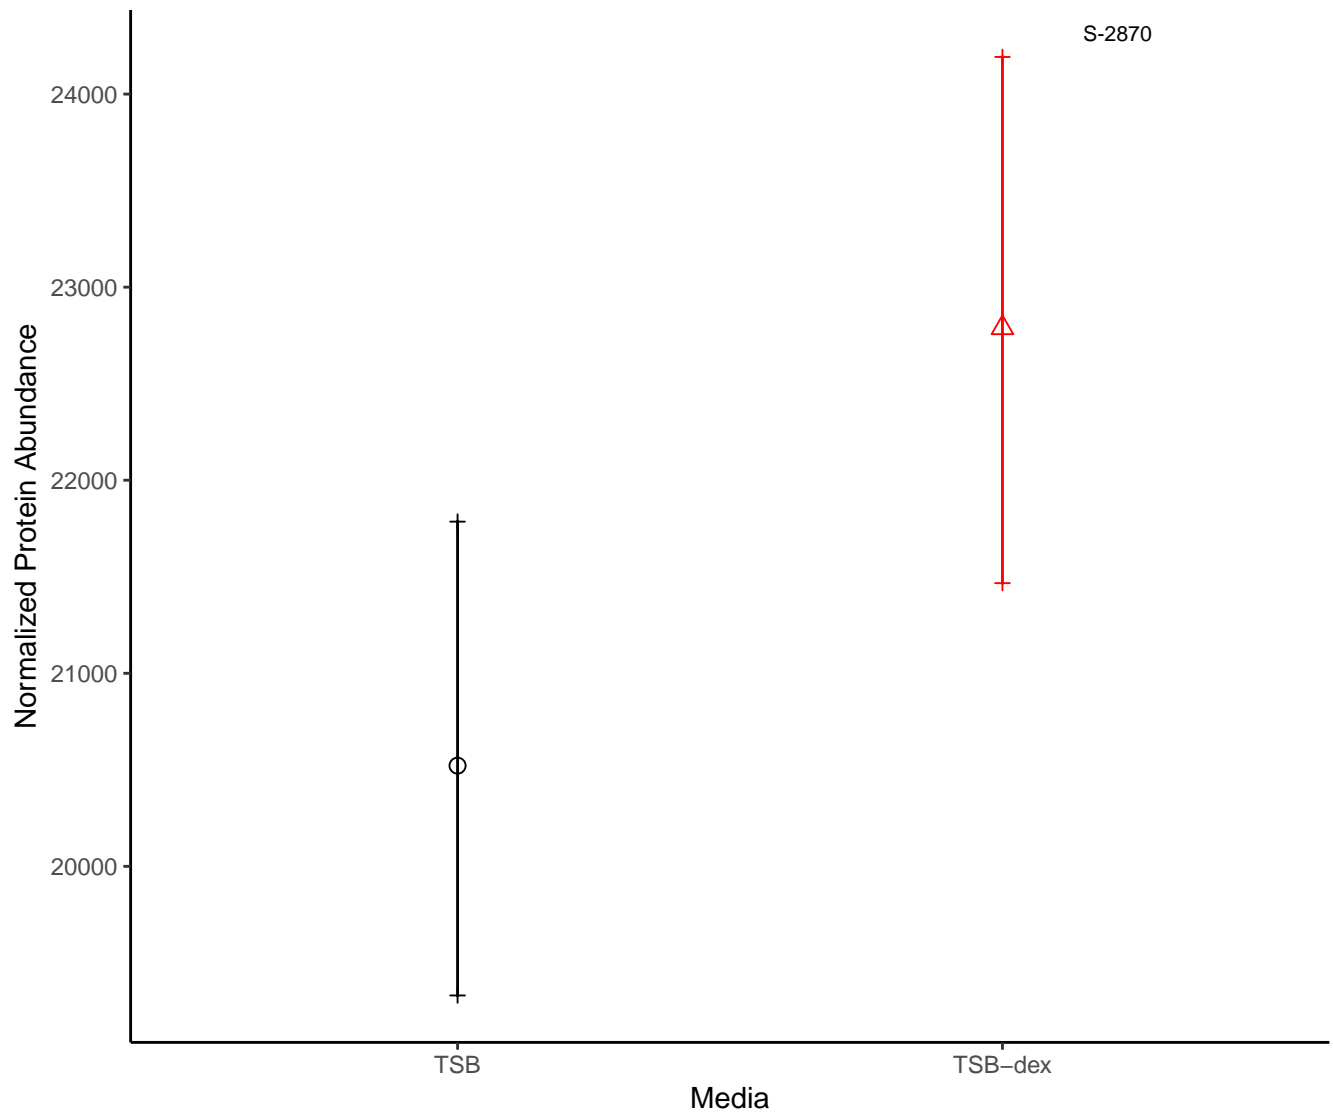

⊕ TSB-dex

△ TSB

# RS4\_STAAM

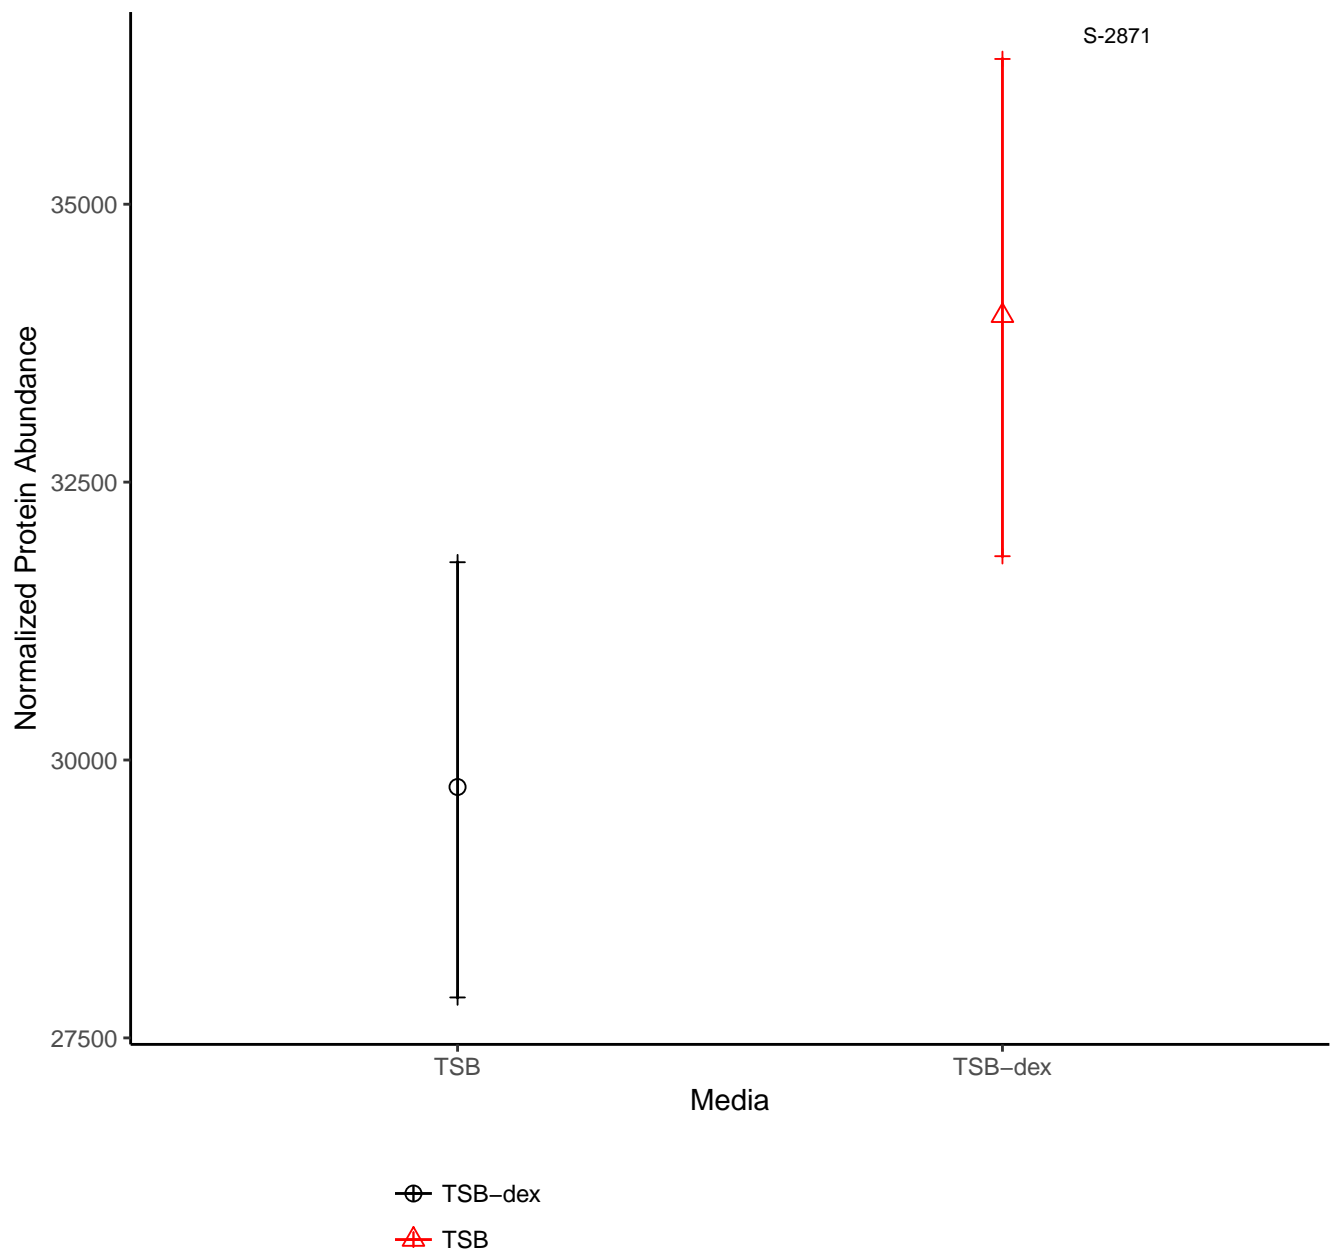

# RS5\_STAAM

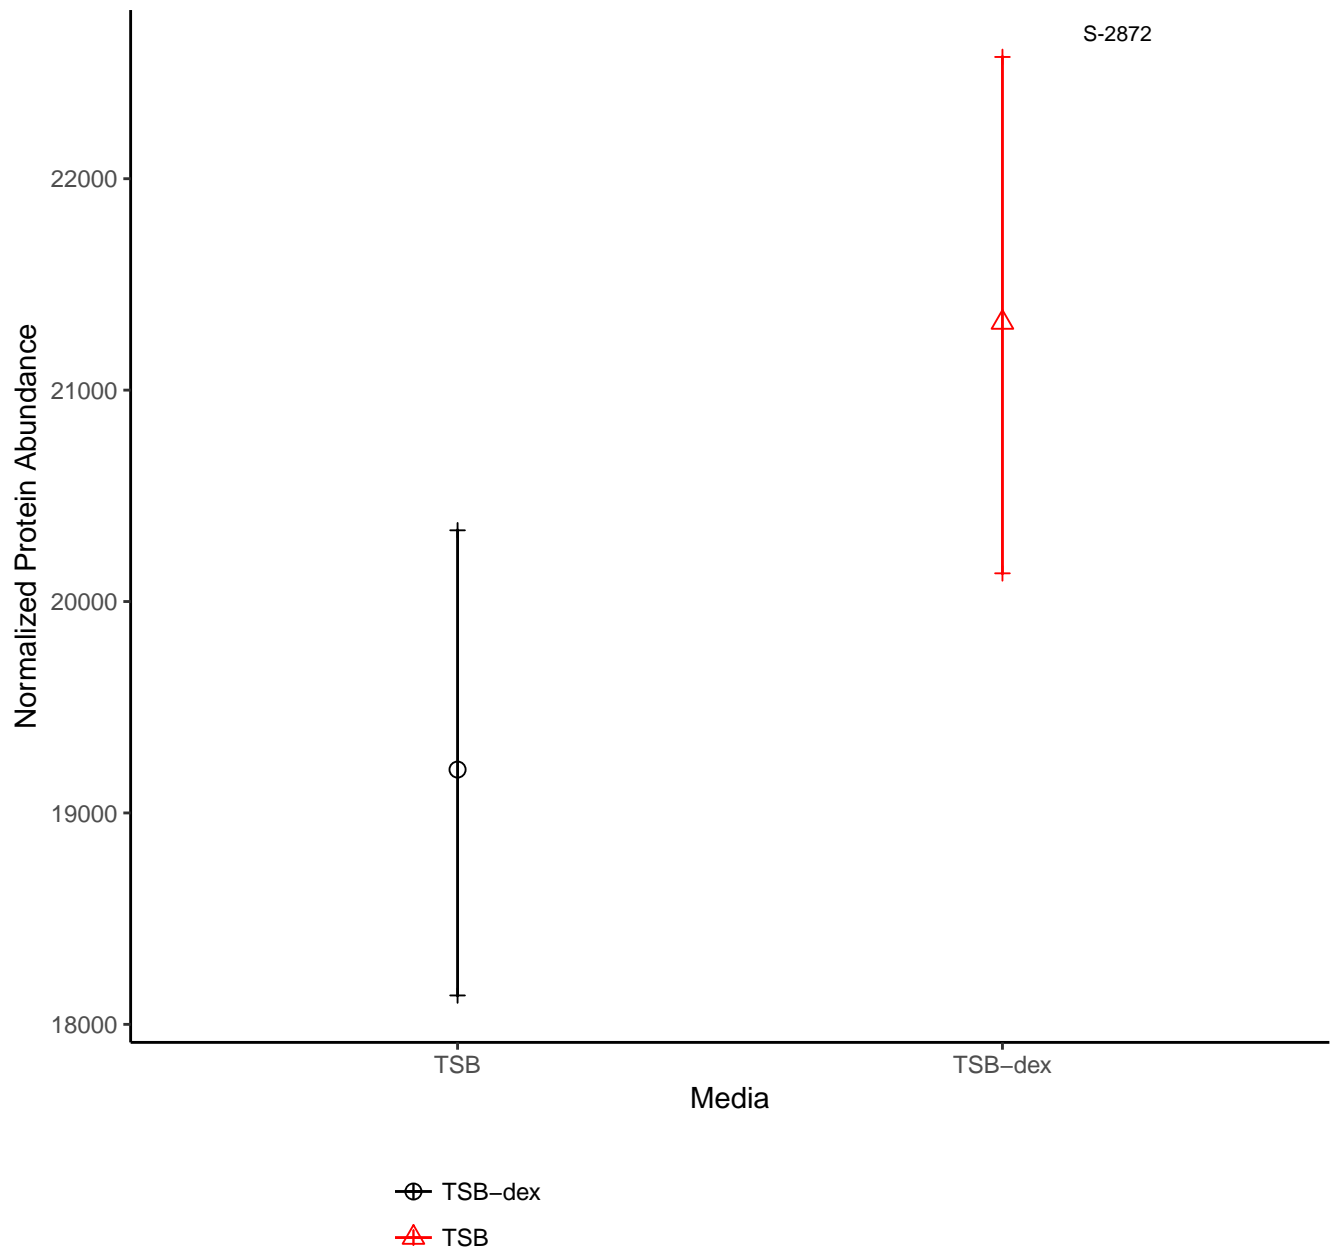



# RS6\_STAAM

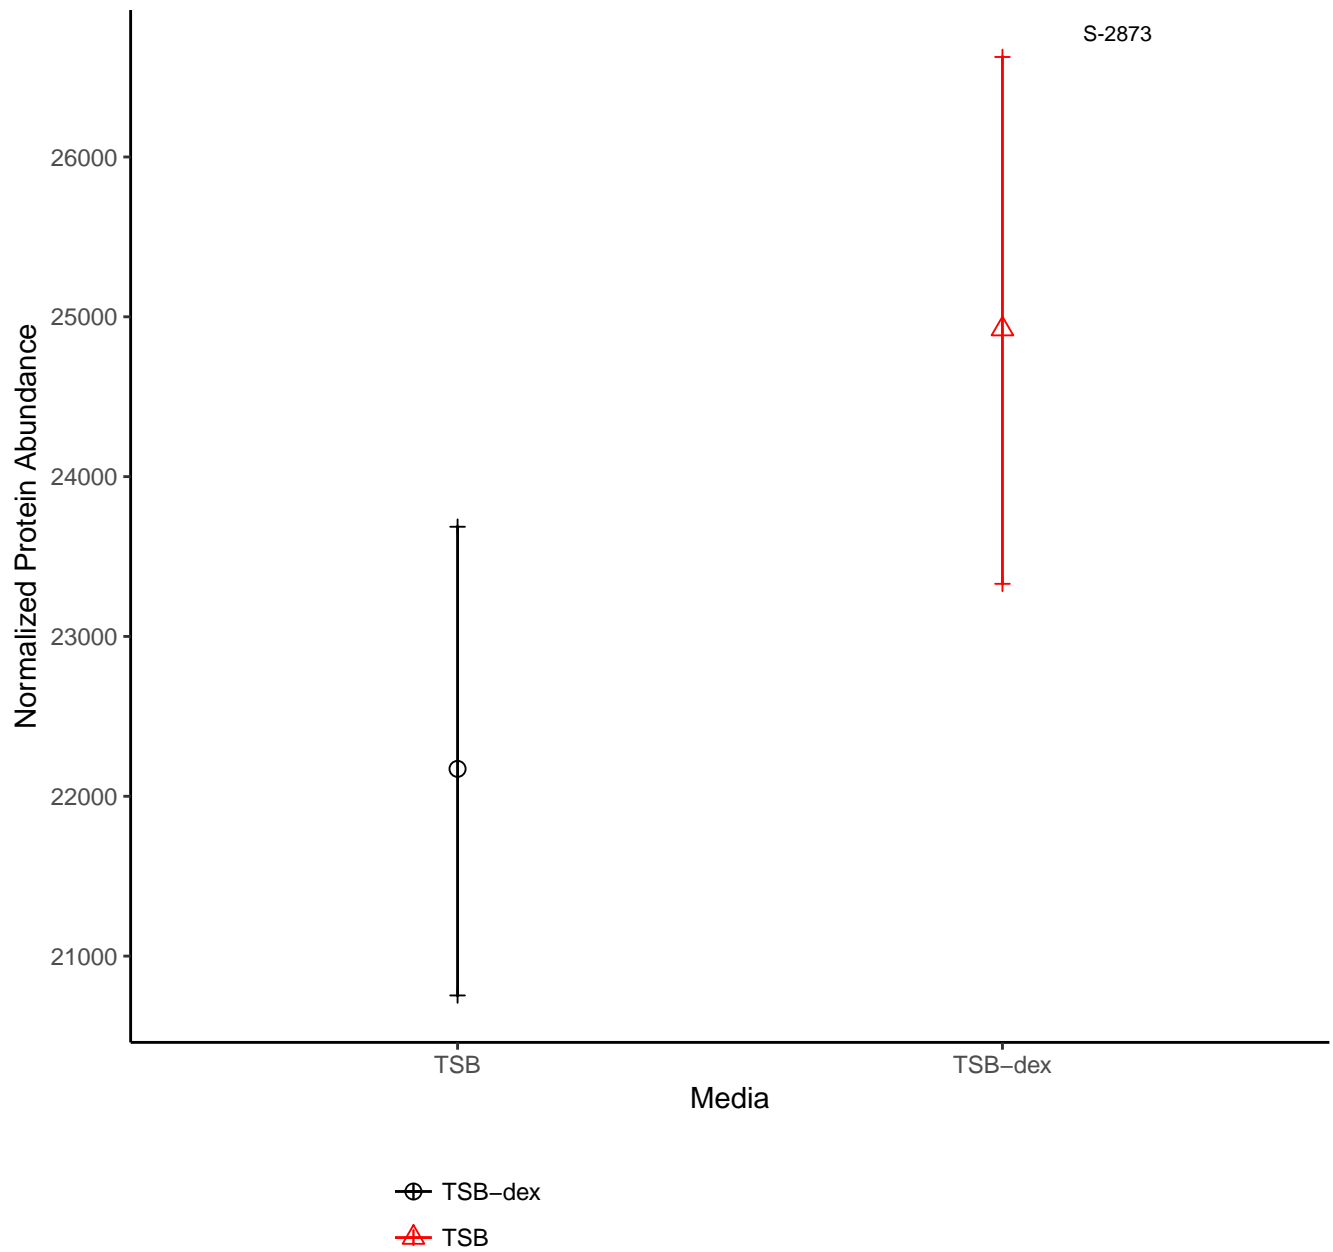

# RS7\_STAAM

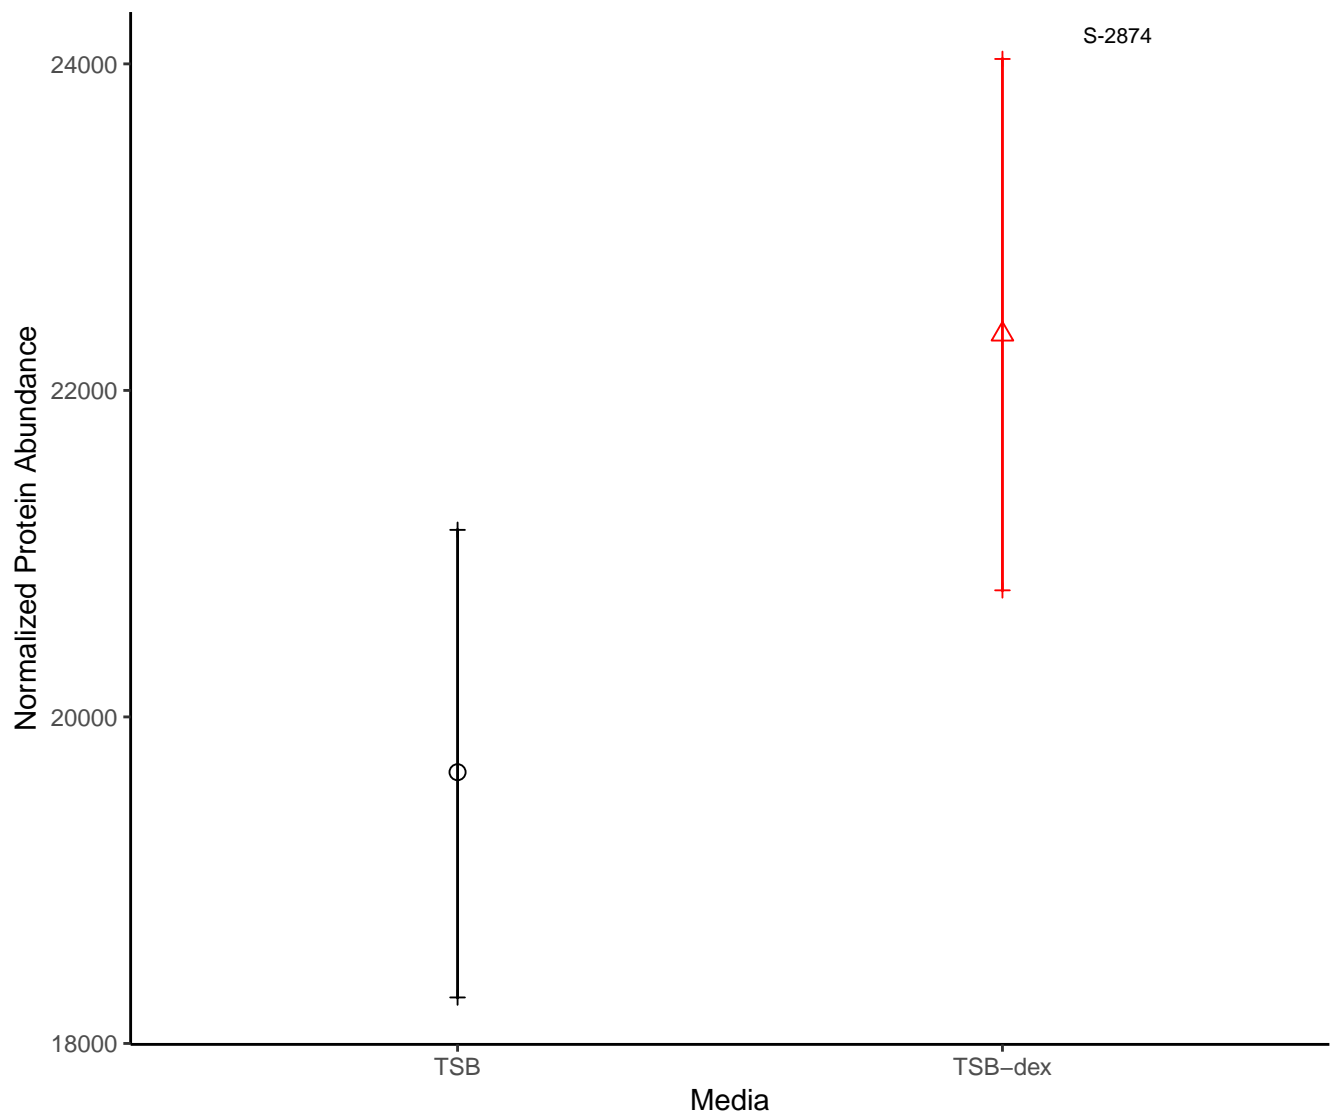

⊕ TSB-dex

△ TSB

# RS8\_STAAM

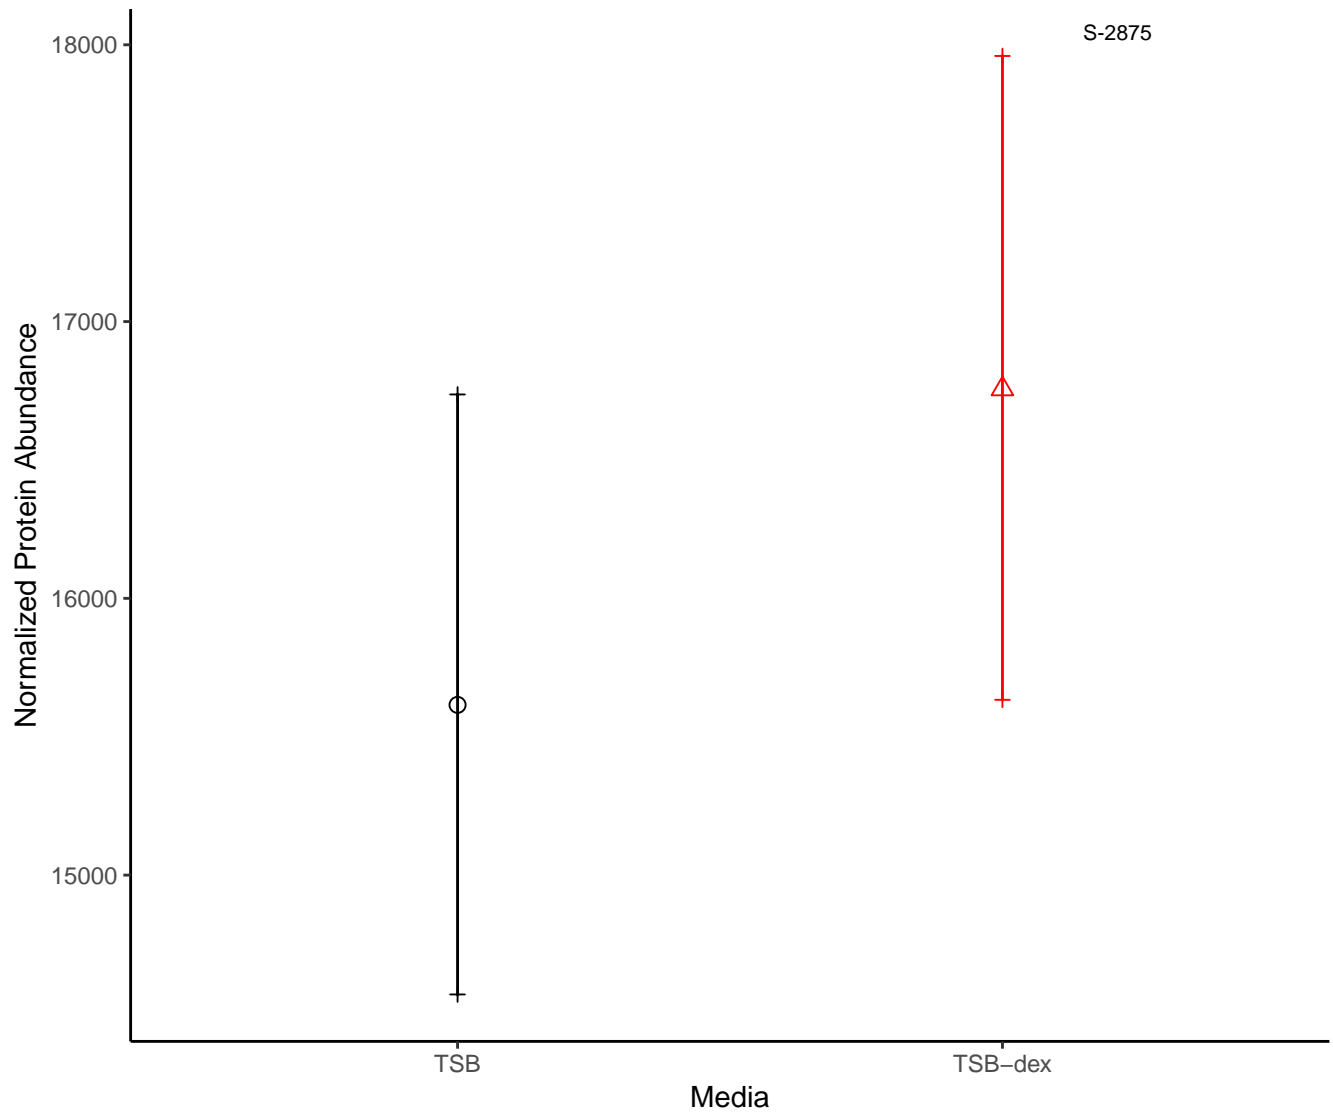

⊕ TSB-dex

△ TSB

# RS9\_STAAM

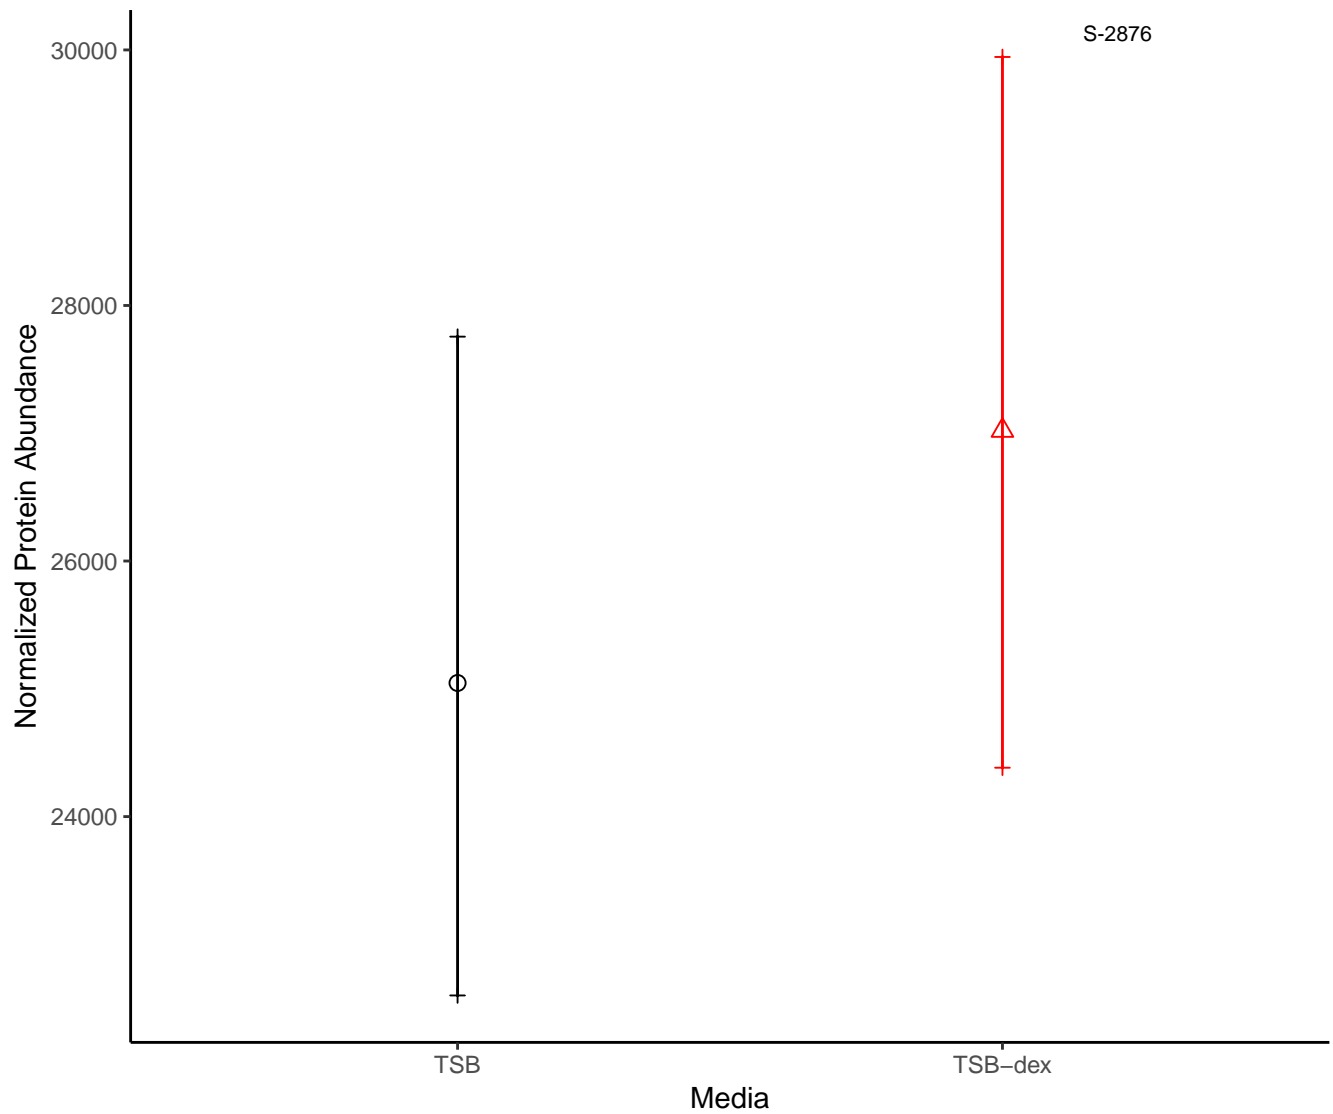

⊖ TSB-dex

△ TSB

# RSBV\_STAAM

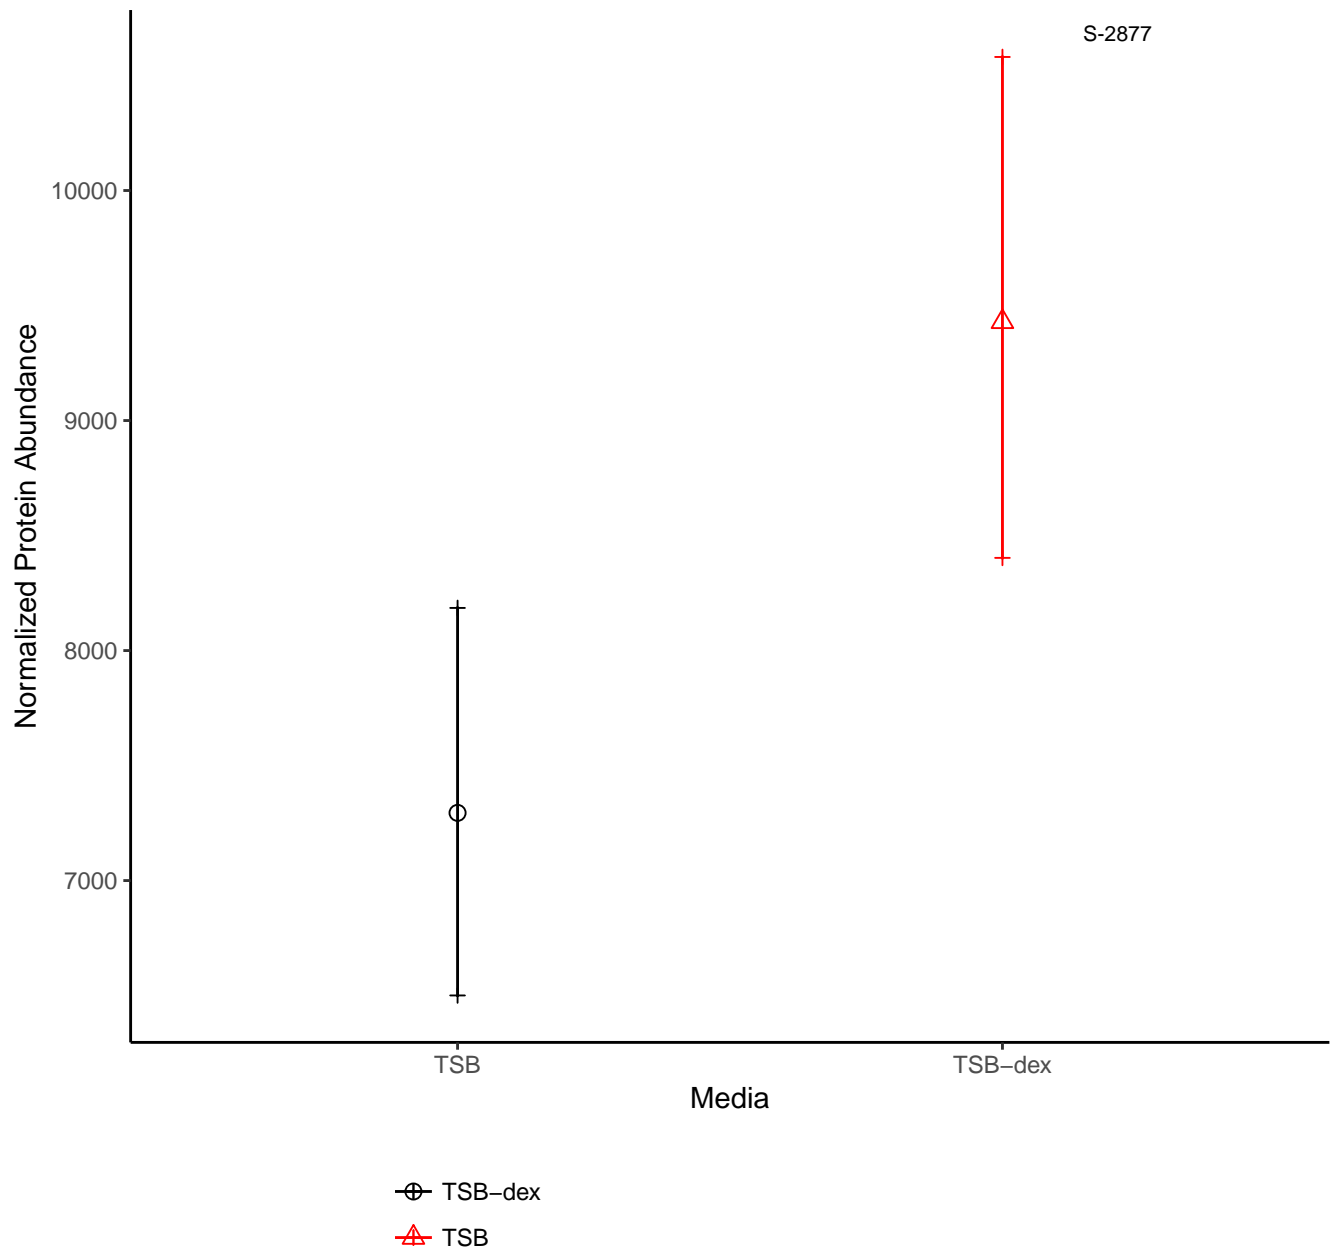

# RSBW\_STAAM

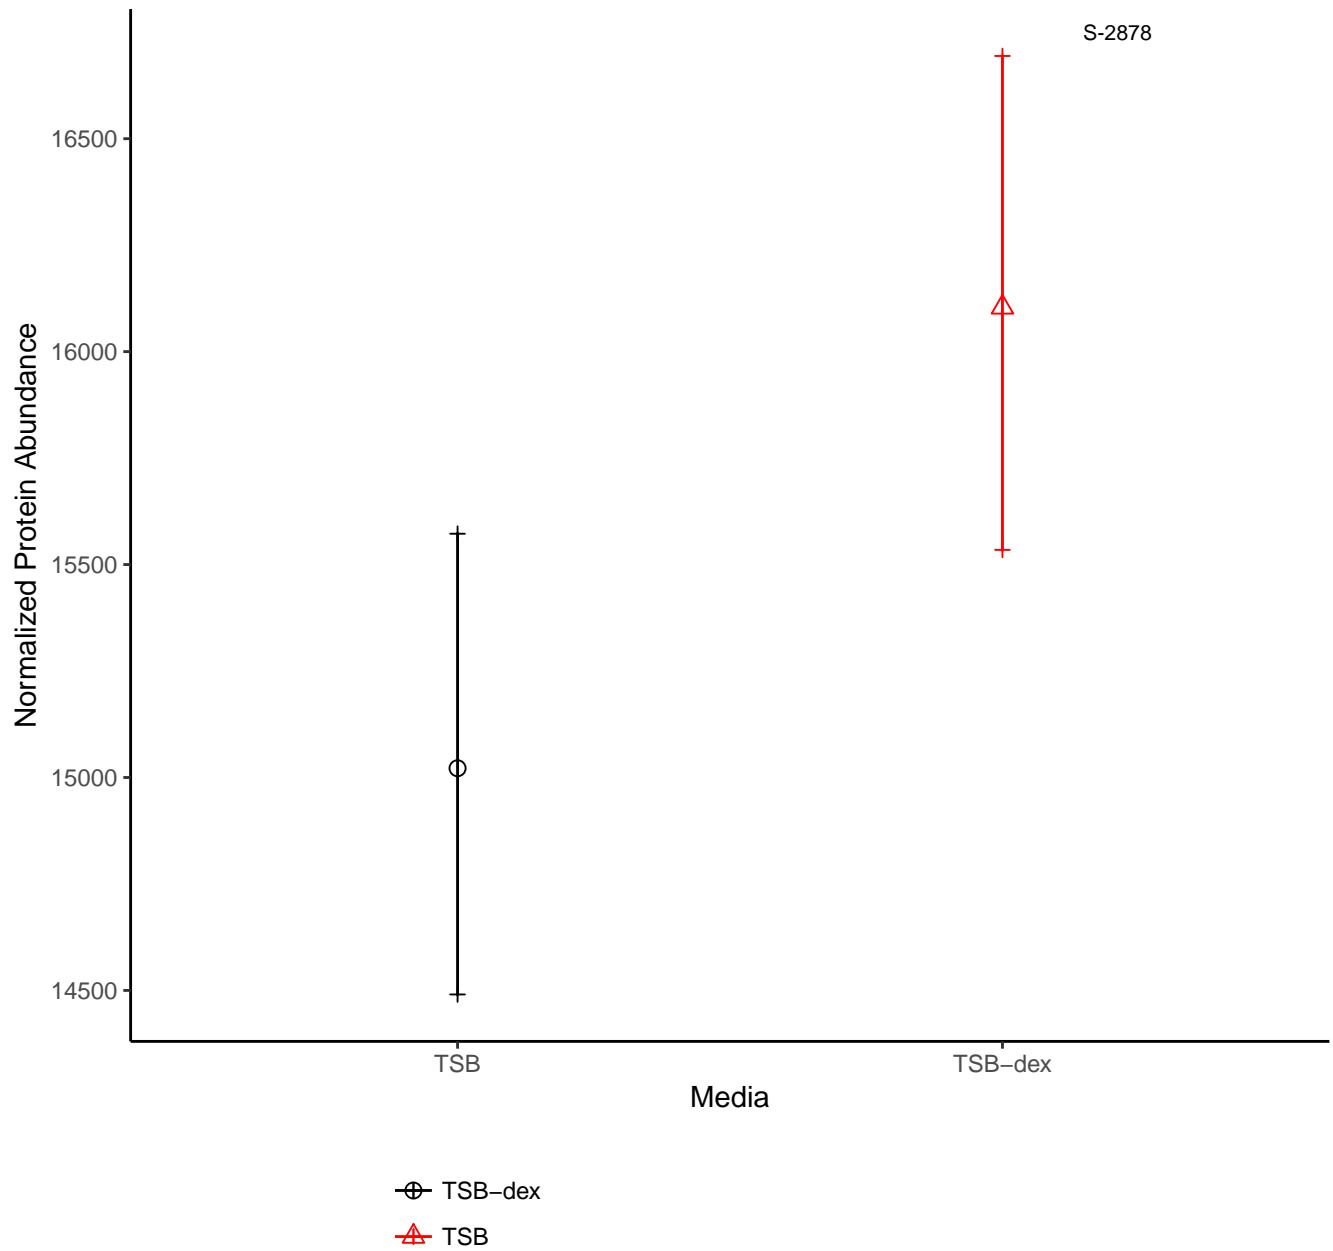

# RSMA\_STAAM

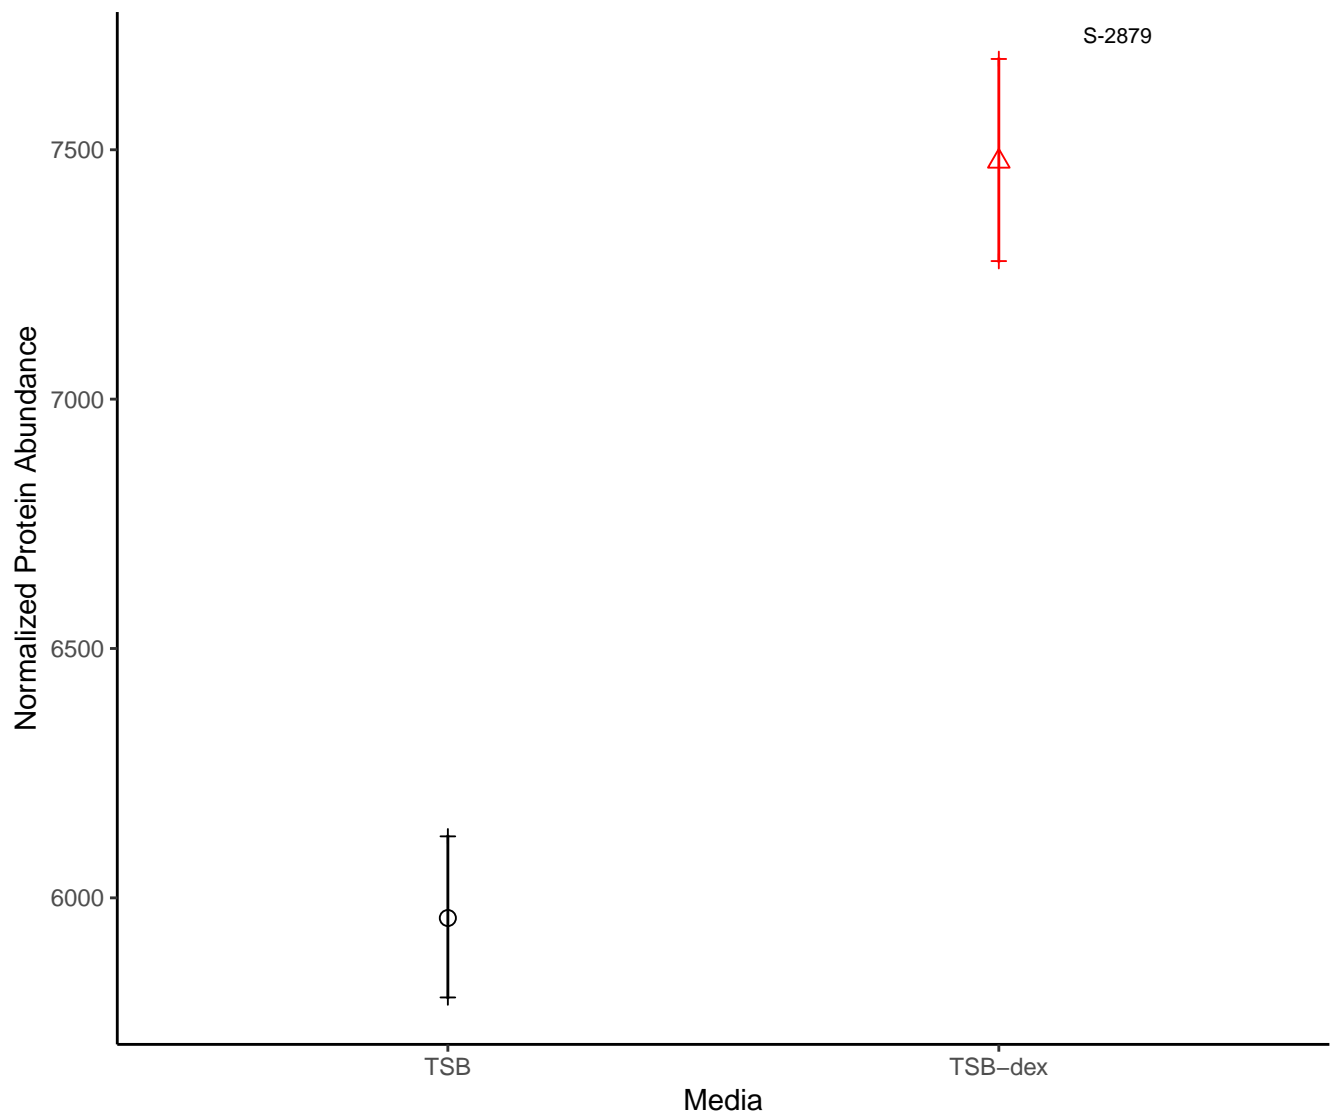

⊕ TSB-dex

△ TSB

# RSMG\_STAAM

S-2880

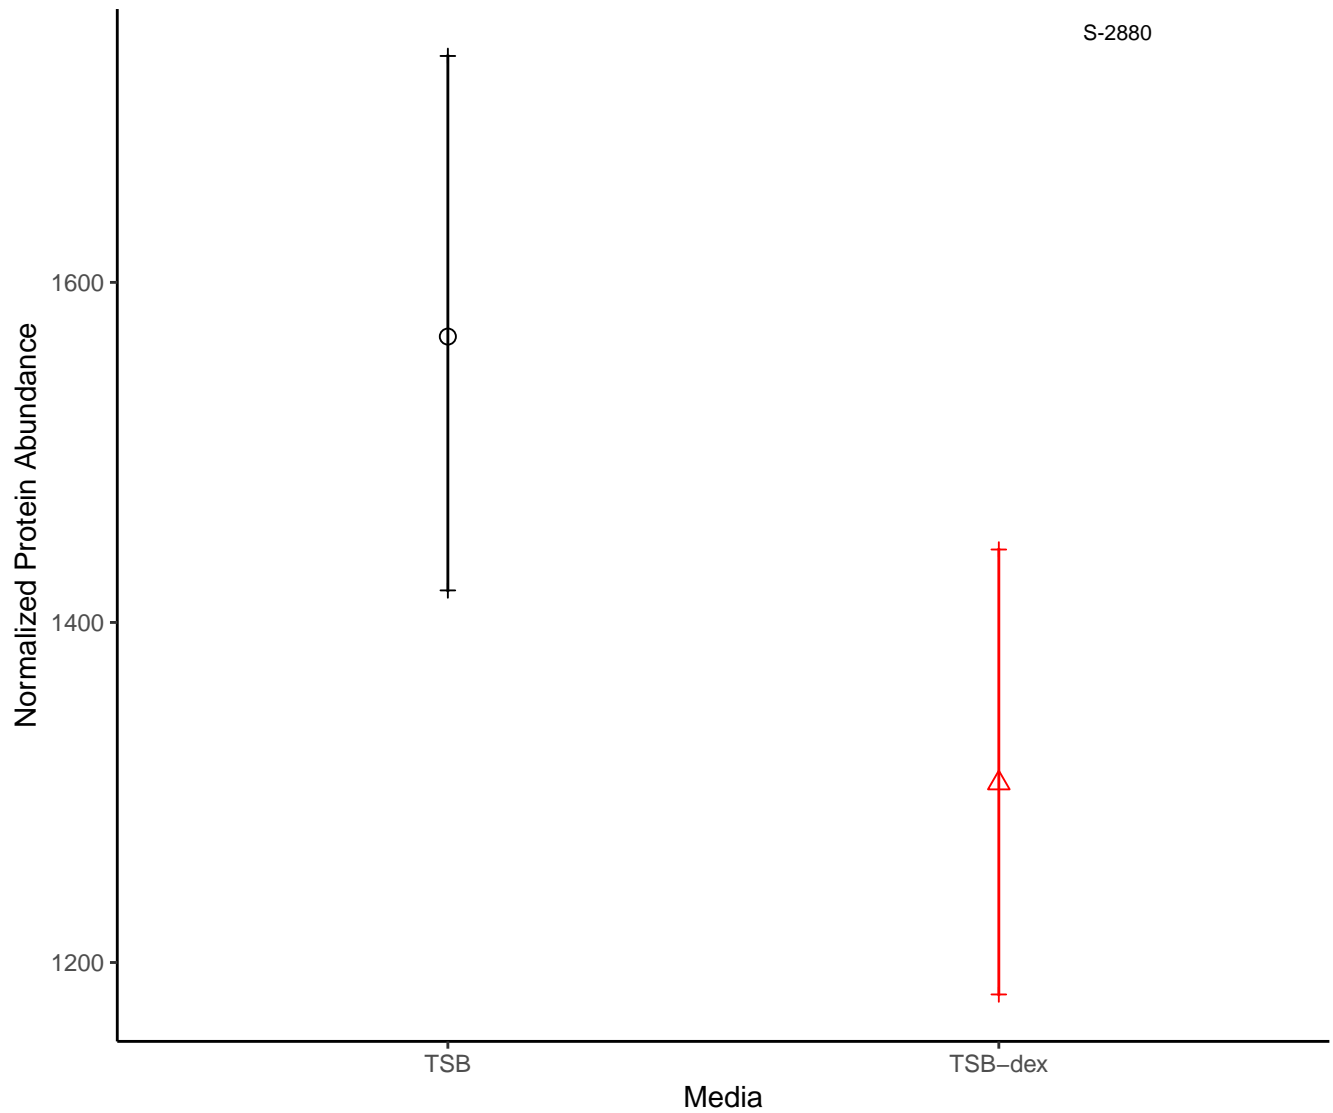

⊕ TSB-dex

△ TSB



# RUVX\_STAAM

S-2881

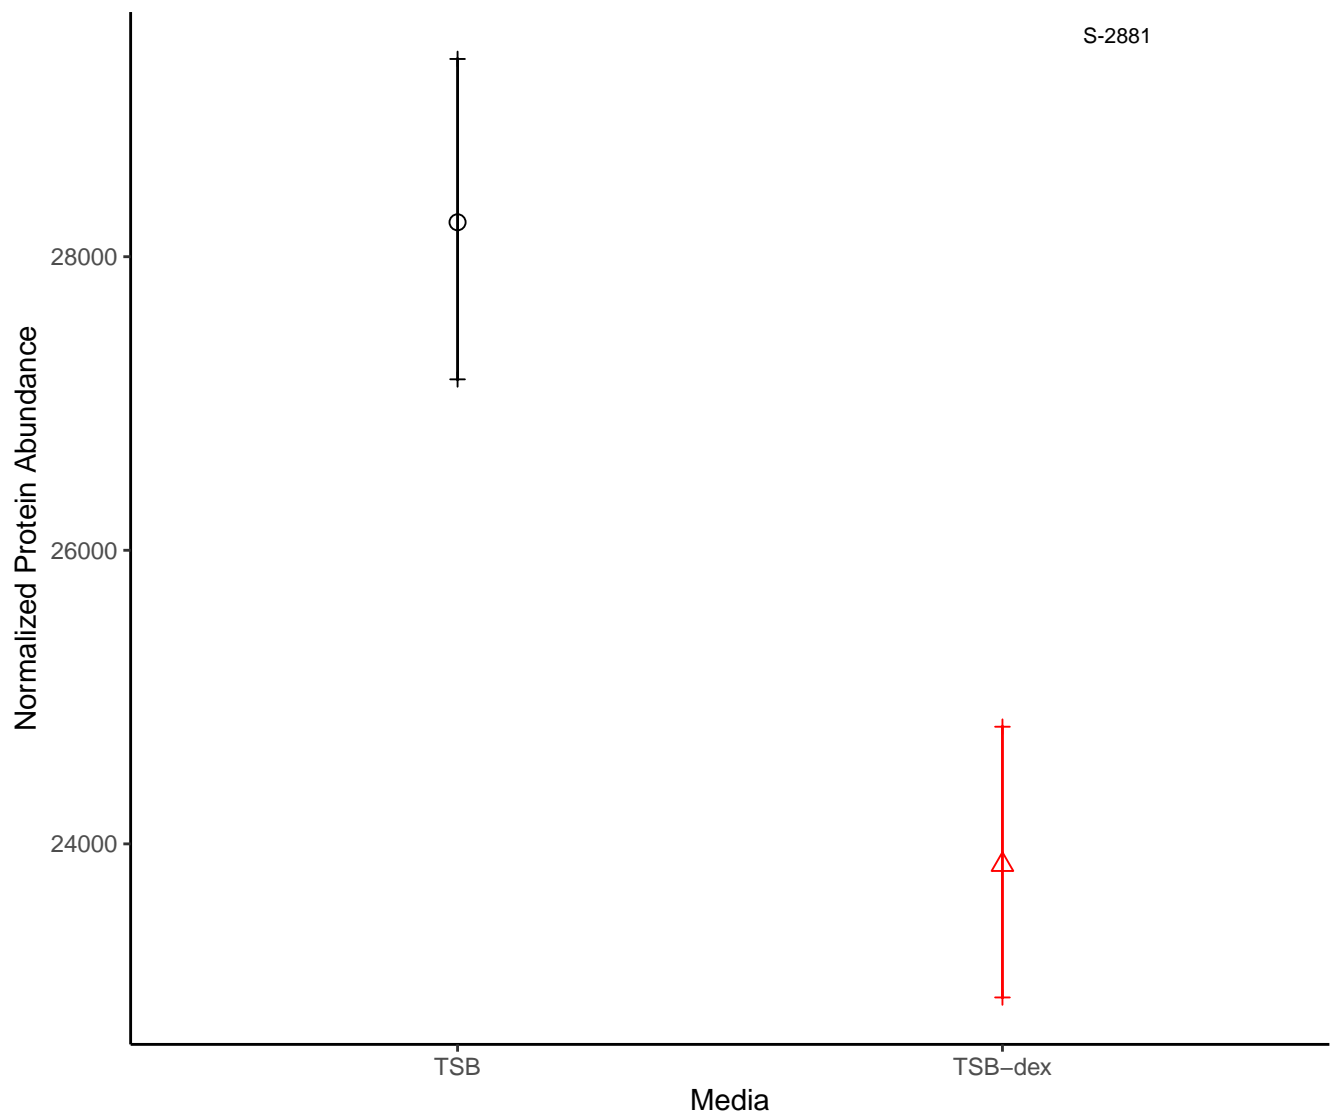

⊕ TSB-dex

△ TSB

# S3AD\_STAAM

S-2882

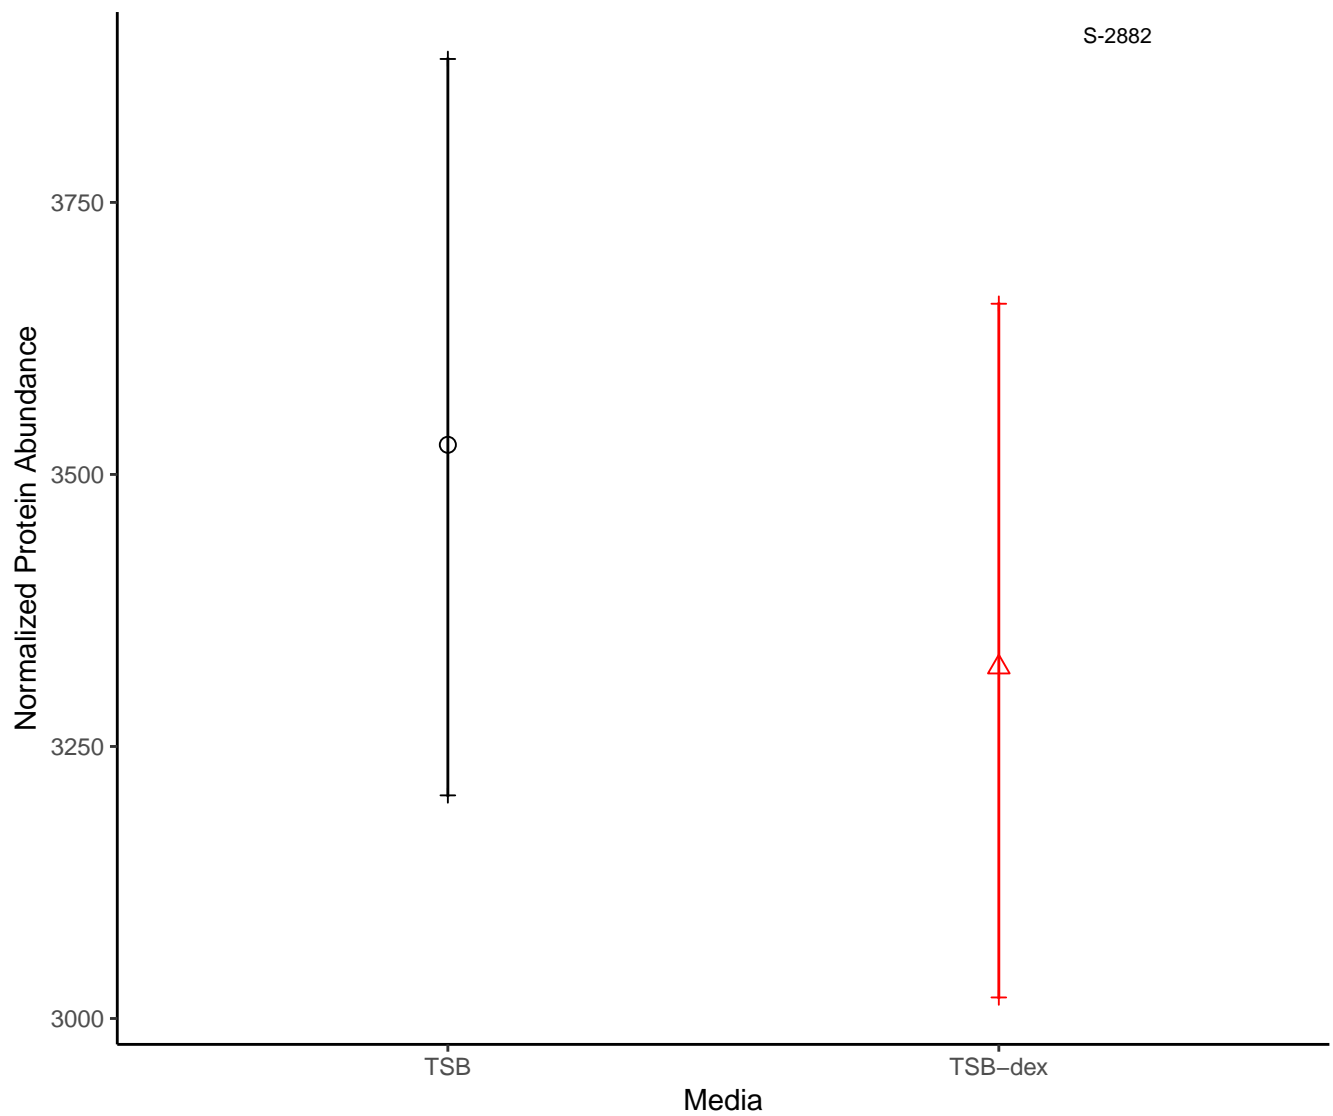

⊕ TSB-dex

△ TSB

# SAER\_STAAM

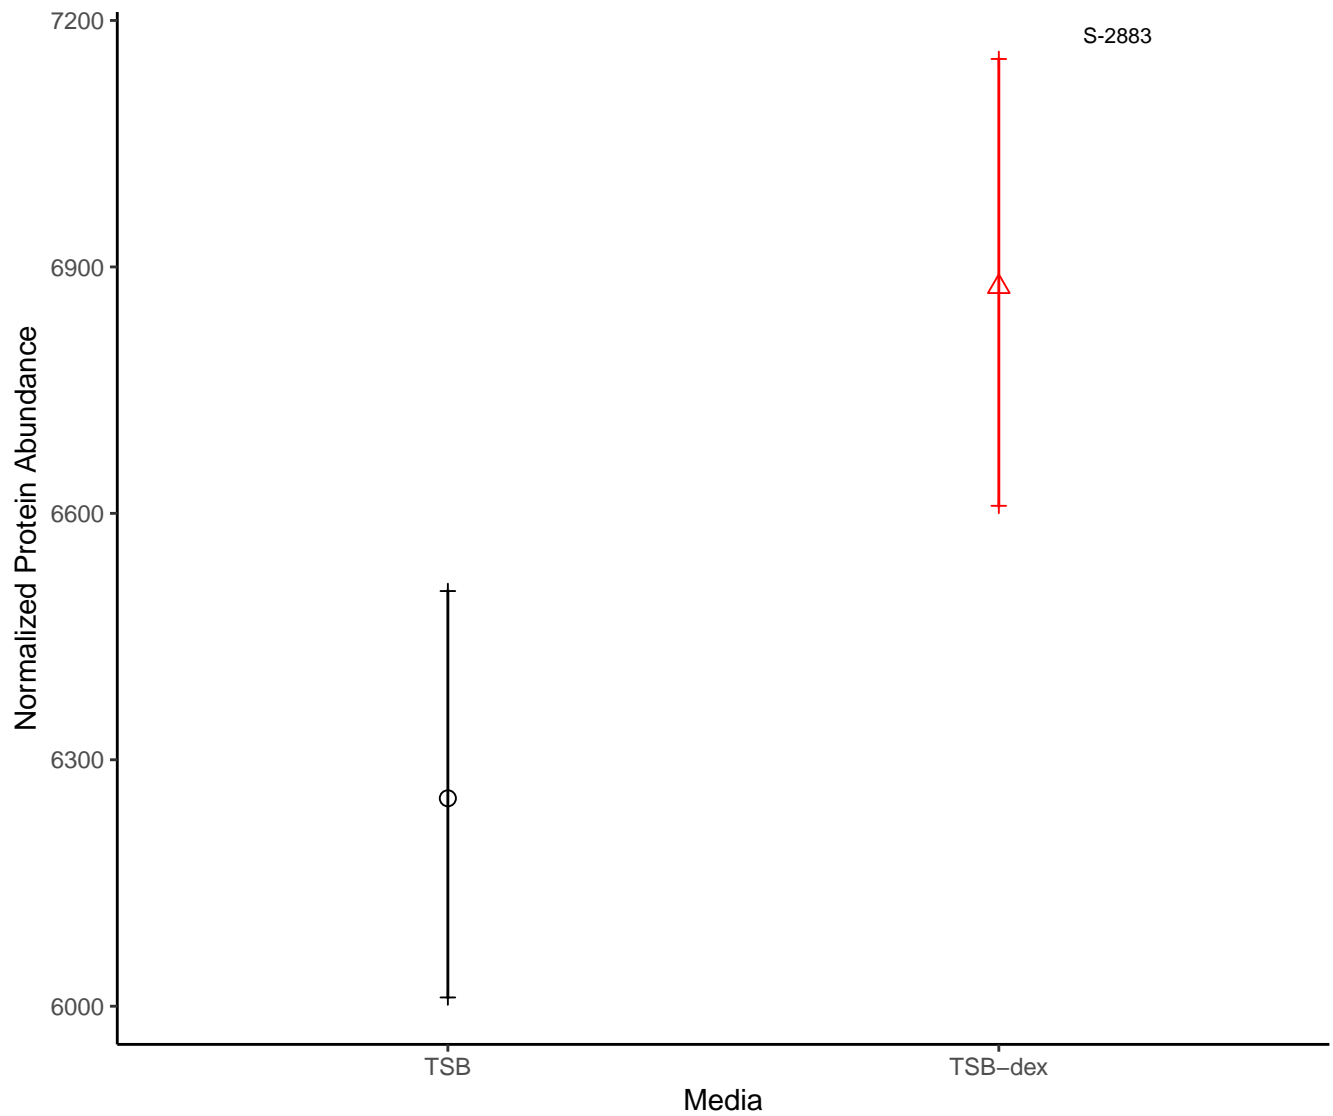

⊕ TSB-dex

△ TSB

# SARA\_STAAM

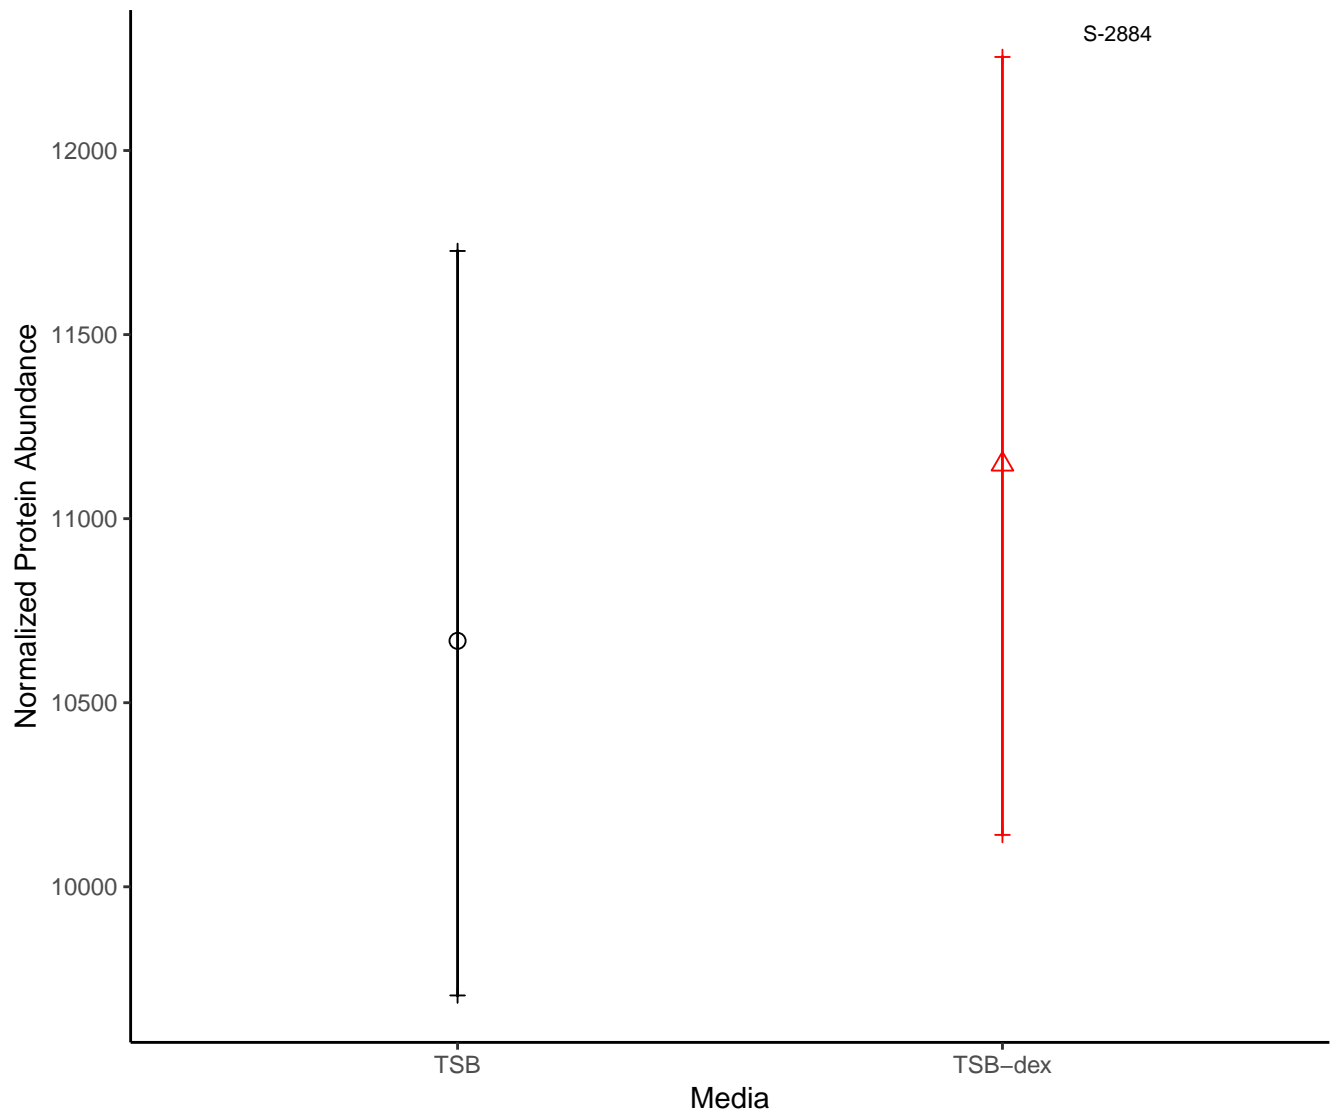

⊕ TSB-dex

△ TSB

# SARR\_STAAM

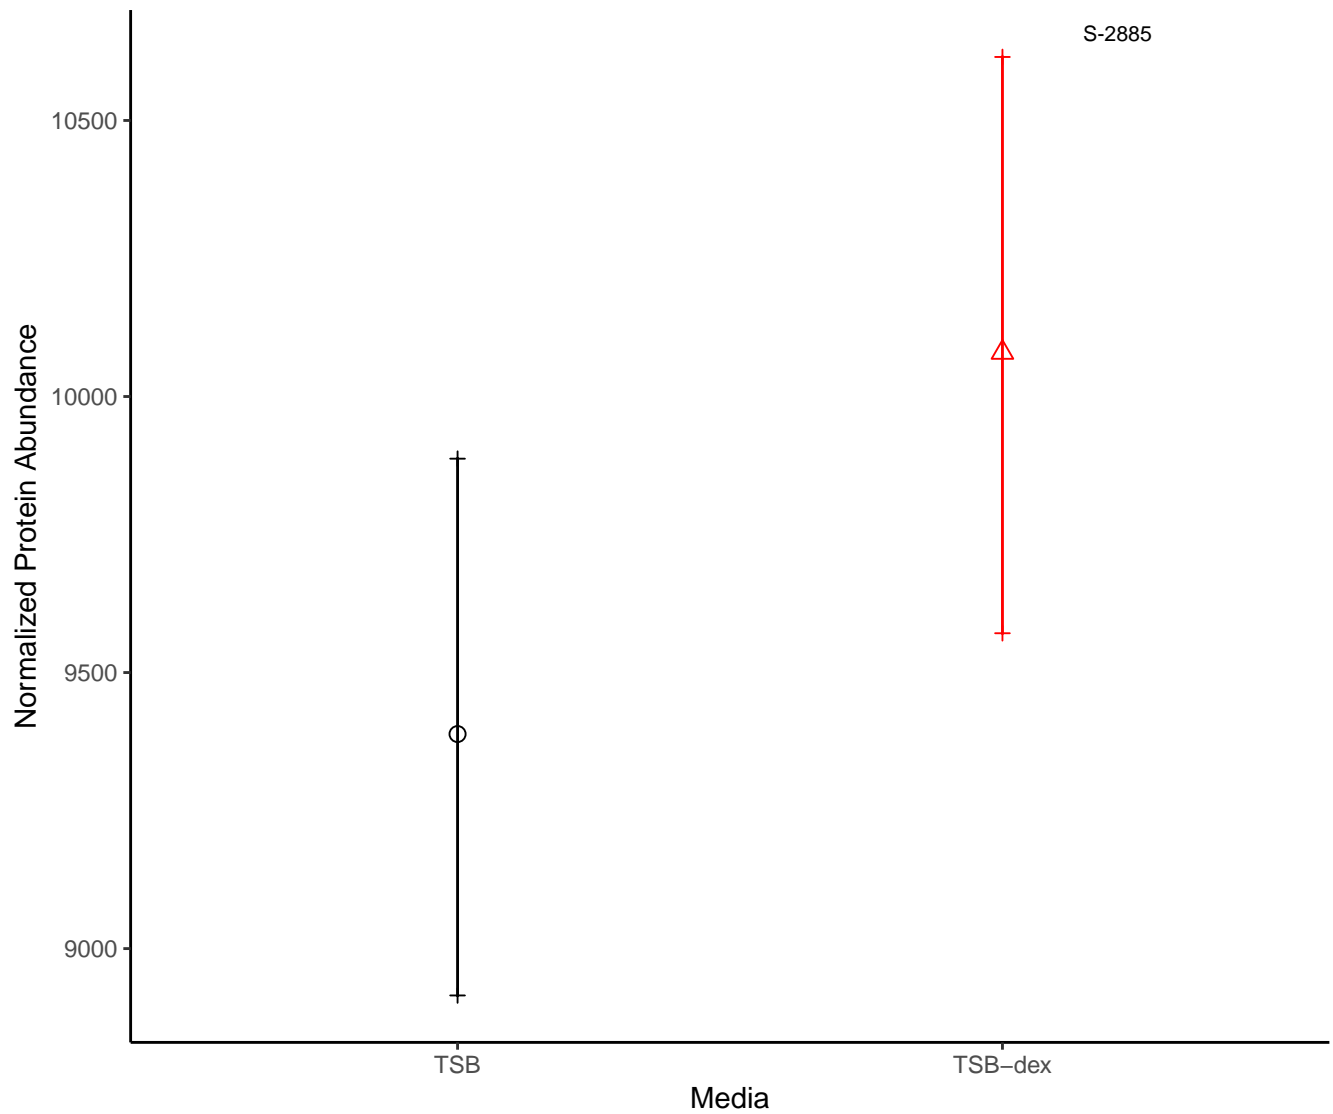

⊕ TSB-dex

△ TSB

# SARS\_STAAM

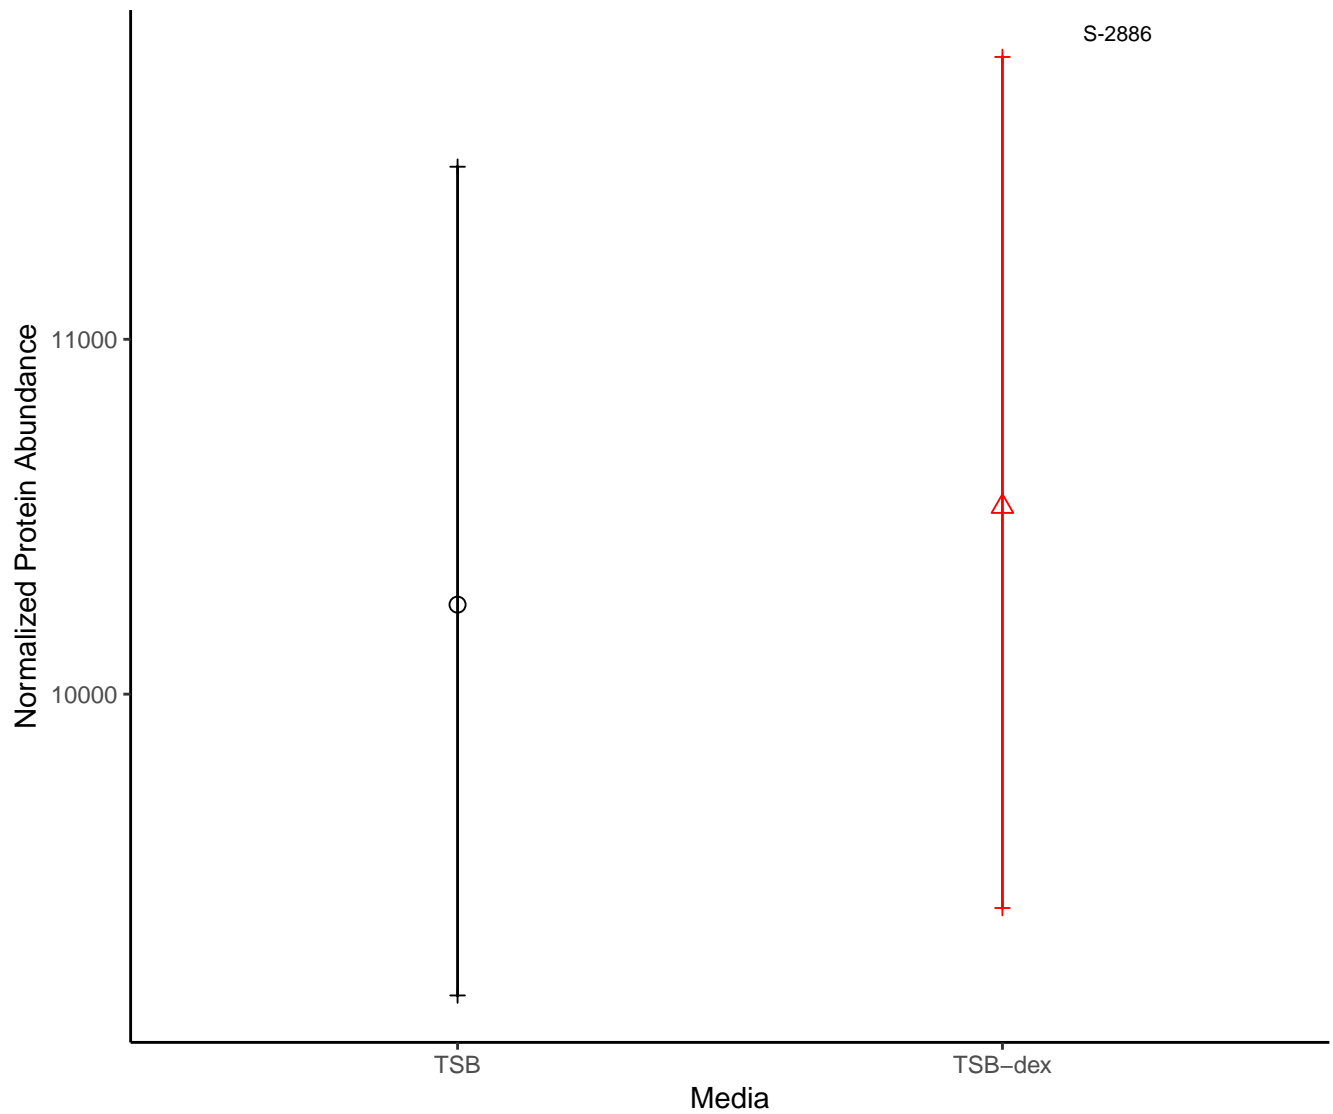

⊕ TSB-dex

△ TSB

# SBCC\_STAAM

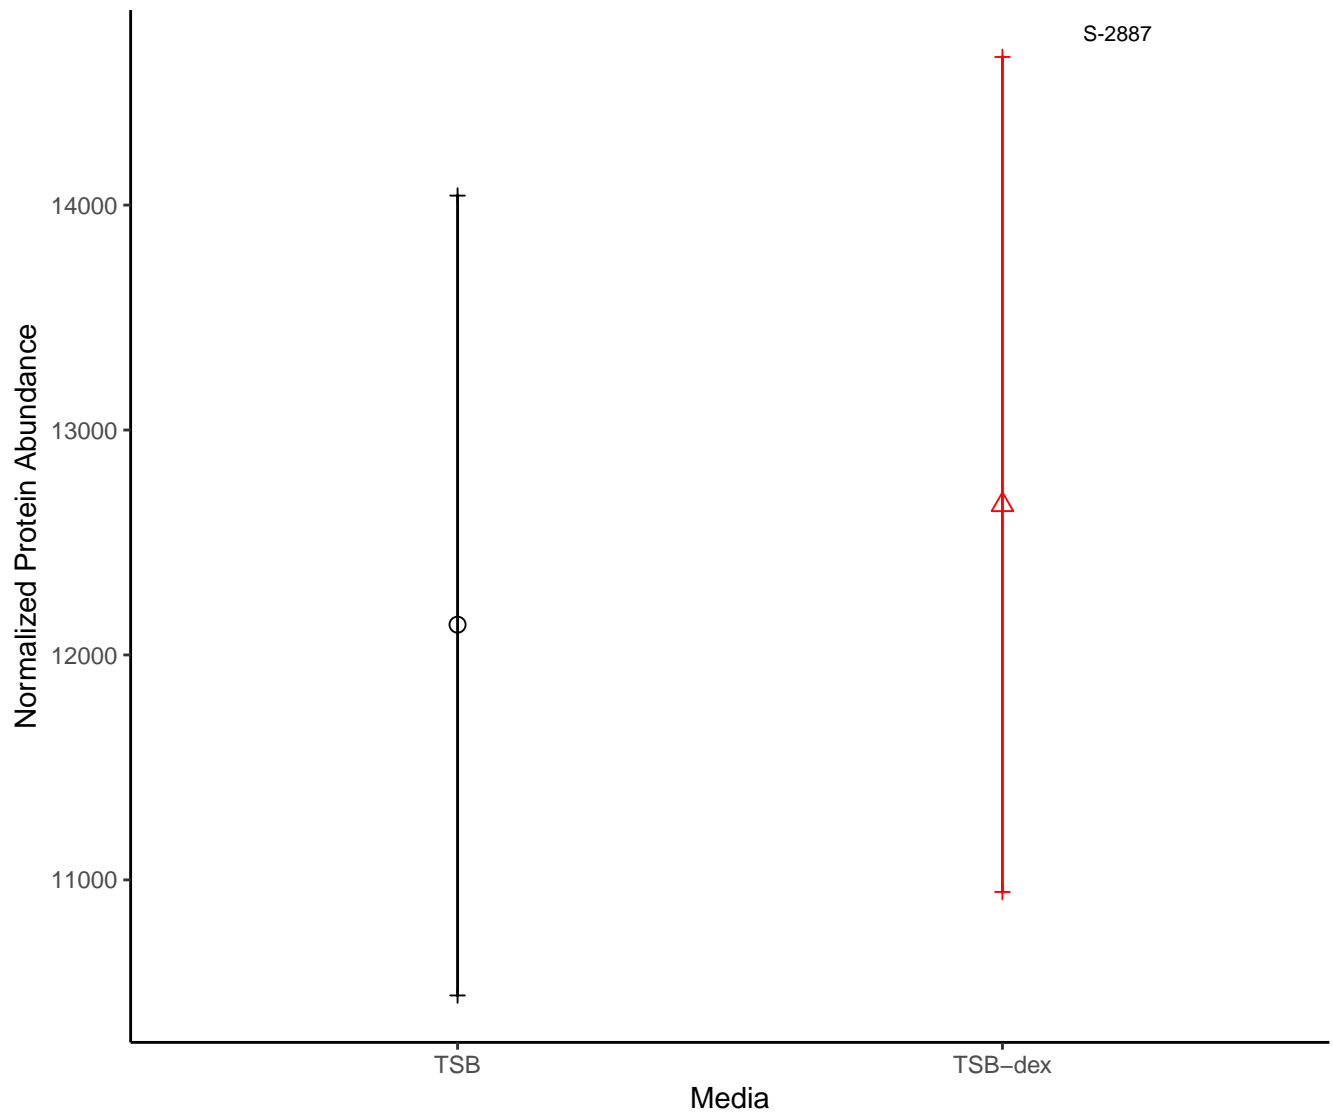

⊕ TSB-dex

△ TSB

# SBI\_STAAM

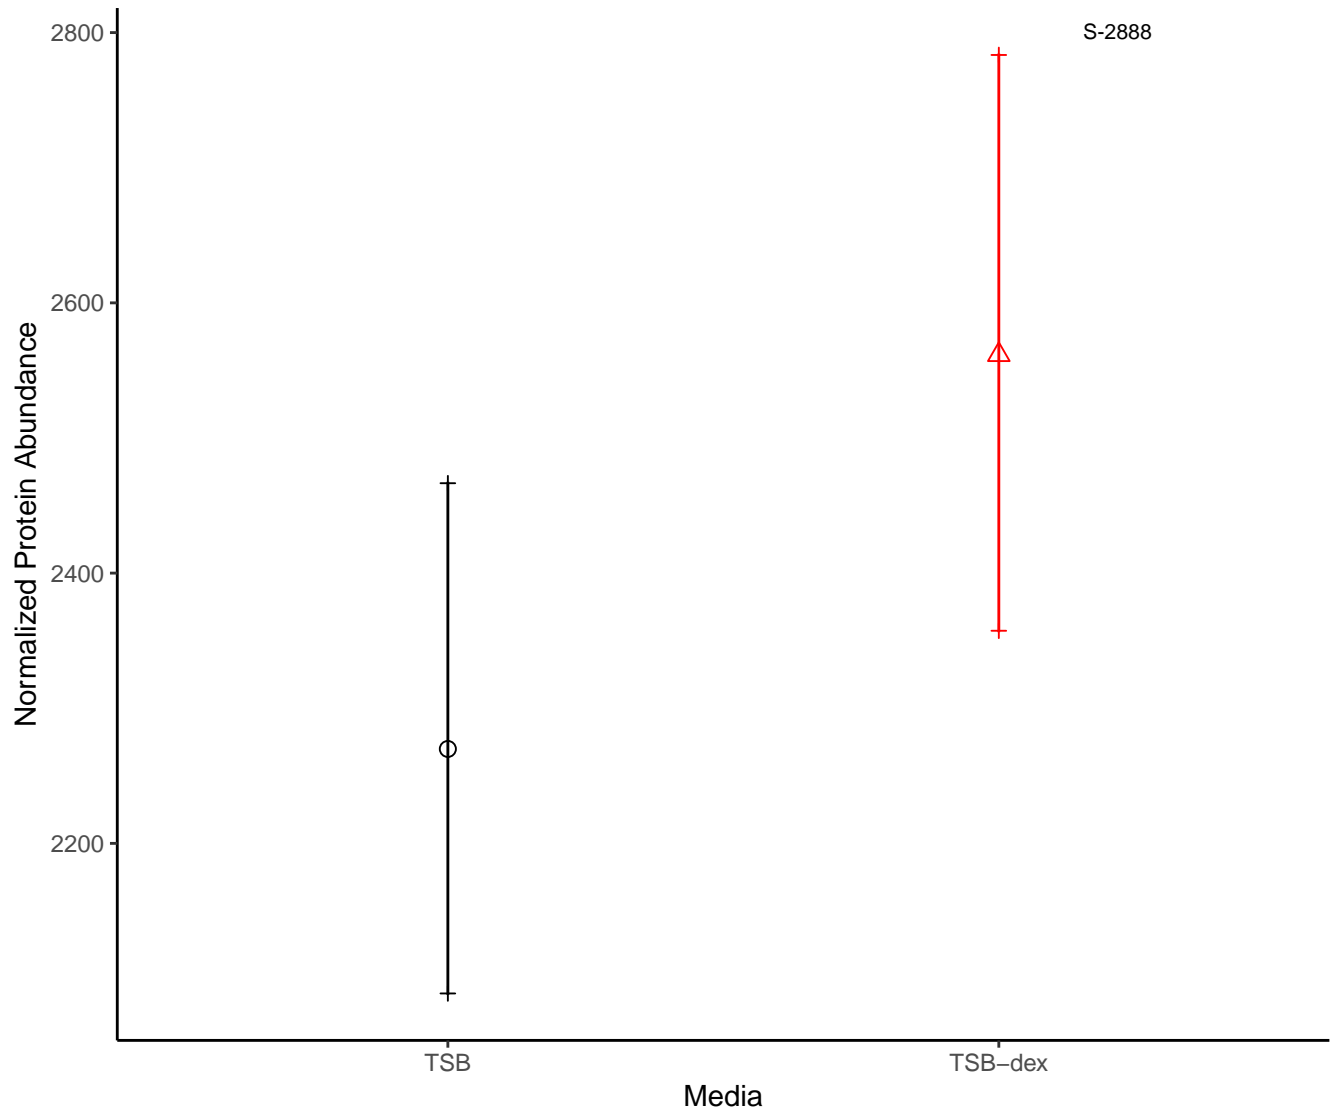

⊕ TSB-dex

△ TSB



# SCPA\_STAAM

S-2889

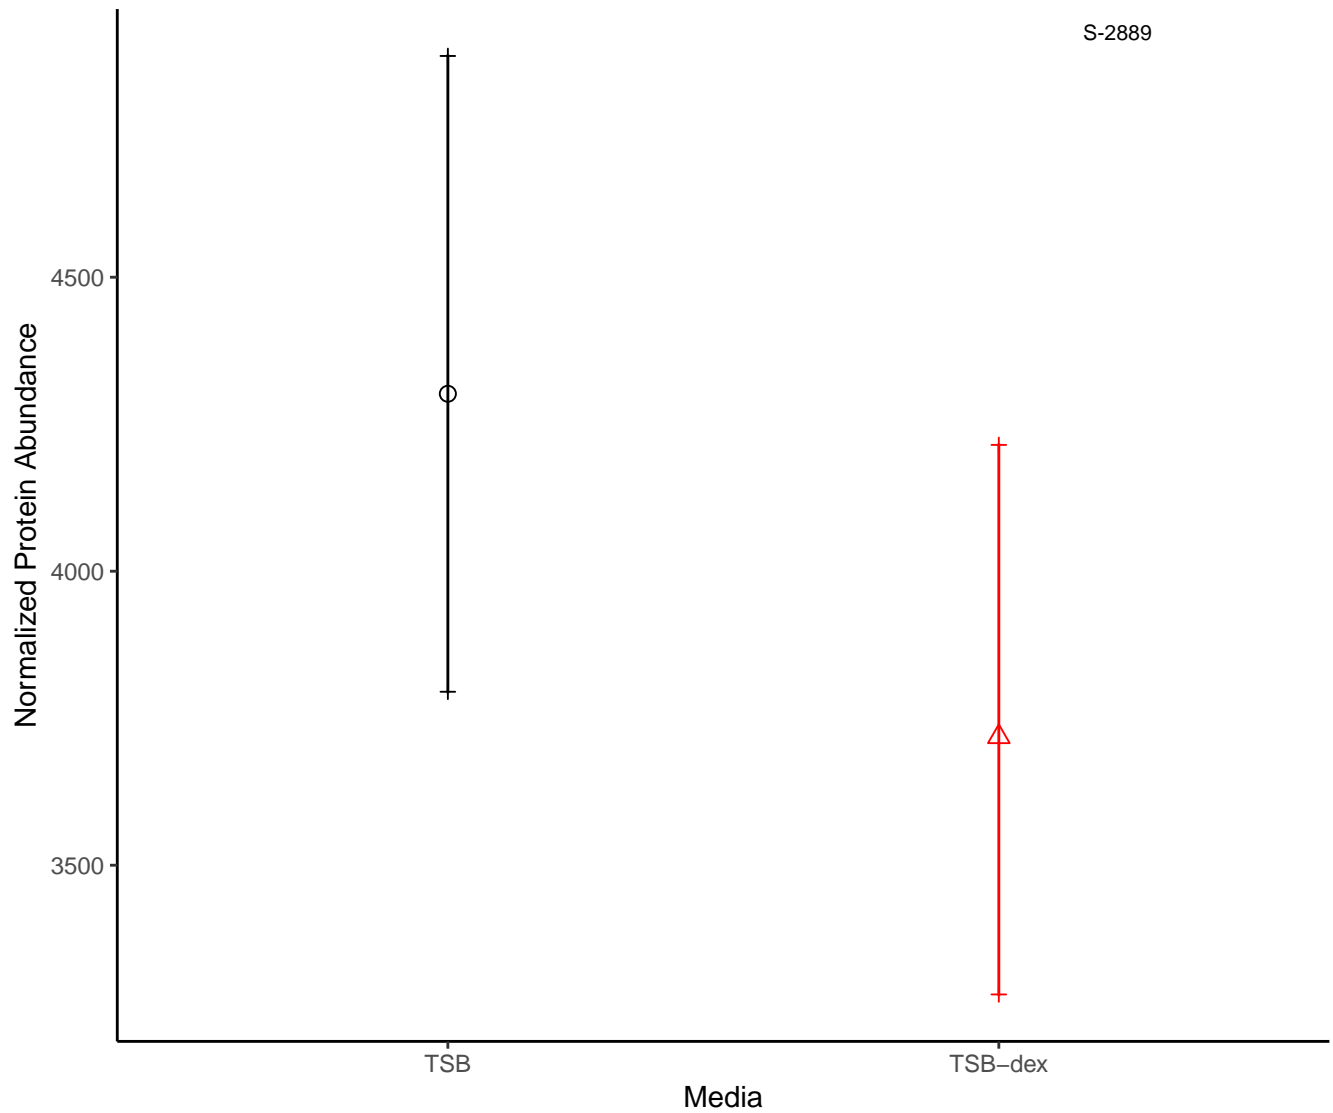

⊕ TSB-dex

△ TSB

# SCPB\_STAAM

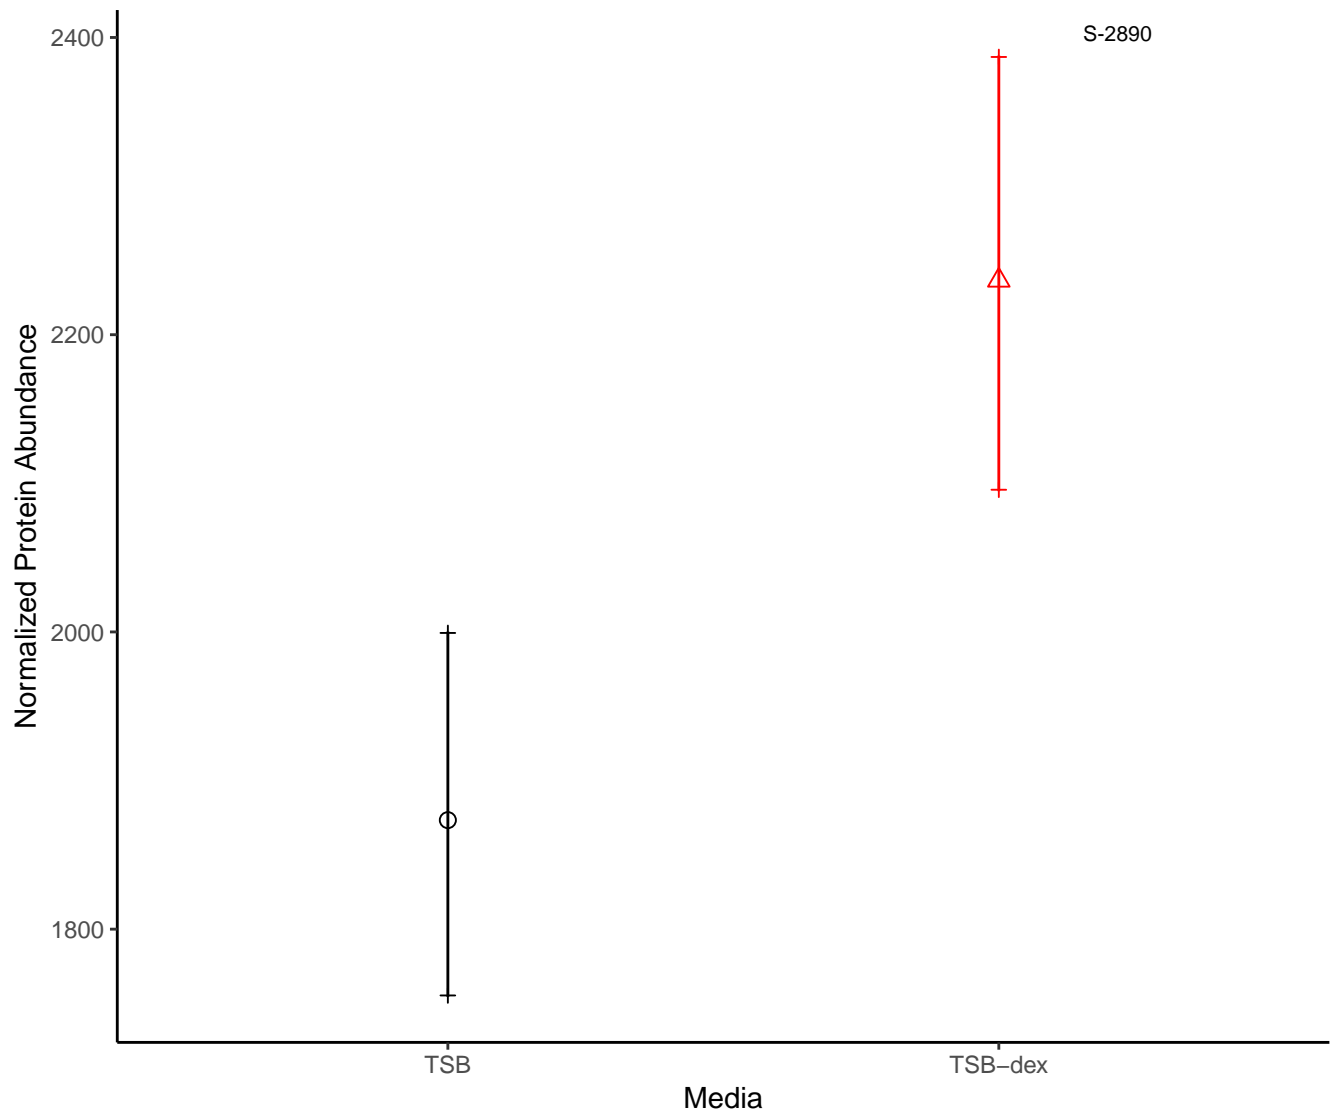

⊕ TSB-dex

△ TSB

# SECA1\_STAAM

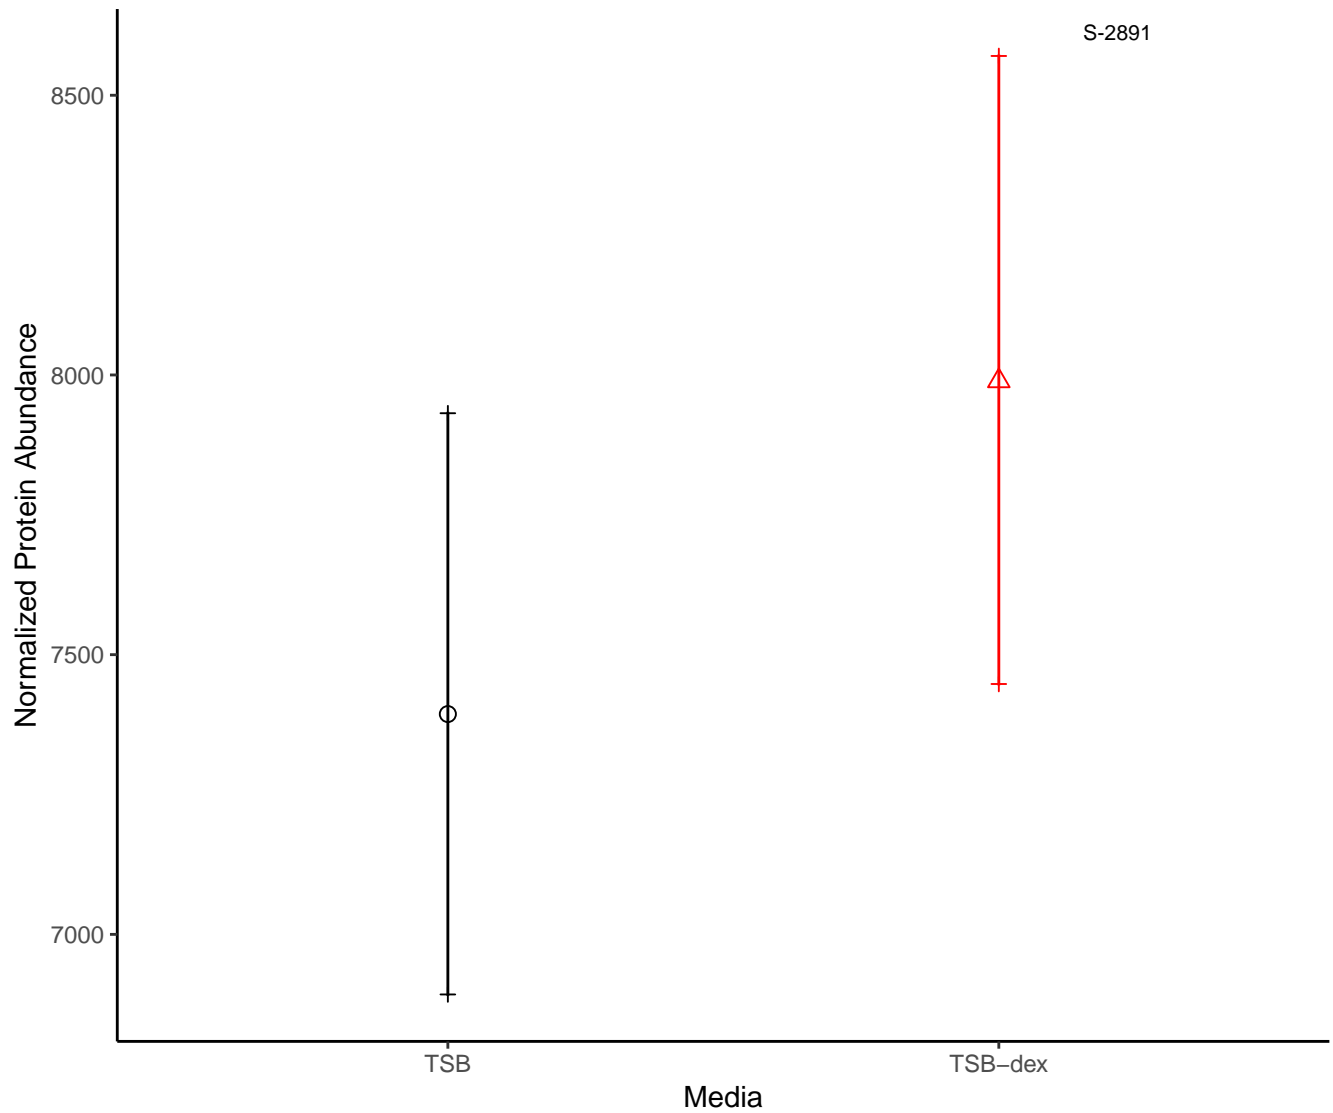

⊕ TSB-dex

△ TSB

# SIGA\_STAAM

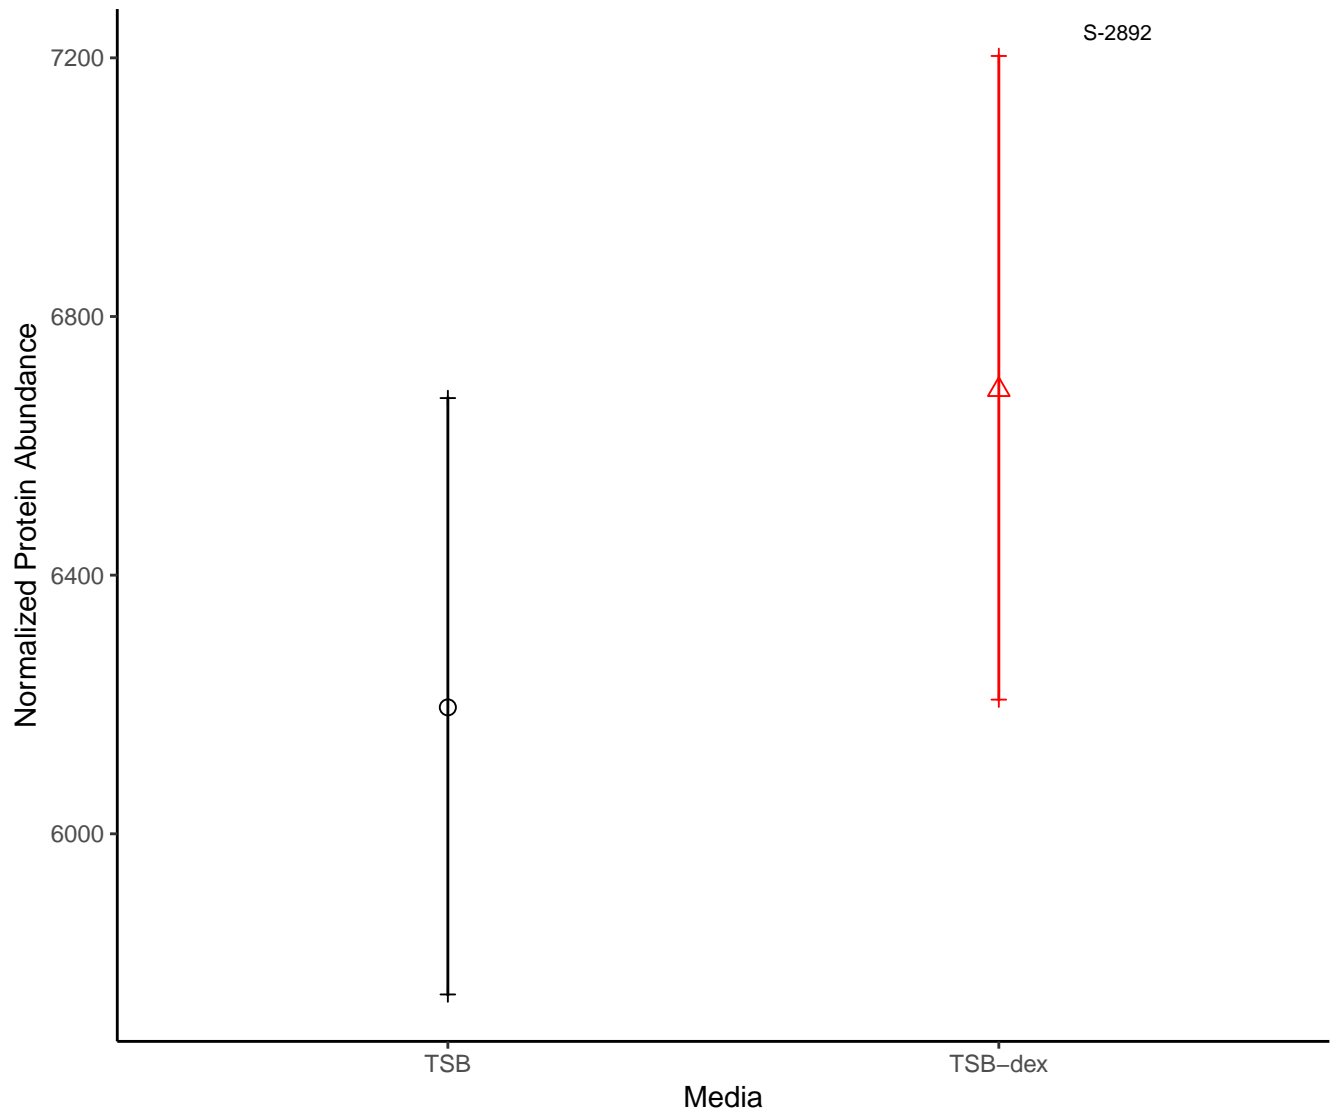

⊕ TSB-dex

△ TSB

# SODM1\_STAAM

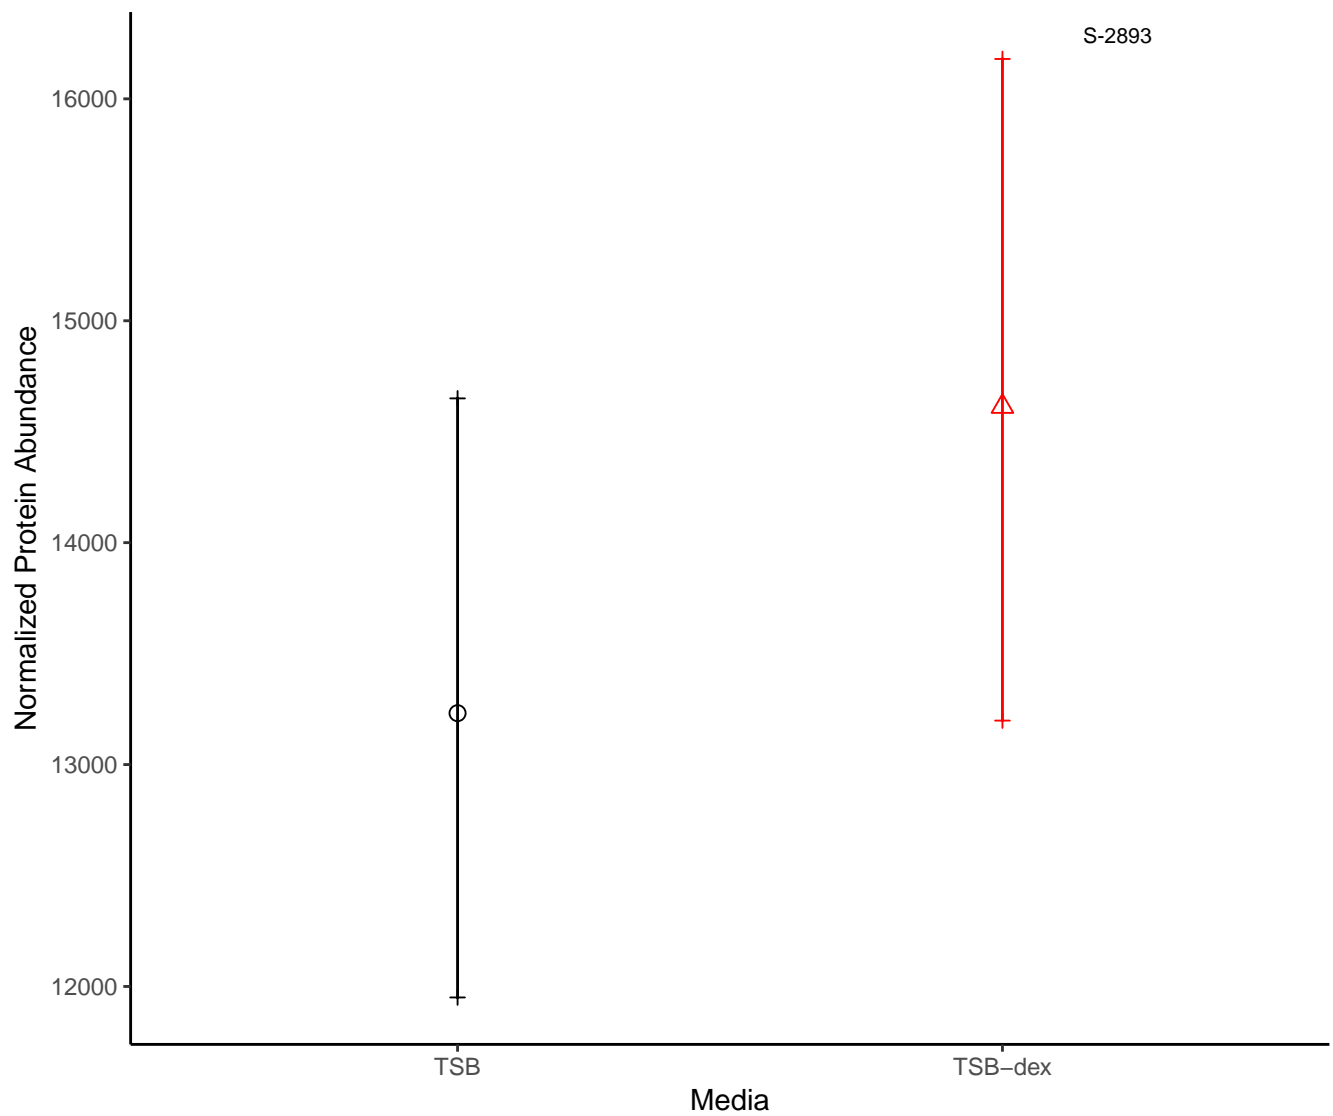

⊖ TSB-dex

△ TSB

# SODM2\_STAAM

S-2894

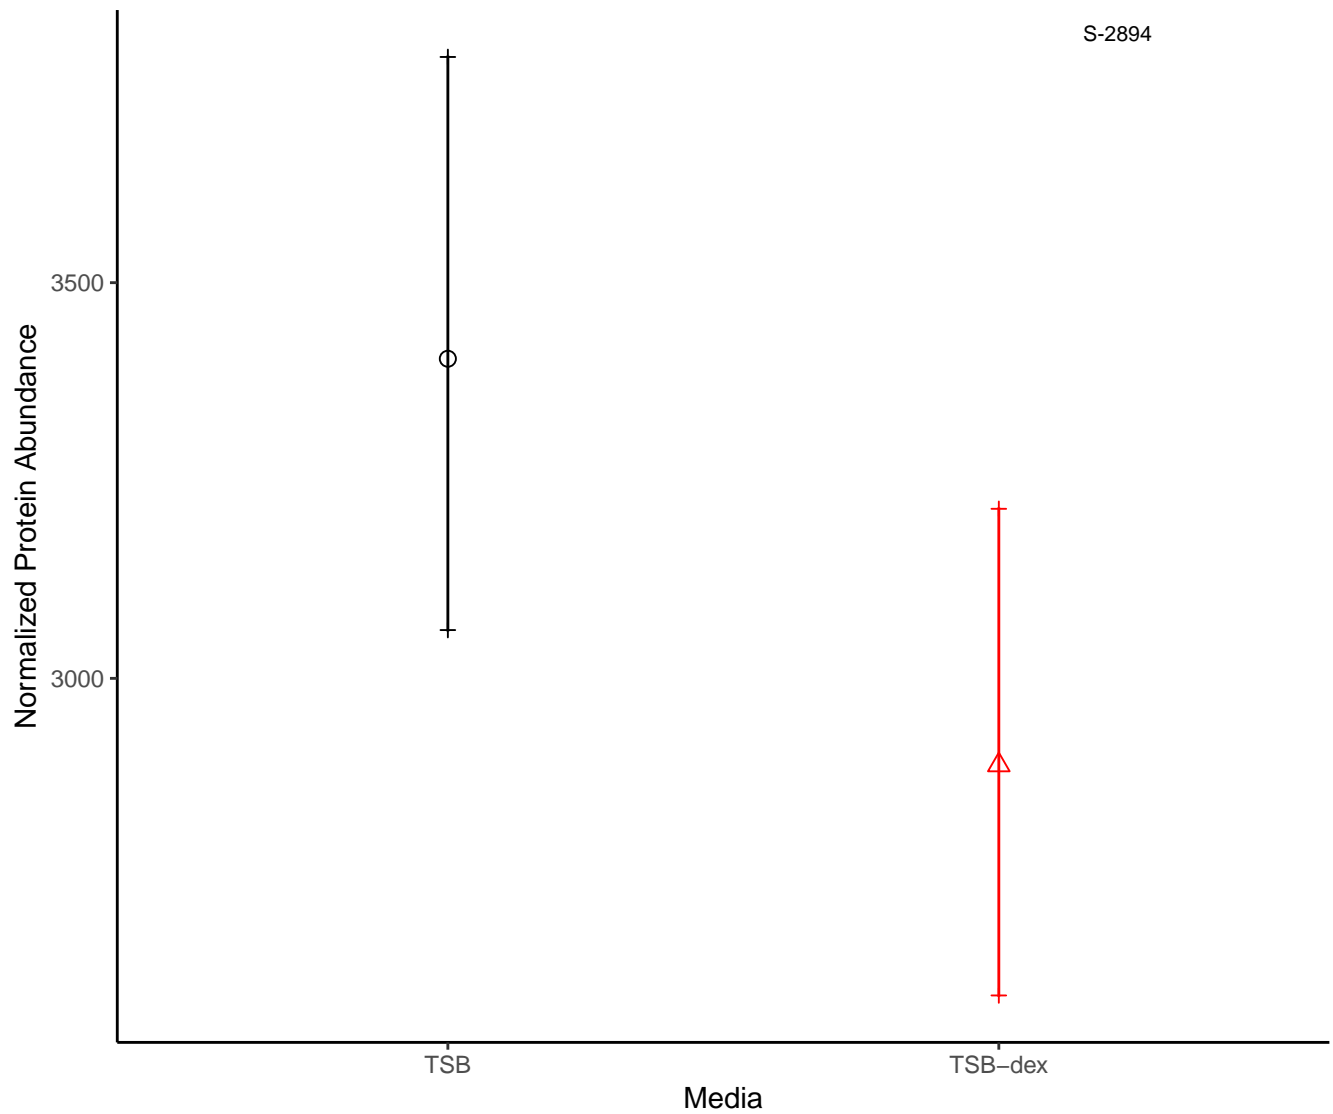

⊕ TSB-dex

△ TSB

# SP5G\_STAAM

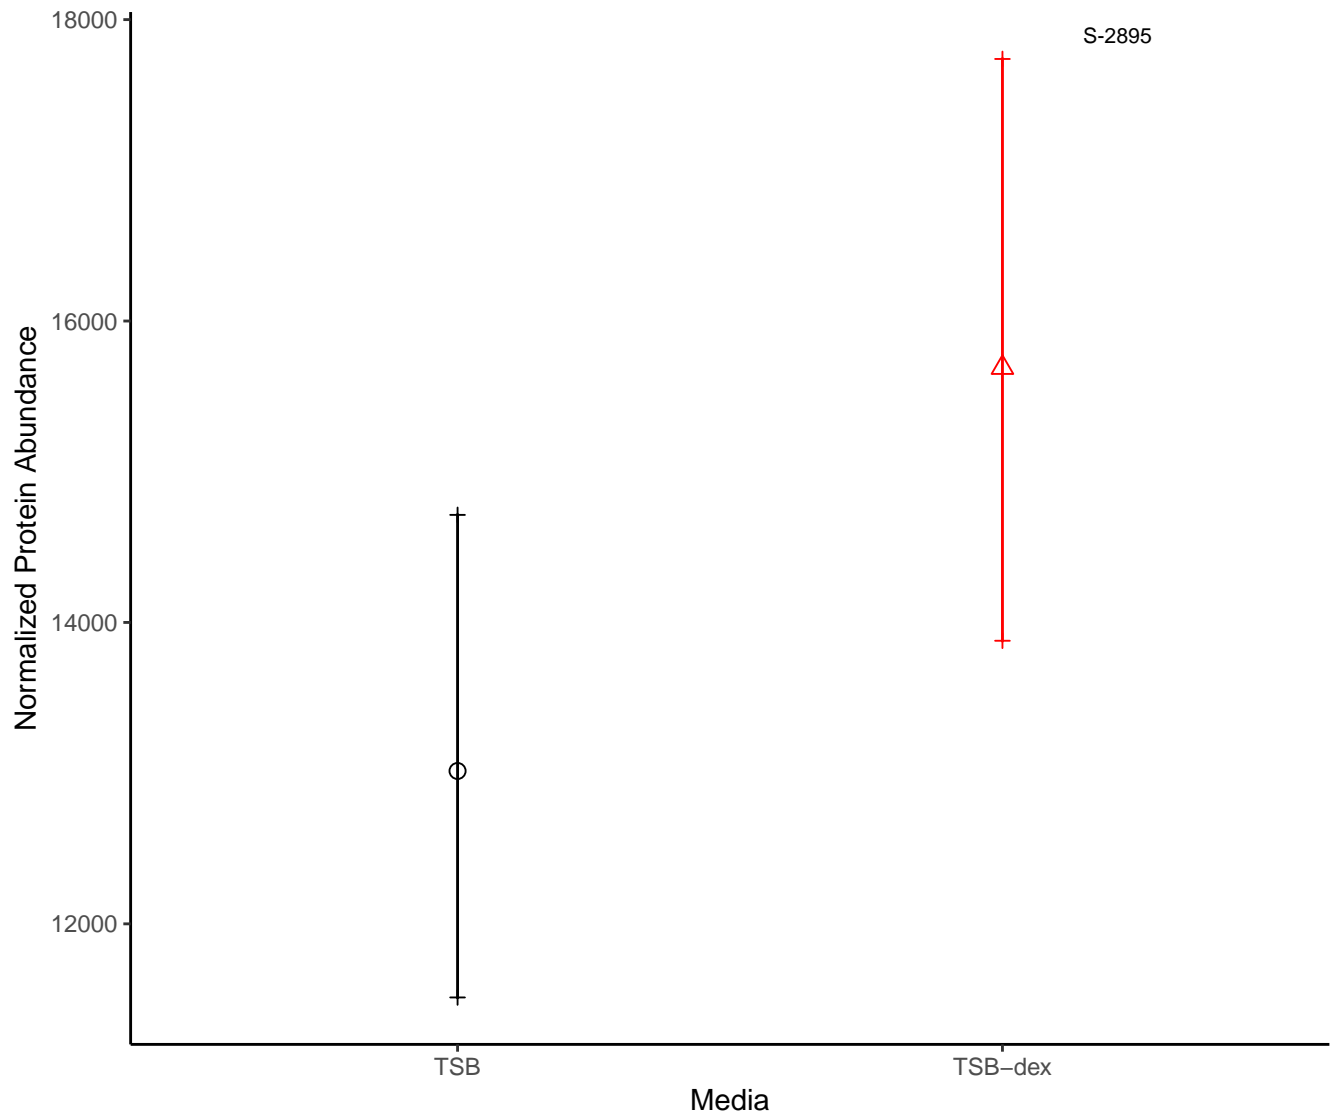

⊕ TSB-dex

△ TSB

# SPA\_STAAM

S-2896

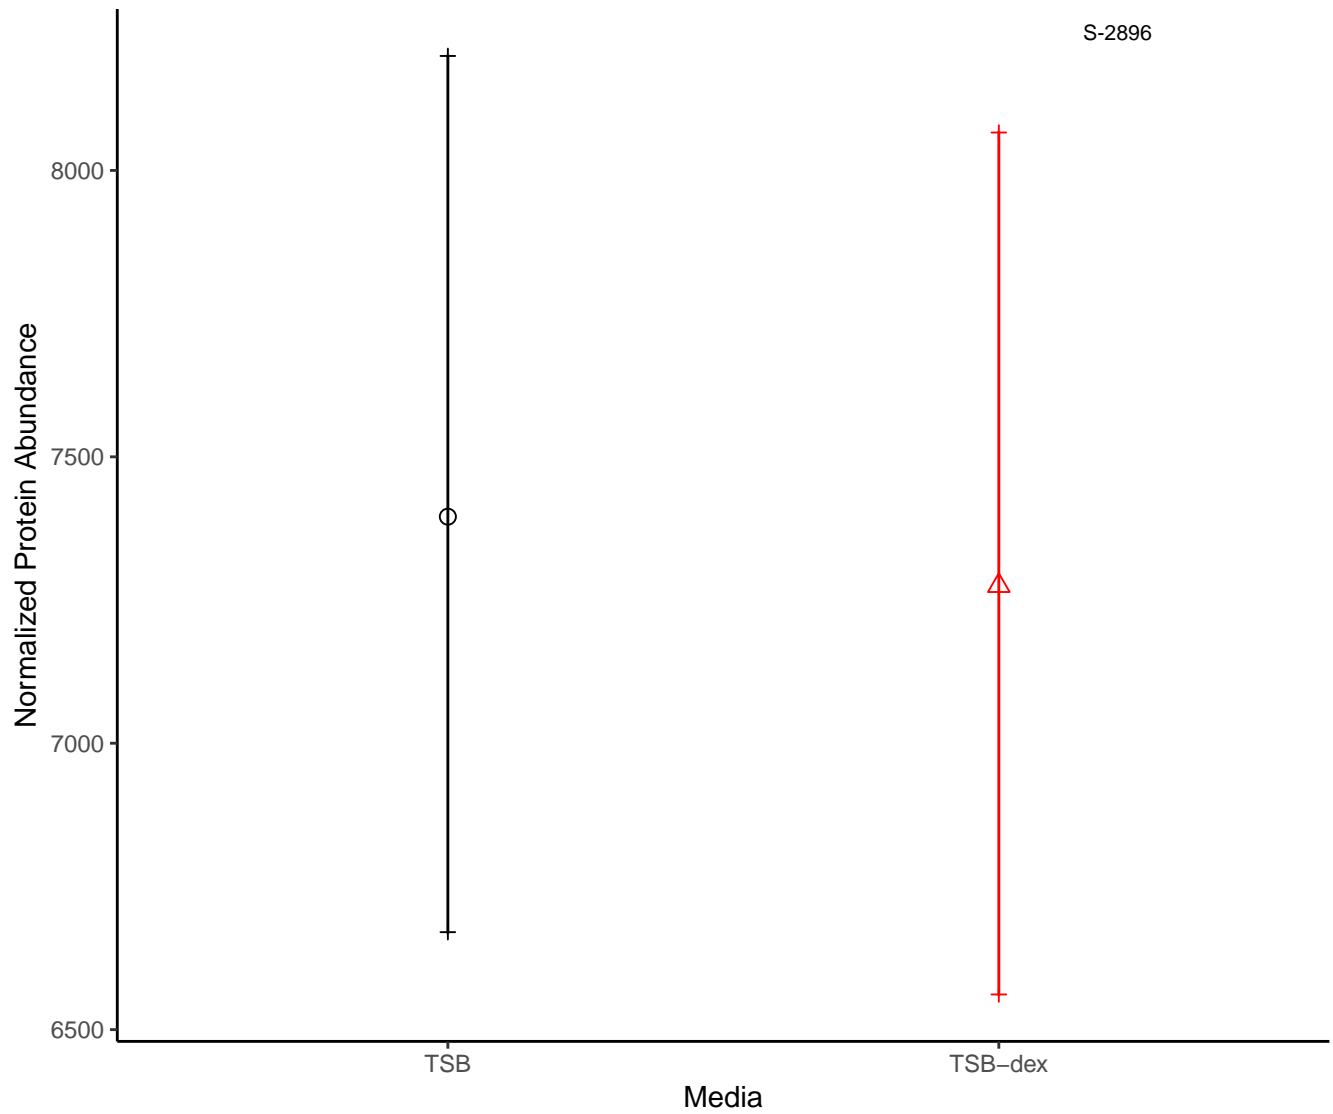

⊕ TSB-dex

△ TSB



# SPLD\_STAAM

S-2897

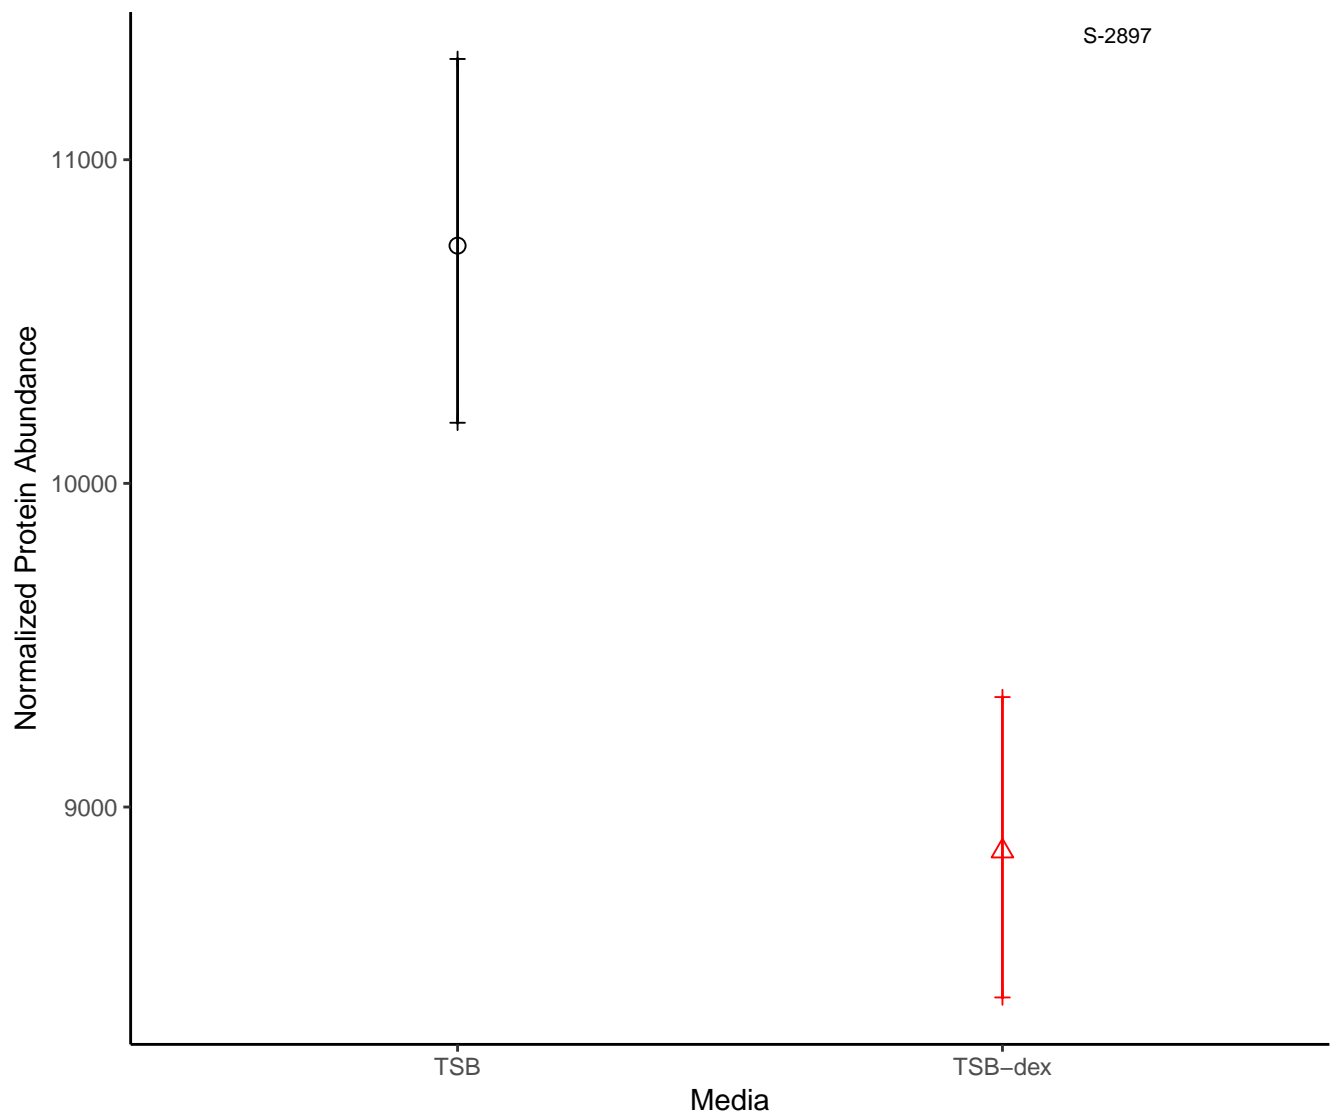

⊕ TSB-dex

△ TSB

# SPX\_STAAM

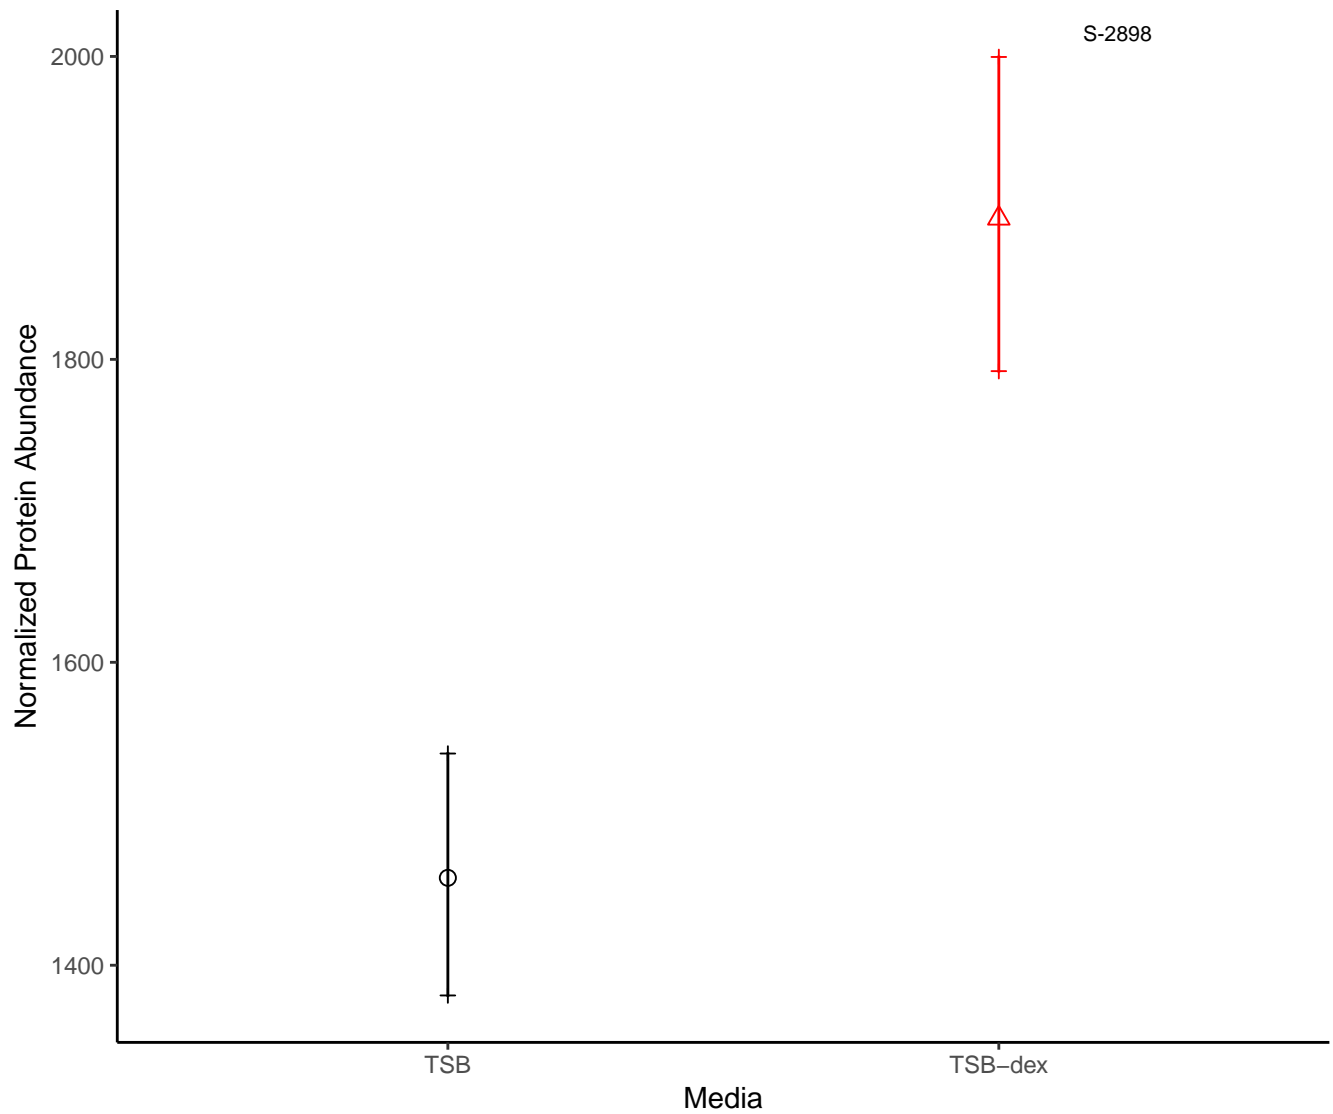

⊕ TSB-dex

△ TSB

# SRRR\_STAAM

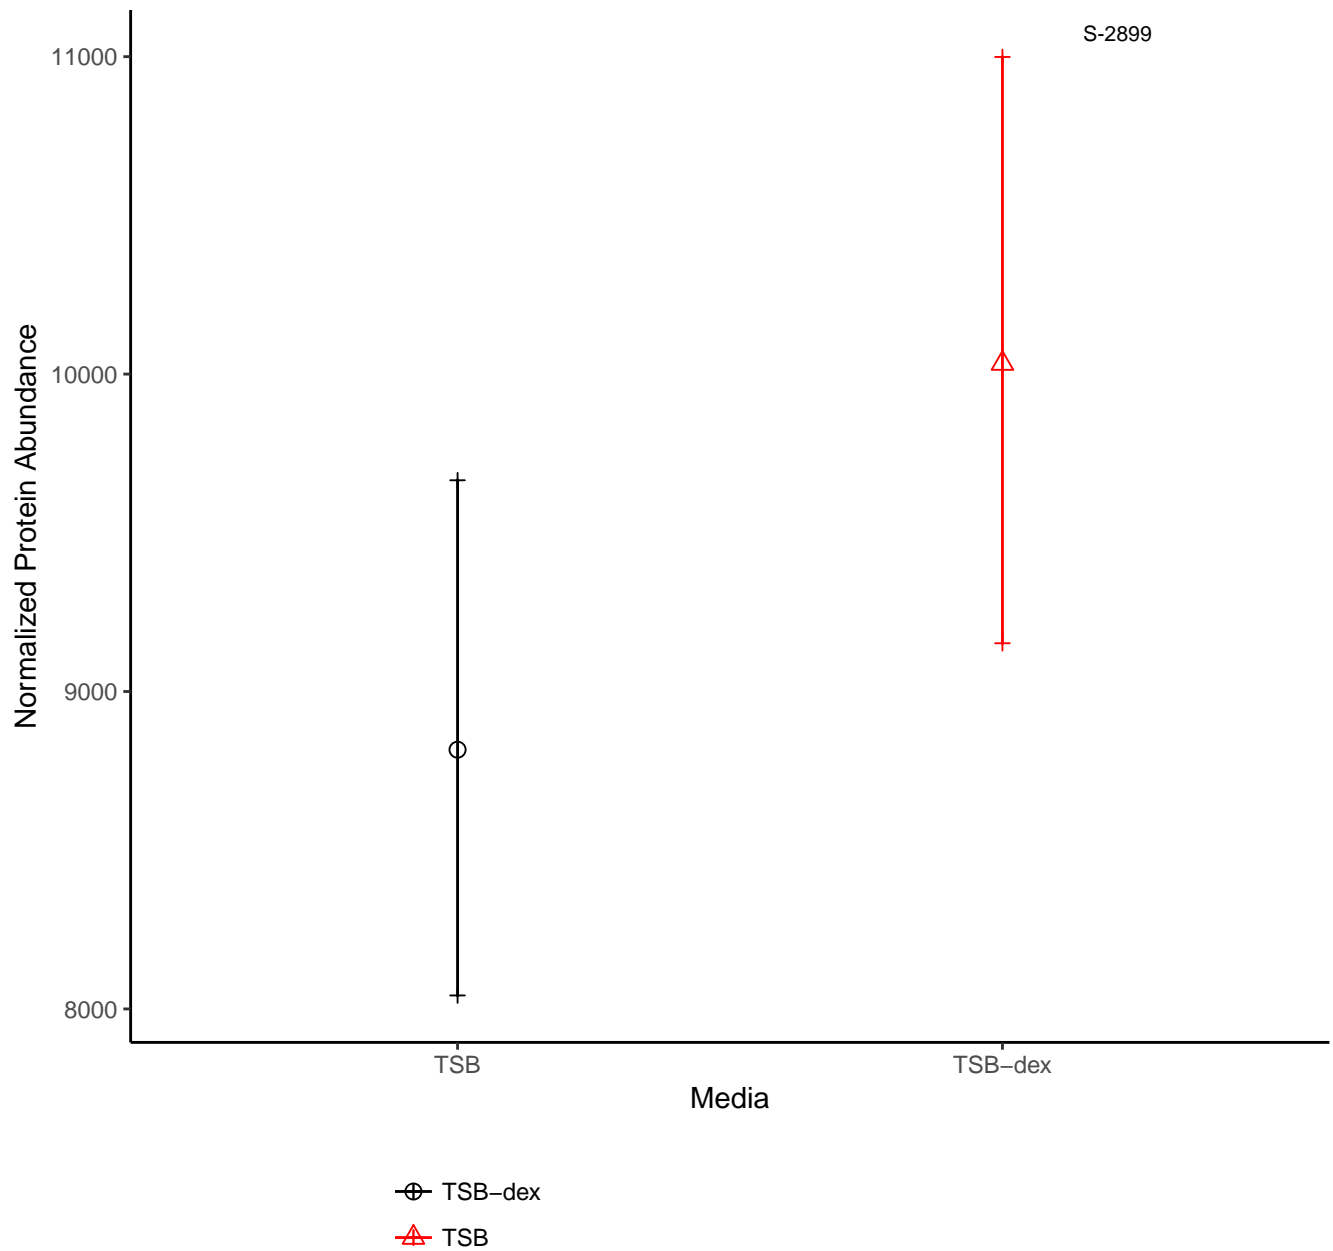

# SSAA2\_STAAM

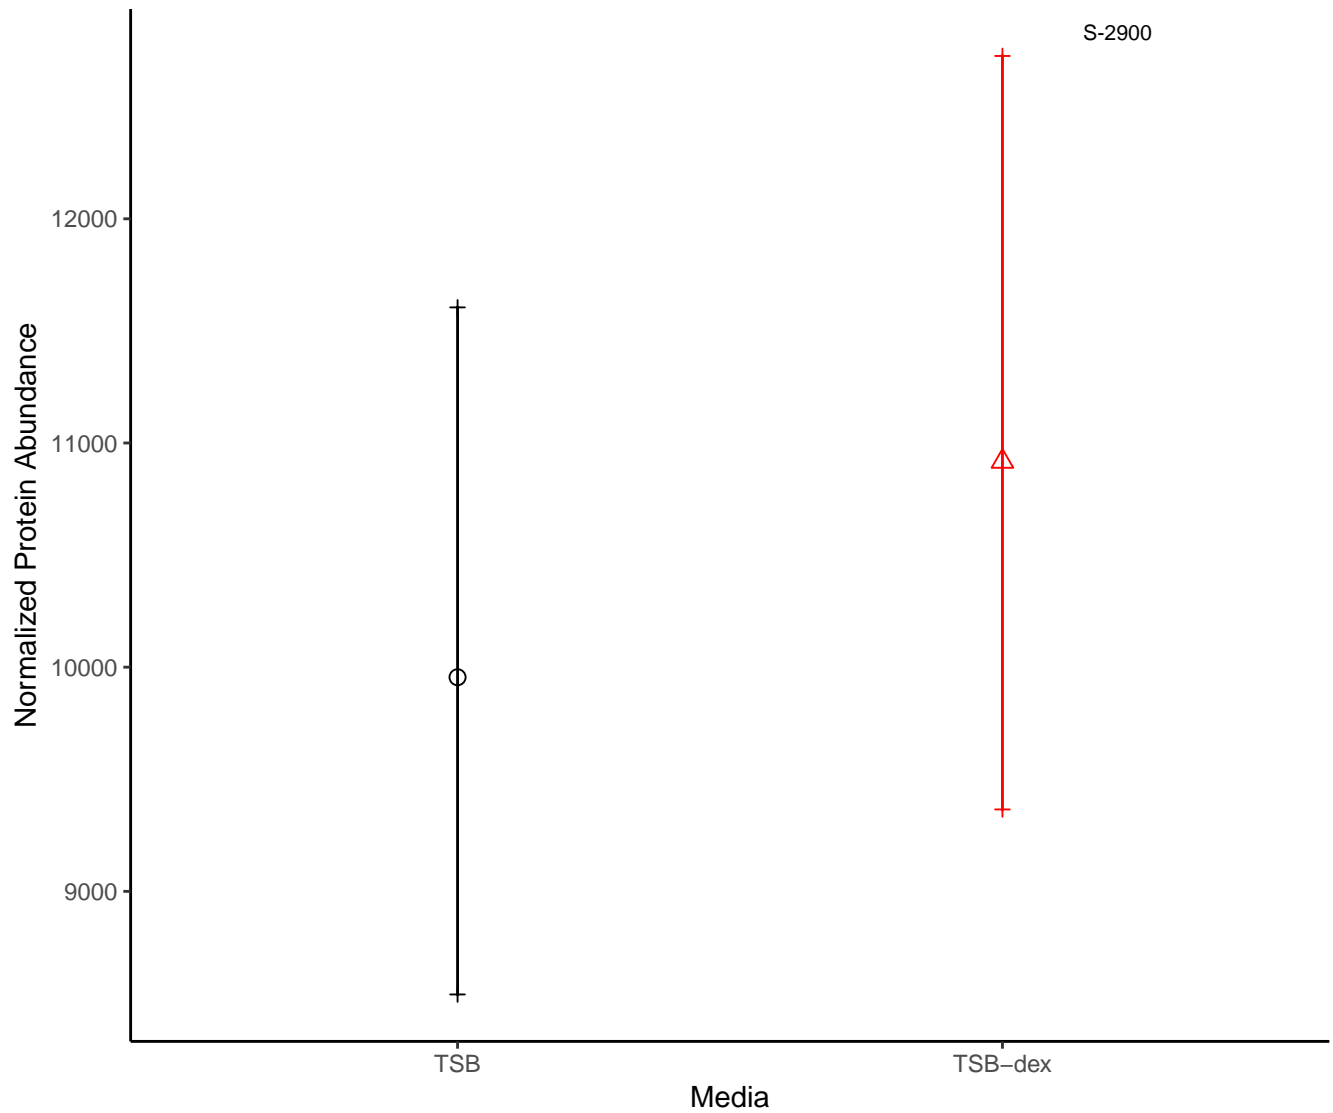

⊕ TSB-dex

△ TSB

# SSB1\_STAAM

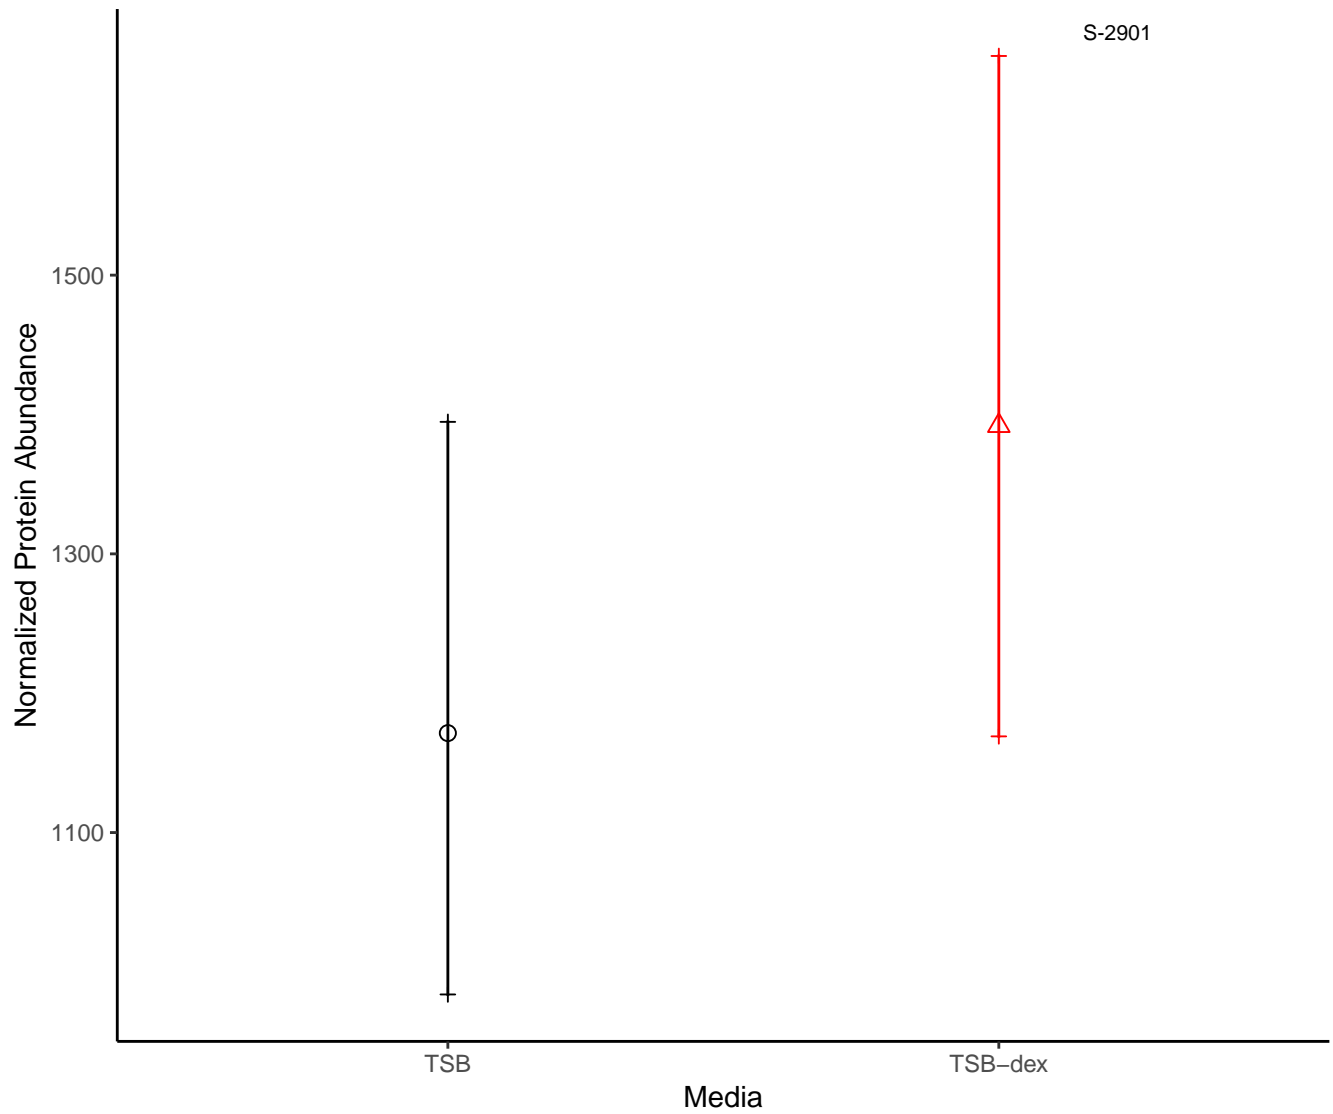

⊕ TSB-dex

△ TSB

# SSB2\_STAAM

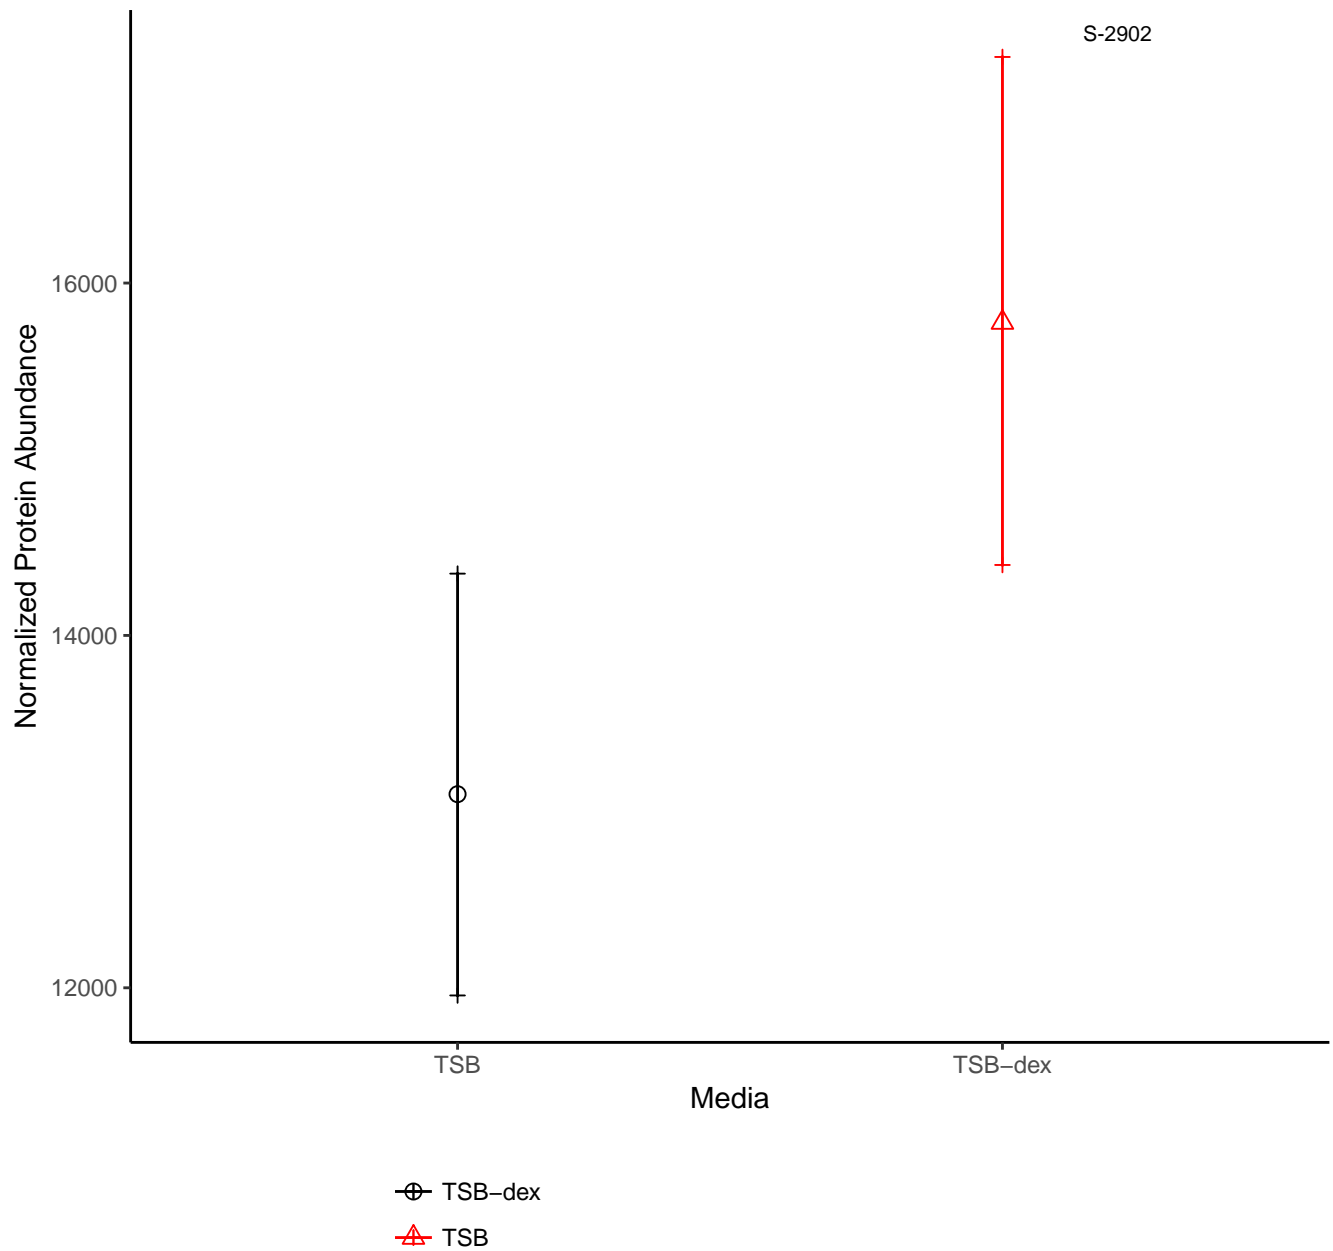

# SUCC\_STAAM

S-2903

Normalized Protein Abundance

16000  
15000  
14000

TSB

Media

TSB-dex

⊕ TSB-dex

△ TSB

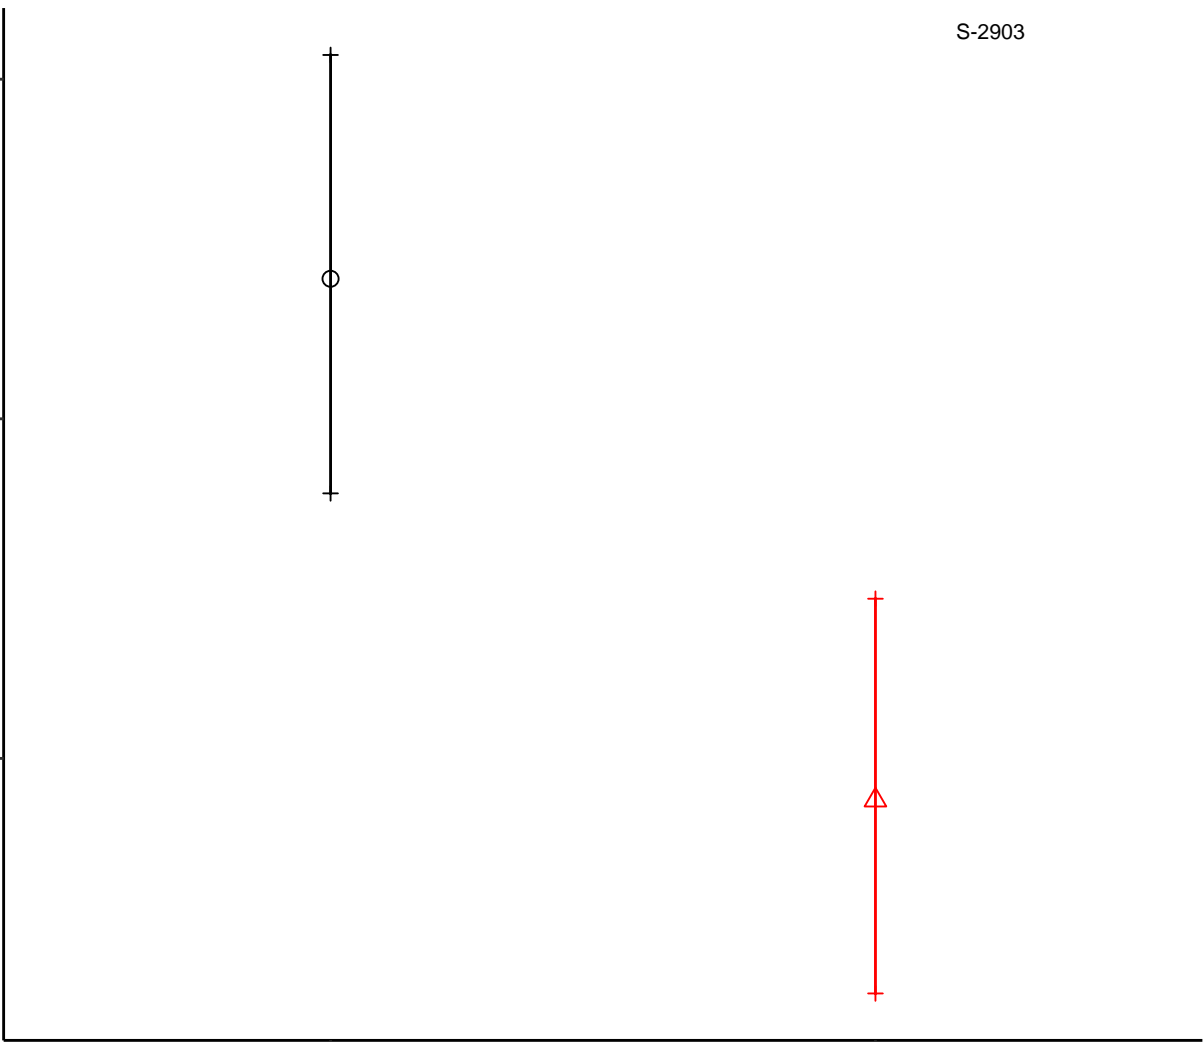

# SUCD\_STAAM

S-2904

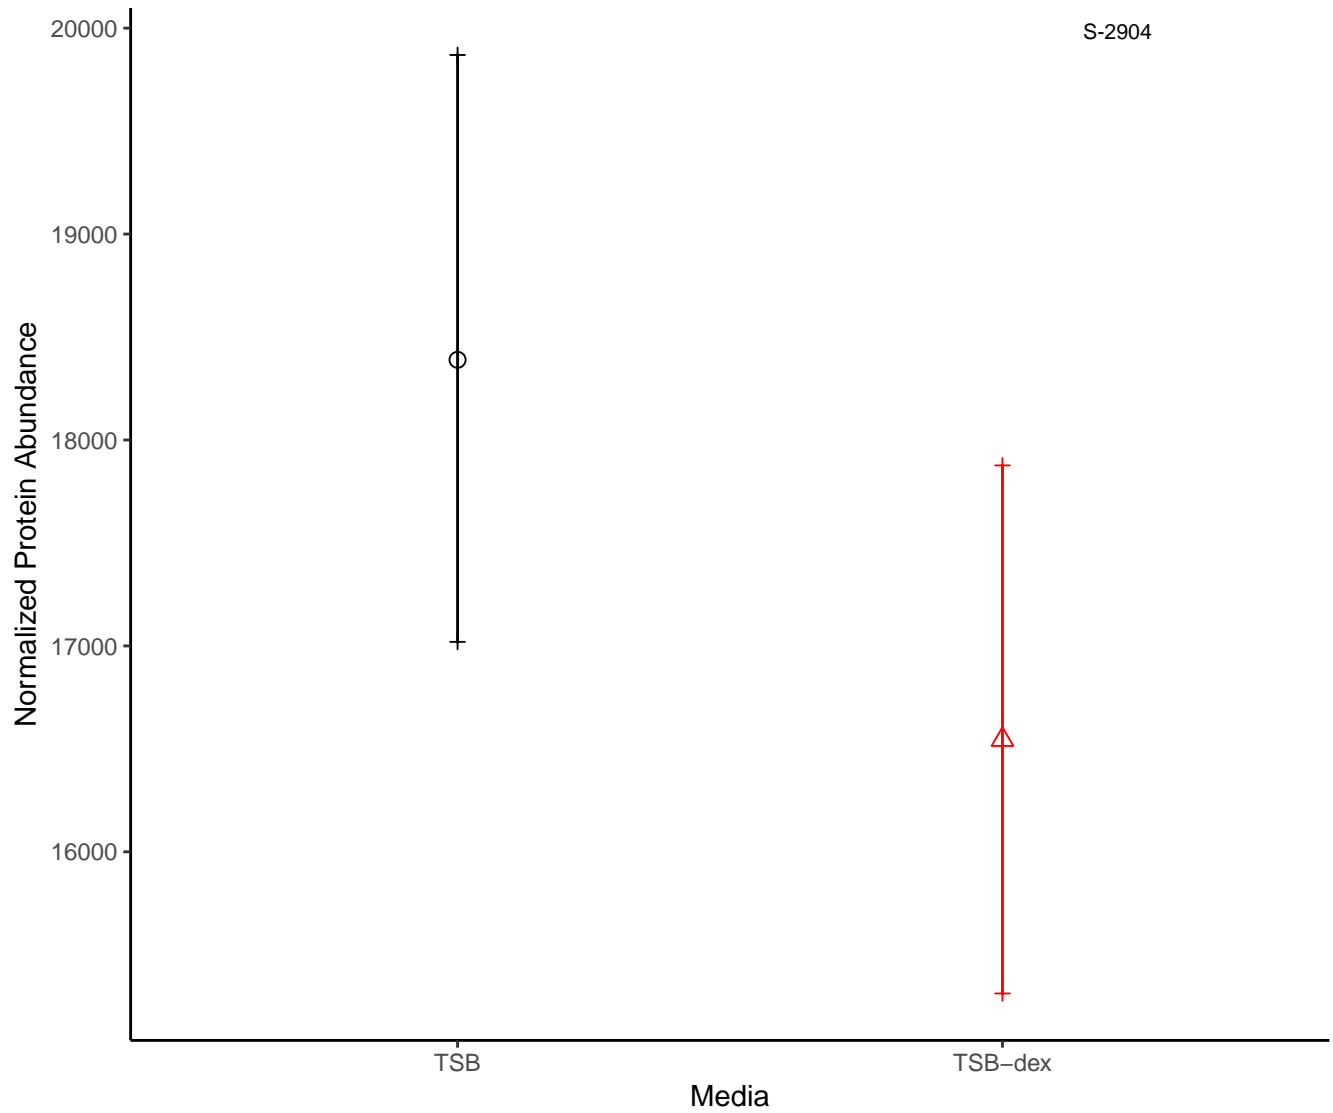

⊕ TSB-dex

△ TSB



# SYA\_STAAM

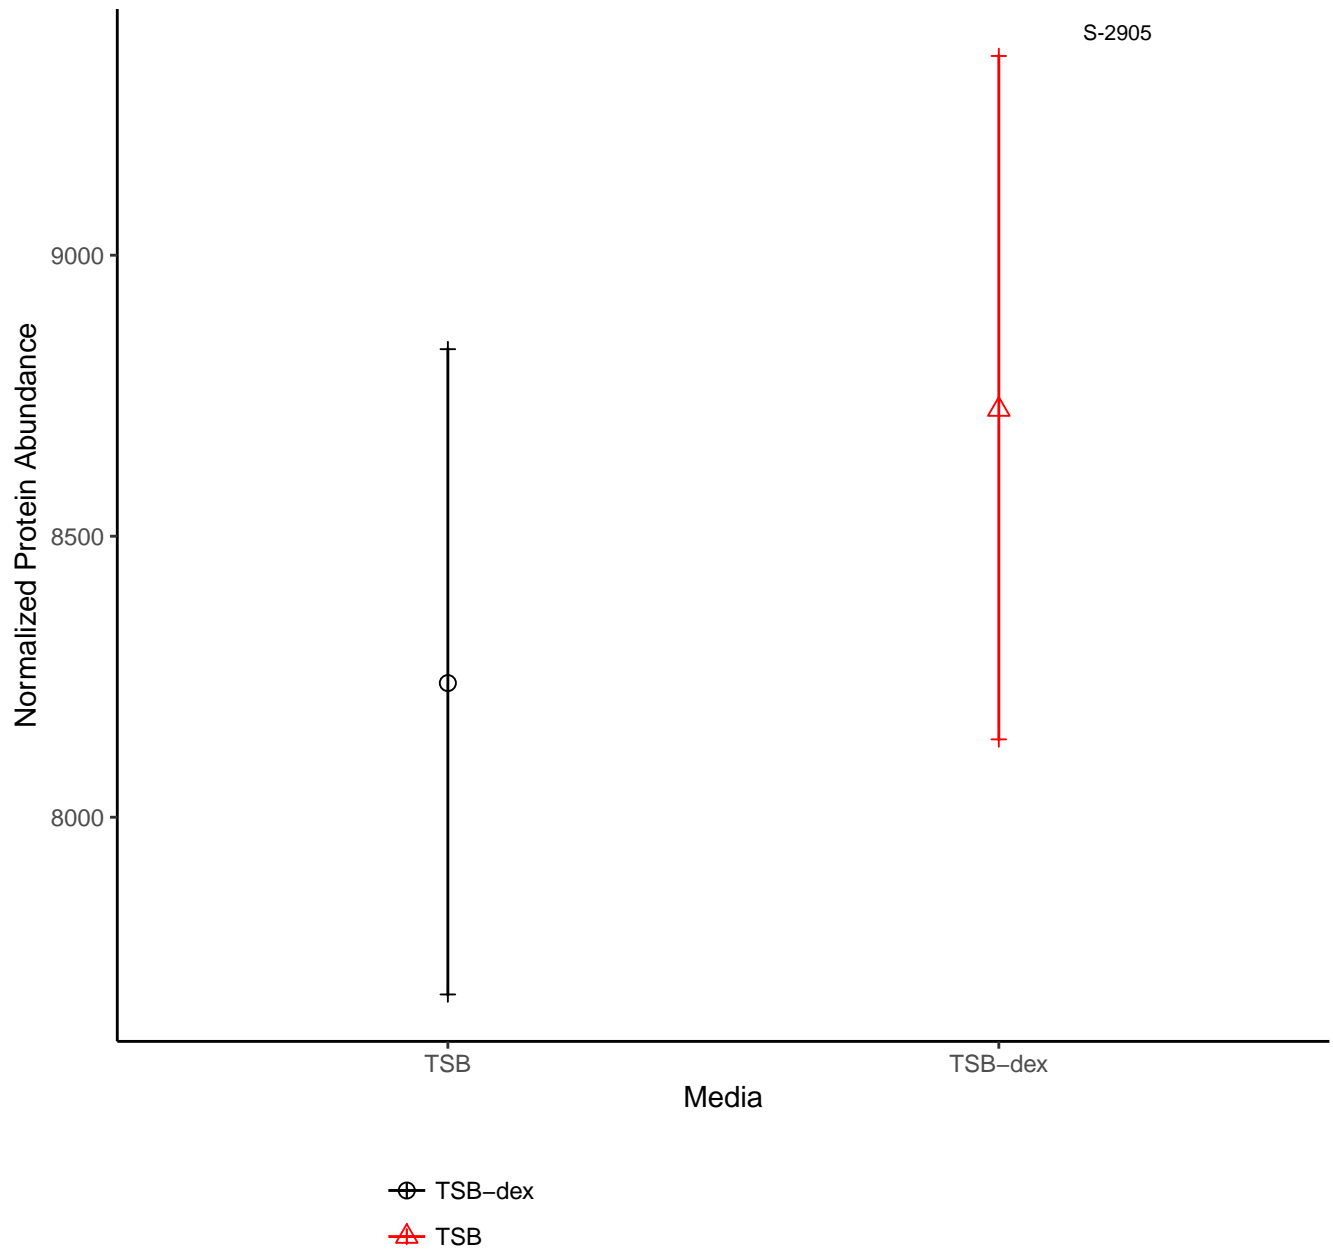

# SYC\_STAAM

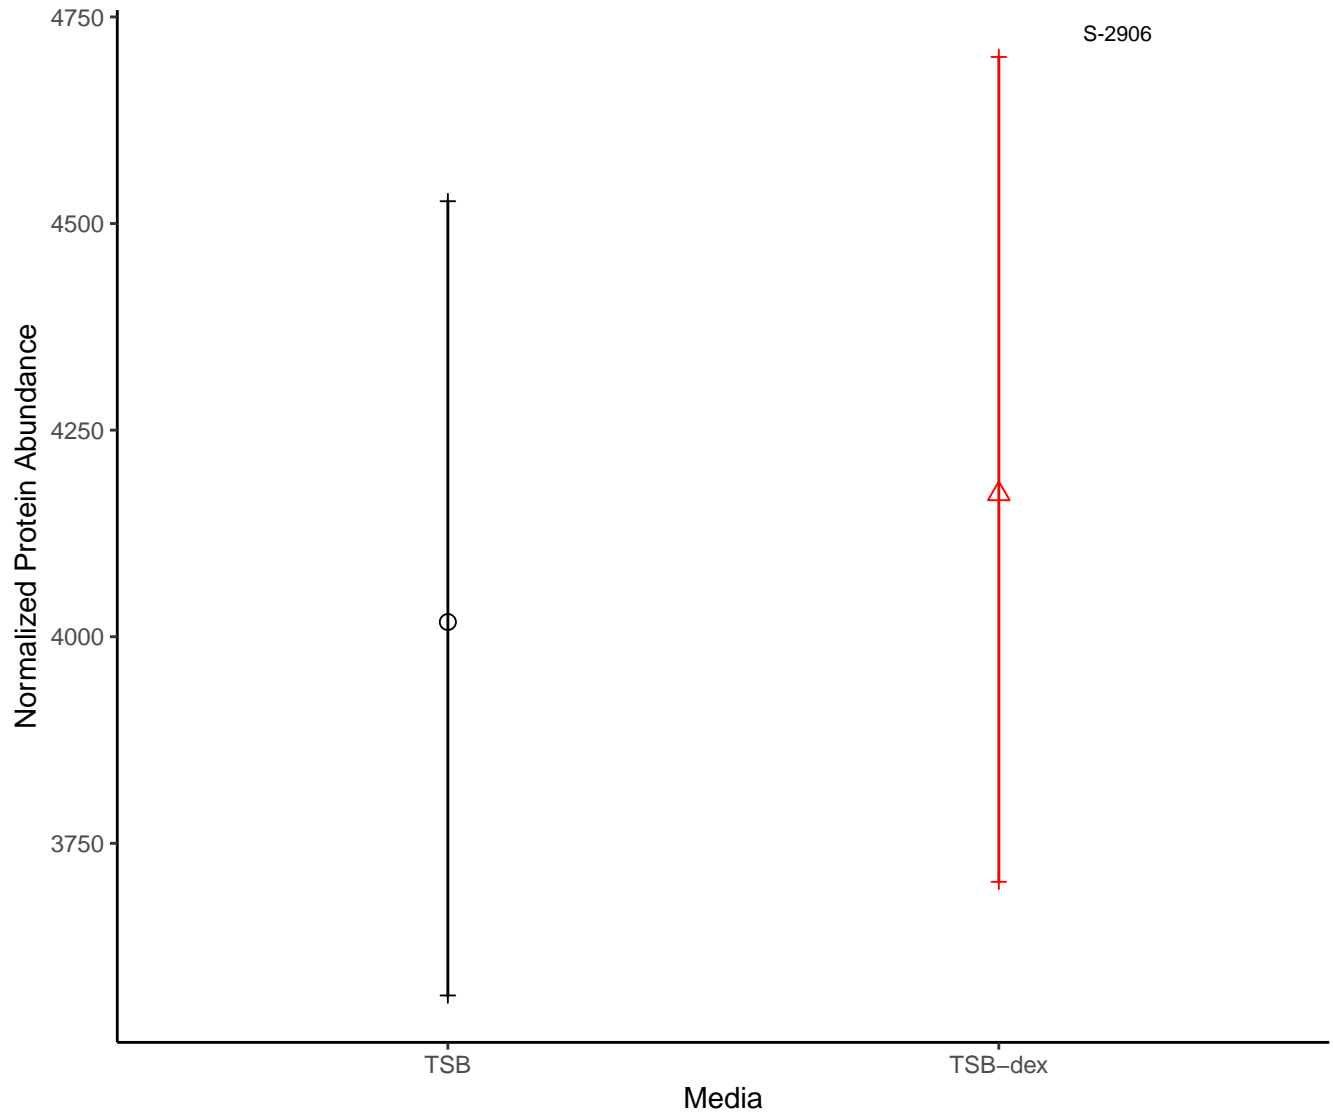

⊕ TSB-dex

△ TSB

# SYD\_STAAM

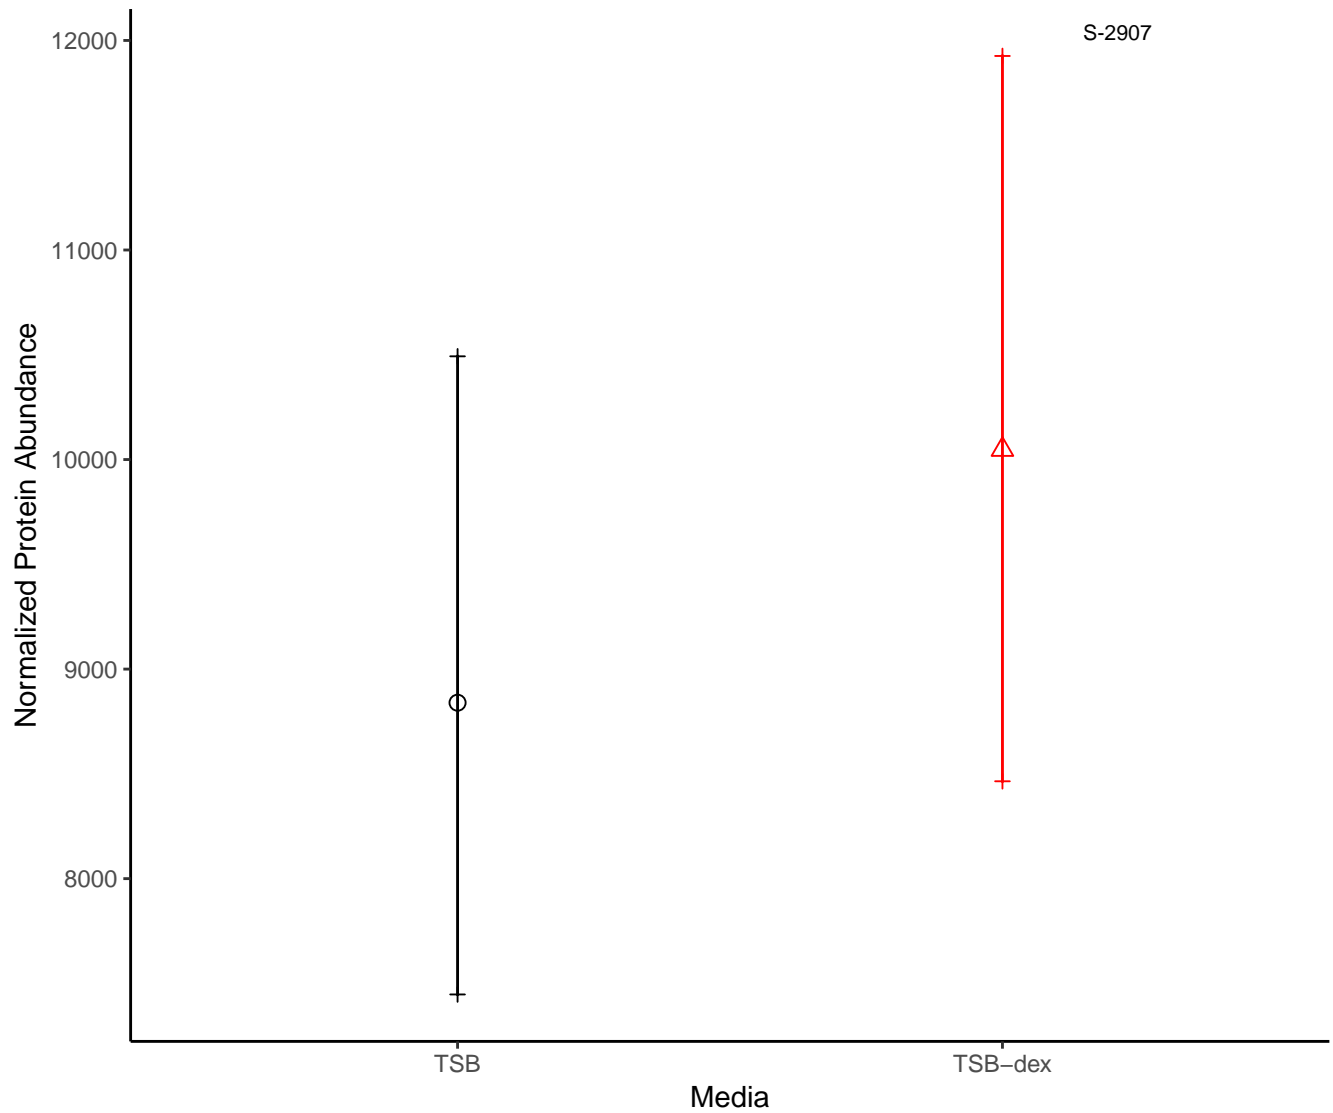

⊕ TSB-dex

△ TSB

# SYE\_STAAM

S-2908

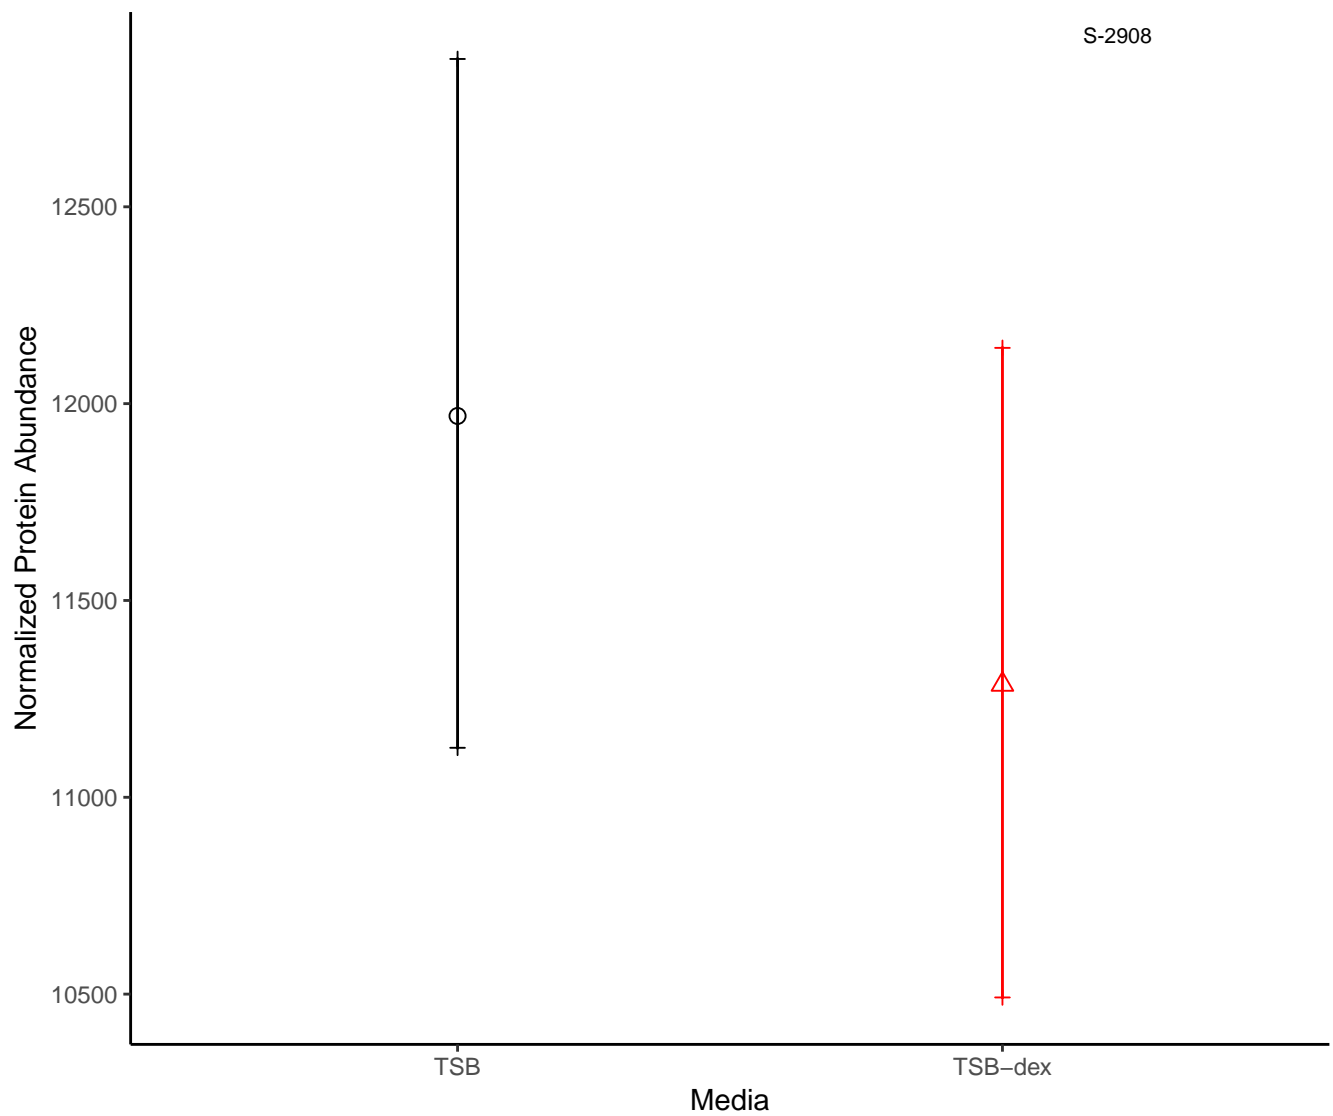

● TSB-dex

▲ TSB

# SYFB\_STAAM

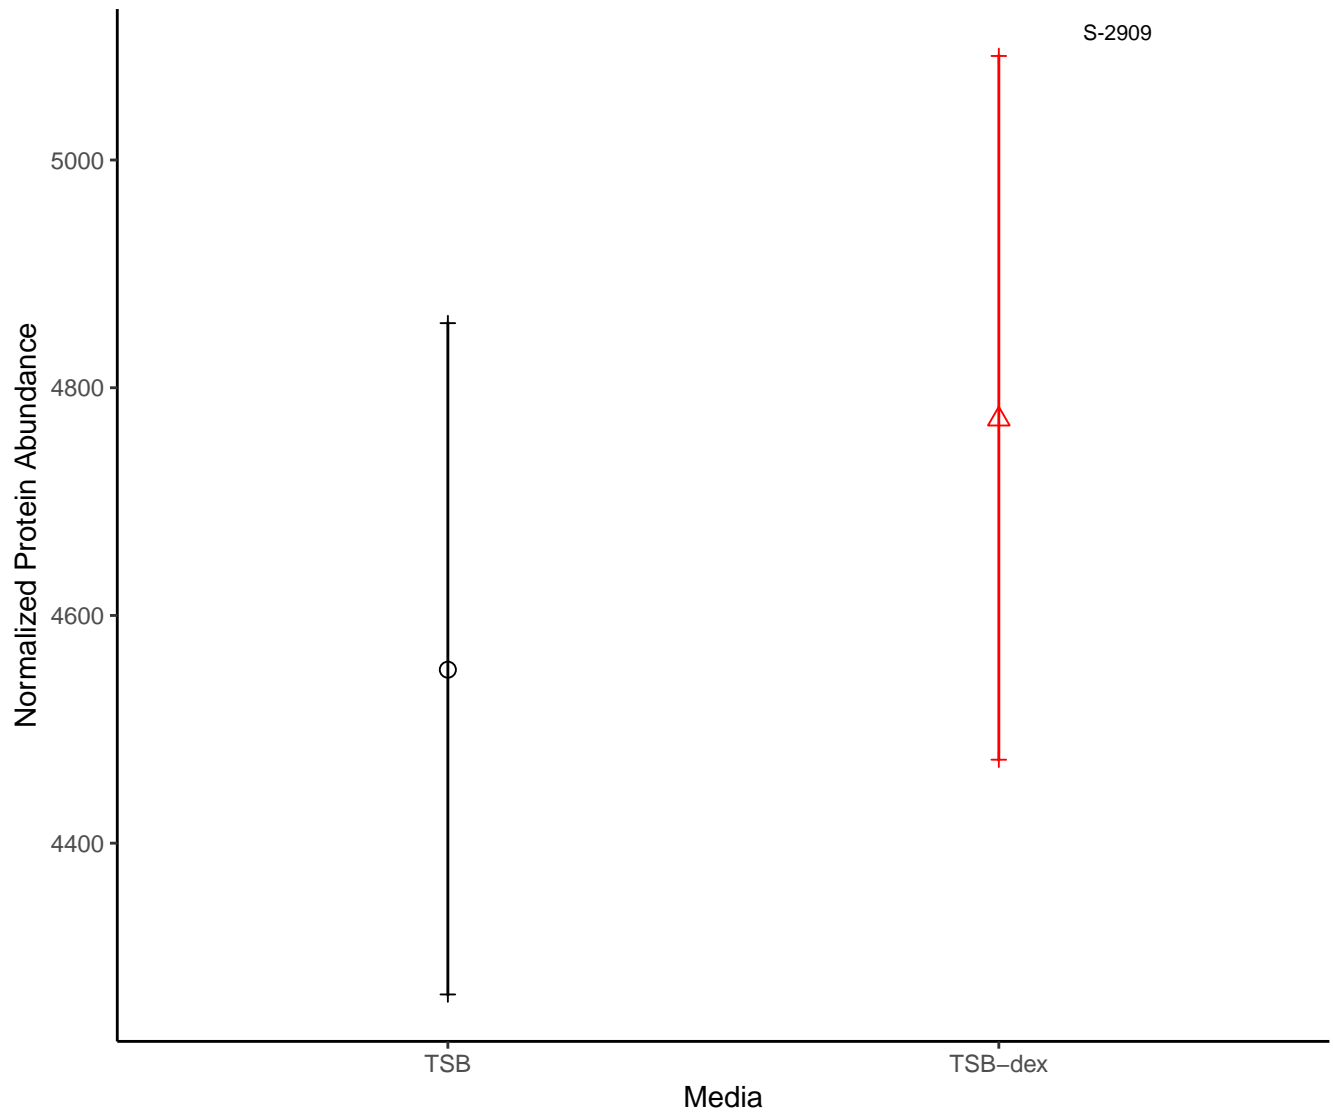

⊕ TSB-dex

△ TSB

# SYG\_STAAM

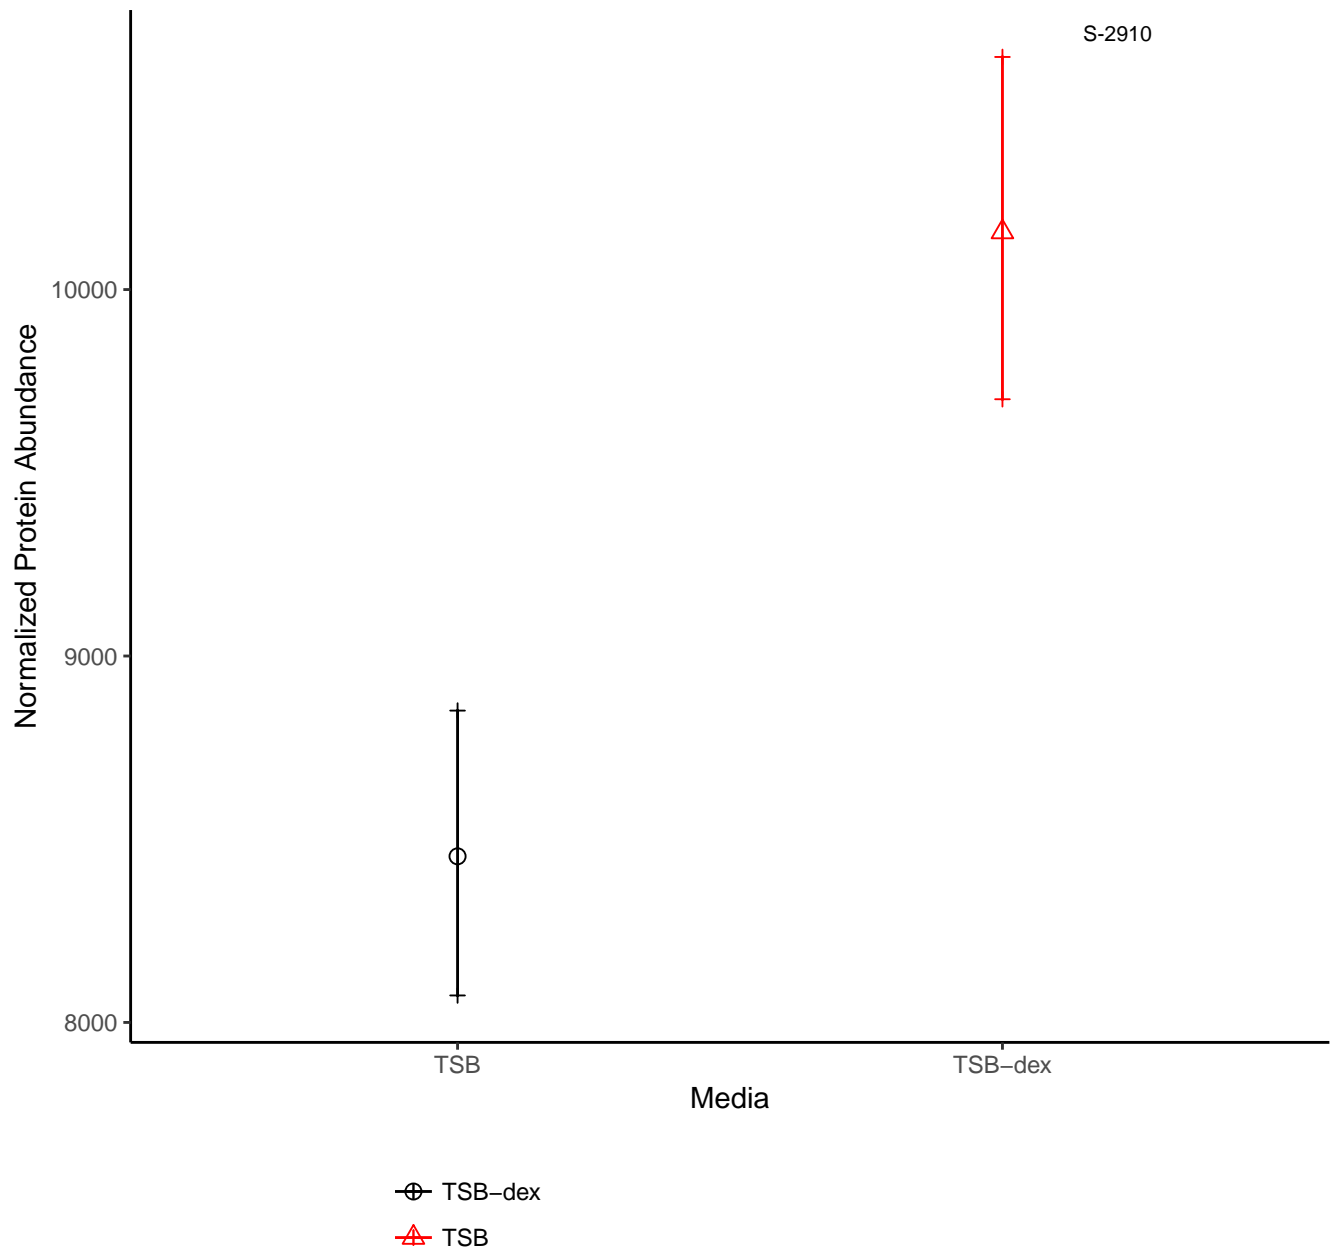

# SYH\_STAAM

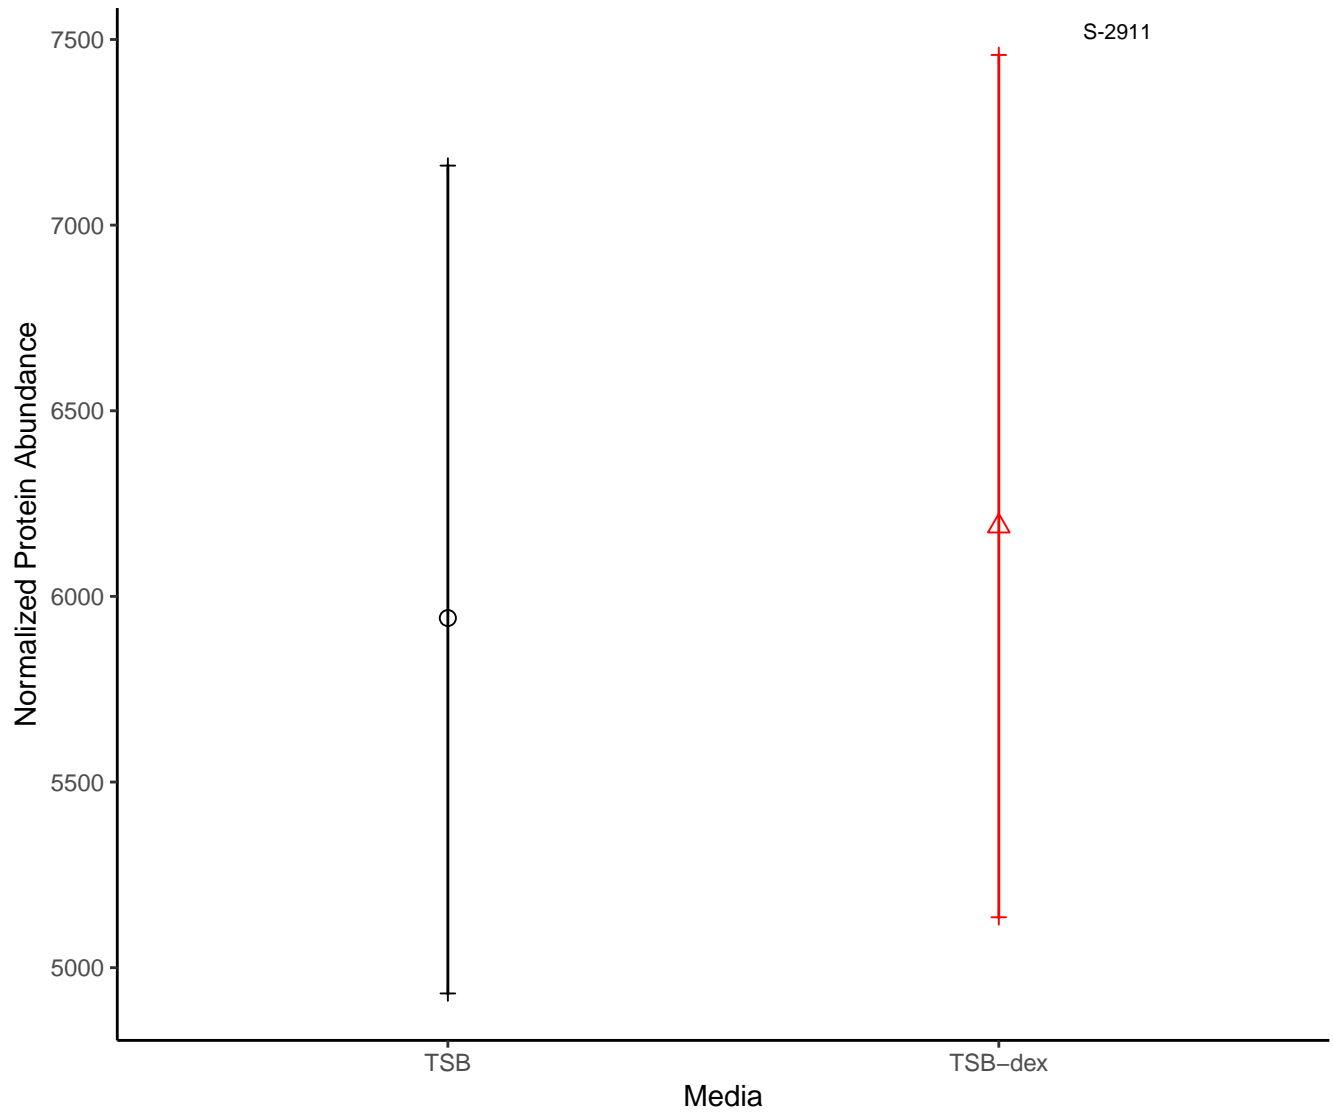

⊕ TSB-dex

△ TSB

# SYI\_STAAM

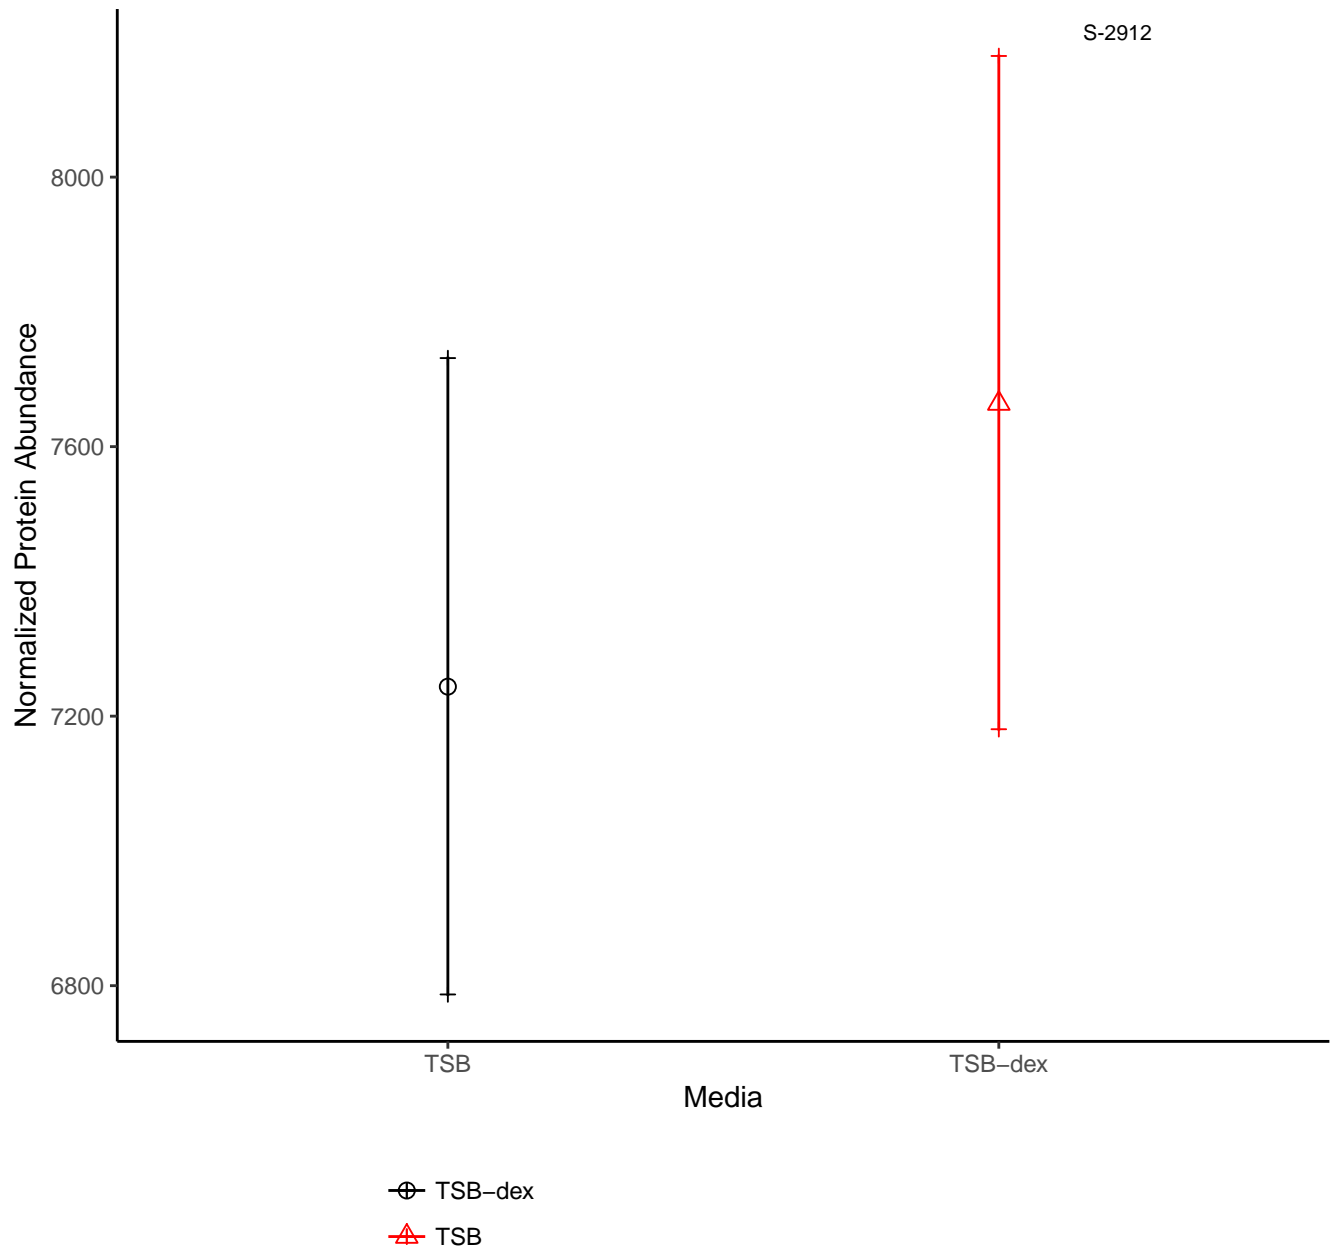



# SYK\_STAAM

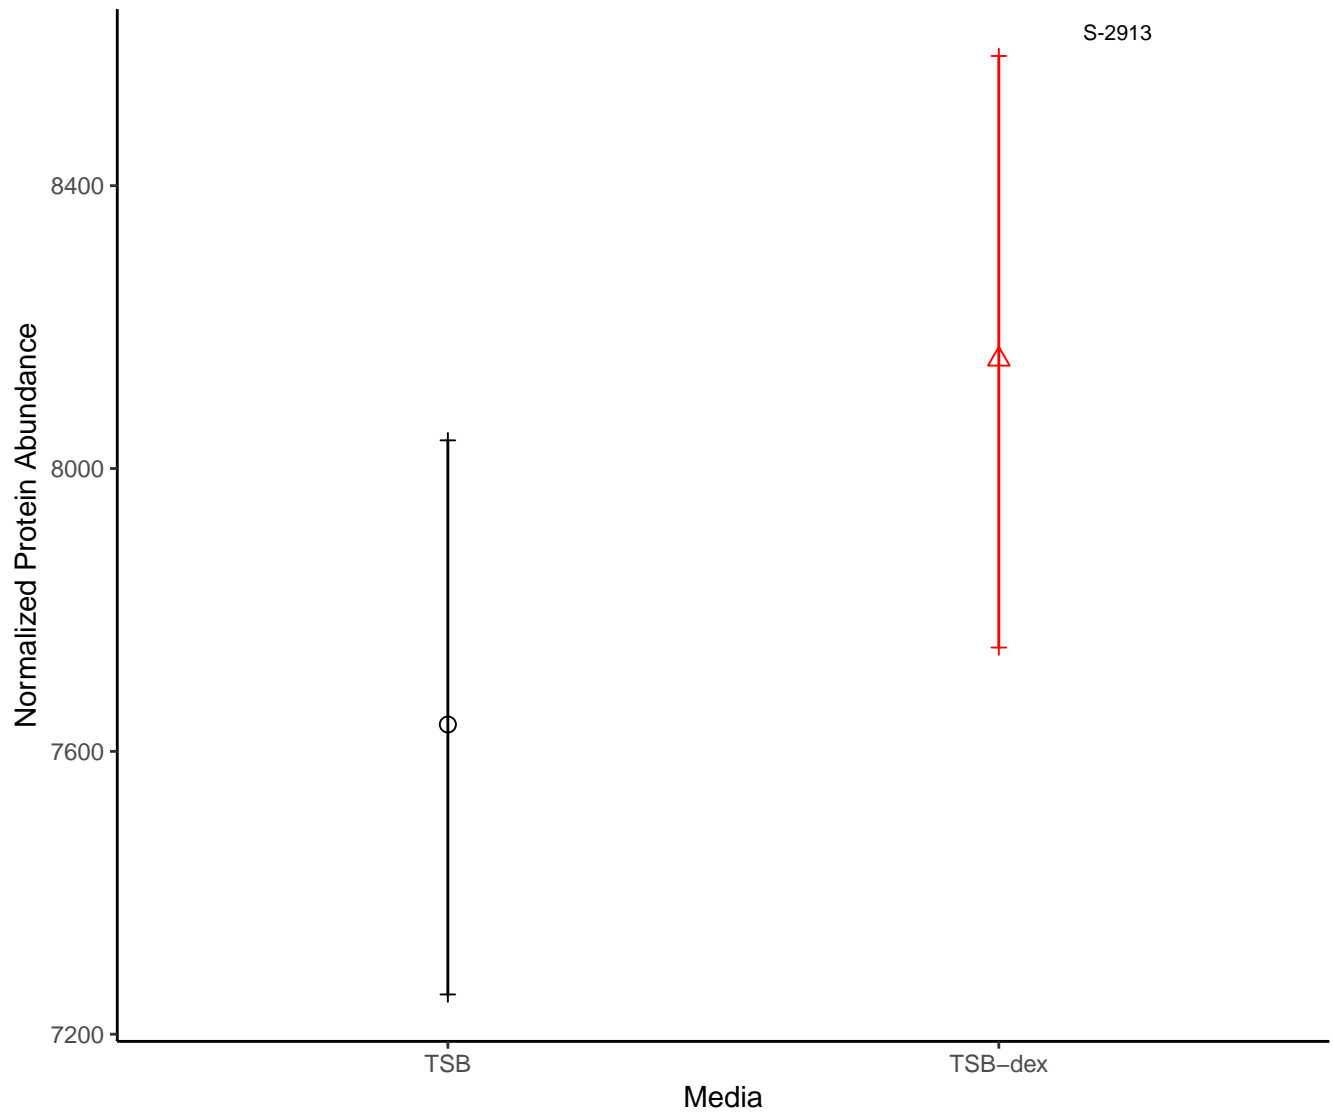

⊕ TSB-dex

△ TSB

# SYM\_STAAM

S-2914

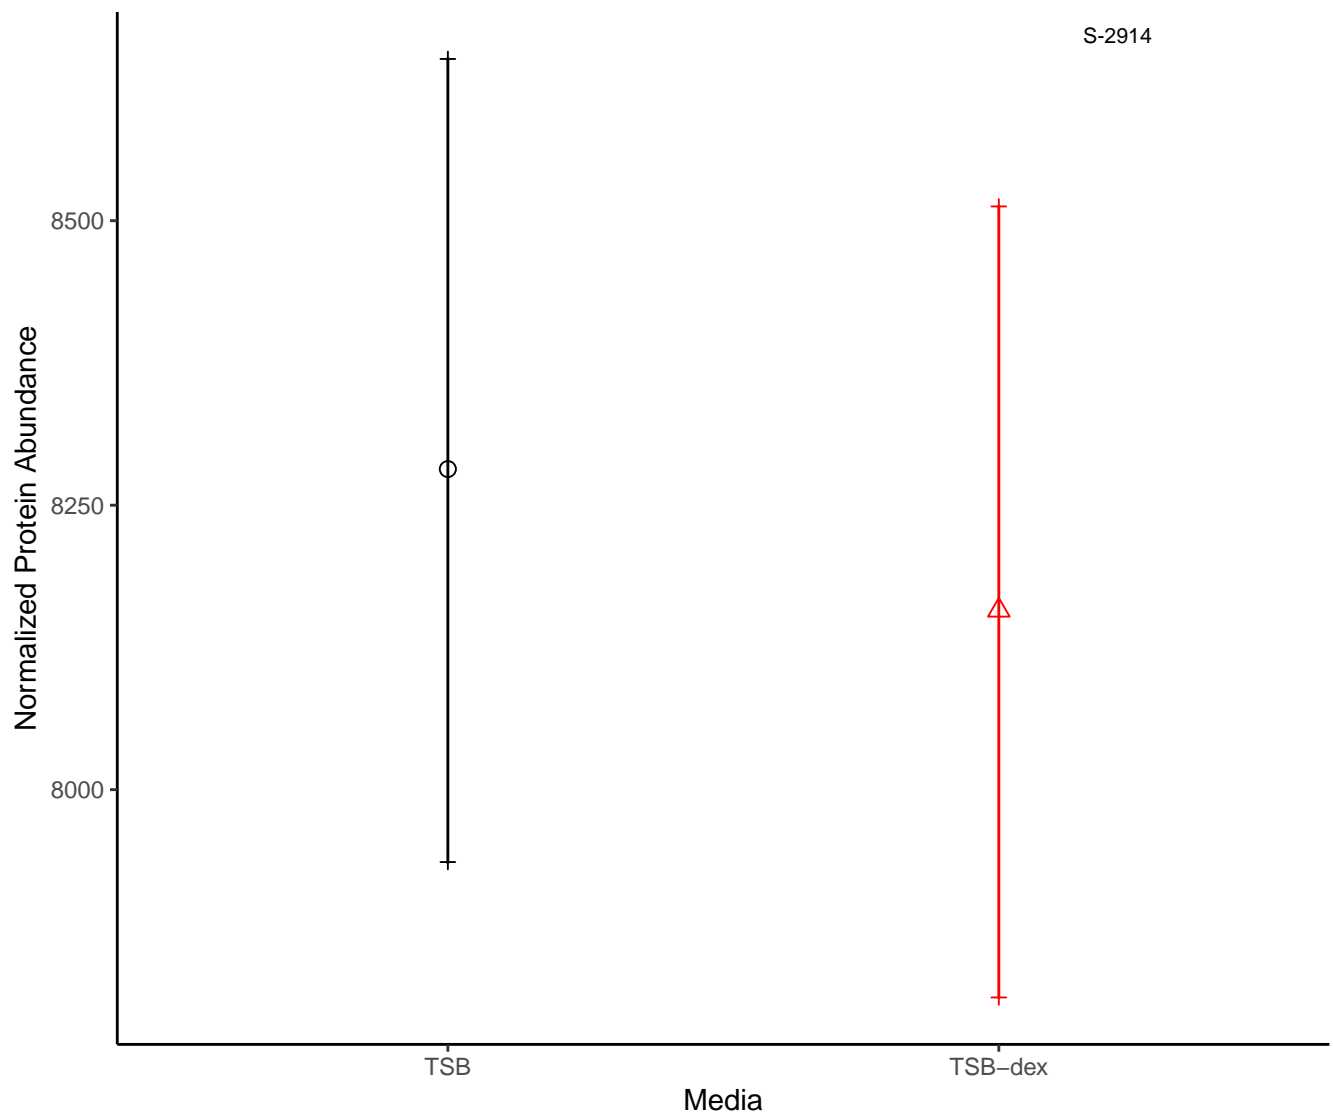

⊕ TSB-dex

△ TSB

# SYN\_STAAM

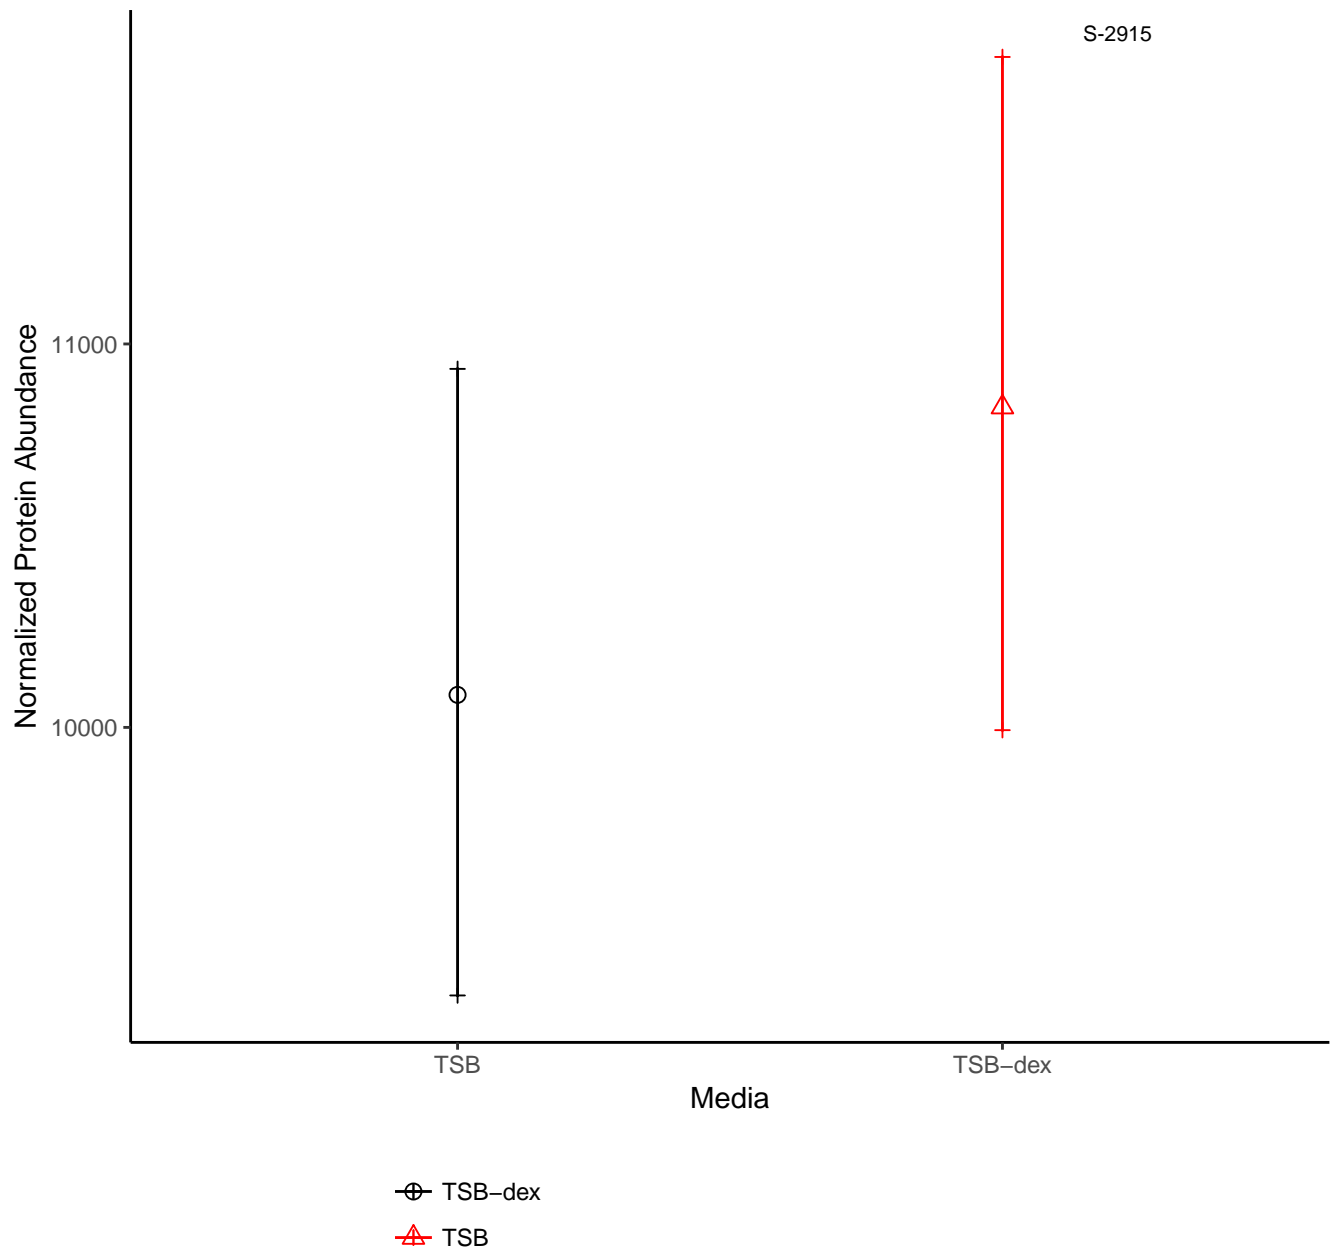

# SYP\_STAAM

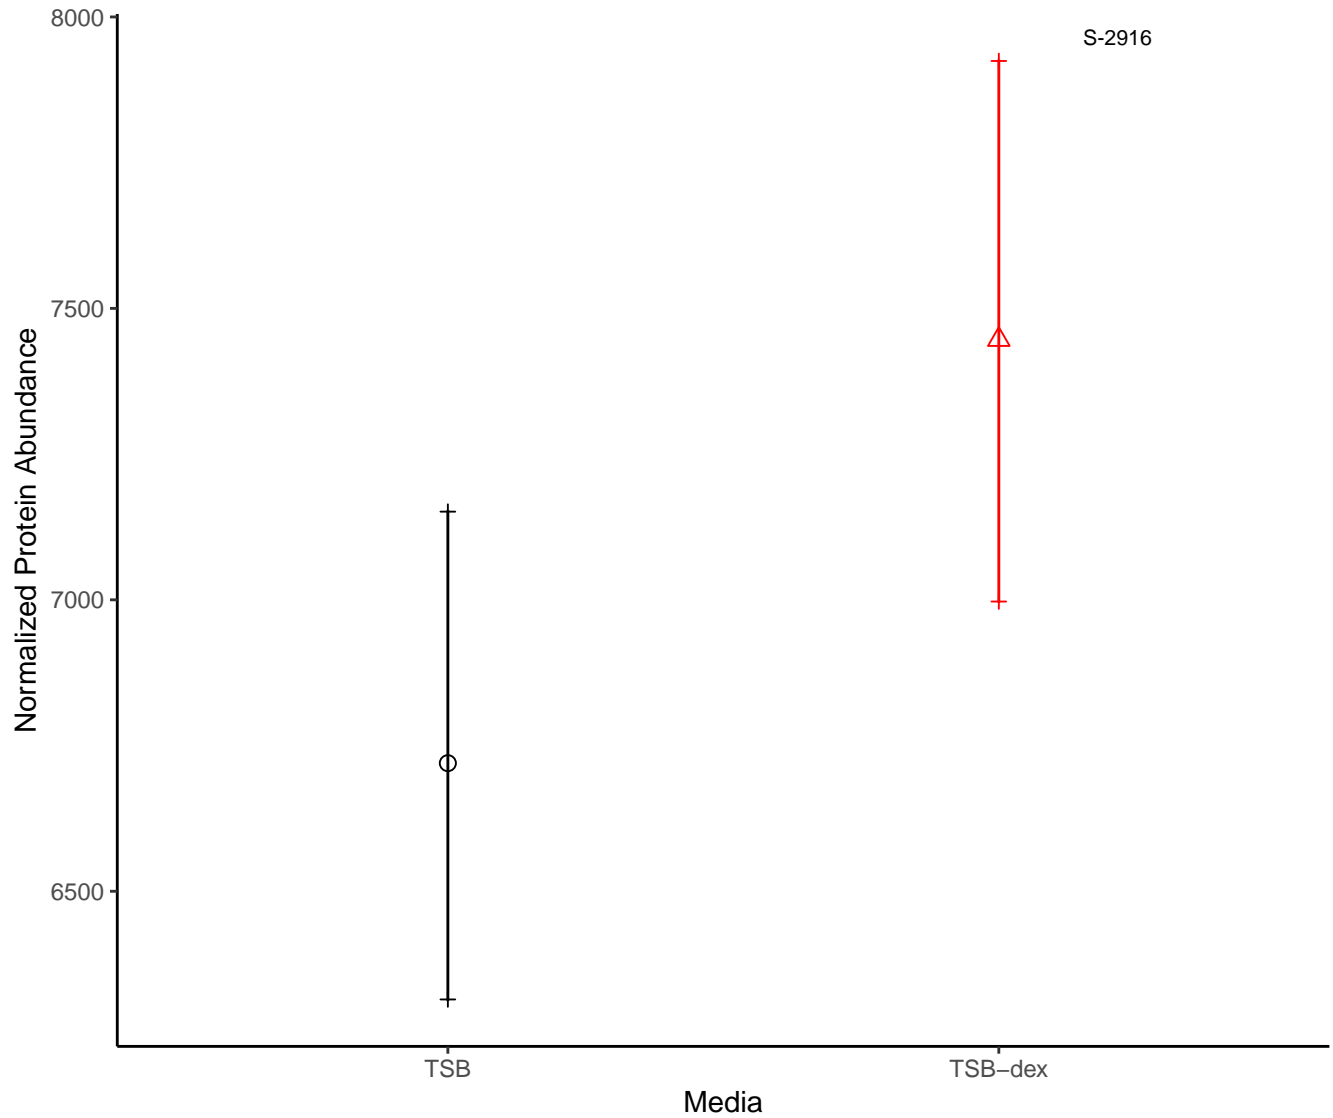

⊕ TSB-dex

△ TSB

# SYR\_STAAM

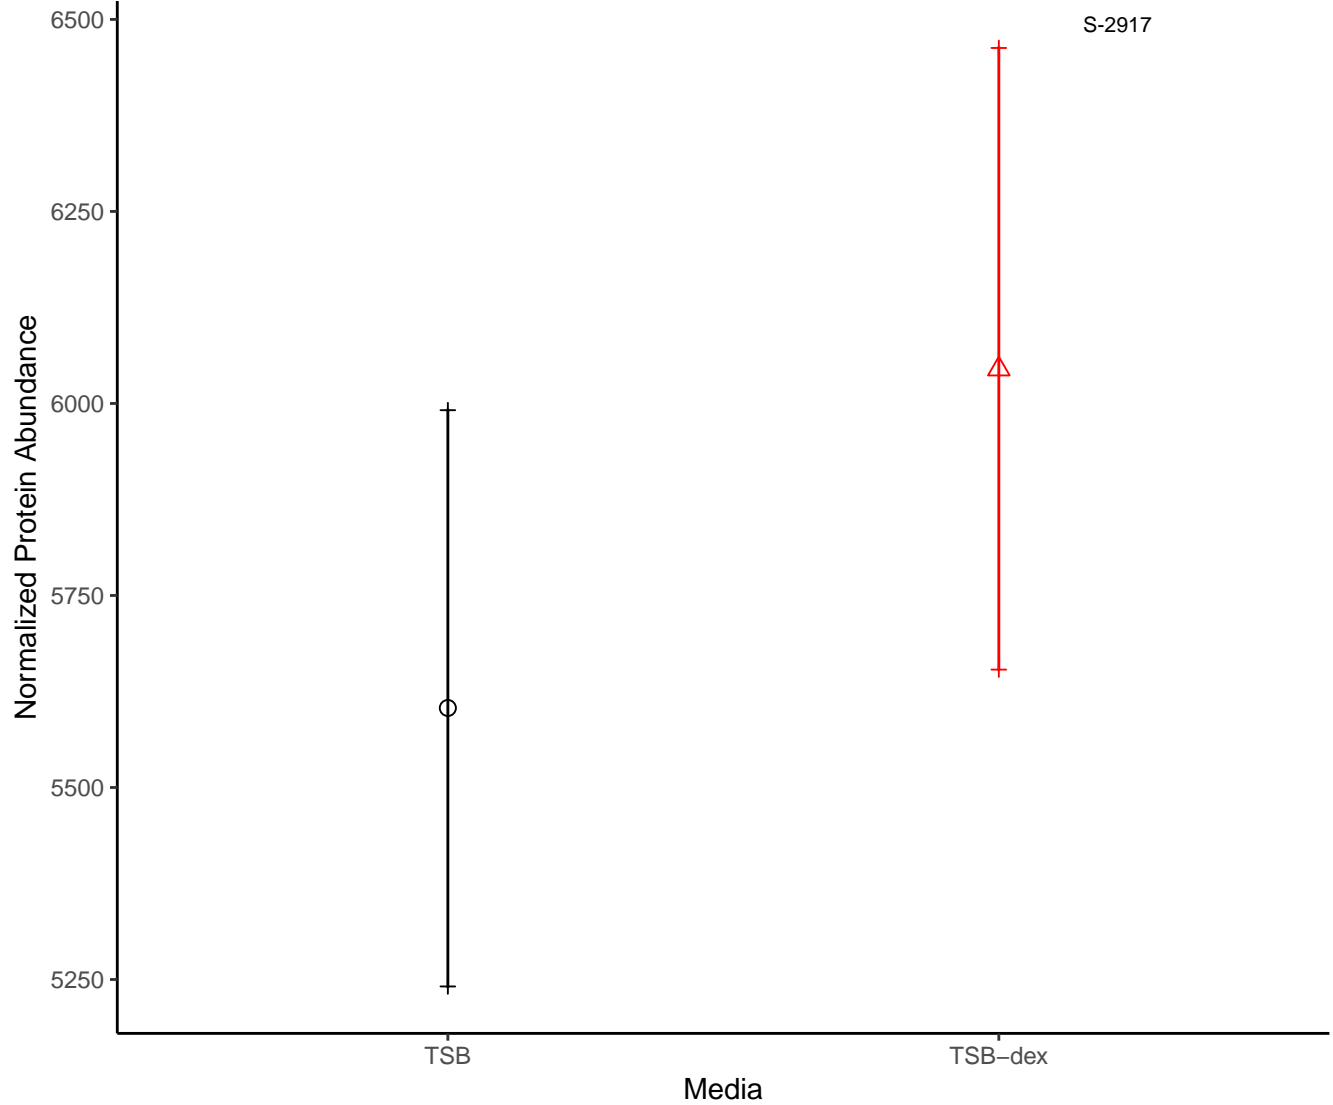

⊕ TSB-dex

△ TSB

# SYS\_STAAM

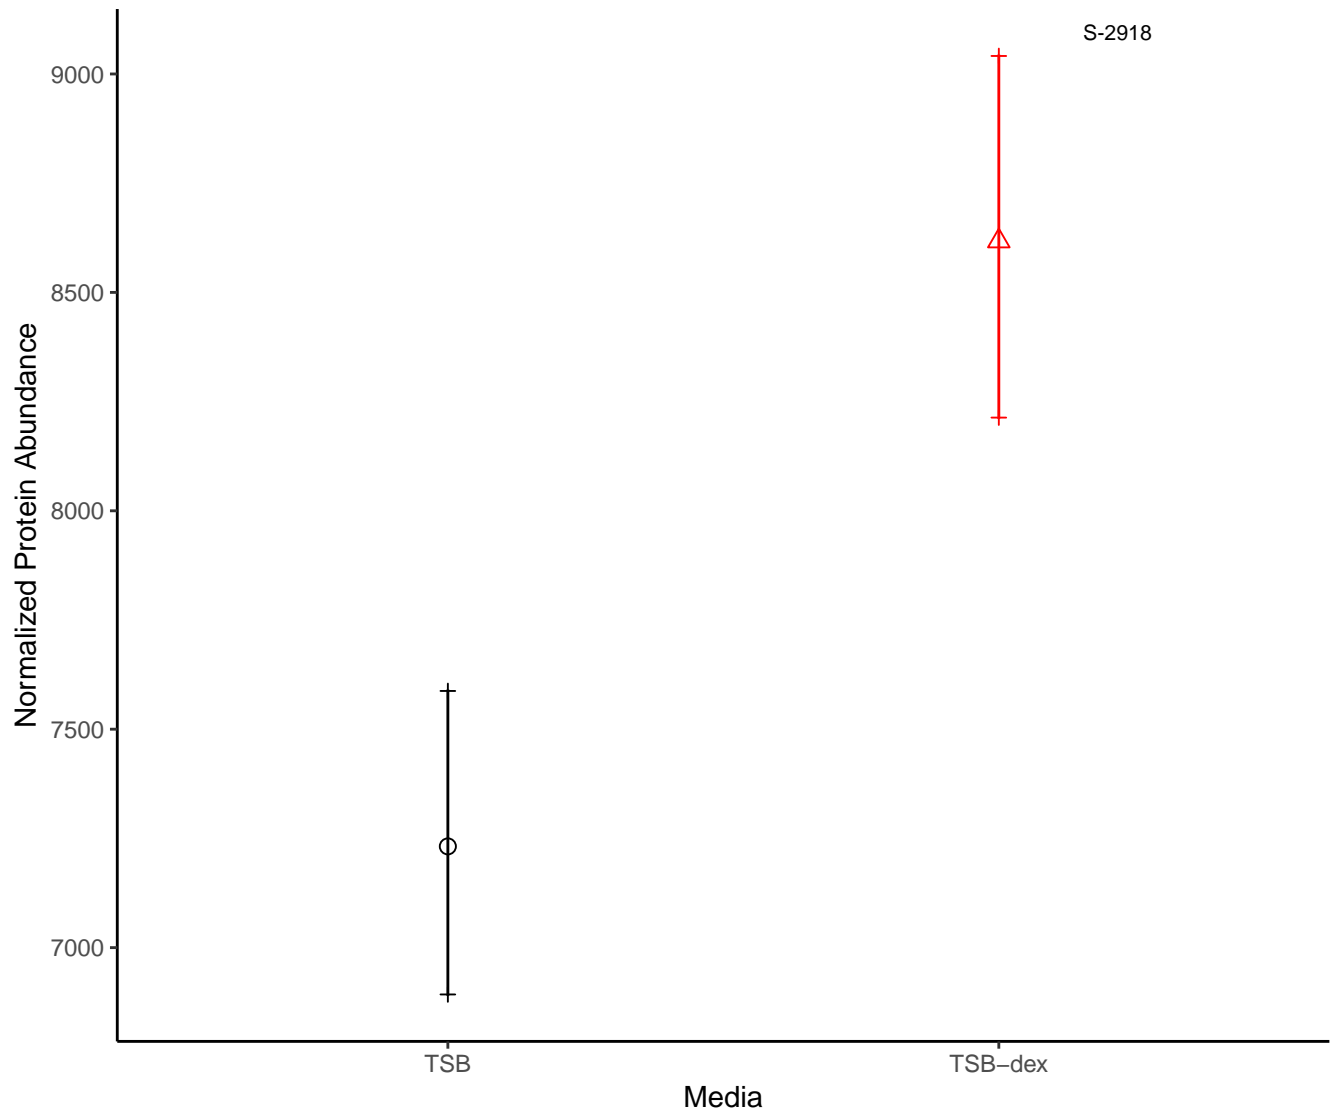

⊕ TSB-dex

△ TSB

# SYT\_STAAM

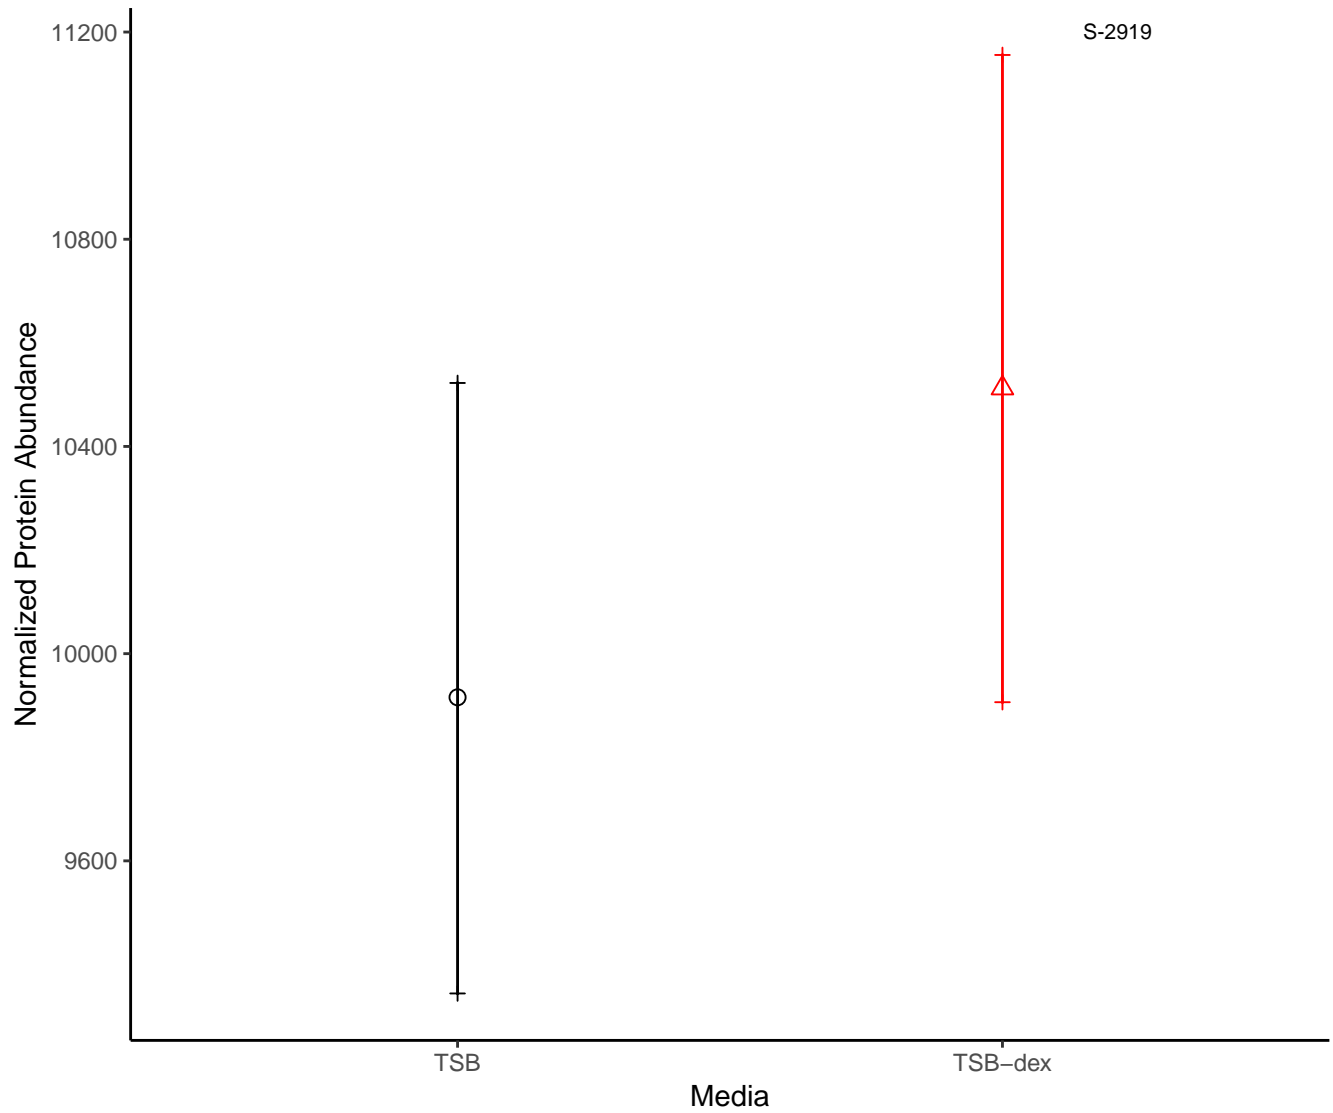

⊖ TSB-dex

△ TSB

# SYV\_STAAM

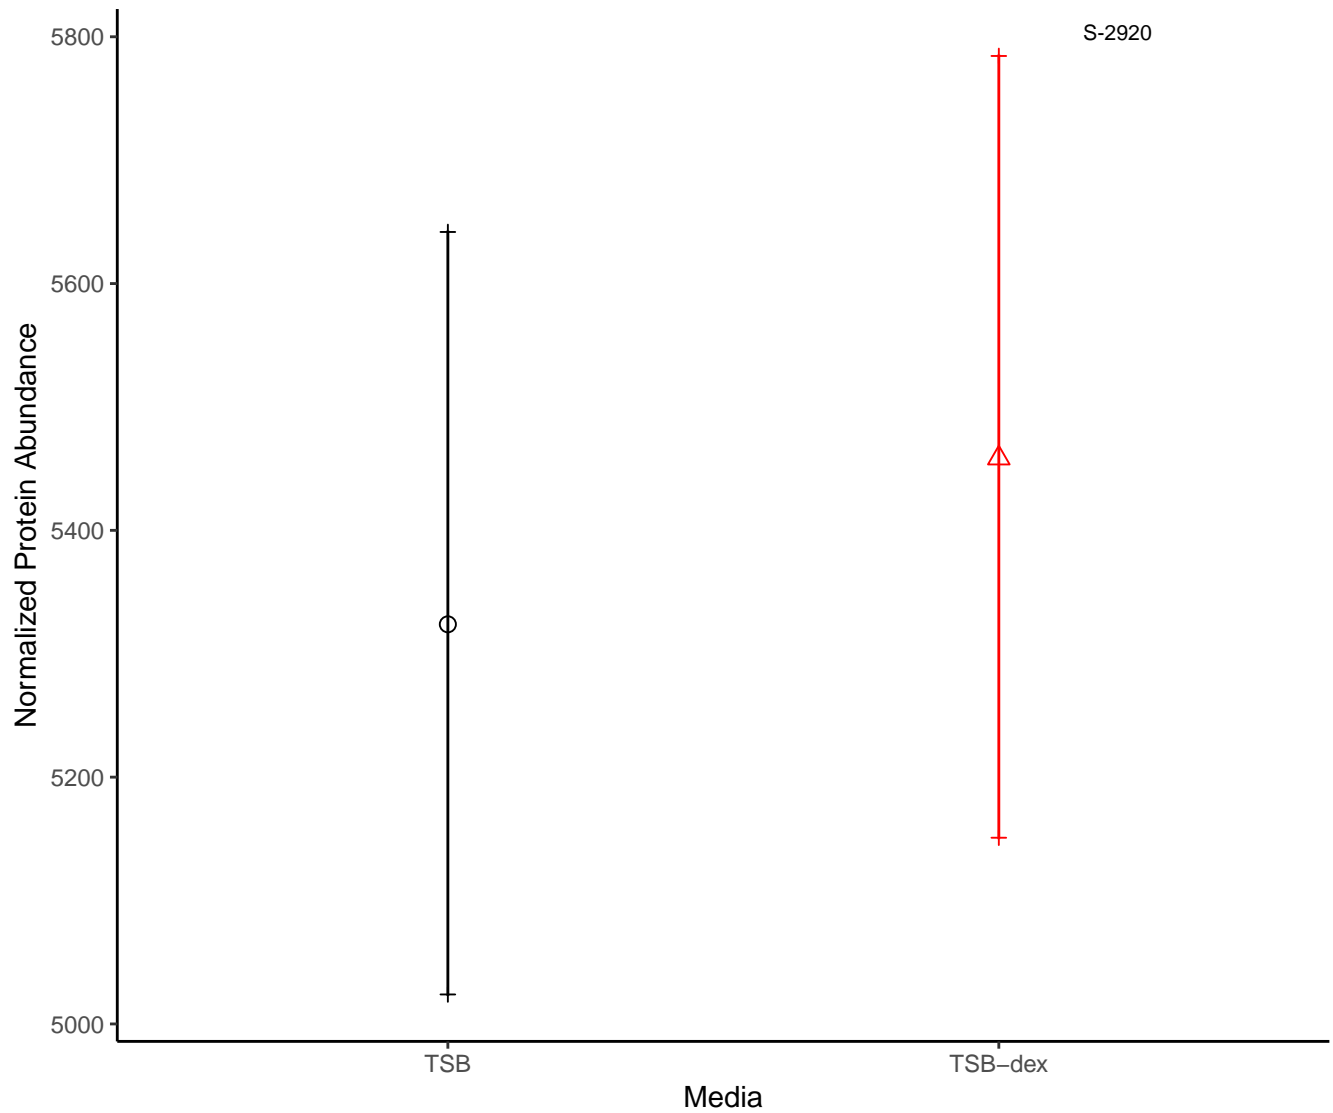

⊕ TSB-dex

△ TSB



# SYW\_STAAM

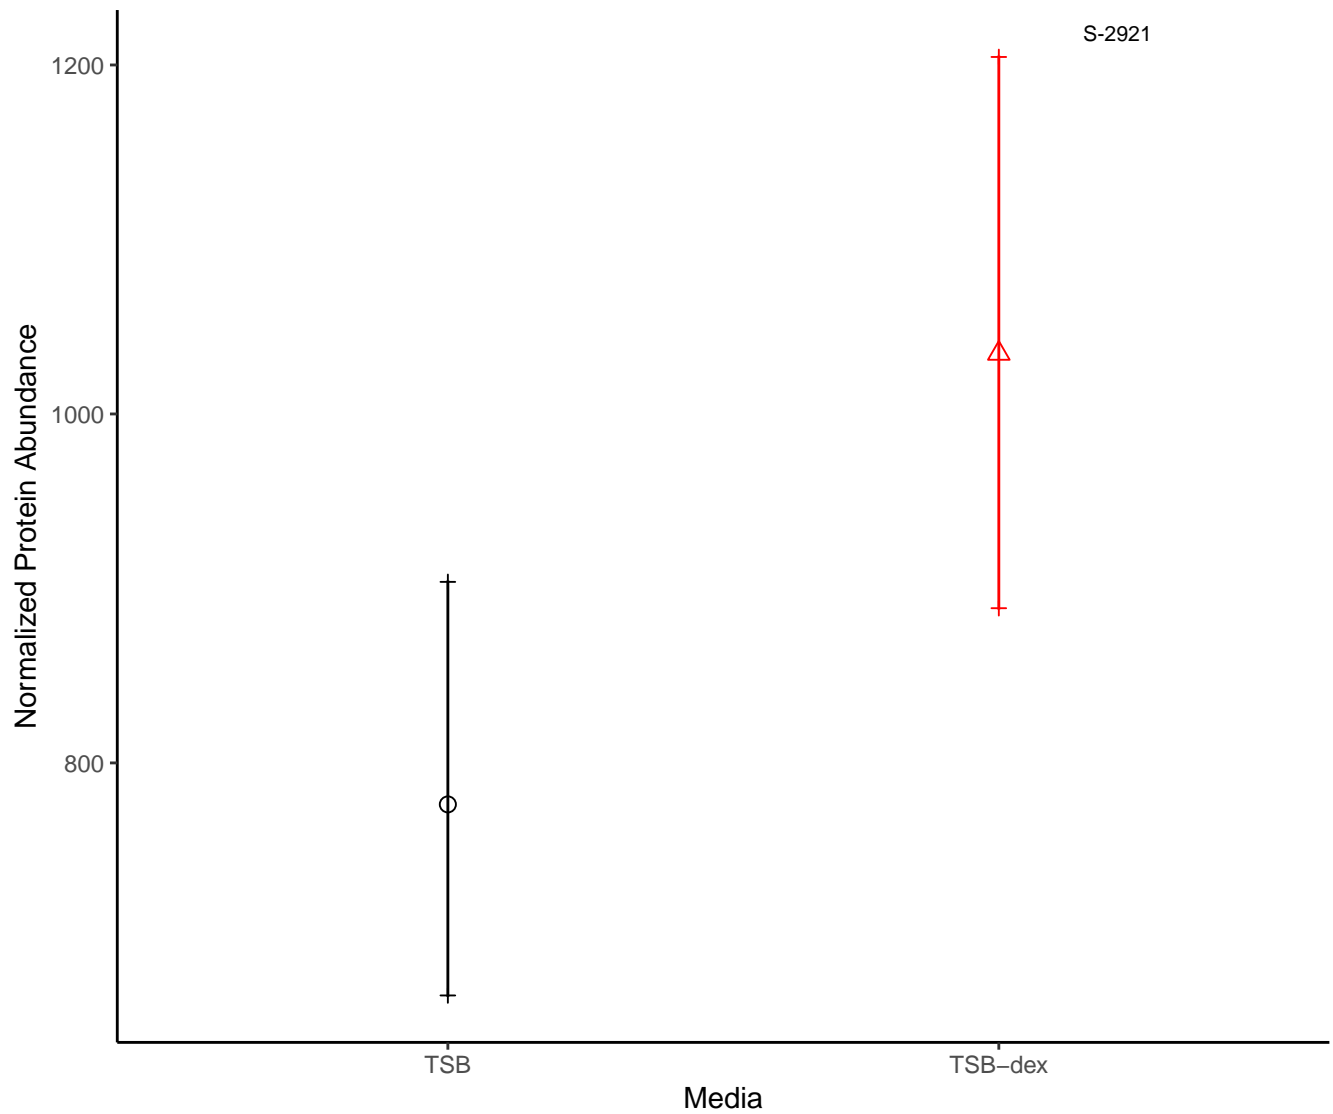

⊕ TSB-dex

△ TSB

# SYT\_STAAM

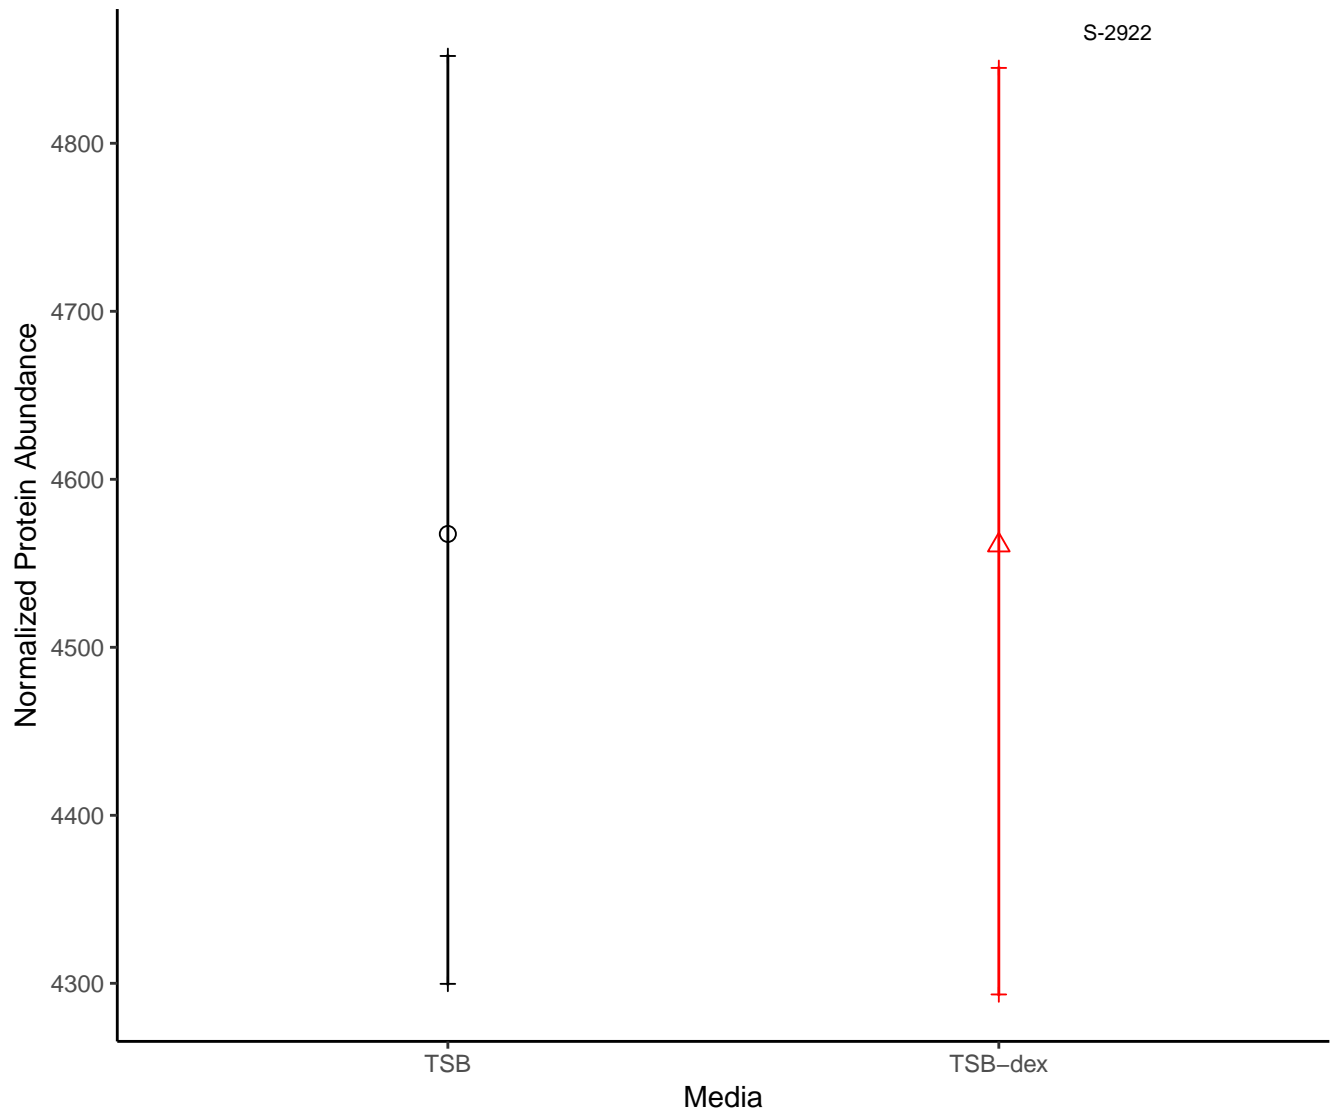

⊕ TSB-dex

△ TSB

# T431\_STAAM

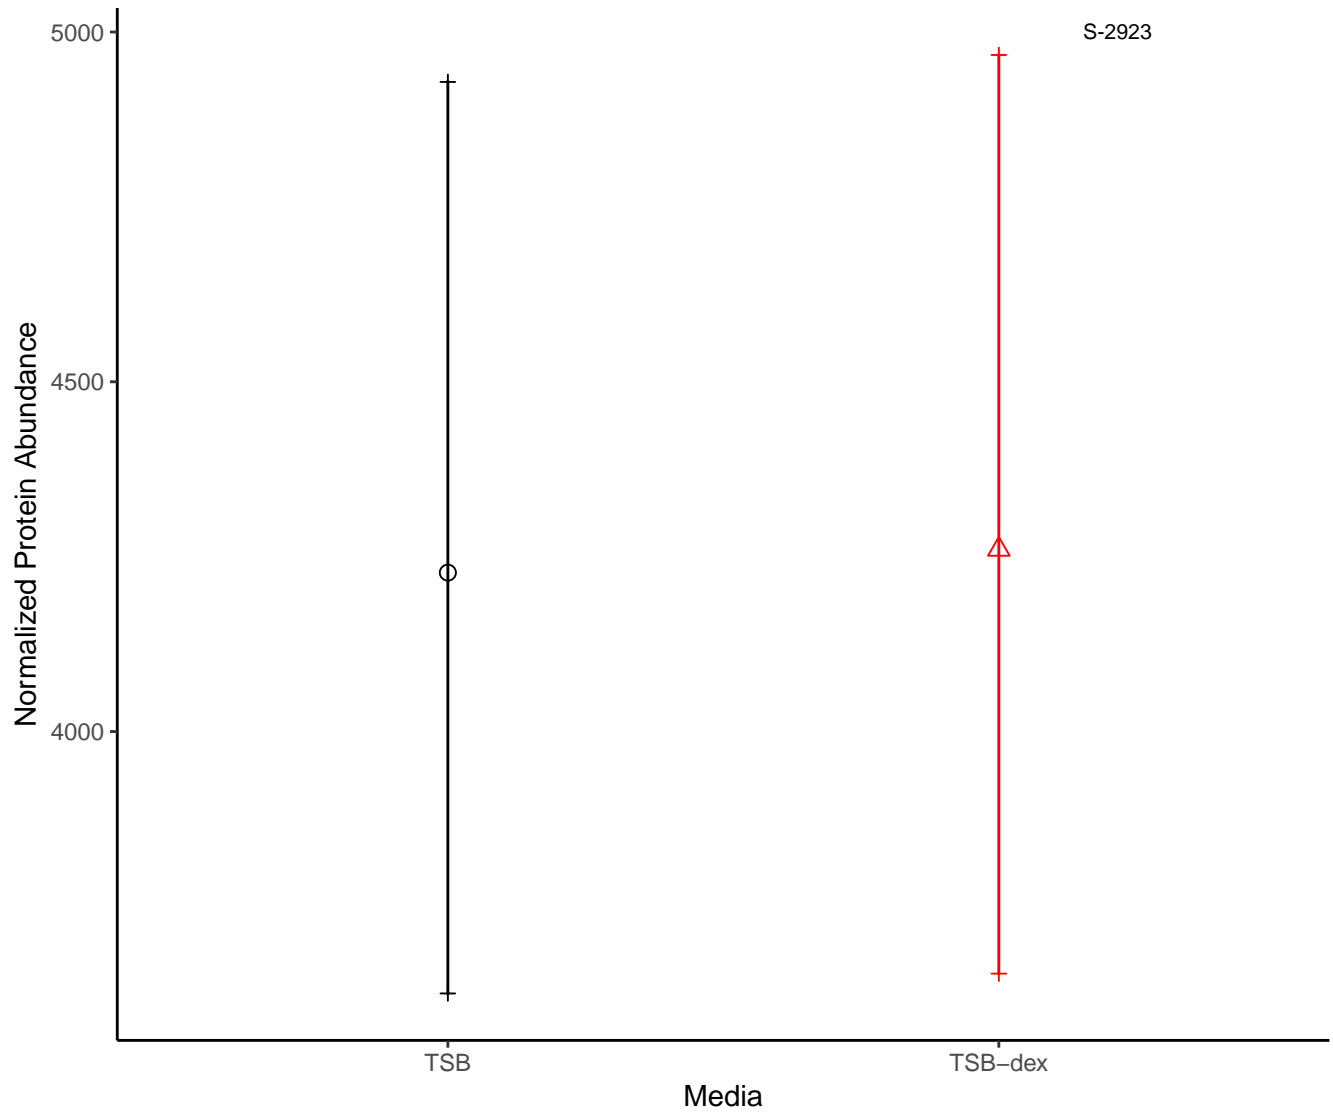

⊕ TSB-dex

△ TSB

# TADA\_STAAM

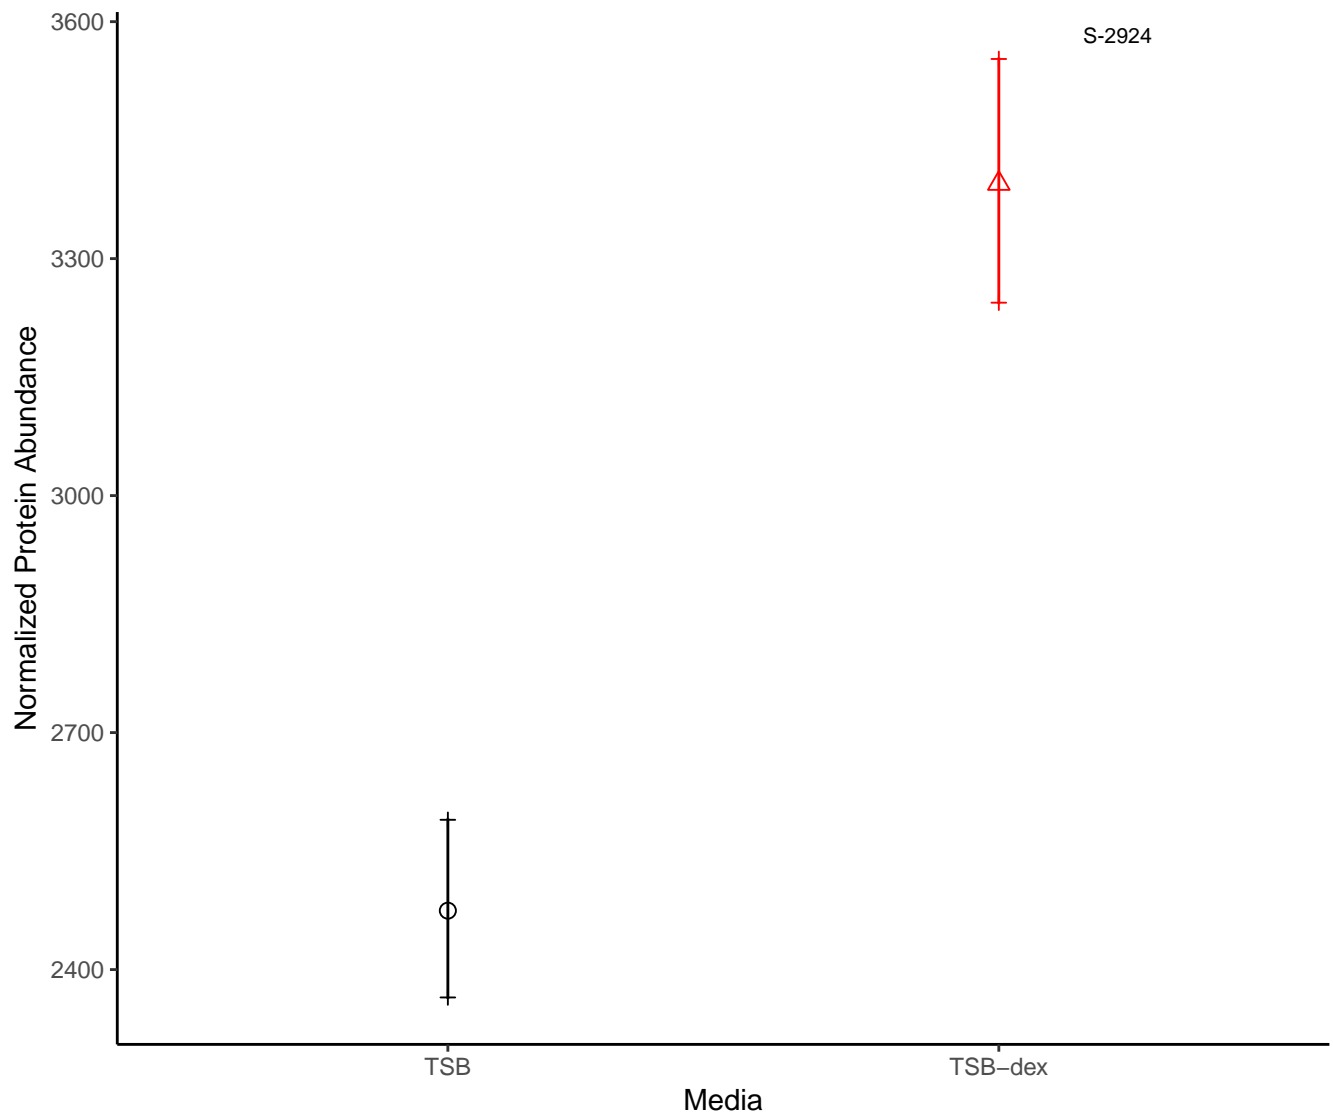

⊕ TSB-dex

△ TSB

# TAGA\_STAAM

S-2925

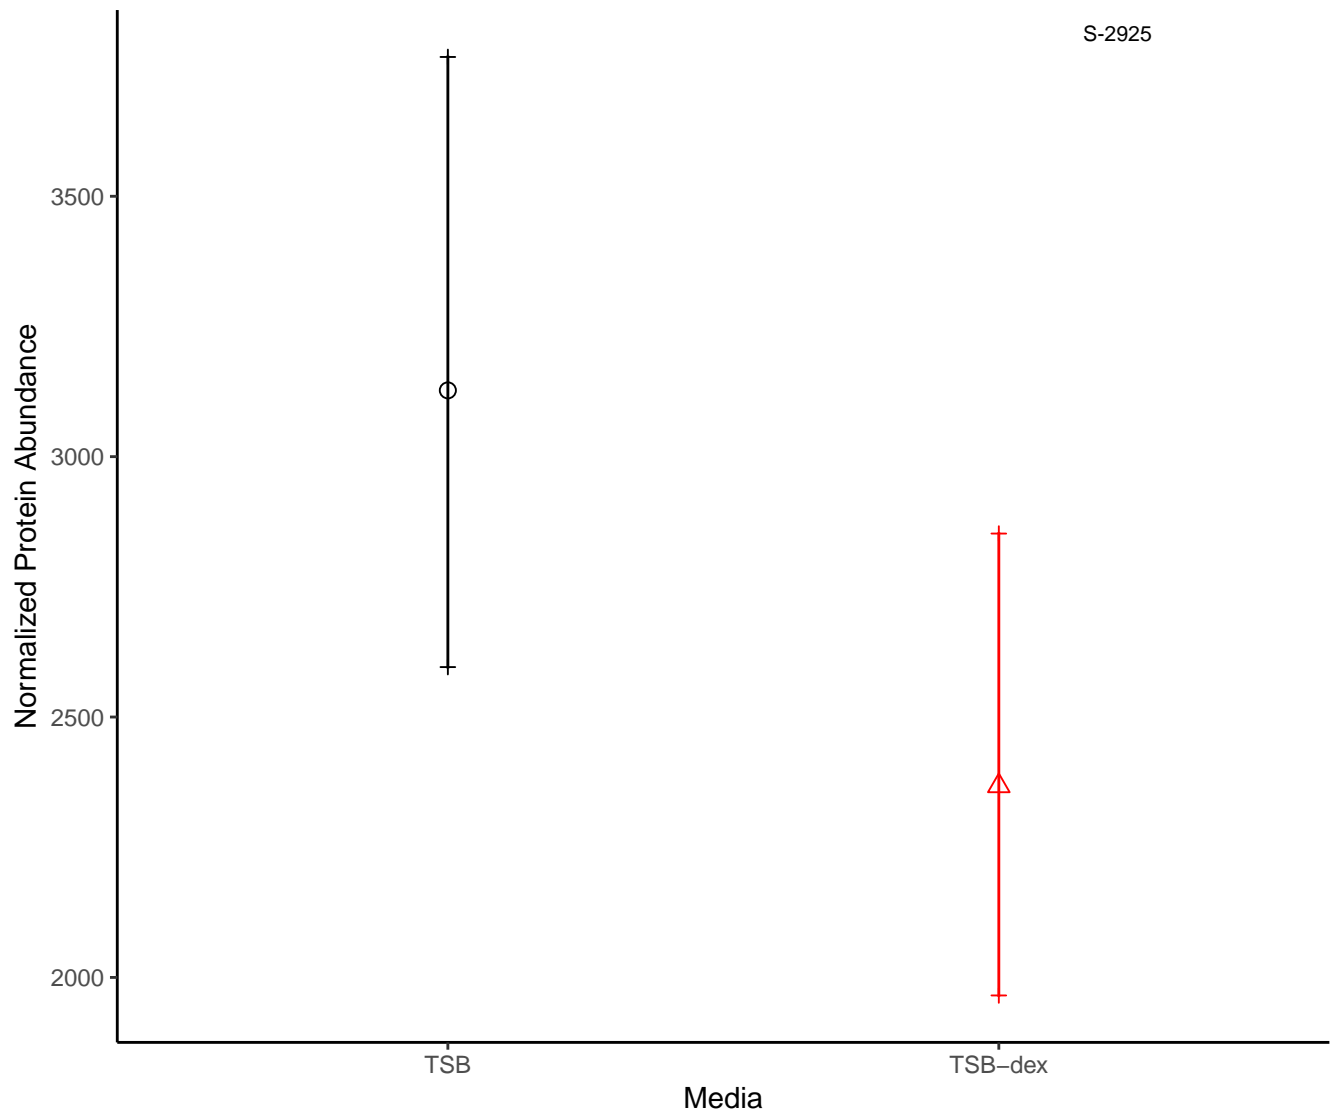

⊕ TSB-dex

△ TSB

# TDCB\_STAAM

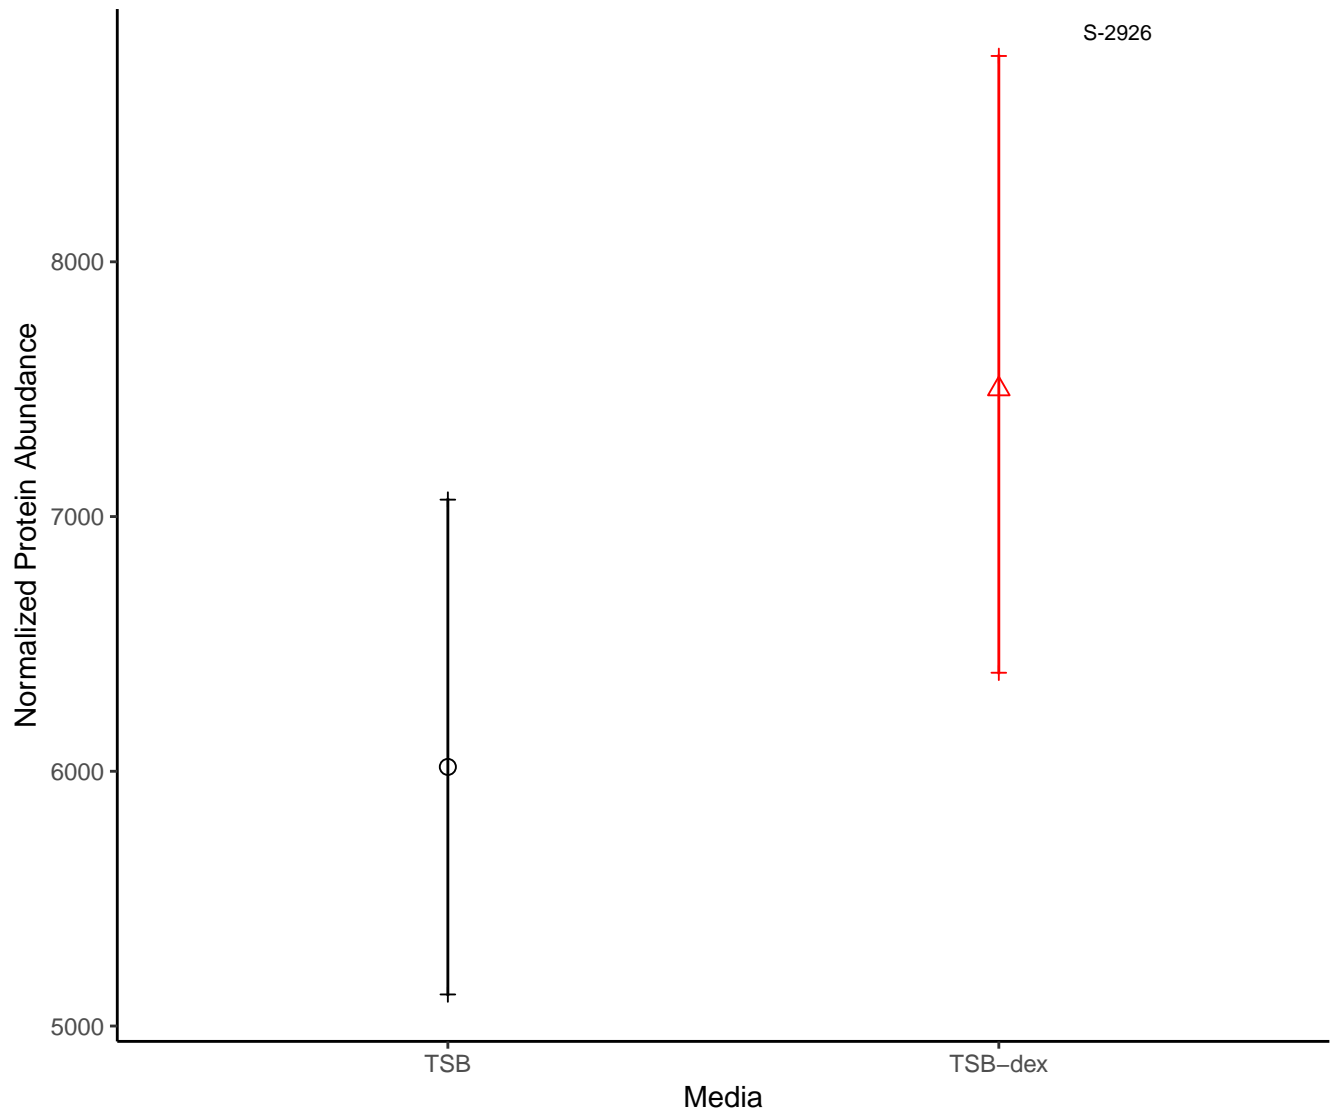

⊕ TSB-dex

△ TSB

# TELL\_STAAM

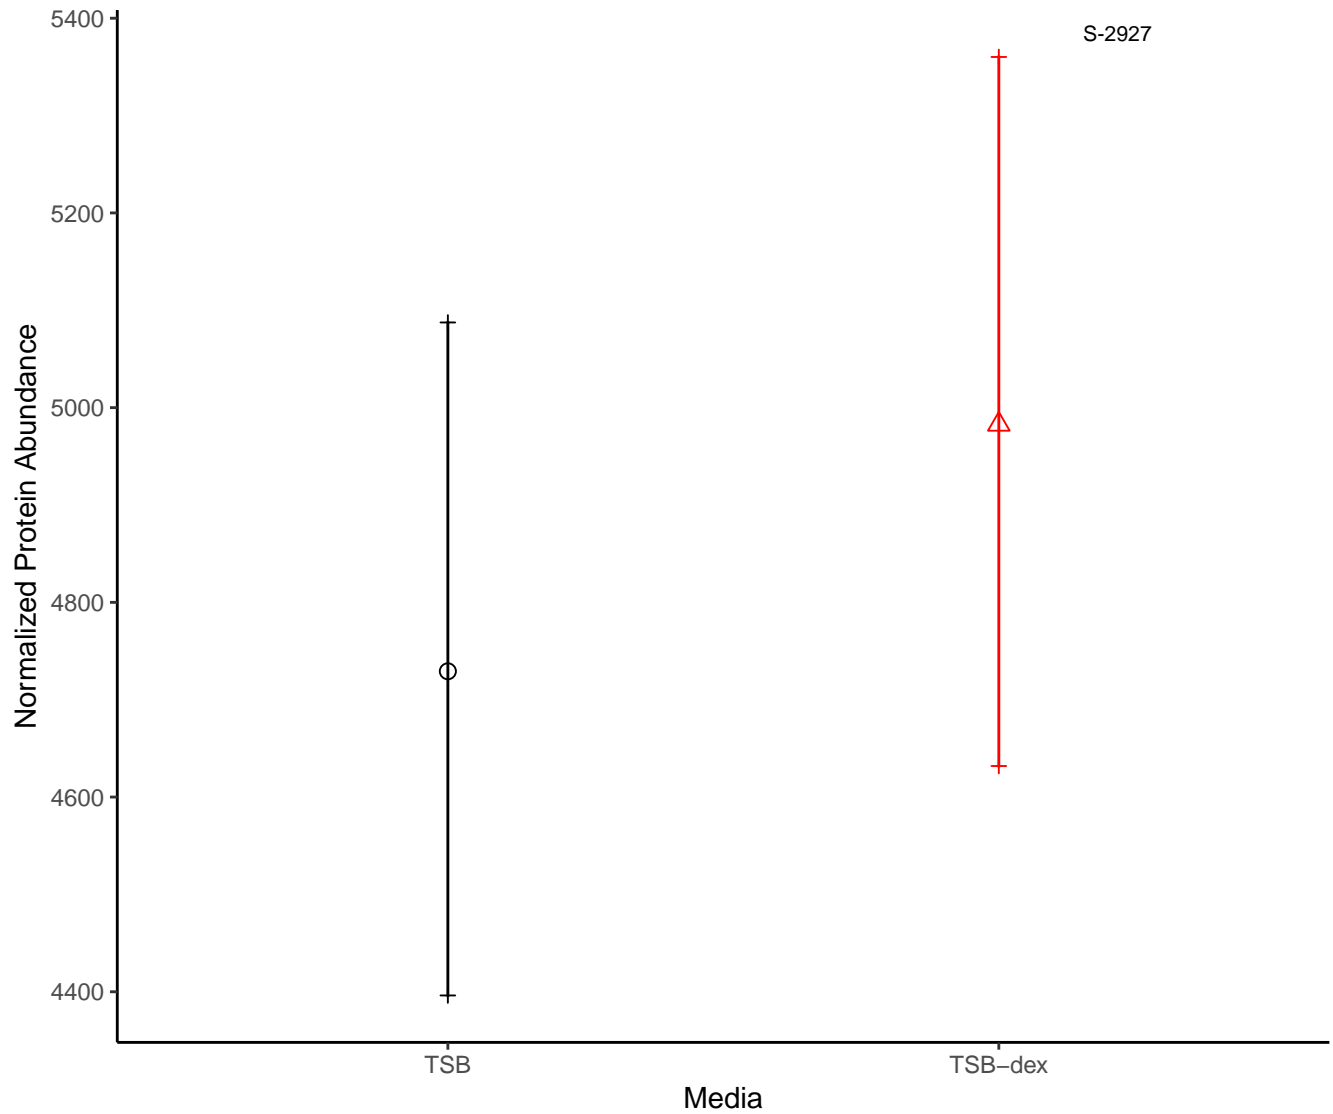

⊕ TSB-dex

△ TSB

# THID\_STAAM

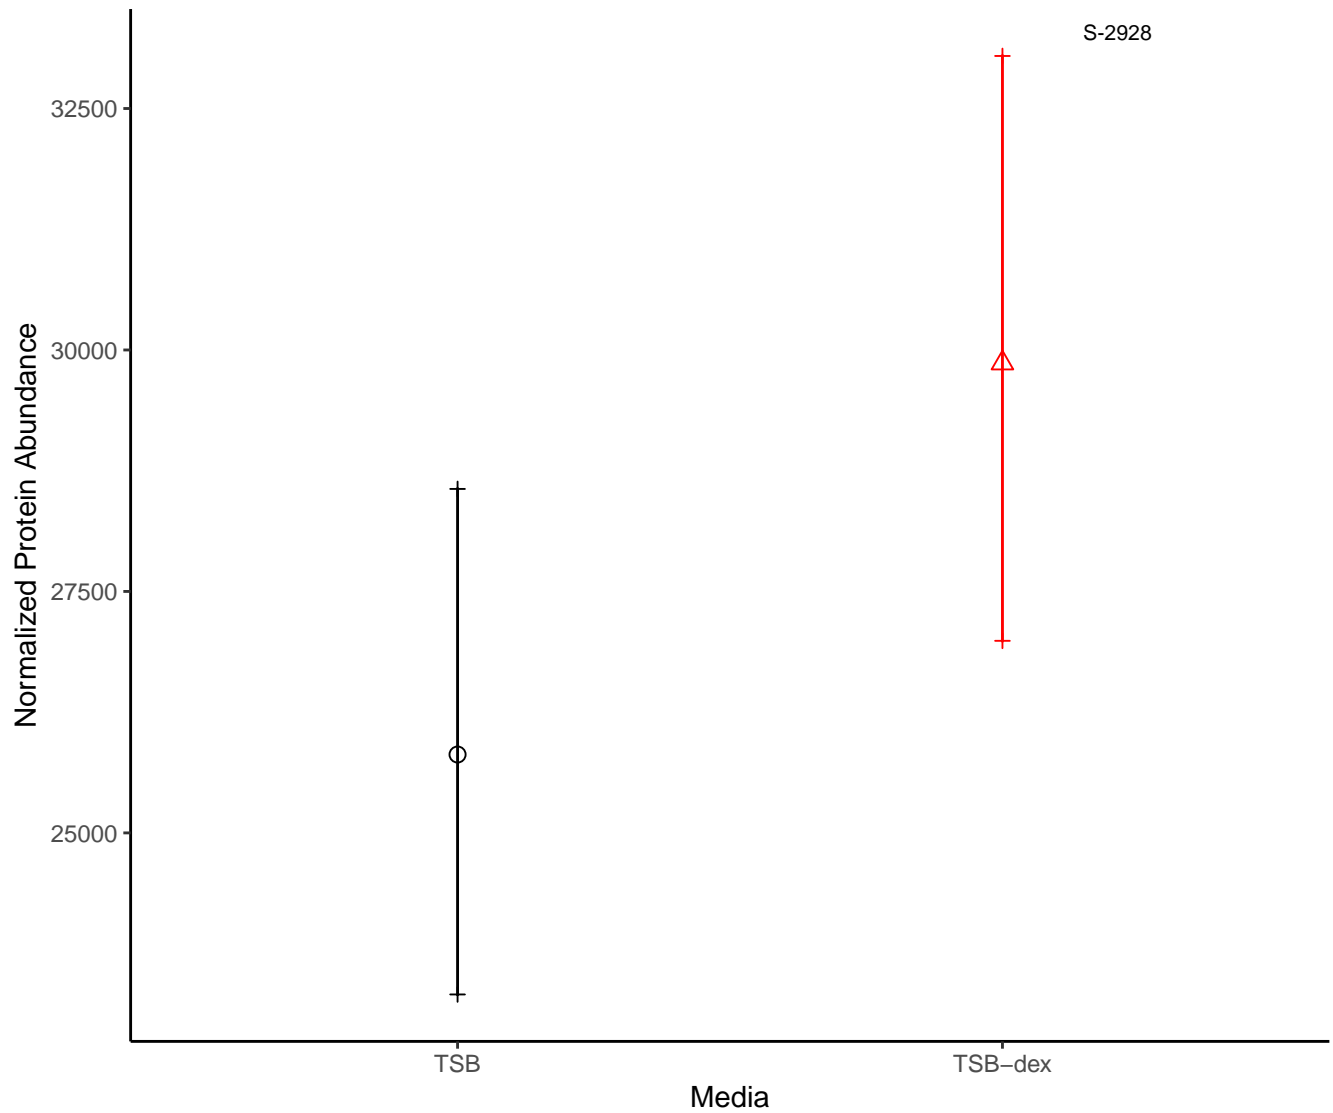

⊕ TSB-dex

△ TSB



# THIM\_STAAM

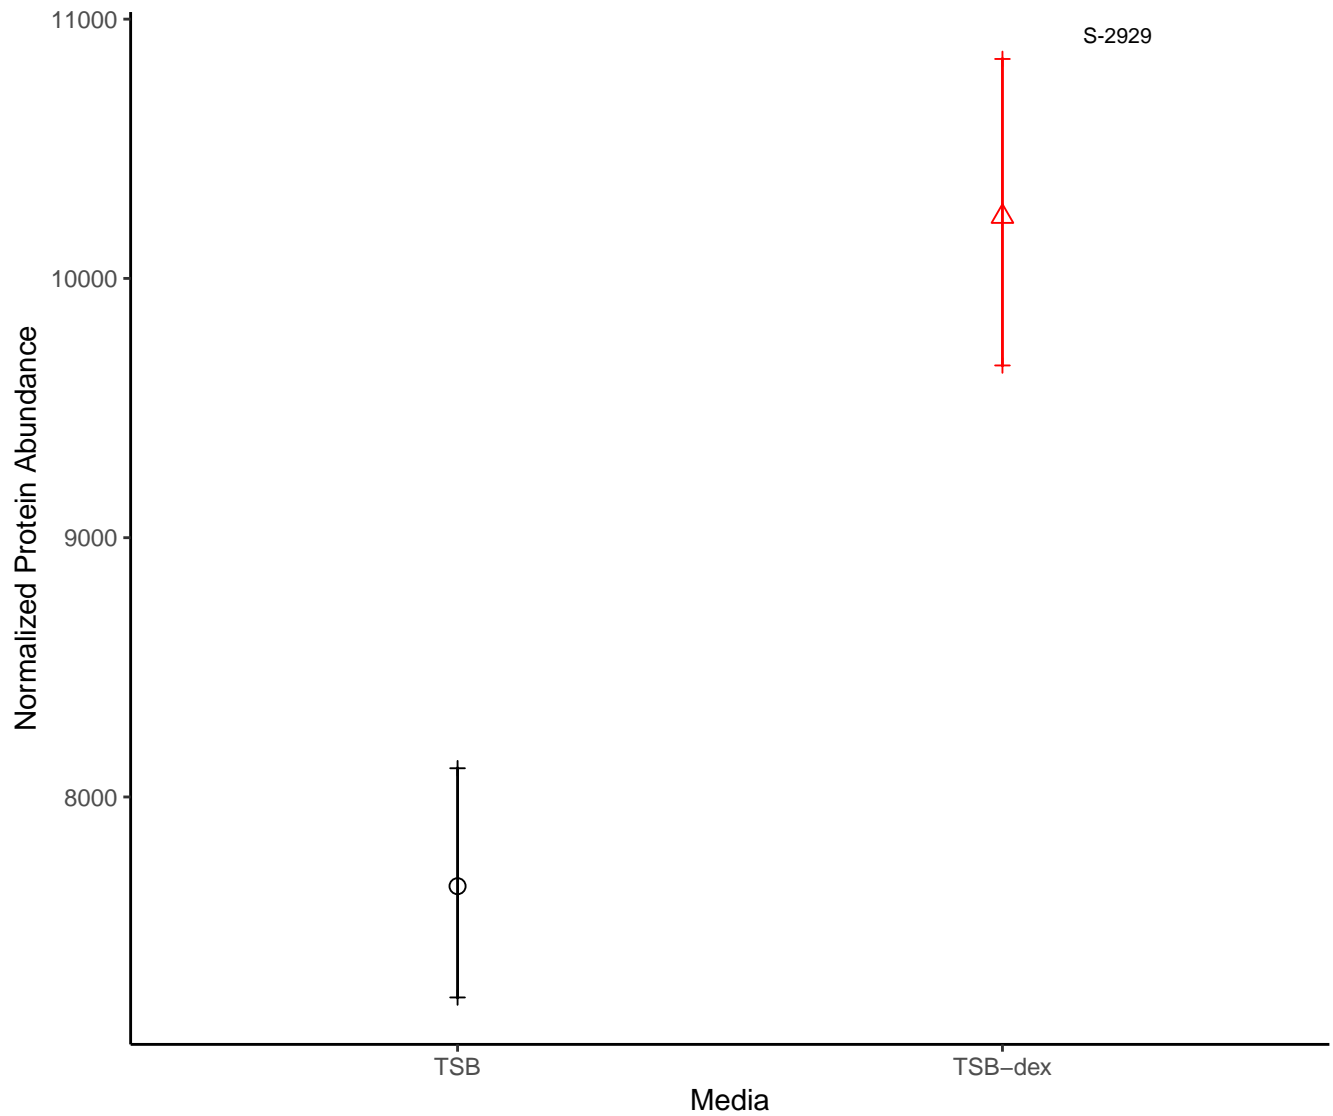

⊕ TSB-dex

△ TSB

# THIO\_STAAM

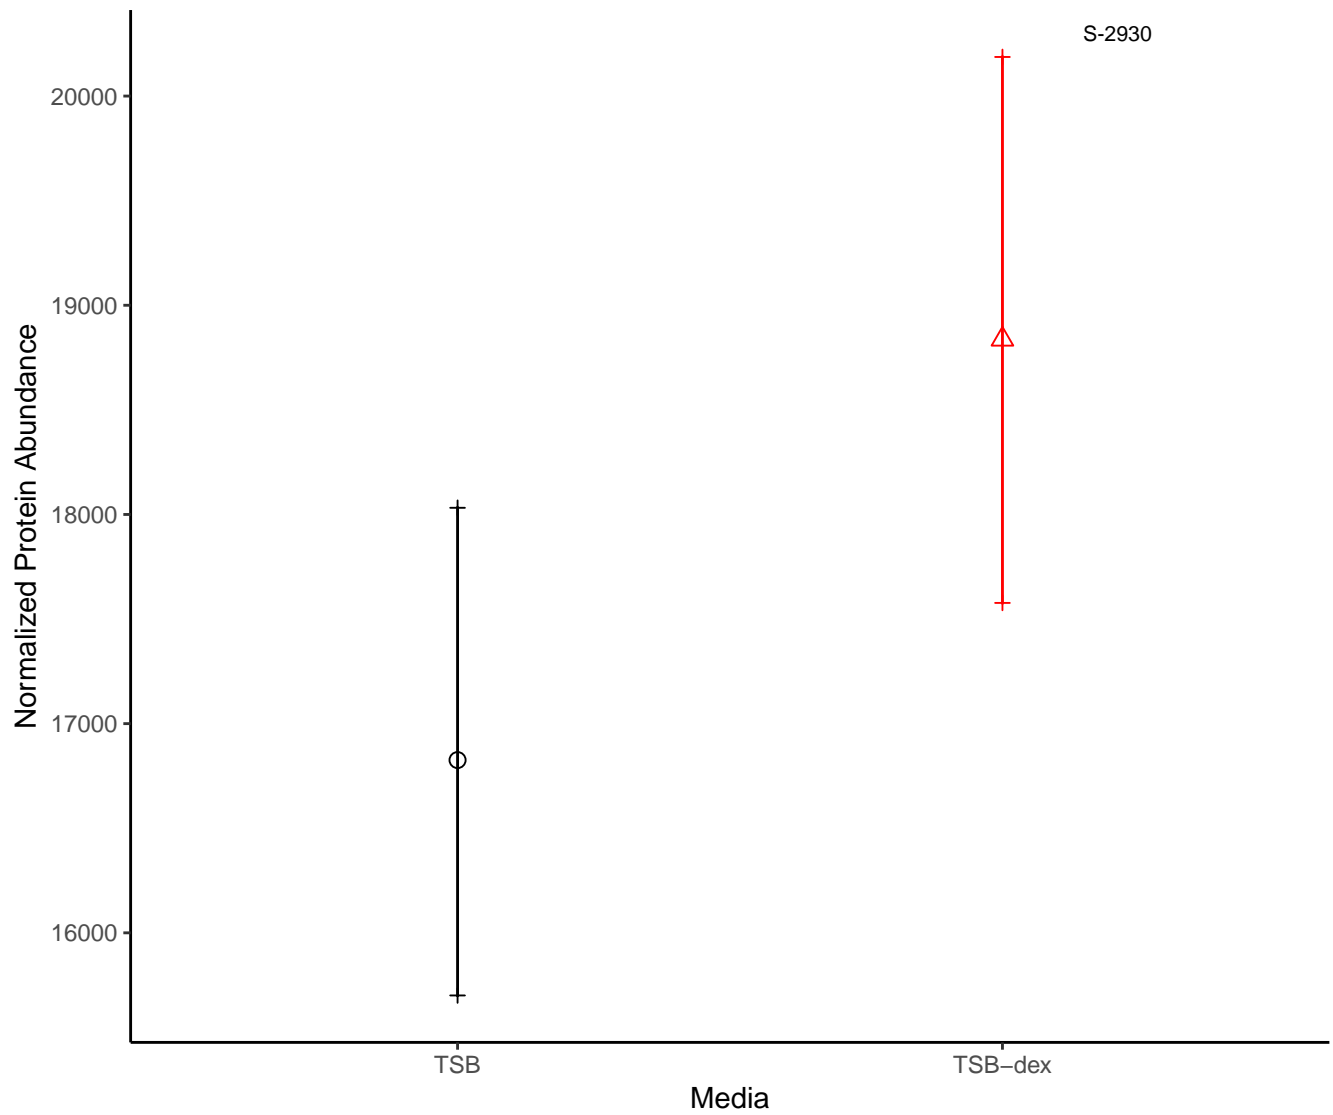

⊕ TSB-dex

△ TSB

# THLA\_STAAM

S-2931

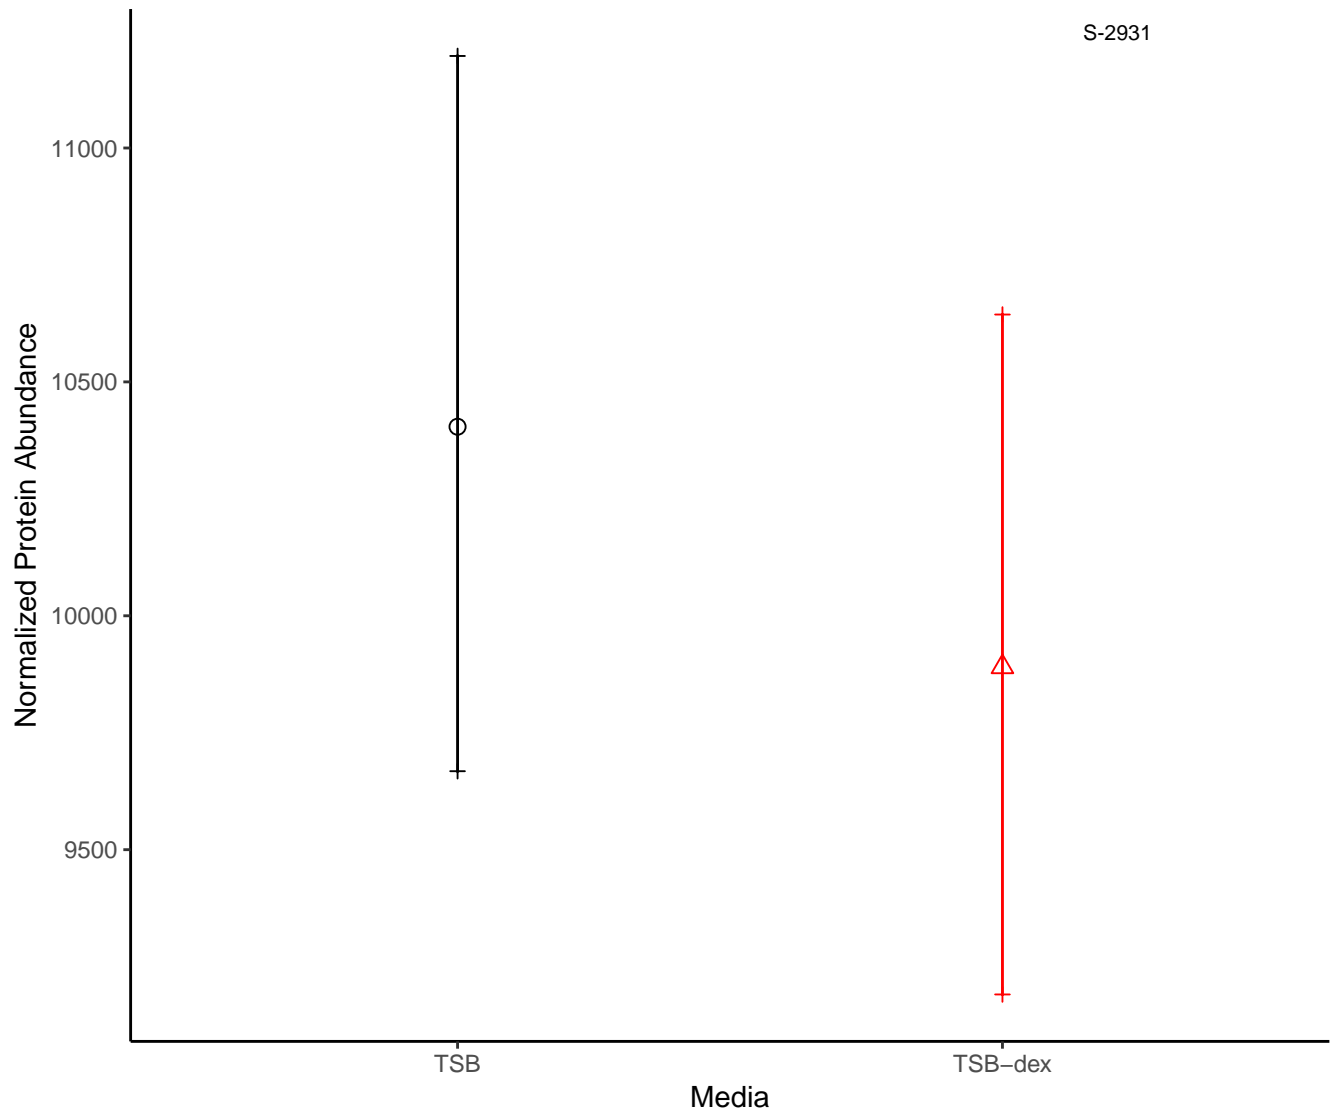

⊕ TSB-dex

△ TSB

# TIG\_STAAM

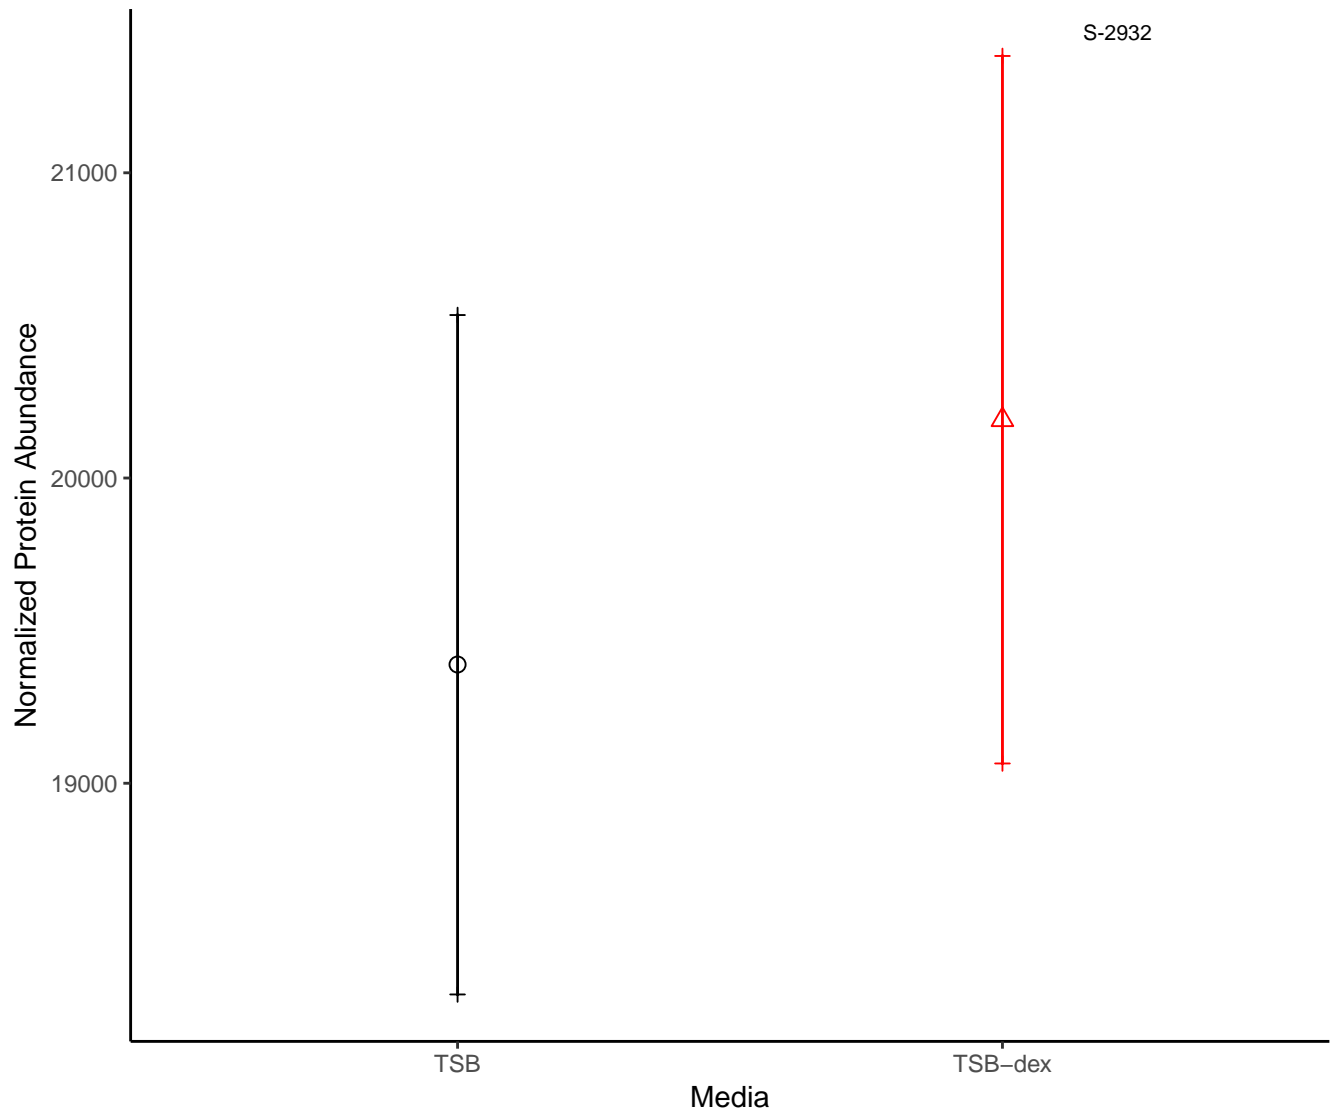

⊕ TSB-dex

△ TSB

# TKT\_STAAM

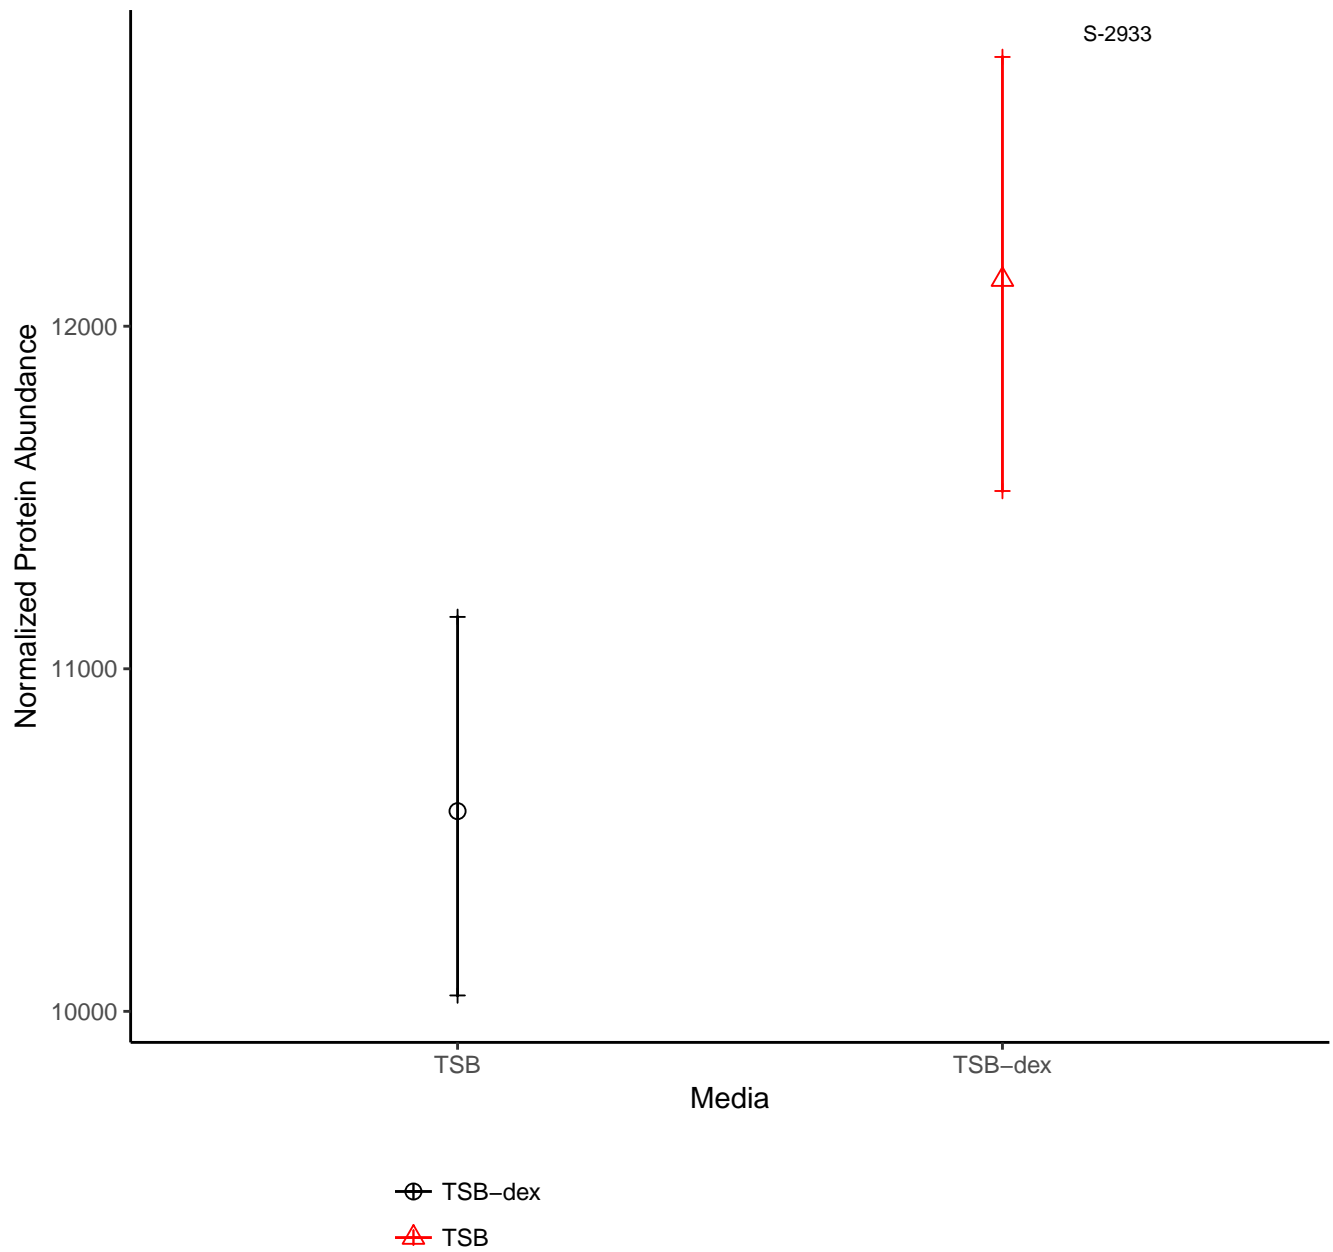

# TOP1\_STAAM

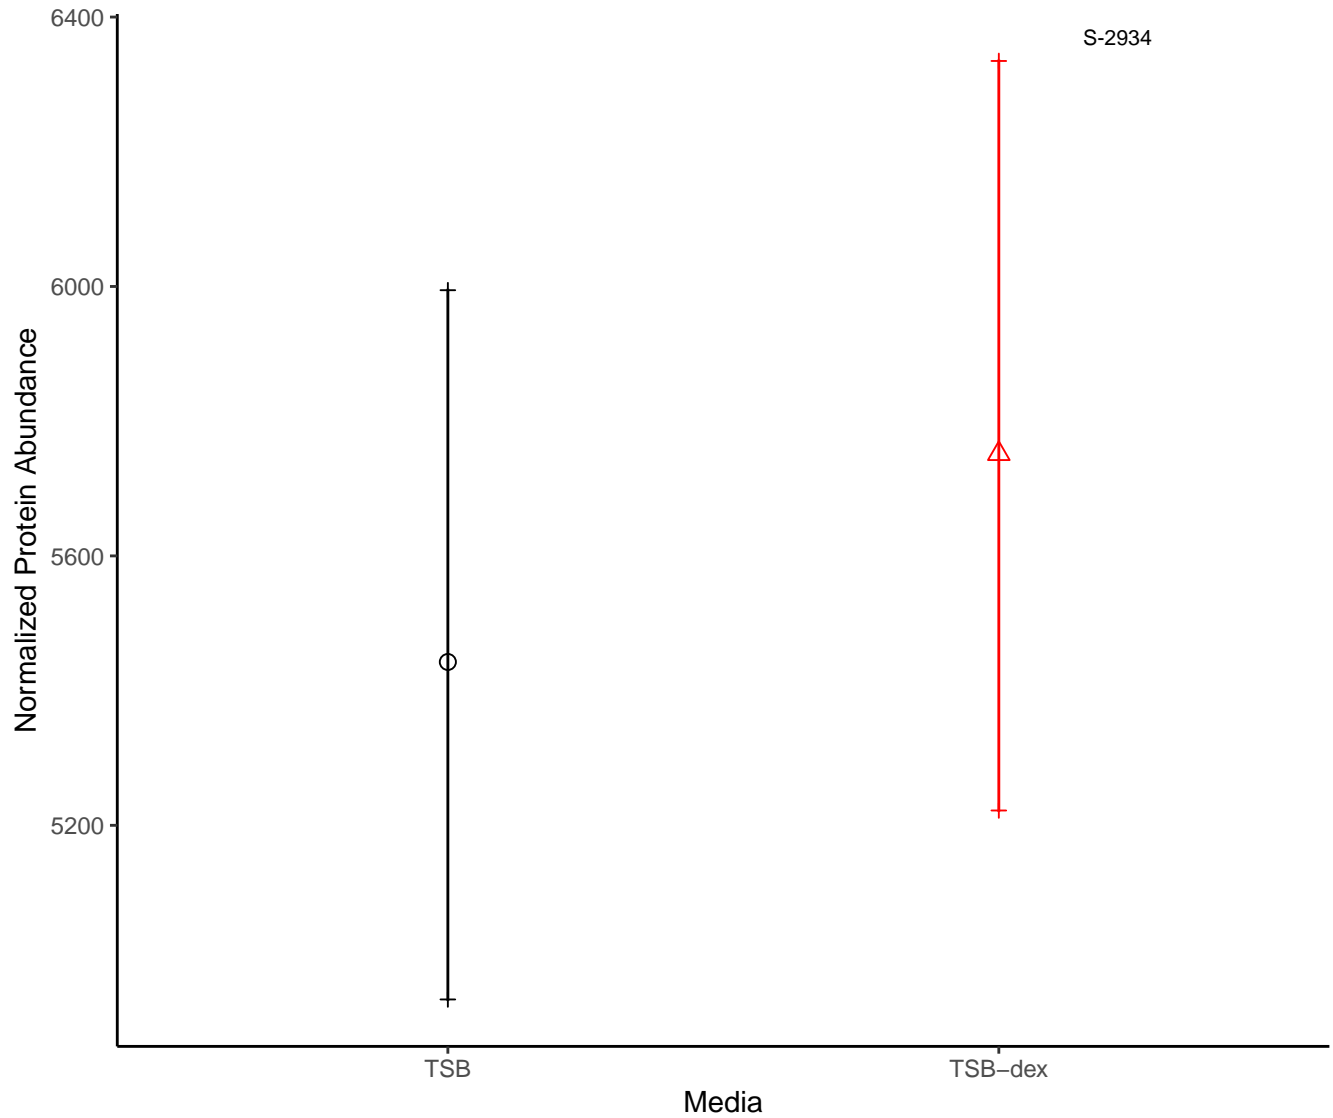

⊕ TSB-dex

△ TSB

# TOP3\_STAAM

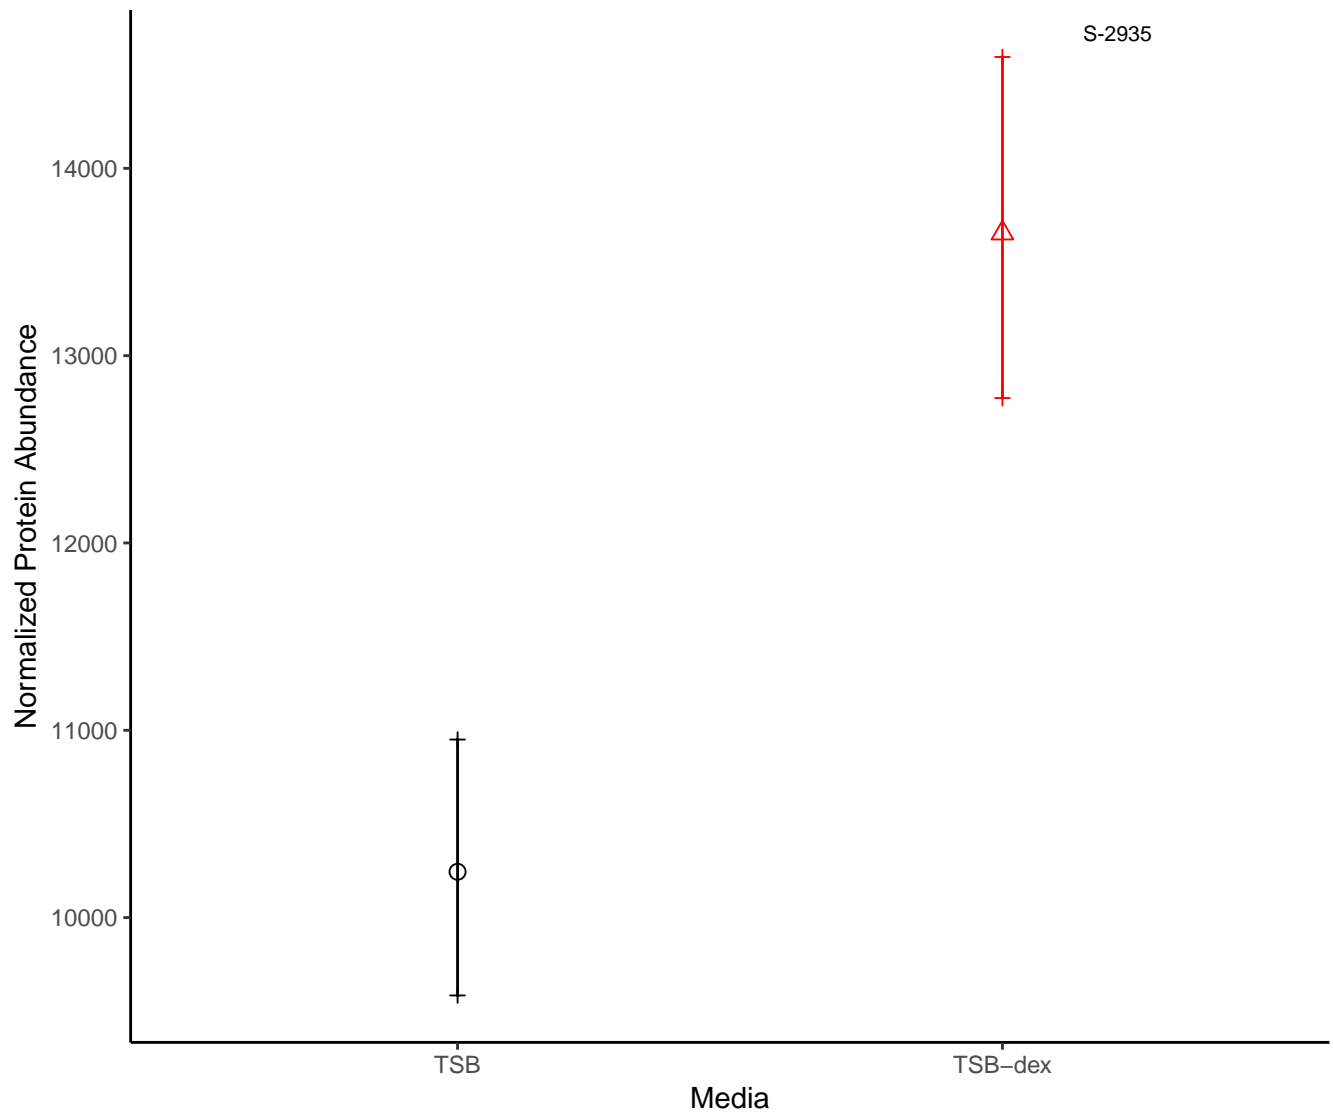

⊕ TSB-dex

△ TSB

# TPIS\_STAAM

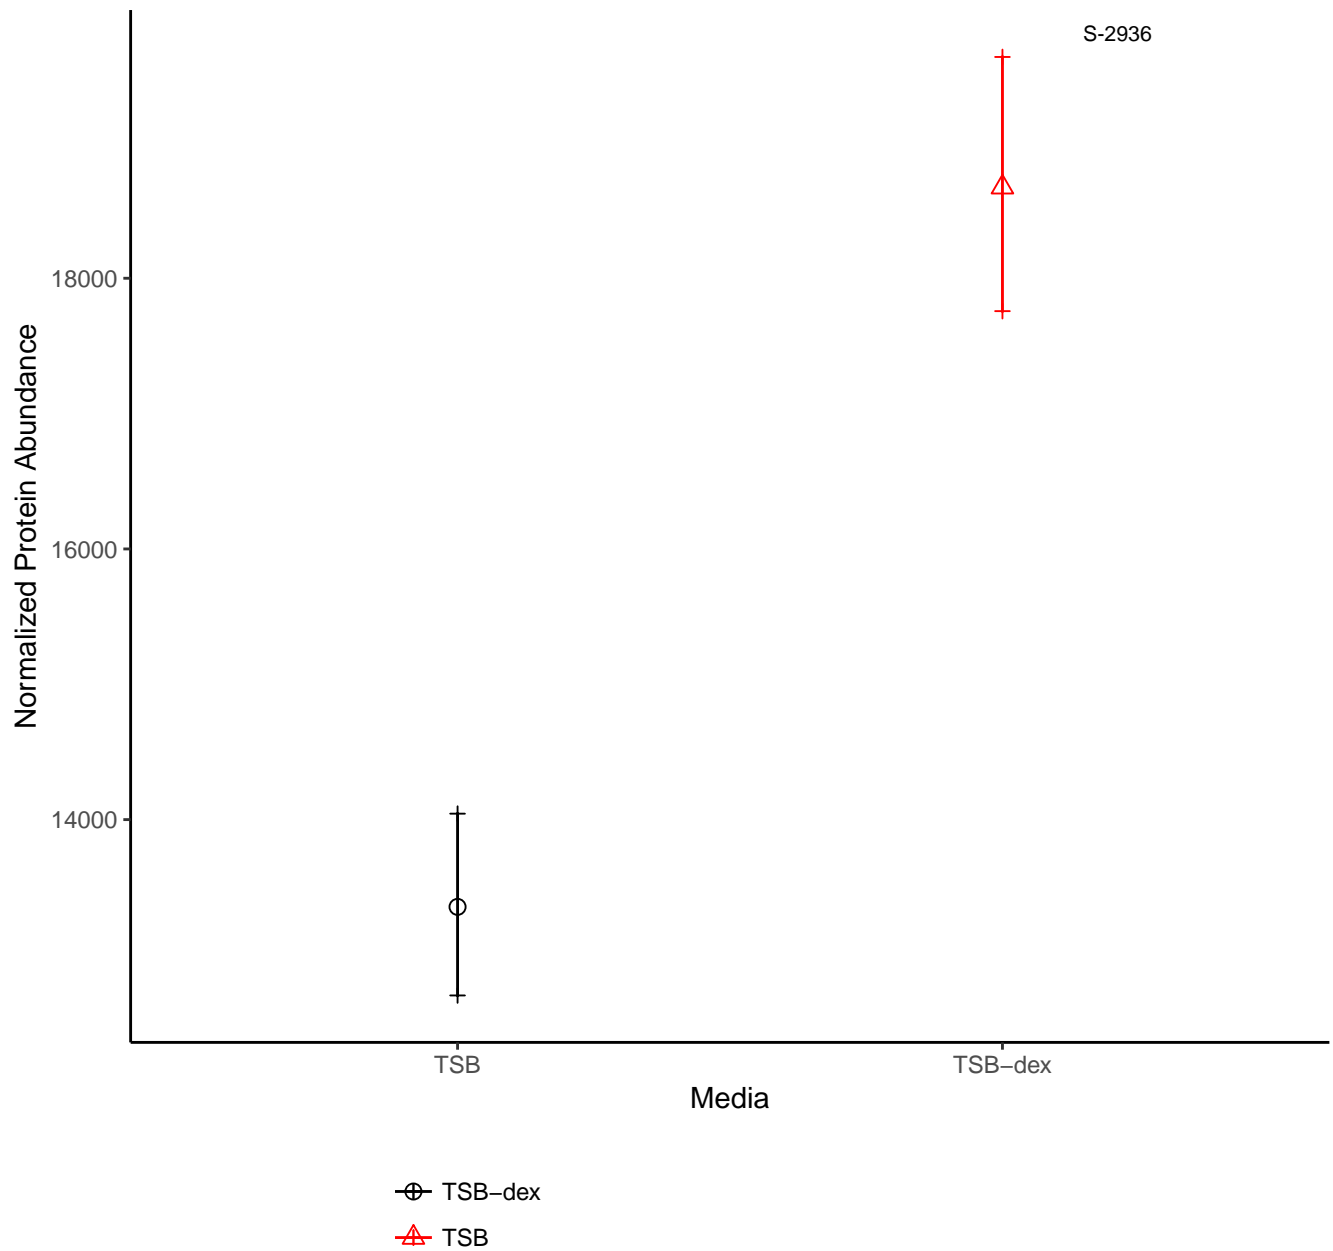



# TPX\_STAAM

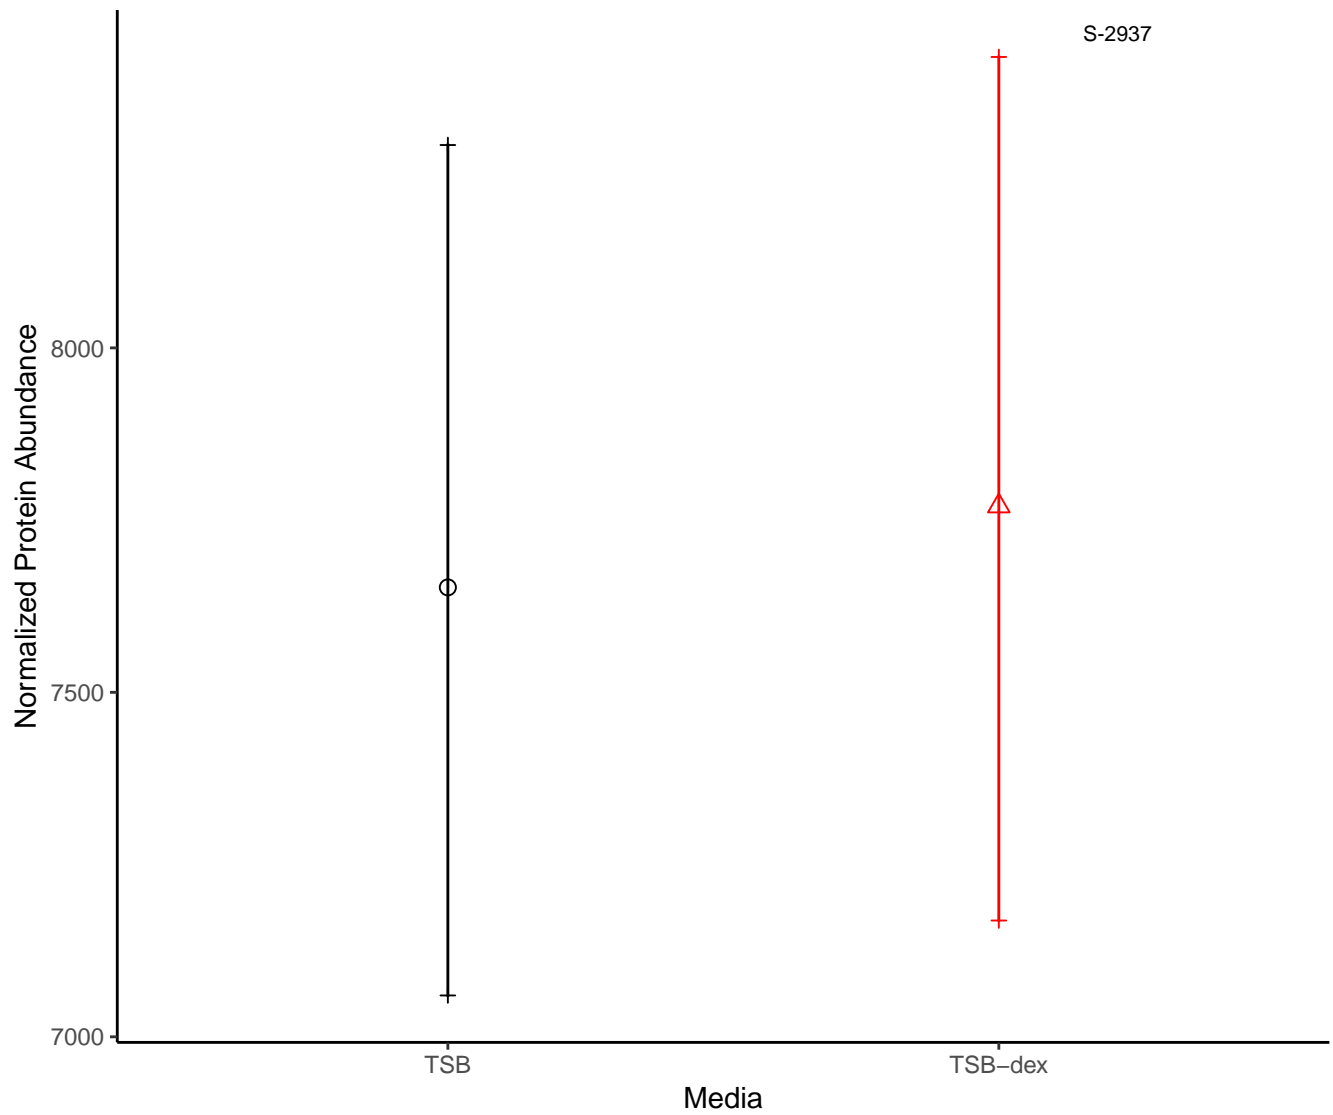

⊕ TSB-dex

△ TSB

# TRAC\_STAAM

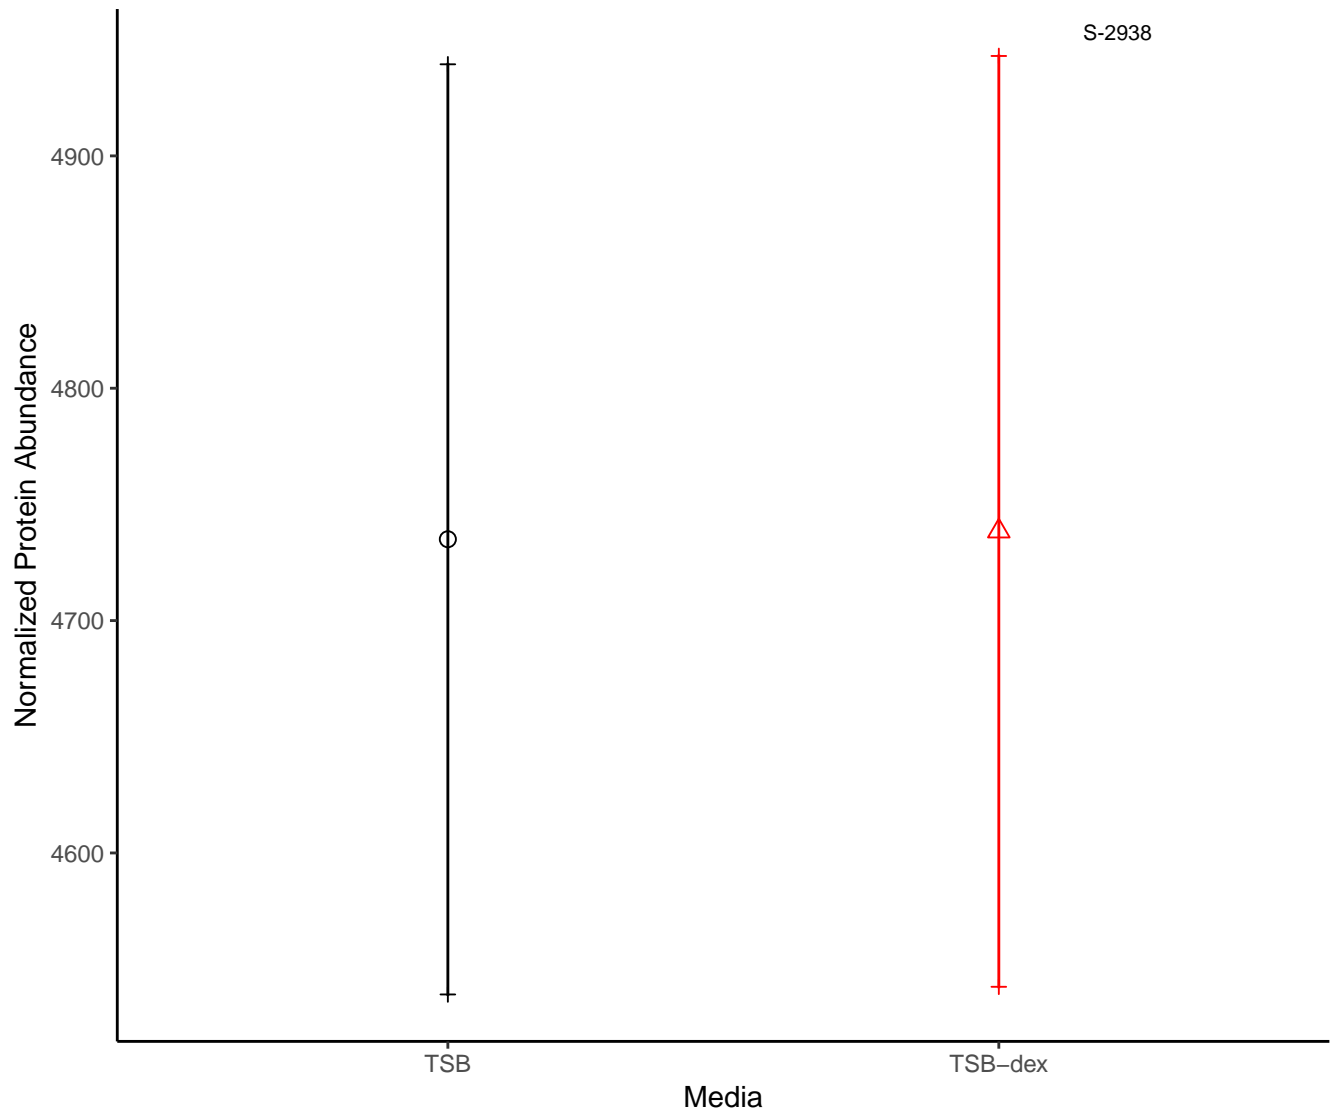

⊕ TSB-dex

△ TSB

# TRAP\_STAAM

S-2939

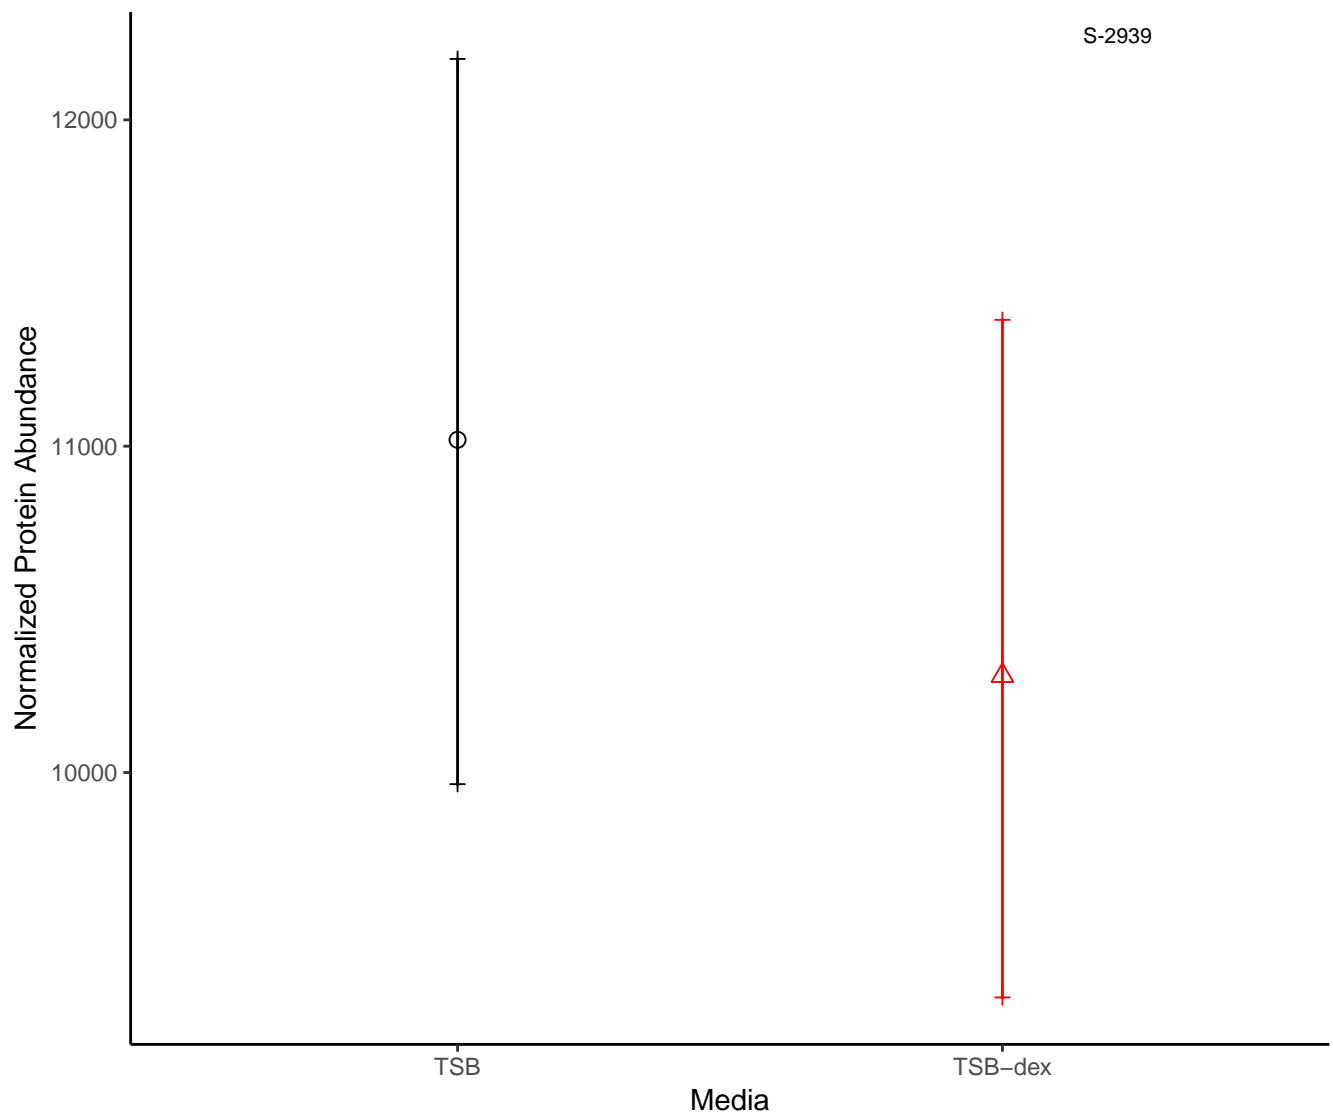

⊕ TSB-dex

△ TSB

# TRMB\_STAAM

S-2940

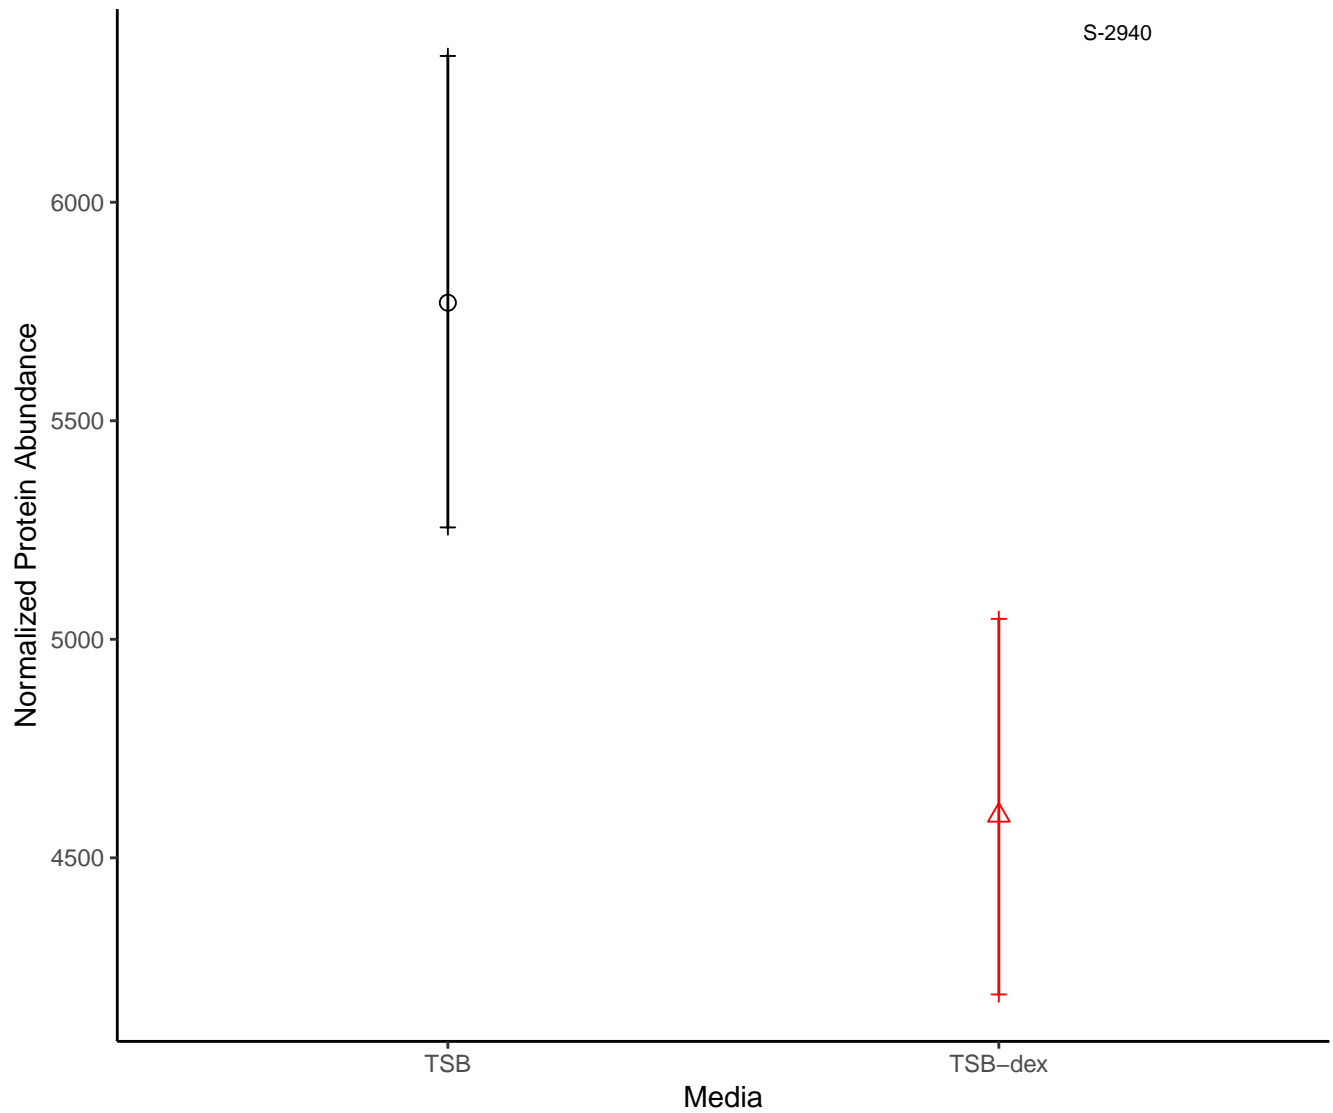

⊕ TSB-dex

△ TSB

# TRMFO\_STAAM

S-2941

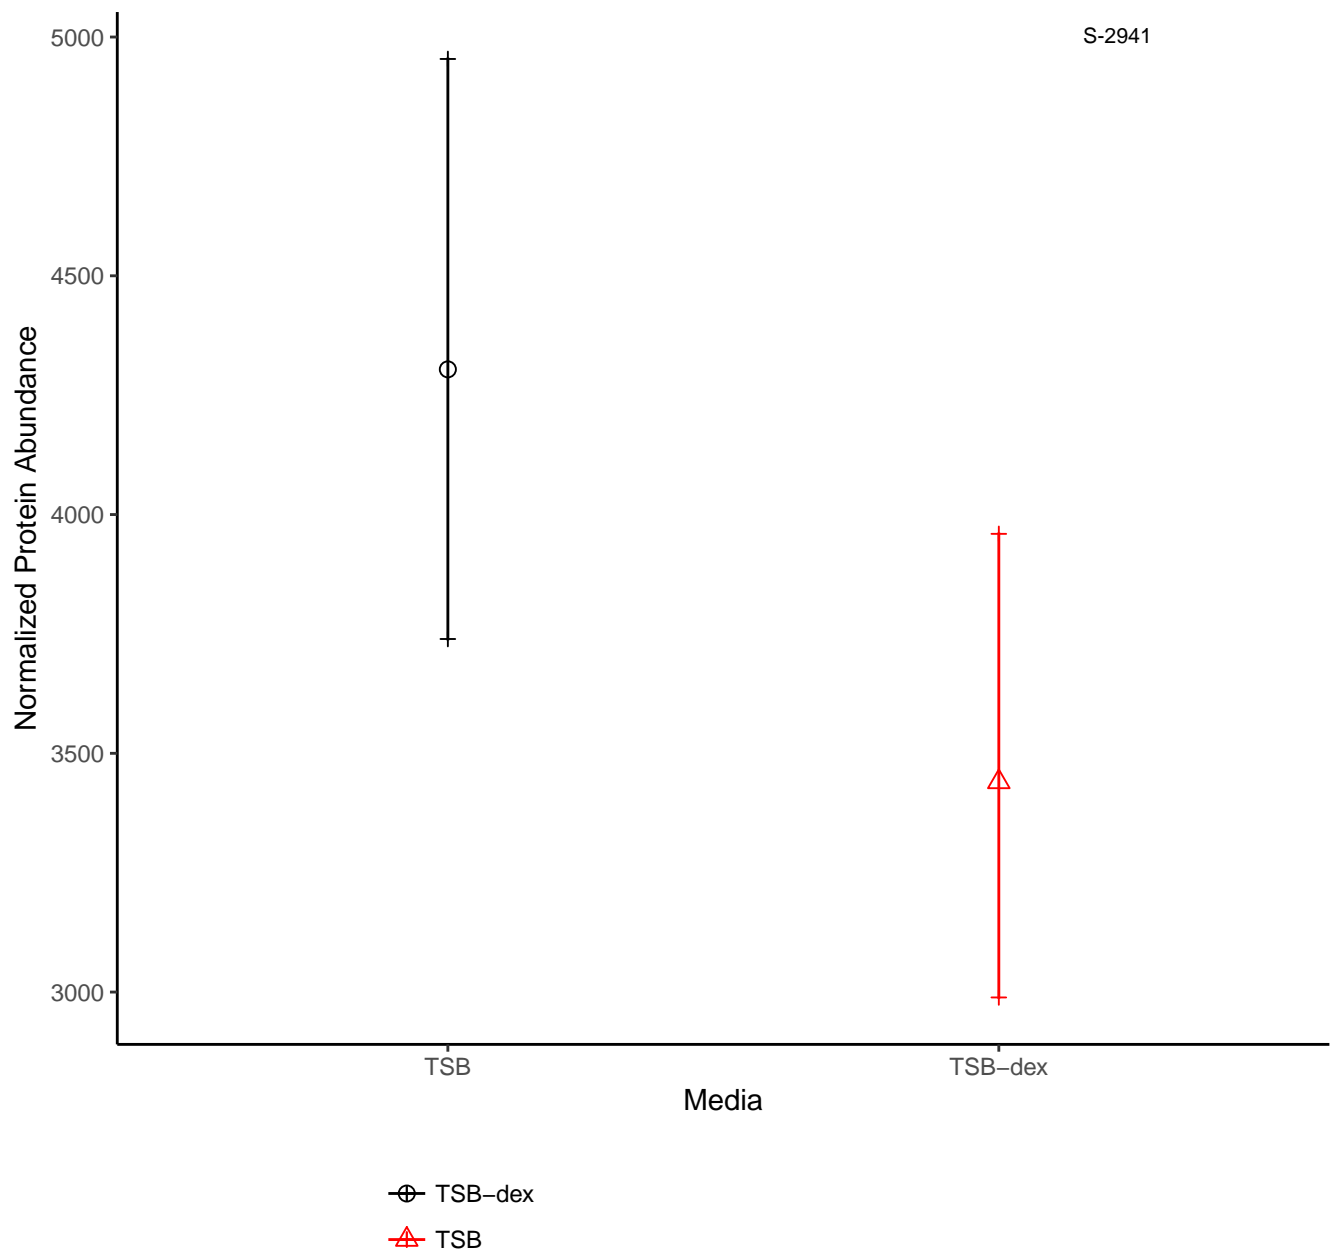

# TRMHL\_STAAM

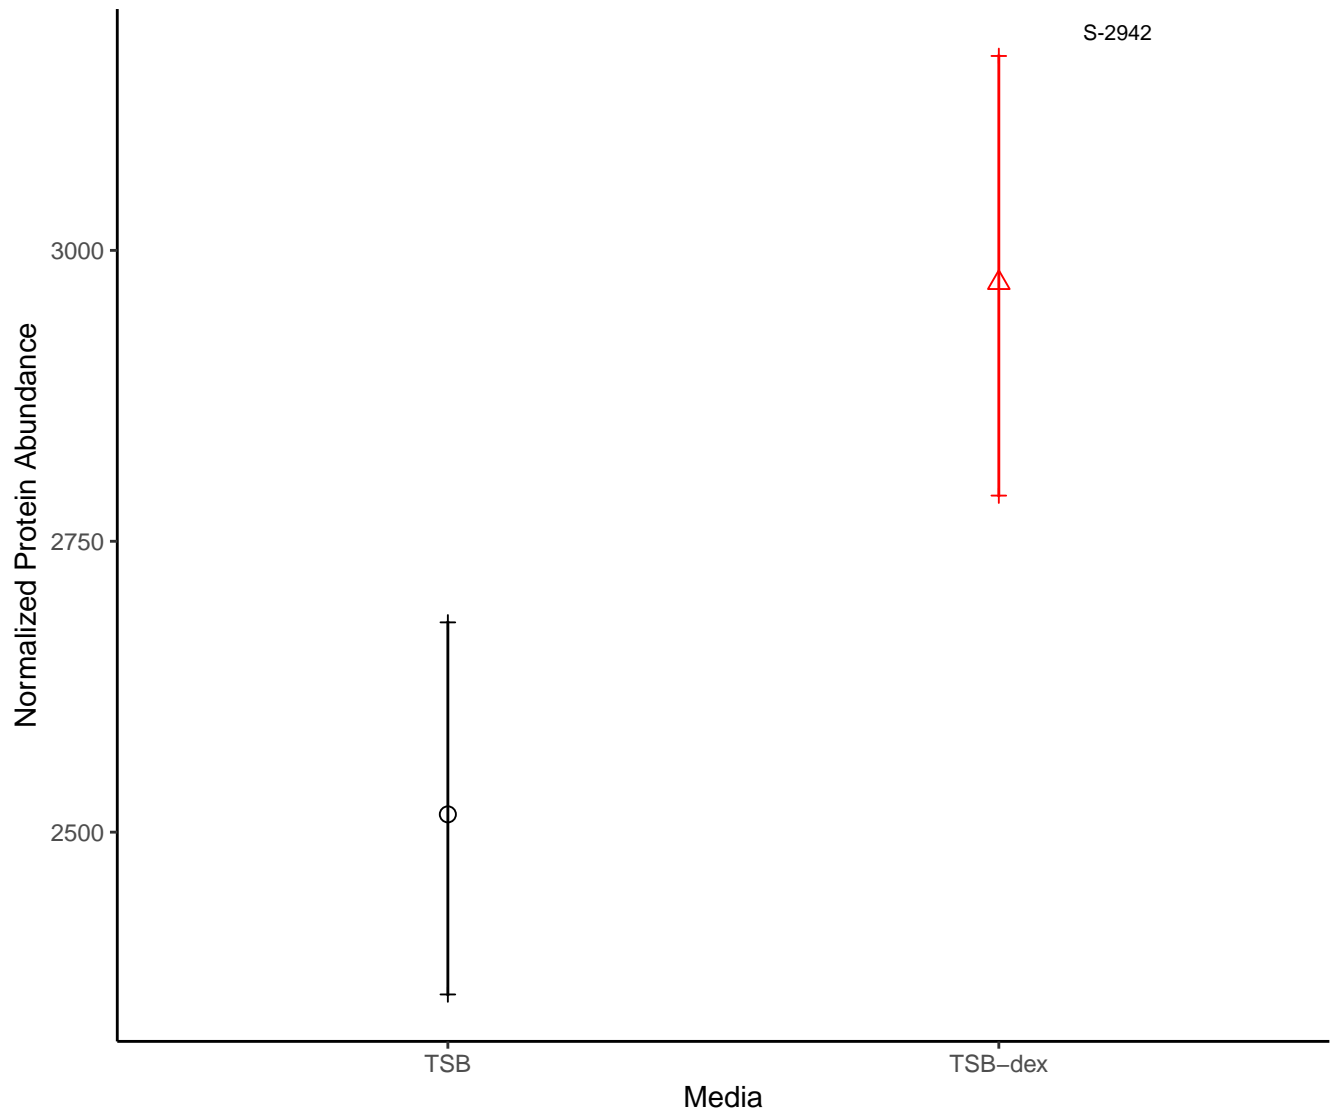

⊕ TSB-dex

△ TSB

# TRPA\_STAAM

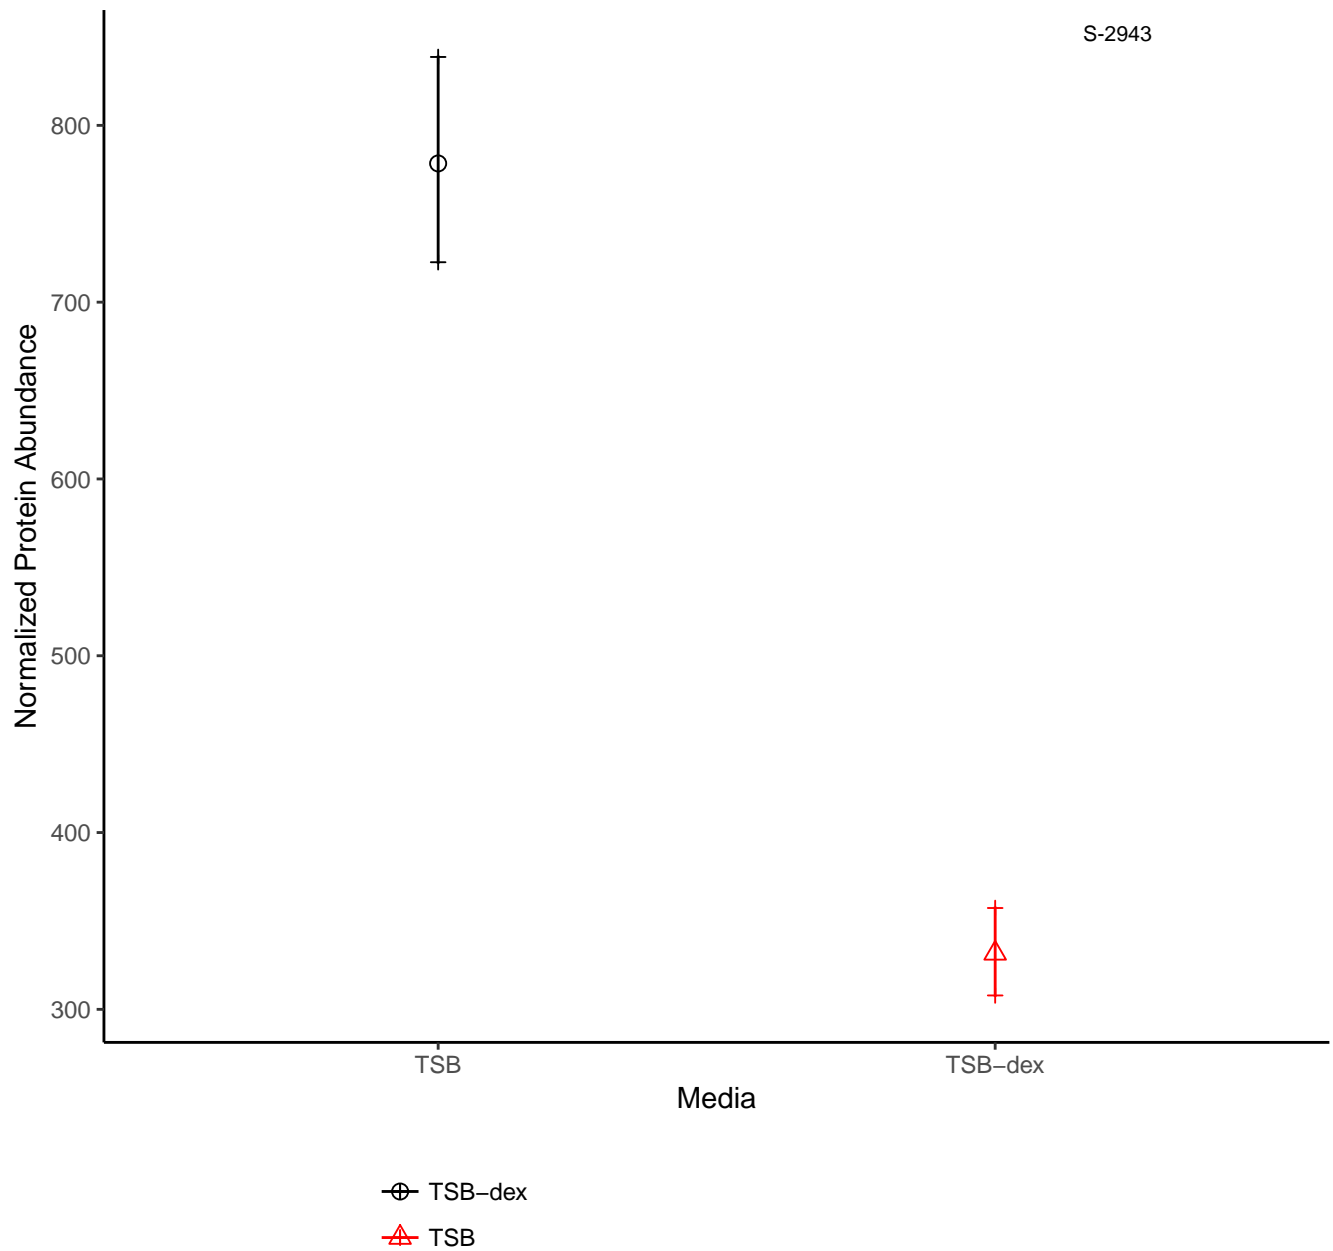

# TRPF\_STAAM

S-2944

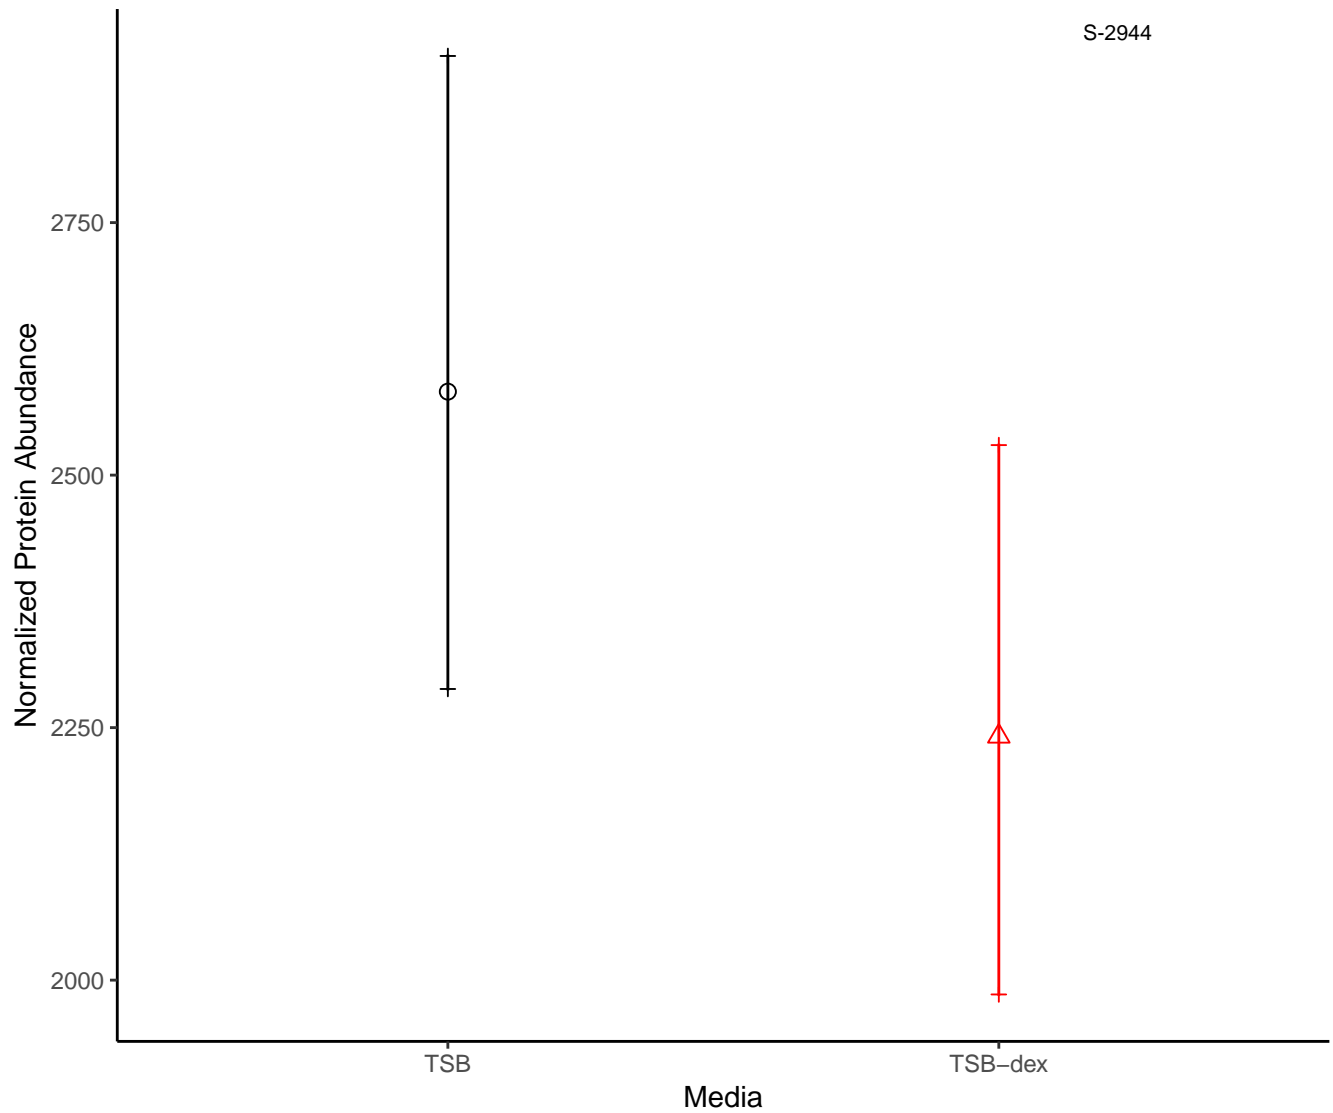

⊕ TSB-dex

△ TSB



# TRUB\_STAAM

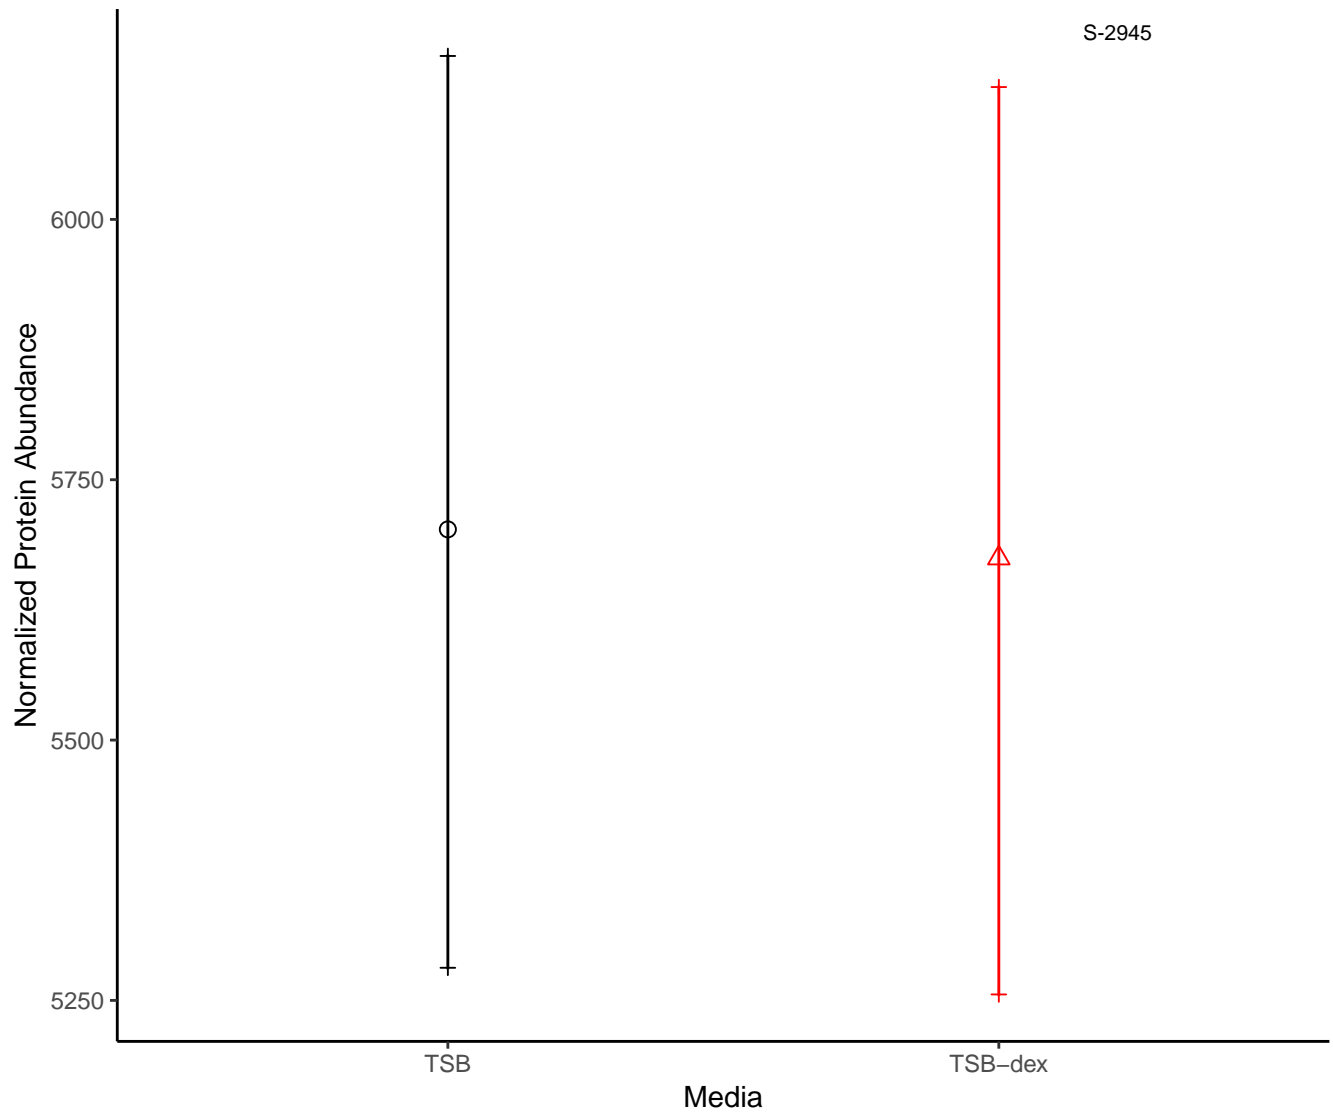

⊕ TSB-dex

△ TSB

# TRXB\_STAAM

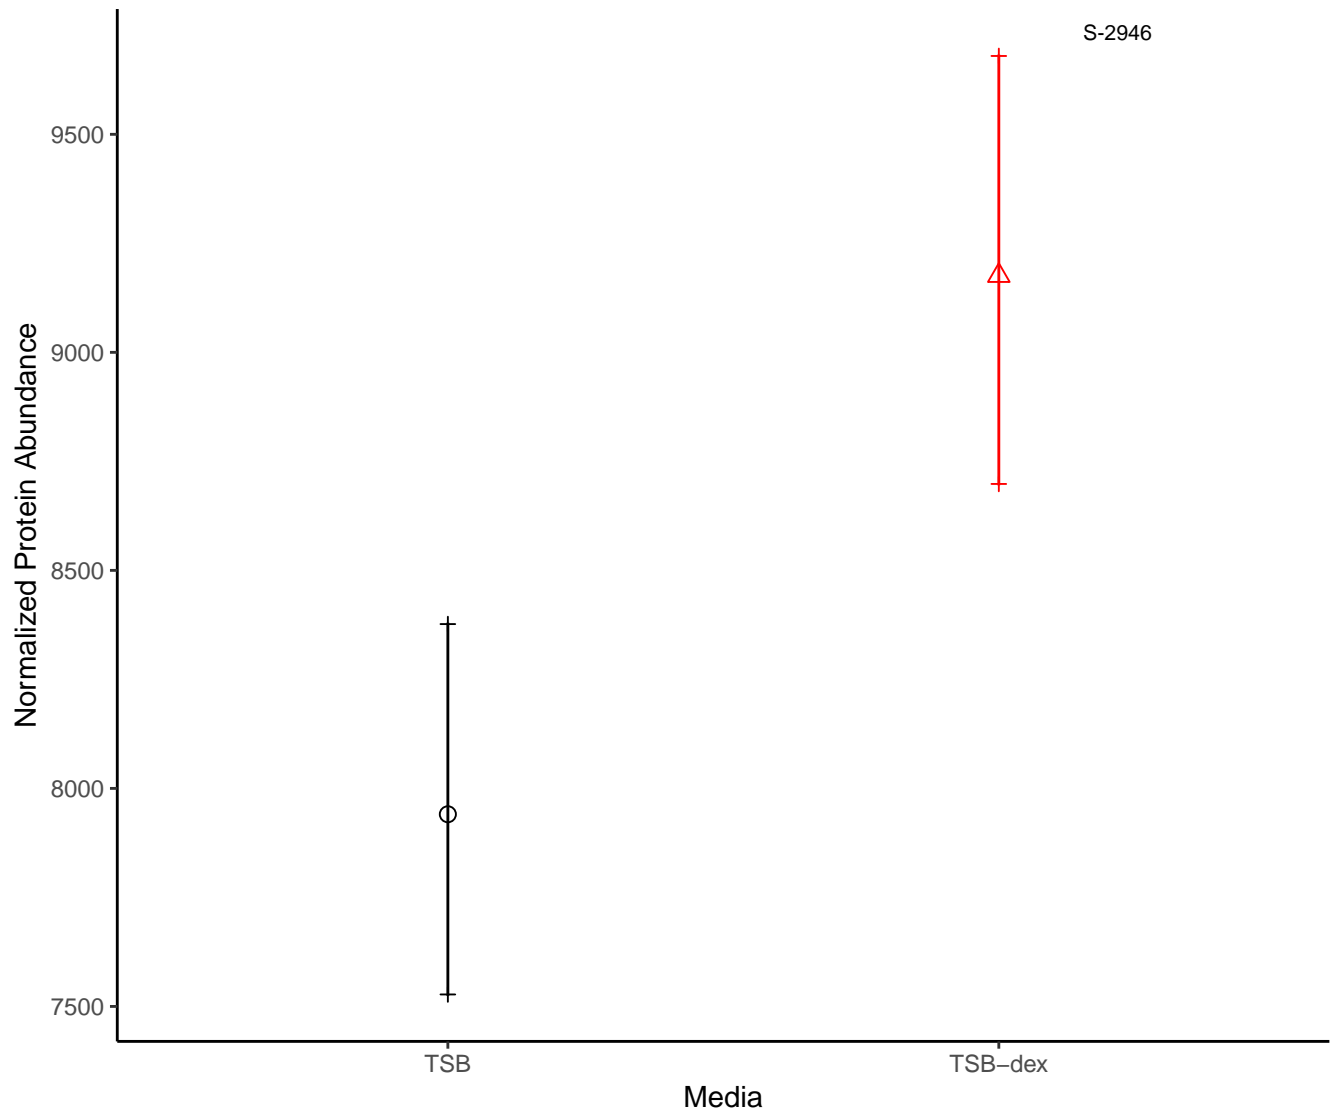

⊕ TSB-dex

△ TSB

# TSAD\_STAAM

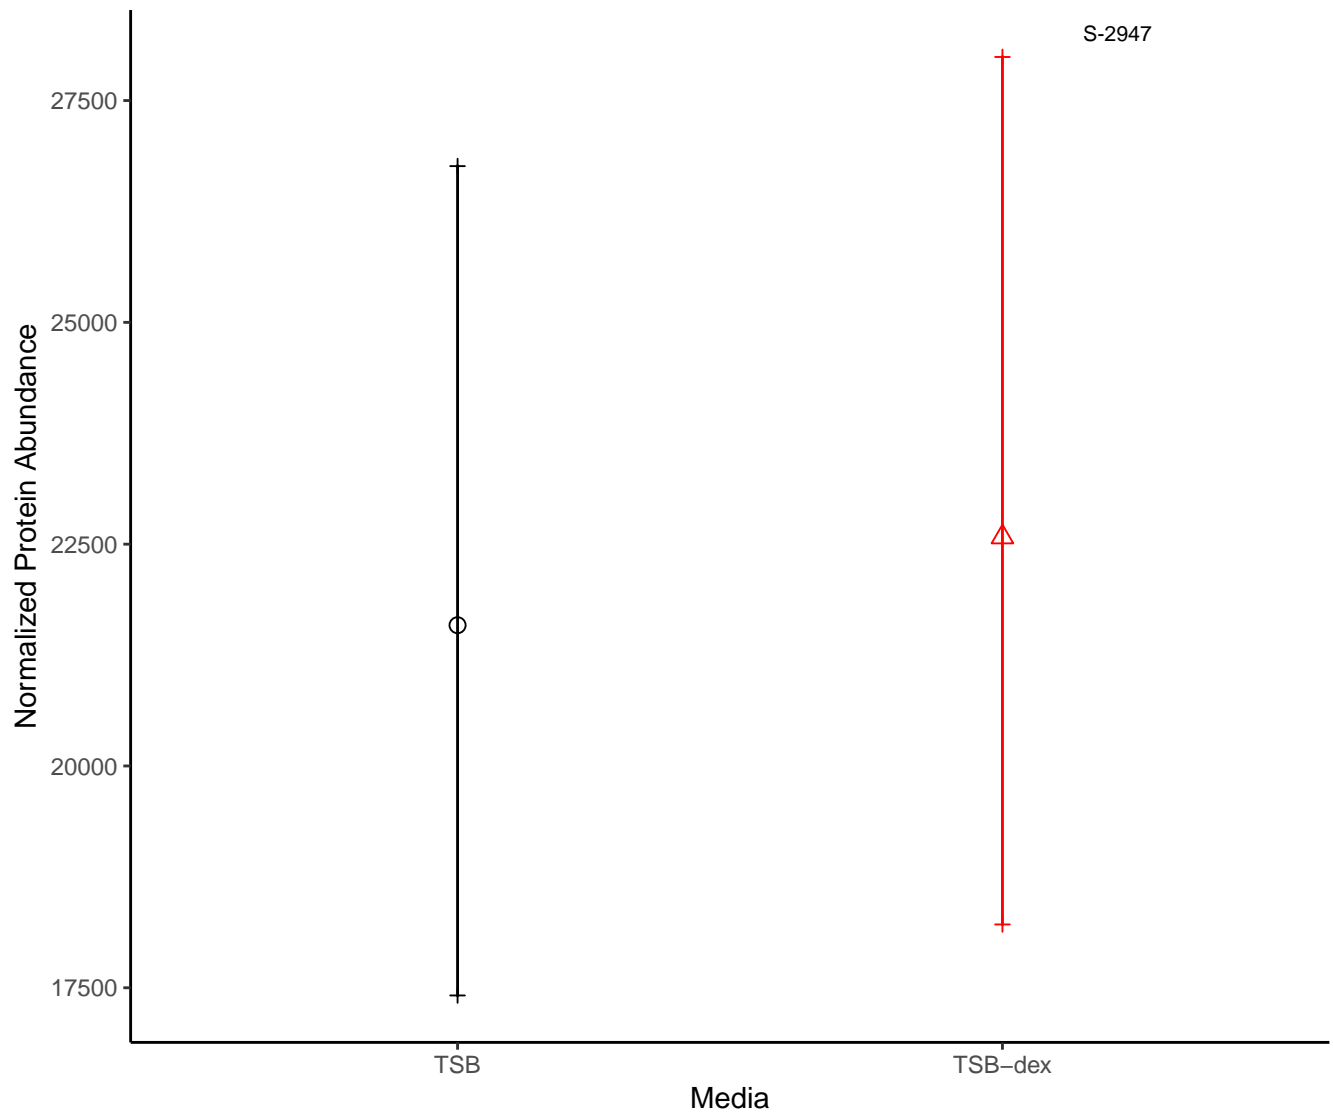

⊕ TSB-dex

△ TSB

# TYRA\_STAAM

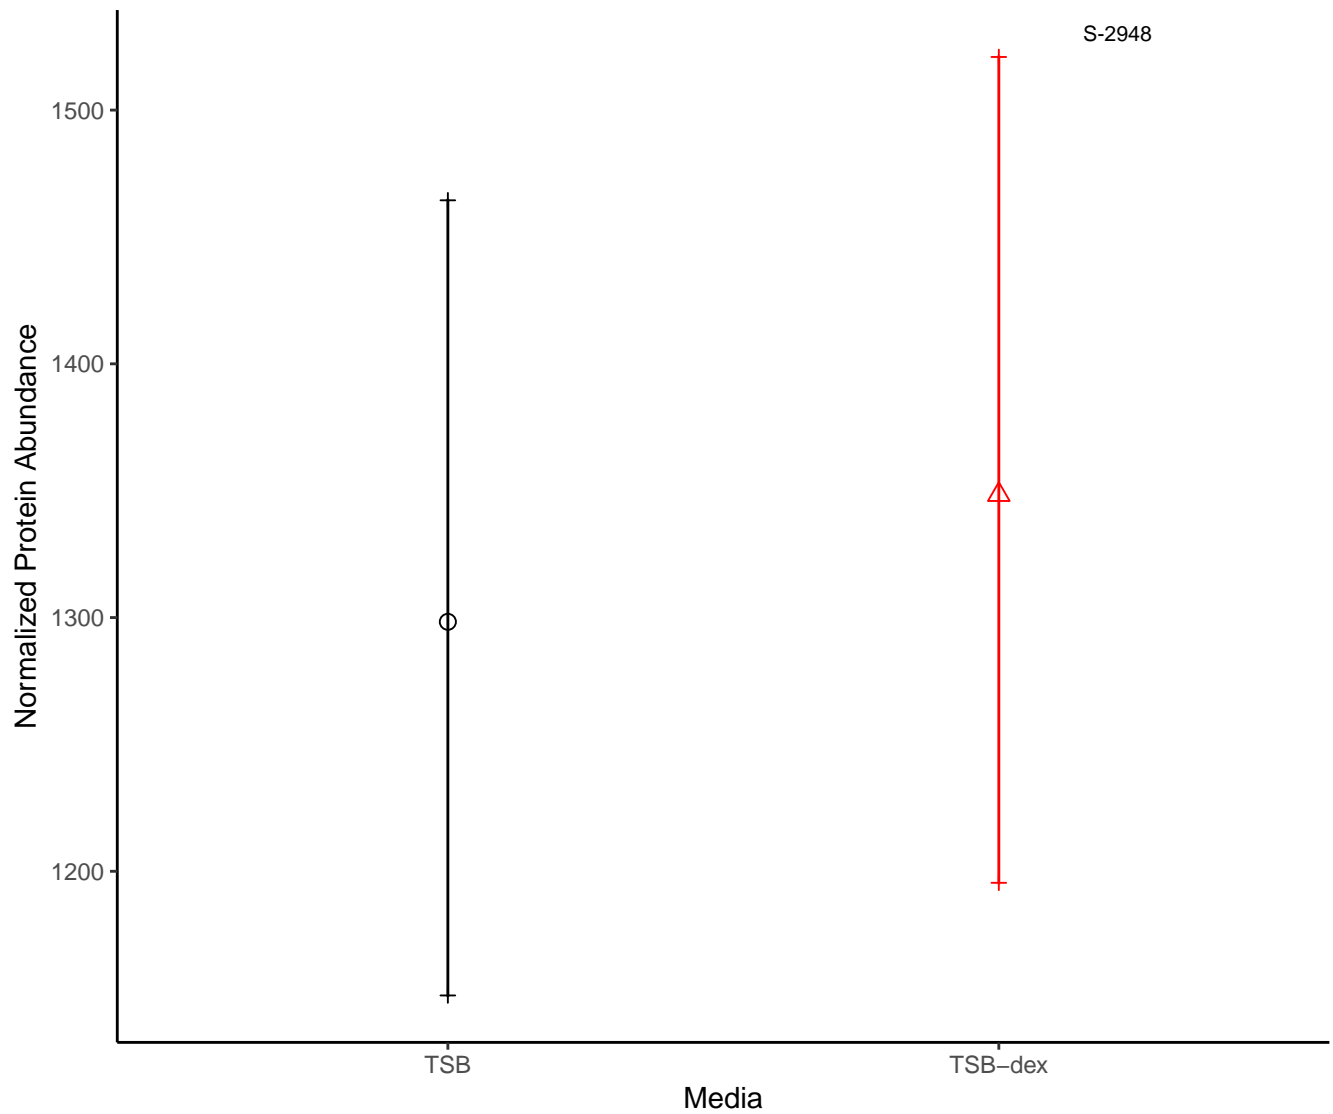

⊕ TSB-dex

△ TSB

# TYSY\_STAAM

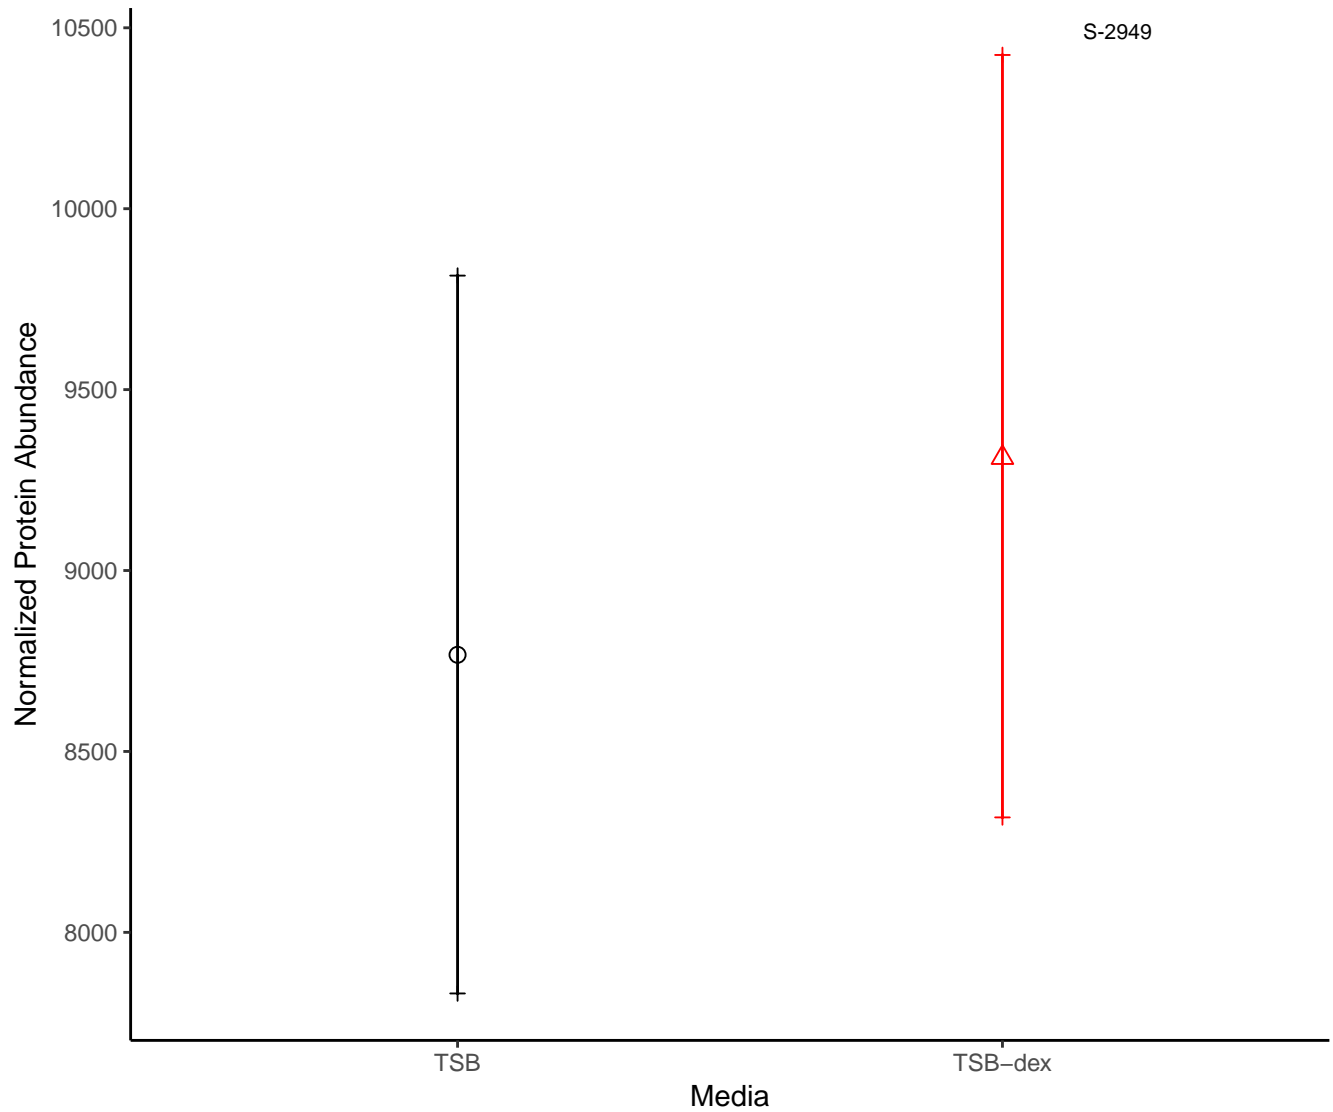

⊕ TSB-dex

△ TSB

# UNG\_STAAM

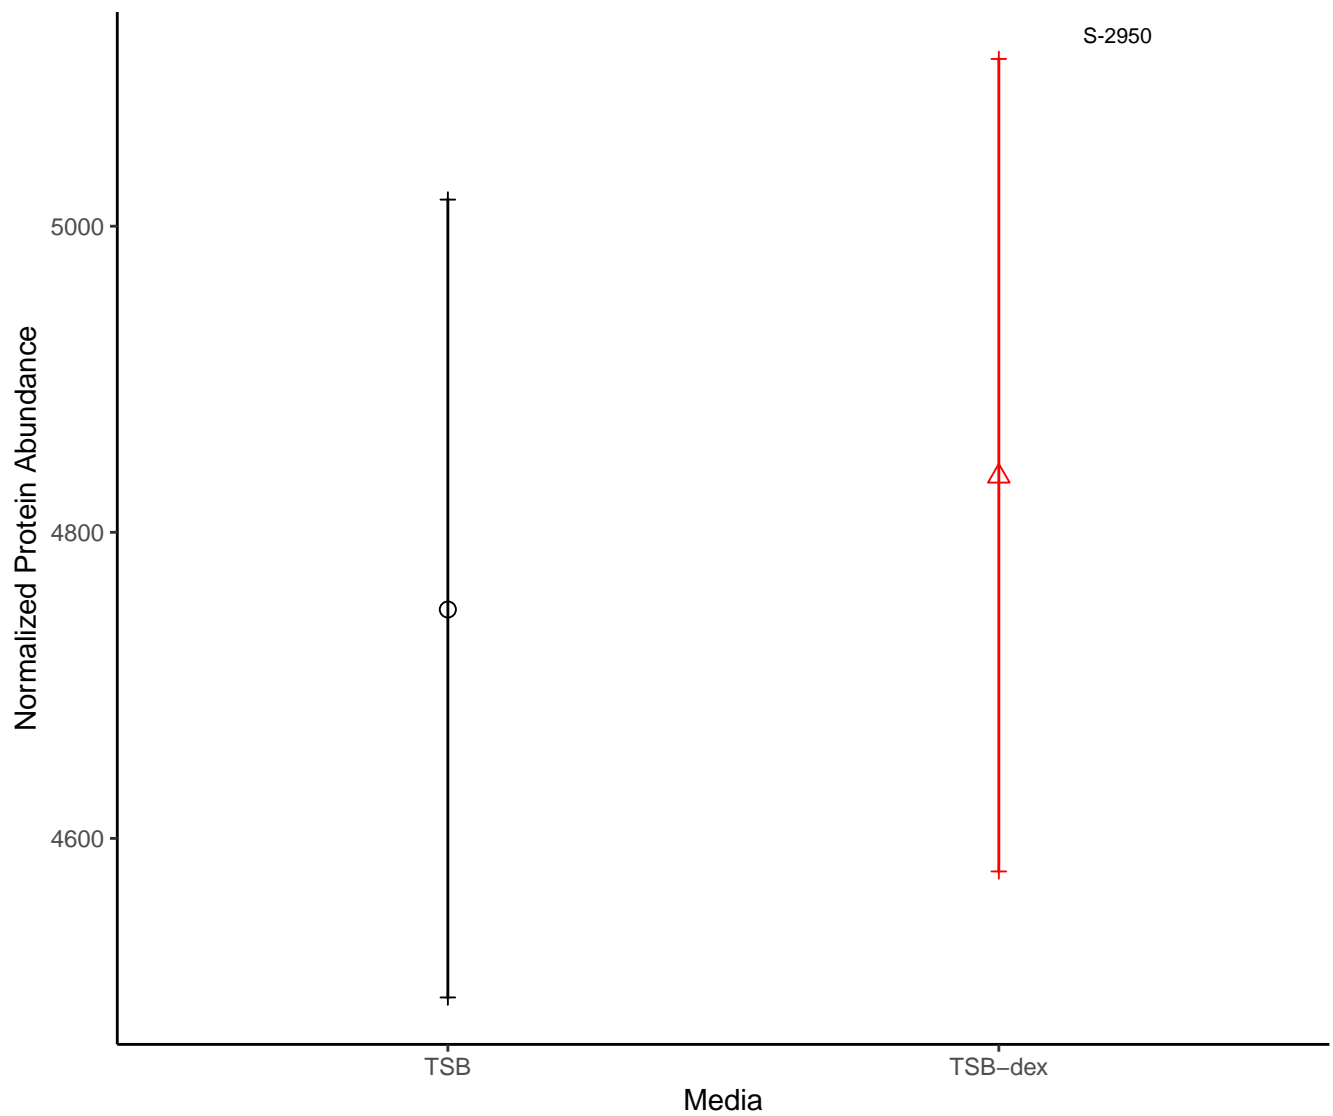

⊕ TSB-dex

△ TSB

# UP355\_STAAM

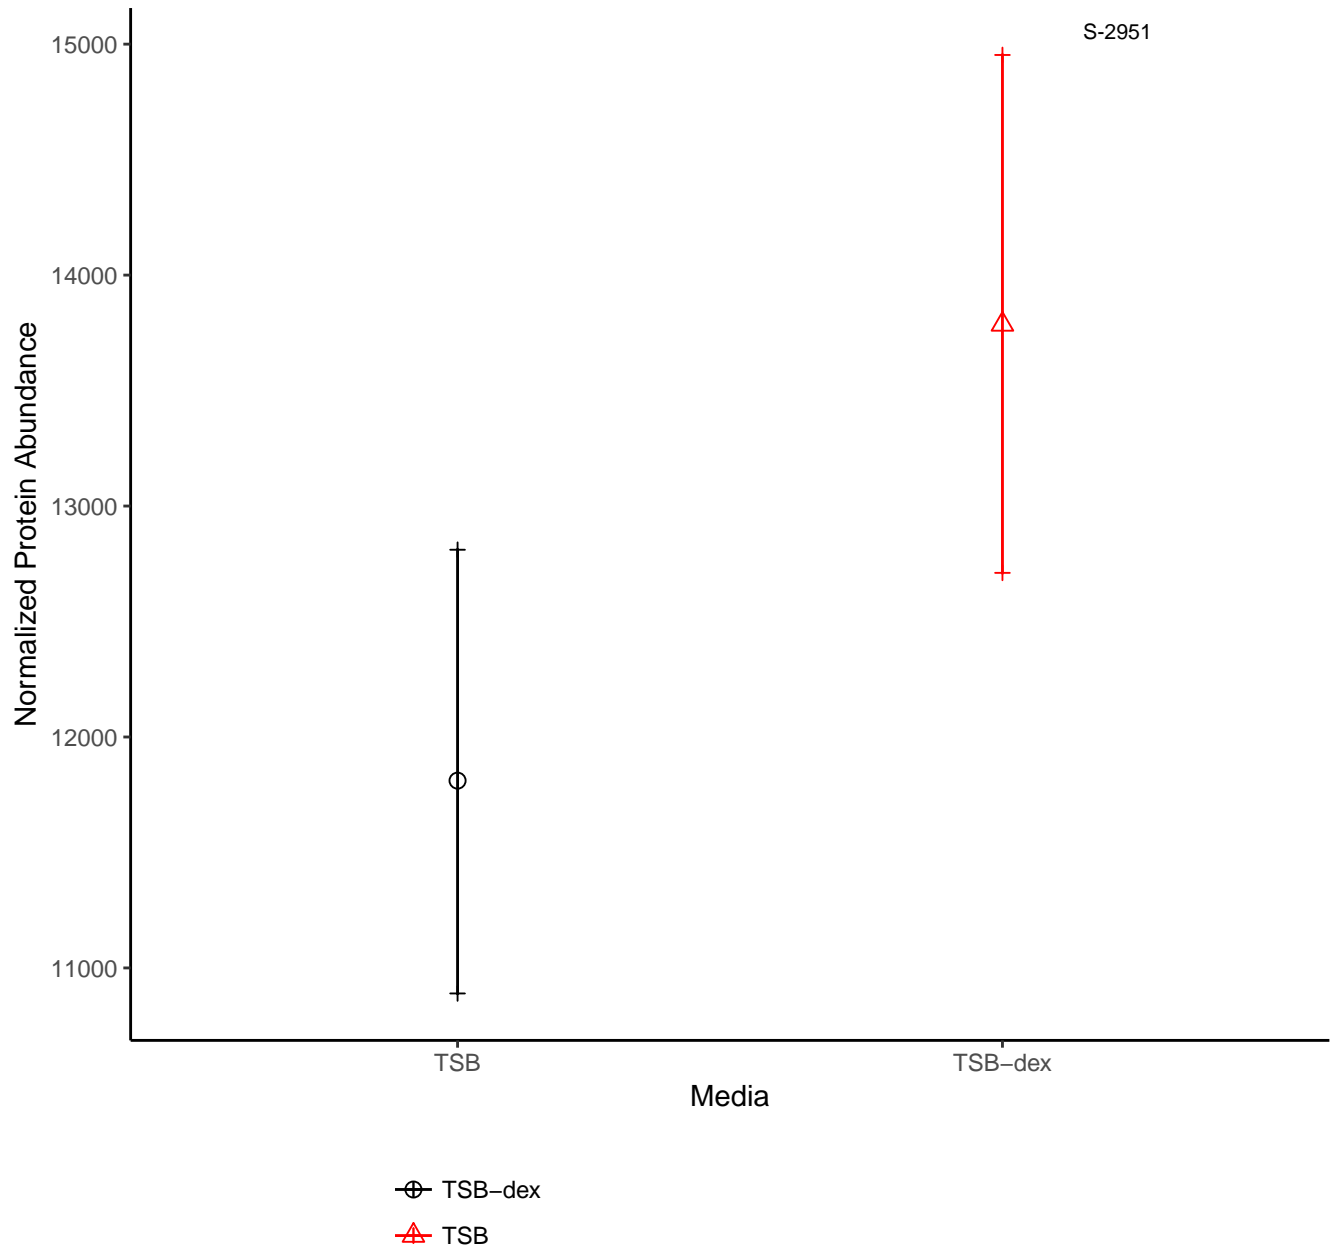

# UPP\_STAAM

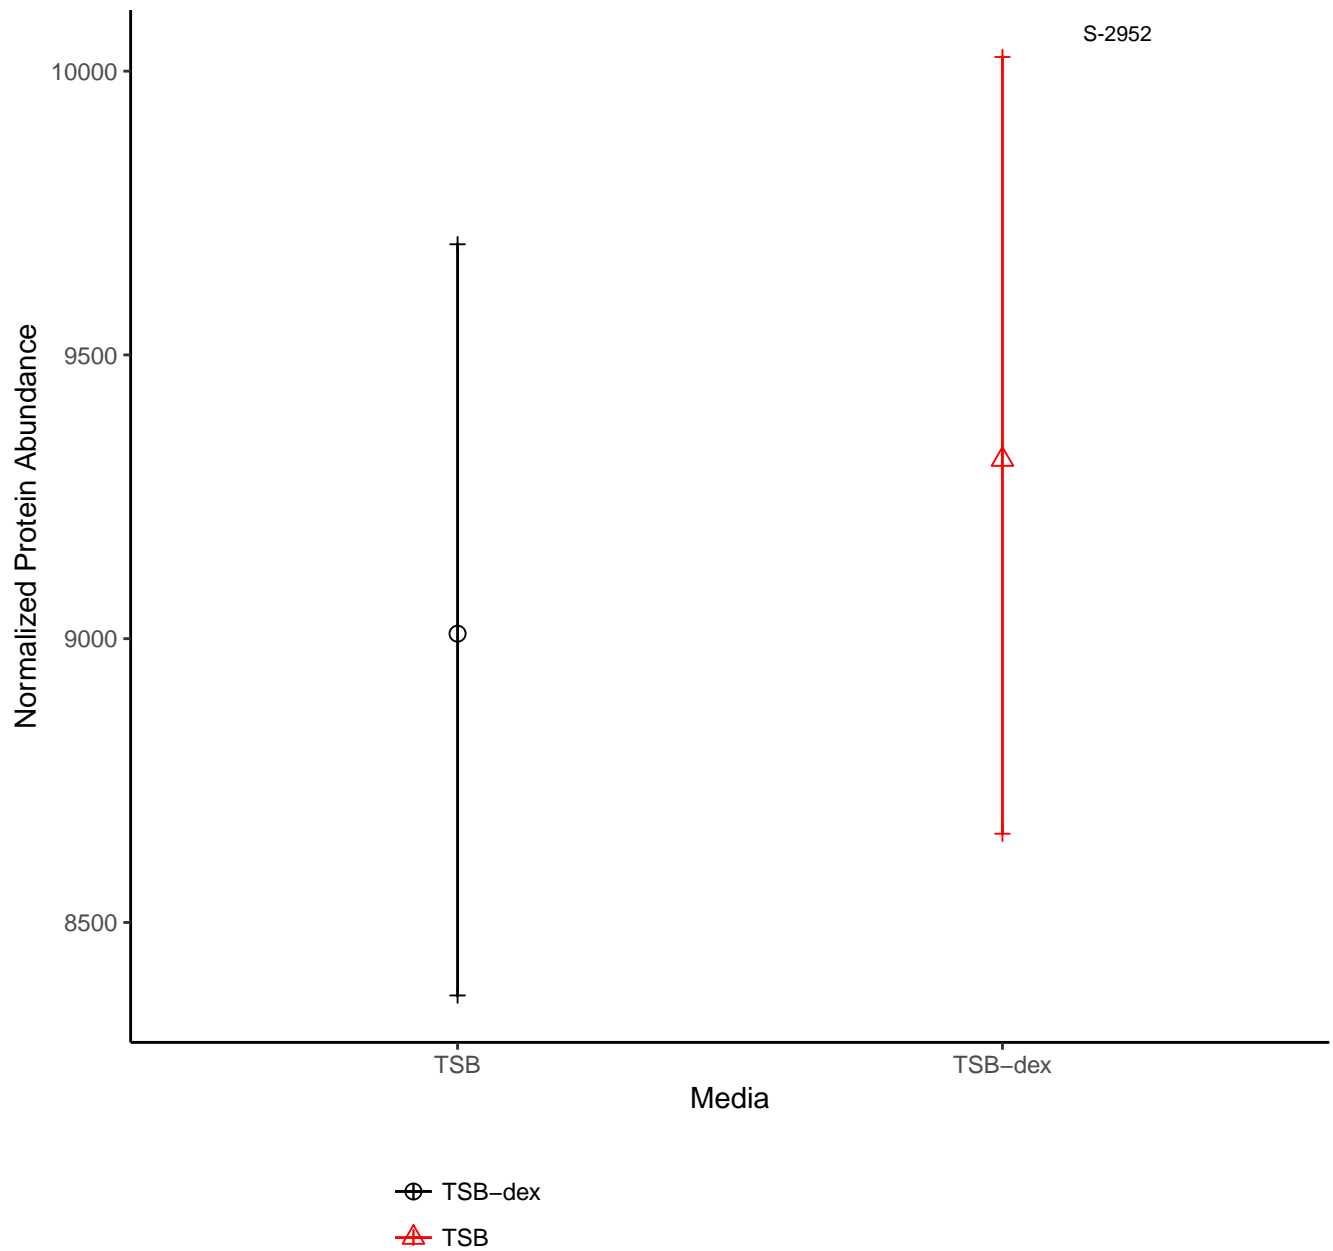



# UREE\_STAAM

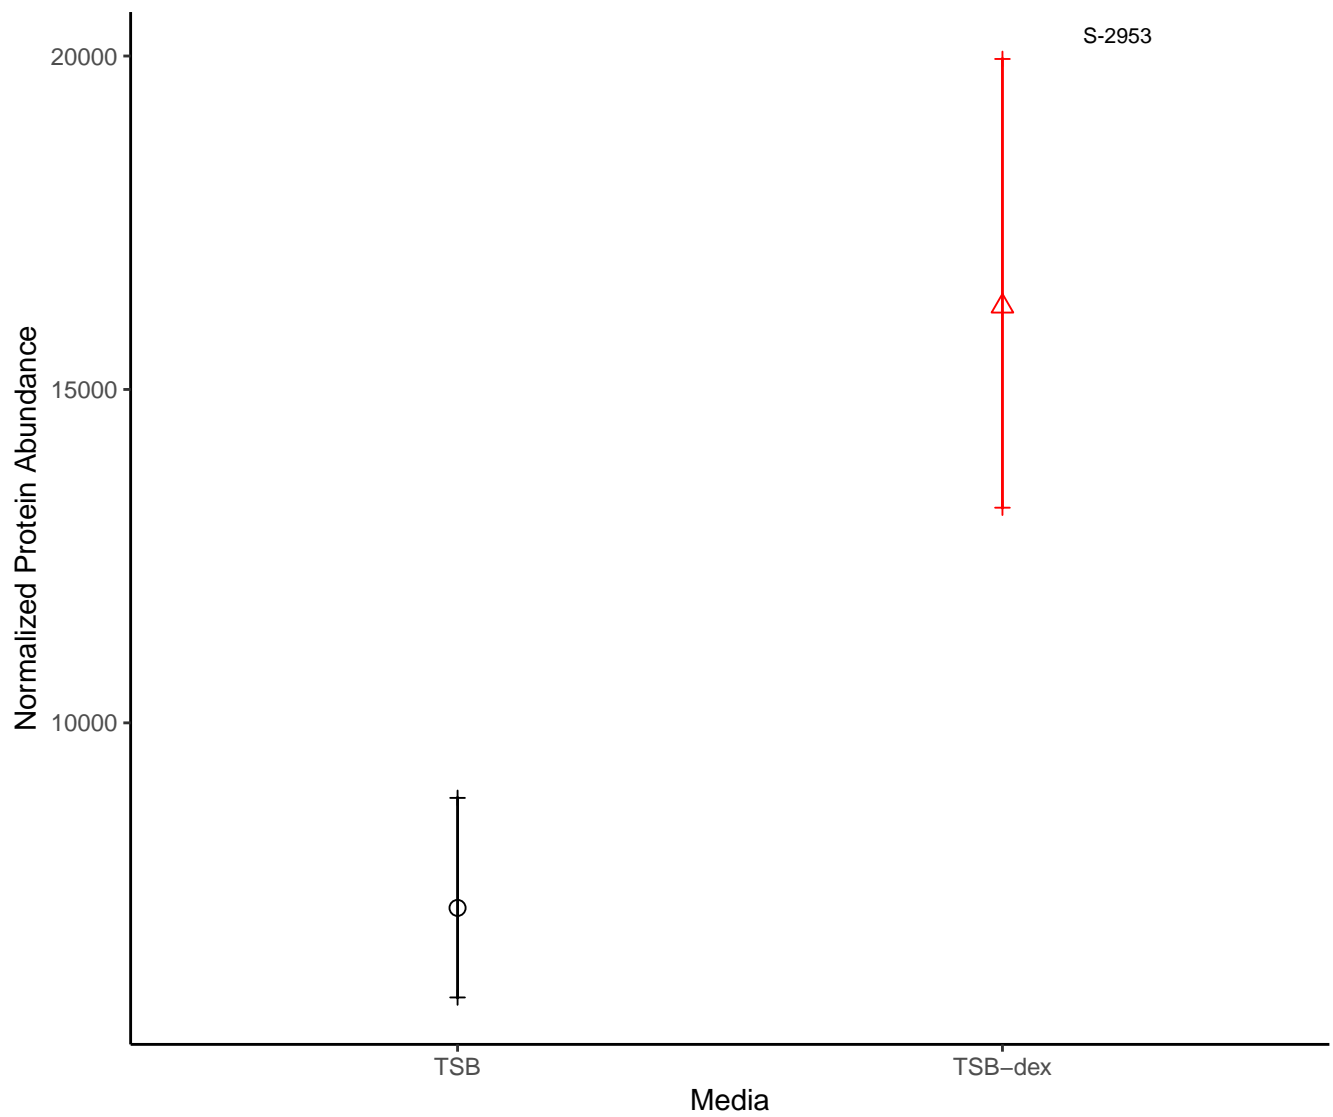

⊖ TSB-dex

△ TSB

# UREG\_STAAM

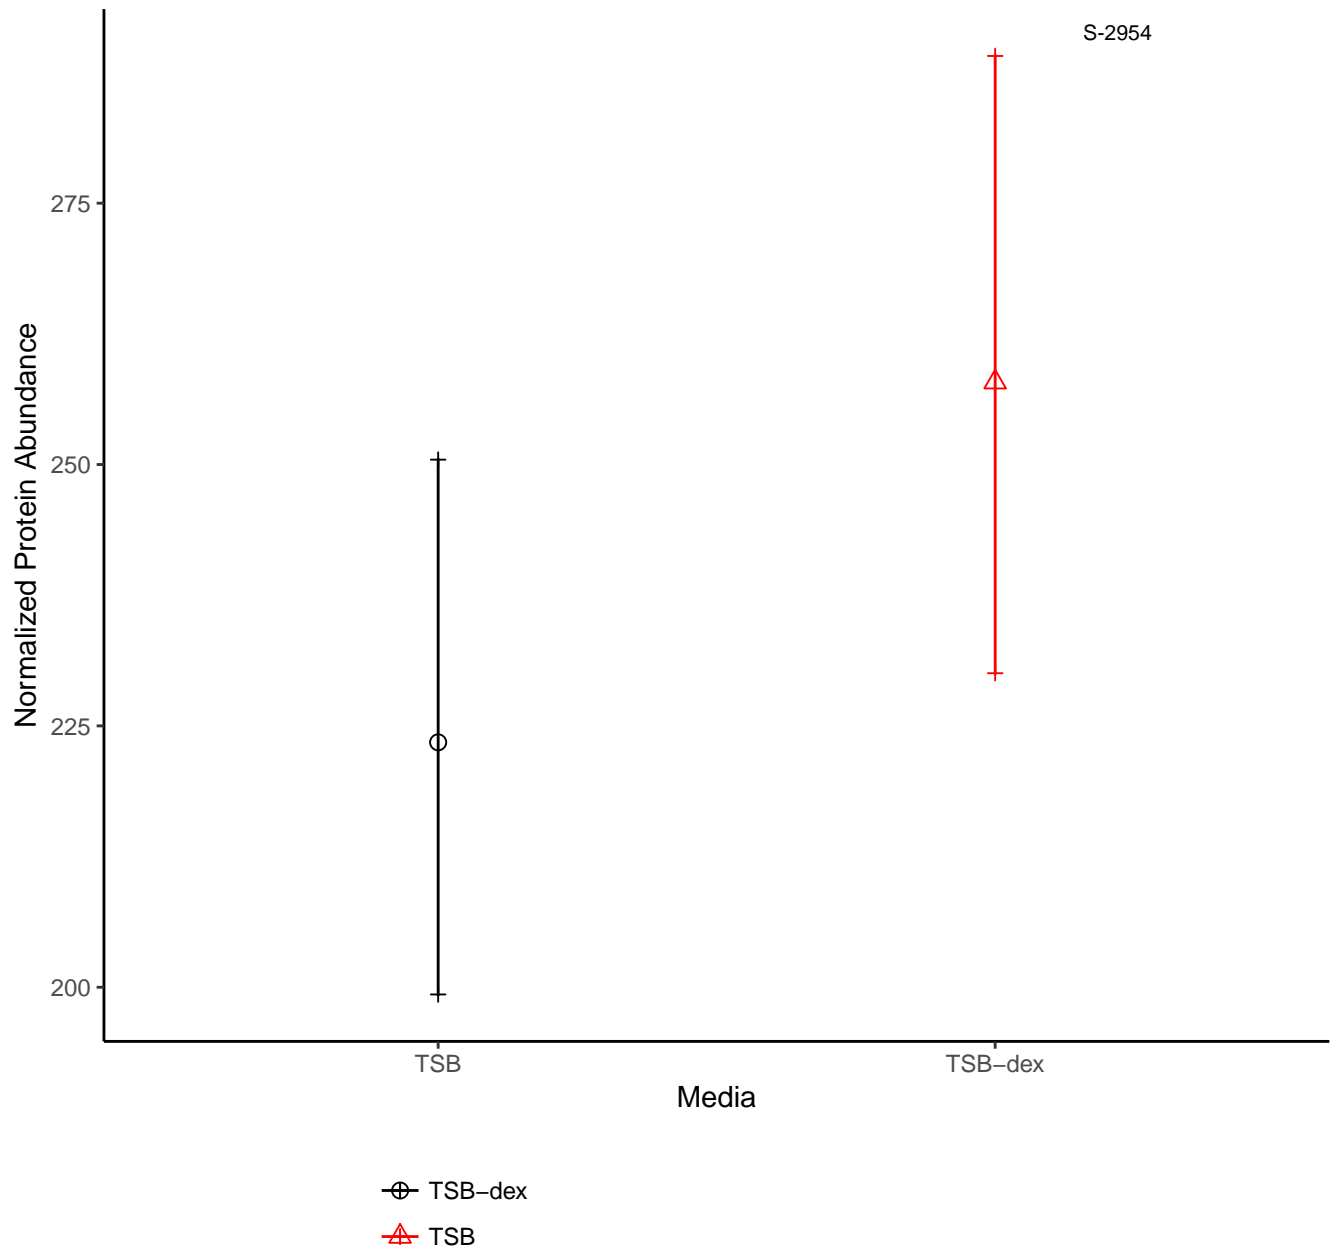

# URK\_STAAM

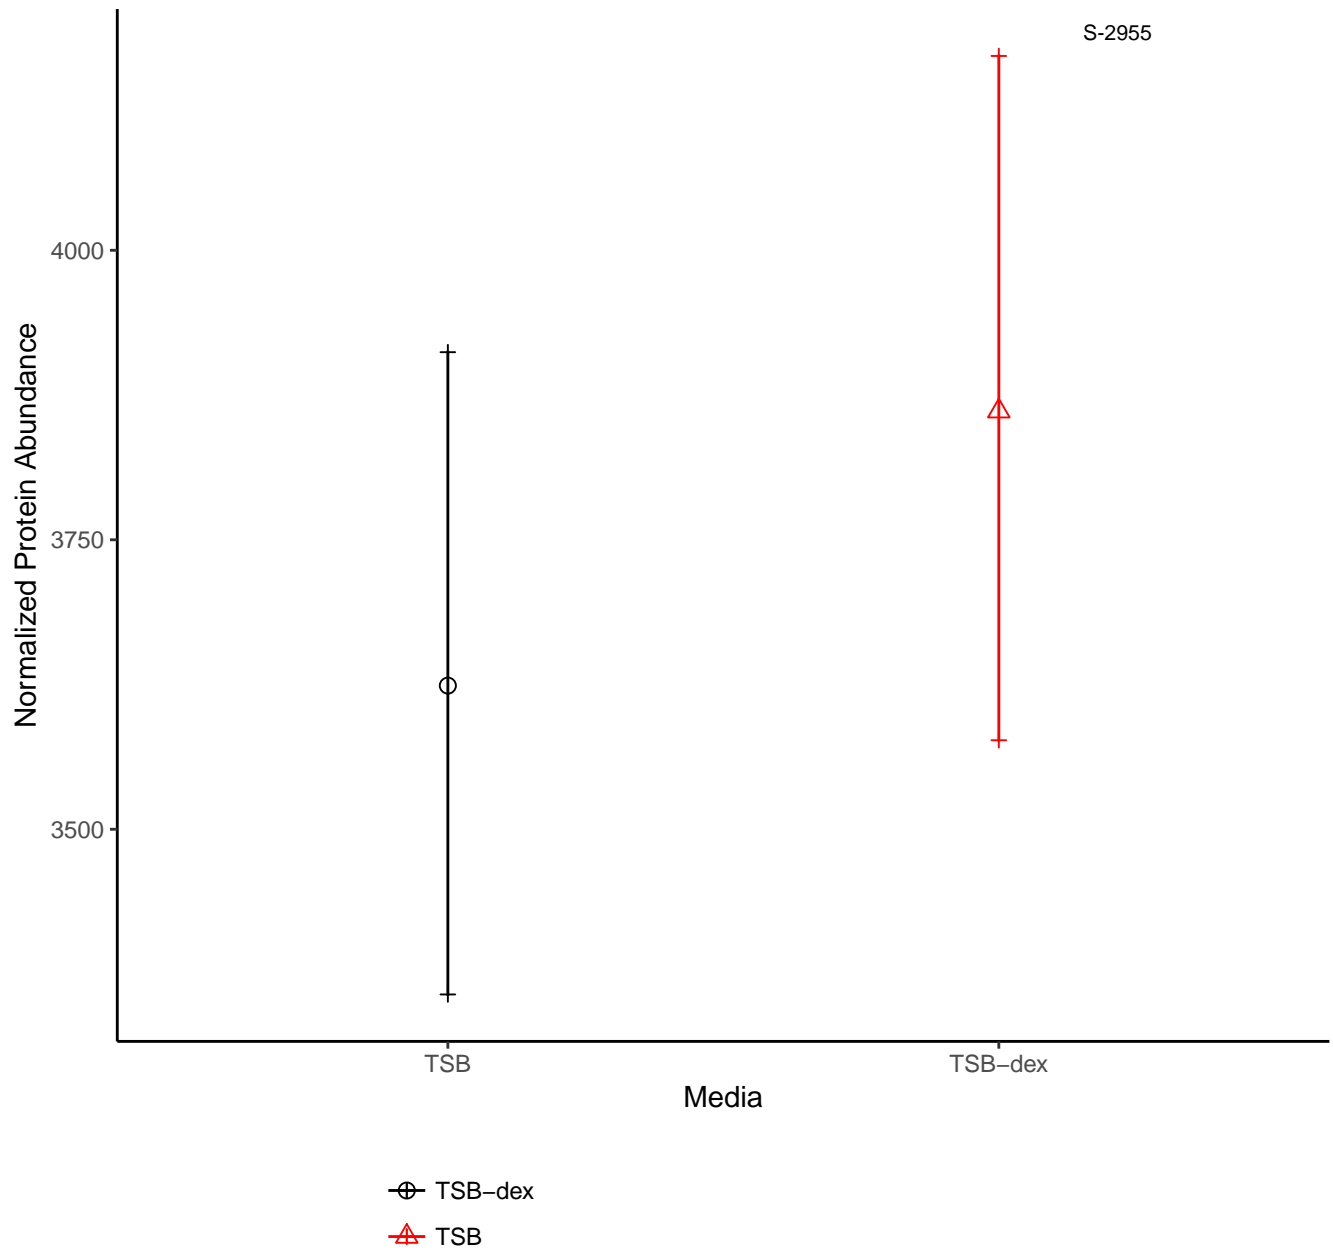

# URTF\_STAAM

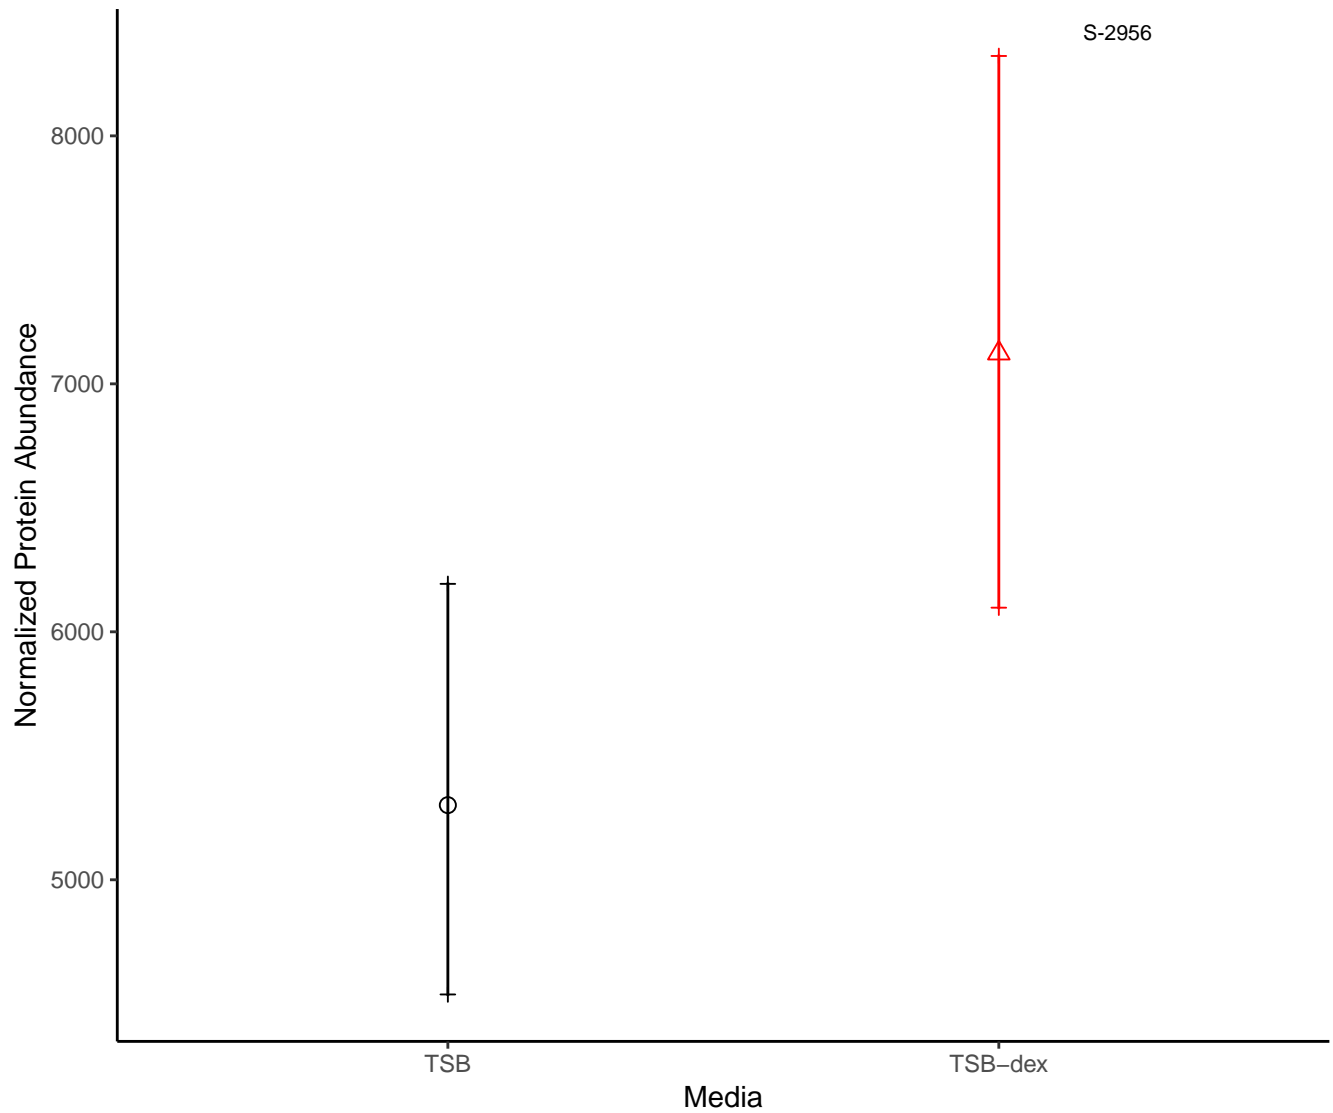

⊕ TSB-dex

△ TSB

# UVRA\_STAAM

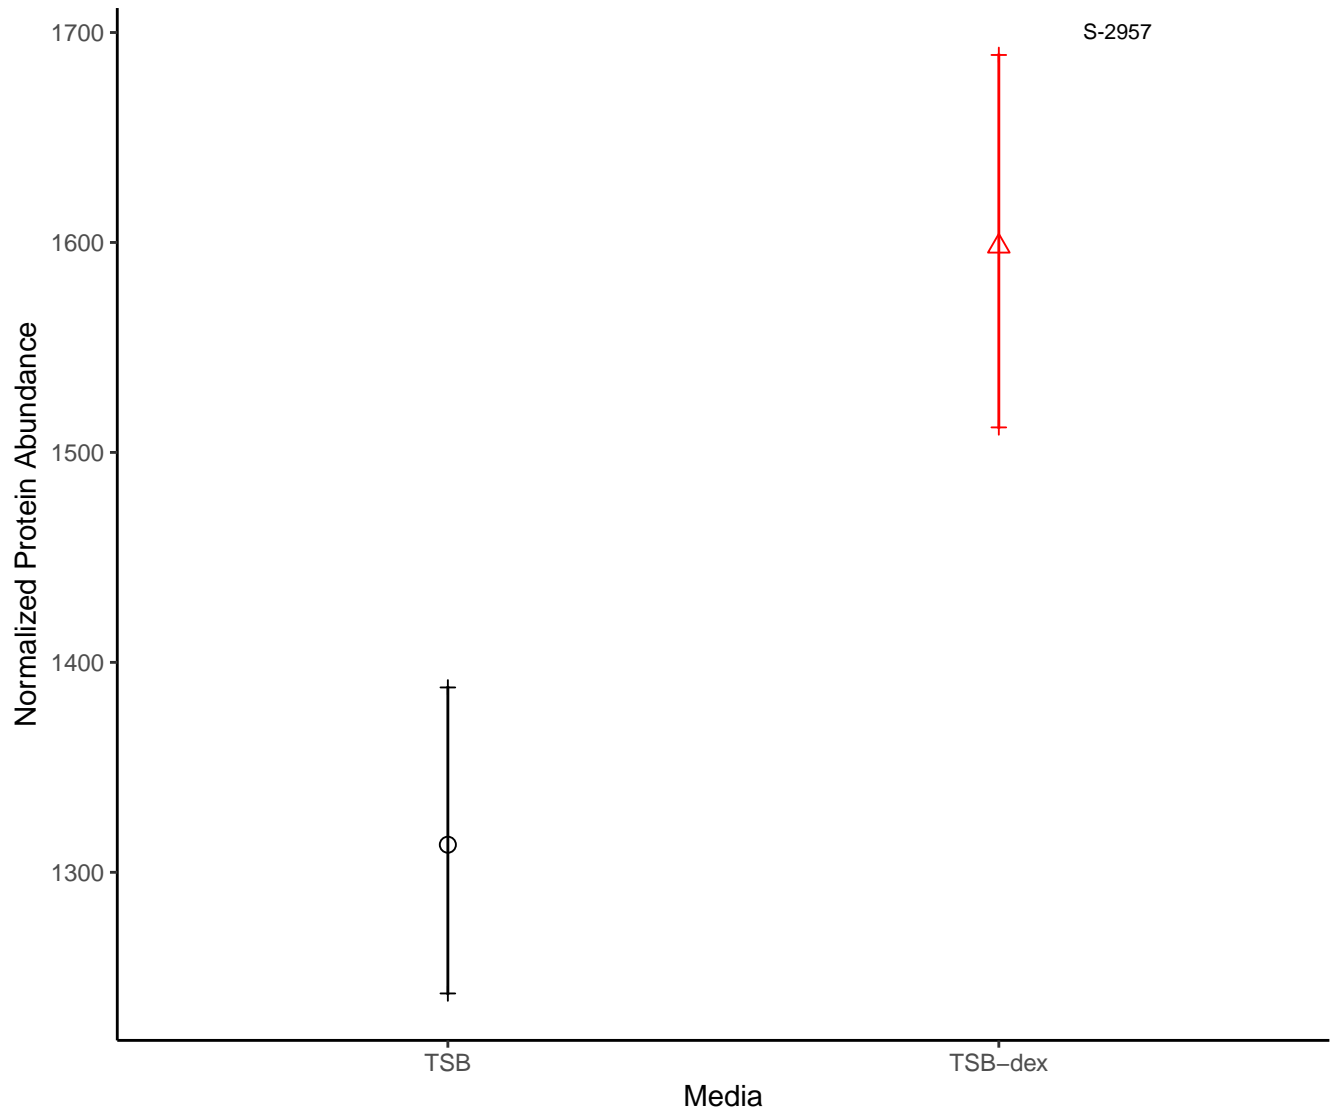

⊕ TSB-dex

△ TSB

# VRAC\_STAAM

S-2958

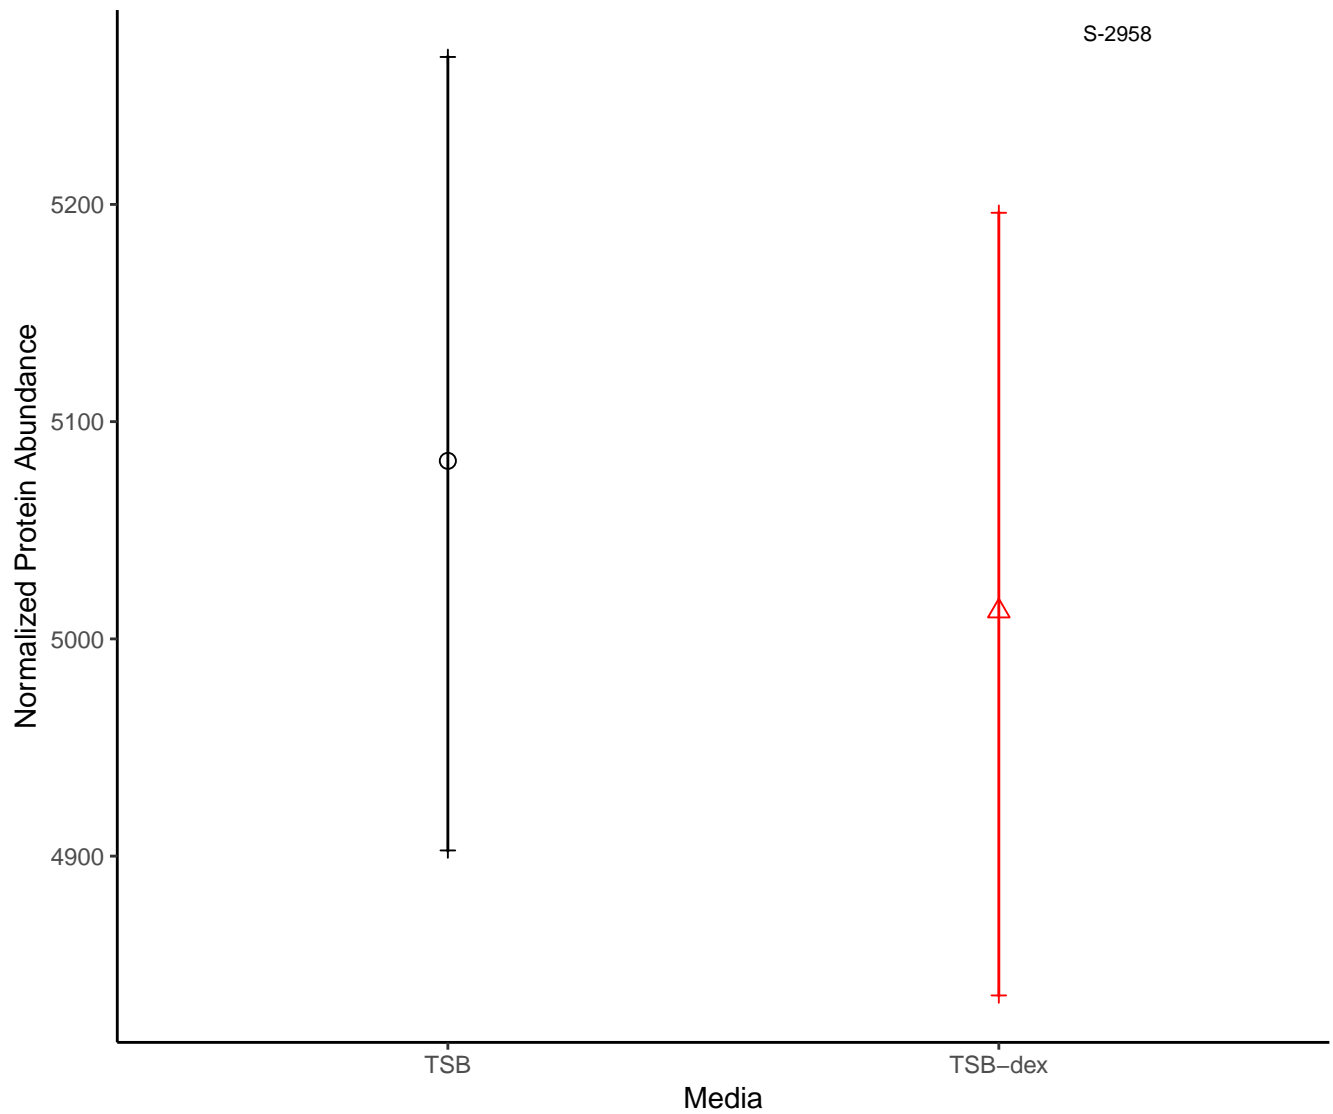

⊕ TSB-dex

△ TSB

# VRAR\_STAAM

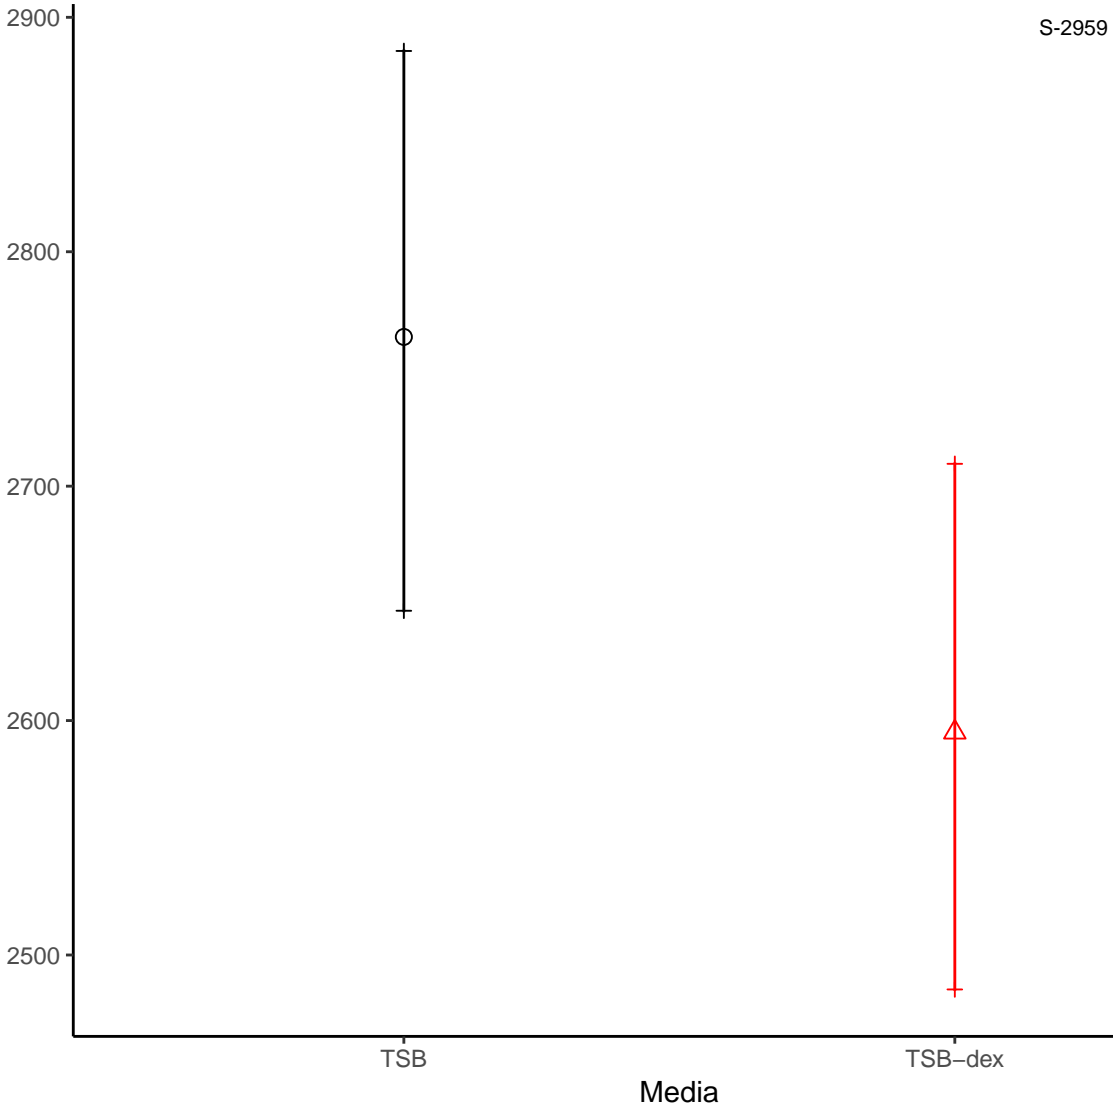

⊕ TSB-dex

△ TSB

# WALK\_STAAM

S-2960

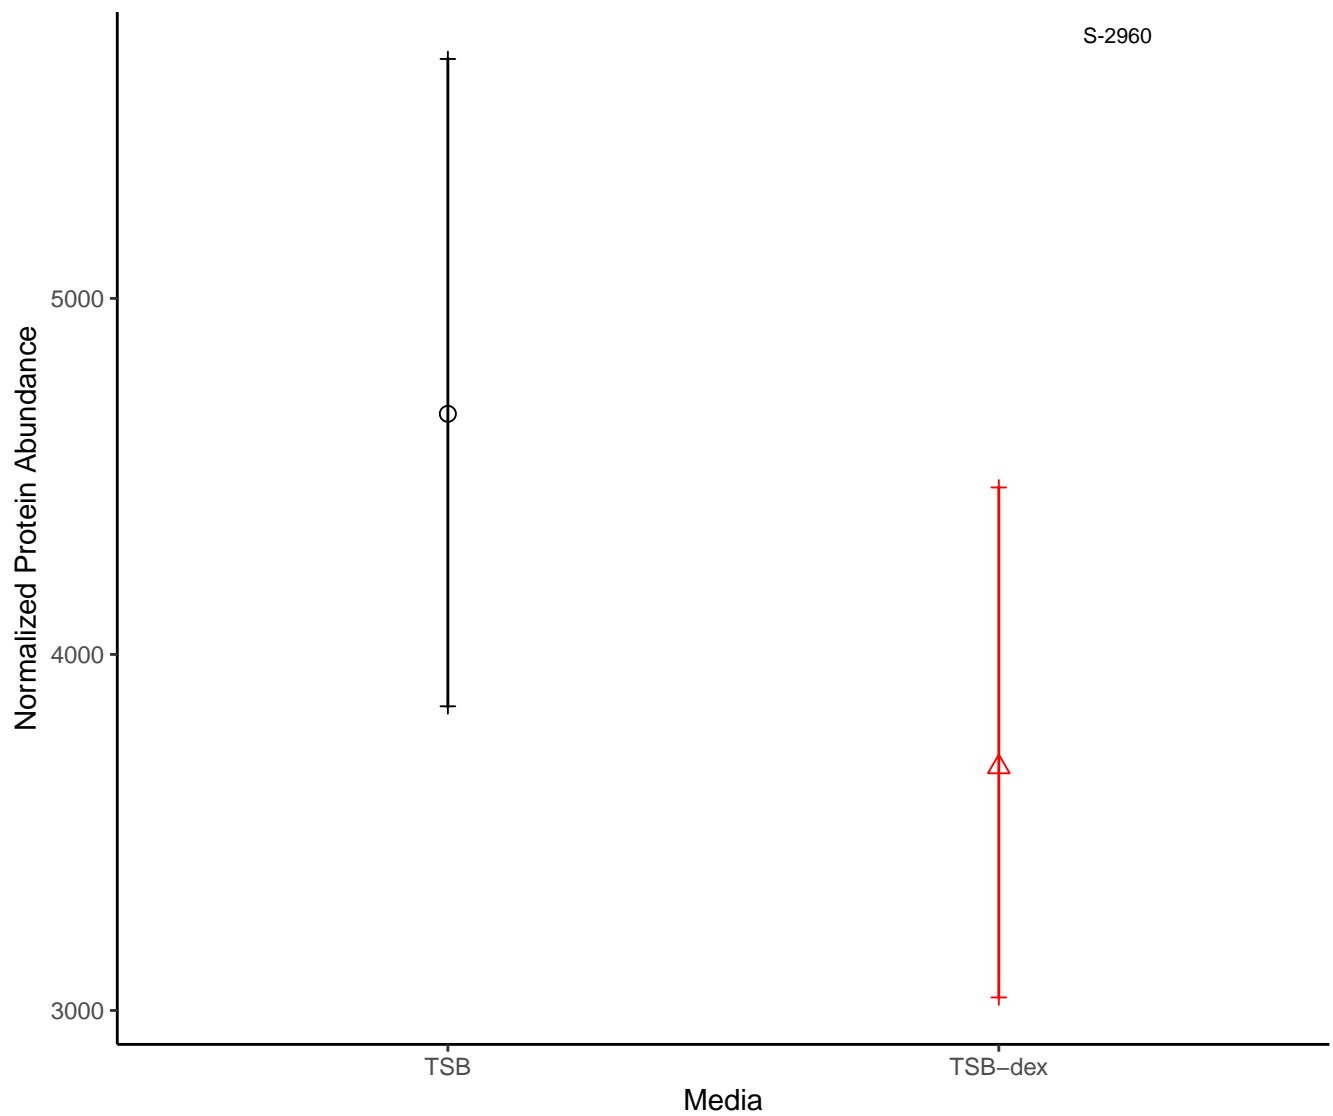

⊕ TSB-dex

△ TSB



# WALR\_STAAM

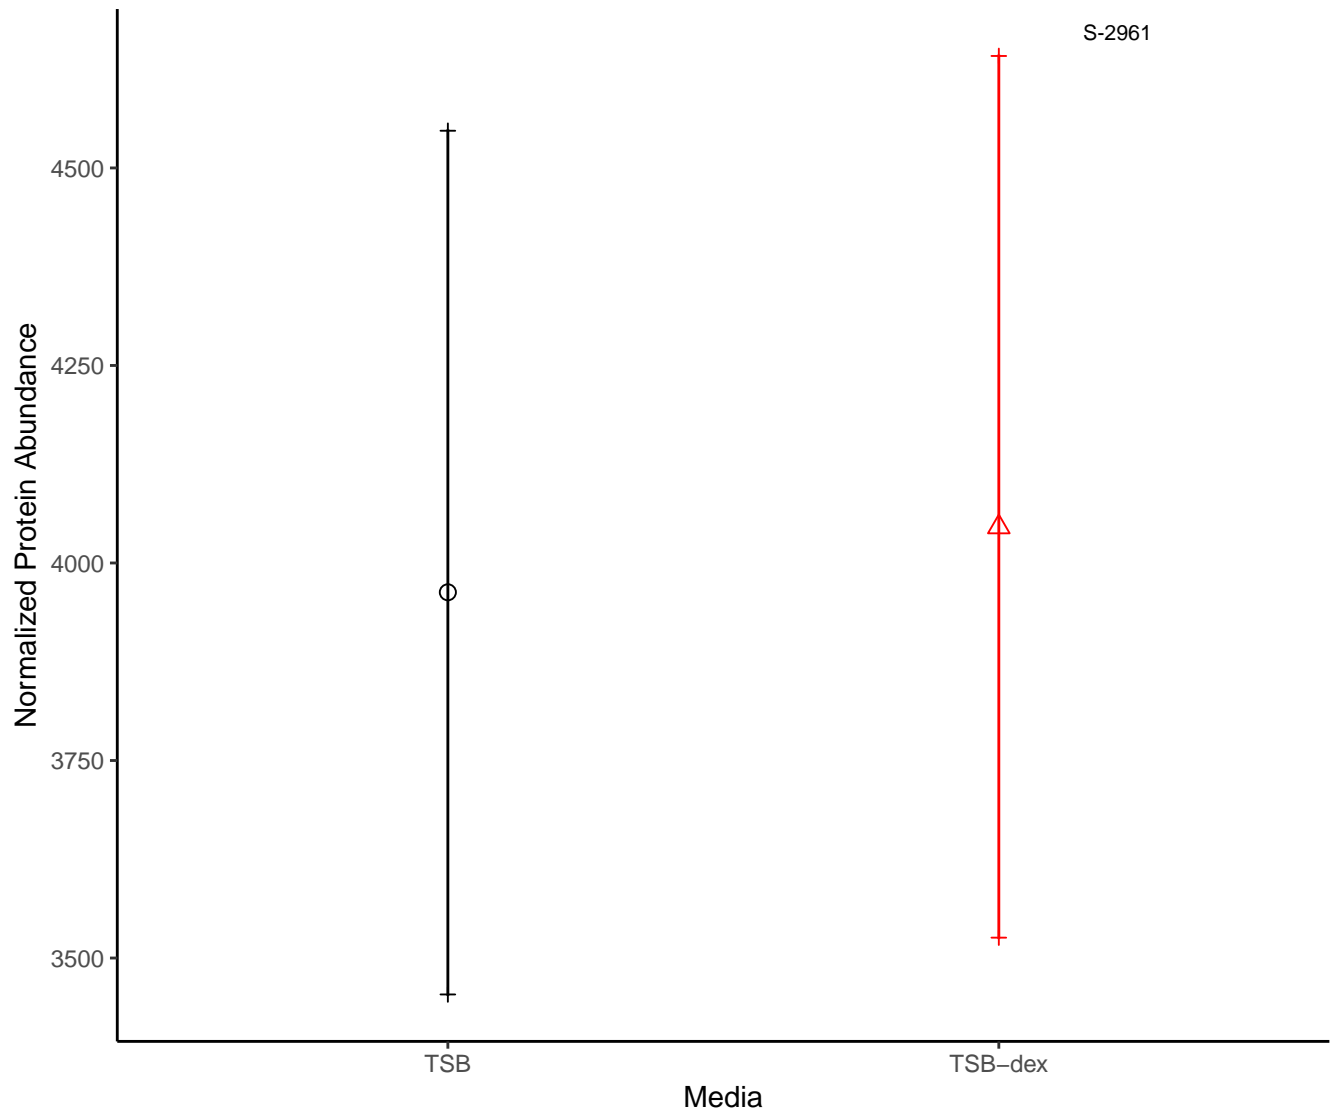

⊕ TSB-dex

△ TSB

# XERD\_STAAM

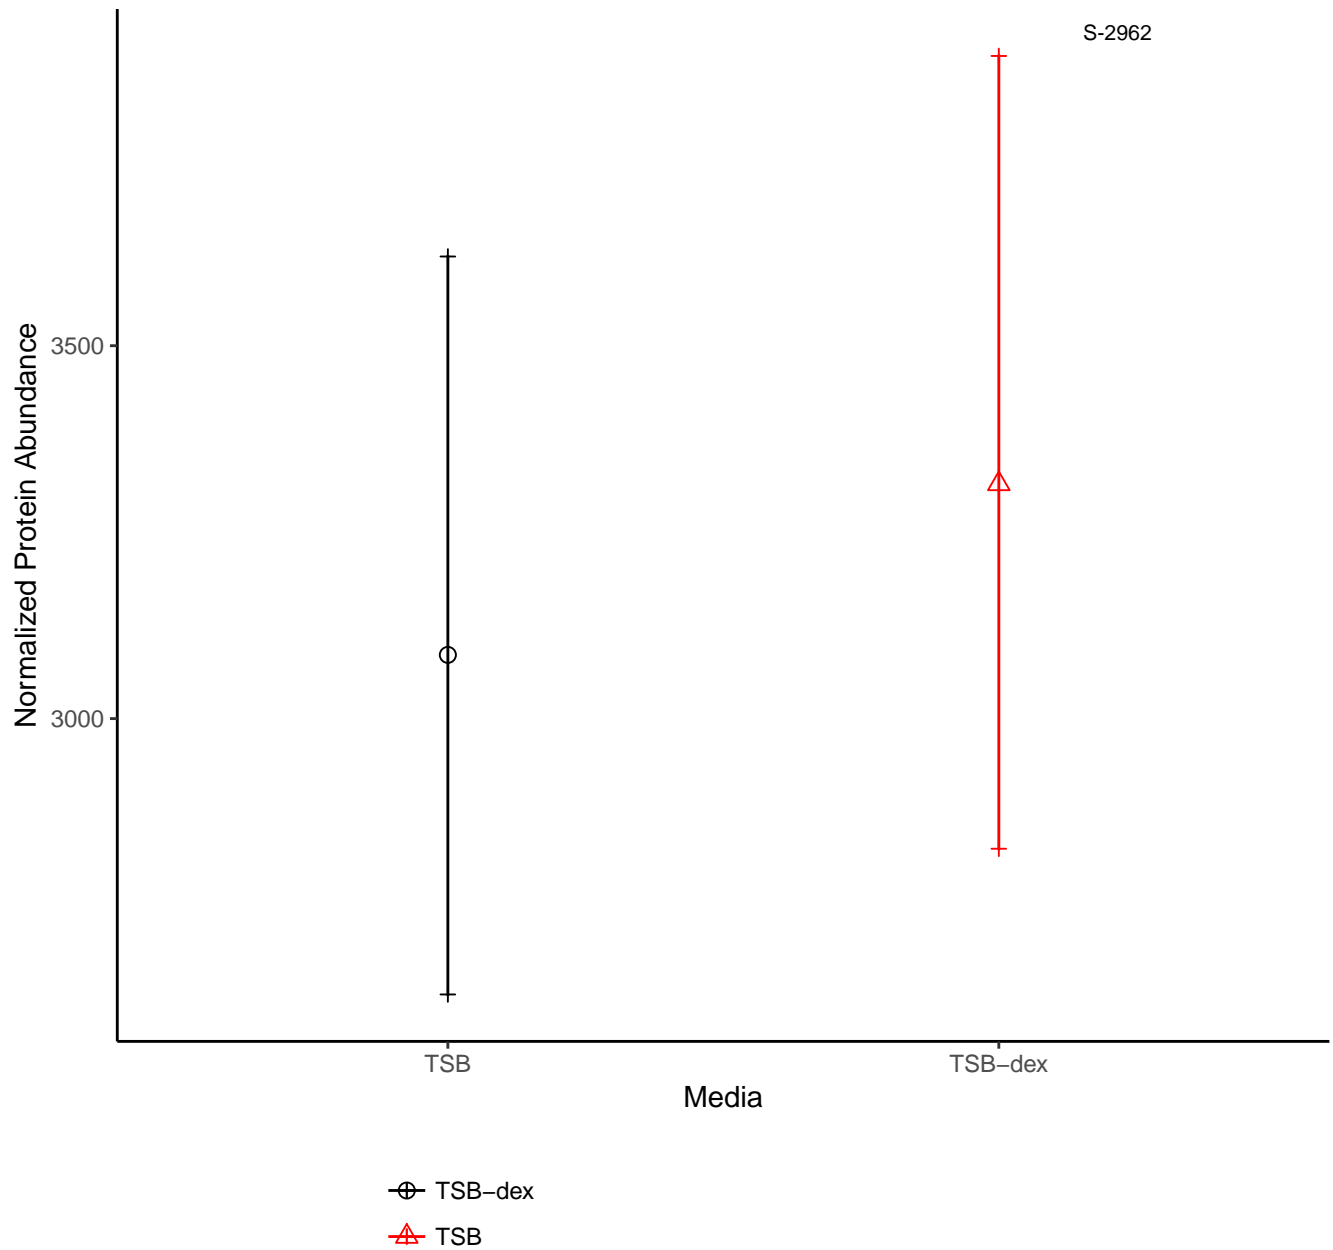

# XPT\_STAAM

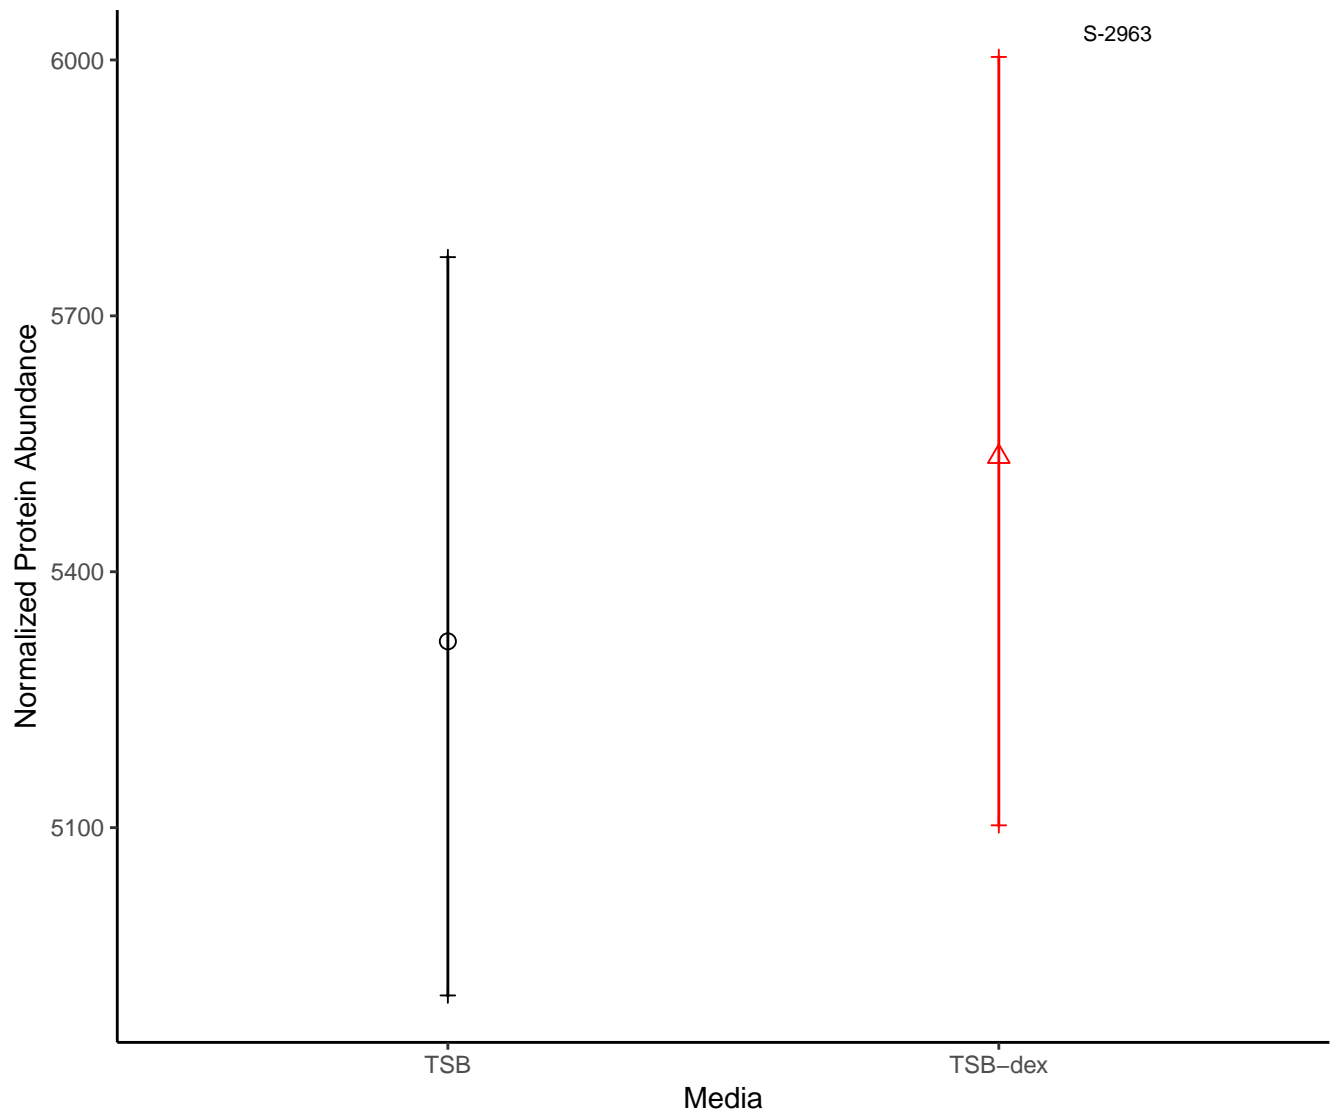

⊕ TSB-dex

△ TSB

# Y098\_STAAM

S-2964

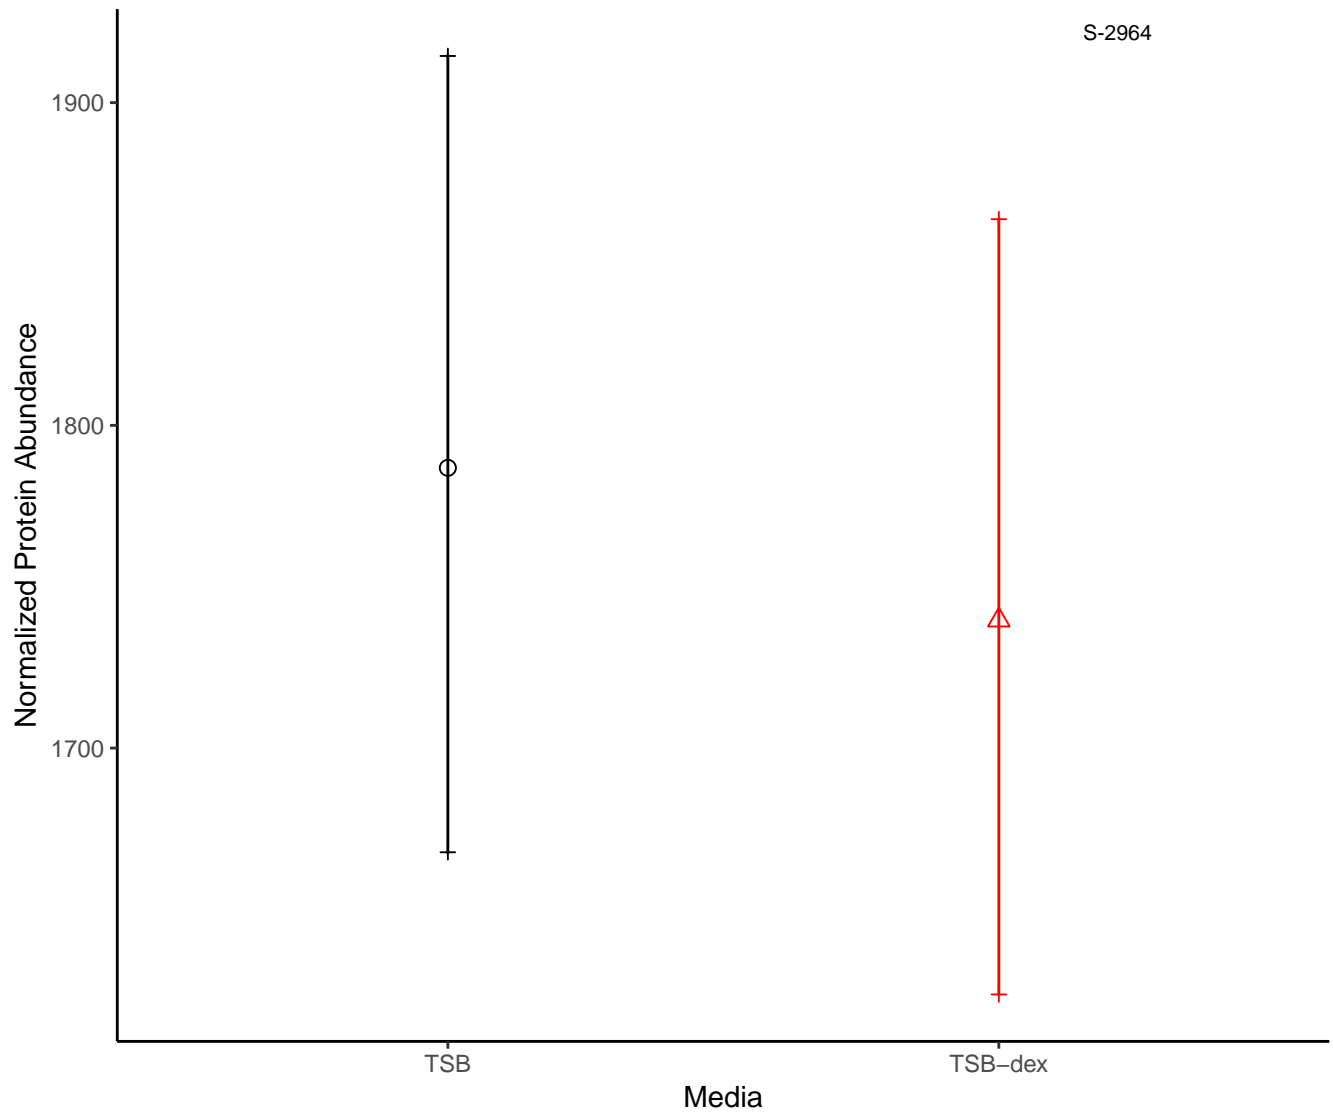

⊕ TSB-dex

△ TSB

# Y099\_STAAM

S-2965

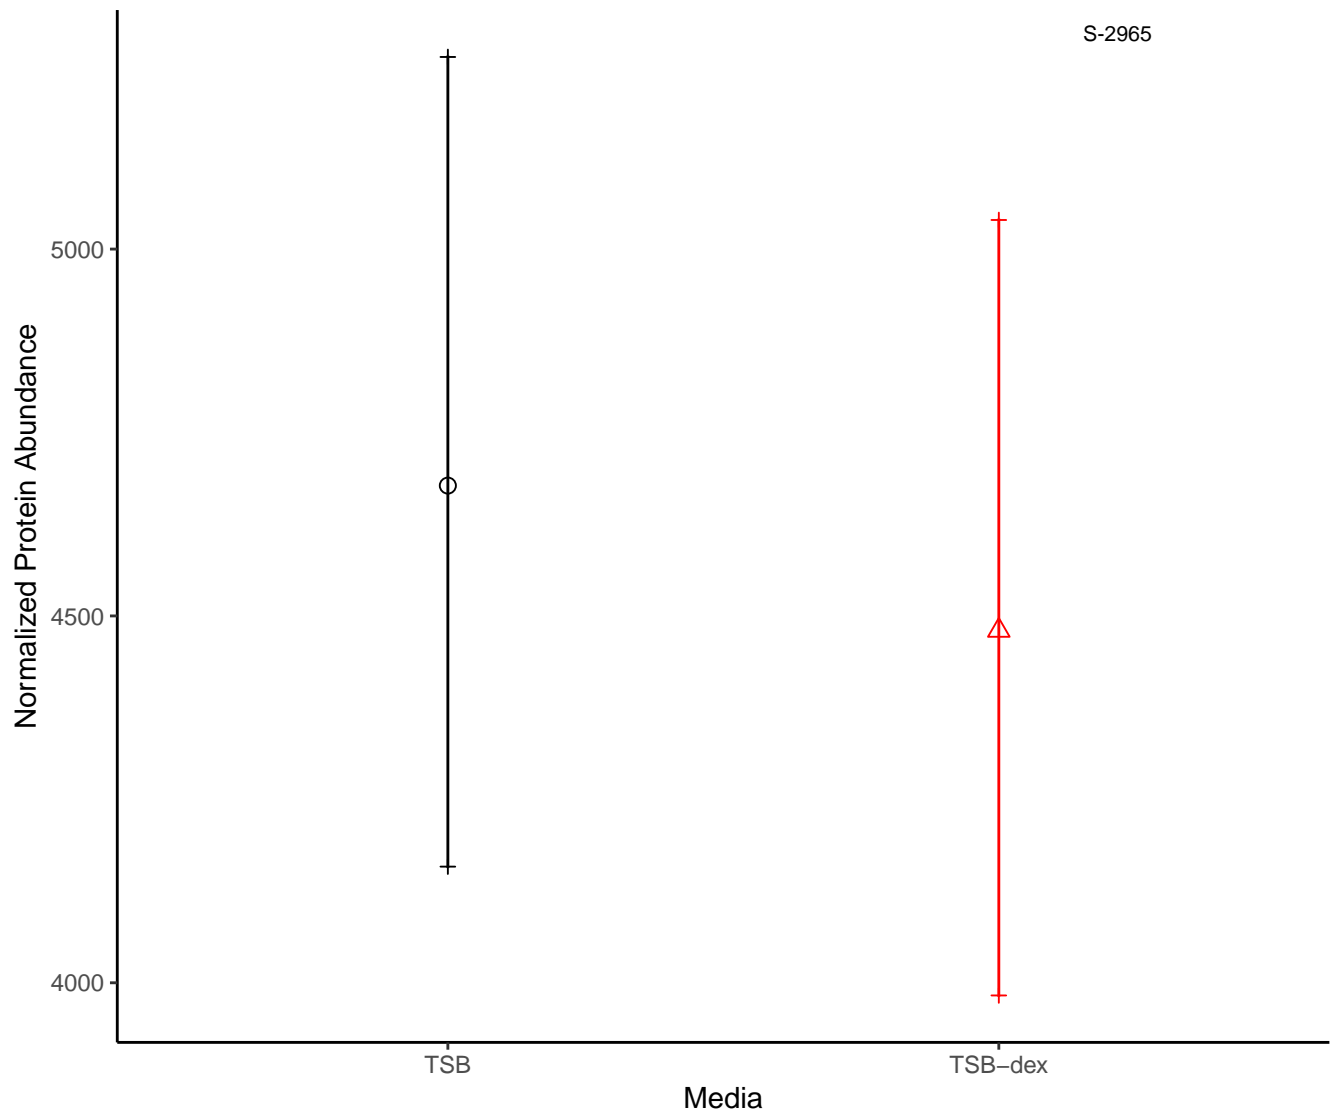

⊕ TSB-dex

△ TSB

# Y1015\_STAAM

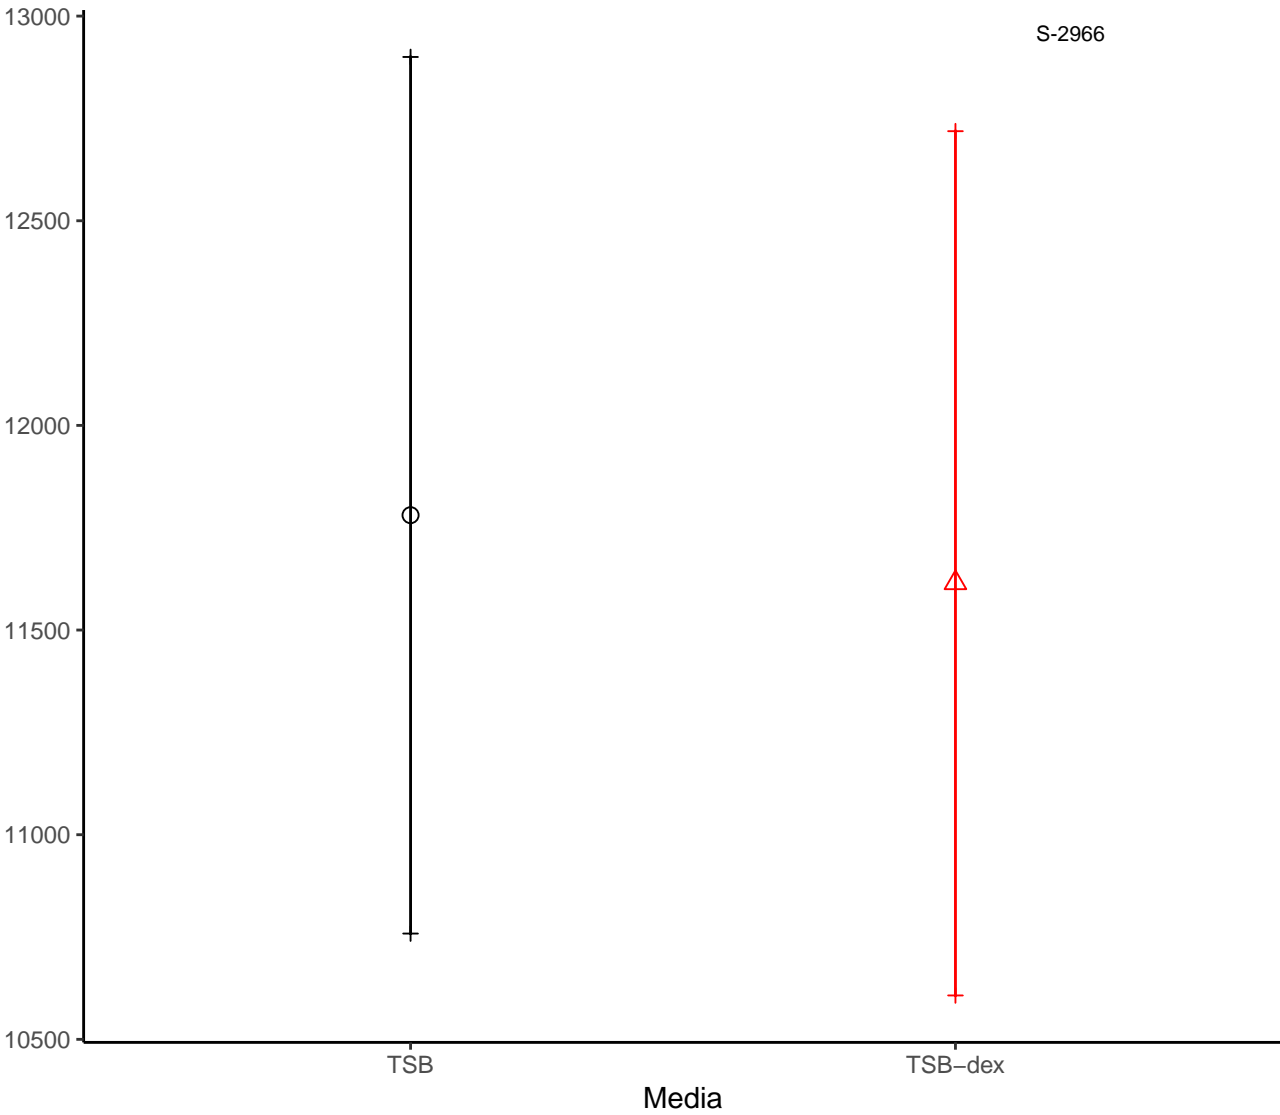

⊕ TSB-dex

△ TSB

# Y1090\_STAAM

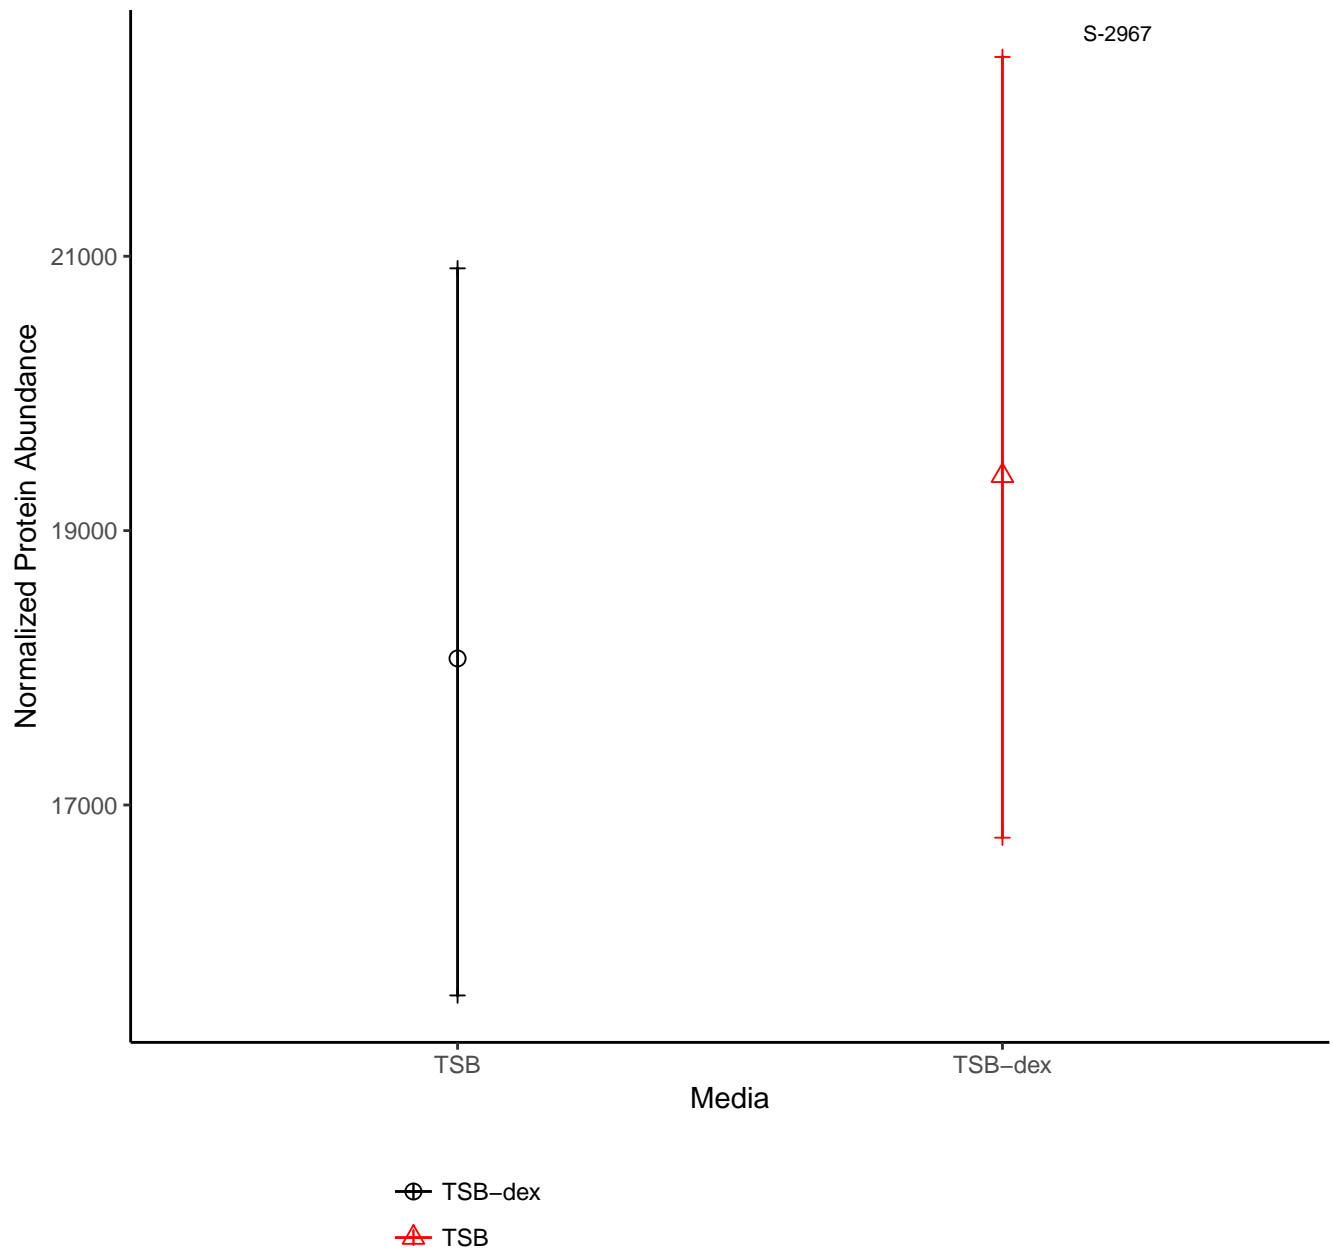

# Y1176\_STAAM

Normalized Protein Abundance

S-2968

14000

13000

12000

11000

10000

TSB

TSB-dex

Media

⊕ TSB-dex

△ TSB

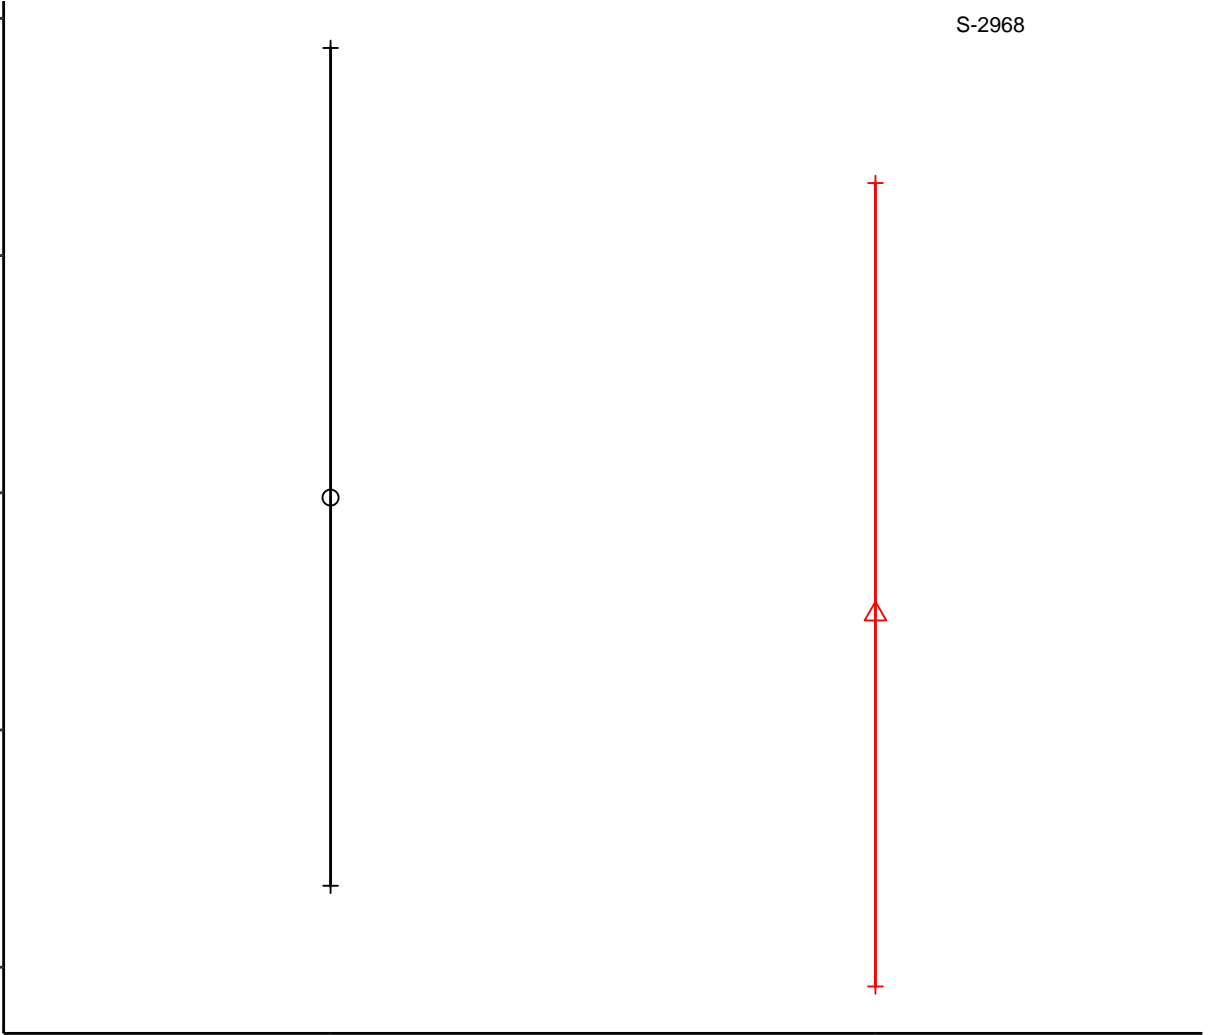



# Y1177\_STAAM

S-2969

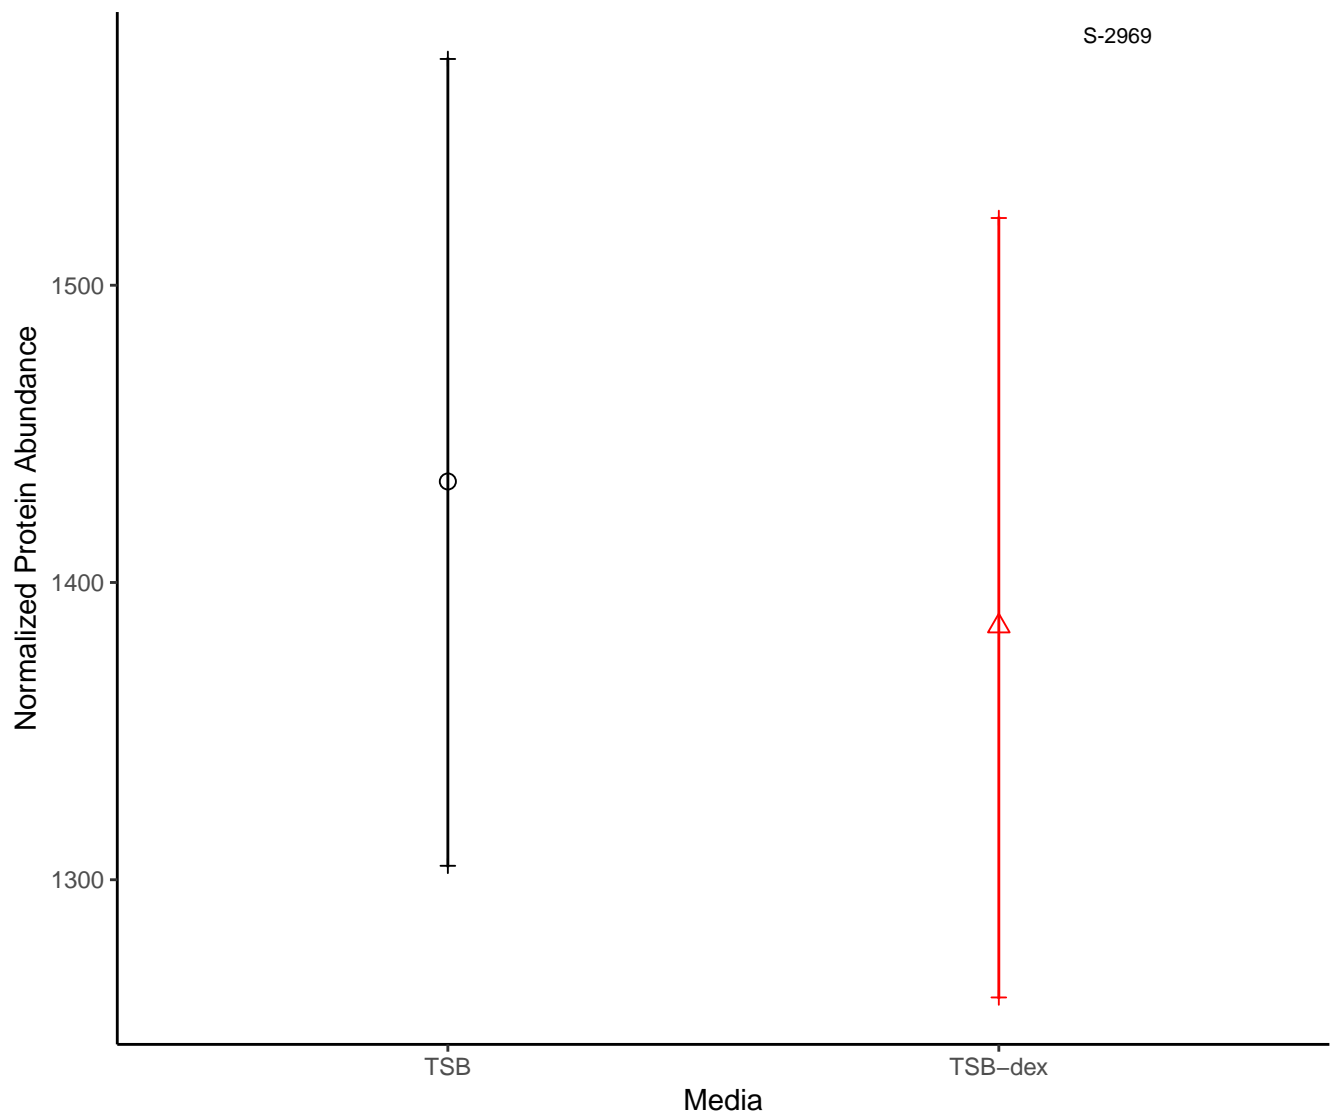

⊕ TSB-dex

△ TSB

# Y1187\_STAAM

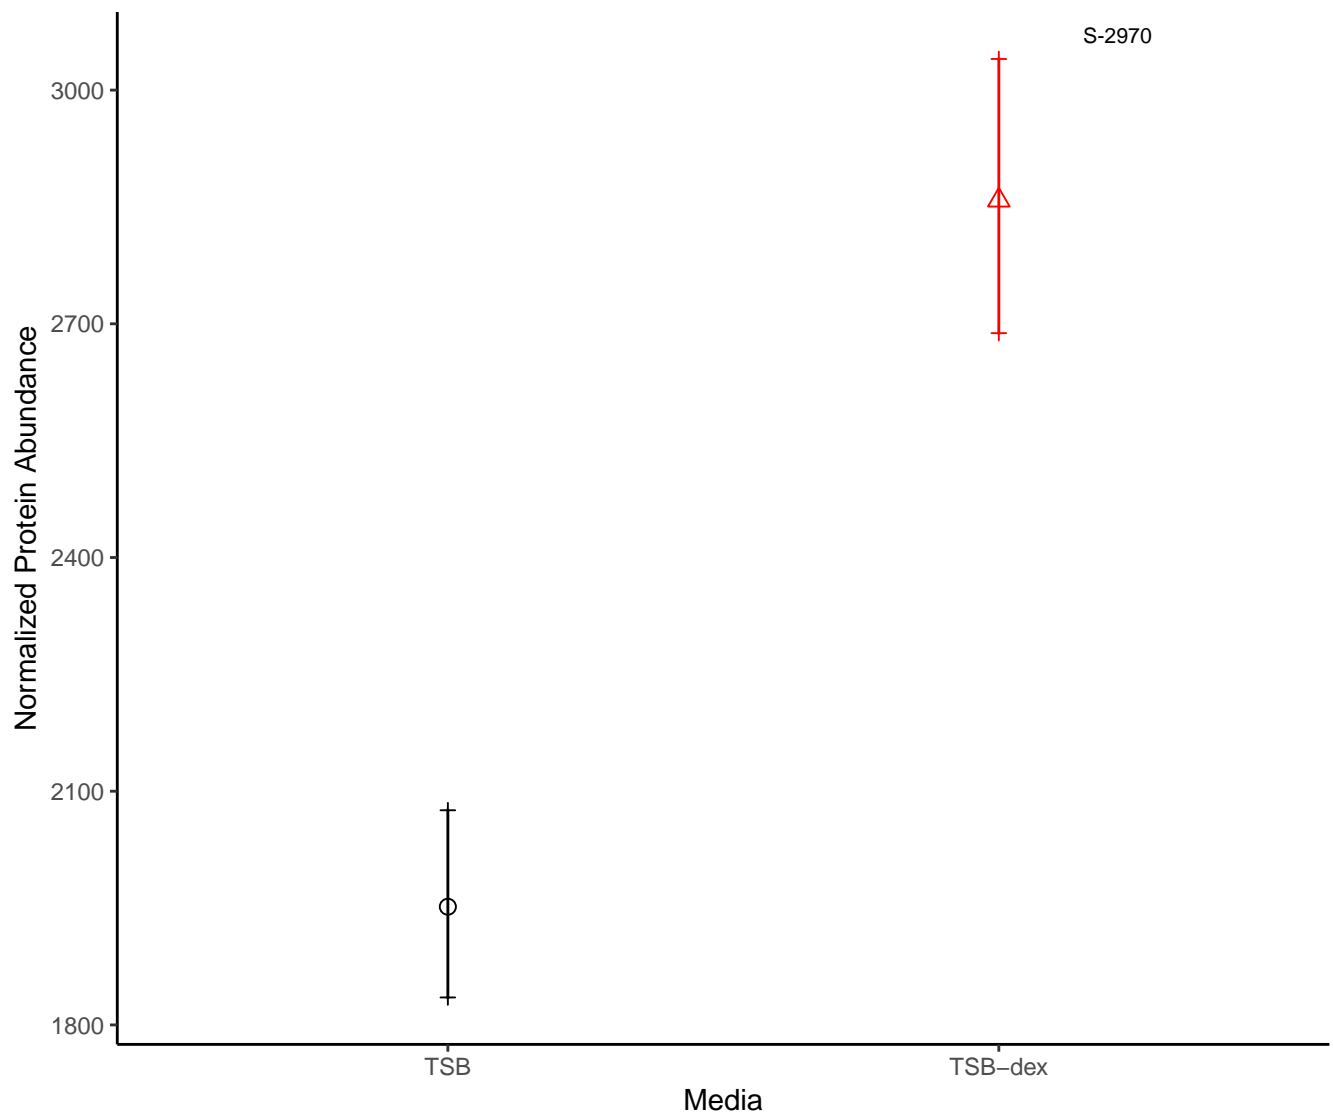

⊕ TSB-dex

△ TSB

# Y1226\_STAAM

S-2971

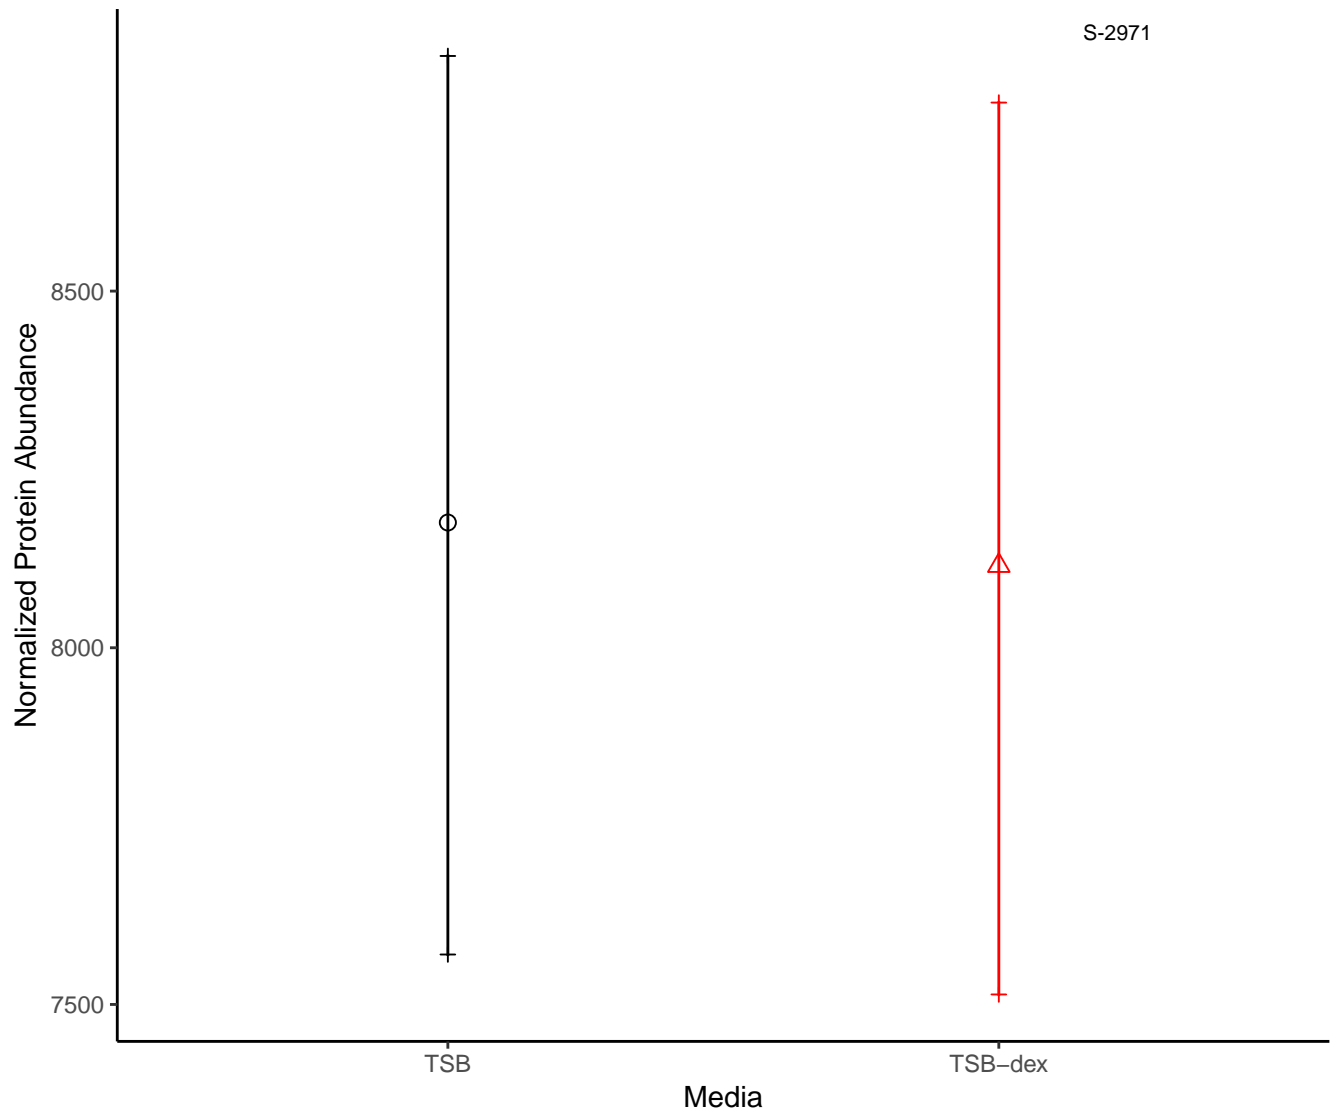

⊕ TSB-dex

△ TSB

# Y1341\_STAAM

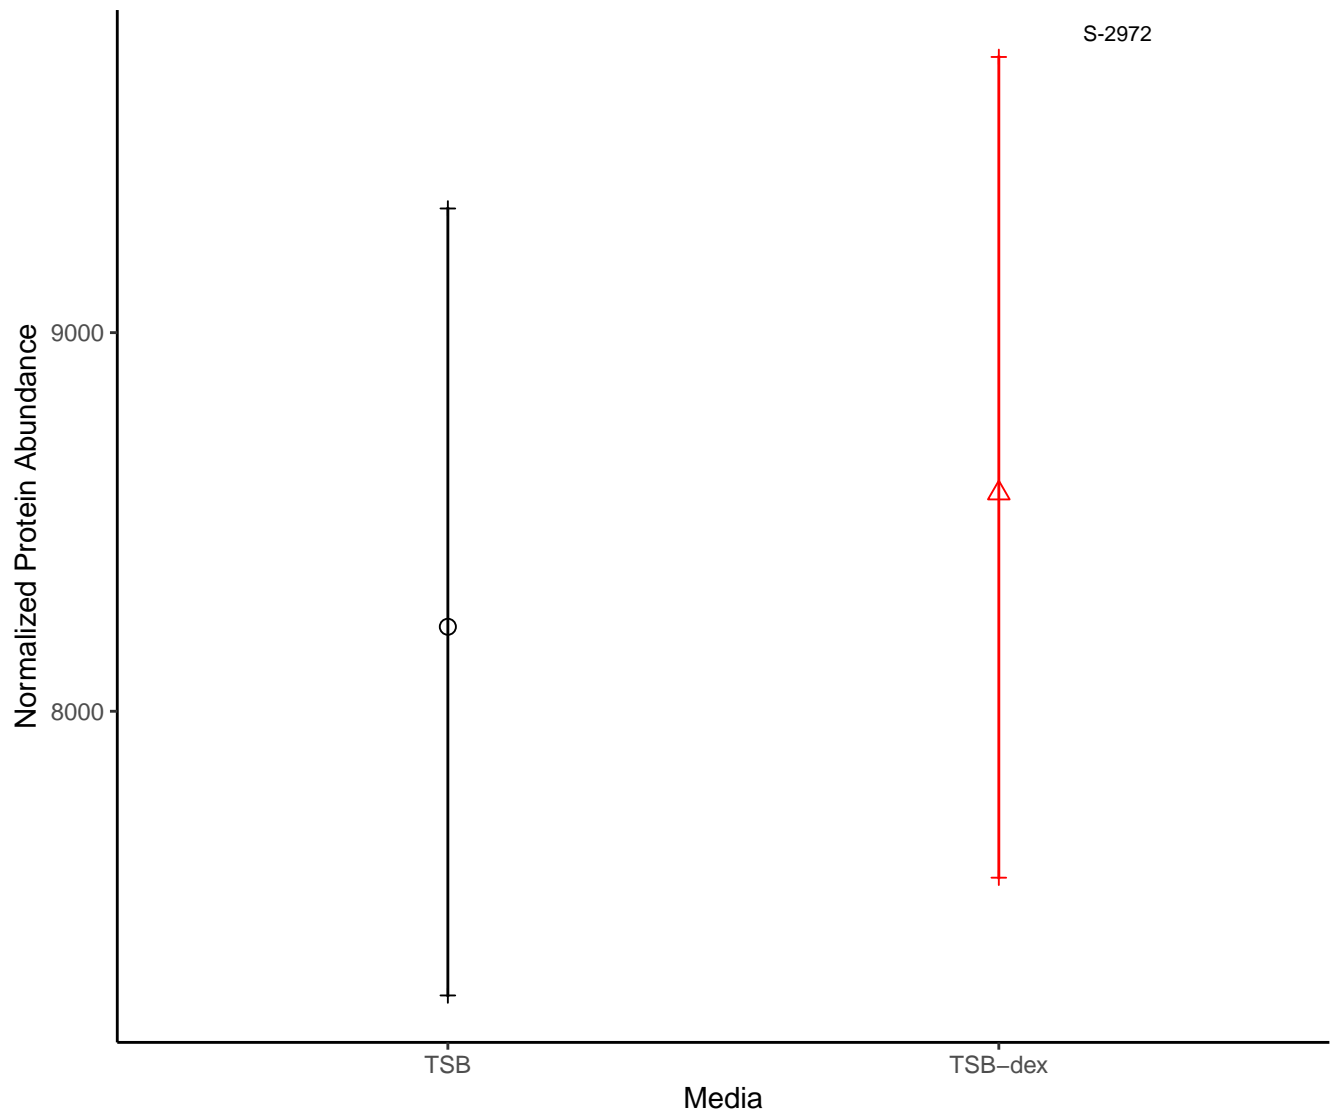

⊕ TSB-dex

△ TSB

# Y1343\_STAAM

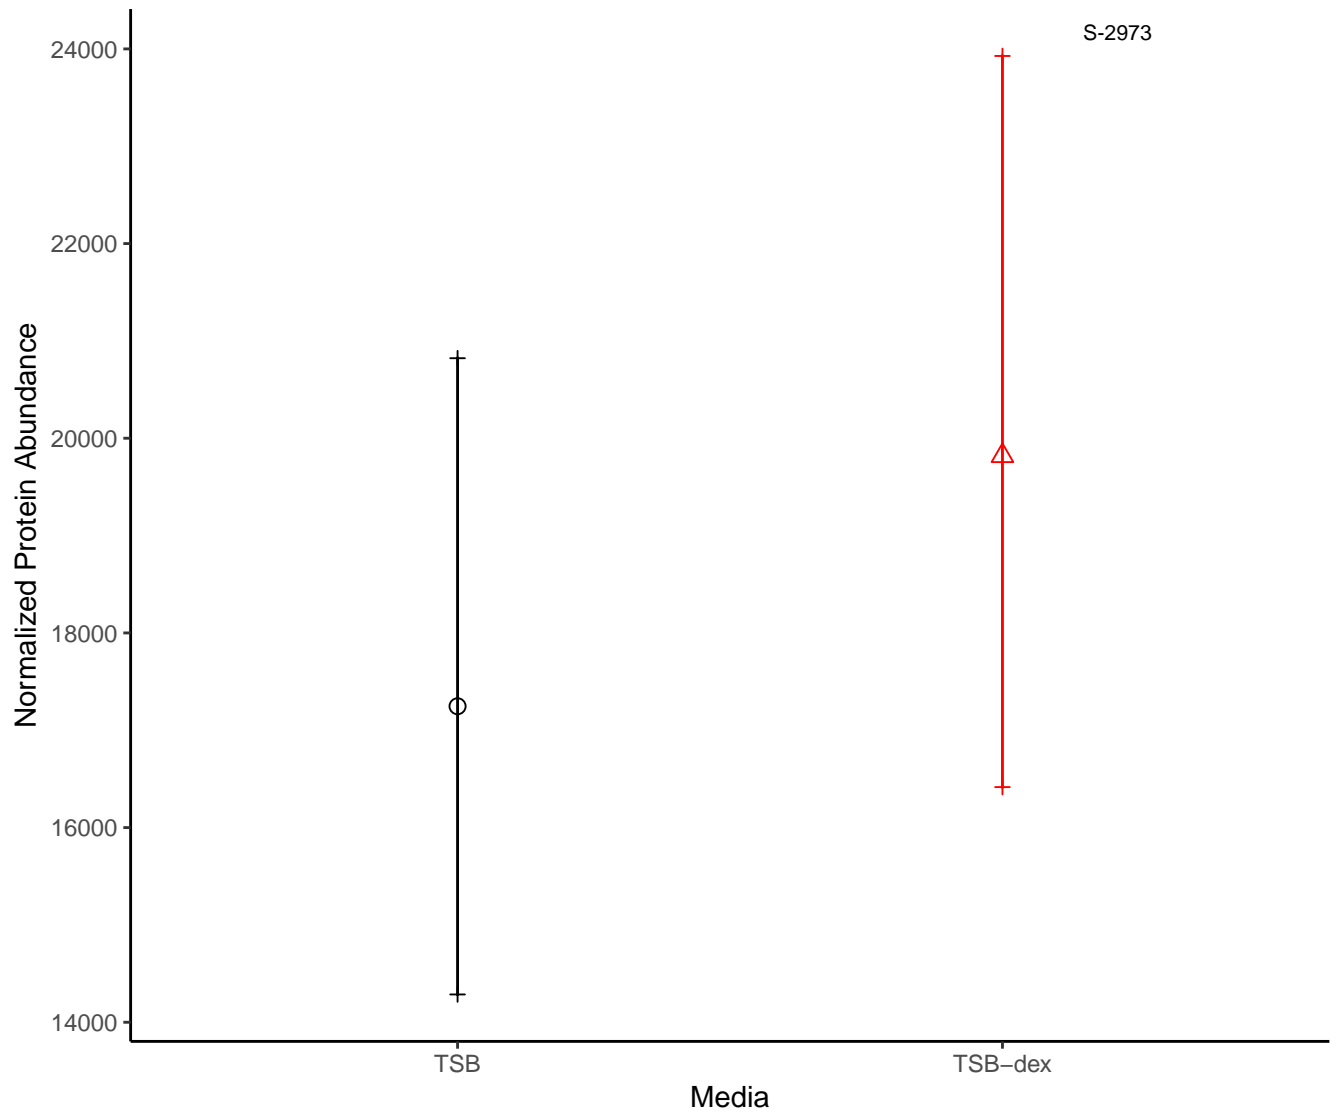

⊕ TSB-dex

△ TSB

# Y1352\_STAAM

S-2974

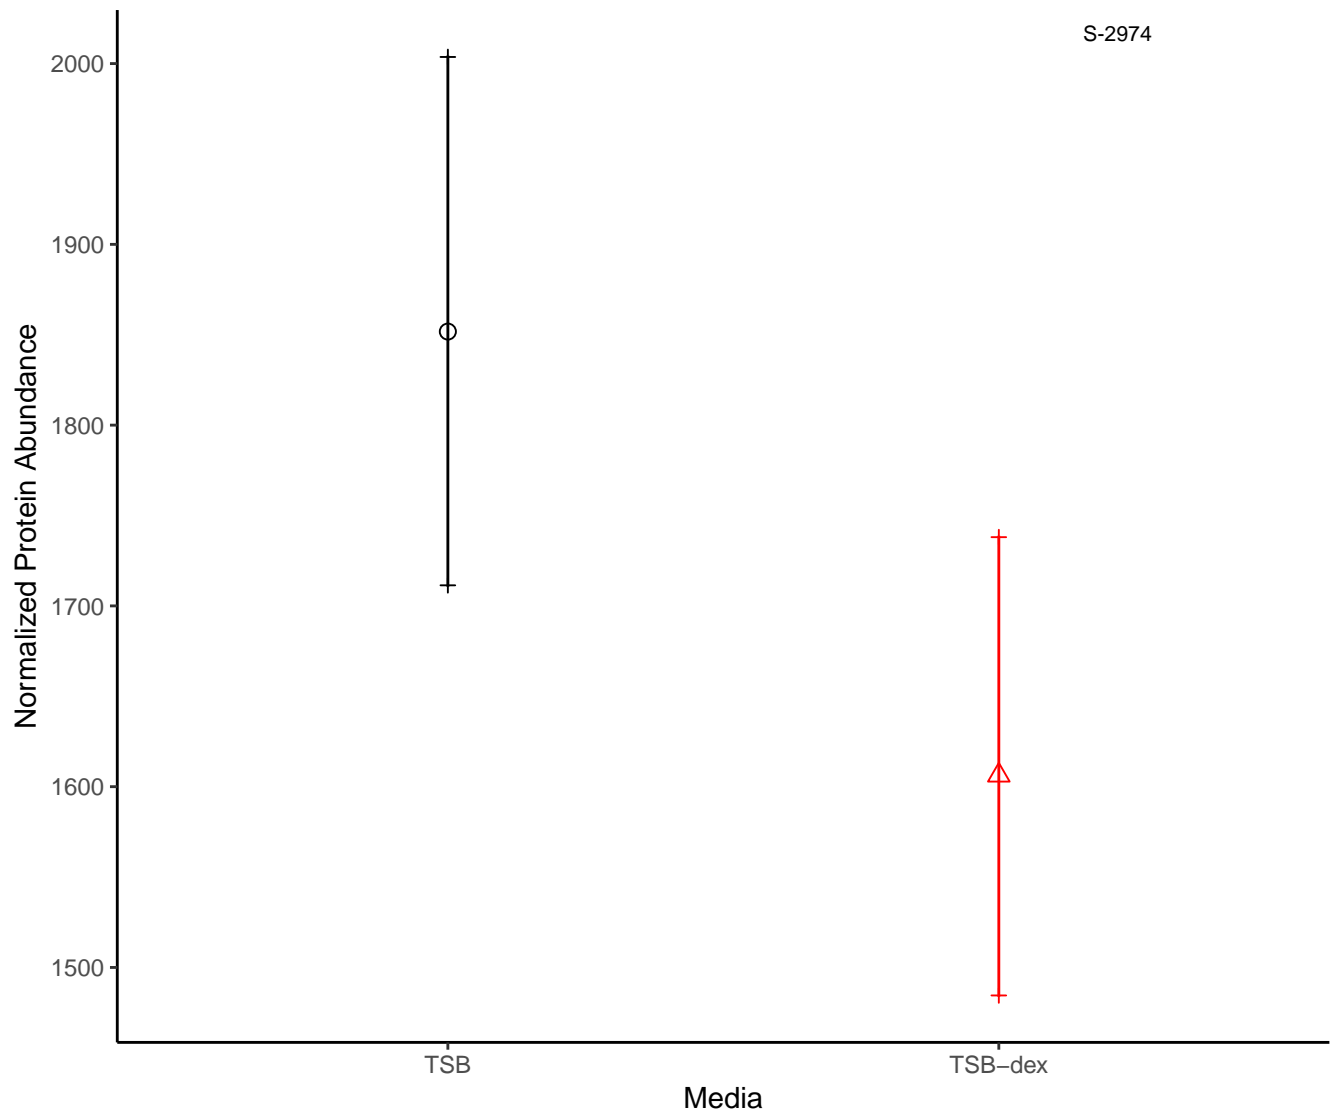

⊕ TSB-dex

△ TSB

# Y1363\_STAAM

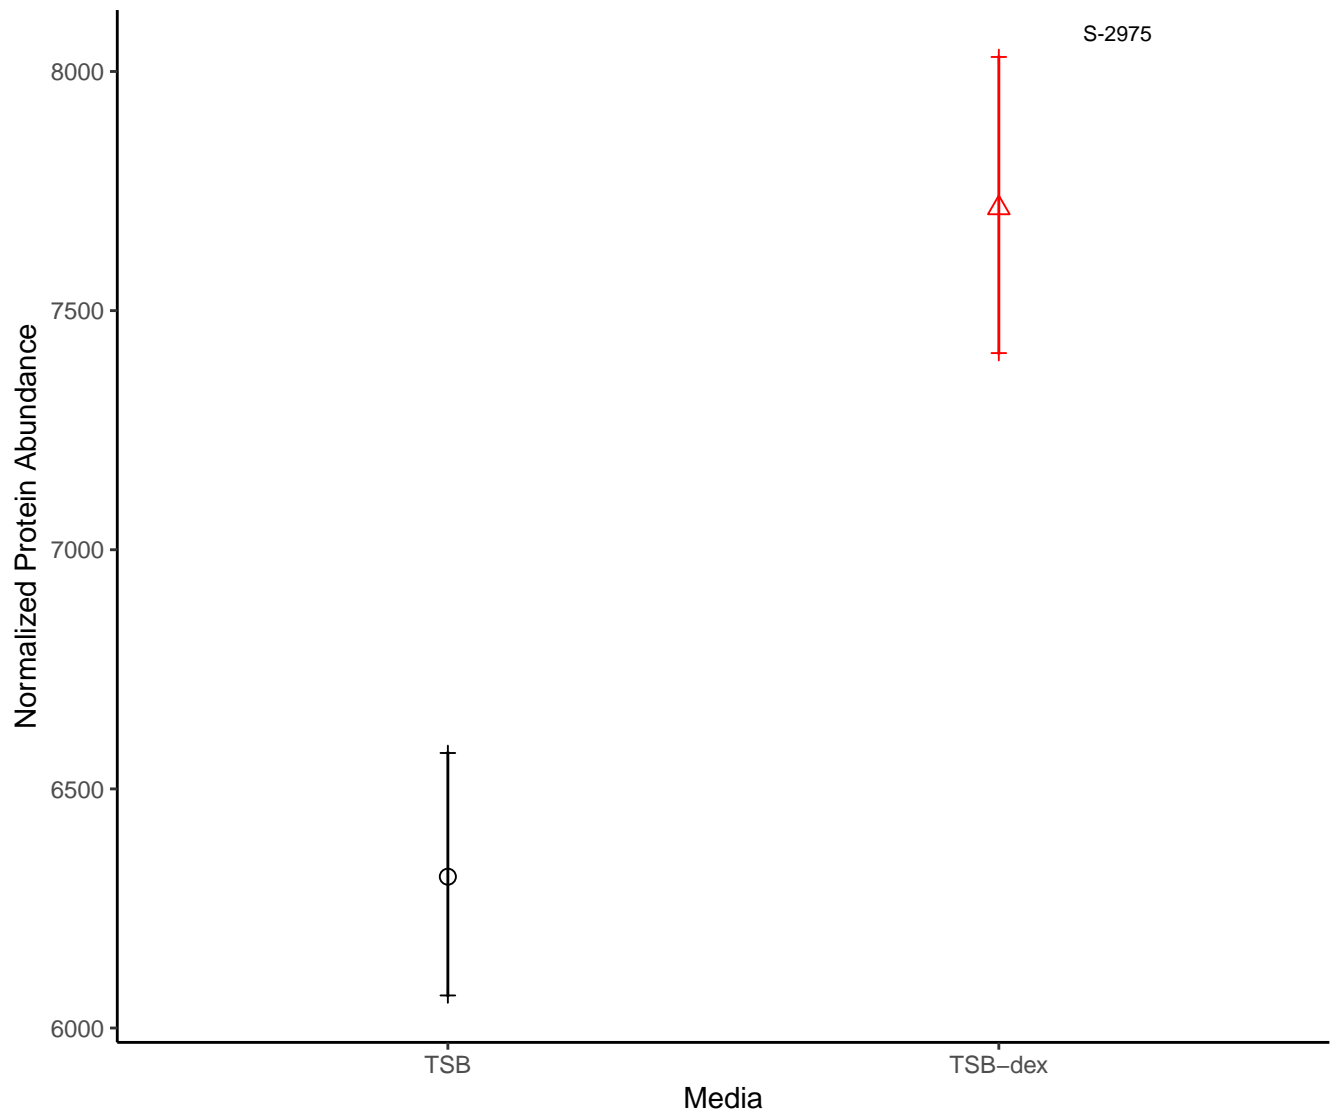

⊕ TSB-dex

△ TSB

# Y1409\_STAAM

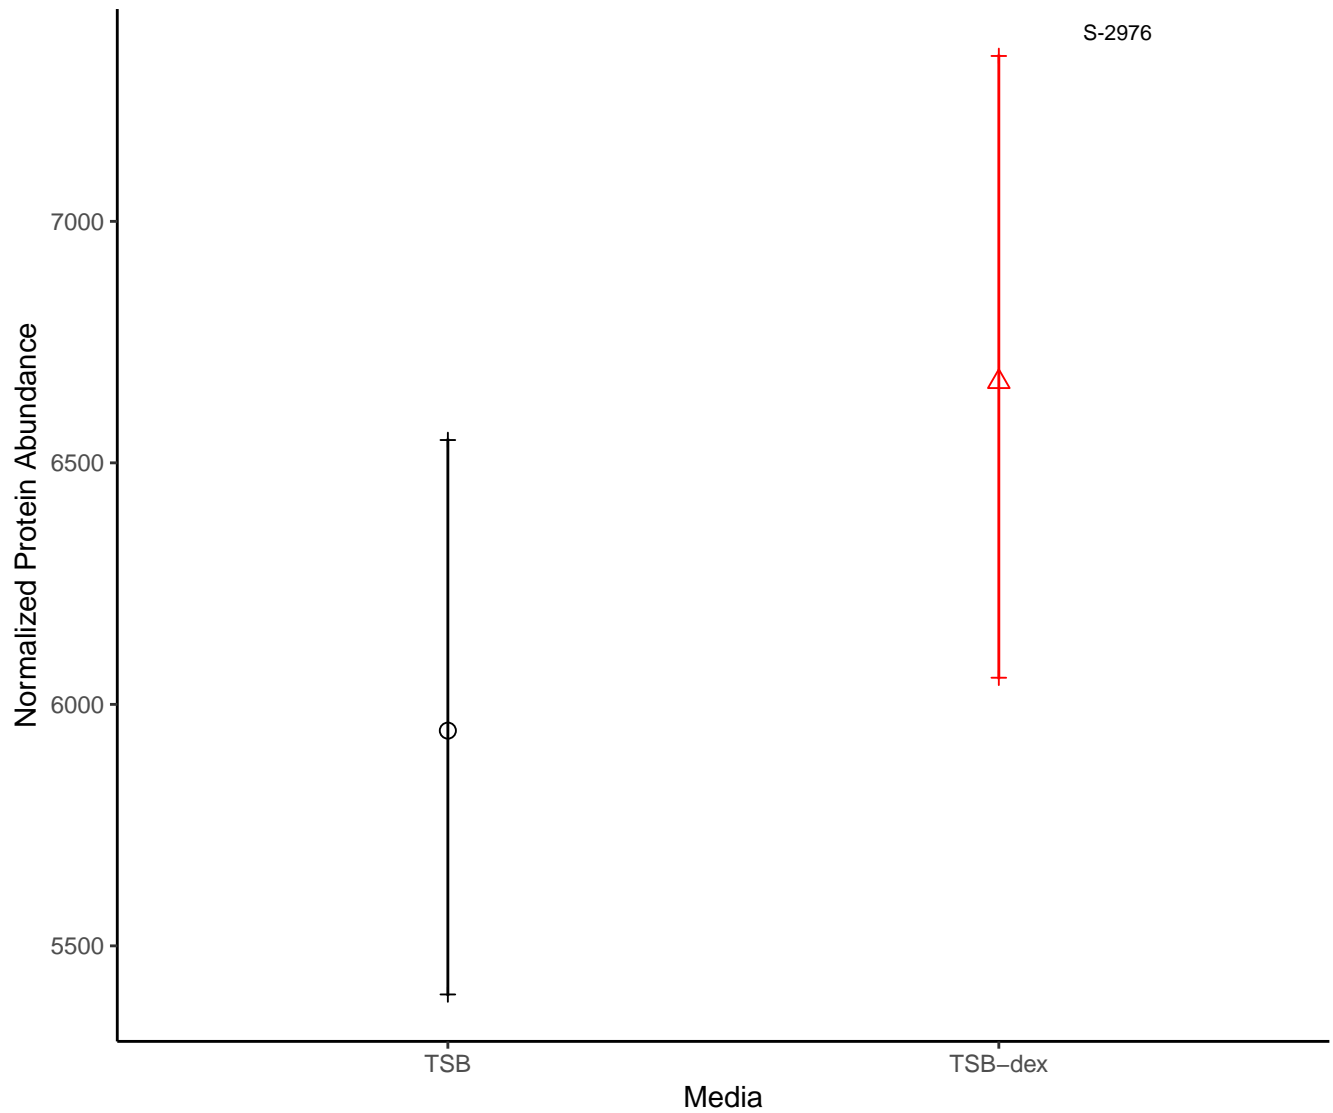

⊕ TSB-dex

△ TSB



# Y1425\_STAAM

S-2977

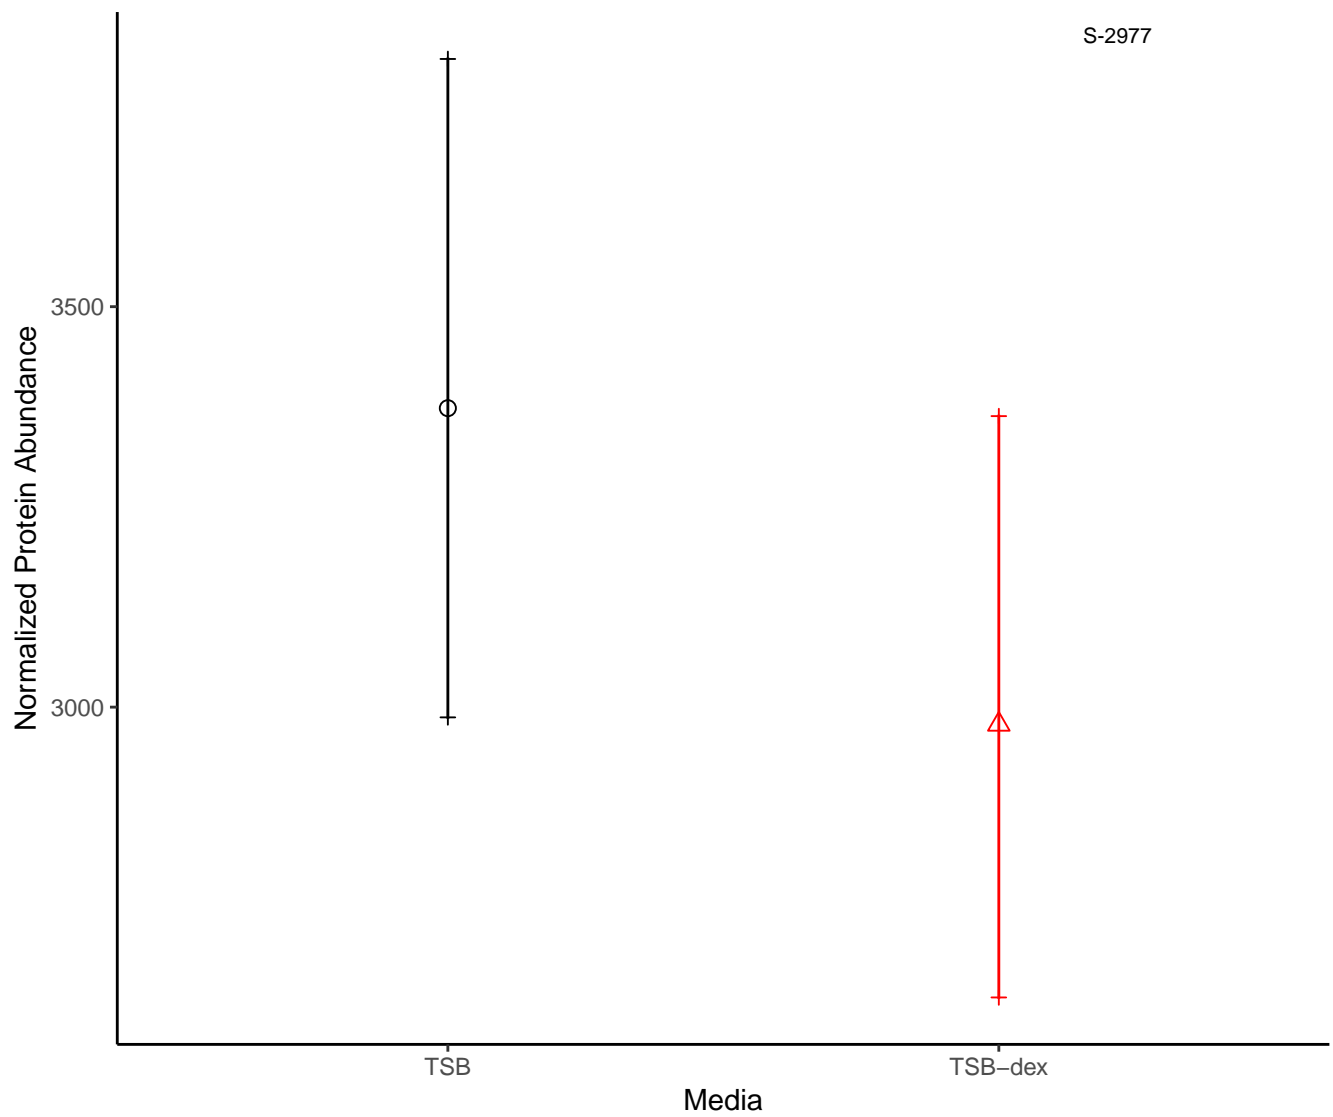

⊕ TSB-dex

△ TSB

# Y1462\_STAAM

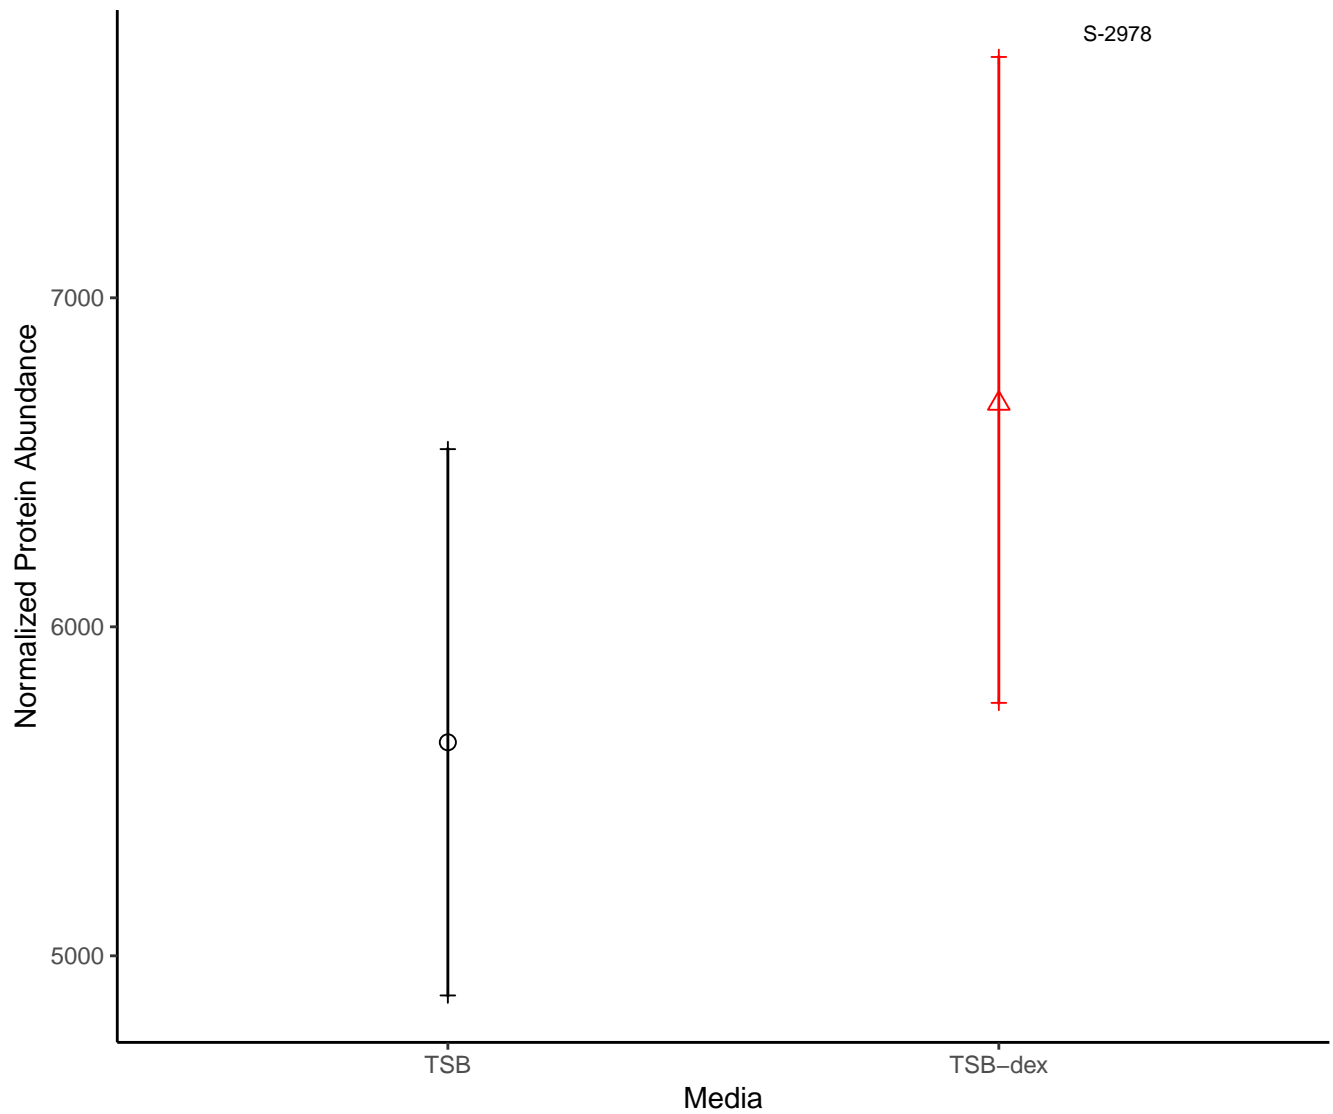

⊕ TSB-dex

△ TSB

# Y1514\_STAAM

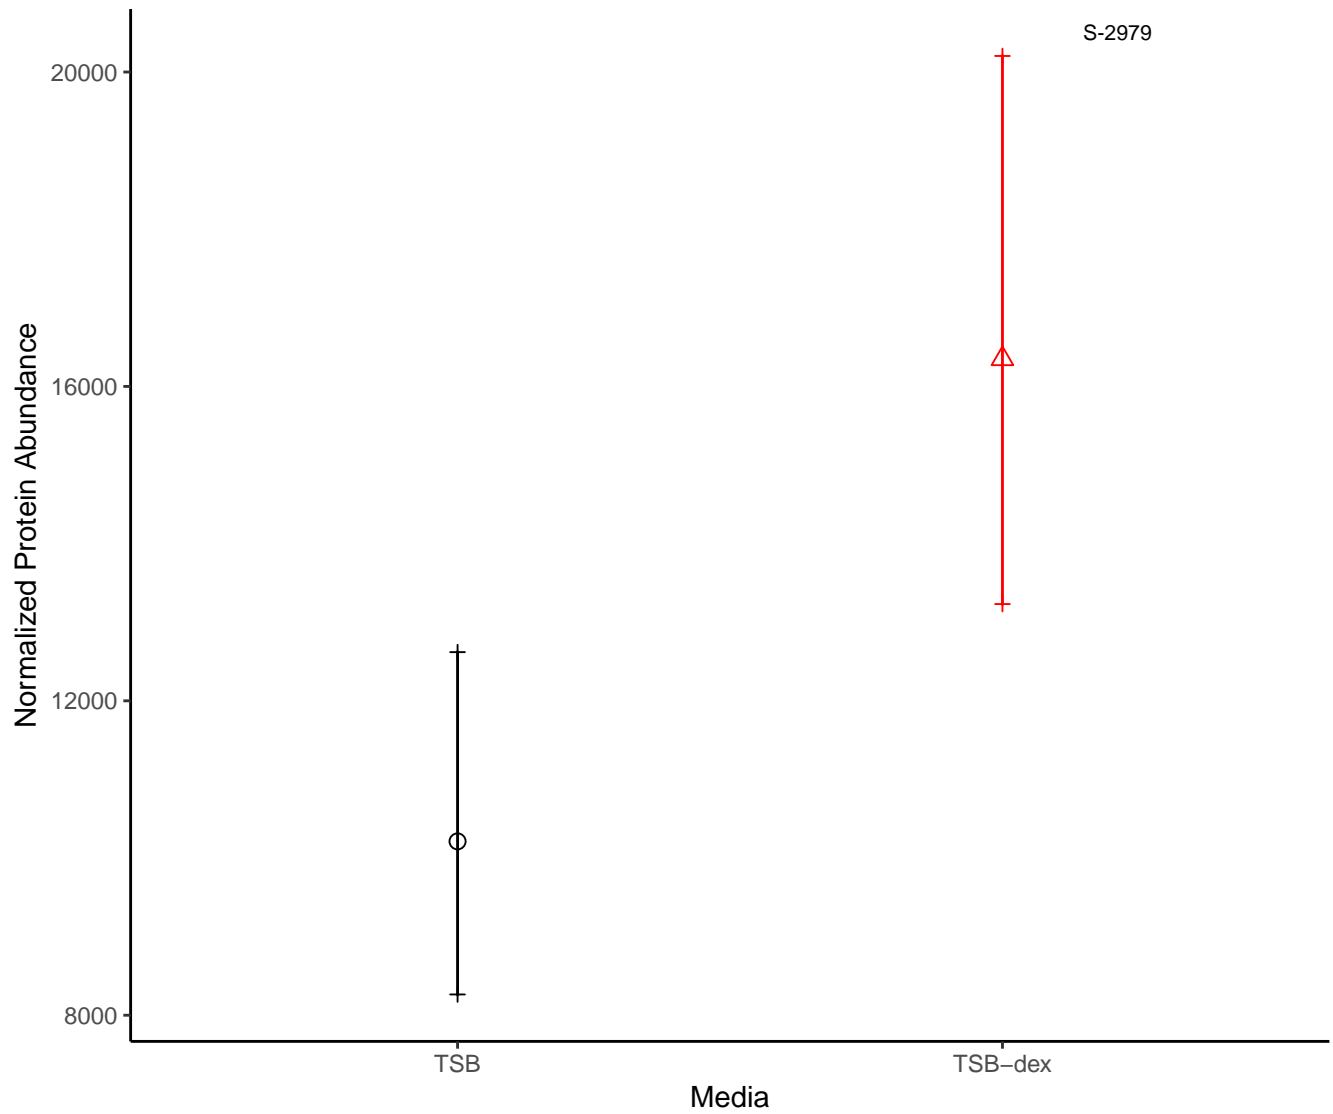

⊕ TSB-dex

△ TSB

# Y1573\_STAAM

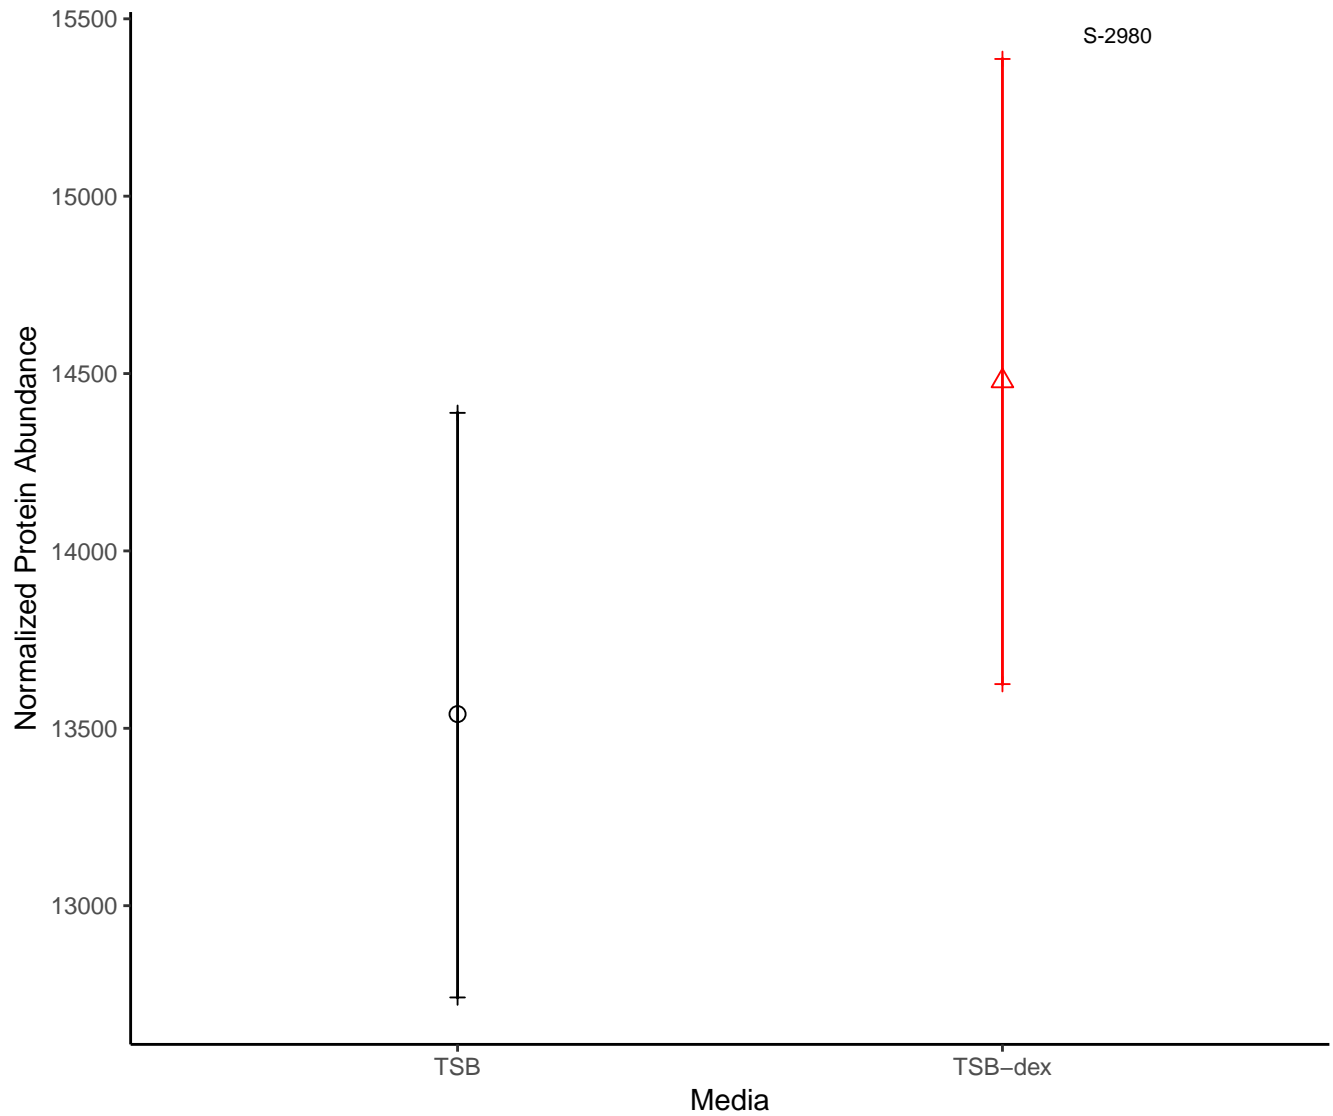

⊕ TSB-dex

△ TSB

# Y1605\_STAAM

S-2981

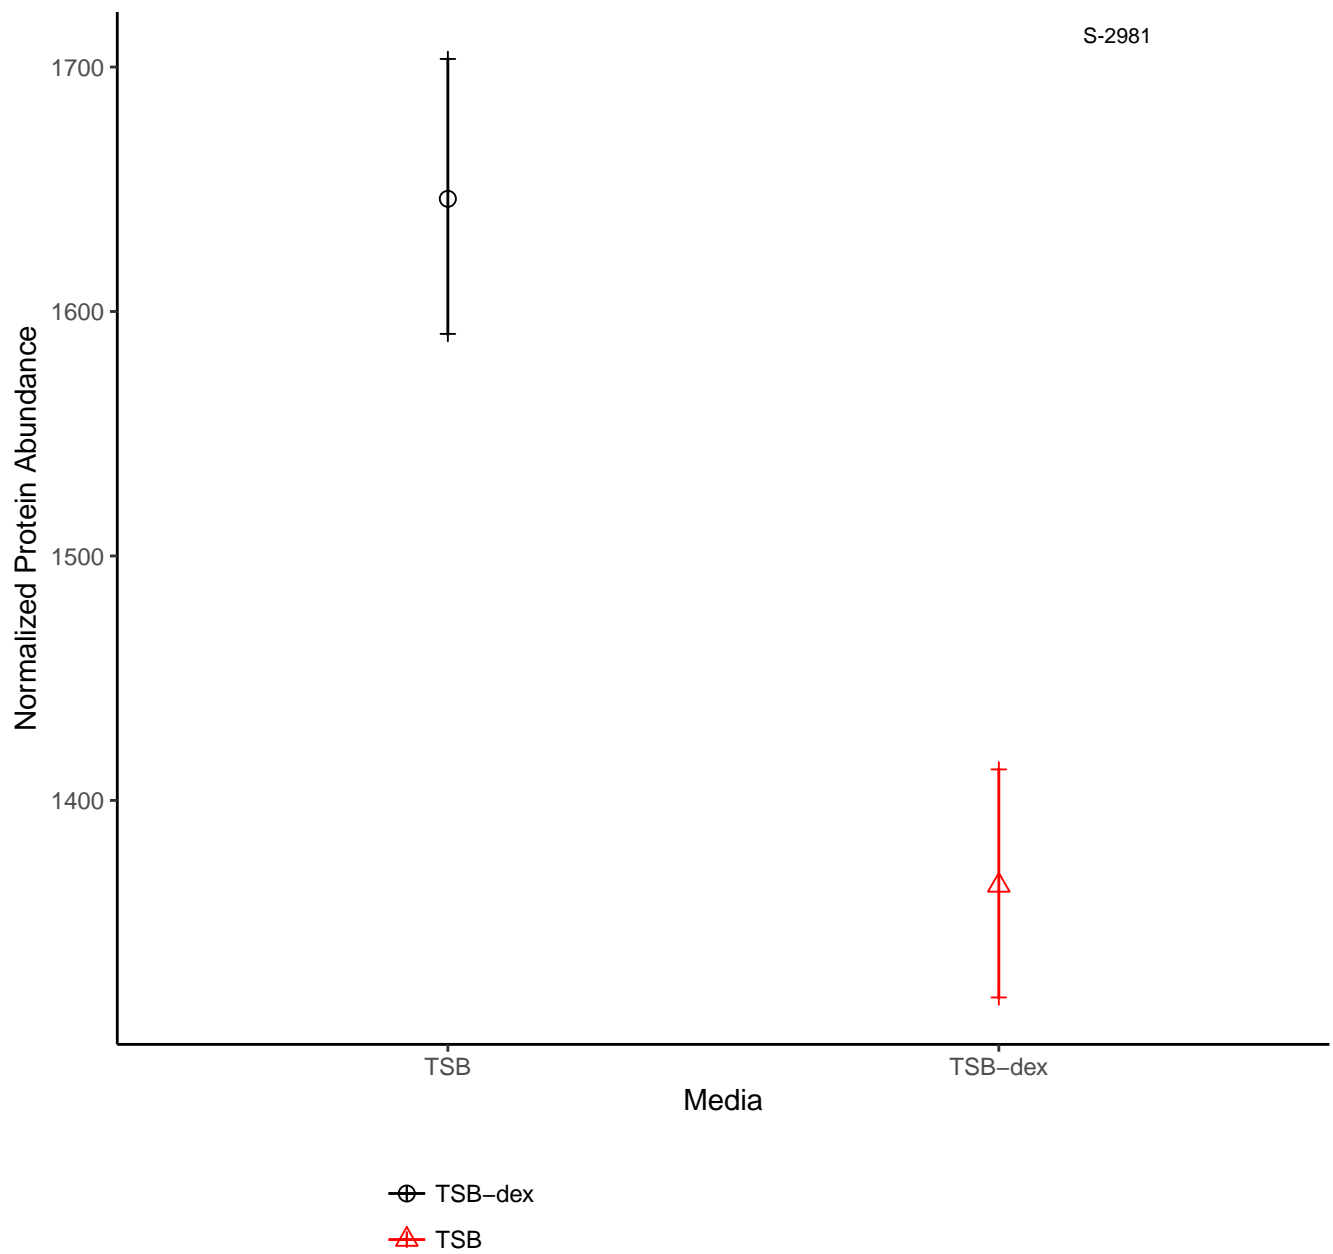

# Y1617\_STAAM

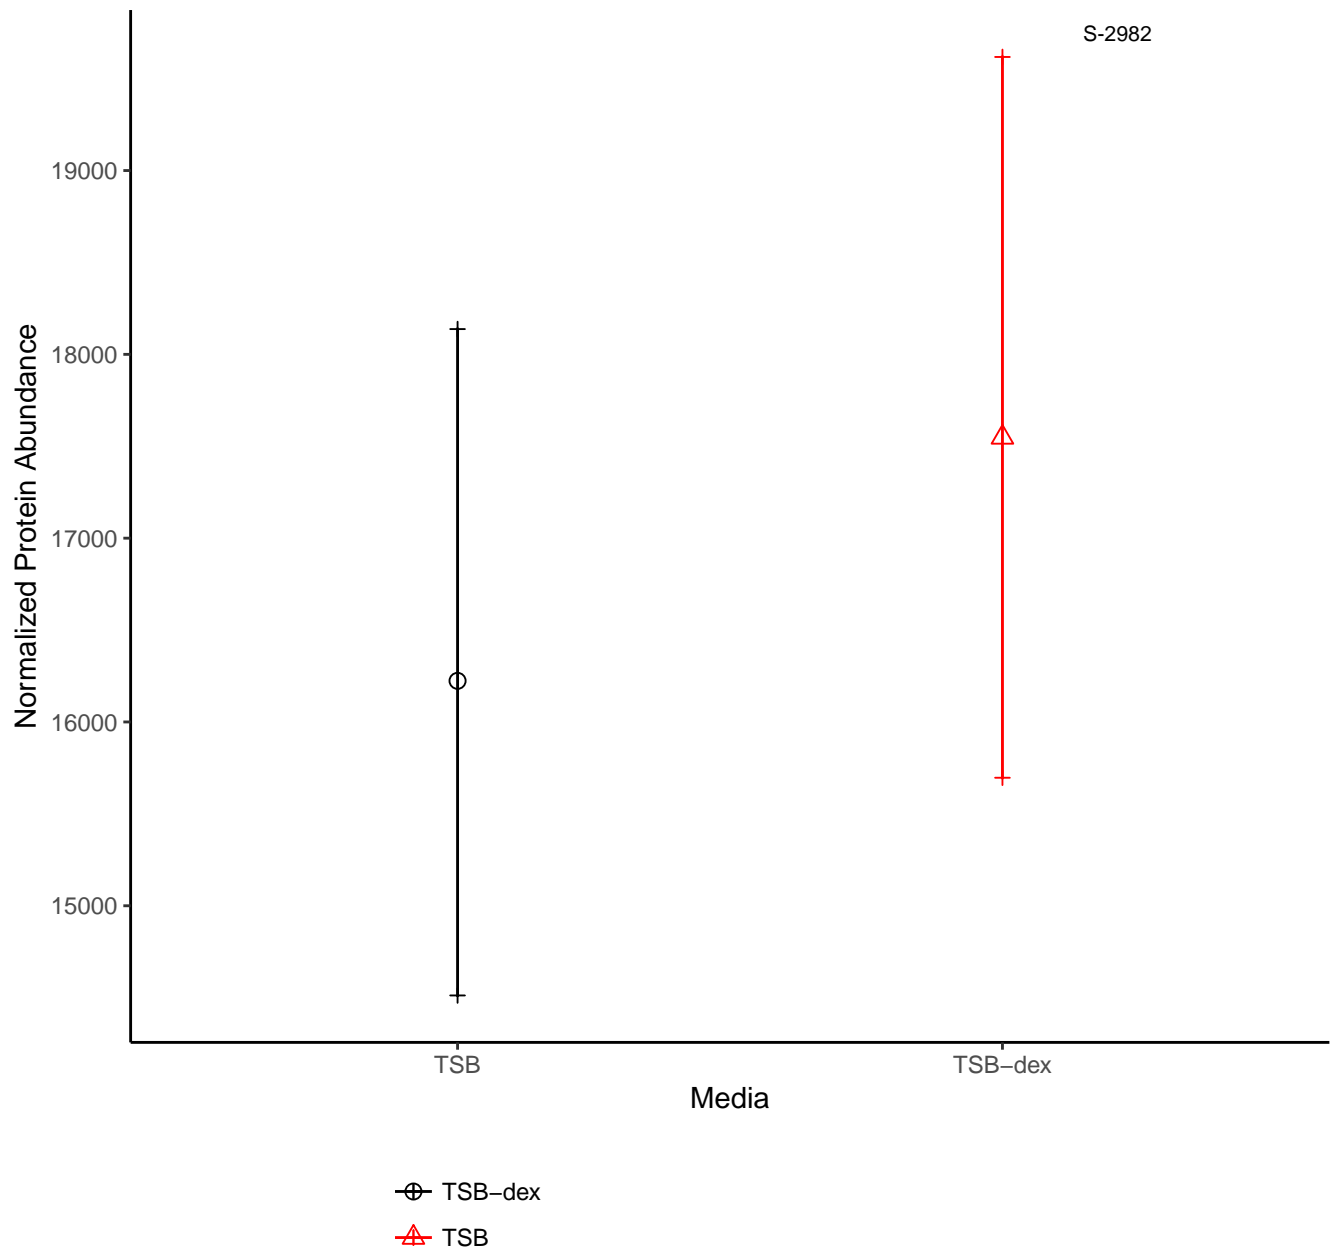

# Y1625\_STAAM

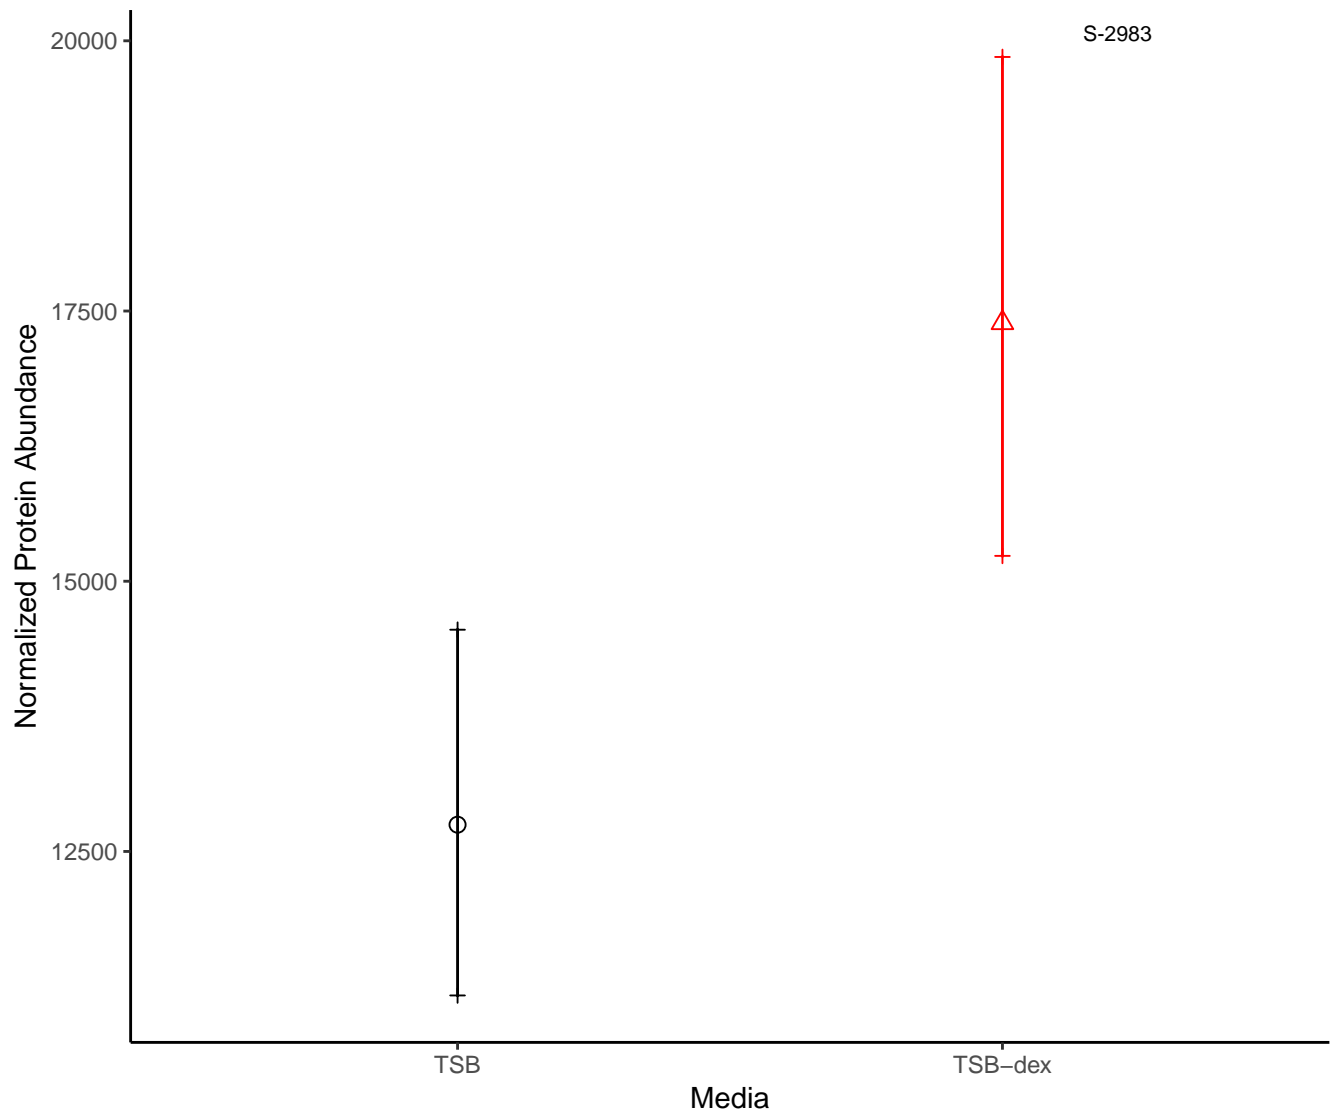

⊖ TSB-dex

△ TSB

# Y1710\_STAAM

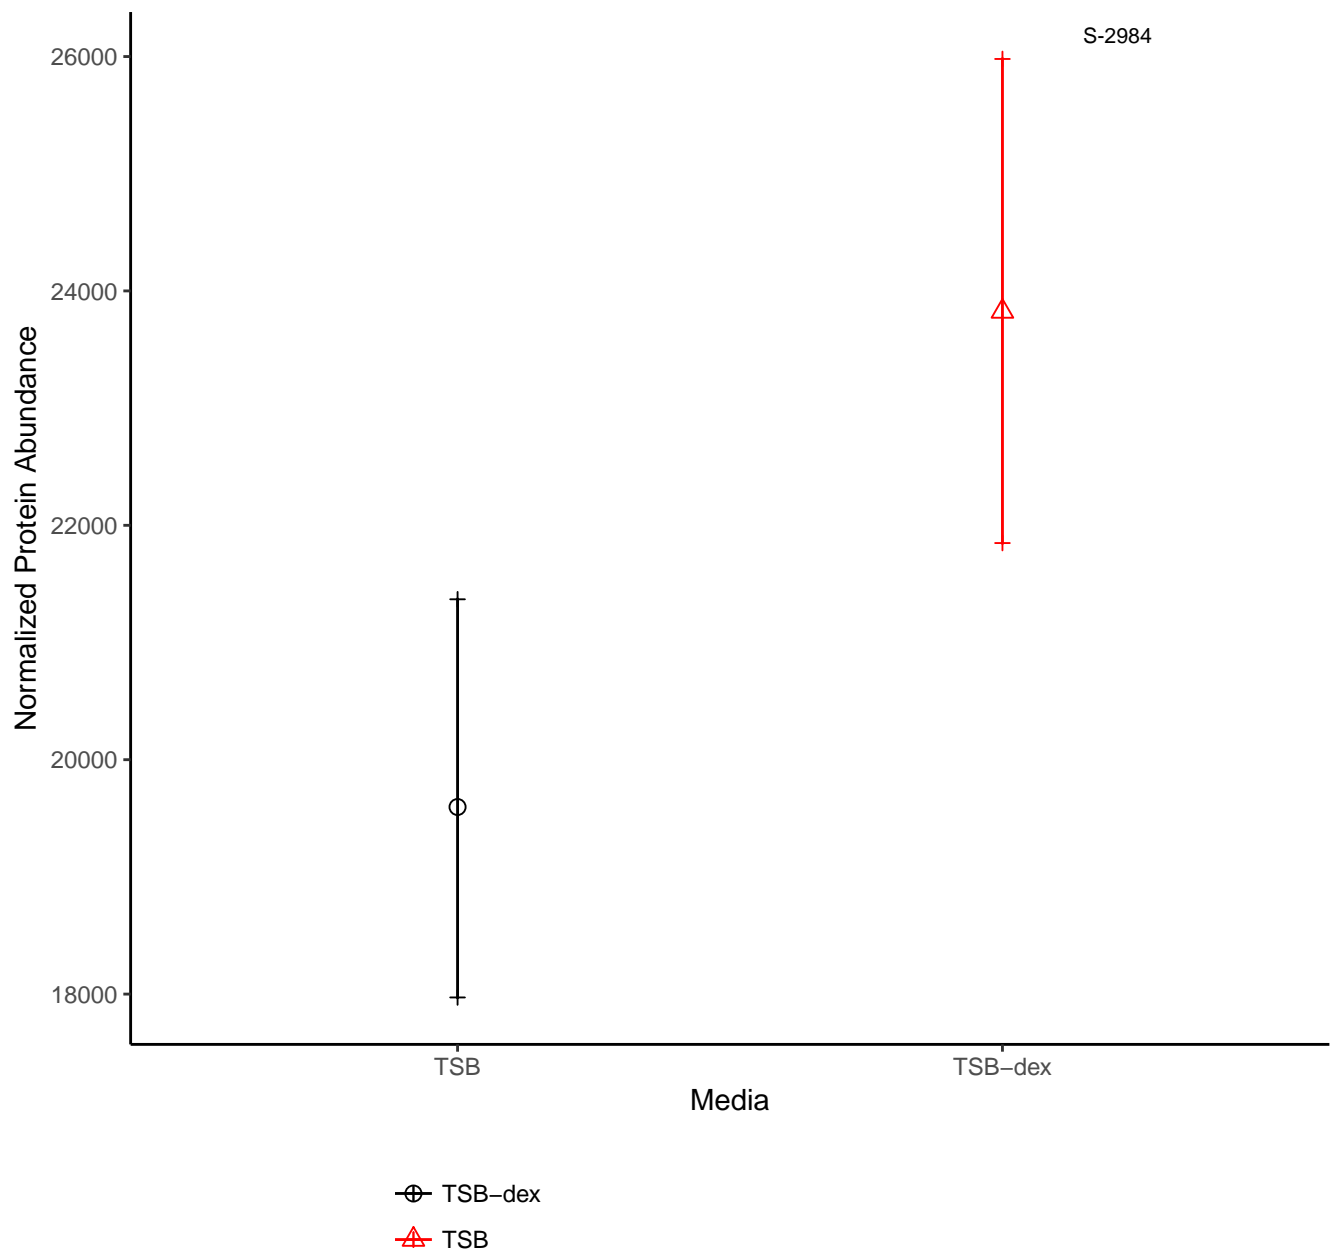



# Y1739\_STAAM

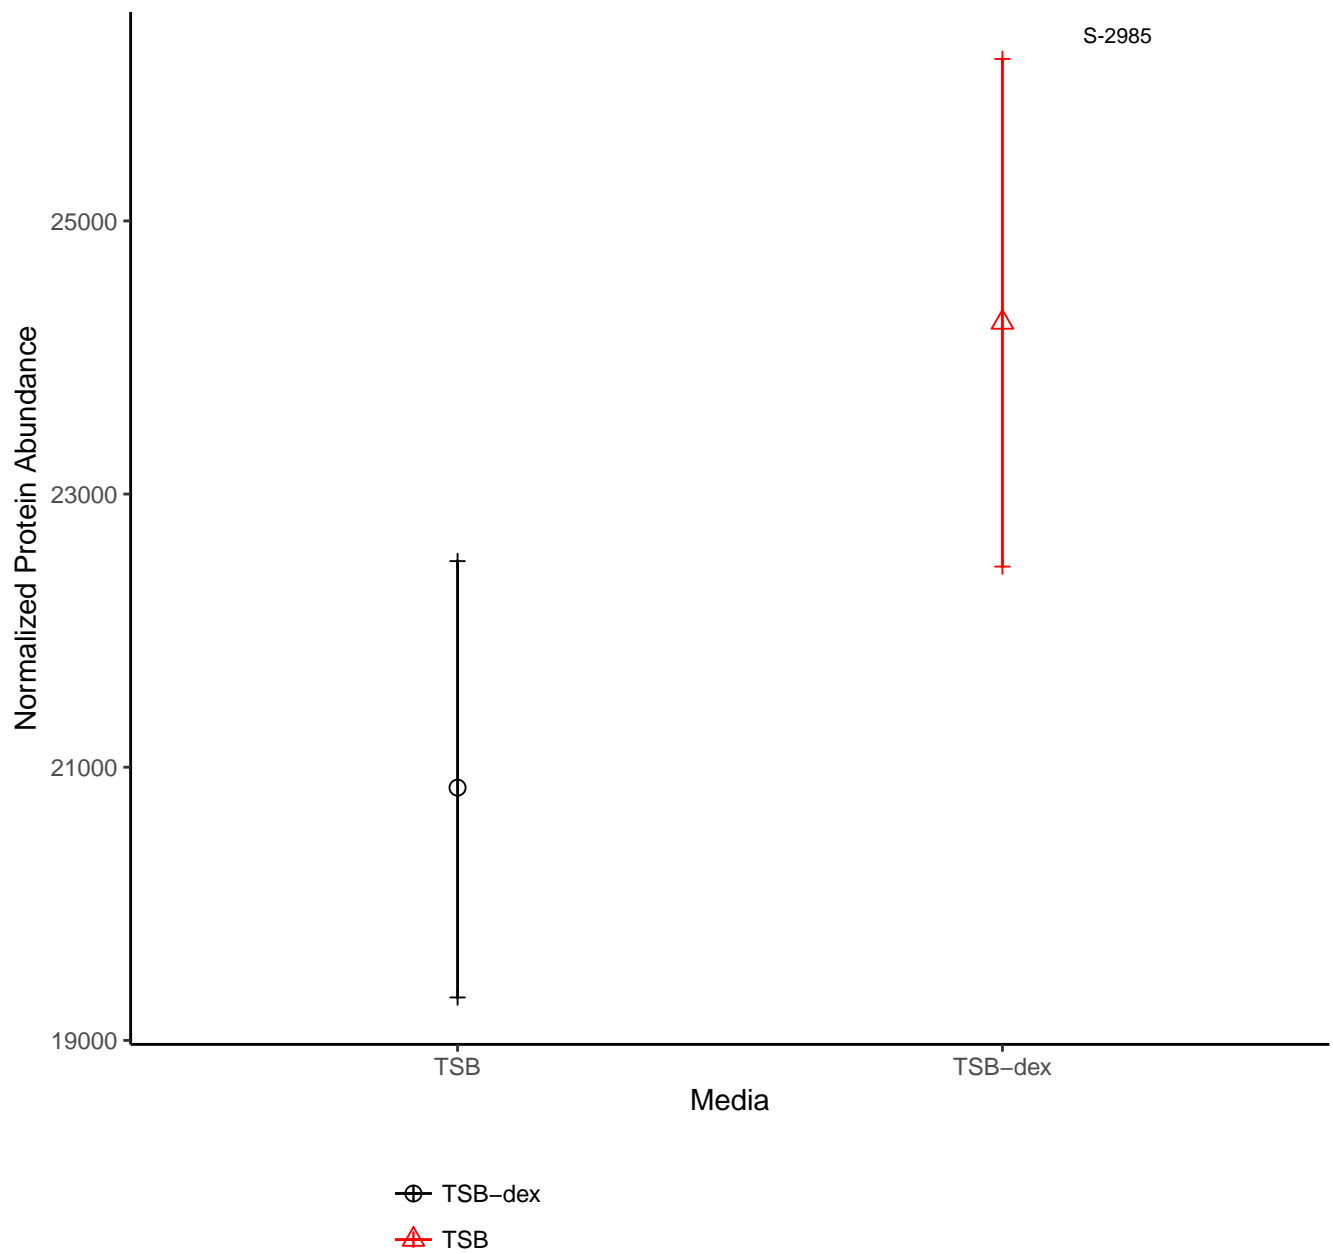

# Y1845\_STAAM

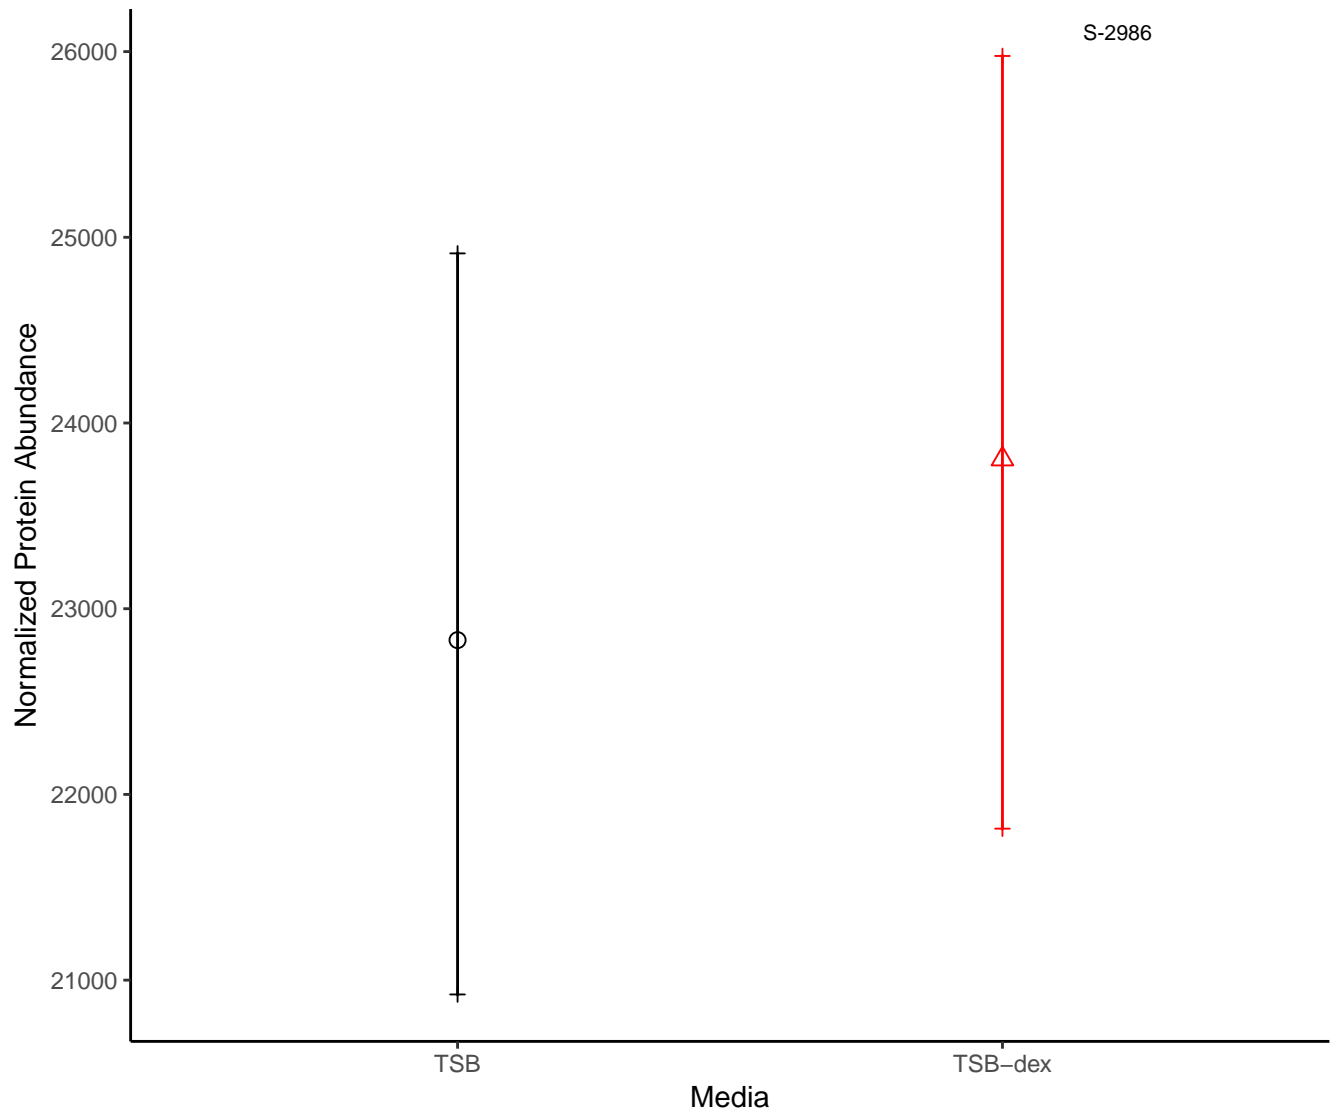

⊕ TSB-dex

△ TSB

# Y1866\_STAAM

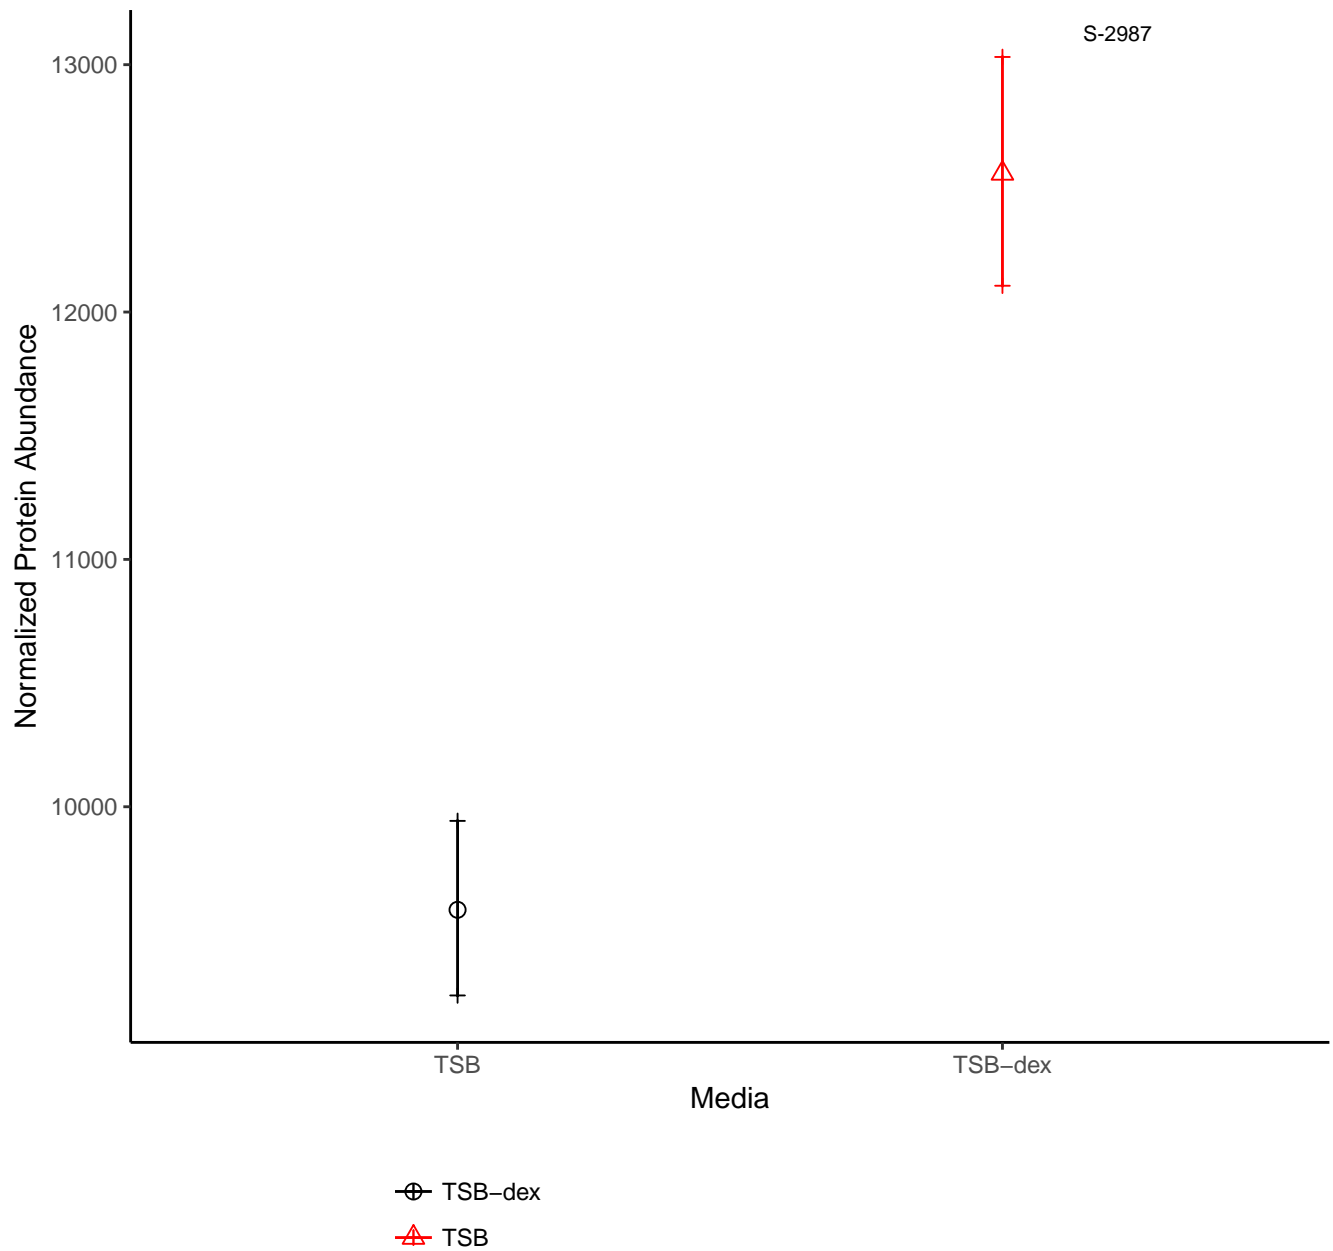

# Y1880\_STAAM

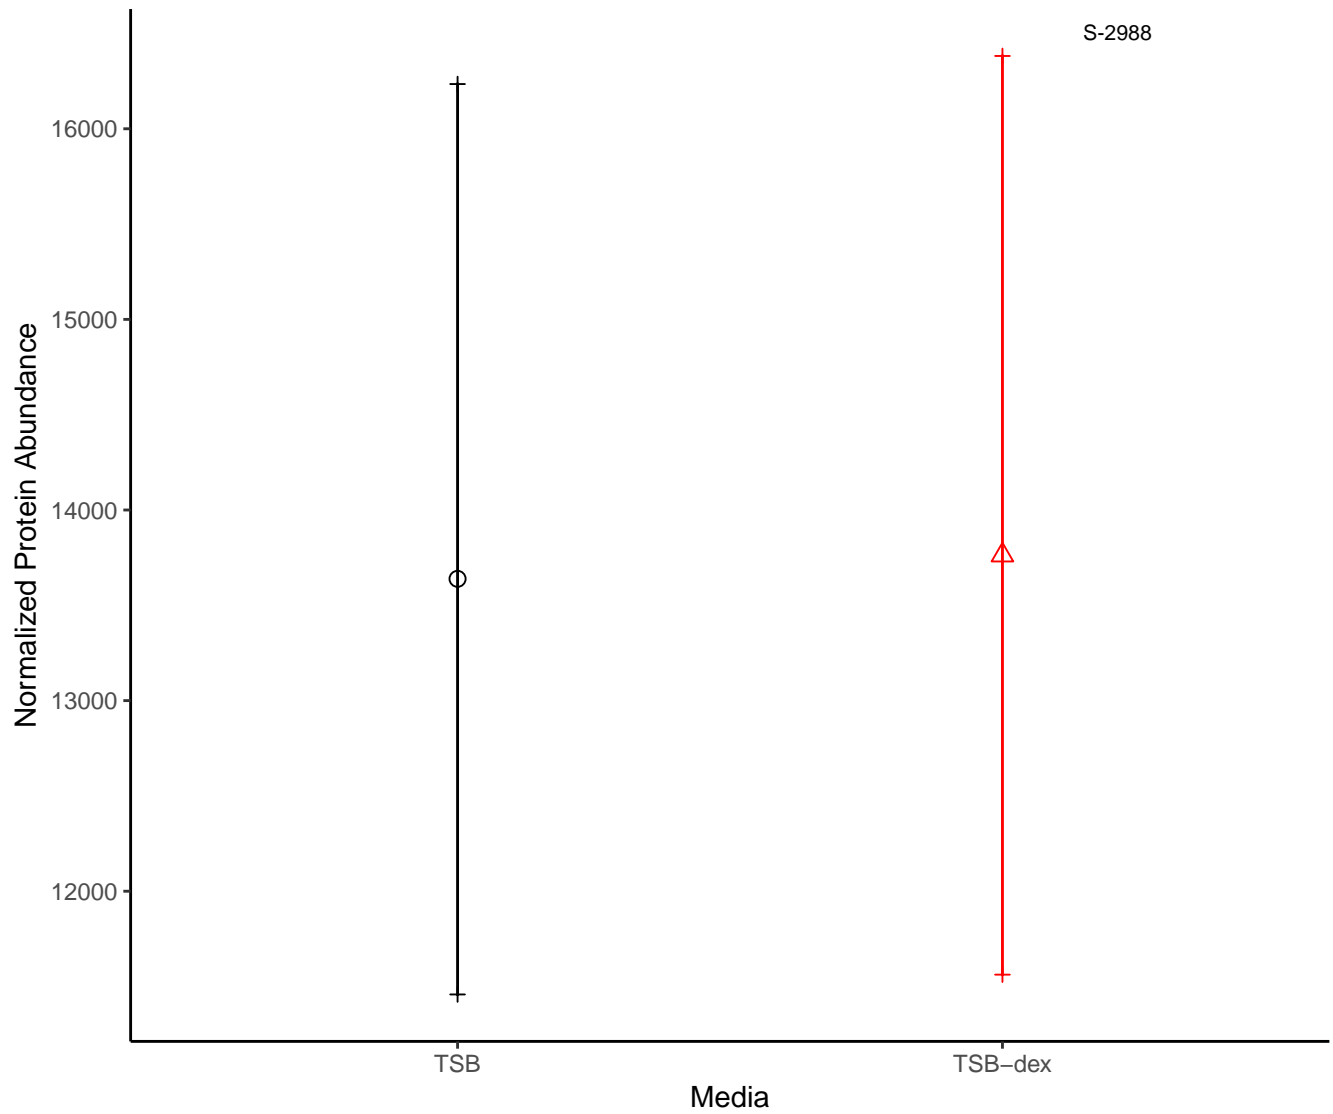

⊕ TSB-dex

△ TSB

# Y1921\_STAAM

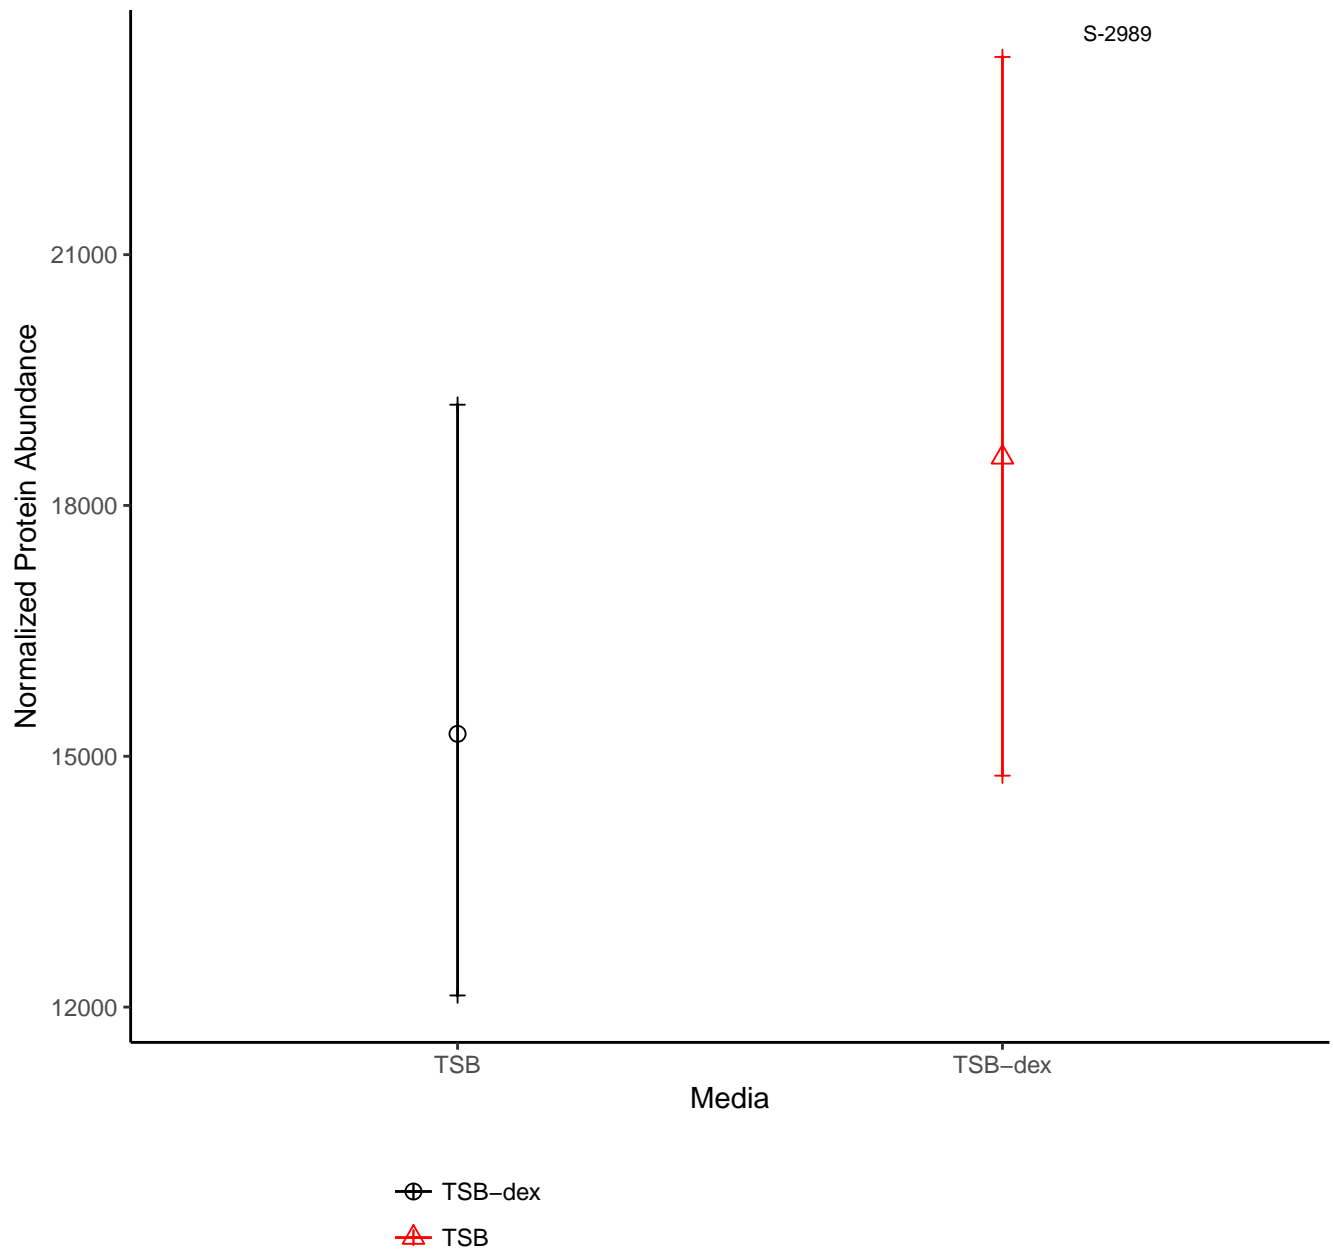

# Y2173\_STAAM

S-2990

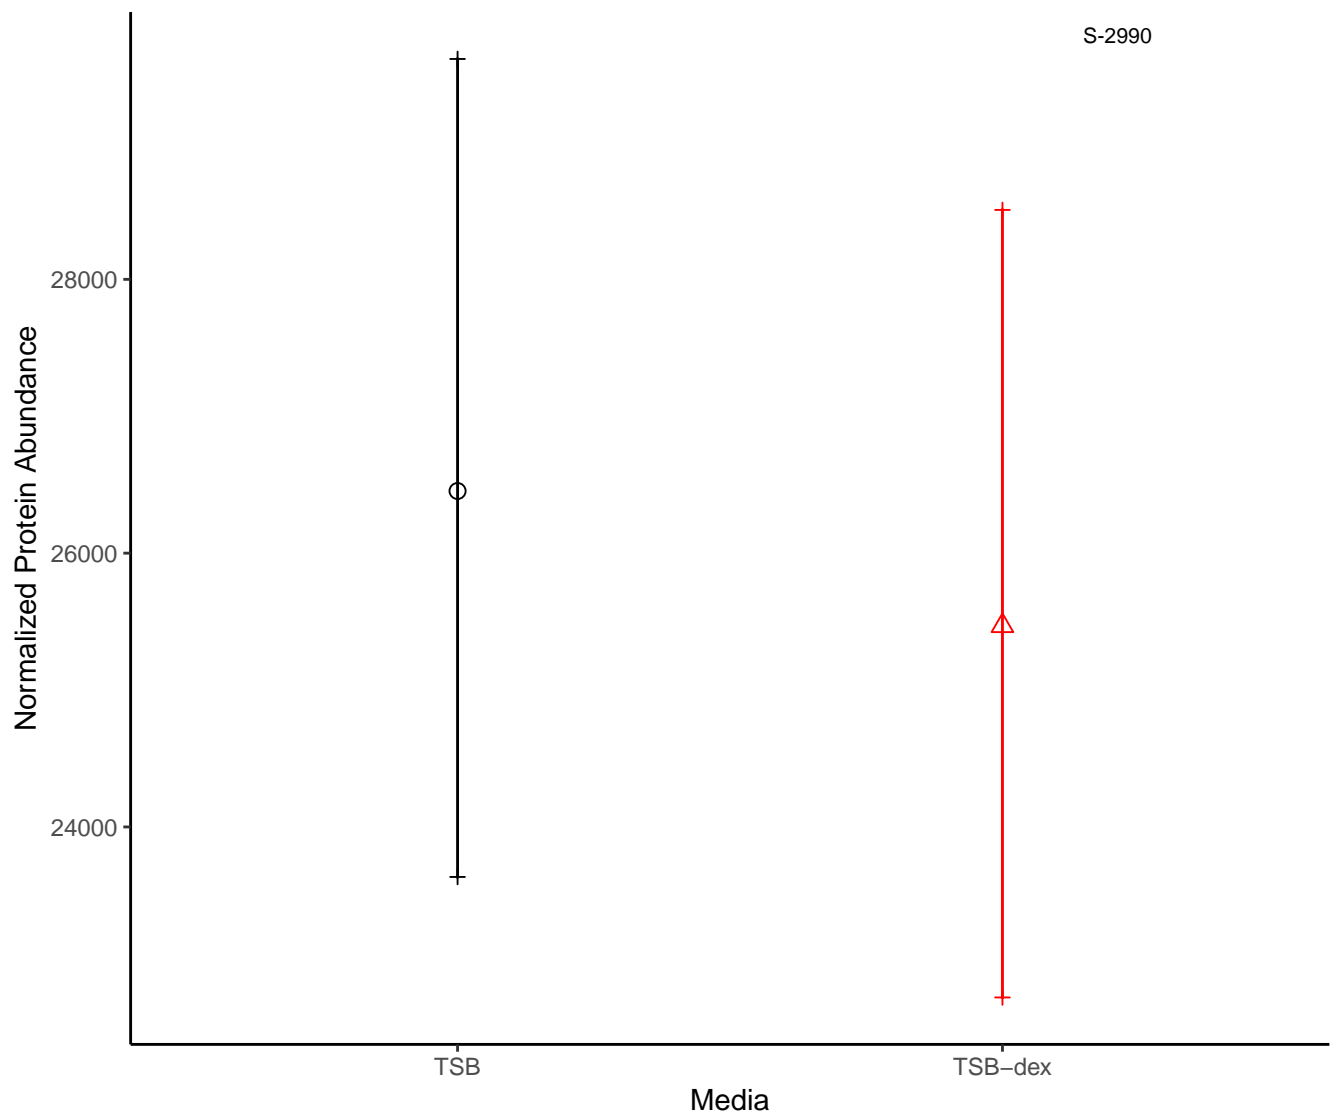

⊕ TSB-dex

△ TSB

# Y2204\_STAAM

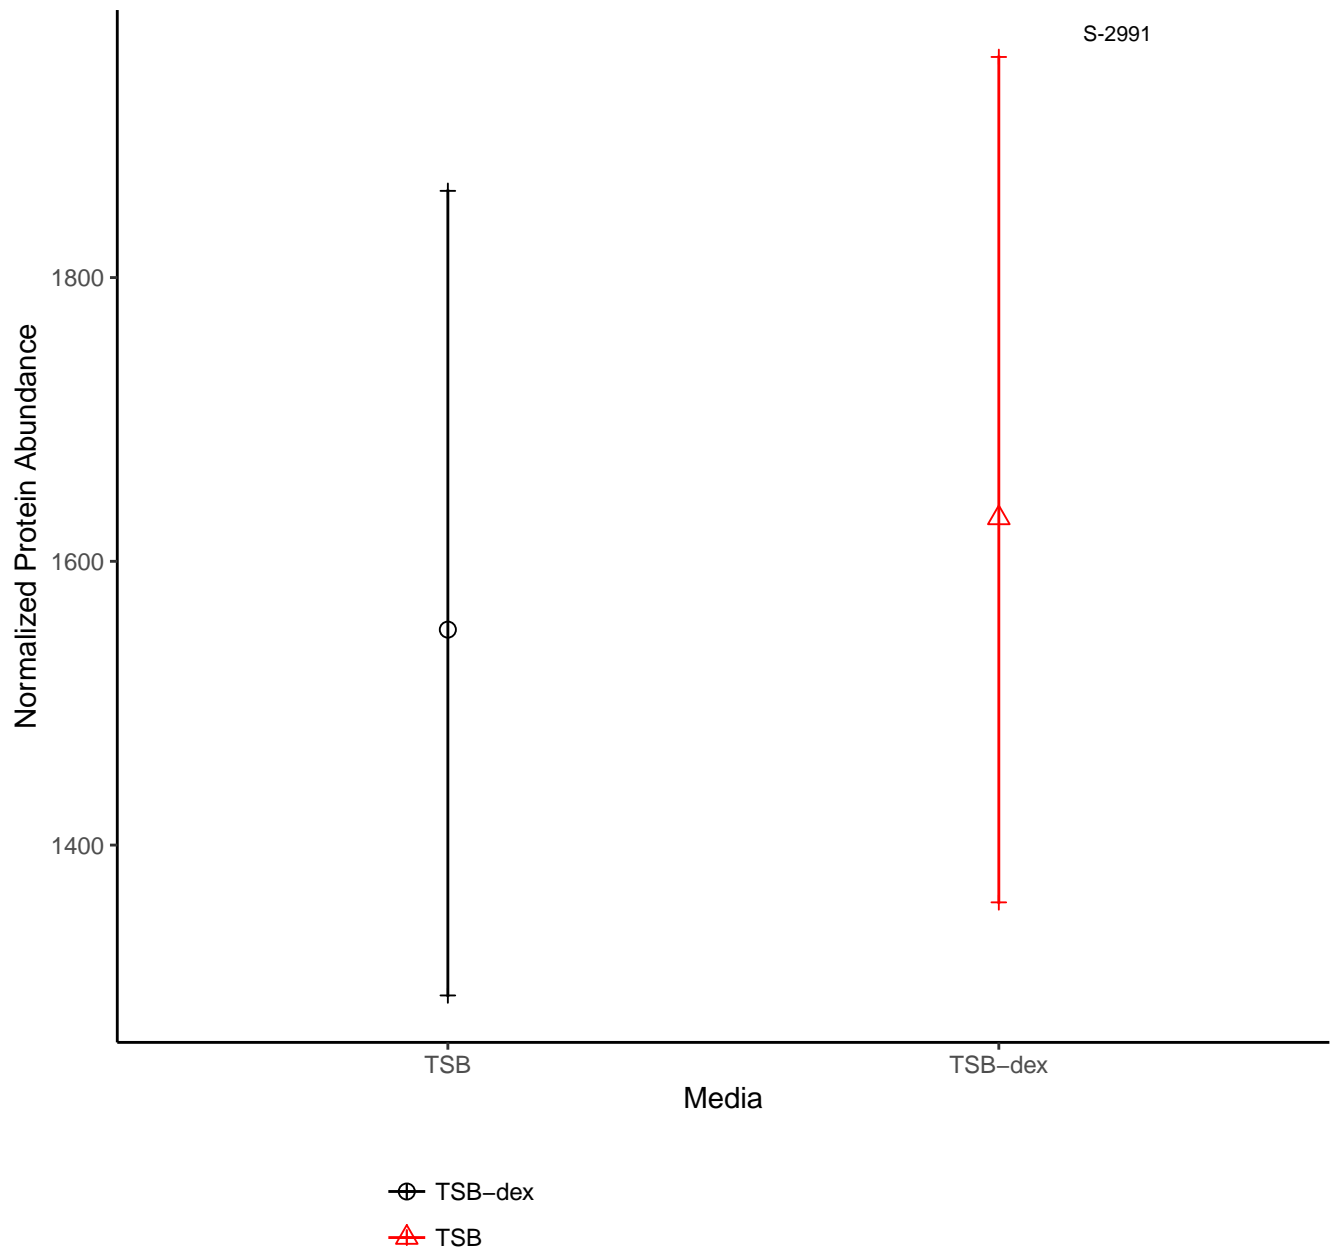

# Y2265\_STAAM

S-2992

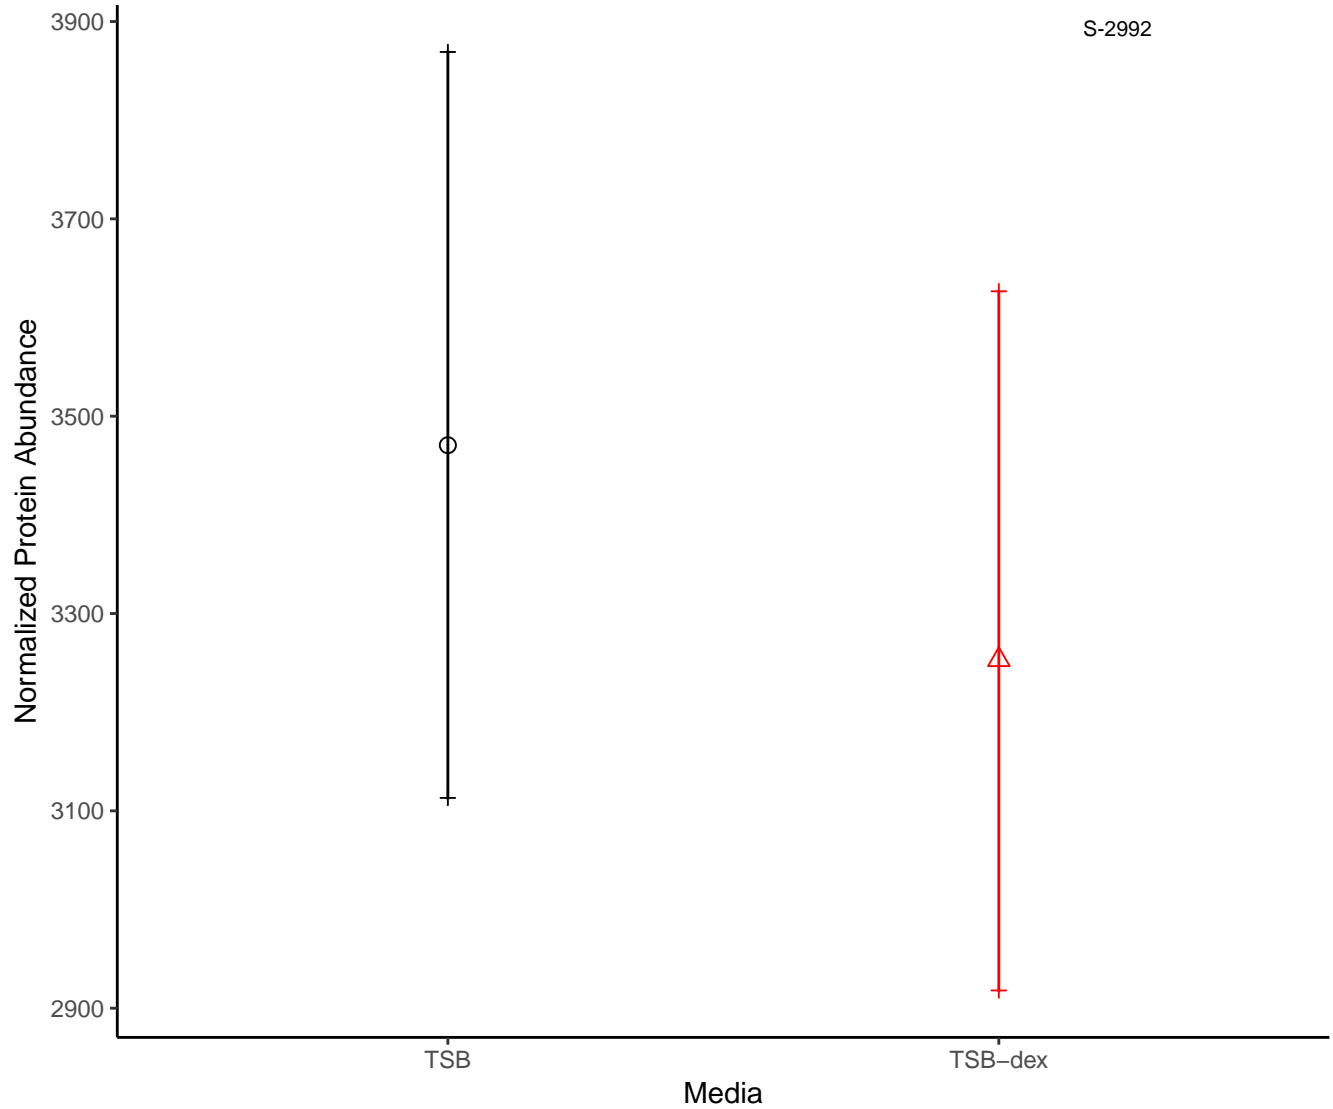

⊕ TSB-dex

△ TSB



# Y2305\_STAAM

S-2993

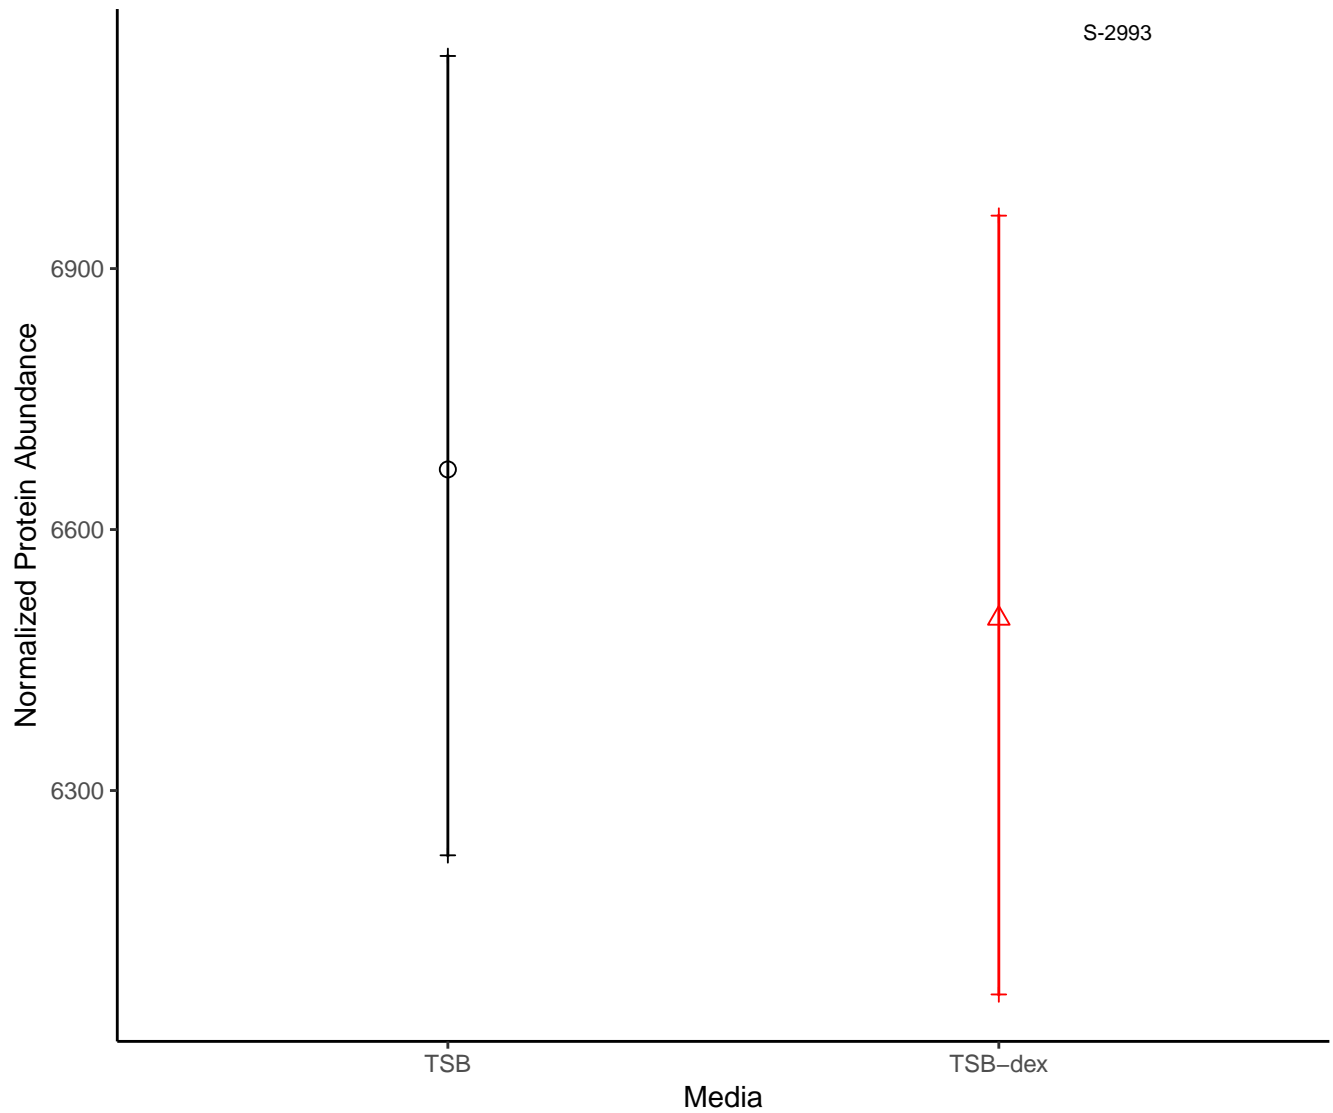

⊕ TSB-dex

△ TSB

# Y2363\_STAAM

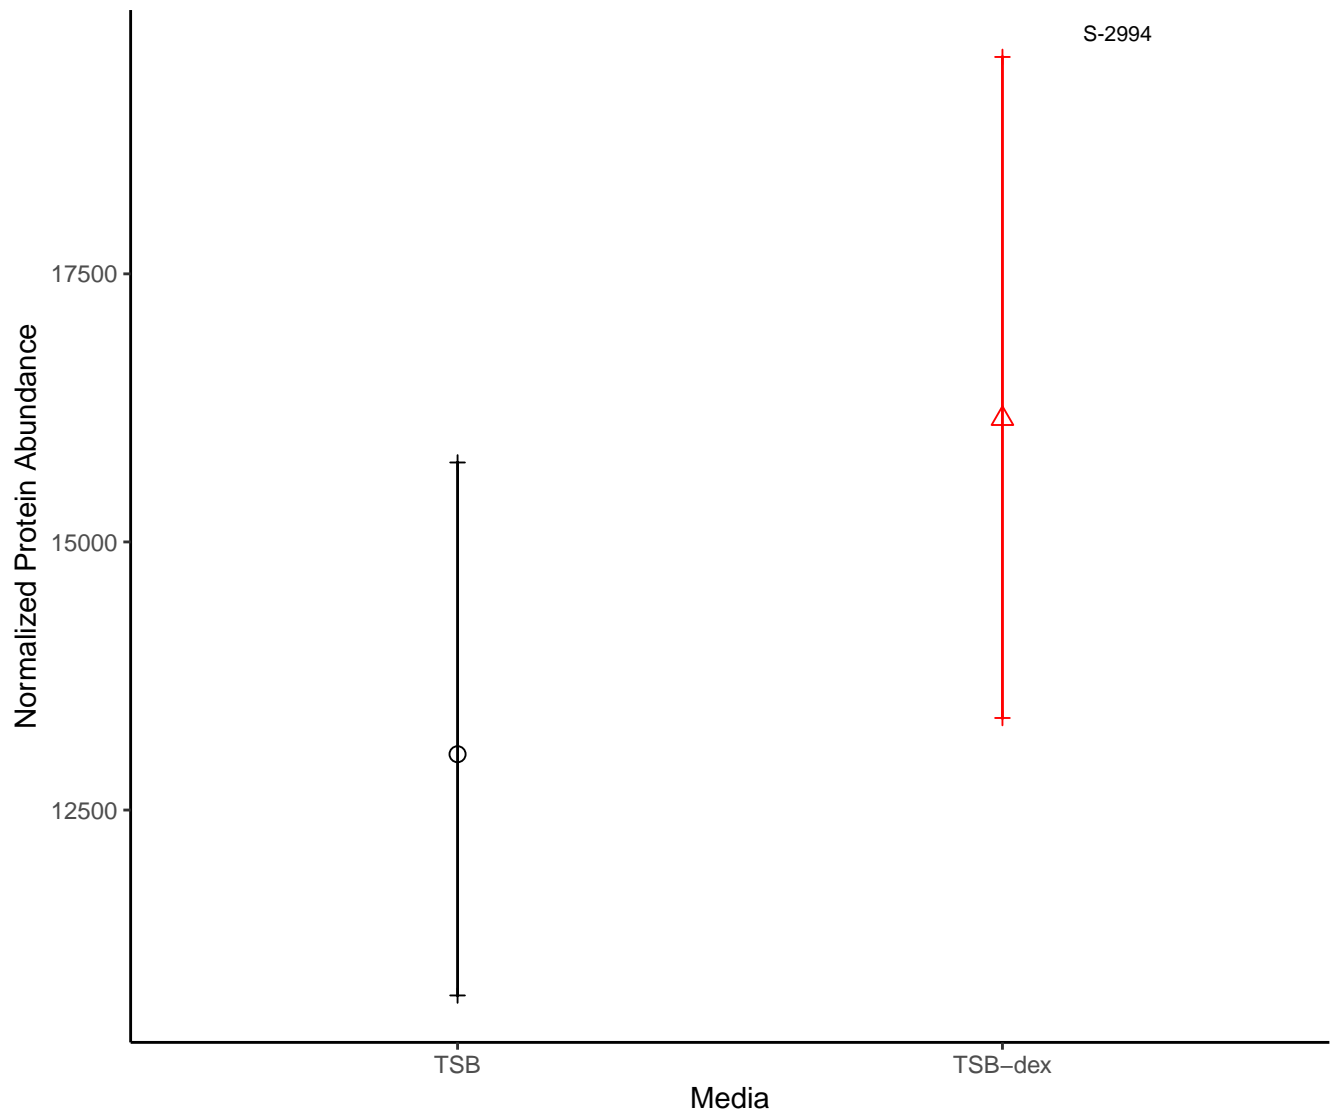

⊕ TSB-dex

△ TSB

# Y2368\_STAAM

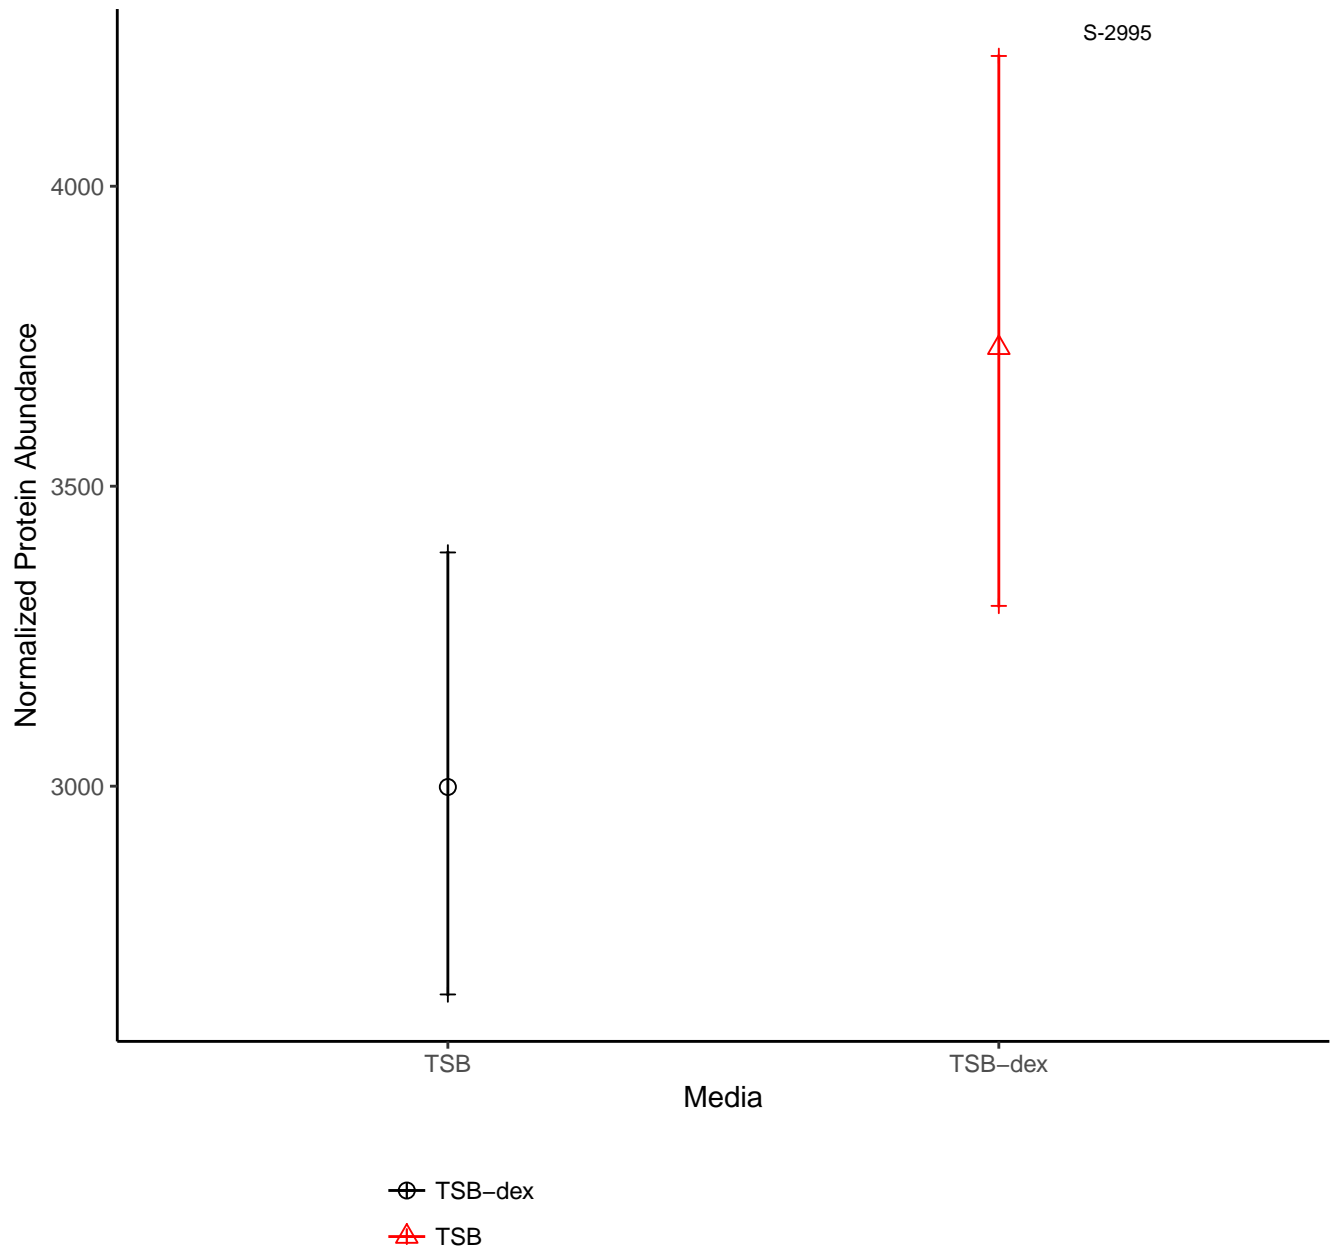

# Y2478\_STAAM

S-2996

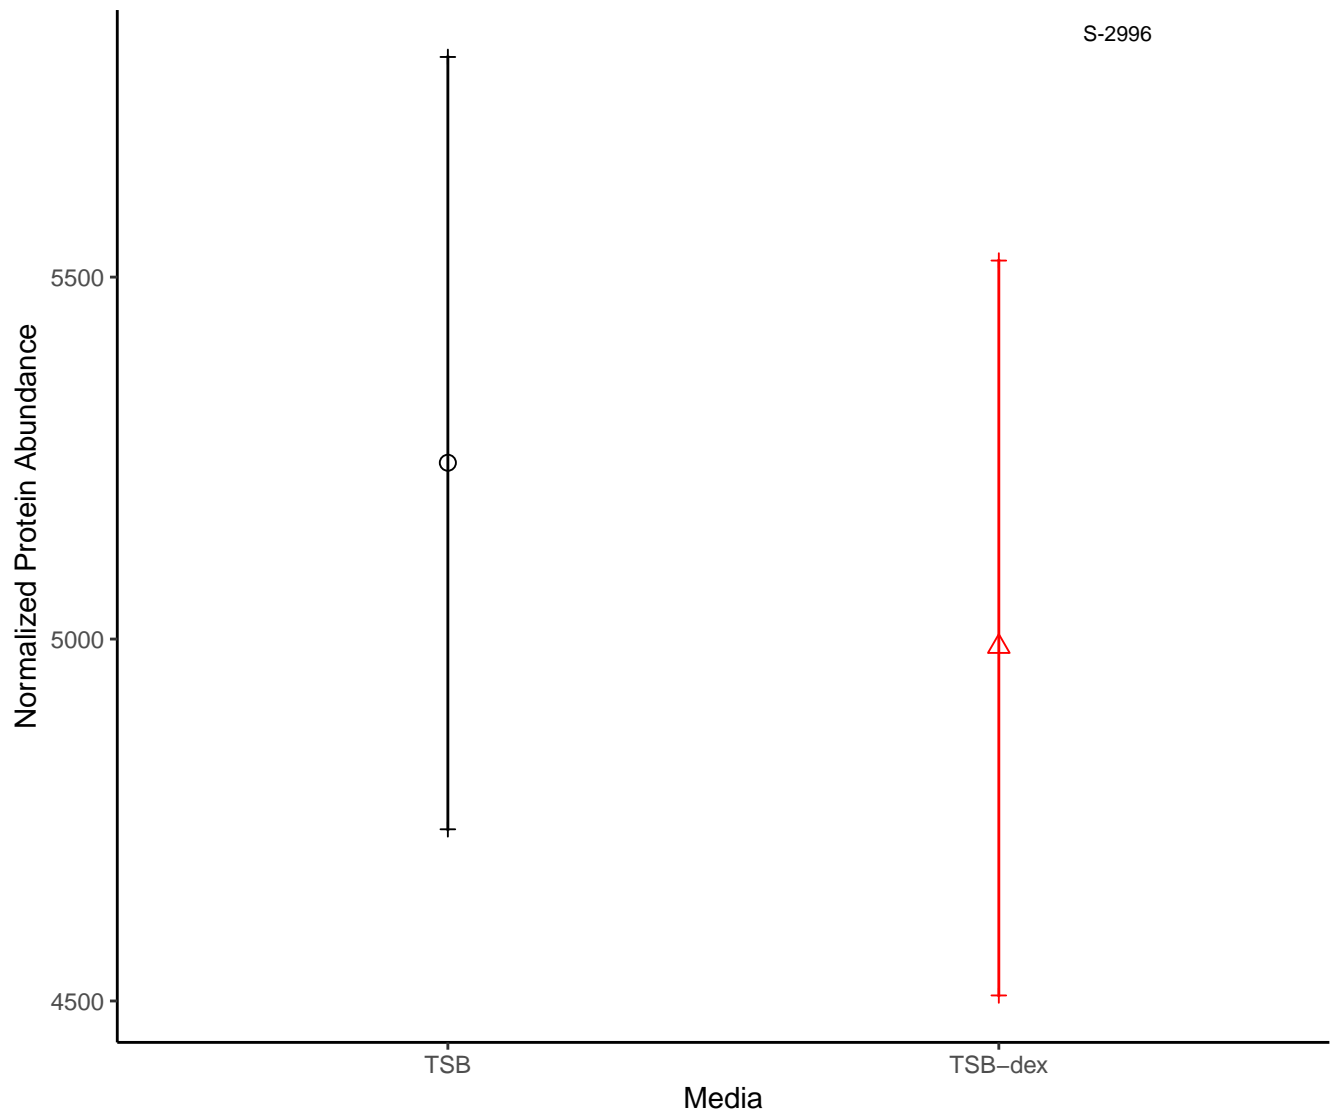

⊕ TSB-dex

△ TSB

# Y2523\_STAAM

S-2997

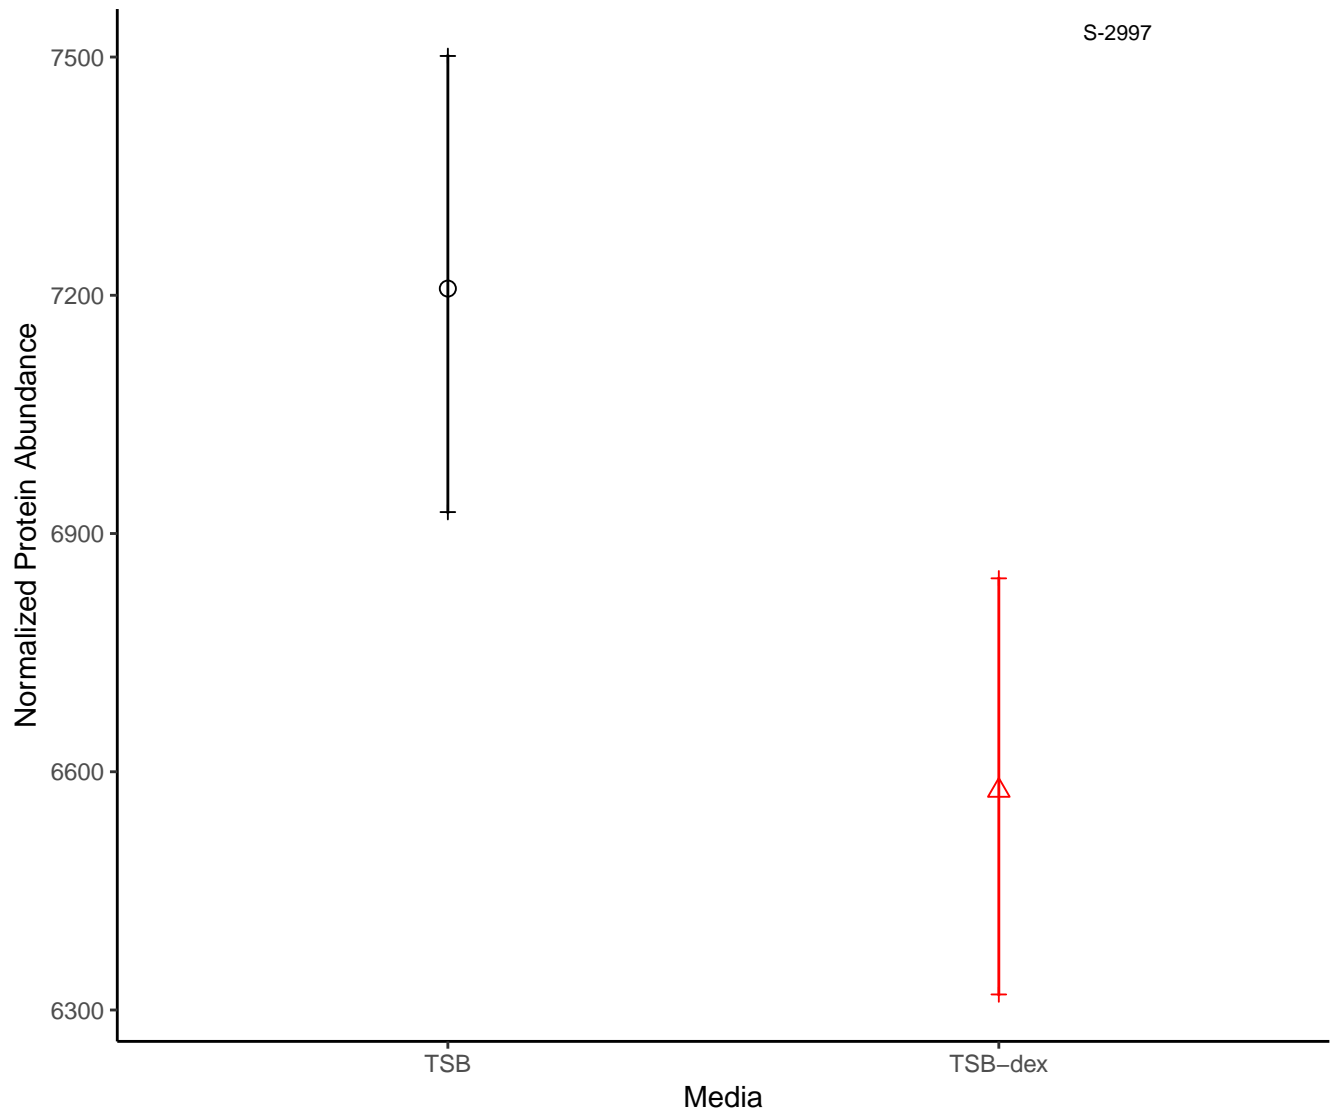

⊕ TSB-dex

△ TSB

# Y2573\_STAAM

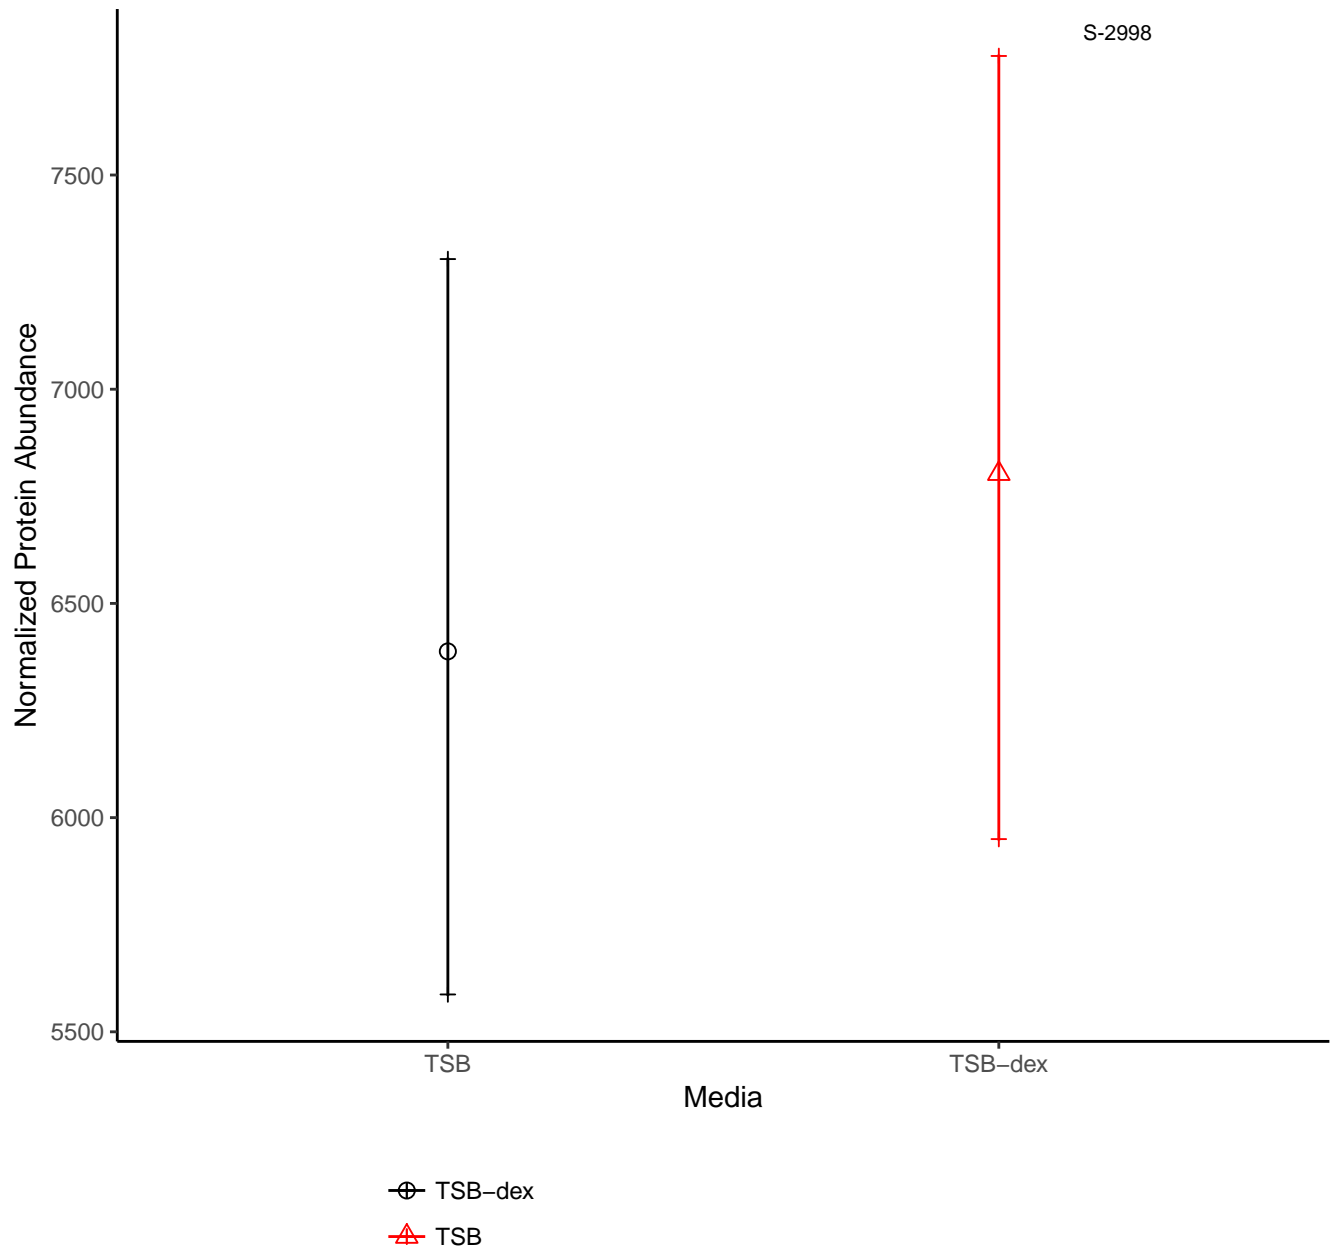

# Y2578\_STAAM

S-2999

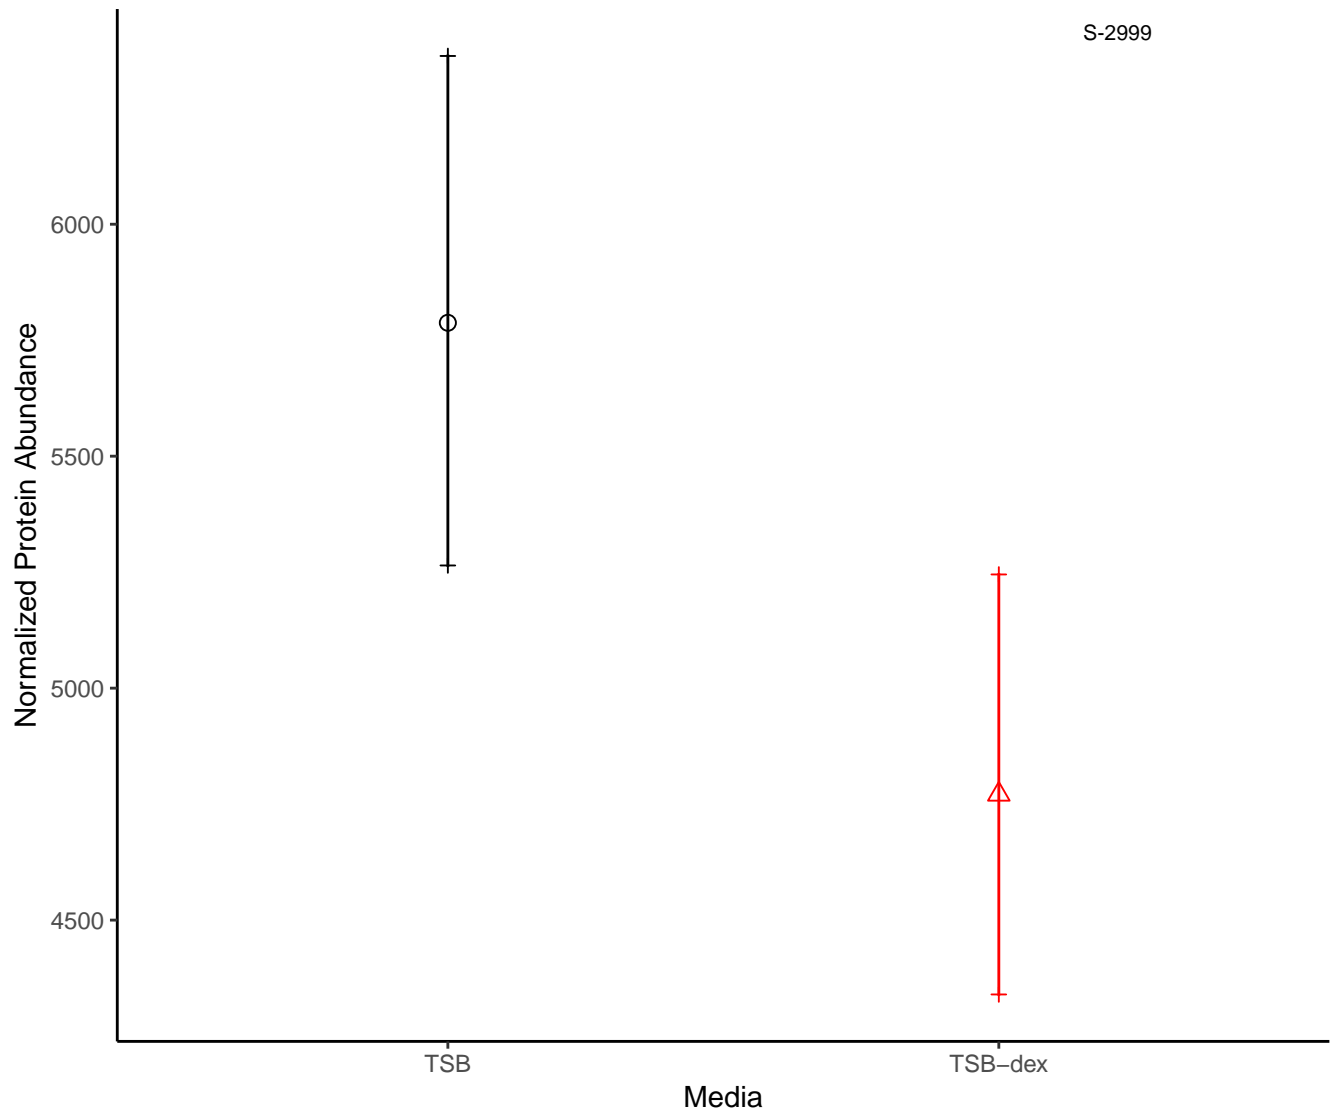

⊕ TSB-dex

△ TSB

# Y2581\_STAAM

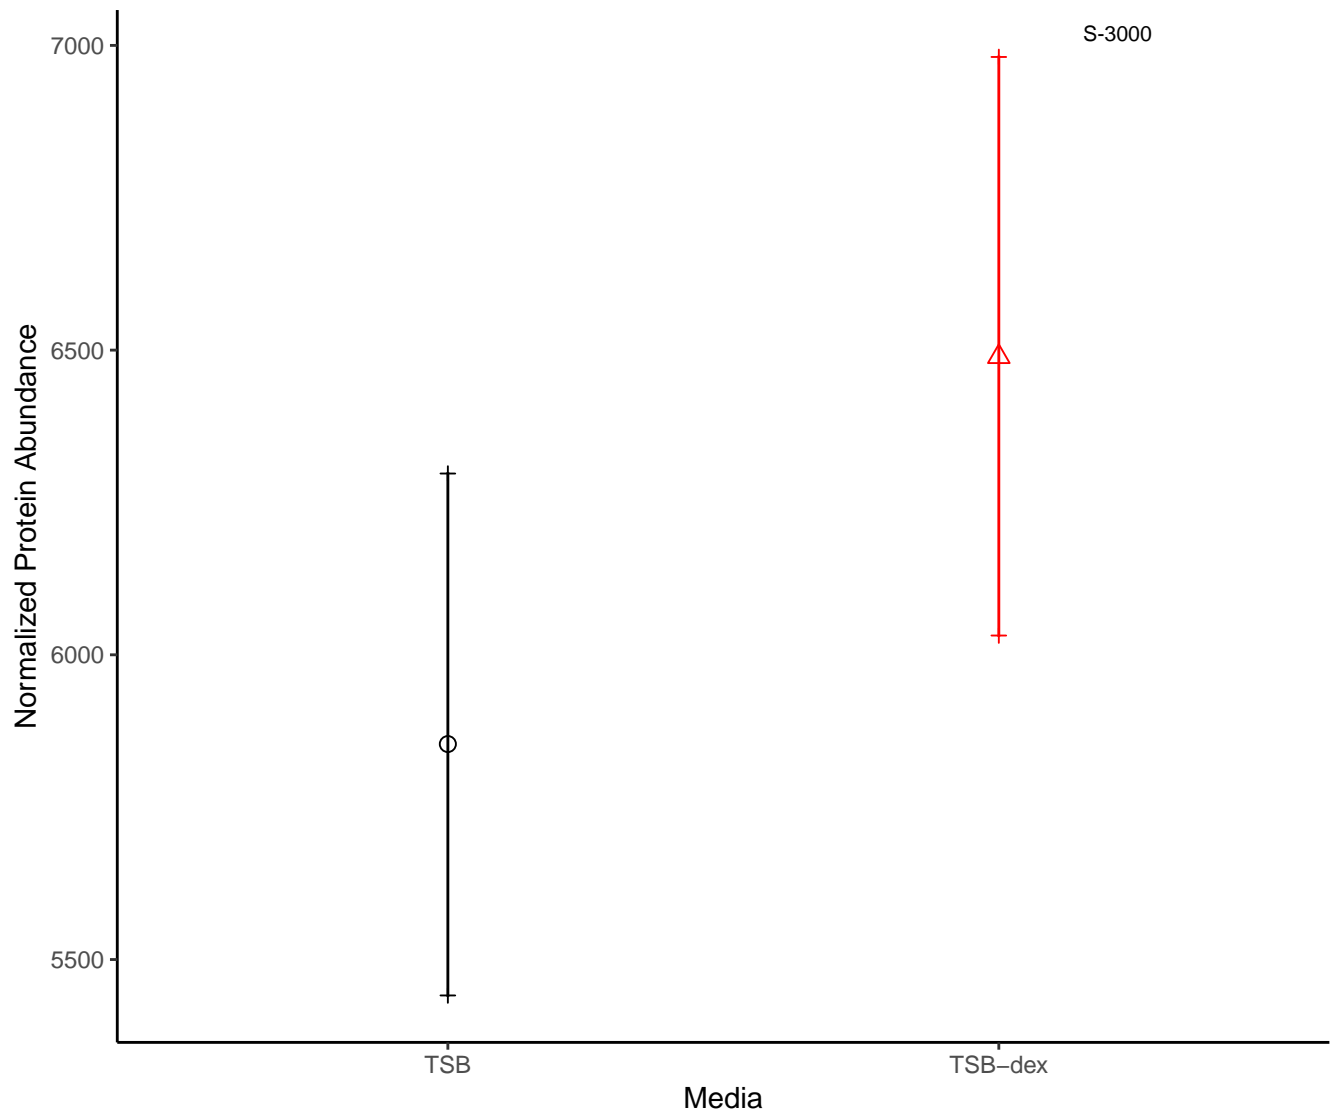

⊕ TSB-dex

△ TSB



# Y2627\_STAAM

S-3001

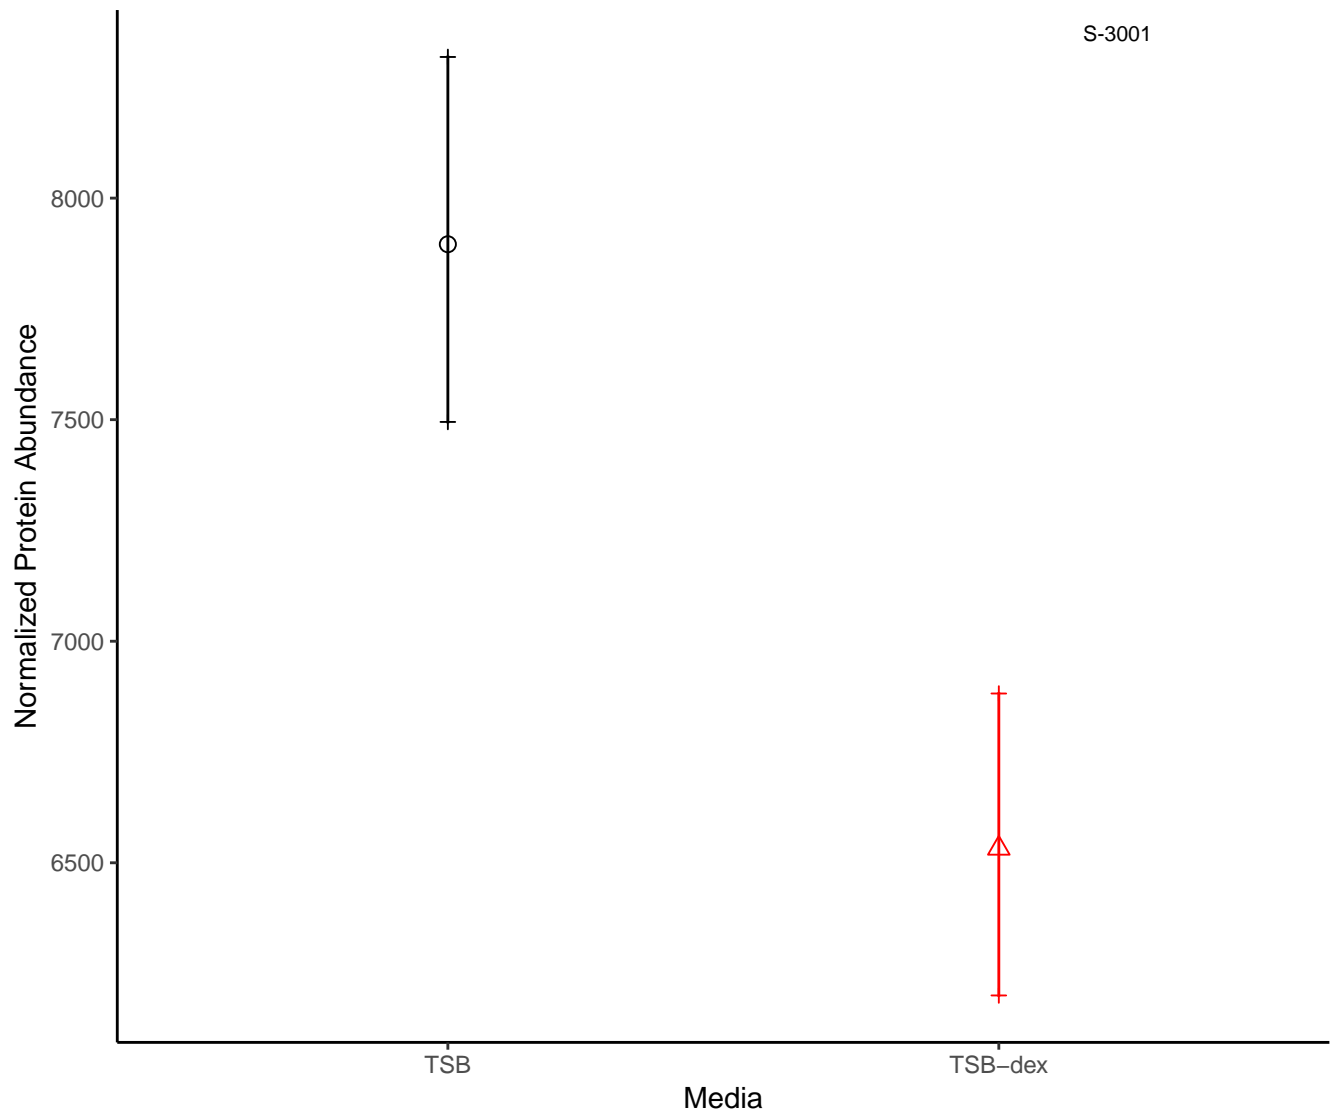

⊕ TSB-dex

△ TSB

# Y2687\_STAAM

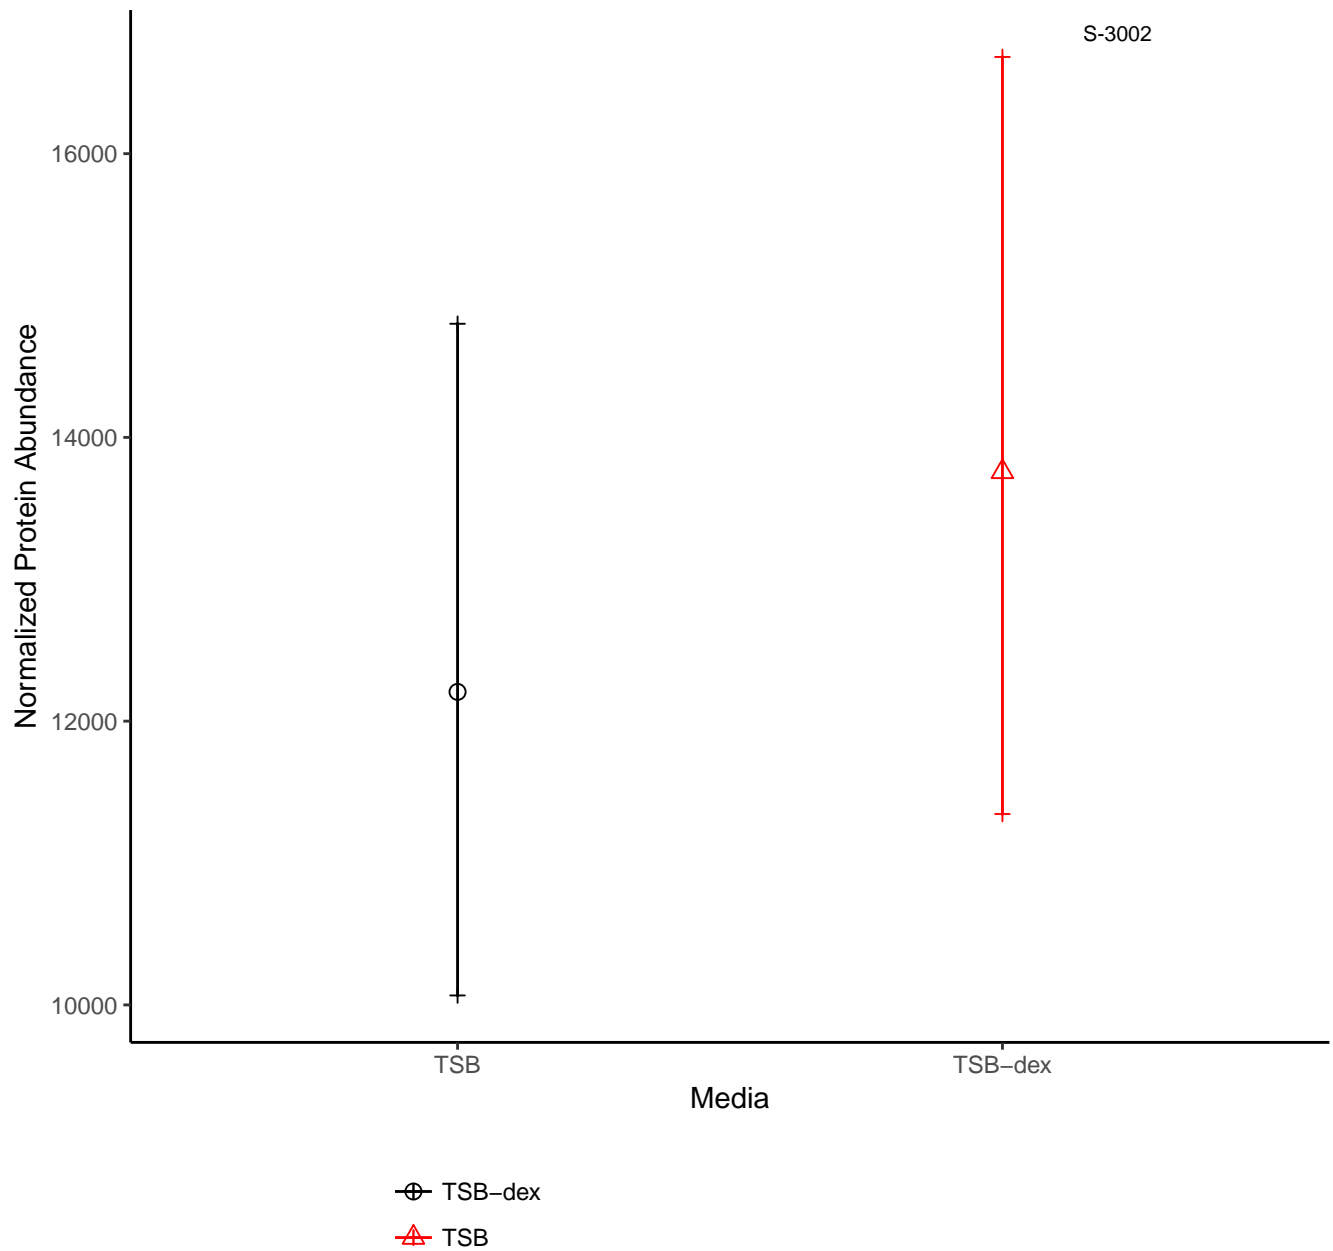

# Y2689\_STAAM

S-3003

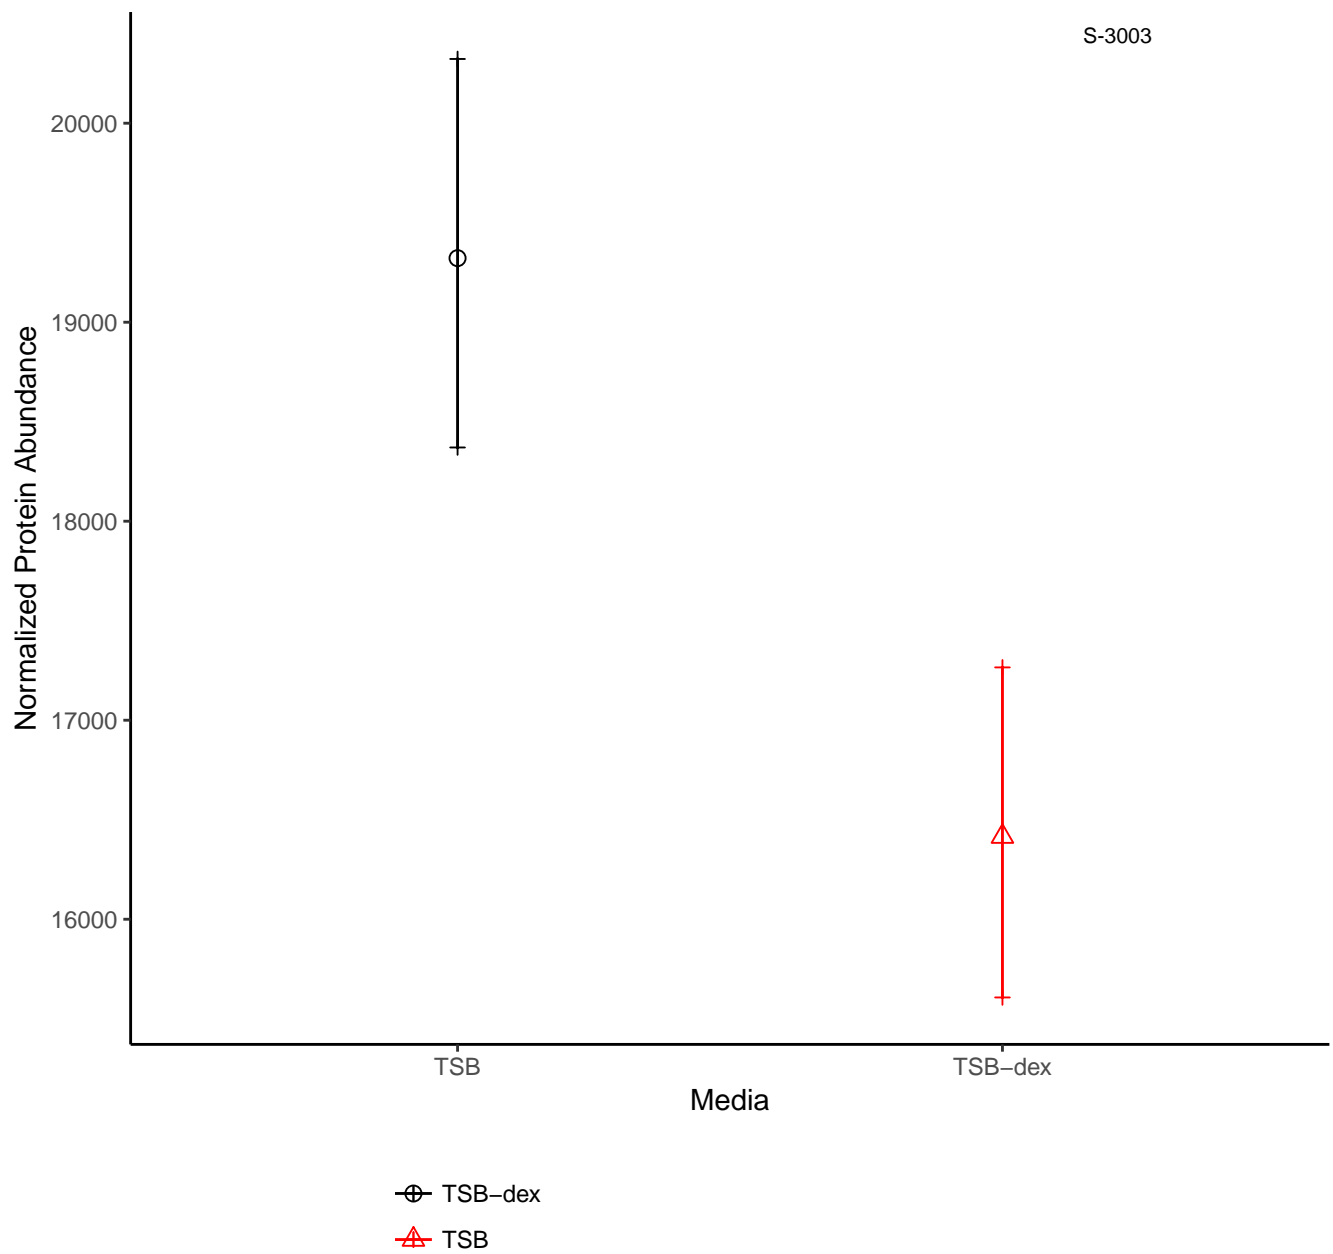

# Y385\_STAAM

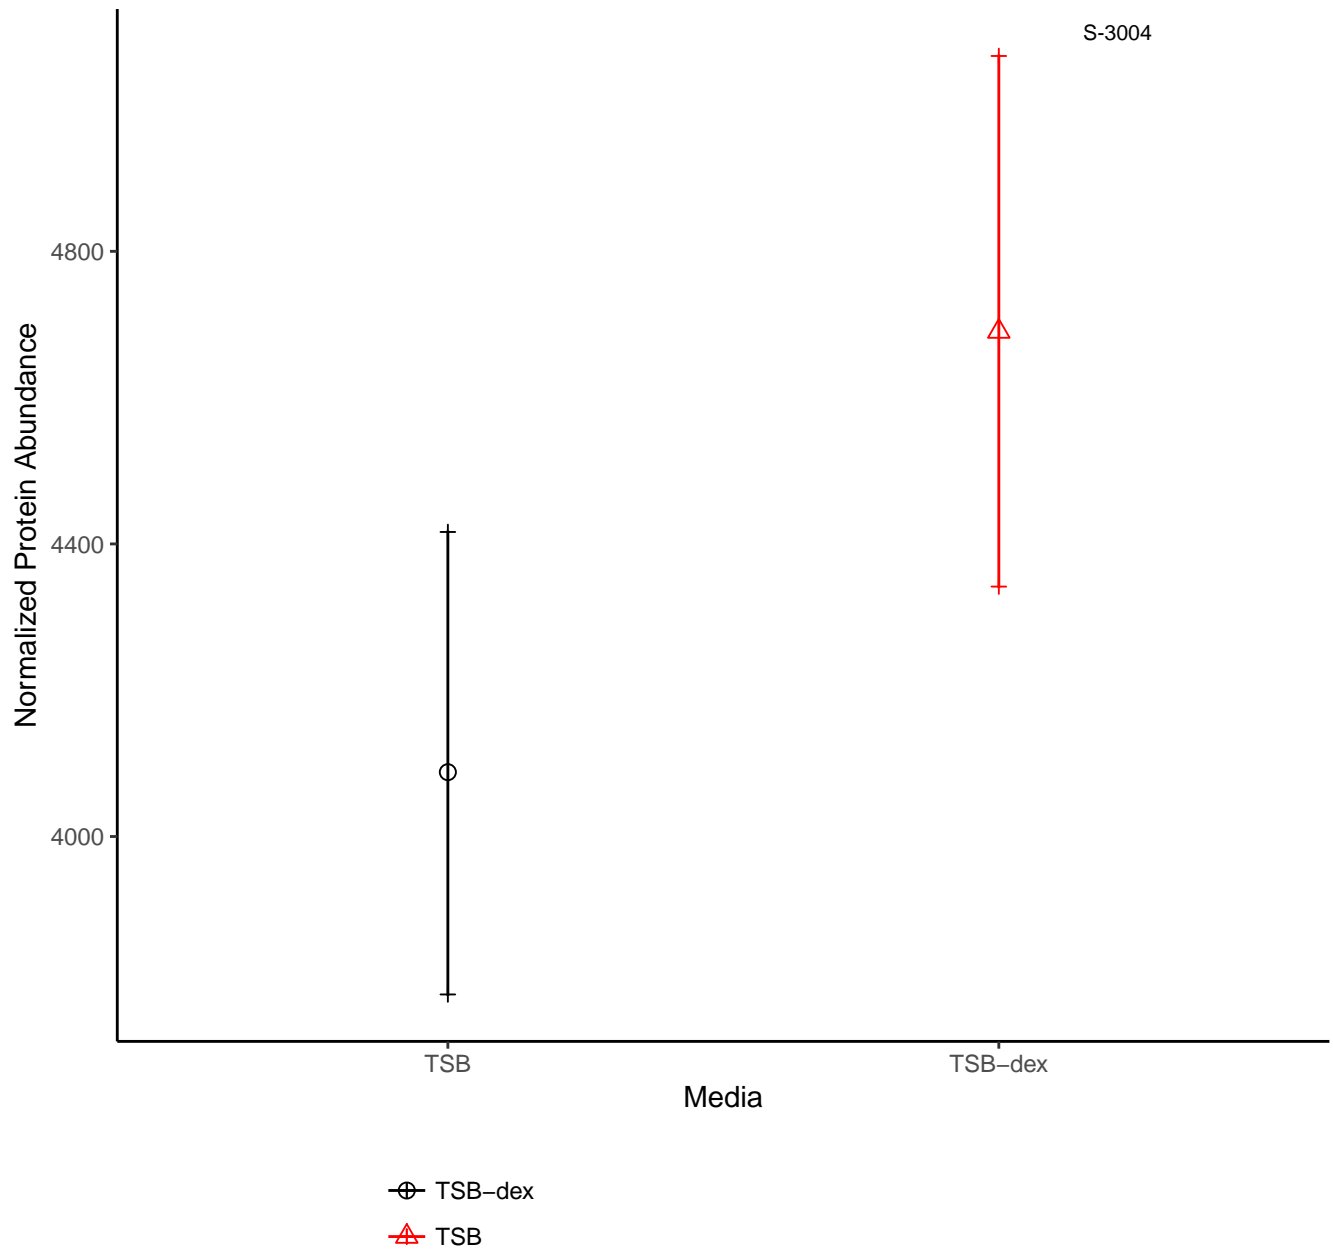

# Y437\_STAAM

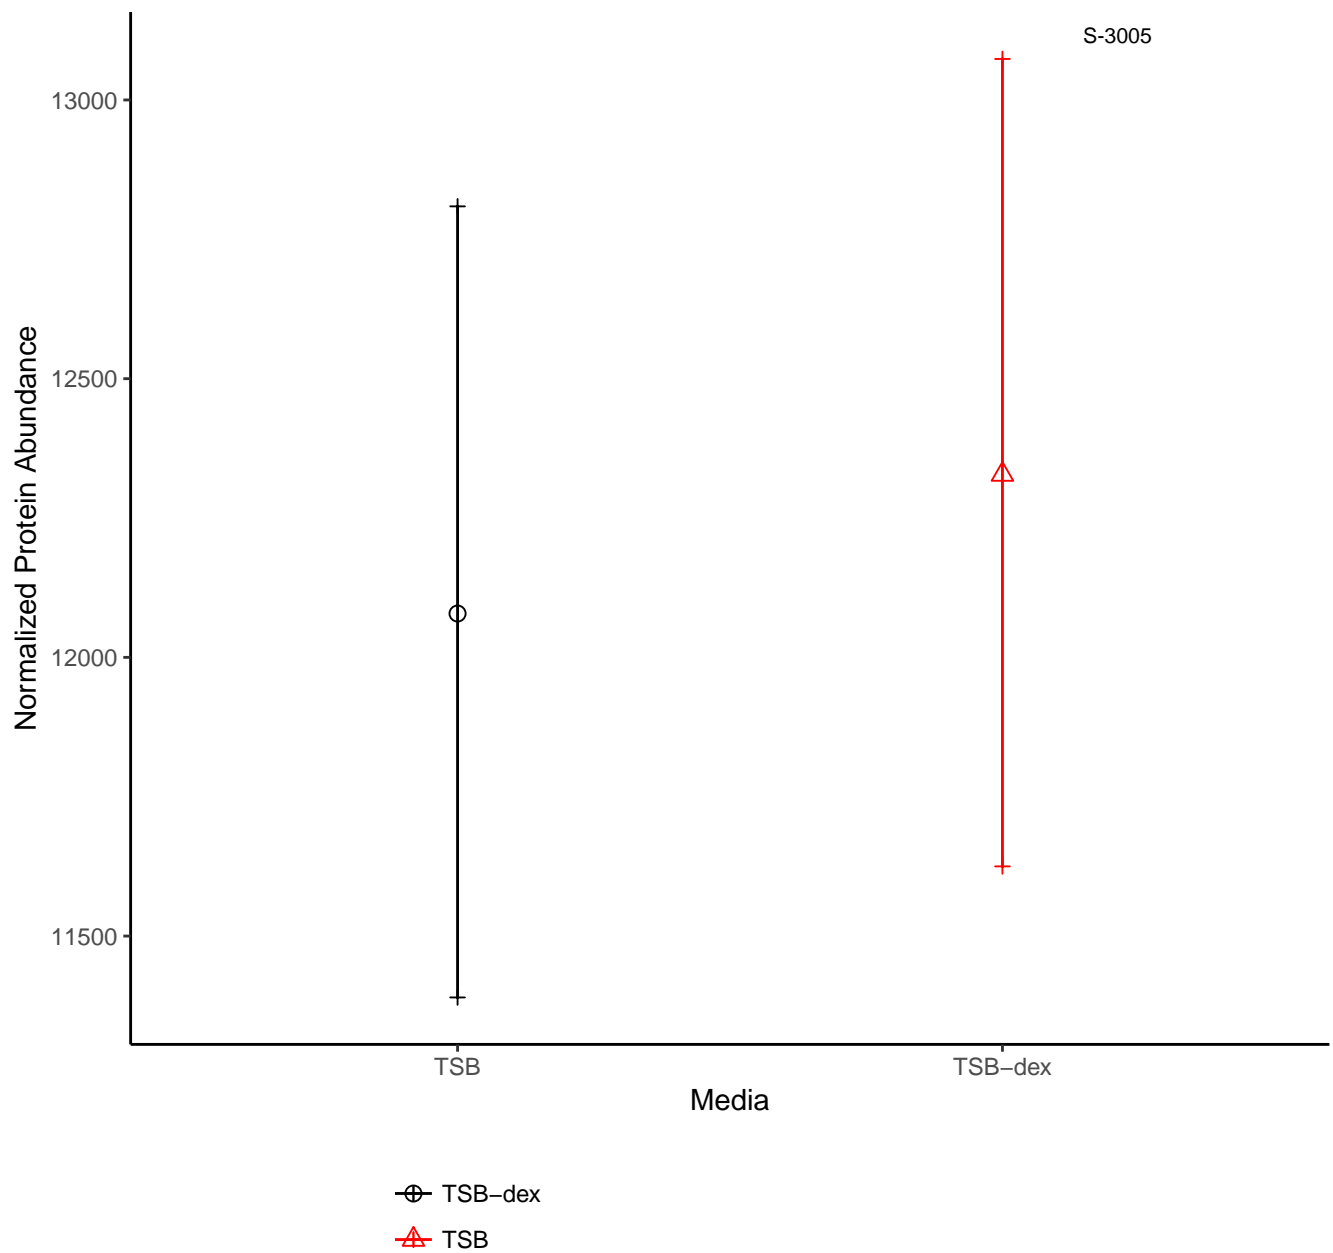

# Y479\_STAAM

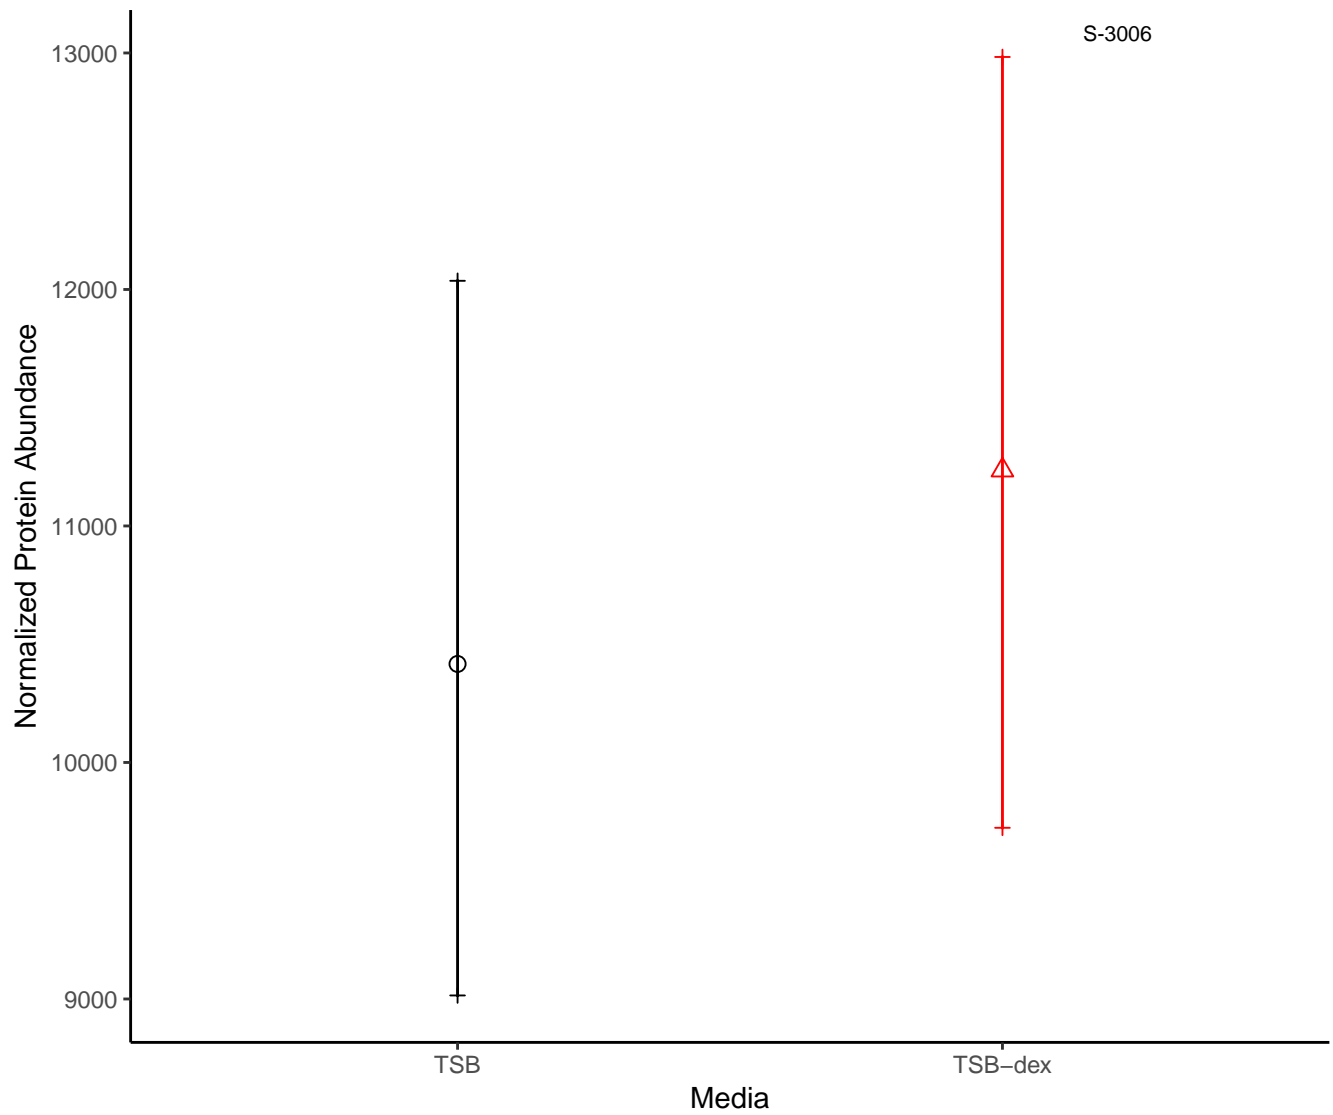

⊕ TSB-dex

△ TSB

# Y553\_STAAM

S-3007

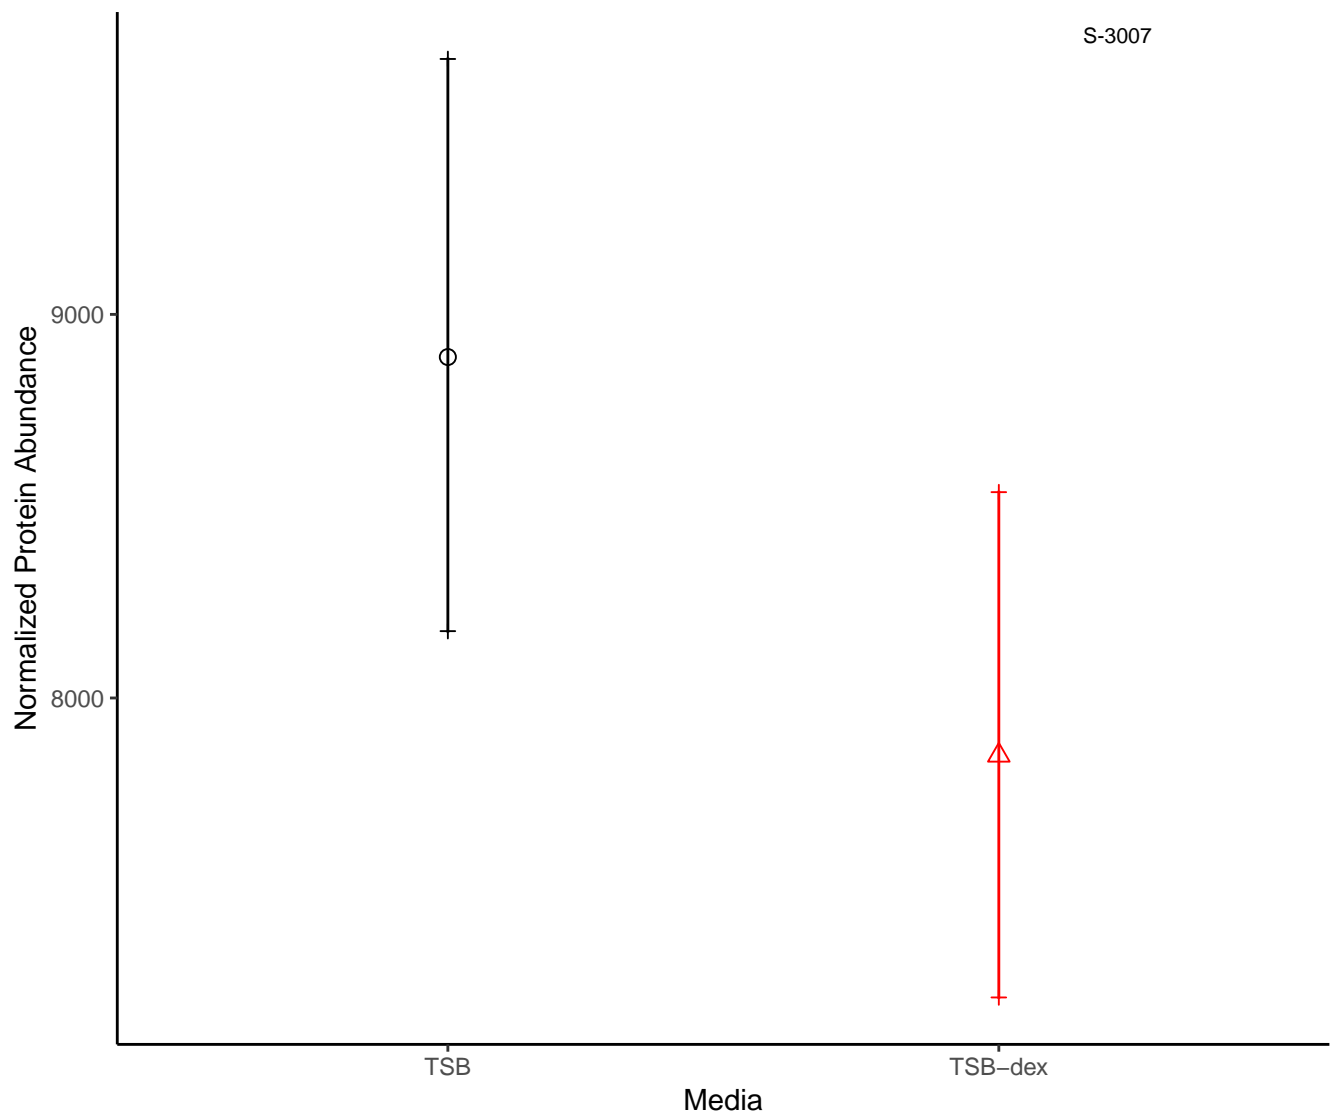

⊕ TSB-dex

△ TSB

# Y587\_STAAM

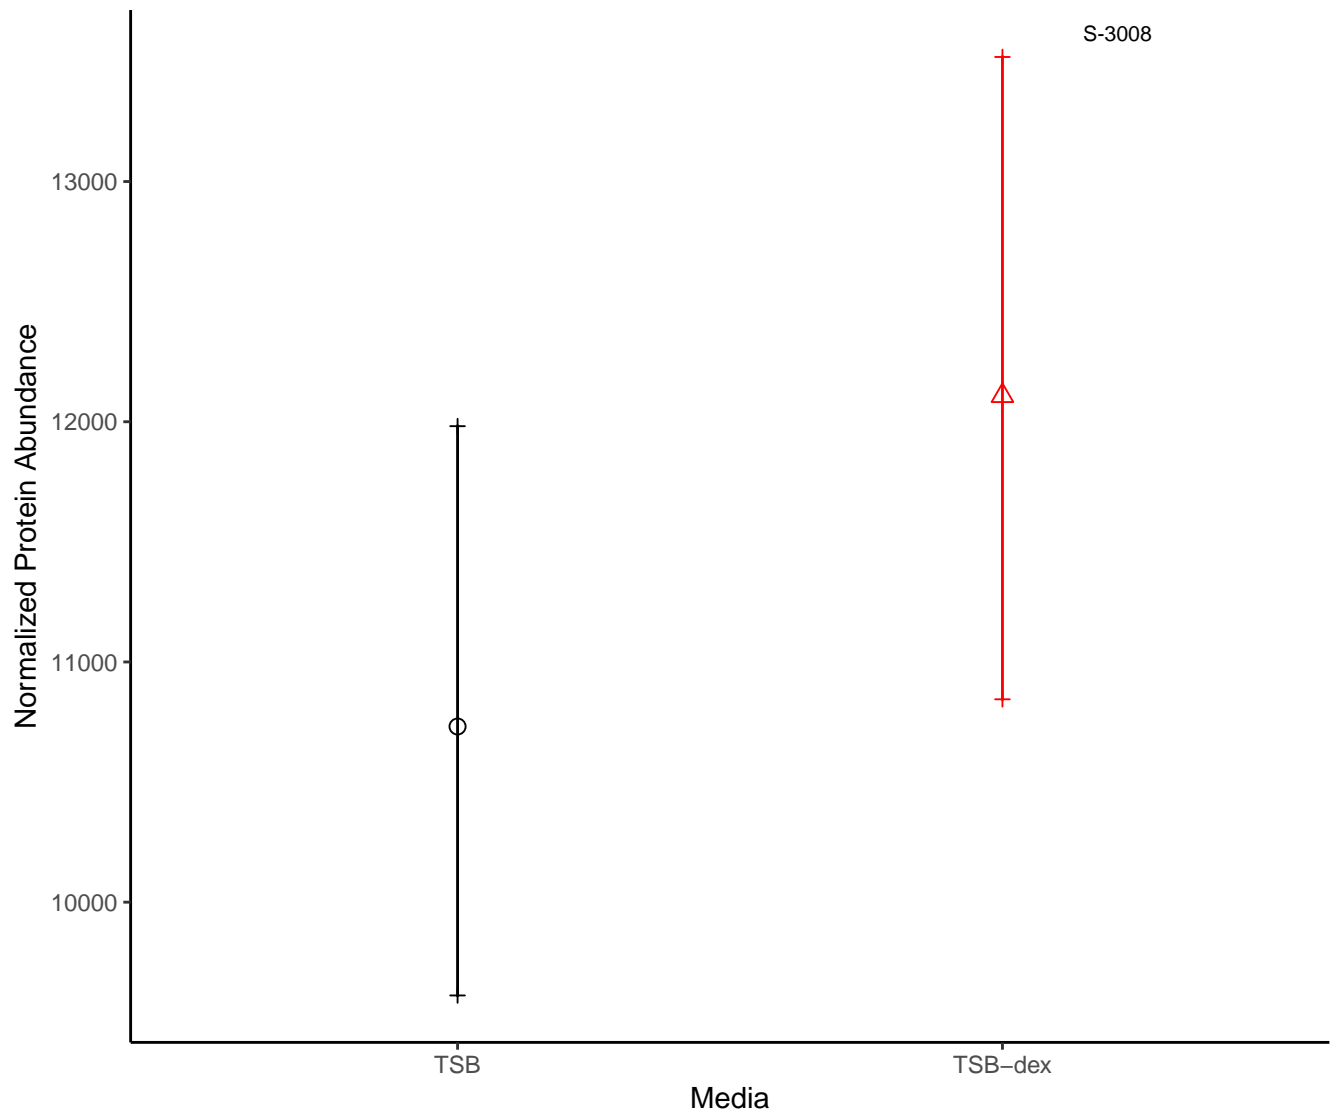

⊕ TSB-dex

△ TSB



# Y669\_STAAM

S-3009

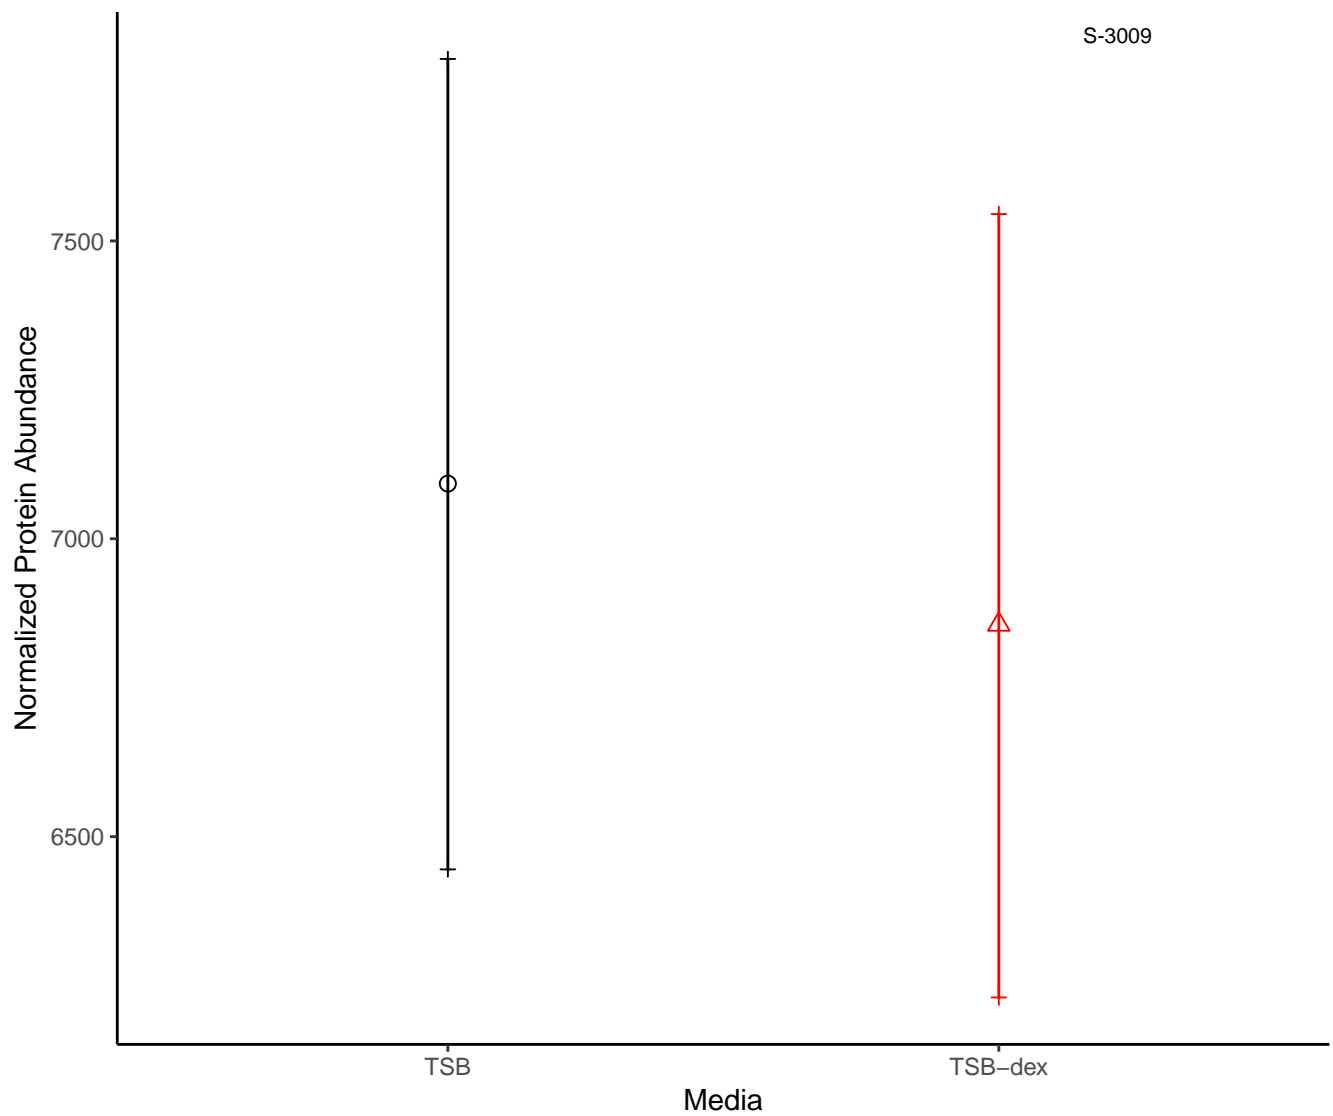

⊕ TSB-dex

△ TSB

# Y752\_STAAM

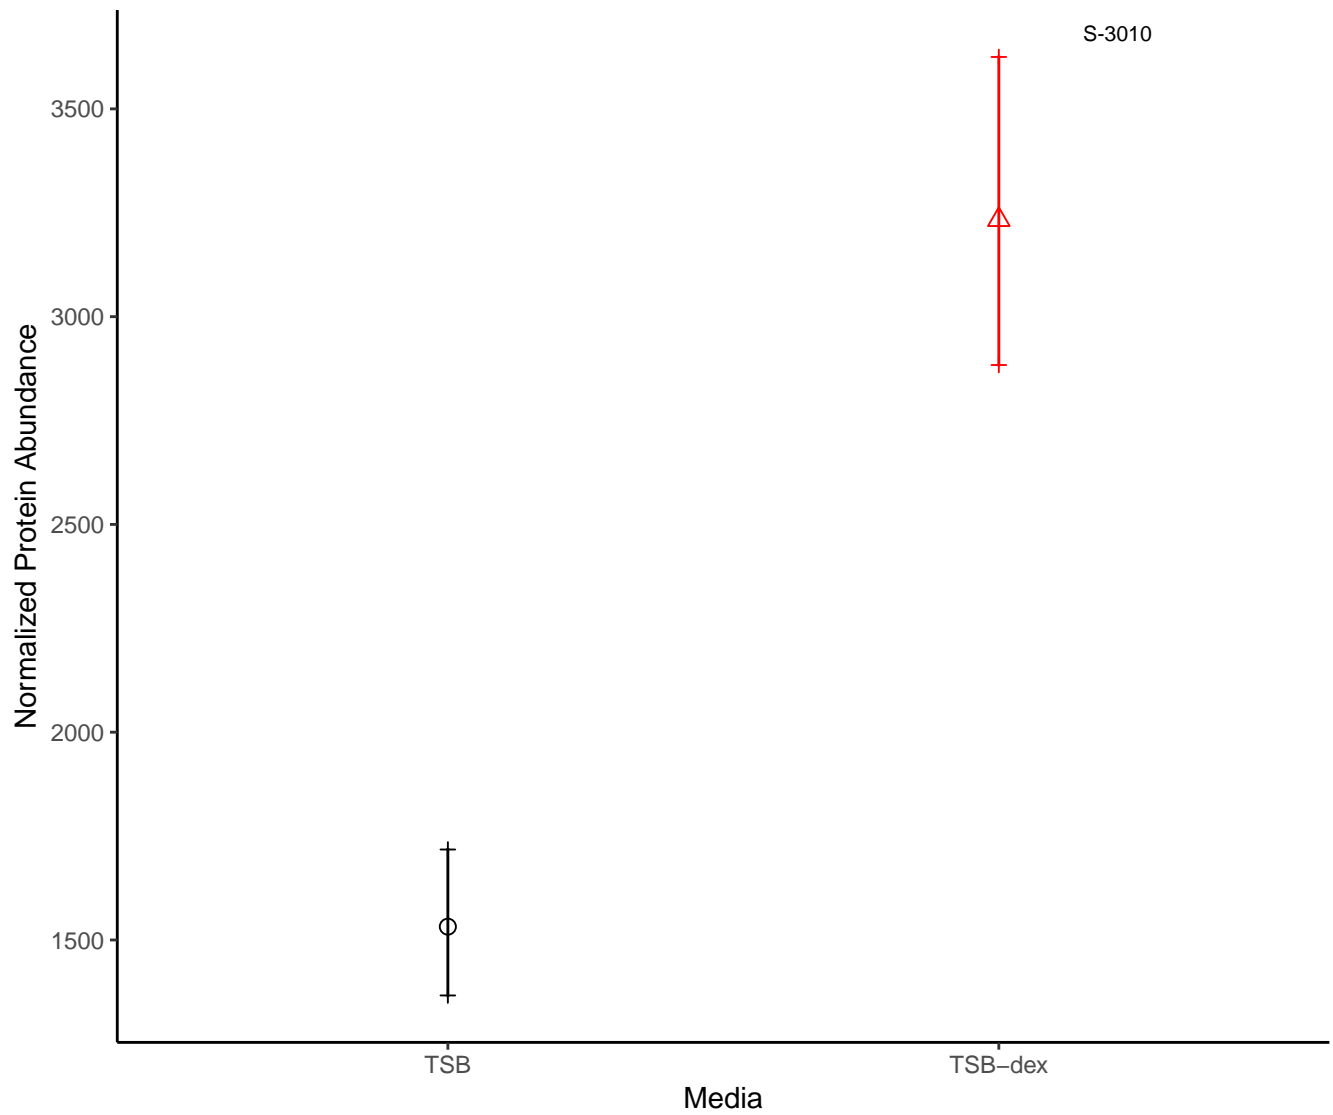

⊕ TSB-dex

△ TSB

# Y765\_STAAM

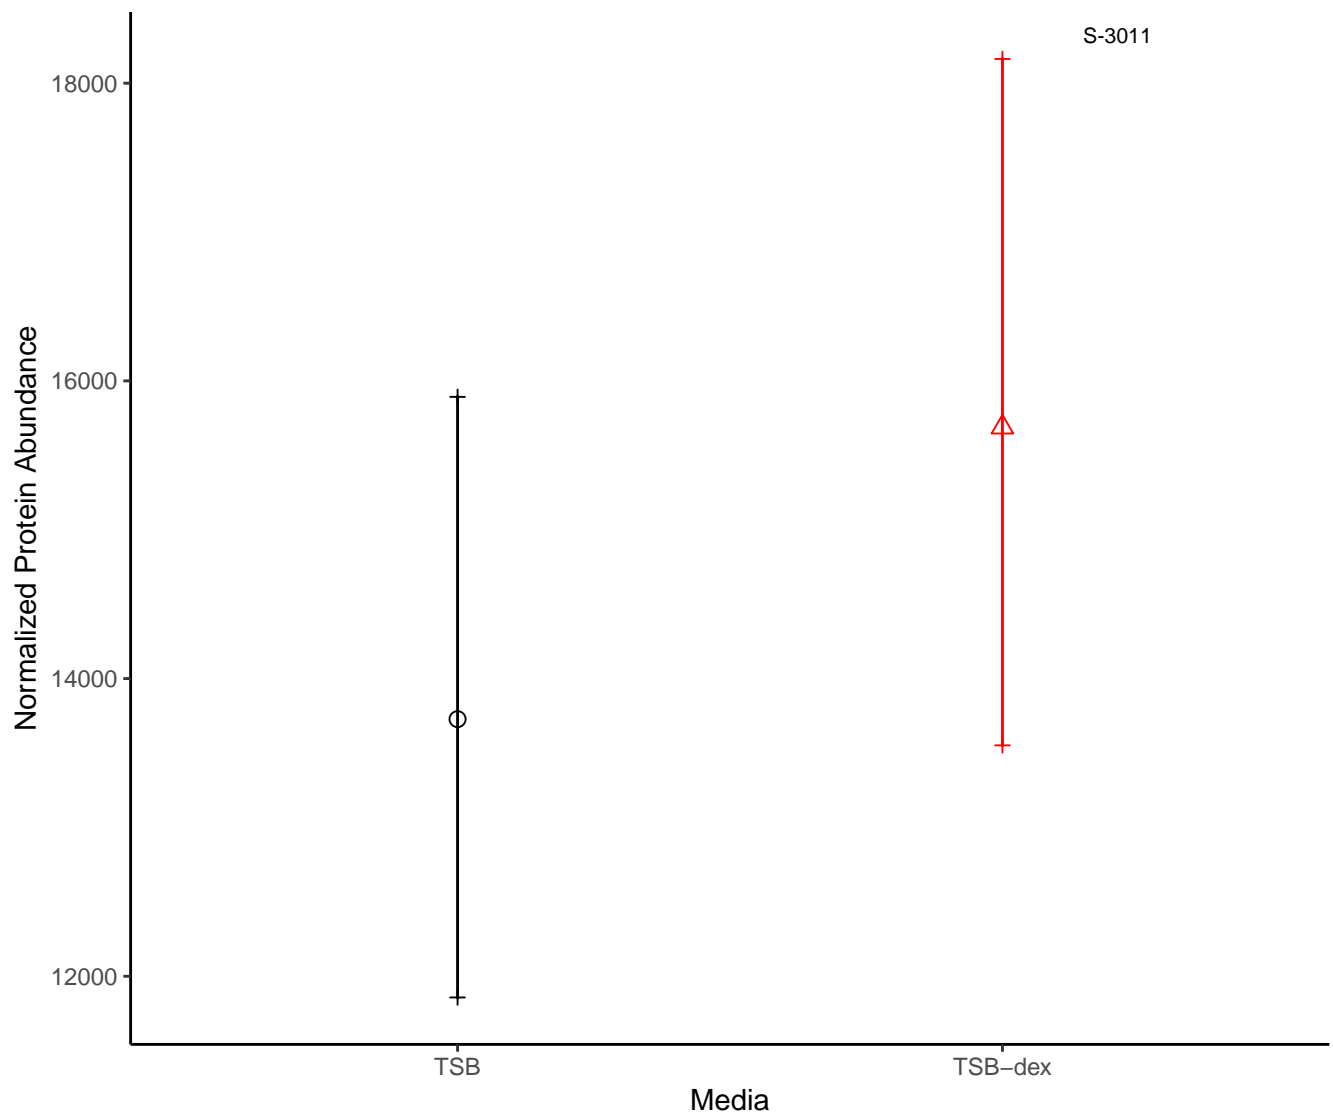

⊖ TSB-dex

△ TSB

# Y769\_STAAM

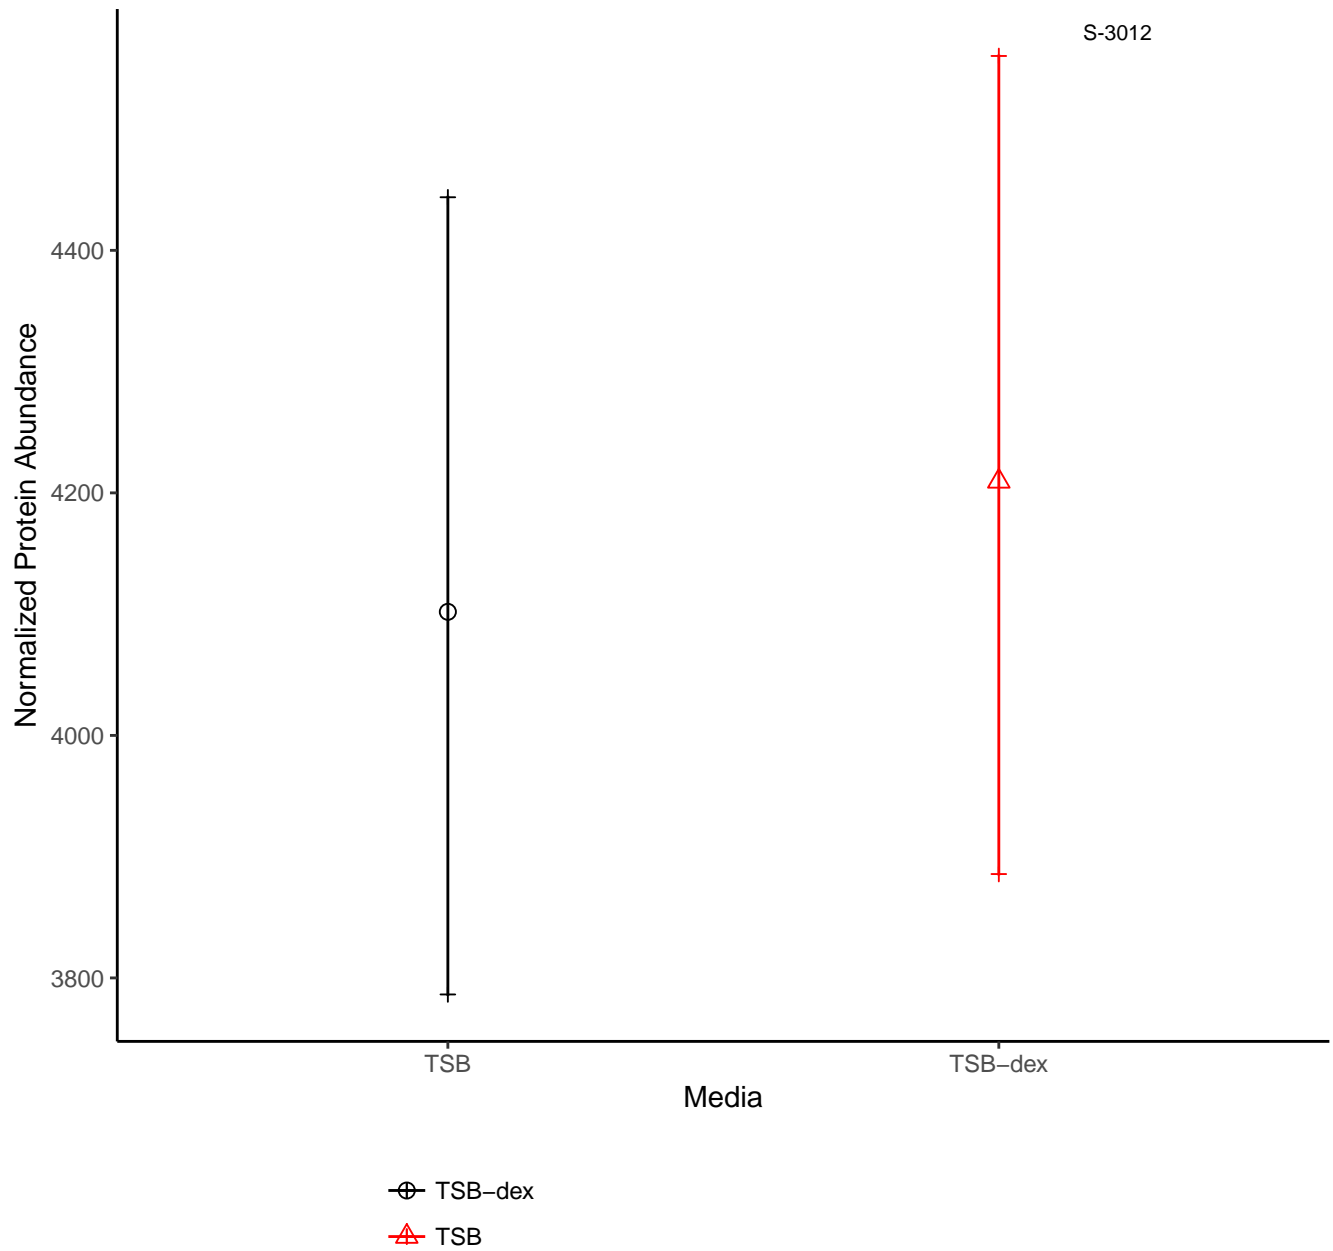

# Y840\_STAAM

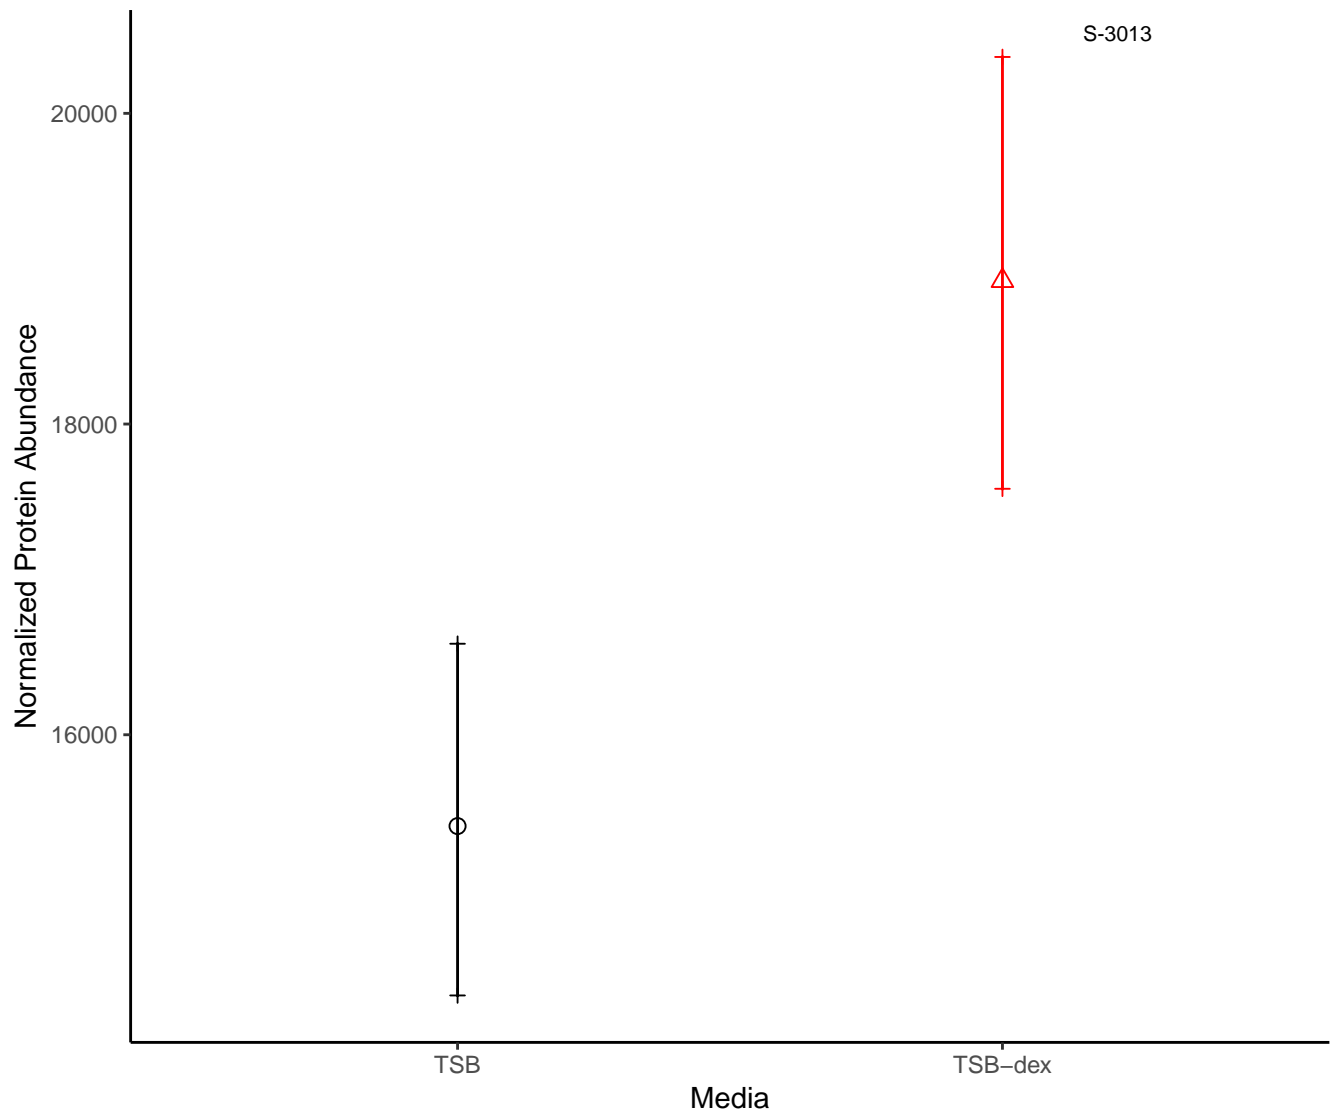

⊖ TSB-dex

⊖ TSB

# Y846\_STAAM

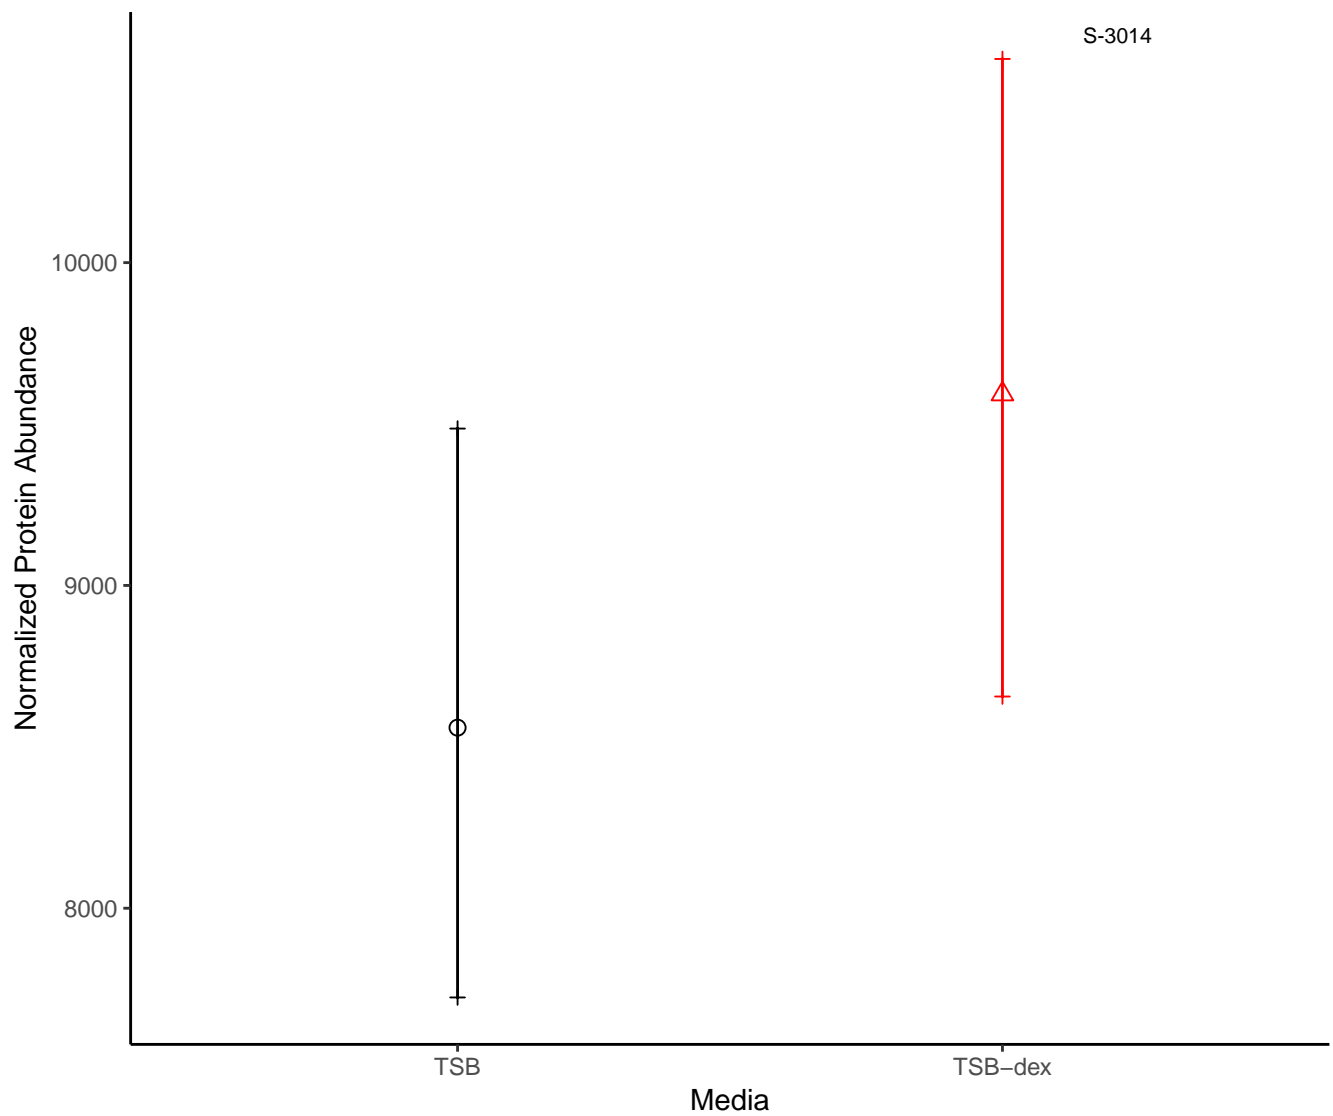

⊖ TSB-dex

△ TSB

# Y941\_STAAM

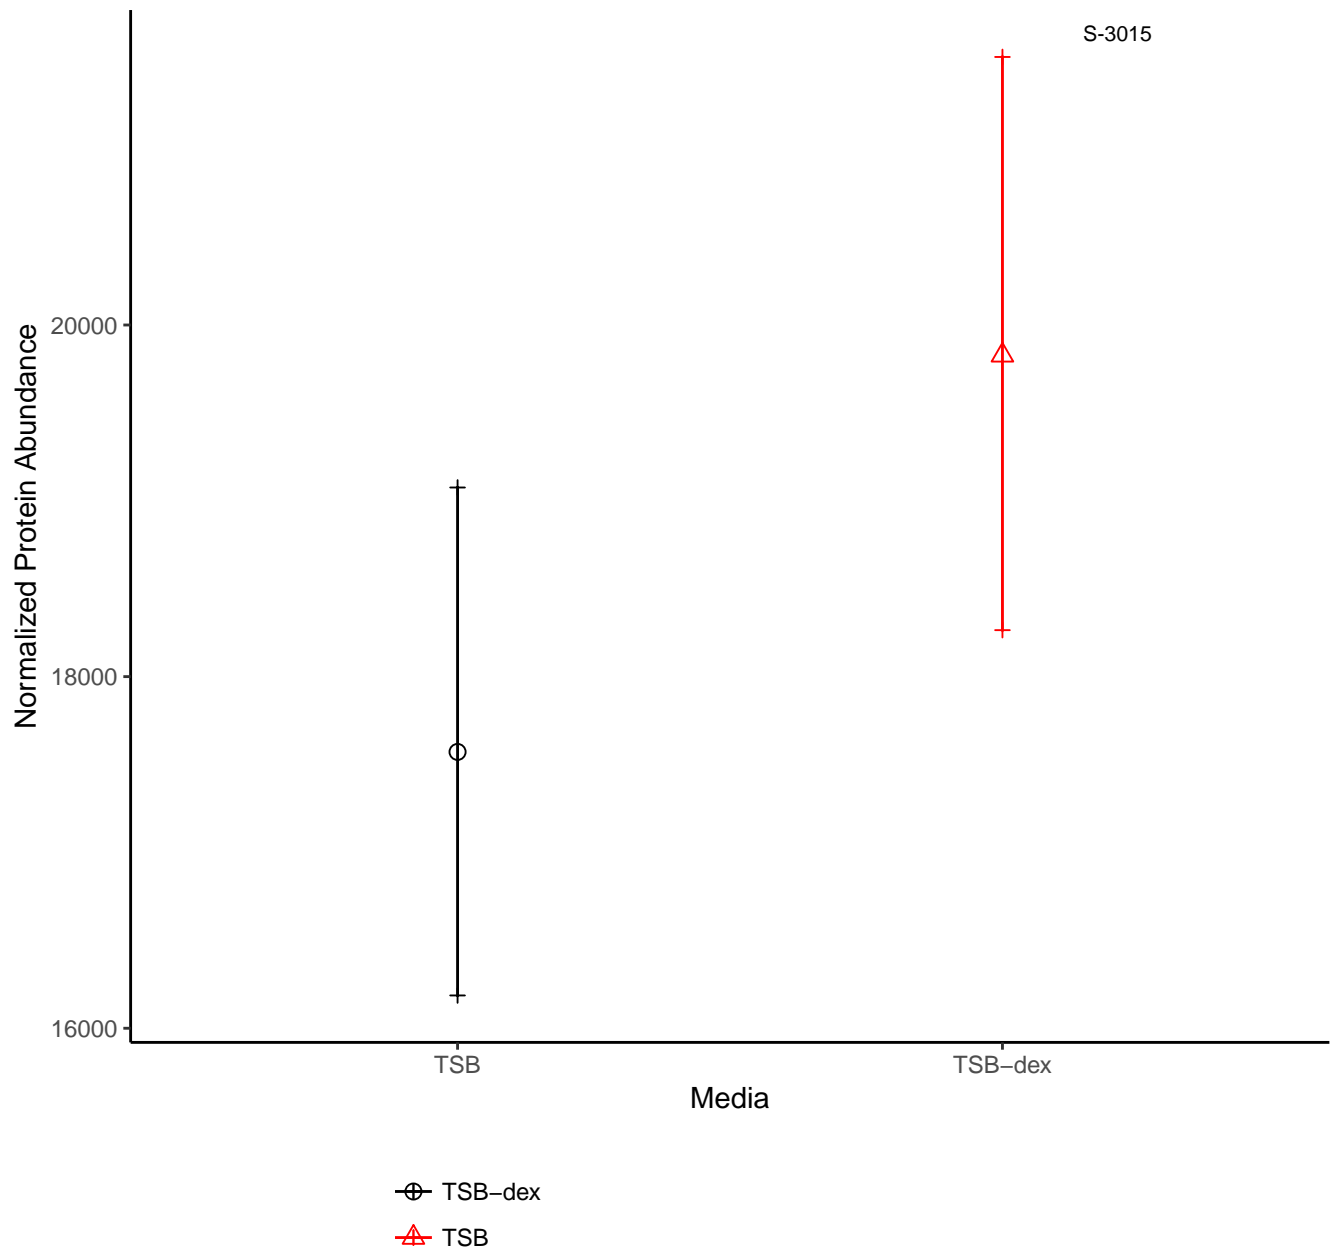

# Y968\_STAAM

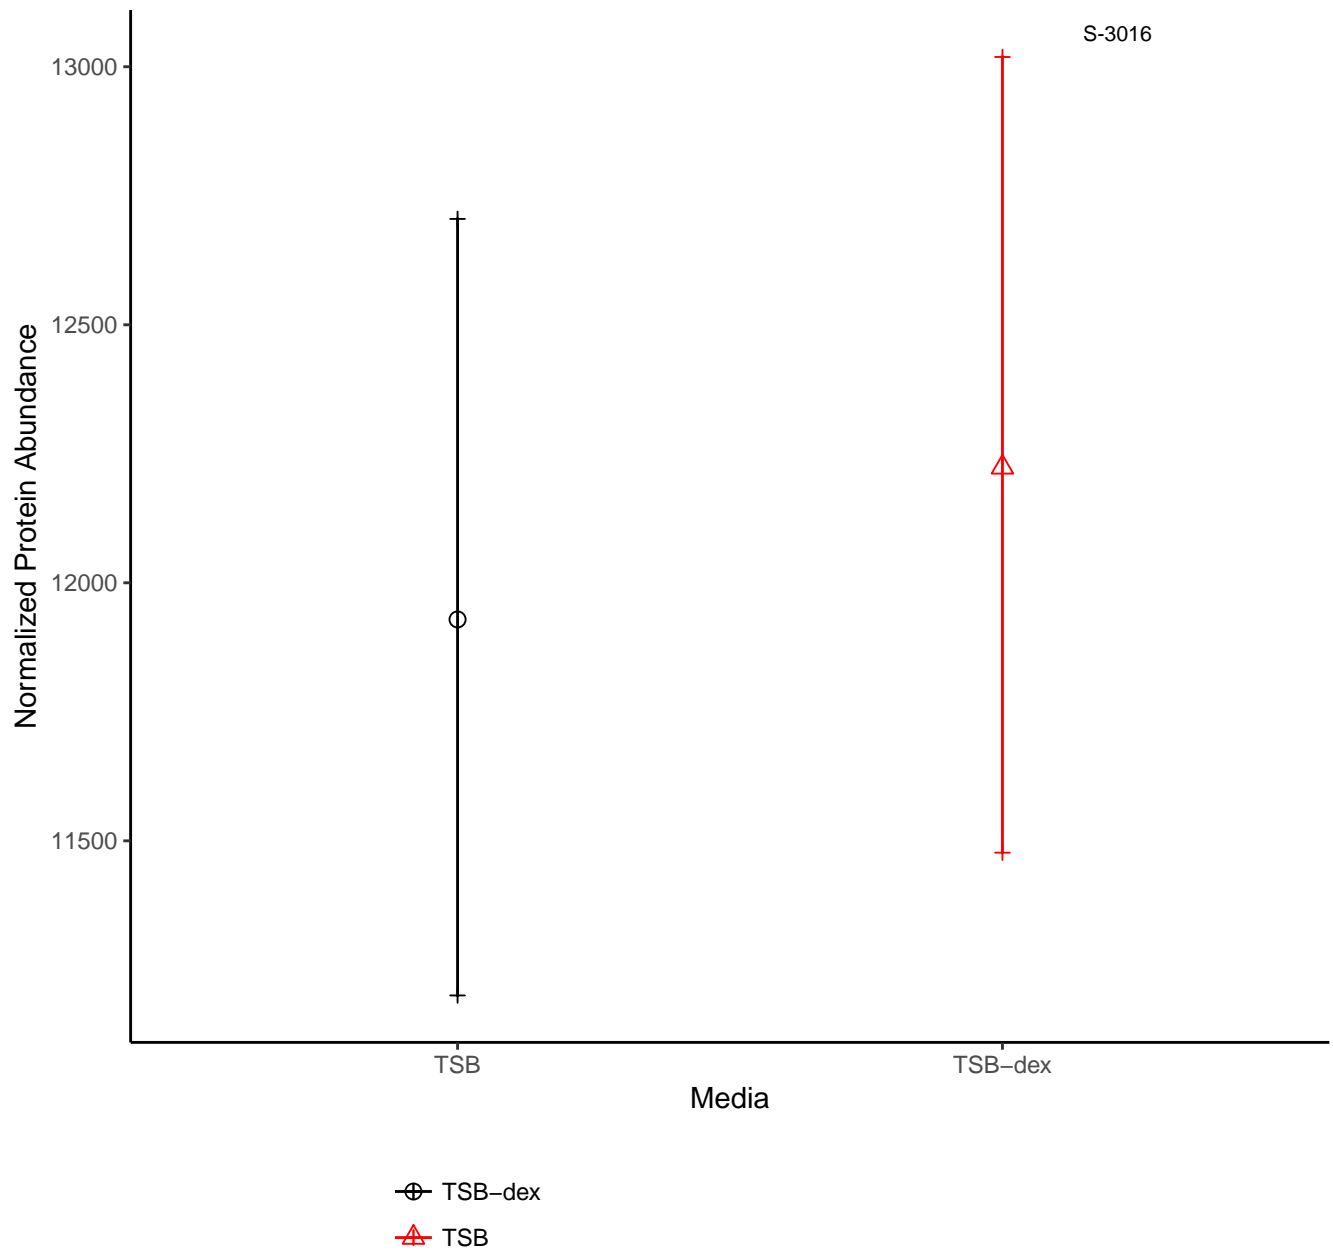



# YABA\_STAAM

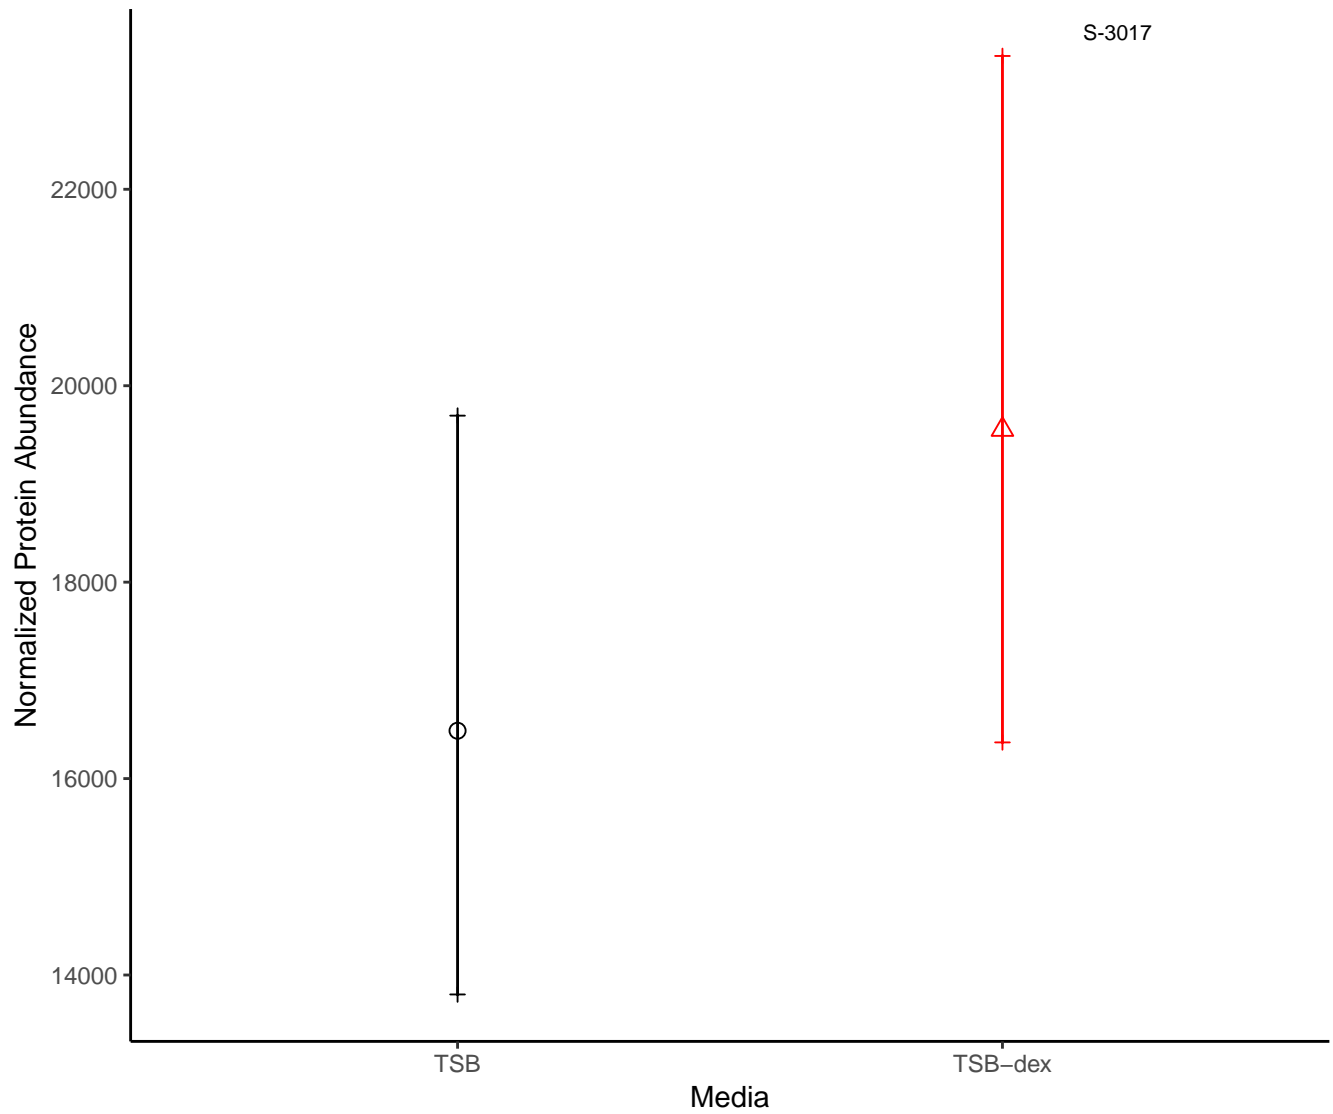

● TSB-dex

▲ TSB

# YBEY\_STAAM

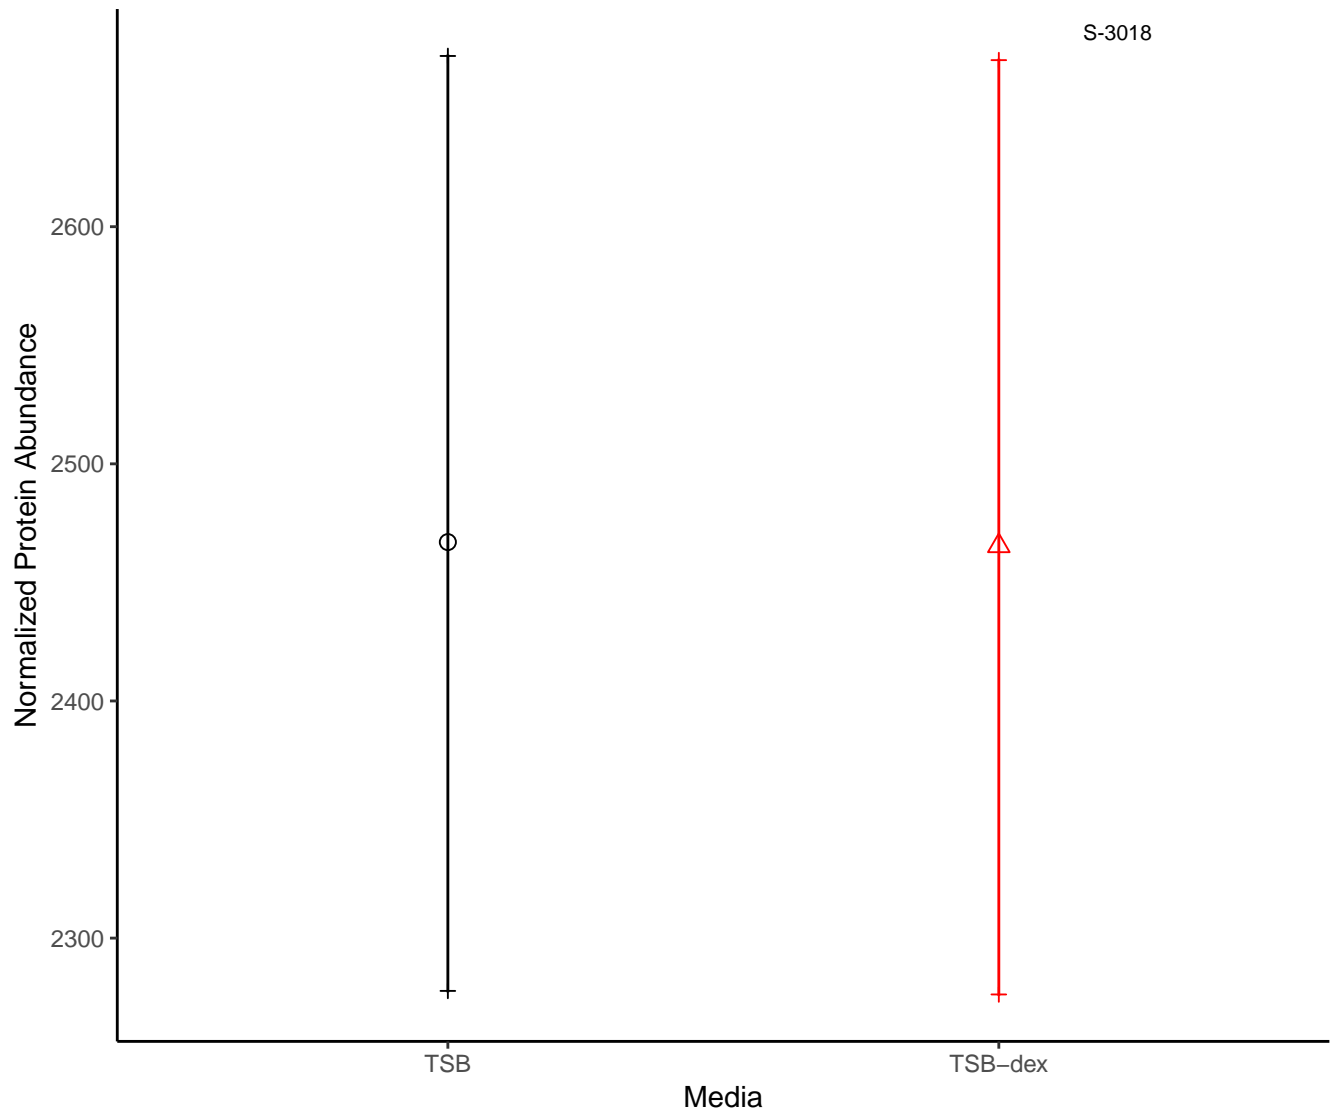

S-3018

⊕ TSB-dex

△ TSB

**Figure L.**

1-way analysis: s

Pages: S3019-S3520

The normalized protein abundance, lower 95% confidence interval, and upper 95% confidence interval were plotted for each protein. These plots were analyzed if the 3-way and 2-way interactions were rejected and a significant main effect (1-way) was identified for strain.

# 6PGD\_STAAM

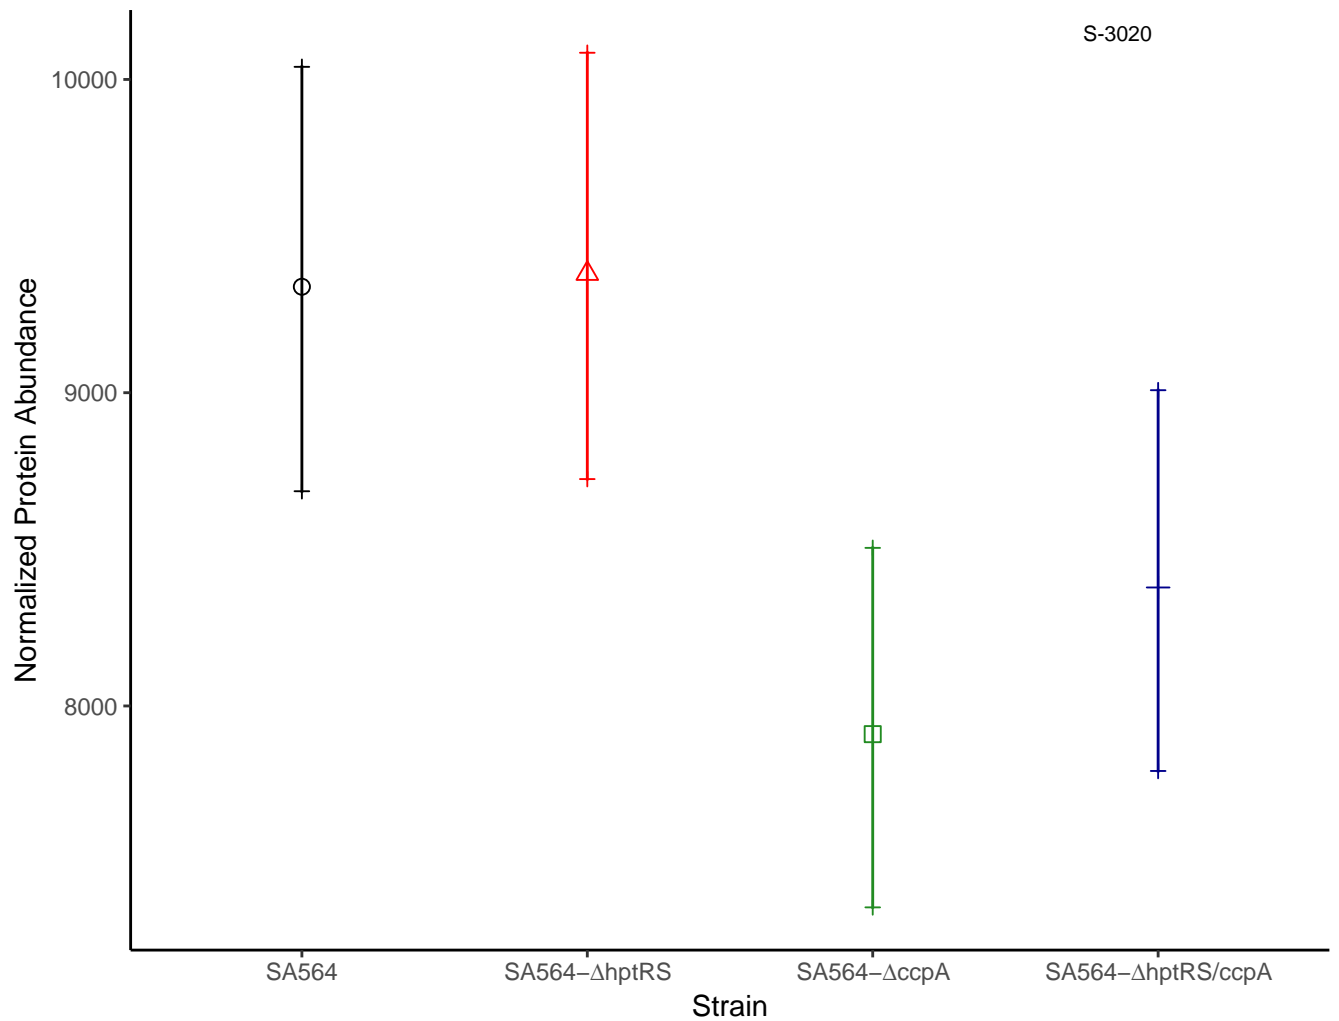

- ⊕ SA564
- △ SA564- $\Delta$ *hptRS*
- ⊞ SA564- $\Delta$ *ccpA*
- + SA564- $\Delta$ *hptRS/ccpA*

# ACCA\_STAAM

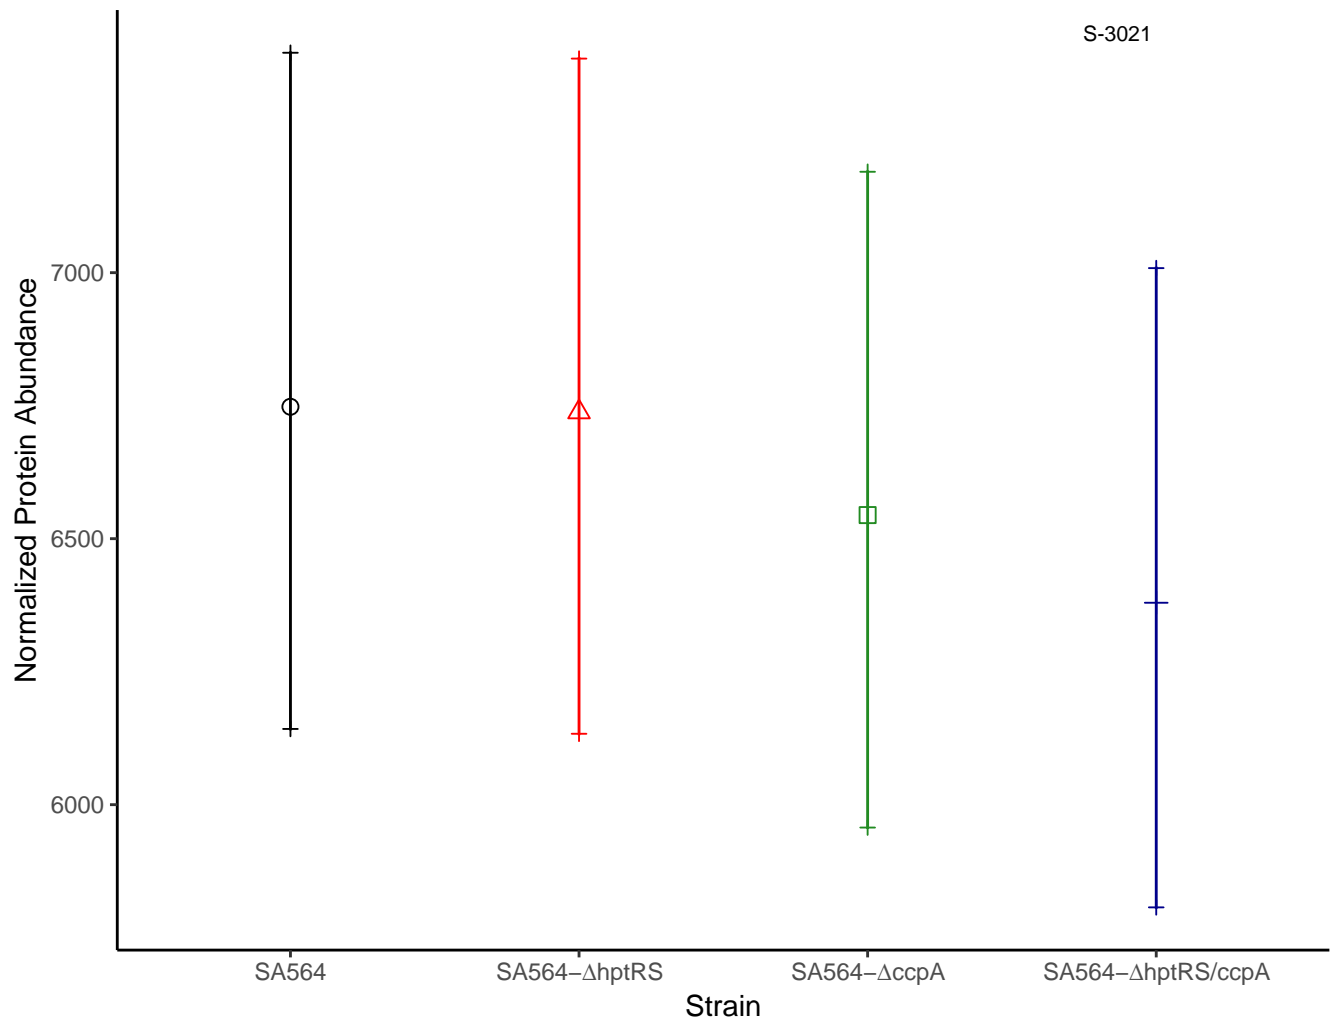

- ⊕ SA564
- △ SA564- $\Delta$ hptRS
- ⊞ SA564- $\Delta$ ccpA
- ⊕ SA564- $\Delta$ hptRS/ccpA

# ACKA\_STAAM

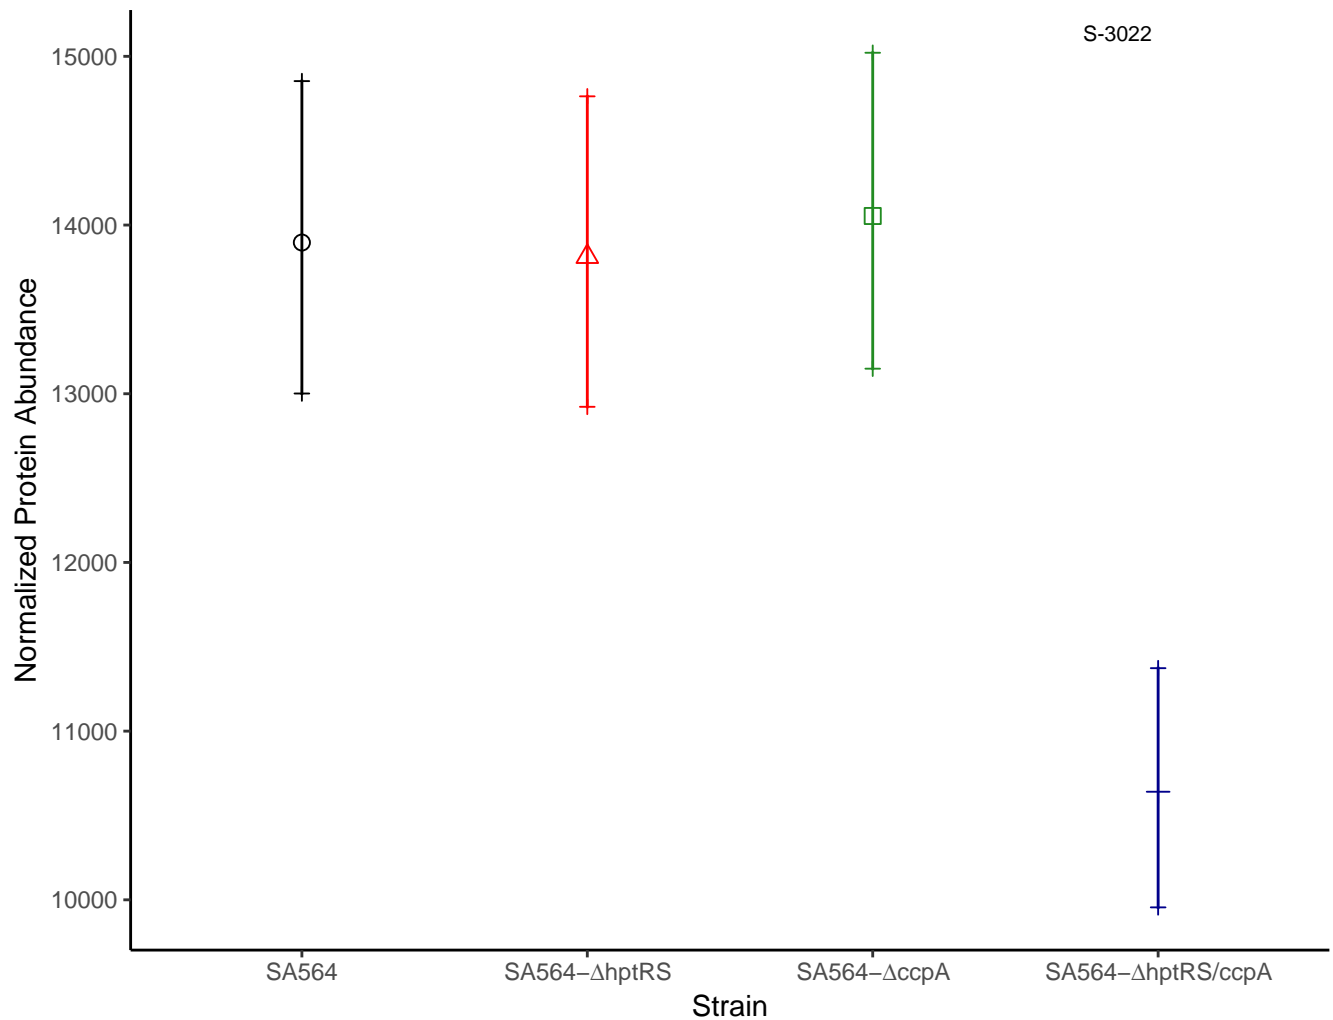

- ⊕ SA564
- △ SA564- $\Delta$ hptRS
- ⊞ SA564- $\Delta$ ccpA
- + SA564- $\Delta$ hptRS/ccpA

# ACON\_STAAM

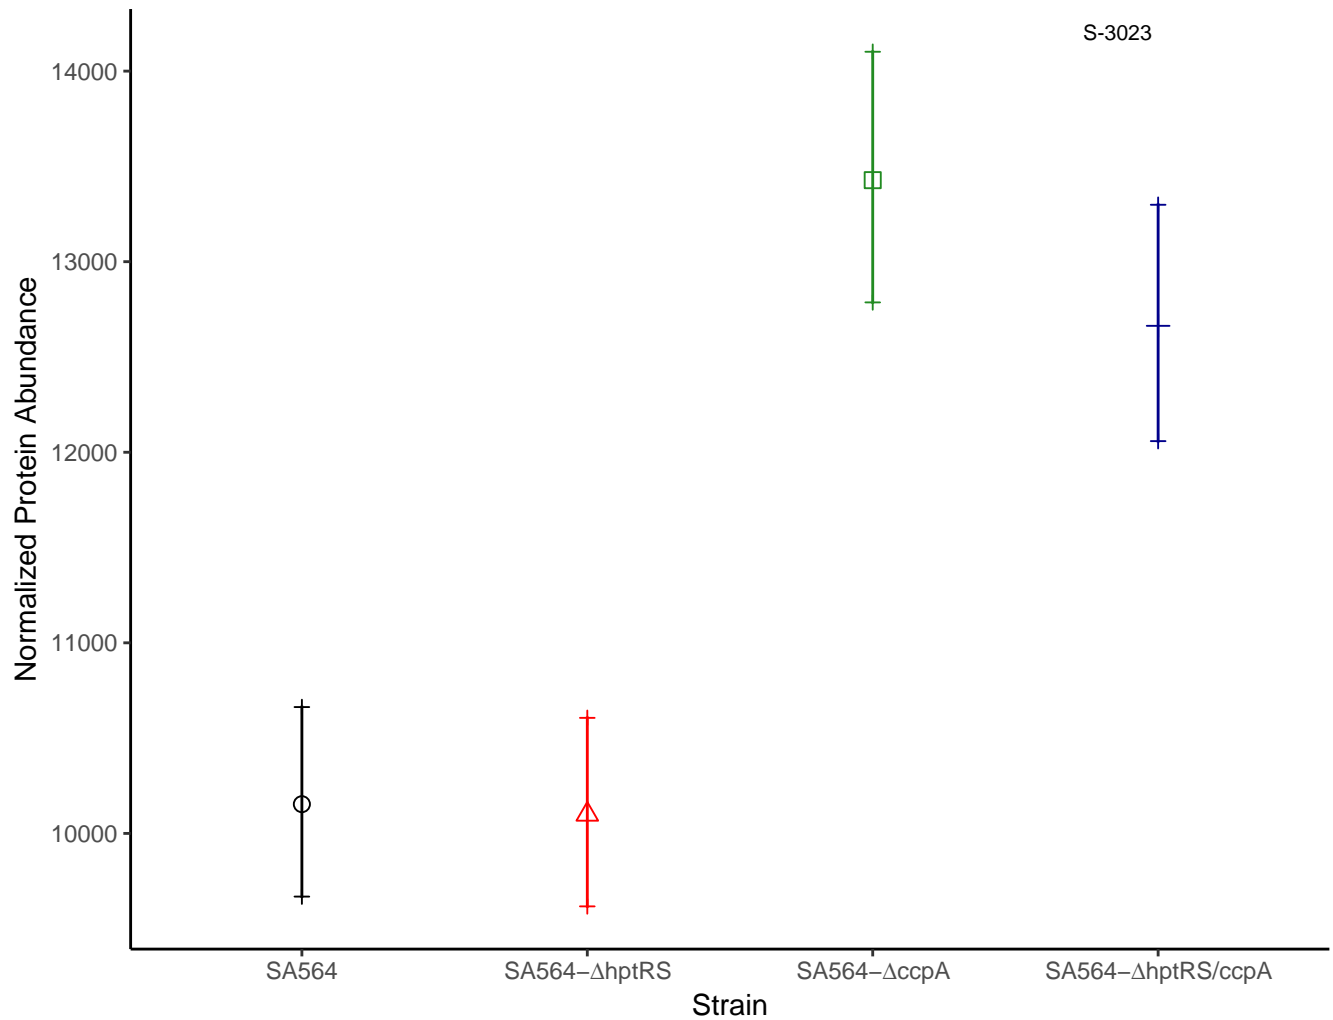

- ⊕ SA564
- △ SA564- $\Delta$ hptRS
- ⊞ SA564- $\Delta$ ccpA
- + SA564- $\Delta$ hptRS/ccpA

# ACP\_STAAM

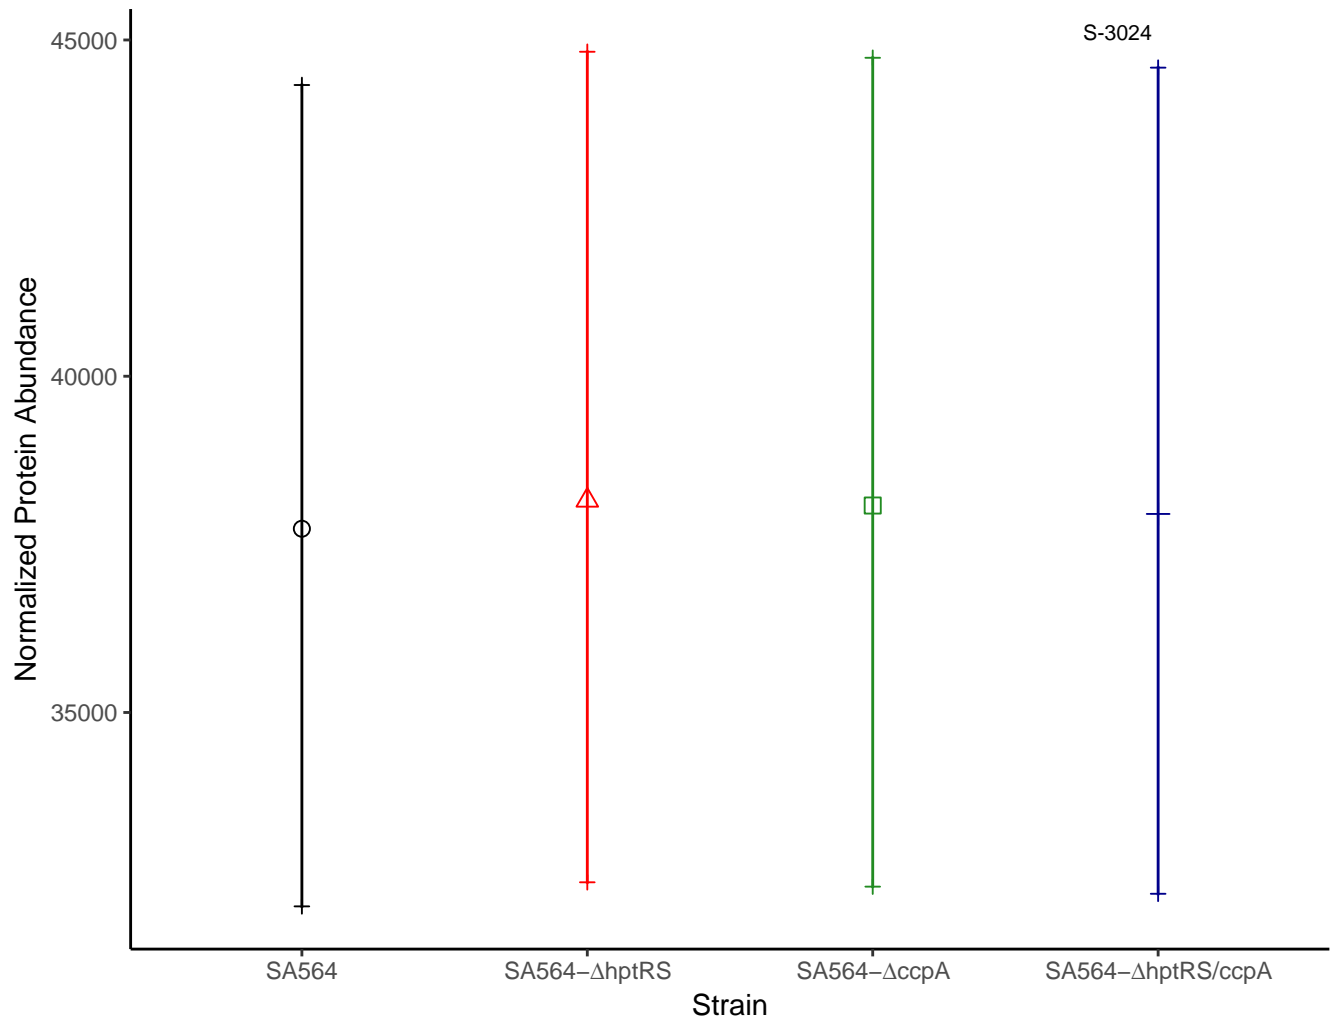

- ⊕ SA564
- △ SA564- $\Delta$ hptRS
- ⊞ SA564- $\Delta$ ccpA
- + SA564- $\Delta$ hptRS/ccpA



# ADH\_STAAM

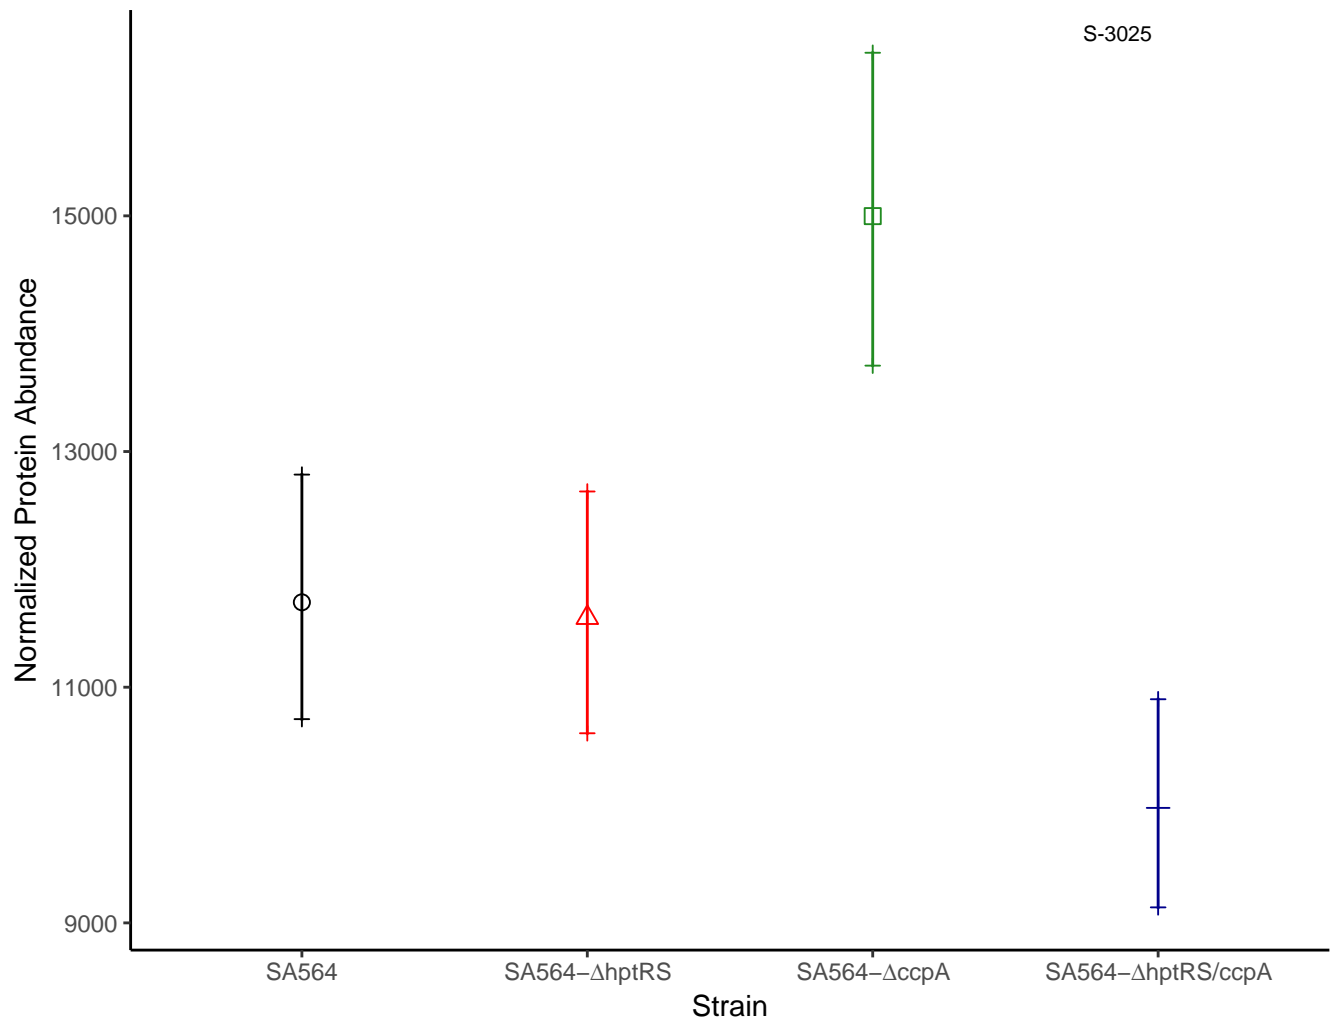

- ⊕ SA564
- △ SA564- $\Delta$ hptRS
- ⊞ SA564- $\Delta$ ccpA
- + SA564- $\Delta$ hptRS/ccpA

# AHPC\_STAAM

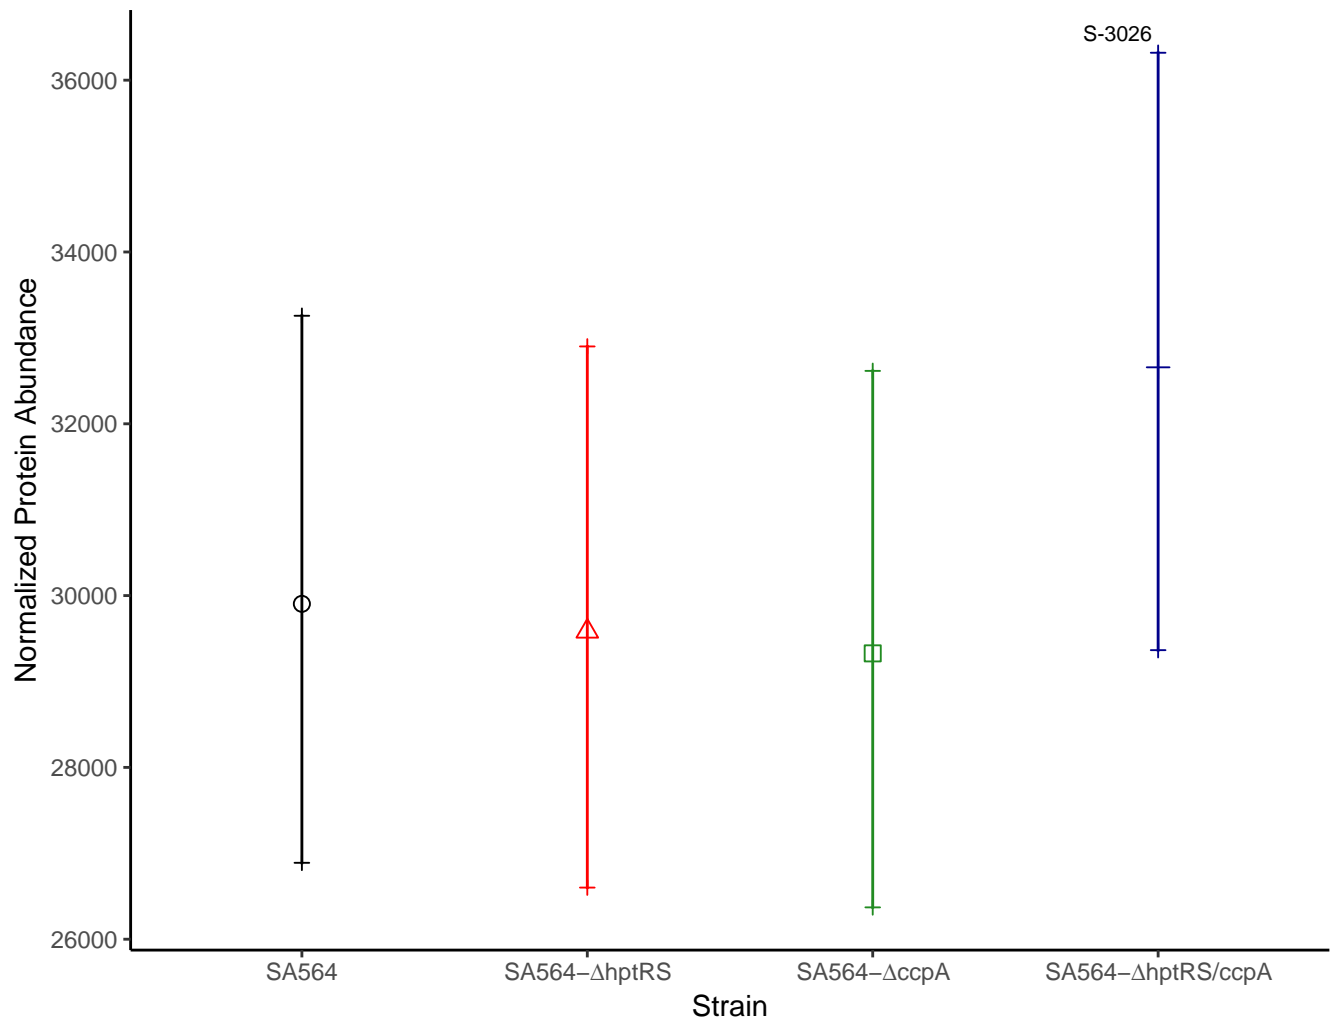

- ⊕ SA564
- △ SA564- $\Delta$ hptRS
- ⊞ SA564- $\Delta$ ccpA
- + SA564- $\Delta$ hptRS/ccpA

# AHPF\_STAAM

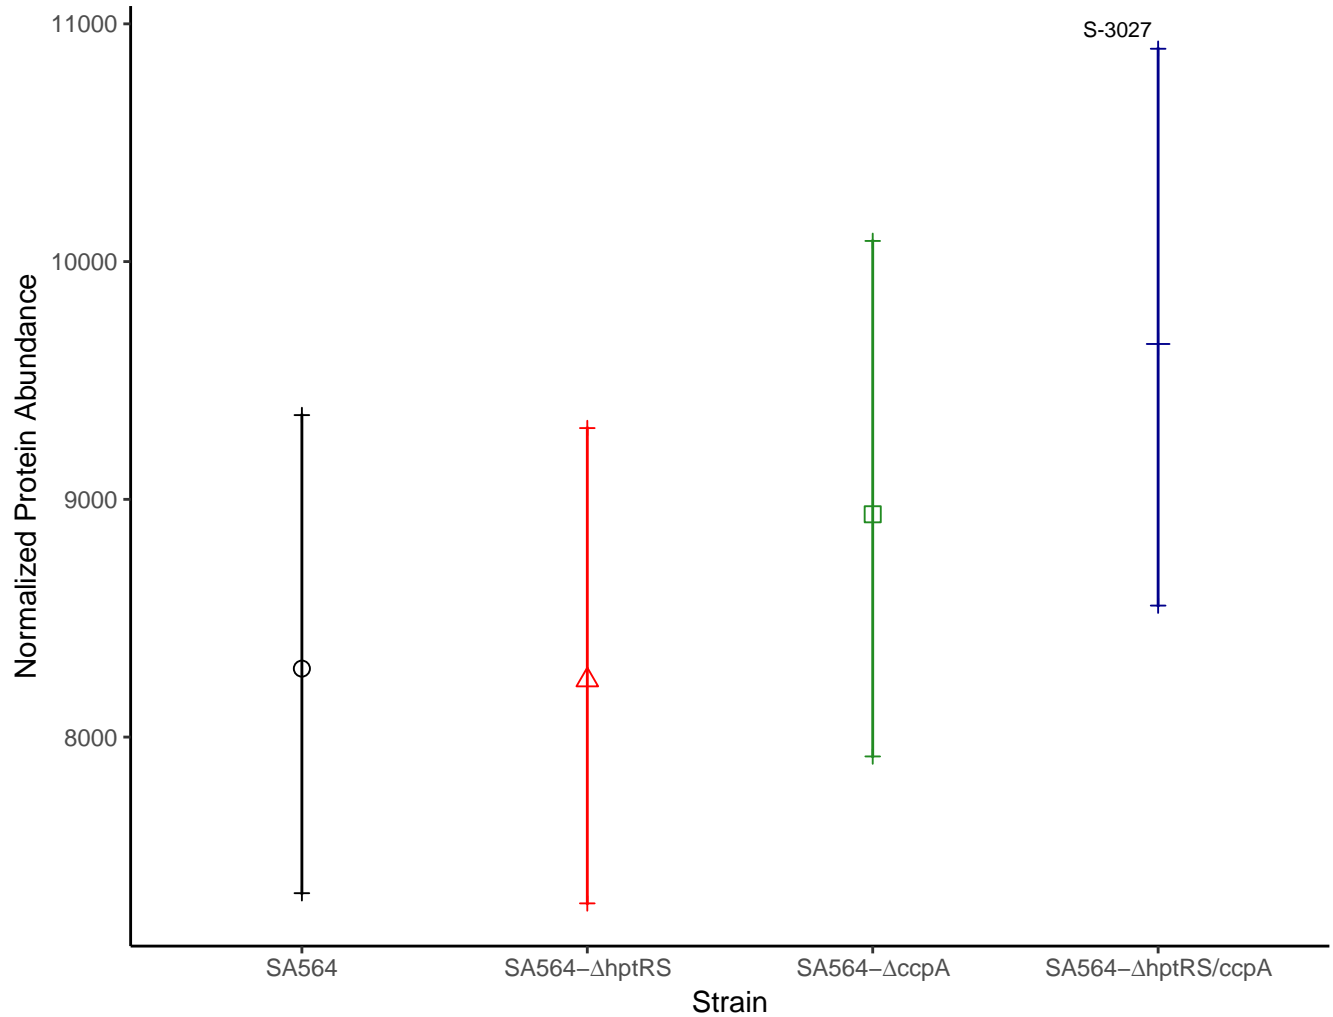

- ⊕ SA564
- △ SA564- $\Delta$ hptRS
- ⊞ SA564- $\Delta$ ccpA
- + SA564- $\Delta$ hptRS/ccpA

# ALD1\_STAAM

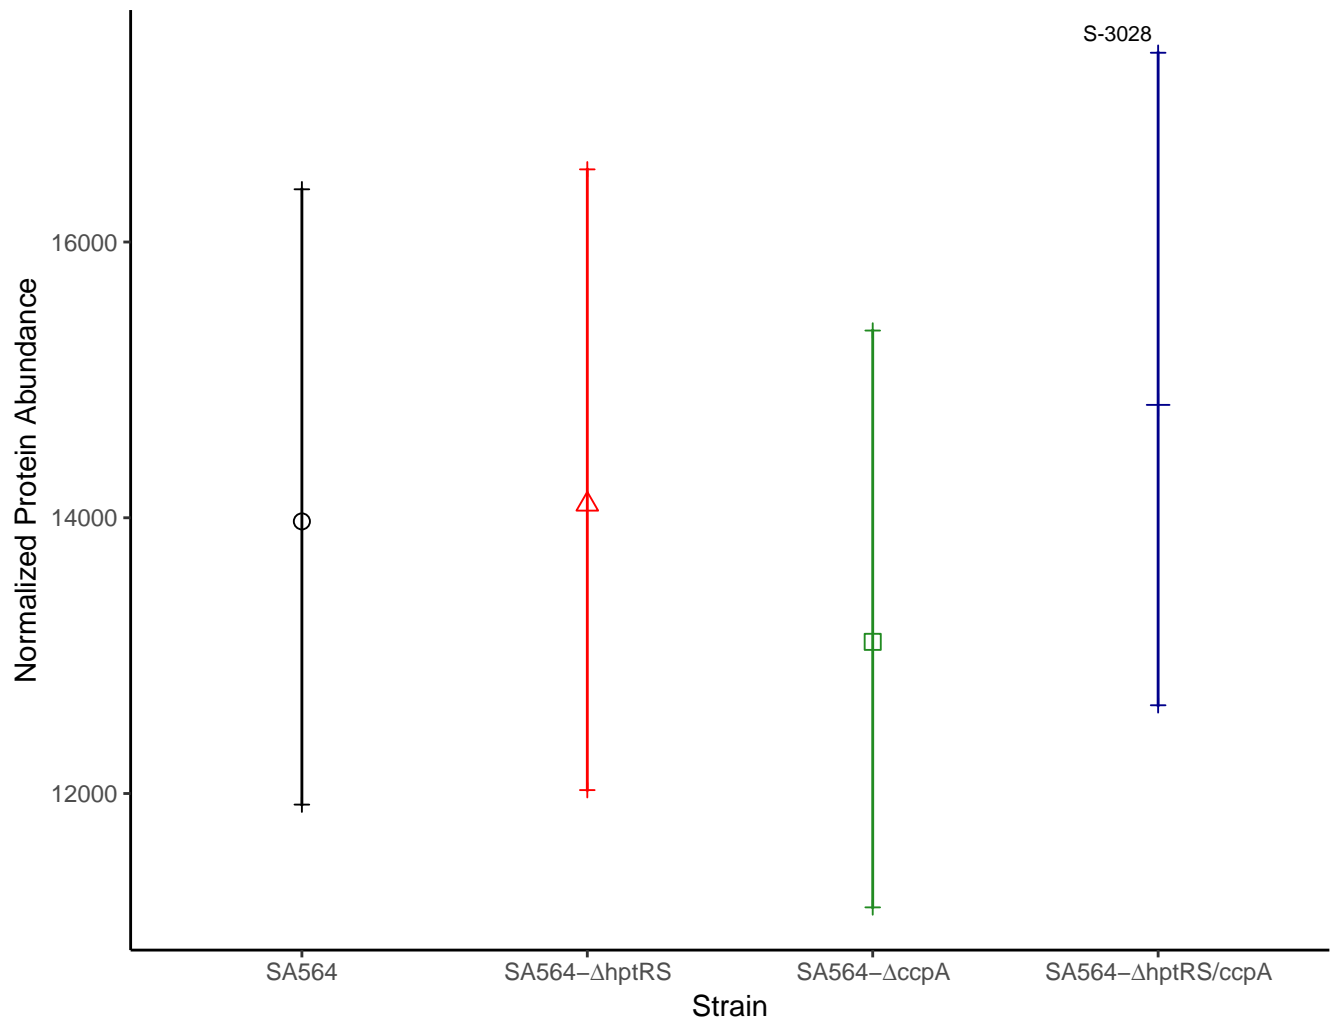

- ⊕ SA564
- △ SA564- $\Delta$ hptRS
- ⊞ SA564- $\Delta$ ccpA
- + SA564- $\Delta$ hptRS/ccpA

# ALDA\_STAAM

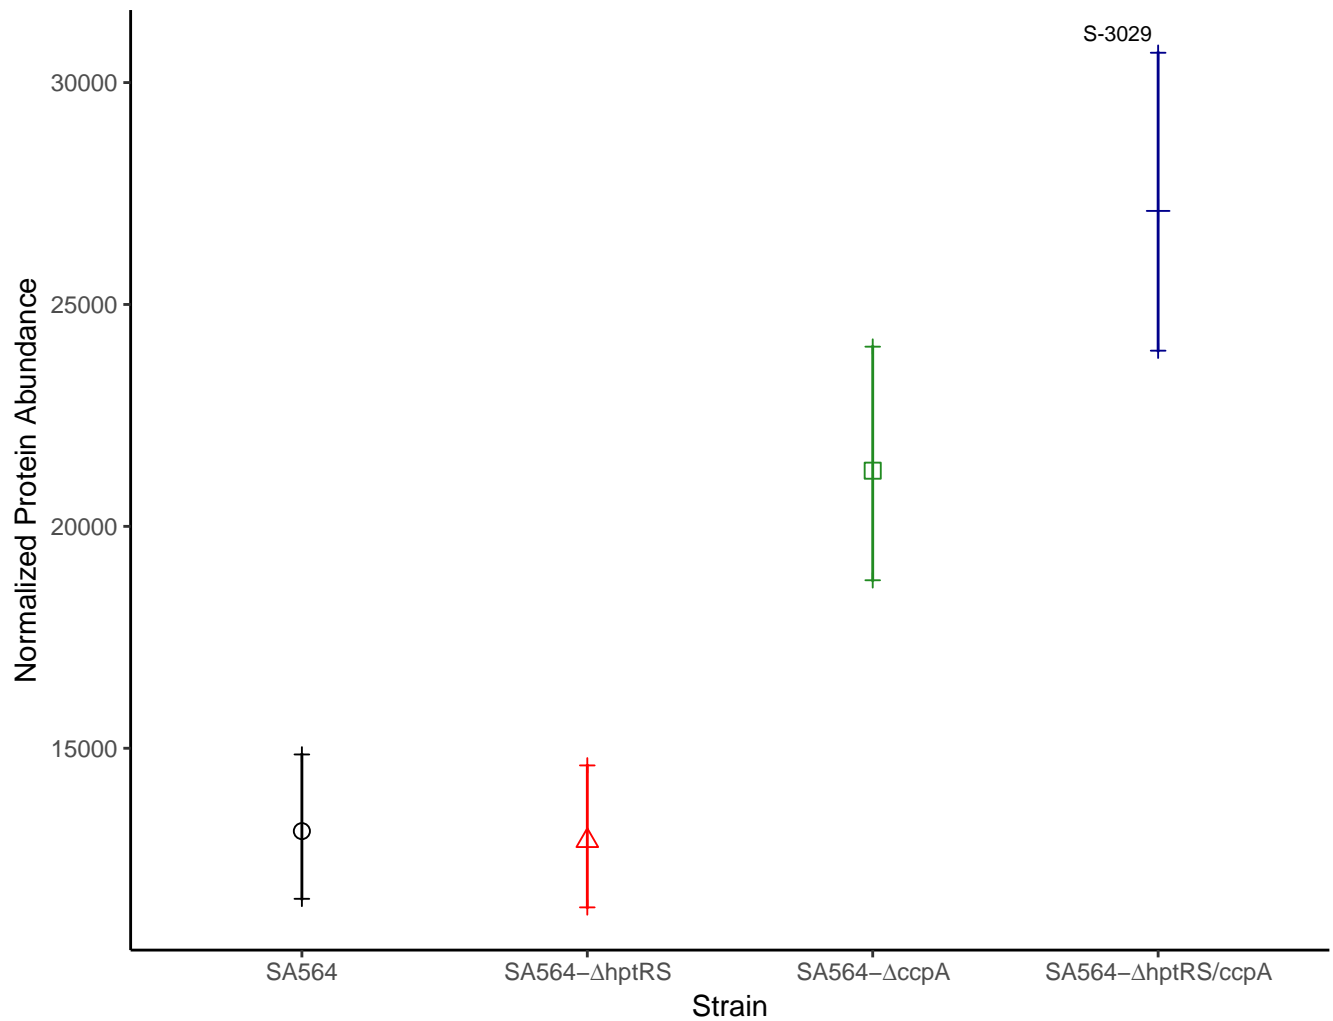

- ⊕ SA564
- △ SA564- $\Delta$ hptRS
- ⊞ SA564- $\Delta$ ccpA
- + SA564- $\Delta$ hptRS/ccpA

# ALF1\_STAAM

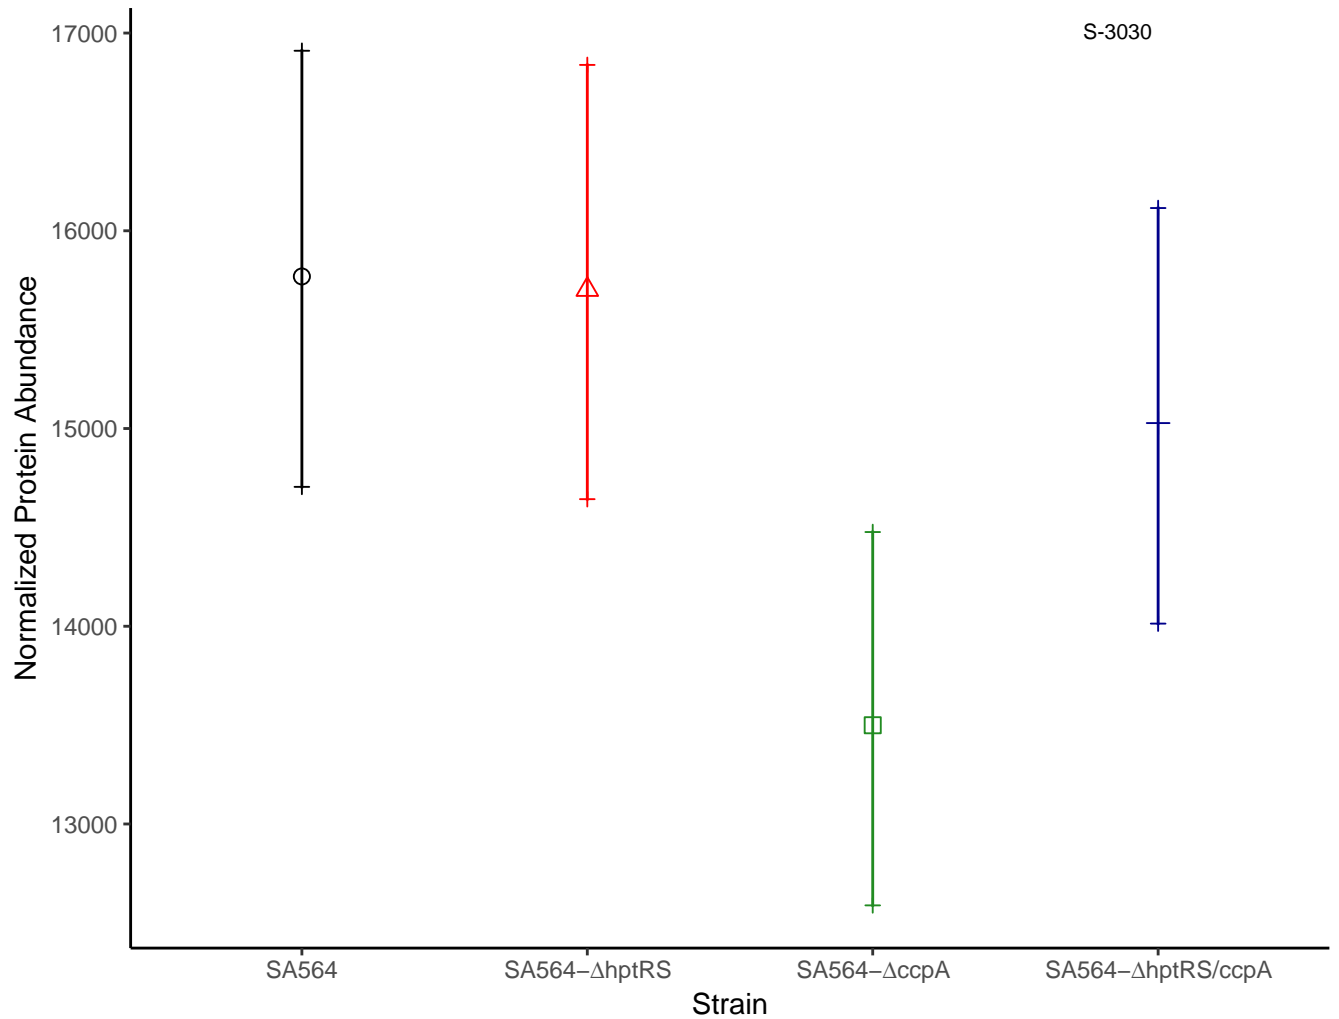

- ⊕ SA564
- △ SA564- $\Delta$ hptRS
- ⊞ SA564- $\Delta$ ccpA
- + SA564- $\Delta$ hptRS/ccpA

# ALF2\_STAAM

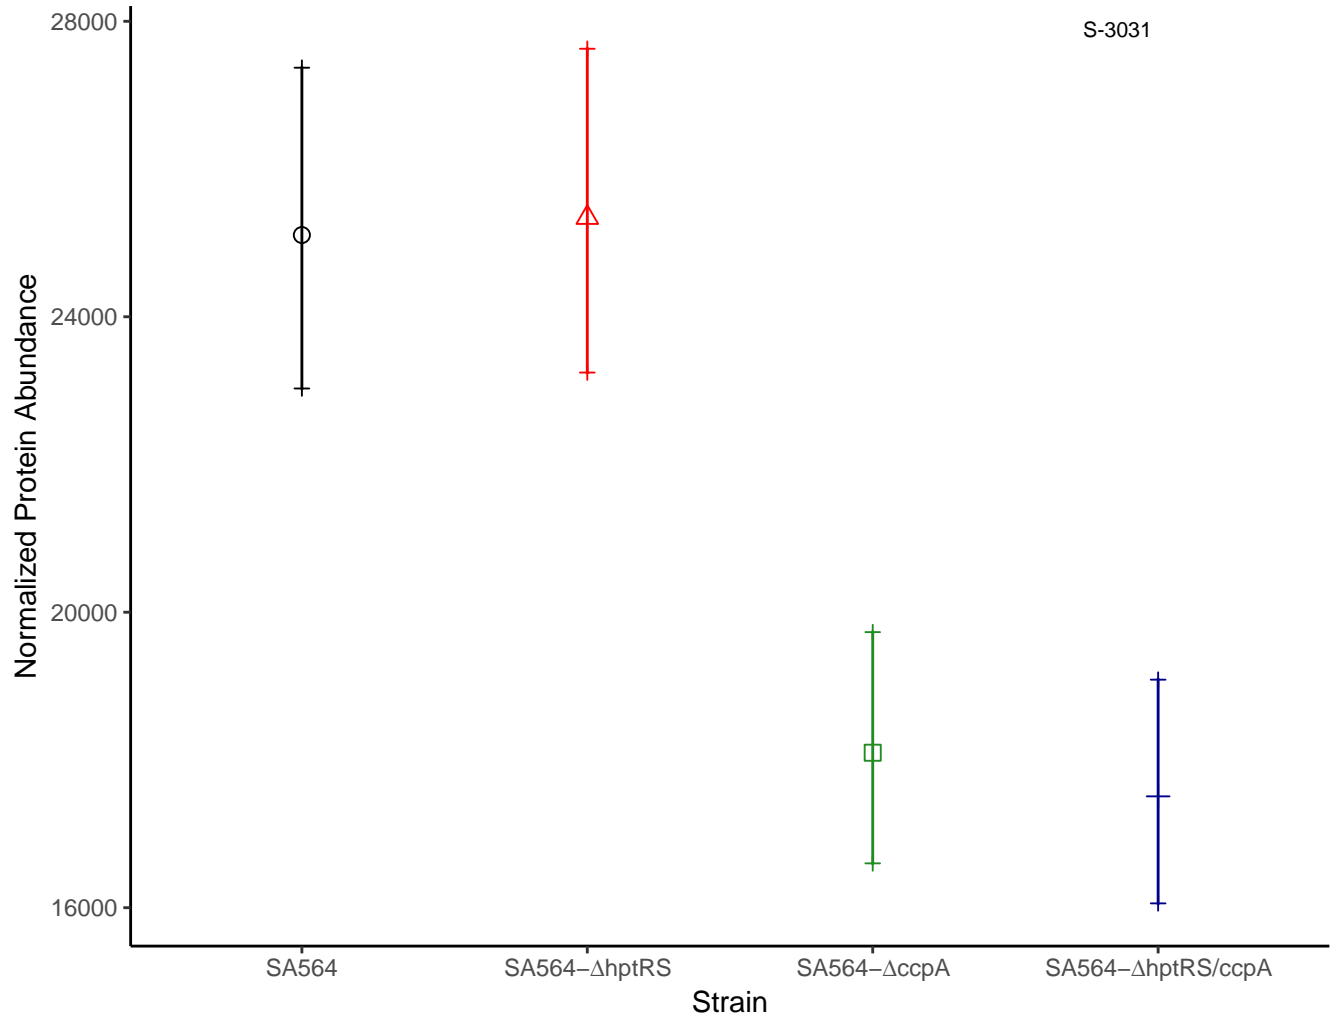

- ⊕ SA564
- △ SA564- $\Delta$ hptRS
- ⊞ SA564- $\Delta$ ccpA
- + SA564- $\Delta$ hptRS/ccpA

# APT\_STAAM

S-3032

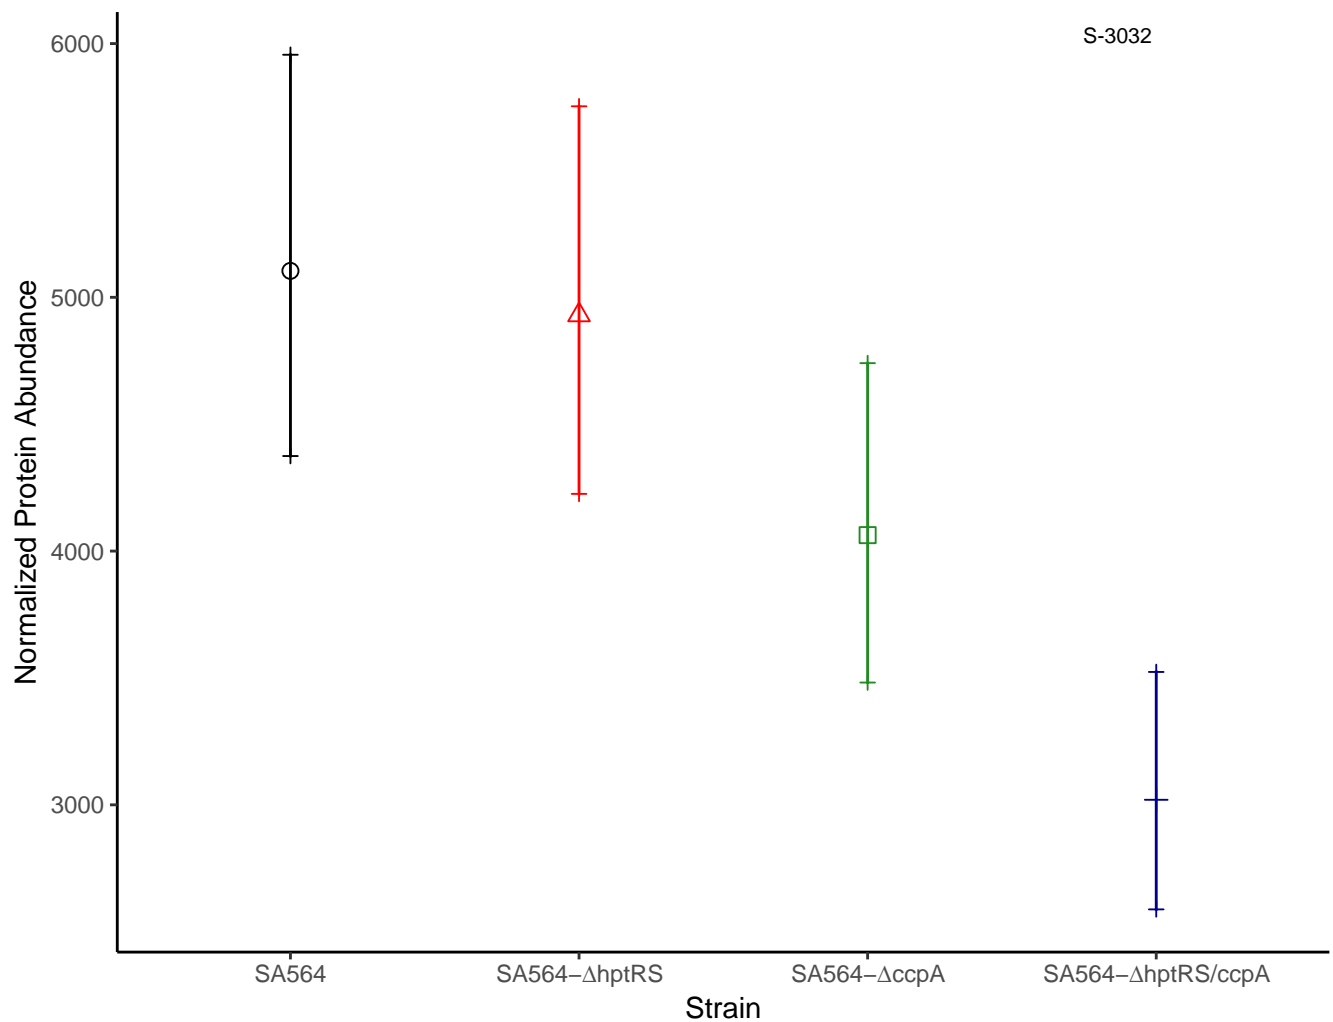

- ⊕ SA564
- △ SA564- $\Delta$ hptRS
- ⊞ SA564- $\Delta$ ccpA
- + SA564- $\Delta$ hptRS/ccpA



# ARCA\_STAAM

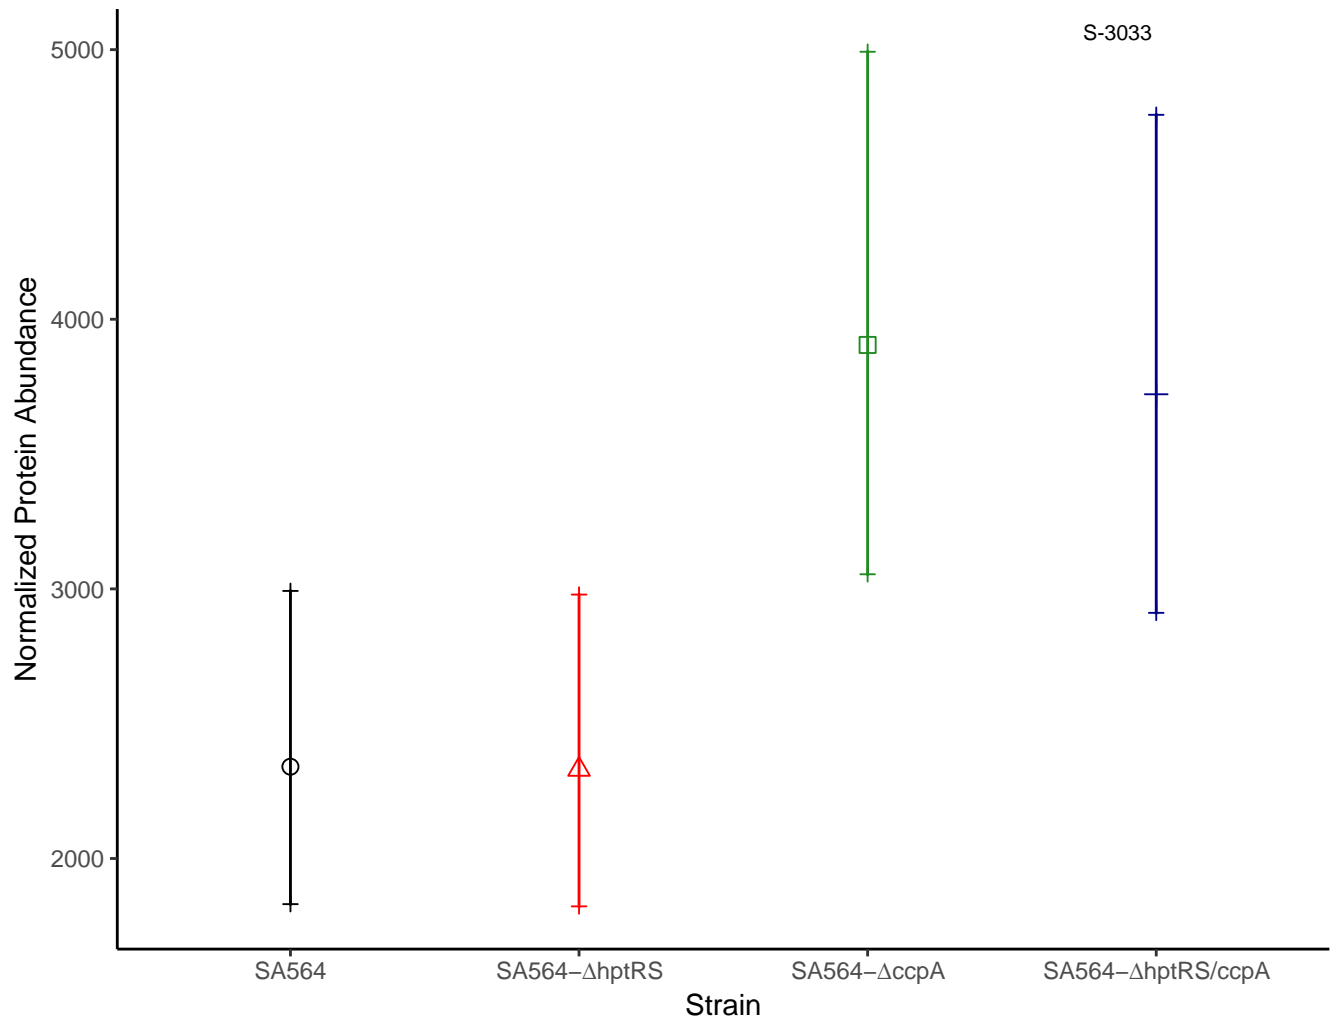

- ⊕ SA564
- △ SA564- $\Delta$ hptRS
- ⊞ SA564- $\Delta$ ccpA
- + SA564- $\Delta$ hptRS/ccpA

# ARCC1\_STAAM

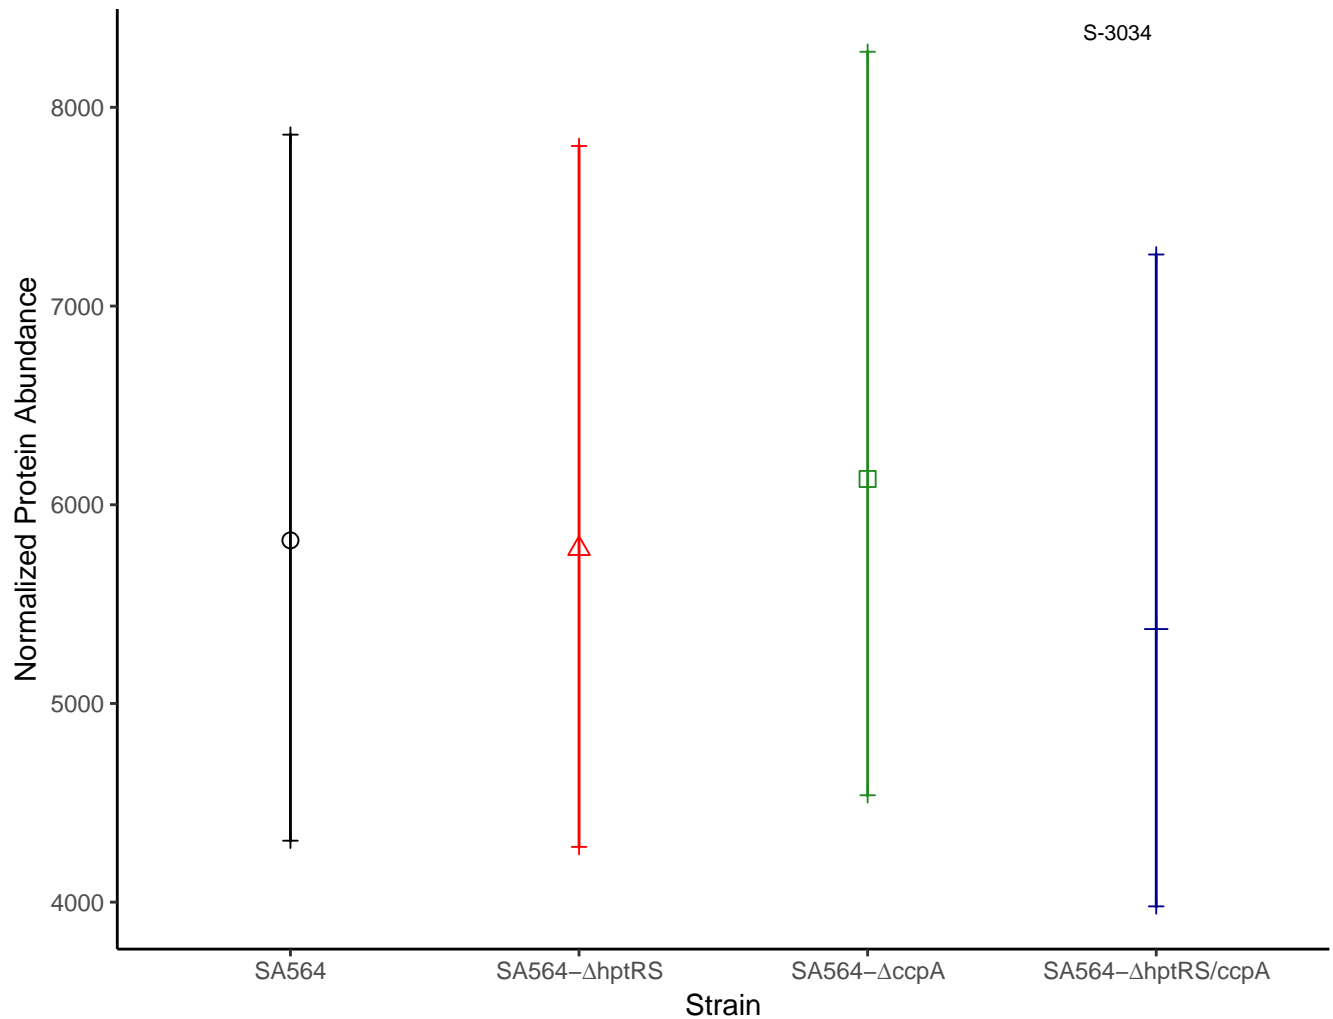

- ⊕ SA564
- △ SA564- $\Delta$ hptRS
- ⊞ SA564- $\Delta$ ccpA
- + SA564- $\Delta$ hptRS/ccpA

# ARGI\_STAAM

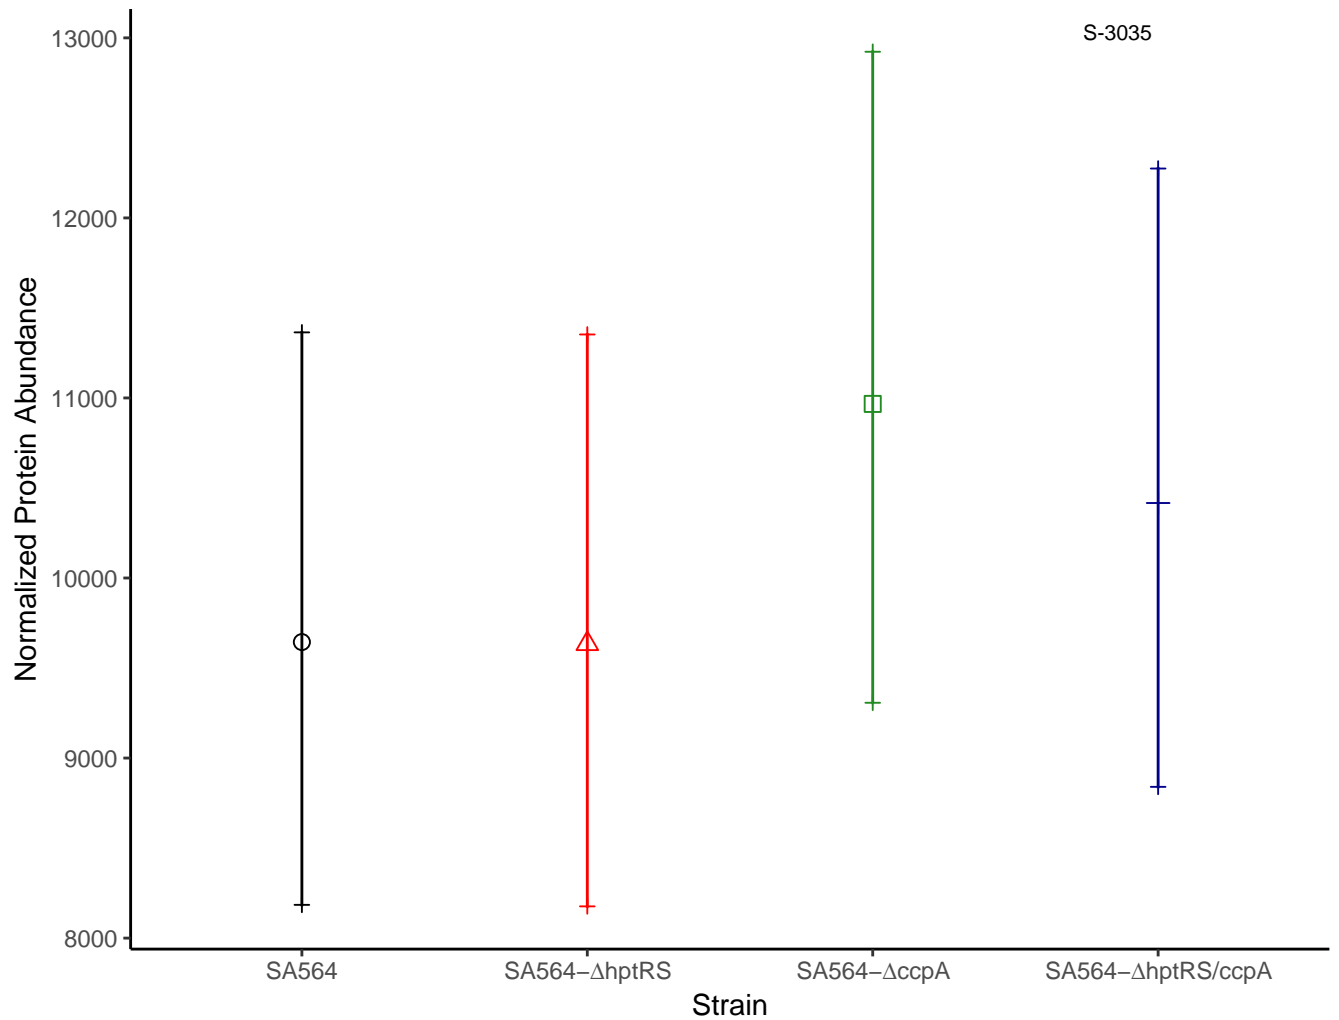

S-3035

- ⊕ SA564
- △ SA564- $\Delta$ hptRS
- ⊞ SA564- $\Delta$ ccpA
- + SA564- $\Delta$ hptRS/ccpA

# ARGR\_STAAM

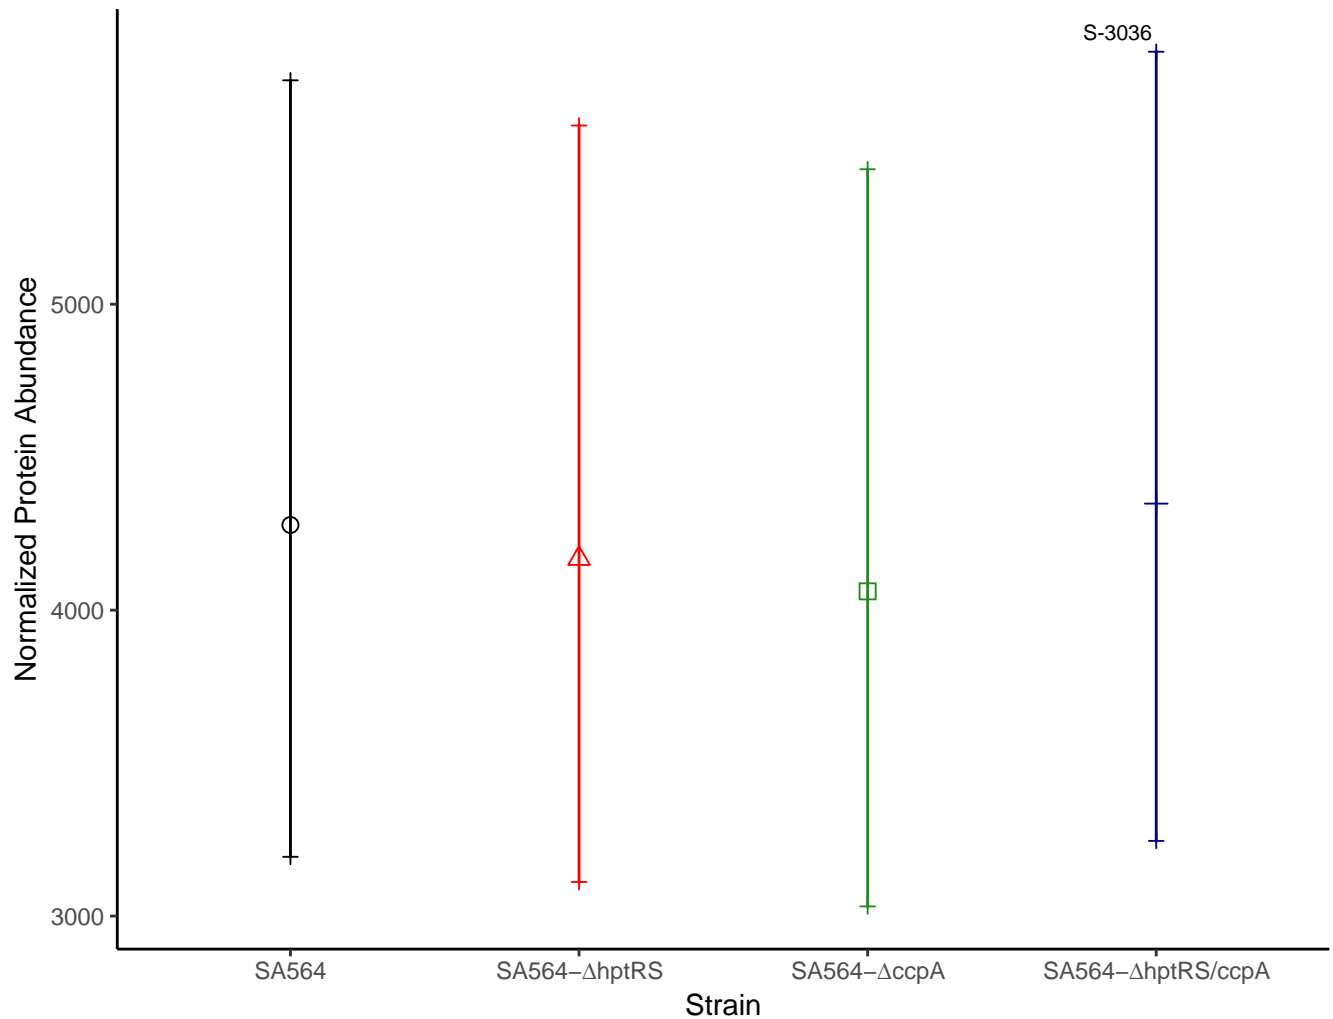

- ⊕ SA564
- △ SA564- $\Delta$ hptRS
- ⊞ SA564- $\Delta$ ccpA
- + SA564- $\Delta$ hptRS/ccpA

# ARLR\_STAAM

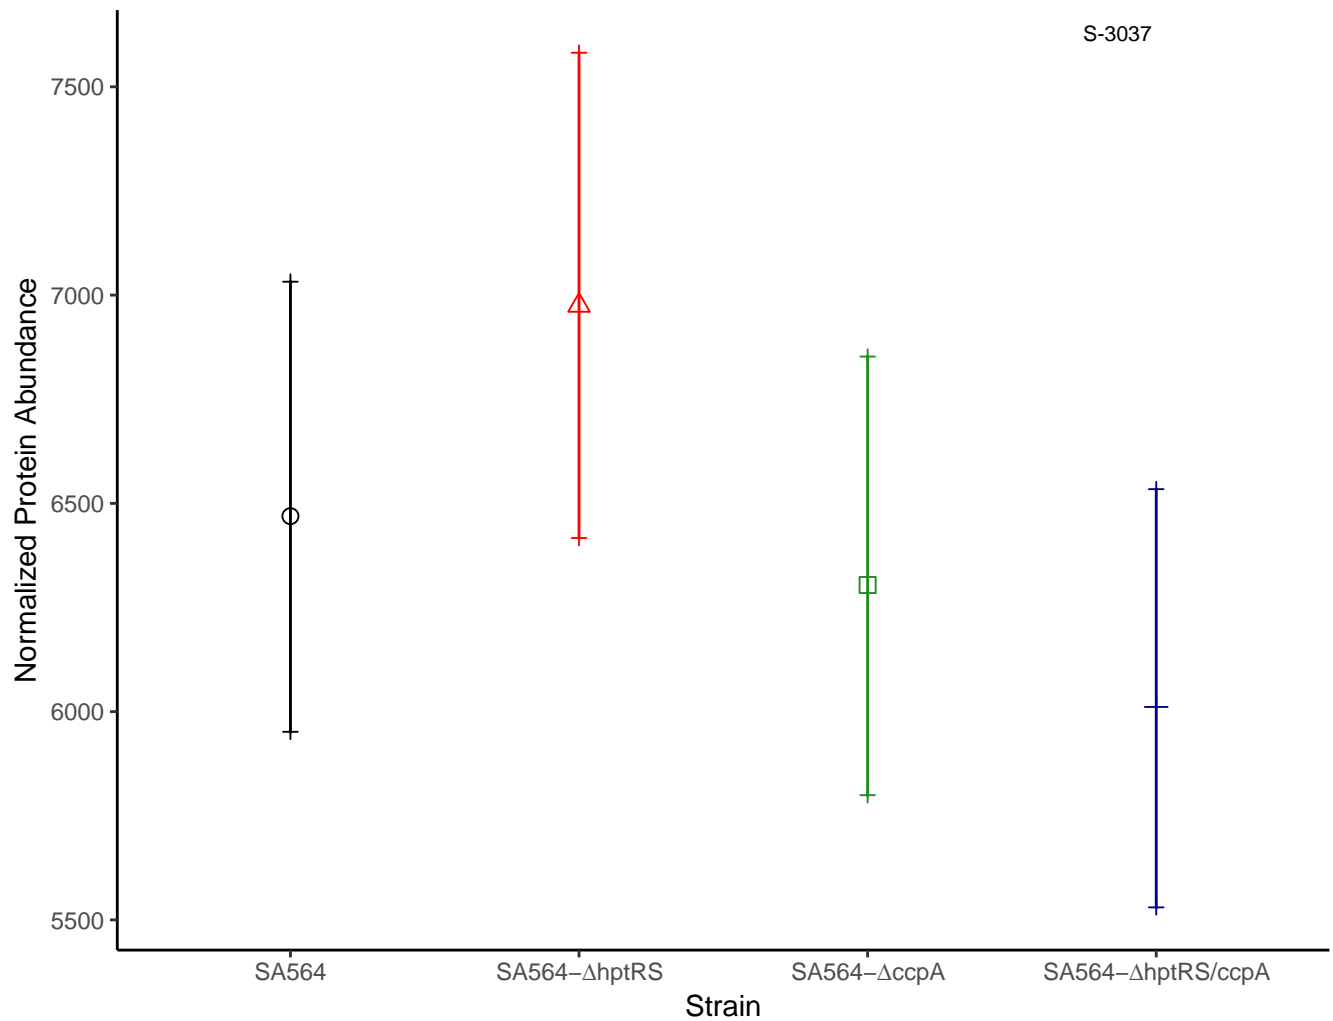

- ⊕ SA564
- △ SA564- $\Delta$ hptRS
- ⊞ SA564- $\Delta$ ccpA
- + SA564- $\Delta$ hptRS/ccpA

# ARLY\_STAAM

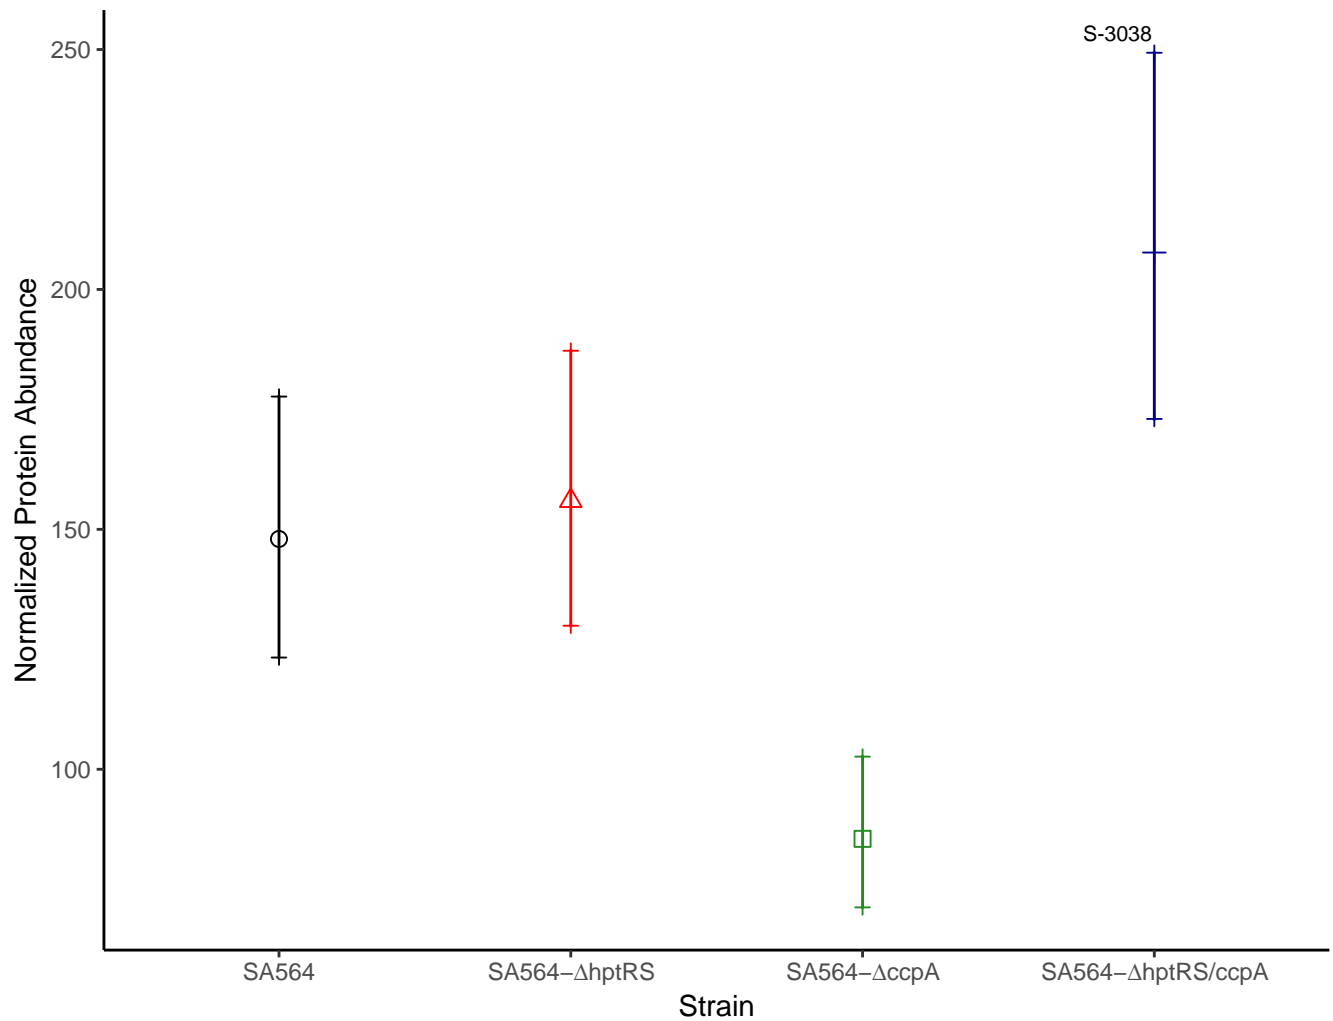

- ⊕ SA564
- △ SA564- $\Delta$ hptRS
- ⊞ SA564- $\Delta$ ccpA
- ⊕ SA564- $\Delta$ hptRS/ccpA

# ARO<sub>A</sub>\_STAAM

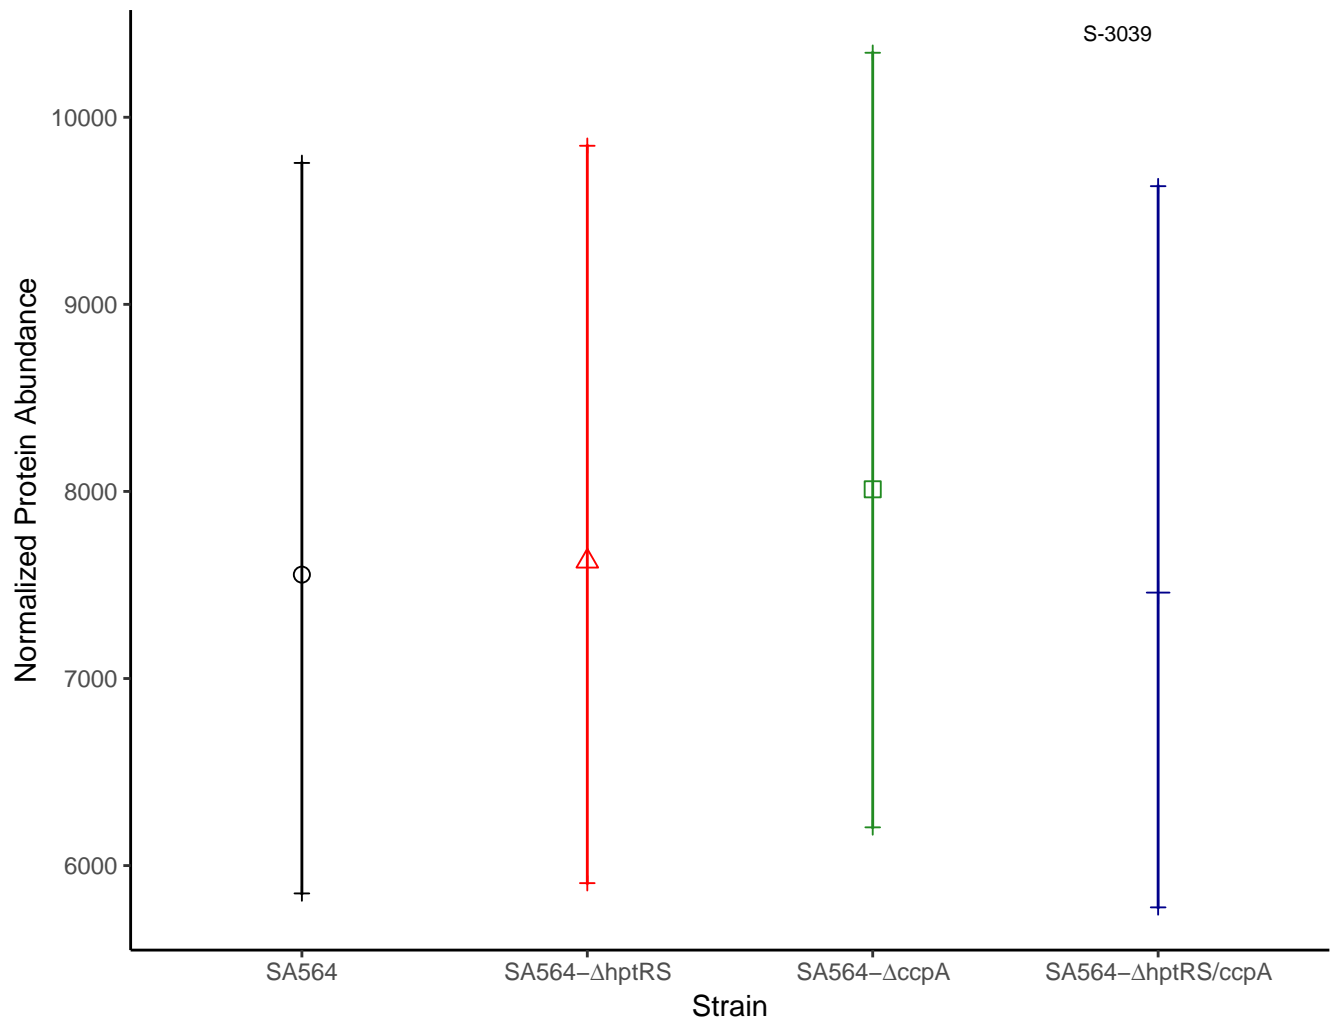

- ⊕ SA564
- △ SA564- $\Delta$ *hptRS*
- ⊞ SA564- $\Delta$ *ccpA*
- ⊕ SA564- $\Delta$ *hptRS/ccpA*

# AROB\_STAAM

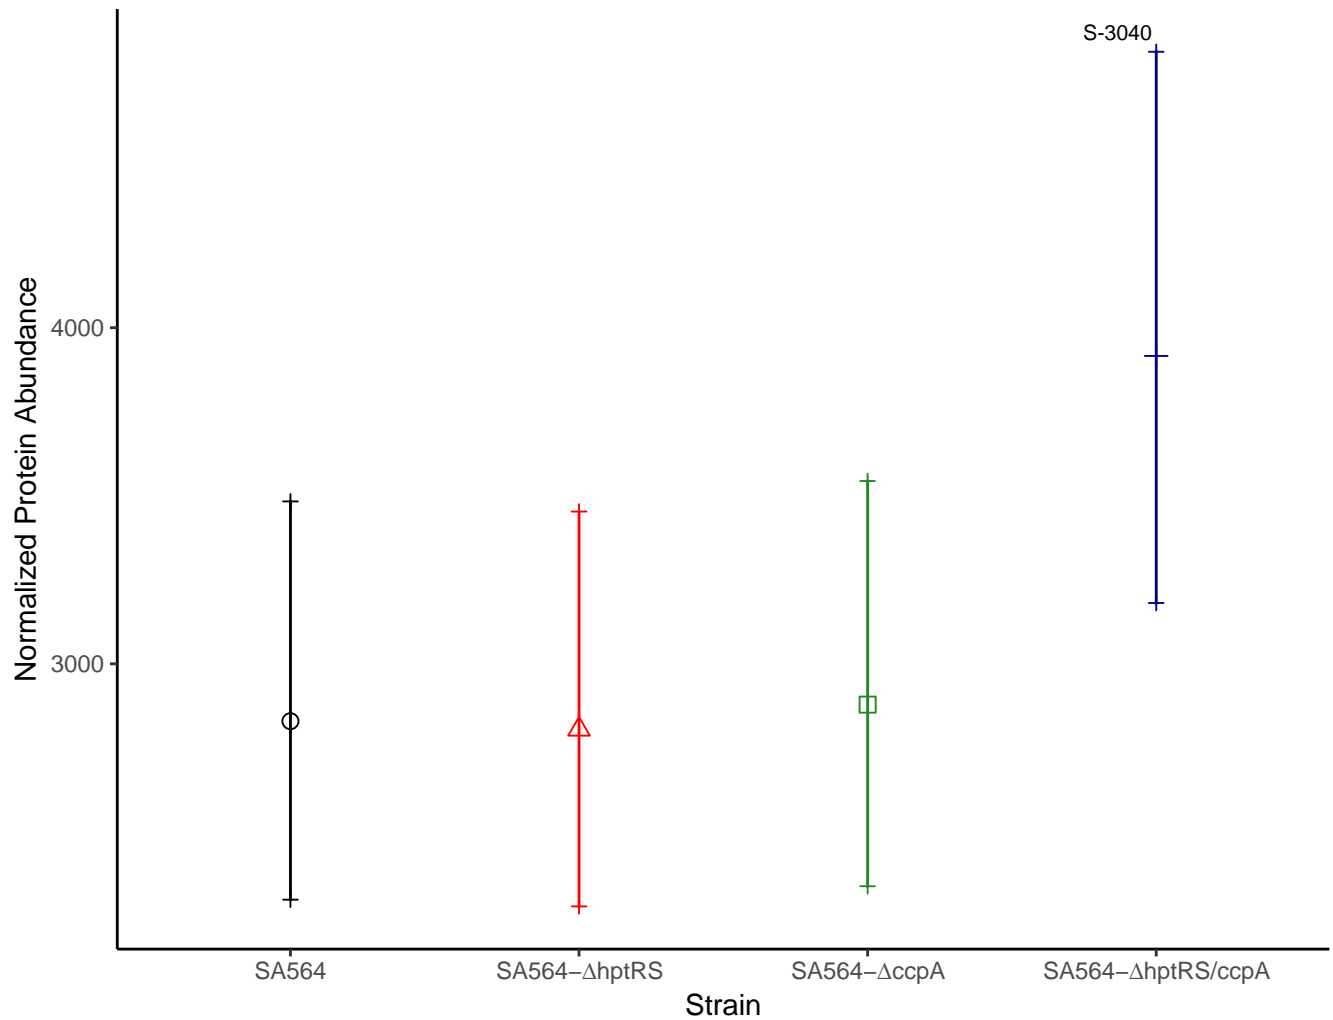

- ⊕ SA564
- △ SA564- $\Delta$ *hptRS*
- ⊞ SA564- $\Delta$ *ccpA*
- + SA564- $\Delta$ *hptRS/ccpA*



# AROE\_STAAM

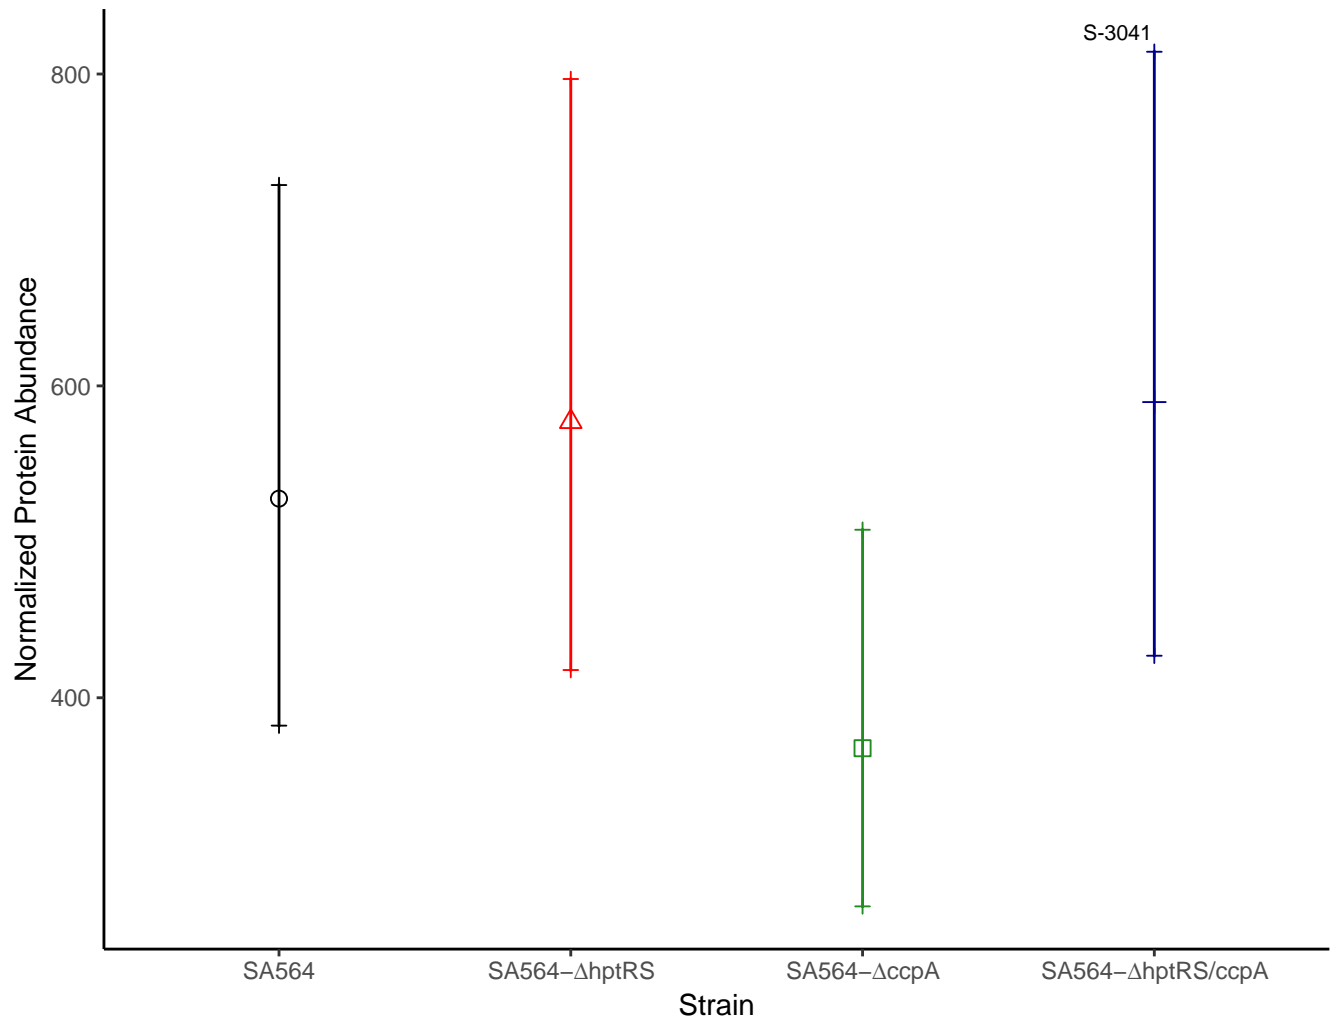

- ⊕ SA564
- △ SA564- $\Delta$ hptRS
- ⊞ SA564- $\Delta$ ccpA
- ⊕ SA564- $\Delta$ hptRS/ccpA

# ASP23\_STAAM

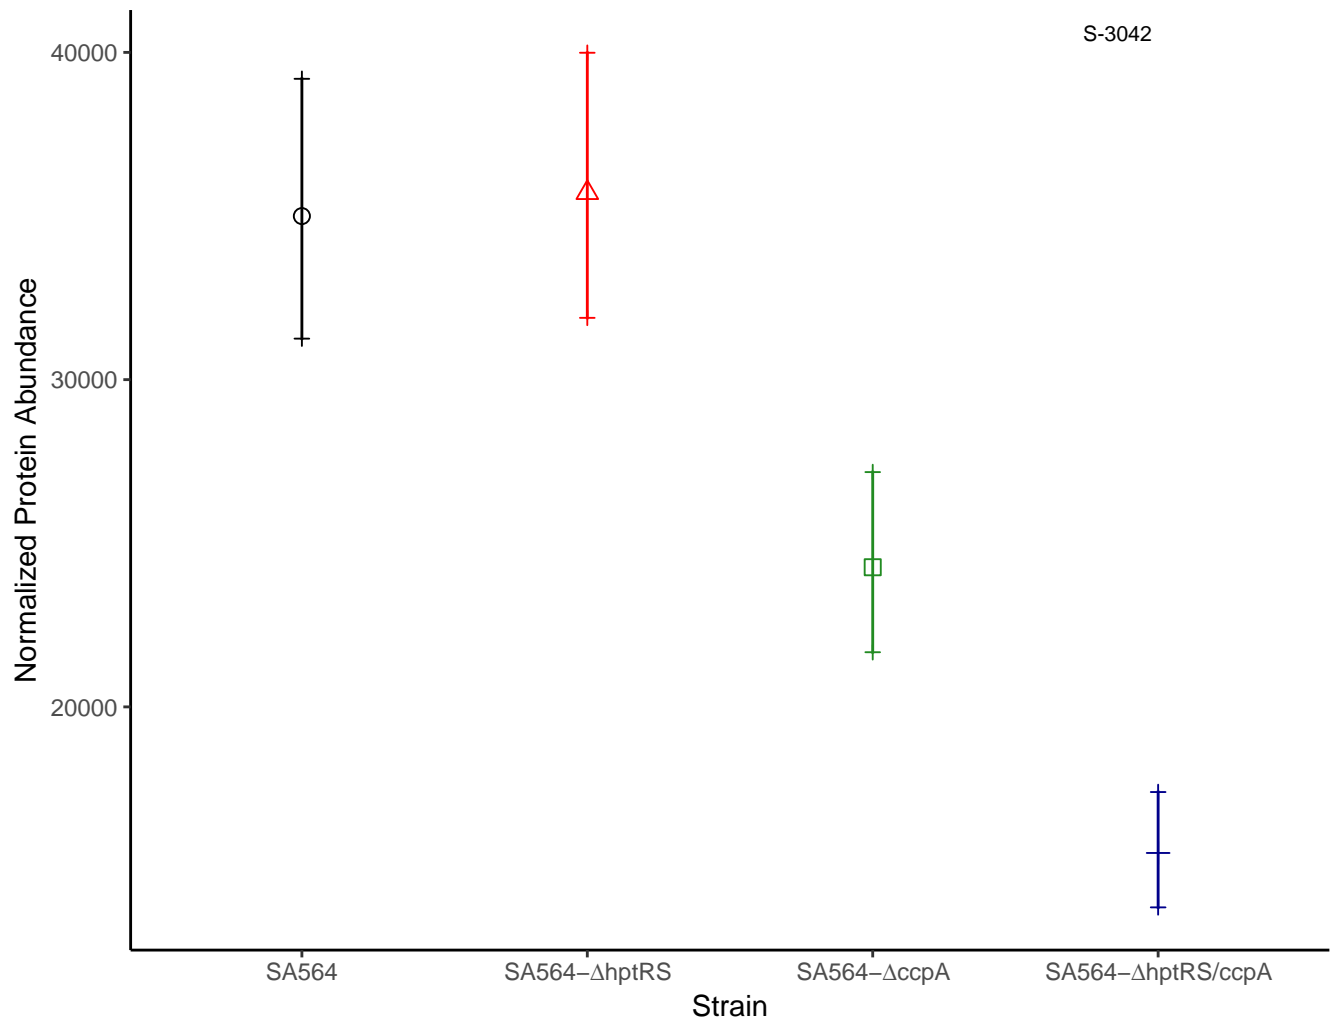

- ⊕ SA564
- △ SA564- $\Delta$ hptRS
- ⊞ SA564- $\Delta$ ccpA
- + SA564- $\Delta$ hptRS/ccpA

# ATL\_STAAM

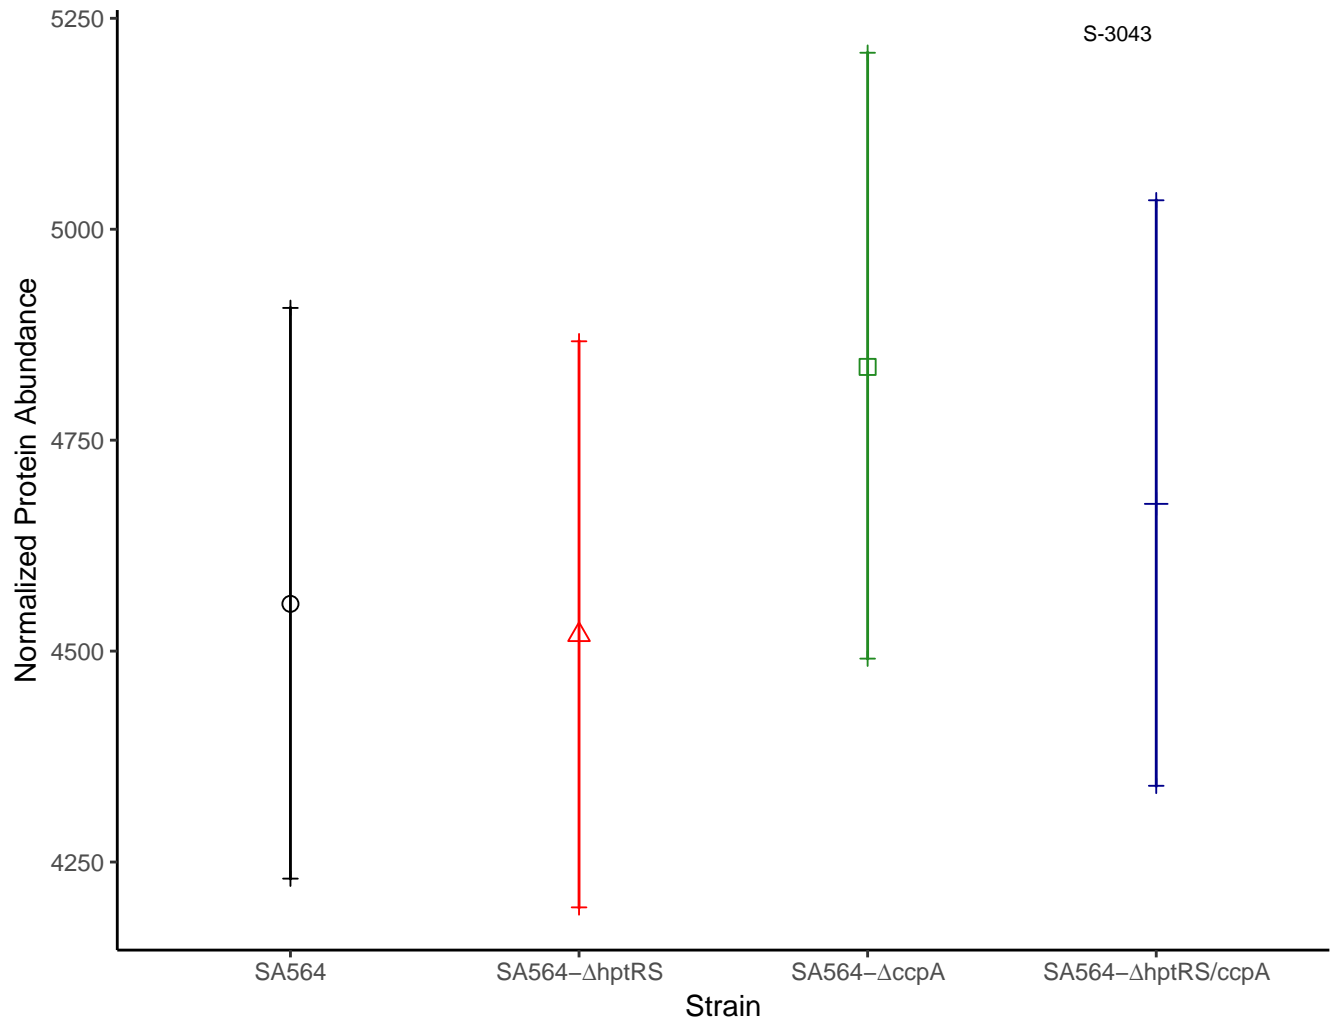

- ⊕ SA564
- △ SA564- $\Delta$ *hptRS*
- ⊞ SA564- $\Delta$ *ccpA*
- + SA564- $\Delta$ *hptRS/ccpA*

# ATPA\_STAAM

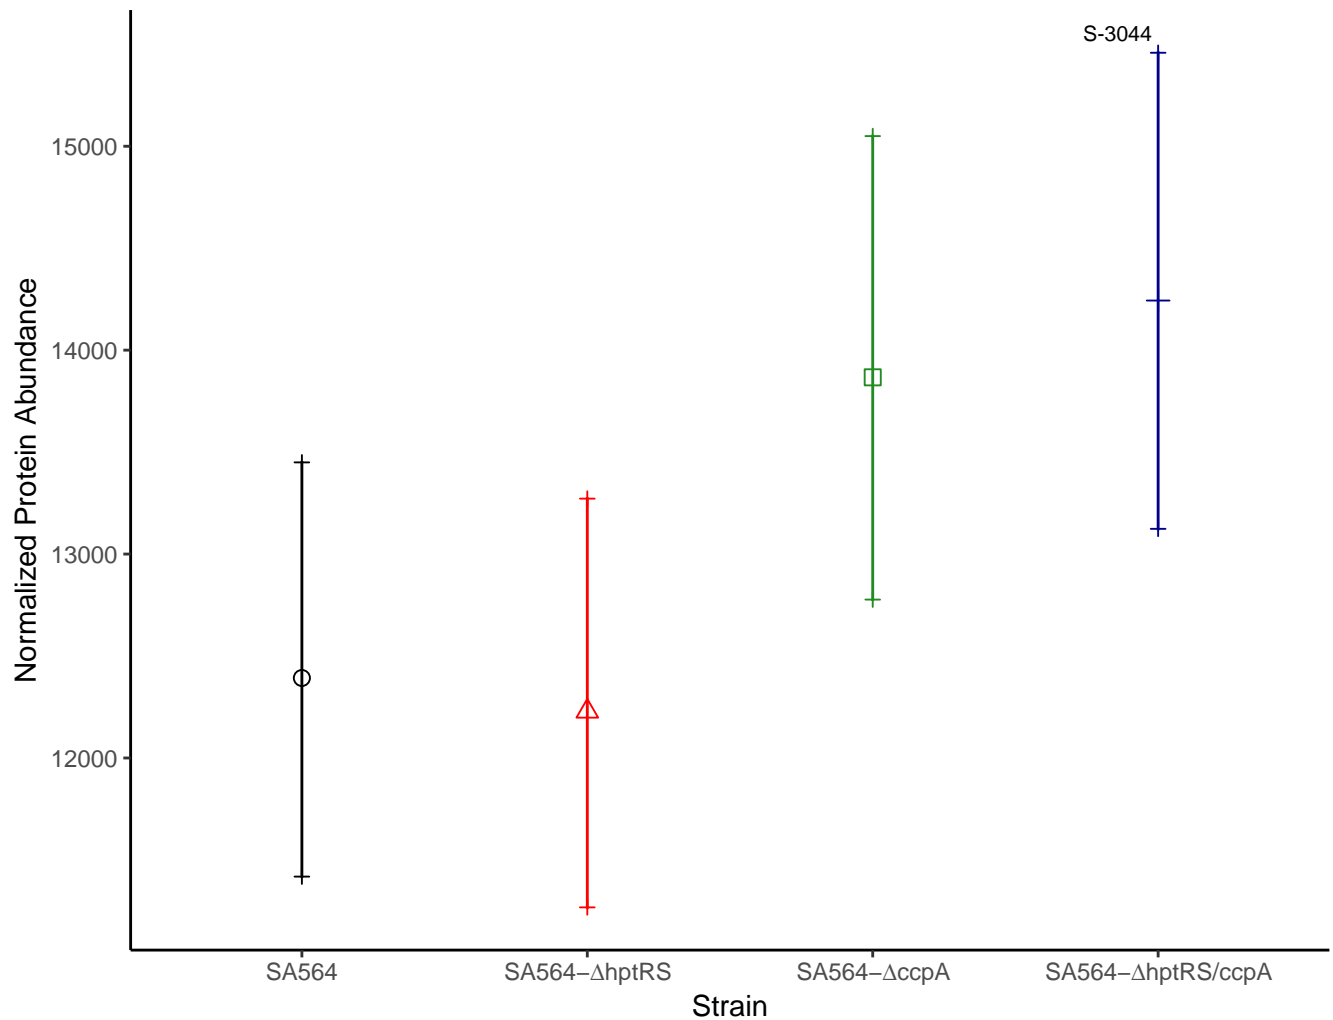

- ⊕ SA564
- △ SA564- $\Delta$ hptRS
- ⊞ SA564- $\Delta$ ccpA
- + SA564- $\Delta$ hptRS/ccpA

# ATPB\_STAAM

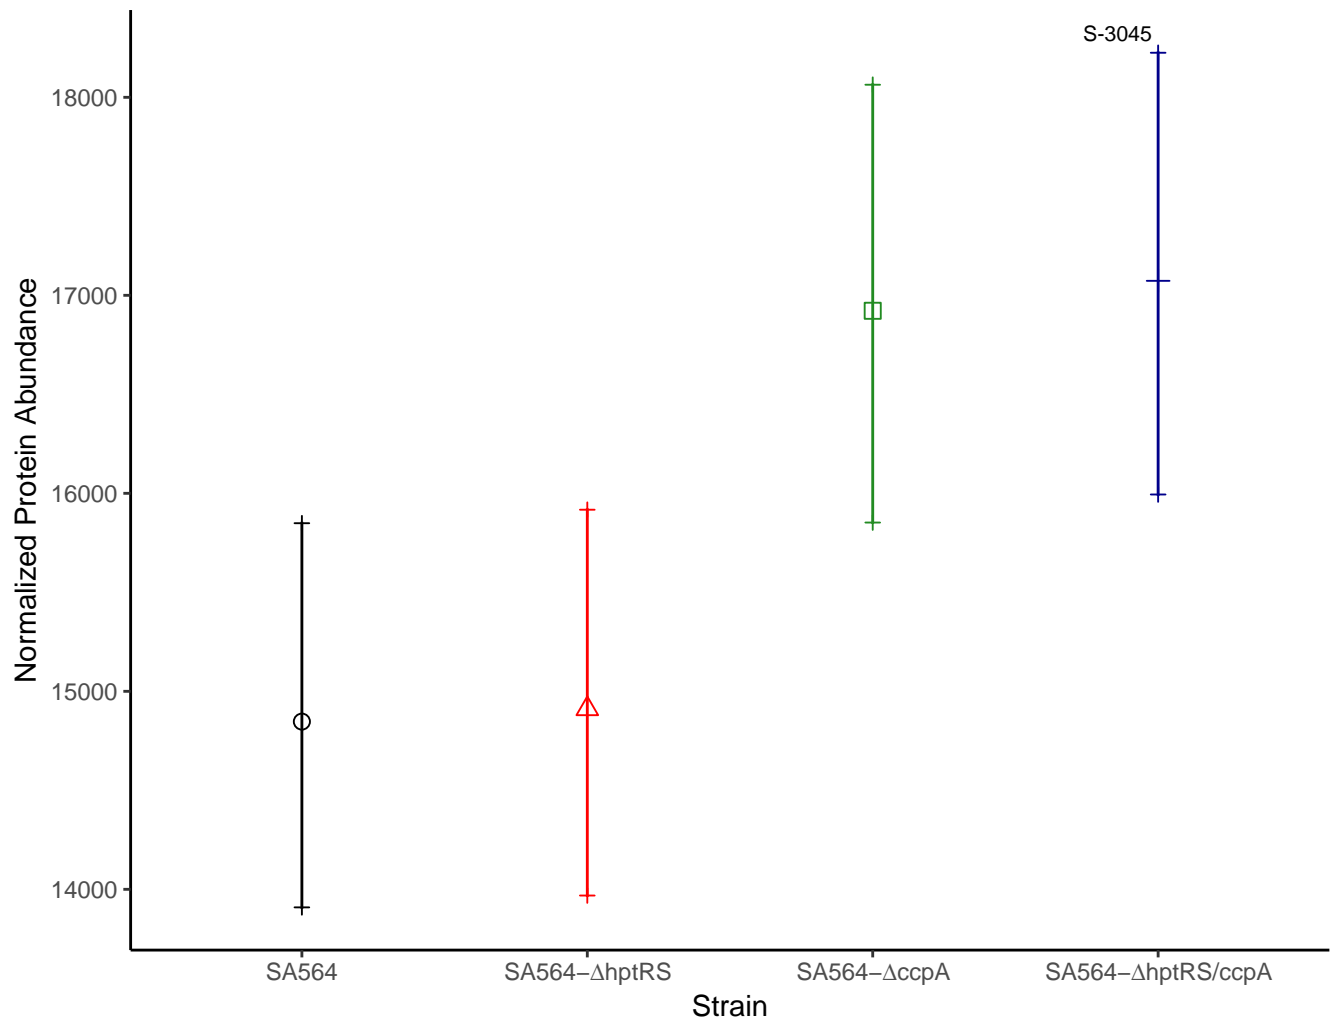

- ⊕ SA564
- △ SA564- $\Delta$ hptRS
- ⊞ SA564- $\Delta$ ccpA
- + SA564- $\Delta$ hptRS/ccpA

# ATPD\_STAAM

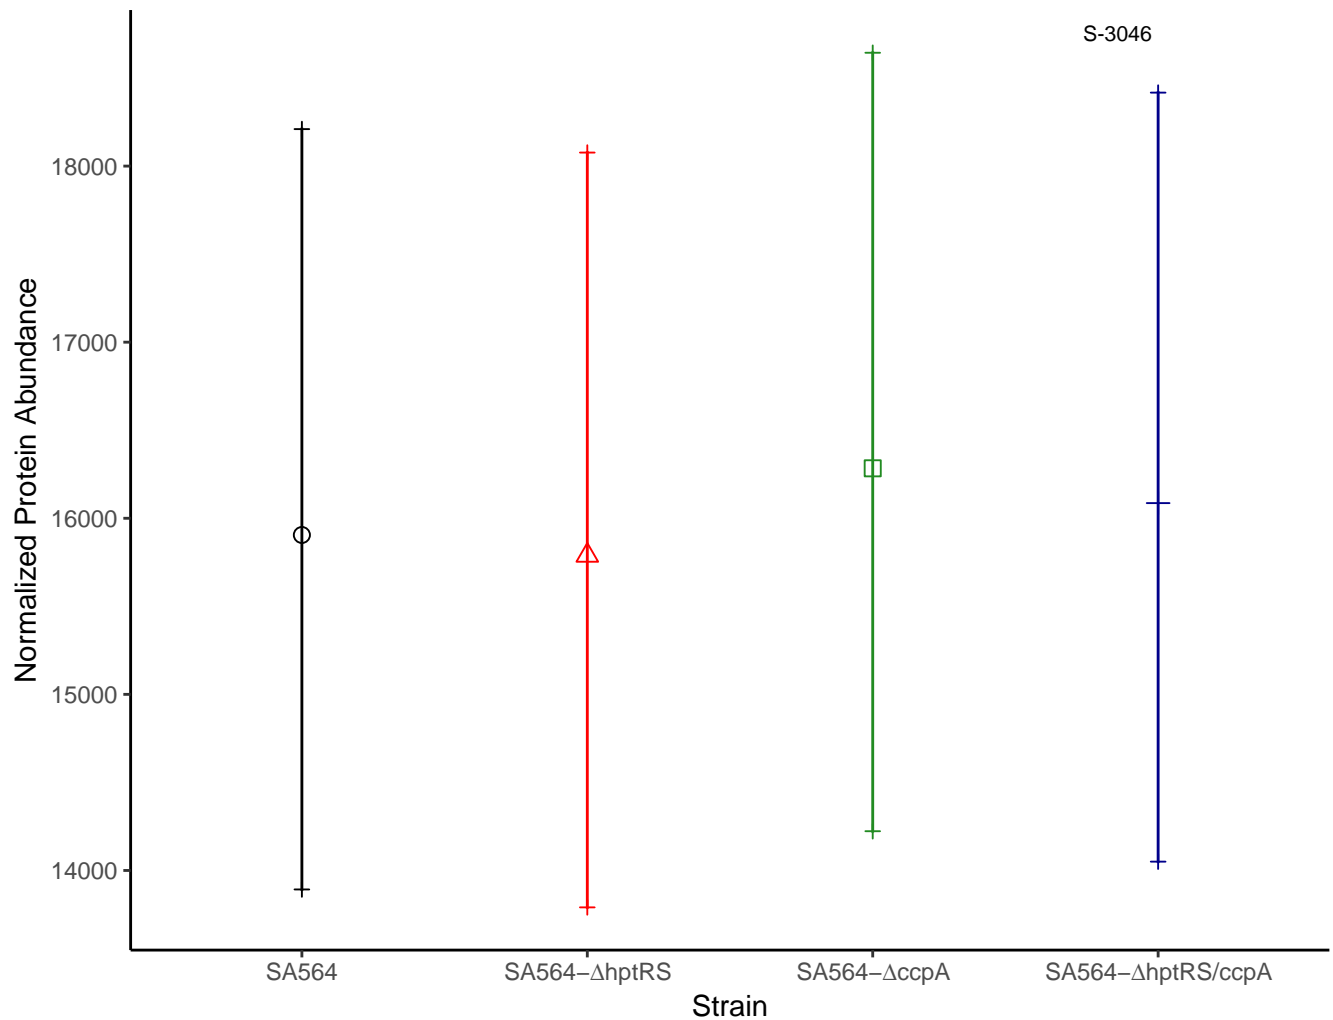

- ⊕ SA564
- △ SA564- $\Delta$ *hptRS*
- ⊞ SA564- $\Delta$ *ccpA*
- + SA564- $\Delta$ *hptRS/ccpA*

# ATPE\_STAAM

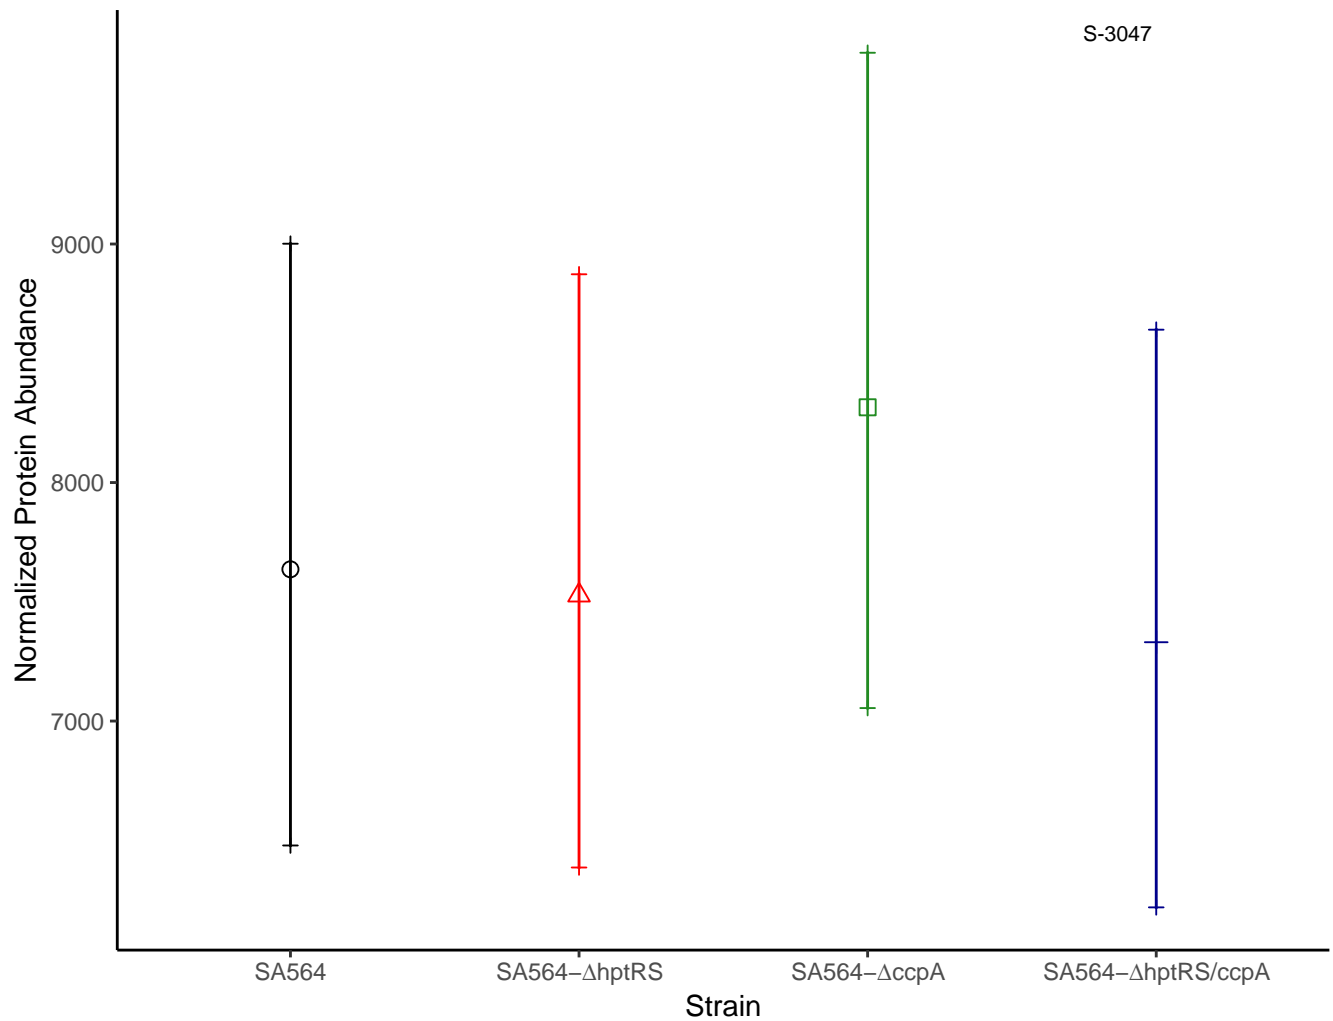

- ⊕ SA564
- △ SA564- $\Delta$ hptRS
- ⊞ SA564- $\Delta$ ccpA
- + SA564- $\Delta$ hptRS/ccpA

# ATPF\_STAAM

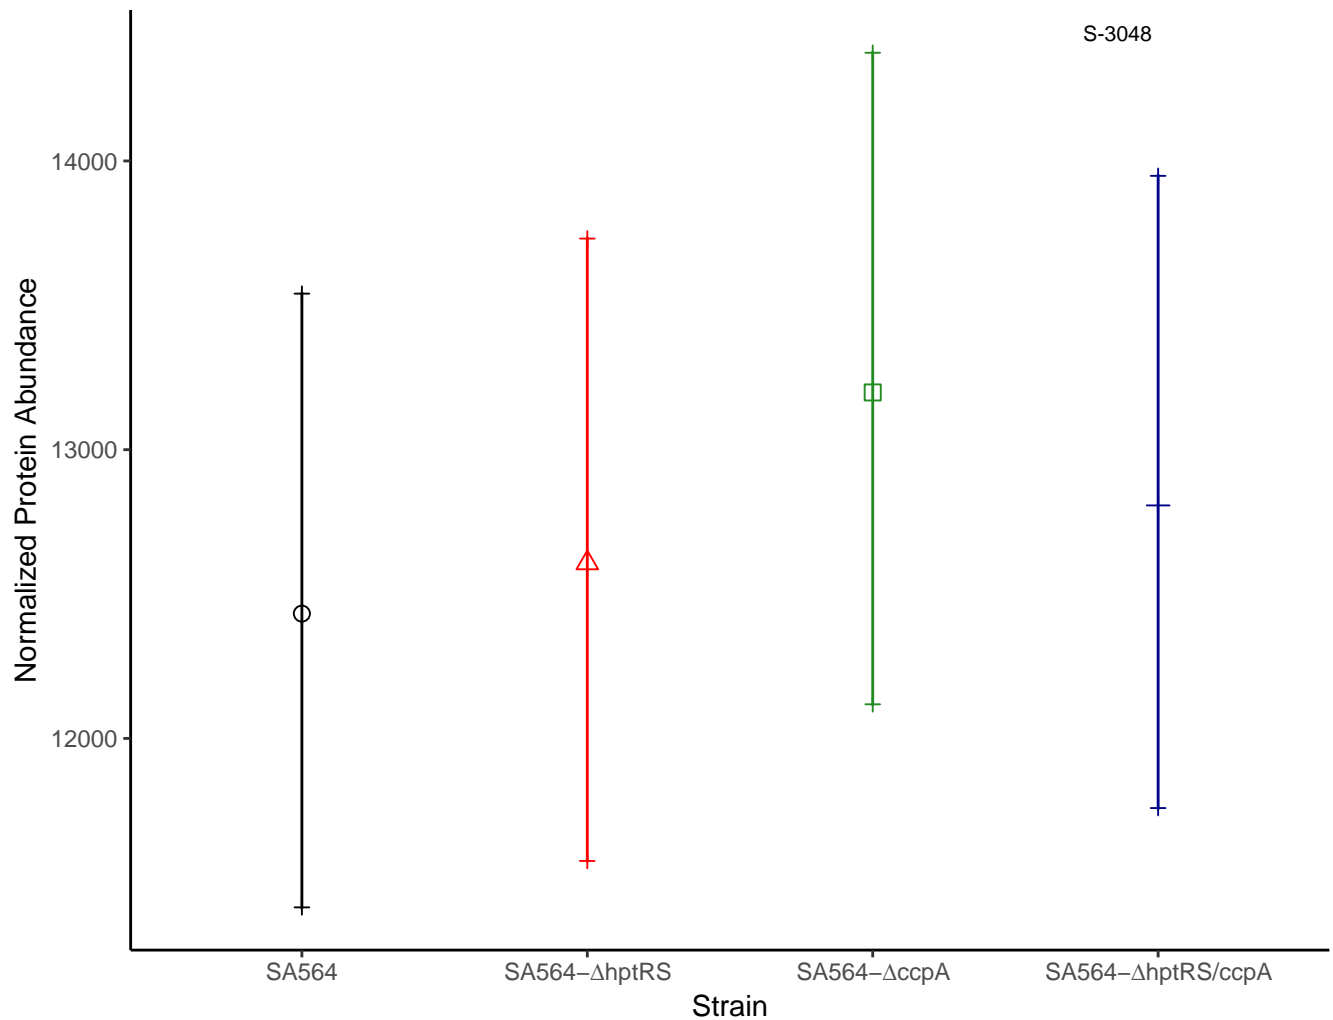

- ⊕ SA564
- △ SA564- $\Delta$ *hptRS*
- ⊞ SA564- $\Delta$ *ccpA*
- + SA564- $\Delta$ *hptRS/ccpA*



# ATPG\_STAAM

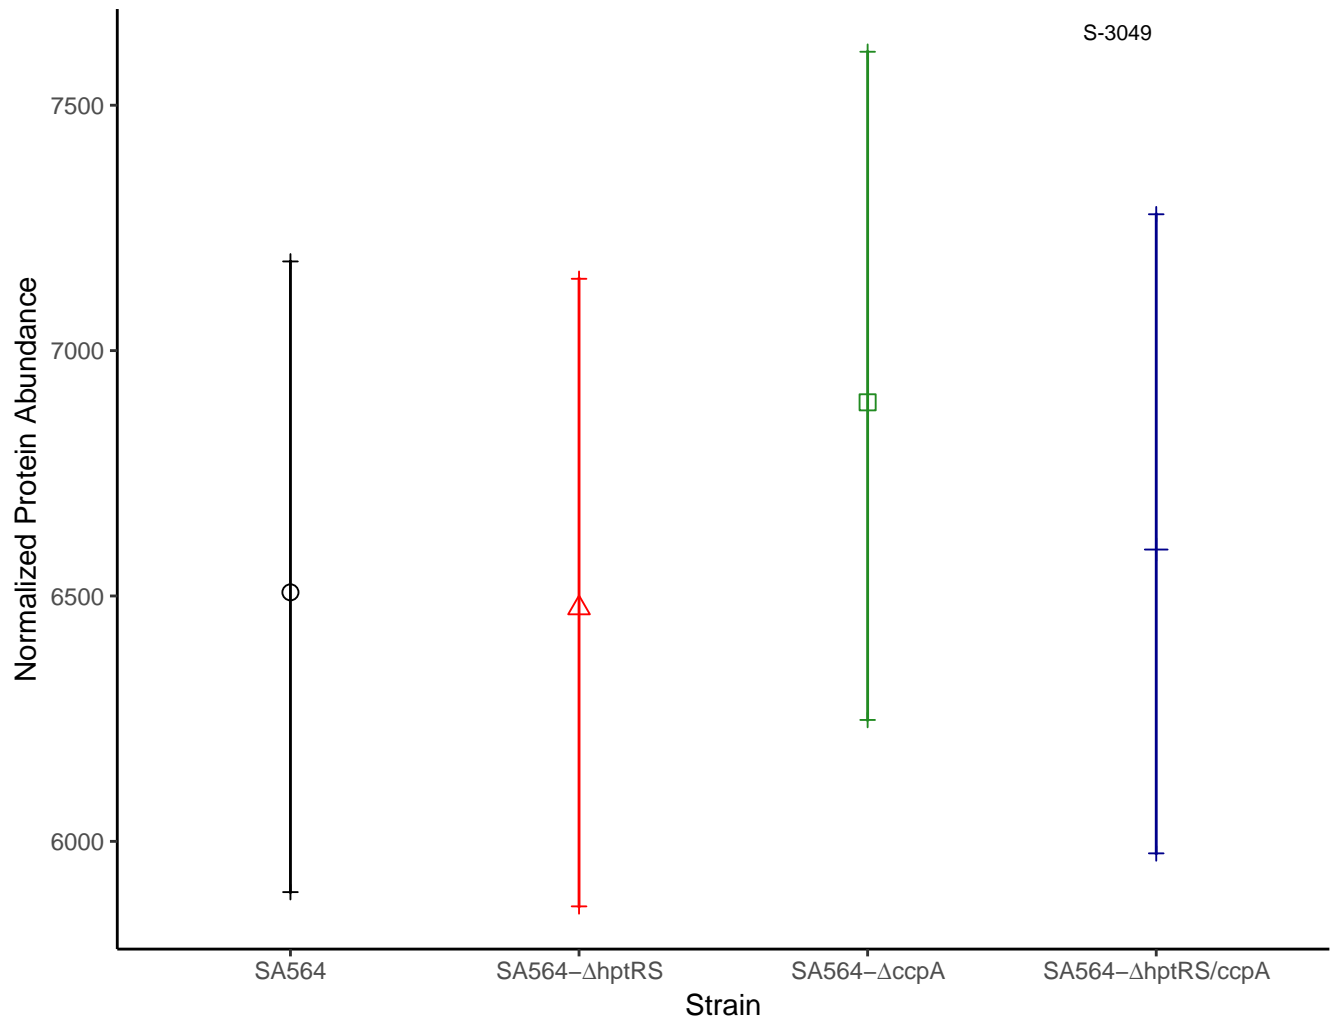

- ⊕ SA564
- △ SA564- $\Delta$ hptRS
- ⊞ SA564- $\Delta$ ccpA
- + SA564- $\Delta$ hptRS/ccpA

# AZO1\_STAAM

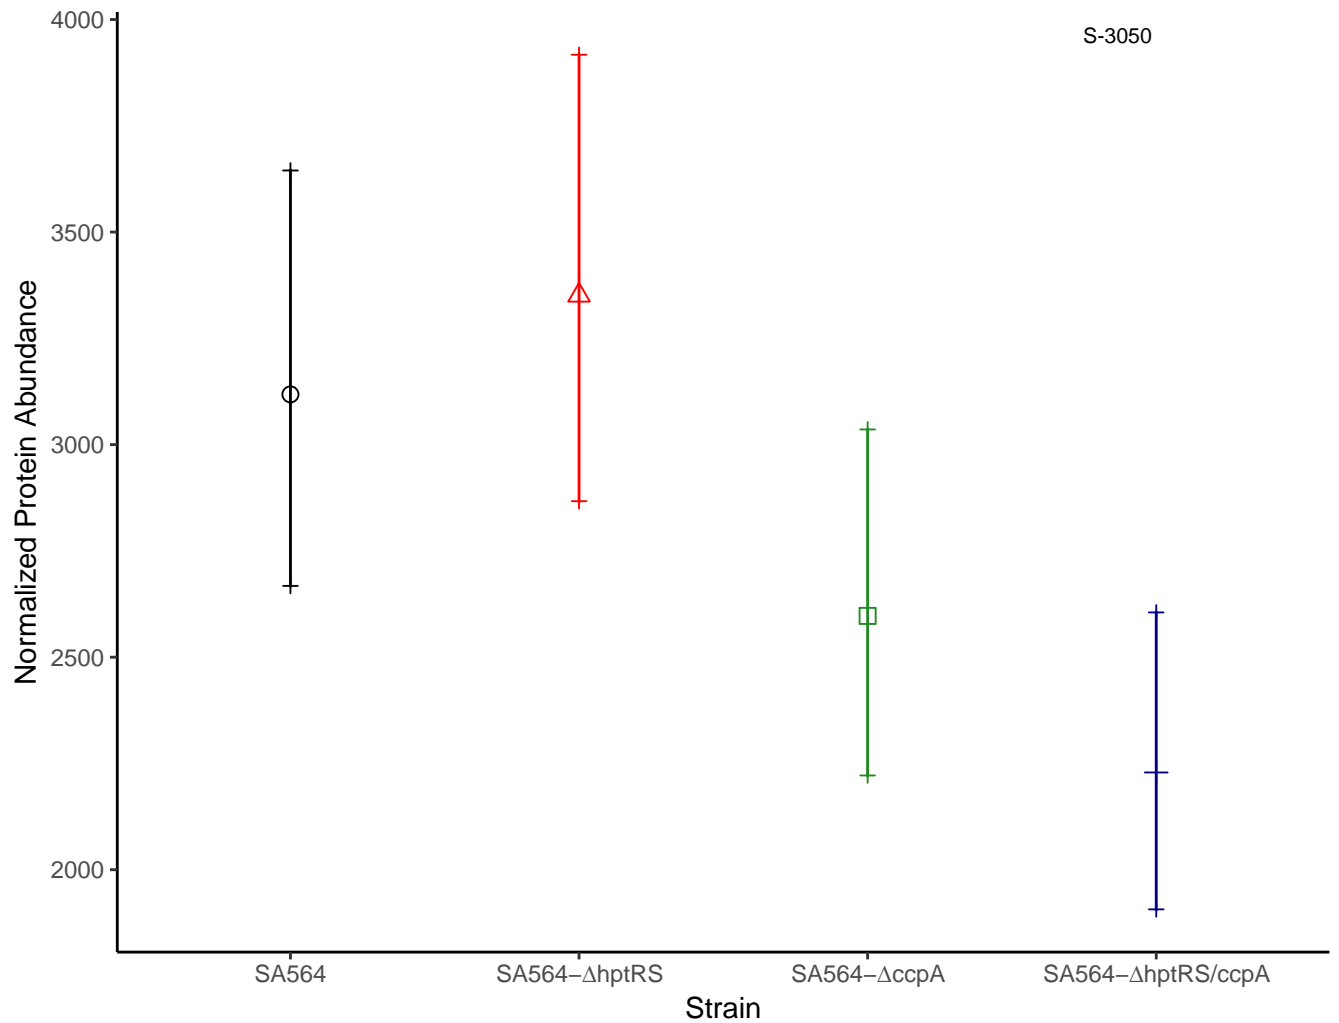

- ⊕ SA564
- △ SA564- $\Delta$ hptRS
- ⊞ SA564- $\Delta$ ccpA
- + SA564- $\Delta$ hptRS/ccpA

# AZOR\_STAAM

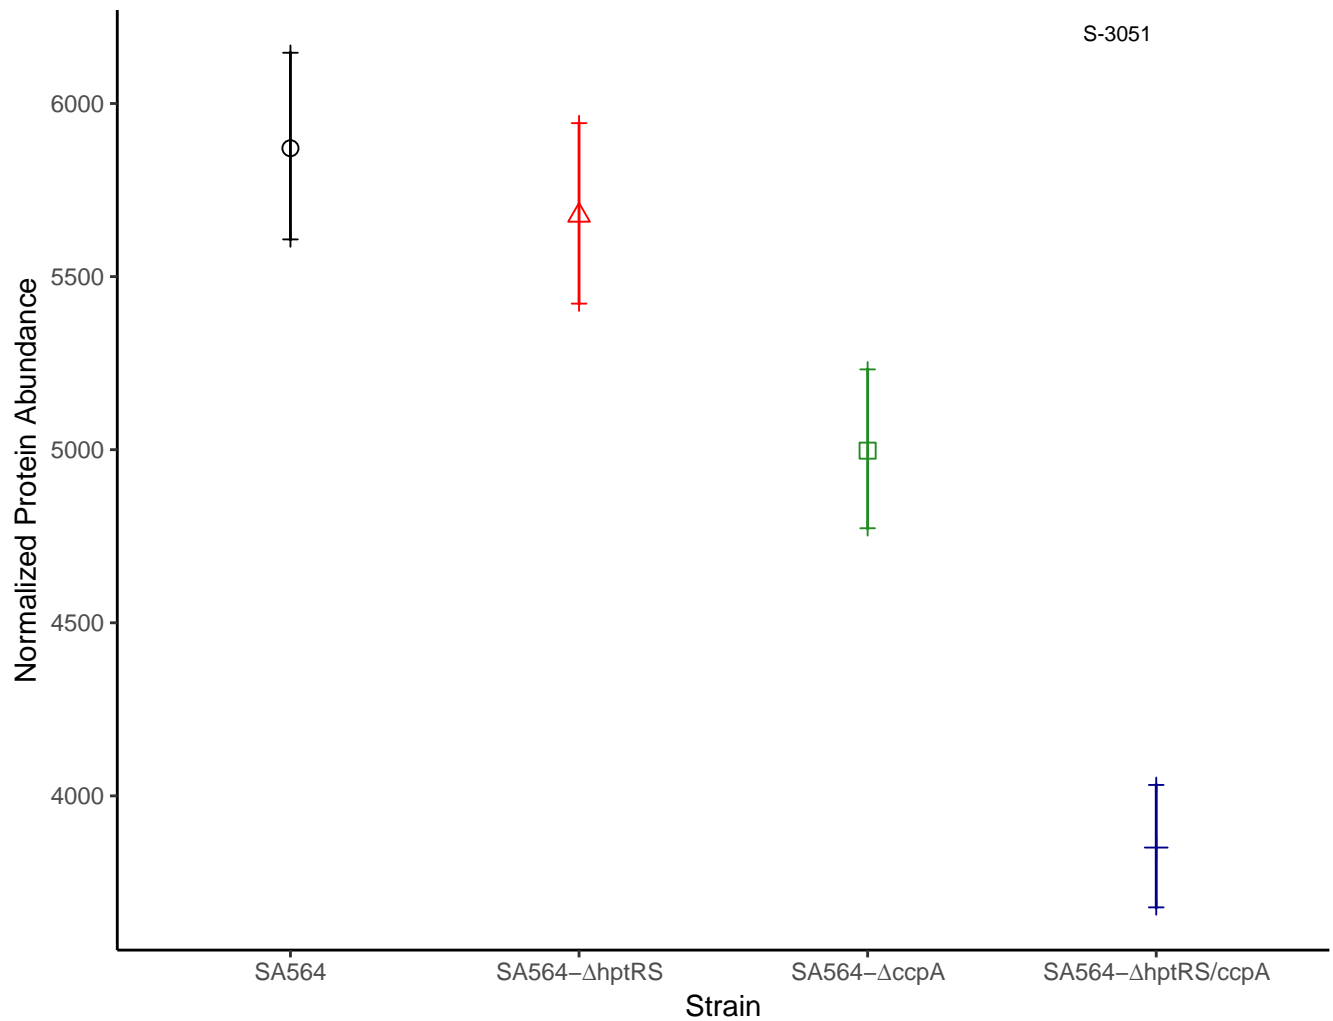

- ⊕ SA564
- △ SA564- $\Delta$ hptRS
- ⊞ SA564- $\Delta$ ccpA
- + SA564- $\Delta$ hptRS/ccpA

# BSAA\_STAAM

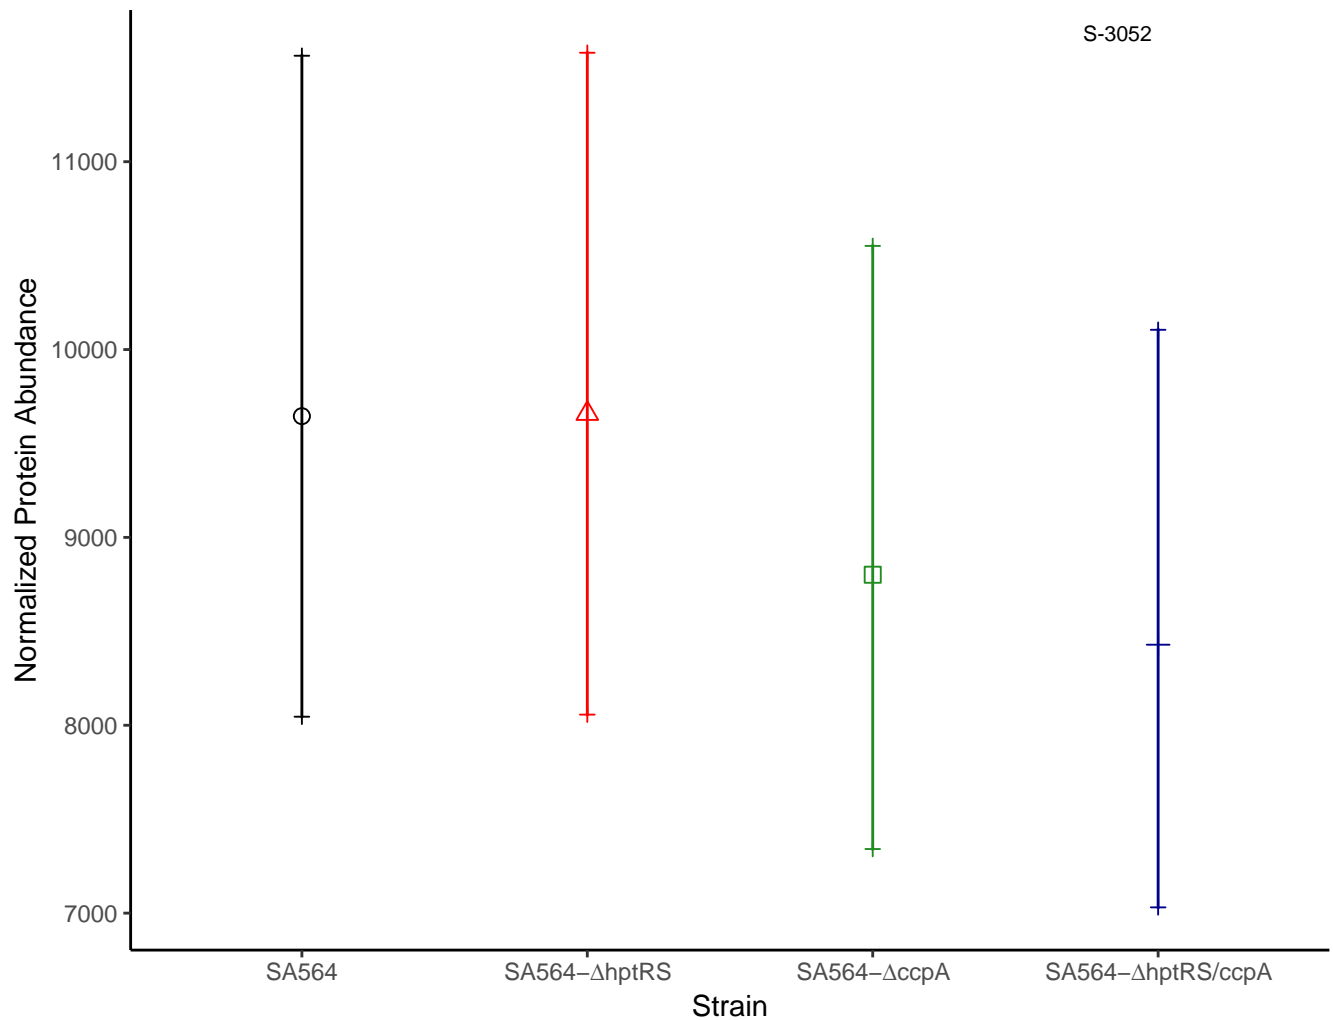

- ⊕ SA564
- △ SA564- $\Delta$ hptRS
- ⊞ SA564- $\Delta$ ccpA
- + SA564- $\Delta$ hptRS/ccpA

# BUTA\_STAAM

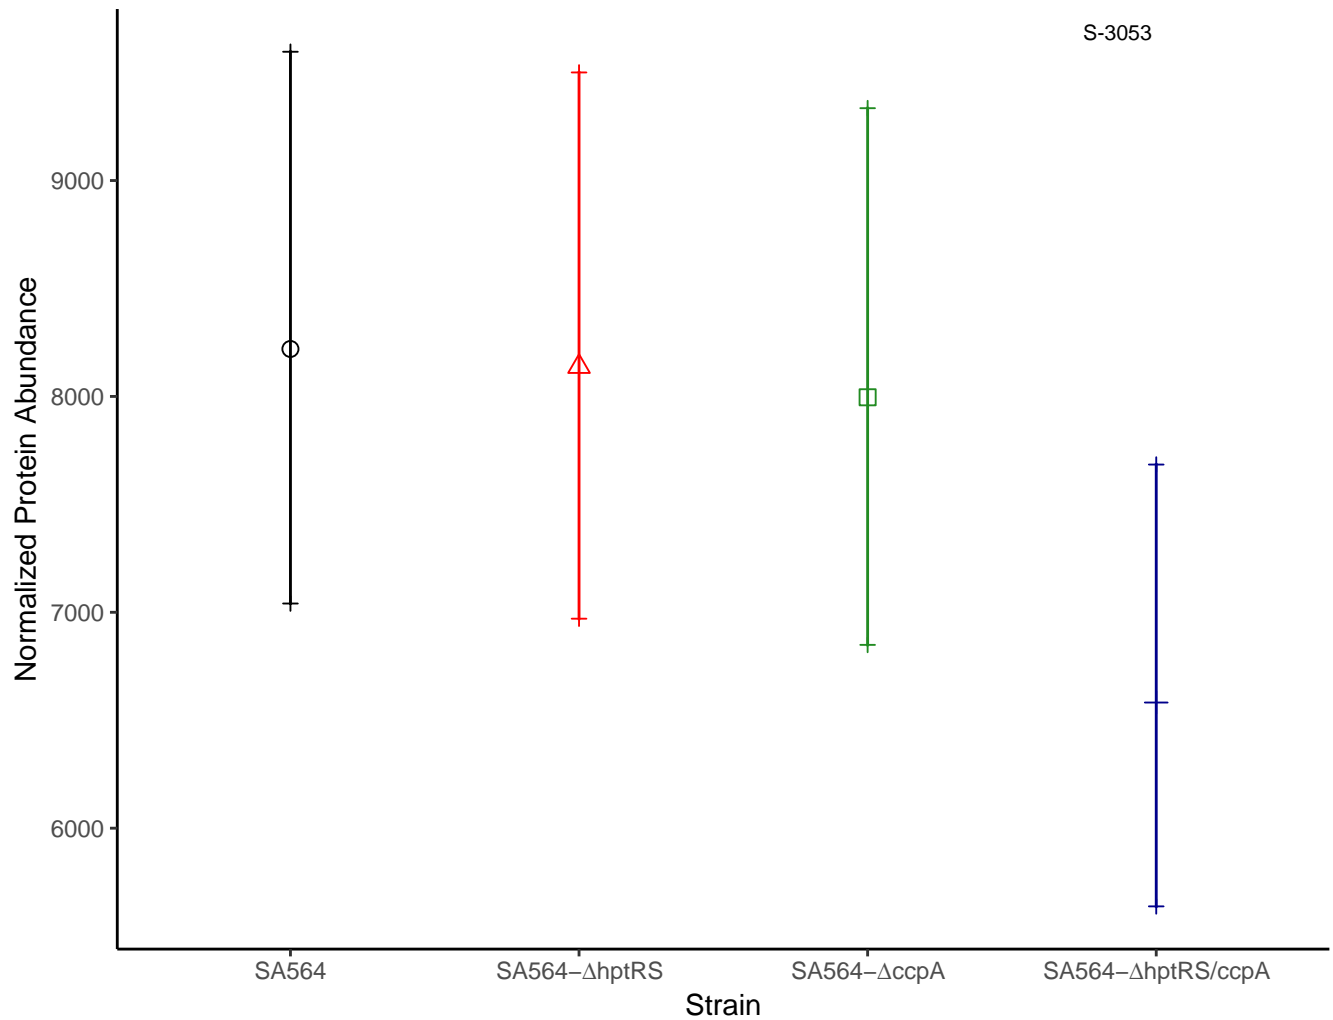

- ⊕ SA564
- △ SA564- $\Delta$ hptRS
- ⊞ SA564- $\Delta$ ccpA
- + SA564- $\Delta$ hptRS/ccpA

# CARA\_STAAM

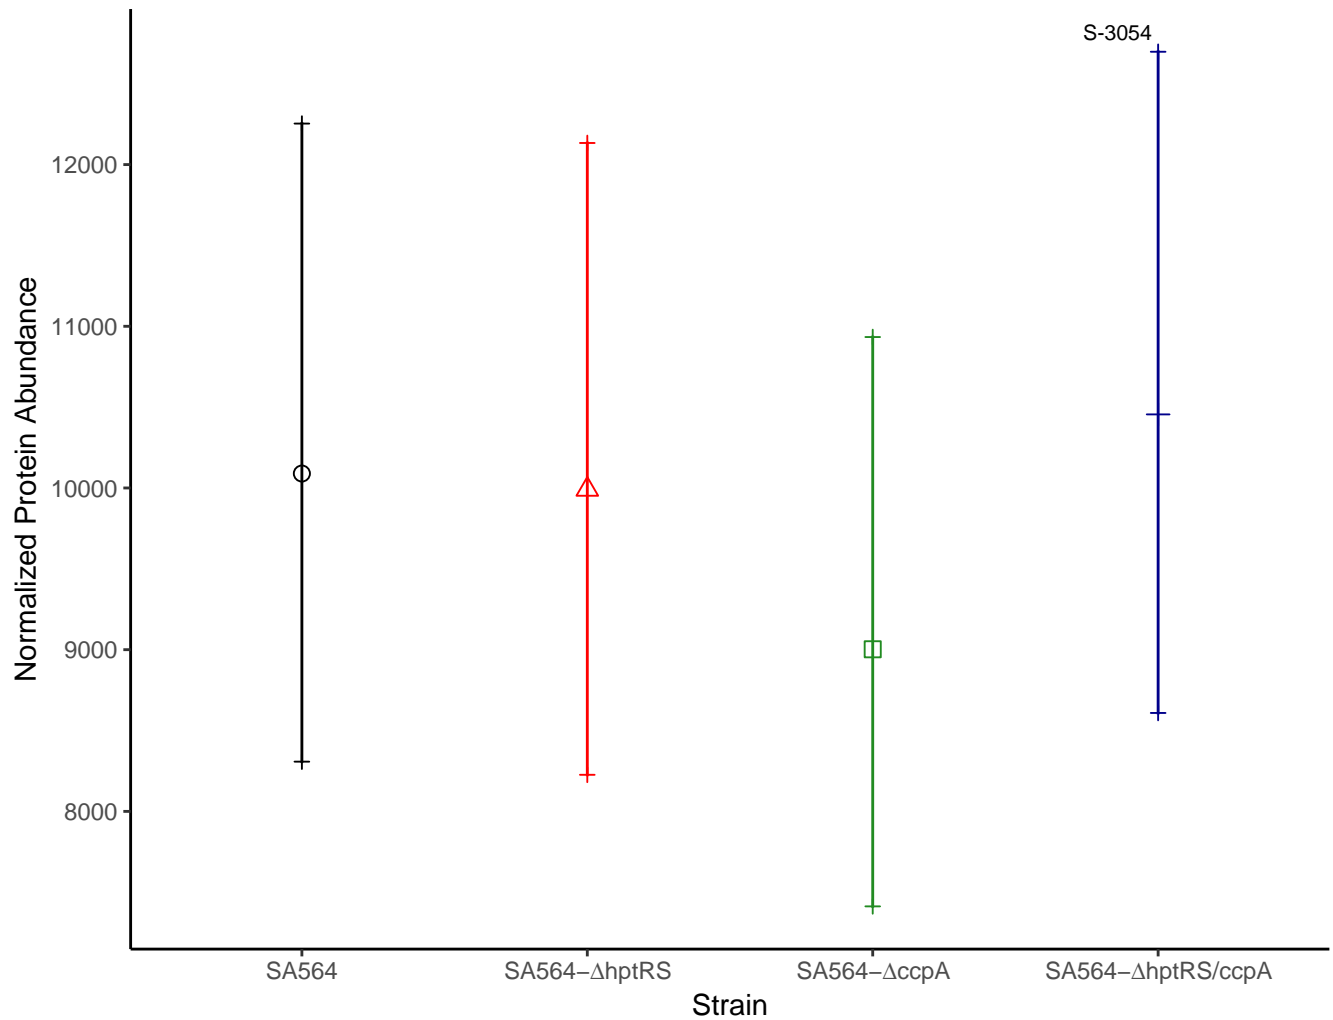

- ⊕ SA564
- △ SA564- $\Delta$ hptRS
- ⊞ SA564- $\Delta$ ccpA
- + SA564- $\Delta$ hptRS/ccpA

# CARB\_STAAM

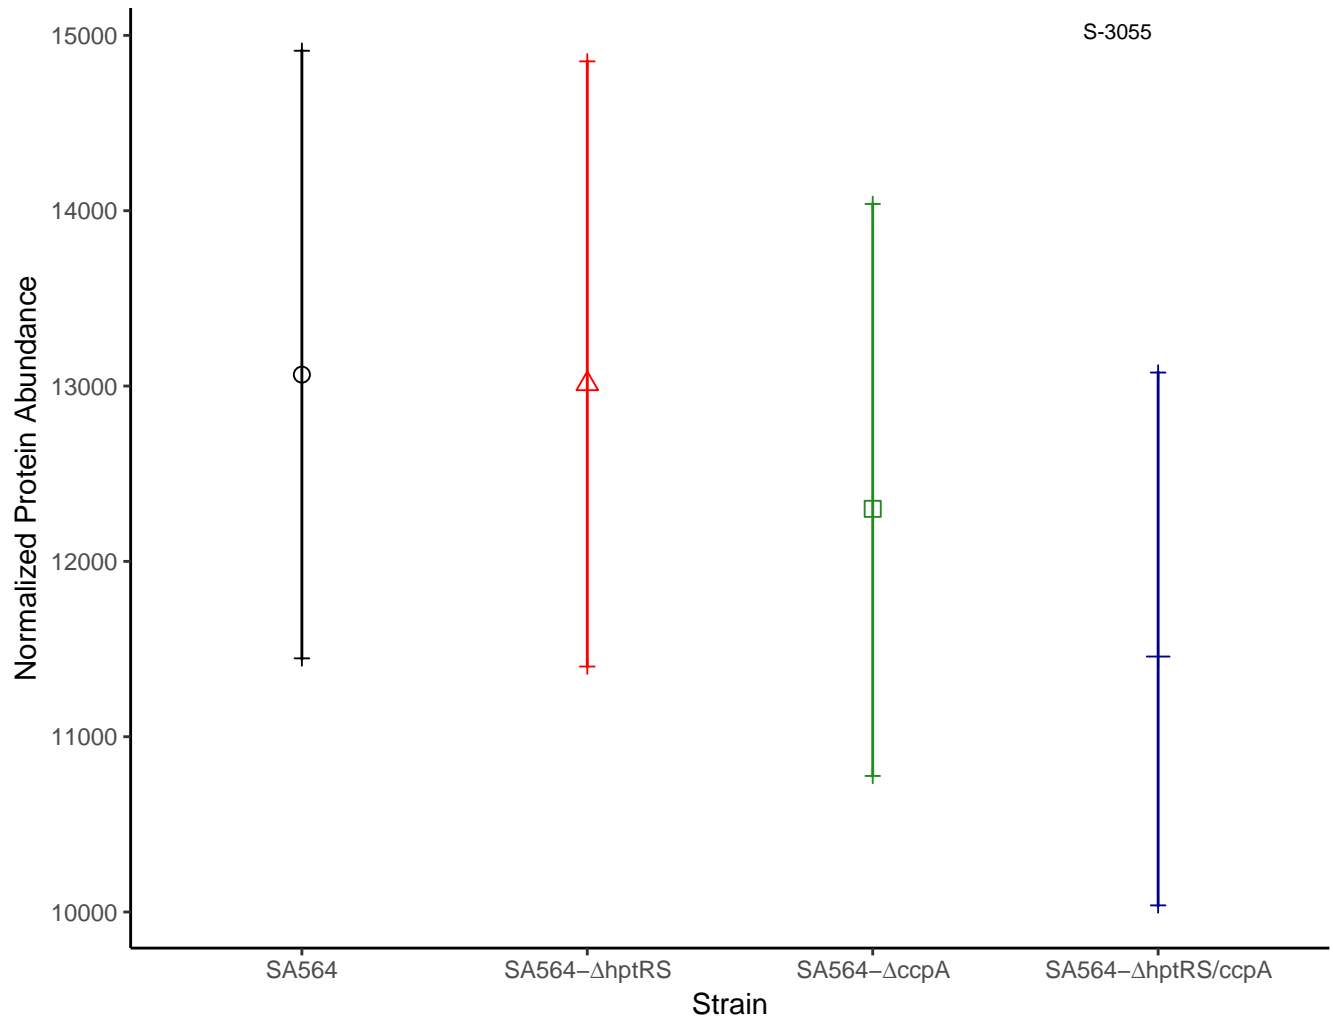

- ⊕ SA564
- △ SA564- $\Delta$ hptRS
- ⊞ SA564- $\Delta$ ccpA
- + SA564- $\Delta$ hptRS/ccpA

# CATA\_STAAM

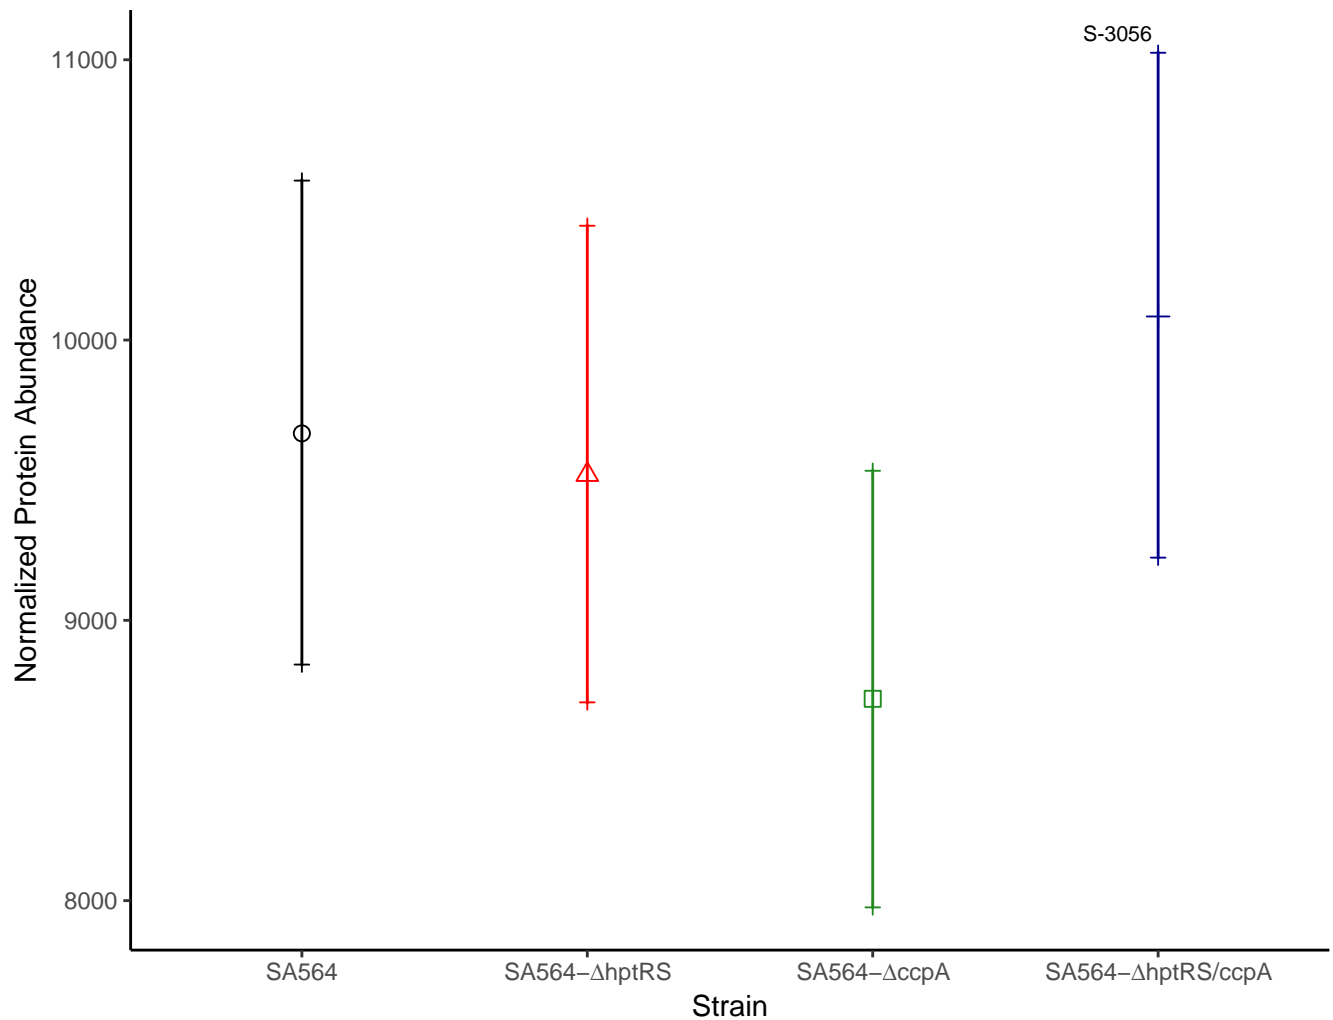

- ⊕ SA564
- △ SA564- $\Delta$ hptRS
- ⊞ SA564- $\Delta$ ccpA
- + SA564- $\Delta$ hptRS/ccpA



# CCPA\_STAAM

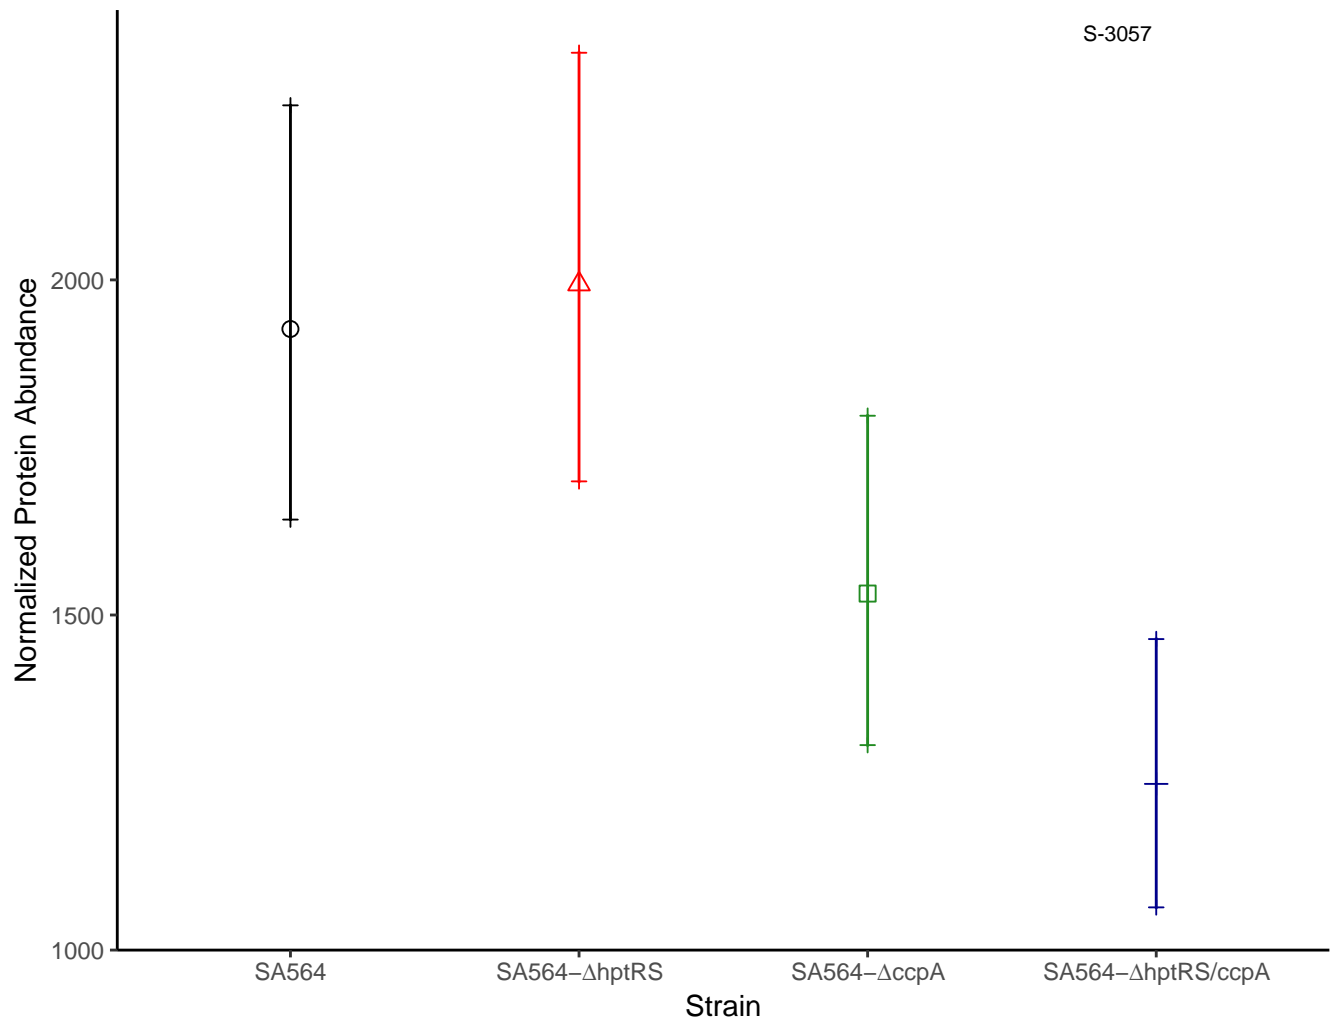

- ⊕ SA564
- △ SA564- $\Delta$ hptRS
- ⊞ SA564- $\Delta$ ccpA
- + SA564- $\Delta$ hptRS/ccpA

# CDR\_STAAM

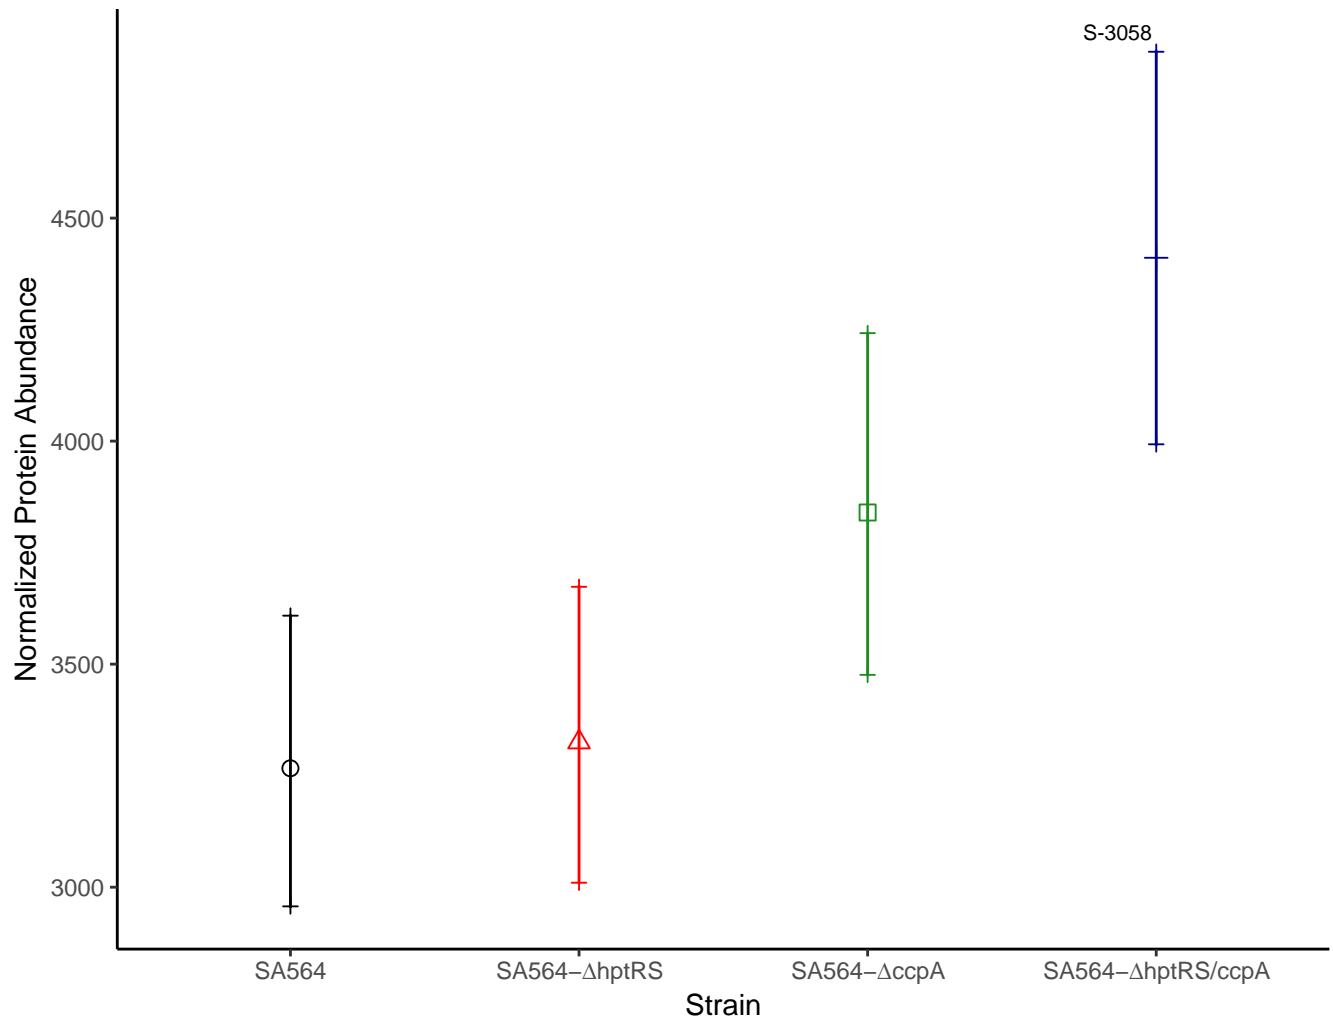

- ⊕ SA564
- △ SA564- $\Delta$ hptRS
- ⊞ SA564- $\Delta$ ccpA
- + SA564- $\Delta$ hptRS/ccpA

# CH10\_STAAM

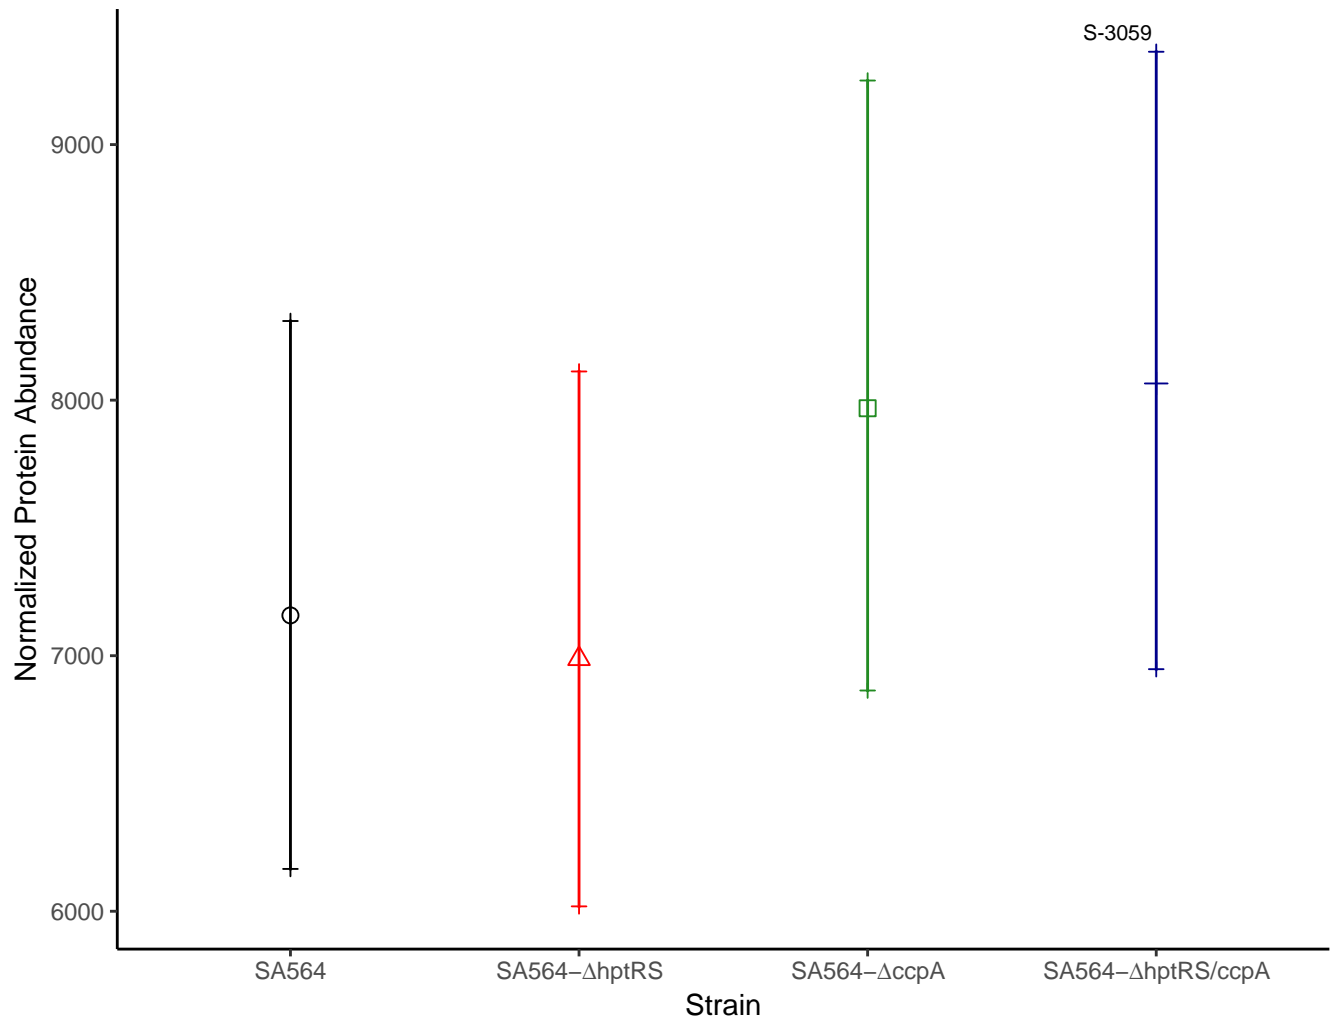

- ⊕ SA564
- △ SA564- $\Delta$ *hptRS*
- ⊞ SA564- $\Delta$ *ccpA*
- + SA564- $\Delta$ *hptRS/ccpA*

# CH60\_STAAM

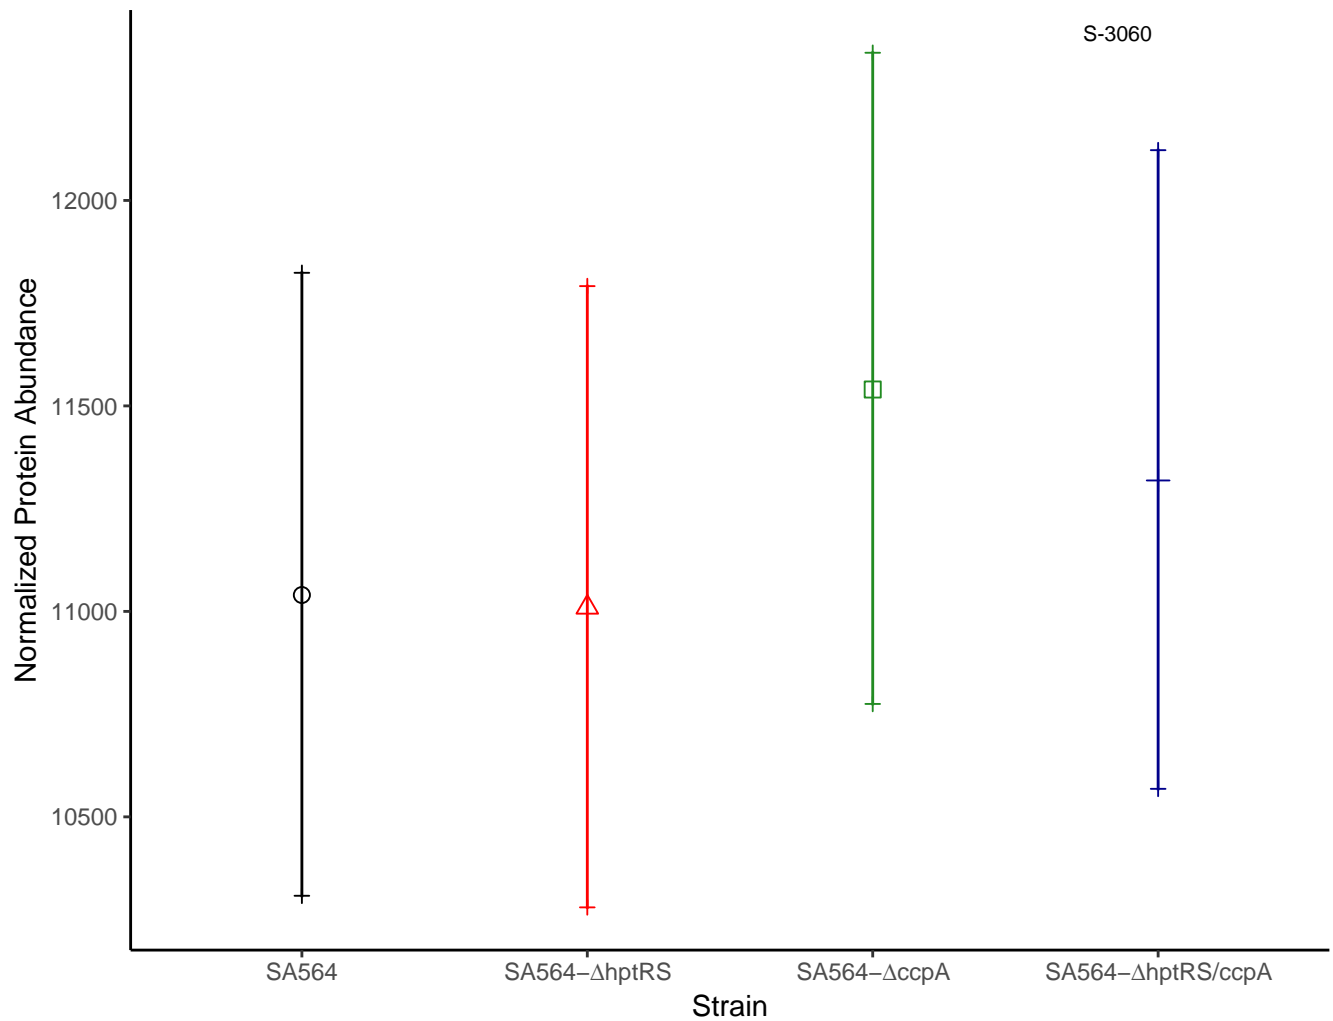

- ⊕ SA564
- △ SA564- $\Delta$ *hptRS*
- ⊞ SA564- $\Delta$ *ccpA*
- + SA564- $\Delta$ *hptRS/ccpA*

# CLPB\_STAAM

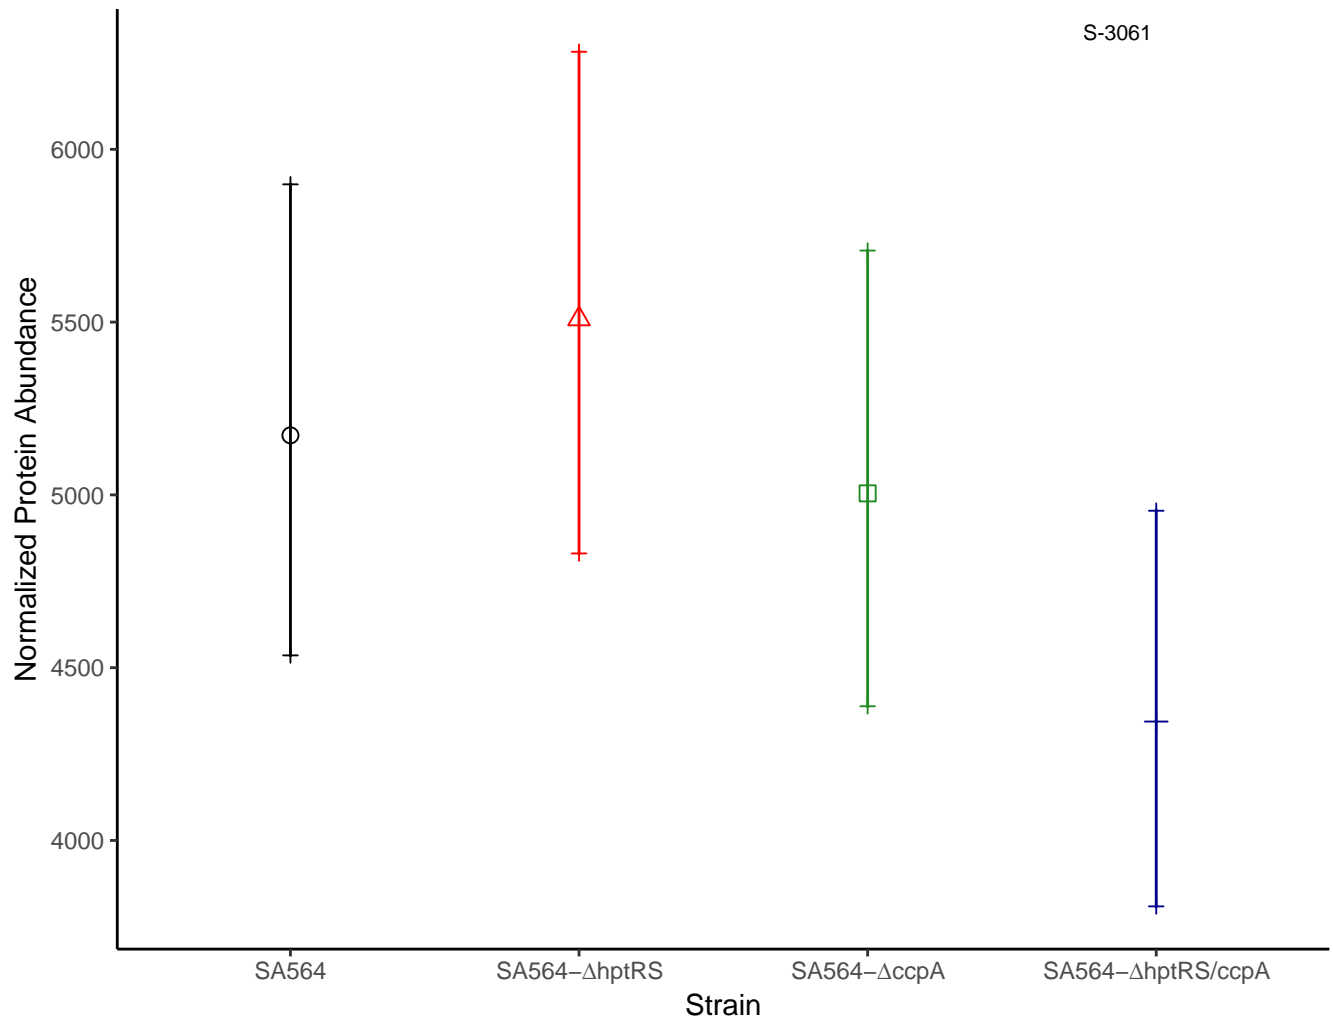

- ⊕ SA564
- △ SA564- $\Delta$ hptRS
- ⊞ SA564- $\Delta$ ccpA
- + SA564- $\Delta$ hptRS/ccpA

# CLPC\_STAAM

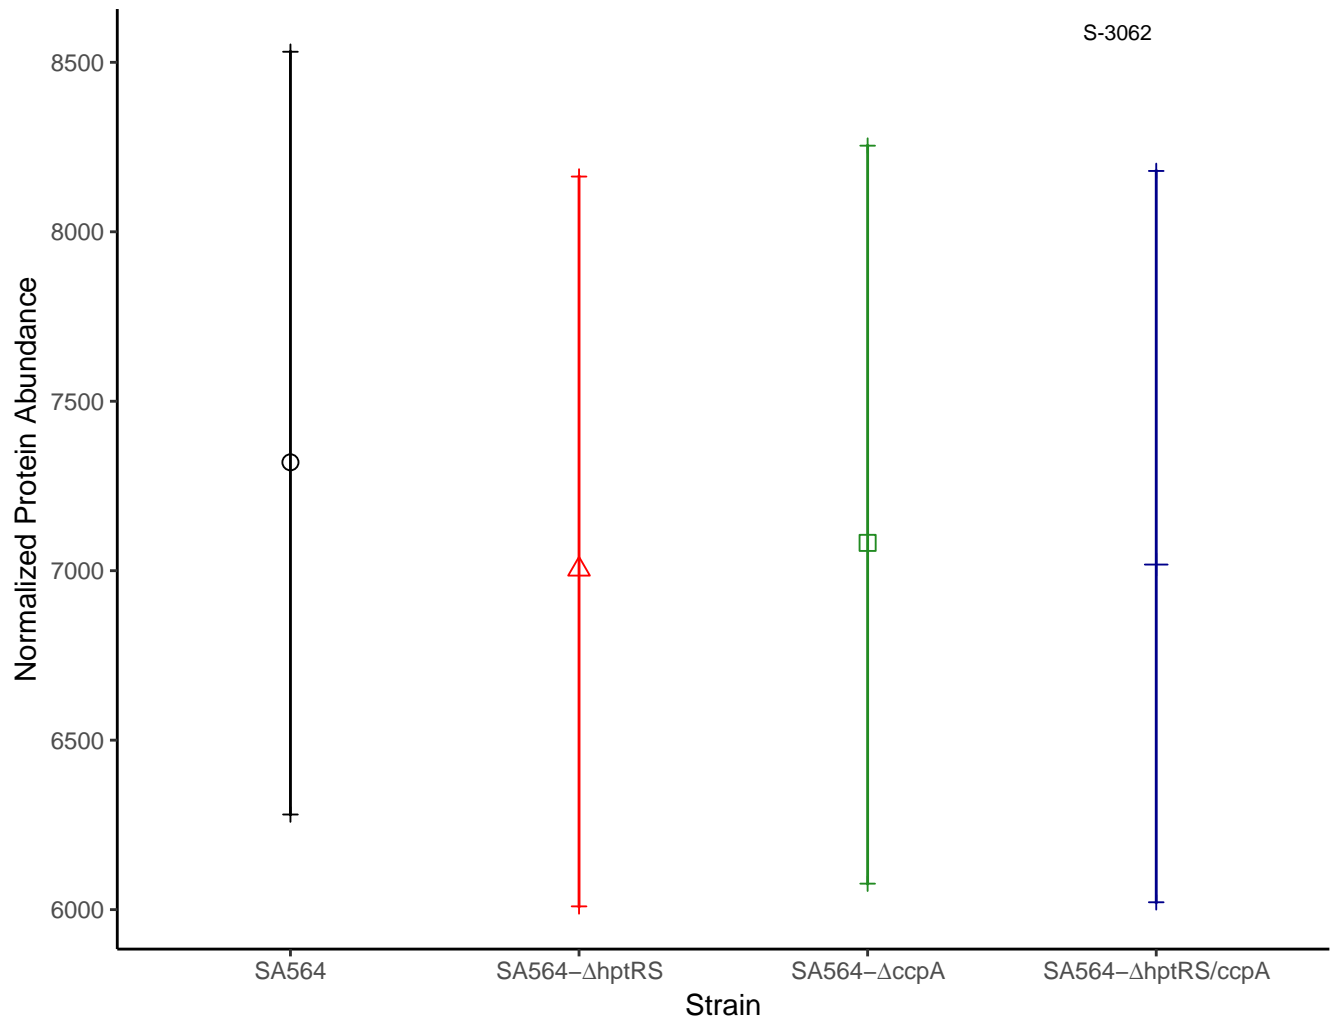

- ⊕ SA564
- △ SA564- $\Delta$ hptRS
- ⊞ SA564- $\Delta$ ccpA
- + SA564- $\Delta$ hptRS/ccpA

# CLPL\_STAAM

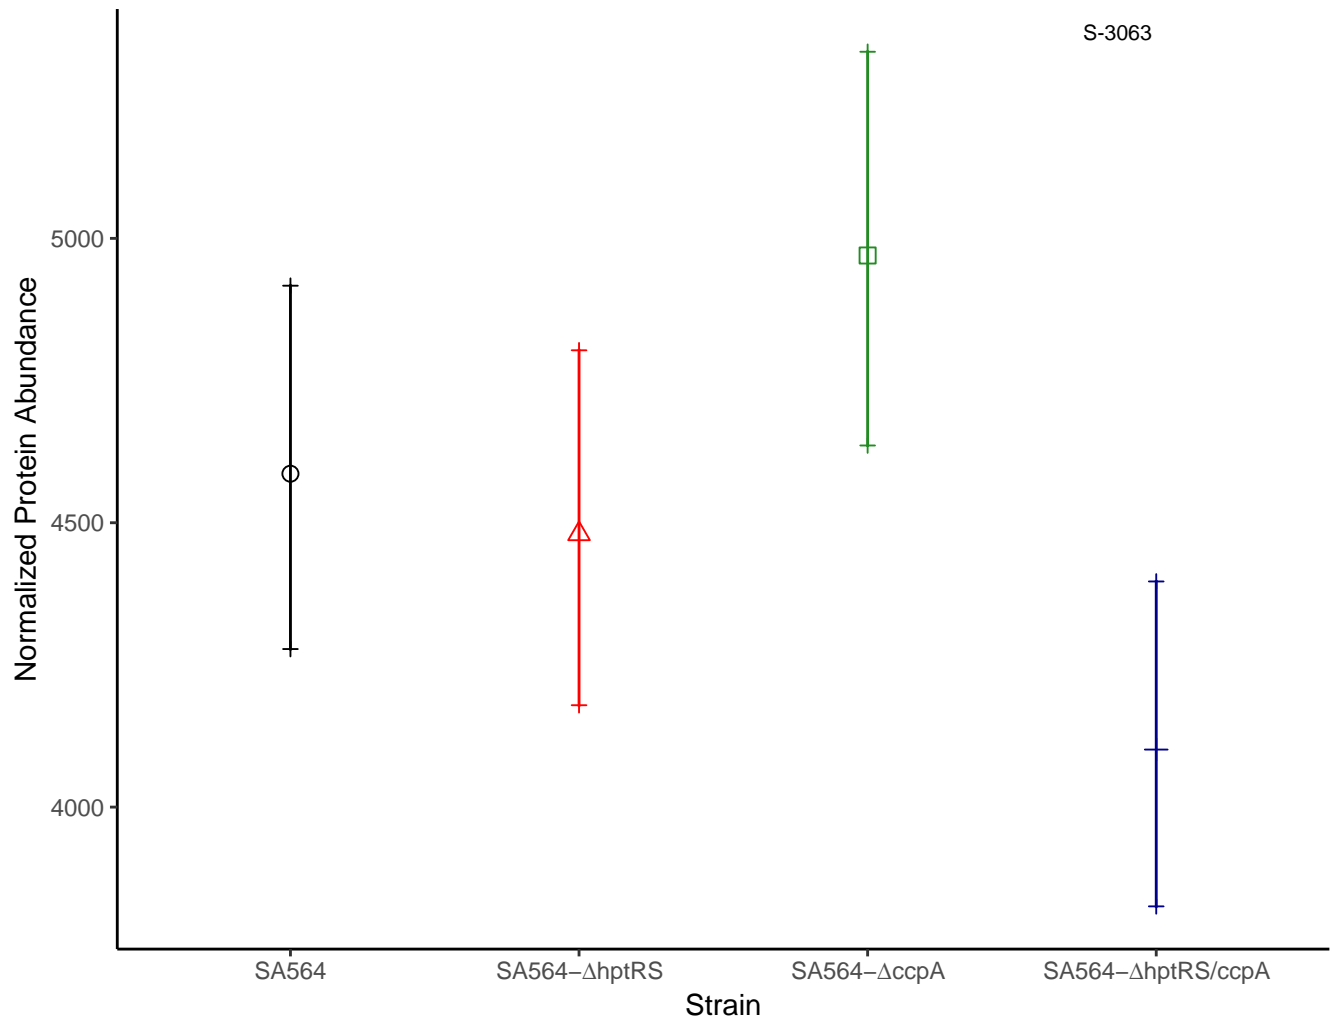

- ⊕ SA564
- △ SA564- $\Delta$ hptRS
- ⊞ SA564- $\Delta$ ccpA
- + SA564- $\Delta$ hptRS/ccpA

# CLPP\_STAAM

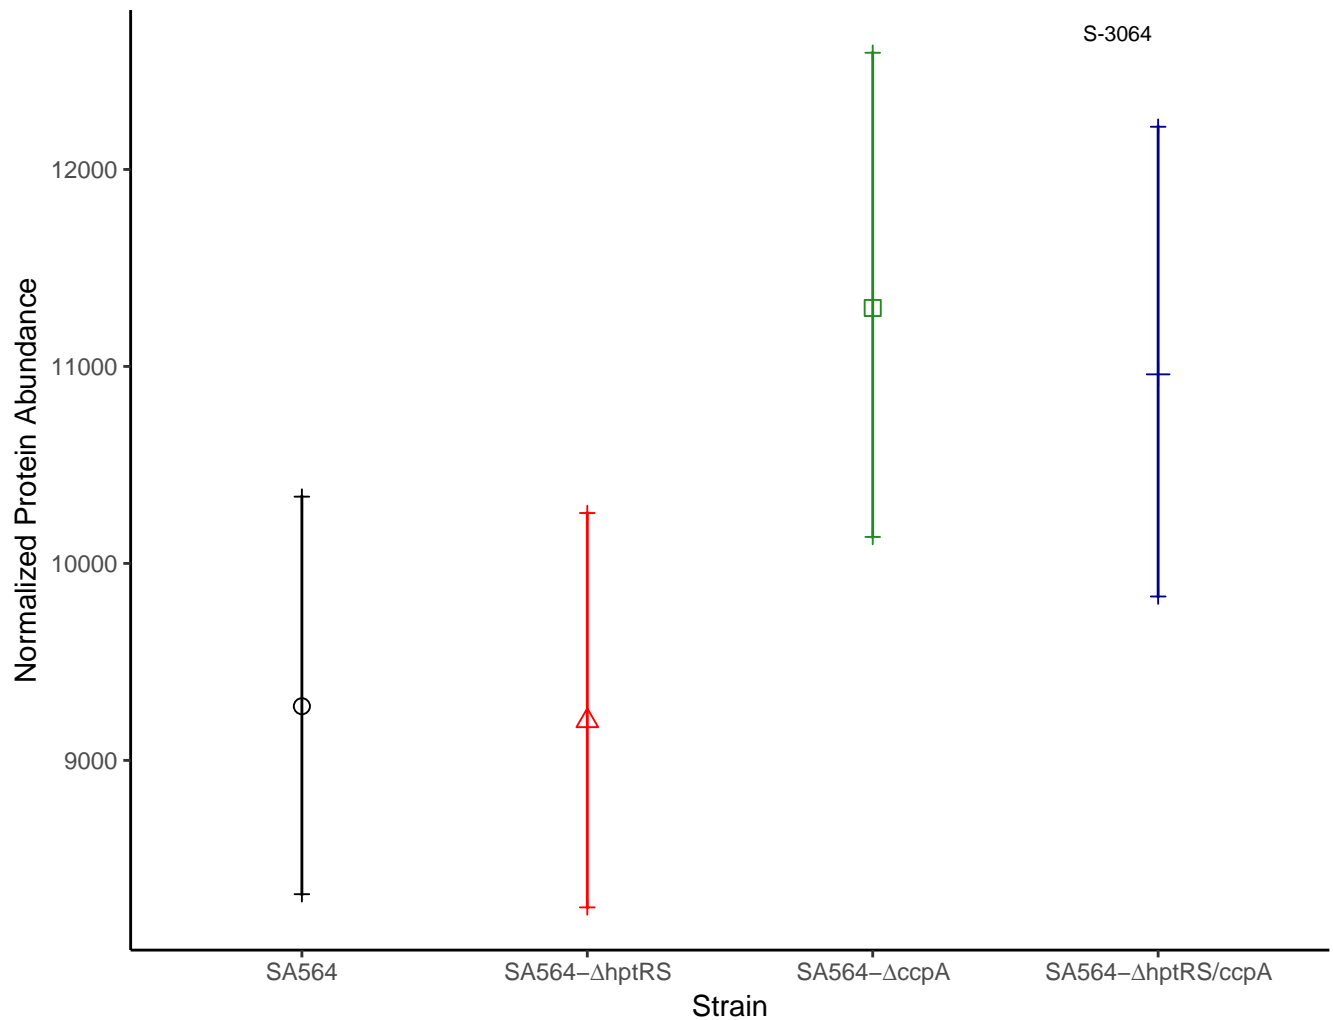

- ⊕ SA564
- △ SA564- $\Delta$ hptRS
- ⊞ SA564- $\Delta$ ccpA
- + SA564- $\Delta$ hptRS/ccpA



# CLPX\_STAAM

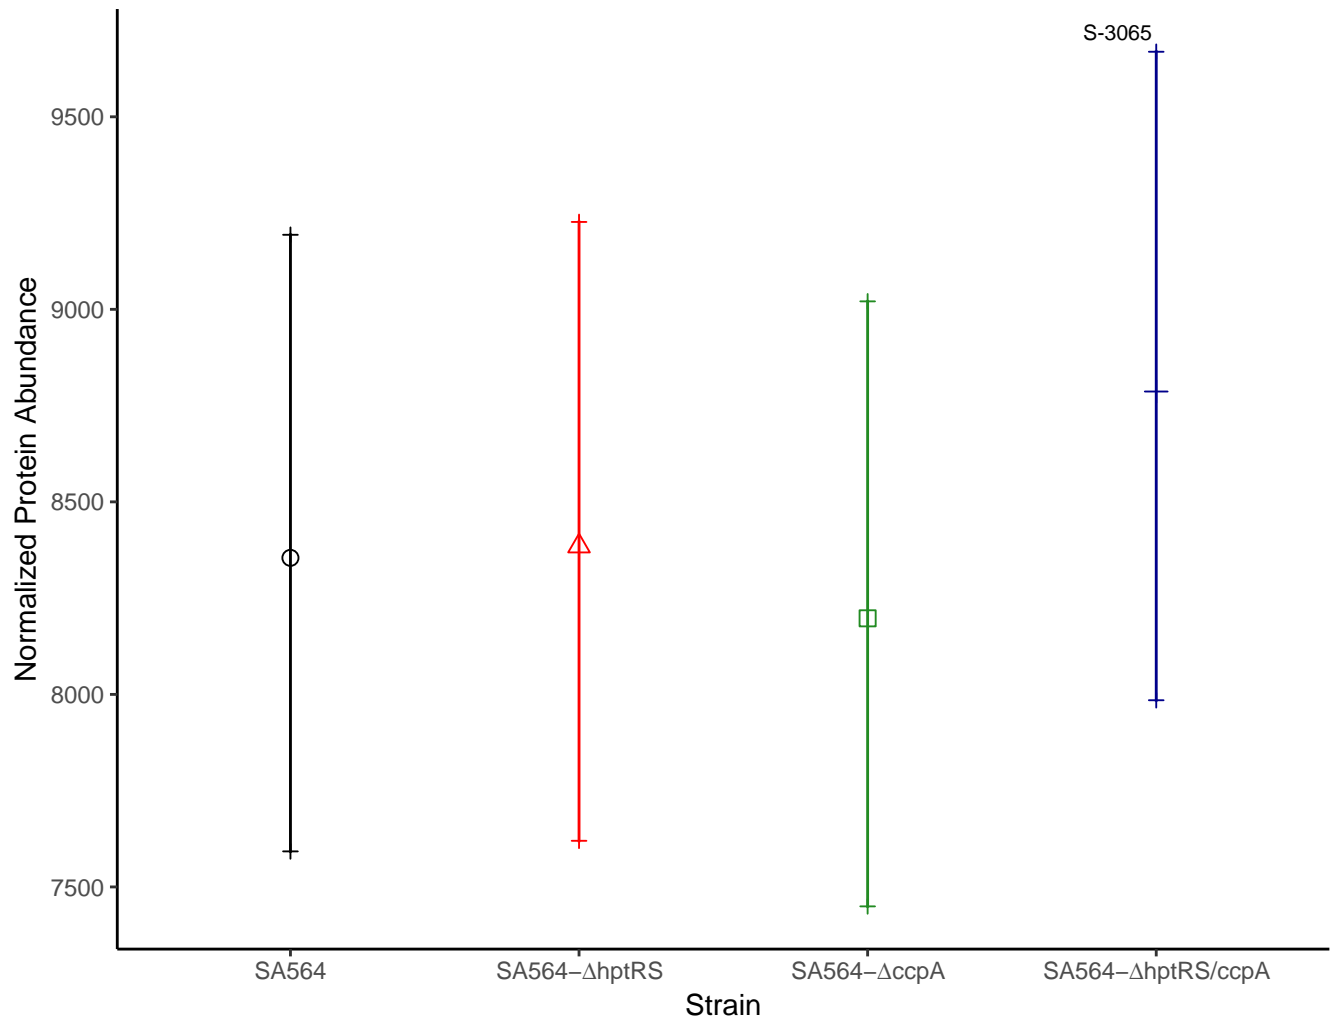

- ⊕ SA564
- △ SA564- $\Delta$ hptRS
- ⊞ SA564- $\Delta$ ccpA
- + SA564- $\Delta$ hptRS/ccpA

# CODY\_STAAM

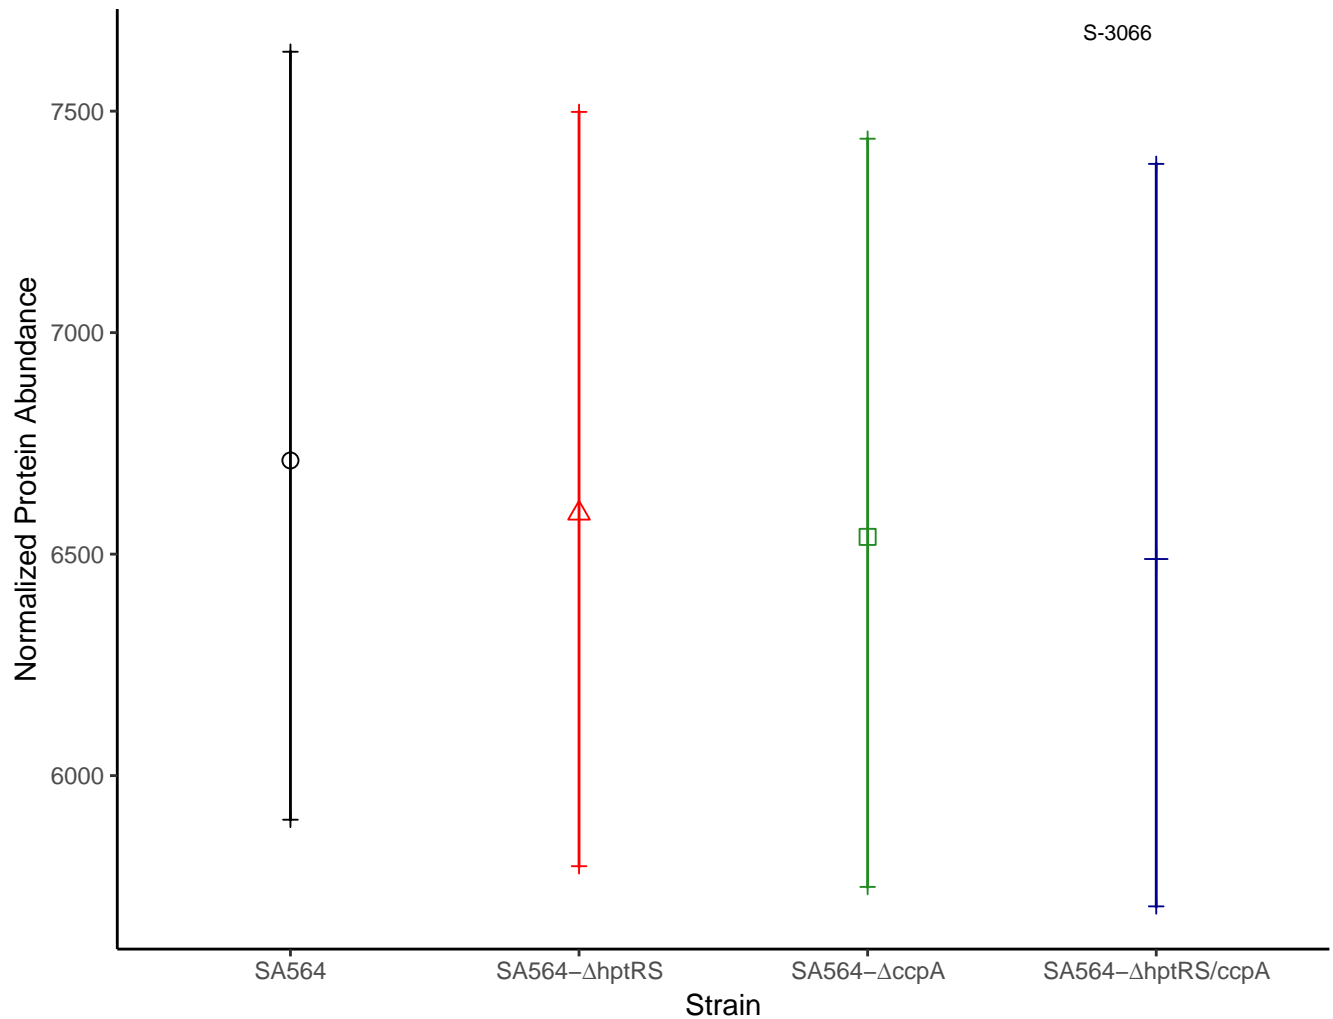

- ⊕ SA564
- △ SA564- $\Delta$ hptRS
- ⊞ SA564- $\Delta$ ccpA
- + SA564- $\Delta$ hptRS/ccpA

# COPZ\_STAAM

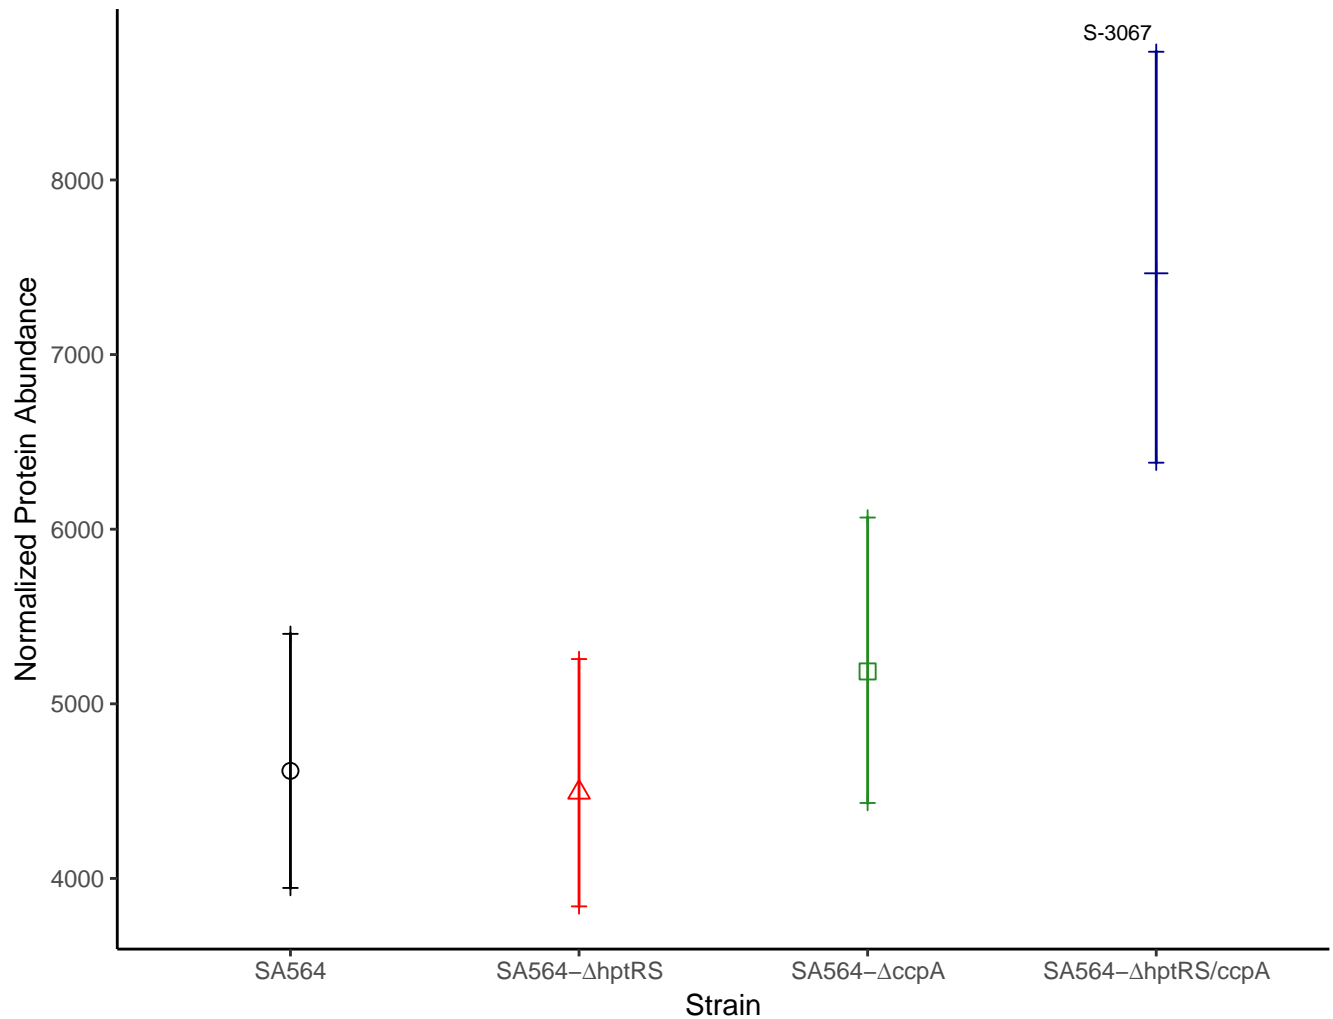

- ⊕ SA564
- △ SA564- $\Delta$ hptRS
- ⊞ SA564- $\Delta$ ccpA
- + SA564- $\Delta$ hptRS/ccpA

# CRTN\_STAAM

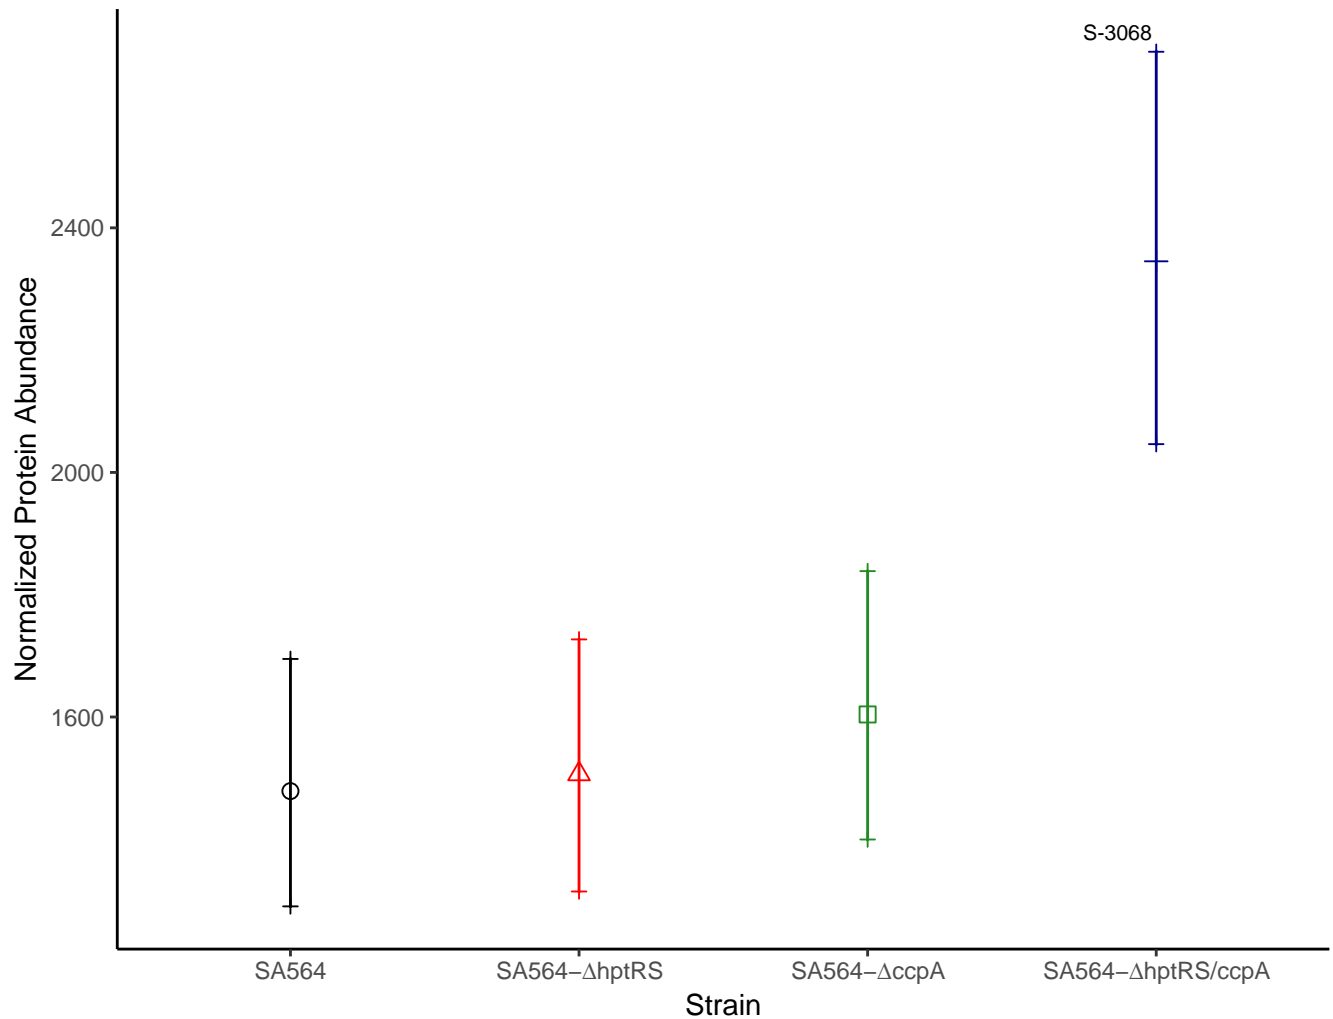

- ⊕ SA564
- △ SA564- $\Delta$ hptRS
- ⊞ SA564- $\Delta$ ccpA
- + SA564- $\Delta$ hptRS/ccpA

# CSD\_STAAM

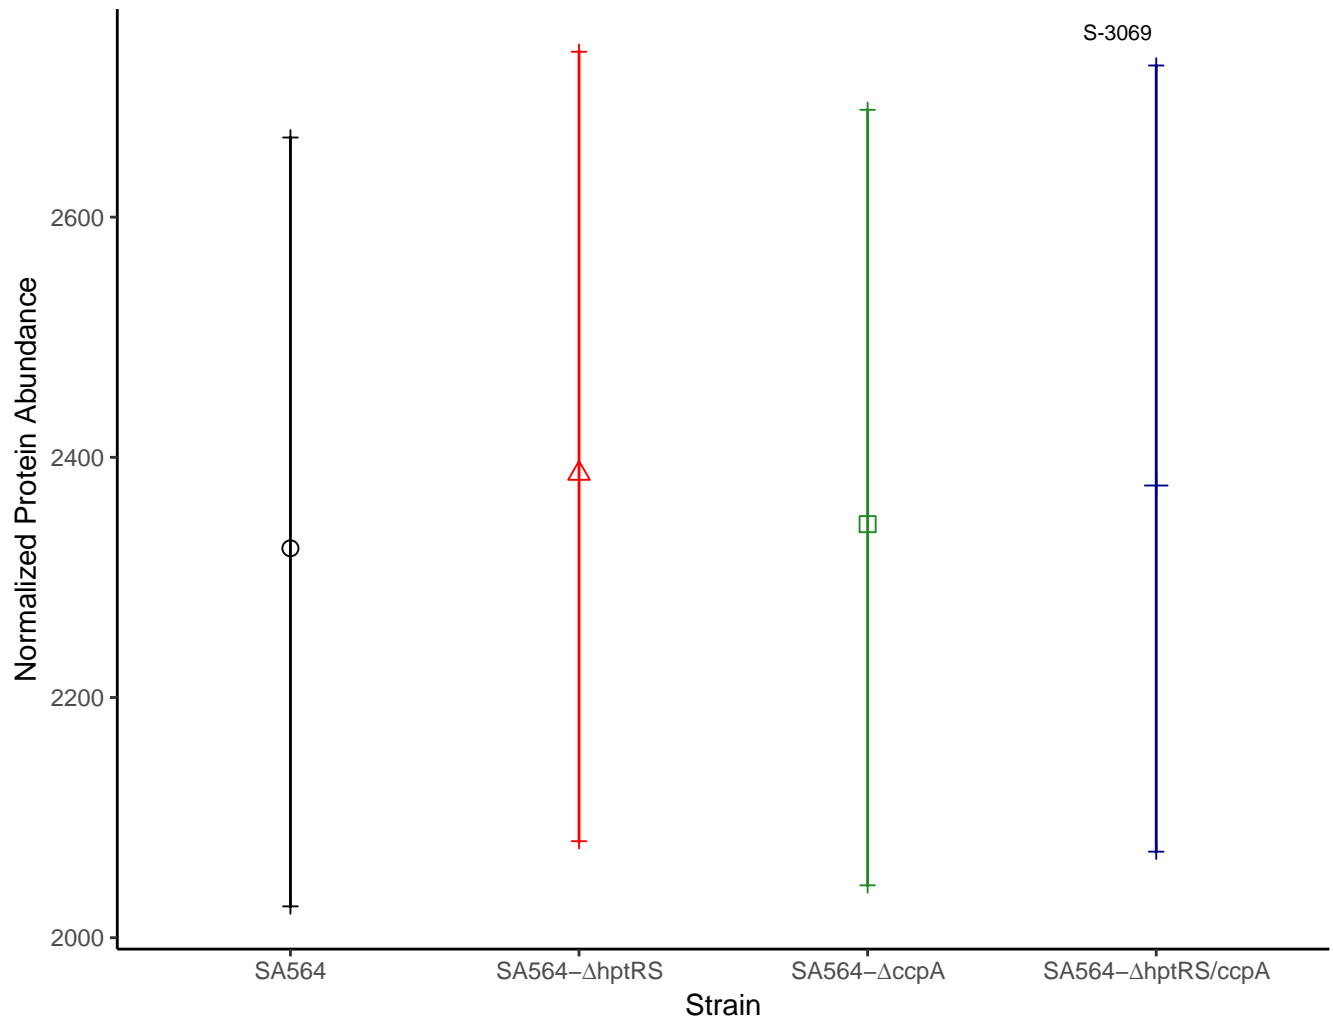

- ⊕ SA564
- △ SA564- $\Delta$ hptRS
- ⊞ SA564- $\Delta$ ccpA
- + SA564- $\Delta$ hptRS/ccpA

# CSHA\_STAAM

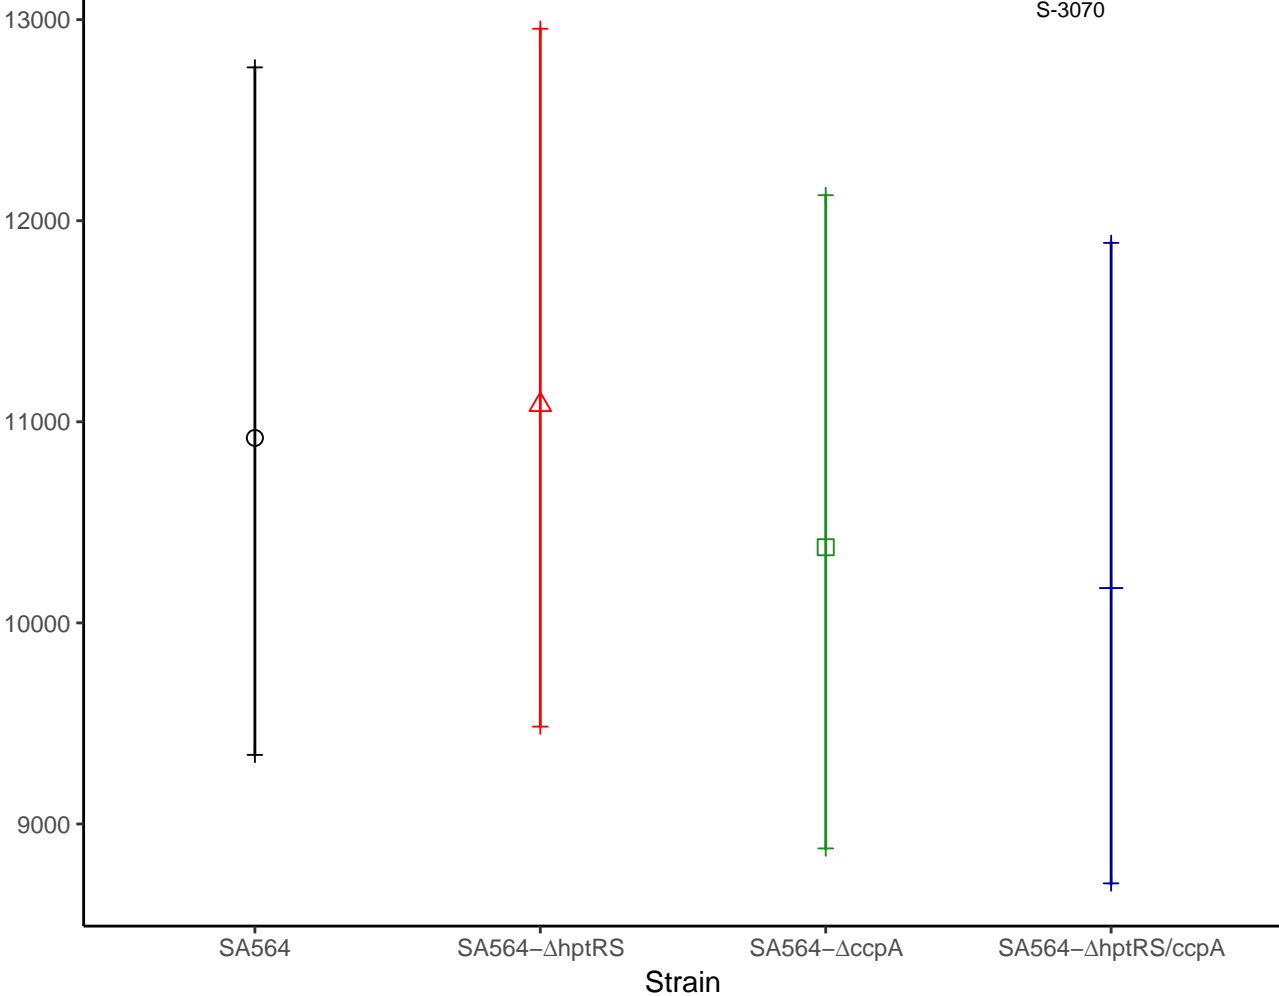

- ⊕ SA564
- △ SA564- $\Delta$ hptRS
- ⊞ SA564- $\Delta$ ccpA
- + SA564- $\Delta$ hptRS/ccpA

# CSPA\_STAAM

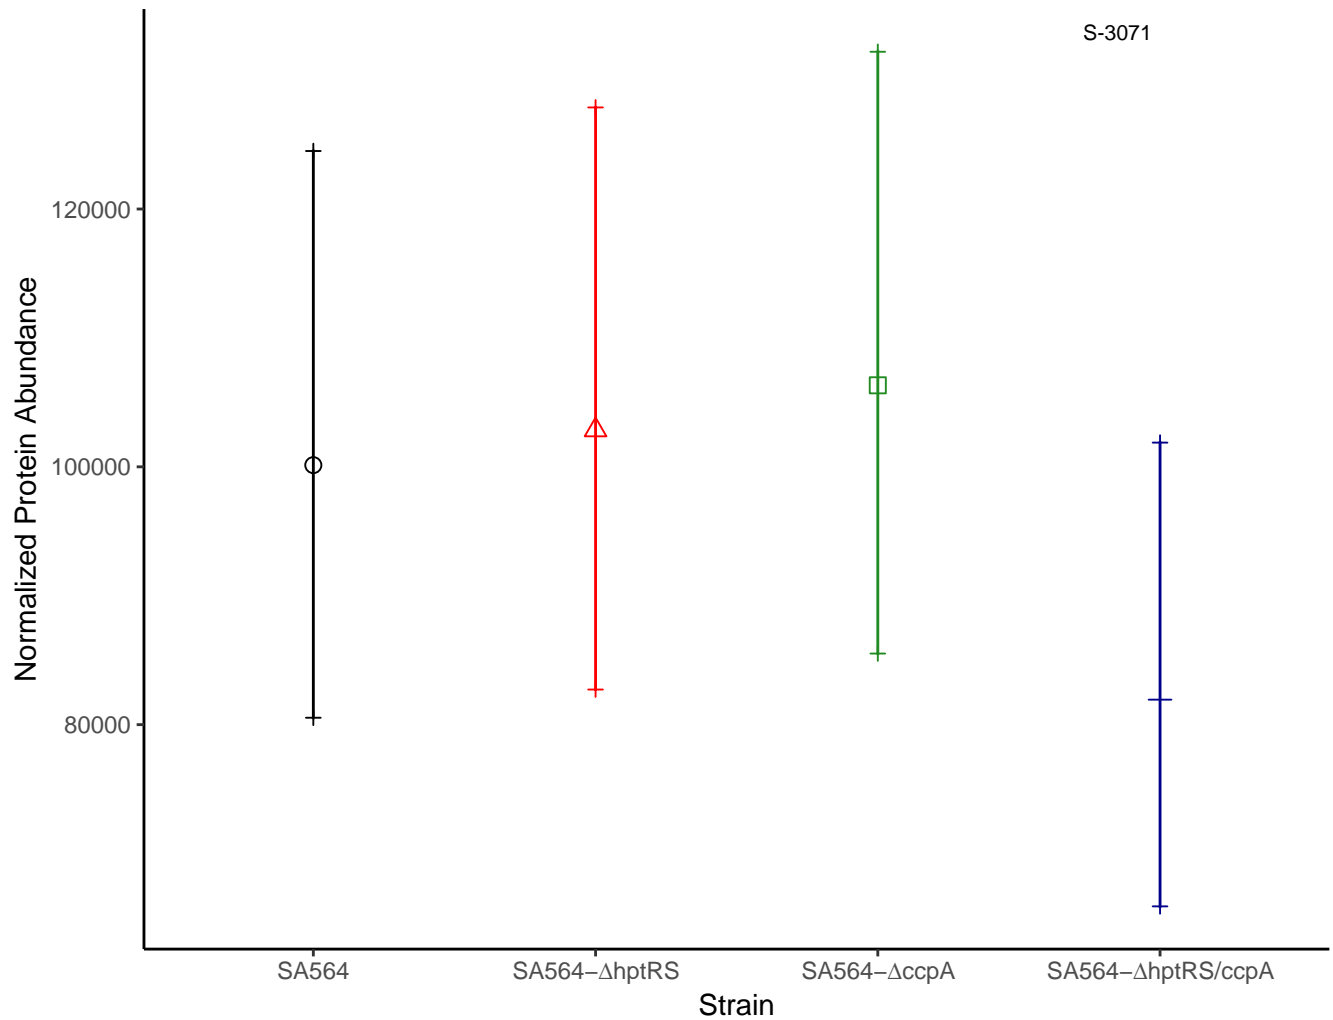

- ⊕ SA564
- △ SA564- $\Delta$ hptRS
- ⊞ SA564- $\Delta$ ccpA
- ⊕ SA564- $\Delta$ hptRS/ccpA

# CTPAL\_STAAM

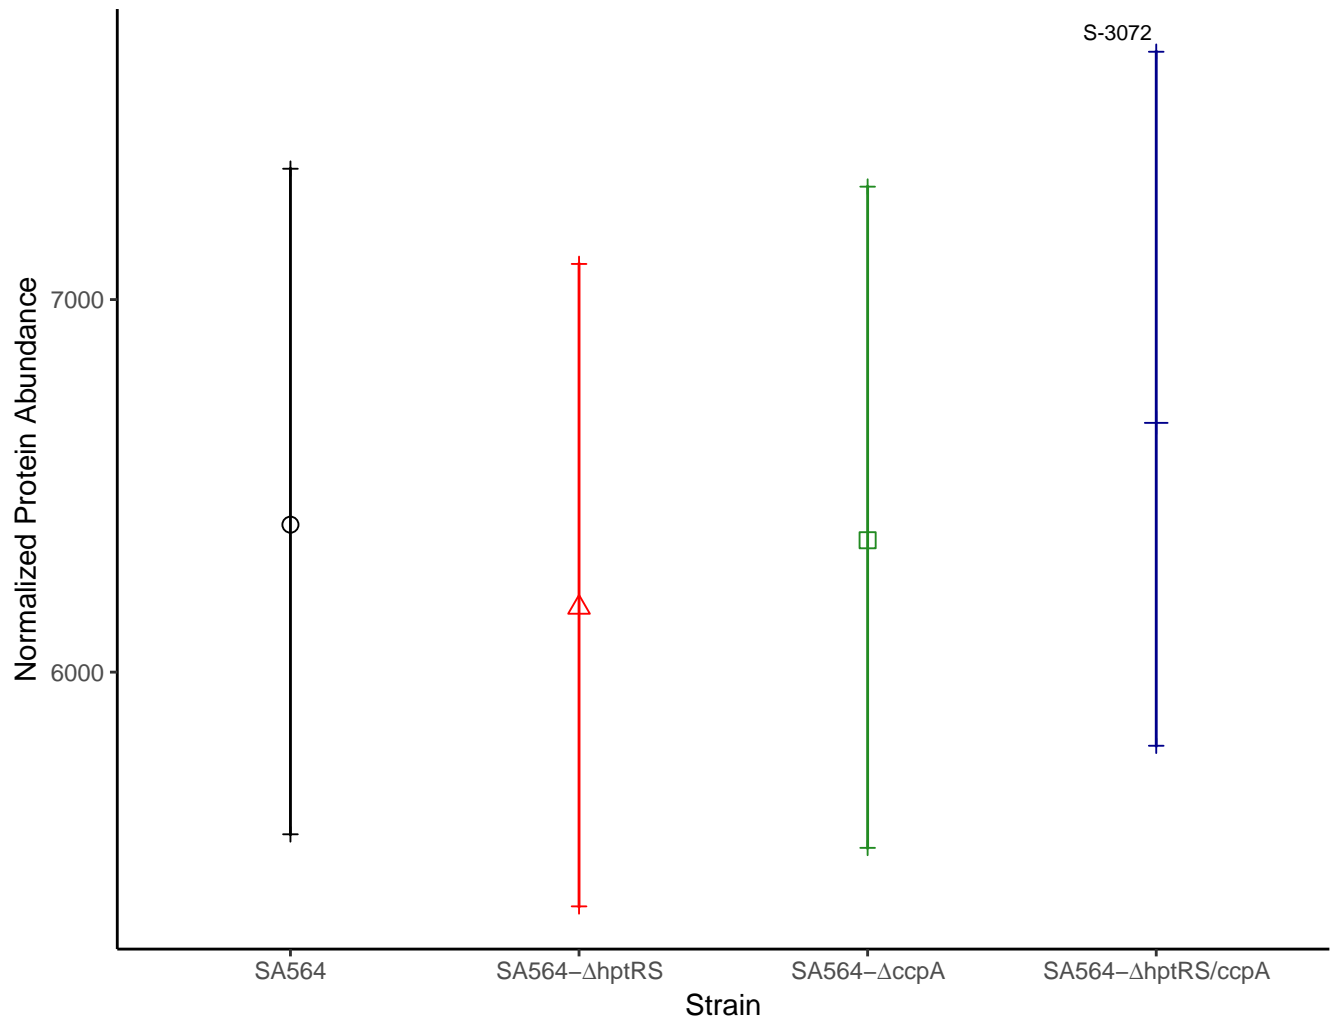

- ⊕ SA564
- △ SA564- $\Delta$ hptRS
- ⊞ SA564- $\Delta$ ccpA
- + SA564- $\Delta$ hptRS/ccpA



# CVFB\_STAAM

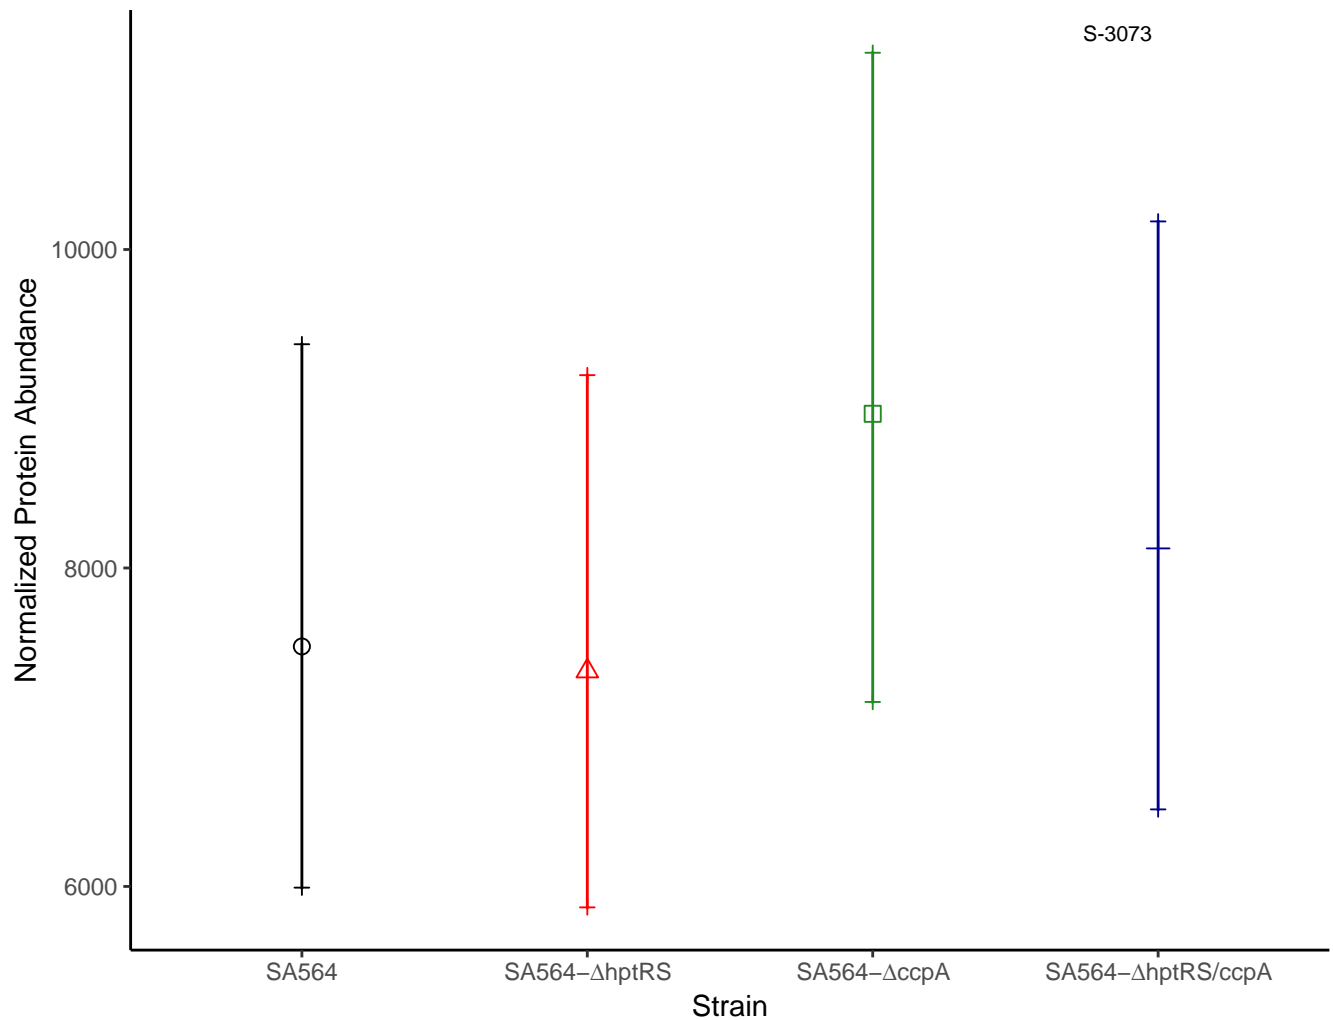

- ⊕ SA564
- △ SA564- $\Delta$ hptRS
- ⊞ SA564- $\Delta$ ccpA
- + SA564- $\Delta$ hptRS/ccpA

# CYSE\_STAAM

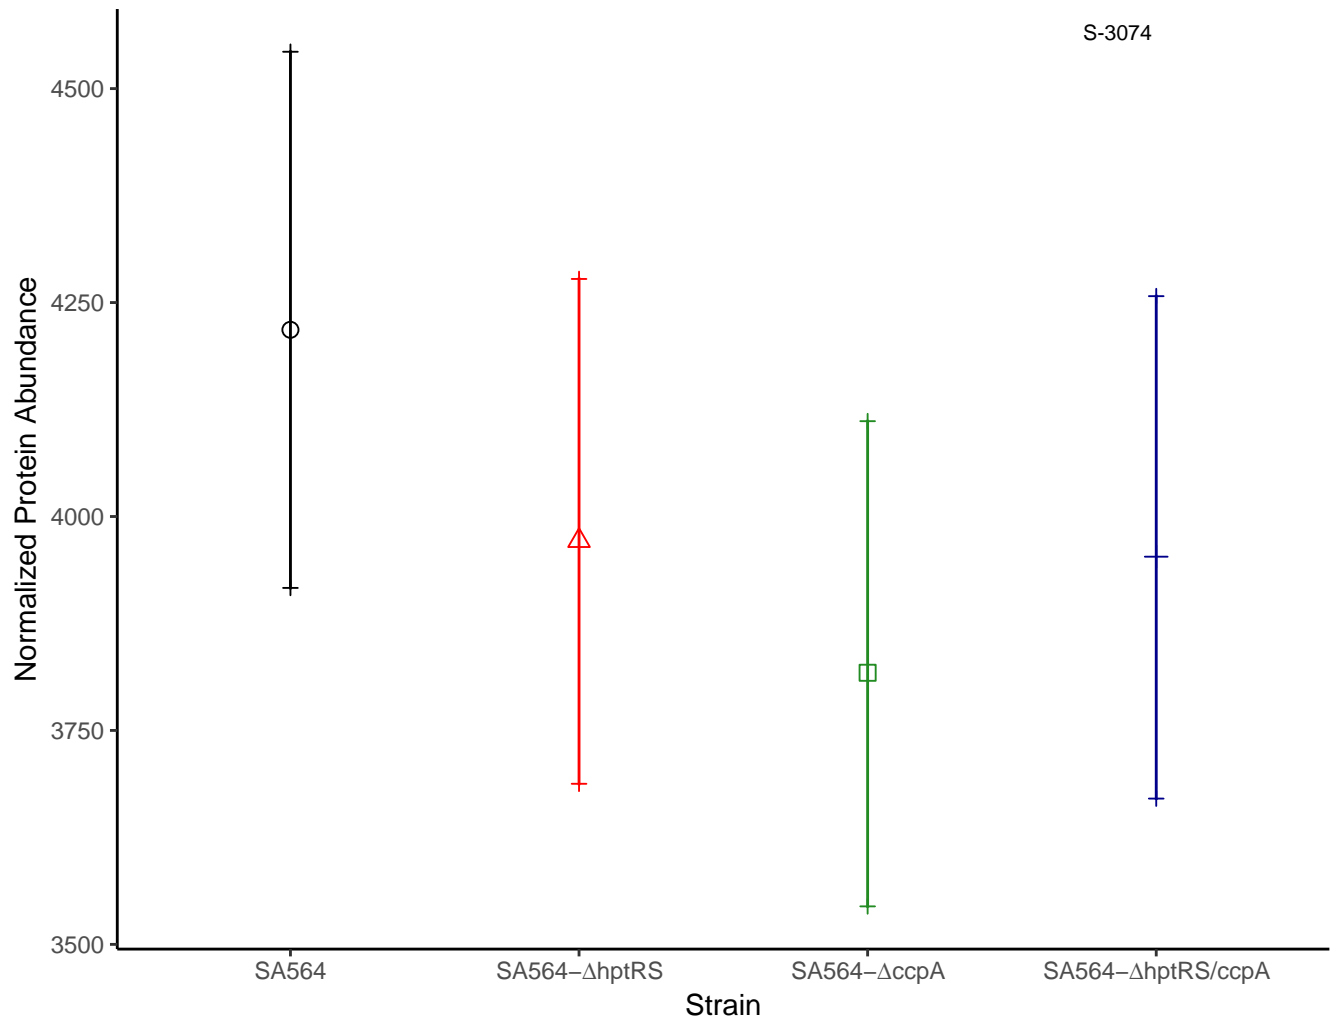

- ⊕ SA564
- △ SA564- $\Delta$ hptRS
- ⊞ SA564- $\Delta$ ccpA
- + SA564- $\Delta$ hptRS/ccpA

# CYSK\_STAAM

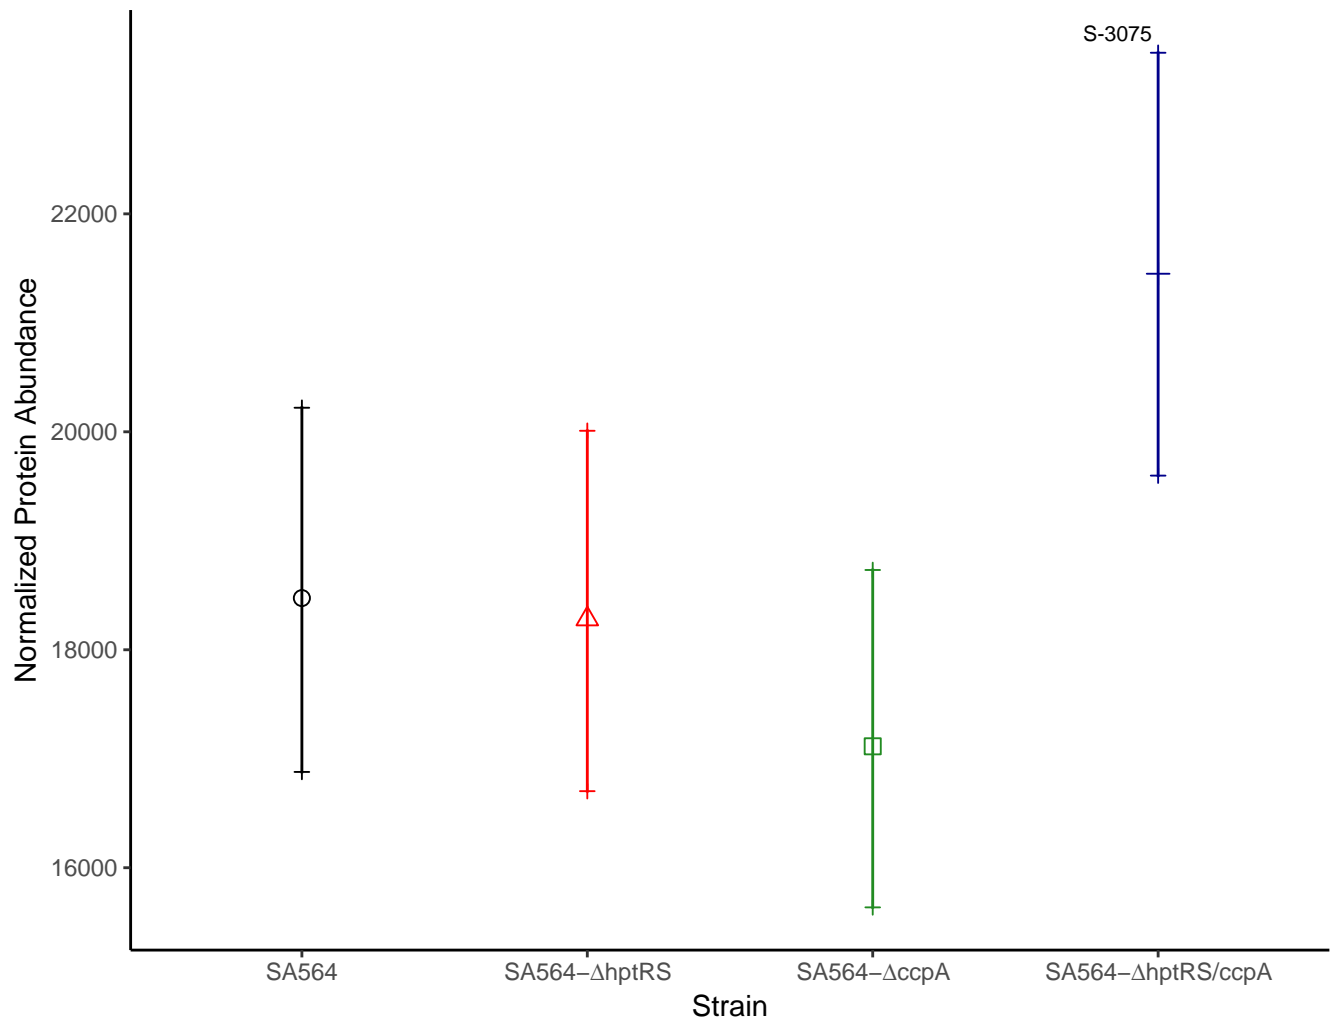

- ⊕ SA564
- △ SA564- $\Delta$ hptRS
- ⊞ SA564- $\Delta$ ccpA
- + SA564- $\Delta$ hptRS/ccpA

# DAAA\_STAAM

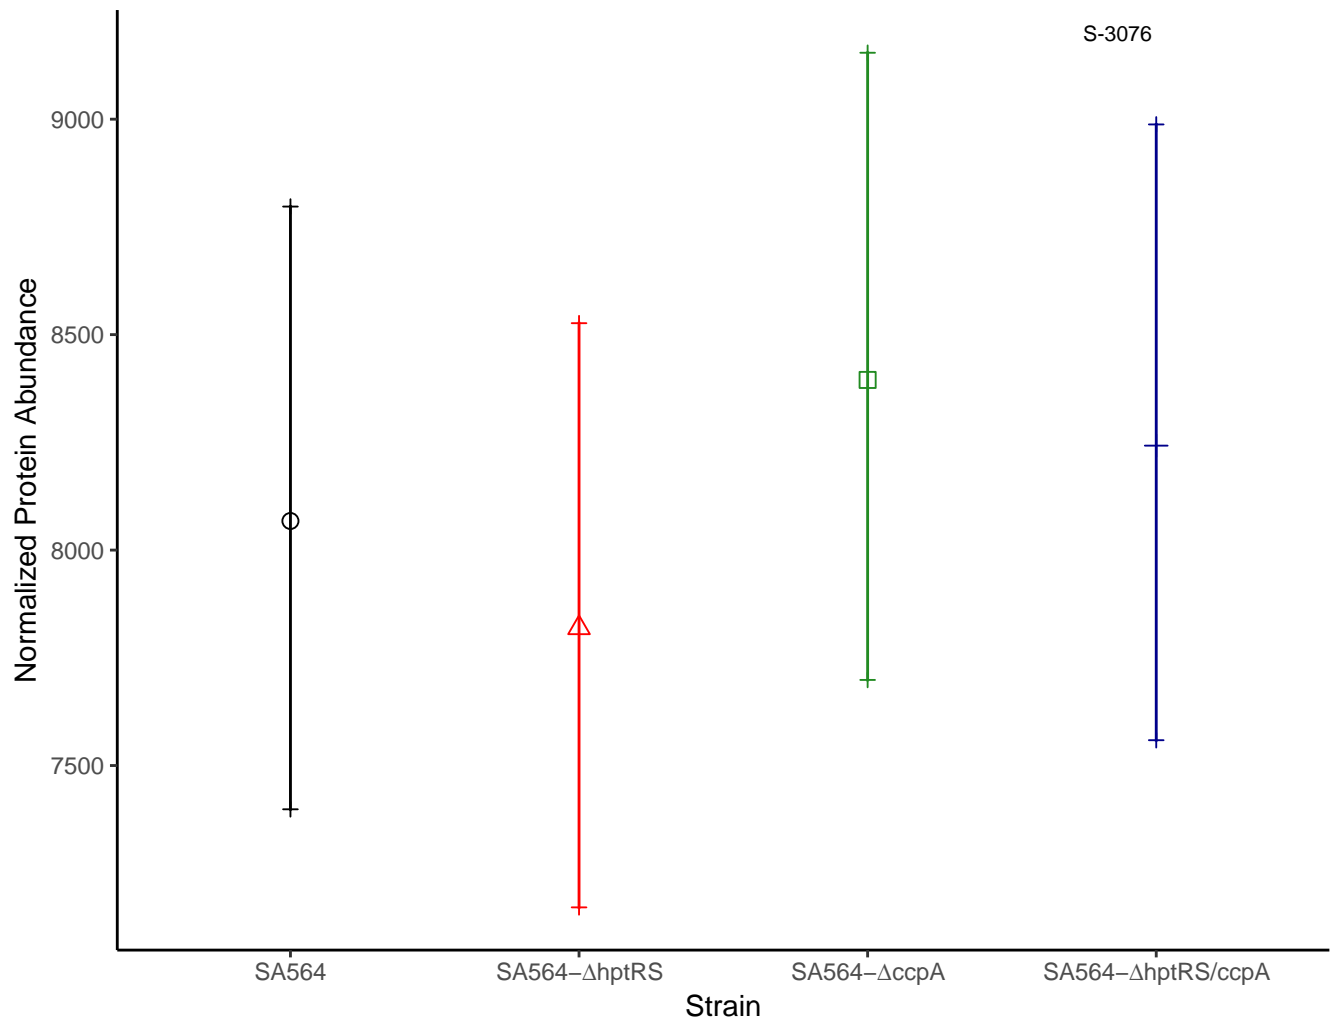

- ⊕ SA564
- △ SA564- $\Delta$ *hptRS*
- ⊞ SA564- $\Delta$ *ccpA*
- + SA564- $\Delta$ *hptRS/ccpA*

# DAPB\_STAAM

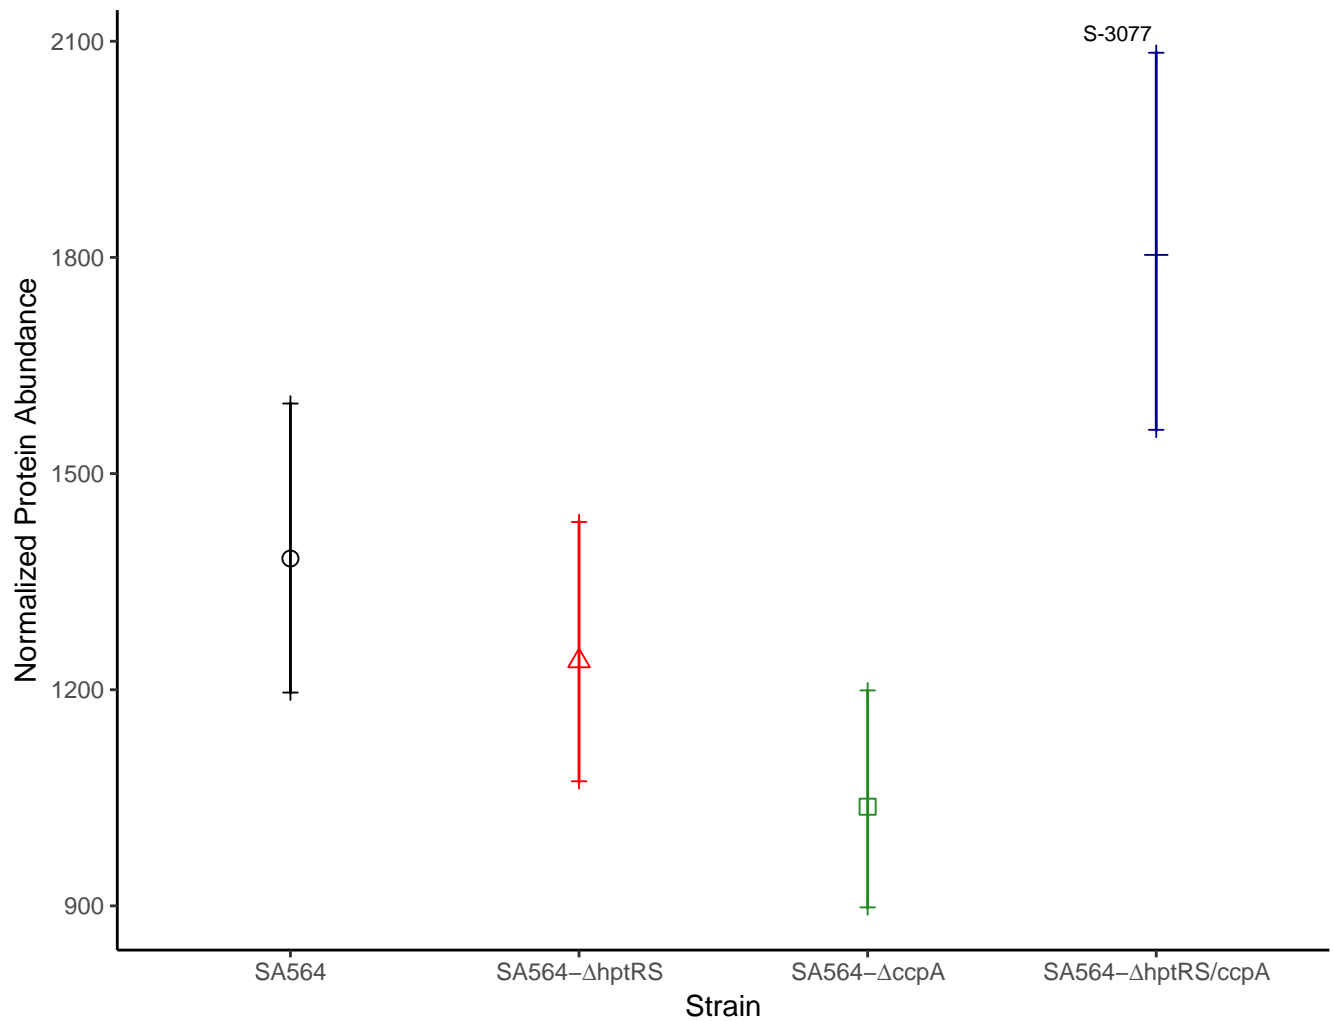

- ⊕ SA564
- △ SA564- $\Delta$ hptRS
- ⊞ SA564- $\Delta$ ccpA
- + SA564- $\Delta$ hptRS/ccpA

# DAPH\_STAAM

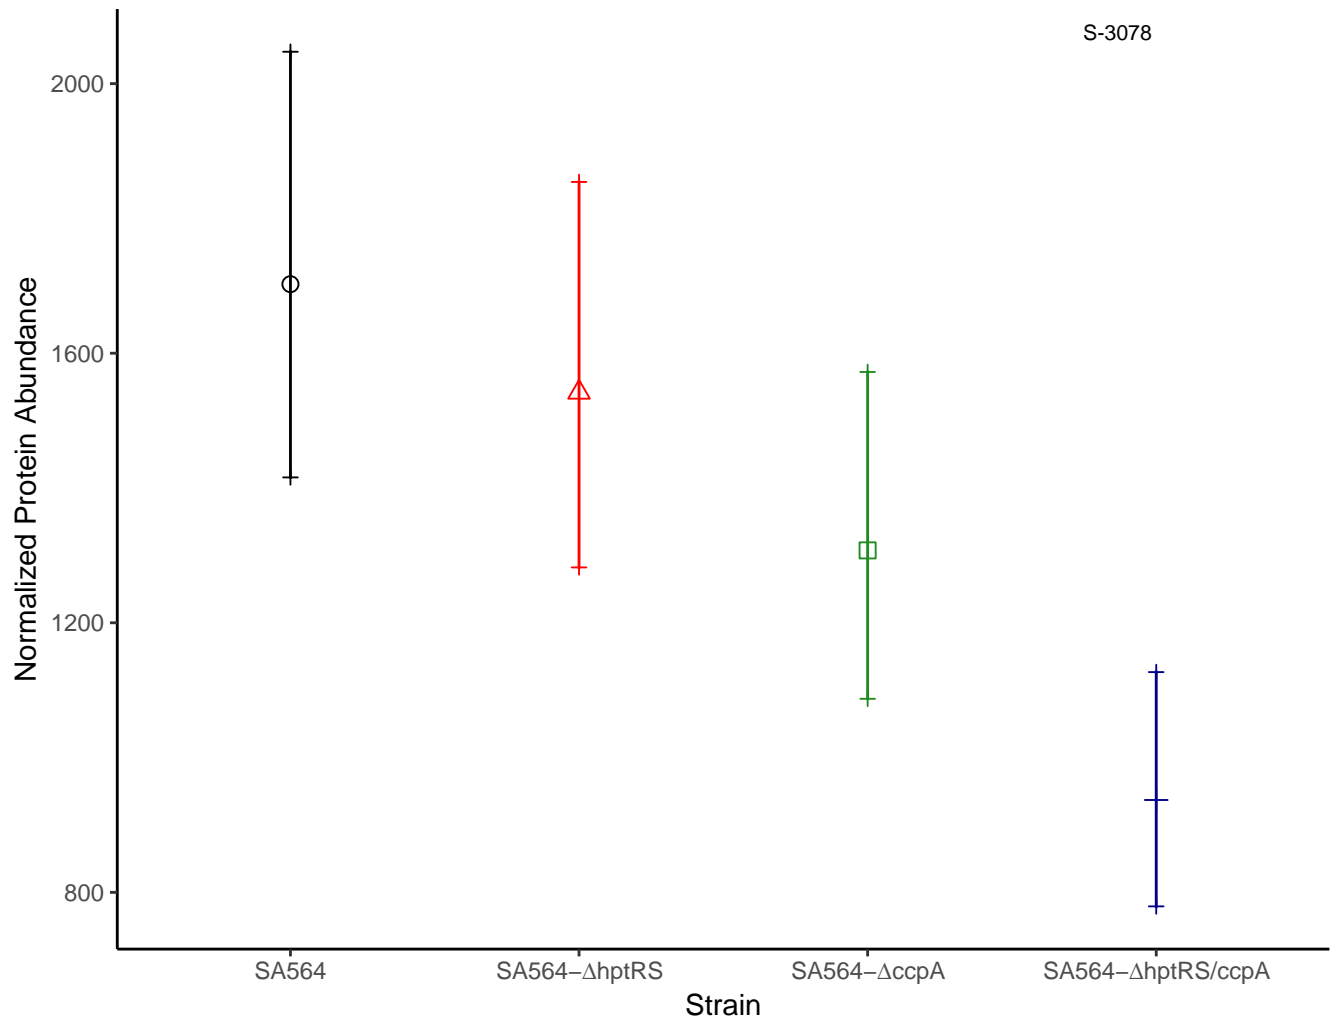

- ⊕ SA564
- △ SA564- $\Delta$ hptRS
- ⊞ SA564- $\Delta$ ccpA
- + SA564- $\Delta$ hptRS/ccpA

# DBH\_STAAM

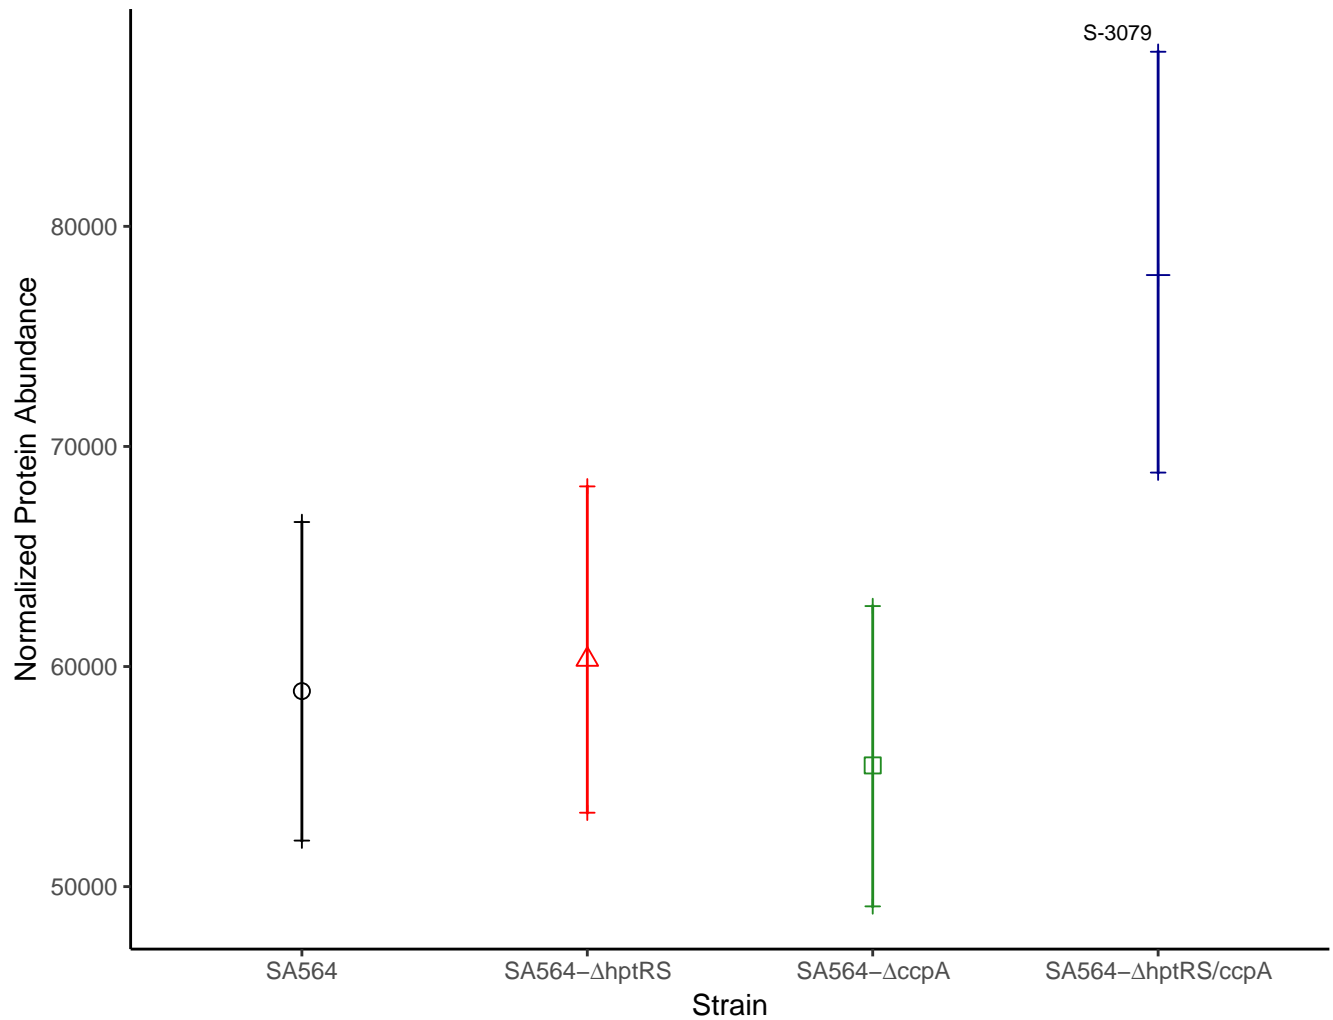

- ⊕ SA564
- △ SA564- $\Delta$ hptRS
- ⊞ SA564- $\Delta$ ccpA
- + SA564- $\Delta$ hptRS/ccpA

# DCUP\_STAAM

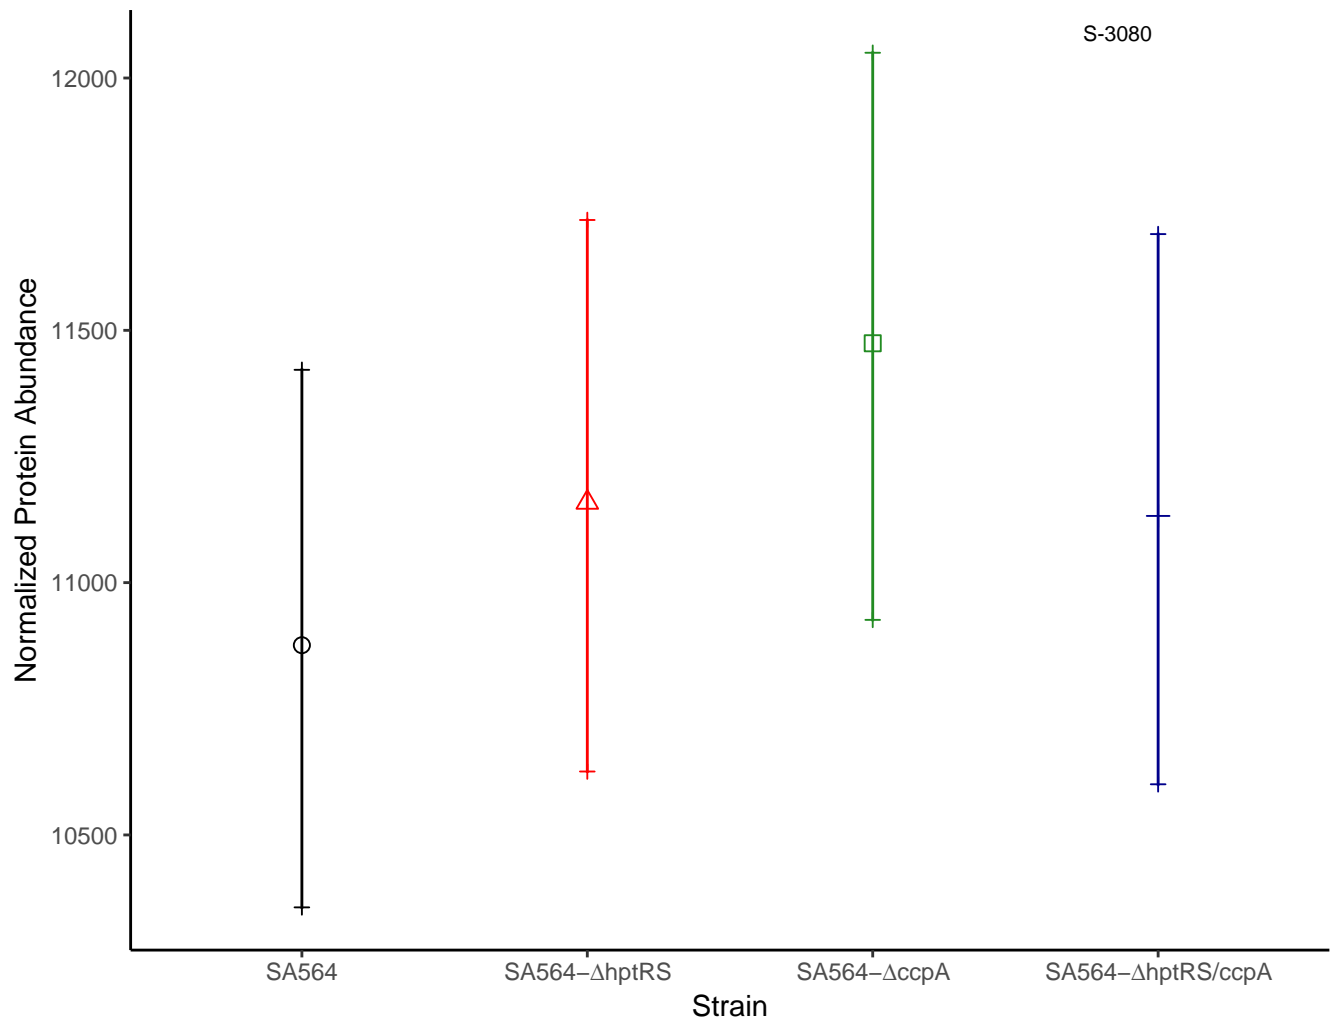

- ⊕ SA564
- △ SA564- $\Delta$ hptRS
- ⊞ SA564- $\Delta$ ccpA
- + SA564- $\Delta$ hptRS/ccpA



# DDL\_STAAM

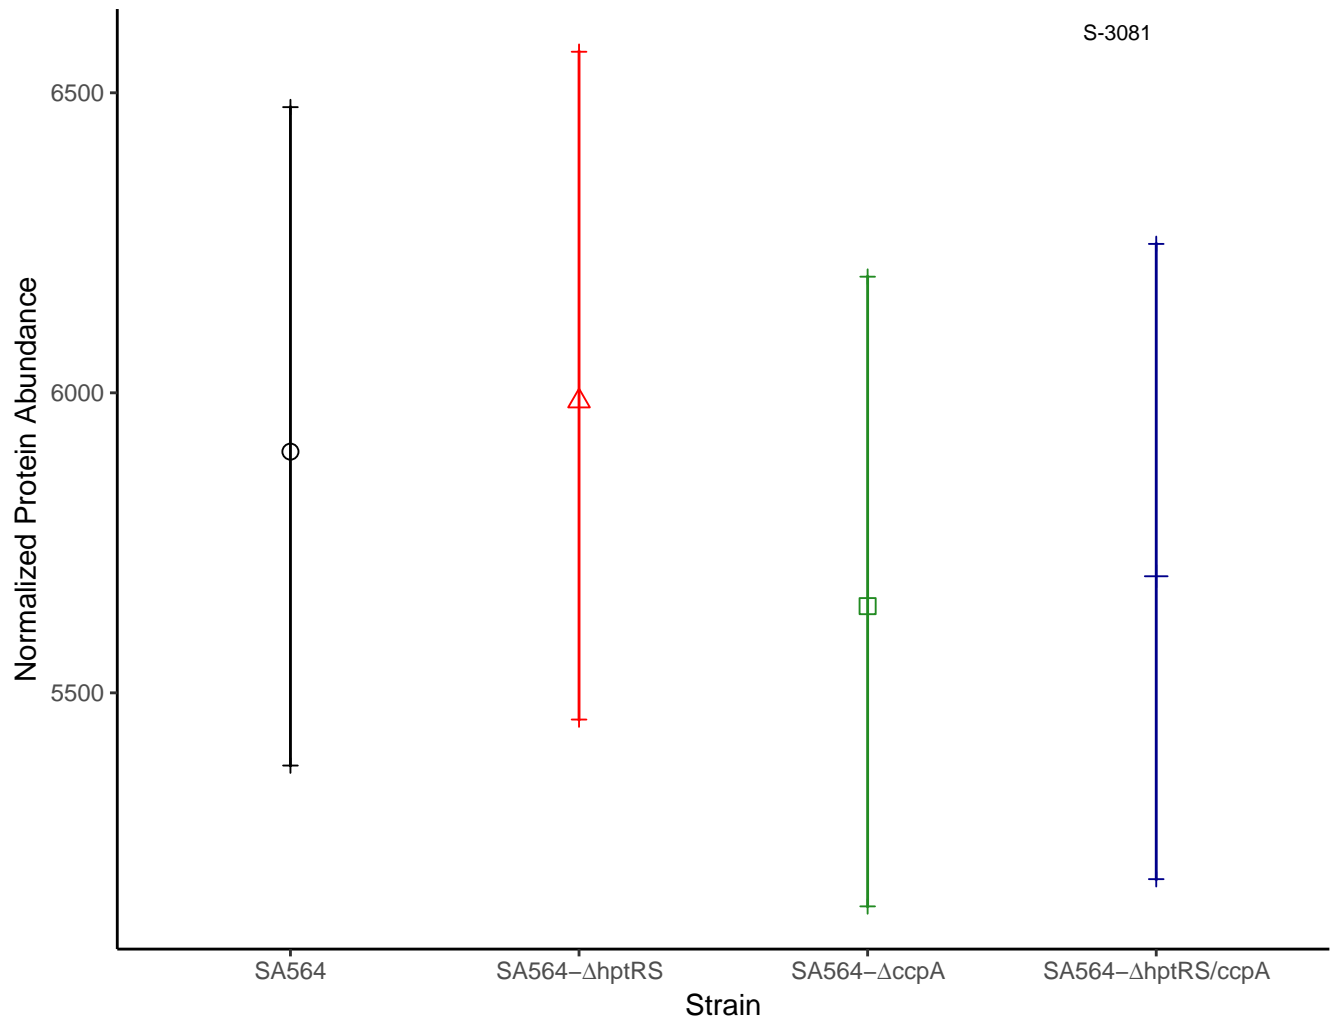

- ⊕ SA564
- △ SA564- $\Delta$ hptRS
- ⊞ SA564- $\Delta$ ccpA
- + SA564- $\Delta$ hptRS/ccpA

# DEF\_STAAM

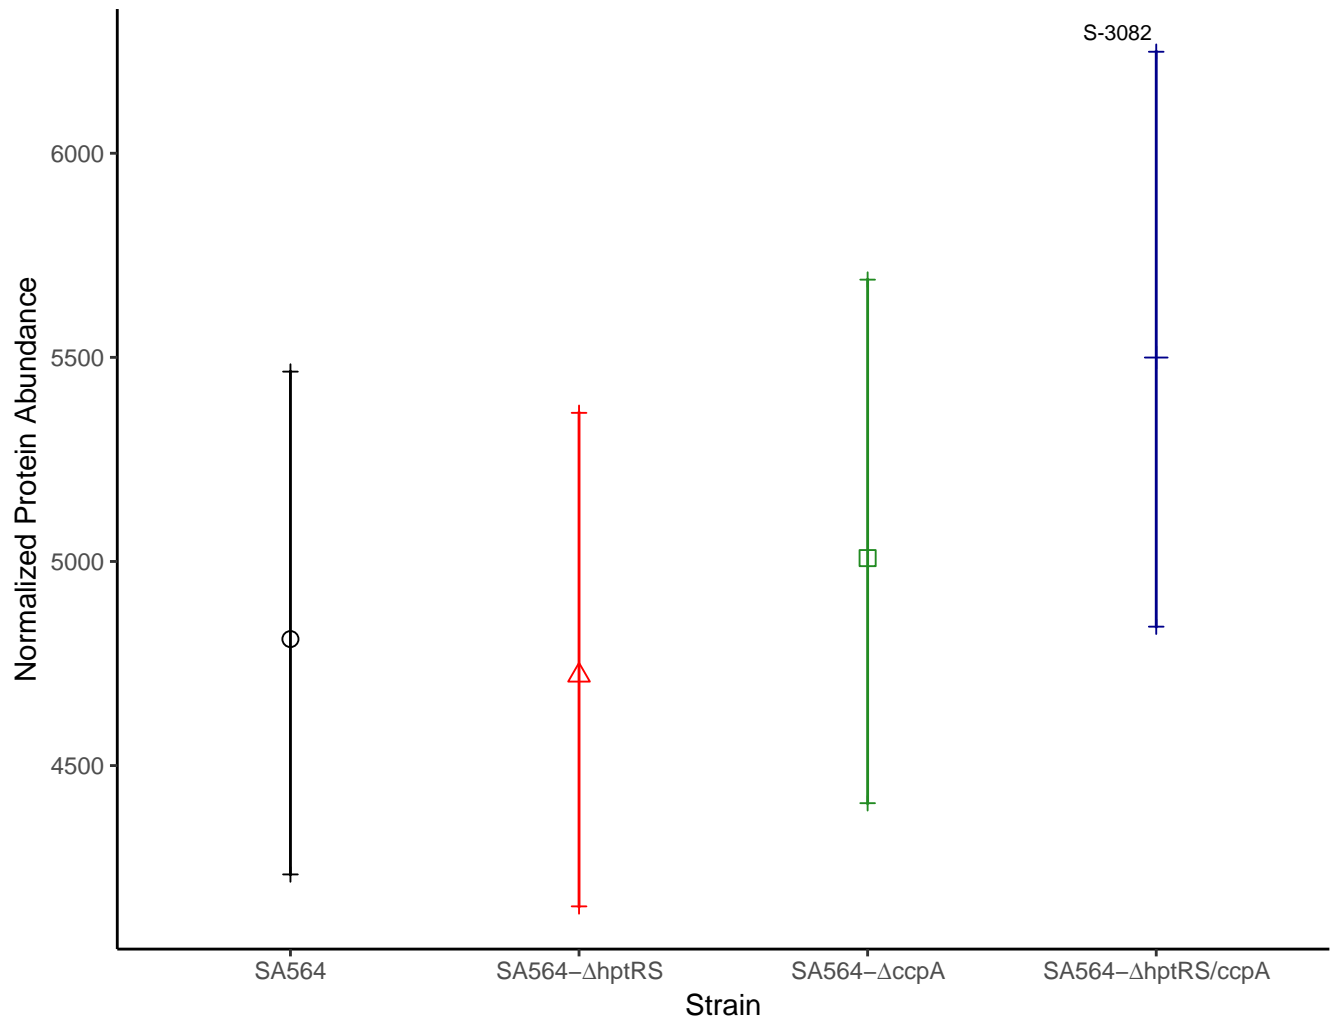

- ⊕ SA564
- △ SA564- $\Delta$ *hptRS*
- ⊞ SA564- $\Delta$ *ccpA*
- + SA564- $\Delta$ *hptRS/ccpA*

# DEOB\_STAAM

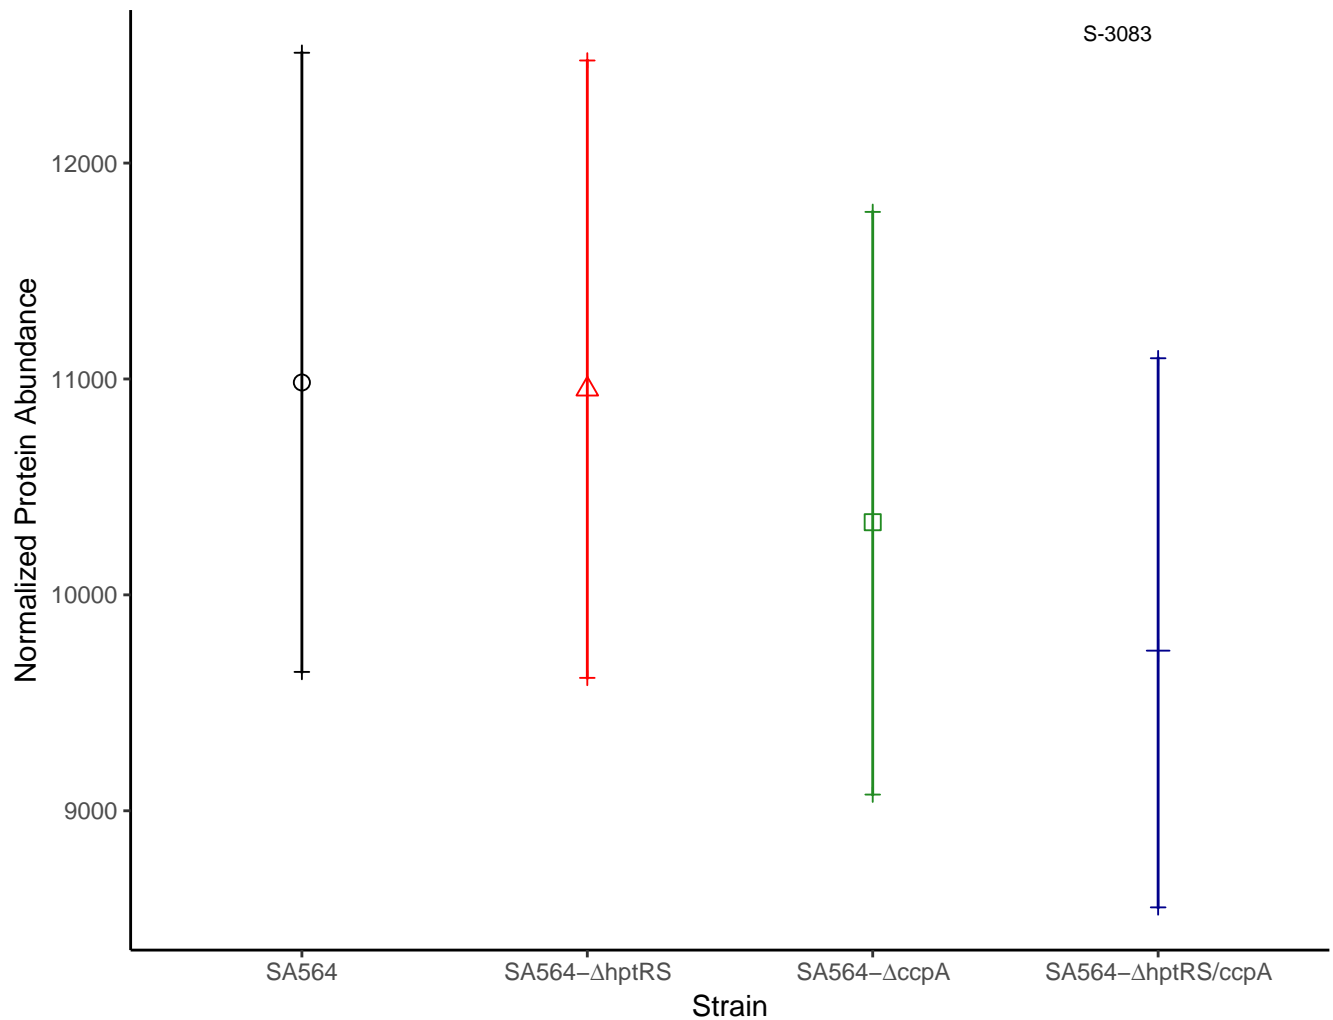

- ⊕ SA564
- △ SA564- $\Delta$ hptRS
- ⊞ SA564- $\Delta$ ccpA
- + SA564- $\Delta$ hptRS/ccpA

# DEOC1\_STAAM

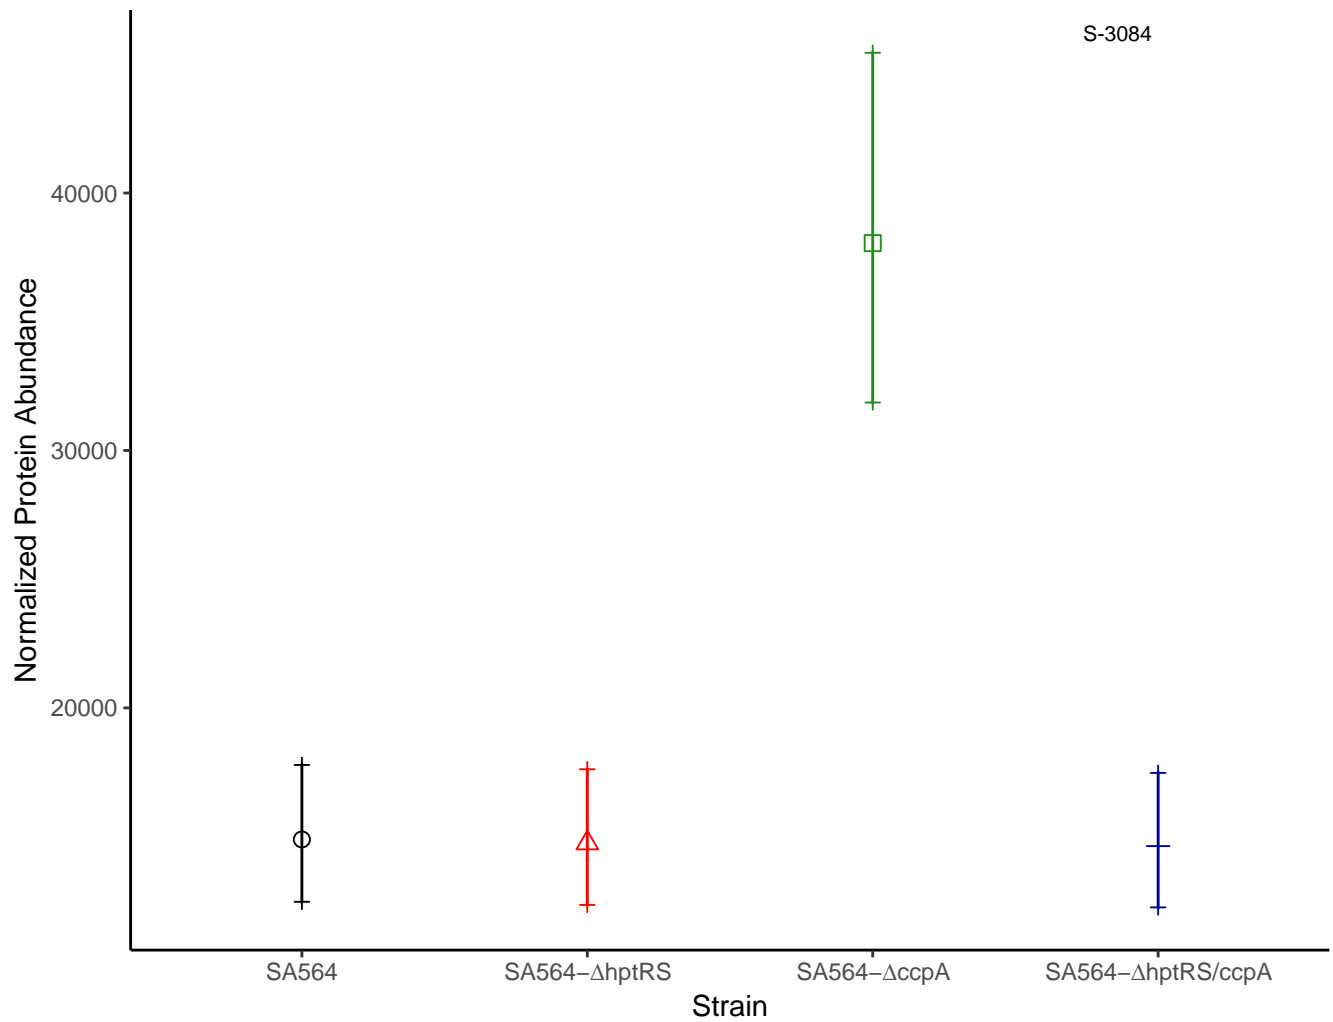

- ⊕ SA564
- △ SA564- $\Delta$ hptRS
- ⊞ SA564- $\Delta$ ccpA
- + SA564- $\Delta$ hptRS/ccpA

# DEOC2\_STAAM

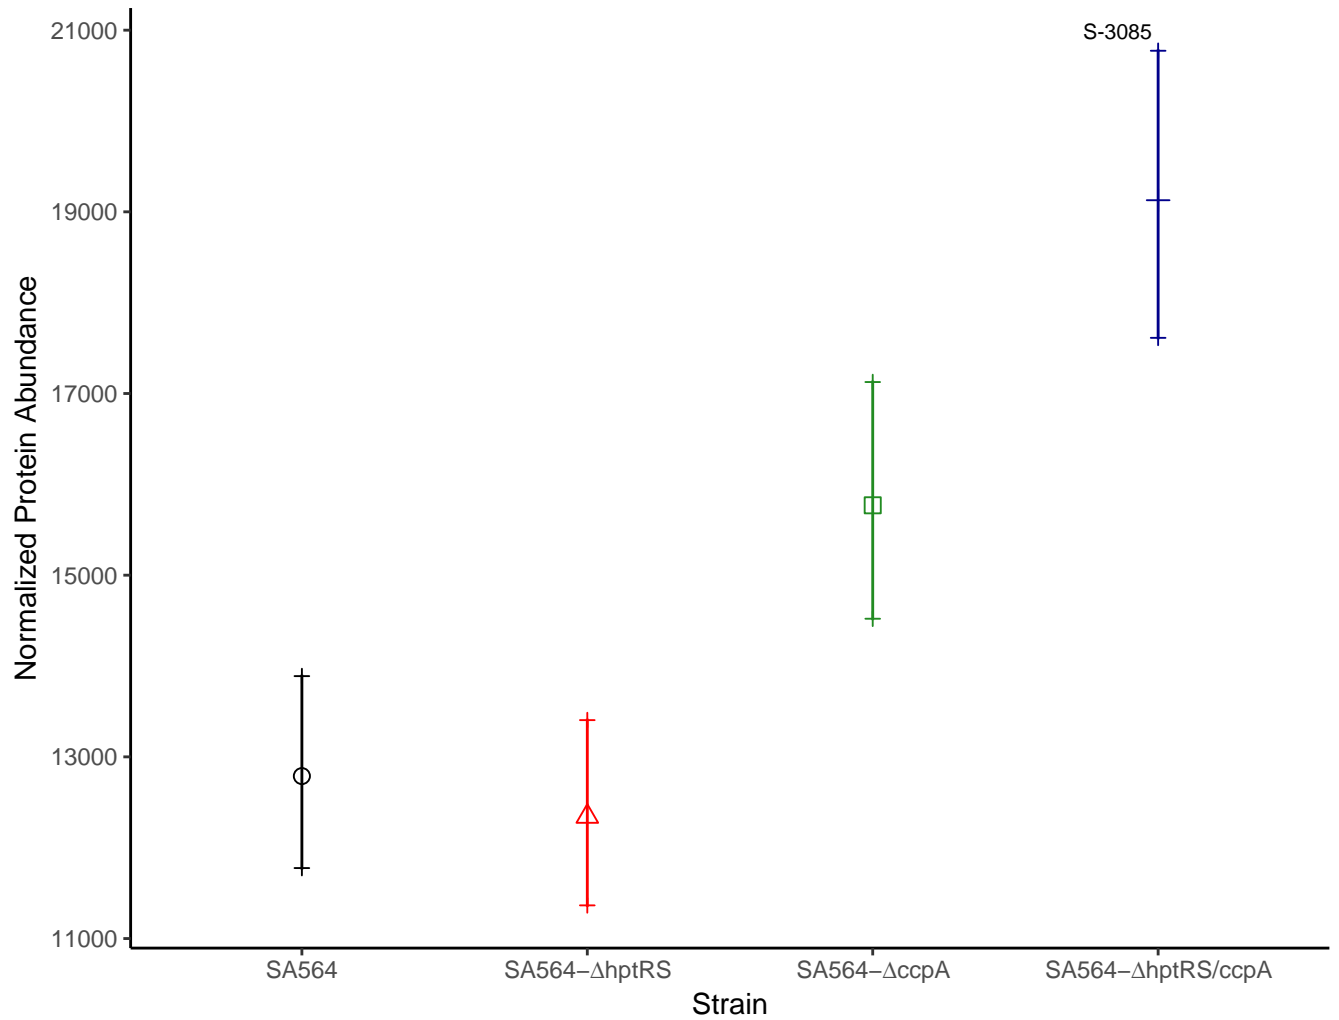

- ⊕ SA564
- △ SA564- $\Delta$ hptRS
- ⊞ SA564- $\Delta$ ccpA
- + SA564- $\Delta$ hptRS/ccpA

# DER\_STAAM

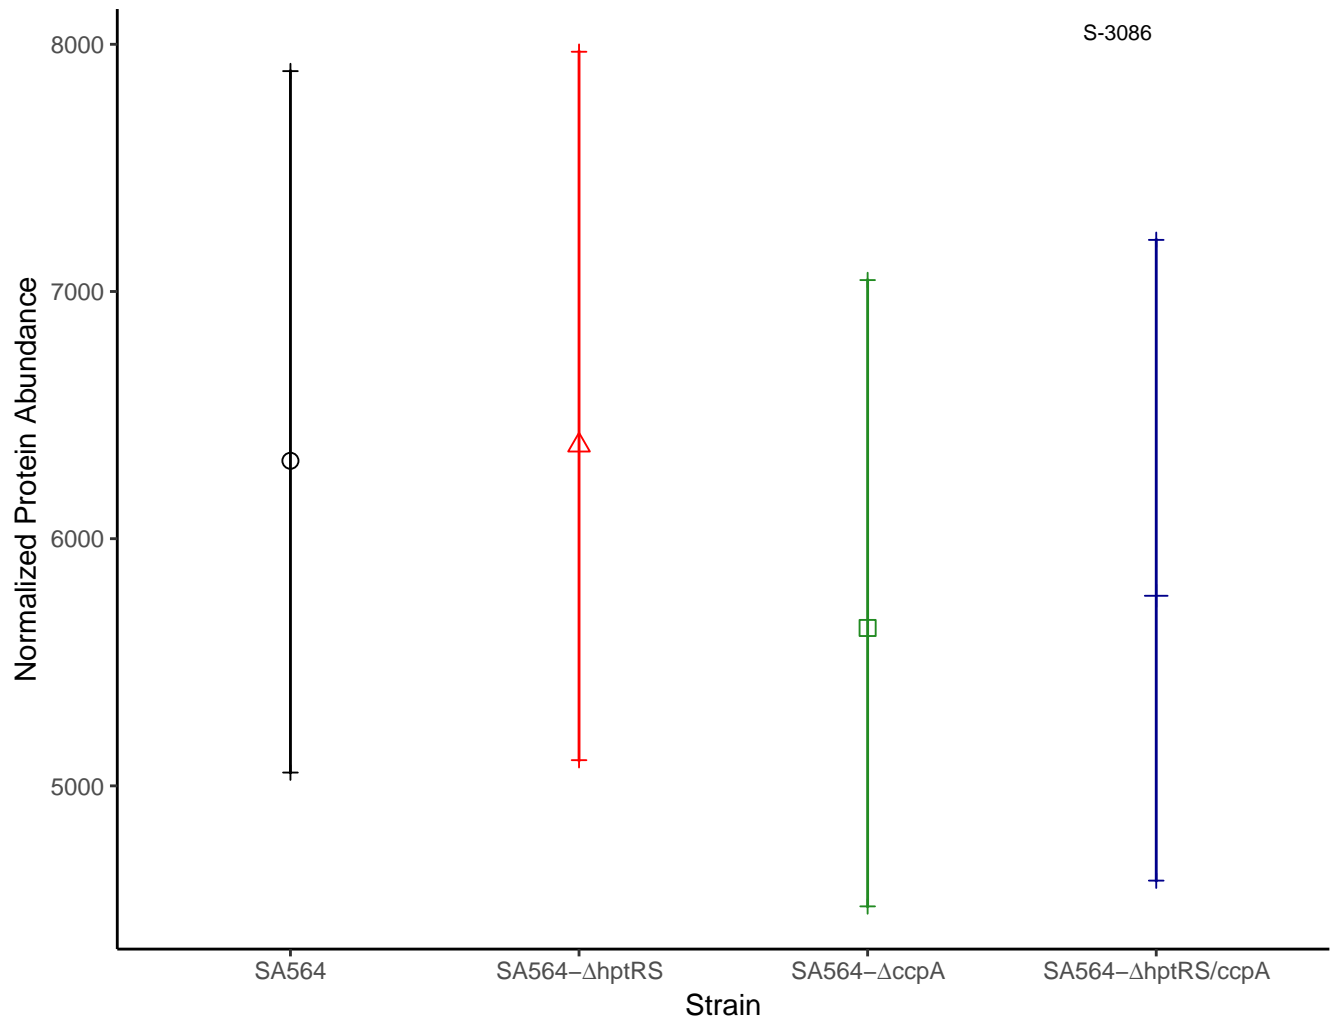

- ⊕ SA564
- △ SA564- $\Delta$ *hptRS*
- ⊞ SA564- $\Delta$ *ccpA*
- + SA564- $\Delta$ *hptRS/ccpA*

# DHA1\_STAAM

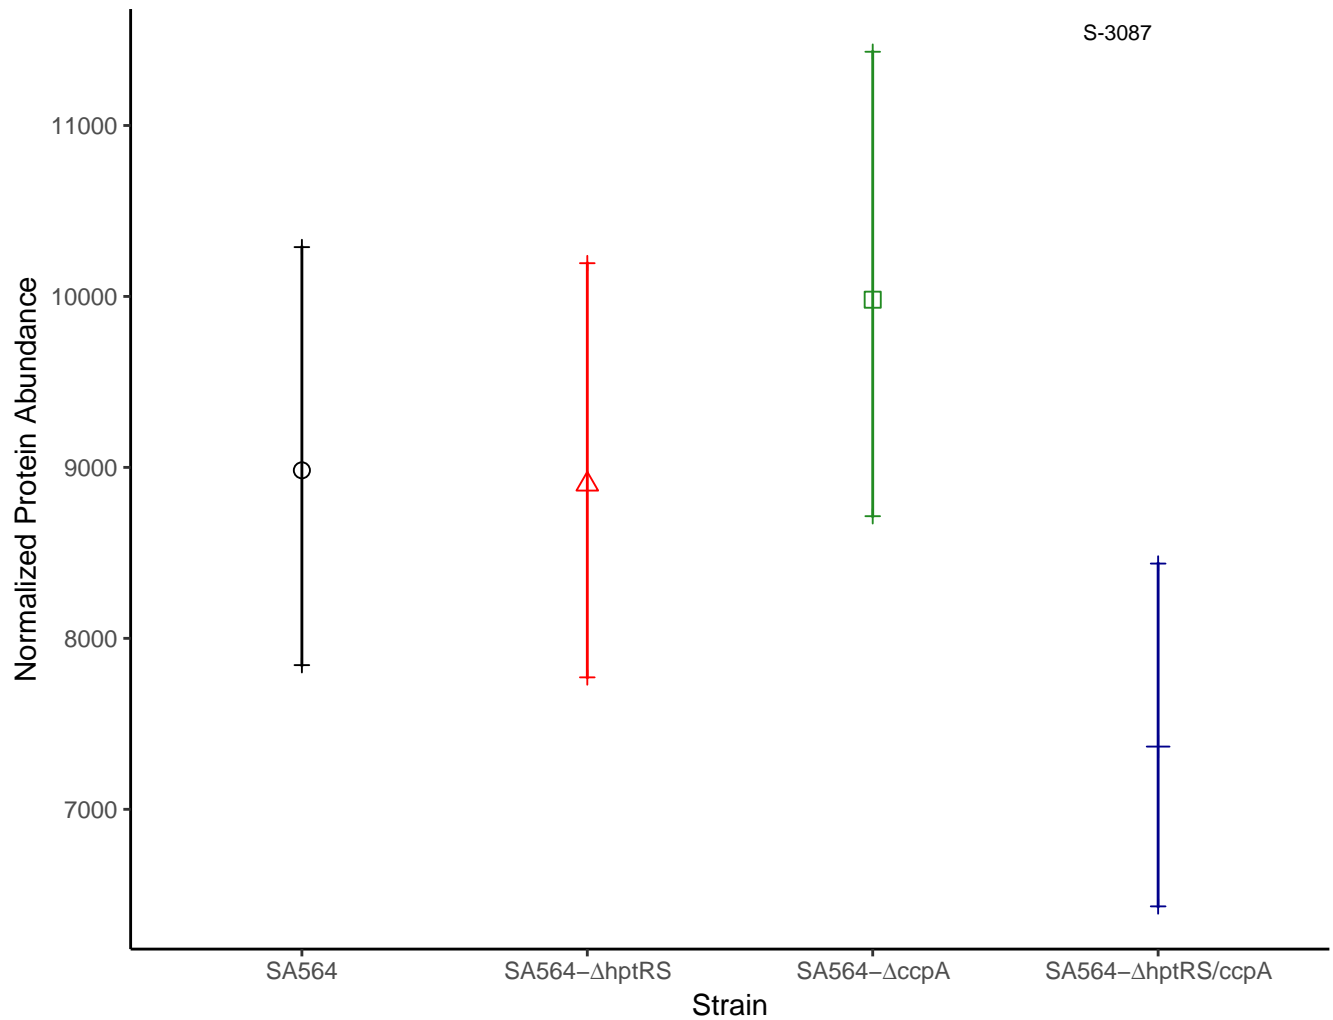

- ⊕ SA564
- △ SA564- $\Delta$ hptRS
- ⊞ SA564- $\Delta$ ccpA
- + SA564- $\Delta$ hptRS/ccpA

# DHA2\_STAAM

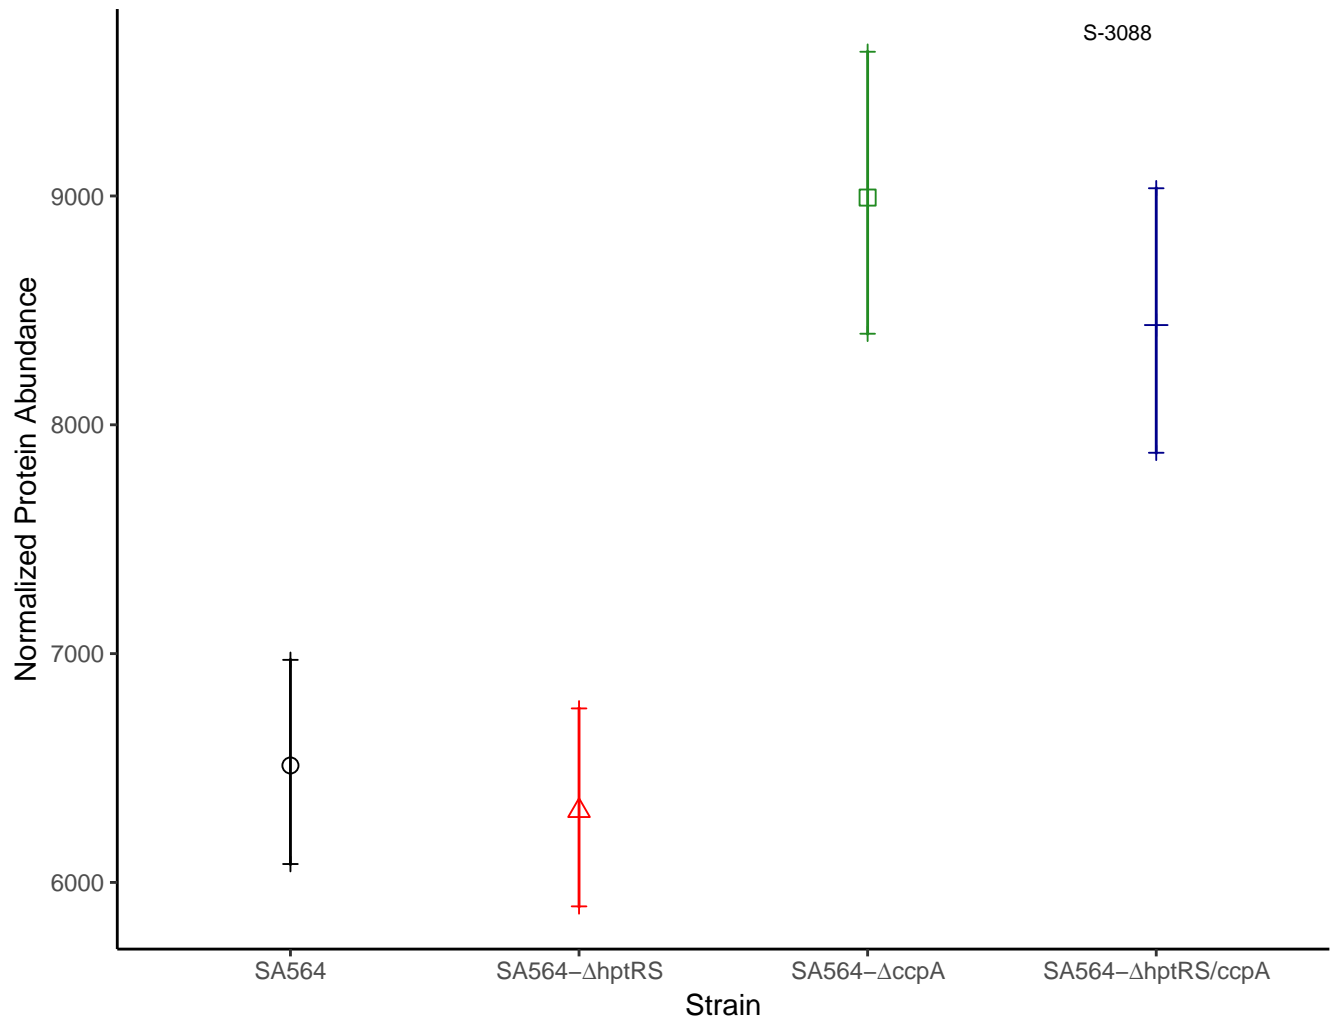

S-3088

- ⊕ SA564
- △ SA564- $\Delta$ hptRS
- ⊞ SA564- $\Delta$ ccpA
- + SA564- $\Delta$ hptRS/ccpA



# DHE2\_STAAM

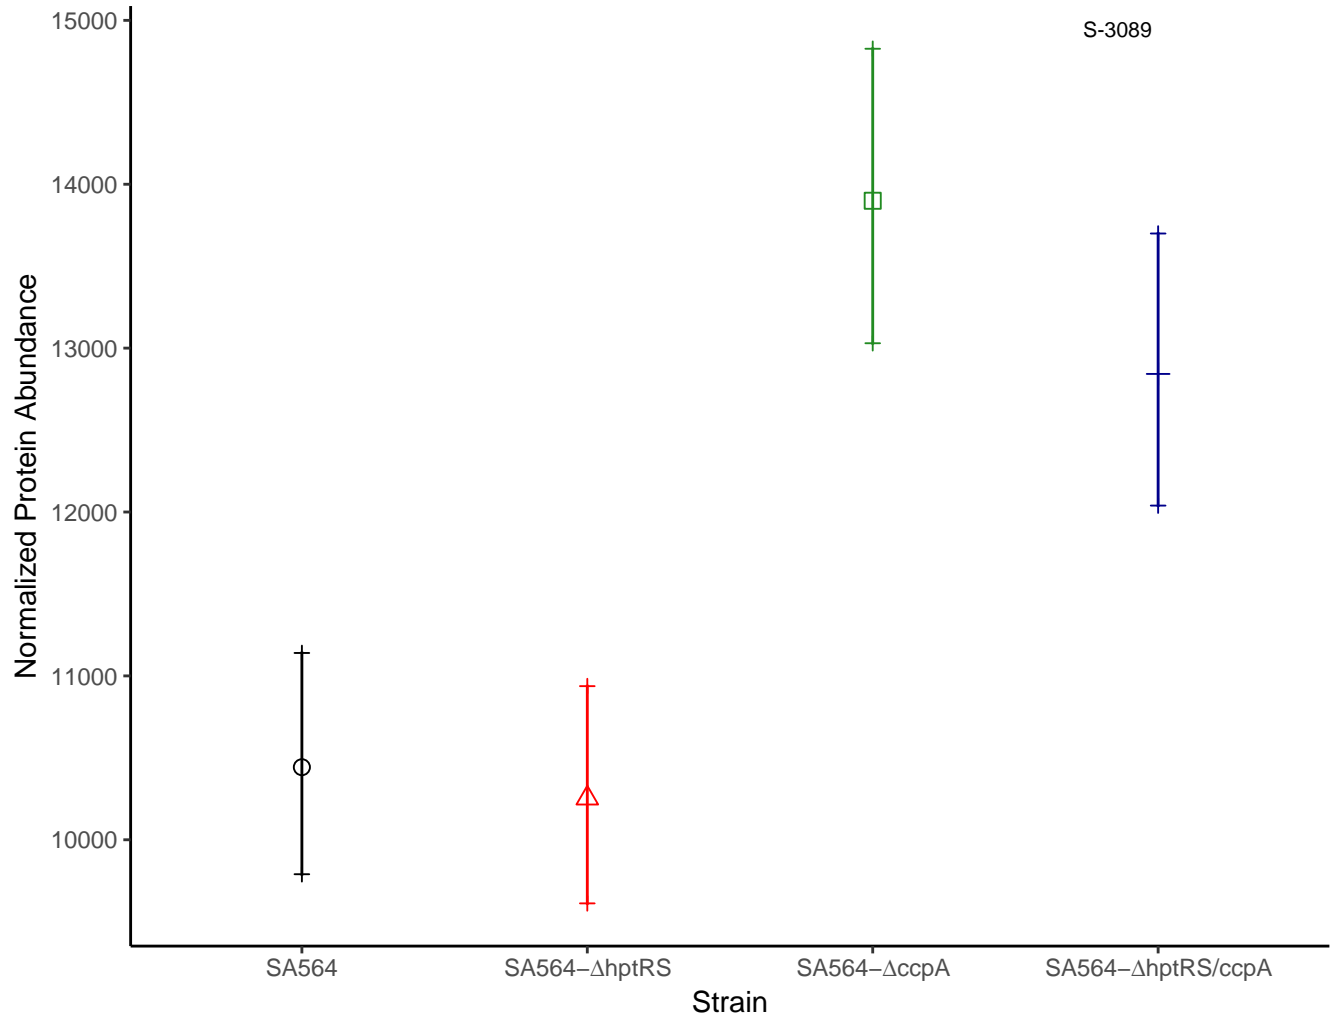

- ⊕ SA564
- △ SA564- $\Delta$ hptRS
- ⊞ SA564- $\Delta$ ccpA
- + SA564- $\Delta$ hptRS/ccpA

# DHPS\_STAAM

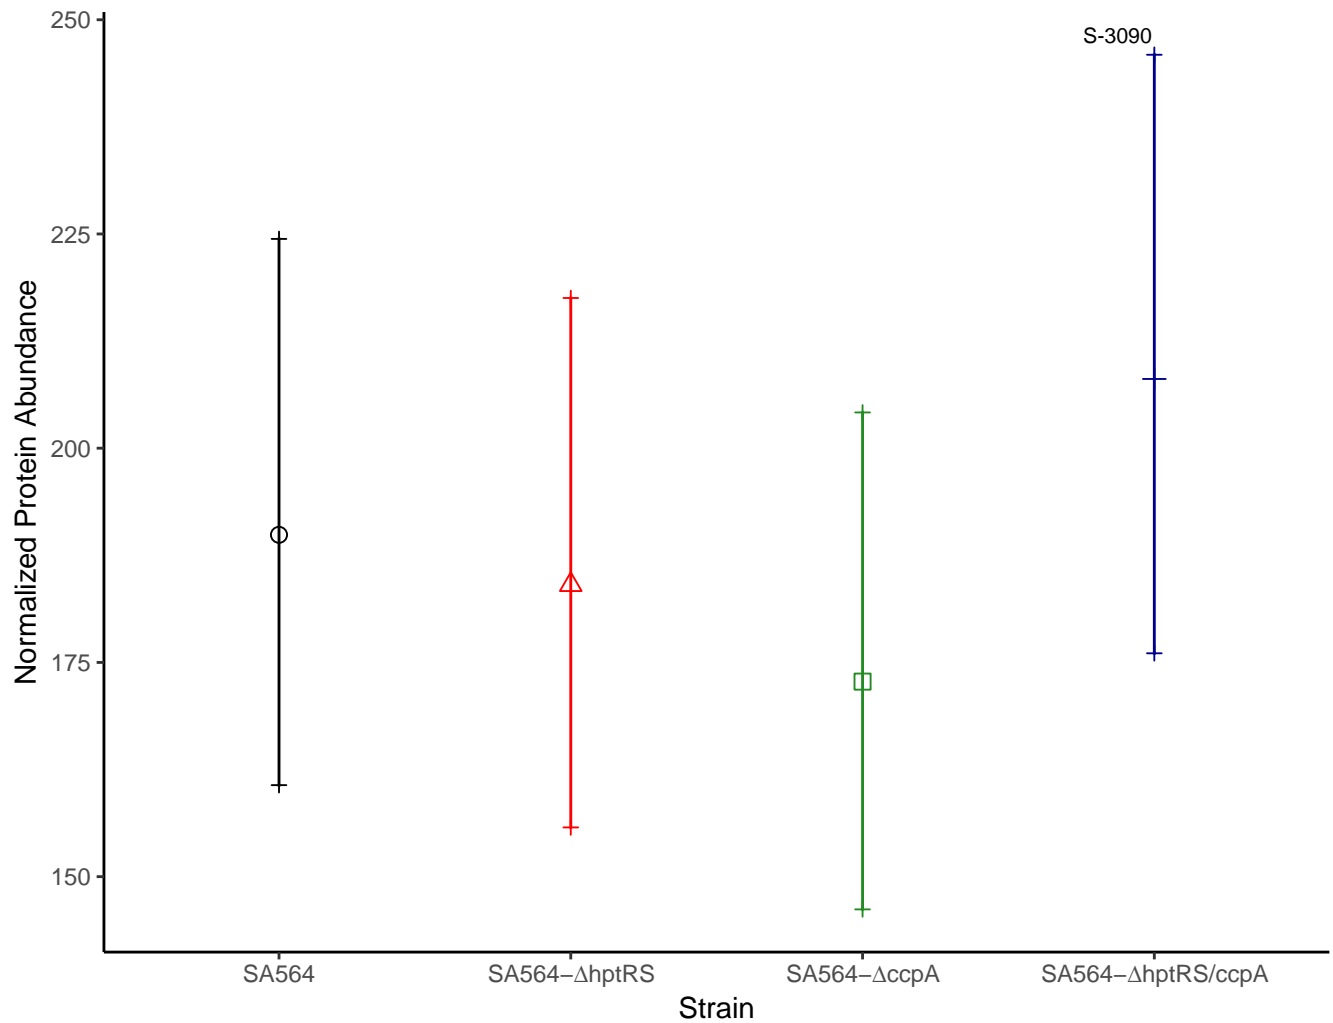

- ⊕ SA564
- △ SA564- $\Delta$ hptRS
- ⊞ SA564- $\Delta$ ccpA
- + SA564- $\Delta$ hptRS/ccpA

# DLDH\_STAAM

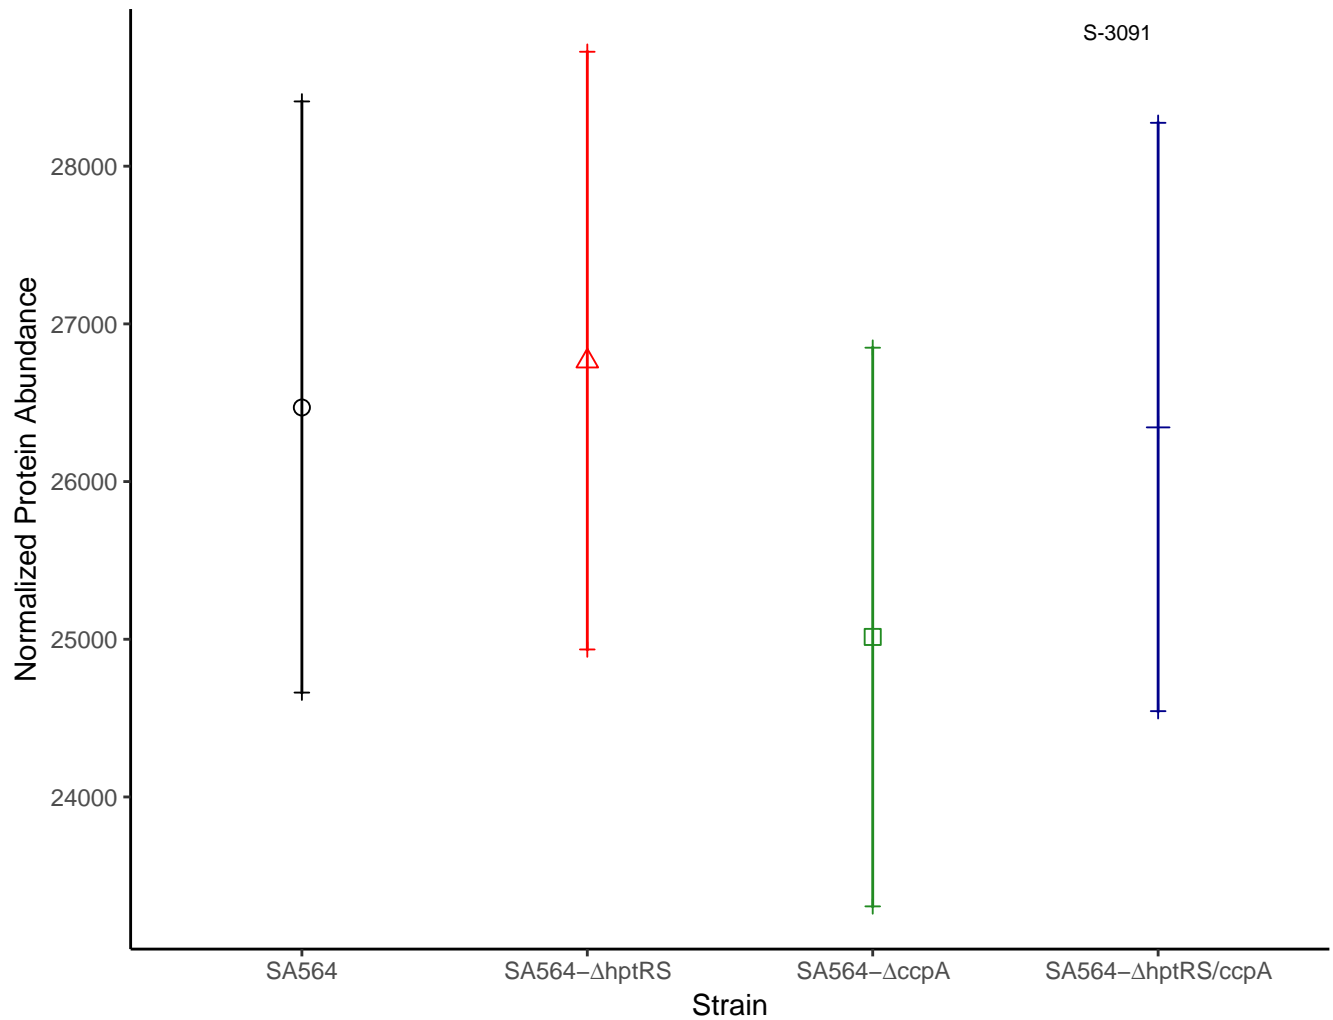

S-3091

- ⊕ SA564
- △ SA564- $\Delta$ hptRS
- ⊞ SA564- $\Delta$ ccpA
- + SA564- $\Delta$ hptRS/ccpA

# DLTA\_STAAM

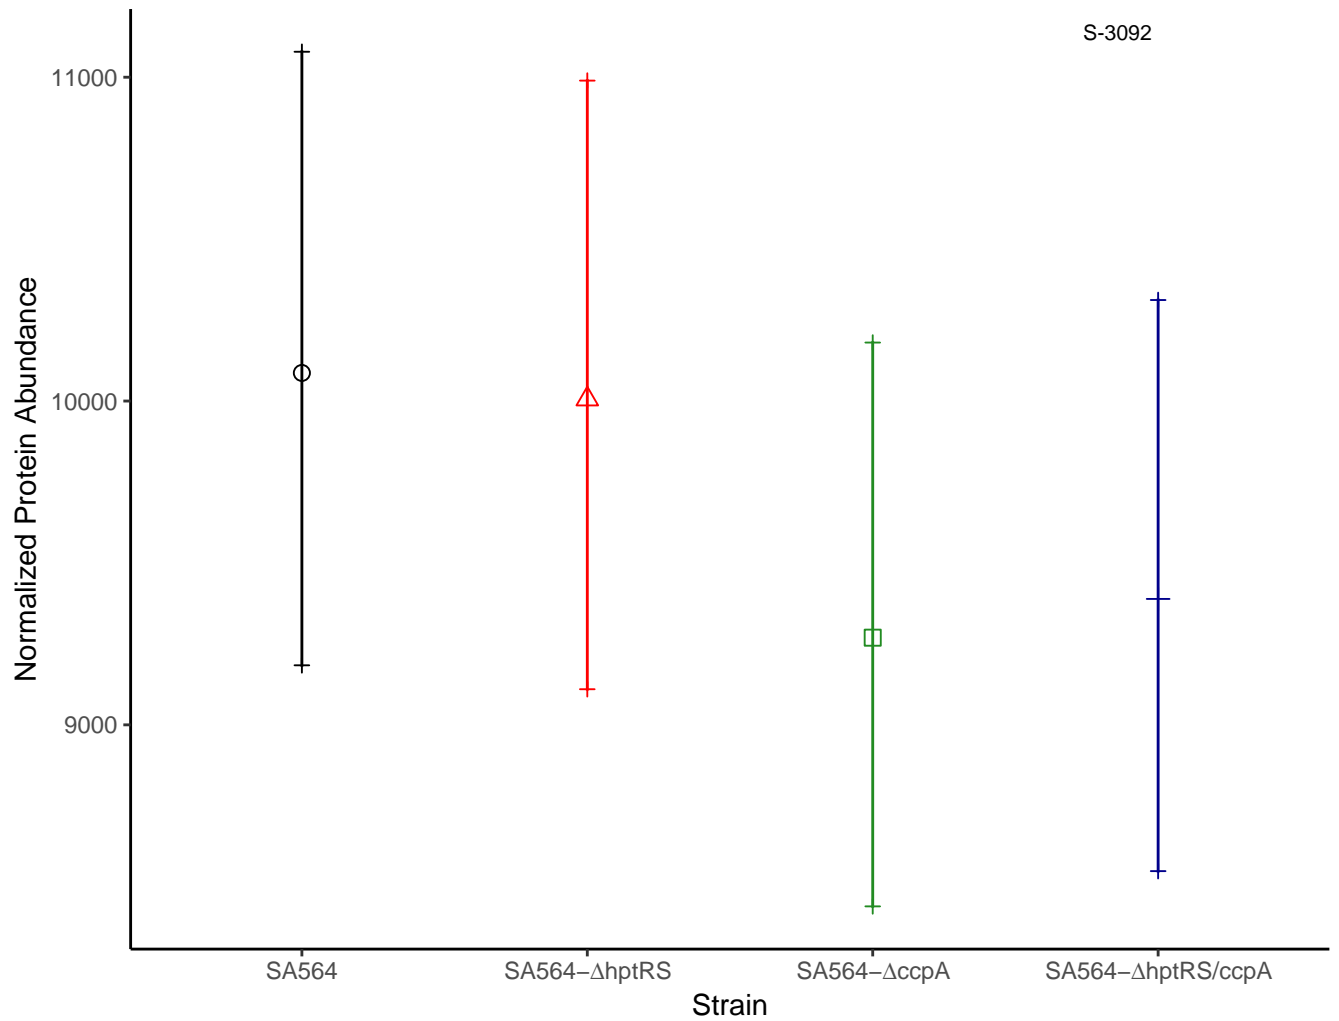

- ⊕ SA564
- △ SA564- $\Delta$ hptRS
- ⊞ SA564- $\Delta$ ccpA
- + SA564- $\Delta$ hptRS/ccpA

# DLTC\_STAAM

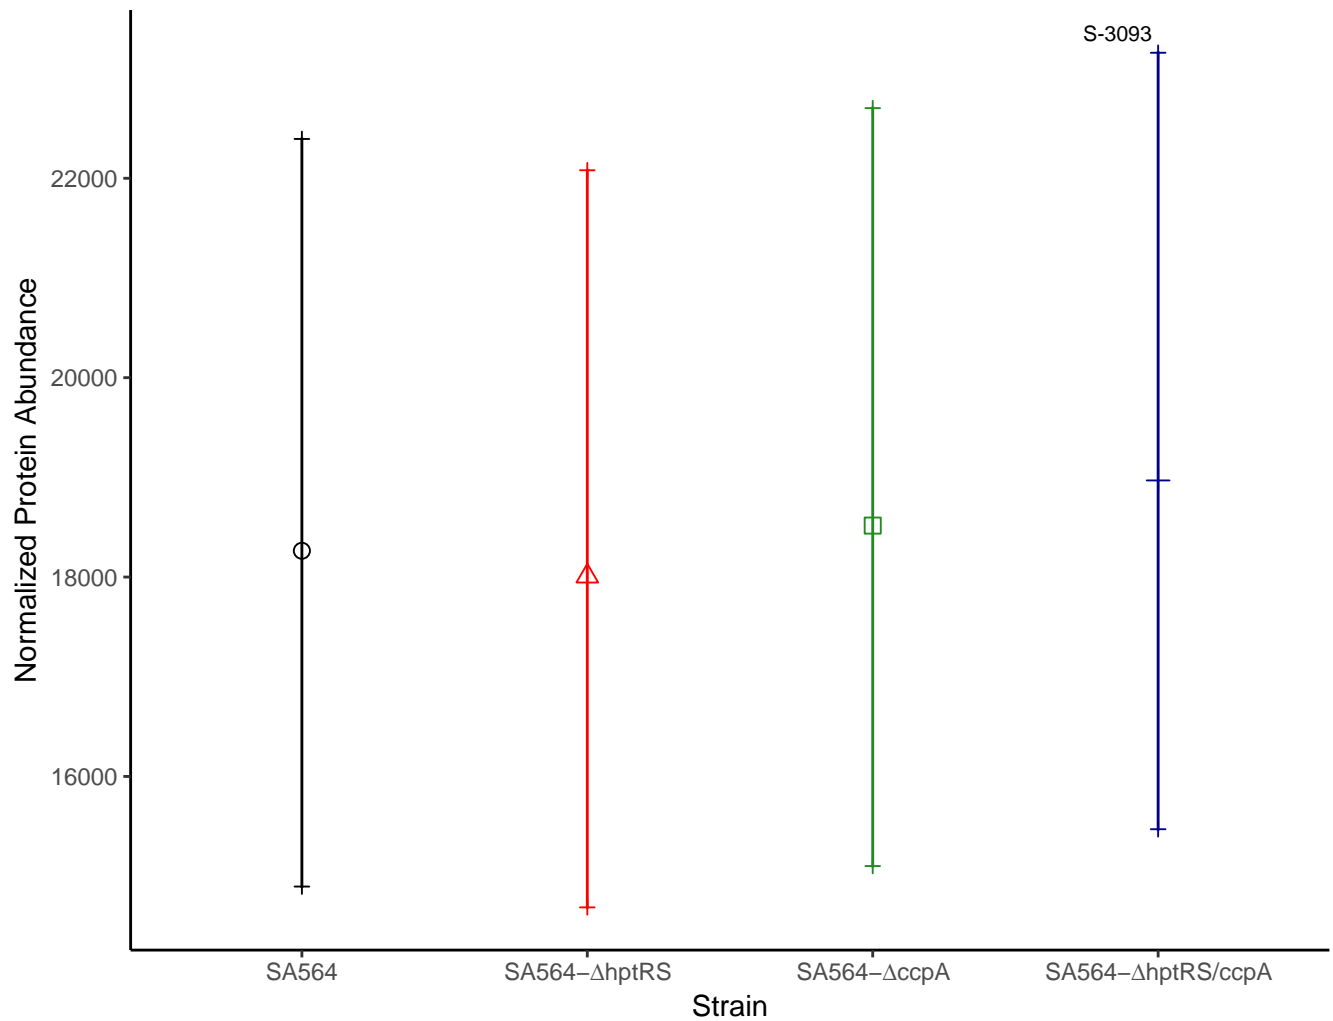

- ⊕ SA564
- △ SA564-ΔhptRS
- ⊞ SA564-ΔccpA
- + SA564-ΔhptRS/ccpA

# DNAA\_STAAM

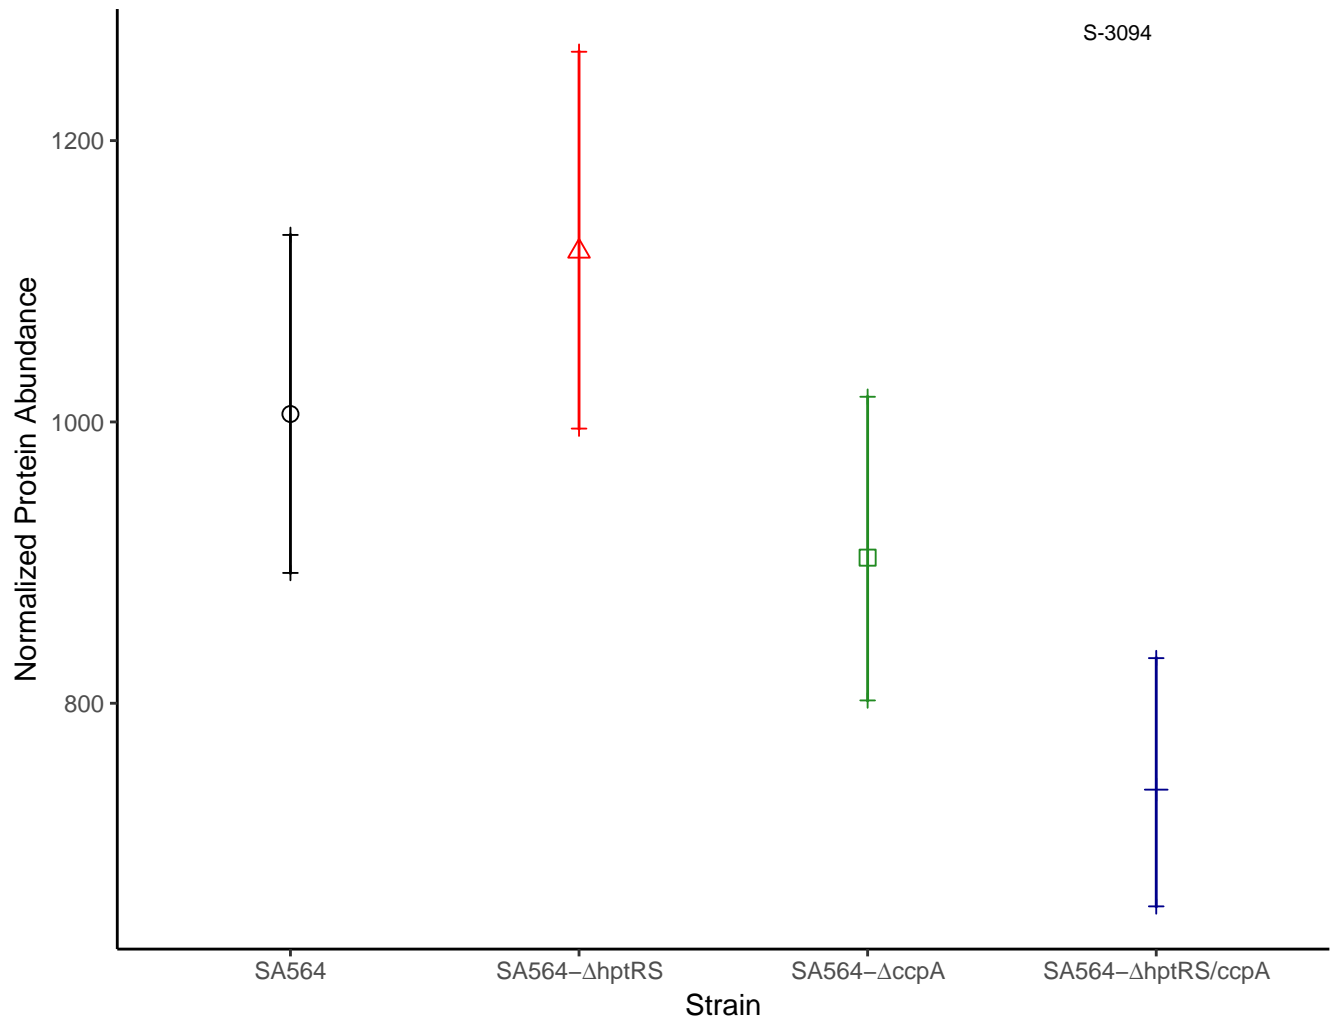

- ⊕ SA564
- △ SA564- $\Delta$ hptRS
- ⊞ SA564- $\Delta$ ccpA
- + SA564- $\Delta$ hptRS/ccpA

# DNAG\_STAAM

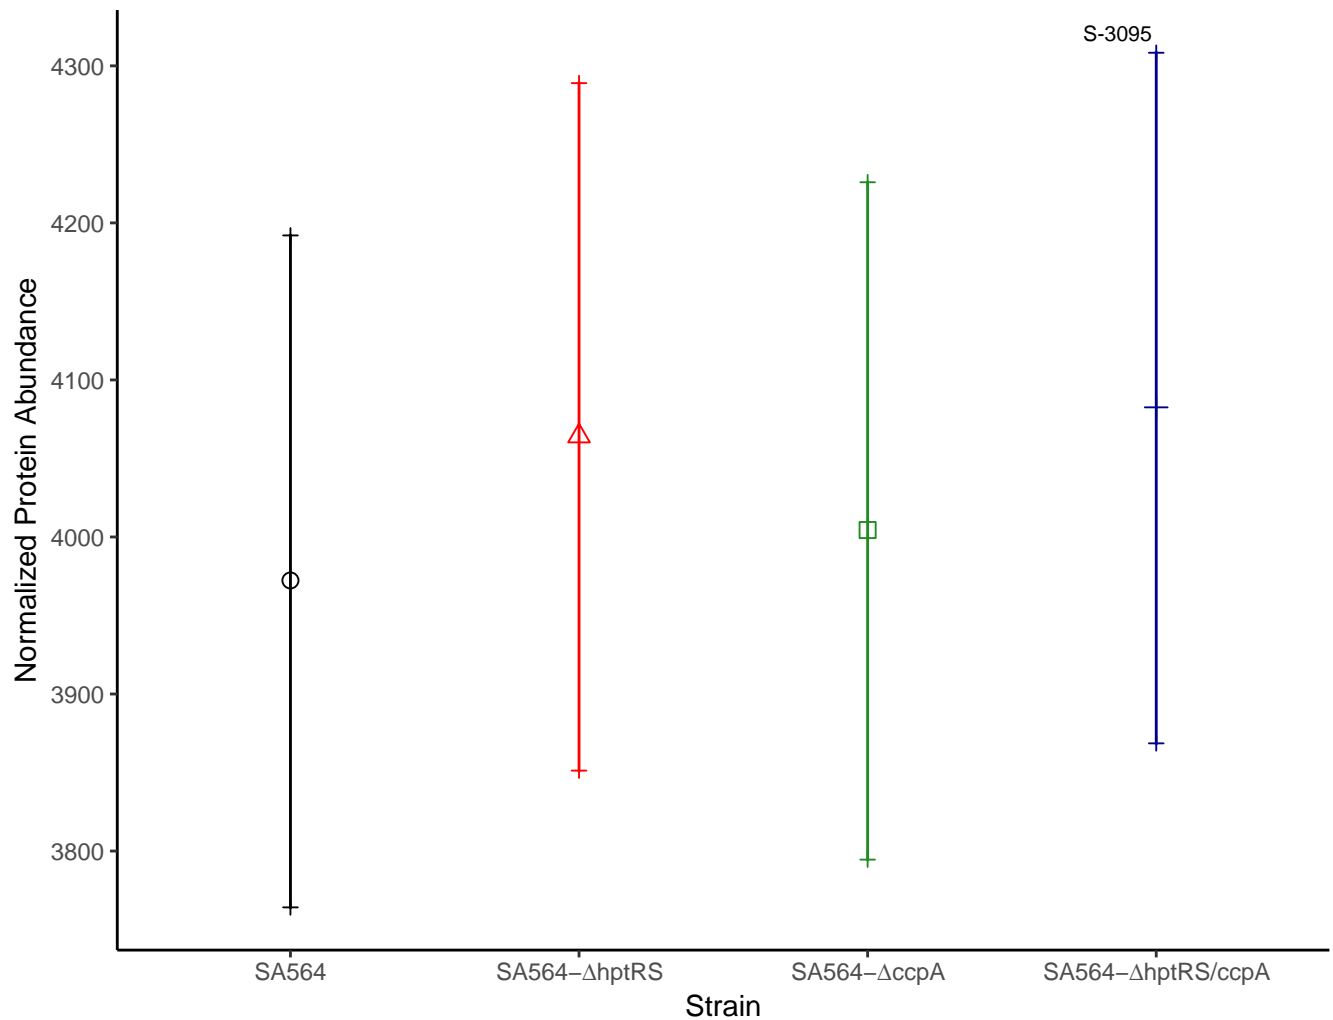

- ⊕ SA564
- △ SA564- $\Delta$ *hptRS*
- ⊞ SA564- $\Delta$ *ccpA*
- + SA564- $\Delta$ *hptRS/ccpA*

# DNAJ\_STAAM

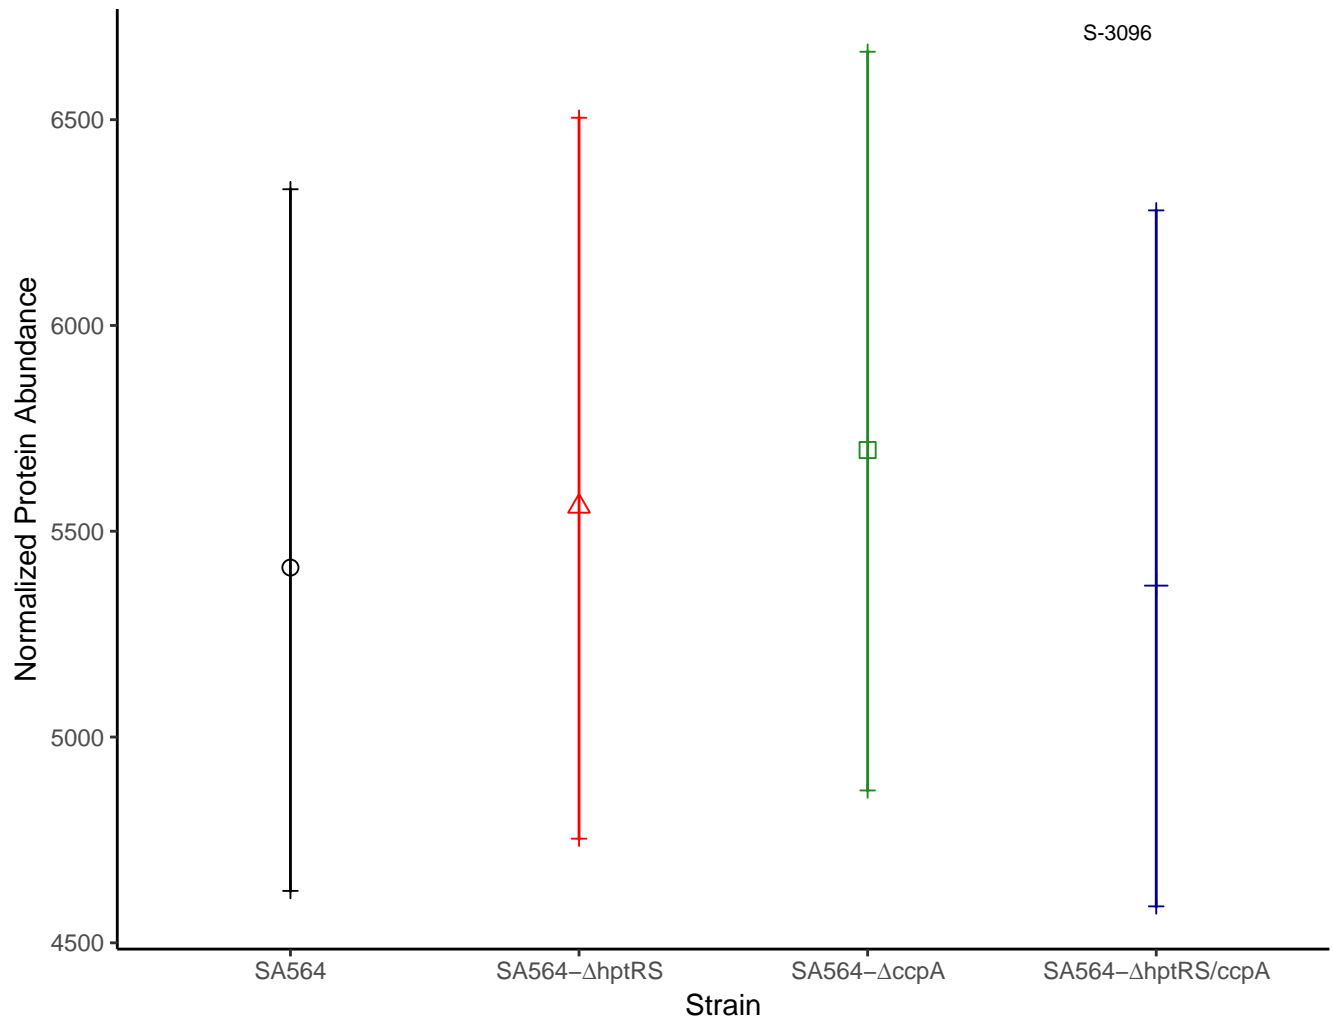

- ⊕ SA564
- △ SA564- $\Delta$ hptRS
- ⊞ SA564- $\Delta$ ccpA
- + SA564- $\Delta$ hptRS/ccpA



# DNAK\_STAAM

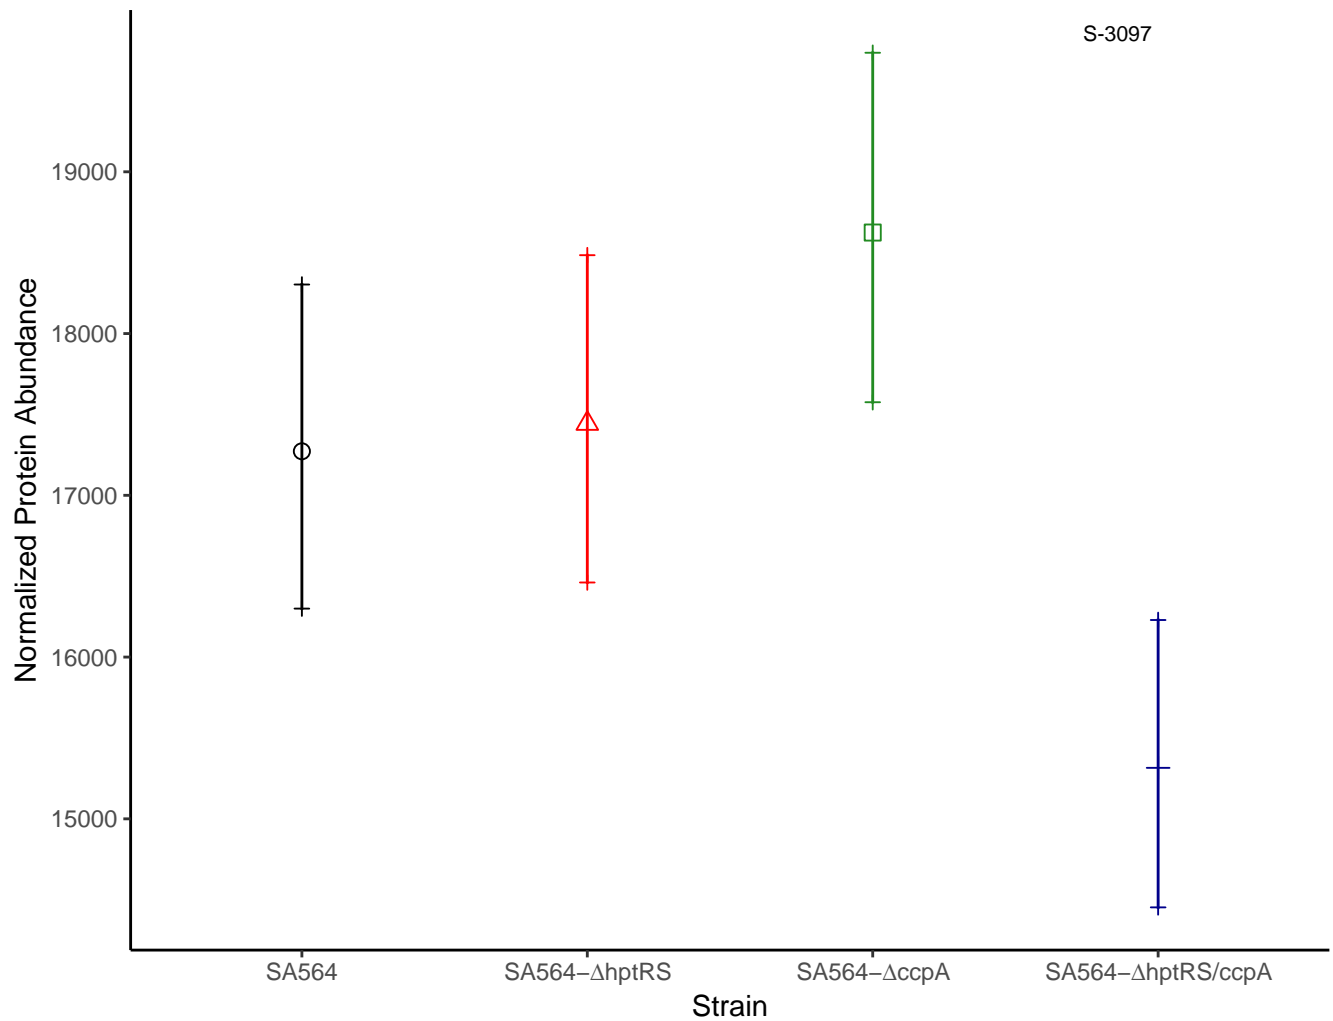

- ⊕ SA564
- △ SA564- $\Delta$ hptRS
- ⊞ SA564- $\Delta$ ccpA
- + SA564- $\Delta$ hptRS/ccpA

# DNLJ\_STAAM

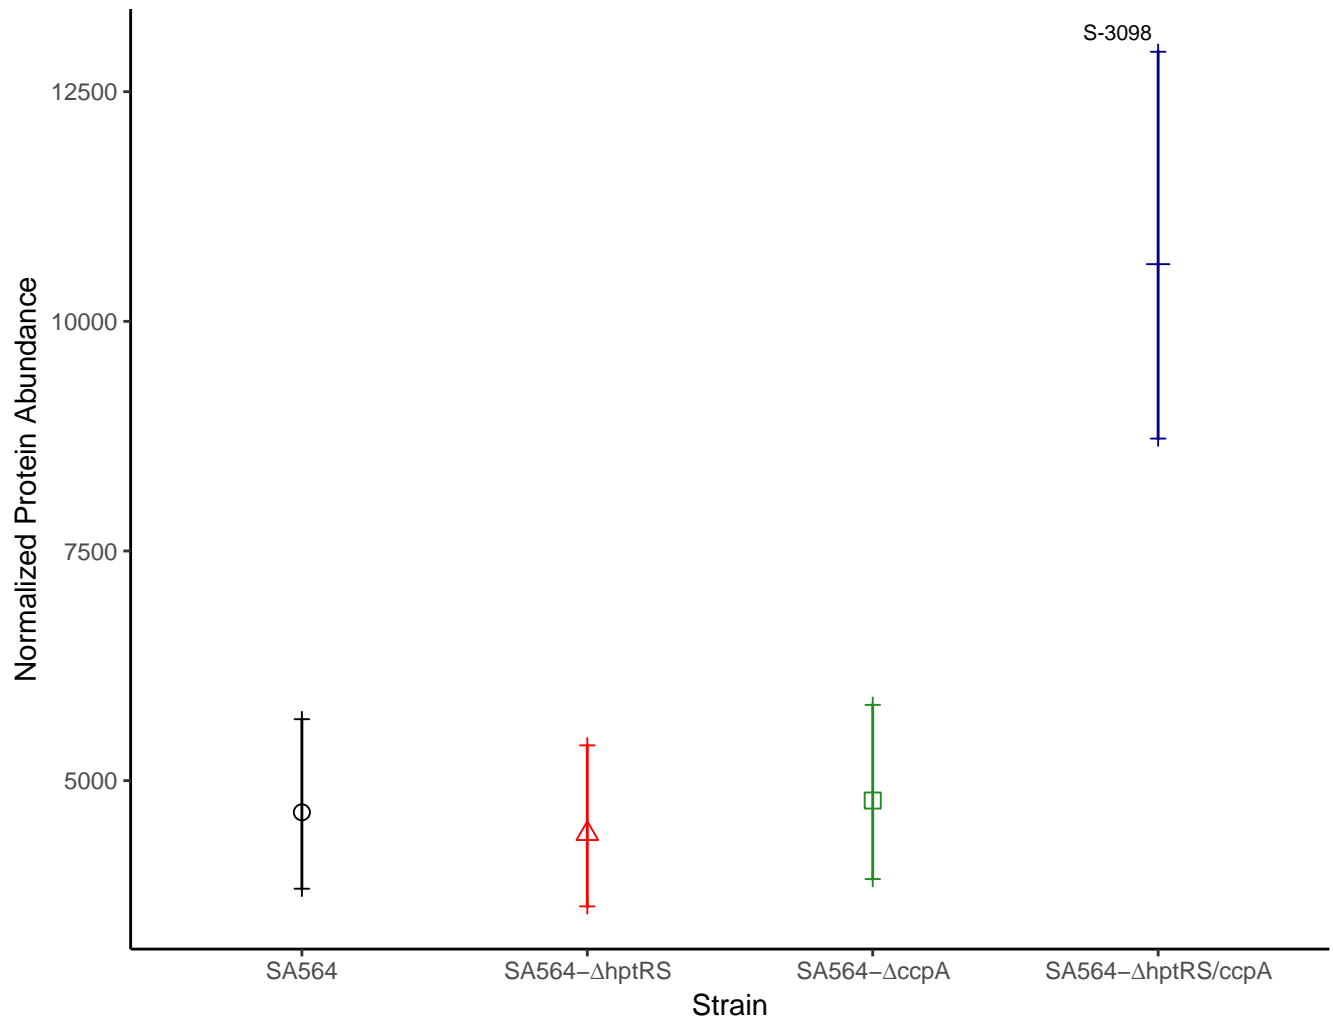

- ⊕ SA564
- △ SA564- $\Delta$ hptRS
- ⊞ SA564- $\Delta$ ccpA
- + SA564- $\Delta$ hptRS/ccpA

# DPO3B\_STAAM

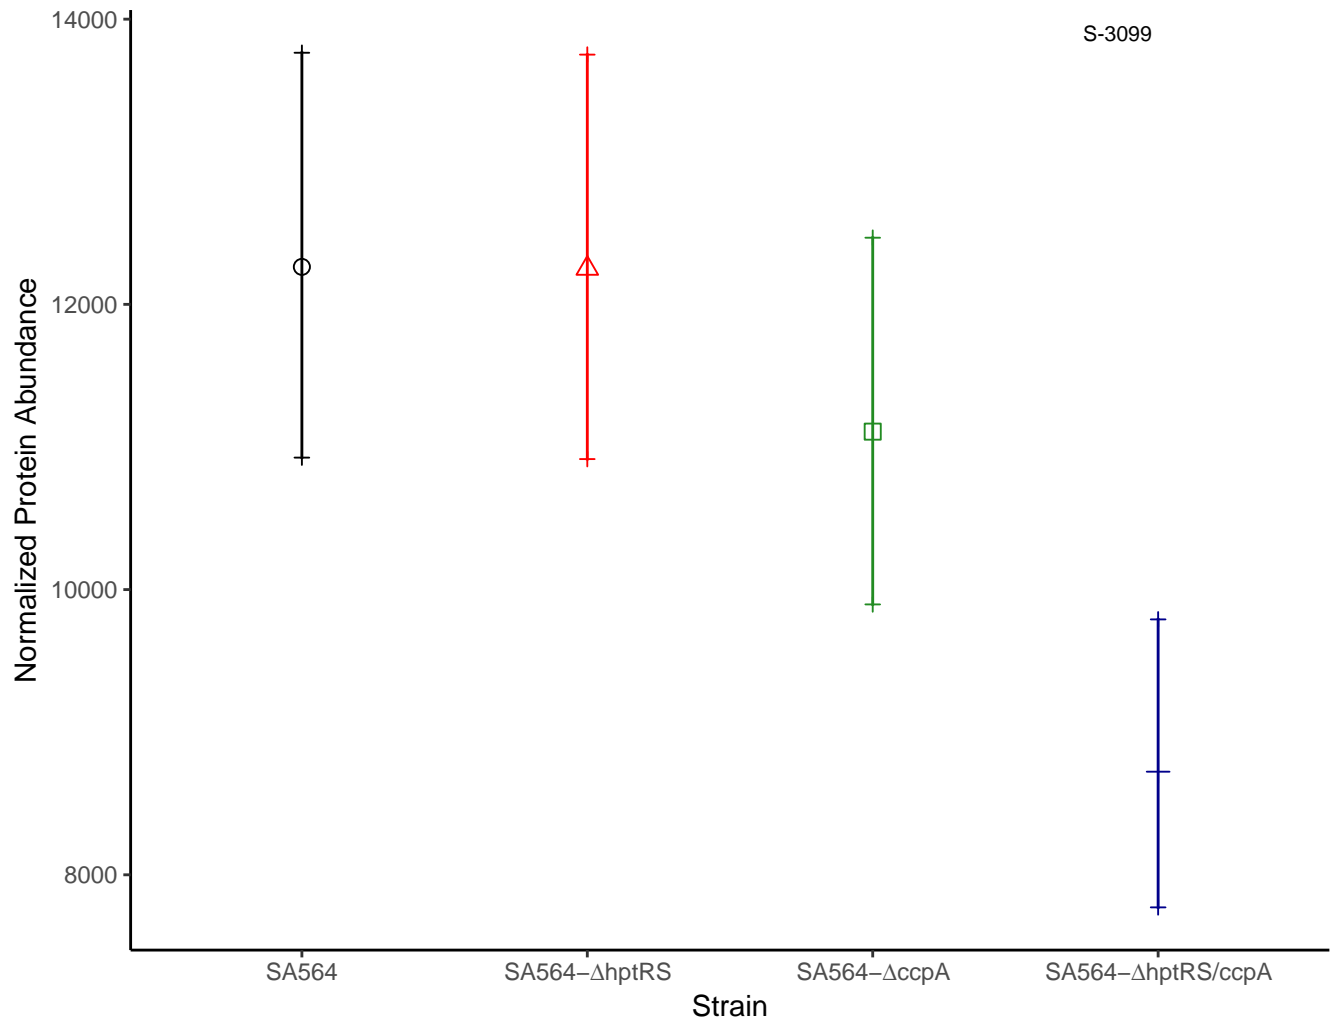

- ⊕ SA564
- △ SA564- $\Delta$ hptRS
- ⊞ SA564- $\Delta$ ccpA
- + SA564- $\Delta$ hptRS/ccpA

# DPO4\_STAAM

S-3100

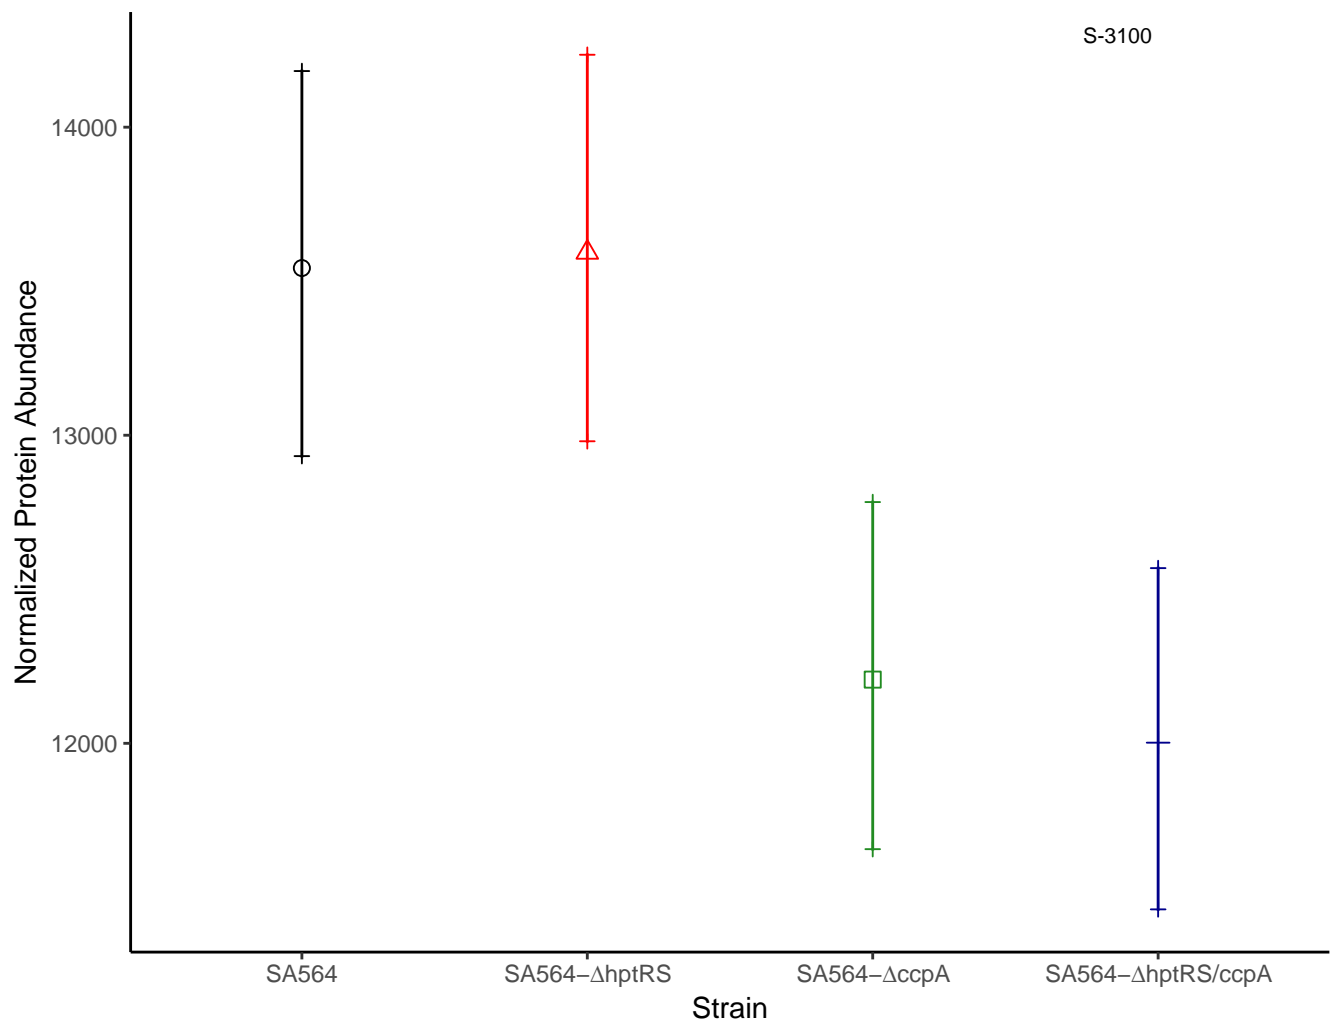

- ⊕ SA564
- △ SA564- $\Delta$ hptRS
- ⊞ SA564- $\Delta$ ccpA
- + SA564- $\Delta$ hptRS/ccpA

# DTD\_STAAM

S-3101

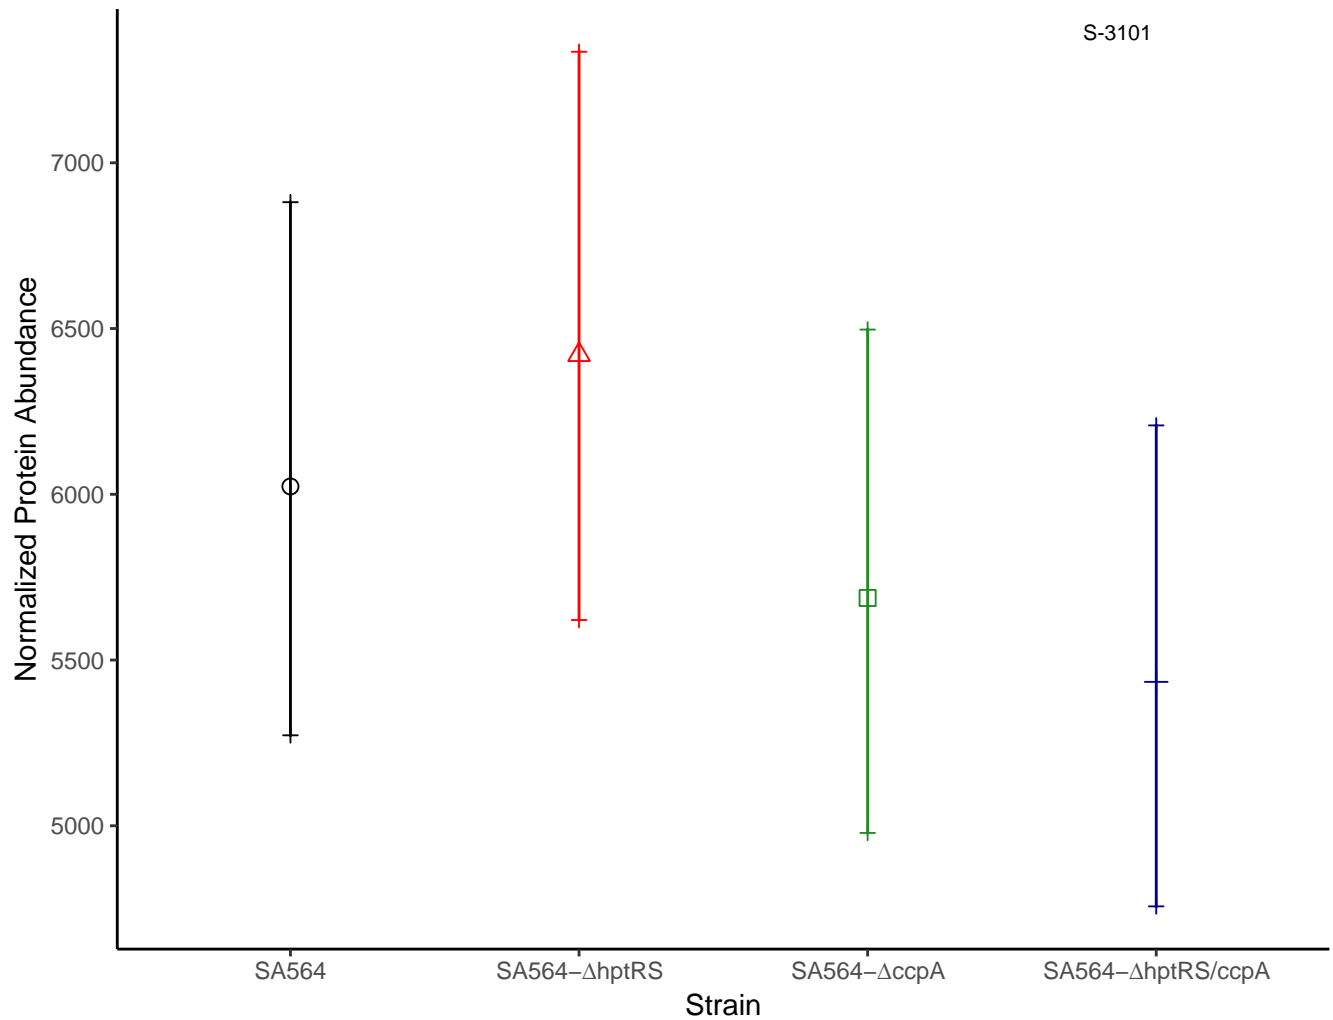

- ⊕ SA564
- △ SA564- $\Delta$ hptRS
- ⊞ SA564- $\Delta$ ccpA
- + SA564- $\Delta$ hptRS/ccpA

# DYR\_STAAM

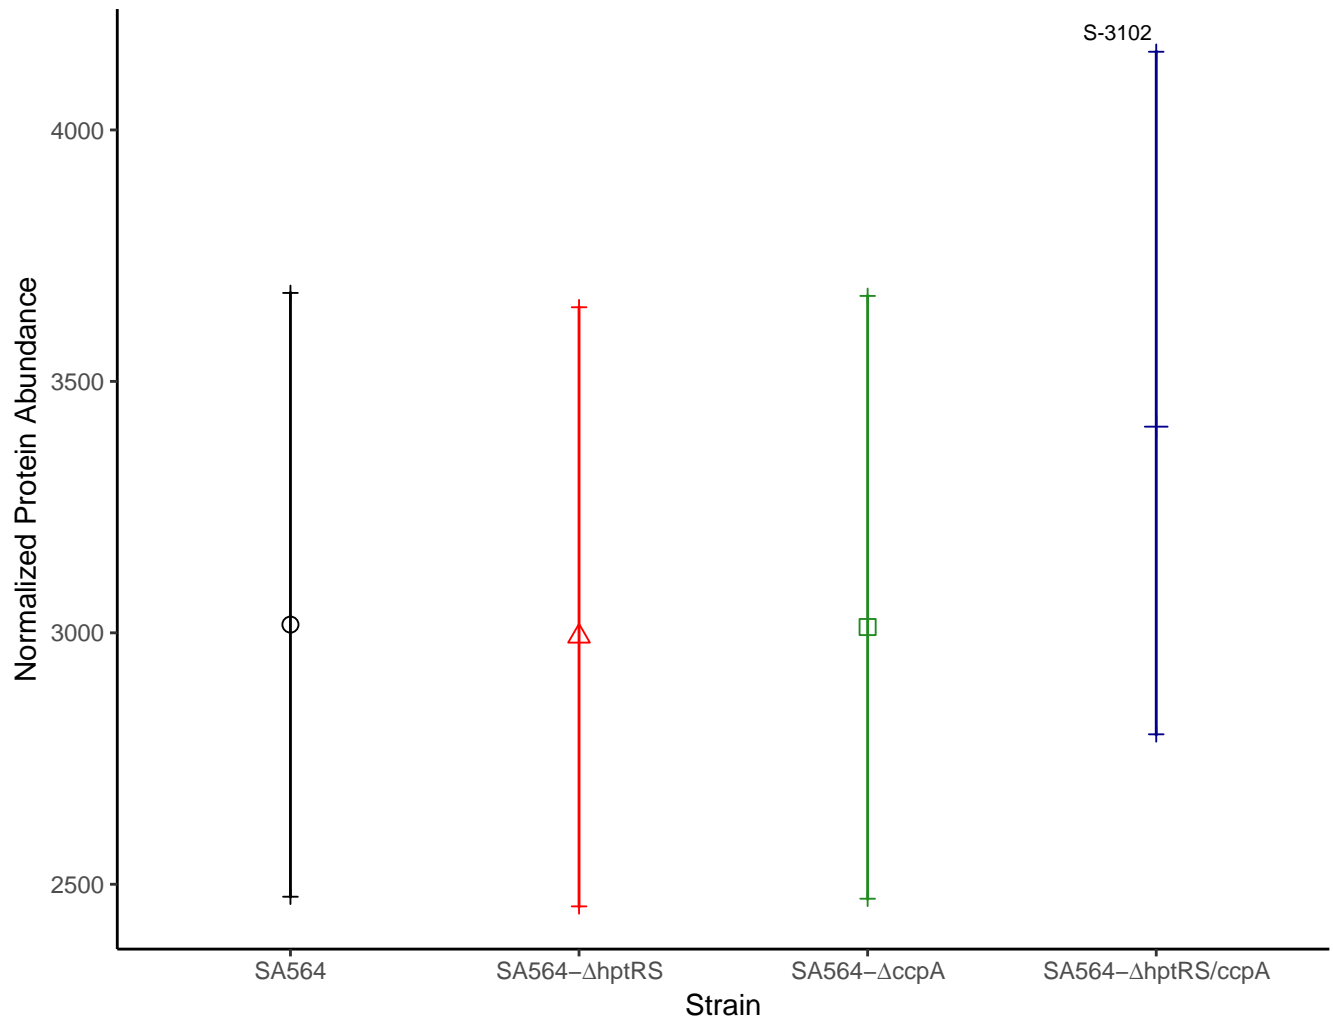

- ⊕ SA564
- △ SA564- $\Delta$ hptRS
- ⊞ SA564- $\Delta$ ccpA
- + SA564- $\Delta$ hptRS/ccpA

# EBPS\_STAAM

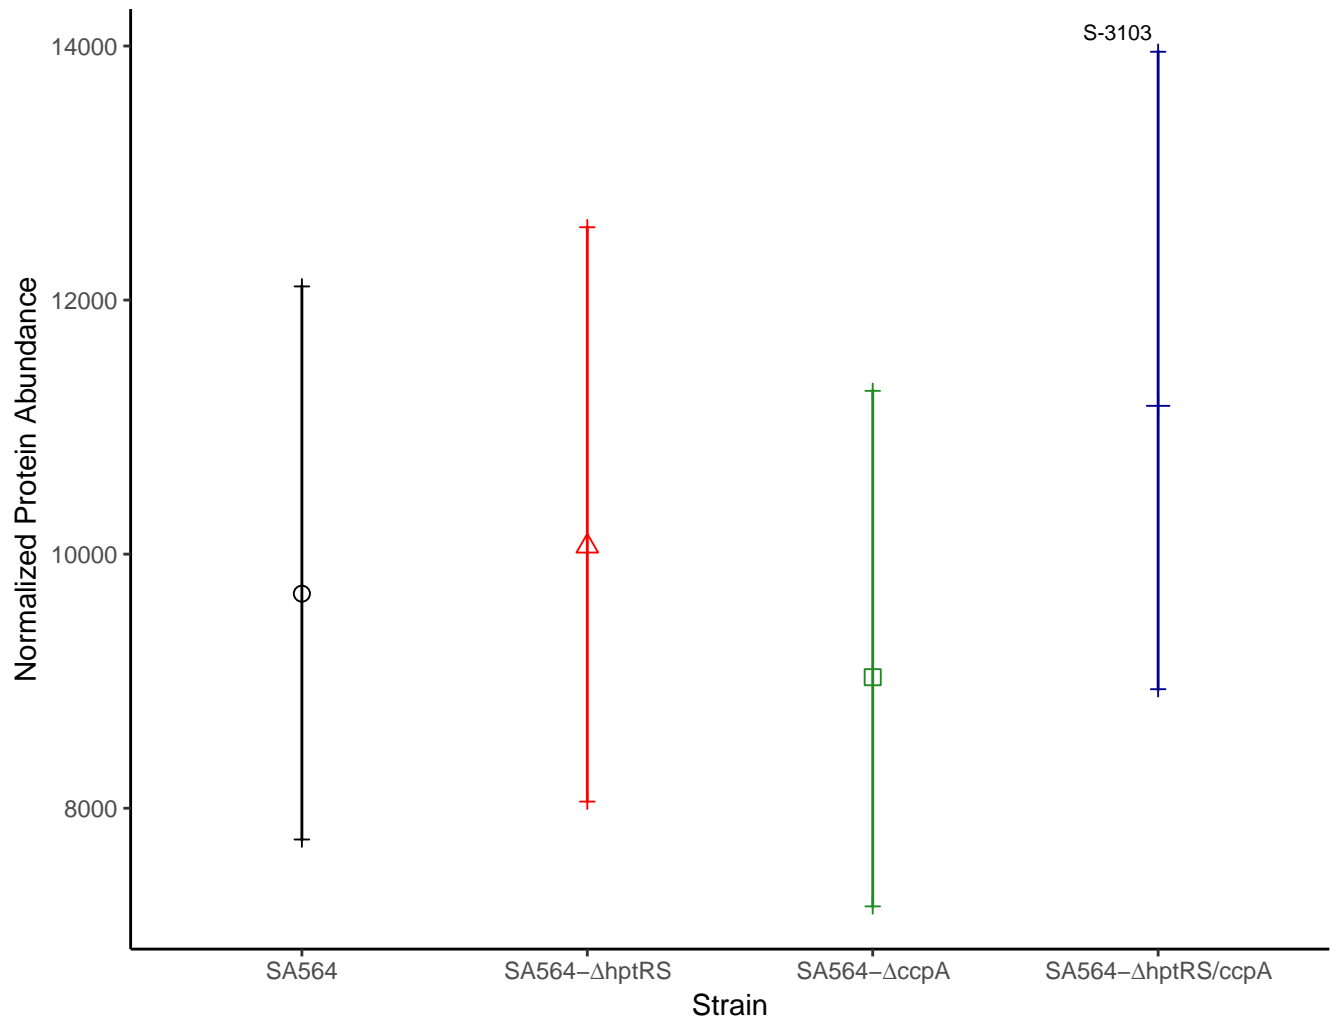

- ⊕ SA564
- △ SA564-ΔhptRS
- ⊞ SA564-ΔccpA
- + SA564-ΔhptRS/ccpA

# ECFA1\_STAAM

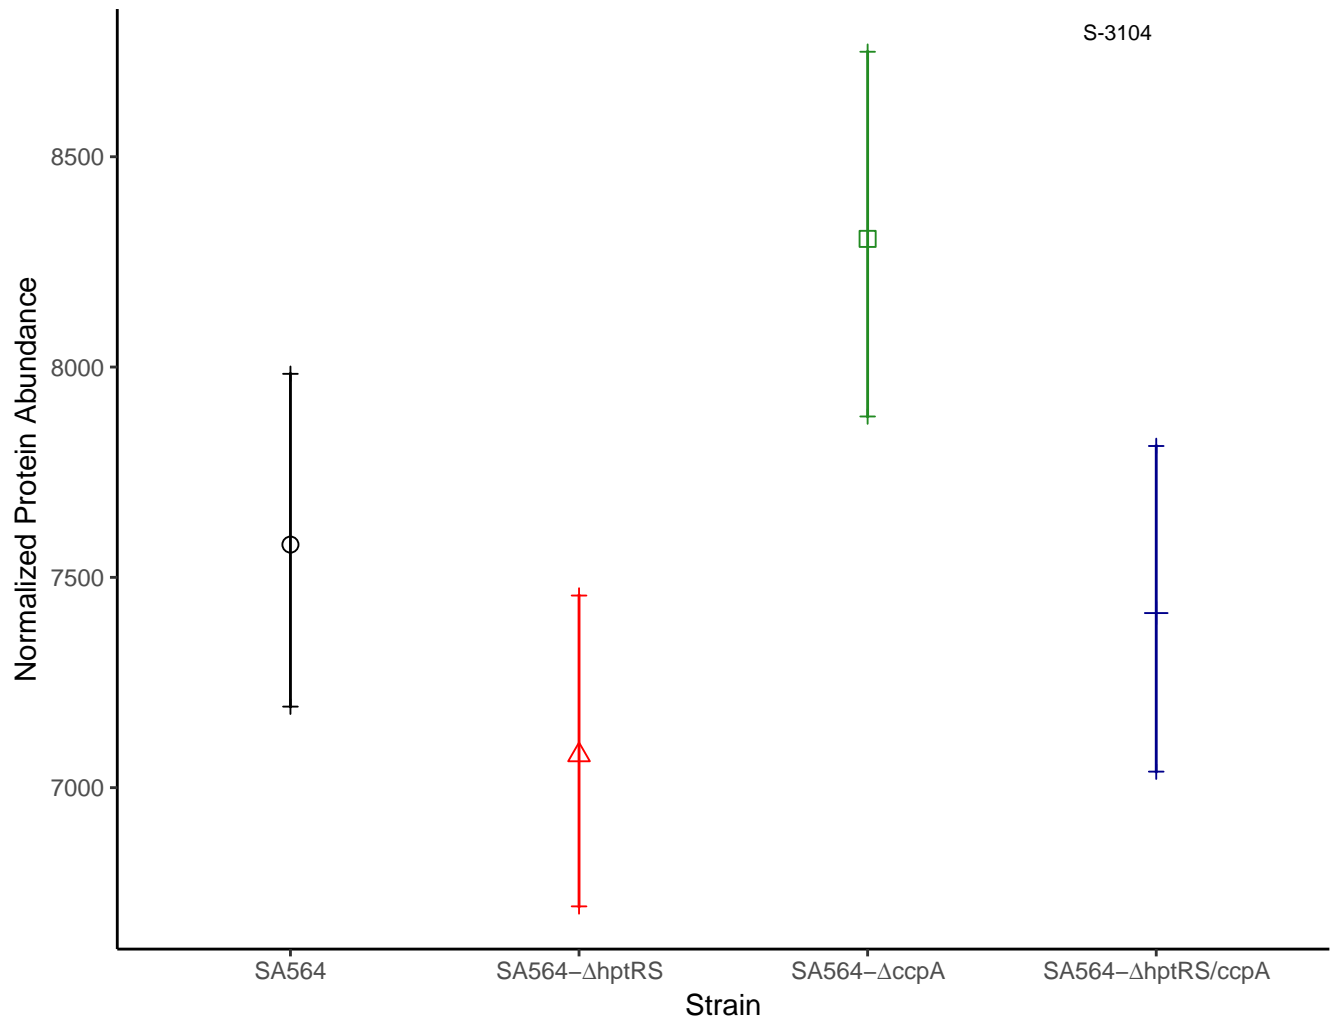

- ⊕ SA564
- △ SA564- $\Delta$ hptRS
- ⊞ SA564- $\Delta$ ccpA
- + SA564- $\Delta$ hptRS/ccpA



# EFG\_STAAM

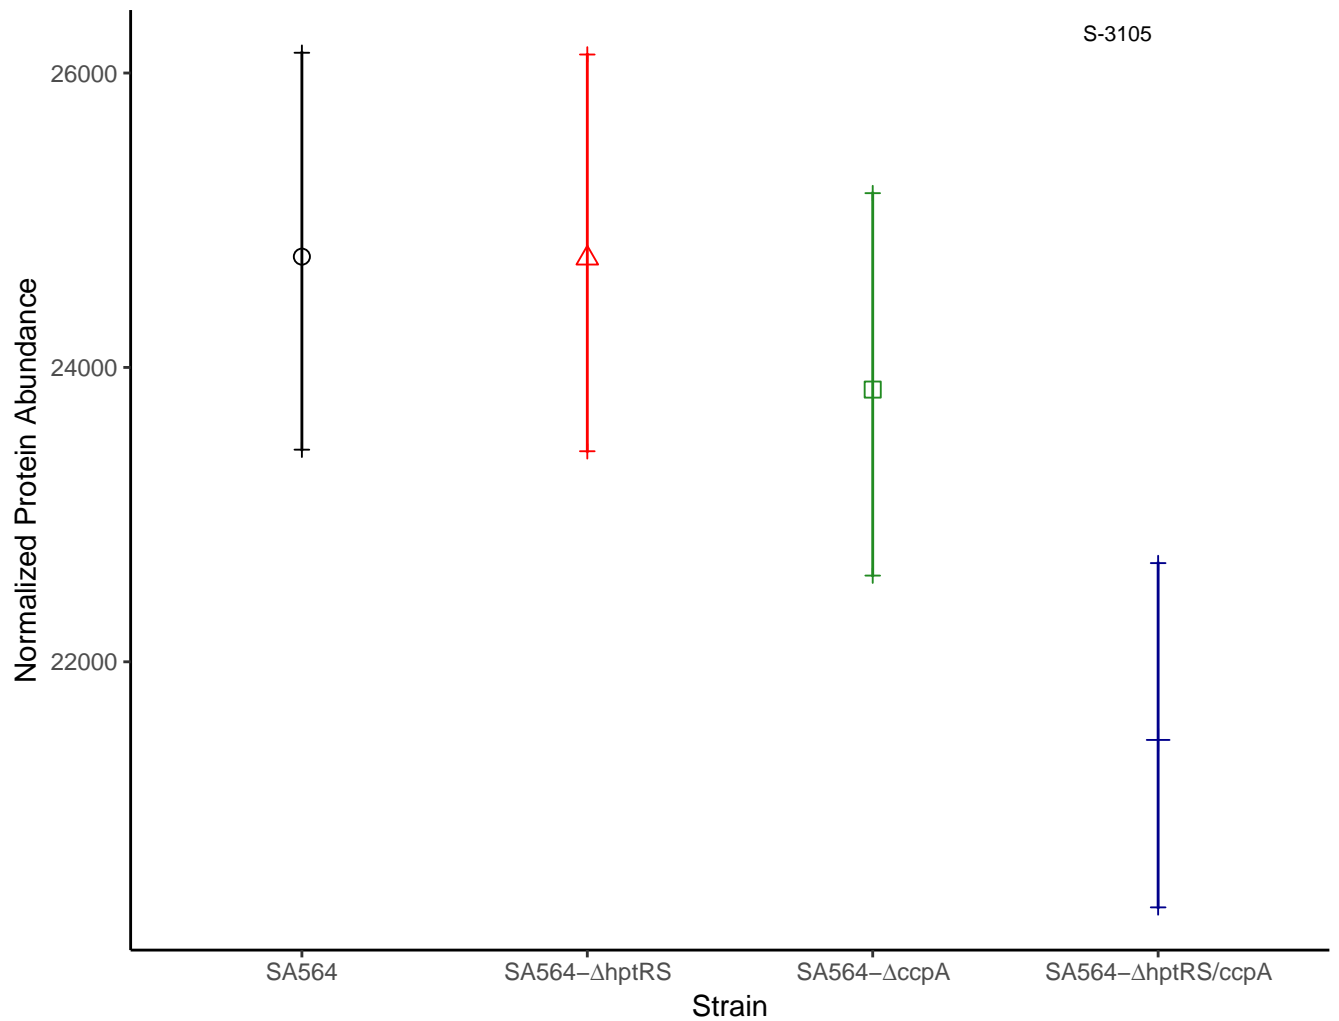

- ⊕ SA564
- △ SA564- $\Delta$ hptRS
- ⊞ SA564- $\Delta$ ccpA
- + SA564- $\Delta$ hptRS/ccpA

# EFP\_STAAM

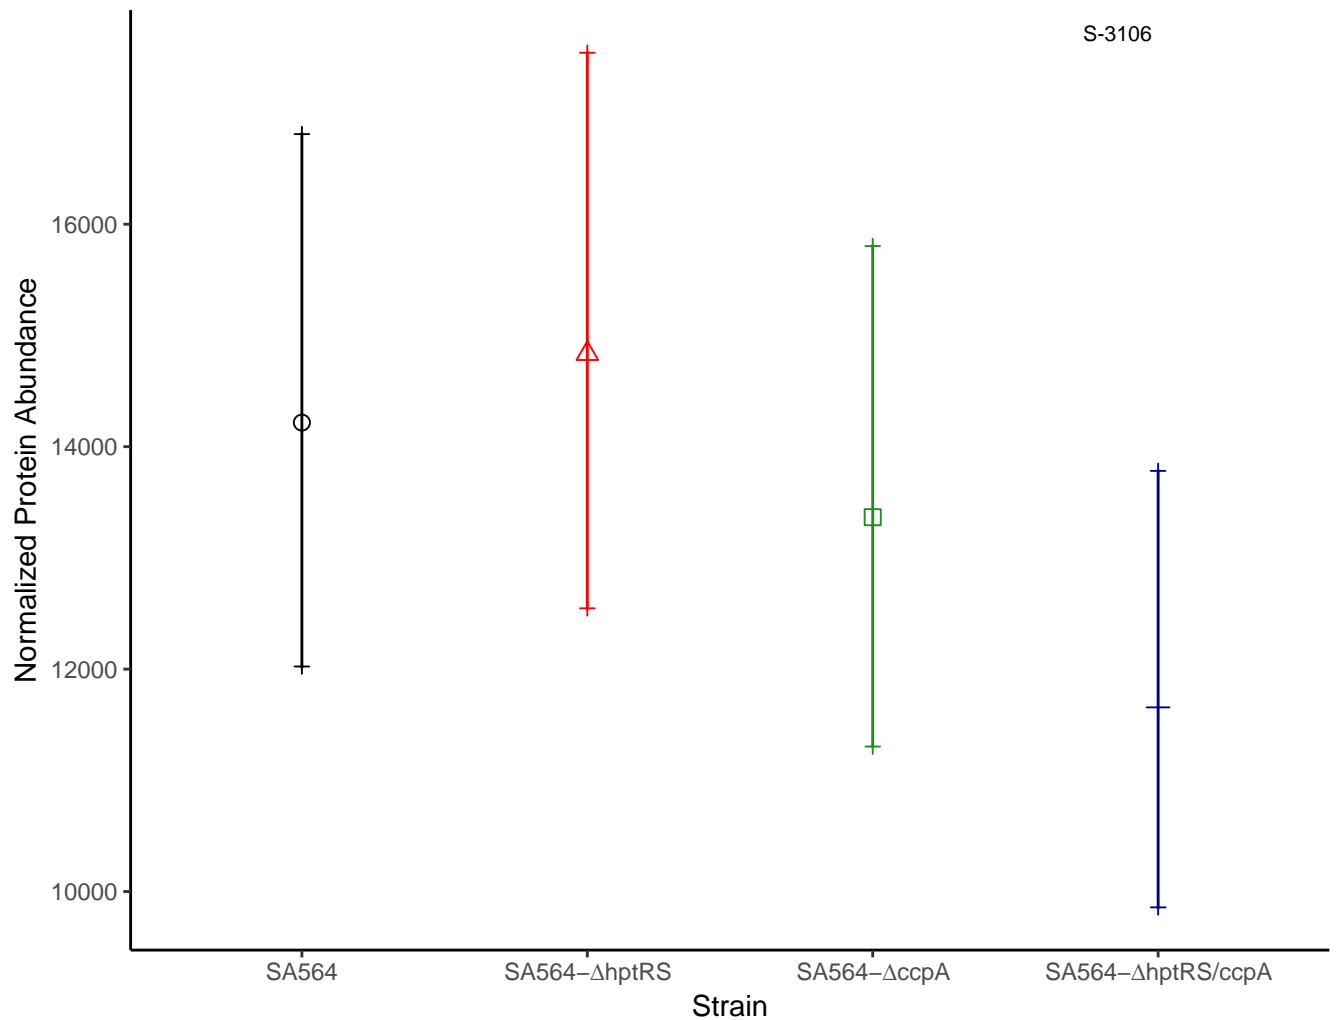

- ⊕ SA564
- △ SA564- $\Delta$ hptRS
- ⊞ SA564- $\Delta$ ccpA
- + SA564- $\Delta$ hptRS/ccpA

# EFTS\_STAAM

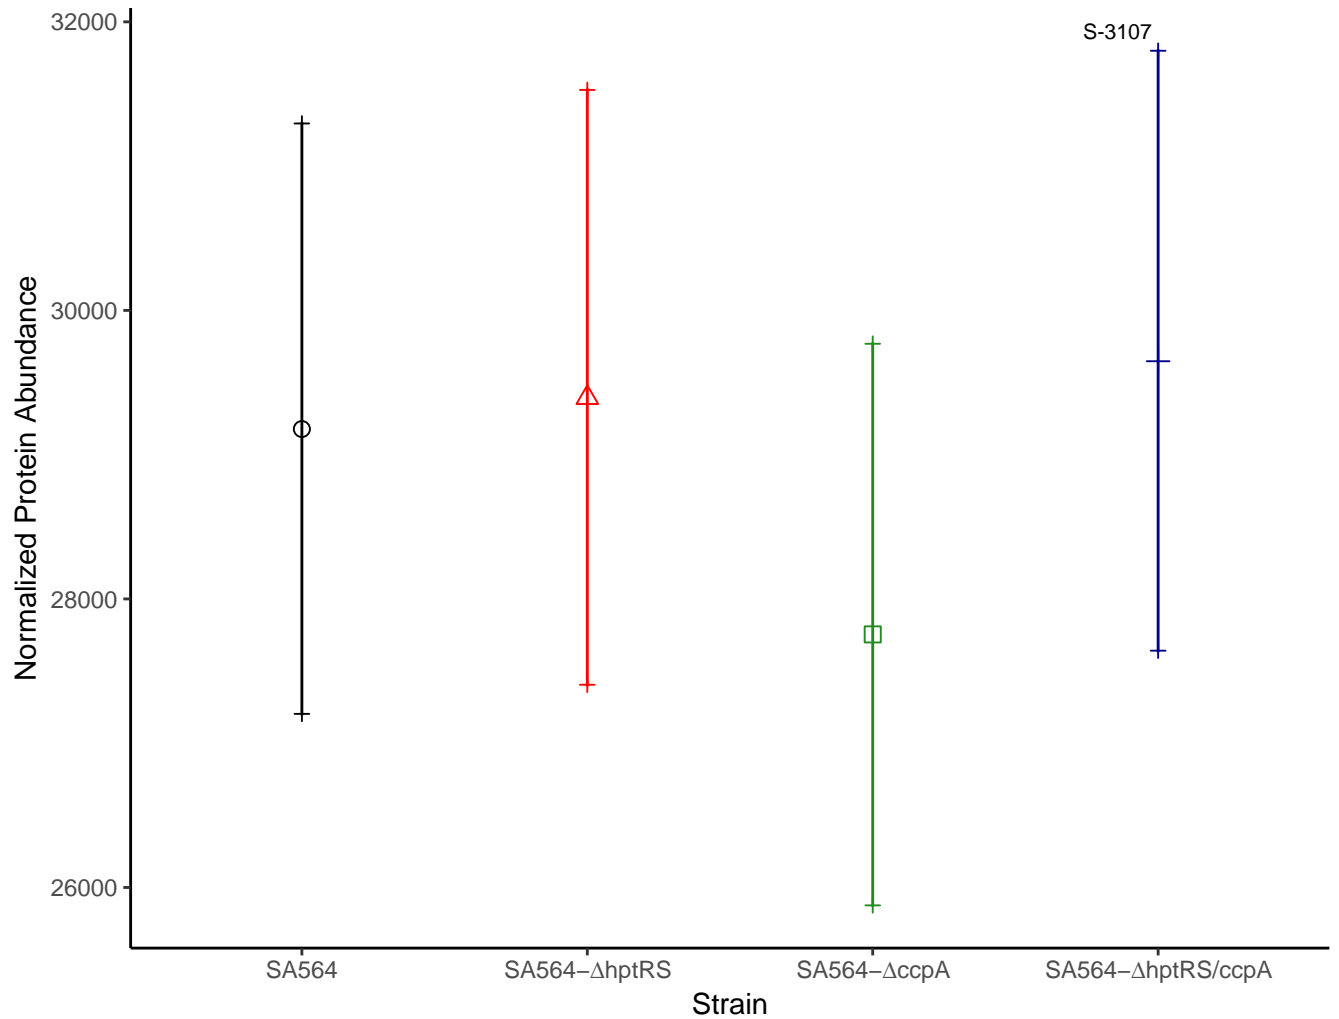

- ⊕ SA564
- △ SA564- $\Delta$ hptRS
- ⊞ SA564- $\Delta$ ccpA
- + SA564- $\Delta$ hptRS/ccpA

# EFTU\_STAAM

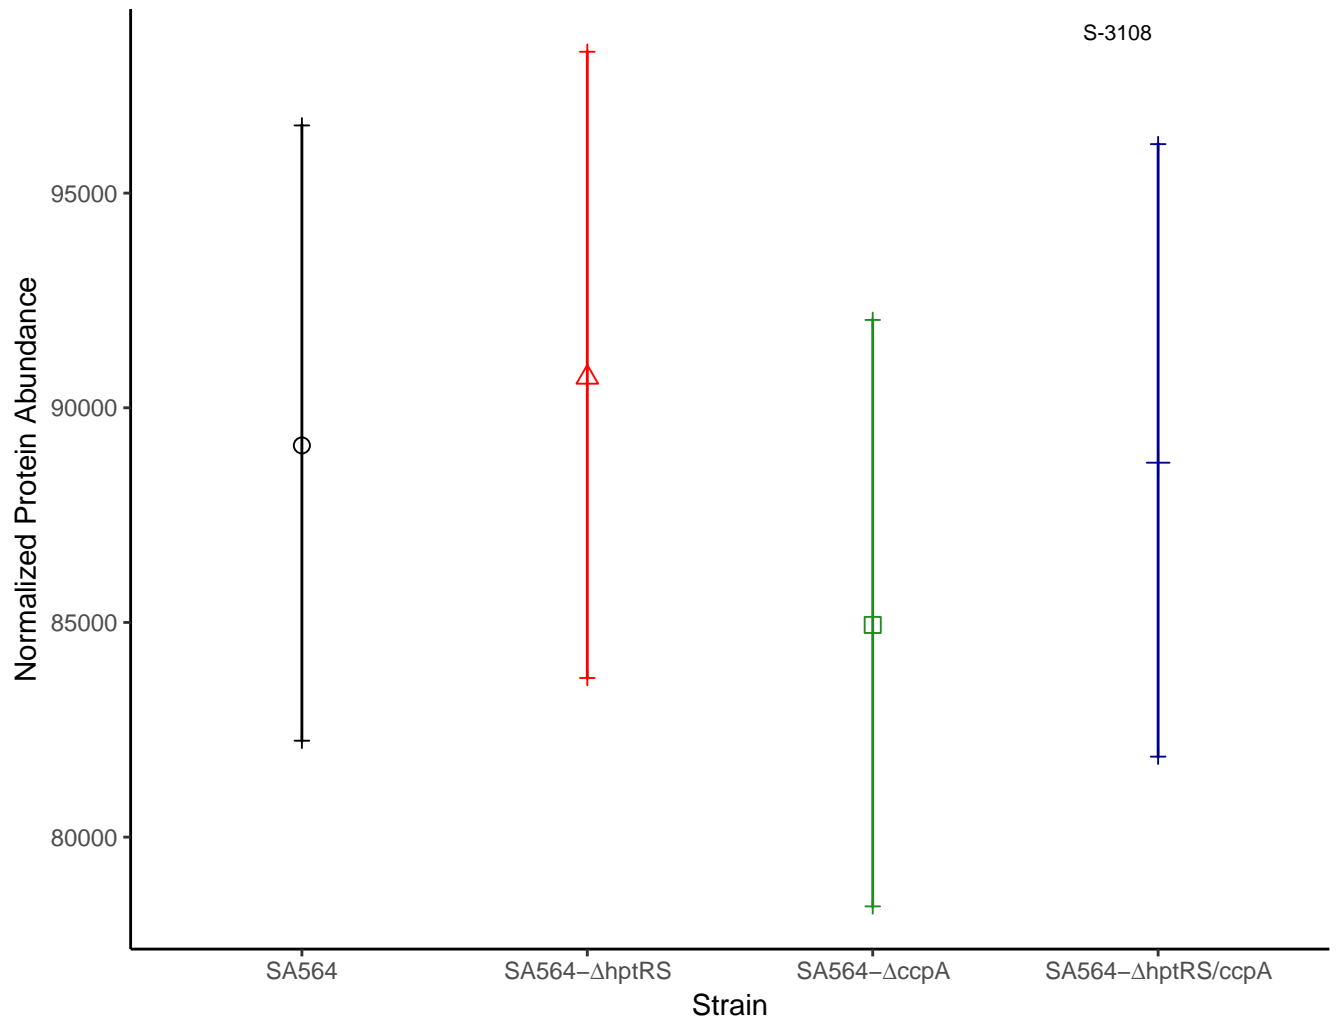

- ⊕ SA564
- △ SA564- $\Delta$ hptRS
- ⊞ SA564- $\Delta$ ccpA
- + SA564- $\Delta$ hptRS/ccpA

# ENO\_STAAM

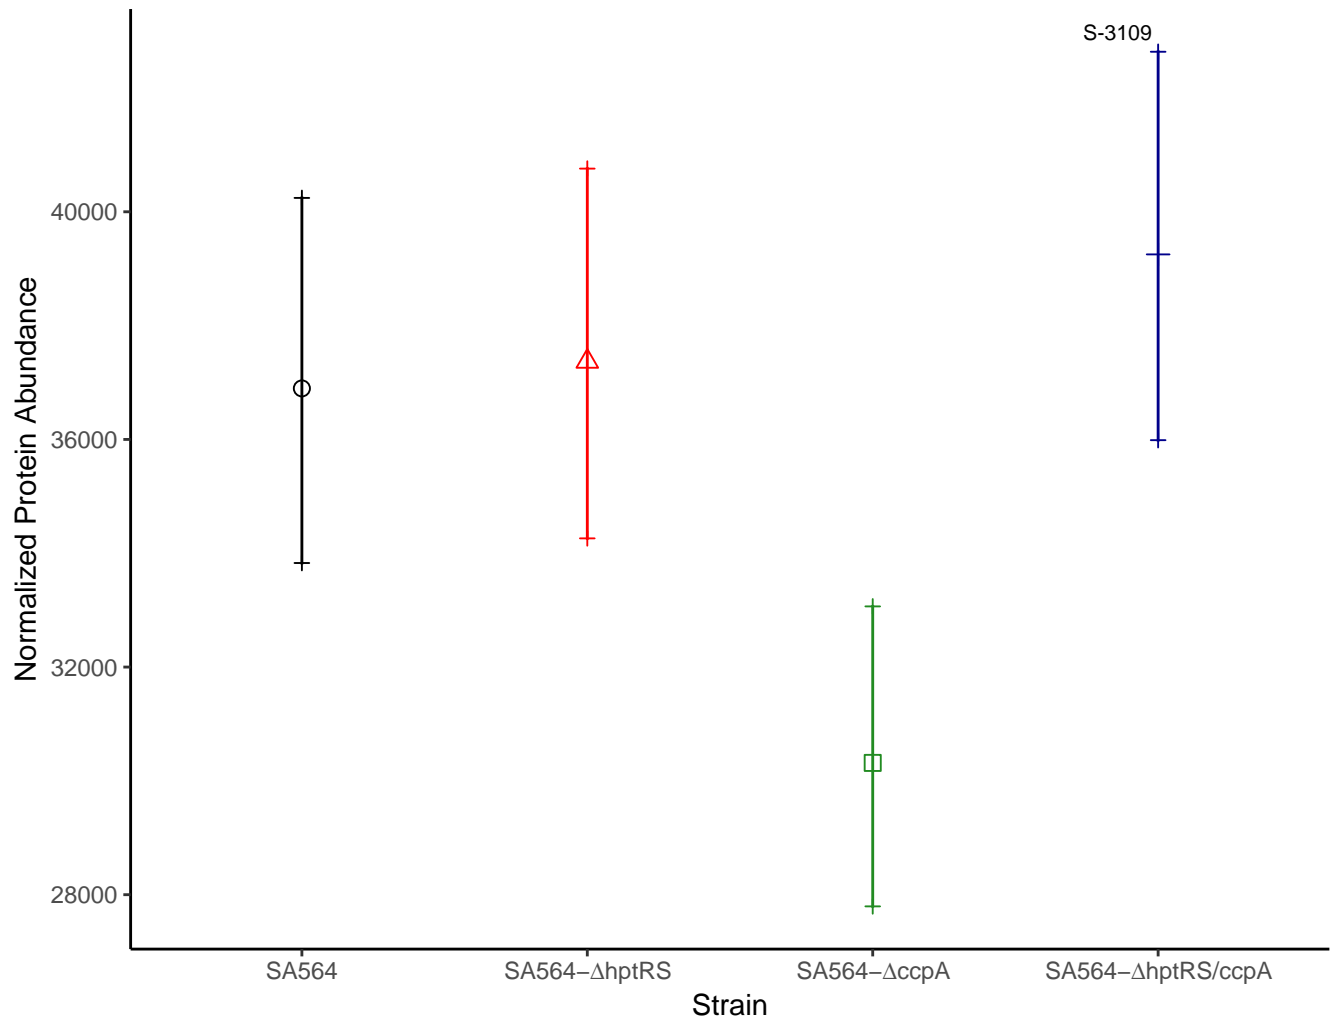

- ⊕ SA564
- △ SA564- $\Delta$ hptRS
- ⊞ SA564- $\Delta$ ccpA
- + SA564- $\Delta$ hptRS/ccpA

# ERA\_STAAM

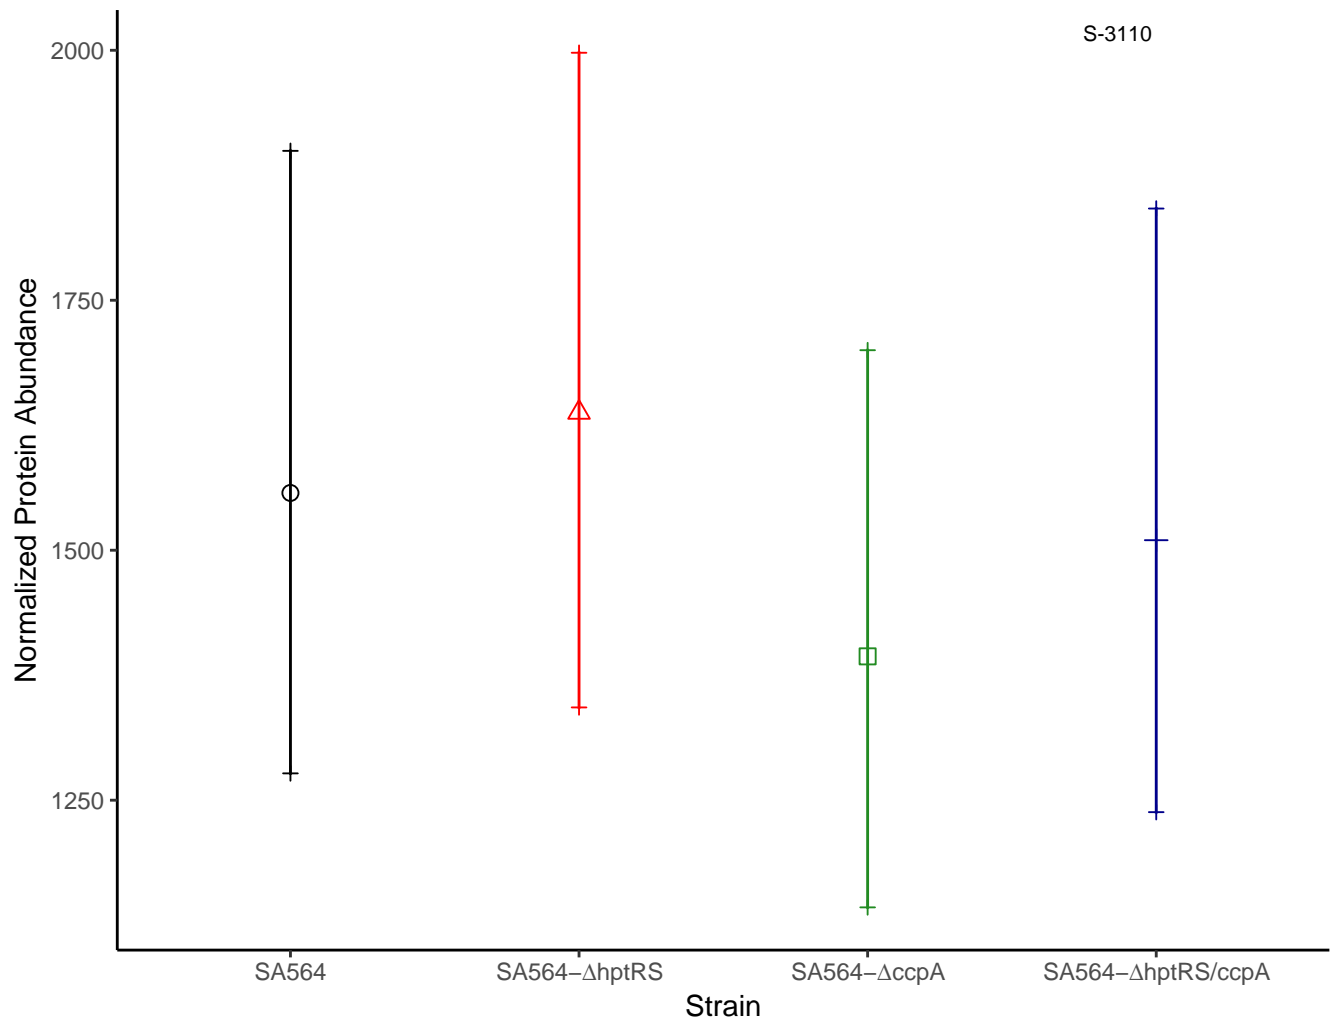

- ⊕ SA564
- △ SA564- $\Delta$ hptRS
- ⊞ SA564- $\Delta$ ccpA
- + SA564- $\Delta$ hptRS/ccpA

# ERMA\_STAAM

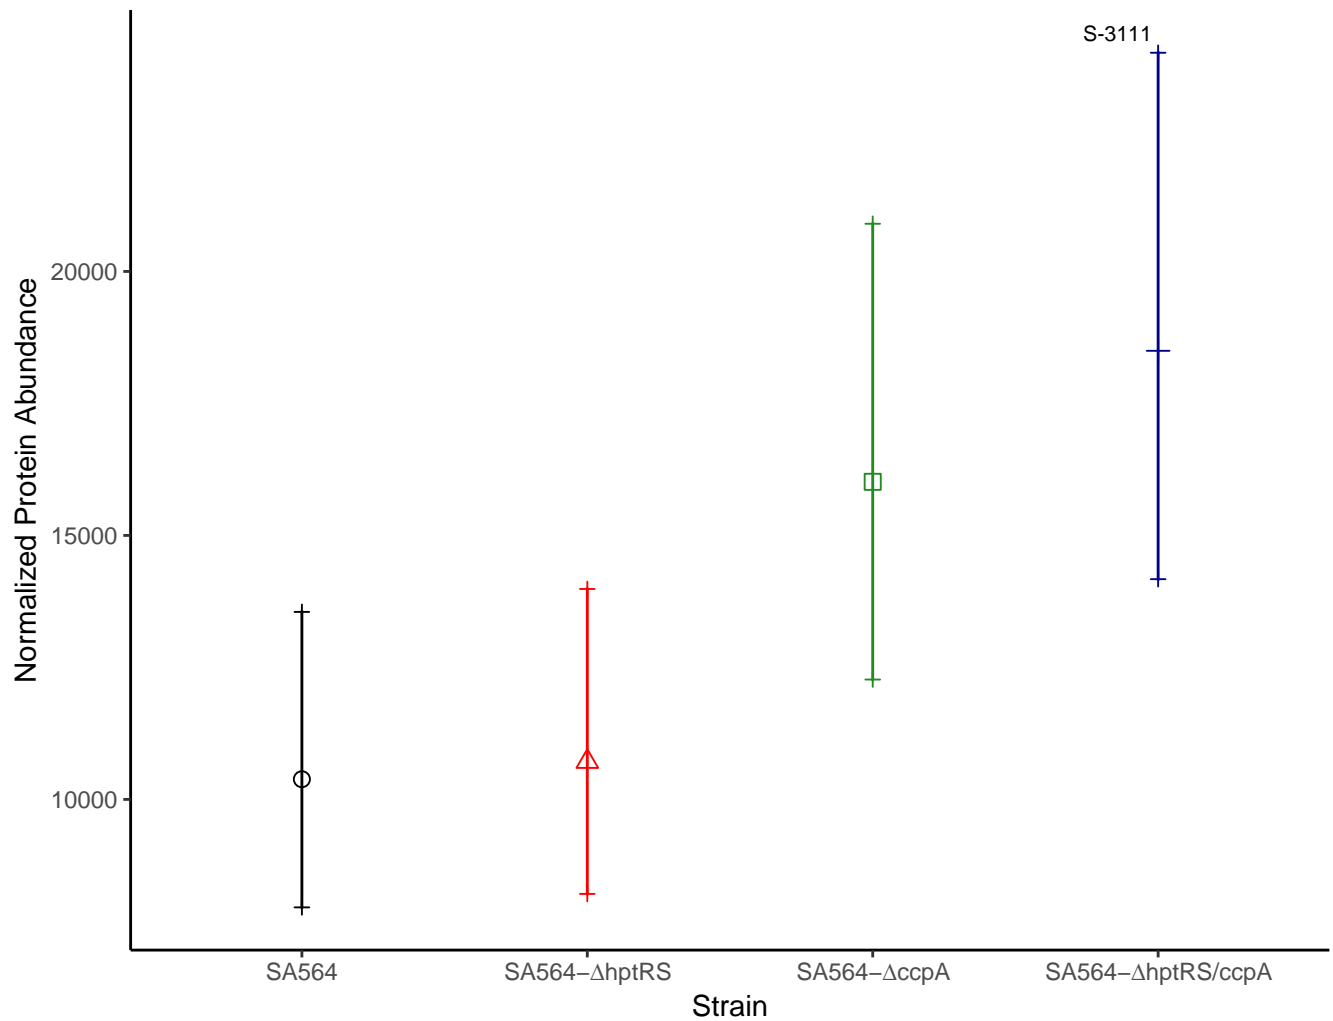

- ⊕ SA564
- △ SA564- $\Delta$ hptRS
- ⊞ SA564- $\Delta$ ccpA
- + SA564- $\Delta$ hptRS/ccpA

# ESSA\_STAAM

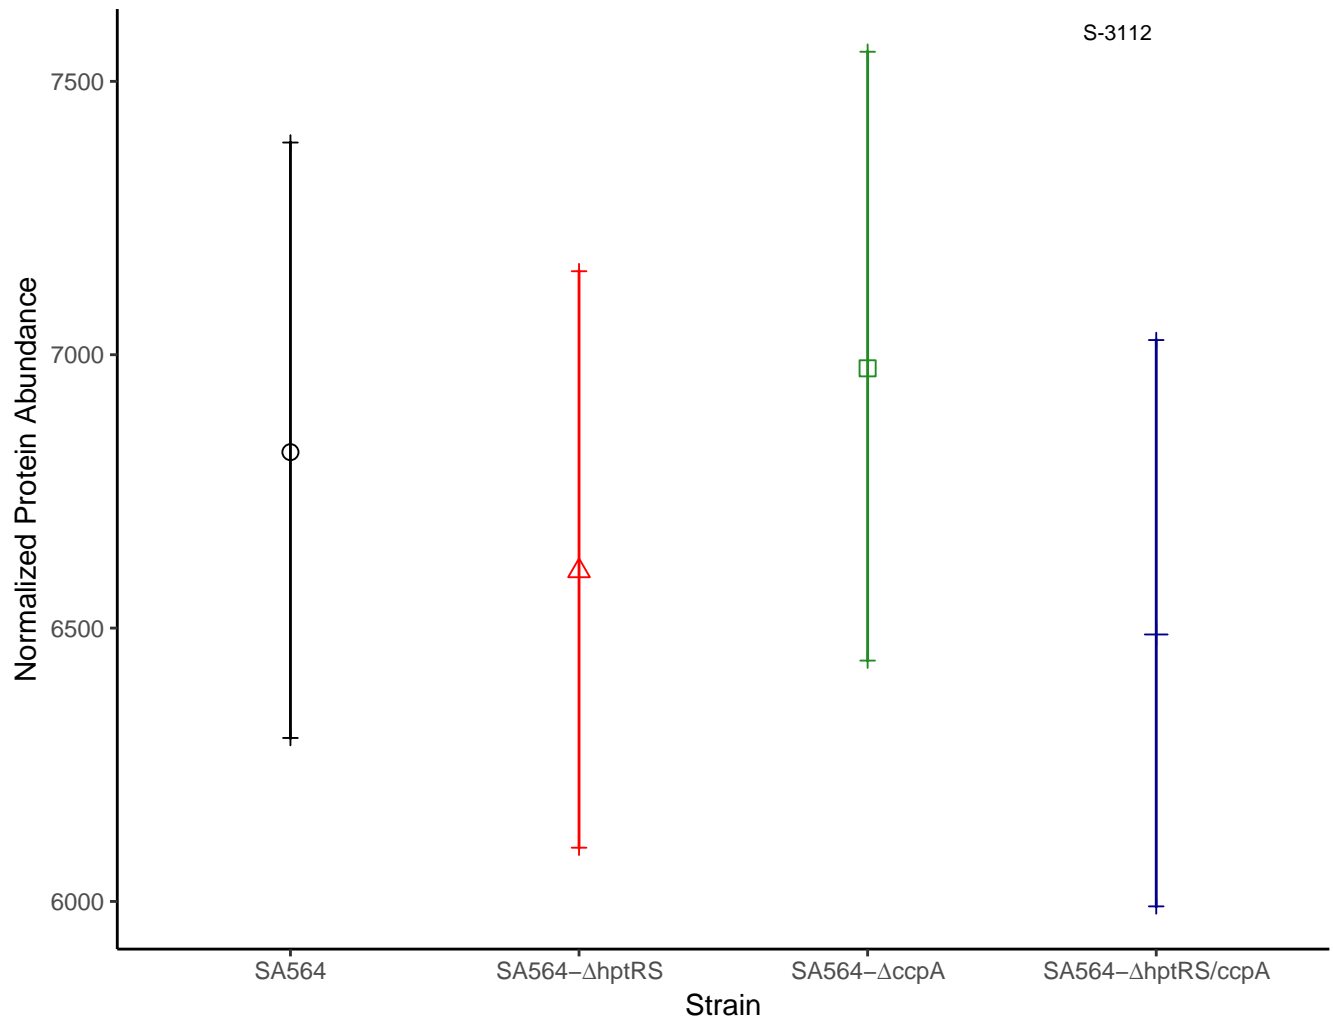

- ⊕ SA564
- △ SA564- $\Delta$ hptRS
- ⊞ SA564- $\Delta$ ccpA
- + SA564- $\Delta$ hptRS/ccpA



# ESXA\_STAAM

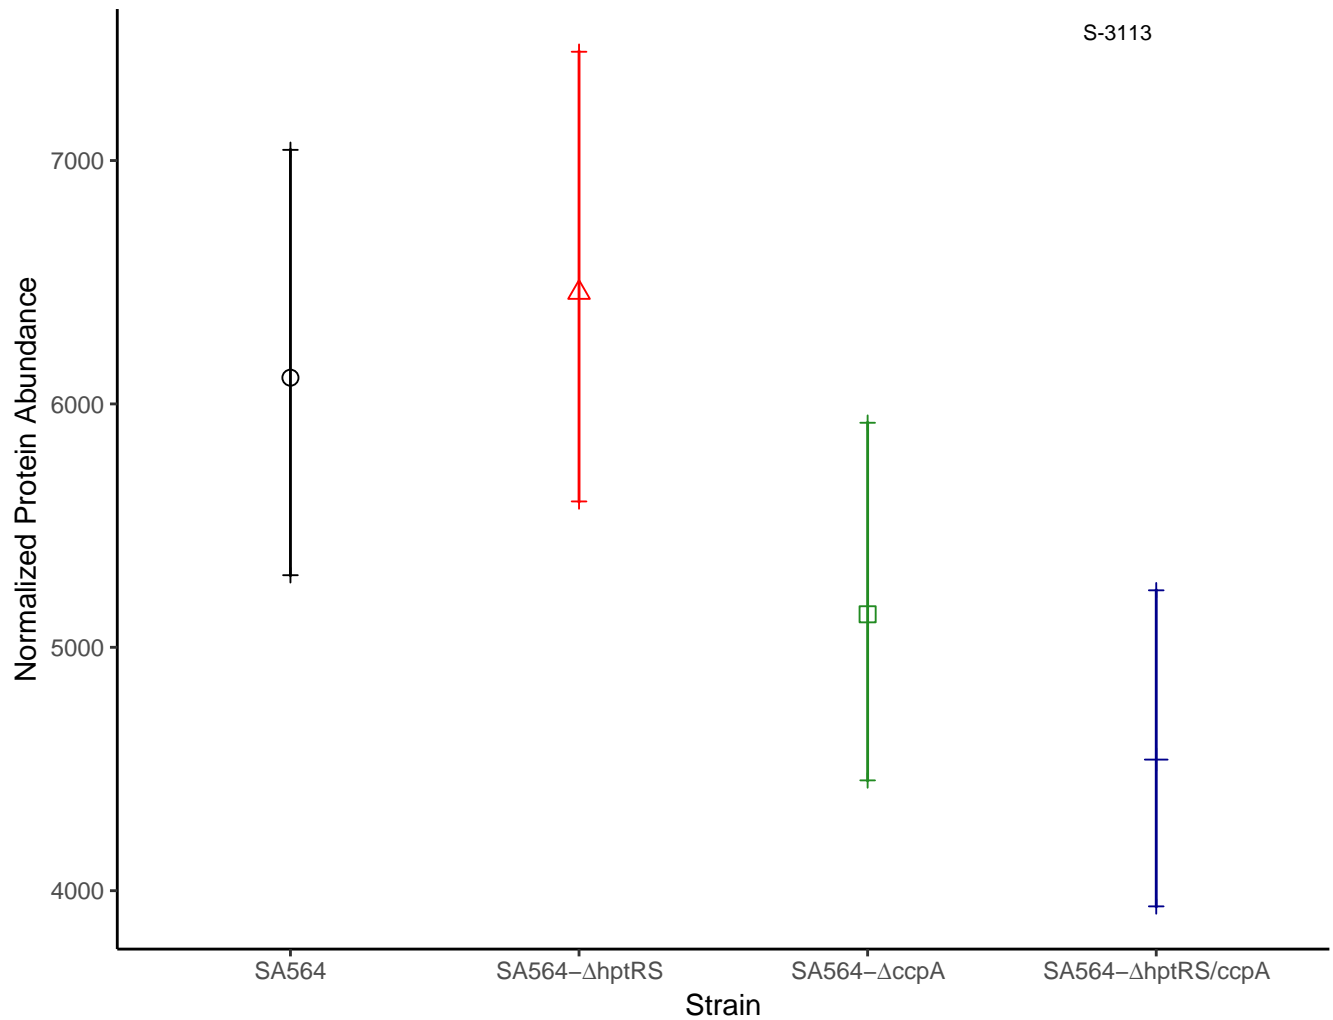

- ⊕ SA564
- △ SA564- $\Delta$ hptRS
- ⊞ SA564- $\Delta$ ccpA
- + SA564- $\Delta$ hptRS/ccpA

# EX7L\_STAAM

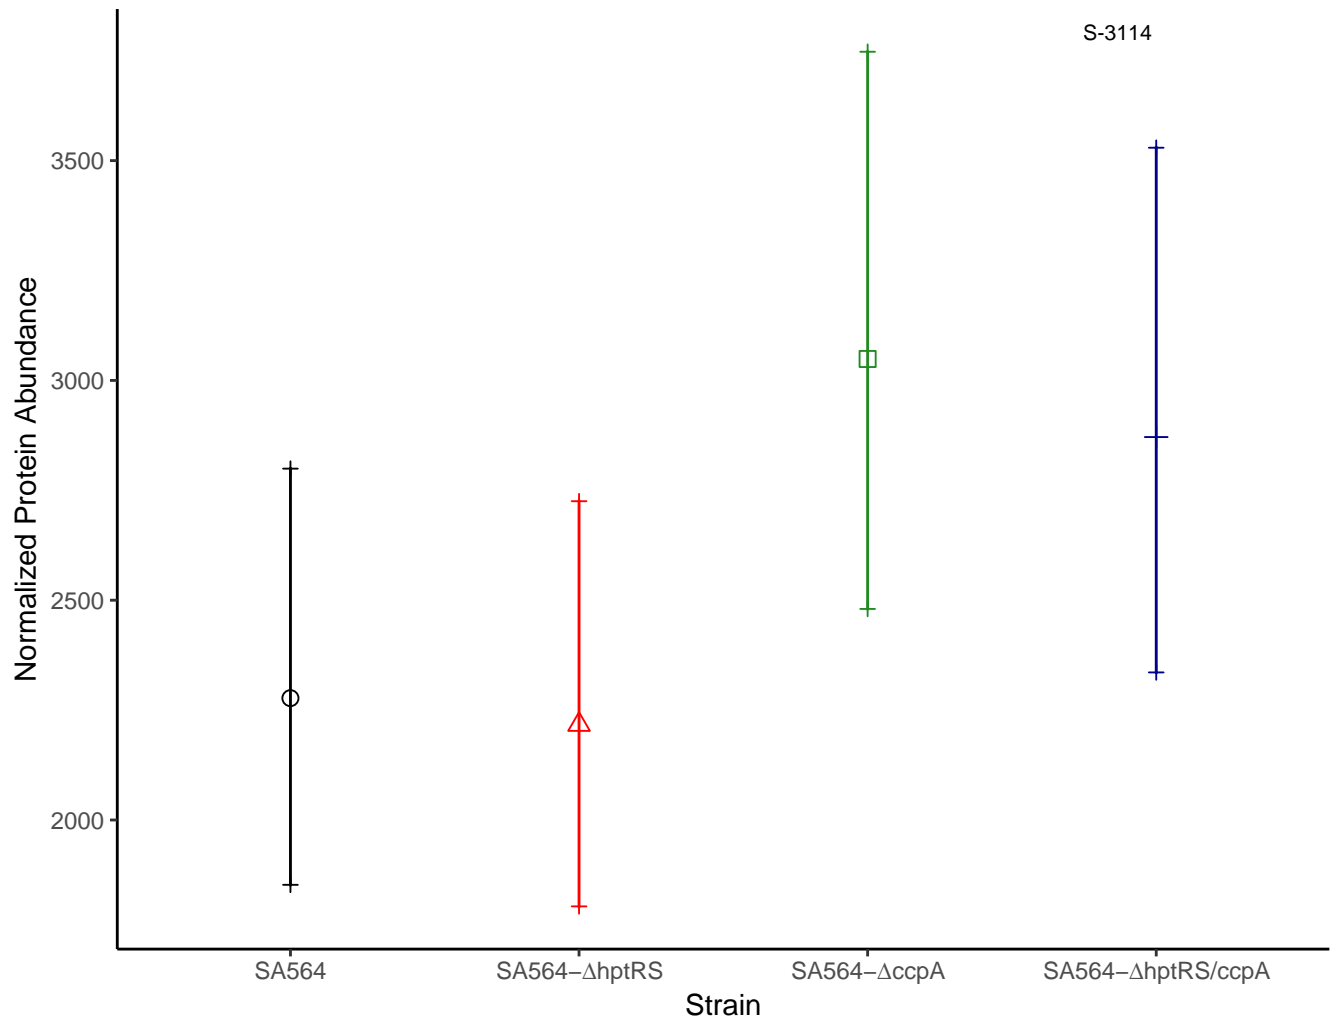

- ⊕ SA564
- △ SA564- $\Delta$ hptRS
- ⊞ SA564- $\Delta$ ccpA
- + SA564- $\Delta$ hptRS/ccpA

# EZRA\_STAAM

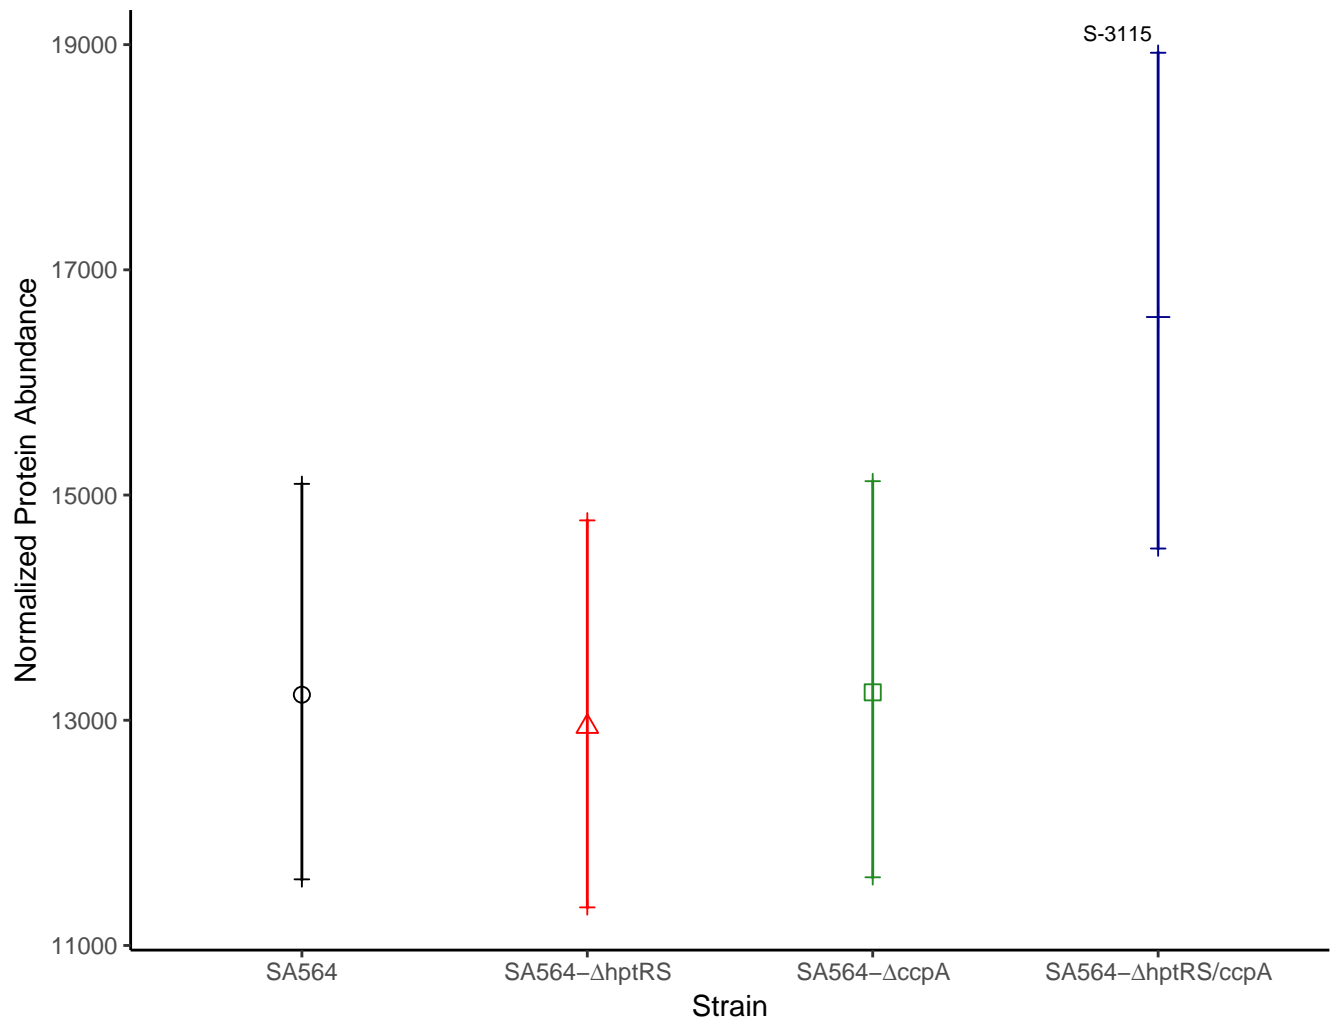

- ⊕ SA564
- △ SA564- $\Delta$ hptRS
- ⊞ SA564- $\Delta$ ccpA
- + SA564- $\Delta$ hptRS/ccpA

# FABD\_STAAM

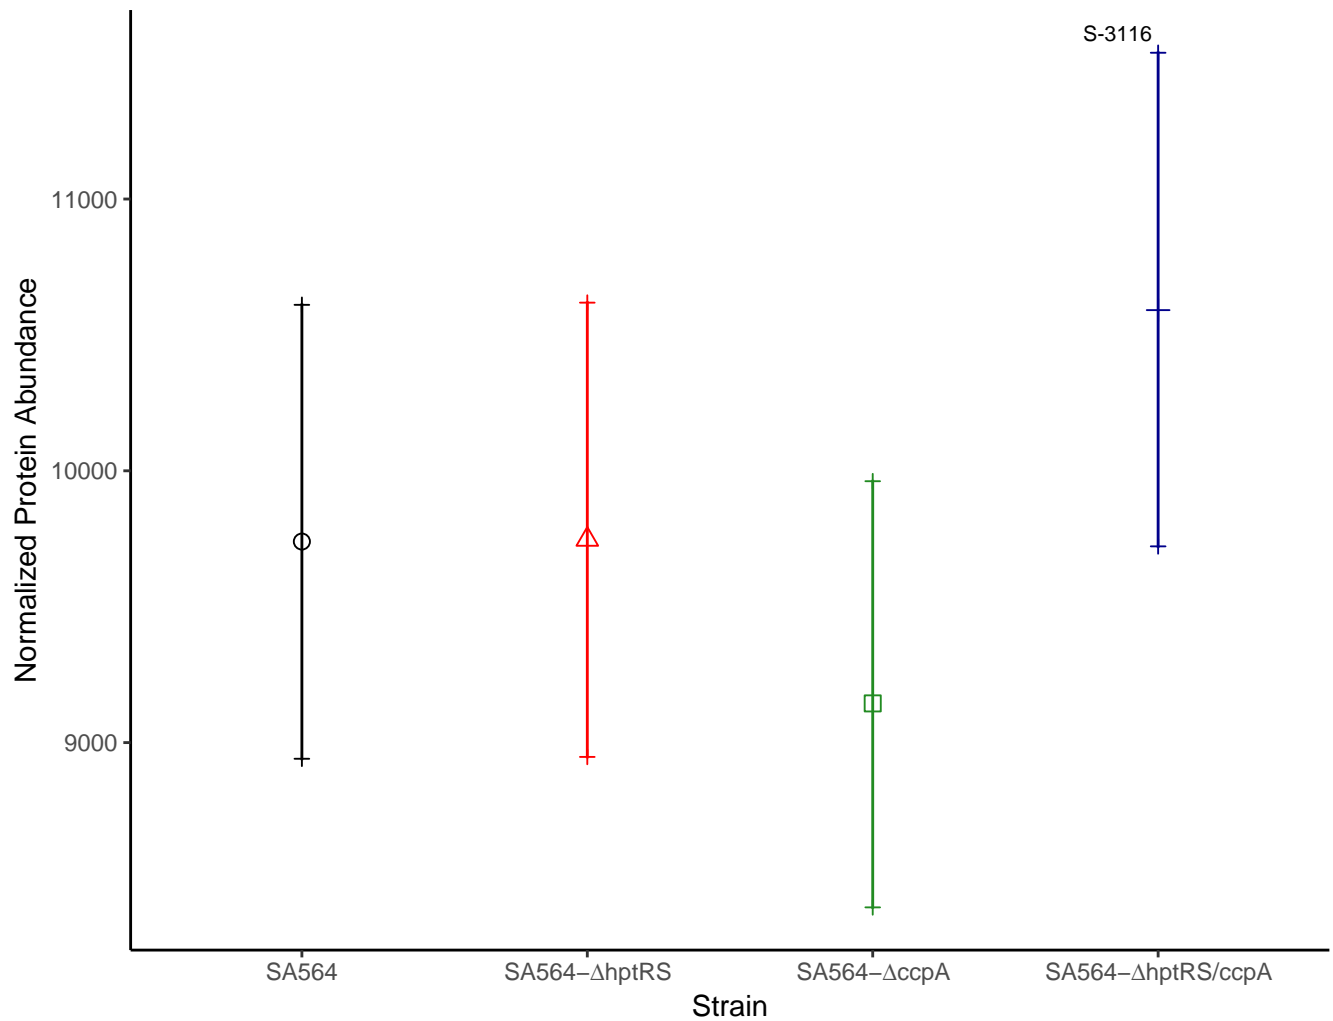

- ⊕ SA564
- △ SA564- $\Delta$ hptRS
- ⊞ SA564- $\Delta$ ccpA
- + SA564- $\Delta$ hptRS/ccpA

# FABF\_STAAM

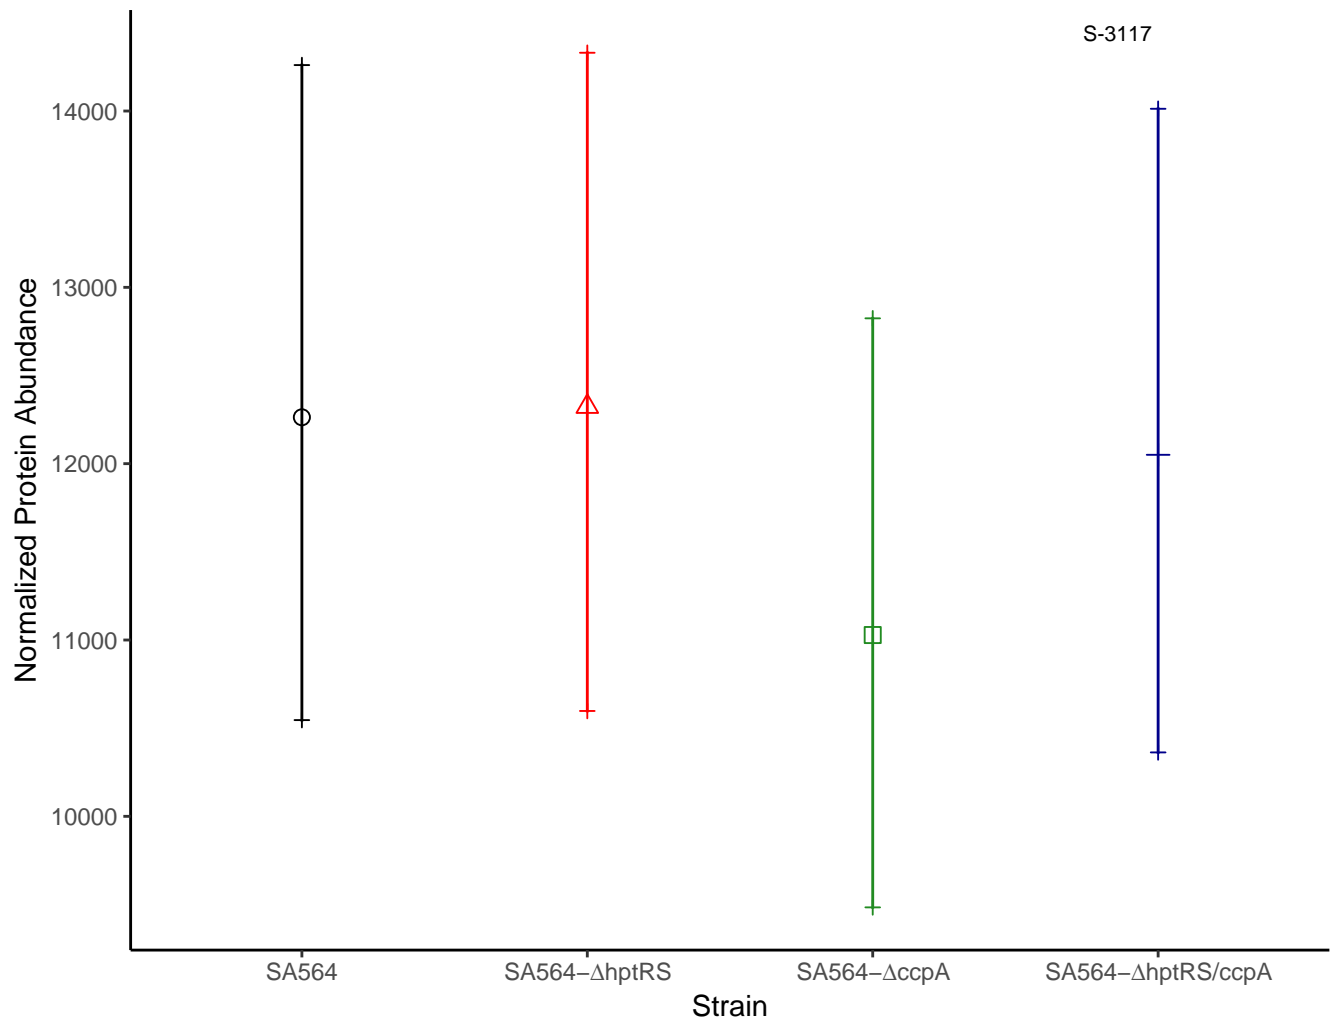

- ⊕ SA564
- △ SA564- $\Delta$ hptRS
- ⊞ SA564- $\Delta$ ccpA
- + SA564- $\Delta$ hptRS/ccpA

# FABG\_STAAM

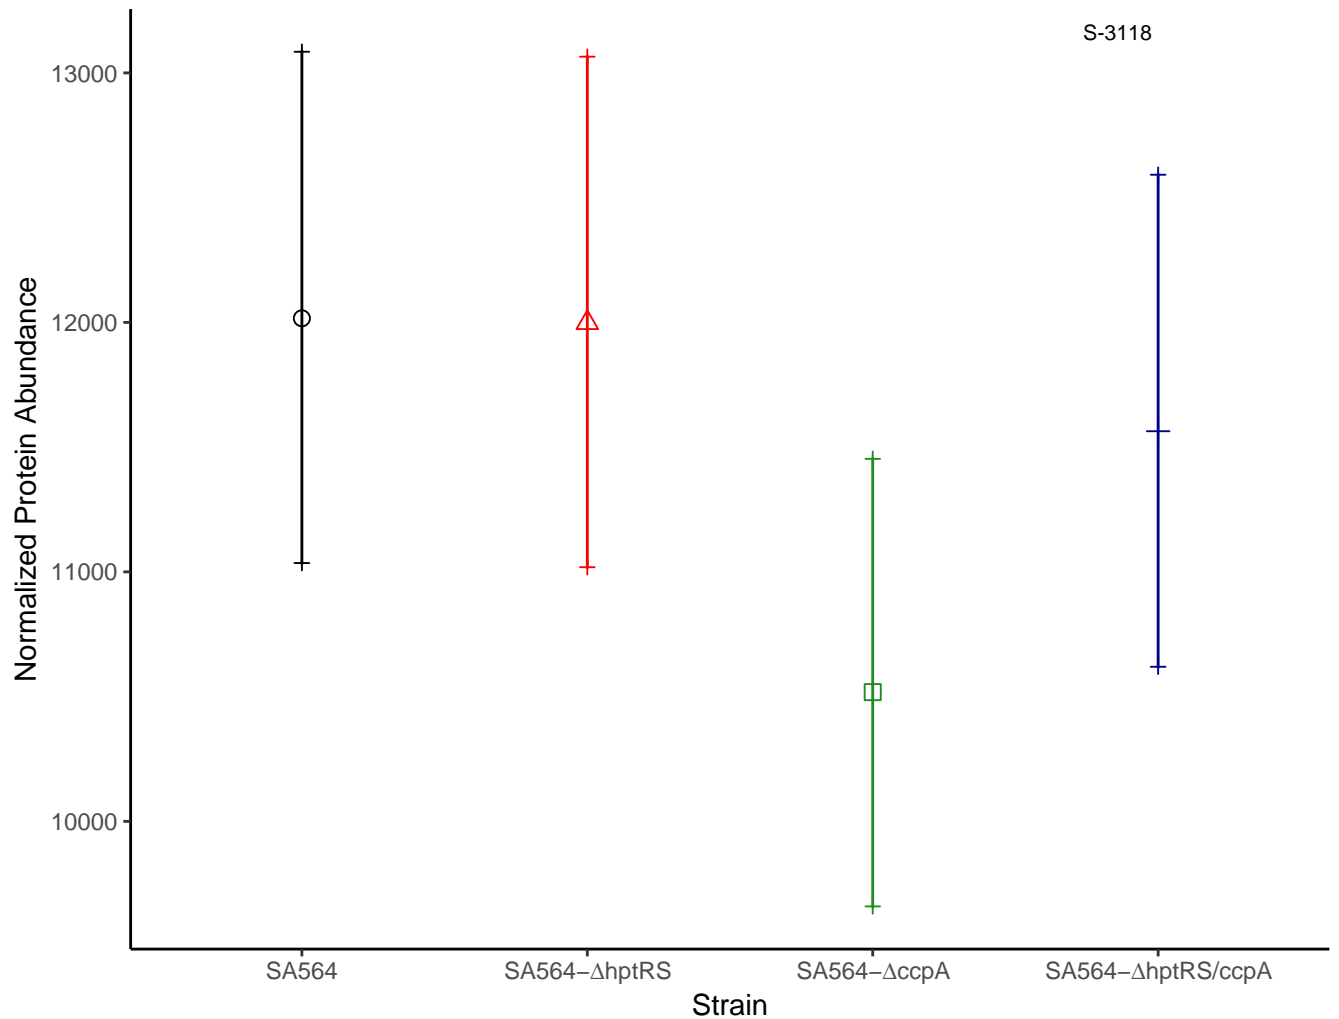

- ⊕ SA564
- △ SA564- $\Delta$ hptRS
- ⊞ SA564- $\Delta$ ccpA
- + SA564- $\Delta$ hptRS/ccpA

# FABH\_STAAM

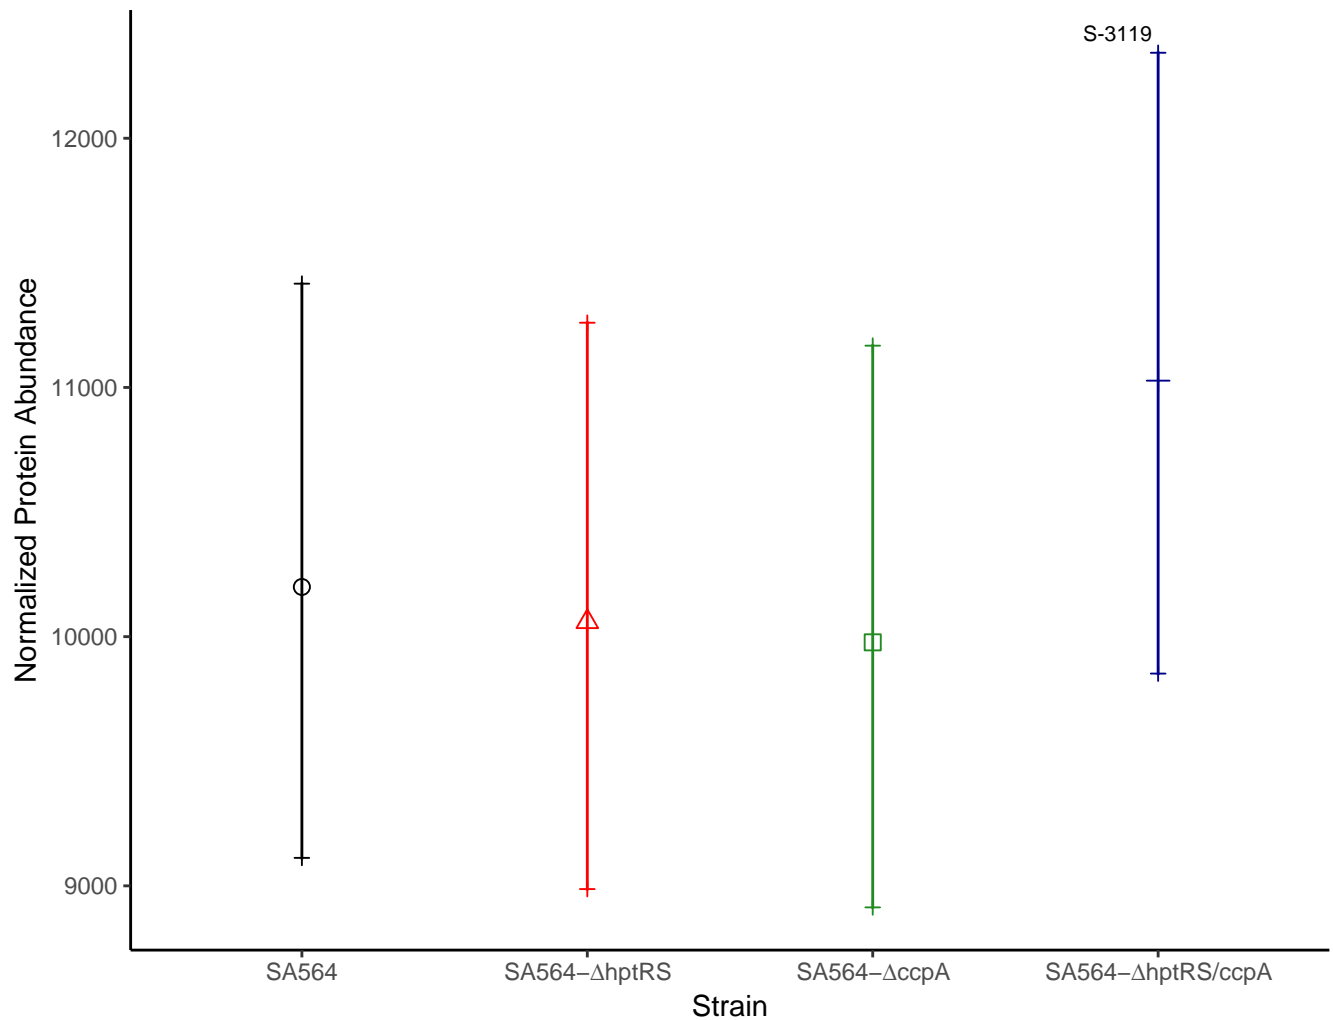

- ⊕ SA564
- △ SA564- $\Delta$ hptRS
- ⊞ SA564- $\Delta$ ccpA
- + SA564- $\Delta$ hptRS/ccpA

# FABZ\_STAAM

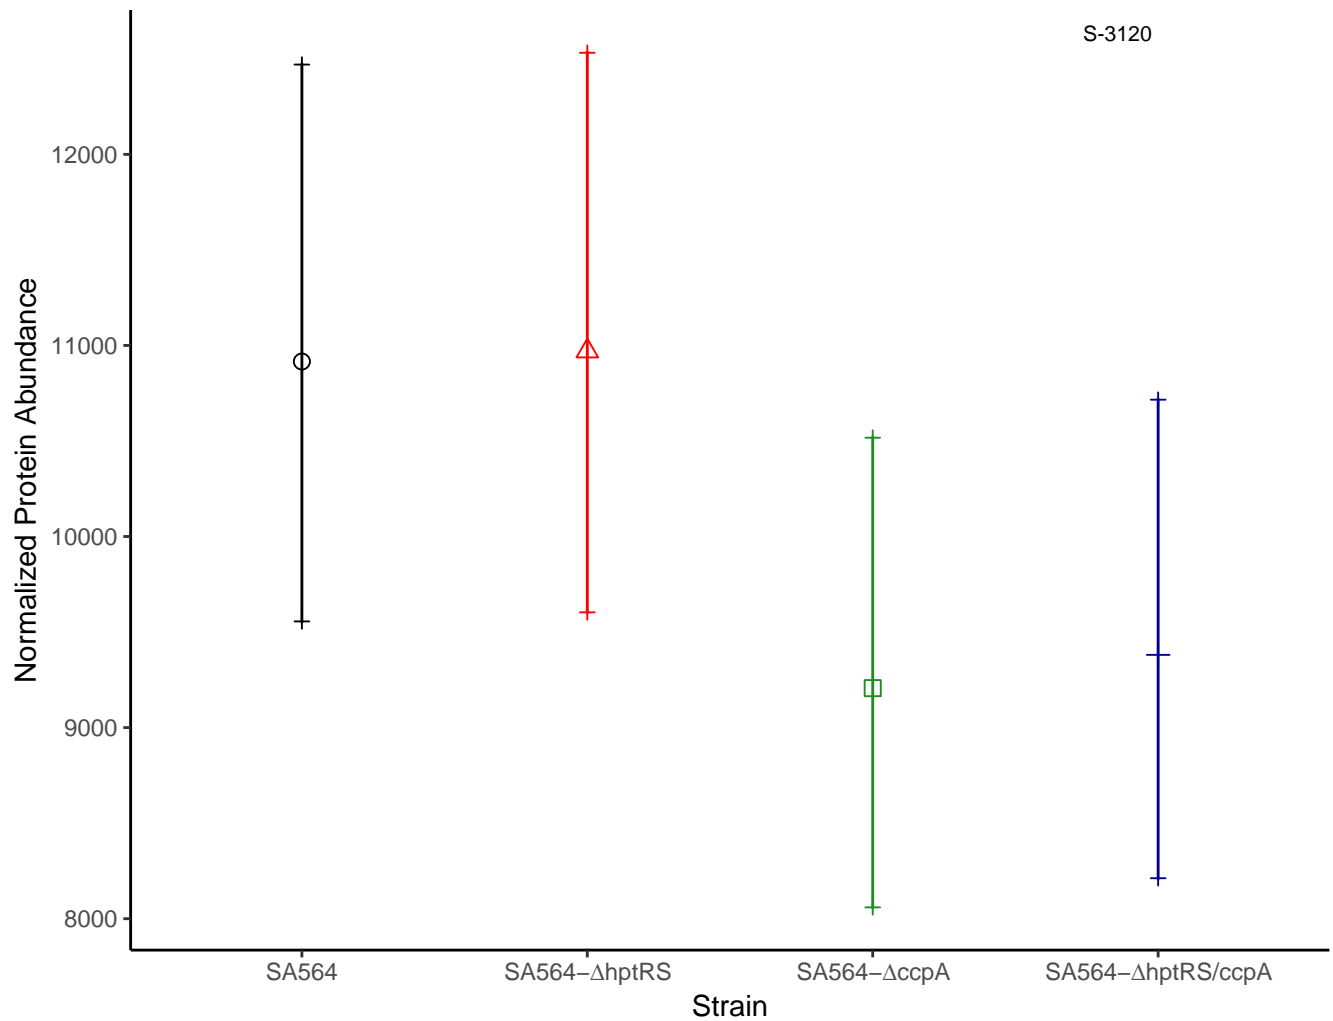

- ⊕ SA564
- △ SA564- $\Delta$ hptRS
- ⊞ SA564- $\Delta$ ccpA
- + SA564- $\Delta$ hptRS/ccpA



# FEMA\_STAAM

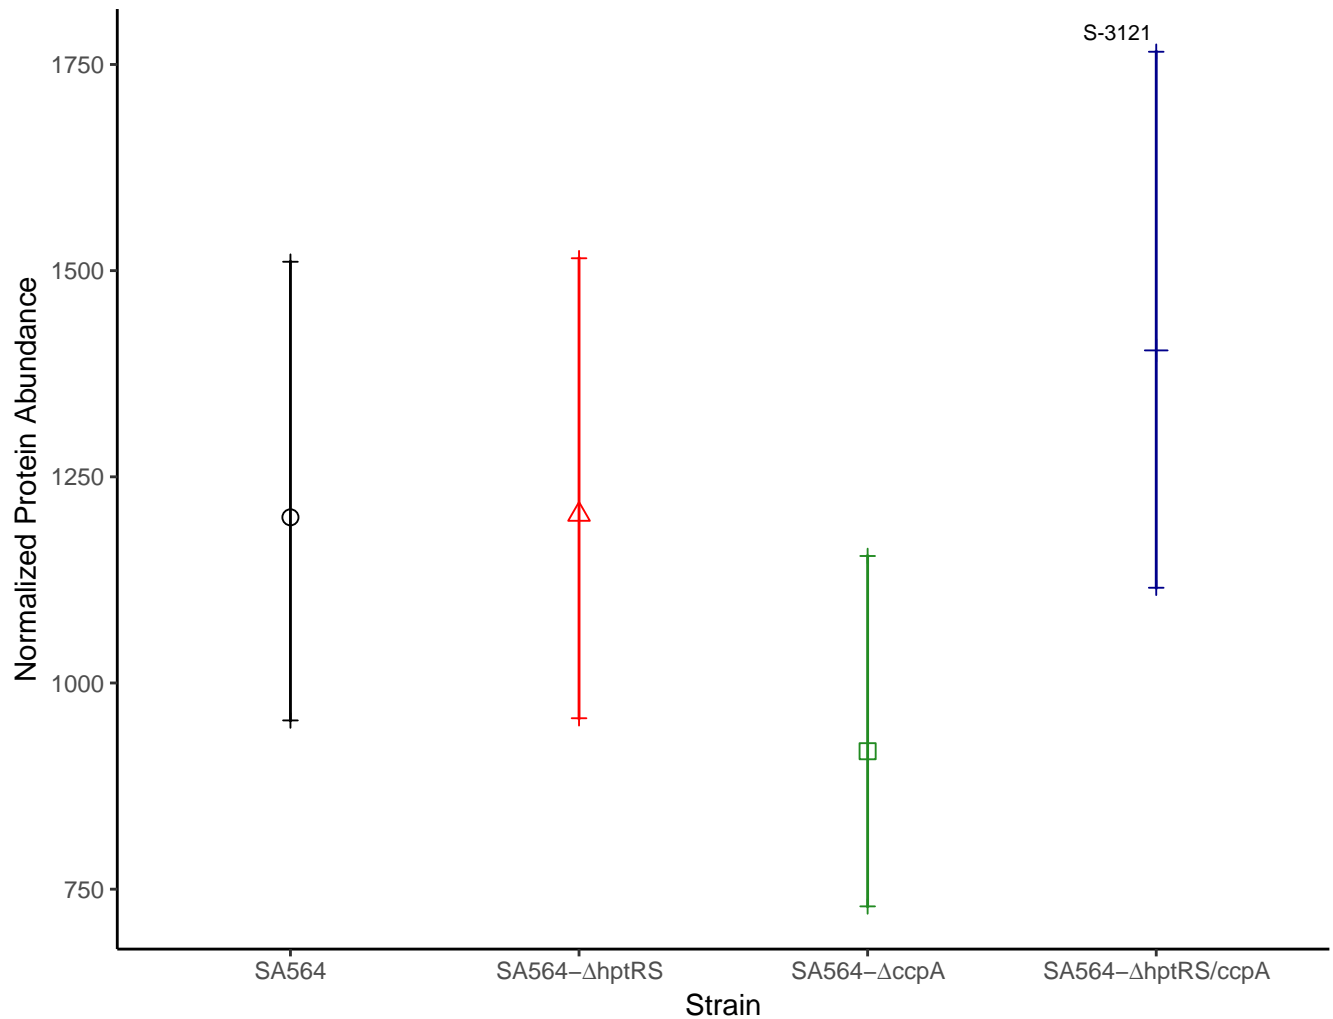

- ⊕ SA564
- △ SA564- $\Delta$ hptRS
- ⊞ SA564- $\Delta$ ccpA
- + SA564- $\Delta$ hptRS/ccpA

# FEMB\_STAAM

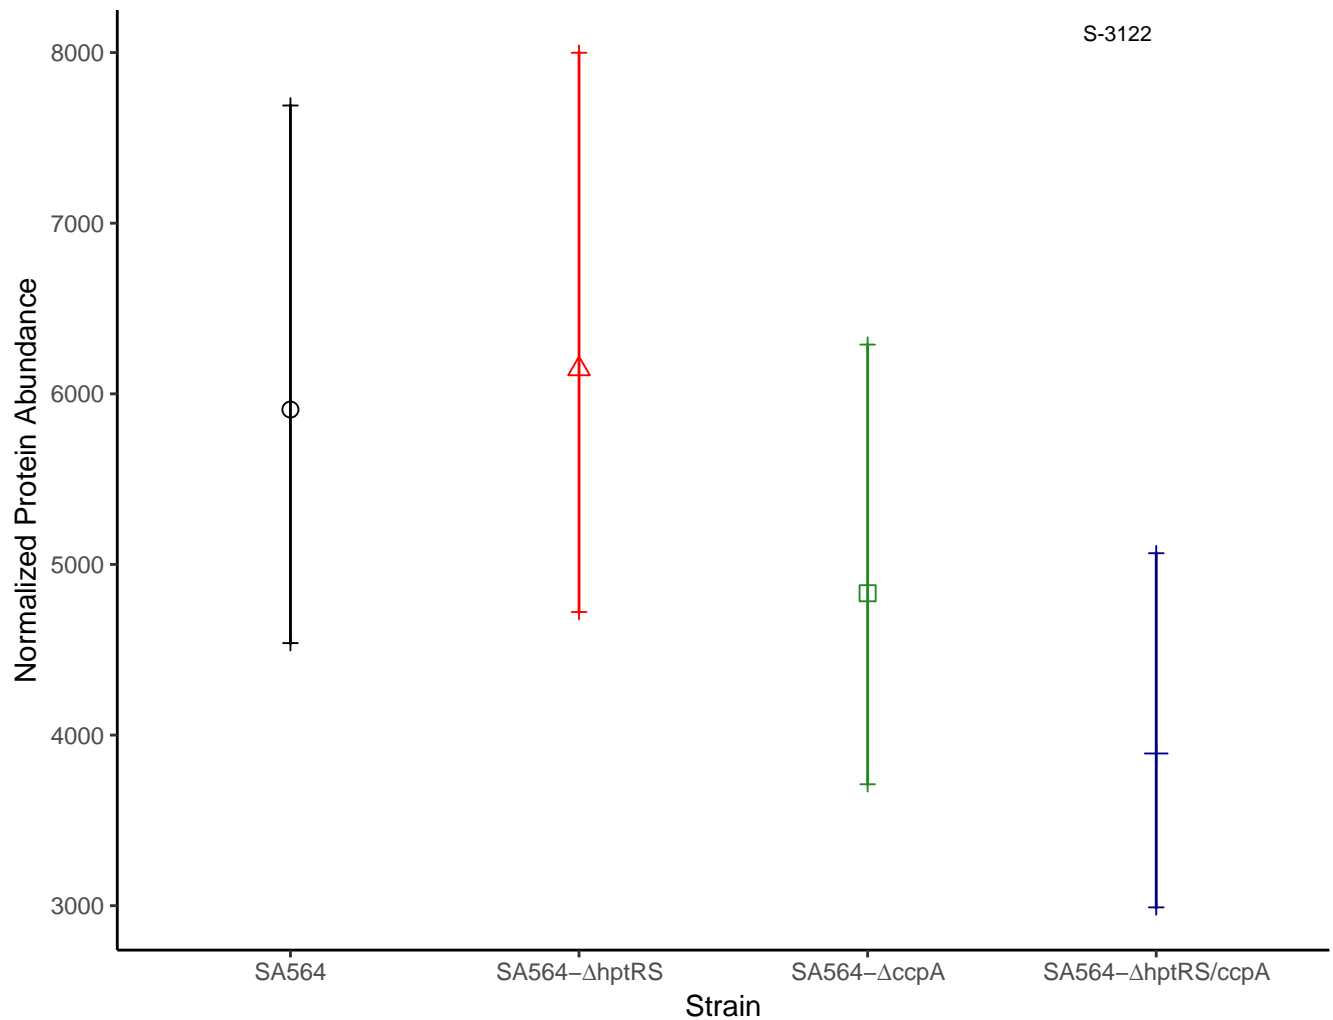

- ⊕ SA564
- △ SA564- $\Delta$ hptRS
- ⊞ SA564- $\Delta$ ccpA
- + SA564- $\Delta$ hptRS/ccpA

# FEMX\_STAAM

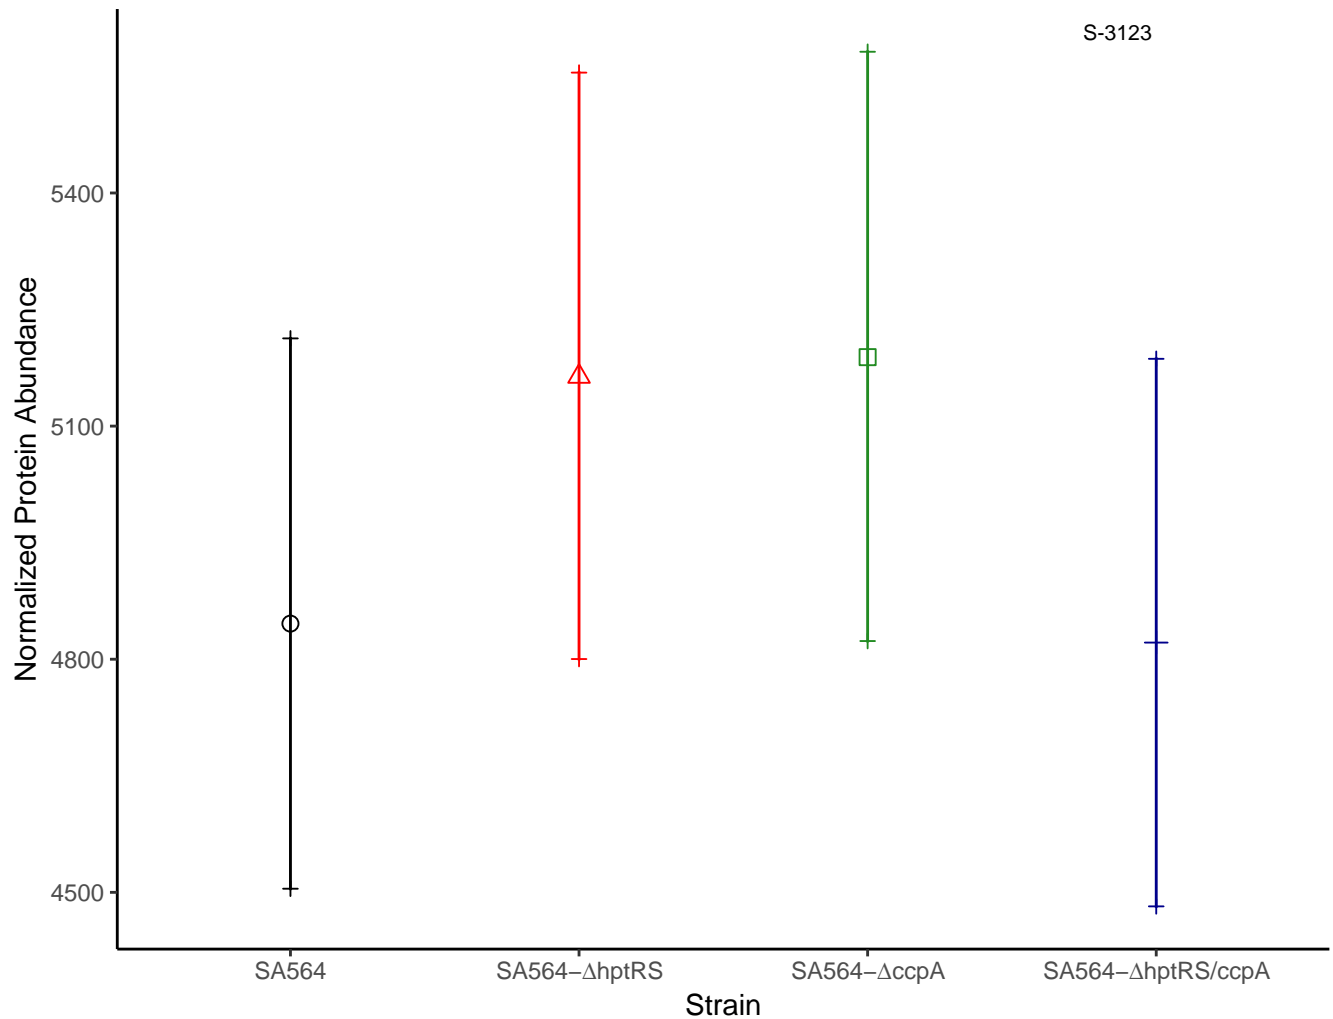

- ⊕ SA564
- △ SA564- $\Delta$ hptRS
- ⊞ SA564- $\Delta$ ccpA
- + SA564- $\Delta$ hptRS/ccpA

# FENR\_STAAM

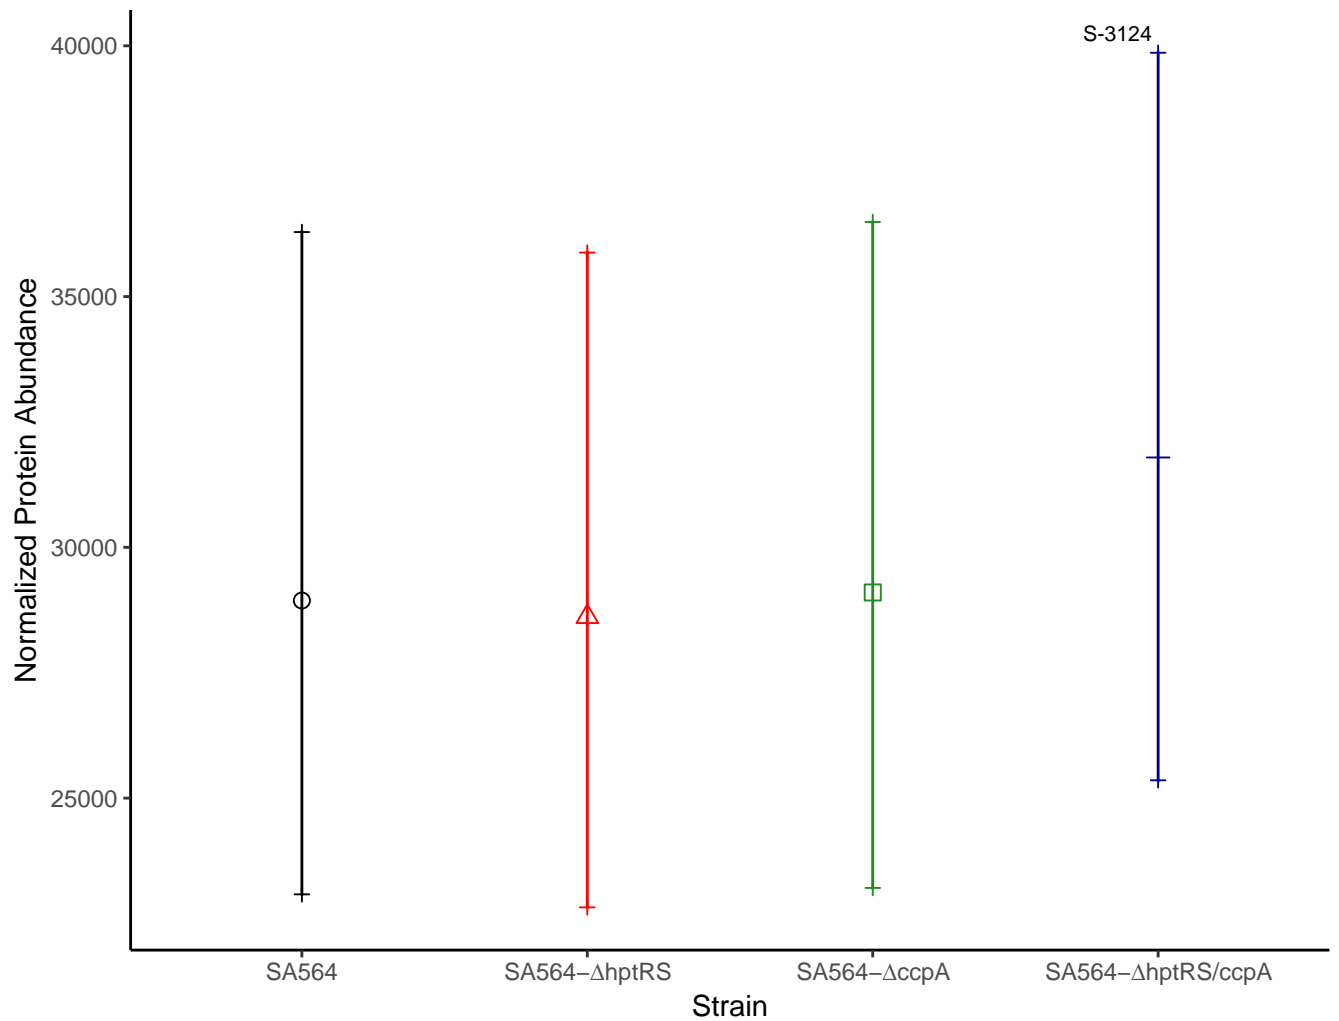

- ⊕ SA564
- △ SA564- $\Delta$ hptRS
- ⊞ SA564- $\Delta$ ccpA
- + SA564- $\Delta$ hptRS/ccpA

# FLIPR\_STAAM

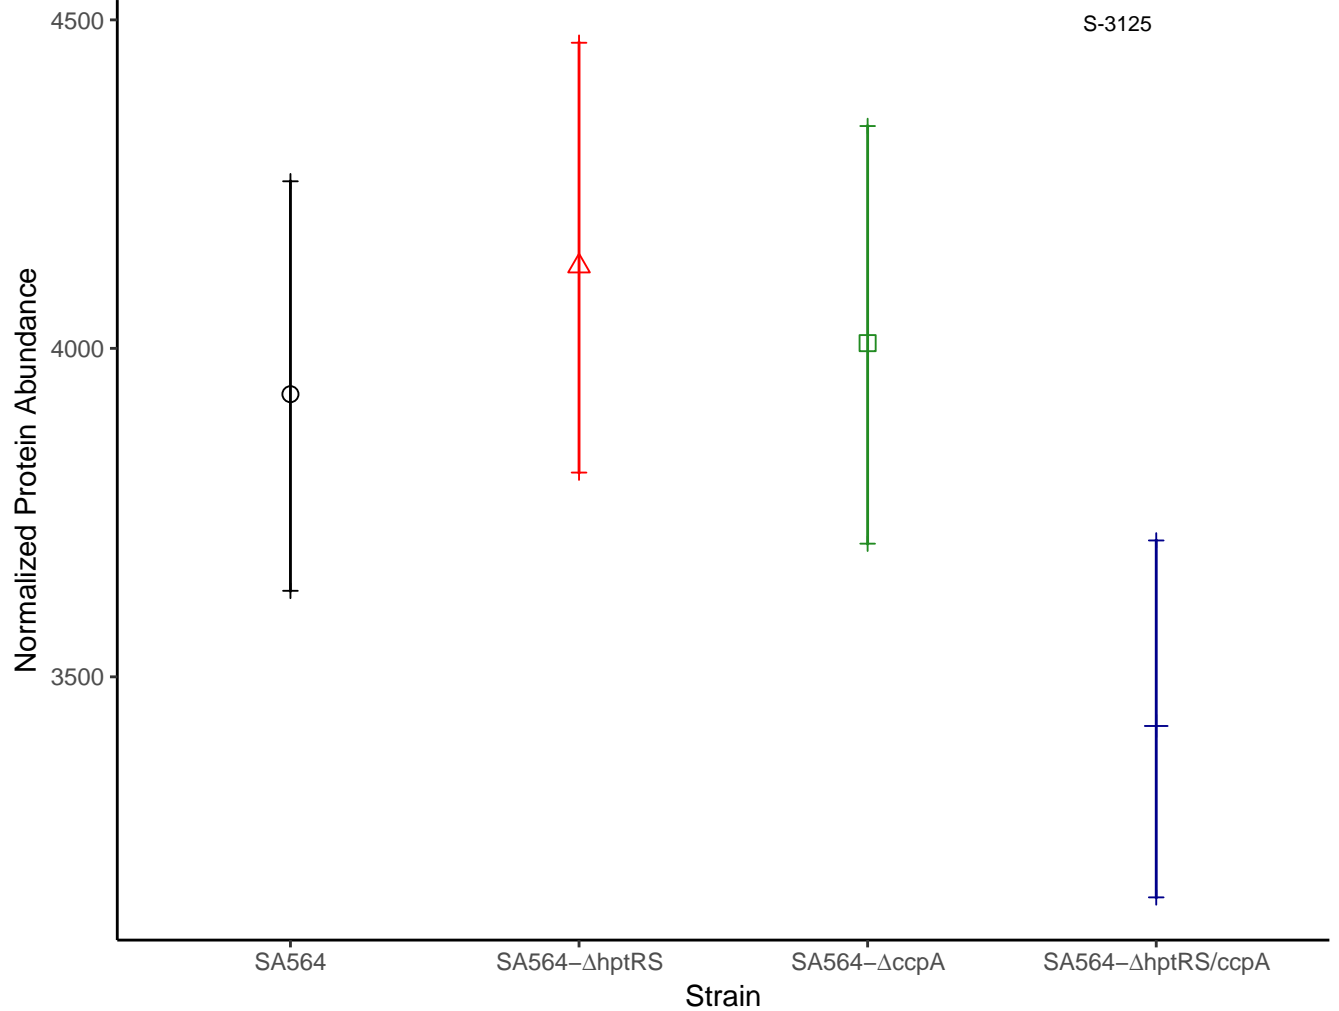

- ⊕ SA564
- △ SA564- $\Delta$ hptRS
- ⊞ SA564- $\Delta$ ccpA
- + SA564- $\Delta$ hptRS/ccpA

# FMT\_STAAM

S-3126

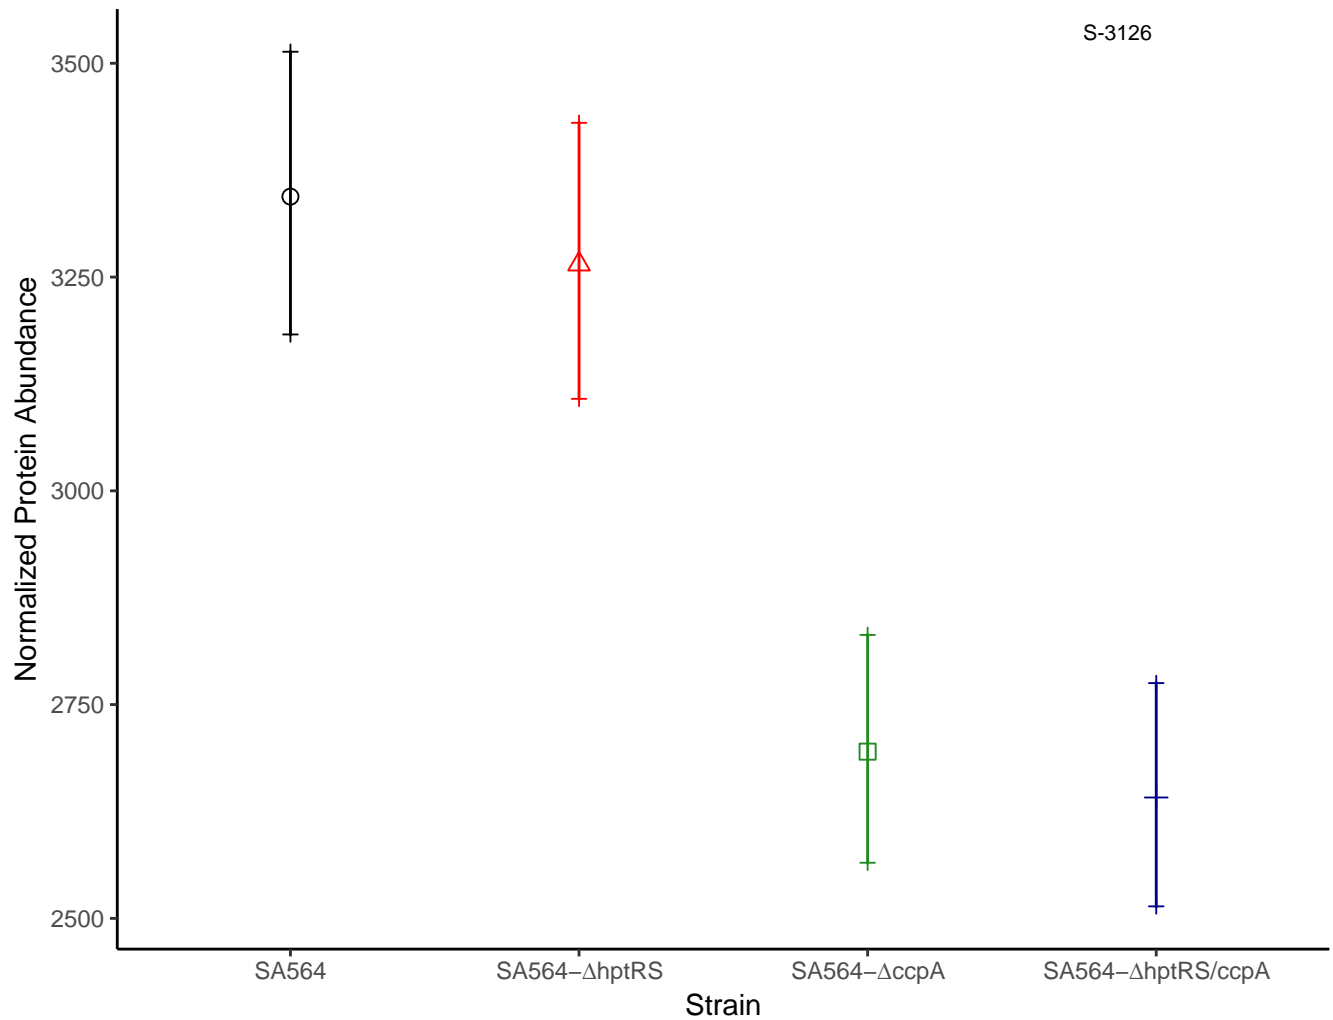

- ⊕ SA564
- △ SA564- $\Delta$ hptRS
- ⊞ SA564- $\Delta$ ccpA
- + SA564- $\Delta$ hptRS/ccpA

# FMTA\_STAAM

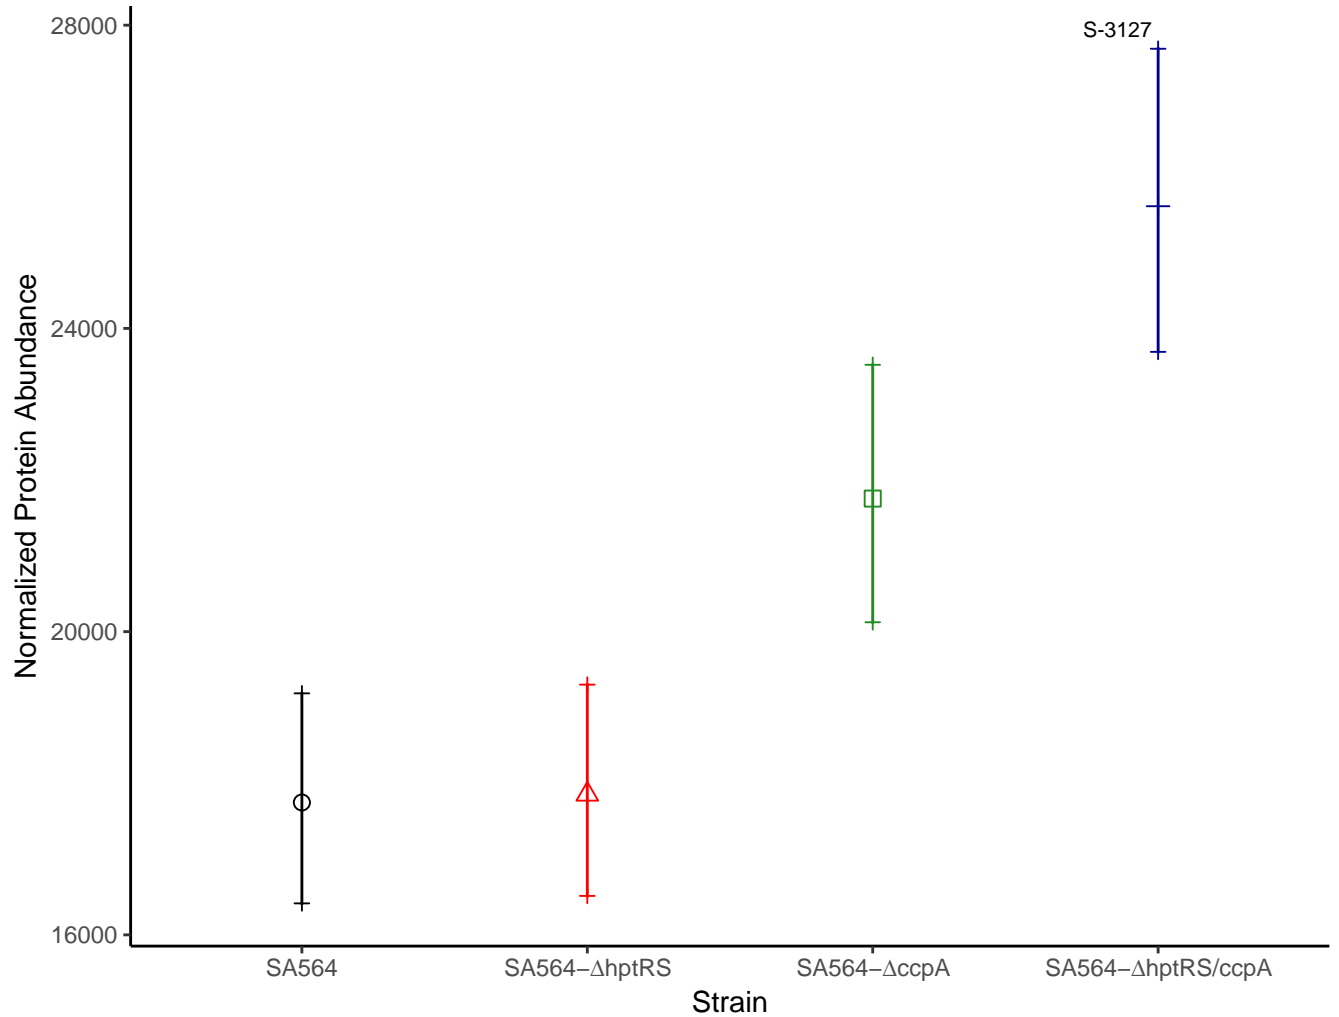

- ⊕ SA564
- △ SA564- $\Delta$ hptRS
- ⊞ SA564- $\Delta$ ccpA
- + SA564- $\Delta$ hptRS/ccpA

# FOLB\_STAAM

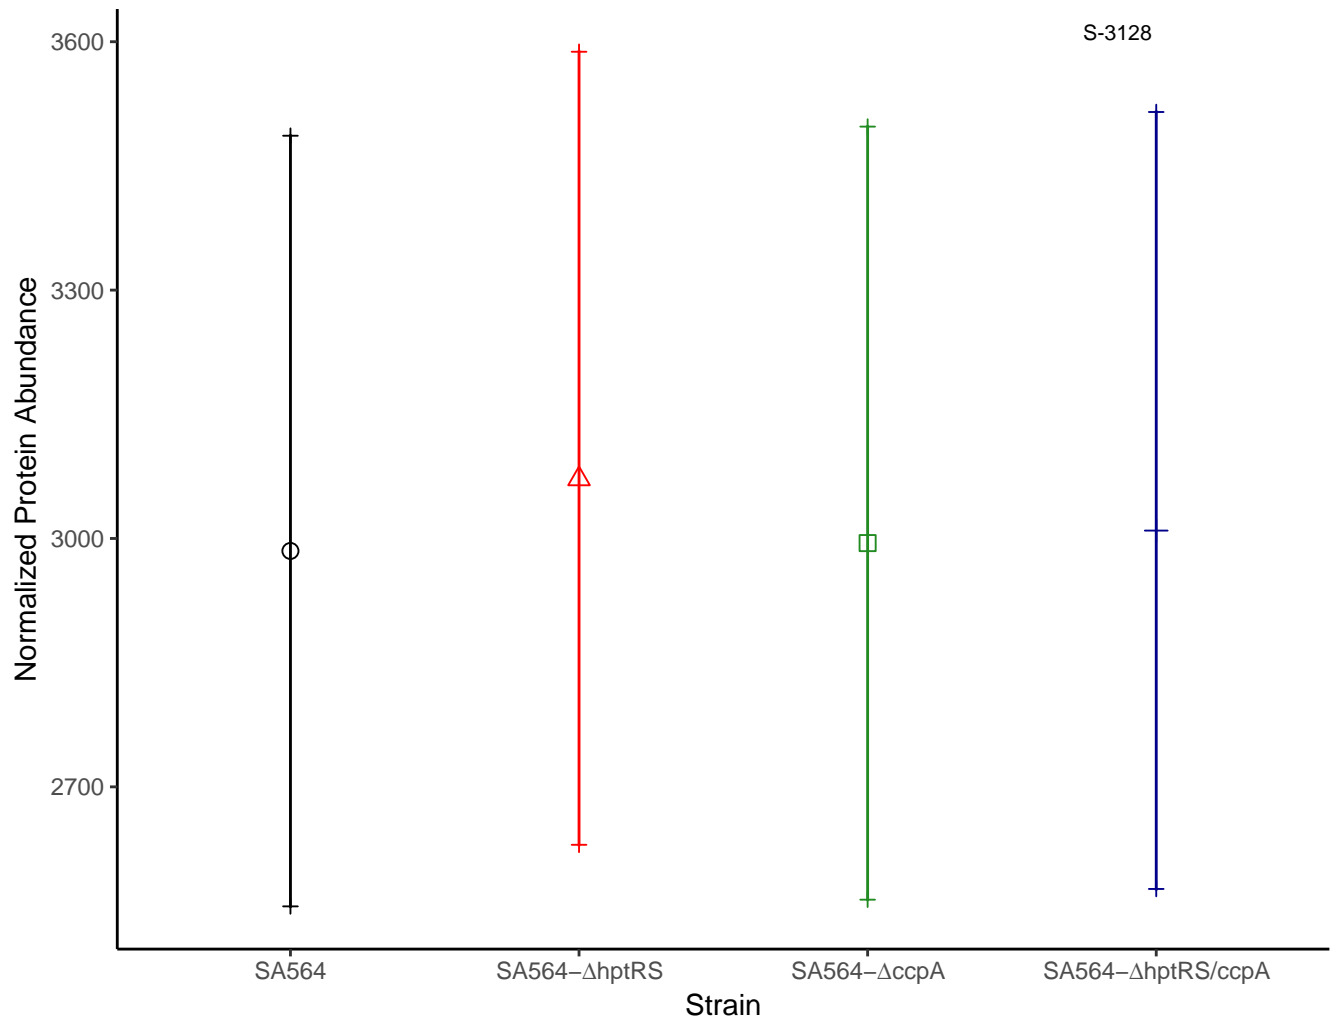

- ⊕ SA564
- △ SA564- $\Delta$ hptRS
- ⊞ SA564- $\Delta$ ccpA
- + SA564- $\Delta$ hptRS/ccpA



# FOLD\_STAAM

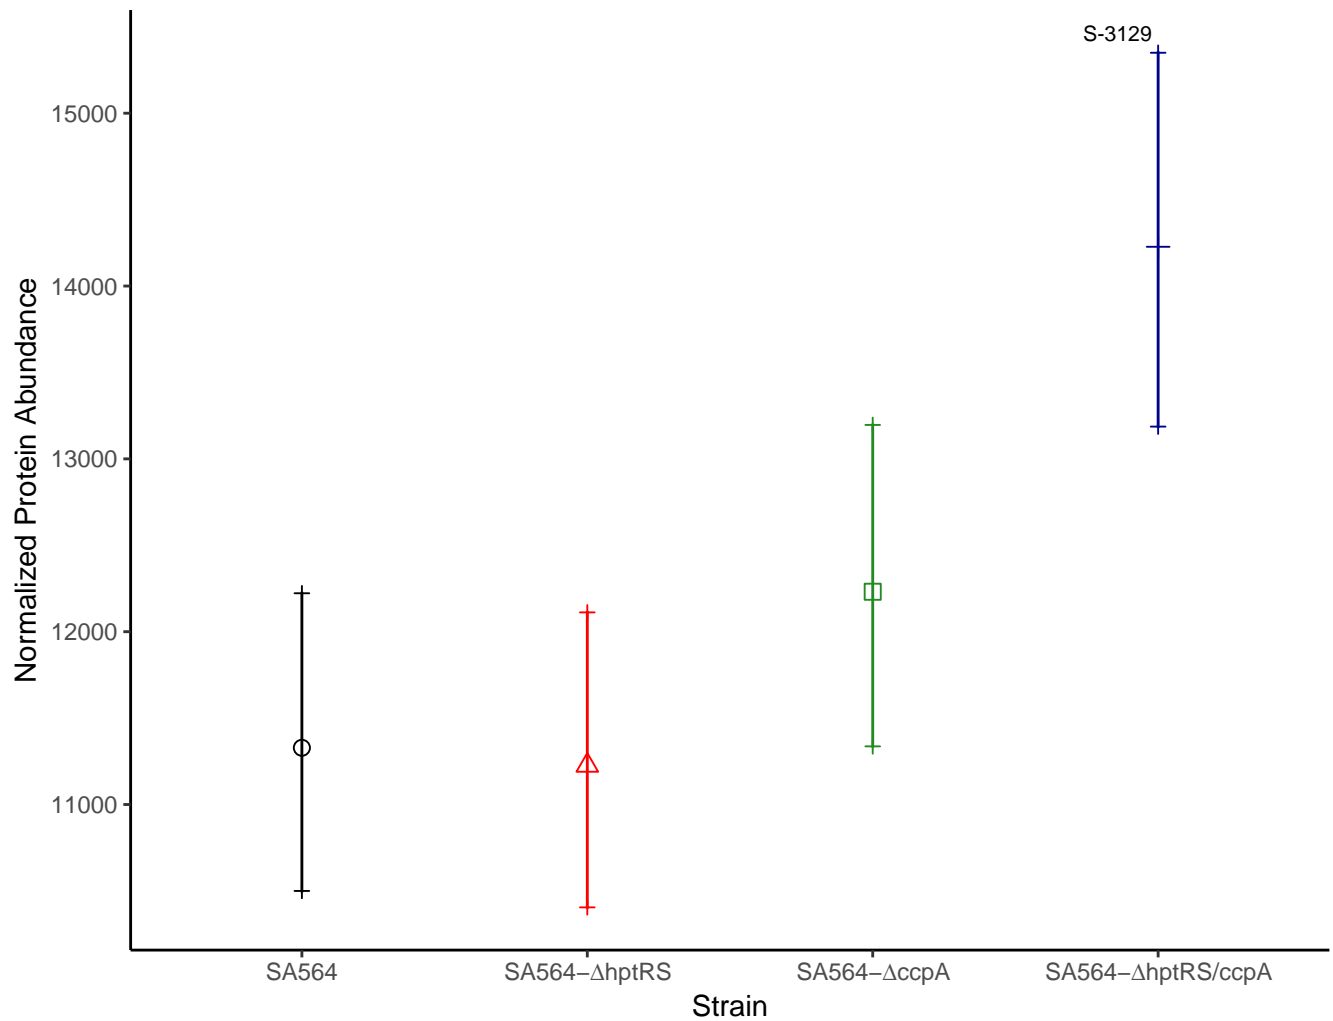

- ⊕ SA564
- △ SA564- $\Delta$ hptRS
- ⊞ SA564- $\Delta$ ccpA
- + SA564- $\Delta$ hptRS/ccpA

# FTHS\_STAAM

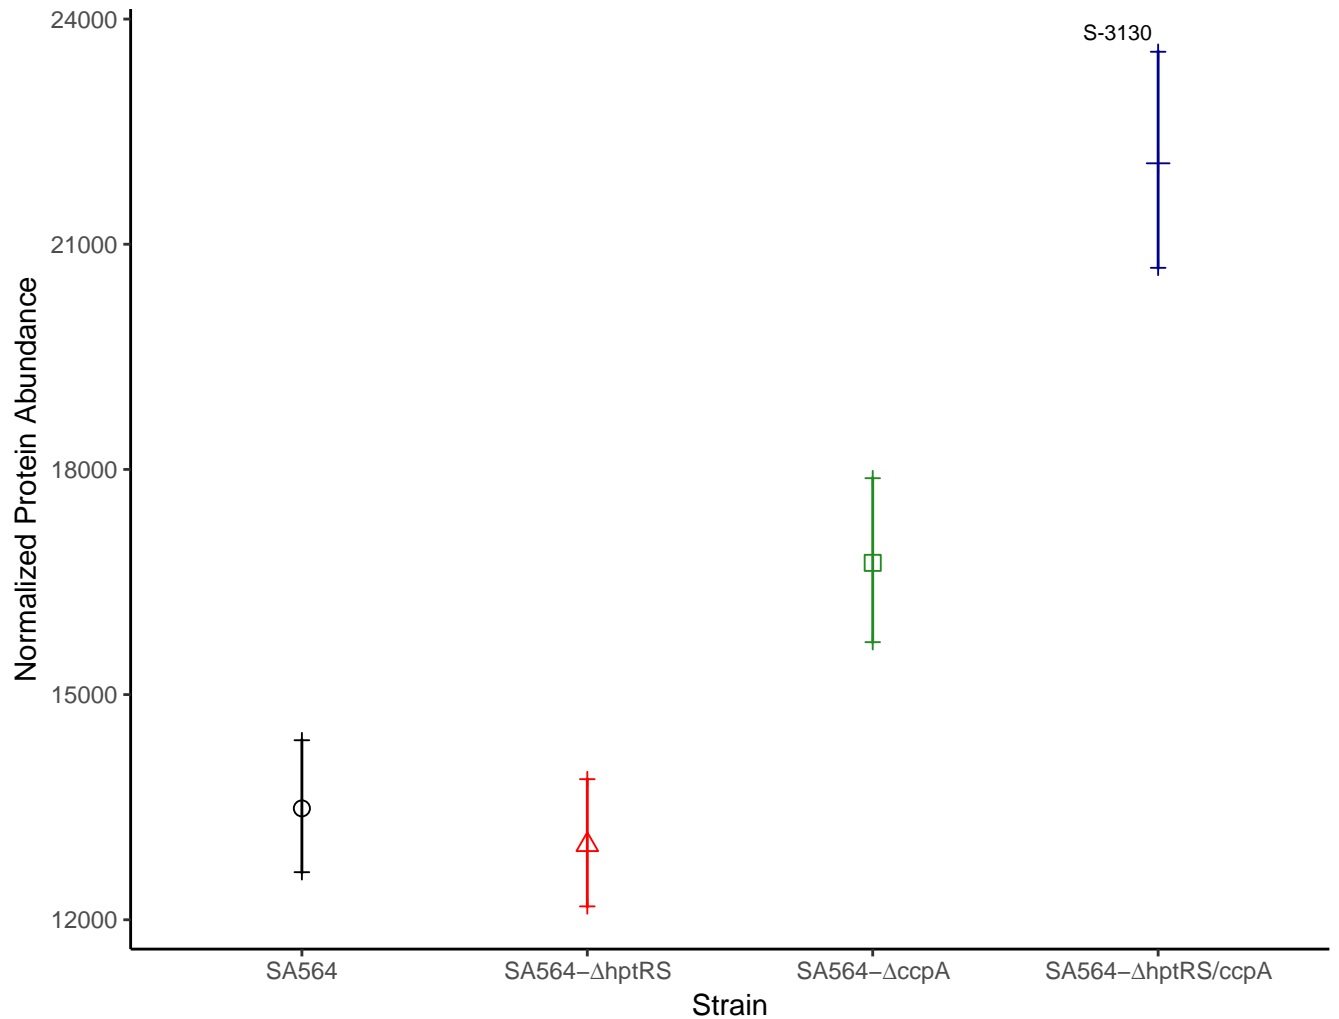

- ⊕ SA564
- △ SA564- $\Delta$ hptRS
- ⊞ SA564- $\Delta$ ccpA
- + SA564- $\Delta$ hptRS/ccpA

# FTN\_STAAM

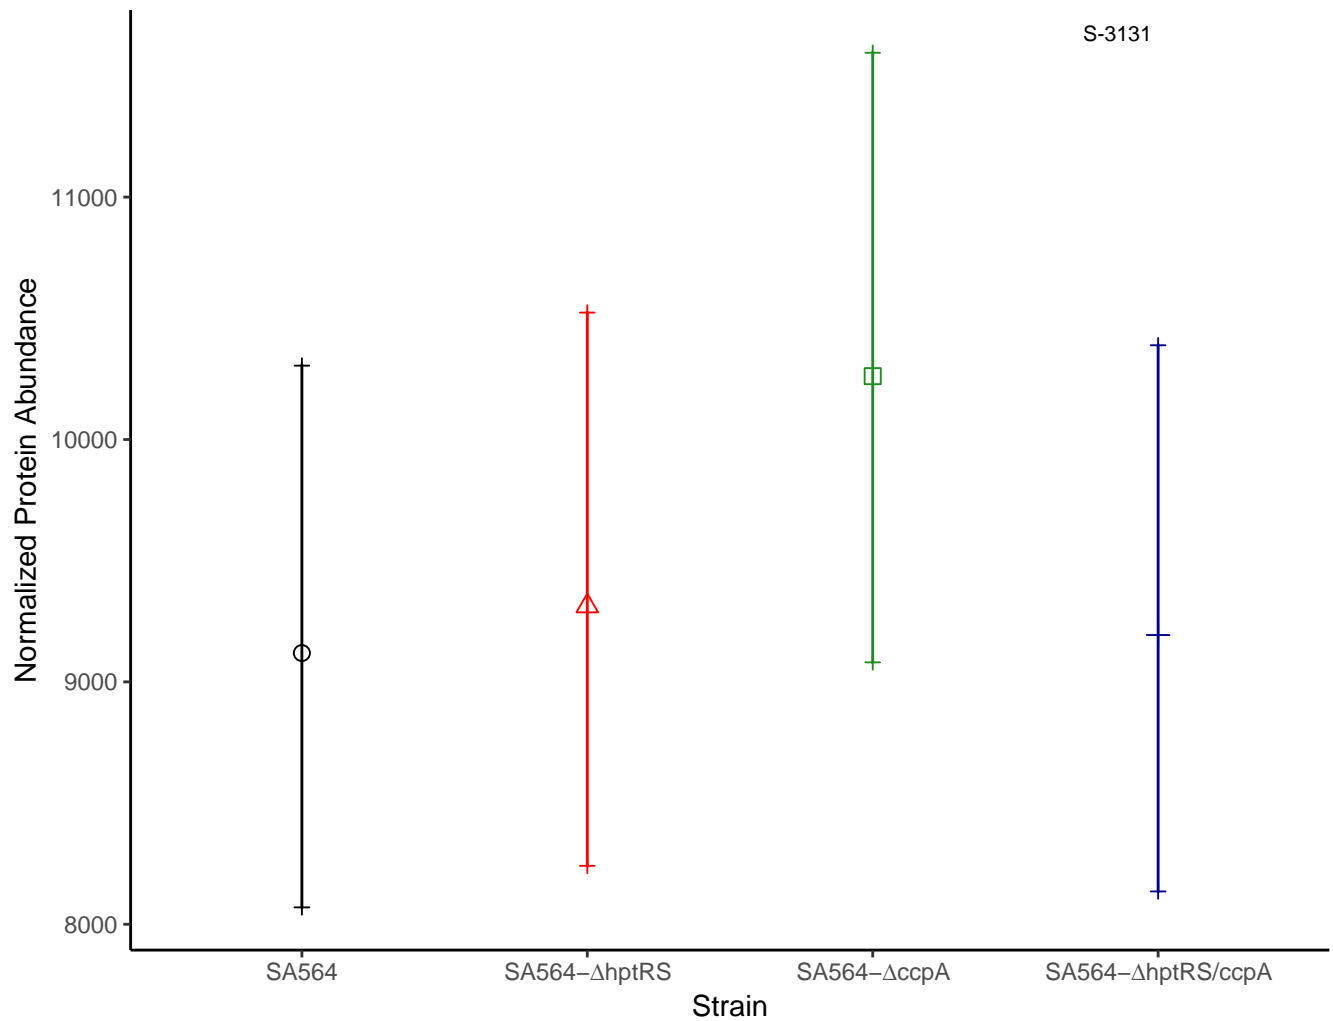

S-3131

- ⊕ SA564
- △ SA564- $\Delta$ hptRS
- ⊞ SA564- $\Delta$ ccpA
- ⊕ SA564- $\Delta$ hptRS/ccpA

# FTSA\_STAAM

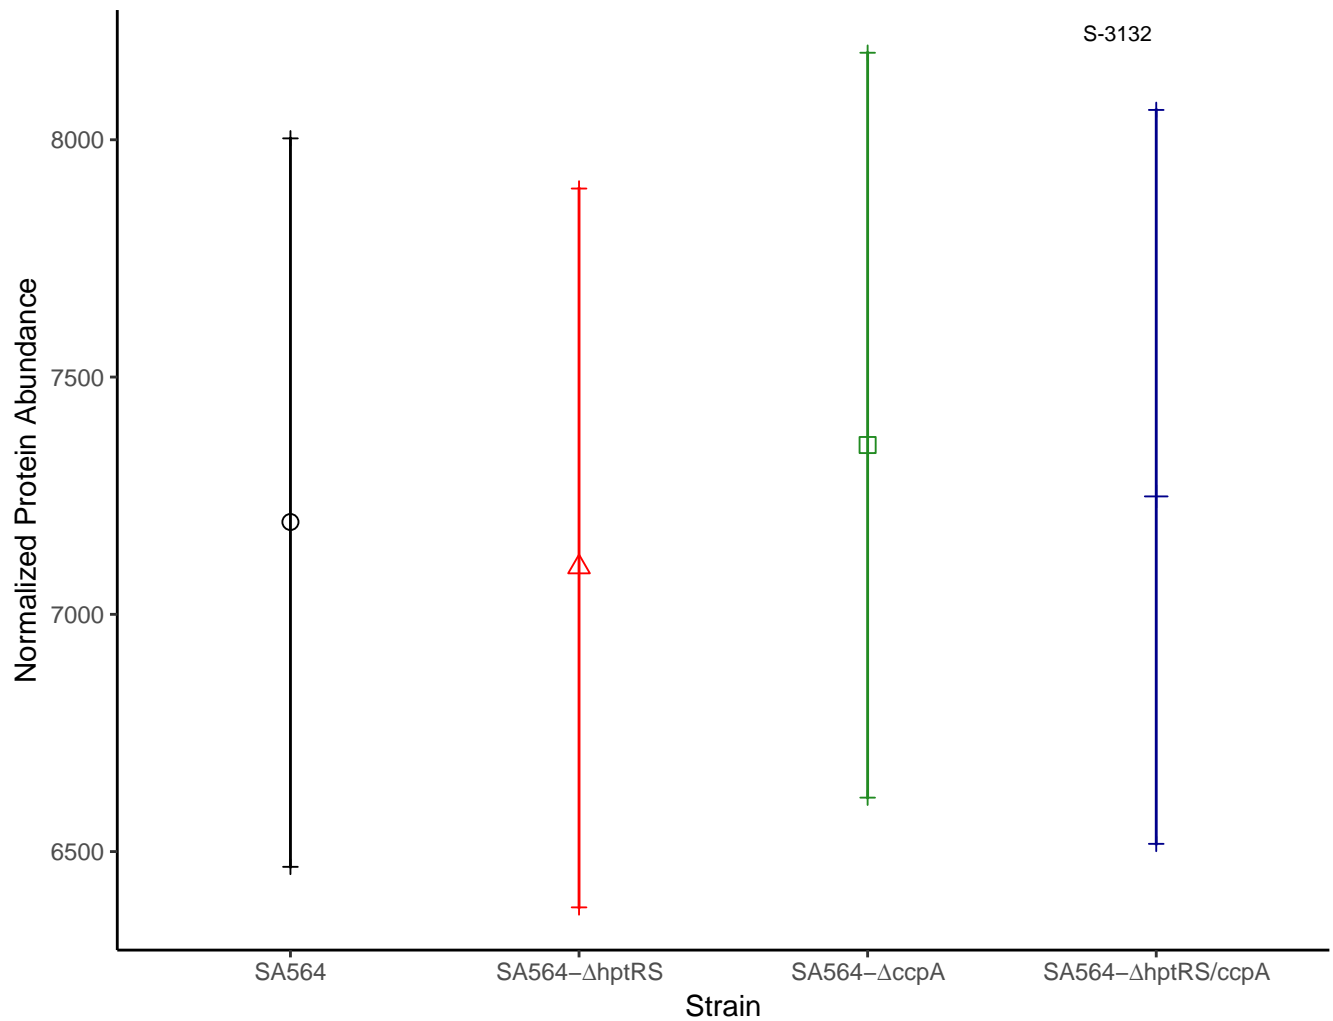

- ⊕ SA564
- △ SA564- $\Delta$ hptRS
- ⊞ SA564- $\Delta$ ccpA
- + SA564- $\Delta$ hptRS/ccpA

# FTSZ\_STAAM

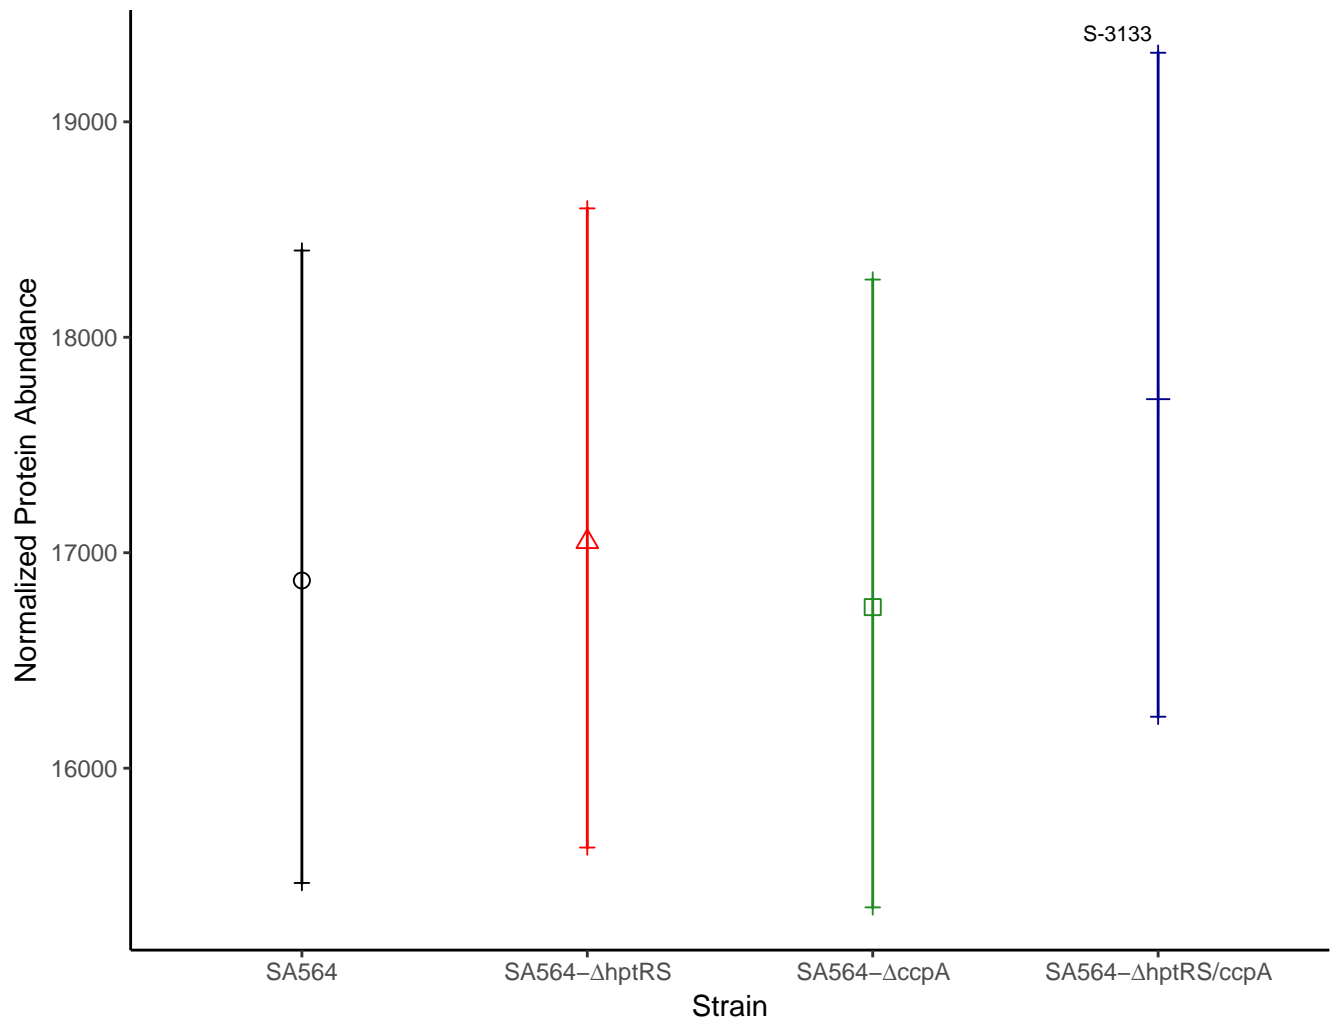

- ⊕ SA564
- △ SA564- $\Delta$ hptRS
- ⊞ SA564- $\Delta$ ccpA
- + SA564- $\Delta$ hptRS/ccpA

# FUMC\_STAAM

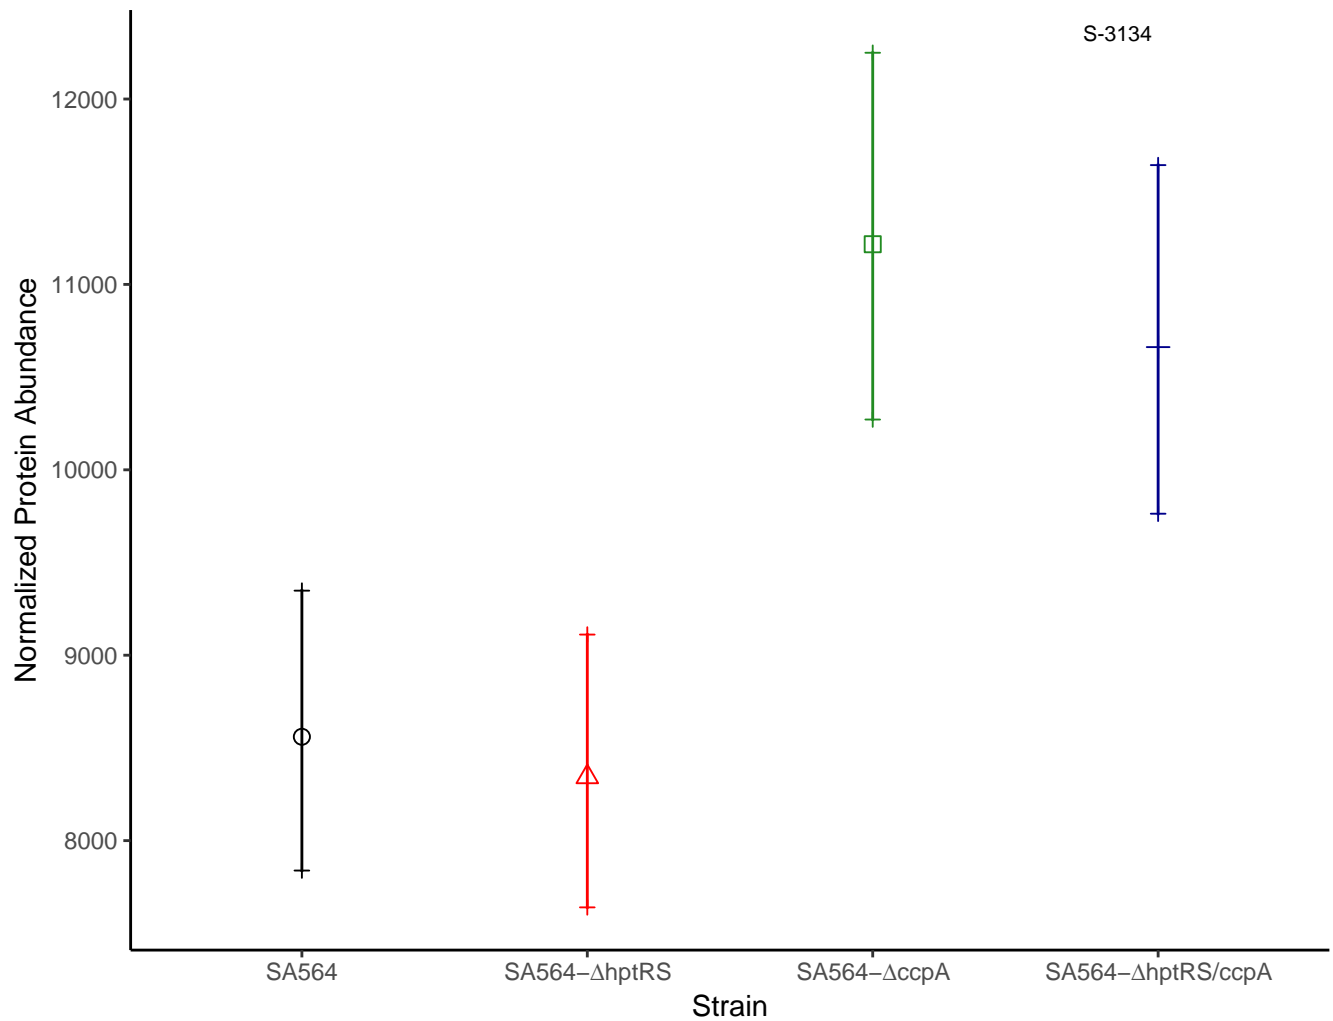

- ⊕ SA564
- △ SA564- $\Delta$ hptRS
- ⊞ SA564- $\Delta$ ccpA
- + SA564- $\Delta$ hptRS/ccpA

# G3P1\_STAAM

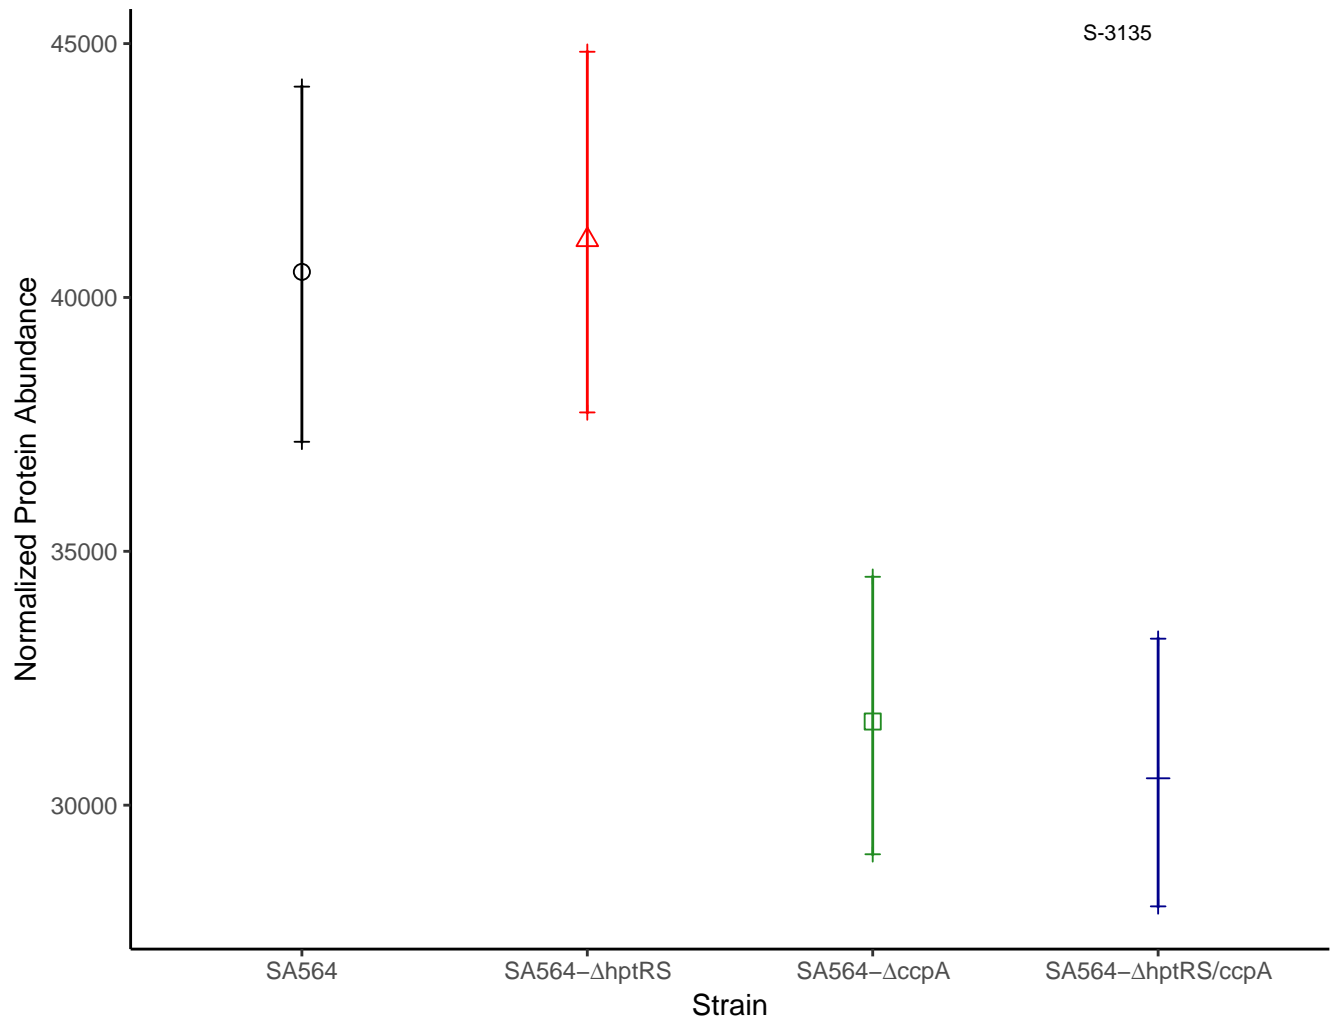

- ⊕ SA564
- △ SA564- $\Delta$ hptRS
- ⊞ SA564- $\Delta$ ccpA
- + SA564- $\Delta$ hptRS/ccpA

# G3P2\_STAAM

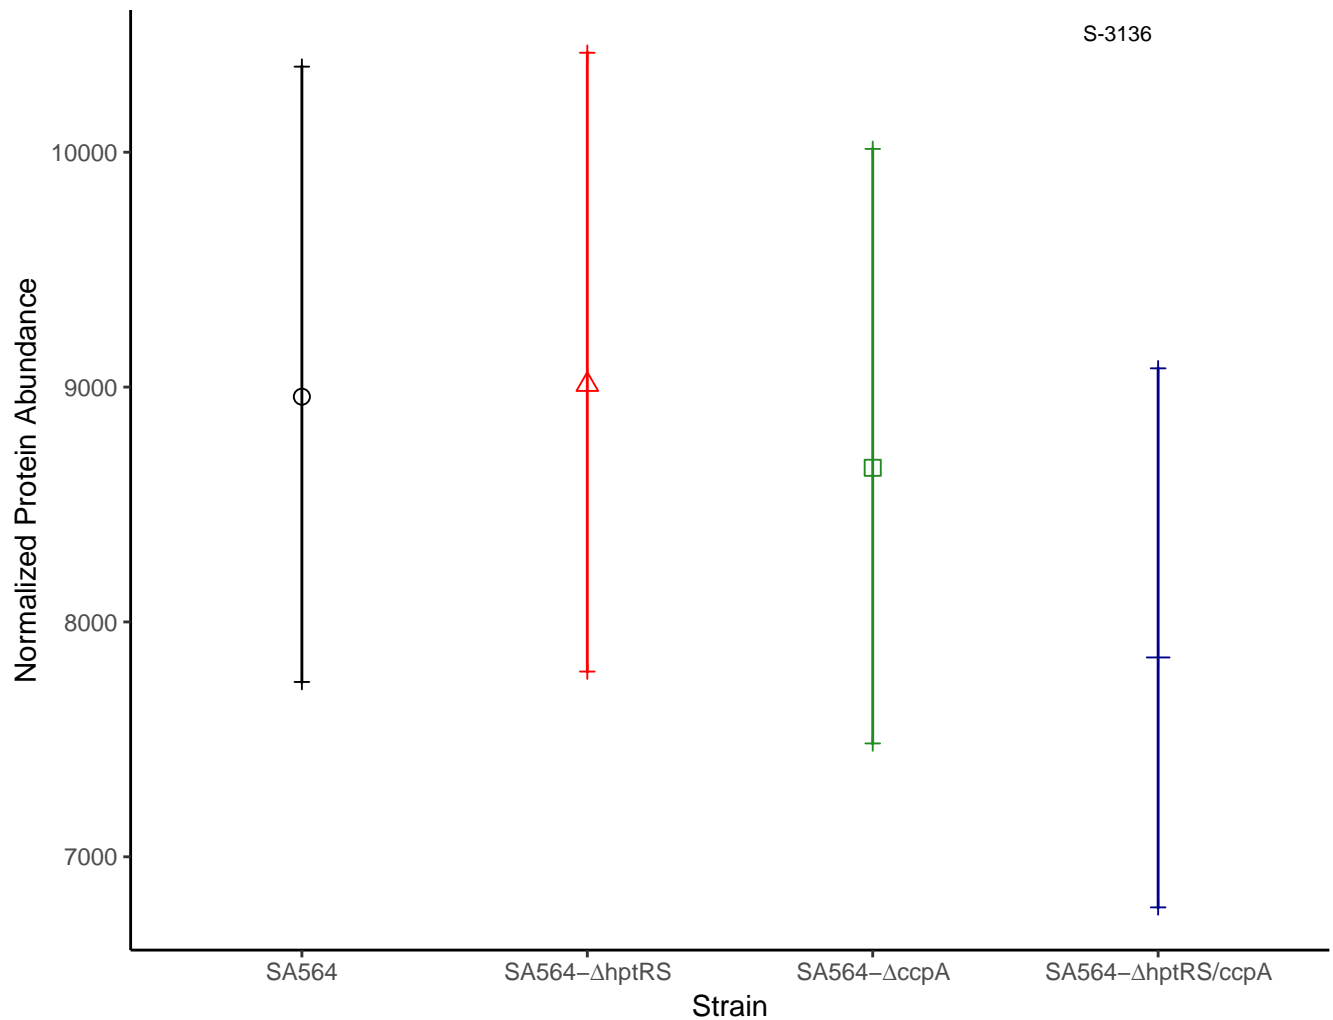

- ⊕ SA564
- △ SA564- $\Delta$ hptRS
- ⊞ SA564- $\Delta$ ccpA
- + SA564- $\Delta$ hptRS/ccpA



# G6PI\_STAAM

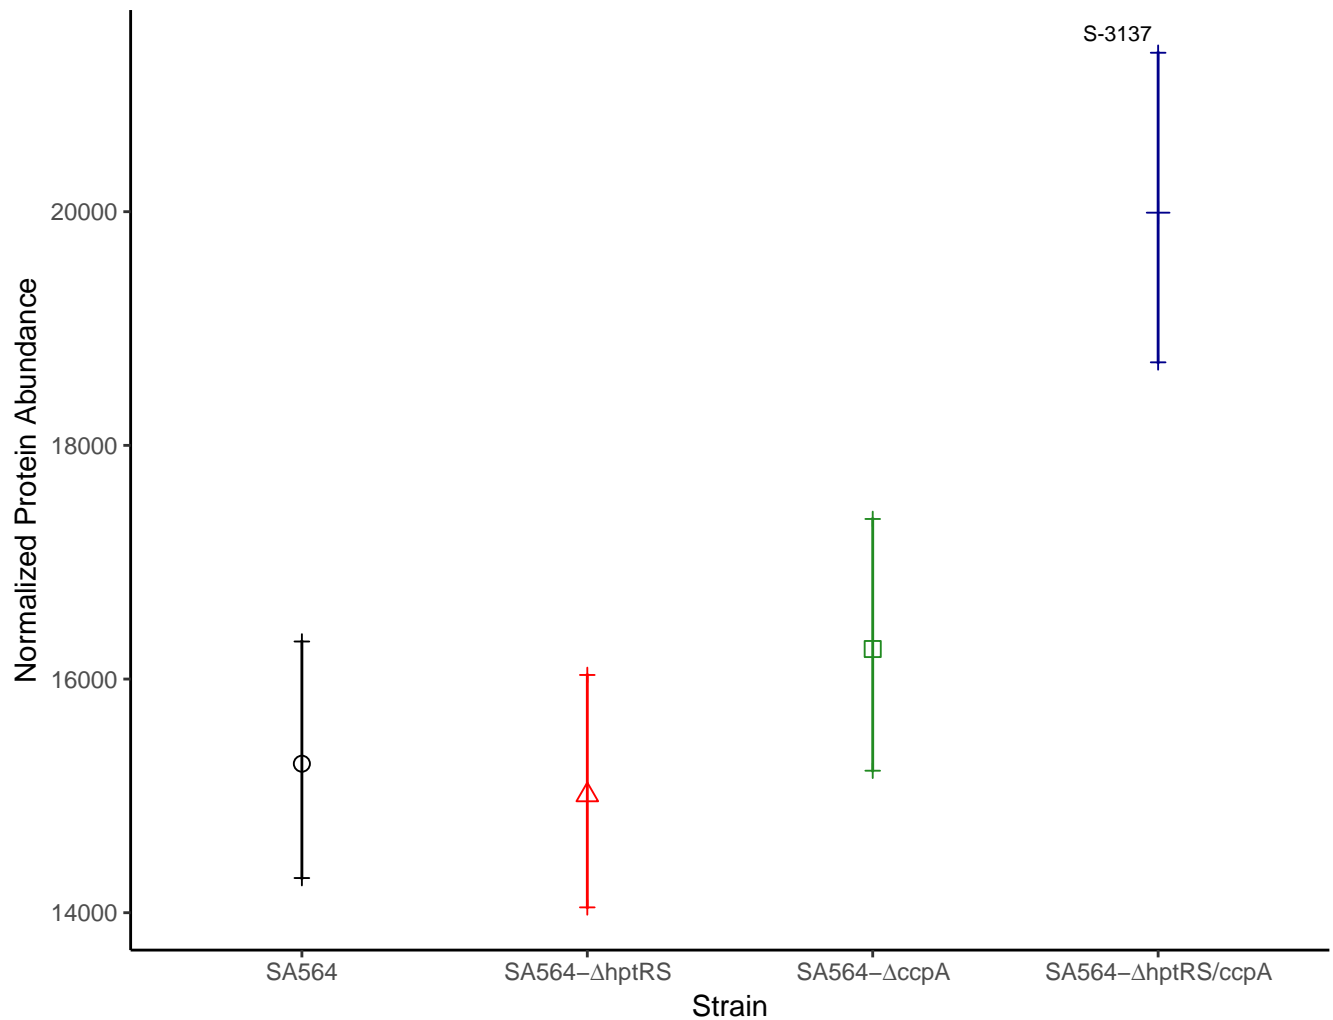

- ⊕ SA564
- △ SA564- $\Delta$ hptRS
- ⊞ SA564- $\Delta$ ccpA
- + SA564- $\Delta$ hptRS/ccpA

# GATA\_STAAM

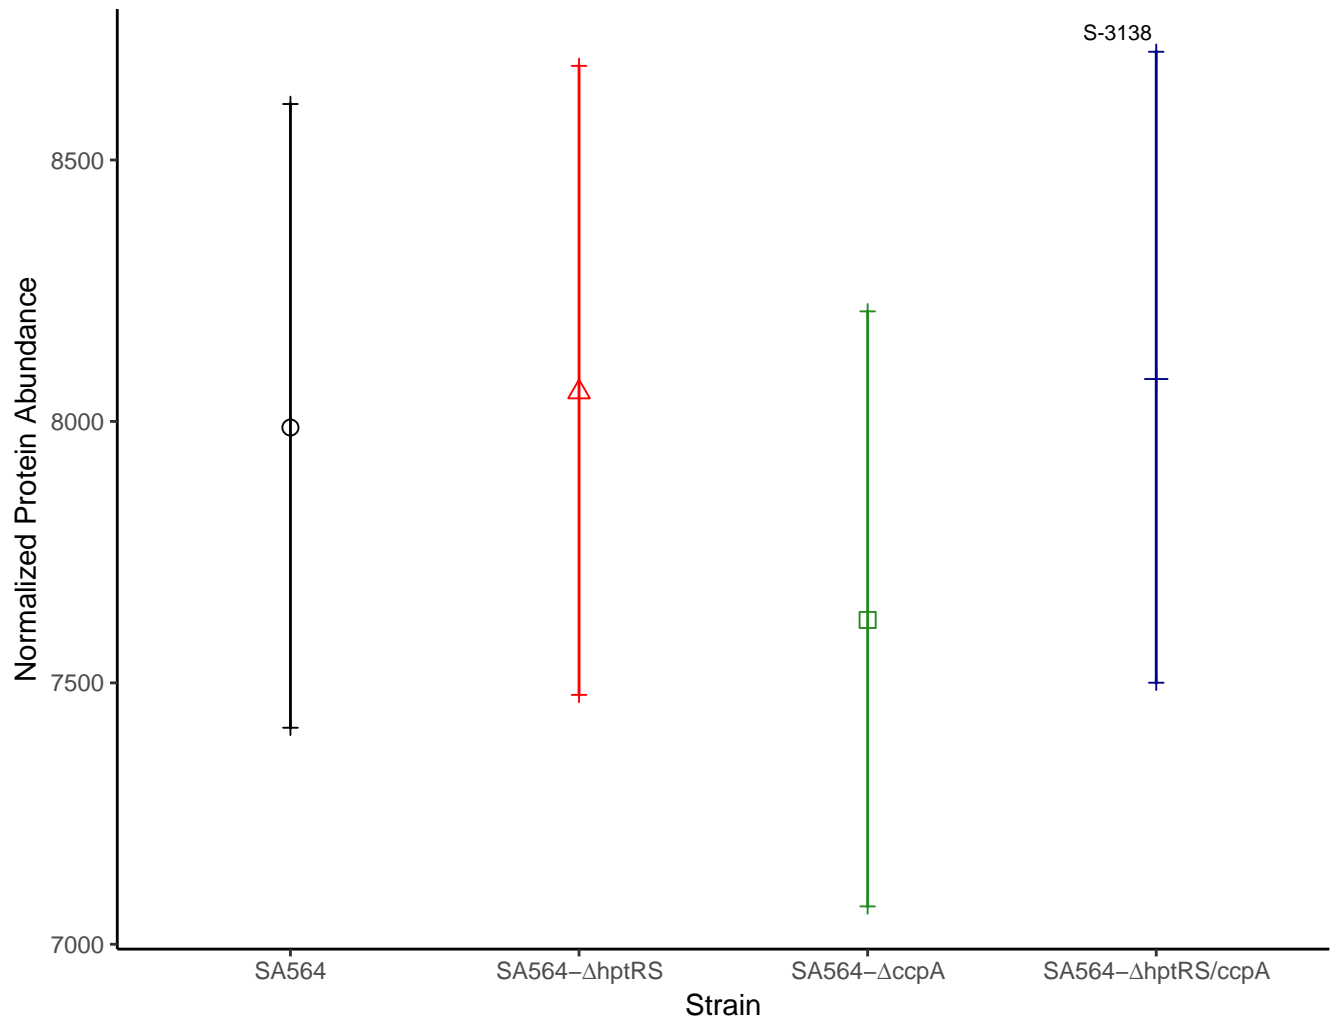

- ⊕ SA564
- △ SA564- $\Delta$ hptRS
- ⊞ SA564- $\Delta$ ccpA
- + SA564- $\Delta$ hptRS/ccpA

# GATB\_STAAM

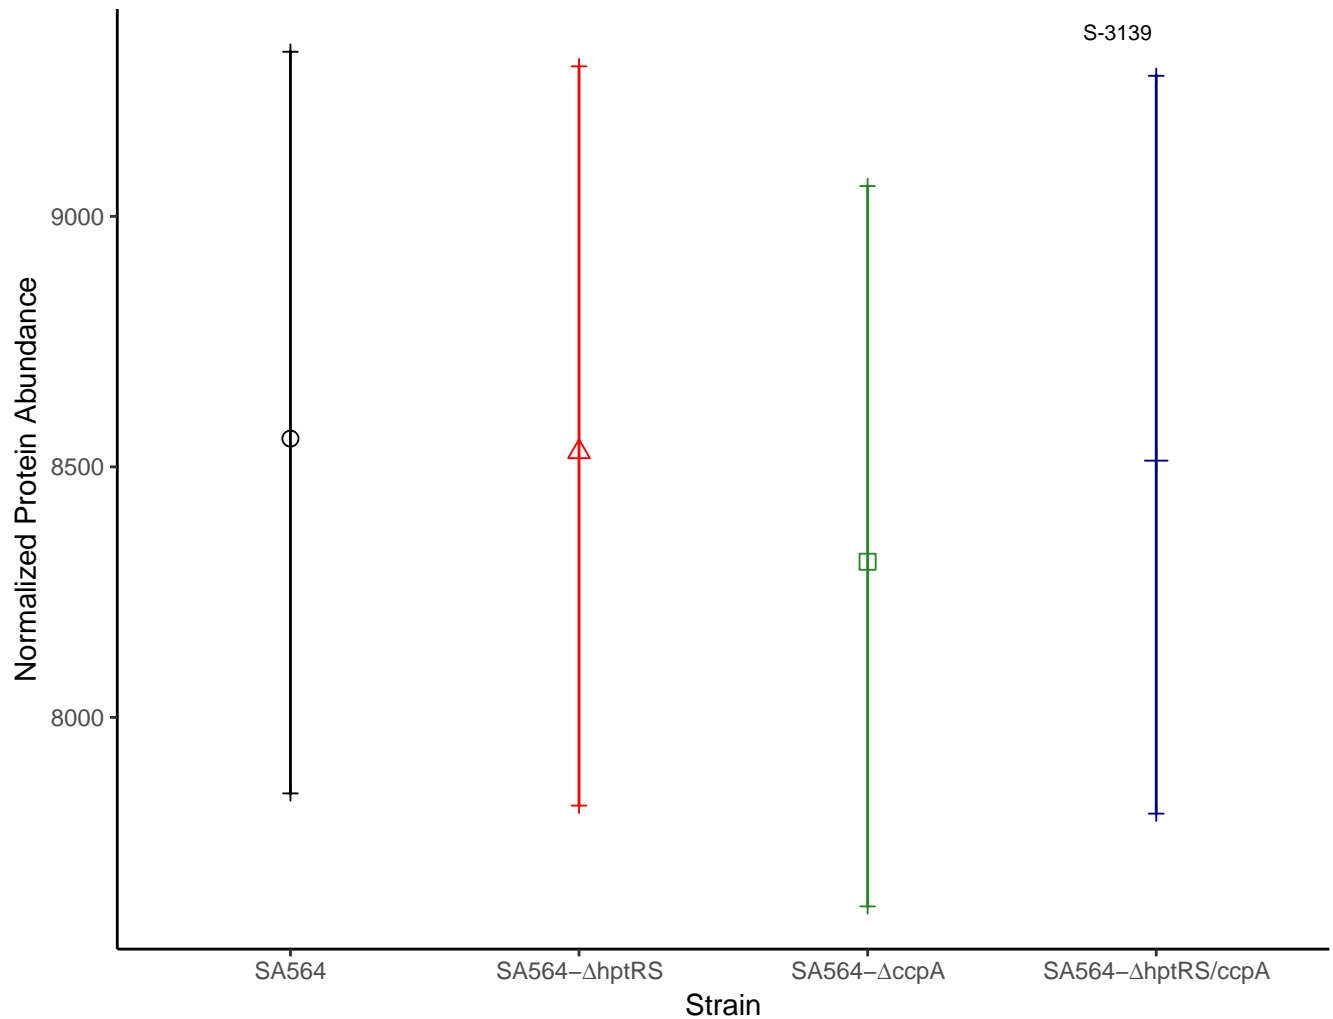

- ⊕ SA564
- △ SA564- $\Delta$ hptRS
- ⊞ SA564- $\Delta$ ccpA
- + SA564- $\Delta$ hptRS/ccpA

# GATC\_STAAM

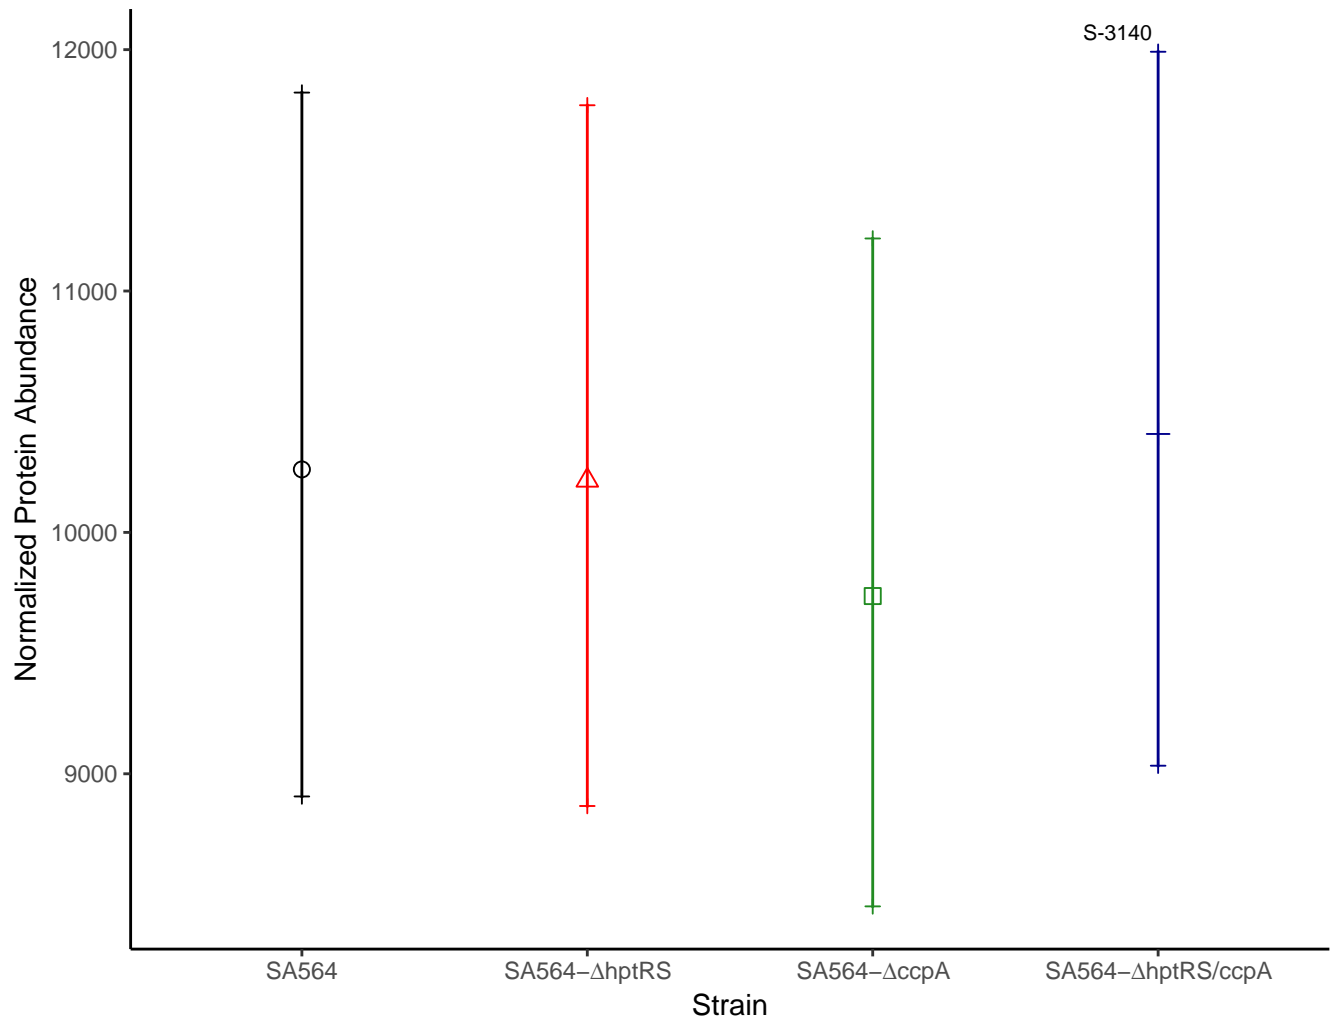

- ⊕ SA564
- △ SA564- $\Delta$ hptRS
- ⊞ SA564- $\Delta$ ccpA
- + SA564- $\Delta$ hptRS/ccpA

# GCH4\_STAAM

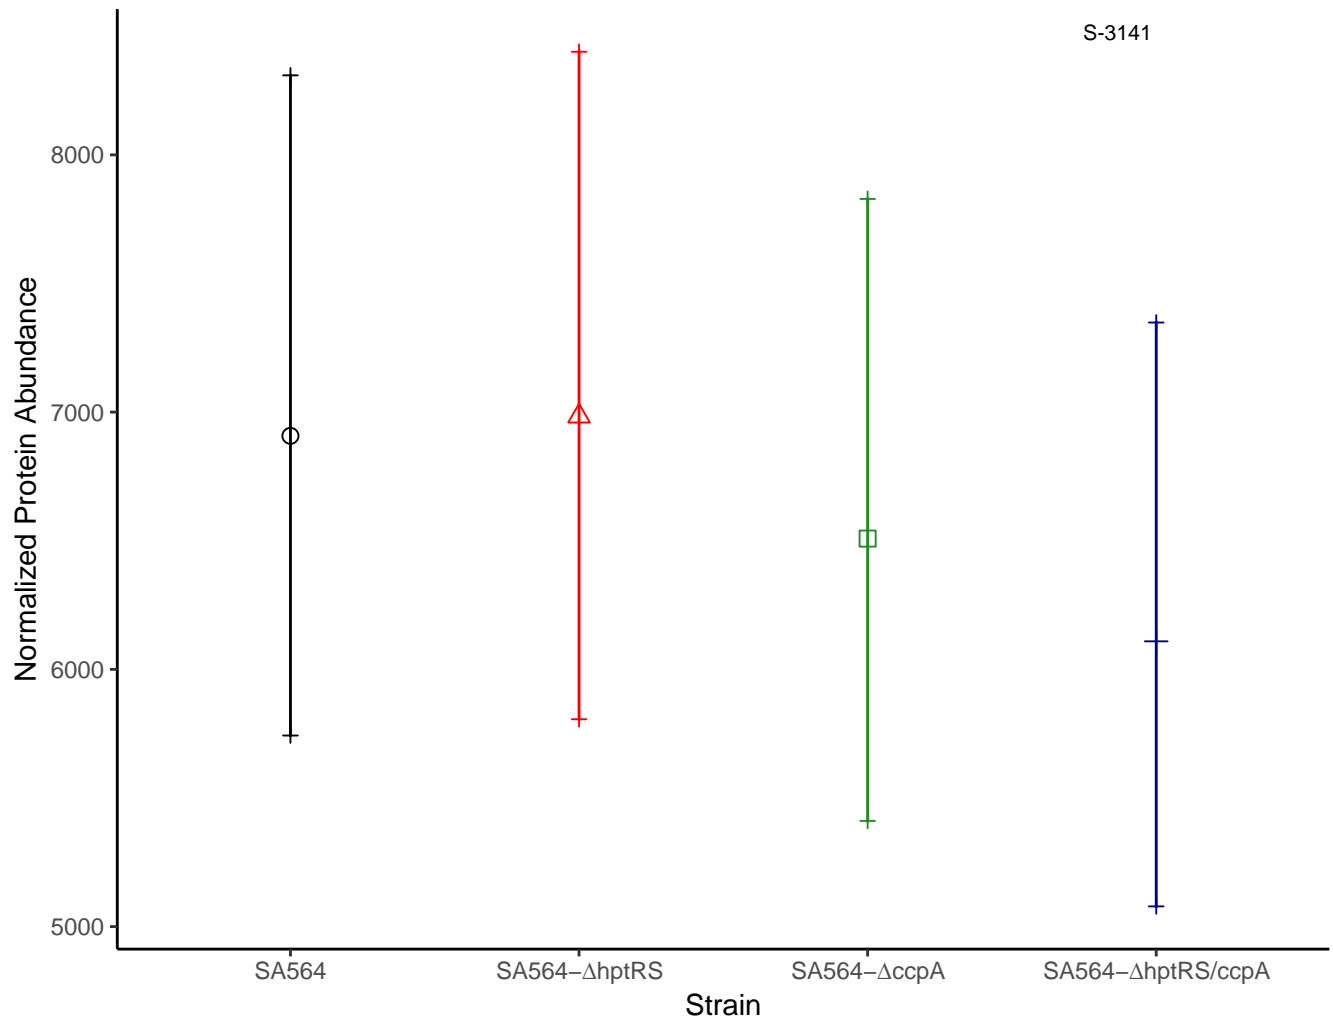

- ⊕ SA564
- △ SA564- $\Delta$ hptRS
- ⊞ SA564- $\Delta$ ccpA
- ⊕ SA564- $\Delta$ hptRS/ccpA

# GCSH\_STAAM

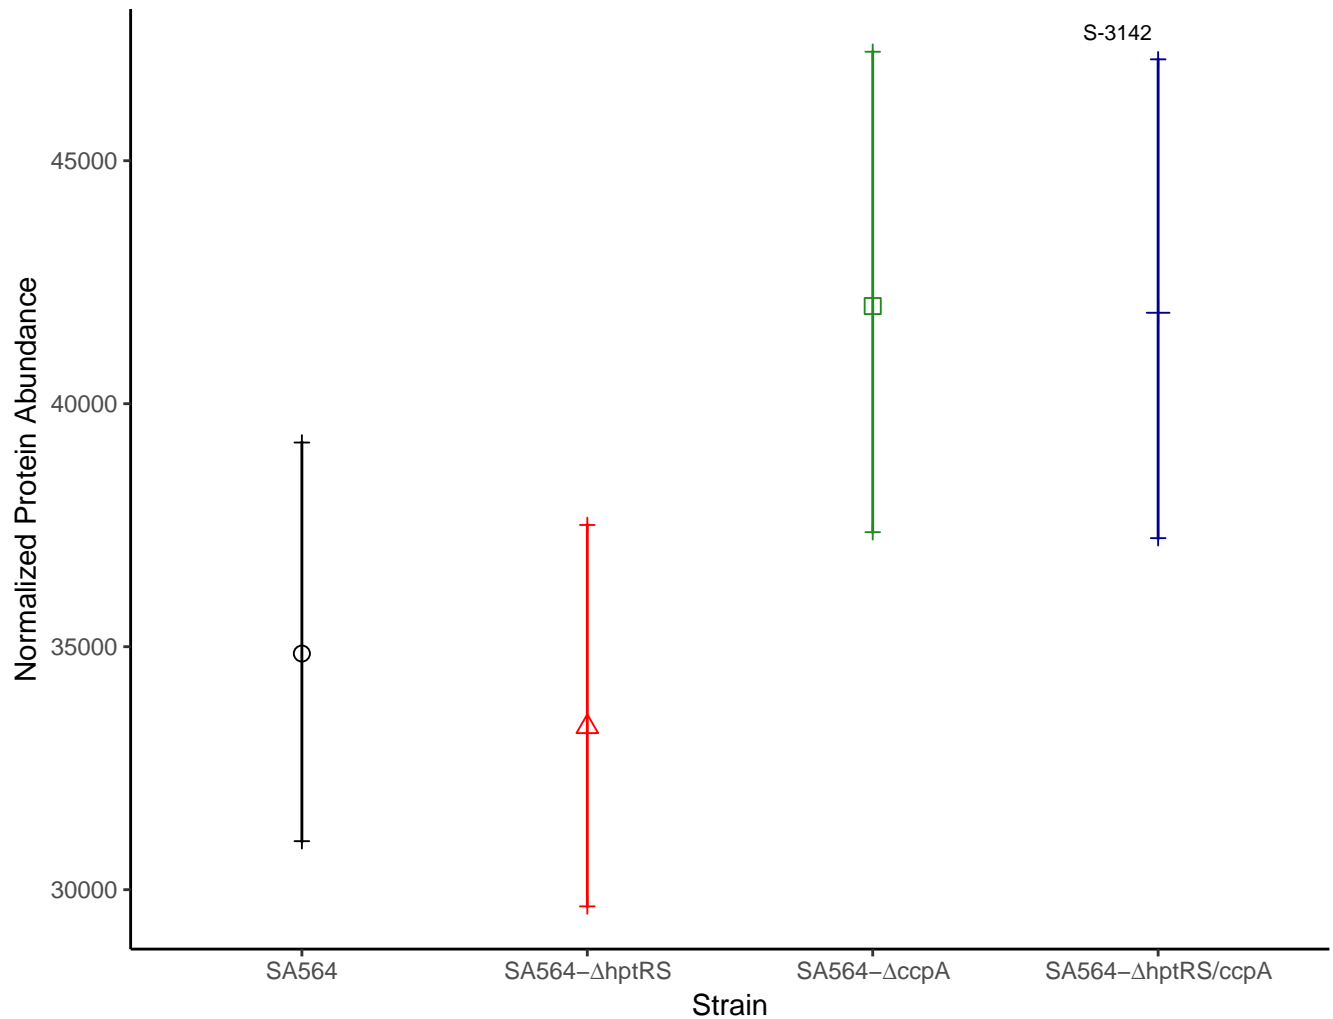

- ⊕ SA564
- △ SA564- $\Delta$ hptRS
- ⊞ SA564- $\Delta$ ccpA
- + SA564- $\Delta$ hptRS/ccpA

# GCSPA\_STAAM

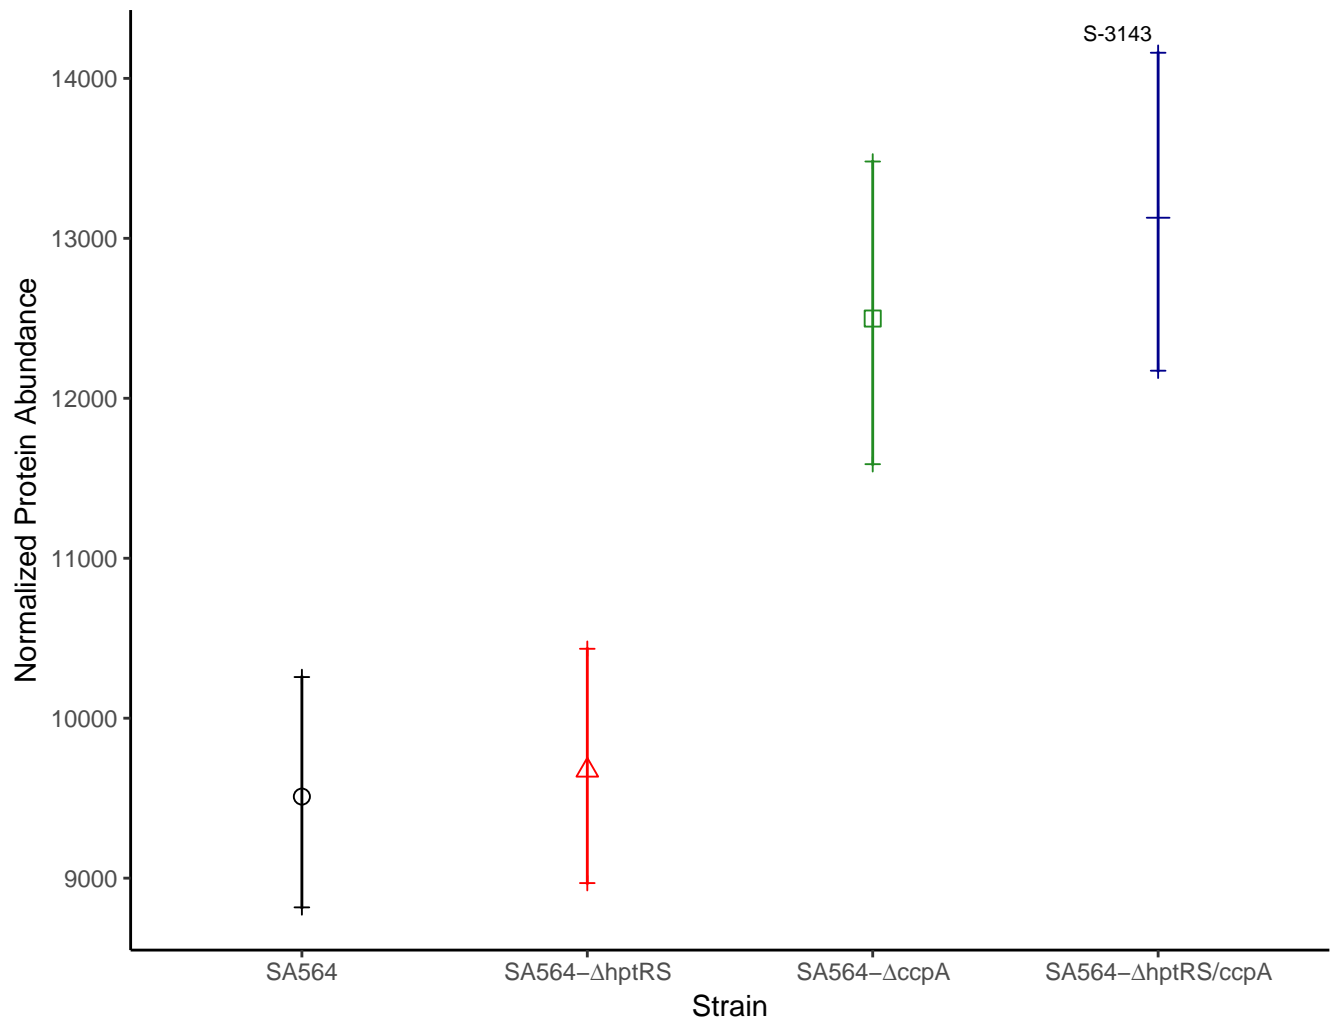

- ⊕ SA564
- △ SA564-ΔhptRS
- ⊞ SA564-ΔccpA
- + SA564-ΔhptRS/ccpA

# GCSPB\_STAAM

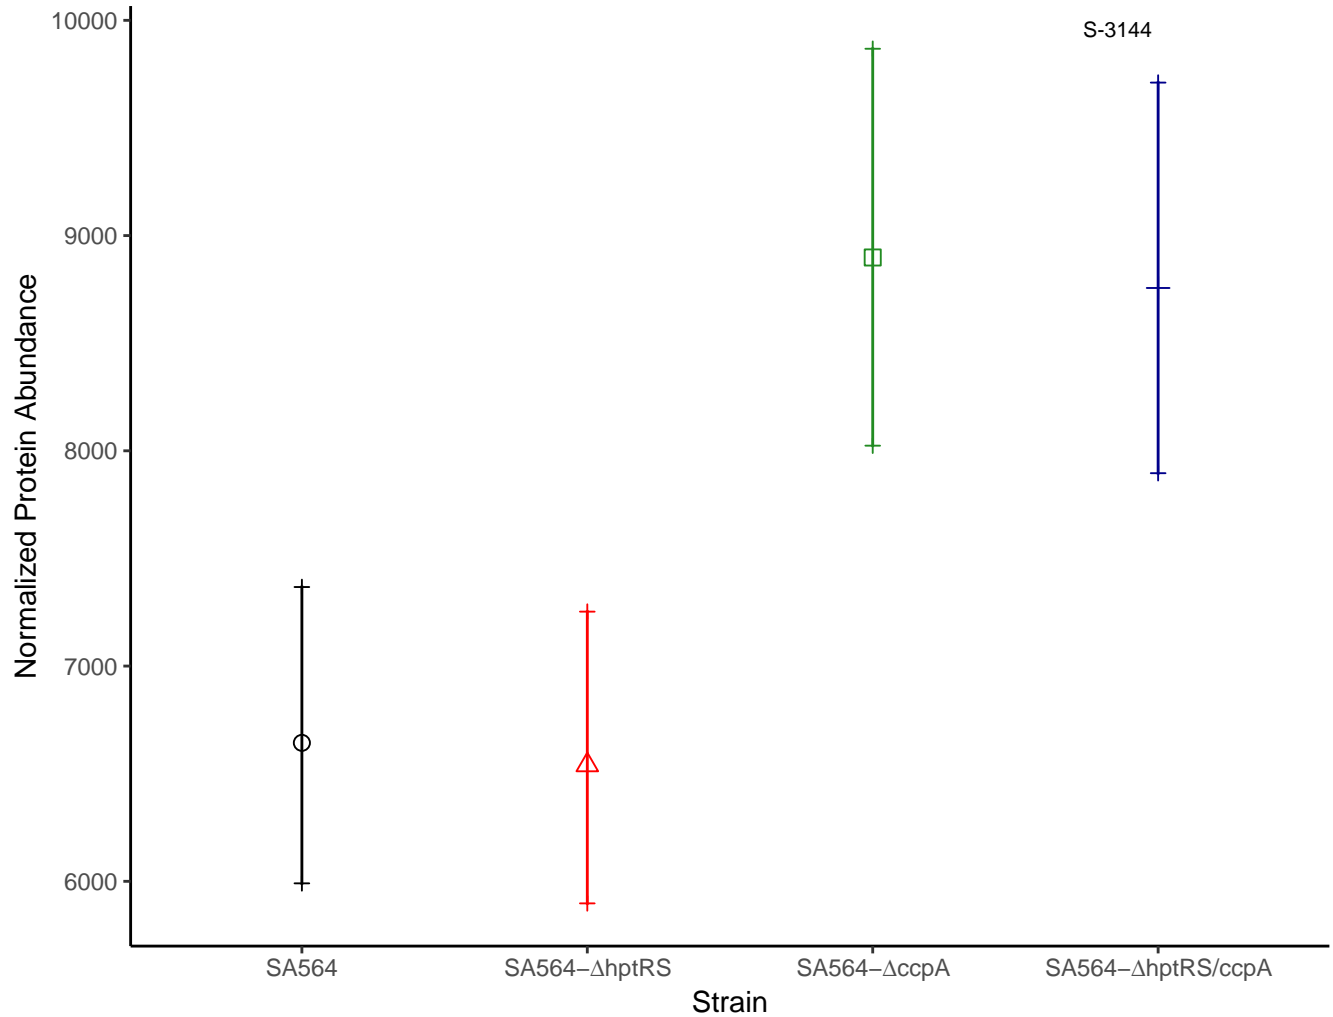

- ⊕ SA564
- △ SA564- $\Delta$ hptRS
- ⊞ SA564- $\Delta$ ccpA
- + SA564- $\Delta$ hptRS/ccpA

S-3144



# GCST\_STAAM

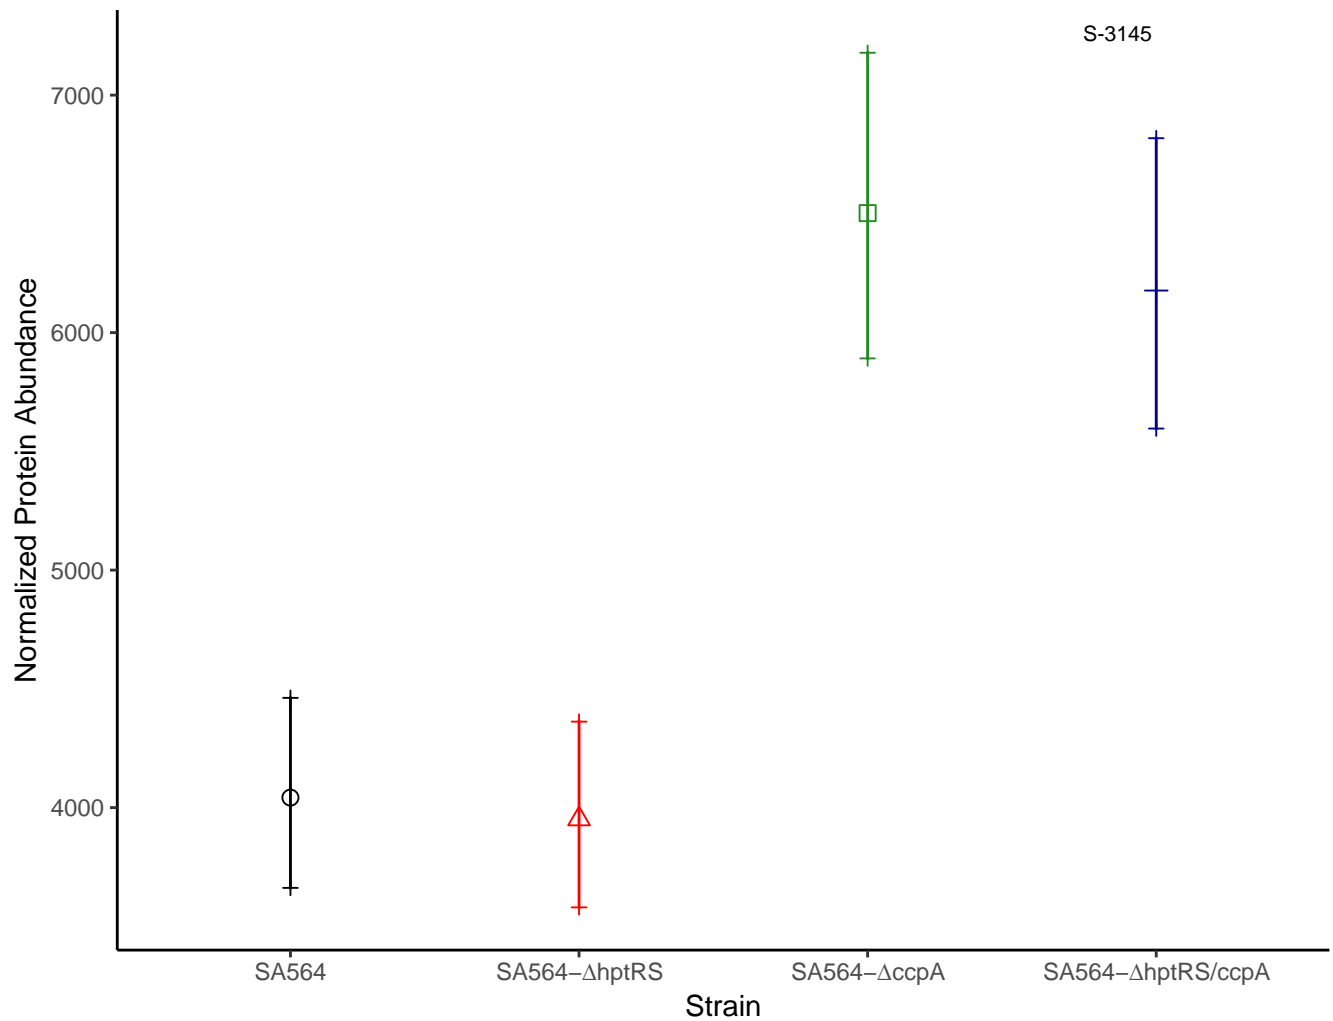

- ⊕ SA564
- △ SA564- $\Delta$ *hptRS*
- ⊞ SA564- $\Delta$ *ccpA*
- + SA564- $\Delta$ *hptRS/ccpA*

# GLMM\_STAAM

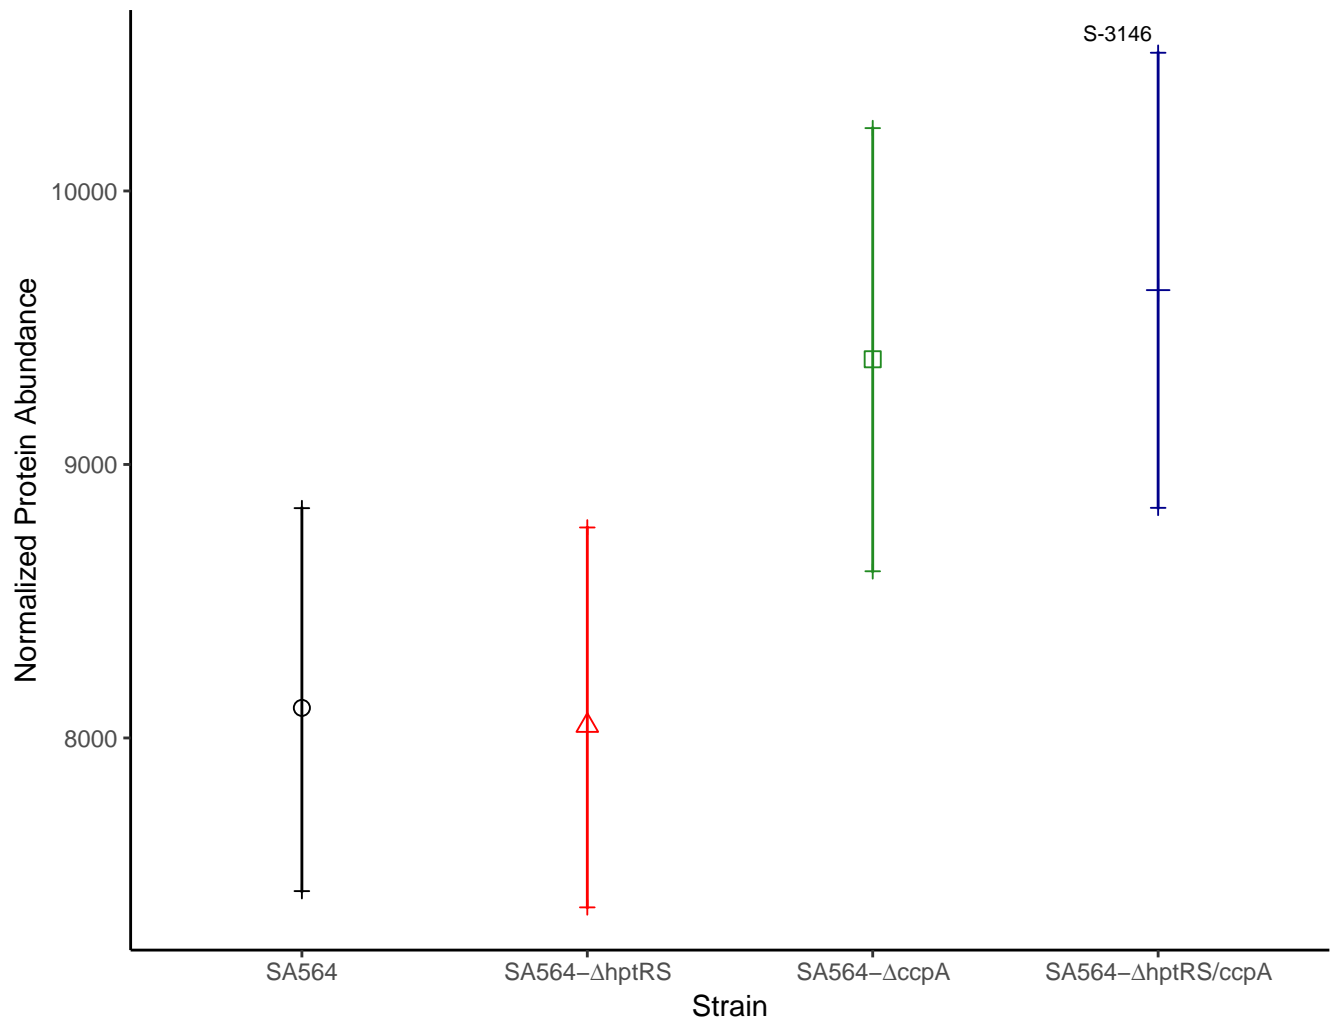

- ⊕ SA564
- △ SA564- $\Delta$ hptRS
- ⊞ SA564- $\Delta$ ccpA
- + SA564- $\Delta$ hptRS/ccpA

# GLMS\_STAAM

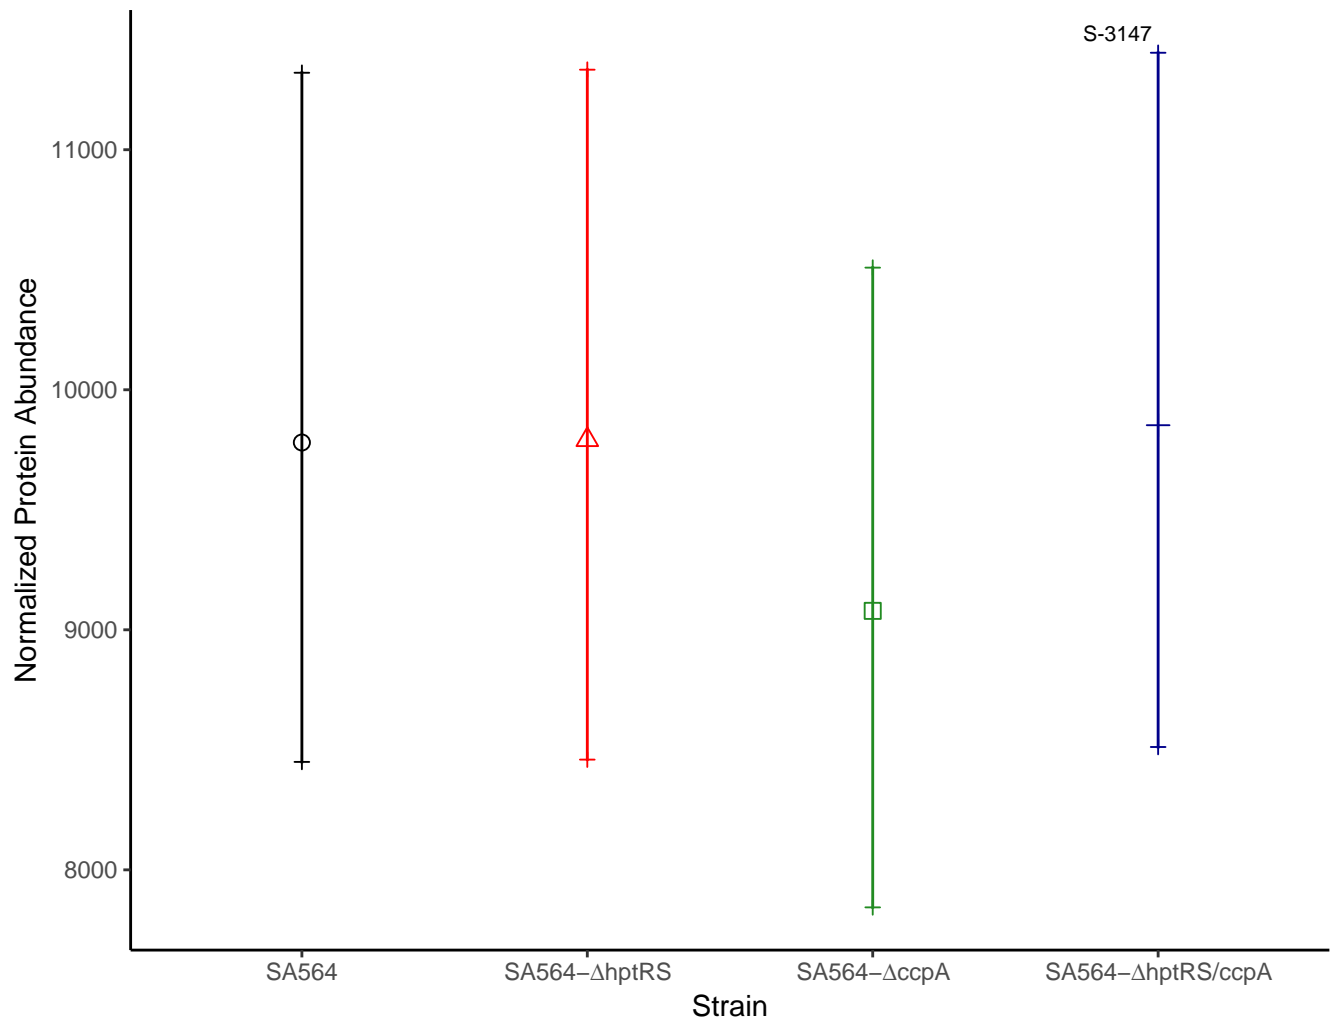

- ⊕ SA564
- △ SA564-ΔhptRS
- ⊞ SA564-ΔccpA
- + SA564-ΔhptRS/ccpA

# GLMU\_STAAM

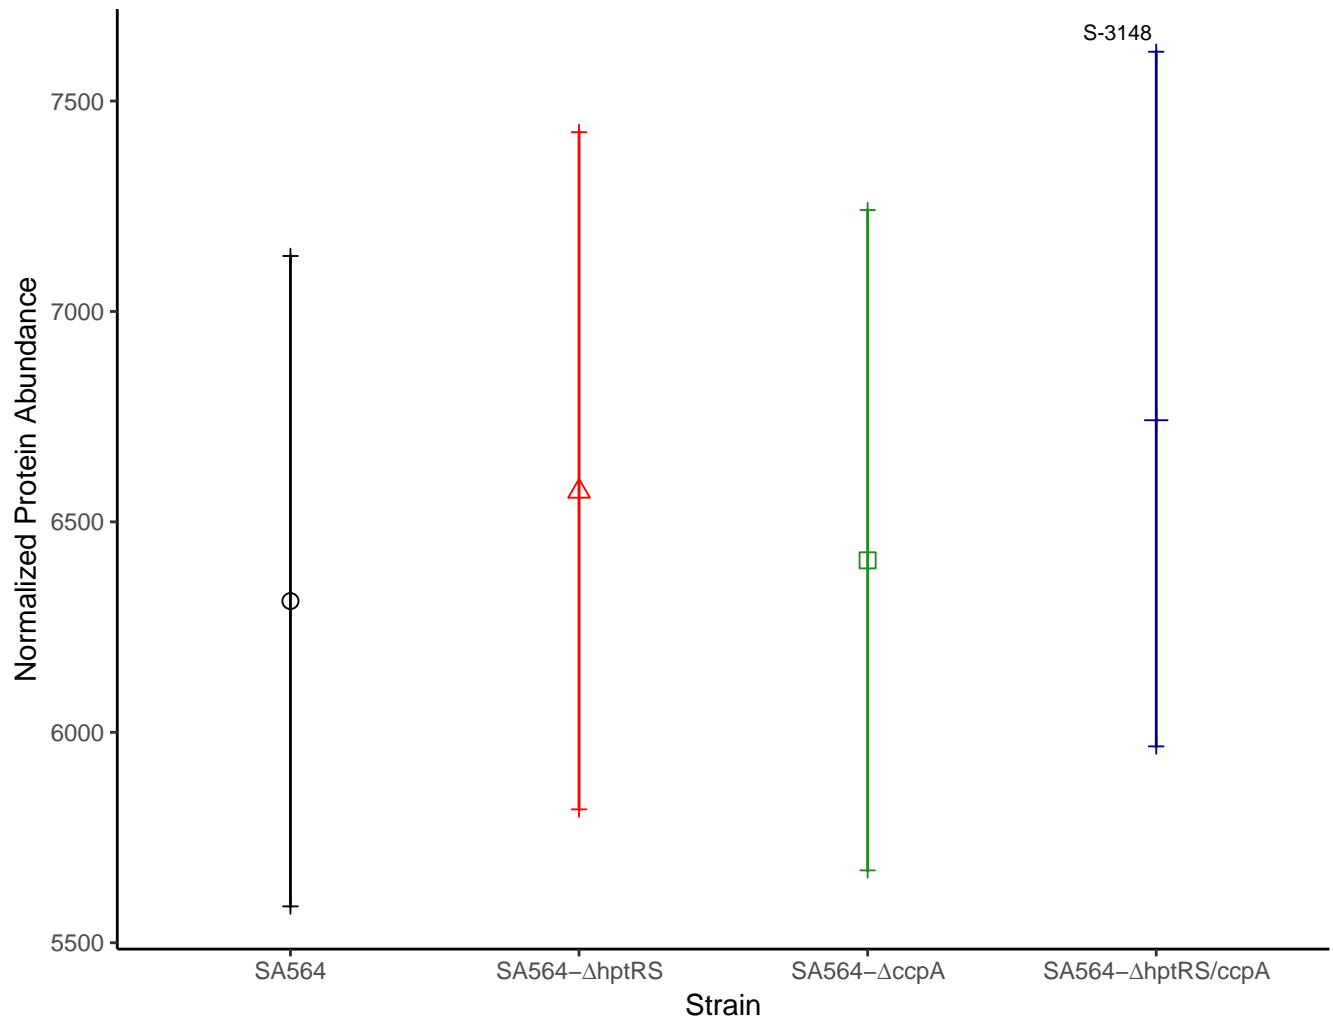

- ⊕ SA564
- △ SA564- $\Delta$ hptRS
- ⊞ SA564- $\Delta$ ccpA
- + SA564- $\Delta$ hptRS/ccpA

# GLNA\_STAAM

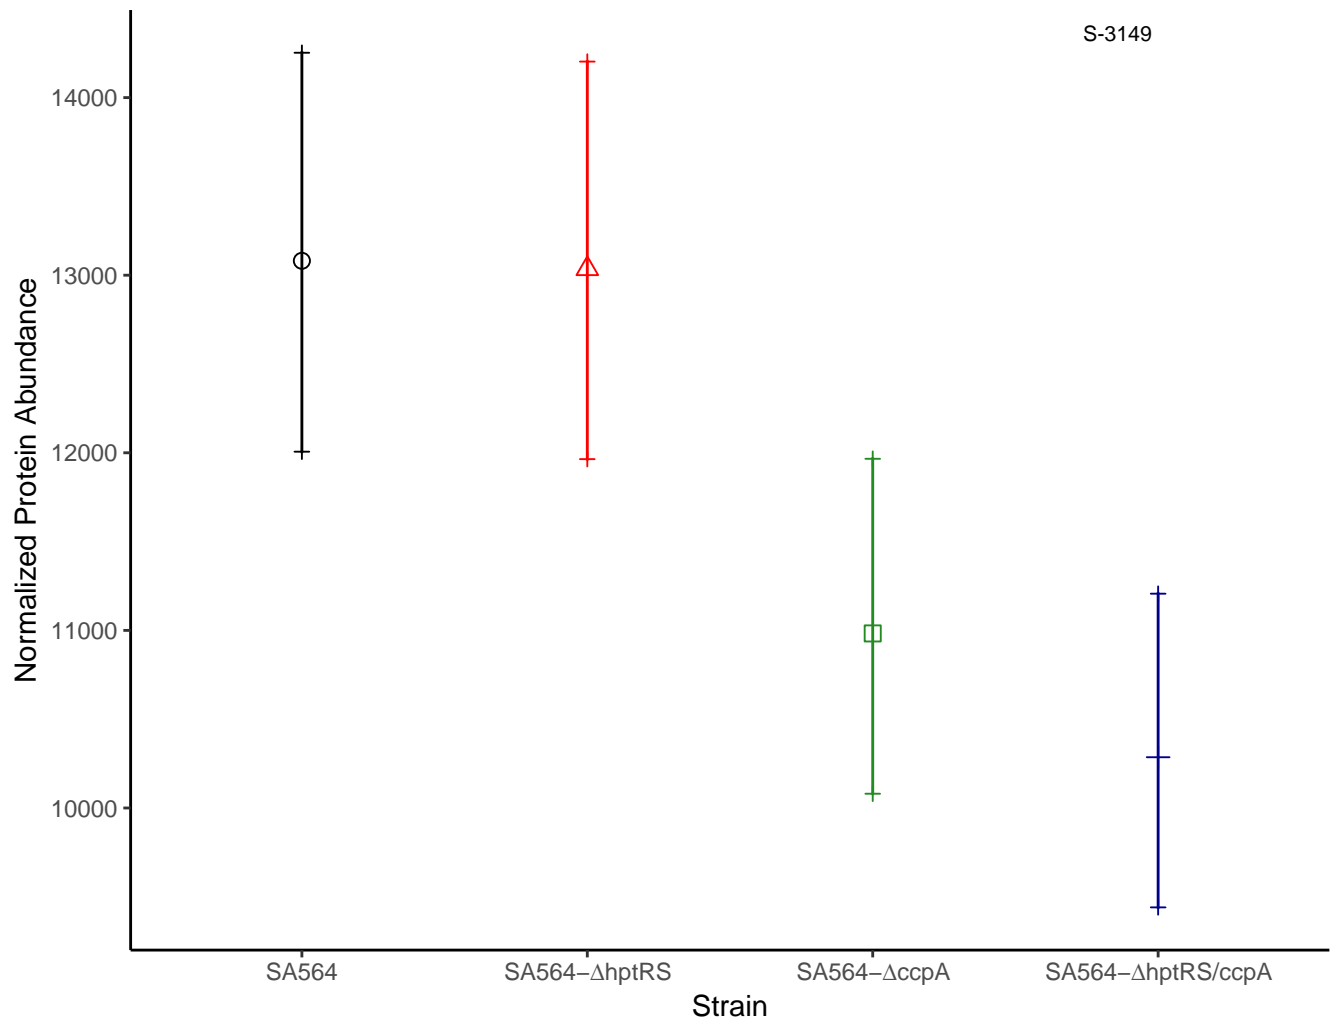

- ⊕ SA564
- △ SA564- $\Delta$ hptRS
- ⊞ SA564- $\Delta$ ccpA
- + SA564- $\Delta$ hptRS/ccpA

# GLPD\_STAAM

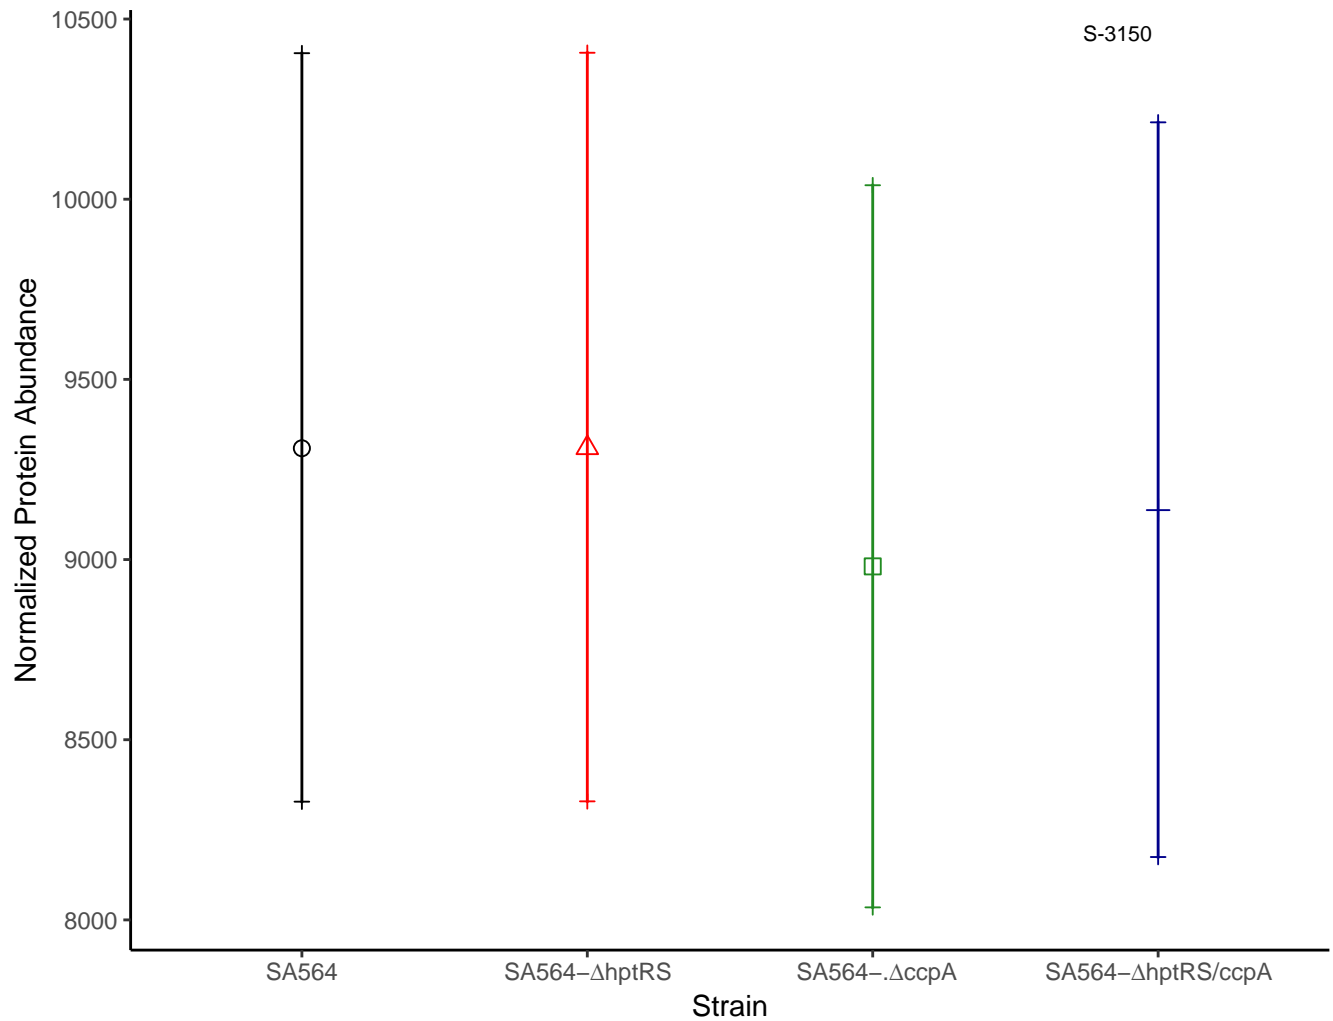

- ⊕ SA564
- △ SA564- $\Delta$ hptRS
- ⊞ SA564- $\Delta$ ccpA
- + SA564- $\Delta$ hptRS/ccpA

# GLPK\_STAAM

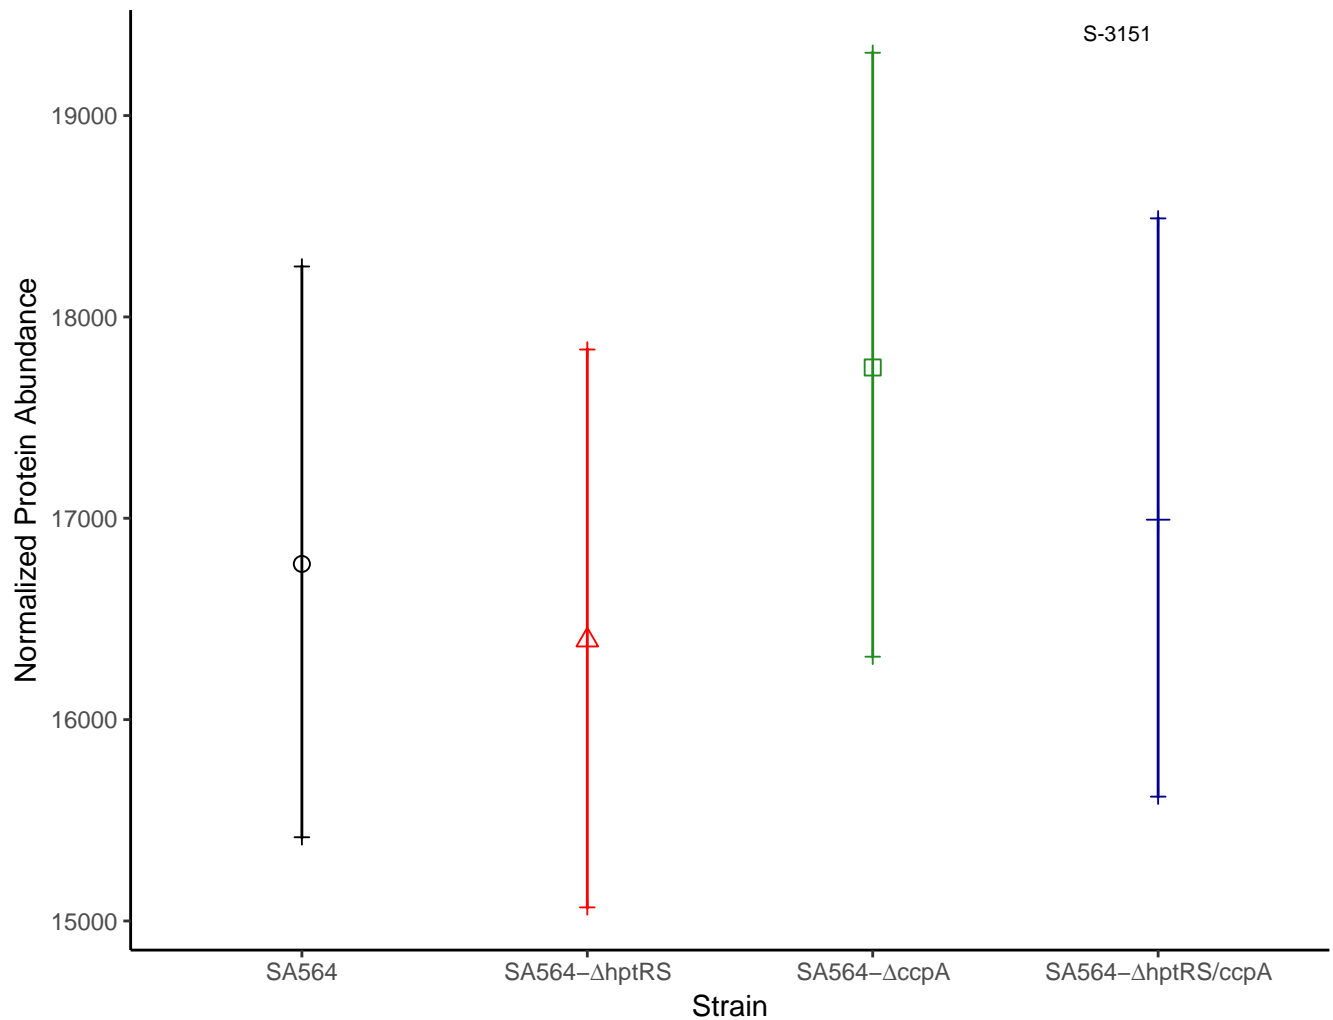

- ⊕ SA564
- △ SA564- $\Delta$ *hptRS*
- ⊞ SA564- $\Delta$ *ccpA*
- + SA564- $\Delta$ *hptRS/ccpA*

# GLYA\_STAAM

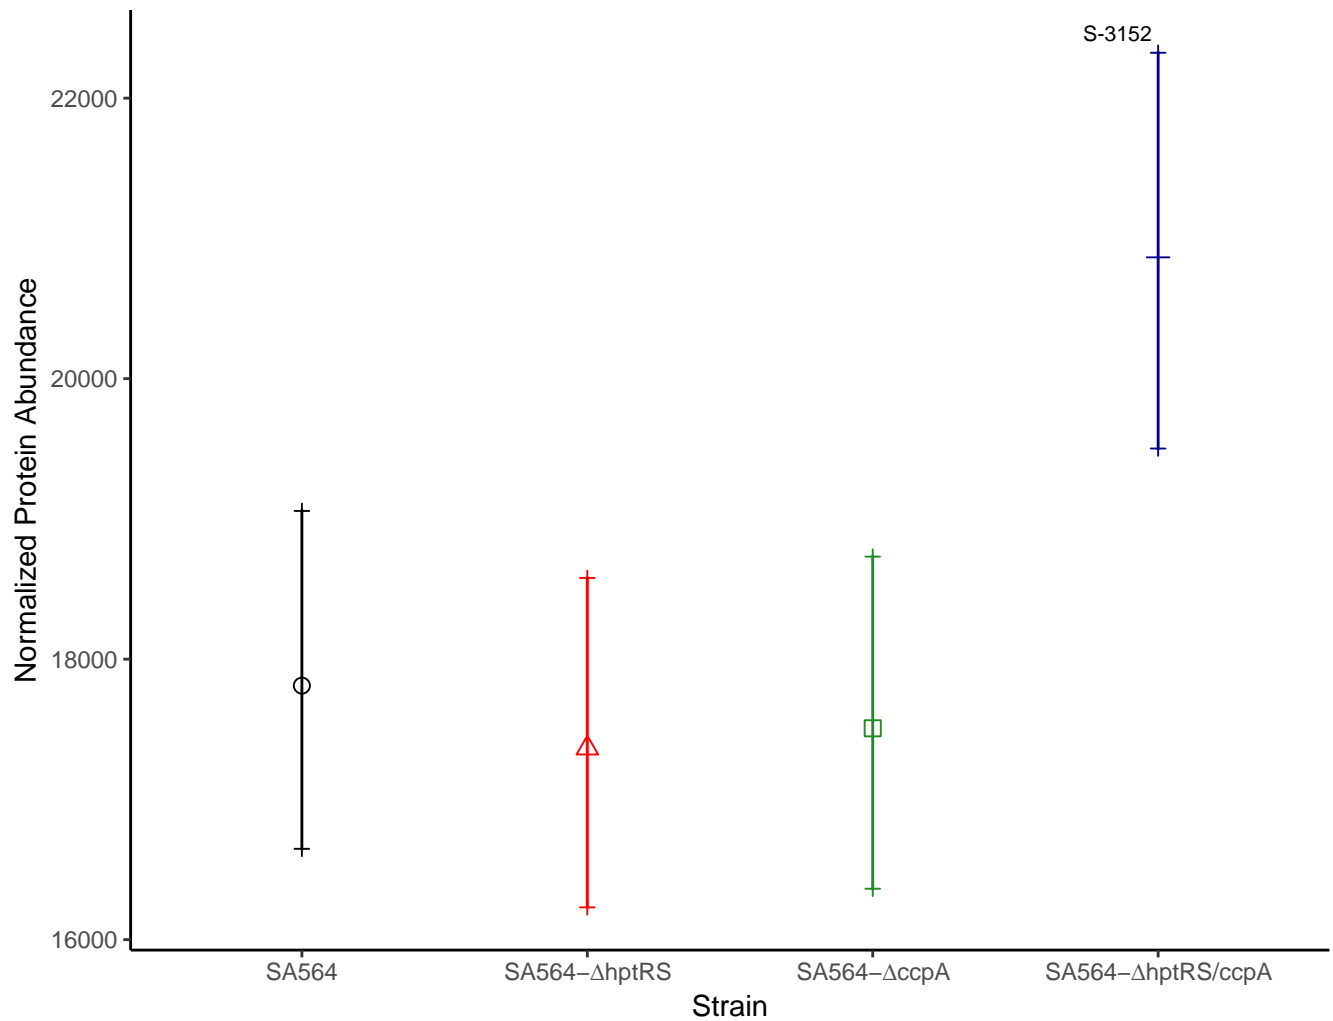

- ⊕ SA564
- △ SA564- $\Delta$ hptRS
- ⊞ SA564- $\Delta$ ccpA
- + SA564- $\Delta$ hptRS/ccpA



# GPDA\_STAAM

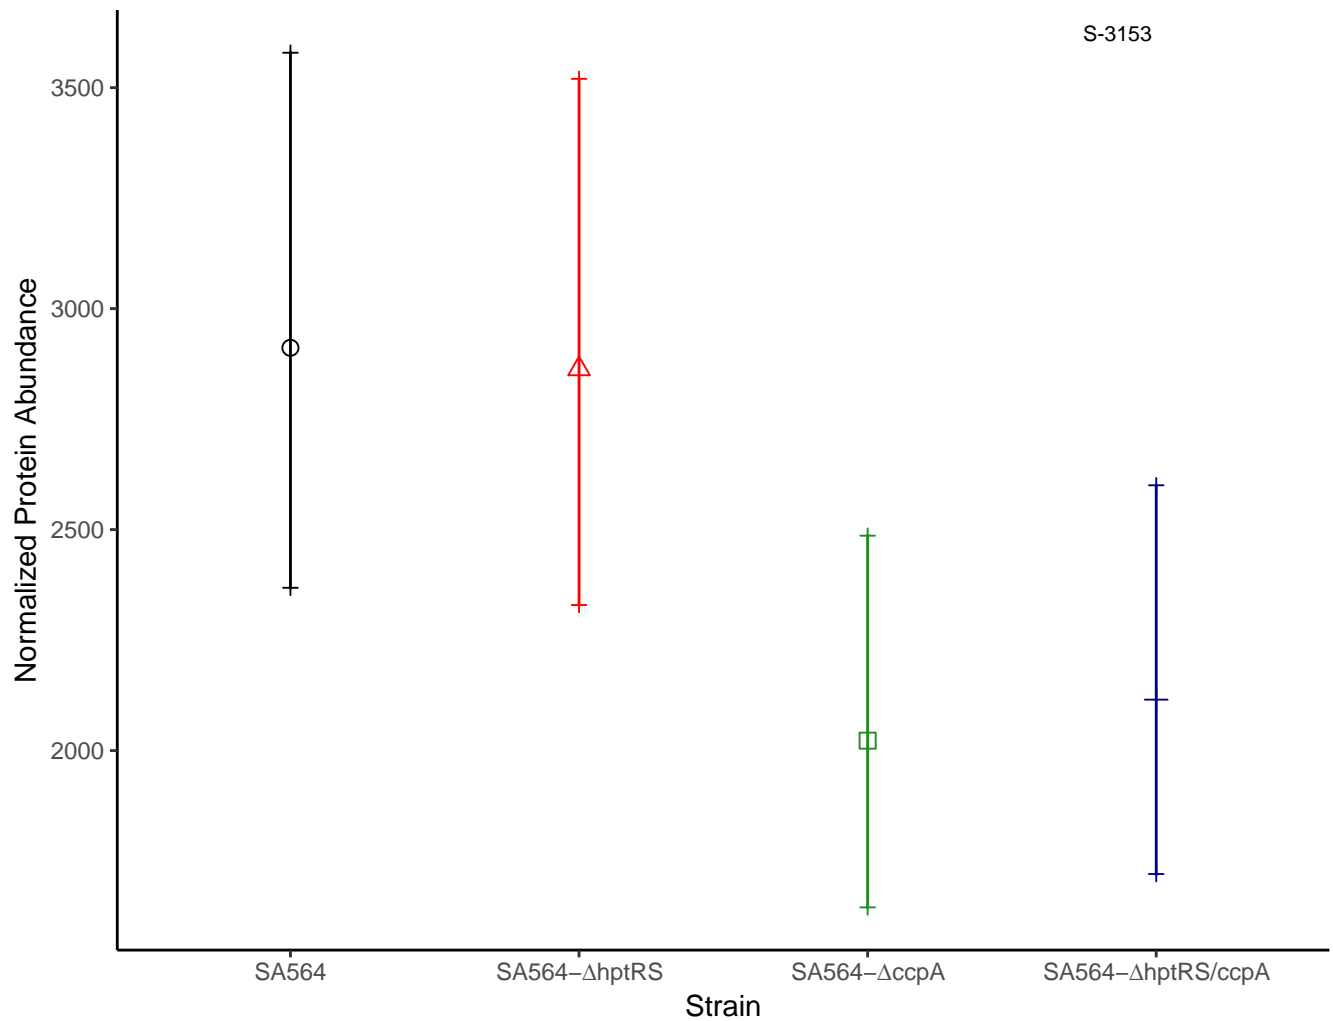

- ⊕ SA564
- △ SA564- $\Delta$ hptRS
- ⊞ SA564- $\Delta$ ccpA
- + SA564- $\Delta$ hptRS/ccpA

# GPMA\_STAAM

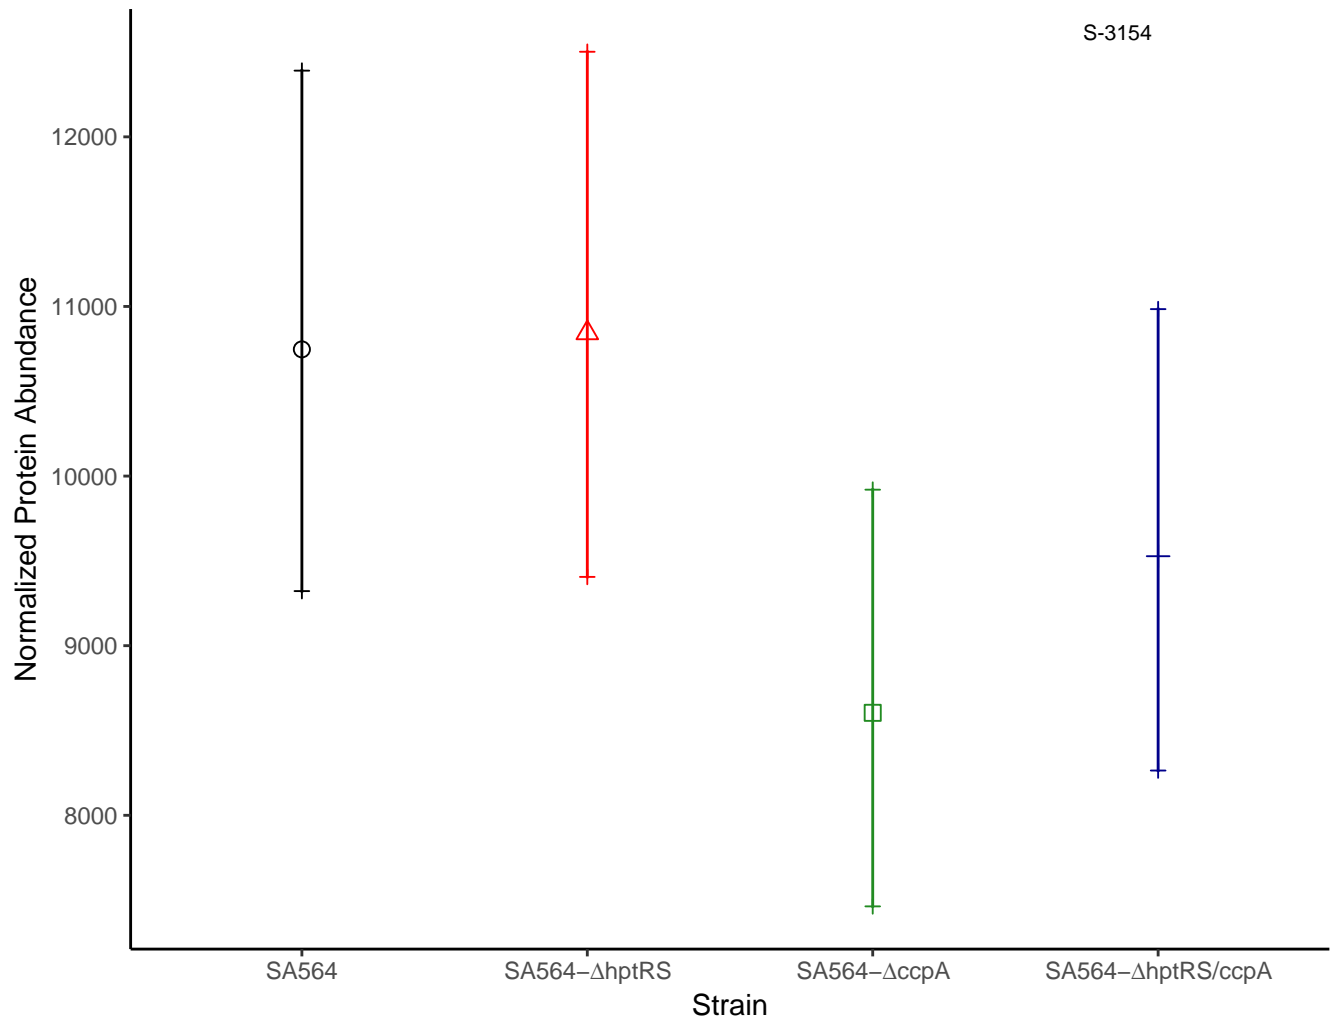

- ⊕ SA564
- △ SA564- $\Delta$ hptRS
- ⊞ SA564- $\Delta$ ccpA
- + SA564- $\Delta$ hptRS/ccpA

# GPMI\_STAAM

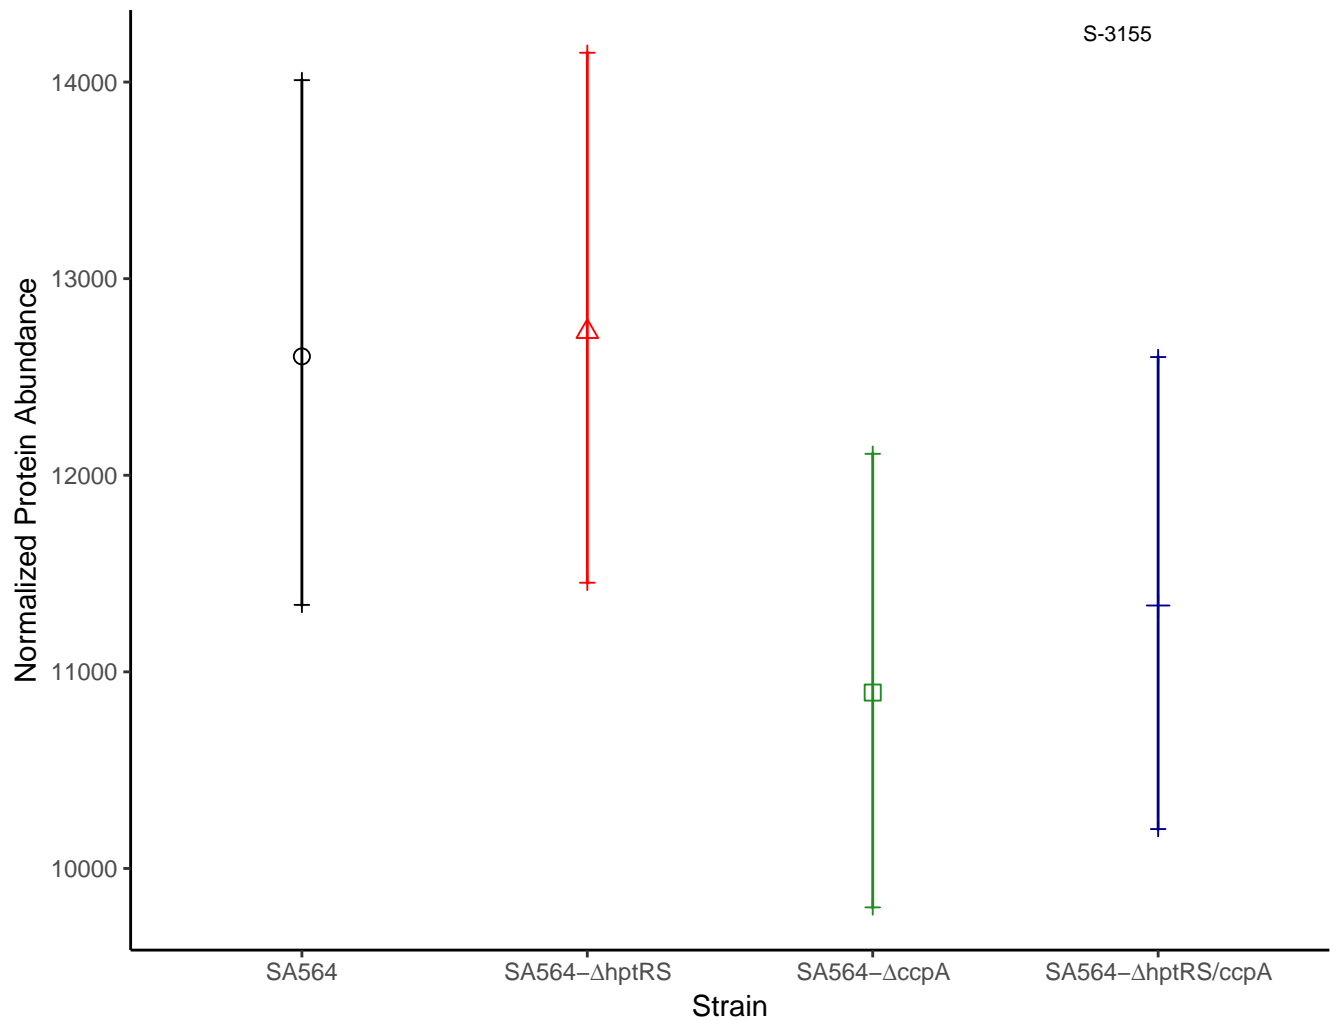

- ⊕ SA564
- △ SA564- $\Delta$ hptRS
- ⊞ SA564- $\Delta$ ccpA
- + SA564- $\Delta$ hptRS/ccpA

# GPSB\_STAAM

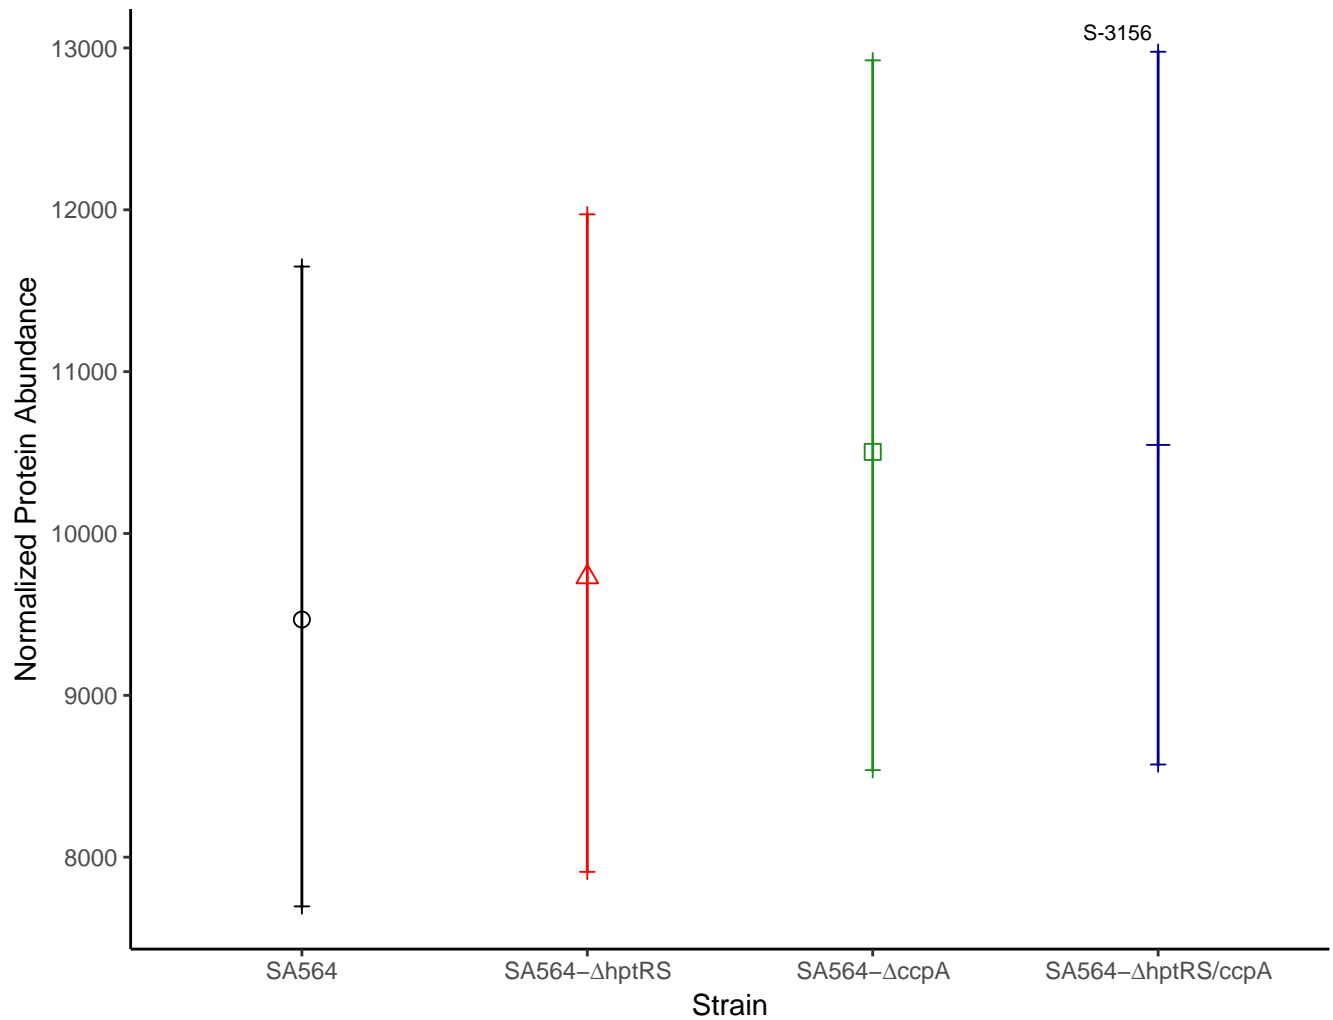

- ⊕ SA564
- △ SA564- $\Delta$ hptRS
- ⊞ SA564- $\Delta$ ccpA
- + SA564- $\Delta$ hptRS/ccpA

# GRAR\_STAAM

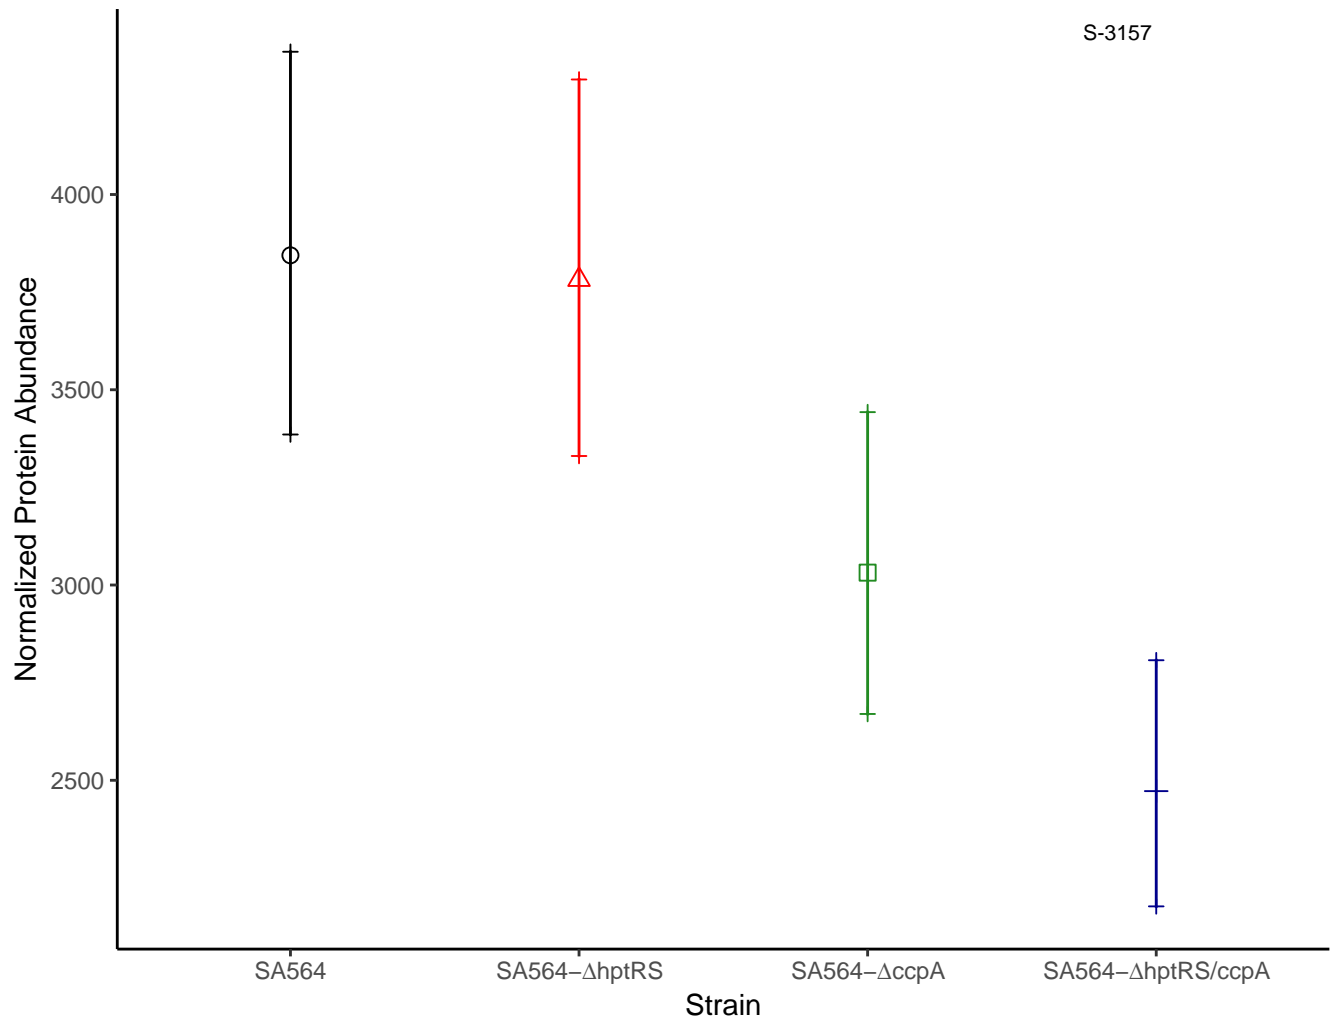

- ⊕ SA564
- △ SA564- $\Delta$ hptRS
- ⊞ SA564- $\Delta$ ccpA
- + SA564- $\Delta$ hptRS/ccpA

# GRE\_A\_STAAM

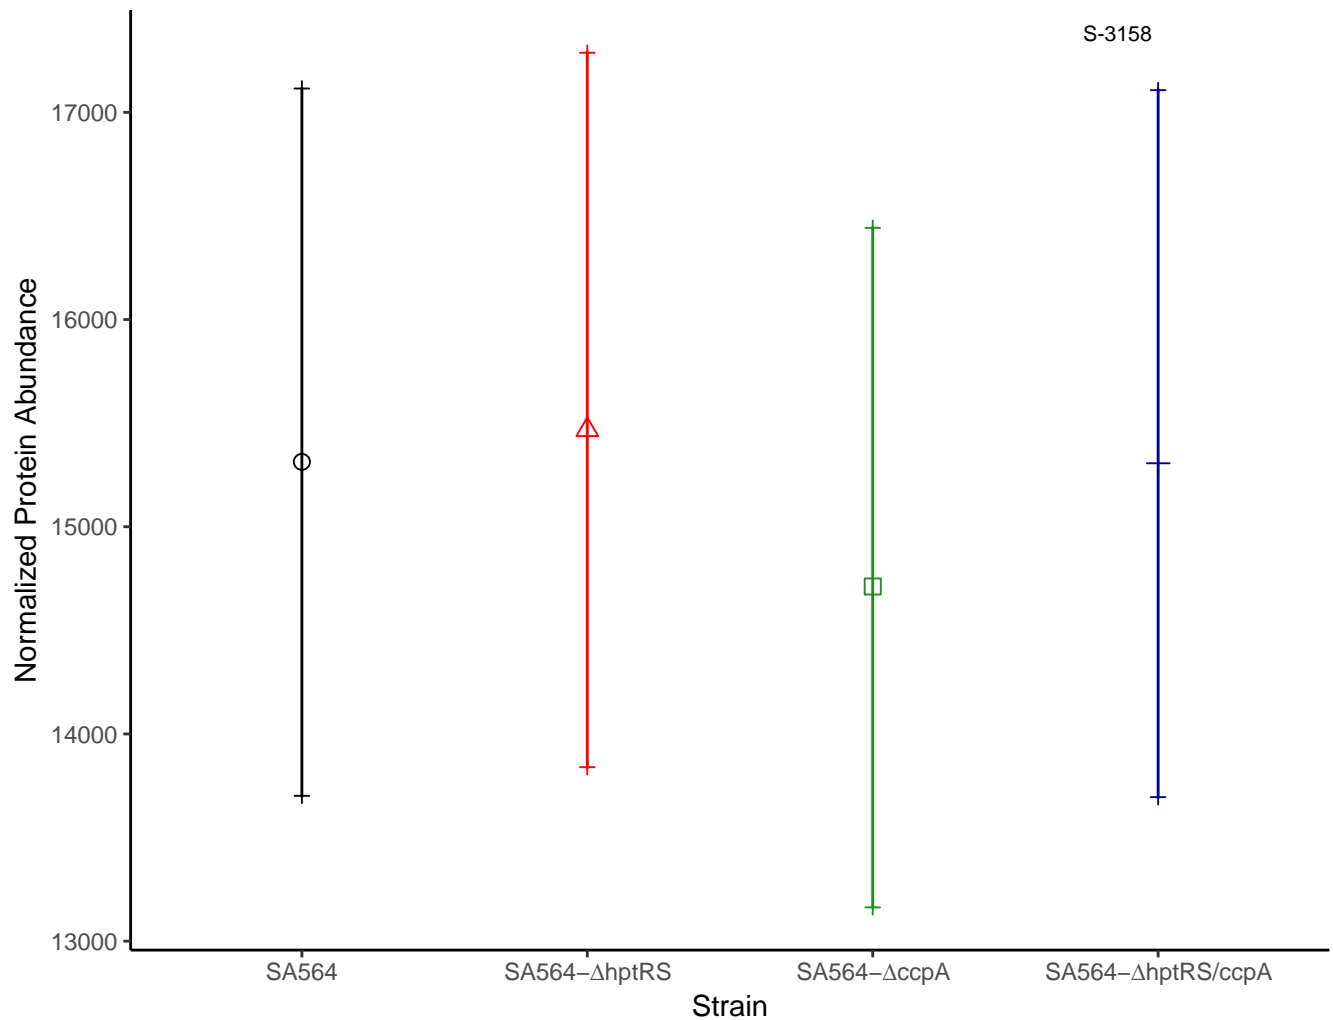

- ⊕ SA564
- △ SA564- $\Delta$ hptRS
- ⊞ SA564- $\Delta$ ccpA
- + SA564- $\Delta$ hptRS/ccpA

# GRPE\_STAAM

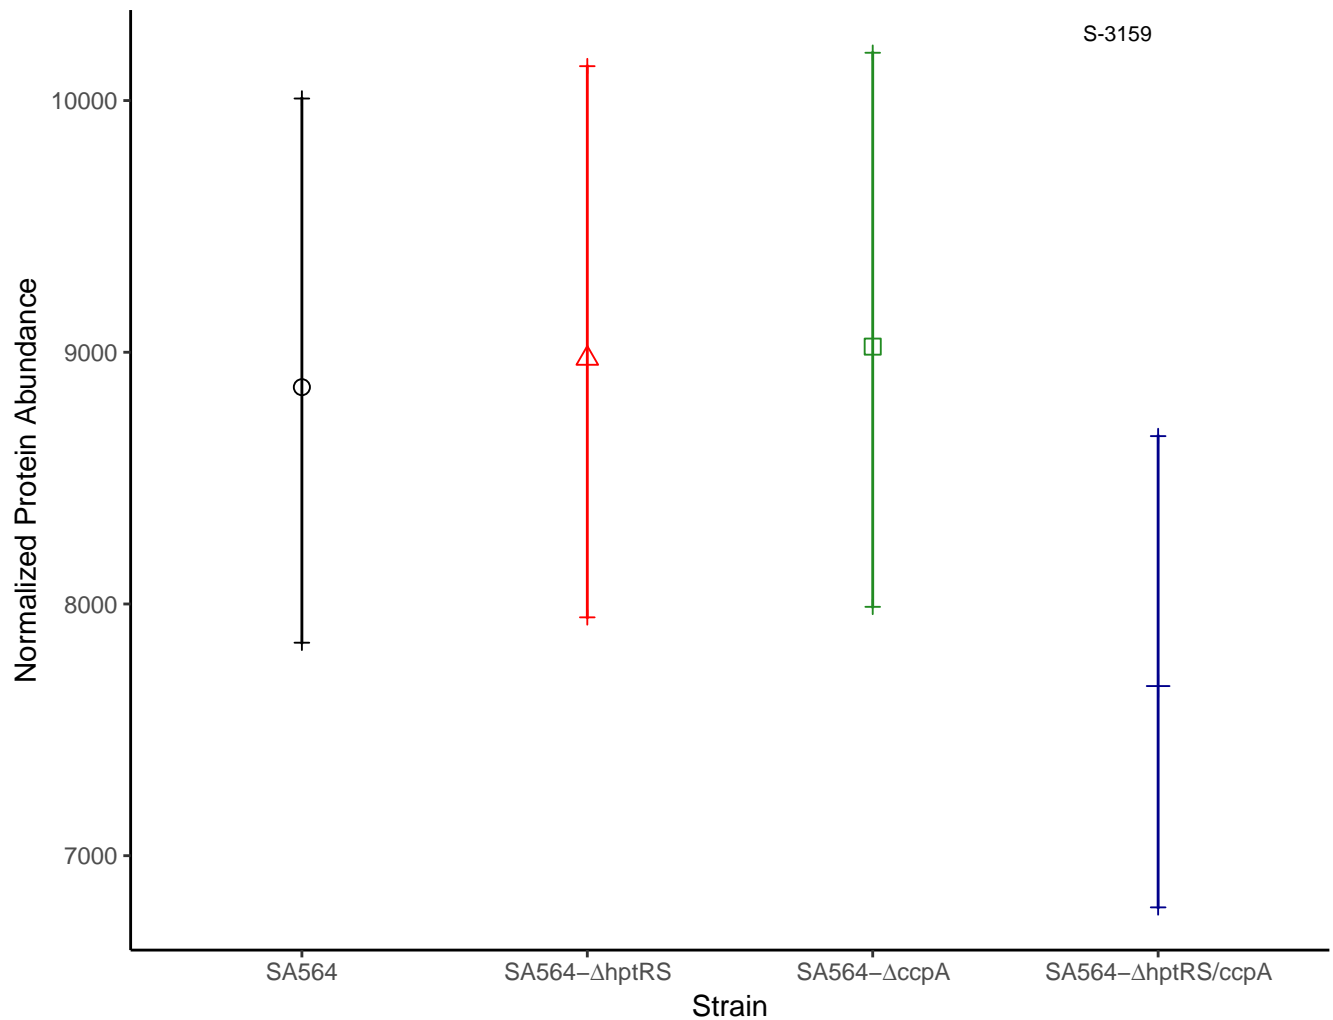

- ⊕ SA564
- △ SA564- $\Delta$ hptRS
- ⊞ SA564- $\Delta$ ccpA
- + SA564- $\Delta$ hptRS/ccpA

# GSA1\_STAAM

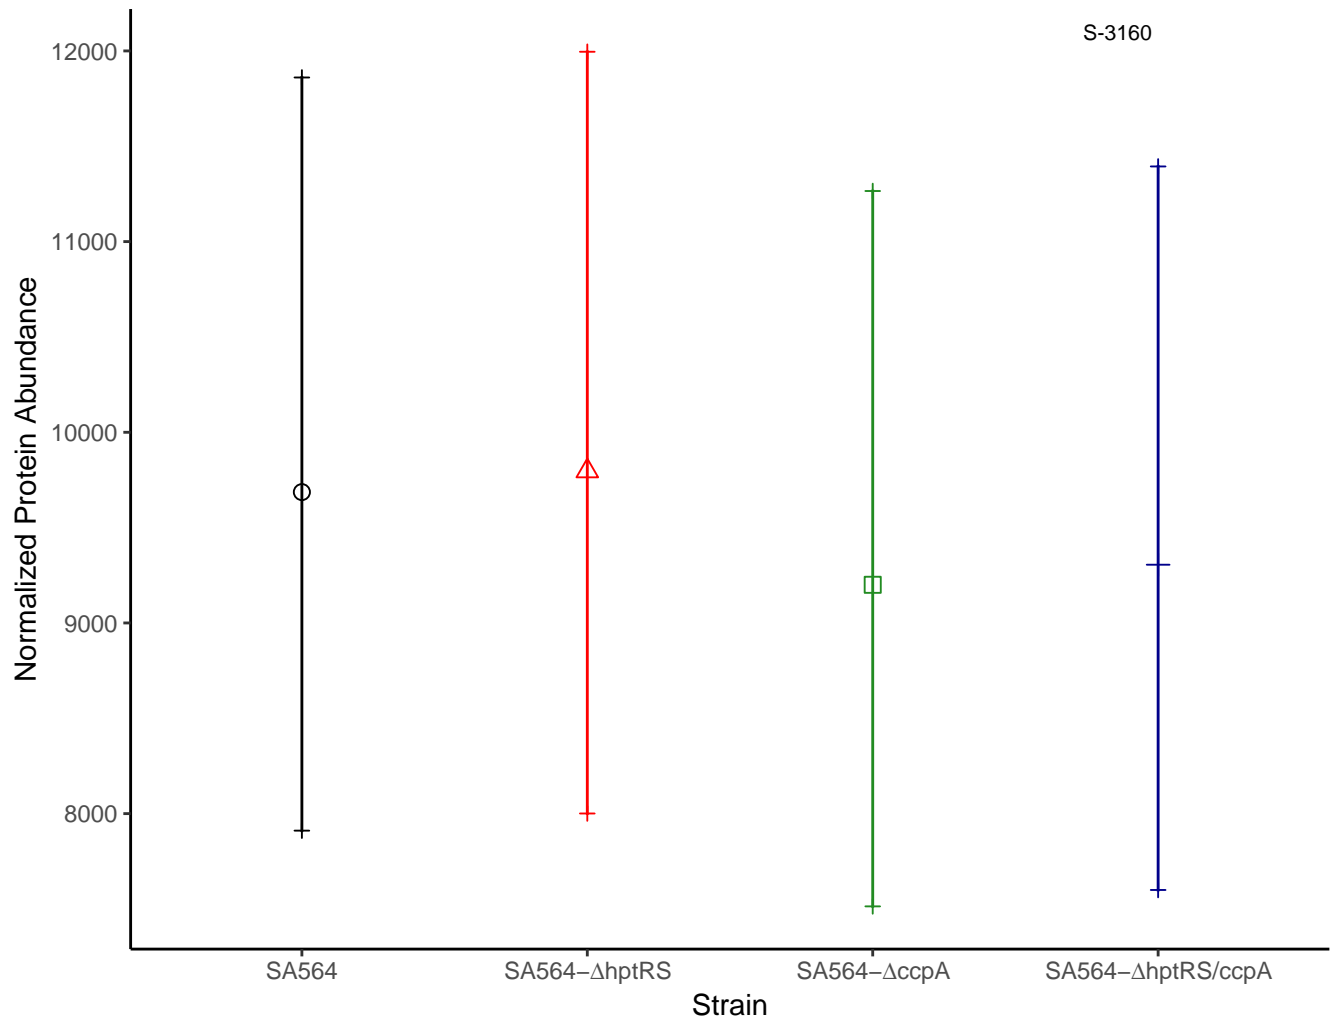

- ⊕ SA564
- △ SA564- $\Delta$ hptRS
- ⊞ SA564- $\Delta$ ccpA
- + SA564- $\Delta$ hptRS/ccpA



# GSA2\_STAAM

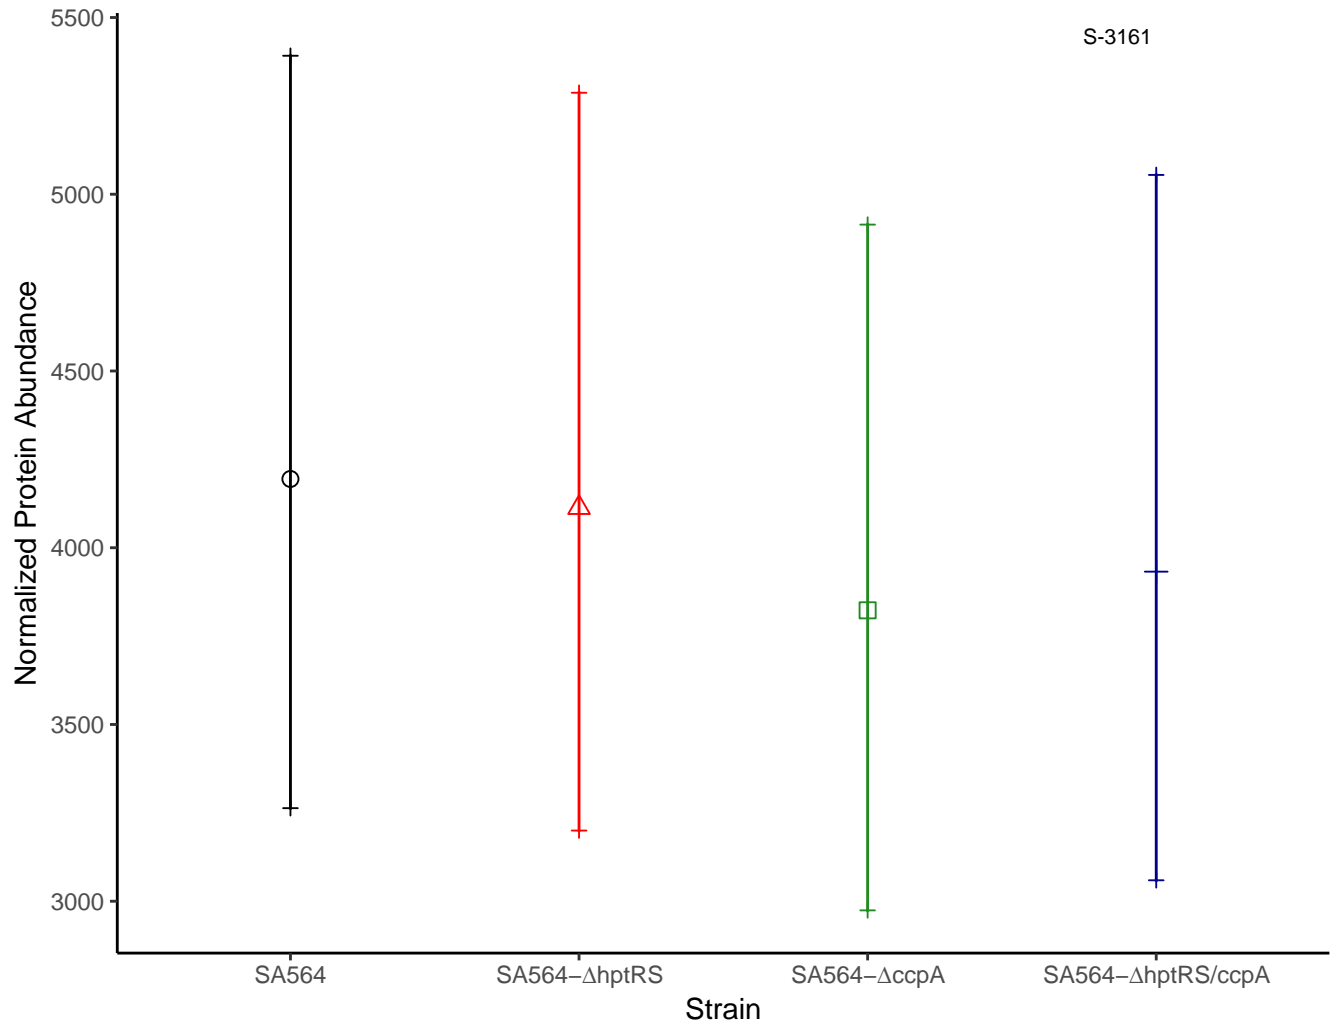

- ⊕ SA564
- △ SA564- $\Delta$ *hptRS*
- ⊞ SA564- $\Delta$ *ccpA*
- + SA564- $\Delta$ *hptRS/ccpA*

# GTAB\_STAAM

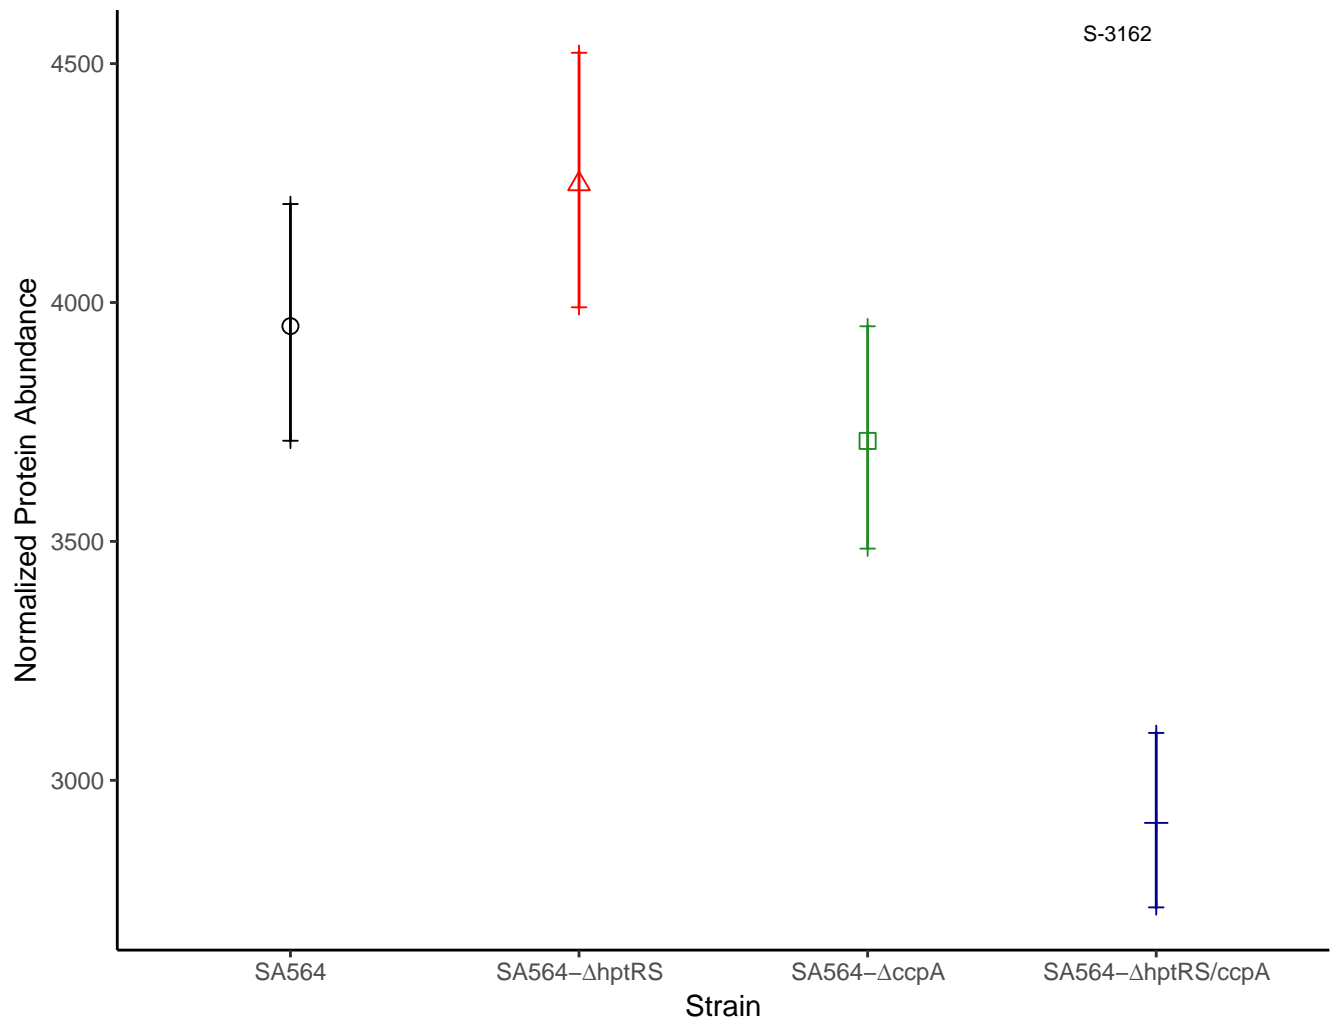

- ⊕ SA564
- △ SA564- $\Delta$ *hptRS*
- ⊞ SA564- $\Delta$ *ccpA*
- + SA564- $\Delta$ *hptRS/ccpA*

# GUA<sub>A</sub>\_STAAM

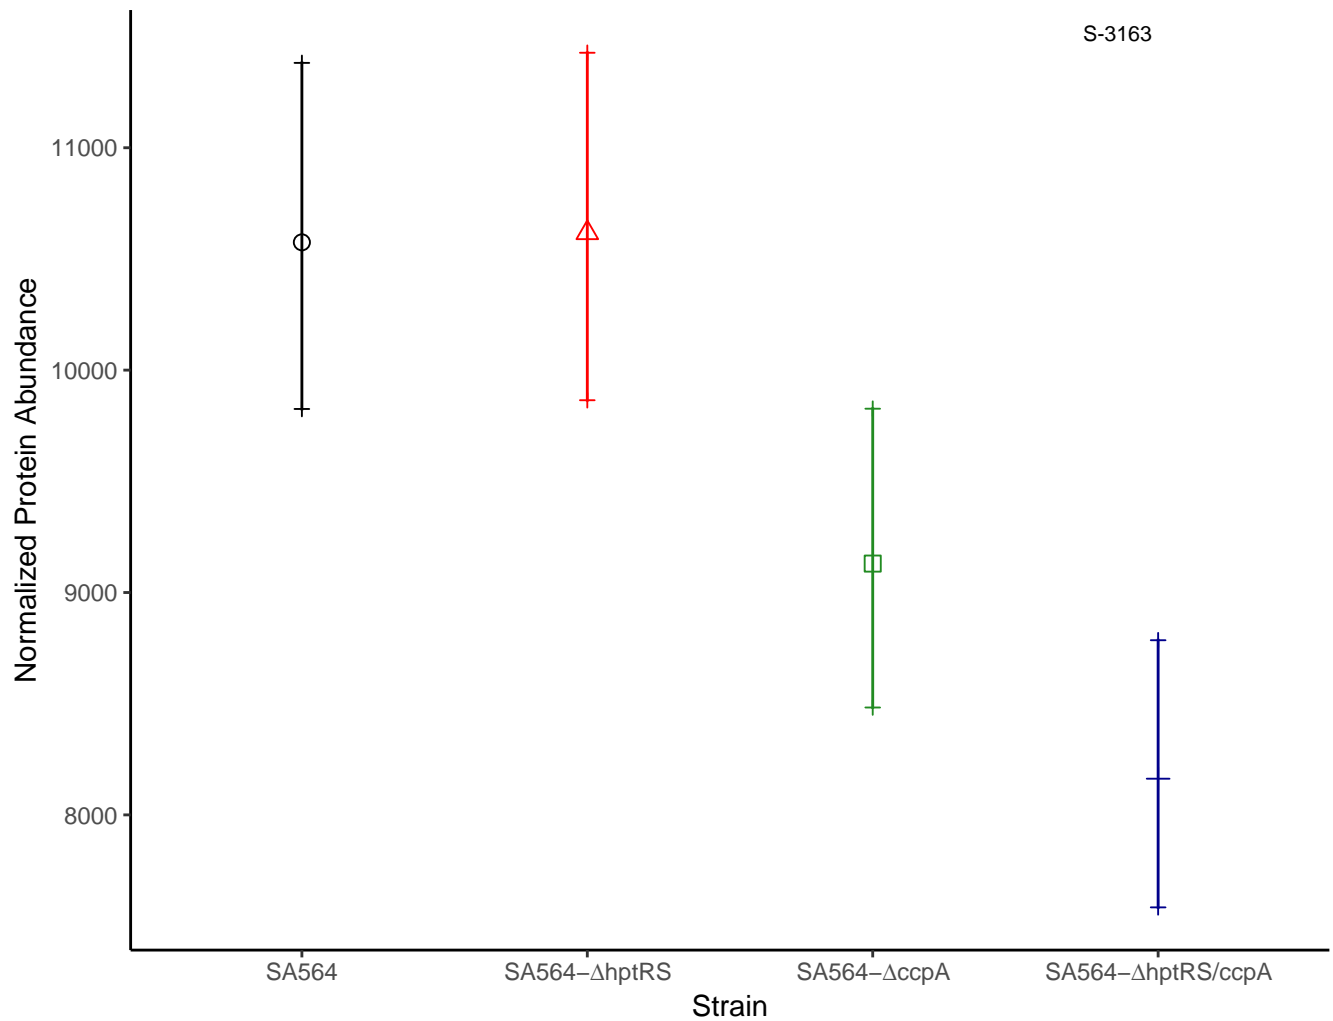

- ⊕ SA564
- △ SA564- $\Delta$ hptRS
- ⊞ SA564- $\Delta$ ccpA
- + SA564- $\Delta$ hptRS/ccpA

# GUAC\_STAAM

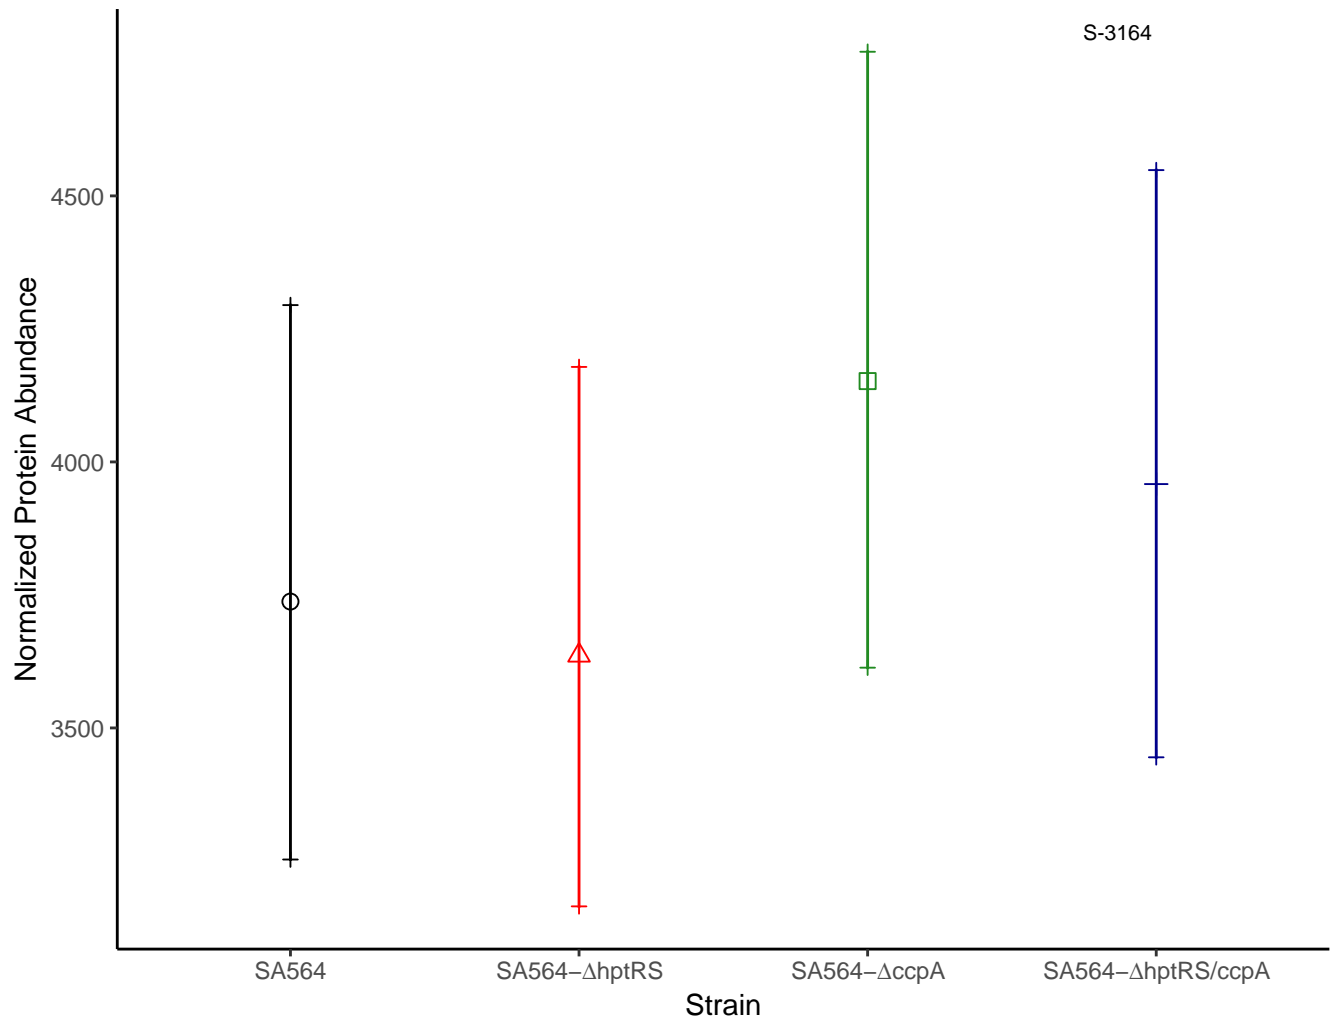

- ⊕ SA564
- △ SA564- $\Delta$ hptRS
- ⊞ SA564- $\Delta$ ccpA
- + SA564- $\Delta$ hptRS/ccpA

# GYRB\_STAAM

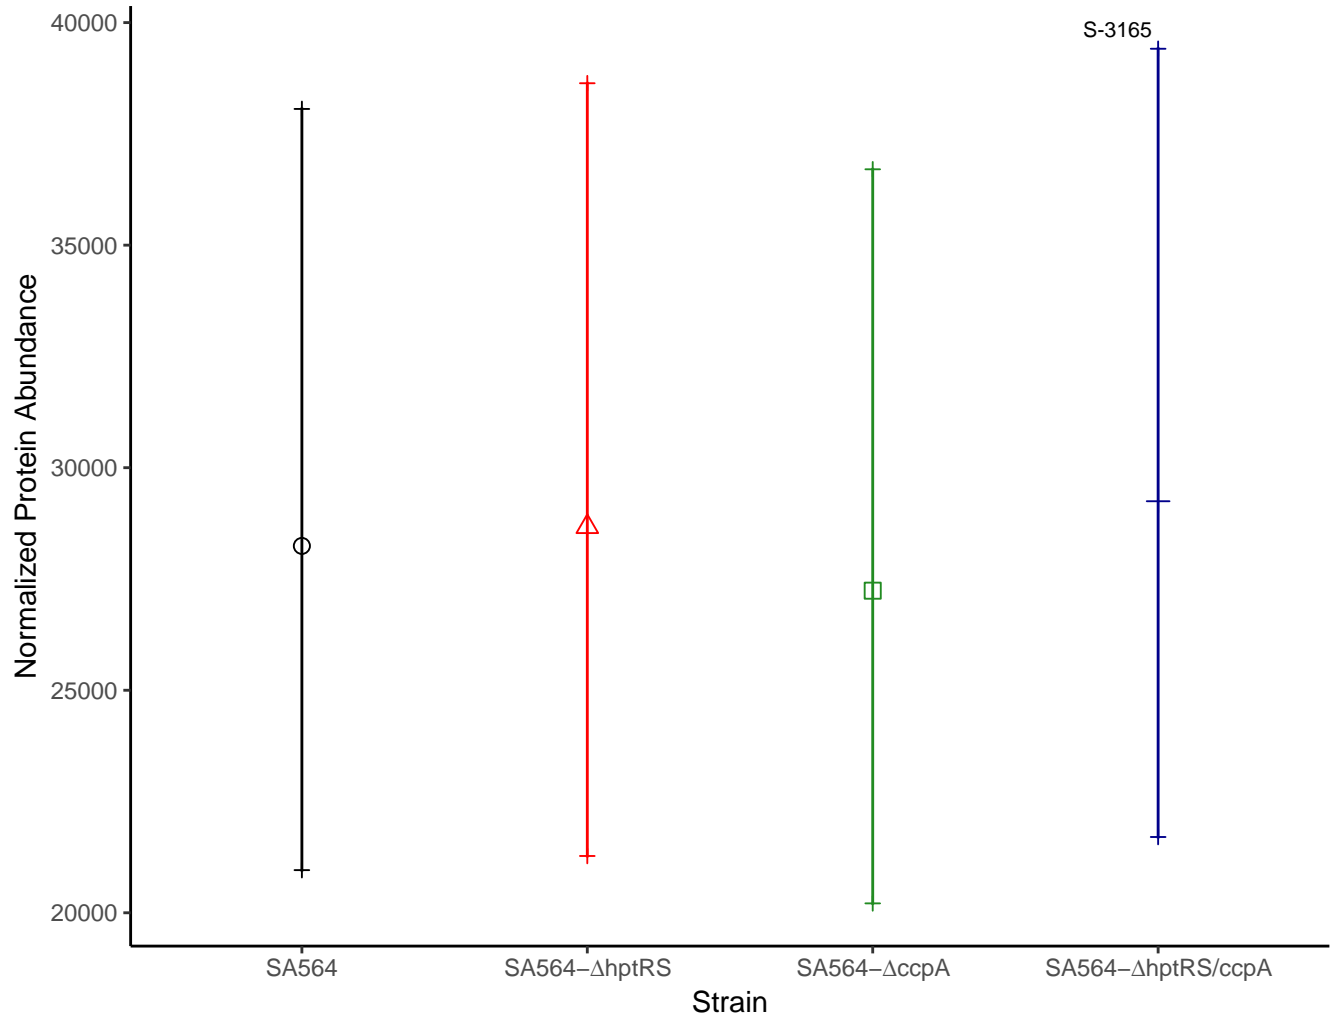

- ⊕ SA564
- △ SA564- $\Delta$ hptRS
- ⊞ SA564- $\Delta$ ccpA
- + SA564- $\Delta$ hptRS/ccpA

# HCHA\_STAAM

S-3166

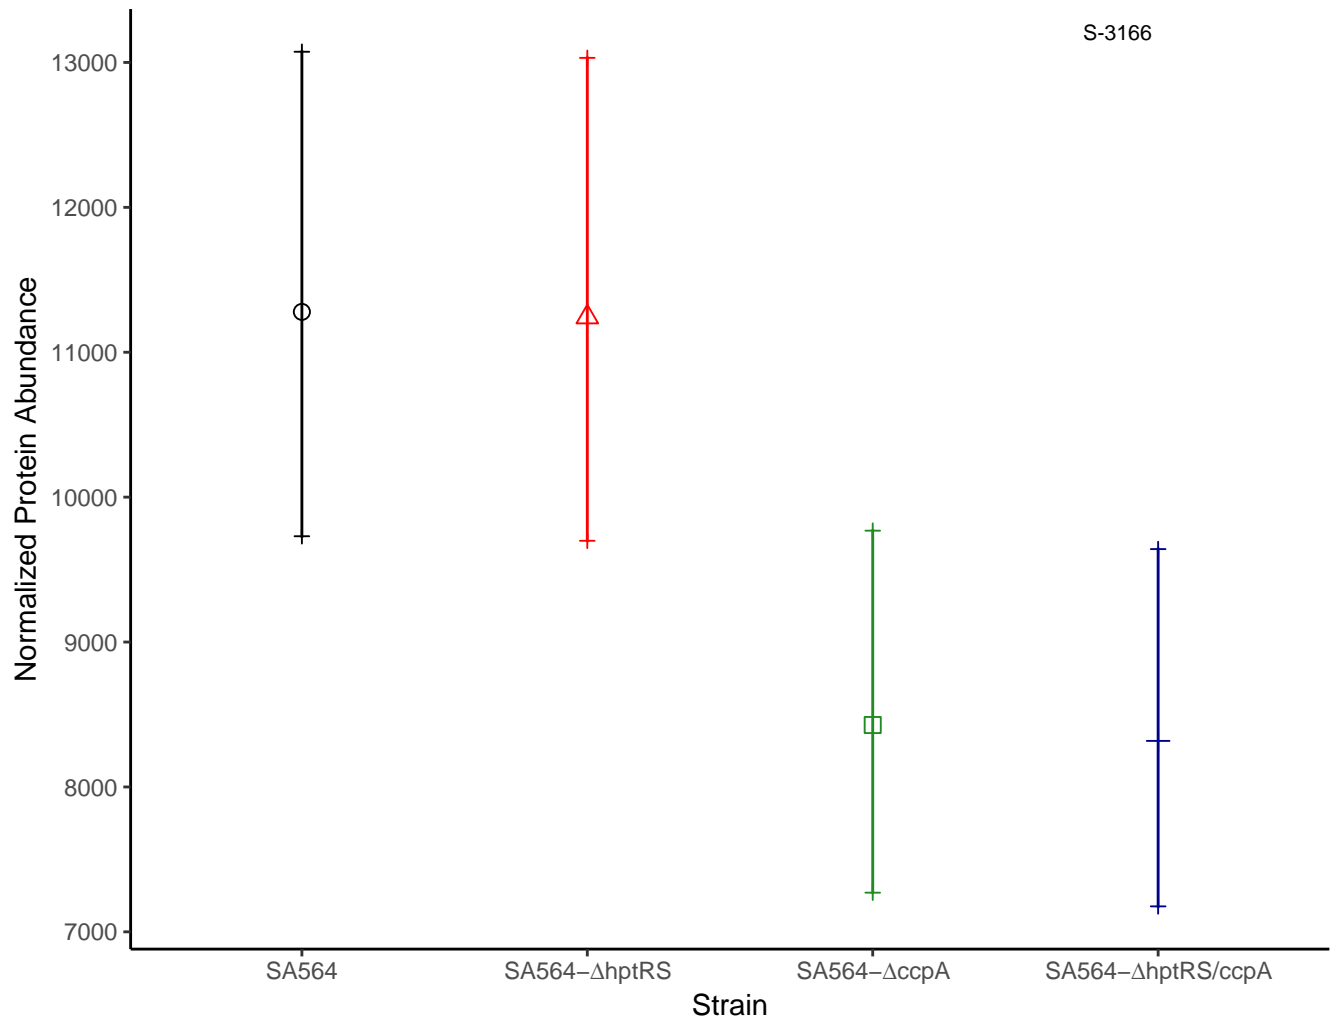

- ⊕ SA564
- △ SA564- $\Delta$ hptRS
- ⊞ SA564- $\Delta$ ccpA
- + SA564- $\Delta$ hptRS/ccpA

# HEM2\_STAAM

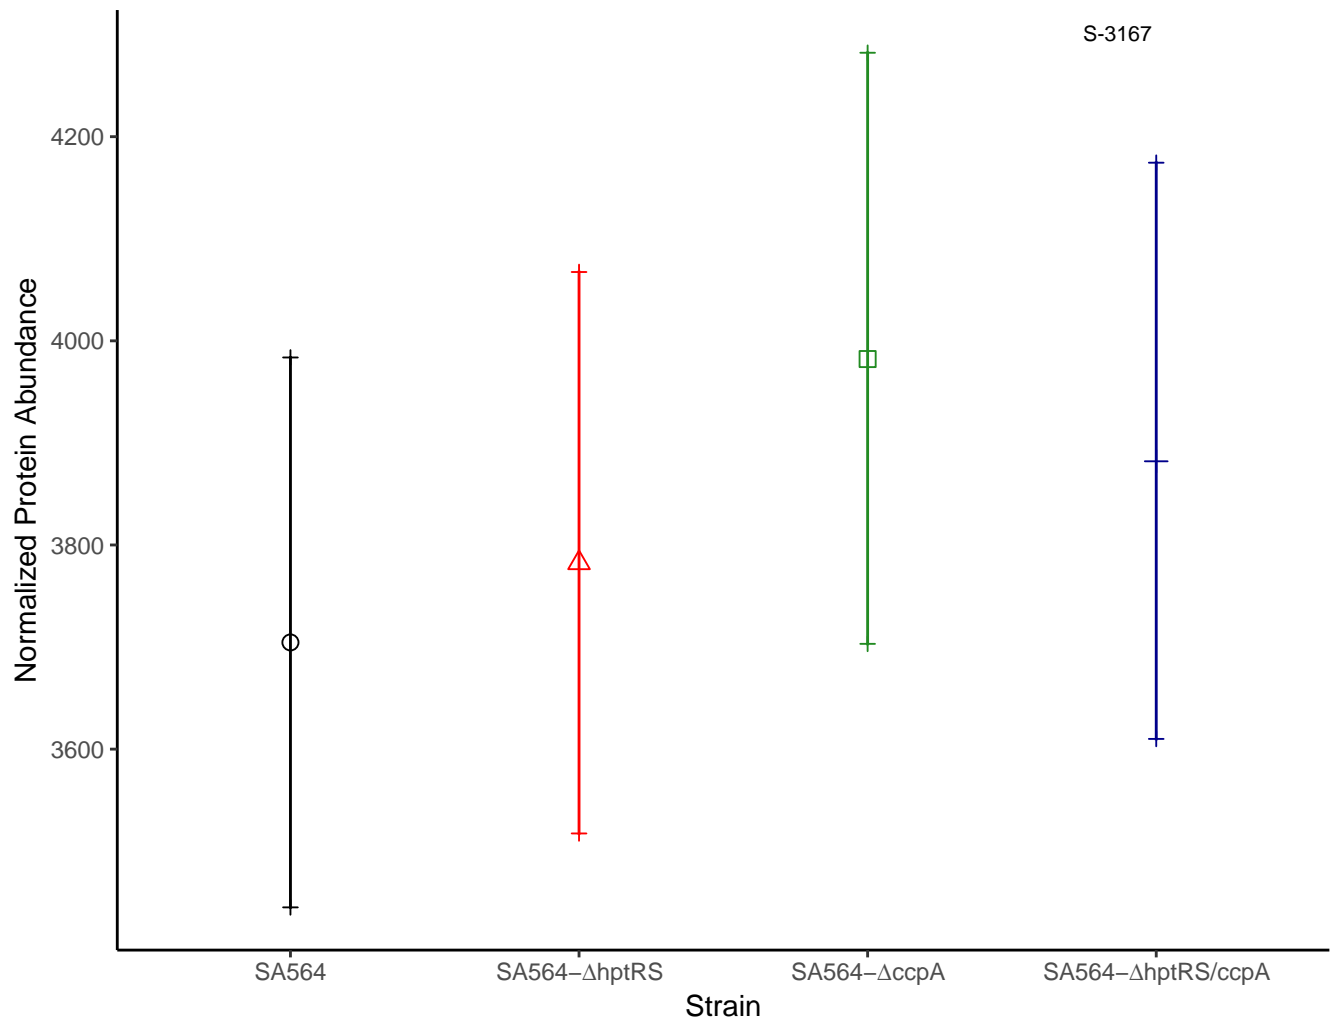

- ⊕ SA564
- △ SA564- $\Delta$ *hptRS*
- ⊞ SA564- $\Delta$ *ccpA*
- + SA564- $\Delta$ *hptRS/ccpA*

# HEM3\_STAAM

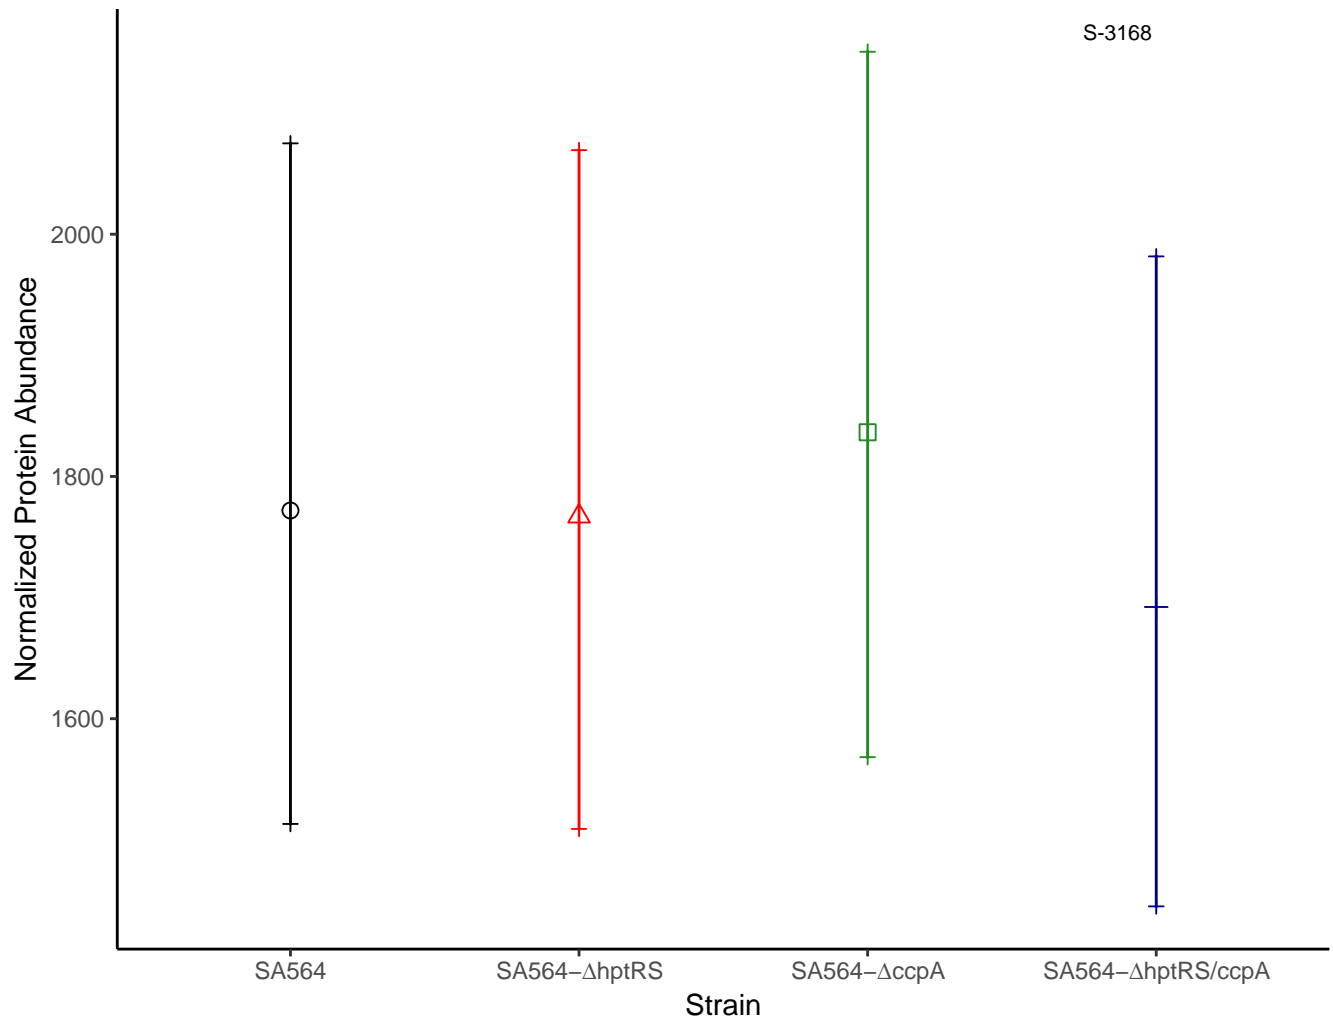

- ⊕ SA564
- △ SA564- $\Delta$ hptRS
- ⊞ SA564- $\Delta$ ccpA
- + SA564- $\Delta$ hptRS/ccpA



# HLD\_STAAM

S-3169

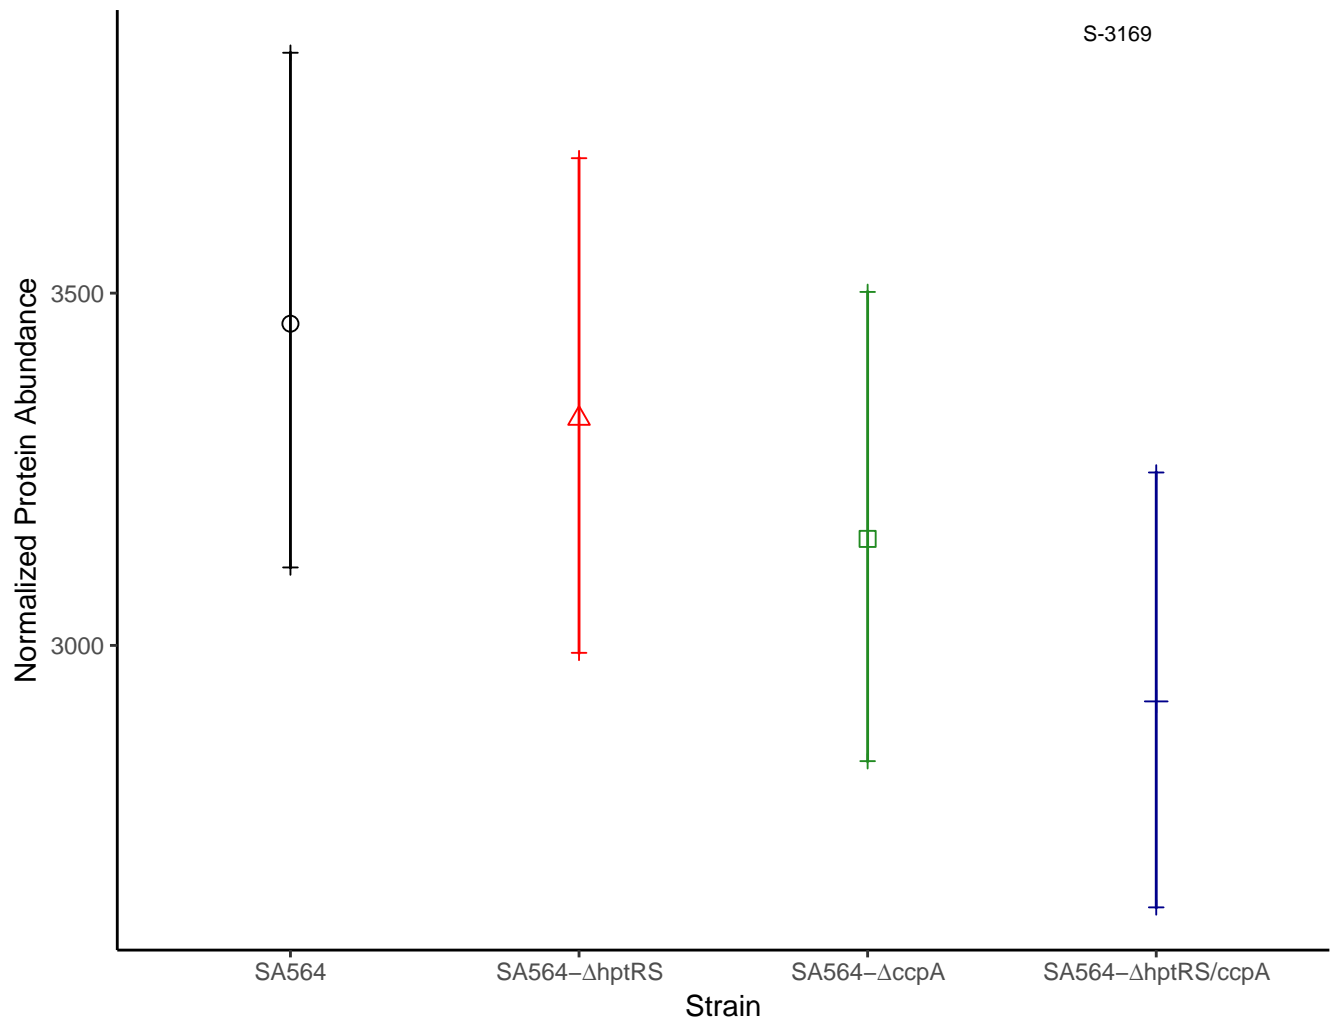

- ⊕ SA564
- △ SA564- $\Delta$ hptRS
- ⊞ SA564- $\Delta$ ccpA
- + SA564- $\Delta$ hptRS/ccpA

# HPRK\_STAAM

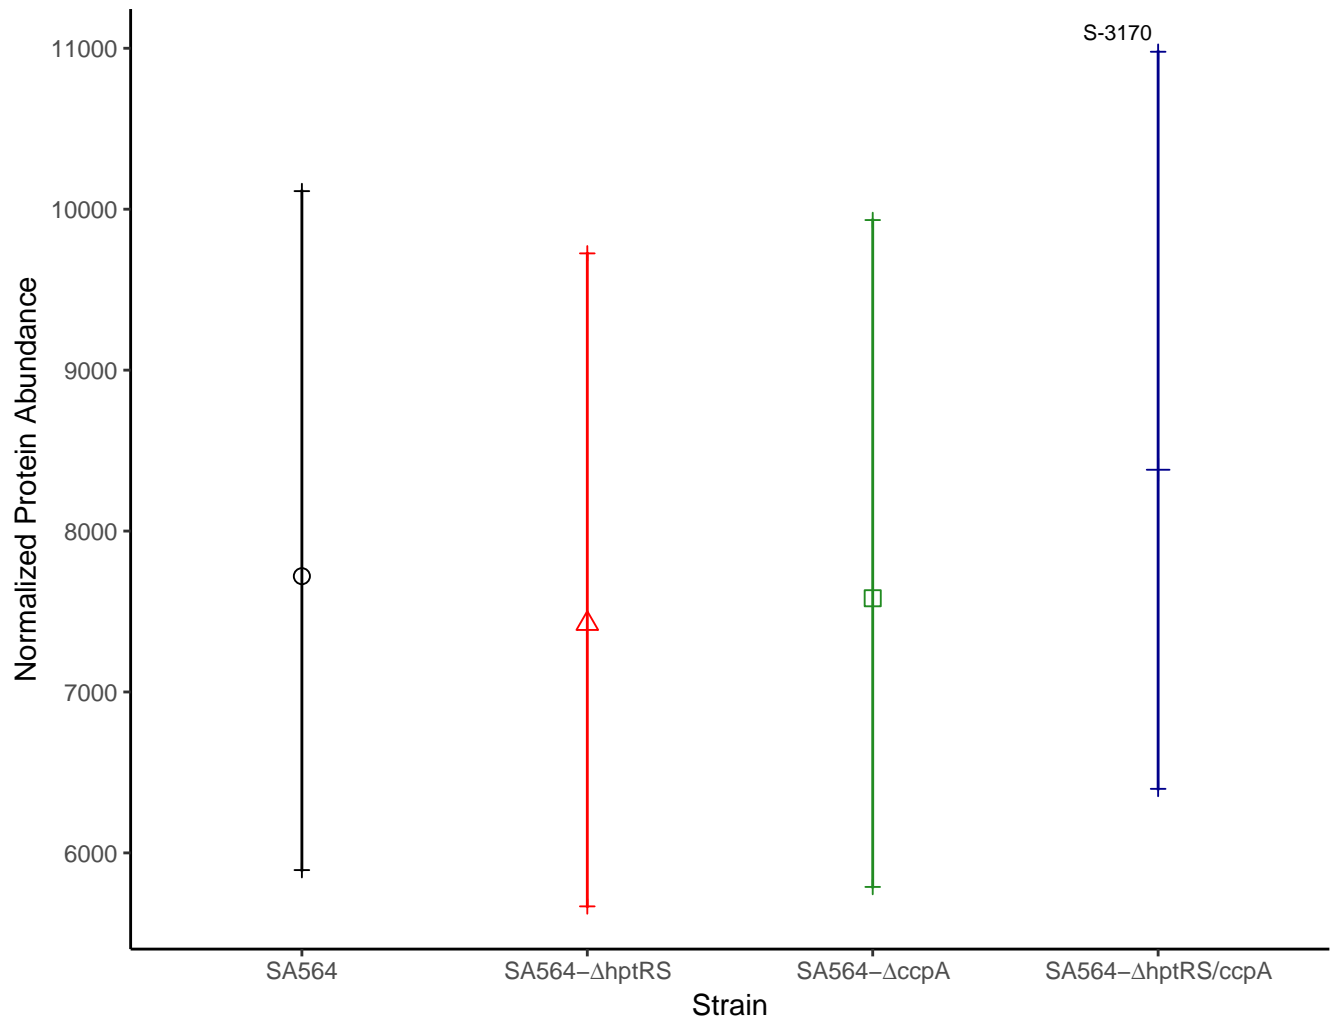

- ⊕ SA564
- △ SA564- $\Delta$ hptRS
- ⊞ SA564- $\Delta$ ccpA
- + SA564- $\Delta$ hptRS/ccpA

# HPRT\_STAAM

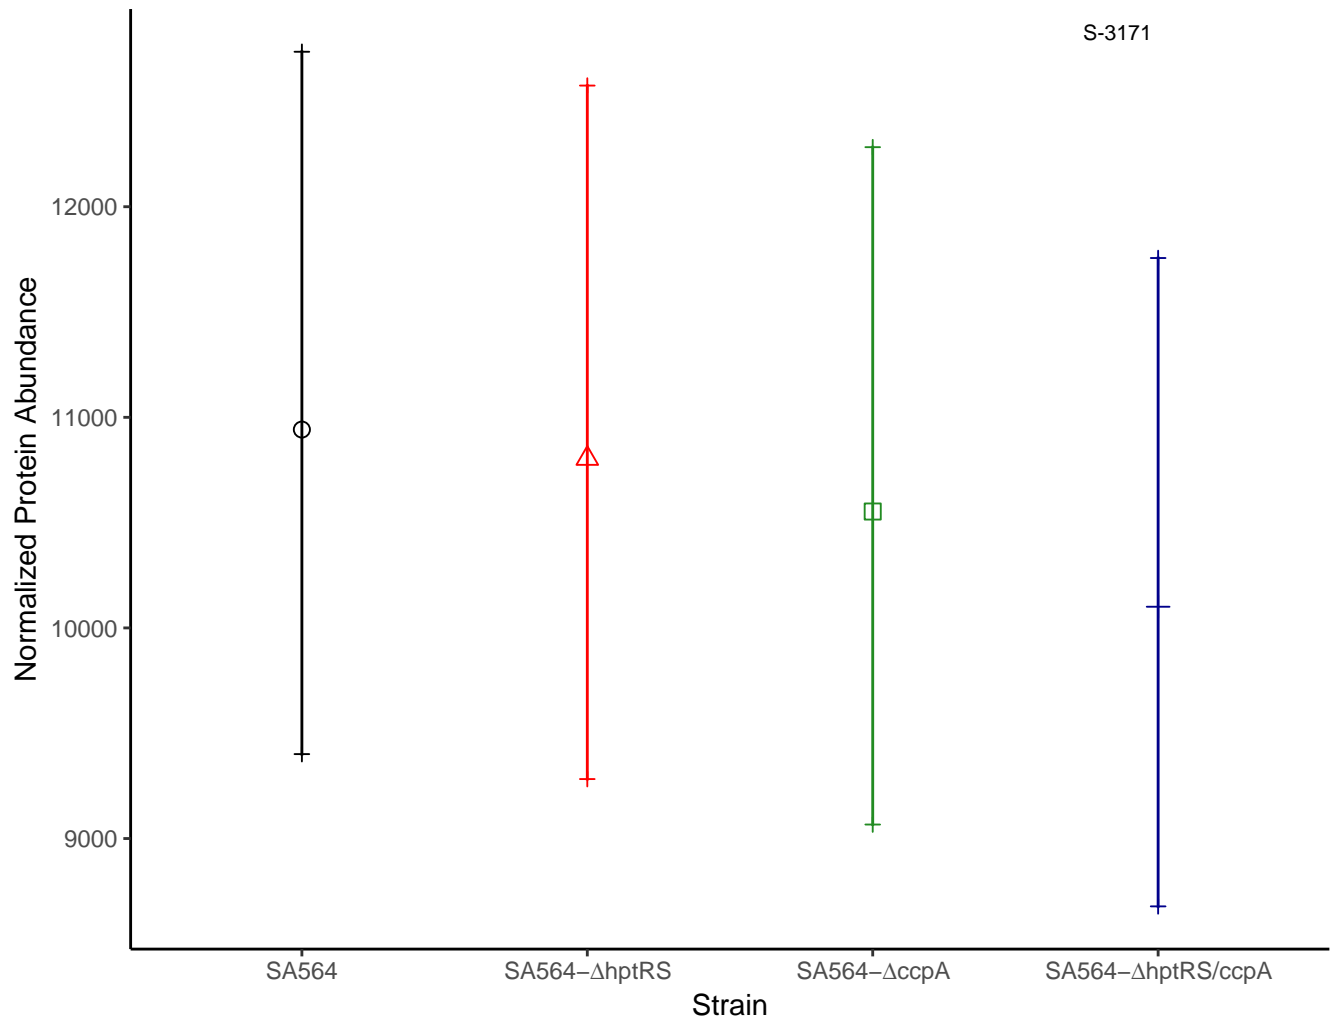

- ⊕ SA564
- △ SA564- $\Delta$ hptRS
- ⊞ SA564- $\Delta$ ccpA
- + SA564- $\Delta$ hptRS/ccpA

# HPS\_STAAM

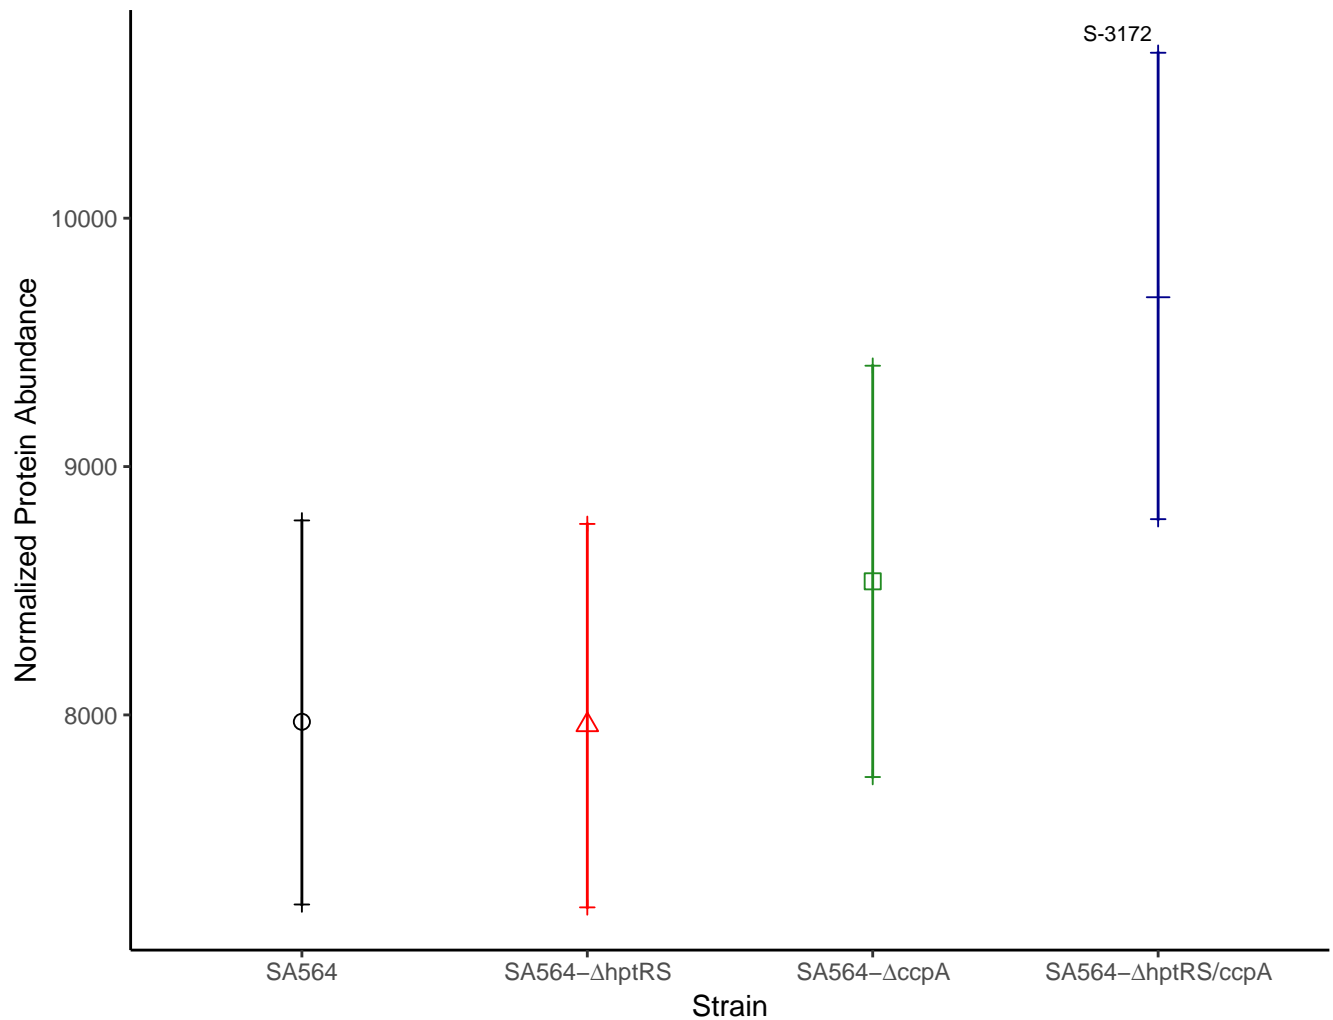

- ⊕ SA564
- △ SA564- $\Delta$ hptRS
- ⊞ SA564- $\Delta$ ccpA
- + SA564- $\Delta$ hptRS/ccpA

# HRTA\_STAAM

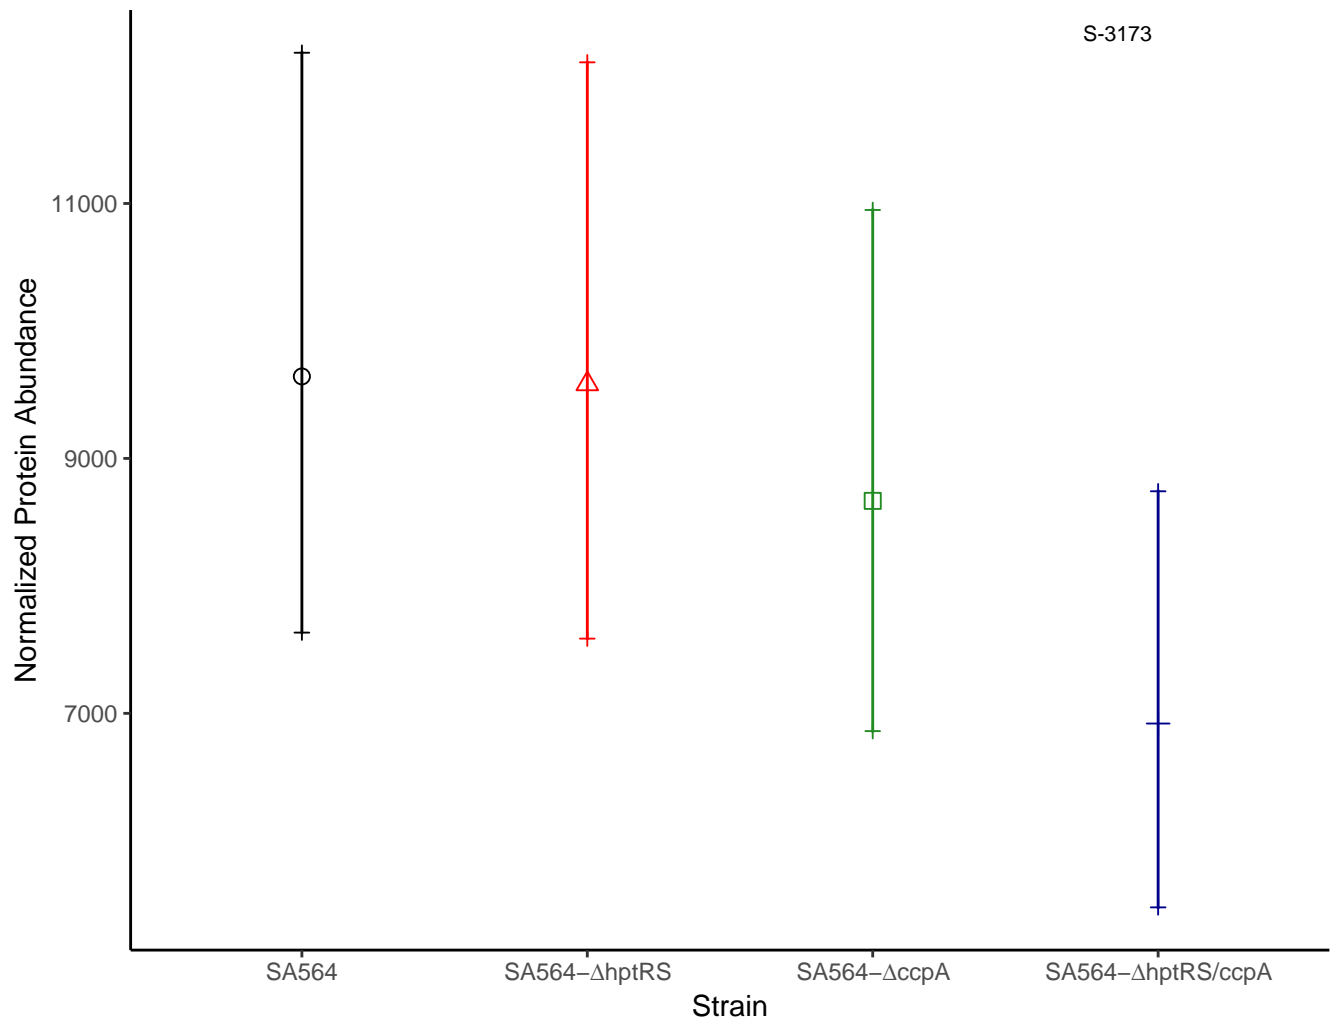

- ⊕ SA564
- △ SA564- $\Delta$ *hptRS*
- ⊞ SA564- $\Delta$ *ccpA*
- + SA564- $\Delta$ *hptRS/ccpA*

# HSLO\_STAAM

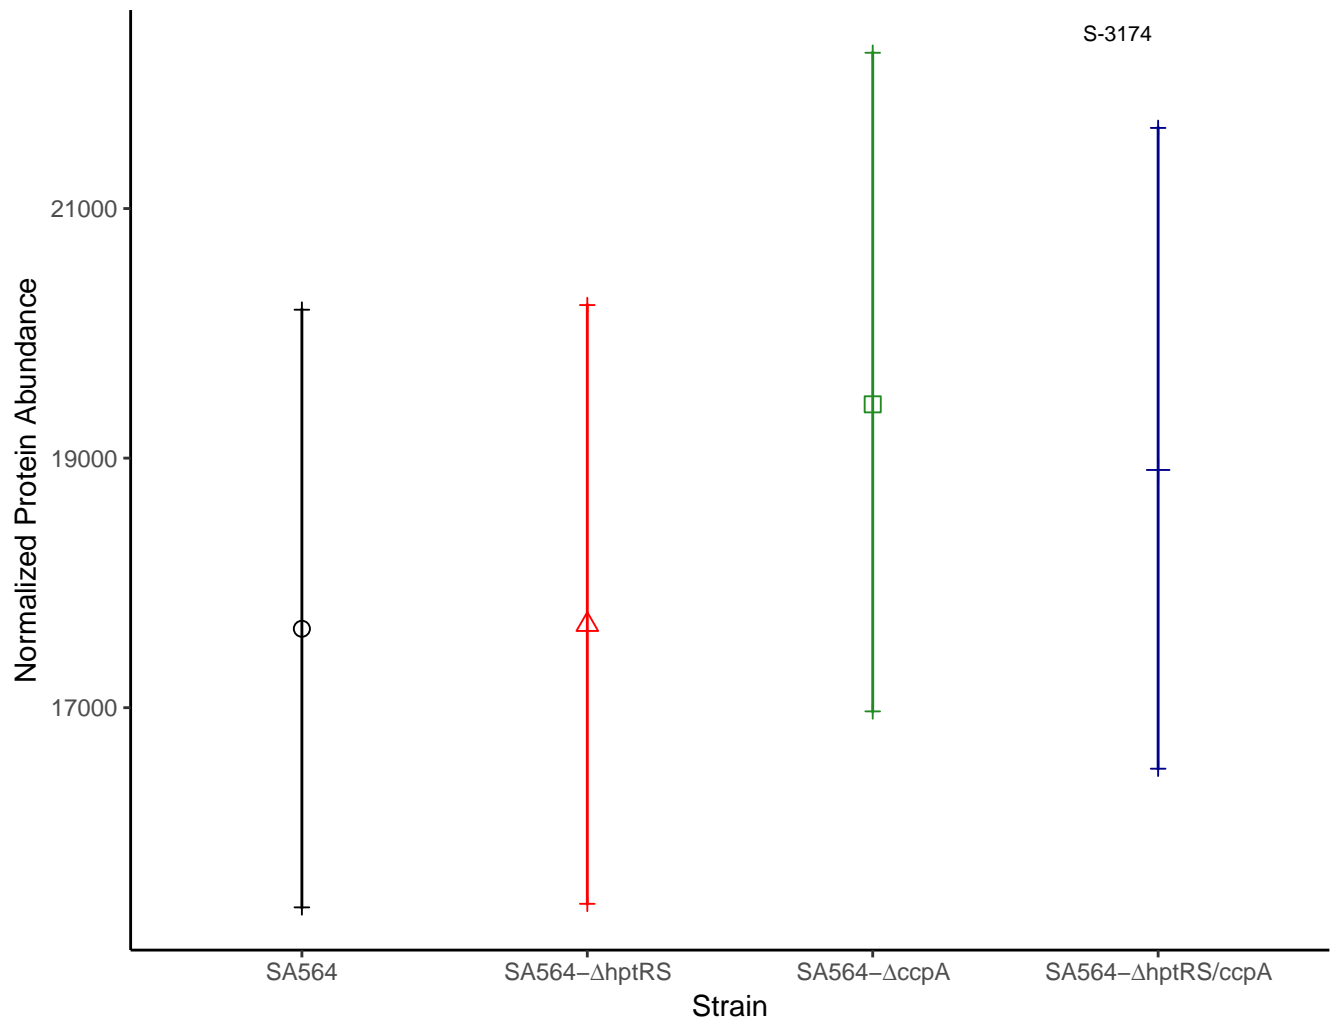

- ⊕ SA564
- △ SA564- $\Delta$ hptRS
- ⊞ SA564- $\Delta$ ccpA
- + SA564- $\Delta$ hptRS/ccpA

# HSLU\_STAAM

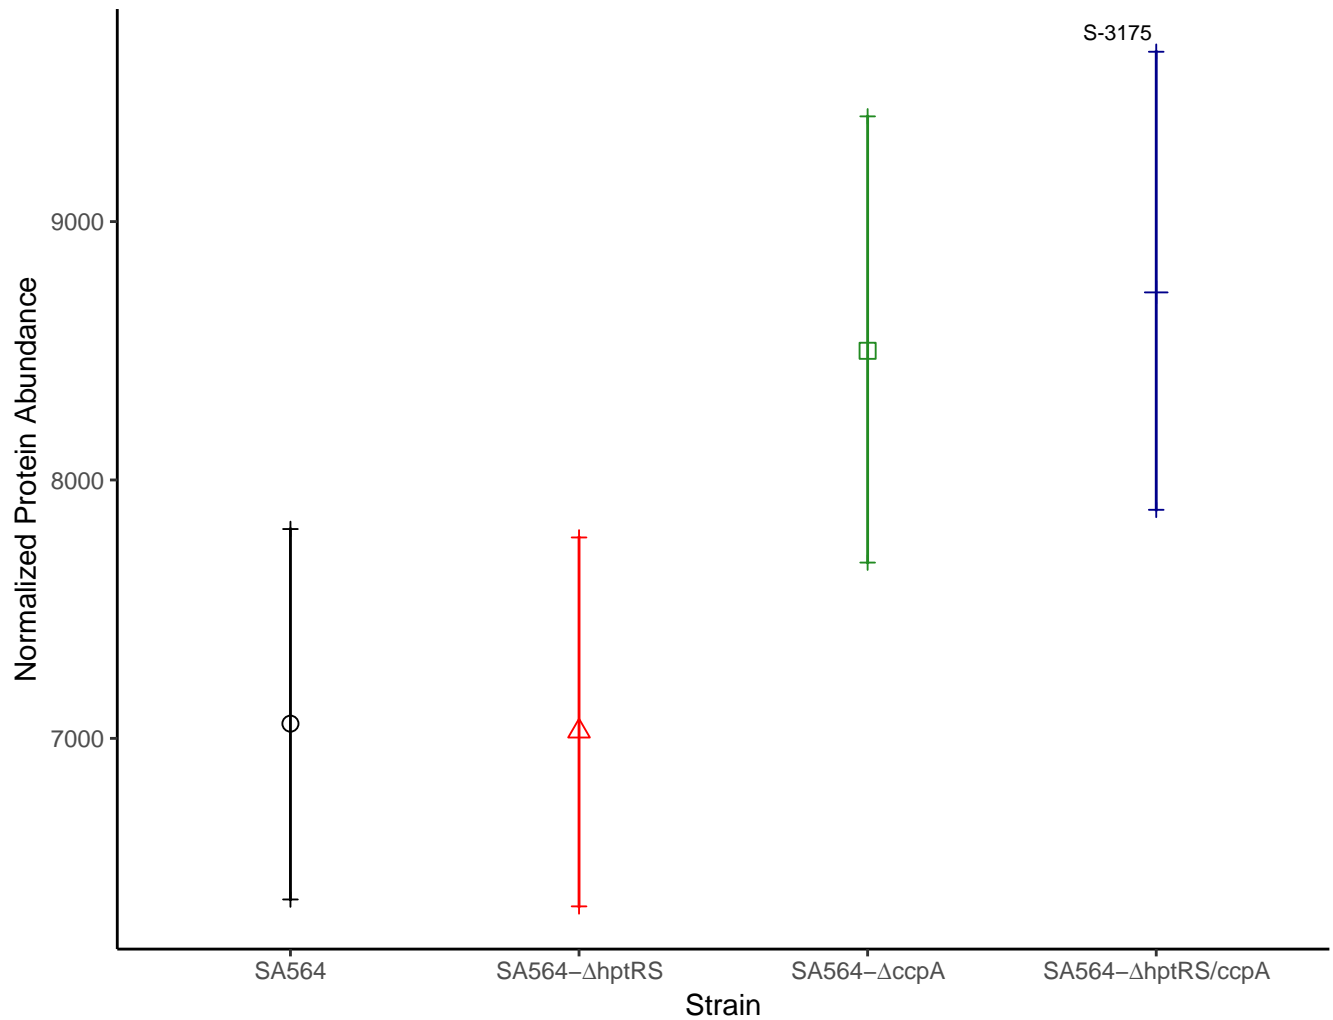

- ⊕ SA564
- △ SA564- $\Delta$ *hptRS*
- ⊞ SA564- $\Delta$ *ccpA*
- + SA564- $\Delta$ *hptRS/ccpA*

# HSLV\_STAAM

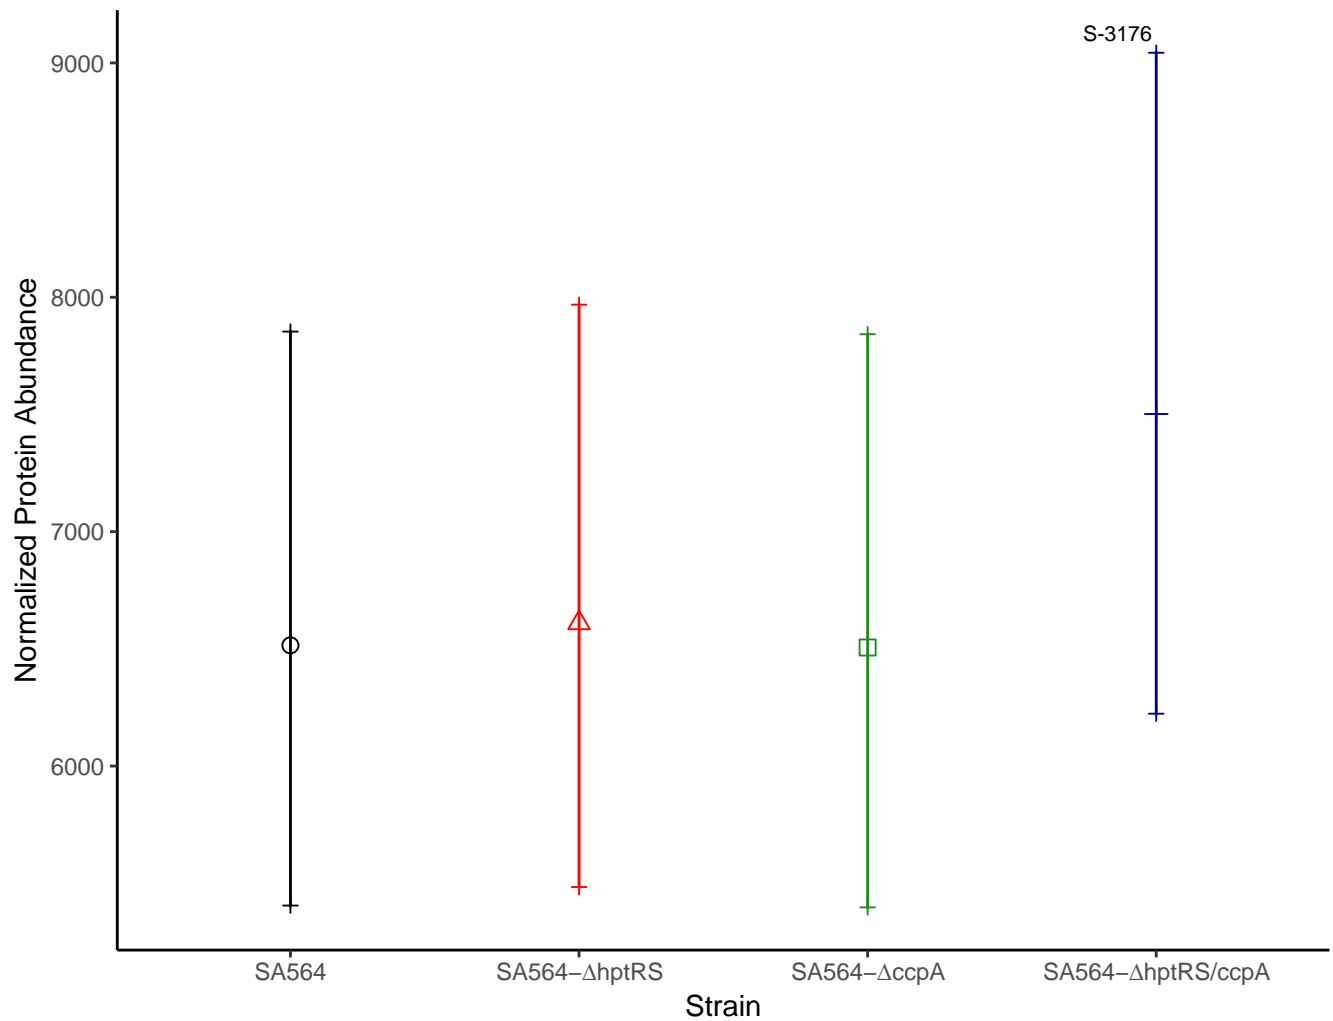

- ⊕ SA564
- △ SA564- $\Delta$ *hptRS*
- ⊞ SA564- $\Delta$ *ccpA*
- + SA564- $\Delta$ *hptRS/ccpA*



# HUTH\_STAAM

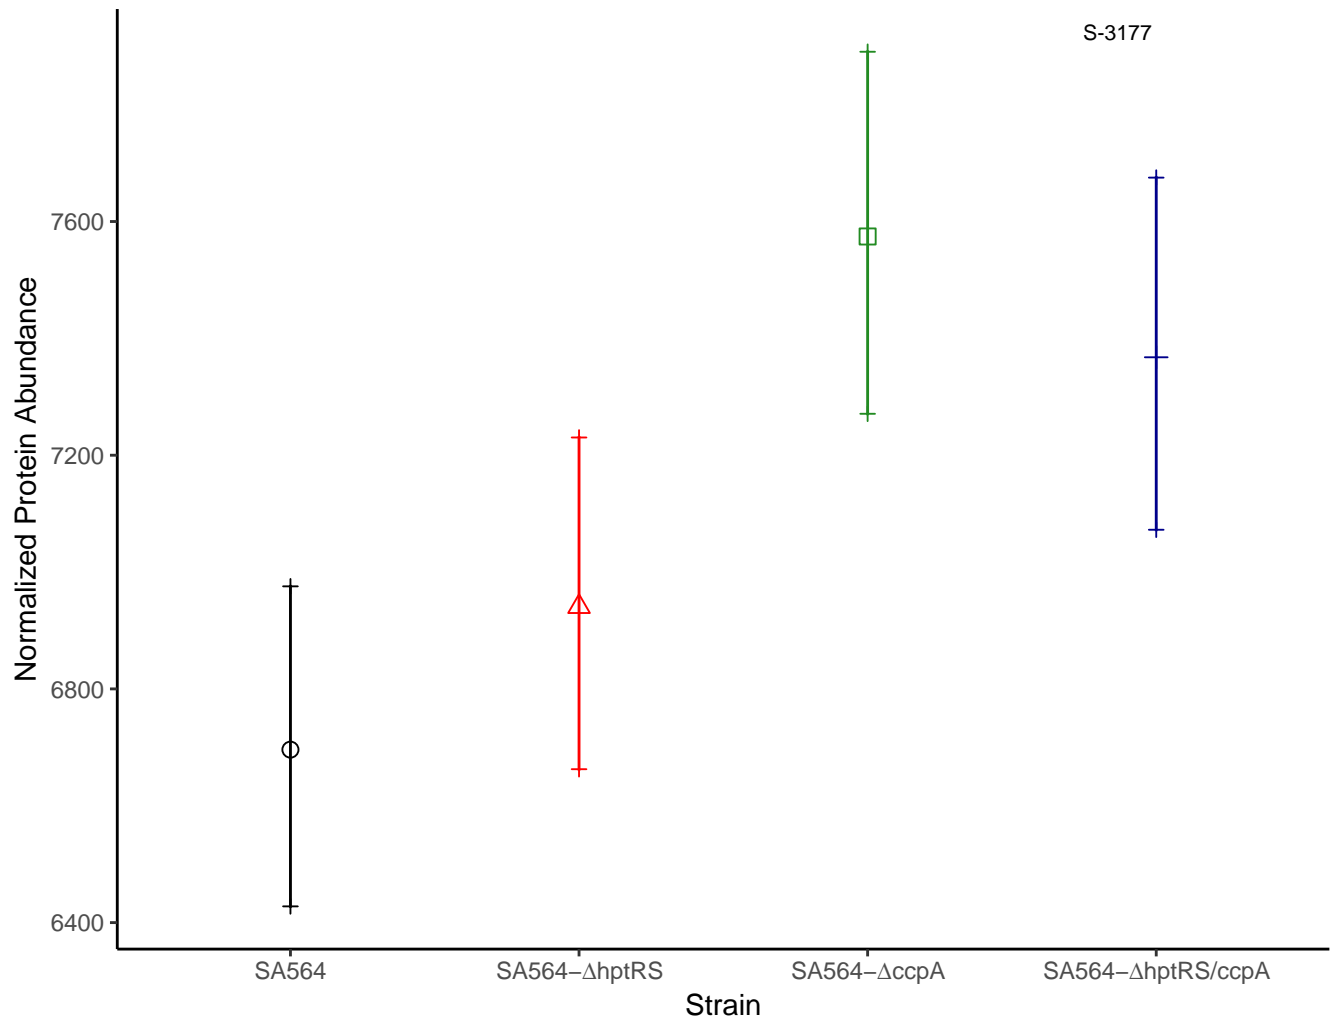

- ⊕ SA564
- △ SA564- $\Delta$ hptRS
- ⊞ SA564- $\Delta$ ccpA
- + SA564- $\Delta$ hptRS/ccpA

# HUTI\_STAAM

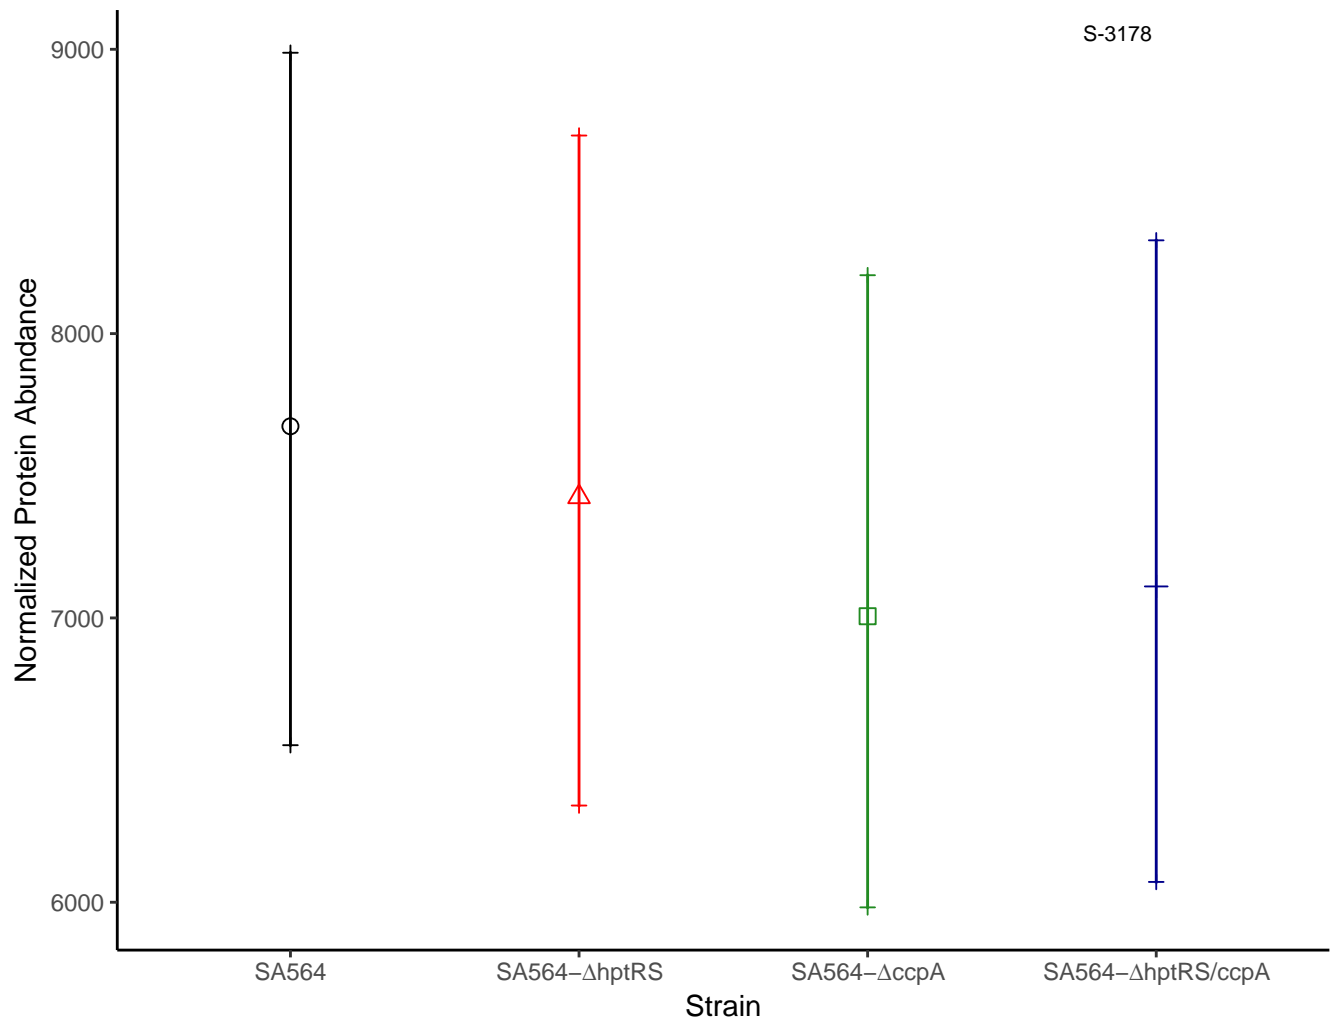

- ⊕ SA564
- △ SA564- $\Delta$ hptRS
- ⊞ SA564- $\Delta$ ccpA
- + SA564- $\Delta$ hptRS/ccpA

# HUTU\_STAAM

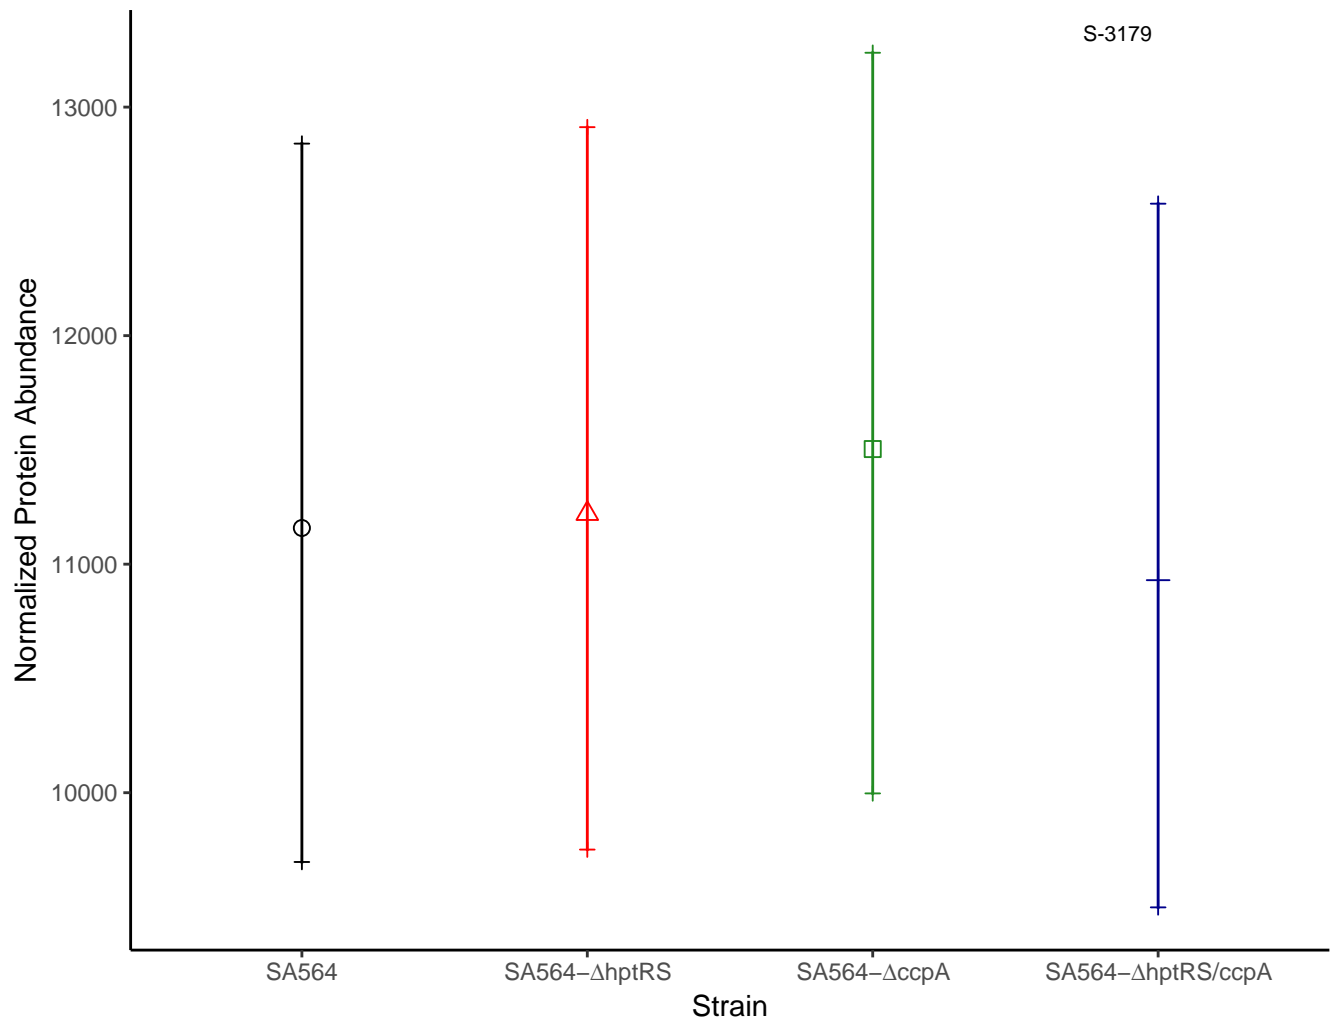

- ⊕ SA564
- △ SA564- $\Delta$ *hptRS*
- ⊞ SA564- $\Delta$ *ccpA*
- + SA564- $\Delta$ *hptRS/ccpA*

# ICAB\_STAAM

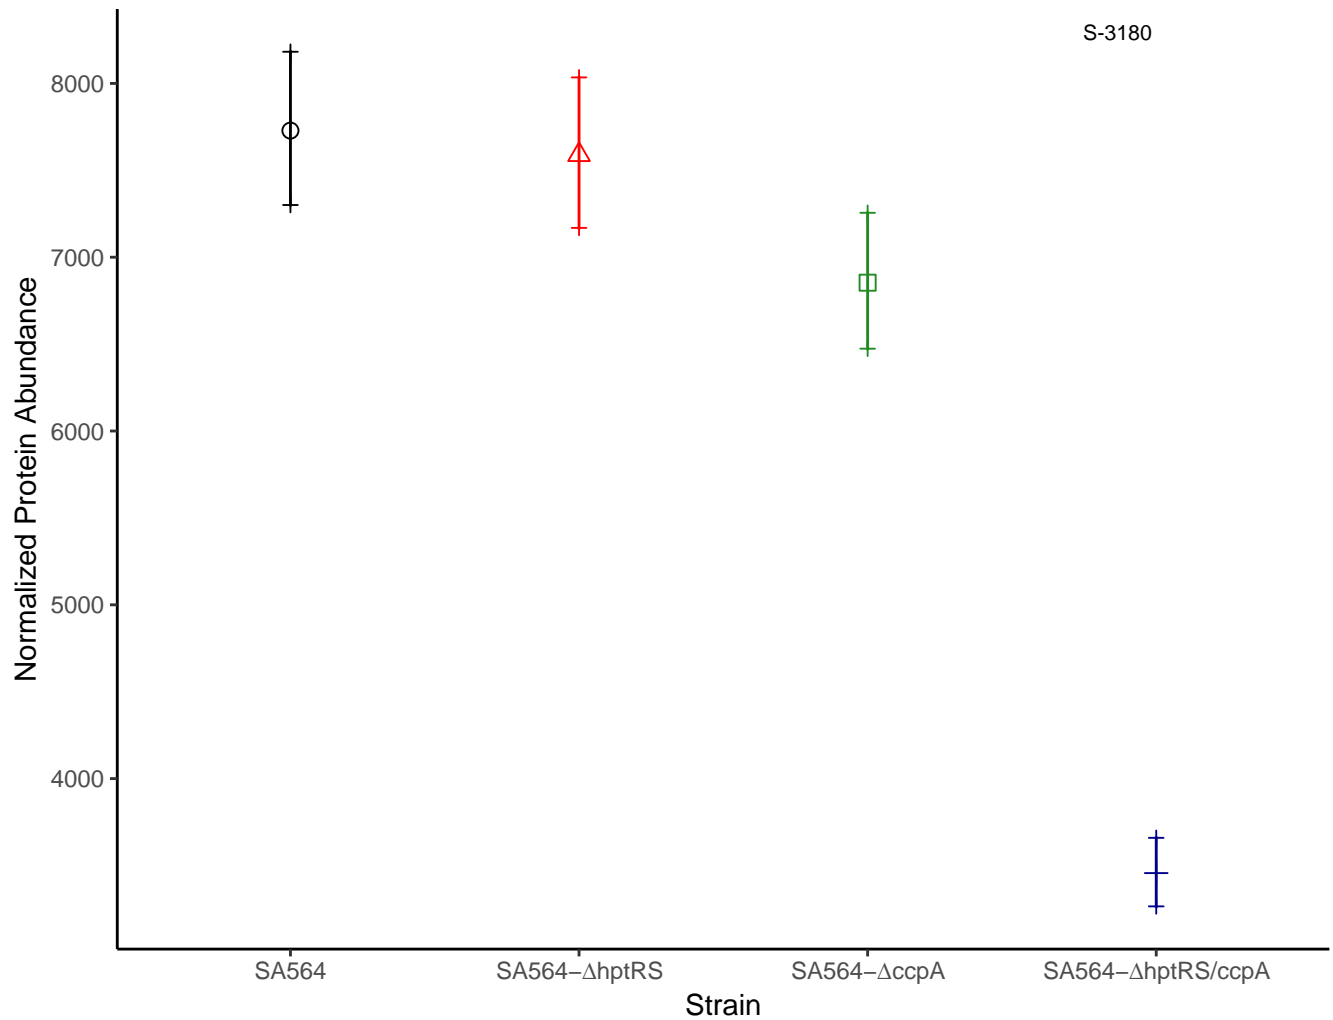

- ⊕ SA564
- △ SA564- $\Delta$ hptRS
- ⊞ SA564- $\Delta$ ccpA
- + SA564- $\Delta$ hptRS/ccpA

# IDH\_STAAM

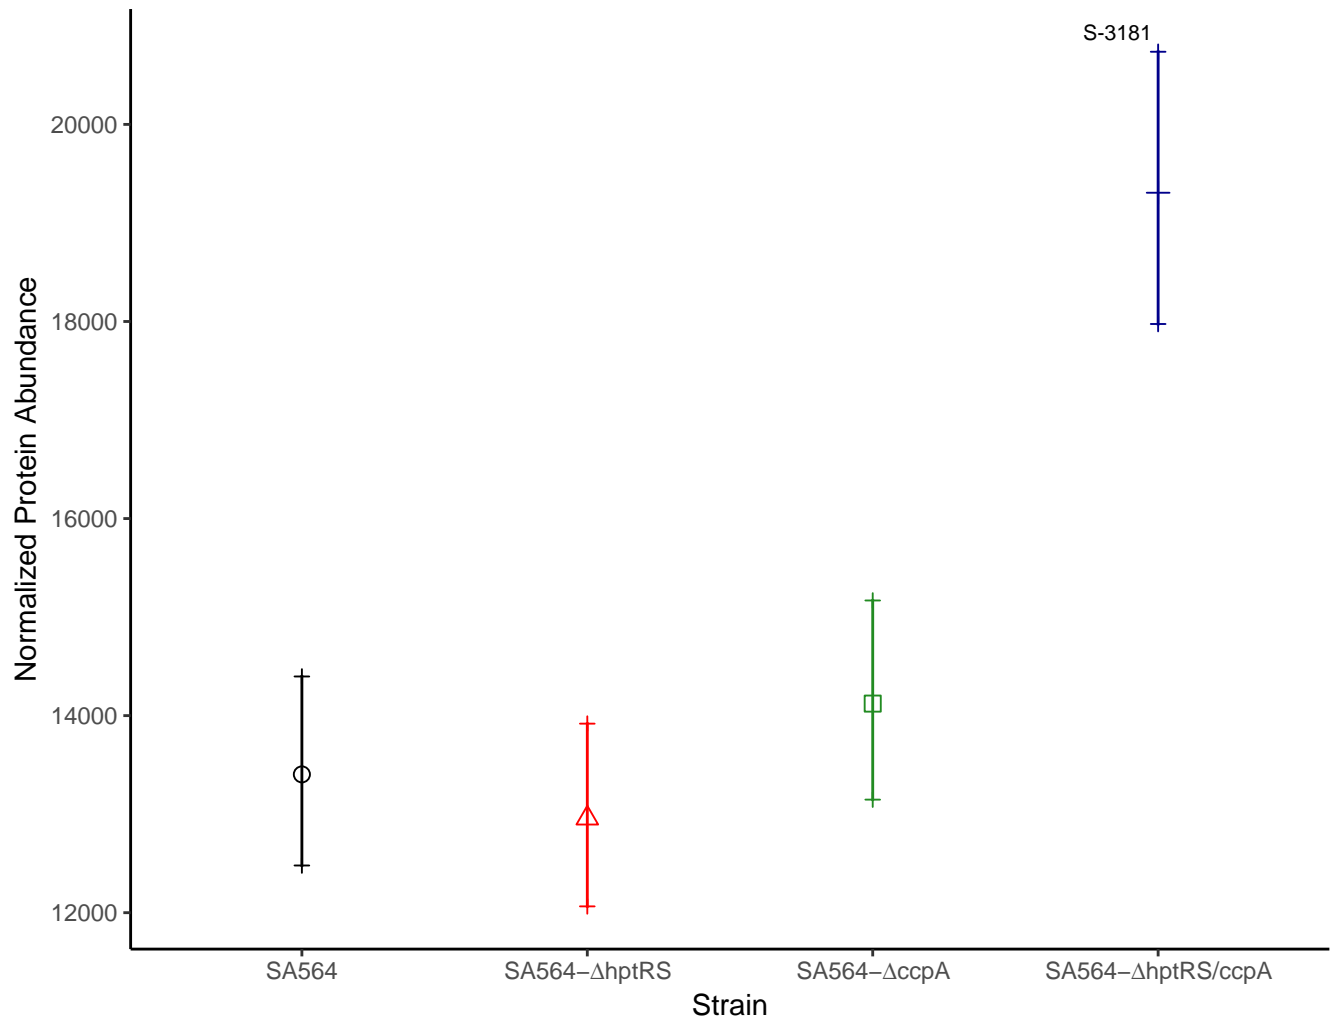

- ⊕ SA564
- △ SA564- $\Delta$ hptRS
- ⊞ SA564- $\Delta$ ccpA
- + SA564- $\Delta$ hptRS/ccpA

# IF1\_STAAM

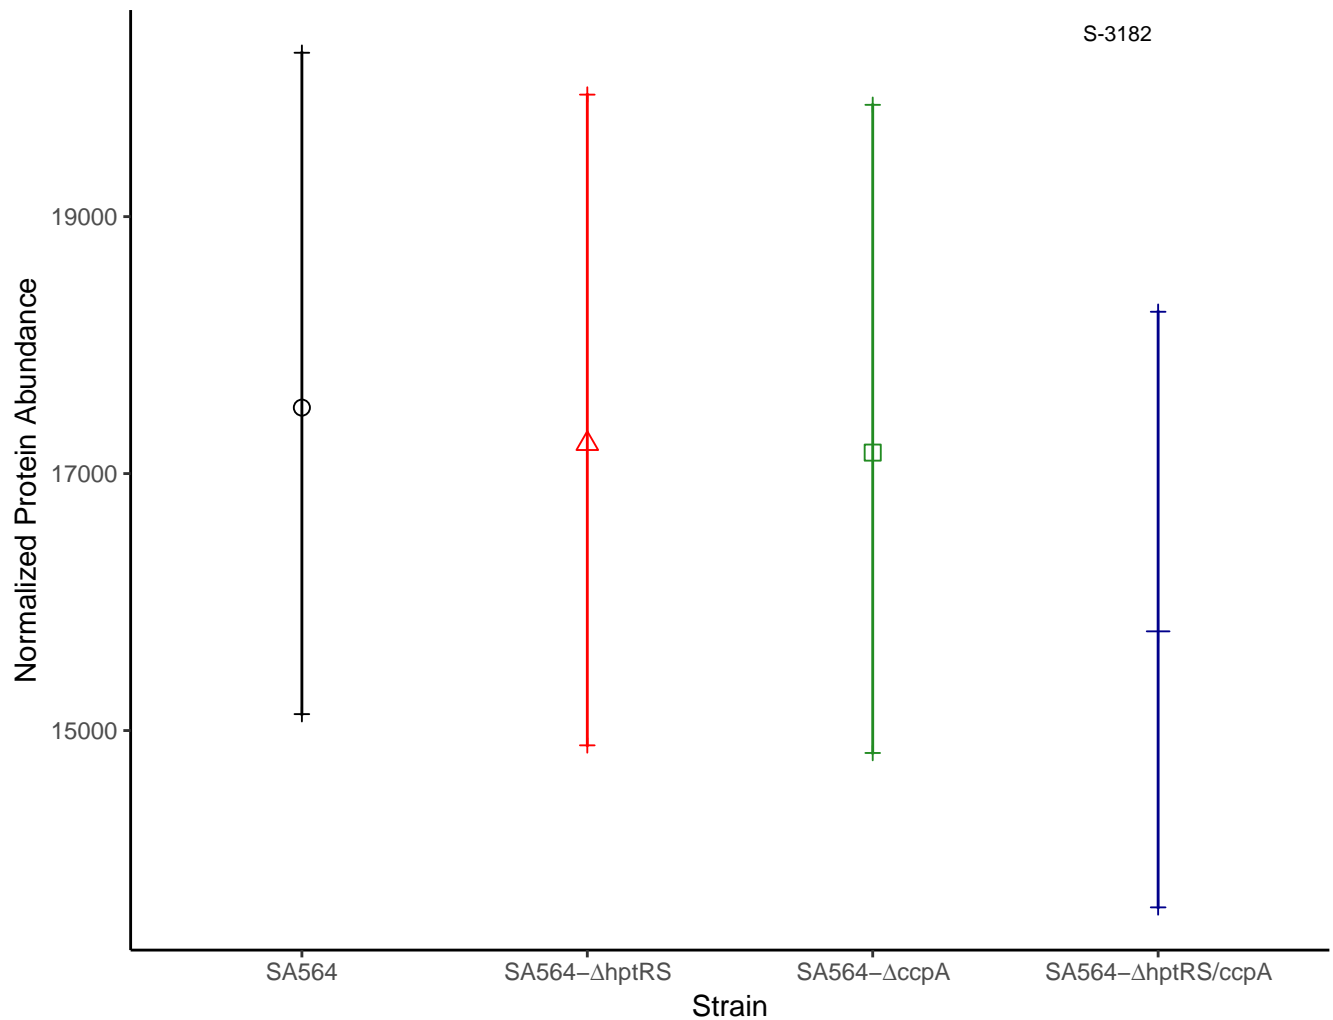

- ⊕ SA564
- △ SA564- $\Delta$ hptRS
- ⊞ SA564- $\Delta$ ccpA
- + SA564- $\Delta$ hptRS/ccpA

# IF2\_STAAM

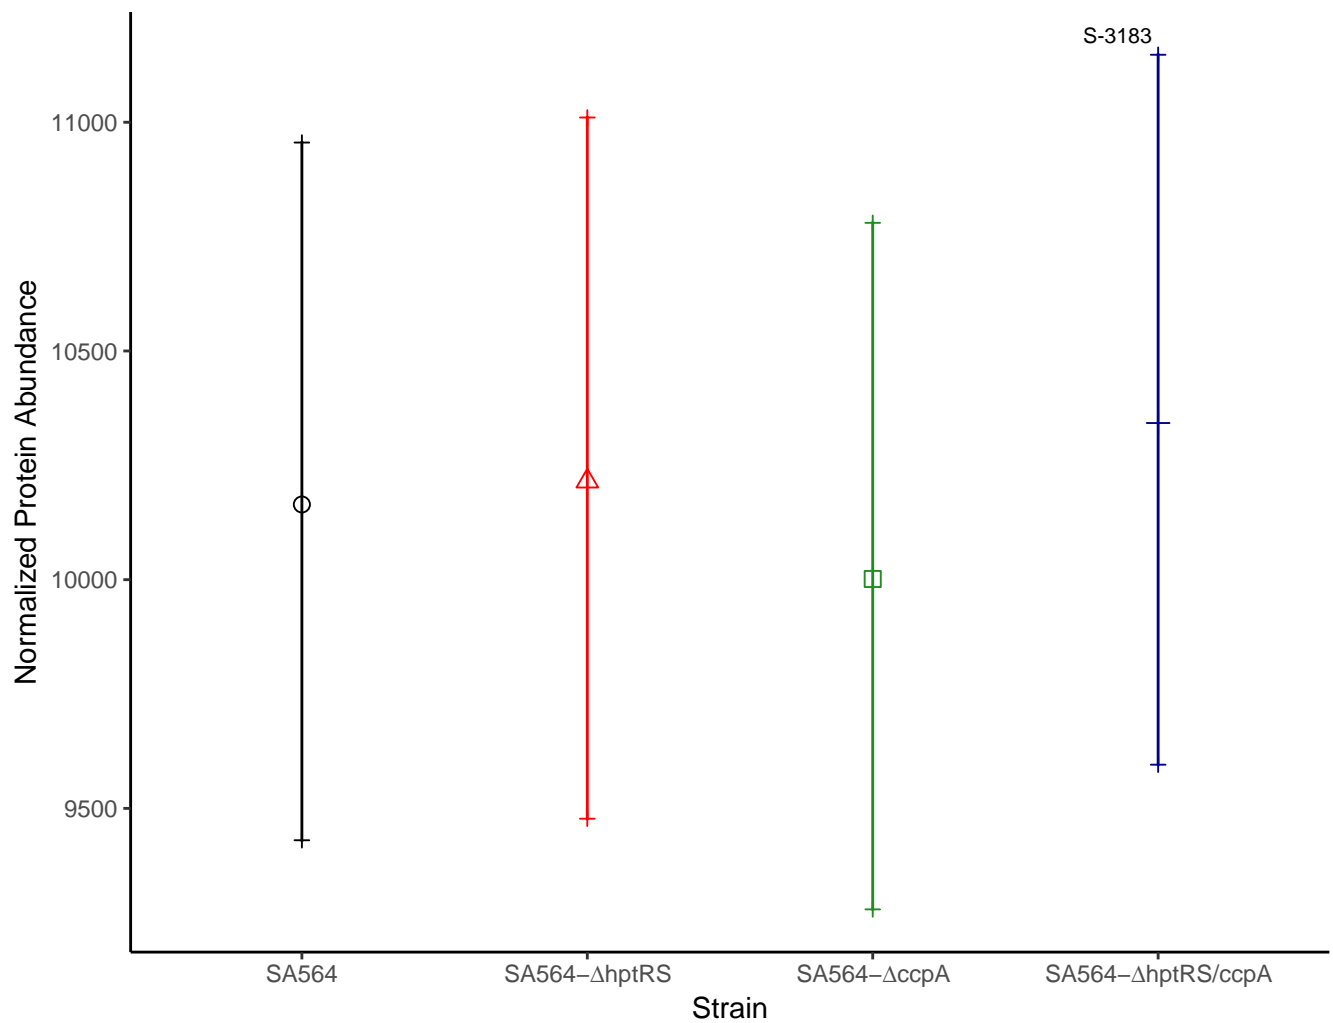

- ⊕ SA564
- △ SA564- $\Delta$ hptRS
- ⊞ SA564- $\Delta$ ccpA
- + SA564- $\Delta$ hptRS/ccpA

# IF3\_STAAM

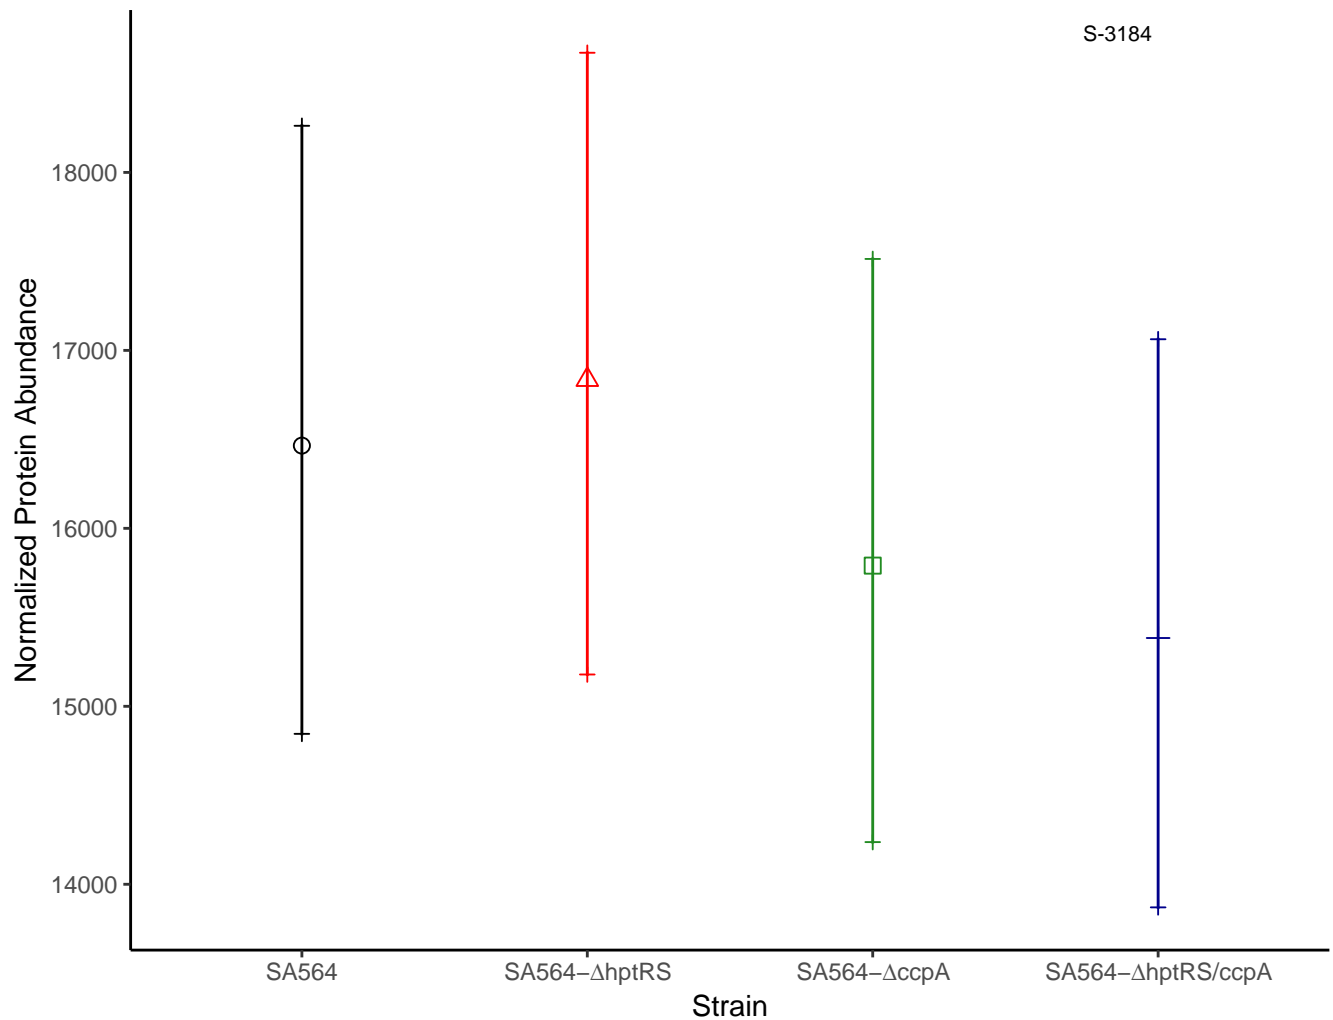

- ⊕ SA564
- △ SA564- $\Delta$ hptRS
- ⊞ SA564- $\Delta$ ccpA
- + SA564- $\Delta$ hptRS/ccpA



# ILVC\_STAAM

S-3185

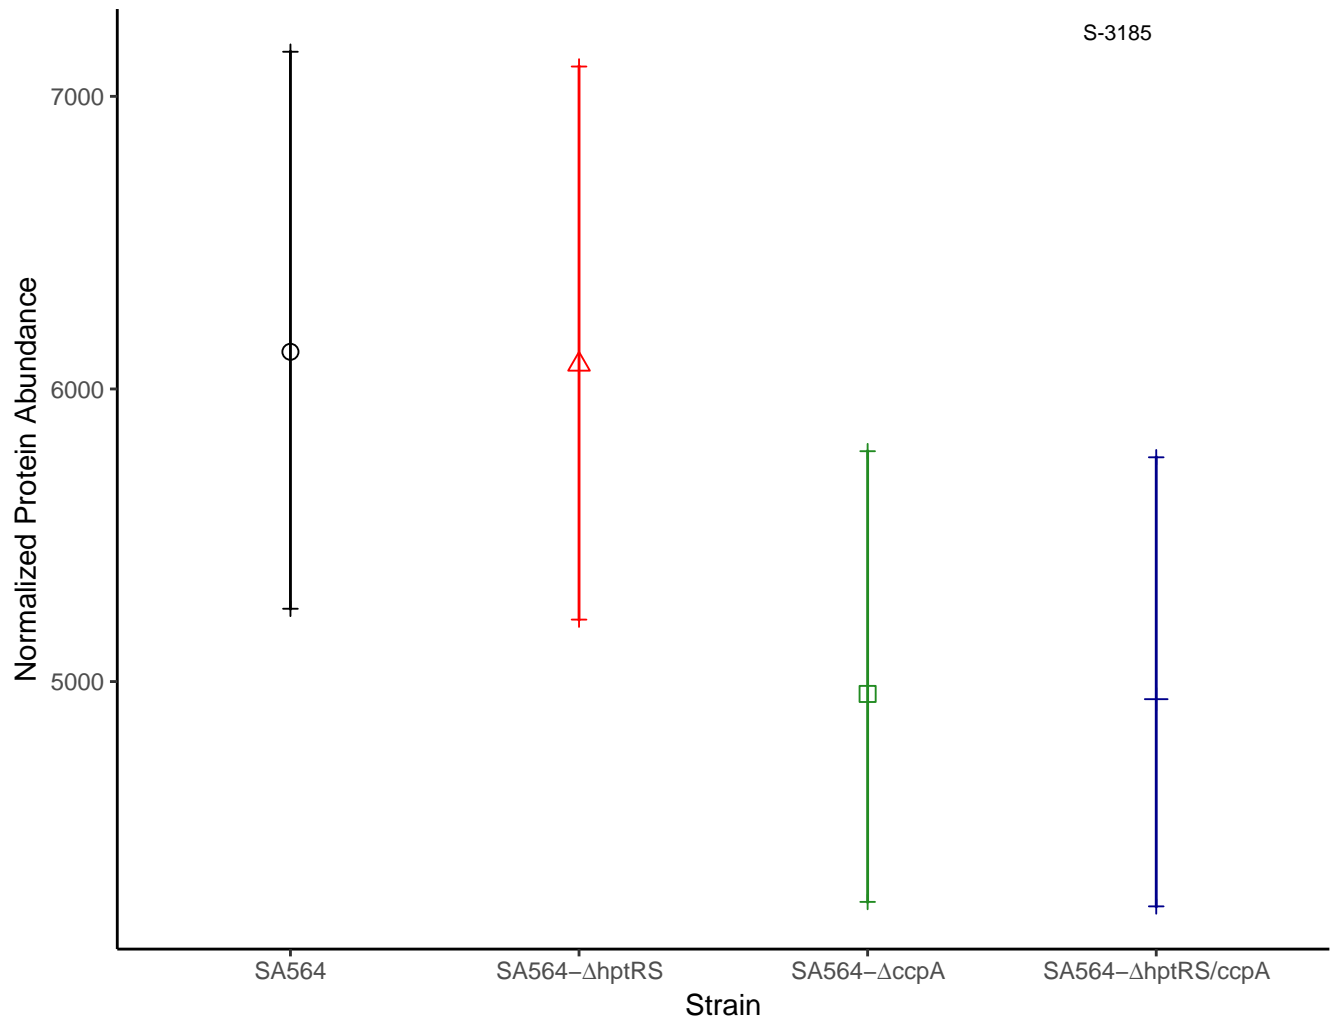

- ⊕ SA564
- △ SA564- $\Delta$ hptRS
- ⊞ SA564- $\Delta$ ccpA
- + SA564- $\Delta$ hptRS/ccpA

# ILVE\_STAAM

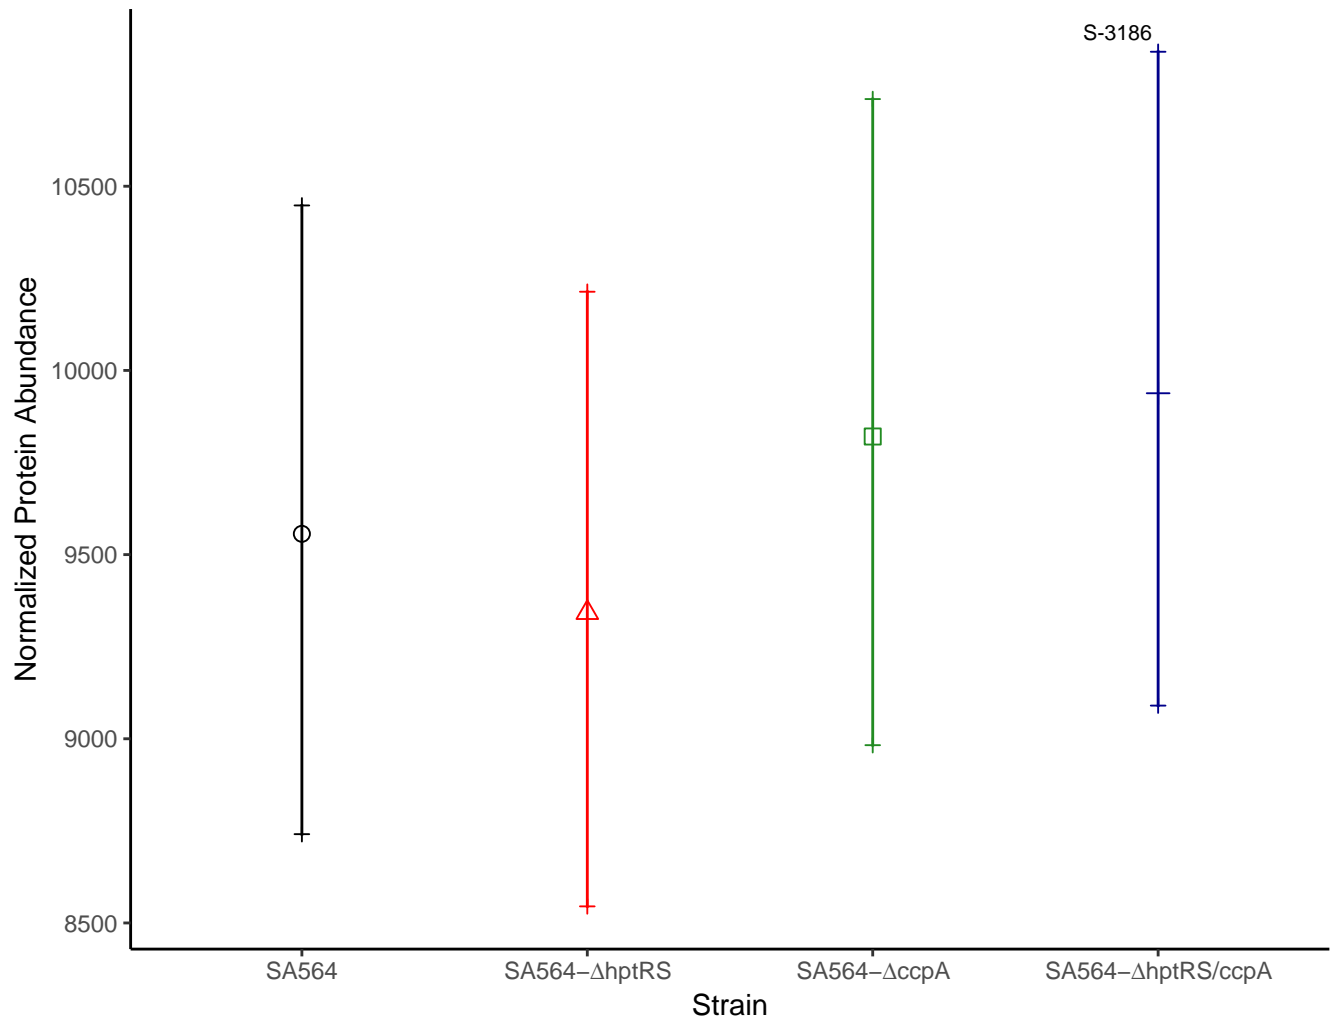

- ⊕ SA564
- △ SA564- $\Delta$ hptRS
- ⊞ SA564- $\Delta$ ccpA
- + SA564- $\Delta$ hptRS/ccpA

# IMDH\_STAAM

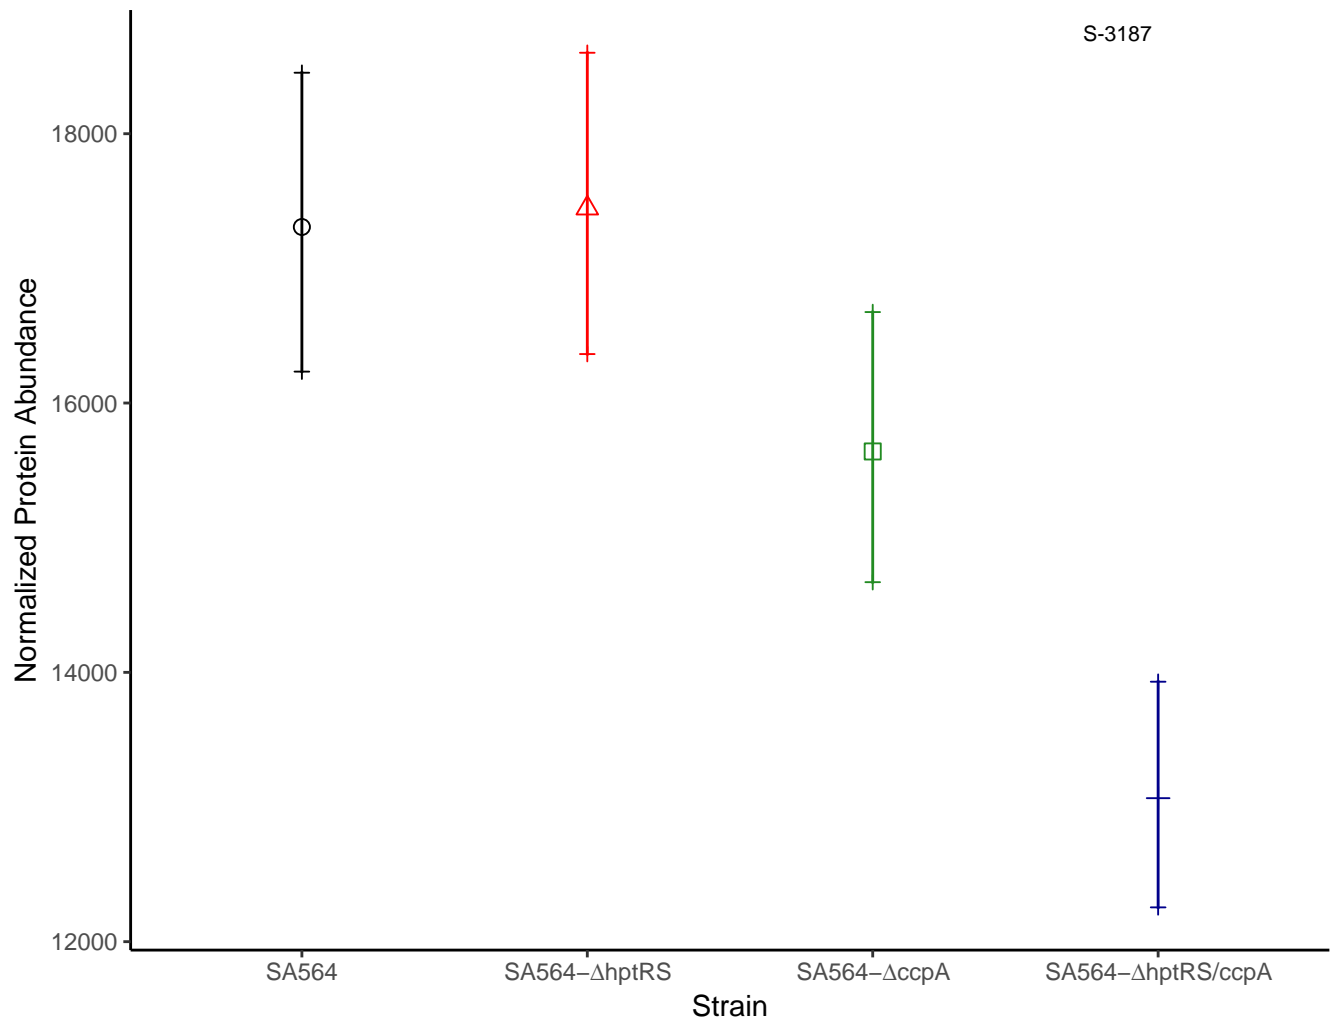

- ⊕ SA564
- △ SA564- $\Delta$ hptRS
- ⊞ SA564- $\Delta$ ccpA
- + SA564- $\Delta$ hptRS/ccpA

# ISAA\_STAAM

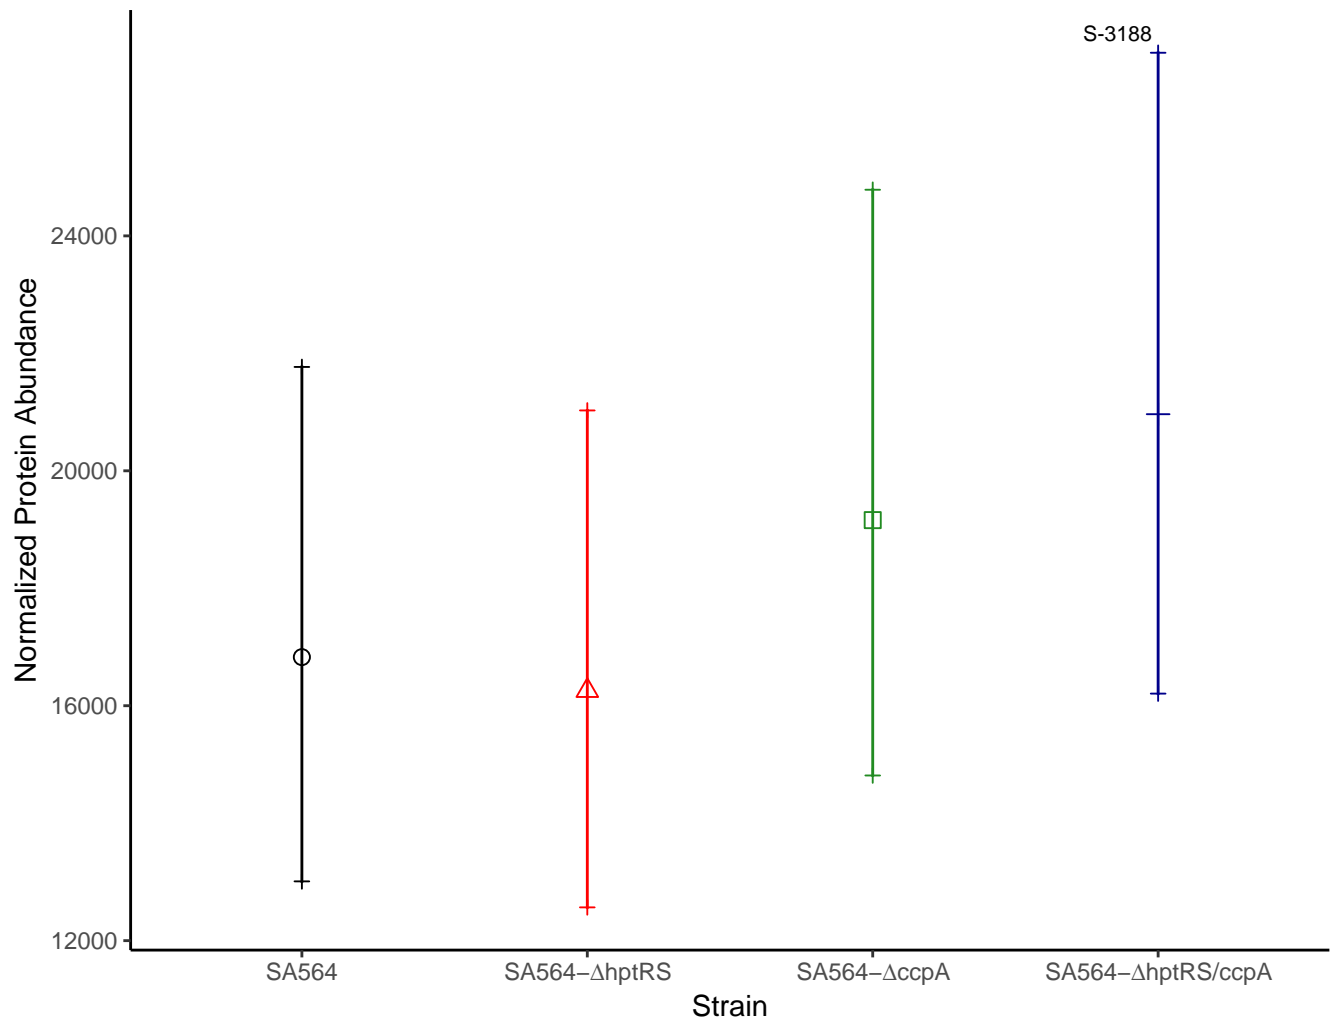

- ⊕ SA564
- △ SA564- $\Delta$ *hptRS*
- ⊞ SA564- $\Delta$ *ccpA*
- + SA564- $\Delta$ *hptRS/ccpA*

# ISPD1\_STAAM

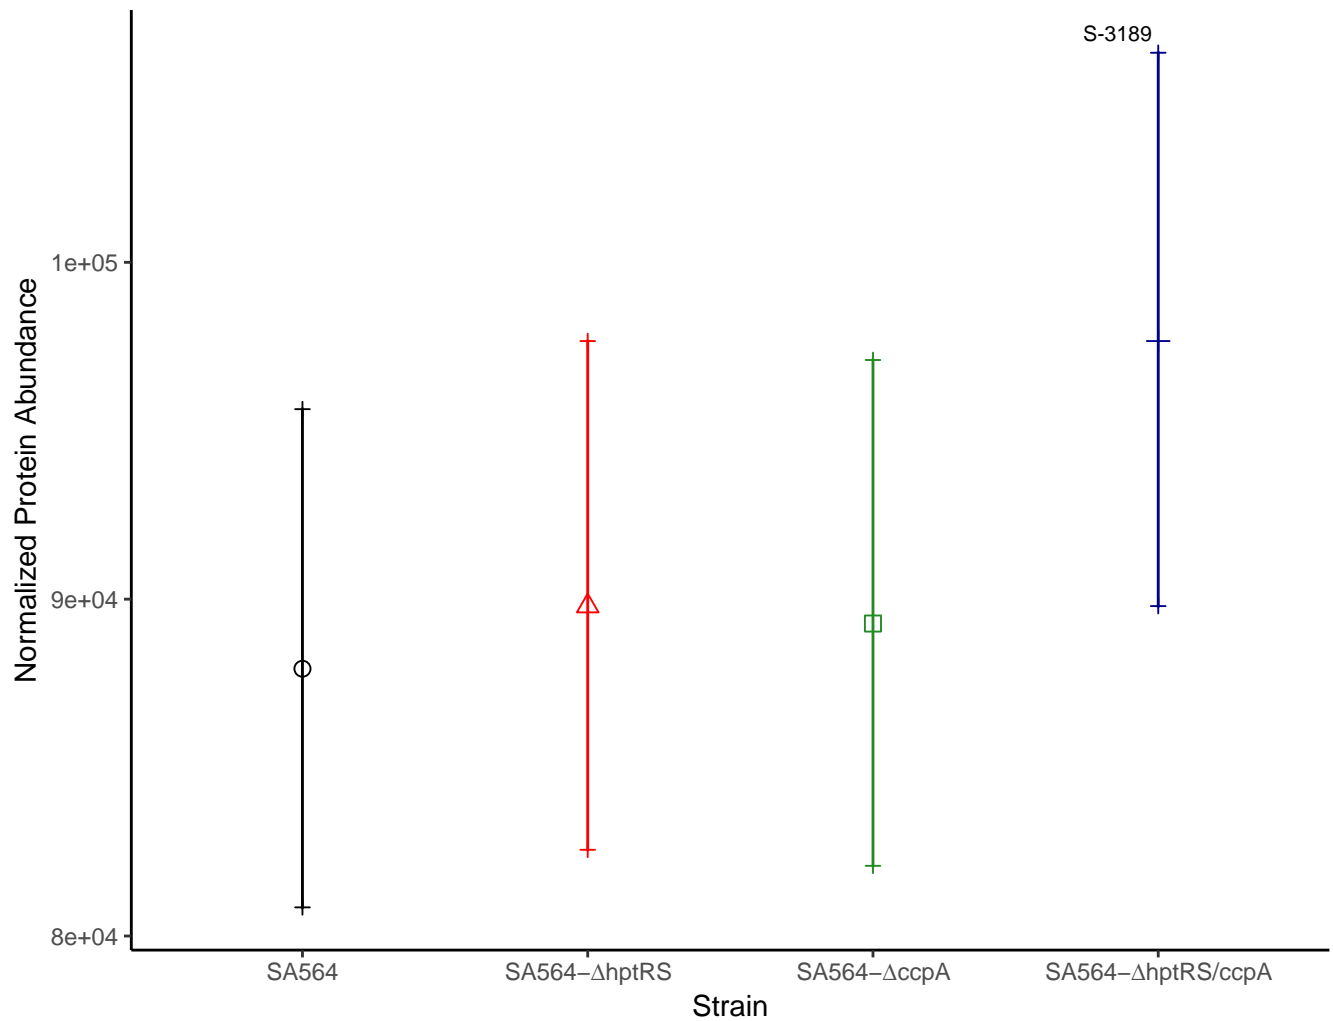

- SA564
- SA564- $\Delta$ hptRS
- SA564- $\Delta$ ccpA
- SA564- $\Delta$ hptRS/ccpA

# ISPD2\_STAAM

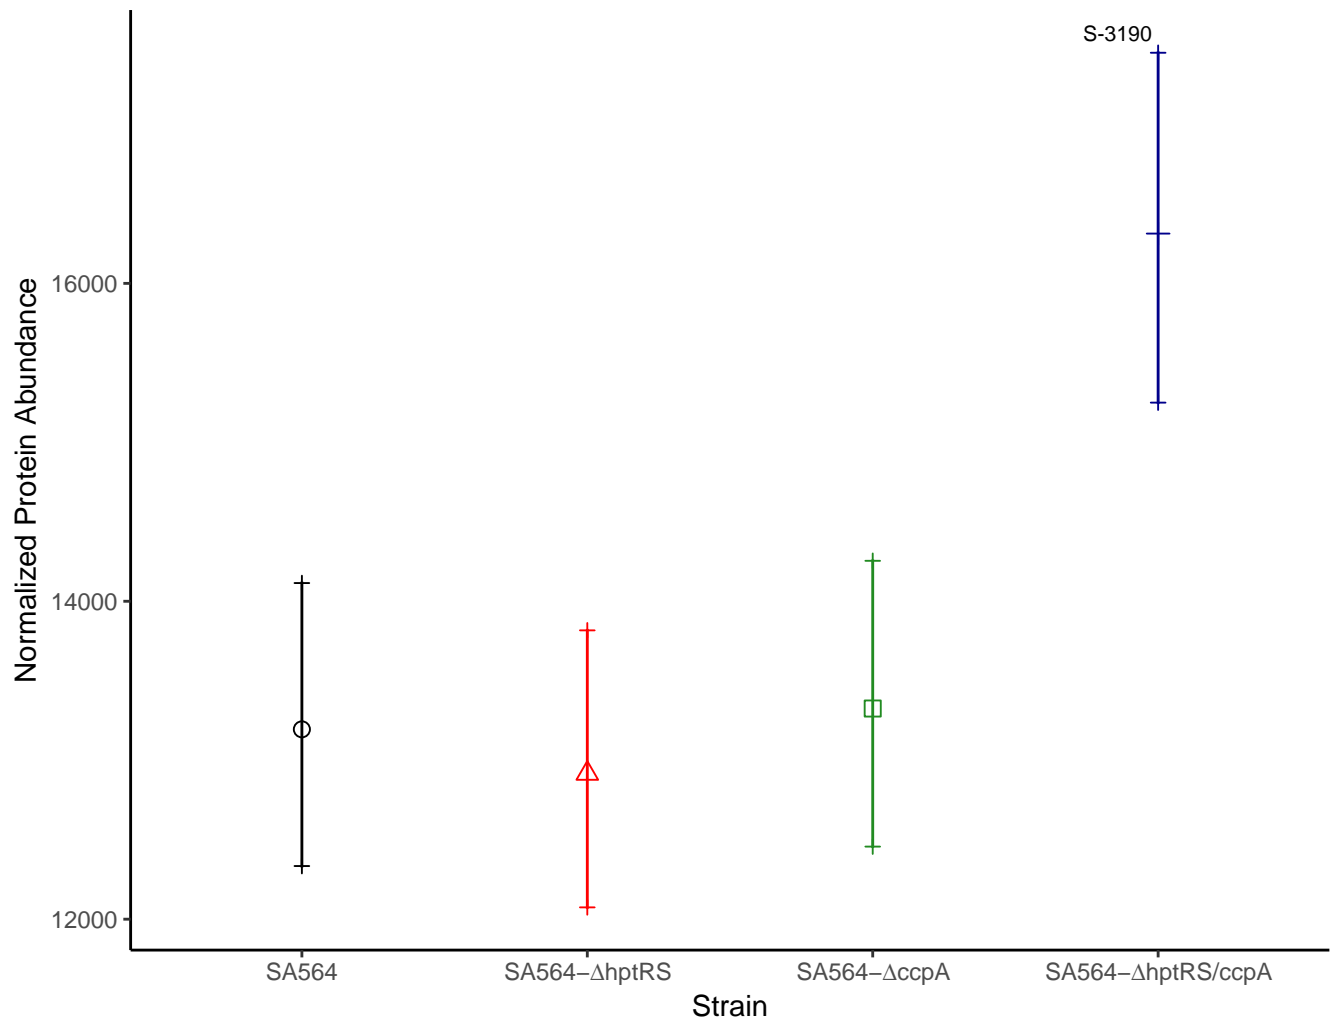

- ⊕ SA564
- △ SA564- $\Delta$ hptRS
- ⊞ SA564- $\Delta$ ccpA
- + SA564- $\Delta$ hptRS/ccpA

# ISPE\_STAAM

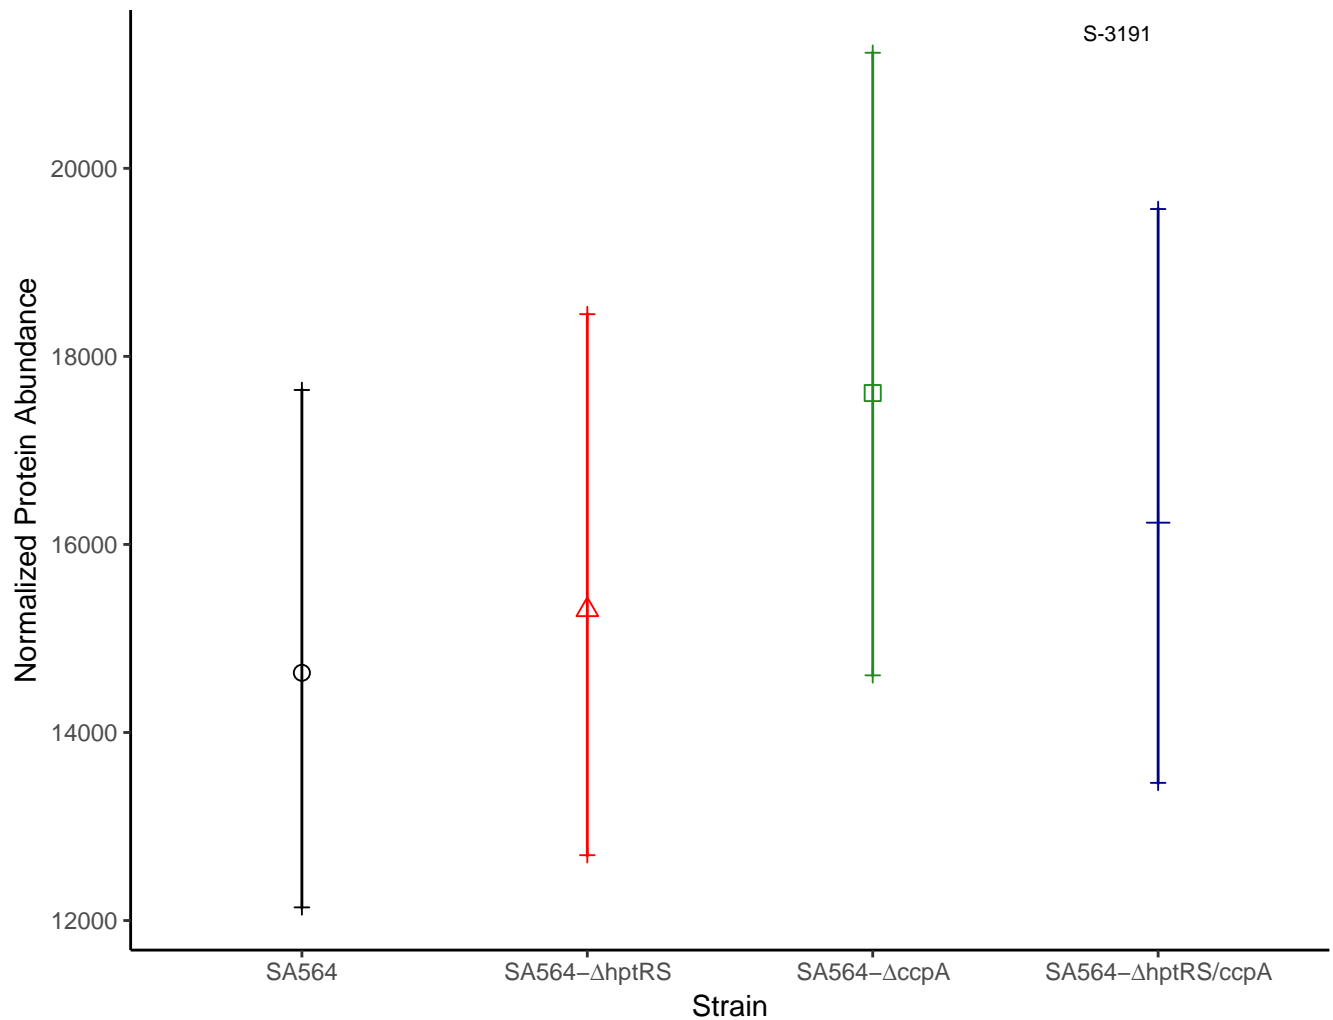

- ⊕ SA564
- △ SA564- $\Delta$ hptRS
- ⊞ SA564- $\Delta$ ccpA
- + SA564- $\Delta$ hptRS/ccpA

# KAD\_STAAM

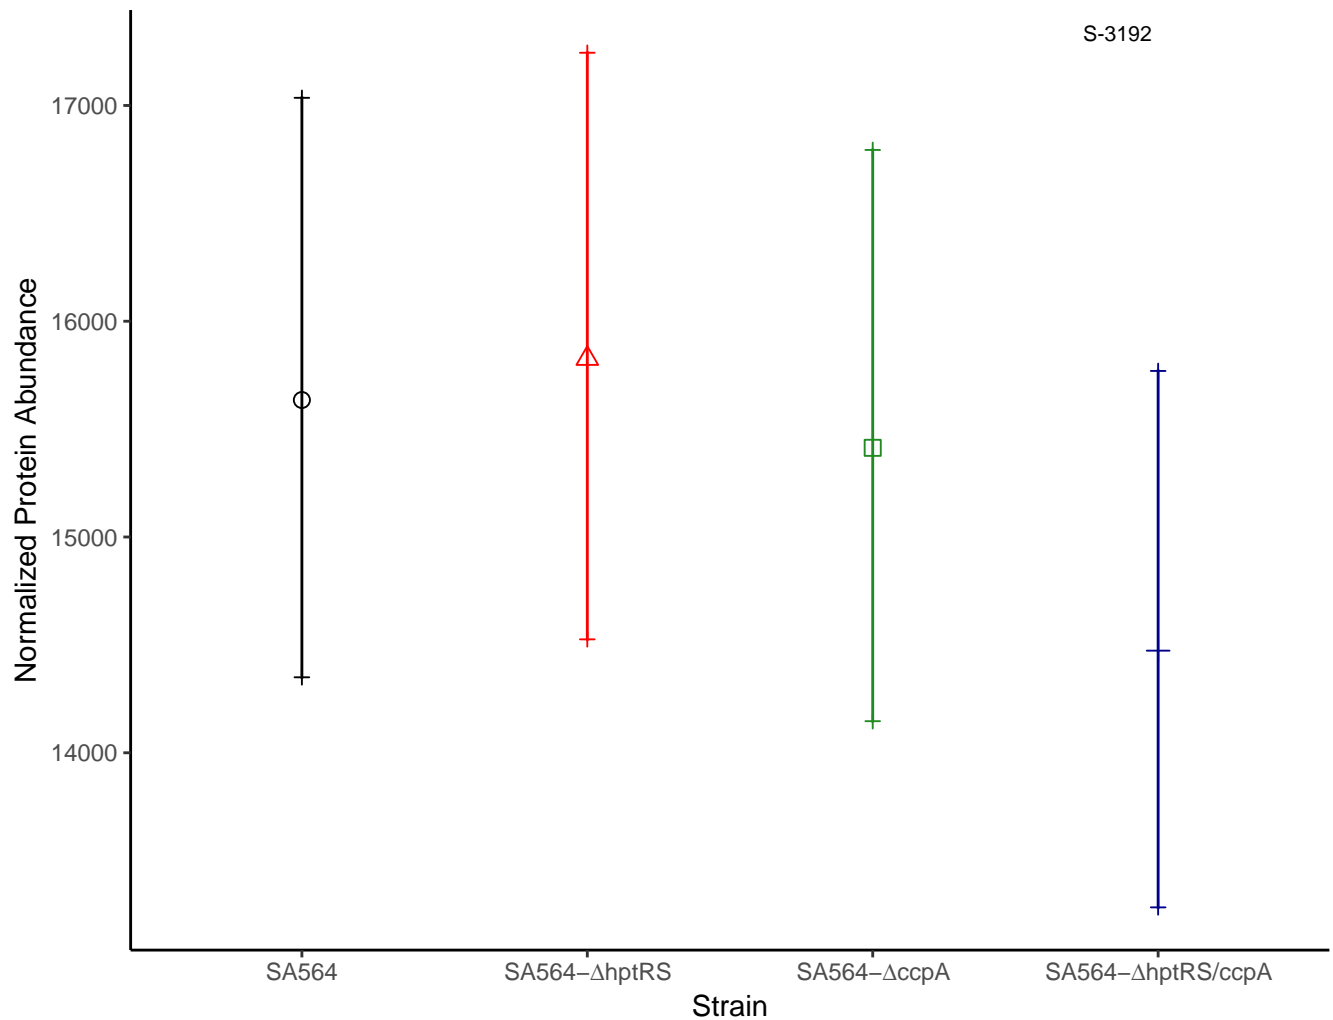

- ⊕ SA564
- △ SA564- $\Delta$ hptRS
- ⊞ SA564- $\Delta$ ccpA
- + SA564- $\Delta$ hptRS/ccpA



# KCY\_STAAM

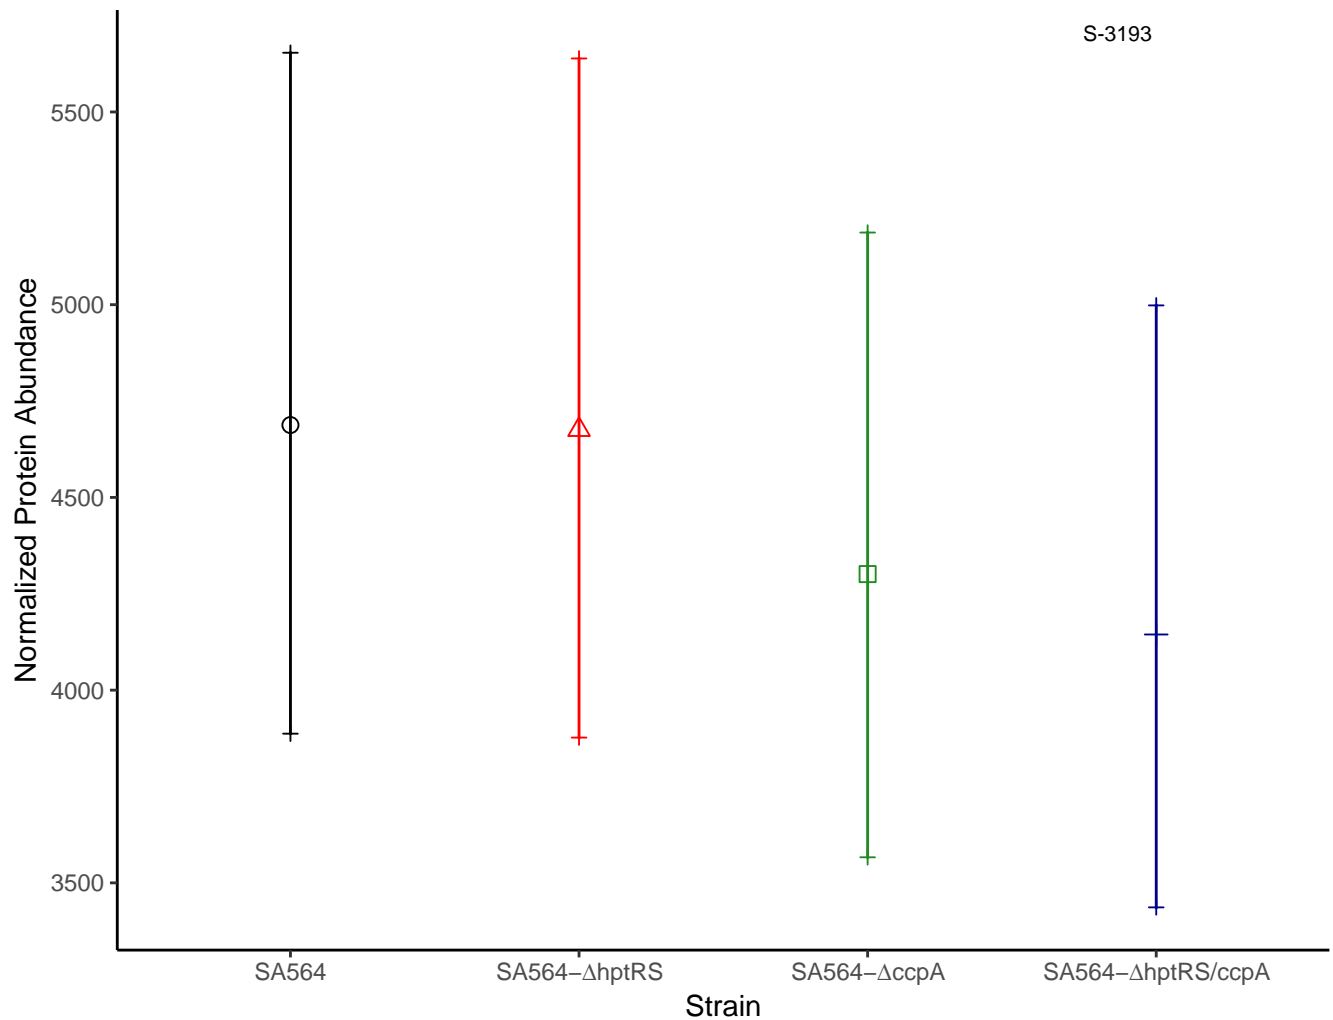

- ⊕ SA564
- △ SA564- $\Delta$ hptRS
- ⊞ SA564- $\Delta$ ccpA
- ⊕ SA564- $\Delta$ hptRS/ccpA

# KITH\_STAAM

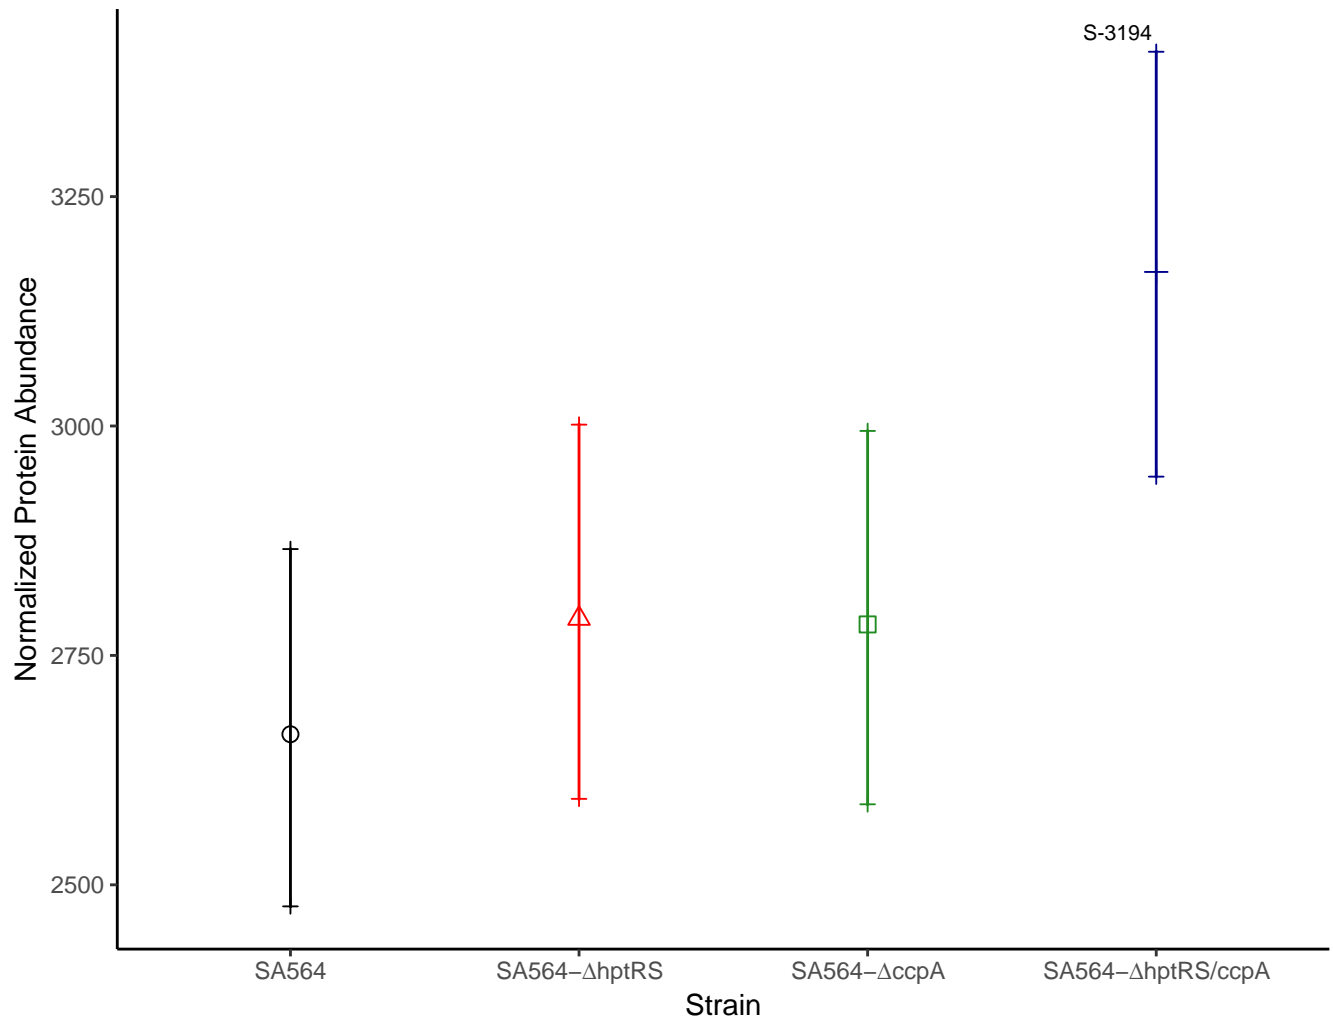

- ⊕ SA564
- △ SA564- $\Delta$ *hptRS*
- ⊞ SA564- $\Delta$ *ccpA*
- + SA564- $\Delta$ *hptRS/ccpA*

# KPRS\_STAAM

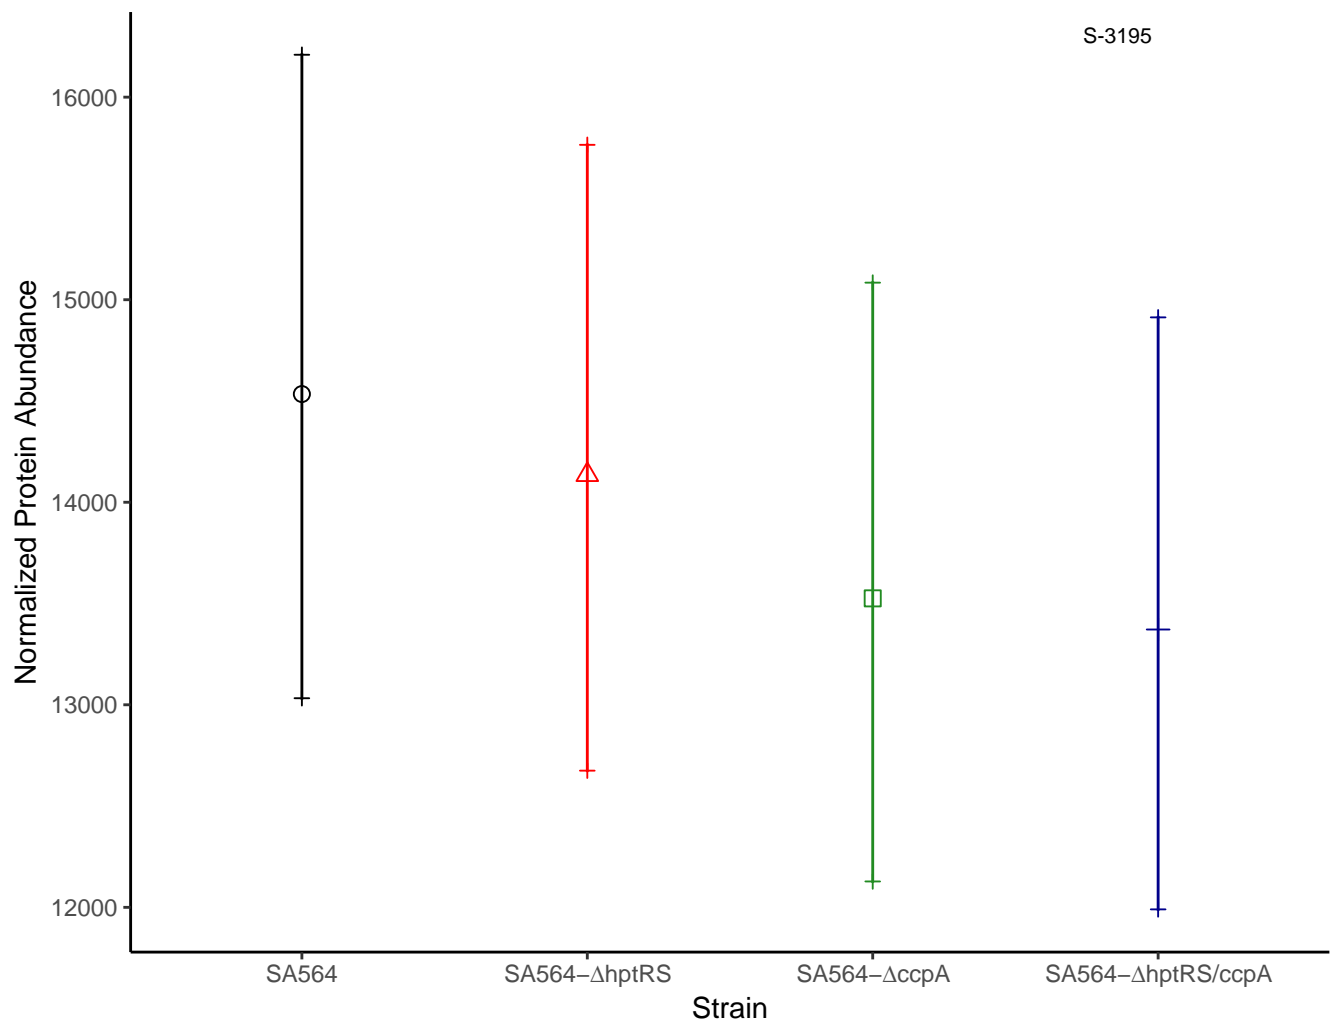

- ⊕ SA564
- △ SA564- $\Delta$ hptRS
- ⊞ SA564- $\Delta$ ccpA
- + SA564- $\Delta$ hptRS/ccpA

# KPYK\_STAAM

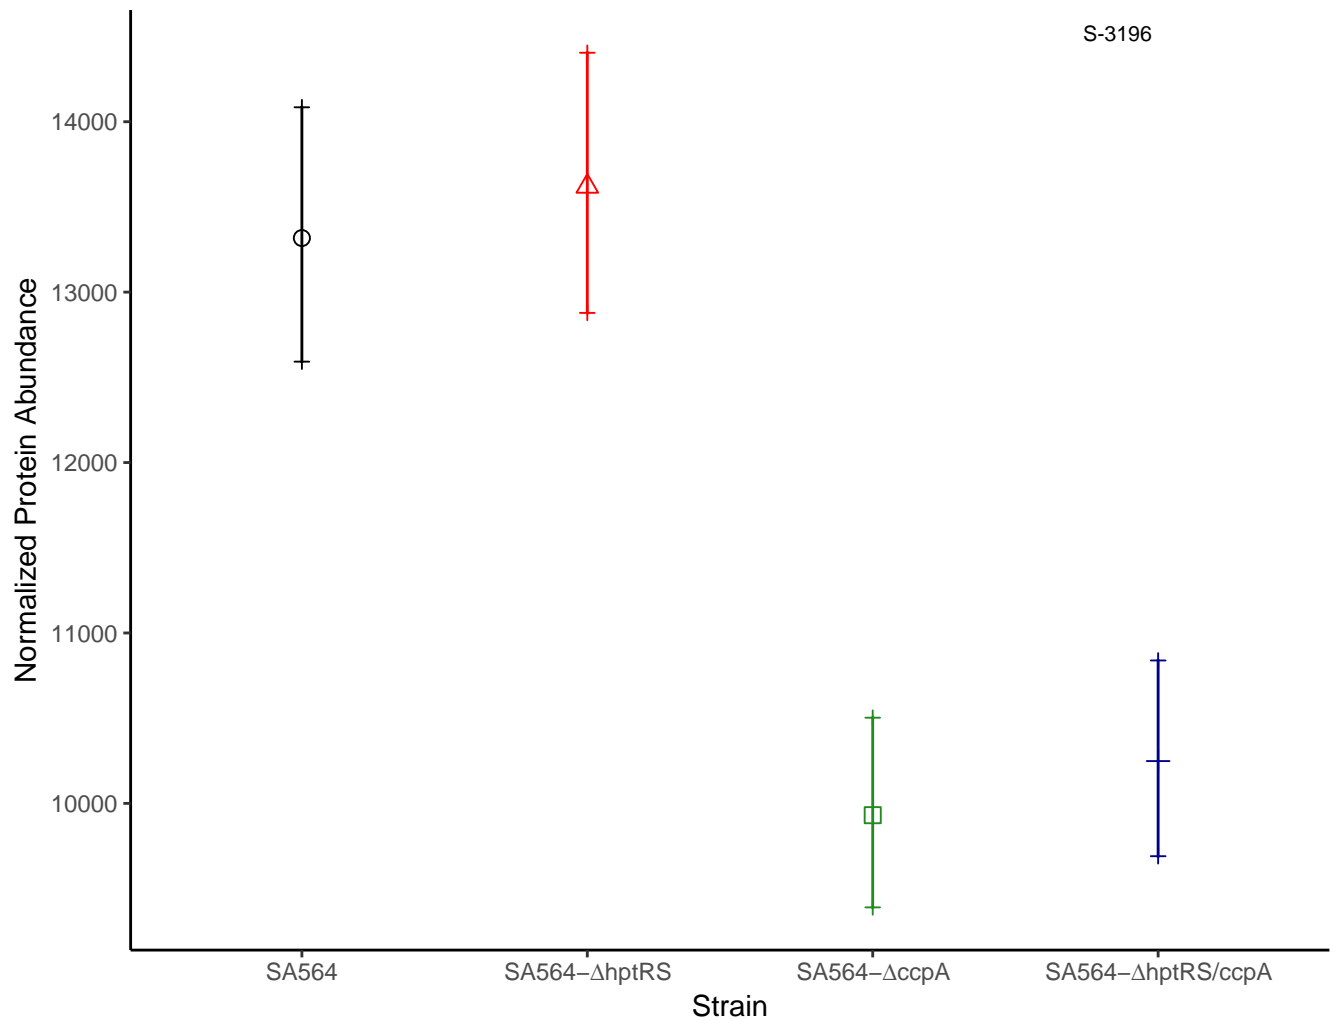

- ⊕ SA564
- △ SA564- $\Delta$ hptRS
- ⊞ SA564- $\Delta$ ccpA
- + SA564- $\Delta$ hptRS/ccpA

# KTHY\_STAAM

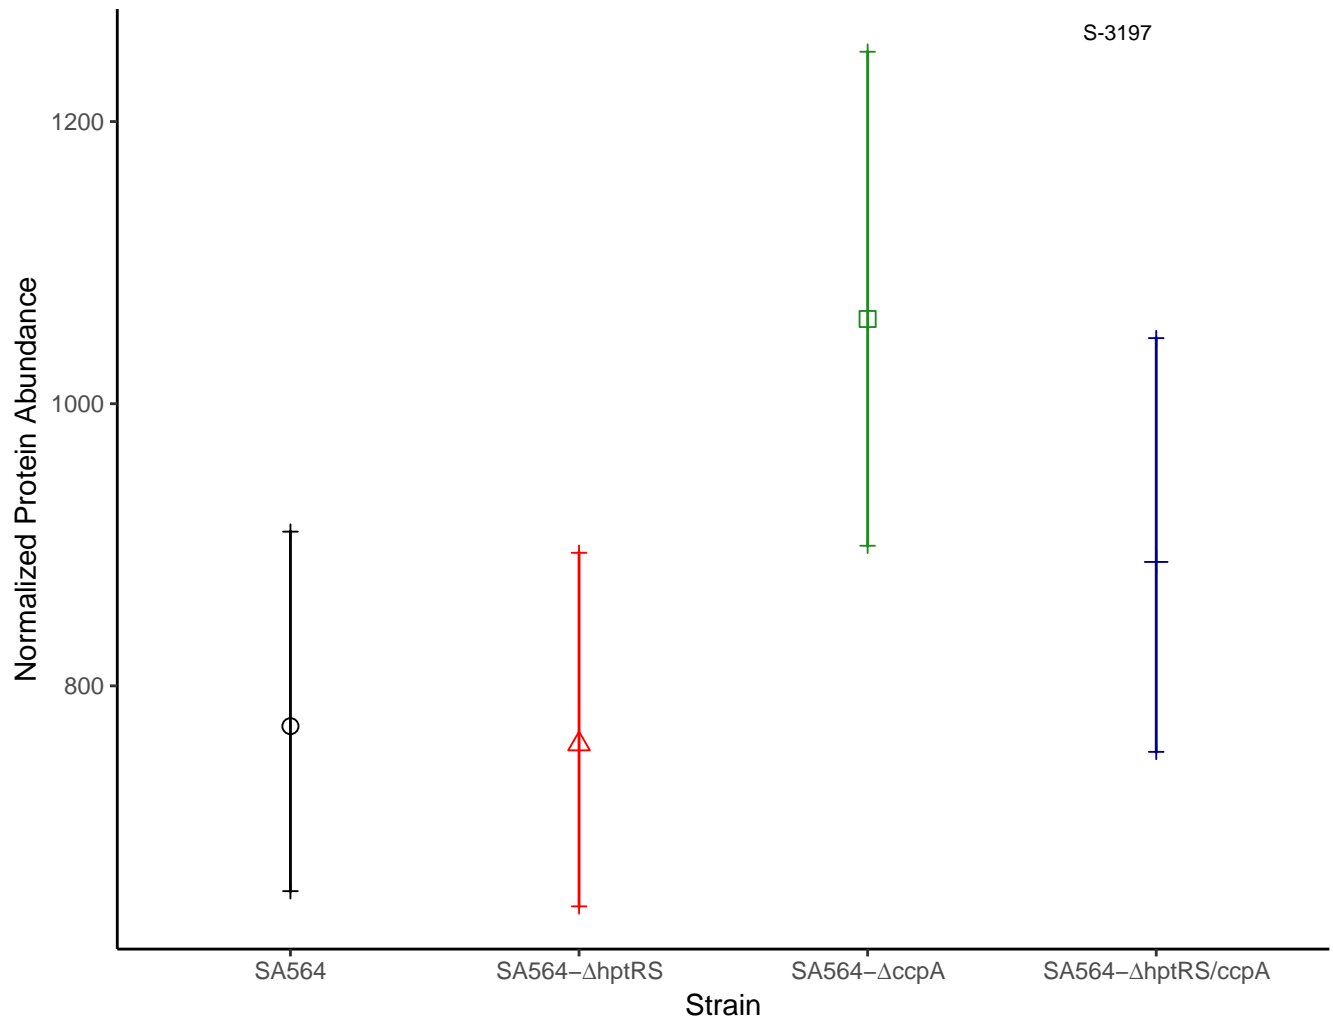

- ⊕ SA564
- △ SA564- $\Delta$ *hptRS*
- ⊞ SA564- $\Delta$ *ccpA*
- + SA564- $\Delta$ *hptRS/ccpA*

# LACA\_STAAM

S-3198

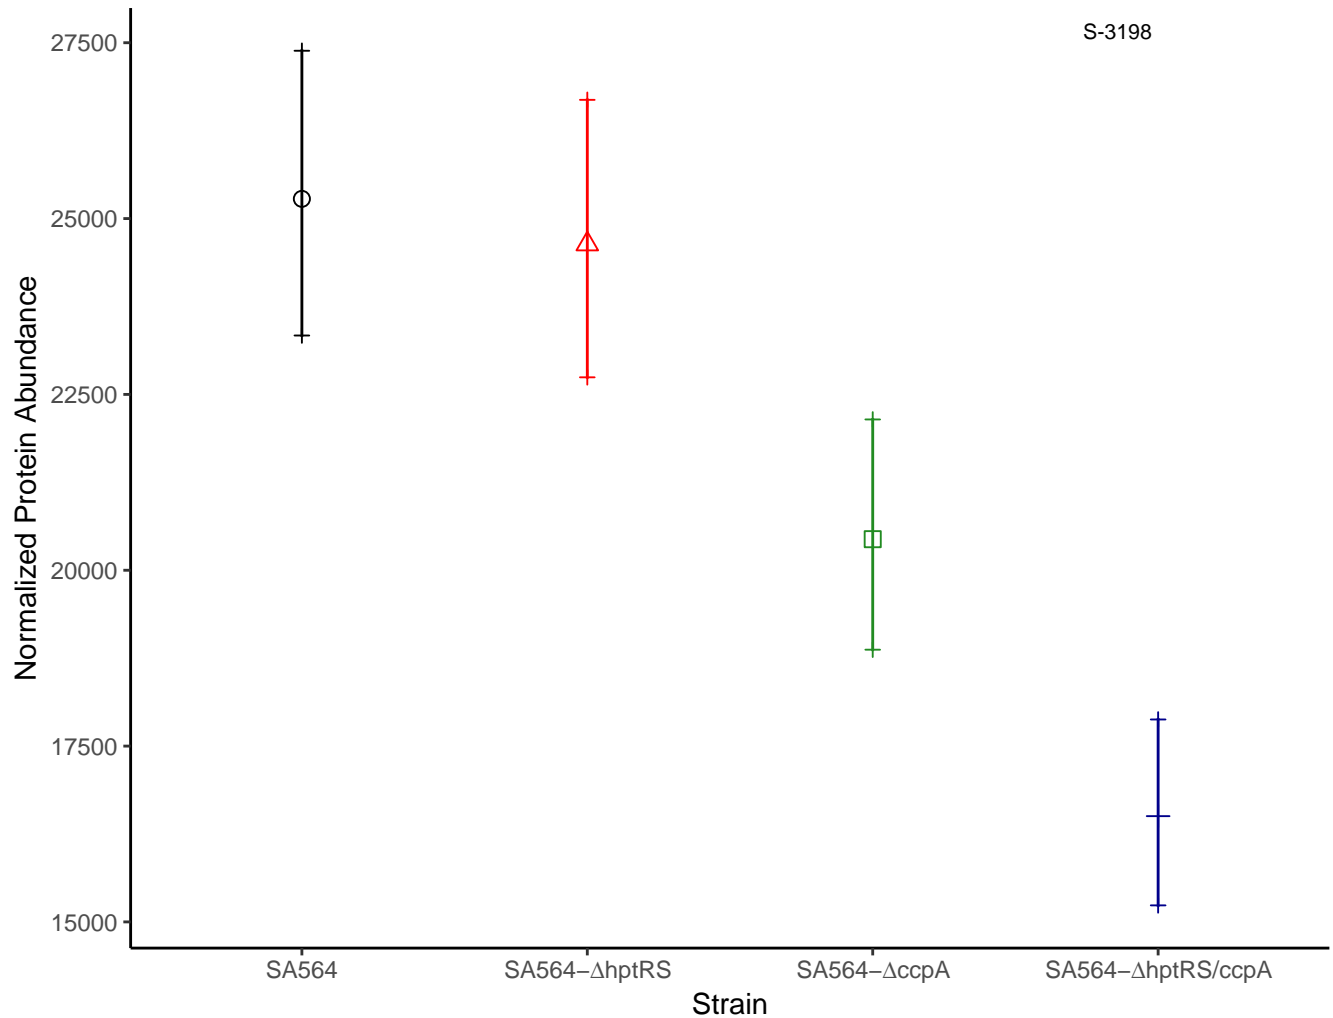

- ⊕ SA564
- △ SA564- $\Delta$ hptRS
- ⊞ SA564- $\Delta$ ccpA
- + SA564- $\Delta$ hptRS/ccpA

# LDH1\_STAAM

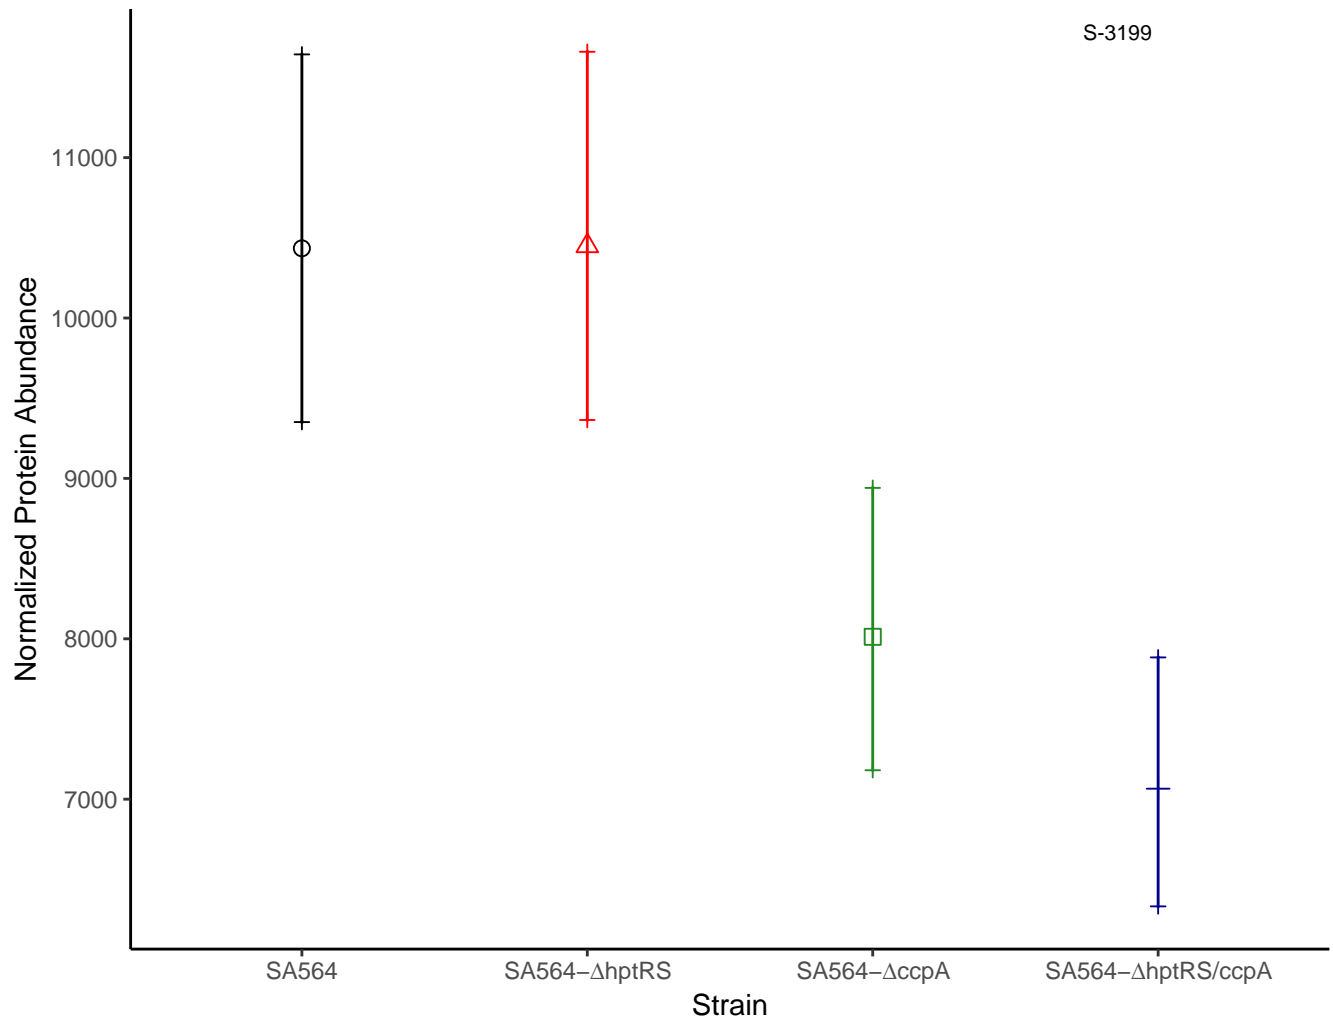

- ⊕ SA564
- △ SA564- $\Delta$ hptRS
- ⊞ SA564- $\Delta$ ccpA
- + SA564- $\Delta$ hptRS/ccpA

# LDH2\_STAAM

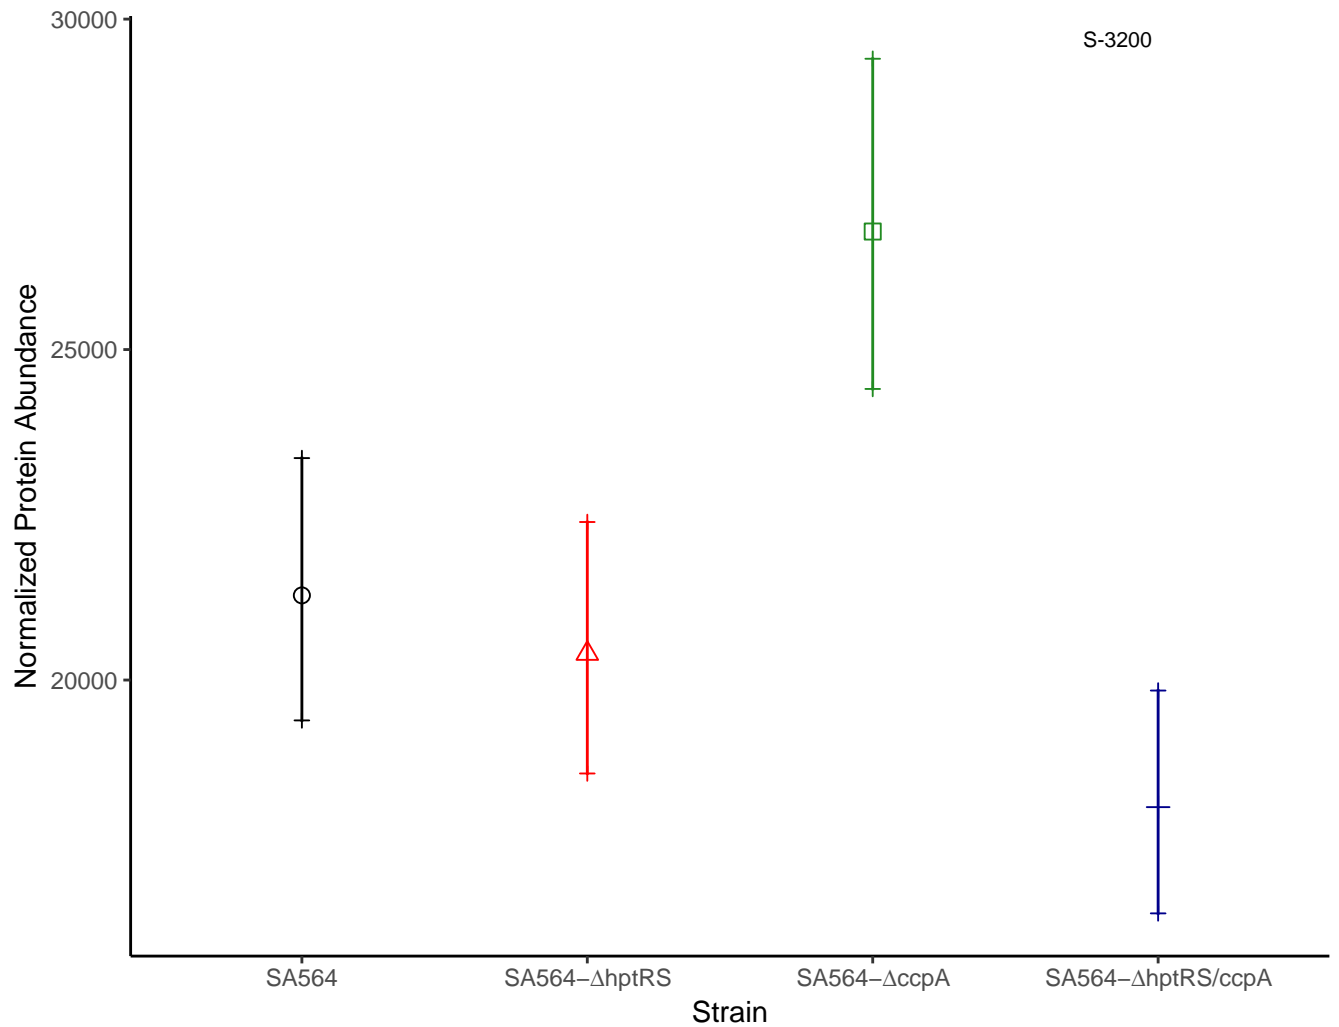

- ⊕ SA564
- △ SA564- $\Delta$ hptRS
- ⊞ SA564- $\Delta$ ccpA
- + SA564- $\Delta$ hptRS/ccpA



# LDHD\_STAAM

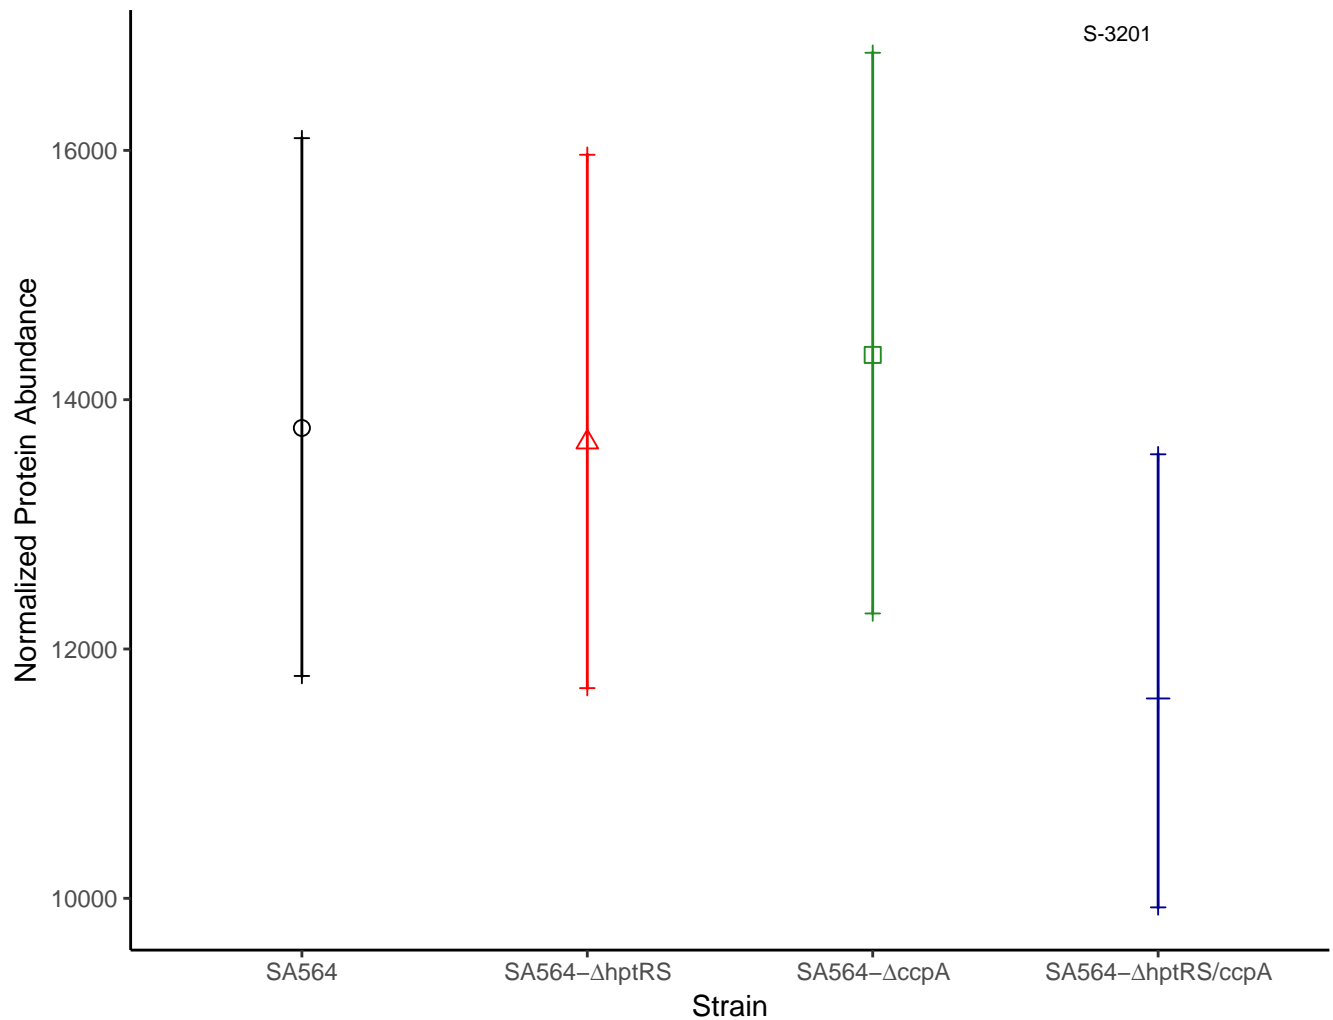

- ⊕ SA564
- △ SA564- $\Delta$ *hptRS*
- ⊞ SA564- $\Delta$ *ccpA*
- + SA564- $\Delta$ *hptRS/ccpA*

# LEP\_STAAM

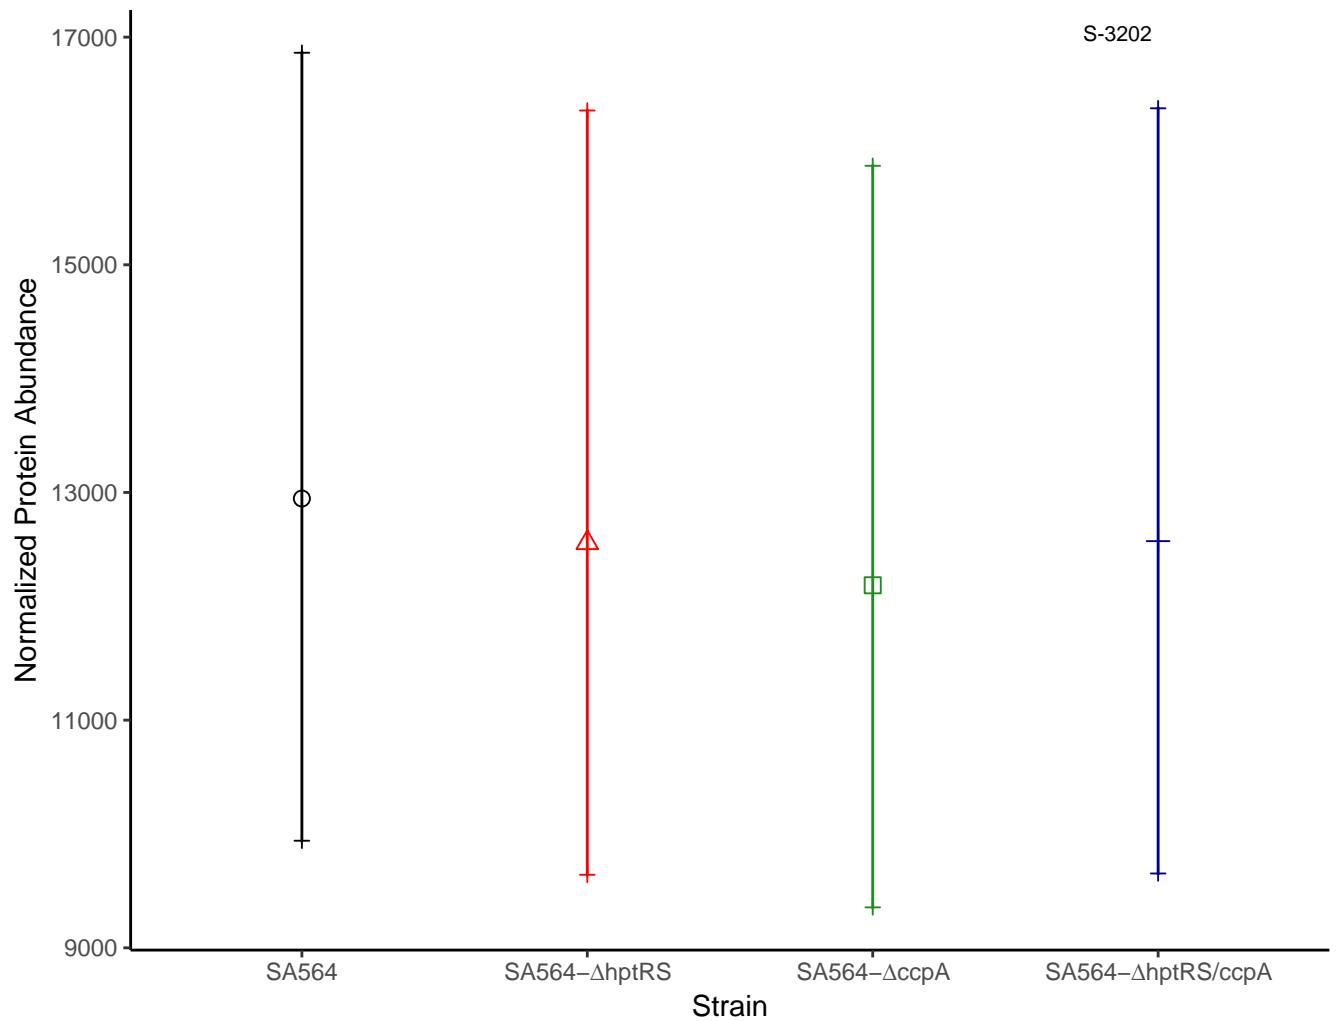

- ⊕ SA564
- △ SA564- $\Delta$ *hptRS*
- ⊞ SA564- $\Delta$ *ccpA*
- + SA564- $\Delta$ *hptRS/ccpA*

# LEPA\_STAAM

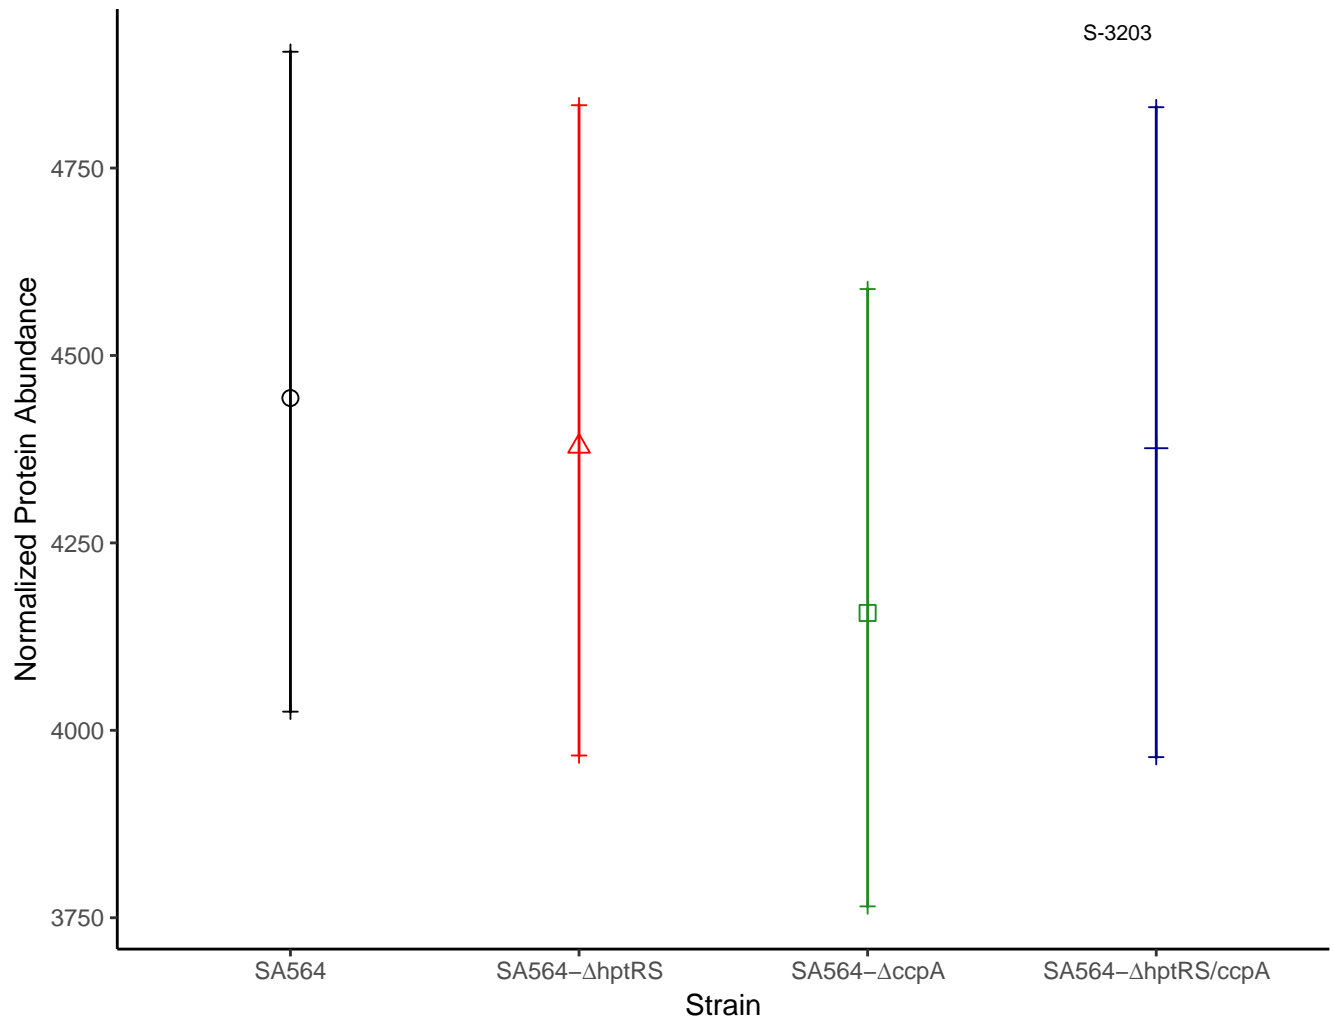

- ⊕ SA564
- △ SA564- $\Delta$ hptRS
- ⊞ SA564- $\Delta$ ccpA
- + SA564- $\Delta$ hptRS/ccpA

# LEU1\_STAAM

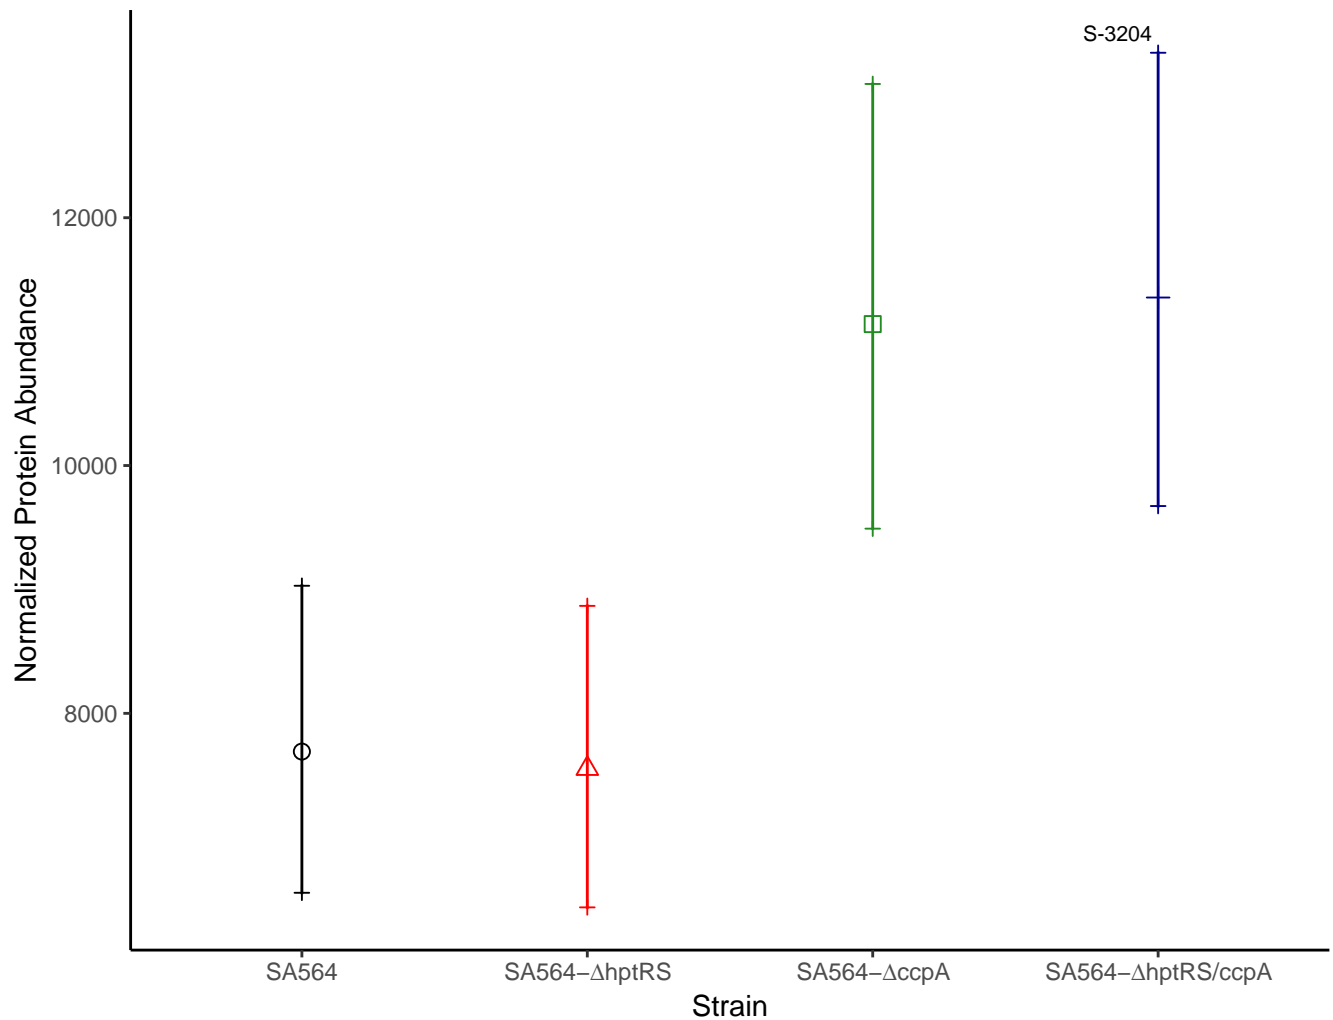

- ⊕ SA564
- △ SA564- $\Delta$ hptRS
- ⊞ SA564- $\Delta$ ccpA
- + SA564- $\Delta$ hptRS/ccpA

# LIPA\_STAAM

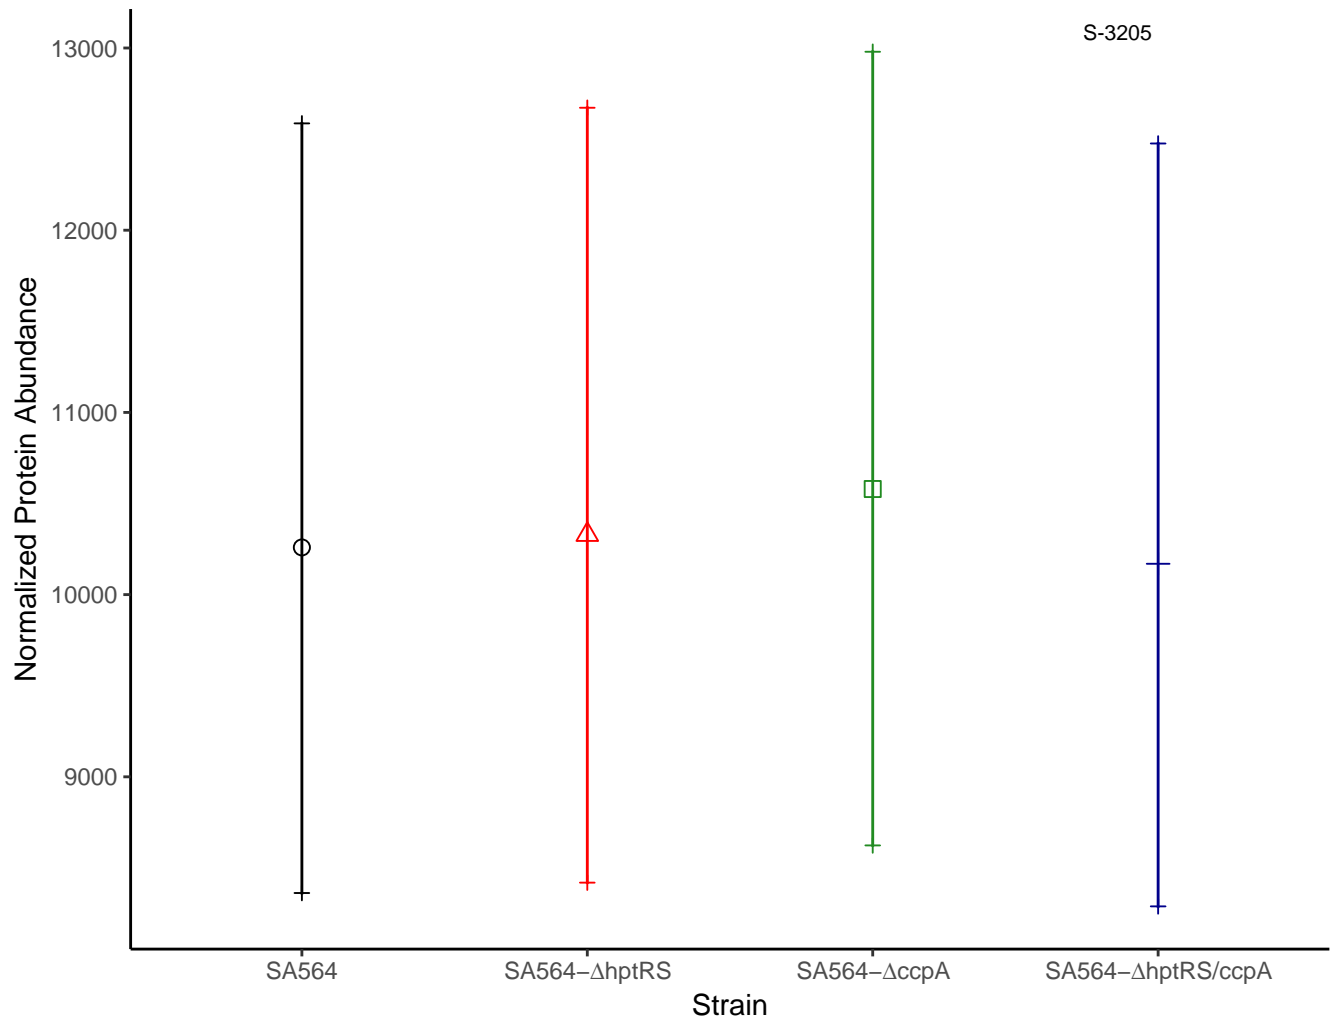

- ⊕ SA564
- △ SA564- $\Delta$ hptRS
- ⊞ SA564- $\Delta$ ccpA
- + SA564- $\Delta$ hptRS/ccpA

# LUXS\_STAAM

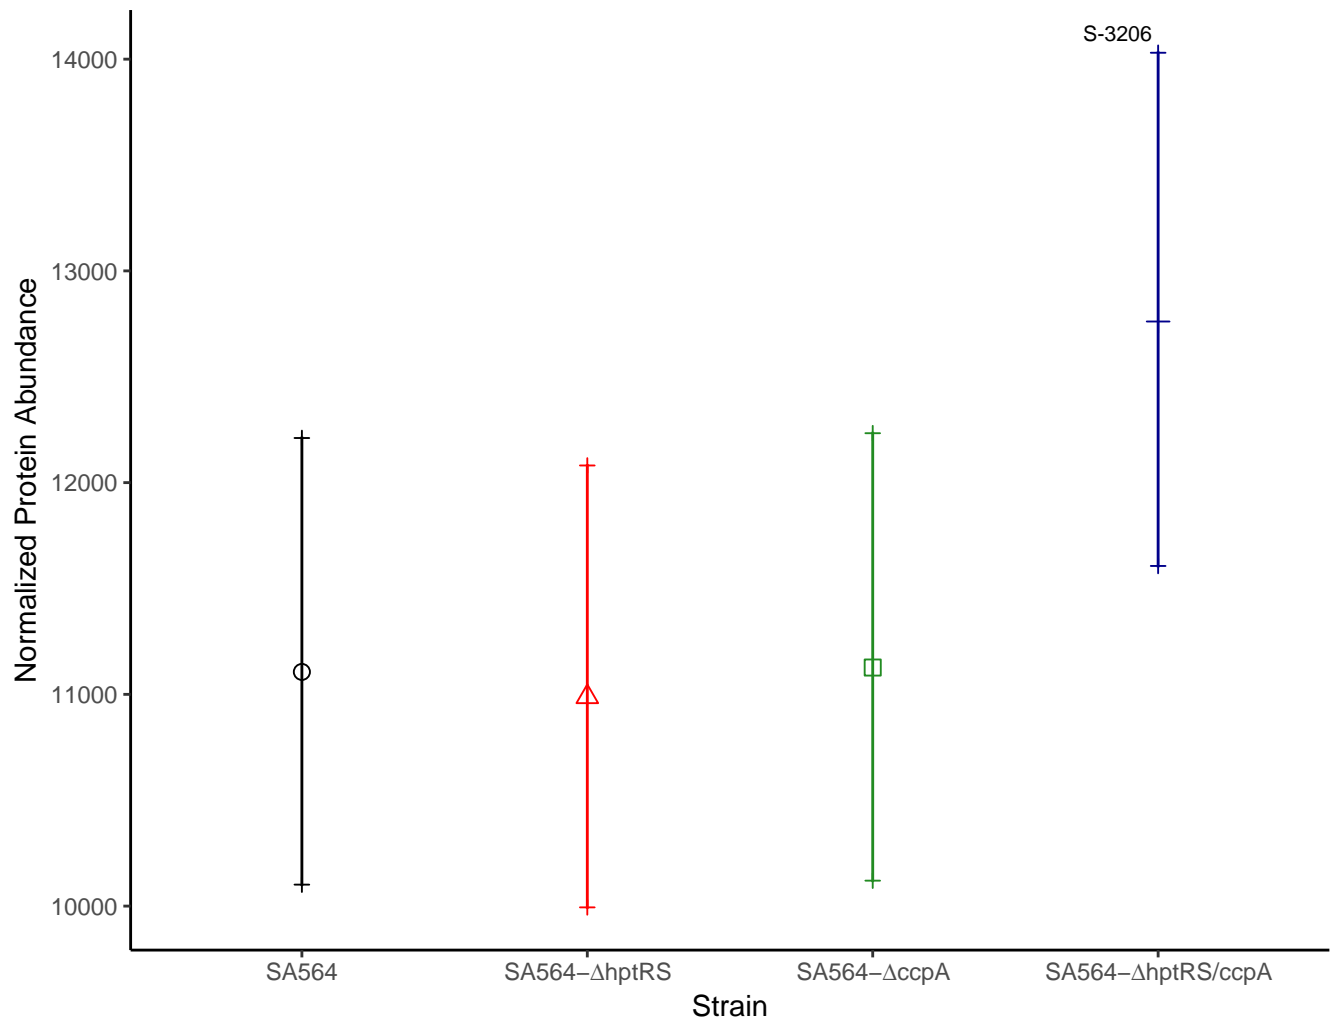

- ⊕ SA564
- △ SA564- $\Delta$ *hptRS*
- ⊞ SA564- $\Delta$ *ccpA*
- + SA564- $\Delta$ *hptRS/ccpA*

# LYTH\_STAAM

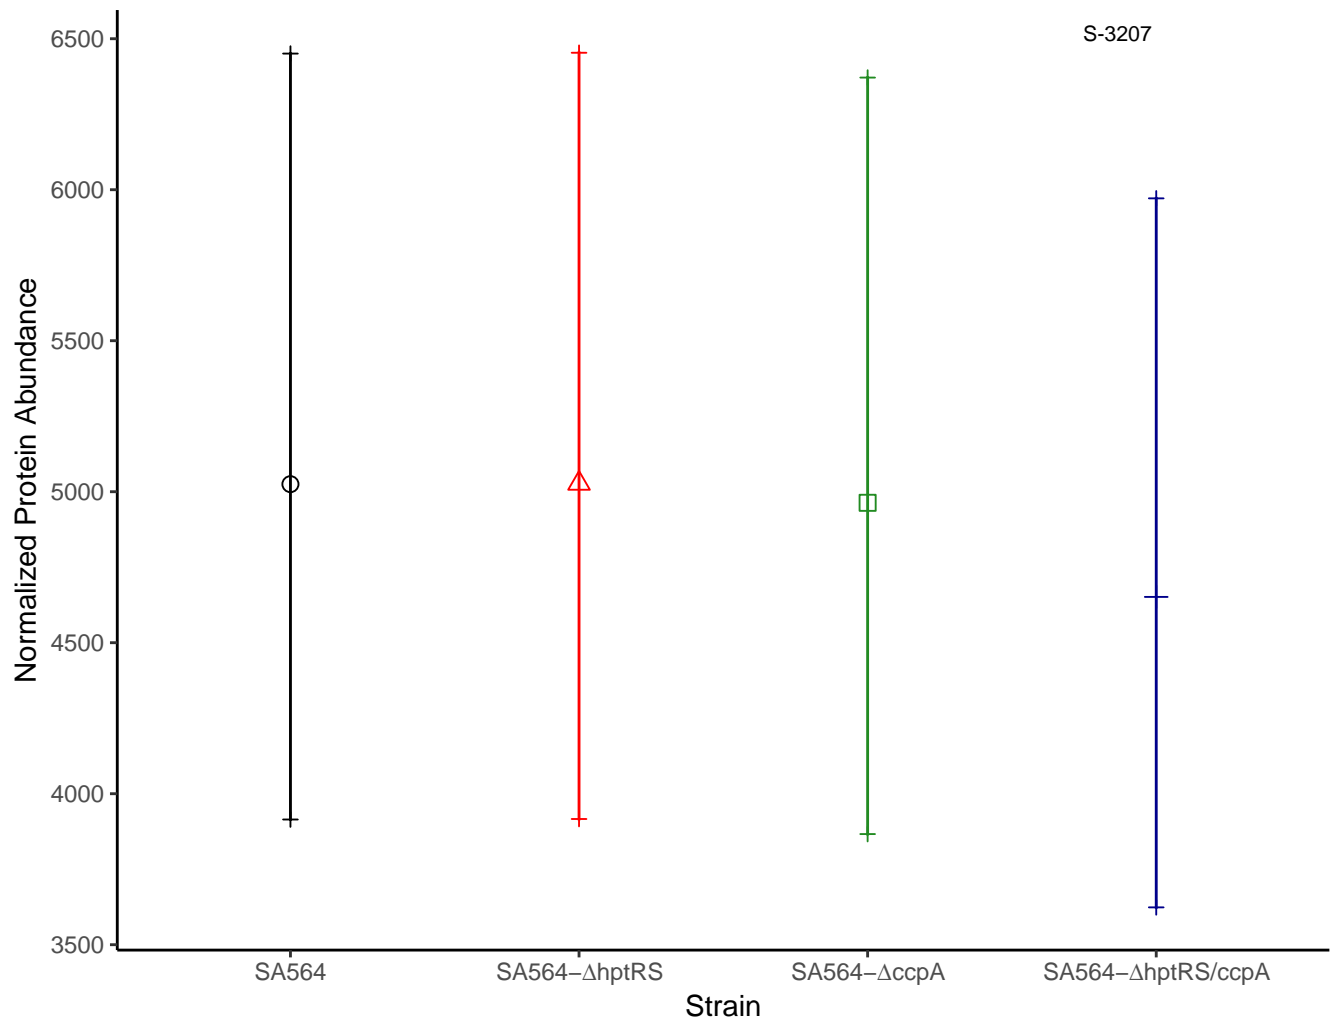

- ⊕ SA564
- △ SA564- $\Delta$ *hptRS*
- ⊞ SA564- $\Delta$ *ccpA*
- + SA564- $\Delta$ *hptRS/ccpA*

# LYTN\_STAAM

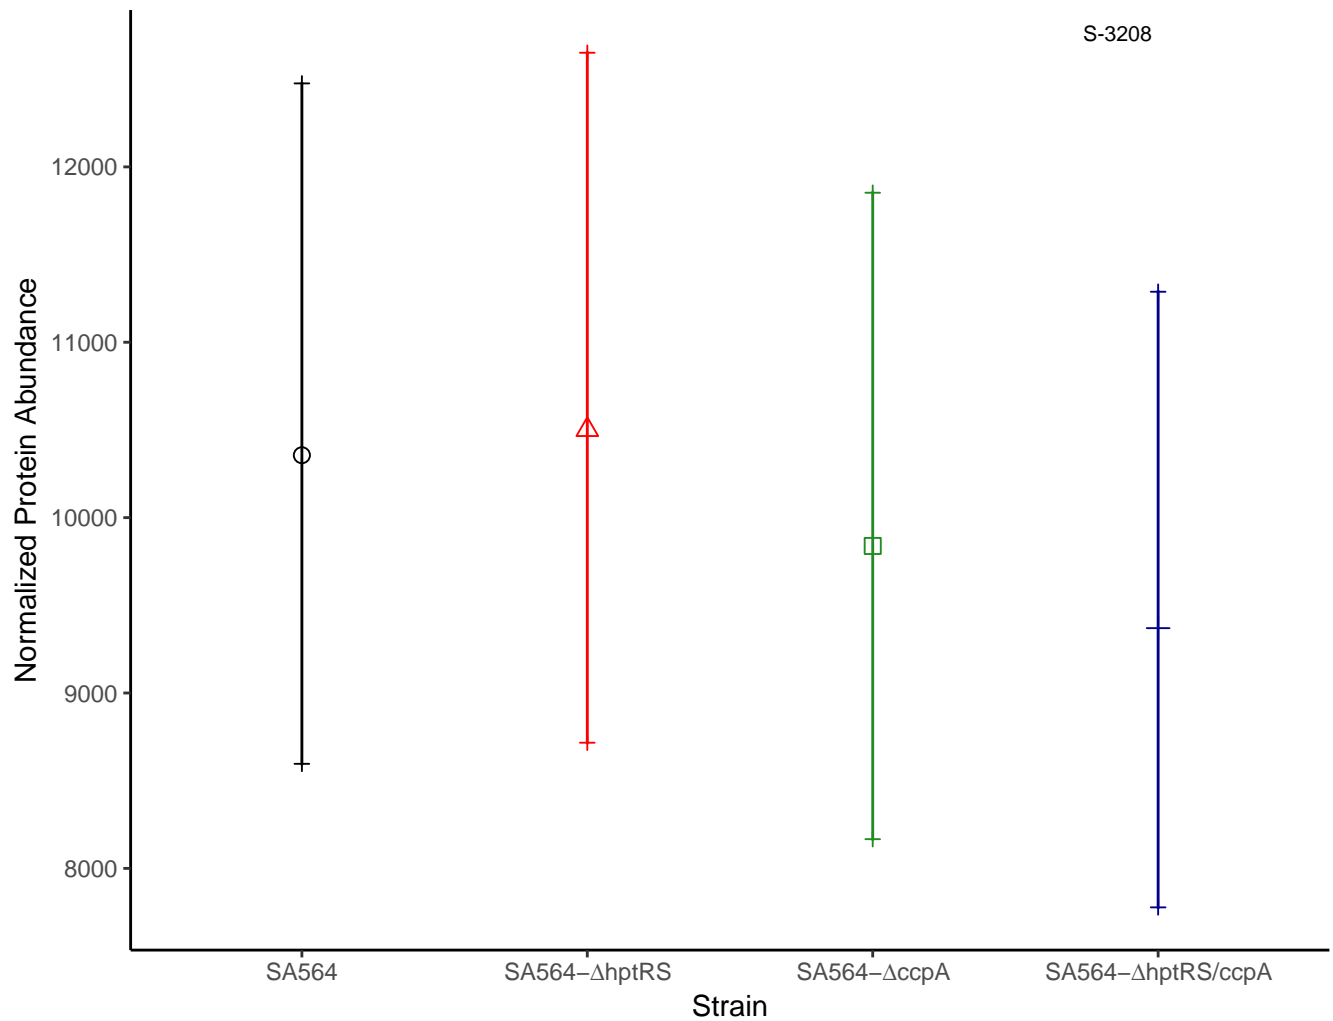

- ⊕ SA564
- △ SA564- $\Delta$ *hptRS*
- ⊞ SA564- $\Delta$ *ccpA*
- + SA564- $\Delta$ *hptRS/ccpA*



# MAP\_STAAM

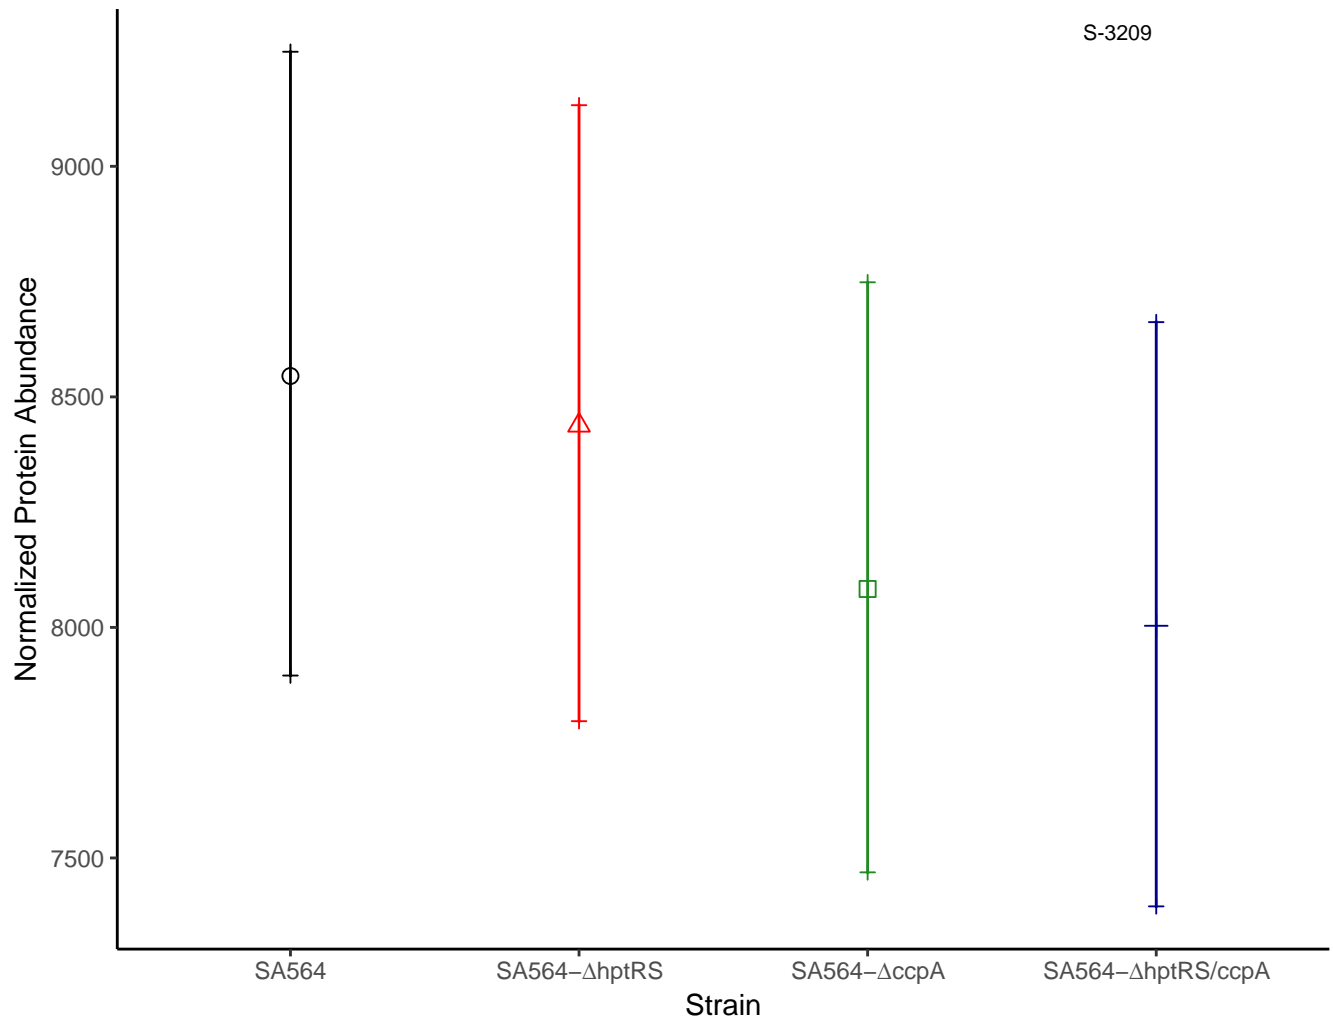

- ⊕ SA564
- △ SA564- $\Delta$ hptRS
- ⊞ SA564- $\Delta$ ccpA
- ⊕ SA564- $\Delta$ hptRS/ccpA

# MAP1\_STAAM

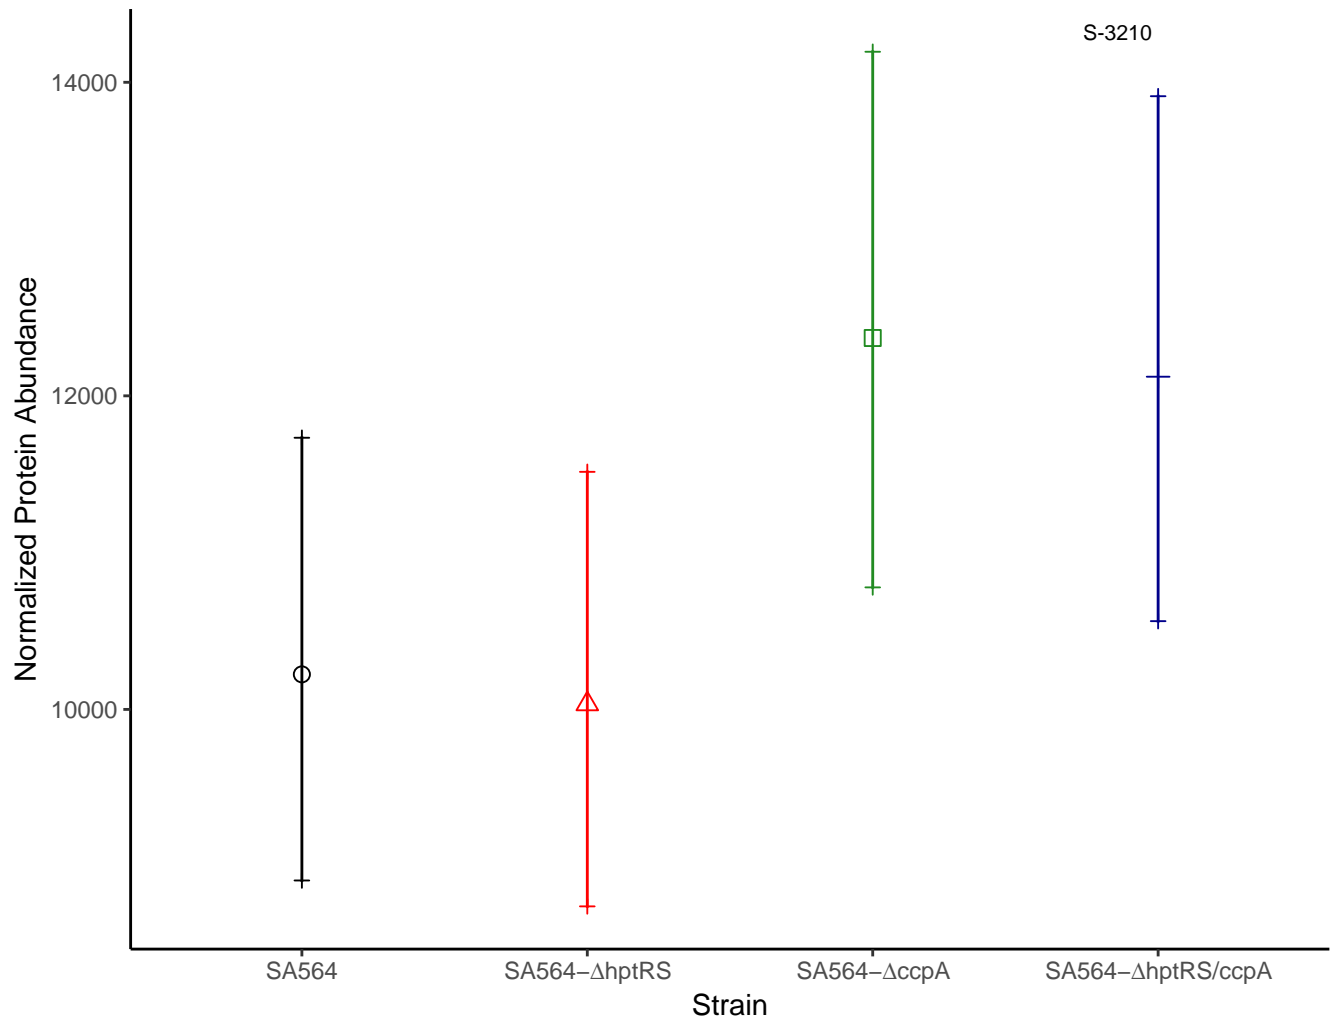

- ⊕ SA564
- △ SA564- $\Delta$ hptRS
- ⊞ SA564- $\Delta$ ccpA
- + SA564- $\Delta$ hptRS/ccpA

# MAZF\_STAAM

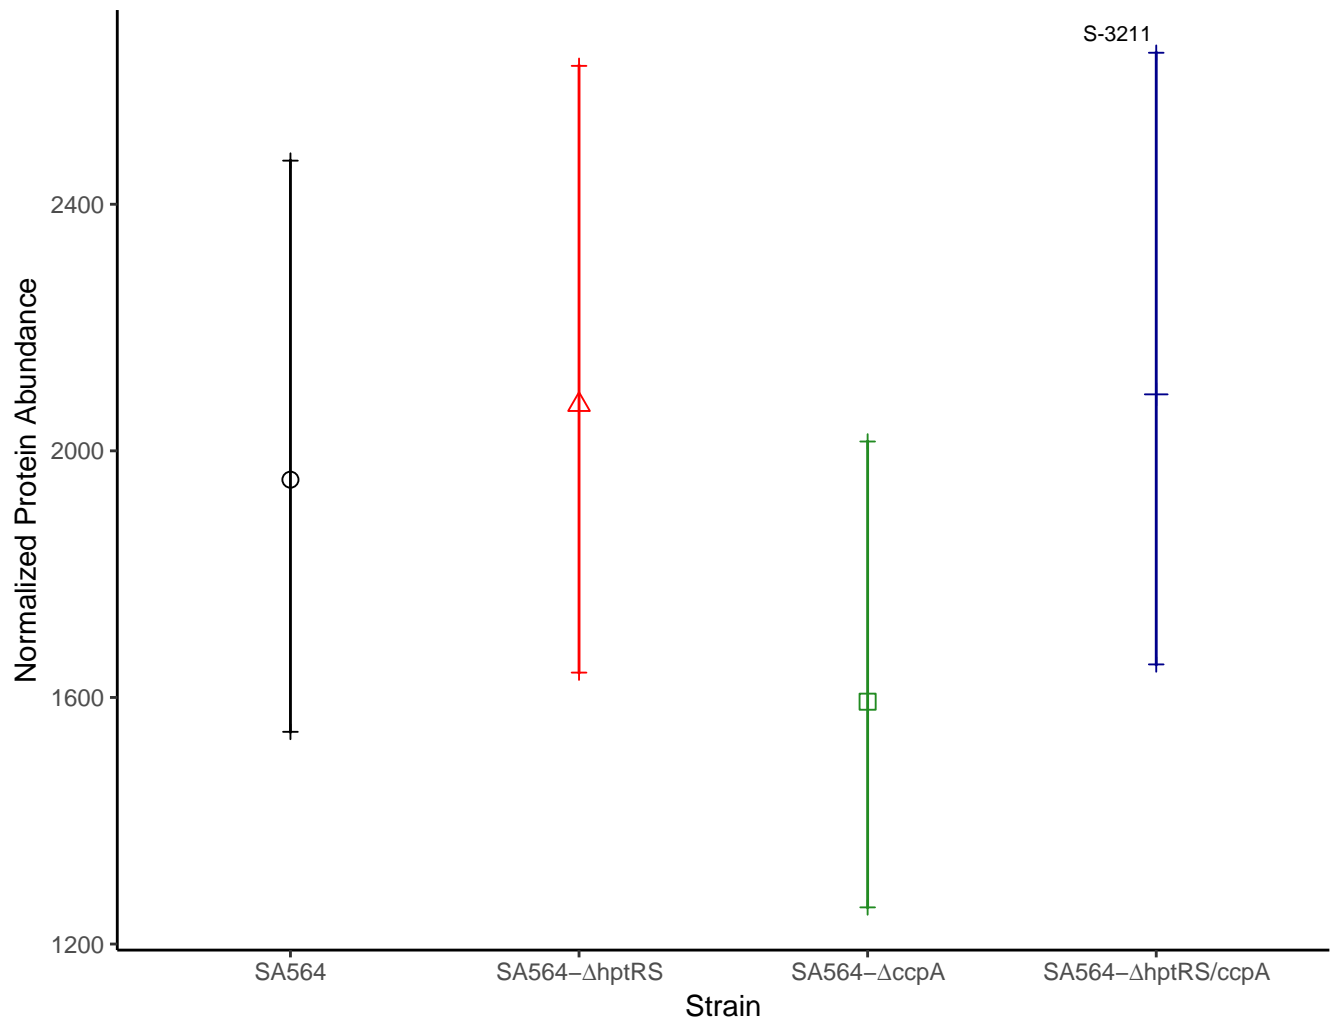

- ⊕ SA564
- △ SA564- $\Delta$ hptRS
- ⊞ SA564- $\Delta$ ccpA
- + SA564- $\Delta$ hptRS/ccpA

S-3211

# MENB\_STAAM

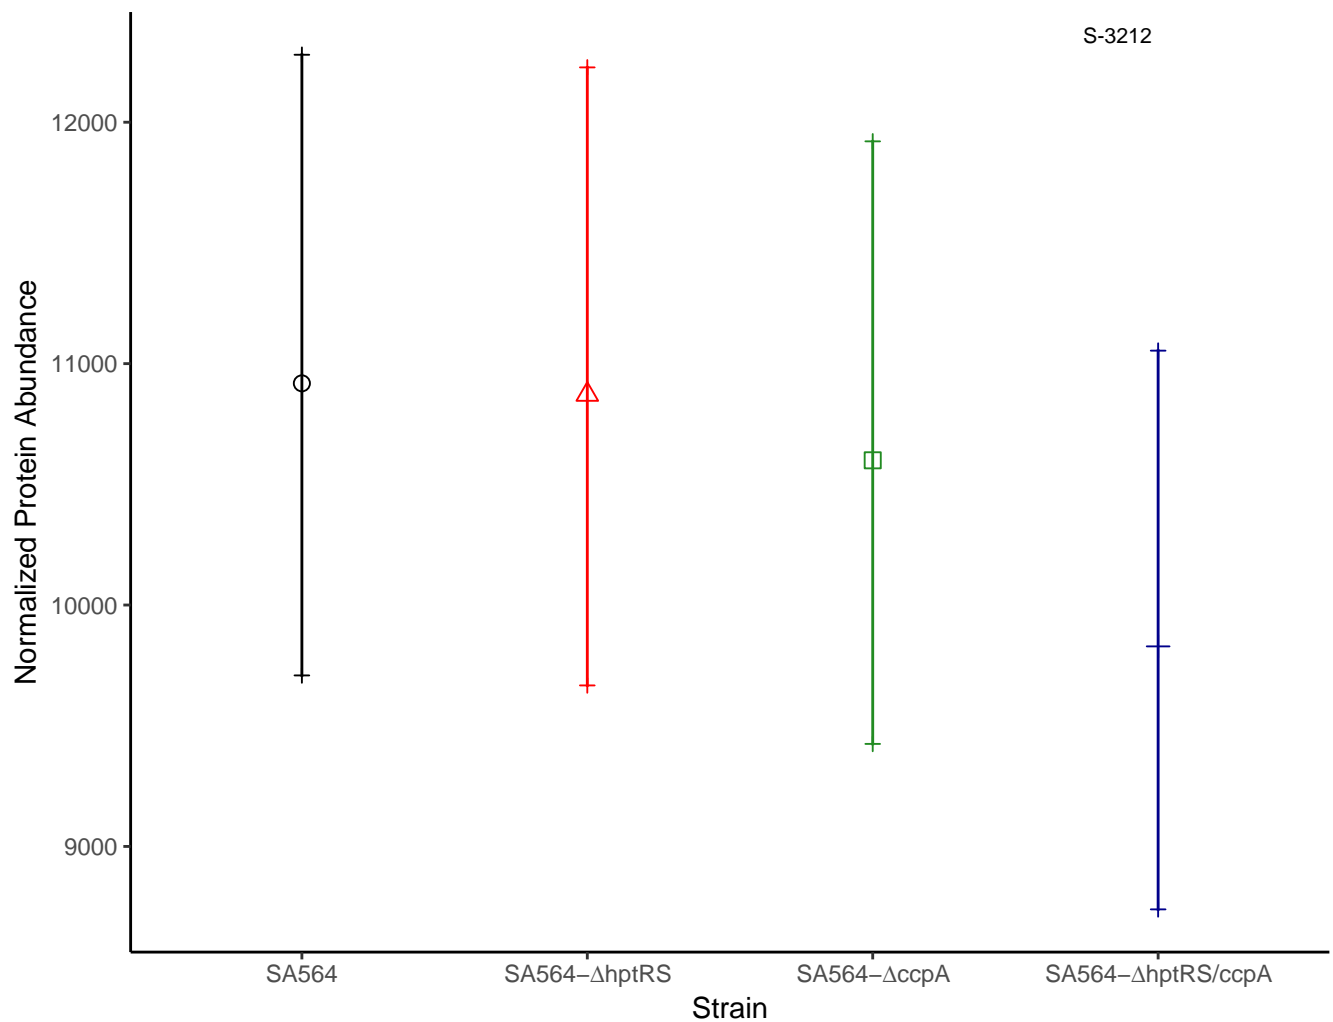

- ⊕ SA564
- △ SA564- $\Delta$ hptRS
- ⊞ SA564- $\Delta$ ccpA
- + SA564- $\Delta$ hptRS/ccpA

# MENG\_STAAM

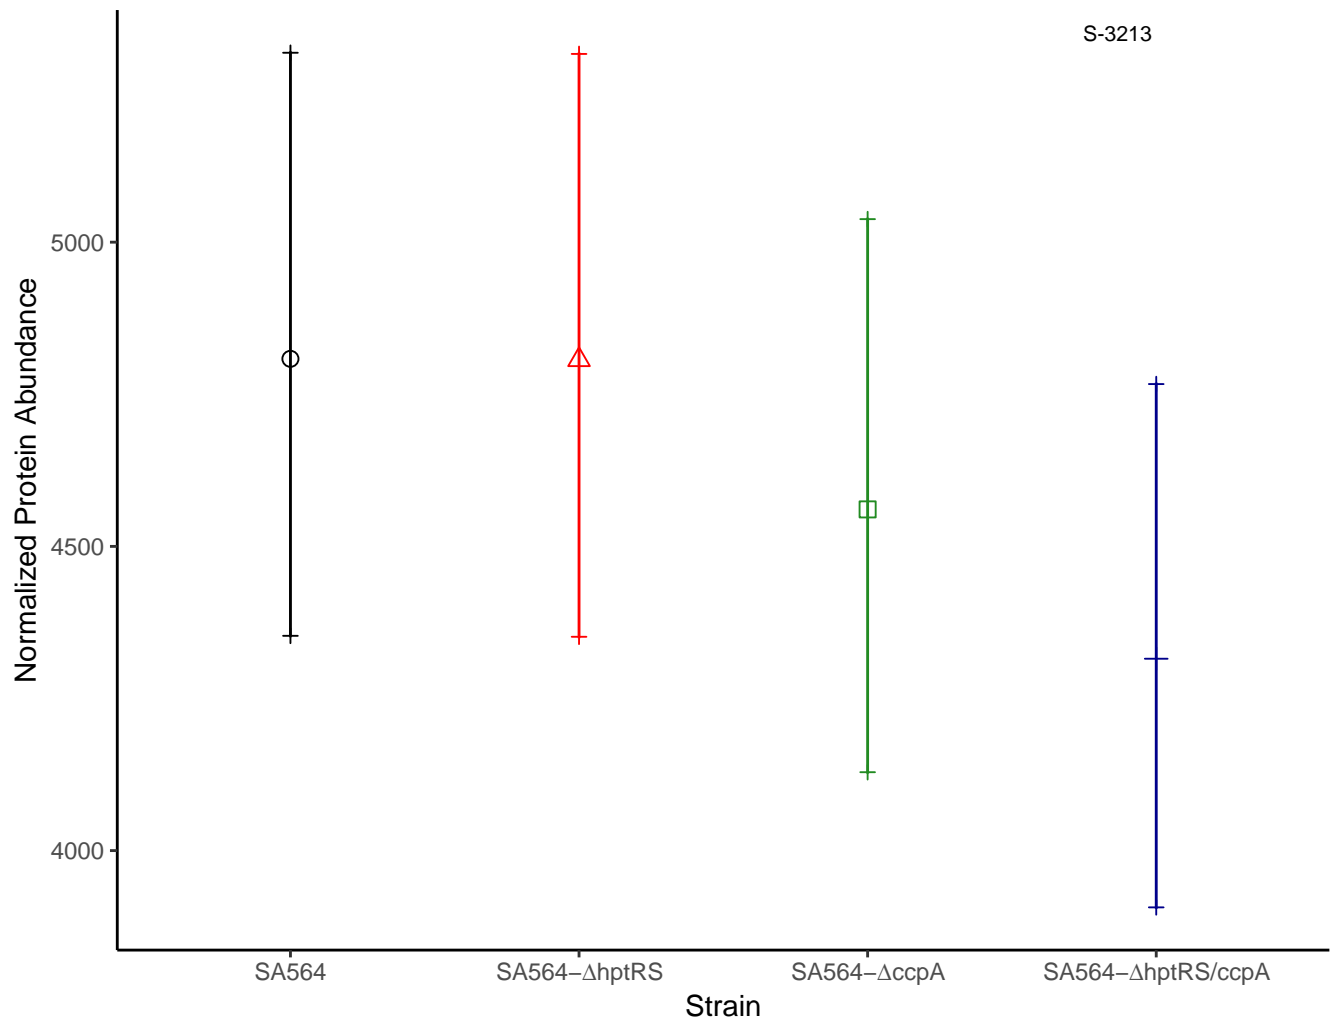

- ⊕ SA564
- △ SA564- $\Delta$ *hptRS*
- ⊞ SA564- $\Delta$ *ccpA*
- + SA564- $\Delta$ *hptRS/ccpA*

# METK\_STAAM

S-3214

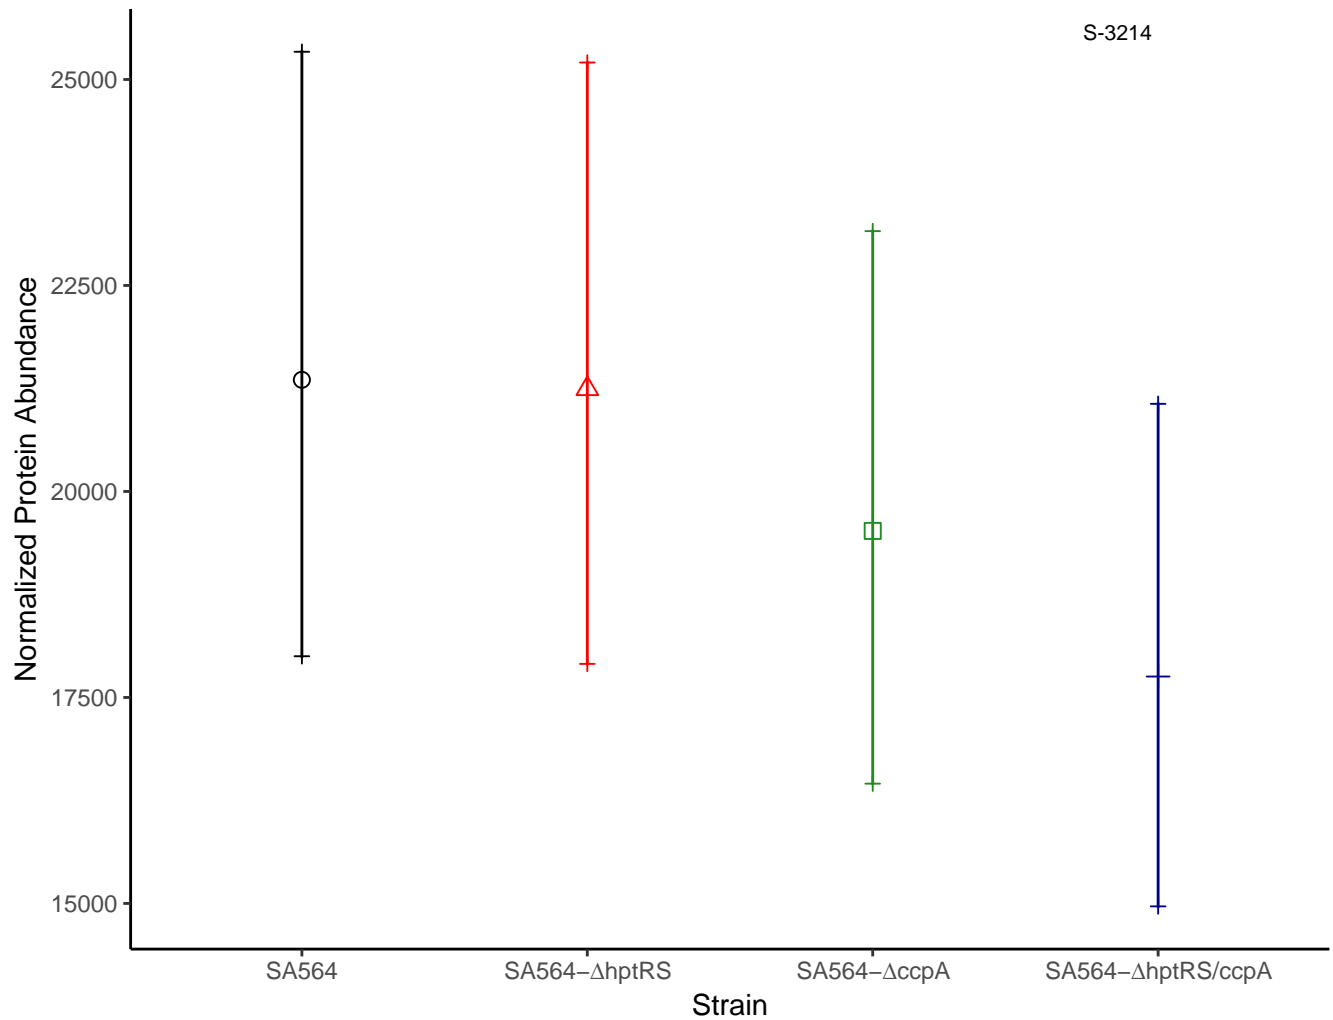

- ⊕ SA564
- △ SA564- $\Delta$ hptRS
- ⊞ SA564- $\Delta$ ccpA
- + SA564- $\Delta$ hptRS/ccpA

# METN2\_STAAM

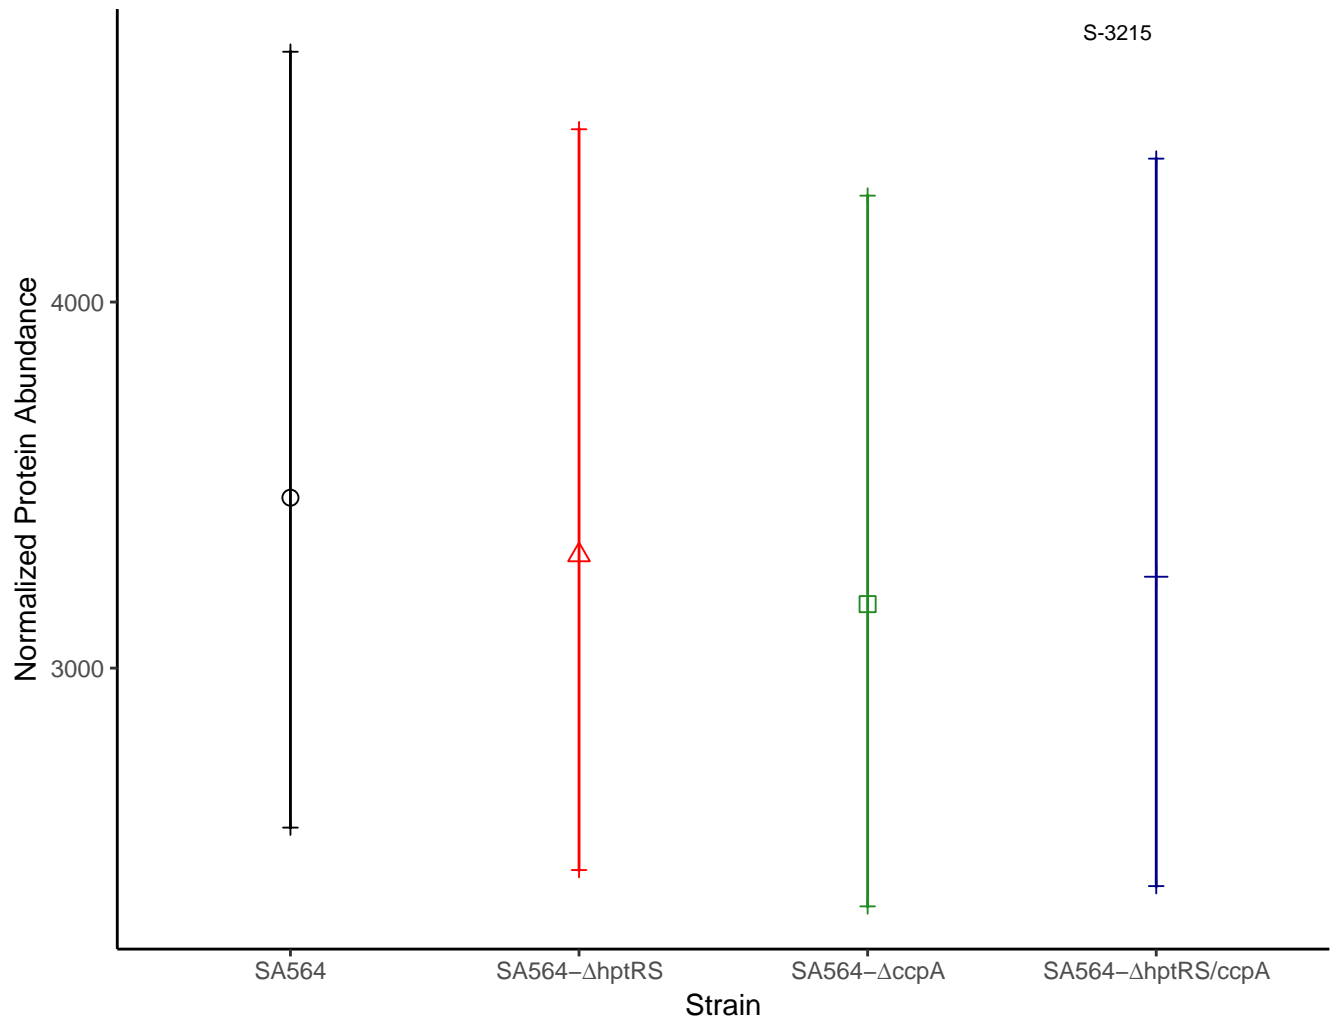

- ⊕ SA564
- △ SA564- $\Delta$ *hptRS*
- ⊞ SA564- $\Delta$ *ccpA*
- + SA564- $\Delta$ *hptRS/ccpA*

# MGRA\_STAAM

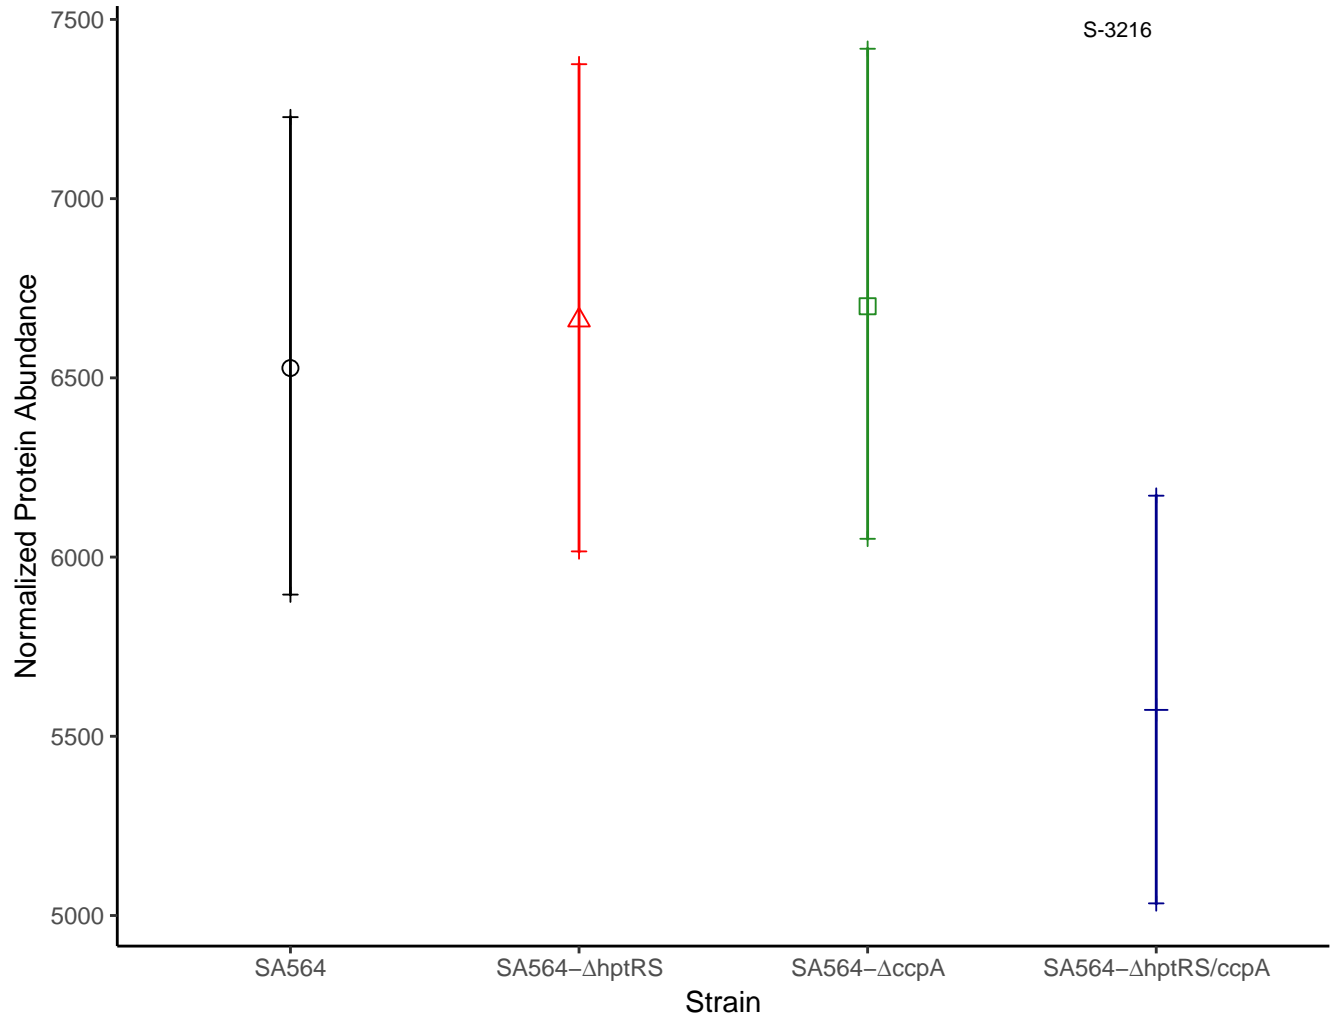

- ⊕ SA564
- △ SA564- $\Delta$ hptRS
- ⊞ SA564- $\Delta$ ccpA
- + SA564- $\Delta$ hptRS/ccpA



# MIAB\_STAAM

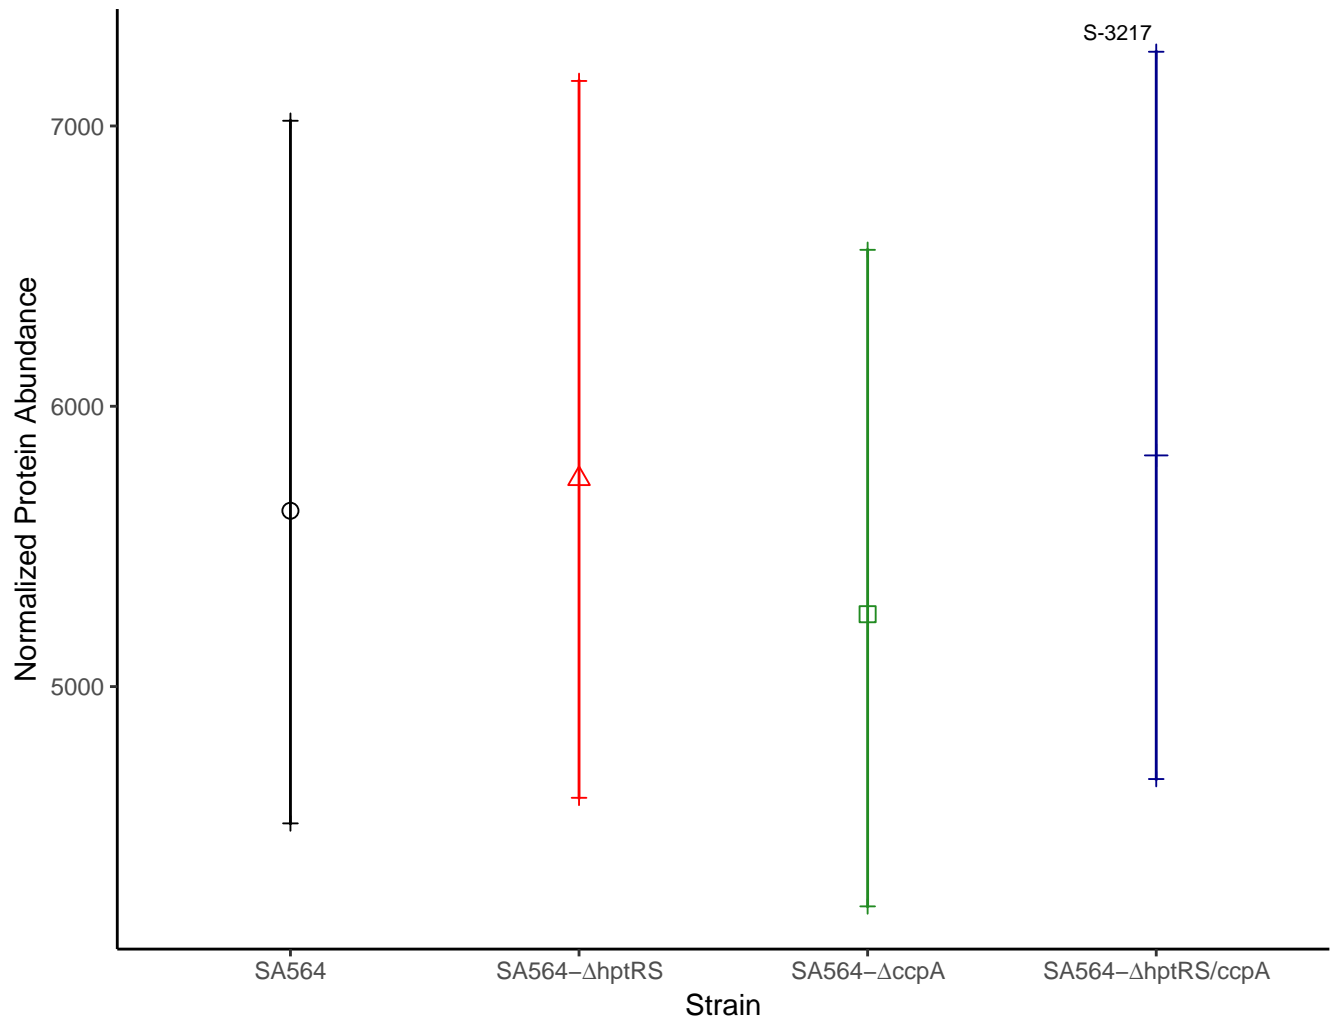

- ⊕ SA564
- △ SA564- $\Delta$ hptRS
- ⊞ SA564- $\Delta$ ccpA
- + SA564- $\Delta$ hptRS/ccpA

# MNME\_STAAM

S-3218

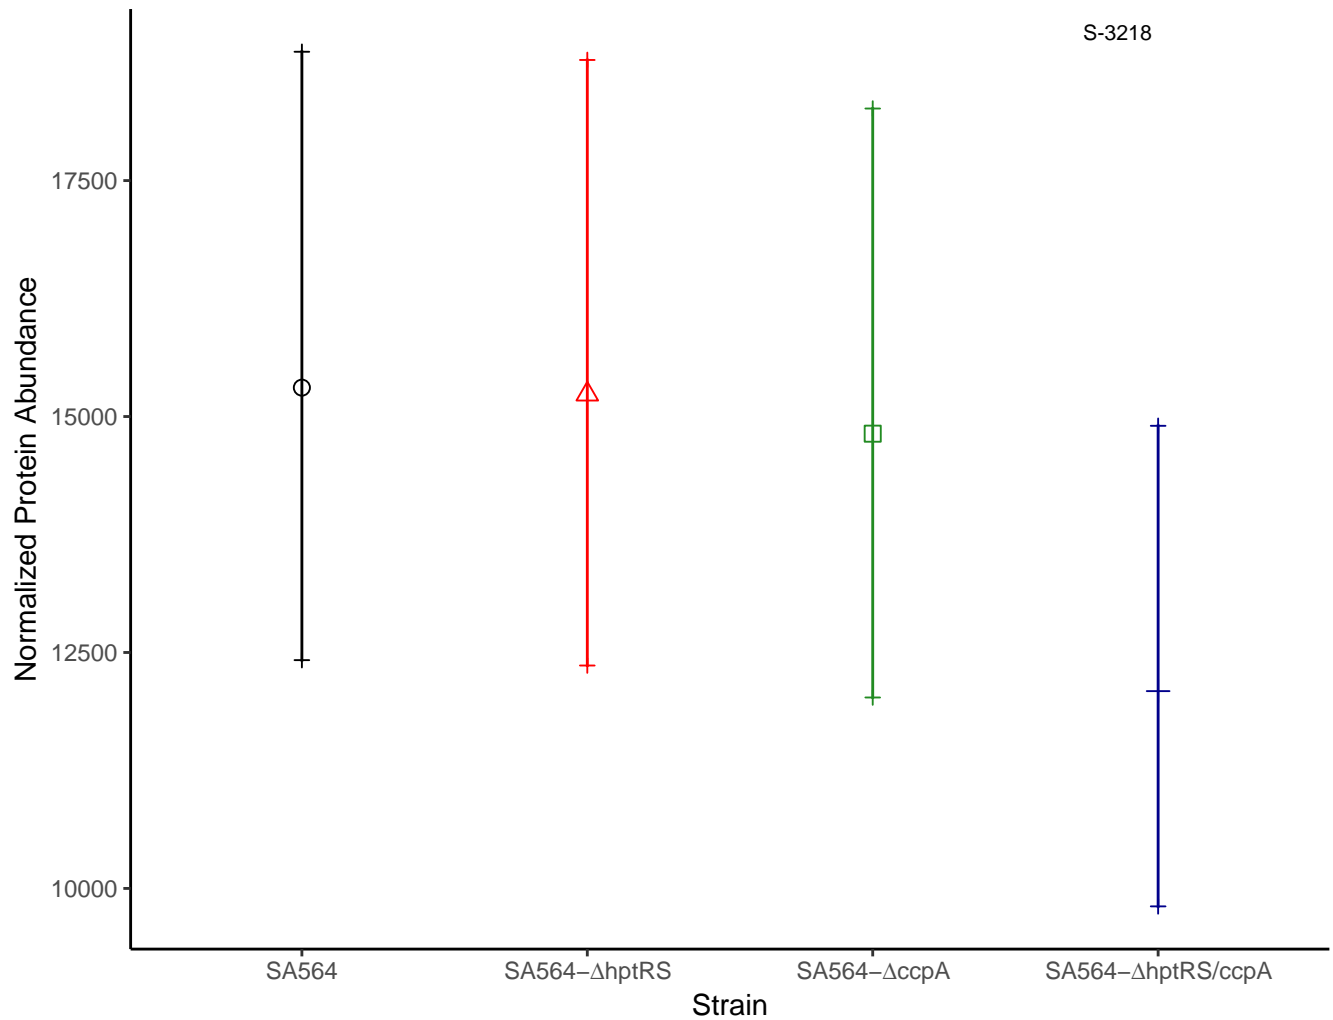

- ⊕ SA564
- △ SA564- $\Delta$ hptRS
- ⊞ SA564- $\Delta$ ccpA
- + SA564- $\Delta$ hptRS/ccpA

# MNMG\_STAAM

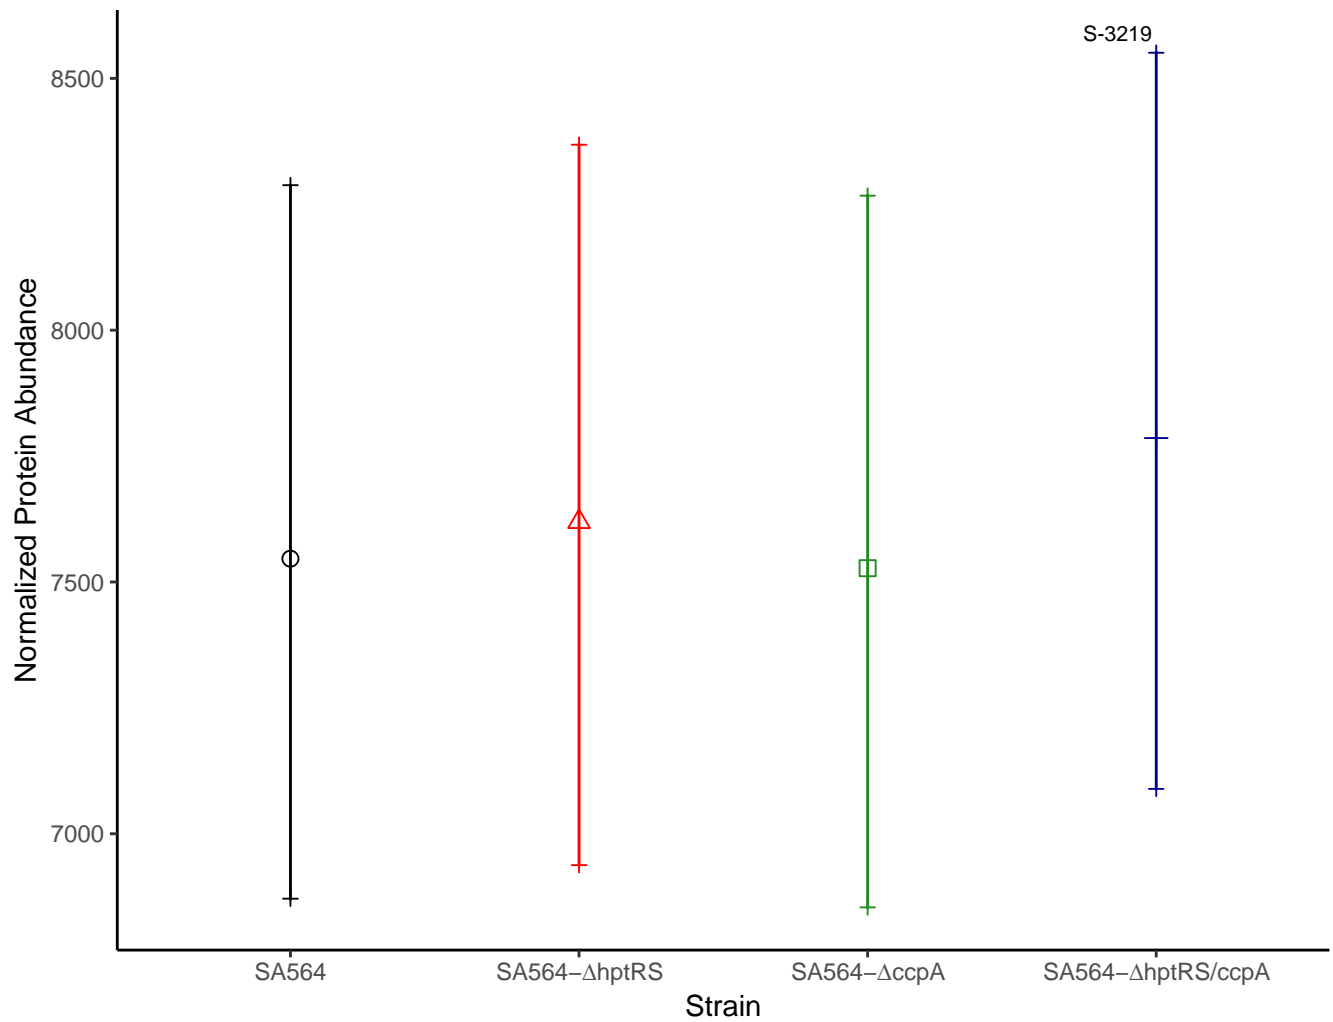

- ⊕ SA564
- △ SA564- $\Delta$ hptRS
- ⊞ SA564- $\Delta$ ccpA
- + SA564- $\Delta$ hptRS/ccpA

# MOAC\_STAAM

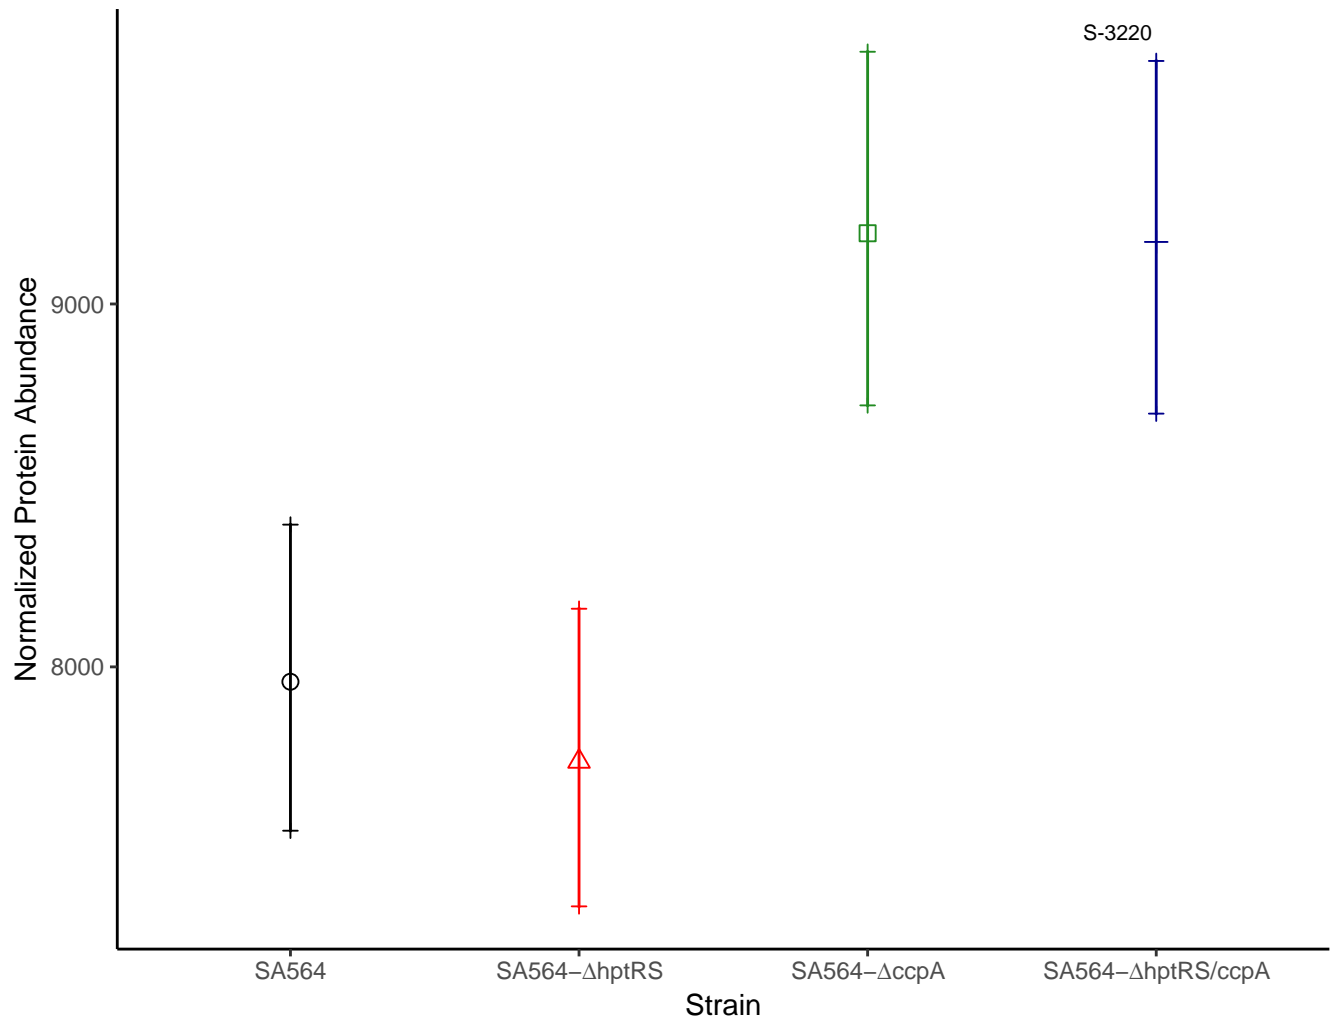

- ⊕ SA564
- △ SA564- $\Delta$ hptRS
- ⊞ SA564- $\Delta$ ccpA
- ⊕ SA564- $\Delta$ hptRS/ccpA

# MOEA\_STAAM

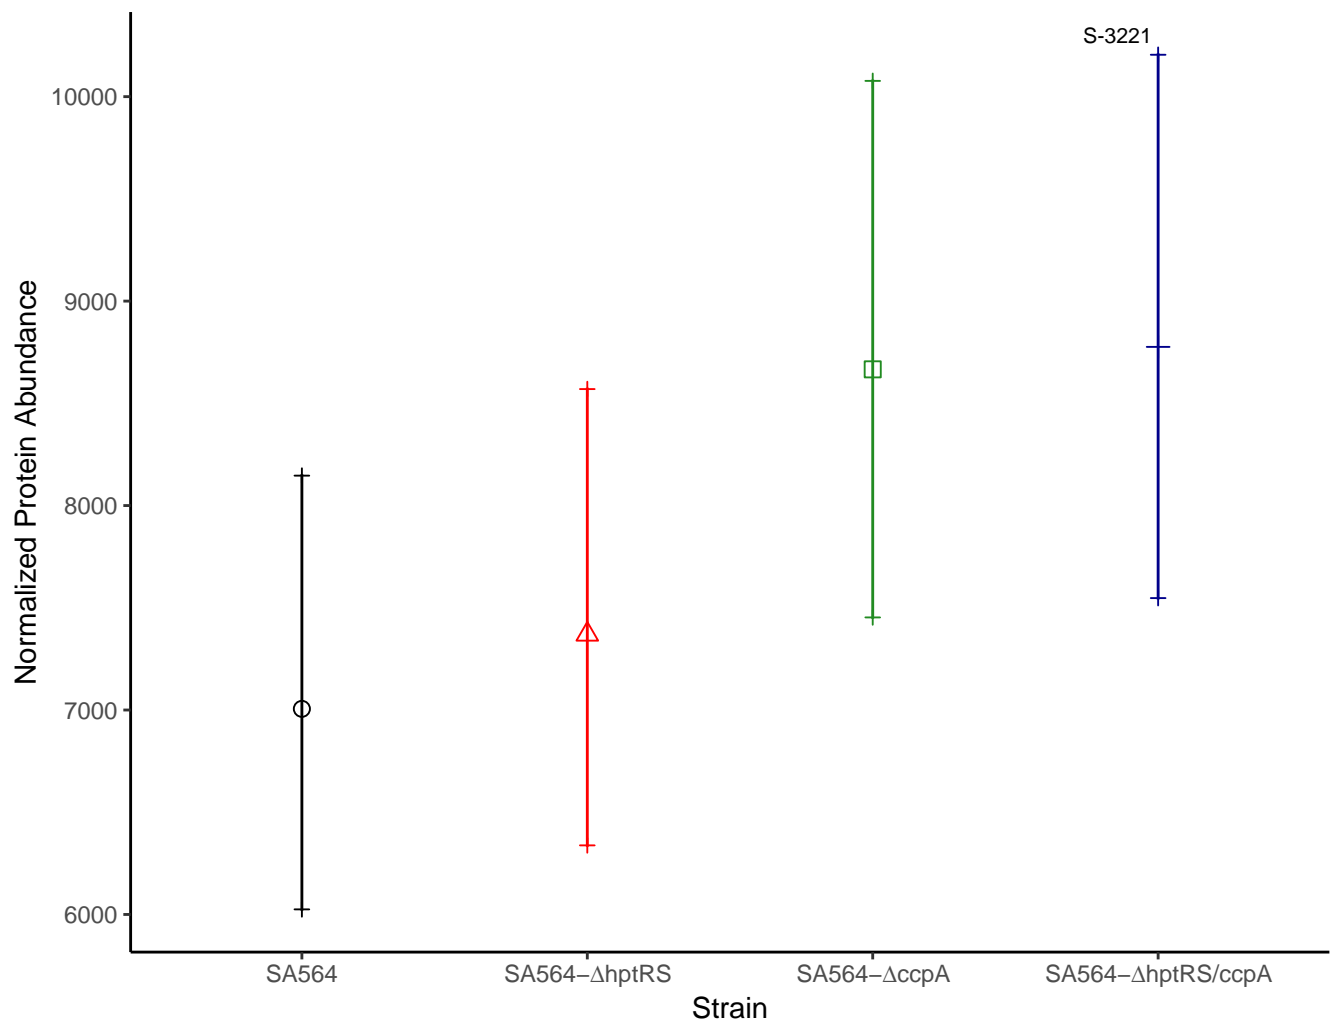

- ⊕ SA564
- △ SA564- $\Delta$ hptRS
- ⊞ SA564- $\Delta$ ccpA
- + SA564- $\Delta$ hptRS/ccpA

# MQO2\_STAAM

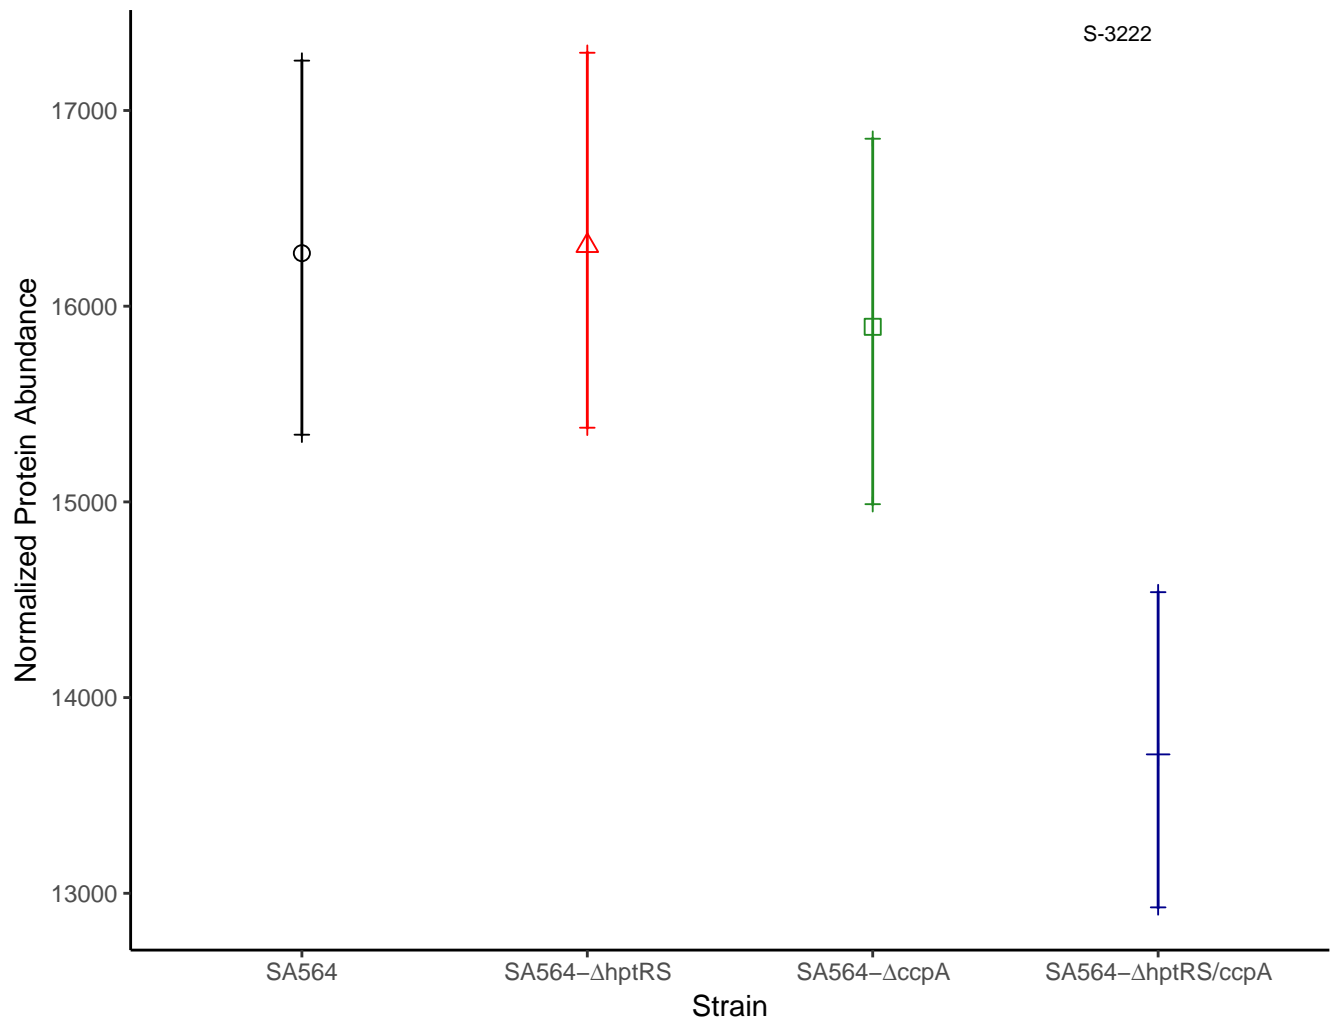

- SA564
- SA564- $\Delta$ hptRS
- SA564- $\Delta$ ccpA
- SA564- $\Delta$ hptRS/ccpA

# MSRA1\_STAAM

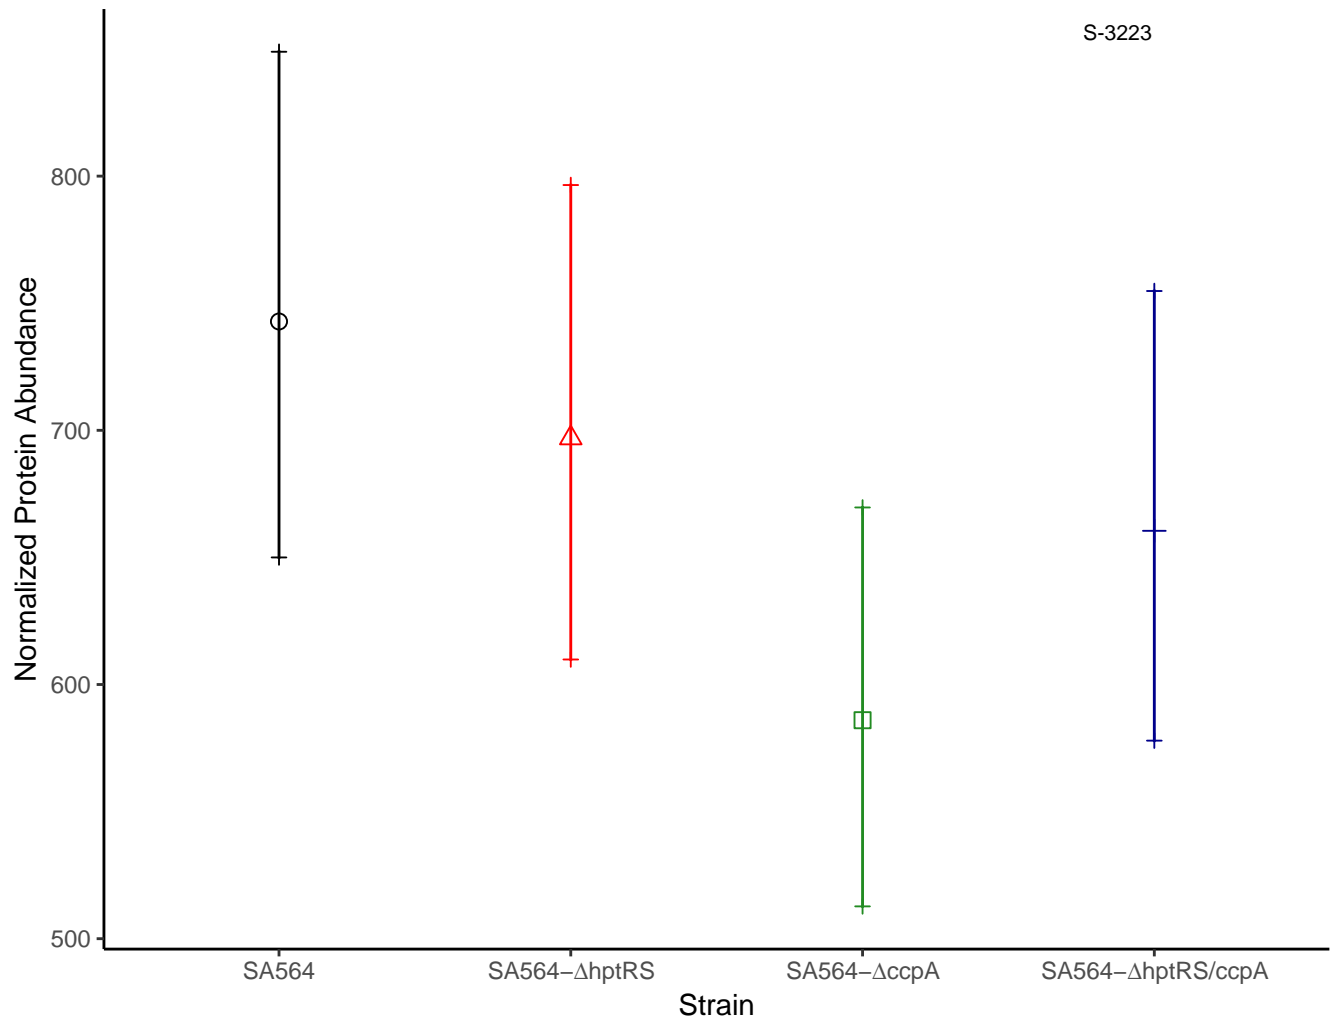

- ⊕ SA564
- △ SA564- $\Delta$ hptRS
- ⊞ SA564- $\Delta$ ccpA
- + SA564- $\Delta$ hptRS/ccpA

# MSRA2\_STAAM

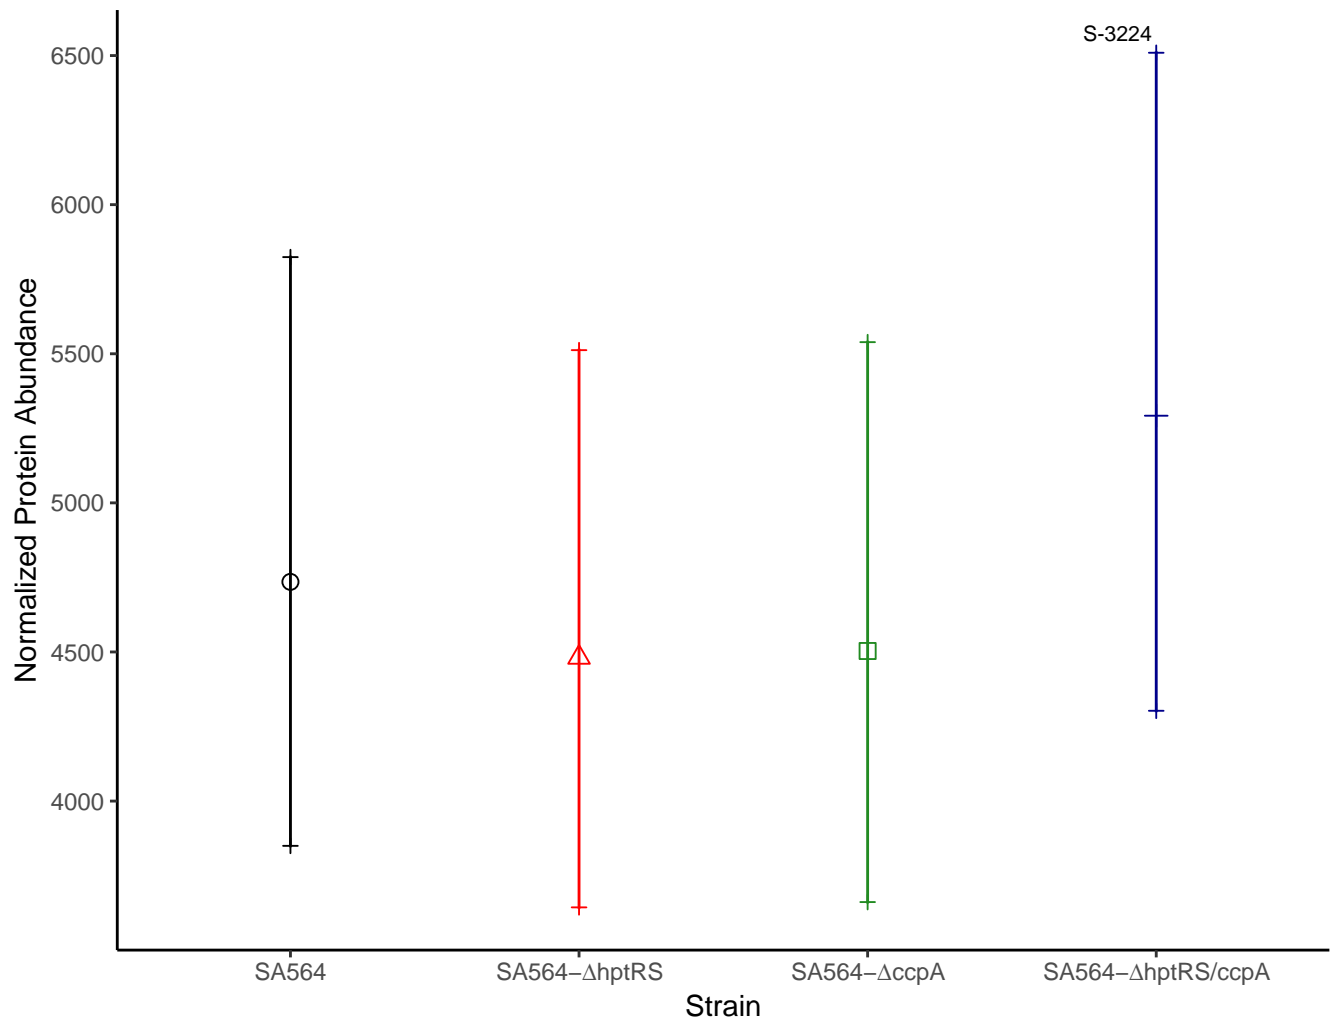

- ⊕ SA564
- △ SA564- $\Delta$ hptRS
- ⊞ SA564- $\Delta$ ccpA
- + SA564- $\Delta$ hptRS/ccpA



# MSRB\_STAAM

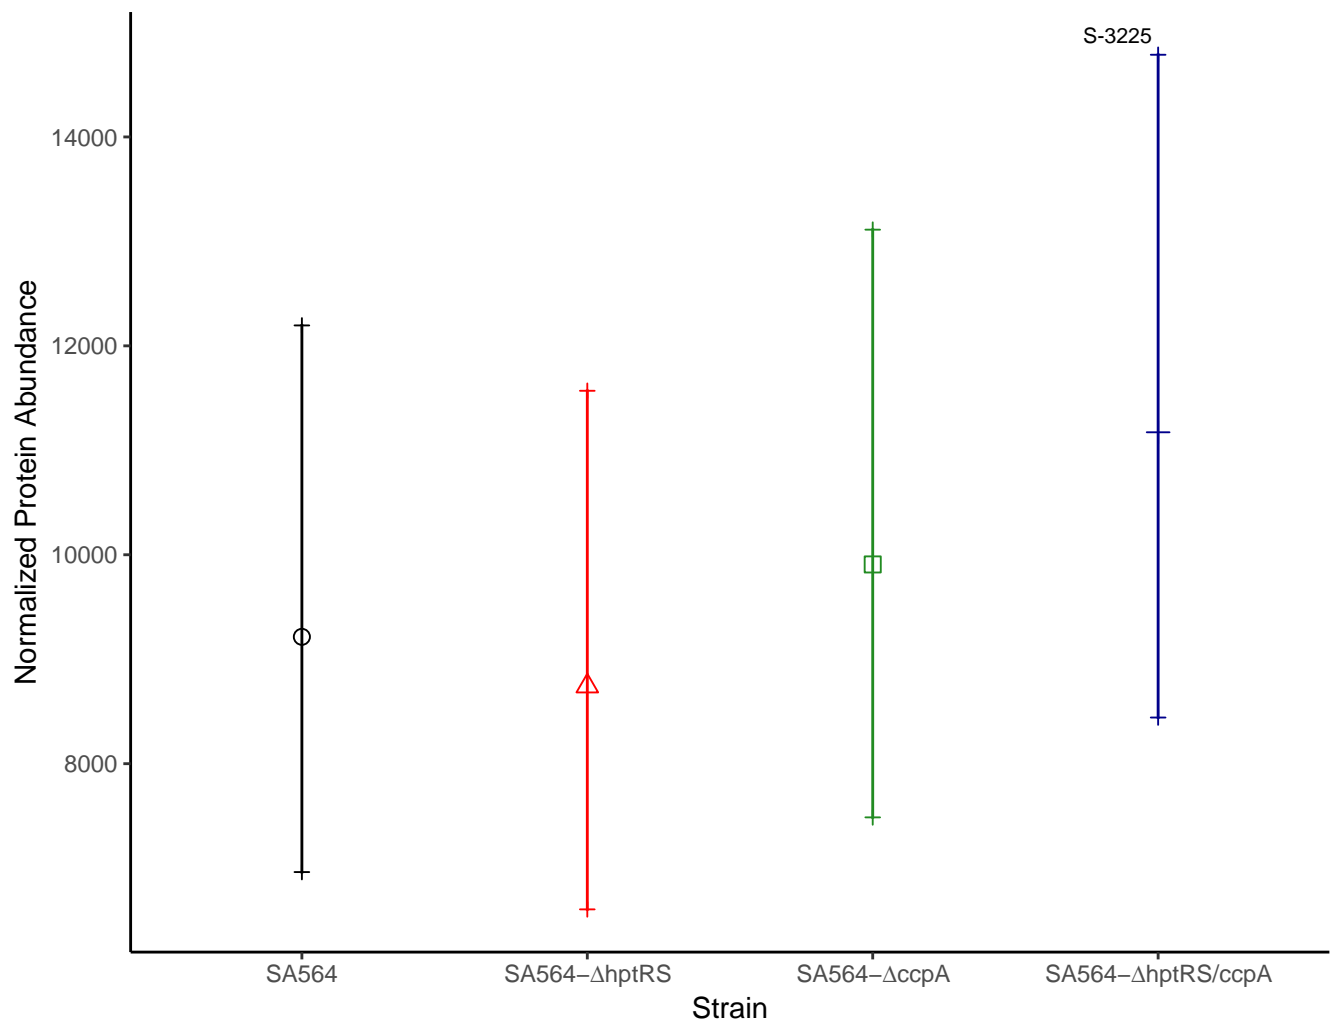

- ⊕ SA564
- △ SA564- $\Delta$ hptRS
- ⊞ SA564- $\Delta$ ccpA
- + SA564- $\Delta$ hptRS/ccpA

# MTLD\_STAAM

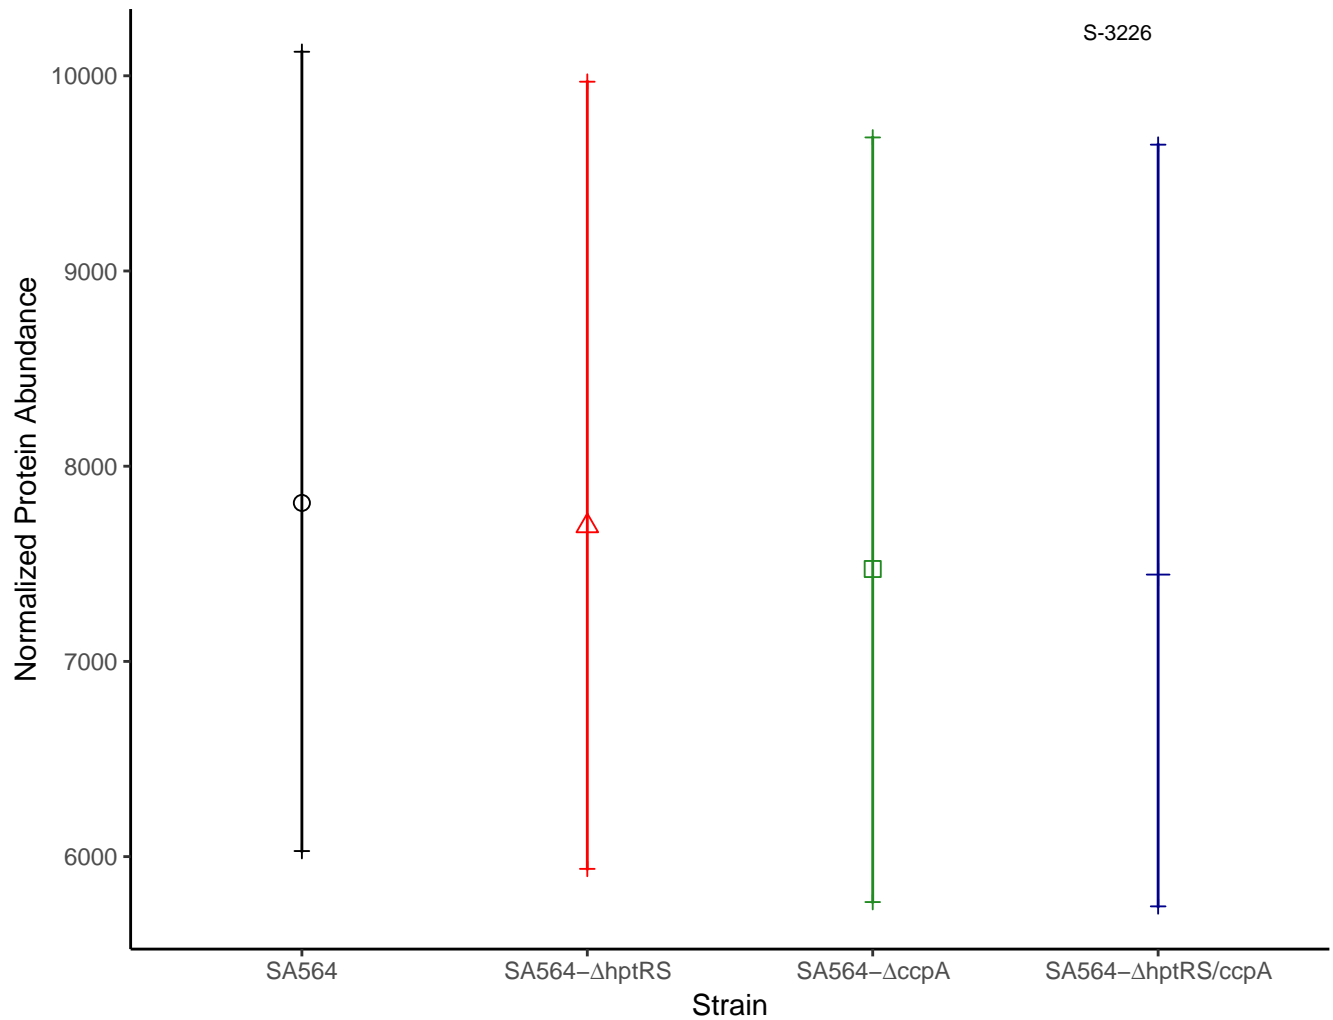

- ⊕ SA564
- △ SA564- $\Delta$ *hptRS*
- ⊞ SA564- $\Delta$ *ccpA*
- + SA564- $\Delta$ *hptRS/ccpA*

# MTNN\_STAAM

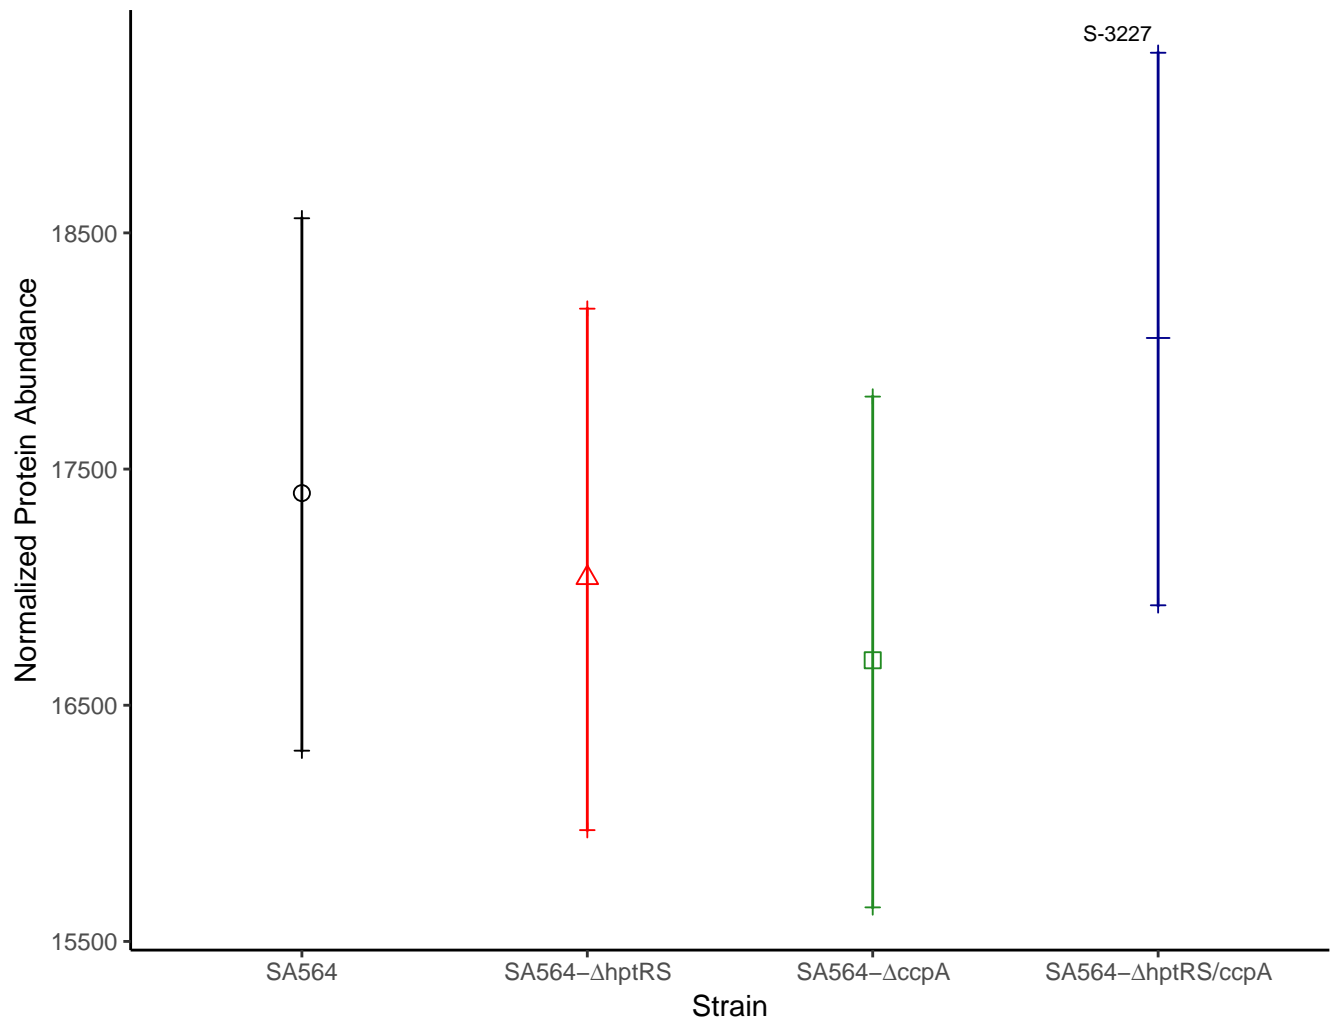

- ⊕ SA564
- △ SA564- $\Delta$ hptRS
- ⊞ SA564- $\Delta$ ccpA
- + SA564- $\Delta$ hptRS/ccpA

# MURA1\_STAAM

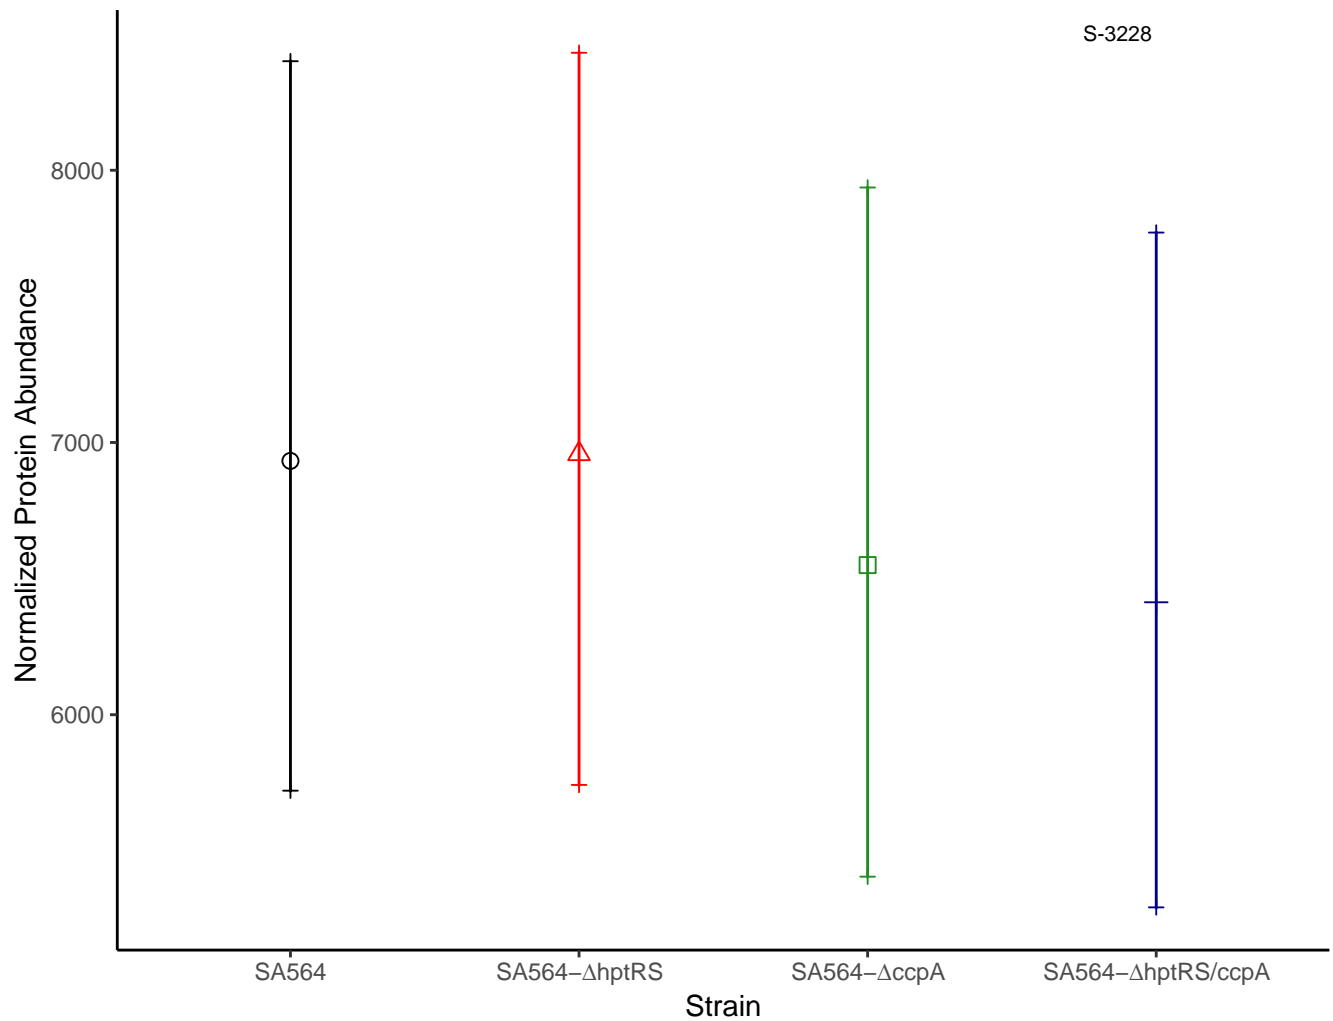

- ⊕ SA564
- △ SA564- $\Delta$ hptRS
- ⊞ SA564- $\Delta$ ccpA
- ⊕ SA564- $\Delta$ hptRS/ccpA

# MURA2\_STAAM

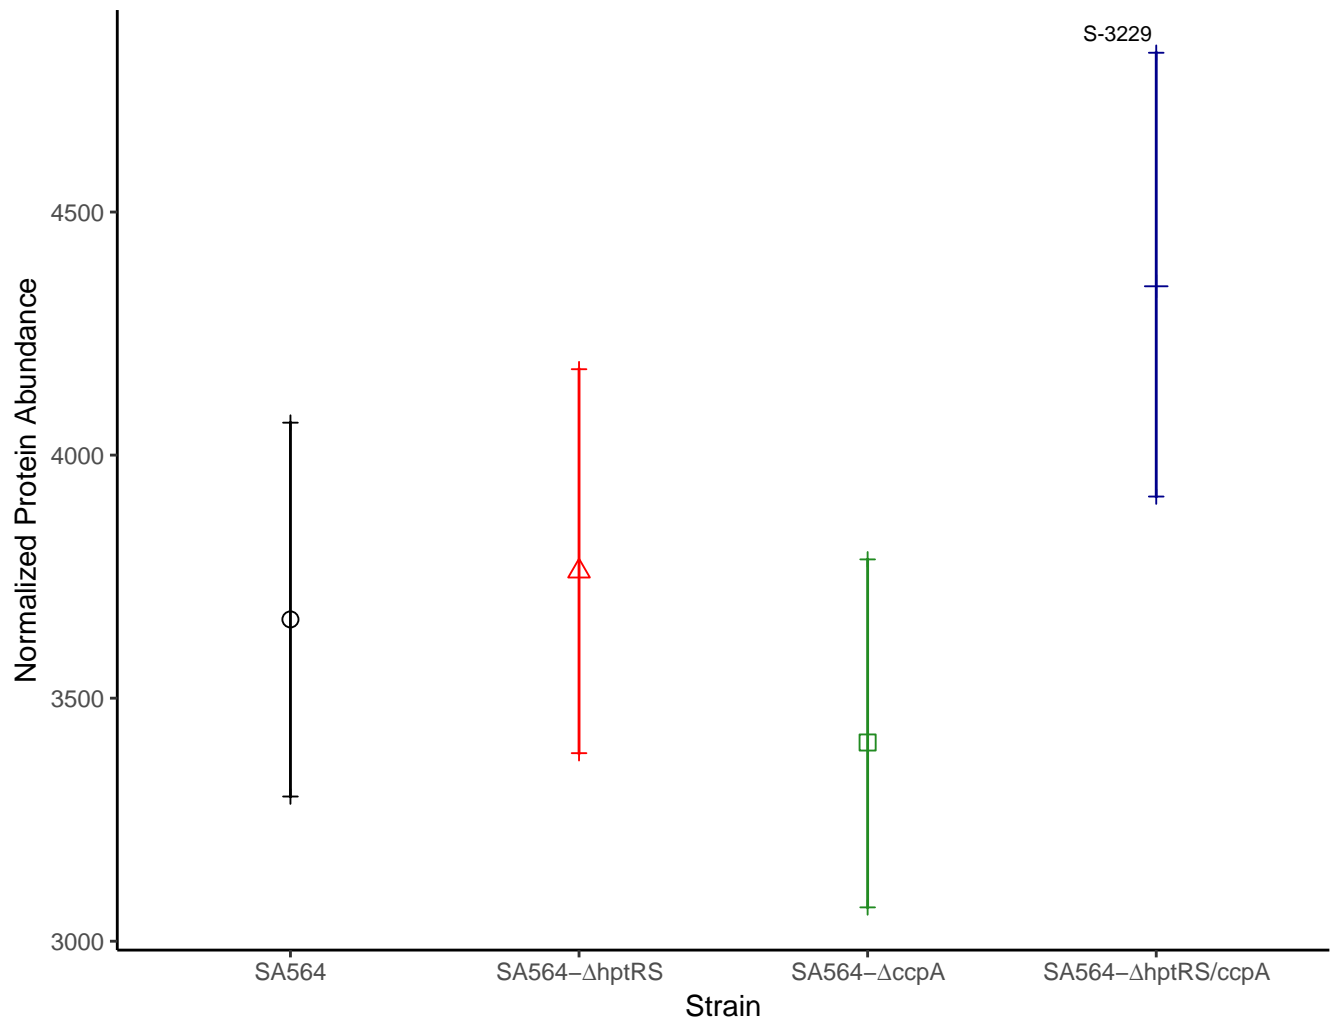

- ⊕ SA564
- △ SA564- $\Delta$ hptRS
- ⊞ SA564- $\Delta$ ccpA
- + SA564- $\Delta$ hptRS/ccpA

# MURC\_STAAM

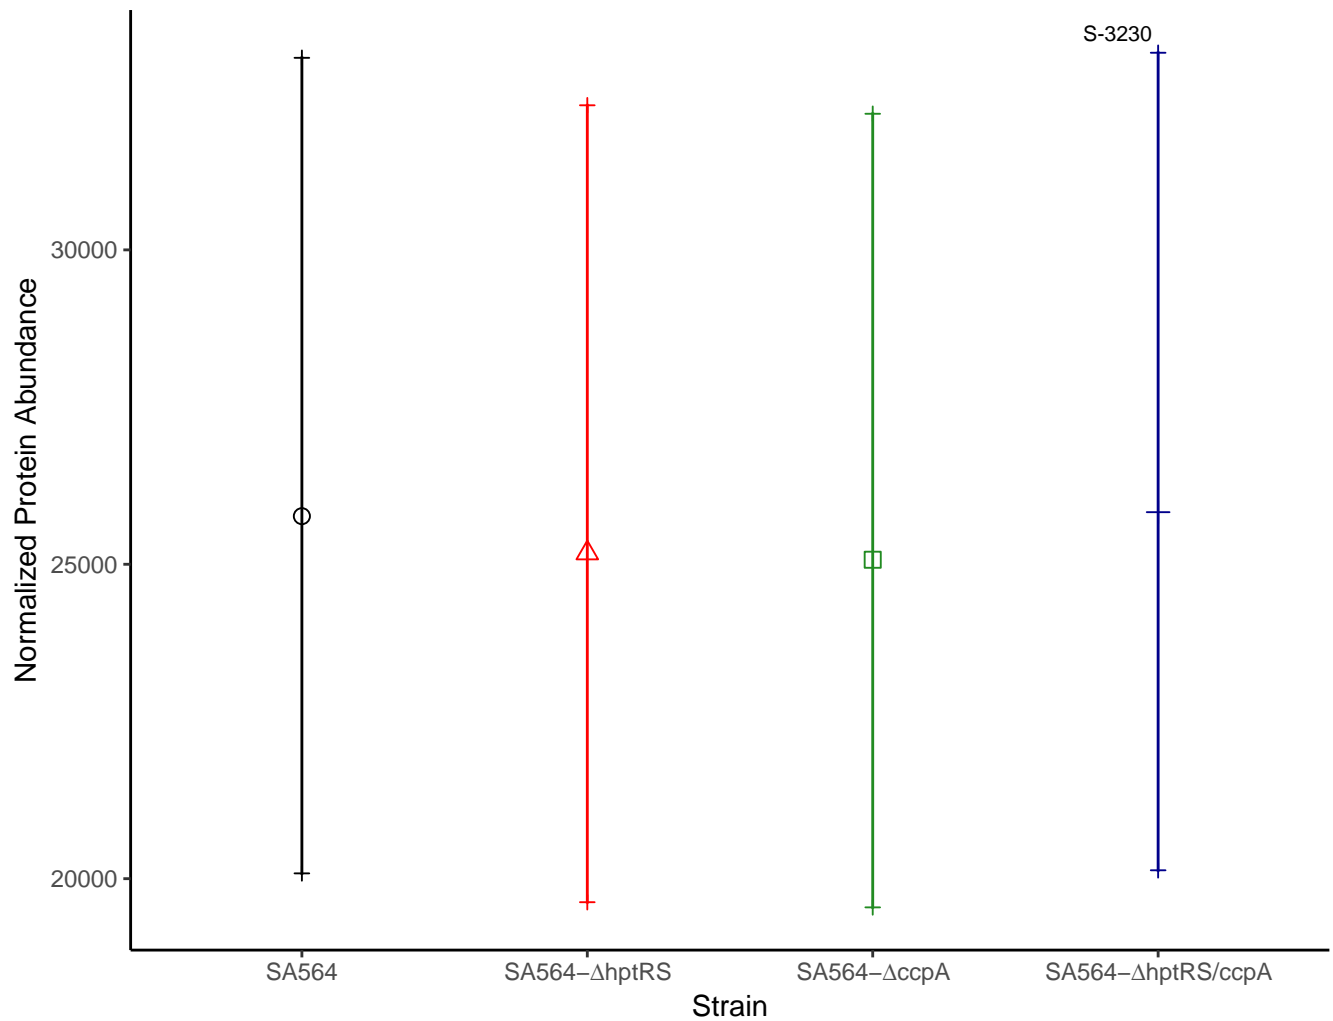

- ⊕ SA564
- △ SA564- $\Delta$ hptRS
- ⊞ SA564- $\Delta$ ccpA
- + SA564- $\Delta$ hptRS/ccpA

# MURD\_STAAM

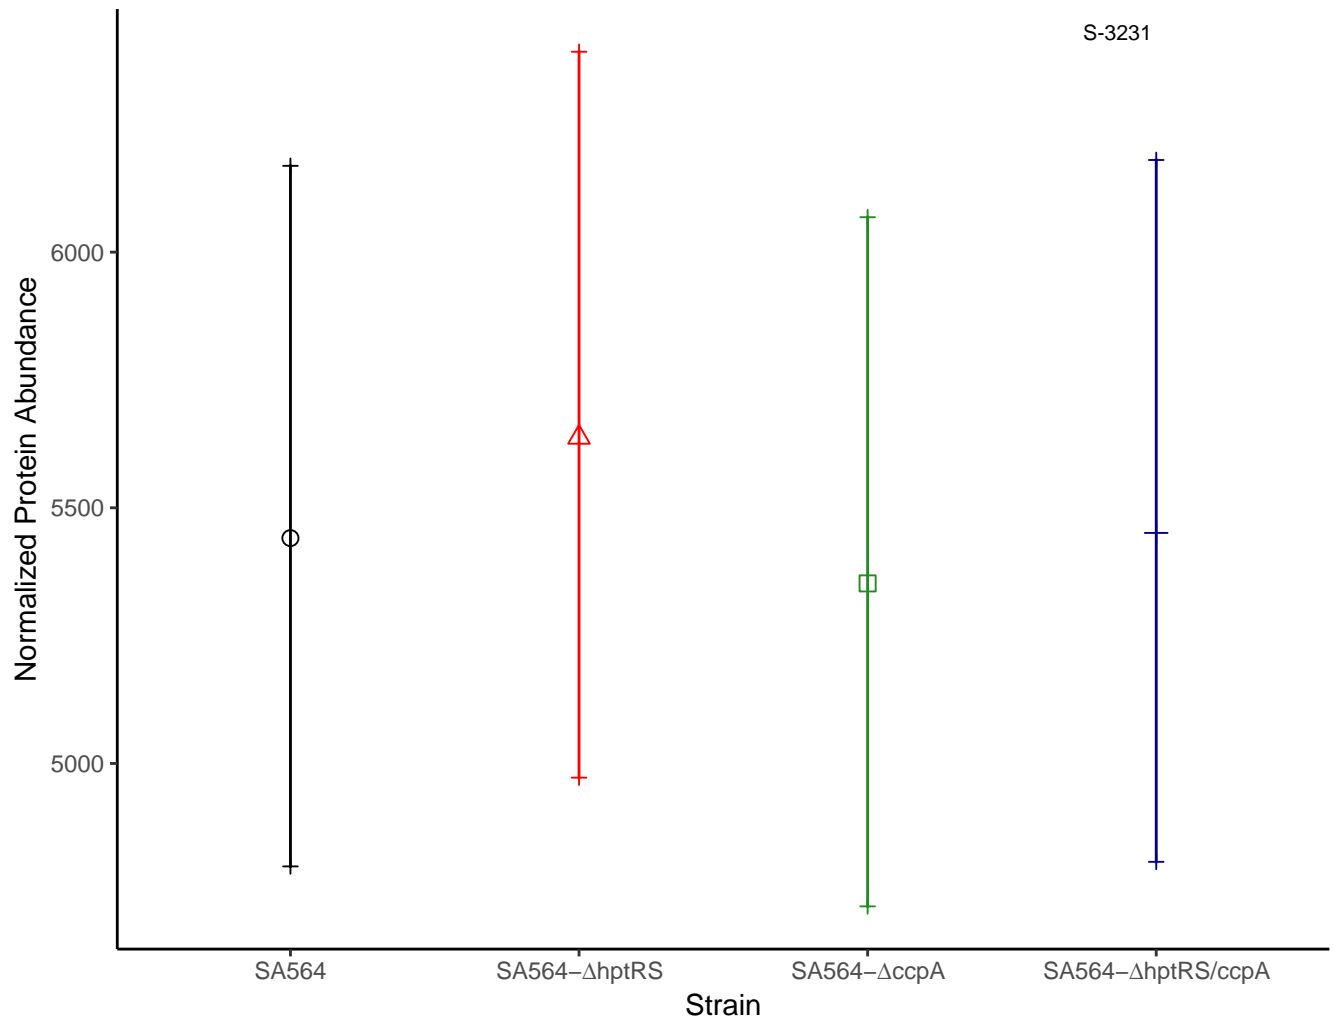

- ⊕ SA564
- △ SA564- $\Delta$ hptRS
- ⊞ SA564- $\Delta$ ccpA
- + SA564- $\Delta$ hptRS/ccpA

# MURE\_STAAM

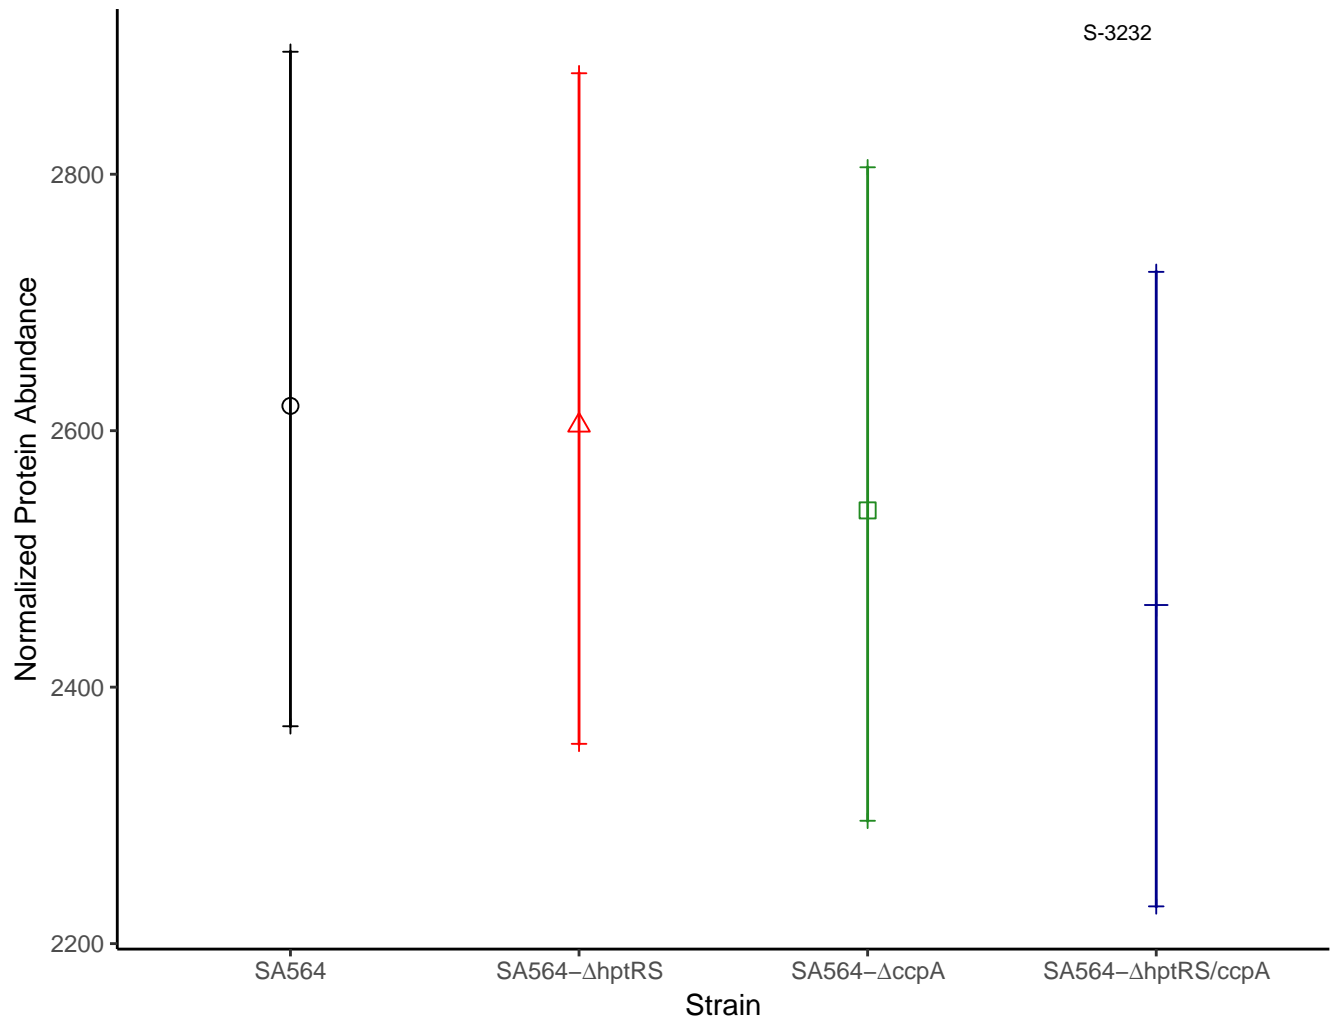

- ⊕ SA564
- △ SA564- $\Delta$ hptRS
- ⊞ SA564- $\Delta$ ccpA
- + SA564- $\Delta$ hptRS/ccpA



# MURG\_STAAM

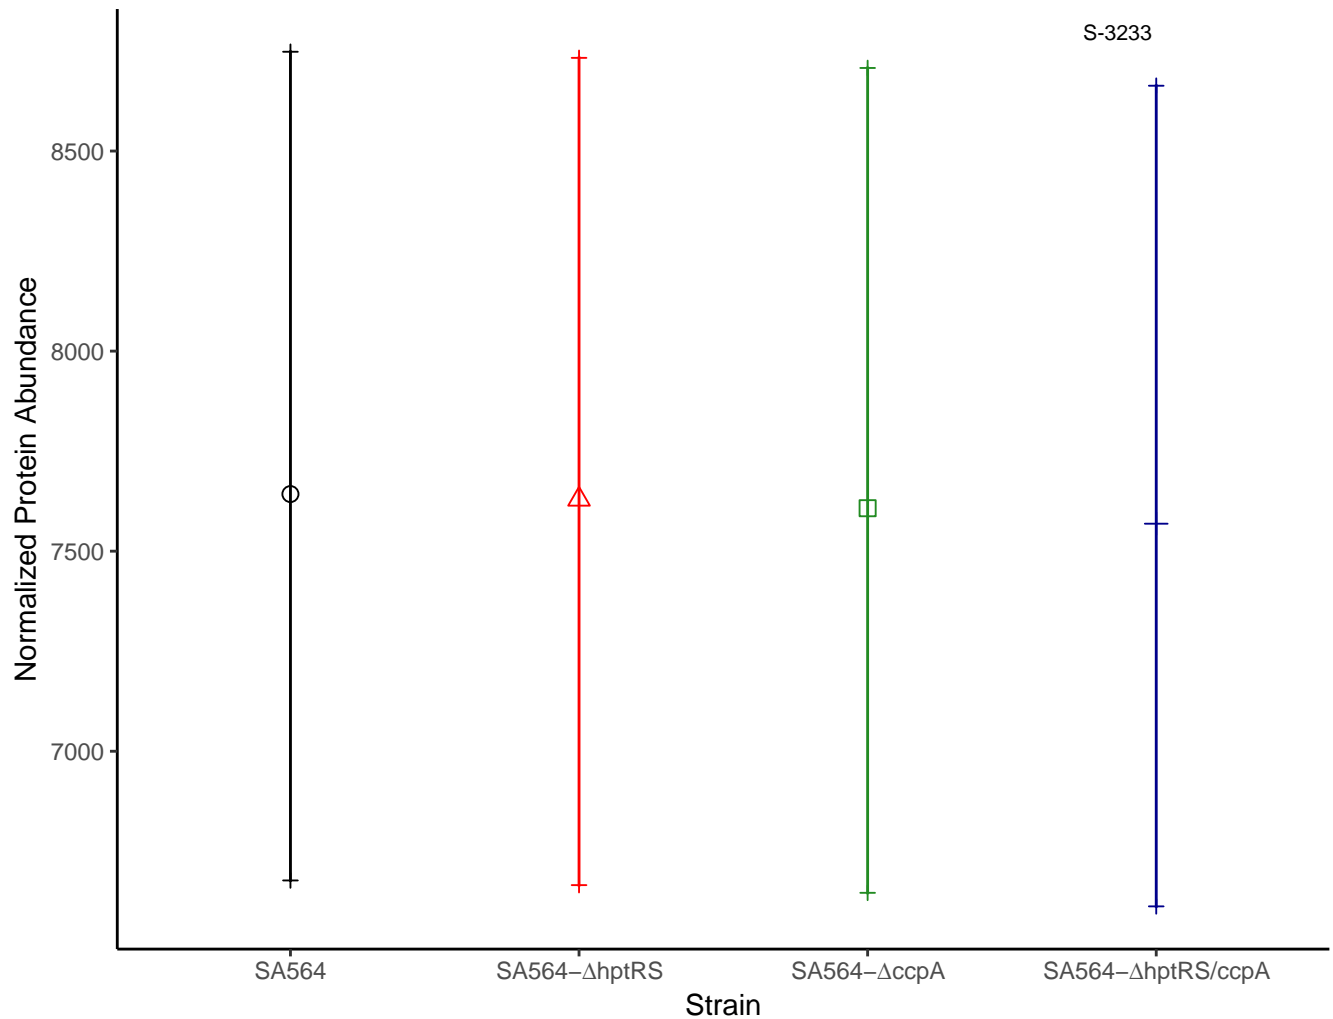

- ⊕ SA564
- △ SA564- $\Delta$ hptRS
- ⊞ SA564- $\Delta$ ccpA
- + SA564- $\Delta$ hptRS/ccpA

# MURI\_STAAM

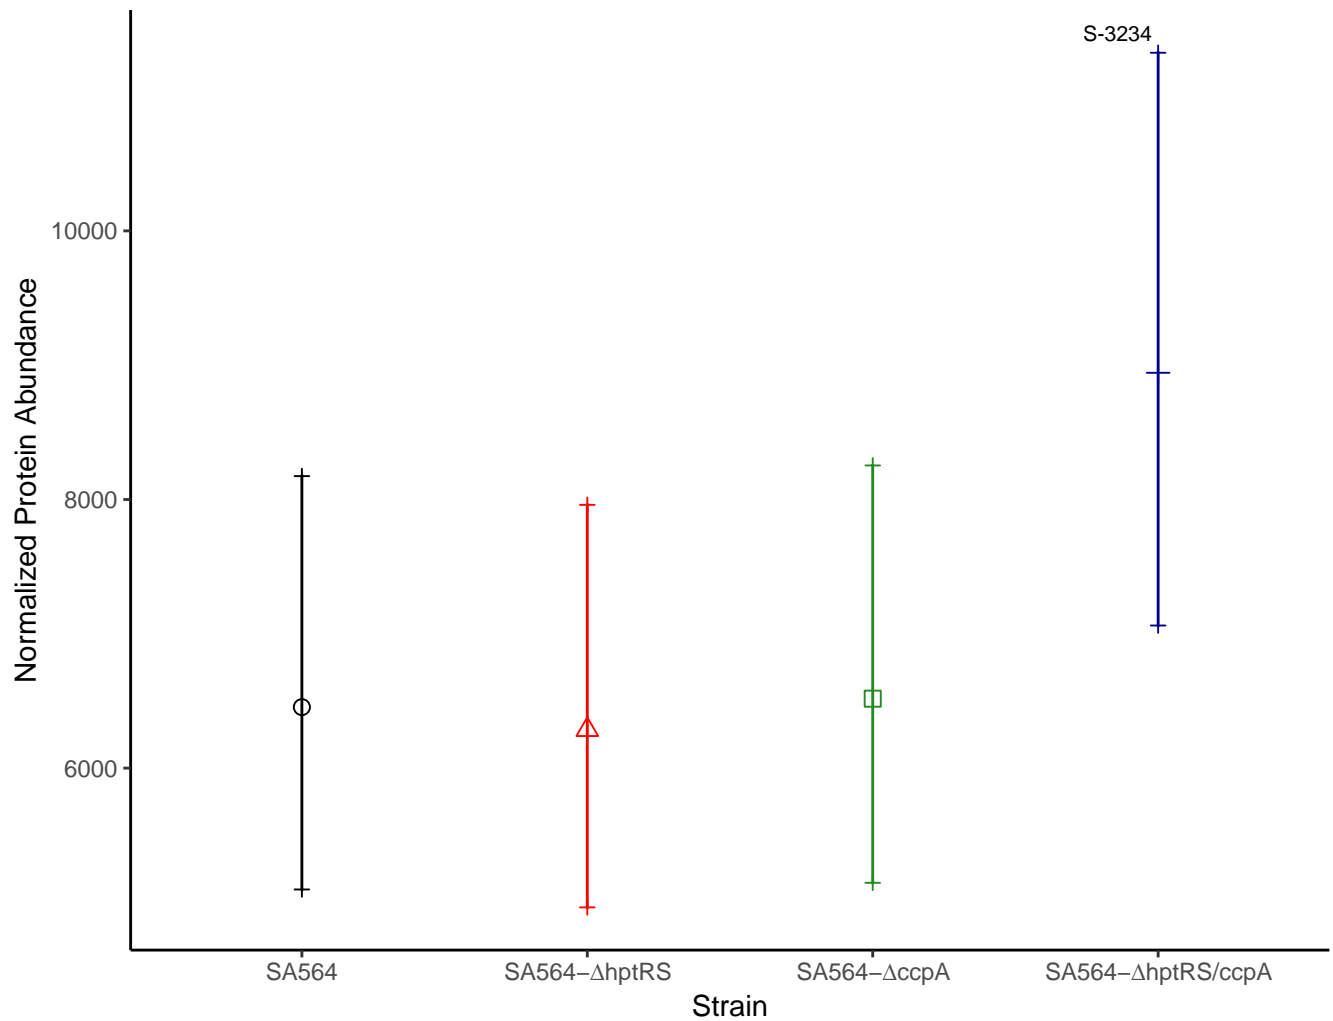

- ⊕ SA564
- △ SA564- $\Delta$ hptRS
- ⊞ SA564- $\Delta$ ccpA
- + SA564- $\Delta$ hptRS/ccpA

# MUTS\_STAAM

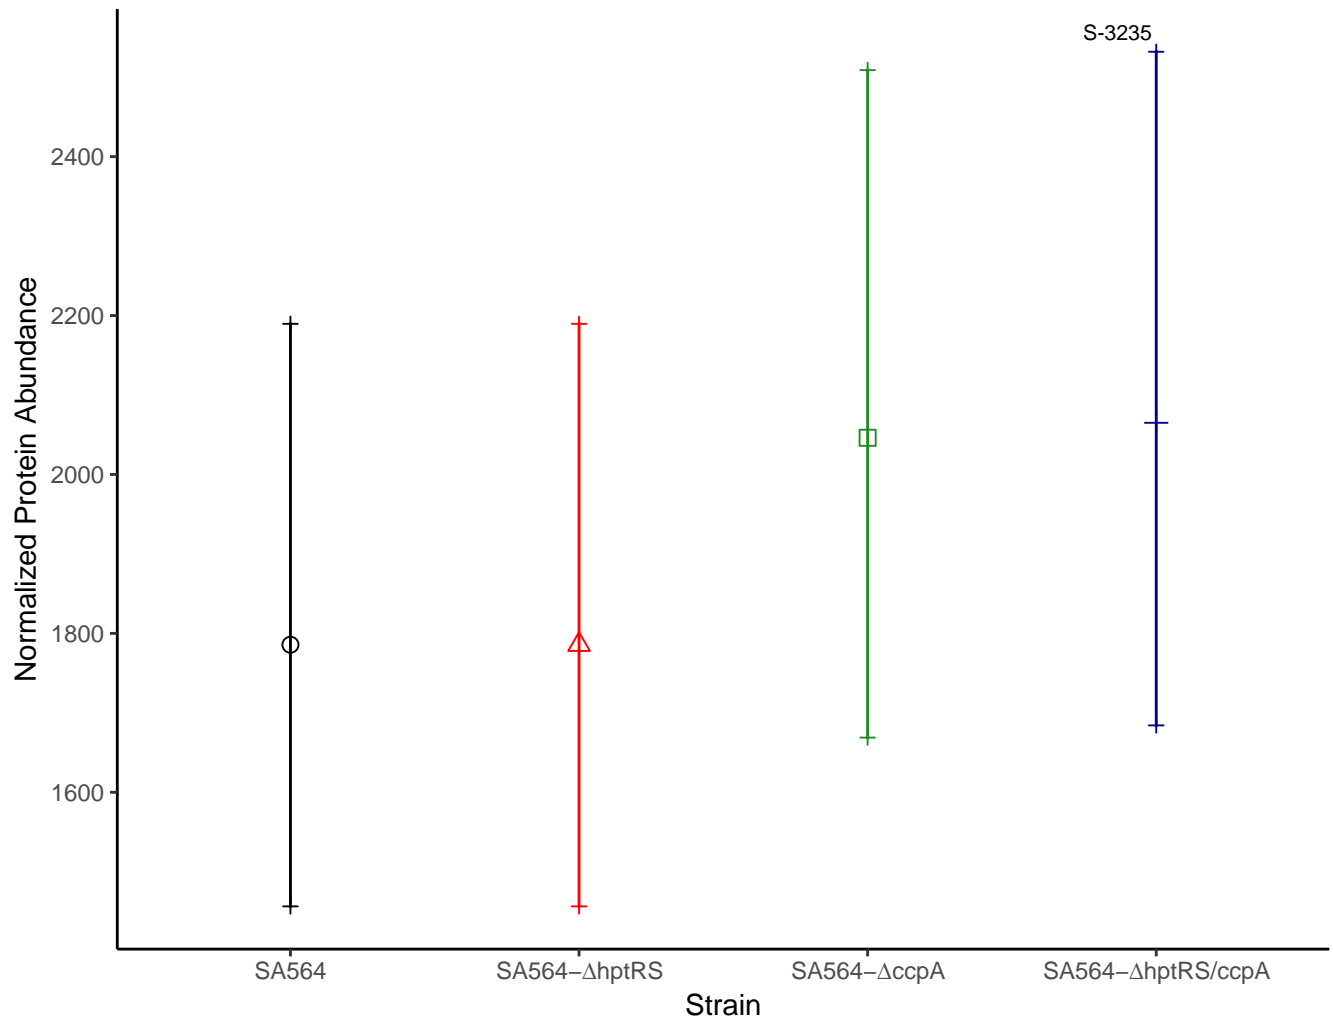

- ⊕ SA564
- △ SA564- $\Delta$ hptRS
- ⊞ SA564- $\Delta$ ccpA
- + SA564- $\Delta$ hptRS/ccpA

# NADD\_STAAM

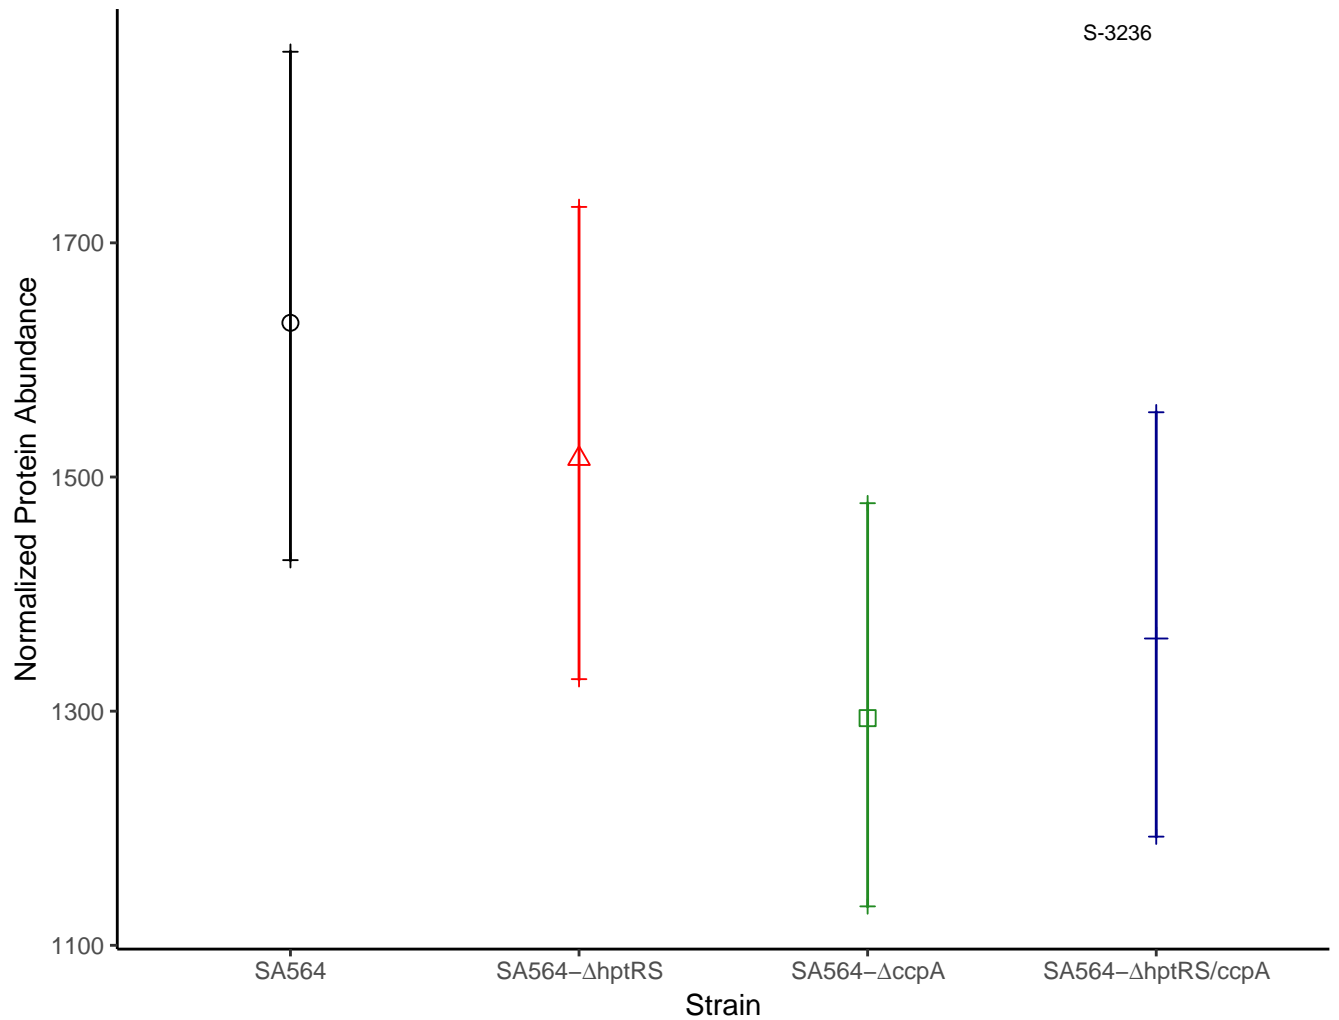

- ⊕ SA564
- △ SA564- $\Delta$ hptRS
- ⊞ SA564- $\Delta$ ccpA
- + SA564- $\Delta$ hptRS/ccpA

# NADE\_STAAM

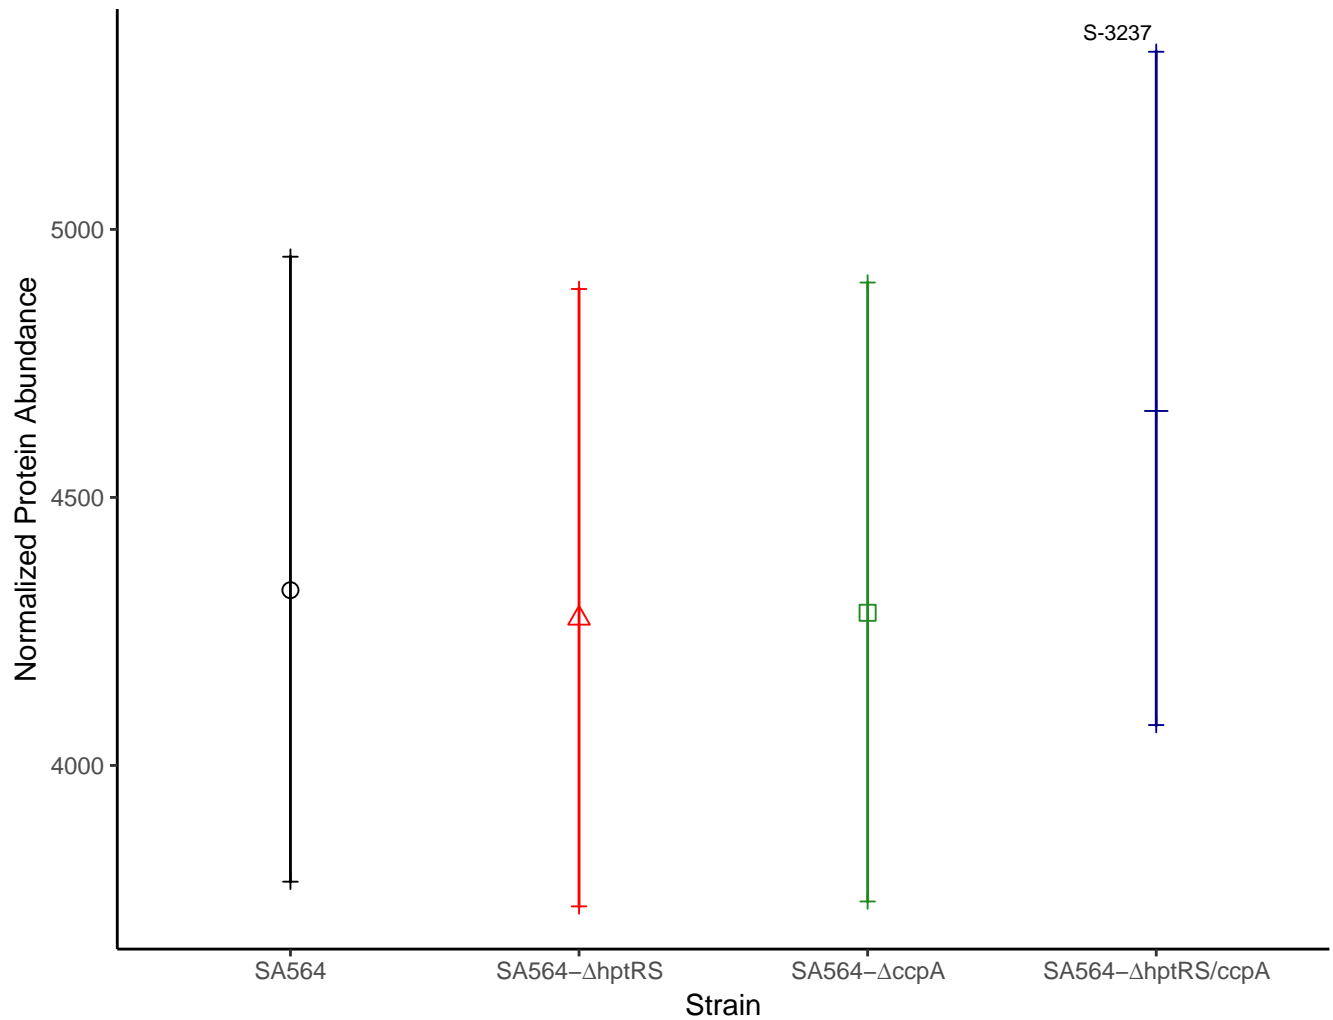

- ⊕ SA564
- △ SA564- $\Delta$ *hptRS*
- ⊞ SA564- $\Delta$ *ccpA*
- + SA564- $\Delta$ *hptRS/ccpA*

# NAGD\_STAAM

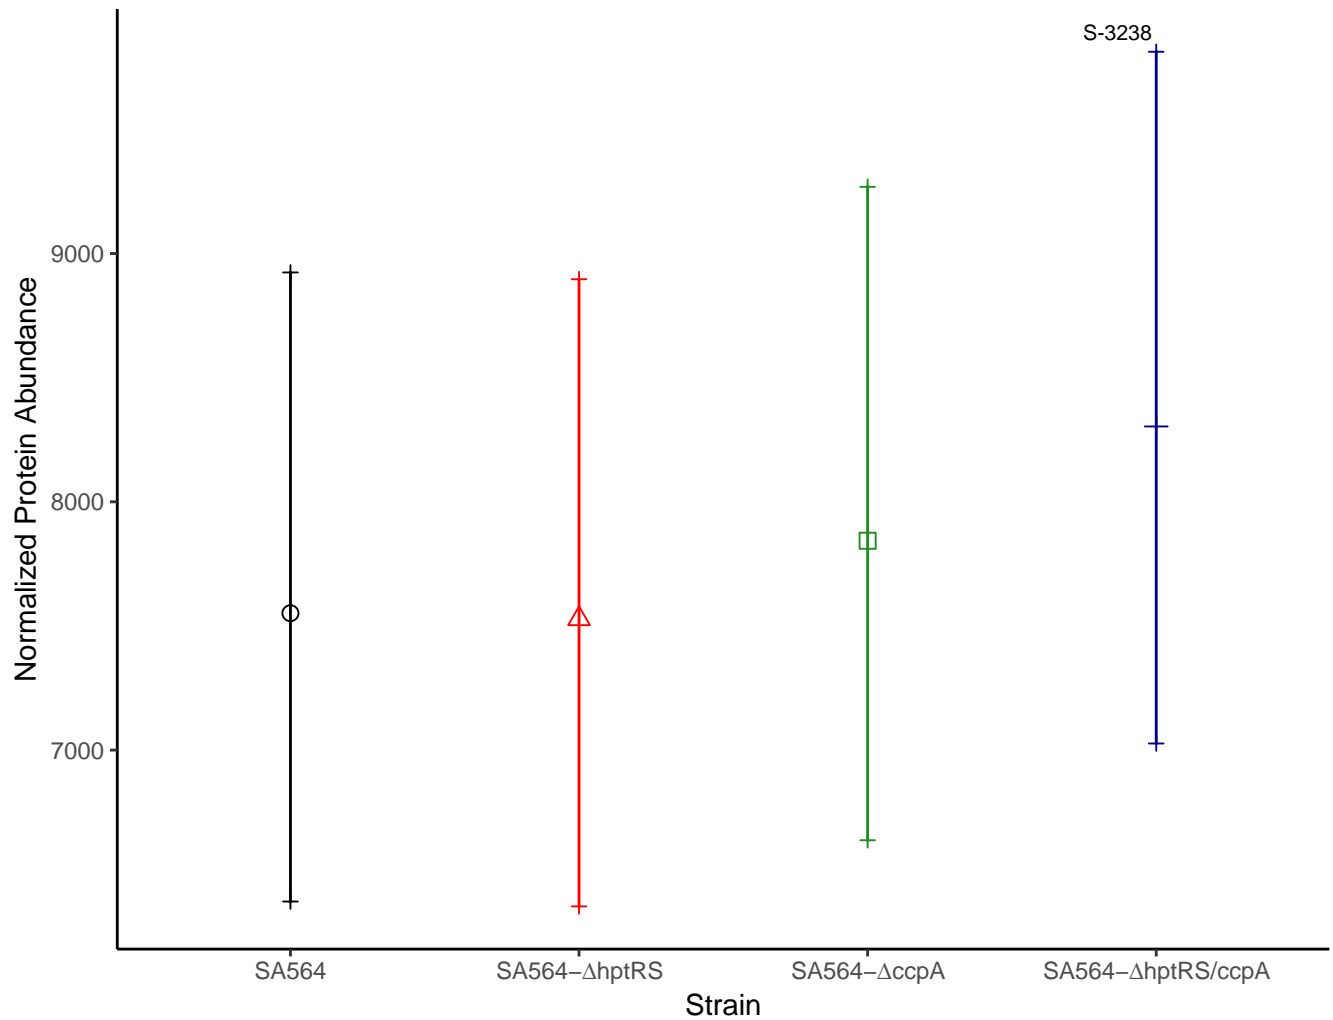

- ⊕ SA564
- △ SA564- $\Delta$ hptRS
- ⊞ SA564- $\Delta$ ccpA
- ⊕ SA564- $\Delta$ hptRS/ccpA

# NDK\_STAAM

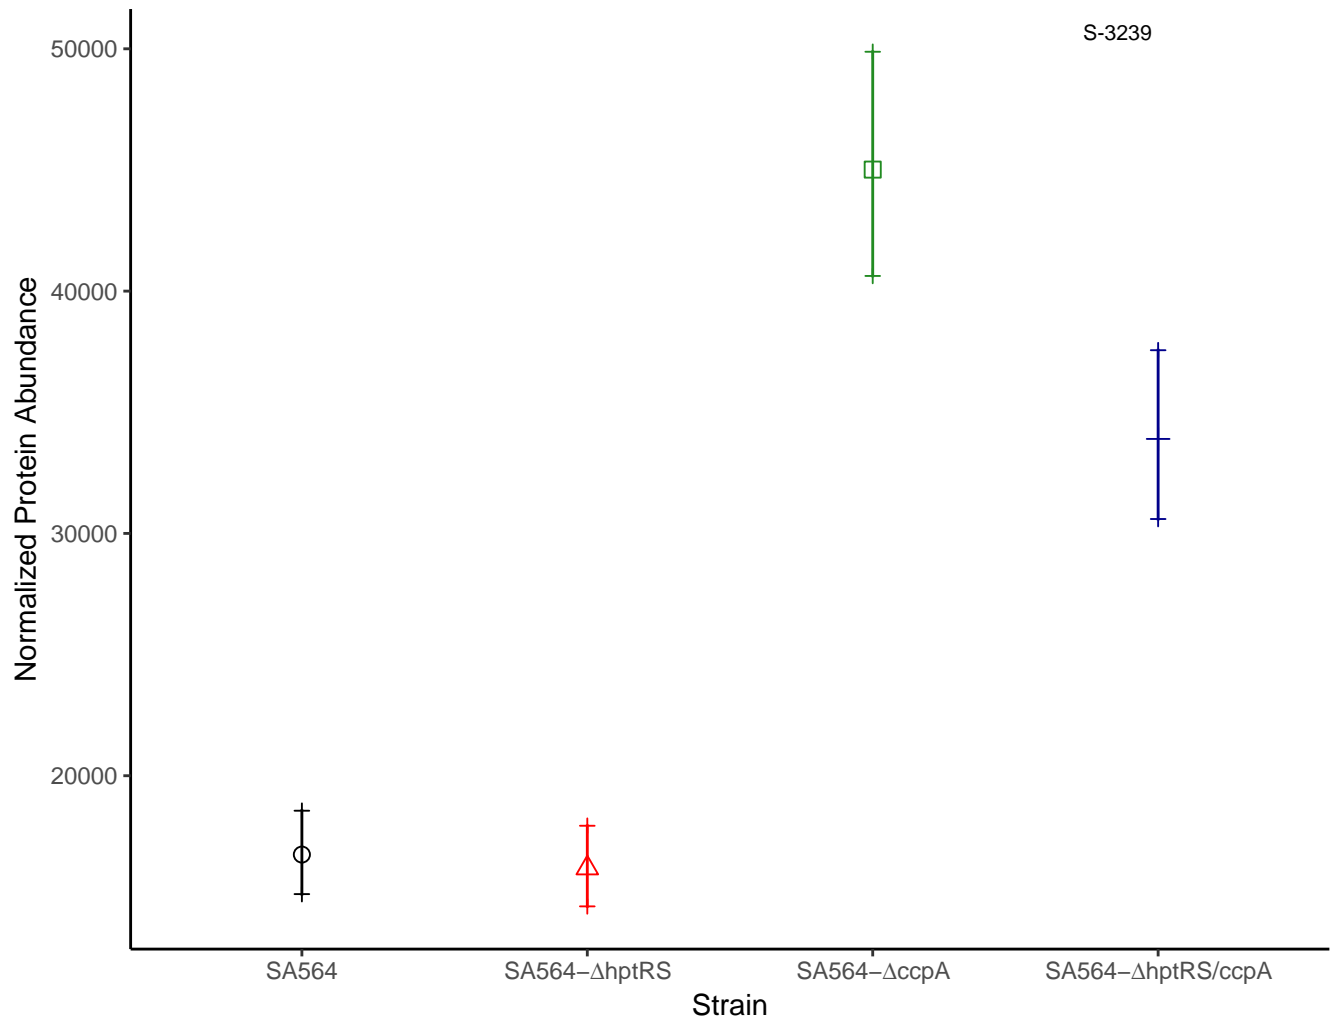

- ⊕ SA564
- △ SA564- $\Delta$ hptRS
- ⊞ SA564- $\Delta$ ccpA
- + SA564- $\Delta$ hptRS/ccpA

# NRDR\_STAAM

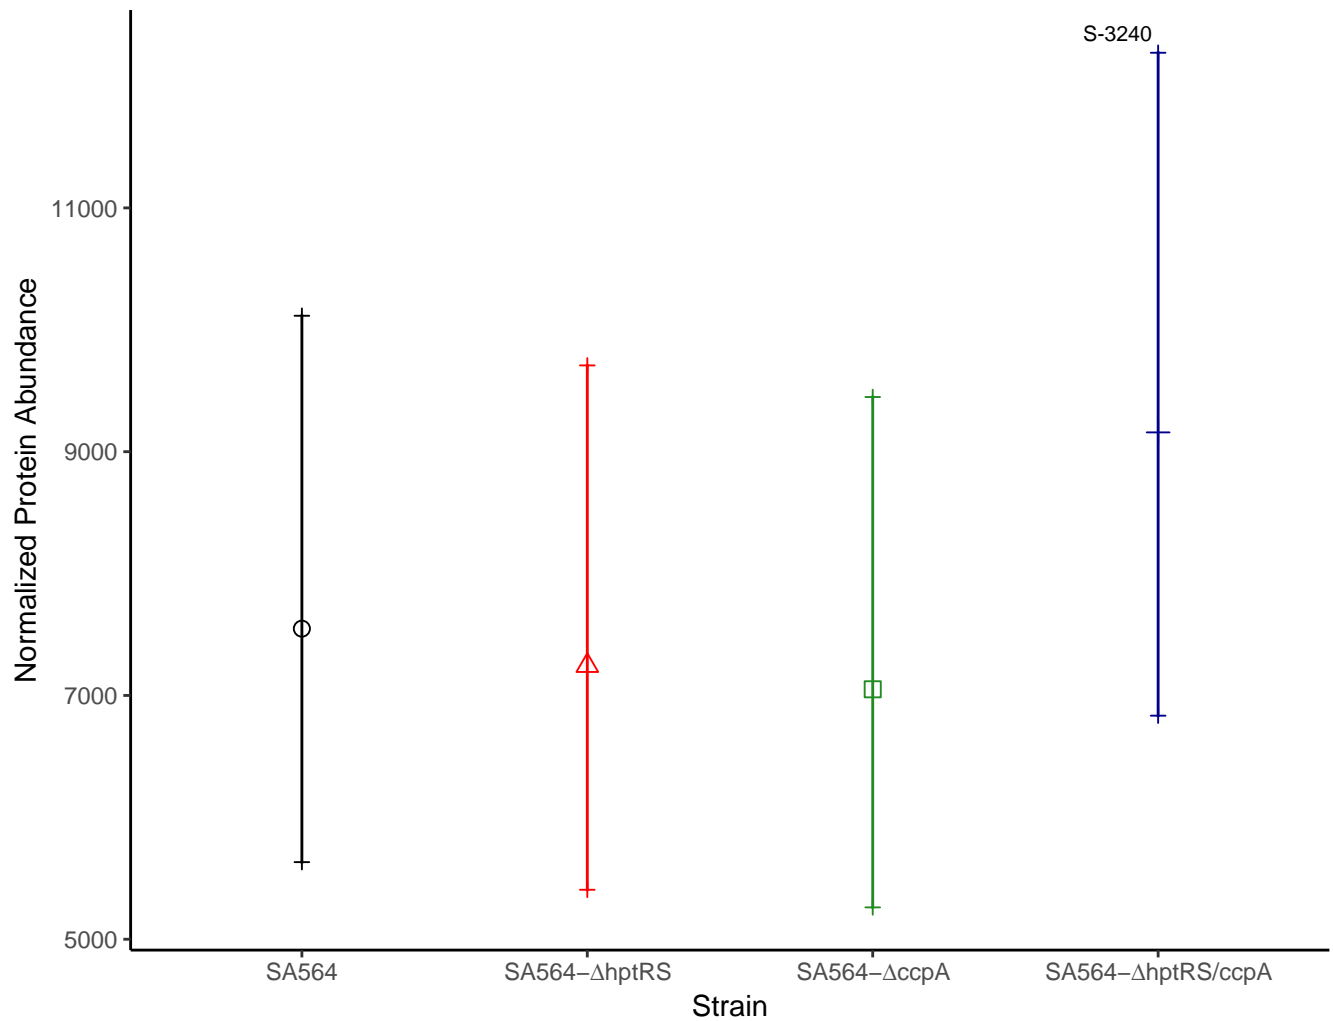

- ⊕ SA564
- △ SA564- $\Delta$ hptRS
- ⊞ SA564- $\Delta$ ccpA
- + SA564- $\Delta$ hptRS/ccpA



# NREB\_STAAM

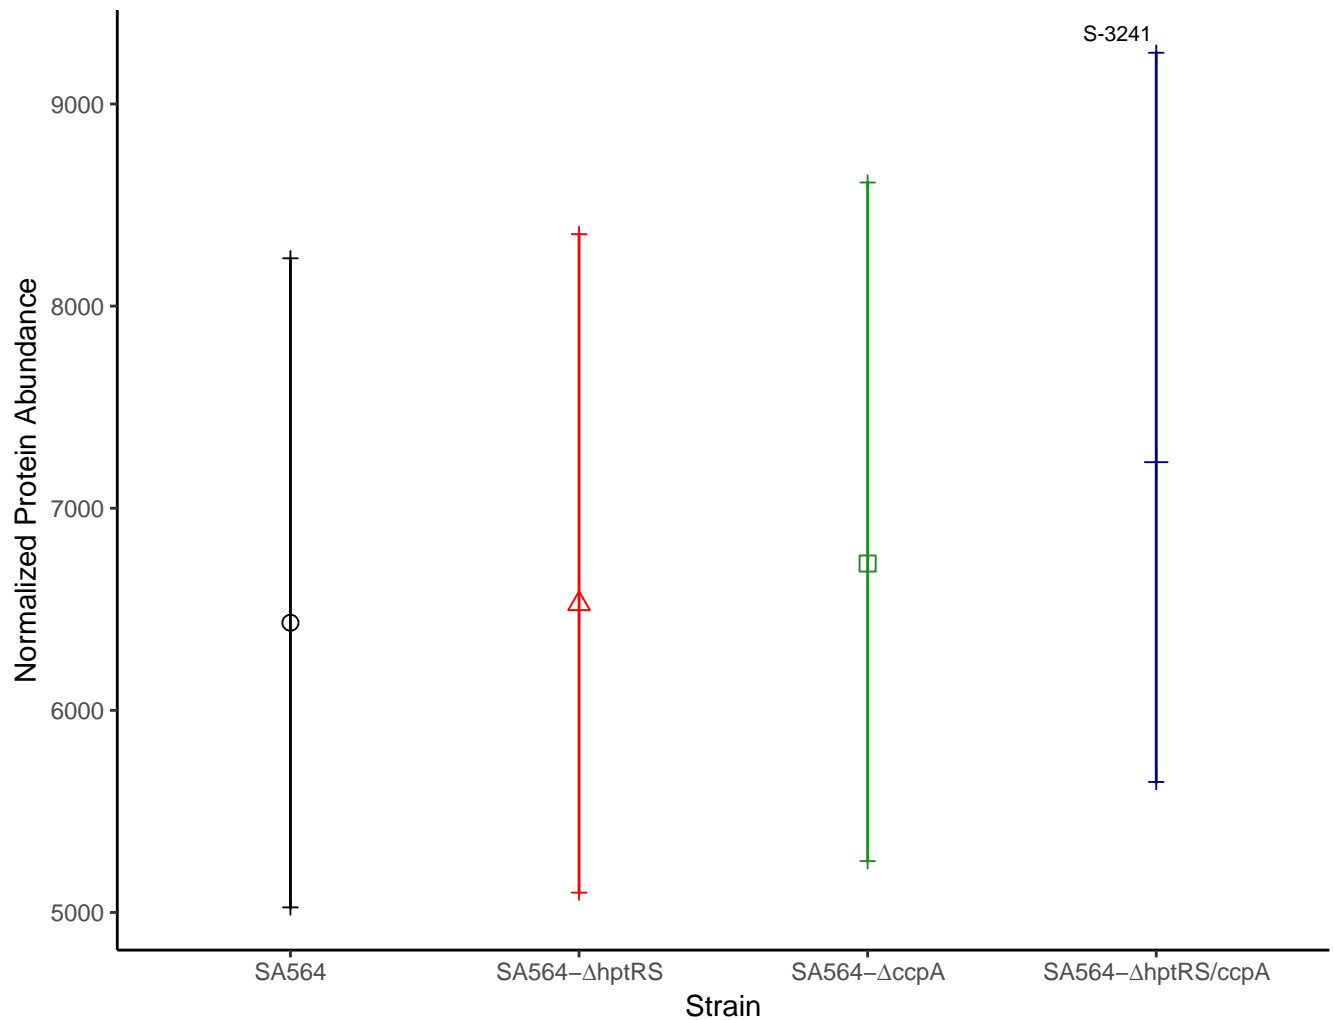

- ⊕ SA564
- △ SA564- $\Delta$ *hptRS*
- ⊞ SA564- $\Delta$ *ccpA*
- + SA564- $\Delta$ *hptRS/ccpA*

# NUSG\_STAAM

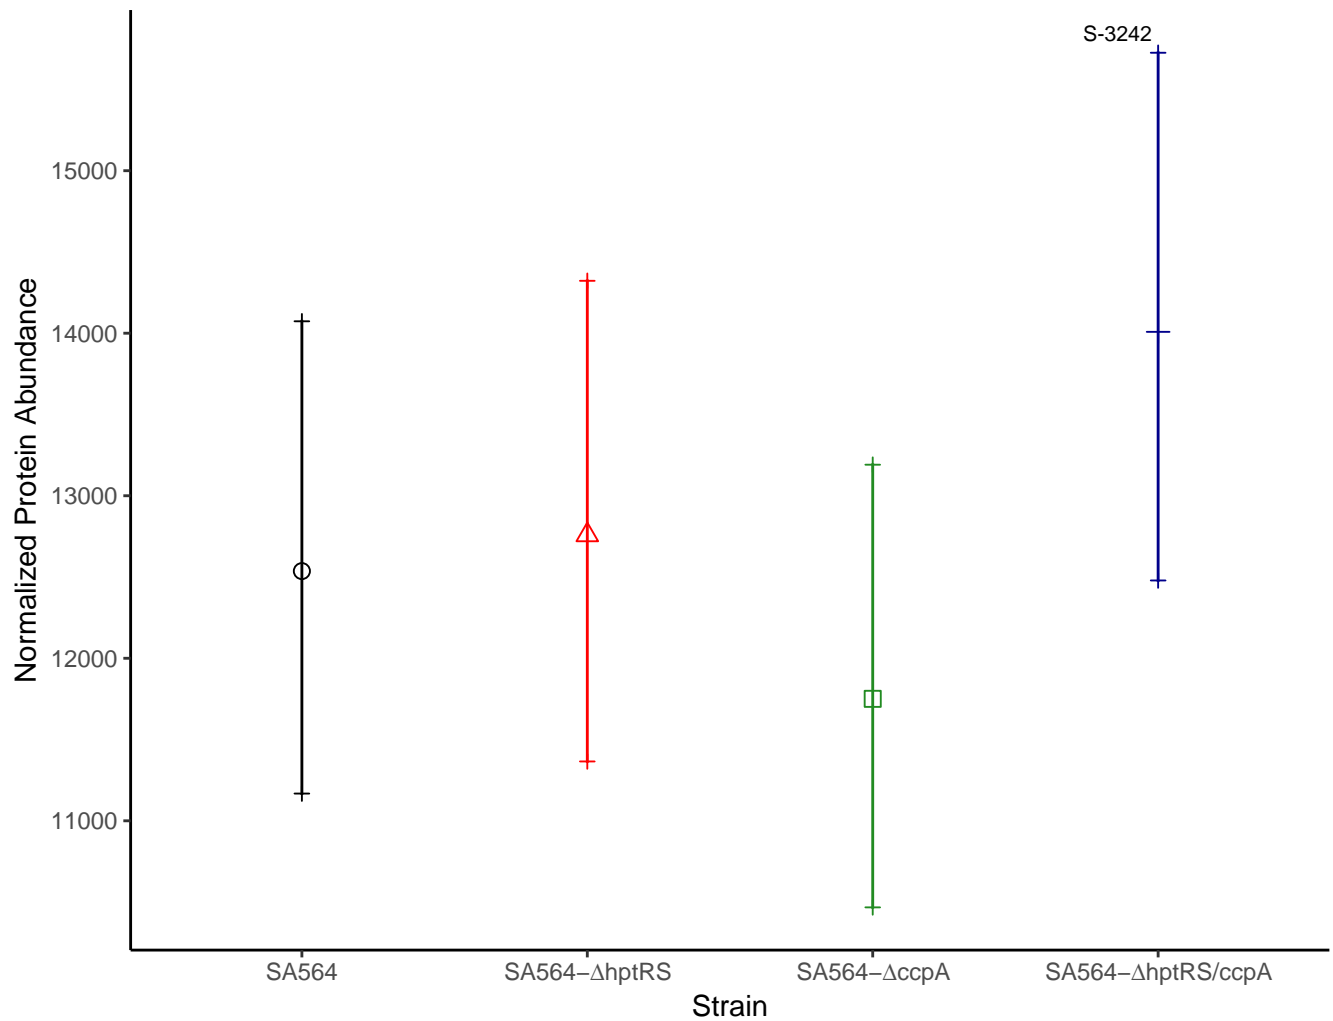

- ⊕ SA564
- △ SA564- $\Delta$ hptRS
- ⊞ SA564- $\Delta$ ccpA
- + SA564- $\Delta$ hptRS/ccpA

# OAT2\_STAAM

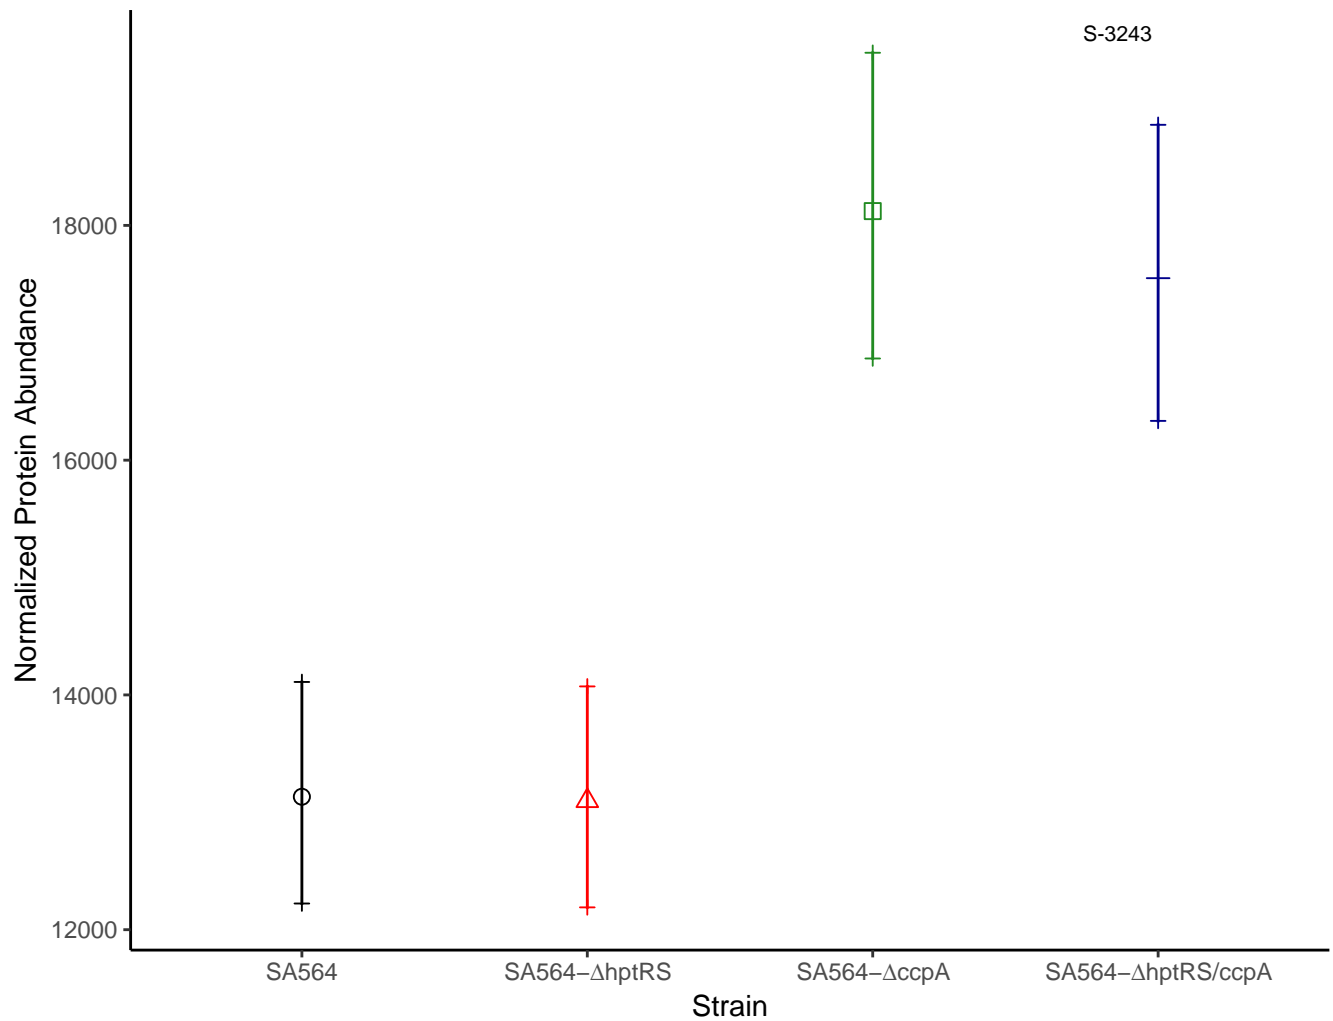

- ⊕ SA564
- △ SA564- $\Delta$ hptRS
- ⊞ SA564- $\Delta$ ccpA
- + SA564- $\Delta$ hptRS/ccpA

# OBG\_STAAM

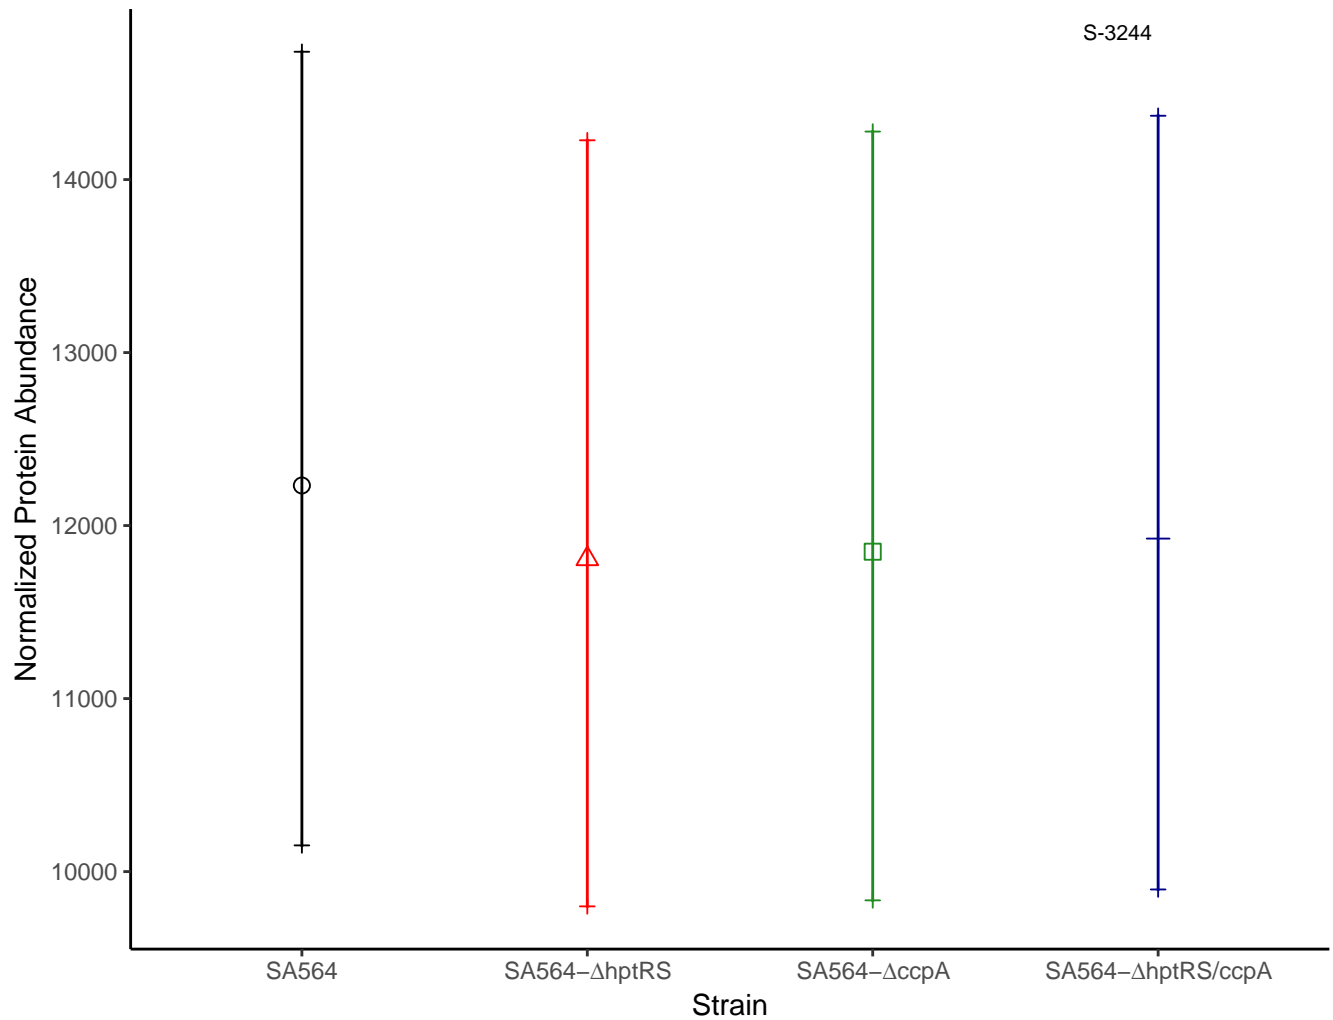

- ⊕ SA564
- △ SA564- $\Delta$ hptRS
- ⊞ SA564- $\Delta$ ccpA
- + SA564- $\Delta$ hptRS/ccpA

# ODO1\_STAAM

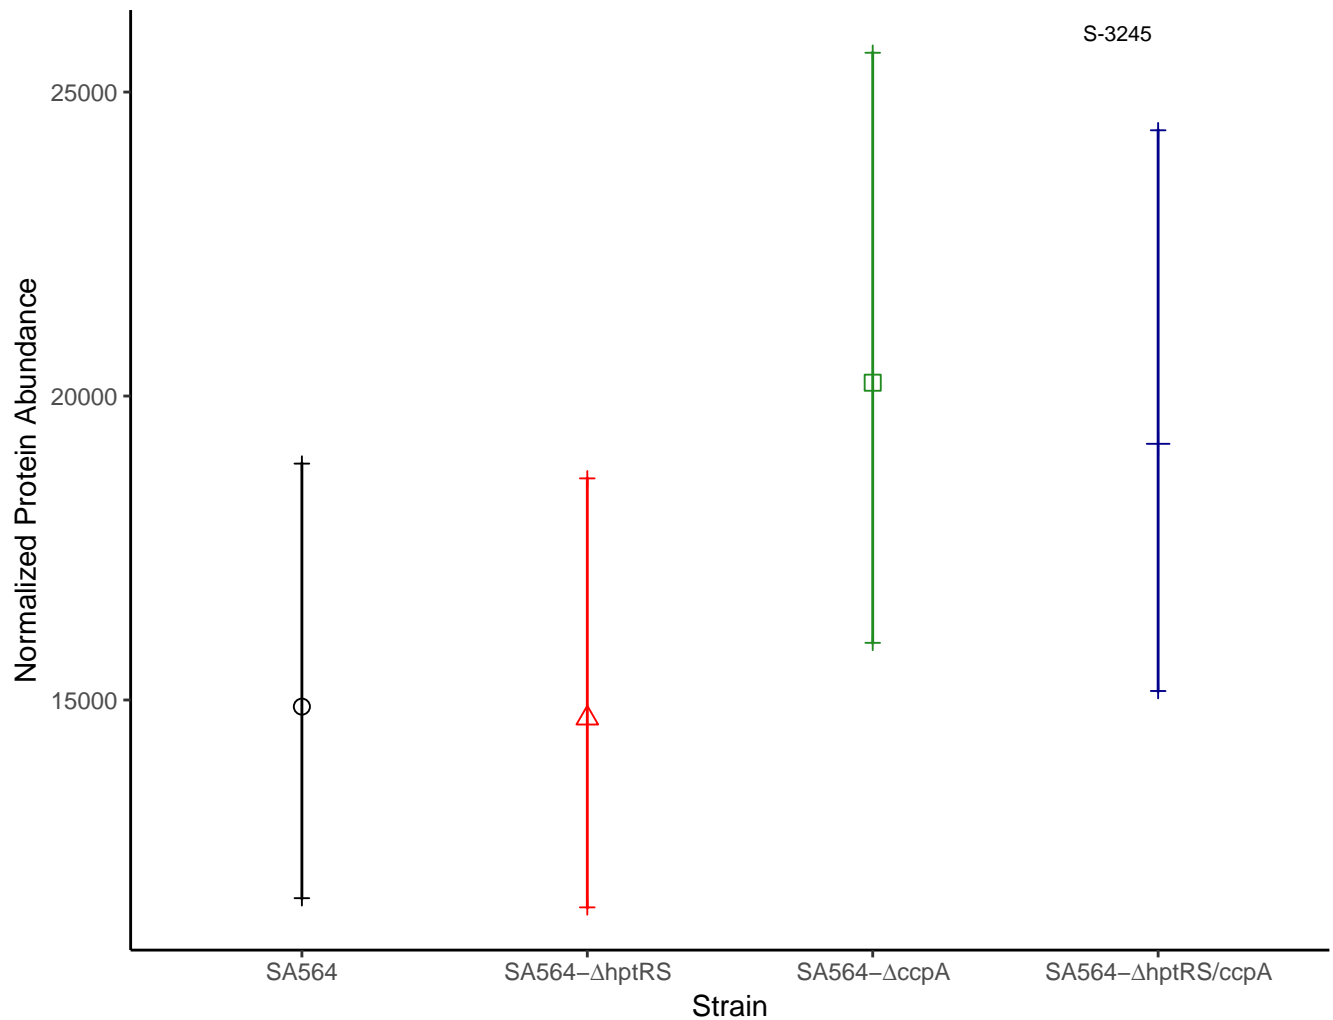

S-3245

- ⊕ SA564
- △ SA564- $\Delta$ hptRS
- ⊞ SA564- $\Delta$ ccpA
- + SA564- $\Delta$ hptRS/ccpA

# ODO2\_STAAM

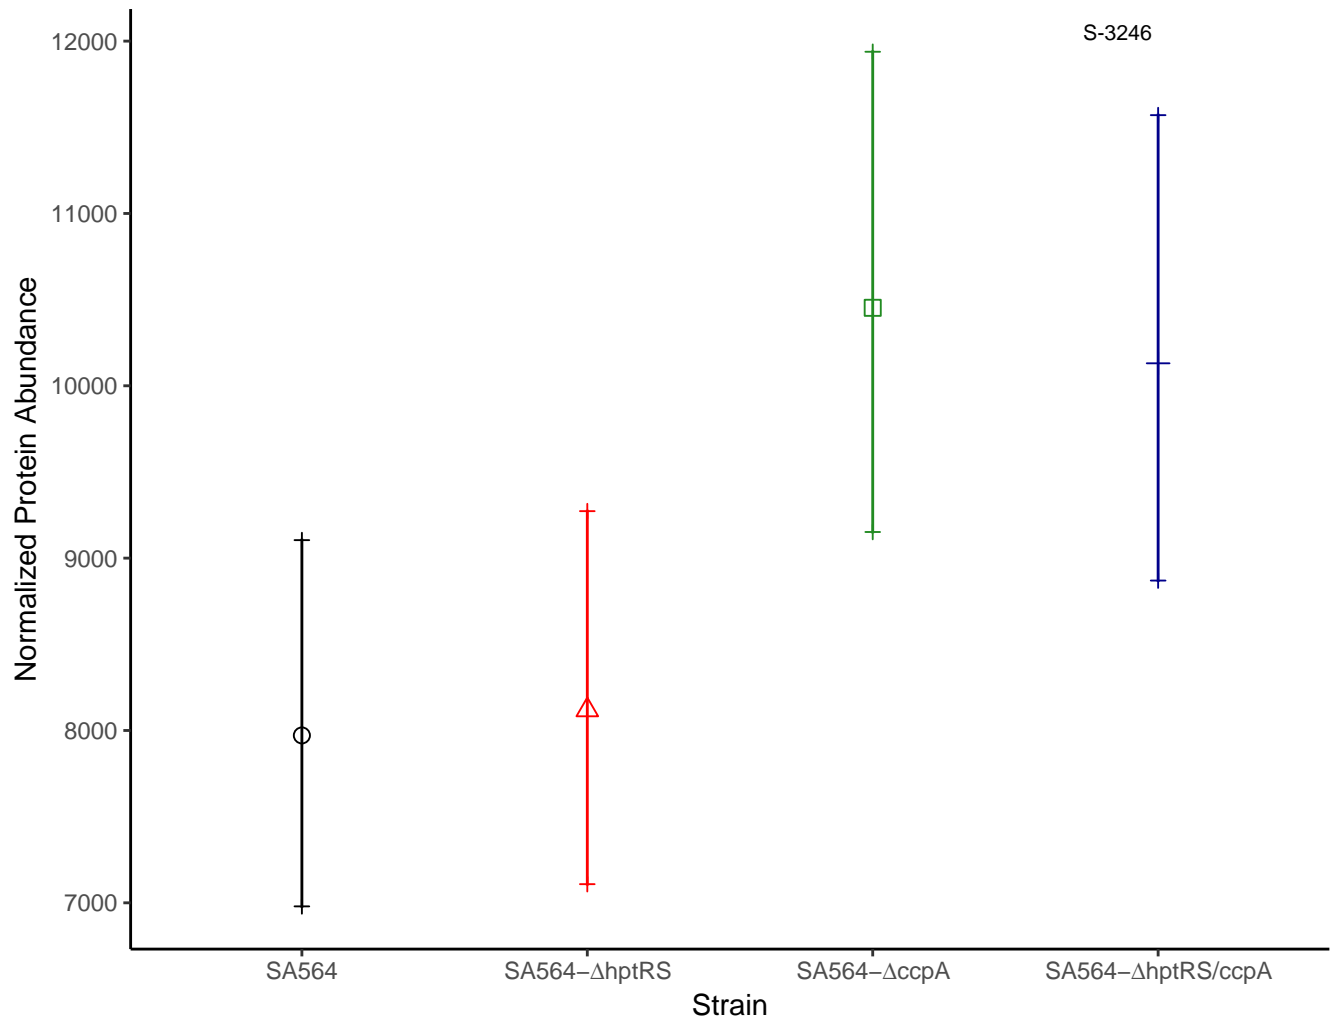

- ⊕ SA564
- △ SA564- $\Delta$ hptRS
- ⊞ SA564- $\Delta$ ccpA
- + SA564- $\Delta$ hptRS/ccpA

# ODP2\_STAAM

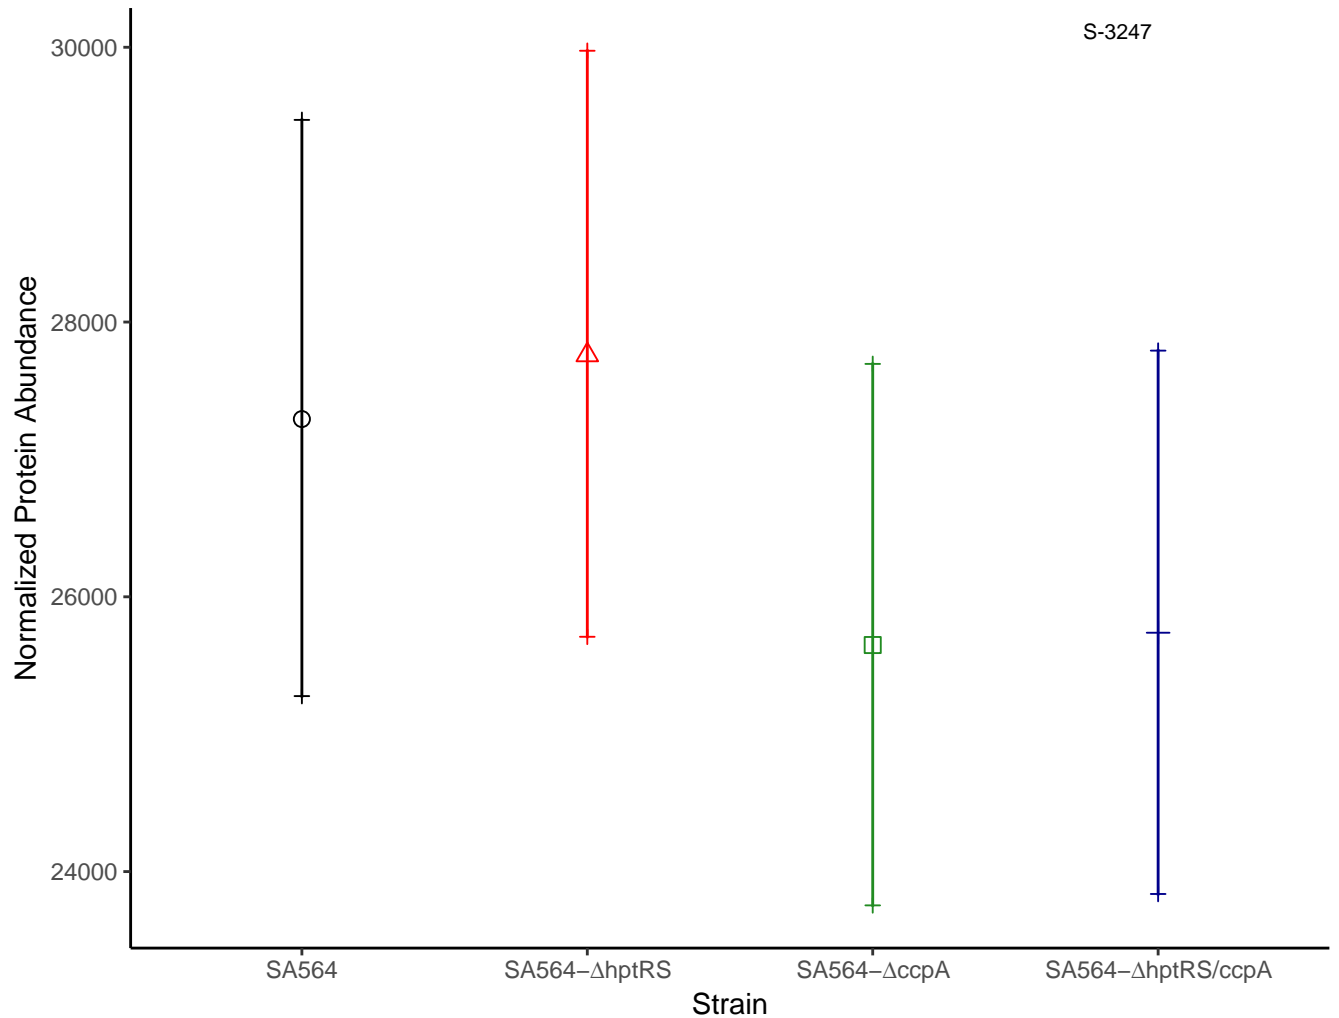

- ⊕ SA564
- △ SA564- $\Delta$ hptRS
- ⊞ SA564- $\Delta$ ccpA
- + SA564- $\Delta$ hptRS/ccpA

# ODPA\_STAAM

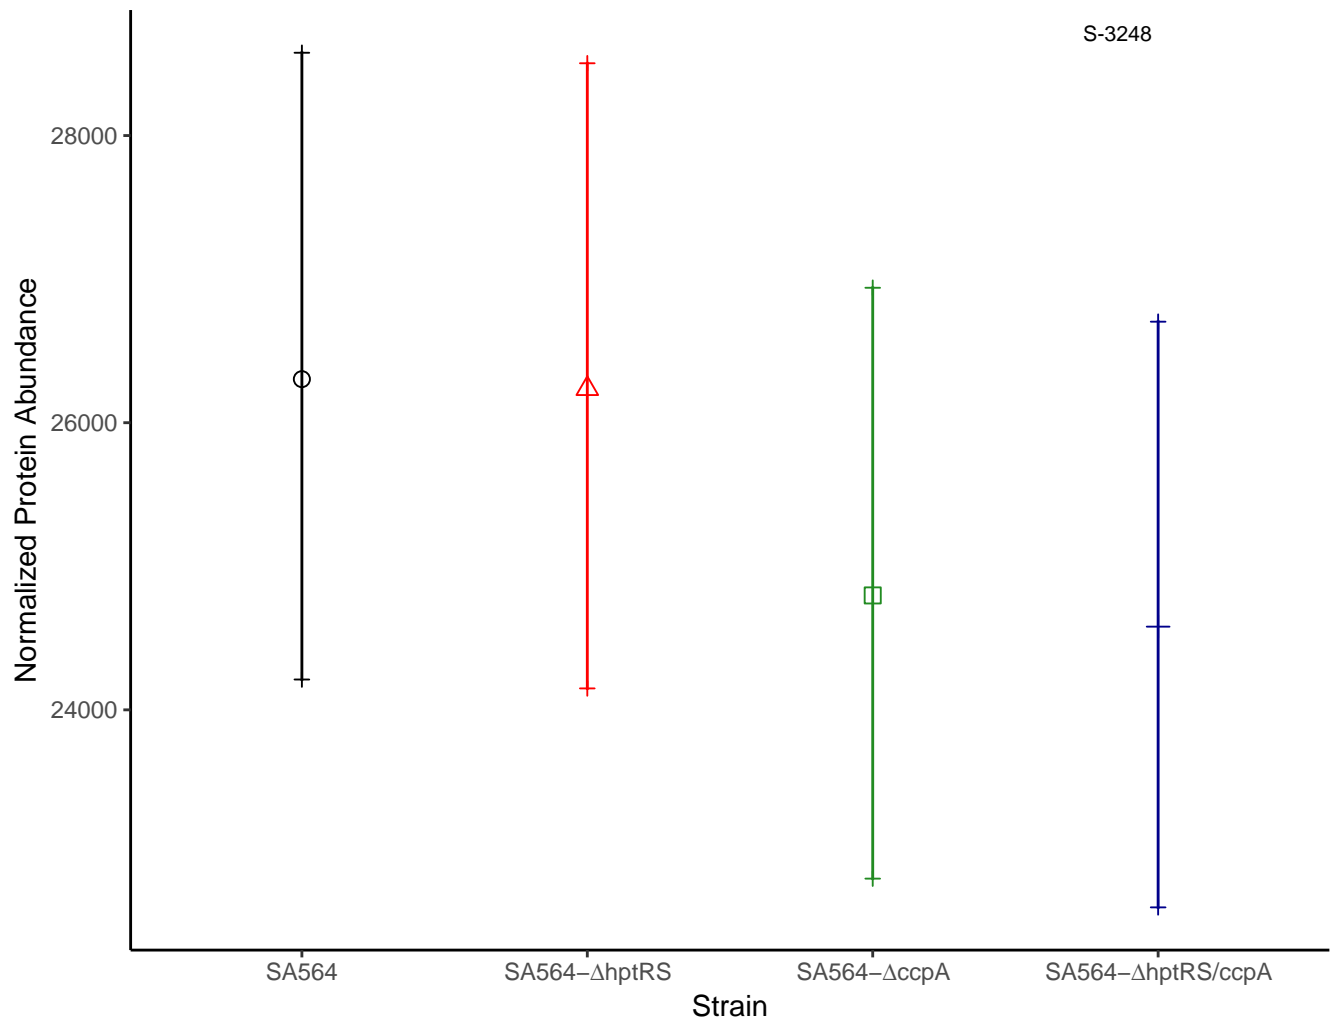

- ⊕ SA564
- △ SA564- $\Delta$ hptRS
- ⊞ SA564- $\Delta$ ccpA
- + SA564- $\Delta$ hptRS/ccpA



# ODPB\_STAAM

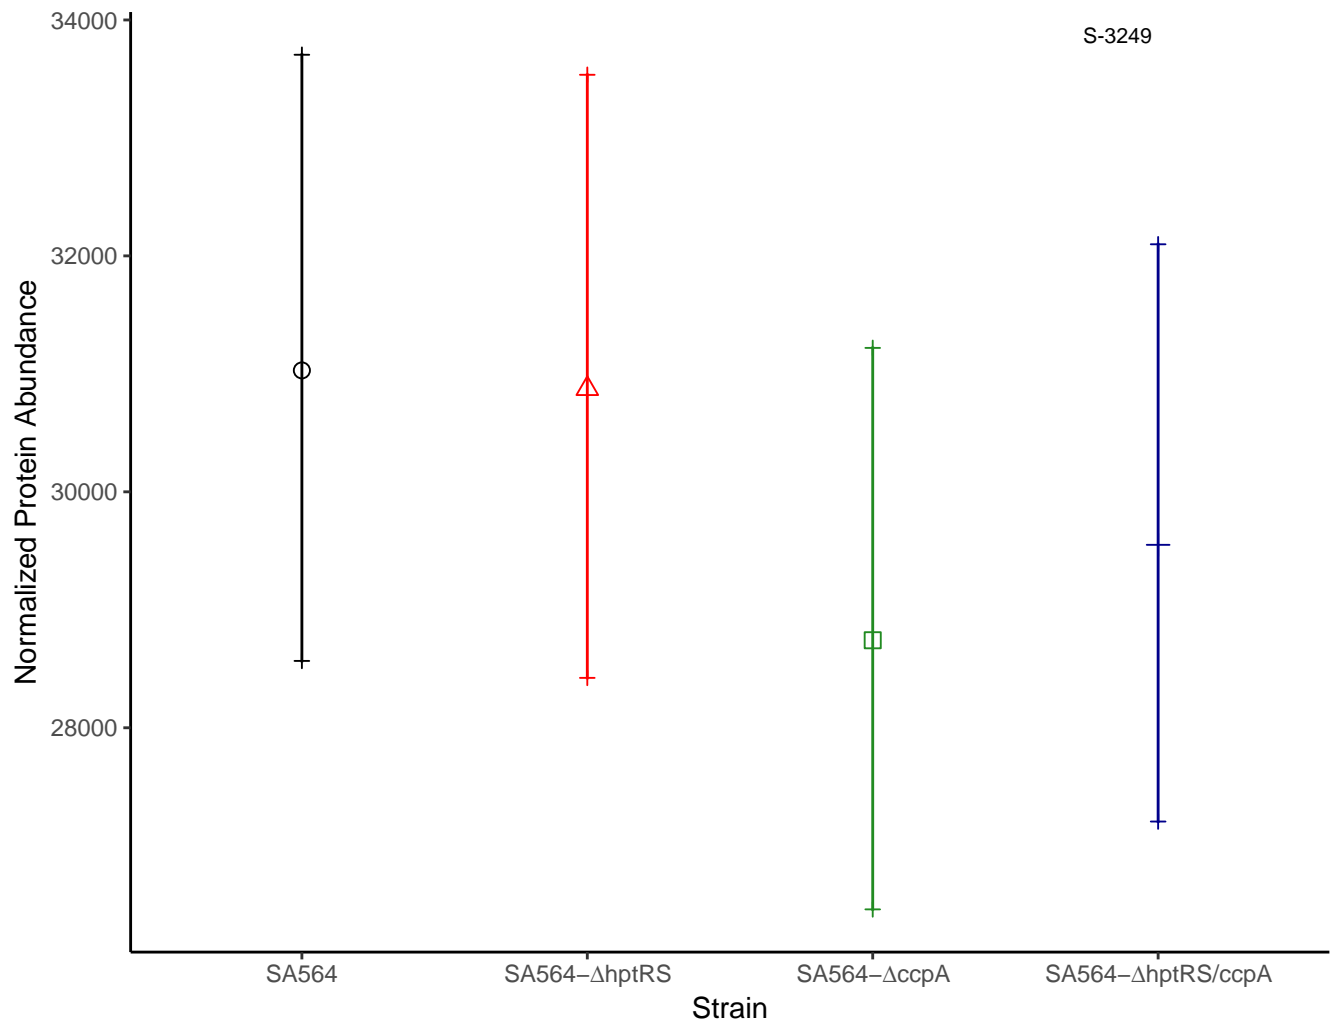

- ⊕ SA564
- △ SA564- $\Delta$ hptRS
- ⊞ SA564- $\Delta$ ccpA
- + SA564- $\Delta$ hptRS/ccpA

# OHRL\_STAAM

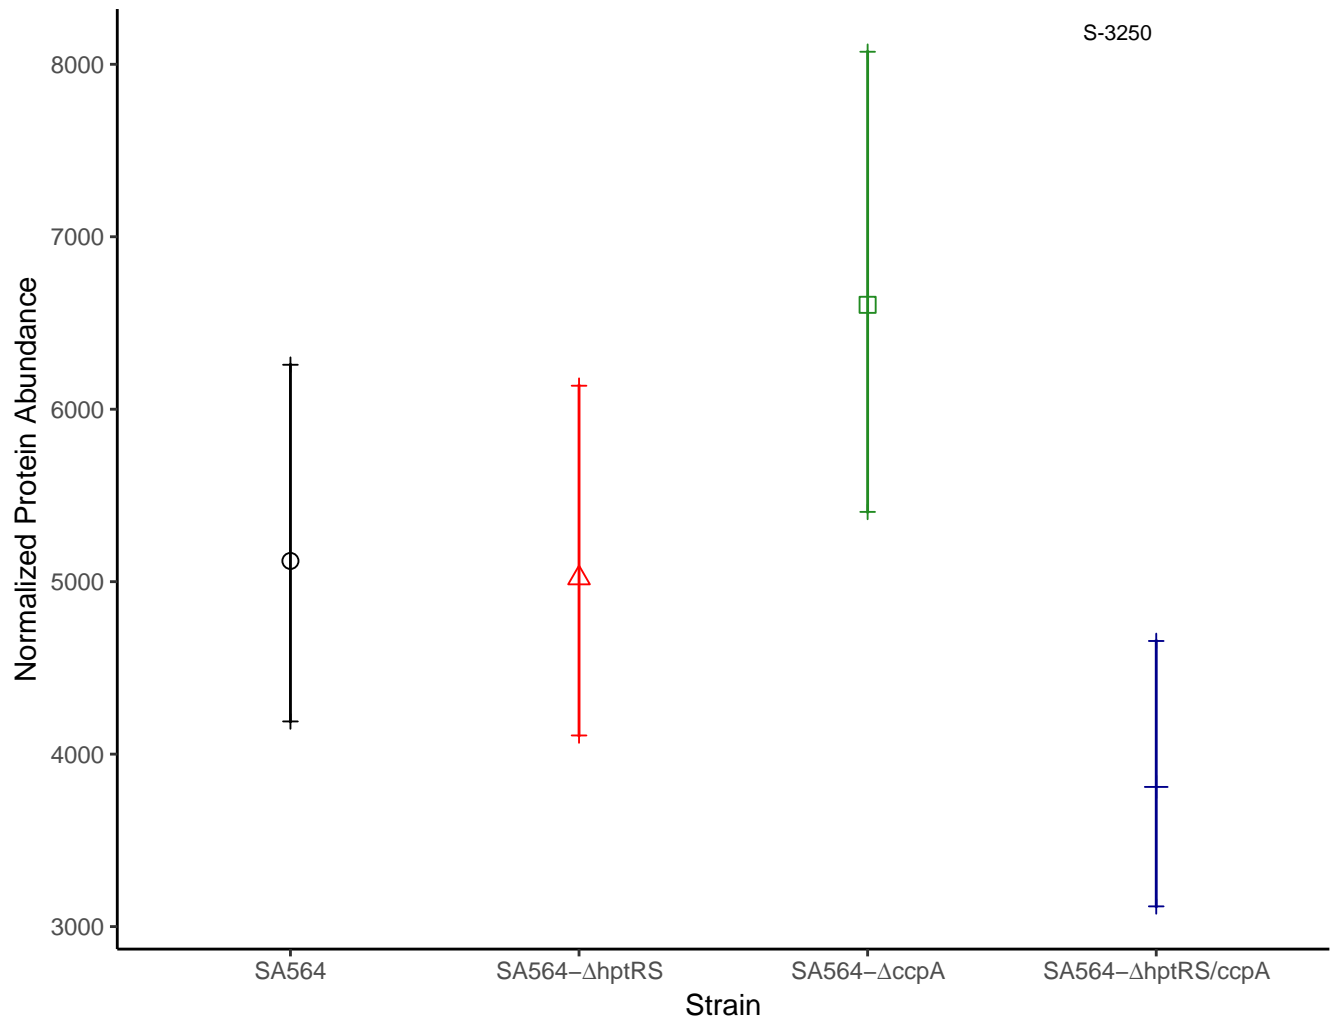

- ⊕ SA564
- △ SA564- $\Delta$ hptRS
- ⊞ SA564- $\Delta$ ccpA
- ⊕ SA564- $\Delta$ hptRS/ccpA

# OTC\_STAAM

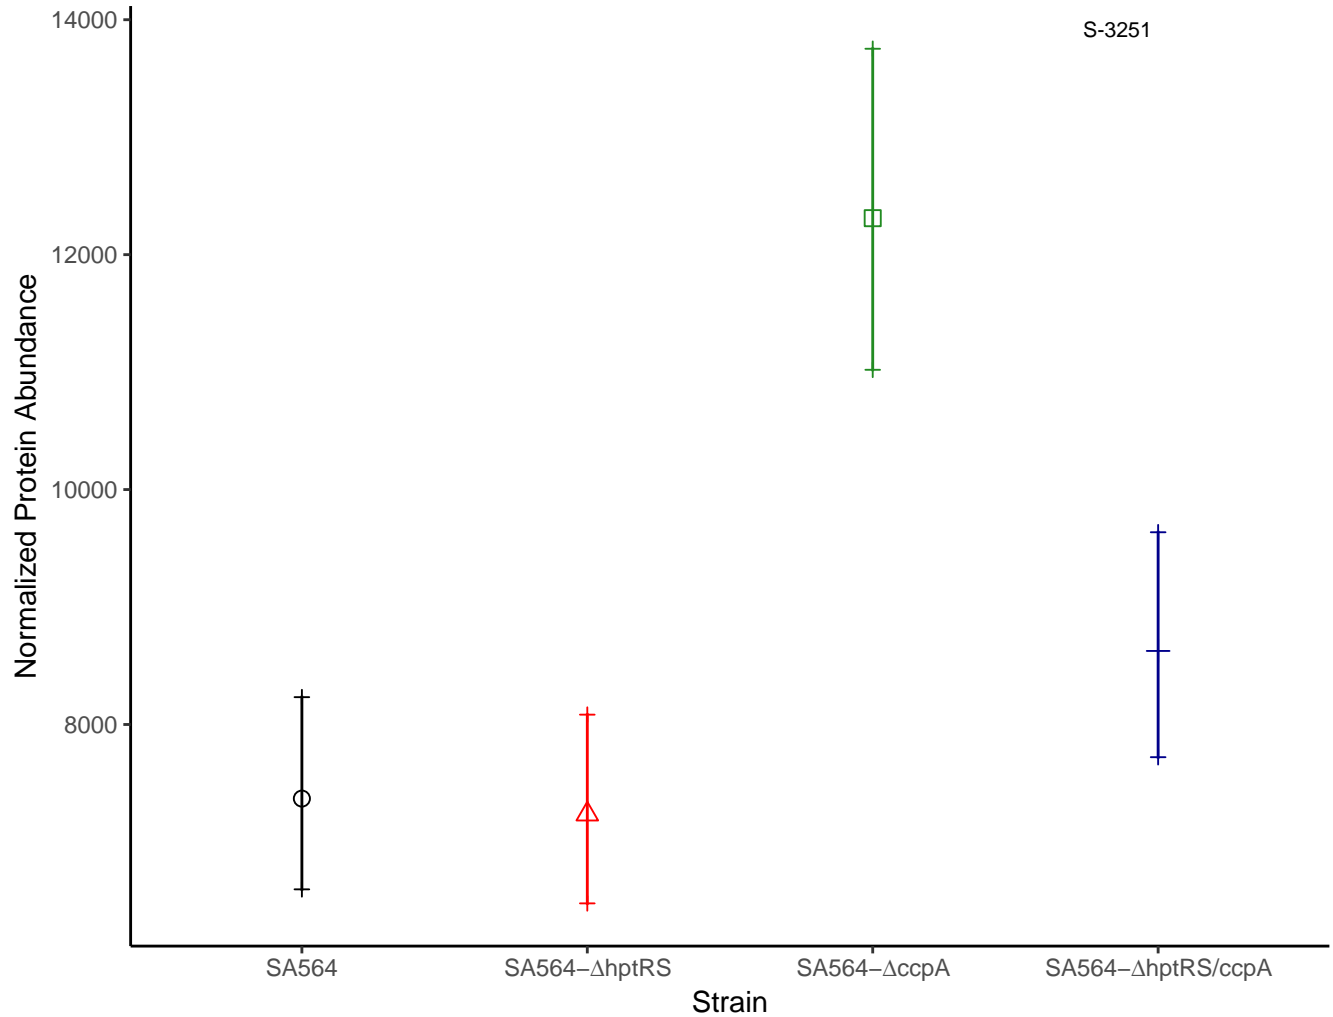

- ⊕ SA564
- △ SA564- $\Delta$ hptRS
- ⊞ SA564- $\Delta$ ccpA
- + SA564- $\Delta$ hptRS/ccpA

# OTCC\_STAAM

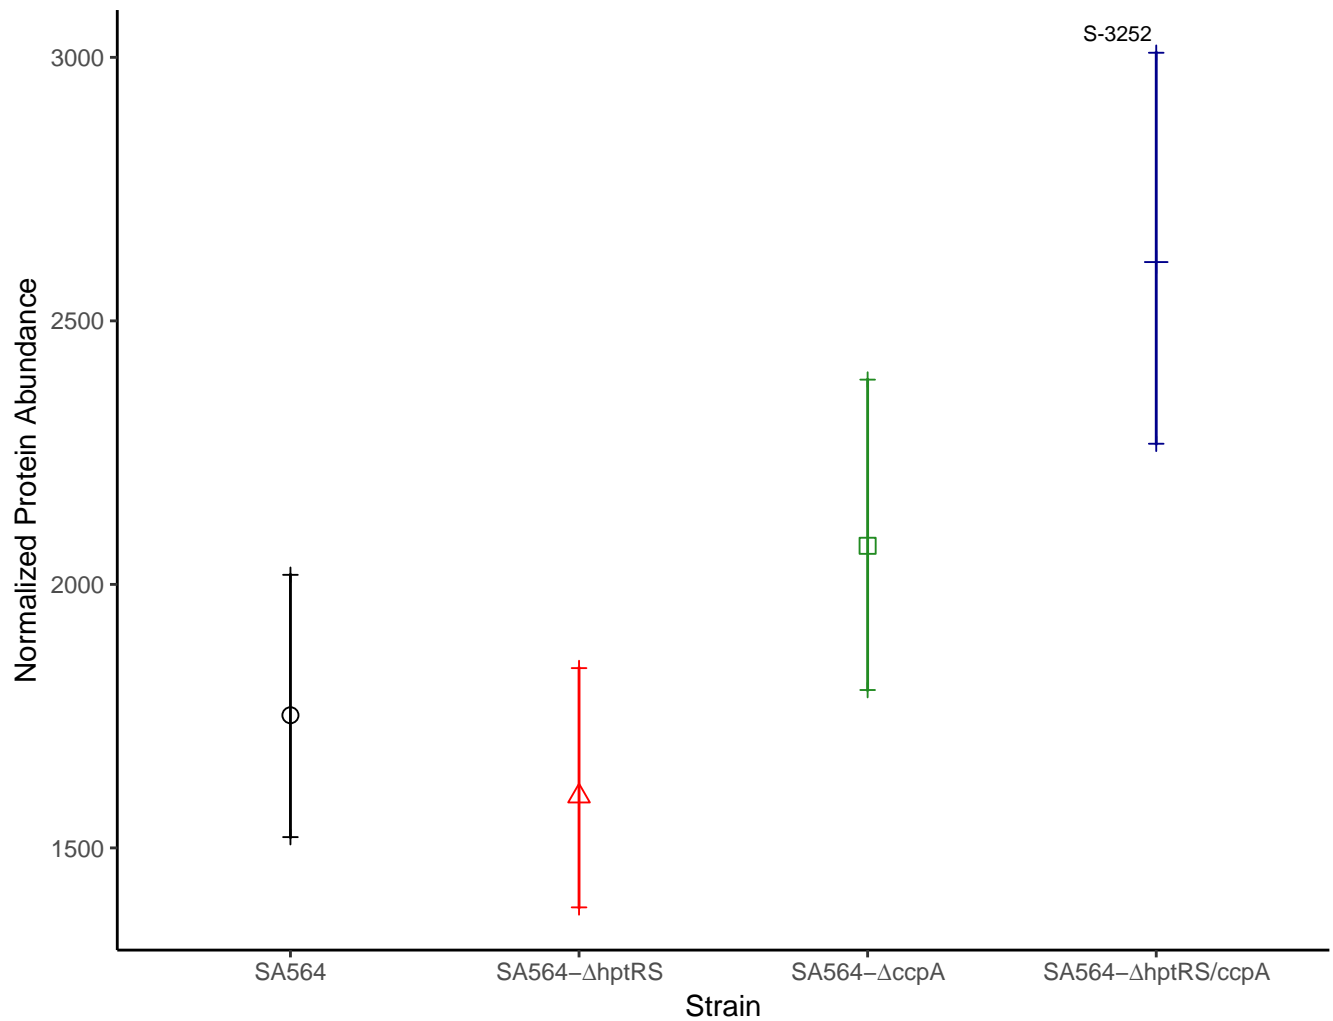

- ⊕ SA564
- △ SA564- $\Delta$ hptRS
- ⊞ SA564- $\Delta$ ccpA
- + SA564- $\Delta$ hptRS/ccpA

# P5CR\_STAAM

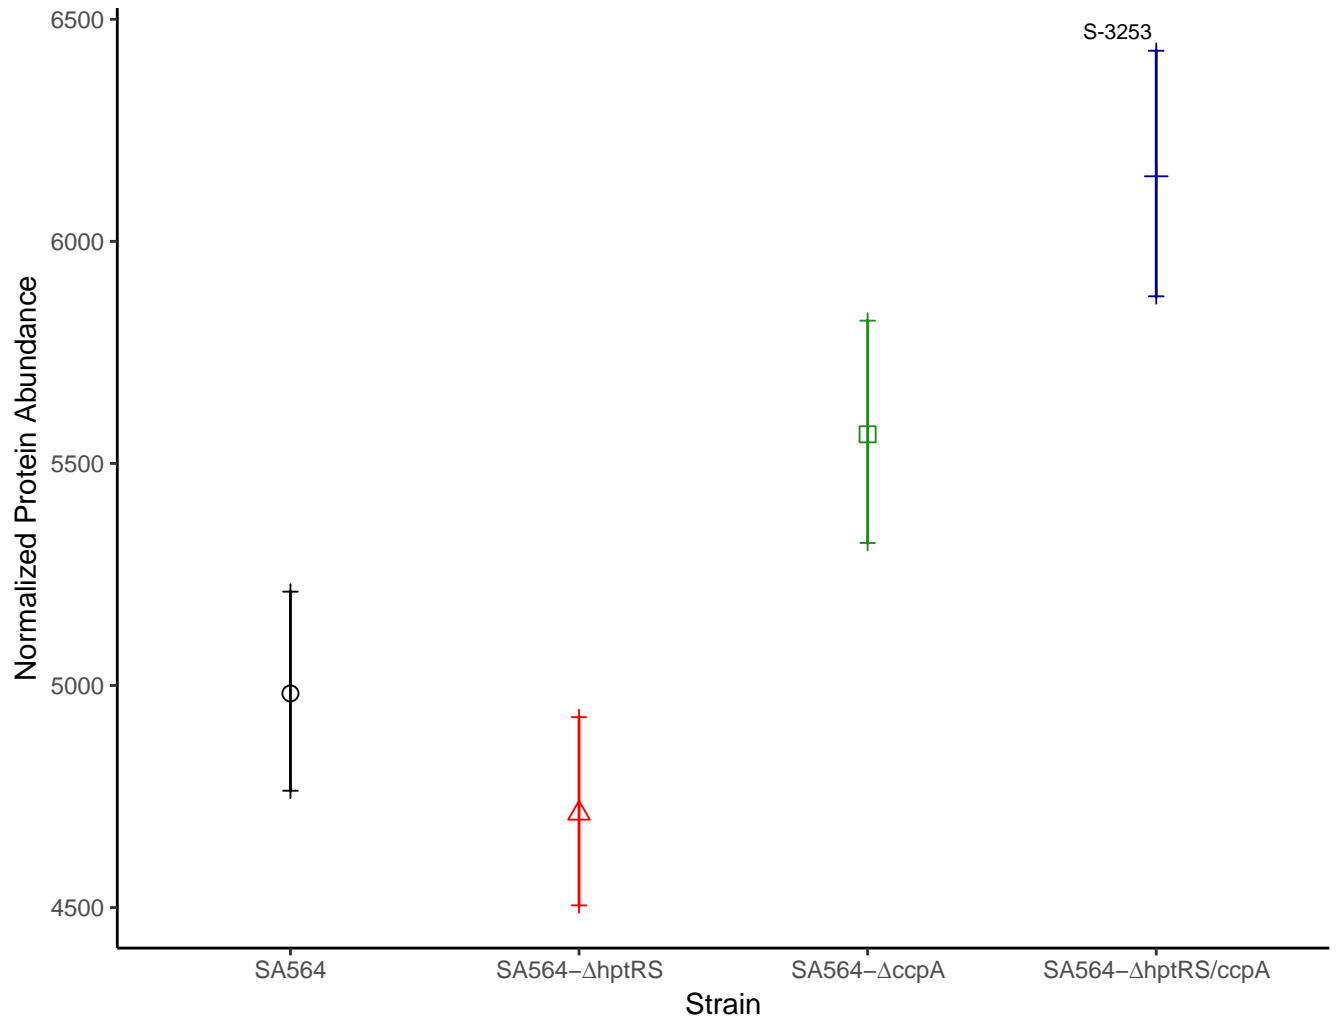

- ⊕ SA564
- △ SA564- $\Delta$ hptRS
- ⊞ SA564- $\Delta$ ccpA
- + SA564- $\Delta$ hptRS/ccpA

# PANB\_STAAM

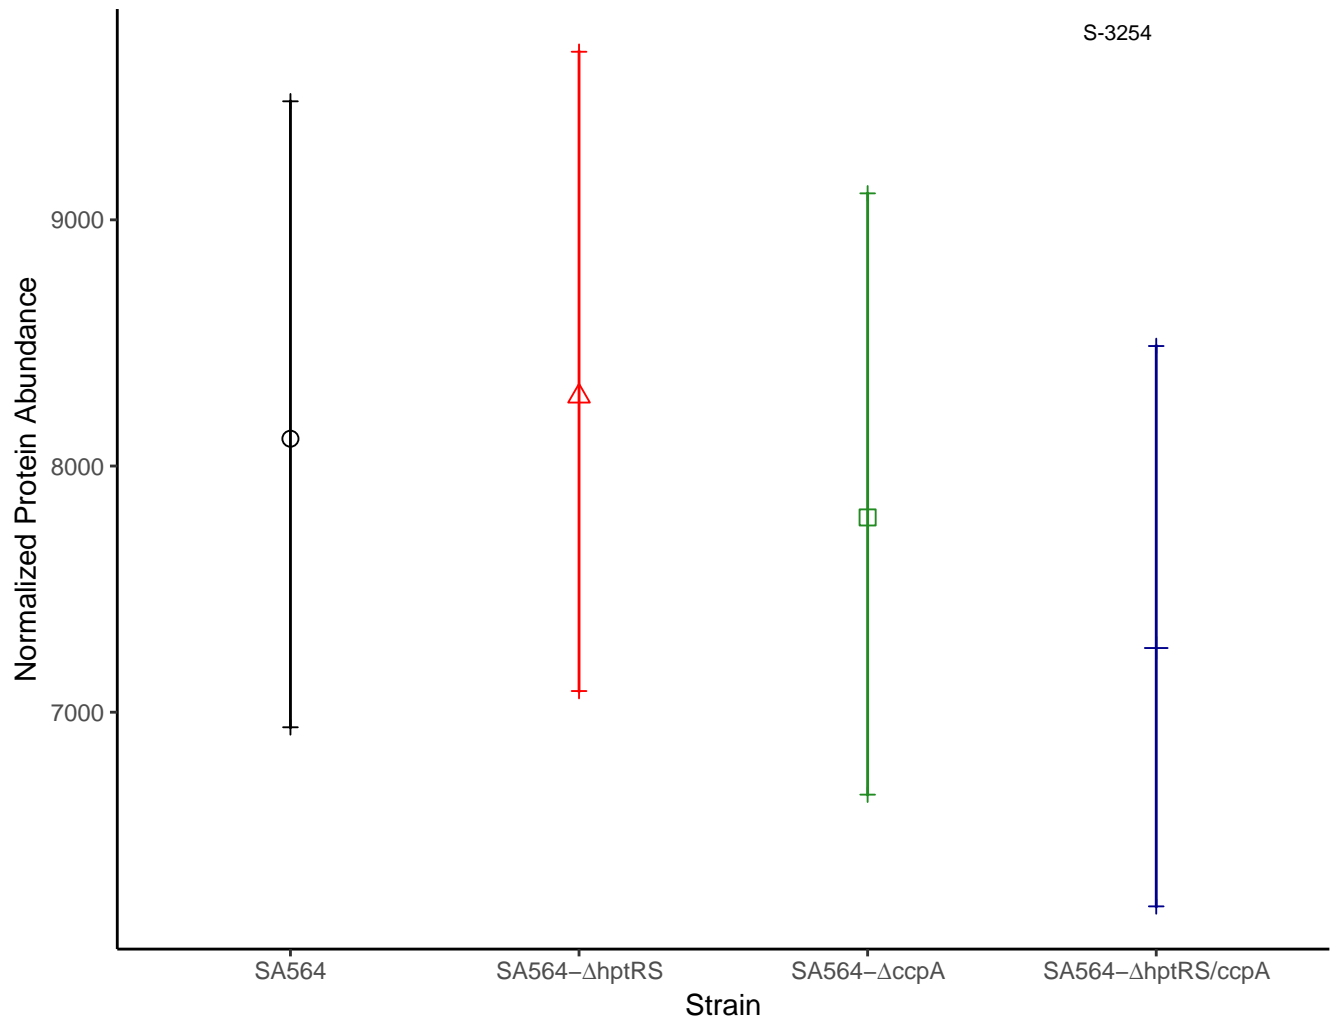

- ⊕ SA564
- △ SA564- $\Delta$ hptRS
- ⊞ SA564- $\Delta$ ccpA
- + SA564- $\Delta$ hptRS/ccpA

# PAND\_STAAM

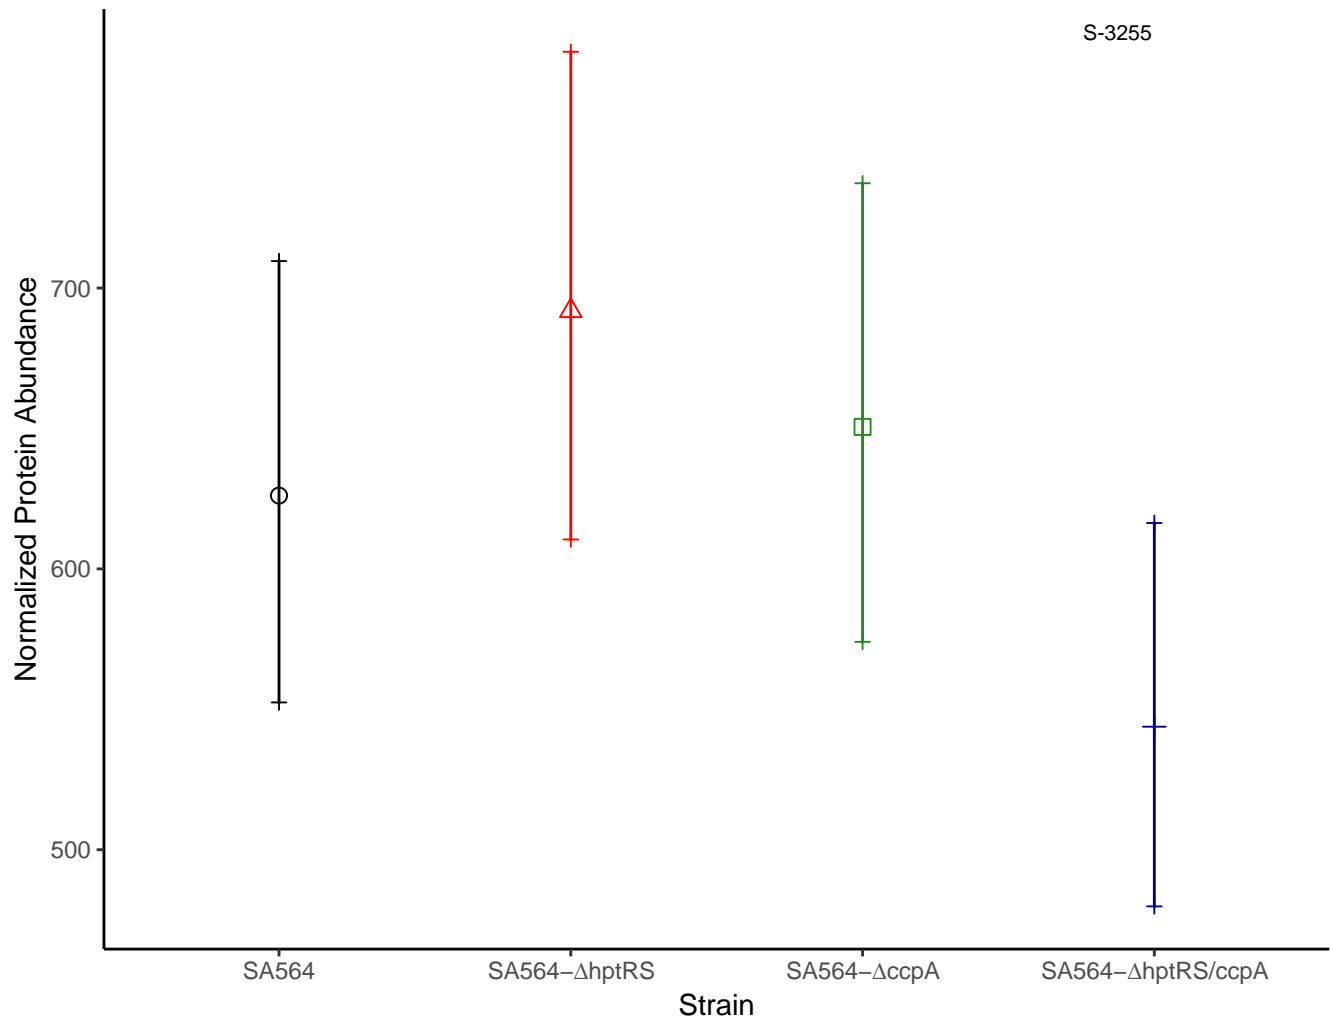

- ⊕ SA564
- △ SA564- $\Delta$ hptRS
- ⊞ SA564- $\Delta$ ccpA
- ⊕ SA564- $\Delta$ hptRS/ccpA

# PARC\_STAAM

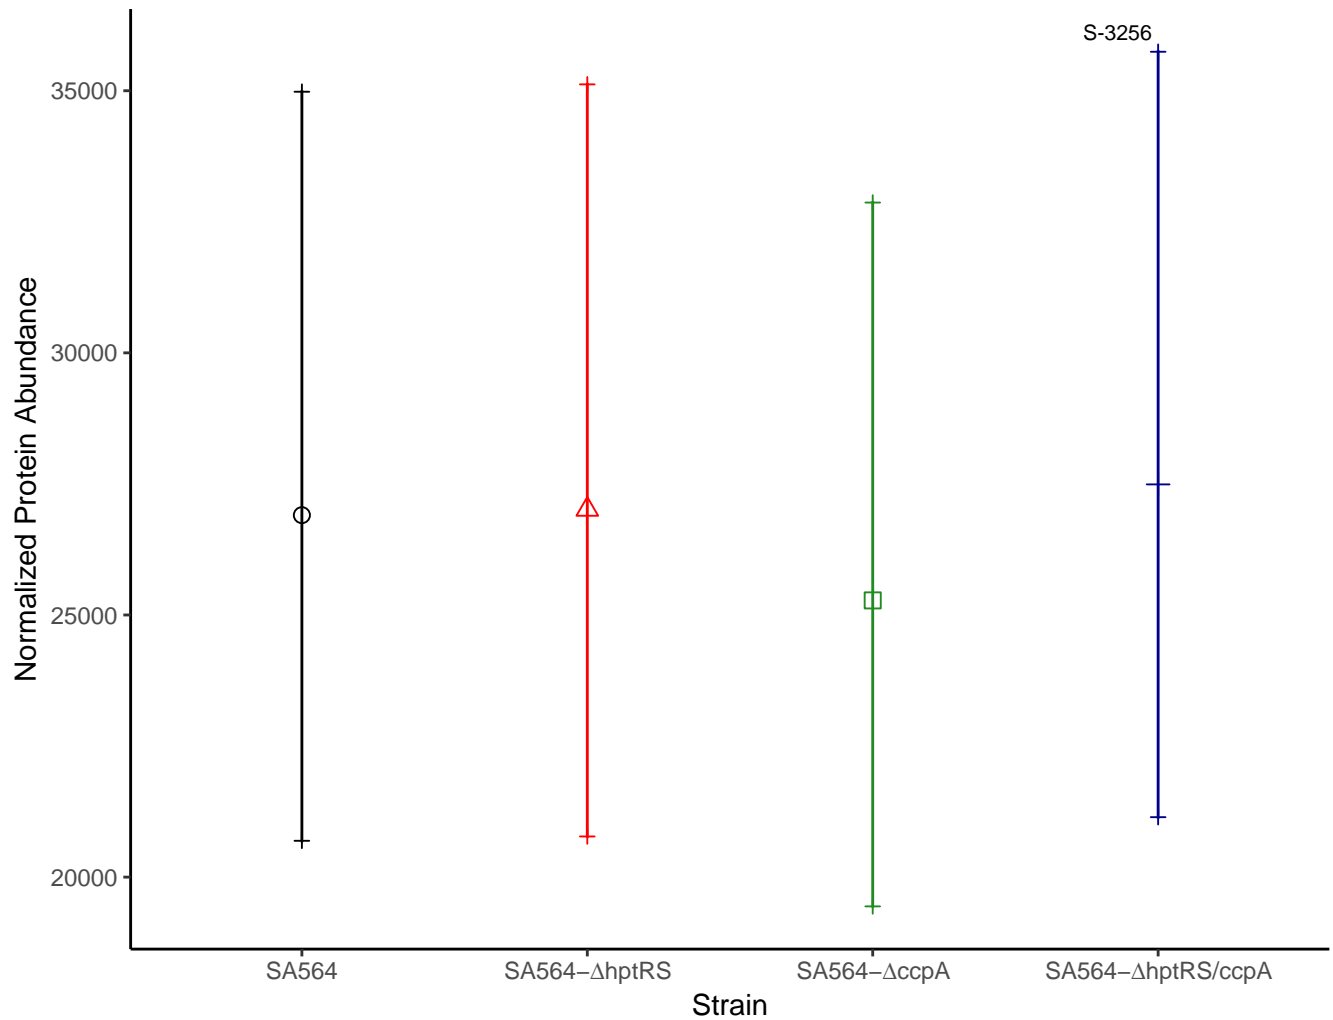

- ⊕ SA564
- △ SA564- $\Delta$ hptRS
- ⊞ SA564- $\Delta$ ccpA
- + SA564- $\Delta$ hptRS/ccpA



# PCKA\_STAAM

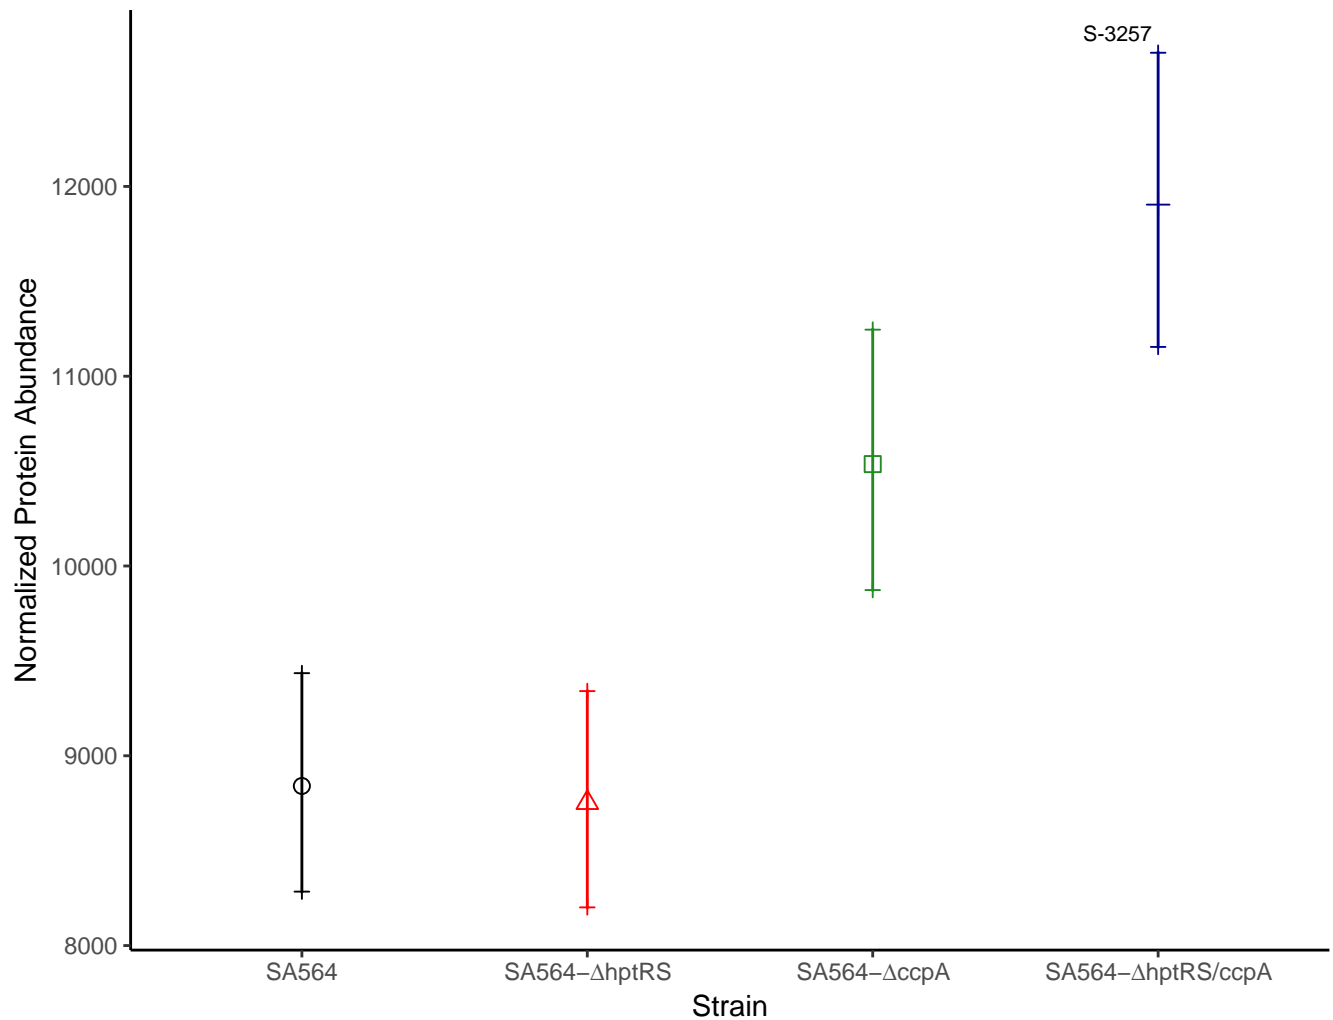

- ⊕ SA564
- △ SA564- $\Delta$ hptRS
- ⊞ SA564- $\Delta$ ccpA
- + SA564- $\Delta$ hptRS/ccpA

# PCRA\_STAAM

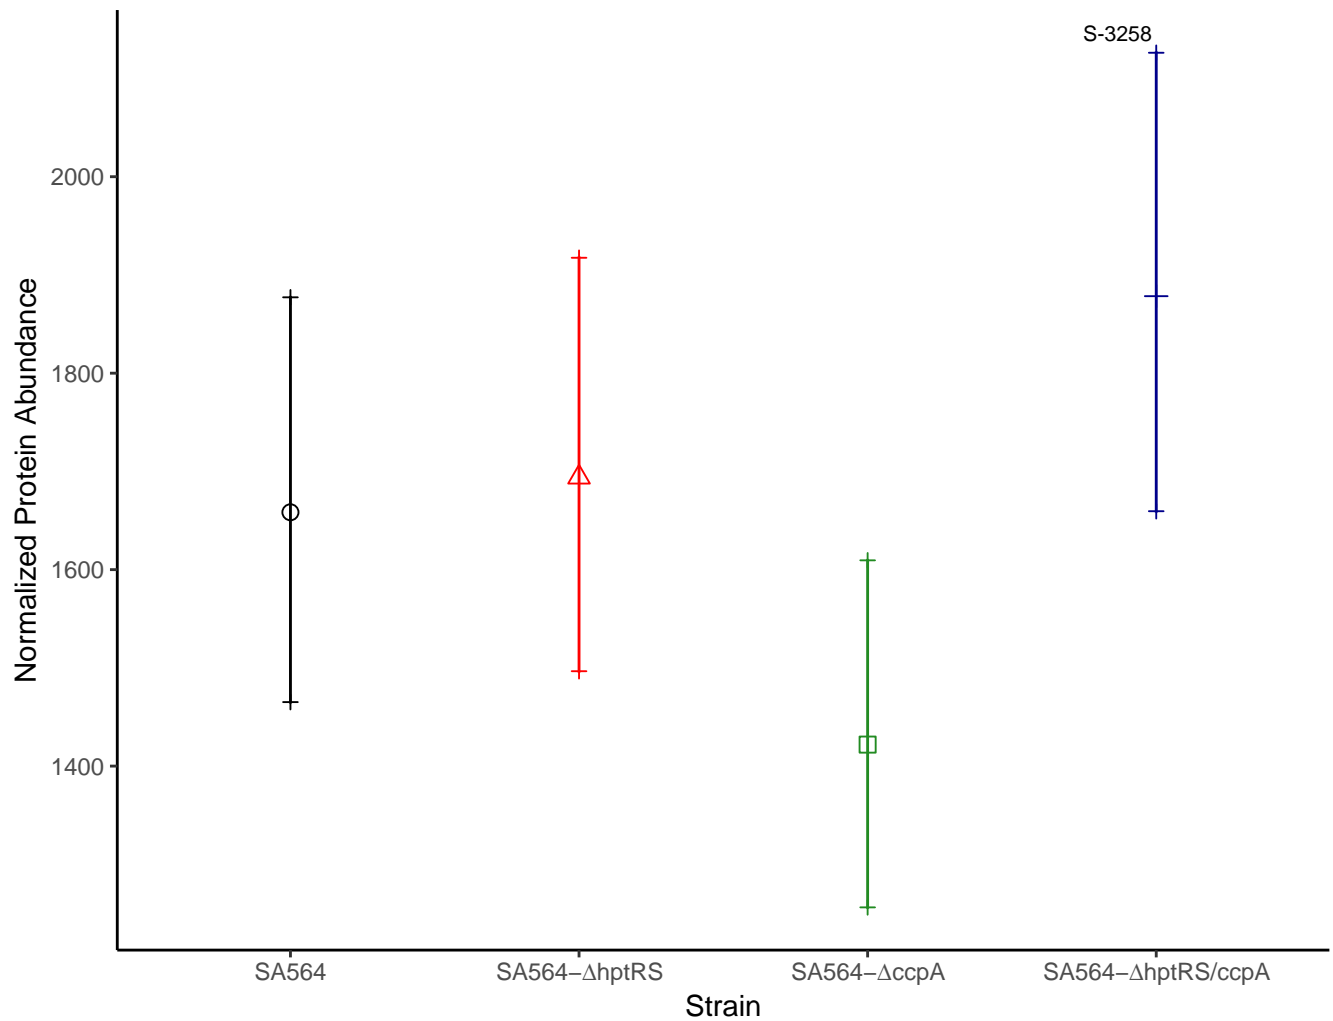

- ⊕ SA564
- △ SA564- $\Delta$ hptRS
- ⊞ SA564- $\Delta$ ccpA
- + SA564- $\Delta$ hptRS/ccpA

# PDP\_STAAM

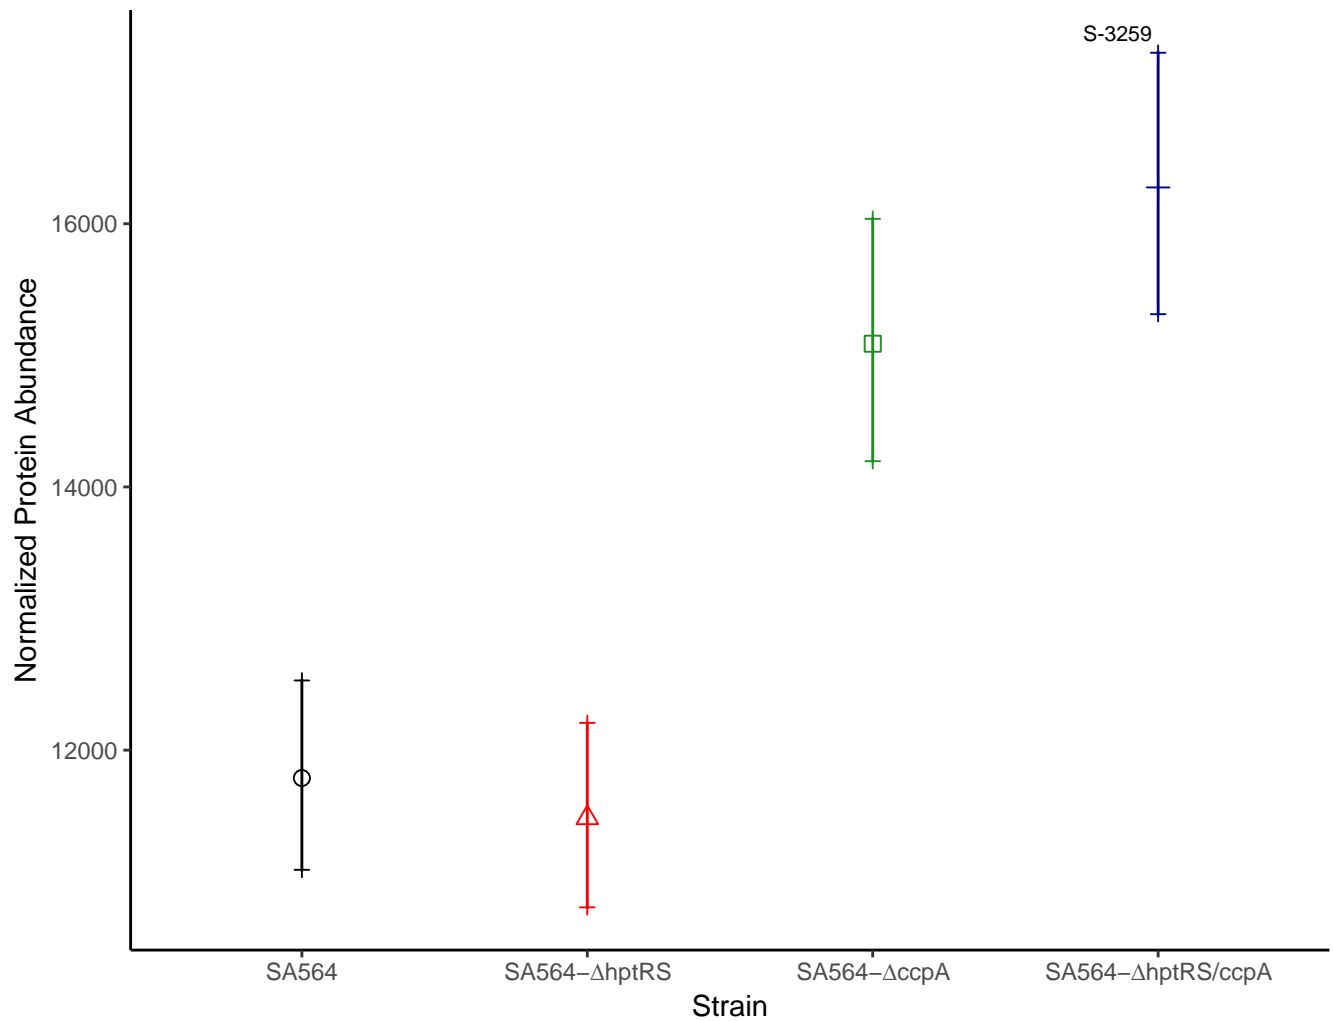

- ⊕ SA564
- △ SA564- $\Delta$ hptRS
- ⊞ SA564- $\Delta$ ccpA
- + SA564- $\Delta$ hptRS/ccpA

S-3259

# PDRP\_STAAM

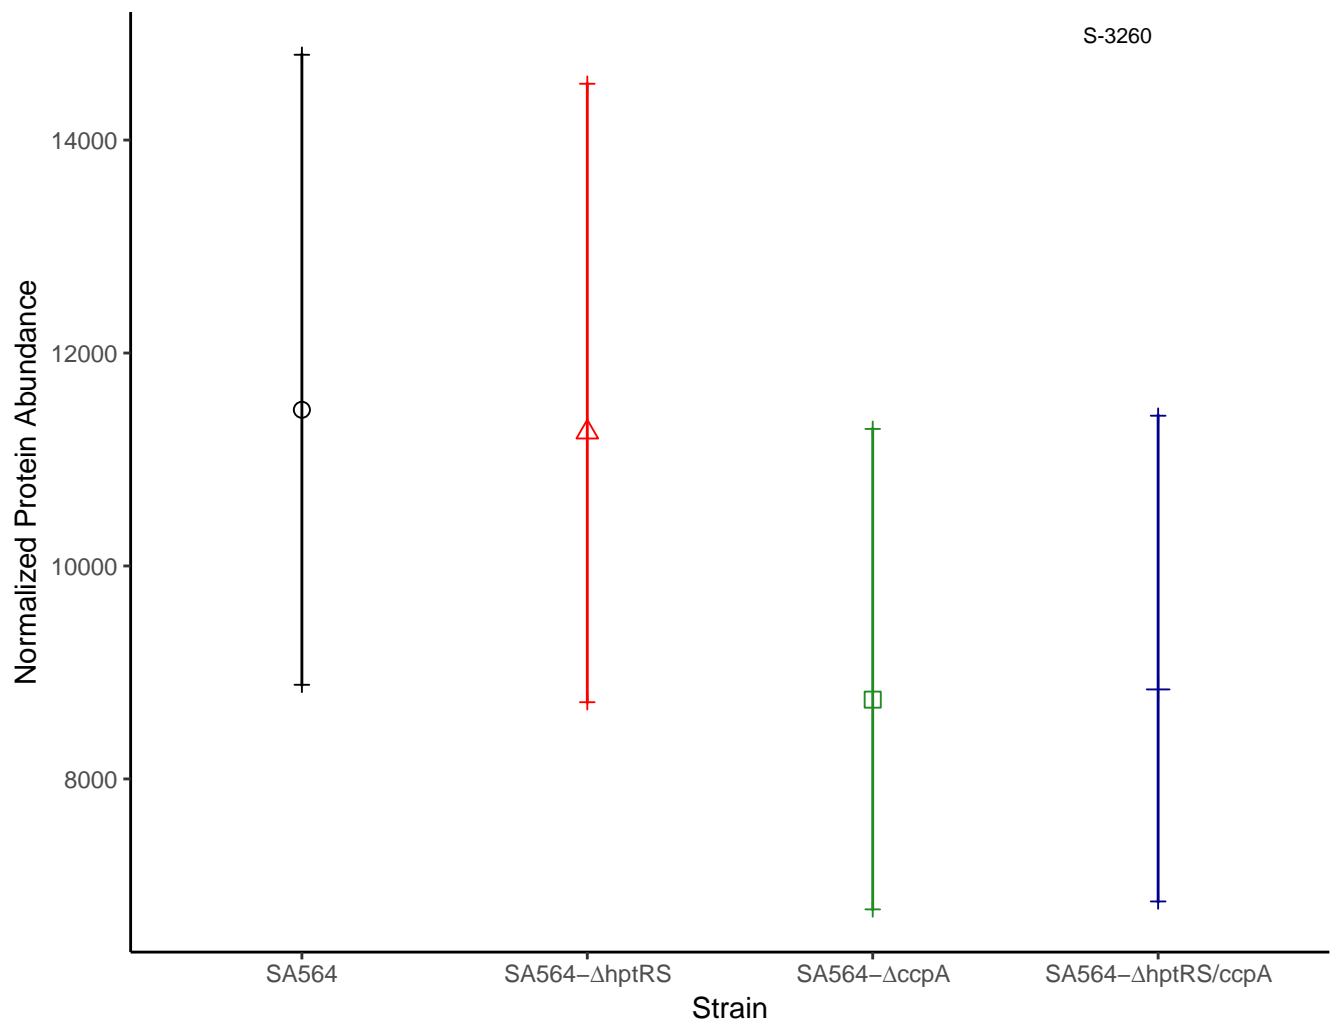

- ⊕ SA564
- △ SA564- $\Delta$ hptRS
- ⊞ SA564- $\Delta$ ccpA
- + SA564- $\Delta$ hptRS/ccpA

# PDXS\_STAAM

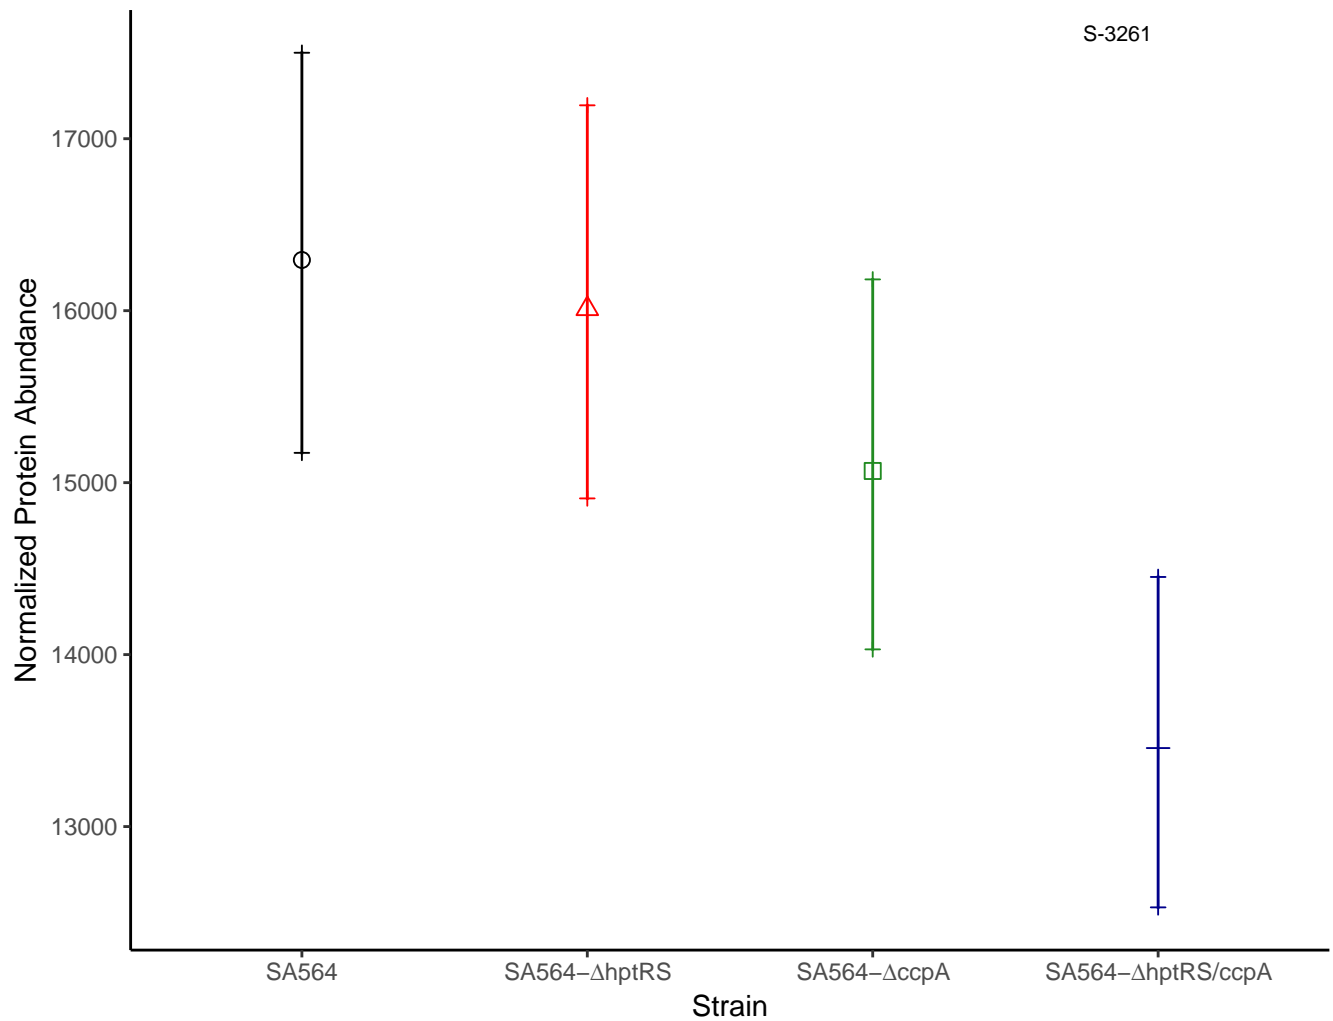

- ⊕ SA564
- △ SA564- $\Delta$ hptRS
- ⊞ SA564- $\Delta$ ccpA
- + SA564- $\Delta$ hptRS/ccpA

# PDXT\_STAAM

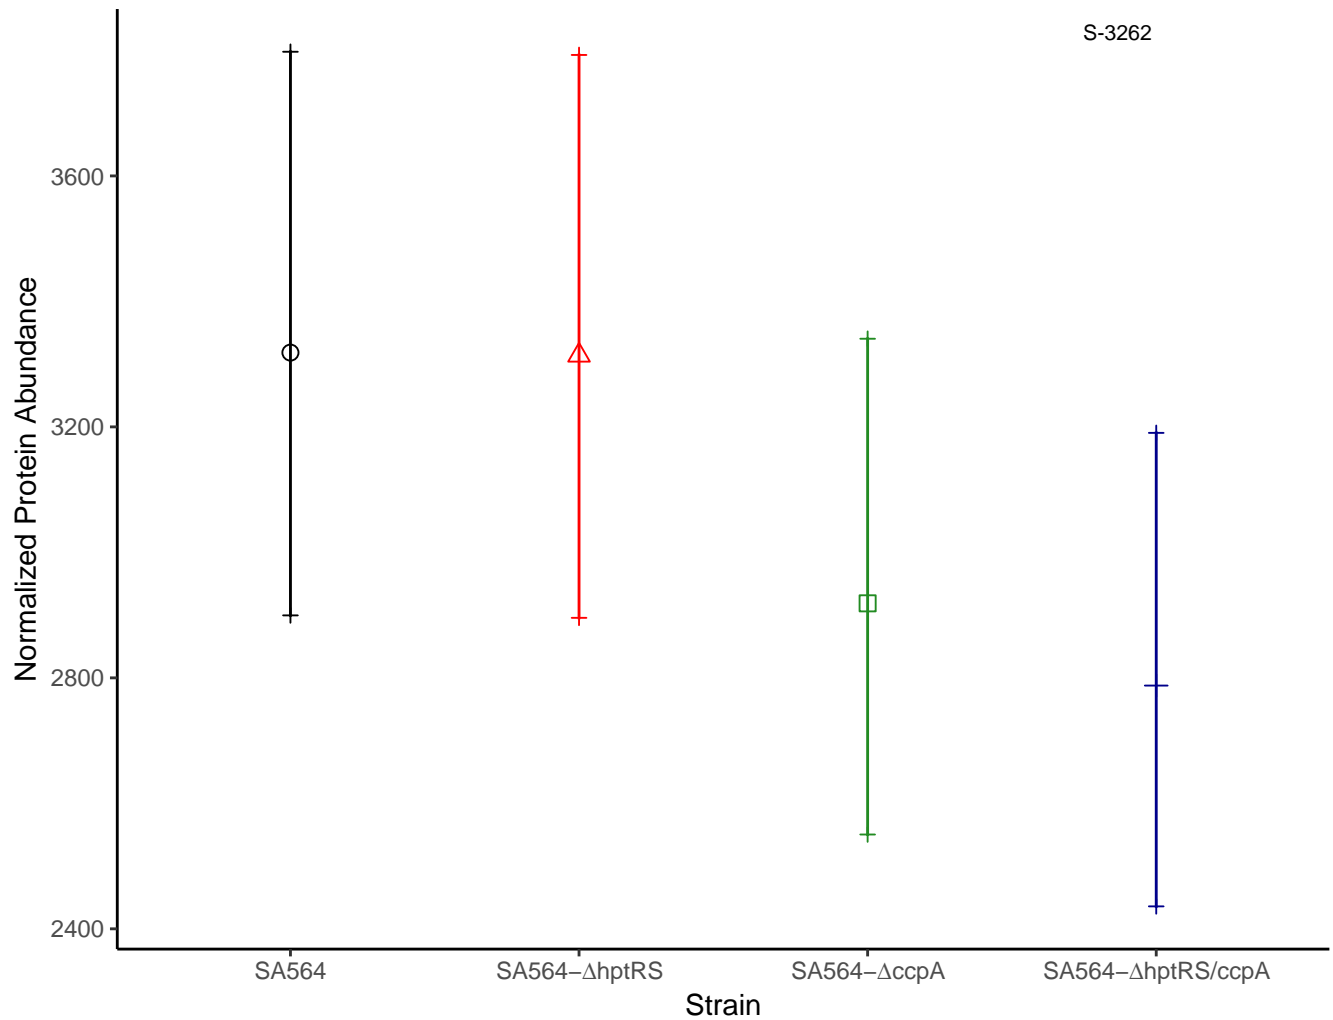

- ⊕ SA564
- △ SA564- $\Delta$ hptRS
- ⊞ SA564- $\Delta$ ccpA
- + SA564- $\Delta$ hptRS/ccpA

# PEPVL\_STAAM

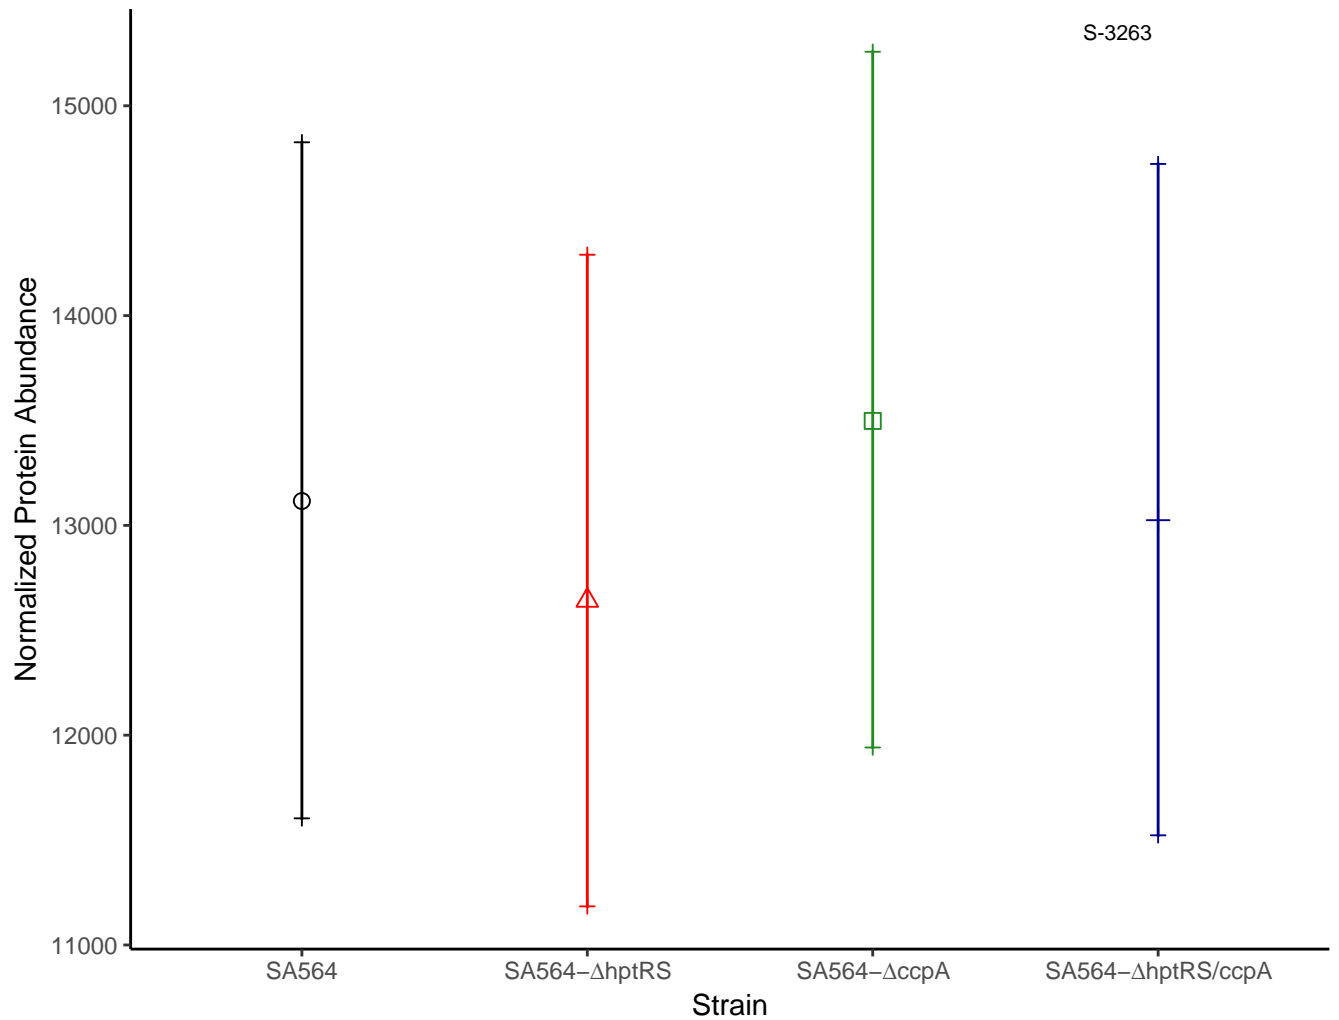

- ⊕ SA564
- △ SA564- $\Delta$ *hptRS*
- ⊞ SA564- $\Delta$ *ccpA*
- + SA564- $\Delta$ *hptRS/ccpA*

# PERR\_STAAM

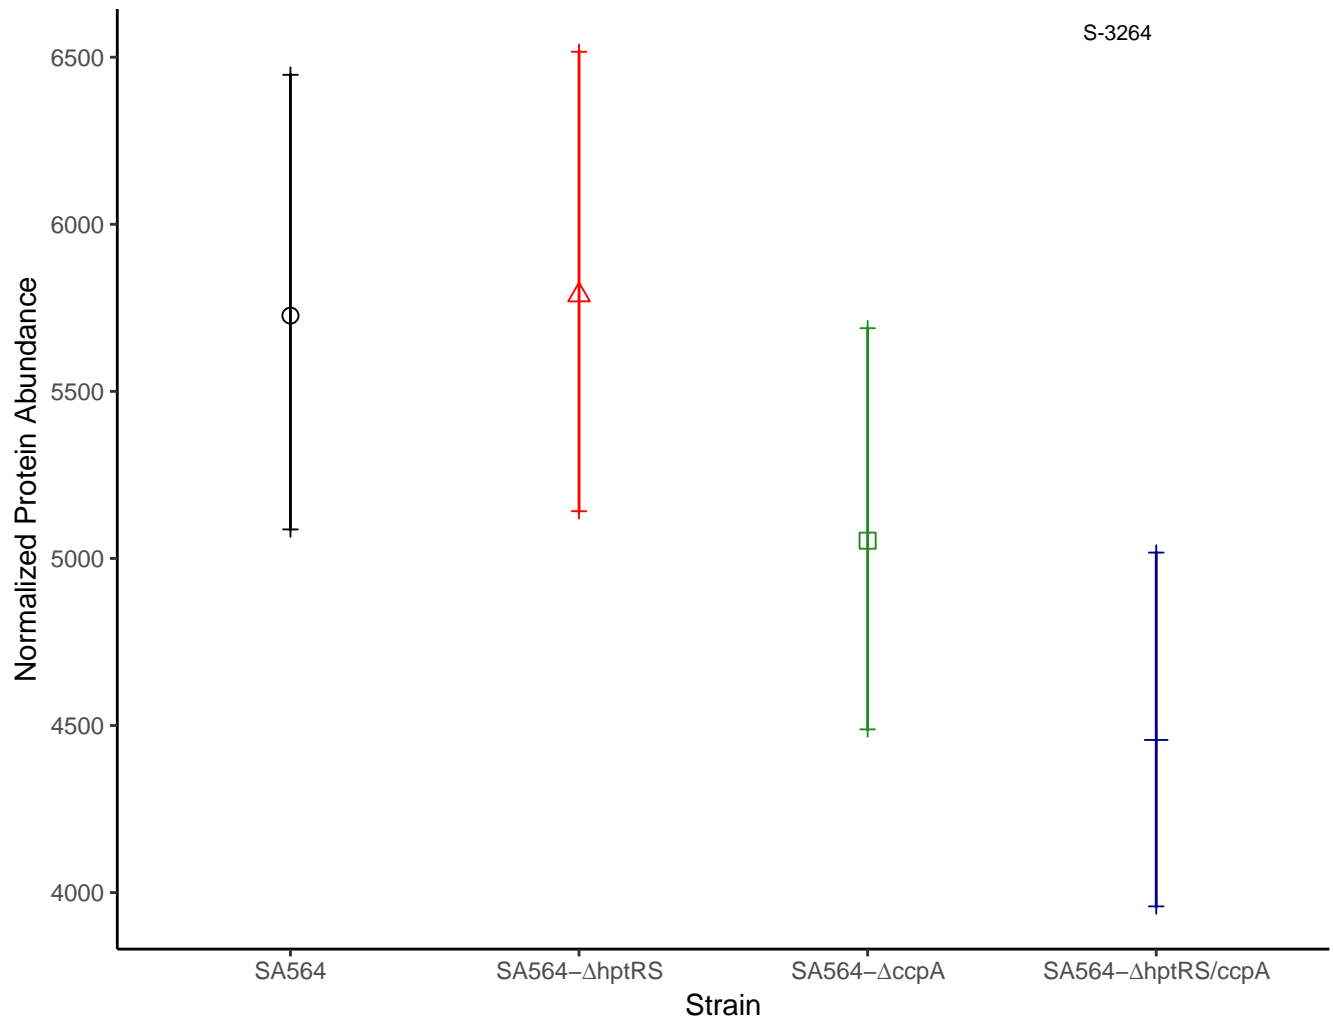

- ⊕ SA564
- △ SA564- $\Delta$ hptRS
- ⊞ SA564- $\Delta$ ccpA
- + SA564- $\Delta$ hptRS/ccpA



# PFKA\_STAAM

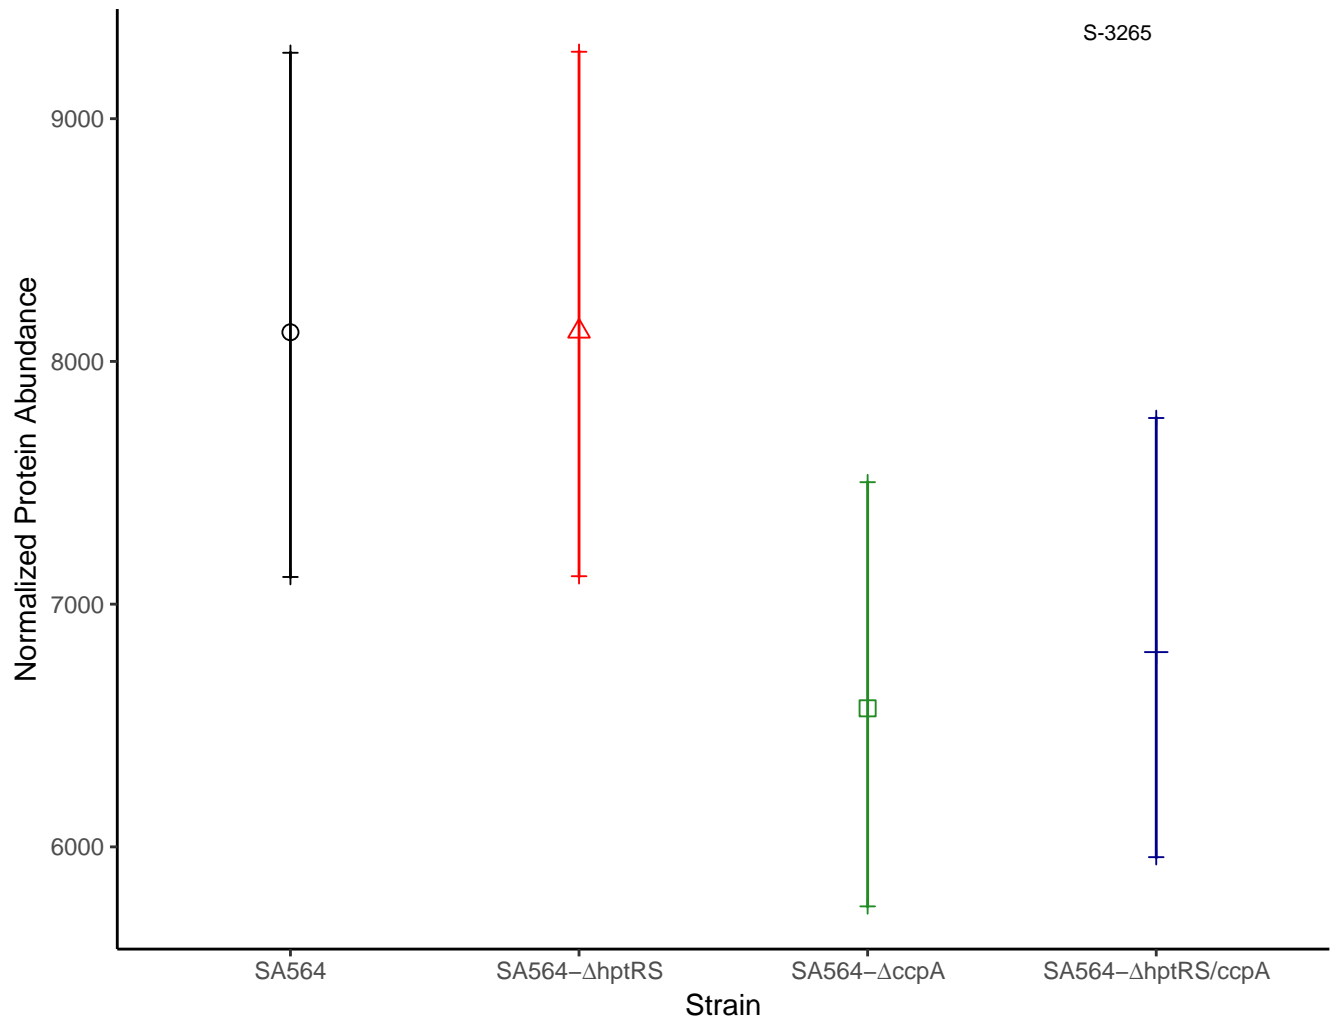

- ⊕ SA564
- △ SA564- $\Delta$ hptRS
- ⊞ SA564- $\Delta$ ccpA
- + SA564- $\Delta$ hptRS/ccpA

# PFLA\_STAAM

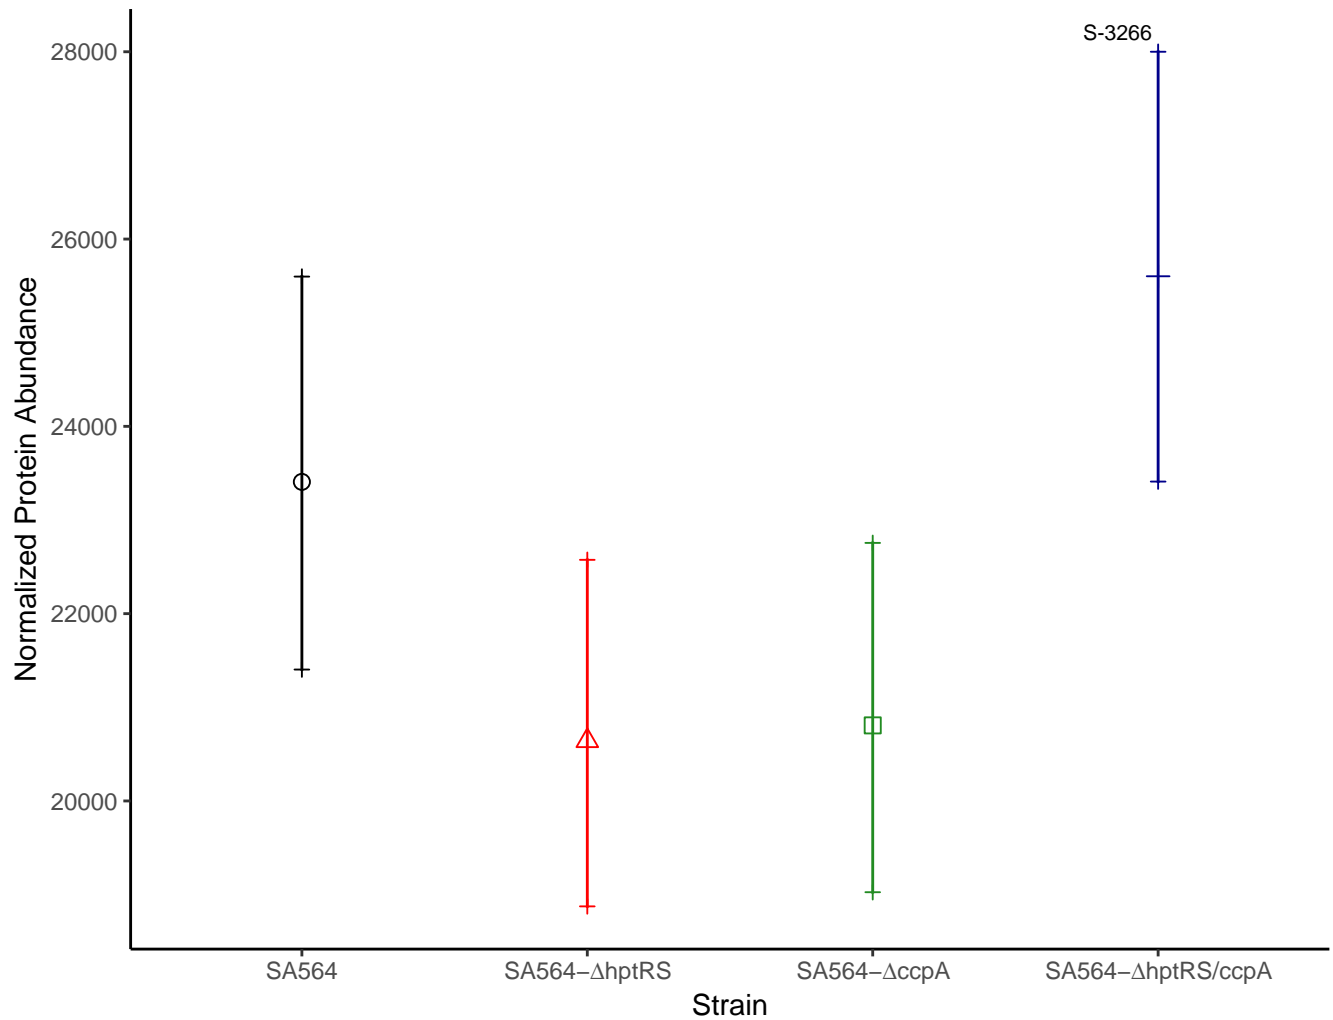

- ⊕ SA564
- △ SA564- $\Delta$ hptRS
- ⊞ SA564- $\Delta$ ccpA
- + SA564- $\Delta$ hptRS/ccpA

# PFLB\_STAAM

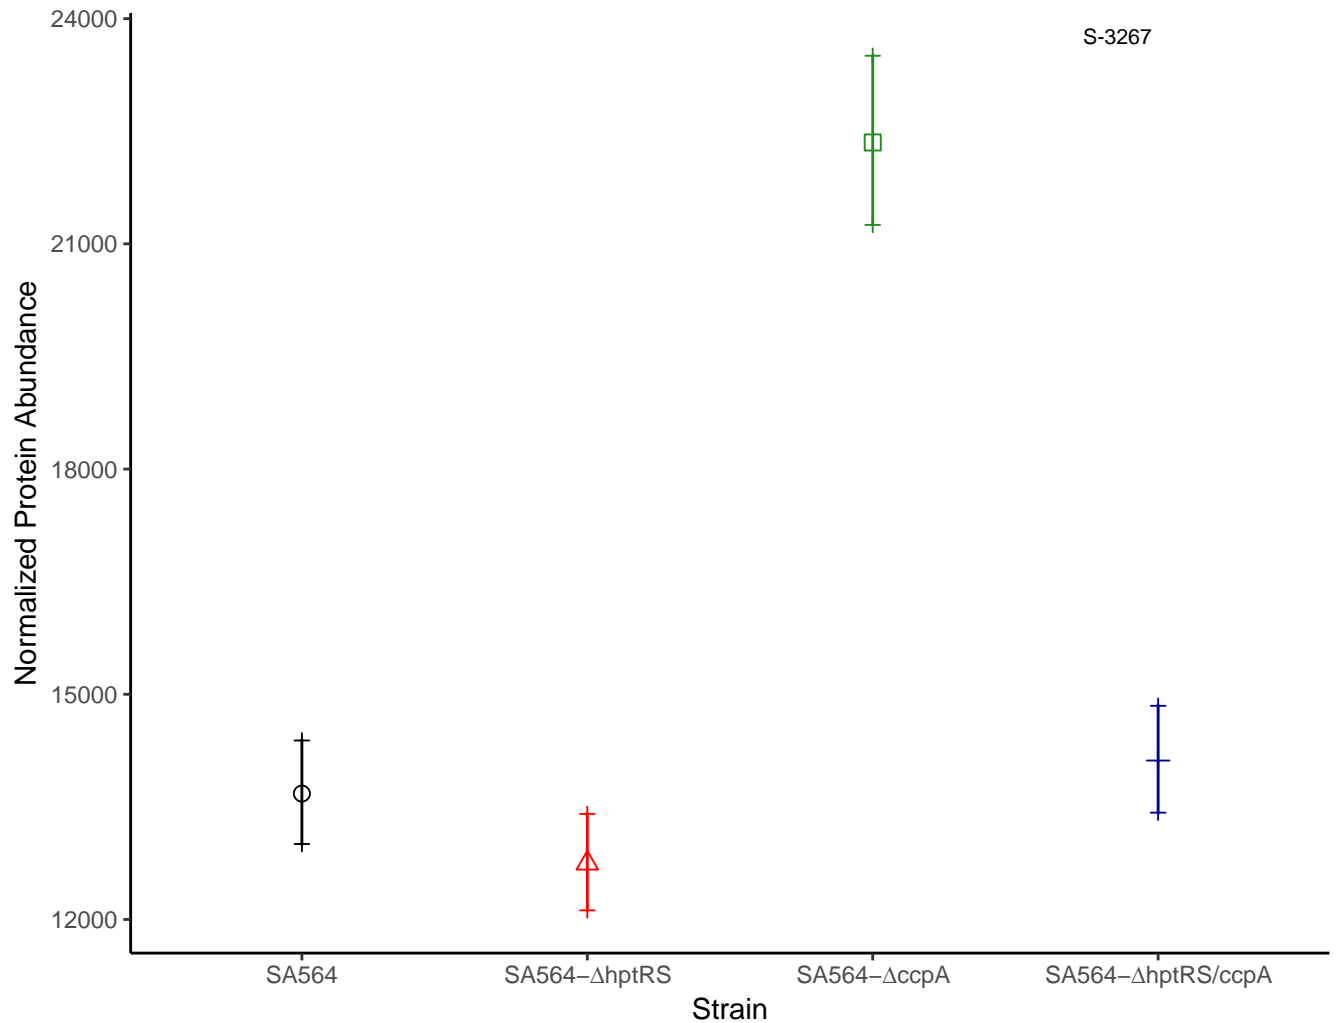

S-3267

- SA564
- SA564- $\Delta$ hptRS
- SA564- $\Delta$ ccpA
- SA564- $\Delta$ hptRS/ccpA

# PGCA\_STAAM

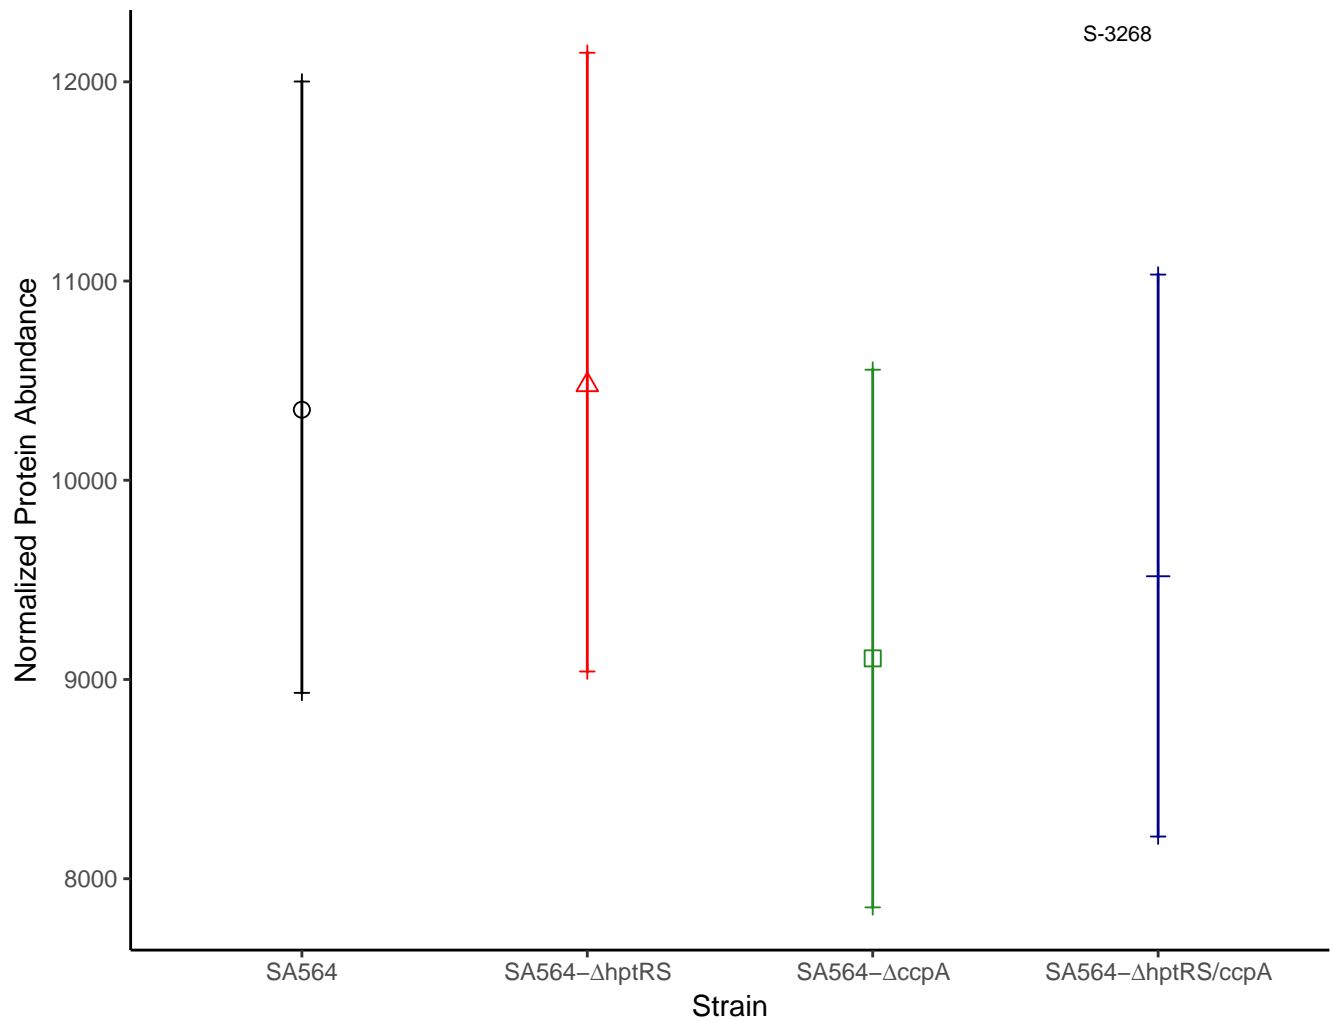

- ⊕ SA564
- △ SA564- $\Delta$ hptRS
- ⊞ SA564- $\Delta$ ccpA
- + SA564- $\Delta$ hptRS/ccpA

# PGK\_STAAM

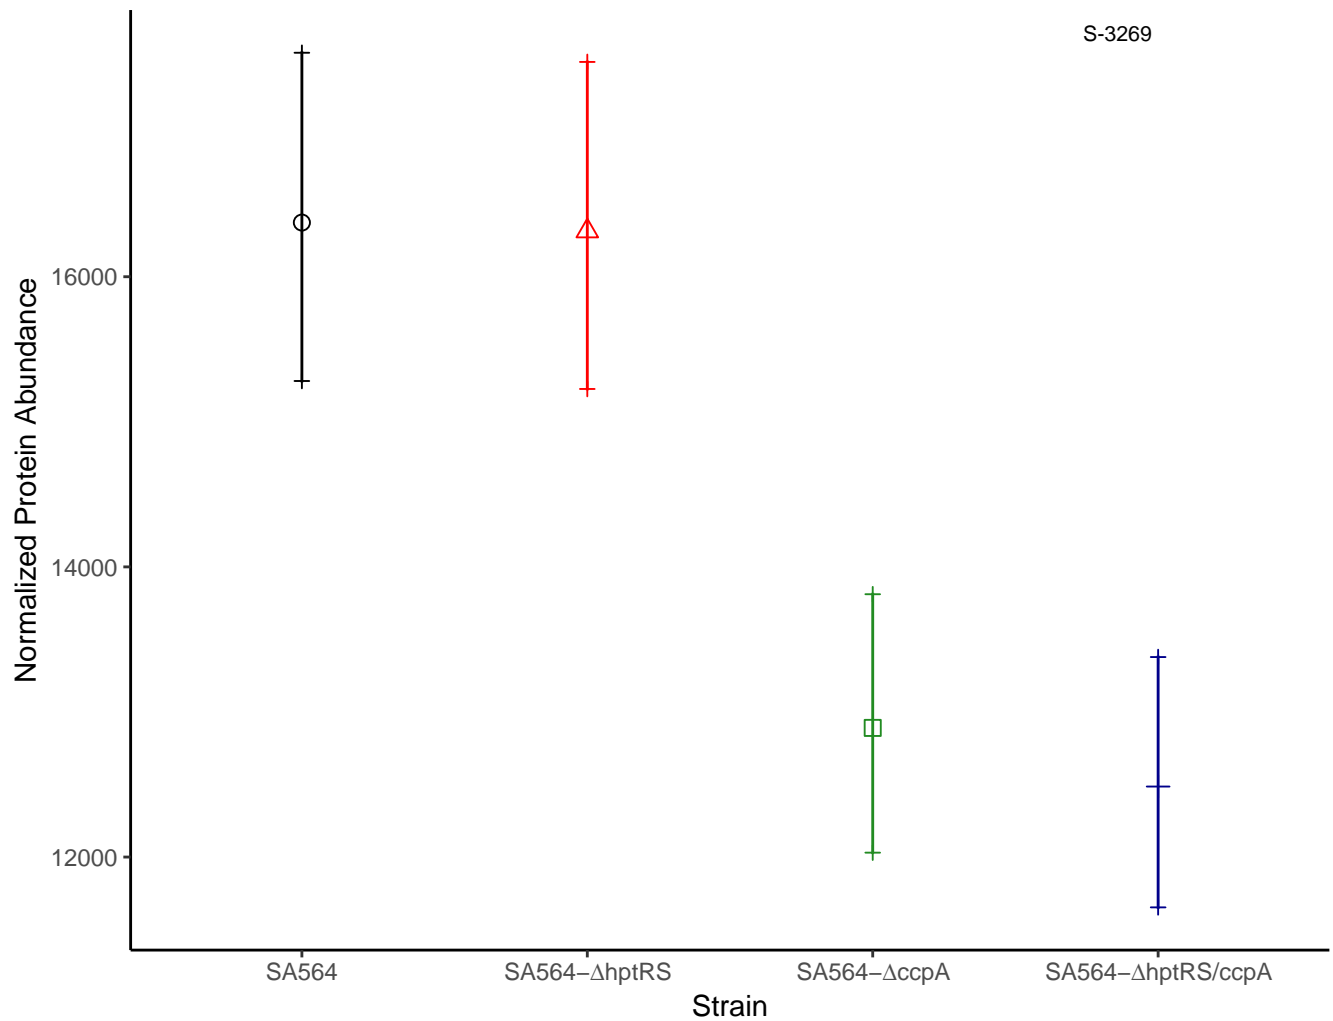

- ⊕ SA564
- △ SA564- $\Delta$ hptRS
- ⊞ SA564- $\Delta$ ccpA
- + SA564- $\Delta$ hptRS/ccpA

# PHNC\_STAAM

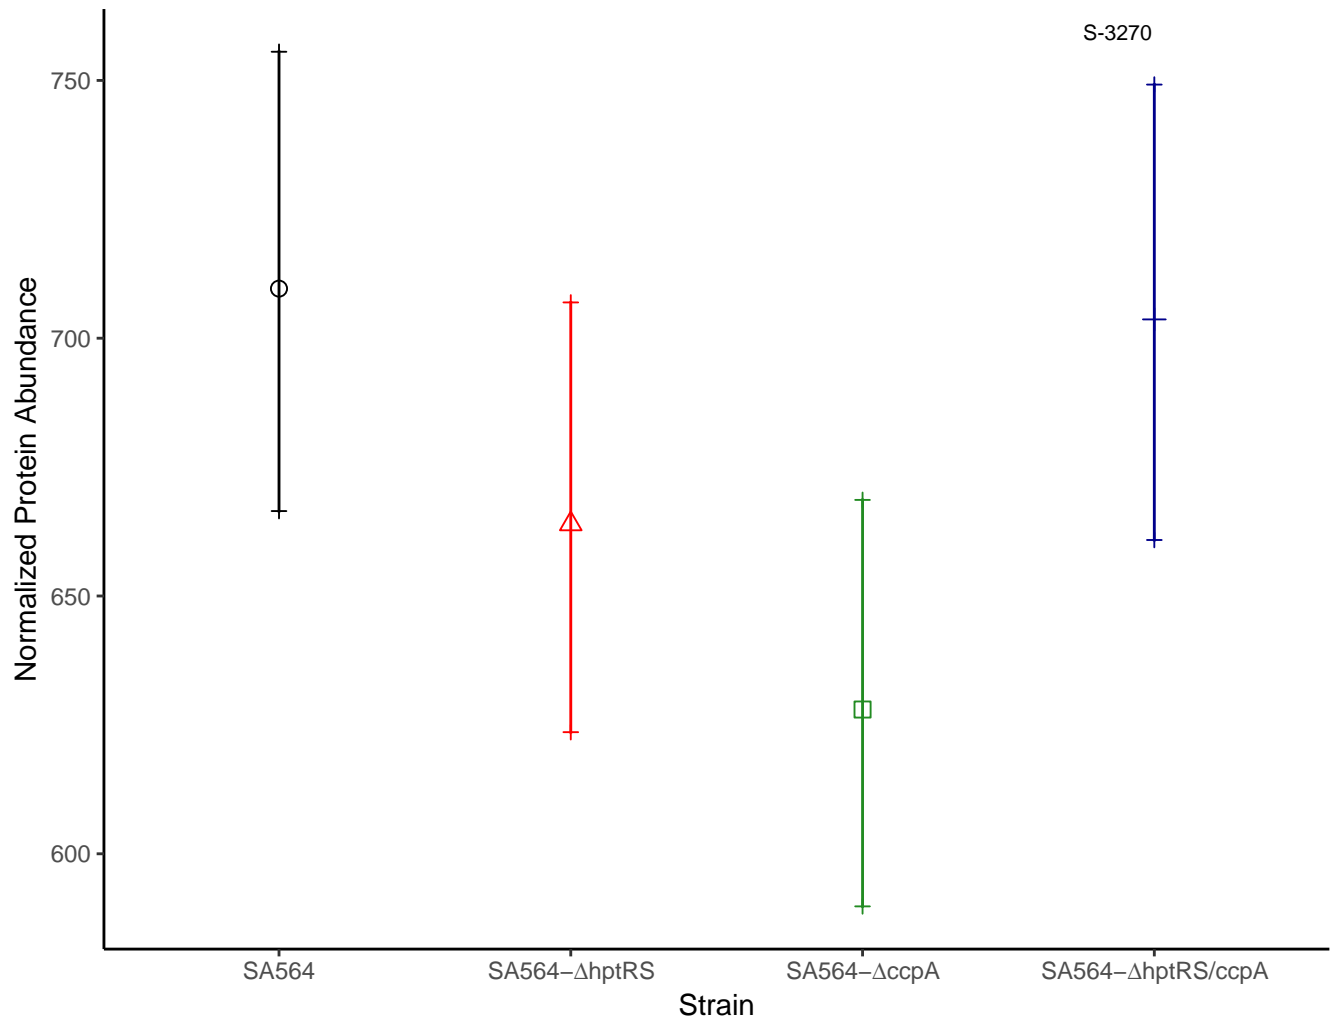

- SA564
- SA564- $\Delta$ hptRS
- SA564- $\Delta$ ccpA
- SA564- $\Delta$ hptRS/ccpA

# PLSX\_STAAM

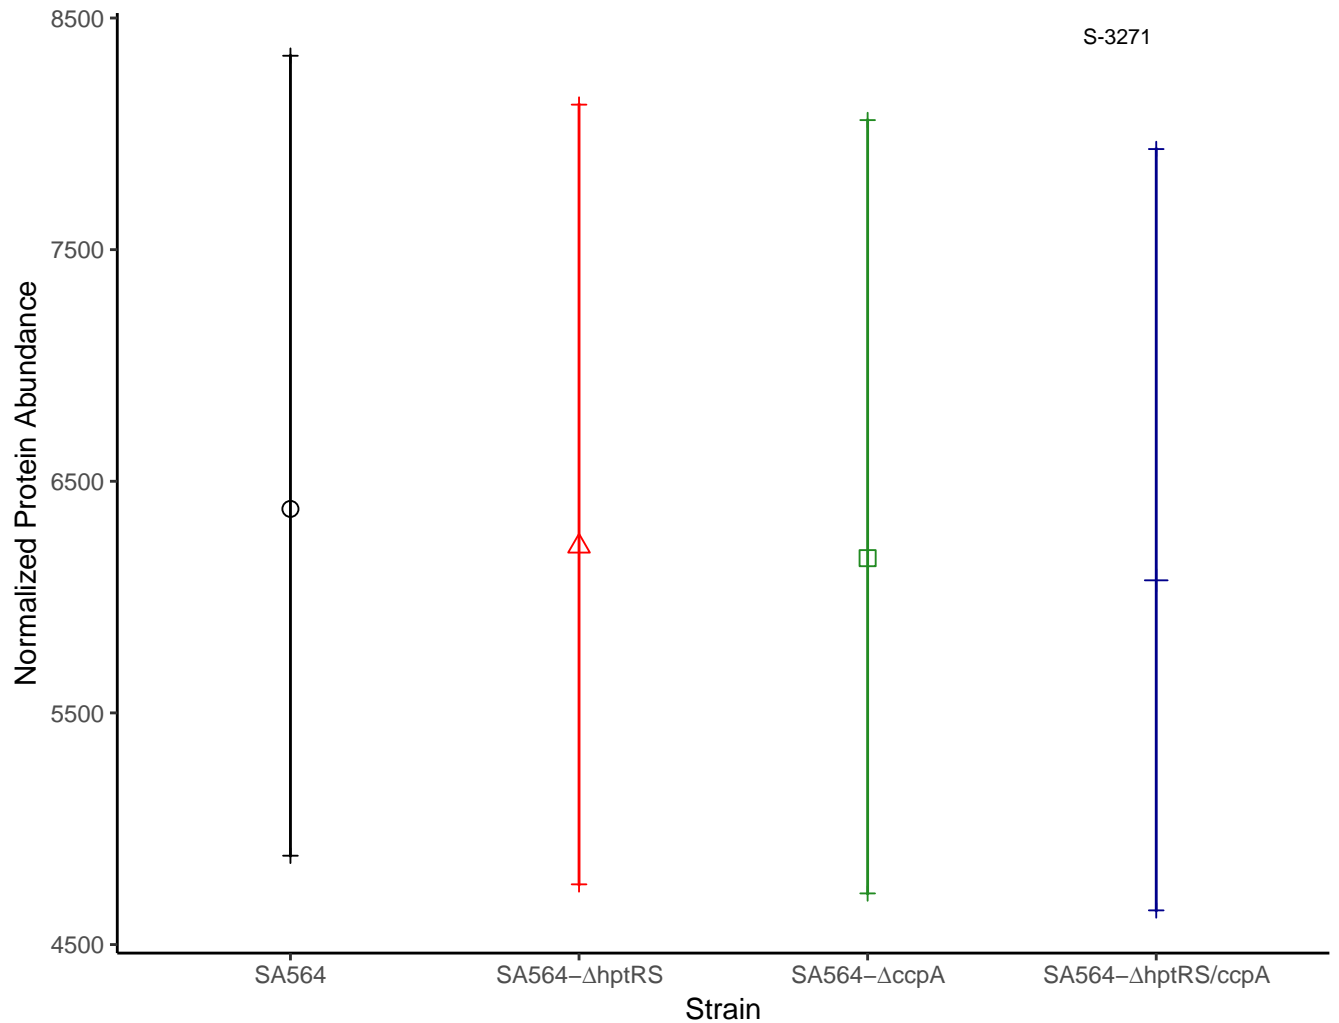

- ⊕ SA564
- △ SA564- $\Delta$ *hptRS*
- ⊞ SA564- $\Delta$ *ccpA*
- + SA564- $\Delta$ *hptRS/ccpA*

# PNP\_STAAM

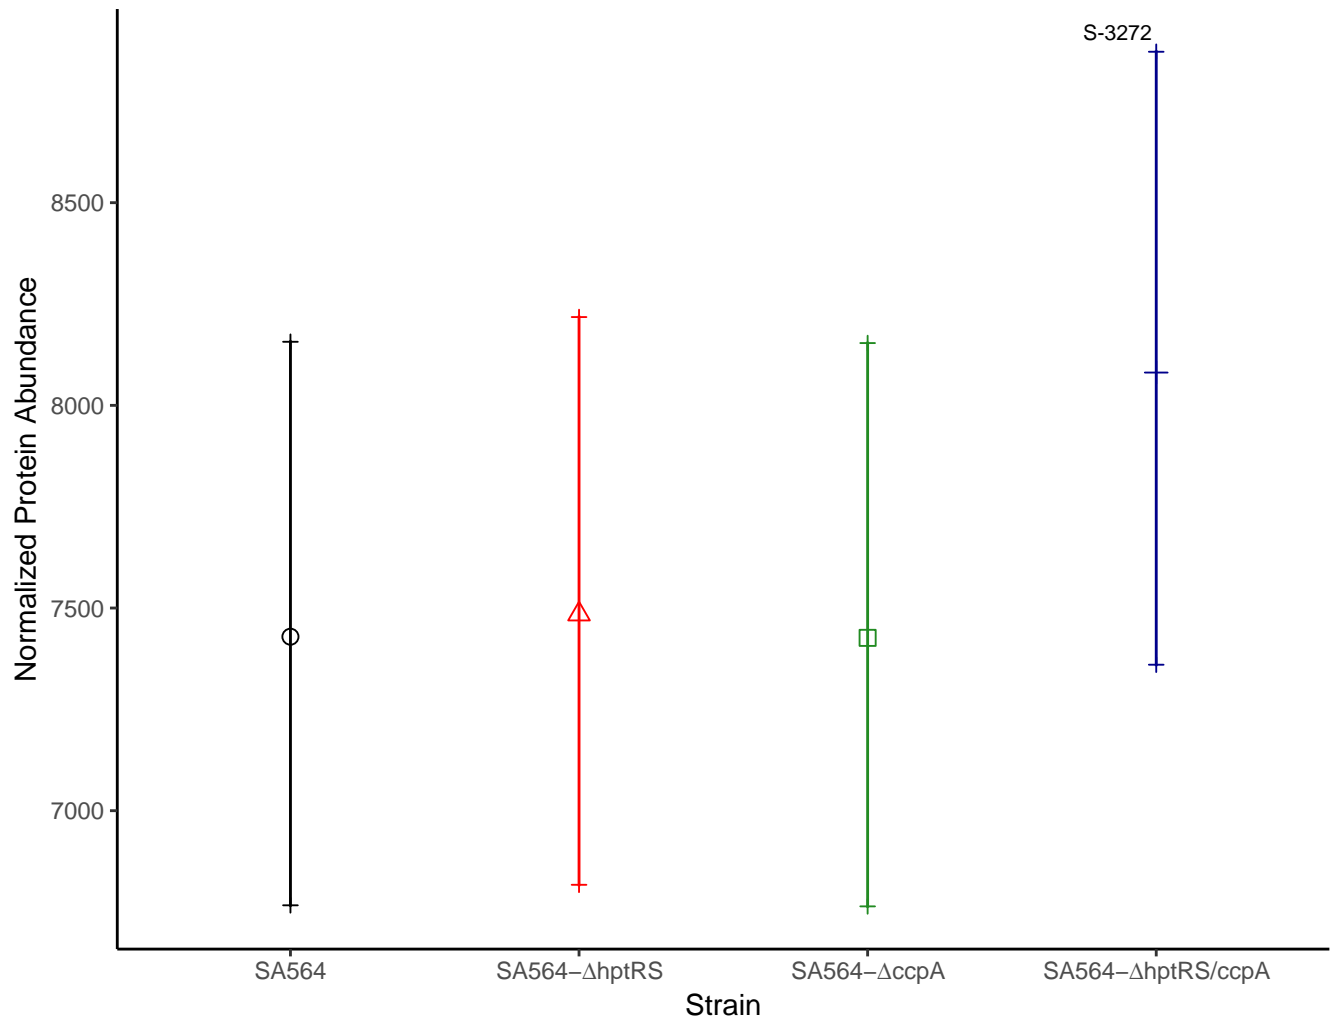

- ⊕ SA564
- △ SA564- $\Delta$ hptRS
- ⊞ SA564- $\Delta$ ccpA
- + SA564- $\Delta$ hptRS/ccpA



# PPAC\_STAAM

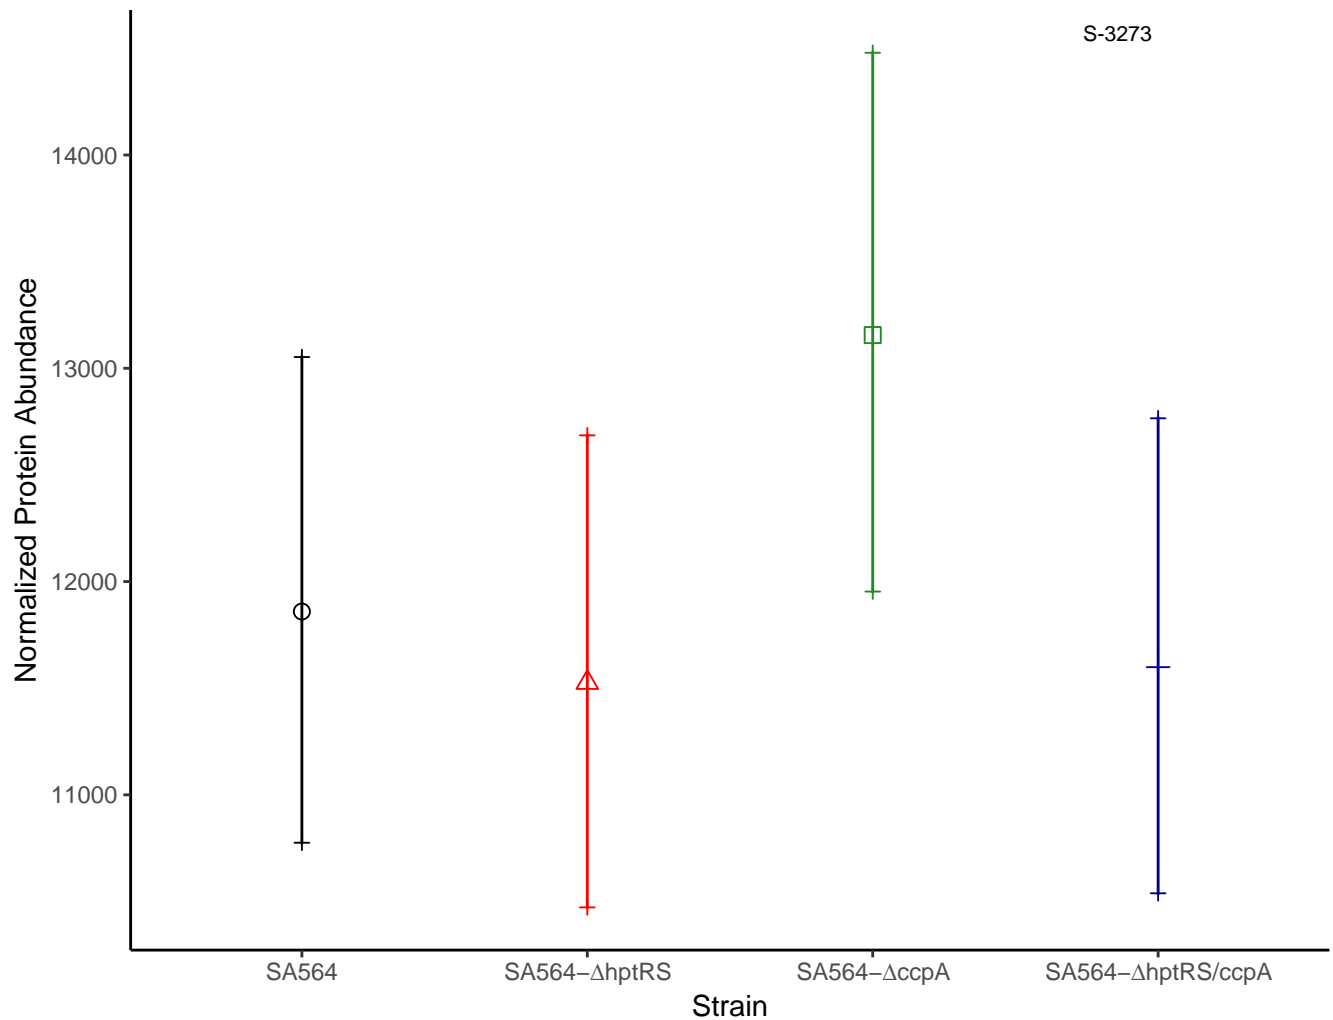

- ⊕ SA564
- △ SA564- $\Delta$ hptRS
- ⊞ SA564- $\Delta$ ccpA
- + SA564- $\Delta$ hptRS/ccpA

# PPAT\_STAAM

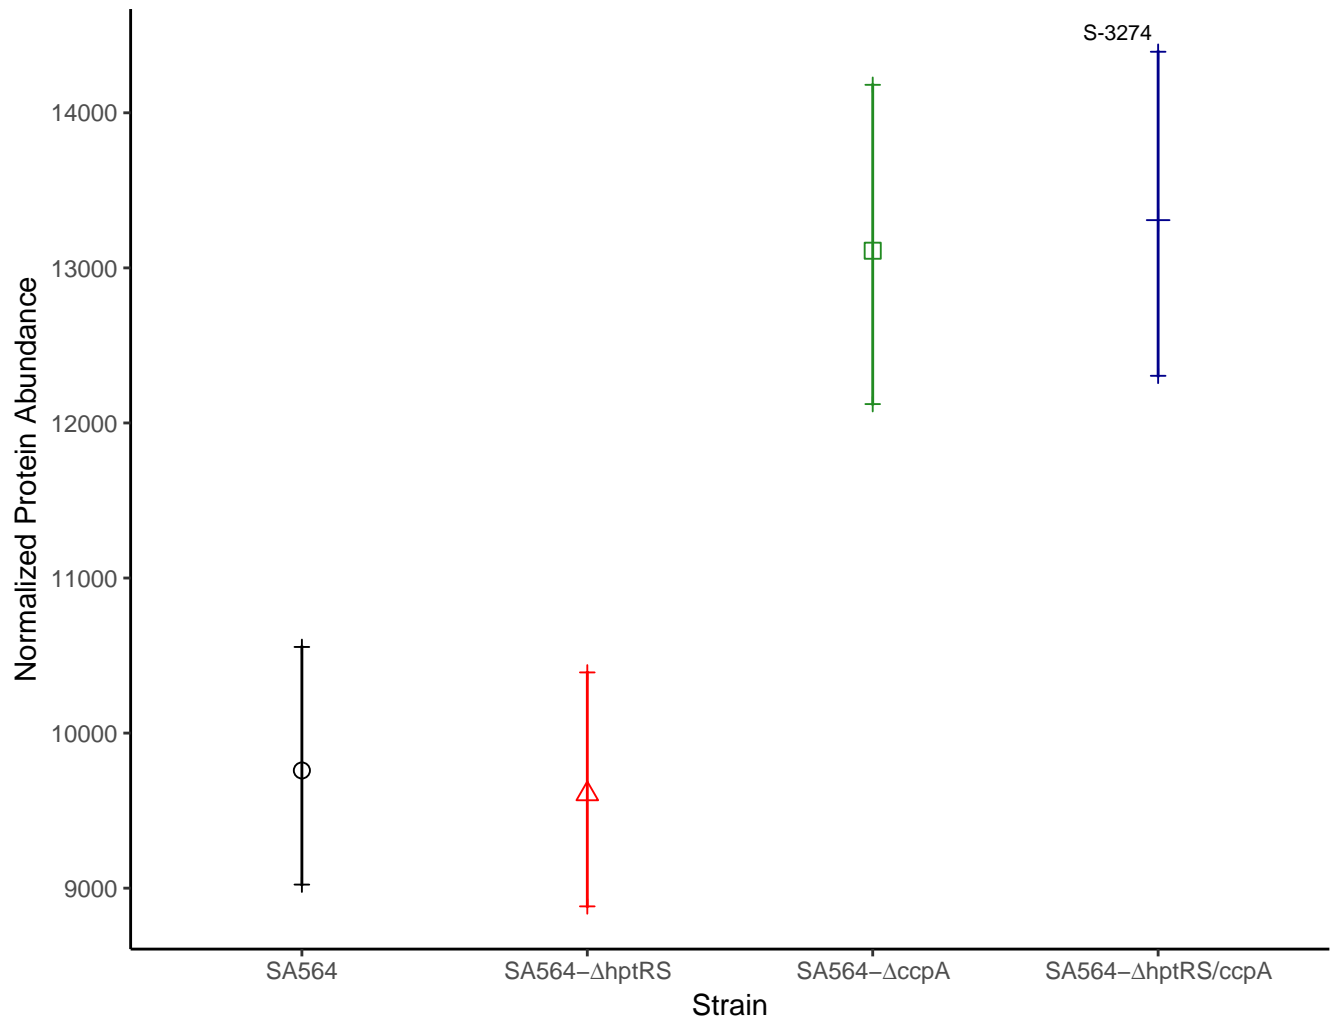

- ⊕ SA564
- △ SA564- $\Delta$ hptRS
- ⊞ SA564- $\Delta$ ccpA
- + SA564- $\Delta$ hptRS/ccpA

# PPI1\_STAAM

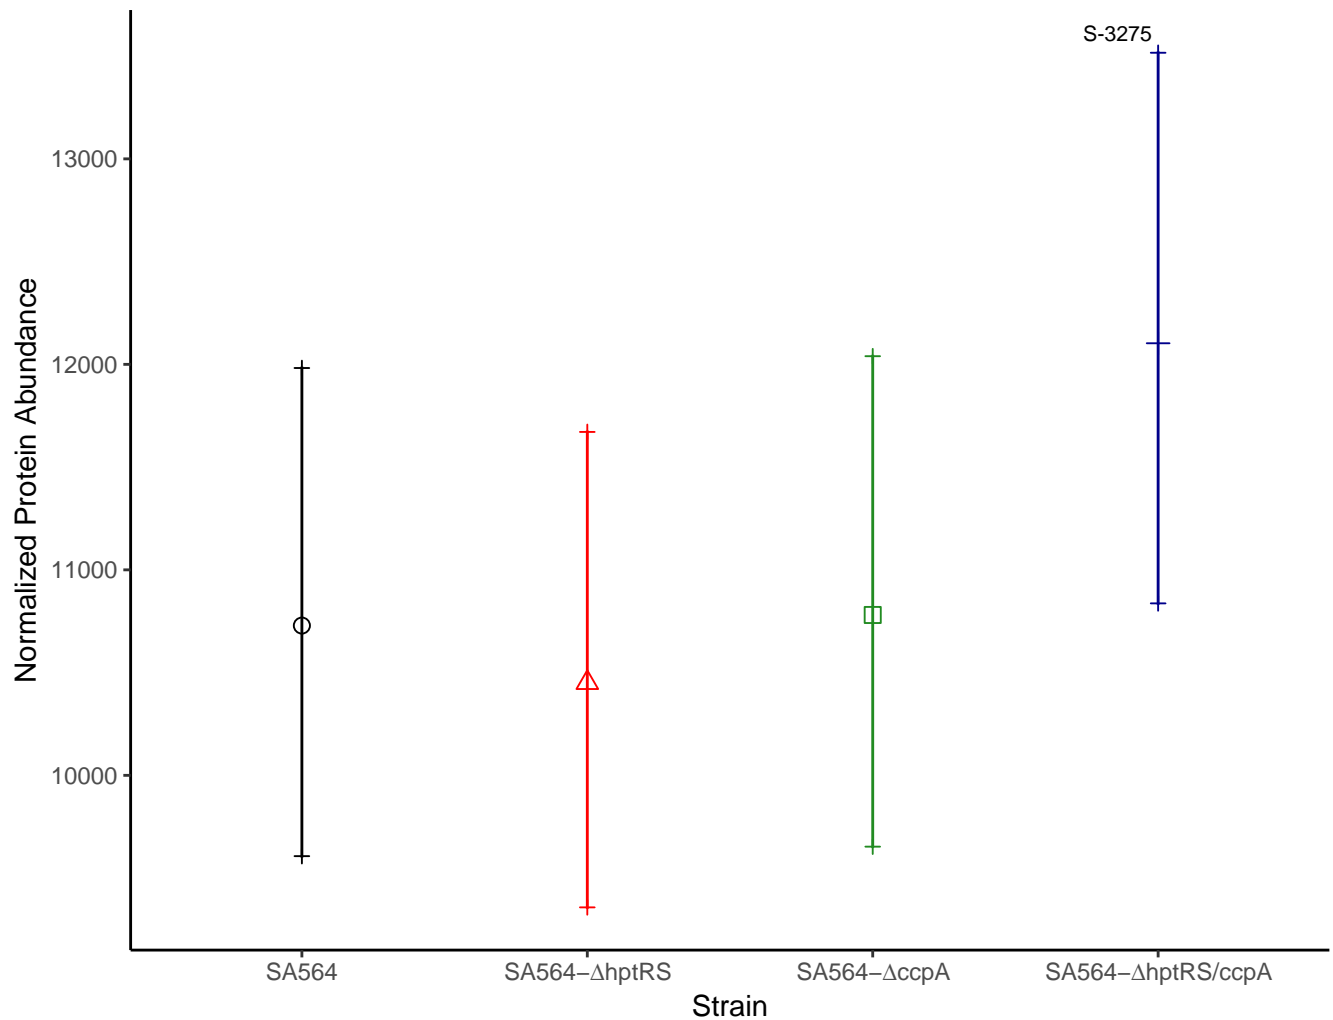

- ⊕ SA564
- △ SA564- $\Delta$ hptRS
- ⊞ SA564- $\Delta$ ccpA
- + SA564- $\Delta$ hptRS/ccpA

# PRSA\_STAAM

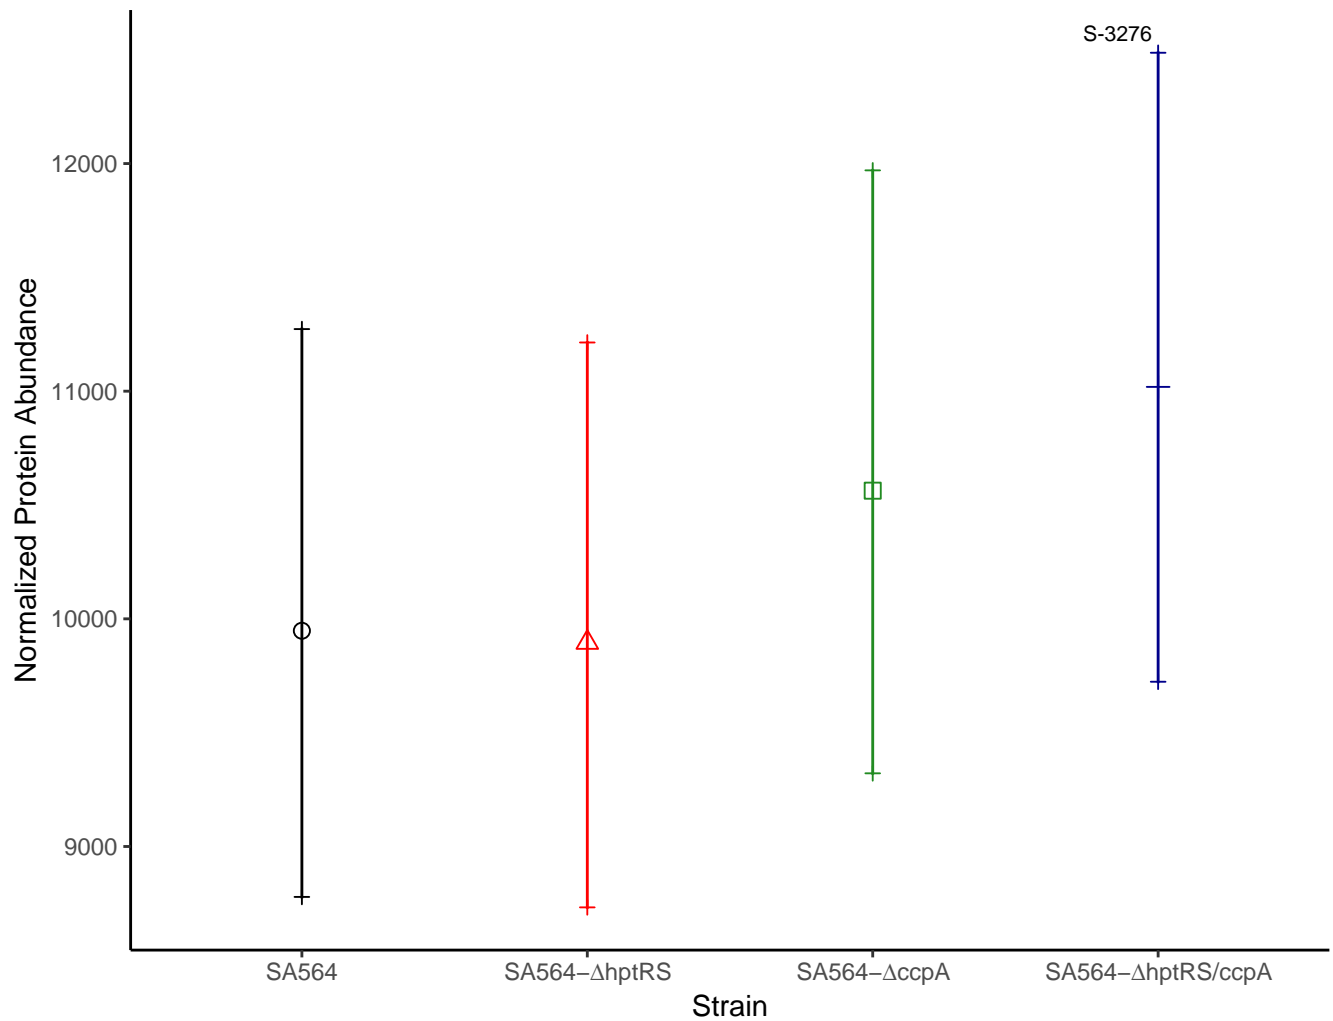

- ⊕ SA564
- △ SA564- $\Delta$ hptRS
- ⊞ SA564- $\Delta$ ccpA
- + SA564- $\Delta$ hptRS/ccpA

# PSTB\_STAAM

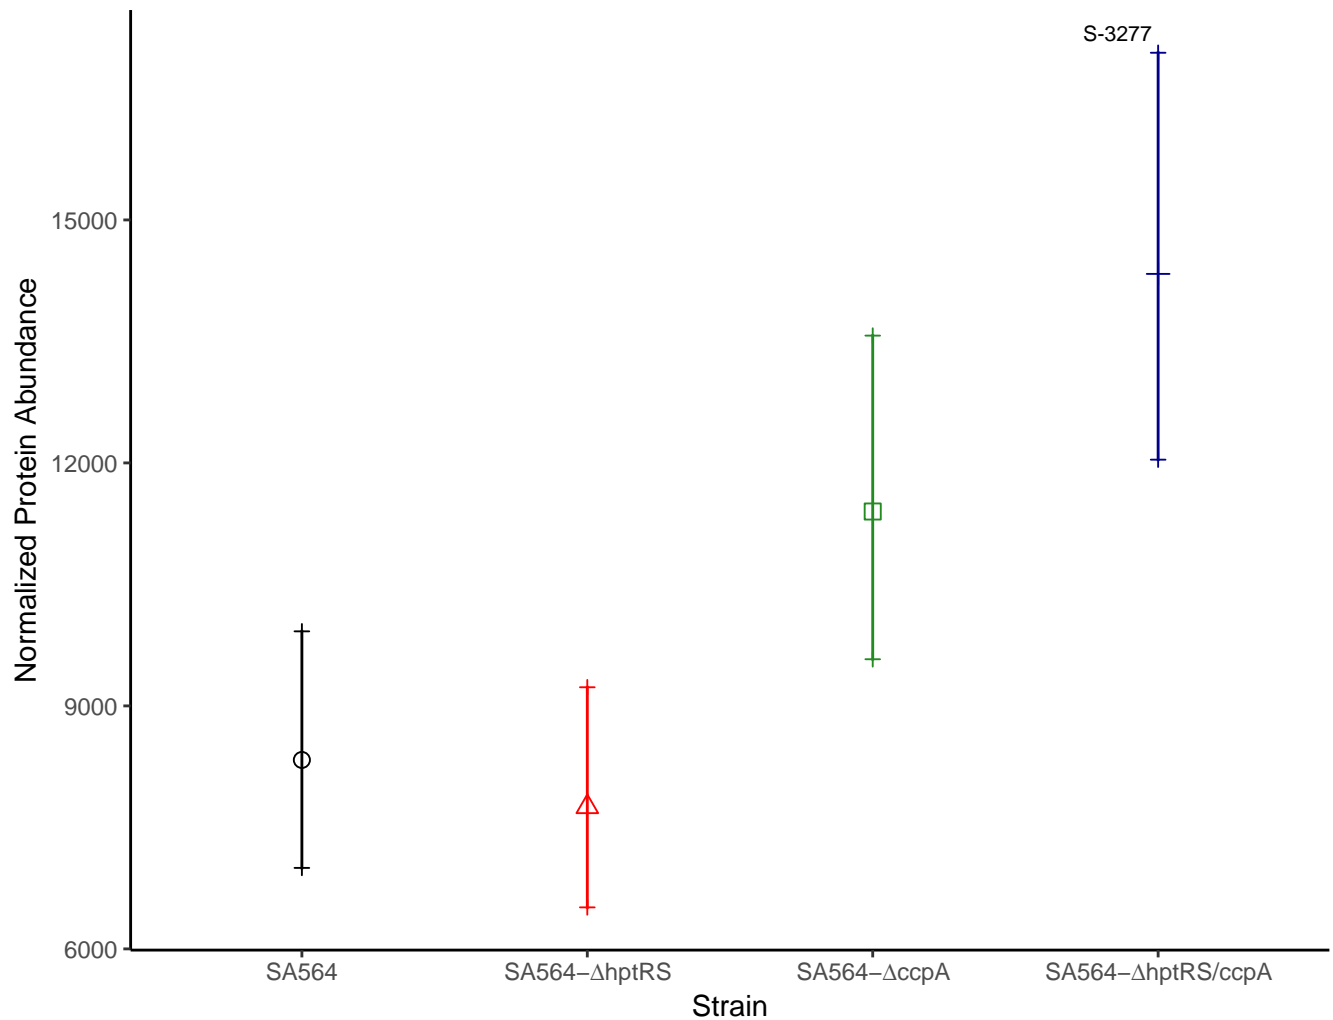

- ⊕ SA564
- △ SA564- $\Delta$ hptRS
- ⊞ SA564- $\Delta$ ccpA
- + SA564- $\Delta$ hptRS/ccpA

# PSTS\_STAAM

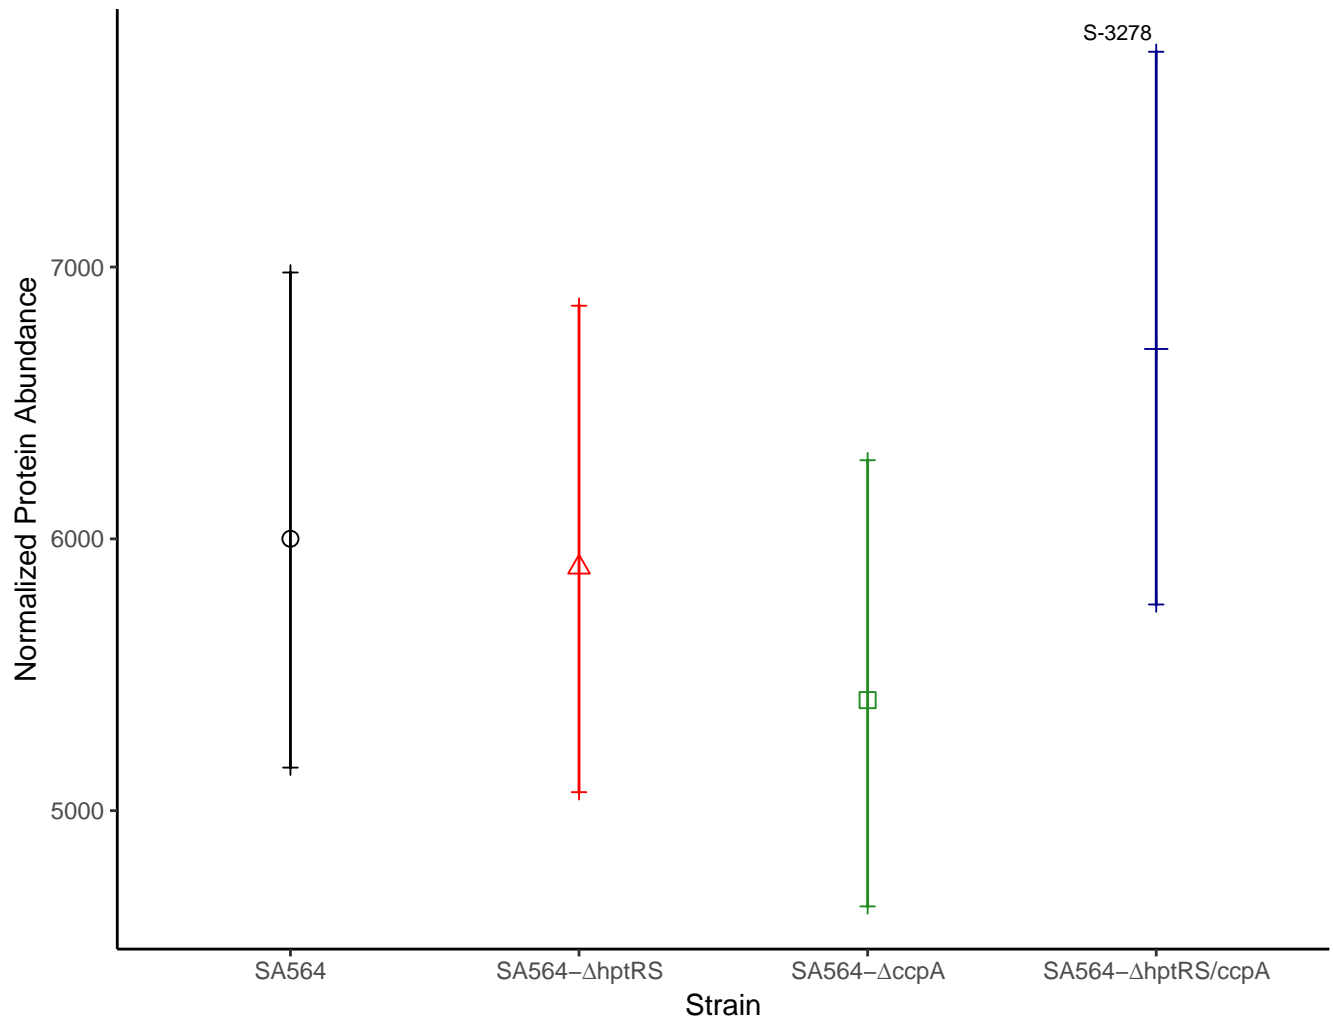

- ⊕ SA564
- △ SA564- $\Delta$ hptRS
- ⊞ SA564- $\Delta$ ccpA
- + SA564- $\Delta$ hptRS/ccpA

# PT1\_STAAM

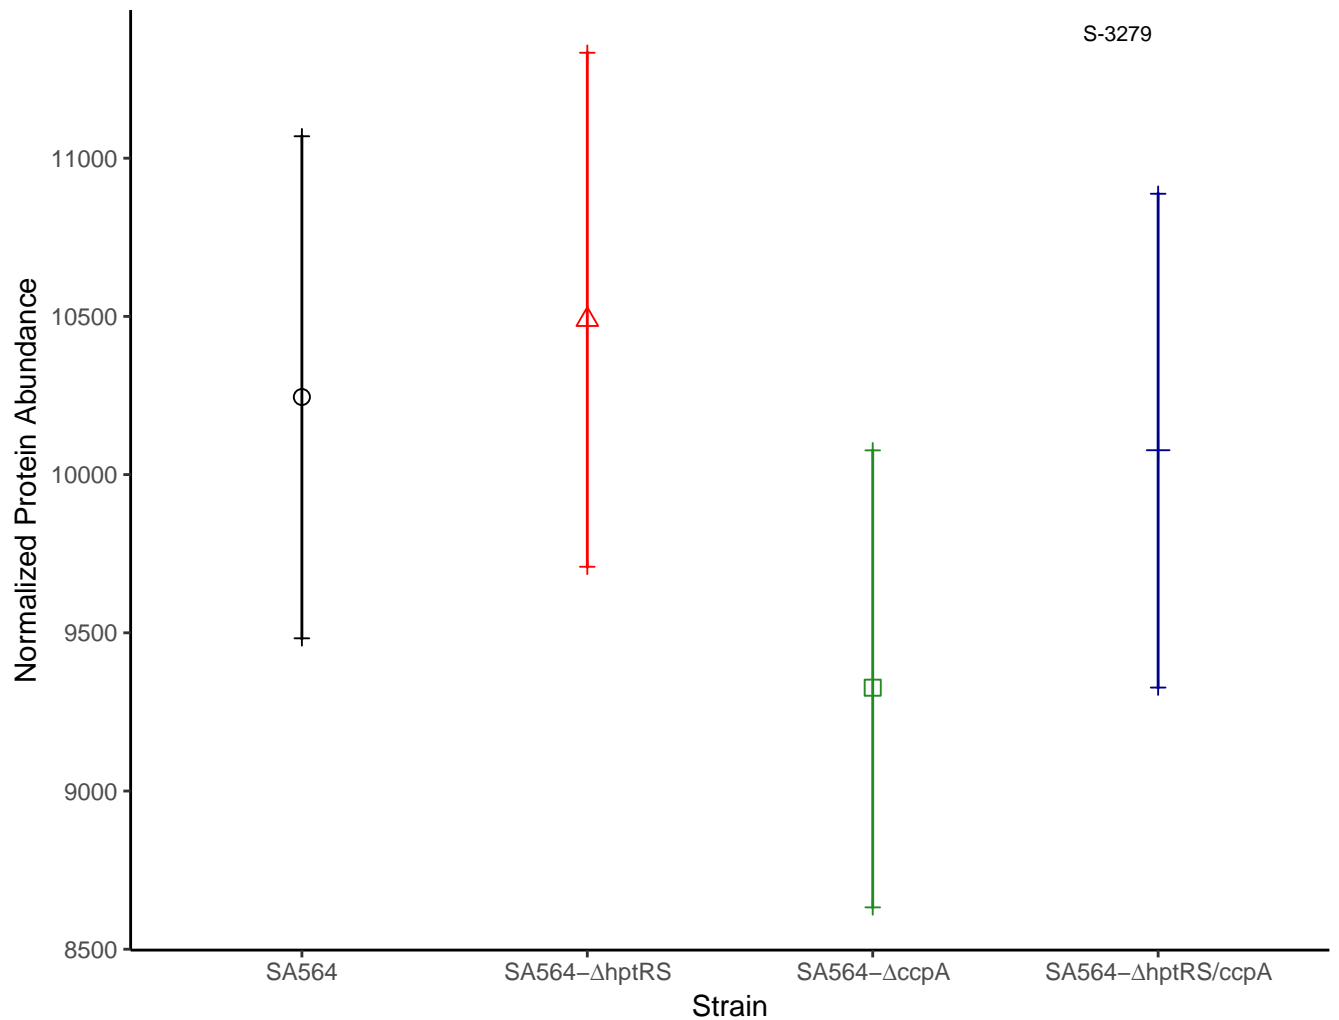

- ⊕ SA564
- △ SA564- $\Delta$ *hptRS*
- ⊞ SA564- $\Delta$ *ccpA*
- + SA564- $\Delta$ *hptRS/ccpA*

# PTAS\_STAAM

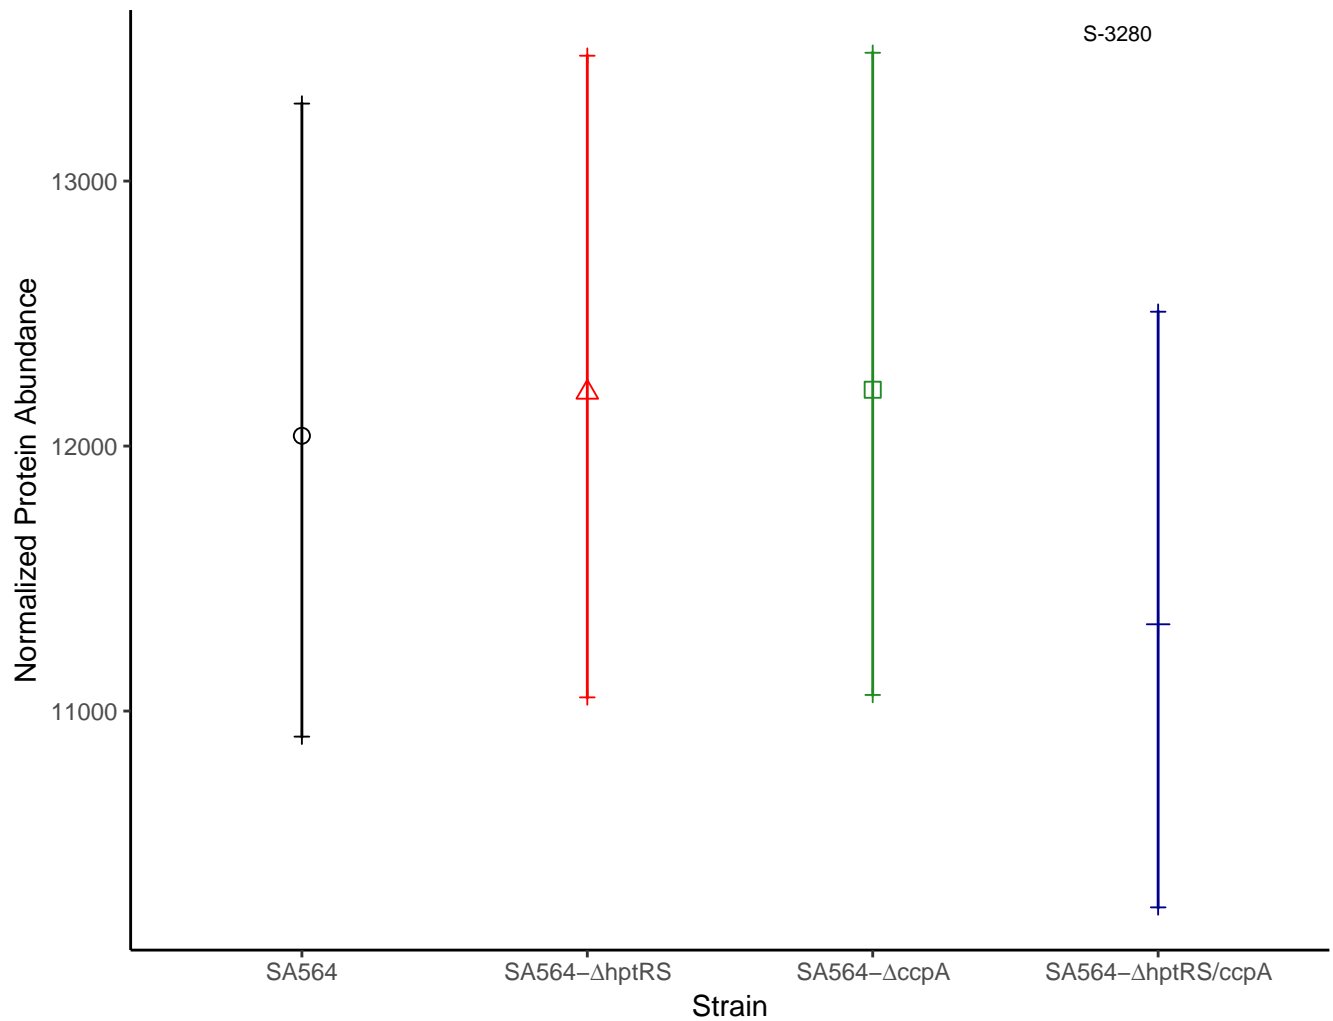

- ⊕ SA564
- △ SA564- $\Delta$ hptRS
- ⊞ SA564- $\Delta$ ccpA
- + SA564- $\Delta$ hptRS/ccpA



# PTG3C\_STAAM

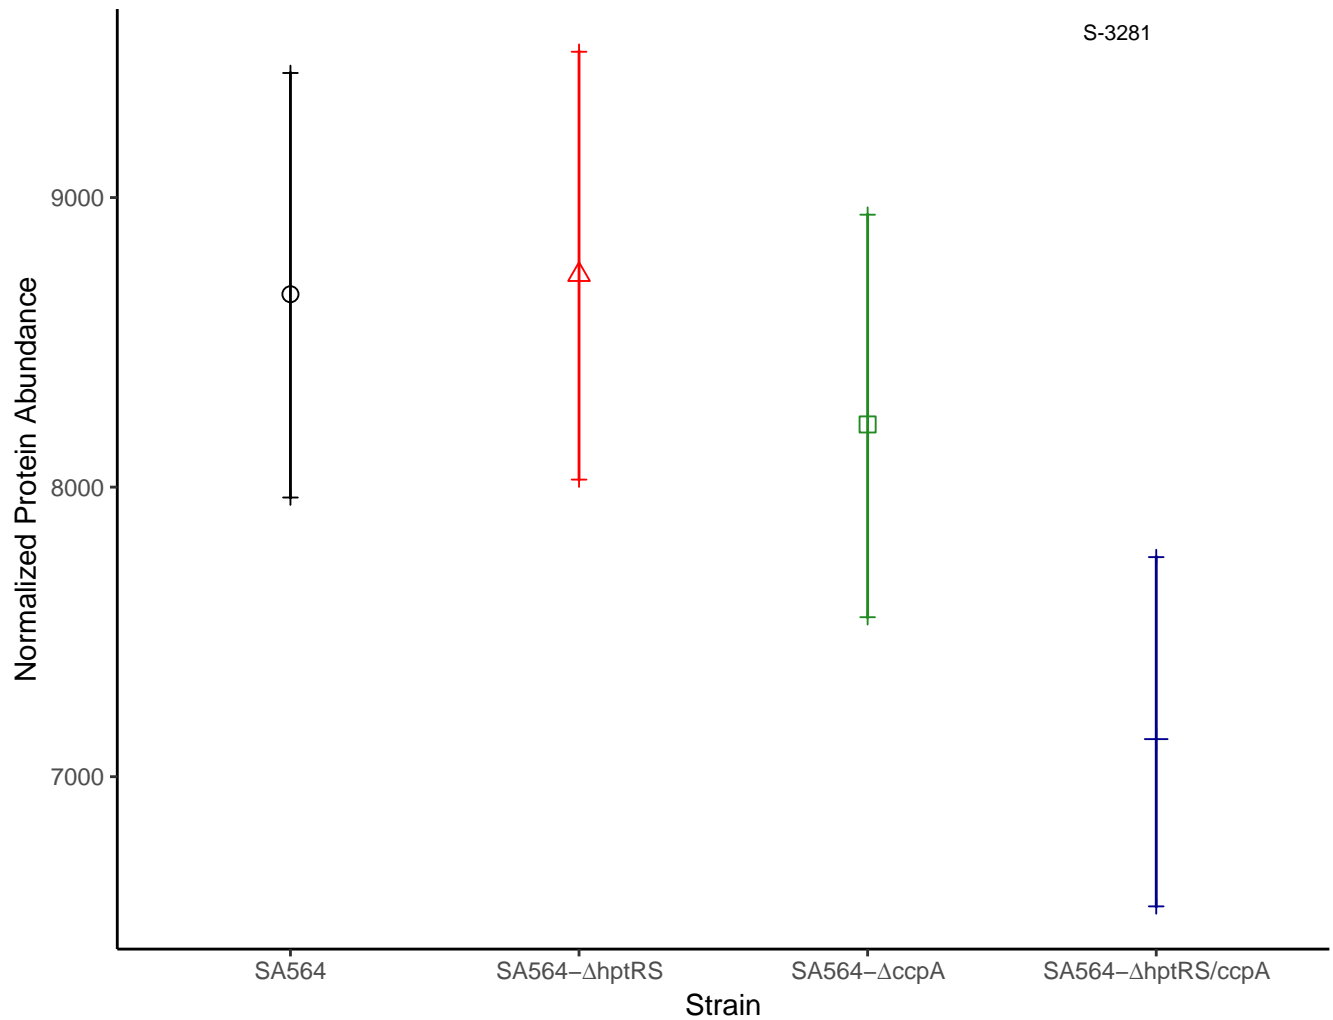

- ⊕ SA564
- △ SA564- $\Delta$ hptRS
- ⊞ SA564- $\Delta$ ccpA
- ⊕ SA564- $\Delta$ hptRS/ccpA

# PTGA\_STAAM

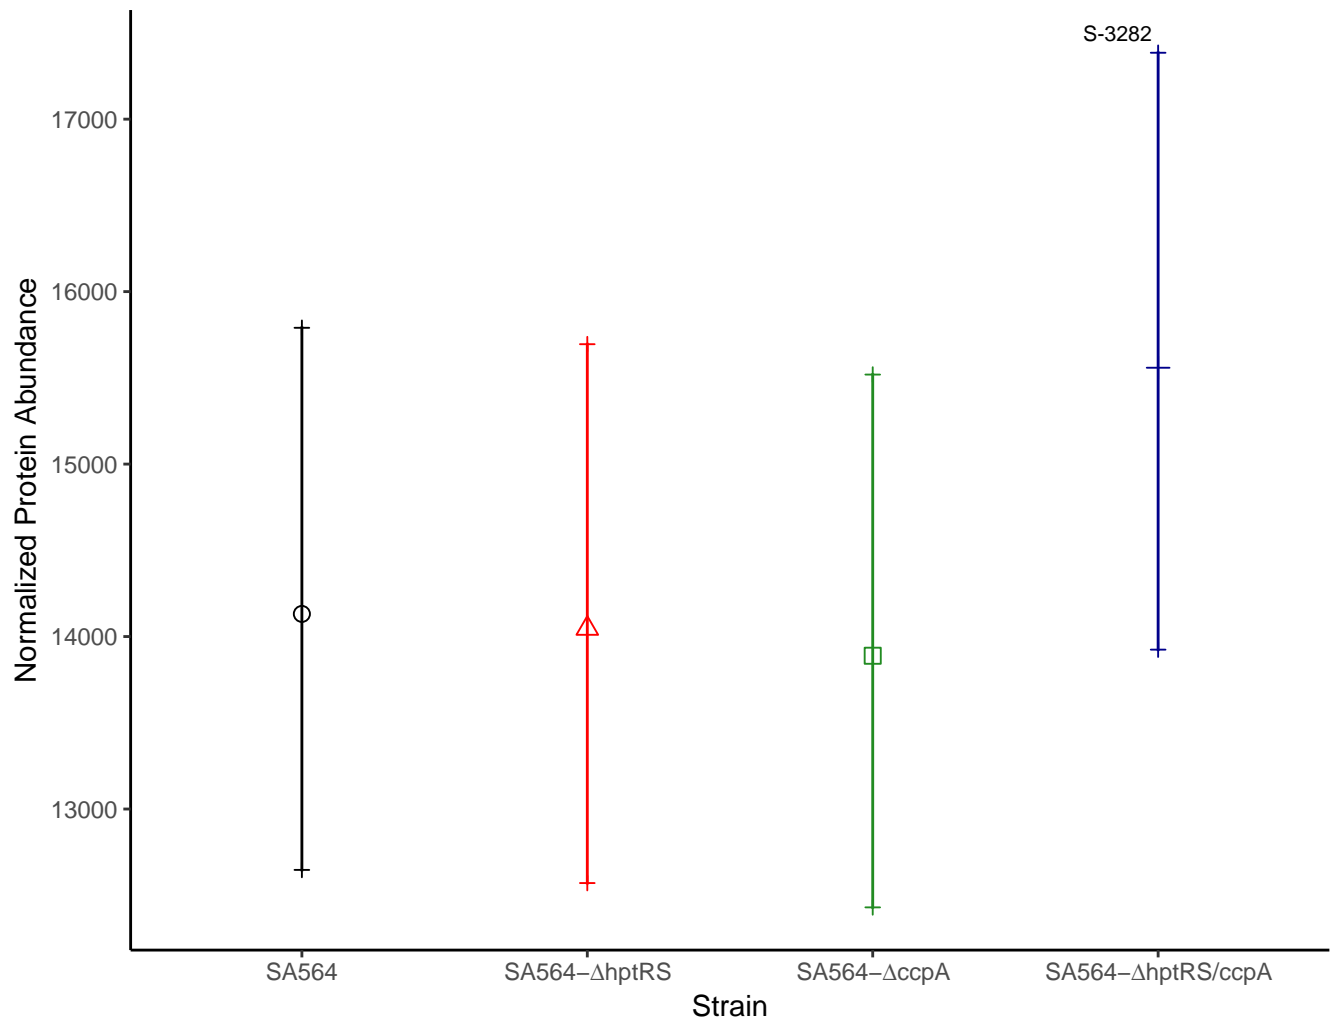

- ⊕ SA564
- △ SA564- $\Delta$ hptRS
- ⊞ SA564- $\Delta$ ccpA
- + SA564- $\Delta$ hptRS/ccpA

# PTH\_STAAM

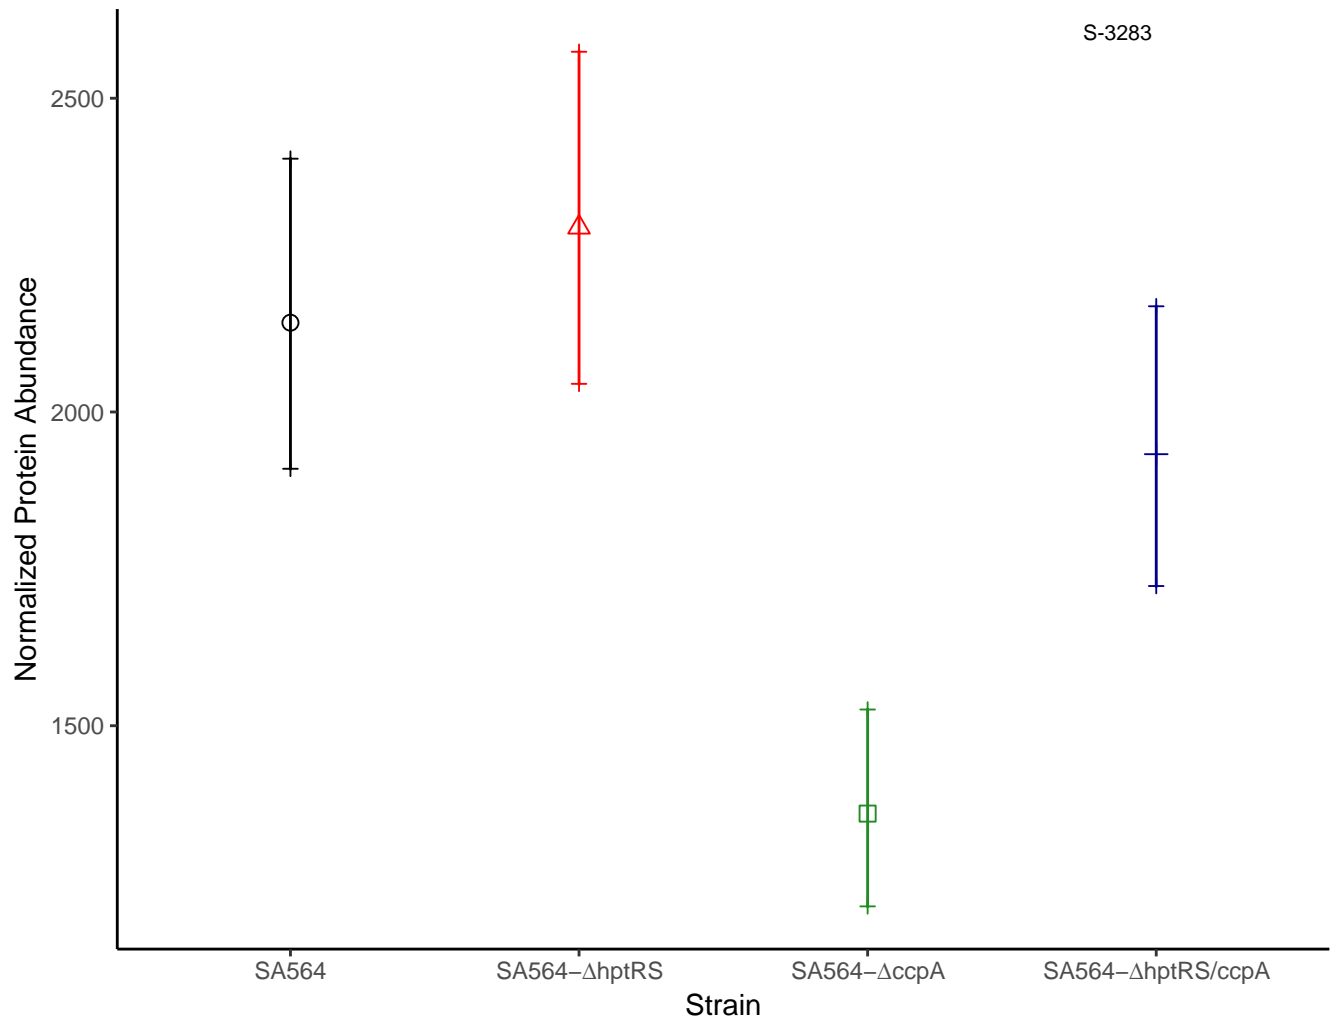

- ⊕ SA564
- △ SA564- $\Delta$ hptRS
- ⊞ SA564- $\Delta$ ccpA
- + SA564- $\Delta$ hptRS/ccpA

# PTHP\_STAAM

S-3284

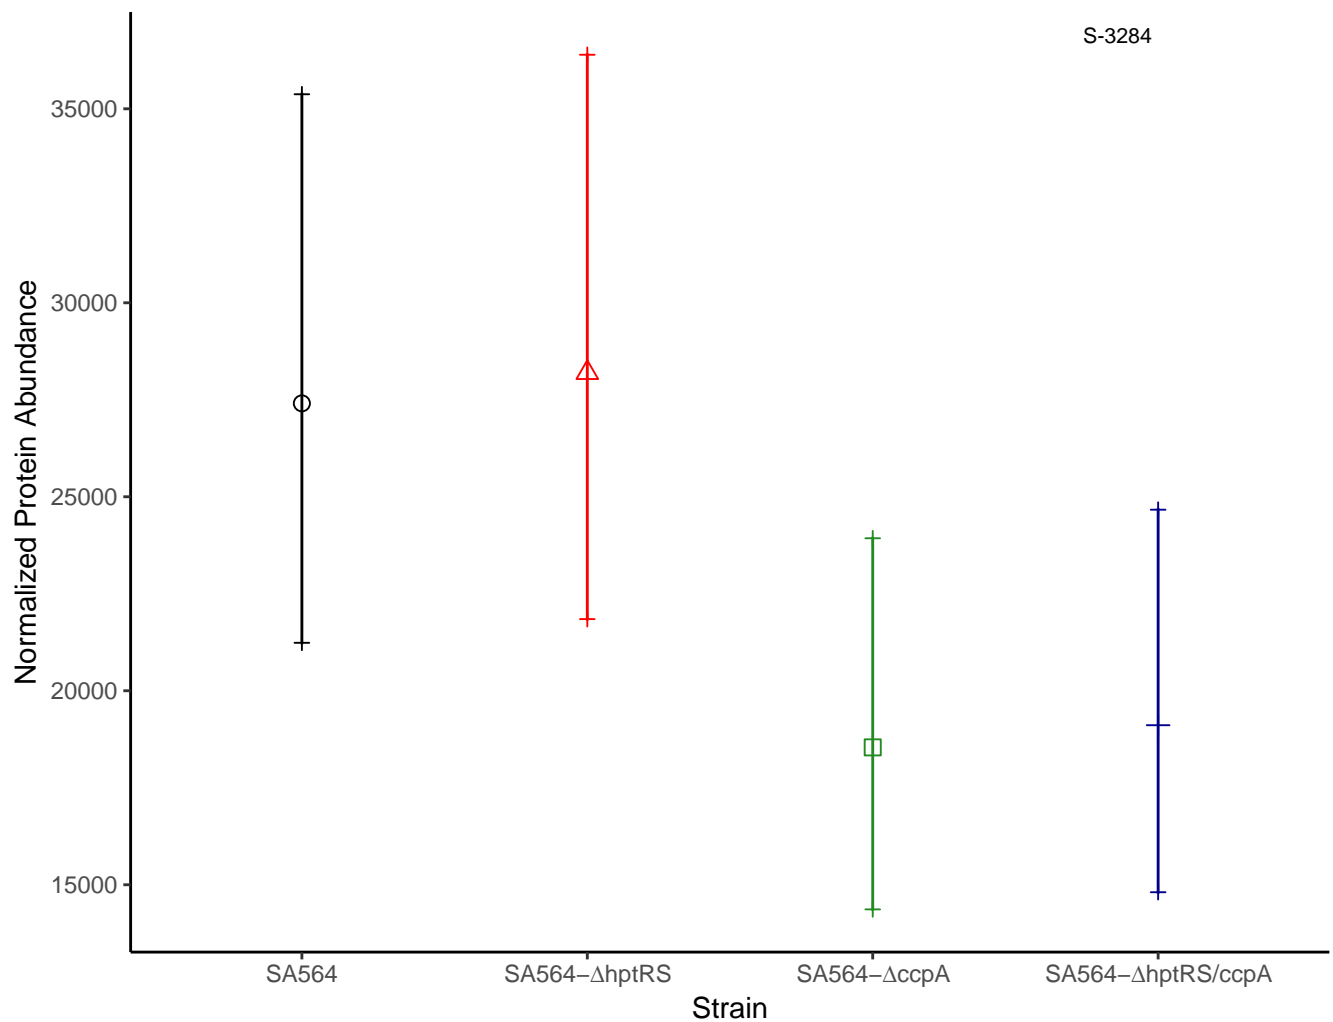

- ⊕ SA564
- △ SA564- $\Delta$ hptRS
- ⊞ SA564- $\Delta$ ccpA
- + SA564- $\Delta$ hptRS/ccpA

# PTMA\_STAAM

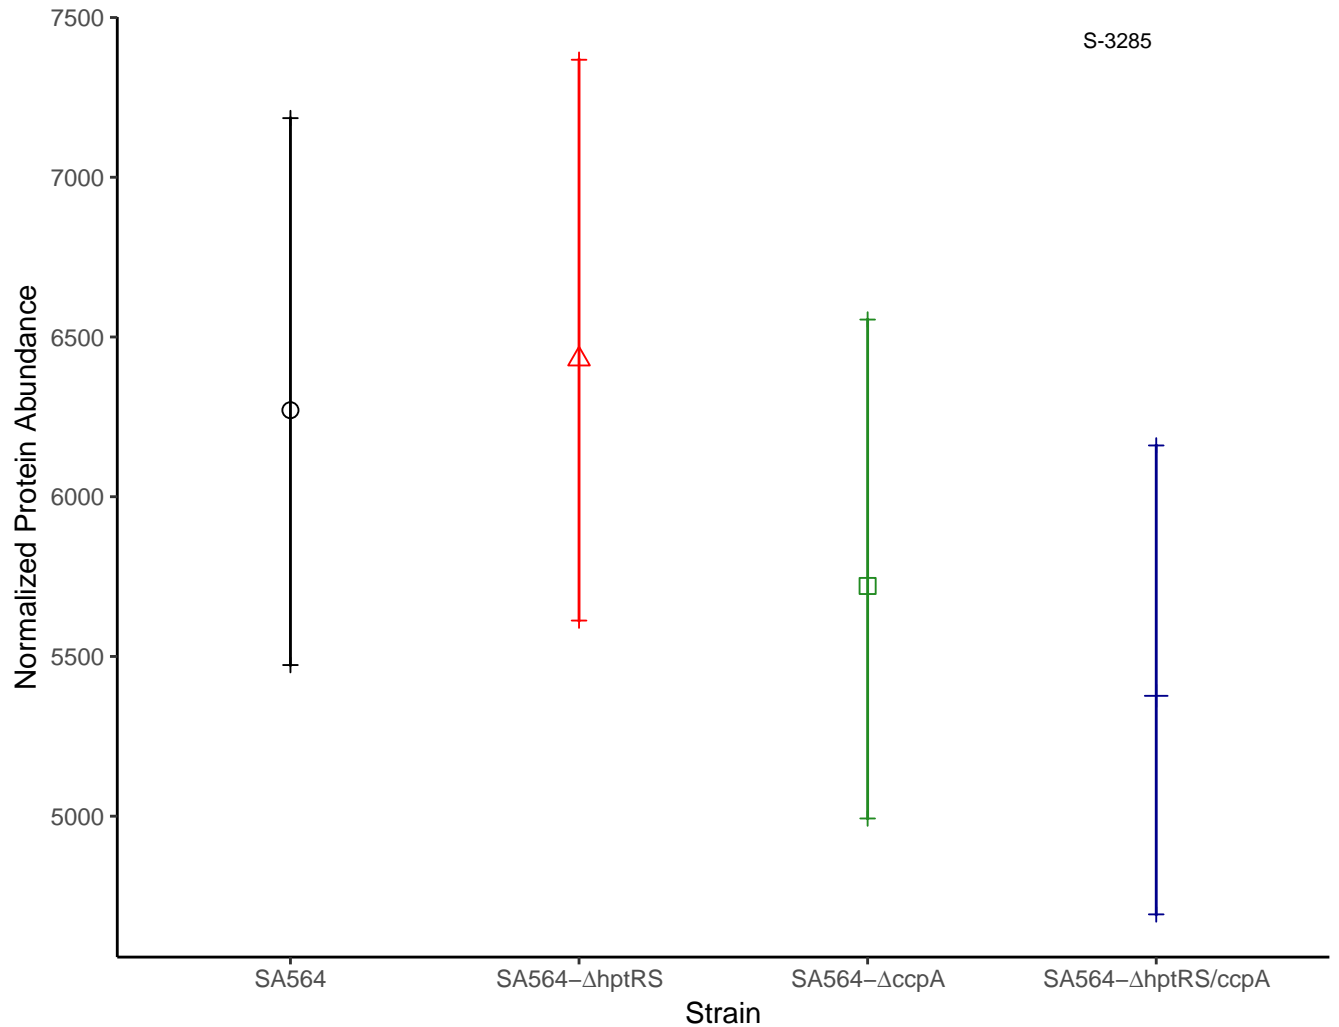

- ⊕ SA564
- △ SA564- $\Delta$ *hptRS*
- ⊞ SA564- $\Delta$ *ccpA*
- + SA564- $\Delta$ *hptRS/ccpA*

# PUR1\_STAAM

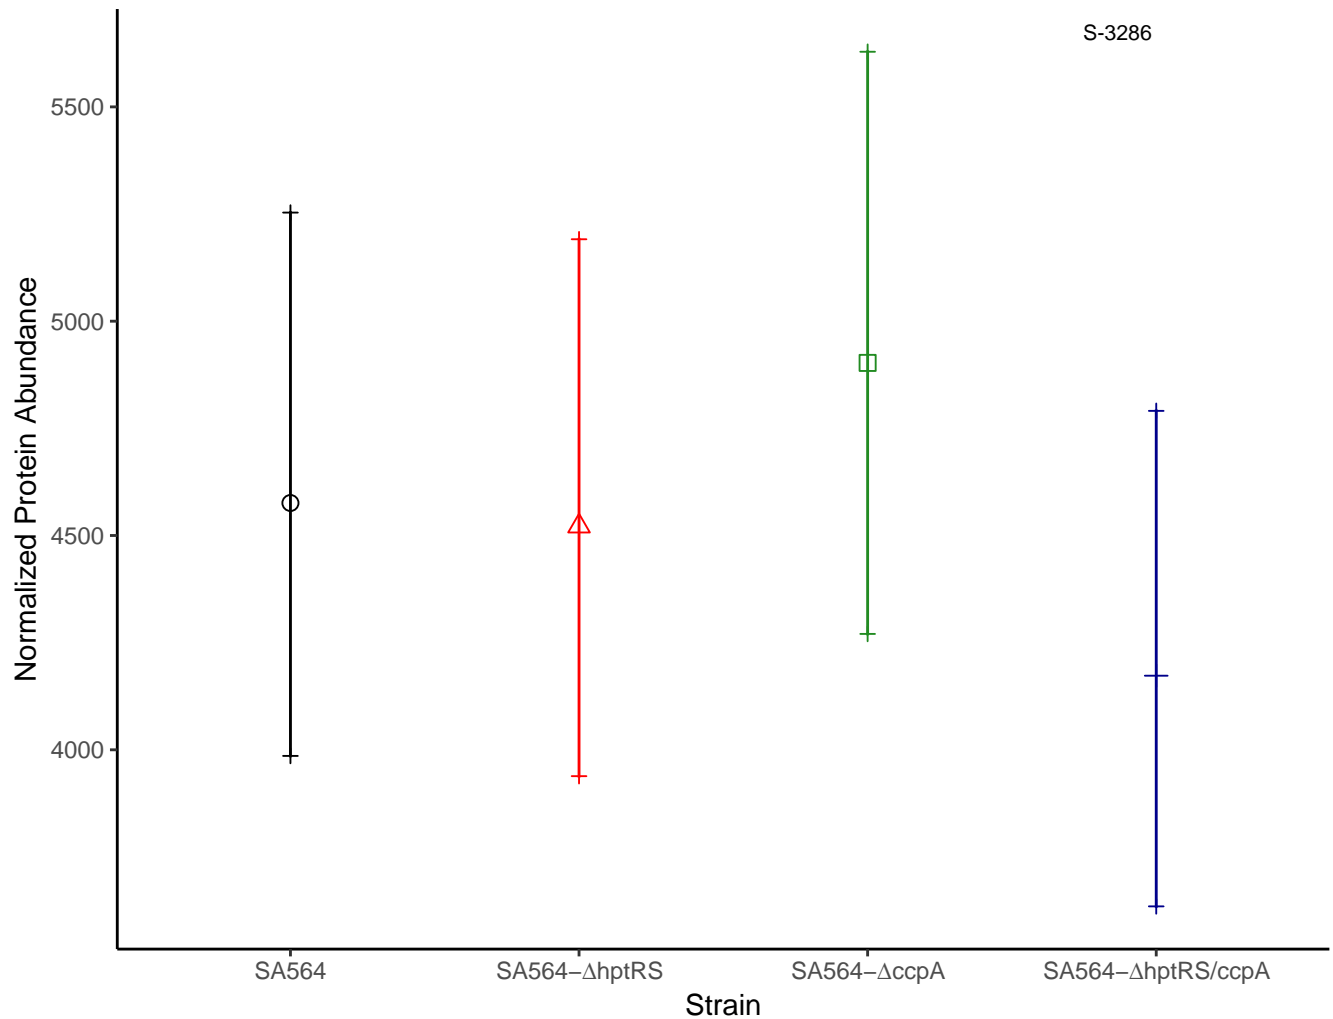

- ⊕ SA564
- △ SA564- $\Delta$ hptRS
- ⊞ SA564- $\Delta$ ccpA
- + SA564- $\Delta$ hptRS/ccpA

# PUR2\_STAAM

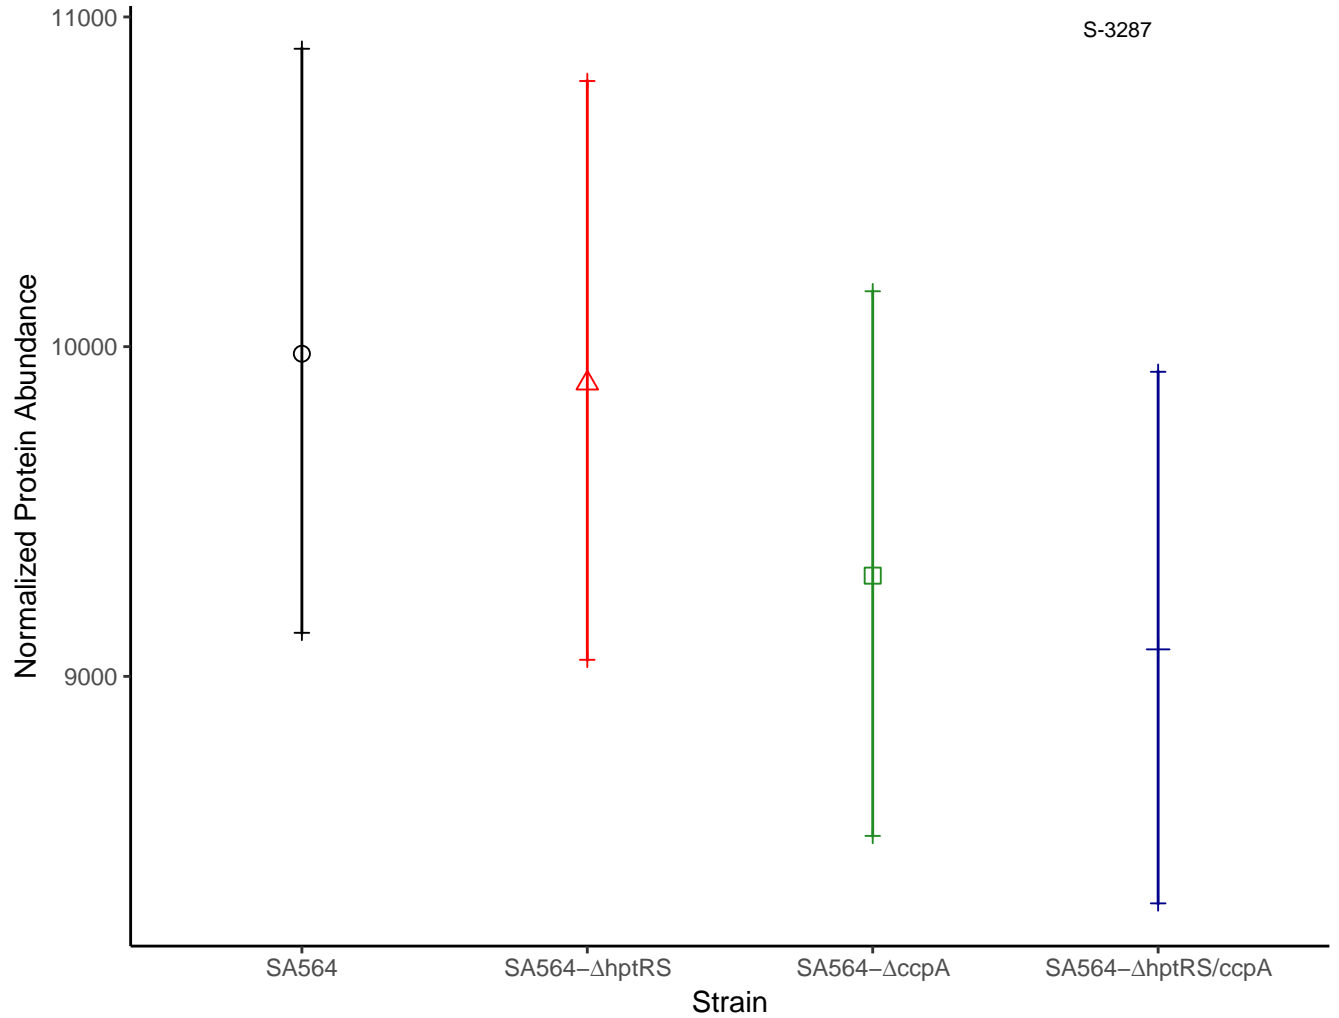

- ⊕ SA564
- △ SA564- $\Delta$ hptRS
- ⊞ SA564- $\Delta$ ccpA
- + SA564- $\Delta$ hptRS/ccpA

# PUR3\_STAAM

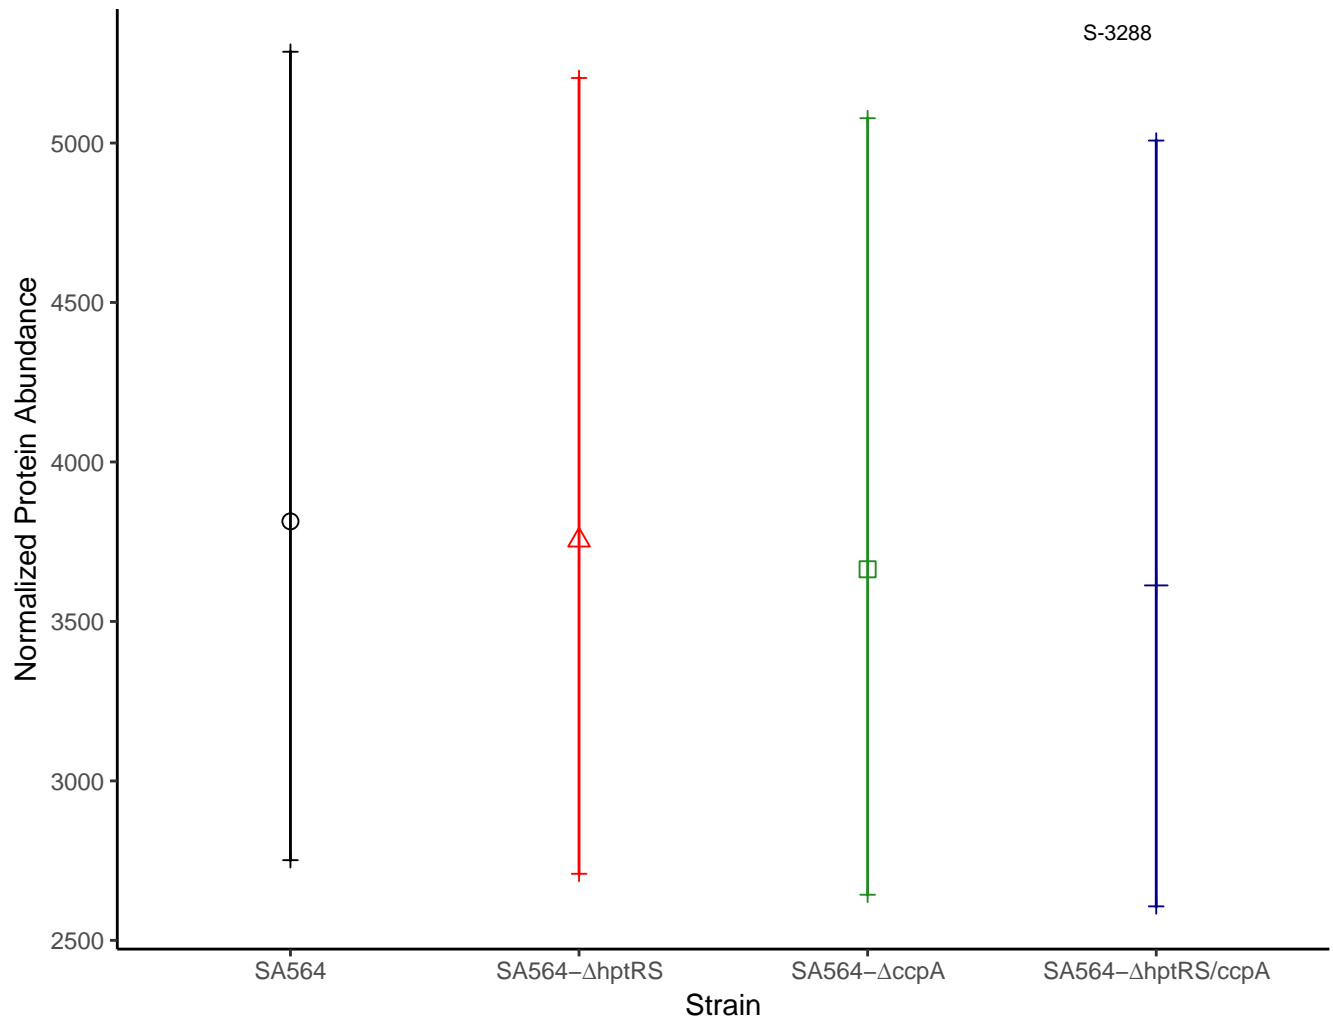

- ⊕ SA564
- △ SA564- $\Delta$ *hptRS*
- ⊞ SA564- $\Delta$ *ccpA*
- + SA564- $\Delta$ *hptRS/ccpA*



# PUR5\_STAAM

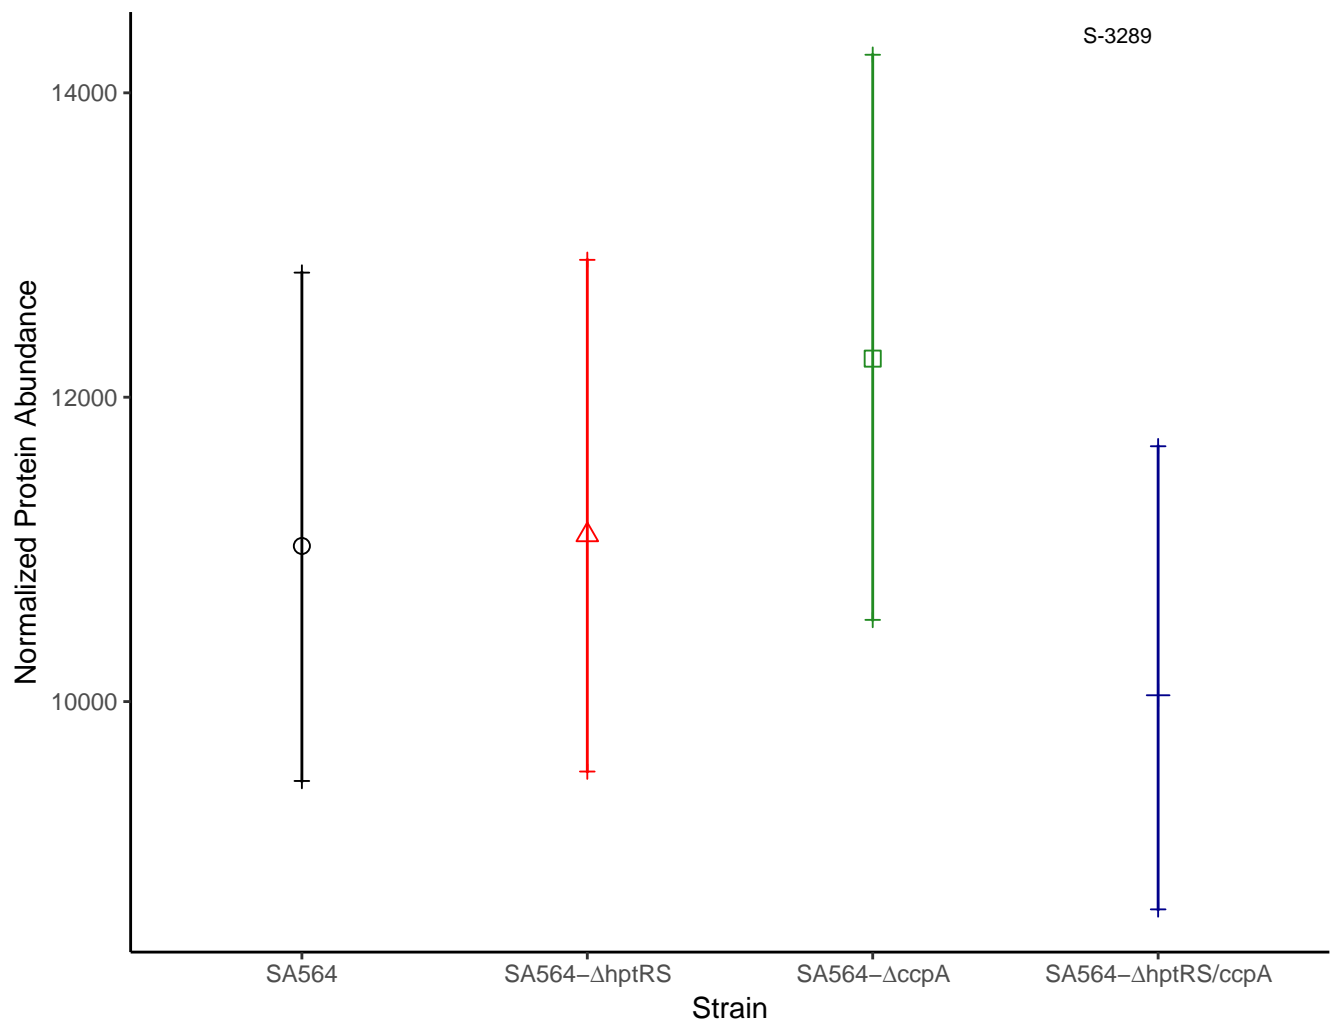

- ⊕ SA564
- △ SA564- $\Delta$ hptRS
- ⊞ SA564- $\Delta$ ccpA
- + SA564- $\Delta$ hptRS/ccpA

# PUR7\_STAAM

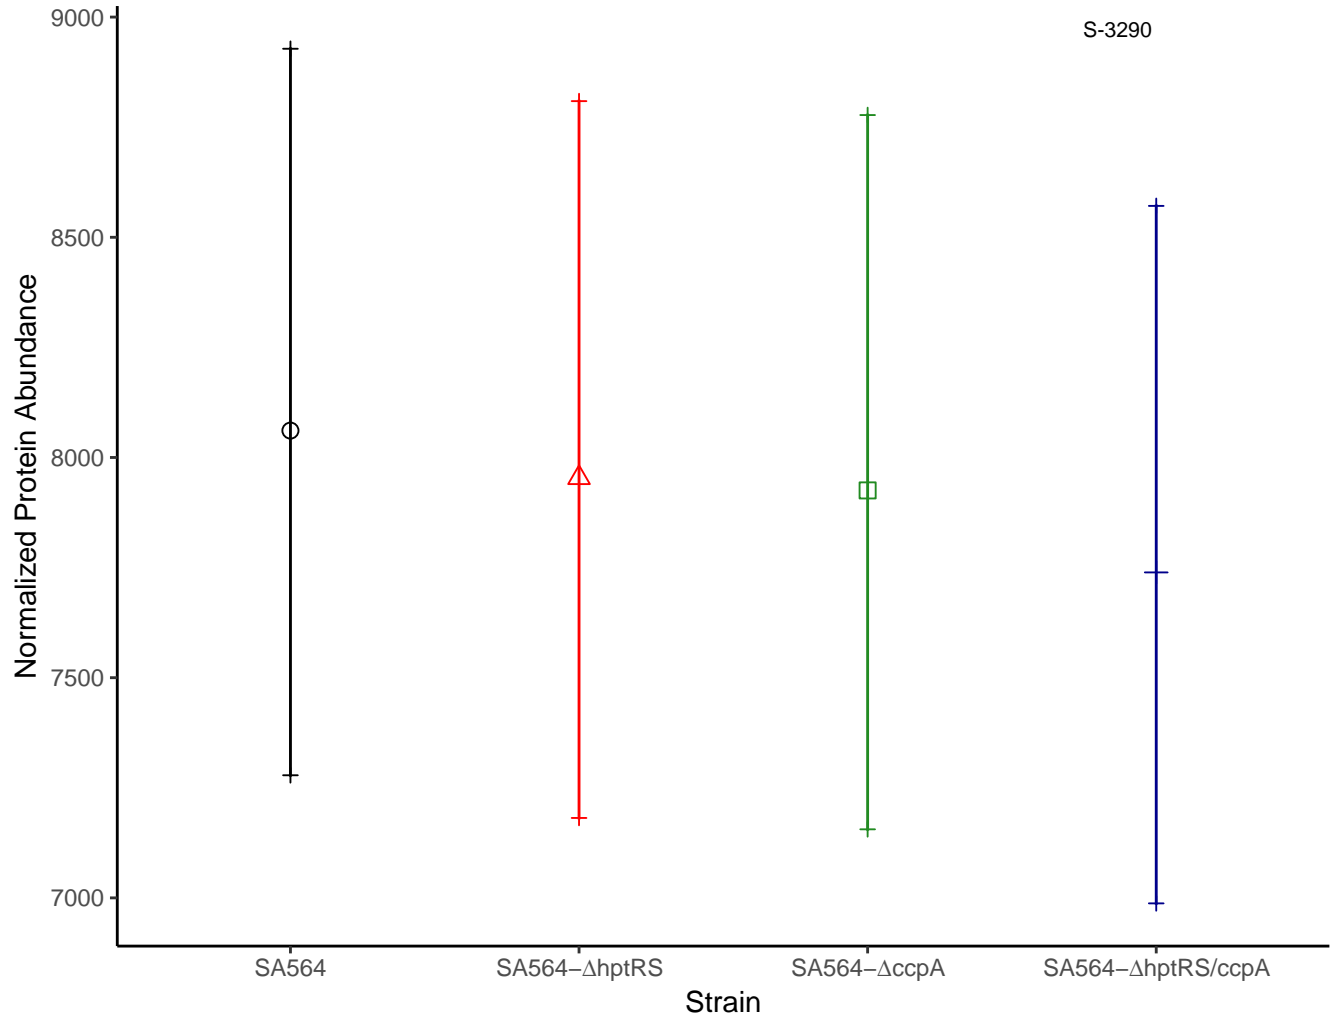

- ⊕ SA564
- △ SA564- $\Delta$ hptRS
- ⊞ SA564- $\Delta$ ccpA
- + SA564- $\Delta$ hptRS/ccpA

# PUR8\_STAAM

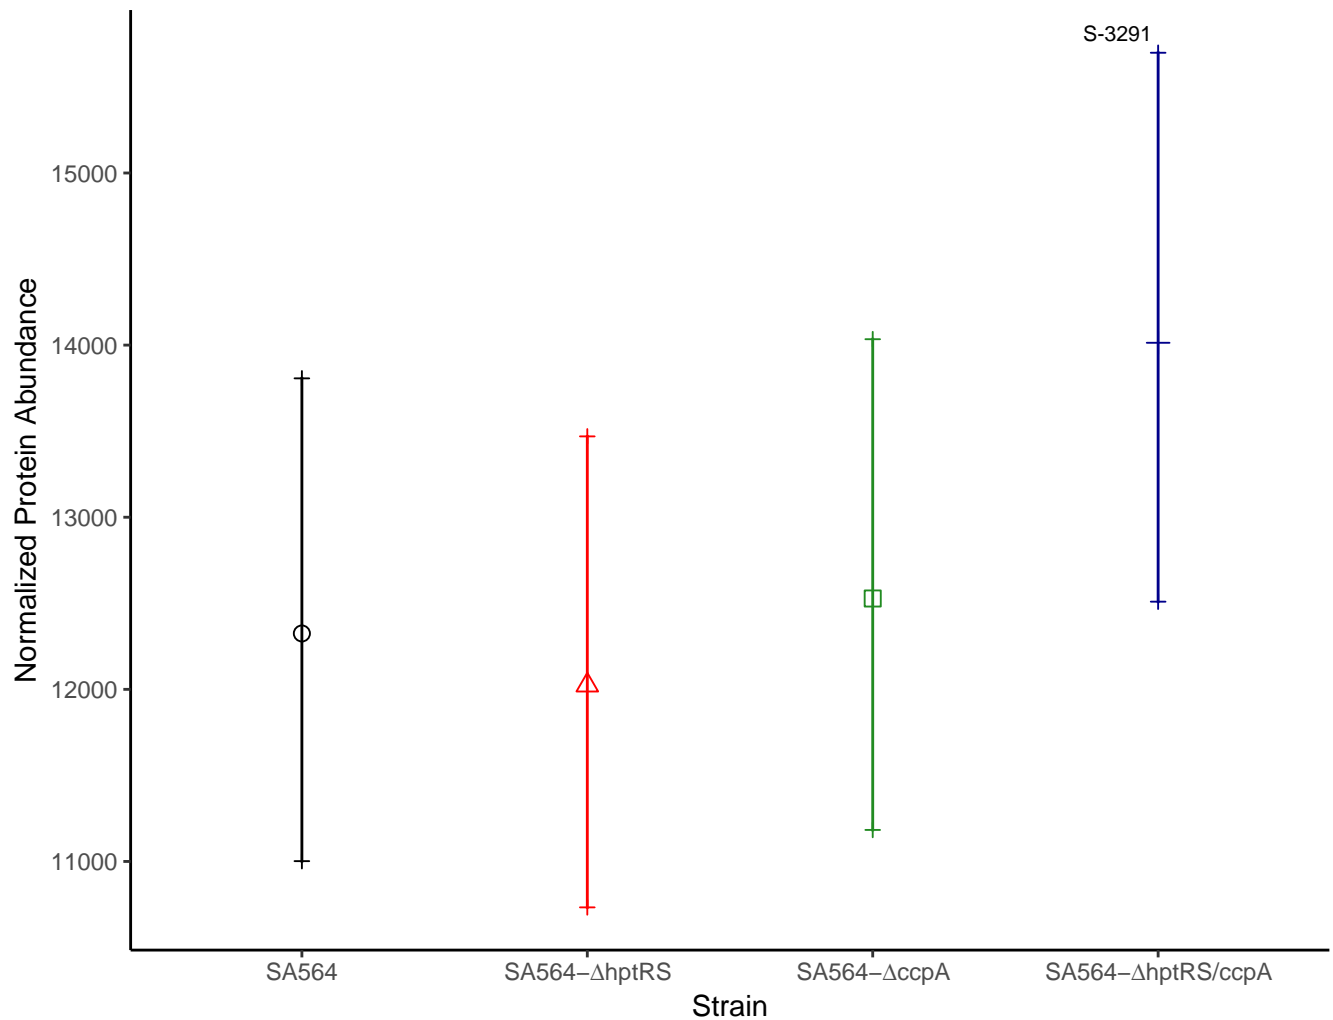

- ⊕ SA564
- △ SA564- $\Delta$ hptRS
- ⊞ SA564- $\Delta$ ccpA
- + SA564- $\Delta$ hptRS/ccpA

# PUR9\_STAAM

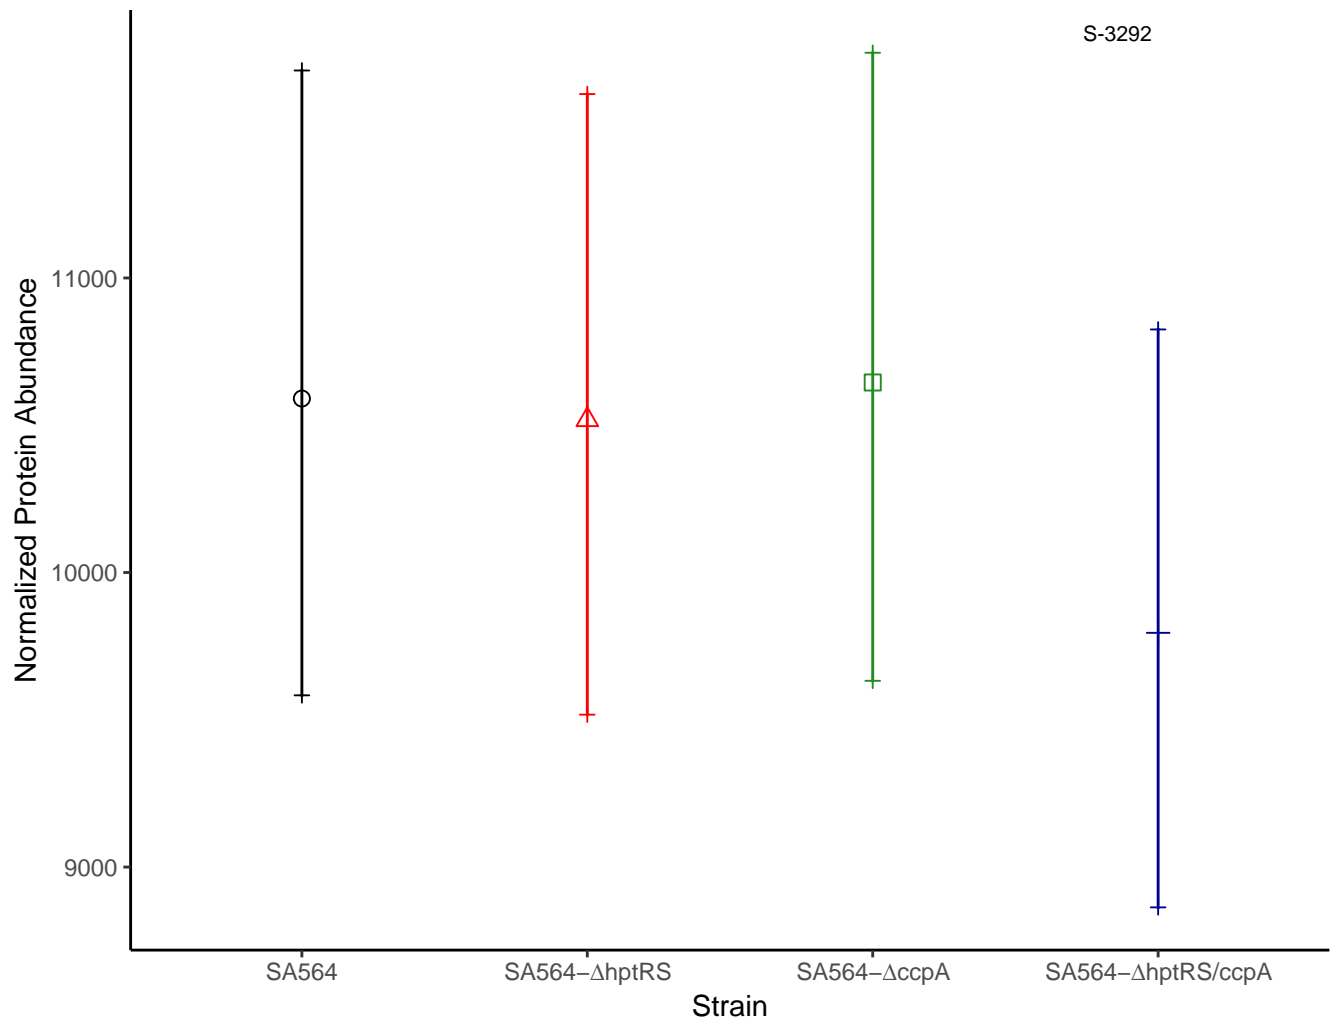

- ⊕ SA564
- △ SA564- $\Delta$ hptRS
- ⊞ SA564- $\Delta$ ccpA
- + SA564- $\Delta$ hptRS/ccpA

# PURA\_STAAM

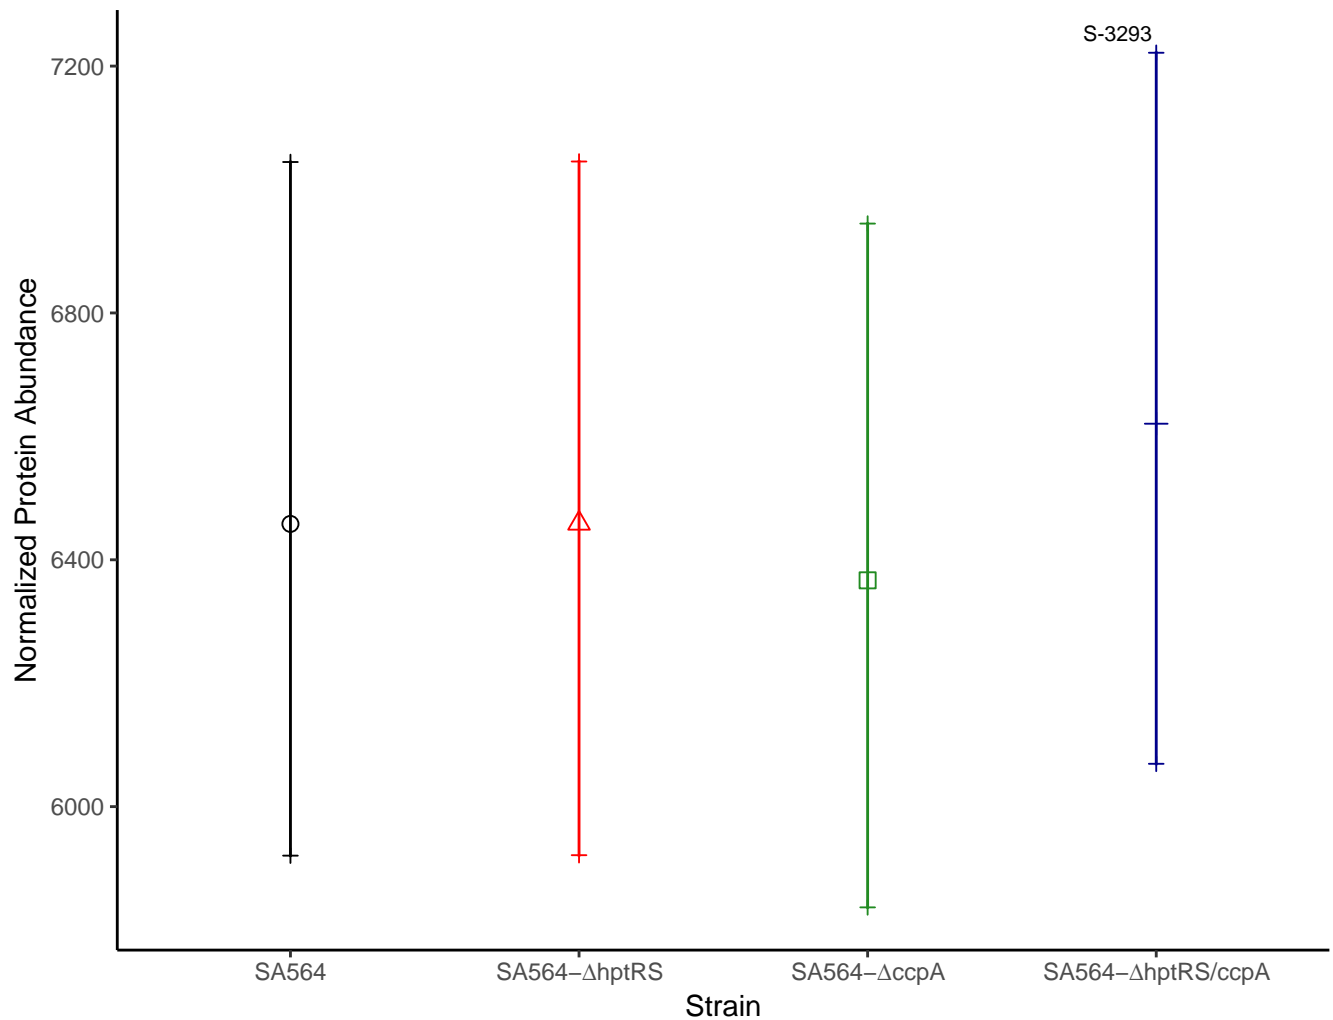

- ⊕ SA564
- △ SA564- $\Delta$ hptRS
- ⊞ SA564- $\Delta$ ccpA
- + SA564- $\Delta$ hptRS/ccpA

# PURK\_STAAM

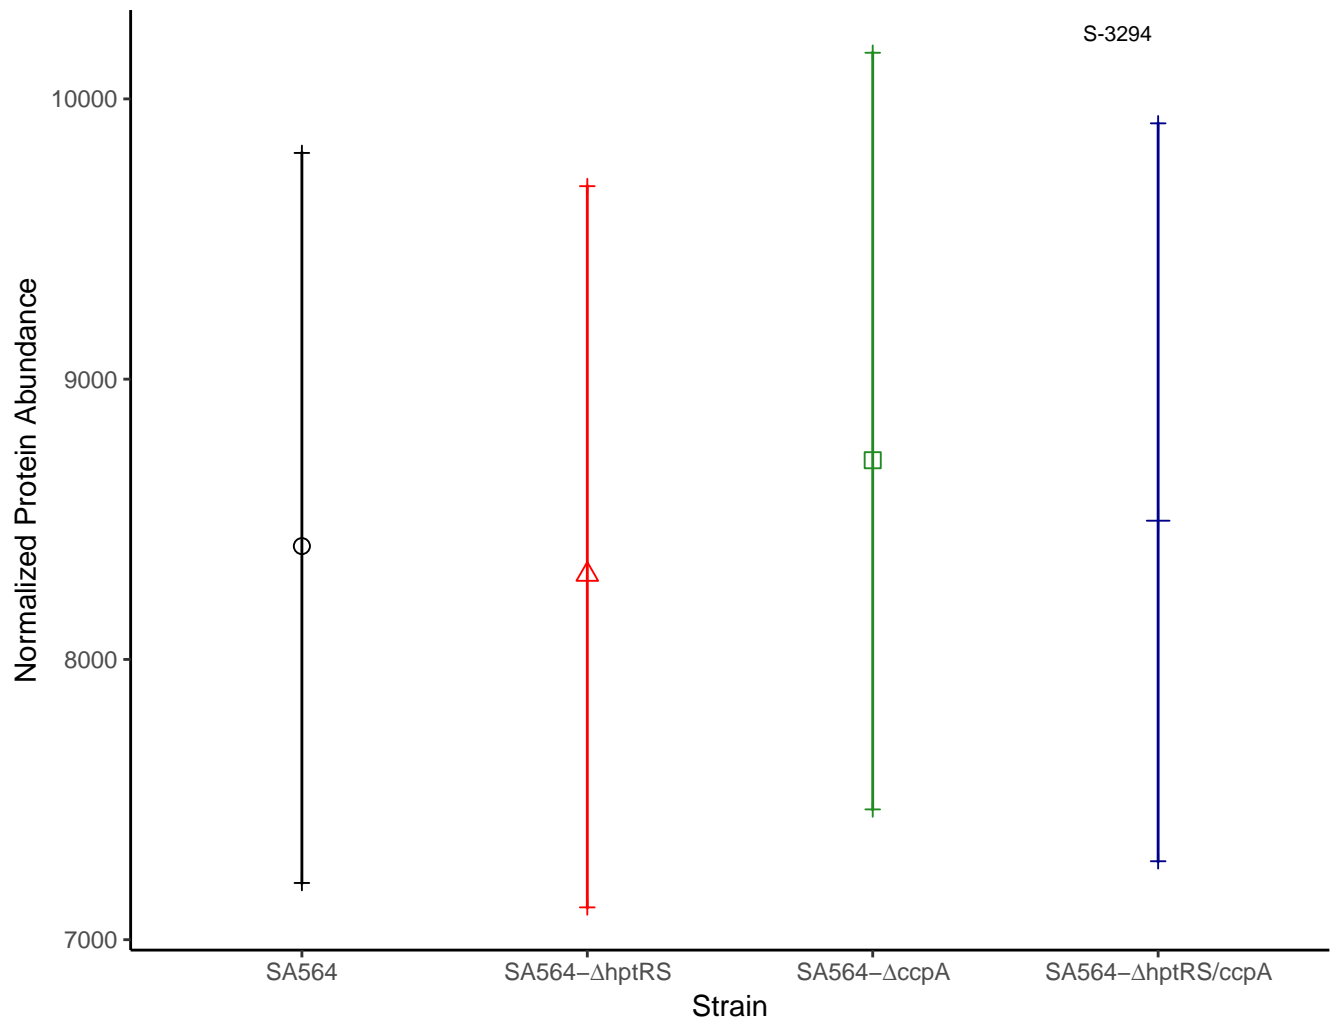

- ⊕ SA564
- △ SA564- $\Delta$ *hptRS*
- ⊞ SA564- $\Delta$ *ccpA*
- + SA564- $\Delta$ *hptRS/ccpA*

# PURL\_STAAM

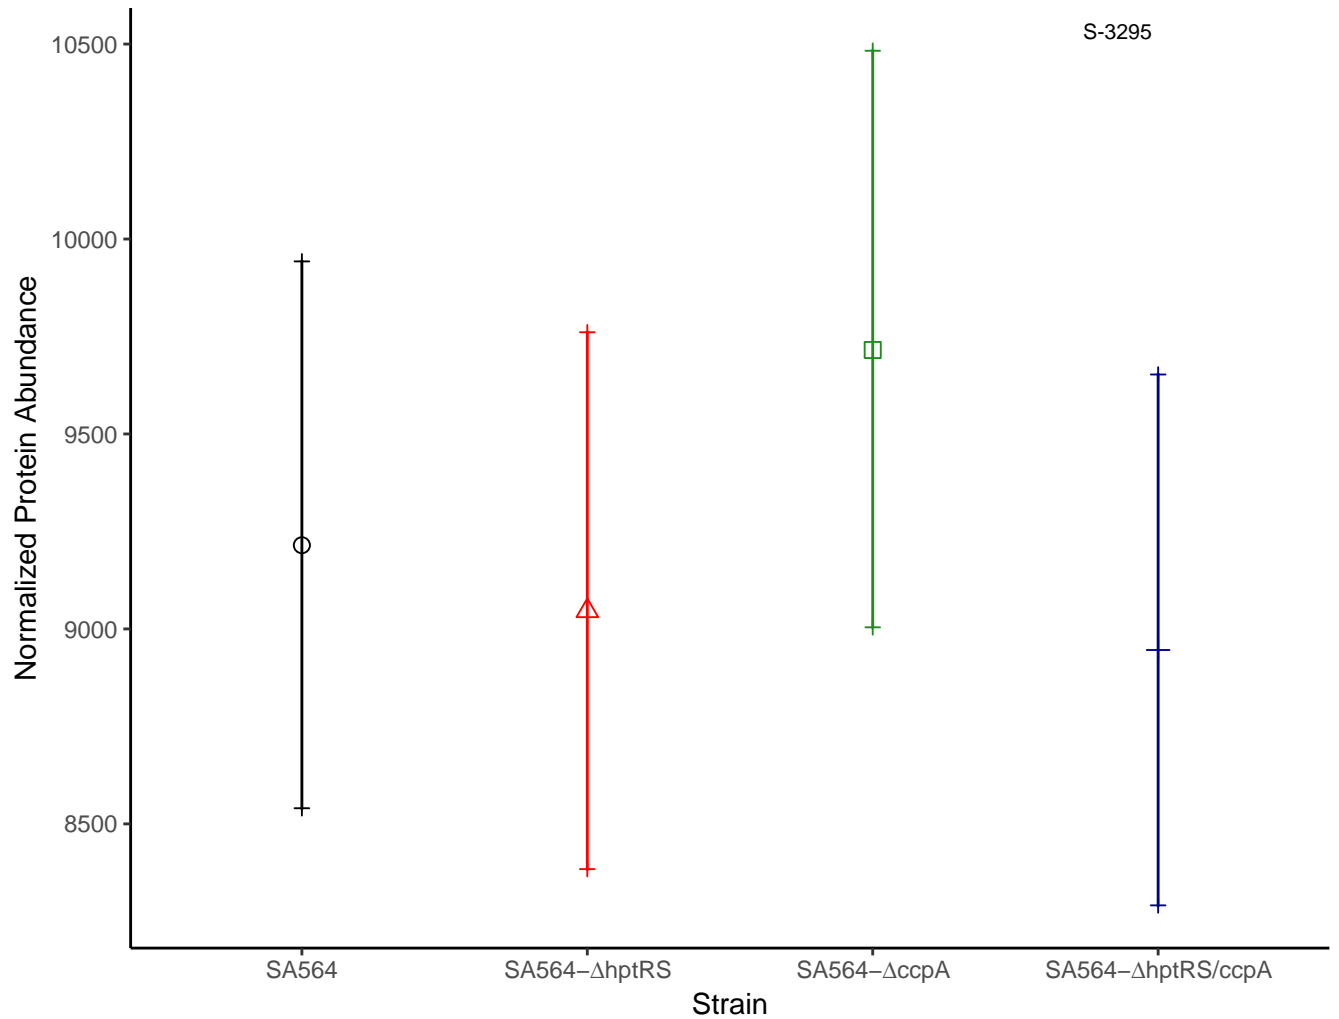

- ⊕ SA564
- △ SA564- $\Delta$ *hptRS*
- ⊞ SA564- $\Delta$ *ccpA*
- + SA564- $\Delta$ *hptRS/ccpA*

# PURQ\_STAAM

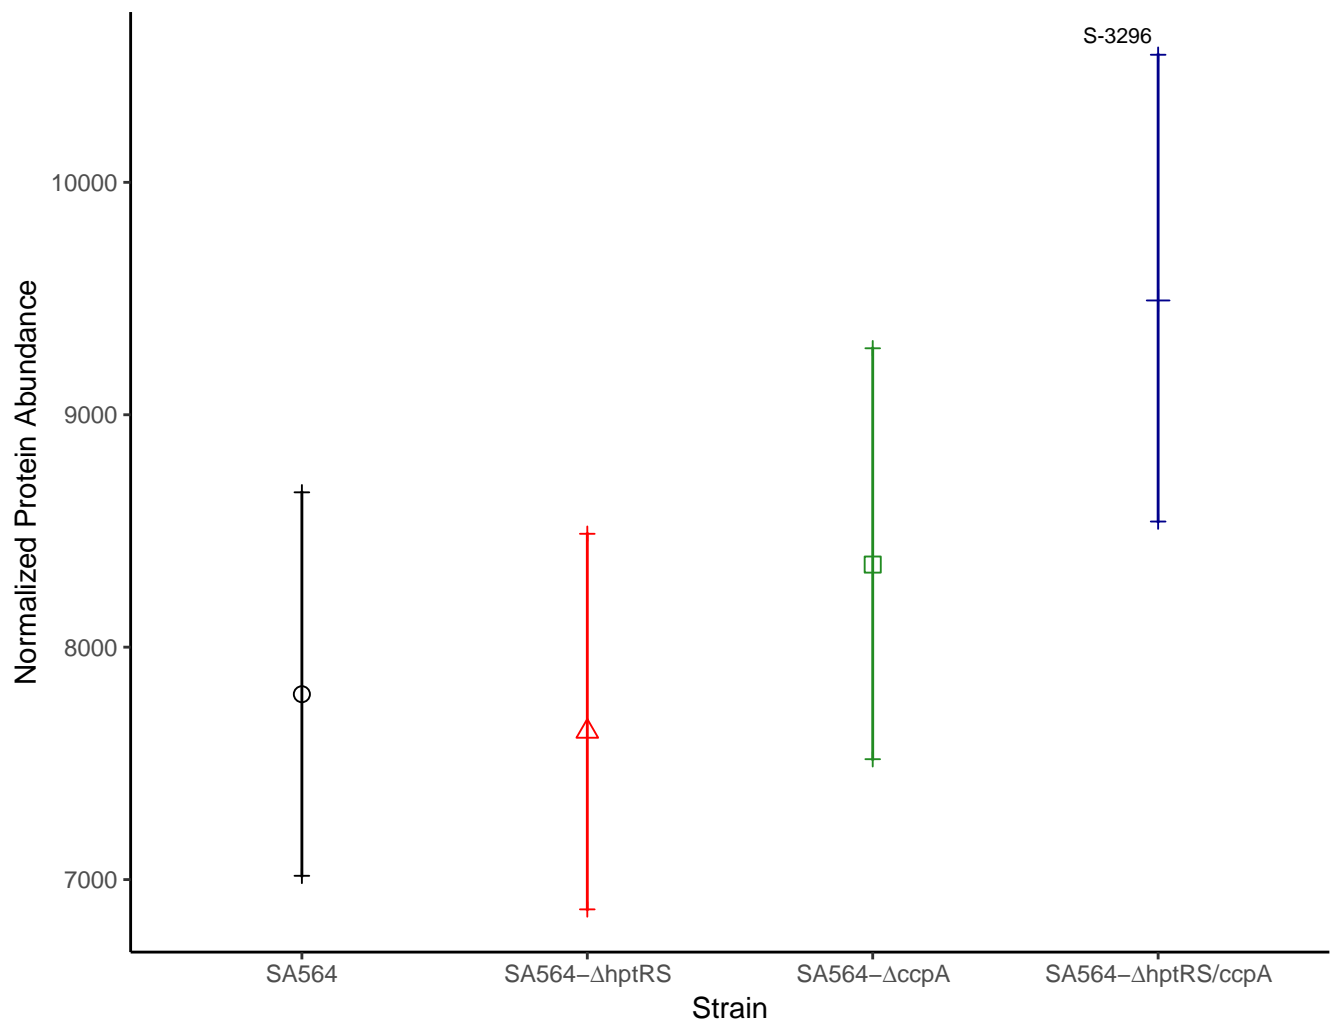

- ⊕ SA564
- △ SA564- $\Delta$ hptRS
- ⊞ SA564- $\Delta$ ccpA
- + SA564- $\Delta$ hptRS/ccpA



# PYRB\_STAAM

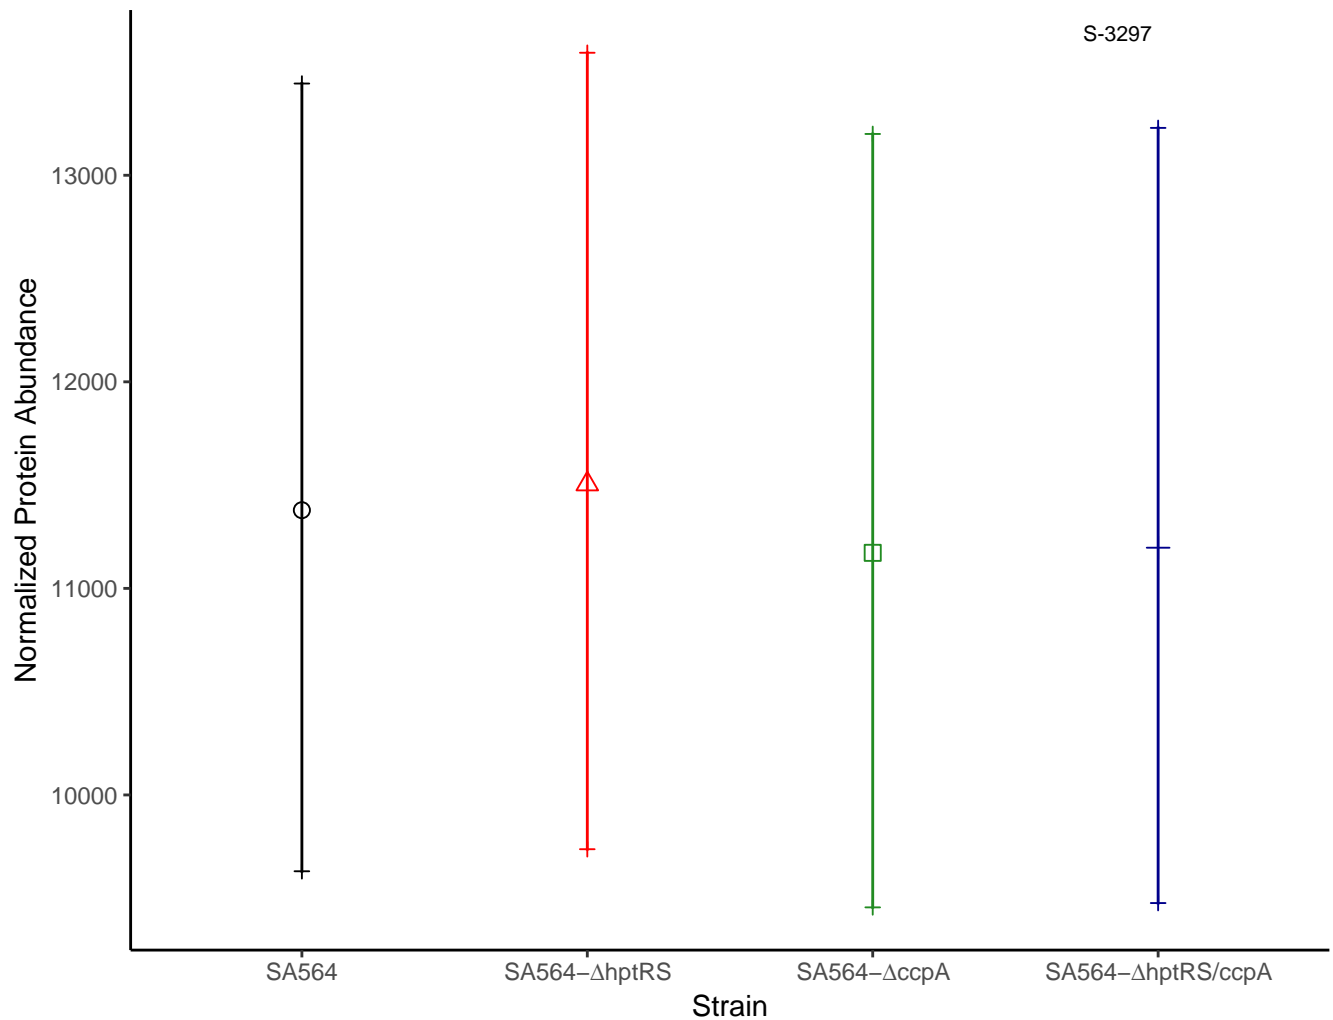

- ⊕ SA564
- △ SA564- $\Delta$ hptRS
- ⊞ SA564- $\Delta$ ccpA
- + SA564- $\Delta$ hptRS/ccpA

# PYRC\_STAAM

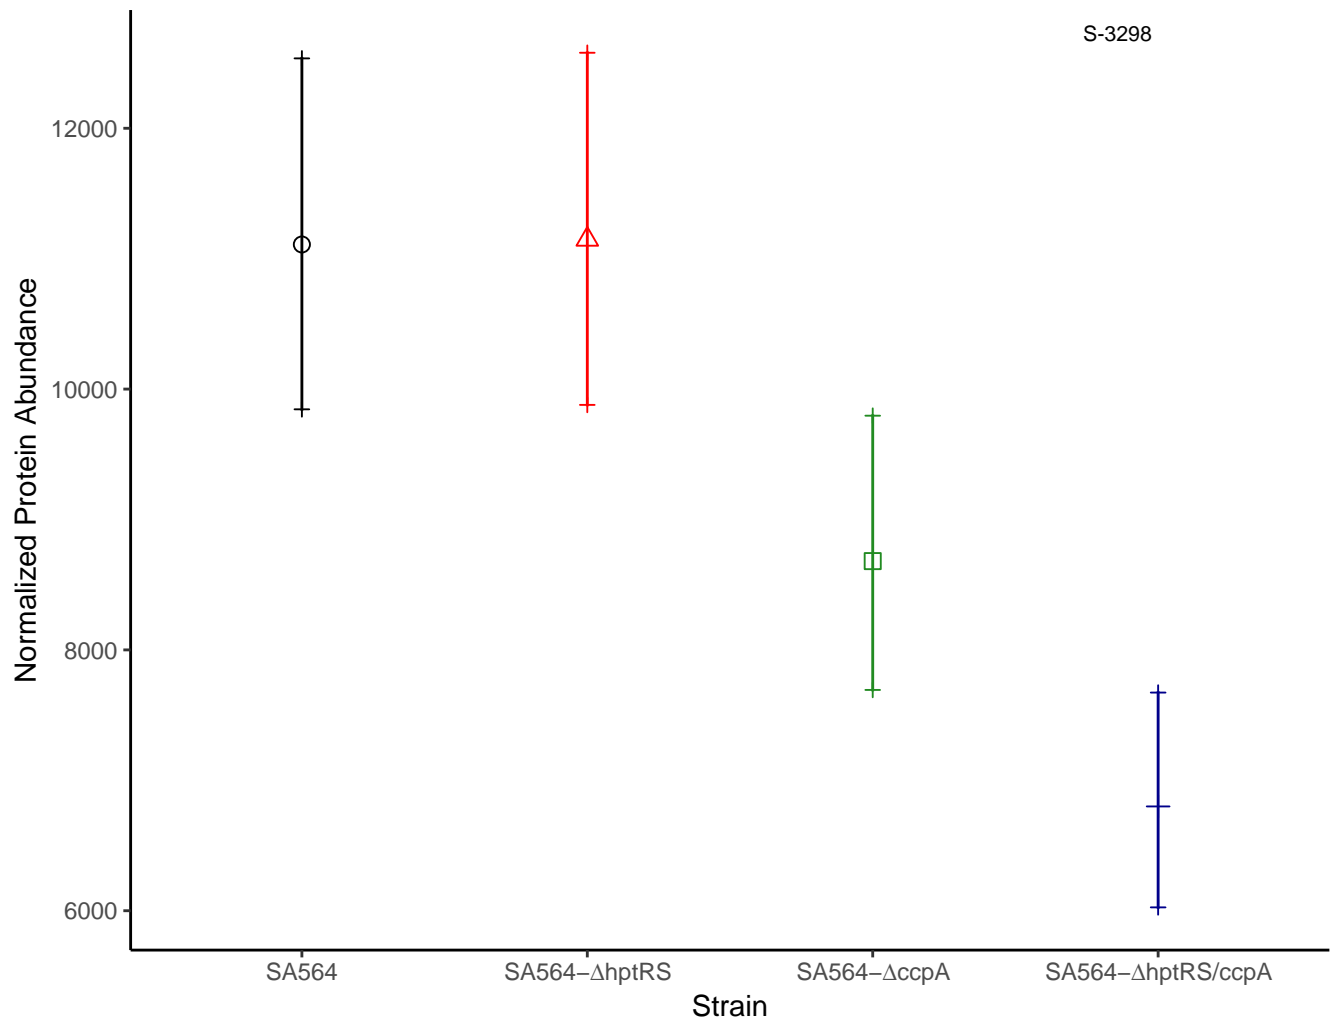

- ⊕ SA564
- △ SA564- $\Delta$ hptRS
- ⊞ SA564- $\Delta$ ccpA
- + SA564- $\Delta$ hptRS/ccpA

# PYRE\_STAAM

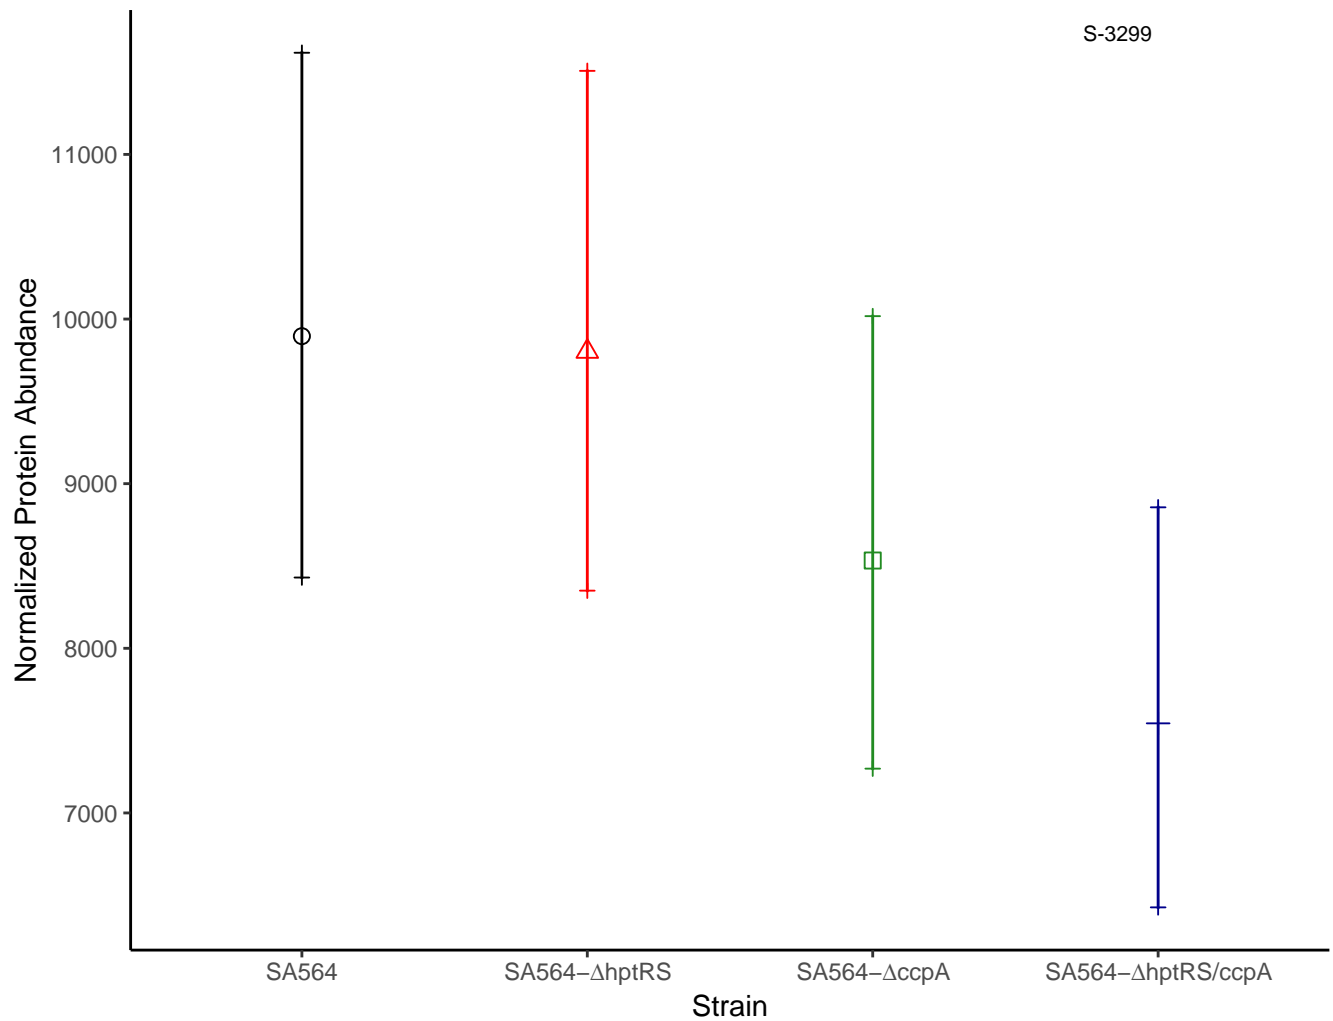

- ⊕ SA564
- △ SA564- $\Delta$ hptRS
- ⊞ SA564- $\Delta$ ccpA
- + SA564- $\Delta$ hptRS/ccpA

# PYRF\_STAAM

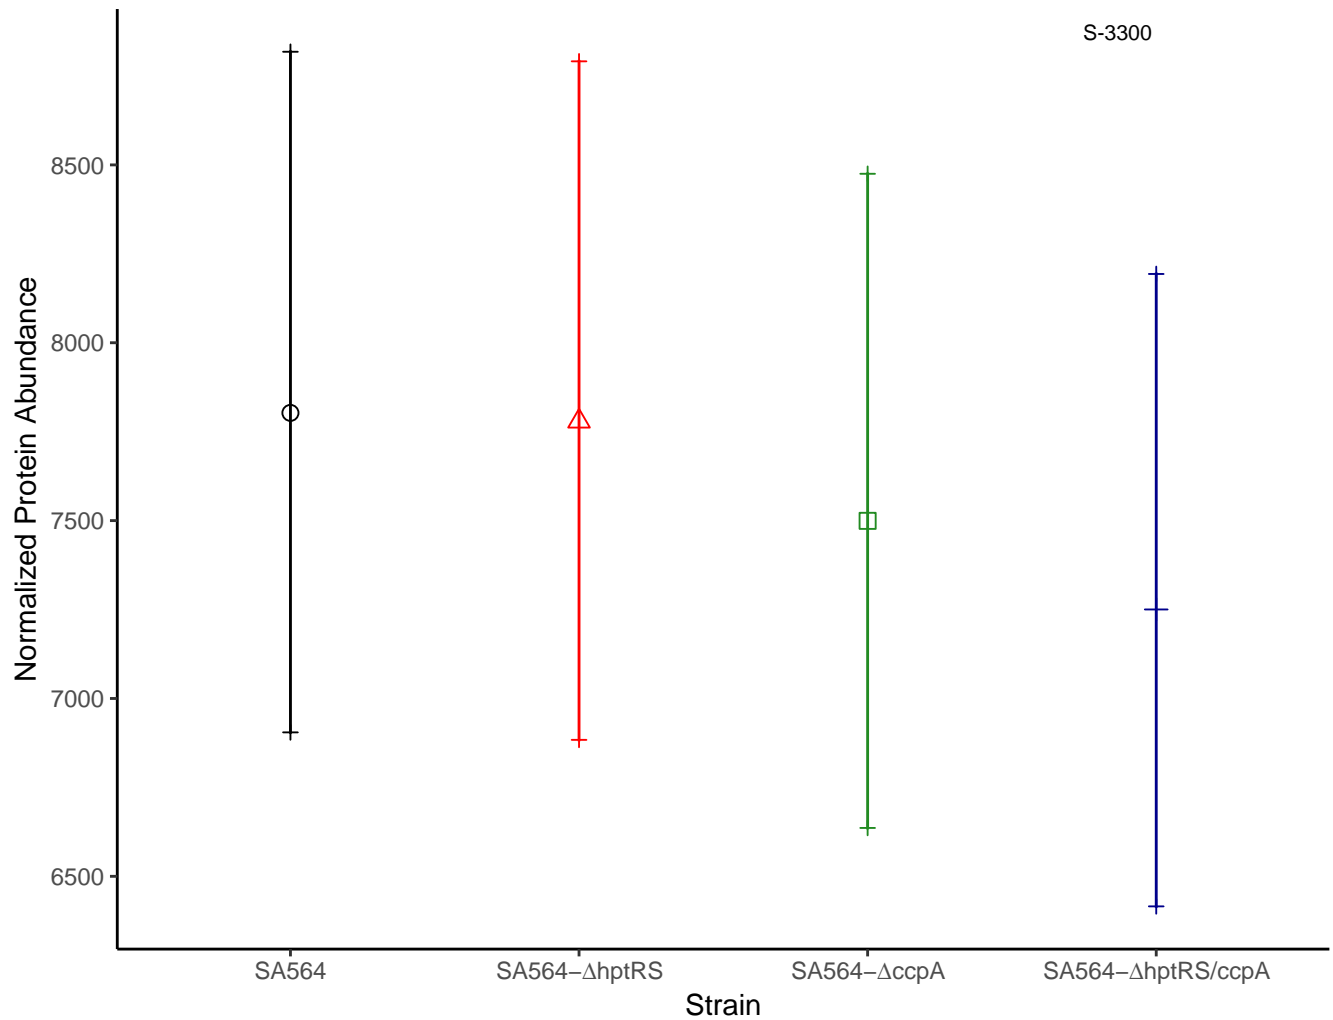

- ⊕ SA564
- △ SA564- $\Delta$ hptRS
- ⊞ SA564- $\Delta$ ccpA
- ⊕ SA564- $\Delta$ hptRS/ccpA

# PYRG\_STAAM

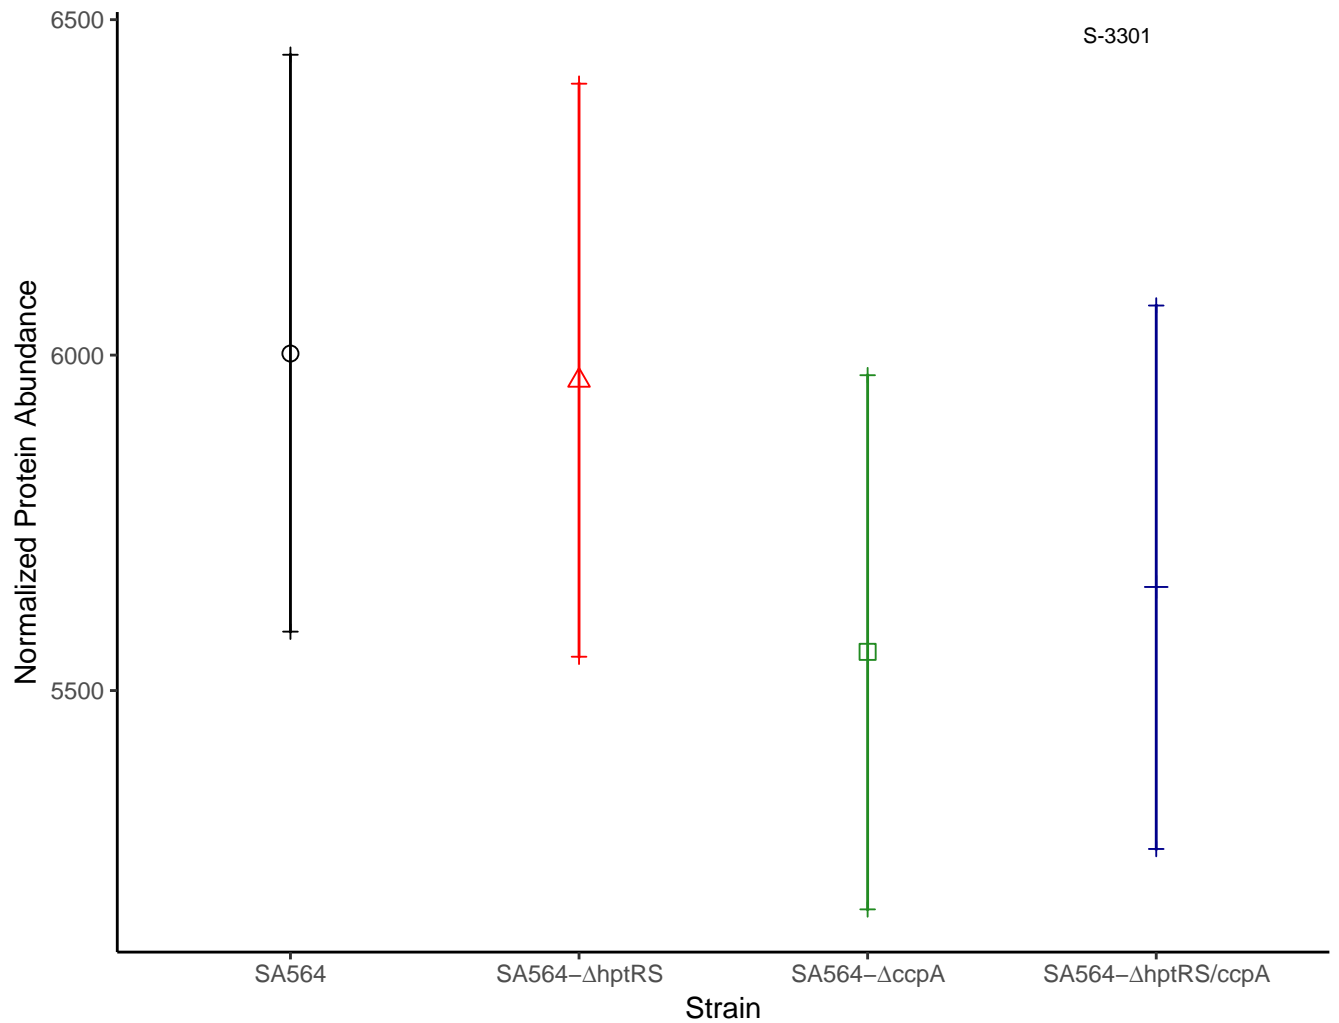

- ⊕ SA564
- △ SA564- $\Delta$ hptRS
- ⊞ SA564- $\Delta$ ccpA
- + SA564- $\Delta$ hptRS/ccpA

# PYRH\_STAAM

S-3302

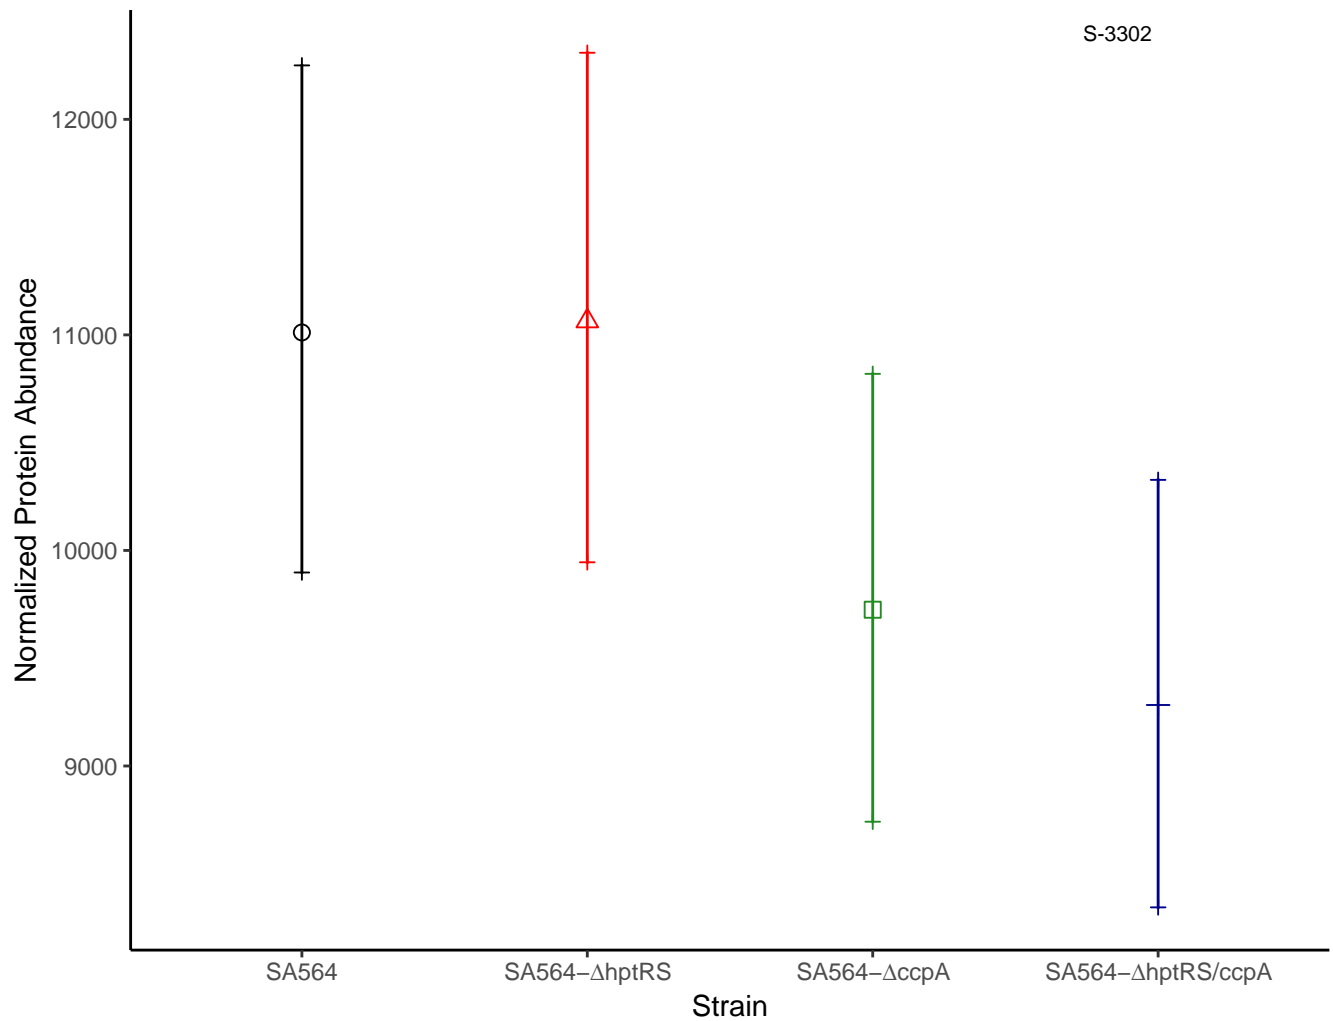

- ⊕ SA564
- △ SA564- $\Delta$ hptRS
- ⊞ SA564- $\Delta$ ccpA
- + SA564- $\Delta$ hptRS/ccpA

# PYRR\_STAAM

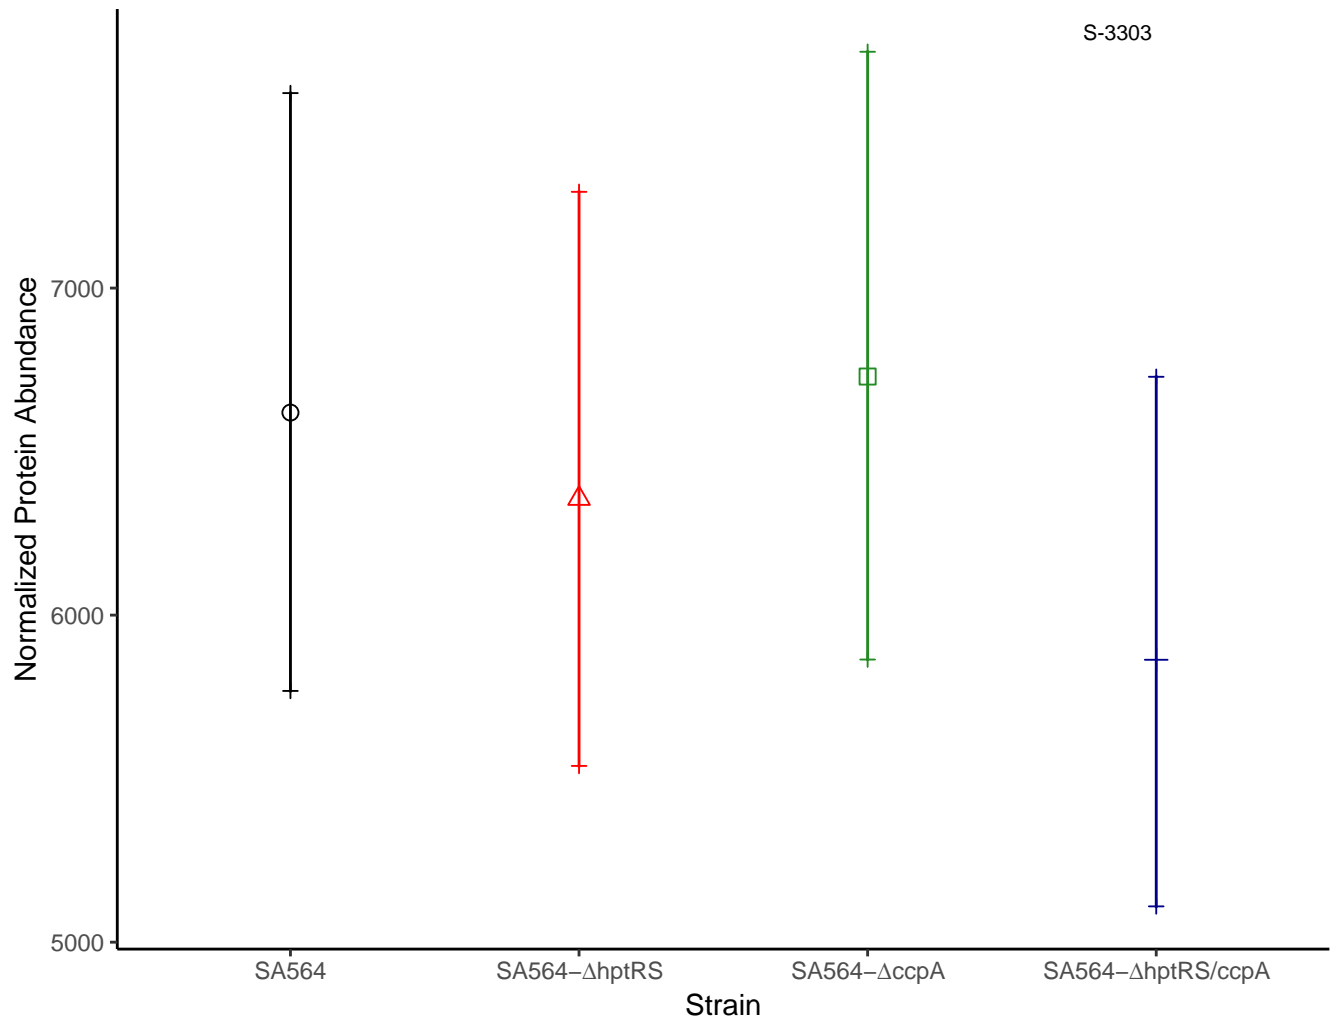

- ⊕ SA564
- △ SA564- $\Delta$ hptRS
- ⊞ SA564- $\Delta$ ccpA
- + SA564- $\Delta$ hptRS/ccpA

# QOX2\_STAAM

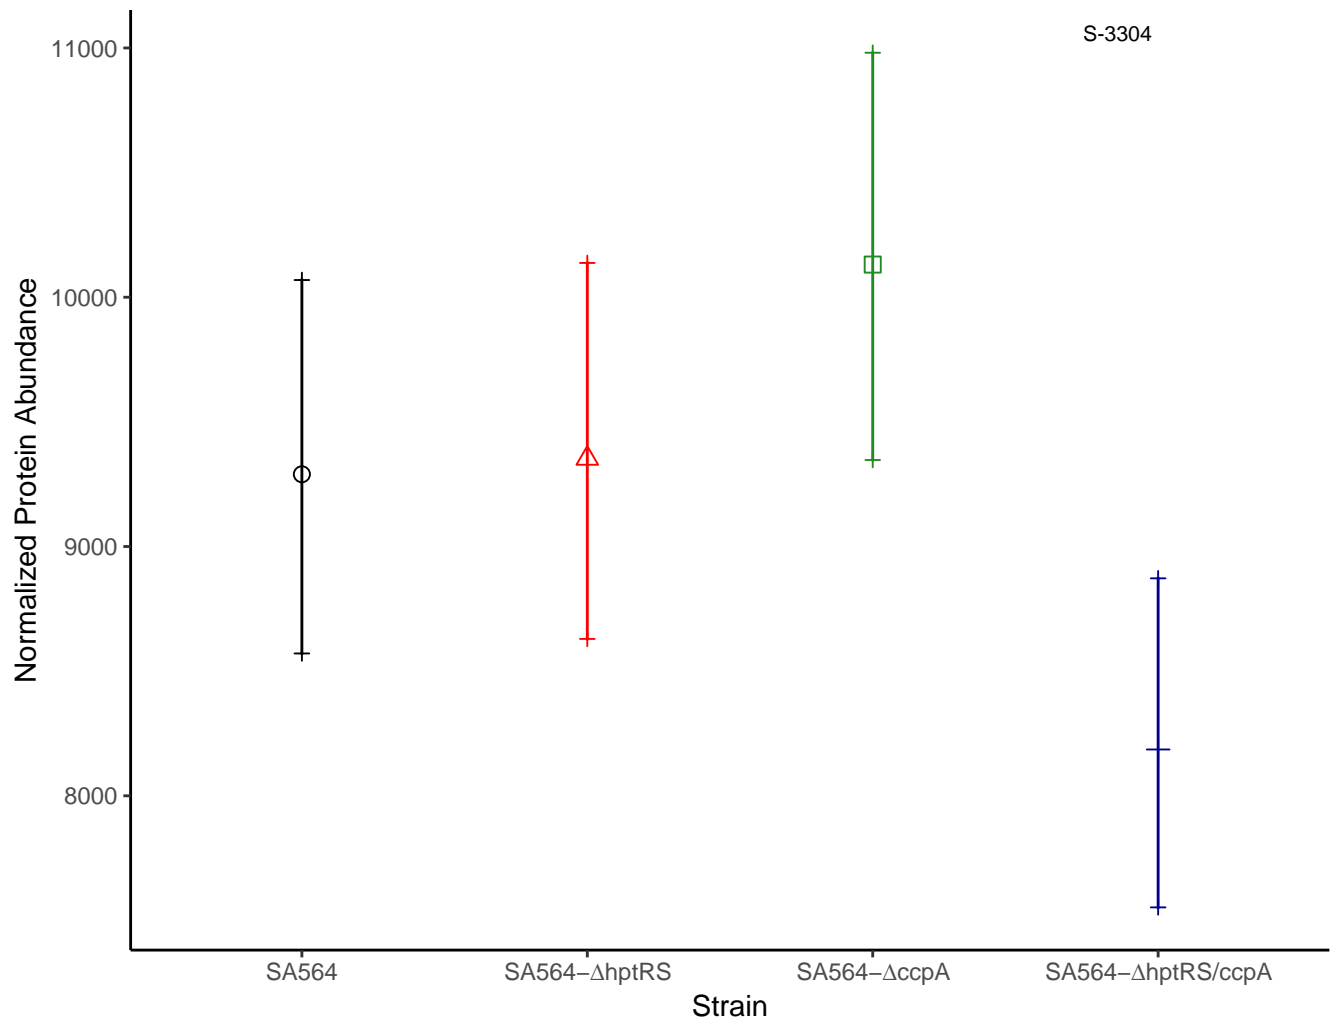

- ⊕ SA564
- △ SA564- $\Delta$ hptRS
- ⊞ SA564- $\Delta$ ccpA
- + SA564- $\Delta$ hptRS/ccpA



# QUEA\_STAAM

S-3305

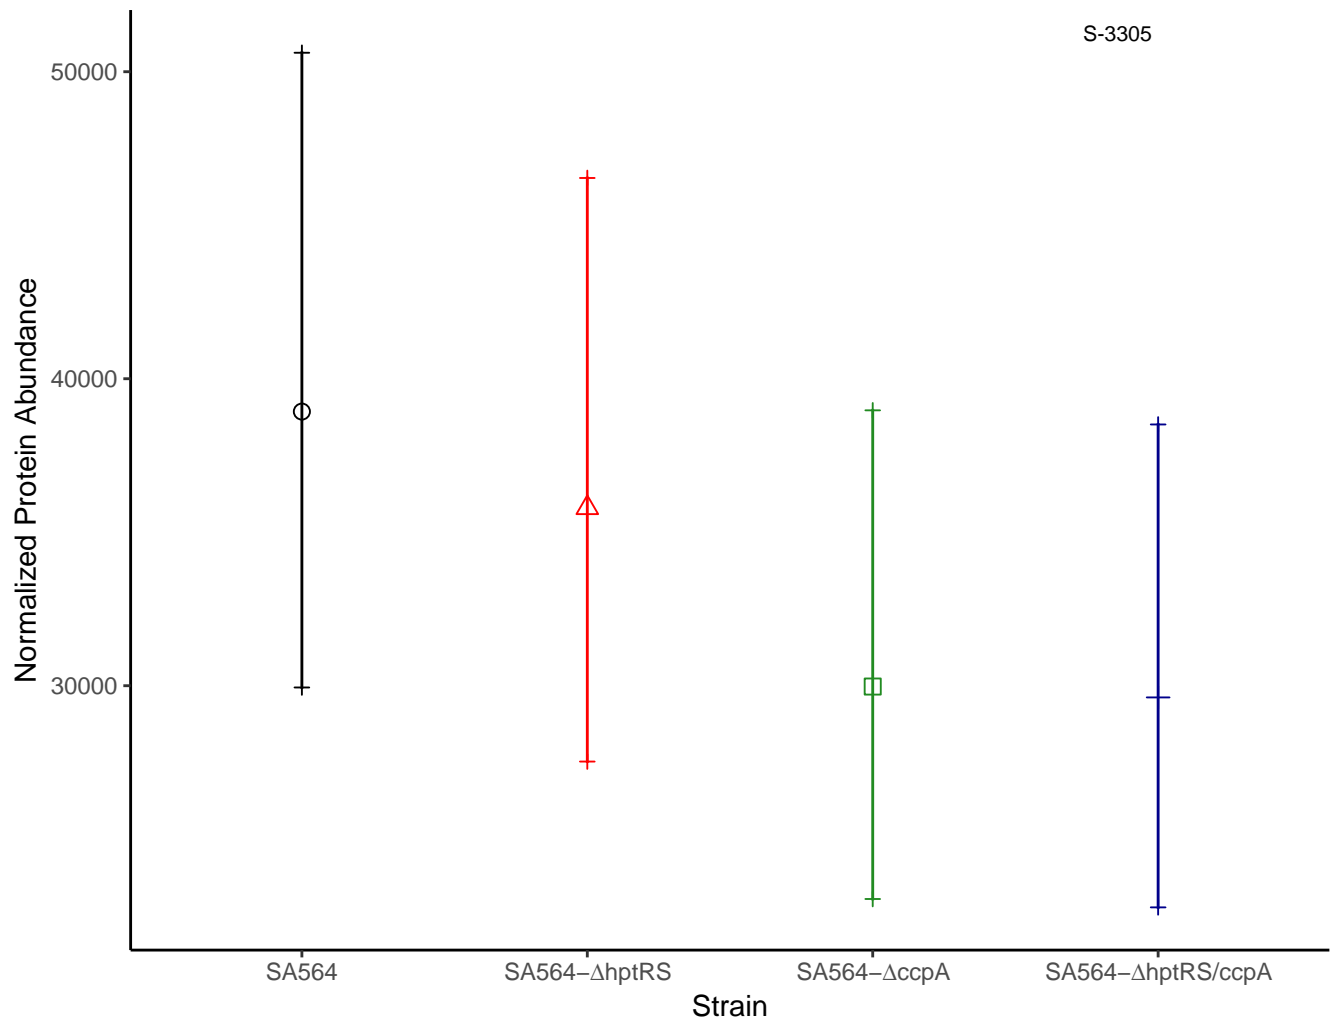

- ⊕ SA564
- △ SA564- $\Delta$ hptRS
- ⊞ SA564- $\Delta$ ccpA
- + SA564- $\Delta$ hptRS/ccpA

# QUEC\_STAAM

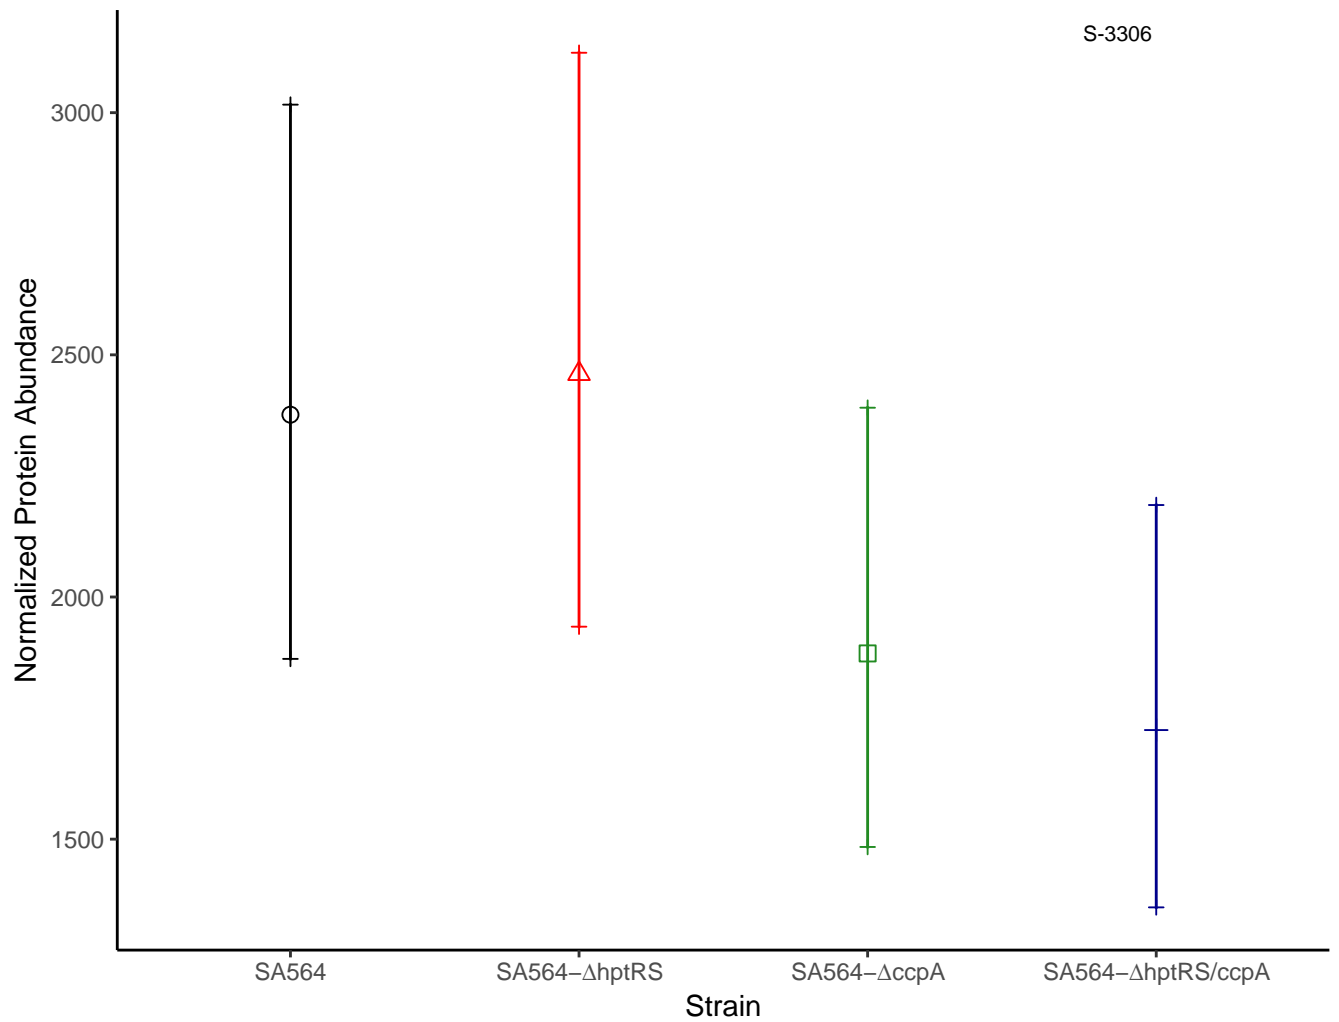

- ⊕ SA564
- △ SA564- $\Delta$ *hptRS*
- ⊞ SA564- $\Delta$ *ccpA*
- + SA564- $\Delta$ *hptRS/ccpA*

# RBFA\_STAAM

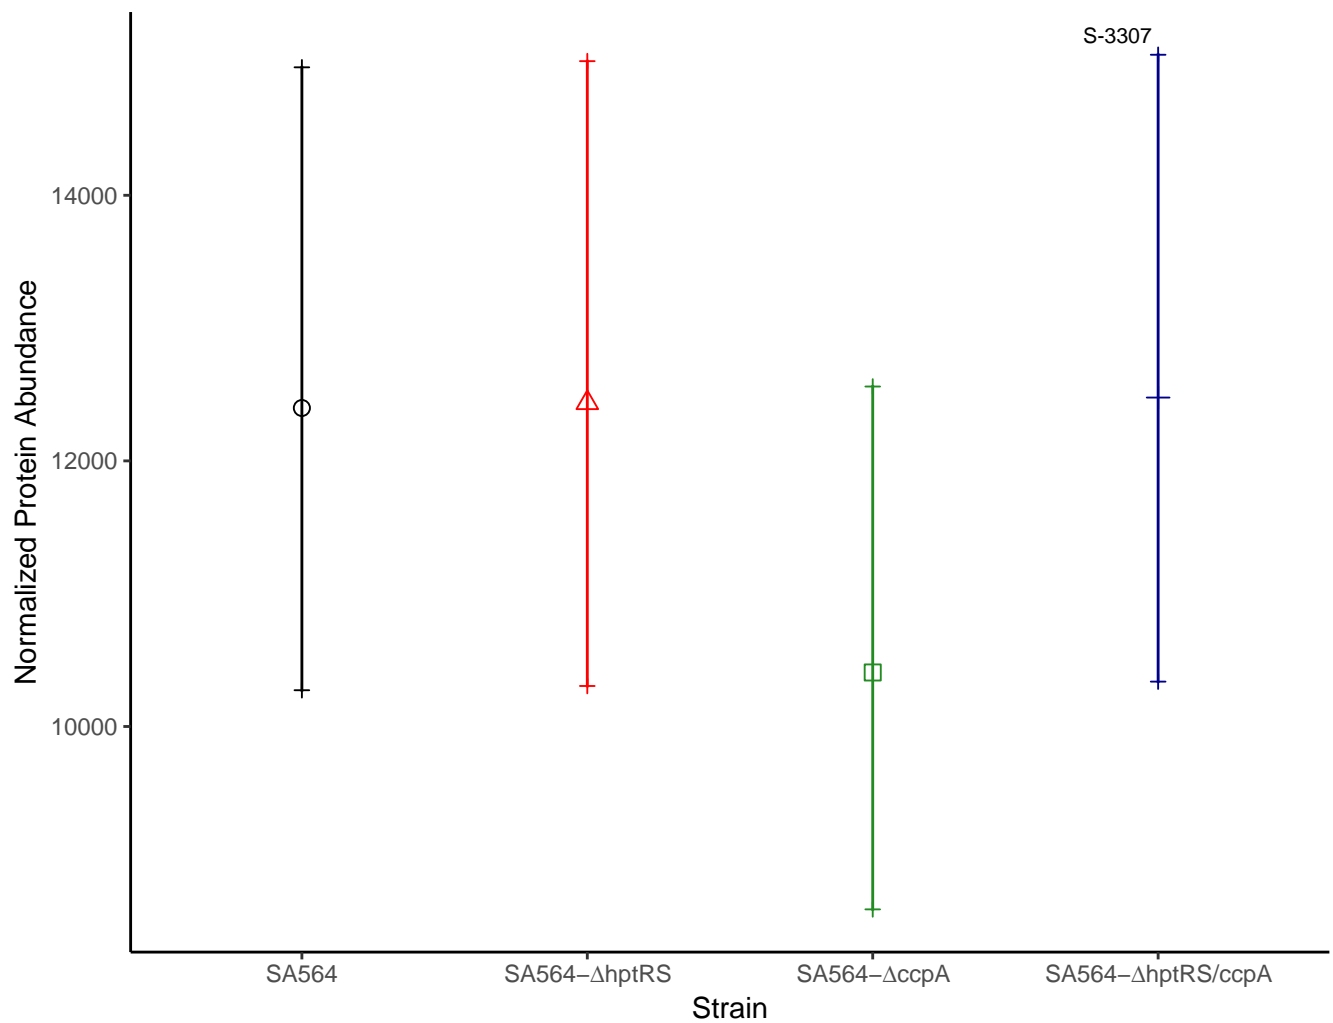

- ⊕ SA564
- △ SA564- $\Delta$ hptRS
- ⊞ SA564- $\Delta$ ccpA
- + SA564- $\Delta$ hptRS/ccpA

# RECA\_STAAM

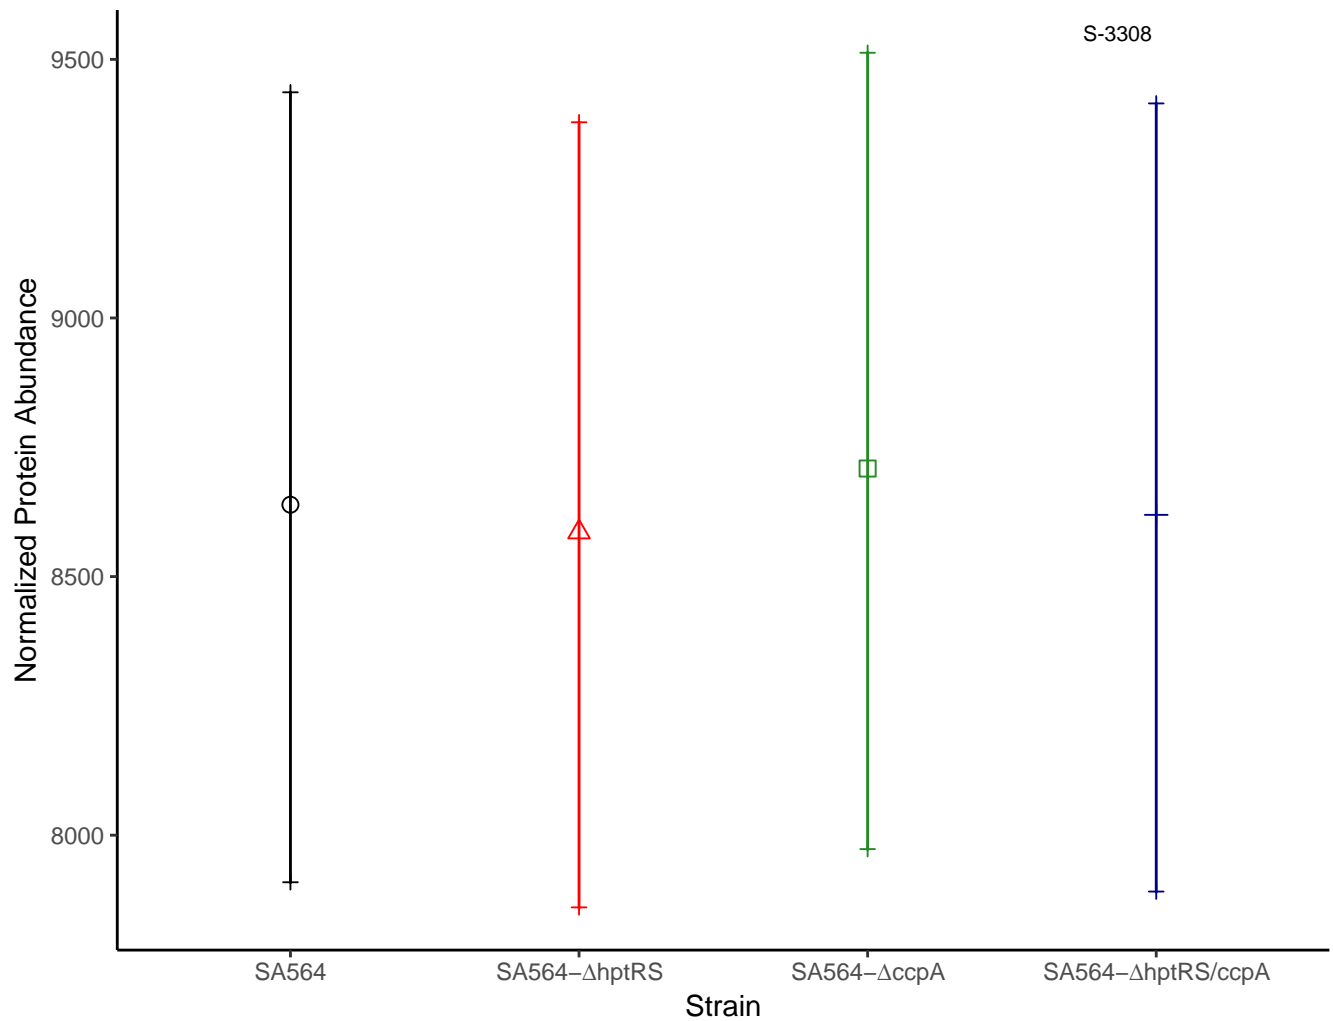

- ⊕ SA564
- △ SA564- $\Delta$ hptRS
- ⊞ SA564- $\Delta$ ccpA
- + SA564- $\Delta$ hptRS/ccpA

# RELA\_STAAM

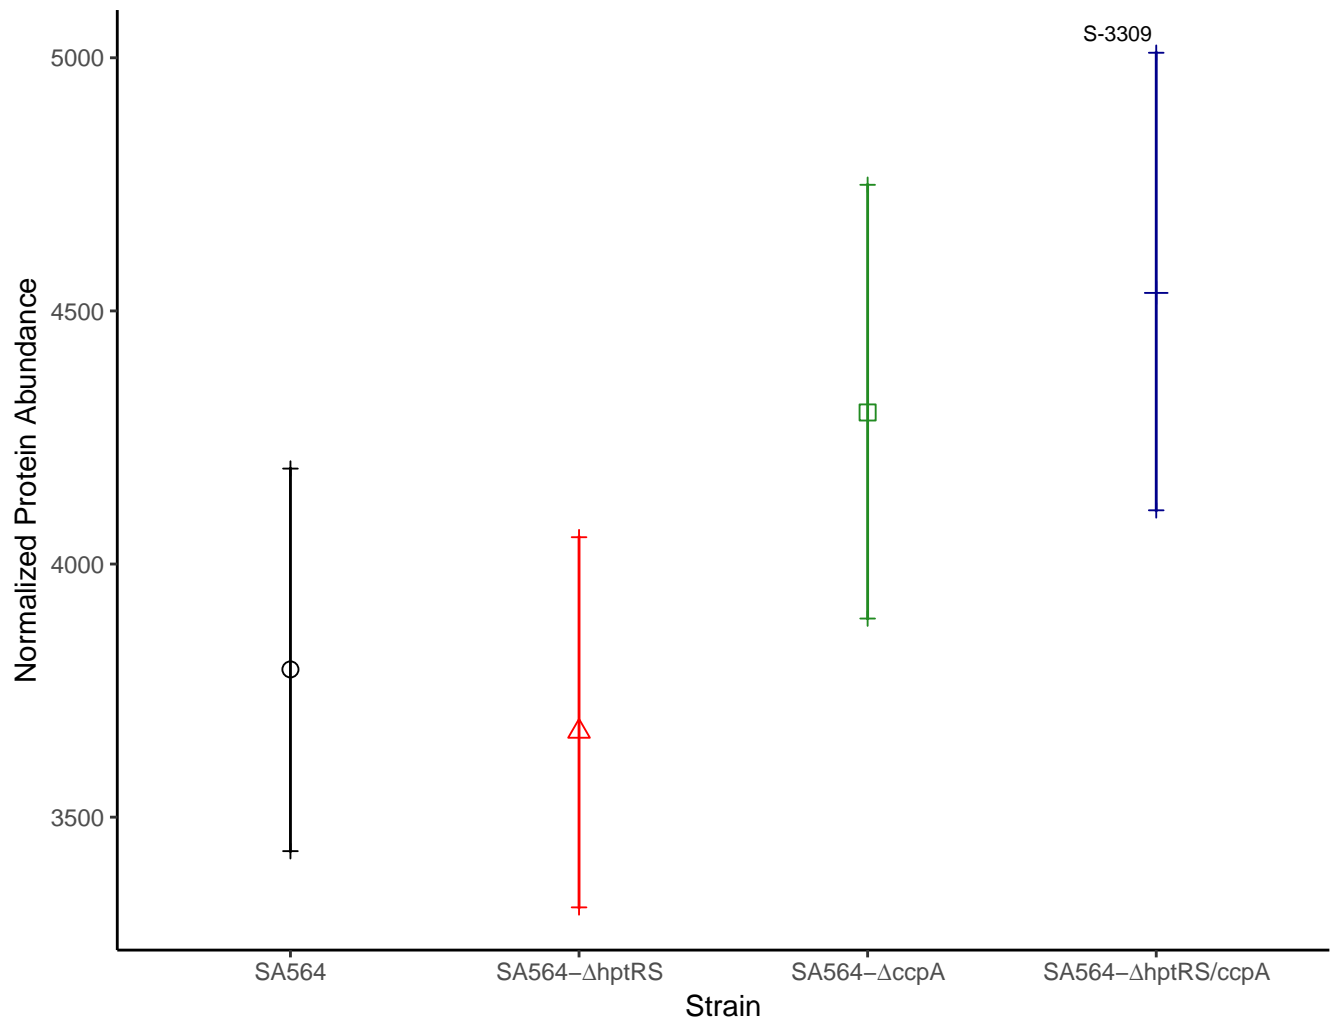

- ⊕ SA564
- △ SA564- $\Delta$ hptRS
- ⊞ SA564- $\Delta$ ccpA
- + SA564- $\Delta$ hptRS/ccpA

# REX\_STAAM

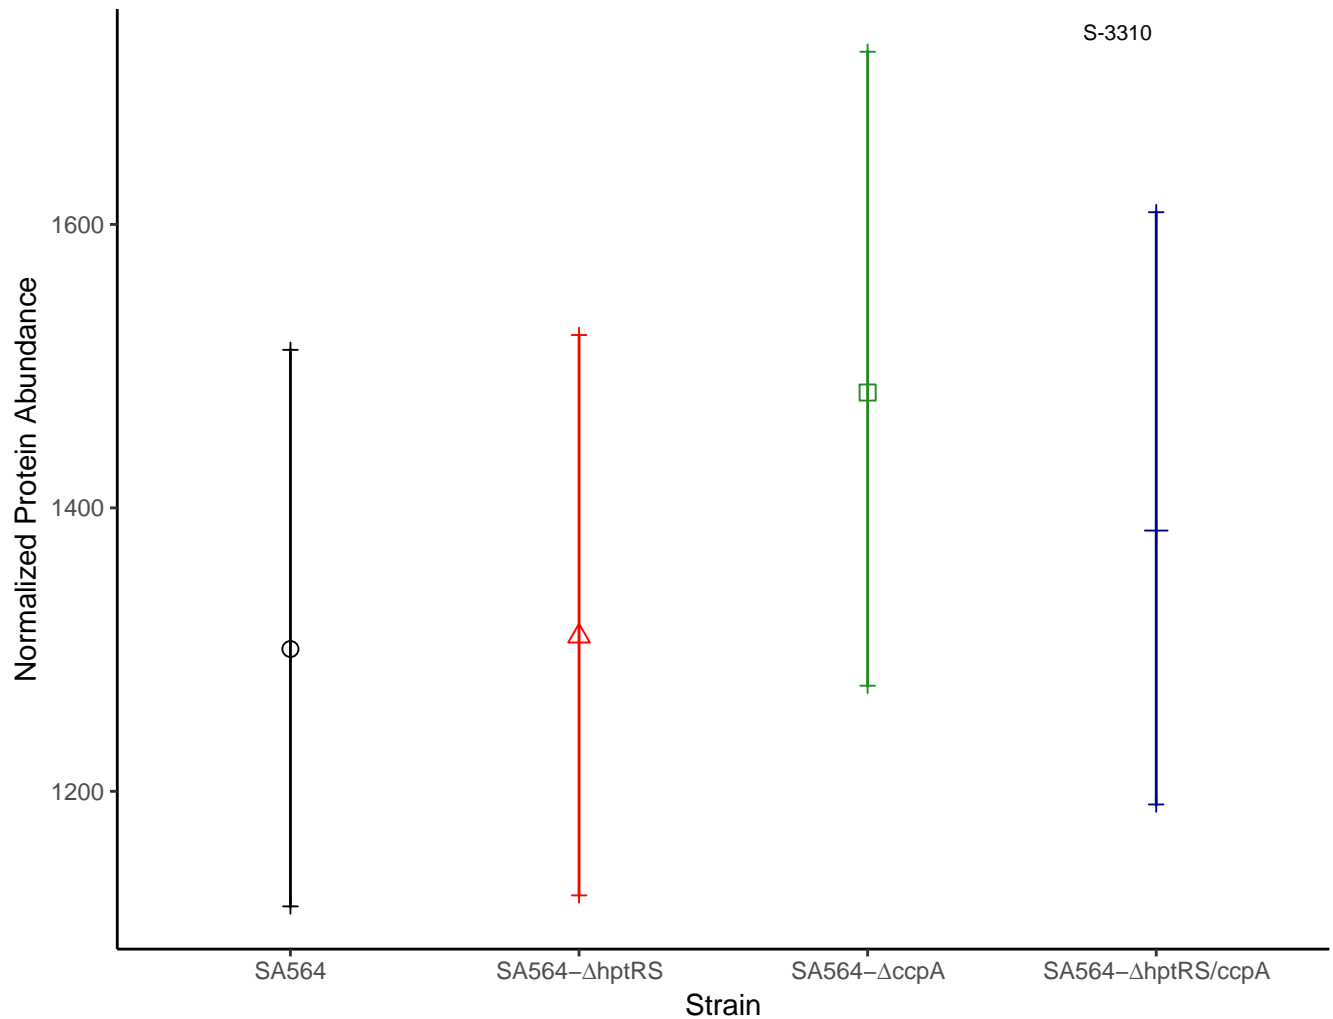

- ⊕ SA564
- △ SA564- $\Delta$ hptRS
- ⊞ SA564- $\Delta$ ccpA
- ⊕ SA564- $\Delta$ hptRS/ccpA

# RF1\_STAAM

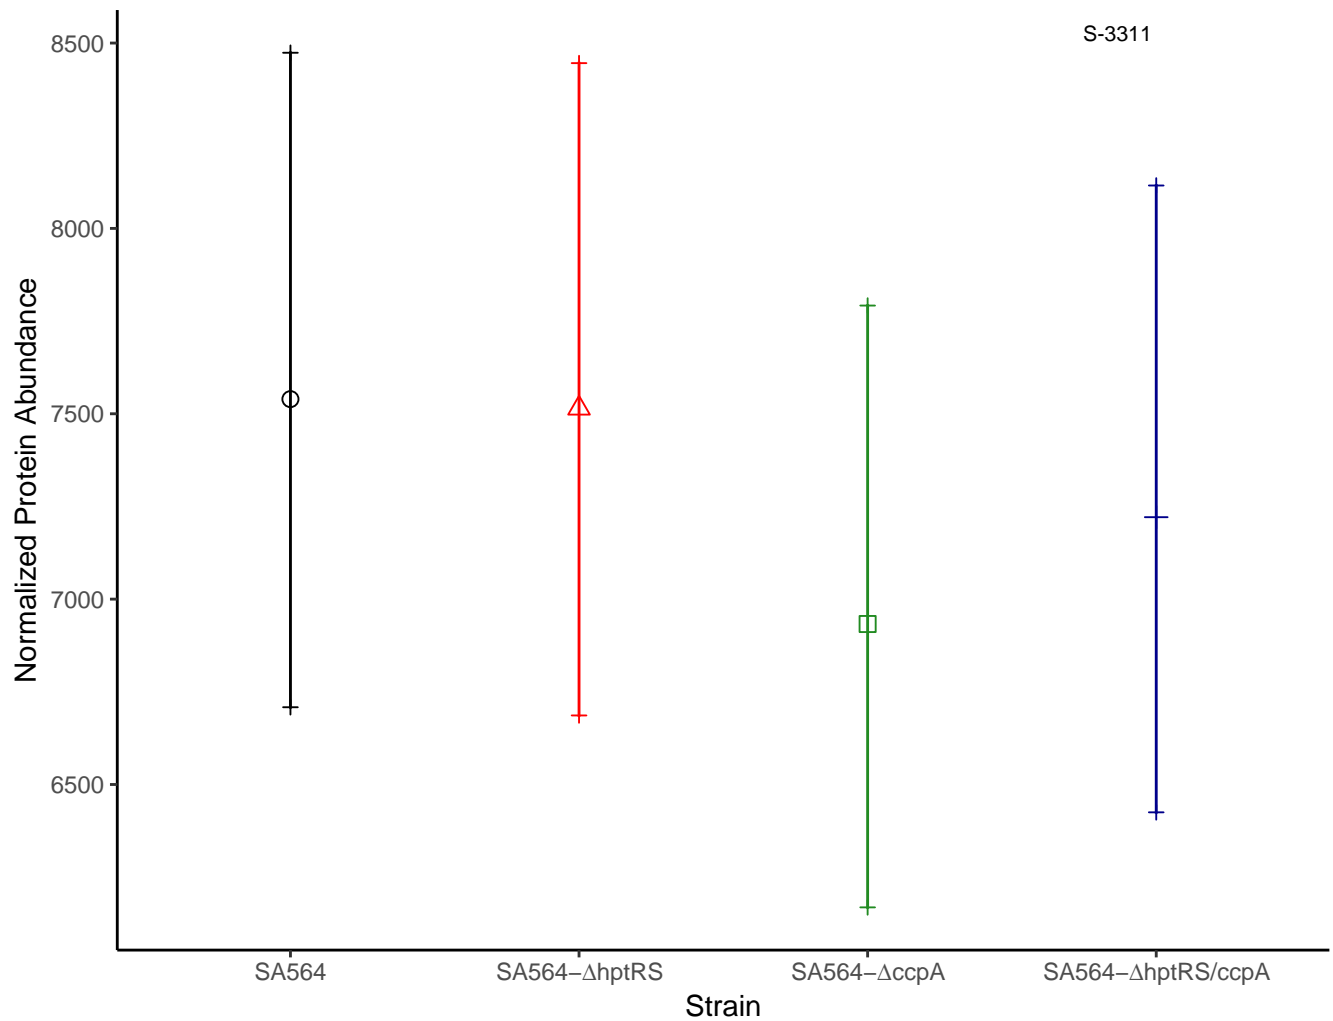

- ⊕ SA564
- △ SA564- $\Delta$ hptRS
- ⊞ SA564- $\Delta$ ccpA
- + SA564- $\Delta$ hptRS/ccpA

# RIBBA\_STAAM

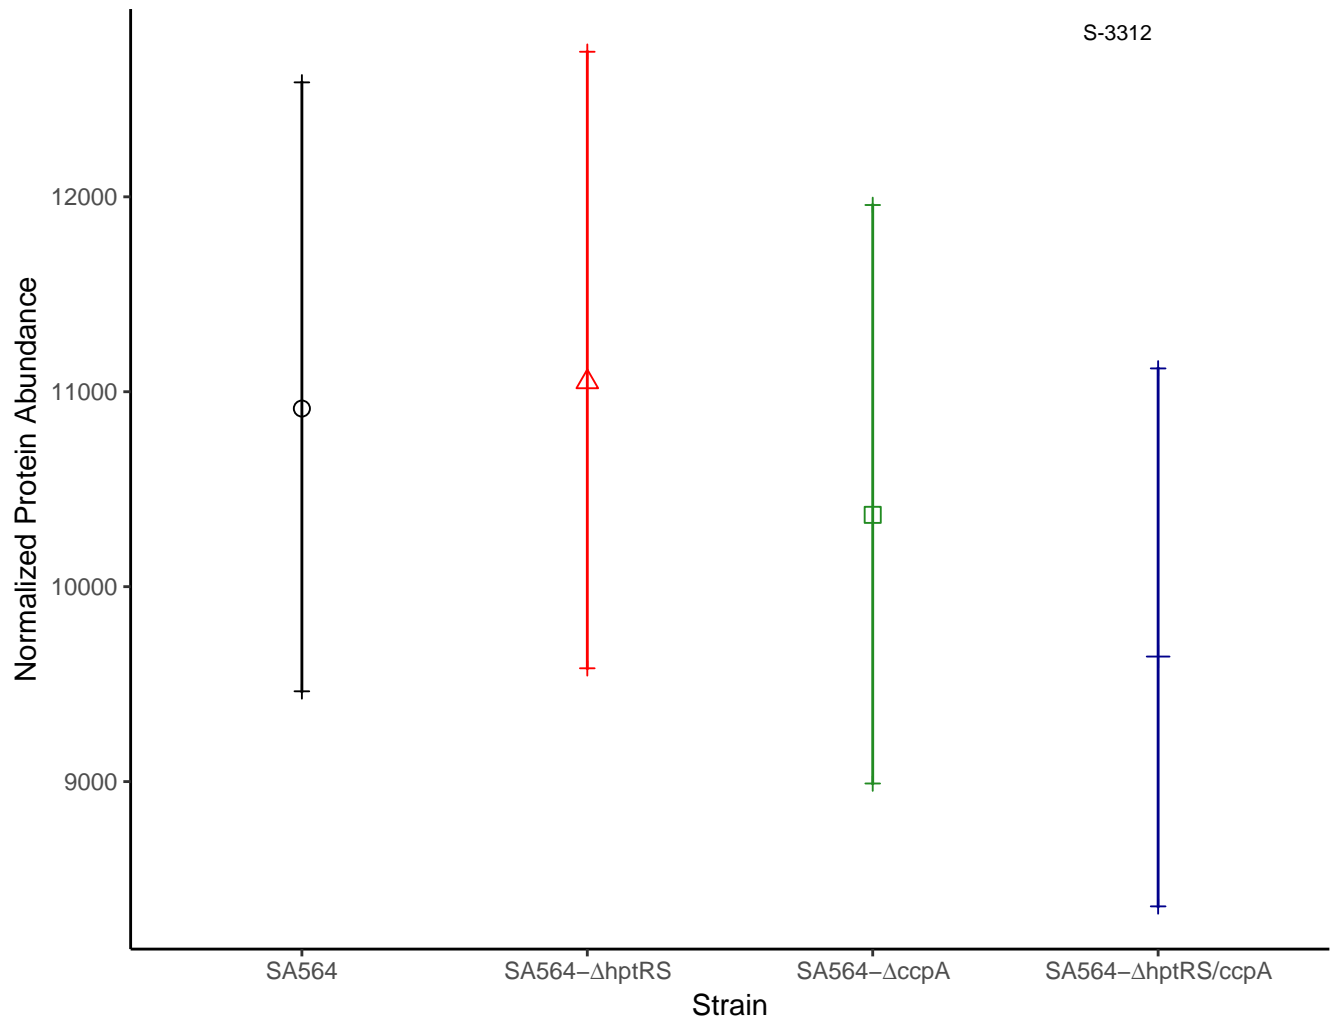

- ⊕ SA564
- △ SA564- $\Delta$ *hptRS*
- ⊞ SA564- $\Delta$ *ccpA*
- + SA564- $\Delta$ *hptRS/ccpA*



# RIMM\_STAAM

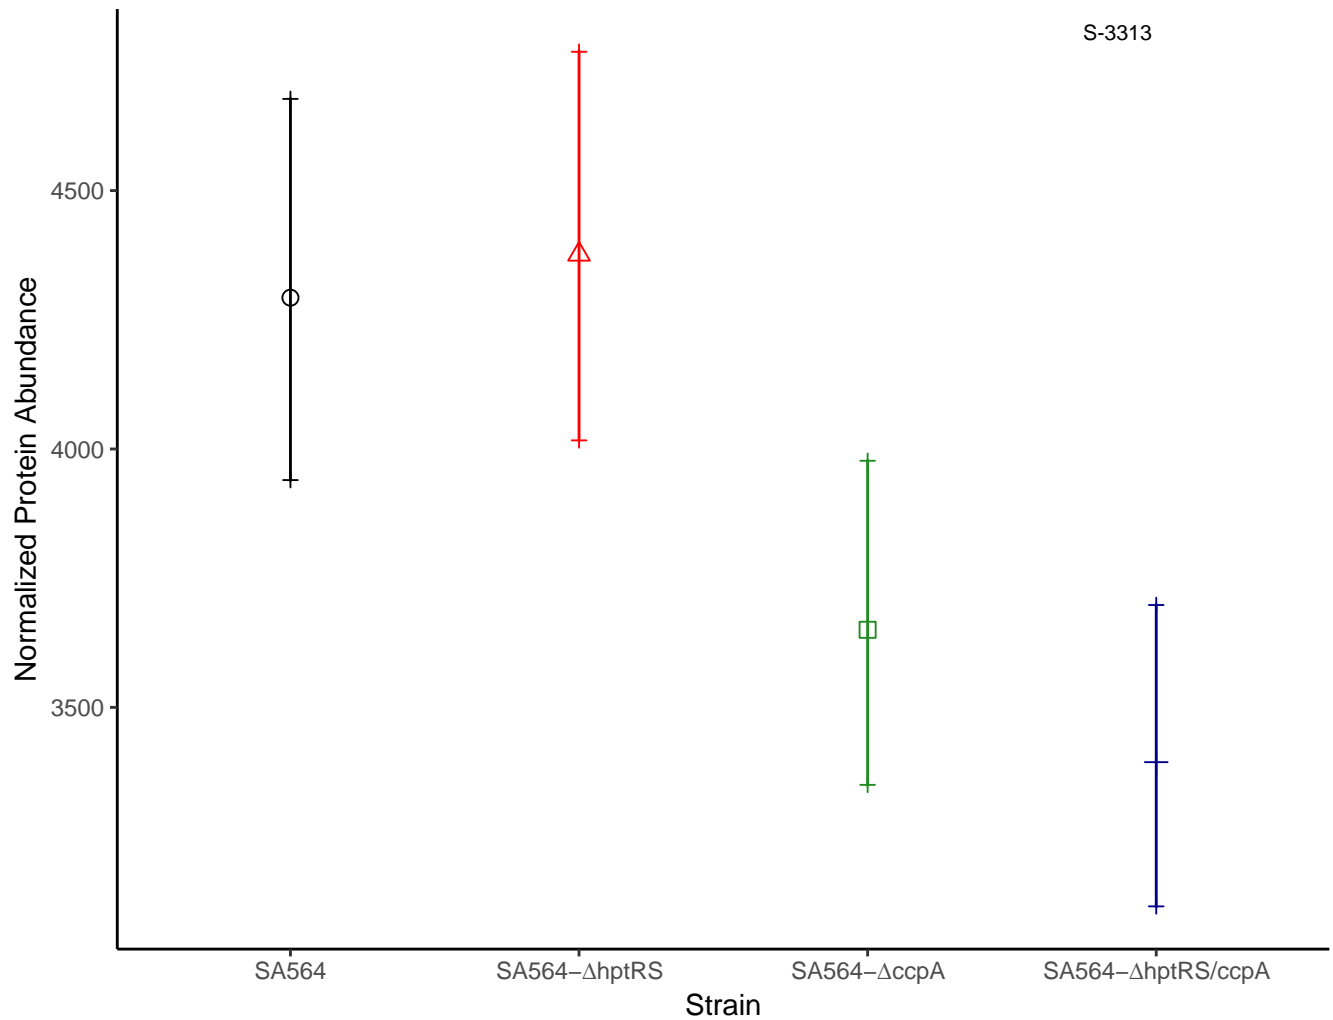

- ⊕ SA564
- △ SA564- $\Delta$ hptRS
- ⊞ SA564- $\Delta$ ccpA
- + SA564- $\Delta$ hptRS/ccpA

# RISB\_STAAM

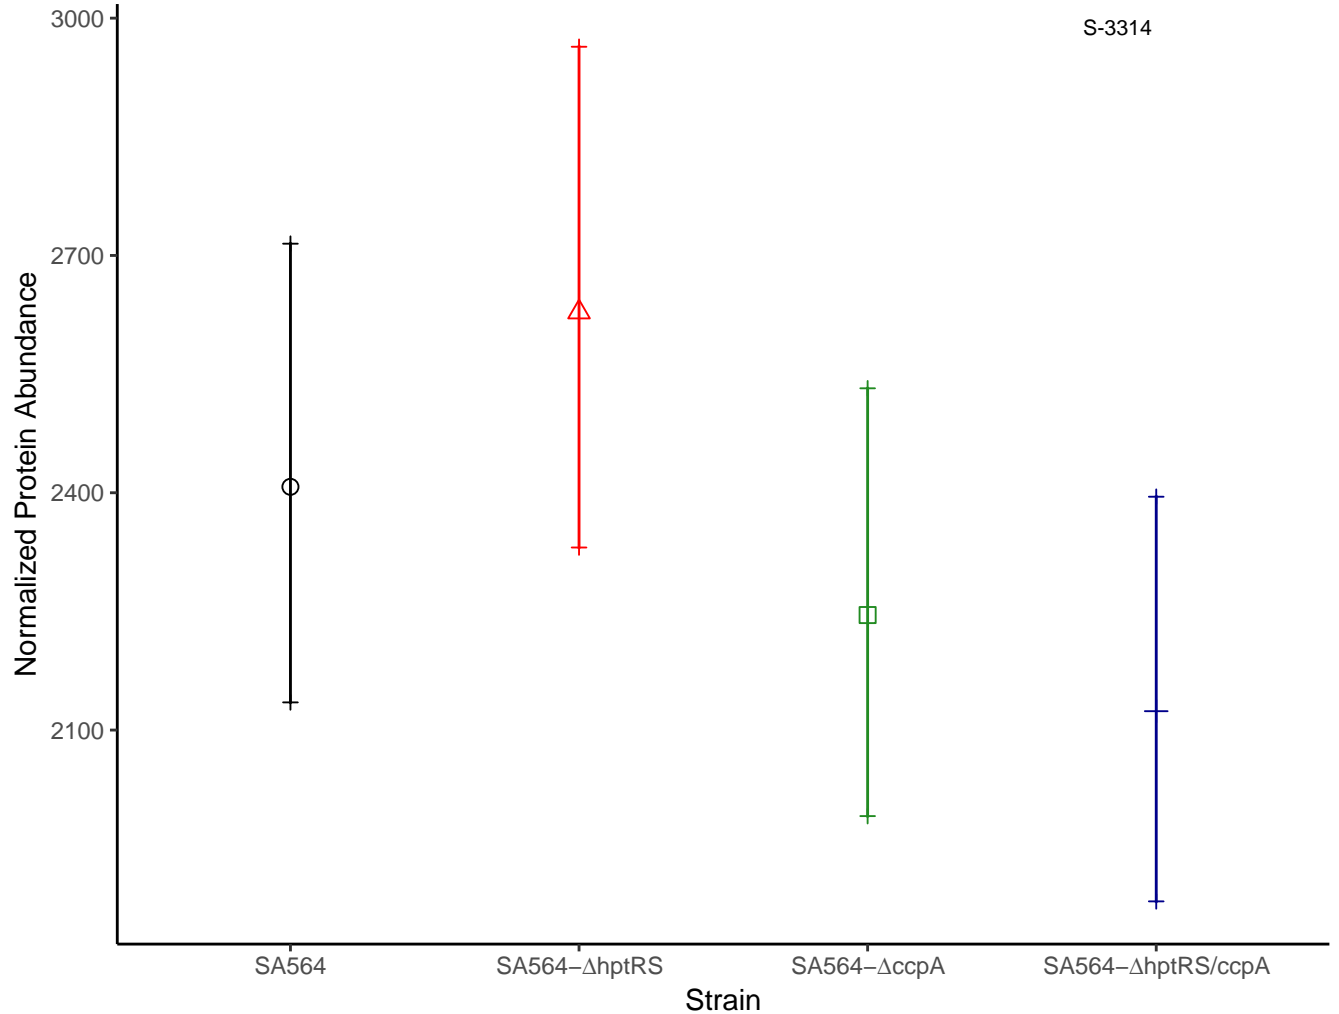

- ⊕ SA564
- △ SA564- $\Delta$ hptRS
- ⊞ SA564- $\Delta$ ccpA
- + SA564- $\Delta$ hptRS/ccpA

# RL1\_STAAM

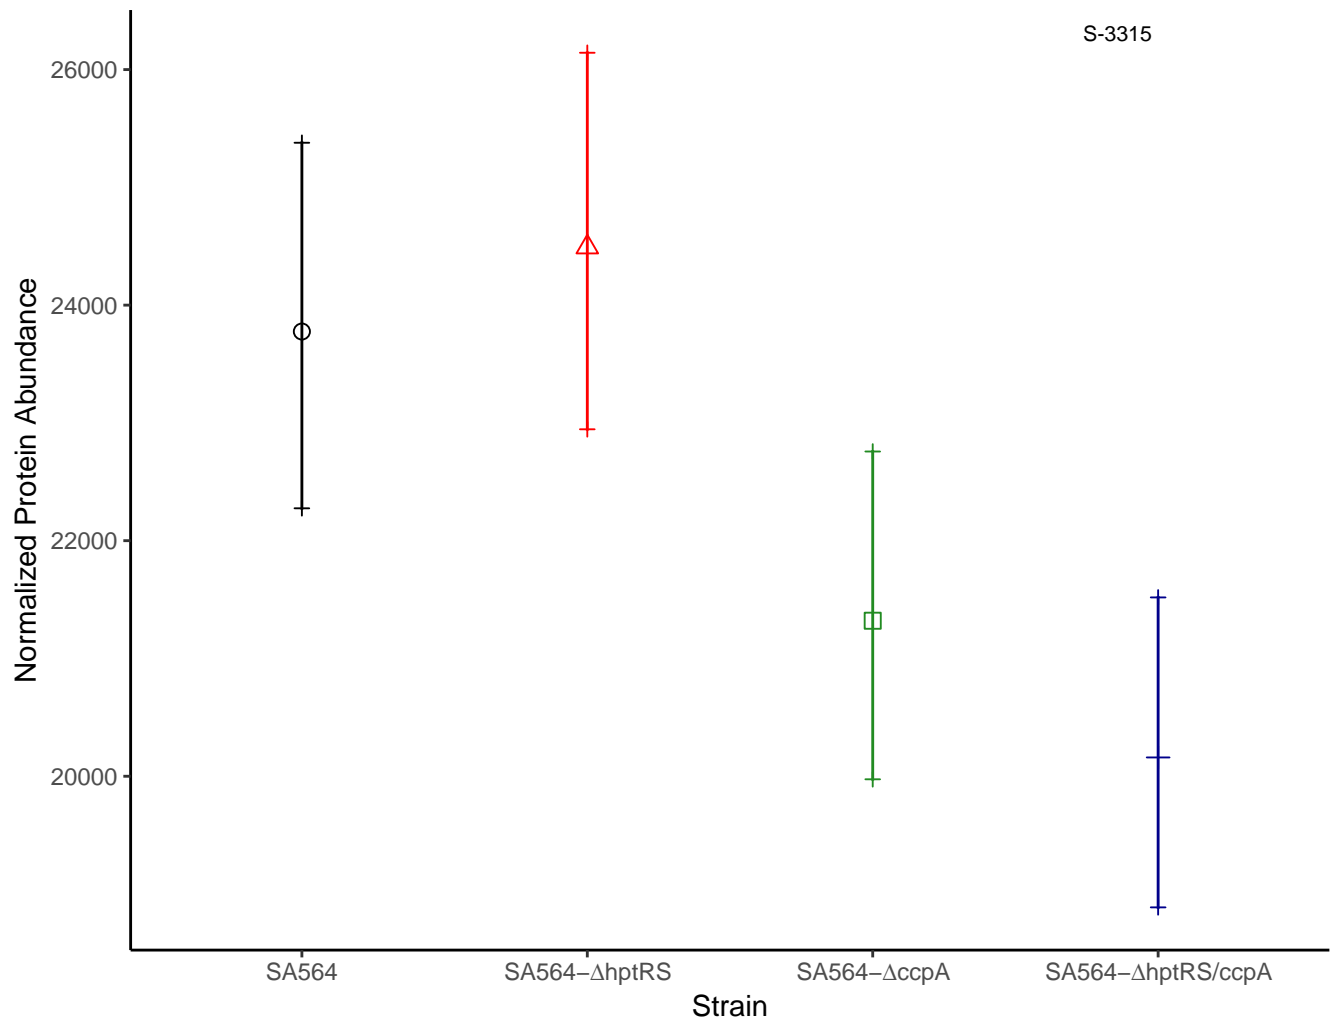

- ⊕ SA564
- △ SA564- $\Delta$ hptRS
- ⊞ SA564- $\Delta$ ccpA
- + SA564- $\Delta$ hptRS/ccpA

# RL10\_STAAM

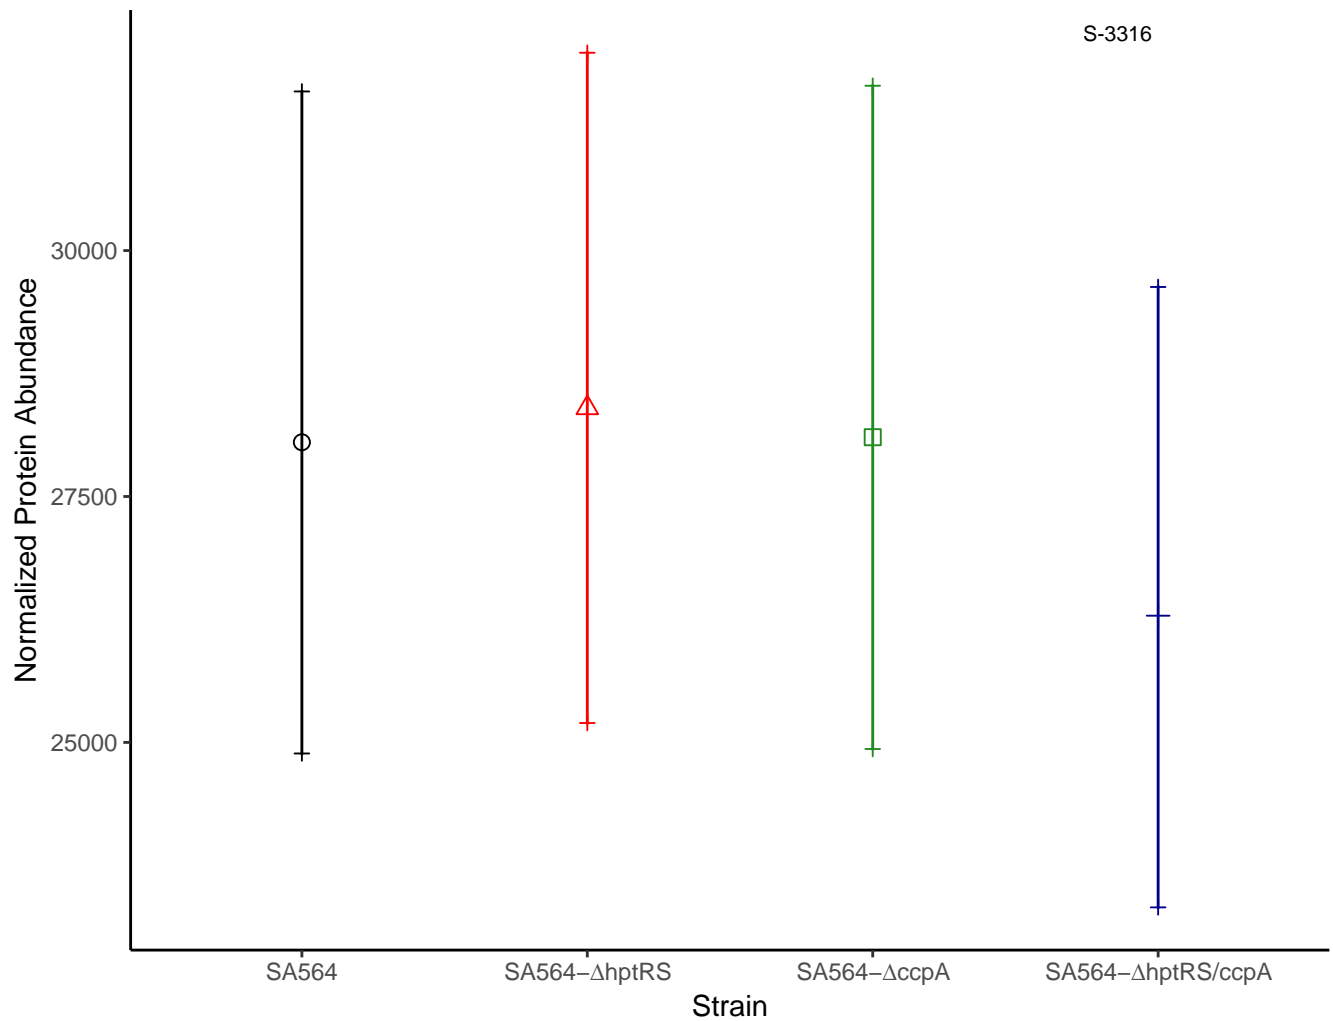

- ⊕ SA564
- △ SA564- $\Delta$ hptRS
- ⊞ SA564- $\Delta$ ccpA
- + SA564- $\Delta$ hptRS/ccpA

# RL11\_STAAM

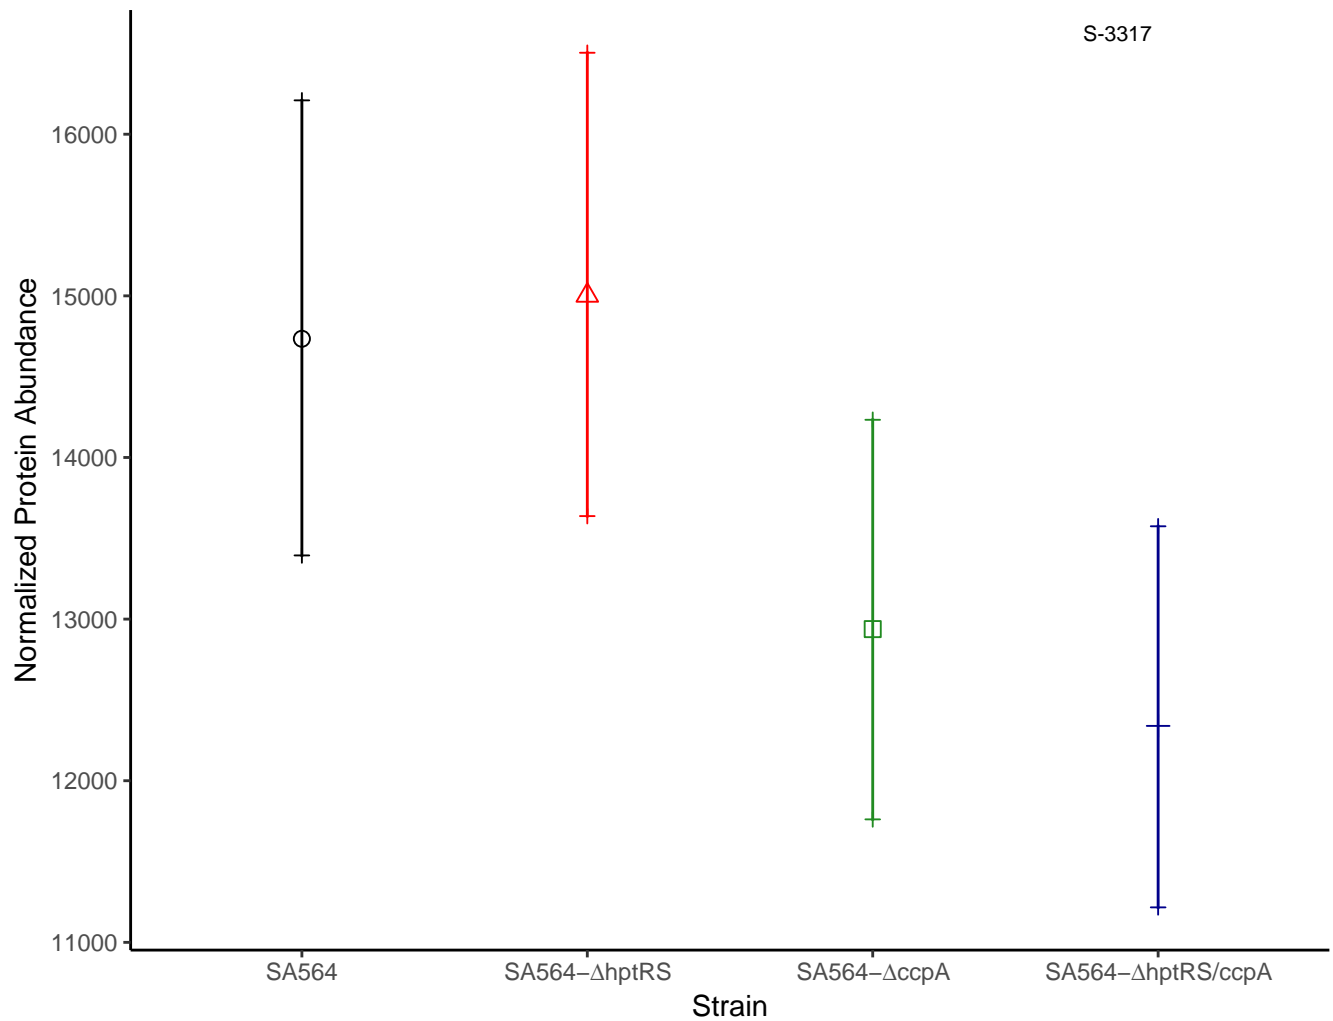

- ⊕ SA564
- △ SA564- $\Delta$ *hptRS*
- ⊞ SA564- $\Delta$ *ccpA*
- + SA564- $\Delta$ *hptRS/ccpA*

## RL13\_STAAM

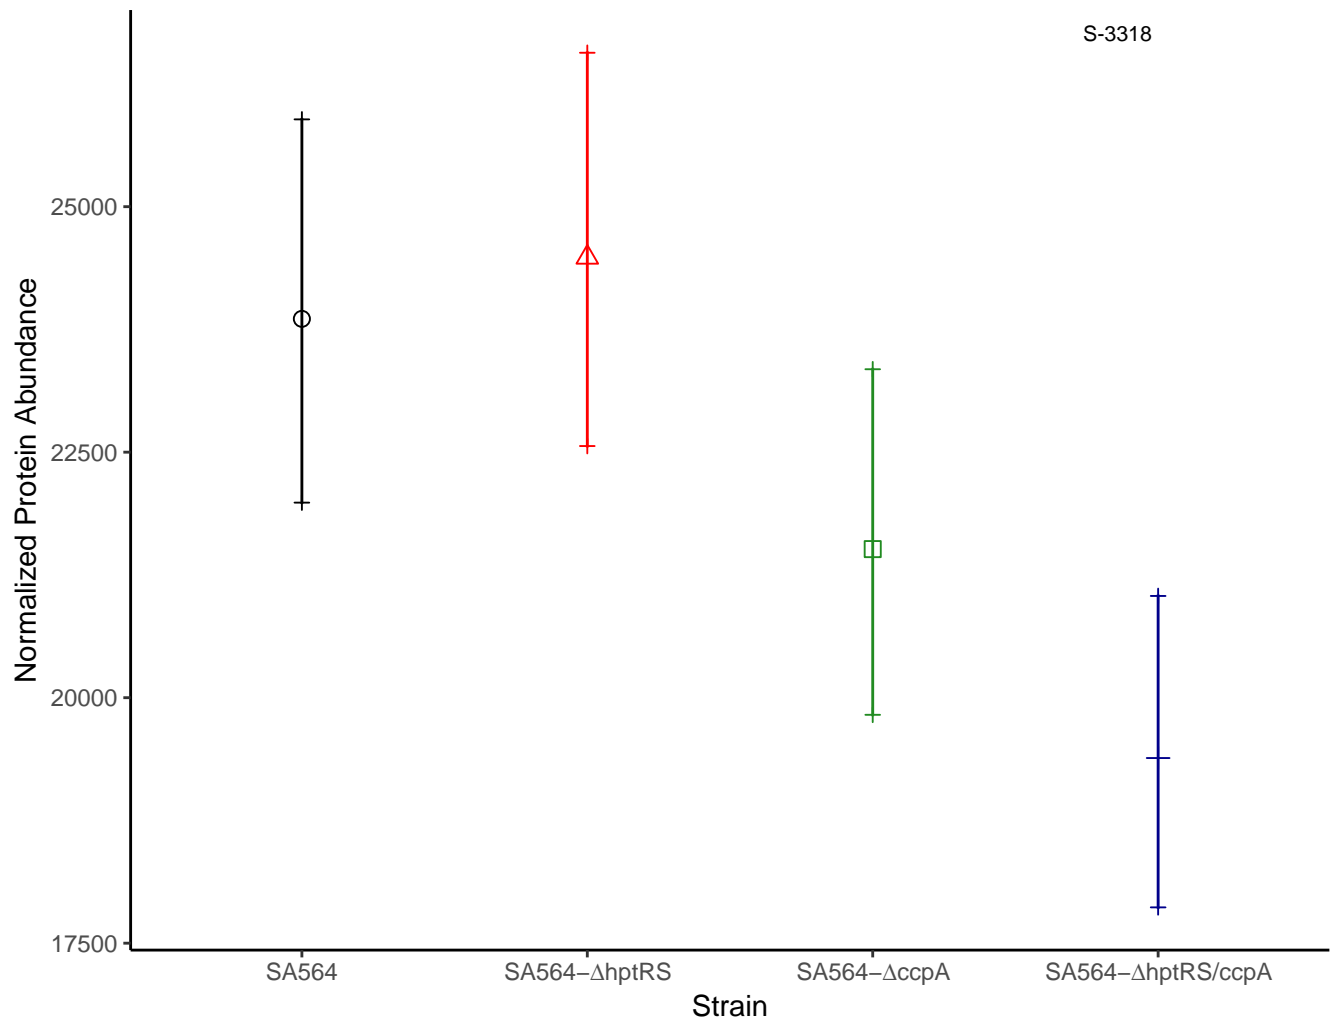

- SA564
- SA564- $\Delta$ hptRS
- SA564- $\Delta$ ccpA
- SA564- $\Delta$ hptRS/ccpA

# RL14\_STAAM

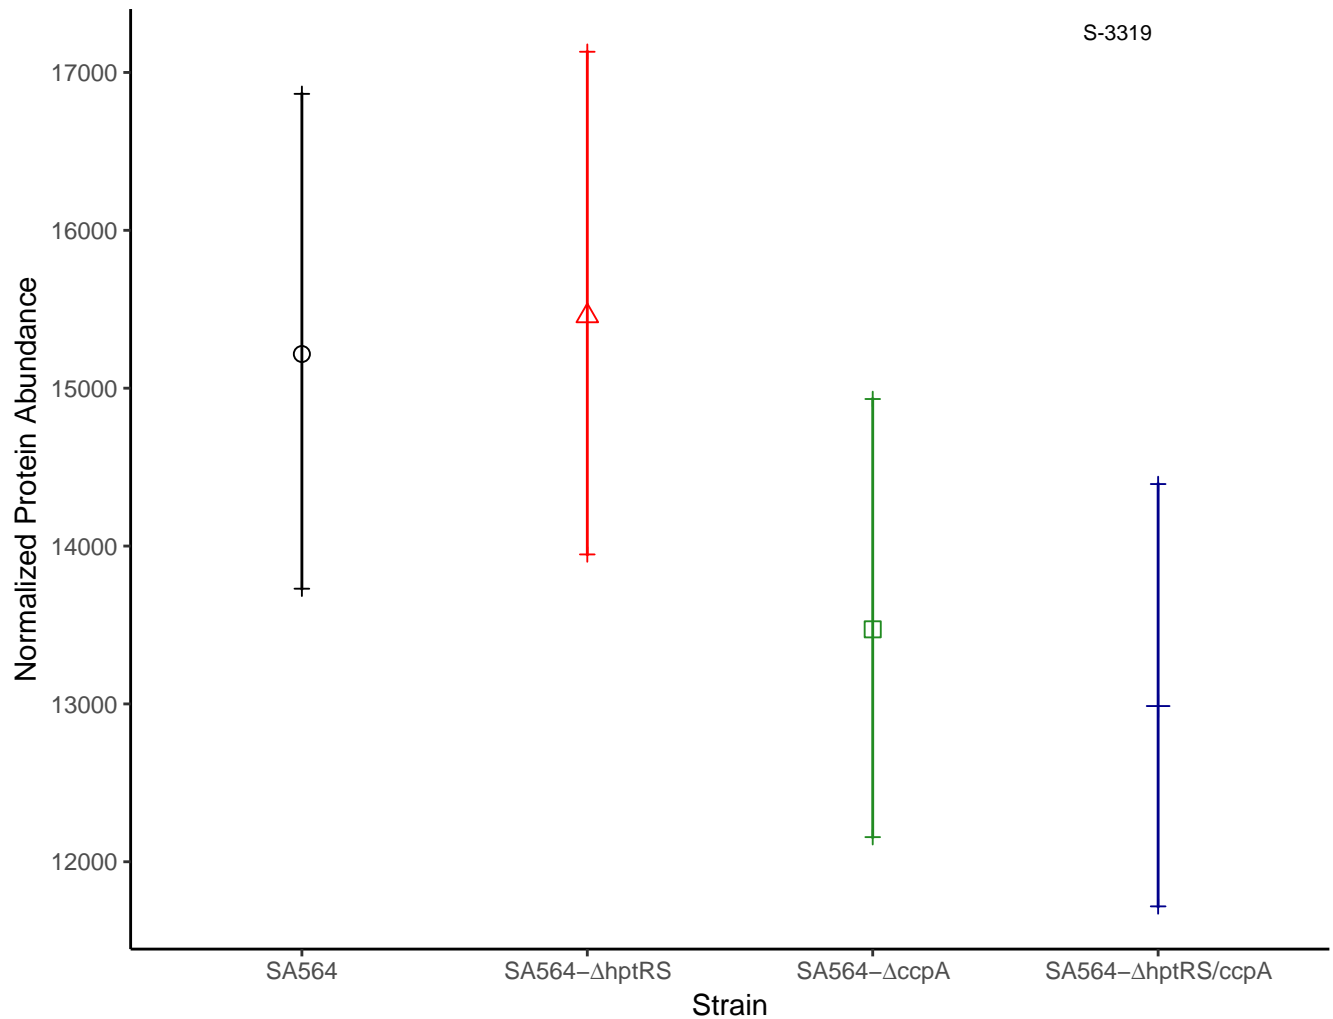

- ⊕ SA564
- △ SA564- $\Delta$ hptRS
- ⊞ SA564- $\Delta$ ccpA
- + SA564- $\Delta$ hptRS/ccpA

# RL15\_STAAM

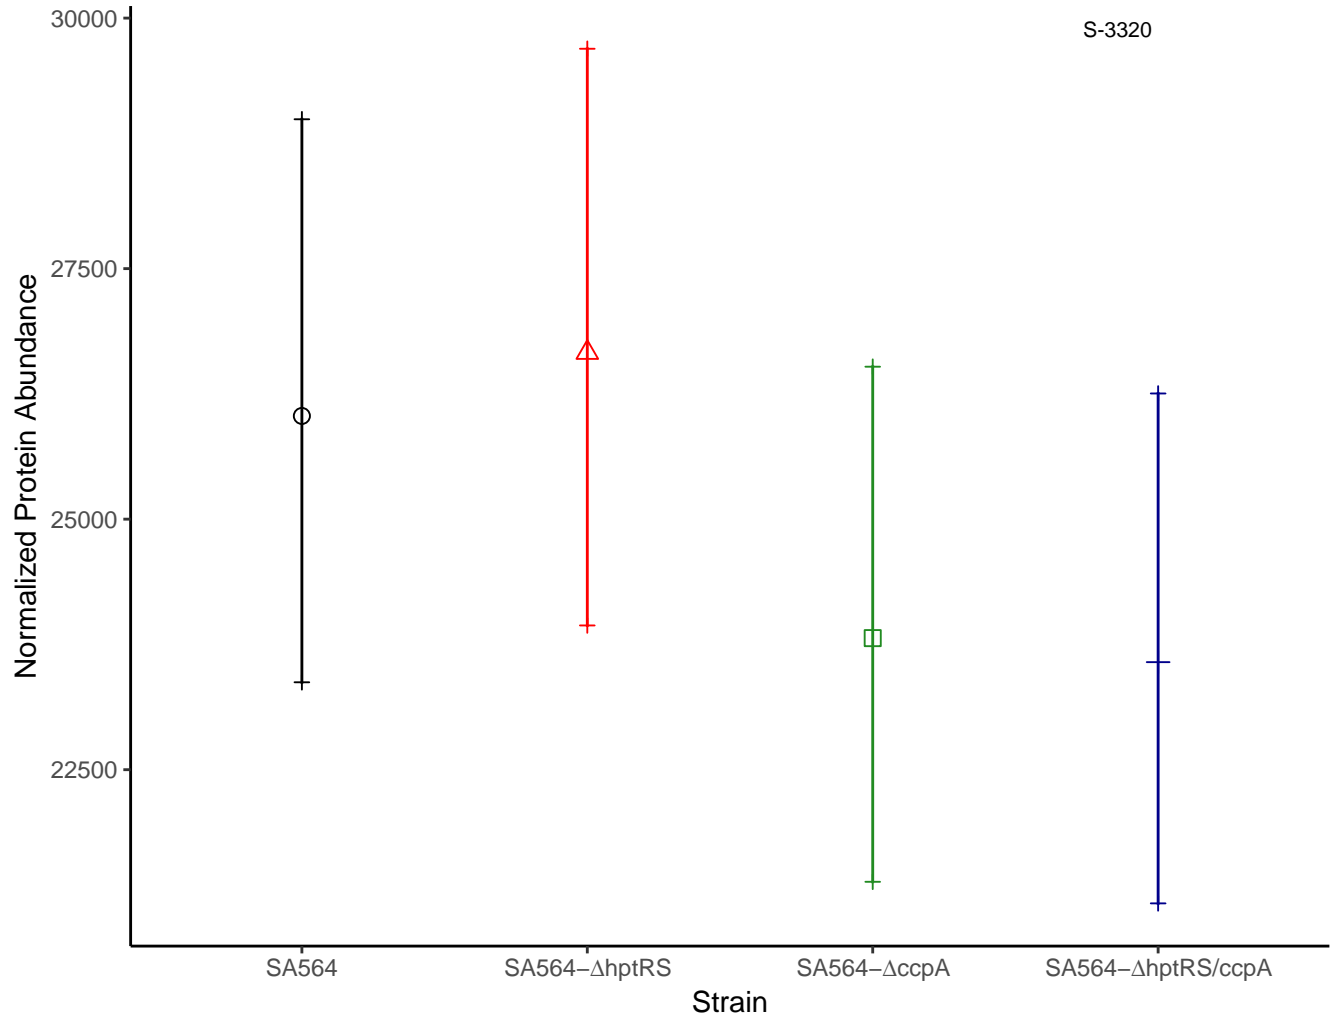

- ⊕ SA564
- △ SA564- $\Delta$ hptRS
- ⊞ SA564- $\Delta$ ccpA
- + SA564- $\Delta$ hptRS/ccpA



# RL16\_STAAM

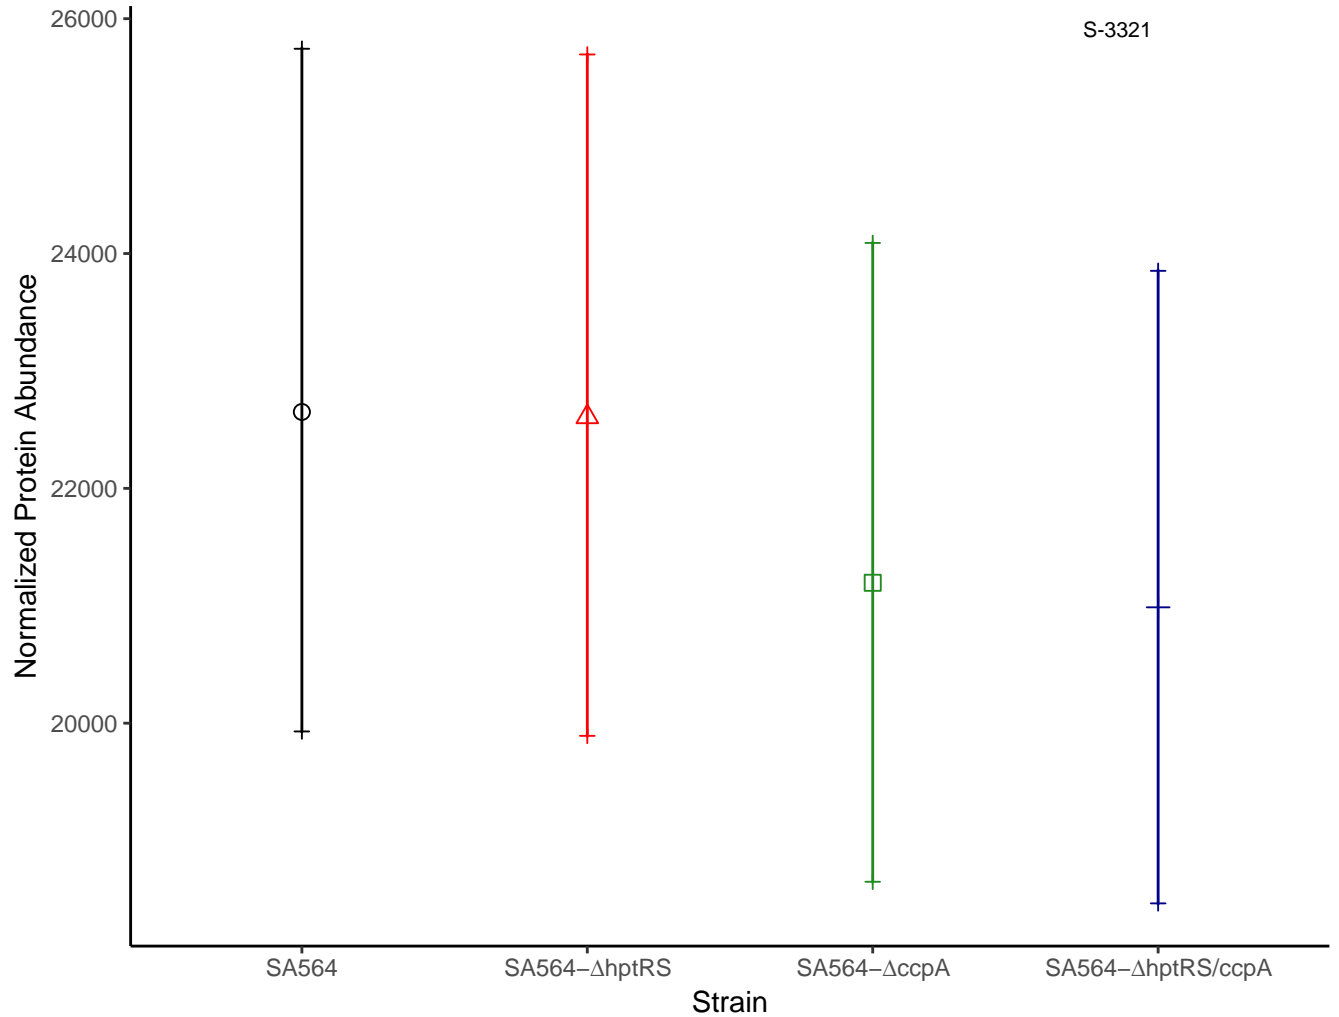

- ⊕ SA564
- △ SA564- $\Delta$ hptRS
- ⊞ SA564- $\Delta$ ccpA
- + SA564- $\Delta$ hptRS/ccpA

# RL17\_STAAM

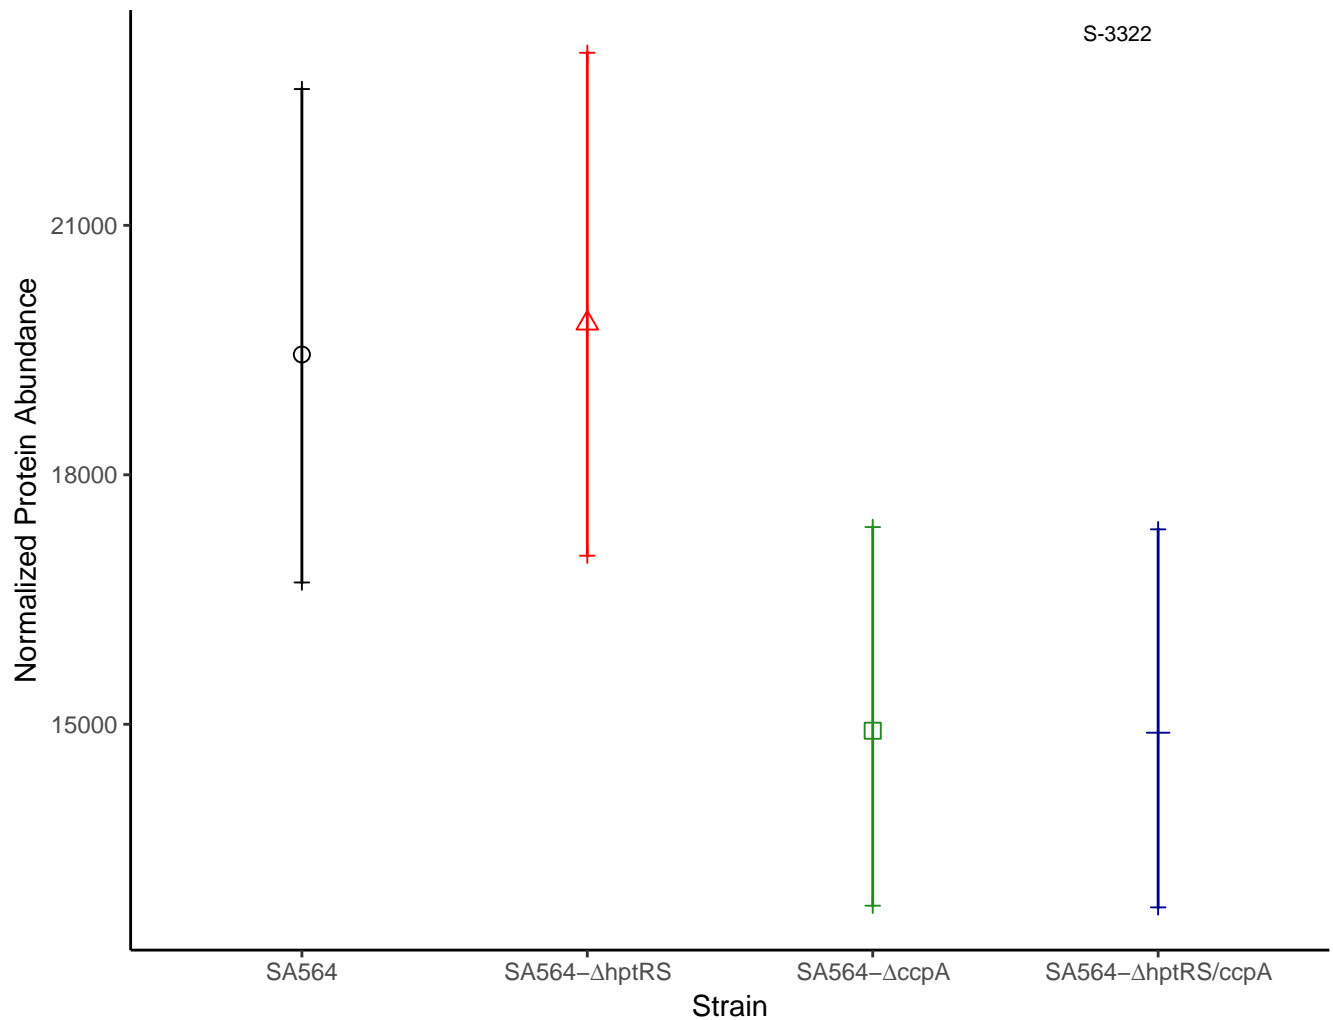

- ⊕ SA564
- △ SA564- $\Delta$ hptRS
- ⊞ SA564- $\Delta$ ccpA
- + SA564- $\Delta$ hptRS/ccpA

# RL18\_STAAM

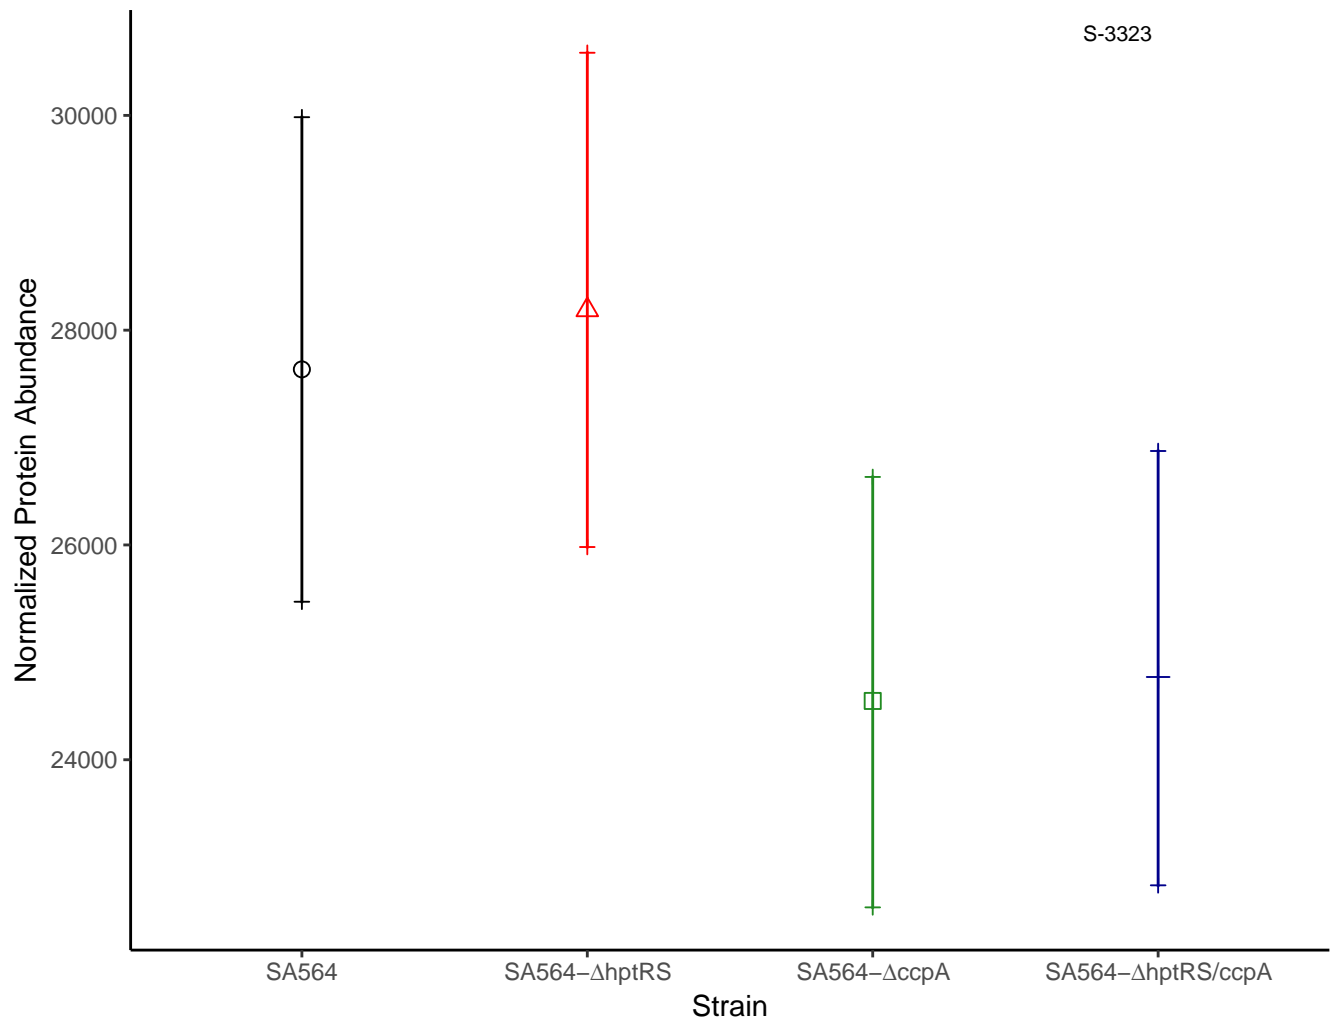

- ⊕ SA564
- △ SA564- $\Delta$ hptRS
- ⊞ SA564- $\Delta$ ccpA
- + SA564- $\Delta$ hptRS/ccpA

# RL19\_STAAM

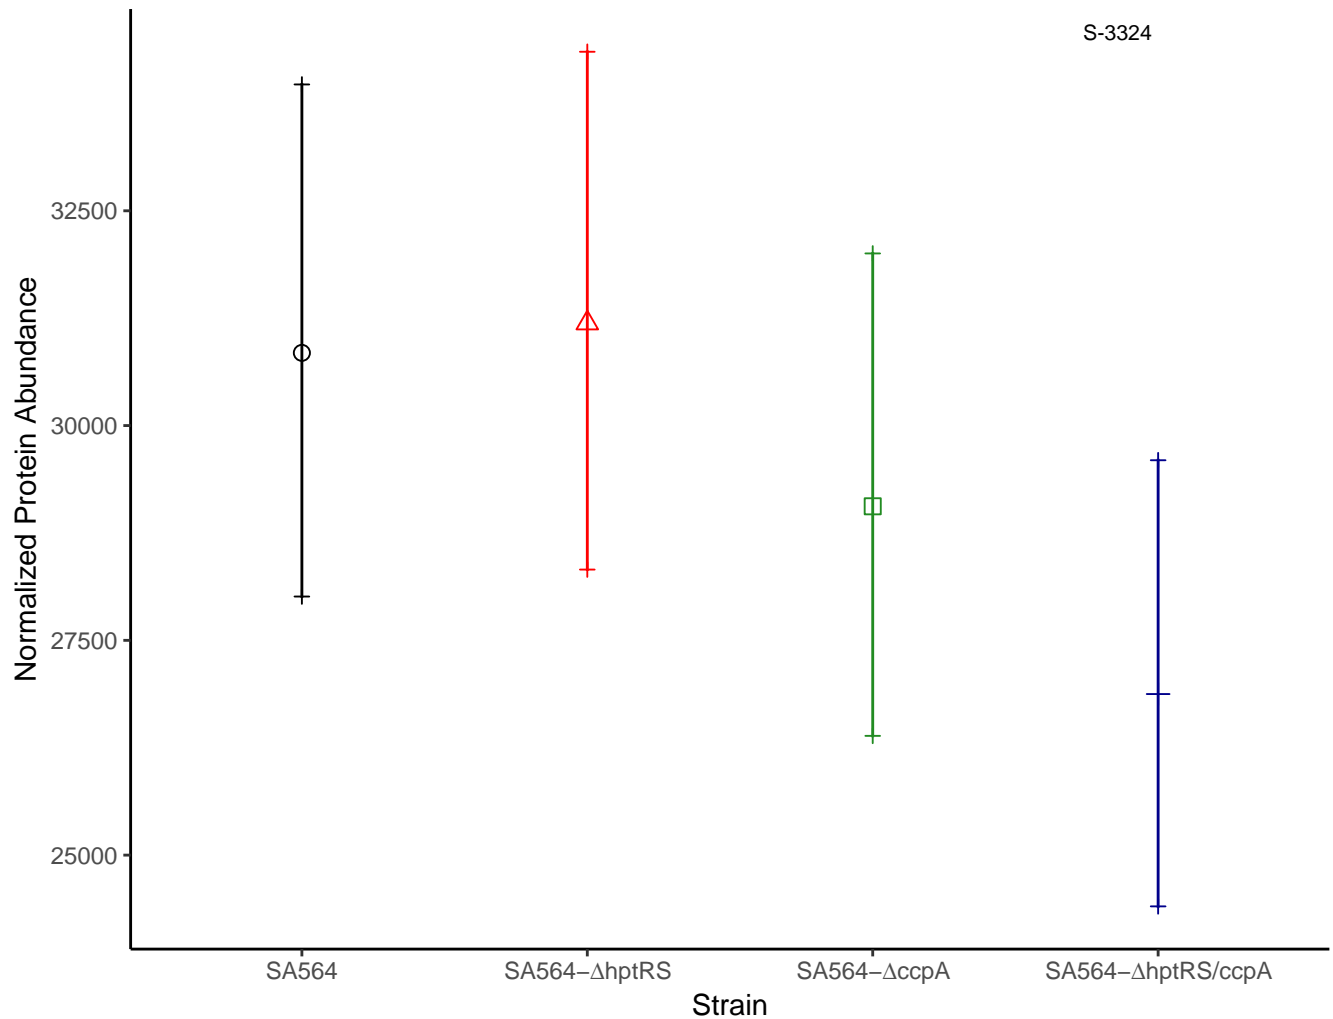

- ⊕ SA564
- △ SA564- $\Delta$ hptRS
- ⊞ SA564- $\Delta$ ccpA
- + SA564- $\Delta$ hptRS/ccpA

# RL2\_STAAM

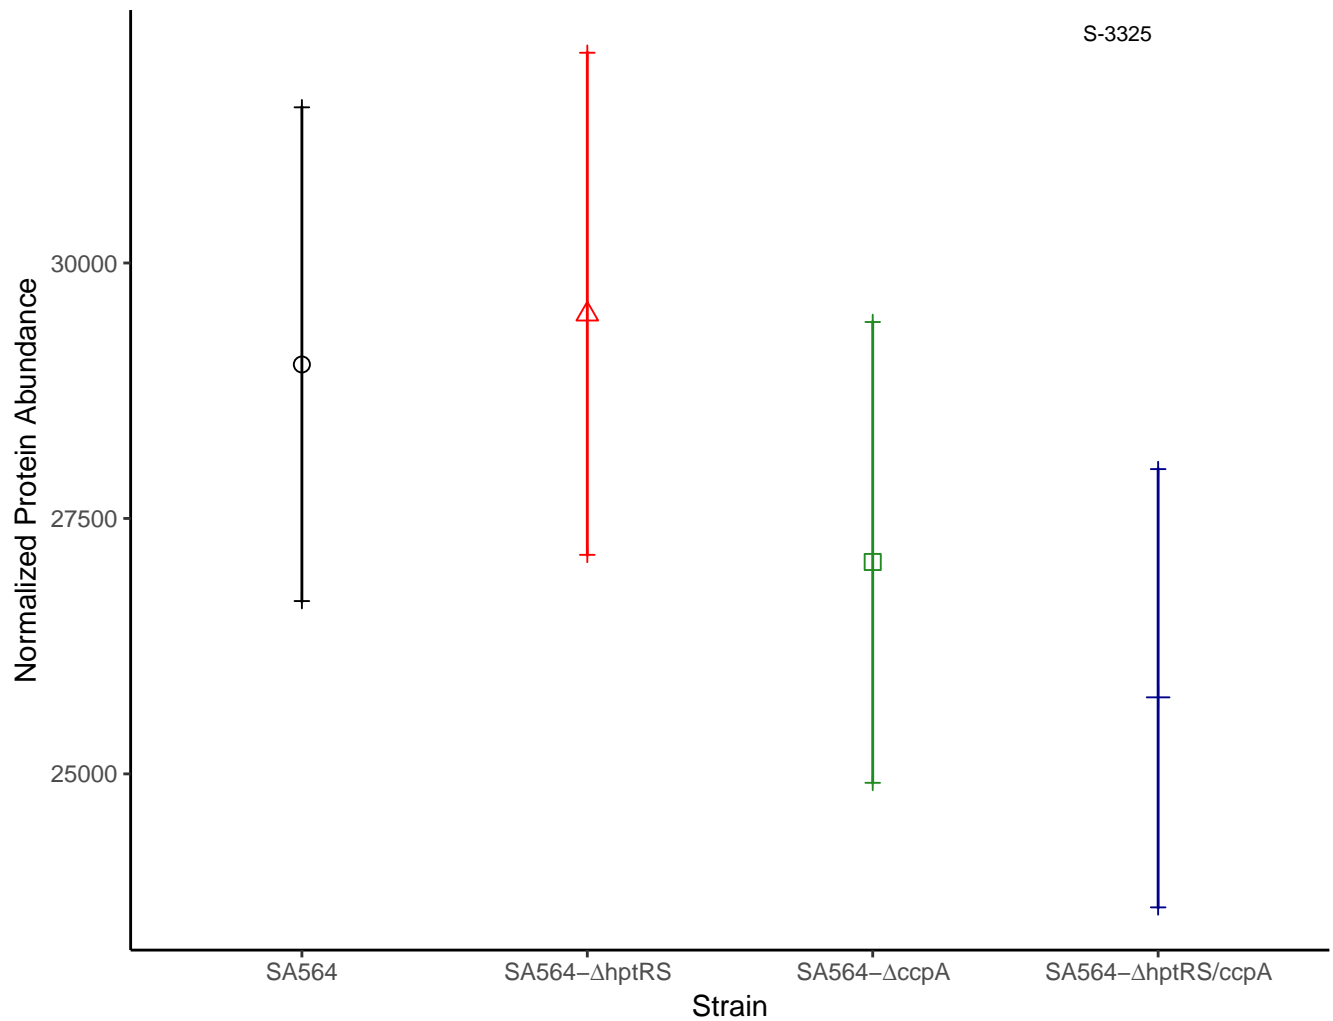

- ⊕ SA564
- △ SA564- $\Delta$ hptRS
- ⊞ SA564- $\Delta$ ccpA
- + SA564- $\Delta$ hptRS/ccpA

# RL20\_STAAM

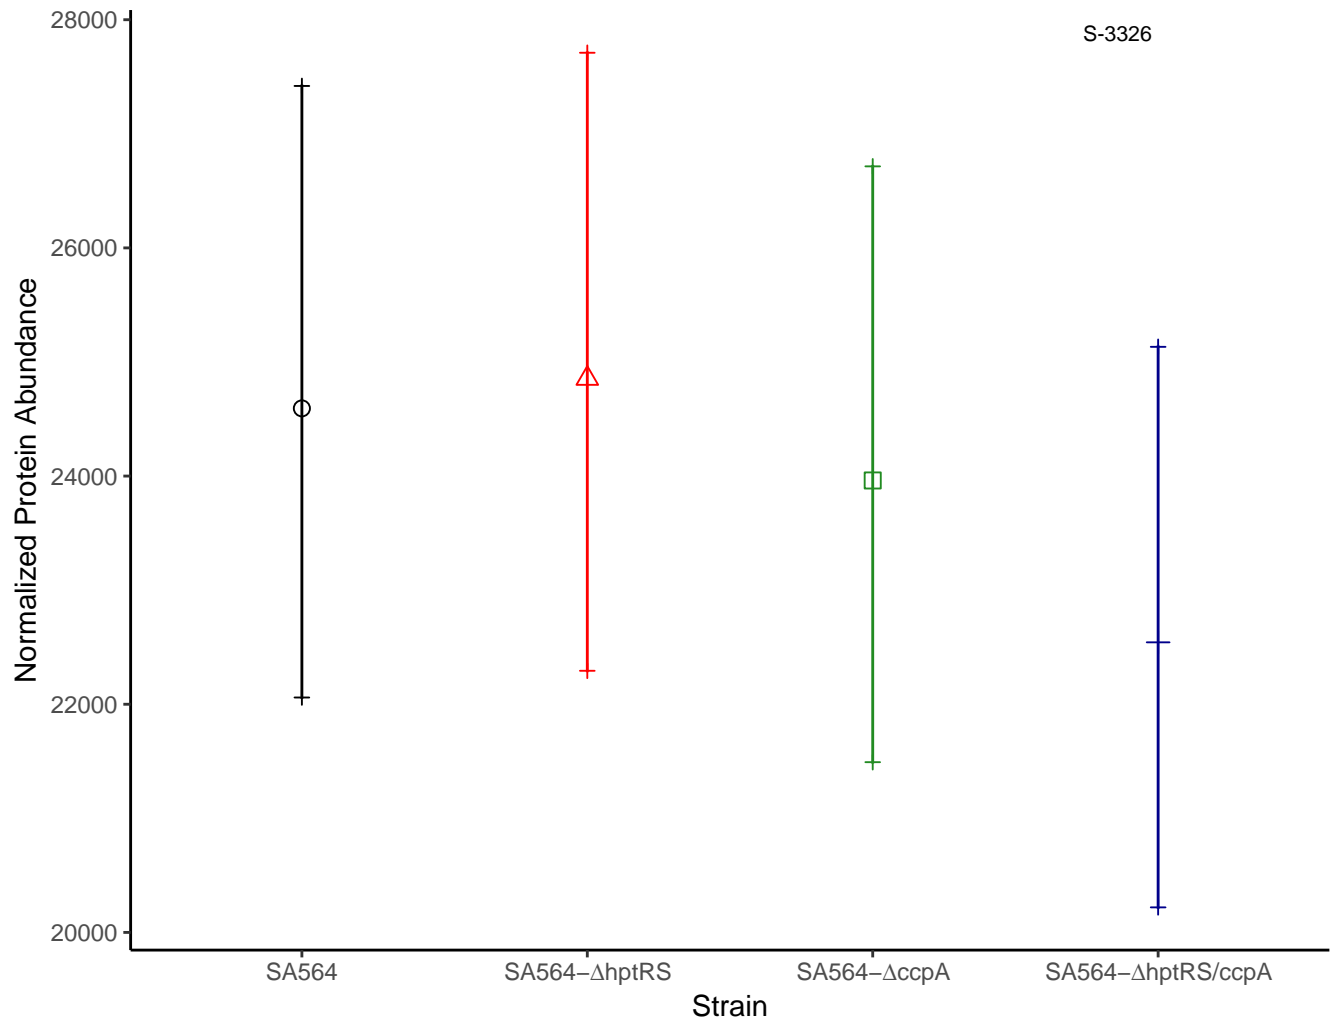

- ⊕ SA564
- △ SA564- $\Delta$ hptRS
- ⊞ SA564- $\Delta$ ccpA
- + SA564- $\Delta$ hptRS/ccpA

# RL21\_STAAM

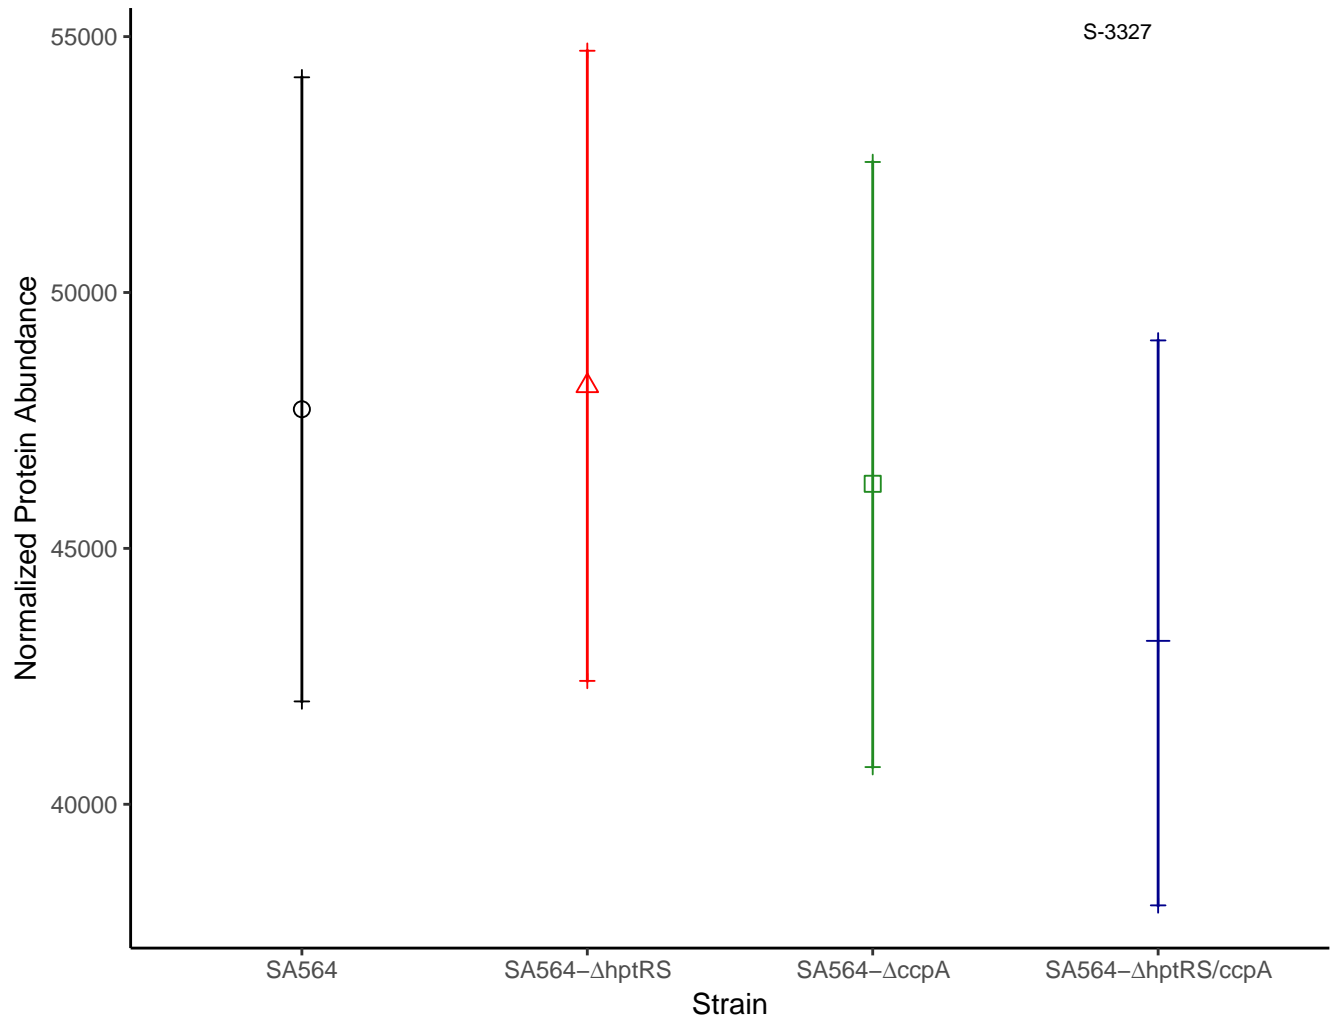

- ⊕ SA564
- △ SA564- $\Delta$ *hptRS*
- ⊞ SA564- $\Delta$ *ccpA*
- + SA564- $\Delta$ *hptRS/ccpA*

# RL22\_STAAM

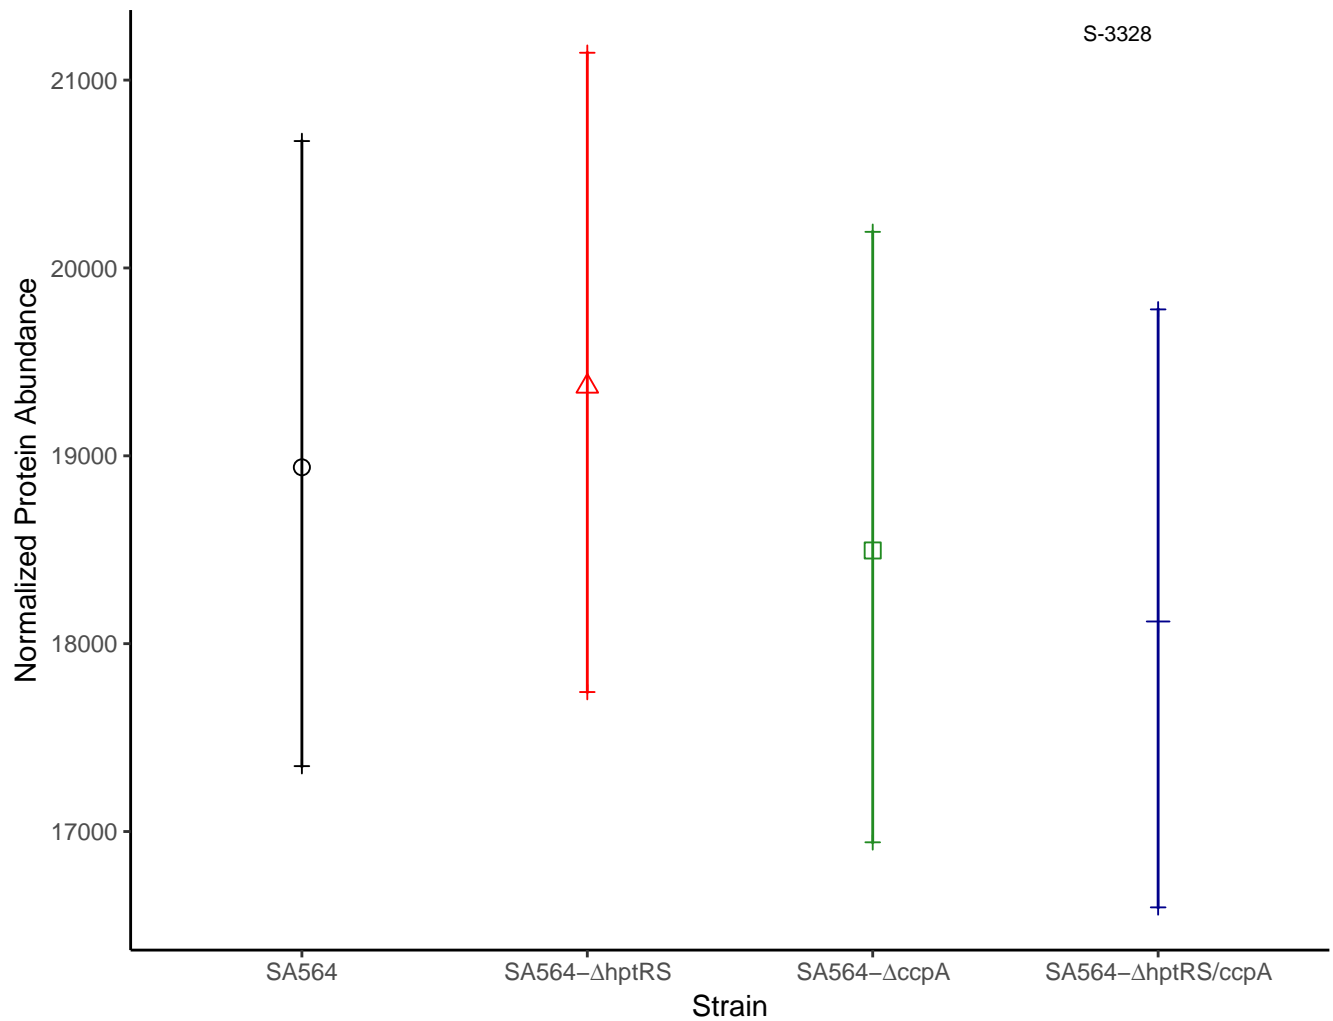

- ⊕ SA564
- △ SA564- $\Delta$ hptRS
- ⊞ SA564- $\Delta$ ccpA
- + SA564- $\Delta$ hptRS/ccpA



# RL23\_STAAM

S-3329

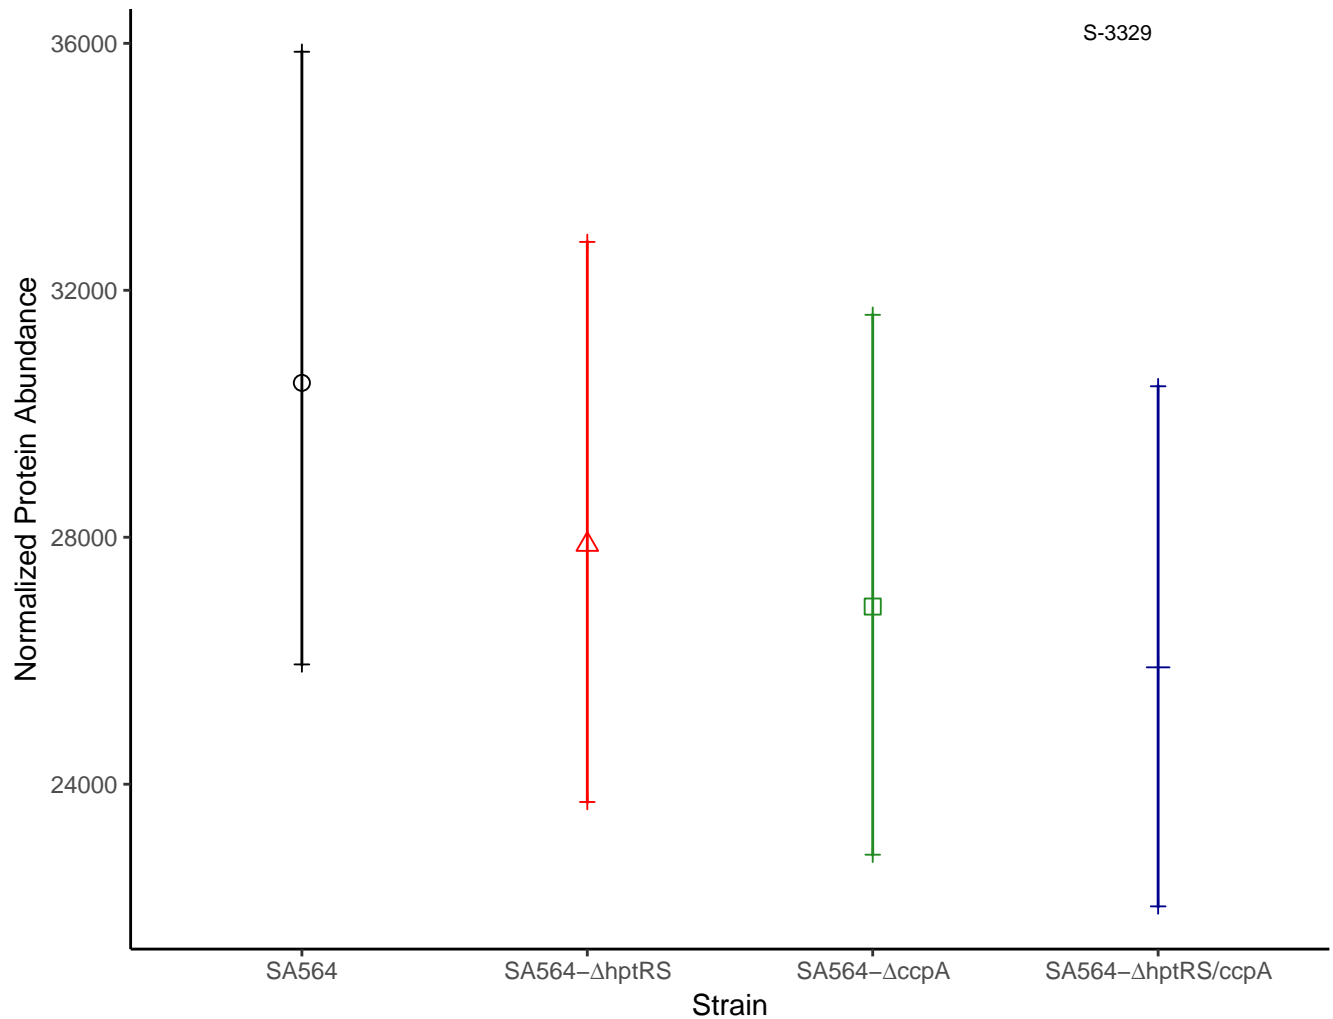

- ⊕ SA564
- △ SA564- $\Delta$ hptRS
- ⊞ SA564- $\Delta$ ccpA
- + SA564- $\Delta$ hptRS/ccpA

# RL24\_STAAM

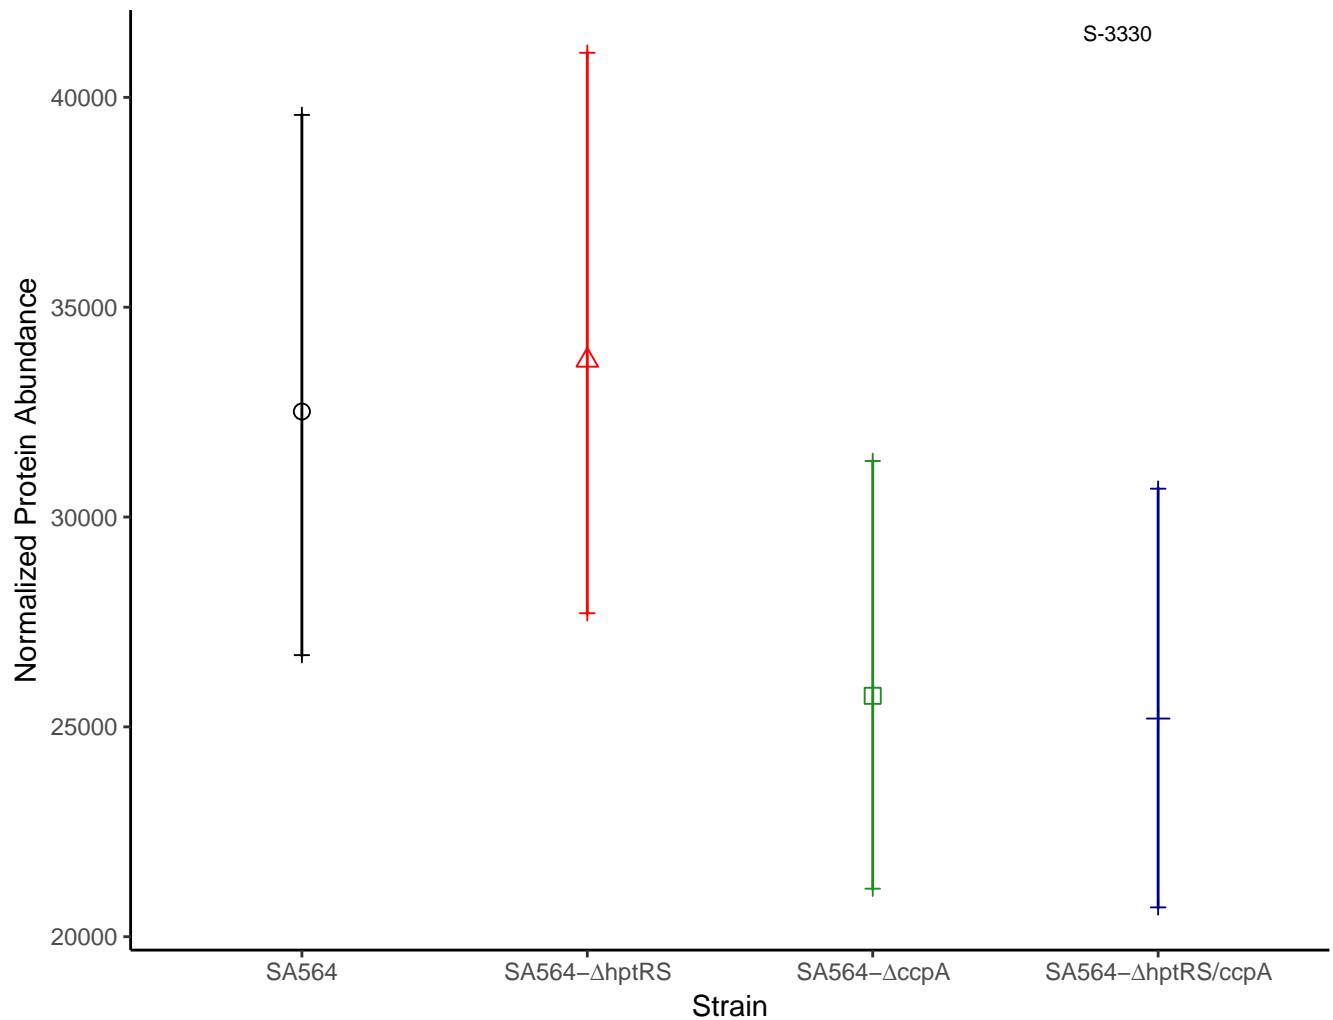

- ⊕ SA564
- △ SA564- $\Delta$ hptRS
- ⊞ SA564- $\Delta$ ccpA
- + SA564- $\Delta$ hptRS/ccpA

# RL25\_STAAM

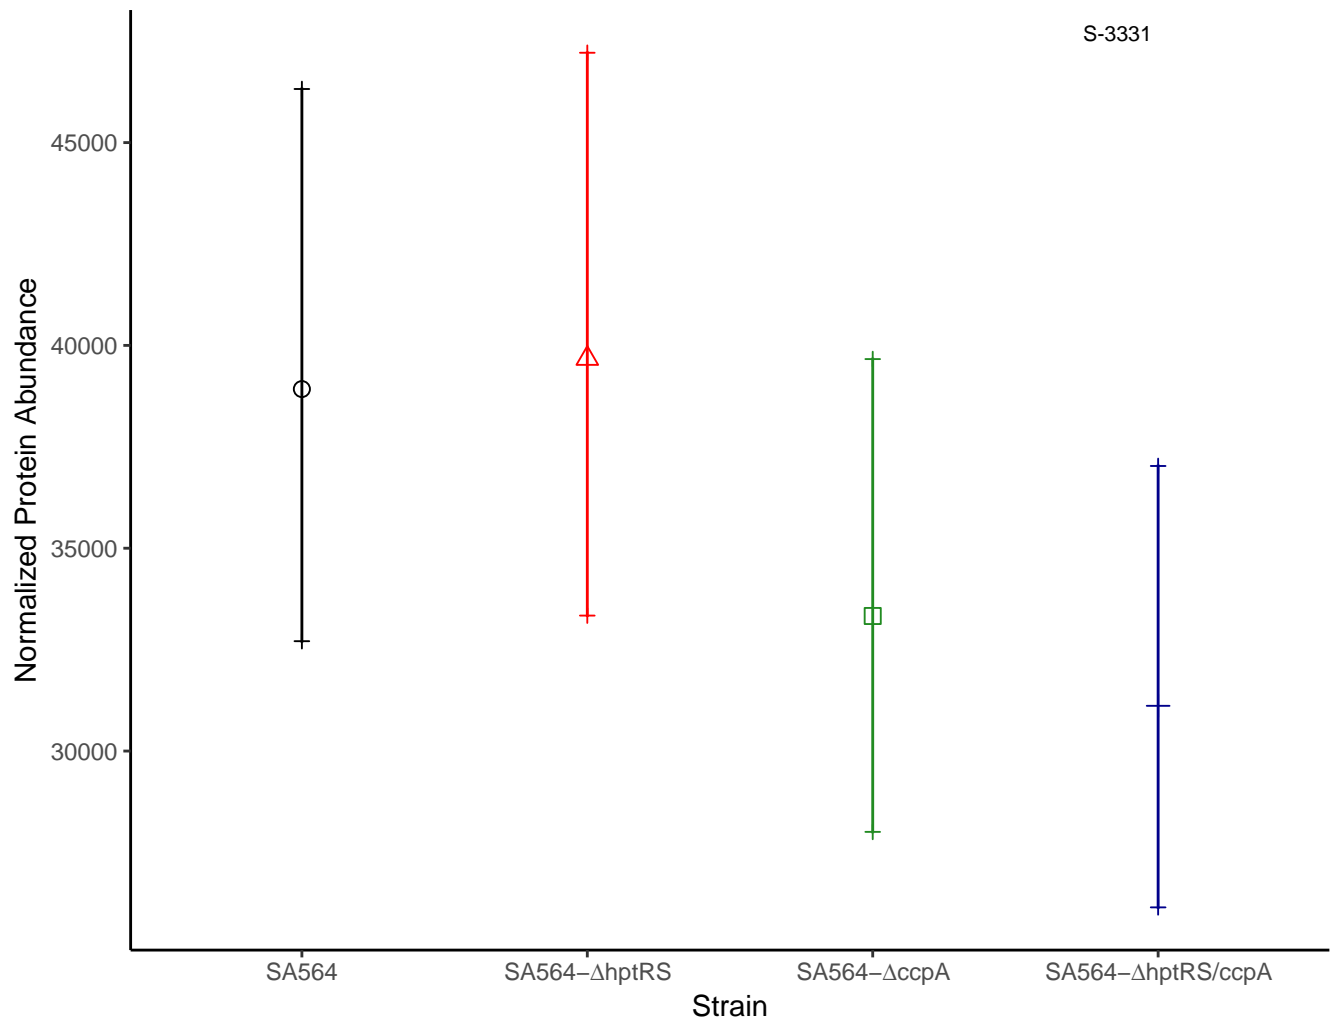

- ⊕ SA564
- △ SA564- $\Delta$ hptRS
- ⊞ SA564- $\Delta$ ccpA
- + SA564- $\Delta$ hptRS/ccpA

# RL27\_STAAM

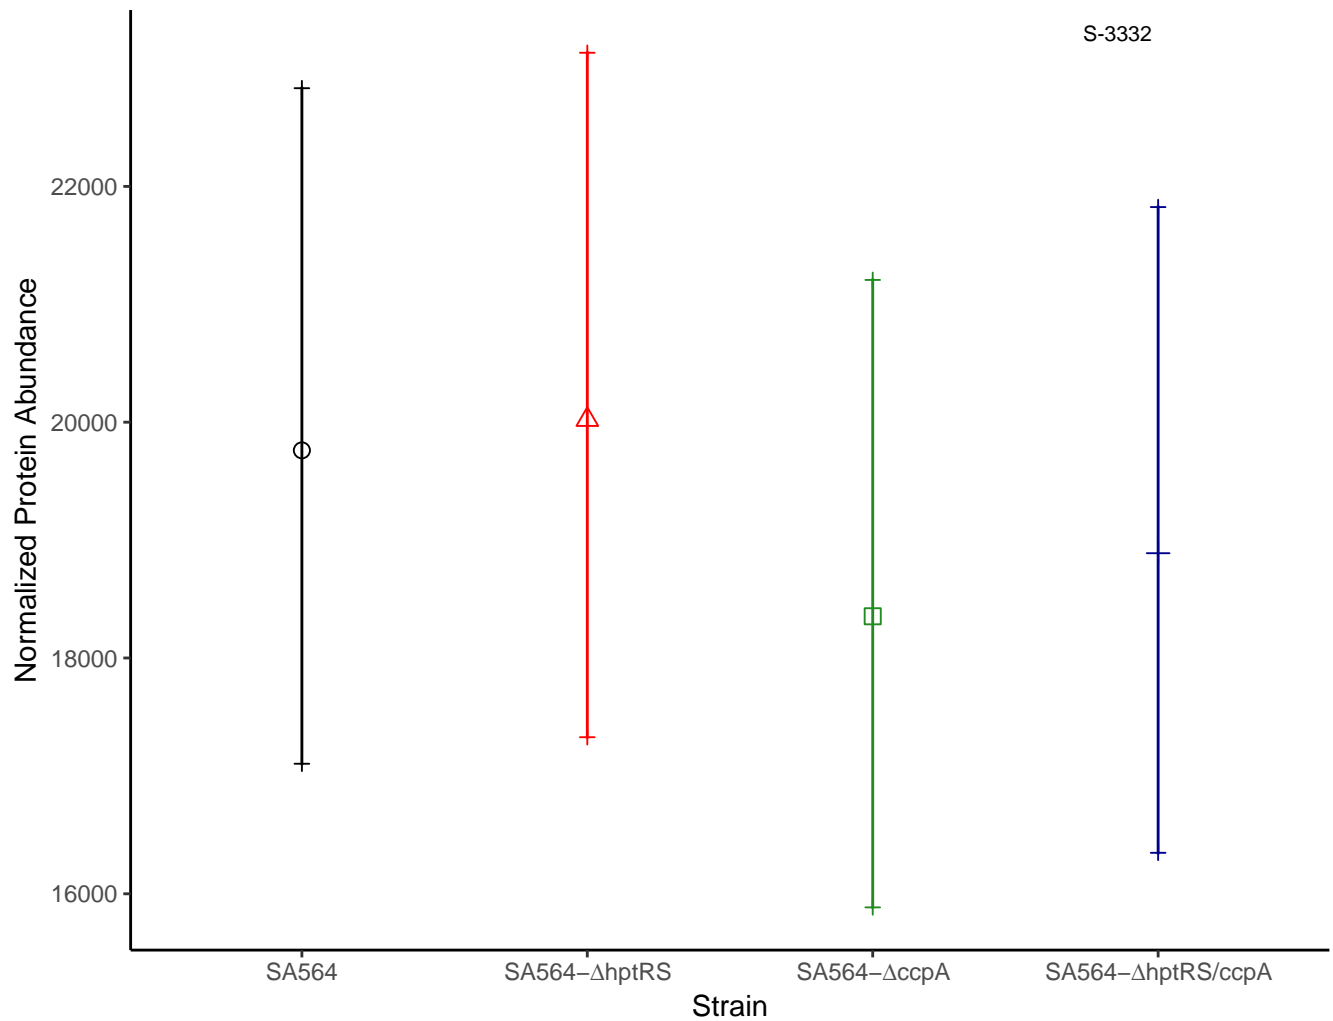

- ⊕ SA564
- △ SA564- $\Delta$ hptRS
- ⊞ SA564- $\Delta$ ccpA
- + SA564- $\Delta$ hptRS/ccpA

# RL28\_STAAM

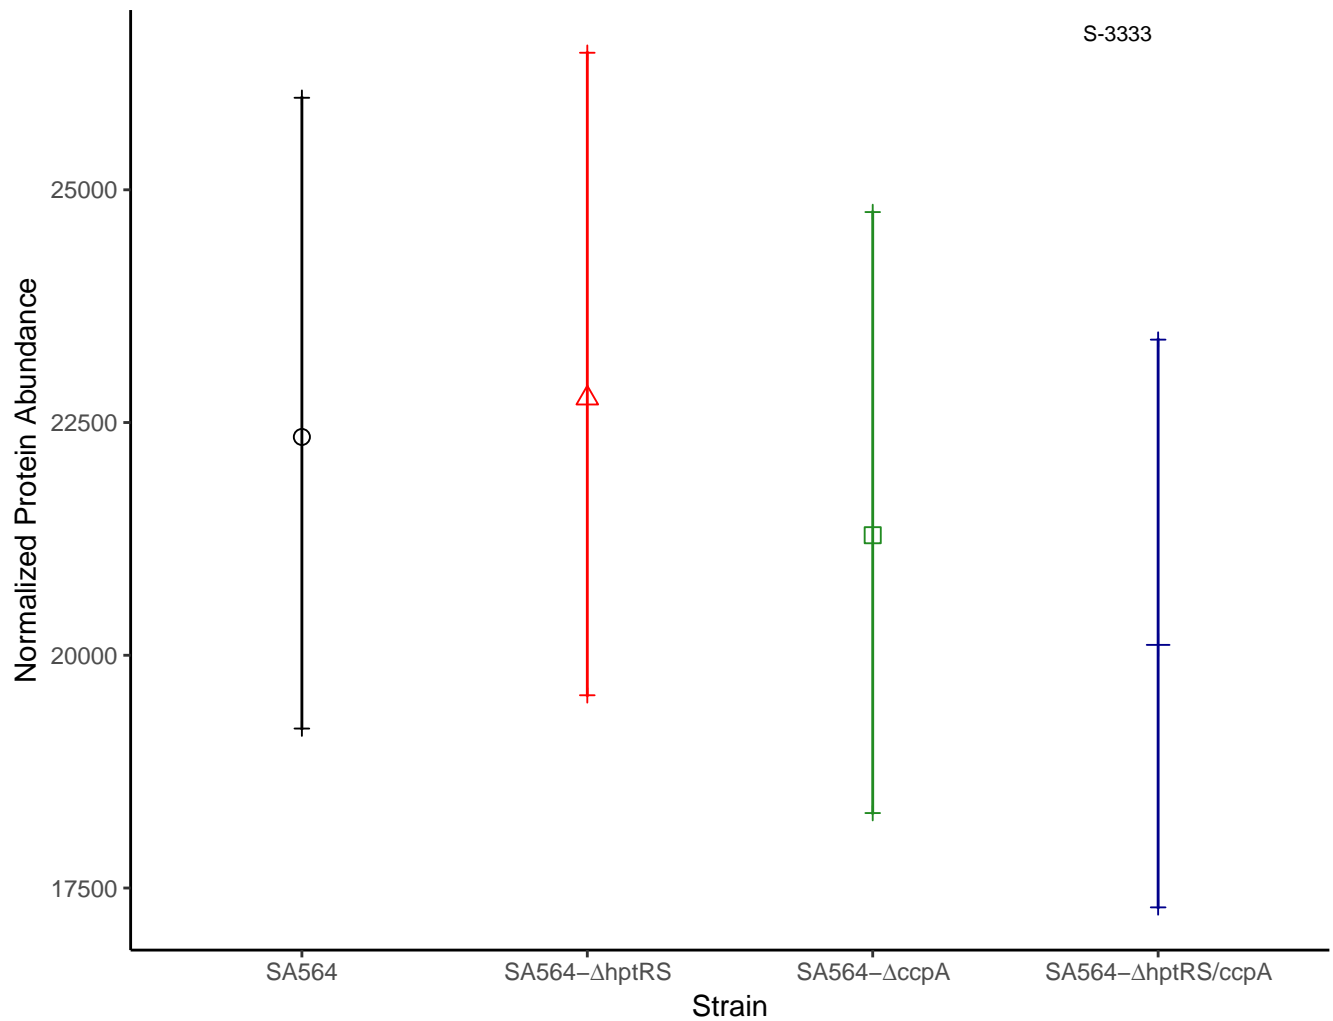

- ⊕ SA564
- △ SA564- $\Delta$ hptRS
- ⊞ SA564- $\Delta$ ccpA
- + SA564- $\Delta$ hptRS/ccpA

# RL29\_STAAM

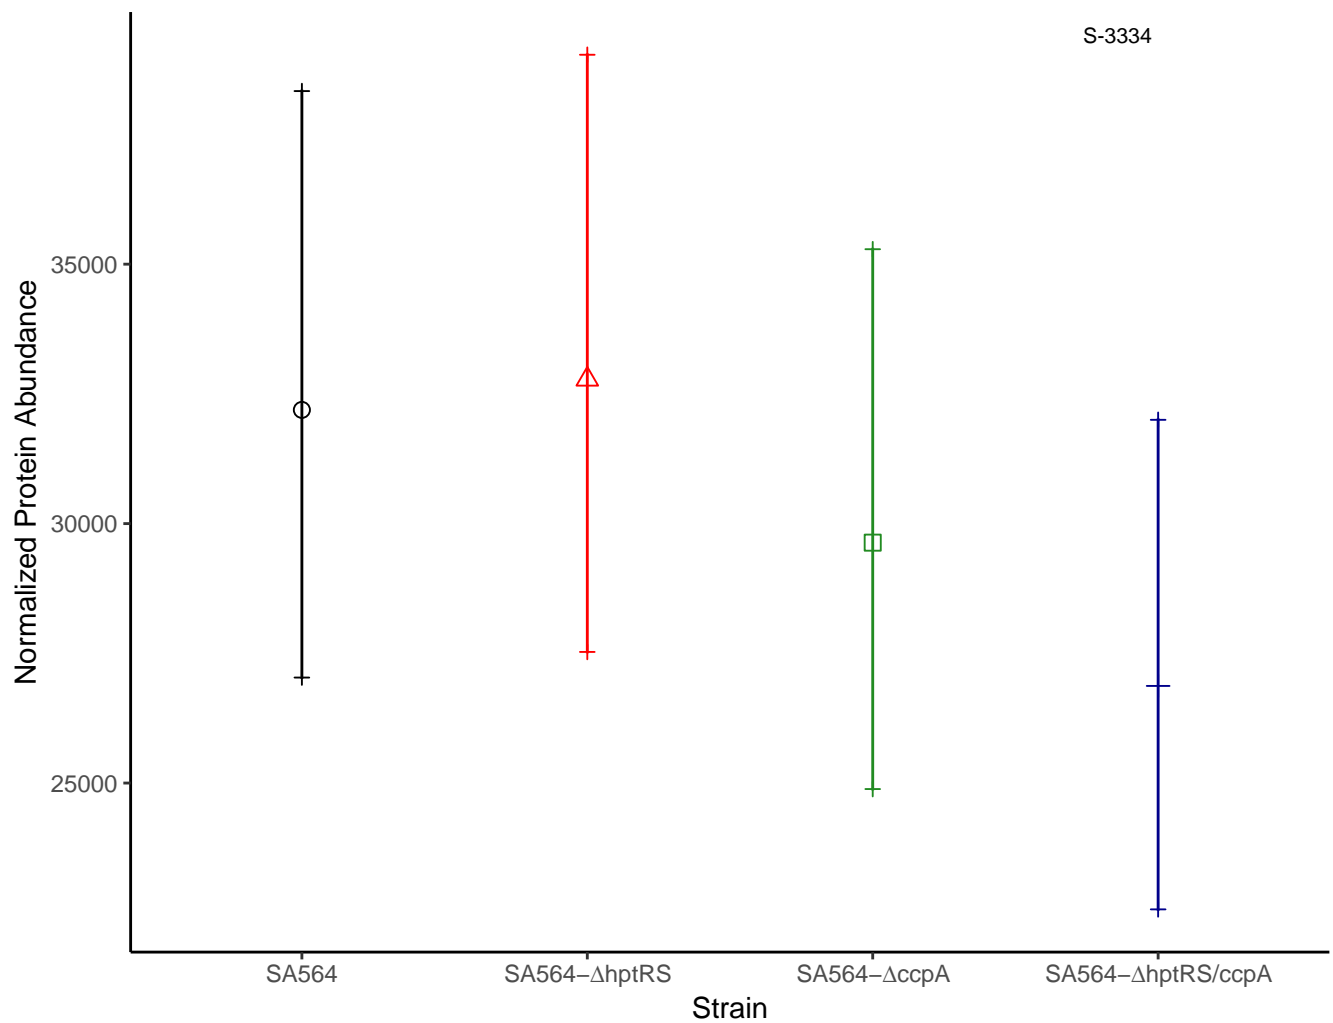

- ⊕ SA564
- △ SA564- $\Delta$ hptRS
- ⊞ SA564- $\Delta$ ccpA
- + SA564- $\Delta$ hptRS/ccpA

# RL3\_STAAM

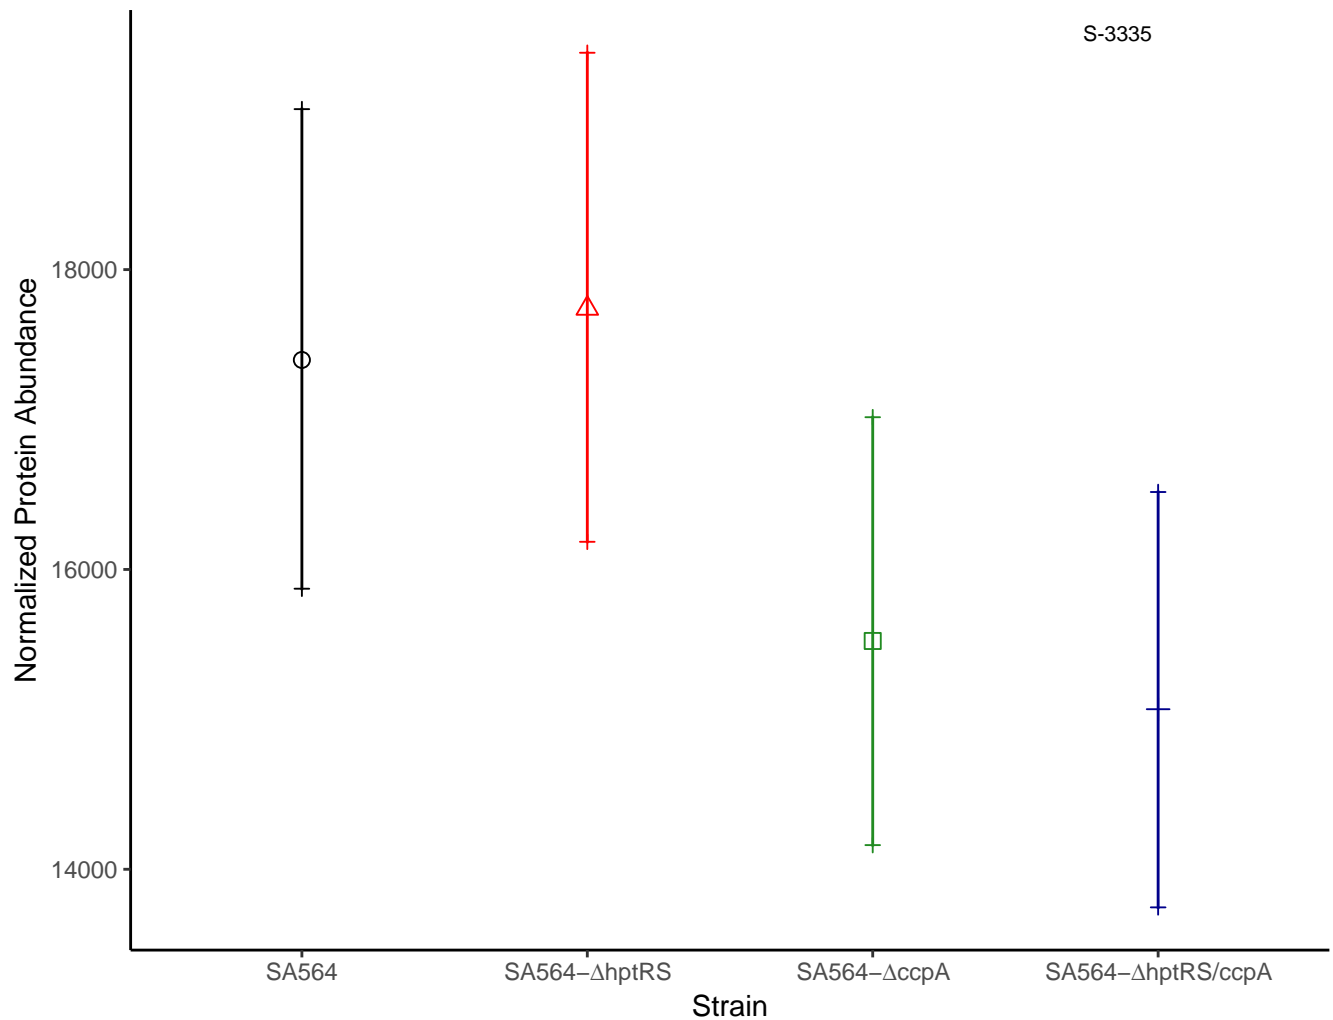

- ⊕ SA564
- △ SA564- $\Delta$ hptRS
- ⊞ SA564- $\Delta$ ccpA
- + SA564- $\Delta$ hptRS/ccpA

# RL30\_STAAM

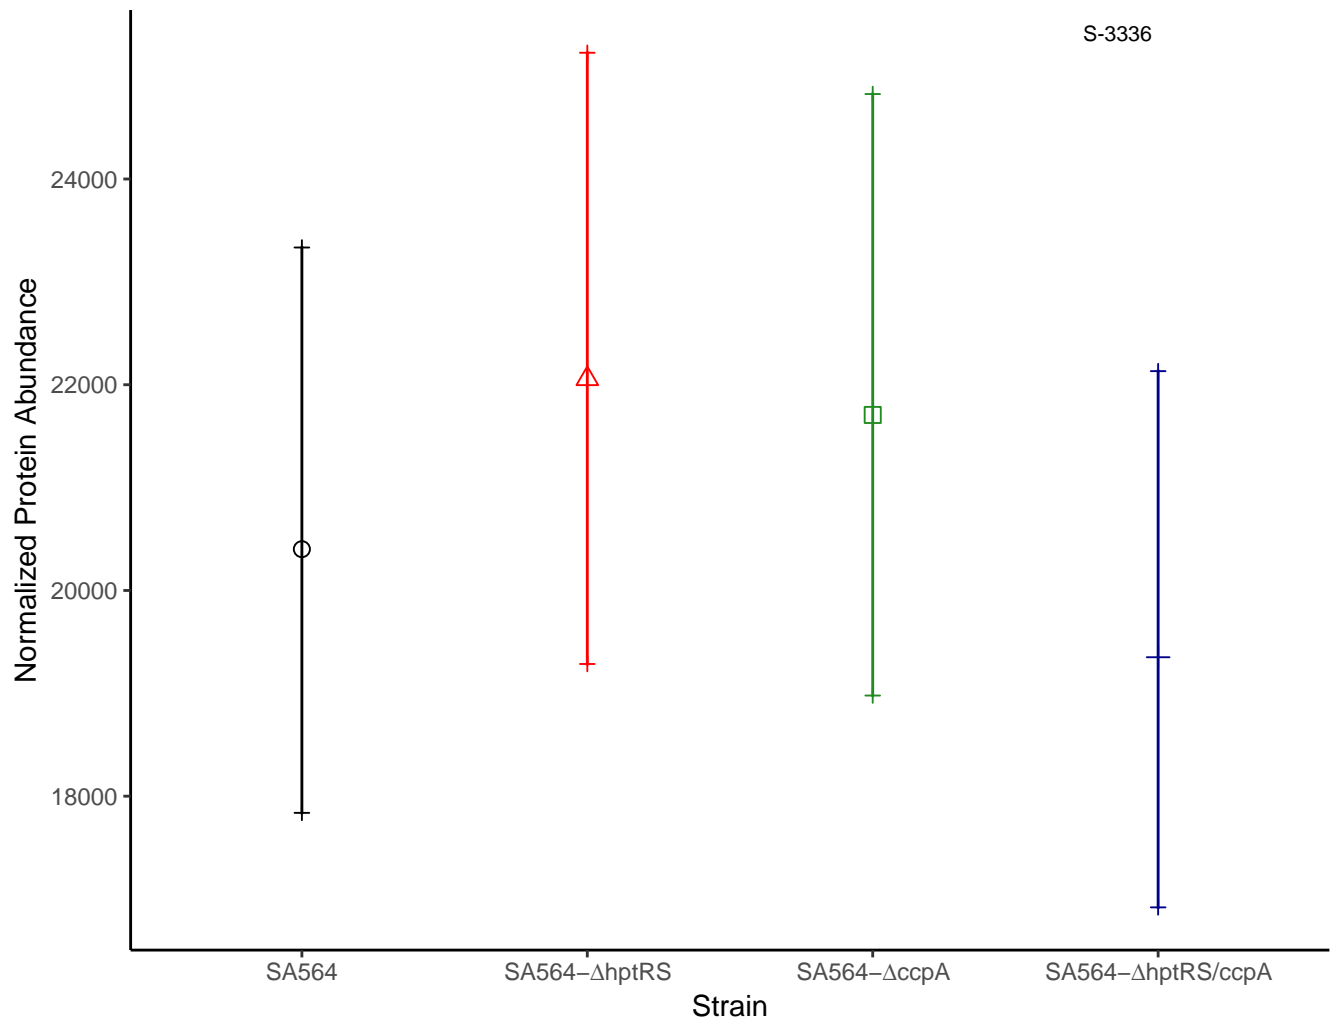

- ⊕ SA564
- △ SA564- $\Delta$ hptRS
- ⊞ SA564- $\Delta$ ccpA
- + SA564- $\Delta$ hptRS/ccpA



# RL31B\_STAAM

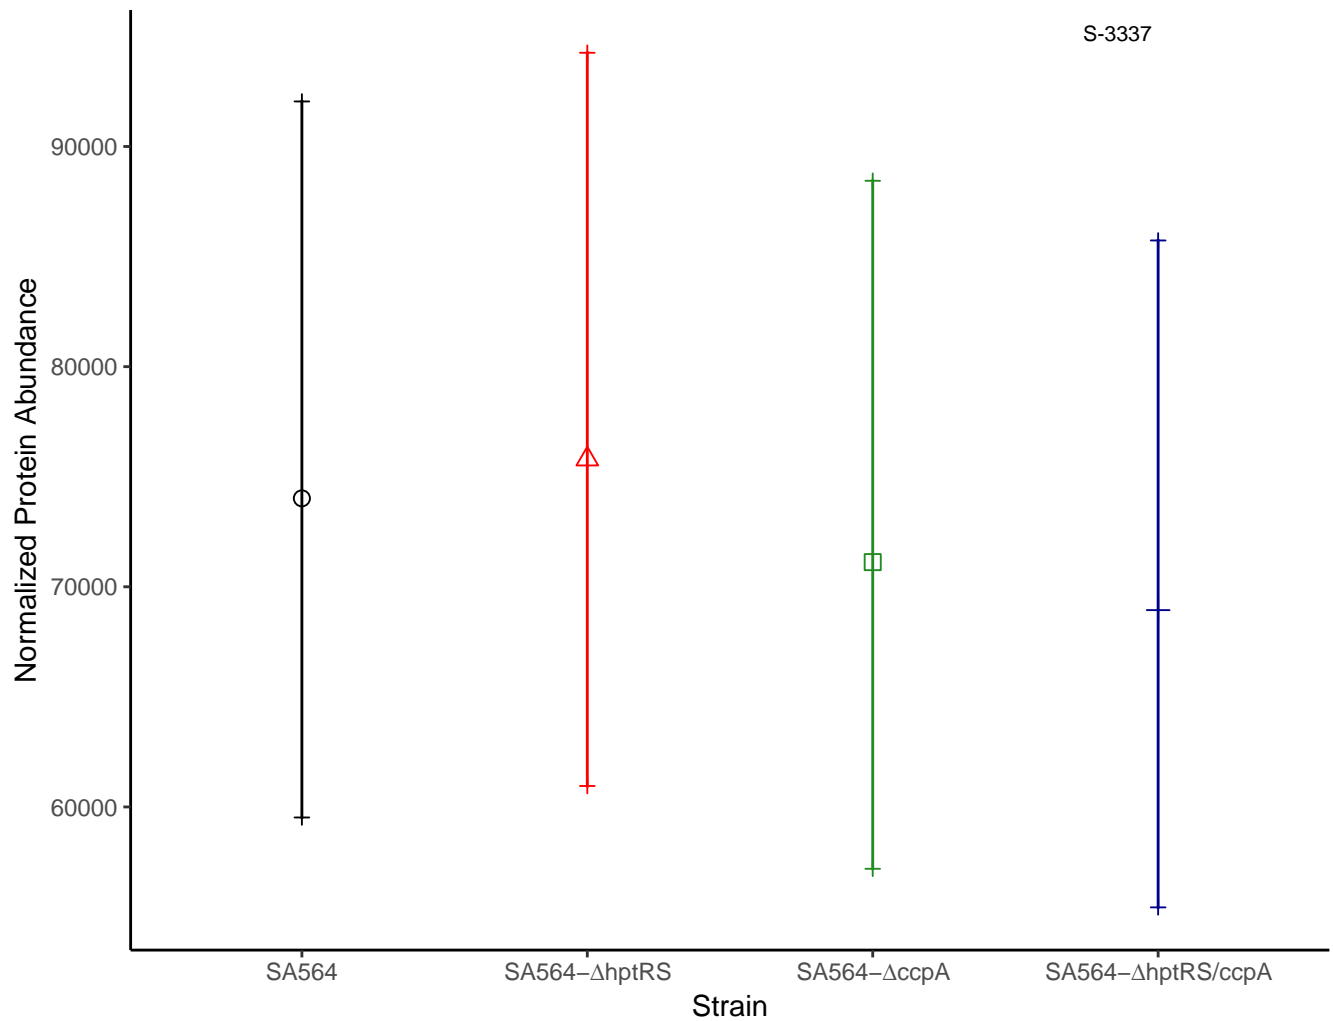

- ⊕ SA564
- △ SA564- $\Delta$ *hptRS*
- ⊞ SA564- $\Delta$ *ccpA*
- + SA564- $\Delta$ *hptRS/ccpA*

# RL32\_STAAM

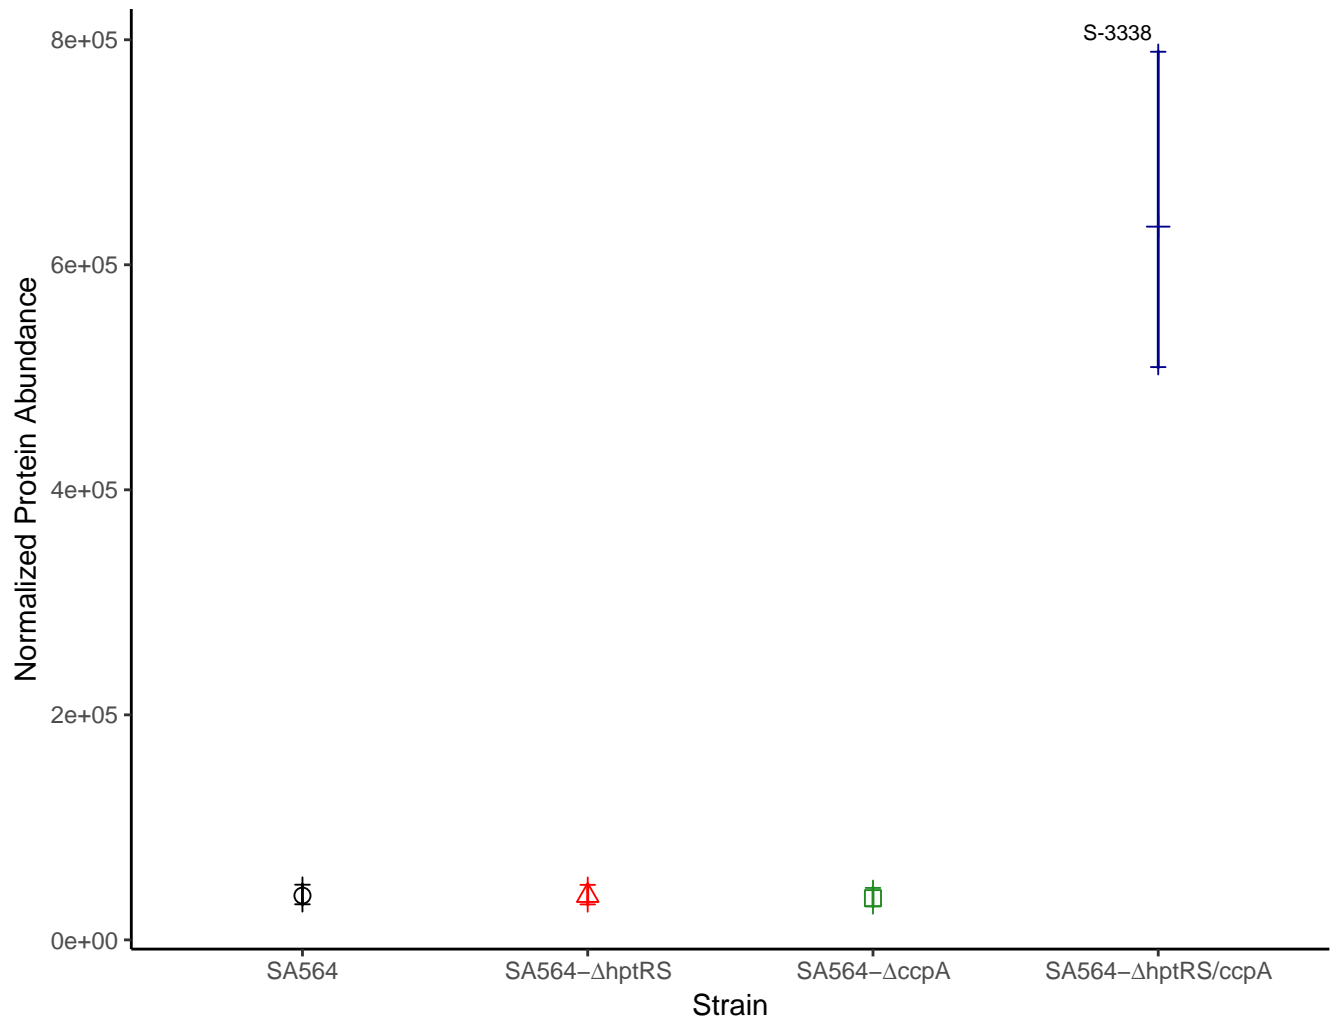

- SA564
- SA564- $\Delta$ hptRS
- SA564- $\Delta$ ccpA
- SA564- $\Delta$ hptRS/ccpA

# RL331\_STAAM

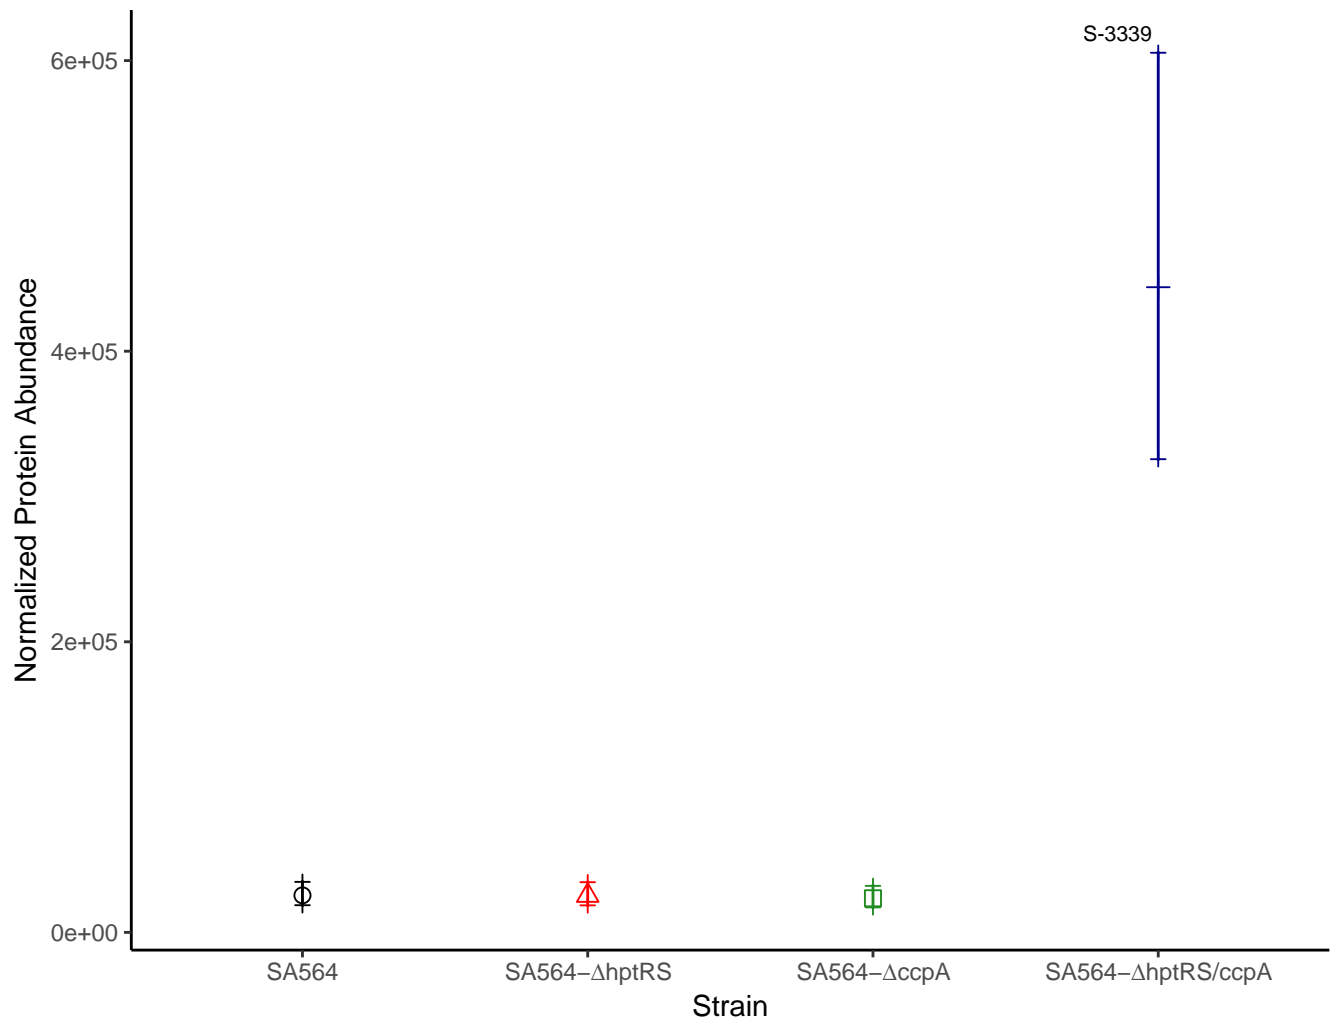

- SA564
- SA564- $\Delta$ hptRS
- SA564- $\Delta$ ccpA
- SA564- $\Delta$ hptRS/ccpA

# RL332\_STAAM

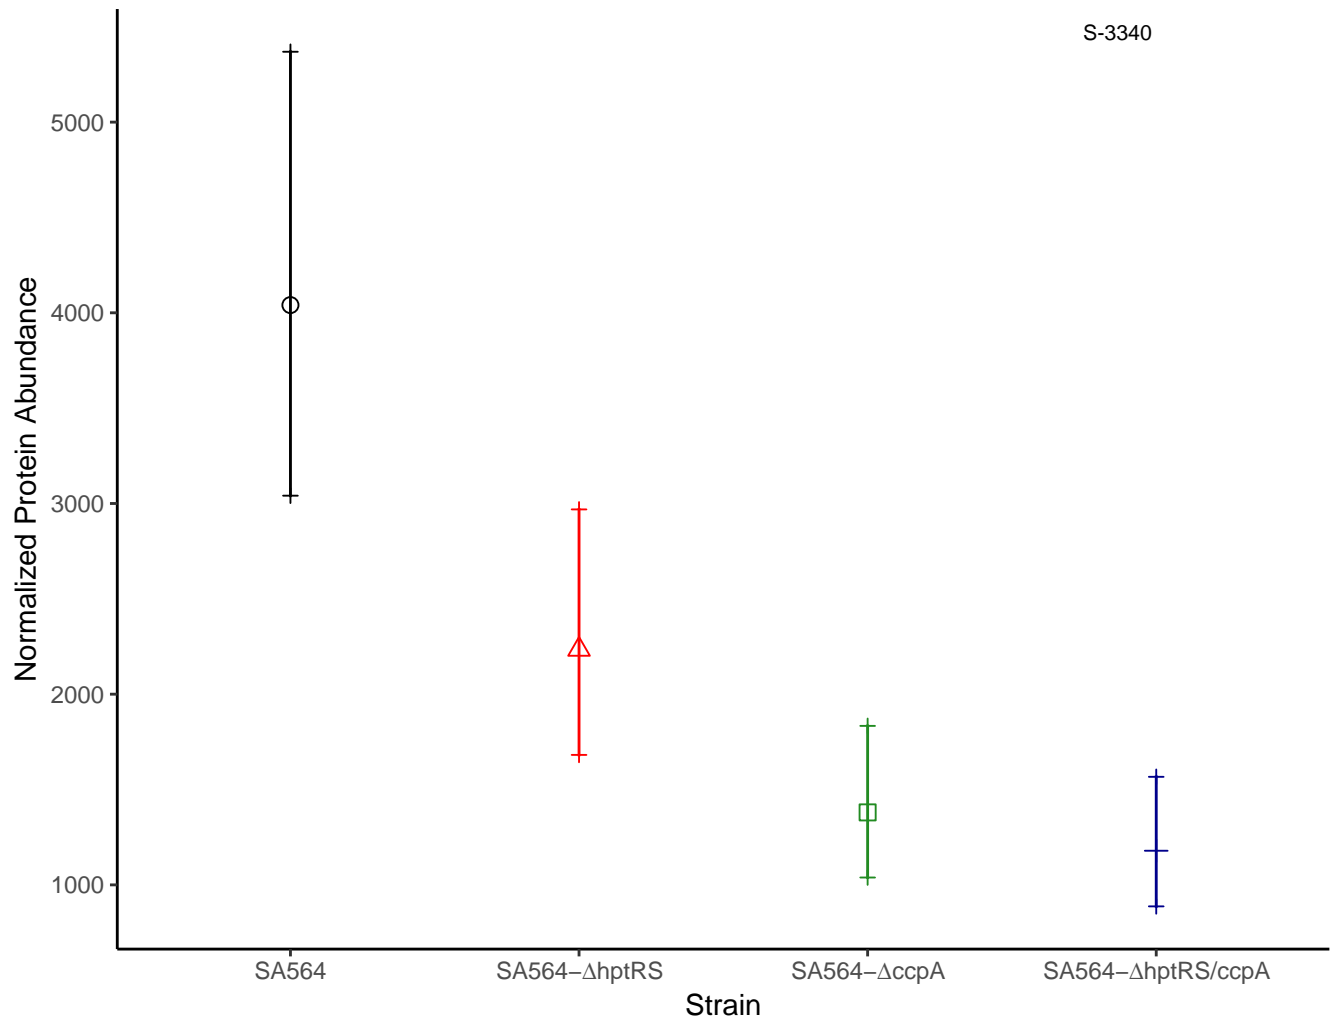

- ⊕ SA564
- △ SA564- $\Delta$ *hptRS*
- ⊞ SA564- $\Delta$ *ccpA*
- + SA564- $\Delta$ *hptRS/ccpA*

# RL35\_STAAM

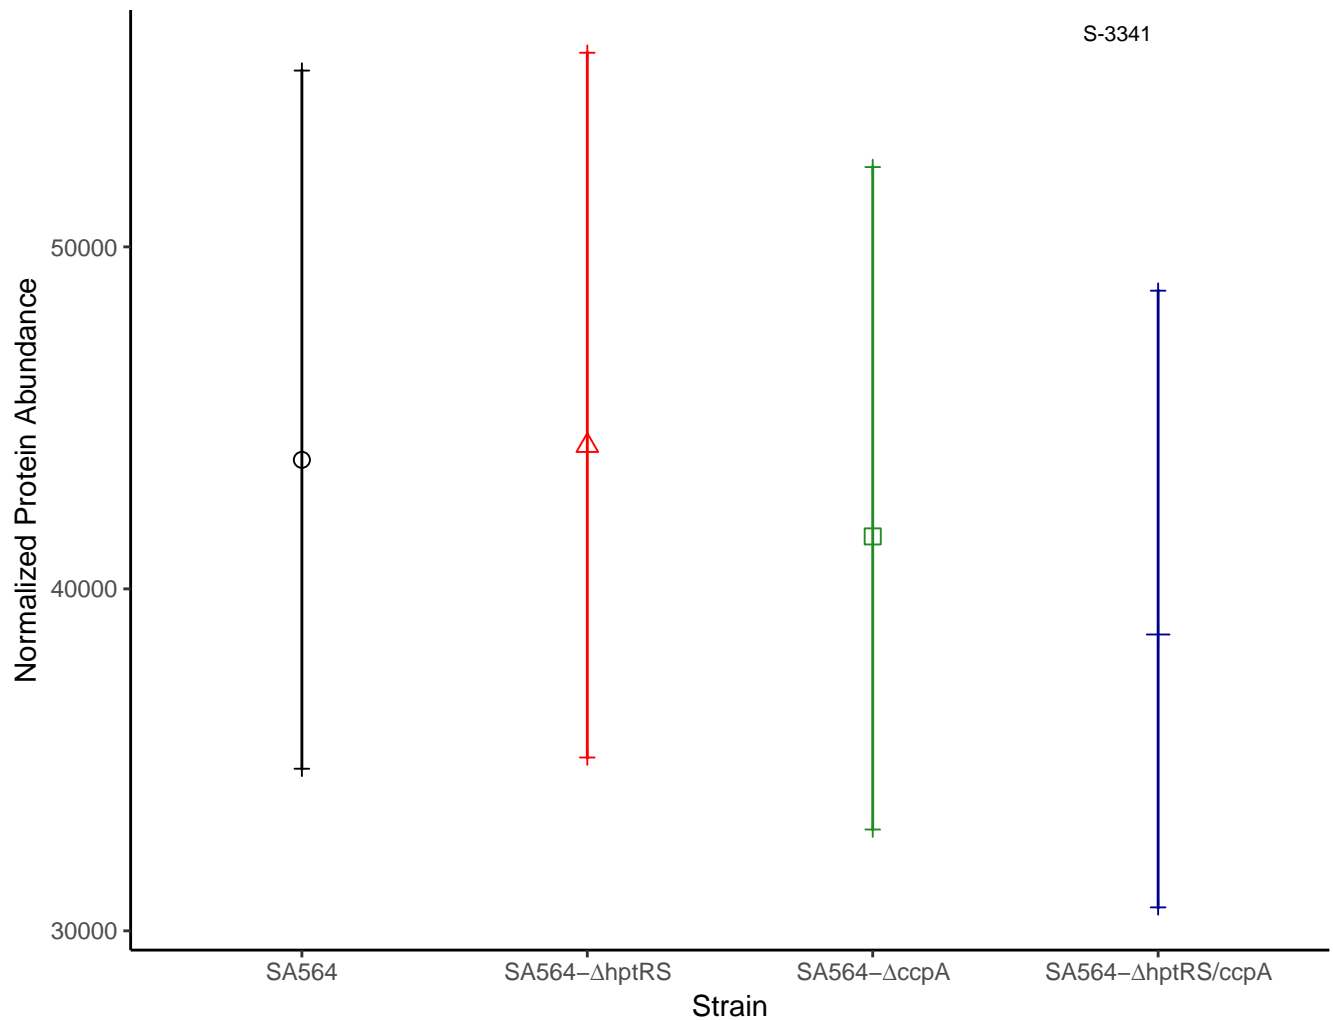

- ⊕ SA564
- △ SA564- $\Delta$ *hptRS*
- ⊞ SA564- $\Delta$ *ccpA*
- + SA564- $\Delta$ *hptRS/ccpA*

# RL36\_STAAM

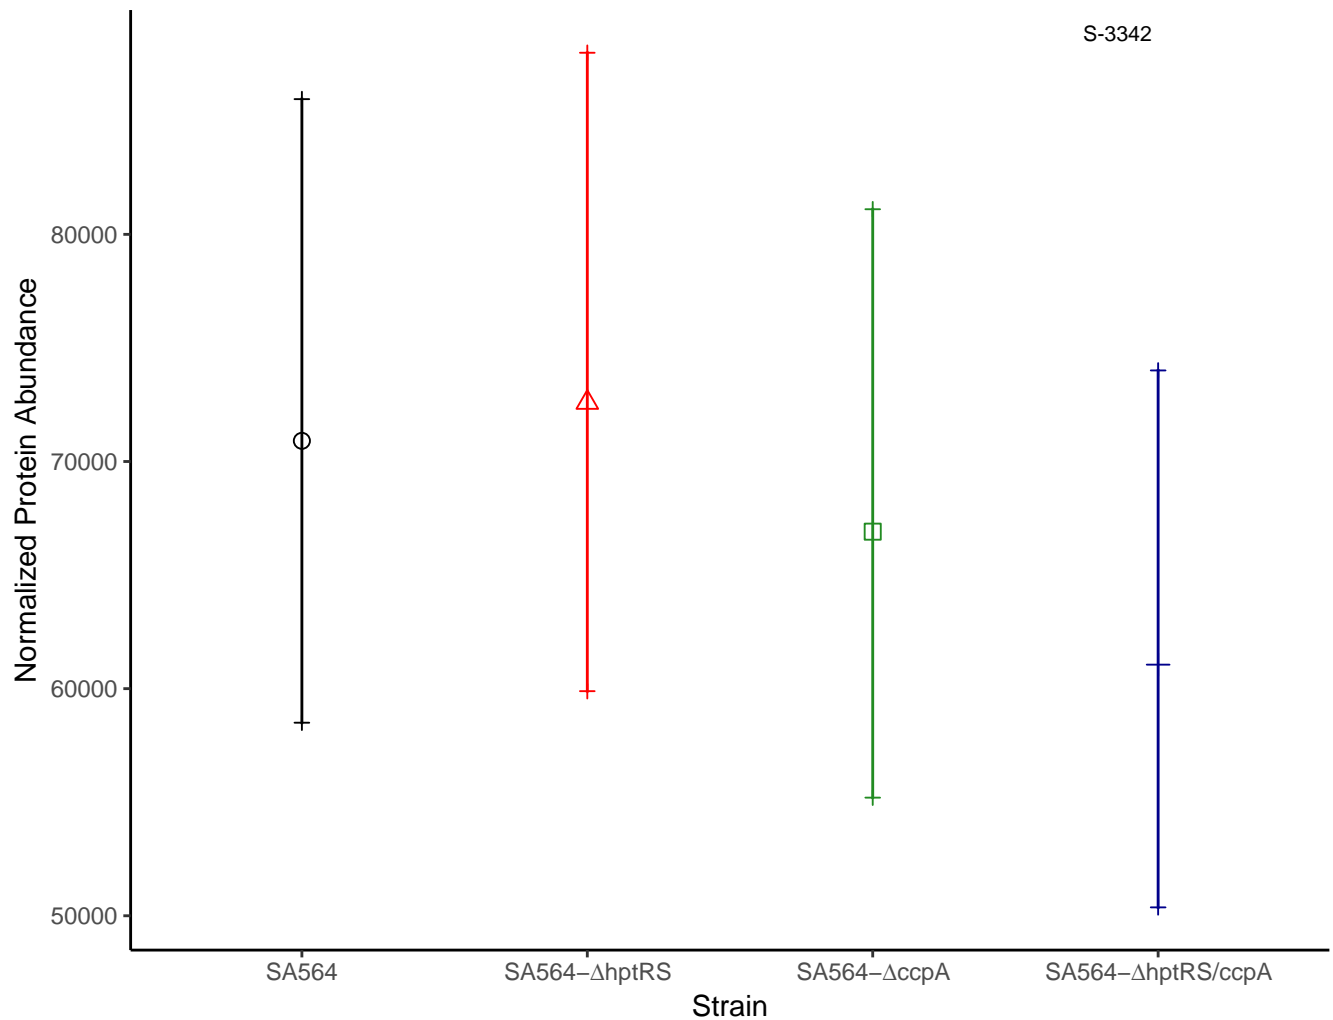

- ⊕ SA564
- △ SA564- $\Delta$ hptRS
- ⊞ SA564- $\Delta$ ccpA
- + SA564- $\Delta$ hptRS/ccpA

# RL4\_STAAM

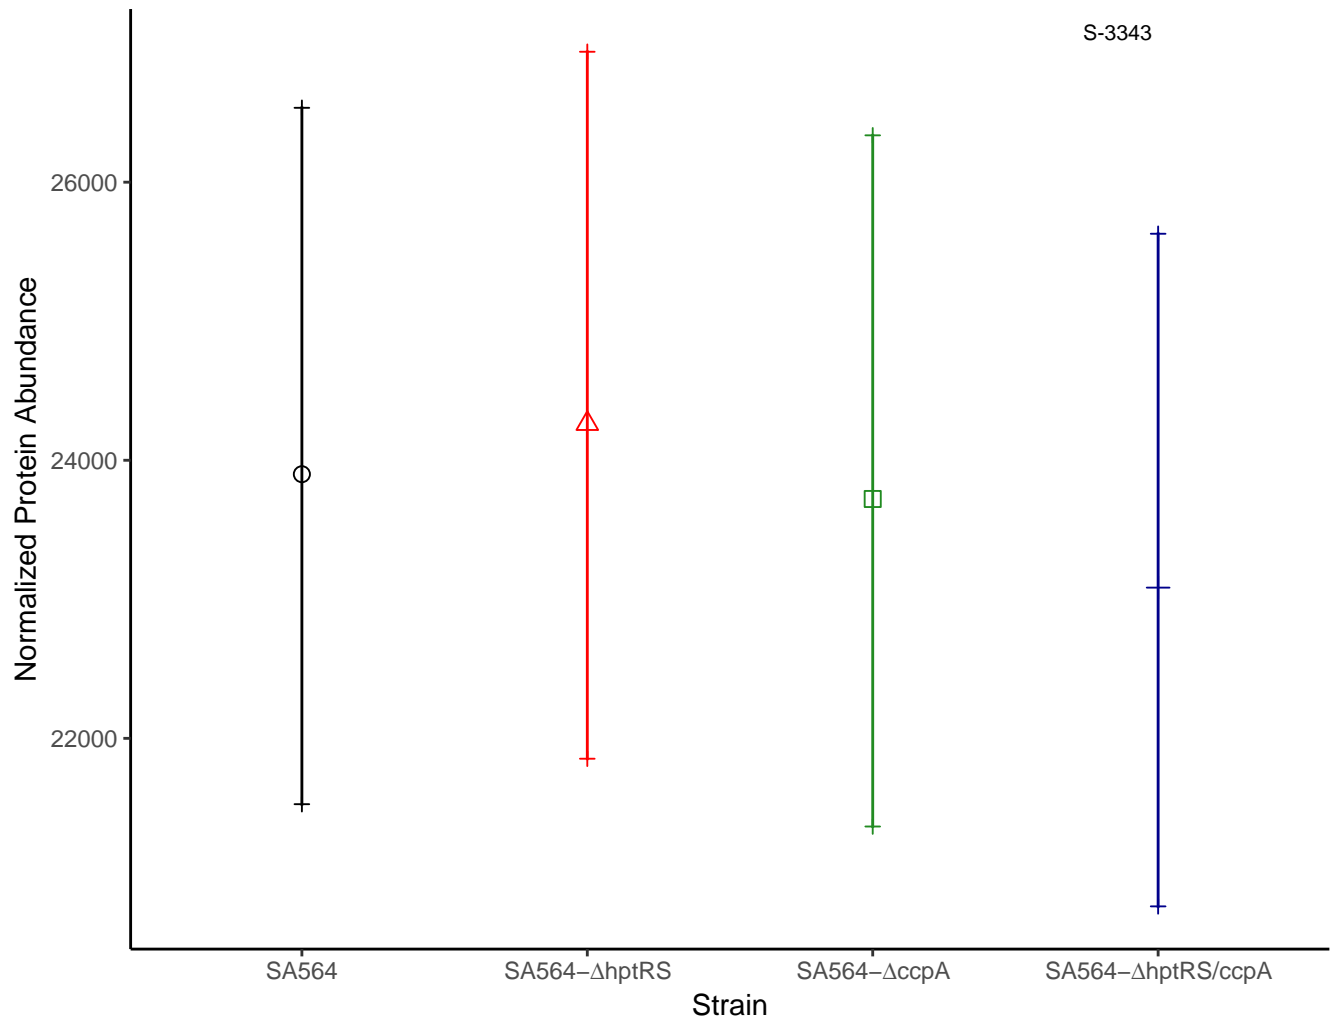

- ⊕ SA564
- △ SA564- $\Delta$ hptRS
- ⊞ SA564- $\Delta$ ccpA
- + SA564- $\Delta$ hptRS/ccpA

# RL5\_STAAM

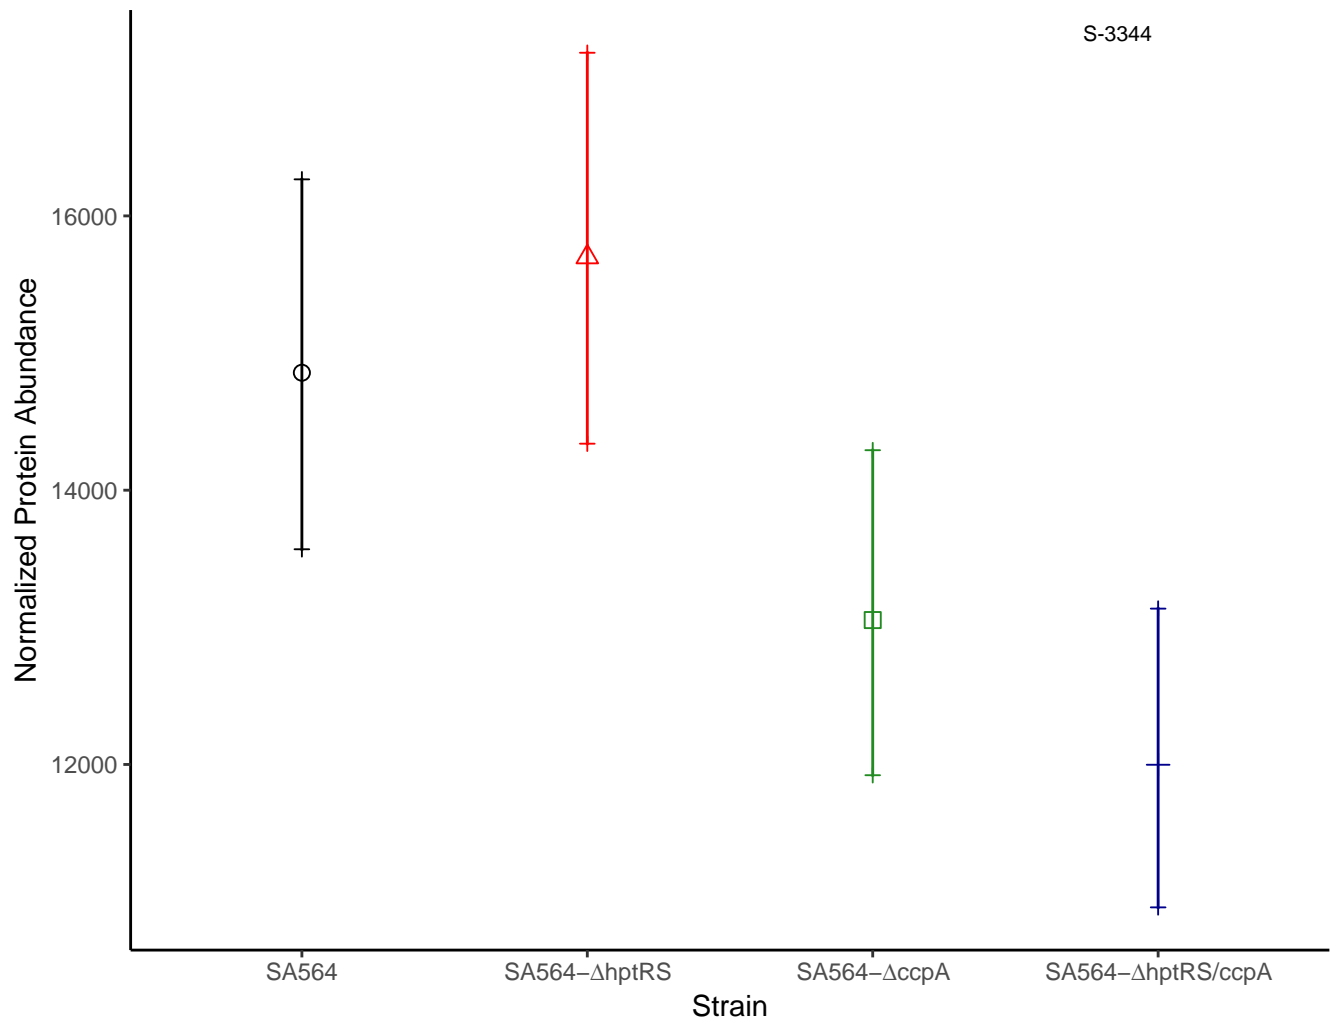

- ⊕ SA564
- △ SA564- $\Delta$ hptRS
- ⊞ SA564- $\Delta$ ccpA
- + SA564- $\Delta$ hptRS/ccpA



# RL6\_STAAM

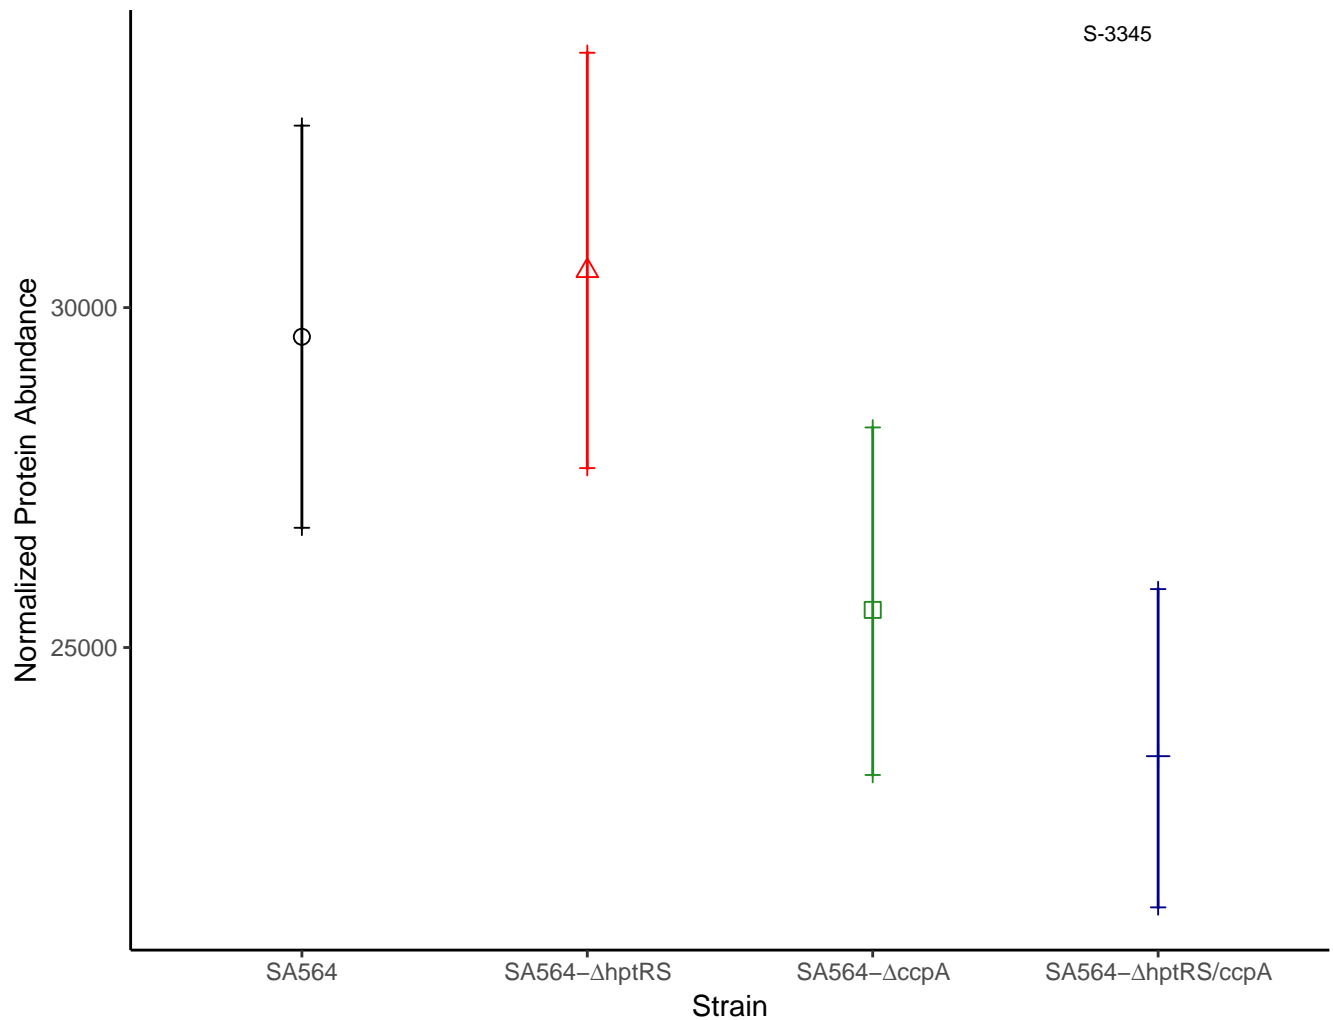

- ⊕ SA564
- △ SA564- $\Delta$ *hptRS*
- ⊞ SA564- $\Delta$ *ccpA*
- + SA564- $\Delta$ *hptRS/ccpA*

# RL7\_STAAM

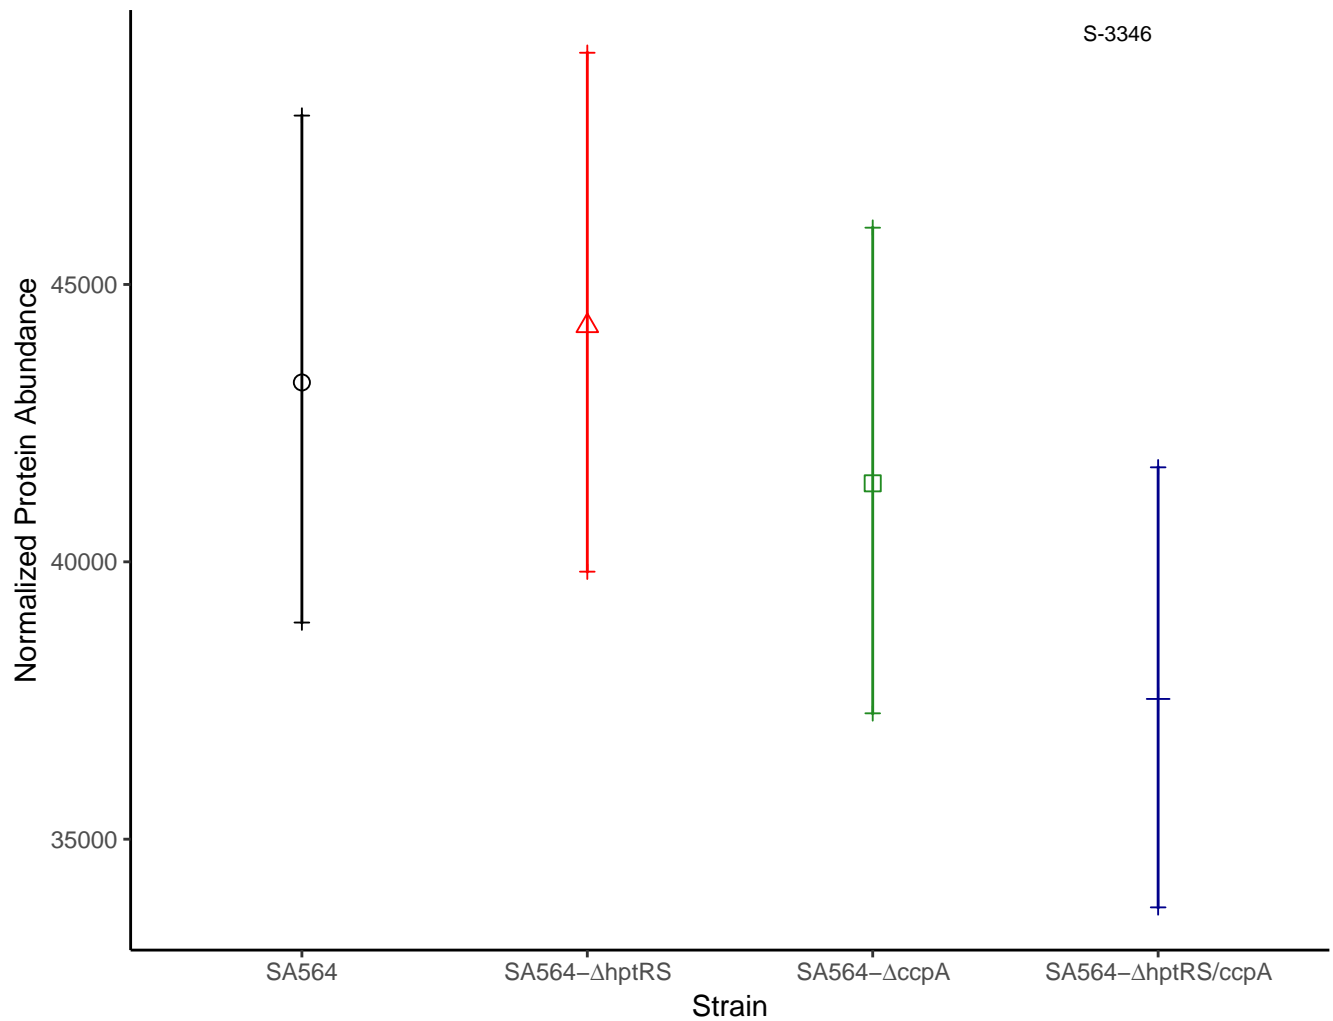

- ⊕ SA564
- △ SA564- $\Delta$ hptRS
- ⊞ SA564- $\Delta$ ccpA
- + SA564- $\Delta$ hptRS/ccpA

# RL9\_STAAM

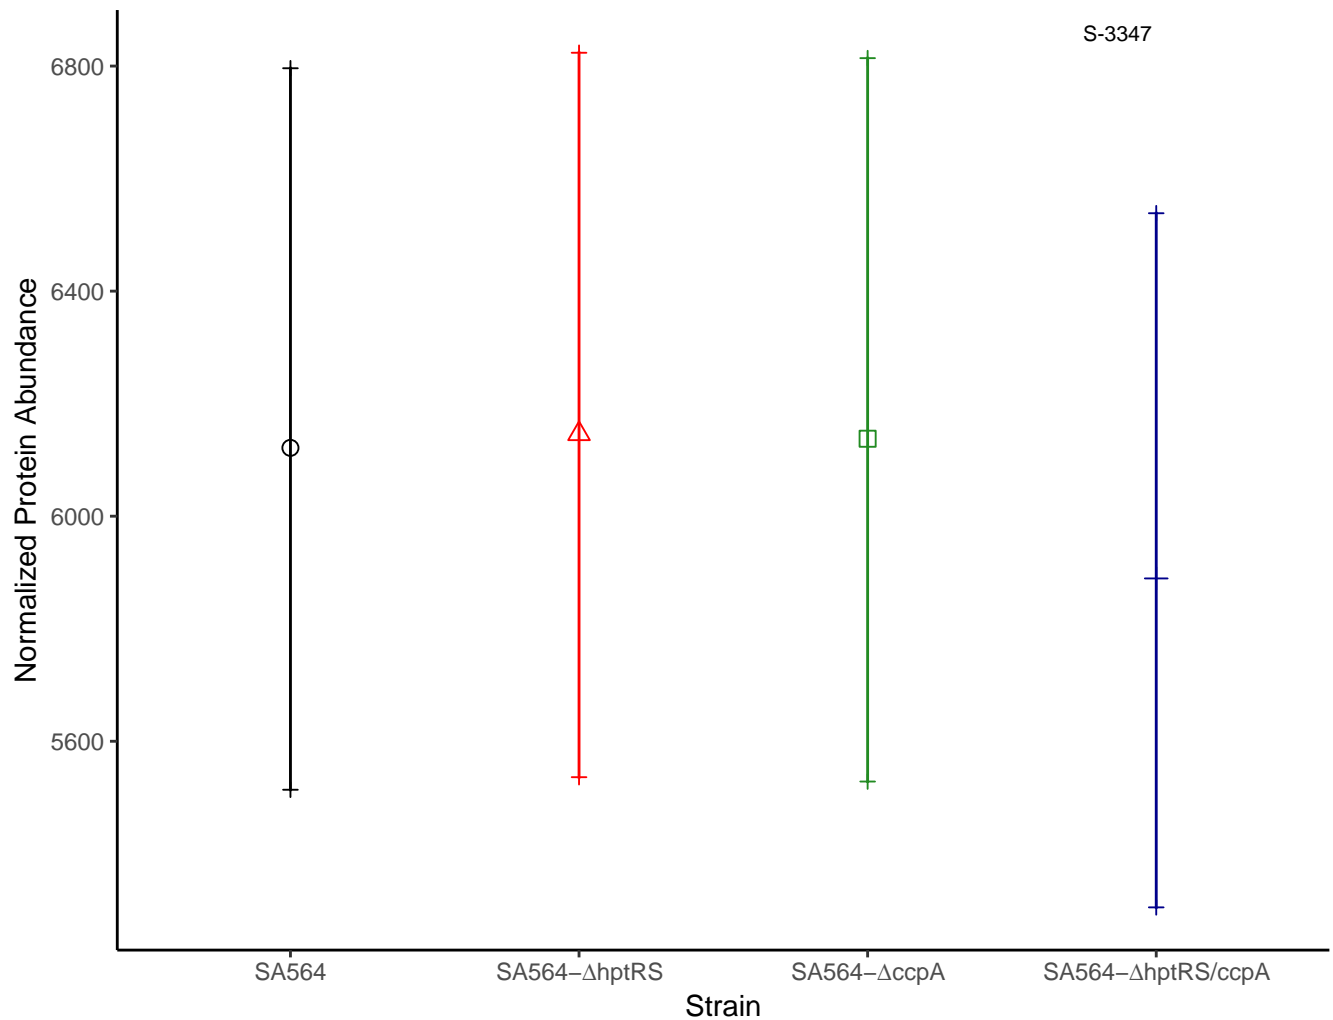

- ⊕ SA564
- △ SA564- $\Delta$ hptRS
- ⊞ SA564- $\Delta$ ccpA
- + SA564- $\Delta$ hptRS/ccpA

# RNJ1\_STAAM

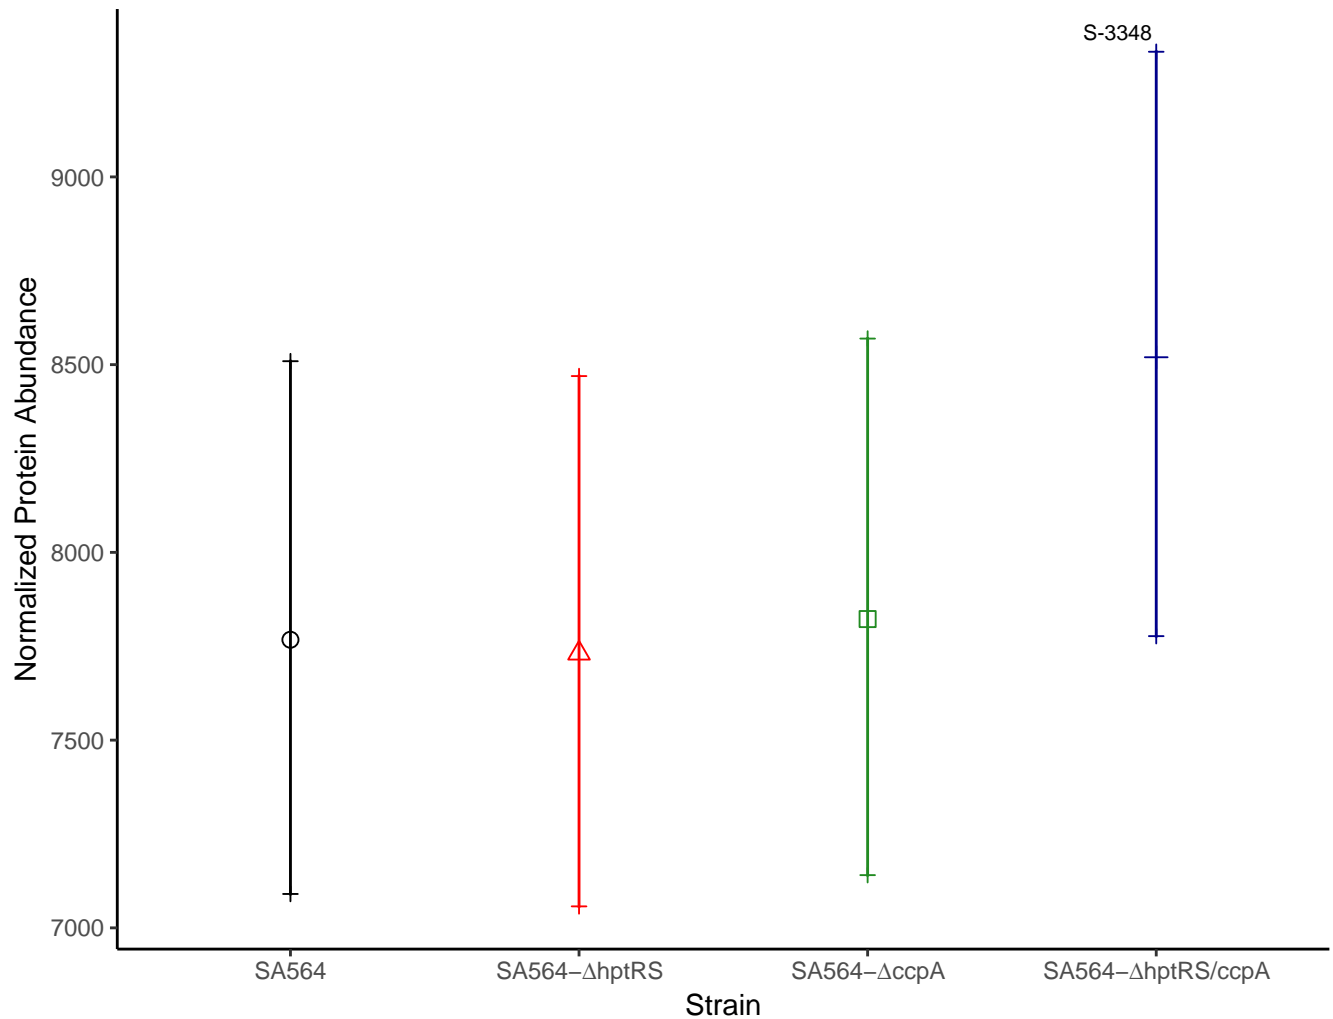

- ⊕ SA564
- △ SA564- $\Delta$ hptRS
- ⊞ SA564- $\Delta$ ccpA
- + SA564- $\Delta$ hptRS/ccpA

# RNJ2\_STAAM

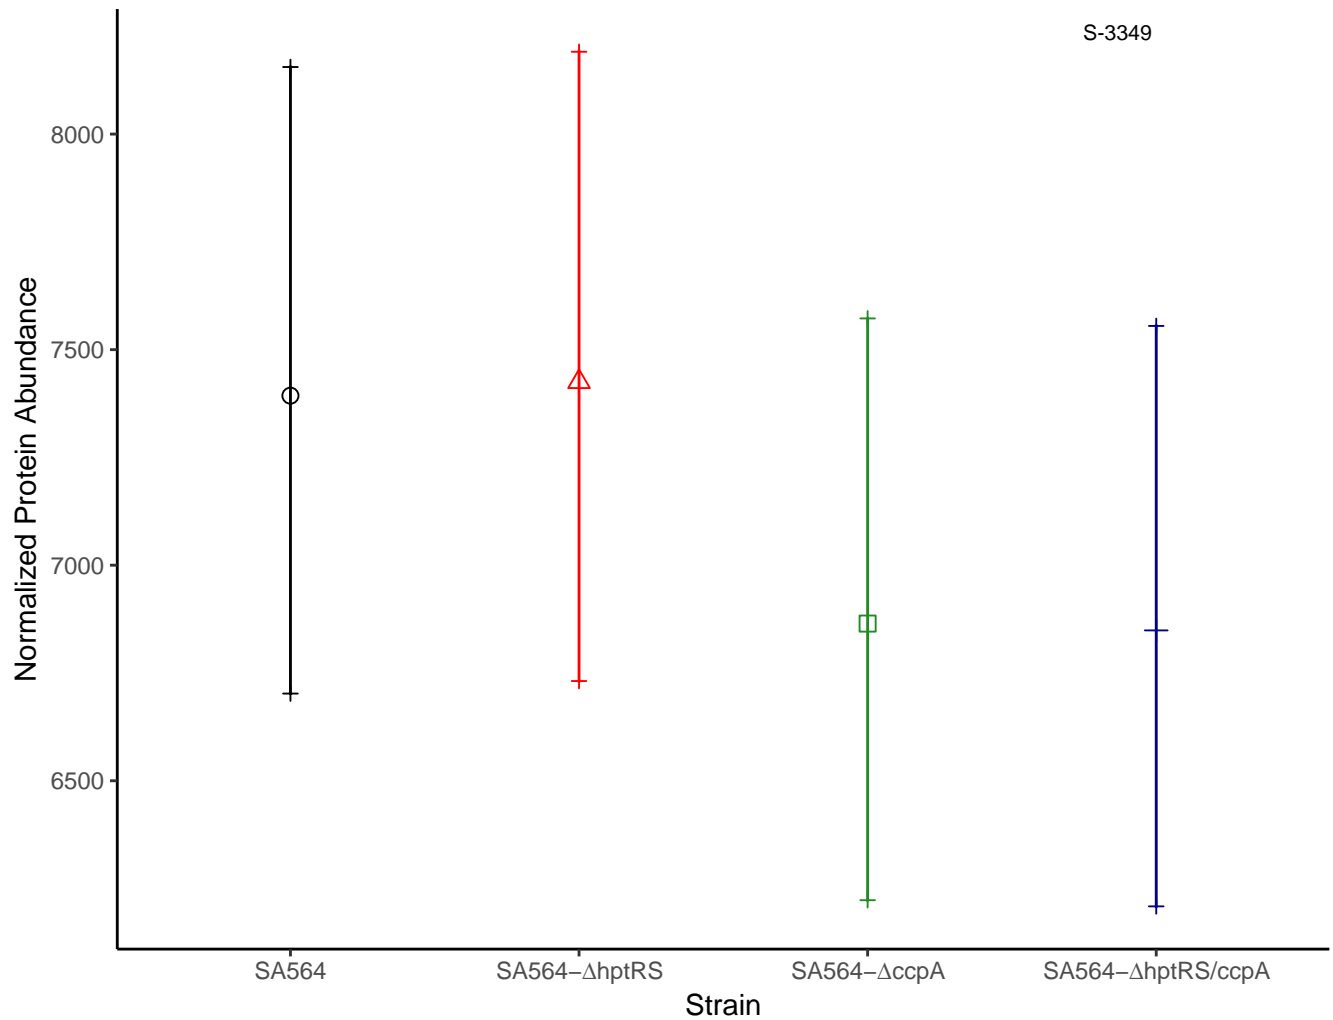

- ⊕ SA564
- △ SA564- $\Delta$ hptRS
- ⊞ SA564- $\Delta$ ccpA
- + SA564- $\Delta$ hptRS/ccpA

# RNY\_STAAM

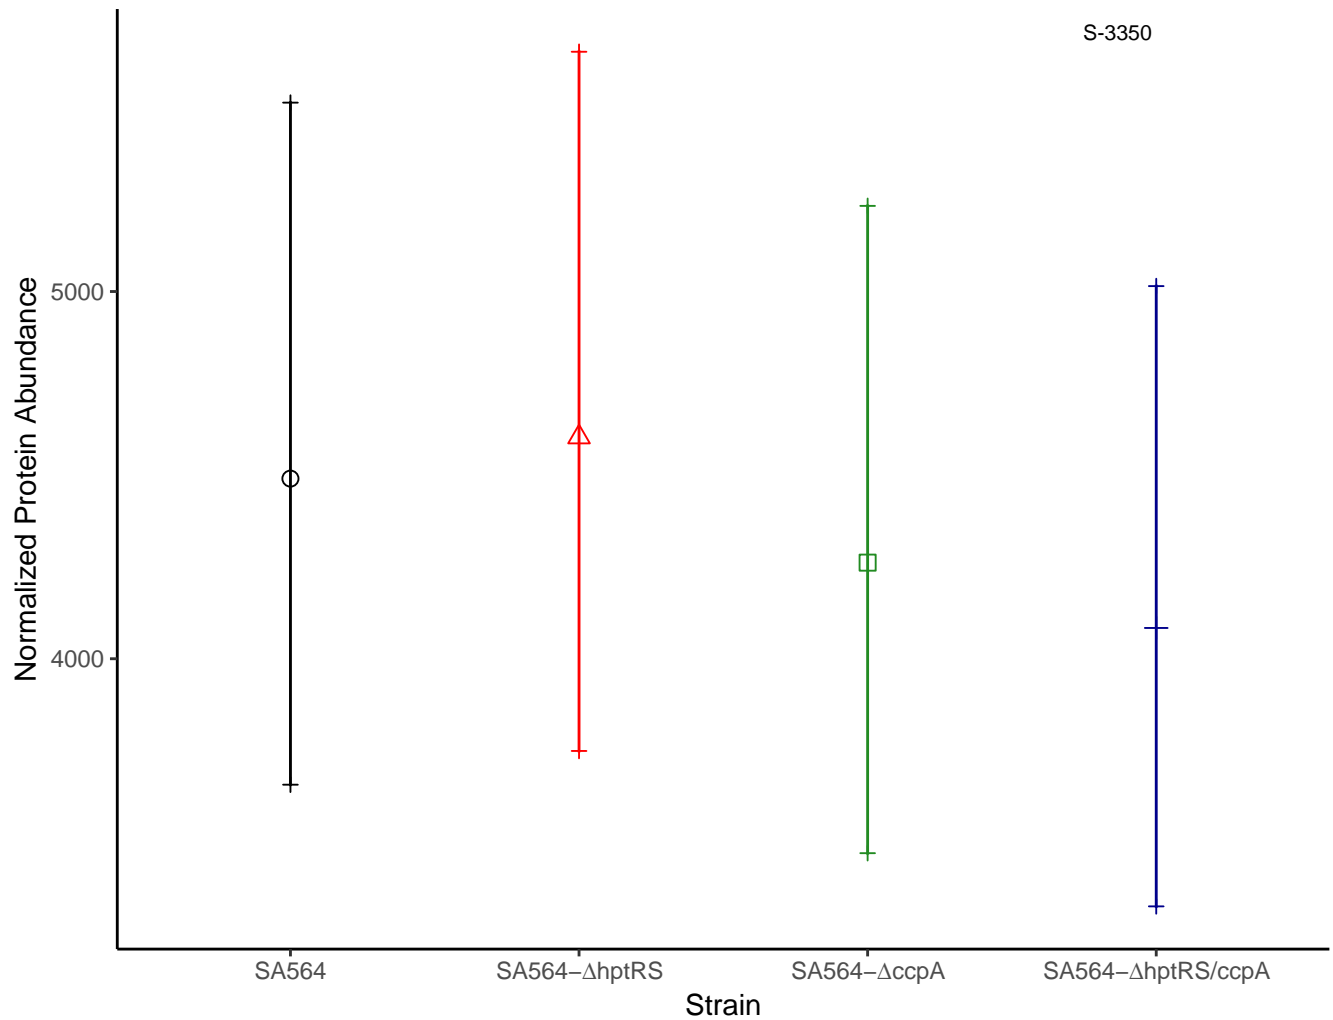

- ⊕ SA564
- △ SA564- $\Delta$ hptRS
- ⊞ SA564- $\Delta$ ccpA
- + SA564- $\Delta$ hptRS/ccpA

# ROCA\_STAAM

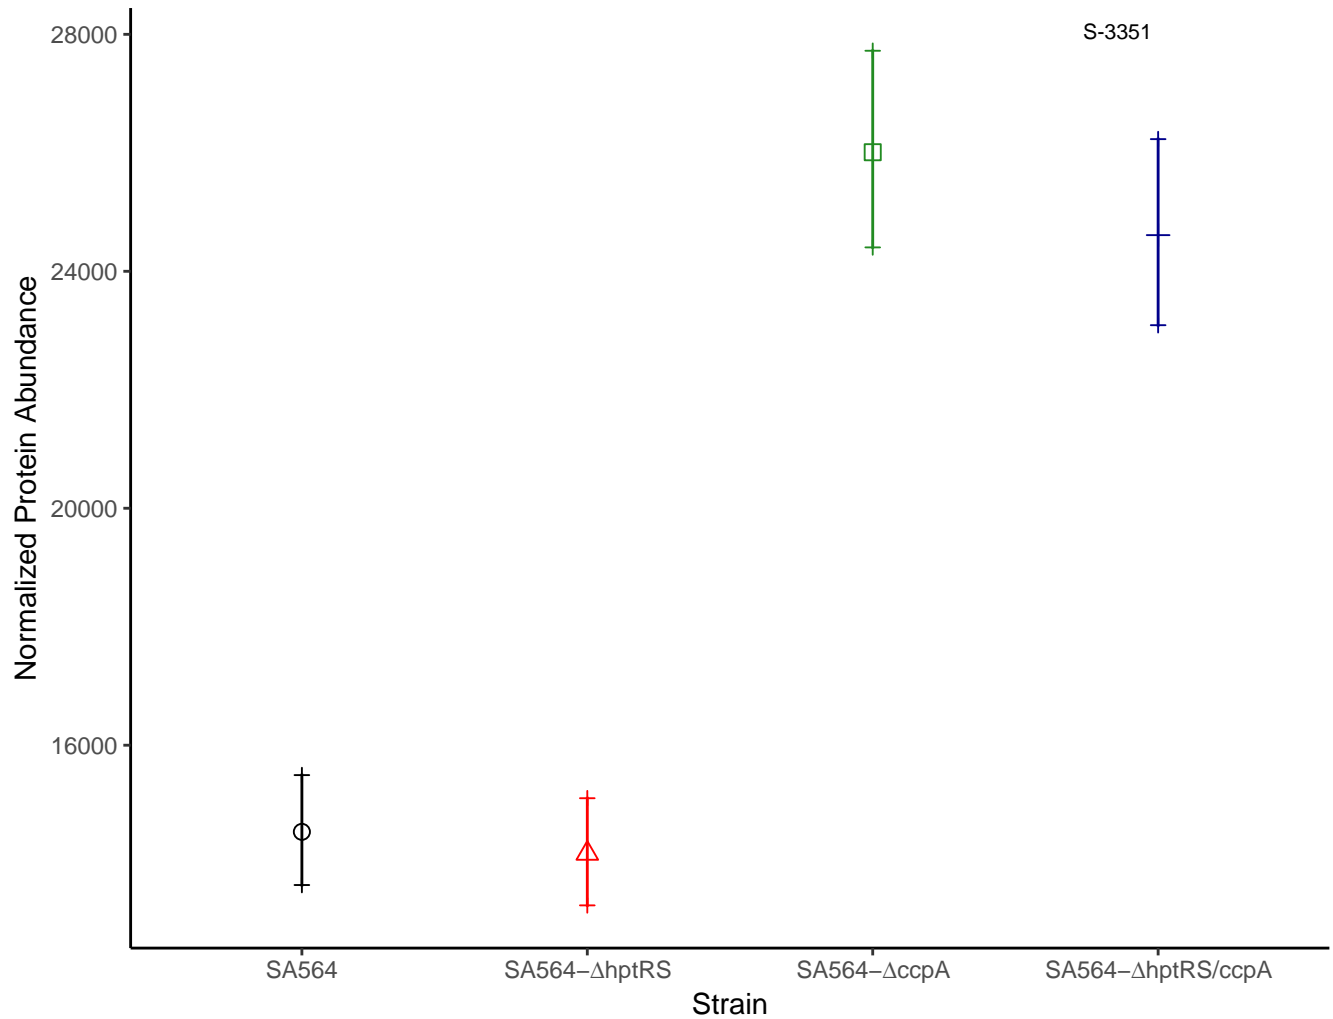

- ⊕ SA564
- △ SA564- $\Delta$ hptRS
- ⊞ SA564- $\Delta$ ccpA
- + SA564- $\Delta$ hptRS/ccpA

# ROT\_STAAM

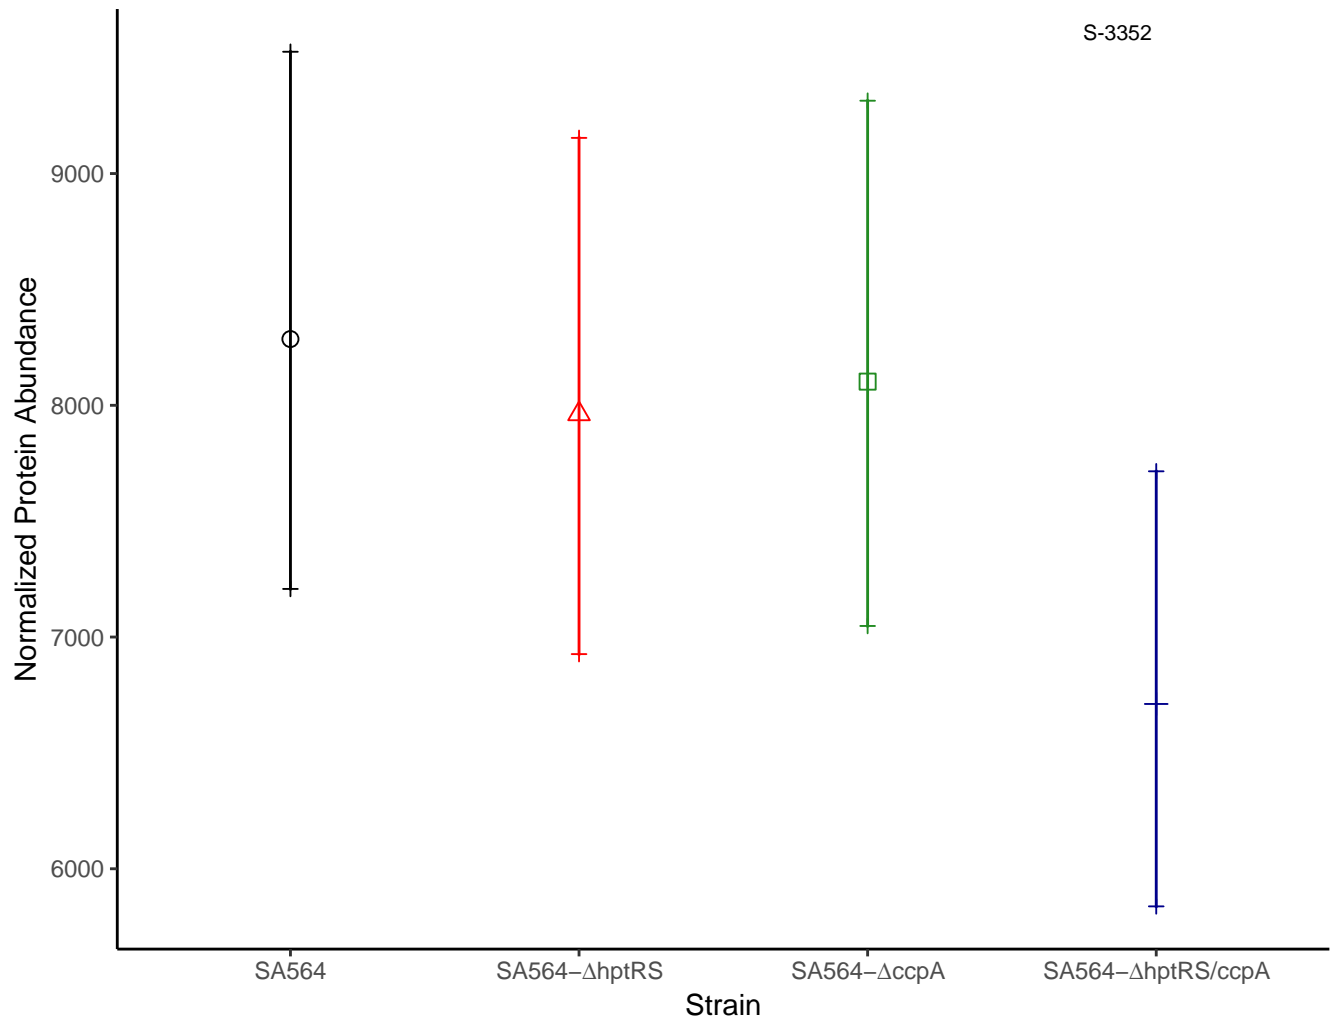

- ⊕ SA564
- △ SA564- $\Delta$ hptRS
- ⊞ SA564- $\Delta$ ccpA
- + SA564- $\Delta$ hptRS/ccpA



# RPOA\_STAAM

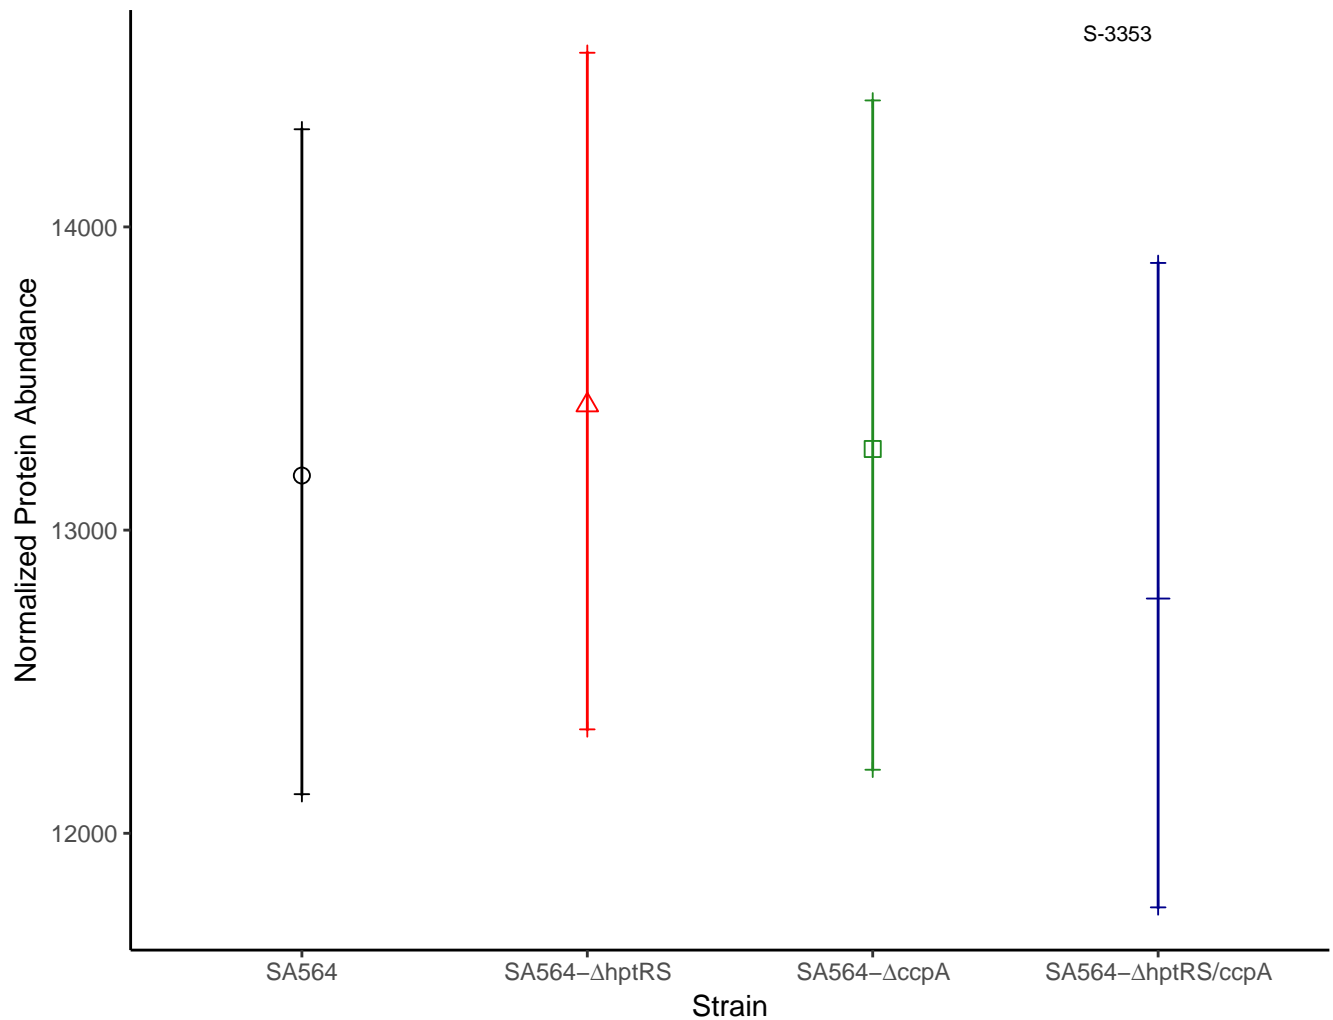

- ⊕ SA564
- △ SA564- $\Delta$ hptRS
- ⊞ SA564- $\Delta$ ccpA
- + SA564- $\Delta$ hptRS/ccpA

# RPOB\_STAAM

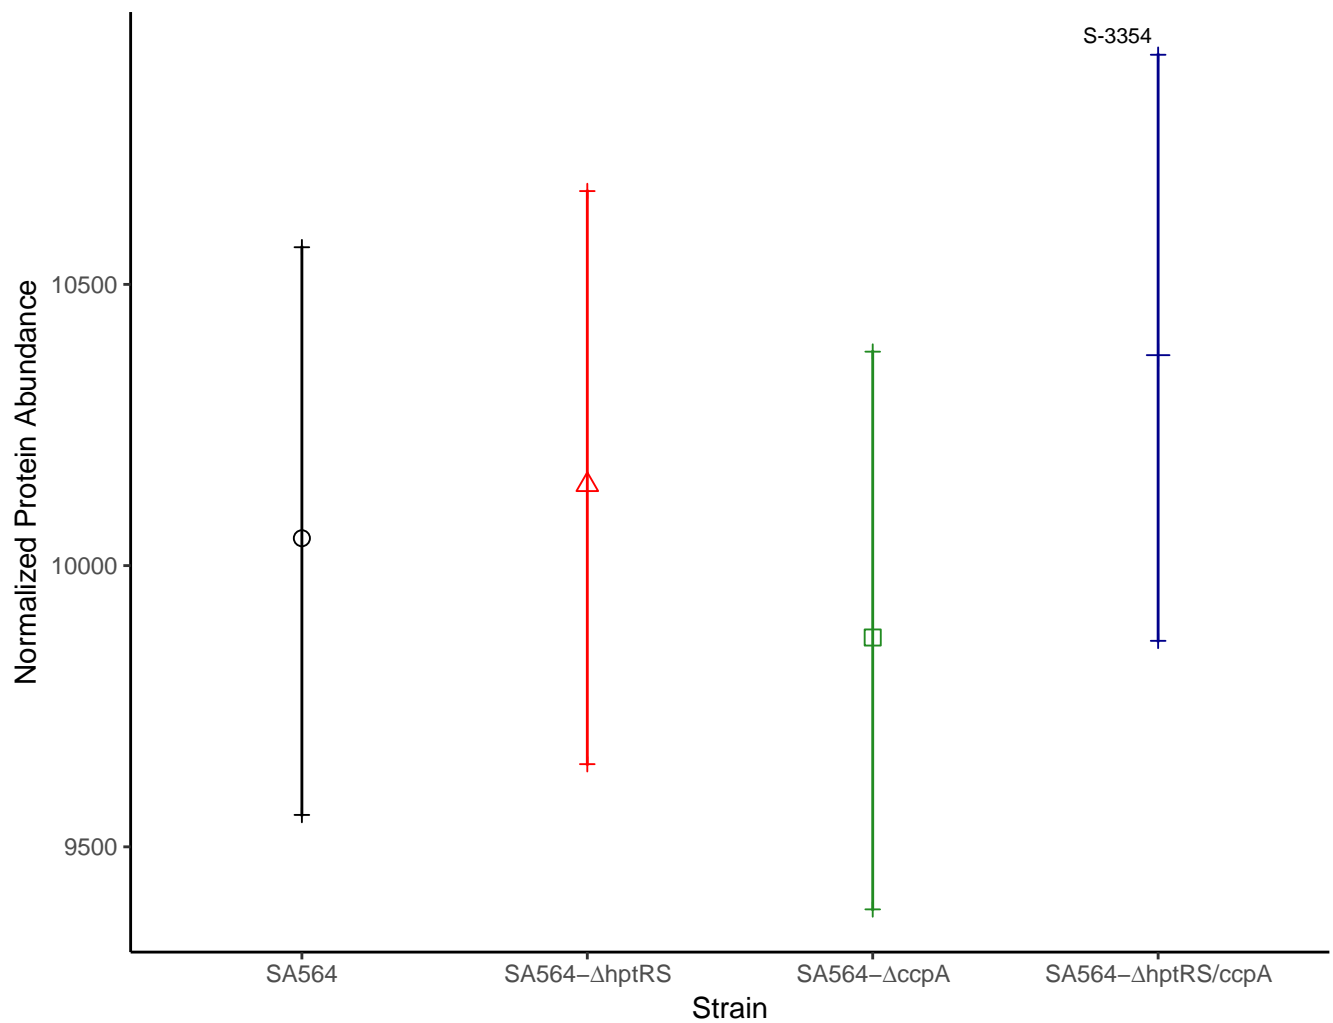

- ⊕ SA564
- △ SA564- $\Delta$ hptRS
- ⊞ SA564- $\Delta$ ccpA
- + SA564- $\Delta$ hptRS/ccpA

# RPOC\_STAAM

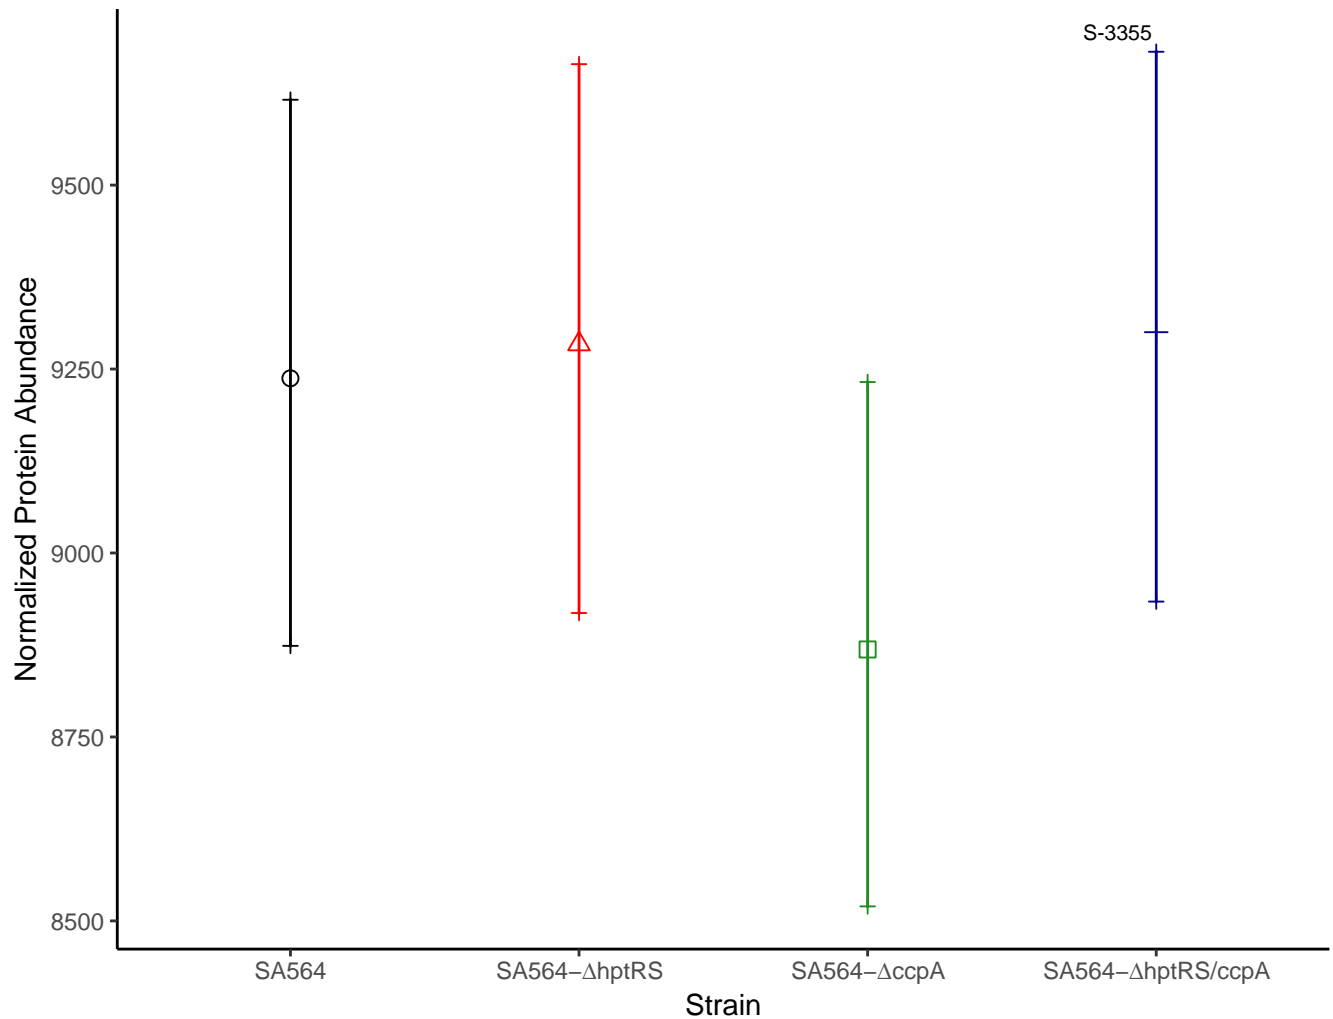

- ⊕ SA564
- △ SA564- $\Delta$ hptRS
- ⊞ SA564- $\Delta$ ccpA
- ⊕ SA564- $\Delta$ hptRS/ccpA

# RPOE\_STAAM

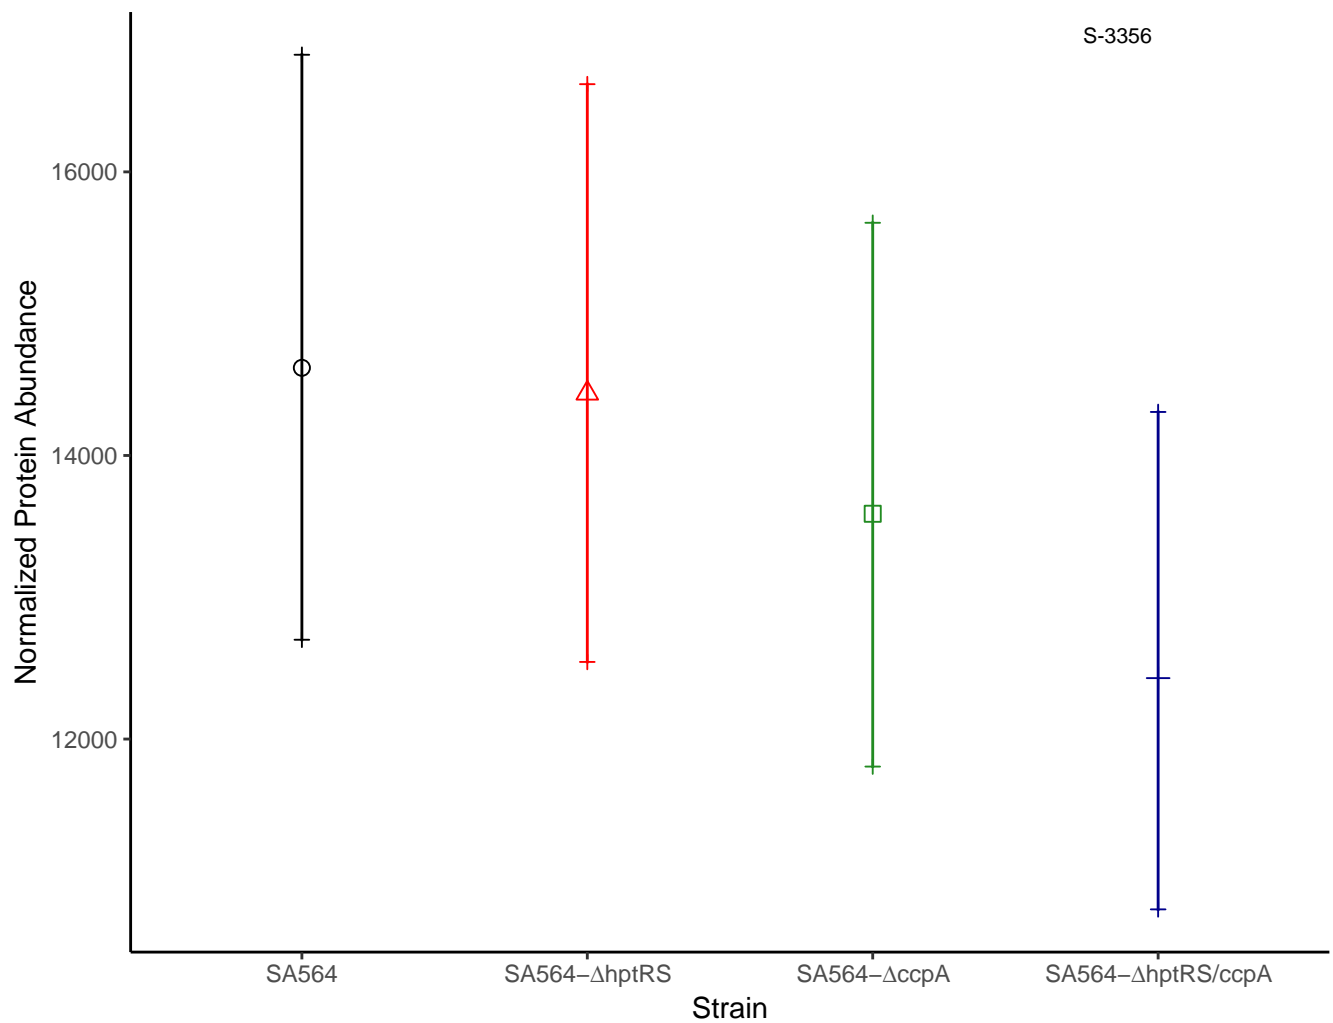

- ⊕ SA564
- △ SA564- $\Delta$ *hptRS*
- ⊞ SA564- $\Delta$ *ccpA*
- + SA564- $\Delta$ *hptRS/ccpA*

# RPOZ\_STAAM

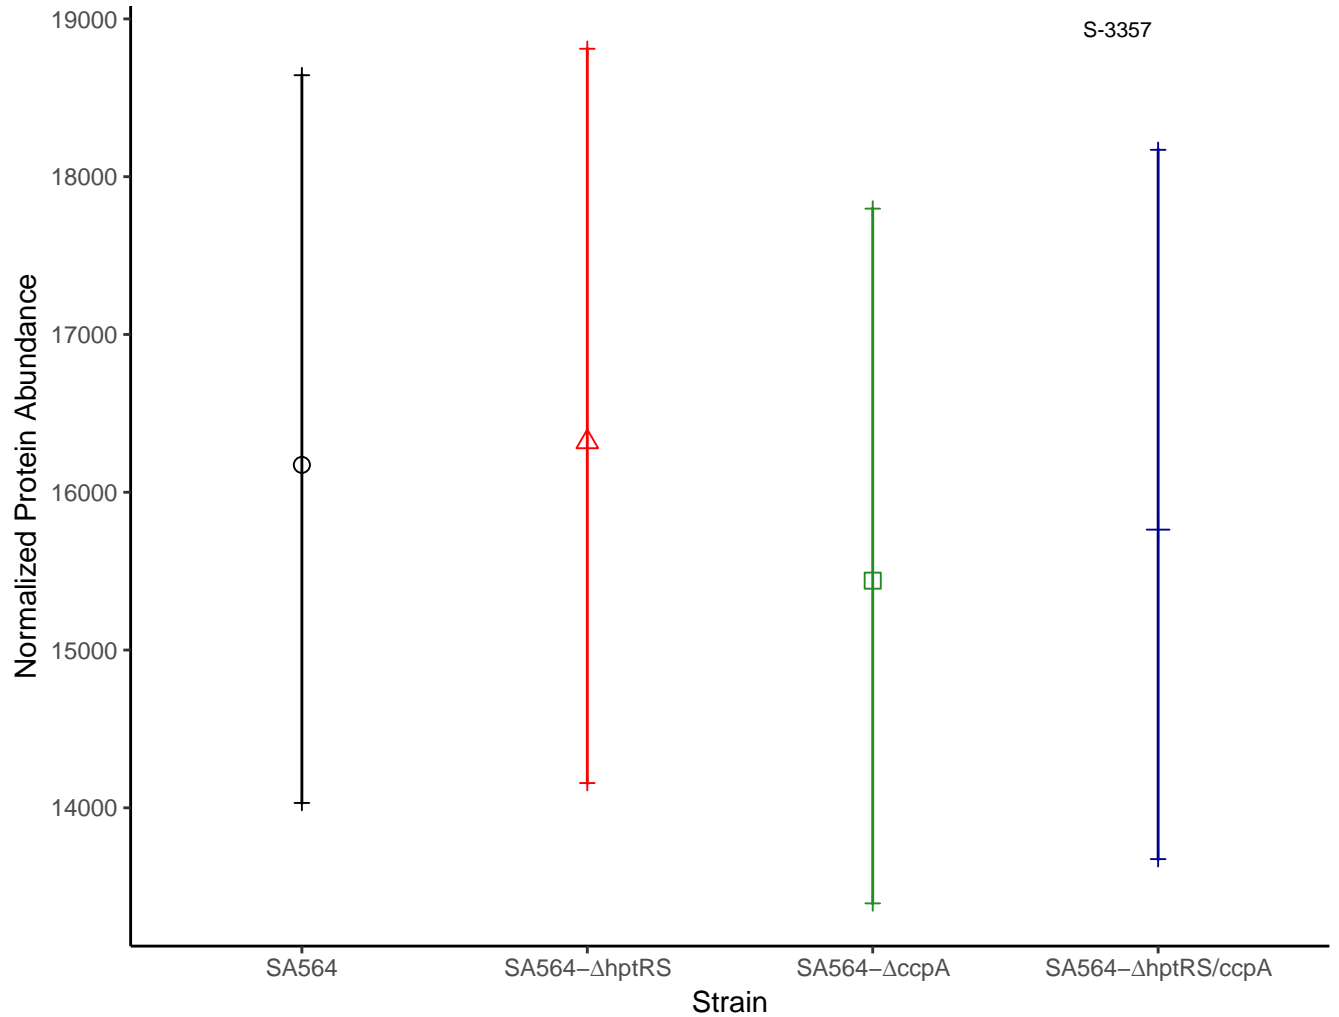

- ⊕ SA564
- △ SA564- $\Delta$ hptRS
- ⊞ SA564- $\Delta$ ccpA
- + SA564- $\Delta$ hptRS/ccpA

# RRF\_STAAM

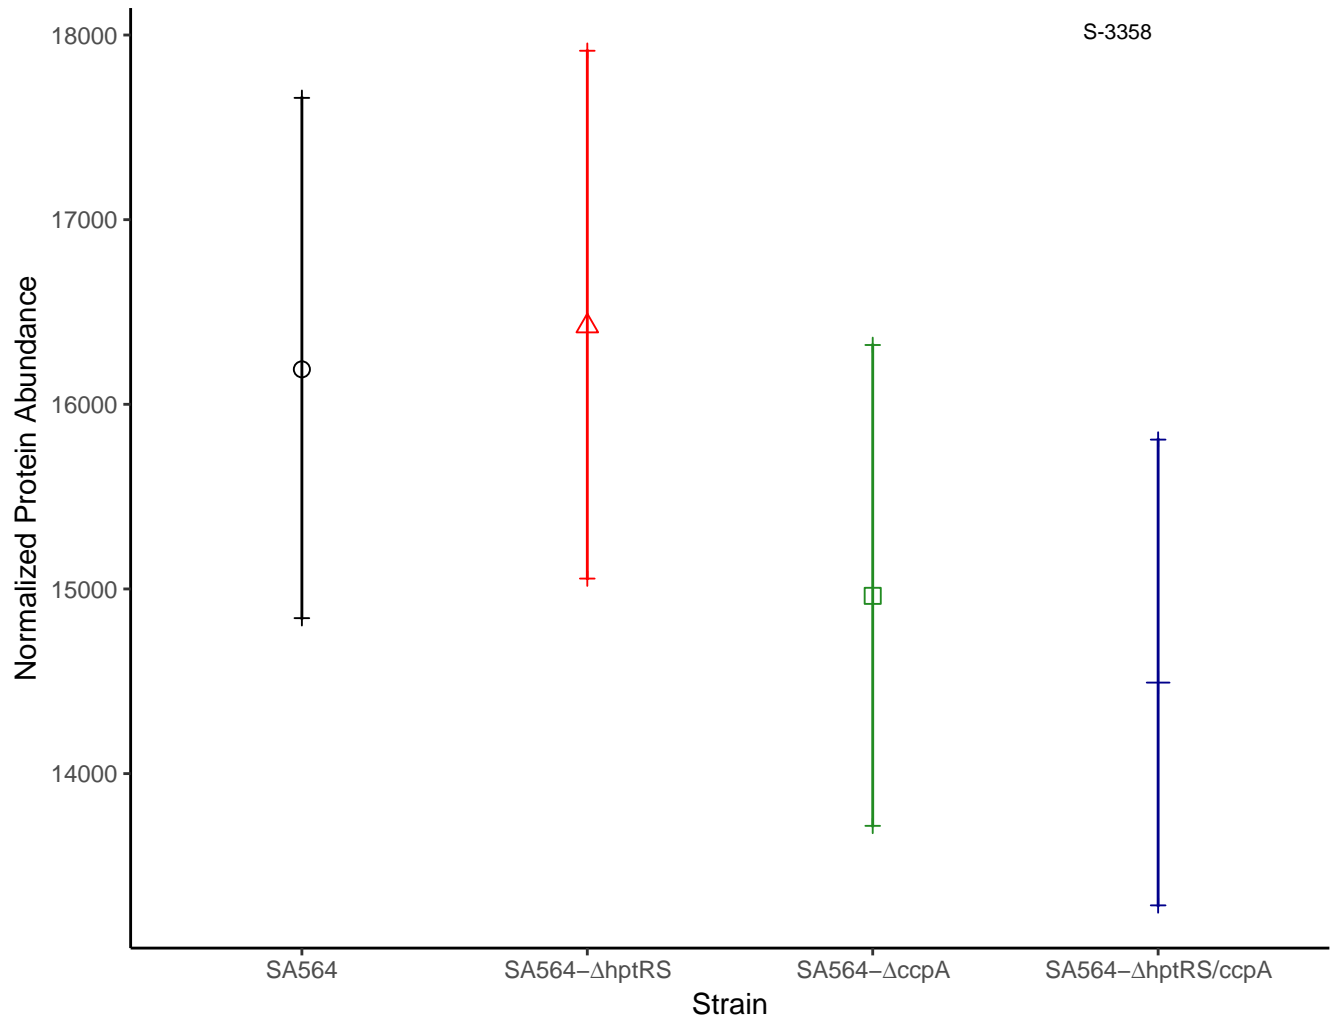

- ⊕ SA564
- △ SA564- $\Delta$ hptRS
- ⊞ SA564- $\Delta$ ccpA
- + SA564- $\Delta$ hptRS/ccpA

# RS1\_STAAM

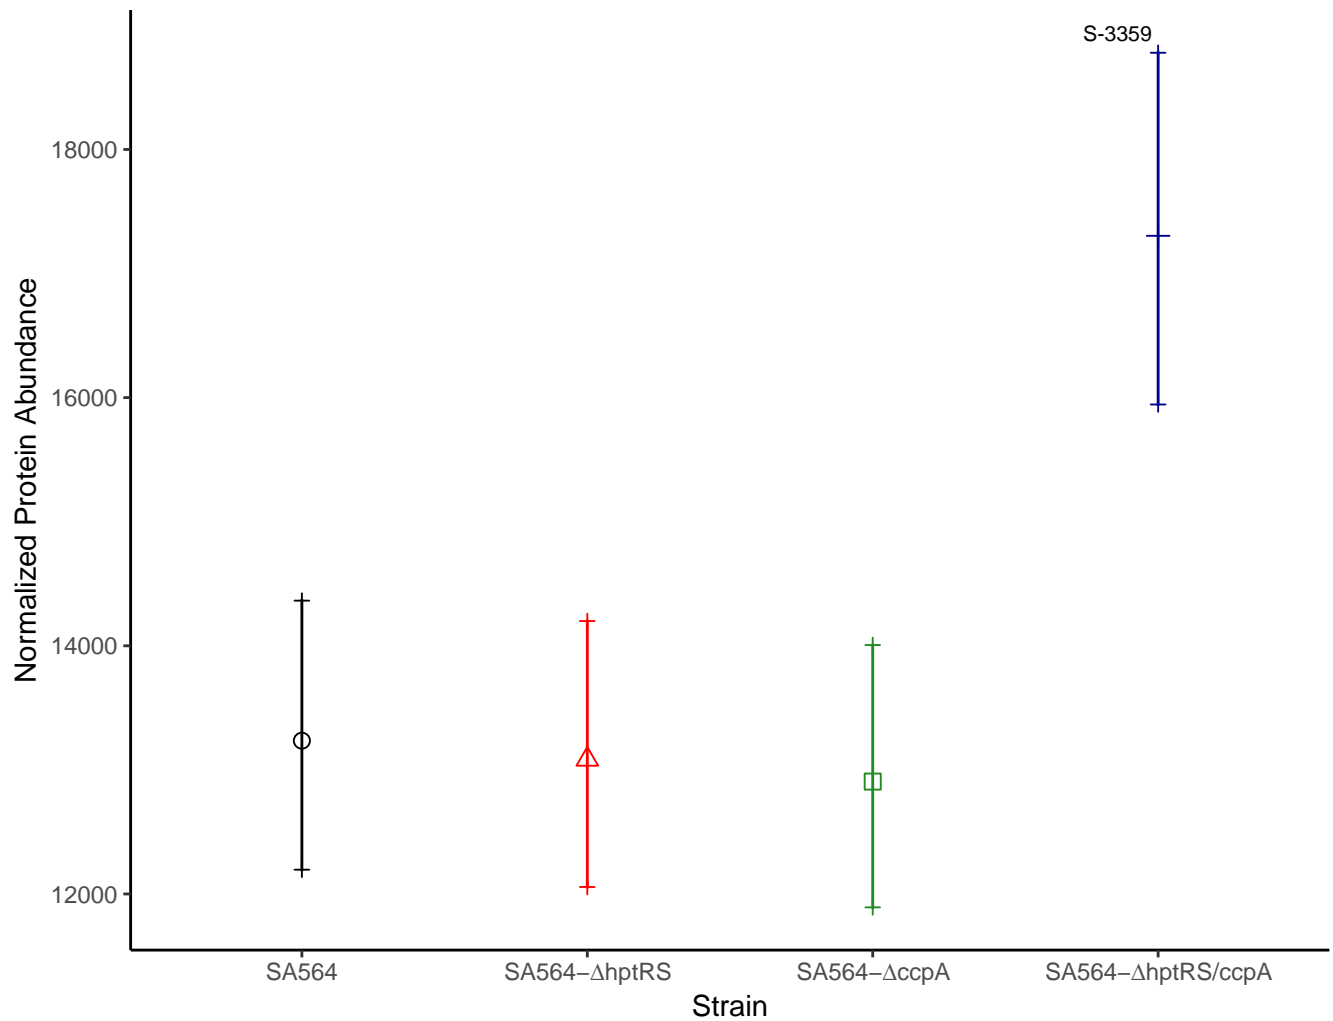

- ⊕ SA564
- △ SA564- $\Delta$ hptRS
- ⊞ SA564- $\Delta$ ccpA
- + SA564- $\Delta$ hptRS/ccpA

# RS10\_STAAM

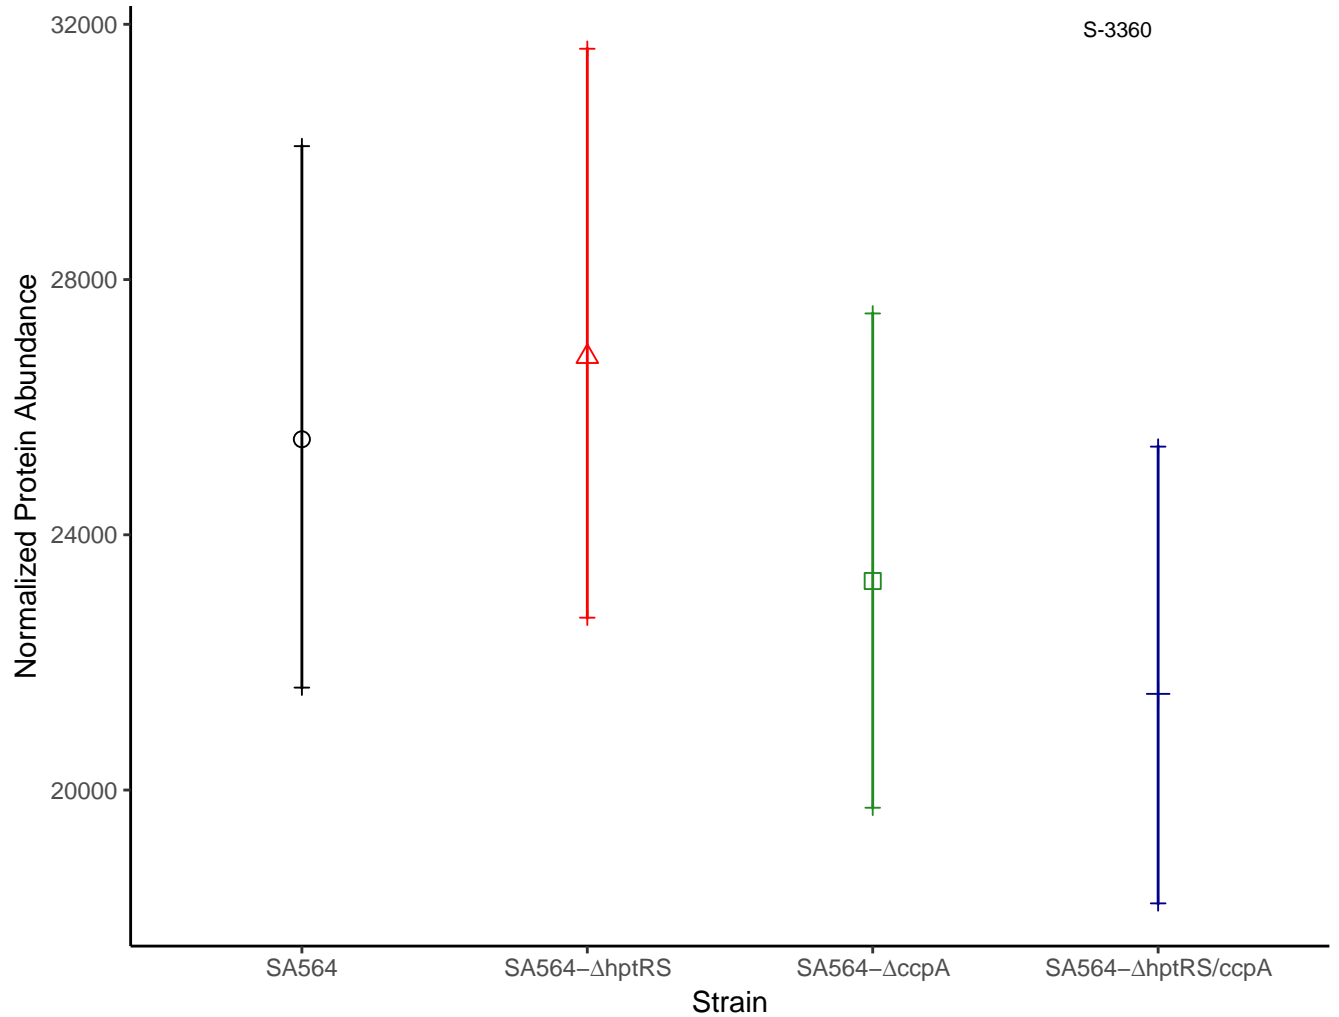

- ⊕ SA564
- △ SA564- $\Delta$ hptRS
- ⊞ SA564- $\Delta$ ccpA
- + SA564- $\Delta$ hptRS/ccpA



# RS11\_STAAM

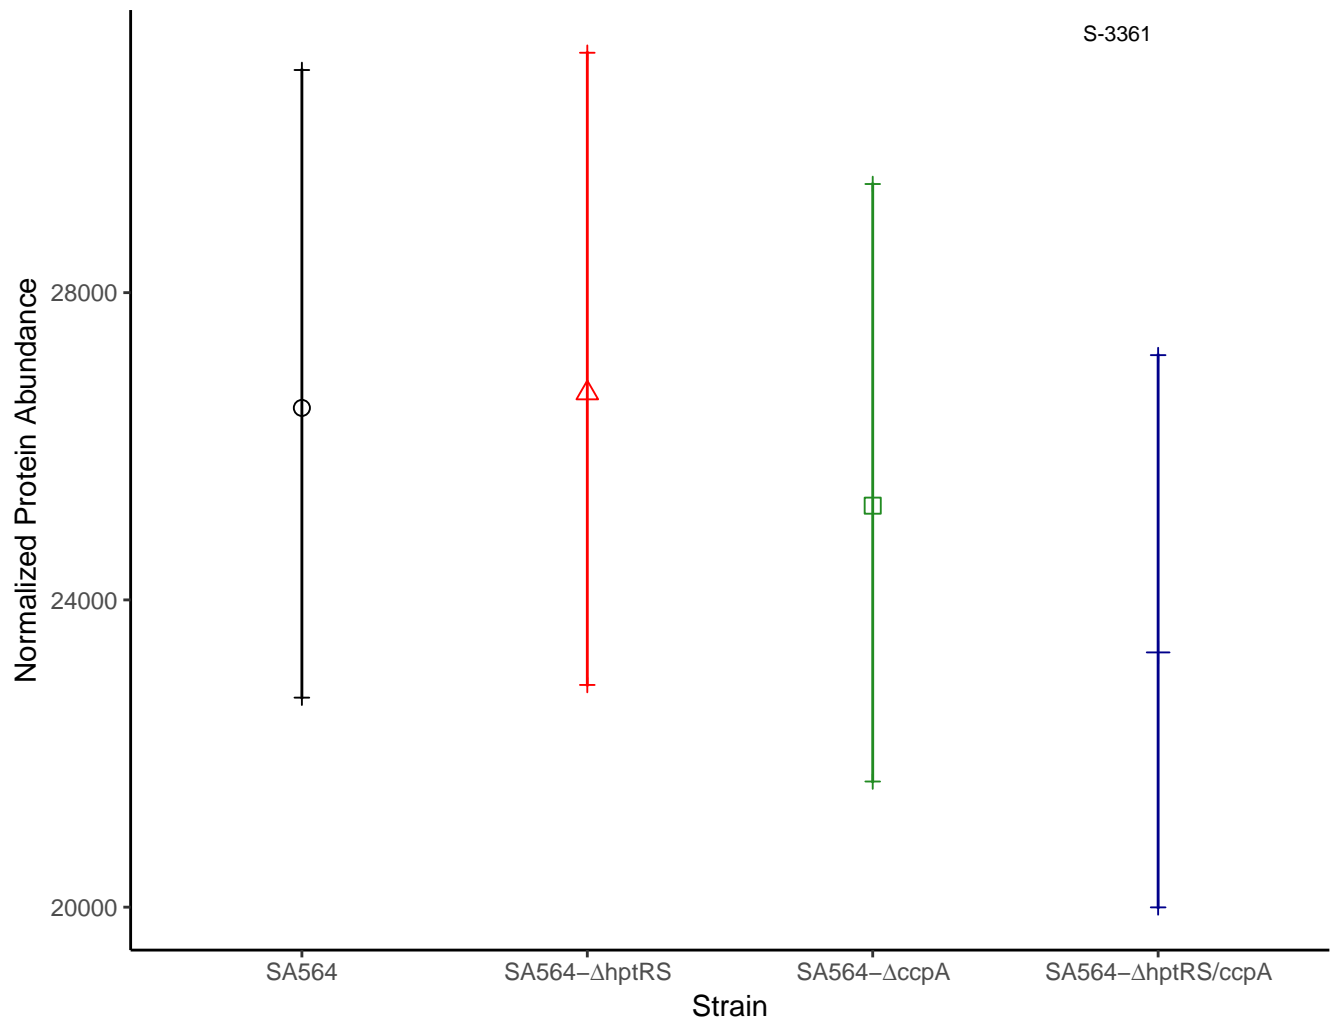

- ⊕ SA564
- △ SA564- $\Delta$ hptRS
- ⊞ SA564- $\Delta$ ccpA
- + SA564- $\Delta$ hptRS/ccpA

# RS12\_STAAM

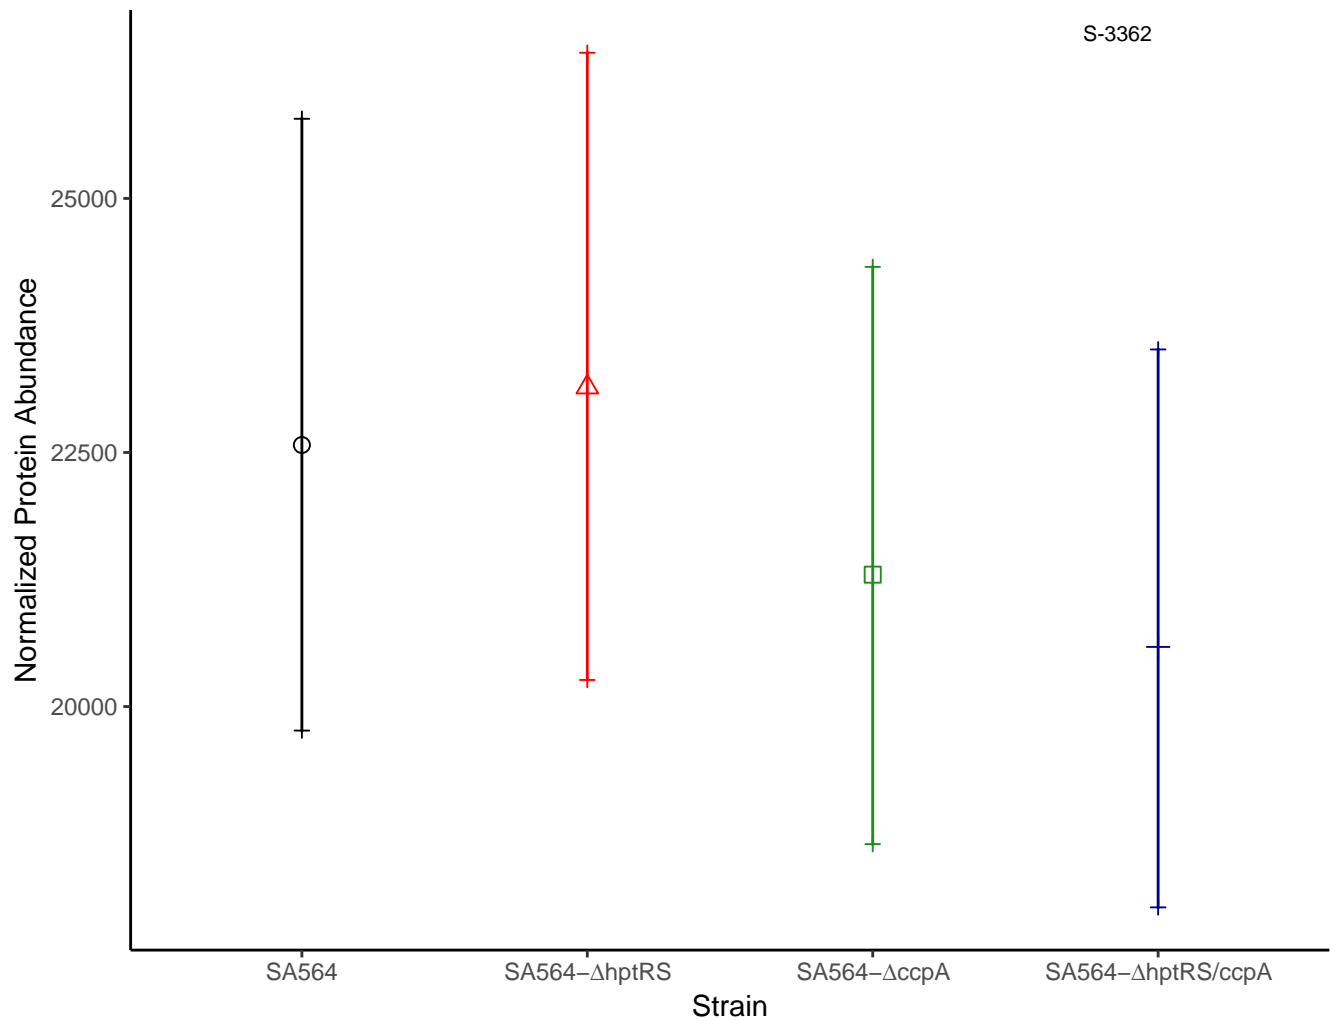

- ⊕ SA564
- △ SA564- $\Delta$ hptRS
- ⊞ SA564- $\Delta$ ccpA
- + SA564- $\Delta$ hptRS/ccpA

# RS13\_STAAM

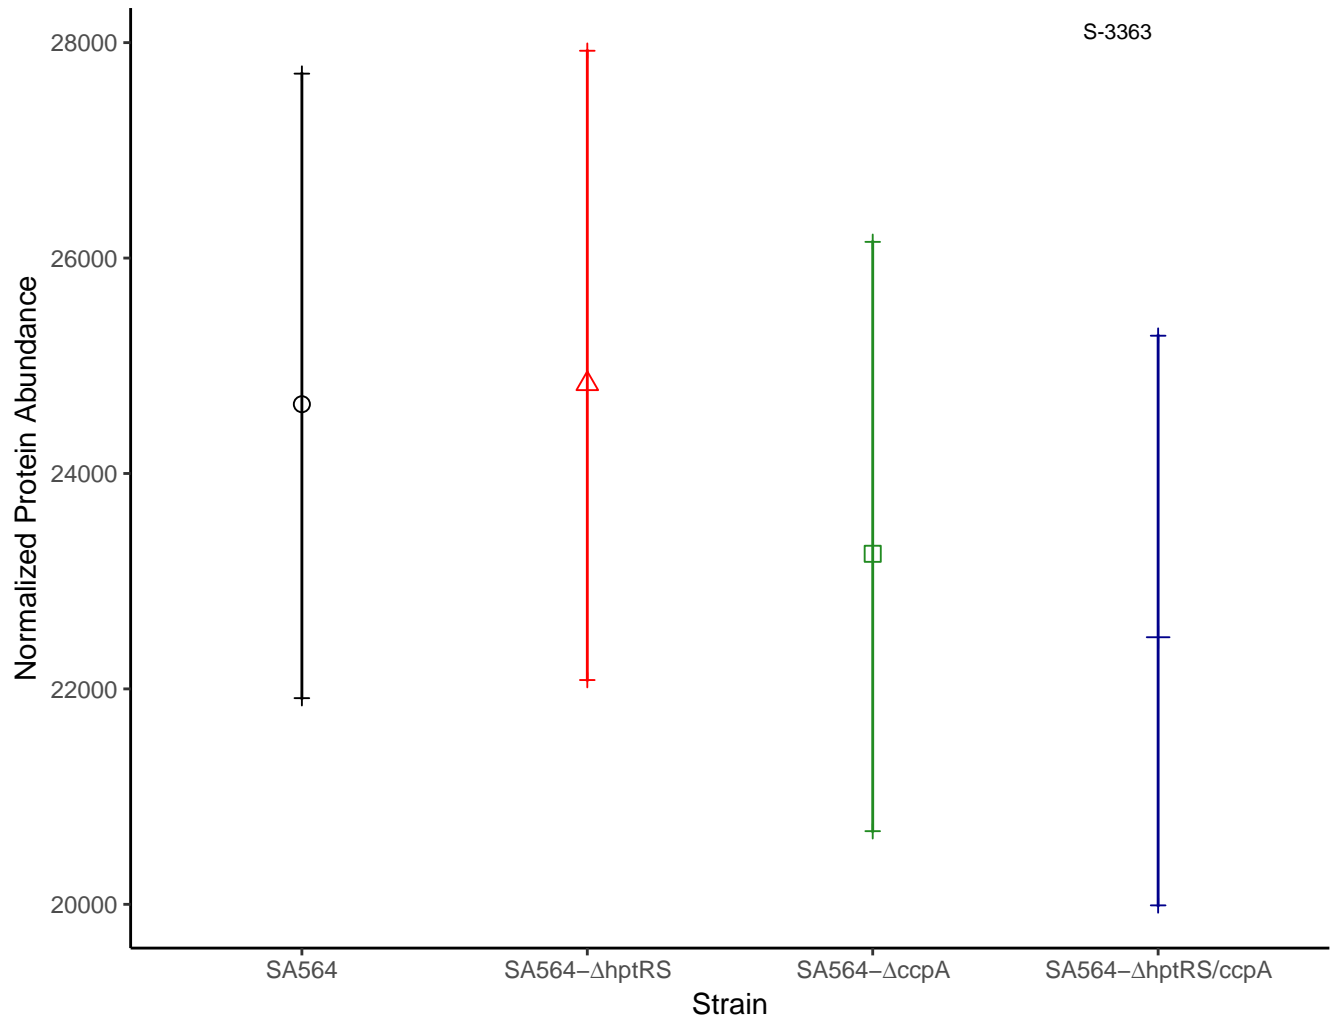

- ⊕ SA564
- △ SA564- $\Delta$ hptRS
- ⊞ SA564- $\Delta$ ccpA
- + SA564- $\Delta$ hptRS/ccpA

# RS15\_STAAM

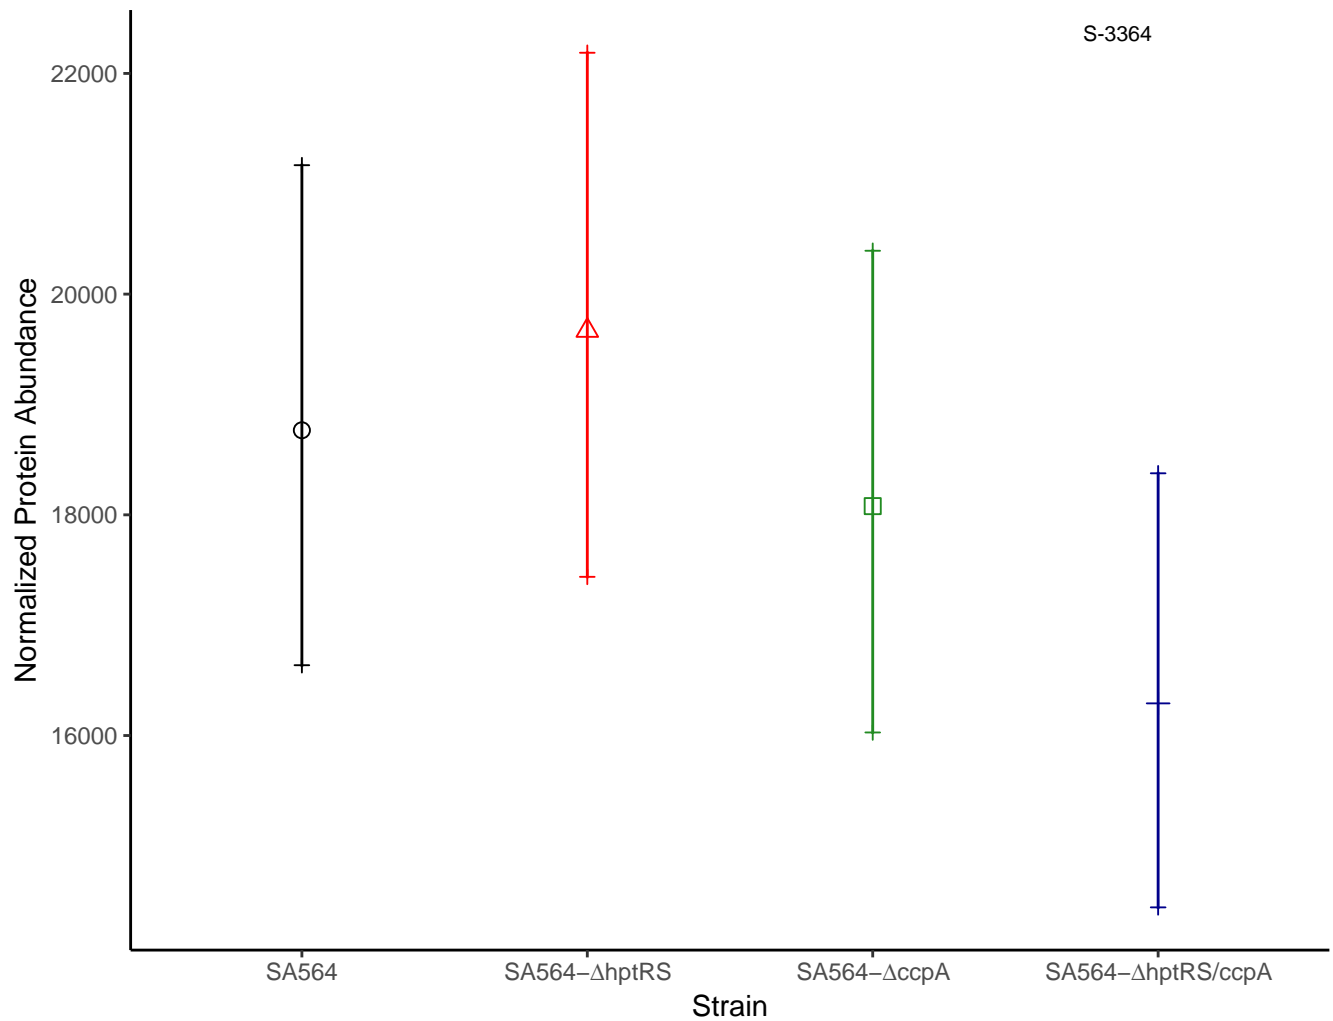

- ⊕ SA564
- △ SA564- $\Delta$ hptRS
- ⊞ SA564- $\Delta$ ccpA
- + SA564- $\Delta$ hptRS/ccpA

# RS16\_STAAM

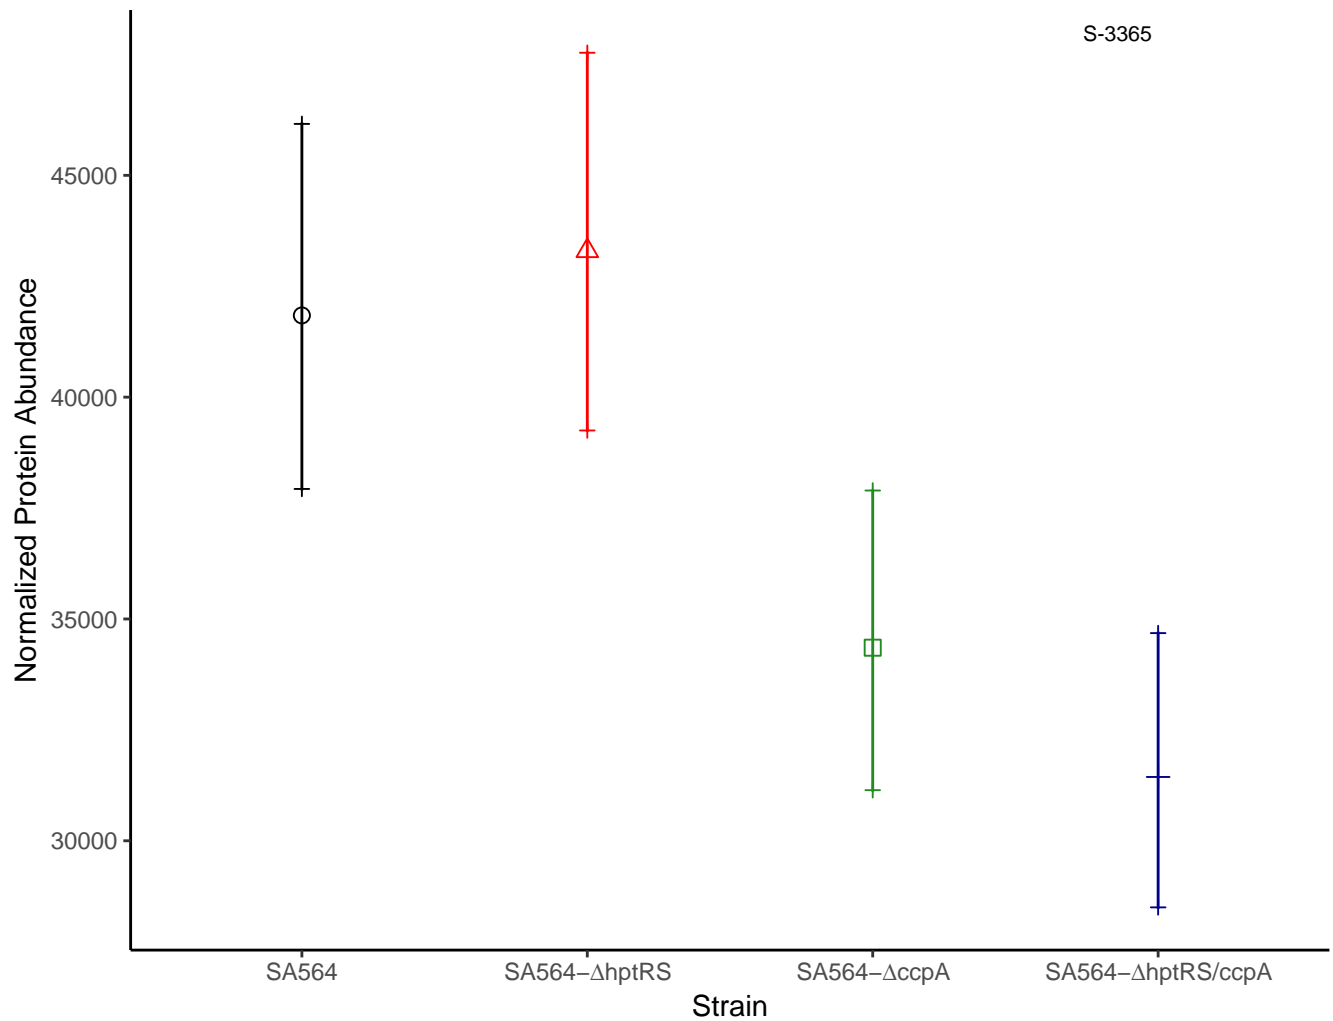

- ⊕ SA564
- △ SA564- $\Delta$ hptRS
- ⊞ SA564- $\Delta$ ccpA
- + SA564- $\Delta$ hptRS/ccpA

# RS17\_STAAM

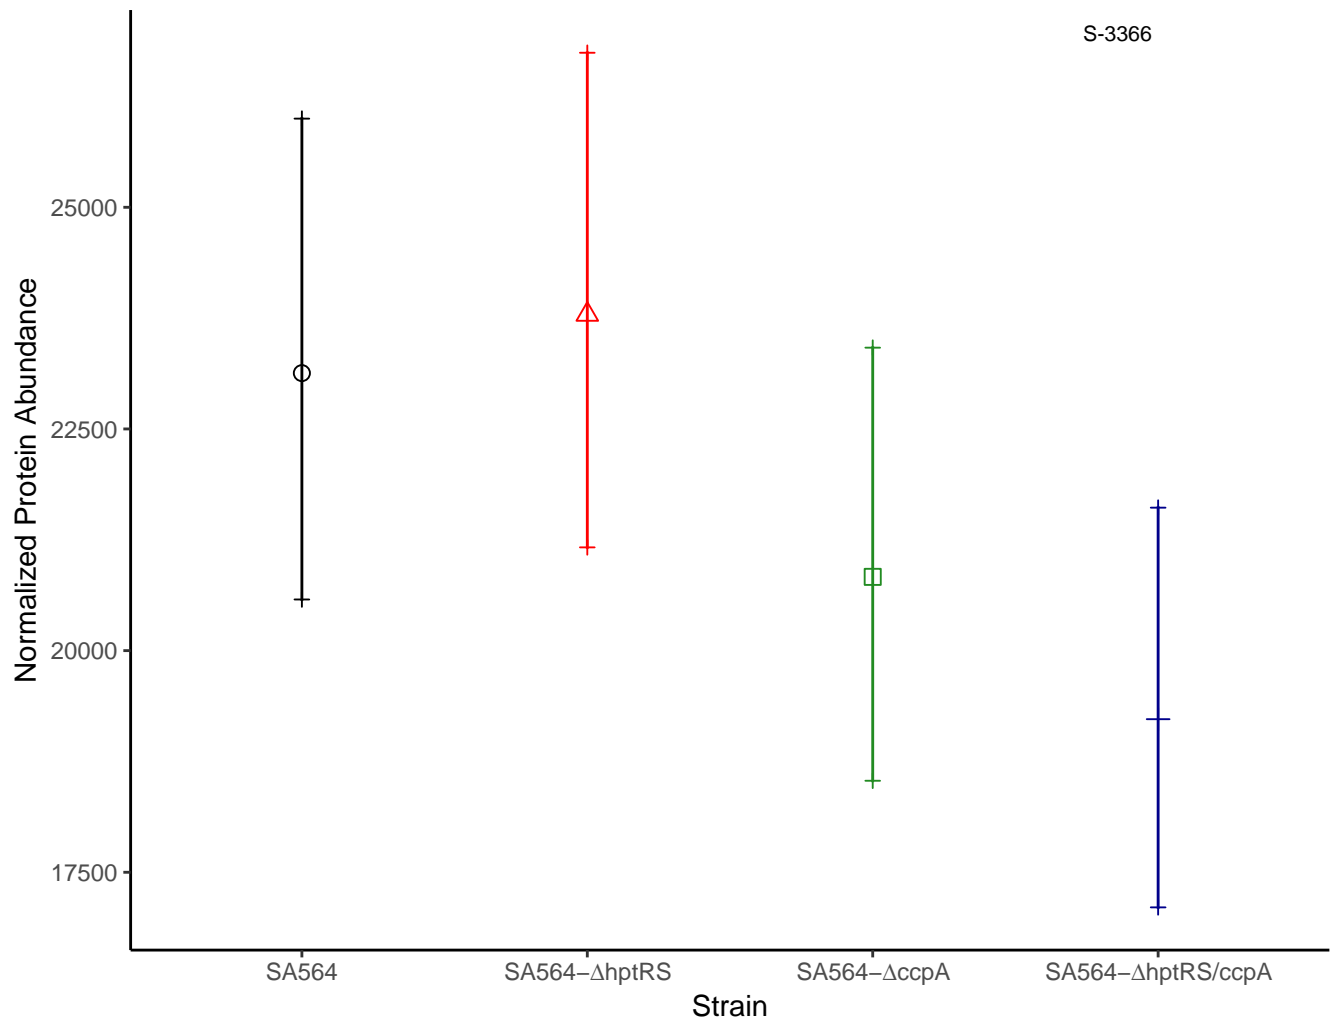

- ⊕ SA564
- △ SA564- $\Delta$ hptRS
- ⊞ SA564- $\Delta$ ccpA
- + SA564- $\Delta$ hptRS/ccpA

# RS18\_STAAM

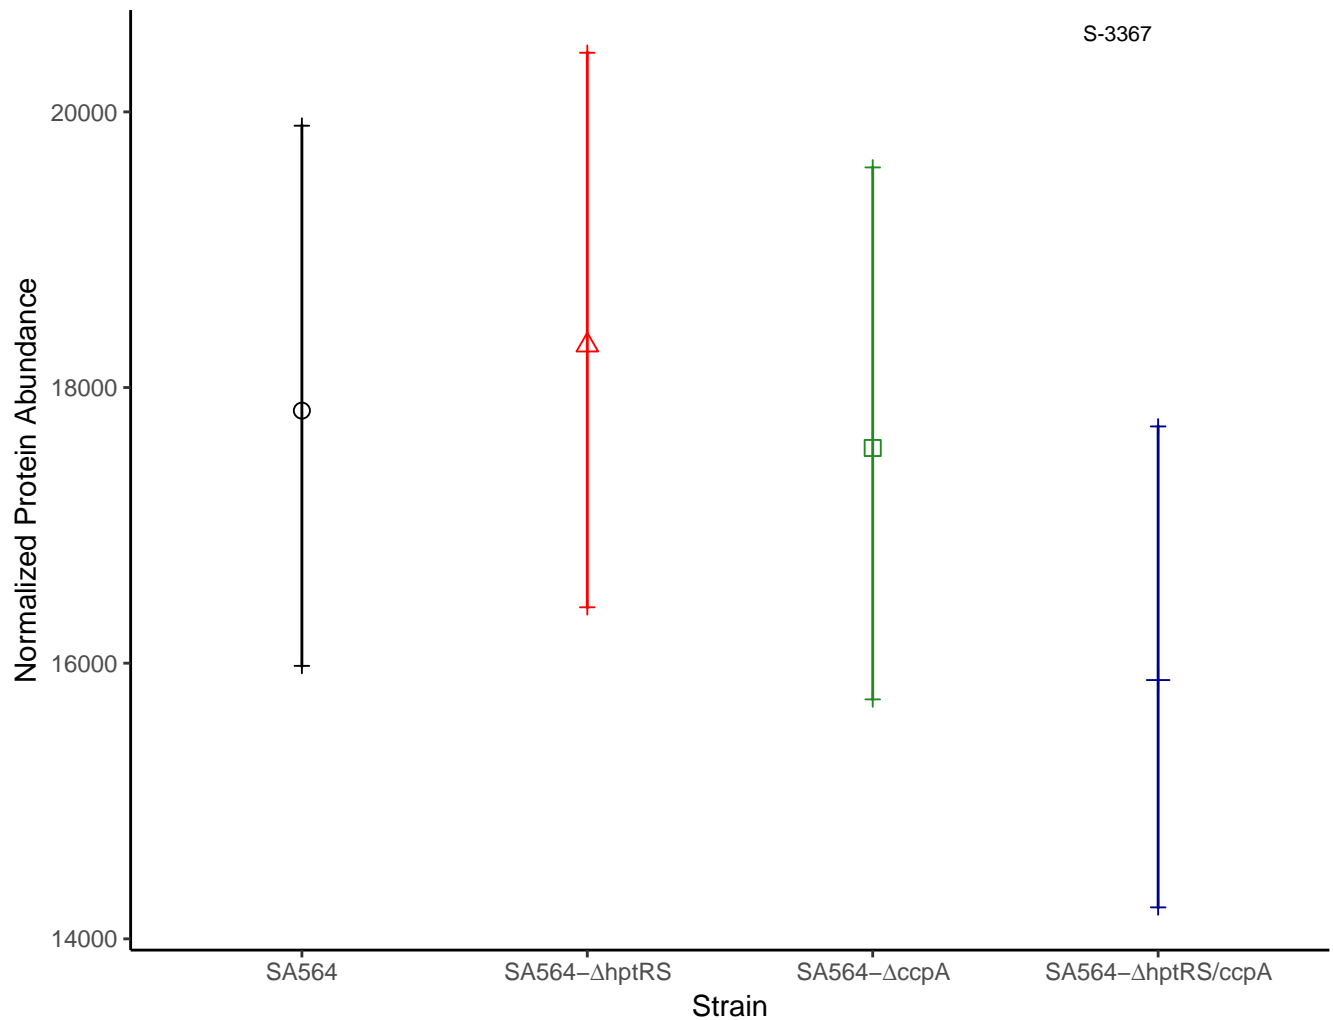

- ⊕ SA564
- △ SA564- $\Delta$ hptRS
- ⊞ SA564- $\Delta$ ccpA
- + SA564- $\Delta$ hptRS/ccpA

# RS19\_STAAM

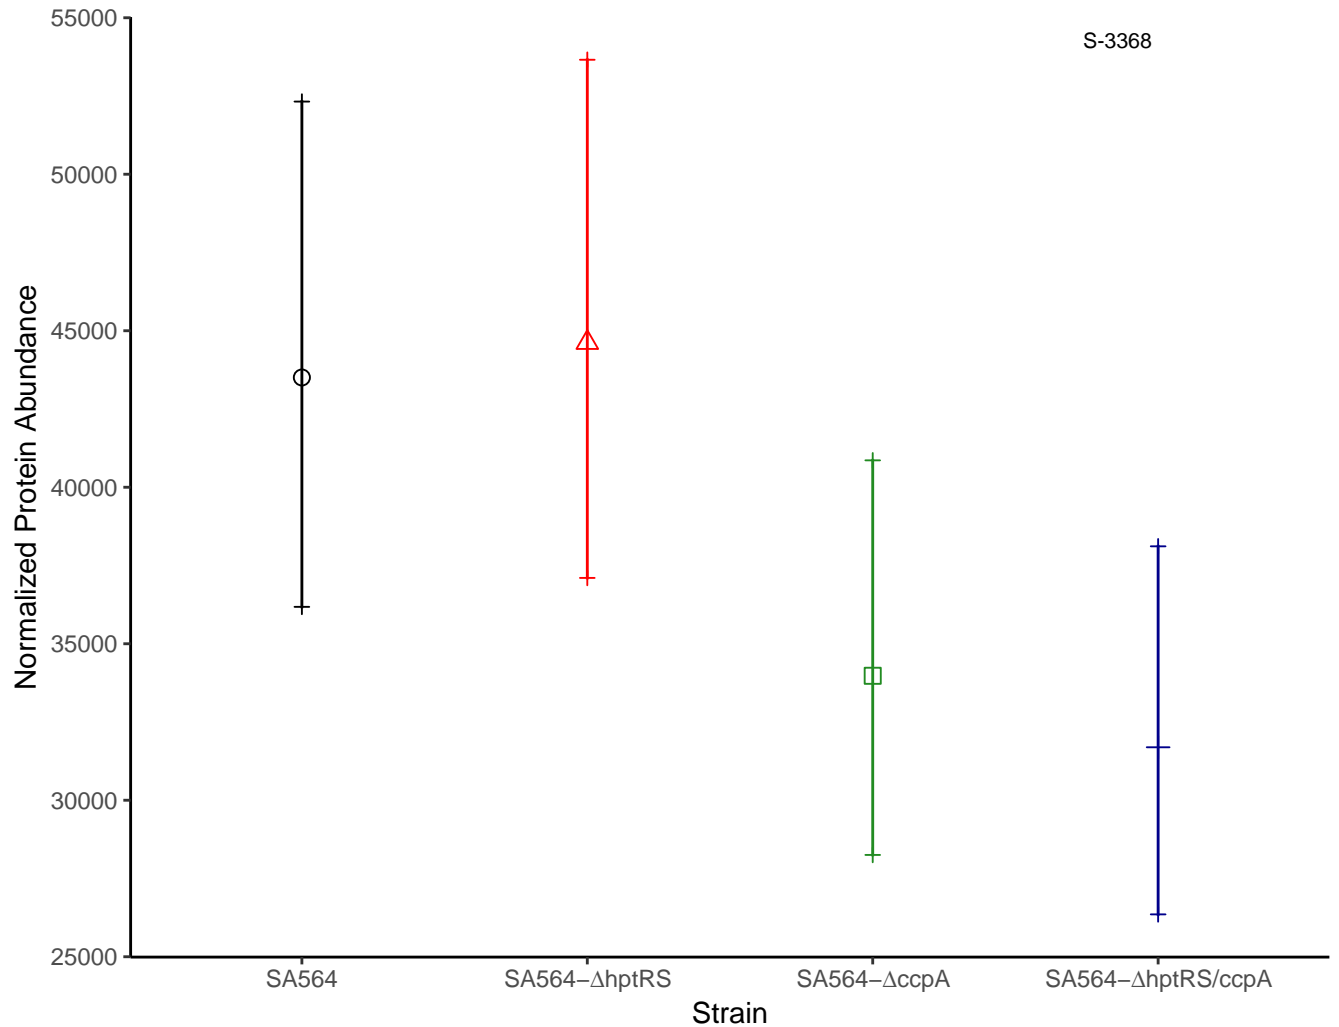

- ⊕ SA564
- △ SA564- $\Delta$ hptRS
- ⊞ SA564- $\Delta$ ccpA
- + SA564- $\Delta$ hptRS/ccpA



# RS2\_STAAM

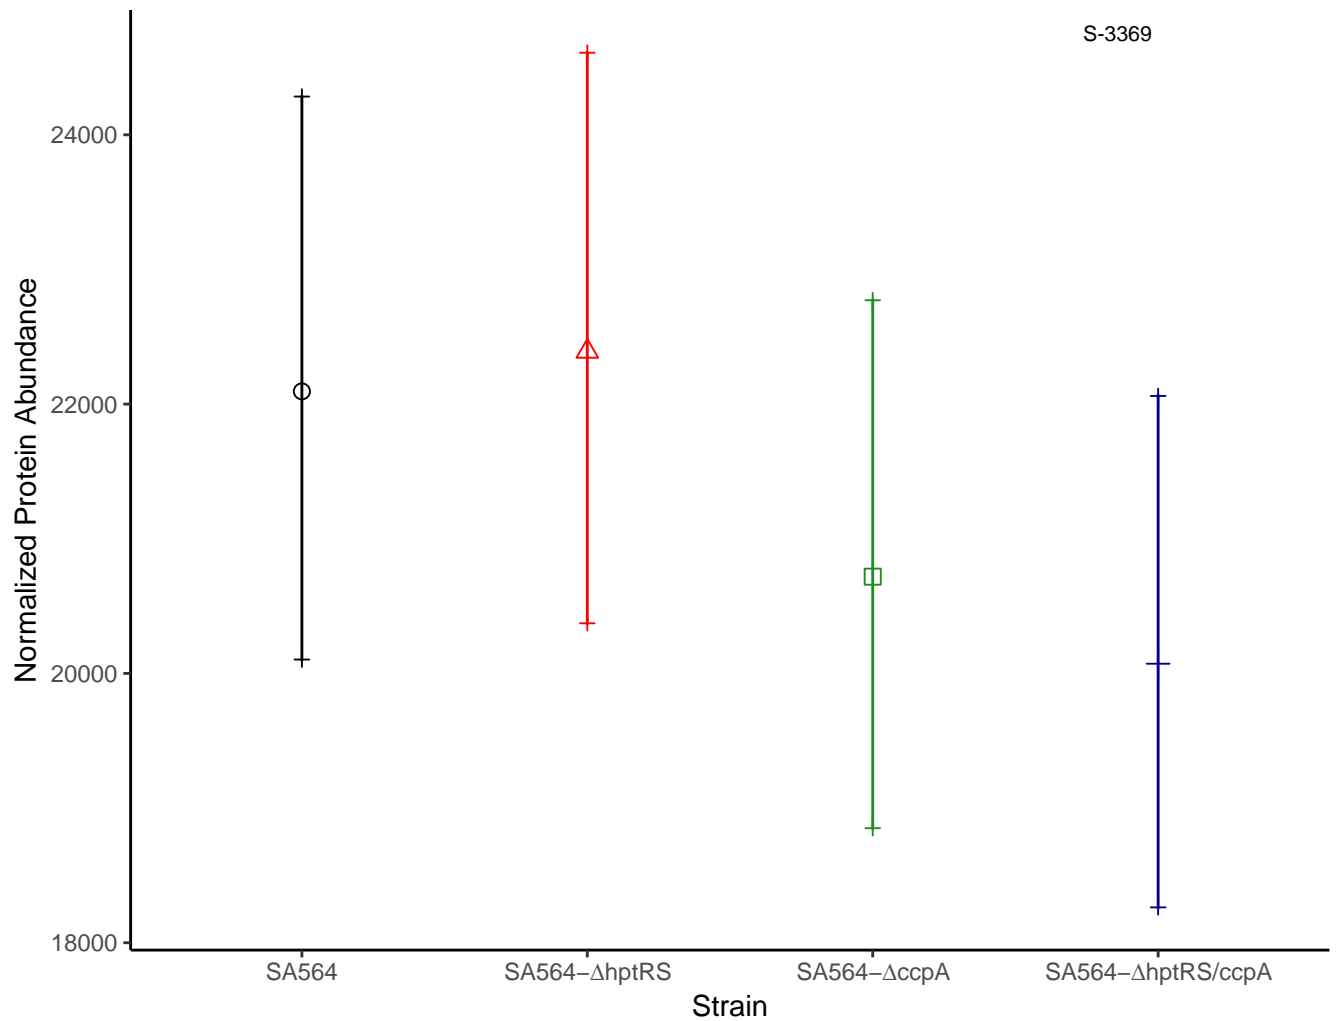

- ⊕ SA564
- △ SA564- $\Delta$ hptRS
- ⊞ SA564- $\Delta$ ccpA
- + SA564- $\Delta$ hptRS/ccpA

# RS20\_STAAM

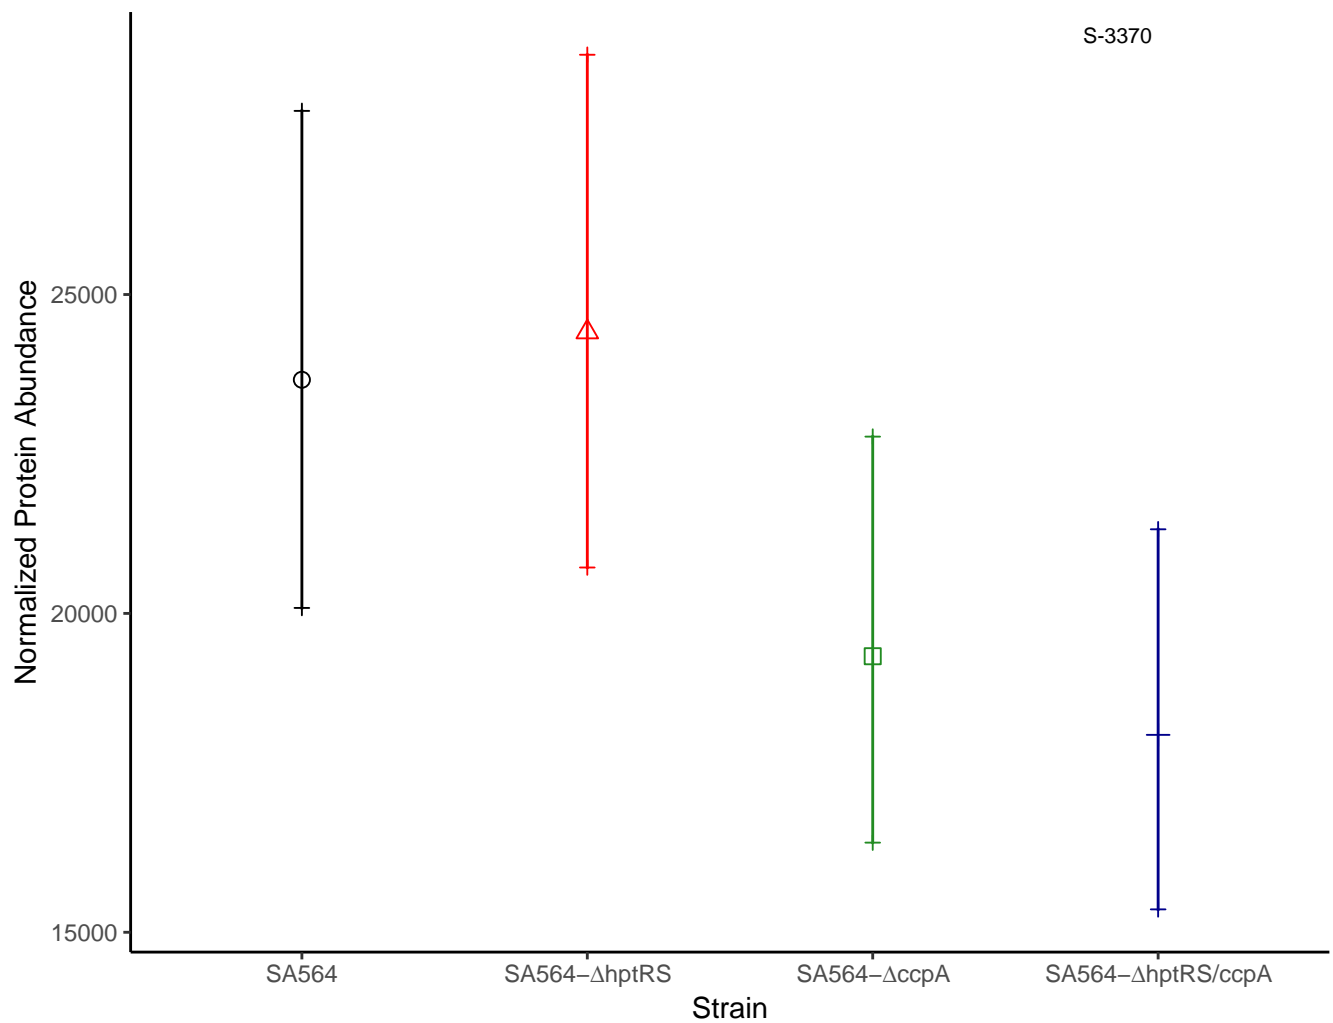

- ⊕ SA564
- △ SA564- $\Delta$ *hptRS*
- ⊞ SA564- $\Delta$ *ccpA*
- + SA564- $\Delta$ *hptRS/ccpA*

# RS21\_STAAM

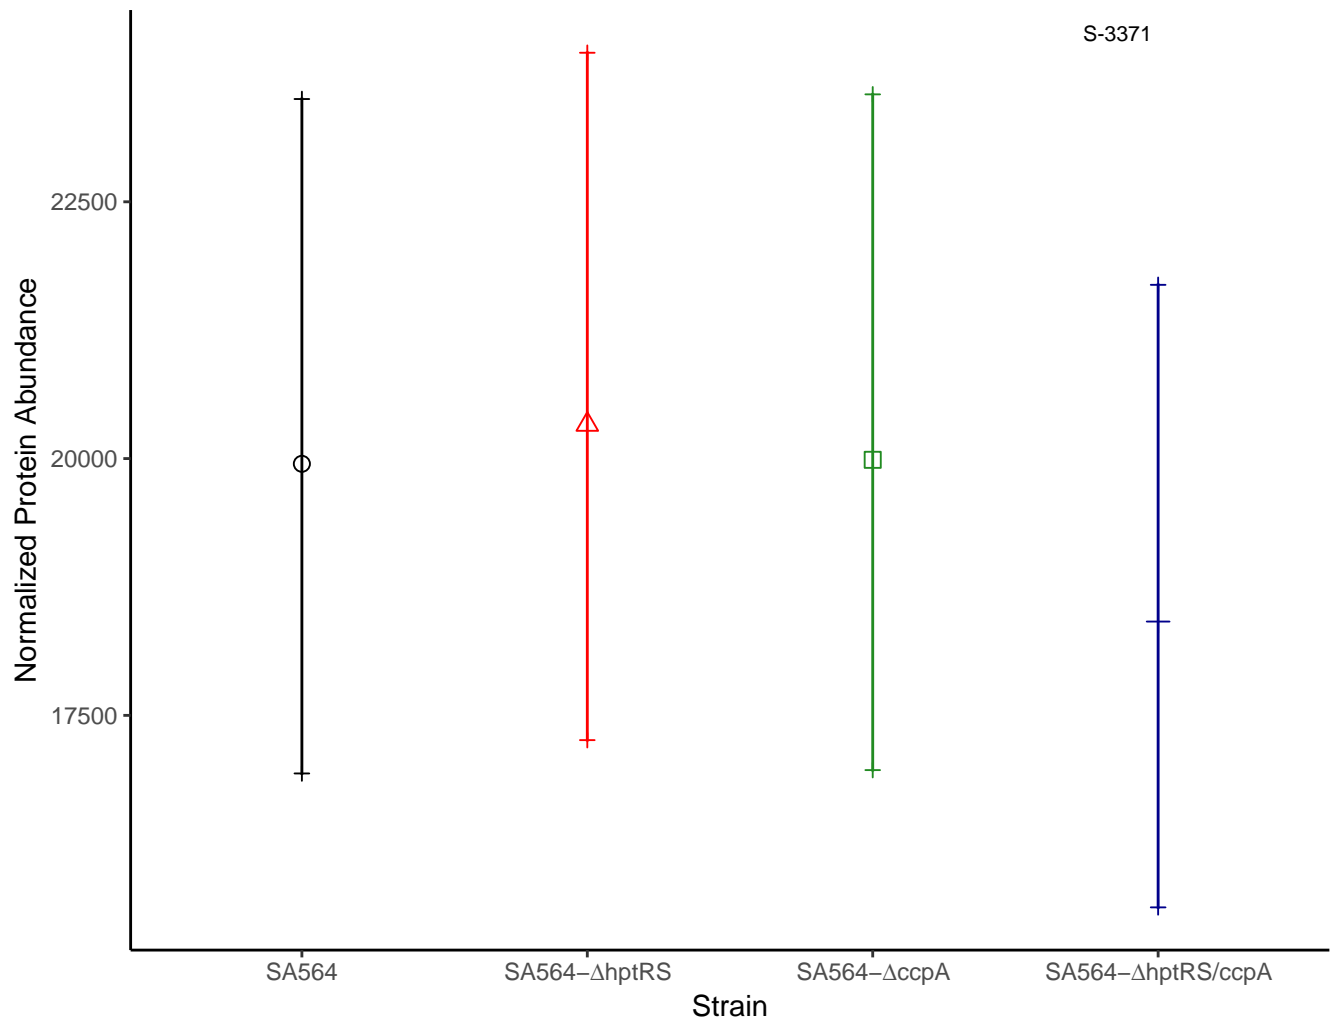

- ⊕ SA564
- △ SA564- $\Delta$ *hptRS*
- ⊞ SA564- $\Delta$ *ccpA*
- + SA564- $\Delta$ *hptRS/ccpA*

# RS3\_STAAM

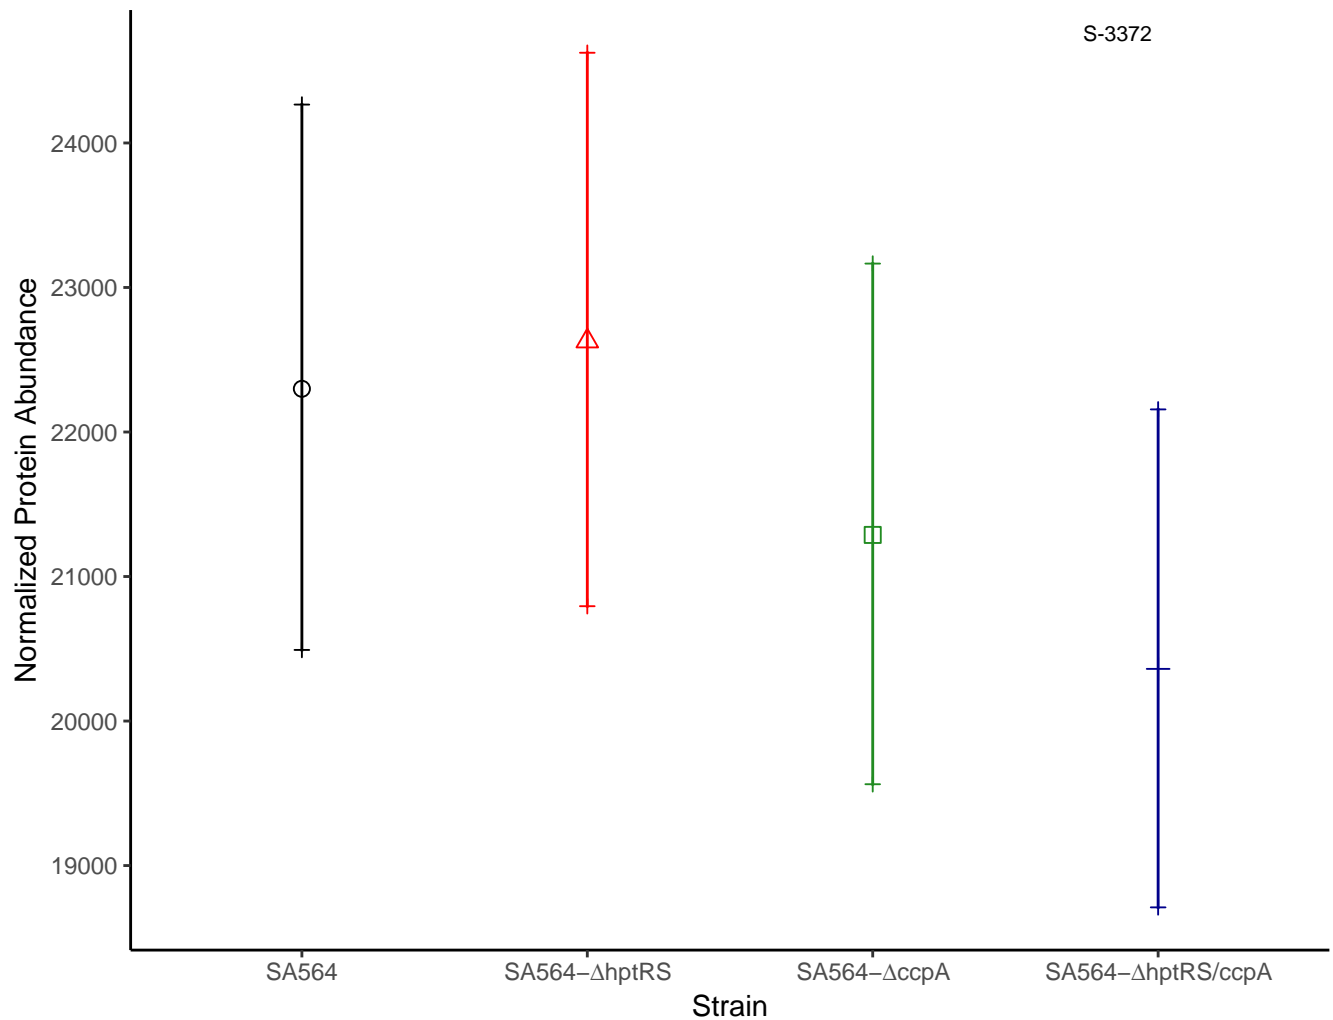

- ⊕ SA564
- △ SA564- $\Delta$ hptRS
- ⊞ SA564- $\Delta$ ccpA
- + SA564- $\Delta$ hptRS/ccpA

# RS4\_STAAM

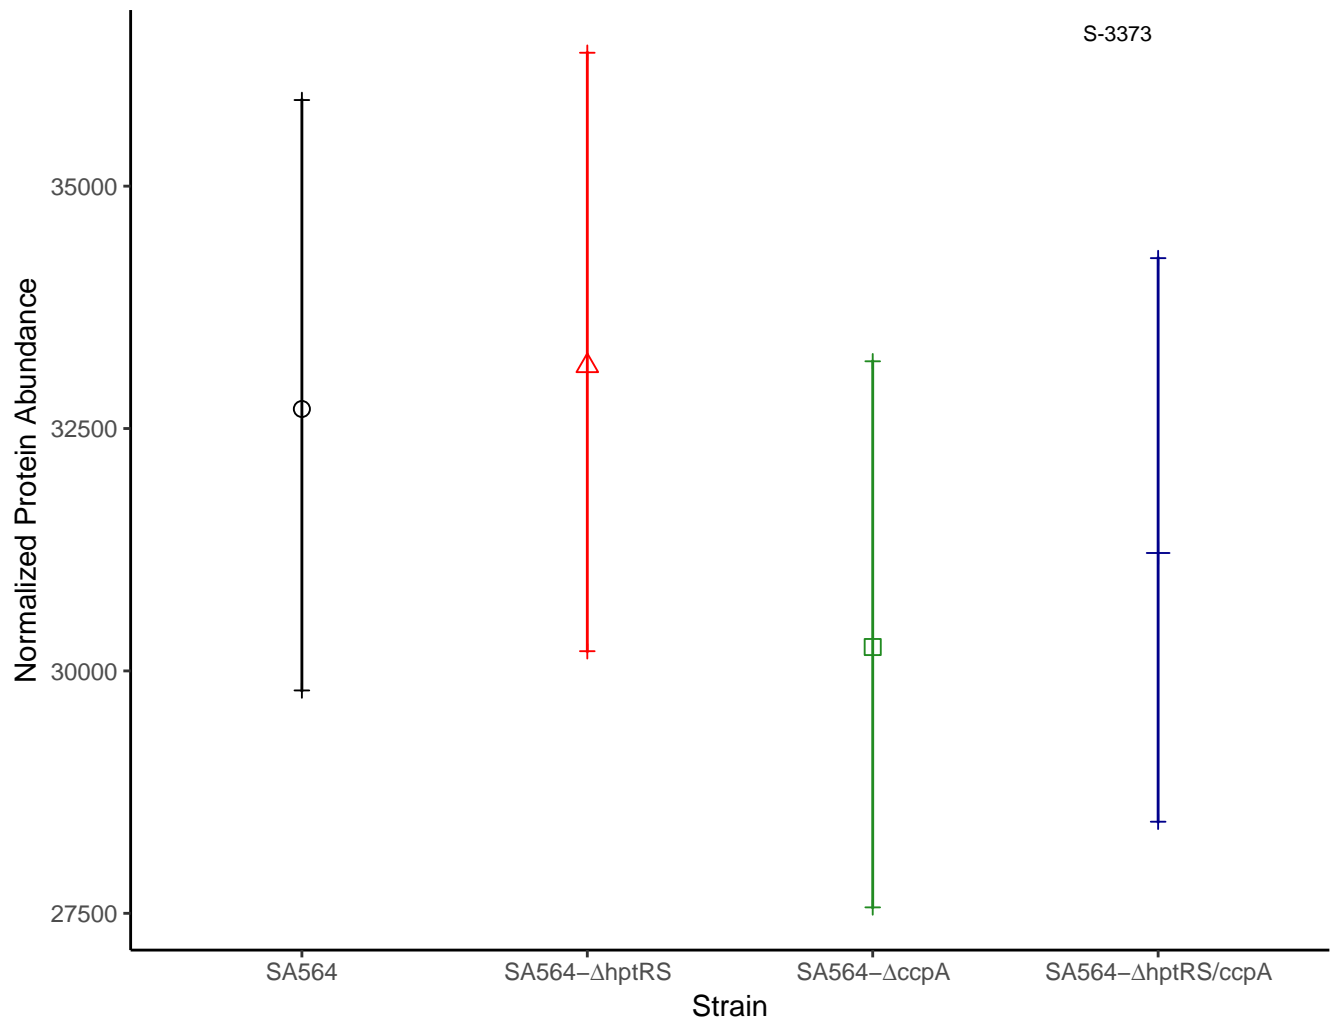

- ⊕ SA564
- △ SA564- $\Delta$ hptRS
- ⊞ SA564- $\Delta$ ccpA
- + SA564- $\Delta$ hptRS/ccpA

# RS5\_STAAM

S-3374

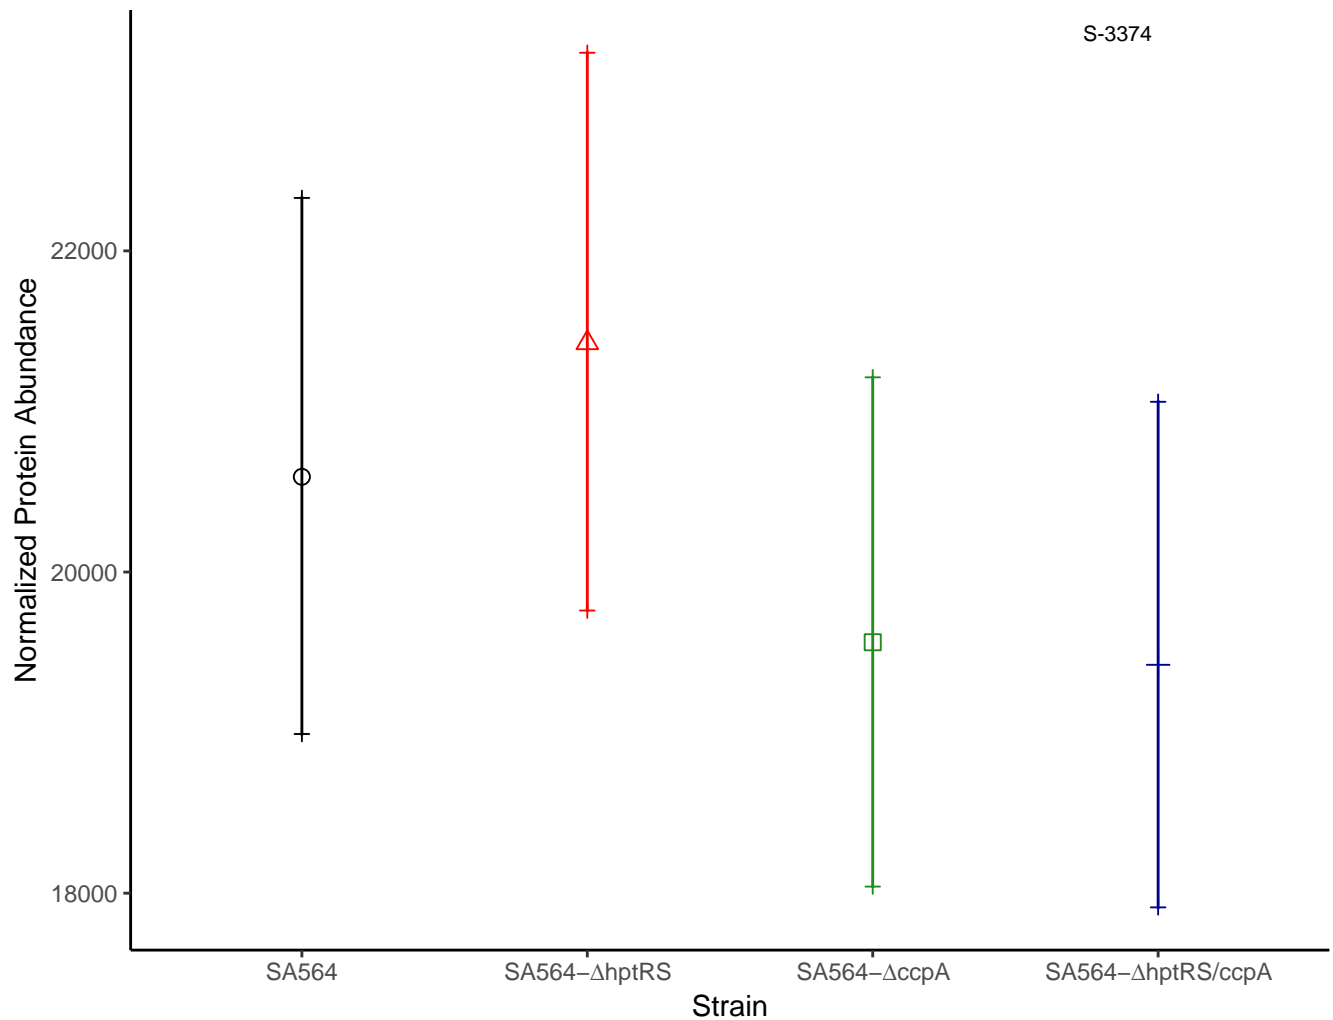

- ⊕ SA564
- △ SA564- $\Delta$ hptRS
- ⊞ SA564- $\Delta$ ccpA
- + SA564- $\Delta$ hptRS/ccpA

# RS6\_STAAM

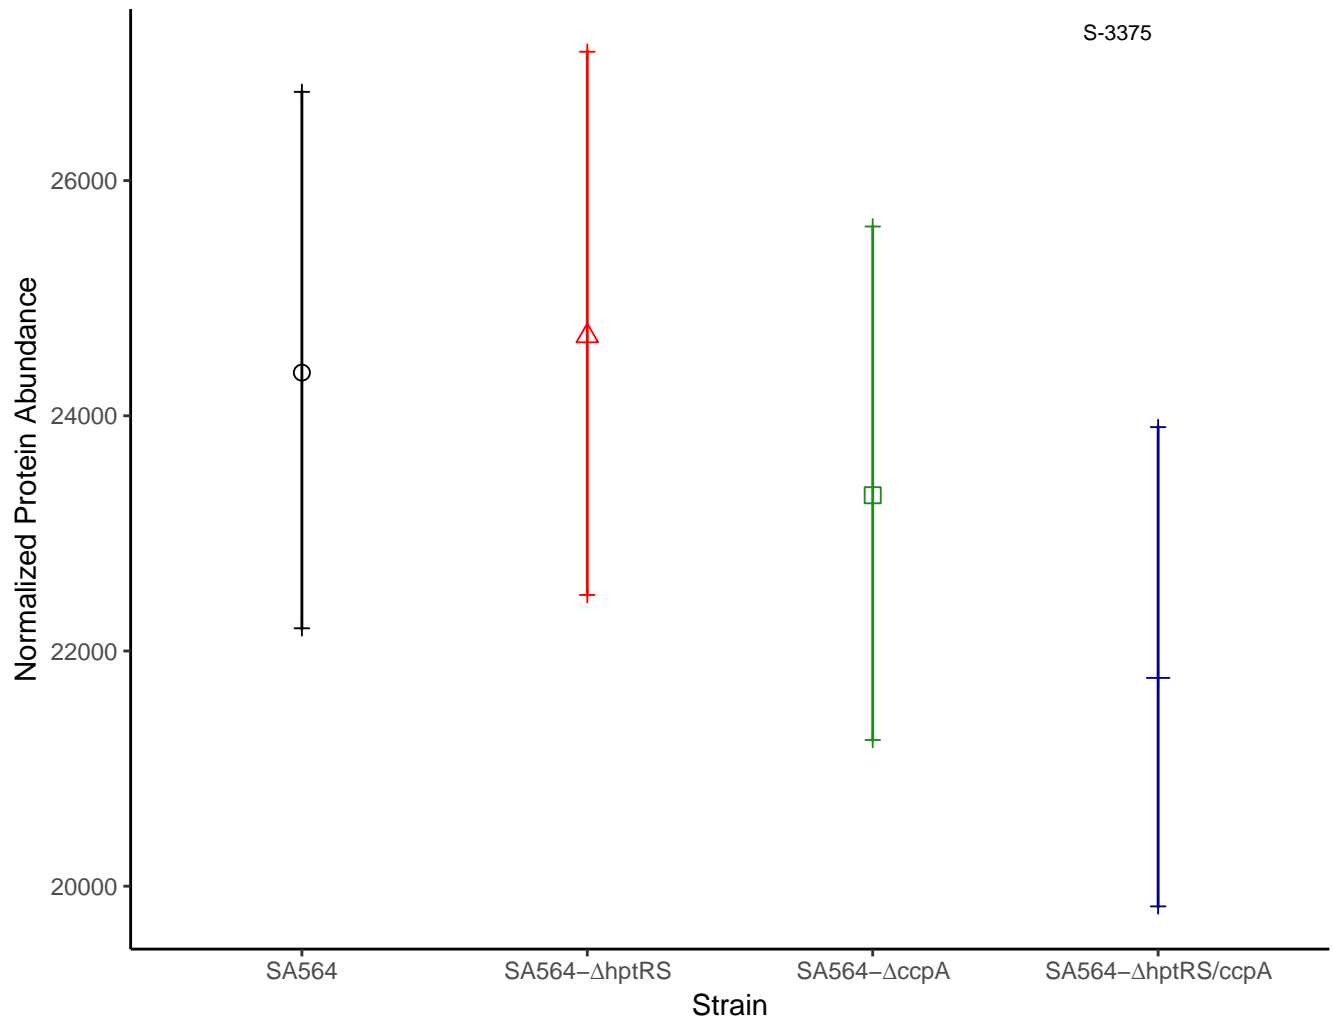

- ⊕ SA564
- △ SA564- $\Delta$ hptRS
- ⊞ SA564- $\Delta$ ccpA
- + SA564- $\Delta$ hptRS/ccpA

# RS7\_STAAM

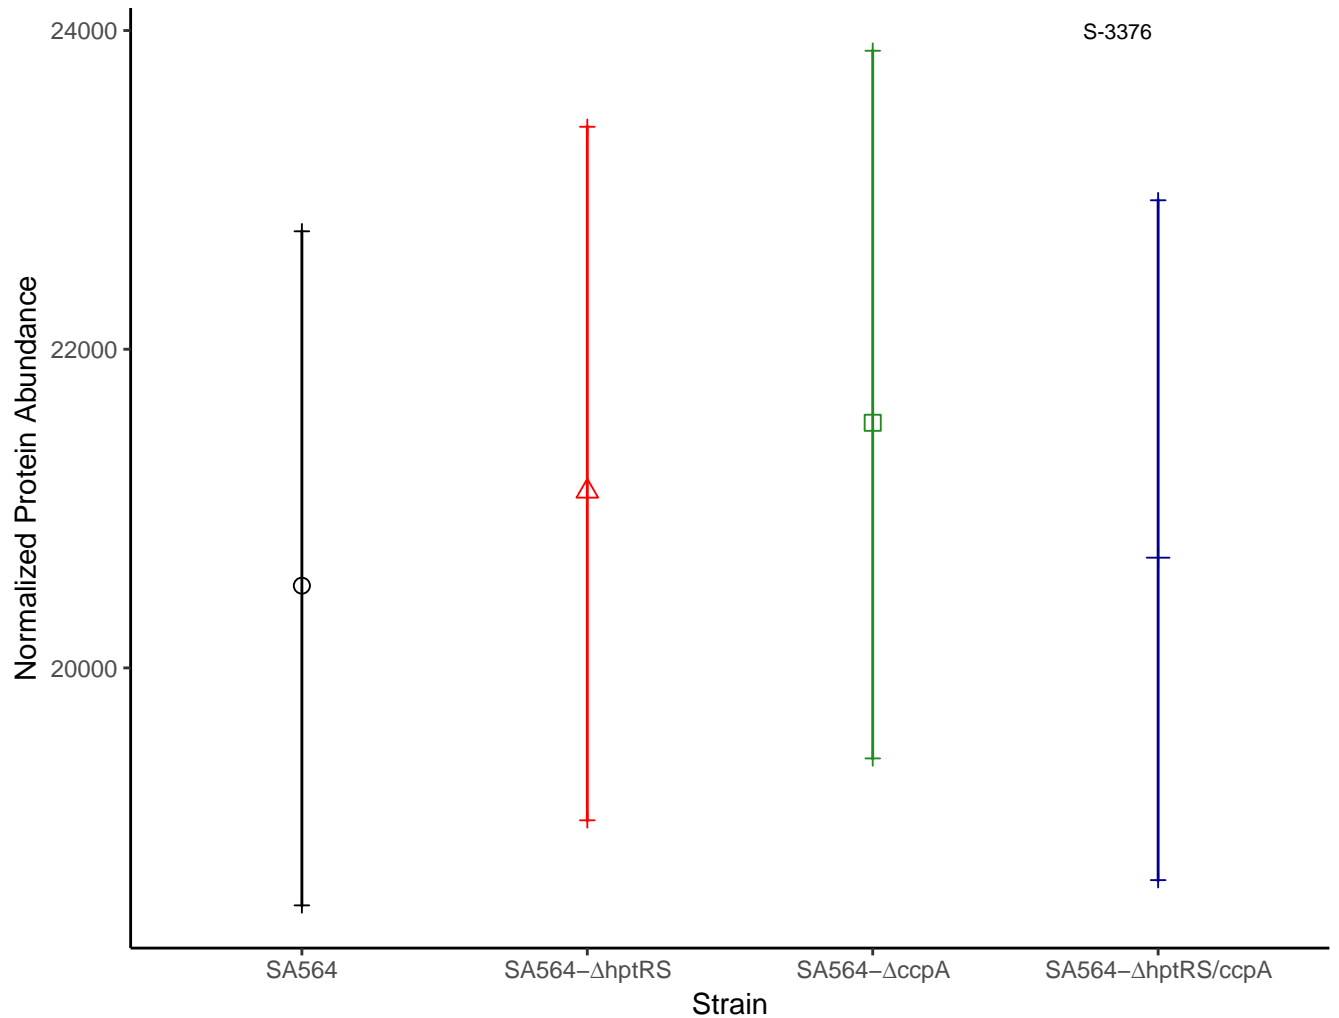

- ⊕ SA564
- △ SA564- $\Delta$ hptRS
- ⊞ SA564- $\Delta$ ccpA
- + SA564- $\Delta$ hptRS/ccpA



# RS8\_STAAM

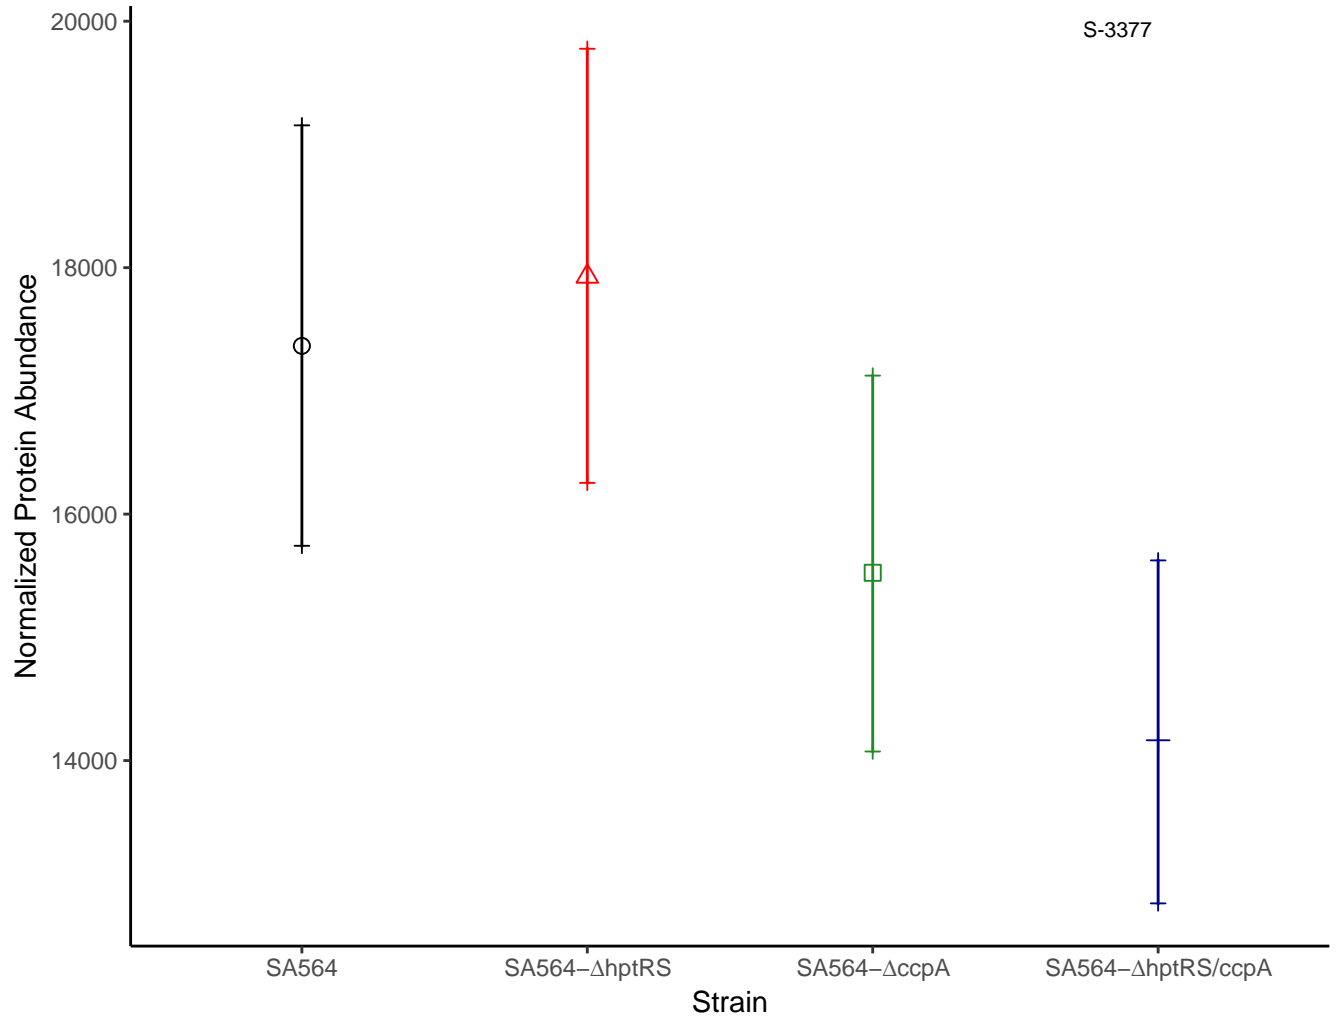

- ⊕ SA564
- △ SA564- $\Delta$ hptRS
- ⊞ SA564- $\Delta$ ccpA
- + SA564- $\Delta$ hptRS/ccpA

# RS9\_STAAM

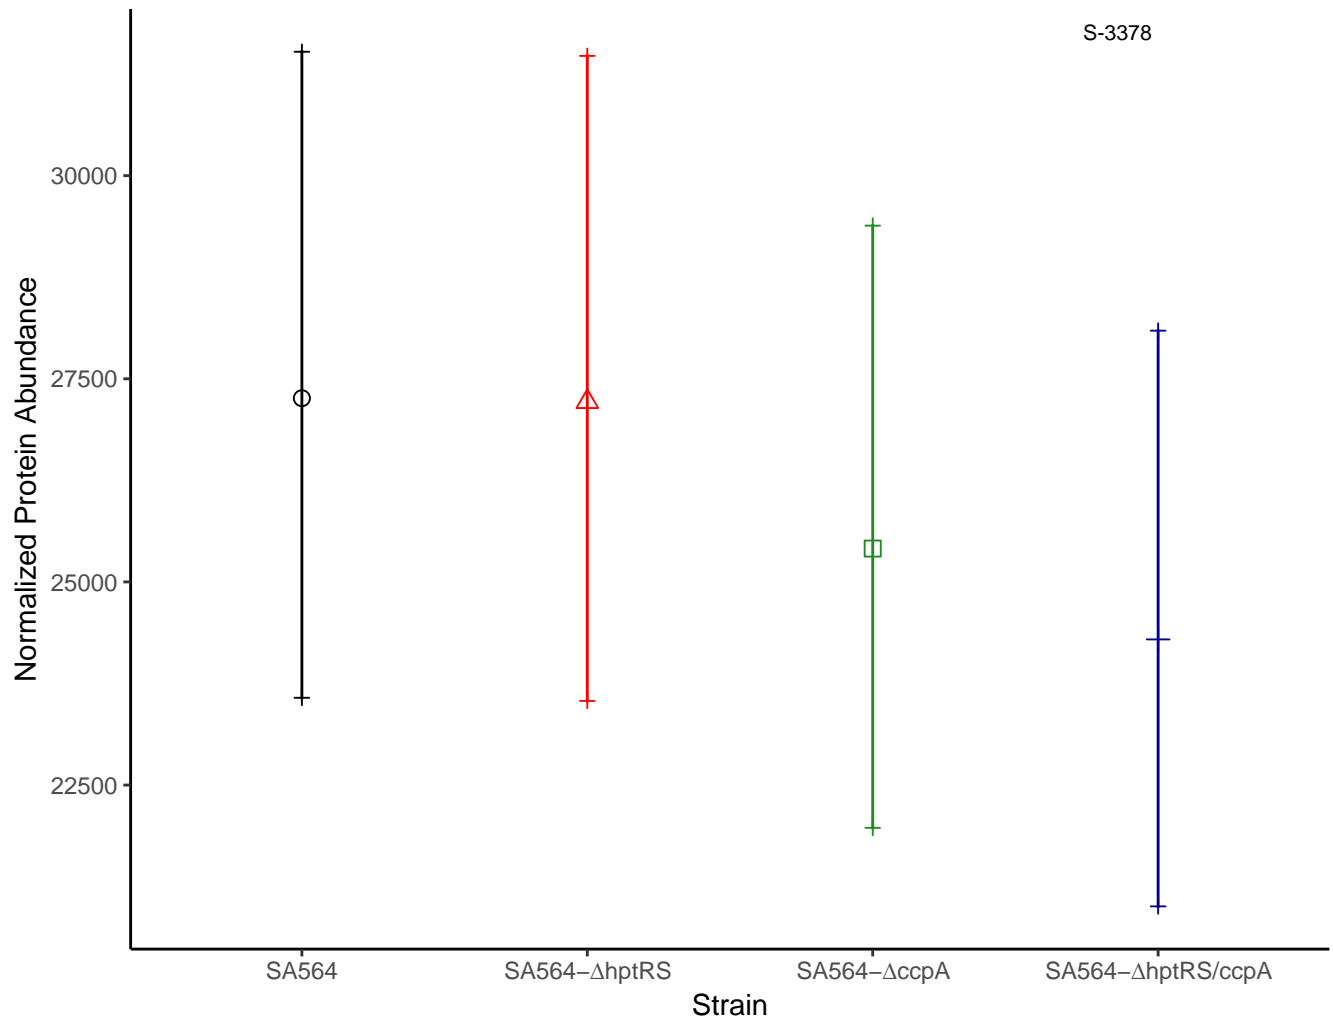

- ⊕ SA564
- △ SA564- $\Delta$ hptRS
- ⊞ SA564- $\Delta$ ccpA
- + SA564- $\Delta$ hptRS/ccpA

# RSBV\_STAAM

S-3379

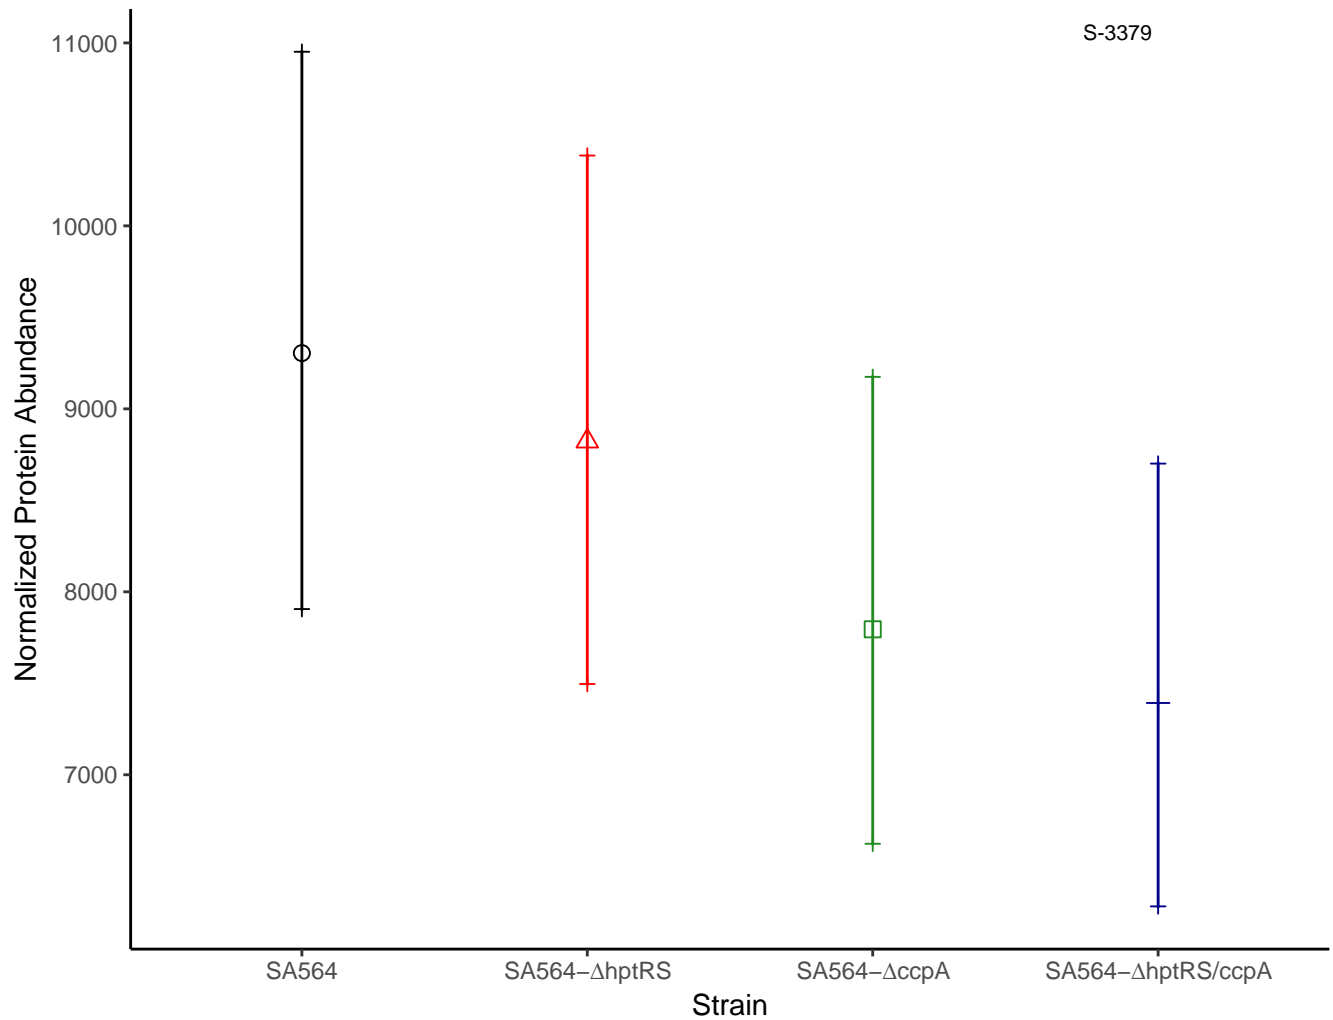

- ⊕ SA564
- △ SA564- $\Delta$ *hptRS*
- ⊞ SA564- $\Delta$ *ccpA*
- + SA564- $\Delta$ *hptRS/ccpA*

# RSBW\_STAAM

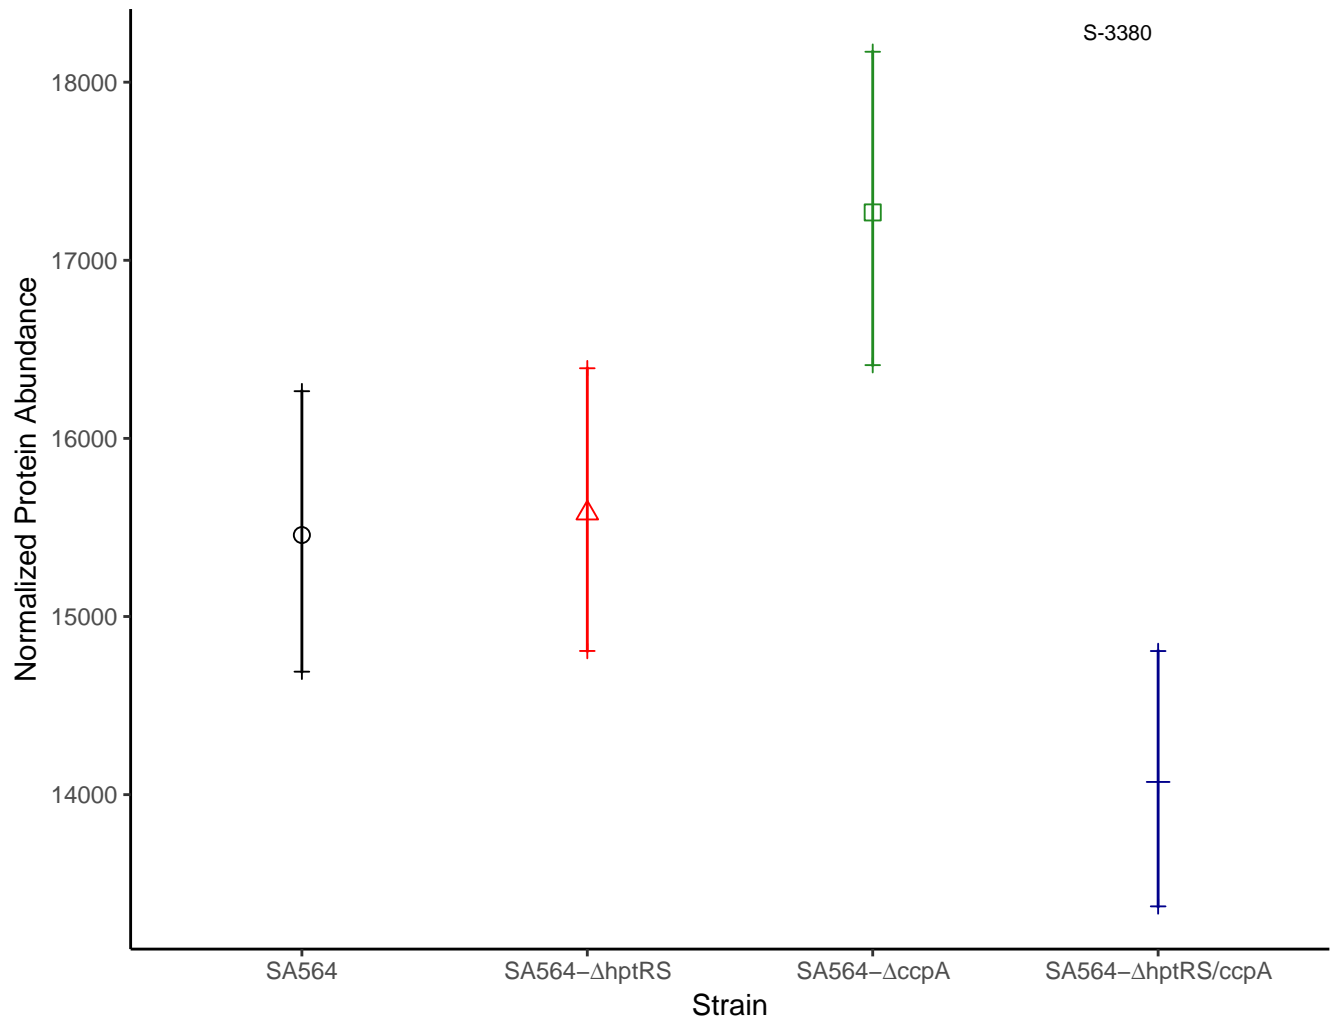

- ⊕ SA564
- △ SA564- $\Delta$ hptRS
- ⊞ SA564- $\Delta$ ccpA
- + SA564- $\Delta$ hptRS/ccpA

# RSMA\_STAAM

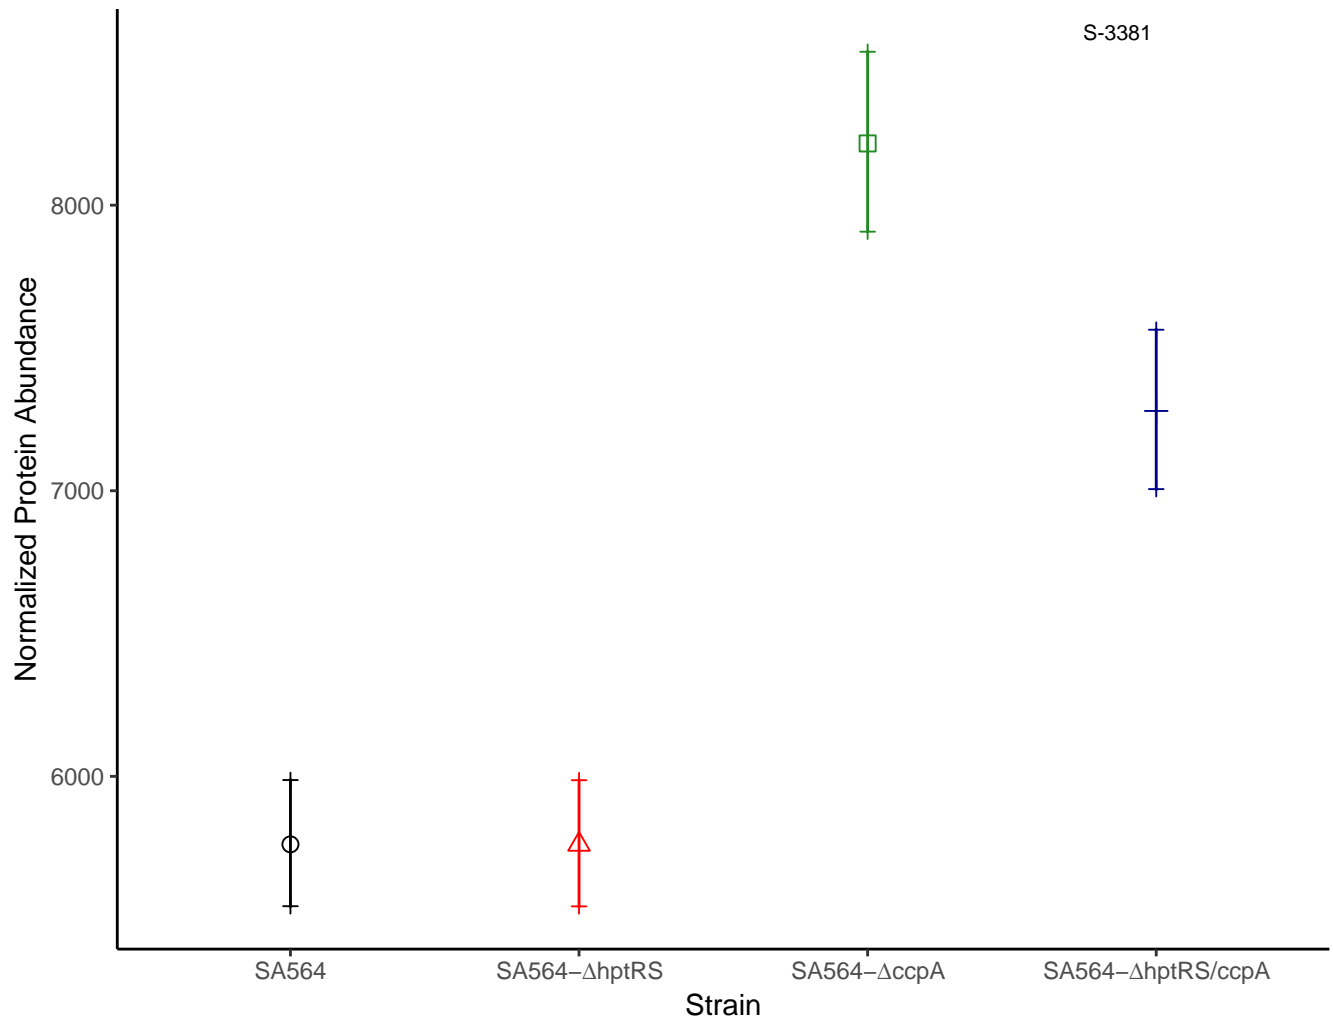

S-3381

- ⊕ SA564
- △ SA564- $\Delta$ hptRS
- ⊞ SA564- $\Delta$ ccpA
- + SA564- $\Delta$ hptRS/ccpA

# RSMG\_STAAM

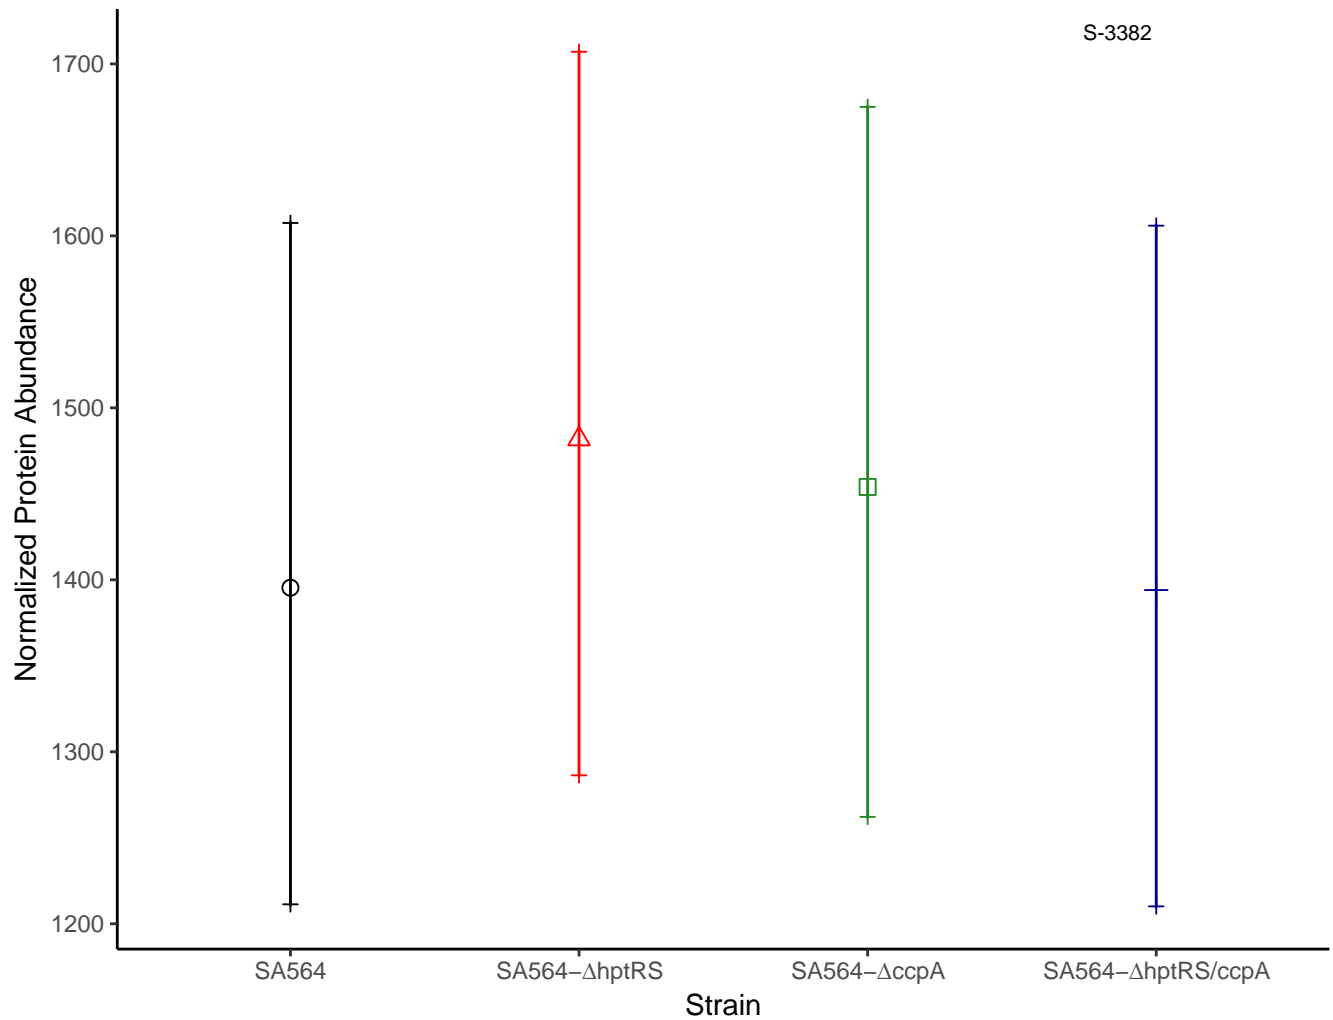

- ⊕ SA564
- △ SA564- $\Delta$ hptRS
- ⊞ SA564- $\Delta$ ccpA
- + SA564- $\Delta$ hptRS/ccpA

# RUVX\_STAAM

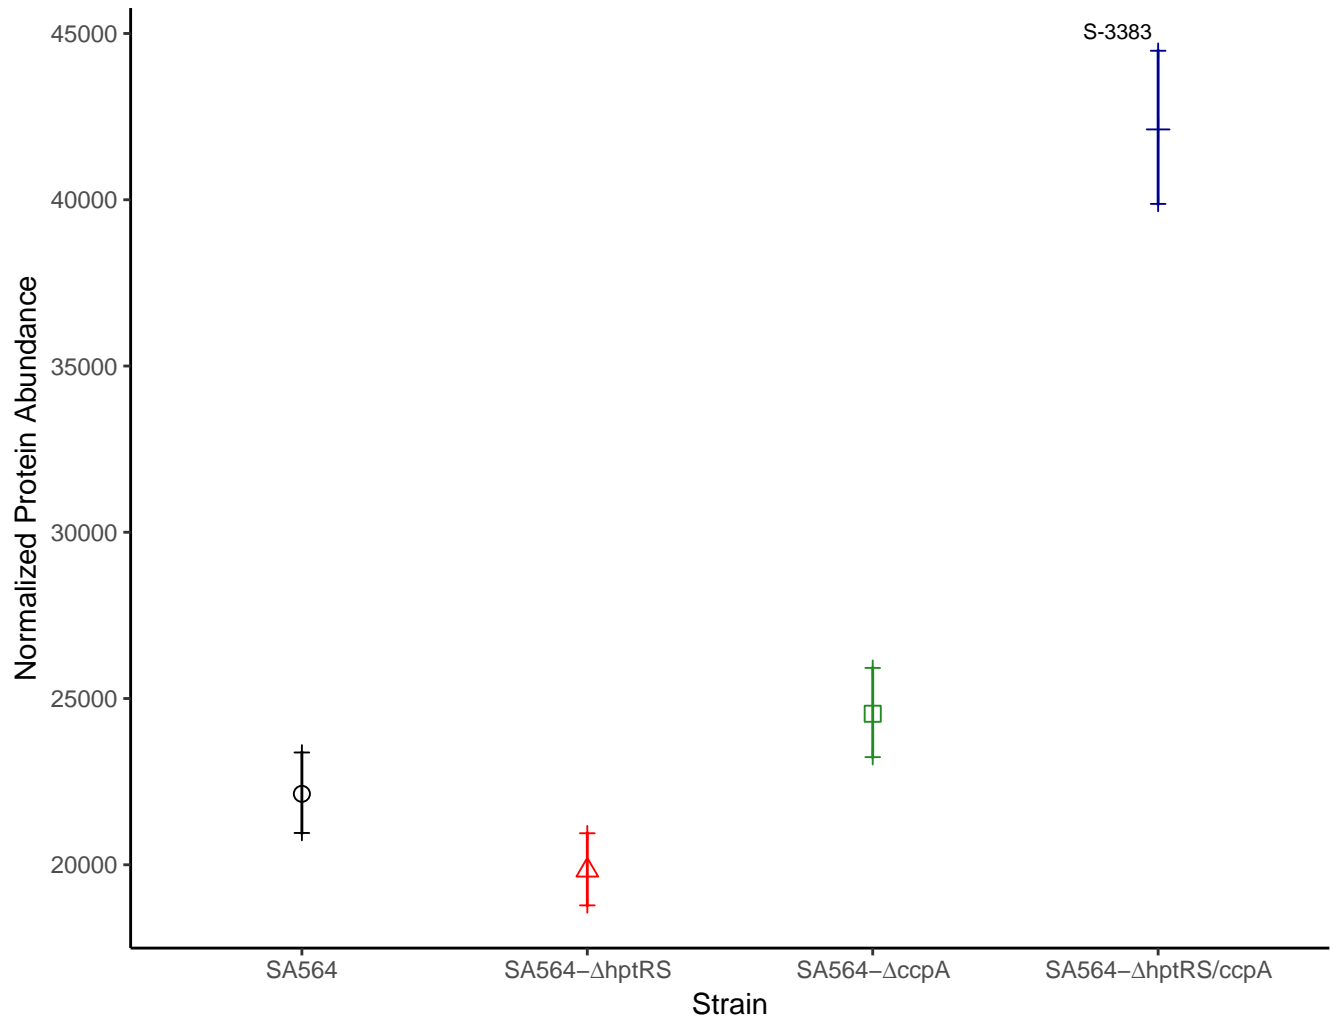

- ⊕ SA564
- △ SA564- $\Delta$ hptRS
- ⊞ SA564- $\Delta$ ccpA
- + SA564- $\Delta$ hptRS/ccpA

# S3AD\_STAAM

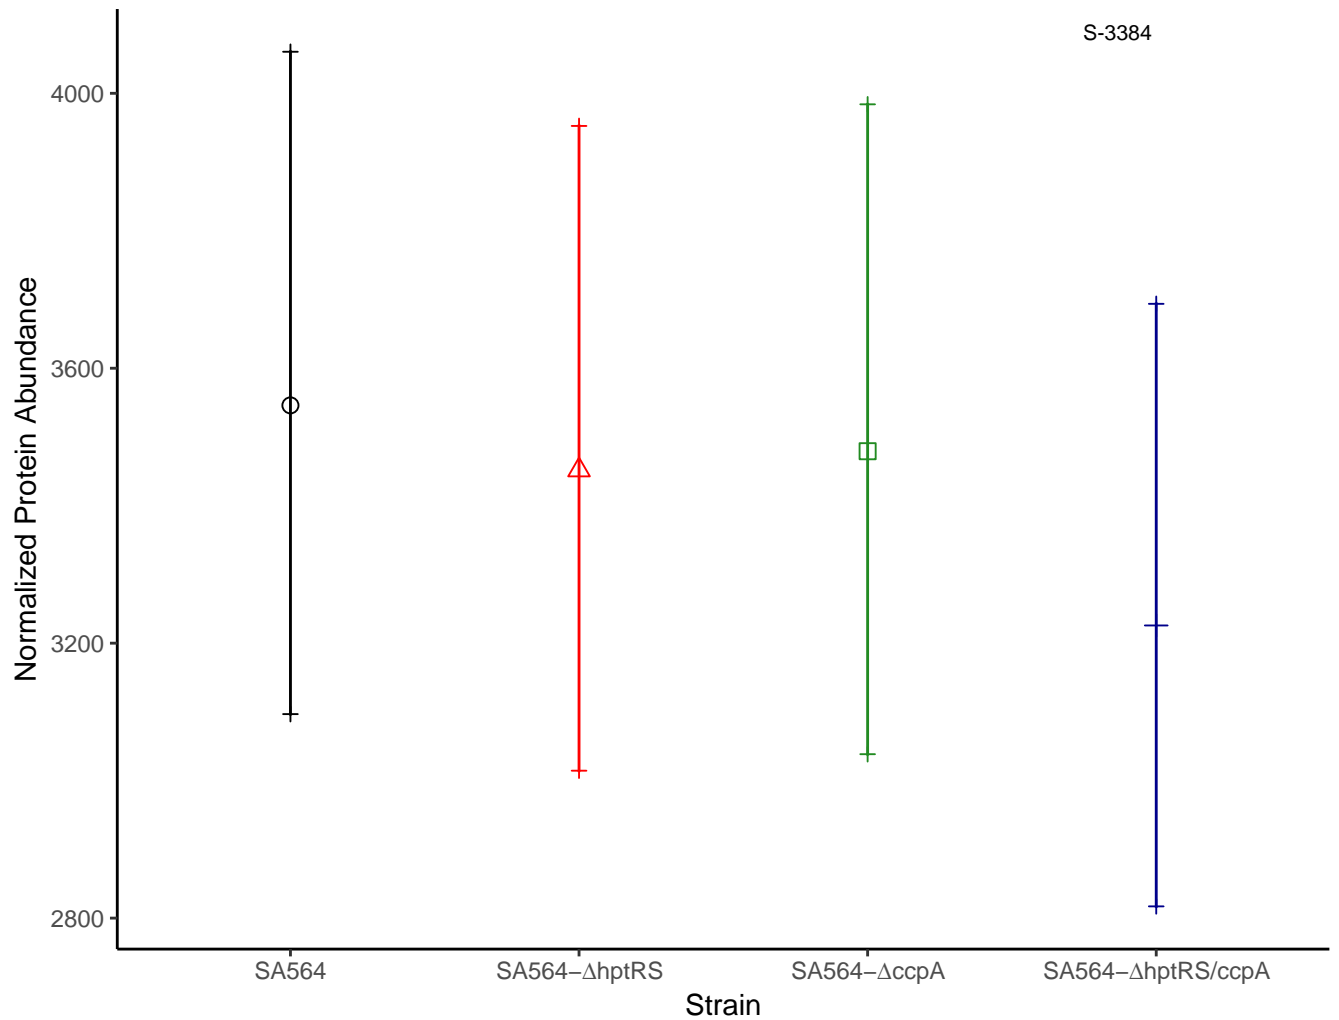

- ⊕ SA564
- △ SA564- $\Delta$ hptRS
- ⊞ SA564- $\Delta$ ccpA
- + SA564- $\Delta$ hptRS/ccpA



# SAER\_STAAM

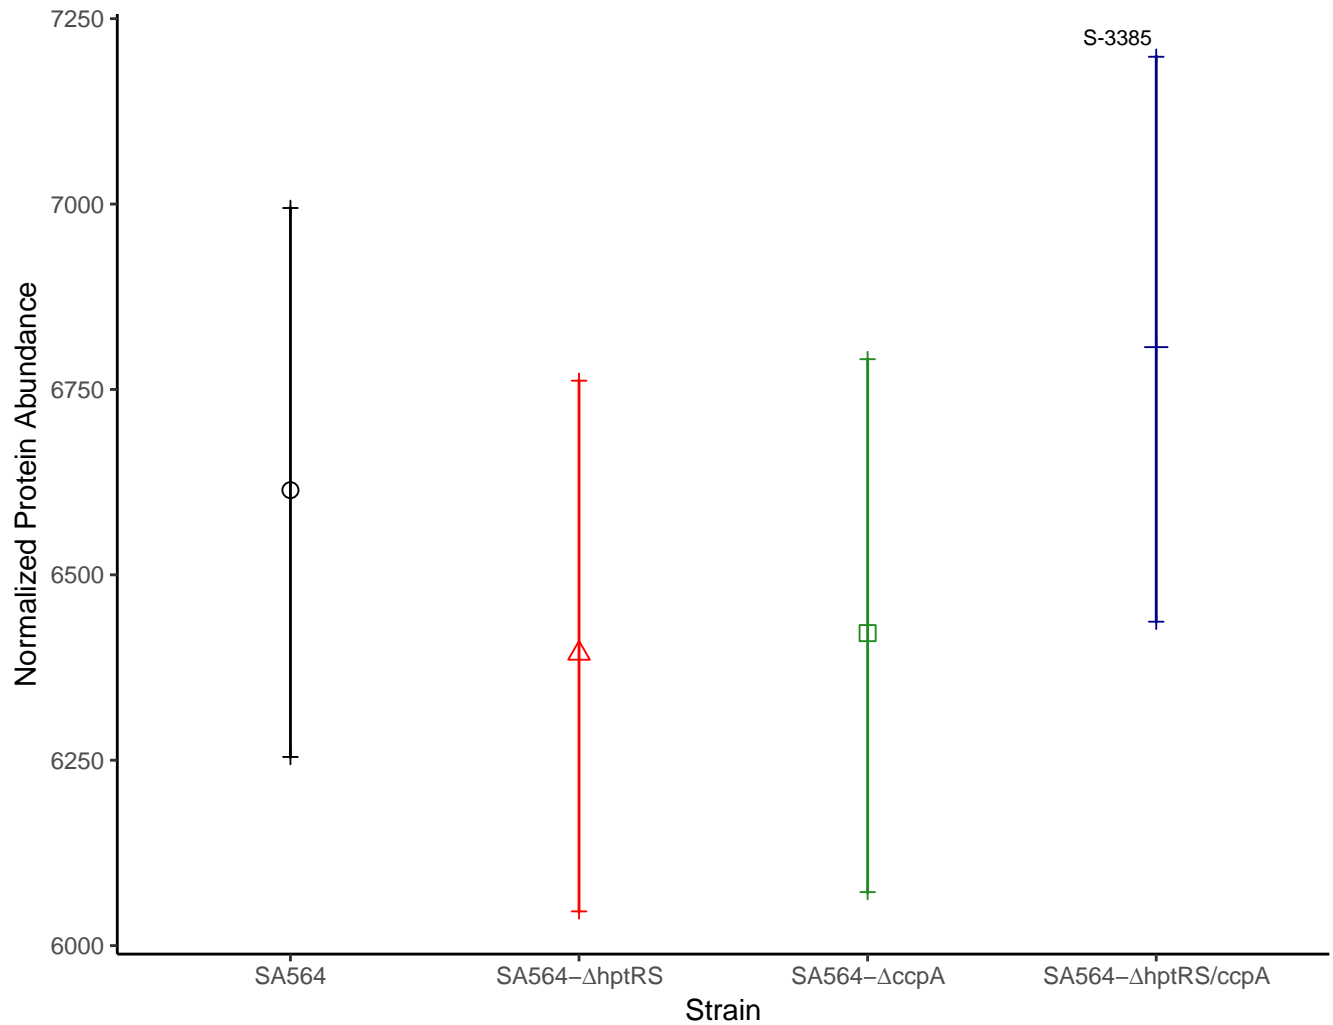

- ⊕ SA564
- △ SA564- $\Delta$ hptRS
- ⊞ SA564- $\Delta$ ccpA
- + SA564- $\Delta$ hptRS/ccpA

# SARA\_STAAM

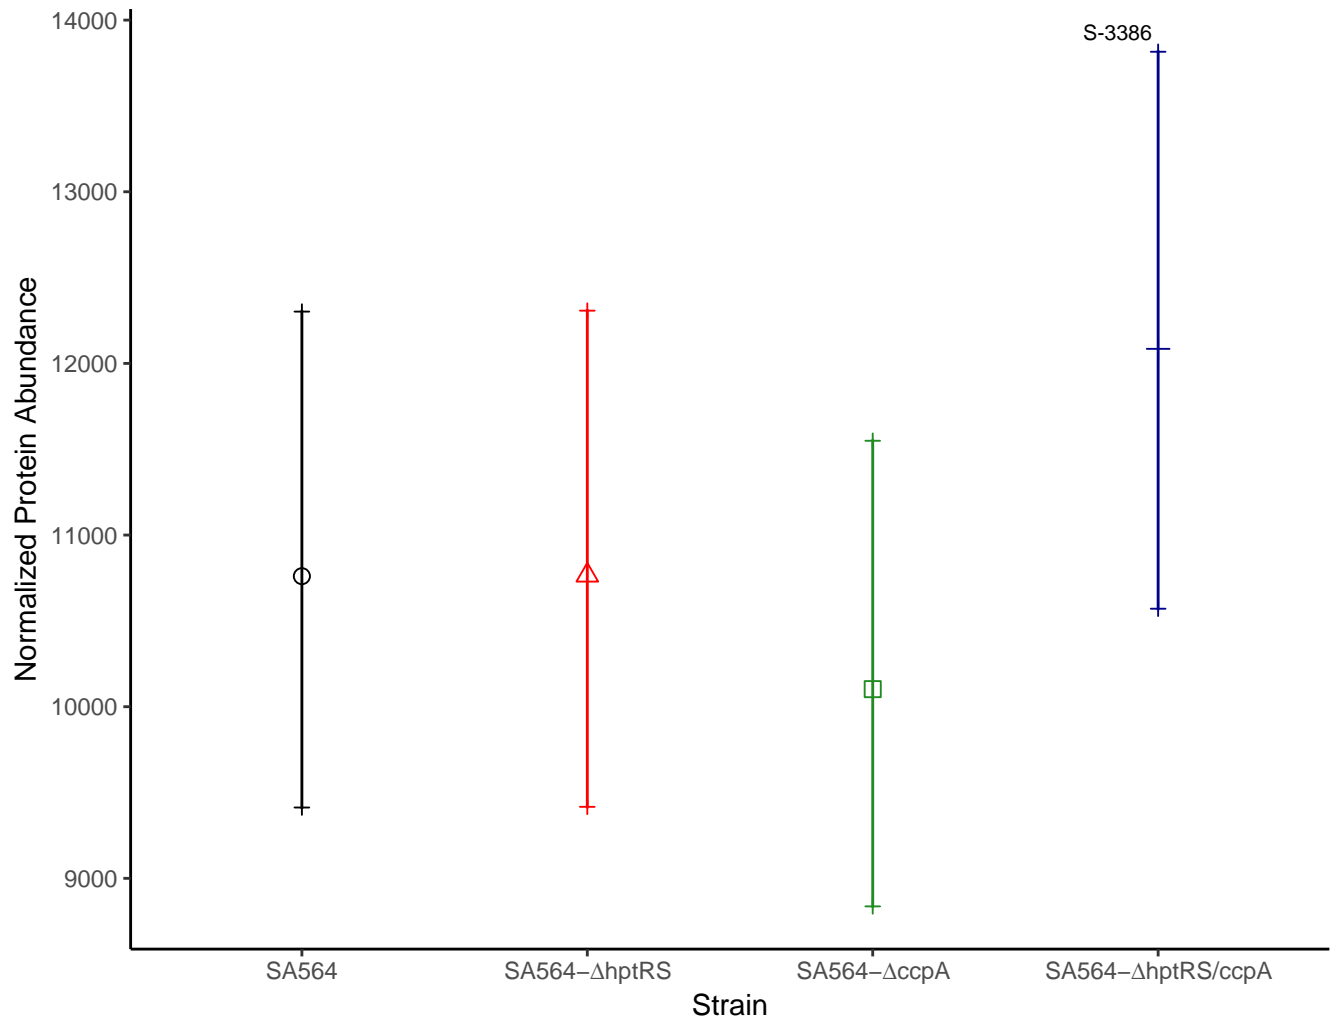

- ⊕ SA564
- △ SA564- $\Delta$ hptRS
- ⊞ SA564- $\Delta$ ccpA
- + SA564- $\Delta$ hptRS/ccpA

# SARR\_STAAM

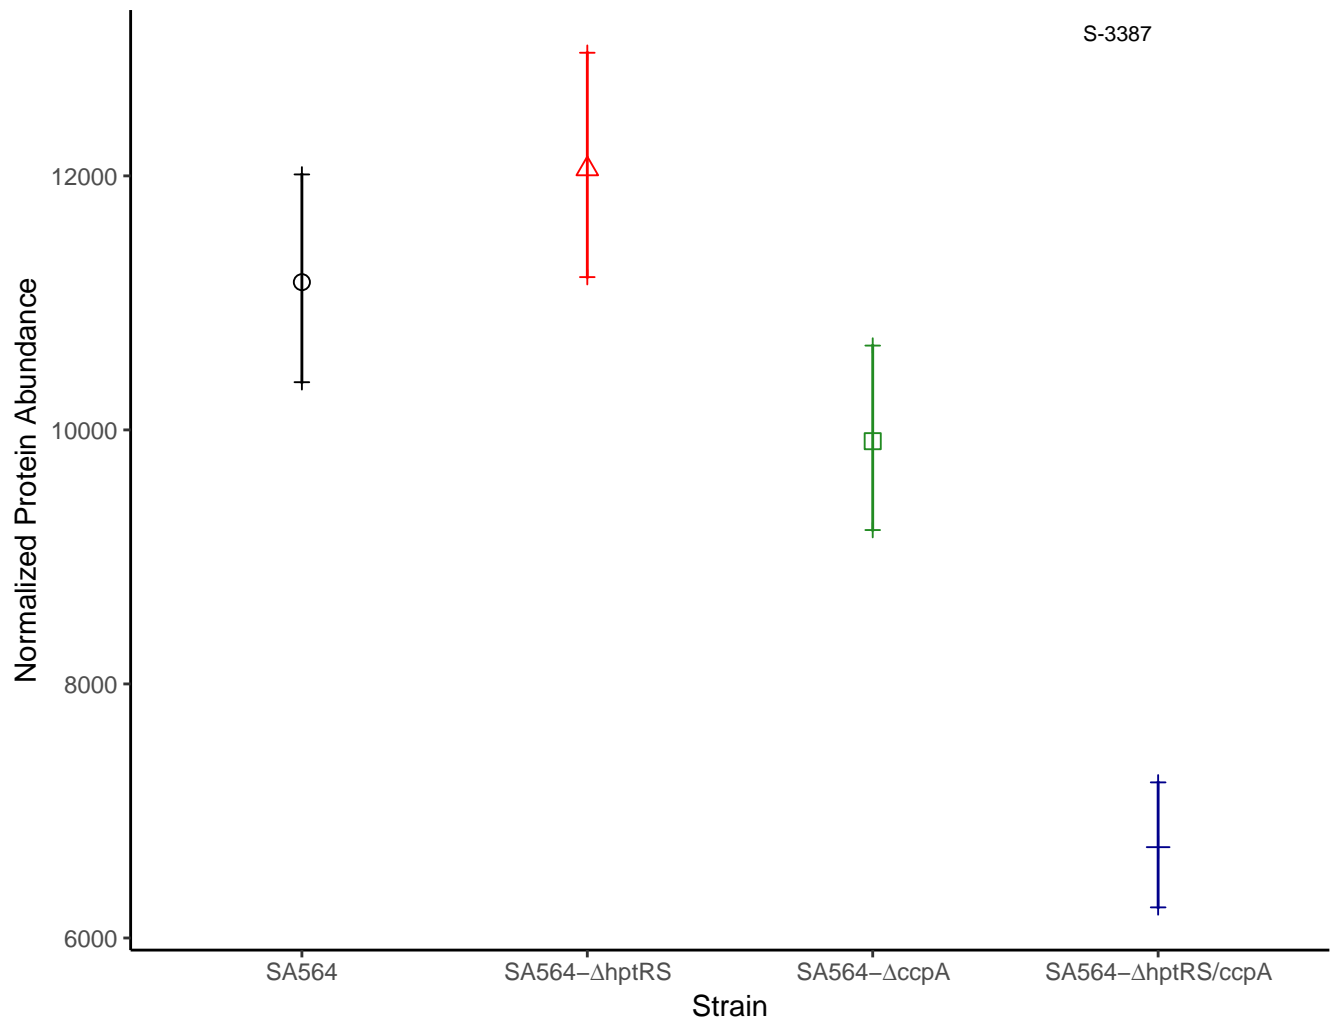

S-3387

- ⊕ SA564
- △ SA564- $\Delta$ hptRS
- ⊞ SA564- $\Delta$ ccpA
- + SA564- $\Delta$ hptRS/ccpA

# SARS\_STAAM

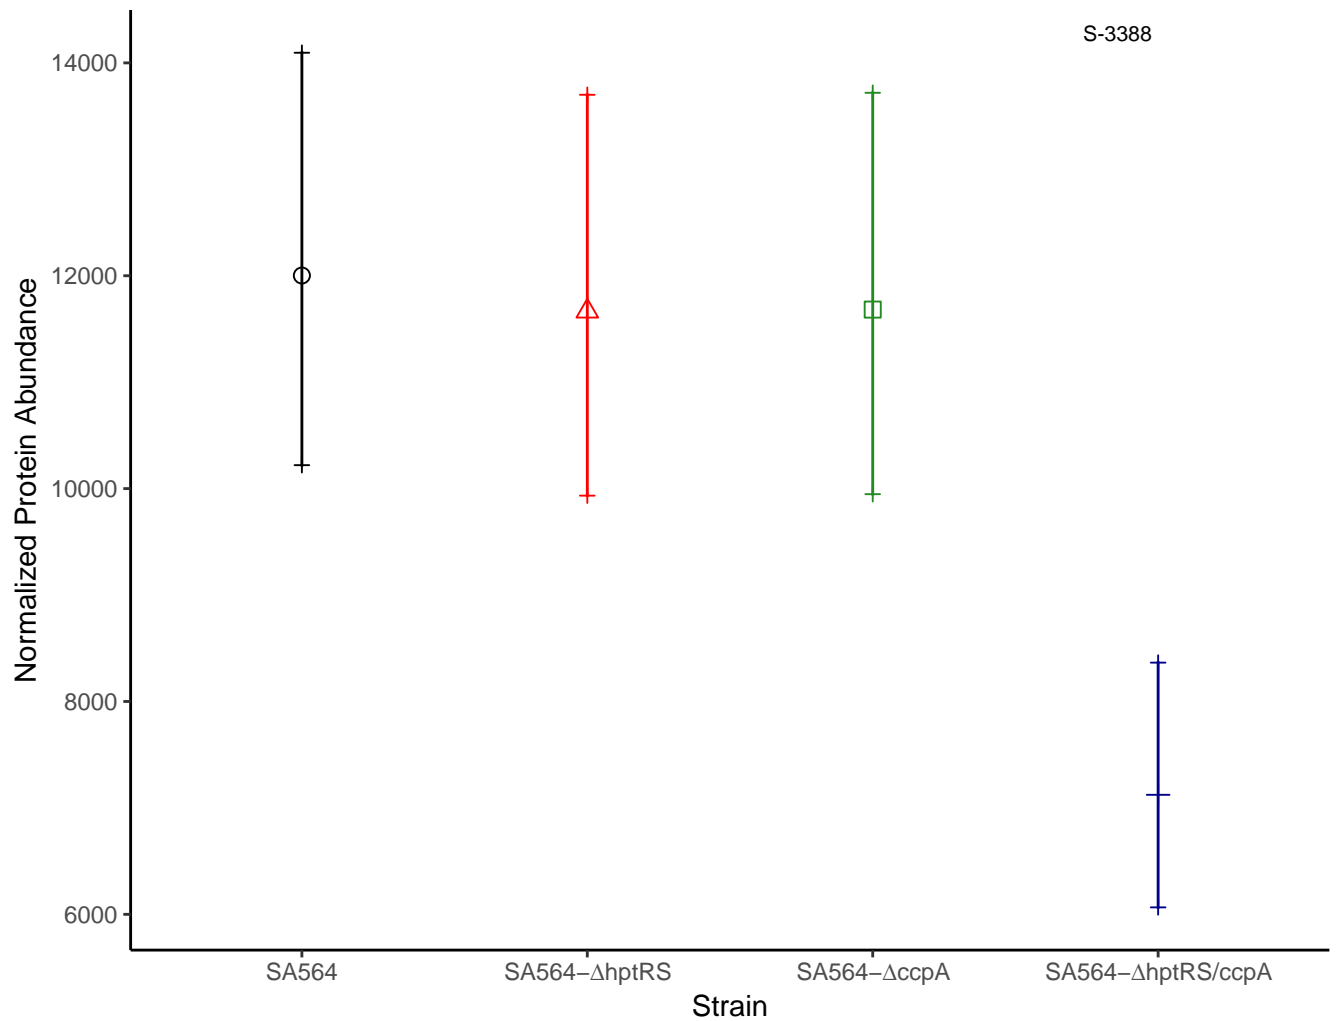

- ⊕ SA564
- △ SA564- $\Delta$ hptRS
- ⊞ SA564- $\Delta$ ccpA
- + SA564- $\Delta$ hptRS/ccpA

# SBCC\_STAAM

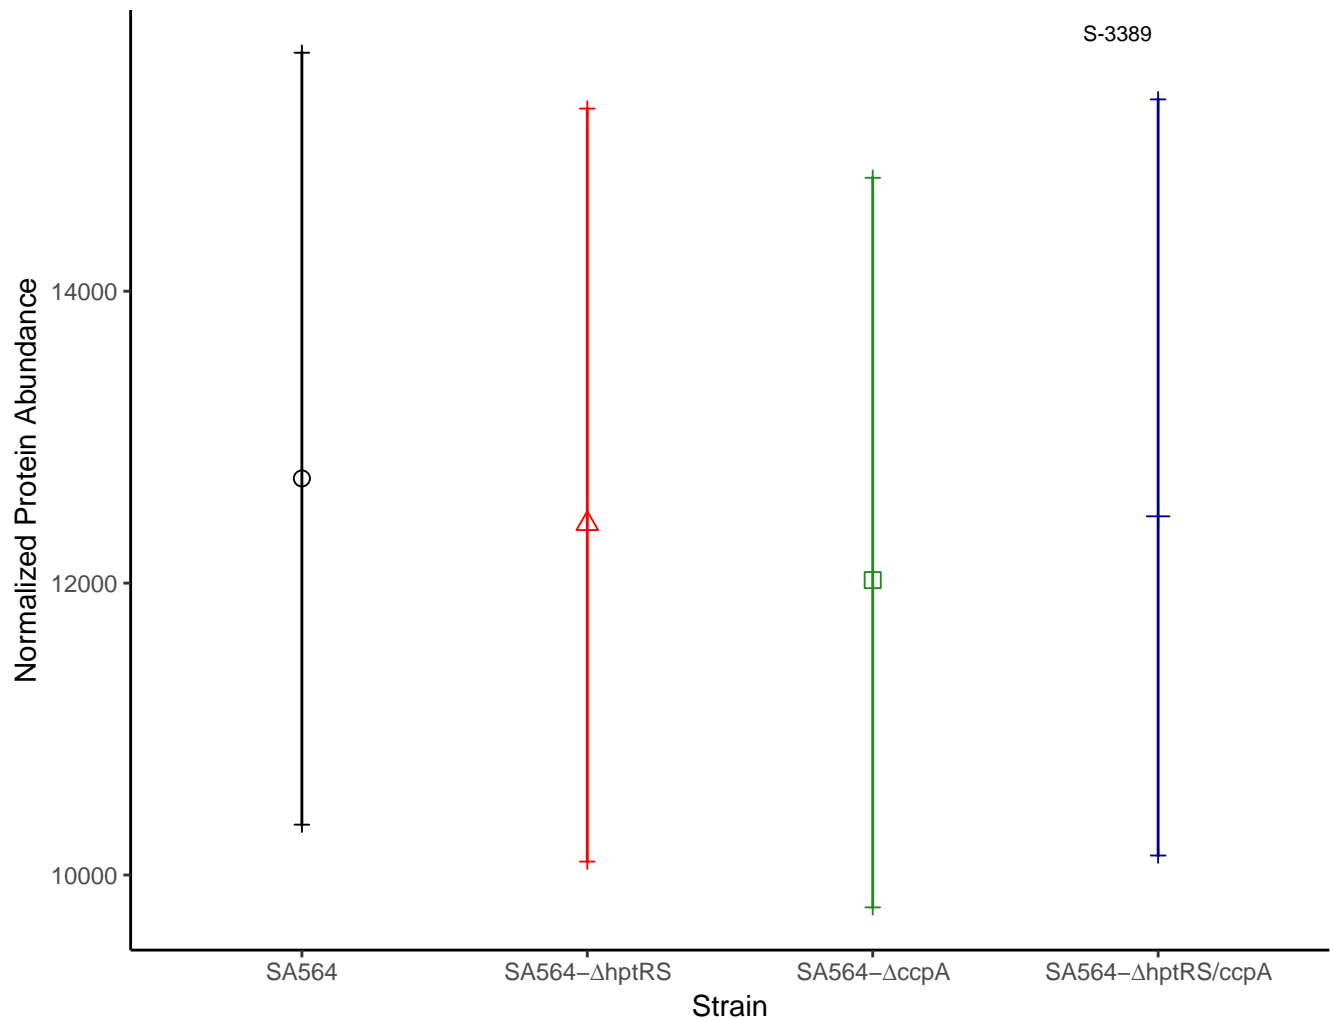

- ⊕ SA564
- △ SA564- $\Delta$ hptRS
- ⊞ SA564- $\Delta$ ccpA
- + SA564- $\Delta$ hptRS/ccpA

# SBI\_STAAM

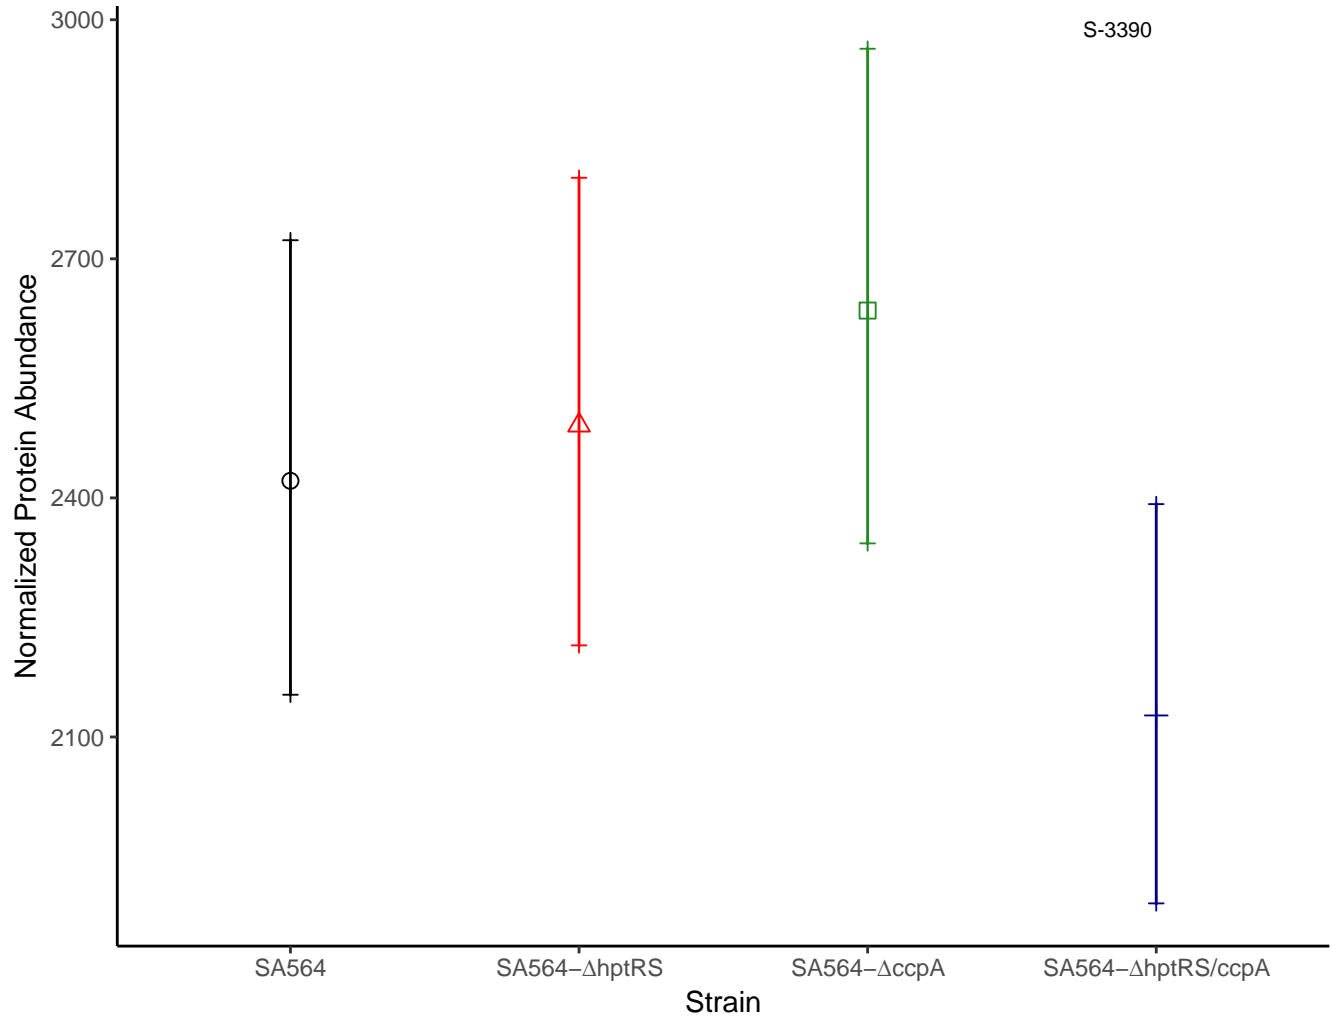

- ⊕ SA564
- △ SA564- $\Delta$ hptRS
- ⊞ SA564- $\Delta$ ccpA
- + SA564- $\Delta$ hptRS/ccpA

# SCPA\_STAAM

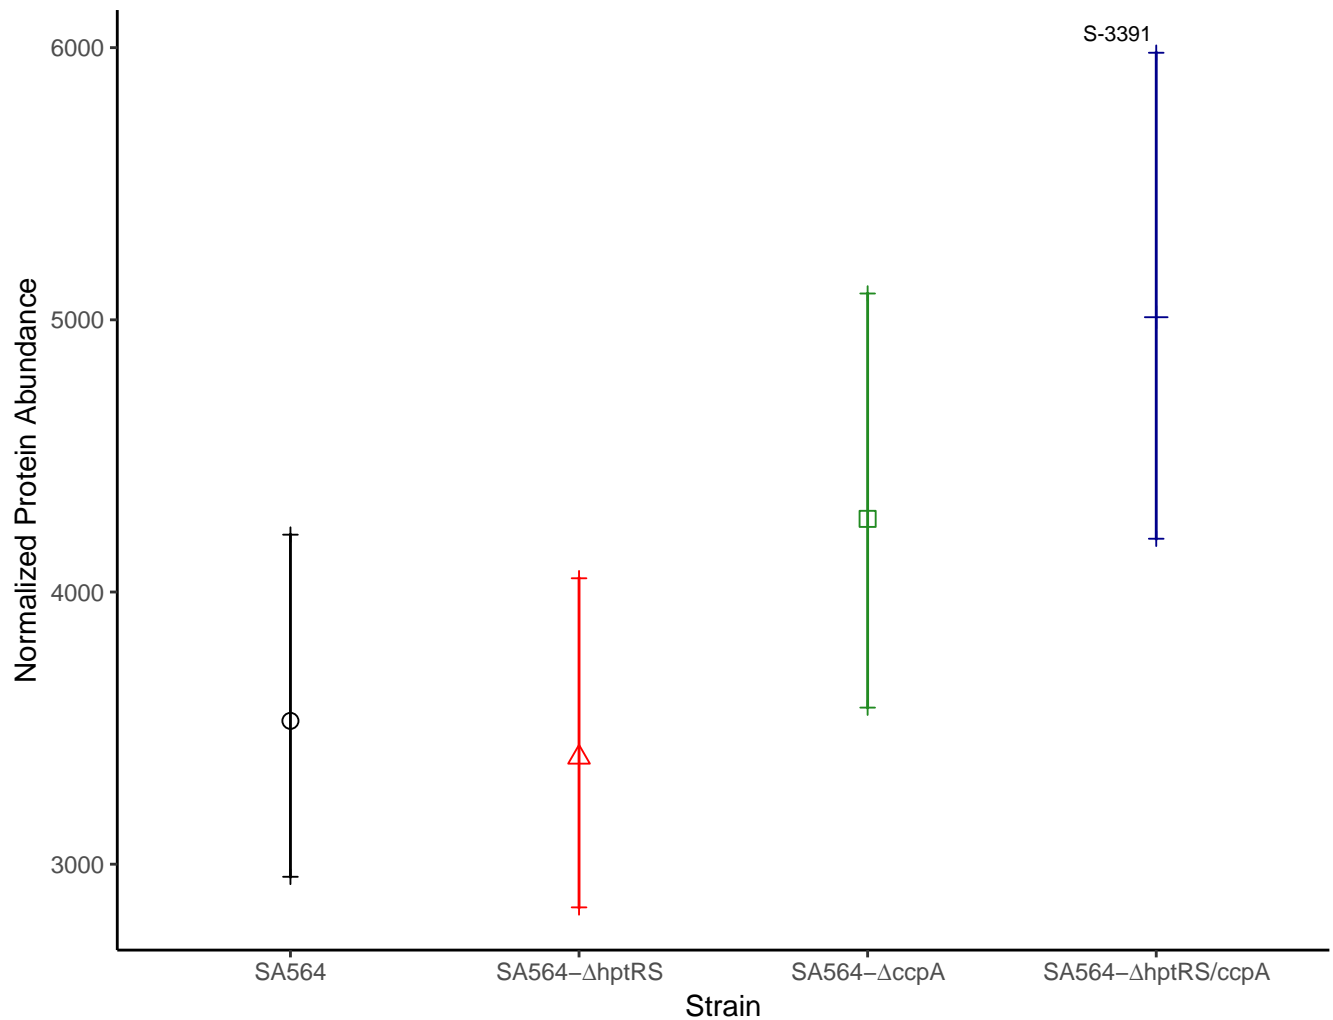

- ⊕ SA564
- △ SA564- $\Delta$ hptRS
- ⊞ SA564- $\Delta$ ccpA
- + SA564- $\Delta$ hptRS/ccpA

# SCPB\_STAAM

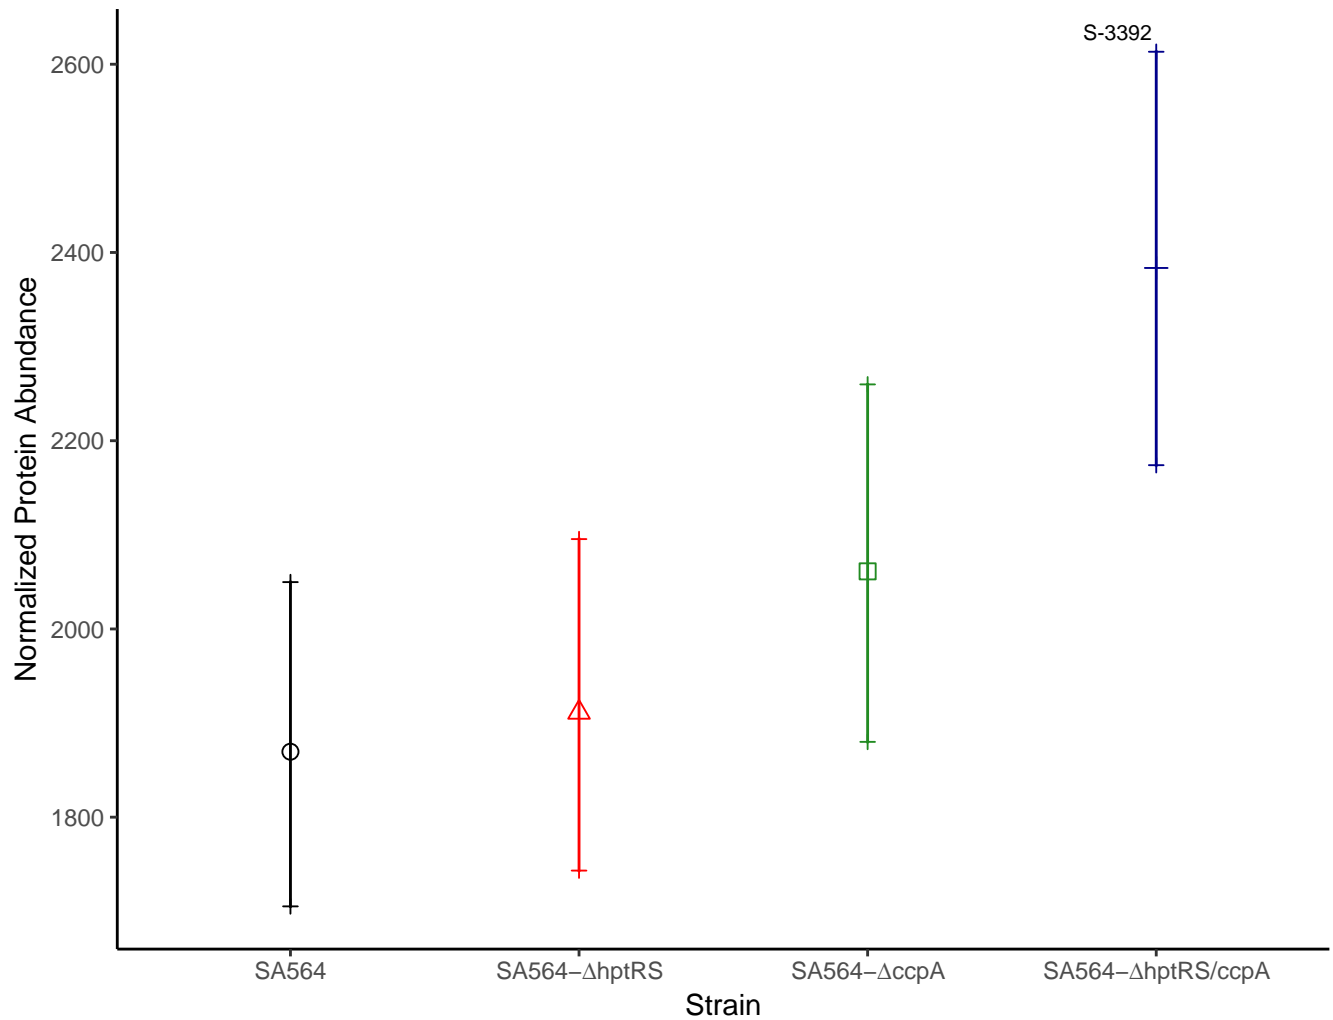

- ⊕ SA564
- △ SA564- $\Delta$ hptRS
- ⊞ SA564- $\Delta$ ccpA
- + SA564- $\Delta$ hptRS/ccpA



# SECA1\_STAAM

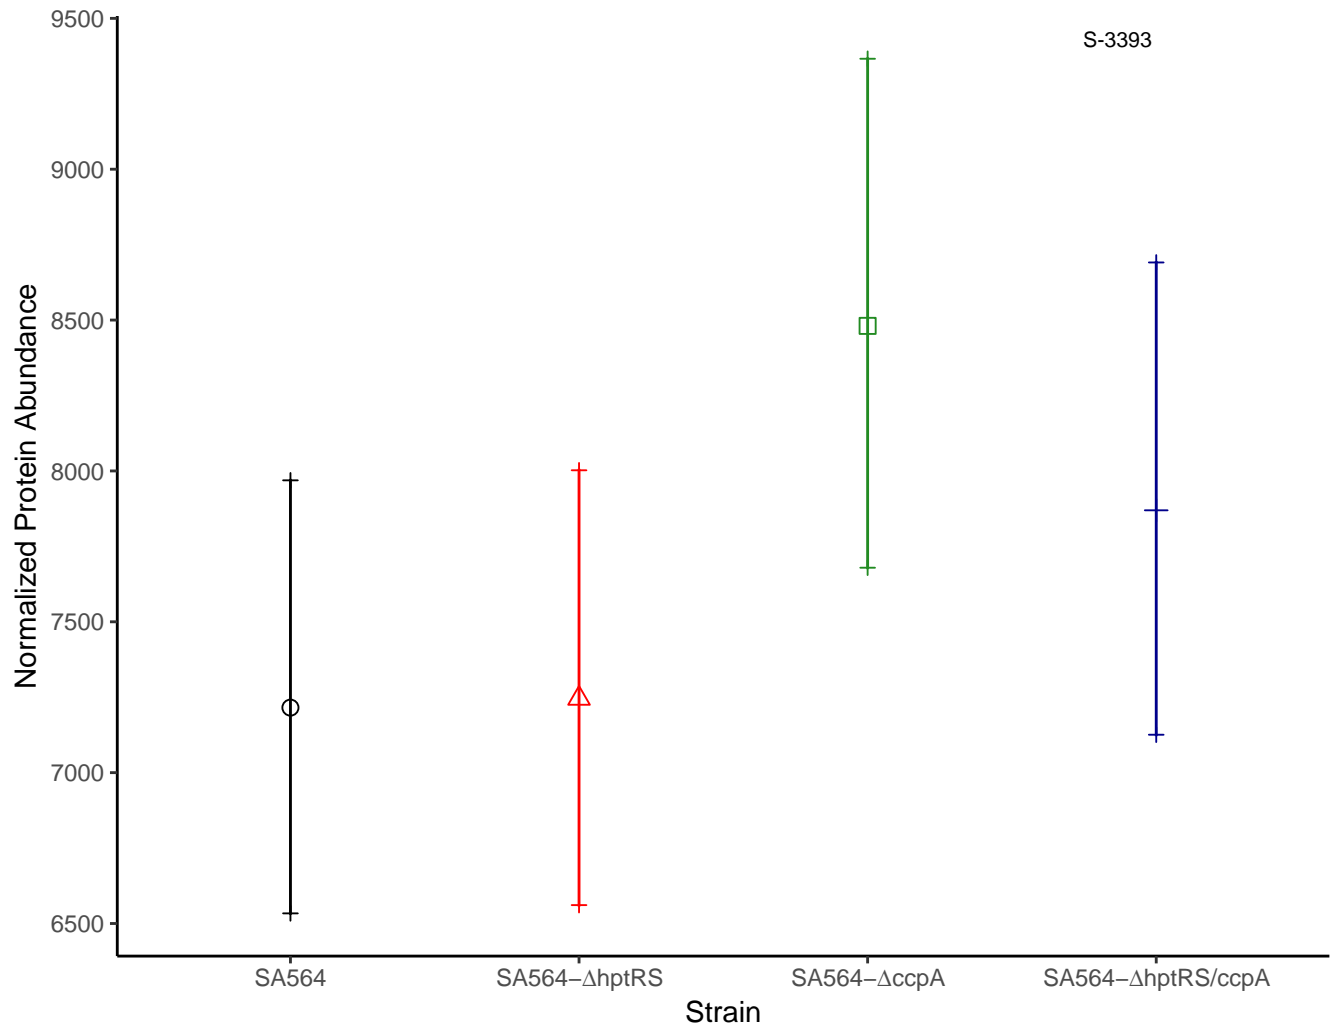

S-3393

- ⊕ SA564
- △ SA564- $\Delta$ hptRS
- ⊞ SA564- $\Delta$ ccpA
- + SA564- $\Delta$ hptRS/ccpA

# SIGA\_STAAM

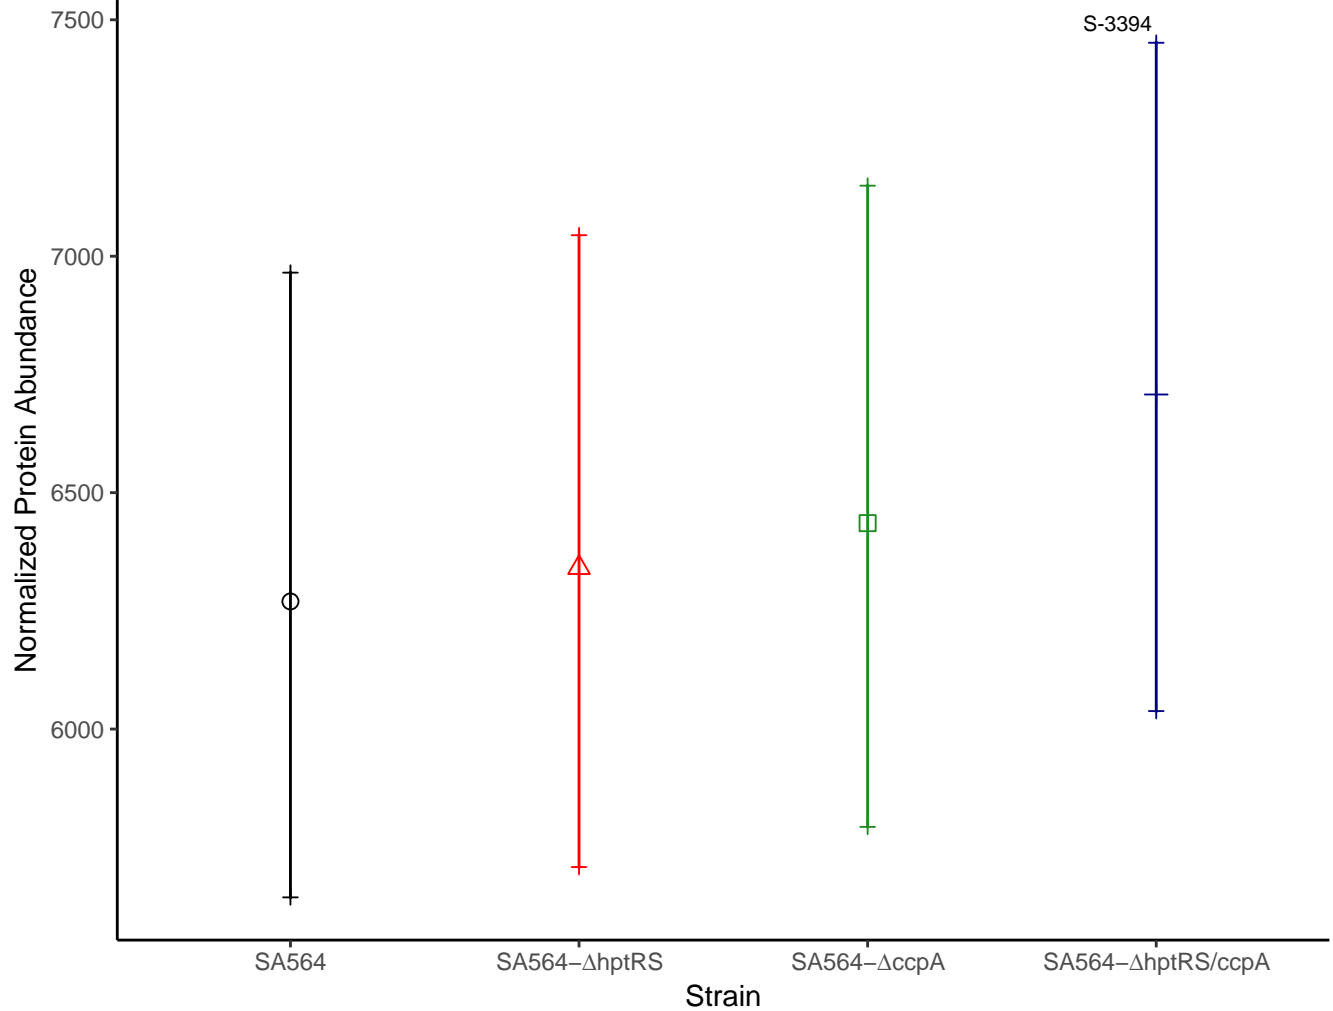

- ⊕ SA564
- △ SA564- $\Delta$ *hptRS*
- ⊞ SA564- $\Delta$ *ccpA*
- + SA564- $\Delta$ *hptRS/ccpA*

# SODM1\_STAAM

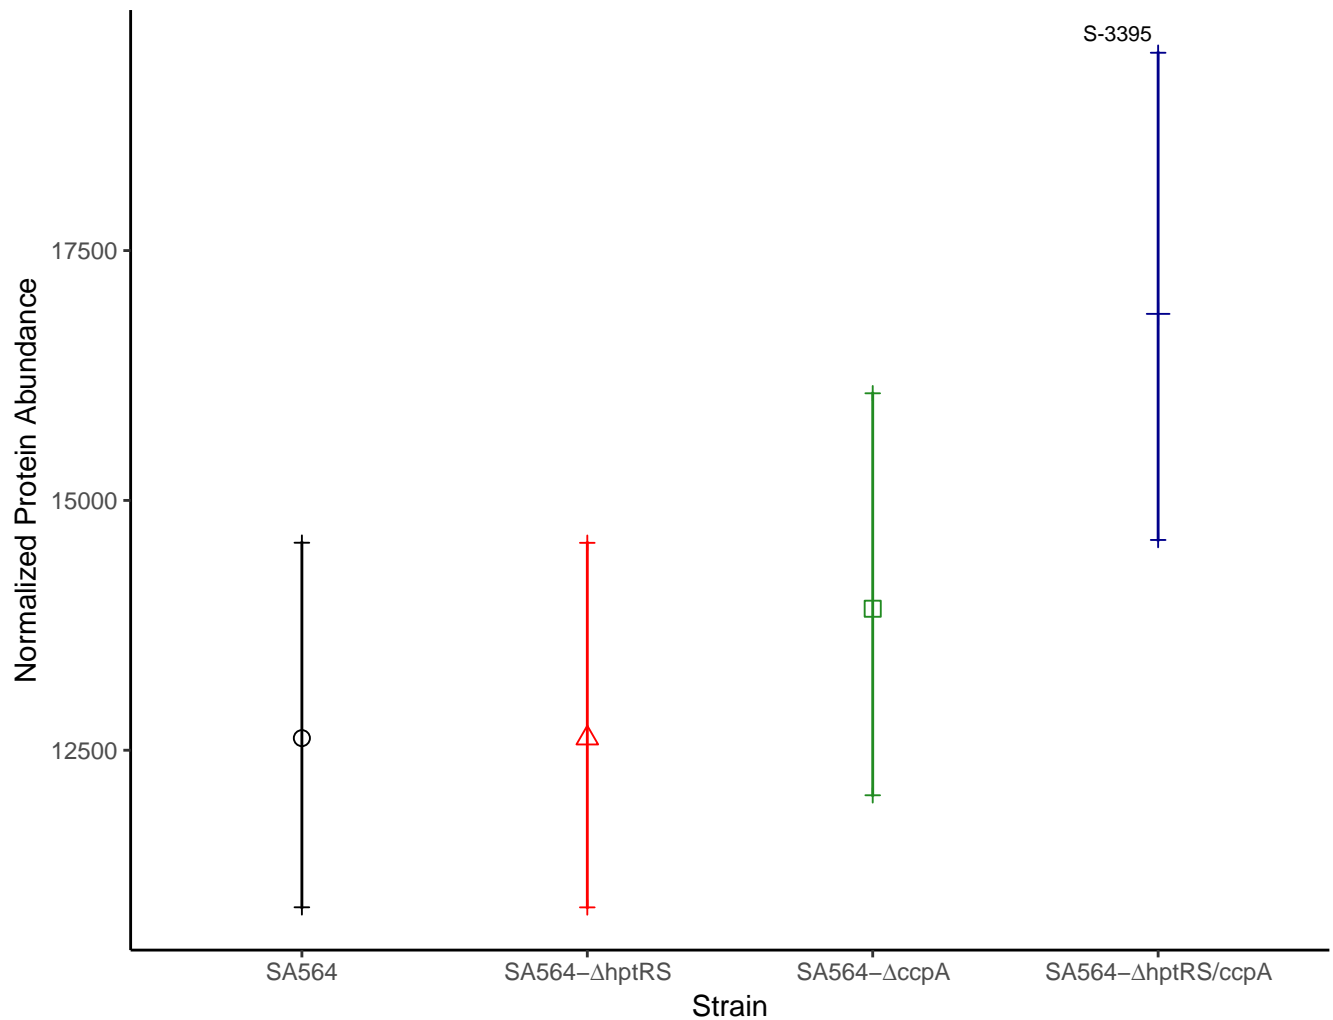

- ⊕ SA564
- △ SA564- $\Delta$ hptRS
- ⊞ SA564- $\Delta$ ccpA
- + SA564- $\Delta$ hptRS/ccpA

# SODM2\_STAAM

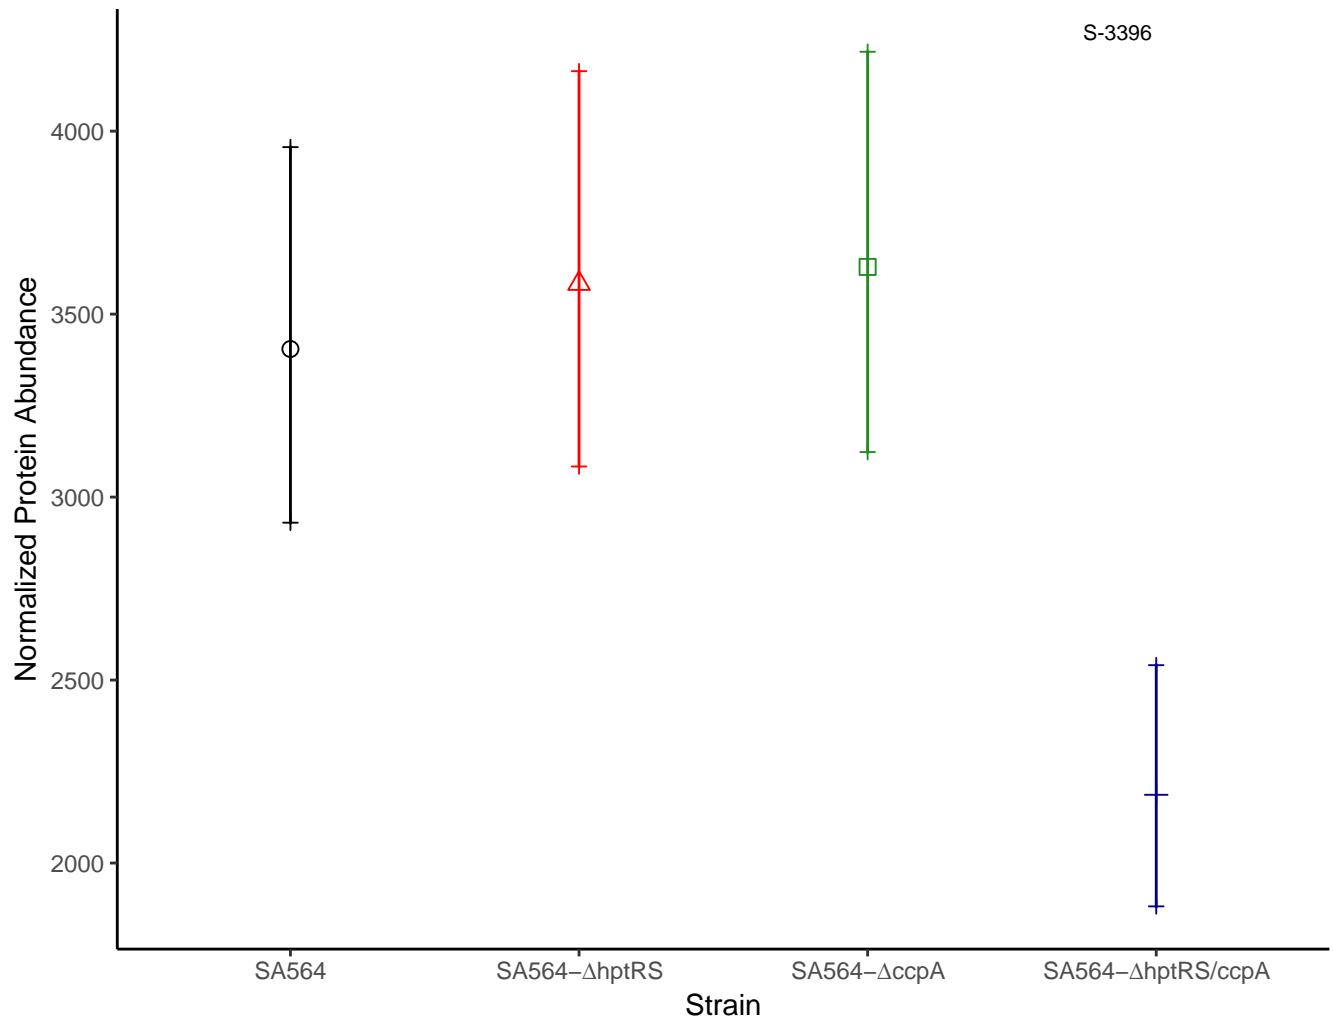

- ⊕ SA564
- △ SA564- $\Delta$ hptRS
- ⊞ SA564- $\Delta$ ccpA
- + SA564- $\Delta$ hptRS/ccpA

# SP5G\_STAAM

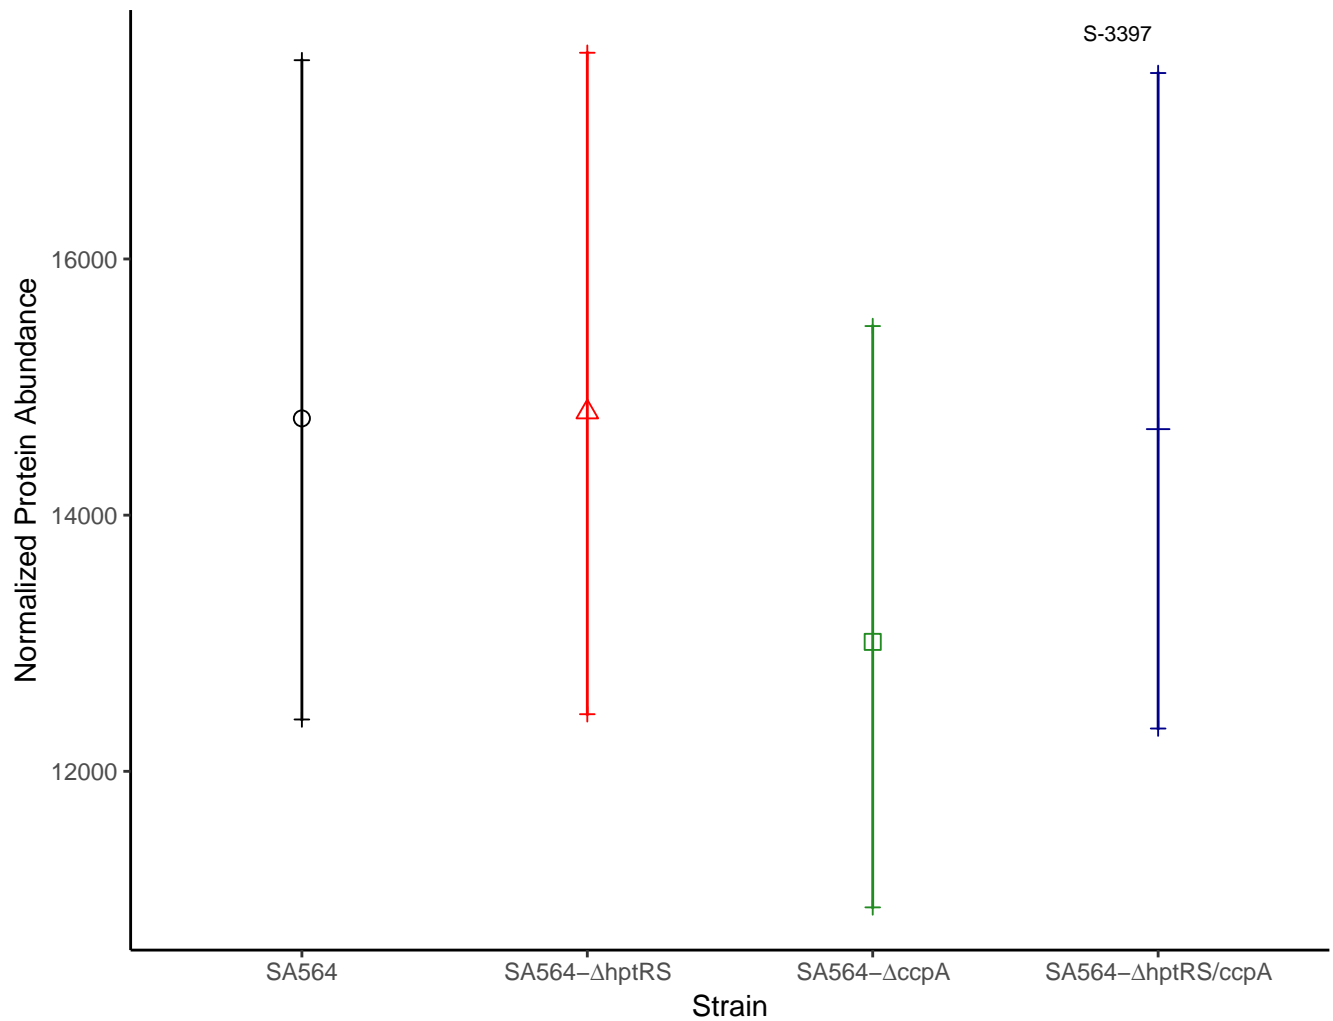

- ⊕ SA564
- △ SA564- $\Delta$ hptRS
- ⊞ SA564- $\Delta$ ccpA
- + SA564- $\Delta$ hptRS/ccpA

## SPA\_STAAM

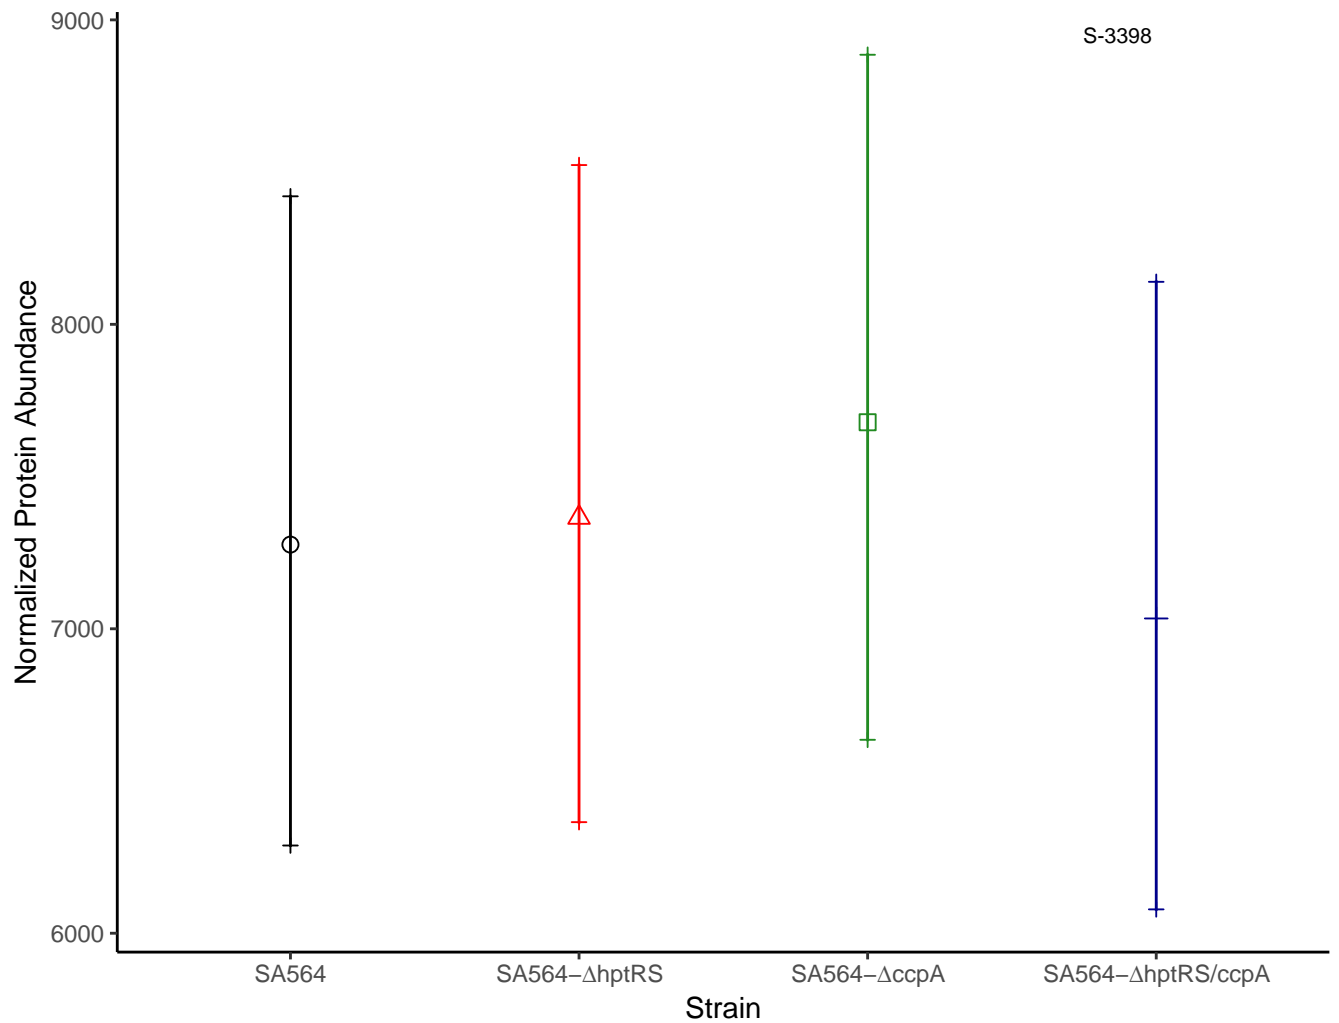

- ⊕ SA564
- △ SA564- $\Delta$ hptRS
- ⊞ SA564- $\Delta$ ccpA
- + SA564- $\Delta$ hptRS/ccpA

# SPLD\_STAAM

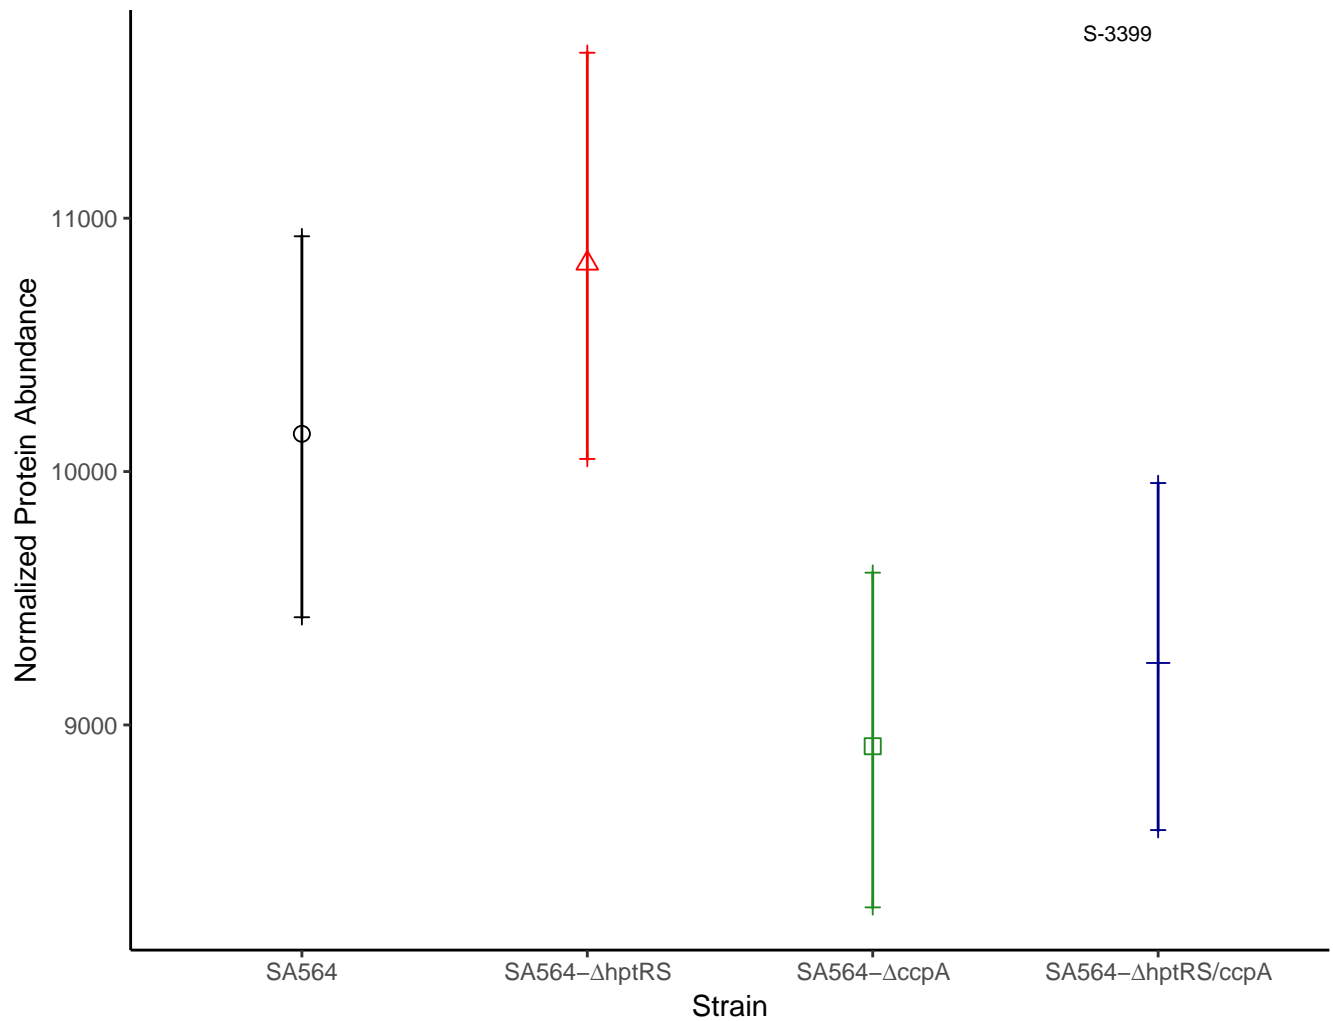

- ⊕ SA564
- △ SA564- $\Delta$ *hptRS*
- ⊞ SA564- $\Delta$ *ccpA*
- + SA564- $\Delta$ *hptRS/ccpA*

# SPX\_STAAM

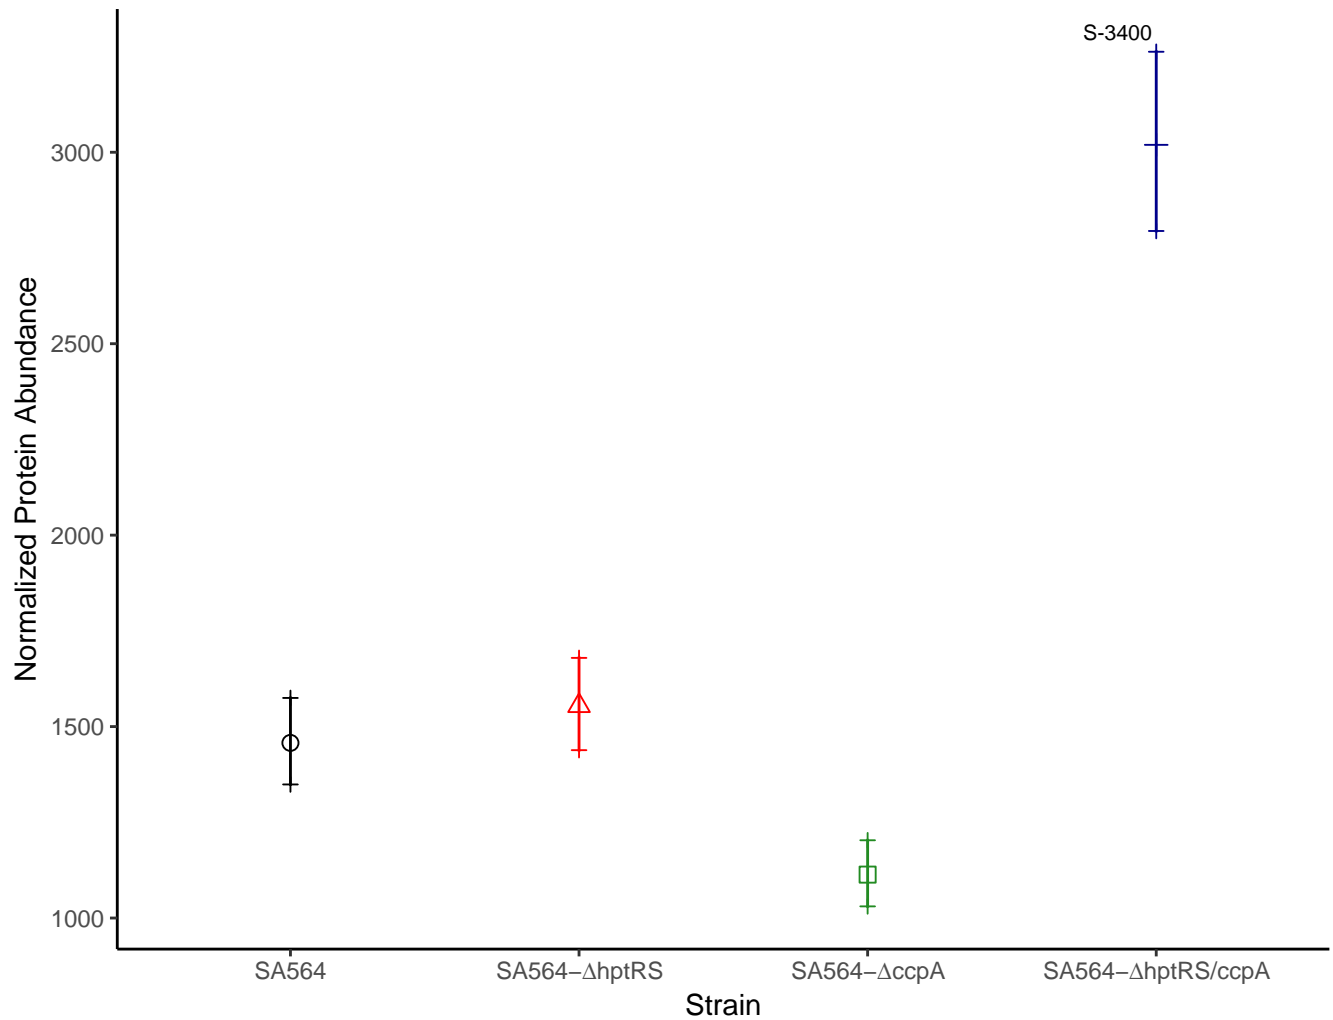

- ⊕ SA564
- △ SA564- $\Delta$ hptRS
- ⊞ SA564- $\Delta$ ccpA
- + SA564- $\Delta$ hptRS/ccpA



# SRRR\_STAAM

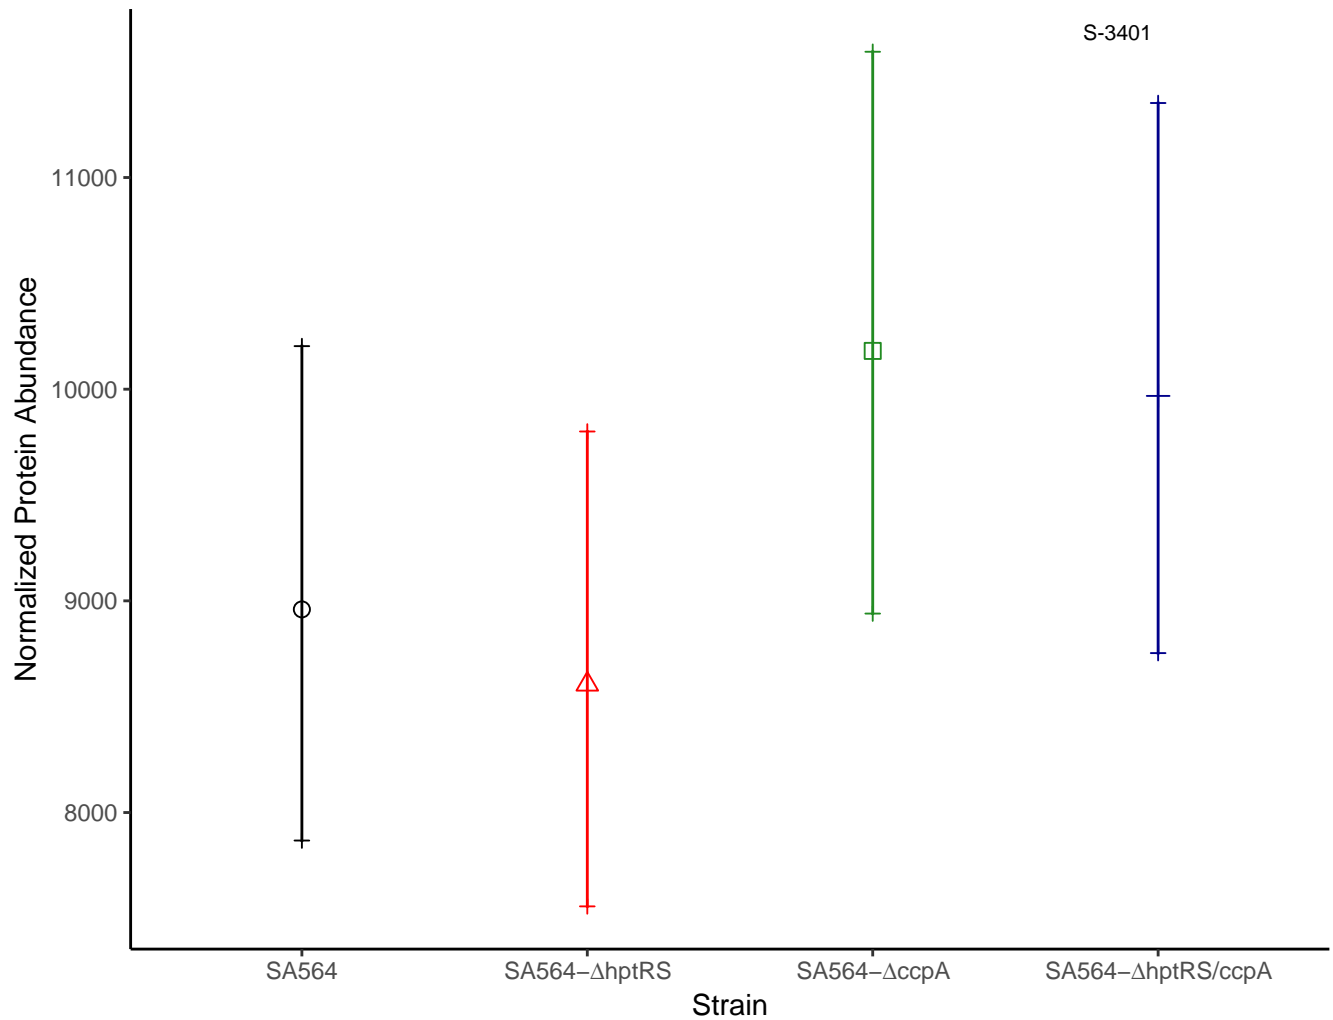

- ⊕ SA564
- △ SA564- $\Delta$ hptRS
- ⊞ SA564- $\Delta$ ccpA
- + SA564- $\Delta$ hptRS/ccpA

# SSAA2\_STAAM

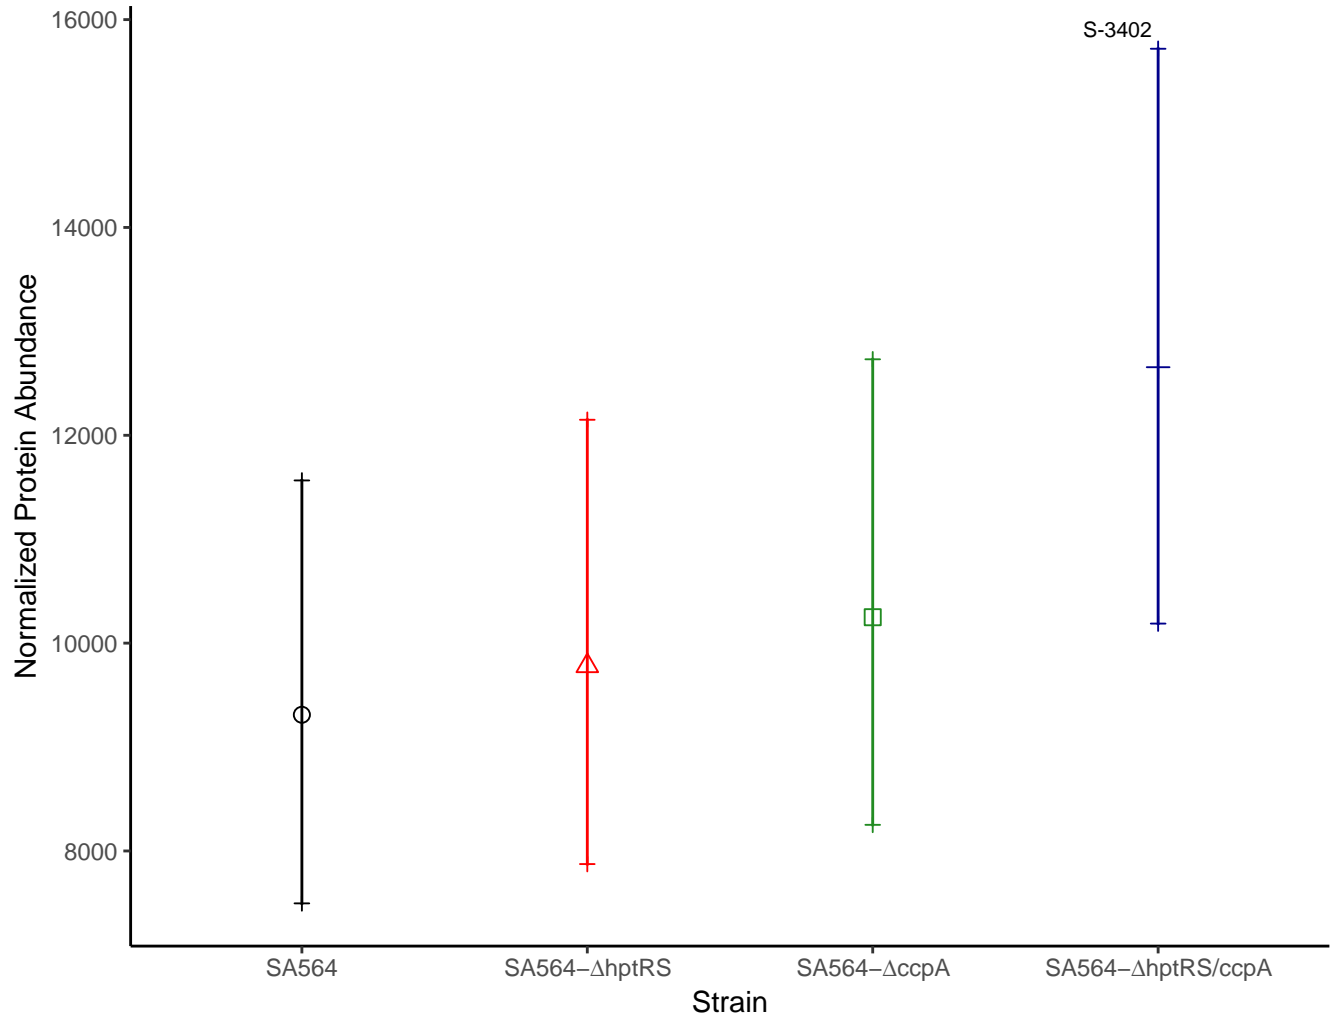

- ⊕ SA564
- △ SA564- $\Delta$ hptRS
- ⊞ SA564- $\Delta$ ccpA
- + SA564- $\Delta$ hptRS/ccpA

# SSB1\_STAAM

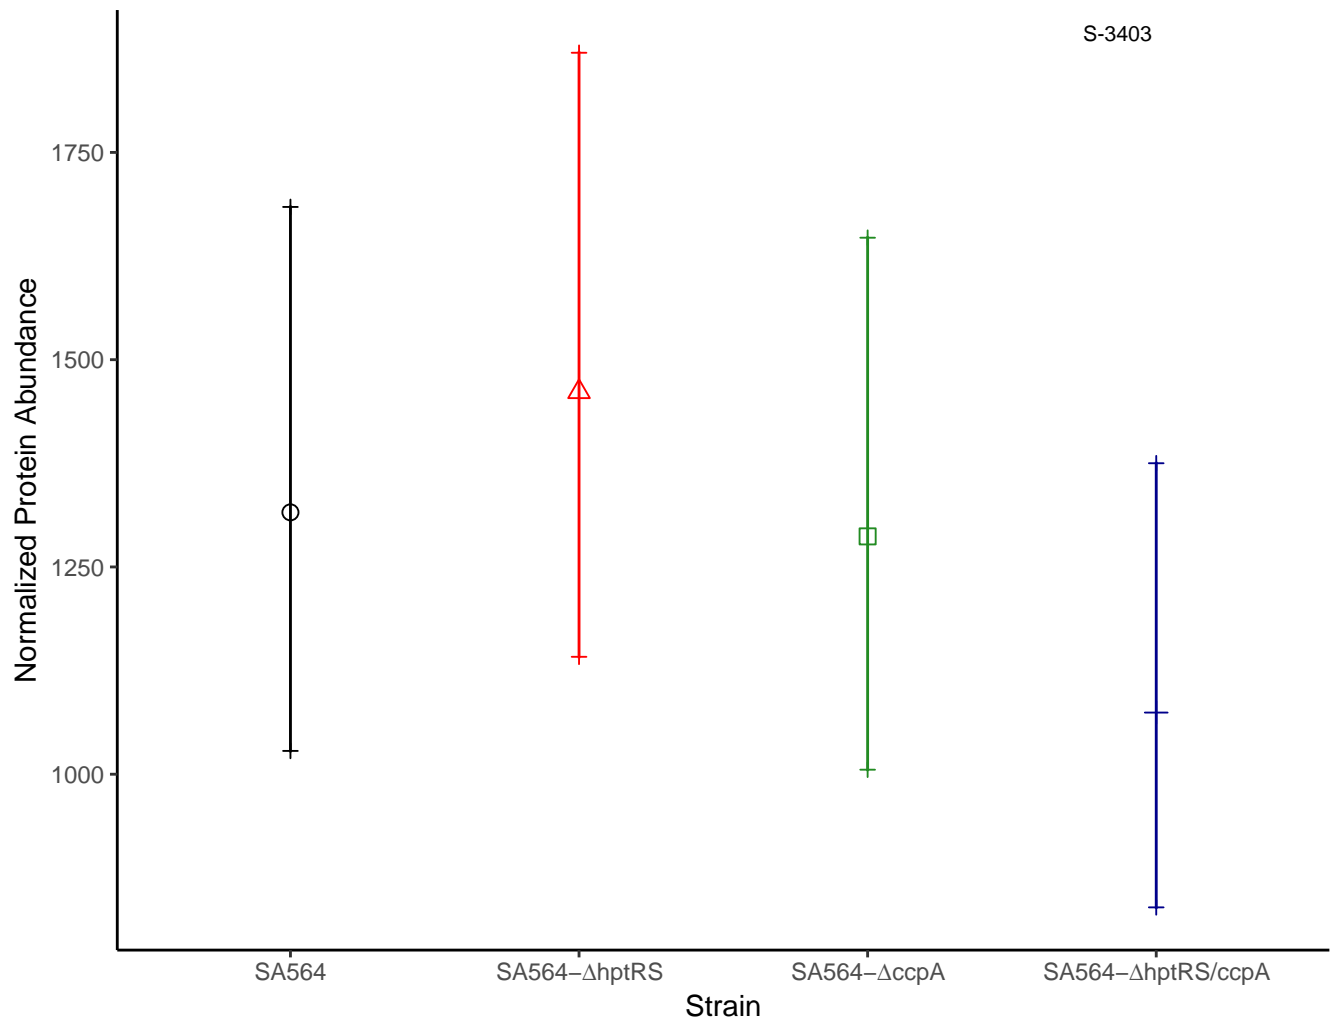

- ⊕ SA564
- △ SA564- $\Delta$ hptRS
- ⊞ SA564- $\Delta$ ccpA
- + SA564- $\Delta$ hptRS/ccpA

# SSB2\_STAAM

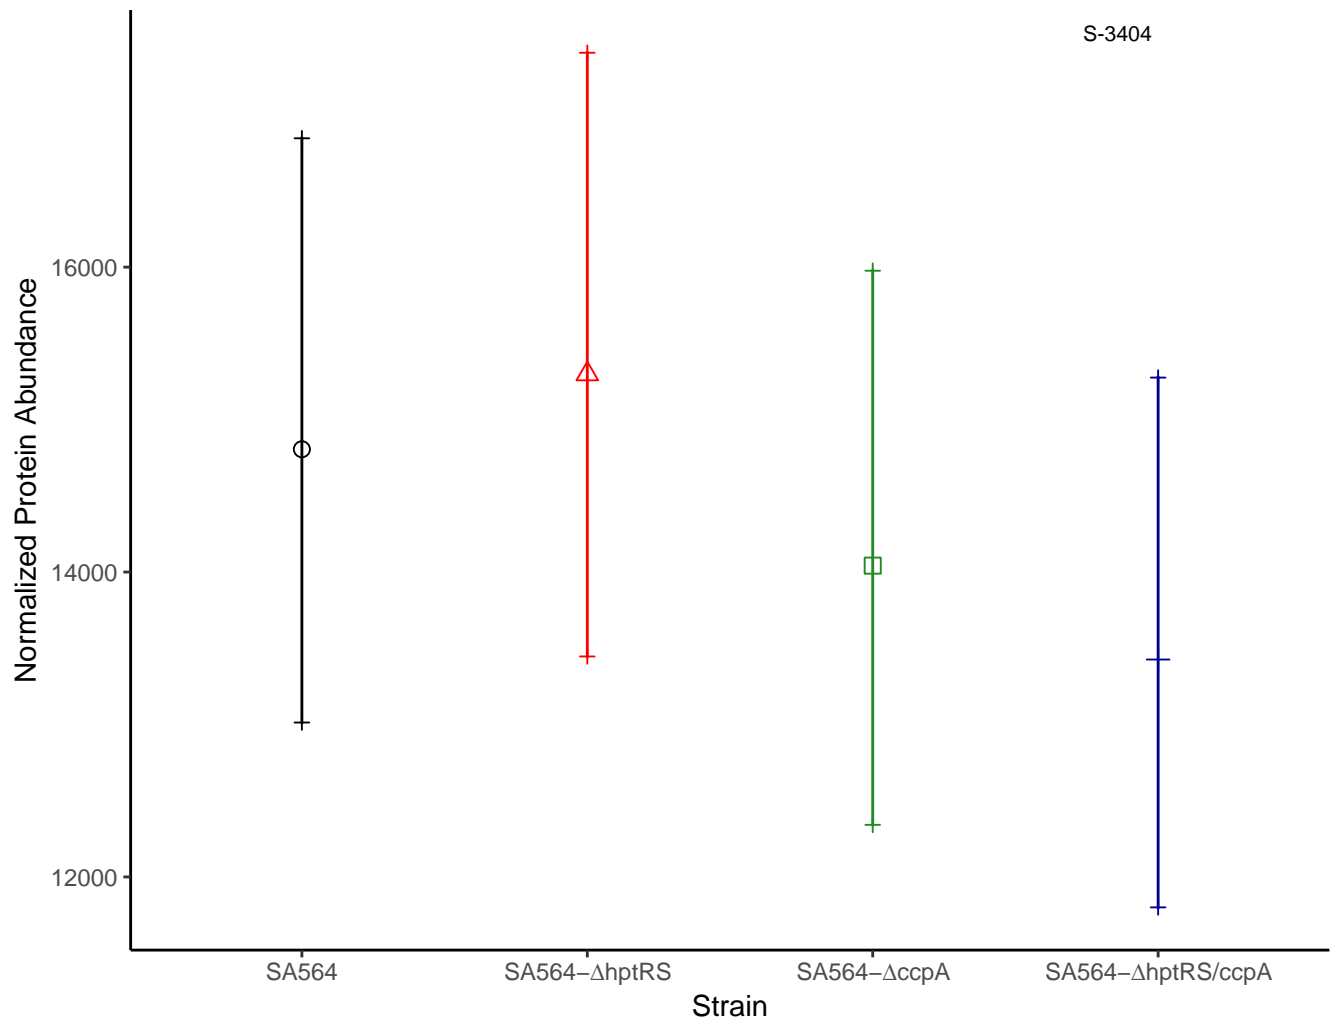

- ⊕ SA564
- △ SA564- $\Delta$ hptRS
- ⊞ SA564- $\Delta$ ccpA
- + SA564- $\Delta$ hptRS/ccpA

# SUCC\_STAAM

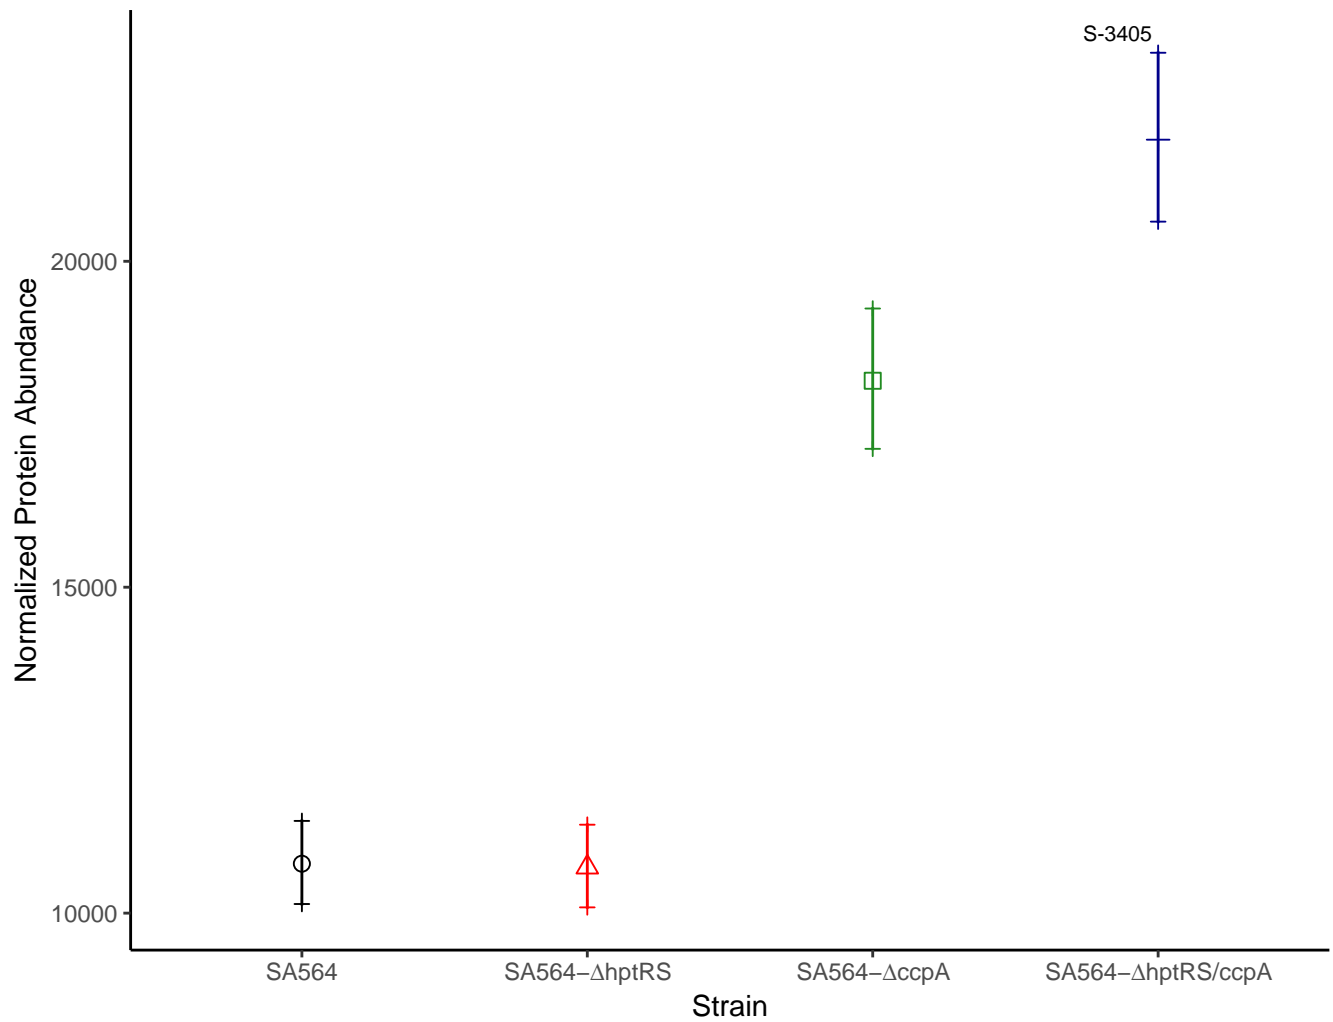

- ⊕ SA564
- △ SA564- $\Delta$ hptRS
- ⊞ SA564- $\Delta$ ccpA
- + SA564- $\Delta$ hptRS/ccpA

# SUCD\_STAAM

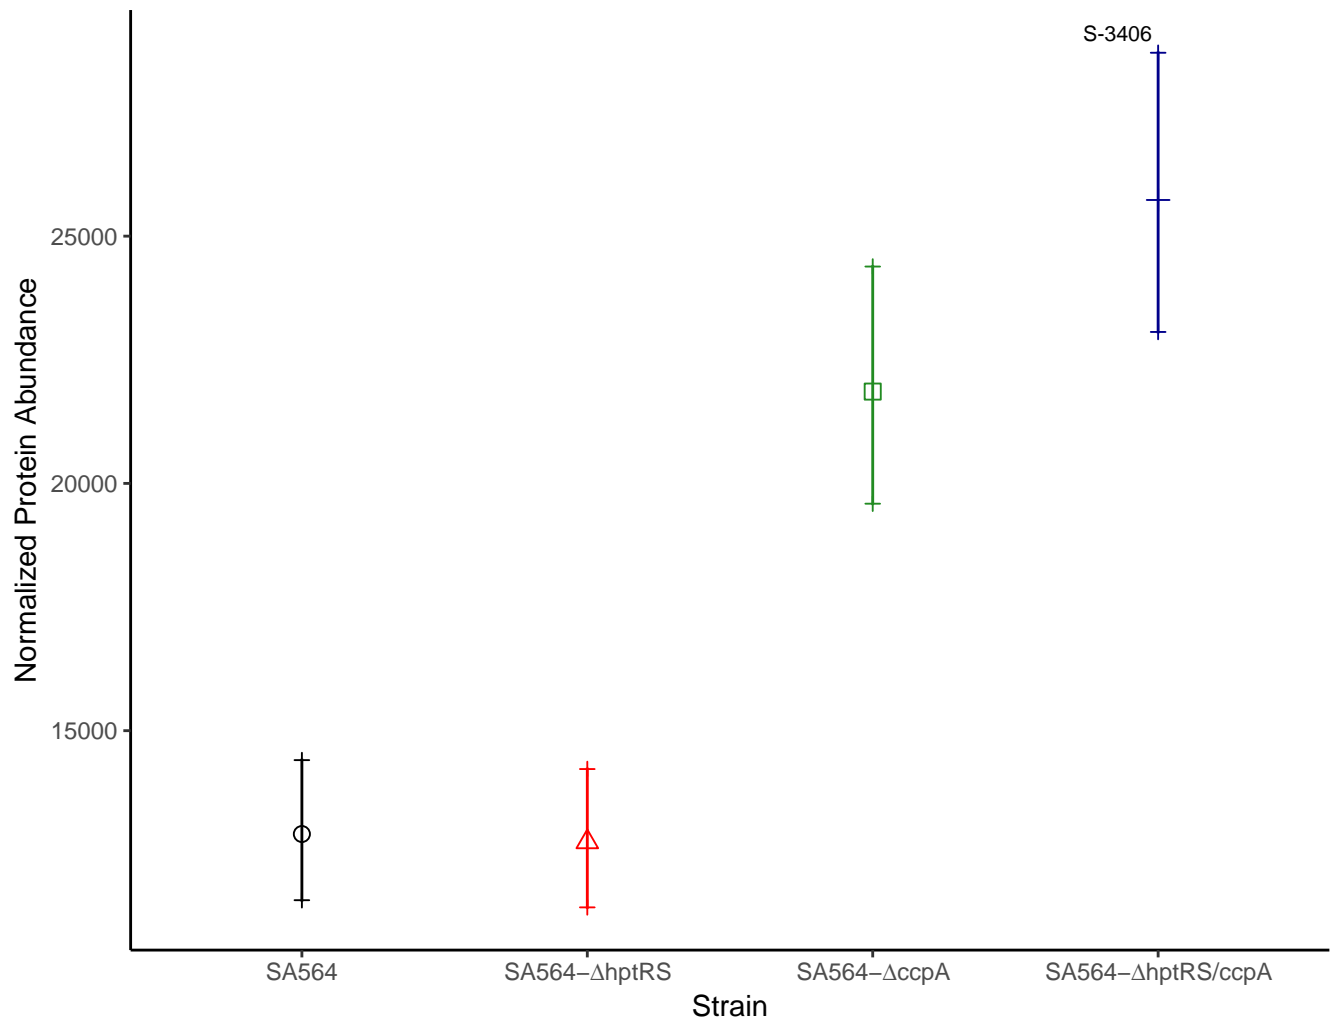

- ⊕ SA564
- △ SA564- $\Delta$ hptRS
- ⊞ SA564- $\Delta$ ccpA
- + SA564- $\Delta$ hptRS/ccpA

# SYA\_STAAM

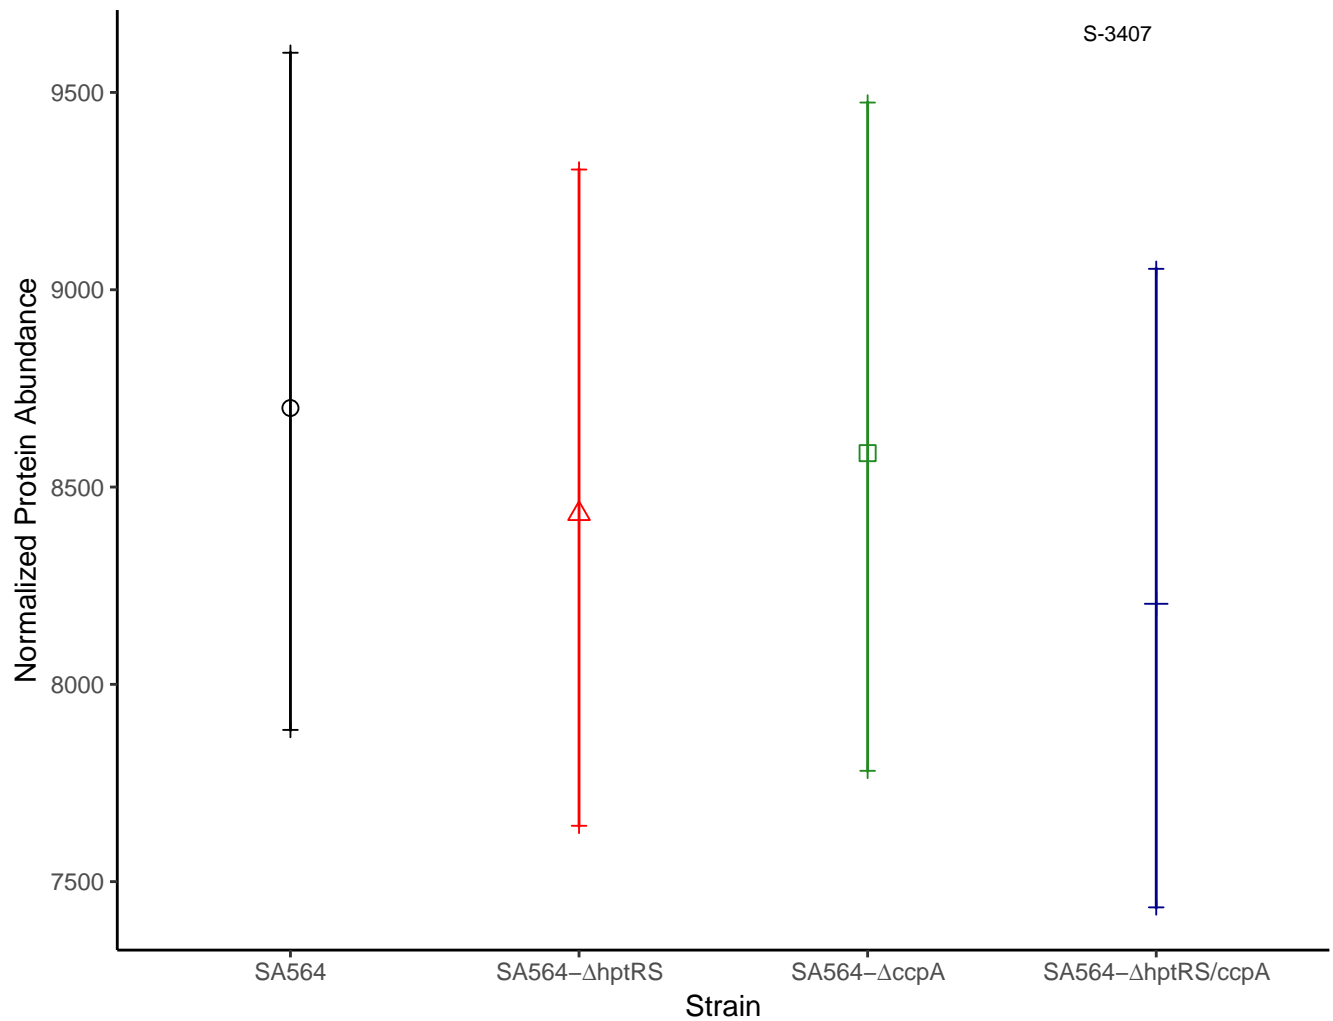

- ⊕ SA564
- △ SA564- $\Delta$ *hptRS*
- ⊞ SA564- $\Delta$ *ccpA*
- + SA564- $\Delta$ *hptRS/ccpA*

# SYC\_STAAM

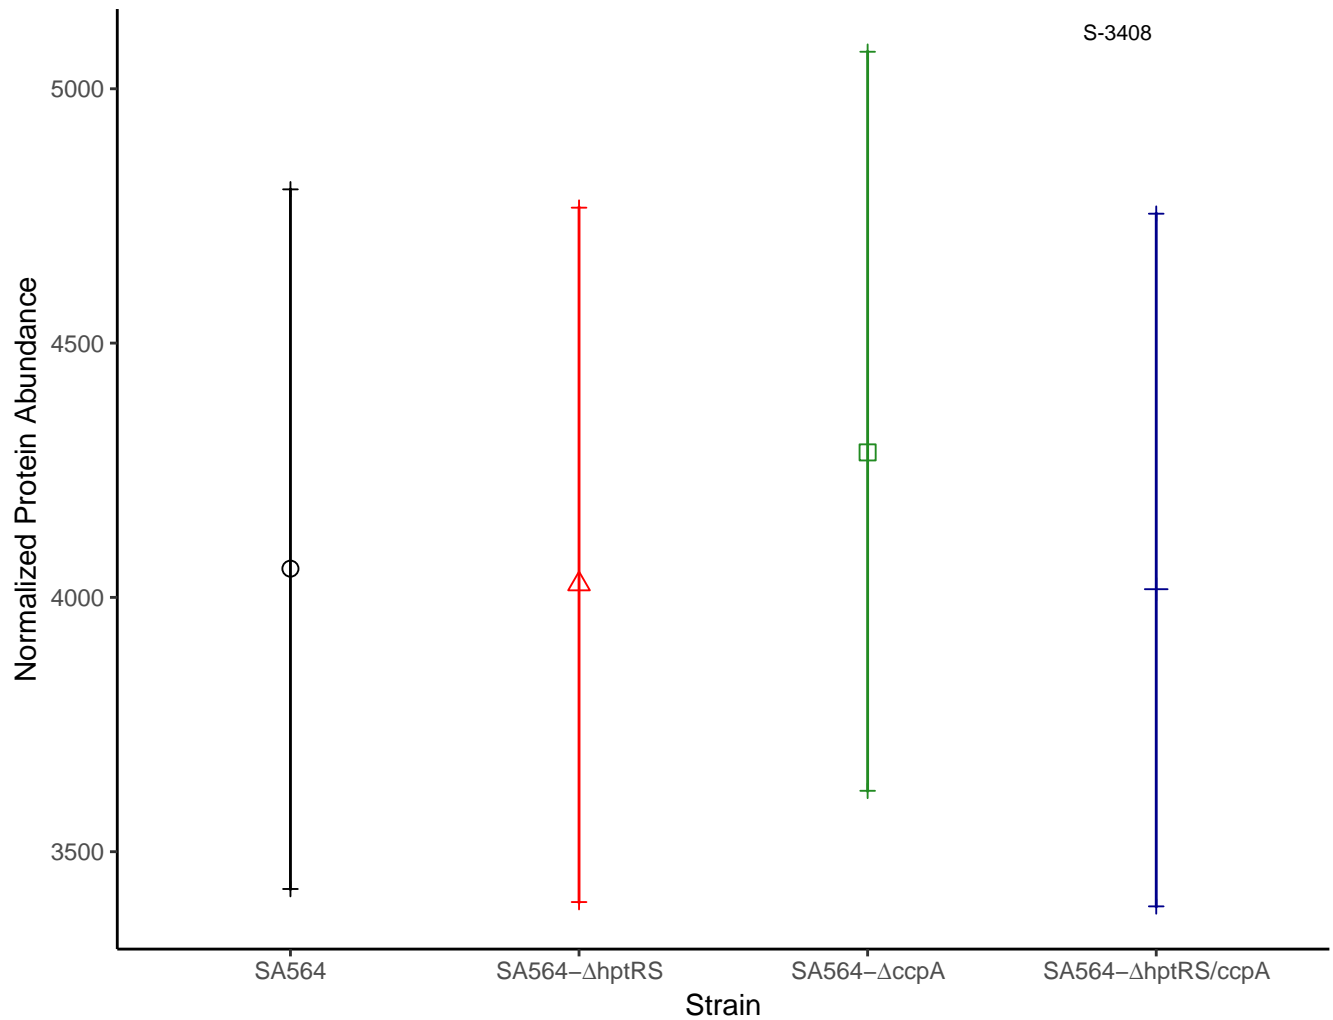

- ⊕ SA564
- △ SA564- $\Delta$ *hptRS*
- ⊞ SA564- $\Delta$ *ccpA*
- + SA564- $\Delta$ *hptRS/ccpA*



# SYD\_STAAM

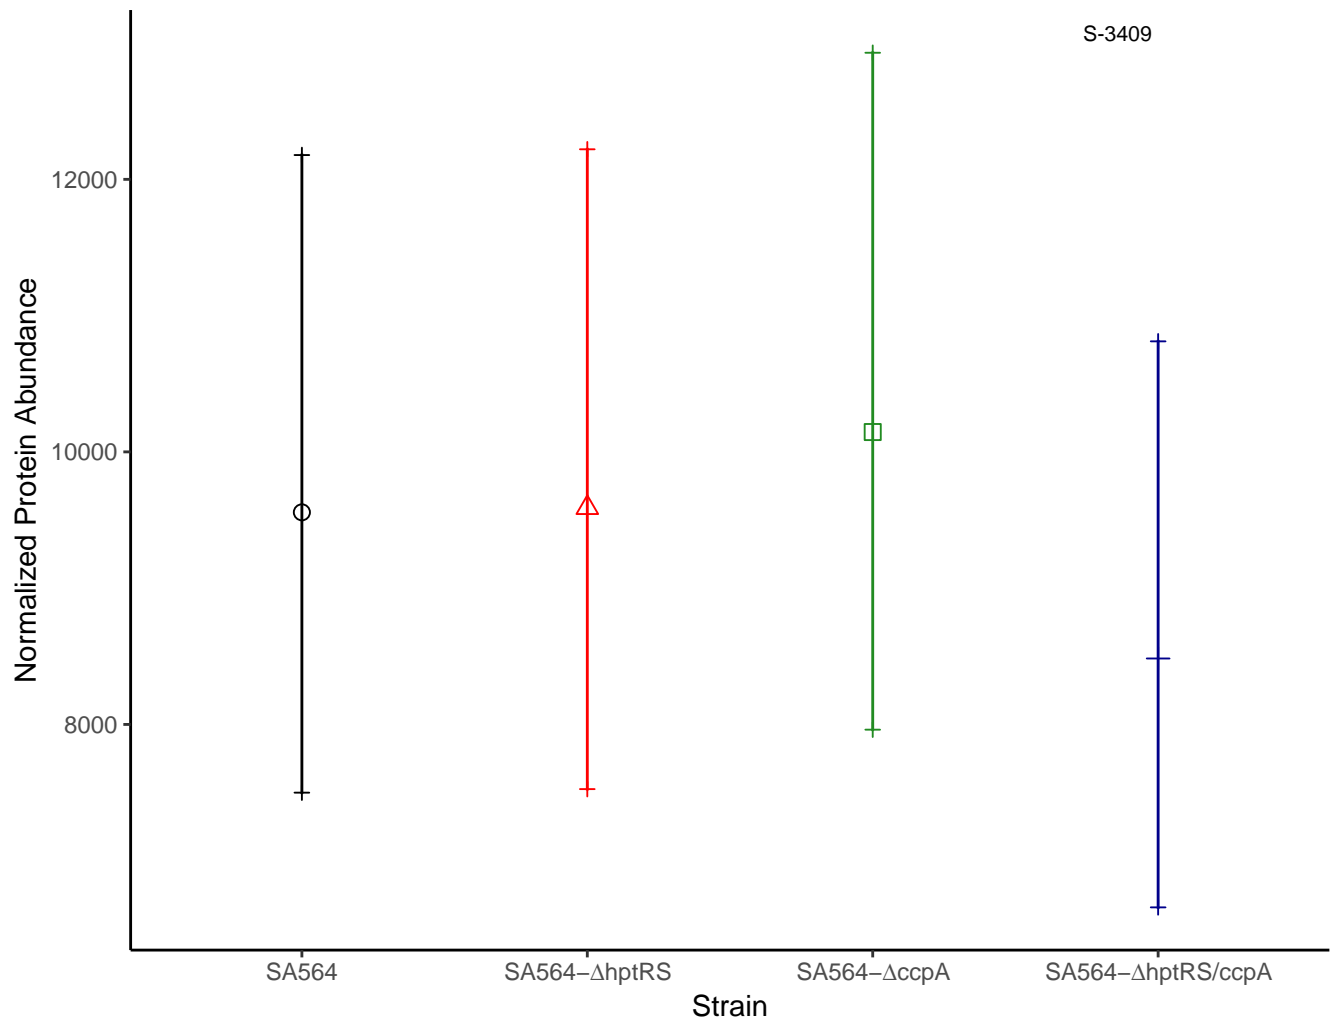

- ⊕ SA564
- △ SA564- $\Delta$ hptRS
- ⊞ SA564- $\Delta$ ccpA
- + SA564- $\Delta$ hptRS/ccpA

# SYE\_STAAM

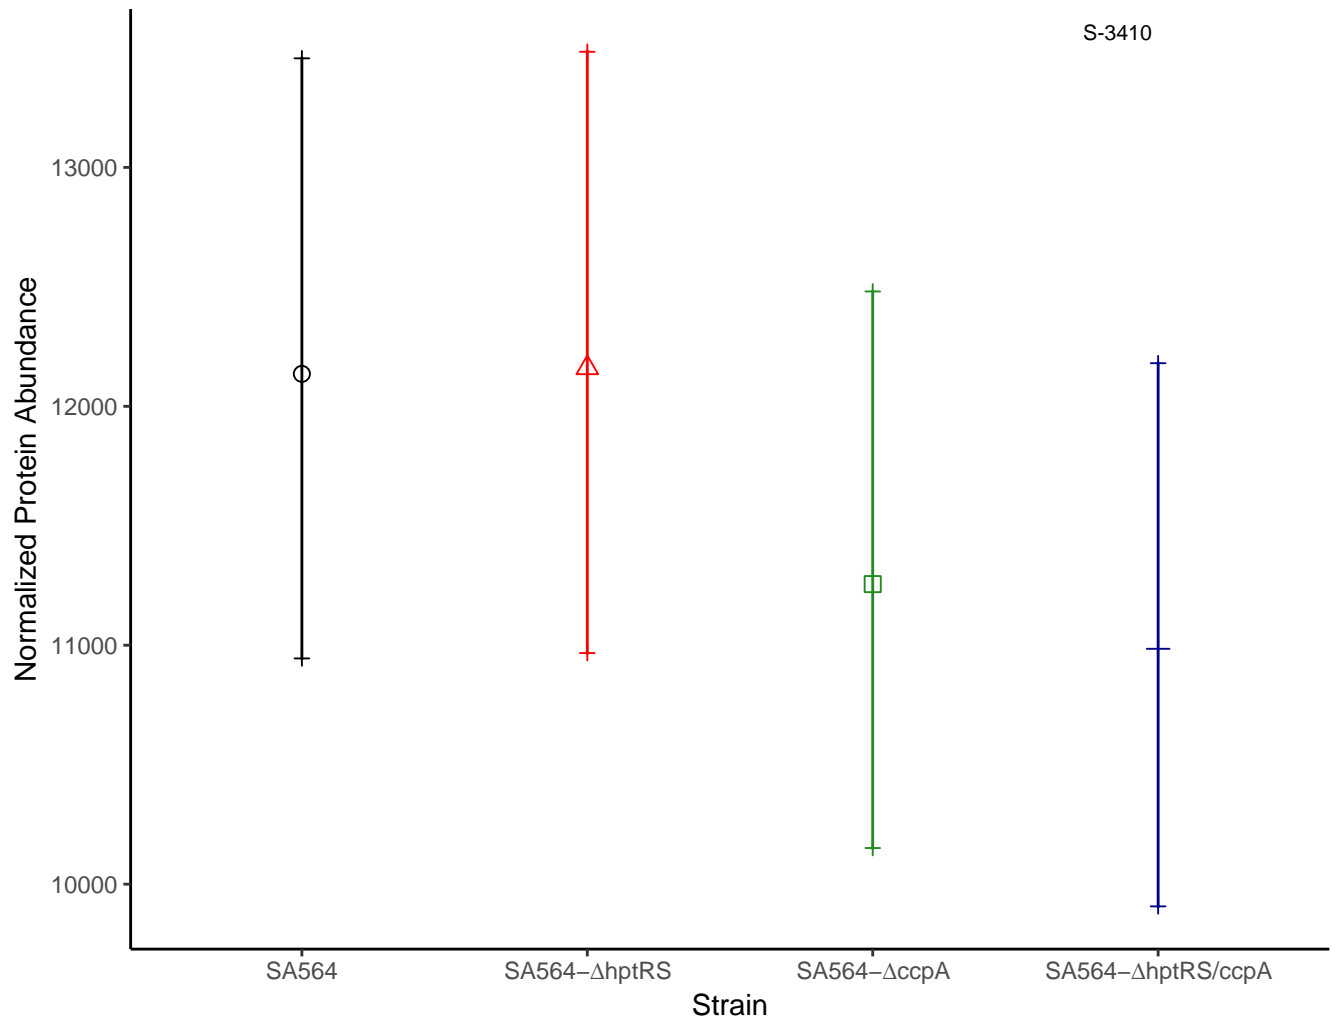

- ⊕ SA564
- △ SA564- $\Delta$ hptRS
- ⊞ SA564- $\Delta$ ccpA
- + SA564- $\Delta$ hptRS/ccpA

# SYFB\_STAAM

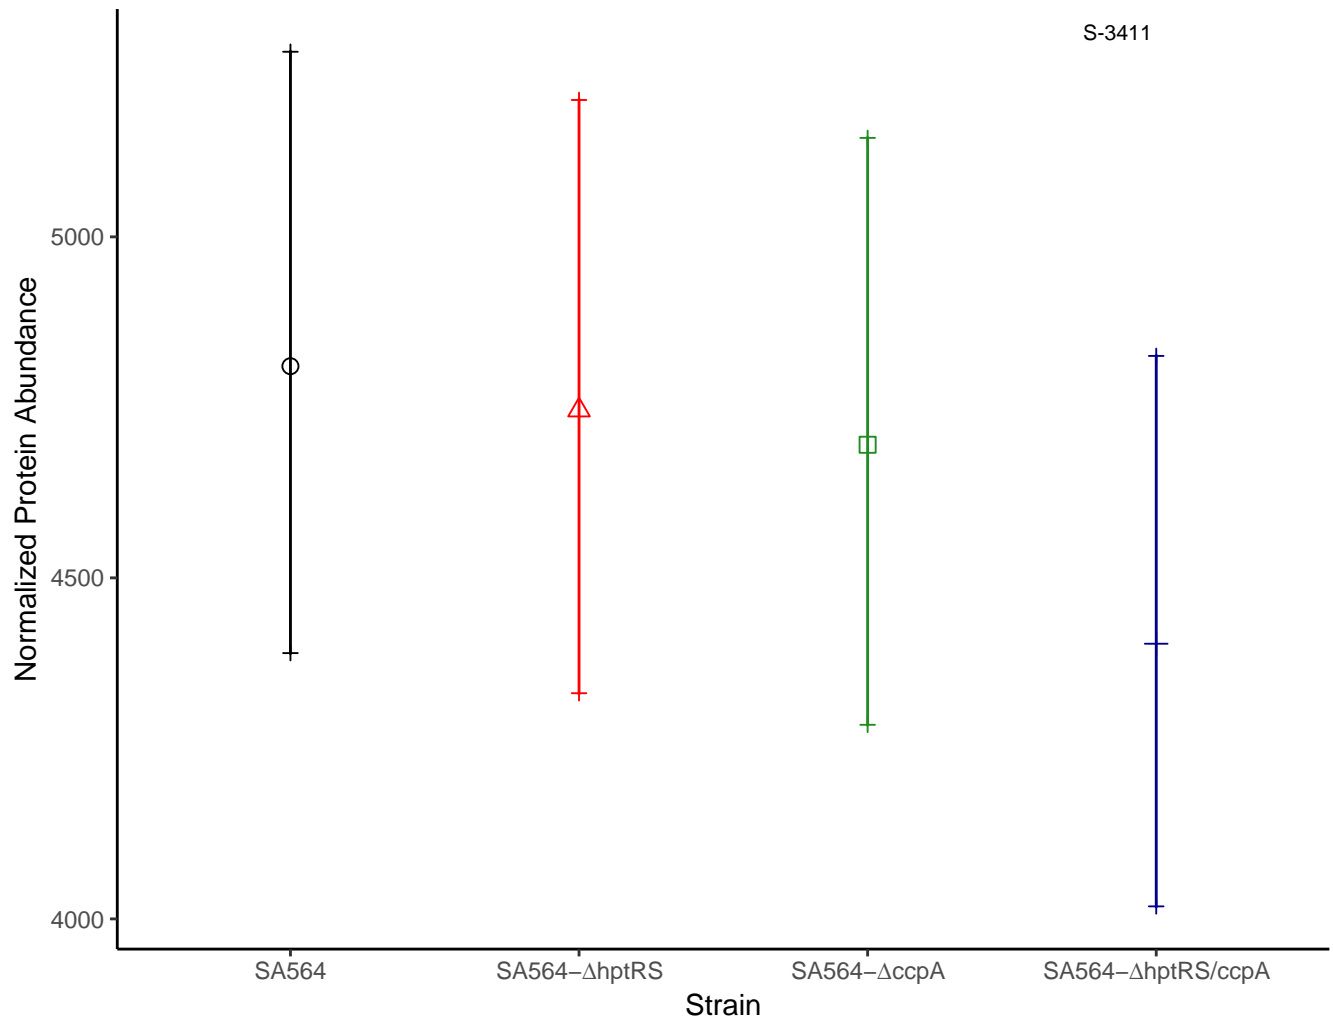

- ⊕ SA564
- △ SA564- $\Delta$ hptRS
- ⊞ SA564- $\Delta$ ccpA
- + SA564- $\Delta$ hptRS/ccpA

# SYG\_STAAM

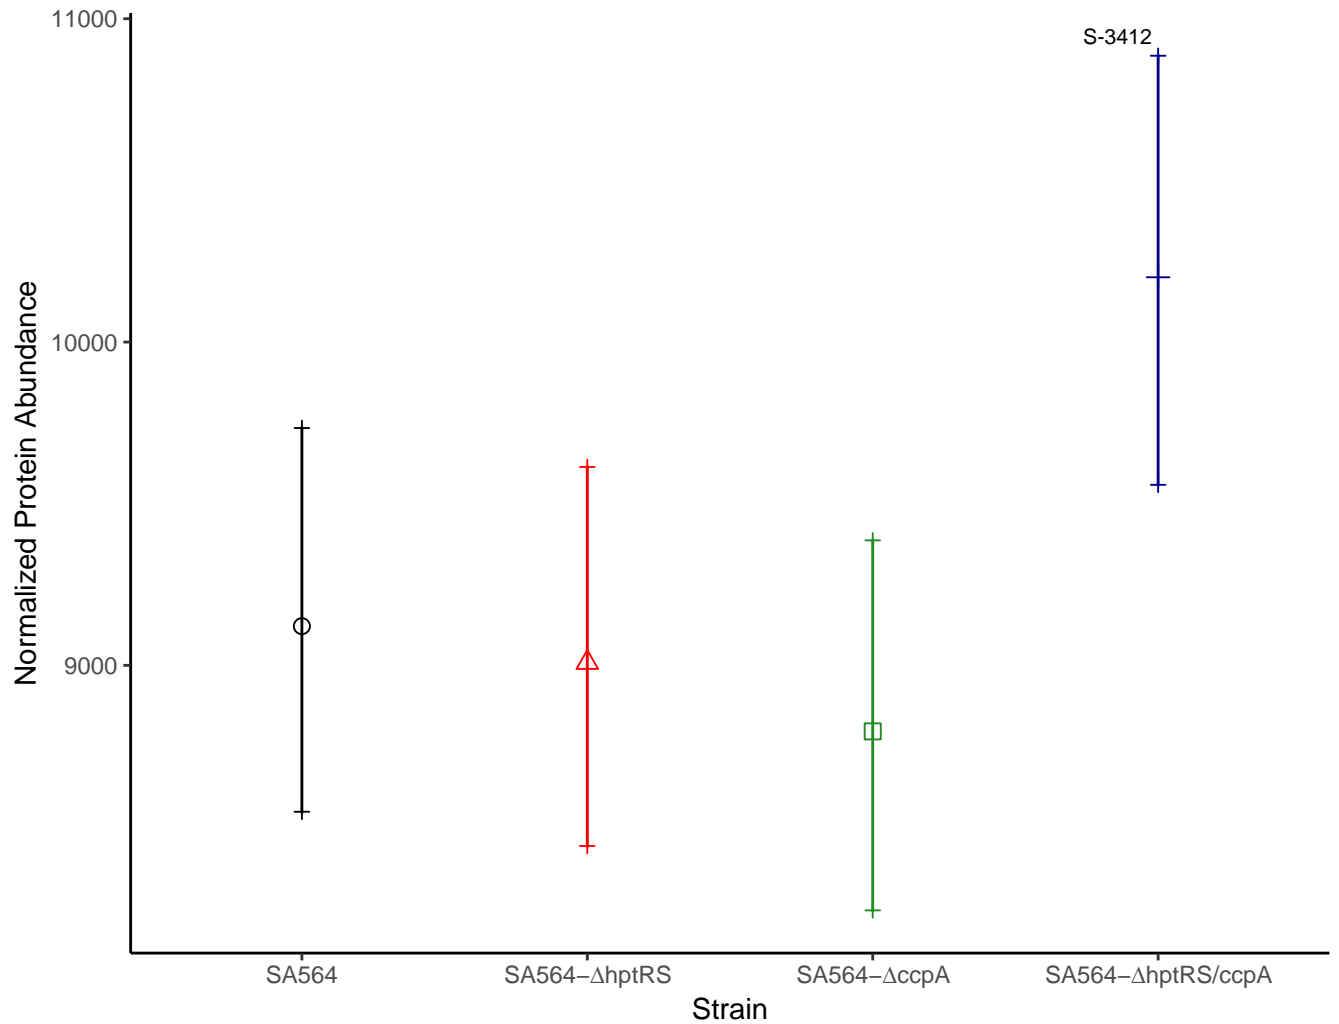

- ⊕ SA564
- △ SA564- $\Delta$ hptRS
- ⊞ SA564- $\Delta$ ccpA
- + SA564- $\Delta$ hptRS/ccpA

# SYH\_STAAM

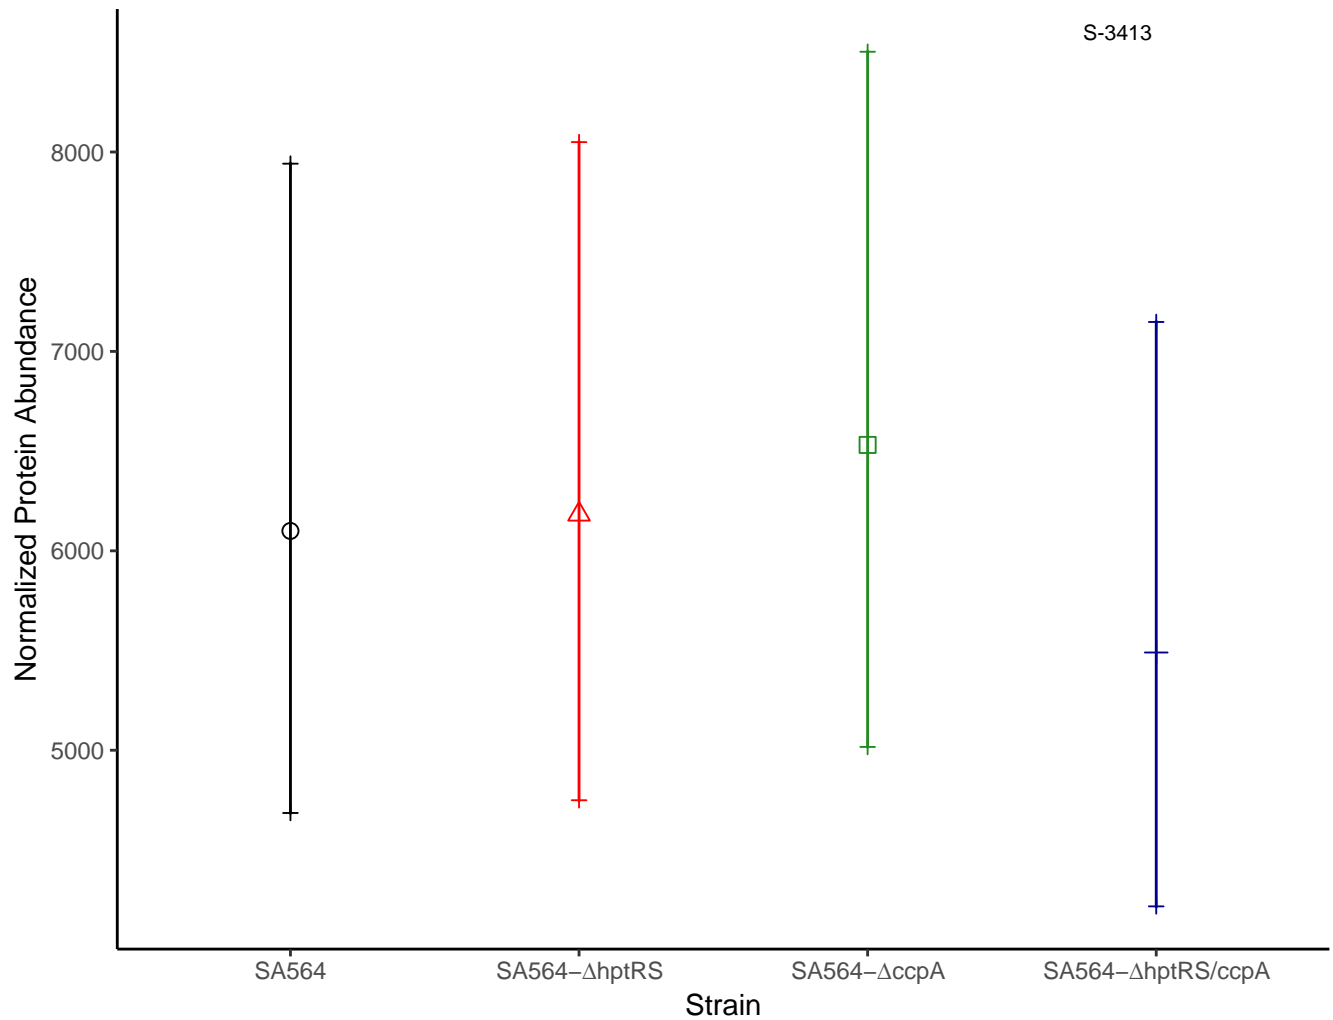

- ⊕ SA564
- △ SA564- $\Delta$ hptRS
- ⊞ SA564- $\Delta$ ccpA
- + SA564- $\Delta$ hptRS/ccpA

# SYI\_STAAM

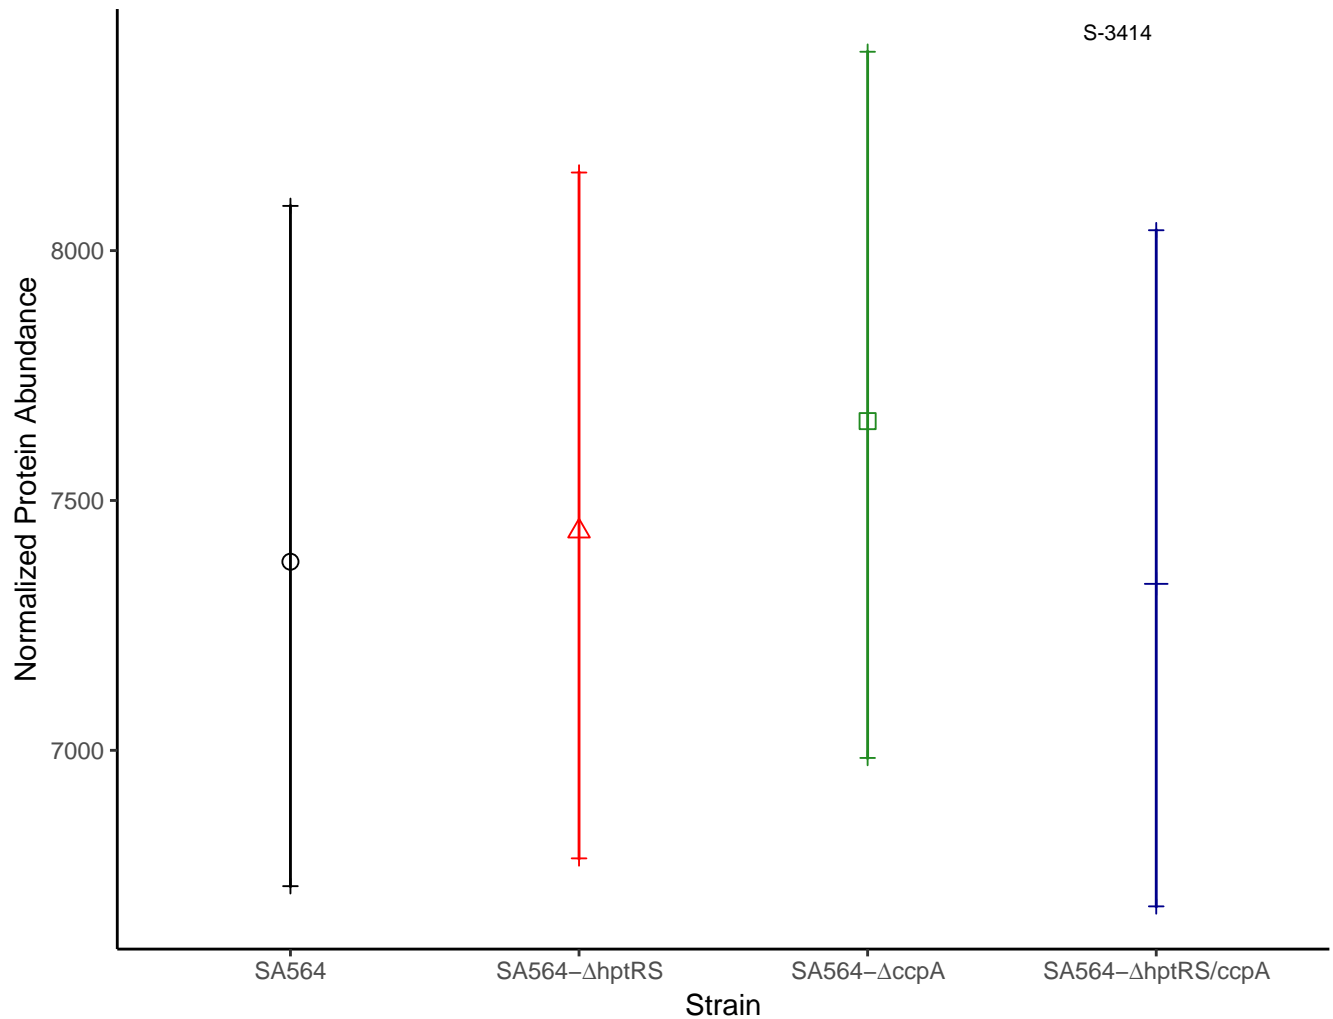

- ⊕ SA564
- △ SA564- $\Delta$ hptRS
- ⊞ SA564- $\Delta$ ccpA
- + SA564- $\Delta$ hptRS/ccpA

# SYK\_STAAM

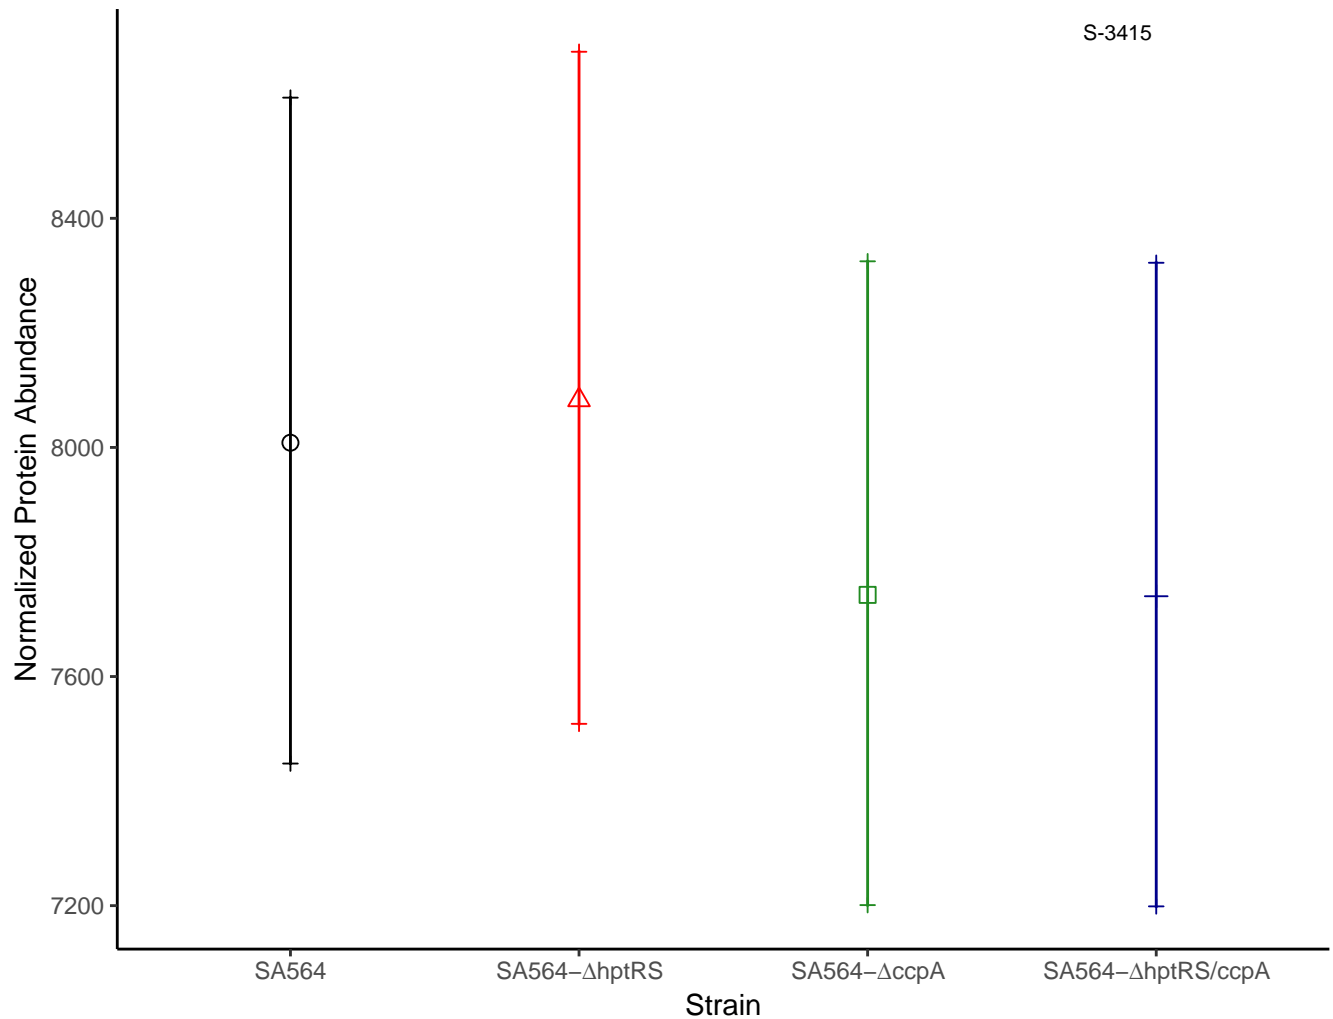

- ⊕ SA564
- △ SA564- $\Delta$ hptRS
- ⊞ SA564- $\Delta$ ccpA
- + SA564- $\Delta$ hptRS/ccpA

# SYM\_STAAM

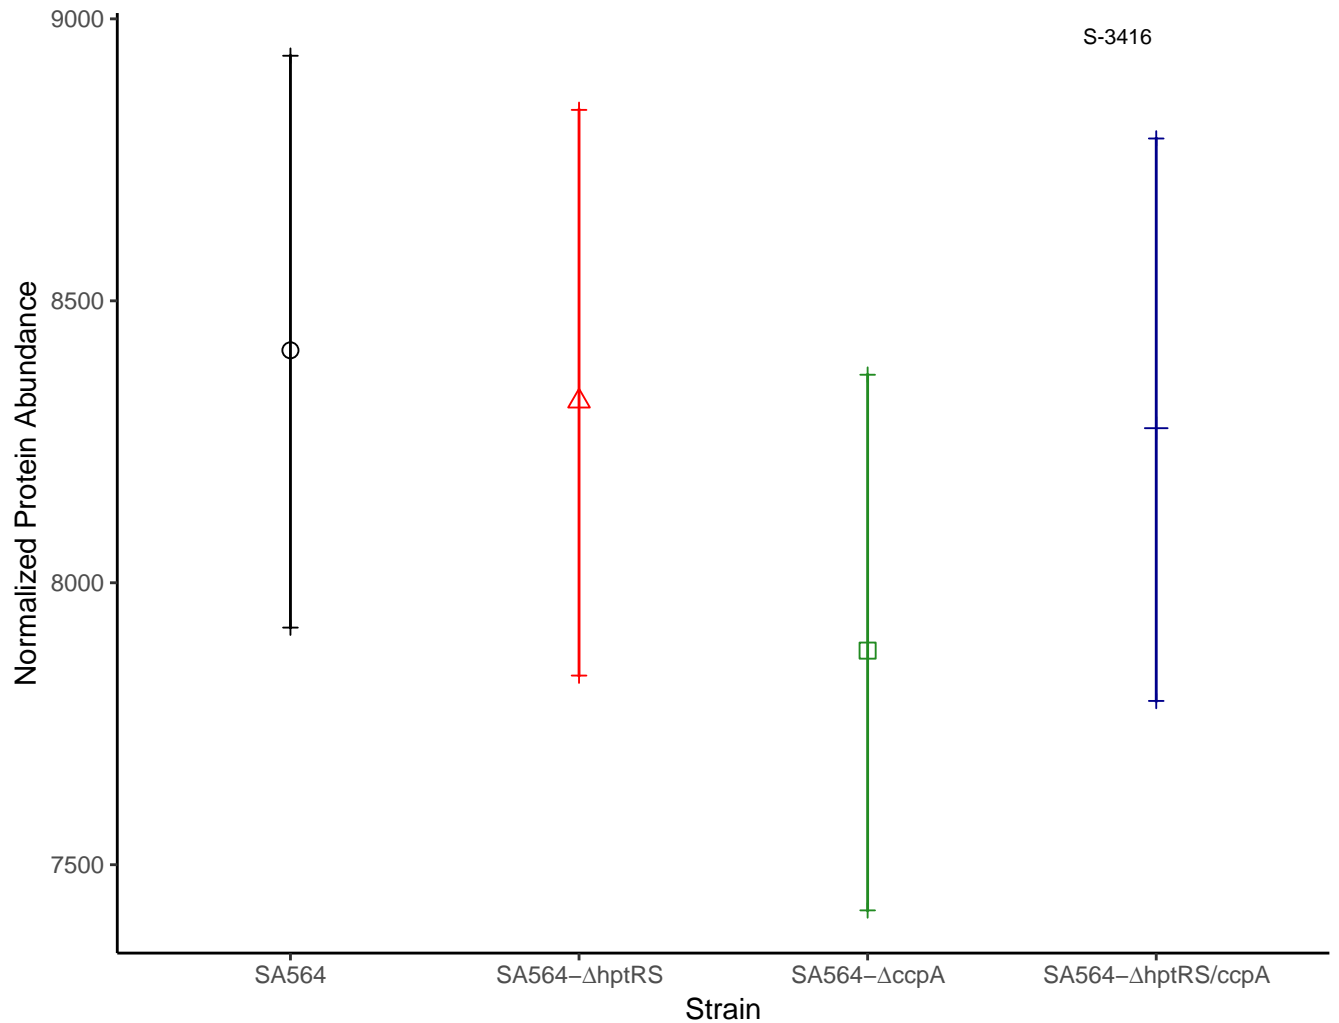

- ⊕ SA564
- △ SA564- $\Delta$ *hptRS*
- ⊞ SA564- $\Delta$ *ccpA*
- + SA564- $\Delta$ *hptRS/ccpA*



# SYN\_STAAM

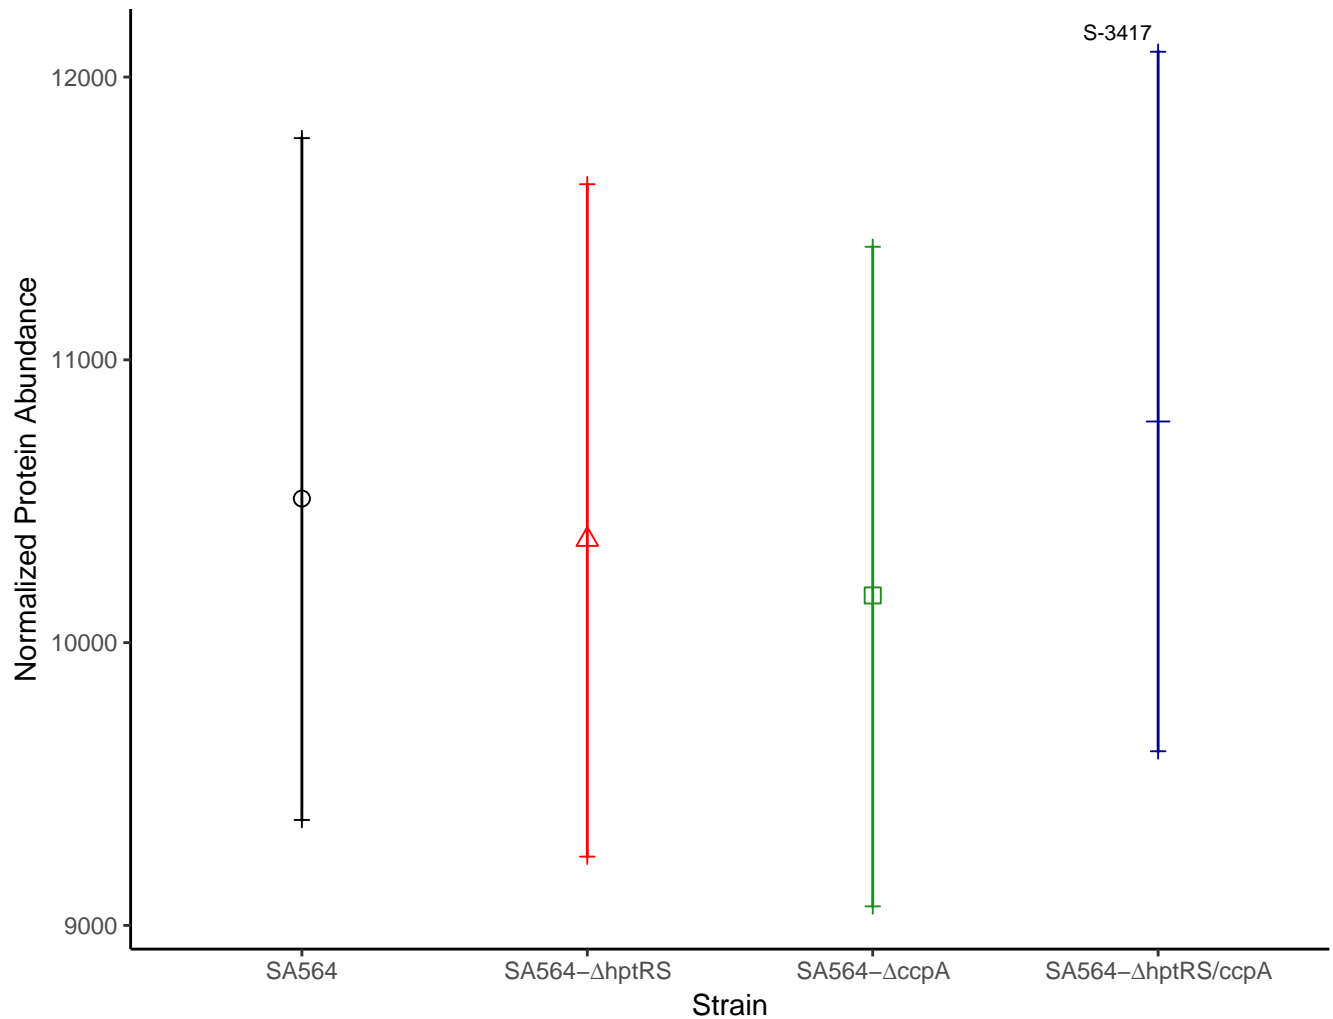

- ⊕ SA564
- △ SA564-ΔhptRS
- ⊞ SA564-ΔccpA
- + SA564-ΔhptRS/ccpA

# SYP\_STAAM

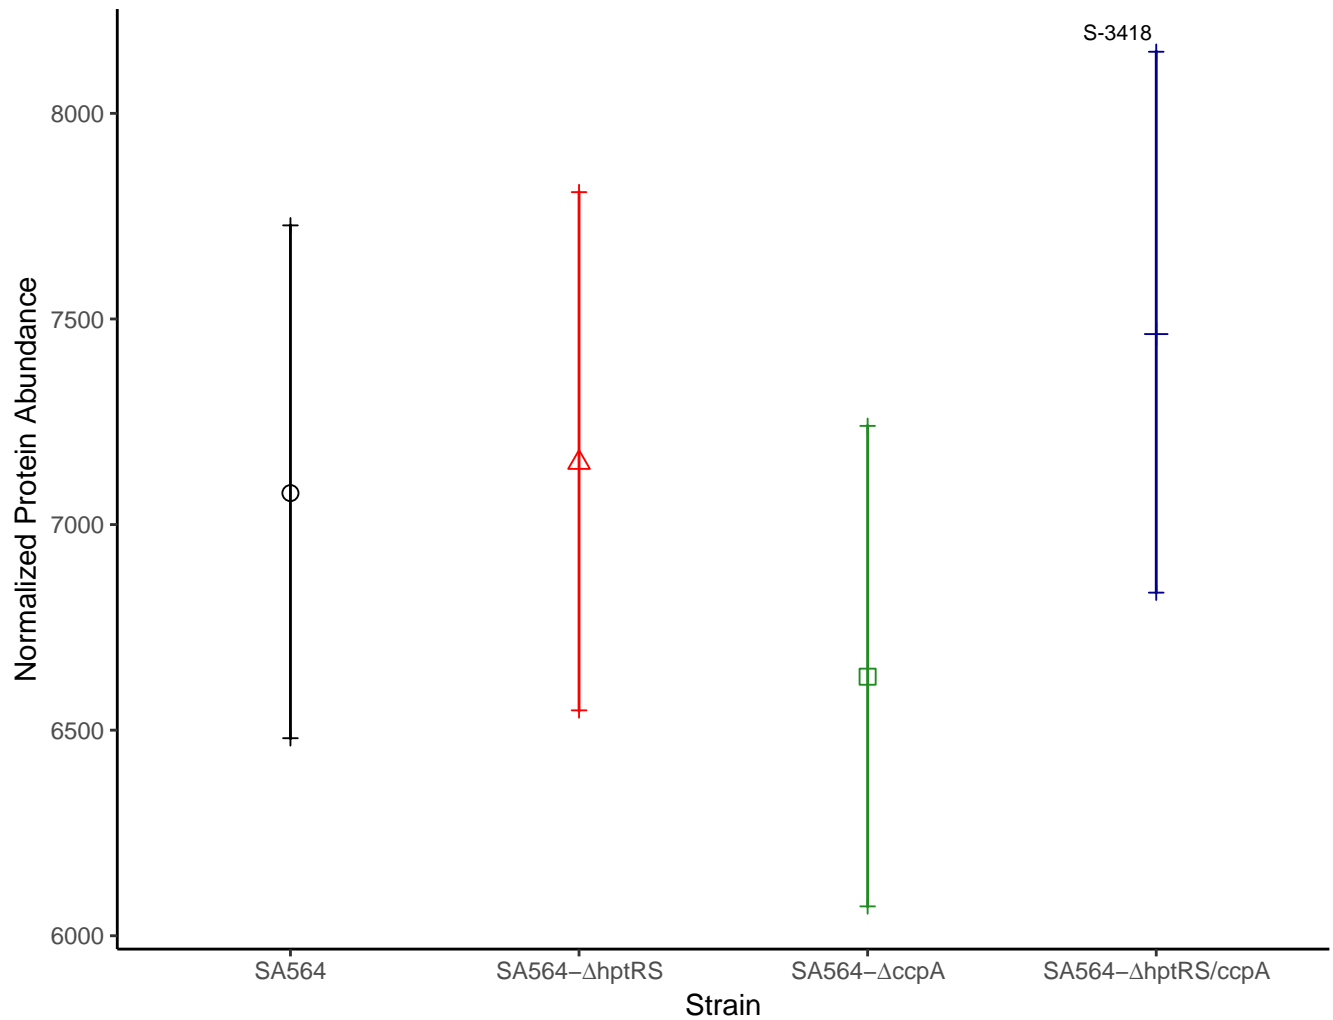

- ⊕ SA564
- △ SA564- $\Delta$ hptRS
- ⊞ SA564- $\Delta$ ccpA
- + SA564- $\Delta$ hptRS/ccpA

# SYR\_STAAM

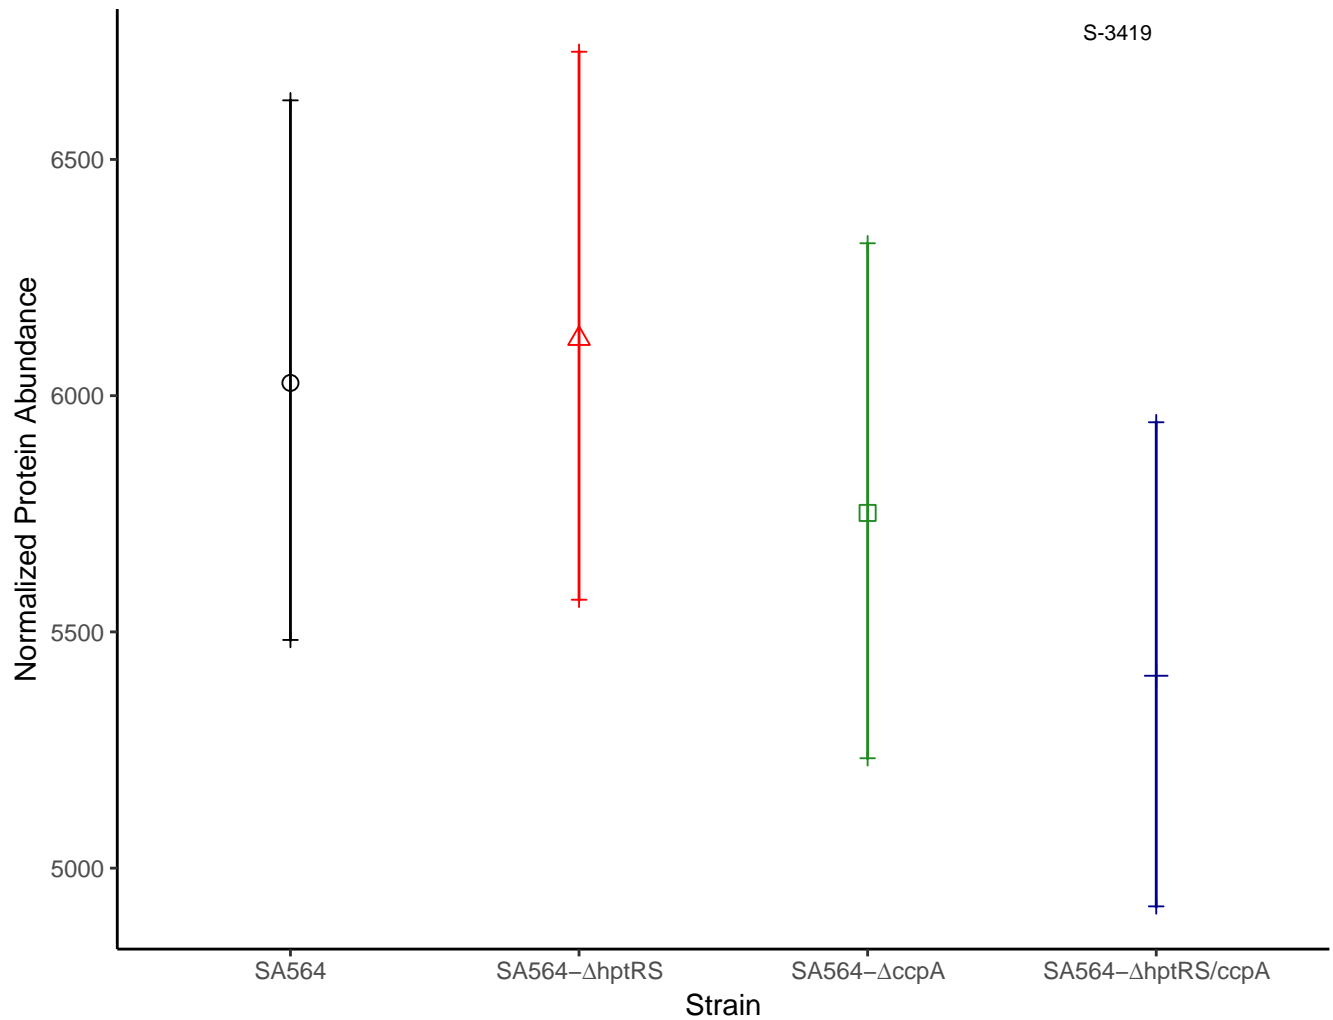

- ⊕ SA564
- △ SA564- $\Delta$ hptRS
- ⊞ SA564- $\Delta$ ccpA
- + SA564- $\Delta$ hptRS/ccpA

# SYS\_STAAM

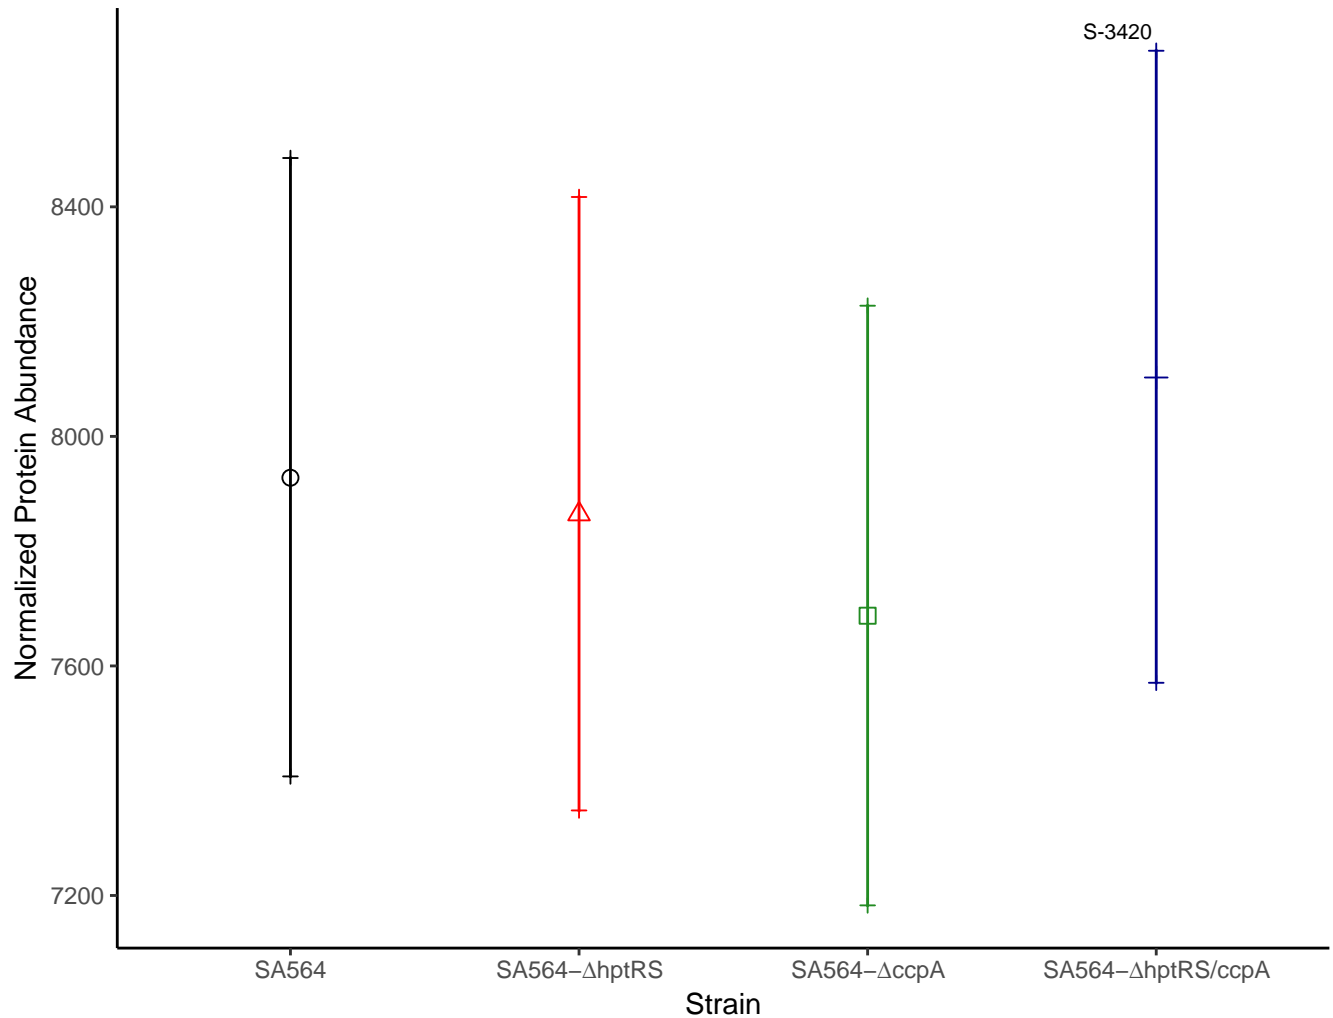

- ⊕ SA564
- △ SA564- $\Delta$ hptRS
- ⊞ SA564- $\Delta$ ccpA
- + SA564- $\Delta$ hptRS/ccpA

# SYT\_STAAM

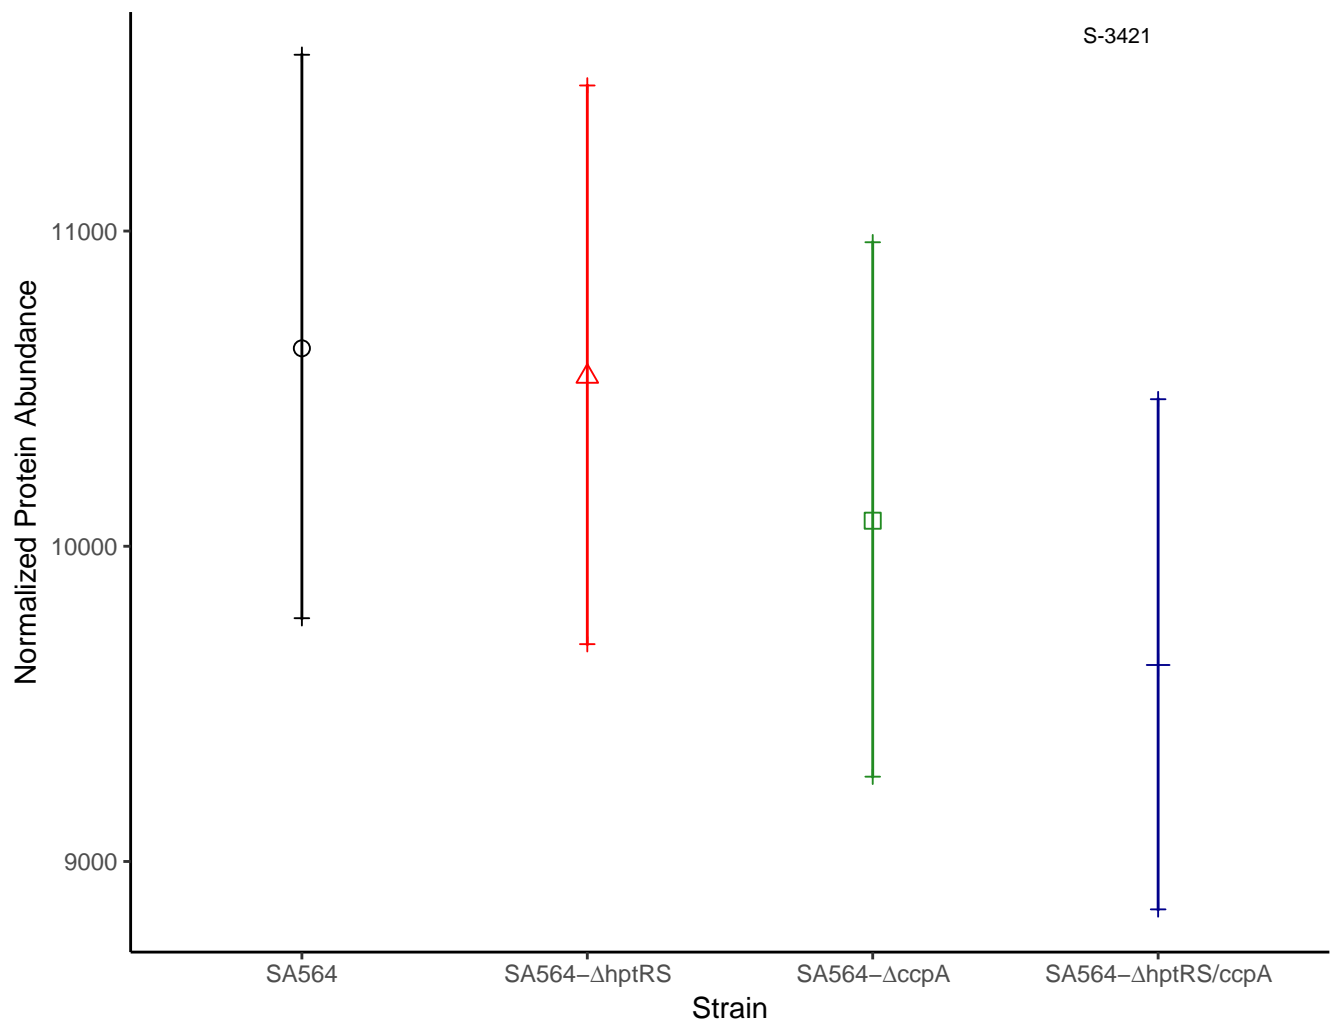

- ⊕ SA564
- △ SA564- $\Delta$ hptRS
- ⊞ SA564- $\Delta$ ccpA
- + SA564- $\Delta$ hptRS/ccpA

# SYV\_STAAM

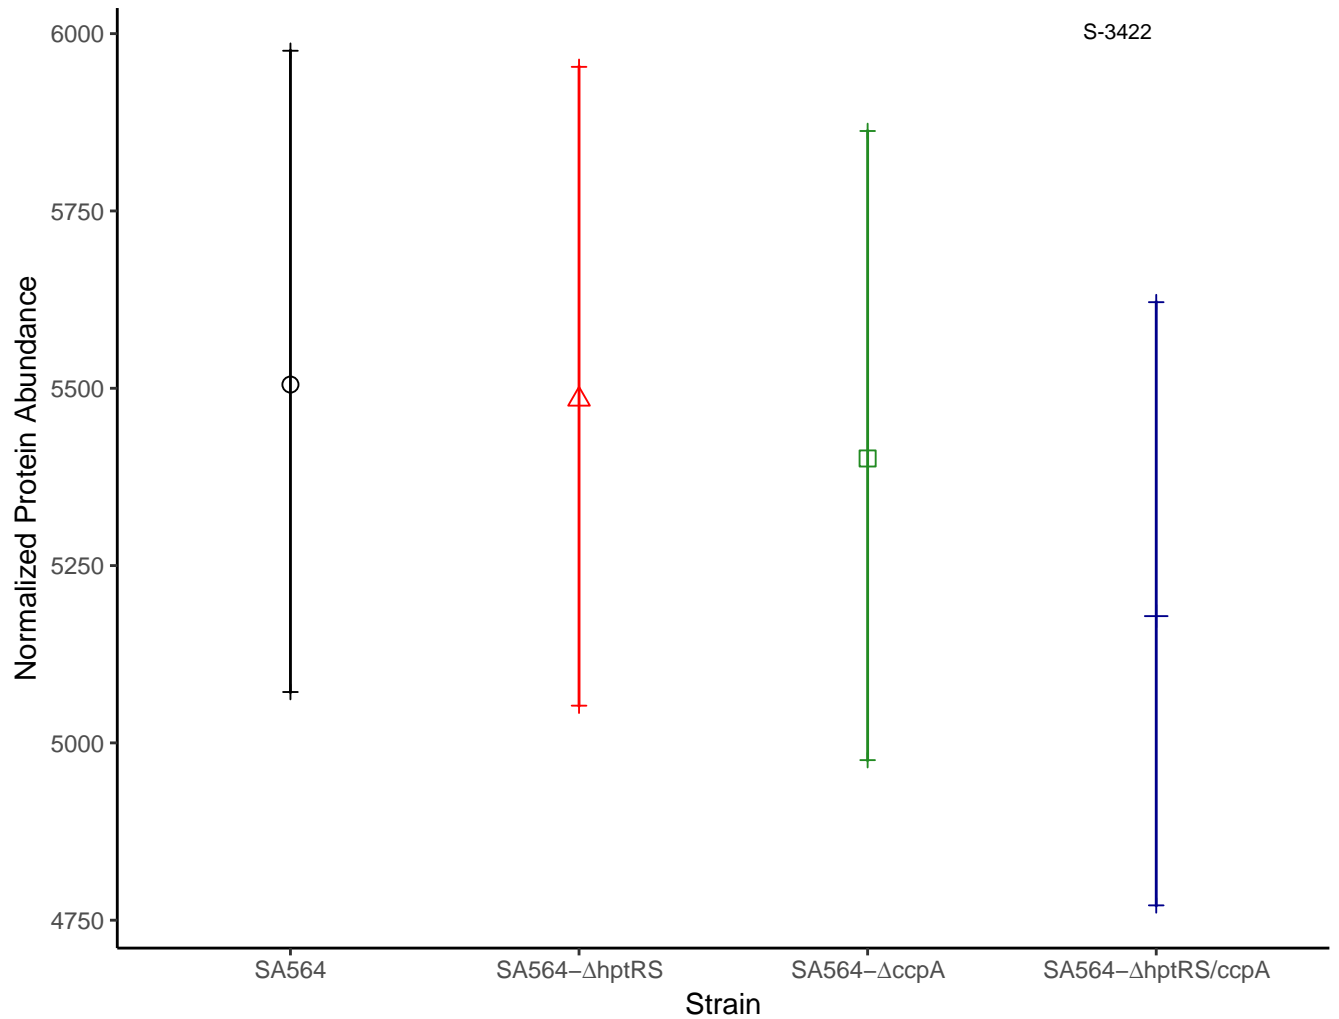

- ⊕ SA564
- △ SA564- $\Delta$ hptRS
- ⊞ SA564- $\Delta$ ccpA
- + SA564- $\Delta$ hptRS/ccpA

# SYW\_STAAM

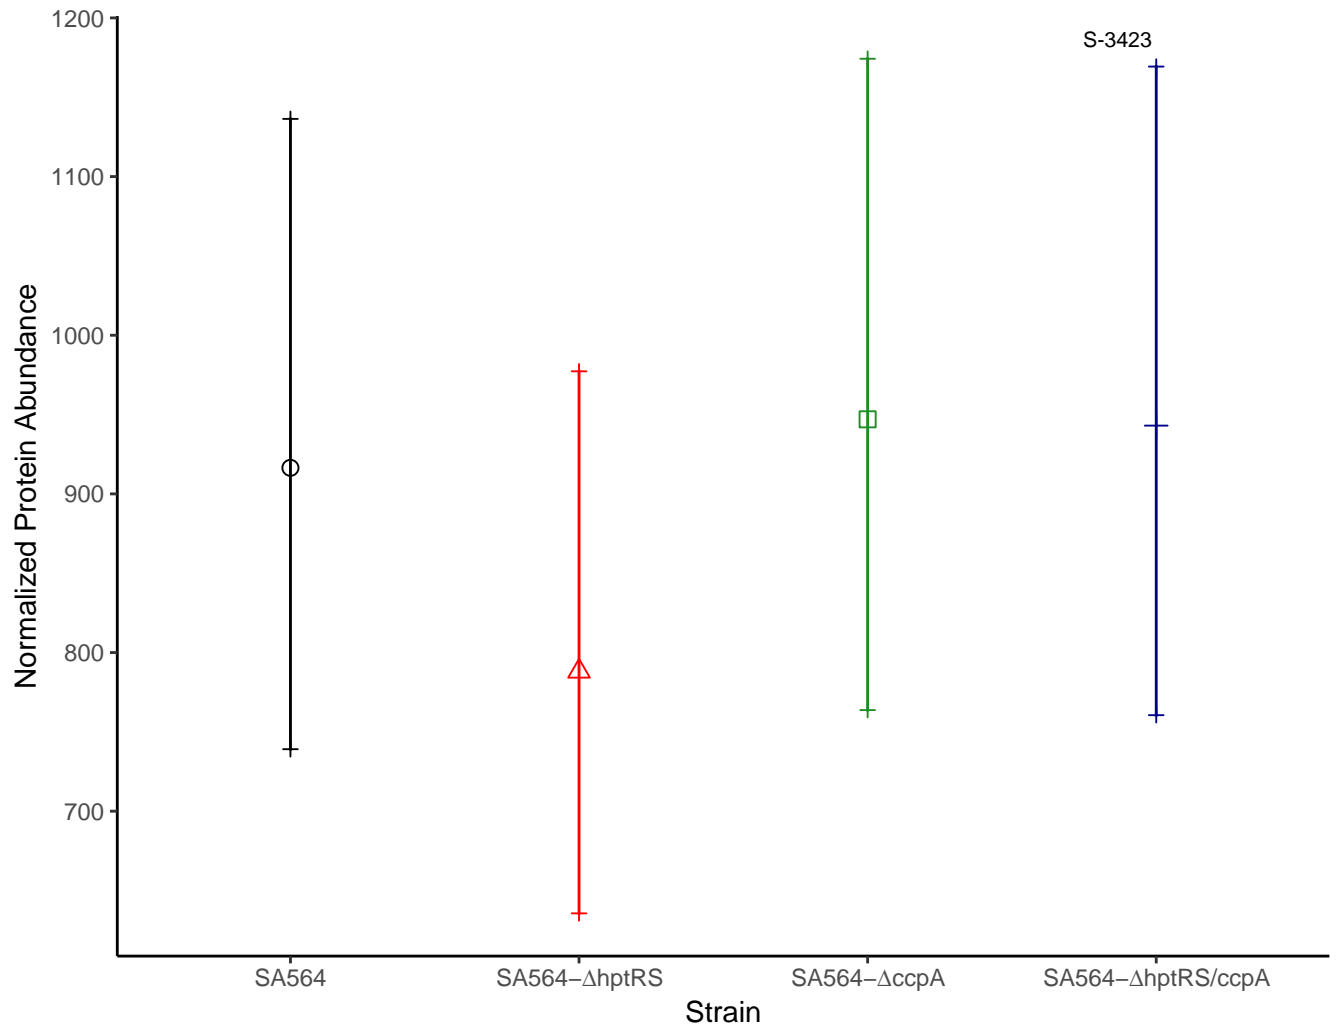

- ⊕ SA564
- △ SA564- $\Delta$ hptRS
- ⊞ SA564- $\Delta$ ccpA
- + SA564- $\Delta$ hptRS/ccpA

# SYT\_STAAM

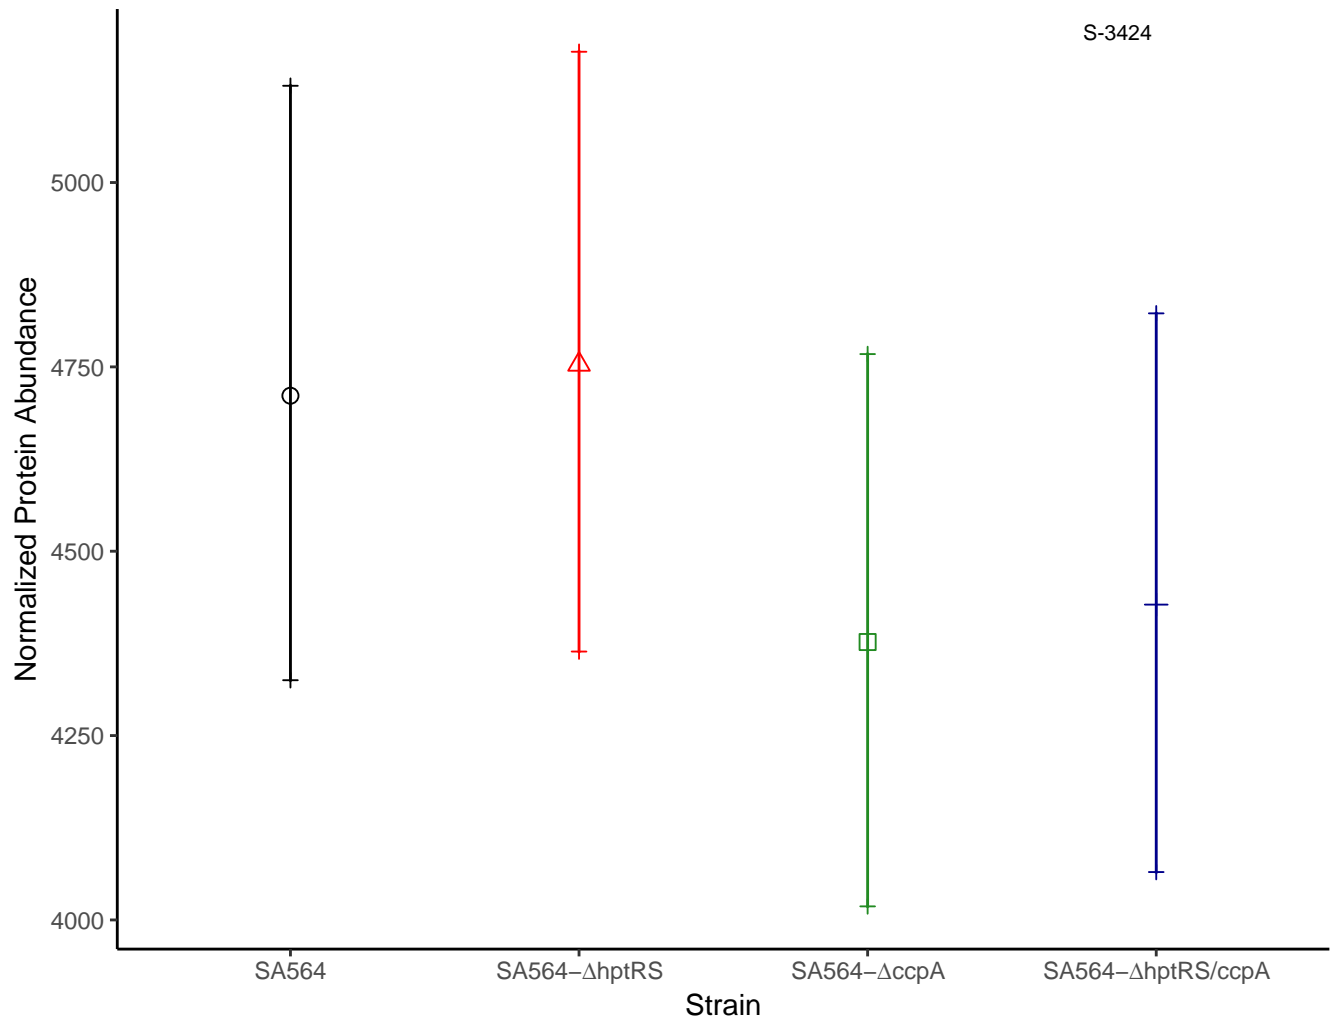

- ⊕ SA564
- △ SA564- $\Delta$ hptRS
- ⊞ SA564- $\Delta$ ccpA
- + SA564- $\Delta$ hptRS/ccpA



# T431\_STAAM

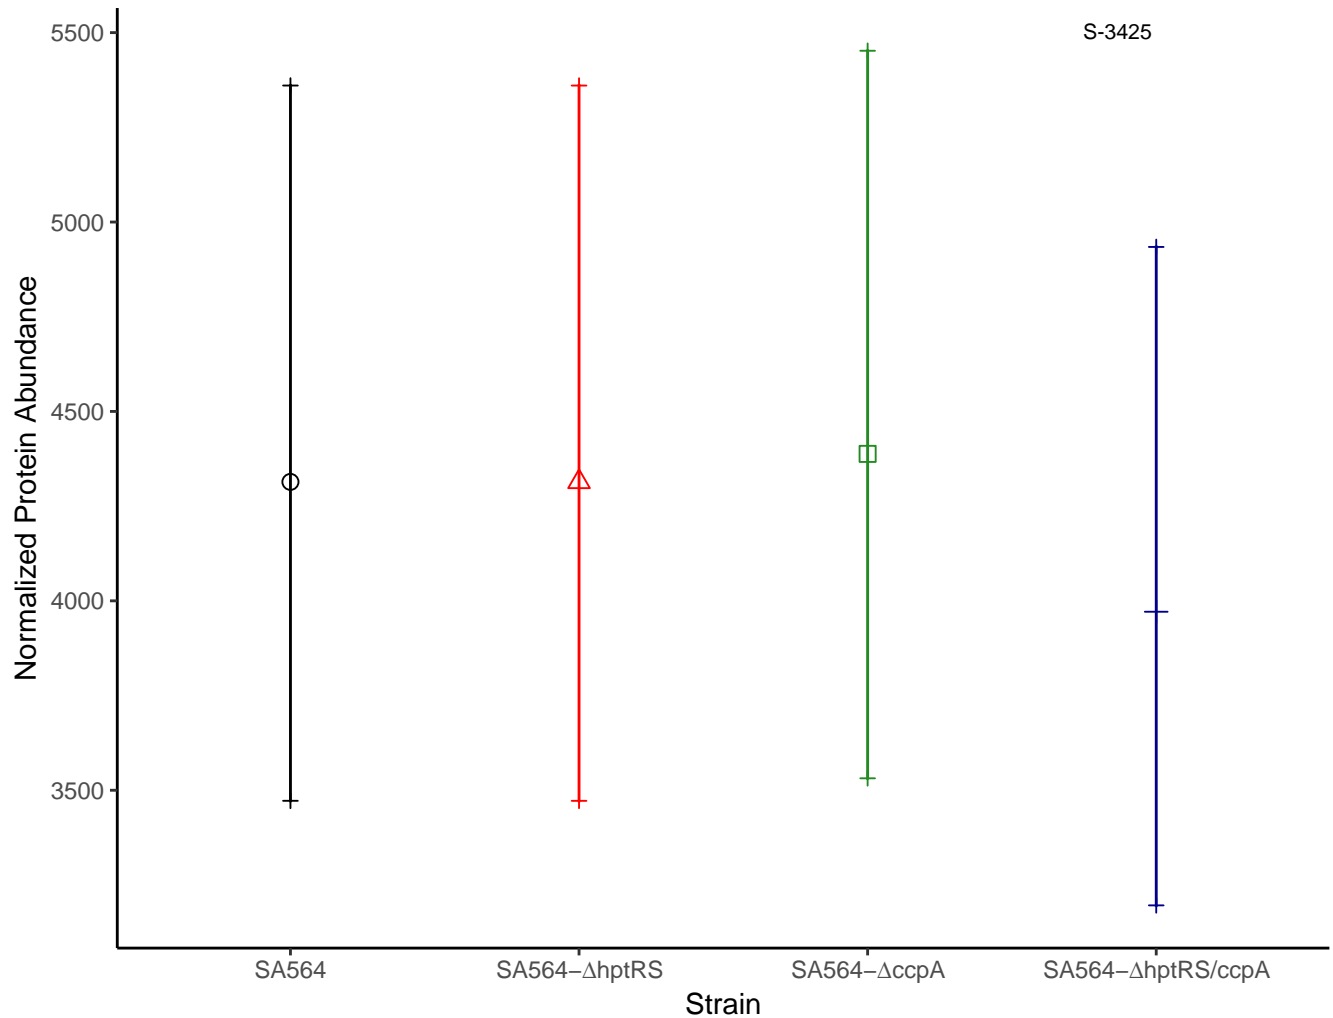

- ⊕ SA564
- △ SA564- $\Delta$ hptRS
- ⊞ SA564- $\Delta$ ccpA
- + SA564- $\Delta$ hptRS/ccpA

# TADA\_STAAM

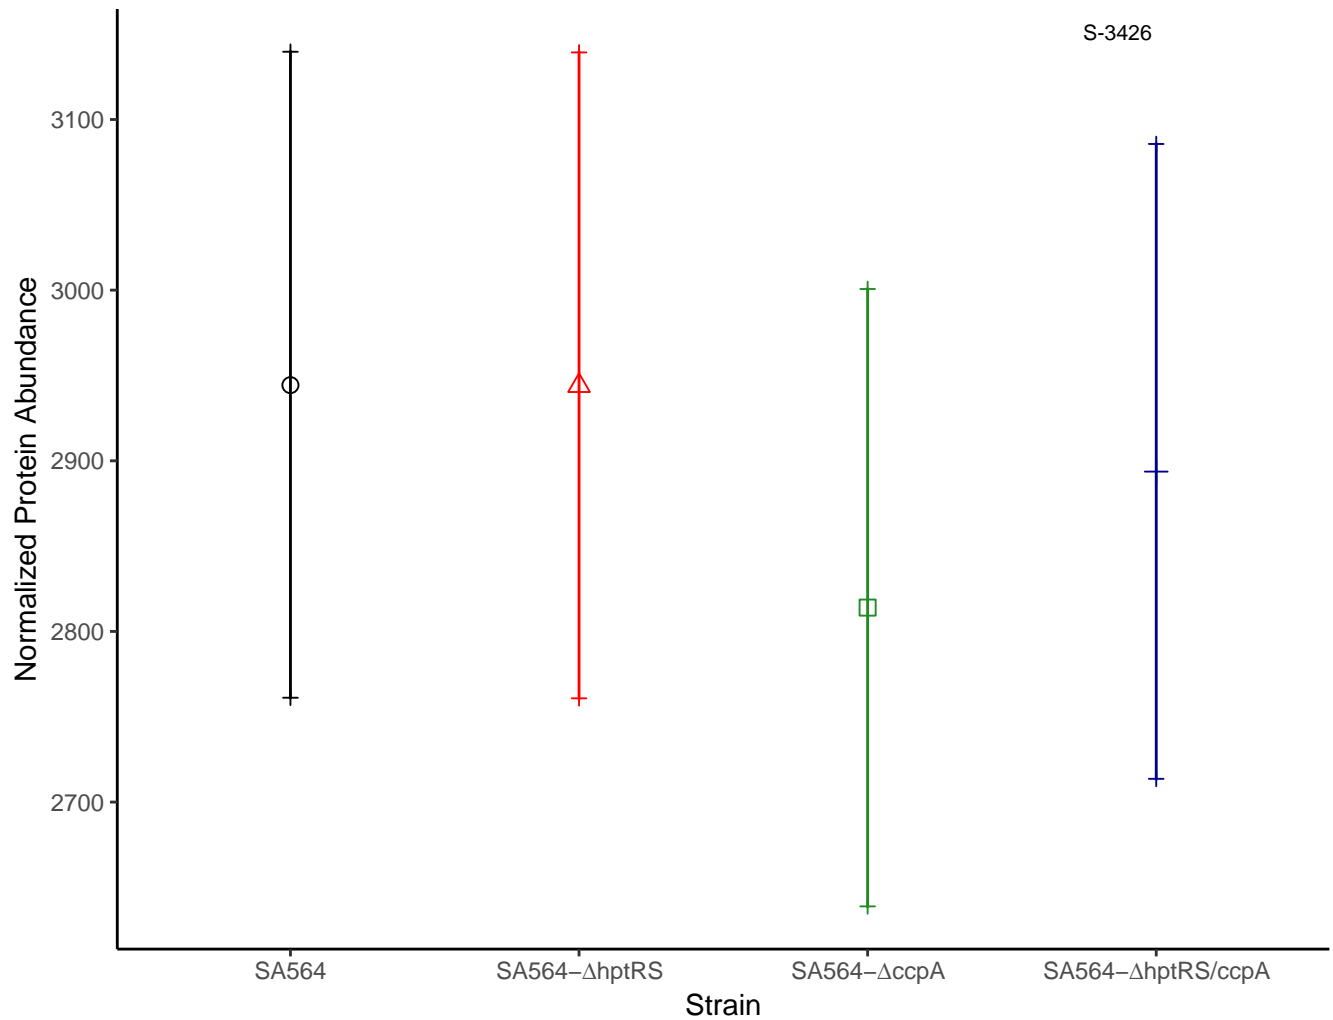

- ⊕ SA564
- △ SA564- $\Delta$ hptRS
- ⊞ SA564- $\Delta$ ccpA
- + SA564- $\Delta$ hptRS/ccpA

# TAGA\_STAAM

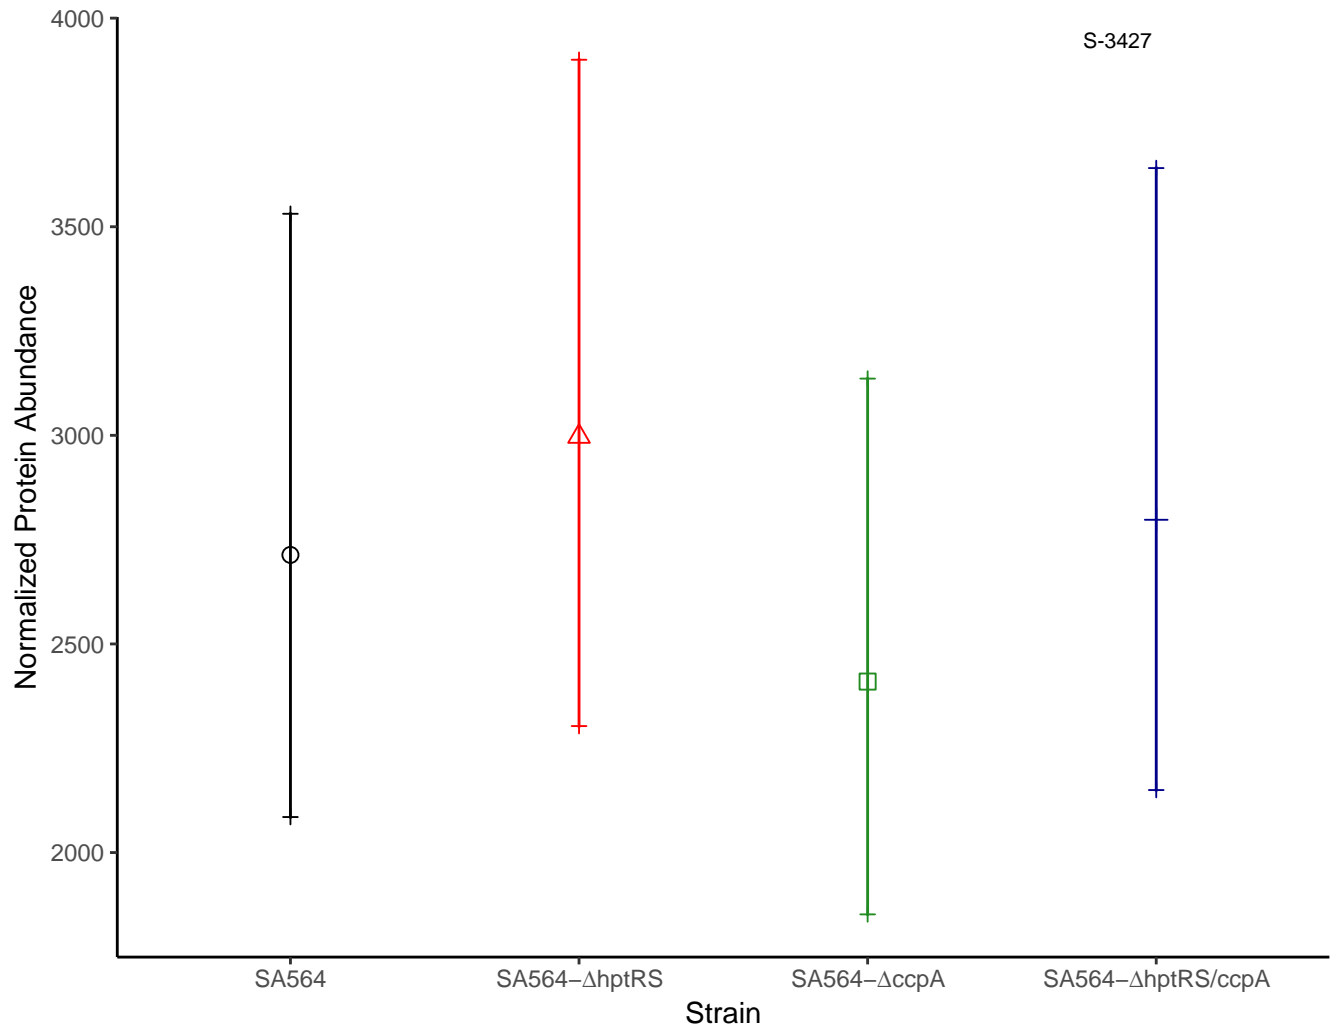

- ⊕ SA564
- △ SA564- $\Delta$ hptRS
- ⊞ SA564- $\Delta$ ccpA
- + SA564- $\Delta$ hptRS/ccpA

# TDCB\_STAAM

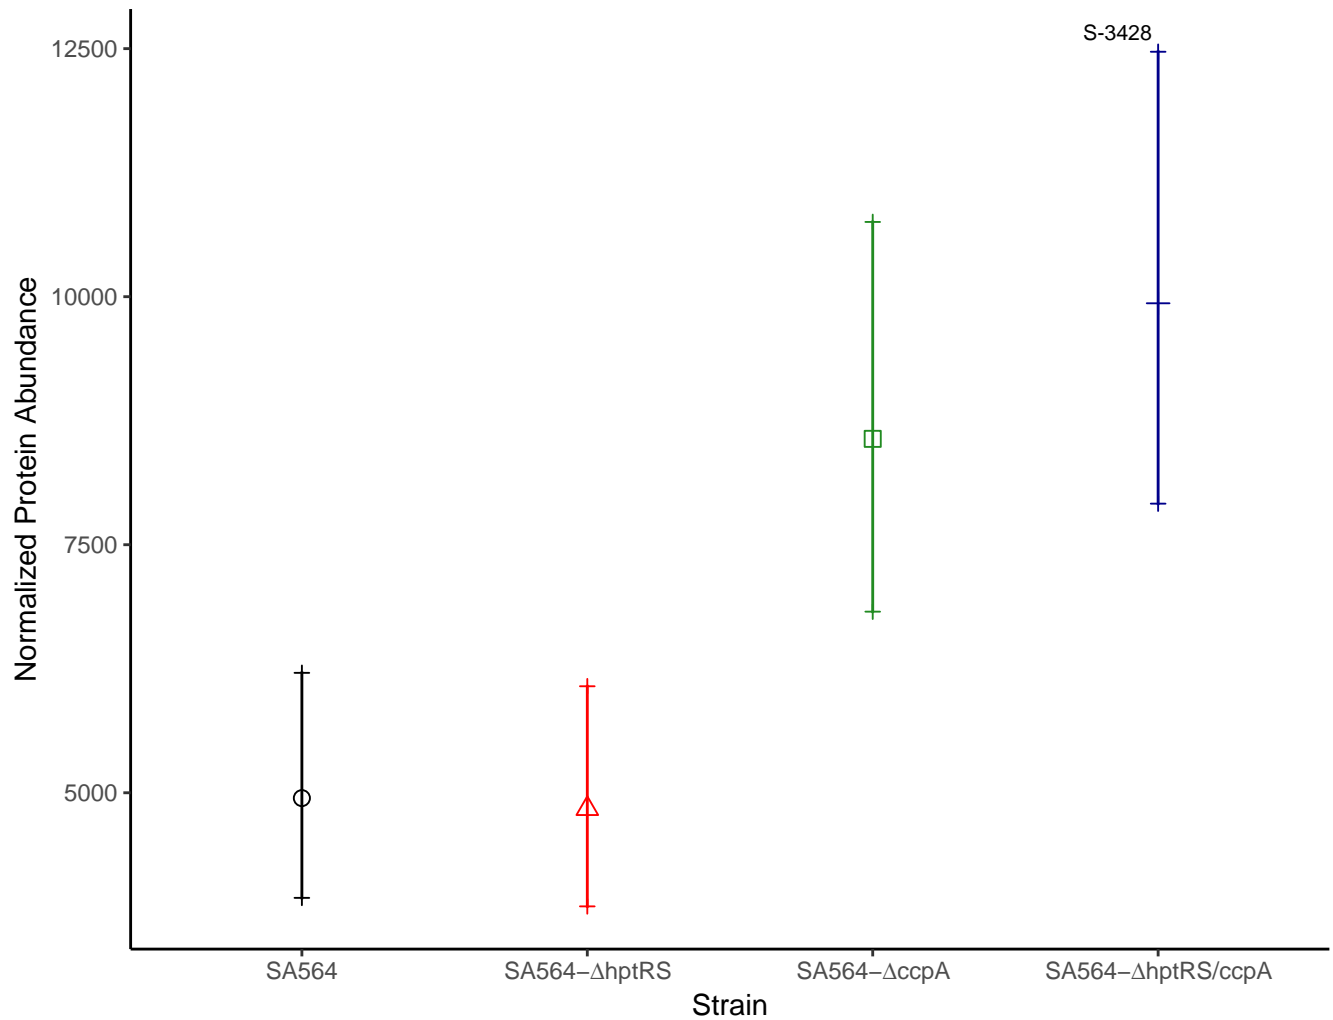

- ⊕ SA564
- △ SA564- $\Delta$ hptRS
- ⊞ SA564- $\Delta$ ccpA
- + SA564- $\Delta$ hptRS/ccpA

# TELL\_STAAM

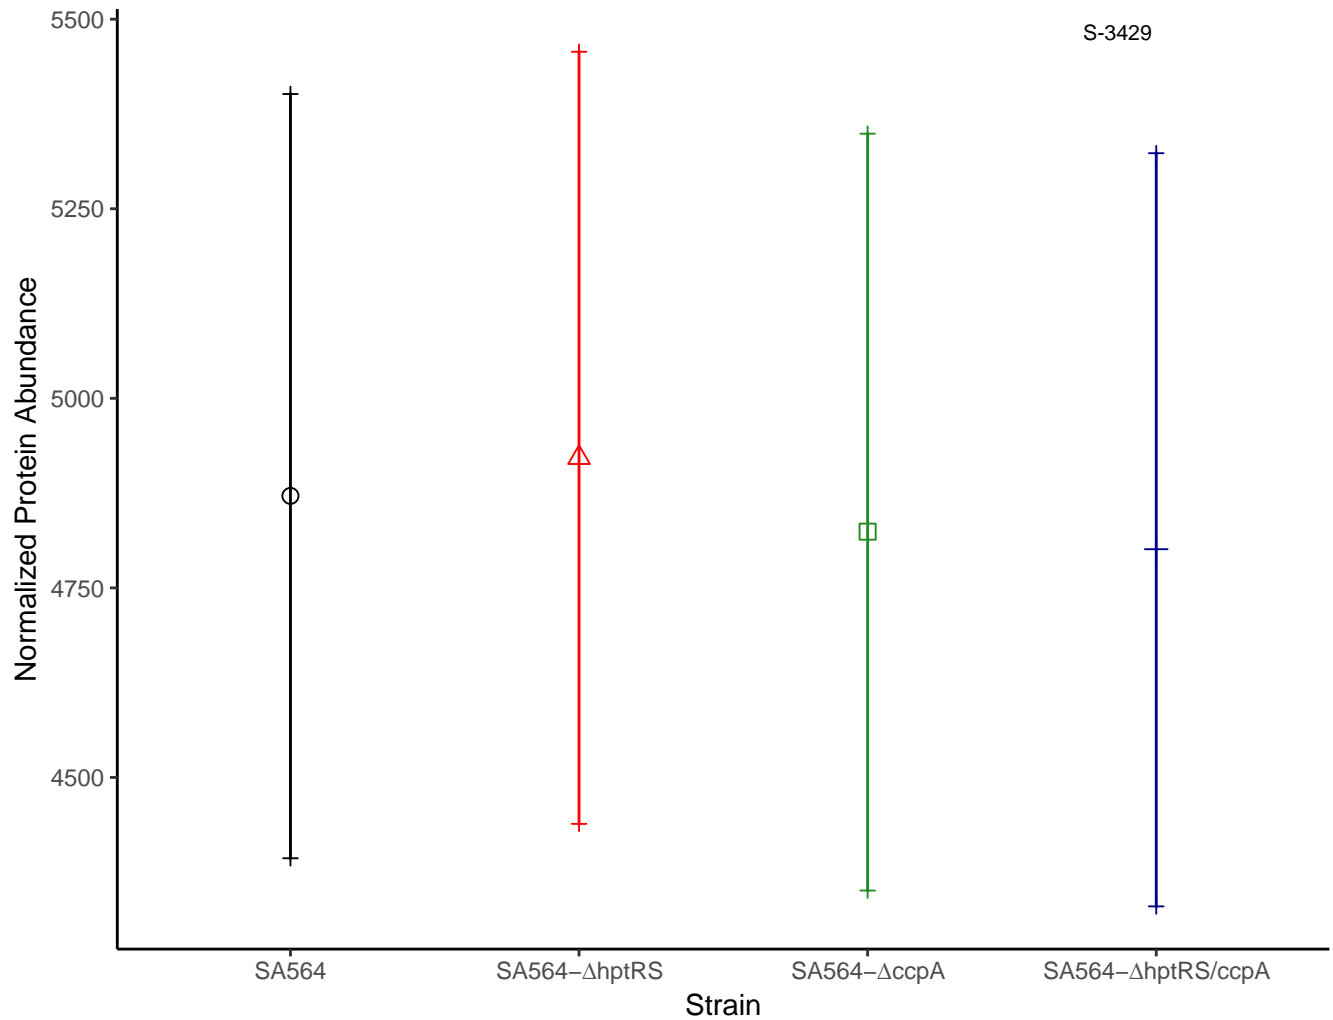

- ⊕ SA564
- △ SA564- $\Delta$ hptRS
- ⊞ SA564- $\Delta$ ccpA
- + SA564- $\Delta$ hptRS/ccpA

# THID\_STAAM

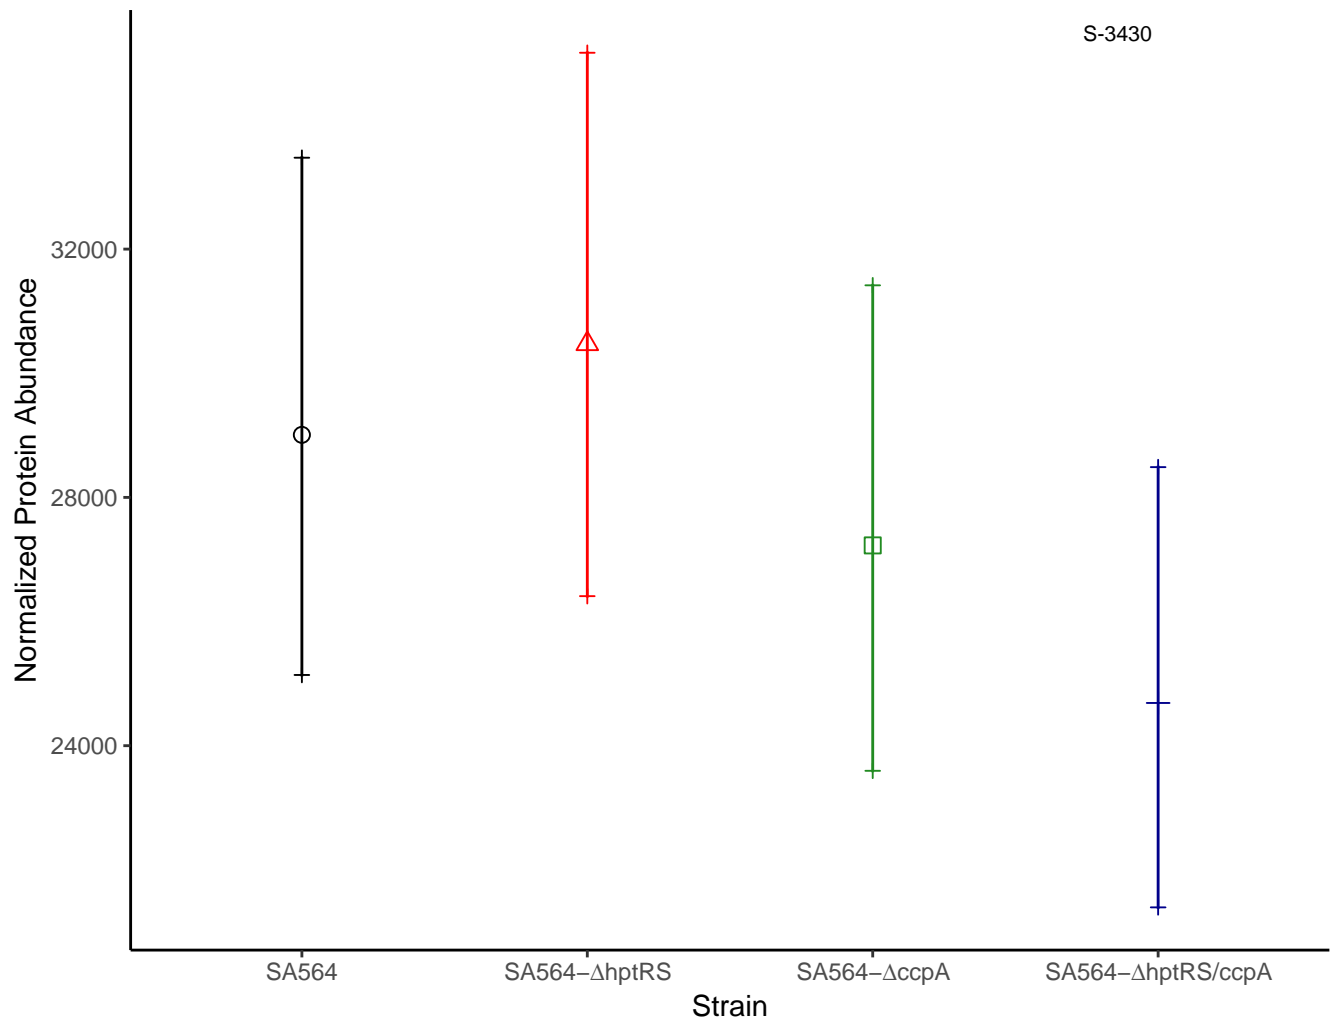

- ⊕ SA564
- △ SA564- $\Delta$ hptRS
- ⊞ SA564- $\Delta$ ccpA
- + SA564- $\Delta$ hptRS/ccpA

# THIM\_STAAM

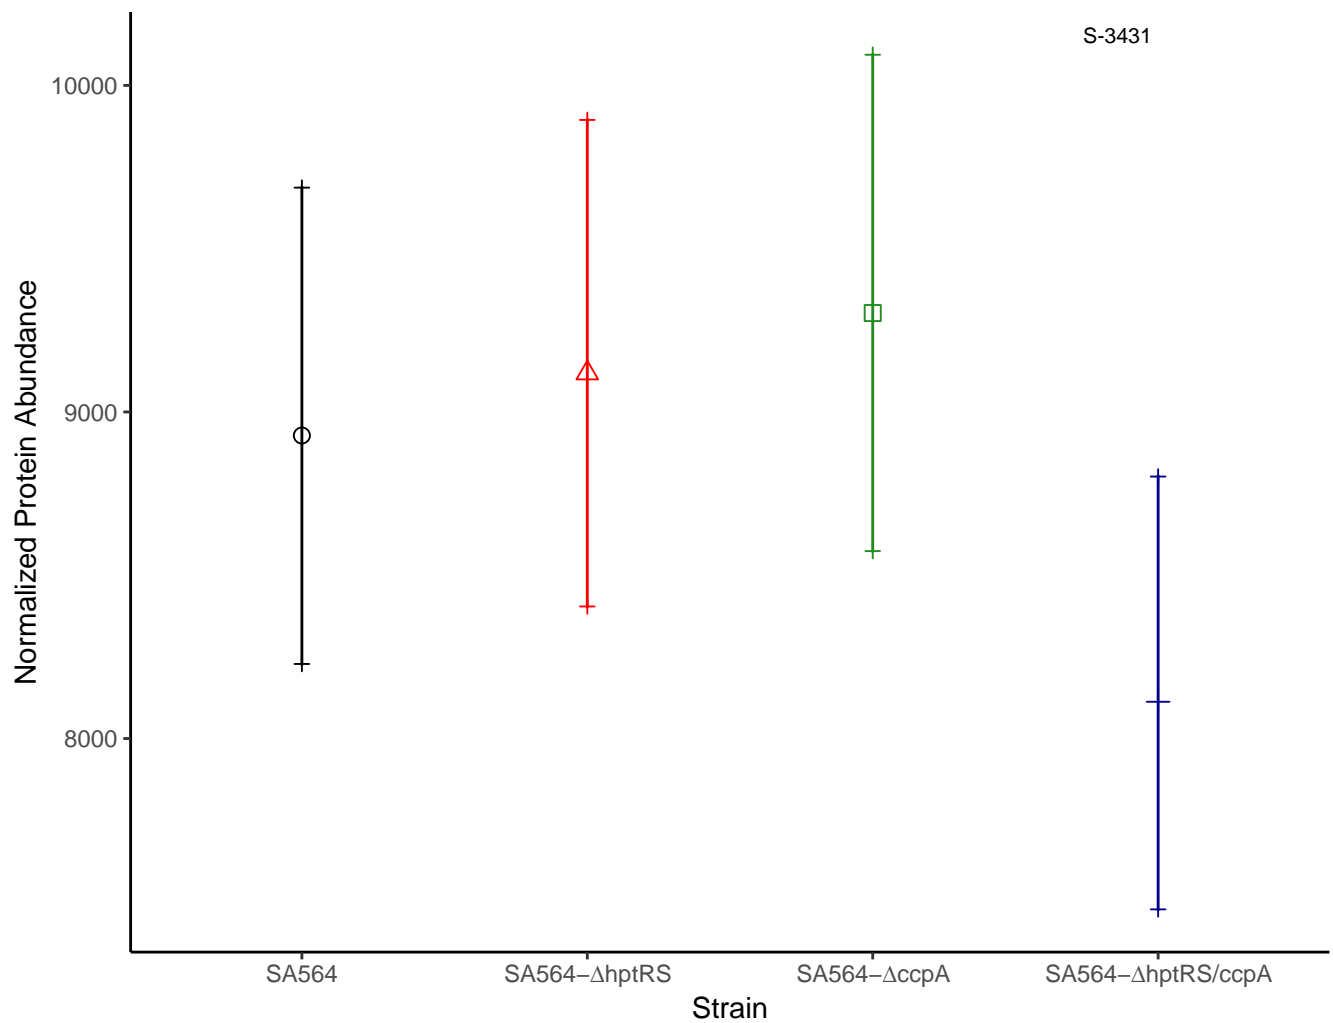

- ⊕ SA564
- △ SA564- $\Delta$ hptRS
- ⊞ SA564- $\Delta$ ccpA
- + SA564- $\Delta$ hptRS/ccpA

# THIO\_STAAM

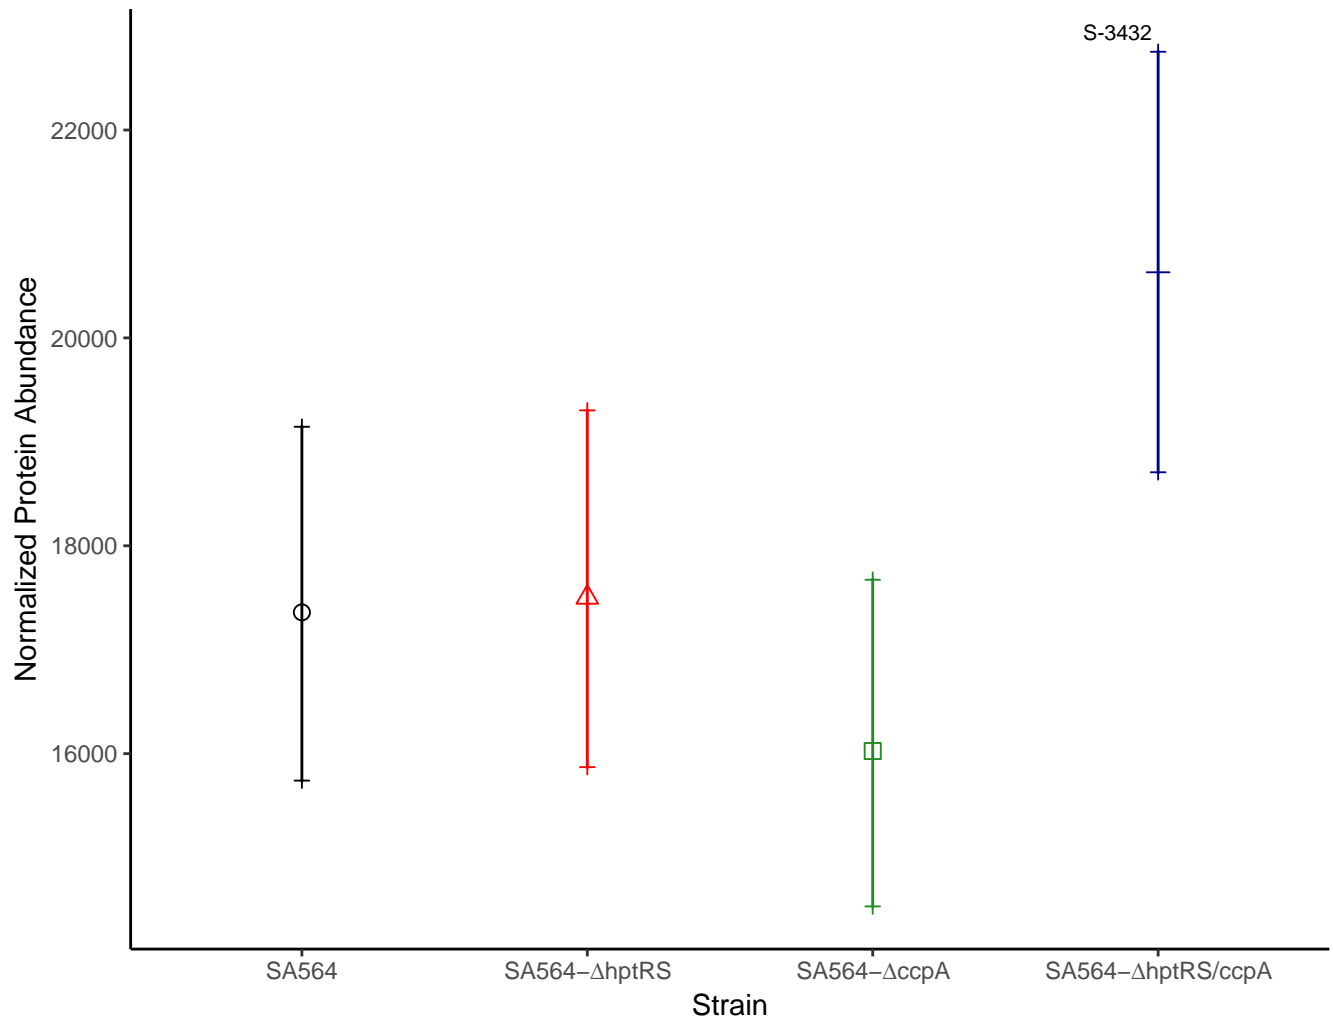

- ⊕ SA564
- △ SA564- $\Delta$ hptRS
- ⊞ SA564- $\Delta$ ccpA
- + SA564- $\Delta$ hptRS/ccpA



# THLA\_STAAM

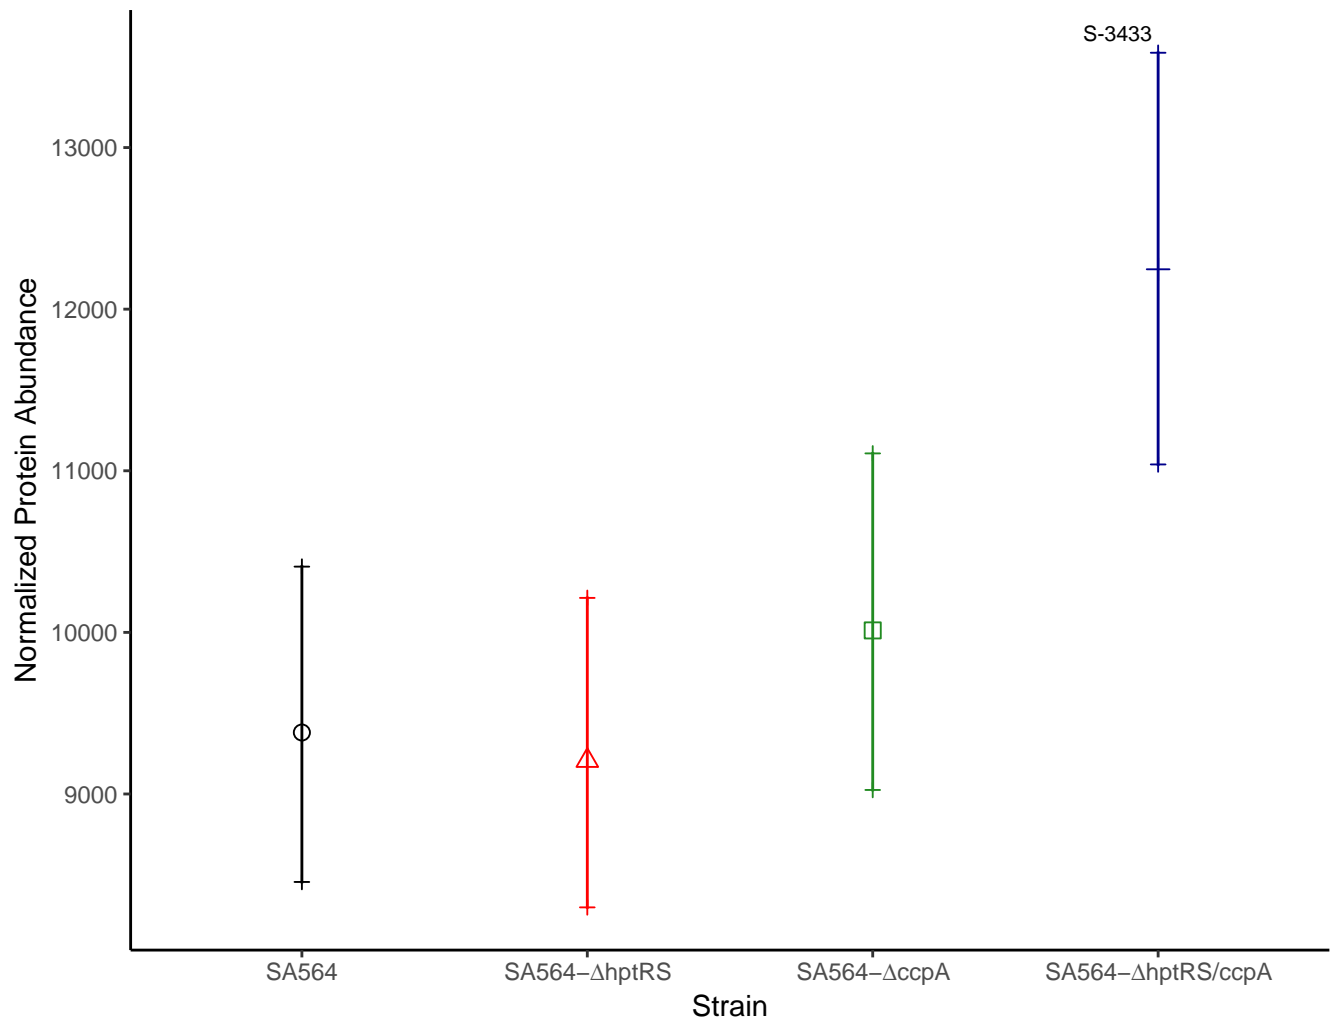

- ⊕ SA564
- △ SA564- $\Delta$ *hptRS*
- ⊞ SA564- $\Delta$ *ccpA*
- + SA564- $\Delta$ *hptRS/ccpA*

# TIG\_STAAM

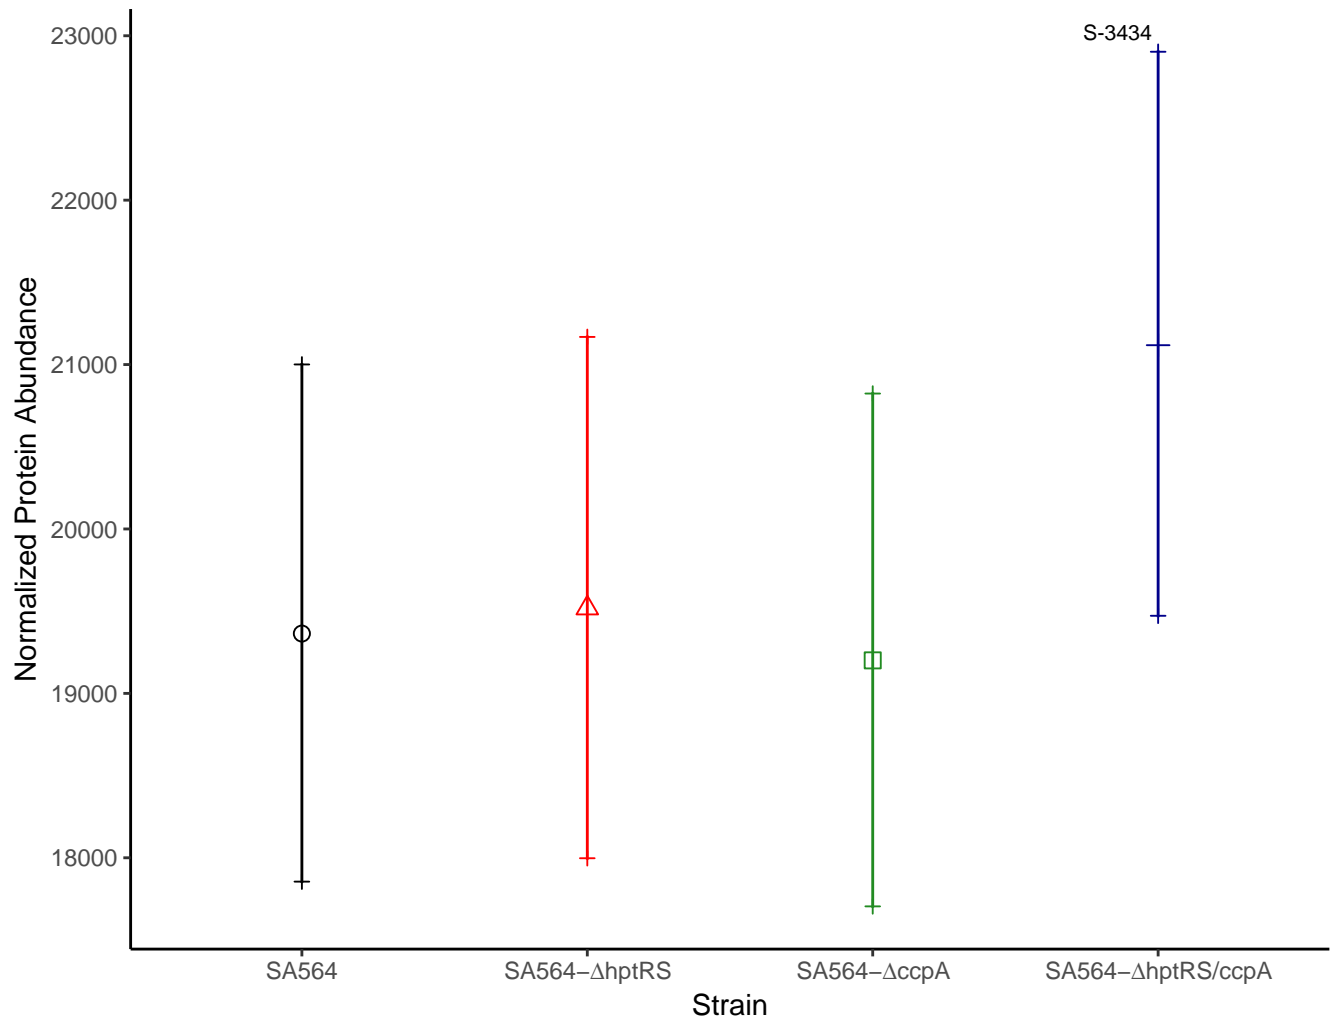

- ⊕ SA564
- △ SA564- $\Delta$ *hptRS*
- ⊞ SA564- $\Delta$ *ccpA*
- + SA564- $\Delta$ *hptRS/ccpA*

# TKT\_STAAM

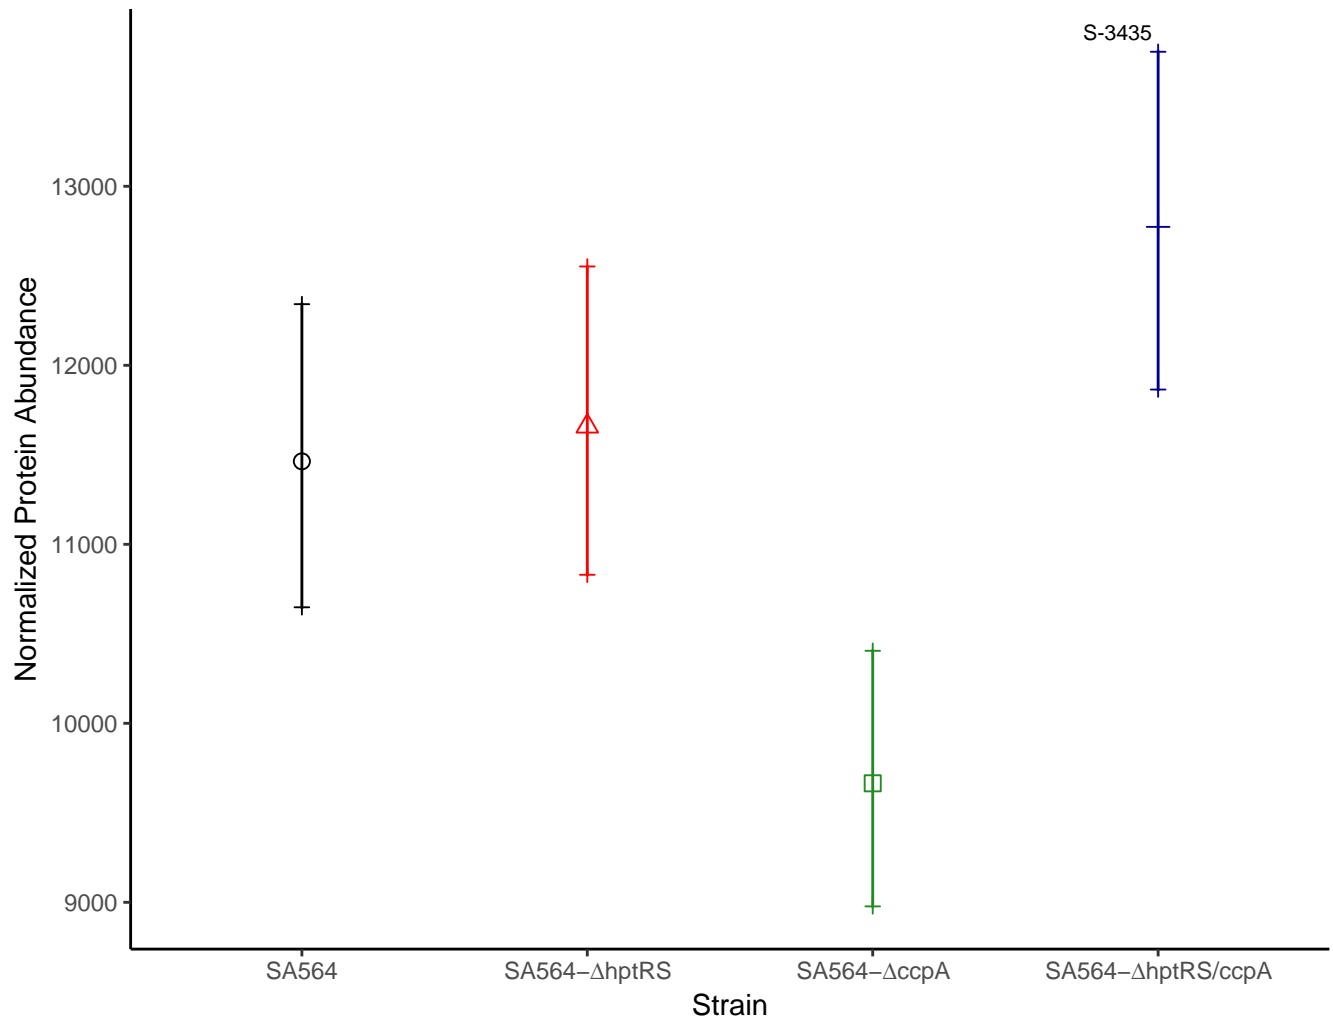

- ⊕ SA564
- △ SA564- $\Delta$ hptRS
- ⊞ SA564- $\Delta$ ccpA
- + SA564- $\Delta$ hptRS/ccpA

# TOP1\_STAAM

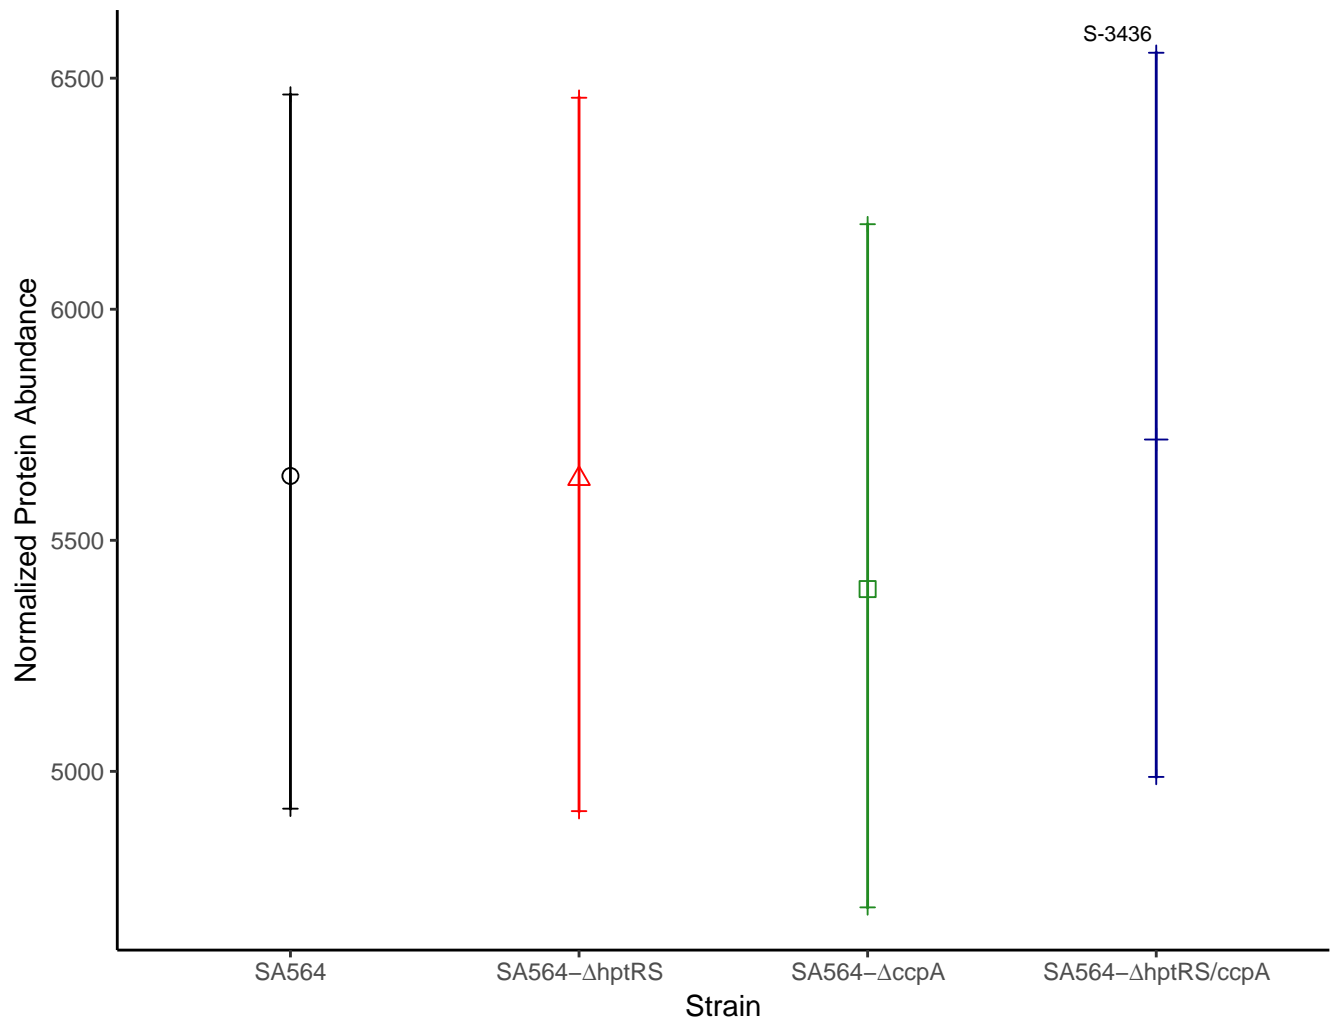

- ⊕ SA564
- △ SA564- $\Delta$ hptRS
- ⊞ SA564- $\Delta$ ccpA
- + SA564- $\Delta$ hptRS/ccpA

# TOP3\_STAAM

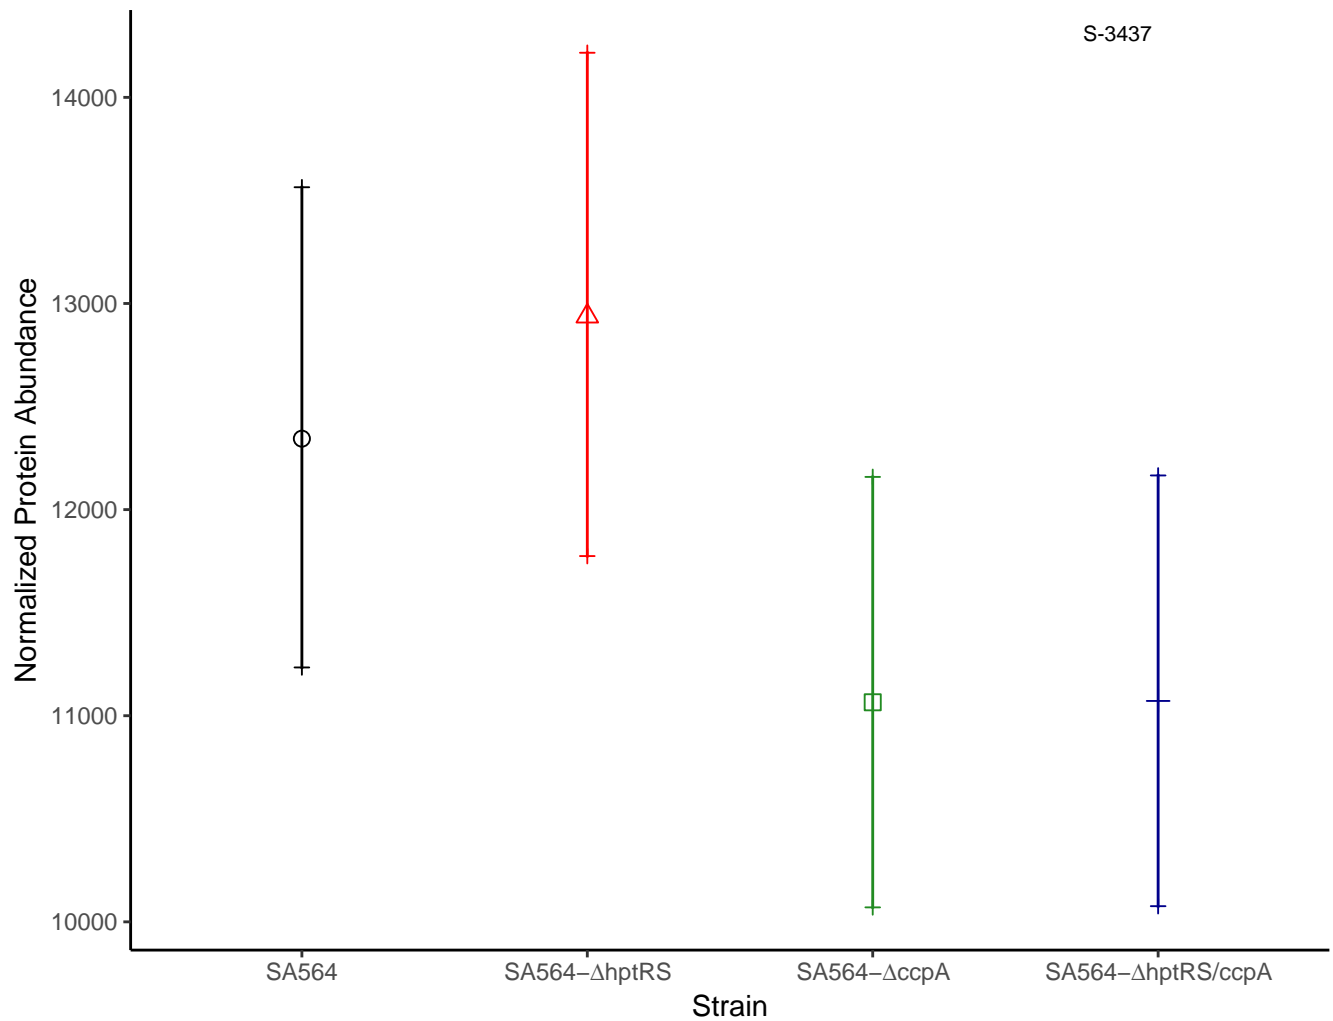

- ⊕ SA564
- △ SA564- $\Delta$ hptRS
- ⊞ SA564- $\Delta$ ccpA
- + SA564- $\Delta$ hptRS/ccpA

# TPIS\_STAAM

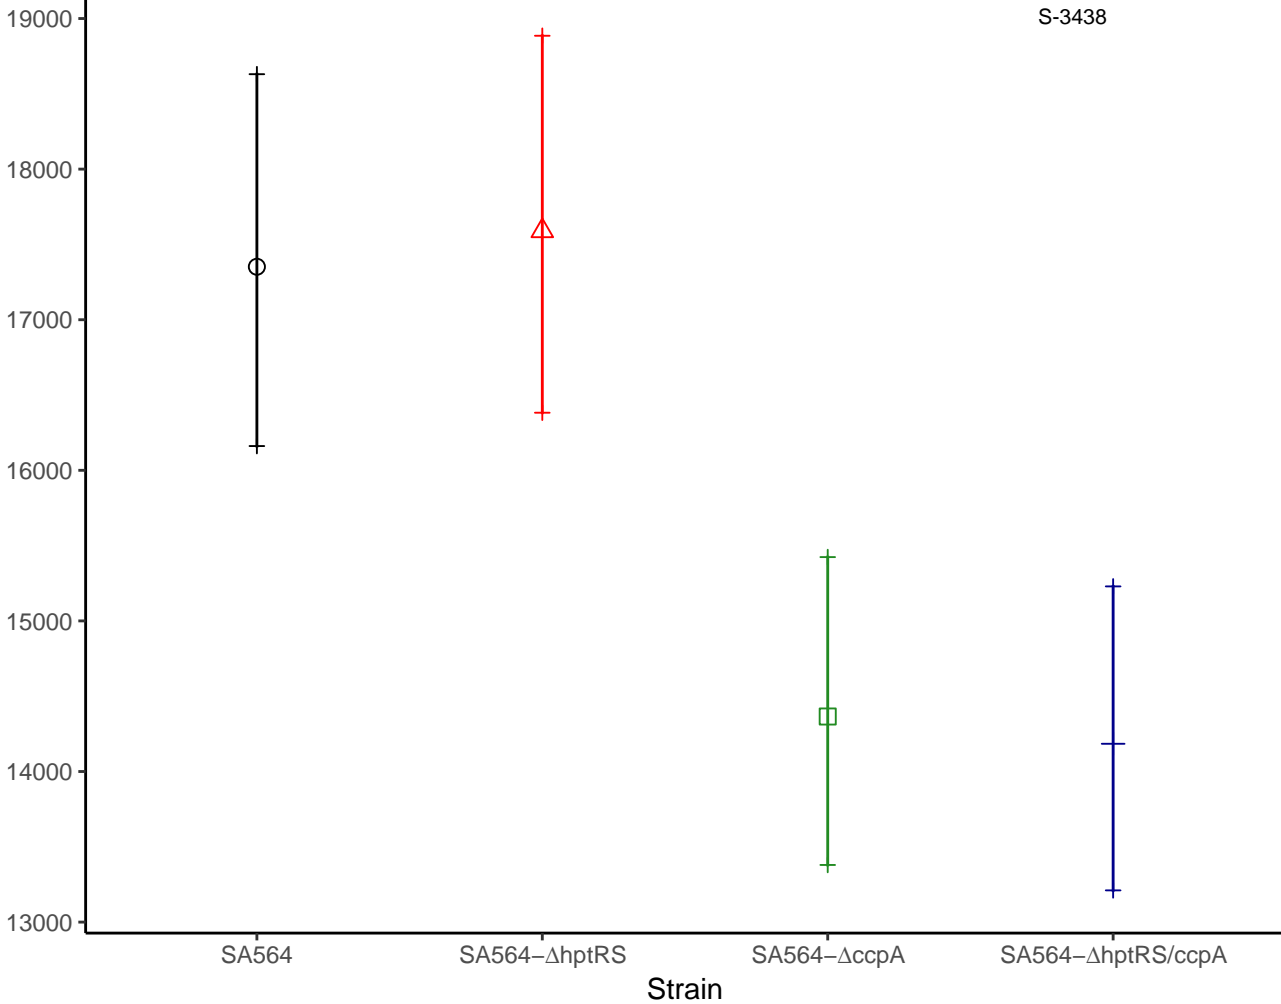

- ⊕ SA564
- △ SA564- $\Delta$ hptRS
- ⊞ SA564- $\Delta$ ccpA
- + SA564- $\Delta$ hptRS/ccpA

# TPX\_STAAM

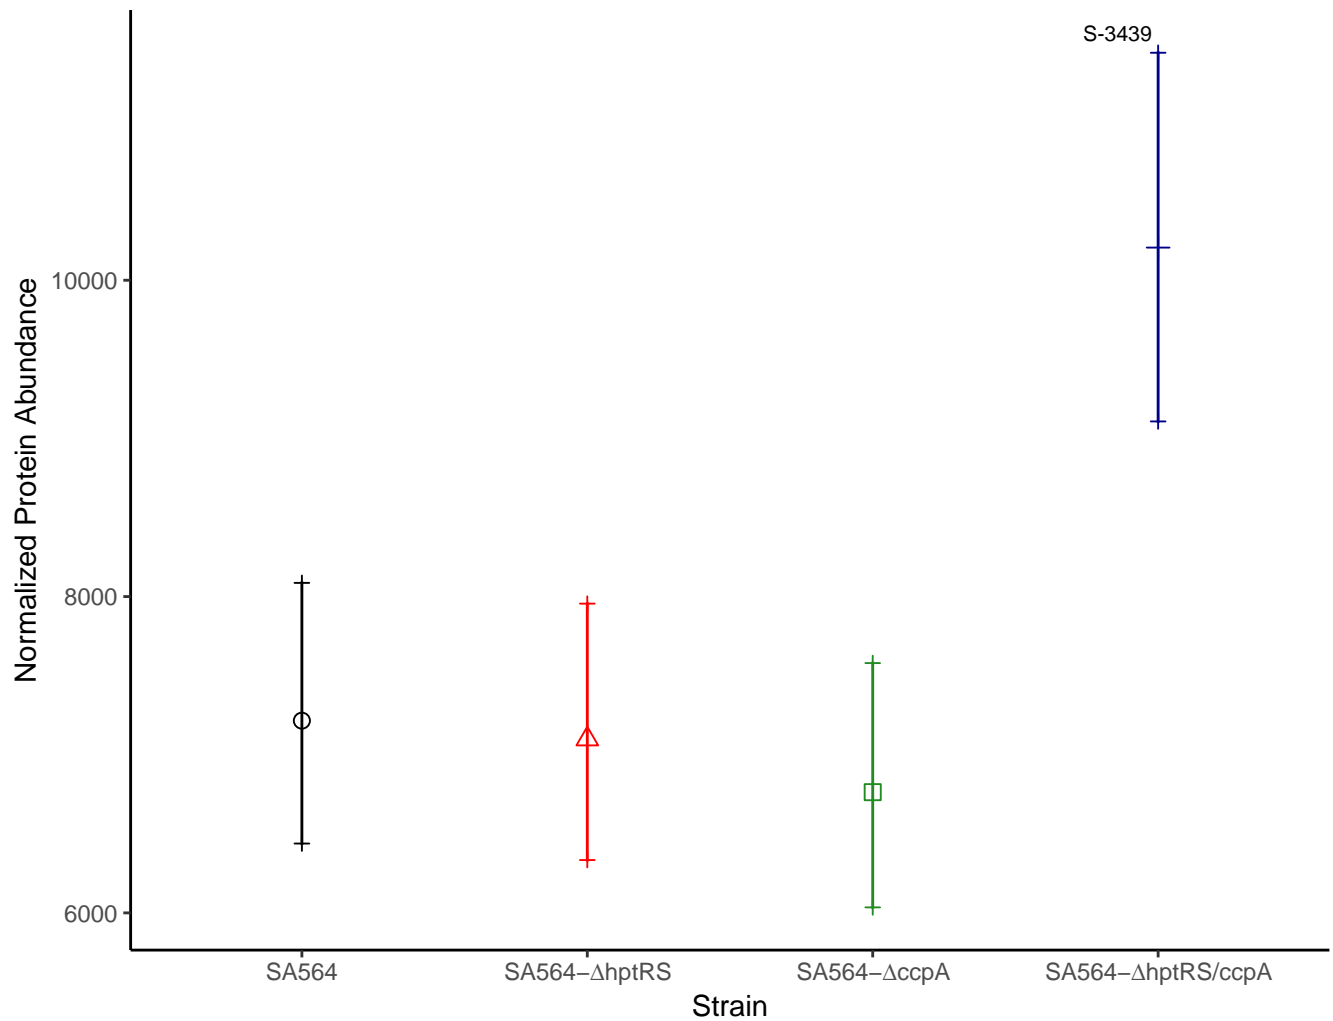

- ⊕ SA564
- △ SA564- $\Delta$ hptRS
- ⊞ SA564- $\Delta$ ccpA
- + SA564- $\Delta$ hptRS/ccpA

# TRAC\_STAAM

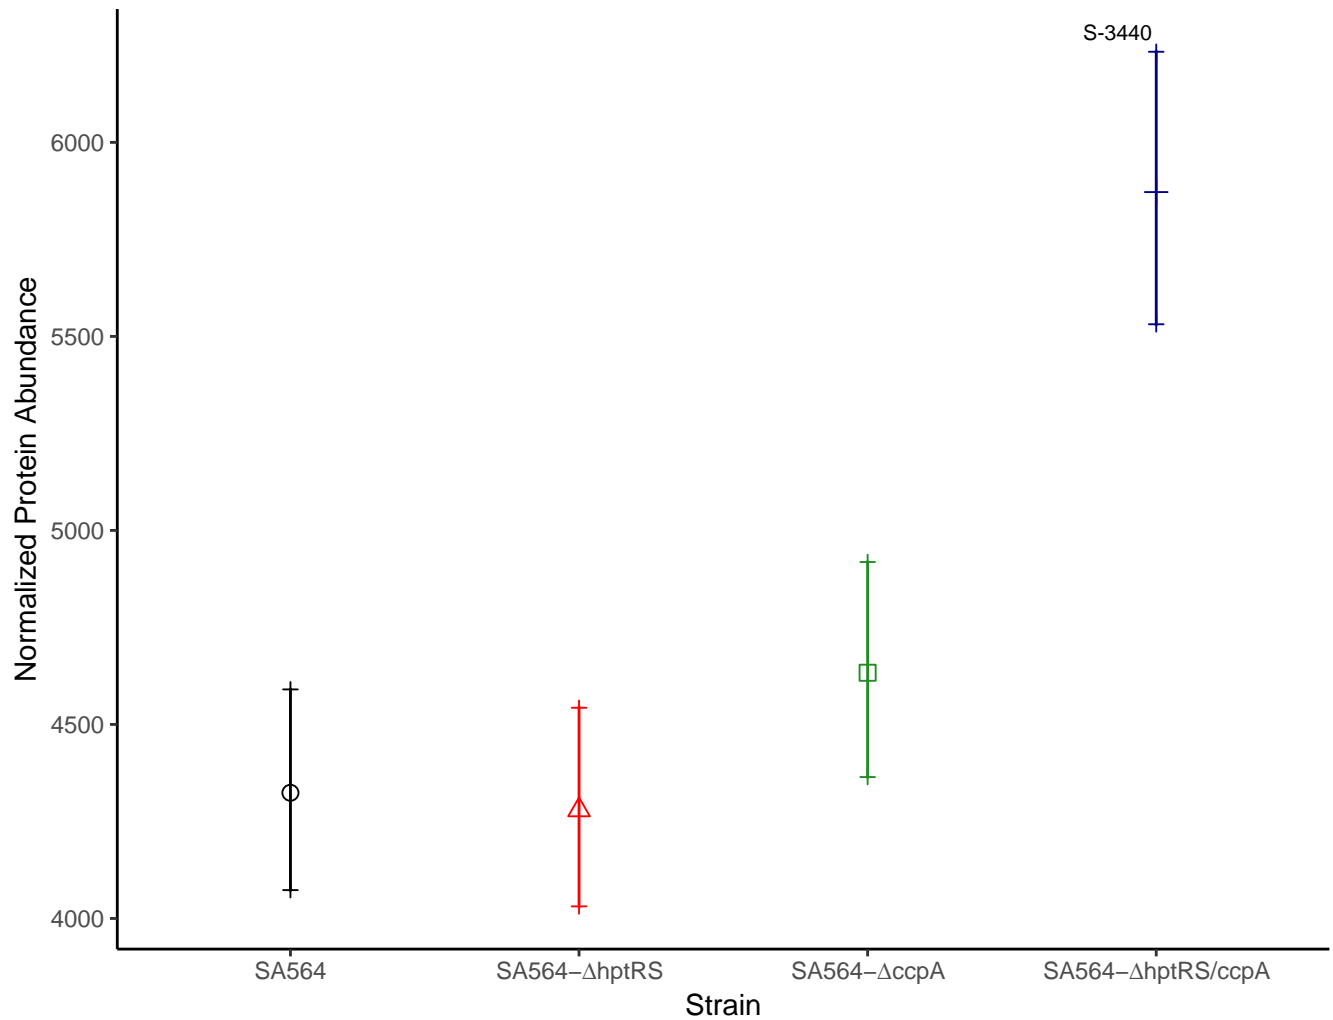

- ⊕ SA564
- △ SA564- $\Delta$ hptRS
- ⊞ SA564- $\Delta$ ccpA
- + SA564- $\Delta$ hptRS/ccpA



# TRAP\_STAAM

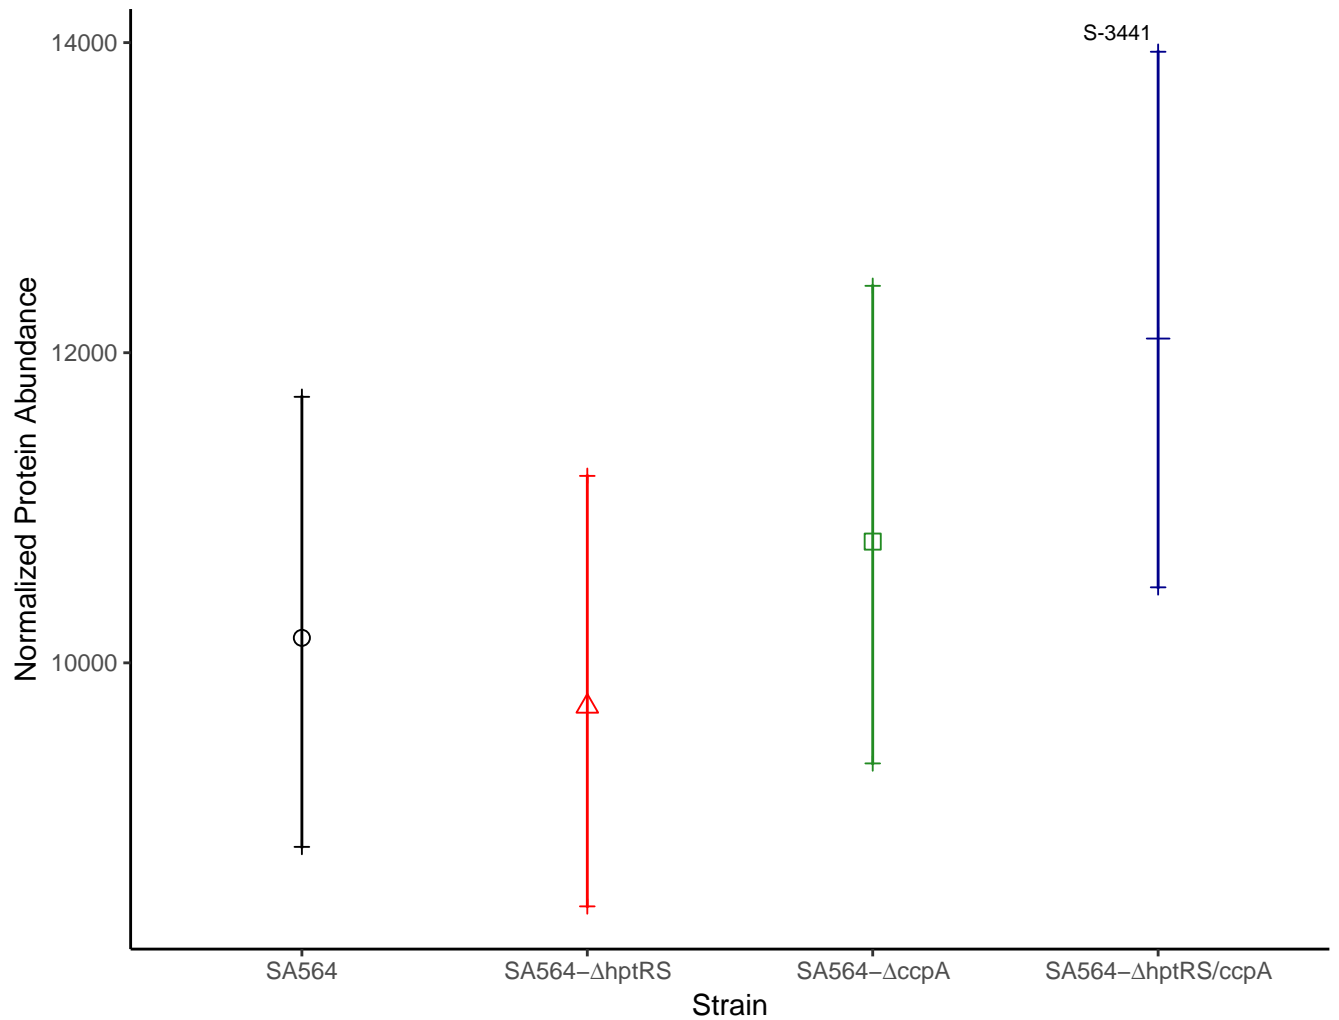

- ⊕ SA564
- △ SA564- $\Delta$ hptRS
- ⊞ SA564- $\Delta$ ccpA
- + SA564- $\Delta$ hptRS/ccpA

# TRMB\_STAAM

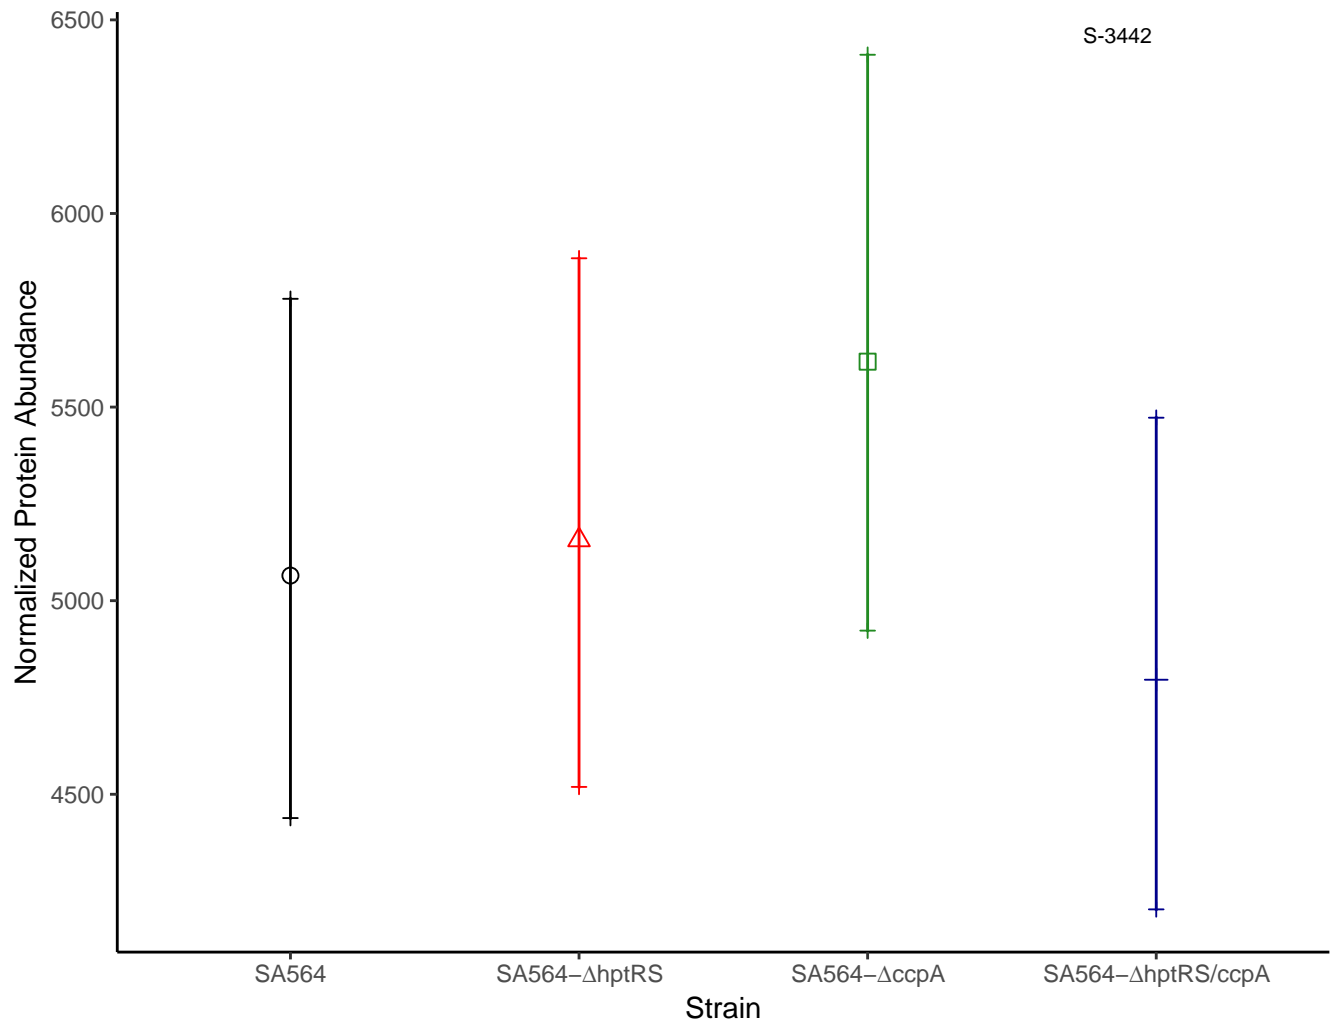

- ⊕ SA564
- △ SA564- $\Delta$ hptRS
- ⊞ SA564- $\Delta$ ccpA
- + SA564- $\Delta$ hptRS/ccpA

# TRMFO\_STAAM

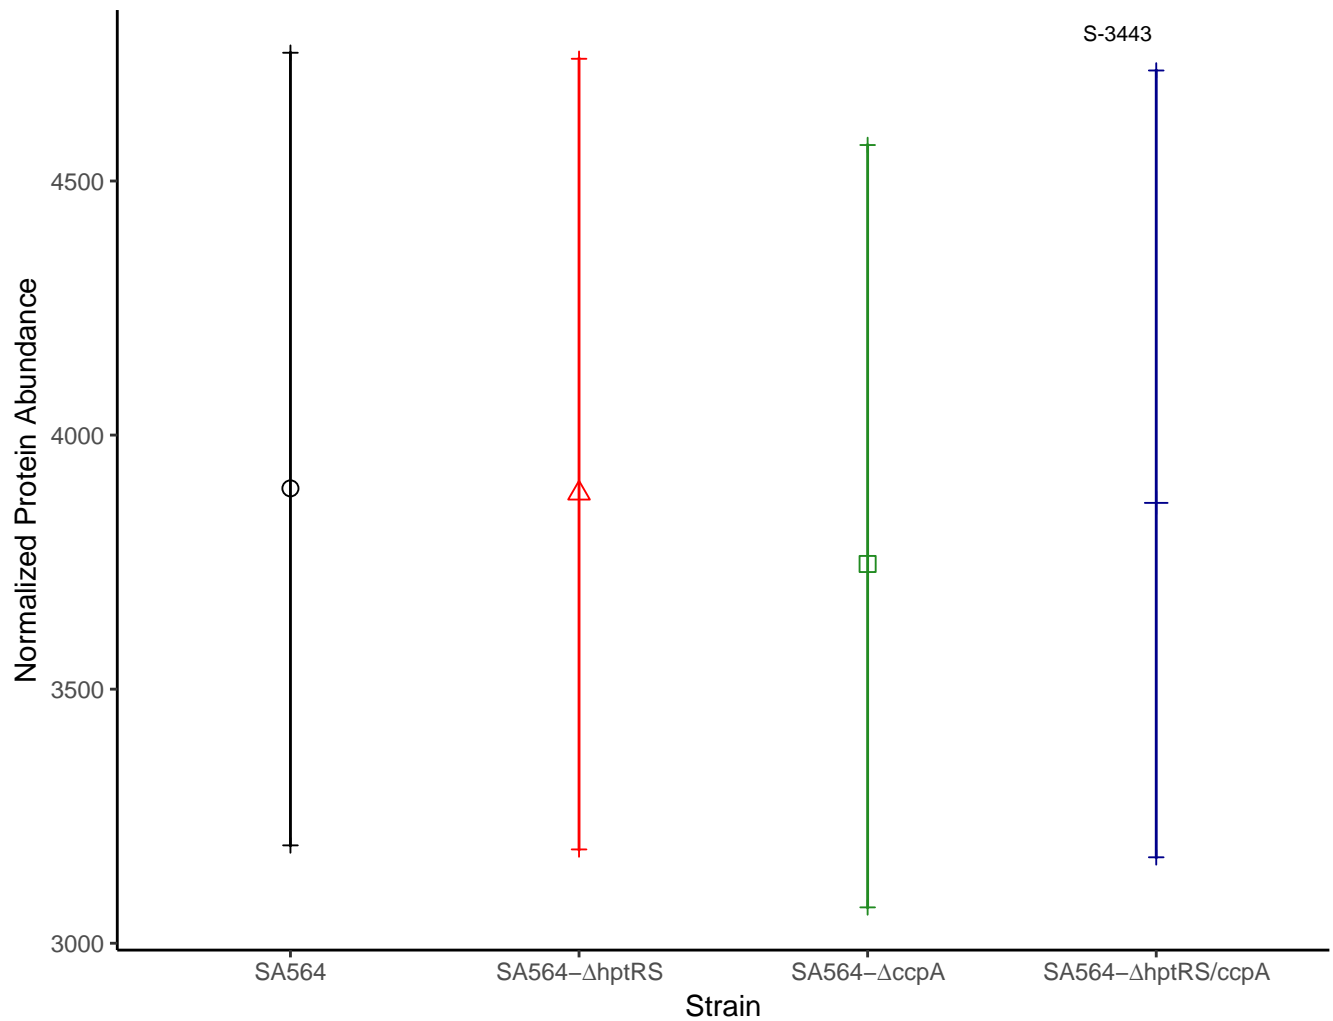

- ⊕ SA564
- △ SA564- $\Delta$ hptRS
- ⊞ SA564- $\Delta$ ccpA
- + SA564- $\Delta$ hptRS/ccpA

# TRMHL\_STAAM

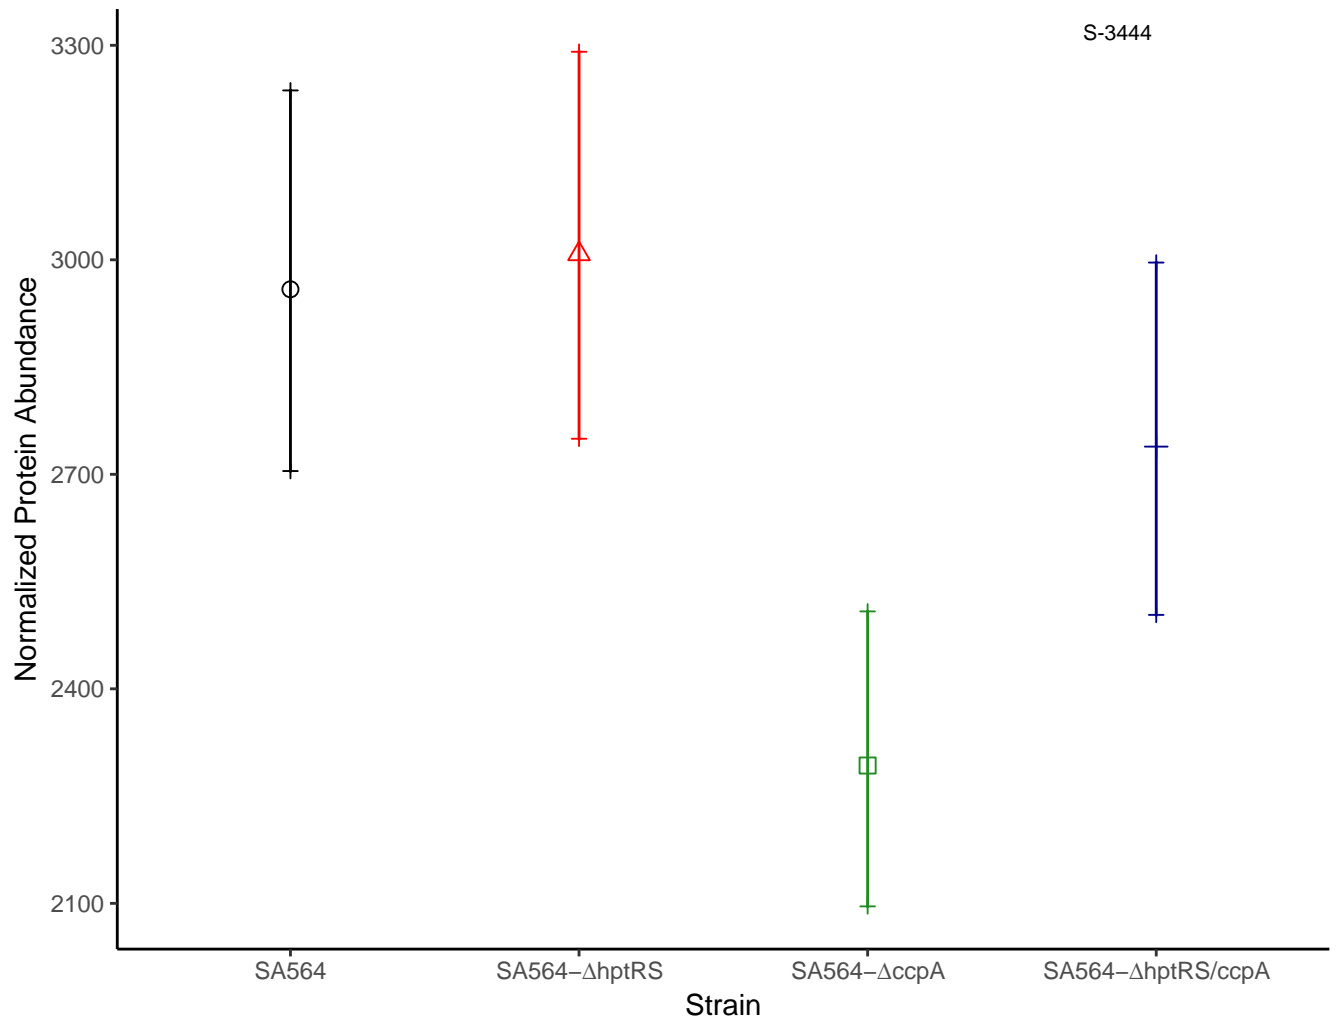

- ⊕ SA564
- △ SA564- $\Delta$ hptRS
- ⊞ SA564- $\Delta$ ccpA
- + SA564- $\Delta$ hptRS/ccpA

# TRPA\_STAAM

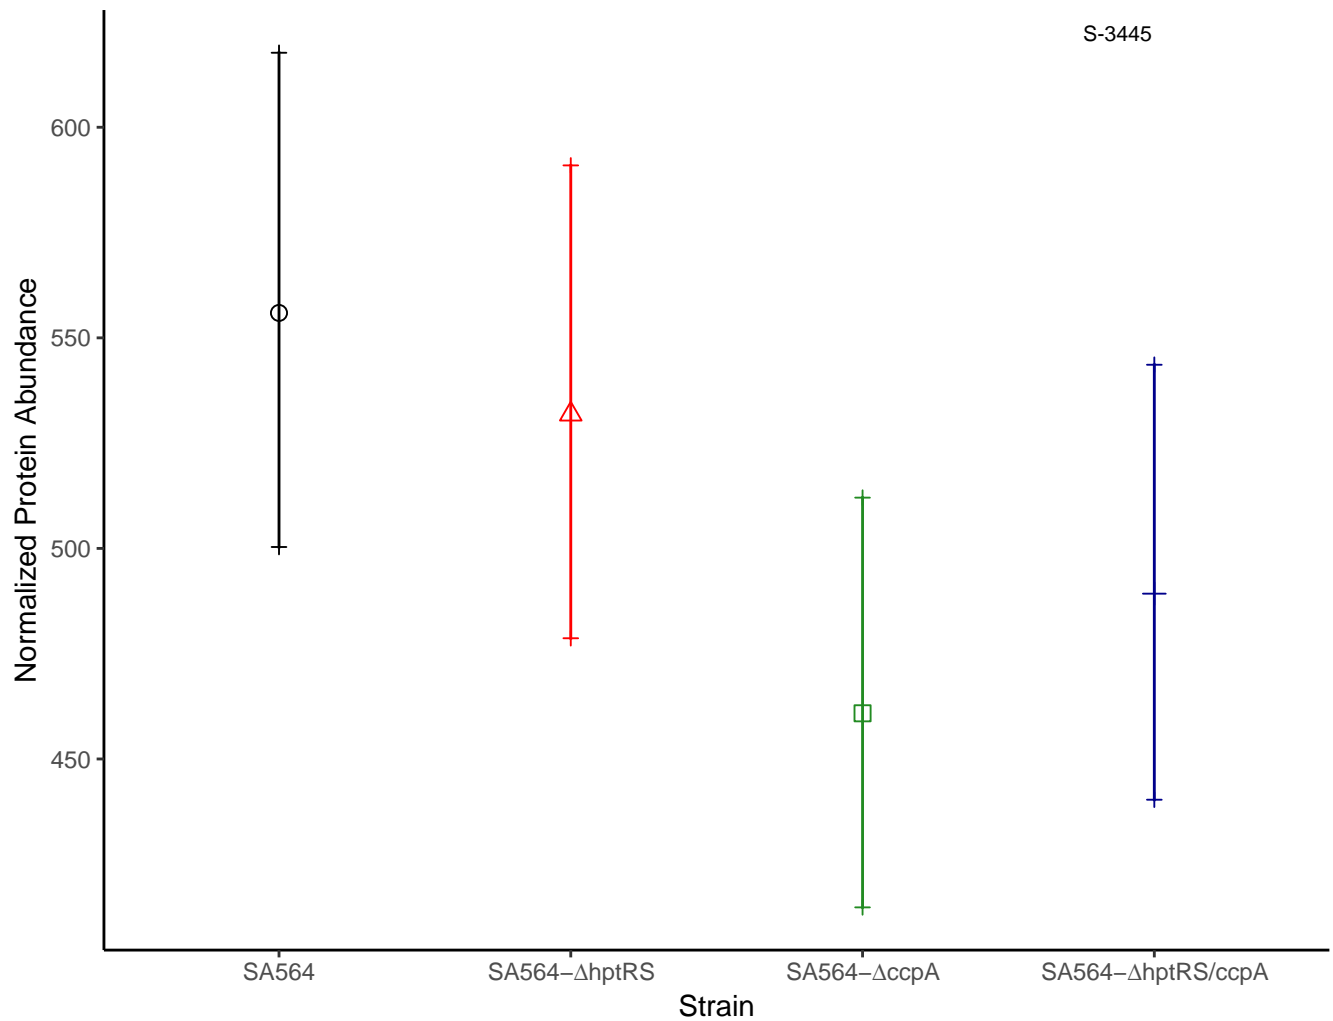

- ⊕ SA564
- △ SA564- $\Delta$ hptRS
- ⊞ SA564- $\Delta$ ccpA
- + SA564- $\Delta$ hptRS/ccpA

# TRPF\_STAAM

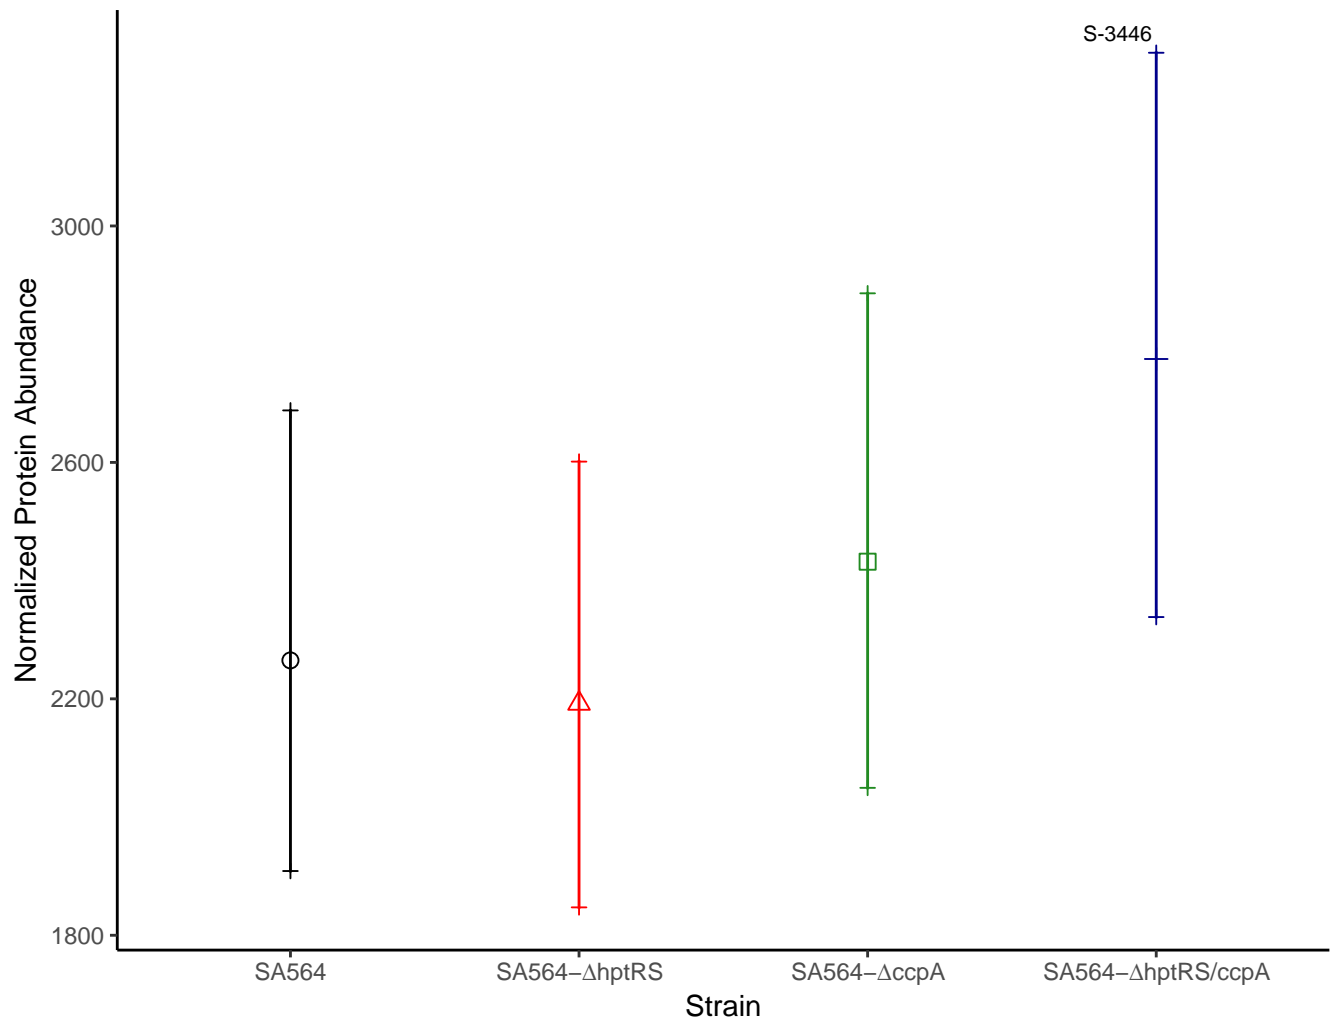

- ⊕ SA564
- △ SA564- $\Delta$ hptRS
- ⊞ SA564- $\Delta$ ccpA
- + SA564- $\Delta$ hptRS/ccpA

# TRUB\_STAAM

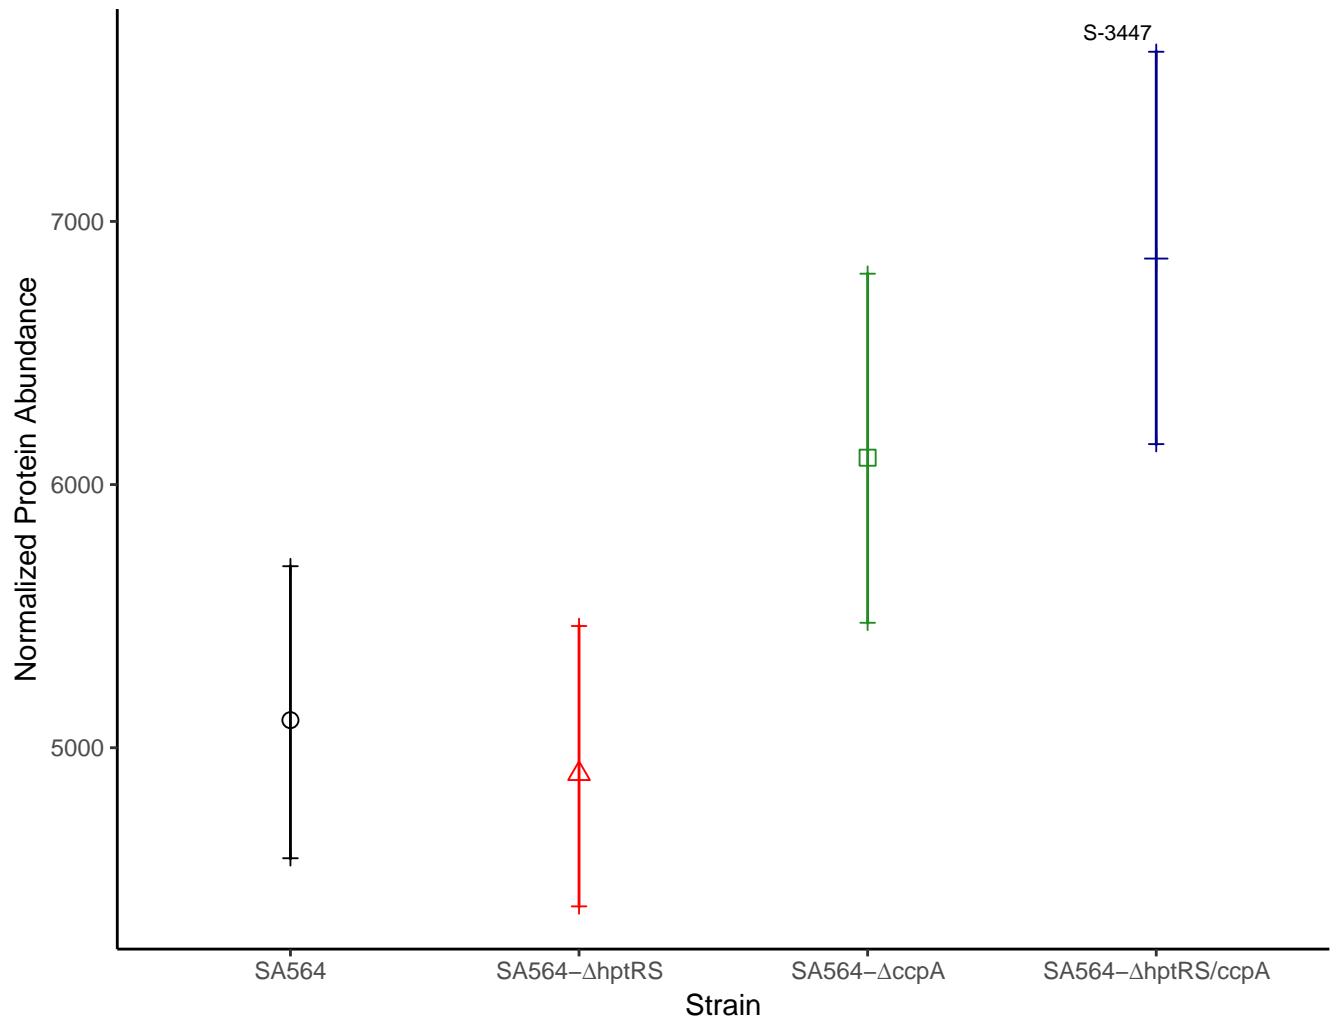

- ⊕ SA564
- △ SA564- $\Delta$ *hptRS*
- ⊞ SA564- $\Delta$ *ccpA*
- + SA564- $\Delta$ *hptRS/ccpA*

# TRXB\_STAAM

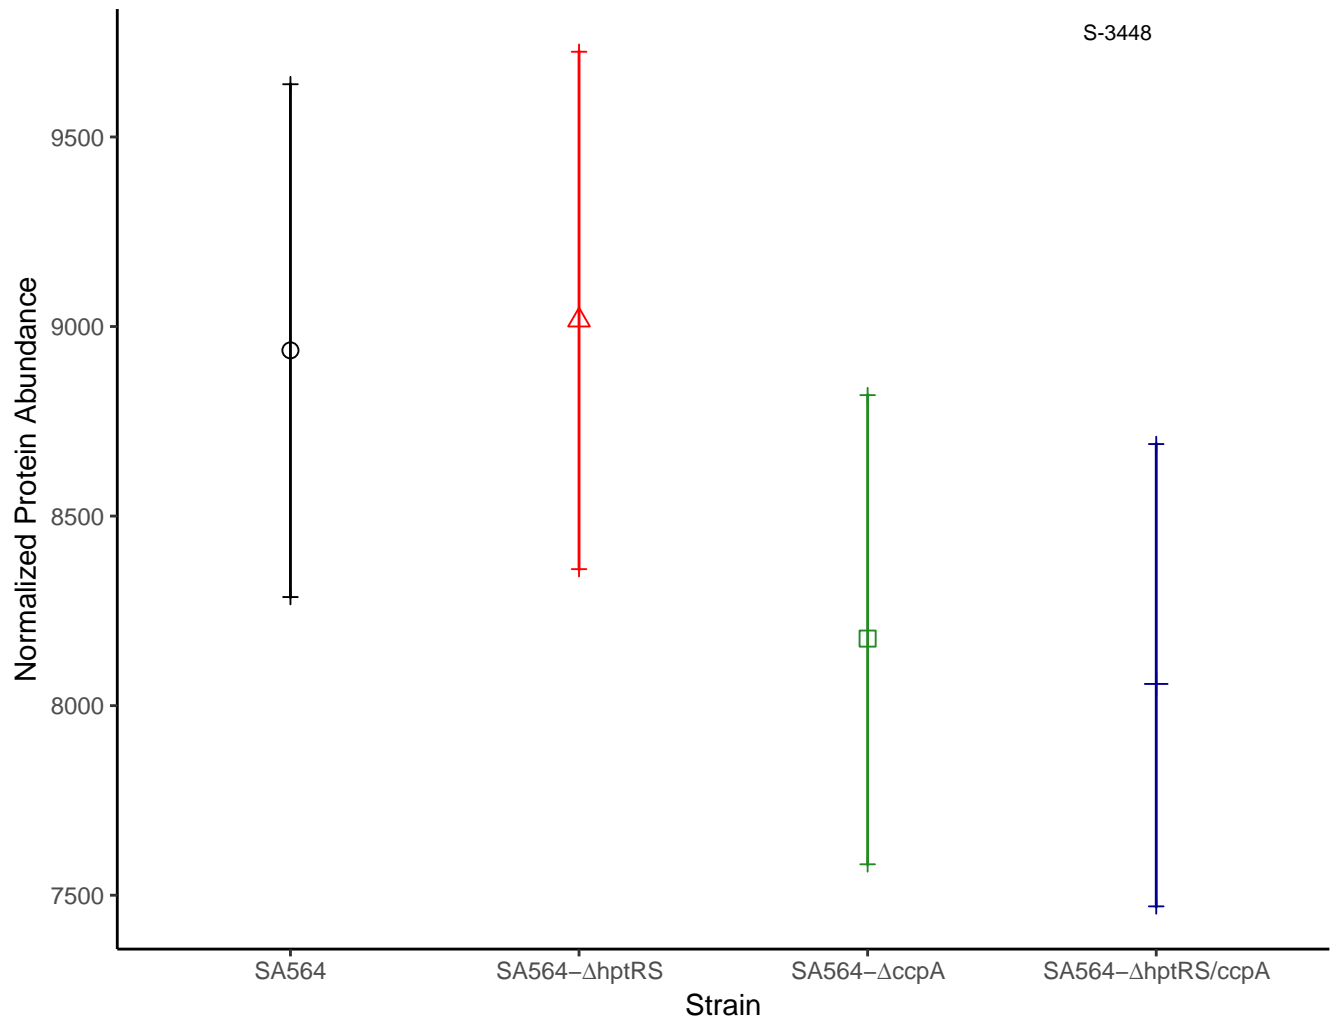

- ⊕ SA564
- △ SA564- $\Delta$ hptRS
- ⊞ SA564- $\Delta$ ccpA
- + SA564- $\Delta$ hptRS/ccpA



# TSAD\_STAAM

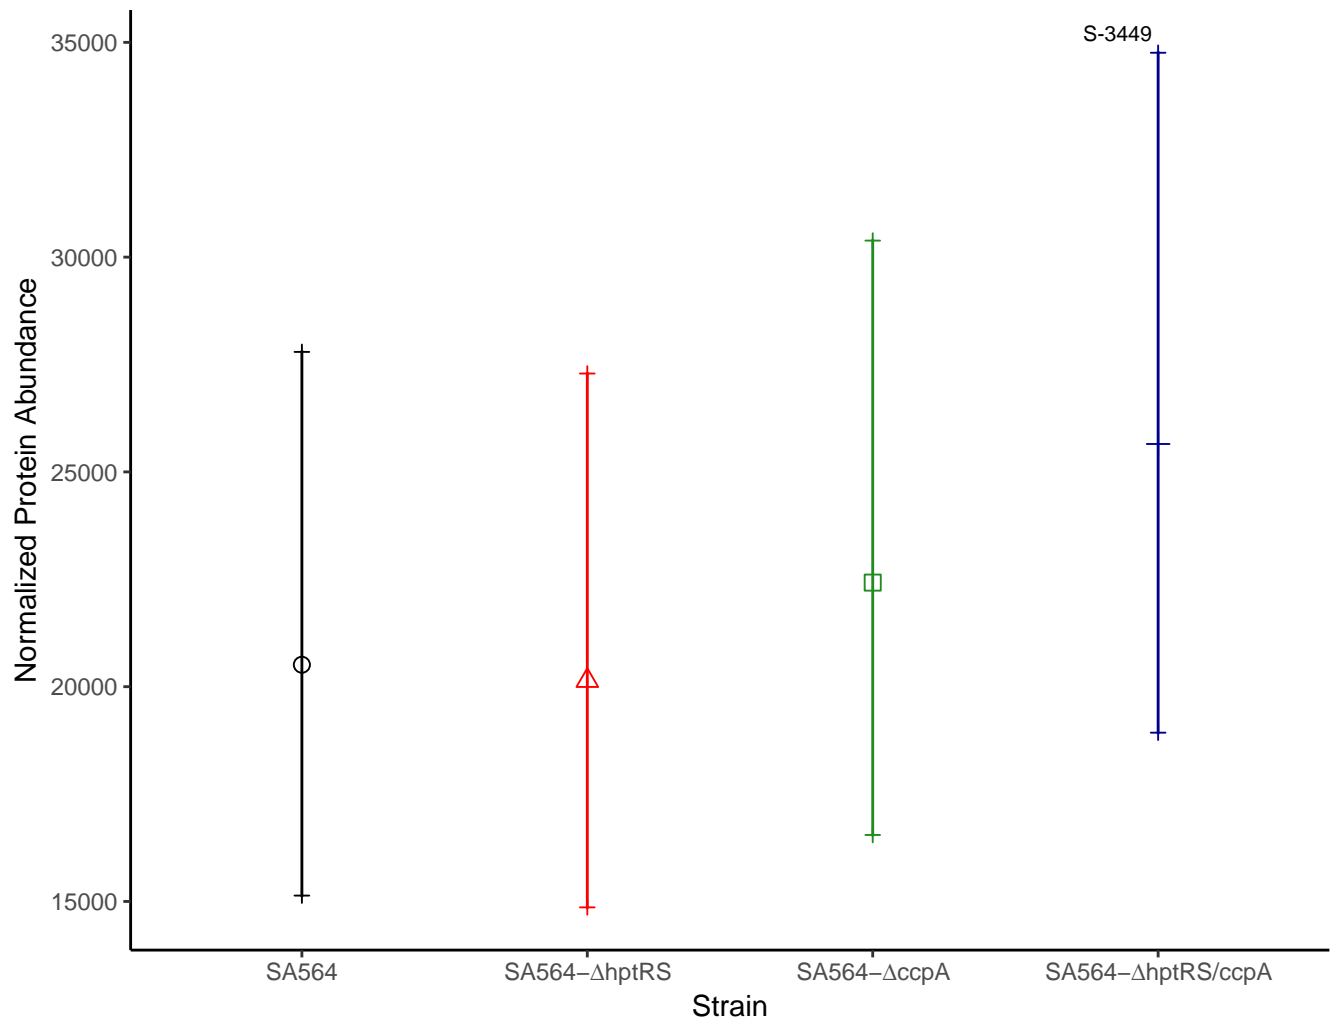

- ⊕ SA564
- △ SA564- $\Delta$ hptRS
- ⊞ SA564- $\Delta$ ccpA
- + SA564- $\Delta$ hptRS/ccpA

# TYRA\_STAAM

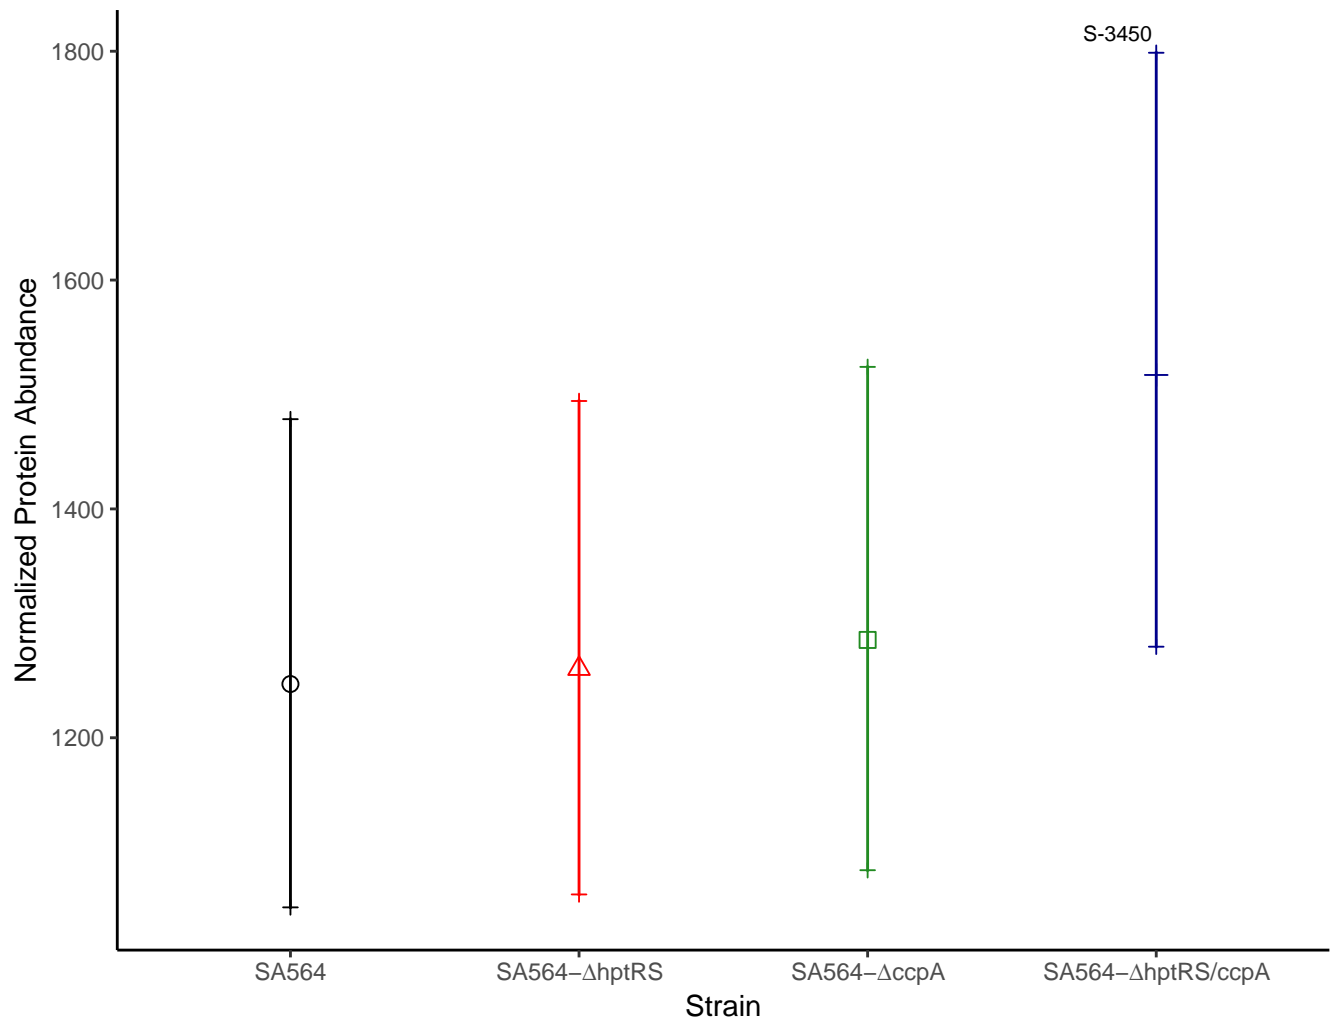

- ⊕ SA564
- △ SA564- $\Delta$ hptRS
- ⊞ SA564- $\Delta$ ccpA
- + SA564- $\Delta$ hptRS/ccpA

# TYSY\_STAAM

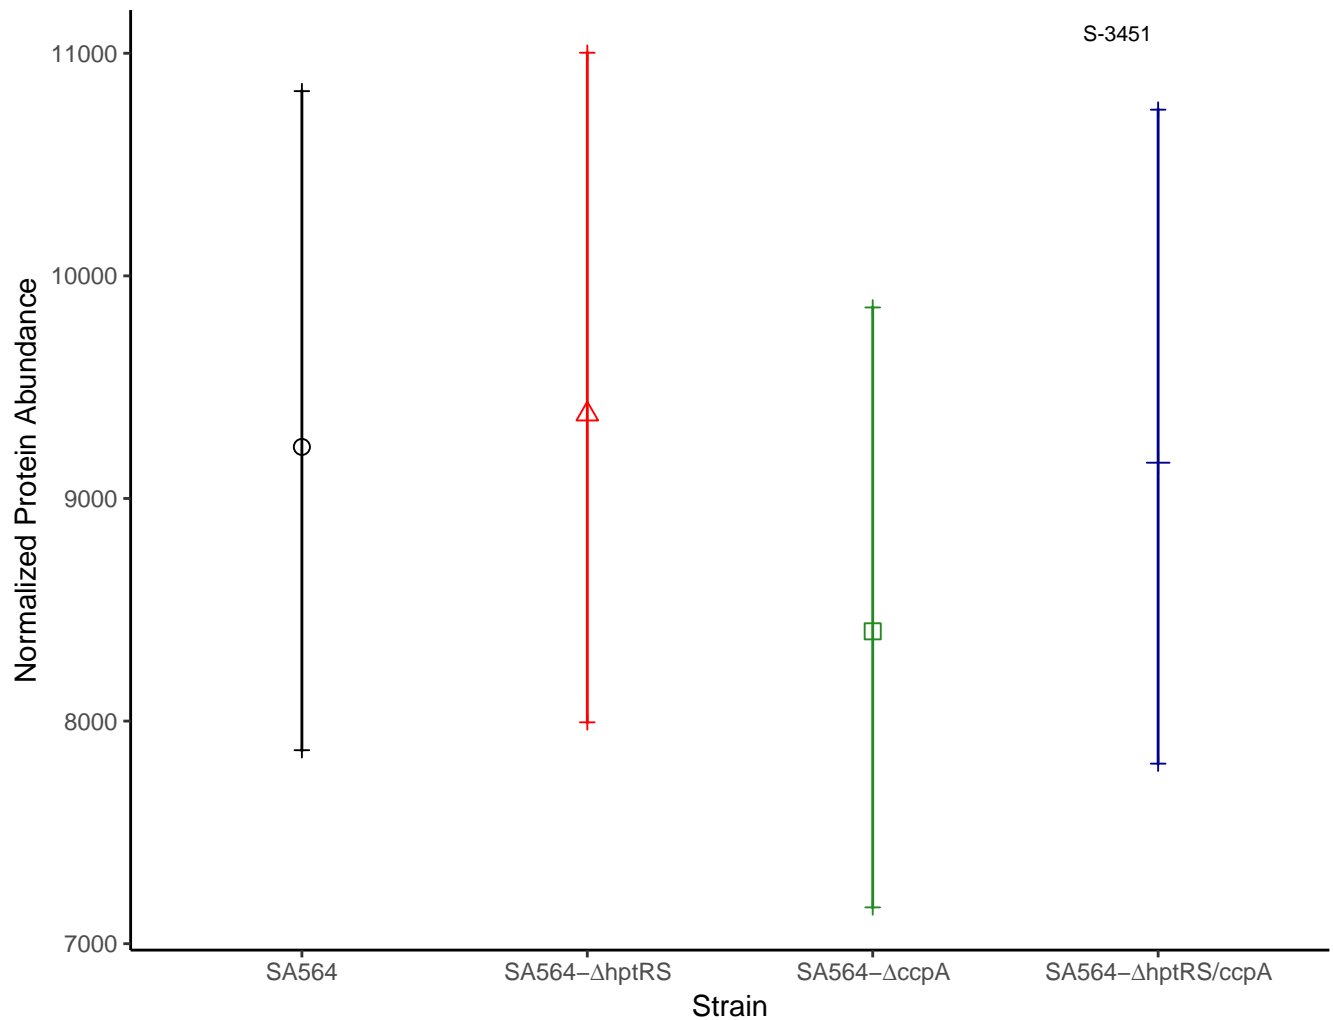

- ⊕ SA564
- △ SA564- $\Delta$ hptRS
- ⊞ SA564- $\Delta$ ccpA
- + SA564- $\Delta$ hptRS/ccpA

# UNG\_STAAM

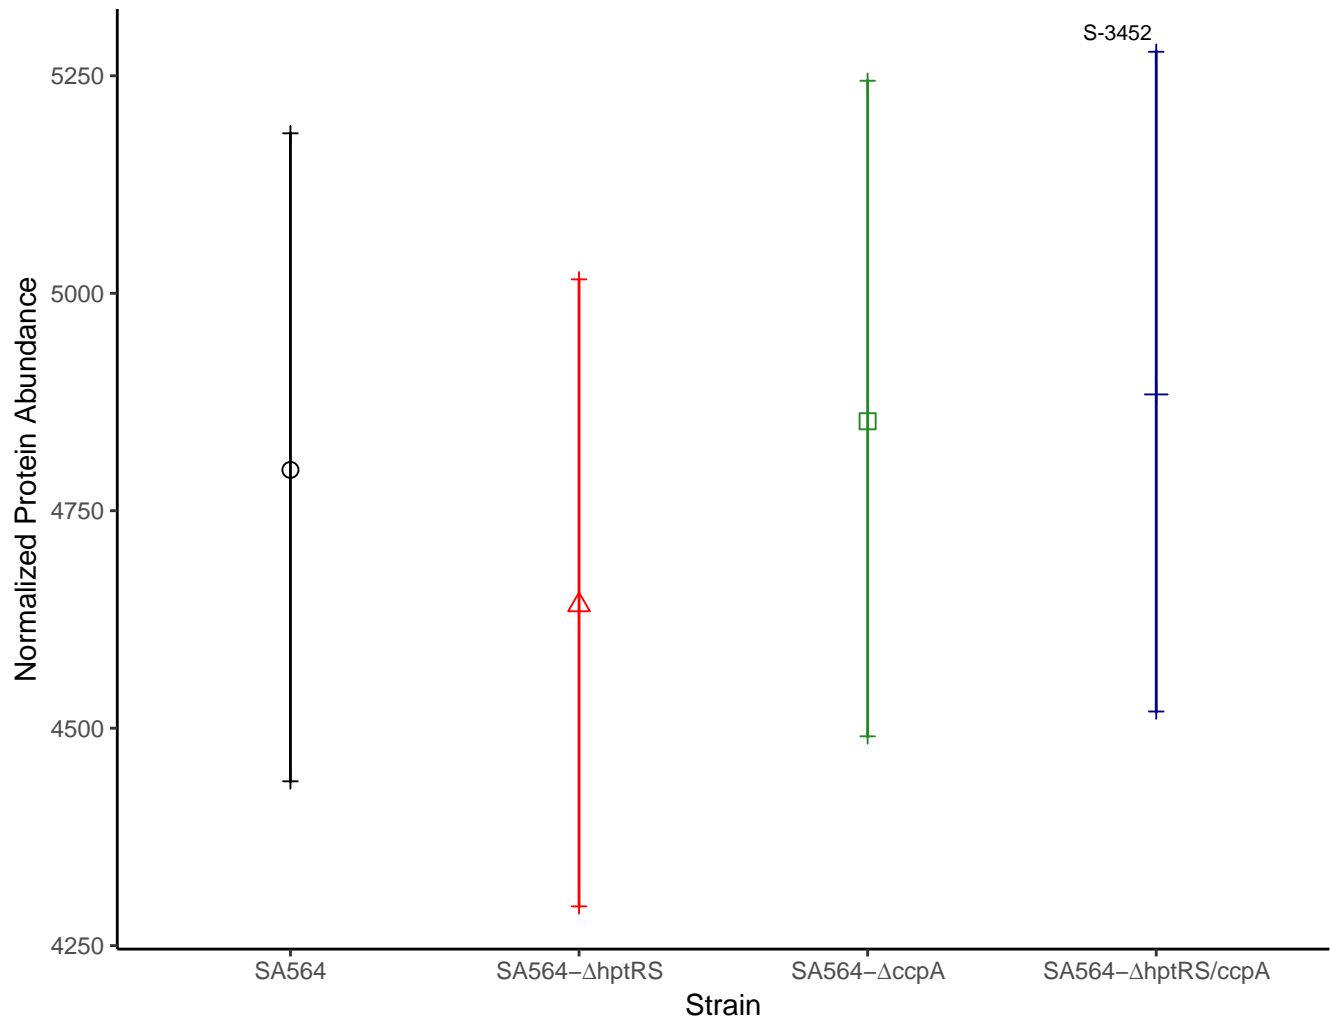

- ⊕ SA564
- △ SA564- $\Delta$ hptRS
- ⊞ SA564- $\Delta$ ccpA
- + SA564- $\Delta$ hptRS/ccpA

# UP355\_STAAM

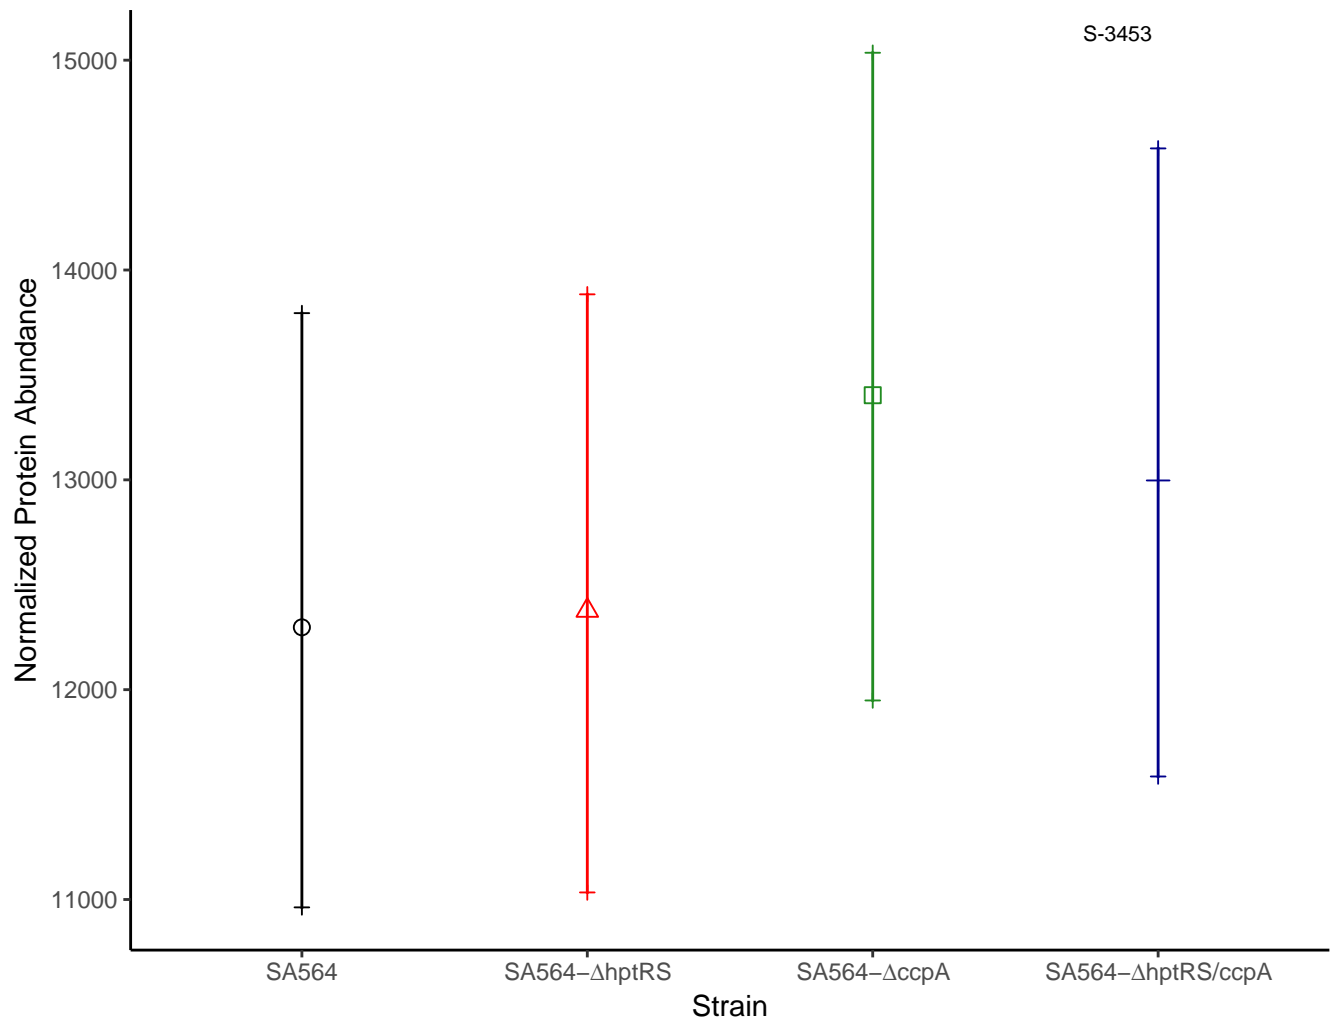

- ⊕ SA564
- △ SA564- $\Delta$ hptRS
- ⊞ SA564- $\Delta$ ccpA
- + SA564- $\Delta$ hptRS/ccpA

# UPP\_STAAM

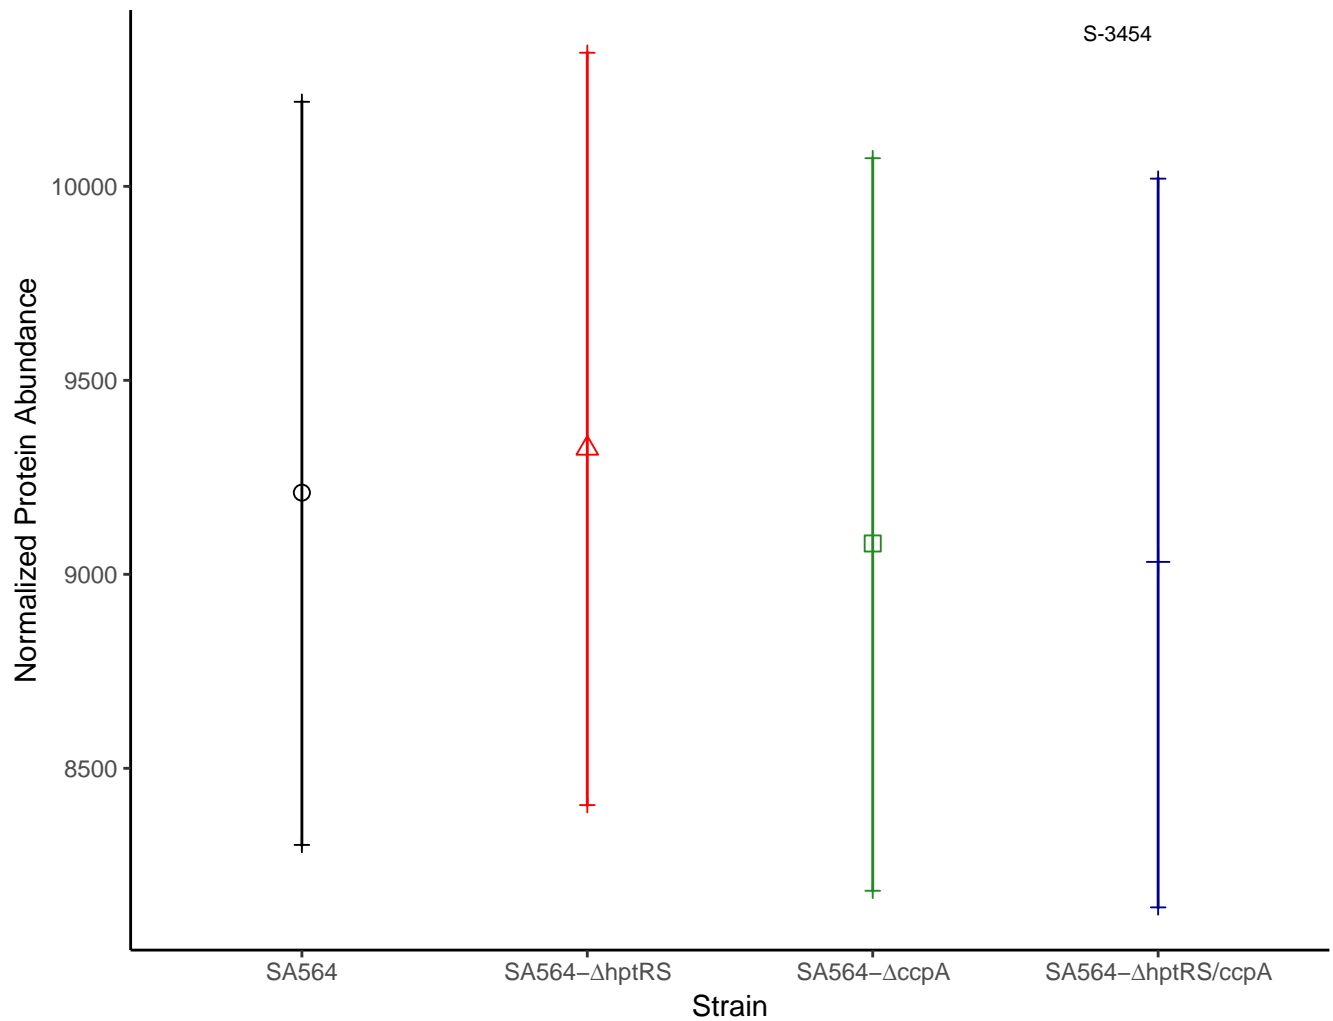

- ⊕ SA564
- △ SA564- $\Delta$ hptRS
- ⊞ SA564- $\Delta$ ccpA
- + SA564- $\Delta$ hptRS/ccpA

# UREE\_STAAM

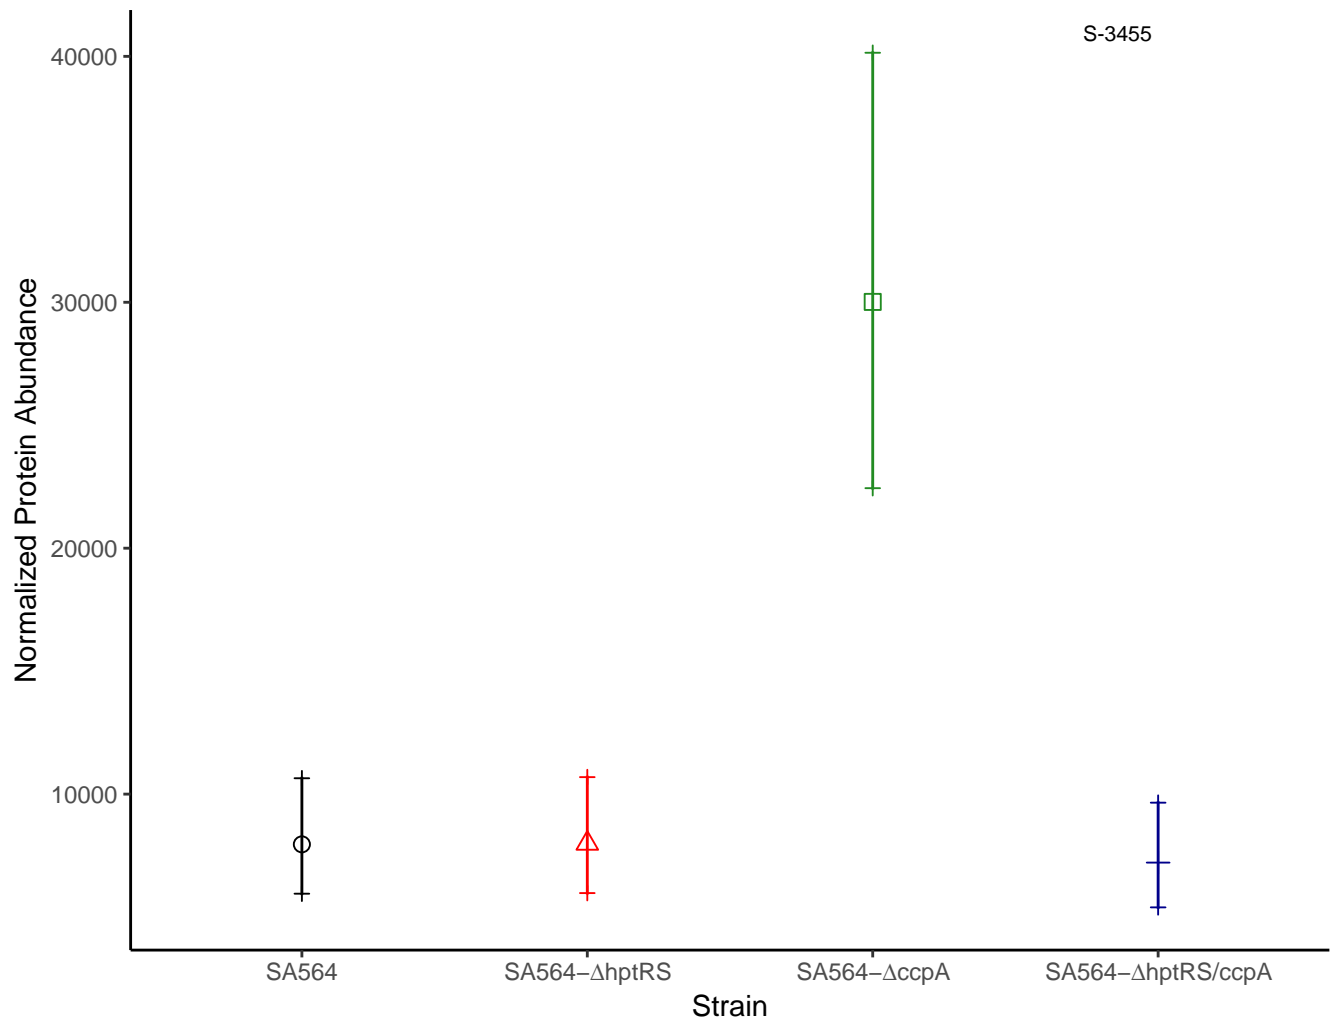

- ⊕ SA564
- △ SA564- $\Delta$ hptRS
- ⊞ SA564- $\Delta$ ccpA
- + SA564- $\Delta$ hptRS/ccpA

# UREG\_STAAM

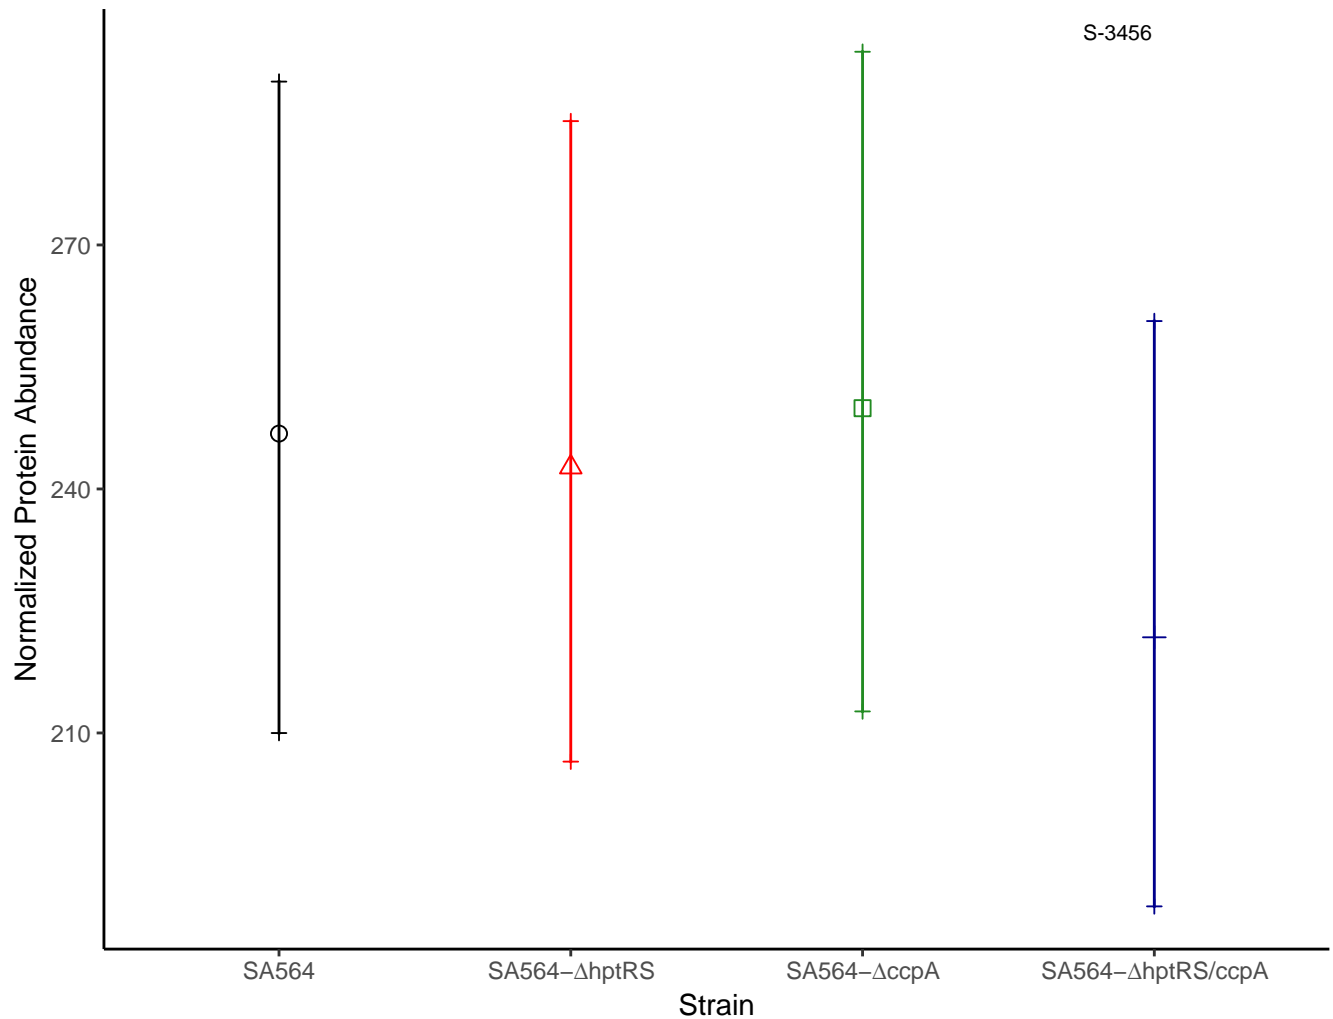

- ⊕ SA564
- △ SA564- $\Delta$ hptRS
- ⊞ SA564- $\Delta$ ccpA
- ⊕ SA564- $\Delta$ hptRS/ccpA



# URK\_STAAM

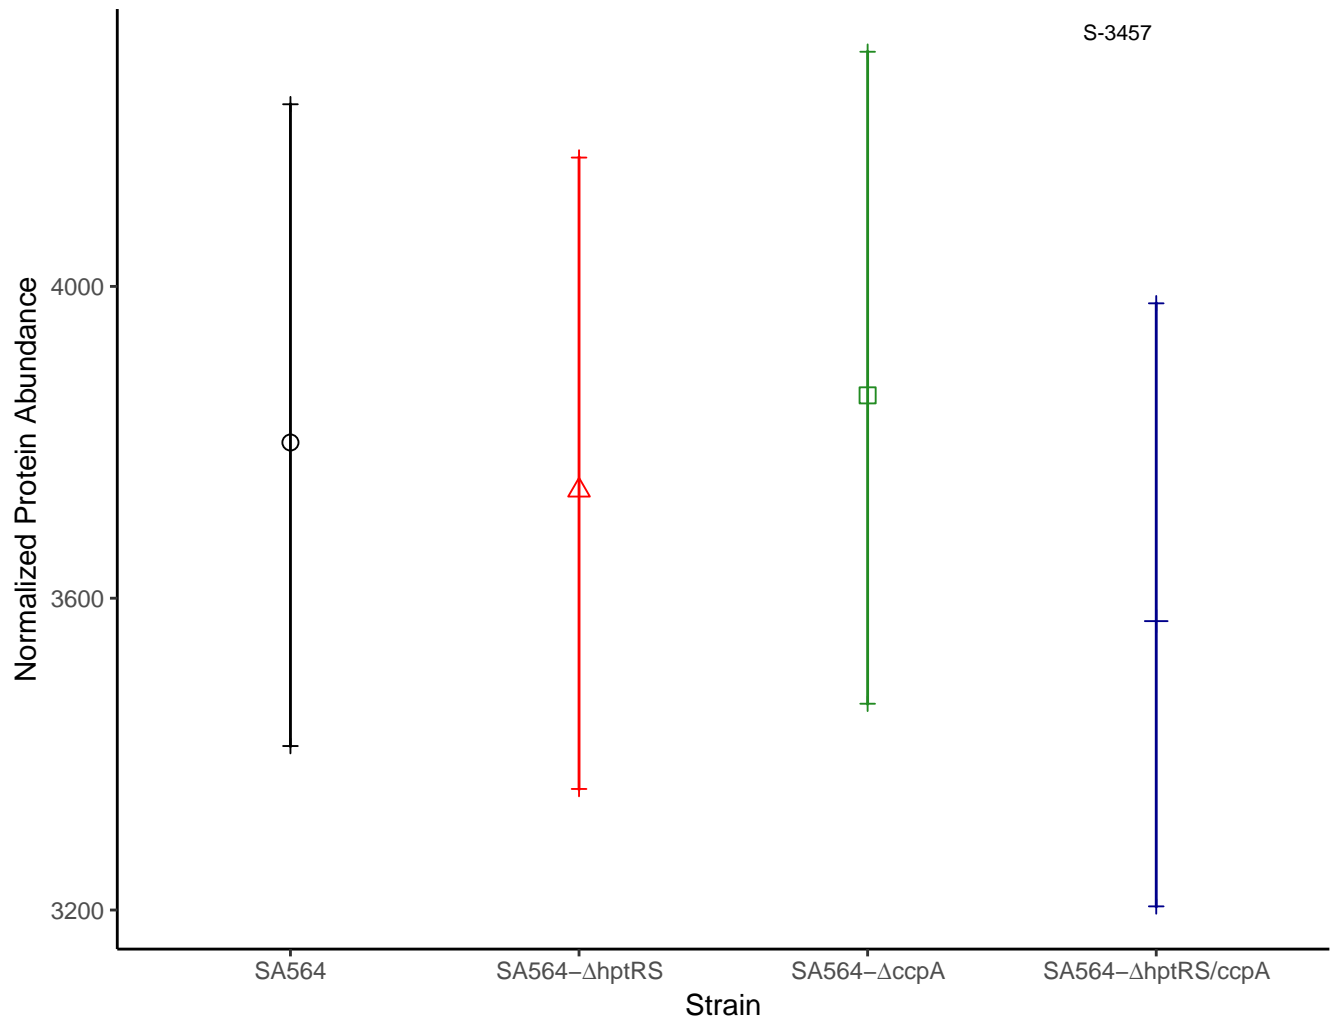

- ⊕ SA564
- △ SA564- $\Delta$ hptRS
- ⊞ SA564- $\Delta$ ccpA
- + SA564- $\Delta$ hptRS/ccpA

# URTF\_STAAM

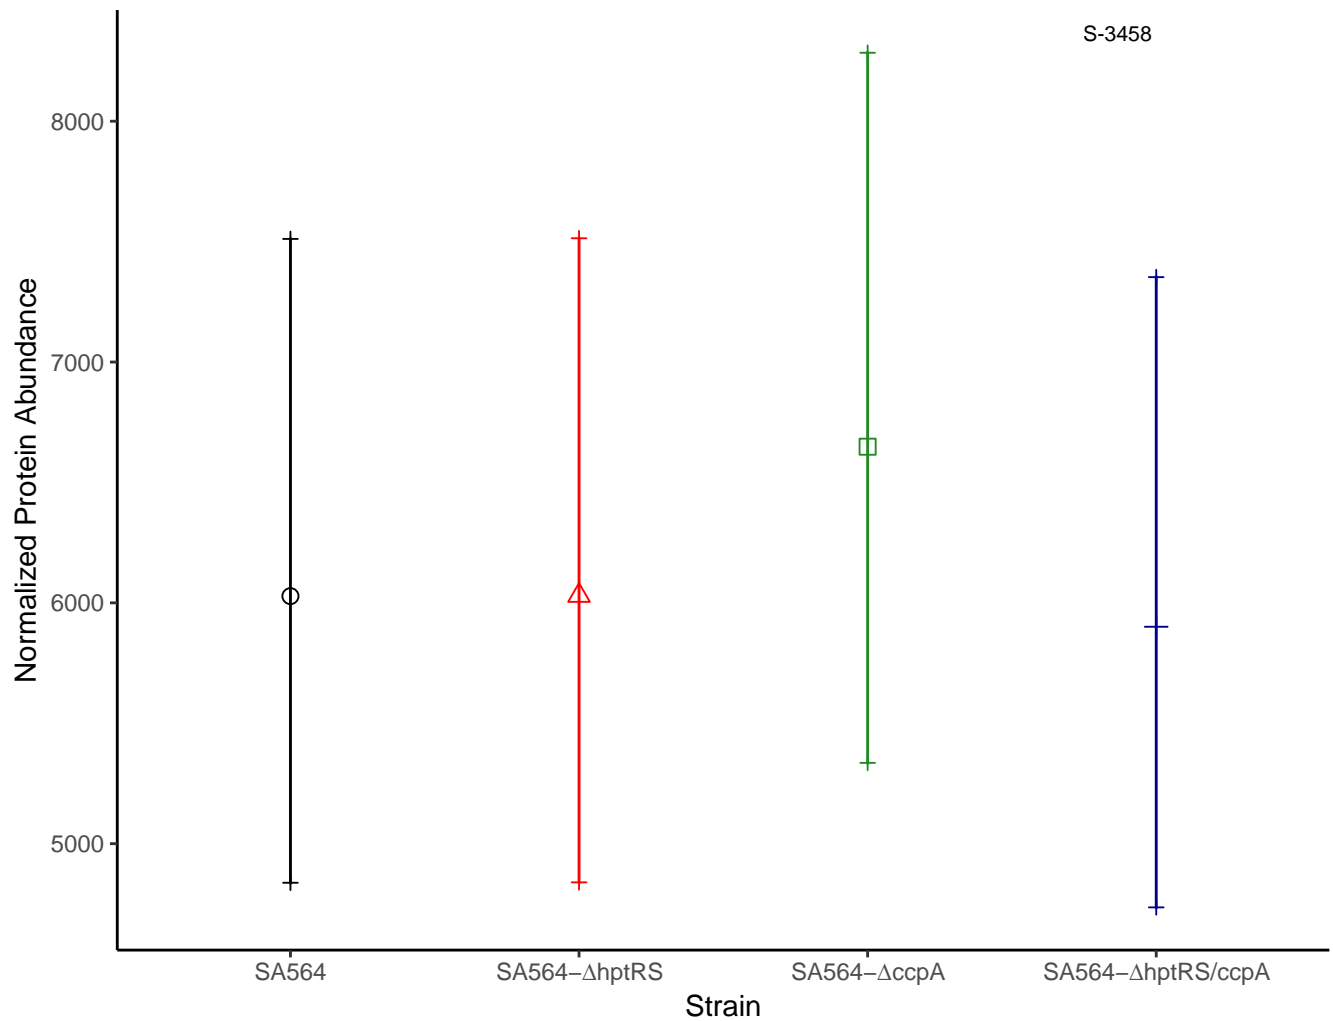

- ⊕ SA564
- △ SA564- $\Delta$ hptRS
- ⊞ SA564- $\Delta$ ccpA
- + SA564- $\Delta$ hptRS/ccpA

# UVRA\_STAAM

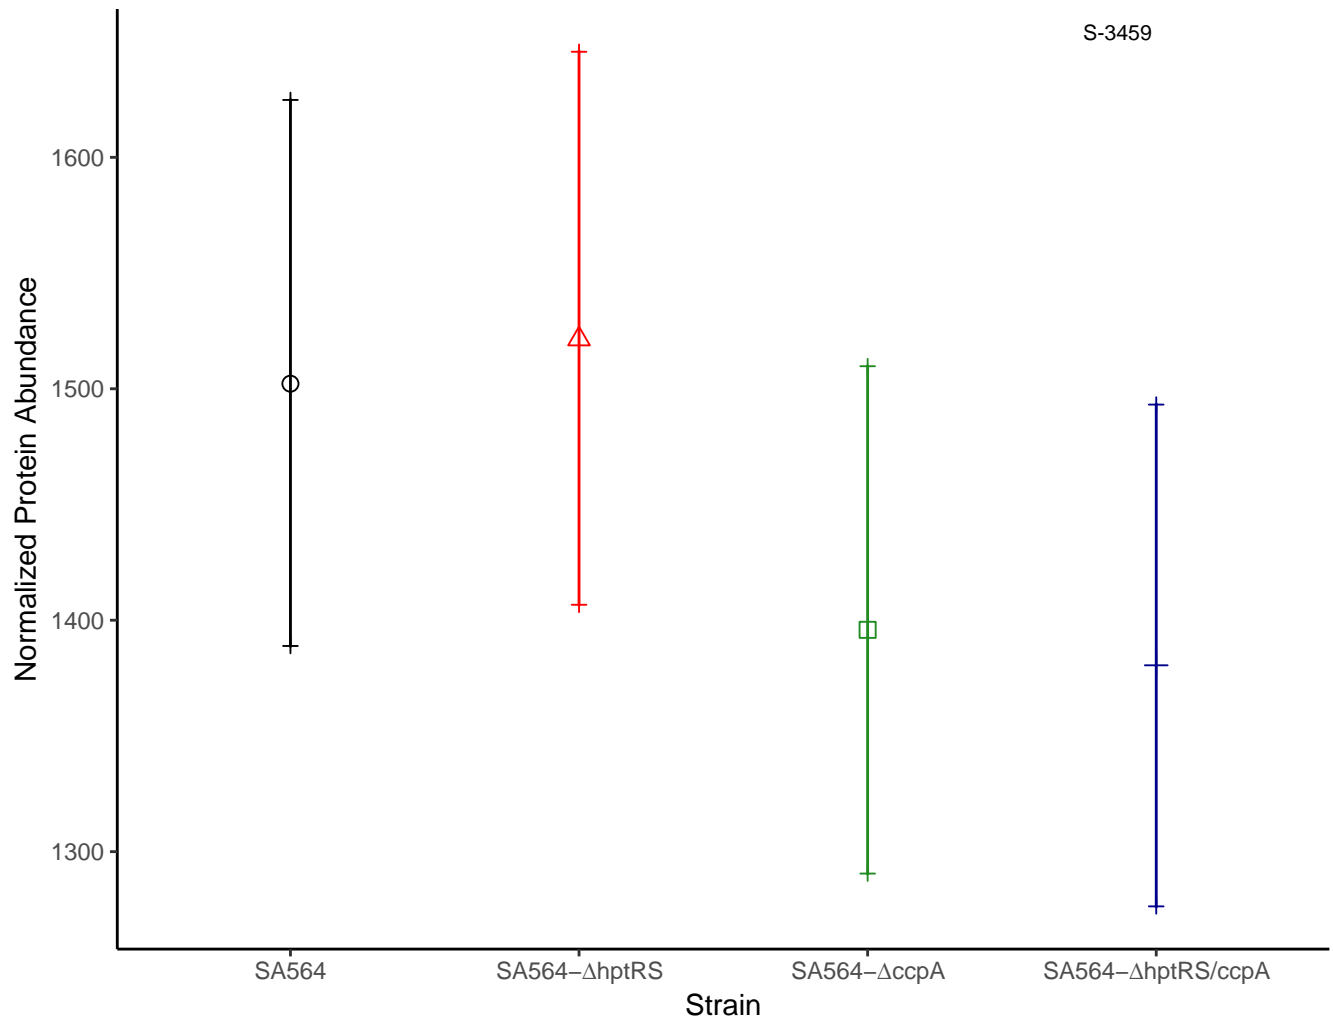

- ⊕ SA564
- △ SA564- $\Delta$ hptRS
- ⊞ SA564- $\Delta$ ccpA
- + SA564- $\Delta$ hptRS/ccpA

# VRAC\_STAAM

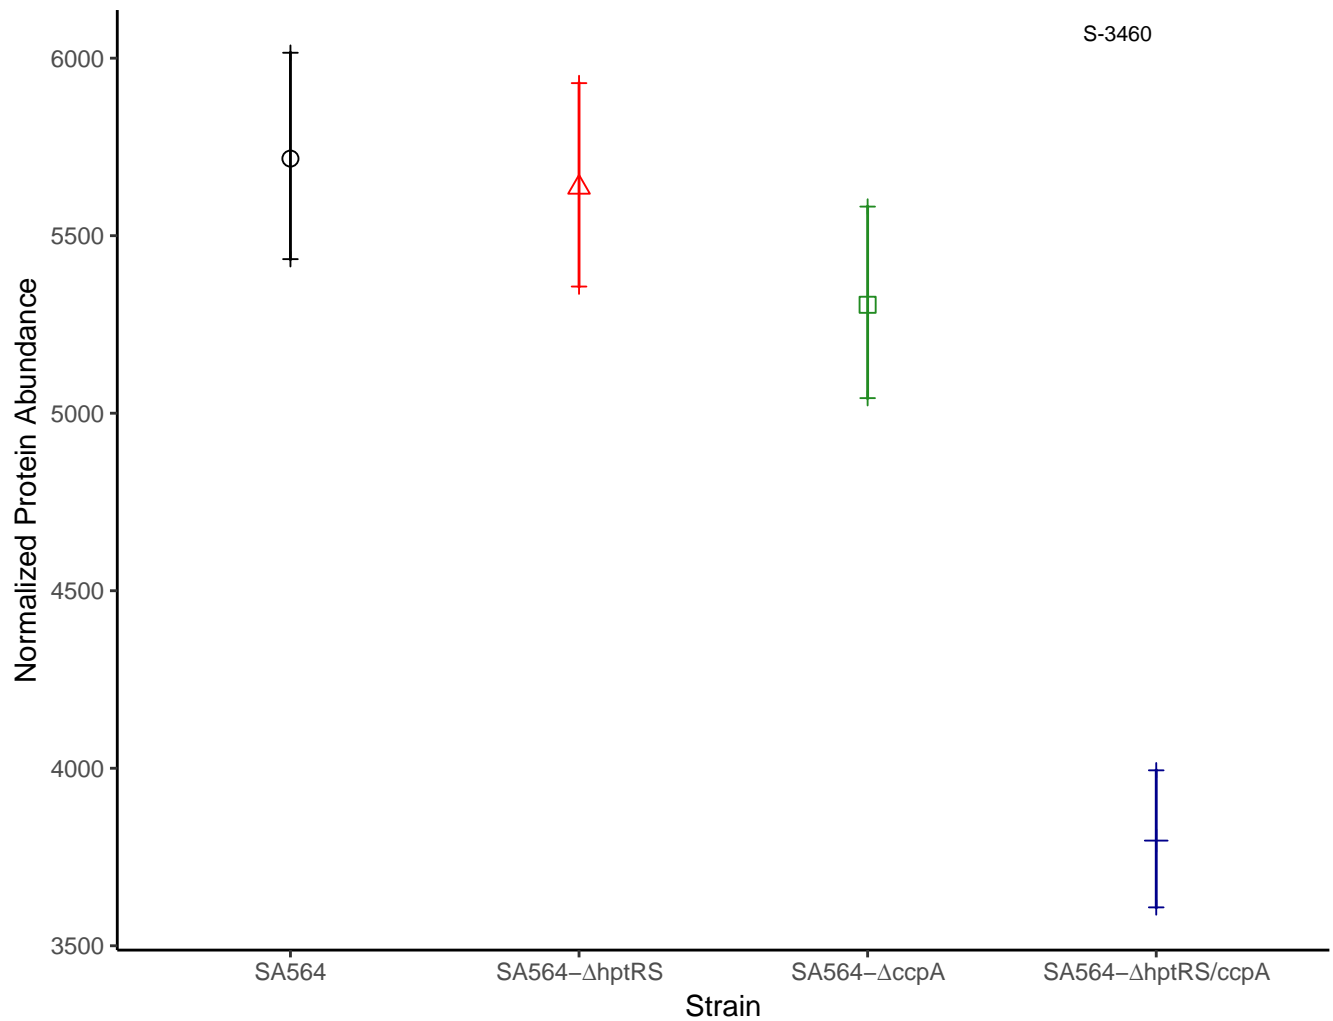

- ⊕ SA564
- △ SA564- $\Delta$ hptRS
- ⊞ SA564- $\Delta$ ccpA
- + SA564- $\Delta$ hptRS/ccpA

# VRAR\_STAAM

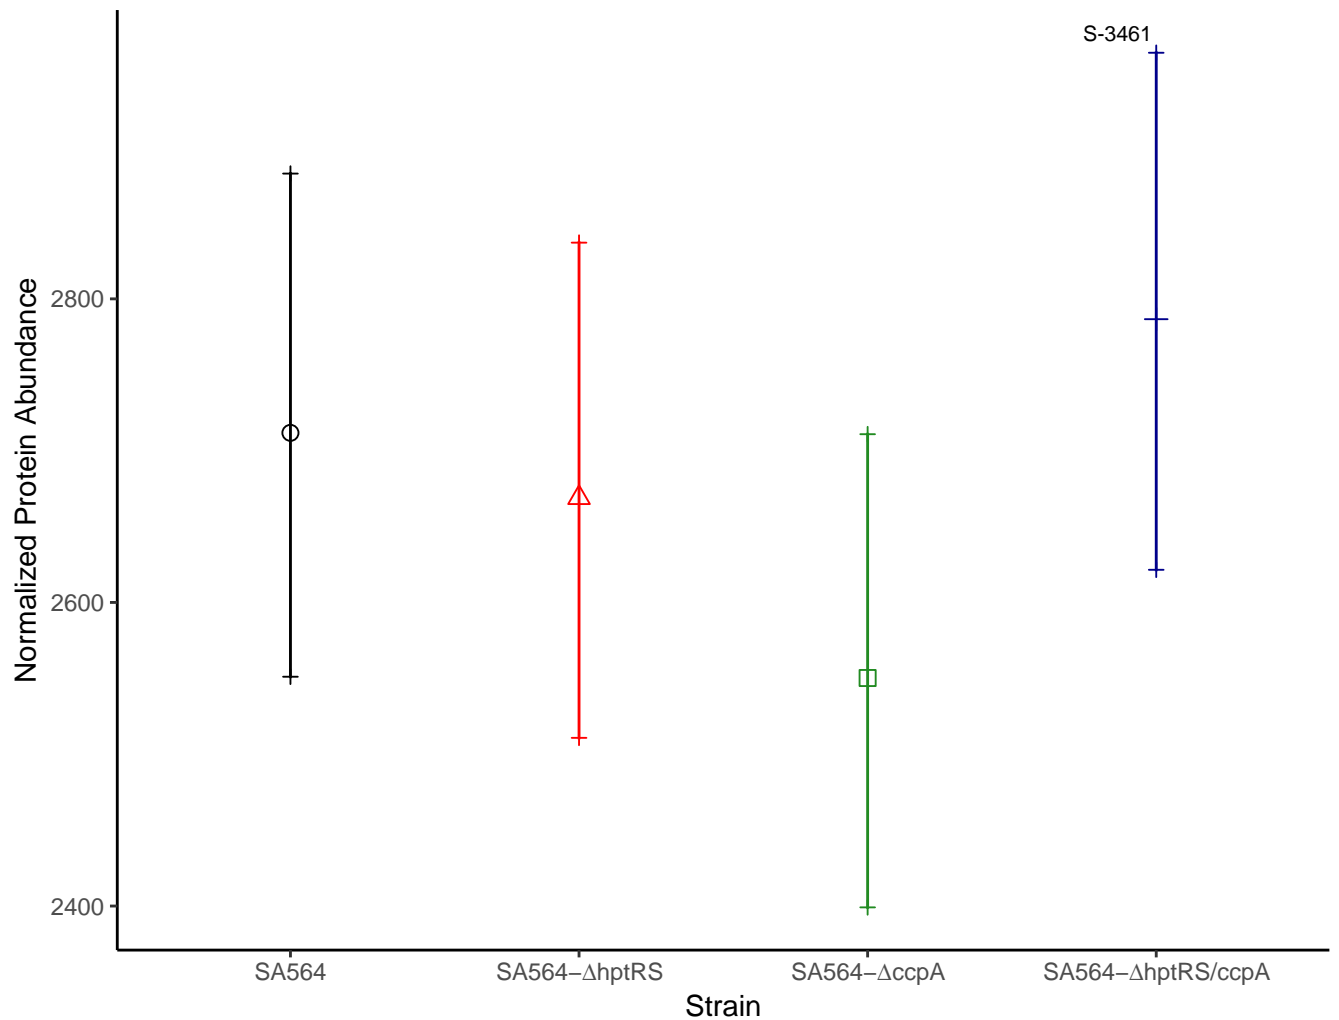

- ⊕ SA564
- △ SA564- $\Delta$ hptRS
- ⊞ SA564- $\Delta$ ccpA
- + SA564- $\Delta$ hptRS/ccpA

# WALK\_STAAM

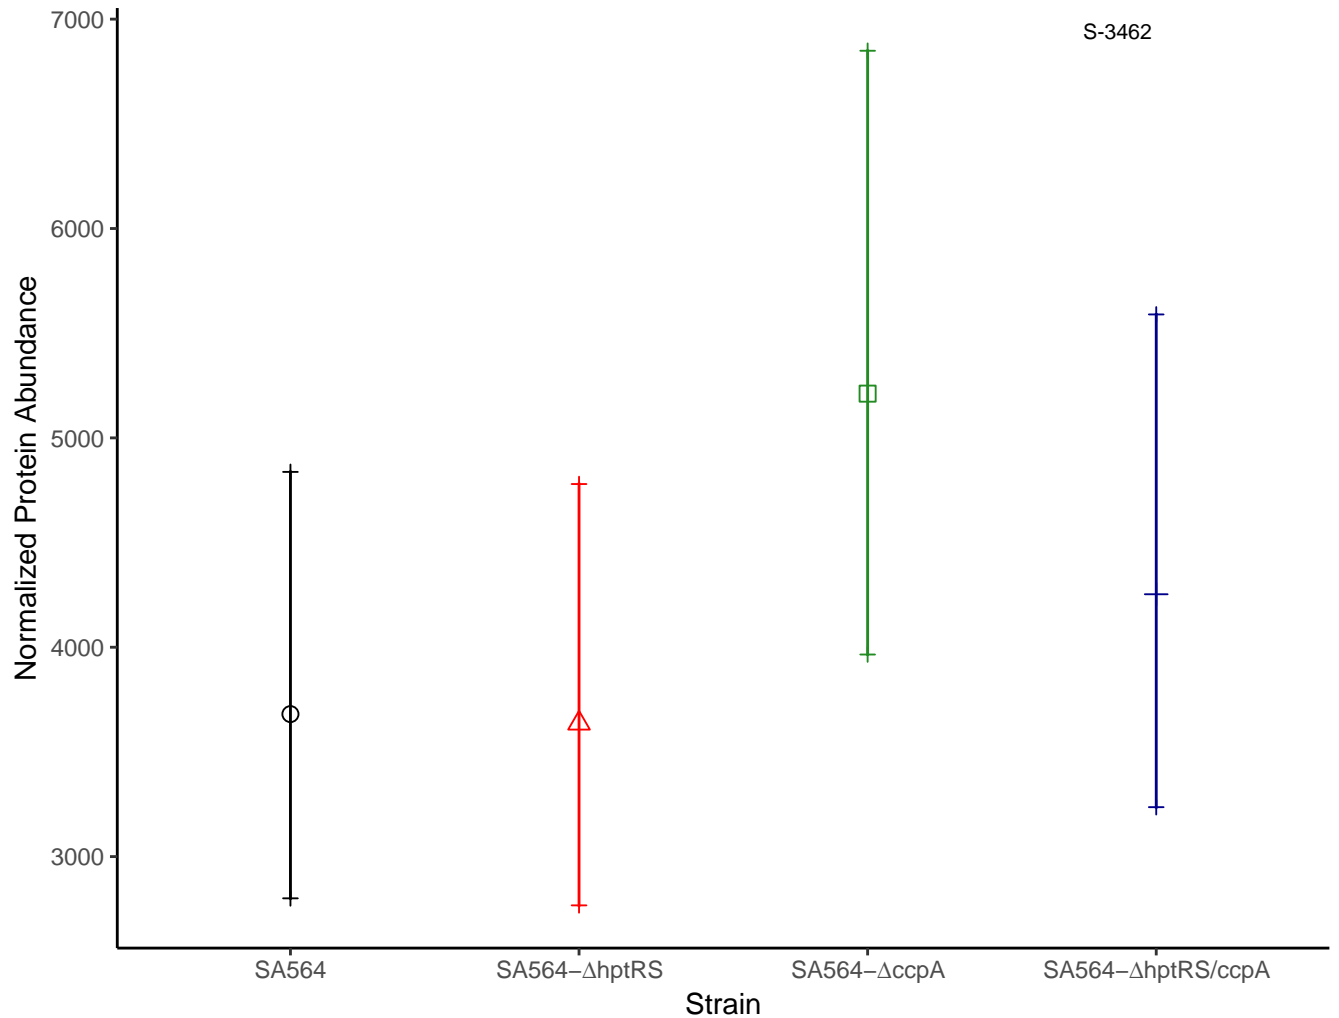

- ⊕ SA564
- △ SA564- $\Delta$ hptRS
- ⊞ SA564- $\Delta$ ccpA
- + SA564- $\Delta$ hptRS/ccpA

# WALR\_STAAM

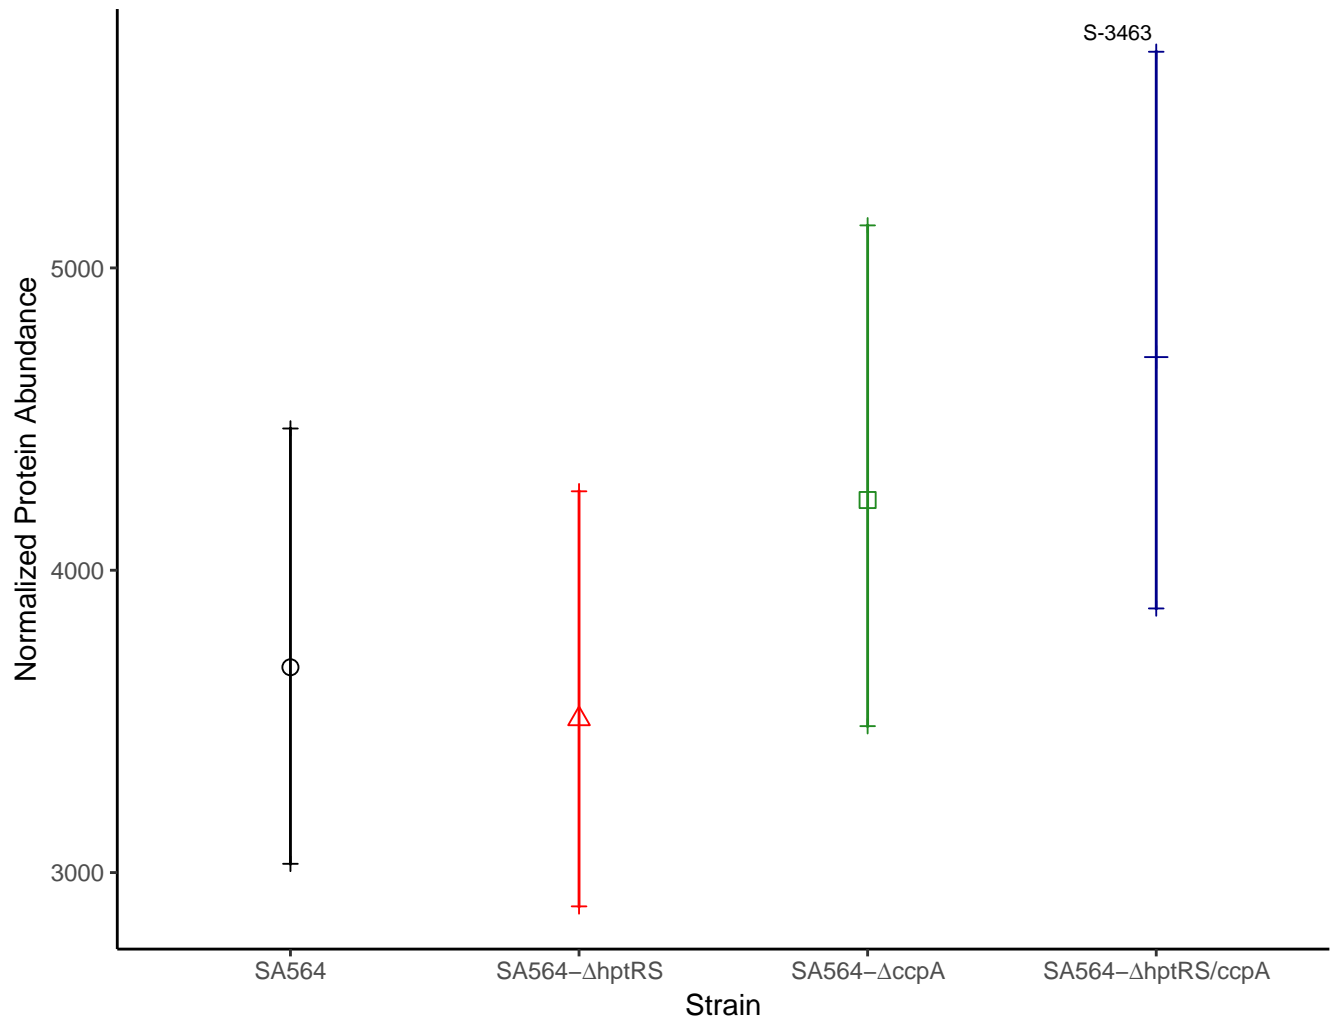

- ⊕ SA564
- △ SA564- $\Delta$ *hptRS*
- ⊞ SA564- $\Delta$ *ccpA*
- + SA564- $\Delta$ *hptRS/ccpA*

# XERD\_STAAM

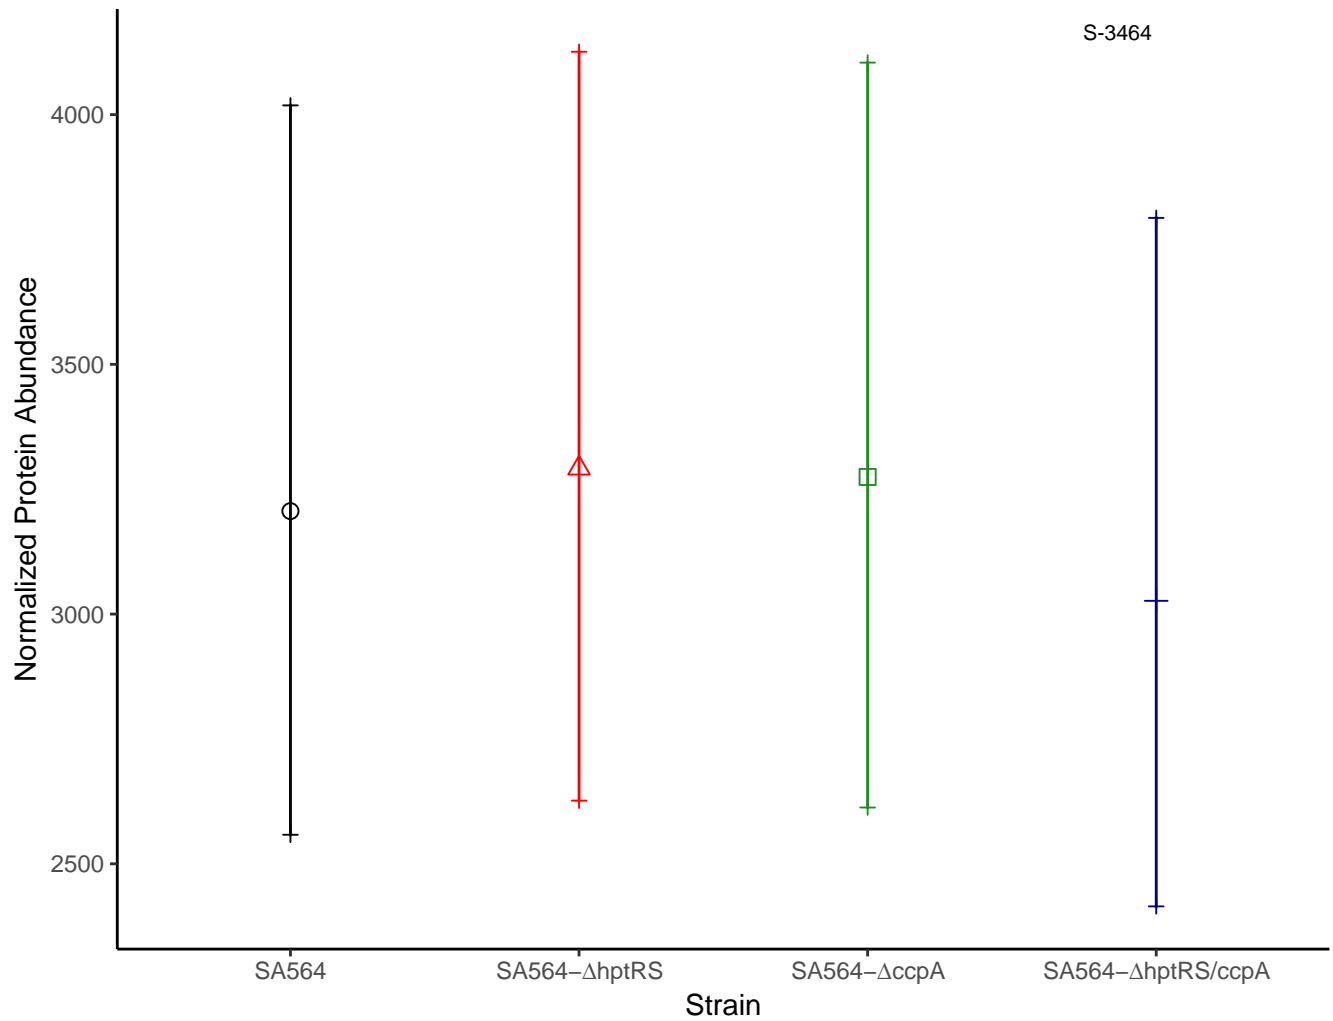

- ⊕ SA564
- △ SA564- $\Delta$ hptRS
- ⊞ SA564- $\Delta$ ccpA
- + SA564- $\Delta$ hptRS/ccpA



# XPT\_STAAM

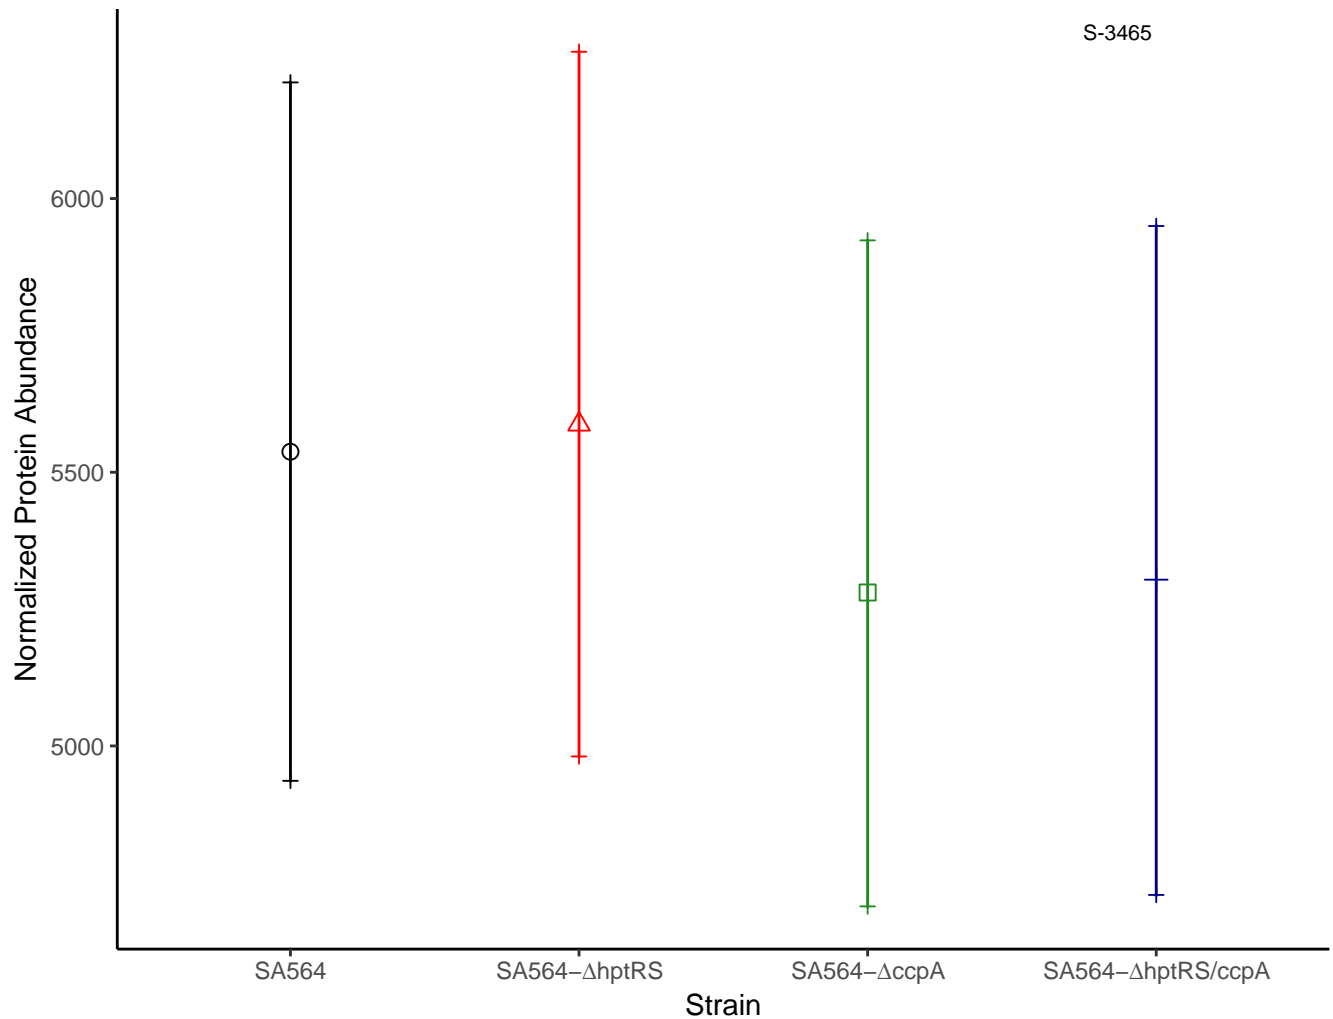

- ⊕ SA564
- △ SA564- $\Delta$ hptRS
- ⊞ SA564- $\Delta$ ccpA
- ⊕ SA564- $\Delta$ hptRS/ccpA

# Y098\_STAAM

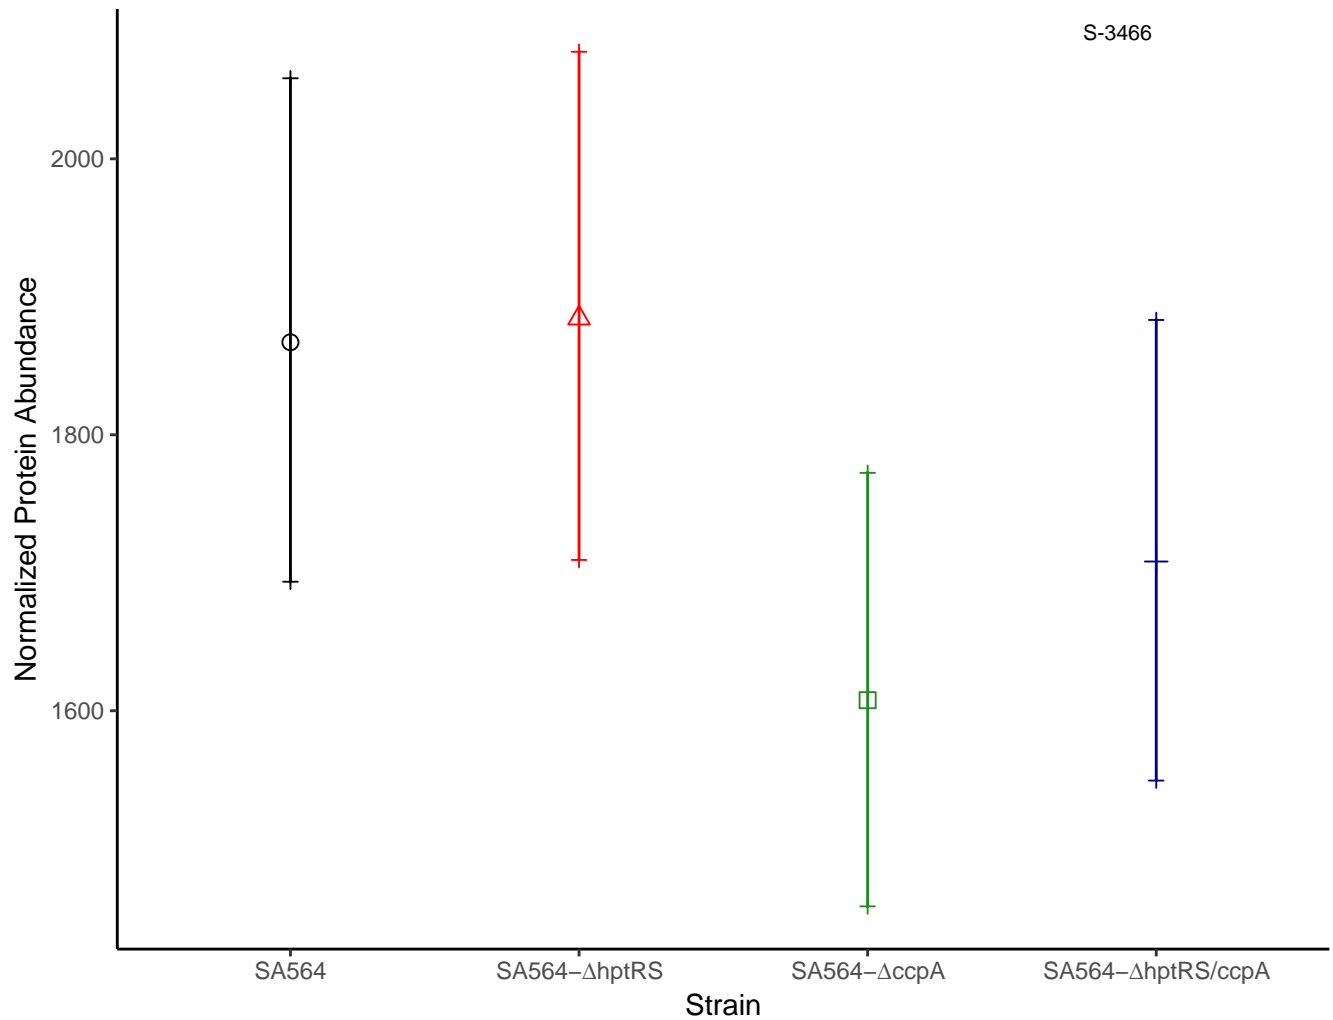

- ⊕ SA564
- △ SA564- $\Delta$ hptRS
- ⊞ SA564- $\Delta$ ccpA
- + SA564- $\Delta$ hptRS/ccpA

# Y099\_STAAM

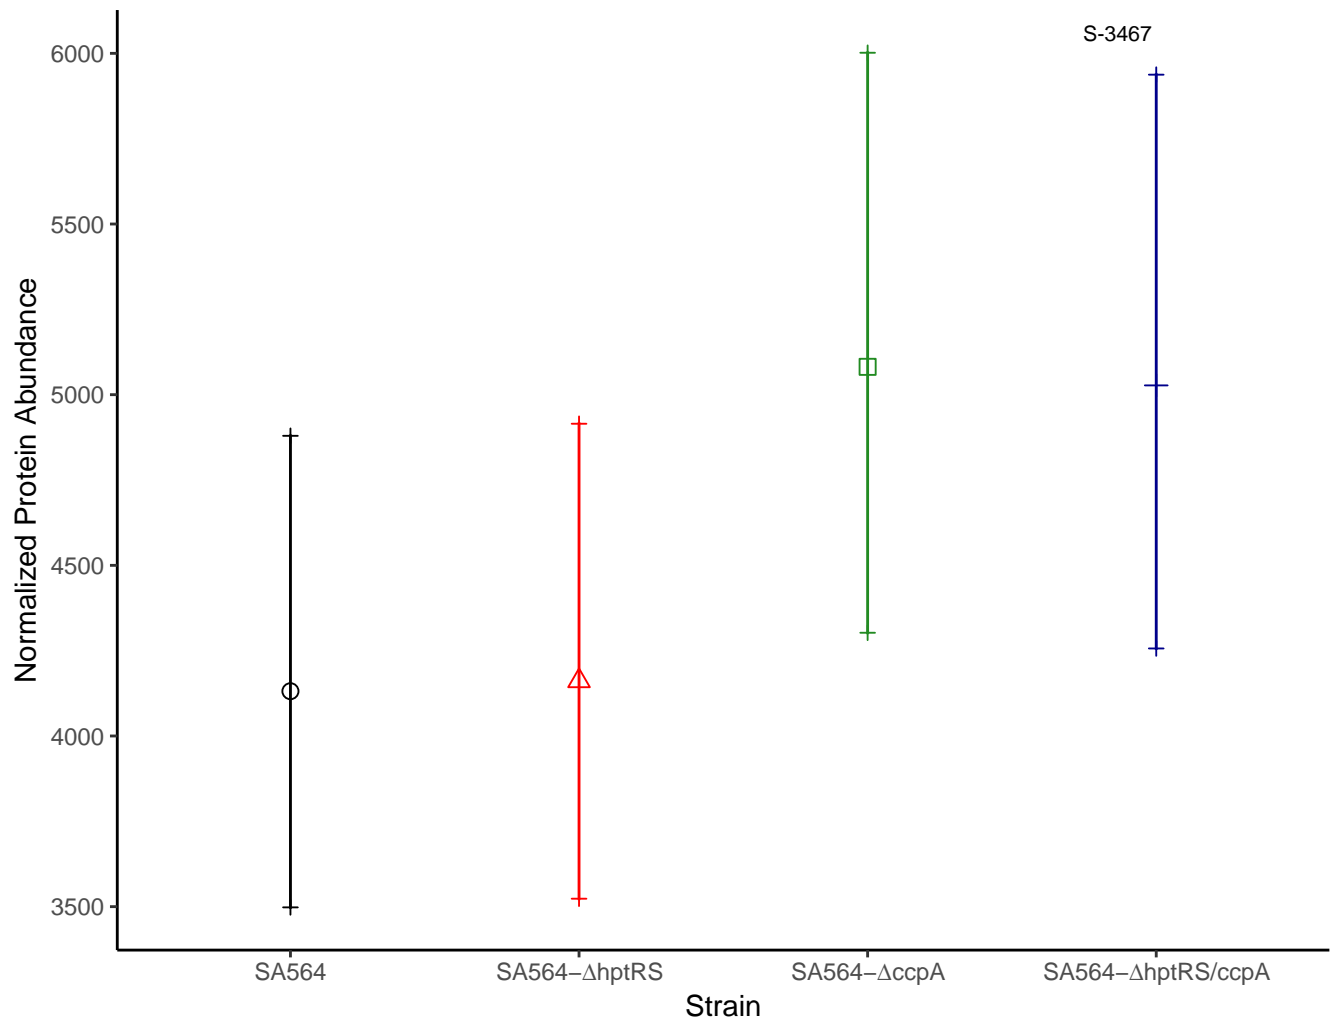

- ⊕ SA564
- △ SA564- $\Delta$ hptRS
- ⊞ SA564- $\Delta$ ccpA
- + SA564- $\Delta$ hptRS/ccpA

# Y1015\_STAAM

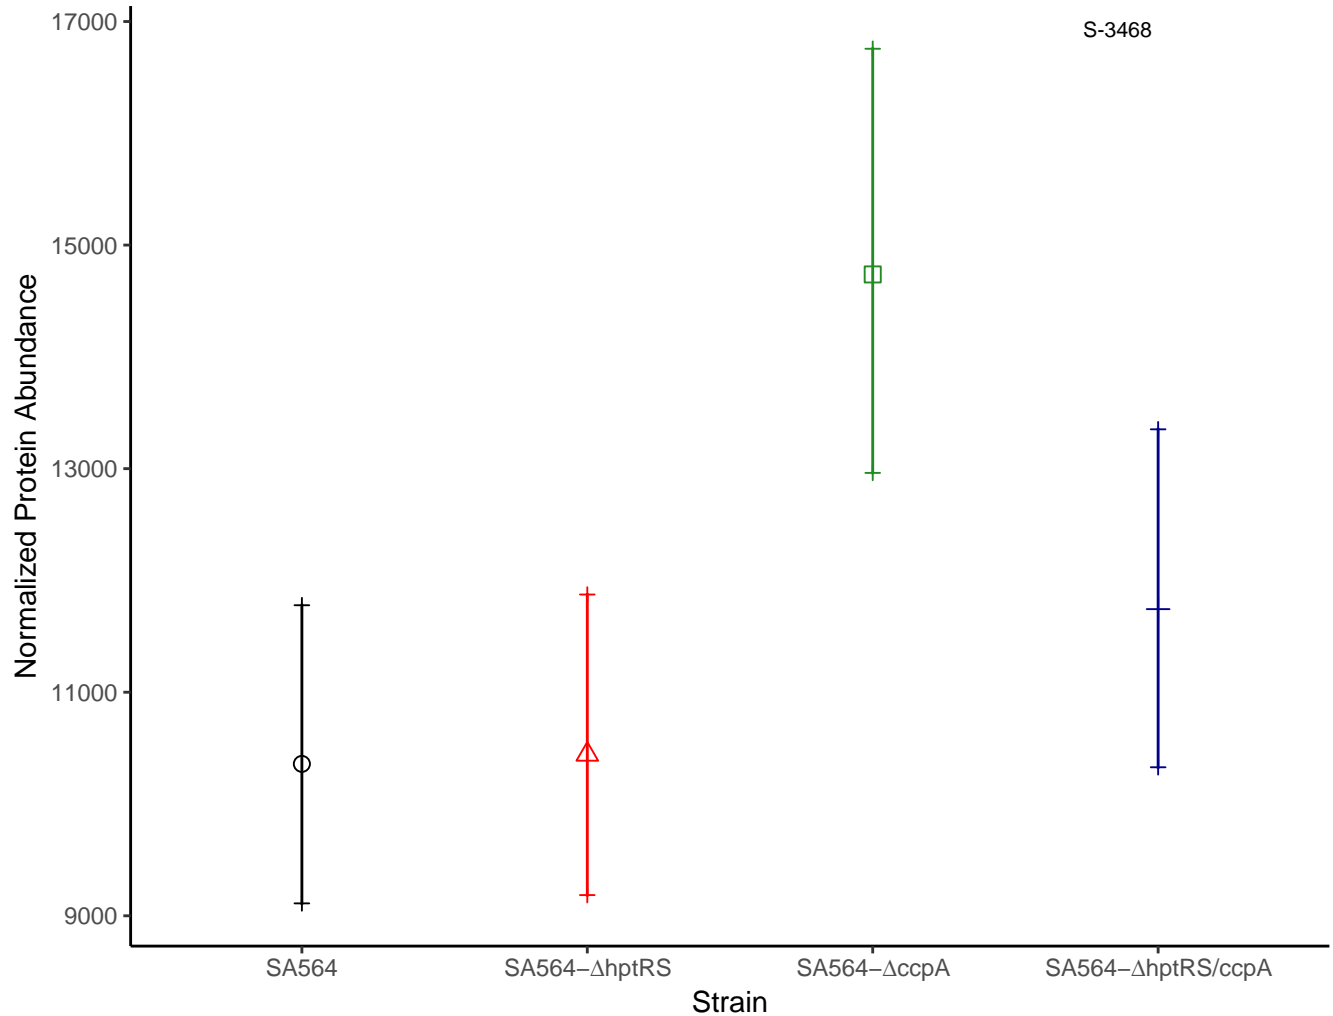

- SA564
- SA564- $\Delta$ hptRS
- SA564- $\Delta$ ccpA
- SA564- $\Delta$ hptRS/ccpA

# Y1090\_STAAM

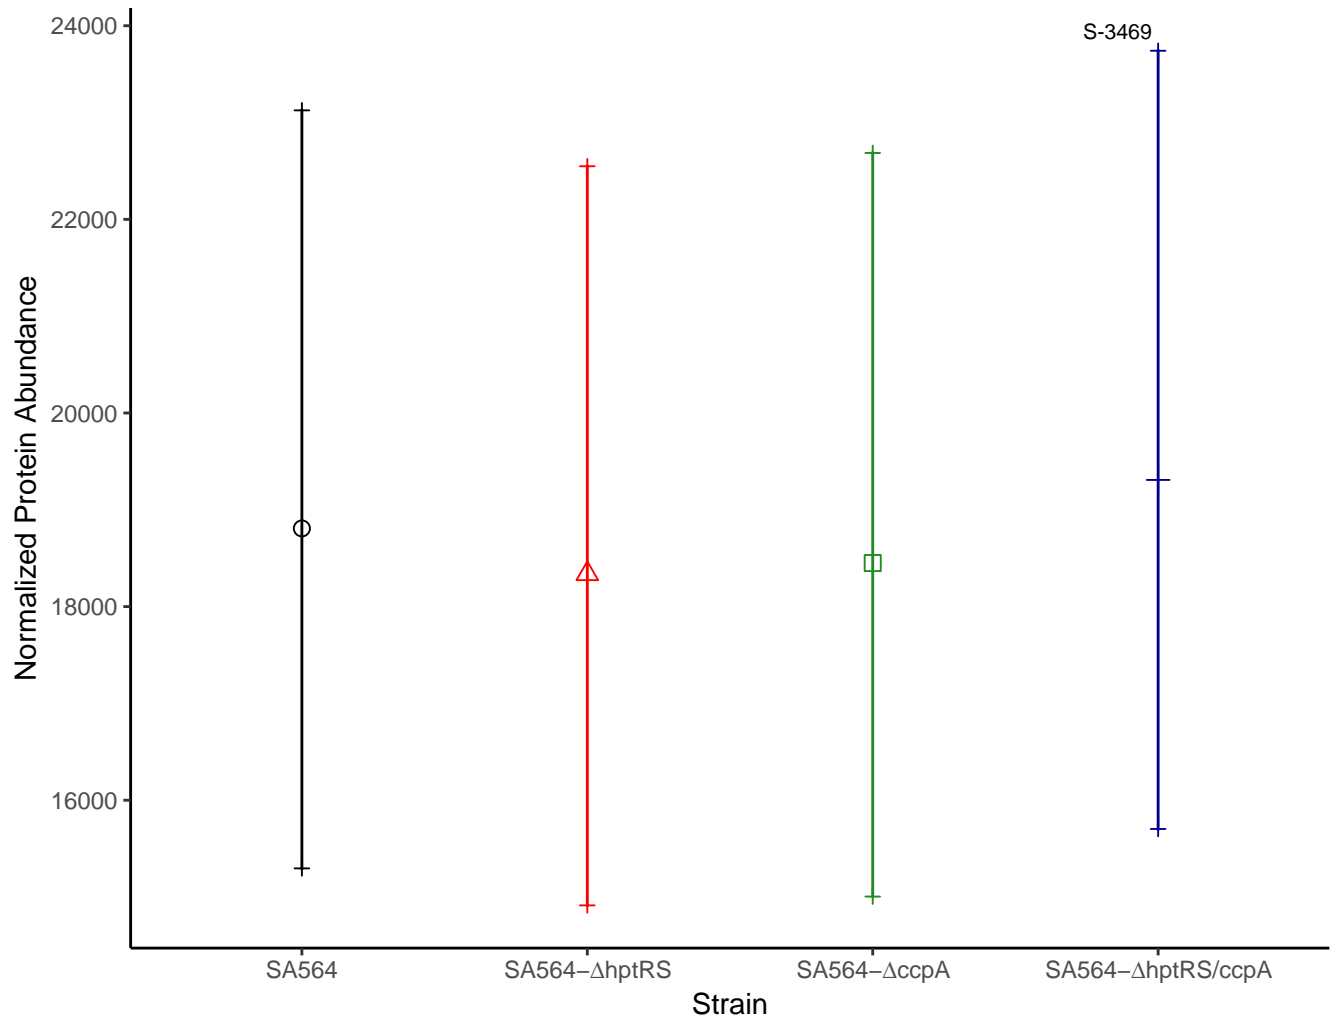

- ⊕ SA564
- △ SA564- $\Delta$ hptRS
- ⊞ SA564- $\Delta$ ccpA
- + SA564- $\Delta$ hptRS/ccpA

# Y1176\_STAAM

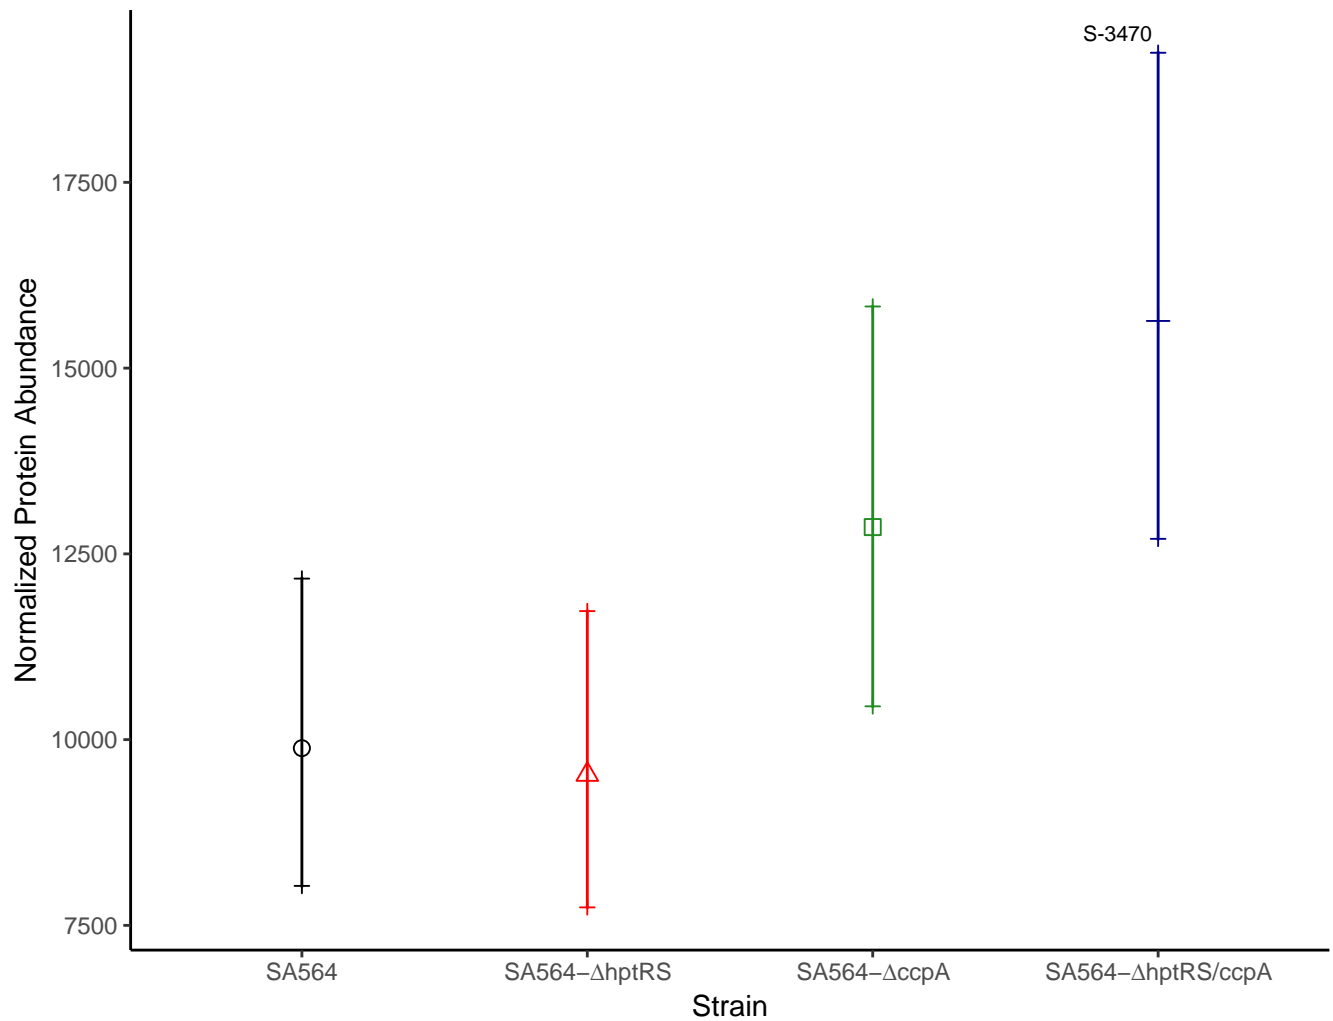

- ⊕ SA564
- △ SA564- $\Delta$ hptRS
- ⊞ SA564- $\Delta$ ccpA
- + SA564- $\Delta$ hptRS/ccpA

# Y1177\_STAAM

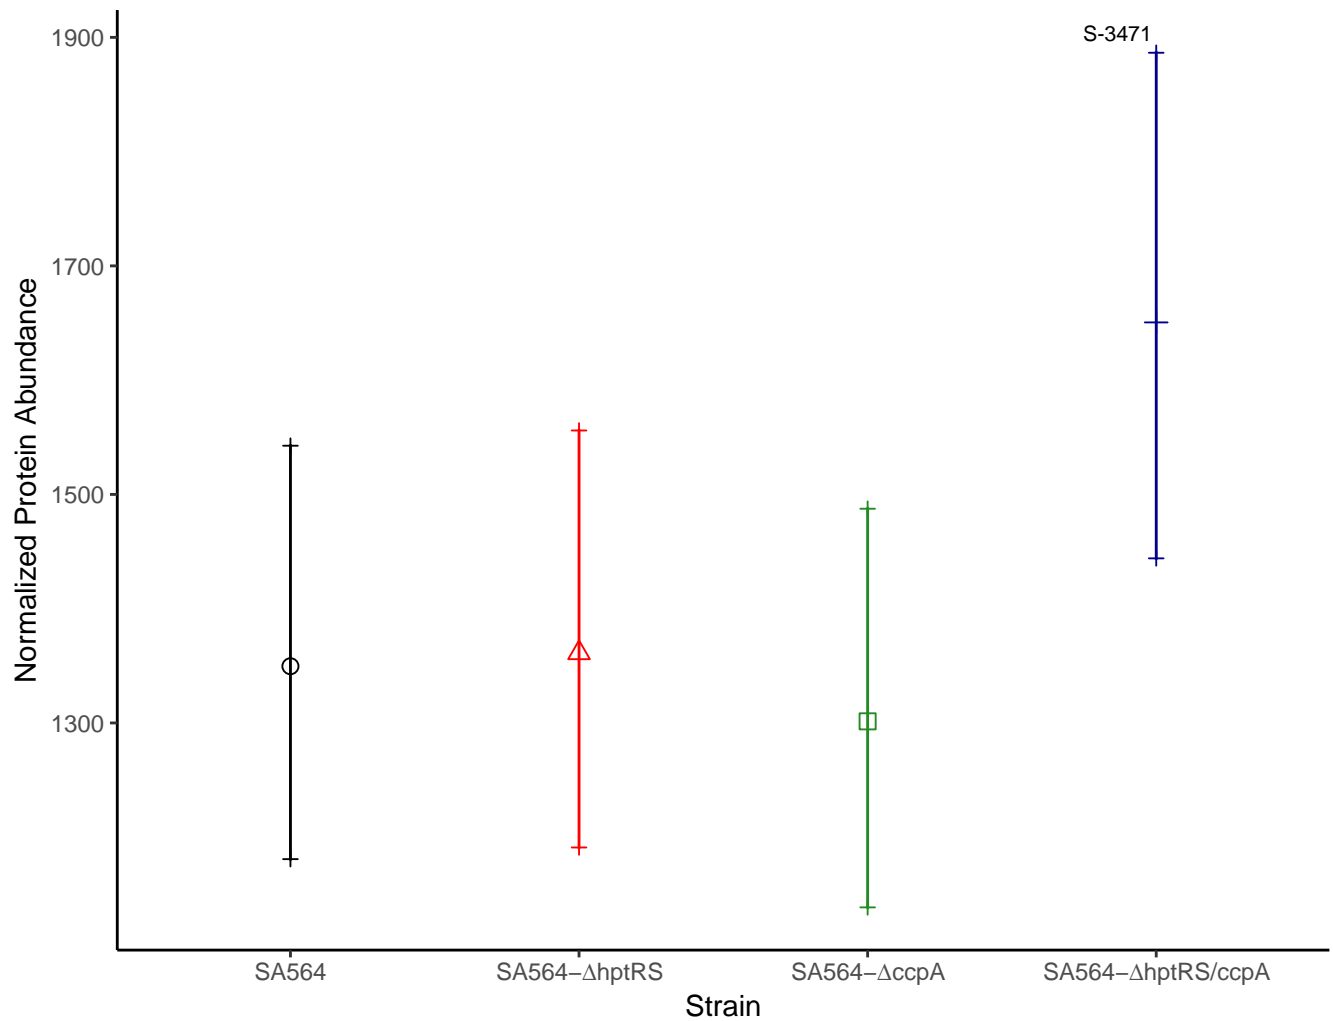

- ⊕ SA564
- △ SA564- $\Delta$ hptRS
- ⊞ SA564- $\Delta$ ccpA
- + SA564- $\Delta$ hptRS/ccpA

# Y1187\_STAAM

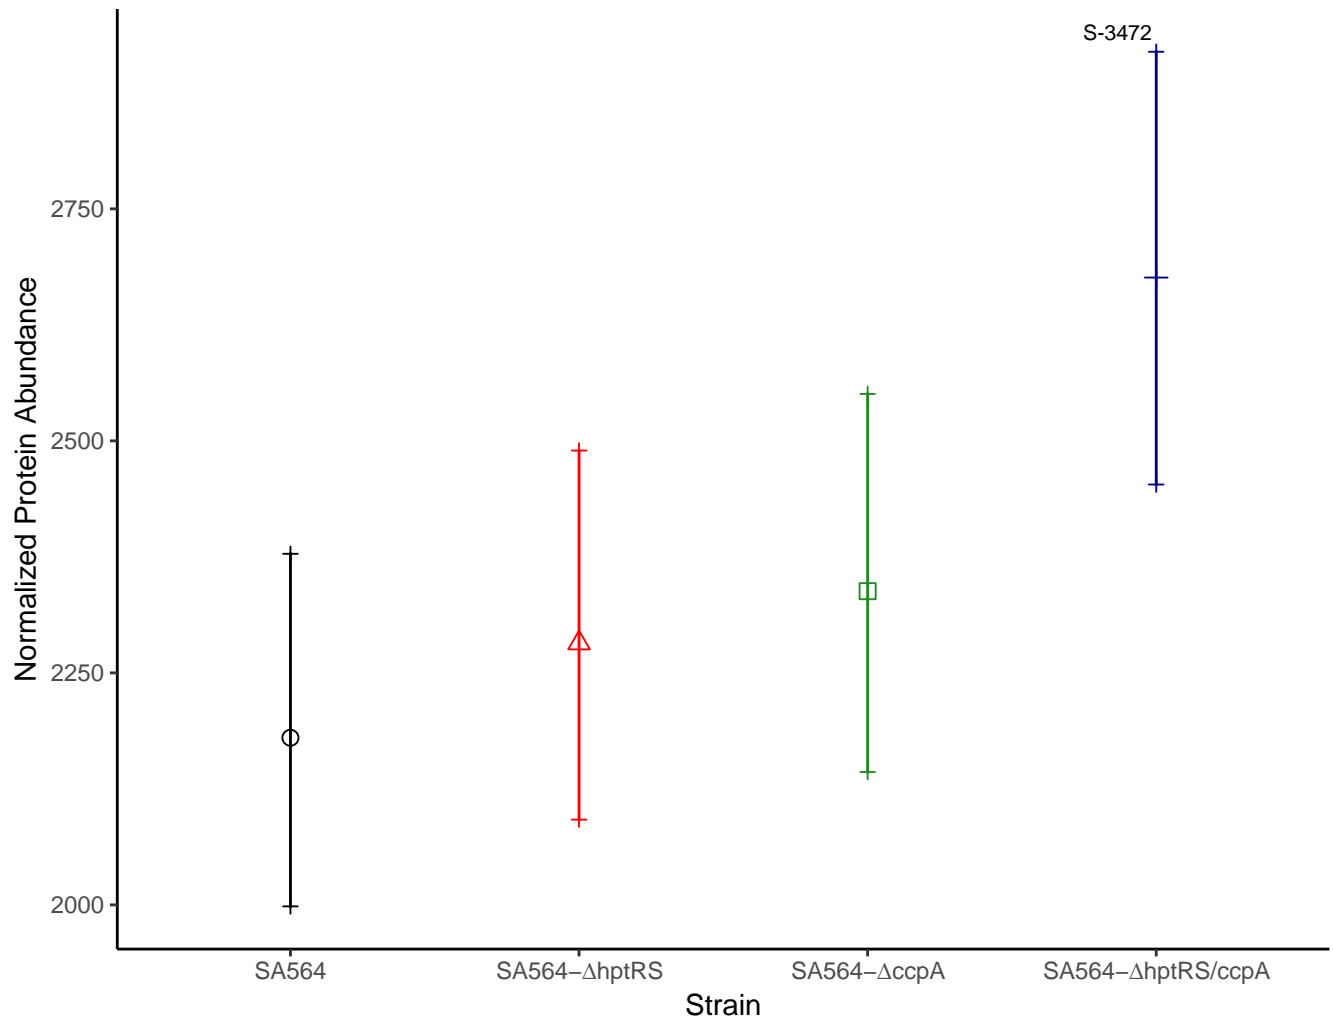

- ⊕ SA564
- △ SA564- $\Delta$ hptRS
- ⊞ SA564- $\Delta$ ccpA
- + SA564- $\Delta$ hptRS/ccpA



# Y1226\_STAAM

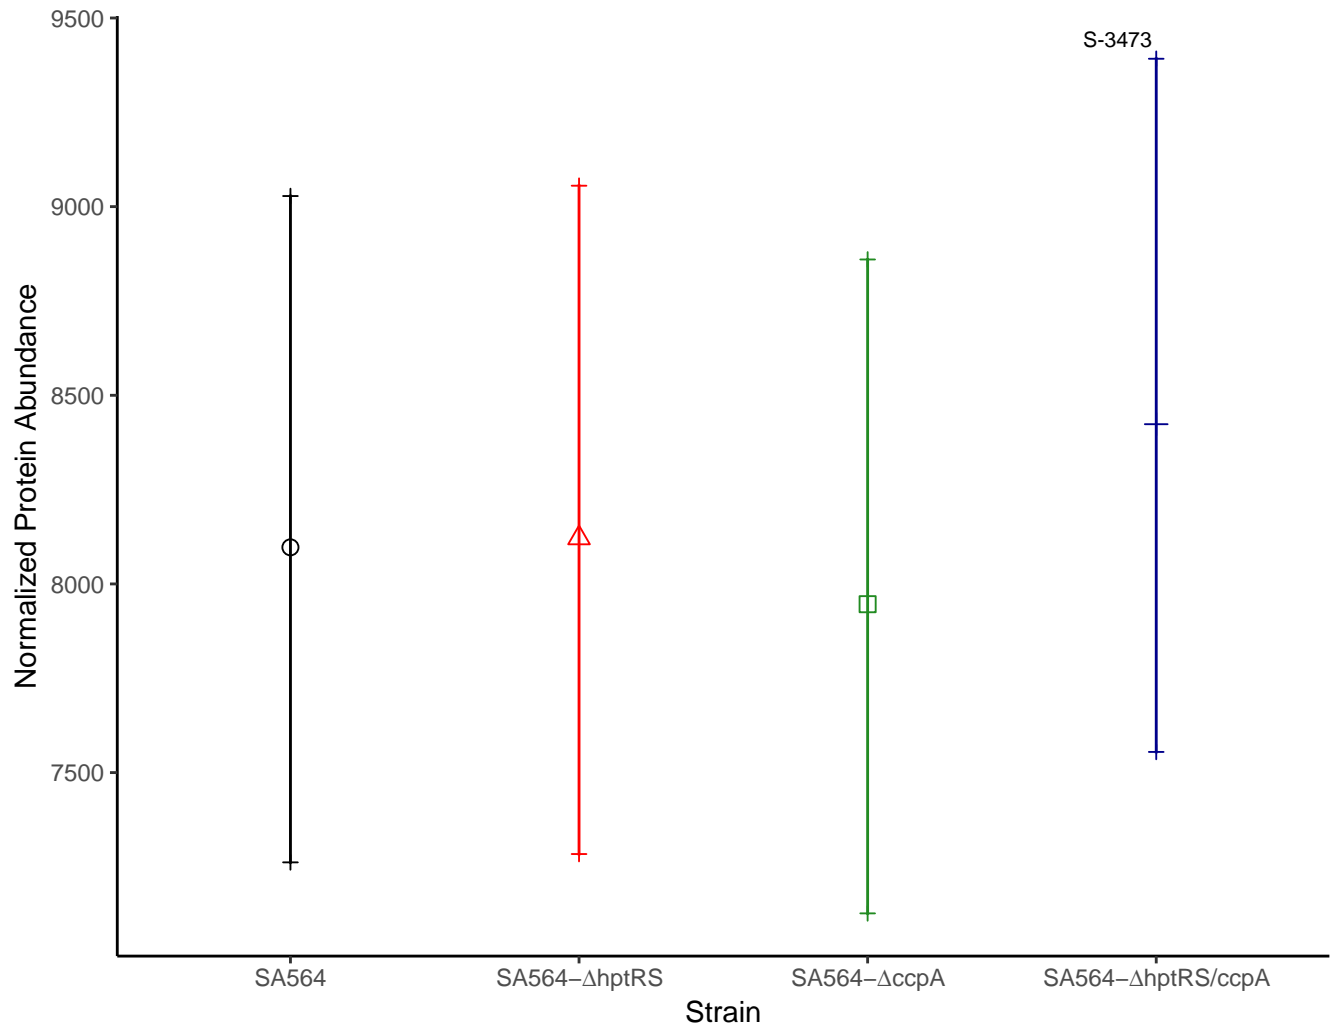

- ⊕ SA564
- △ SA564- $\Delta$ hptRS
- ⊞ SA564- $\Delta$ ccpA
- + SA564- $\Delta$ hptRS/ccpA

# Y1341\_STAAM

S-3474

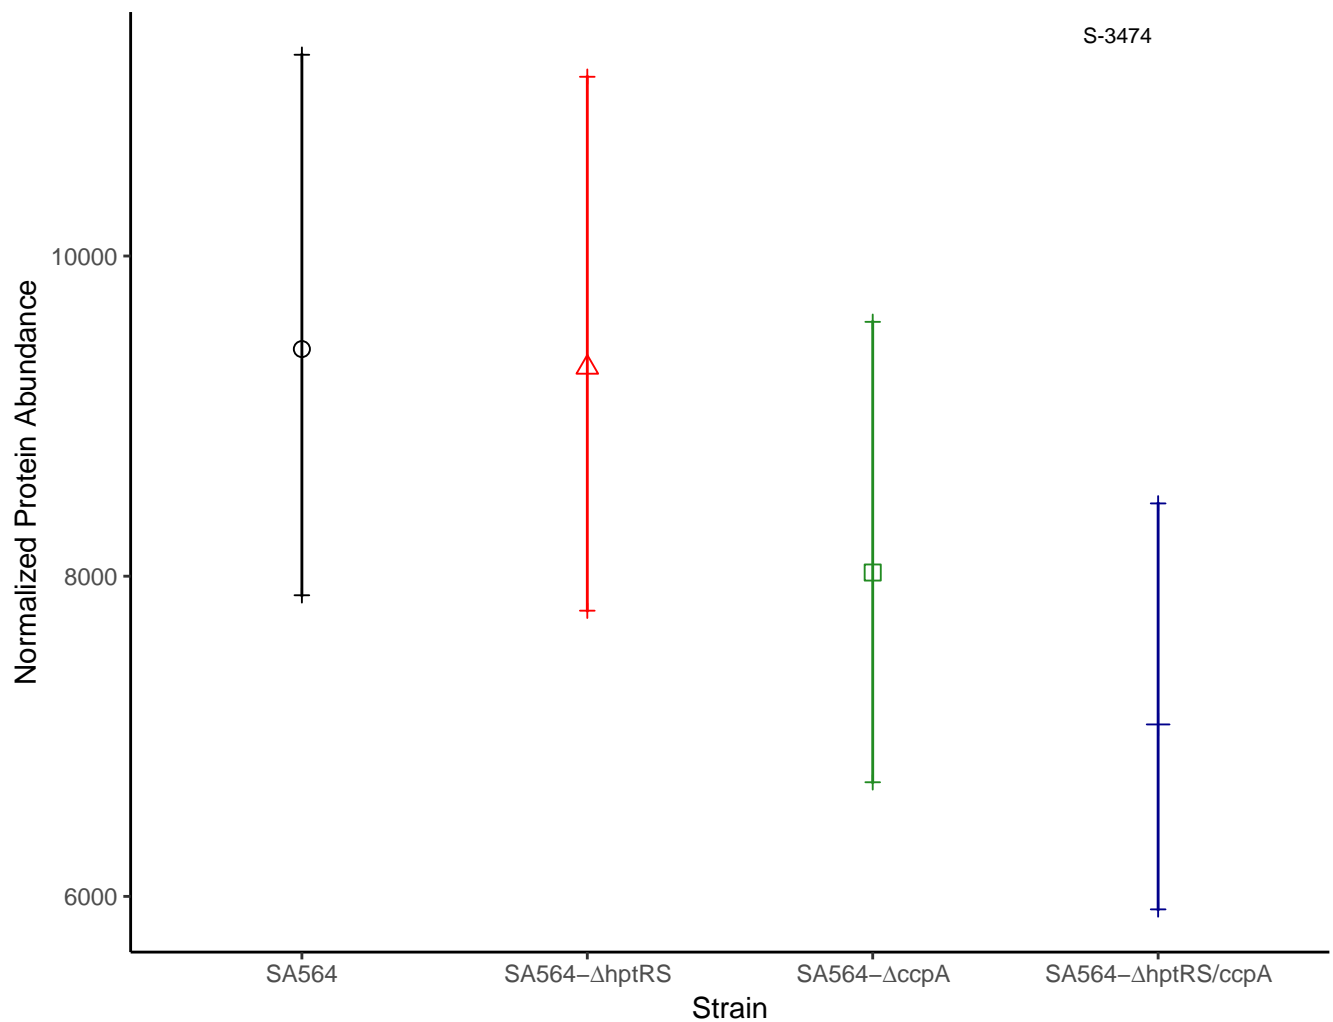

- ⊕ SA564
- △ SA564- $\Delta$ hptRS
- ⊞ SA564- $\Delta$ ccpA
- + SA564- $\Delta$ hptRS/ccpA

# Y1343\_STAAM

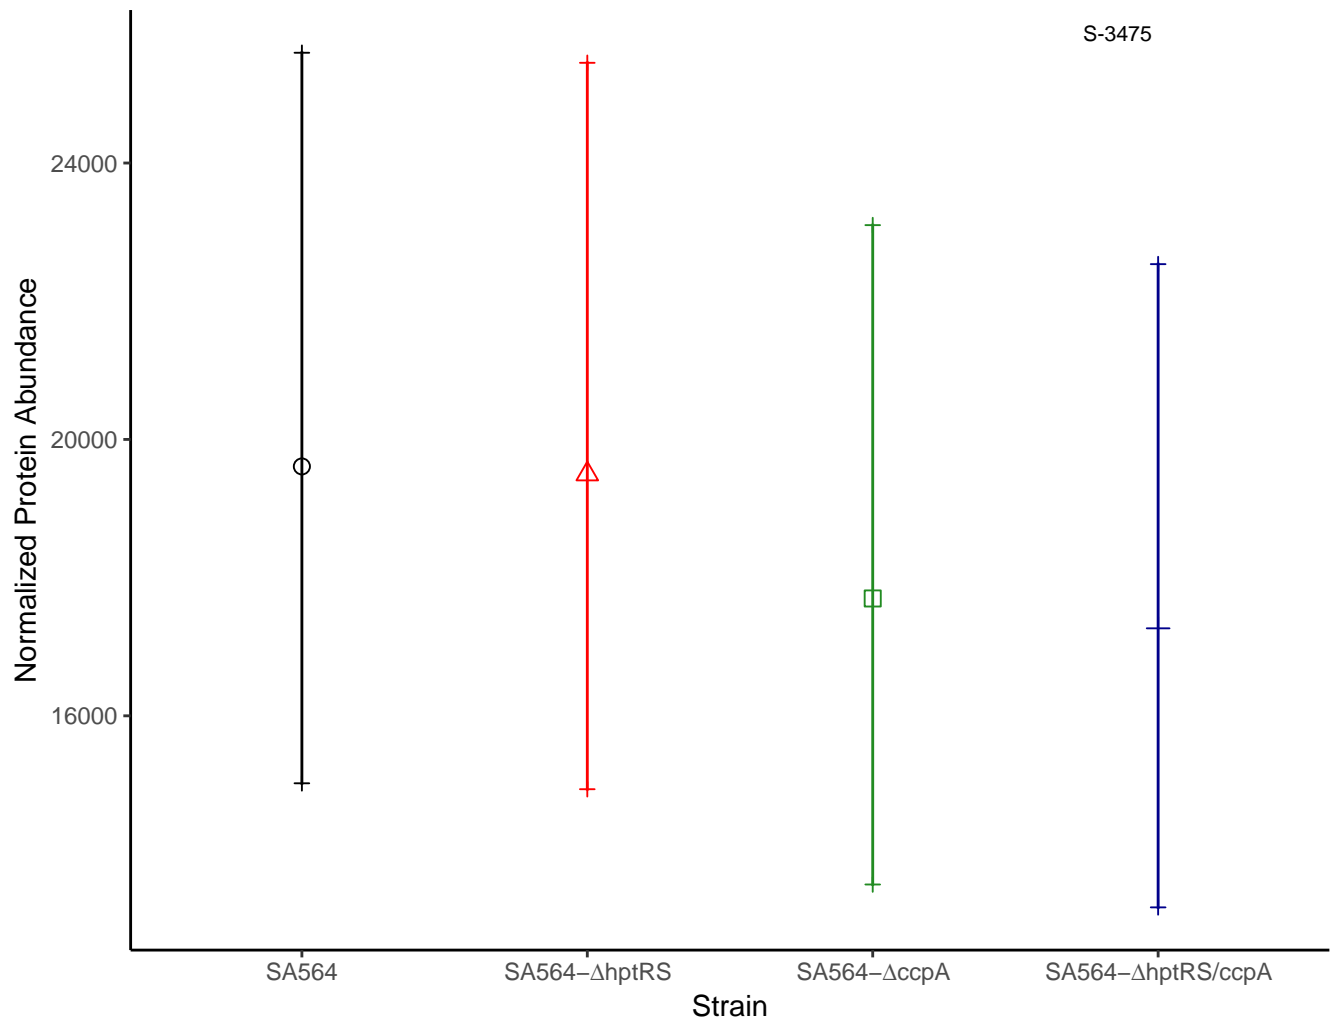

- ⊕ SA564
- △ SA564- $\Delta$ hptRS
- ⊞ SA564- $\Delta$ ccpA
- + SA564- $\Delta$ hptRS/ccpA

# Y1352\_STAAM

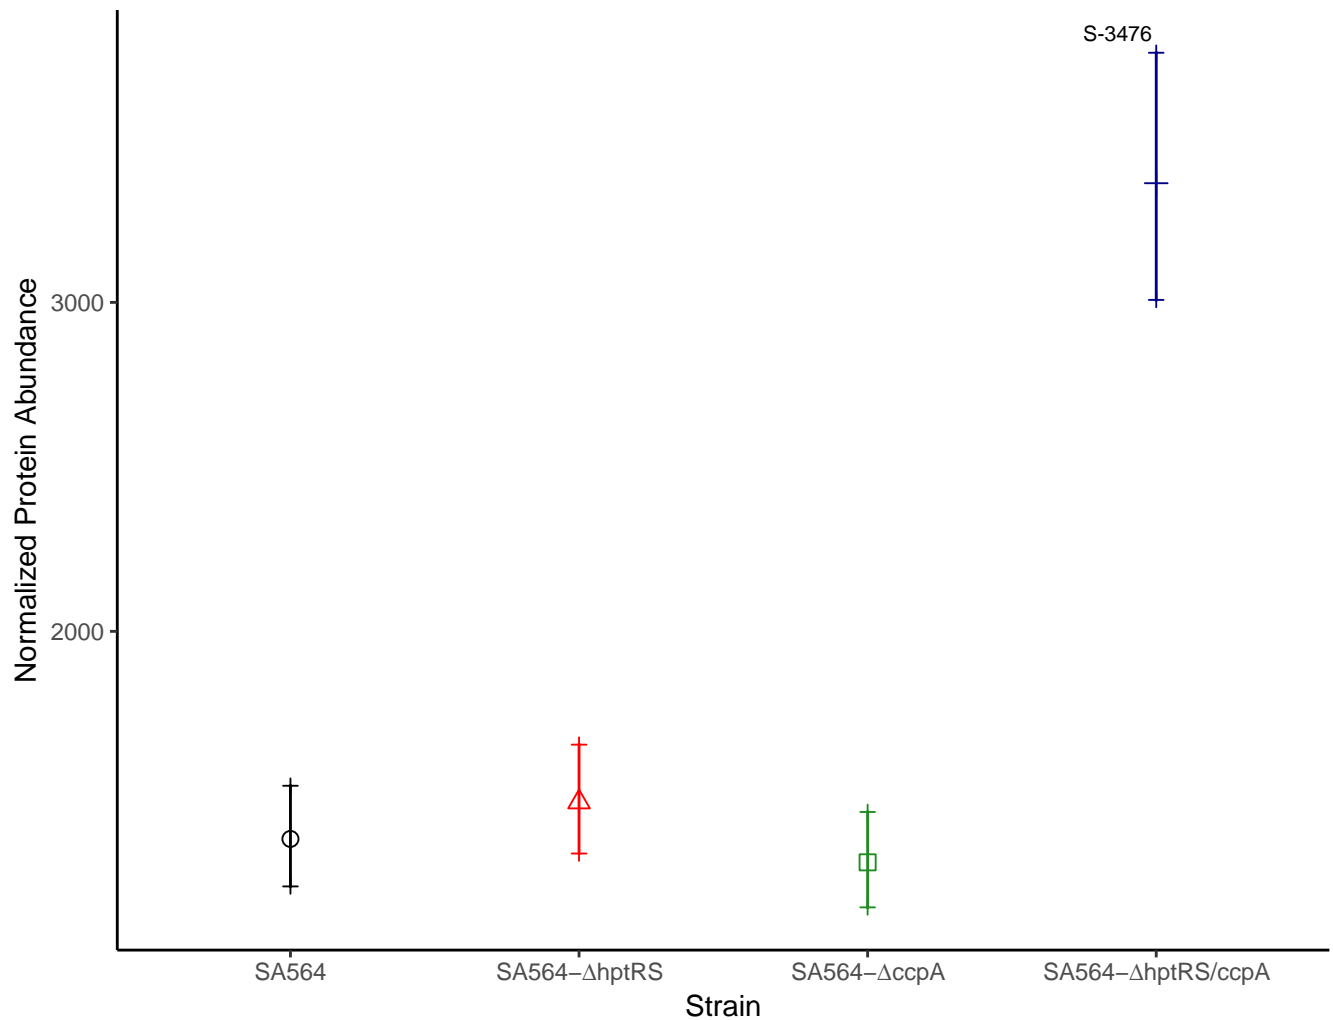

- ⊕ SA564
- △ SA564- $\Delta$ hptRS
- ⊞ SA564- $\Delta$ ccpA
- + SA564- $\Delta$ hptRS/ccpA

# Y1363\_STAAM

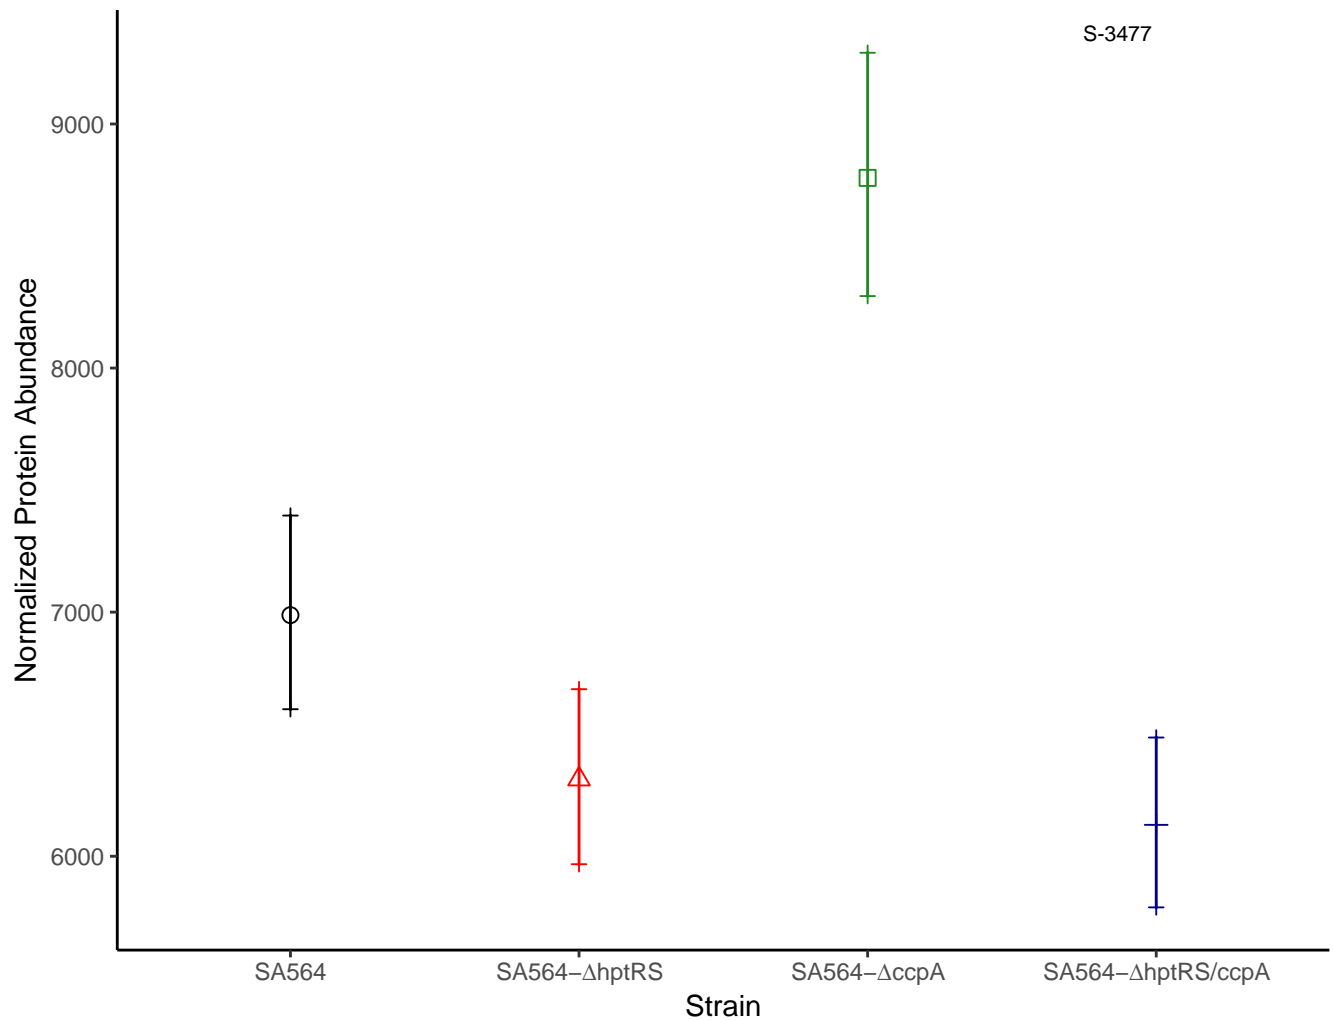

- ⊕ SA564
- △ SA564- $\Delta$ hptRS
- ⊞ SA564- $\Delta$ ccpA
- ⊕ SA564- $\Delta$ hptRS/ccpA

# Y1409\_STAAM

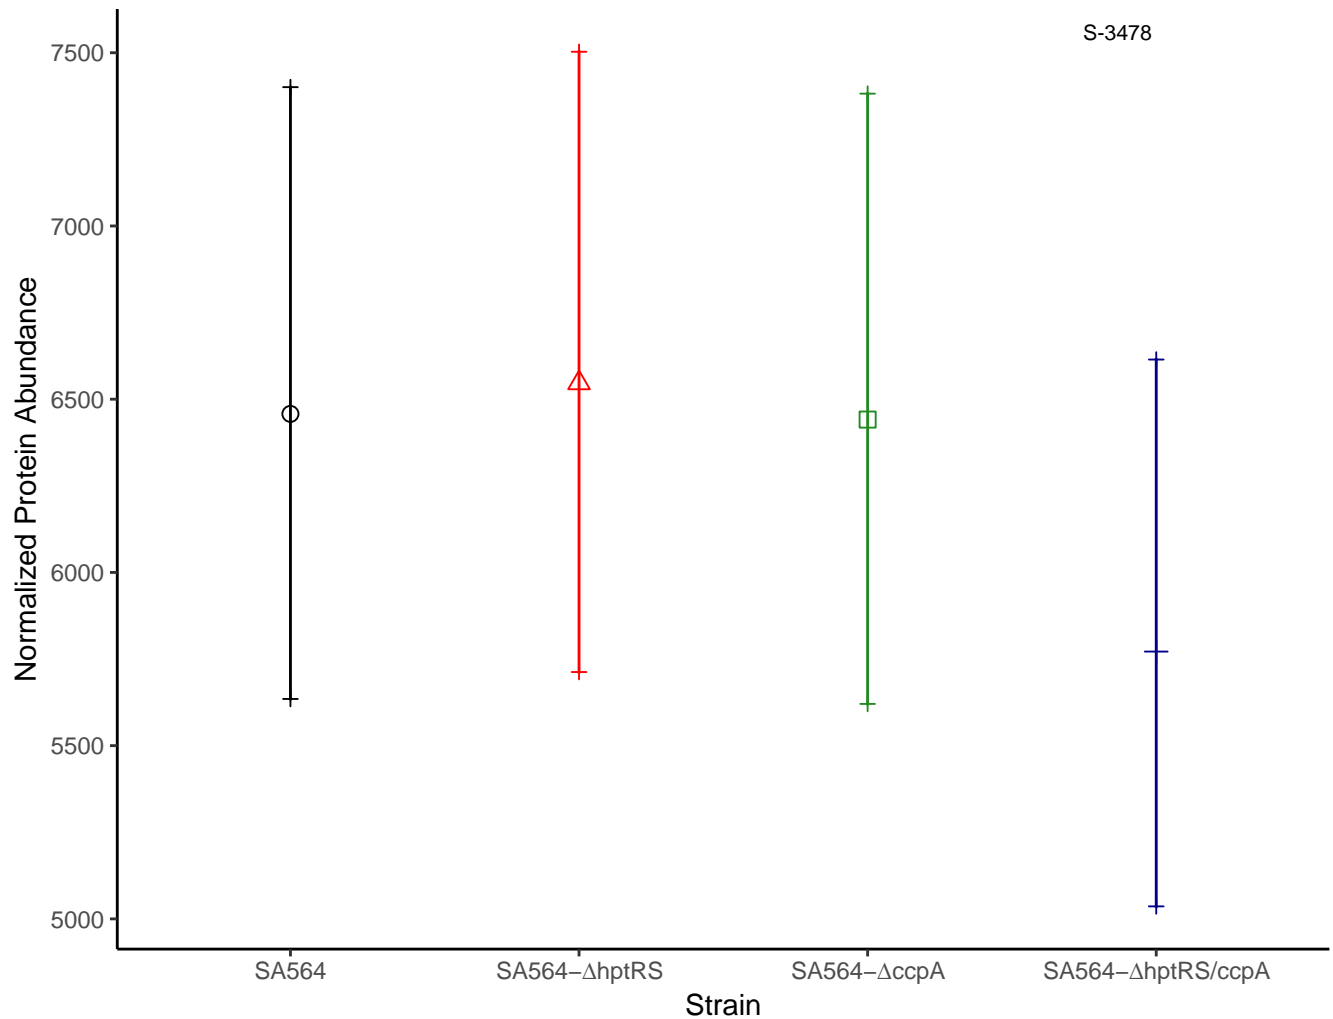

- ⊕ SA564
- △ SA564- $\Delta$ hptRS
- ⊞ SA564- $\Delta$ ccpA
- + SA564- $\Delta$ hptRS/ccpA

# Y1425\_STAAM

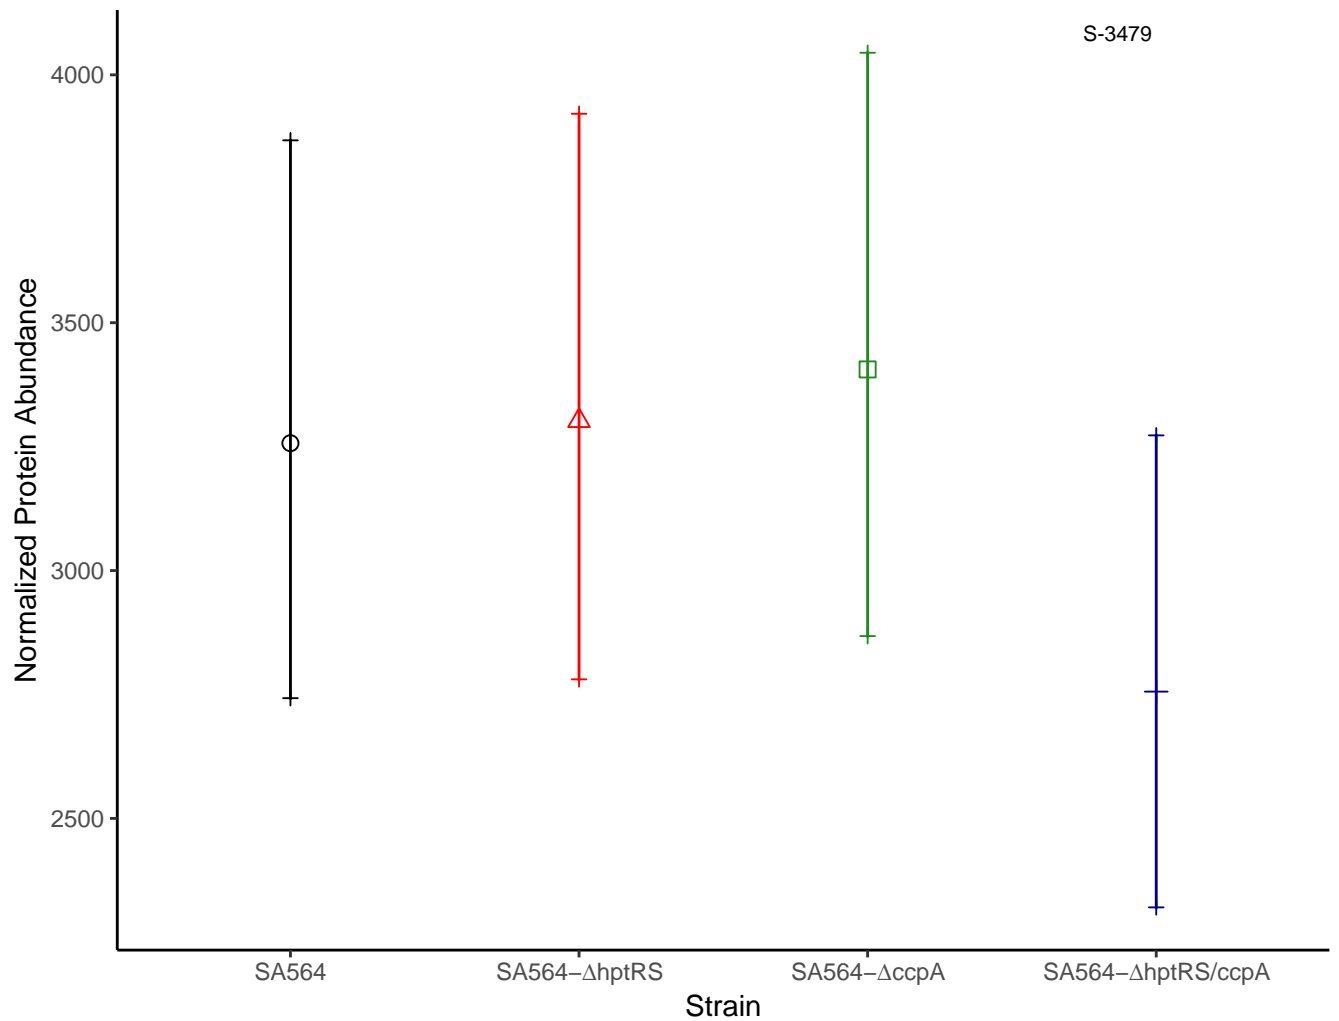

- ⊕ SA564
- △ SA564- $\Delta$ hptRS
- ⊞ SA564- $\Delta$ ccpA
- + SA564- $\Delta$ hptRS/ccpA

# Y1462\_STAAM

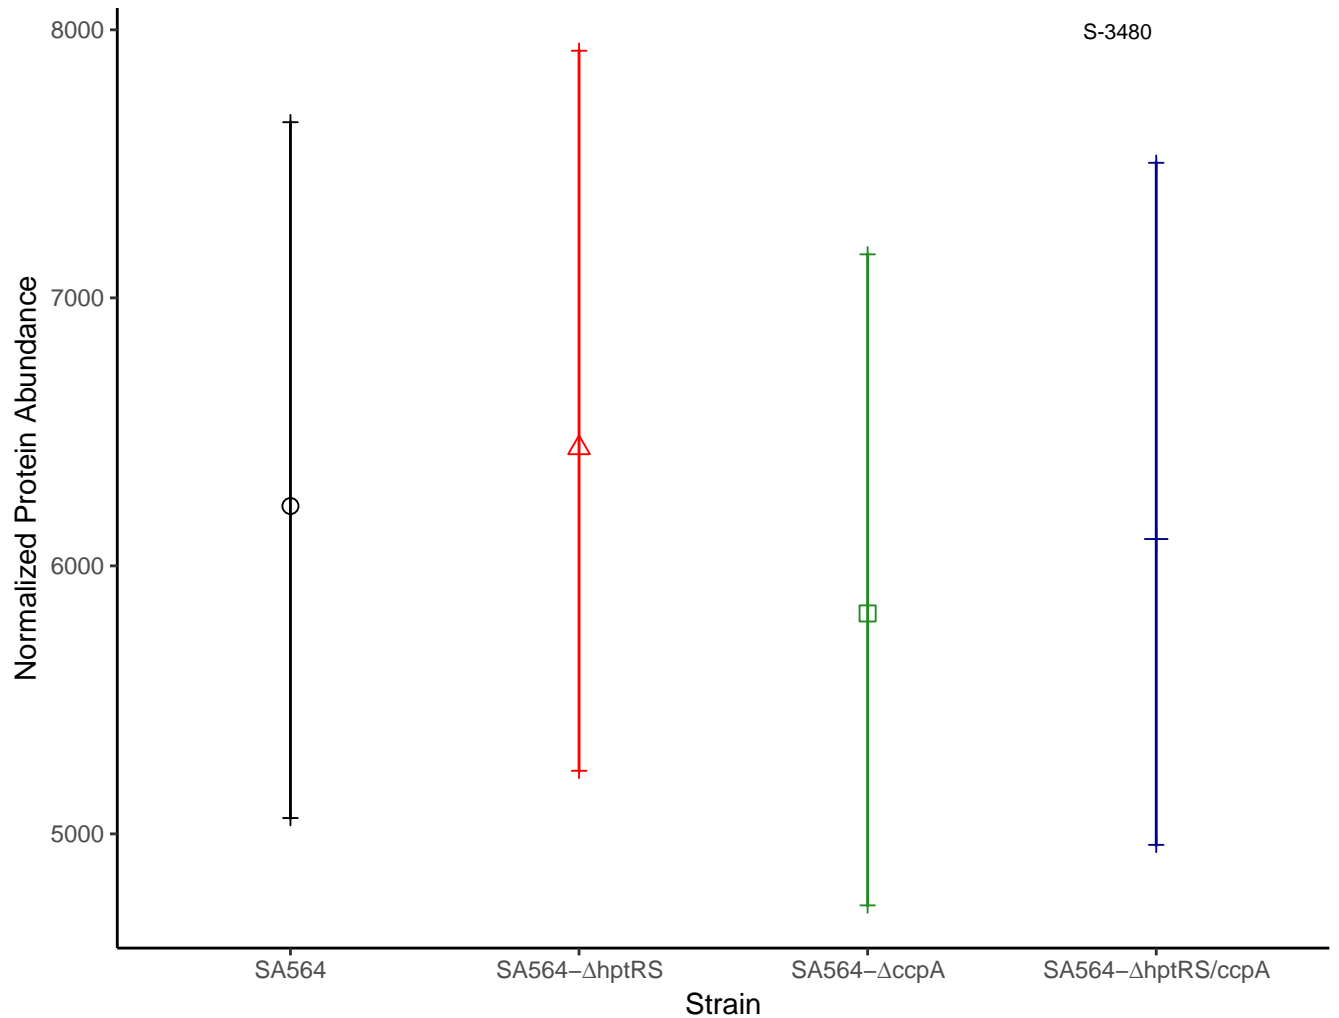

- ⊕ SA564
- △ SA564- $\Delta$ hptRS
- ⊞ SA564- $\Delta$ ccpA
- + SA564- $\Delta$ hptRS/ccpA



# Y1514\_STAAM

S-3481

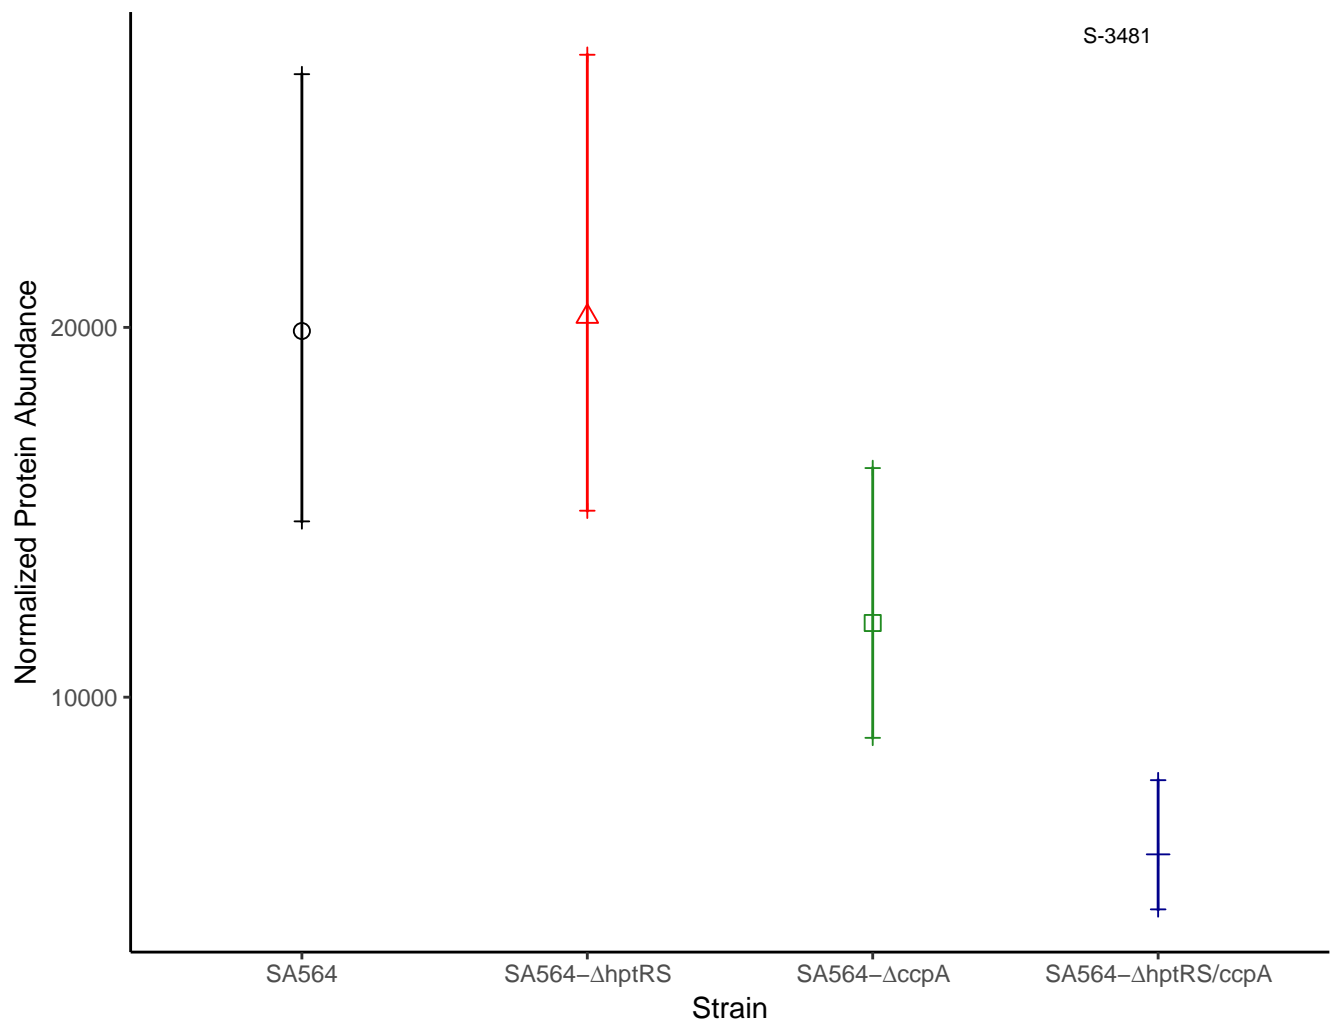

- ⊕ SA564
- △ SA564-ΔhptRS
- ⊞ SA564-ΔccpA
- + SA564-ΔhptRS/ccpA

# Y1573\_STAAM

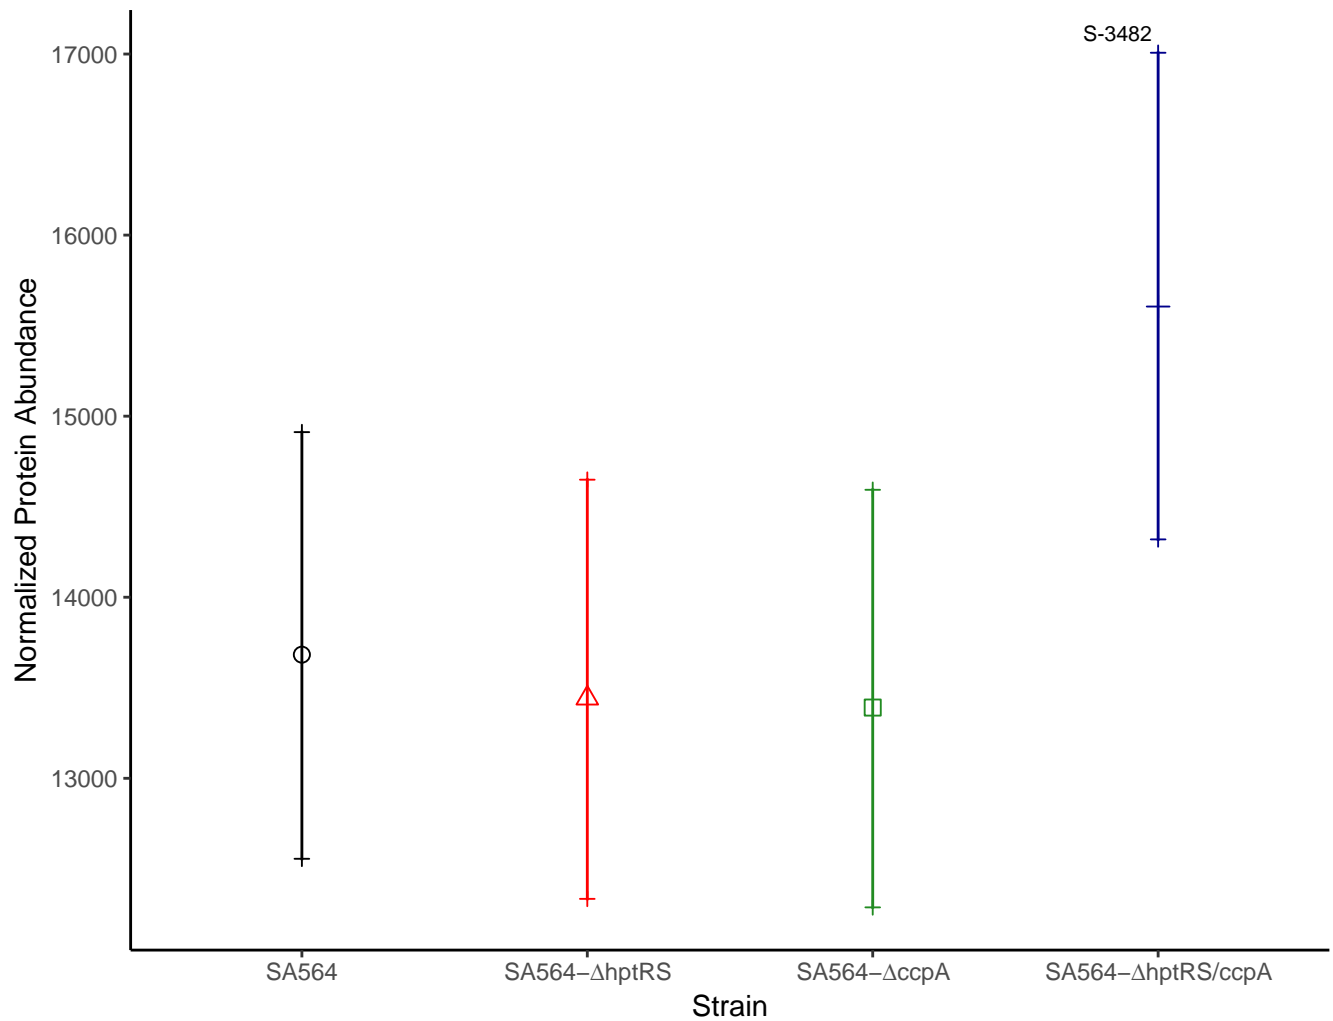

- ⊕ SA564
- △ SA564- $\Delta$ hptRS
- ⊞ SA564- $\Delta$ ccpA
- + SA564- $\Delta$ hptRS/ccpA

# Y1605\_STAAM

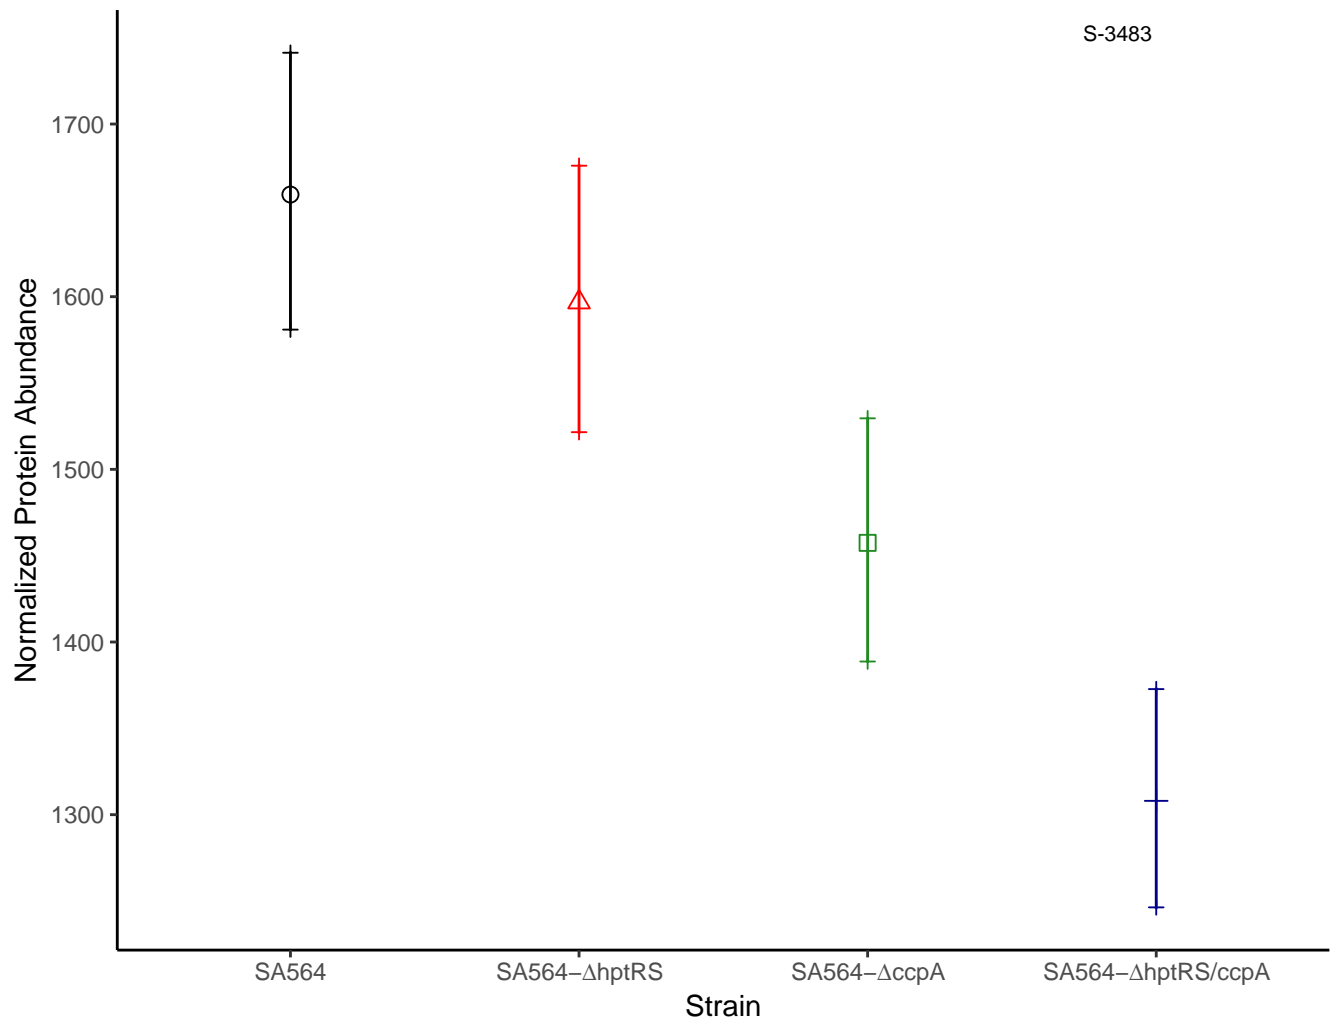

- ⊕ SA564
- △ SA564- $\Delta$ hptRS
- ⊞ SA564- $\Delta$ ccpA
- + SA564- $\Delta$ hptRS/ccpA

# Y1617\_STAAM

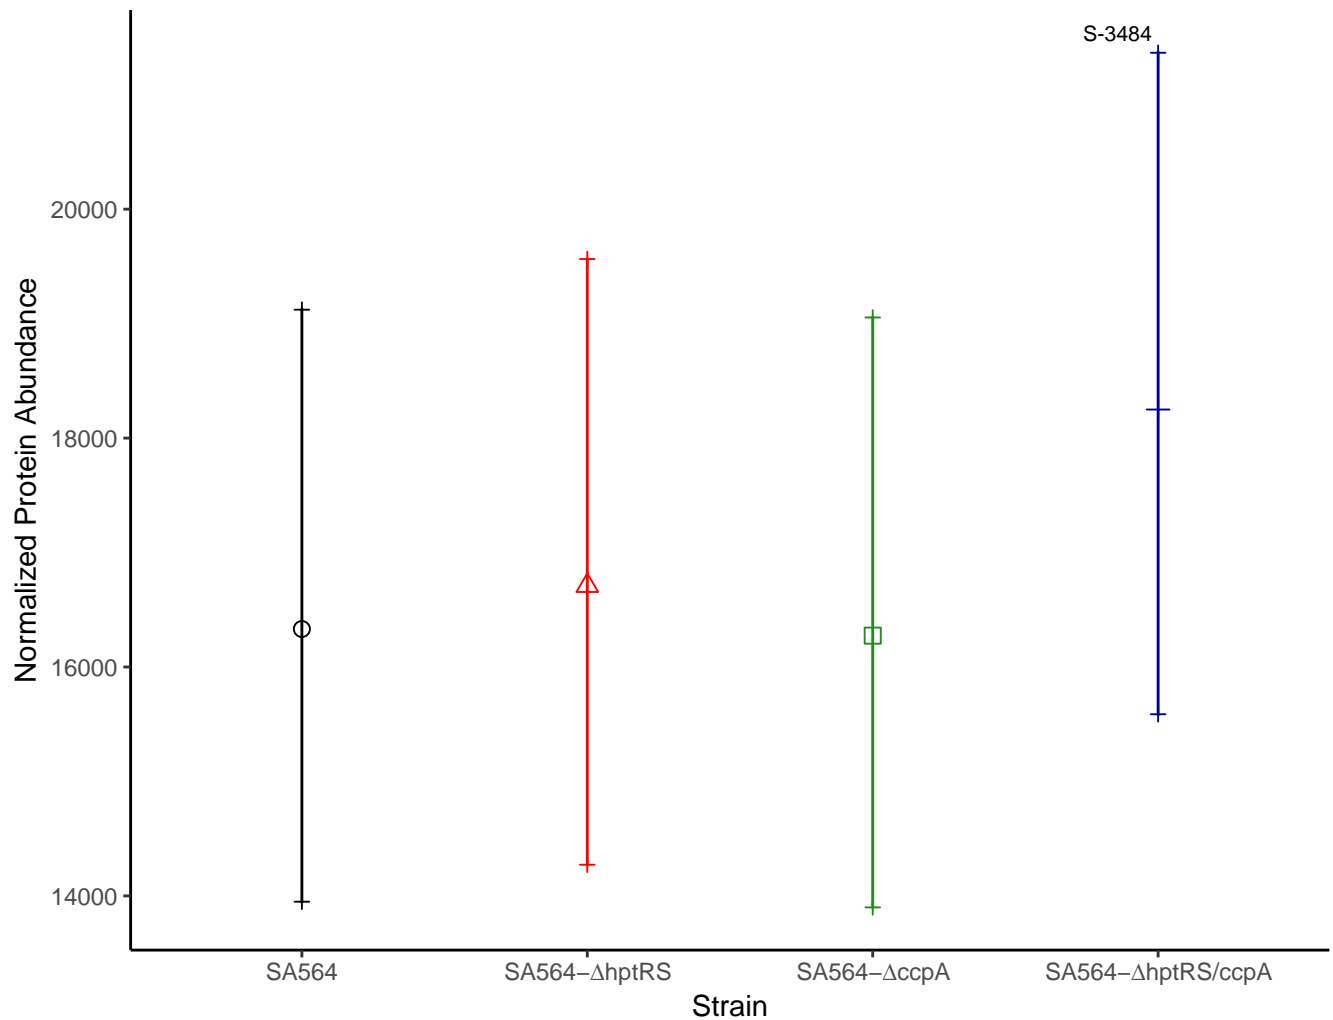

- ⊕ SA564
- △ SA564- $\Delta$ hptRS
- ⊞ SA564- $\Delta$ ccpA
- + SA564- $\Delta$ hptRS/ccpA

# Y1625\_STAAM

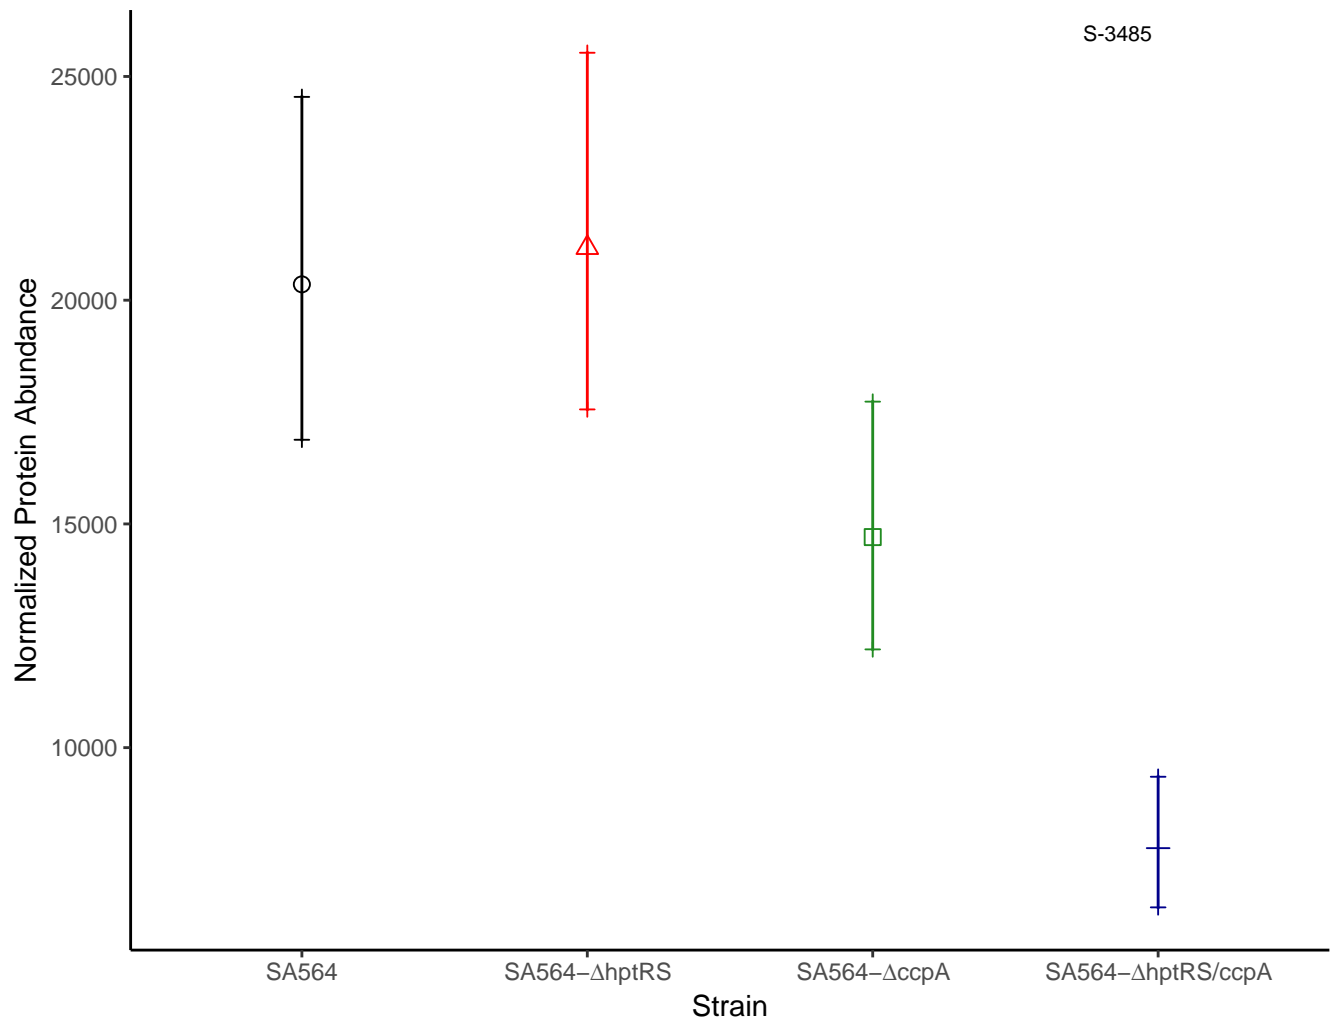

- ⊕ SA564
- △ SA564- $\Delta$ hptRS
- ⊞ SA564- $\Delta$ ccpA
- + SA564- $\Delta$ hptRS/ccpA

# Y1710\_STAAM

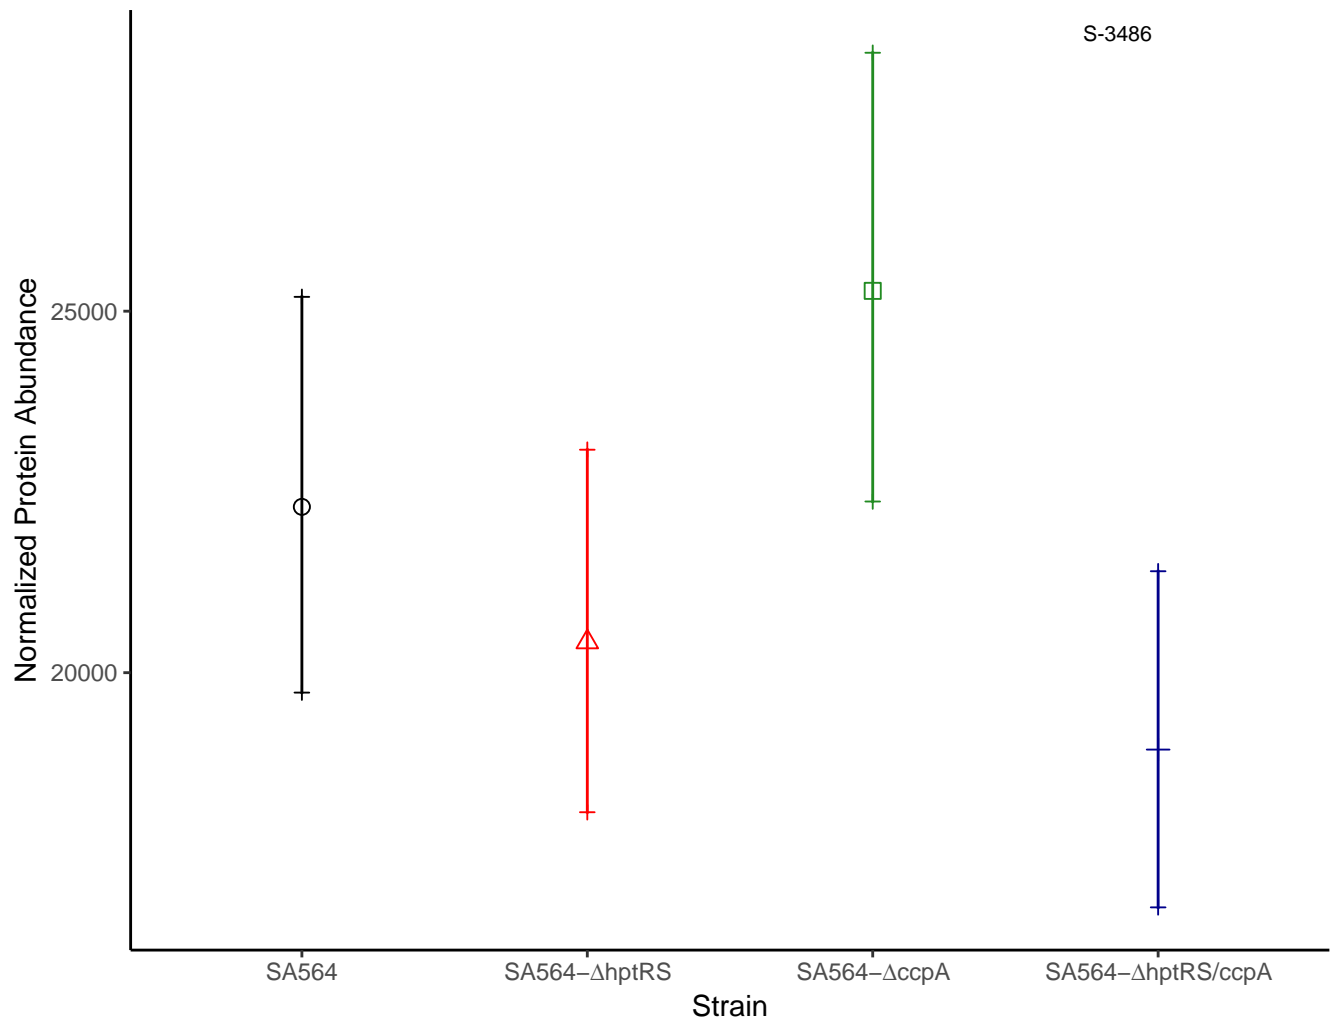

- ⊕ SA564
- △ SA564- $\Delta$ *hptRS*
- ⊞ SA564- $\Delta$ *ccpA*
- + SA564- $\Delta$ *hptRS/ccpA*

# Y1739\_STAAM

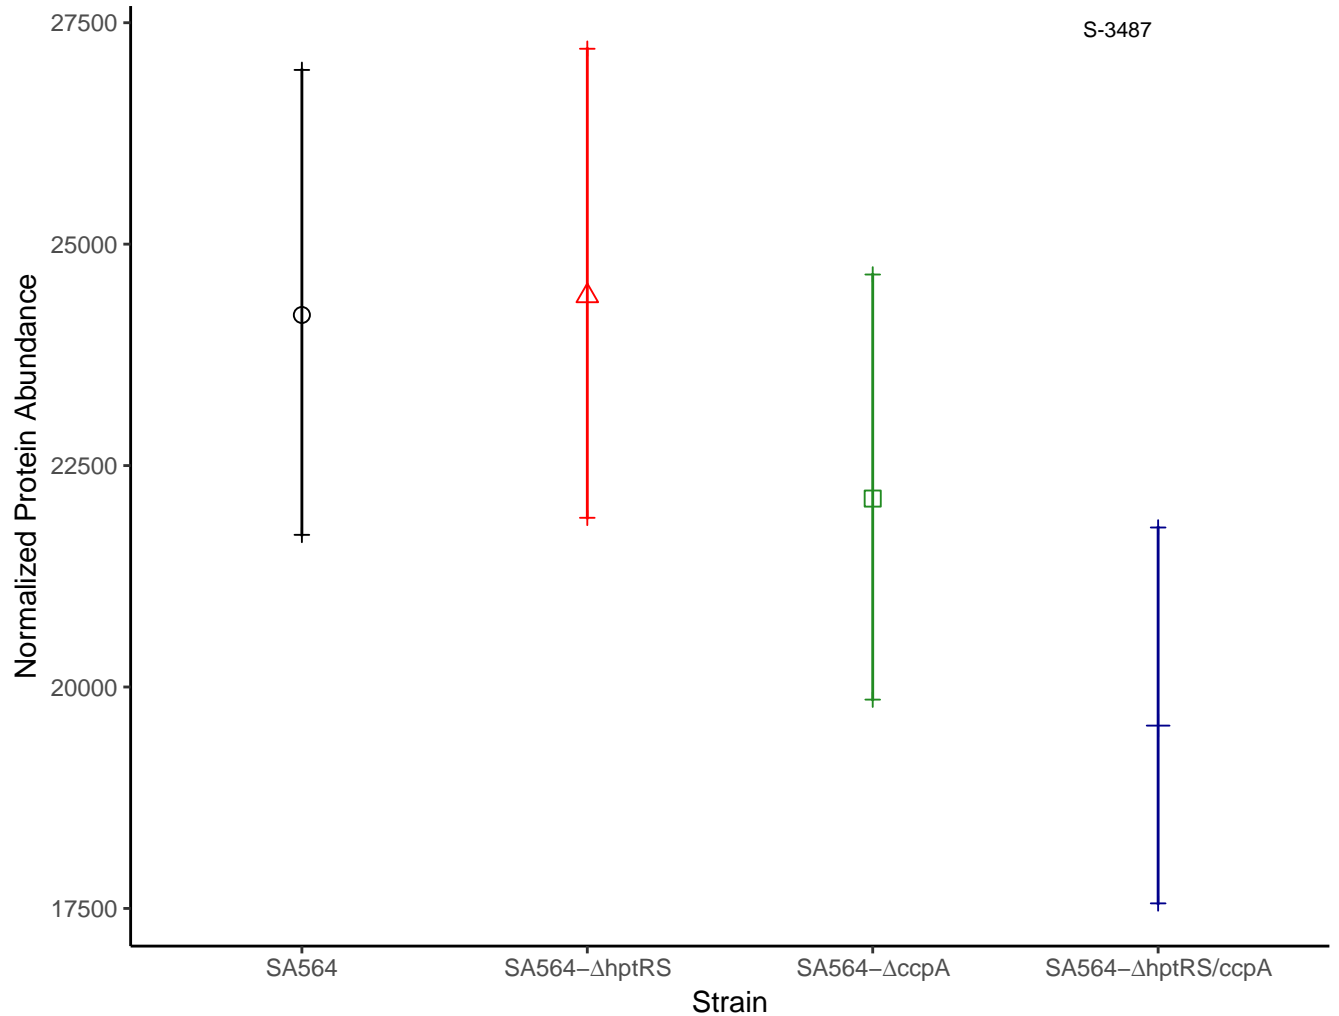

- SA564
- SA564- $\Delta$ hptRS
- SA564- $\Delta$ ccpA
- SA564- $\Delta$ hptRS/ccpA

# Y1845\_STAAM

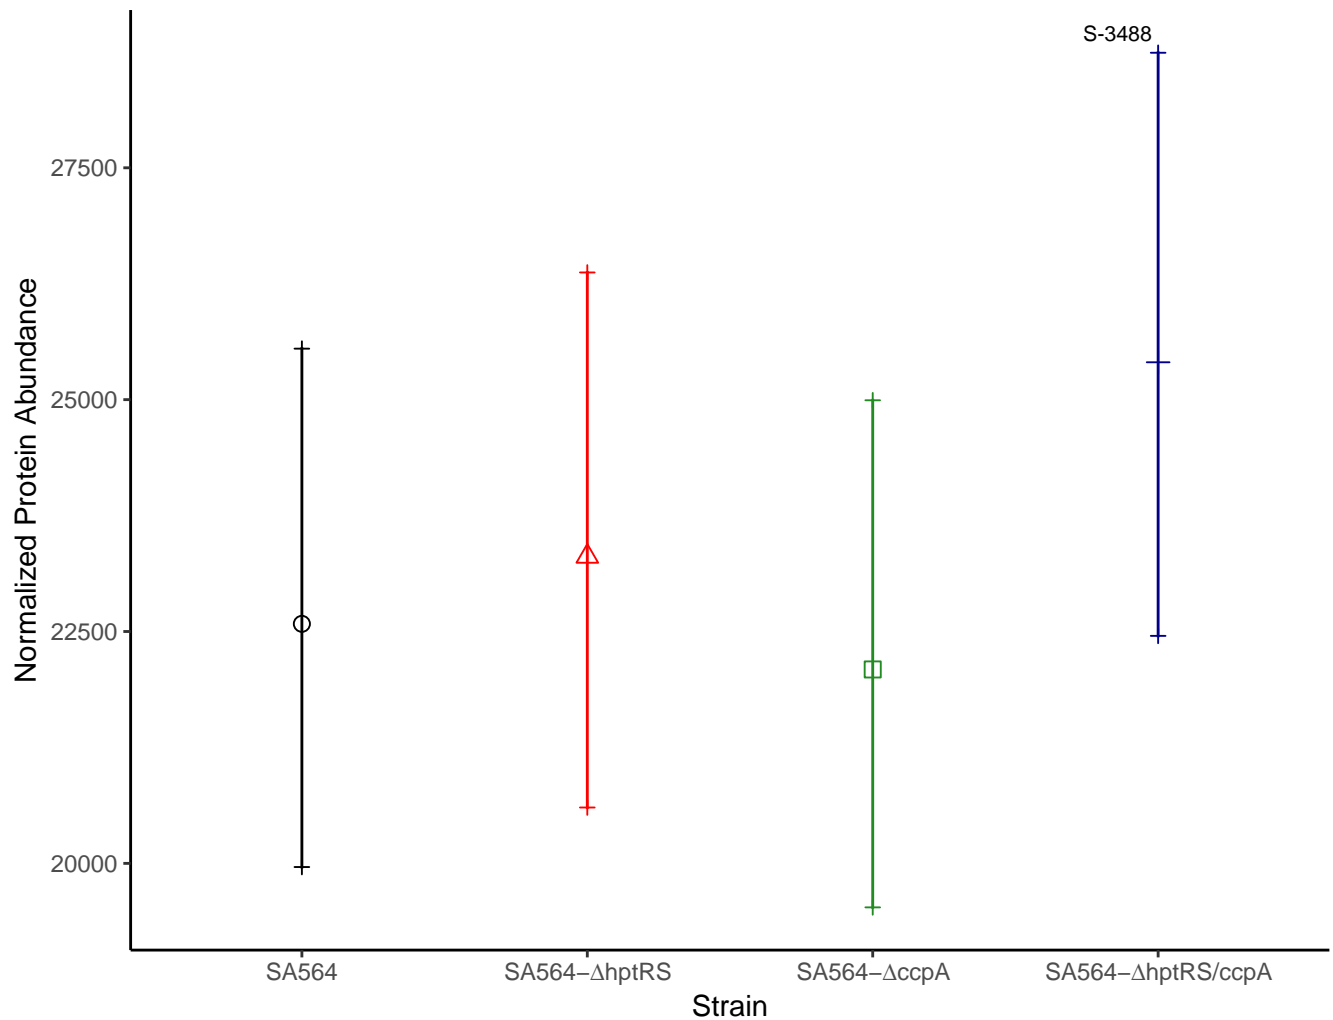

- ⊕ SA564
- △ SA564- $\Delta$ *hptRS*
- ⊞ SA564- $\Delta$ *ccpA*
- + SA564- $\Delta$ *hptRS/ccpA*



# Y1866\_STAAM

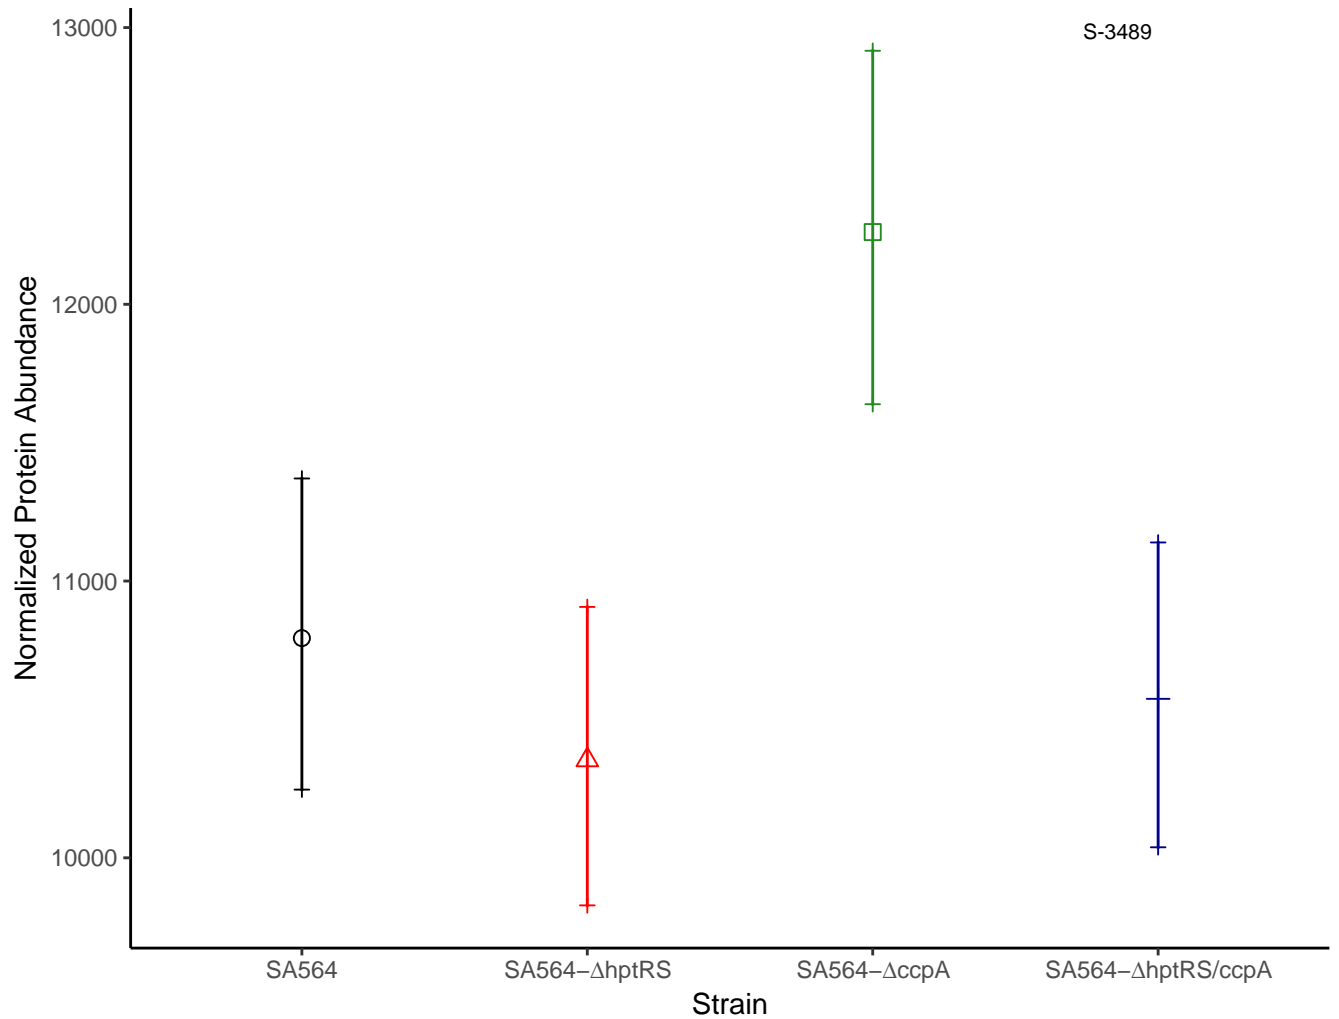

- ⊕ SA564
- △ SA564- $\Delta$ hptRS
- ⊞ SA564- $\Delta$ ccpA
- + SA564- $\Delta$ hptRS/ccpA

# Y1880\_STAAM

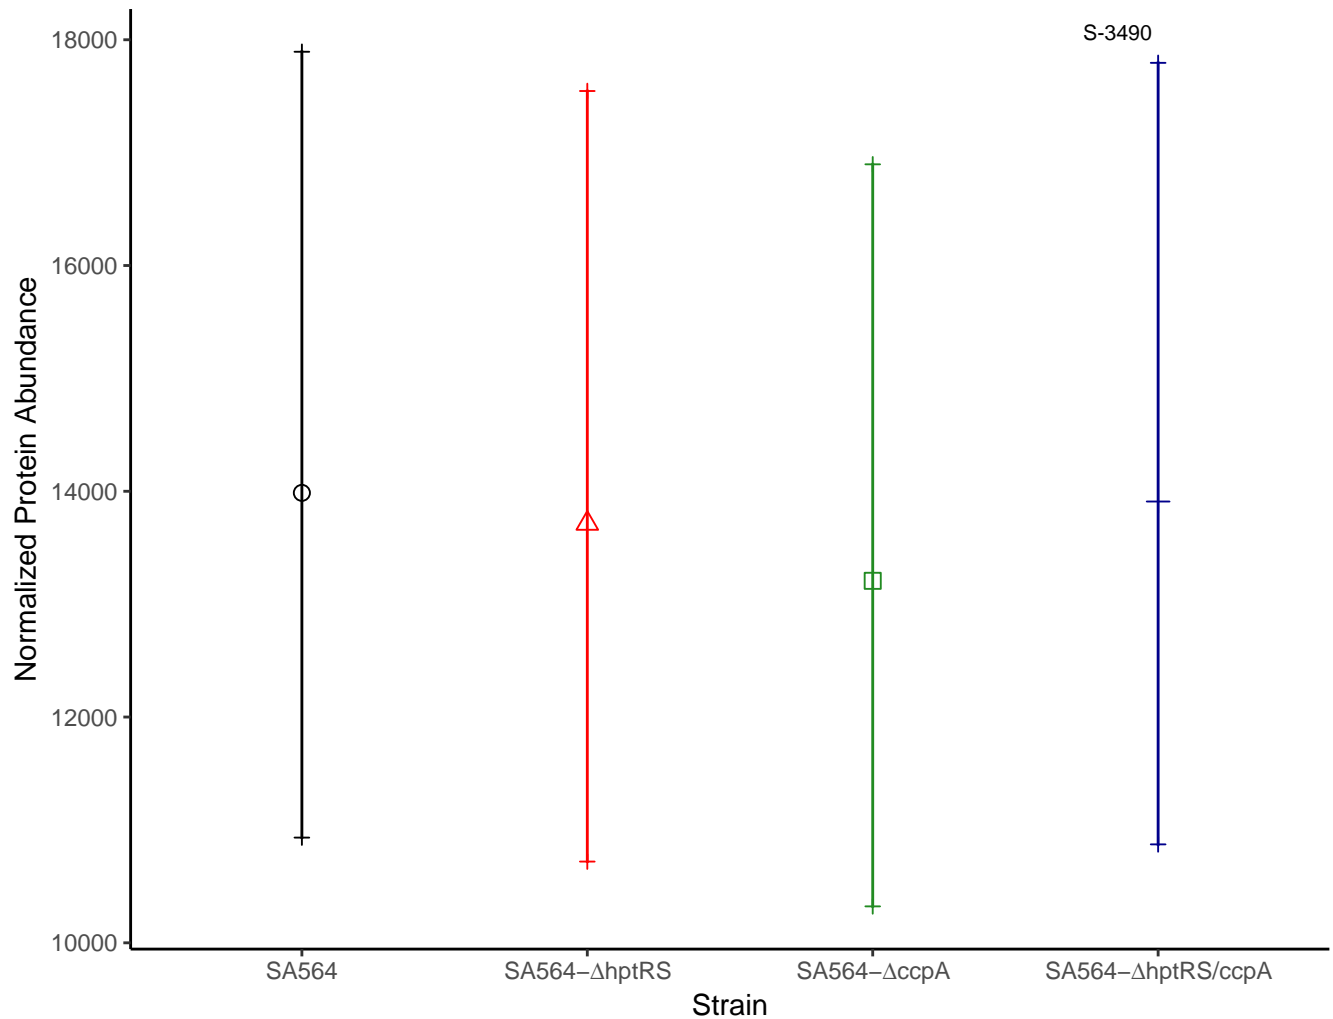

- ⊕ SA564
- △ SA564- $\Delta$ hptRS
- ⊞ SA564- $\Delta$ ccpA
- + SA564- $\Delta$ hptRS/ccpA

# Y1921\_STAAM

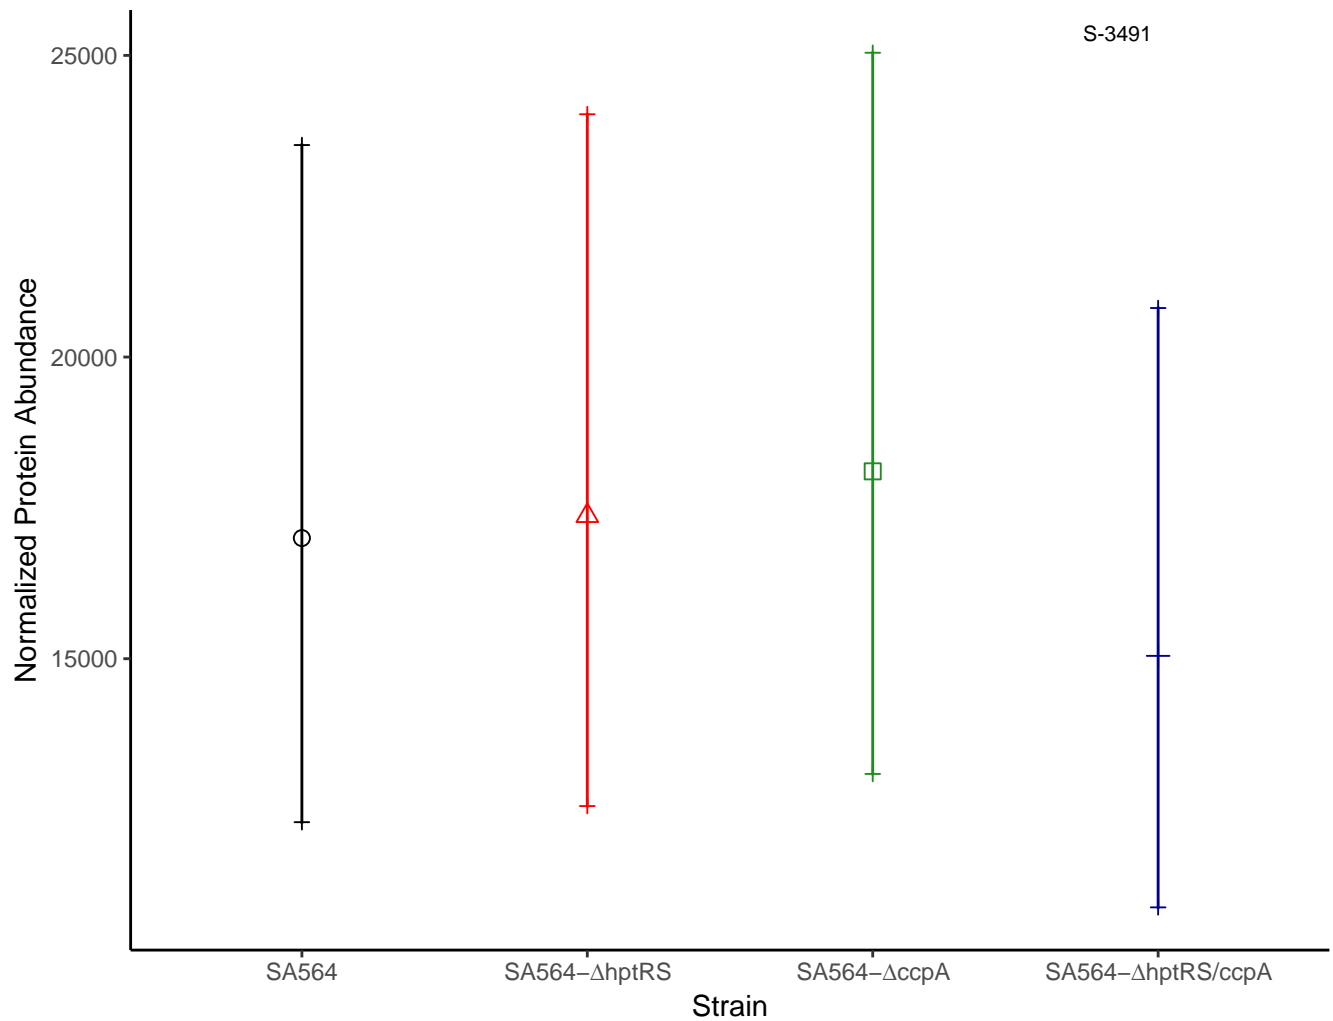

- ⊕ SA564
- △ SA564- $\Delta$ hptRS
- ⊞ SA564- $\Delta$ ccpA
- + SA564- $\Delta$ hptRS/ccpA

# Y2173\_STAAM

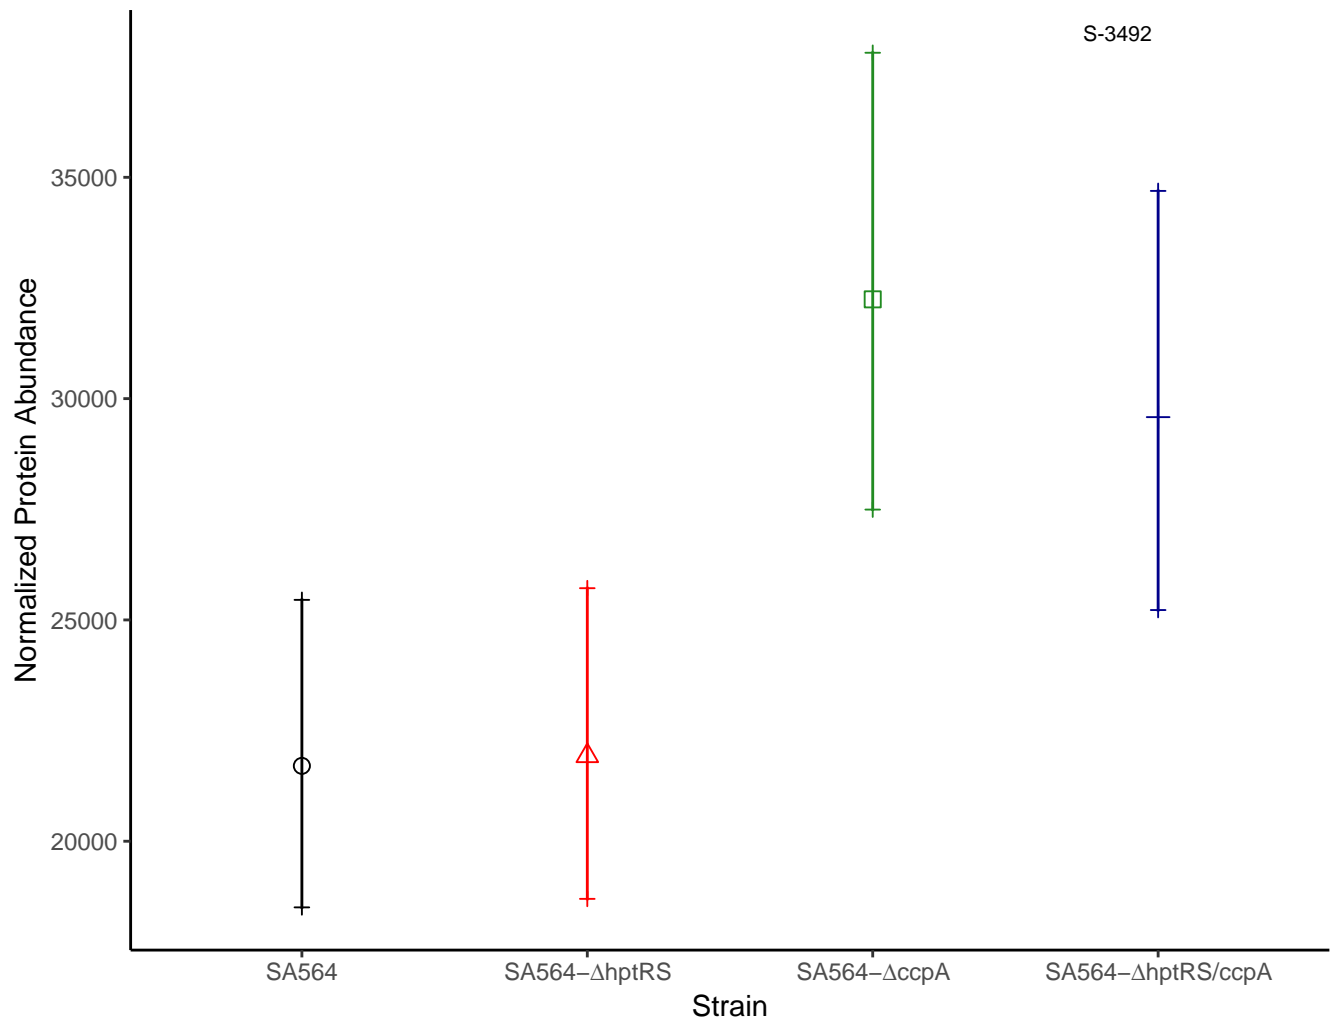

- ⊕ SA564
- △ SA564- $\Delta$ hptRS
- ⊞ SA564- $\Delta$ ccpA
- + SA564- $\Delta$ hptRS/ccpA

# Y2204\_STAAM

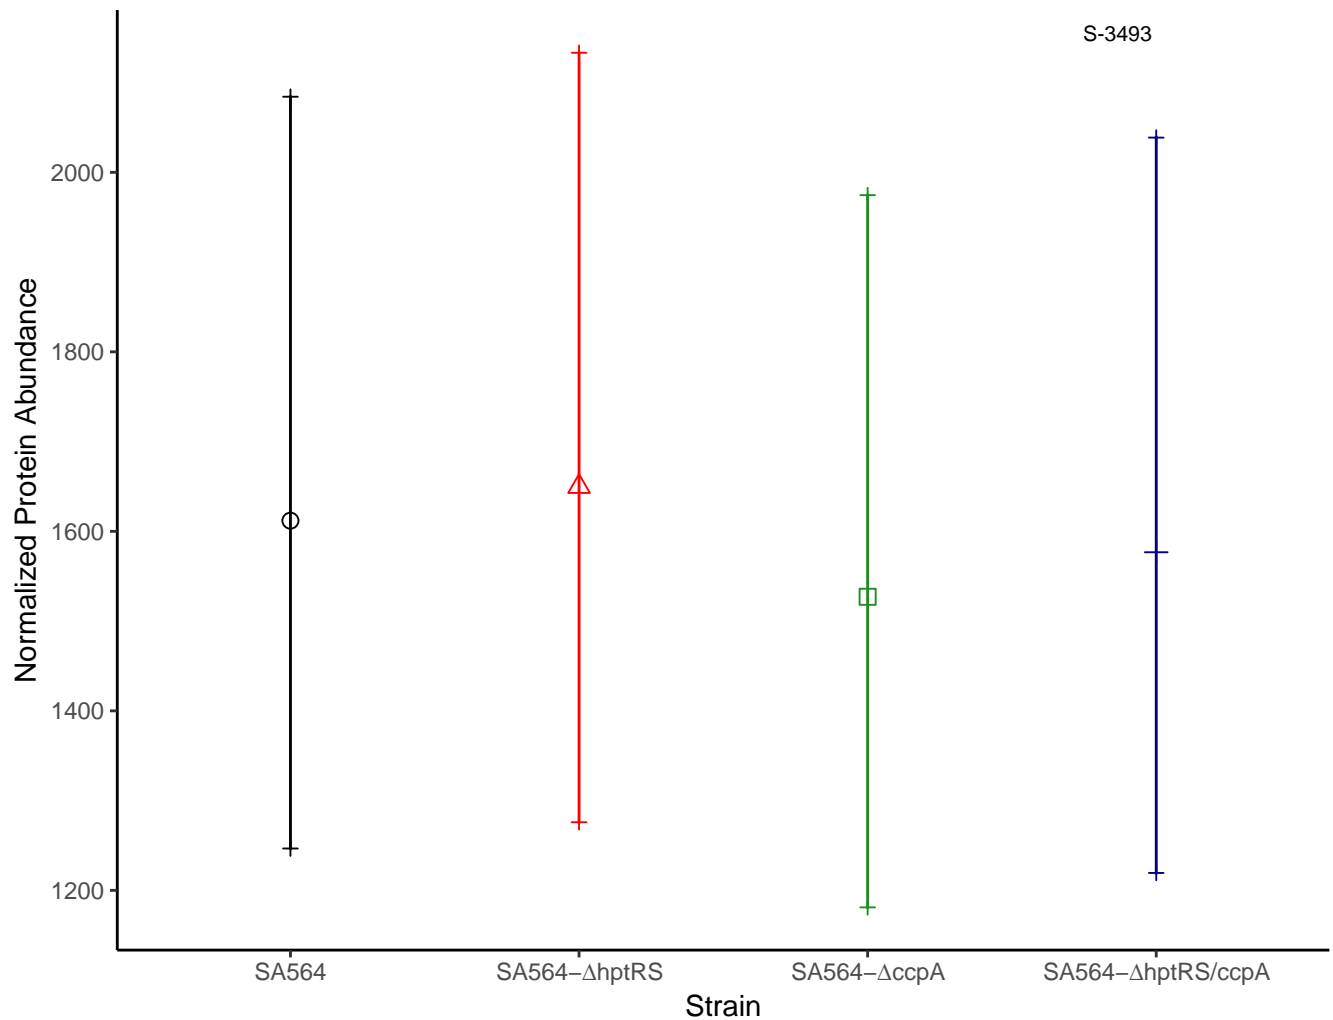

- ⊕ SA564
- △ SA564- $\Delta$ *hptRS*
- ⊞ SA564- $\Delta$ *ccpA*
- + SA564- $\Delta$ *hptRS/ccpA*

# Y2265\_STAAM

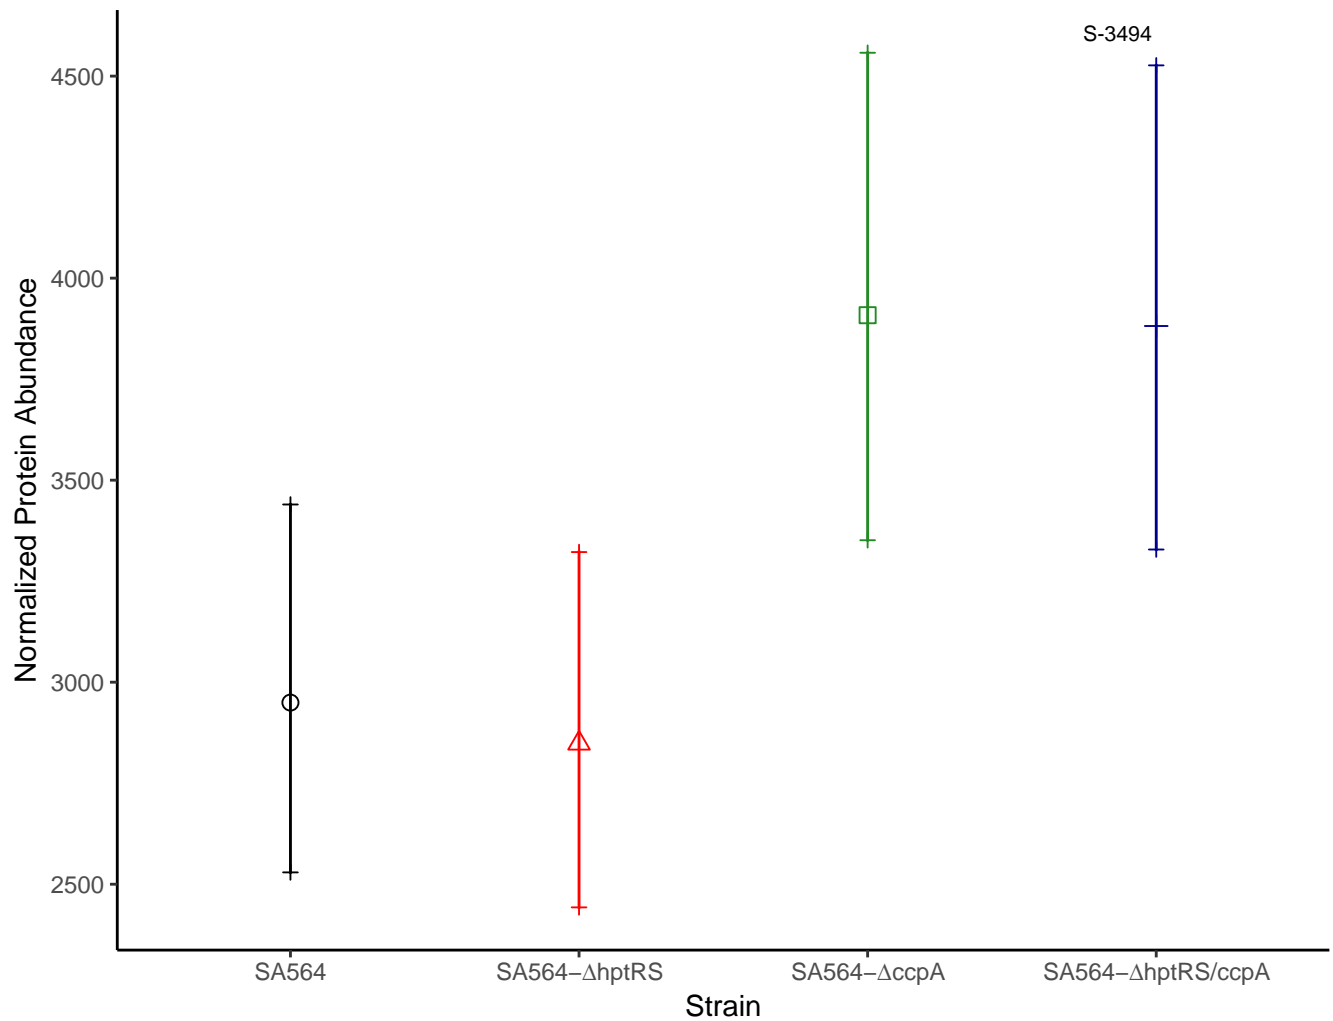

- ⊕ SA564
- △ SA564- $\Delta$ hptRS
- ⊞ SA564- $\Delta$ ccpA
- + SA564- $\Delta$ hptRS/ccpA

# Y2305\_STAAM

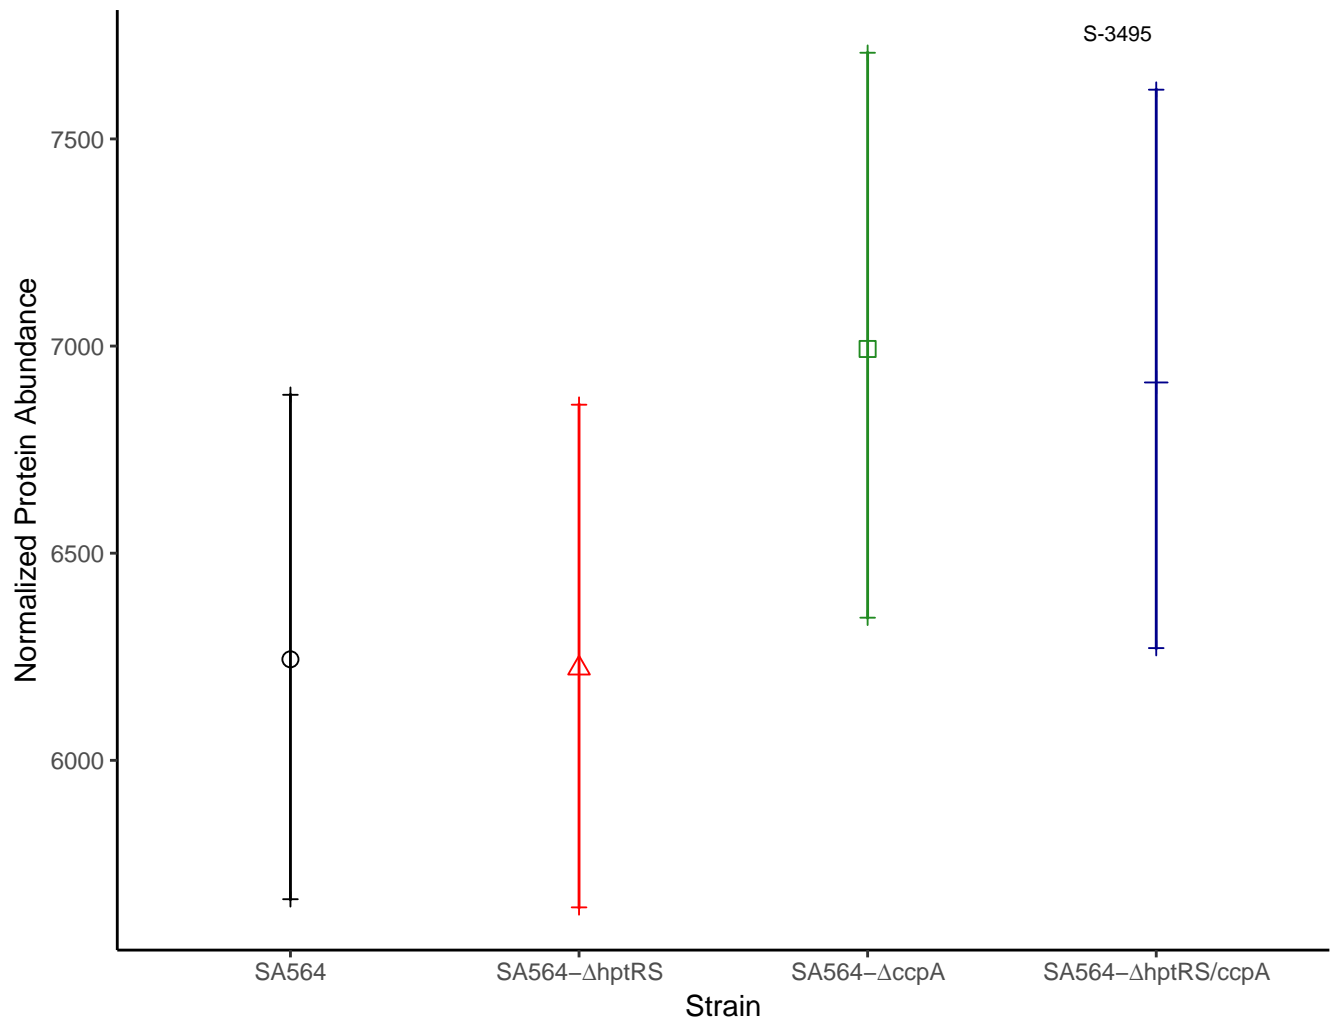

- ⊕ SA564
- △ SA564- $\Delta$ hptRS
- ⊞ SA564- $\Delta$ ccpA
- + SA564- $\Delta$ hptRS/ccpA

# Y2363\_STAAM

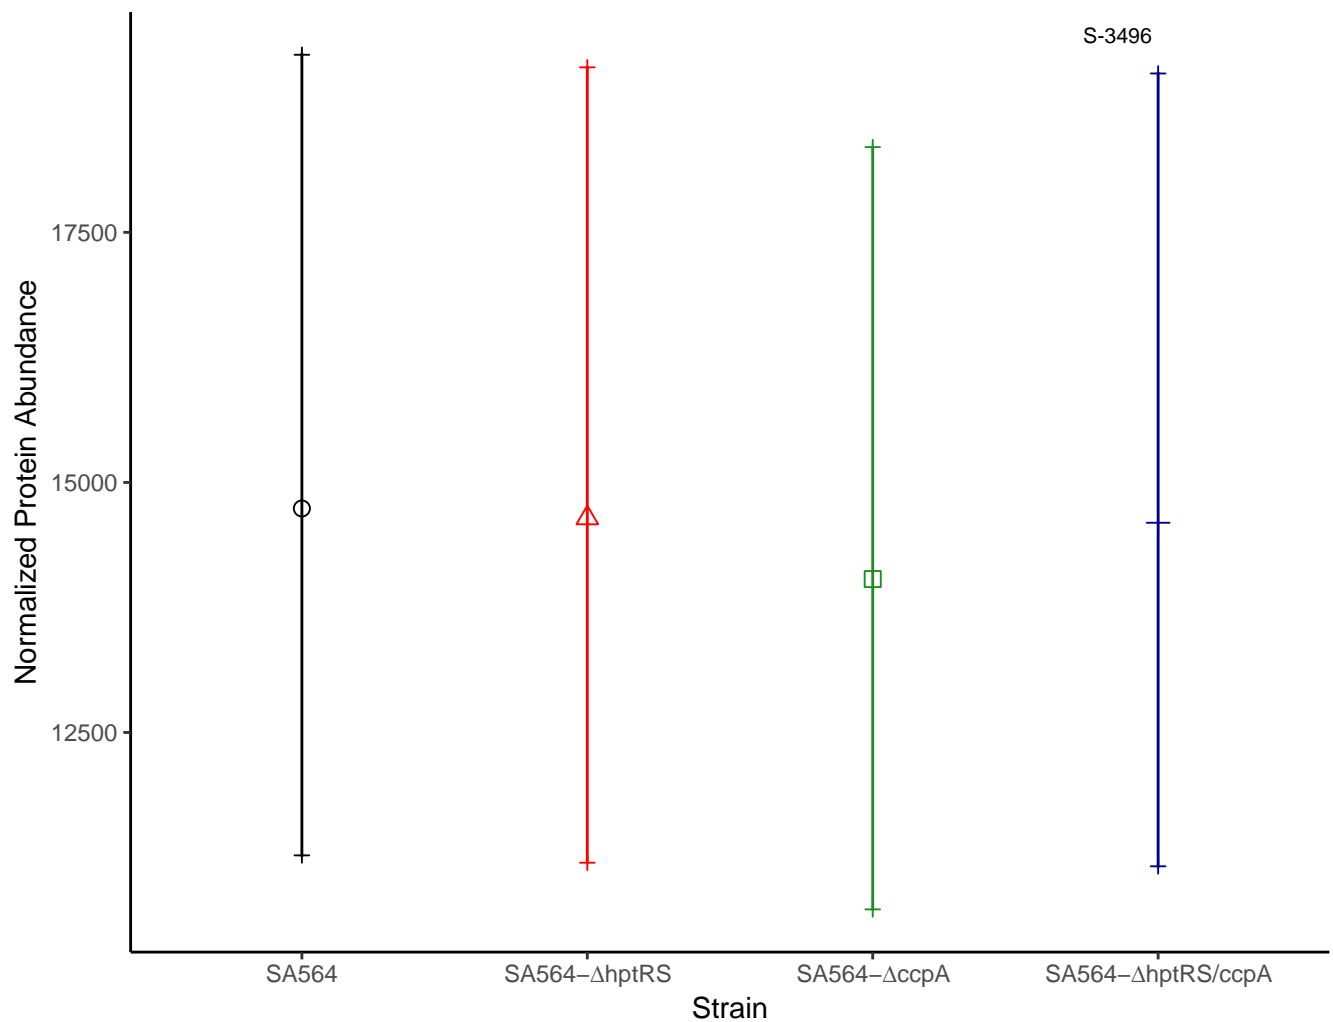

- ⊕ SA564
- △ SA564- $\Delta$ hptRS
- ⊞ SA564- $\Delta$ ccpA
- + SA564- $\Delta$ hptRS/ccpA



# Y2368\_STAAM

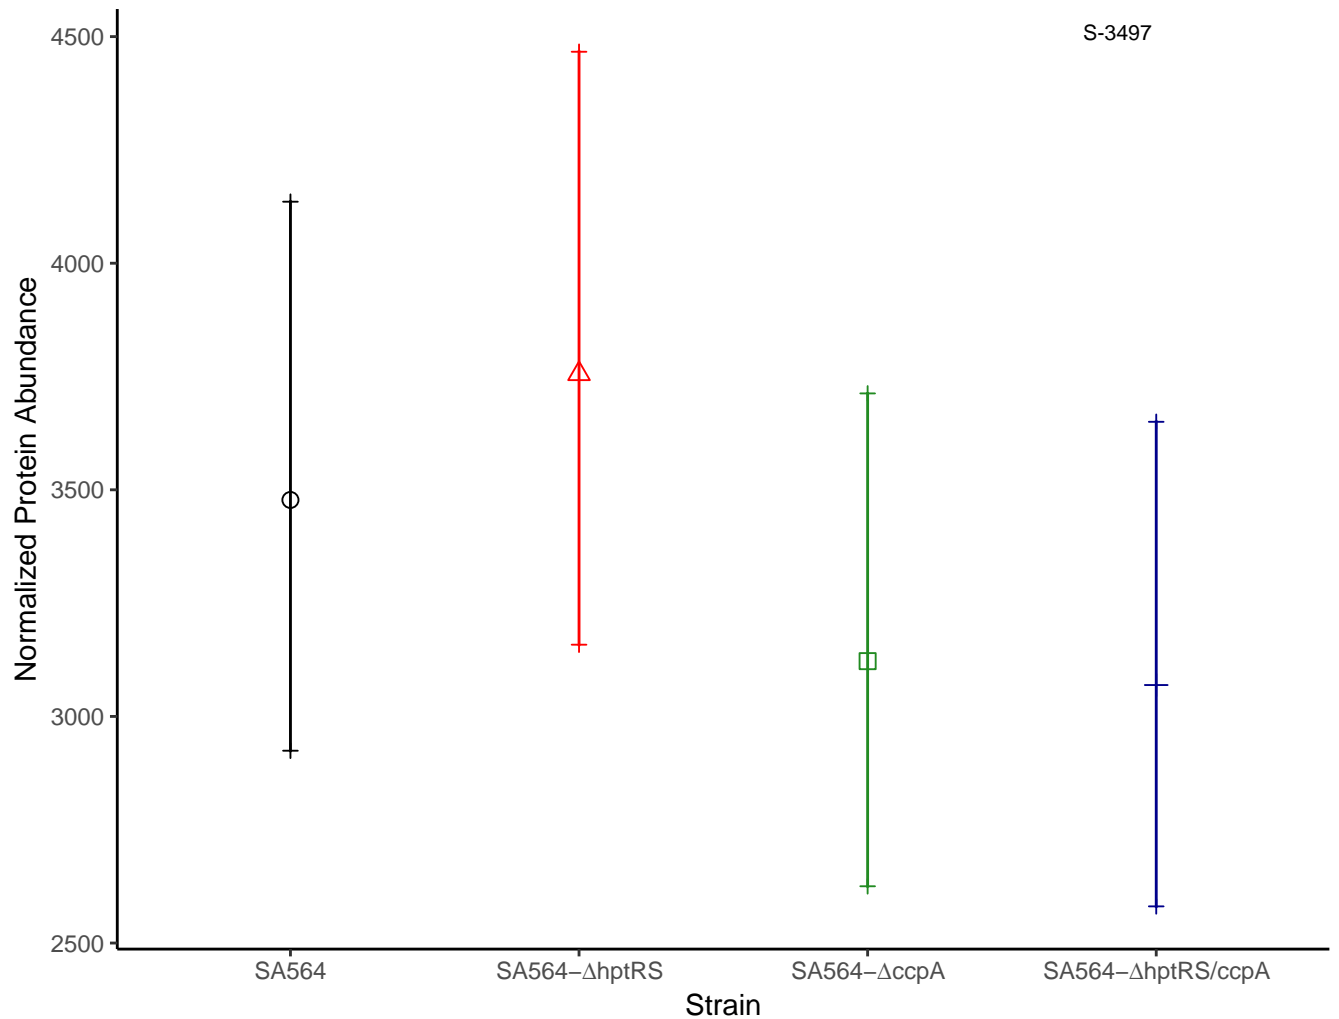

- ⊕ SA564
- △ SA564- $\Delta$ hptRS
- ⊞ SA564- $\Delta$ ccpA
- + SA564- $\Delta$ hptRS/ccpA

# Y2478\_STAAM

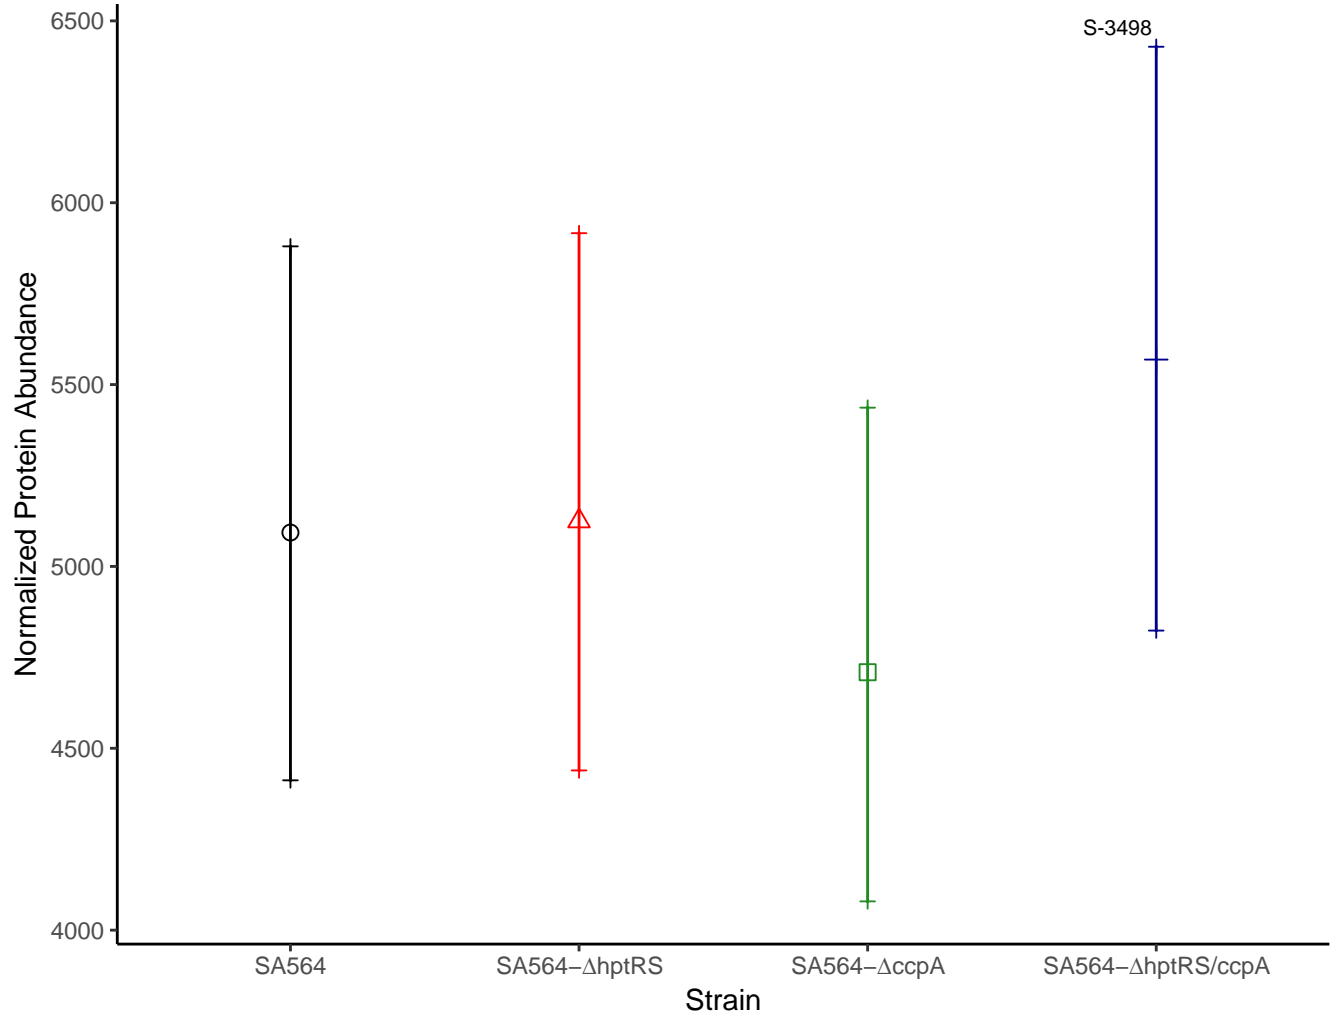

- ⊕ SA564
- △ SA564- $\Delta$ hptRS
- ⊞ SA564- $\Delta$ ccpA
- + SA564- $\Delta$ hptRS/ccpA

# Y2523\_STAAM

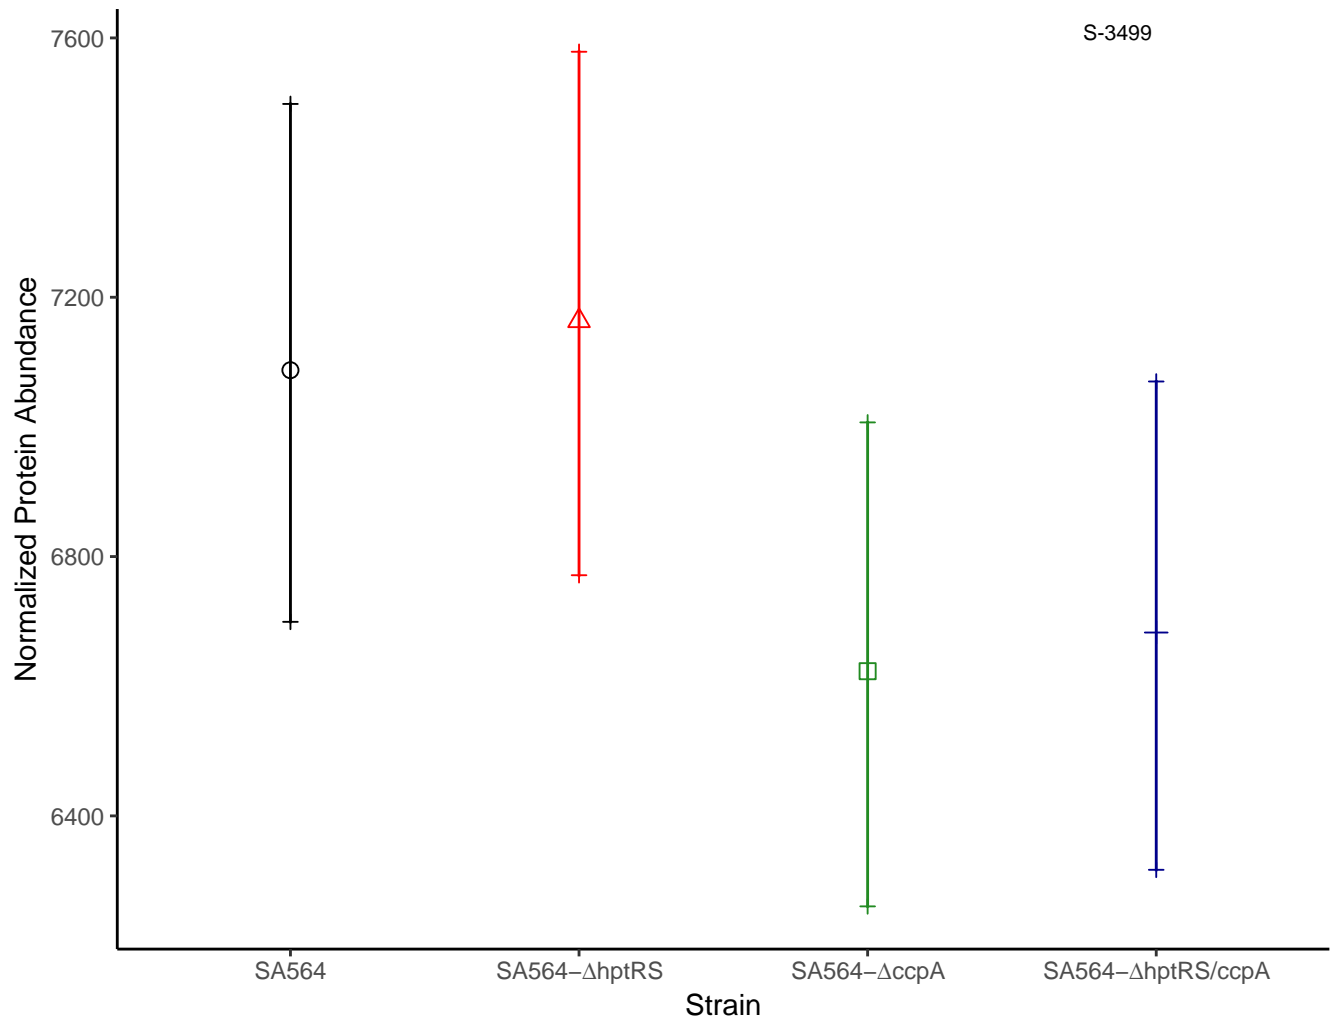

- ⊕ SA564
- △ SA564- $\Delta$ hptRS
- ⊞ SA564- $\Delta$ ccpA
- + SA564- $\Delta$ hptRS/ccpA

# Y2573\_STAAM

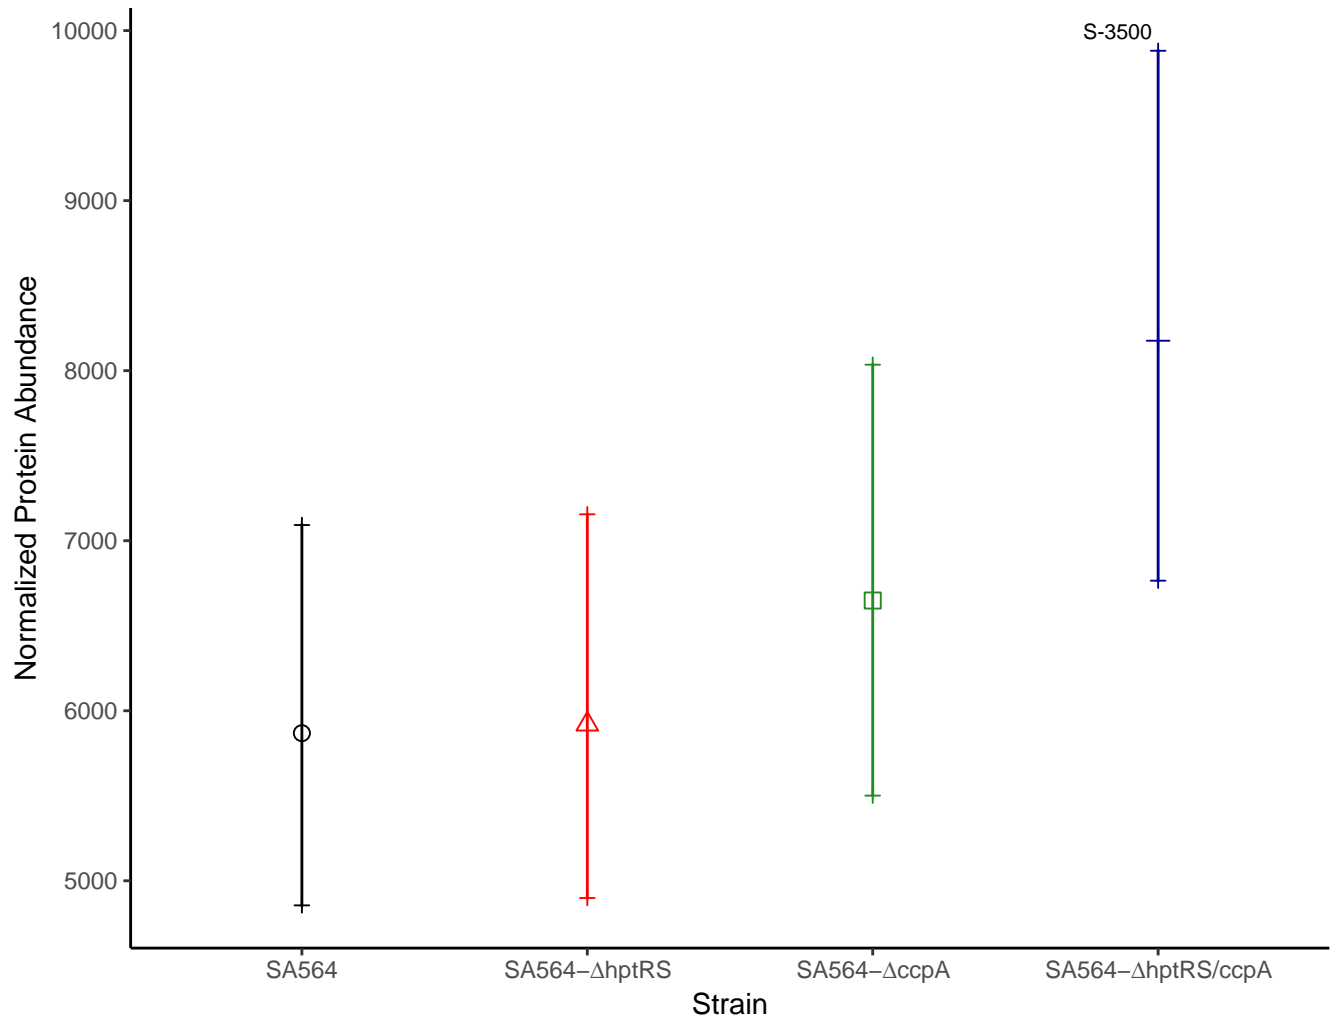

- ⊕ SA564
- △ SA564- $\Delta$ hptRS
- ⊞ SA564- $\Delta$ ccpA
- + SA564- $\Delta$ hptRS/ccpA

# Y2578\_STAAM

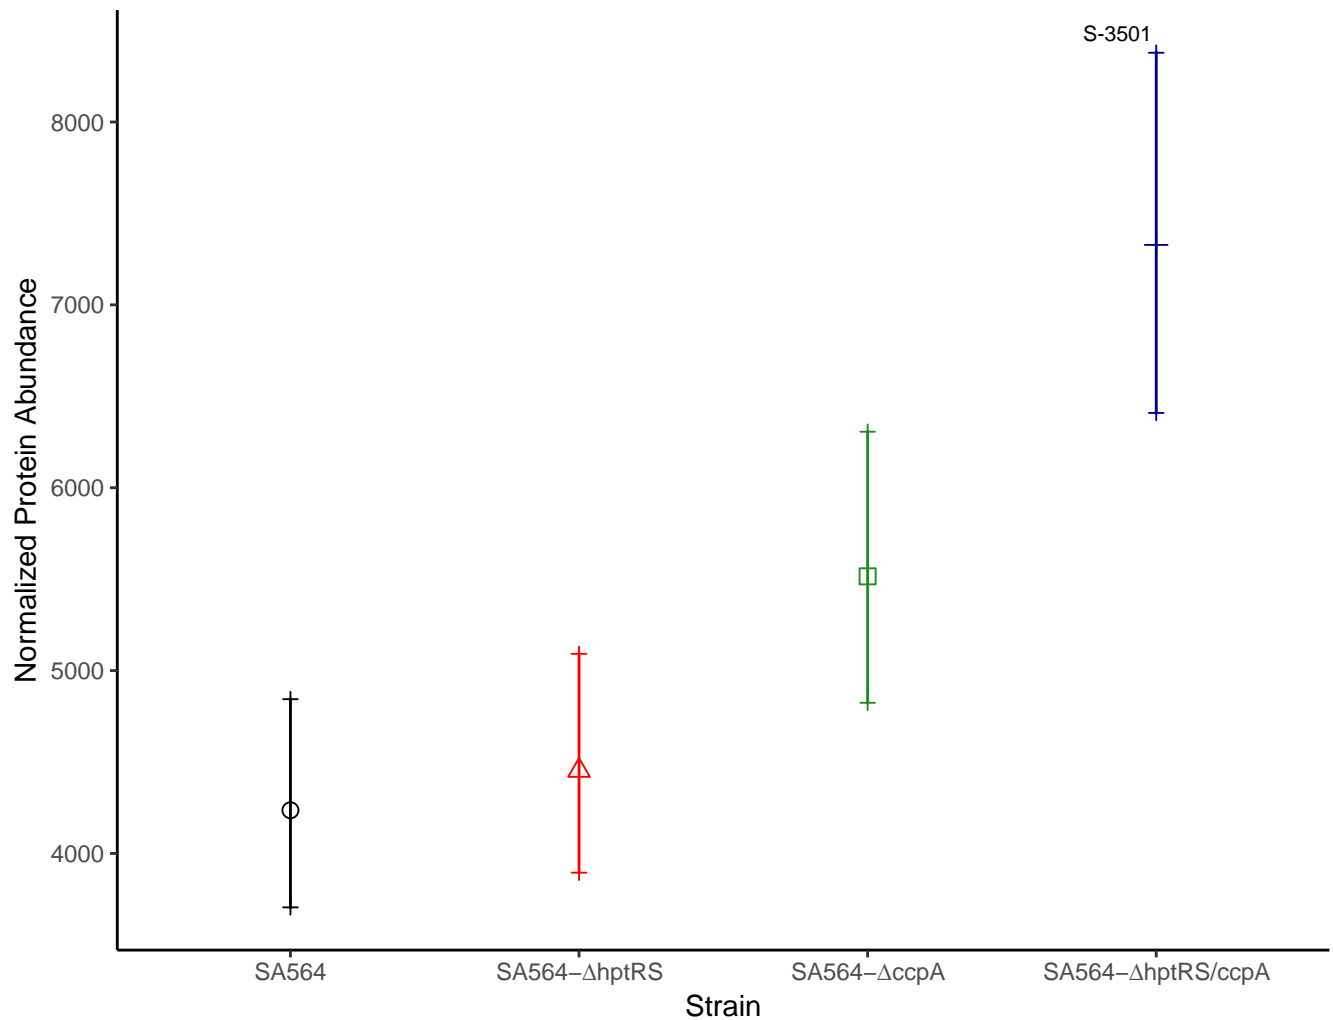

- ⊕ SA564
- △ SA564- $\Delta$ *hptRS*
- ⊞ SA564- $\Delta$ *ccpA*
- + SA564- $\Delta$ *hptRS/ccpA*

# Y2581\_STAAM

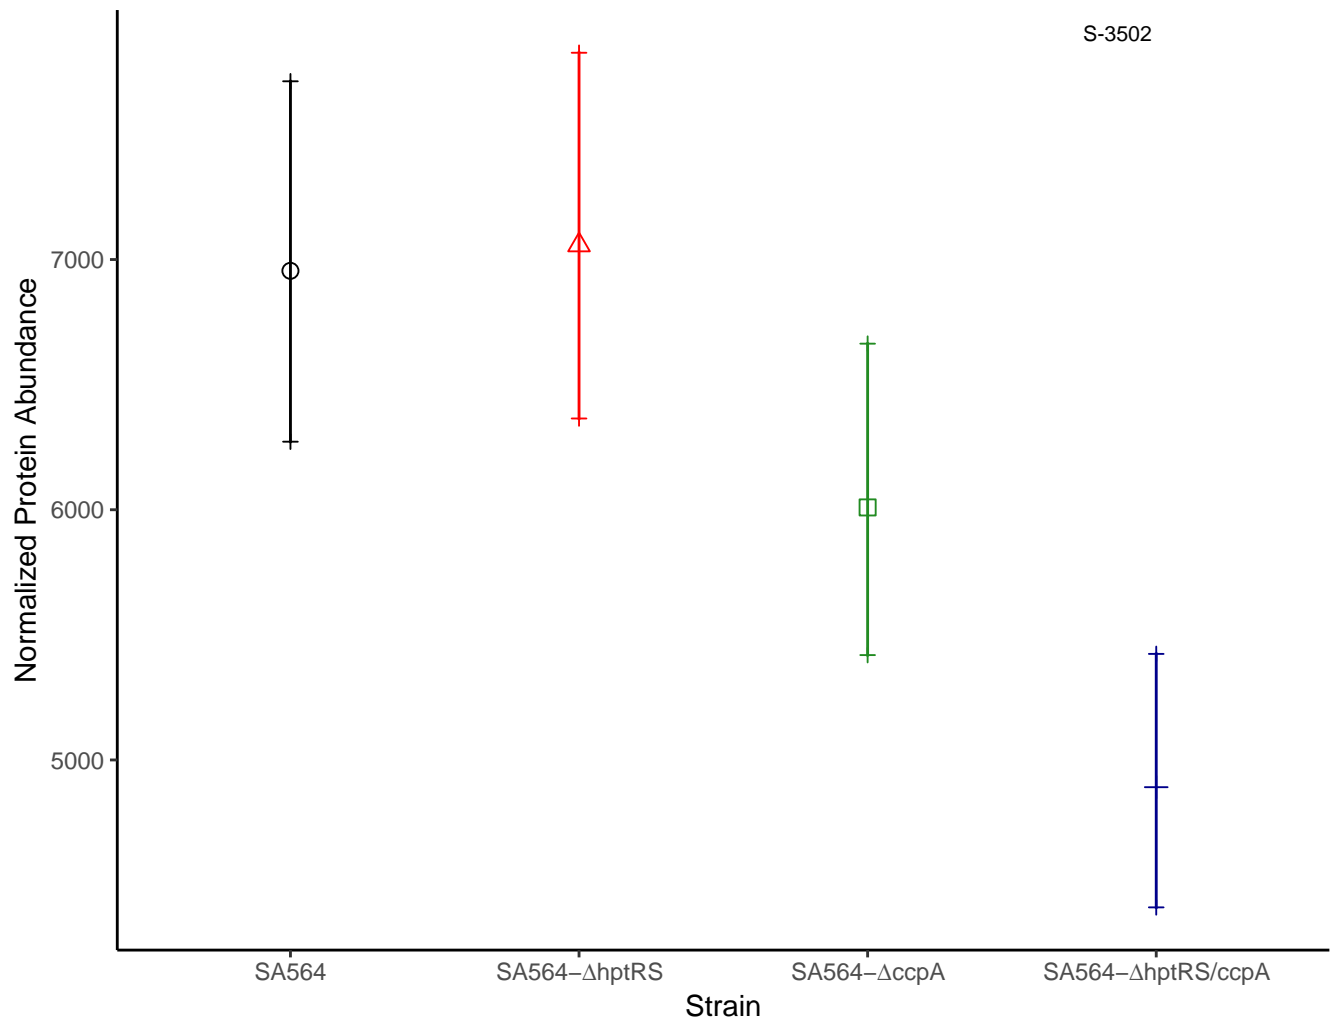

- ⊕ SA564
- △ SA564- $\Delta$ hptRS
- ⊞ SA564- $\Delta$ ccpA
- ⊕ SA564- $\Delta$ hptRS/ccpA

# Y2627\_STAAM

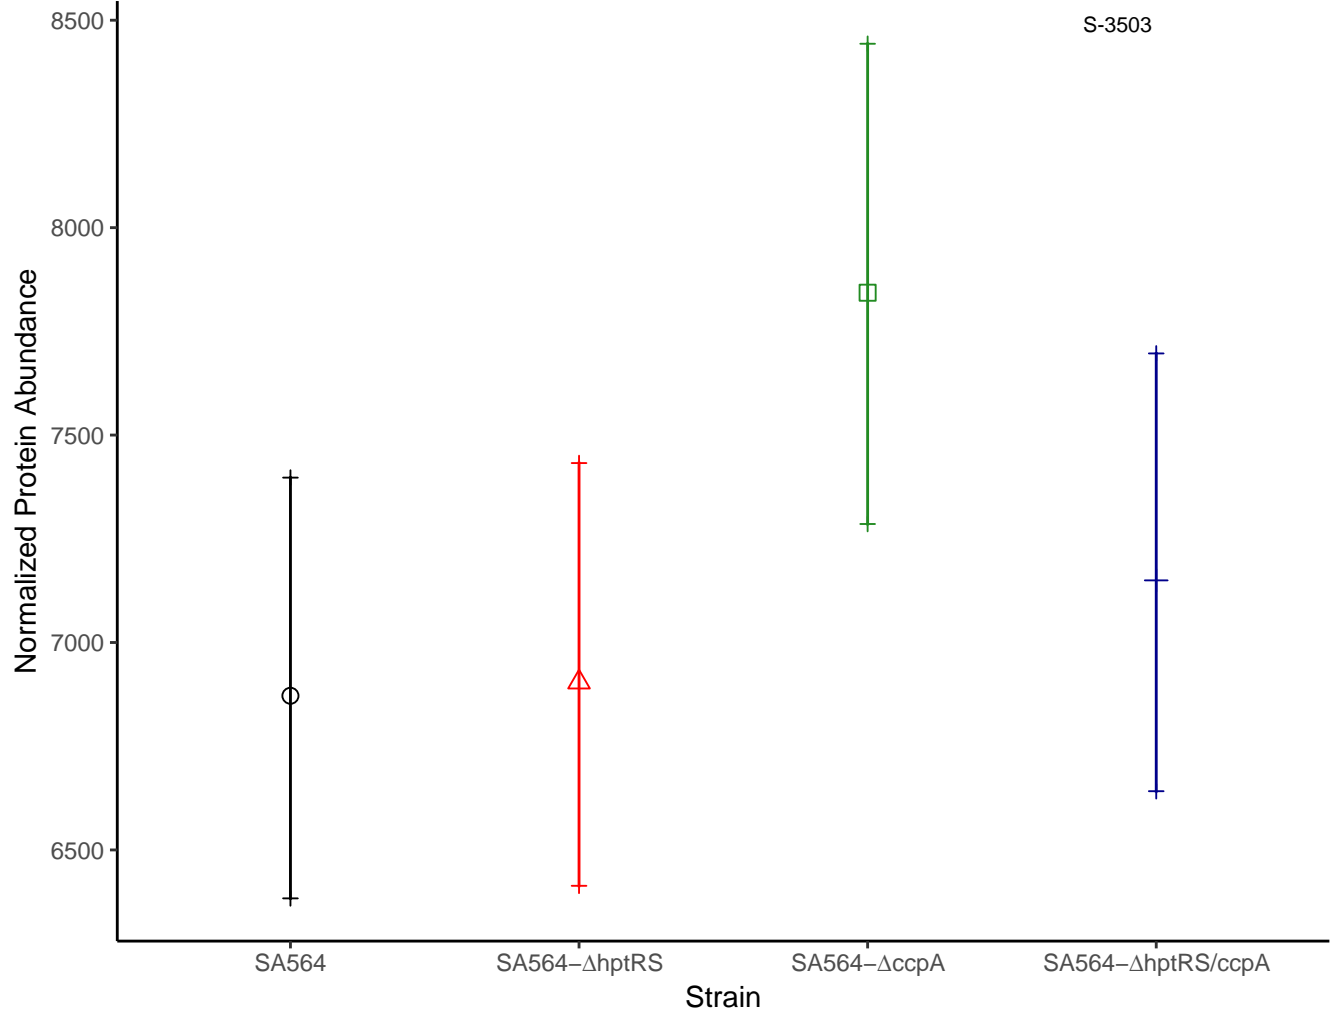

- ⊕ SA564
- △ SA564- $\Delta$ hptRS
- ⊞ SA564- $\Delta$ ccpA
- + SA564- $\Delta$ hptRS/ccpA

# Y2687\_STAAM

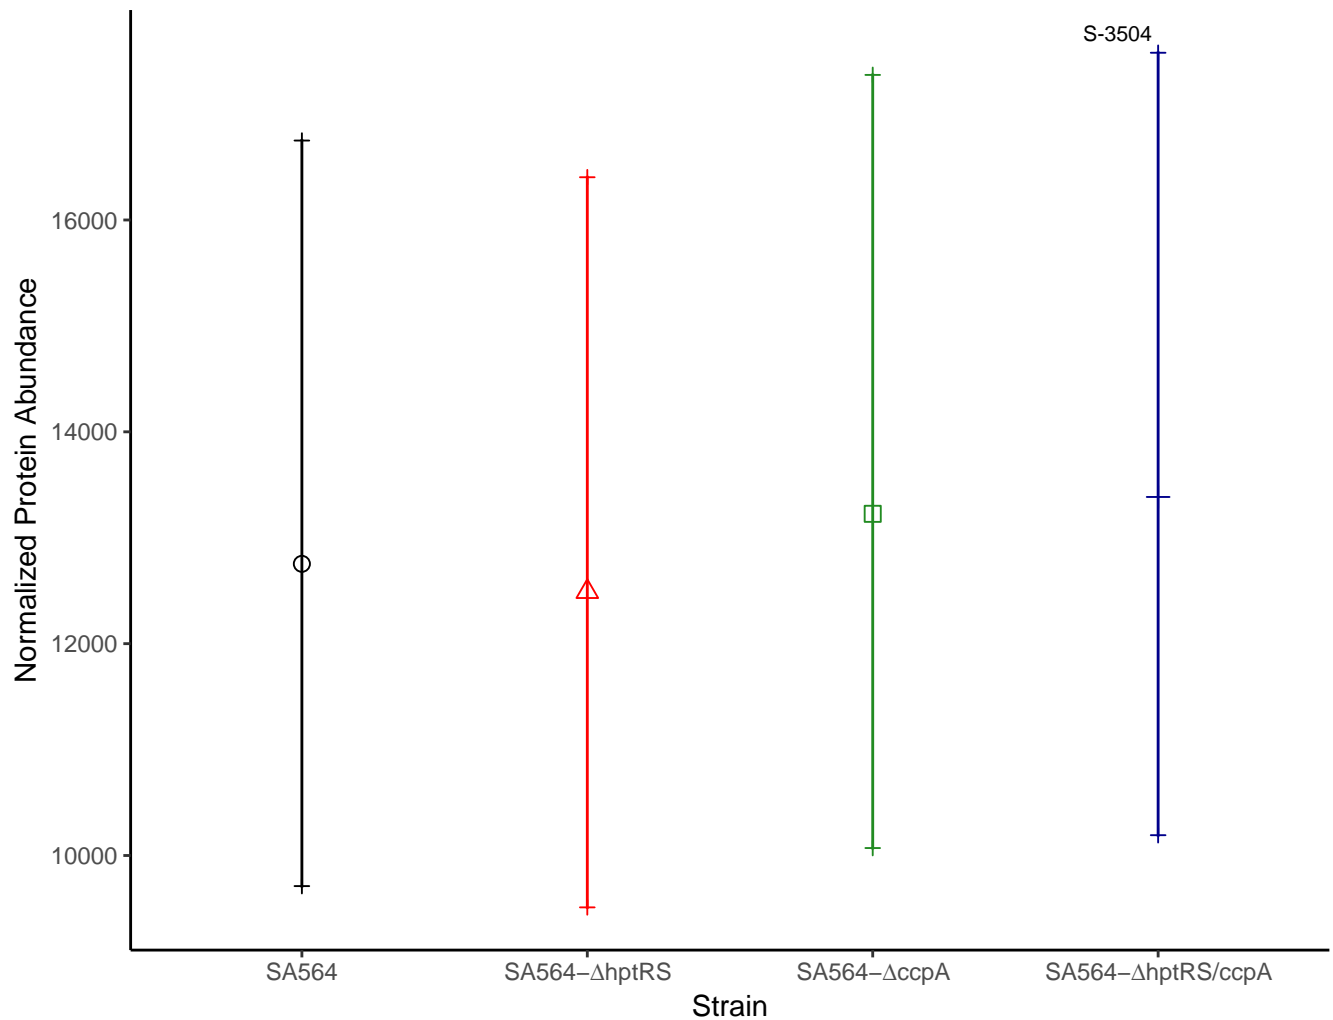

- ⊕ SA564
- △ SA564- $\Delta$ hptRS
- ⊞ SA564- $\Delta$ ccpA
- + SA564- $\Delta$ hptRS/ccpA



# Y2689\_STAAM

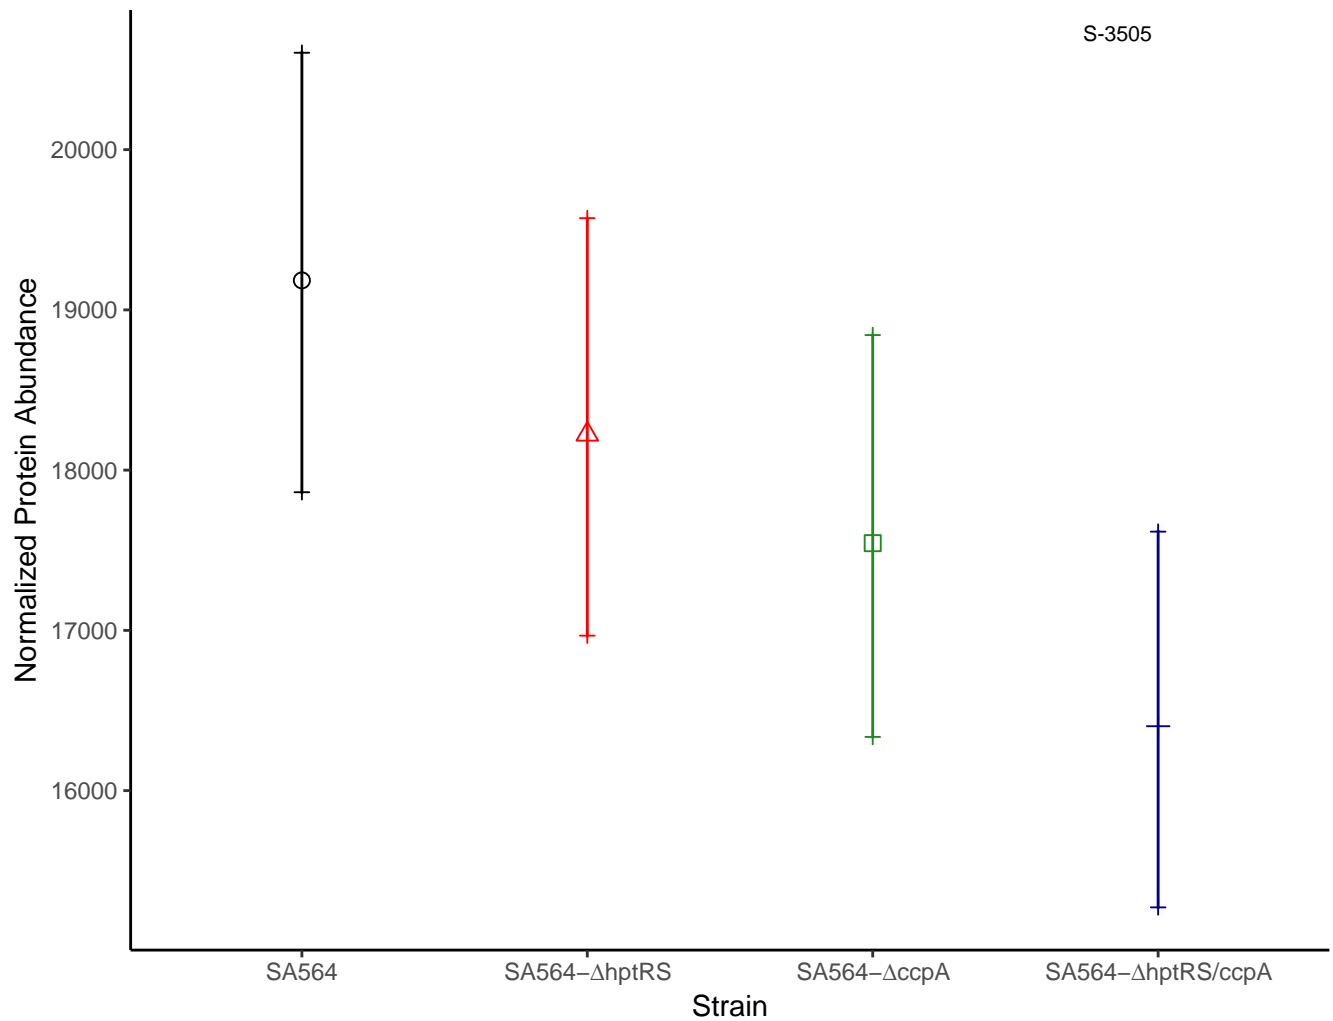

- SA564
- SA564- $\Delta$ hptRS
- SA564- $\Delta$ ccpA
- SA564- $\Delta$ hptRS/ccpA

# Y385\_STAAM

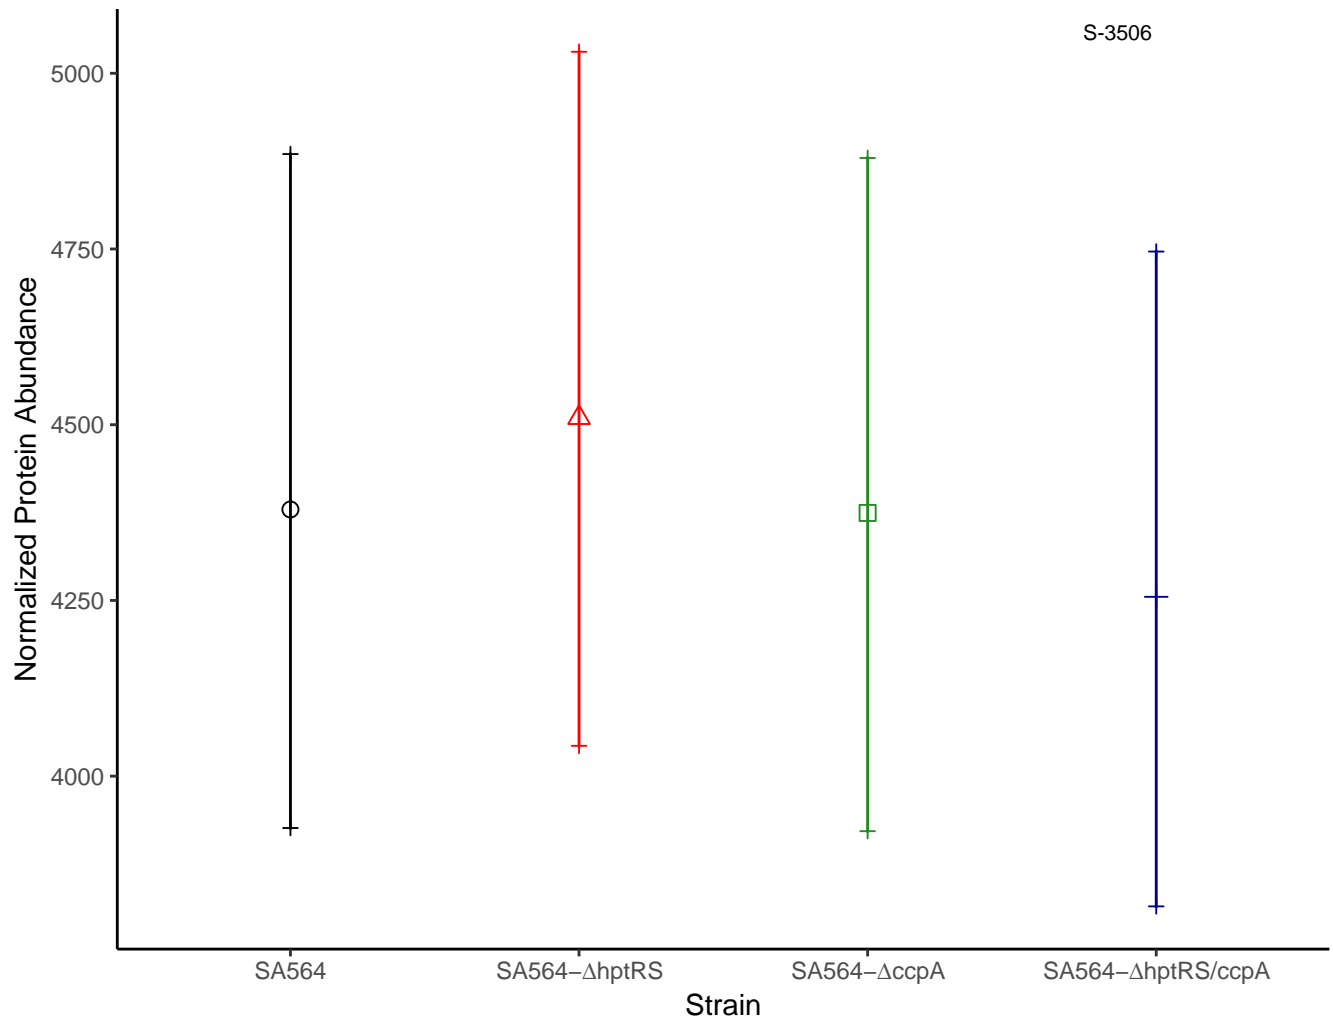

- ⊕ SA564
- △ SA564- $\Delta$ hptRS
- ⊞ SA564- $\Delta$ ccpA
- + SA564- $\Delta$ hptRS/ccpA

# Y437\_STAAM

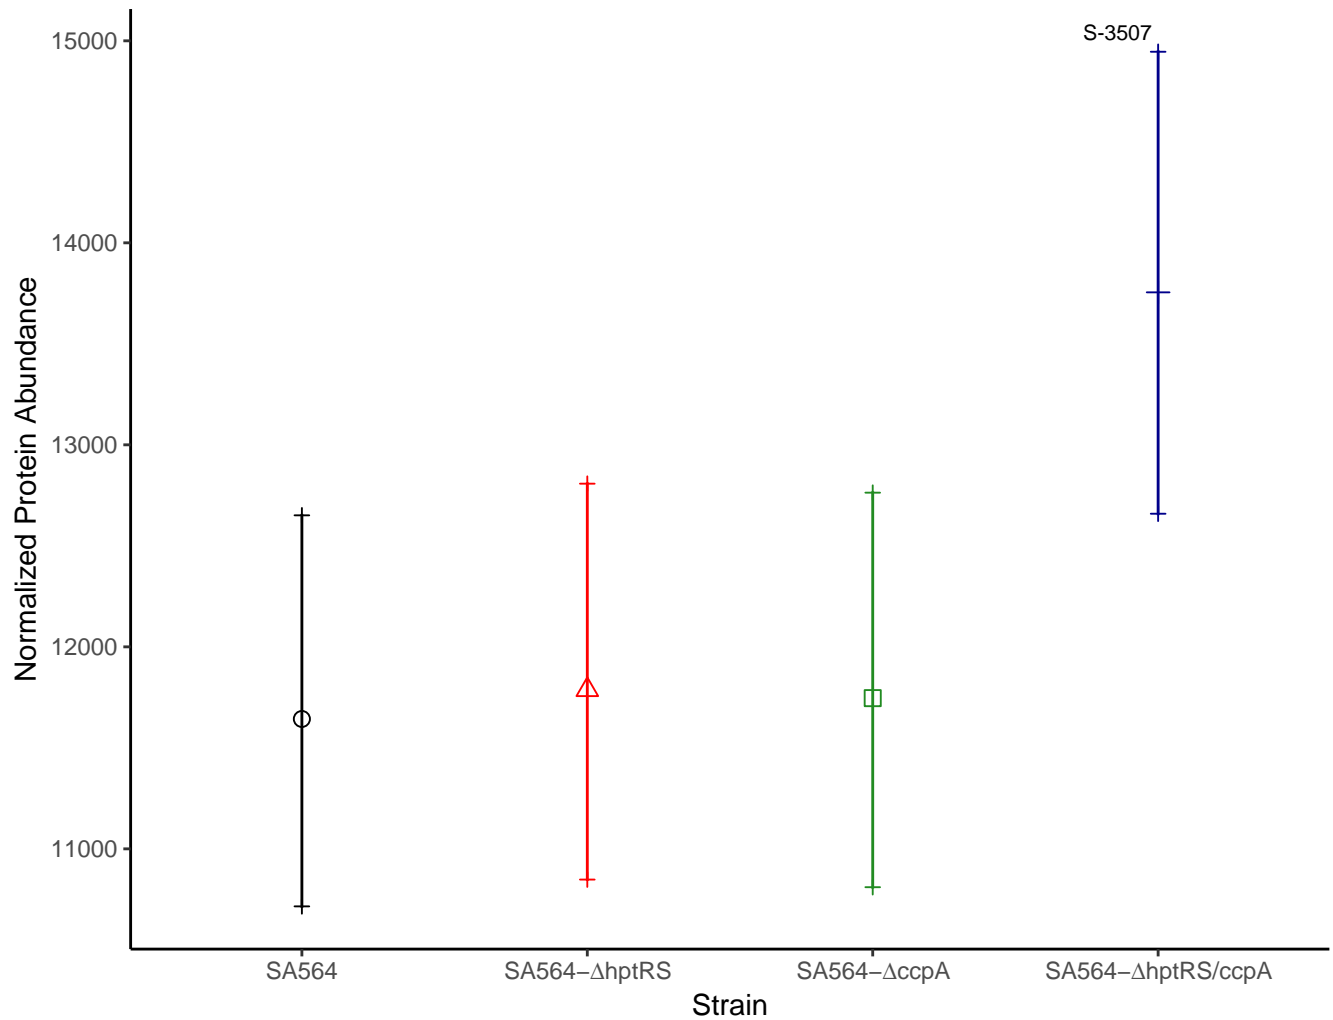

- ⊕ SA564
- △ SA564- $\Delta$ hptRS
- ⊞ SA564- $\Delta$ ccpA
- + SA564- $\Delta$ hptRS/ccpA

# Y479\_STAAM

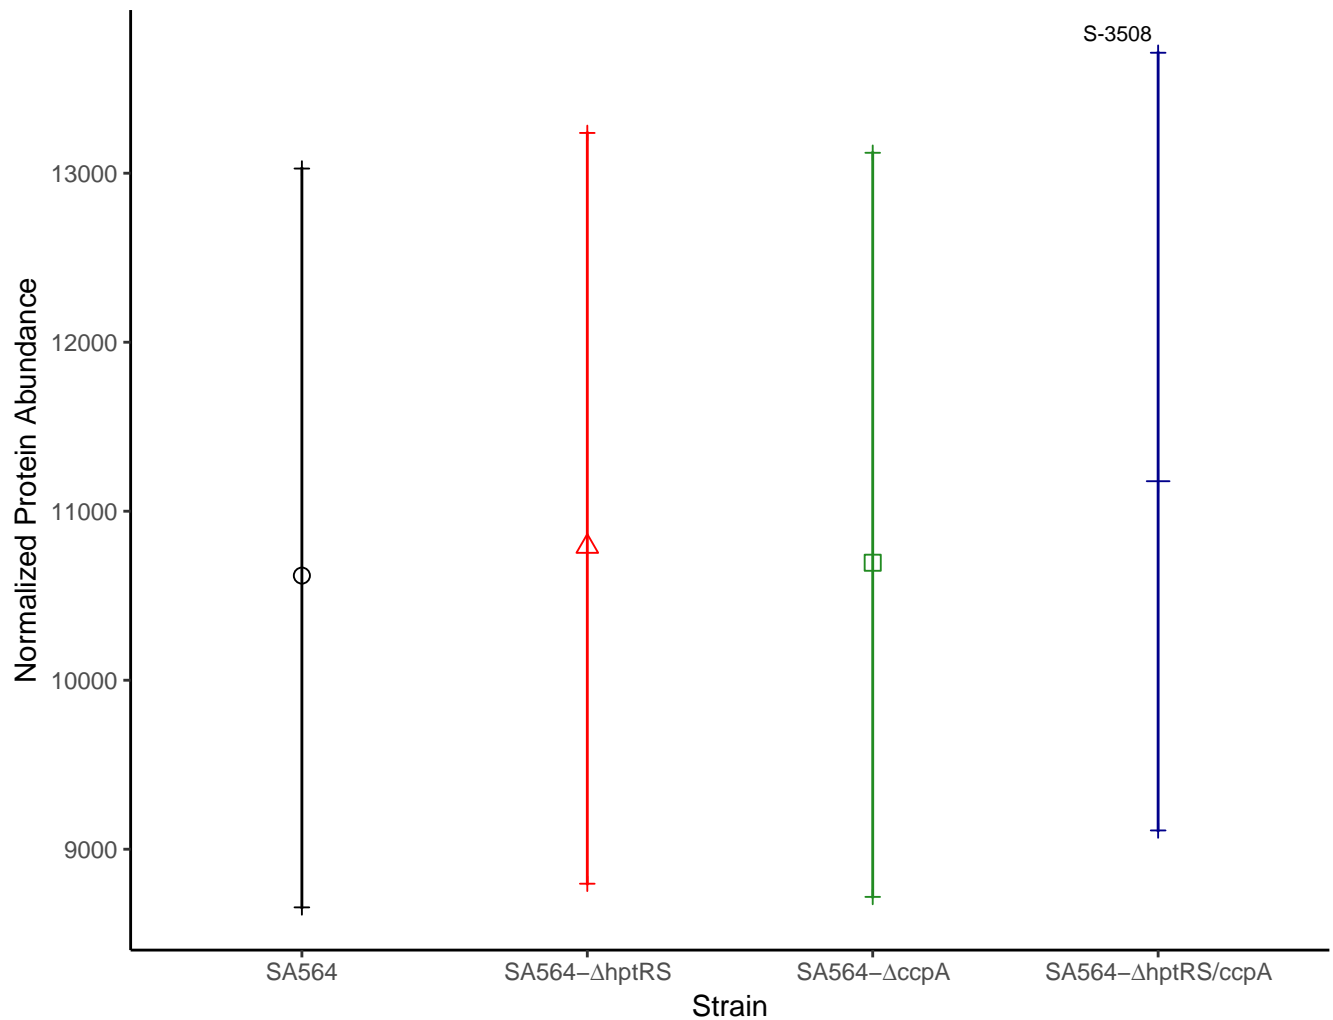

- ⊕ SA564
- △ SA564- $\Delta$ *hptRS*
- ⊞ SA564- $\Delta$ *ccpA*
- + SA564- $\Delta$ *hptRS/ccpA*

# Y553\_STAAM

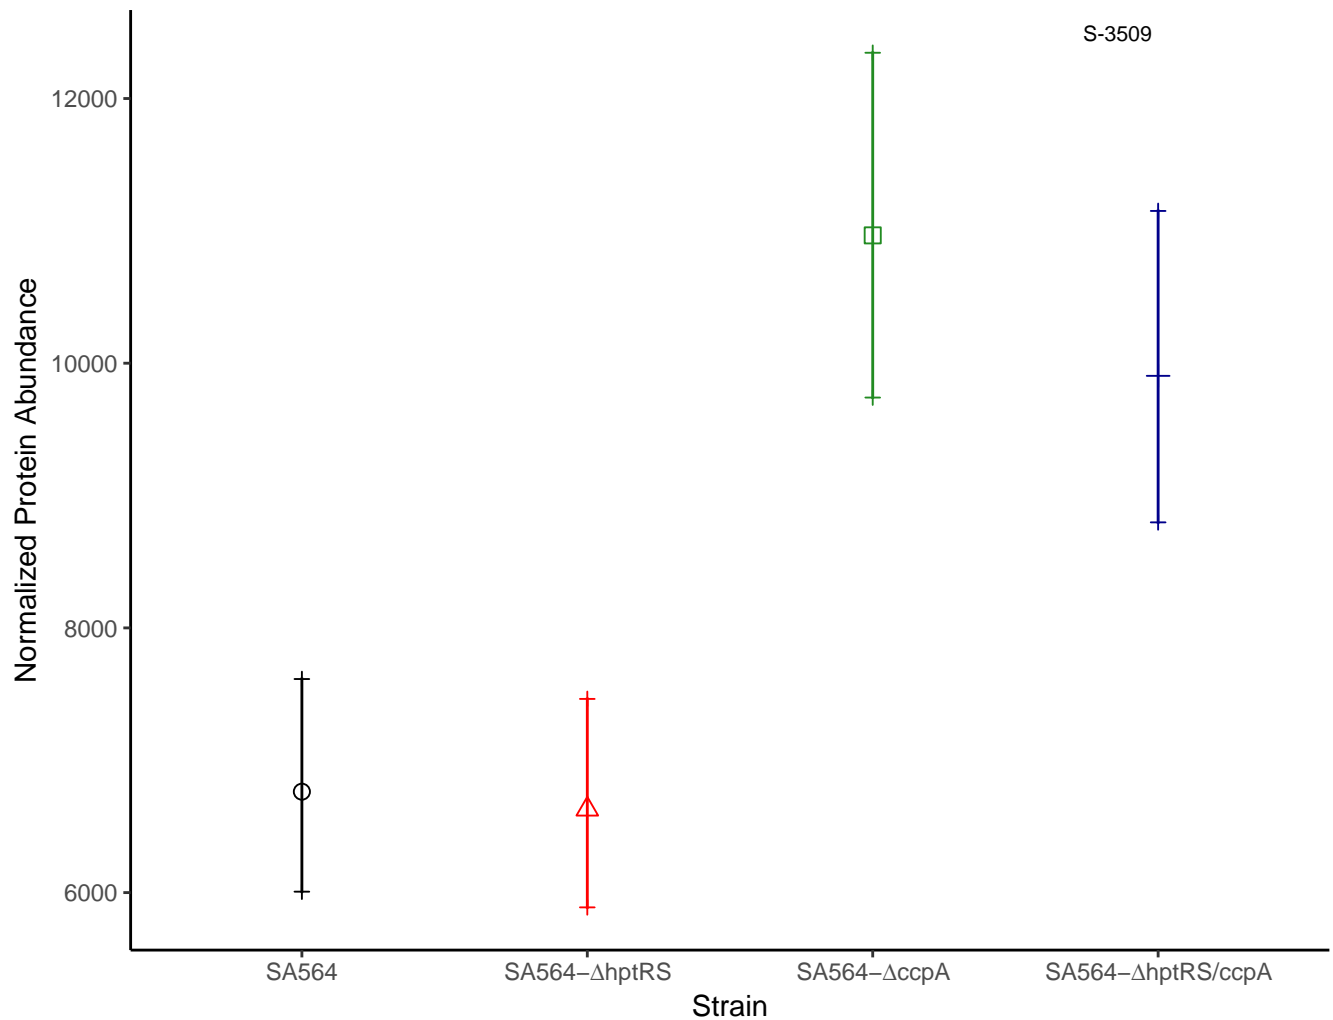

- ⊕ SA564
- △ SA564- $\Delta$ hptRS
- ⊞ SA564- $\Delta$ ccpA
- + SA564- $\Delta$ hptRS/ccpA

# Y587\_STAAM

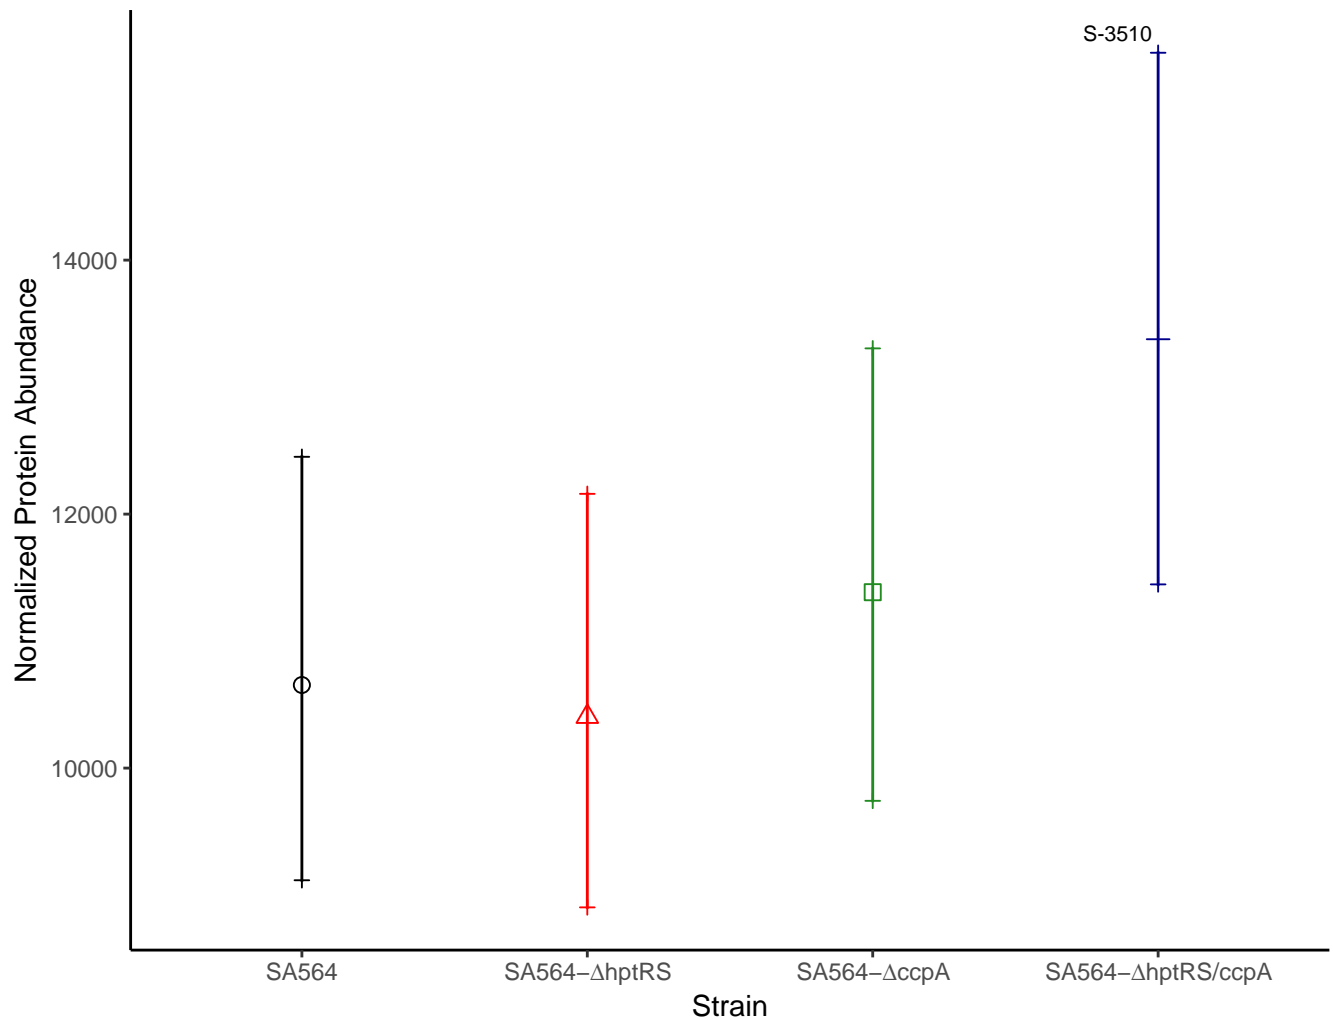

- ⊕ SA564
- △ SA564- $\Delta$ hptRS
- ⊞ SA564- $\Delta$ ccpA
- + SA564- $\Delta$ hptRS/ccpA

# Y669\_STAAM

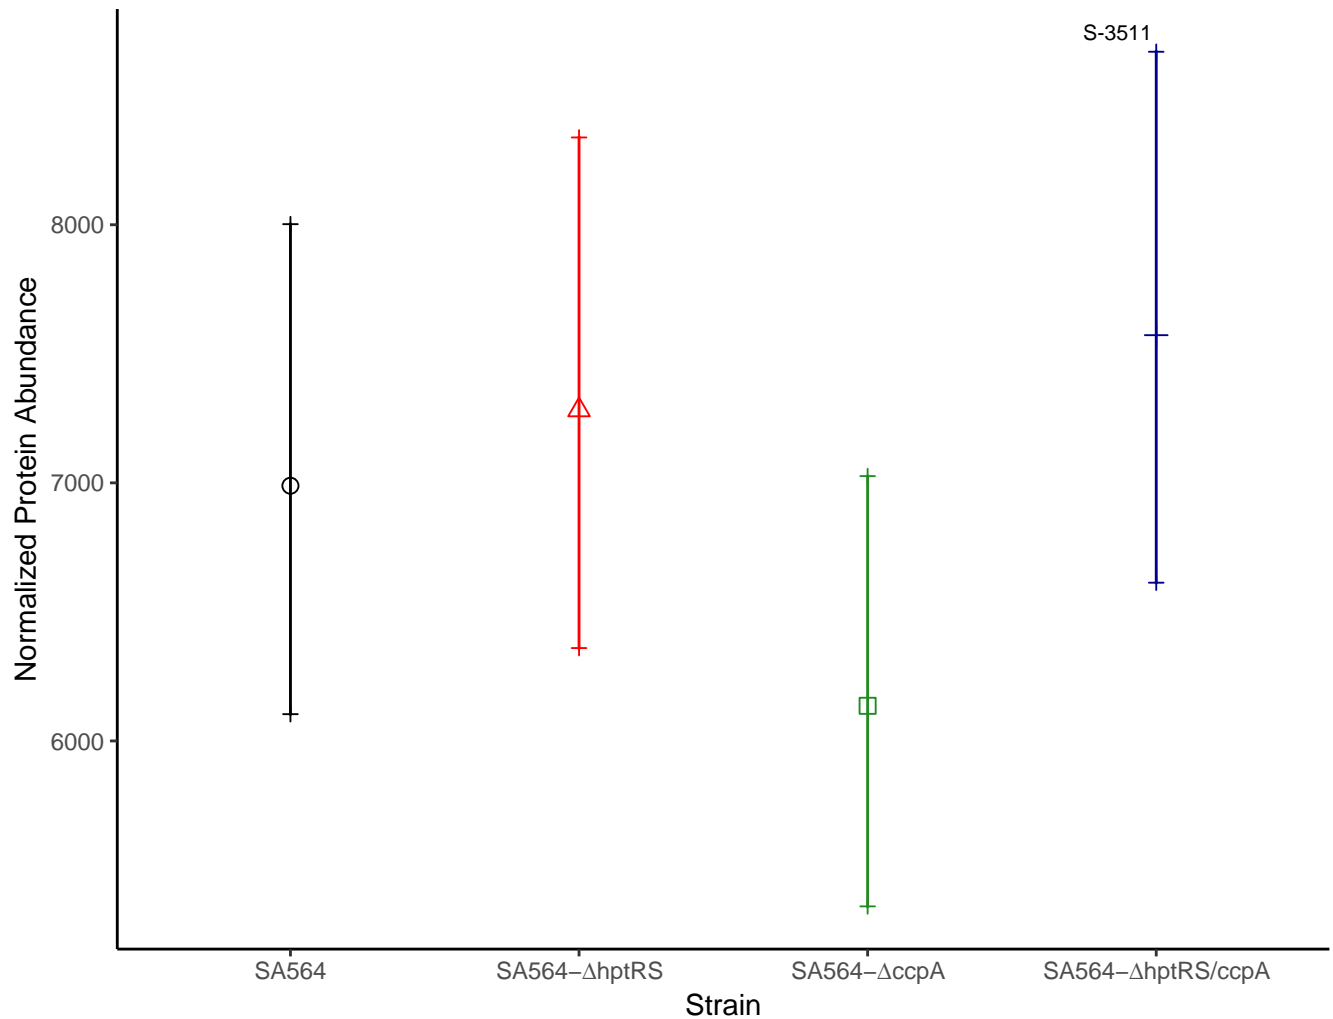

- ⊕ SA564
- △ SA564- $\Delta$ *hptRS*
- ⊞ SA564- $\Delta$ *ccpA*
- + SA564- $\Delta$ *hptRS/ccpA*

# Y752\_STAAM

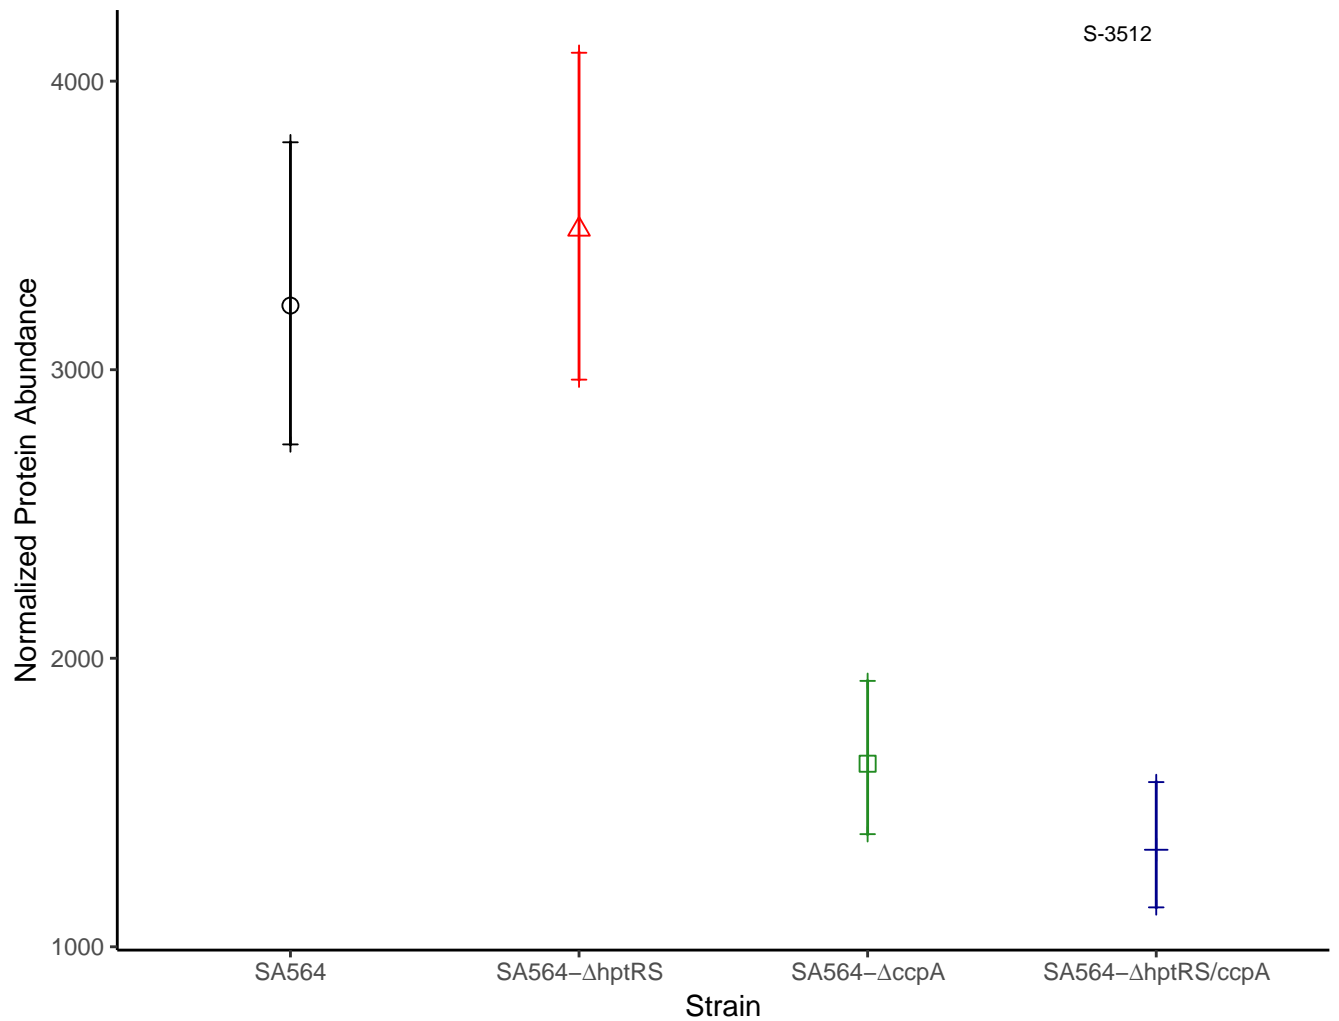

- ⊕ SA564
- △ SA564- $\Delta$ hptRS
- ⊞ SA564- $\Delta$ ccpA
- + SA564- $\Delta$ hptRS/ccpA



# Y765\_STAAM

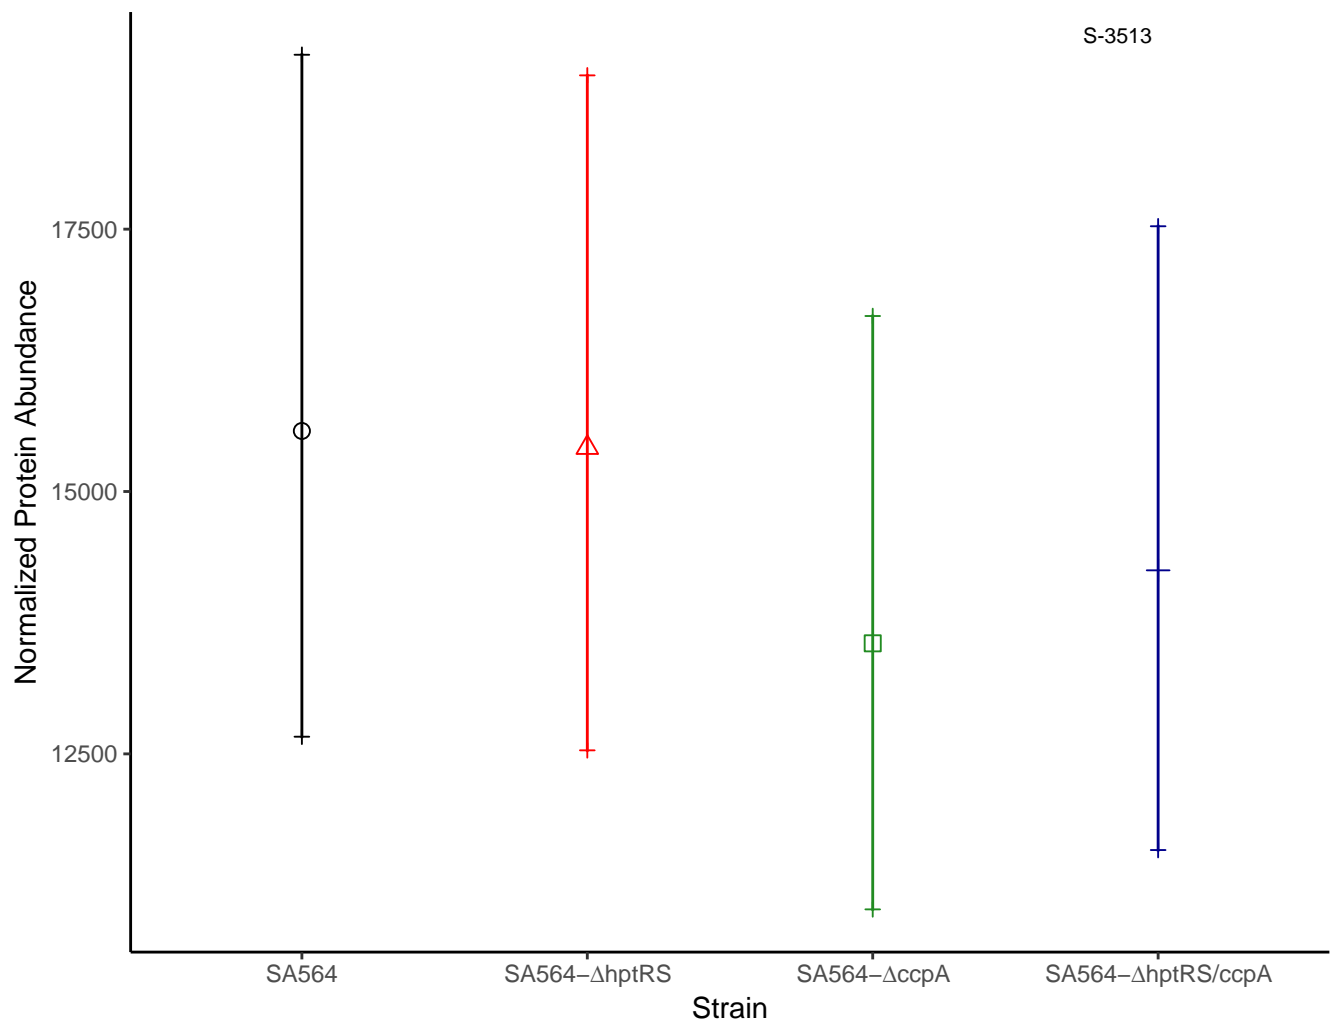

- ⊕ SA564
- △ SA564- $\Delta$ *hptRS*
- ⊞ SA564- $\Delta$ *ccpA*
- + SA564- $\Delta$ *hptRS/ccpA*

# Y769\_STAAM

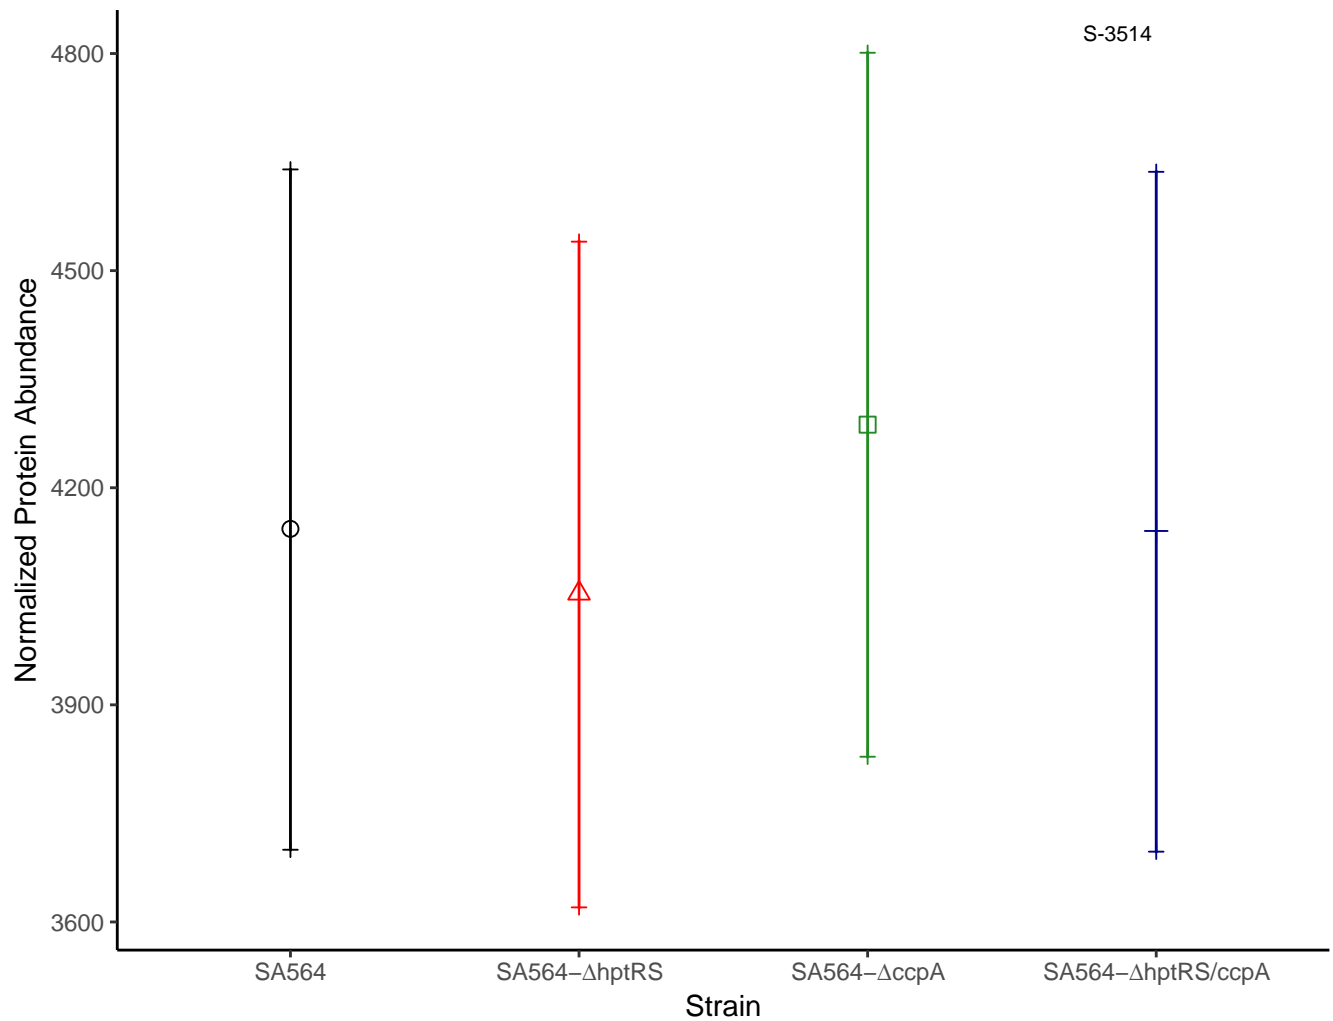

- ⊕ SA564
- △ SA564- $\Delta$ hptRS
- ⊞ SA564- $\Delta$ ccpA
- + SA564- $\Delta$ hptRS/ccpA

# Y840\_STAAM

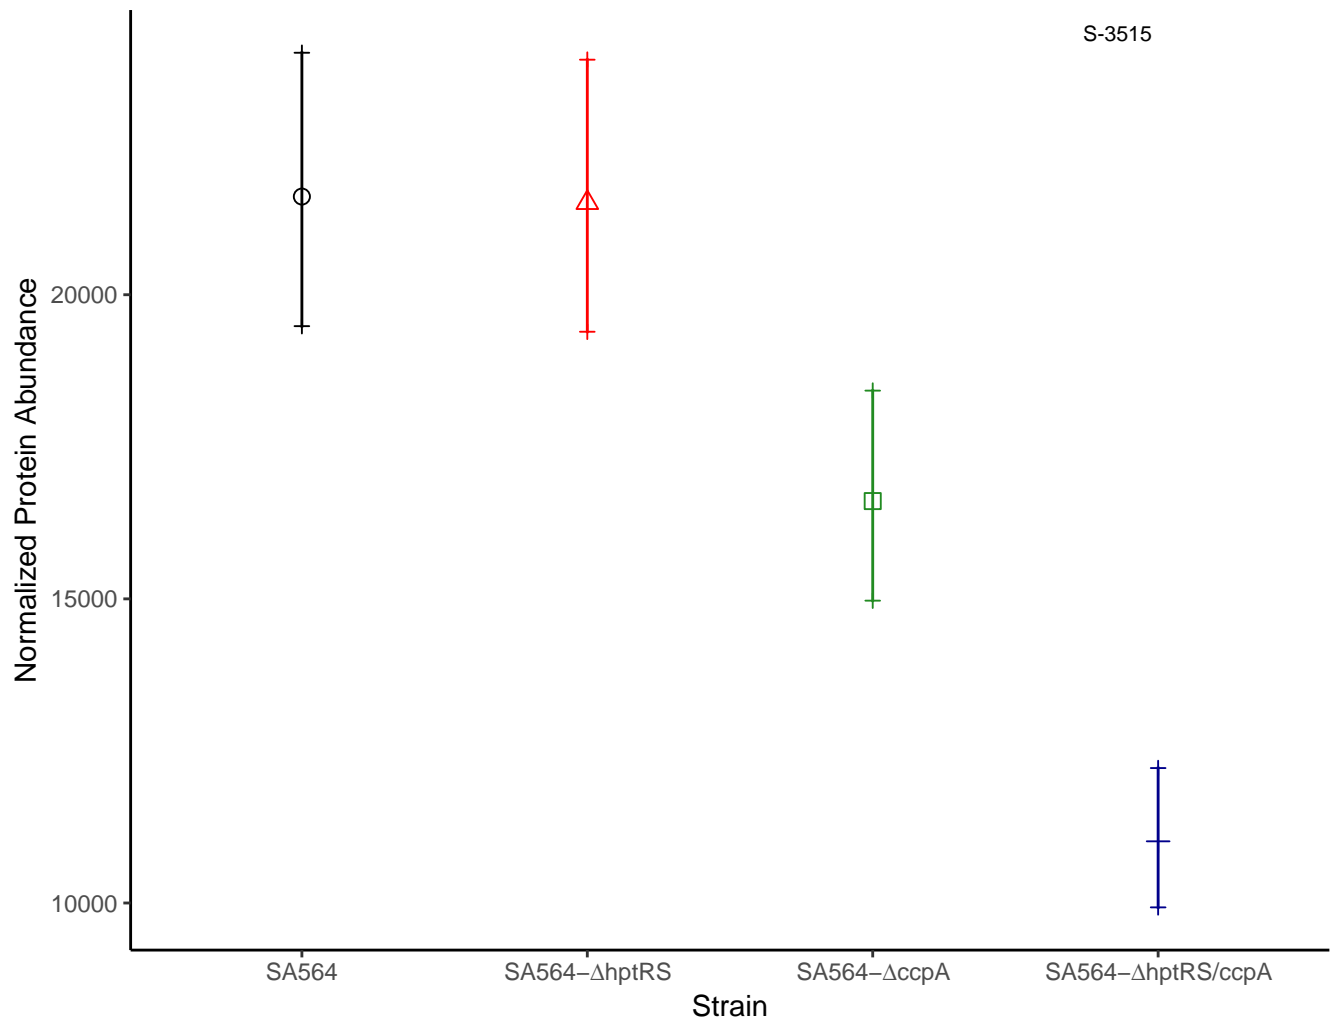

- ⊕ SA564
- △ SA564- $\Delta$ hptRS
- ⊞ SA564- $\Delta$ ccpA
- + SA564- $\Delta$ hptRS/ccpA

# Y846\_STAAM

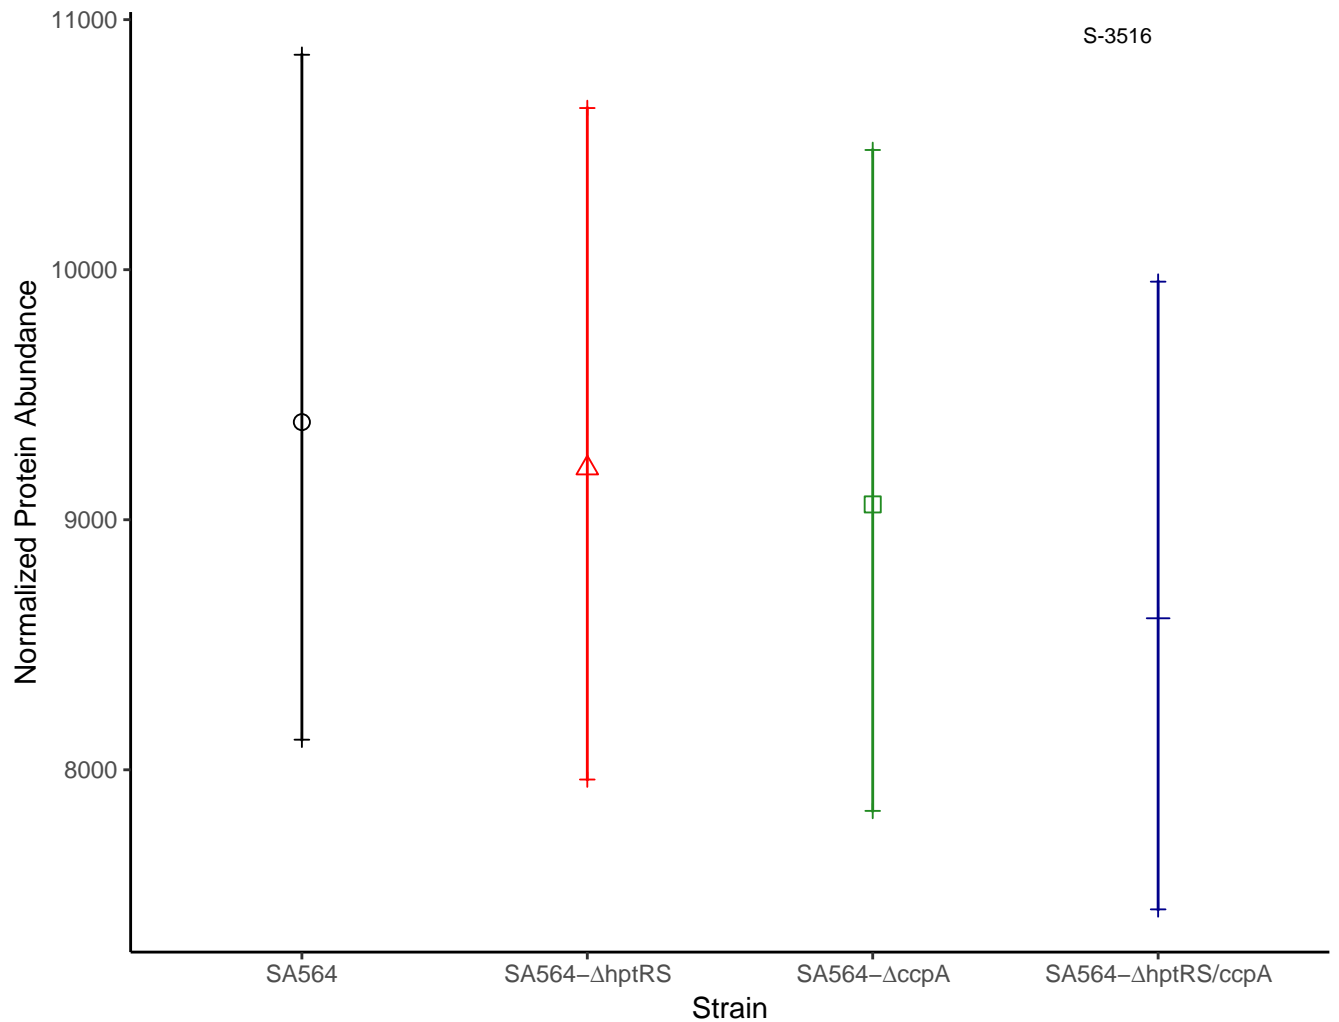

- ⊕ SA564
- △ SA564- $\Delta$ hptRS
- ⊞ SA564- $\Delta$ ccpA
- + SA564- $\Delta$ hptRS/ccpA

# Y941\_STAAM

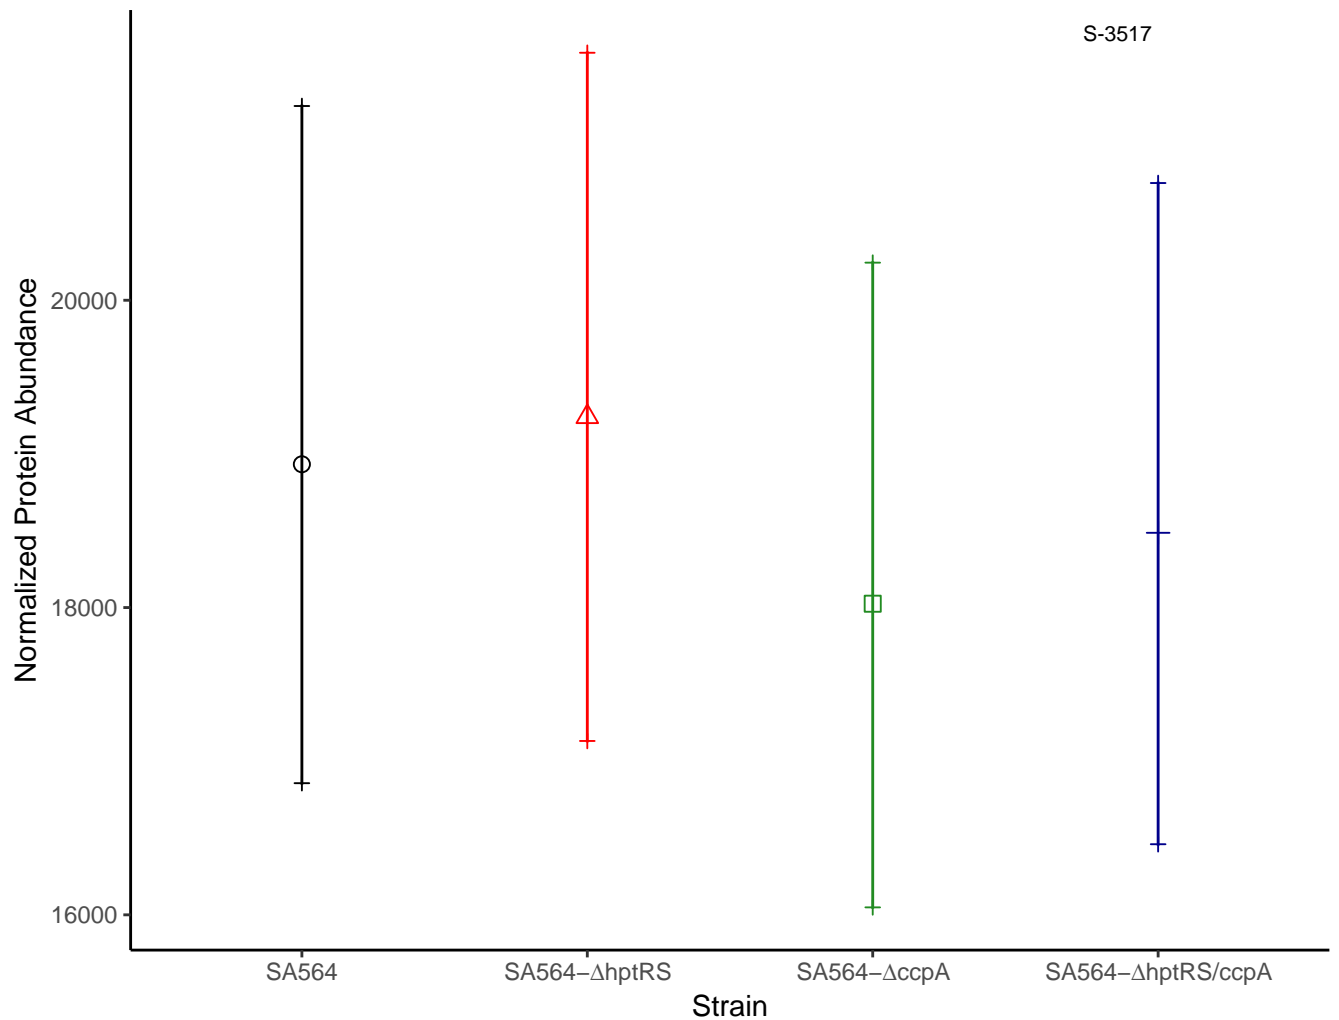

- ⊕ SA564
- △ SA564- $\Delta$ hptRS
- ⊞ SA564- $\Delta$ ccpA
- + SA564- $\Delta$ hptRS/ccpA

# Y968\_STAAM

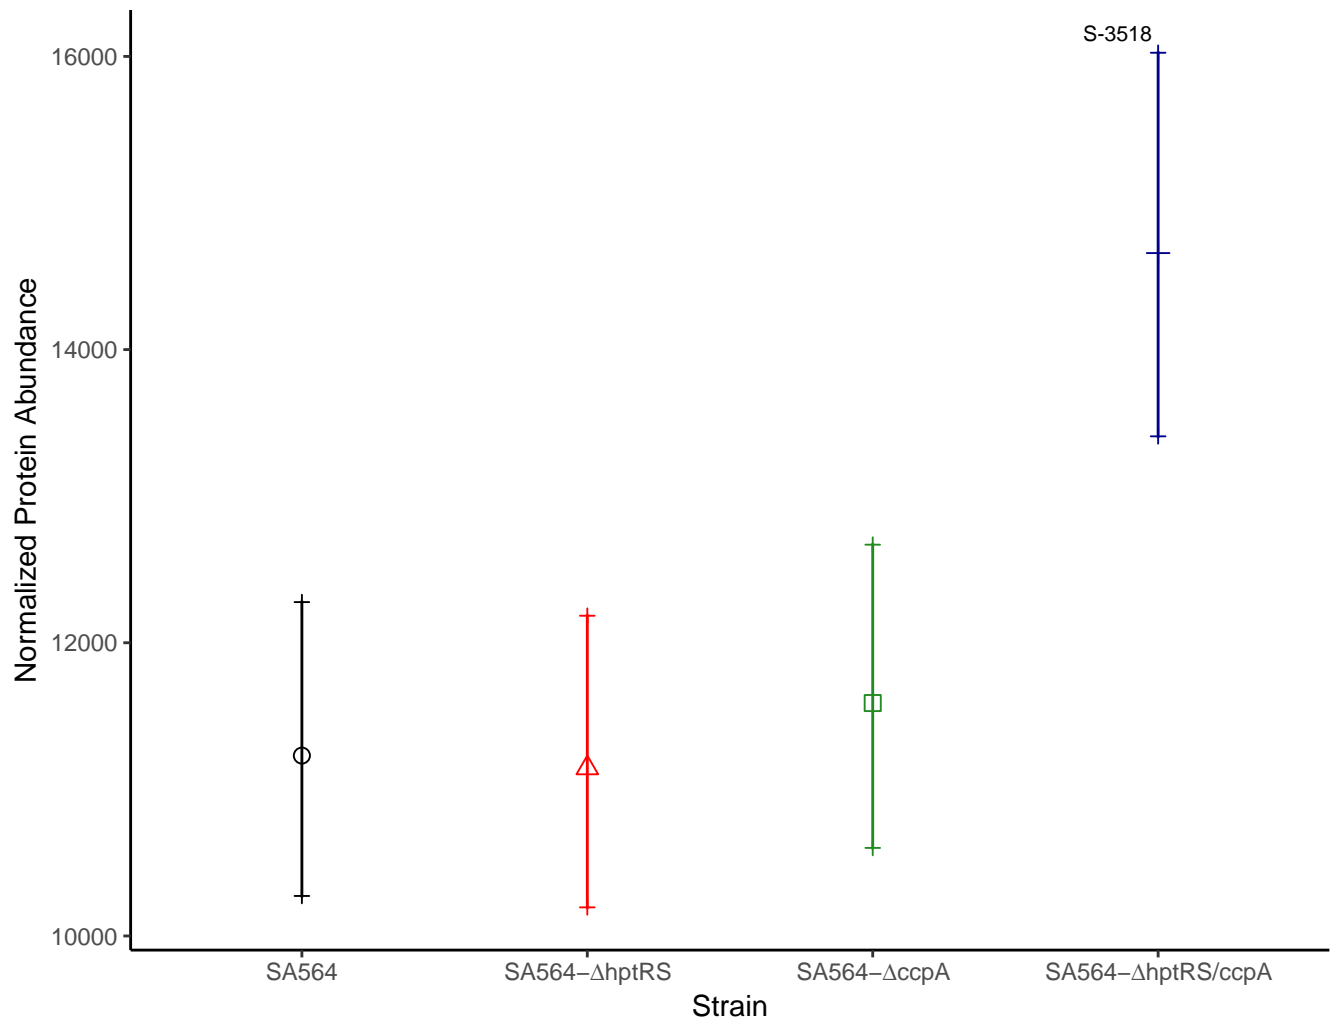

- ⊕ SA564
- △ SA564- $\Delta$ hptRS
- ⊞ SA564- $\Delta$ ccpA
- + SA564- $\Delta$ hptRS/ccpA

# YABA\_STAAM

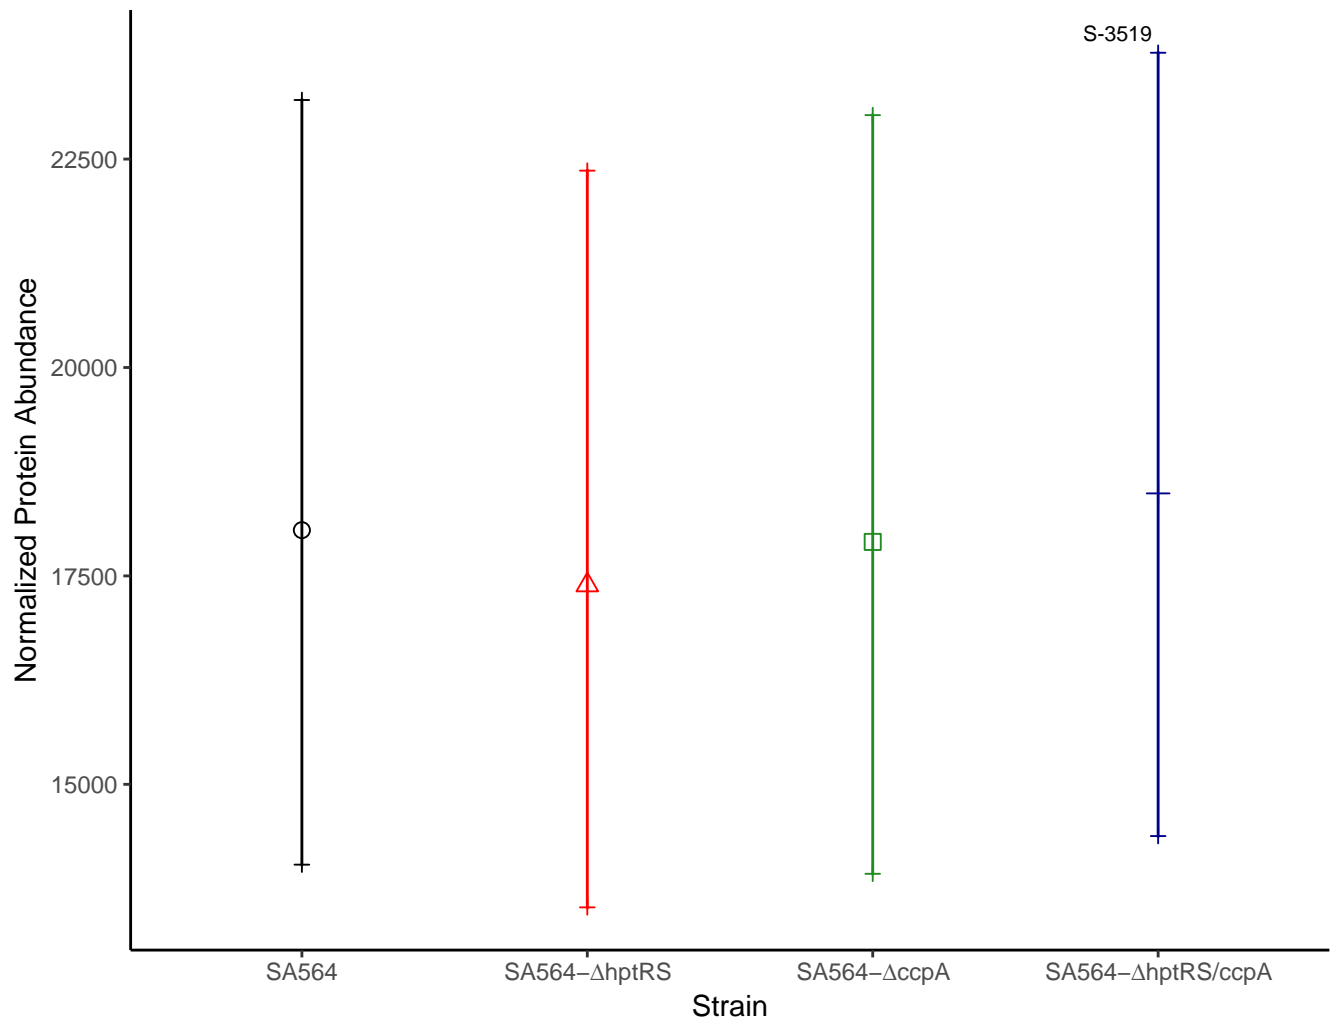

- ⊕ SA564
- △ SA564- $\Delta$ hptRS
- ⊞ SA564- $\Delta$ ccpA
- + SA564- $\Delta$ hptRS/ccpA

# YBEY\_STAAM

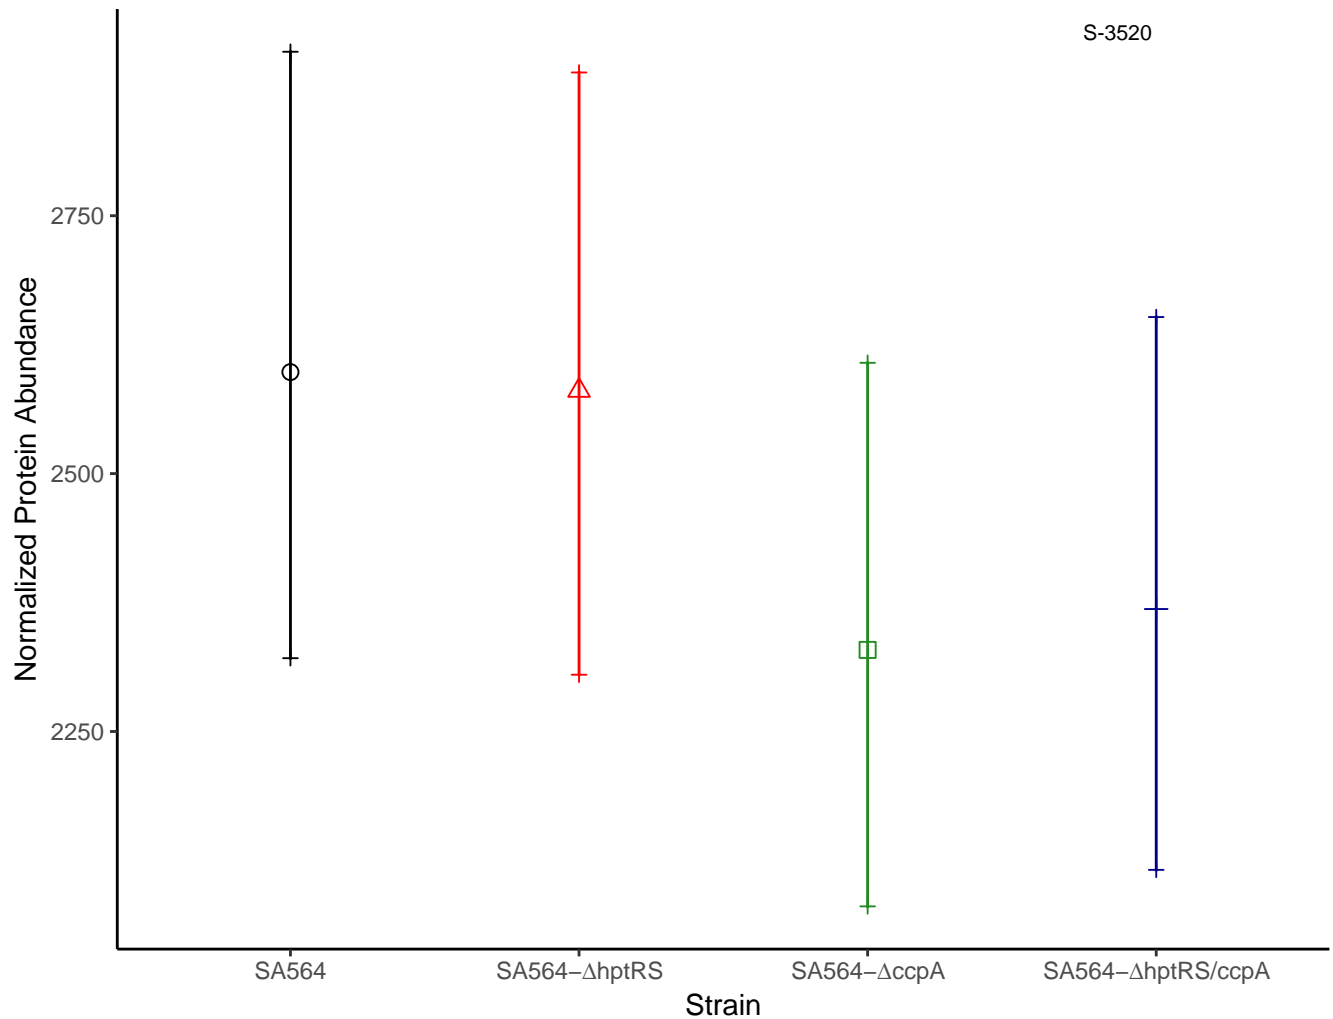

- ⊕ SA564
- △ SA564- $\Delta$ hptRS
- ⊞ SA564- $\Delta$ ccpA
- + SA564- $\Delta$ hptRS/ccpA
